# Supplementary material for: Inflammatory Transcriptome Profiling of Human Monocytes Exposed Acutely to Cigarette Smoke
Source: PubMed Central journal article supplement (PMC3281820; doi:10.1371/journal.pone.0030120), 2012-02-17
Supplement: pone.0030120.s001.pdf [file pone.0030120.s001.pdf]

Illumina Inc. GenomeStudio version 1.5.4

Normalization = none

Array Content = HumanRef-8\_V3\_0\_R0\_11282963\_A.bgx.xml

Error Model = none

DateTime = 03/03/2010 15:55 (TC1, TC2, TS1, TS2) and 09/07/2010 14:09 (TC3, TC4, TC5, TC6, TS3, TS4,

Local Settings = en-GB

| TargetID | AVG_Signa | AVG_Signa | AVG_Signa | AVG_Signa | AVG_Signa | AVG_Signa | AVG_Signa | AVG_Signa |
|----------|-----------|-----------|-----------|-----------|-----------|-----------|-----------|-----------|
| 15E1.2   | 329.5     | 389.1     | 194.7     | 193       | 157.8     | 139.8     | 240.5     | 342       |
| 2'-PDE   | 428.8     | 549.5     | 343.8     | 318.9     | 255.4     | 382.8     | 351.7     | 525.9     |
| 7A5      | 88.2      | 80.8      | 82.5      | 91.7      | 72.4      | 89.1      | 89.3      | 87.3      |
| A1BG     | 108.4     | 117.5     | 113.7     | 104.4     | 106.2     | 116.4     | 104.2     | 105.2     |
| A2BP1    | 86.4      | 92        | 97.7      | 80.3      | 84.3      | 90        | 82.4      | 90.1      |
| A2BP1    | 101.2     | 102.6     | 103.1     | 83.8      | 83.4      | 94.1      | 96        | 97.8      |
| A2BP1    | 78.8      | 88.2      | 105.5     | 90.3      | 84.8      | 90.8      | 82.3      | 90.8      |
| A2BP1    | 101.5     | 132.3     | 104.1     | 96.1      | 80.8      | 84        | 114.2     | 110.7     |
| A2M      | 80.3      | 84.7      | 86.3      | 84.5      | 81.8      | 83.6      | 77.6      | 92        |
| A2ML1    | 81        | 80.9      | 100.4     | 98.7      | 86.1      | 89.1      | 80.4      | 76.3      |
| A3GALT2  | 73        | 80.3      | 82.8      | 80.4      | 86.3      | 75.6      | 71.8      | 75.8      |
| A3GALT2  | 83        | 80.5      | 98.2      | 96.7      | 90.6      | 90.6      | 76.9      | 87        |
| A4GALT   | 177.7     | 217.4     | 150.3     | 135.5     | 115.2     | 126.6     | 178.4     | 192.2     |
| A4GNT    | 120.7     | 114.5     | 91.1      | 95.5      | 91.5      | 92.7      | 109       | 114.9     |
| AAA1     | 102.3     | 111.3     | 113       | 92.8      | 93.3      | 99.1      | 93.3      | 113.8     |
| AAA1     | 130.9     | 155.5     | 110.4     | 101.5     | 103.3     | 103.7     | 142.6     | 149.3     |
| AAA1     | 112.8     | 111.2     | 98.4      | 99.4      | 85.7      | 97.3      | 98.4      | 112.3     |
| AAA1     | 68.7      | 72.3      | 81.7      | 76.4      | 78        | 70.4      | 73.9      | 73.6      |
| AAA1     | 92.8      | 103.9     | 84.4      | 85.7      | 78.7      | 81.1      | 89.2      | 98.4      |
| AAAS     | 165.1     | 212.7     | 134.9     | 125.1     | 95.3      | 117.9     | 150       | 220.1     |
| AACS     | 208.5     | 268.6     | 210.5     | 217.4     | 228.6     | 264.8     | 196       | 195.7     |
| AADAC    | 101.9     | 112.1     | 101.4     | 93.6      | 87.6      | 98.3      | 91.3      | 101.1     |
| AADACL1  | 277.9     | 333.5     | 132.1     | 167.6     | 129.2     | 194.6     | 273.7     | 389.1     |
| AADACL2  | 92.6      | 91        | 97.9      | 89.9      | 79.6      | 90.1      | 88        | 84.4      |
| AADAT    | 144.5     | 157.6     | 103.9     | 92.2      | 80        | 89.1      | 140       | 129.7     |
| AADAT    | 81.7      | 94.1      | 91.2      | 87.6      | 83.2      | 86.9      | 88.2      | 88.1      |
| AADAT    | 73.2      | 82.1      | 90.3      | 79.7      | 88        | 83.4      | 93.2      | 92.1      |
| AAK1     | 83.3      | 82.7      | 98.1      | 93.9      | 91        | 92.6      | 78.3      | 79.7      |
| AAMP     | 329.4     | 478.3     | 192.7     | 171.4     | 132       | 185       | 326.6     | 418.5     |
| AANAT    | 78.7      | 87.7      | 88.9      | 83.7      | 74.2      | 71.1      | 82.2      | 86.2      |
| AARS     | 5885.8    | 7945.2    | 4622.1    | 3583.6    | 3033.1    | 3985.3    | 5385.3    | 6295.9    |
| AARSD1   | 798.4     | 1088.8    | 546.3     | 563       | 527       | 838.8     | 721.4     | 856.8     |
| AARSL    | 572.9     | 644.2     | 283.9     | 291.7     | 296.7     | 357.2     | 438.2     | 485.5     |
| AASDH    | 469.9     | 591.6     | 272.1     | 277.1     | 227.3     | 394.8     | 424.8     | 563.9     |
| AASDHPPT | 1641.1    | 1879.5    | 552.4     | 658.1     | 443.9     | 795.4     | 1229.9    | 2143.3    |
| AASS     | 106.2     | 127.9     | 114.7     | 119.7     | 96.5      | 109.4     | 105.1     | 116.6     |
| AATF     | 1479.8    | 1954.2    | 1010.7    | 820.2     | 626.5     | 987.9     | 1271.5    | 1846.6    |
| AATK     | 95.9      | 119.6     | 106.1     | 104.9     | 98.3      | 102.1     | 105.4     | 120.3     |
| AATK     | 85.8      | 92.2      | 85.6      | 83.4      | 99.9      | 85        | 89.6      | 92.9      |
| ABAT     | 99.7      | 116.5     | 99.2      | 91.6      | 85.4      | 93.3      | 104.6     | 116.8     |
| ABAT     | 129.7     | 151.9     | 94.8      | 85.5      | 83.4      | 89.4      | 145       | 176       |
| ABAT     | 88.5      | 97.2      | 96.5      | 85.1      | 89.6      | 89.8      | 91.2      | 107       |

|        |        |        |       |       |       |        |        |        |
|--------|--------|--------|-------|-------|-------|--------|--------|--------|
| ABC1   | 247.7  | 329.9  | 165   | 181.8 | 150.7 | 162.6  | 203.3  | 231.5  |
| ABCA1  | 451.5  | 729.9  | 280.5 | 724.5 | 638   | 1121.6 | 421.5  | 559.6  |
| ABCA10 | 107.8  | 125    | 92.5  | 95.6  | 102.5 | 101.9  | 96     | 111.5  |
| ABCA11 | 205.6  | 228.5  | 141.1 | 136   | 111.1 | 139.6  | 141.4  | 207.2  |
| ABCA12 | 100.4  | 119.8  | 103   | 77.9  | 91.8  | 95.1   | 100.2  | 110.5  |
| ABCA12 | 161.8  | 177    | 99.1  | 85.9  | 89.4  | 85.5   | 150.8  | 180.4  |
| ABCA13 | 81.4   | 86.9   | 93.7  | 93.2  | 87.3  | 82.6   | 81     | 82.6   |
| ABCA2  | 112    | 109.6  | 109.6 | 103.5 | 82.5  | 91.2   | 106.1  | 99.5   |
| ABCA2  | 170.4  | 185.5  | 157.5 | 149.8 | 130   | 190.6  | 131.7  | 196.4  |
| ABCA3  | 152.1  | 169    | 113.1 | 92.7  | 97.9  | 88.8   | 121.6  | 123.4  |
| ABCA4  | 106    | 129.6  | 137.7 | 140.3 | 139   | 137.4  | 104.4  | 130    |
| ABCA5  | 106.5  | 120.6  | 116.1 | 106.8 | 114.8 | 104.1  | 105.2  | 129.1  |
| ABCA5  | 87.9   | 97.4   | 84.2  | 89.2  | 87.1  | 88.3   | 84.8   | 85.1   |
| ABCA5  | 107.7  | 120.4  | 84    | 86.6  | 85.5  | 96.3   | 95.8   | 120.6  |
| ABCA6  | 92.2   | 85.8   | 87.3  | 86.8  | 87.4  | 91.7   | 87.8   | 87.3   |
| ABCA6  | 98.6   | 107.9  | 115.8 | 112.5 | 115.3 | 110.4  | 89.7   | 95     |
| ABCA7  | 82.6   | 86.1   | 79    | 79.7  | 86.2  | 76.9   | 82.9   | 85.1   |
| ABCA7  | 204.6  | 230.3  | 226.9 | 203.3 | 202.7 | 312    | 137.3  | 161.9  |
| ABCA7  | 67.3   | 83     | 93    | 91.6  | 87.5  | 95.9   | 78.8   | 75.5   |
| ABCA8  | 85.5   | 87     | 89.1  | 80.5  | 84.5  | 83.8   | 83.6   | 85.7   |
| ABCA9  | 123.6  | 167.9  | 94.9  | 90.9  | 84.7  | 86.5   | 110.2  | 127.8  |
| ABCA9  | 116.1  | 125.1  | 98.2  | 84.4  | 93.6  | 94.4   | 114.1  | 123.4  |
| ABCB1  | 79.3   | 88.7   | 77.4  | 81.4  | 75.9  | 83.2   | 84.3   | 87.1   |
| ABCB10 | 1638.5 | 1621.5 | 831.3 | 978.1 | 787.1 | 1134.5 | 1478.1 | 2201.4 |
| ABCB11 | 84.5   | 94.2   | 101.7 | 97.1  | 95.9  | 102    | 92     | 82.2   |
| ABCB4  | 136.5  | 174.4  | 122.1 | 96.6  | 91.2  | 114.3  | 138.7  | 186.5  |
| ABCB5  | 89.5   | 96.3   | 82.9  | 74    | 78.6  | 78.1   | 83.1   | 98.4   |
| ABCB6  | 147.5  | 169.1  | 121.3 | 121.3 | 121   | 129.9  | 149.9  | 228.1  |
| ABCB7  | 967.8  | 1155.6 | 296.4 | 340.3 | 250.8 | 446.3  | 804.5  | 1444.8 |
| ABCB8  | 117.7  | 148.4  | 94.2  | 90.2  | 84.5  | 98.7   | 141.1  | 140.4  |
| ABCB9  | 84.7   | 86.9   | 107.6 | 101.6 | 98.5  | 113.7  | 81.6   | 84.3   |
| ABCB9  | 110    | 123.6  | 141.1 | 137.4 | 134.6 | 143.8  | 103.8  | 163.2  |
| ABCB9  | 224.3  | 276.5  | 212.8 | 202.5 | 176.3 | 181.1  | 178.7  | 196.3  |
| ABCC1  | 96.9   | 103.3  | 105   | 97    | 92.6  | 94.8   | 91.4   | 92.6   |
| ABCC1  | 115.9  | 156.3  | 113   | 97.8  | 97    | 96.1   | 118.3  | 129.4  |
| ABCC10 | 139.6  | 156.1  | 112.9 | 103.4 | 105.1 | 109.9  | 113.8  | 152.7  |
| ABCC11 | 94.3   | 95     | 79.2  | 79.8  | 73.9  | 73.6   | 95     | 105.5  |
| ABCC11 | 135.8  | 155.9  | 107.4 | 99.4  | 89.9  | 104.2  | 131.7  | 127.5  |
| ABCC11 | 85.1   | 93.9   | 99.2  | 96.1  | 97.1  | 99.6   | 85.2   | 89     |
| ABCC12 | 123.2  | 141.1  | 105.8 | 103.2 | 95.4  | 113.8  | 125.7  | 135    |
| ABCC13 | 166.7  | 191.3  | 129.7 | 112.3 | 103.3 | 117.9  | 145.1  | 155.2  |
| ABCC13 | 117.7  | 130.9  | 107.5 | 110.7 | 100.5 | 99.2   | 106.5  | 125.9  |
| ABCC2  | 112.8  | 107.5  | 101.2 | 99.4  | 97.3  | 99.8   | 107.2  | 92.6   |
| ABCC3  | 89.6   | 93.2   | 96.6  | 141.6 | 131.2 | 159.8  | 92.9   | 107.5  |
| ABCC4  | 577    | 730.8  | 182.5 | 225.5 | 165.7 | 274.9  | 487    | 618.2  |
| ABCC5  | 92.3   | 101.7  | 90.3  | 81.8  | 85.9  | 78.4   | 86.5   | 97.5   |
| ABCC5  | 178.8  | 237    | 166.4 | 190.5 | 201.4 | 255.5  | 223.4  | 215.6  |
| ABCC5  | 159.3  | 164.4  | 140.3 | 137.3 | 142.3 | 166.1  | 118    | 159    |
| ABCC6  | 98.9   | 113.2  | 107   | 95.1  | 91.7  | 92.8   | 105.5  | 112.8  |
| ABCC6  | 144.1  | 193.1  | 108   | 92    | 87.4  | 101.4  | 168.3  | 179.5  |

|         |        |        |        |        |       |        |        |        |
|---------|--------|--------|--------|--------|-------|--------|--------|--------|
| ABCC6   | 75.7   | 82.3   | 87.2   | 81     | 69.9  | 77.5   | 83.4   | 98.5   |
| ABCC6   | 100.7  | 124.5  | 94.9   | 98     | 87.9  | 87.5   | 96.2   | 112    |
| ABCC6   | 136    | 173.7  | 146.9  | 123.3  | 118.9 | 127    | 131    | 131.9  |
| ABCC8   | 97.6   | 100.8  | 99     | 93     | 83.7  | 86.9   | 92.6   | 90     |
| ABCC9   | 97.4   | 95.5   | 82.9   | 88.7   | 77.3  | 87     | 86.9   | 90.7   |
| ABCC9   | 135.5  | 131.3  | 96.8   | 99.3   | 83.9  | 84.1   | 113.4  | 136.4  |
| ABCD1   | 151    | 170.6  | 273.4  | 186.8  | 193.5 | 279.1  | 154.2  | 290.7  |
| ABCD2   | 74.9   | 82.2   | 89     | 82     | 84.8  | 85.3   | 79.2   | 93.9   |
| ABCD4   | 82.5   | 99.8   | 91.2   | 84.1   | 87.5  | 88.9   | 81.9   | 89.1   |
| ABCD4   | 97.1   | 96.5   | 111.8  | 105.1  | 110.6 | 107.2  | 91.6   | 106.2  |
| ABCE1   | 2579.6 | 3057.9 | 1258.4 | 871.3  | 544   | 1544.5 | 1725.9 | 3630.3 |
| ABCE1   | 2122.2 | 2881.4 | 1184.8 | 813.5  | 531.9 | 1401.5 | 1607.1 | 3267.8 |
| ABCF1   | 533.2  | 711.1  | 366.7  | 377.9  | 317.4 | 535.1  | 405.7  | 745    |
| ABCF1   | 1380.1 | 2114.5 | 1005.1 | 1000.1 | 870   | 1167.3 | 1035.8 | 1191.4 |
| ABCF2   | 114.8  | 137.4  | 109.4  | 91.2   | 95.9  | 105.1  | 112.8  | 130.6  |
| ABCF2   | 965.2  | 1265.6 | 526.2  | 372.6  | 322.3 | 433    | 732.8  | 1122.9 |
| ABCF2   | 216.8  | 247.2  | 192.1  | 173.2  | 141.3 | 224.5  | 180.6  | 328.4  |
| ABCF3   | 150.7  | 179.1  | 128.2  | 146.8  | 118.7 | 185.7  | 147.7  | 167.6  |
| ABCG1   | 149.4  | 171.9  | 124.4  | 109    | 105.4 | 121.2  | 136    | 142.1  |
| ABCG1   | 96.6   | 107.6  | 116.2  | 94.4   | 101   | 97.7   | 96     | 100.6  |
| ABCG1   | 102.6  | 121.3  | 91.4   | 87.6   | 82    | 86.1   | 106.3  | 110.4  |
| ABCG1   | 81.2   | 98.2   | 82.9   | 84.2   | 87.5  | 91.8   | 90.1   | 96.5   |
| ABCG1   | 111.3  | 147.4  | 96.5   | 97.4   | 88.5  | 84.7   | 131.3  | 150.8  |
| ABCG1   | 119.9  | 122.8  | 92.4   | 82.8   | 76.6  | 91.3   | 102.4  | 137.8  |
| ABCG2   | 78.8   | 89.5   | 86.6   | 73.7   | 77.6  | 75.9   | 72.6   | 80.6   |
| ABCG4   | 119.5  | 135.4  | 103.4  | 99.5   | 95.9  | 92.6   | 121.3  | 117.8  |
| ABCG5   | 132.1  | 157.8  | 128.9  | 114.3  | 97.3  | 103.7  | 131.2  | 152.5  |
| ABCG8   | 86.2   | 104.3  | 99.1   | 86.1   | 88.5  | 90.9   | 90.7   | 89.6   |
| ABHD1   | 115.1  | 124    | 108.8  | 97.2   | 89.1  | 91.7   | 104    | 123    |
| ABHD10  | 513.9  | 648.9  | 328.9  | 299.9  | 232.1 | 345.6  | 347.8  | 532.3  |
| ABHD11  | 297.9  | 376.3  | 178.9  | 158.4  | 132.2 | 144.6  | 256.1  | 286.9  |
| ABHD11  | 107.6  | 120.2  | 96.6   | 79.4   | 77.5  | 84.1   | 87.4   | 124.4  |
| ABHD11  | 306.8  | 390.1  | 223    | 197.8  | 167.5 | 155.7  | 282.2  | 332.2  |
| ABHD12  | 516.4  | 670.9  | 231.8  | 222.5  | 174.1 | 234.4  | 441.7  | 730.8  |
| ABHD12  | 435.2  | 530.2  | 376.8  | 369.3  | 341.8 | 508.7  | 349.8  | 486.7  |
| ABHD13  | 91.8   | 101    | 95.9   | 101.4  | 85.7  | 94.4   | 95     | 113.5  |
| ABHD14A | 908.6  | 1154   | 560.1  | 328.5  | 321.1 | 364.1  | 871.5  | 1141   |
| ABHD14B | 155.9  | 187.7  | 214.4  | 280.3  | 244.4 | 308.2  | 135.4  | 205.4  |
| ABHD2   | 175.2  | 227.6  | 123.4  | 122.5  | 104.9 | 125.7  | 168.8  | 217.2  |
| ABHD2   | 101.9  | 111.2  | 100    | 95.9   | 81.9  | 105.8  | 101.4  | 119    |
| ABHD2   | 164.6  | 234.9  | 114.2  | 96.2   | 84.3  | 84.4   | 143.5  | 198.4  |
| ABHD3   | 943.6  | 1130.1 | 484.3  | 529    | 445.7 | 900.9  | 843.8  | 1675.9 |
| ABHD4   | 110.1  | 111.6  | 103.4  | 97.9   | 83.7  | 93.9   | 117.7  | 147.9  |
| ABHD5   | 300.9  | 348.6  | 156.5  | 131.6  | 112.7 | 156.6  | 286.1  | 497.6  |
| ABHD6   | 217.7  | 287.7  | 155.5  | 140.2  | 133.6 | 150.2  | 211    | 302.3  |
| ABHD7   | 178.8  | 219.4  | 117.9  | 113.2  | 100   | 95.8   | 156.3  | 207    |
| ABHD8   | 816.9  | 976.8  | 442    | 351.3  | 283.6 | 343.1  | 779.9  | 835    |
| ABHD9   | 128.8  | 163.3  | 98     | 93.1   | 85.6  | 90.2   | 142.9  | 143.9  |
| ABI1    | 91.9   | 114.6  | 95.7   | 90.3   | 83.8  | 81.5   | 90     | 101.7  |
| ABI1    | 318.1  | 367.9  | 169.2  | 133    | 139.3 | 183.4  | 284.7  | 500.3  |

|        |        |        |        |        |        |        |        |        |
|--------|--------|--------|--------|--------|--------|--------|--------|--------|
| ABI2   | 226.7  | 289.5  | 135.2  | 114.6  | 94.2   | 105.1  | 189.4  | 233.8  |
| ABI2   | 638.5  | 814.4  | 413.7  | 293.2  | 233.6  | 346.8  | 566.2  | 911    |
| ABI2   | 228.1  | 302.6  | 117.1  | 101.5  | 100.8  | 100.9  | 193.9  | 250.5  |
| ABI3   | 115.7  | 137.1  | 111.1  | 92.1   | 87.8   | 104    | 121    | 127.9  |
| ABI3BP | 99.9   | 141.2  | 91.8   | 81.1   | 78.8   | 88.4   | 101.6  | 121.3  |
| ABL1   | 559.8  | 757.3  | 600.4  | 474.3  | 391.6  | 405    | 499.3  | 593.9  |
| ABL1   | 116.5  | 125.3  | 130.2  | 143.3  | 127.6  | 138    | 116.8  | 130.3  |
| ABL1   | 120    | 137.5  | 86.6   | 86.5   | 83.1   | 89.6   | 118.6  | 125.8  |
| ABL2   | 101.3  | 118.6  | 107.6  | 86.2   | 82.6   | 111.4  | 112.1  | 118.5  |
| ABL2   | 82.3   | 82.6   | 87.4   | 95.7   | 87.3   | 87.5   | 85.2   | 88.4   |
| ABL2   | 123.7  | 134.8  | 101.5  | 94.2   | 101.7  | 92.4   | 117.9  | 120.2  |
| ABLIM1 | 100.2  | 108.9  | 101.3  | 95.5   | 94.6   | 102.3  | 98.4   | 111.9  |
| ABLIM1 | 90.2   | 105.3  | 92.3   | 82.6   | 87.8   | 83.7   | 88.8   | 93.5   |
| ABLIM1 | 87.6   | 105.5  | 94.6   | 87.5   | 90.4   | 81.8   | 94.4   | 103.9  |
| ABLIM1 | 90.3   | 87.7   | 92.3   | 86.8   | 78.2   | 83     | 89.8   | 100.3  |
| ABLIM2 | 106.7  | 152.4  | 100.5  | 93.8   | 94.9   | 104.1  | 106.6  | 127.7  |
| ABLIM3 | 93.5   | 96.1   | 113.9  | 103.2  | 85.1   | 104.8  | 92.7   | 100.3  |
| ABO    | 88.6   | 103.2  | 99.4   | 94.9   | 86.3   | 87.2   | 99.2   | 107.6  |
| ABP1   | 1187.1 | 1551.5 | 720.6  | 2788.3 | 2621   | 2074.2 | 1039.4 | 776.1  |
| ABR    | 1235.5 | 1564.2 | 1189.8 | 1471.7 | 1114.3 | 1615.6 | 1076.1 | 1030   |
| ABR    | 131.6  | 143.3  | 111.7  | 100.8  | 96.8   | 87.6   | 116.5  | 128.2  |
| ABR    | 107.7  | 114.8  | 102.6  | 95.9   | 86.4   | 79.6   | 97.3   | 95.4   |
| ABRA   | 97.5   | 102.7  | 99.4   | 82.9   | 86     | 95     | 96.3   | 99     |
| ABT1   | 127.2  | 188.4  | 104.5  | 120.3  | 99.7   | 110.8  | 125.6  | 186.9  |
| ABTB1  | 231.8  | 281.6  | 154.5  | 188.8  | 211.7  | 198    | 253    | 277.7  |
| ABTB1  | 96.7   | 133.7  | 135.2  | 135.7  | 168.5  | 168.9  | 127.5  | 183.2  |
| ABTB2  | 105.8  | 130.2  | 114.6  | 130.4  | 117.1  | 172    | 125.1  | 194.9  |
| ACAA1  | 748.8  | 1016.6 | 460.7  | 585.4  | 504.2  | 784.3  | 697.7  | 930.2  |
| ACAA2  | 620.8  | 759.5  | 196.8  | 175.9  | 141.4  | 228.6  | 507.3  | 779.8  |
| ACACA  | 1111.1 | 1560.8 | 820.5  | 1384.2 | 1224.3 | 1736.6 | 1112.1 | 1326.3 |
| ACACA  | 778.3  | 1204.2 | 518.2  | 734.2  | 722.2  | 953.1  | 795.9  | 906.6  |
| ACACA  | 90.2   | 96     | 98.4   | 94     | 89.1   | 91.1   | 89.3   | 99.6   |
| ACACB  | 273.2  | 318.1  | 240.1  | 426.2  | 378.2  | 454.4  | 211.4  | 234.2  |
| ACAD10 | 245.3  | 262.1  | 166.7  | 238    | 189    | 285.6  | 169.1  | 248.8  |
| ACAD11 | 338.7  | 351.8  | 191.5  | 239.2  | 234.7  | 285.7  | 227.4  | 318.5  |
| ACAD8  | 675.1  | 902.9  | 615.9  | 279.3  | 235.2  | 379.4  | 491.4  | 706.6  |
| ACAD9  | 1174.5 | 1492.7 | 778.5  | 930.2  | 799.7  | 1028.6 | 972.9  | 980.1  |
| ACADL  | 93.1   | 99.4   | 93.3   | 87.4   | 77.6   | 80.9   | 89.2   | 88.6   |
| ACADM  | 3971.4 | 4368.9 | 1926.9 | 2205.7 | 1815.4 | 2662.3 | 2833.7 | 4107.6 |
| ACADS  | 233.2  | 300.6  | 173    | 140.7  | 123.4  | 159.2  | 170.7  | 213.8  |
| ACADSB | 120.7  | 137.5  | 96.8   | 99.2   | 99.4   | 109.9  | 116.6  | 124.7  |
| ACADVL | 268.2  | 338.7  | 161.2  | 177.1  | 152.3  | 115.5  | 224.3  | 269.9  |
| ACADVL | 2845.6 | 3233.3 | 2335.6 | 1903.6 | 1716.9 | 2552.3 | 2484.8 | 4020.9 |
| ACADVL | 823.1  | 911    | 696.3  | 625.9  | 619.3  | 950.7  | 682.8  | 930    |
| ACAT1  | 5494.5 | 7064.9 | 3074.4 | 2703.5 | 2102.6 | 3637.4 | 4292.1 | 5637.8 |
| ACAT2  | 155.1  | 182.9  | 115.3  | 111.7  | 111.3  | 119.7  | 136.6  | 212.7  |
| ACBD3  | 1350.4 | 1668.3 | 672.6  | 844.9  | 661.5  | 1344.7 | 1376.5 | 2512.1 |
| ACBD4  | 128.3  | 144    | 94.6   | 95.6   | 95.6   | 104.8  | 116.9  | 145.9  |
| ACBD5  | 124    | 149.4  | 87.8   | 88.5   | 80     | 95.6   | 115.1  | 171.7  |
| ACBD5  | 83.8   | 92     | 93     | 89     | 84.2   | 84.6   | 79.4   | 87.1   |

|        |        |        |        |        |       |        |        |        |
|--------|--------|--------|--------|--------|-------|--------|--------|--------|
| ACBD5  | 95.5   | 101.9  | 93.1   | 82     | 97.9  | 92.4   | 87.4   | 103.3  |
| ACBD6  | 610.2  | 796.6  | 439    | 293.7  | 282.4 | 346.5  | 622.1  | 821.5  |
| ACBD7  | 100.3  | 115.9  | 96.1   | 85.6   | 90.5  | 90.2   | 107.7  | 106.3  |
| ACBD7  | 79.8   | 98     | 91     | 87.6   | 84.3  | 86.8   | 87.7   | 95.6   |
| ACCN1  | 85.9   | 79.5   | 92.8   | 84.7   | 79.6  | 87.5   | 76.3   | 81.5   |
| ACCN2  | 330.9  | 337    | 153.4  | 131.4  | 120.7 | 155.7  | 200.5  | 192.5  |
| ACCN2  | 92.5   | 93.4   | 100.6  | 92.5   | 82.4  | 94.7   | 82.2   | 101.3  |
| ACCN3  | 235.3  | 228.6  | 136.6  | 112    | 112.9 | 119.5  | 188.7  | 242    |
| ACCN3  | 102.9  | 114.2  | 111    | 91.5   | 91.4  | 102.5  | 95.9   | 110.6  |
| ACCN4  | 105.5  | 123    | 108.3  | 100.4  | 95.6  | 101.8  | 107.8  | 128    |
| ACCN4  | 78.4   | 97.8   | 100.2  | 83.5   | 87.5  | 86.2   | 100.6  | 100    |
| ACCN4  | 89.9   | 104.2  | 97.9   | 87.3   | 85.6  | 81.8   | 87.3   | 98.5   |
| ACCN5  | 92.2   | 103.9  | 102.8  | 78.7   | 83    | 84.9   | 96.2   | 109.3  |
| ACD    | 555.8  | 652.9  | 535.7  | 277.4  | 213.1 | 264.7  | 511.1  | 1007.1 |
| ACE    | 105.3  | 119.6  | 102.5  | 95.7   | 87    | 90.2   | 103.7  | 110.3  |
| ACE    | 94.6   | 95.2   | 82.2   | 78.7   | 76.4  | 91.7   | 92.4   | 93.7   |
| ACE    | 103.7  | 120.2  | 99.3   | 83.4   | 86.3  | 79.6   | 115.5  | 116.9  |
| ACE2   | 91.5   | 113    | 92.3   | 89     | 86.4  | 85.8   | 101.5  | 112.2  |
| ACF    | 94.9   | 94.9   | 96.8   | 84     | 82    | 100.5  | 84.5   | 101.2  |
| ACF    | 92.5   | 94.7   | 98.1   | 93.6   | 85.1  | 87.5   | 82.9   | 94.4   |
| ACF    | 90.5   | 98.1   | 109.9  | 93.9   | 98    | 95.2   | 86.2   | 93.5   |
| ACHE   | 80.6   | 89.9   | 83     | 76.4   | 79.1  | 89.1   | 84.1   | 89.5   |
| ACHE   | 86     | 105.8  | 96.8   | 96.4   | 82.1  | 95.3   | 95     | 91.5   |
| ACIN1  | 646    | 890    | 702.1  | 556    | 530.6 | 1065.2 | 544.5  | 914.1  |
| ACLY   | 3345.2 | 4455.8 | 3165.2 | 4101.9 | 3216  | 5100.7 | 3120.8 | 3570.7 |
| ACMSD  | 179.3  | 174.7  | 140.6  | 120.9  | 129.5 | 135.8  | 165.1  | 174.6  |
| ACN9   | 1331.5 | 1373.2 | 665.5  | 627.9  | 403.6 | 696.7  | 1033.8 | 1717.6 |
| ACO1   | 1316.6 | 1725.8 | 1009   | 1095.5 | 843   | 1283.8 | 1166.4 | 1676.8 |
| ACO2   | 592.8  | 704.4  | 274.5  | 209.8  | 184.9 | 277.9  | 489    | 727    |
| ACOT1  | 118.9  | 158.9  | 96.7   | 77.8   | 89.8  | 86.8   | 115.9  | 130.1  |
| ACOT1  | 426.6  | 638.1  | 186.7  | 123.4  | 129.1 | 160.1  | 339.1  | 364    |
| ACOT11 | 555    | 709.7  | 398.3  | 373    | 280.5 | 413.8  | 396.6  | 420.4  |
| ACOT11 | 91.7   | 114.8  | 117.8  | 104    | 112.7 | 105.7  | 90.3   | 94.1   |
| ACOT12 | 102.3  | 120.3  | 100.3  | 104.5  | 96.7  | 95.9   | 109.8  | 119.9  |
| ACOT2  | 93.2   | 99.5   | 97.6   | 97.4   | 87.1  | 91.4   | 90.4   | 97.8   |
| ACOT4  | 894.8  | 1092.5 | 604.2  | 253.5  | 213   | 303.8  | 759.2  | 1208.3 |
| ACOT6  | 78.7   | 88.8   | 85.9   | 88.7   | 80.3  | 83.9   | 79.8   | 83.6   |
| ACOT7  | 93.5   | 105    | 84.6   | 86.1   | 81.2  | 93.5   | 95     | 114.8  |
| ACOT7  | 83     | 95.4   | 85.6   | 81.4   | 87.5  | 86.1   | 94.9   | 92.9   |
| ACOT7  | 3113.8 | 4043.5 | 1424.3 | 1076   | 888.6 | 1022.7 | 2906   | 3193.8 |
| ACOT7  | 99.2   | 111    | 102.7  | 87.6   | 82.4  | 85.6   | 101    | 114.8  |
| ACOT7  | 883.3  | 1330.6 | 798.3  | 402.9  | 327.3 | 423.1  | 847.1  | 1171.1 |
| ACOT7  | 105.5  | 108.1  | 92.6   | 85.2   | 71.5  | 81     | 99.2   | 111.6  |
| ACOT8  | 253.1  | 310.9  | 171.5  | 149    | 125.8 | 141.6  | 194.4  | 231.1  |
| ACOT9  | 235.3  | 308.7  | 134.6  | 133.1  | 127   | 150.2  | 239    | 287.8  |
| ACOT9  | 799.6  | 1057.7 | 353.1  | 328.7  | 269   | 485.9  | 686.5  | 1010.9 |
| ACOX1  | 321.9  | 436    | 203.5  | 171.1  | 148.4 | 211.2  | 290.1  | 460.1  |
| ACOX1  | 106.8  | 120.3  | 83.6   | 95     | 92.2  | 95.8   | 115.6  | 118.4  |
| ACOX1  | 103.4  | 117.5  | 100.5  | 100    | 87.5  | 81.2   | 87.2   | 97.8   |
| ACOX2  | 353.8  | 478    | 247.4  | 262.7  | 156   | 258.9  | 352.1  | 461.4  |

|        |         |         |        |         |         |         |         |         |
|--------|---------|---------|--------|---------|---------|---------|---------|---------|
| ACOX3  | 645.8   | 841.1   | 463.4  | 361.9   | 285.6   | 396.8   | 526.1   | 733     |
| ACOXL  | 81.4    | 94.2    | 96.4   | 92.8    | 76.9    | 77.4    | 86      | 90.7    |
| ACP1   | 1983.7  | 2736.4  | 1203   | 1081.6  | 867.3   | 1422.2  | 1895.8  | 2849.6  |
| ACP1   | 5925.1  | 7747    | 3478.6 | 2491.1  | 1818.2  | 2609.7  | 5354.4  | 7777.7  |
| ACP2   | 256.3   | 278.9   | 165.6  | 128.4   | 132.3   | 150.5   | 251.2   | 359.2   |
| ACP5   | 98.4    | 107     | 92.4   | 85.4    | 91.9    | 83.1    | 84      | 100.5   |
| ACP6   | 221.8   | 289.8   | 173.2  | 169.8   | 125.3   | 171.5   | 192.3   | 191.8   |
| ACPL2  | 124.4   | 147.9   | 129.2  | 98.9    | 98.7    | 96.2    | 113.7   | 136.8   |
| ACPP   | 244.4   | 278.2   | 188.2  | 733.6   | 284.3   | 963     | 220.6   | 366     |
| ACPT   | 171.6   | 222.7   | 200.9  | 183.8   | 190.3   | 155.3   | 150.7   | 162.6   |
| ACPT   | 86      | 82.8    | 87.6   | 89      | 79.3    | 89.5    | 89.8    | 91.9    |
| ACR    | 132.1   | 158.5   | 102.2  | 94.4    | 88.7    | 98.5    | 130.4   | 140.4   |
| ACRBP  | 106.9   | 136.1   | 122.8  | 112.3   | 100.5   | 118.8   | 103.8   | 124.8   |
| ACRC   | 242     | 345.7   | 131.1  | 125.5   | 113.6   | 133.4   | 242.3   | 315.3   |
| ACRV1  | 127     | 149.6   | 112.3  | 105.8   | 98.8    | 107.9   | 120.9   | 149.5   |
| ACRV1  | 118.6   | 130.6   | 102.5  | 91      | 83.7    | 95.7    | 111.8   | 117.6   |
| ACSBG1 | 168.2   | 186.9   | 107.6  | 88.5    | 85.9    | 93.1    | 160     | 190.9   |
| ACSBG2 | 136.3   | 155.9   | 104.7  | 98.9    | 94.9    | 99.1    | 125.8   | 129     |
| ACSL1  | 536.7   | 636.2   | 175.8  | 137.7   | 115.9   | 153.7   | 400.5   | 662.3   |
| ACSL3  | 2506.4  | 3445.8  | 1501.4 | 1719.9  | 1640.1  | 2448.6  | 2262.3  | 3171.1  |
| ACSL3  | 267.4   | 348.6   | 143.5  | 153.7   | 150.4   | 120.6   | 203.6   | 233.7   |
| ACSL3  | 432.8   | 558.7   | 308.6  | 342.4   | 313.6   | 445.4   | 373.6   | 438.1   |
| ACSL4  | 151.8   | 182     | 117.3  | 105.5   | 94.7    | 98.6    | 124.1   | 133.8   |
| ACSL4  | 669.6   | 813.5   | 285    | 253.7   | 164.8   | 267.7   | 637.3   | 839.8   |
| ACSL4  | 914.4   | 1131.9  | 651.5  | 1121.9  | 879.3   | 1444.6  | 911.9   | 1545.2  |
| ACSL5  | 260.2   | 389.3   | 182.2  | 160.7   | 115.2   | 193     | 184.3   | 280.6   |
| ACSL5  | 96.7    | 105.9   | 91.7   | 87.6    | 99      | 87.1    | 94.9    | 94.8    |
| ACSL5  | 73.6    | 86.4    | 91.3   | 92.4    | 85      | 90.7    | 86.1    | 85.8    |
| ACSL5  | 151.5   | 199.2   | 101.1  | 93.3    | 86.4    | 84.9    | 127.1   | 146     |
| ACSL5  | 882.8   | 1157.1  | 603    | 538.2   | 343.6   | 559.6   | 645.5   | 707.2   |
| ACSL6  | 89.8    | 100     | 87.5   | 83.1    | 82.3    | 77.1    | 89.4    | 102.9   |
| ACSL6  | 78.9    | 87.8    | 95.8   | 95.7    | 85.9    | 86.5    | 80.6    | 89.6    |
| ACSL6  | 99.2    | 110.3   | 102.5  | 94.6    | 92.5    | 92.2    | 100.3   | 109.4   |
| ACSM1  | 70.2    | 77.6    | 82.1   | 86.1    | 82.6    | 82      | 79.7    | 76.7    |
| ACSM2  | 108.3   | 116     | 93.7   | 80.6    | 84.4    | 79.7    | 96      | 106.4   |
| ACSM2  | 99.3    | 110.4   | 104.1  | 94.5    | 84.3    | 92.6    | 99.7    | 121.3   |
| ACSM3  | 97      | 100.4   | 104    | 89.4    | 95.8    | 89.6    | 92.5    | 112.2   |
| ACSM3  | 76.6    | 92.4    | 103.8  | 92.6    | 90.5    | 97.1    | 83.8    | 104.3   |
| ACSM3  | 103.9   | 135.8   | 106.9  | 107.7   | 91.8    | 105.6   | 109.3   | 114.1   |
| ACSS1  | 145.9   | 197.6   | 220.9  | 181.1   | 180     | 240     | 118.3   | 158.1   |
| ACSS2  | 131.5   | 154.2   | 85.9   | 78.6    | 77      | 87.8    | 108.8   | 167.1   |
| ACSS2  | 99.3    | 121.5   | 91.3   | 82.8    | 83.2    | 93.7    | 98      | 104.8   |
| ACSS2  | 1440.1  | 1840.6  | 1133.8 | 1526.7  | 1396.8  | 1735.6  | 1208.7  | 1342.4  |
| ACSS2  | 1796.9  | 2228.1  | 1362.9 | 2041.6  | 2027.3  | 2370.8  | 1489.8  | 1553.5  |
| ACTA1  | 93.2    | 102.6   | 98.6   | 89.1    | 92.5    | 89.6    | 91.4    | 103     |
| ACTA2  | 116.4   | 146.5   | 107.4  | 112.6   | 91.7    | 102.3   | 128.2   | 141.8   |
| ACTB   | 31866.2 | 31406.1 | 25615  | 27578.8 | 23963.8 | 29893.2 | 29811.6 | 32311.5 |
| ACTB   | 28810.3 | 31998.4 | 20140  | 23234.8 | 17479.7 | 30753.7 | 25435.6 | 33636.6 |
| ACTBL1 | 94.4    | 94.5    | 86.4   | 78.4    | 75      | 91.1    | 91.9    | 96.5    |
| ACTC   | 88.3    | 94.1    | 91.4   | 91.6    | 77.9    | 96.5    | 82.4    | 101.6   |

|        |         |         |         |         |         |         |         |         |
|--------|---------|---------|---------|---------|---------|---------|---------|---------|
| ACTG1  | 34708.4 | 33714.1 | 41666.1 | 44609.1 | 33331.4 | 41150.9 | 33335.6 | 33778.6 |
| ACTG2  | 84.7    | 95.4    | 93.4    | 99.5    | 92.1    | 103.6   | 93.3    | 99.3    |
| ACTL6A | 4728    | 6082.4  | 3745.5  | 3218.1  | 2448.7  | 4058.2  | 3922.9  | 5549.3  |
| ACTL6A | 3075.3  | 4312    | 1100.6  | 819.1   | 624.7   | 1240.8  | 2271.4  | 3764    |
| ACTL6B | 95.5    | 87.7    | 96.7    | 102.2   | 95.6    | 98.6    | 89.4    | 104.5   |
| ACTL7A | 85.4    | 91.1    | 96.2    | 88.8    | 83.5    | 97.3    | 76.4    | 95.6    |
| ACTL7B | 102.1   | 134.7   | 100.4   | 95      | 94.6    | 92      | 96      | 111     |
| ACTL8  | 130.7   | 131.1   | 104.8   | 93      | 94.1    | 88.2    | 110.6   | 130.1   |
| ACTN1  | 3648.8  | 3970.4  | 3836.6  | 3928.1  | 3020.3  | 4462    | 2610.7  | 3626.7  |
| ACTN2  | 160.7   | 209.6   | 114.9   | 104.5   | 96.9    | 112.6   | 159     | 195.6   |
| ACTN3  | 77.9    | 87.7    | 97      | 83.6    | 84.9    | 86.8    | 81.6    | 85.2    |
| ACTN4  | 579.3   | 774.6   | 808.6   | 883.4   | 677.7   | 980.7   | 653.6   | 1416.8  |
| ACTR10 | 1155.9  | 1455.1  | 663.7   | 603.7   | 494.1   | 799     | 1301.7  | 2249.5  |
| ACTR1A | 917.2   | 1175.6  | 570.7   | 350.7   | 284.6   | 315.5   | 871     | 952.5   |
| ACTR1B | 554.6   | 615.3   | 450.6   | 408.4   | 384.5   | 575.6   | 352.9   | 560.9   |
| ACTR2  | 12068   | 15255.2 | 8130.7  | 8205    | 6004.5  | 9048.7  | 10981.4 | 16770.4 |
| ACTR3  | 1719.8  | 1964.9  | 790.6   | 943.2   | 683.8   | 1411    | 1626.5  | 3569.9  |
| ACTR3B | 184.8   | 251.7   | 147.7   | 111     | 101.6   | 125.6   | 159     | 171.4   |
| ACTR3B | 98.3    | 128.8   | 101.7   | 89.2    | 92      | 89.5    | 103.4   | 109.8   |
| ACTR3B | 175.7   | 251.2   | 115.8   | 99.9    | 87.2    | 95      | 159.8   | 176.2   |
| ACTR5  | 437.5   | 555.3   | 247     | 240.2   | 217.1   | 265.7   | 319.8   | 433.5   |
| ACTR6  | 614.4   | 688.4   | 342.7   | 381.7   | 308.7   | 484.2   | 594.9   | 1034.8  |
| ACTR8  | 214.5   | 263.1   | 167     | 165.5   | 162.6   | 208.3   | 203.8   | 266.9   |
| ACTRT1 | 115     | 140.7   | 118.2   | 114.8   | 106.3   | 112.9   | 113.2   | 139.2   |
| ACVR1  | 416.5   | 578.3   | 277.6   | 248.3   | 207.9   | 259.9   | 482     | 759.3   |
| ACVR1B | 115.2   | 140.5   | 109.4   | 106.4   | 93.5    | 96.5    | 117     | 119.8   |
| ACVR1B | 96.5    | 125.9   | 98.6    | 94.6    | 92.1    | 107     | 103.4   | 117     |
| ACVR1B | 469.3   | 578.6   | 314.3   | 331.7   | 289.1   | 357.2   | 473.8   | 514     |
| ACVR1B | 89.5    | 103.5   | 93.7    | 91      | 86.4    | 90.3    | 88.8    | 113.6   |
| ACVR1C | 91.3    | 104.7   | 95.7    | 91.4    | 83.7    | 86.9    | 95.3    | 110.4   |
| ACVR2A | 163.4   | 186.2   | 160.6   | 157.2   | 154.7   | 181.5   | 158.6   | 230.9   |
| ACVR2B | 80.8    | 118.4   | 99.4    | 93.8    | 79.4    | 74.6    | 86.9    | 122.9   |
| ACVRL1 | 120.8   | 151.3   | 142.4   | 114.9   | 106.4   | 111.1   | 123.5   | 136.1   |
| ACY1   | 911     | 1203.9  | 865.4   | 589.4   | 453.7   | 715.3   | 780.1   | 1120.3  |
| ACY1L2 | 441.7   | 523.3   | 244.7   | 199     | 162.2   | 297     | 275.9   | 781.7   |
| ACY3   | 102.2   | 109.6   | 97.7    | 86.1    | 83.4    | 90      | 98.4    | 110.8   |
| ACYP1  | 276.2   | 357.9   | 114.4   | 111     | 121.5   | 129.6   | 195.3   | 214.8   |
| ACYP1  | 1162.3  | 1216.4  | 583.2   | 495.5   | 473.4   | 580.8   | 791.4   | 1004.6  |
| ACYP1  | 167.1   | 191     | 134.4   | 117.2   | 100.9   | 103.3   | 140.1   | 183.8   |
| ACYP2  | 372.7   | 463.7   | 265.1   | 263     | 222.6   | 245.1   | 380.9   | 744     |
| AD031  | 113.5   | 111.6   | 84.7    | 78.6    | 83.3    | 77.2    | 104.2   | 123.8   |
| ADA    | 534.5   | 716.5   | 505     | 501.3   | 469.9   | 643     | 440.1   | 585.6   |
| ADAL   | 185.9   | 249.8   | 137.8   | 145.9   | 137     | 145.7   | 167.1   | 248.9   |
| ADAM10 | 133.7   | 148     | 98.7    | 93.6    | 93.7    | 126     | 124.8   | 147.4   |
| ADAM11 | 95.4    | 102.5   | 104.9   | 99.9    | 93.9    | 117.8   | 91.9    | 115.2   |
| ADAM12 | 100.3   | 120.6   | 83.7    | 86.1    | 87.1    | 91.4    | 101.3   | 111.5   |
| ADAM12 | 106.6   | 119.1   | 100.7   | 80.9    | 81.7    | 83.9    | 106.2   | 128.3   |
| ADAM12 | 78.4    | 101.5   | 90.5    | 88.6    | 80.7    | 84.8    | 78.7    | 85.8    |
| ADAM15 | 301.1   | 426.3   | 261.3   | 211.3   | 166.6   | 204.2   | 245.8   | 488.5   |
| ADAM15 | 5503.9  | 6870    | 4062.5  | 2893.5  | 2496.5  | 2461    | 4716.5  | 4349.6  |

|          |       |       |       |       |       |       |       |       |
|----------|-------|-------|-------|-------|-------|-------|-------|-------|
| ADAM15   | 200.8 | 241.7 | 191.6 | 174.5 | 136.3 | 137.1 | 157.7 | 228.4 |
| ADAM17   | 368.4 | 518.4 | 239.4 | 274.7 | 244.4 | 265.9 | 433.2 | 543.6 |
| ADAM18   | 72.4  | 94.7  | 98.8  | 84.2  | 86.1  | 88.7  | 76.3  | 74.2  |
| ADAM19   | 107.9 | 146.6 | 89.7  | 89.2  | 78.2  | 87.3  | 113   | 130.6 |
| ADAM19   | 89.1  | 97.4  | 103.5 | 95.6  | 87    | 91.4  | 85.5  | 92.4  |
| ADAM19   | 117.2 | 130.6 | 128.6 | 156.7 | 112.2 | 133.7 | 105   | 122.7 |
| ADAM2    | 100.6 | 119.7 | 100.3 | 96.5  | 90.6  | 95.8  | 97.4  | 109.6 |
| ADAM20   | 94.7  | 83.8  | 90    | 78    | 69.6  | 86.7  | 86    | 86.3  |
| ADAM21   | 109   | 109.9 | 112.7 | 106.1 | 98.4  | 102.8 | 110.3 | 106.5 |
| ADAM22   | 105.1 | 126.8 | 102.1 | 81    | 92.1  | 86.8  | 97.7  | 124.1 |
| ADAM22   | 78.6  | 91    | 95.4  | 85.6  | 79.7  | 80.4  | 73.8  | 89.9  |
| ADAM22   | 113.7 | 142   | 83.2  | 84.1  | 72.8  | 85.3  | 122.1 | 139.4 |
| ADAM23   | 77.2  | 87.5  | 93.2  | 85.7  | 79.7  | 83.5  | 86.1  | 81.5  |
| ADAM28   | 84.9  | 94.2  | 78.4  | 88.7  | 102.3 | 97.6  | 90.5  | 100.7 |
| ADAM28   | 90.4  | 102.9 | 97.5  | 96.9  | 85.9  | 87.7  | 100.2 | 116.1 |
| ADAM28   | 79.3  | 94.9  | 92.5  | 93.7  | 85.2  | 101.6 | 81.5  | 84.3  |
| ADAM29   | 91.4  | 103.9 | 109.3 | 89.5  | 97    | 92.5  | 92.3  | 95.1  |
| ADAM30   | 90.1  | 104.4 | 104   | 95.7  | 99.6  | 83.5  | 93.1  | 97.8  |
| ADAM32   | 126.2 | 133.6 | 111.5 | 107.2 | 100.1 | 102.9 | 121.4 | 122.2 |
| ADAM32   | 99.1  | 132.9 | 88.3  | 85.2  | 73.6  | 78.2  | 105.4 | 111   |
| ADAM33   | 112.1 | 130   | 123   | 101.9 | 106   | 107.8 | 110.4 | 112.5 |
| ADAM33   | 112.3 | 107.1 | 97.7  | 89.7  | 95.3  | 101.3 | 108.8 | 119.1 |
| ADAM3A   | 71.5  | 88    | 91.8  | 89.8  | 80.3  | 88.9  | 75    | 78.5  |
| ADAM6    | 94.3  | 100   | 106.9 | 97.2  | 92.7  | 98.8  | 84.3  | 104.5 |
| ADAM7    | 133.3 | 146.2 | 111   | 94.4  | 98.2  | 91.8  | 132.5 | 133.5 |
| ADAM8    | 83.8  | 94.6  | 99    | 92.2  | 101.2 | 96.1  | 85.4  | 96.8  |
| ADAM9    | 242.3 | 291.5 | 131.2 | 124.2 | 127.4 | 133.2 | 192   | 283.7 |
| ADAMDEC  | 85.5  | 97.1  | 97.1  | 255.5 | 249.4 | 343.4 | 98.7  | 107.8 |
| ADAMTS1  | 208.9 | 245.4 | 113.2 | 117.1 | 97.1  | 119.3 | 154   | 189.7 |
| ADAMTS10 | 84.5  | 96.6  | 100.2 | 91.9  | 91.2  | 97.5  | 93.1  | 116.3 |
| ADAMTS12 | 89.6  | 105.6 | 93.2  | 83.6  | 88.7  | 79.7  | 95.6  | 93.7  |
| ADAMTS13 | 104.7 | 117.9 | 90.7  | 77.2  | 88.5  | 84.7  | 101.7 | 122.1 |
| ADAMTS13 | 79.9  | 81.5  | 84.7  | 81.8  | 82.3  | 74    | 79    | 77.3  |
| ADAMTS13 | 117.9 | 147   | 105.1 | 95.6  | 104.2 | 94.6  | 128.3 | 144.5 |
| ADAMTS14 | 85.2  | 94.1  | 93.9  | 87    | 80.5  | 91.9  | 86.5  | 89.6  |
| ADAMTS14 | 97.7  | 116.2 | 84.7  | 83.5  | 79.4  | 91.1  | 103.8 | 124.7 |
| ADAMTS15 | 101.9 | 127.3 | 93.6  | 94.8  | 84.7  | 90.1  | 94.6  | 110.9 |
| ADAMTS16 | 99.4  | 112.4 | 106.3 | 97.7  | 107.5 | 96.2  | 105.1 | 113.2 |
| ADAMTS17 | 107.9 | 129.5 | 112.9 | 100.8 | 100.2 | 95.2  | 122.5 | 134.1 |
| ADAMTS18 | 109.3 | 140.1 | 107   | 90.5  | 90.3  | 89    | 128.5 | 141.3 |
| ADAMTS18 | 91.7  | 102.9 | 98.9  | 89.4  | 94.2  | 85.7  | 90.9  | 94.2  |
| ADAMTS19 | 107.4 | 111.7 | 134.4 | 123.2 | 118.3 | 129.7 | 98.2  | 112.6 |
| ADAMTS2  | 113.3 | 129.9 | 97.5  | 111.7 | 102.1 | 100   | 115.1 | 123.1 |
| ADAMTS2  | 140.9 | 169.1 | 171.2 | 237.5 | 194.3 | 247.9 | 110.3 | 176.1 |
| ADAMTS20 | 92.5  | 108.3 | 88.3  | 84.5  | 84.8  | 87.6  | 94.8  | 104.2 |
| ADAMTS20 | 80    | 90.5  | 92    | 82.4  | 89.4  | 84.6  | 75    | 91.2  |
| ADAMTS3  | 94.1  | 94.9  | 85    | 78.5  | 83.3  | 82.7  | 91.5  | 109.7 |
| ADAMTS4  | 86.7  | 92.1  | 115.5 | 99.9  | 98.2  | 91.4  | 89.2  | 76.8  |
| ADAMTS5  | 88.6  | 96.9  | 93    | 77.3  | 85.1  | 85    | 90.9  | 85.4  |
| ADAMTS6  | 111.4 | 95.6  | 105.6 | 87    | 83.8  | 98.7  | 99.9  | 111.7 |



|           |        |        |        |        |        |        |        |        |
|-----------|--------|--------|--------|--------|--------|--------|--------|--------|
| ADAMTS7   | 92.3   | 94.7   | 85.9   | 90.3   | 81.2   | 84.3   | 86.7   | 91     |
| ADAMTS8   | 131.2  | 153.4  | 98.6   | 91.3   | 89.1   | 94.2   | 132.2  | 116.6  |
| ADAMTS9   | 106.4  | 140.3  | 109.8  | 105.7  | 96.7   | 93.8   | 106.8  | 110.6  |
| ADAMTSL1  | 91.8   | 99.3   | 88.9   | 97.7   | 88.5   | 89.9   | 83.7   | 111.1  |
| ADAMTSL1  | 88.1   | 93.2   | 80     | 84.9   | 82.5   | 78.7   | 85.9   | 92.2   |
| ADAMTSL1  | 104.7  | 127.7  | 103.8  | 103.1  | 93.4   | 94.2   | 105.2  | 110.3  |
| ADAMTSL1  | 80.6   | 85.1   | 82     | 80.5   | 79     | 81.6   | 85.1   | 85.9   |
| ADAMTSL2  | 81.3   | 89.1   | 104.3  | 93.6   | 90.2   | 100.6  | 84.9   | 81     |
| ADAMTSL3  | 120.7  | 136.5  | 92.7   | 96.3   | 81.2   | 82.4   | 119.6  | 139    |
| ADAMTSL5  | 120.4  | 143.1  | 137.9  | 115.1  | 117.4  | 117.4  | 109.1  | 151    |
| ADAR      | 2979.2 | 3664.5 | 1319.4 | 1516.5 | 1173.7 | 1676.4 | 2619.3 | 3006.1 |
| ADAR      | 116.1  | 117.9  | 85.3   | 93     | 81.2   | 80     | 103.5  | 128.2  |
| ADAR      | 718    | 1109.6 | 991.2  | 787.4  | 647.8  | 1360.7 | 674.1  | 879.3  |
| ADARB1    | 110.3  | 158.4  | 103    | 90.6   | 87.3   | 89.7   | 114.5  | 140    |
| ADARB1    | 155    | 194    | 146.9  | 140.9  | 133.3  | 147.7  | 137    | 164    |
| ADARB1    | 104.8  | 121.3  | 93.3   | 96.3   | 89.7   | 89.5   | 106.2  | 114.5  |
| ADARB1    | 378.5  | 513    | 269.9  | 336.9  | 311.1  | 410.2  | 351.7  | 470.4  |
| ADARB2    | 103.5  | 114.4  | 98.3   | 95.7   | 89.6   | 93     | 109.7  | 114.7  |
| ADAT1     | 413.8  | 581.3  | 425.8  | 373.5  | 278.2  | 477.4  | 326.9  | 505.2  |
| ADC       | 104.9  | 106.9  | 97.7   | 89.4   | 97     | 103.3  | 106.7  | 99.2   |
| ADCK1     | 213.8  | 268.2  | 206.3  | 200.3  | 179.2  | 228.5  | 173.1  | 284.8  |
| ADCK2     | 1423.4 | 1878.5 | 1232.6 | 893.8  | 647.7  | 1002   | 1161.7 | 999.6  |
| ADCK4     | 167.3  | 189.4  | 119.2  | 107    | 88.9   | 126    | 153.4  | 188.5  |
| ADCK5     | 247.9  | 305    | 181.2  | 149.7  | 141.3  | 203.6  | 198    | 271    |
| ADCY1     | 251.8  | 374.1  | 281.4  | 684    | 429.7  | 939.4  | 226.5  | 456    |
| ADCY2     | 148.3  | 161.8  | 103.7  | 102.8  | 90.6   | 103.6  | 150    | 196.2  |
| ADCY3     | 2339.2 | 2649.3 | 2701.2 | 2306.4 | 1518.5 | 2531.7 | 1608.2 | 2187.1 |
| ADCY4     | 166.2  | 177.8  | 169.6  | 149.4  | 153    | 173.8  | 147.7  | 176.6  |
| ADCY5     | 80.6   | 89.7   | 79.3   | 72.5   | 74.6   | 84.2   | 87.8   | 86.9   |
| ADCY6     | 110.8  | 139.5  | 117.4  | 99.8   | 100    | 112.4  | 117.5  | 134.1  |
| ADCY6     | 110.1  | 140.2  | 127.5  | 99.4   | 117.6  | 129.1  | 111.3  | 124.3  |
| ADCY7     | 287.3  | 418.5  | 204.6  | 179.7  | 190.9  | 278.4  | 248.5  | 284.8  |
| ADCY8     | 104.8  | 108.9  | 97     | 86.5   | 92.2   | 90.5   | 99     | 105.3  |
| ADCY9     | 440.7  | 676.6  | 391.8  | 214.5  | 205.9  | 259.9  | 404.9  | 808.2  |
| ADCYAP1   | 134.7  | 130.7  | 100.5  | 88.7   | 85.4   | 92.7   | 119    | 126.6  |
| ADCYAP1R: | 101.4  | 114.7  | 103.1  | 92     | 85.8   | 96.1   | 103.9  | 106.2  |
| ADD1      | 142.9  | 166.5  | 100.3  | 101.3  | 87     | 109.4  | 146.1  | 190.7  |
| ADD1      | 3192.7 | 3417.8 | 2043.6 | 2219.1 | 1685.7 | 2410.9 | 2510.1 | 2984.5 |
| ADD2      | 102.2  | 116.6  | 92.1   | 93.5   | 93     | 82.8   | 98.6   | 117.1  |
| ADD2      | 77     | 96.8   | 91.8   | 91.6   | 88     | 89.7   | 83.4   | 98.4   |
| ADD2      | 123.7  | 152.8  | 109.7  | 86.9   | 86     | 84     | 128.8  | 129    |
| ADD3      | 95.6   | 109.2  | 98.1   | 87.8   | 84.8   | 90.4   | 92.3   | 103.1  |
| ADD3      | 120.5  | 142.7  | 102.9  | 116.1  | 99.7   | 122.4  | 104    | 126.7  |
| ADD3      | 396.5  | 464.3  | 193.5  | 261.2  | 212.1  | 381.6  | 314.7  | 465.2  |
| ADD3      | 253.9  | 305.8  | 148.2  | 185.7  | 165.6  | 228.9  | 172.3  | 248.9  |
| ADFP      | 1551.1 | 2097.3 | 1343.6 | 1378.7 | 1184.9 | 3136.8 | 1784.5 | 3147.9 |
| ADH1A     | 79.4   | 91.5   | 82     | 84.7   | 86.9   | 94.2   | 86.5   | 92.8   |
| ADH1B     | 76     | 77.5   | 94.1   | 92.3   | 87.8   | 90.3   | 82.5   | 83.4   |
| ADH1C     | 70.7   | 82.1   | 89.1   | 82.5   | 79.8   | 86.5   | 74.8   | 81.3   |
| ADH4      | 89     | 99.3   | 82.7   | 77.6   | 79.3   | 71.6   | 85.4   | 91.7   |

|         |        |         |        |        |        |        |        |        |
|---------|--------|---------|--------|--------|--------|--------|--------|--------|
| ADH5    | 203.9  | 268.4   | 117.3  | 103.1  | 85.8   | 110.1  | 161.1  | 248.6  |
| ADH6    | 100.2  | 118.5   | 103.8  | 101.1  | 93     | 90.7   | 100.1  | 117.9  |
| ADH7    | 83.1   | 90.4    | 82     | 84.9   | 80     | 82.5   | 79.3   | 95.5   |
| ADHFE1  | 98.3   | 107     | 98.3   | 93.1   | 92.6   | 92.1   | 99.3   | 107.7  |
| ADHFE1  | 94.3   | 94.9    | 90     | 78     | 86.9   | 82.3   | 96     | 93.6   |
| ADI1    | 220.5  | 270.8   | 108.1  | 103.9  | 92.7   | 105.5  | 187.4  | 296.8  |
| ADIPOQ  | 164.4  | 162.8   | 87.2   | 91.7   | 81.6   | 92.1   | 144.6  | 144.2  |
| ADIPOR1 | 529    | 693.9   | 492.4  | 506.8  | 397.6  | 602.8  | 447.5  | 1139.7 |
| ADIPOR2 | 1022.3 | 1275.9  | 925.7  | 962.9  | 867.4  | 1111.2 | 801.3  | 1279.7 |
| ADK     | 317.2  | 391.7   | 156.6  | 129.7  | 129.2  | 128.5  | 268.6  | 262    |
| ADK     | 84.4   | 88.9    | 87.4   | 84.2   | 79.4   | 82.8   | 85.3   | 91.8   |
| ADK     | 422.2  | 555     | 279.5  | 173.3  | 171.2  | 229.9  | 322.3  | 357    |
| ADM     | 86.1   | 102     | 98.1   | 162.9  | 205.6  | 314.6  | 130.8  | 210.7  |
| ADM2    | 333.7  | 372.8   | 190    | 149.2  | 129.9  | 145.2  | 411.2  | 561    |
| ADMR    | 131.5  | 134.3   | 96.8   | 79.8   | 73.5   | 86.9   | 127.4  | 136.8  |
| ADNP    | 701.4  | 939     | 305.2  | 303    | 220.8  | 368.2  | 632.4  | 981.4  |
| ADNP    | 125.9  | 178.6   | 127.6  | 178.1  | 155.5  | 154.2  | 117.5  | 151.8  |
| ADORA1  | 83.3   | 85.8    | 89.7   | 81.4   | 79.5   | 83.2   | 85.8   | 93     |
| ADORA1  | 93.9   | 109.3   | 91.2   | 90.4   | 88.5   | 89.5   | 103.3  | 111.8  |
| ADORA2A | 124.6  | 126.6   | 110.6  | 110.7  | 109.6  | 108.6  | 104.7  | 126    |
| ADORA2B | 496.4  | 661.5   | 328.3  | 375.5  | 261.8  | 451.3  | 576.8  | 1045.7 |
| ADORA3  | 131.1  | 147.8   | 132.3  | 209.1  | 151.6  | 193    | 138.5  | 140.2  |
| ADORA3  | 324.9  | 381.7   | 178.5  | 188.3  | 169.1  | 234.6  | 250.1  | 315.5  |
| ADPGK   | 1067.8 | 1315.8  | 779.3  | 970.3  | 865.3  | 1220   | 893.7  | 1182.3 |
| ADPN    | 86.9   | 97      | 100.4  | 105.6  | 111.7  | 107.9  | 88.2   | 104.3  |
| ADPRH   | 146.2  | 198.3   | 100.6  | 95.4   | 90.6   | 97.9   | 124.7  | 177.3  |
| ADPRHL1 | 92     | 112.5   | 94.8   | 96.6   | 86.1   | 82     | 100.6  | 104.1  |
| ADPRHL1 | 86.2   | 100     | 101    | 93.3   | 91.9   | 87.1   | 97.8   | 106.6  |
| ADPRHL1 | 115.4  | 128.5   | 92.7   | 93.5   | 88.8   | 94.9   | 124.8  | 123.2  |
| ADPRHL2 | 459.3  | 581.8   | 253.6  | 192.4  | 203.2  | 261.8  | 391.6  | 399.1  |
| ADRA1A  | 77.8   | 81.8    | 88.8   | 83.4   | 81.1   | 85.2   | 84.3   | 88.4   |
| ADRA1A  | 80.8   | 95.9    | 90.9   | 82.2   | 78.6   | 87.9   | 84.4   | 84.1   |
| ADRA1A  | 126.6  | 155.2   | 93.6   | 87.6   | 79.4   | 74.6   | 121    | 151.8  |
| ADRA1A  | 130.9  | 147.1   | 110.5  | 106.8  | 101.4  | 101.7  | 111.2  | 129.5  |
| ADRA1A  | 106.7  | 127.9   | 99     | 103.7  | 95.6   | 97.4   | 113.1  | 113.8  |
| ADRA1B  | 94.1   | 111.2   | 108.9  | 106.9  | 99.6   | 99.7   | 94.6   | 100.5  |
| ADRA1D  | 116.6  | 151.7   | 104.1  | 101.8  | 95.2   | 102.3  | 110.3  | 126.4  |
| ADRA2A  | 129.9  | 152.9   | 109.6  | 95.6   | 101.2  | 91     | 152.9  | 148.8  |
| ADRA2B  | 190.3  | 210.2   | 102.3  | 115.4  | 109.8  | 115.2  | 202.6  | 206    |
| ADRA2C  | 107    | 131.4   | 112.4  | 101    | 94.2   | 105.1  | 109.6  | 111.6  |
| ADRB1   | 124.2  | 142.3   | 113.5  | 108.4  | 112.1  | 123.4  | 110.1  | 129.8  |
| ADRB2   | 300.9  | 383     | 198.5  | 292.5  | 296.1  | 317.3  | 174.1  | 209.5  |
| ADRB3   | 101.6  | 123     | 93.4   | 87.9   | 95.6   | 93.1   | 112.6  | 106.2  |
| ADRBK1  | 81.3   | 84.8    | 92.7   | 85.7   | 83.3   | 82.8   | 72.7   | 80.4   |
| ADRBK2  | 100    | 118.3   | 83.8   | 87     | 82.1   | 87.4   | 98.7   | 109.6  |
| ADRM1   | 684.6  | 794.3   | 525.1  | 356.1  | 285    | 395.7  | 679.7  | 1279.3 |
| ADRM1   | 2274.7 | 2691.5  | 673    | 488.6  | 468    | 717.3  | 2530.9 | 6690.4 |
| ADSL    | 7255.1 | 10043.6 | 5387.7 | 4898.5 | 4525.3 | 6434.1 | 6291.4 | 6203.2 |
| ADSS    | 3123.1 | 3833.6  | 2182.2 | 2356.5 | 1583.1 | 2665.4 | 2580   | 4140.4 |
| ADSSL1  | 88.5   | 105.7   | 93.8   | 84.8   | 81.9   | 86.8   | 94.1   | 102    |

|            |        |        |        |        |       |        |        |        |
|------------|--------|--------|--------|--------|-------|--------|--------|--------|
| ADSSL1     | 238.9  | 293.8  | 223.5  | 207.2  | 176.2 | 259.3  | 195.9  | 275.3  |
| ADSSL1     | 175.7  | 254.4  | 124.5  | 94.6   | 92.5  | 105    | 155.4  | 183.1  |
| AEBP1      | 120    | 135.6  | 77.6   | 81.6   | 79    | 85.5   | 114.8  | 130.9  |
| AEBP2      | 180    | 183.3  | 113.4  | 139    | 120.1 | 159.9  | 142    | 193.2  |
| AES        | 864.9  | 1226.9 | 927.3  | 596.5  | 444.8 | 781.8  | 898    | 1686.9 |
| AES        | 586.1  | 800.1  | 493.3  | 327.1  | 262.8 | 323.7  | 508.5  | 1095   |
| AES        | 110.4  | 117    | 83.7   | 86     | 92.8  | 83.8   | 98     | 106.2  |
| AFAP       | 87.7   | 93.1   | 91.2   | 89.7   | 95.3  | 96.1   | 78.3   | 88.9   |
| AFAP       | 127.7  | 159.6  | 123.3  | 132.9  | 112.9 | 134.8  | 110    | 126.7  |
| AFAP       | 91.2   | 104.6  | 116.4  | 107.3  | 95.8  | 101.3  | 92.8   | 100.9  |
| AFAP1L2    | 110.2  | 115    | 89.2   | 85.5   | 83.7  | 85.1   | 112.7  | 114.9  |
| AFAR3      | 141.8  | 165.6  | 95.7   | 102.6  | 88.3  | 106.7  | 142.2  | 171    |
| AFARP1     | 100.5  | 126.2  | 93.8   | 87.8   | 84.3  | 86.8   | 105.3  | 127.9  |
| AFARP1     | 82.1   | 84.5   | 97.6   | 95.3   | 88.1  | 96.4   | 82     | 86.6   |
| AFF1       | 482.9  | 836.4  | 221.4  | 306.3  | 237.6 | 352.8  | 338.9  | 375.8  |
| AFF2       | 104.5  | 127.9  | 101.2  | 117.6  | 104.1 | 121.7  | 112    | 124.7  |
| AFF3       | 784.3  | 1091.4 | 256.1  | 399.6  | 403.1 | 462.5  | 561.1  | 644.8  |
| AFF3       | 110.4  | 122    | 102    | 101.7  | 88.4  | 98.5   | 101.1  | 103.8  |
| AFF4       | 249.5  | 349.5  | 122    | 145.8  | 161.9 | 197.8  | 218.1  | 362.4  |
| AFG3L1     | 329.3  | 414.5  | 388.1  | 393    | 368.1 | 639.1  | 310.2  | 715.3  |
| AFG3L1     | 136.6  | 155.6  | 128.6  | 129.2  | 119.5 | 112.8  | 111.3  | 133.8  |
| AFG3L1     | 122.8  | 141.4  | 88.2   | 91.9   | 86.1  | 81.3   | 112.2  | 120    |
| AFG3L1     | 96.6   | 105.5  | 90.3   | 89.8   | 88    | 79.7   | 101.6  | 97.8   |
| AFG3L2     | 1786.6 | 2452.7 | 1230.6 | 997.8  | 973.9 | 1488.2 | 1463.7 | 1716.7 |
| AFM        | 86     | 79.8   | 86.4   | 89.4   | 83.5  | 78.4   | 75.4   | 79.9   |
| AFMID      | 113.3  | 136.9  | 121.1  | 96.6   | 94.9  | 113.1  | 108.7  | 110.2  |
| AFP        | 132.8  | 136.5  | 102    | 92.8   | 97.4  | 94.3   | 111.3  | 129.6  |
| AFTIPHILIN | 145.4  | 181.5  | 152.9  | 120.5  | 112.4 | 158    | 129.5  | 142    |
| AFTIPHILIN | 230.2  | 273.9  | 123.7  | 124.8  | 100.5 | 140.1  | 228.2  | 382.5  |
| AFTPH      | 491.4  | 703.3  | 258.5  | 209.5  | 173.7 | 416.9  | 447.7  | 569.3  |
| AGA        | 606.7  | 765.9  | 307.8  | 301.6  | 255.5 | 309.9  | 536.9  | 801.8  |
| AGBL1      | 91.9   | 105.4  | 79.2   | 81.5   | 76.3  | 70.2   | 88.5   | 87.6   |
| AGBL2      | 86.9   | 92.4   | 108.6  | 89.4   | 83.9  | 97.2   | 95.3   | 88.4   |
| AGBL4      | 73.9   | 88.1   | 79.4   | 91.5   | 73.5  | 83.1   | 81.3   | 92.5   |
| AGC1       | 111.1  | 119.8  | 120.3  | 112.4  | 90.7  | 111.3  | 111.7  | 107.9  |
| AGC1       | 74.3   | 82.8   | 89.2   | 83     | 78.7  | 78.9   | 75.2   | 66.5   |
| AGER       | 117.2  | 133    | 97.1   | 90.9   | 76.2  | 86.6   | 114.4  | 121.6  |
| AGER       | 112.5  | 127.8  | 103    | 102.1  | 95.6  | 115.2  | 93.5   | 120.2  |
| AGGF1      | 1176.7 | 1435.2 | 782.4  | 1043.7 | 854.1 | 1410.5 | 1003.8 | 1318.3 |
| AGL        | 107.9  | 113.5  | 89.5   | 76.7   | 78.4  | 85.2   | 116.4  | 123    |
| AGL        | 90.1   | 98.1   | 93.7   | 88     | 85.9  | 90.1   | 93.3   | 103.5  |
| AGL        | 569.6  | 688.4  | 365.5  | 345.9  | 244.8 | 461.6  | 524.3  | 935.3  |
| AGL        | 94.4   | 105.3  | 95.2   | 85.8   | 73.7  | 85.1   | 92.1   | 111.2  |
| AGL        | 98.4   | 116.6  | 101    | 95.8   | 92.9  | 92.3   | 101    | 108.9  |
| AGL        | 215.6  | 250.7  | 120.4  | 123.1  | 130.1 | 172.5  | 170.8  | 281.1  |
| AGMAT      | 401    | 497    | 384.5  | 253.8  | 202   | 152.2  | 309.1  | 472.3  |
| AGPAT1     | 82.4   | 88.8   | 86.8   | 75.8   | 73.3  | 79.1   | 86.3   | 89     |
| AGPAT1     | 81.2   | 92.4   | 84.4   | 88.1   | 84.8  | 84.8   | 84.8   | 95     |
| AGPAT1     | 236.8  | 306.5  | 251.1  | 312.3  | 261.7 | 395.8  | 228.6  | 450.7  |
| AGPAT2     | 1181.9 | 1649.8 | 812.3  | 583.2  | 453.2 | 824.6  | 1115.2 | 1550.1 |

|         |        |        |        |        |        |        |        |        |
|---------|--------|--------|--------|--------|--------|--------|--------|--------|
| AGPAT2  | 1486.2 | 1897.8 | 591.3  | 434.2  | 353.1  | 287.1  | 1341.6 | 1788.5 |
| AGPAT2  | 1064.5 | 1507.2 | 402.2  | 332.8  | 276.6  | 363.9  | 1029   | 1504   |
| AGPAT3  | 93.3   | 136.2  | 109.1  | 107.8  | 95.5   | 91.4   | 105.3  | 124.5  |
| AGPAT3  | 211.9  | 328.3  | 189.1  | 215.8  | 181.9  | 190.8  | 176.5  | 228.1  |
| AGPAT4  | 136.4  | 150.3  | 137.8  | 158.8  | 143.4  | 203.5  | 120.7  | 158.4  |
| AGPAT5  | 968.6  | 1278.8 | 496    | 338.9  | 282.2  | 481.7  | 574.5  | 704.8  |
| AGPAT6  | 194.5  | 241    | 102.8  | 95.6   | 100.8  | 98.1   | 171.2  | 180.3  |
| AGPAT7  | 136.9  | 150.8  | 157.5  | 99.3   | 107.9  | 126.9  | 125.1  | 168.7  |
| AGPS    | 1362.7 | 1686.9 | 936.1  | 1064.7 | 740.4  | 1469.6 | 891.9  | 1420.2 |
| AGR2    | 157.1  | 164.3  | 99.1   | 85.7   | 91     | 100.4  | 119.6  | 154.7  |
| AGR3    | 88.9   | 92.3   | 87.2   | 86.8   | 81.9   | 91.9   | 83.3   | 99.6   |
| AGRN    | 91.9   | 105.8  | 90.5   | 89.9   | 92.7   | 91.3   | 94.1   | 95.3   |
| AGRP    | 122.8  | 119.4  | 101    | 90.8   | 78.4   | 84.5   | 106.5  | 145.3  |
| AGRP    | 83.8   | 96.8   | 94.8   | 91.5   | 87.6   | 95.6   | 85     | 101.6  |
| AGT     | 1166.6 | 1594.7 | 825.1  | 934.8  | 832    | 1263.8 | 1001.9 | 1466.9 |
| AGTPBP1 | 91     | 98.3   | 85.3   | 96.4   | 86.4   | 97.3   | 102.8  | 133.1  |
| AGTR1   | 75.3   | 87.7   | 87.2   | 85.7   | 80.7   | 85.7   | 71.5   | 88.5   |
| AGTR1   | 133.9  | 151.1  | 96.6   | 91.9   | 84.8   | 96.8   | 129.9  | 125.4  |
| AGTR2   | 117.5  | 136.1  | 103.5  | 87.7   | 92.7   | 101.2  | 96.8   | 129.5  |
| AGTRAP  | 349.7  | 402.2  | 201.1  | 171.4  | 122.5  | 176.6  | 250.9  | 450.4  |
| AGTRAP  | 282.3  | 382.3  | 207.7  | 127.8  | 120.4  | 198.7  | 238    | 319.5  |
| AGTRL1  | 88.2   | 104.3  | 95.6   | 82.8   | 83.9   | 95.3   | 95.7   | 99.7   |
| AGXT    | 87.2   | 98.3   | 88.5   | 84.5   | 91.2   | 92     | 90     | 80.6   |
| AGXT2   | 80.4   | 91.6   | 85.7   | 87.5   | 74.5   | 84.3   | 89.6   | 98.1   |
| AGXT2L1 | 97.3   | 107.7  | 82     | 82.7   | 83.8   | 80.6   | 94.9   | 101.6  |
| AHCTF1  | 829.6  | 1085.8 | 548    | 914.4  | 591.5  | 1155.6 | 698.1  | 1094.6 |
| AHCTF1  | 817.2  | 1236.5 | 724    | 699.4  | 566.3  | 1291.5 | 632.5  | 1123.5 |
| AHCY    | 5138.3 | 6658.7 | 5900.7 | 5859.9 | 4379.6 | 6641.9 | 4427.1 | 8680.4 |
| AHCYL1  | 2569.6 | 3985.7 | 1589.3 | 1187.2 | 885.4  | 1717   | 2428.9 | 3730   |
| AHDC1   | 124.8  | 118.6  | 112.5  | 102.1  | 111.6  | 117.9  | 108.9  | 114.3  |
| AHI1    | 272.2  | 320.1  | 219.5  | 280.5  | 256.1  | 348    | 200.6  | 308.9  |
| AHNAK   | 936.7  | 1762   | 494.3  | 1563.2 | 1633.8 | 2026.4 | 1277.7 | 1917.1 |
| AHNAK   | 199.2  | 256.3  | 173.4  | 122.4  | 120.9  | 109.7  | 190.8  | 184.9  |
| AHNAK   | 236.5  | 285.1  | 111.5  | 96.7   | 98.3   | 101    | 210.6  | 318.7  |
| AHR     | 123.8  | 136.7  | 110.1  | 97.3   | 92.6   | 96.9   | 111.1  | 137.6  |
| AHRR    | 111.3  | 125.3  | 91.7   | 116.2  | 98.1   | 115.4  | 120.8  | 126.4  |
| AHSA1   | 2558.5 | 3518.5 | 1093.3 | 552.6  | 506.8  | 855.2  | 2529.9 | 3420.4 |
| AHSA2   | 537.4  | 414    | 167    | 178.6  | 178.4  | 205.7  | 284.4  | 532.9  |
| AHSG    | 137.8  | 173.4  | 93.5   | 92.5   | 81.1   | 87.8   | 131.7  | 142.4  |
| AICDA   | 96.1   | 110.7  | 100.7  | 80.9   | 97.5   | 94.6   | 102.9  | 99.4   |
| AIF1    | 5851.1 | 7535.4 | 3063.3 | 3861.5 | 3162.6 | 5093.8 | 4665.7 | 5253.2 |
| AIF1    | 7394.9 | 8940.6 | 6552.3 | 7859.1 | 5805   | 8217   | 6210.3 | 11105  |
| AIF1    | 81.9   | 107.1  | 96.5   | 114.7  | 106.8  | 101.5  | 81.4   | 98.3   |
| AIFL    | 141.4  | 148.9  | 92.3   | 89.1   | 87.4   | 92.6   | 121.6  | 158.1  |
| AIFM1   | 1899.4 | 2602.6 | 1178.5 | 1377.2 | 978.3  | 1602.7 | 1658.2 | 2022.6 |
| AIG1    | 1070.5 | 1341.5 | 402.6  | 720.5  | 510.8  | 867.6  | 895.7  | 1323.8 |
| AIM1    | 197.7  | 265.4  | 139.1  | 134.3  | 130.1  | 172.5  | 154.1  | 210.8  |
| AIM1L   | 83.2   | 93.1   | 95.7   | 89.6   | 80.6   | 88.3   | 80.6   | 91.5   |
| AIM2    | 95.8   | 104.3  | 96.5   | 85.9   | 78.5   | 89.1   | 96.8   | 114.4  |
| AIP     | 941.5  | 1098.8 | 1016.1 | 798.8  | 757.3  | 1094.5 | 928.3  | 1185.7 |

|        |        |        |        |        |        |        |        |        |
|--------|--------|--------|--------|--------|--------|--------|--------|--------|
| AIPL1  | 93.4   | 116.8  | 104.8  | 94.3   | 90.9   | 93.8   | 96.9   | 107.4  |
| AIPL1  | 85.3   | 99.3   | 106.3  | 96.7   | 95.4   | 90.4   | 78     | 93.5   |
| AIRE   | 116.2  | 128    | 96.6   | 99.2   | 82.7   | 93.3   | 110.7  | 120.2  |
| AIRE   | 5940.1 | 6692.6 | 2558.7 | 4188.6 | 4256.6 | 3107.8 | 5095.4 | 4284.5 |
| AJAP1  | 74.9   | 98.6   | 93.9   | 81.2   | 82     | 77.3   | 80.8   | 78.7   |
| AJAP1  | 106.6  | 137.2  | 93.7   | 95.6   | 84.6   | 101.1  | 106    | 130.7  |
| AJAP1  | 140.6  | 194.9  | 108.6  | 107.6  | 100.5  | 113.3  | 145.7  | 161.6  |
| AK1    | 553    | 620.9  | 300.5  | 172.1  | 172.2  | 172.6  | 428.7  | 395    |
| AK2    | 1683.4 | 2184.2 | 403.5  | 341    | 284.8  | 386.5  | 1536.7 | 1690.5 |
| AK2    | 594.5  | 731.5  | 456.7  | 675.6  | 470.1  | 811.7  | 365.9  | 471.8  |
| AK2    | 4017.6 | 5732.9 | 2984.6 | 2645.2 | 2071.9 | 3278   | 3393.1 | 4804.6 |
| AK3    | 2631.1 | 3284.3 | 1718.4 | 1658.8 | 1268.4 | 1838.1 | 2025.6 | 2484.8 |
| AK3L1  | 965.8  | 1222.1 | 637.7  | 712    | 593.7  | 805.8  | 608.2  | 813.4  |
| AK3L1  | 88     | 112.4  | 89.8   | 86     | 79.8   | 86.7   | 91.4   | 102.9  |
| AK5    | 103.2  | 111.3  | 83.6   | 78.7   | 83.4   | 82.2   | 91.8   | 100.7  |
| AK5    | 82     | 81.4   | 89.8   | 81.5   | 79.9   | 85.1   | 78.2   | 74.5   |
| AK5    | 79.4   | 83     | 103.5  | 82.8   | 94.9   | 82.4   | 78.4   | 80.5   |
| AK7    | 109.6  | 131.6  | 90.2   | 81     | 86.6   | 86.4   | 116.2  | 119.6  |
| AKAP1  | 383.6  | 430.6  | 174.5  | 159.8  | 164.7  | 210.1  | 262.5  | 592.8  |
| AKAP10 | 139.2  | 186    | 111    | 126.5  | 128.9  | 136.3  | 149.2  | 141.7  |
| AKAP11 | 75     | 83     | 77.7   | 83     | 76.4   | 78.6   | 80.2   | 82.5   |
| AKAP11 | 427.1  | 548.8  | 283.2  | 449.3  | 310    | 693.1  | 361.1  | 583.6  |
| AKAP11 | 121.6  | 108.2  | 124.9  | 105    | 102.2  | 101.9  | 84.7   | 99.8   |
| AKAP12 | 87.1   | 96.1   | 100.7  | 97.1   | 85.3   | 89.7   | 99.1   | 91.9   |
| AKAP12 | 109.6  | 142.8  | 99.8   | 85.8   | 72.3   | 85.5   | 102.3  | 121.8  |
| AKAP12 | 193.2  | 265    | 160.1  | 132.4  | 127.2  | 135.7  | 193.3  | 237    |
| AKAP13 | 113.4  | 113.9  | 114.7  | 147.5  | 149.1  | 191.2  | 100    | 114.9  |
| AKAP13 | 381.5  | 548.8  | 290.7  | 671.9  | 527.2  | 800    | 304.3  | 298    |
| AKAP14 | 70.4   | 80.9   | 85.9   | 83.6   | 83.2   | 82     | 66.6   | 78.3   |
| AKAP14 | 79.2   | 90.1   | 91.3   | 92.5   | 87.5   | 85.5   | 84.6   | 82.6   |
| AKAP14 | 86.1   | 102.9  | 100.3  | 83.1   | 87.1   | 95     | 104.4  | 102.9  |
| AKAP2  | 76.3   | 88     | 88     | 95.9   | 84.4   | 87.4   | 80.2   | 90     |
| AKAP3  | 110.9  | 116.9  | 108.1  | 100.3  | 98.5   | 109.4  | 116.1  | 108.2  |
| AKAP4  | 115.8  | 129.9  | 90.9   | 94.4   | 74.3   | 82.1   | 132.2  | 125.9  |
| AKAP4  | 102    | 92.1   | 105.7  | 108.3  | 95.9   | 102.4  | 87.9   | 92.8   |
| AKAP4  | 130.3  | 152.9  | 99.7   | 100.8  | 99.9   | 93.2   | 146.5  | 133.8  |
| AKAP5  | 109.5  | 127.9  | 86.7   | 88.1   | 74.2   | 87.4   | 105    | 109.4  |
| AKAP6  | 82     | 87.2   | 93.1   | 87.1   | 77.8   | 86.2   | 81.7   | 88.4   |
| AKAP7  | 89.6   | 114.6  | 84.8   | 74.7   | 67.9   | 73.8   | 92.9   | 105.5  |
| AKAP7  | 109    | 130.7  | 99.1   | 99.1   | 90.6   | 100.9  | 97.3   | 125.6  |
| AKAP7  | 1253.9 | 1728.3 | 1206.8 | 1137.2 | 1095.6 | 1517.2 | 700.7  | 991.7  |
| AKAP7  | 248.3  | 325.3  | 140.9  | 126.6  | 136    | 152.8  | 116.9  | 112.3  |
| AKAP8  | 565.3  | 734.4  | 582.2  | 522.4  | 451.9  | 761    | 508.9  | 874.7  |
| AKAP8L | 246.2  | 254.6  | 216.7  | 188.2  | 160.3  | 201.2  | 242.8  | 357.7  |
| AKAP9  | 106.8  | 121.1  | 84.9   | 85.8   | 85.7   | 84.5   | 105.4  | 113.2  |
| AKAP9  | 176.9  | 166    | 106.8  | 92.3   | 86.4   | 98.8   | 144.6  | 141.7  |
| AKNA   | 245.9  | 286    | 278.7  | 283.5  | 230.8  | 398.3  | 230.9  | 486.5  |
| AKR1A1 | 1431.9 | 1952   | 1211.7 | 1372.6 | 1228   | 1762   | 1206   | 1648.2 |
| AKR1A1 | 113.1  | 132.3  | 94     | 85.7   | 84.9   | 90.1   | 111.5  | 133.3  |
| AKR1A1 | 2122.7 | 2390.1 | 815.4  | 1023.1 | 911    | 1212.9 | 1775   | 2298.7 |

|          |        |         |        |        |        |        |        |        |
|----------|--------|---------|--------|--------|--------|--------|--------|--------|
| AKR1B1   | 3669.6 | 4663.3  | 2501.7 | 1941.2 | 1525.4 | 2142.7 | 3111.4 | 4645   |
| AKR1B10  | 75.3   | 84.6    | 97.8   | 90.1   | 79.8   | 81.6   | 83.3   | 83.6   |
| AKR1C1   | 77     | 79.7    | 76.6   | 78.8   | 81.6   | 78     | 76.2   | 80.6   |
| AKR1C2   | 431.1  | 649.3   | 333.9  | 262.6  | 198.1  | 270    | 773.7  | 1037.1 |
| AKR1C3   | 113.9  | 135.8   | 110.2  | 111.8  | 93.1   | 116.5  | 163.8  | 215.2  |
| AKR1C4   | 93.7   | 101.8   | 108    | 92.6   | 98.7   | 93.4   | 88.8   | 92.3   |
| AKR1CL1  | 84.7   | 93.7    | 101.2  | 90.6   | 87.8   | 89.9   | 93.6   | 88.1   |
| AKR1CL2  | 74.8   | 95.2    | 93.2   | 86.2   | 75.9   | 74.7   | 80.3   | 88.5   |
| AKR1D1   | 9416.3 | 10981.1 | 3238.9 | 6768.4 | 6568.8 | 4408.4 | 8082.7 | 6817.8 |
| AKR7A2   | 5769.2 | 7523.2  | 3381.4 | 2650.6 | 2260.3 | 2898.7 | 5198   | 5499.6 |
| AKR7A3   | 981    | 1244.1  | 570.5  | 504.1  | 424    | 556.2  | 928.3  | 1831.1 |
| AKT1     | 3318.4 | 4010.2  | 3136.2 | 2480.6 | 1985.6 | 2571.5 | 2778.8 | 3999.2 |
| AKT1     | 1941.1 | 2612.3  | 2359.9 | 1974.3 | 1439.4 | 3188.8 | 1818.3 | 3748   |
| AKT1     | 139.1  | 134.1   | 95.4   | 87     | 71.7   | 98.4   | 128.8  | 150.3  |
| AKT1S1   | 102.1  | 125     | 103.8  | 104.2  | 95.8   | 98     | 91.4   | 127.8  |
| AKT2     | 106.5  | 126.1   | 120.8  | 106.7  | 92.6   | 95.8   | 91     | 133.2  |
| AKT3     | 84.8   | 108.6   | 102.2  | 91.1   | 89.5   | 102.4  | 83     | 111.4  |
| AKT3     | 119.6  | 137.8   | 114.3  | 89.3   | 83.5   | 94.4   | 124.8  | 139.2  |
| AKT3     | 104.2  | 134.4   | 98.1   | 91.1   | 88.5   | 90.7   | 118.1  | 122.1  |
| AKTIP    | 362    | 446.3   | 288.6  | 230.1  | 200.4  | 298.7  | 289.9  | 500.4  |
| ALAD     | 135    | 131     | 99.5   | 93.1   | 95     | 92.1   | 123.7  | 130    |
| ALAD     | 780    | 1067.2  | 547.6  | 533.2  | 490.5  | 720.6  | 575.7  | 612.5  |
| ALAD     | 75.4   | 76.6    | 90.2   | 91.6   | 87.5   | 89.2   | 72.8   | 78.6   |
| ALAS1    | 124    | 160.3   | 118.7  | 103    | 95.3   | 114    | 114.5  | 131.9  |
| ALAS1    | 136.7  | 193.8   | 114.7  | 129.9  | 119.2  | 116.7  | 164.7  | 206.3  |
| ALAS1    | 98.3   | 112.6   | 107.9  | 91.4   | 99     | 87     | 90.6   | 112.5  |
| ALAS2    | 85.9   | 101.6   | 98.9   | 99.1   | 93     | 91.7   | 88.8   | 98.5   |
| ALAS2    | 81.4   | 93.3    | 93.5   | 91.3   | 82.3   | 78.2   | 82.1   | 83.2   |
| ALAS2    | 107.5  | 119.3   | 104.4  | 96.4   | 93.5   | 83.5   | 114.9  | 132.4  |
| ALB      | 106.1  | 129.6   | 91.4   | 106.6  | 78.6   | 96.2   | 101.6  | 106    |
| ALCAM    | 1081   | 1382.1  | 496.8  | 672.7  | 384.1  | 1080   | 844    | 2258.2 |
| ALDH16A1 | 273.4  | 377.4   | 355.6  | 255.1  | 239.9  | 324.3  | 233.4  | 407.4  |
| ALDH18A1 | 632.2  | 883.4   | 405.8  | 368    | 266.3  | 371.6  | 385.9  | 421.8  |
| ALDH1A1  | 101.5  | 122.1   | 103.9  | 92.7   | 83.9   | 99.8   | 87.8   | 102.7  |
| ALDH1A2  | 108.6  | 113.1   | 101.7  | 102    | 85     | 90.5   | 99.6   | 106.7  |
| ALDH1A2  | 175.8  | 211.5   | 111.9  | 104.4  | 108.9  | 112.6  | 174.5  | 188.5  |
| ALDH1A3  | 125.1  | 137.9   | 104.8  | 85.3   | 81.8   | 101.9  | 116.7  | 129.7  |
| ALDH1B1  | 642.4  | 934.8   | 308.1  | 217.6  | 179    | 258.4  | 464    | 713.7  |
| ALDH1L1  | 74.4   | 87.4    | 98.5   | 87.9   | 91.3   | 86.1   | 81.2   | 85.8   |
| ALDH1L2  | 123.1  | 145.6   | 90.6   | 93.5   | 84.9   | 90.6   | 115.7  | 151.8  |
| ALDH2    | 1686.9 | 2111.6  | 1088.2 | 1819.5 | 1517.5 | 2800.5 | 1140.9 | 1569.6 |
| ALDH3A1  | 89.2   | 94      | 88.9   | 96.8   | 85.1   | 97.4   | 99.3   | 103    |
| ALDH3A2  | 144.4  | 241.5   | 88.9   | 104.9  | 92.9   | 113.8  | 146.9  | 177.2  |
| ALDH3A2  | 218.6  | 261.7   | 166.3  | 194.2  | 170.7  | 210.4  | 179.5  | 209.1  |
| ALDH3B1  | 155.9  | 190.7   | 95.9   | 111.7  | 84.4   | 97.8   | 124.2  | 168.9  |
| ALDH3B1  | 603.4  | 701.5   | 512.5  | 677.9  | 509.3  | 610.5  | 521.4  | 1158.5 |
| ALDH3B2  | 87.1   | 114.3   | 97.1   | 92.5   | 91.4   | 97.4   | 95.1   | 117.3  |
| ALDH3B2  | 97.6   | 117.7   | 83.4   | 89.9   | 80.9   | 82.6   | 102.3  | 109.1  |
| ALDH3B2  | 77.9   | 90.3    | 94.1   | 86.7   | 79.6   | 91     | 86     | 82.8   |
| ALDH4A1  | 66.8   | 79.6    | 95.5   | 88.4   | 82.7   | 101.9  | 73     | 92.7   |

|          |        |         |        |        |        |        |        |        |
|----------|--------|---------|--------|--------|--------|--------|--------|--------|
| ALDH4A1  | 187.8  | 207.7   | 118.6  | 135    | 117.9  | 131.2  | 168.2  | 171.9  |
| ALDH4A1  | 118.3  | 129.5   | 117.9  | 117.8  | 96.1   | 104.4  | 107.2  | 129    |
| ALDH5A1  | 282.2  | 429     | 259.8  | 311.1  | 240.6  | 404.4  | 193.5  | 336.6  |
| ALDH6A1  | 143.1  | 198.4   | 117.9  | 108.1  | 97.6   | 93.3   | 129.7  | 174.1  |
| ALDH7A1  | 299.3  | 360.4   | 190.5  | 254.7  | 214.3  | 299.2  | 266.8  | 294.7  |
| ALDH8A1  | 111.1  | 136.7   | 97.3   | 106.3  | 106.5  | 99.7   | 103.2  | 129.6  |
| ALDH8A1  | 75.4   | 96.9    | 97.5   | 90.2   | 79.3   | 94.7   | 84.4   | 82.5   |
| ALDH9A1  | 9660.4 | 11625.2 | 6893.7 | 5349.8 | 4268.9 | 5689.1 | 8347.6 | 9525.6 |
| ALDOA    | 111.7  | 114.8   | 111.2  | 97.2   | 104.1  | 98.8   | 103.1  | 107.6  |
| ALDOA    | 6699.3 | 9412.6  | 4753.9 | 3273.9 | 3051.4 | 1910.6 | 6077.8 | 8206.6 |
| ALDOA    | 165.7  | 175.8   | 111.2  | 102.8  | 89.4   | 92.6   | 155    | 162.9  |
| ALDOA    | 7122.5 | 9544.6  | 5288.4 | 3963.8 | 2966   | 4663.7 | 6381.9 | 9412.8 |
| ALDOB    | 99.9   | 118.1   | 107.7  | 92.6   | 96.1   | 108.3  | 99.8   | 115.8  |
| ALDOC    | 706.8  | 976.8   | 503.3  | 447.9  | 480.1  | 492.6  | 648.5  | 583    |
| ALF      | 98     | 92.6    | 102.3  | 94.8   | 87.8   | 94.5   | 95.1   | 99.8   |
| ALF      | 85.3   | 96      | 82.2   | 86.8   | 72.4   | 80.3   | 84.8   | 93.9   |
| ALG1     | 343.8  | 535.4   | 234.2  | 151.2  | 128    | 121.9  | 345    | 382.5  |
| ALG10    | 134.7  | 147.5   | 109.1  | 112.9  | 99.4   | 116.5  | 115    | 115.4  |
| ALG11    | 215.6  | 341.4   | 119.5  | 175.8  | 135.2  | 118.9  | 257    | 314.5  |
| ALG12    | 118.2  | 134.8   | 122.3  | 118.5  | 130.5  | 117.6  | 117.5  | 125.2  |
| ALG13    | 129.1  | 123.4   | 108.6  | 102.2  | 97.9   | 116.4  | 122.7  | 159.5  |
| ALG14    | 285.4  | 389.7   | 149.2  | 152.4  | 121.4  | 142    | 231.2  | 285.8  |
| ALG2     | 101.2  | 102.7   | 97.7   | 94.5   | 87.9   | 92.3   | 103.7  | 111.3  |
| ALG3     | 2185   | 2716.5  | 1000.2 | 766.9  | 585.8  | 617.2  | 1879.8 | 2050.7 |
| ALG5     | 2281   | 2610.9  | 907    | 770.1  | 543.5  | 773    | 2565.8 | 4329.7 |
| ALG6     | 546.8  | 706.4   | 380.7  | 336.7  | 252.3  | 452.9  | 425.9  | 983    |
| ALG8     | 2295.4 | 2899    | 1061.6 | 809.4  | 510    | 979.4  | 2086   | 3231.6 |
| ALG8     | 83.8   | 94.1    | 105.2  | 92.2   | 99.5   | 94.8   | 88     | 92.7   |
| ALG8     | 3238.5 | 4620.3  | 2036.6 | 1594.9 | 1012.4 | 1677.9 | 3538.6 | 4046.8 |
| ALG9     | 656.1  | 871.4   | 355.4  | 270.1  | 194.4  | 252    | 530.8  | 688.7  |
| ALK      | 101.9  | 116.7   | 101.4  | 99.8   | 87.4   | 88.2   | 104.7  | 100.2  |
| ALKBH    | 442.9  | 650.3   | 312.5  | 232.2  | 196.5  | 346.8  | 399    | 601.9  |
| ALKBH1   | 168.3  | 199.7   | 133.7  | 114.6  | 109.3  | 110.8  | 139    | 163.2  |
| ALKBH1   | 488.7  | 689.7   | 338.3  | 254.8  | 217.4  | 354.4  | 426    | 644.6  |
| ALKBH2   | 362.9  | 438.2   | 331.1  | 196.6  | 175.7  | 233.9  | 249.7  | 266    |
| ALKBH3   | 824.4  | 1031.3  | 680.9  | 736.1  | 561.2  | 1008.1 | 611.7  | 958.9  |
| ALKBH4   | 198.1  | 262.8   | 156.7  | 147.9  | 148.3  | 144.5  | 196.5  | 204.6  |
| ALKBH5   | 3124   | 3746.3  | 2523.6 | 2850.1 | 2327.9 | 3279.2 | 2427.7 | 3676.7 |
| ALKBH6   | 481.1  | 615.8   | 298.6  | 270.8  | 243.6  | 259.4  | 453.1  | 564.5  |
| ALKBH7   | 384.3  | 492.9   | 314.5  | 274.6  | 230.3  | 317.7  | 405    | 424.5  |
| ALKBH8   | 346.1  | 410.7   | 177    | 187.7  | 147.8  | 151    | 243.8  | 334.9  |
| ALLC     | 100.8  | 110.7   | 94.1   | 92.9   | 85     | 92.6   | 97     | 110.7  |
| ALLC     | 91.6   | 88.6    | 83.8   | 82.1   | 81     | 83.5   | 84.2   | 96.3   |
| ALLC     | 98.9   | 107.4   | 114.1  | 96.6   | 102.6  | 94.3   | 90.5   | 92.4   |
| ALMS1    | 124.8  | 158.3   | 143.1  | 160.9  | 160    | 195.2  | 115.1  | 133.2  |
| ALOX12   | 86.3   | 86.8    | 88.6   | 84.8   | 75.7   | 86.8   | 88.1   | 80.8   |
| ALOX12B  | 91.5   | 91.3    | 94.5   | 91.4   | 94.4   | 88.2   | 88.7   | 98.1   |
| ALOX12P2 | 78.3   | 76      | 82.8   | 87.6   | 83.1   | 88.1   | 76.1   | 80.4   |
| ALOX15   | 108.9  | 126.6   | 107.9  | 109.8  | 104.1  | 106.6  | 110.7  | 114    |
| ALOX15   | 120    | 146.3   | 85.4   | 86.7   | 76.8   | 97.4   | 127.5  | 136.3  |

|          |        |        |        |        |        |        |        |        |
|----------|--------|--------|--------|--------|--------|--------|--------|--------|
| ALOX15B  | 105.7  | 125.9  | 92.7   | 90.9   | 87.4   | 86     | 106.8  | 122.8  |
| ALOX15B  | 88.6   | 88.3   | 98.2   | 81     | 86.4   | 82.7   | 86.4   | 90.2   |
| ALOX15B  | 107.8  | 131    | 116.6  | 102.4  | 96.6   | 88.3   | 104.4  | 117.6  |
| ALOX5    | 1291.5 | 1538   | 858.7  | 1522.7 | 883.3  | 1631.5 | 687.3  | 620.4  |
| ALOX5    | 105.2  | 110.5  | 99.2   | 106.5  | 97.6   | 104.7  | 105.1  | 114.6  |
| ALOX5AP  | 3353.2 | 4210.4 | 2347.1 | 3275.5 | 2058.1 | 2258.2 | 3630.5 | 4924.4 |
| ALOXE3   | 87.9   | 107    | 98.4   | 93     | 92.8   | 99.8   | 89.3   | 97     |
| ALPI     | 107.1  | 127.9  | 103.4  | 94.7   | 94.5   | 104.1  | 118.5  | 119.5  |
| ALPK1    | 182.8  | 238.2  | 193.4  | 207.7  | 177    | 245.7  | 161.6  | 245.3  |
| ALPK3    | 83.3   | 95.4   | 88.1   | 88     | 84.9   | 93.6   | 94.5   | 92.2   |
| ALPL     | 106.3  | 109.2  | 99.8   | 100    | 87.7   | 89.9   | 100.3  | 112    |
| ALPP     | 2146.6 | 2196.5 | 1017.3 | 1840.3 | 2090   | 1467.3 | 1970.8 | 2267.3 |
| ALPPL2   | 310    | 365.9  | 146.8  | 167.1  | 138.6  | 178.6  | 220.8  | 284.8  |
| ALS2     | 355.4  | 464.2  | 288.7  | 405.4  | 328.4  | 459.5  | 418.4  | 555.7  |
| ALS2CL   | 103.9  | 121.9  | 99.9   | 96.9   | 87.4   | 104.2  | 104.3  | 122.6  |
| ALS2CL   | 88     | 88.3   | 108.8  | 80.2   | 90.8   | 89.2   | 79.5   | 97.8   |
| ALS2CL   | 86.8   | 102    | 98.2   | 78.4   | 78     | 84.9   | 83.8   | 98.8   |
| ALS2CR11 | 80.6   | 86.1   | 96.7   | 99.8   | 89     | 90.6   | 76.1   | 89.3   |
| ALS2CR12 | 108.8  | 115.7  | 95     | 80.4   | 79.4   | 84.3   | 106.9  | 100.6  |
| ALS2CR13 | 1071   | 1472.7 | 695    | 1350.8 | 923.7  | 1571.5 | 814.6  | 1112.3 |
| ALS2CR15 | 118    | 152.4  | 128.6  | 111.7  | 99.3   | 120    | 105.5  | 155.4  |
| ALS2CR16 | 91.6   | 91.6   | 92.4   | 96.7   | 94.8   | 96     | 90.5   | 94.3   |
| ALS2CR19 | 91.1   | 93.1   | 99.7   | 87.4   | 85.1   | 83.5   | 82.3   | 88.1   |
| ALS2CR2  | 659.4  | 813.3  | 448.6  | 567.6  | 432.7  | 655.6  | 488.4  | 706.9  |
| ALS2CR4  | 531.9  | 695.6  | 444.1  | 393    | 281.1  | 467.6  | 398.2  | 599.5  |
| ALS2CR7  | 103.9  | 109.1  | 93.3   | 84.5   | 82.2   | 91.1   | 100.9  | 112.6  |
| ALS2CR8  | 112.4  | 137.5  | 121.8  | 93.7   | 92.2   | 109.4  | 97.3   | 121.2  |
| ALX3     | 91.7   | 106.9  | 81.9   | 83.5   | 80.1   | 87.6   | 97.9   | 100.7  |
| ALX4     | 103.3  | 112.6  | 89     | 86.4   | 73.5   | 77.9   | 85.8   | 107.5  |
| AMAC1    | 122.4  | 159.1  | 95.7   | 84     | 79.3   | 89.8   | 106.9  | 130.5  |
| AMAC1L2  | 76.5   | 83.1   | 106.8  | 107.1  | 97.6   | 88.1   | 81.9   | 80.5   |
| AMACR    | 191.7  | 230.4  | 141.8  | 122.1  | 132.9  | 136    | 154.8  | 169.7  |
| AMACR    | 148.3  | 182.1  | 136.3  | 143.1  | 123.3  | 159.4  | 133.9  | 150.8  |
| AMBN     | 94.1   | 114.2  | 103.4  | 98.4   | 95.6   | 99.6   | 114.6  | 122.6  |
| AMBN     | 86.3   | 96.8   | 96.6   | 81.8   | 86.2   | 85     | 88.8   | 90.3   |
| AMBP     | 155.2  | 194.2  | 117.3  | 108.9  | 100.6  | 110    | 157.5  | 163.3  |
| AMD1     | 4504.4 | 5052.8 | 2769.3 | 2223.4 | 1732.2 | 2420.7 | 2920.3 | 4570   |
| AMD1     | 2098   | 2798.4 | 715.4  | 678.9  | 498    | 488.1  | 1167.2 | 1608.1 |
| AMDHD1   | 112.6  | 125.9  | 104.2  | 105.2  | 96.6   | 112.1  | 105.6  | 116.8  |
| AMDHD2   | 118.6  | 147.2  | 137.9  | 100    | 110.8  | 141.6  | 92.6   | 142.2  |
| AMELX    | 78.7   | 77     | 95.3   | 90.2   | 96.5   | 98.5   | 81.1   | 82.1   |
| AMELY    | 92.7   | 113.4  | 112.2  | 102.3  | 102.4  | 95     | 102.8  | 106.9  |
| AMFR     | 336.9  | 433.2  | 421.3  | 330.2  | 262.3  | 249.7  | 266.8  | 563.4  |
| AMFR     | 156    | 202.9  | 119.1  | 107.1  | 98.5   | 109.5  | 147.3  | 167.9  |
| AMH      | 90.1   | 106.3  | 104.7  | 89.1   | 77.2   | 88.6   | 92.4   | 122.3  |
| AMHR2    | 77.2   | 94.7   | 86.2   | 92.9   | 91.9   | 81     | 84.7   | 90     |
| AMICA1   | 110.9  | 140.2  | 116.8  | 155.5  | 173.5  | 183.1  | 104.8  | 129.2  |
| AMID     | 99.5   | 108.5  | 111.6  | 96.2   | 98.4   | 115.2  | 120.6  | 205.1  |
| AMIGO1   | 148.6  | 175.1  | 93.7   | 88.8   | 95.6   | 94.1   | 125.4  | 151.4  |
| AMIGO2   | 149.2  | 161.2  | 103.6  | 98.9   | 98.7   | 98.2   | 143.4  | 158.4  |



|         |        |        |        |        |        |        |        |        |
|---------|--------|--------|--------|--------|--------|--------|--------|--------|
| AMIGO3  | 115.6  | 137    | 90.6   | 85.3   | 98.8   | 97.9   | 113.1  | 125.7  |
| AMMECR1 | 135.7  | 194.7  | 95.3   | 105.8  | 107    | 107    | 124    | 165.2  |
| AMMECR1 | 634.1  | 683.2  | 244.1  | 285.5  | 181    | 307.5  | 578.3  | 745.3  |
| AMMECR1 | 265.4  | 368.7  | 201.8  | 194.7  | 169.8  | 253.4  | 236.6  | 318.9  |
| AMN     | 96.5   | 106.7  | 101.3  | 99.6   | 91.5   | 97.3   | 92.6   | 100.2  |
| AMOT    | 126    | 148.8  | 124.5  | 111.6  | 108.9  | 115    | 118.4  | 127.3  |
| AMOTL2  | 115.5  | 160    | 87.3   | 85.9   | 81.9   | 98.7   | 121.5  | 142.9  |
| AMPD1   | 87.2   | 101.9  | 87.3   | 82.6   | 88.4   | 80.1   | 92.6   | 96.1   |
| AMPD2   | 92.4   | 113.1  | 90.4   | 92     | 93.6   | 94.4   | 90.2   | 111.1  |
| AMPD2   | 109.1  | 110.8  | 82.3   | 78.4   | 81.7   | 86.1   | 107.2  | 120.1  |
| AMPD2   | 110.4  | 124.7  | 85.9   | 90     | 93.1   | 83.5   | 99.3   | 123.5  |
| AMPD3   | 120.4  | 145.2  | 111    | 106.4  | 97.5   | 108.2  | 110.4  | 118.5  |
| AMPD3   | 115.4  | 135.3  | 87.5   | 86.1   | 80.3   | 79.8   | 106    | 106    |
| AMPD3   | 79.2   | 87.6   | 89.7   | 83     | 83.5   | 81.1   | 87.7   | 88.8   |
| AMPD3   | 90.9   | 100.2  | 105.1  | 91.6   | 96.6   | 88.7   | 90.2   | 86.9   |
| AMPH    | 99.7   | 127.1  | 102.4  | 99.4   | 91.6   | 95     | 109.7  | 123.7  |
| AMPH    | 134.1  | 149.3  | 87.4   | 98.6   | 81.7   | 94.7   | 124.2  | 152.8  |
| AMT     | 218.7  | 196.1  | 147.4  | 134.4  | 131.2  | 183.8  | 136.8  | 144.8  |
| AMY1A   | 75.3   | 76.7   | 91.3   | 91.6   | 78.8   | 82.3   | 75.7   | 80.9   |
| AMY1A   | 883.2  | 955.9  | 456.8  | 591.6  | 380.8  | 383.1  | 655.5  | 1591.1 |
| AMY1A   | 71.7   | 82.5   | 91     | 80.5   | 80.7   | 89.4   | 73.8   | 78.9   |
| AMY1B   | 82.1   | 92.3   | 85.4   | 86.2   | 75     | 75.9   | 77.4   | 89.4   |
| AMY2A   | 90.7   | 105.8  | 102.1  | 89.4   | 91.1   | 90.3   | 83.7   | 85.1   |
| AMY2B   | 103.9  | 110.8  | 102.6  | 95.7   | 103.4  | 107.6  | 112.4  | 124.4  |
| AMZ1    | 93.6   | 95.8   | 90     | 93.5   | 85.3   | 88.2   | 99.1   | 106.6  |
| AMZ2    | 101.8  | 115.6  | 106.8  | 98.6   | 92.9   | 101.9  | 103.5  | 110.1  |
| AMZ2    | 1504.6 | 2189.1 | 1085.5 | 1113.2 | 922.6  | 1738.2 | 1128   | 1741.7 |
| ANAPC1  | 1262.4 | 1903.3 | 1369.3 | 1608.1 | 1237.9 | 1902.6 | 1093.2 | 1144.3 |
| ANAPC10 | 1096.4 | 1263.2 | 752.5  | 658.6  | 479.8  | 705.8  | 1033.3 | 1721.2 |
| ANAPC11 | 1173.7 | 1586.4 | 1032.7 | 834.2  | 639.3  | 783.9  | 1074.5 | 1251.5 |
| ANAPC11 | 92.4   | 105.6  | 92.5   | 84.3   | 83.6   | 93.1   | 102.3  | 98.4   |
| ANAPC11 | 1568.8 | 1961.8 | 917.1  | 927.1  | 797    | 938.4  | 1939.7 | 1746.7 |
| ANAPC13 | 5024.8 | 6476.2 | 2458.8 | 2863   | 2331.5 | 3021.9 | 4582.9 | 5991.7 |
| ANAPC2  | 117.3  | 142.3  | 107.5  | 103.4  | 109.4  | 89.3   | 111.4  | 109.4  |
| ANAPC2  | 134.1  | 178.2  | 150.1  | 117.5  | 121.5  | 185.7  | 109.3  | 148.8  |
| ANAPC4  | 1355.9 | 1651.6 | 836.1  | 809.7  | 668    | 1139.2 | 863.4  | 1083.4 |
| ANAPC5  | 3908   | 4186.8 | 2370.6 | 2678.8 | 2401.8 | 3270.2 | 2815.8 | 4440.2 |
| ANAPC7  | 377    | 486.7  | 220.5  | 147.1  | 136.2  | 170.7  | 248.5  | 316.6  |
| ANG     | 151.4  | 171.3  | 124.5  | 126.2  | 133.8  | 135.4  | 160.8  | 168.5  |
| ANGEL1  | 174.8  | 208.5  | 190.5  | 189.8  | 158.2  | 219.7  | 147.5  | 239.2  |
| ANGEL2  | 850.7  | 1095.1 | 749.2  | 947.6  | 775.1  | 1098.9 | 848.9  | 1363.4 |
| ANGPT1  | 99     | 110    | 110.8  | 100.5  | 95.1   | 102.7  | 97.1   | 107.9  |
| ANGPT2  | 100.6  | 111.5  | 104.8  | 92     | 97.1   | 90.2   | 102.2  | 103.5  |
| ANGPT4  | 79.7   | 91.1   | 90.1   | 89     | 77.8   | 86.9   | 82.4   | 91.9   |
| ANGPTL1 | 74.9   | 92.3   | 100.4  | 84.4   | 79.1   | 83.8   | 85.1   | 86.2   |
| ANGPTL2 | 131.4  | 133    | 107.7  | 91.9   | 89.6   | 98.8   | 120.1  | 133.4  |
| ANGPTL3 | 75.3   | 79.7   | 82.9   | 73.8   | 82.2   | 85.6   | 73.7   | 93     |
| ANGPTL4 | 138.7  | 138.5  | 96.8   | 89.8   | 84.3   | 97     | 124.3  | 146.9  |
| ANGPTL4 | 133.5  | 150.4  | 87     | 94.2   | 81.2   | 86.6   | 121.5  | 139.9  |
| ANGPTL4 | 167.4  | 210.4  | 104    | 100    | 90.5   | 95.5   | 147.2  | 187.1  |

|          |       |        |       |       |       |       |       |        |
|----------|-------|--------|-------|-------|-------|-------|-------|--------|
| ANGPTL5  | 81.6  | 88.4   | 98.5  | 87.9  | 84.1  | 79.3  | 83.4  | 90.9   |
| ANGPTL6  | 96.9  | 94.9   | 100.8 | 126   | 115.5 | 149   | 88.8  | 101.6  |
| ANGPTL7  | 87.7  | 89.3   | 98.9  | 100.3 | 97.1  | 100.2 | 95.2  | 100.8  |
| ANK1     | 94.4  | 103    | 95.6  | 93.7  | 95.6  | 97.3  | 94.4  | 104.9  |
| ANK1     | 119.4 | 124.4  | 88.1  | 85.9  | 83.1  | 77.1  | 112.1 | 140.5  |
| ANK2     | 81    | 93.4   | 93.2  | 89.2  | 84.8  | 86.1  | 85.5  | 110.8  |
| ANK2     | 99.3  | 111.2  | 101.5 | 89.5  | 94.9  | 94.4  | 98.1  | 114.4  |
| ANK3     | 105.2 | 114.1  | 110.6 | 100   | 94    | 113.8 | 97.8  | 108.4  |
| ANK3     | 115.8 | 124.5  | 106.7 | 99    | 94.1  | 110.4 | 101.4 | 97.2   |
| ANK3     | 124   | 145    | 91.6  | 80.3  | 83.2  | 87.3  | 111.1 | 131.4  |
| ANKAR    | 116.6 | 123.2  | 96.2  | 98.1  | 90.1  | 99.6  | 98.7  | 122.9  |
| ANKDD1A  | 266   | 336.3  | 214.2 | 138.8 | 140.9 | 173.4 | 268.2 | 300.3  |
| ANKFN1   | 93.8  | 105.5  | 91.3  | 81.1  | 76.8  | 80    | 104.4 | 105    |
| ANKFY1   | 323.3 | 485.7  | 188.8 | 285.9 | 215.7 | 310.3 | 294.4 | 318.9  |
| ANKFY1   | 144.2 | 187.7  | 138.5 | 160.7 | 160.4 | 191.7 | 146.5 | 181.4  |
| ANKFY1   | 107   | 126.6  | 92.8  | 100.6 | 118.1 | 98    | 98.6  | 106.2  |
| ANKH     | 121.2 | 122.7  | 96.5  | 80    | 83    | 80.8  | 116.9 | 141.6  |
| ANKHD1   | 113.1 | 156.5  | 118.1 | 117.4 | 114.3 | 95.3  | 105.8 | 123.2  |
| ANKHD1   | 84.5  | 94.9   | 80.7  | 79.9  | 85.4  | 91.8  | 85.6  | 85     |
| ANKK1    | 75    | 91.4   | 94    | 81.1  | 78.4  | 79.5  | 79.8  | 82     |
| ANKMY1   | 338.8 | 406.5  | 276   | 347.3 | 360.2 | 408.4 | 263.8 | 254.9  |
| ANKMY1   | 96.9  | 126.4  | 91.6  | 91.1  | 87.3  | 90.8  | 92.2  | 102.6  |
| ANKMY1   | 80.3  | 89.1   | 105.3 | 92.7  | 90    | 99.1  | 80.6  | 88.6   |
| ANKMY2   | 785   | 878.3  | 381.5 | 418.1 | 307   | 530.9 | 604   | 1022.6 |
| ANKRA2   | 365.2 | 373.8  | 243.5 | 395.8 | 359.2 | 560.1 | 305.2 | 512.3  |
| ANKRD1   | 85.9  | 92.7   | 101   | 96.6  | 84.9  | 92.2  | 87.6  | 93.9   |
| ANKRD10  | 672   | 907.2  | 344.2 | 294.9 | 270.3 | 322.5 | 648   | 852.2  |
| ANKRD11  | 527.2 | 650.6  | 371.7 | 592   | 525.4 | 731.4 | 565.6 | 676.9  |
| ANKRD12  | 349.3 | 473.1  | 191.9 | 418.9 | 435.3 | 767.4 | 429.9 | 574    |
| ANKRD13  | 828.5 | 1009.9 | 504   | 715.1 | 609.5 | 883.3 | 757.8 | 1040.5 |
| ANKRD13B | 94.6  | 93.8   | 97.4  | 106.5 | 105.2 | 106.5 | 92.4  | 105.4  |
| ANKRD13C | 318.3 | 350.2  | 217.9 | 236.1 | 184.9 | 303.7 | 249.6 | 414.3  |
| ANKRD13D | 126.4 | 132.2  | 100.2 | 97.2  | 84    | 97    | 124.7 | 155.2  |
| ANKRD15  | 83.6  | 89.9   | 93.1  | 93.2  | 91.4  | 88.6  | 82    | 83.3   |
| ANKRD15  | 78.2  | 86.9   | 84.8  | 78.7  | 79.2  | 87    | 81.9  | 90.8   |
| ANKRD15  | 245.8 | 333.8  | 356   | 356.4 | 230.8 | 493.2 | 230.2 | 514.7  |
| ANKRD16  | 429.2 | 568.4  | 224.2 | 160.5 | 136.1 | 165.9 | 316.3 | 326.8  |
| ANKRD16  | 121   | 135.3  | 89.9  | 95.4  | 75    | 89.2  | 108.9 | 140.7  |
| ANKRD16  | 178.8 | 223.6  | 138.9 | 125.5 | 106.6 | 138.9 | 177.8 | 180.1  |
| ANKRD17  | 165.1 | 189.8  | 121.7 | 122   | 112.4 | 141.4 | 149.7 | 189.9  |
| ANKRD17  | 383.4 | 543.1  | 204.8 | 298.9 | 212.7 | 389.5 | 390.9 | 596.1  |
| ANKRD17  | 577.9 | 934.9  | 401.4 | 497.5 | 388.9 | 724.2 | 573.5 | 1075.9 |
| ANKRD19  | 95.6  | 104.3  | 94.3  | 98    | 82.9  | 88.7  | 96.9  | 104.6  |
| ANKRD2   | 78    | 74.7   | 95.4  | 92.3  | 93.8  | 93.5  | 74.1  | 80.2   |
| ANKRD20A | 193.1 | 251.2  | 135.5 | 178.5 | 177.7 | 191.7 | 159.7 | 236.7  |
| ANKRD20A | 126.1 | 134.6  | 105.4 | 91.1  | 92.1  | 95.7  | 103.9 | 118.1  |
| ANKRD20A | 99.6  | 111.7  | 95.1  | 88.9  | 90.3  | 96.5  | 108.3 | 114.4  |
| ANKRD20B | 75.6  | 79.7   | 87.8  | 90.1  | 80.8  | 88.1  | 73.9  | 72.5   |
| ANKRD20B | 76    | 83.3   | 97.8  | 85.1  | 76.8  | 86.4  | 82.9  | 86.9   |
| ANKRD21  | 83.8  | 94.3   | 91    | 87.5  | 84.6  | 81.7  | 87.3  | 89.8   |

|          |        |        |       |       |       |       |        |        |
|----------|--------|--------|-------|-------|-------|-------|--------|--------|
| ANKRD22  | 115.9  | 146.7  | 106.9 | 82.3  | 74.5  | 91.9  | 103.9  | 116.6  |
| ANKRD23  | 114.4  | 138.3  | 106   | 96.1  | 85.7  | 109.3 | 120.8  | 137    |
| ANKRD24  | 86.5   | 103.6  | 87.8  | 77.8  | 78.9  | 86.1  | 79.2   | 94.7   |
| ANKRD25  | 229.1  | 348.5  | 230.3 | 170.8 | 169.4 | 165.4 | 191    | 279.5  |
| ANKRD26  | 148.8  | 168.7  | 145   | 121.5 | 126.7 | 190   | 130.3  | 153.1  |
| ANKRD27  | 218.4  | 307.7  | 152.7 | 133.5 | 118.8 | 185.8 | 208.1  | 281.4  |
| ANKRD28  | 194.9  | 206.7  | 155.8 | 221.7 | 156.9 | 219   | 210.4  | 400.2  |
| ANKRD29  | 118.1  | 120.1  | 98    | 93    | 87.3  | 102.7 | 97.9   | 116.6  |
| ANKRD30A | 88     | 85.4   | 91.8  | 87.4  | 92.7  | 88.3  | 71.9   | 80.9   |
| ANKRD30A | 86.5   | 101.2  | 89.5  | 83    | 79.1  | 90.8  | 83.9   | 91     |
| ANKRD30B | 76.3   | 91.2   | 92.9  | 86.5  | 83.5  | 89.2  | 82.3   | 87.5   |
| ANKRD32  | 429.3  | 494.4  | 198.2 | 217.6 | 177.6 | 204.1 | 336.3  | 484.1  |
| ANKRD33  | 294.2  | 337.6  | 217.5 | 242.1 | 209.6 | 251.8 | 313.1  | 284    |
| ANKRD34  | 120.6  | 122.2  | 114.6 | 82.9  | 97    | 98.7  | 117.6  | 115.6  |
| ANKRD35  | 158.3  | 165.3  | 100.5 | 89.1  | 84.1  | 92.6  | 159.8  | 172.5  |
| ANKRD36  | 120.4  | 134    | 100   | 99.5  | 101.8 | 101.8 | 99.4   | 118.9  |
| ANKRD36  | 94     | 101.2  | 88.6  | 81.1  | 80    | 81.3  | 85.4   | 97.8   |
| ANKRD36  | 225.8  | 233.4  | 107.5 | 127.1 | 130.7 | 104   | 114.1  | 179.9  |
| ANKRD37  | 131.5  | 177.1  | 132.4 | 190.8 | 186.5 | 348.7 | 119.4  | 179.6  |
| ANKRD38  | 143.3  | 154.4  | 100.7 | 111   | 96.1  | 112.6 | 109.7  | 119.3  |
| ANKRD39  | 439.9  | 530.9  | 377.5 | 243.4 | 215.6 | 252.8 | 401.9  | 616.4  |
| ANKRD40  | 177.5  | 205.7  | 108.6 | 86.4  | 86    | 96.7  | 173.8  | 195.5  |
| ANKRD41  | 178.3  | 198.4  | 134.3 | 122.2 | 112.7 | 137.7 | 135.6  | 159    |
| ANKRD42  | 83.9   | 93.9   | 94.2  | 87.3  | 83.2  | 93.9  | 87.3   | 91.1   |
| ANKRD43  | 89.2   | 114.2  | 98.8  | 93    | 84    | 85.9  | 98.2   | 105    |
| ANKRD44  | 149.4  | 175.7  | 107.1 | 106.2 | 123.5 | 101.3 | 140.5  | 183    |
| ANKRD45  | 104.9  | 117.2  | 99    | 90.8  | 97.2  | 81.2  | 100.7  | 102.9  |
| ANKRD46  | 932    | 1099.4 | 609.7 | 491.5 | 347   | 645.3 | 786.8  | 1441.3 |
| ANKRD47  | 113.5  | 140.8  | 108.1 | 101.7 | 96.5  | 103.6 | 125.5  | 119.7  |
| ANKRD49  | 791.7  | 1020.1 | 500.6 | 431.7 | 369.2 | 764.3 | 549.2  | 987.1  |
| ANKRD5   | 99.9   | 92.6   | 90.4  | 85.4  | 83    | 88.4  | 95     | 88.4   |
| ANKRD5   | 73.9   | 88.4   | 88    | 85.1  | 86.9  | 81.3  | 77.7   | 80.8   |
| ANKRD5   | 86.9   | 106.3  | 89.5  | 82.6  | 81.8  | 92.8  | 88     | 96.5   |
| ANKRD50  | 377.9  | 456.4  | 261.4 | 362   | 303.2 | 522.4 | 349.5  | 386.6  |
| ANKRD55  | 201.6  | 259.7  | 141.7 | 160.4 | 143.3 | 184.2 | 132.4  | 139.7  |
| ANKRD56  | 85.4   | 92.9   | 94.6  | 82    | 82.4  | 81.3  | 79.1   | 89.7   |
| ANKRD6   | 185.9  | 244.9  | 189.8 | 197.6 | 157.9 | 227.8 | 158.3  | 191.1  |
| ANKRD7   | 105.8  | 139.9  | 111.7 | 111   | 102   | 99.3  | 107.2  | 118.5  |
| ANKRD7   | 96     | 107.5  | 93.3  | 84.3  | 95.4  | 90.2  | 105.7  | 115.6  |
| ANKRD9   | 1316.3 | 1584   | 838.7 | 627.7 | 497.3 | 609.7 | 1085.1 | 1218   |
| ANKS1A   | 534.5  | 682.3  | 485.9 | 589.7 | 487.5 | 683.1 | 489    | 628.1  |
| ANKS1B   | 77.3   | 95.2   | 77.6  | 80    | 71.8  | 76.2  | 86.2   | 86.2   |
| ANKS1B   | 80.6   | 86.5   | 91.9  | 81.5  | 73.6  | 79.3  | 81.9   | 88.7   |
| ANKS1B   | 95.7   | 98.1   | 95.3  | 89.7  | 93.8  | 93.8  | 85.3   | 91     |
| ANKS3    | 113.3  | 128.5  | 138.6 | 124   | 110.5 | 132.8 | 113    | 137.4  |
| ANKS4B   | 106.1  | 137    | 87.8  | 86.6  | 80.7  | 83    | 115.2  | 131.2  |
| ANKS6    | 99     | 101    | 87.7  | 83.8  | 87.4  | 90.7  | 91.2   | 100.1  |
| ANKZF1   | 229.5  | 299.3  | 217.1 | 174.1 | 178.1 | 228   | 188.3  | 274.3  |
| ANKZF1   | 98.5   | 118.3  | 97.5  | 98.9  | 94.6  | 90.7  | 101.3  | 102.4  |
| ANKZF1   | 125.6  | 140.5  | 113   | 100.9 | 95.6  | 113.2 | 119    | 144    |

|         |        |         |        |         |        |         |         |         |
|---------|--------|---------|--------|---------|--------|---------|---------|---------|
| ANLN    | 742.7  | 881.9   | 351.7  | 329.6   | 281.5  | 518.9   | 543.8   | 942.4   |
| ANP32A  | 313.7  | 368.1   | 122.6  | 110.4   | 102.2  | 113     | 260.9   | 423.7   |
| ANP32B  | 19793  | 24409.3 | 15059  | 11773.6 | 8736.1 | 14666.3 | 18818.9 | 22848.6 |
| ANP32C  | 91.9   | 94.4    | 93     | 93.9    | 86.6   | 109.6   | 80.2    | 83.6    |
| ANP32D  | 85.4   | 107.3   | 87.5   | 78.5    | 72     | 80      | 90.7    | 110.6   |
| ANP32E  | 100.2  | 119.7   | 94.4   | 85.2    | 83.2   | 95.5    | 88.9    | 121.9   |
| ANPEP   | 366.4  | 503.6   | 550.8  | 768.6   | 670.4  | 761.1   | 362.5   | 638.4   |
| ANTXR1  | 346.6  | 396.9   | 218.4  | 322.6   | 227.1  | 369.8   | 267.7   | 327.4   |
| ANTXR1  | 179.4  | 213     | 130.6  | 115.7   | 121.5  | 120.7   | 160.5   | 195     |
| ANTXR1  | 105.2  | 115.8   | 105.8  | 95.4    | 91.7   | 112.4   | 101.2   | 119.5   |
| ANTXR2  | 295.2  | 423.5   | 229.4  | 218.7   | 183    | 331.6   | 289.7   | 460.4   |
| ANUBL1  | 83.7   | 106     | 93.1   | 85.9    | 89.2   | 92      | 90.1    | 93.5    |
| ANXA1   | 4145.5 | 4613.4  | 4042.6 | 4676    | 2739.9 | 5695    | 4620    | 10943.7 |
| ANXA10  | 85.1   | 109.6   | 87.6   | 81.3    | 83.1   | 86.4    | 86.3    | 99.7    |
| ANXA11  | 360.6  | 439.7   | 195.8  | 174     | 180.1  | 179.1   | 276.9   | 405.8   |
| ANXA11  | 669.7  | 955.1   | 476.5  | 405.1   | 343.7  | 363.9   | 540.1   | 671     |
| ANXA11  | 141.1  | 165.8   | 104.2  | 99.4    | 85.3   | 91.4    | 143.9   | 166.5   |
| ANXA13  | 83.5   | 90.6    | 87.7   | 80.9    | 79     | 88.4    | 79.4    | 93      |
| ANXA13  | 82.9   | 93.9    | 97.4   | 93.2    | 85.1   | 92.4    | 79.3    | 83.3    |
| ANXA13  | 98.2   | 109.5   | 88.2   | 92.6    | 81.2   | 87.6    | 98.2    | 101.4   |
| ANXA2   | 1207.7 | 1580.7  | 629.8  | 678     | 506.9  | 628.6   | 1169.9  | 1435.3  |
| ANXA2   | 231.9  | 271     | 211.9  | 210.7   | 163.6  | 202.5   | 294.3   | 406     |
| ANXA2   | 6240.7 | 7931.1  | 4712.4 | 4845.4  | 4180   | 6937    | 7318.3  | 10177.5 |
| ANXA2P1 | 942.6  | 1149    | 576.4  | 920.1   | 575.6  | 1218.7  | 1510.4  | 3091.8  |
| ANXA3   | 98     | 112.9   | 87.8   | 77.5    | 71.9   | 70      | 83.7    | 124.2   |
| ANXA4   | 252.7  | 305.9   | 132.7  | 159.2   | 133.7  | 182.6   | 226.1   | 510.6   |
| ANXA5   | 3494.7 | 4808.3  | 2769.9 | 2751.7  | 2512.3 | 3830.1  | 3113.1  | 3700.3  |
| ANXA6   | 160.9  | 197.3   | 138.3  | 126.8   | 130.8  | 151.6   | 151.5   | 209.8   |
| ANXA6   | 272.5  | 352.2   | 221.5  | 218.8   | 189.1  | 259.9   | 278.6   | 310.6   |
| ANXA7   | 83.7   | 104.4   | 87.1   | 88.5    | 79.6   | 86.5    | 79.7    | 91.2    |
| ANXA7   | 2025.3 | 2334.5  | 1282.4 | 1112.6  | 854.6  | 1380.9  | 2273.5  | 3447.3  |
| ANXA8   | 105.1  | 110.7   | 117.3  | 112.7   | 104.4  | 107.5   | 106.2   | 107.7   |
| ANXA8L1 | 182.8  | 230.5   | 121.8  | 113.4   | 99.6   | 109.1   | 129.1   | 157.1   |
| ANXA9   | 91.3   | 99.7    | 91.4   | 92.2    | 83.7   | 90.4    | 93.5    | 100.3   |
| AOAH    | 118.2  | 133.4   | 107.7  | 111.1   | 116.9  | 137.2   | 107.1   | 118.9   |
| AOC2    | 93.4   | 126.6   | 114.3  | 102.6   | 92.9   | 105.4   | 105.6   | 93.3    |
| AOC2    | 99.4   | 106     | 112.7  | 92.2    | 77.5   | 96.2    | 99.9    | 108.8   |
| AOC2    | 79.1   | 84.6    | 102.8  | 82.7    | 88.3   | 86.3    | 86.7    | 86.3    |
| AOC3    | 124.8  | 152.4   | 102.4  | 88.9    | 78     | 75      | 100.9   | 142.5   |
| AOF1    | 86.7   | 105.5   | 89.5   | 82.3    | 89     | 85.8    | 91.1    | 100.3   |
| AOF2    | 1097.1 | 1467.6  | 885.9  | 1079.3  | 889.9  | 1432.6  | 794.8   | 1076.7  |
| AOX1    | 73.6   | 94.7    | 87.1   | 85.8    | 76.1   | 83.1    | 83.4    | 90.1    |
| AP1B1   | 100.1  | 111     | 120.8  | 116.4   | 113.2  | 167.2   | 95.2    | 128     |
| AP1B1   | 739.2  | 901.2   | 581.7  | 656.1   | 480.7  | 565.7   | 562.5   | 551.9   |
| AP1G1   | 462.1  | 765.1   | 361.4  | 408.6   | 263.3  | 461.1   | 464     | 586.8   |
| AP1G2   | 100    | 89.1    | 89.4   | 77.3    | 81.4   | 75.4    | 92.3    | 101.9   |
| AP1G2   | 255.8  | 338.9   | 241    | 178.1   | 176.8  | 239     | 185     | 328     |
| AP1GBP1 | 104.1  | 121.1   | 102.7  | 92.9    | 94.6   | 98.4    | 110.6   | 115.7   |
| AP1GBP1 | 100    | 143.8   | 89.8   | 94.2    | 82.5   | 94.2    | 118.6   | 126.8   |
| AP1M1   | 2301.5 | 2442.9  | 1706.2 | 1235.5  | 1031.1 | 949.5   | 1544    | 1534.8  |

|         |         |         |         |         |         |         |         |         |
|---------|---------|---------|---------|---------|---------|---------|---------|---------|
| AP1M2   | 143.3   | 158.1   | 102.8   | 99.8    | 81.8    | 85.1    | 133     | 152.6   |
| AP1S1   | 1027.4  | 1397    | 580.1   | 468.1   | 328.8   | 555.1   | 862.9   | 1232.3  |
| AP1S1   | 1930.7  | 2993.3  | 994.8   | 572.1   | 503.5   | 460.5   | 1706.7  | 2284.6  |
| AP1S2   | 9179.4  | 11036.2 | 4967    | 6947.7  | 4112.9  | 6998.1  | 6843.5  | 9377    |
| AP1S3   | 96.2    | 112.4   | 92.1    | 83      | 77.2    | 86.8    | 88.2    | 125.4   |
| AP2A1   | 141.4   | 180.4   | 142.6   | 114     | 106.8   | 141.4   | 140.6   | 184.9   |
| AP2A1   | 112.5   | 143     | 103.7   | 105.2   | 91.4    | 118.4   | 94.4    | 144     |
| AP2A1   | 88.4    | 113.6   | 108.6   | 97.6    | 103.8   | 100.9   | 89.1    | 101.7   |
| AP2A2   | 122.2   | 155.7   | 139.2   | 131.1   | 113.6   | 154.3   | 117.7   | 168.5   |
| AP2B1   | 137     | 178.7   | 151.5   | 163.2   | 126.2   | 196.8   | 135.6   | 155.5   |
| AP2B1   | 157.3   | 226.2   | 122.2   | 149     | 126.2   | 179.1   | 155.6   | 219.8   |
| AP2M1   | 1174    | 1559.7  | 1111    | 912.8   | 806.7   | 1129.6  | 1090.9  | 1716.9  |
| AP2M1   | 1383.6  | 1910.3  | 906.2   | 1184.8  | 933.3   | 1469.5  | 1272.6  | 2127.1  |
| AP2S1   | 8203.6  | 10041.7 | 4519.8  | 2106    | 1551.9  | 3047.8  | 6942.7  | 10306.5 |
| AP2S1   | 22533.9 | 25925.8 | 22164.1 | 13906.5 | 10856.1 | 12298.8 | 24034.7 | 24904.3 |
| AP3B1   | 2413.4  | 3402.2  | 2537.7  | 2312.6  | 1981.2  | 2972.7  | 2296.4  | 3688.9  |
| AP3B2   | 91.4    | 114.9   | 99.4    | 93.2    | 83.5    | 103.1   | 92.6    | 107.4   |
| AP3D1   | 89.3    | 112.3   | 95.6    | 88.6    | 84.1    | 90.4    | 99.3    | 100.5   |
| AP3D1   | 520.6   | 637.7   | 712.8   | 604.1   | 465     | 765.7   | 511.4   | 924.3   |
| AP3D1   | 538.5   | 701.2   | 733.3   | 607.3   | 483.3   | 802.4   | 543.6   | 1018.6  |
| AP3M1   | 608.6   | 837.5   | 617.9   | 437.5   | 347.7   | 596.8   | 543.1   | 1140.7  |
| AP3M1   | 96.7    | 98.1    | 91.1    | 86.7    | 86.4    | 91.1    | 94.5    | 92.5    |
| AP3M1   | 946.8   | 1214.5  | 856.5   | 703.3   | 531.4   | 870.7   | 846.9   | 1594.1  |
| AP3M2   | 600.1   | 750.3   | 434.3   | 359.1   | 288.3   | 379     | 376.1   | 473.1   |
| AP3S1   | 1361.9  | 2027.6  | 672.2   | 749.5   | 598.8   | 875     | 1117.9  | 1477.7  |
| AP3S2   | 161.5   | 206     | 155.5   | 151.8   | 145.2   | 166.5   | 171.8   | 179.4   |
| AP4B1   | 1965.8  | 2224.3  | 1269.2  | 808.1   | 623.3   | 861     | 1567.3  | 1796.1  |
| AP4E1   | 388.8   | 546.7   | 389.7   | 455.4   | 380.6   | 752.3   | 387.3   | 618.6   |
| AP4M1   | 137.2   | 148.4   | 107     | 113.5   | 99.1    | 108.1   | 130.8   | 148.9   |
| AP4S1   | 157.9   | 189.3   | 128.7   | 107.2   | 109.7   | 104.9   | 145.7   | 194.1   |
| APAF1   | 1193.7  | 1587.3  | 619.8   | 1109.8  | 885.7   | 1872.1  | 1108.2  | 1434.6  |
| APAF1   | 124.2   | 150.5   | 110     | 107.9   | 104.5   | 94.5    | 123.8   | 140.3   |
| APBA1   | 86.1    | 93.7    | 92.1    | 84.4    | 84.5    | 84.5    | 82.9    | 92.8    |
| APBA2   | 111.8   | 134.8   | 101.8   | 98.8    | 90.3    | 96.4    | 100.6   | 124.8   |
| APBA2BP | 94.2    | 121.3   | 107     | 112.1   | 102.1   | 135.7   | 105.4   | 126     |
| APBA2BP | 73.8    | 88.8    | 82.6    | 82.9    | 77.3    | 85.6    | 83.6    | 76.4    |
| APBA2BP | 121.5   | 145.1   | 99.3    | 102.2   | 87.4    | 103.5   | 119.1   | 159.3   |
| APBA3   | 396.6   | 497.1   | 395.4   | 219     | 211.6   | 256     | 427.8   | 458     |
| APBB1   | 117.2   | 131.4   | 87.9    | 82.7    | 80.4    | 76.6    | 98.4    | 109.8   |
| APBB1   | 111.5   | 114.3   | 87.7    | 84.2    | 79.5    | 82.4    | 91.3    | 119.1   |
| APBB1   | 79.9    | 98      | 92.6    | 81.8    | 82.2    | 82      | 86.6    | 88.5    |
| APBB1IP | 674.2   | 929.5   | 719.2   | 930.9   | 682.7   | 1028.2  | 467.9   | 993     |
| APBB2   | 96.3    | 122     | 105.5   | 87.5    | 87.3    | 89.5    | 108.4   | 109.2   |
| APBB3   | 434.7   | 407.2   | 361.6   | 403.2   | 421.1   | 564.3   | 242.5   | 238.2   |
| APBB3   | 223.5   | 247.1   | 147     | 165.3   | 165.2   | 209.8   | 148.2   | 154.8   |
| APC     | 91.8    | 111.3   | 96.7    | 82.7    | 84.8    | 86      | 96.5    | 105.4   |
| APC2    | 85.6    | 103     | 96.1    | 96.3    | 93.7    | 93.6    | 88.9    | 95.7    |
| APCDD1  | 117.8   | 144.4   | 108.5   | 118.1   | 107.9   | 110.3   | 120.1   | 130.3   |
| APCS    | 118.6   | 150     | 126.7   | 106.4   | 109.6   | 116.4   | 121.4   | 125.4   |
| APEH    | 1652.4  | 2235.2  | 967.3   | 931.6   | 800.7   | 1109    | 1392.2  | 2155.1  |

|          |        |         |        |        |        |        |        |        |
|----------|--------|---------|--------|--------|--------|--------|--------|--------|
| APEX1    | 6374.1 | 7690.5  | 4234.3 | 3231.7 | 2600.9 | 4743.8 | 4417.7 | 4698.1 |
| APEX1    | 9087.6 | 10630.4 | 8083.5 | 6897.5 | 5035.4 | 9588.6 | 6826.1 | 8407.1 |
| APEX2    | 905.1  | 1082.1  | 736.5  | 499.4  | 363.8  | 463.4  | 762.8  | 1287.5 |
| APH1A    | 2419.9 | 3415.6  | 2226.4 | 1675.3 | 1365.4 | 1351.1 | 2070.3 | 3099.2 |
| APH1A    | 450    | 623.7   | 259.6  | 194.8  | 175.4  | 216.1  | 421    | 745.3  |
| APH1B    | 551.6  | 755.5   | 455.7  | 367.8  | 316    | 331.8  | 581.2  | 763    |
| API5     | 1847.9 | 2330.3  | 819.8  | 929.3  | 618.1  | 1580.6 | 1280.6 | 2683.7 |
| APIN     | 107.1  | 117.3   | 96.3   | 79.7   | 86.2   | 88.8   | 104.8  | 113.3  |
| APIP     | 477.8  | 575.3   | 248.6  | 179.2  | 191    | 338.5  | 386.4  | 725.8  |
| APITD1   | 214.2  | 271.7   | 136.2  | 107    | 93.1   | 105.7  | 164.4  | 171.9  |
| APITD1   | 1229   | 1729.5  | 821    | 522    | 422.5  | 658.4  | 910.4  | 1388.4 |
| APLN     | 109.7  | 109.5   | 97.8   | 91.1   | 84.2   | 96.9   | 120.1  | 110    |
| APLP1    | 111.8  | 109.9   | 89.1   | 83.8   | 86.7   | 90.3   | 98.5   | 124.8  |
| APLP1    | 102.8  | 117.1   | 113.3  | 83.4   | 79.7   | 88.9   | 108.8  | 152.4  |
| APLP2    | 127.5  | 132.4   | 101.6  | 90.9   | 86.1   | 104.3  | 109.7  | 126.2  |
| APOA1    | 125.4  | 142.9   | 102.9  | 71.2   | 76.1   | 96.7   | 106.3  | 125.9  |
| APOA1BP  | 3315.4 | 4256.1  | 2779   | 2052.4 | 1514.5 | 2416.9 | 2536.7 | 3640.1 |
| APOA2    | 98.1   | 115.5   | 111.6  | 105.7  | 98.7   | 114.7  | 110.6  | 114    |
| APOA4    | 80.8   | 93      | 84.7   | 78.1   | 92.3   | 75.8   | 88.6   | 105.4  |
| APOA5    | 116    | 149.6   | 91.5   | 82.1   | 88.8   | 87.8   | 113.2  | 131    |
| APOB     | 123.5  | 140.3   | 90     | 79.5   | 79.7   | 83.2   | 111.2  | 140.7  |
| APOB48R  | 240.1  | 261.3   | 257.6  | 274    | 221.7  | 337.7  | 195.2  | 248.9  |
| APOBEC1  | 89.7   | 107.4   | 102.5  | 98.6   | 91.2   | 95.4   | 92.4   | 112.8  |
| APOBEC2  | 93.9   | 89.8    | 81.7   | 85.1   | 84.9   | 84.6   | 82.7   | 94.2   |
| APOBEC3A | 67.7   | 84.6    | 84.6   | 82.7   | 82     | 86.6   | 74.1   | 75.5   |
| APOBEC3B | 732.6  | 976     | 485.5  | 390.6  | 337.7  | 451.3  | 612.6  | 651.2  |
| APOBEC3C | 167.5  | 180.1   | 148.3  | 160.1  | 160.4  | 153.8  | 154.4  | 253.3  |
| APOBEC3D | 88.8   | 100.3   | 93.8   | 90     | 78.7   | 91.6   | 94.5   | 98.3   |
| APOBEC3F | 321.1  | 401.6   | 134.9  | 146.1  | 141.1  | 136.2  | 241.6  | 230.4  |
| APOBEC3F | 218.1  | 277.9   | 173.2  | 185.4  | 155    | 167.5  | 212    | 248.4  |
| APOBEC3F | 175.5  | 196.8   | 124.2  | 135    | 125    | 130.3  | 163.5  | 183.8  |
| APOBEC3G | 443.2  | 616.6   | 233.9  | 223.4  | 197.3  | 254.1  | 348.8  | 430.7  |
| APOBEC4  | 72.4   | 83.6    | 96.5   | 87.2   | 73.9   | 84.6   | 83.3   | 86.8   |
| APOC1    | 494.1  | 597.7   | 379.6  | 676.2  | 484.6  | 598.3  | 510    | 780.3  |
| APOC2    | 2438.8 | 2916.5  | 758    | 776    | 616.2  | 671.9  | 2465.9 | 3490.1 |
| APOC3    | 81.6   | 85.8    | 95.4   | 81.2   | 84.9   | 80.8   | 85.2   | 87.8   |
| APOC4    | 92.9   | 106.3   | 97.3   | 86.6   | 84.8   | 91.4   | 94.3   | 104.1  |
| APOD     | 71.8   | 78      | 100.7  | 79.2   | 80.3   | 79.9   | 72.9   | 80.5   |
| APOE     | 176.5  | 173.2   | 141.4  | 1379.7 | 1251.4 | 1764.7 | 138.3  | 188.9  |
| APOF     | 85.6   | 106.8   | 95.6   | 77     | 84.3   | 82.6   | 88.4   | 106.9  |
| APOH     | 81.9   | 97      | 91.3   | 88.5   | 75.2   | 79.2   | 80.7   | 95.2   |
| APOL1    | 142    | 226.1   | 132.1  | 95.4   | 98.4   | 132.2  | 155    | 217.4  |
| APOL1    | 89.7   | 105.2   | 87.8   | 76.8   | 74.7   | 80.5   | 83.5   | 99.1   |
| APOL2    | 120    | 155.3   | 90.8   | 90.2   | 83.7   | 91.5   | 120.5  | 152.3  |
| APOL2    | 88.4   | 94.5    | 118.6  | 112.4  | 100.1  | 106.7  | 87.2   | 96.2   |
| APOL2    | 151.2  | 211.6   | 108.5  | 91.4   | 83.5   | 104.8  | 151.6  | 164.1  |
| APOL3    | 71.4   | 75.9    | 97     | 81.5   | 75.6   | 75.3   | 79     | 81.9   |
| APOL3    | 113.4  | 128.3   | 91.7   | 99.5   | 103.4  | 99.2   | 111.6  | 126.4  |
| APOL3    | 113.9  | 143.9   | 90.1   | 98.8   | 84.6   | 93.3   | 98.9   | 122.5  |
| APOL4    | 103.1  | 126.8   | 108.5  | 88.4   | 77.9   | 92.4   | 102.6  | 126.9  |

|        |        |        |        |        |        |        |        |        |
|--------|--------|--------|--------|--------|--------|--------|--------|--------|
| APOL4  | 100.3  | 121.5  | 93.8   | 98.3   | 91.8   | 89.7   | 100.6  | 109.1  |
| APOL5  | 100.1  | 109.1  | 94.8   | 88.2   | 78.3   | 86.2   | 99.9   | 96.2   |
| APOL6  | 180    | 239.6  | 113.2  | 126.8  | 110.5  | 118.4  | 152.7  | 191.3  |
| APOLD1 | 139.3  | 150.2  | 126.9  | 117.6  | 111.3  | 132.3  | 134.1  | 210.2  |
| APOM   | 246.5  | 324.6  | 212.3  | 232.4  | 183    | 264.5  | 248.6  | 330.9  |
| APP    | 1362.9 | 2252.3 | 1431.1 | 1483.1 | 1315.2 | 2530.9 | 1269.2 | 1473.2 |
| APP    | 139.2  | 205.3  | 116.3  | 122.3  | 112    | 117.9  | 133.1  | 137.2  |
| APP    | 1132.8 | 1683.3 | 977.5  | 1196.6 | 1059.4 | 1759.8 | 1041.3 | 1023.7 |
| APPBP1 | 231.7  | 263.3  | 140.6  | 128.6  | 128    | 146.4  | 172.7  | 185    |
| APPBP1 | 4619.1 | 5466.6 | 2082.2 | 1644.1 | 1178.3 | 2321.3 | 3636.2 | 4177.9 |
| APPBP1 | 1470.4 | 1660.2 | 766.6  | 619.5  | 500.2  | 849.5  | 1268.6 | 2339   |
| APPBP2 | 402.7  | 557.3  | 284.3  | 575.2  | 430.8  | 603.3  | 421.4  | 483.5  |
| APPL   | 324    | 380.8  | 174.6  | 186.7  | 148.8  | 225.7  | 282.2  | 468.2  |
| APRIN  | 175.8  | 217.1  | 163.3  | 182.9  | 141.5  | 204.3  | 161.5  | 190.1  |
| APRIN  | 781.1  | 1003.9 | 410.5  | 390.3  | 354.4  | 537.3  | 658.3  | 984.5  |
| APRT   | 2846.4 | 3434.5 | 2645.4 | 1409.8 | 1143.4 | 1597.6 | 2158   | 2610.9 |
| APRT   | 2221.7 | 2810.5 | 1200.6 | 650    | 530    | 710.1  | 1548.8 | 1908.1 |
| APS    | 161.3  | 184.9  | 161.3  | 111.9  | 97.1   | 112.8  | 148.6  | 256    |
| APTX   | 1100.9 | 1496.9 | 691.9  | 664.7  | 550    | 810.6  | 805.9  | 1261.5 |
| APTX   | 73.9   | 83.6   | 92.8   | 89.4   | 89.8   | 89.6   | 76.4   | 78.6   |
| APTX   | 456.4  | 631.8  | 309.3  | 247.9  | 187.5  | 277.9  | 376.8  | 630.5  |
| APXL   | 93.5   | 123.8  | 88.9   | 98.2   | 93.6   | 97     | 89     | 100.7  |
| APXL2  | 95     | 97.7   | 112.3  | 92.8   | 96.2   | 106.2  | 89.7   | 107.7  |
| AQP1   | 105.8  | 138.1  | 103.9  | 85.2   | 98.2   | 91.7   | 106.3  | 135.6  |
| AQP1   | 110.9  | 120    | 96.1   | 93.3   | 90     | 94.5   | 110.1  | 130.5  |
| AQP10  | 81.8   | 81.3   | 85.7   | 93     | 74.6   | 76.1   | 81.2   | 82.1   |
| AQP11  | 120.8  | 128.3  | 103.2  | 94.3   | 99.9   | 101.8  | 104.4  | 108.9  |
| AQP12A | 92.4   | 99.4   | 98.6   | 105.8  | 97.6   | 91.9   | 102.7  | 94.1   |
| AQP2   | 88.9   | 94     | 102    | 87.9   | 97.8   | 102.9  | 88.6   | 87.7   |
| AQP3   | 105.8  | 141.1  | 79.2   | 78.3   | 70.7   | 76.9   | 103.8  | 153.9  |
| AQP4   | 94     | 116.2  | 97.1   | 89.3   | 80.7   | 95.5   | 94     | 97.4   |
| AQP4   | 89.8   | 93.4   | 90.3   | 85.3   | 79.8   | 85.9   | 74.9   | 104.8  |
| AQP5   | 91.2   | 109.4  | 96.7   | 81.9   | 80.2   | 82.2   | 95.2   | 93.4   |
| AQP6   | 163.3  | 187.1  | 120.7  | 121.7  | 111.6  | 123.4  | 153.5  | 180.2  |
| AQP7   | 82.1   | 93     | 90.5   | 85.8   | 83.1   | 80.5   | 82.1   | 101.1  |
| AQP7P2 | 107.1  | 148    | 88.7   | 76.7   | 73     | 78     | 92.9   | 118.7  |
| AQP8   | 74.3   | 89.2   | 78.8   | 86.7   | 84.5   | 86.3   | 86.5   | 86.9   |
| AQP9   | 99.4   | 101.3  | 91     | 93.7   | 92.3   | 106.8  | 93.7   | 100.6  |
| AQR    | 129.8  | 144.6  | 103.1  | 109.9  | 90.8   | 114.6  | 115.6  | 168    |
| AR     | 205.6  | 265.4  | 151.4  | 171.2  | 146.4  | 195.1  | 181.4  | 226.9  |
| AR     | 109.5  | 150.7  | 96.1   | 105.4  | 90.5   | 93.7   | 103.3  | 121.3  |
| AR     | 81.1   | 98.9   | 94.5   | 83.7   | 87.1   | 76.8   | 98.6   | 105.3  |
| ARAF   | 1298.2 | 1525.2 | 645.2  | 506.7  | 482.2  | 493.8  | 930    | 718.7  |
| ARC    | 140.8  | 184.2  | 100    | 95.8   | 91.4   | 99.6   | 138.6  | 162.9  |
| ARCN1  | 2189.2 | 3216.3 | 1944.7 | 1167.5 | 921    | 1341.6 | 1968.6 | 4289.2 |
| ARD1A  | 1515.1 | 1669.8 | 702.7  | 640    | 420.6  | 639    | 1442.8 | 1548.2 |
| AREG   | 79.4   | 84.6   | 101.2  | 97     | 84.7   | 97.5   | 87.4   | 81.6   |
| ARF1   | 889.6  | 1178.6 | 425.8  | 259.3  | 227.7  | 296.2  | 833.1  | 1152.2 |
| ARF1   | 6859.4 | 9583.9 | 4558.1 | 3560.2 | 2788.4 | 3666.1 | 6759.9 | 8493.9 |
| ARF1   | 140.8  | 156.7  | 98.1   | 90.6   | 74.8   | 113.5  | 126.4  | 164.6  |

|          |        |        |        |        |        |        |        |        |
|----------|--------|--------|--------|--------|--------|--------|--------|--------|
| ARF3     | 830.3  | 1249.4 | 416.5  | 383.3  | 280.6  | 491.6  | 730.7  | 1169.2 |
| ARF4     | 800    | 1077.8 | 373.6  | 344.6  | 270.5  | 310    | 671.5  | 786.1  |
| ARF4     | 4233.6 | 5374   | 2448.6 | 2444.8 | 1645.7 | 2414.2 | 3935.1 | 7450.1 |
| ARF5     | 1010.1 | 1405.4 | 846.3  | 994.2  | 776.9  | 1446.3 | 894.4  | 1098.2 |
| ARF6     | 130.2  | 149.8  | 107.8  | 87.3   | 84     | 83.7   | 131.7  | 164.4  |
| ARFGAP1  | 110.5  | 119.1  | 102.1  | 84.1   | 91.5   | 91.8   | 114.7  | 138.2  |
| ARFGAP1  | 261.8  | 256.5  | 288.9  | 247.4  | 257.1  | 476.6  | 225.2  | 343.7  |
| ARFGAP3  | 102.4  | 117.5  | 96.5   | 82.9   | 79.6   | 98.9   | 109.9  | 131.4  |
| ARFGEF1  | 222.7  | 287.9  | 148.2  | 176.4  | 137.8  | 240.4  | 231.9  | 358.7  |
| ARFGEF2  | 168    | 204.5  | 146.6  | 131.4  | 136    | 145.7  | 146.7  | 198.1  |
| ARFIP1   | 646.3  | 933.4  | 329    | 296.6  | 241.8  | 442.7  | 535.2  | 851.1  |
| ARFIP1   | 178.4  | 221.2  | 113    | 97.6   | 94.3   | 100.3  | 137.2  | 166    |
| ARFIP2   | 101.2  | 144.9  | 91.7   | 83.6   | 80.4   | 88     | 125.3  | 160.5  |
| ARFRP1   | 145.1  | 163.2  | 127.4  | 124.8  | 113.8  | 124.6  | 141.1  | 156.3  |
| ARG1     | 79.1   | 86.9   | 88.7   | 82.8   | 83.6   | 78.5   | 83.1   | 91.4   |
| ARG2     | 138.2  | 152.9  | 107.4  | 88.2   | 90.4   | 91.4   | 126.3  | 131.5  |
| ARG99    | 85.5   | 101.3  | 92.1   | 89.9   | 88.3   | 91.2   | 88     | 94     |
| ARGFX    | 86.4   | 102.1  | 86.5   | 83.9   | 80.6   | 86.3   | 84.2   | 92.9   |
| ARGFXP2  | 91     | 102.5  | 100.8  | 84.2   | 77.4   | 89.6   | 85     | 94.9   |
| ARHGAP1  | 1737.2 | 2108.7 | 1661.8 | 1082.2 | 785.6  | 918.4  | 1612.2 | 2041.8 |
| ARHGAP10 | 228    | 297.1  | 143.6  | 112.5  | 132.5  | 138.6  | 216.1  | 289.8  |
| ARHGAP11 | 295.7  | 390.6  | 163.1  | 174.7  | 166.6  | 201.7  | 265    | 291.2  |
| ARHGAP11 | 249.6  | 330    | 170.6  | 210.5  | 176.1  | 307.7  | 223.3  | 316.7  |
| ARHGAP11 | 180    | 197.1  | 109.3  | 107.1  | 103.4  | 114.3  | 157.3  | 192    |
| ARHGAP12 | 108.5  | 114.6  | 106.5  | 93.4   | 89     | 110.9  | 117.3  | 145.8  |
| ARHGAP15 | 2437   | 3024.6 | 1806.1 | 2073.3 | 1829.7 | 3078.5 | 1931.3 | 3057.1 |
| ARHGAP17 | 2131.4 | 2803.3 | 1880.8 | 2203.4 | 2001.3 | 2281.8 | 1700.7 | 1771.2 |
| ARHGAP17 | 229.4  | 326.9  | 227.9  | 260.4  | 242.6  | 301.6  | 232.6  | 412.4  |
| ARHGAP17 | 102.8  | 102.3  | 108    | 95.1   | 90.7   | 89.3   | 89.7   | 100.6  |
| ARHGAP18 | 143.8  | 167.9  | 102    | 108.8  | 94.4   | 118.2  | 135.3  | 201.8  |
| ARHGAP19 | 609.8  | 899    | 682.4  | 581    | 478.4  | 832    | 642.8  | 1043.6 |
| ARHGAP20 | 86.1   | 102.1  | 100.5  | 85.6   | 87     | 90.1   | 97.1   | 97.4   |
| ARHGAP21 | 398    | 602.7  | 238.4  | 229.9  | 194.9  | 279.1  | 528.9  | 677.9  |
| ARHGAP22 | 128.5  | 148.1  | 102.2  | 102.4  | 91     | 99.5   | 122.1  | 117.7  |
| ARHGAP24 | 80.8   | 91.1   | 90.9   | 92.1   | 88.1   | 88.6   | 86.2   | 88.1   |
| ARHGAP24 | 93     | 102.2  | 91.4   | 88.9   | 90.8   | 99.1   | 89.2   | 90.1   |
| ARHGAP24 | 134.6  | 121.9  | 96.2   | 85.1   | 85.4   | 96     | 113.7  | 139.8  |
| ARHGAP24 | 111.1  | 115.6  | 115.9  | 117.3  | 115    | 125.6  | 111    | 120    |
| ARHGAP25 | 103.8  | 108.2  | 91.5   | 85.2   | 92.8   | 92.7   | 96.5   | 105.9  |
| ARHGAP25 | 315.1  | 418.2  | 181.6  | 198.8  | 185.5  | 304.6  | 313.8  | 404.5  |
| ARHGAP25 | 88.6   | 103.3  | 84.1   | 80     | 84.7   | 89.7   | 87.7   | 104.2  |
| ARHGAP26 | 145    | 196.5  | 123.1  | 110.9  | 113.3  | 93     | 141.4  | 160.9  |
| ARHGAP27 | 125.2  | 145.6  | 96.3   | 97.6   | 86.5   | 99.5   | 118.8  | 140.7  |
| ARHGAP28 | 75.2   | 96.7   | 89     | 80.5   | 86.5   | 75.5   | 82.6   | 83.9   |
| ARHGAP28 | 78.1   | 85.4   | 103.6  | 86.6   | 78.2   | 89.3   | 85.6   | 97.9   |
| ARHGAP28 | 70     | 90.1   | 90.5   | 88.6   | 84.3   | 80.9   | 86     | 86     |
| ARHGAP29 | 72.4   | 93     | 107.5  | 84.2   | 98.3   | 94.3   | 72.9   | 81.1   |
| ARHGAP30 | 1055.7 | 1586.6 | 736.4  | 368.6  | 349.9  | 409.7  | 958.5  | 1310.2 |
| ARHGAP30 | 1625.9 | 2130.6 | 1187.7 | 710.8  | 734    | 734.7  | 1561.4 | 1425   |
| ARHGAP30 | 456.5  | 657.9  | 325.9  | 250.6  | 236    | 165.3  | 364    | 526.5  |



|           |         |         |         |         |         |         |        |         |
|-----------|---------|---------|---------|---------|---------|---------|--------|---------|
| ARHGAP4   | 1318.7  | 1392.8  | 1218.2  | 1247    | 1127.9  | 1666.8  | 926.3  | 1360.4  |
| ARHGAP5   | 99.8    | 118.7   | 96.9    | 97.4    | 82.5    | 87.3    | 93.6   | 111.3   |
| ARHGAP6   | 99.3    | 111.4   | 96.5    | 89.6    | 84.4    | 86.7    | 106    | 105.8   |
| ARHGAP6   | 88.4    | 99.4    | 82.8    | 77.3    | 82.6    | 74.2    | 99.5   | 98.8    |
| ARHGAP6   | 76.3    | 95.3    | 90.8    | 74      | 77.6    | 89.1    | 86.5   | 91.8    |
| ARHGAP6   | 85.3    | 101.9   | 87.9    | 88.9    | 79.1    | 90.6    | 93     | 91.8    |
| ARHGAP8   | 99.5    | 104.6   | 85.3    | 95.1    | 81.5    | 85.3    | 104.8  | 92.3    |
| ARHGAP8   | 85.1    | 83.9    | 87      | 81.2    | 76.1    | 80.9    | 80.8   | 87.6    |
| ARHGAP8   | 87.3    | 107.2   | 86.4    | 79.2    | 76.9    | 74.3    | 89.2   | 100.2   |
| ARHGAP9   | 1757.3  | 1605.9  | 917.7   | 1251.3  | 1289.1  | 1676.6  | 1211.7 | 1580.5  |
| ARHGAP9   | 490.2   | 583.5   | 315     | 305.1   | 297     | 420.3   | 371.1  | 501.1   |
| ARHGDIA   | 1372.1  | 1776.4  | 1087.2  | 1052.3  | 659.3   | 1263.4  | 1452.6 | 3916.4  |
| ARHGDIB   | 22773.2 | 26617.1 | 18208.3 | 19492.3 | 14216.5 | 20015.6 | 22176  | 23444.3 |
| ARHGDIG   | 88.9    | 90.6    | 95.8    | 87.7    | 74      | 90.4    | 86.4   | 91.9    |
| ARHGEF1   | 184.9   | 240.1   | 239.7   | 173.9   | 148.5   | 269.2   | 170    | 276.2   |
| ARHGEF1   | 97.4    | 109.1   | 111.8   | 90.5    | 96.2    | 87.2    | 97.4   | 112.3   |
| ARHGEF1   | 133.6   | 191.2   | 129.8   | 108.7   | 107.6   | 117.5   | 118.2  | 204.1   |
| ARHGEF10  | 752.1   | 1087.5  | 792     | 472.6   | 433     | 639.7   | 516.3  | 644.6   |
| ARHGEF10I | 120.6   | 161.7   | 107.7   | 93      | 78.2    | 90.4    | 118.8  | 140.1   |
| ARHGEF10I | 112.1   | 158.5   | 93      | 85.5    | 90.3    | 98.6    | 113.8  | 130.2   |
| ARHGEF10I | 103.6   | 122.4   | 103     | 79.4    | 81      | 90.7    | 85.1   | 130.1   |
| ARHGEF11  | 82.1    | 85.6    | 90.4    | 118     | 84.6    | 83.3    | 77.9   | 80.9    |
| ARHGEF11  | 210.8   | 231.9   | 125.8   | 108.6   | 112.2   | 135.3   | 198.3  | 235.4   |
| ARHGEF11  | 118.7   | 158.3   | 149.1   | 129.3   | 111.3   | 147     | 128.2  | 159.2   |
| ARHGEF12  | 100.9   | 125.6   | 112.6   | 87.5    | 82.5    | 88.1    | 100.3  | 126.5   |
| ARHGEF15  | 172.2   | 183.4   | 80.5    | 85.1    | 90.6    | 79.9    | 131.7  | 160.5   |
| ARHGEF16  | 145.5   | 153.9   | 89.7    | 92.5    | 86.1    | 90.7    | 121.5  | 141.4   |
| ARHGEF17  | 142.9   | 159.5   | 138.9   | 145.5   | 135     | 184.4   | 129.3  | 166.3   |
| ARHGEF18  | 1515.4  | 2017.8  | 1784.6  | 2005.7  | 1949    | 2353.5  | 1124.9 | 1528.4  |
| ARHGEF19  | 370.3   | 481.9   | 317.5   | 217     | 218.2   | 253.1   | 414.2  | 404     |
| ARHGEF2   | 2405.3  | 2599.9  | 2101.6  | 2402.3  | 1966.8  | 2662.7  | 1901.8 | 2493.8  |
| ARHGEF3   | 370.6   | 511     | 353.8   | 472.8   | 424.1   | 629.1   | 437.1  | 675.9   |
| ARHGEF4   | 88.8    | 87.5    | 83.3    | 82.3    | 90.1    | 79.9    | 83.1   | 94      |
| ARHGEF4   | 100.1   | 103.6   | 93.9    | 86.5    | 83.1    | 81.4    | 97.8   | 122.4   |
| ARHGEF5   | 97.4    | 119.4   | 105.4   | 102.6   | 90.4    | 122.1   | 105.6  | 130.5   |
| ARHGEF6   | 3791.6  | 5390.5  | 3468.4  | 3391.7  | 2761.3  | 4873.2  | 3360.6 | 3659.8  |
| ARHGEF7   | 827.4   | 1075.3  | 863.2   | 1016.3  | 886.3   | 1236.9  | 866.5  | 1424.8  |
| ARHGEF7   | 85.2    | 100.8   | 86.4    | 77.9    | 72.2    | 84      | 80.5   | 99.7    |
| ARHGEF7   | 129.8   | 127.3   | 108.7   | 99      | 90.7    | 97.6    | 111.1  | 143.5   |
| ARHGEF9   | 123.4   | 123.6   | 105.3   | 103.7   | 96.5    | 104.3   | 118.2  | 128.6   |
| ARID1A    | 91.9    | 95.1    | 91.4    | 92      | 97.4    | 86.6    | 98.5   | 101.5   |
| ARID1A    | 1910.8  | 2985.7  | 1193.1  | 1735.1  | 1562.7  | 1769.5  | 1951.7 | 1928.5  |
| ARID1B    | 83.4    | 94.3    | 92.7    | 101     | 100.3   | 96.3    | 86.3   | 97.2    |
| ARID1B    | 100.8   | 107.7   | 103.5   | 107     | 98.2    | 103.7   | 104.1  | 104.4   |
| ARID2     | 433.1   | 673.6   | 186.1   | 203.3   | 155.2   | 270.9   | 422    | 580.6   |
| ARID3A    | 1301.8  | 1594.7  | 1315.7  | 1287.5  | 1180.6  | 2242    | 1197.6 | 1747    |
| ARID3C    | 114.4   | 131.7   | 90.3    | 93.7    | 81.9    | 90.8    | 116.4  | 124.1   |
| ARID4A    | 213.4   | 243.4   | 137.1   | 141.1   | 138.8   | 154.2   | 173.5  | 229.7   |
| ARID4A    | 166.7   | 230.7   | 118.9   | 115.9   | 118.8   | 162.2   | 170.5  | 233.3   |
| ARID4A    | 283.9   | 336.1   | 188.3   | 192.9   | 221.6   | 388.8   | 237.5  | 404.6   |

|         |        |         |        |        |        |        |        |        |
|---------|--------|---------|--------|--------|--------|--------|--------|--------|
| ARID4B  | 215.9  | 270.9   | 129.8  | 112.9  | 115.2  | 166    | 194.4  | 247.1  |
| ARID4B  | 690.7  | 875.9   | 328.3  | 403.6  | 405.6  | 472.1  | 575.7  | 1050   |
| ARID4B  | 301.1  | 387.4   | 167.9  | 182.7  | 184.2  | 160.5  | 242.7  | 324.9  |
| ARID5A  | 91.8   | 91.1    | 97.2   | 86.4   | 91.2   | 91.9   | 99.9   | 92.7   |
| ARID5A  | 85.8   | 85.1    | 97.7   | 85     | 94     | 86     | 87.8   | 93.1   |
| ARID5A  | 104.6  | 124     | 116.7  | 111.1  | 101.8  | 111.1  | 106.3  | 141.8  |
| ARID5B  | 129.1  | 165.1   | 133.3  | 179.5  | 154.3  | 213.3  | 121.3  | 146.9  |
| ARIH1   | 439.9  | 619.4   | 258.9  | 249.9  | 249.7  | 345    | 427.4  | 599.6  |
| ARIH2   | 1311.5 | 1452.2  | 1153.2 | 1139.7 | 1034.4 | 1248.4 | 1187.4 | 1130.7 |
| ARL1    | 722.3  | 950     | 456.3  | 530.6  | 379.9  | 677.8  | 597.5  | 936.5  |
| ARL10   | 83.7   | 109.6   | 86.6   | 80.4   | 87.6   | 92.9   | 88.5   | 92.9   |
| ARL11   | 101.8  | 114.6   | 95.8   | 96.5   | 89.5   | 96.8   | 100.9  | 108.7  |
| ARL13A  | 84.9   | 92.2    | 100.8  | 91     | 87     | 95.6   | 96.3   | 101.7  |
| ARL13B  | 167.1  | 231.8   | 105    | 88.3   | 91.3   | 101.9  | 132.9  | 269.6  |
| ARL13B  | 132.1  | 154.3   | 95.8   | 107.9  | 98.8   | 83.3   | 143.9  | 189.9  |
| ARL14   | 76.1   | 93.5    | 90.9   | 86.4   | 81.9   | 95     | 81.1   | 97.6   |
| ARL15   | 135.5  | 159.3   | 109.2  | 104.3  | 96.2   | 102.4  | 122    | 154.7  |
| ARL16   | 1442.1 | 1353.7  | 610.2  | 653.1  | 767.7  | 743.3  | 1201.1 | 1911.3 |
| ARL2    | 4300   | 5720    | 2546.8 | 1530.2 | 1341.5 | 1308.4 | 3577.9 | 2674.9 |
| ARL2BP  | 2015.4 | 2620.8  | 1331.9 | 1222.7 | 953.3  | 1386.4 | 1520.4 | 2728.4 |
| ARL3    | 113.2  | 125.9   | 135.4  | 119    | 98.9   | 117.9  | 99.7   | 143.3  |
| ARL4    | 283    | 343     | 179.5  | 116    | 115.7  | 146.4  | 206.3  | 221.1  |
| ARL4    | 350.4  | 508     | 228.1  | 160.9  | 163.5  | 206.5  | 302.8  | 393.9  |
| ARL4    | 259    | 302.6   | 166    | 138.5  | 122.7  | 170.2  | 200.3  | 282    |
| ARL4A   | 105.3  | 107.1   | 95.3   | 86.2   | 79.3   | 79.8   | 95.5   | 119.4  |
| ARL4C   | 128.5  | 138.2   | 104.2  | 90.7   | 90.5   | 84.5   | 119    | 149.5  |
| ARL4D   | 93.2   | 103.5   | 94.2   | 99.1   | 94.5   | 87     | 95.5   | 113    |
| ARL5    | 505.4  | 671.9   | 185.8  | 167.4  | 156.4  | 171.2  | 356.8  | 438.7  |
| ARL5    | 7775.4 | 11117.1 | 3744.9 | 4749.9 | 3720   | 5084.7 | 6980.1 | 8454.7 |
| ARL5A   | 2430.1 | 2746    | 1046.3 | 1273.2 | 916.4  | 1564.9 | 1845.5 | 2839.4 |
| ARL5B   | 156.4  | 184.2   | 110.8  | 108.4  | 91.9   | 104.5  | 147.6  | 193.2  |
| ARL6    | 99.2   | 114.3   | 83.6   | 81.2   | 81.9   | 79.2   | 103.1  | 119.2  |
| ARL6    | 74.3   | 90.5    | 102.6  | 93.7   | 83.6   | 91.2   | 78.6   | 78.2   |
| ARL6    | 79.3   | 89.2    | 95.2   | 96     | 85.1   | 86.3   | 74.6   | 78.1   |
| ARL6IP1 | 183    | 189.8   | 115.9  | 106.8  | 99.5   | 121.4  | 163    | 293.6  |
| ARL6IP2 | 535.4  | 604.3   | 295.7  | 252.4  | 211.8  | 391.8  | 354.1  | 545.6  |
| ARL6IP4 | 428.5  | 641.9   | 186.9  | 191.4  | 204.9  | 272    | 434    | 546.9  |
| ARL6IP4 | 107.9  | 121.2   | 114.1  | 101.7  | 101.8  | 122.7  | 98.8   | 116.3  |
| ARL6IP4 | 505.9  | 585     | 316.2  | 271.8  | 324.6  | 411.3  | 497.2  | 547.6  |
| ARL6IP5 | 1823.1 | 2680.6  | 669.3  | 697.4  | 757.6  | 903.7  | 1492.4 | 1875.9 |
| ARL6IP6 | 77.8   | 90.5    | 96.4   | 90.5   | 86.5   | 88.7   | 84.4   | 96.1   |
| ARL8A   | 128.6  | 139.2   | 103.3  | 89     | 82.4   | 100.3  | 131.2  | 143.7  |
| ARL8B   | 2650.1 | 3238.1  | 978.9  | 1599.2 | 982.7  | 1929.5 | 2372.2 | 3894.6 |
| ARL9    | 84.6   | 96.6    | 89.7   | 90.7   | 84.4   | 86.7   | 97.1   | 101.9  |
| ARMC1   | 1293   | 1658.8  | 487.1  | 407    | 301.3  | 511.7  | 1118.1 | 1836.6 |
| ARMC10  | 2477.9 | 2968.2  | 1594.5 | 1606.4 | 1048.4 | 1729.6 | 1850.9 | 3241.8 |
| ARMC2   | 109.1  | 137.7   | 91.1   | 84.8   | 77.6   | 80     | 111.2  | 125.5  |
| ARMC4   | 93.9   | 107     | 115.6  | 106.9  | 95.2   | 116.6  | 99.2   | 98.7   |
| ARMC5   | 165.6  | 193     | 106.3  | 98.5   | 98     | 99.2   | 160.2  | 333    |
| ARMC6   | 316.3  | 339.1   | 220    | 176.6  | 168.8  | 232.2  | 272.8  | 365.7  |

|         |         |         |         |         |        |         |         |         |
|---------|---------|---------|---------|---------|--------|---------|---------|---------|
| ARMC7   | 295.6   | 396.5   | 314.4   | 278.2   | 274.4  | 311.3   | 291.7   | 467.2   |
| ARMC8   | 169     | 201.7   | 115.2   | 97.6    | 95.5   | 99.9    | 155.8   | 214.4   |
| ARMC8   | 549.5   | 798.7   | 282.8   | 304.1   | 250.1  | 359.2   | 403.8   | 545.4   |
| ARMC8   | 111.8   | 122.2   | 113.4   | 105.7   | 96.4   | 98.2    | 104.3   | 122.2   |
| ARMC8   | 157.7   | 229.8   | 101.8   | 103.7   | 86     | 101.2   | 137.1   | 184     |
| ARMC9   | 125.4   | 161.8   | 91.5    | 91.9    | 88.3   | 89.4    | 123.3   | 168.5   |
| ARMCX1  | 177.5   | 187.7   | 117.7   | 163.6   | 139.3  | 217.4   | 147.7   | 225.8   |
| ARMCX2  | 77.1    | 90.7    | 91.9    | 80.7    | 86.4   | 85.6    | 94.4    | 104.2   |
| ARMCX3  | 313.9   | 393.9   | 191     | 208.5   | 173.7  | 249     | 268.3   | 468.1   |
| ARMCX3  | 114.2   | 151     | 85.9    | 89.4    | 88.2   | 95      | 116.2   | 130.1   |
| ARMCX5  | 397.2   | 425.6   | 187.8   | 175.1   | 151.1  | 226.6   | 282.5   | 587.4   |
| ARMCX6  | 743.6   | 990.8   | 373.3   | 280.8   | 272.3  | 363.1   | 677     | 916.9   |
| ARMCX6  | 1250.7  | 1655    | 435.4   | 316.4   | 281.6  | 394.1   | 1067    | 1382.2  |
| ARMET   | 7135.9  | 8388.6  | 6473    | 4183.8  | 3143.4 | 4919.3  | 8491.9  | 11127.7 |
| ARMETL1 | 101.5   | 117.5   | 99.8    | 116.5   | 94.6   | 96.8    | 110     | 107     |
| ARNT    | 216.9   | 241.7   | 122     | 113.6   | 102.2  | 123.2   | 208.2   | 258.4   |
| ARNT    | 113.6   | 134.1   | 96.1    | 104.4   | 95.9   | 85.7    | 93      | 117.2   |
| ARNT2   | 98.4    | 98.8    | 96.3    | 90      | 87     | 84.8    | 98.3    | 110.2   |
| ARNTL   | 142.1   | 185.1   | 108.3   | 98.1    | 92.3   | 98.9    | 138.3   | 144.6   |
| ARNTL   | 270.6   | 357.4   | 291.3   | 263.8   | 269.4  | 382.2   | 261.7   | 473.2   |
| ARNTL2  | 103.2   | 126.3   | 94.2    | 84.3    | 82.2   | 89.6    | 106.1   | 113     |
| ARP10   | 112.1   | 121.5   | 106.6   | 100.1   | 88.8   | 98.6    | 95.7    | 112.2   |
| ARPC1A  | 2479    | 3076.7  | 1866.4  | 1888.1  | 1348.3 | 1756.6  | 2145    | 3508.8  |
| ARPC1B  | 2651.5  | 3643.6  | 1510.3  | 1131.4  | 1005   | 889.1   | 2426.7  | 2390.3  |
| ARPC2   | 107.4   | 129.7   | 90.7    | 77.2    | 86.9   | 92.7    | 121.1   | 115.9   |
| ARPC2   | 15160.2 | 18472.5 | 10006.9 | 10358.9 | 8444.7 | 11640.8 | 13858.8 | 19617.8 |
| ARPC2   | 105.2   | 115.6   | 114.7   | 90.9    | 83.8   | 96.2    | 106.9   | 132.7   |
| ARPC3   | 12512.3 | 14461.1 | 9653.2  | 10371.3 | 8527.9 | 12863.3 | 11016   | 12418.6 |
| ARPC4   | 155.9   | 191.9   | 104.3   | 95      | 85.6   | 89.7    | 129.9   | 150.4   |
| ARPC4   | 5040    | 7208.8  | 4232.9  | 2879.8  | 2078.2 | 1816.4  | 4625.3  | 5748.5  |
| ARPC4   | 3033.1  | 4256.1  | 1798.9  | 1074.3  | 832.6  | 946.9   | 2680.4  | 2973.1  |
| ARPC5   | 8662.9  | 9616.8  | 2767.2  | 3517.6  | 2279   | 3399.3  | 8180.8  | 10777.5 |
| ARPC5L  | 1643.4  | 2247.4  | 1376.1  | 917.2   | 659.1  | 988.9   | 1494.9  | 2408.4  |
| ARPM1   | 145.6   | 178.6   | 97.6    | 90.2    | 102.3  | 101.3   | 137.6   | 154.3   |
| ARPM2   | 98.7    | 123     | 87.6    | 90.5    | 85     | 89.7    | 96.4    | 105.2   |
| ARPP-19 | 725.7   | 983.4   | 317.6   | 330.6   | 306.1  | 356.4   | 705.9   | 1049.4  |
| ARPP-21 | 90      | 110.3   | 101.1   | 89.2    | 84.9   | 98.6    | 77.6    | 86.9    |
| ARPP-21 | 130.6   | 148.5   | 90.7    | 79      | 80.5   | 77.3    | 139.5   | 144.8   |
| ARPP-21 | 115.9   | 119.3   | 89.2    | 77.4    | 83.9   | 81      | 94.8    | 106.9   |
| ARPP-21 | 114.7   | 132.2   | 104.2   | 88      | 86.7   | 91      | 115.8   | 104.8   |
| ARR3    | 89.4    | 104.3   | 96.7    | 91.9    | 84.3   | 82      | 92.6    | 94.3    |
| ARRB1   | 372.5   | 445.6   | 257.3   | 248.1   | 203.4  | 277.6   | 241.8   | 365.2   |
| ARRB1   | 255     | 318.2   | 237.9   | 214.5   | 195.4  | 249.9   | 165     | 216.7   |
| ARRB2   | 139.3   | 165.8   | 111.8   | 94.5    | 89.2   | 104.6   | 145.1   | 149.8   |
| ARRB2   | 132.1   | 162     | 113.9   | 101.9   | 95.9   | 116.9   | 108.9   | 151.7   |
| ARRDC1  | 179.5   | 227.7   | 163.9   | 147     | 155.9  | 171.2   | 137.8   | 182     |
| ARRDC2  | 133.2   | 131.9   | 103     | 88.4    | 85.9   | 89.5    | 109.5   | 143.4   |
| ARRDC2  | 100.1   | 110.3   | 91.6    | 89.3    | 86.6   | 82.5    | 89.4    | 107.3   |
| ARRDC2  | 235.6   | 255     | 224.2   | 174.2   | 156    | 200.3   | 215.2   | 400.5   |
| ARRDC3  | 237.6   | 321.7   | 169.1   | 249     | 250.1  | 377.6   | 192.6   | 259.5   |

|          |        |        |        |        |        |        |        |        |
|----------|--------|--------|--------|--------|--------|--------|--------|--------|
| ARRDC4   | 128.7  | 150    | 108.4  | 160.6  | 134.4  | 198.2  | 148.5  | 293.6  |
| ARRDC5   | 91.6   | 105.7  | 86.6   | 79.5   | 94     | 87     | 97.2   | 100.7  |
| ARS2     | 6252.7 | 7360.9 | 4381.7 | 3359.4 | 3133.6 | 4221.8 | 4762.5 | 5264.5 |
| ARS2     | 94.9   | 103.2  | 90.1   | 81.1   | 73.8   | 81.9   | 92.2   | 111.9  |
| ARSA     | 218.4  | 235.6  | 111.8  | 131.9  | 124.9  | 121.5  | 180.4  | 174.1  |
| ARSB     | 114.3  | 126.6  | 96.7   | 90.9   | 88     | 90.8   | 111.5  | 116.5  |
| ARSB     | 601.3  | 850.3  | 377    | 502.8  | 360.6  | 404.7  | 648.6  | 810.8  |
| ARSB     | 218.7  | 262.8  | 137    | 157.2  | 140.7  | 161.3  | 172    | 221.7  |
| ARSD     | 190.9  | 228.5  | 136.9  | 202.7  | 192.5  | 140.7  | 144.3  | 179.1  |
| ARSD     | 91     | 113.8  | 119.6  | 105.9  | 93.9   | 104    | 104.4  | 102.7  |
| ARSD     | 765.7  | 925.2  | 792.2  | 1165.4 | 875.2  | 1333.4 | 704.3  | 1402.3 |
| ARSE     | 82.5   | 87.3   | 92.9   | 89.2   | 80.8   | 79.9   | 84.7   | 89.6   |
| ARSF     | 77.5   | 92.1   | 85.2   | 87.5   | 81.6   | 90.6   | 79.2   | 83.8   |
| ARSG     | 143.5  | 180.7  | 113.8  | 100.6  | 94.9   | 124.7  | 154.1  | 152.7  |
| ARSH     | 82     | 84.7   | 94     | 87.6   | 89.1   | 107.1  | 84.3   | 94.3   |
| ARSI     | 96.1   | 112.9  | 90.5   | 91     | 80.7   | 102.8  | 94.3   | 106.4  |
| ARSJ     | 89.3   | 98.3   | 100.9  | 102.8  | 93     | 94.3   | 94.4   | 93.2   |
| ARSK     | 168.1  | 195.7  | 140.1  | 133.8  | 122.1  | 142.2  | 143.5  | 161.9  |
| ART1     | 150.6  | 162.9  | 105.7  | 88     | 94.4   | 100.3  | 129.8  | 161.6  |
| ART3     | 91.8   | 107.8  | 106.9  | 92.2   | 87.1   | 90.2   | 90.8   | 97     |
| ART4     | 101.6  | 137.2  | 104.9  | 103.9  | 92.4   | 113.7  | 117.2  | 112.2  |
| ART5     | 105    | 105.2  | 90.1   | 77.5   | 81.3   | 74.1   | 87     | 96.4   |
| ART5     | 90.6   | 107.8  | 90.2   | 88.2   | 90.9   | 85.1   | 90.2   | 94.5   |
| ARTN     | 85.1   | 96.3   | 85.5   | 74.8   | 66.3   | 78.5   | 83.5   | 87.8   |
| ARTN     | 87.4   | 90.5   | 94.1   | 93.4   | 84.9   | 83.7   | 81     | 92     |
| ARTN     | 87.9   | 94.7   | 94.6   | 90     | 92.5   | 81.9   | 77.9   | 98.6   |
| ARTN     | 102.7  | 113.4  | 109.1  | 100.9  | 92.7   | 101.9  | 91.9   | 112.9  |
| ARTS-1   | 151    | 187.8  | 113.8  | 121.9  | 110.1  | 111.6  | 130.5  | 146.7  |
| ARTS-1   | 114.6  | 131.5  | 89.6   | 78.4   | 75     | 78.9   | 109.2  | 122.3  |
| ARV1     | 2347   | 2725.5 | 972.5  | 1012   | 722    | 1115.4 | 1622.1 | 2579.6 |
| ARVCF    | 114.3  | 117.1  | 99.7   | 86.4   | 73.6   | 89.5   | 102.2  | 128    |
| ARVP6125 | 96.1   | 96.3   | 101.6  | 103.2  | 90.8   | 90.5   | 89.7   | 95.3   |
| ARX      | 106.8  | 147.4  | 122.7  | 103.3  | 106    | 104.3  | 111.3  | 141.4  |
| AS3MT    | 116.9  | 130.9  | 109.4  | 94.1   | 91.1   | 102.1  | 122.4  | 126    |
| ASAH1    | 290.2  | 387.8  | 173.2  | 198.8  | 167    | 248.5  | 257.5  | 311.1  |
| ASAH1    | 141.6  | 150.7  | 114.7  | 101.4  | 91.4   | 100.5  | 137.1  | 130.6  |
| ASAH2    | 91.5   | 97.7   | 94.8   | 86.1   | 81.8   | 84.7   | 90.7   | 94     |
| ASAH3    | 99.6   | 119.4  | 97.2   | 88     | 79.2   | 81.3   | 102.4  | 110.5  |
| ASAH3L   | 103.8  | 114.1  | 127.5  | 105.3  | 103.4  | 110.4  | 103    | 109    |
| AS AHL   | 1108.8 | 1470.1 | 573.3  | 426    | 344.8  | 519    | 1048.4 | 1357   |
| AS AHL   | 1118   | 1497.6 | 650    | 520.9  | 471.6  | 630.3  | 880.8  | 1068.6 |
| AS AHL   | 465.8  | 606.3  | 265.5  | 201.9  | 184.3  | 213    | 399.8  | 560.8  |
| ASAM     | 79.6   | 83.7   | 85.2   | 89.8   | 84.9   | 90.1   | 81.4   | 83.1   |
| ASB1     | 472    | 528.8  | 200.1  | 209.5  | 215.7  | 209    | 406.7  | 463.6  |
| ASB10    | 125.1  | 118.6  | 102.7  | 89.5   | 87.6   | 101.9  | 95.3   | 135.4  |
| ASB11    | 80.8   | 94.2   | 92.7   | 83.4   | 81.4   | 87.1   | 90.5   | 97.4   |
| ASB11    | 108.3  | 117.9  | 82     | 89     | 88.2   | 84.9   | 104.4  | 131.1  |
| ASB11    | 129.1  | 148.8  | 108.7  | 105.6  | 113.2  | 125.6  | 129.9  | 114.3  |
| ASB12    | 120.4  | 134.5  | 114.1  | 105.8  | 101.5  | 105.1  | 108.4  | 124.1  |
| ASB13    | 357.2  | 445.7  | 311.2  | 245.2  | 189.8  | 266.7  | 290.5  | 382.7  |

|         |        |        |        |        |        |        |        |        |
|---------|--------|--------|--------|--------|--------|--------|--------|--------|
| ASB14   | 85     | 107.3  | 86.2   | 92     | 78.3   | 87.4   | 84     | 88.1   |
| ASB15   | 95.4   | 99     | 101    | 91.3   | 95.1   | 93.4   | 88.5   | 93     |
| ASB16   | 94.1   | 99     | 97.5   | 89.3   | 81.8   | 89.5   | 92.4   | 108.8  |
| ASB17   | 77.6   | 80.7   | 85.7   | 89.3   | 82.7   | 92.5   | 84.8   | 88.3   |
| ASB2    | 111.9  | 134.3  | 100.2  | 89.1   | 95.6   | 95.9   | 103.9  | 111.1  |
| ASB3    | 267.7  | 327.6  | 153.6  | 162    | 170.1  | 184.3  | 299.8  | 465.7  |
| ASB3    | 315.7  | 459    | 210.3  | 202.4  | 175.9  | 202    | 274.2  | 353.5  |
| ASB4    | 105    | 144.4  | 90.6   | 76.5   | 79.9   | 80.4   | 106.9  | 112.7  |
| ASB4    | 93.5   | 102.3  | 91.4   | 75.4   | 81.4   | 82.6   | 98.1   | 103.3  |
| ASB4    | 83.2   | 97     | 92.6   | 90.4   | 84     | 91.8   | 83     | 85.3   |
| ASB5    | 84.6   | 94.1   | 88.5   | 85     | 92.4   | 86.4   | 79.7   | 89.6   |
| ASB6    | 85.1   | 95.6   | 88.6   | 81.2   | 78     | 79     | 90     | 102.5  |
| ASB6    | 117.7  | 111    | 127.3  | 115.8  | 112    | 112.6  | 123.6  | 166.9  |
| ASB6    | 97.1   | 128.9  | 129.1  | 117.7  | 107.4  | 128    | 107.6  | 166.5  |
| ASB7    | 124.2  | 150.4  | 95.3   | 87.1   | 88     | 94.7   | 122.1  | 142.7  |
| ASB7    | 106.3  | 136.9  | 99.5   | 102.4  | 88.1   | 92.3   | 106.9  | 114    |
| ASB7    | 232.6  | 312.4  | 144.6  | 127.9  | 101.9  | 144.7  | 207.9  | 214.5  |
| ASB8    | 300.7  | 391.6  | 172.3  | 180.1  | 133.1  | 228.6  | 313.1  | 428.5  |
| ASB9    | 78.7   | 85     | 90.9   | 85.9   | 78.5   | 87.2   | 83.9   | 82     |
| ASB9    | 74.3   | 83.2   | 87     | 79.1   | 80.4   | 77.3   | 73.8   | 78.6   |
| ASCC1   | 931.6  | 1413.1 | 901.9  | 607.4  | 482.7  | 805.3  | 862.6  | 1075.1 |
| ASCC2   | 3012.5 | 3853.8 | 1818.2 | 2023.3 | 1509.6 | 2076.9 | 2224.1 | 1694.7 |
| ASCC3   | 148.5  | 218    | 86     | 93.6   | 94     | 100.7  | 156.3  | 189.3  |
| ASCC3   | 249    | 305.9  | 151.2  | 184.4  | 120.6  | 167.9  | 217.6  | 369.6  |
| ASCC3   | 127.8  | 160.6  | 100    | 98     | 84.5   | 80.6   | 123.6  | 146.7  |
| ASCC3L1 | 204.8  | 290.1  | 125.8  | 168.9  | 139.5  | 178.9  | 183.2  | 233.8  |
| ASCIZ   | 163.7  | 200.8  | 112.2  | 117.9  | 122.1  | 129.7  | 177.1  | 272.1  |
| ASCL1   | 99.3   | 122.1  | 103.2  | 103.9  | 96.4   | 89.4   | 102.7  | 111    |
| ASCL2   | 317.9  | 411.5  | 229.6  | 233.3  | 223.9  | 222    | 290.9  | 279    |
| ASCL3   | 98.1   | 111.7  | 93     | 84.5   | 75.6   | 81.6   | 98.2   | 103.1  |
| ASCL4   | 92     | 109.2  | 80     | 86.4   | 69.3   | 83.4   | 91.2   | 102.2  |
| ASF1A   | 899.7  | 1110   | 630.3  | 722.1  | 539.3  | 1164.6 | 1162.8 | 2573.3 |
| ASF1B   | 937.6  | 1191.5 | 615.1  | 305.6  | 317.7  | 364.6  | 706.7  | 857.9  |
| ASGR1   | 142.3  | 152.1  | 115.2  | 95     | 98.3   | 80.4   | 139.3  | 154.7  |
| ASGR2   | 90.3   | 97.6   | 90     | 82.4   | 98.8   | 87.1   | 90.2   | 102    |
| ASGR2   | 335.3  | 395.2  | 237.2  | 376.7  | 303.7  | 394.8  | 265.1  | 544    |
| ASGR2   | 176.8  | 201.9  | 150.9  | 161.8  | 159.2  | 201    | 146.1  | 218.5  |
| ASH1L   | 101    | 129.5  | 86.7   | 105.3  | 92.2   | 90.4   | 99.1   | 102.3  |
| ASH2L   | 3337.1 | 4359.1 | 2362.6 | 1825.4 | 1358.7 | 2343.5 | 2826.5 | 3720.6 |
| ASIP    | 78.9   | 92     | 83.2   | 87.2   | 86.1   | 82.9   | 86.9   | 75.3   |
| ASL     | 78.4   | 93.8   | 102    | 88.9   | 94.4   | 83.4   | 90     | 92     |
| ASL     | 97.3   | 121.1  | 111.4  | 105    | 94.5   | 116.5  | 107.8  | 115.3  |
| ASL     | 220.4  | 275.4  | 156.3  | 157.1  | 150.7  | 174.2  | 216.6  | 233.3  |
| ASMT    | 90.1   | 105    | 95     | 96.1   | 84     | 93.3   | 86.4   | 83.5   |
| ASMTL   | 173.2  | 213.5  | 165.6  | 194.8  | 161.3  | 246.9  | 181.5  | 232    |
| ASNA1   | 109.4  | 120.9  | 98.7   | 74.6   | 71.4   | 92.9   | 104.9  | 117    |
| ASNS    | 2574.7 | 3584.5 | 1774.4 | 712.9  | 493.6  | 743    | 2646.6 | 3092.3 |
| ASNS    | 353.2  | 400.7  | 163.2  | 127.4  | 90.2   | 115.7  | 325.4  | 402.6  |
| ASNSD1  | 2324   | 2856   | 1843.7 | 1760.6 | 1267.4 | 2461.4 | 1500.7 | 2470.8 |
| ASPA    | 95.9   | 101.2  | 93.7   | 90.4   | 82.5   | 86.8   | 85.9   | 104.9  |

|         |         |         |        |        |        |        |         |         |
|---------|---------|---------|--------|--------|--------|--------|---------|---------|
| ASPH    | 289.6   | 336.2   | 124.3  | 128    | 119.1  | 128.8  | 244.6   | 284.5   |
| ASPH    | 146.4   | 194.2   | 121.4  | 106    | 108.3  | 119    | 146.6   | 222.1   |
| ASPH    | 120.9   | 147.8   | 97     | 100.3  | 97.9   | 92.3   | 116.2   | 123.3   |
| ASPHD1  | 480.4   | 598.3   | 370.2  | 235.9  | 195.6  | 256.8  | 408.5   | 475.2   |
| ASPHD1  | 185.6   | 193.7   | 118.1  | 107.8  | 95.1   | 108.2  | 169.5   | 144.6   |
| ASPHD2  | 179.8   | 236.2   | 150.1  | 118    | 116.8  | 120.9  | 209.5   | 271.1   |
| ASPM    | 1825.5  | 2230.6  | 827.8  | 991.7  | 838.2  | 1136.4 | 1789.1  | 2534    |
| ASPN    | 82.9    | 87.2    | 94.3   | 98.4   | 93.2   | 86.5   | 85.1    | 78.8    |
| ASPSCR1 | 164     | 198.7   | 109.5  | 103.7  | 104.6  | 103.4  | 158.2   | 198.9   |
| ASPSCR1 | 2944.1  | 3217.2  | 1922.8 | 1600.1 | 1503.1 | 1705.6 | 2547.7  | 2484.9  |
| ASRGL1  | 126.5   | 167.1   | 110.9  | 121.8  | 115.4  | 138.2  | 112     | 150.1   |
| ASS     | 2404.3  | 3197.8  | 1084.4 | 741.9  | 721.6  | 965.6  | 2260.8  | 4466.1  |
| ASS1    | 1486.3  | 2020    | 394.3  | 257.3  | 265.5  | 337.4  | 1464.5  | 2881.5  |
| ASTE1   | 425     | 534.8   | 182.2  | 190.3  | 139.1  | 230.3  | 387.4   | 459.1   |
| ASTL    | 99.5    | 106.3   | 108.2  | 91.5   | 89.6   | 90.2   | 109.9   | 109.7   |
| ASTN    | 101.9   | 106     | 102.8  | 99.2   | 89.4   | 85.9   | 92      | 101.2   |
| ASTN    | 97.7    | 105.3   | 94.4   | 88     | 86.6   | 85.1   | 90.5    | 120.1   |
| ASTN2   | 135.7   | 166     | 106.8  | 89.2   | 88.1   | 91     | 108.6   | 132.4   |
| ASTN2   | 117     | 143.4   | 96.2   | 92.2   | 97.2   | 84.3   | 100.7   | 117.1   |
| ASTN2   | 85.3    | 96.4    | 96     | 85.7   | 83.9   | 103.7  | 91.4    | 95.8    |
| ASXL1   | 319.3   | 431.2   | 329    | 372.3  | 322.4  | 479.6  | 290.5   | 329.9   |
| ASXL2   | 734.1   | 1012.7  | 505.3  | 1213.3 | 970.2  | 1288.3 | 709.9   | 740     |
| ASZ1    | 76.5    | 83.6    | 86.8   | 87.7   | 75.9   | 83.8   | 79.3    | 85.7    |
| ATAD1   | 324.1   | 378.9   | 125.5  | 121.8  | 111.9  | 127.3  | 246.6   | 489     |
| ATAD2   | 1622.3  | 2224.1  | 1285.1 | 1101.2 | 921.3  | 1703.5 | 1278.6  | 2175.8  |
| ATAD3A  | 428.5   | 528.4   | 372.7  | 330.5  | 271.6  | 484.1  | 381.6   | 690.3   |
| ATAD3B  | 164.4   | 214.5   | 144.5  | 143.4  | 131.9  | 116.7  | 157     | 209.1   |
| ATAD3C  | 123.7   | 139.5   | 93.7   | 99.4   | 93.8   | 103.3  | 112.6   | 106.7   |
| ATAD4   | 226.7   | 278.7   | 166.2  | 132.6  | 121    | 148.6  | 242     | 250.3   |
| ATBF1   | 106.3   | 101.1   | 99.6   | 127.2  | 110.9  | 103.7  | 102.9   | 116.9   |
| ATCAY   | 102.3   | 125.1   | 94.5   | 90.9   | 90.7   | 90.3   | 102.4   | 112.9   |
| ATE1    | 109.6   | 157.4   | 93     | 90.6   | 84.1   | 92.4   | 115.5   | 109.4   |
| ATE1    | 93.6    | 92.5    | 89.5   | 82.7   | 79.7   | 88.1   | 89.8    | 109.4   |
| ATE1    | 118.2   | 142.3   | 91.8   | 85.4   | 93     | 81.2   | 111.8   | 152.8   |
| ATF1    | 216.3   | 253.3   | 113.9  | 110.7  | 94.1   | 122.8  | 185.3   | 321.8   |
| ATF2    | 320.3   | 450.1   | 212.9  | 213.7  | 220.1  | 300.3  | 275.7   | 353.4   |
| ATF3    | 151.5   | 181.1   | 121.7  | 101.8  | 105.9  | 114.7  | 156.1   | 266.4   |
| ATF3    | 77.2    | 98.2    | 103.5  | 99.7   | 86.4   | 96.6   | 84      | 92.7    |
| ATF3    | 90.8    | 100.5   | 105.9  | 87.9   | 82     | 85.7   | 98.5    | 95.2    |
| ATF4    | 12864.5 | 15313.2 | 6188.1 | 5473.2 | 4269   | 6403   | 14738.7 | 20141.5 |
| ATF4    | 191.1   | 165.4   | 135.6  | 121.5  | 115.4  | 151    | 141.4   | 146.2   |
| ATF4    | 1011.1  | 1483.6  | 256.3  | 230.4  | 189    | 292.3  | 1294.4  | 1880    |
| ATF5    | 1424.2  | 1710.7  | 725.6  | 956    | 1073.4 | 888.2  | 1521.5  | 1639    |
| ATF6    | 1495.4  | 1876.6  | 658.1  | 823.3  | 679.5  | 972.9  | 1305.1  | 1661    |
| ATF7    | 121.4   | 129.3   | 95.6   | 87.7   | 86     | 92.6   | 100.6   | 124     |
| ATF7IP  | 103     | 94.5    | 96.6   | 97.6   | 93.3   | 90.2   | 88.7    | 103.7   |
| ATF7IP2 | 376.2   | 488.3   | 291.8  | 323.5  | 248.2  | 405.2  | 304.4   | 501.9   |
| ATG10   | 229.3   | 341.5   | 228.5  | 246.5  | 191.5  | 244.2  | 209.6   | 322.8   |
| ATG12   | 1586.3  | 1855.3  | 1145   | 1094.5 | 1010.9 | 977.2  | 1459.2  | 2359.5  |
| ATG16L1 | 447.8   | 623.7   | 378.8  | 277.9  | 248.6  | 484.7  | 350.8   | 625.3   |

|         |        |        |        |        |        |        |        |        |
|---------|--------|--------|--------|--------|--------|--------|--------|--------|
| ATG16L1 | 471.5  | 618.6  | 481.2  | 388.6  | 298.8  | 569.5  | 335.2  | 564.5  |
| ATG16L2 | 219.4  | 233.2  | 186.4  | 189.6  | 242.8  | 262.8  | 195    | 230.6  |
| ATG3    | 187.1  | 207.3  | 125.1  | 116.7  | 122.6  | 125.2  | 181.6  | 209.8  |
| ATG4A   | 264    | 400.2  | 225.9  | 248.2  | 216.7  | 305.5  | 232.4  | 334.6  |
| ATG4A   | 90.4   | 108.5  | 78.4   | 81.3   | 78     | 85.9   | 87.5   | 102.5  |
| ATG4B   | 75.3   | 80.3   | 93.7   | 87.7   | 91.1   | 92.5   | 80.7   | 84.5   |
| ATG4B   | 1434.4 | 2089.5 | 744.2  | 431.2  | 467.3  | 254    | 1103.4 | 1576.1 |
| ATG4C   | 85.4   | 93.1   | 94.3   | 89     | 71.7   | 90.2   | 86.8   | 88.6   |
| ATG4D   | 124.9  | 146.8  | 91.7   | 85.5   | 88.3   | 89.5   | 116.7  | 146.8  |
| ATG5    | 341.8  | 412    | 223.9  | 257.4  | 207.8  | 277    | 314.2  | 520.8  |
| ATG7    | 808.9  | 1109.4 | 591.5  | 721.5  | 559.1  | 820.9  | 673.2  | 720.6  |
| ATG9A   | 83.1   | 89.1   | 83.9   | 77.8   | 83.2   | 79.2   | 85.6   | 85.9   |
| ATG9A   | 208.8  | 304    | 305.3  | 300.9  | 261.1  | 457.2  | 219.5  | 417.3  |
| ATG9A   | 185.9  | 261    | 257    | 201.6  | 200.5  | 270.8  | 205.7  | 409.5  |
| ATG9B   | 90.4   | 99     | 81.6   | 87.7   | 85.7   | 86.8   | 91.2   | 94.1   |
| ATHL1   | 161.3  | 154.5  | 176.4  | 185.4  | 181.7  | 298.3  | 139.2  | 171.5  |
| ATIC    | 5995.7 | 7402.4 | 4828.3 | 3161.1 | 1911.8 | 2715.4 | 4408.9 | 5224.6 |
| ATM     | 97.1   | 119.9  | 103.4  | 92.9   | 92.4   | 92.9   | 95.9   | 99.8   |
| ATM     | 572.8  | 878    | 345.9  | 664.7  | 556.7  | 890.1  | 548    | 676.8  |
| ATM     | 82.5   | 95.4   | 71.8   | 81.9   | 70.7   | 77.8   | 81.3   | 88.4   |
| ATN1    | 103.9  | 118    | 84.9   | 87.1   | 83.2   | 94     | 105.3  | 120.3  |
| ATN1    | 116.9  | 137.3  | 128.4  | 134.1  | 135.2  | 160    | 120.1  | 159.9  |
| ATN1    | 89.3   | 102.3  | 86.4   | 88.5   | 73.8   | 72.2   | 79.6   | 102.7  |
| ATOH1   | 96.8   | 106.6  | 96.5   | 90     | 85.2   | 83.4   | 93.7   | 99.8   |
| ATOH7   | 90.3   | 102.8  | 94     | 80.3   | 90.6   | 87     | 97.2   | 110.7  |
| ATOH8   | 97.1   | 102.1  | 91.7   | 79.4   | 82.6   | 90.1   | 102.9  | 103.2  |
| ATOX1   | 3360   | 3948   | 2504.6 | 1895.7 | 1509.3 | 1954.9 | 3688.2 | 3553   |
| ATP10A  | 101.6  | 132.4  | 102.9  | 100.5  | 77.9   | 85.8   | 114.3  | 150.2  |
| ATP10D  | 154.5  | 190.5  | 123.8  | 120.8  | 106.7  | 119.5  | 134.9  | 143.9  |
| ATP11A  | 99.7   | 122.6  | 87.8   | 89.5   | 74.3   | 91.2   | 102.3  | 111    |
| ATP11A  | 84.6   | 90.5   | 92     | 77.6   | 76.4   | 90.1   | 82.1   | 96.8   |
| ATP11B  | 232    | 262.1  | 172    | 250.9  | 187.7  | 297.4  | 224.6  | 359.5  |
| ATP11C  | 158.1  | 237.9  | 128.8  | 130.7  | 111.1  | 137.1  | 148    | 194.8  |
| ATP11C  | 330.2  | 417.3  | 200.5  | 270.8  | 203.3  | 366.7  | 306.3  | 465.9  |
| ATP12A  | 107.5  | 132.3  | 95.6   | 79.7   | 100.4  | 84.8   | 102    | 113.7  |
| ATP13A1 | 738.6  | 902.2  | 481.3  | 391.9  | 367.9  | 352.1  | 540.7  | 563.4  |
| ATP13A2 | 116.4  | 145    | 140.7  | 113.8  | 126.7  | 126.3  | 114.6  | 177.5  |
| ATP13A4 | 94.2   | 104    | 86.4   | 92.7   | 77.6   | 76.7   | 89.4   | 98.2   |
| ATP13A5 | 69.6   | 91.2   | 90.4   | 83.9   | 84.7   | 84.5   | 83.9   | 96.7   |
| ATP1A1  | 2112.4 | 2663.4 | 2439.2 | 1563.3 | 1209.7 | 1972.6 | 1842.8 | 2140.7 |
| ATP1A1  | 4658.8 | 5968.4 | 2648   | 1947.4 | 1897.9 | 2511.2 | 4054   | 6375.2 |
| ATP1A1  | 1474.9 | 2345.8 | 857.4  | 348.5  | 277.3  | 323.1  | 1215.5 | 1720.3 |
| ATP1A2  | 80.4   | 80.5   | 84.8   | 88.8   | 83.1   | 76.7   | 84.3   | 85     |
| ATP1A3  | 116.1  | 118.9  | 105.8  | 96.7   | 102    | 104.3  | 102.9  | 104.4  |
| ATP1A4  | 88.6   | 94.2   | 97.1   | 92.2   | 84.4   | 84.3   | 86.8   | 93.4   |
| ATP1A4  | 98.2   | 116.7  | 101.6  | 85.2   | 86.2   | 91.1   | 97.8   | 110.9  |
| ATP1B1  | 230.2  | 312.7  | 138.6  | 261.6  | 195.5  | 257.2  | 231.5  | 421.6  |
| ATP1B1  | 492.4  | 632.9  | 320.5  | 643.4  | 431.8  | 601.4  | 469.7  | 794.5  |
| ATP1B1  | 389.8  | 525    | 196.7  | 300.5  | 237.3  | 257.7  | 337.3  | 429.6  |
| ATP1B2  | 309.6  | 478.6  | 182.2  | 225.4  | 192.2  | 201.3  | 329.6  | 374.6  |

|        |         |         |         |         |         |         |         |         |
|--------|---------|---------|---------|---------|---------|---------|---------|---------|
| ATP1B3 | 4718.9  | 5793.8  | 2139.5  | 1753.7  | 898.7   | 1596.5  | 5710.8  | 8036.3  |
| ATP1B3 | 818.8   | 1148.9  | 346.2   | 308.7   | 244.3   | 341.2   | 625.2   | 760.3   |
| ATP1B3 | 4234.8  | 4536.3  | 926.1   | 868.4   | 680.1   | 1007.4  | 4182    | 6679.3  |
| ATP1B4 | 76      | 89      | 104.1   | 92.1    | 87.1    | 95.1    | 88      | 90.3    |
| ATP2A1 | 84.5    | 93.6    | 96.8    | 88.8    | 83.4    | 81.9    | 89.7    | 94.2    |
| ATP2A2 | 554.1   | 915.1   | 633.1   | 705.4   | 620.1   | 1062.7  | 620.1   | 878.9   |
| ATP2A2 | 934.6   | 1114    | 911.7   | 1264.3  | 959.6   | 1682.3  | 991     | 2474    |
| ATP2A2 | 574.6   | 792.7   | 585.6   | 561.9   | 481.6   | 911.2   | 600.1   | 1012.2  |
| ATP2A3 | 131.5   | 134     | 120.6   | 111.1   | 103.9   | 108.8   | 129.5   | 120.5   |
| ATP2A3 | 102.4   | 121.2   | 108.2   | 110.6   | 107     | 141.2   | 113.8   | 127.8   |
| ATP2B1 | 113.2   | 129.4   | 105.8   | 102.6   | 95.4    | 107     | 111     | 136.8   |
| ATP2B1 | 92      | 119.9   | 106.7   | 82.8    | 83.2    | 93      | 103     | 110.9   |
| ATP2B2 | 94      | 116.1   | 93.6    | 89      | 89.4    | 91.7    | 91.6    | 96.7    |
| ATP2B2 | 84.3    | 94      | 95.8    | 86.3    | 95      | 87.2    | 86.4    | 94.3    |
| ATP2B2 | 81.3    | 98.1    | 85      | 86.1    | 87.6    | 78.5    | 86.2    | 91.3    |
| ATP2B3 | 274     | 316.7   | 199.4   | 253.5   | 205.4   | 274.4   | 252.2   | 320     |
| ATP2B3 | 120     | 131.9   | 89.6    | 88.6    | 83.3    | 88.5    | 109.2   | 123.9   |
| ATP2B3 | 86.5    | 86.8    | 101     | 96.7    | 99.1    | 96.7    | 81.1    | 91.2    |
| ATP2B4 | 115.4   | 151.3   | 96      | 116.9   | 121.7   | 110.7   | 110.9   | 127.5   |
| ATP2B4 | 503.7   | 857.1   | 498.8   | 863.3   | 872.7   | 1198.9  | 513.4   | 631.8   |
| ATP2C1 | 233.6   | 287.2   | 180     | 232.3   | 173.6   | 263.2   | 208.2   | 304.1   |
| ATP2C1 | 157     | 212.7   | 111.9   | 123.5   | 101.2   | 107.4   | 145.6   | 213.9   |
| ATP2C1 | 558.1   | 757.5   | 364.1   | 337.6   | 250.7   | 449.2   | 378.6   | 564.5   |
| ATP4A  | 104.8   | 121.7   | 91.1    | 84.6    | 79.2    | 81.6    | 86.6    | 112.1   |
| ATP4B  | 101.8   | 100.2   | 94.3    | 91.5    | 84.1    | 93.3    | 94.5    | 93.4    |
| ATP4B  | 94      | 99.5    | 102.4   | 84.7    | 85.6    | 86.1    | 91.6    | 99.6    |
| ATP5A1 | 19414.9 | 24068.4 | 17472.1 | 17314.9 | 13342.1 | 19054.8 | 16875.6 | 23345.7 |
| ATP5A1 | 21701.3 | 25463.5 | 15829.2 | 16992.8 | 13500.7 | 16899.7 | 19161.4 | 23137.8 |
| ATP5B  | 22424.7 | 27829.4 | 17992.7 | 18643.9 | 14221.4 | 21480.2 | 19262.1 | 20982.5 |
| ATP5C1 | 4337.7  | 5719.2  | 2664.2  | 1792.6  | 1356    | 2608.3  | 3821.1  | 6656.9  |
| ATP5D  | 476     | 586.6   | 538     | 416     | 303.1   | 411.8   | 496.8   | 873.5   |
| ATP5D  | 5261.9  | 6547.9  | 5003.8  | 2915.2  | 2028.2  | 2829.7  | 4502.1  | 9048    |
| ATP5F1 | 6644.4  | 7873.4  | 2071    | 968.6   | 916.7   | 1231.9  | 5436.8  | 6286.9  |
| ATP5F1 | 19374.6 | 21801   | 10115.4 | 6616.9  | 5216.9  | 7994    | 16840.2 | 23206.4 |
| ATP5G1 | 286.2   | 337.5   | 178.1   | 162.8   | 137.5   | 170.7   | 246.9   | 252.8   |
| ATP5G1 | 6479.9  | 7518.3  | 5466.3  | 4923.9  | 3786.1  | 4182.6  | 6217.5  | 6047.6  |
| ATP5G2 | 84.9    | 88.6    | 95.2    | 100.8   | 89.4    | 79.6    | 86.6    | 89.2    |
| ATP5G2 | 228     | 254.9   | 197.1   | 134.4   | 111.2   | 105.6   | 182     | 219.8   |
| ATP5G2 | 8637.9  | 11007.7 | 5974.8  | 2900.9  | 2300.6  | 2474.6  | 7966.5  | 8390.5  |
| ATP5G3 | 369.3   | 434.1   | 220.9   | 243.4   | 193.8   | 240.4   | 293.6   | 435.6   |
| ATP5H  | 10429.4 | 11138.7 | 6483.6  | 6483.7  | 4753.8  | 7159.3  | 9517.2  | 14305.5 |
| ATP5H  | 10452.5 | 12507.6 | 8102    | 7825.4  | 5669.9  | 8857.6  | 9815    | 15488.9 |
| ATP5I  | 13661.4 | 14263.5 | 10820.4 | 10082.6 | 8279.5  | 9646.9  | 12967.6 | 15392.1 |
| ATP5I  | 1053    | 1294.4  | 904.9   | 766.9   | 642.1   | 825.8   | 868.9   | 999.1   |
| ATP5J  | 1376.1  | 1659.8  | 647.3   | 755.1   | 529.9   | 771     | 1157.4  | 1169    |
| ATP5J  | 13415.2 | 17353.9 | 10448   | 10642.7 | 8716.1  | 11707.8 | 11219.1 | 13309.9 |
| ATP5J  | 14941.5 | 17507.4 | 11267   | 11802.5 | 9243.4  | 13857.3 | 12936.1 | 13956.7 |
| ATP5J2 | 6942.7  | 7591.4  | 4381.9  | 4110.3  | 3321.8  | 4644.5  | 6577.2  | 7353.8  |
| ATP5J2 | 8899    | 9905.8  | 6226.1  | 5808.5  | 4651    | 6191    | 8660.6  | 10712.5 |
| ATP5L  | 682.4   | 836.2   | 210.2   | 266     | 225     | 268.4   | 651.6   | 1050.7  |



|           |         |         |        |        |        |        |        |         |
|-----------|---------|---------|--------|--------|--------|--------|--------|---------|
| ATP5O     | 12195.3 | 14322.2 | 7062   | 7740.5 | 6057.2 | 8299   | 10784  | 14695.9 |
| ATP5S     | 390.7   | 418.1   | 189.1  | 212.2  | 169.7  | 231    | 315.9  | 403.8   |
| ATP5S     | 356.4   | 467.6   | 158.2  | 132.4  | 143.4  | 141    | 266    | 336.3   |
| ATP6AP1   | 4743.1  | 6584    | 3583.6 | 4299.7 | 3819.2 | 4448.1 | 4758.9 | 4303.7  |
| ATP6AP2   | 4286.4  | 5545.8  | 1796.3 | 2423.9 | 2143.3 | 3326.6 | 4235.5 | 6089.2  |
| ATP6VOA1  | 876.8   | 1095.5  | 642.2  | 724.5  | 629.9  | 713    | 992.1  | 1087.3  |
| ATP6VOA2  | 421     | 581.4   | 338.8  | 294.8  | 227.4  | 307    | 382.3  | 500.9   |
| ATP6VOA4  | 90      | 93.3    | 99.5   | 91     | 85     | 79.5   | 95.7   | 97.5    |
| ATP6VOA4  | 110.3   | 107.8   | 95.4   | 98     | 92.5   | 92.6   | 110.8  | 110.4   |
| ATP6VOA4  | 84      | 103.4   | 84.9   | 81.9   | 76     | 83.6   | 87.8   | 85.5    |
| ATP6VOA4  | 72      | 83.5    | 94.2   | 91.6   | 97.2   | 96.2   | 73.3   | 72.2    |
| ATP6VOB   | 6965.2  | 8956.3  | 6174.4 | 5411.2 | 4314.7 | 5197.5 | 7767.4 | 10379.1 |
| ATP6VOB   | 709.5   | 742.6   | 188.7  | 170.6  | 151.6  | 206.5  | 669    | 830.8   |
| ATP6VOC   | 604.2   | 951.6   | 485    | 280.9  | 215.3  | 262.7  | 562.6  | 945.2   |
| ATP6VOD1  | 1302.9  | 1838.8  | 1132.1 | 805.7  | 654.5  | 931    | 1318.1 | 1802.9  |
| ATP6VOD2  | 99.3    | 132.5   | 90.2   | 87.1   | 87.8   | 86.6   | 98.2   | 113.8   |
| ATP6VOE1  | 6549.8  | 7655.8  | 4154   | 5047.1 | 3683.6 | 4375.9 | 7224.1 | 8256.1  |
| ATP6VOE2L | 1626.9  | 1970.9  | 1111.4 | 712.5  | 593.2  | 593.4  | 1186.5 | 1218.7  |
| ATP6V1A   | 3242.2  | 3889.8  | 2050.9 | 3661.8 | 2744.1 | 4415.6 | 4094.5 | 5961.3  |
| ATP6V1B1  | 415.3   | 392     | 277.1  | 232.7  | 266.8  | 261.9  | 326    | 382.6   |
| ATP6V1B2  | 9456.1  | 12445.6 | 8803.7 | 5931.8 | 4656.5 | 6528.6 | 7926   | 10968.2 |
| ATP6V1C1  | 326.7   | 424.2   | 258.7  | 340.9  | 237.6  | 441.1  | 314.4  | 632.7   |
| ATP6V1C1  | 139.5   | 177.4   | 103.6  | 81.1   | 85.8   | 104.4  | 136.5  | 207.9   |
| ATP6V1C2  | 93.7    | 116.5   | 94.4   | 131.8  | 131.3  | 153.7  | 91.5   | 98.4    |
| ATP6V1C2  | 78.9    | 82      | 83.1   | 86.4   | 80.9   | 76.6   | 83.7   | 79.6    |
| ATP6V1D   | 1440.1  | 1985.8  | 1031   | 882.7  | 653.5  | 1086.6 | 1311.2 | 2231.3  |
| ATP6V1E1  | 5001.7  | 6418.8  | 3446.5 | 3430.8 | 2891.3 | 3987.9 | 4703.8 | 5129.6  |
| ATP6V1E1  | 3460.6  | 4201.4  | 3029.6 | 3263.6 | 2748.6 | 3219.1 | 3378.6 | 3802.3  |
| ATP6V1E2  | 282     | 351.4   | 207.9  | 246.4  | 219    | 308.8  | 239.4  | 295.6   |
| ATP6V1F   | 4047.2  | 5578.5  | 2548.8 | 2464.5 | 2075   | 2450.1 | 4539.8 | 5565.9  |
| ATP6V1G1  | 4368.5  | 5174.6  | 2101.9 | 2404.4 | 1912   | 3154.7 | 4122.7 | 6465.7  |
| ATP6V1G2  | 188.7   | 220.9   | 144.3  | 113.8  | 98.9   | 121.4  | 158.5  | 213.5   |
| ATP6V1G2  | 92.3    | 111.4   | 92.7   | 92.1   | 88.9   | 85     | 98.5   | 100.3   |
| ATP6V1G3  | 86      | 86.2    | 95.2   | 92.9   | 81     | 87.4   | 84.4   | 94.1    |
| ATP6V1H   | 110.2   | 102.4   | 96.2   | 81.6   | 83.6   | 95.8   | 94.2   | 120.3   |
| ATP6V1H   | 627     | 1002.1  | 429.3  | 340.1  | 241.1  | 459.8  | 730.5  | 1354.5  |
| ATP7A     | 93.1    | 110.8   | 96.4   | 114.8  | 106.8  | 150.9  | 97.2   | 121.8   |
| ATP7B     | 154.4   | 187.9   | 103.2  | 101.8  | 93.9   | 99.4   | 147.1  | 162.6   |
| ATP7B     | 113.8   | 120.6   | 131.4  | 180    | 153.4  | 205.6  | 99.7   | 136.3   |
| ATP8A1    | 107.3   | 117.9   | 90.5   | 86.4   | 83.4   | 95.9   | 103    | 103.9   |
| ATP8A2    | 110.4   | 126.6   | 119.4  | 98.5   | 101.3  | 108.3  | 104    | 99.3    |
| ATP8B1    | 137.9   | 151     | 90.6   | 99     | 84.4   | 93.8   | 116.7  | 138.2   |
| ATP8B2    | 144.2   | 129.2   | 107.9  | 97.3   | 92.1   | 83.6   | 113.9  | 169.5   |
| ATP8B2    | 312     | 407.5   | 186.1  | 143.4  | 153.5  | 152.3  | 268.2  | 309.9   |
| ATP8B3    | 226.5   | 267.8   | 179.9  | 205.9  | 203.7  | 237.9  | 185.6  | 202.9   |
| ATP8B4    | 3721.5  | 5316.5  | 2855.9 | 5209.3 | 3949.9 | 7809.1 | 3203.6 | 3665.2  |
| ATP9A     | 217.8   | 342     | 217    | 373.5  | 274.8  | 415.2  | 235.1  | 284.7   |
| ATP9B     | 147.4   | 160.7   | 125.4  | 121.2  | 109.3  | 148.4  | 157    | 181.2   |
| ATPAF1    | 946.3   | 1266.7  | 555.3  | 371.4  | 288.8  | 452.8  | 846.1  | 942.9   |
| ATPAF1    | 581.3   | 739.9   | 468.9  | 389.5  | 275.6  | 442.8  | 442.9  | 463.7   |

|          |        |        |        |        |        |        |        |        |
|----------|--------|--------|--------|--------|--------|--------|--------|--------|
| ATPAF2   | 136.3  | 169.4  | 124.3  | 118.4  | 115.4  | 137.6  | 126.9  | 146.9  |
| ATPBD1B  | 983.5  | 1350.9 | 666.6  | 606.9  | 504.1  | 555.9  | 792.8  | 772    |
| ATPBD1C  | 86.8   | 91.8   | 89     | 86.2   | 85.8   | 89     | 85.1   | 86.8   |
| ATPBD3   | 173.1  | 234.1  | 147.3  | 122.8  | 105.4  | 120.2  | 196.7  | 192.5  |
| ATPBD4   | 228.7  | 264.2  | 119.9  | 127    | 86.9   | 126.9  | 203.6  | 266.7  |
| ATPIF1   | 1229.6 | 1548.5 | 571.6  | 487.7  | 442    | 455.6  | 1089.1 | 1210.1 |
| ATPIF1   | 187.5  | 199.2  | 120.7  | 125.9  | 105.9  | 145.1  | 152.6  | 249.2  |
| ATR      | 73.5   | 89.3   | 90.6   | 91.9   | 73.4   | 90.2   | 81.5   | 91     |
| ATR      | 101.7  | 134    | 80.8   | 90.7   | 81.1   | 82.4   | 106.8  | 121.9  |
| ATR      | 91.3   | 113.7  | 107.4  | 95.7   | 88     | 92.1   | 101    | 102.7  |
| ATRN     | 101.4  | 140.2  | 101.6  | 142    | 118.7  | 148.5  | 110.5  | 188.1  |
| ATRN     | 104    | 123.6  | 89.1   | 94.6   | 88.4   | 86.4   | 102.7  | 114.6  |
| ATRN11   | 84.7   | 101.2  | 108.6  | 89.9   | 90.4   | 79.3   | 84.6   | 88.7   |
| ATRX     | 146.5  | 182.1  | 101.6  | 103    | 96     | 97.1   | 121.1  | 141.5  |
| ATRX     | 72.2   | 87.8   | 81.6   | 83.8   | 82.5   | 83.4   | 78     | 82.5   |
| ATRX     | 83.9   | 99.3   | 80     | 79     | 82.7   | 78.3   | 91.6   | 114.2  |
| ATXN1    | 134.3  | 171.9  | 127.8  | 161.7  | 134.9  | 165.6  | 145.4  | 198.6  |
| ATXN10   | 178.2  | 231.2  | 97     | 133.2  | 118.1  | 124.6  | 151.6  | 221.7  |
| ATXN2    | 1164.4 | 1491.1 | 889.6  | 1342.1 | 1040.6 | 1219.2 | 1124.8 | 1321.4 |
| ATXN2L   | 117.3  | 125.3  | 176    | 157.2  | 146.1  | 261.1  | 117.9  | 135.1  |
| ATXN2L   | 114.4  | 110.3  | 114.9  | 101.8  | 100.2  | 98.9   | 95.3   | 122.4  |
| ATXN3    | 332.2  | 487.8  | 254.1  | 335.2  | 312.7  | 289    | 390.7  | 432.1  |
| ATXN3    | 123.4  | 142.9  | 100.3  | 102.9  | 103.3  | 101.3  | 119.1  | 138.9  |
| ATXN7    | 96.7   | 112.8  | 88.5   | 81.2   | 82.6   | 87     | 106.6  | 119.6  |
| ATXN7L2  | 182.9  | 218.5  | 182.8  | 115.8  | 116.6  | 125.4  | 175.7  | 301.9  |
| ATXN7L4  | 101.9  | 114.8  | 96.5   | 97.9   | 88.3   | 95.2   | 86.8   | 98.1   |
| ATXN8OS  | 84.7   | 83     | 94.1   | 88.6   | 84.4   | 92.3   | 81.3   | 80.1   |
| AUH      | 293    | 425.9  | 210.5  | 155.5  | 167.1  | 230.1  | 235.1  | 264.9  |
| AUP1     | 1283.8 | 1336   | 374.2  | 332.2  | 275    | 351.6  | 1223.5 | 1804.4 |
| AURKA    | 3392.3 | 4228   | 2908   | 2570.8 | 2212.6 | 2917.8 | 3018.3 | 4295   |
| AURKA    | 2961.1 | 3930.1 | 2552.3 | 2180.2 | 1690.6 | 2463.2 | 2882.2 | 4393.7 |
| AURKAIP1 | 7196   | 8390.7 | 5515.7 | 4859.3 | 4314.4 | 5417.6 | 6241.6 | 5932.3 |
| AURKB    | 1012.3 | 1121.2 | 967.9  | 437.2  | 379.8  | 536.4  | 850.6  | 1217.4 |
| AURKC    | 86.3   | 103.5  | 88.7   | 79.3   | 76     | 86.8   | 87.4   | 90.1   |
| AURKC    | 75     | 90.9   | 90.4   | 83.3   | 74.6   | 89.6   | 78.1   | 90.2   |
| AURKC    | 139    | 170.8  | 106.3  | 87.5   | 83.7   | 92.9   | 139.6  | 157.9  |
| AUTS2    | 88.1   | 103.8  | 99.8   | 82.6   | 81     | 82.2   | 100.3  | 86.5   |
| AVEN     | 287    | 345.8  | 151    | 139.4  | 135.9  | 167.4  | 279.3  | 475.6  |
| AVIL     | 105.5  | 121.9  | 113.3  | 110.4  | 96.5   | 102.5  | 104.3  | 102.9  |
| AVP      | 101.6  | 117.5  | 109.3  | 96     | 84.8   | 91.7   | 111    | 110.4  |
| AVPI1    | 346.2  | 475.8  | 281    | 231.4  | 185.6  | 237.8  | 363.8  | 360.4  |
| AVPR1A   | 93.8   | 110.6  | 100.8  | 89.5   | 86.3   | 84.6   | 97.4   | 106.7  |
| AVPR1B   | 106.8  | 127.4  | 92.9   | 87.4   | 73.5   | 84.9   | 93.3   | 128.8  |
| AVPR2    | 124.4  | 145.4  | 91.1   | 78.9   | 80.1   | 81.7   | 109.7  | 128.6  |
| AXIIR    | 895.1  | 1025.4 | 755.4  | 980.1  | 823.8  | 1112.4 | 667.3  | 759.5  |
| AXIN1    | 654.8  | 697.6  | 875    | 710.1  | 642.4  | 972.8  | 611.7  | 1244.9 |
| AXIN1    | 103.1  | 118.5  | 90.8   | 81.8   | 87     | 111.8  | 100.6  | 117.6  |
| AXIN2    | 89     | 100.4  | 102.2  | 90.8   | 85.3   | 91.1   | 92.2   | 108.5  |
| AXL      | 249.9  | 312.1  | 191.6  | 362.2  | 240.6  | 232.2  | 220.9  | 212.3  |
| AXL      | 248.9  | 301.2  | 170.7  | 357.6  | 230.2  | 294.9  | 179.1  | 236.6  |

|          |         |         |         |        |        |        |         |         |
|----------|---------|---------|---------|--------|--------|--------|---------|---------|
| AXUD1    | 309.2   | 400.6   | 272.3   | 269.8  | 273.6  | 277.9  | 381     | 475.5   |
| AYP1     | 118.5   | 127.7   | 109.8   | 104.8  | 106.7  | 101.4  | 104.5   | 117.9   |
| AYTL1    | 259.7   | 341.3   | 140     | 121.9  | 108.8  | 122.2  | 206.4   | 250.9   |
| AYTL2    | 633.9   | 806.6   | 377.1   | 237.7  | 197.4  | 227.7  | 509.1   | 513.3   |
| AZGP1    | 116.3   | 141.8   | 111.2   | 91     | 96.8   | 95.7   | 117.6   | 155.5   |
| AZI1     | 584.5   | 734.7   | 505.6   | 533.7  | 495.1  | 533    | 392.5   | 413.6   |
| AZI1     | 132.8   | 152.1   | 89.8    | 85.6   | 77.6   | 86.3   | 120.9   | 137.2   |
| AZI2     | 544.5   | 720.2   | 177.4   | 253.2  | 178.2  | 342.4  | 427.9   | 678.9   |
| AZIN1    | 4479.6  | 5794.1  | 2982.2  | 3284   | 2253.5 | 4388.5 | 3941.2  | 5680.7  |
| AZIN1    | 563.2   | 781.5   | 207.5   | 217    | 157.2  | 163.5  | 324.3   | 488.3   |
| AZIN1    | 297.9   | 371     | 162.6   | 145    | 113.4  | 175.6  | 299.1   | 535.5   |
| AZU1     | 13000.7 | 15809.2 | 13333.6 | 9574.1 | 7633.9 | 9828.3 | 10130.6 | 14989   |
| B2M      | 11781.2 | 12771.4 | 3197.7  | 3208.6 | 2560.6 | 3649.5 | 10812.4 | 11565.7 |
| B3GALNT1 | 416.6   | 536     | 289.7   | 284.1  | 215.8  | 360.1  | 344.3   | 461.7   |
| B3GALNT2 | 449.9   | 633.4   | 266.6   | 236.2  | 178.3  | 218.2  | 378.9   | 498.7   |
| B3GALT1  | 103.8   | 117.4   | 116.2   | 100.9  | 103.8  | 102.1  | 101.7   | 100.3   |
| B3GALT2  | 109     | 123.7   | 103.8   | 98.5   | 90.6   | 92.9   | 113.8   | 124.8   |
| B3GALT3  | 167.1   | 222.1   | 125.6   | 131.8  | 118    | 153    | 155.6   | 174.7   |
| B3GALT3  | 119.3   | 142.1   | 95.8    | 94.1   | 84.4   | 89.8   | 99.3    | 114.1   |
| B3GALT3  | 180.3   | 206     | 104.5   | 96.5   | 102.2  | 109.8  | 147.3   | 196.7   |
| B3GALT4  | 118.4   | 127.7   | 99.8    | 97.5   | 117.4  | 113.7  | 111.1   | 118.5   |
| B3GALT5  | 88.7    | 92.2    | 84.7    | 79.1   | 75.2   | 87.4   | 84.6    | 91.9    |
| B3GALT5  | 103.2   | 114.9   | 96.7    | 89.4   | 83.2   | 89.3   | 105.8   | 117.6   |
| B3GALT5  | 74.3    | 98.1    | 88      | 91.5   | 71.4   | 77.5   | 91.1    | 87.9    |
| B3GALT6  | 466.3   | 608.9   | 477.5   | 555.2  | 414.1  | 654.8  | 467.5   | 945.1   |
| B3GALT7  | 192.8   | 261.8   | 137.6   | 136.6  | 130.8  | 166.2  | 197.4   | 280.5   |
| B3GAT1   | 100.7   | 117.1   | 100.8   | 97     | 104.4  | 99.1   | 94      | 108.3   |
| B3GAT1   | 107     | 120.8   | 83.8    | 79.8   | 74.3   | 85.2   | 98.6    | 118.4   |
| B3GAT1   | 81.7    | 97.4    | 97.7    | 93.9   | 95.1   | 99.2   | 94.3    | 96      |
| B3GAT2   | 82.7    | 83.5    | 100.8   | 90.8   | 86.5   | 96.7   | 80.8    | 87.2    |
| B3GAT3   | 233.8   | 254.7   | 255.4   | 193.9  | 167.7  | 215.7  | 181.7   | 221.1   |
| B3GNT1   | 724.1   | 1154.1  | 380.5   | 307.4  | 259.8  | 475.5  | 453.1   | 641     |
| B3GNT3   | 136.6   | 151.9   | 93.4    | 98.2   | 90.3   | 96     | 123.8   | 142.9   |
| B3GNT4   | 121.3   | 155.1   | 95.9    | 83.3   | 92.3   | 93.7   | 113     | 132.1   |
| B3GNT5   | 122.4   | 122.6   | 103.8   | 101.2  | 98.1   | 137.5  | 106.9   | 159.7   |
| B3GNT6   | 280.4   | 379.9   | 259     | 194.5  | 176.4  | 204.8  | 198.2   | 255.7   |
| B3GN-T6  | 100.2   | 111     | 93      | 78.9   | 77.4   | 76.3   | 99.6    | 126.7   |
| B3GNT7   | 86.7    | 102.4   | 99.3    | 113.2  | 93     | 94.5   | 96.7    | 90.3    |
| B3GNTL1  | 216.3   | 260.2   | 184.4   | 188.1  | 154.3  | 184.7  | 172.4   | 211.1   |
| B3GTL    | 221.9   | 259.8   | 201     | 159.9  | 128.5  | 166.7  | 163.4   | 223.7   |
| B4GALNT2 | 92      | 90.9    | 102.3   | 82.8   | 82.2   | 88     | 89.5    | 94.2    |
| B4GALNT3 | 92.6    | 97.2    | 93.7    | 83.5   | 77.2   | 87.1   | 86.2    | 94.4    |
| B4GALNT4 | 76.3    | 87.4    | 79.7    | 77.5   | 83.8   | 82.3   | 80.2    | 89.6    |
| B4GALT1  | 247.6   | 301.4   | 137.1   | 153.1  | 142.1  | 145.9  | 263     | 388.3   |
| B4GALT2  | 93.6    | 110.6   | 108.5   | 97.4   | 88.2   | 94.6   | 94.5    | 87.5    |
| B4GALT2  | 111.6   | 139.1   | 108.7   | 97.7   | 102.7  | 102.1  | 109.7   | 135.7   |
| B4GALT2  | 144.3   | 170.3   | 105     | 85.5   | 90.1   | 90.7   | 119.4   | 197.8   |
| B4GALT3  | 2246.8  | 2798.7  | 1484    | 1043.8 | 771.2  | 872    | 2210.3  | 2137.1  |
| B4GALT4  | 290.5   | 420.4   | 171.5   | 147.5  | 153.2  | 218.4  | 299.5   | 416.5   |
| B4GALT4  | 135.4   | 164.1   | 152.7   | 128.4  | 128.3  | 143.3  | 155.6   | 186.1   |

|            |        |        |        |        |        |        |        |        |
|------------|--------|--------|--------|--------|--------|--------|--------|--------|
| B4GALT5    | 2139.6 | 2514   | 1220.2 | 1677.6 | 989.9  | 1805   | 1811.4 | 2342.2 |
| B4GALT6    | 112.9  | 138    | 110.9  | 101.4  | 89.2   | 111.1  | 100.2  | 126    |
| B4GALT7    | 821.3  | 1020   | 504.7  | 491.8  | 417.8  | 445.4  | 629.2  | 523    |
| BA16L21.2. | 294.9  | 333.2  | 150.3  | 152.2  | 130.1  | 183.6  | 222.7  | 335.1  |
| BA9F11.1   | 87.5   | 111.7  | 77.5   | 86.5   | 76.7   | 79.7   | 92.8   | 96.9   |
| BAALC      | 125.5  | 128.8  | 110    | 111    | 97.3   | 112.5  | 115    | 136.6  |
| BAALC      | 101.3  | 97.8   | 102.8  | 95     | 85.2   | 99.5   | 91.5   | 104.3  |
| BAAT       | 81.5   | 85.7   | 81.5   | 75.6   | 82     | 81.8   | 83     | 102.9  |
| BACE1      | 215.3  | 303.5  | 141.5  | 136.9  | 112.9  | 155.2  | 208.1  | 260    |
| BACE1      | 110.6  | 124.8  | 100    | 95.5   | 83.2   | 88.3   | 108.2  | 125.5  |
| BACE2      | 96.7   | 119.4  | 93.8   | 85.9   | 85     | 79.3   | 106.9  | 125.8  |
| BACE2      | 117.2  | 115.6  | 89.5   | 94     | 93.2   | 86.1   | 105.2  | 115.2  |
| BACH1      | 161    | 219.5  | 101    | 104.8  | 105.9  | 94.6   | 176.3  | 198.9  |
| BACH1      | 93.5   | 99.6   | 85.5   | 82.7   | 80.4   | 81.7   | 97.4   | 105.2  |
| BACH1      | 84.9   | 102.5  | 89.8   | 86.2   | 77.6   | 89.8   | 93.2   | 119.7  |
| BACH2      | 83.6   | 86.3   | 88.5   | 88.8   | 83.5   | 82.9   | 74.1   | 87.4   |
| BAD        | 152.8  | 183.7  | 115.7  | 89.9   | 96.6   | 94.6   | 141    | 145.8  |
| BAD        | 451.7  | 594.3  | 331.3  | 224.7  | 213.5  | 235.2  | 392.2  | 460    |
| BAD        | 100.4  | 117.2  | 102.4  | 93.1   | 85.6   | 89.3   | 96.3   | 104.2  |
| BAG1       | 182.5  | 248.5  | 148.6  | 109.6  | 111.4  | 119    | 182.6  | 261    |
| BAG3       | 980.2  | 1253.6 | 694.2  | 353.9  | 322.6  | 351.4  | 1199   | 1868.2 |
| BAG4       | 333.9  | 434.5  | 150.1  | 133.7  | 115.8  | 127.2  | 289.4  | 400    |
| BAG5       | 1600.1 | 1837.1 | 1331.1 | 1359.2 | 975    | 1317   | 1215   | 1953.9 |
| BAG5       | 112.9  | 134.3  | 99.4   | 88.9   | 78.8   | 86.7   | 98.6   | 126.5  |
| BAG5       | 82.8   | 105.9  | 87     | 91.9   | 78.7   | 90.4   | 88.8   | 100.9  |
| BAG5       | 396    | 546    | 273.8  | 249.1  | 223    | 374.8  | 285.7  | 471    |
| BAGE       | 138.7  | 165    | 100.2  | 96.9   | 93.4   | 106.1  | 144.4  | 154.3  |
| BAGE2      | 94.3   | 114.9  | 91.3   | 88     | 81     | 87.8   | 80.9   | 105.6  |
| BAGE3      | 88.6   | 112.3  | 94.9   | 90.2   | 90.8   | 87.1   | 96.6   | 109.9  |
| BAGE4      | 78.1   | 82.9   | 94.7   | 88.5   | 91.8   | 89     | 86.3   | 83.6   |
| BAGE5      | 123.2  | 159.7  | 104    | 104.6  | 104.2  | 113.6  | 123.8  | 147.5  |
| BAHD1      | 120.3  | 137.4  | 83.2   | 100.5  | 78.6   | 81.9   | 112.3  | 132.4  |
| BAI1       | 130.9  | 133.2  | 97.1   | 100.3  | 94.4   | 104.5  | 119.2  | 119.1  |
| BAI1       | 90.7   | 96.5   | 84.9   | 73.4   | 93.8   | 84.7   | 84.6   | 93.3   |
| BAI1       | 81.9   | 89.9   | 91     | 87.7   | 81.3   | 90.1   | 78.8   | 86.5   |
| BAI2       | 74.8   | 81.2   | 85.6   | 85     | 81.6   | 79.9   | 81.9   | 88.6   |
| BAI3       | 83.7   | 97.1   | 91.7   | 92     | 86.8   | 110.9  | 77.9   | 94.9   |
| BAIAP2     | 174.7  | 245.3  | 146.5  | 194    | 169.1  | 219.2  | 174.3  | 212.1  |
| BAIAP2     | 149.2  | 172.5  | 117.1  | 103.8  | 102.1  | 127.9  | 134    | 156.4  |
| BAIAP2     | 88     | 106.5  | 88.5   | 97.8   | 95.2   | 90.1   | 98.6   | 115.2  |
| BAIAP2     | 105.5  | 117.2  | 97     | 79.6   | 79.3   | 84.9   | 95     | 104.7  |
| BAIAP2L1   | 104.7  | 135    | 108.9  | 118.6  | 117.6  | 135.3  | 122.6  | 143.8  |
| BAIAP2L2   | 108.5  | 108    | 109.7  | 114.7  | 119.1  | 123.8  | 100.9  | 124.4  |
| BAIAP3     | 81.9   | 79.5   | 82.6   | 78.3   | 77.4   | 81.3   | 79     | 77.4   |
| BAK1       | 367.9  | 497.9  | 198.1  | 146.9  | 149.7  | 146    | 336.8  | 529.6  |
| BAMBI      | 157.1  | 163.4  | 94.5   | 112.5  | 100.9  | 147.9  | 191.9  | 241.3  |
| BANF1      | 3724.5 | 4754.9 | 4330.8 | 2672.4 | 2207.9 | 3193.8 | 3477.7 | 5127.3 |
| BANK1      | 518.6  | 702    | 232.2  | 407.6  | 333    | 566.4  | 358.5  | 401.5  |
| BANP       | 148.4  | 176.6  | 110.3  | 109.7  | 109    | 132    | 142.8  | 180    |
| BAP1       | 304.5  | 392.8  | 285.5  | 248.8  | 224.8  | 330.3  | 269.2  | 380.4  |

|           |        |        |        |        |        |        |        |        |
|-----------|--------|--------|--------|--------|--------|--------|--------|--------|
| BAPX1     | 1035.6 | 1209.6 | 883.8  | 465.4  | 457.7  | 553.4  | 778.3  | 819.8  |
| BARD1     | 1100.6 | 1592.2 | 858.5  | 1047.2 | 975.3  | 948.4  | 1029.1 | 1165.2 |
| BARHL1    | 99.5   | 111.7  | 97.8   | 87.7   | 86.2   | 86.4   | 99.7   | 107.1  |
| BARHL2    | 113.8  | 153.2  | 86.4   | 86.7   | 79.4   | 84.6   | 136.8  | 134.6  |
| BARX1     | 843.8  | 1129.8 | 291    | 202    | 164    | 291.9  | 718.5  | 1208.4 |
| BARX2     | 121.3  | 136    | 102.8  | 109.4  | 104.6  | 108.3  | 108.7  | 128.9  |
| BASP1     | 3517.7 | 4452.7 | 2918.9 | 5201.6 | 3490.3 | 7848   | 3822.3 | 7740.9 |
| BAT1      | 2541.6 | 3208.7 | 2077.5 | 1962.7 | 1522.1 | 3158.5 | 1749.2 | 3375.9 |
| BAT1      | 141.7  | 187    | 89.6   | 83.3   | 80.8   | 91.9   | 113.6  | 139    |
| BAT1      | 122.9  | 155.2  | 98.1   | 103.4  | 94.5   | 107.7  | 113.2  | 145.8  |
| BAT2      | 247.1  | 352    | 581.6  | 559.2  | 495.3  | 835.1  | 254.4  | 432.4  |
| BAT2      | 382.2  | 506.4  | 881    | 893.3  | 707.5  | 1143.8 | 368.7  | 732.7  |
| BAT2D1    | 1262.4 | 2016.3 | 952.3  | 1508.9 | 1253   | 2664.2 | 1196   | 1497.2 |
| BAT3      | 313.2  | 448.2  | 348.9  | 265.5  | 240.5  | 238.6  | 249.2  | 335.3  |
| BAT3      | 260.8  | 335.4  | 280.2  | 291.7  | 245.4  | 386.6  | 275.2  | 415.1  |
| BAT4      | 239.9  | 304.6  | 137.3  | 108    | 115.7  | 121.1  | 239.8  | 280.4  |
| BAT5      | 787.9  | 1013.7 | 722.6  | 795.7  | 701    | 1066.7 | 718.1  | 1622.4 |
| BATF      | 675.3  | 996.9  | 619.8  | 386.2  | 311.1  | 455.8  | 718.6  | 627.8  |
| BATF2     | 102.5  | 118.3  | 100.3  | 89.3   | 92     | 91.6   | 100.8  | 106.8  |
| BAX       | 1312.1 | 1721.5 | 1386.2 | 1282.9 | 1076.4 | 1260.2 | 1417.4 | 1418.2 |
| BAX       | 136.9  | 154.4  | 84.2   | 90.6   | 78.9   | 87.7   | 136.9  | 149.5  |
| BAX       | 145.6  | 204.4  | 162.9  | 129.2  | 121.1  | 157.3  | 161.9  | 286.8  |
| BAZ1A     | 2300.7 | 2804.7 | 1774   | 1744.6 | 1297.4 | 2928.4 | 1918.5 | 3777.9 |
| BAZ1A     | 533.5  | 803.1  | 343.5  | 380.5  | 332.1  | 419.6  | 421.4  | 716.6  |
| BAZ1B     | 804.7  | 1078.6 | 707.7  | 710.4  | 673.9  | 1211.6 | 775.7  | 1340.8 |
| BAZ2A     | 91.3   | 114.9  | 103.5  | 94.3   | 92.9   | 97.4   | 103.6  | 124.3  |
| BAZ2B     | 467.3  | 589.3  | 317.5  | 476.4  | 437    | 719.1  | 360.8  | 512.4  |
| BBC3      | 108    | 114.1  | 88     | 75.9   | 81     | 86.2   | 106.6  | 130.9  |
| BBOX1     | 107.3  | 139.6  | 80     | 82.1   | 73.2   | 83     | 101.3  | 147.8  |
| BBS1      | 139.8  | 163.7  | 143    | 141.9  | 138.6  | 157.8  | 109.2  | 141.9  |
| BBS12     | 108.9  | 110.9  | 124    | 113.2  | 110.7  | 122.9  | 104.8  | 97.1   |
| BBS2      | 309.9  | 357.4  | 193.6  | 300.9  | 291.7  | 406.9  | 245.6  | 291.9  |
| BBS4      | 318.8  | 340.5  | 226.6  | 239.3  | 214.6  | 305.1  | 282.2  | 320    |
| BBS5      | 123.4  | 121.8  | 106.2  | 93.2   | 94.6   | 90.3   | 115.1  | 125.1  |
| BBS5      | 122.2  | 118    | 90     | 89.6   | 85.9   | 82.9   | 102.5  | 110.5  |
| BBS5      | 85     | 95.8   | 95.2   | 94.5   | 82.7   | 90.3   | 80.2   | 90.7   |
| BBS7      | 114.3  | 114.5  | 98.3   | 95.8   | 87.4   | 105.2  | 111.4  | 136    |
| BBS7      | 239.6  | 255.8  | 168.4  | 156.2  | 128.5  | 197.2  | 213.1  | 271.8  |
| BBS7      | 92.8   | 93.1   | 90.4   | 85.9   | 81     | 85.5   | 83.5   | 101.4  |
| BBS9      | 134.5  | 135.4  | 85.1   | 78.3   | 77.7   | 97.1   | 106.7  | 122.2  |
| BBX       | 317.2  | 420.9  | 219.1  | 260.2  | 265.7  | 269    | 266.1  | 511.2  |
| BC002942  | 366.1  | 441.3  | 484    | 540.1  | 417.6  | 683    | 309.5  | 726.3  |
| BC37295_3 | 85.4   | 91.4   | 81.6   | 84     | 80.7   | 80.4   | 89.3   | 91.9   |
| BCAM      | 111.1  | 112.1  | 108    | 93.8   | 86.2   | 88.9   | 108.8  | 122.9  |
| BCAM      | 87     | 98.9   | 90     | 81.6   | 92.4   | 82.5   | 84.7   | 94.5   |
| BCAM      | 101.8  | 97.3   | 120.6  | 97.9   | 97.3   | 106    | 86.7   | 87.1   |
| BCAN      | 149.8  | 205.9  | 118.9  | 111.9  | 107.6  | 106.4  | 143.5  | 175.5  |
| BCAN      | 86.6   | 95     | 96.3   | 94.2   | 84.1   | 95.9   | 82.8   | 96.3   |
| BCAN      | 93.6   | 104.1  | 92.8   | 87.7   | 83.4   | 84.1   | 89.4   | 109.2  |
| BCAP29    | 719.4  | 848.6  | 327.1  | 351.7  | 258.5  | 352.5  | 504.7  | 828.2  |

|         |        |        |        |        |        |        |        |        |
|---------|--------|--------|--------|--------|--------|--------|--------|--------|
| BCAP29  | 102    | 106.6  | 96.6   | 89.7   | 87.9   | 95.2   | 95.1   | 96.2   |
| BCAP29  | 694.5  | 816.5  | 260.8  | 295.4  | 213.6  | 313.3  | 511.8  | 781    |
| BCAP29  | 72.3   | 79.7   | 103.3  | 93.9   | 94.8   | 94.3   | 74.4   | 79.1   |
| BCAP29  | 331.9  | 412.5  | 257.5  | 299.5  | 239    | 337.6  | 278.9  | 388.1  |
| BCAP31  | 4044.3 | 5541.6 | 2988.6 | 2702.8 | 2071.8 | 2856   | 4551   | 6442.4 |
| BCAR1   | 104.5  | 125.2  | 115    | 103.6  | 91.2   | 107.1  | 109.3  | 135.7  |
| BCAR3   | 123    | 142.7  | 124.3  | 159.7  | 132.4  | 157.5  | 140.5  | 196.3  |
| BCAS1   | 108.8  | 120.7  | 95     | 86.2   | 76.2   | 86.9   | 98.4   | 107.9  |
| BCAS2   | 132.9  | 130.7  | 96.1   | 85.1   | 84.4   | 98     | 126.9  | 174.6  |
| BCAS3   | 77.5   | 85.3   | 97.3   | 95.2   | 90.7   | 93.9   | 80.3   | 75.3   |
| BCAS4   | 110.3  | 139.6  | 112.9  | 106.2  | 109.7  | 104.4  | 107.2  | 117    |
| BCAS4   | 100    | 118.2  | 111.9  | 90.7   | 97.5   | 90.2   | 101.9  | 102.3  |
| BCAS4   | 163.9  | 208.4  | 113.2  | 105.1  | 108    | 100.3  | 134.7  | 182.9  |
| BCAT1   | 737.3  | 1084.5 | 537.5  | 264.3  | 209.7  | 438.1  | 673.7  | 1423.8 |
| BCAT2   | 546.4  | 762.9  | 482.7  | 306.1  | 269.5  | 324.5  | 514.6  | 590.9  |
| BCCIP   | 3319.2 | 4294.6 | 2063.9 | 1644.9 | 1153   | 2035.1 | 2343.7 | 3231.3 |
| BCCIP   | 1477.9 | 1839.1 | 542.9  | 378.7  | 290    | 539.1  | 988.3  | 1458.1 |
| BCCIP   | 689.1  | 927    | 393.1  | 345.8  | 257.3  | 383.8  | 558.5  | 795.8  |
| BCCIP   | 137.5  | 158.5  | 99.9   | 95.5   | 77.5   | 87.9   | 137.1  | 167.7  |
| BCDIN3  | 1551.4 | 1933.2 | 1247.3 | 791.8  | 763.4  | 683.7  | 1376.5 | 1332.1 |
| BCDO2   | 84.8   | 91.8   | 77.5   | 80.8   | 84.4   | 74     | 82.5   | 98.4   |
| BCHE    | 92.4   | 98.1   | 102.1  | 83     | 86.2   | 85.3   | 96.9   | 97.2   |
| BCKDHA  | 2117.2 | 2681.5 | 1285.8 | 1175.8 | 1094.7 | 1230.1 | 1740.7 | 1449.6 |
| BCKDHB  | 596.6  | 850.5  | 236.9  | 218.2  | 248.4  | 245.9  | 570.4  | 713.8  |
| BCKDHB  | 91.1   | 111.4  | 112.8  | 107.7  | 95.9   | 96.8   | 95     | 94.4   |
| BCKDK   | 3008.5 | 3700.3 | 1750.7 | 1156.8 | 1093.3 | 1103.6 | 2518.9 | 2071.7 |
| BCL10   | 292.4  | 357.8  | 124.5  | 127.1  | 114.8  | 103.9  | 231.1  | 374.8  |
| BCL11A  | 806.3  | 1049.5 | 225.6  | 159.5  | 126.7  | 166    | 639.8  | 681.8  |
| BCL11A  | 114.3  | 147    | 107.2  | 86.6   | 86.4   | 88.1   | 120    | 122    |
| BCL11A  | 177.2  | 232    | 147.1  | 141    | 119.3  | 112.7  | 163.3  | 188.7  |
| BCL11B  | 98.2   | 110.6  | 98.3   | 81.8   | 86.5   | 90.2   | 99.9   | 98.2   |
| BCL11B  | 83.3   | 94.5   | 93.5   | 90.9   | 86     | 87.7   | 83.9   | 96.8   |
| BCL2    | 123.4  | 150.1  | 103.5  | 106.1  | 89     | 115.5  | 115.8  | 111.1  |
| BCL2    | 116.8  | 130.2  | 81.2   | 81.4   | 89.7   | 78.8   | 114.9  | 130.7  |
| BCL2    | 1921.5 | 2396.8 | 1662   | 1873.3 | 1247.6 | 2262.7 | 1315.1 | 2075.5 |
| BCL2A1  | 228.8  | 263.9  | 106.7  | 100.9  | 94     | 106    | 182.7  | 206.5  |
| BCL2L1  | 489.9  | 590.1  | 633    | 477.1  | 377.9  | 628.4  | 560.5  | 1534.5 |
| BCL2L1  | 171.4  | 198.2  | 129    | 110.9  | 121.7  | 108.5  | 152.1  | 196.5  |
| BCL2L10 | 95.3   | 107.1  | 89.2   | 81.1   | 84.3   | 87.4   | 92     | 105.7  |
| BCL2L11 | 107.4  | 113.9  | 102.2  | 104.3  | 89.1   | 95.2   | 100.2  | 111.5  |
| BCL2L11 | 101    | 113.8  | 109.6  | 104.5  | 86.9   | 108.7  | 100.8  | 103.3  |
| BCL2L11 | 122    | 134    | 106.5  | 105.5  | 99.3   | 104    | 110.9  | 122.8  |
| BCL2L12 | 265.7  | 305.8  | 195.8  | 150    | 139.1  | 127.6  | 221.8  | 271.3  |
| BCL2L12 | 1946.2 | 2511.7 | 1388   | 787.5  | 688.4  | 732    | 1848.9 | 2150.5 |
| BCL2L12 | 1716   | 1929   | 914.2  | 542.2  | 461.4  | 548    | 1512.6 | 1699.5 |
| BCL2L13 | 2644.2 | 3335   | 2675.9 | 2874.6 | 2462   | 3469.7 | 2030.6 | 2534.3 |
| BCL2L14 | 95.9   | 118.3  | 92.6   | 91.1   | 93.7   | 85.7   | 102.2  | 125.2  |
| BCL2L14 | 106.4  | 124    | 107    | 104.6  | 84.6   | 86.8   | 108    | 116    |
| BCL2L14 | 98.1   | 121.4  | 102.6  | 110.3  | 94.7   | 94.2   | 96.3   | 102.1  |
| BCL2L14 | 75.7   | 79.5   | 84.9   | 78.4   | 85.4   | 88.4   | 75.3   | 78     |

|        |        |        |        |        |        |        |        |        |
|--------|--------|--------|--------|--------|--------|--------|--------|--------|
| BCL2L2 | 538.6  | 605.7  | 272.5  | 269.4  | 235.2  | 329.9  | 424.8  | 684    |
| BCL3   | 156.7  | 166.1  | 138.5  | 111    | 131.4  | 116.8  | 183.4  | 283.8  |
| BCL6   | 84.1   | 106.3  | 92.7   | 86.3   | 91.1   | 86.6   | 89.6   | 94.8   |
| BCL6   | 353.3  | 412.9  | 246.9  | 317.2  | 226.7  | 339.4  | 356.2  | 571.9  |
| BCL6B  | 144.5  | 195.1  | 108.6  | 77.3   | 82.6   | 81.2   | 174    | 167.7  |
| BCL7A  | 108.6  | 135.9  | 101.8  | 88.9   | 81.7   | 93.2   | 114.9  | 145.3  |
| BCL7A  | 114.2  | 112.6  | 98     | 91.6   | 87.5   | 94.2   | 105.3  | 124.8  |
| BCL7A  | 91.6   | 116    | 108.9  | 94.2   | 85.6   | 92.6   | 93.1   | 118.2  |
| BCL7B  | 434.9  | 591.2  | 272.8  | 222.3  | 185.2  | 285.4  | 401.3  | 536.9  |
| BCL7B  | 687.5  | 841.1  | 426.3  | 402.9  | 363.1  | 352.7  | 649.8  | 729.4  |
| BCL7C  | 1038.7 | 1329.2 | 882.6  | 477.5  | 433.4  | 587.9  | 876.3  | 1415.4 |
| BCL9   | 160.5  | 193.6  | 129.6  | 101.3  | 109.4  | 117.5  | 173.5  | 237.3  |
| BCL9L  | 83.6   | 109.9  | 95.7   | 100.2  | 95.6   | 88.8   | 97.6   | 121.8  |
| BCLAF1 | 2857.8 | 3817.5 | 1701.5 | 1938.5 | 1686.8 | 2883   | 2371.7 | 4049.6 |
| BCLAF1 | 809.9  | 1121.4 | 444.3  | 462.7  | 380.4  | 777.6  | 652.7  | 1252.9 |
| BCMO1  | 76.7   | 88     | 84.3   | 80.4   | 77.9   | 79.3   | 83.2   | 92.4   |
| BCNP1  | 98.6   | 109    | 101.2  | 91.3   | 100.3  | 97.9   | 103.1  | 95.2   |
| BCOR   | 617.8  | 868.1  | 659.2  | 938.2  | 675.2  | 1291.5 | 588.2  | 1096.9 |
| BCOR   | 98.9   | 122.2  | 113.4  | 134.1  | 135    | 137.8  | 87.4   | 115    |
| BCOR   | 193.4  | 199.5  | 134.4  | 167.6  | 160.9  | 148.8  | 153.6  | 226    |
| BCORL1 | 91.8   | 110.8  | 96.5   | 127.9  | 108.9  | 131.5  | 101.3  | 143.5  |
| BCORL2 | 85.7   | 90.8   | 95.3   | 85     | 75.5   | 78.7   | 86.5   | 91.1   |
| BCR    | 92.5   | 97.2   | 92.3   | 95.1   | 86.1   | 108.6  | 102.2  | 98.7   |
| BCR    | 97.3   | 109.4  | 94.9   | 103    | 104.3  | 96.8   | 91.3   | 104.8  |
| BCR    | 122.6  | 144.6  | 120.5  | 140.7  | 131.7  | 113.3  | 133.2  | 131.9  |
| BCS1L  | 576.6  | 656.7  | 417.6  | 367    | 284    | 411.3  | 426.5  | 604.8  |
| BDH    | 105.7  | 126.5  | 79     | 80.8   | 82.7   | 79.1   | 128.7  | 121.8  |
| BDH    | 81.3   | 101.3  | 83     | 79.2   | 77.6   | 79.9   | 98     | 103.1  |
| BDH    | 189    | 257.4  | 170.3  | 135.2  | 116.1  | 156.7  | 162.3  | 176.2  |
| BDH2   | 87.5   | 107.2  | 92.8   | 93.3   | 79.2   | 87.3   | 103.8  | 119.9  |
| BDKRB1 | 87.9   | 92.7   | 109.5  | 98.2   | 92.6   | 101.1  | 89.9   | 90.1   |
| BDKRB2 | 101.9  | 103.2  | 87.9   | 89.6   | 81.8   | 79.1   | 91.8   | 104.9  |
| BDNF   | 84.5   | 92.4   | 87.4   | 86.1   | 84.9   | 87.7   | 92.9   | 89.9   |
| BDNF   | 117.2  | 120.5  | 98.2   | 97.4   | 96     | 99.7   | 117.8  | 109.7  |
| BDNF   | 111.3  | 141.1  | 94.5   | 82.6   | 85.9   | 87.1   | 131.3  | 145.8  |
| BDNF   | 133.8  | 143.8  | 110.5  | 92.5   | 86.5   | 102.7  | 113.7  | 133.2  |
| BDNF   | 85     | 101.6  | 100.4  | 85.8   | 83.9   | 98.5   | 95     | 87.5   |
| BDNF   | 162.2  | 194.4  | 97.1   | 89.8   | 82.7   | 101    | 159.2  | 171.4  |
| BDNF   | 82.6   | 107    | 99.7   | 90.3   | 93.1   | 89.4   | 94.7   | 98.6   |
| BDP1   | 102.4  | 156.6  | 105.2  | 122.6  | 109.6  | 97.9   | 124.2  | 146.9  |
| BECN1  | 1269.7 | 1592.7 | 354.5  | 456.4  | 367.4  | 546.4  | 971.6  | 1352.7 |
| BET1   | 519.1  | 732.4  | 216.7  | 178.2  | 180.3  | 270.1  | 424.5  | 598.1  |
| BET1L  | 157    | 176.9  | 129.5  | 105.9  | 102    | 134.1  | 146.4  | 189.9  |
| BEX1   | 6260.4 | 9089   | 4665.6 | 839.1  | 632.1  | 890.7  | 6202.2 | 6397.6 |
| BEX2   | 81.2   | 89.9   | 101.1  | 91.3   | 101.7  | 96.2   | 93     | 85.9   |
| BEXL1  | 208.8  | 278.2  | 136.4  | 107.9  | 93.4   | 122.8  | 176.5  | 230.8  |
| BEXL1  | 304.8  | 449.6  | 171.1  | 137.6  | 131.3  | 139.6  | 341    | 351.7  |
| BFAR   | 709.4  | 860.5  | 420.8  | 408.4  | 306.3  | 450.8  | 682.5  | 1422.6 |
| BFSP1  | 101    | 120.6  | 98.6   | 80     | 88     | 84.4   | 100    | 114.8  |
| BFSP2  | 127.7  | 144.6  | 99.7   | 89.8   | 94.7   | 90.2   | 130.2  | 141.9  |

|         |        |        |        |        |        |        |        |        |
|---------|--------|--------|--------|--------|--------|--------|--------|--------|
| BGLAP   | 164    | 181.2  | 125.1  | 109.7  | 98.8   | 115.3  | 163.3  | 165.3  |
| BGN     | 114.6  | 129.2  | 107.6  | 99.4   | 86.6   | 110.7  | 222.6  | 281.6  |
| BHLHB2  | 312.4  | 347.4  | 345    | 1502.4 | 1633.7 | 2372.4 | 282.8  | 498.4  |
| BHLHB3  | 89.3   | 95.4   | 95.4   | 99.3   | 83.7   | 86.3   | 87.1   | 91.8   |
| BHLHB4  | 89.5   | 97.7   | 97.4   | 82.1   | 85.6   | 84.7   | 93.4   | 97.9   |
| BHLHB5  | 5964.7 | 6949.3 | 4162.7 | 4499.6 | 3715.6 | 5439   | 5730.3 | 8443.6 |
| BHLHB8  | 103.2  | 115.5  | 111.2  | 102    | 89.8   | 97.4   | 96.5   | 111.1  |
| BHLHB9  | 164.6  | 198.8  | 121.9  | 129.6  | 116.4  | 149.1  | 152.6  | 176.2  |
| BHMT    | 76.6   | 74.1   | 79.6   | 74.3   | 72.6   | 76.5   | 71.3   | 79.6   |
| BHMT2   | 77.8   | 79.4   | 79     | 69.4   | 68.3   | 76.3   | 77.7   | 76.2   |
| BICC1   | 81.3   | 100.2  | 92.7   | 95.2   | 80.1   | 94.7   | 85.4   | 87.1   |
| BICD1   | 97.9   | 104.3  | 88.1   | 84.3   | 87     | 92.5   | 91.2   | 86.7   |
| BICD1   | 95.1   | 101    | 115.2  | 113    | 98.4   | 102    | 97.4   | 108.7  |
| BICD2   | 73.8   | 88.7   | 82.5   | 89.5   | 83.9   | 83.6   | 88.1   | 79.5   |
| BICD2   | 988.8  | 1115   | 677.7  | 815.5  | 676.1  | 1085.2 | 769.7  | 1181.8 |
| BID     | 790.2  | 1020.7 | 499.2  | 606.6  | 564.5  | 893.4  | 607.6  | 945.2  |
| BID     | 1315.9 | 1522   | 430.3  | 528.5  | 412    | 664.8  | 1124.5 | 1465.1 |
| BID     | 104.1  | 98.4   | 73.3   | 76.5   | 84.5   | 91.8   | 87.7   | 102.4  |
| BIK     | 390.1  | 540.3  | 469.9  | 522.8  | 569.6  | 650.5  | 327.2  | 535    |
| BIN1    | 292.9  | 365.7  | 272.6  | 312    | 225.2  | 438.7  | 296.4  | 418.6  |
| BIN1    | 340.9  | 471.1  | 426.2  | 404.2  | 300.8  | 589.3  | 383.7  | 567.5  |
| BIN2    | 142.6  | 163.6  | 101.1  | 104.3  | 91.3   | 98.9   | 129.8  | 165.7  |
| BIN3    | 187.8  | 189.9  | 134.2  | 142.8  | 133.7  | 131    | 162.1  | 226.5  |
| BIRC1   | 90.4   | 102.5  | 95.7   | 94.9   | 84.8   | 83.2   | 96.8   | 95.9   |
| BIRC1   | 132.9  | 148.4  | 113.2  | 183.5  | 167.4  | 126.7  | 109.5  | 124.5  |
| BIRC2   | 982.5  | 1009.7 | 486.9  | 597.8  | 428.7  | 683    | 808.5  | 1423.8 |
| BIRC3   | 573.2  | 638    | 342    | 733.4  | 684.1  | 654.1  | 594.6  | 743.7  |
| BIRC3   | 93     | 98.6   | 106.1  | 105.1  | 120.4  | 97.3   | 90.3   | 92.3   |
| BIRC3   | 84.6   | 92.8   | 105.8  | 101.3  | 89.9   | 91     | 79.5   | 85.4   |
| BIRC4   | 161.8  | 170.8  | 100.4  | 96.9   | 92.5   | 93.1   | 128.8  | 177.2  |
| BIRC5   | 1781.9 | 2271.7 | 850.2  | 498.4  | 406.7  | 468.7  | 1463.3 | 1775.5 |
| BIRC5   | 279.9  | 362.5  | 314.3  | 171.6  | 162.1  | 193.4  | 250.6  | 317.8  |
| BIRC6   | 183.7  | 307.1  | 140.9  | 189.1  | 163.5  | 276    | 203.4  | 251    |
| BIRC7   | 83.6   | 100.3  | 109.4  | 91.1   | 92.3   | 91.4   | 83.3   | 97.7   |
| BIRC7   | 106.2  | 129.1  | 96.8   | 94.9   | 91.2   | 87     | 103.6  | 113.1  |
| BIRC8   | 84.7   | 83.1   | 103.2  | 93.6   | 91.2   | 92     | 92.5   | 83.8   |
| BIVM    | 516.2  | 671.9  | 458.1  | 395.6  | 333.8  | 648    | 469.9  | 1043.8 |
| BLCAP   | 502.2  | 638.7  | 348.1  | 432.1  | 333.3  | 573.9  | 353.1  | 540.1  |
| BLES03  | 126.1  | 160.2  | 111.8  | 99.9   | 100.3  | 121.5  | 120.3  | 180.4  |
| BLK     | 83.8   | 90.9   | 104.4  | 88.3   | 90.4   | 88.7   | 92.1   | 92.3   |
| BLM     | 681.5  | 831.4  | 461.6  | 665    | 501.5  | 915.1  | 611.1  | 872.7  |
| BLMH    | 1000.5 | 1410   | 397    | 317.2  | 249.7  | 305.5  | 917    | 1129.4 |
| BLNK    | 81.7   | 112.4  | 97.6   | 85.3   | 79.4   | 94.4   | 93.3   | 94.3   |
| BLOC1S1 | 1285.9 | 1620.4 | 376.2  | 323.4  | 431    | 514.9  | 1046.3 | 1792.8 |
| BLOC1S2 | 91     | 119.1  | 107.5  | 87.4   | 86.5   | 91.9   | 101    | 115.9  |
| BLOC1S2 | 143    | 172    | 111.8  | 90     | 104.6  | 104.9  | 168.7  | 202.1  |
| BLOC1S3 | 86.8   | 93.5   | 91.2   | 97.6   | 92.3   | 90     | 81.7   | 81.5   |
| BLR1    | 79.9   | 86.2   | 78.5   | 89.8   | 76.5   | 87.5   | 84.7   | 87.8   |
| BLR1    | 148.5  | 218.8  | 117.7  | 125.5  | 121    | 128.7  | 158.9  | 163.7  |
| BLR1    | 79.2   | 83.8   | 96.2   | 85     | 84.4   | 79.4   | 77.3   | 76     |



|        |        |        |        |        |        |        |        |        |
|--------|--------|--------|--------|--------|--------|--------|--------|--------|
| BLVRA  | 1000.7 | 1218.3 | 287.7  | 665.9  | 495.4  | 739.7  | 885.8  | 954.4  |
| BLVRB  | 436.1  | 508.1  | 146.1  | 162.7  | 146.9  | 172.2  | 485.5  | 530.2  |
| BLZF1  | 266.9  | 300.7  | 169.3  | 273    | 220.9  | 196.5  | 299.8  | 410.4  |
| BM88   | 116.9  | 155.2  | 92.4   | 92     | 93.8   | 93.7   | 123.4  | 129.6  |
| BMF    | 92.2   | 98.5   | 82.4   | 86.5   | 103    | 116.3  | 82.5   | 107.8  |
| BMF    | 73.3   | 92.4   | 83.4   | 90.5   | 84.2   | 85.7   | 88.4   | 88.2   |
| BMF    | 87.6   | 88.2   | 88.8   | 87.9   | 85.4   | 89.2   | 90.7   | 90.4   |
| BMF    | 107.8  | 117.8  | 82.6   | 90.7   | 95.7   | 106.2  | 110.6  | 120.1  |
| BMP1   | 89.5   | 93.8   | 108.3  | 92.7   | 82.2   | 101.2  | 92.8   | 84     |
| BMP1   | 129.3  | 144.2  | 112    | 105    | 90.4   | 100    | 133.5  | 142.2  |
| BMP1   | 203.3  | 264    | 275.1  | 192.8  | 188.9  | 219.3  | 176.2  | 262.4  |
| BMP10  | 76     | 84.7   | 84.8   | 88.2   | 72.3   | 81     | 86.6   | 98.5   |
| BMP15  | 93     | 107.3  | 105.8  | 103.1  | 88.9   | 103.9  | 90.2   | 91.8   |
| BMP2   | 167.9  | 189.9  | 156.7  | 126.7  | 123    | 134.6  | 152.5  | 198.7  |
| BMP2K  | 200.6  | 261.1  | 145.5  | 143.3  | 123.5  | 170.8  | 136.8  | 193.4  |
| BMP2K  | 146.3  | 164    | 112.1  | 110.8  | 107.1  | 110.2  | 129.5  | 155    |
| BMP2K  | 123.2  | 150    | 120.4  | 122.3  | 123.8  | 141.9  | 121.1  | 158.1  |
| BMP3   | 113.8  | 135.7  | 89     | 81.5   | 81     | 87     | 111.2  | 130.4  |
| BMP4   | 229.6  | 308.9  | 193.2  | 118.3  | 105.5  | 131    | 237.1  | 363.7  |
| BMP4   | 99.9   | 94.7   | 77.4   | 76.6   | 81.3   | 76.9   | 96.4   | 92.9   |
| BMP4   | 115.1  | 155.8  | 96.8   | 82     | 81.6   | 79.7   | 141    | 145.3  |
| BMP5   | 142.9  | 164.7  | 94.6   | 96.4   | 93.6   | 89     | 134.5  | 158.3  |
| BMP6   | 101    | 139    | 90.2   | 99.1   | 78.6   | 106.9  | 112.3  | 165.2  |
| BMP7   | 107.4  | 120.6  | 94.3   | 102.9  | 81.8   | 92.5   | 112.6  | 124.9  |
| BMP8A  | 96.8   | 121.1  | 100.4  | 109.7  | 106.4  | 92.9   | 95     | 96.2   |
| BMP8B  | 940.9  | 1457.7 | 791.5  | 301.4  | 310.8  | 468.9  | 520.3  | 684.6  |
| BMPER  | 92     | 106.2  | 94.7   | 85     | 75.1   | 80     | 89.5   | 111.6  |
| BMPR1A | 105.3  | 122.9  | 90.8   | 87.6   | 86.3   | 90     | 106.3  | 108    |
| BMPR1B | 89     | 97.3   | 89.6   | 85     | 77.6   | 87.6   | 92.2   | 92.3   |
| BMPR2  | 209.4  | 343.5  | 142.6  | 177.8  | 159.3  | 205.2  | 222.9  | 382.2  |
| BMS1L  | 1185.9 | 1469   | 866.4  | 672.2  | 586.4  | 988.4  | 924.7  | 858.3  |
| BMX    | 94.8   | 101.9  | 100.8  | 90.3   | 94.7   | 84.9   | 94.5   | 99.4   |
| BMX    | 84.7   | 100    | 96.4   | 99     | 88.6   | 101    | 90.9   | 93.3   |
| BNC1   | 126.6  | 144    | 100    | 102.4  | 85.8   | 97.3   | 125.5  | 129.1  |
| BNC1   | 73.4   | 84.3   | 83.1   | 81.9   | 84.9   | 83.6   | 77.7   | 78.8   |
| BNC2   | 95.4   | 100.9  | 93.7   | 88.8   | 85.3   | 83.8   | 94.3   | 113    |
| BNIP1  | 230.6  | 304.5  | 141.5  | 123    | 130.9  | 146.6  | 274.2  | 299.3  |
| BNIP1  | 312.2  | 428.4  | 279.2  | 169.5  | 199.8  | 239    | 318.6  | 390.5  |
| BNIP2  | 1618.9 | 2014.4 | 1153.6 | 1582   | 1081.9 | 2156.9 | 1453.3 | 3072.9 |
| BNIP3  | 2570.6 | 3409   | 1440.4 | 1431.1 | 1334   | 2169.8 | 2186   | 3167.5 |
| BNIP3L | 113.2  | 129.4  | 83.6   | 98.4   | 90.7   | 115.7  | 121.2  | 210.8  |
| BNIPL  | 119.8  | 141.2  | 116.2  | 112.2  | 102.8  | 112    | 109.4  | 106    |
| BNIPL  | 137.1  | 148.8  | 122.5  | 115.1  | 99.8   | 108.8  | 140.7  | 146.7  |
| BNIPL  | 90.9   | 108.1  | 76.5   | 67.9   | 76.2   | 78.8   | 83.7   | 106.9  |
| BOC    | 79.1   | 85.4   | 78.1   | 84.8   | 77.4   | 87     | 81.2   | 78.2   |
| BOK    | 134.7  | 157.8  | 140.1  | 115.1  | 116.5  | 130    | 150.1  | 159.7  |
| BOLA1  | 209.8  | 233    | 111.6  | 104.7  | 94.1   | 119.7  | 168.2  | 202.4  |
| BOLA2  | 4157.1 | 4780.8 | 2981.1 | 2538   | 1850.6 | 2809.1 | 3427.5 | 3486.8 |
| BOLA2  | 726.5  | 743.5  | 360    | 317.8  | 238.6  | 291.8  | 650.2  | 821.6  |
| BOLA3  | 6540.8 | 7089   | 5065.4 | 4576.2 | 3268.2 | 4396.6 | 6145.4 | 8085.4 |

|         |        |        |        |        |        |        |        |        |
|---------|--------|--------|--------|--------|--------|--------|--------|--------|
| BOLA3   | 6630.7 | 7512.1 | 5662   | 5145.5 | 3550.1 | 4918.7 | 6198.4 | 8273.6 |
| BOLA3   | 113.9  | 142.2  | 103.7  | 95.6   | 92.5   | 84.8   | 117.7  | 134.1  |
| BOLL    | 86.2   | 84.2   | 93.8   | 76.7   | 72.1   | 87.7   | 83.5   | 82.5   |
| BOLL    | 95.8   | 100.7  | 98.4   | 95.6   | 98.2   | 101    | 89     | 92.7   |
| BOLL    | 77.5   | 78.3   | 90.1   | 83.4   | 81     | 84.8   | 75.2   | 87.8   |
| BOP1    | 6247.4 | 7847.1 | 3325   | 1896.1 | 1539.6 | 1972.1 | 4871.4 | 4362.8 |
| BP75    | 584.3  | 754.8  | 276.2  | 226.4  | 178.5  | 307.3  | 491.2  | 628.6  |
| BPGM    | 255.9  | 332.1  | 160.1  | 154    | 119.6  | 189.1  | 204.5  | 269.3  |
| BPGM    | 83.4   | 89.4   | 83.9   | 89.5   | 84.8   | 82.5   | 87.6   | 88.5   |
| BPHL    | 210.7  | 275.2  | 201.7  | 181.4  | 158    | 197.3  | 191.1  | 243.4  |
| BPI     | 96.7   | 113.2  | 91.3   | 91.5   | 81.4   | 92.2   | 99.4   | 110.3  |
| BPIL1   | 89.9   | 101.5  | 80.7   | 83.5   | 78     | 92.1   | 84.1   | 97     |
| BPIL2   | 83.5   | 93.9   | 100    | 91.8   | 82.1   | 89.7   | 85.3   | 97.9   |
| BPIL3   | 80     | 94.6   | 80.1   | 88.5   | 82.2   | 82.1   | 86.9   | 98.7   |
| BPNT1   | 338.2  | 422.2  | 239.6  | 191.1  | 172.1  | 126.8  | 251.2  | 397.3  |
| BPY2    | 76.2   | 84.1   | 95.4   | 95.1   | 88.2   | 80.3   | 72.9   | 79.1   |
| BPY2B   | 135.3  | 126    | 105.8  | 90.6   | 86.5   | 92.7   | 127.4  | 122.7  |
| BPY2IP1 | 217.3  | 254.3  | 332    | 240.9  | 201.6  | 331.1  | 213    | 401.2  |
| BRAF    | 135.8  | 158.6  | 115.6  | 119.2  | 106.9  | 116.3  | 131.1  | 196.9  |
| BRAP    | 112.6  | 127.5  | 92.3   | 85     | 66.5   | 84.5   | 109.5  | 146.7  |
| BRCA1   | 1205.7 | 1420.6 | 430.5  | 351    | 251.1  | 485.9  | 816    | 954.3  |
| BRCA1   | 1489.5 | 1978.4 | 514.3  | 465.4  | 395.6  | 539.1  | 992.1  | 1159.6 |
| BRCA1   | 142.4  | 152.8  | 94.9   | 91.7   | 87.9   | 74.9   | 127    | 172.6  |
| BRCA2   | 109.3  | 119.1  | 105.9  | 110.9  | 87     | 111.6  | 128.5  | 132.5  |
| BRCC2   | 103.7  | 115.7  | 109.3  | 93.5   | 93.8   | 103.2  | 97.8   | 107.3  |
| BRD1    | 177.6  | 222    | 198.7  | 192.6  | 201.8  | 277.4  | 169.5  | 244.5  |
| BRD2    | 3161.1 | 4124.8 | 2360.1 | 2207.9 | 2132.5 | 2493.7 | 3088.6 | 3085.5 |
| BRD3    | 837.2  | 1268.1 | 1077.4 | 1172.5 | 931.7  | 1157.7 | 838.8  | 1621.7 |
| BRD4    | 122.4  | 143.7  | 111.2  | 90.8   | 92.2   | 92.2   | 115.3  | 135.4  |
| BRD4    | 84.5   | 102.2  | 109.8  | 102.3  | 102.1  | 115.7  | 90.6   | 98.8   |
| BRD7    | 1295.7 | 1603   | 639.6  | 620.7  | 454.2  | 803.1  | 1046.5 | 1548.5 |
| BRD8    | 642.5  | 832.4  | 363.4  | 405.5  | 399.1  | 657.1  | 628.6  | 1142.9 |
| BRD8    | 79.9   | 81     | 98.3   | 83.4   | 74.3   | 81.4   | 77     | 93.9   |
| BRD9    | 2281.4 | 2547.8 | 1644.5 | 1706   | 1528.4 | 1993.5 | 1811.5 | 2108.3 |
| BRD9    | 130.9  | 145.1  | 100.8  | 101.7  | 82.1   | 89.4   | 120.8  | 132.5  |
| BRDG1   | 98.2   | 88.2   | 97.8   | 100.7  | 94.1   | 91.1   | 93.8   | 100.4  |
| BRDT    | 71.3   | 81     | 81.7   | 82.9   | 81.7   | 85.9   | 76.4   | 81.4   |
| BRDT    | 69.2   | 84.3   | 84.6   | 83.3   | 82.4   | 84.3   | 76.5   | 78.7   |
| BRDT    | 109.5  | 114.9  | 88.1   | 84.5   | 79.4   | 91.4   | 92.8   | 113.5  |
| BRE     | 1025.9 | 1486.2 | 765    | 589.9  | 454.1  | 543.5  | 901.3  | 1166.8 |
| BRE     | 674.5  | 963.7  | 449.4  | 469.6  | 343.8  | 411.6  | 565.9  | 968.3  |
| BRE     | 101.9  | 111.5  | 95.2   | 89.1   | 81.7   | 85.7   | 90.7   | 88.5   |
| BRF1    | 106    | 118.1  | 89.4   | 95.5   | 88.1   | 94     | 105.8  | 114.3  |
| BRF1    | 124.4  | 157.9  | 155.8  | 120    | 119.1  | 165.5  | 110.4  | 167.2  |
| BRF1    | 103    | 120.3  | 109.6  | 101.8  | 101.8  | 93     | 96.5   | 110.4  |
| BRF2    | 672.6  | 819.3  | 613.2  | 491.4  | 397    | 689.9  | 723.7  | 1555.8 |
| BRI3    | 2557.4 | 2785.1 | 2066.8 | 2378.4 | 1470   | 2770   | 2532.4 | 5419.2 |
| BRI3BP  | 217.1  | 221.9  | 134.5  | 121.2  | 119.2  | 107.6  | 179.1  | 224    |
| BRI3BP  | 1464.6 | 1796.1 | 746.8  | 804.9  | 557.6  | 685.6  | 1345.5 | 1415   |
| BRI3BP  | 746.1  | 974.4  | 334    | 292.9  | 275.6  | 275.7  | 667.2  | 703.9  |

|         |        |        |        |        |        |        |        |        |
|---------|--------|--------|--------|--------|--------|--------|--------|--------|
| BRIP1   | 118    | 112.3  | 97     | 97.1   | 90.2   | 110    | 106.2  | 100.9  |
| BRMS1   | 2577.8 | 3508.1 | 2214.1 | 1722.2 | 1360.9 | 1417   | 2430.8 | 2463.3 |
| BRMS1   | 364.7  | 461.1  | 327.6  | 171.9  | 172.6  | 162.4  | 335    | 436.2  |
| BRMS1L  | 104.8  | 114.2  | 98.9   | 90.5   | 93.4   | 95.1   | 102.1  | 105.5  |
| BRP44   | 2213.9 | 2413.8 | 1353.5 | 1285.1 | 1026.8 | 1466   | 1950.2 | 3456.5 |
| BRP44L  | 6416.6 | 8323   | 2915.3 | 2717.7 | 2428.7 | 3241.2 | 6481.8 | 7931.1 |
| BRPF1   | 268.7  | 352.8  | 272.3  | 264    | 231.9  | 369.5  | 287.8  | 501.3  |
| BRPF1   | 3108.3 | 3381.6 | 3223.2 | 3779.5 | 3042.1 | 3914.1 | 2686.4 | 4030.4 |
| BRPF3   | 510.7  | 647.9  | 366.5  | 537.2  | 443    | 612.4  | 504.4  | 655.6  |
| BRRN1   | 129    | 171.2  | 98     | 85.1   | 81.3   | 98     | 138.4  | 146.5  |
| BRS3    | 98.9   | 105.6  | 99.8   | 89.6   | 82.8   | 92.1   | 88.1   | 108.1  |
| BRSK1   | 517.2  | 558.6  | 513.6  | 418    | 378.5  | 348.2  | 621.7  | 1180.5 |
| BRSK2   | 117.6  | 125.7  | 98.9   | 84.6   | 77     | 89.7   | 106.4  | 119.3  |
| BRUNOL4 | 86.2   | 97.6   | 97.3   | 104.8  | 99.6   | 101    | 83.2   | 82.3   |
| BRUNOL4 | 83.3   | 103.8  | 92.4   | 89.7   | 80.6   | 79.5   | 89.7   | 103.8  |
| BRUNOL5 | 89.5   | 98.7   | 97.7   | 90.2   | 93.7   | 92.6   | 84.4   | 89.6   |
| BRUNOL6 | 91.1   | 112.5  | 112.7  | 97.1   | 93.2   | 96.8   | 99.7   | 96.1   |
| BRWD1   | 73.5   | 88.5   | 88.9   | 81.5   | 81.2   | 79.8   | 79.3   | 77.8   |
| BRWD1   | 185.5  | 204.2  | 89.4   | 86.4   | 92.2   | 96     | 168.2  | 201.3  |
| BRWD1   | 757.7  | 1075.3 | 458.8  | 478.3  | 396.3  | 635.7  | 655.4  | 854.7  |
| BRWD1   | 81.8   | 98     | 101.1  | 105    | 97.2   | 98.6   | 83.5   | 111.8  |
| BRWD2   | 207    | 235.7  | 116.5  | 103.7  | 97.6   | 122.3  | 191.8  | 241    |
| BRWD3   | 109.5  | 139.1  | 90.1   | 96.5   | 96.7   | 105.7  | 124.5  | 173.3  |
| BSCL2   | 711    | 902    | 404.9  | 288    | 288.7  | 317.8  | 577.7  | 571.8  |
| BSDC1   | 265.4  | 333    | 213.6  | 252.6  | 214.5  | 276    | 285.5  | 468.6  |
| BSG     | 2557   | 3724.6 | 2960.4 | 2508.3 | 1873   | 3032   | 2589.5 | 4466.1 |
| BSG     | 115    | 126.4  | 88.3   | 101.9  | 95.3   | 91.8   | 120.4  | 122.9  |
| BSN     | 111.1  | 134.7  | 106    | 108.3  | 103.1  | 105.8  | 113.8  | 114.1  |
| BSND    | 135.6  | 152.8  | 107.7  | 95.4   | 79.7   | 86.7   | 112.6  | 134.7  |
| BST1    | 501.7  | 696.1  | 361.1  | 368.7  | 295    | 428.6  | 505.3  | 554.9  |
| BST2    | 1586.7 | 1801.2 | 799.1  | 650.2  | 562.6  | 712.3  | 1326.1 | 1352.5 |
| BTAF1   | 967.4  | 1117   | 717    | 939.5  | 827.7  | 1677.8 | 671.8  | 966.1  |
| BTBD1   | 516.3  | 697.9  | 180.9  | 207.7  | 168.5  | 338.6  | 399.6  | 664.9  |
| BTBD1   | 542.7  | 833.3  | 218.2  | 194.1  | 161.6  | 231    | 324.5  | 533.7  |
| BTBD10  | 476.2  | 640.6  | 217.6  | 201.8  | 149.6  | 358    | 406.8  | 694.4  |
| BTBD11  | 109.7  | 133.7  | 98.6   | 82.3   | 84.9   | 79.5   | 114.4  | 114    |
| BTBD11  | 100.1  | 95.5   | 94.1   | 89.2   | 80     | 85.1   | 88.1   | 97.5   |
| BTBD11  | 82.2   | 71.3   | 90.2   | 78.8   | 71.5   | 90.3   | 66.5   | 96.9   |
| BTBD11  | 88.1   | 98.5   | 94     | 94.6   | 84.2   | 87.1   | 90     | 99.4   |
| BTBD12  | 559.2  | 634.2  | 298.9  | 298    | 244.7  | 241.7  | 484.3  | 405.7  |
| BTBD14A | 481    | 595    | 333.9  | 236.4  | 229.1  | 253.1  | 386.7  | 342.4  |
| BTBD14B | 118.3  | 152.6  | 106.8  | 89.2   | 96.6   | 104.6  | 112.8  | 137.2  |
| BTBD3   | 126.2  | 127.5  | 98.4   | 93.9   | 89.3   | 92.7   | 121.6  | 121.4  |
| BTBD3   | 201    | 248.2  | 169.3  | 164.8  | 117.9  | 145.9  | 184.6  | 284.5  |
| BTBD4   | 180.8  | 212.1  | 231.6  | 358.8  | 317.9  | 428.2  | 184.9  | 287.7  |
| BTBD5   | 205.3  | 276.9  | 202    | 282.5  | 223.8  | 233.7  | 219.9  | 344.5  |
| BTBD6   | 1477.9 | 1544.9 | 734.2  | 517.2  | 449    | 538.2  | 1243.8 | 1510.7 |
| BTBD7   | 428.9  | 656.5  | 391.5  | 396.5  | 328.4  | 428.5  | 453.6  | 826.4  |
| BTBD7   | 139.4  | 147.9  | 88.5   | 102.1  | 93.2   | 89.6   | 110.9  | 121.3  |
| BTBD7   | 301.7  | 412.2  | 178.3  | 192.4  | 157.6  | 175.3  | 232.4  | 282.1  |

|                       |         |         |         |         |         |         |         |         |
|-----------------------|---------|---------|---------|---------|---------|---------|---------|---------|
| BTBD8                 | 83      | 95      | 90.9    | 83.2    | 79.6    | 78.2    | 92.1    | 98.3    |
| BTBD9                 | 145     | 164.1   | 99.6    | 108.2   | 95      | 104.8   | 132.8   | 142.4   |
| BTC                   | 85.8    | 85.7    | 99      | 87.7    | 95.1    | 94.8    | 84.2    | 82.2    |
| BTD                   | 192.2   | 210.2   | 131.3   | 128.3   | 131.2   | 127.6   | 160.7   | 211     |
| BTF3                  | 24906.5 | 28664.1 | 18644.5 | 18243.9 | 12843.8 | 17202.1 | 24961.9 | 30463.3 |
| BTF3                  | 25574.8 | 26401.5 | 25758   | 23955.5 | 19414.4 | 23659.6 | 21857.8 | 30464.6 |
| BTF3                  | 377.5   | 524.8   | 231.1   | 210.6   | 168     | 211.4   | 303.4   | 343.3   |
| BTF3L4                | 975.5   | 1289.3  | 424.9   | 410.2   | 315     | 530.7   | 780.8   | 1116.8  |
| BTG1                  | 1440.7  | 1739.1  | 635.4   | 940.7   | 789.6   | 1054.5  | 1199.8  | 1939.6  |
| BTG2                  | 144.6   | 186.8   | 148.7   | 140.6   | 162     | 184.8   | 185.1   | 273.3   |
| BTG3                  | 359.5   | 388.4   | 212.9   | 229.8   | 169.8   | 216.7   | 323.3   | 667.1   |
| BTG4                  | 97.5    | 124.2   | 83.6    | 86.4    | 82.7    | 74.2    | 92.6    | 102.4   |
| BTK                   | 2602    | 3244.9  | 735.5   | 749     | 550.4   | 917.7   | 2074.2  | 2273.5  |
| BTLA                  | 103.3   | 113.4   | 96      | 104.5   | 86      | 94.8    | 82.9    | 96.8    |
| BTN1A1                | 67.5    | 75.8    | 83.4    | 83.7    | 77.1    | 87.8    | 80.3    | 78.3    |
| BTN2A1                | 95.3    | 103.5   | 86      | 96.8    | 83.6    | 79.3    | 85.1    | 109.5   |
| BTN2A1                | 480.9   | 547.9   | 289.3   | 276.7   | 288.1   | 294.2   | 390.4   | 512     |
| BTN2A2                | 117.3   | 128.4   | 127     | 107     | 113.1   | 125.1   | 114.1   | 128     |
| BTN2A2                | 94      | 113.1   | 86.7    | 86.7    | 85.2    | 77.3    | 95      | 85.2    |
| BTN2A3                | 78      | 85.9    | 96.9    | 90.5    | 80.5    | 84.2    | 80.6    | 88.6    |
| BTN3A1                | 89.2    | 103.8   | 96.2    | 91.1    | 82.9    | 84.1    | 89.5    | 87.1    |
| BTN3A1                | 101.8   | 114     | 109.9   | 101.2   | 99.2    | 107.8   | 114.1   | 114.7   |
| BTN3A2                | 185.2   | 224.3   | 128.2   | 141.1   | 98.2    | 178.7   | 135.7   | 224.9   |
| BTN3A3                | 152.8   | 170.1   | 111.2   | 113.1   | 93.1    | 109.8   | 135.5   | 158.7   |
| BTNL2                 | 148.1   | 186.1   | 109.2   | 90.9    | 88.7    | 94.7    | 146.2   | 184.8   |
| BTNL3                 | 92.8    | 112.3   | 82      | 91.2    | 78.8    | 79      | 93.2    | 101.8   |
| BTNL3                 | 81      | 95.9    | 87      | 83      | 84.1    | 84.6    | 88.5    | 84.8    |
| BTNL3                 | 87.3    | 105     | 107.6   | 86.5    | 80.2    | 99.4    | 90.3    | 93.9    |
| BTNL8                 | 77.8    | 89.2    | 81.6    | 84.5    | 68.5    | 82.3    | 85.8    | 84.1    |
| BTNL9                 | 97.4    | 105.3   | 104.7   | 87.9    | 82.4    | 86.8    | 107.6   | 130.7   |
| BTRC                  | 116.4   | 168     | 107.7   | 92      | 83.2    | 84.4    | 127.6   | 160.7   |
| BTRC                  | 86.4    | 101.5   | 94.9    | 103.9   | 86.9    | 97.4    | 93      | 104.6   |
| BUB1                  | 1842.8  | 2080.2  | 1051.4  | 846.2   | 720.9   | 1431.9  | 1279.2  | 2330.3  |
| BUB1B                 | 366.2   | 436.8   | 139.8   | 120.1   | 122.7   | 131.1   | 260.2   | 496.8   |
| BUB3                  | 8195.1  | 10605.1 | 6472.6  | 4217.3  | 3224.6  | 4266.1  | 6828.1  | 7481.6  |
| BUB3                  | 94.5    | 100.5   | 98.6    | 95.3    | 92.9    | 100.4   | 93.1    | 114.8   |
| BUB3                  | 1711.6  | 2469.9  | 442.4   | 250.1   | 171.9   | 242     | 1436.1  | 2358.1  |
| BVES                  | 87.4    | 86.5    | 101.4   | 83.9    | 81.7    | 83.3    | 90.3    | 96.5    |
| BVES                  | 106     | 127.6   | 103.6   | 90.6    | 86.8    | 85      | 111.4   | 122     |
| BVES                  | 349.9   | 551.6   | 338.9   | 323.8   | 263     | 428.4   | 333.8   | 496.3   |
| BXDC1                 | 5502.4  | 6838.8  | 3264.4  | 2839    | 1904.1  | 3332.8  | 5095.8  | 6389.8  |
| BXDC2                 | 2112.5  | 2684.6  | 757.4   | 589.1   | 396     | 718.2   | 1511.1  | 2385.3  |
| BXDC5                 | 901     | 1055.6  | 352.5   | 392.2   | 261.5   | 462.9   | 791.8   | 1407.8  |
| BYSL                  | 1348.8  | 1706.1  | 916.3   | 522.6   | 327.7   | 624.1   | 1085.3  | 2073.2  |
| BZRAP1                | 105.6   | 111.7   | 120.8   | 181.5   | 174.7   | 229.8   | 94.9    | 119.4   |
| BZRPL1                | 84.7    | 85.2    | 80.4    | 81.7    | 77.4    | 80.2    | 81.4    | 82.1    |
| BZW1                  | 123.3   | 131.7   | 110.8   | 103.5   | 97.4    | 108     | 123.1   | 140.1   |
| BZW2                  | 3670.6  | 4409.7  | 2153.4  | 2398.5  | 1531.6  | 2693.1  | 2624.5  | 4528    |
| C10ORF10              | 104.1   | 132.8   | 109.7   | 94      | 88.2    | 103.6   | 130.1   | 145.3   |
| C10ORF10 <sup>4</sup> | 404.8   | 511.4   | 226.7   | 288.8   | 212.3   | 290     | 407.4   | 681.7   |

|           |        |        |        |        |        |        |        |        |
|-----------|--------|--------|--------|--------|--------|--------|--------|--------|
| C10ORF107 | 86.8   | 101.4  | 95.4   | 91.3   | 87.2   | 93.7   | 94.9   | 90.8   |
| C10ORF11  | 492.1  | 652.1  | 236.8  | 187.2  | 163.6  | 226.3  | 505.8  | 976.7  |
| C10ORF111 | 83.1   | 84.3   | 97.1   | 88     | 83.4   | 90.1   | 88.9   | 87.1   |
| C10ORF113 | 86.1   | 96.9   | 84.3   | 83.6   | 68.7   | 82.5   | 87.3   | 100.8  |
| C10ORF114 | 233.7  | 263.6  | 161    | 126.2  | 128.1  | 136.1  | 198.2  | 242.3  |
| C10ORF116 | 140.4  | 169.8  | 116.7  | 97     | 99.4   | 106.8  | 150.5  | 152.7  |
| C10ORF118 | 107.9  | 154.2  | 85.4   | 90.9   | 78.8   | 86.7   | 108.8  | 135.2  |
| C10ORF119 | 196.1  | 240.8  | 168.9  | 141.7  | 139.1  | 185    | 152.6  | 206.9  |
| C10ORF12  | 124.8  | 134.4  | 109.5  | 103.6  | 93.8   | 104.4  | 127.4  | 135.6  |
| C10ORF120 | 82.9   | 78.4   | 82.2   | 79.3   | 81.8   | 84.6   | 79.2   | 84.9   |
| C10ORF125 | 347.6  | 474.7  | 264.1  | 211.4  | 168.5  | 217.9  | 275.3  | 372    |
| C10ORF129 | 97.6   | 107.9  | 91.6   | 76.3   | 78.2   | 84.8   | 100.9  | 108.1  |
| C10ORF13  | 102.7  | 142.4  | 105.2  | 101.3  | 93.8   | 93.5   | 105.7  | 123.4  |
| C10ORF130 | 86.9   | 92.1   | 92.4   | 79     | 91.7   | 78.2   | 87.6   | 99.5   |
| C10ORF132 | 80.3   | 83.9   | 93.3   | 92     | 93.6   | 76     | 75.7   | 91.7   |
| C10ORF137 | 401.3  | 465    | 216.5  | 184.9  | 173.7  | 225.9  | 343    | 438.3  |
| C10ORF22  | 740.2  | 880.4  | 412.4  | 352.5  | 267.6  | 450.6  | 620.6  | 894.5  |
| C10ORF25  | 95.3   | 100.8  | 78.3   | 74.3   | 75.7   | 86.2   | 95.4   | 105.5  |
| C10ORF26  | 216.8  | 308    | 198.8  | 197.4  | 187.9  | 253.3  | 197.4  | 276.9  |
| C10ORF27  | 94.4   | 99.9   | 94.7   | 93.6   | 89.5   | 94.8   | 98.1   | 94.2   |
| C10ORF28  | 224.2  | 296.7  | 139    | 128    | 124    | 139.5  | 211.7  | 307.5  |
| C10ORF30  | 106.8  | 119.4  | 98     | 93.5   | 80.9   | 85.8   | 100.7  | 101.3  |
| C10ORF32  | 483.5  | 636.8  | 347    | 350.1  | 292.4  | 363.4  | 455.4  | 872.4  |
| C10ORF33  | 324.6  | 440.7  | 260.6  | 186.7  | 169.5  | 188.5  | 248.9  | 313.7  |
| C10ORF35  | 250.9  | 311.2  | 205.8  | 177    | 177.8  | 210.7  | 273.2  | 264.4  |
| C10ORF37  | 108.1  | 115.2  | 99.4   | 92.8   | 98.3   | 86     | 121    | 108.5  |
| C10ORF38  | 188.7  | 211.7  | 156.2  | 148.9  | 114.5  | 156    | 183    | 207.5  |
| C10ORF4   | 96.4   | 105.1  | 102.5  | 102.2  | 91.5   | 102.8  | 92     | 100.5  |
| C10ORF4   | 92.3   | 121.7  | 81.1   | 86     | 82.9   | 95     | 92.6   | 104.2  |
| C10ORF4   | 134.3  | 129.1  | 99.2   | 89.7   | 96.5   | 91.8   | 119.1  | 130.3  |
| C10ORF4   | 98.2   | 94.5   | 106.2  | 96     | 86.4   | 86     | 93.8   | 110.7  |
| C10ORF4   | 80.7   | 92.3   | 92.4   | 91.2   | 92.1   | 96.8   | 83.9   | 89.1   |
| C10ORF42  | 288.9  | 402.6  | 237.8  | 221.8  | 163    | 328.5  | 215.7  | 341.4  |
| C10ORF46  | 139.2  | 163.7  | 105.8  | 100.6  | 109.3  | 96.2   | 108.7  | 157.7  |
| C10ORF47  | 275.7  | 358.3  | 201.9  | 139.5  | 128.8  | 164.9  | 249.9  | 342.3  |
| C10ORF49  | 95.2   | 96.8   | 101    | 92.8   | 86.8   | 87.2   | 87.3   | 97.8   |
| C10ORF53  | 96.3   | 96.3   | 92.1   | 84.8   | 79.1   | 90.5   | 92.2   | 107.9  |
| C10ORF53  | 83.3   | 93.7   | 91.8   | 93.5   | 76.1   | 84.7   | 85.9   | 91.4   |
| C10ORF53  | 82.1   | 89.4   | 110.9  | 96     | 99.4   | 91.1   | 93.4   | 90.5   |
| C10ORF54  | 396.2  | 460.9  | 331.5  | 270.9  | 226.3  | 238.6  | 306.9  | 322.3  |
| C10ORF55  | 127.6  | 152.4  | 109.1  | 96.4   | 93.7   | 87.5   | 122.8  | 143.3  |
| C10ORF56  | 225.6  | 316.9  | 211.6  | 169.6  | 157.4  | 170.2  | 301.8  | 535.1  |
| C10ORF57  | 497.8  | 633    | 234.2  | 219.8  | 182.9  | 207.7  | 379.4  | 417.7  |
| C10ORF58  | 4821.9 | 5573.6 | 2284.2 | 1654.2 | 1993.2 | 1792.8 | 4397.7 | 4391.2 |
| C10ORF59  | 81.5   | 91.7   | 86.3   | 82.2   | 81.9   | 92.9   | 80.1   | 96.2   |
| C10ORF59  | 373.9  | 467    | 242.5  | 230.9  | 193.4  | 263.4  | 345.7  | 470.3  |
| C10ORF59  | 209.2  | 294.9  | 144.4  | 128.4  | 106.7  | 143.9  | 196.3  | 268.1  |
| C10ORF6   | 341.3  | 561.8  | 453.7  | 547.5  | 455.2  | 730.9  | 334    | 411.2  |
| C10ORF61  | 631.6  | 914.4  | 374.1  | 243.9  | 179.3  | 269.5  | 412.4  | 600    |
| C10ORF61  | 94     | 94.5   | 92.9   | 87.5   | 84.8   | 87.1   | 88.9   | 89.3   |

|          |         |         |         |        |        |        |         |         |
|----------|---------|---------|---------|--------|--------|--------|---------|---------|
| C10ORF61 | 257.7   | 312.4   | 163.8   | 140.1  | 110.8  | 171.9  | 208.4   | 300.1   |
| C10ORF62 | 80.6    | 88.1    | 89.1    | 79.2   | 87.3   | 96.5   | 71.7    | 82.7    |
| C10ORF63 | 86.3    | 93.5    | 91.8    | 87.7   | 80.8   | 83.1   | 80.5    | 83.2    |
| C10ORF65 | 83.1    | 78.5    | 86.4    | 79.1   | 66.2   | 80.2   | 75      | 98      |
| C10ORF67 | 96.6    | 101.5   | 83.6    | 75.1   | 75.3   | 80.9   | 90.9    | 98.1    |
| C10ORF68 | 76.8    | 81.6    | 88      | 92.6   | 87.2   | 84.6   | 80.1    | 86.3    |
| C10ORF7  | 2858.8  | 3934.3  | 1871.3  | 1063.3 | 852.9  | 1246.3 | 2323.9  | 3709.4  |
| C10ORF71 | 80.8    | 83.5    | 79.6    | 80.7   | 78.7   | 82.3   | 88.6    | 88.6    |
| C10ORF72 | 119.6   | 136     | 105.9   | 105.9  | 93.1   | 94     | 112.3   | 122.8   |
| C10ORF72 | 121.7   | 124.4   | 101.2   | 98.7   | 84.5   | 89.8   | 114.3   | 127.5   |
| C10ORF72 | 120.3   | 136.4   | 104.8   | 93.5   | 84.2   | 85.5   | 111     | 124.8   |
| C10ORF76 | 228.3   | 268.9   | 290.6   | 239.3  | 192.3  | 291.4  | 238.2   | 390     |
| C10ORF77 | 178.6   | 216.4   | 136.2   | 110.7  | 94.6   | 112.8  | 178.2   | 192.5   |
| C10ORF78 | 126.2   | 161     | 115     | 101.8  | 102.7  | 99     | 135.3   | 155     |
| C10ORF79 | 81.9    | 104.5   | 105.6   | 89.7   | 82.6   | 82.3   | 85.2    | 96.1    |
| C10ORF80 | 93.2    | 99.4    | 105.9   | 102.5  | 81.4   | 100.2  | 91.2    | 101.2   |
| C10ORF81 | 93.9    | 105.8   | 104.4   | 96     | 89.2   | 94     | 90.8    | 98.6    |
| C10ORF82 | 121.4   | 149.2   | 90.7    | 94.5   | 70.5   | 84.5   | 112.7   | 119.8   |
| C10ORF83 | 91.3    | 110.9   | 95      | 90.8   | 84.6   | 84.3   | 91.5    | 94.8    |
| C10ORF84 | 152.6   | 215.9   | 131.6   | 121.7  | 96     | 120.1  | 146.5   | 163.7   |
| C10ORF85 | 96.1    | 96.8    | 104.6   | 96.3   | 105.2  | 90.9   | 92.6    | 103.3   |
| C10ORF86 | 3244.7  | 3672.6  | 1605.2  | 1109.3 | 749.2  | 1105.3 | 2092.5  | 2604.9  |
| C10ORF87 | 151.8   | 198.4   | 120.9   | 109    | 111.6  | 115.4  | 145.6   | 157.9   |
| C10ORF88 | 170     | 192.3   | 96.3    | 87.8   | 98     | 106.5  | 171.1   | 258.1   |
| C10ORF89 | 191     | 232.9   | 124.6   | 111.8  | 104.3  | 121.9  | 186.2   | 231.9   |
| C10ORF9  | 258     | 295.3   | 143.6   | 130.9  | 128.3  | 153.2  | 263.6   | 459.4   |
| C10ORF9  | 77.2    | 91.5    | 85.5    | 78.1   | 78.3   | 76.2   | 84.4    | 85.3    |
| C10ORF90 | 86.9    | 105.8   | 89.1    | 77     | 75.6   | 85.8   | 100.8   | 103.1   |
| C10ORF91 | 94.9    | 103.9   | 99.5    | 95.6   | 98     | 97     | 93.2    | 93.7    |
| C10ORF92 | 97.1    | 113.6   | 109.1   | 102.5  | 97.6   | 97.8   | 99.9    | 97.1    |
| C10ORF93 | 70.8    | 84.9    | 97.3    | 80.7   | 84.8   | 93.8   | 85.5    | 83.4    |
| C10ORF93 | 79.9    | 91.6    | 79.1    | 76.1   | 76.4   | 67.6   | 73.6    | 81.7    |
| C10ORF95 | 103.6   | 109.8   | 111.4   | 98.2   | 86     | 93     | 104.7   | 113.7   |
| C10ORF96 | 90      | 94      | 92.7    | 86.2   | 79     | 87     | 89.5    | 95.3    |
| C10ORF97 | 531.5   | 624.9   | 235.5   | 238.1  | 210    | 279.5  | 468.9   | 656.3   |
| C10ORF99 | 98      | 107.7   | 104.3   | 94.3   | 91     | 90.8   | 99.3    | 110.4   |
| C11ORF1  | 1666.3  | 1962.7  | 1306.5  | 906.9  | 639.8  | 1032.5 | 1532.1  | 2782.2  |
| C11ORF10 | 13332.4 | 15046.3 | 11198.4 | 6588   | 5501.7 | 7190.5 | 13125.7 | 15552.2 |
| C11ORF11 | 178.6   | 251.6   | 179.4   | 142.7  | 137.5  | 142.9  | 197.5   | 178.2   |
| C11ORF16 | 189     | 221.6   | 103     | 102.8  | 93     | 97.4   | 172.7   | 195.3   |
| C11ORF17 | 123.3   | 125     | 102.6   | 87.3   | 85.6   | 95.8   | 116.2   | 123.2   |
| C11ORF17 | 1151    | 1659.6  | 953.5   | 526.5  | 492.1  | 695.2  | 956     | 1395.5  |
| C11ORF17 | 739.3   | 1082.5  | 444.2   | 399.5  | 330.1  | 494.7  | 709     | 930.3   |
| C11ORF17 | 108.5   | 125     | 88.2    | 71.8   | 77.2   | 86.9   | 98.3    | 130.3   |
| C11ORF17 | 1590.6  | 2417.5  | 1217    | 1101   | 844.9  | 1306.1 | 1727.9  | 2174.7  |
| C11ORF2  | 1761.2  | 2191.5  | 1584.8  | 1263.2 | 1137   | 1100.2 | 1663    | 1261    |
| C11ORF24 | 400.7   | 487.2   | 186.5   | 157.9  | 129.9  | 163    | 367.2   | 386.2   |
| C11ORF30 | 127.2   | 134.7   | 108.4   | 115.7  | 108    | 111.8  | 101.3   | 123.2   |
| C11ORF31 | 201.2   | 262     | 199.9   | 185    | 161.7  | 213.4  | 181     | 233.7   |
| C11ORF35 | 98.4    | 126.2   | 109     | 144.4  | 126.2  | 183.8  | 103.9   | 150.9   |

|          |        |        |       |       |       |       |        |        |
|----------|--------|--------|-------|-------|-------|-------|--------|--------|
| C11ORF36 | 87     | 84.5   | 85.5  | 83.3  | 87.2  | 84.1  | 87.1   | 96.9   |
| C11ORF38 | 341.3  | 413.9  | 184.9 | 181.8 | 135.3 | 151.1 | 278.1  | 395    |
| C11ORF40 | 90.7   | 100.4  | 102.8 | 88.1  | 85    | 87.2  | 91     | 93.9   |
| C11ORF42 | 84.6   | 102.2  | 89.9  | 88.4  | 84.4  | 95.9  | 87.1   | 104.6  |
| C11ORF44 | 93.8   | 97.4   | 99    | 98.8  | 86    | 85.9  | 98.1   | 101.1  |
| C11ORF45 | 155.7  | 193    | 168.9 | 143.6 | 128.1 | 166.7 | 118.6  | 141.3  |
| C11ORF46 | 1296.2 | 1461.5 | 644.3 | 523.3 | 408.2 | 553   | 847.2  | 1535.6 |
| C11ORF47 | 113.8  | 142.3  | 118.2 | 120.7 | 124.3 | 153.7 | 101.7  | 127    |
| C11ORF48 | 1296.5 | 1504.9 | 628.1 | 517.5 | 401.4 | 616.9 | 1060.1 | 1111.4 |
| C11ORF49 | 102.1  | 118.7  | 99.3  | 88.2  | 89.6  | 96.2  | 96.1   | 99.6   |
| C11ORF49 | 150.8  | 180.2  | 143.4 | 112.3 | 93.9  | 102.7 | 122    | 156.6  |
| C11ORF49 | 262.2  | 361.6  | 158.3 | 125   | 119.1 | 120   | 205.7  | 262.1  |
| C11ORF49 | 102.7  | 120.8  | 100   | 96.8  | 88.4  | 90.3  | 94.6   | 115.8  |
| C11ORF51 | 607.8  | 863.3  | 277.2 | 182.2 | 178.9 | 251.9 | 588.1  | 747.4  |
| C11ORF52 | 88.4   | 92.6   | 92.3  | 106.5 | 100.5 | 93.7  | 83.9   | 105.4  |
| C11ORF53 | 80.3   | 106.8  | 93.8  | 95.1  | 98.6  | 94.2  | 89.4   | 91.6   |
| C11ORF54 | 346.5  | 463.4  | 288.9 | 353.2 | 319.1 | 403.8 | 347.9  | 631.8  |
| C11ORF55 | 149.9  | 185.9  | 98.4  | 89.3  | 91.9  | 96.7  | 151.9  | 170.2  |
| C11ORF56 | 292.1  | 349.4  | 369.7 | 390.9 | 364.3 | 710.7 | 231.6  | 365    |
| C11ORF61 | 120.2  | 157.9  | 96.2  | 102   | 100.1 | 96.6  | 125.1  | 154.1  |
| C11ORF63 | 120.1  | 129.7  | 99.1  | 103.8 | 94.4  | 97.9  | 114.4  | 145.5  |
| C11ORF63 | 149.4  | 158.4  | 110.7 | 102.4 | 95.6  | 100.7 | 125.3  | 141.9  |
| C11ORF63 | 194    | 217.5  | 160.8 | 152.4 | 171.8 | 152.6 | 195.5  | 292.2  |
| C11ORF65 | 142.2  | 171.7  | 96.6  | 90.7  | 88.6  | 102.6 | 131.2  | 168.4  |
| C11ORF70 | 78.6   | 85.5   | 90.1  | 75.5  | 81.4  | 88    | 84.2   | 81     |
| C11ORF71 | 133.8  | 138.7  | 117.2 | 114.3 | 115.1 | 141.4 | 110    | 137.4  |
| C11ORF76 | 67.3   | 78.1   | 80.4  | 88.1  | 79.1  | 89.6  | 76     | 75.2   |
| C11ORF77 | 181.8  | 187.5  | 132.4 | 131.7 | 123.6 | 127.8 | 138.4  | 225.5  |
| C11ORF9  | 94.8   | 99.8   | 86.3  | 89.4  | 82.7  | 97.2  | 93.3   | 93.2   |
| C12ORF10 | 1413.4 | 1804.3 | 793.6 | 496.1 | 393.8 | 487.8 | 1297.9 | 1224.3 |
| C12ORF11 | 190.1  | 219.5  | 100.4 | 123.2 | 88    | 101.7 | 165.7  | 294.2  |
| C12ORF12 | 81.4   | 99.7   | 102   | 88.3  | 95.9  | 97.6  | 91.3   | 103.8  |
| C12ORF23 | 138.3  | 166.9  | 98.8  | 93.3  | 91.8  | 102.9 | 130.7  | 174.1  |
| C12ORF24 | 1585.5 | 2186.6 | 830.7 | 579.6 | 496.4 | 754   | 1024.8 | 1113.5 |
| C12ORF25 | 101.2  | 109.3  | 97.1  | 90.7  | 81.3  | 92.3  | 109.2  | 92.7   |
| C12ORF26 | 573.3  | 707.9  | 350.3 | 461.8 | 348.6 | 464.7 | 421    | 649.5  |
| C12ORF28 | 95.5   | 104.5  | 98.3  | 98.3  | 89.5  | 97.1  | 98     | 103.5  |
| C12ORF29 | 591    | 684.5  | 294.1 | 340.9 | 211.7 | 398.2 | 522.3  | 890.6  |
| C12ORF30 | 115.2  | 109.2  | 108.9 | 102   | 93.2  | 100.8 | 90.8   | 110.5  |
| C12ORF31 | 1202.9 | 1713.9 | 439.2 | 565.5 | 421.1 | 420   | 1055   | 1737.9 |
| C12ORF32 | 612.2  | 739.9  | 506   | 485.8 | 365.1 | 501.6 | 428.4  | 835    |
| C12ORF34 | 113.4  | 137.1  | 125.5 | 113   | 94    | 110.7 | 111.9  | 147.7  |
| C12ORF35 | 266.1  | 355.3  | 116.5 | 124.1 | 101.6 | 189.2 | 303.9  | 518.9  |
| C12ORF36 | 84.1   | 98.4   | 95.1  | 79.7  | 86.4  | 89.8  | 86     | 91.4   |
| C12ORF38 | 97.5   | 107.6  | 93.3  | 82.5  | 79.7  | 86    | 95.4   | 91.4   |
| C12ORF39 | 82.4   | 106.6  | 95.2  | 102.2 | 92.3  | 85.9  | 81.6   | 84.2   |
| C12ORF4  | 236.2  | 329.5  | 227.9 | 229.4 | 164.7 | 293.9 | 216.3  | 355    |
| C12ORF40 | 82.7   | 92.5   | 92.9  | 91.9  | 74.8  | 90    | 87.4   | 89.6   |
| C12ORF40 | 85     | 104.9  | 77.4  | 74.3  | 81.1  | 85.8  | 86.4   | 95.4   |
| C12ORF41 | 1423   | 1887.4 | 925.8 | 790.9 | 668.5 | 940.1 | 1169.4 | 1395.3 |

|           |        |        |        |        |        |        |        |        |
|-----------|--------|--------|--------|--------|--------|--------|--------|--------|
| C12ORF42  | 67.9   | 75.7   | 79.2   | 77.2   | 75.5   | 75.7   | 75.7   | 79.9   |
| C12ORF43  | 223.9  | 320.5  | 170.8  | 179.7  | 128.7  | 245    | 228.5  | 356.9  |
| C12ORF44  | 443.1  | 639    | 458.4  | 348    | 313.3  | 390    | 510.6  | 753.7  |
| C12ORF45  | 409.8  | 526.2  | 255.4  | 190.9  | 160.8  | 237.6  | 392.7  | 370.6  |
| C12ORF46  | 263.5  | 326.5  | 185.3  | 190.6  | 172.6  | 259.4  | 227.6  | 274.6  |
| C12ORF47  | 1217.2 | 1463.8 | 507.4  | 504    | 532.9  | 664.1  | 966    | 1081.9 |
| C12ORF48  | 726.5  | 783.3  | 370.5  | 285.6  | 264.3  | 424.2  | 558.2  | 858.2  |
| C12ORF49  | 223    | 304.6  | 167.9  | 138.8  | 126.4  | 113.5  | 189.1  | 288.2  |
| C12ORF5   | 258.2  | 300.1  | 136.2  | 116    | 99.7   | 130.4  | 227.6  | 306.7  |
| C12ORF50  | 88.5   | 92.6   | 104.3  | 88.3   | 84.4   | 94.1   | 88.7   | 93.1   |
| C12ORF52  | 1045.1 | 1396.7 | 512.8  | 411.7  | 332.1  | 449.5  | 894.8  | 890.5  |
| C12ORF53  | 81.6   | 98.5   | 81.7   | 87.2   | 86.5   | 78.9   | 87.4   | 90.3   |
| C12ORF54  | 102.5  | 140.6  | 106.1  | 85.7   | 81.5   | 95     | 101    | 123    |
| C12ORF57  | 2323.1 | 2683.2 | 1518.4 | 977.3  | 784.2  | 1093   | 1876.4 | 2292.6 |
| C12ORF58  | 167.2  | 189.4  | 94.5   | 100    | 99.6   | 134.5  | 134.4  | 151.9  |
| C12ORF59  | 106.5  | 114.4  | 88.2   | 86.9   | 80.2   | 97.1   | 108.1  | 103.8  |
| C12ORF60  | 109.4  | 124.7  | 117.2  | 103    | 84.5   | 96.1   | 102.2  | 139.3  |
| C12ORF61  | 95.7   | 108.3  | 86.4   | 85.2   | 81.5   | 82.9   | 88.9   | 100.1  |
| C12ORF62  | 429.4  | 489.8  | 187.2  | 168.4  | 134    | 164.1  | 410    | 497.3  |
| C12ORF64  | 89.2   | 104    | 101.9  | 82.7   | 90.1   | 99.9   | 98     | 97.8   |
| C13ORF1   | 291.9  | 379.2  | 154.7  | 170.4  | 139    | 193    | 294.1  | 421.8  |
| C13ORF10  | 478.5  | 613.1  | 224.9  | 253.9  | 231.4  | 438.6  | 420.7  | 678.5  |
| C13ORF16  | 82.9   | 95.1   | 93.9   | 89.6   | 84.2   | 91.3   | 88.9   | 98.5   |
| C13ORF18  | 1846.5 | 2553.2 | 685.3  | 816.1  | 713.2  | 1037.3 | 1253.8 | 1718.1 |
| C13ORF21  | 73     | 93.4   | 99     | 74.6   | 71     | 76.2   | 89.2   | 84.7   |
| C13ORF23  | 683    | 798.4  | 602.1  | 808.7  | 484.9  | 889.9  | 684.1  | 1336.4 |
| C13ORF23  | 516.7  | 628.7  | 462.8  | 602.9  | 433.7  | 675.7  | 498.8  | 1026.2 |
| C13ORF23  | 71.3   | 78.7   | 91.7   | 78.7   | 76     | 88.6   | 78.7   | 84.2   |
| C13ORF24  | 141.8  | 177.9  | 129.1  | 143.3  | 120.6  | 189.2  | 143.5  | 198.2  |
| C13ORF26  | 78.7   | 77.5   | 80.9   | 76.4   | 79.6   | 90.3   | 72.8   | 90.6   |
| C13ORF3   | 689.1  | 831.3  | 237.7  | 207.6  | 192.8  | 258.3  | 492.9  | 738.6  |
| C13ORF7   | 741.7  | 1118.3 | 349.6  | 360.6  | 238.1  | 527    | 659.2  | 1161.7 |
| C13ORF8   | 2304.4 | 2898.2 | 1807.1 | 2156.4 | 1367.8 | 2224.6 | 1808.4 | 2166.6 |
| C14ORF1   | 133.5  | 145.5  | 92.9   | 92     | 84.9   | 85.3   | 106.4  | 146.8  |
| C14ORF10  | 995.6  | 1255.3 | 454    | 323.7  | 273.3  | 471.5  | 958.1  | 2407.9 |
| C14ORF101 | 167.4  | 177.8  | 104.2  | 97.6   | 101.7  | 105.8  | 139.2  | 155.2  |
| C14ORF102 | 824.9  | 880.1  | 600.2  | 792.5  | 730.8  | 799.8  | 869.5  | 1040.6 |
| C14ORF102 | 280.4  | 350    | 258.6  | 294.5  | 291.7  | 481.2  | 258.2  | 379.1  |
| C14ORF103 | 143.2  | 178.8  | 126.3  | 114.1  | 115.5  | 140.7  | 153.3  | 199.2  |
| C14ORF104 | 459.8  | 492.7  | 222.2  | 145.8  | 151.2  | 198    | 330.5  | 790.4  |
| C14ORF105 | 71.6   | 83.5   | 98.9   | 91.4   | 89.2   | 88.3   | 82     | 81.9   |
| C14ORF106 | 2081.8 | 2266.8 | 870.4  | 1185   | 879    | 2014.9 | 1438.9 | 2270.5 |
| C14ORF108 | 729.9  | 827.9  | 263    | 290.3  | 211.7  | 332.4  | 583.6  | 881.1  |
| C14ORF11  | 159    | 186.5  | 104.4  | 91.4   | 74.1   | 89.7   | 158.5  | 207.2  |
| C14ORF112 | 2343.8 | 2754   | 1360.5 | 1218.3 | 924.7  | 1374.1 | 2041.6 | 2967.6 |
| C14ORF115 | 118.9  | 142.9  | 95.1   | 91     | 87.2   | 93     | 105.3  | 133.5  |
| C14ORF118 | 122.1  | 156.6  | 113.5  | 121.3  | 113.4  | 112.4  | 131.1  | 149.5  |
| C14ORF118 | 211    | 250.2  | 159.6  | 171.8  | 147.8  | 196.9  | 172.3  | 239.7  |
| C14ORF119 | 153.9  | 177.1  | 107.1  | 97     | 87.3   | 82.8   | 150.2  | 190.4  |
| C14ORF120 | 1265.4 | 1782   | 493    | 375.9  | 304.4  | 545.4  | 927.5  | 1207.8 |



|           |         |         |         |        |        |        |         |         |
|-----------|---------|---------|---------|--------|--------|--------|---------|---------|
| C14ORF121 | 103.4   | 130     | 124.4   | 112.5  | 106    | 109.7  | 102.8   | 111.8   |
| C14ORF122 | 322.7   | 356.9   | 196.9   | 169.9  | 159.6  | 163.7  | 312.4   | 295.8   |
| C14ORF124 | 383.6   | 438.2   | 153     | 126.1  | 121.4  | 121.1  | 284.9   | 295.2   |
| C14ORF126 | 255.9   | 314.6   | 176.6   | 132.3  | 119.4  | 119.1  | 188.6   | 238     |
| C14ORF129 | 206.5   | 251.6   | 135.1   | 121.6  | 116.2  | 149.4  | 209.2   | 326.6   |
| C14ORF130 | 647.5   | 805     | 401.4   | 273.6  | 229.5  | 327    | 477.7   | 796.7   |
| C14ORF130 | 1336.2  | 1798.6  | 670.4   | 542.6  | 469.1  | 839    | 1023.3  | 2121.5  |
| C14ORF130 | 100.3   | 139.9   | 83.4    | 81.2   | 82.6   | 87.3   | 107.2   | 128     |
| C14ORF131 | 815.3   | 950.8   | 577.2   | 534.6  | 506.1  | 608.4  | 609.7   | 612.3   |
| C14ORF133 | 225.7   | 352.2   | 230.2   | 149.2  | 153.8  | 184.1  | 212.2   | 261.1   |
| C14ORF135 | 903.9   | 1232.1  | 574     | 605.2  | 453.7  | 809.5  | 751.9   | 1128.9  |
| C14ORF138 | 86.6    | 82.8    | 93.4    | 85.8   | 89     | 88.6   | 83.4    | 86.8    |
| C14ORF138 | 384     | 469.6   | 243.8   | 193.3  | 155.8  | 236.1  | 302.5   | 448.6   |
| C14ORF138 | 438.9   | 492     | 262.6   | 258.8  | 206.4  | 269.9  | 395.3   | 642.6   |
| C14ORF139 | 286.9   | 403.8   | 237.7   | 225.8  | 197.7  | 239.5  | 309     | 318.7   |
| C14ORF140 | 89.4    | 113.7   | 96.4    | 96.5   | 91.9   | 90.1   | 91.5    | 104.8   |
| C14ORF140 | 100     | 102.3   | 98.3    | 92.2   | 82.5   | 86.8   | 93.9    | 104.2   |
| C14ORF142 | 1352.3  | 1573.9  | 409.3   | 366.5  | 169.2  | 327.6  | 1102.9  | 1669.5  |
| C14ORF143 | 524.1   | 585.9   | 271.9   | 171.7  | 137.4  | 198.9  | 497.9   | 718.4   |
| C14ORF145 | 339.5   | 453.8   | 183.5   | 129.9  | 152.9  | 207.6  | 272.3   | 319.3   |
| C14ORF147 | 597.7   | 776.1   | 391.5   | 575    | 459.9  | 596.4  | 527.9   | 868.2   |
| C14ORF148 | 84.3    | 93.9    | 93.5    | 91.6   | 84.1   | 87.9   | 82.2    | 101.1   |
| C14ORF149 | 511.9   | 692.7   | 242.1   | 243.5  | 158.6  | 233.2  | 488.1   | 693.9   |
| C14ORF150 | 88.8    | 88.5    | 87.6    | 79.1   | 75.8   | 80.3   | 77.9    | 94.1    |
| C14ORF150 | 142.8   | 168.9   | 113.4   | 112.5  | 103    | 106.5  | 131.7   | 154.5   |
| C14ORF150 | 225.6   | 280.8   | 115.6   | 108    | 102.8  | 123.9  | 144.8   | 183.3   |
| C14ORF151 | 141     | 172.2   | 148.4   | 127.8  | 120.2  | 156    | 159.1   | 253.4   |
| C14ORF152 | 85.7    | 90.3    | 100.3   | 93.5   | 91.8   | 99.3   | 89.9    | 92.5    |
| C14ORF153 | 1861.6  | 1702.1  | 1415.2  | 2175.3 | 2066.1 | 1736.5 | 1721.1  | 3158    |
| C14ORF155 | 79.3    | 85.5    | 88.1    | 81.4   | 78.4   | 96.2   | 84      | 84.3    |
| C14ORF156 | 13714   | 16295.6 | 10774.8 | 8541.1 | 5670.6 | 8915.5 | 10663.9 | 15011.6 |
| C14ORF159 | 726.2   | 921.8   | 673.1   | 606.4  | 566.2  | 816    | 513.9   | 701.2   |
| C14ORF161 | 80.3    | 84.8    | 97.7    | 95.3   | 95.1   | 98.4   | 83.2    | 84.1    |
| C14ORF162 | 111.7   | 127     | 87.1    | 90.2   | 78.9   | 92.7   | 103.1   | 132.7   |
| C14ORF166 | 3217.1  | 3823.2  | 724.3   | 540    | 462.5  | 704.9  | 2847.2  | 4304.7  |
| C14ORF166 | 80.5    | 91      | 94.4    | 85.5   | 81.4   | 95.3   | 73.2    | 76      |
| C14ORF169 | 619     | 820.7   | 262.7   | 204.8  | 159.7  | 219.7  | 594.8   | 815.3   |
| C14ORF172 | 148.2   | 181.1   | 149     | 104    | 102.8  | 156.5  | 147.2   | 194.3   |
| C14ORF173 | 2272.2  | 2745.3  | 2403    | 1895   | 1985.9 | 1614.2 | 1875    | 1755.3  |
| C14ORF173 | 153.6   | 169.4   | 245.4   | 163    | 167.1  | 288.3  | 145.5   | 207.9   |
| C14ORF19  | 133.2   | 156     | 106.8   | 94.8   | 105.1  | 102.5  | 150.8   | 173.2   |
| C14ORF2   | 1552.9  | 1997.5  | 1192.4  | 1149.8 | 832.3  | 1519.1 | 1377.7  | 1694.7  |
| C14ORF21  | 168.5   | 219.8   | 123.9   | 121.7  | 121.9  | 132.7  | 171.5   | 172     |
| C14ORF24  | 12467.2 | 13485.3 | 4323.6  | 6300.9 | 5277   | 4573.5 | 11451.5 | 12701.4 |
| C14ORF24  | 150.7   | 170.8   | 101.4   | 95.6   | 87.2   | 102.5  | 158.5   | 233.4   |
| C14ORF24  | 151.1   | 205.1   | 111.7   | 103.6  | 87.2   | 101    | 154.1   | 203.2   |
| C14ORF28  | 152.8   | 178.9   | 135.7   | 137.8  | 131.5  | 141.5  | 132.7   | 216.1   |
| C14ORF29  | 103.6   | 121.8   | 108.4   | 103.3  | 93.6   | 93.7   | 106.1   | 109     |
| C14ORF29  | 82.7    | 88.7    | 93.1    | 99     | 87.7   | 86.2   | 81.6    | 92.1    |
| C14ORF32  | 1159.8  | 1529    | 844.2   | 907.3  | 640.2  | 1085.3 | 1042.1  | 1634.6  |

|          |        |        |        |        |        |        |        |        |
|----------|--------|--------|--------|--------|--------|--------|--------|--------|
| C14ORF37 | 90.5   | 108.3  | 84.6   | 79.2   | 75.6   | 81.4   | 84.2   | 111.3  |
| C14ORF39 | 81.7   | 95.6   | 95.7   | 87.7   | 79.1   | 83.9   | 74.9   | 90.4   |
| C14ORF4  | 258.9  | 287    | 147.8  | 139.8  | 131.3  | 166    | 192.4  | 255.4  |
| C14ORF43 | 72.9   | 82.8   | 76.5   | 78.7   | 76.6   | 64.5   | 76.9   | 88.7   |
| C14ORF43 | 321    | 434.2  | 214.6  | 180.4  | 159    | 195.4  | 309.4  | 366.6  |
| C14ORF43 | 556.8  | 754.9  | 312.7  | 294    | 297.8  | 364.4  | 552.1  | 1089.7 |
| C14ORF44 | 90.2   | 113    | 100.5  | 88.5   | 82.5   | 90.5   | 90.5   | 108.5  |
| C14ORF45 | 76.2   | 72.9   | 94.6   | 94.7   | 75.3   | 86.7   | 75.8   | 83.1   |
| C14ORF46 | 402.1  | 500.2  | 191.4  | 167.9  | 160.1  | 179.4  | 372.1  | 532.3  |
| C14ORF48 | 127    | 137.8  | 108.7  | 97.7   | 101.5  | 105.6  | 120.9  | 132.7  |
| C14ORF49 | 117.6  | 128.4  | 124.3  | 112.4  | 92.5   | 102.4  | 109.6  | 110.5  |
| C14ORF50 | 124.6  | 136.8  | 90.2   | 79.9   | 83.5   | 94.5   | 122.6  | 132.7  |
| C14ORF54 | 81.5   | 85.7   | 95.3   | 85     | 87.4   | 87.4   | 78.1   | 89     |
| C14ORF58 | 285.6  | 355.1  | 143.1  | 161    | 147.6  | 177.6  | 271.1  | 302.7  |
| C14ORF68 | 92.3   | 107.8  | 96.9   | 82.1   | 76.9   | 78.7   | 105.2  | 102.1  |
| C14ORF73 | 90.8   | 93.9   | 86.5   | 95.3   | 76.3   | 83.9   | 93     | 96.7   |
| C14ORF73 | 127.5  | 133.6  | 96.2   | 85.3   | 88     | 93.2   | 114.5  | 116.5  |
| C14ORF79 | 170.9  | 226    | 163.5  | 124.6  | 114.5  | 138.6  | 137    | 177.7  |
| C14ORF8  | 86.1   | 87.2   | 92.2   | 84.9   | 78.3   | 77.4   | 81.6   | 84.1   |
| C14ORF80 | 859.8  | 1020.8 | 346.4  | 241.1  | 228.4  | 266.8  | 691.7  | 502.1  |
| C14ORF85 | 3532.2 | 3485.6 | 1615.7 | 1852.9 | 1899.3 | 1561   | 3342.5 | 5848.8 |
| C14ORF92 | 187.8  | 235.2  | 114.2  | 116.5  | 96.8   | 114.9  | 191.7  | 276.9  |
| C14ORF93 | 534.5  | 726.7  | 365.9  | 306.7  | 257.8  | 329.8  | 452.1  | 447.4  |
| C14ORF94 | 850.7  | 1072.9 | 519.9  | 274.5  | 292.2  | 385.4  | 623.4  | 740.3  |
| C15ORF15 | 7233.3 | 8992.6 | 2846.2 | 3100.6 | 2149.5 | 3399.1 | 6925   | 8723.3 |
| C15ORF17 | 450.1  | 570.3  | 304.3  | 303.2  | 270.9  | 379.9  | 392.5  | 492.6  |
| C15ORF2  | 102.8  | 138.8  | 92     | 82.1   | 96.2   | 93     | 104.7  | 135.4  |
| C15ORF21 | 131.4  | 145.5  | 114    | 99     | 99     | 114.3  | 128.3  | 160.1  |
| C15ORF21 | 108    | 123.7  | 108.9  | 104.9  | 101    | 104.3  | 100.7  | 93.3   |
| C15ORF21 | 112    | 111.5  | 87.3   | 92.4   | 78.3   | 86.7   | 108.8  | 116.6  |
| C15ORF23 | 908.5  | 1341.7 | 303    | 179.4  | 181.3  | 233.2  | 752.3  | 951    |
| C15ORF24 | 5256.9 | 6605.6 | 3968.4 | 3037   | 2489.6 | 3993.7 | 4704.1 | 6983.9 |
| C15ORF26 | 107.5  | 107.3  | 91.3   | 90.3   | 85.8   | 91.9   | 89.1   | 113.9  |
| C15ORF27 | 119.3  | 151.2  | 101.7  | 102    | 82.6   | 99.4   | 107.3  | 107.5  |
| C15ORF29 | 155.1  | 182.4  | 103.4  | 99     | 95.4   | 105.6  | 136.5  | 175.1  |
| C15ORF32 | 72.3   | 94.5   | 98.3   | 84.4   | 88.4   | 90.8   | 85.9   | 93.6   |
| C15ORF33 | 78.1   | 93.5   | 84.2   | 86.6   | 78.9   | 83.3   | 77.8   | 88.8   |
| C15ORF37 | 89.8   | 107.2  | 92.5   | 90.2   | 88.3   | 91.4   | 94.4   | 104.3  |
| C15ORF38 | 223.7  | 273.7  | 156    | 130.3  | 117.2  | 122.1  | 179.4  | 206    |
| C15ORF39 | 201.4  | 252    | 233.3  | 245.1  | 200.3  | 257.1  | 206.9  | 342.2  |
| C15ORF40 | 238    | 283    | 187.3  | 207.2  | 174    | 210.2  | 201.3  | 294.6  |
| C15ORF41 | 346.9  | 508.5  | 325.8  | 223.7  | 178.4  | 291    | 231.3  | 424.6  |
| C15ORF42 | 194.3  | 275.4  | 221.8  | 214.7  | 187.8  | 262.7  | 178.2  | 235.2  |
| C15ORF43 | 80.2   | 88     | 96.7   | 90.9   | 80.8   | 83.1   | 81     | 83.6   |
| C15ORF44 | 166.6  | 218.9  | 116.5  | 118.9  | 104.4  | 130.2  | 176.9  | 217.6  |
| C15ORF44 | 492    | 721.9  | 279.4  | 184.7  | 176.4  | 242.7  | 410.1  | 477.4  |
| C15ORF48 | 120.6  | 127.4  | 100.4  | 99.1   | 95.6   | 102.3  | 119.8  | 121.5  |
| C15ORF48 | 71.2   | 75.8   | 88.7   | 80.8   | 79.5   | 76.9   | 75     | 82.7   |
| C15ORF48 | 98.2   | 122.5  | 86.7   | 91.5   | 80.8   | 89     | 94.8   | 126.4  |
| C15ORF5  | 98.2   | 106.2  | 111.7  | 92.9   | 81.4   | 92     | 96.7   | 107    |

|          |         |         |         |         |        |         |         |         |
|----------|---------|---------|---------|---------|--------|---------|---------|---------|
| C16ORF24 | 796.3   | 1131.4  | 643.5   | 524.1   | 442    | 521.5   | 689.9   | 865     |
| C16ORF25 | 100.7   | 105.5   | 113     | 90.1    | 91.1   | 110.4   | 84      | 102.6   |
| C16ORF25 | 82.6    | 86      | 98.4    | 91      | 77.5   | 83.1    | 81.4    | 96.4    |
| C16ORF28 | 200.2   | 208.6   | 162.7   | 132.3   | 123.2  | 112.9   | 315.9   | 813.6   |
| C16ORF3  | 105     | 119.8   | 89      | 86.4    | 90.1   | 83      | 110.9   | 120.7   |
| C16ORF30 | 92.2    | 98      | 98.3    | 83.2    | 92.5   | 85.6    | 80.5    | 86.8    |
| C16ORF33 | 4669.4  | 5422.9  | 5007.1  | 3068.1  | 2637.1 | 4778.2  | 3928.5  | 5798.9  |
| C16ORF34 | 255.5   | 293.8   | 159.8   | 150     | 135.5  | 198.2   | 234.3   | 288.2   |
| C16ORF35 | 90.7    | 127.1   | 91.7    | 90.8    | 85.3   | 77.3    | 89.5    | 107.3   |
| C16ORF35 | 1159.1  | 1459.7  | 698.2   | 556     | 422    | 476.6   | 818.4   | 733.6   |
| C16ORF44 | 609.4   | 793.3   | 430.1   | 300.2   | 303.9  | 335.8   | 632.6   | 770.3   |
| C16ORF45 | 121.1   | 130.8   | 105.2   | 85.5    | 88.4   | 90.5    | 102.5   | 127.1   |
| C16ORF46 | 95.6    | 121.2   | 92.5    | 94.9    | 78     | 94.5    | 99.3    | 105.8   |
| C16ORF48 | 1023    | 1219.6  | 449.1   | 345.9   | 300.9  | 383.2   | 733.2   | 715     |
| C16ORF5  | 119.2   | 138.8   | 124.1   | 99      | 100.7  | 112.6   | 137.2   | 166.9   |
| C16ORF50 | 238.4   | 320.8   | 112.1   | 98.1    | 108.3  | 110.1   | 242.1   | 268.2   |
| C16ORF53 | 1704.8  | 2214.6  | 560.5   | 347.3   | 249.4  | 390.4   | 1401    | 1863.5  |
| C16ORF54 | 124.3   | 174.9   | 96.4    | 83.4    | 87.7   | 79.3    | 131.1   | 140.4   |
| C16ORF55 | 97.5    | 118.5   | 92.8    | 86.8    | 81.5   | 84.2    | 90.3    | 121.6   |
| C16ORF56 | 360.2   | 363.2   | 542.6   | 411.2   | 488.3  | 867.6   | 251.9   | 447.8   |
| C16ORF57 | 850     | 909     | 328.5   | 327.6   | 259    | 288.8   | 749.3   | 723.3   |
| C16ORF58 | 2829.3  | 3433.1  | 1502    | 1625.9  | 1443.7 | 1688.2  | 2159.8  | 1720.6  |
| C16ORF60 | 1623.5  | 2233.4  | 925.9   | 641.4   | 542.4  | 684.4   | 1392.4  | 1825.9  |
| C16ORF61 | 4856.7  | 6247.1  | 3057.9  | 2393.3  | 1898.7 | 2424    | 4407.9  | 4896.3  |
| C16ORF63 | 3799    | 3484.1  | 2240.3  | 2225.5  | 1607.8 | 2133.1  | 3314    | 7070.9  |
| C16ORF69 | 93.2    | 110.4   | 109.5   | 86.8    | 93.7   | 94      | 88.9    | 102.9   |
| C16ORF7  | 143.5   | 189.7   | 155.9   | 172.9   | 166.8  | 188.1   | 141.2   | 211     |
| C16ORF78 | 81.7    | 89.4    | 91.5    | 82.9    | 76.1   | 74.8    | 85.3    | 86.6    |
| C16ORF80 | 1472.5  | 1794.9  | 787.1   | 624.3   | 385.4  | 617.7   | 1093.2  | 1640.3  |
| C16ORF9  | 398.3   | 508.8   | 631     | 422.4   | 347.7  | 643.9   | 400.1   | 821.9   |
| C17ORF25 | 1279    | 1573.7  | 419.1   | 346.1   | 243.6  | 517.7   | 962.7   | 1510.3  |
| C17ORF27 | 91.2    | 107.5   | 100.4   | 89.4    | 96.1   | 89.3    | 102.2   | 106.8   |
| C17ORF28 | 83.2    | 91.1    | 98.6    | 99.7    | 84.5   | 86.7    | 84.6    | 90.1    |
| C17ORF32 | 453     | 539.3   | 209.1   | 188.2   | 159.8  | 209.6   | 403.3   | 836.4   |
| C17ORF37 | 158     | 200.5   | 116.5   | 112.8   | 107.1  | 103.9   | 139.4   | 180.1   |
| C17ORF38 | 89.1    | 94.5    | 96.6    | 100.2   | 96.2   | 90.5    | 99.8    | 108.1   |
| C17ORF39 | 212.1   | 269.4   | 133.2   | 107.3   | 103.7  | 102.6   | 214.2   | 285.5   |
| C17ORF40 | 3016.8  | 3414.9  | 1099    | 1288.4  | 919.2  | 1581.2  | 2288    | 2913.8  |
| C17ORF42 | 79.9    | 93.7    | 115     | 105.2   | 93.7   | 110.2   | 80.4    | 96.1    |
| C17ORF45 | 14919.6 | 21094.6 | 12171.2 | 12597.6 | 9374.3 | 14663.9 | 15728.6 | 17100.1 |
| C17ORF46 | 130.5   | 130.4   | 101     | 91.6    | 102.4  | 91.8    | 120.9   | 130.4   |
| C17ORF47 | 104.2   | 149.2   | 102.9   | 80.7    | 71     | 91.7    | 106.4   | 140.3   |
| C17ORF47 | 144.2   | 179.7   | 105.3   | 90.1    | 90.9   | 88.7    | 139.8   | 181.1   |
| C17ORF48 | 166.9   | 204.1   | 125.8   | 155     | 123.2  | 166.3   | 156.4   | 257     |
| C17ORF49 | 712     | 933.1   | 646.5   | 540.4   | 452.7  | 534.6   | 761.8   | 1137.9  |
| C17ORF50 | 86.3    | 86.9    | 98.4    | 106.4   | 96.7   | 91.1    | 84.2    | 88.6    |
| C17ORF53 | 851.4   | 1000.3  | 615.2   | 429.3   | 425.8  | 424.8   | 622.2   | 507.4   |
| C17ORF54 | 91.9    | 100.5   | 110.7   | 94.2    | 97.9   | 87.1    | 90.4    | 89.2    |
| C17ORF55 | 98.5    | 108.8   | 140.6   | 150.1   | 163.9  | 197.1   | 91.5    | 98.4    |
| C17ORF56 | 148.6   | 147.8   | 121     | 111.2   | 113.8  | 119.5   | 120.1   | 170.4   |

|          |        |        |        |        |        |        |        |        |
|----------|--------|--------|--------|--------|--------|--------|--------|--------|
| C17ORF57 | 104.8  | 112.4  | 99.3   | 84.5   | 79.2   | 88     | 96.3   | 114.6  |
| C17ORF58 | 1351.7 | 1698.2 | 921.9  | 633.6  | 491.7  | 793.2  | 1024.2 | 1442.2 |
| C17ORF58 | 938.9  | 1101.3 | 769.1  | 505.6  | 388.2  | 578.2  | 741.9  | 1059.1 |
| C17ORF58 | 118.3  | 159.3  | 111.8  | 104.1  | 96.8   | 100.5  | 117.7  | 134.8  |
| C17ORF59 | 98.7   | 109.7  | 98.8   | 99.7   | 86     | 98.3   | 102.1  | 115.8  |
| C17ORF61 | 2036.3 | 2508.5 | 1787.4 | 1871.4 | 1680.3 | 1867.9 | 2150.2 | 1902.8 |
| C17ORF62 | 772.1  | 987.8  | 913.3  | 689.6  | 595.6  | 1173.5 | 544.6  | 959.4  |
| C17ORF63 | 240.8  | 290.9  | 240.7  | 326    | 270.8  | 282.5  | 251.7  | 479.8  |
| C17ORF64 | 150    | 175.3  | 111.3  | 102.4  | 95.9   | 99.9   | 145.5  | 159.3  |
| C17ORF65 | 127.1  | 157    | 222.7  | 153.1  | 151.4  | 173.5  | 108.7  | 173    |
| C17ORF66 | 84.3   | 82.4   | 96.1   | 83.2   | 89.3   | 90.2   | 79.3   | 83.5   |
| C17ORF68 | 194.9  | 231.5  | 162.9  | 157.9  | 147.6  | 161.5  | 143.2  | 142.8  |
| C17ORF68 | 133.2  | 156.2  | 109.9  | 110.6  | 111.6  | 105.6  | 119.9  | 113.5  |
| C17ORF69 | 67.1   | 76.3   | 84.5   | 79.2   | 72     | 77.9   | 72     | 82.9   |
| C17ORF70 | 1711.1 | 2121.4 | 1490   | 1434.9 | 1230.3 | 1436.8 | 1059.1 | 1004.3 |
| C17ORF71 | 430.9  | 522.7  | 194.5  | 158.5  | 133.3  | 169.5  | 365.6  | 500.1  |
| C17ORF73 | 137.9  | 172.2  | 104.4  | 106.7  | 102.8  | 114.3  | 138.2  | 161.7  |
| C17ORF74 | 128.2  | 169.4  | 116.8  | 111.3  | 105    | 126.8  | 135.3  | 151.2  |
| C17ORF75 | 178.7  | 180.8  | 120.8  | 118.5  | 109.2  | 93.4   | 139.8  | 177.4  |
| C17ORF76 | 122.1  | 137.5  | 102.9  | 98.5   | 90.7   | 101.7  | 119    | 125.5  |
| C17ORF77 | 70.3   | 75.5   | 77.6   | 80.9   | 78.6   | 74.5   | 76.3   | 74.2   |
| C17ORF78 | 92.1   | 107.1  | 89.5   | 91.6   | 80.1   | 89.5   | 89.1   | 88.9   |
| C17ORF79 | 780.5  | 907.4  | 243.3  | 229.1  | 162.1  | 267.5  | 681.8  | 726.2  |
| C17ORF80 | 282.4  | 376.3  | 214    | 205.2  | 196.5  | 295    | 190.1  | 244.1  |
| C17ORF81 | 162.4  | 169.4  | 135.4  | 97.5   | 100.9  | 115.5  | 154.6  | 190    |
| C17ORF81 | 322.3  | 439.3  | 234.2  | 202.5  | 171.1  | 218.3  | 270.6  | 286.2  |
| C17ORF81 | 161.6  | 239.7  | 158.5  | 149.2  | 124.5  | 171.8  | 151.7  | 188.4  |
| C17ORF81 | 106.2  | 128.7  | 87     | 86.1   | 75.9   | 82.6   | 97     | 111.8  |
| C17ORF83 | 99.2   | 99     | 105.6  | 92.1   | 94.2   | 82.1   | 92.3   | 97.3   |
| C17ORF85 | 262    | 265.1  | 215    | 226.8  | 220.9  | 270.8  | 245.6  | 302.6  |
| C18ORF1  | 95.4   | 118.1  | 91.7   | 85.2   | 85.1   | 81.1   | 98.9   | 110    |
| C18ORF10 | 948.5  | 1313.6 | 365.1  | 370    | 261.3  | 465.6  | 727.5  | 1302.2 |
| C18ORF14 | 84.8   | 94     | 85.6   | 83.9   | 78.3   | 85.3   | 95.2   | 91.4   |
| C18ORF17 | 321.7  | 408.1  | 246.3  | 237.3  | 204.2  | 321.8  | 313.6  | 405.8  |
| C18ORF19 | 540.1  | 730.6  | 222.7  | 240.7  | 204.7  | 241    | 356.7  | 473.5  |
| C18ORF21 | 673.6  | 977.4  | 282.1  | 336.8  | 275.4  | 354.6  | 682.9  | 1186.8 |
| C18ORF22 | 502    | 639    | 335.1  | 235.3  | 218.7  | 296    | 352.2  | 382.7  |
| C18ORF24 | 379.3  | 497.9  | 263.7  | 210.9  | 189.2  | 269.8  | 322    | 525.5  |
| C18ORF25 | 1092.9 | 1362.5 | 986.5  | 1320.3 | 1010.7 | 1506.4 | 981.6  | 1464.3 |
| C18ORF25 | 90.8   | 94.1   | 78.7   | 78.6   | 77.4   | 83.6   | 95.4   | 104    |
| C18ORF26 | 99.1   | 95.4   | 91.6   | 86.2   | 88.3   | 87.4   | 84.6   | 108.5  |
| C18ORF34 | 84.1   | 91.3   | 97.1   | 90.8   | 91     | 86.1   | 89.5   | 95.2   |
| C18ORF37 | 815.7  | 1026.7 | 429.1  | 361.9  | 311.7  | 471.3  | 650.9  | 809.9  |
| C18ORF45 | 172.8  | 311.7  | 122.9  | 135.2  | 125.1  | 108.7  | 205    | 202.3  |
| C18ORF51 | 106.7  | 122.5  | 98.3   | 78.8   | 85.4   | 89.1   | 89.5   | 98.2   |
| C18ORF51 | 112.2  | 119.3  | 95.4   | 85.9   | 82.5   | 79.6   | 99.2   | 130.5  |
| C18ORF54 | 311.5  | 410.3  | 237.4  | 176.3  | 175.8  | 212.2  | 284.8  | 390.6  |
| C18ORF55 | 3425.2 | 4064.3 | 2107.4 | 2284.7 | 1777.9 | 2971   | 2358.2 | 3634.2 |
| C18ORF56 | 917.7  | 1103.4 | 735    | 561.4  | 454.7  | 384.8  | 796.7  | 1231.4 |
| C18ORF8  | 562    | 768.4  | 364.4  | 353.1  | 328.2  | 428.8  | 513.6  | 1145.5 |

|           |         |         |         |         |         |         |         |         |
|-----------|---------|---------|---------|---------|---------|---------|---------|---------|
| C19ORF10  | 2760.1  | 3329.6  | 1808    | 956     | 885.8   | 1159.5  | 2856.4  | 3436.2  |
| C19ORF12  | 93.9    | 108.8   | 97.5    | 90.7    | 94.2    | 90.6    | 83.6    | 93.7    |
| C19ORF12  | 280.9   | 332.2   | 197.4   | 136.3   | 141.7   | 173.2   | 245.7   | 337.4   |
| C19ORF12  | 747.5   | 1022.1  | 440.9   | 326.5   | 316.6   | 406.5   | 582.6   | 613.6   |
| C19ORF12  | 128.3   | 163.2   | 93.5    | 95.8    | 82.3    | 76.7    | 141.1   | 164.4   |
| C19ORF15  | 100.6   | 117.1   | 99.1    | 101.6   | 90      | 97      | 94      | 102.1   |
| C19ORF18  | 87.5    | 94.9    | 89.6    | 89.4    | 86.4    | 90      | 83.3    | 90.2    |
| C19ORF19  | 86.4    | 93.3    | 90.5    | 89.8    | 90.4    | 85.3    | 90.8    | 101.3   |
| C19ORF2   | 1233.5  | 1821.6  | 499.7   | 454.9   | 337.3   | 589     | 997.8   | 1303.4  |
| C19ORF2   | 4785.2  | 6254.2  | 2987.6  | 2722.5  | 1922.2  | 3576    | 4034.8  | 4942.5  |
| C19ORF20  | 116.3   | 153.1   | 110.2   | 102.6   | 103.7   | 110.5   | 126.5   | 158.8   |
| C19ORF21  | 111     | 122.2   | 124.2   | 112.4   | 118.8   | 107.4   | 97.2    | 108.7   |
| C19ORF22  | 946.2   | 1305.1  | 885.5   | 800.8   | 595.8   | 761.9   | 871.5   | 1726    |
| C19ORF23  | 133.6   | 149.9   | 115.7   | 110.3   | 99      | 107.3   | 130.3   | 152.2   |
| C19ORF24  | 508.4   | 612.4   | 383.6   | 271.8   | 212.9   | 235.9   | 466     | 589     |
| C19ORF25  | 241.3   | 265.1   | 296.3   | 251.5   | 222.6   | 260.7   | 212.8   | 399.4   |
| C19ORF26  | 155.4   | 197     | 88.3    | 96.8    | 74.6    | 82.5    | 159.5   | 190.1   |
| C19ORF28  | 161.2   | 176.2   | 100.4   | 104.3   | 84.7    | 104.8   | 140.9   | 191.6   |
| C19ORF28  | 221.1   | 257.5   | 171.6   | 156     | 132.8   | 146.9   | 208.3   | 267.7   |
| C19ORF29  | 164.5   | 197.3   | 171.7   | 160.4   | 129.3   | 217.9   | 156.4   | 215.9   |
| C19ORF29  | 144     | 171.1   | 118.5   | 106     | 100     | 142     | 125.6   | 180.2   |
| C19ORF30  | 154.7   | 165.3   | 102.9   | 106.2   | 101.8   | 104.9   | 147.9   | 162.2   |
| C19ORF31  | 27860.4 | 28416.7 | 20720.6 | 23558.3 | 25622.1 | 23808.6 | 28879.4 | 27836.1 |
| C19ORF33  | 78      | 83.4    | 83.8    | 77.5    | 78.3    | 85.5    | 82.4    | 86.8    |
| C19ORF34  | 94.2    | 95.1    | 84.6    | 104.3   | 76.5    | 87.5    | 101     | 114.6   |
| C19ORF35  | 94.3    | 105.9   | 105     | 109.2   | 91.4    | 97      | 92.2    | 98.8    |
| C19ORF36  | 94.7    | 113.4   | 93.9    | 92.3    | 79.2    | 104.8   | 104     | 108.2   |
| C19ORF36  | 94.3    | 94.7    | 106.7   | 85.2    | 89.3    | 84.3    | 83.1    | 90.3    |
| C19ORF37  | 3129.2  | 3736.6  | 1574.4  | 1384.6  | 1152.2  | 1424.7  | 3164.3  | 2872.2  |
| C19ORF4   | 87.2    | 96.5    | 97      | 93.3    | 99.1    | 92.9    | 90.1    | 101.3   |
| C19ORF40  | 264.2   | 360.4   | 229.7   | 204.4   | 203.3   | 241.7   | 222     | 227.1   |
| C19ORF48  | 1185    | 1532.5  | 576.9   | 276.4   | 268     | 297.1   | 1128.5  | 1150.9  |
| C19ORF55  | 107.9   | 121.4   | 102.9   | 95.9    | 98.2    | 98      | 100.4   | 108.3   |
| C19ORF6   | 240.1   | 284.2   | 198.2   | 172.4   | 185.7   | 134.6   | 216.9   | 356.8   |
| C19ORF6   | 445.2   | 529     | 386     | 407.9   | 381.2   | 761.4   | 377.9   | 652.7   |
| C19ORF7   | 1291.8  | 1501    | 1148.3  | 992     | 711.2   | 939.5   | 1189.2  | 1866.9  |
| C1D       | 115.1   | 135.6   | 95.1    | 91.5    | 85.7    | 89.4    | 124.6   | 153.4   |
| C1D       | 89.6    | 90.6    | 80.7    | 82      | 84.6    | 82      | 93.7    | 89.4    |
| C1GALT1   | 199.9   | 238.2   | 134.6   | 128.7   | 110.5   | 139.4   | 168.6   | 272.8   |
| C1GALT1C1 | 87.7    | 88.3    | 90.3    | 93.9    | 91.5    | 78.5    | 85.5    | 97.4    |
| C1GALT1C1 | 264     | 309.6   | 162.3   | 171.1   | 150.3   | 192.3   | 232.5   | 296     |
| C1ORF100  | 93.3    | 118.8   | 105.9   | 85.1    | 87.5    | 83.7    | 96.8    | 109.7   |
| C1ORF101  | 141     | 130.6   | 141.9   | 153.2   | 147.2   | 172.5   | 117.3   | 157.9   |
| C1ORF102  | 109.7   | 122.2   | 99.1    | 92.9    | 83.2    | 85.3    | 106.6   | 110.3   |
| C1ORF102  | 97.8    | 127.3   | 107.2   | 86.2    | 90      | 93.4    | 100.1   | 134     |
| C1ORF102  | 99.3    | 114.2   | 99.9    | 94.1    | 85.9    | 96.5    | 91.8    | 92.5    |
| C1ORF103  | 87.9    | 87.5    | 84.1    | 80.3    | 89.7    | 83.4    | 82.2    | 80.7    |
| C1ORF103  | 333.6   | 448     | 154.9   | 118.8   | 107.5   | 119.2   | 253.7   | 511.1   |
| C1ORF104  | 108.3   | 134.5   | 103.2   | 92.1    | 99.5    | 103.7   | 107     | 118.3   |
| C1ORF105  | 107.3   | 137.4   | 88.3    | 85.5    | 80.6    | 89.3    | 109.8   | 134.6   |

|          |        |        |        |        |        |        |        |        |
|----------|--------|--------|--------|--------|--------|--------|--------|--------|
| C1ORF106 | 885.5  | 995.3  | 1120.7 | 399.4  | 314.4  | 456.2  | 524.6  | 629    |
| C1ORF107 | 187.2  | 230.4  | 176.4  | 197.7  | 178.2  | 233.4  | 178.9  | 224.5  |
| C1ORF108 | 734.9  | 931.9  | 448.5  | 439.2  | 352.9  | 359.8  | 677.8  | 1122.7 |
| C1ORF108 | 181.6  | 227.7  | 103    | 102    | 101.6  | 83.8   | 158.3  | 189.6  |
| C1ORF108 | 905    | 1130.8 | 385.7  | 329.2  | 299.4  | 271.3  | 665    | 1009.4 |
| C1ORF109 | 476    | 694.7  | 415.3  | 322.3  | 280.4  | 440.9  | 377.7  | 526.9  |
| C1ORF110 | 102.5  | 113.5  | 91.1   | 94.3   | 82.4   | 85.6   | 93.5   | 100.6  |
| C1ORF111 | 85.4   | 100.7  | 102.6  | 101    | 85.5   | 101.6  | 90.7   | 94.8   |
| C1ORF112 | 828.1  | 1026.7 | 650    | 459.5  | 395.1  | 557    | 582.2  | 598.5  |
| C1ORF113 | 127.7  | 151.7  | 97.5   | 93.6   | 88.3   | 89.9   | 125.1  | 139.8  |
| C1ORF114 | 121.1  | 123.6  | 90.1   | 69.6   | 76.8   | 84     | 116    | 115.4  |
| C1ORF115 | 105    | 118.7  | 114.1  | 130.6  | 123.1  | 177.2  | 108    | 122.8  |
| C1ORF116 | 94.5   | 93.6   | 94.2   | 85.9   | 85.9   | 88.3   | 89.8   | 90.8   |
| C1ORF117 | 108.9  | 135.9  | 94.3   | 94     | 72.3   | 84     | 113.4  | 117.3  |
| C1ORF118 | 100.2  | 102.8  | 90.5   | 82.4   | 76.2   | 93.9   | 85.6   | 107    |
| C1ORF119 | 1024.7 | 1347   | 604.1  | 399.6  | 311.4  | 545.8  | 857.3  | 1312.2 |
| C1ORF121 | 1506   | 2030.7 | 757    | 648    | 399    | 780.8  | 1194.7 | 2153.8 |
| C1ORF122 | 230.4  | 291.3  | 220.3  | 205.8  | 177    | 231.7  | 215.7  | 325.5  |
| C1ORF123 | 1235   | 1592.3 | 1031.5 | 1098.8 | 872.2  | 1214.6 | 899.8  | 1036   |
| C1ORF124 | 650.8  | 893.3  | 410.1  | 330.8  | 253.1  | 483.6  | 524.1  | 733.7  |
| C1ORF124 | 490.9  | 604.5  | 217.7  | 179.4  | 163.9  | 209.5  | 327.3  | 491.9  |
| C1ORF124 | 152.6  | 204    | 129.8  | 100.7  | 101.3  | 121.3  | 145.5  | 169.6  |
| C1ORF125 | 97.1   | 114.8  | 97.6   | 91.2   | 100.8  | 94.8   | 101.9  | 101.3  |
| C1ORF125 | 80.5   | 91.3   | 88.7   | 95.5   | 85.6   | 82.5   | 91.8   | 90.7   |
| C1ORF127 | 106.1  | 162    | 96.1   | 86.5   | 84     | 85.2   | 125.5  | 149.7  |
| C1ORF128 | 1293.6 | 1876.3 | 1217.3 | 1155.1 | 842.8  | 1740.3 | 1299.4 | 1769.8 |
| C1ORF129 | 121.5  | 133.7  | 114.1  | 101.8  | 86.9   | 88.6   | 115.2  | 118.3  |
| C1ORF131 | 3152.5 | 3707.6 | 2973.8 | 2553.6 | 1975   | 3311.8 | 2777.7 | 4945.1 |
| C1ORF135 | 459.9  | 603.9  | 302.4  | 226.7  | 181.5  | 238.1  | 381.2  | 503.2  |
| C1ORF14  | 74.3   | 88.6   | 92.5   | 86.3   | 86     | 86.1   | 71.5   | 82.7   |
| C1ORF140 | 82     | 101.5  | 103.9  | 101.8  | 97.3   | 102    | 79.7   | 87.7   |
| C1ORF141 | 72.9   | 73.8   | 103.2  | 101.7  | 93.6   | 96.1   | 81     | 80.5   |
| C1ORF142 | 236.6  | 309    | 243.6  | 206.5  | 148.1  | 219.4  | 226.9  | 349.7  |
| C1ORF144 | 830.4  | 1138   | 495.3  | 516.9  | 434.4  | 604.9  | 763.7  | 865    |
| C1ORF146 | 83.1   | 82.9   | 85.1   | 88.6   | 91     | 79.9   | 80.7   | 83     |
| C1ORF149 | 277.1  | 359.4  | 244.3  | 208.6  | 159.5  | 256.5  | 214.3  | 322.3  |
| C1ORF150 | 93.4   | 99.5   | 89.9   | 80.8   | 87.9   | 83.2   | 98.4   | 95.9   |
| C1ORF151 | 97.7   | 113.8  | 91.7   | 101.3  | 89     | 94.7   | 103.3  | 102.4  |
| C1ORF152 | 91.8   | 103.7  | 74.1   | 97.1   | 74.9   | 79.5   | 92.6   | 99.6   |
| C1ORF155 | 1104   | 1430.7 | 602.2  | 503.1  | 395    | 461.5  | 890.5  | 1790.7 |
| C1ORF156 | 80.2   | 98     | 85     | 79.7   | 75.4   | 89.7   | 90.4   | 98.2   |
| C1ORF157 | 82.3   | 96.1   | 105.8  | 83.1   | 83.5   | 78.9   | 93.8   | 100.2  |
| C1ORF158 | 91.8   | 100.8  | 96.3   | 99.3   | 88.1   | 87.3   | 86.4   | 102.3  |
| C1ORF159 | 194.6  | 240.6  | 207.4  | 191.7  | 152.3  | 230.8  | 163.3  | 242    |
| C1ORF160 | 212.3  | 244    | 181    | 155    | 139.2  | 183.7  | 206    | 390.6  |
| C1ORF162 | 3557.3 | 4447.1 | 2333.4 | 1903.7 | 1172.8 | 1825.3 | 3209.7 | 3463.9 |
| C1ORF163 | 541.1  | 769.1  | 301.9  | 295.8  | 236.1  | 248.1  | 489.5  | 524.5  |
| C1ORF164 | 1401.7 | 1643.2 | 1160.7 | 785.2  | 732.4  | 913.7  | 1315.7 | 1083.7 |
| C1ORF165 | 112.5  | 130.9  | 103.9  | 94     | 102    | 103.7  | 100    | 117.9  |
| C1ORF166 | 203.8  | 211.5  | 127.7  | 146.4  | 125.6  | 161.7  | 174.7  | 304.8  |

|          |        |        |        |        |        |        |        |        |
|----------|--------|--------|--------|--------|--------|--------|--------|--------|
| C1ORF168 | 78.3   | 91.2   | 92.7   | 82.8   | 87.6   | 87.6   | 76.1   | 86.4   |
| C1ORF171 | 623.8  | 881.1  | 207.1  | 225.2  | 178.4  | 282.5  | 502.4  | 718.3  |
| C1ORF172 | 98.5   | 112.4  | 107.5  | 93.6   | 86.2   | 94     | 95.6   | 104.8  |
| C1ORF173 | 85.2   | 99.3   | 108.5  | 98.4   | 93.9   | 93.3   | 92.3   | 87.4   |
| C1ORF175 | 94.1   | 119.7  | 93.7   | 99.8   | 96.2   | 97.9   | 87.2   | 100.6  |
| C1ORF176 | 687.1  | 644.3  | 377.8  | 552.9  | 549.4  | 404.2  | 633.5  | 1118   |
| C1ORF177 | 98.1   | 108.7  | 105.4  | 99     | 103.6  | 101.3  | 90.2   | 118.6  |
| C1ORF178 | 78.3   | 86.5   | 85.1   | 78.3   | 80.5   | 80.8   | 76.9   | 95.3   |
| C1ORF178 | 97.7   | 97.3   | 98.1   | 99.3   | 89.6   | 96.5   | 83.8   | 98.2   |
| C1ORF179 | 80.5   | 107.1  | 89.4   | 84.9   | 82.1   | 76.6   | 79.7   | 89.5   |
| C1ORF181 | 973.6  | 1301.9 | 652.6  | 850.3  | 605.9  | 1153.3 | 845.1  | 1202.5 |
| C1ORF182 | 107.2  | 155.5  | 120.1  | 102.6  | 103.1  | 108.7  | 126.9  | 130.4  |
| C1ORF183 | 98.3   | 108.1  | 92.7   | 100.7  | 100.3  | 90.8   | 110.7  | 108.2  |
| C1ORF183 | 103.7  | 103.1  | 89.2   | 85.5   | 86.4   | 99.2   | 94.9   | 99.6   |
| C1ORF183 | 101.2  | 96.1   | 97.5   | 103.6  | 93.6   | 111.6  | 96     | 103.3  |
| C1ORF186 | 506.2  | 519.1  | 371.8  | 196.5  | 152.2  | 210.9  | 269.8  | 372.7  |
| C1ORF187 | 92.7   | 114.1  | 98.8   | 94.7   | 90.2   | 98.2   | 95.8   | 102.6  |
| C1ORF188 | 126.8  | 148.9  | 163.6  | 121.9  | 131.3  | 137.8  | 104    | 101.8  |
| C1ORF189 | 83.8   | 114    | 91     | 83     | 85.4   | 85.9   | 84.9   | 104.7  |
| C1ORF19  | 2584.8 | 3620.6 | 1611.1 | 1167.8 | 763.7  | 1368.7 | 2150.3 | 2953.3 |
| C1ORF190 | 104.3  | 124    | 97.9   | 93.2   | 90.5   | 96.8   | 105.2  | 113.5  |
| C1ORF192 | 113.2  | 133.9  | 107.6  | 83.7   | 84.7   | 102.1  | 108.6  | 121.3  |
| C1ORF198 | 252.1  | 323.8  | 244.5  | 216.4  | 186    | 254.9  | 256.8  | 399.9  |
| C1ORF2   | 2217.1 | 2988.4 | 1051   | 912.2  | 727.1  | 742.5  | 1556.5 | 1309.5 |
| C1ORF2   | 78.5   | 99.4   | 102.9  | 95.6   | 86.1   | 85.7   | 84.2   | 94.4   |
| C1ORF2   | 122    | 149.4  | 142.9  | 115.9  | 132.1  | 162    | 118.9  | 143.5  |
| C1ORF201 | 135.4  | 157.7  | 95.1   | 80.8   | 87.7   | 92.3   | 145.6  | 155.1  |
| C1ORF21  | 111.6  | 124.7  | 120.6  | 119.1  | 122.6  | 127    | 116    | 125.4  |
| C1ORF210 | 92.2   | 112.8  | 100.9  | 93.4   | 93.6   | 86.2   | 96.5   | 99     |
| C1ORF24  | 517.6  | 676.6  | 427.9  | 689.7  | 553.8  | 357.1  | 639.2  | 941.9  |
| C1ORF25  | 122    | 130    | 95.9   | 93.8   | 90.6   | 82.4   | 110.2  | 156.4  |
| C1ORF26  | 145.6  | 141.8  | 102.1  | 92.8   | 89.3   | 93     | 129.5  | 159.9  |
| C1ORF27  | 90.3   | 108.4  | 93.3   | 79.6   | 84.3   | 89.4   | 101.6  | 103.5  |
| C1ORF31  | 572.3  | 635.6  | 331.6  | 354.3  | 303.5  | 423.9  | 529.6  | 888.7  |
| C1ORF32  | 92.3   | 116.4  | 93.8   | 88.8   | 90.9   | 90.7   | 102.1  | 112.8  |
| C1ORF33  | 987.1  | 1235.2 | 556.9  | 509.9  | 376.7  | 419.9  | 733.1  | 891.7  |
| C1ORF34  | 97.6   | 96.1   | 94.1   | 89.9   | 92.8   | 96     | 93.9   | 97.5   |
| C1ORF35  | 819.8  | 948    | 643.1  | 646.2  | 556.3  | 788.7  | 627.6  | 939.2  |
| C1ORF36  | 97.7   | 124.3  | 104.9  | 82.2   | 82.9   | 93.2   | 97.3   | 130.6  |
| C1ORF37  | 5143.8 | 6496.5 | 3502   | 3062.3 | 2284.2 | 4182.1 | 5074.4 | 6388.7 |
| C1ORF38  | 111.1  | 122.2  | 95.6   | 101.6  | 87.4   | 94     | 121.3  | 113.5  |
| C1ORF41  | 3216.9 | 4079.4 | 2209.7 | 2067.1 | 1692.7 | 2784.8 | 2451.3 | 3104.5 |
| C1ORF42  | 80.9   | 89.7   | 101.7  | 95.5   | 93.8   | 104.1  | 85.2   | 90.4   |
| C1ORF43  | 2467   | 2912.8 | 868.8  | 785.8  | 607.4  | 735.7  | 2071.7 | 3546.3 |
| C1ORF43  | 1271   | 1609.1 | 396.6  | 204.4  | 224.3  | 332.7  | 903.7  | 1522.3 |
| C1ORF45  | 84.1   | 94.8   | 90.2   | 90.1   | 84.4   | 80.7   | 89.9   | 88.5   |
| C1ORF48  | 3129.8 | 4220.3 | 2015.1 | 1714.3 | 1260.9 | 1913.8 | 2955.9 | 4762   |
| C1ORF49  | 81.1   | 97     | 102.3  | 81     | 84.4   | 86.7   | 96.3   | 112.7  |
| C1ORF50  | 1867.1 | 2409.8 | 1650.2 | 1776.9 | 1514.7 | 1961.8 | 1771.4 | 1961.5 |
| C1ORF51  | 130.9  | 128.6  | 119.5  | 92.4   | 97.7   | 90.6   | 101.3  | 167.1  |

|         |        |        |        |        |        |        |        |        |
|---------|--------|--------|--------|--------|--------|--------|--------|--------|
| C1ORF52 | 922.8  | 1157.2 | 738.3  | 814.7  | 697.2  | 860.9  | 939.9  | 1328.3 |
| C1ORF53 | 687.2  | 819.3  | 533.2  | 652.3  | 503.1  | 673.1  | 568.7  | 1001.6 |
| C1ORF54 | 5367.3 | 5727.2 | 4120.1 | 3043.9 | 2326.6 | 3250.2 | 5316.3 | 5929.6 |
| C1ORF55 | 742.9  | 861.5  | 490.9  | 583.7  | 487    | 828.3  | 637.9  | 1498.9 |
| C1ORF56 | 182.6  | 212.3  | 114.3  | 124    | 106.6  | 115.2  | 155    | 244.7  |
| C1ORF57 | 1746.3 | 2203.9 | 1094.3 | 1015.5 | 737.5  | 1212.2 | 1597.1 | 2800.1 |
| C1ORF58 | 282.4  | 285.7  | 114    | 86.8   | 87     | 101.2  | 186.8  | 282.6  |
| C1ORF59 | 3308.4 | 4258.2 | 2875.2 | 1920.5 | 1417.5 | 2226.7 | 2565.8 | 3644.6 |
| C1ORF60 | 482.1  | 483.4  | 602.4  | 716    | 654.1  | 1151.3 | 387.4  | 612    |
| C1ORF61 | 77.5   | 79.3   | 98.5   | 90.2   | 83.3   | 85     | 78.1   | 80.4   |
| C1ORF62 | 98.6   | 110.6  | 88.1   | 94.1   | 79.1   | 90.9   | 104.4  | 101.7  |
| C1ORF63 | 488.2  | 533.6  | 139.2  | 173.1  | 138.8  | 182.2  | 405.4  | 673.8  |
| C1ORF64 | 91.1   | 97     | 89.8   | 85     | 90.9   | 82.9   | 100.7  | 94.9   |
| C1ORF65 | 72.3   | 80.7   | 92     | 79.8   | 79.6   | 86     | 83.5   | 82.2   |
| C1ORF66 | 389.6  | 437.1  | 512    | 307.6  | 322.8  | 458.5  | 354.2  | 445.7  |
| C1ORF69 | 194.6  | 239.9  | 227.6  | 187.7  | 177.3  | 233.7  | 181.1  | 255.6  |
| C1ORF71 | 1468.6 | 1779   | 1137.4 | 1062.6 | 905.6  | 863.8  | 811.1  | 1515.9 |
| C1ORF73 | 435.4  | 595.1  | 293.2  | 219.5  | 202.9  | 272.6  | 393    | 505.6  |
| C1ORF74 | 359.8  | 493.1  | 200.9  | 149.8  | 118.3  | 144.3  | 391.1  | 410.8  |
| C1ORF75 | 98.5   | 120.4  | 103.8  | 95.2   | 93.3   | 105.6  | 86.6   | 104.6  |
| C1ORF76 | 154.9  | 183.3  | 142.9  | 154.9  | 140.8  | 151.2  | 133.4  | 141.5  |
| C1ORF77 | 1439.4 | 1800.7 | 720.2  | 698    | 607.4  | 851.1  | 1220.3 | 1184.7 |
| C1ORF78 | 124.3  | 134.5  | 96     | 97.8   | 96.5   | 99.9   | 122.8  | 133.6  |
| C1ORF82 | 449.4  | 606.7  | 334.7  | 535.1  | 436    | 574.1  | 394.2  | 557.7  |
| C1ORF83 | 288.6  | 393    | 208.7  | 237.7  | 205.2  | 334.8  | 230.2  | 303.6  |
| C1ORF84 | 144.7  | 136.6  | 125.3  | 117.6  | 121.5  | 137.5  | 120.1  | 163.6  |
| C1ORF84 | 142    | 187.6  | 124.4  | 130.7  | 110.7  | 111.4  | 121.2  | 142    |
| C1ORF84 | 142.2  | 169    | 111.5  | 101.5  | 114.7  | 107.3  | 135    | 142.1  |
| C1ORF85 | 1554.6 | 2119.2 | 970.5  | 1020.8 | 783.1  | 1001.2 | 1472   | 1391.8 |
| C1ORF86 | 530.8  | 707    | 513.4  | 363.2  | 325.5  | 398.3  | 473.7  | 670.7  |
| C1ORF87 | 104.1  | 118.3  | 98.2   | 82.4   | 80.4   | 91.4   | 103.7  | 110.4  |
| C1ORF88 | 117.7  | 141.3  | 109.9  | 93.7   | 104.2  | 94     | 123.1  | 150    |
| C1ORF89 | 109.7  | 138.5  | 100.7  | 97     | 90.2   | 104.7  | 107.3  | 112.2  |
| C1ORF9  | 94.8   | 102.2  | 85.5   | 78.9   | 82.2   | 82.2   | 75.9   | 100.5  |
| C1ORF9  | 118.6  | 115.4  | 92.4   | 91.3   | 86.7   | 87.5   | 124.3  | 129.4  |
| C1ORF9  | 100.6  | 121.9  | 108.7  | 86.9   | 91.6   | 98.5   | 101.8  | 115.2  |
| C1ORF90 | 105.4  | 134.5  | 94.8   | 76.6   | 81.7   | 94     | 107.7  | 125.6  |
| C1ORF91 | 107.2  | 141.9  | 96.2   | 84.3   | 74.3   | 80.4   | 100.9  | 124.3  |
| C1ORF92 | 105.5  | 106.1  | 94.4   | 86.1   | 85.2   | 92     | 84.8   | 109.1  |
| C1ORF94 | 113.9  | 137.5  | 99.8   | 93.5   | 84.3   | 84.8   | 127.1  | 120.7  |
| C1ORF95 | 93.5   | 97.9   | 84.7   | 80     | 78.1   | 78.4   | 101.4  | 111.1  |
| C1ORF96 | 156.6  | 199    | 115.8  | 109.3  | 98.6   | 126.7  | 140.2  | 171    |
| C1ORF97 | 947.9  | 1085.8 | 524.9  | 565.6  | 396.6  | 588.6  | 918    | 1282.6 |
| C1ORF99 | 90.7   | 107.7  | 87.3   | 79.4   | 85.7   | 81.2   | 95.3   | 102.7  |
| C1QA    | 127.6  | 152.1  | 102.5  | 91.5   | 87.9   | 112.4  | 102.5  | 129.2  |
| C1QB    | 99     | 120.3  | 95.8   | 92.9   | 84.8   | 95.9   | 96.2   | 110.5  |
| C1QBP   | 5013.6 | 6262.5 | 2963.8 | 2605.3 | 1632.6 | 3016.3 | 4039   | 7166.7 |
| C1QC    | 87.7   | 98.7   | 97.5   | 95.2   | 89.2   | 94.3   | 93.1   | 100.2  |
| C1QDC1  | 137.3  | 167.3  | 106.2  | 116.2  | 112.5  | 165.2  | 125.3  | 210.6  |
| C1QDC1  | 122.7  | 157.8  | 120.3  | 144.2  | 117.9  | 183.3  | 119.6  | 151    |



|           |        |        |        |        |        |        |        |        |
|-----------|--------|--------|--------|--------|--------|--------|--------|--------|
| C1QDC2    | 100.3  | 90.9   | 107.8  | 100.8  | 99.1   | 97     | 85.1   | 103.1  |
| C1QL1     | 99.2   | 111.7  | 116.3  | 99.6   | 95.3   | 98.3   | 95.1   | 110.5  |
| C1QL2     | 98.5   | 101.4  | 109.2  | 101.4  | 86.6   | 98.1   | 83.8   | 97     |
| C1QL3     | 92.8   | 122.6  | 103.8  | 84.3   | 79.7   | 86.1   | 98.9   | 109.5  |
| C1QL4     | 93.7   | 94.7   | 85     | 79.5   | 87.8   | 103.3  | 88.4   | 111.7  |
| C1QR1     | 3129.7 | 4044.8 | 3011   | 3043.7 | 2127.5 | 3525.5 | 2593.9 | 4005.1 |
| C1QTNF1   | 102.5  | 111.6  | 112    | 107.7  | 110    | 111.1  | 99.1   | 99.4   |
| C1QTNF1   | 74     | 80.2   | 85.5   | 75.8   | 88.6   | 84.4   | 76.9   | 81.5   |
| C1QTNF1   | 82.2   | 102.5  | 86.3   | 76.5   | 75.2   | 80.2   | 83.1   | 93.7   |
| C1QTNF2   | 122.2  | 145.9  | 100.2  | 88.8   | 84.9   | 93.8   | 113.9  | 120.9  |
| C1QTNF3   | 74.4   | 82.5   | 102.7  | 98.1   | 92.7   | 91.8   | 82.1   | 88.6   |
| C1QTNF3   | 85.5   | 112.4  | 91.3   | 90     | 86.8   | 83.7   | 97.9   | 112.2  |
| C1QTNF4   | 94     | 108.3  | 95.5   | 78.9   | 91.2   | 93.2   | 81.9   | 96.6   |
| C1QTNF5   | 116    | 163    | 79.7   | 77.5   | 80.3   | 77.3   | 124.5  | 150.8  |
| C1QTNF6   | 94.8   | 106.8  | 99.6   | 102.5  | 94.4   | 92.1   | 93.3   | 97.4   |
| C1QTNF6   | 91.8   | 107.6  | 99.1   | 96.8   | 97     | 106.6  | 86     | 93.1   |
| C1QTNF6   | 82.4   | 93     | 91.8   | 94.8   | 88.1   | 93.2   | 75.9   | 77.8   |
| C1QTNF7   | 93.5   | 113.1  | 89.4   | 88.2   | 82.4   | 88     | 106.8  | 103.7  |
| C1QTNF8   | 126.5  | 180.2  | 98.8   | 84.1   | 74.2   | 86.2   | 145.1  | 158.8  |
| C1R       | 95     | 106.3  | 92.7   | 94.7   | 87.4   | 83.3   | 104.3  | 88.1   |
| C1RL      | 200.2  | 194.6  | 153.8  | 214.7  | 181.6  | 198.7  | 137.7  | 156.8  |
| C1S       | 82.1   | 79.3   | 104.5  | 84.8   | 102.9  | 91.8   | 86.3   | 81.5   |
| C1S       | 95.5   | 114.4  | 96.9   | 86.6   | 92.3   | 100.2  | 92.1   | 104.7  |
| C2        | 166.9  | 192.5  | 112.5  | 201.4  | 194.9  | 233    | 149.4  | 184.6  |
| C20ORF10  | 88.3   | 99.6   | 82.1   | 88.1   | 79     | 93.8   | 97.6   | 98.4   |
| C20ORF100 | 1687.4 | 2237.2 | 1444.4 | 2377.3 | 1936.4 | 2016.1 | 1598.7 | 1536.3 |
| C20ORF102 | 85.8   | 101.9  | 99.2   | 91.6   | 87.1   | 84.9   | 87.5   | 95.5   |
| C20ORF103 | 2298.2 | 3066.3 | 1443.4 | 1534.2 | 1253.6 | 1895.9 | 1496.7 | 1868.4 |
| C20ORF106 | 93.2   | 105.3  | 106.9  | 110.7  | 116.9  | 108.7  | 111.6  | 136.5  |
| C20ORF107 | 117.9  | 121.3  | 106.3  | 115.2  | 108.5  | 115.5  | 107.2  | 144    |
| C20ORF108 | 170.4  | 228.2  | 135.7  | 187.5  | 159.4  | 243.2  | 174.9  | 430.9  |
| C20ORF11  | 1550.2 | 1862.6 | 1846.1 | 2170.3 | 1654.9 | 2061.8 | 1301.5 | 2103.6 |
| C20ORF111 | 1459.9 | 1713   | 895    | 713.2  | 627    | 1103.5 | 1360.3 | 2350.5 |
| C20ORF112 | 106.9  | 123.8  | 80.9   | 77     | 69.5   | 85.4   | 97.7   | 123.3  |
| C20ORF114 | 95.1   | 105.8  | 94.4   | 95.1   | 87     | 99.5   | 91.1   | 92     |
| C20ORF116 | 825.7  | 1001   | 542.4  | 420.4  | 369.7  | 481.5  | 868.8  | 1241.6 |
| C20ORF117 | 246    | 382.6  | 352.2  | 445.8  | 382.4  | 552.8  | 307.3  | 492.9  |
| C20ORF117 | 75.6   | 105.5  | 81.6   | 88.8   | 81.2   | 85.2   | 89.5   | 98.9   |
| C20ORF118 | 139.7  | 163.8  | 98.6   | 94.8   | 95.4   | 98.8   | 133.4  | 142.2  |
| C20ORF12  | 277    | 393.4  | 217.2  | 221    | 249.4  | 273.5  | 202.1  | 252.5  |
| C20ORF121 | 399.5  | 536.2  | 478.6  | 527.5  | 390.7  | 610.8  | 362.5  | 553    |
| C20ORF121 | 360.3  | 483.9  | 222.6  | 245.6  | 194.6  | 253.7  | 290.8  | 411.9  |
| C20ORF128 | 112    | 128.6  | 96     | 90     | 91.9   | 93.9   | 115.9  | 134.7  |
| C20ORF129 | 616.5  | 919.1  | 528.4  | 375.9  | 284.1  | 410.8  | 561.8  | 1009.3 |
| C20ORF132 | 95.4   | 114.2  | 102    | 100.7  | 86.1   | 96.5   | 93.9   | 97.3   |
| C20ORF132 | 102.9  | 119.8  | 120.4  | 118.2  | 103.9  | 113.2  | 102.7  | 117.5  |
| C20ORF132 | 112.6  | 136.5  | 96.7   | 99     | 90     | 121.6  | 114.1  | 109.2  |
| C20ORF133 | 90.9   | 103    | 84.4   | 93.6   | 87.7   | 84.2   | 82.1   | 99.4   |
| C20ORF133 | 98.7   | 105.4  | 86.1   | 79.3   | 89.5   | 84.6   | 92.6   | 108.2  |
| C20ORF134 | 102.6  | 133.9  | 113.7  | 89.1   | 84.3   | 91.3   | 111.5  | 114.2  |

|           |         |         |         |         |         |         |         |         |
|-----------|---------|---------|---------|---------|---------|---------|---------|---------|
| C20ORF13E | 90.5    | 86.4    | 87.5    | 82.7    | 89.2    | 81.8    | 92      | 94.1    |
| C20ORF14  | 375.6   | 534.8   | 136.8   | 177.6   | 132.3   | 117.1   | 258.1   | 339.4   |
| C20ORF141 | 89.8    | 96.4    | 115.6   | 112.2   | 108.1   | 98.5    | 93.8    | 91.4    |
| C20ORF142 | 109.1   | 110.4   | 88      | 90.1    | 83.6    | 93.9    | 108.1   | 107     |
| C20ORF144 | 80      | 96.2    | 91.7    | 75.2    | 85.9    | 77.1    | 93.5    | 94      |
| C20ORF14E | 284.9   | 399.4   | 291.8   | 216.4   | 161.6   | 140.7   | 246.6   | 338.7   |
| C20ORF151 | 99.6    | 113.6   | 79      | 79.8    | 81.9    | 74.4    | 97.2    | 134.9   |
| C20ORF152 | 75.8    | 99.2    | 89.2    | 84.8    | 77.7    | 81.7    | 80.8    | 90.1    |
| C20ORF15E | 1969.6  | 2678.1  | 1109.2  | 959.4   | 709.6   | 1245.8  | 1656.6  | 2143.8  |
| C20ORF16C | 90.5    | 99.4    | 105.1   | 93.6    | 85.1    | 90.9    | 96.6    | 99.6    |
| C20ORF161 | 94.1    | 117.1   | 96.9    | 97.7    | 84.2    | 86.1    | 95.6    | 111.9   |
| C20ORF161 | 127.3   | 143.2   | 108.9   | 103.9   | 99.4    | 109.1   | 124.9   | 171.6   |
| C20ORF16E | 90.3    | 107.3   | 91.8    | 86.2    | 81      | 89      | 92.5    | 94.5    |
| C20ORF16E | 86.8    | 105.2   | 87.3    | 85      | 79.5    | 84      | 98.8    | 106.9   |
| C20ORF172 | 793.1   | 1083.5  | 381.5   | 350.3   | 318.8   | 459.8   | 692.1   | 1081.1  |
| C20ORF174 | 80.5    | 79.6    | 87.1    | 81.1    | 82.3    | 78.5    | 78.5    | 80.8    |
| C20ORF174 | 80.6    | 88.7    | 96.1    | 90.1    | 92      | 82.3    | 80.4    | 80.9    |
| C20ORF177 | 991.6   | 1502.7  | 1175.5  | 1269    | 1030.9  | 1151.4  | 1179    | 1986    |
| C20ORF17E | 89.1    | 103.2   | 104.7   | 108.4   | 85.9    | 97.5    | 95.6    | 95.9    |
| C20ORF17E | 72.5    | 84.1    | 91.6    | 81.6    | 87.6    | 81.7    | 80.7    | 83.3    |
| C20ORF18E | 87.4    | 95.1    | 93.2    | 84      | 86.5    | 82.9    | 89.7    | 101     |
| C20ORF18E | 81.2    | 87.4    | 88.2    | 84.8    | 77.2    | 81.9    | 82.1    | 78.2    |
| C20ORF19  | 166.9   | 191     | 100.8   | 96.1    | 89.2    | 110.9   | 157     | 181.9   |
| C20ORF191 | 444.2   | 607.9   | 157.6   | 161.9   | 178.4   | 213.1   | 437.4   | 534.2   |
| C20ORF19E | 86.7    | 93      | 99.1    | 91.6    | 87.8    | 90.6    | 93.2    | 102.8   |
| C20ORF20  | 2603.1  | 3545.9  | 1912.9  | 1726.1  | 1674.3  | 2109    | 2447.6  | 2754    |
| C20ORF22  | 398.9   | 498.5   | 240.6   | 161.7   | 150.5   | 188.1   | 444.9   | 700.9   |
| C20ORF23  | 87.9    | 99.3    | 103.7   | 100.9   | 98.3    | 120.3   | 91.2    | 116     |
| C20ORF24  | 12982.2 | 15729.9 | 10954   | 9709    | 8220.2  | 11558.5 | 16302.6 | 22994.6 |
| C20ORF24  | 12806.3 | 15498   | 12429.8 | 12788.7 | 10038.6 | 14568   | 15828.9 | 22544.9 |
| C20ORF24  | 6624.3  | 8980.8  | 3667    | 3849.7  | 2884    | 4712.6  | 8334.6  | 10876   |
| C20ORF26  | 86.2    | 94.3    | 92      | 96.4    | 88.4    | 82.3    | 86.5    | 82.3    |
| C20ORF27  | 1728.9  | 2284.3  | 810     | 630.4   | 549.5   | 522.6   | 1389.6  | 1135.1  |
| C20ORF28  | 125.5   | 164.1   | 102.8   | 92.5    | 78.1    | 96      | 128.1   | 145.4   |
| C20ORF29  | 152.4   | 179.1   | 171.2   | 142.2   | 122.4   | 137.8   | 138     | 232.9   |
| C20ORF3   | 488.6   | 752.5   | 381.1   | 353     | 242.5   | 360.4   | 509     | 857.6   |
| C20ORF30  | 2365.7  | 2873.1  | 1341.1  | 1829.9  | 1188.4  | 1762.6  | 1819.5  | 3474.9  |
| C20ORF30  | 2467.6  | 3267.7  | 2261.6  | 2834.7  | 2138.3  | 3081.1  | 2145.3  | 4043.6  |
| C20ORF31  | 582.7   | 836.1   | 333.6   | 277.6   | 233.4   | 281.3   | 604.3   | 795.2   |
| C20ORF32  | 80.7    | 89.1    | 85.7    | 87.2    | 81.8    | 81.5    | 94.2    | 87      |
| C20ORF35  | 276.7   | 388.5   | 265.5   | 317     | 237.5   | 413.3   | 236.5   | 374.2   |
| C20ORF39  | 86.2    | 87.2    | 103.4   | 101.9   | 96.7    | 96.3    | 85.8    | 80.9    |
| C20ORF4   | 690.6   | 911     | 828.6   | 766.9   | 582.2   | 946.7   | 649.8   | 1442.2  |
| C20ORF42  | 182.3   | 201.8   | 159.6   | 125.3   | 105.1   | 139.8   | 122.7   | 170.8   |
| C20ORF43  | 3850.7  | 5322.4  | 3173.2  | 4141    | 3279.6  | 4869.3  | 3761.2  | 4668.7  |
| C20ORF44  | 399.8   | 622.9   | 292.1   | 231.1   | 173.2   | 276     | 357.5   | 599.2   |
| C20ORF44  | 232.6   | 303.5   | 126.6   | 125.6   | 97.7    | 109.6   | 213     | 324.5   |
| C20ORF44  | 1401.8  | 1728.4  | 501.5   | 523.7   | 352.3   | 584.2   | 1367    | 1725.6  |
| C20ORF45  | 1169.6  | 1613.6  | 784.5   | 780.6   | 621.6   | 1061.4  | 828     | 1009.9  |
| C20ORF46  | 96.5    | 95      | 101.2   | 86.2    | 91.5    | 89.6    | 84.5    | 89.2    |

|           |        |        |        |        |        |        |        |         |
|-----------|--------|--------|--------|--------|--------|--------|--------|---------|
| C20ORF52  | 7055.2 | 6800.7 | 7644.2 | 6704.9 | 5244.8 | 6217.5 | 7292.3 | 8780.4  |
| C20ORF54  | 101.1  | 97.3   | 96.5   | 86.8   | 83.9   | 82.8   | 96.7   | 101     |
| C20ORF55  | 177.8  | 194.9  | 143.6  | 105.9  | 115.3  | 113.4  | 167.9  | 278.4   |
| C20ORF55  | 91.6   | 112.4  | 80.5   | 79.4   | 78.2   | 86.7   | 82.5   | 113.9   |
| C20ORF55  | 265.3  | 307.6  | 214.1  | 177.9  | 152.5  | 188    | 225.5  | 282.8   |
| C20ORF58  | 87.1   | 94.8   | 96.1   | 88.6   | 80.8   | 93.9   | 93.7   | 89.4    |
| C20ORF59  | 187.6  | 209.4  | 190.5  | 169    | 163.6  | 238.1  | 170.5  | 238.5   |
| C20ORF6   | 92.3   | 106.7  | 94.6   | 94.3   | 81.9   | 88.3   | 87.6   | 96.1    |
| C20ORF67  | 114.1  | 147.6  | 152.9  | 142.6  | 141.4  | 177.5  | 115.5  | 157.9   |
| C20ORF7   | 94.4   | 95.6   | 105.3  | 99     | 88.5   | 97.6   | 87.4   | 99      |
| C20ORF7   | 571.8  | 711.3  | 327.1  | 253.2  | 204.4  | 341.8  | 455.3  | 674.6   |
| C20ORF7   | 271.6  | 342    | 157.4  | 143.8  | 120.6  | 148.3  | 229.6  | 381.1   |
| C20ORF70  | 84.2   | 104.9  | 104.4  | 86     | 81.3   | 89.6   | 89.4   | 101.5   |
| C20ORF71  | 93.6   | 109.2  | 86.1   | 87.2   | 78.8   | 91.5   | 94.4   | 100.9   |
| C20ORF71  | 84.8   | 91.9   | 111.6  | 105    | 92.4   | 100.5  | 93.8   | 84.4    |
| C20ORF71  | 78     | 87.9   | 87.7   | 86.8   | 83.8   | 85.2   | 85.1   | 86.4    |
| C20ORF72  | 934.1  | 1258.8 | 716    | 701.2  | 655.7  | 908    | 663.3  | 907.8   |
| C20ORF74  | 85.5   | 102.1  | 91.5   | 100.1  | 86.6   | 96.9   | 90.4   | 95.5    |
| C20ORF74  | 134.9  | 146.8  | 86.1   | 77.7   | 75     | 86.1   | 117.3  | 147.1   |
| C20ORF75  | 112.5  | 124.1  | 101.2  | 94     | 86     | 108.8  | 103.1  | 111.7   |
| C20ORF77  | 80.9   | 93.7   | 91.7   | 92.8   | 93.1   | 91.6   | 86.1   | 103     |
| C20ORF79  | 89.9   | 97.5   | 98.7   | 99.6   | 85.2   | 90.2   | 90.1   | 106.8   |
| C20ORF85  | 89.8   | 110.4  | 114.1  | 93.3   | 82.2   | 97.3   | 87     | 101.9   |
| C20ORF86  | 107.6  | 106.2  | 93.2   | 95.1   | 88.1   | 95     | 98.6   | 121.5   |
| C20ORF94  | 166.7  | 196.6  | 139.4  | 159.1  | 144.3  | 110.7  | 184    | 181.9   |
| C20ORF96  | 97.4   | 110.4  | 109.7  | 104.7  | 93.8   | 110.2  | 113.6  | 133.8   |
| C20ORF98  | 283.1  | 365.8  | 327.2  | 297    | 265.8  | 292    | 270.6  | 416.6   |
| C21ORF100 | 83.2   | 97     | 103.5  | 87.1   | 77.9   | 96.7   | 73.7   | 88.1    |
| C21ORF110 | 168.9  | 214.2  | 131.7  | 140.8  | 111.4  | 134.6  | 144.9  | 185.6   |
| C21ORF120 | 78.1   | 91.3   | 86     | 85.2   | 84.3   | 80.3   | 85.5   | 89.5    |
| C21ORF120 | 322.1  | 429.9  | 259.1  | 232.5  | 184.4  | 275.8  | 261.9  | 324.3   |
| C21ORF120 | 77     | 84.3   | 93.9   | 89.6   | 86.7   | 91     | 80.1   | 83.7    |
| C21ORF13  | 91.9   | 106.8  | 93.2   | 96.7   | 90.7   | 96.5   | 96.9   | 97.5    |
| C21ORF2   | 402.6  | 465.5  | 337.9  | 359.9  | 348.5  | 381.9  | 332.3  | 345.3   |
| C21ORF24  | 7767.1 | 6857   | 4102.2 | 6535.8 | 6472.5 | 5356.9 | 7223.2 | 10556.9 |
| C21ORF25  | 138.5  | 238.5  | 172.6  | 147.6  | 132.3  | 152.9  | 183    | 247.2   |
| C21ORF25  | 397.7  | 584.9  | 292.4  | 324.8  | 279.1  | 304.5  | 375.3  | 408.6   |
| C21ORF29  | 87.5   | 88.2   | 92.8   | 80.5   | 82.8   | 87.5   | 85     | 91.8    |
| C21ORF33  | 930.1  | 1083.2 | 495.6  | 550.3  | 420.9  | 501.3  | 673.4  | 761.3   |
| C21ORF33  | 2919.7 | 4082   | 1749.6 | 1773.6 | 1347.4 | 2138.1 | 1953.1 | 2447.7  |
| C21ORF33  | 553.4  | 692.9  | 377.7  | 444.8  | 336.8  | 452.1  | 393.3  | 472.2   |
| C21ORF34  | 105.6  | 140.1  | 95     | 89.2   | 83.3   | 97.9   | 119.2  | 132.8   |
| C21ORF34  | 88.9   | 89.3   | 83.9   | 78.4   | 86.6   | 83.2   | 98     | 91.6    |
| C21ORF34  | 103.5  | 104.3  | 80.6   | 78.3   | 75.9   | 74.1   | 97.7   | 108.1   |
| C21ORF41  | 83.8   | 90.3   | 87     | 86.1   | 82.1   | 92.9   | 82.8   | 89.9    |
| C21ORF45  | 190.9  | 270.7  | 112.1  | 105.4  | 84.3   | 102.4  | 186.3  | 210.5   |
| C21ORF49  | 89.3   | 101.6  | 86     | 80.3   | 75.9   | 86.5   | 90.8   | 103.5   |
| C21ORF51  | 618.6  | 697.2  | 332.2  | 472.5  | 377    | 637.3  | 486.9  | 644.4   |
| C21ORF51  | 259.3  | 328.8  | 187.2  | 202.6  | 172.9  | 329.3  | 232.6  | 263.2   |
| C21ORF55  | 85.6   | 95     | 86.8   | 87     | 82.2   | 85.9   | 83.1   | 84      |

|          |        |        |        |        |        |        |        |        |
|----------|--------|--------|--------|--------|--------|--------|--------|--------|
| C21ORF55 | 115.4  | 161.7  | 94     | 100.8  | 99.4   | 94.6   | 92.4   | 105.6  |
| C21ORF55 | 95.7   | 98     | 97.7   | 89.9   | 86.6   | 85.6   | 83.3   | 109.2  |
| C21ORF56 | 356    | 505.1  | 207.1  | 189.6  | 174.3  | 160.6  | 313.5  | 437.3  |
| C21ORF57 | 3311.8 | 4095.9 | 2156.2 | 2238.3 | 2170.8 | 2930.6 | 3101.4 | 4149.2 |
| C21ORF57 | 396.1  | 482.8  | 188.8  | 266.8  | 253    | 346    | 352.9  | 512.7  |
| C21ORF57 | 98.7   | 108.8  | 108.3  | 106.8  | 95.1   | 96.6   | 89.8   | 94.1   |
| C21ORF58 | 117.9  | 116.9  | 128.8  | 124.4  | 122.1  | 126.1  | 109.1  | 123.2  |
| C21ORF58 | 121.2  | 135.6  | 86.3   | 77.2   | 79.1   | 78.7   | 116.8  | 120    |
| C21ORF58 | 94     | 104.6  | 115    | 104.7  | 102.9  | 88     | 92.2   | 105.1  |
| C21ORF59 | 88.6   | 87     | 93.5   | 85.1   | 82.5   | 85.6   | 87.9   | 90.3   |
| C21ORF59 | 1236.1 | 1599.5 | 673.1  | 647.5  | 542.4  | 962.8  | 978    | 1152.4 |
| C21ORF6  | 267.5  | 363.5  | 184.7  | 183.7  | 147.9  | 221.4  | 218.7  | 238.6  |
| C21ORF62 | 102.5  | 128.3  | 85.4   | 92.3   | 76.4   | 83.6   | 115.2  | 123.1  |
| C21ORF63 | 123.6  | 136.2  | 111.2  | 94.3   | 91.4   | 93.8   | 121.7  | 146    |
| C21ORF66 | 254.3  | 275.8  | 125.1  | 146.7  | 160.3  | 146.3  | 159.4  | 250.9  |
| C21ORF66 | 179.7  | 206.8  | 131.5  | 135.9  | 126.5  | 148.9  | 133.9  | 177.2  |
| C21ORF66 | 217.8  | 277.3  | 135.8  | 137.9  | 117.6  | 138.8  | 154.5  | 204.4  |
| C21ORF66 | 1218.3 | 1459.2 | 609.8  | 714    | 679.5  | 1222.6 | 922.5  | 1226.5 |
| C21ORF67 | 148.7  | 152.8  | 113.4  | 97     | 86.7   | 96.4   | 116.5  | 141.9  |
| C21ORF69 | 140.7  | 189.5  | 130.6  | 119.2  | 112.1  | 119.3  | 121.8  | 123    |
| C21ORF7  | 151.2  | 167.2  | 108.5  | 103.2  | 102    | 113.8  | 135.2  | 161.8  |
| C21ORF70 | 495.1  | 619.8  | 352    | 321.4  | 268.1  | 342.2  | 476.4  | 515.6  |
| C21ORF87 | 144.1  | 139.2  | 96.4   | 84.6   | 82.3   | 88.4   | 126.9  | 139.2  |
| C21ORF87 | 115.6  | 120.5  | 100    | 92     | 76.7   | 79.2   | 100    | 133.6  |
| C21ORF88 | 118.3  | 118.9  | 99.8   | 89.4   | 82.6   | 87.8   | 110.9  | 121.4  |
| C21ORF90 | 118.8  | 133.2  | 92.4   | 87.5   | 86.6   | 88.1   | 116.7  | 126.5  |
| C21ORF91 | 165.3  | 210.3  | 136.8  | 132    | 123.5  | 151.7  | 146.8  | 203.6  |
| C21ORF94 | 87.2   | 110    | 85.6   | 87     | 91     | 98.9   | 84.4   | 91.4   |
| C21ORF99 | 80.7   | 86.9   | 82     | 78.1   | 74.3   | 73.1   | 81.1   | 91.2   |
| C22ORF13 | 2781.6 | 3275.3 | 2035.9 | 2285.9 | 1717.8 | 2243.4 | 2257.5 | 2396.2 |
| C22ORF15 | 81.3   | 87.4   | 114.5  | 97.3   | 107.5  | 97.8   | 93.2   | 80.5   |
| C22ORF16 | 3061.4 | 3896.9 | 2842.3 | 1826.2 | 1302.7 | 2183.6 | 2127.9 | 3618.2 |
| C22ORF18 | 1127.3 | 1544.2 | 624.3  | 444.8  | 361.3  | 408.1  | 855.9  | 943.9  |
| C22ORF23 | 126.6  | 156.6  | 93.9   | 98.6   | 103.4  | 97.3   | 141.2  | 144.6  |
| C22ORF25 | 230.6  | 251.7  | 275.1  | 274.4  | 261.3  | 301.3  | 186.3  | 292.4  |
| C22ORF5  | 156.6  | 196.6  | 217.1  | 210.4  | 187.7  | 289.9  | 157.9  | 250.3  |
| C22ORF8  | 168.1  | 225.4  | 141.9  | 125.8  | 123.1  | 143.3  | 173.3  | 196.6  |
| C22ORF9  | 147.9  | 179.1  | 111    | 109    | 111.5  | 86.8   | 115    | 158    |
| C22ORF9  | 988.2  | 1233.9 | 769.6  | 1005.4 | 886.9  | 1249.2 | 758.3  | 1157   |
| C22ORF9  | 99.8   | 92     | 91.7   | 94     | 99.1   | 84.3   | 89.7   | 95.5   |
| C2ORF10  | 132.8  | 168.2  | 125.7  | 95.3   | 99.5   | 137.5  | 128    | 163.1  |
| C2ORF11  | 114    | 107.3  | 87     | 82.3   | 75.1   | 87.1   | 97.9   | 105.7  |
| C2ORF12  | 89.9   | 91.8   | 93.6   | 87.1   | 80.9   | 96.8   | 84.4   | 114.2  |
| C2ORF13  | 81.6   | 81.6   | 92.1   | 92.7   | 96.8   | 95.7   | 81.7   | 79.6   |
| C2ORF16  | 96.1   | 104.9  | 98.5   | 100.4  | 109.3  | 88.7   | 97.6   | 105.2  |
| C2ORF17  | 245.9  | 317.2  | 279.4  | 245.7  | 242.3  | 342.3  | 246.1  | 351    |
| C2ORF18  | 307.1  | 499.4  | 263    | 214.8  | 164.4  | 178.4  | 284.3  | 341.8  |
| C2ORF21  | 131.8  | 151.1  | 92     | 90.9   | 87.6   | 79.7   | 127.1  | 142.2  |
| C2ORF24  | 328.4  | 381    | 343    | 266.1  | 225.5  | 316.4  | 285.5  | 600.2  |
| C2ORF25  | 4774.3 | 5111.6 | 3005.3 | 3510.1 | 2131.1 | 3382.3 | 4110.7 | 8986.4 |

|         |        |        |        |        |        |        |        |        |
|---------|--------|--------|--------|--------|--------|--------|--------|--------|
| C2ORF26 | 251    | 280.5  | 163    | 201.9  | 188.8  | 213.6  | 262.1  | 385.6  |
| C2ORF27 | 88.9   | 100.5  | 84     | 84.5   | 82.6   | 85     | 83.4   | 91.8   |
| C2ORF28 | 6020.4 | 7454   | 4363.4 | 4159.7 | 2760.6 | 3993.1 | 5391.5 | 6918.1 |
| C2ORF28 | 3927.9 | 5290.7 | 1917.9 | 1397.9 | 1331.2 | 1860   | 3175.1 | 4741.5 |
| C2ORF29 | 3622.4 | 4393.5 | 2277.2 | 2055.8 | 1535.4 | 2088.7 | 2803.2 | 3403.7 |
| C2ORF3  | 119.2  | 145    | 104.4  | 104.2  | 77.2   | 101.1  | 111.3  | 135.4  |
| C2ORF30 | 1002.7 | 1215.7 | 706.5  | 767.2  | 579.9  | 1028.8 | 897.4  | 1705.5 |
| C2ORF32 | 139    | 188.2  | 145.6  | 119.7  | 110.9  | 142.3  | 123.1  | 153    |
| C2ORF33 | 823.8  | 937.5  | 214.3  | 246.5  | 178.2  | 228.3  | 782.3  | 1354.5 |
| C2ORF34 | 239.8  | 344.9  | 193.6  | 148.3  | 132.7  | 184    | 230.8  | 292.8  |
| C2ORF4  | 576.8  | 896.7  | 395    | 340.9  | 286.9  | 414.3  | 452.5  | 634.5  |
| C2ORF52 | 88.3   | 99.9   | 103.6  | 93.6   | 95.9   | 101    | 92.1   | 93.1   |
| C2ORF7  | 407.7  | 551.2  | 223.2  | 199.8  | 160.1  | 248.4  | 349.1  | 661.2  |
| C3      | 96.9   | 113.2  | 105.1  | 102.8  | 93.3   | 101.8  | 100.7  | 121.6  |
| C3AR1   | 121.1  | 135.5  | 97.3   | 85.5   | 85.3   | 84.4   | 105.6  | 110.1  |
| C3ORF1  | 235.6  | 293.6  | 197.1  | 216.5  | 184.5  | 211.1  | 182.9  | 226.1  |
| C3ORF10 | 1662   | 2069.9 | 976.2  | 1357.8 | 961.5  | 1289.6 | 1363.1 | 1568.8 |
| C3ORF14 | 2815.4 | 3592.3 | 2088.5 | 1344.7 | 940.7  | 1281.3 | 2434.7 | 3382.3 |
| C3ORF15 | 134    | 161.4  | 103.2  | 94.6   | 85     | 103.8  | 129.8  | 155.1  |
| C3ORF17 | 2762.3 | 3244.2 | 1556   | 1321.2 | 1285.1 | 1750.5 | 2378.1 | 3126.6 |
| C3ORF17 | 166.9  | 188.9  | 97     | 94.4   | 88.7   | 93     | 130.3  | 162.5  |
| C3ORF17 | 118.2  | 171.2  | 122.3  | 147.8  | 104.7  | 124.7  | 118.5  | 149.5  |
| C3ORF18 | 119.9  | 128    | 97.6   | 89.5   | 96.5   | 83.7   | 117    | 126.1  |
| C3ORF19 | 769.3  | 994.8  | 616.2  | 779.2  | 709    | 1080.4 | 574.3  | 817.2  |
| C3ORF20 | 85.4   | 99.5   | 86.3   | 85.2   | 81     | 82.1   | 91.8   | 88.2   |
| C3ORF21 | 1127.1 | 1394.7 | 578    | 562.6  | 378.3  | 421.2  | 692.5  | 702.8  |
| C3ORF22 | 140.1  | 164.9  | 102.3  | 105.8  | 91.6   | 102.6  | 127.2  | 160    |
| C3ORF23 | 358.1  | 494.6  | 154.2  | 126.4  | 102    | 137.6  | 256.1  | 389.3  |
| C3ORF23 | 98.4   | 97.6   | 98.8   | 92.1   | 71.5   | 95.7   | 97     | 90.3   |
| C3ORF23 | 135.7  | 172    | 118.2  | 103.9  | 102.4  | 98.4   | 126.3  | 140.8  |
| C3ORF23 | 171.9  | 240.1  | 160.5  | 181.6  | 145.2  | 214    | 154.8  | 235.3  |
| C3ORF24 | 75.1   | 82.4   | 101.8  | 86     | 89.4   | 82.2   | 77.9   | 84     |
| C3ORF25 | 96.9   | 111.7  | 95     | 102.4  | 86.7   | 104.6  | 99.6   | 87.6   |
| C3ORF26 | 2376.8 | 3238.4 | 1115.9 | 1188.9 | 855.6  | 1323.7 | 1826.4 | 2922.1 |
| C3ORF27 | 91.3   | 104.3  | 95.7   | 92     | 84.8   | 84.5   | 93.7   | 98.9   |
| C3ORF28 | 576    | 687.2  | 352.6  | 286.5  | 225.1  | 317.6  | 532.7  | 715.7  |
| C3ORF29 | 2342.8 | 2844.8 | 1263.8 | 1433.8 | 1378   | 1468.1 | 2107.7 | 1991.6 |
| C3ORF29 | 520.4  | 635.4  | 322.8  | 364.6  | 301.7  | 438.3  | 487.9  | 820.2  |
| C3ORF30 | 91.9   | 101.3  | 88.3   | 77.8   | 82.3   | 87.3   | 90.8   | 102    |
| C3ORF31 | 708.1  | 906.6  | 428.1  | 354.5  | 270.4  | 367.9  | 608    | 788.5  |
| C3ORF32 | 109.5  | 132.7  | 95.8   | 92.9   | 86.6   | 102.1  | 109.1  | 124.7  |
| C3ORF33 | 124.2  | 157.9  | 104.1  | 92.5   | 87.9   | 100.6  | 131    | 119.4  |
| C3ORF34 | 270.3  | 408.5  | 164.7  | 180.9  | 174.4  | 191    | 282.6  | 475    |
| C3ORF34 | 3365.4 | 2992.9 | 2932.3 | 3340   | 3097.1 | 2884.9 | 3355.5 | 5722.7 |
| C3ORF35 | 113.3  | 131.5  | 117.8  | 102.6  | 101    | 106.8  | 117.2  | 138.1  |
| C3ORF35 | 85.7   | 96.3   | 89.3   | 80.8   | 81.5   | 85.7   | 88     | 92.7   |
| C3ORF36 | 99.3   | 119.3  | 96.1   | 90.1   | 85.6   | 91.7   | 100.3  | 121.9  |
| C3ORF37 | 669.5  | 936.8  | 501.1  | 307.2  | 271.3  | 323.1  | 576.7  | 597.6  |
| C3ORF37 | 104.6  | 104.5  | 96.2   | 93     | 85.8   | 88.8   | 81.4   | 108.1  |
| C3ORF38 | 873.6  | 1277.6 | 559.3  | 470.1  | 372.8  | 651.5  | 602.7  | 1043.2 |

|         |         |         |        |        |        |        |         |         |
|---------|---------|---------|--------|--------|--------|--------|---------|---------|
| C3ORF39 | 196     | 238.6   | 208.4  | 179.9  | 139.9  | 226.3  | 175.6   | 272.1   |
| C3ORF40 | 242.9   | 311     | 172.1  | 135.2  | 126.6  | 156.9  | 254.6   | 233.6   |
| C3ORF42 | 92.3    | 105.7   | 94.8   | 91.7   | 103.7  | 90.1   | 92.9    | 104.9   |
| C3ORF42 | 84.8    | 98.5    | 103.7  | 99.4   | 94.8   | 97.4   | 94      | 94.8    |
| C3ORF45 | 104.7   | 109.1   | 93.1   | 79     | 80.3   | 82.9   | 100.1   | 110.1   |
| C3ORF48 | 91      | 104.4   | 98.1   | 90.7   | 84.7   | 96.3   | 89.9    | 93.2    |
| C3ORF52 | 87.7    | 94.4    | 89.3   | 92.4   | 89.5   | 87.7   | 94.9    | 85.5    |
| C3ORF54 | 499.1   | 676.1   | 353.2  | 281.9  | 306.2  | 351.8  | 484.4   | 440.5   |
| C3ORF56 | 89.3    | 87      | 87.5   | 79.7   | 86.1   | 79.5   | 80.2    | 89.9    |
| C3ORF57 | 88.1    | 97.7    | 93.5   | 94.8   | 86.8   | 94.1   | 91.8    | 88.7    |
| C3ORF58 | 322     | 385     | 189.4  | 228.7  | 182    | 243    | 286.6   | 610.5   |
| C3ORF59 | 259.3   | 297.1   | 134.4  | 101.1  | 89.8   | 110.7  | 229.2   | 243.5   |
| C3ORF60 | 272.9   | 326.9   | 195.9  | 126.2  | 117.7  | 119.6  | 261.4   | 262.1   |
| C3ORF60 | 110     | 117.2   | 130.8  | 114.4  | 109.5  | 123.1  | 98      | 106.1   |
| C3ORF60 | 102.6   | 122.9   | 84.6   | 82.8   | 77.8   | 84.4   | 106.5   | 106     |
| C3ORF60 | 192.8   | 249.6   | 109.7  | 109.2  | 106    | 102.8  | 173.9   | 194.8   |
| C3ORF60 | 11078.1 | 13395.8 | 8084.7 | 7185.6 | 5514.4 | 5938.3 | 11347.7 | 12406.9 |
| C3ORF62 | 169.7   | 194.7   | 151.2  | 143.6  | 158.8  | 159    | 168     | 404.2   |
| C3ORF63 | 312     | 499.2   | 283.7  | 215.5  | 221.7  | 304.3  | 287.4   | 307.9   |
| C3ORF64 | 308.8   | 358.2   | 156.9  | 171.7  | 159.6  | 217.1  | 300     | 439.2   |
| C3ORF65 | 85.6    | 109     | 92.6   | 102    | 90.3   | 97.6   | 89.5    | 98.7    |
| C3ORF9  | 466.9   | 664.4   | 267.3  | 218.4  | 192.2  | 244    | 382.5   | 763     |
| C3ORF9  | 1614.5  | 2048.6  | 1010.1 | 970.5  | 756.7  | 1017.5 | 1181.2  | 1677.5  |
| C4A     | 110.2   | 155     | 97.1   | 78.2   | 73.6   | 87.3   | 100.1   | 130.5   |
| C4BPA   | 106.8   | 102.2   | 94.1   | 89.7   | 81.3   | 86     | 98.8    | 107.4   |
| C4BPB   | 116.6   | 161.3   | 109.2  | 87.7   | 103.8  | 97.1   | 110.6   | 115.3   |
| C4BPB   | 88.4    | 94.5    | 90.3   | 81.7   | 85.3   | 79.5   | 96.9    | 91.4    |
| C4ORF13 | 167.5   | 207.7   | 113.5  | 101.9  | 102.5  | 98.7   | 137.2   | 169.2   |
| C4ORF13 | 354.5   | 506     | 242.7  | 197.5  | 168.1  | 260.3  | 290.7   | 374.6   |
| C4ORF14 | 1070.2  | 1506.7  | 872.3  | 693.2  | 612.3  | 963    | 948.6   | 1466    |
| C4ORF15 | 95.1    | 106.6   | 116.2  | 102.1  | 103.2  | 103.6  | 92.3    | 98.8    |
| C4ORF16 | 99.4    | 108.4   | 98.4   | 87.5   | 87.5   | 93.8   | 96.7    | 141.6   |
| C4ORF17 | 81.8    | 98.6    | 89.1   | 81     | 77.3   | 85.4   | 86.2    | 92.8    |
| C4ORF18 | 89.5    | 108.9   | 96.2   | 102    | 99     | 102.6  | 100.9   | 107.4   |
| C4ORF18 | 90.2    | 100     | 92.2   | 113.4  | 101.8  | 115.2  | 89.2    | 93.6    |
| C4ORF18 | 92.7    | 91.1    | 96.9   | 101.1  | 89.9   | 86.4   | 95      | 102.7   |
| C4ORF28 | 93.1    | 102.1   | 85.6   | 79.5   | 80.7   | 81.7   | 92.9    | 86.1    |
| C4ORF32 | 96.2    | 101.7   | 90.1   | 85.1   | 93     | 99.2   | 90      | 93.1    |
| C4ORF34 | 344.7   | 439.6   | 188.7  | 205.7  | 205.3  | 215.9  | 348.2   | 325.5   |
| C4ORF36 | 97.3    | 109.3   | 114    | 99.1   | 80.7   | 103.7  | 94.2    | 101.1   |
| C4ORF6  | 84      | 97.4    | 88     | 93.9   | 97.7   | 93.3   | 88.3    | 86.1    |
| C4ORF7  | 80.3    | 101.9   | 97.4   | 98.6   | 89.8   | 98     | 82.6    | 89.3    |
| C4ORF8  | 292.8   | 324.3   | 216.8  | 186.8  | 173    | 243.5  | 259     | 381.8   |
| C4ORF9  | 830     | 1131    | 711.7  | 456.1  | 319.5  | 495.3  | 687.8   | 898.7   |
| C5      | 963.7   | 1290.5  | 770.8  | 800.5  | 783.7  | 1111   | 706     | 907.5   |
| C5AR1   | 89.1    | 101     | 91.3   | 110.8  | 96.1   | 107.2  | 93.8    | 123.1   |
| C5ORF13 | 2731.4  | 3222    | 1903.5 | 1790.8 | 1567.2 | 2674.1 | 1704.5  | 2683.3  |
| C5ORF14 | 170.6   | 222.8   | 116.3  | 106.4  | 95.1   | 98.8   | 164     | 175.8   |
| C5ORF15 | 2066    | 2824.8  | 1486.3 | 1944.5 | 1657.3 | 2108.3 | 1760.3  | 1979.2  |
| C5ORF16 | 261.4   | 305.3   | 215.4  | 168.6  | 157.2  | 312.8  | 206.4   | 350.2   |

|          |        |        |        |        |        |        |        |        |
|----------|--------|--------|--------|--------|--------|--------|--------|--------|
| C5ORF20  | 520.1  | 662.5  | 493.6  | 673.6  | 624.8  | 684.9  | 366.3  | 402.1  |
| C5ORF21  | 897    | 1121   | 571.6  | 715.1  | 556.2  | 823.6  | 761.9  | 1066.3 |
| C5ORF28  | 2219.7 | 2269.9 | 893.3  | 1537.5 | 1574   | 1232.1 | 1909.1 | 2403   |
| C5ORF3   | 173    | 239.1  | 138.6  | 131.3  | 133.8  | 156    | 162.1  | 225.9  |
| C5ORF34  | 140.4  | 145.6  | 110.3  | 102.5  | 100.9  | 119.9  | 125.9  | 169.6  |
| C5ORF36  | 79.1   | 86     | 92.4   | 80.5   | 84.2   | 82.1   | 78.3   | 88.7   |
| C5ORF37  | 592.5  | 849.3  | 436.3  | 436.5  | 398.7  | 557.3  | 551.6  | 749.3  |
| C5ORF4   | 92     | 106.2  | 88.8   | 84.4   | 87.2   | 90.7   | 101    | 95.6   |
| C5ORF4   | 77.2   | 89.8   | 97     | 85.4   | 83.2   | 87.5   | 77     | 80.9   |
| C5ORF4   | 101.5  | 109.7  | 99.1   | 101.5  | 95.5   | 96.1   | 103.5  | 99.2   |
| C5ORF5   | 788.3  | 867.4  | 392.5  | 708.3  | 596.2  | 966.6  | 663.7  | 1278.8 |
| C6       | 82.7   | 107.7  | 102.6  | 91.5   | 88.8   | 94.8   | 97.6   | 96.1   |
| C6ORF1   | 117.4  | 127.4  | 108.5  | 93.1   | 106.5  | 101.8  | 121.1  | 142.8  |
| C6ORF1   | 268    | 317.3  | 176.2  | 117.6  | 129.5  | 115.9  | 271.6  | 381.3  |
| C6ORF1   | 163.3  | 216.5  | 133.6  | 107.9  | 110.6  | 107.6  | 141.7  | 197.9  |
| C6ORF10  | 114.2  | 125.8  | 96.7   | 88.3   | 90.9   | 83.3   | 120.8  | 124.3  |
| C6ORF105 | 98.9   | 109.6  | 92.6   | 85.7   | 82.3   | 92.6   | 101.4  | 109.5  |
| C6ORF106 | 204.6  | 267.1  | 156.6  | 162.6  | 147.4  | 124.1  | 245.7  | 234    |
| C6ORF106 | 204.1  | 278.5  | 208.4  | 216.2  | 185.5  | 276.6  | 209.7  | 263.8  |
| C6ORF107 | 124.5  | 123.1  | 113.7  | 91.4   | 103.4  | 101.8  | 116.3  | 120.4  |
| C6ORF108 | 119.7  | 127.5  | 100    | 92.7   | 80.3   | 101.3  | 118.5  | 139.4  |
| C6ORF108 | 4981.8 | 6737.6 | 4777.7 | 4121.3 | 3195.5 | 5280.8 | 4159.1 | 4852.3 |
| C6ORF111 | 1130   | 931.8  | 952.6  | 915.7  | 842.9  | 1827.8 | 565    | 1156.8 |
| C6ORF113 | 742.3  | 949.2  | 390.8  | 401.3  | 360    | 629.5  | 662.6  | 1197   |
| C6ORF114 | 82.4   | 95.8   | 82.5   | 73.5   | 69.4   | 74.7   | 85.2   | 92.8   |
| C6ORF117 | 162.8  | 206.3  | 163.9  | 456.1  | 401.7  | 475.8  | 155.8  | 188.5  |
| C6ORF118 | 86.9   | 99.8   | 102.7  | 95.6   | 89.4   | 100.9  | 95     | 101.3  |
| C6ORF120 | 217    | 283.6  | 159.1  | 209.8  | 167    | 301.4  | 200.8  | 358.4  |
| C6ORF122 | 89.9   | 92.7   | 97.4   | 90.8   | 88.5   | 92.5   | 88.3   | 87.2   |
| C6ORF125 | 5968.6 | 6814.8 | 4224.9 | 3830.7 | 2877.1 | 4577.6 | 4442.2 | 4889.7 |
| C6ORF128 | 94.6   | 125.9  | 96.6   | 93.6   | 96.6   | 104.7  | 94     | 107.8  |
| C6ORF129 | 1431.8 | 1626.1 | 1075.5 | 754.6  | 609.8  | 906.8  | 1443.3 | 1738.6 |
| C6ORF130 | 1130   | 1537.8 | 893.1  | 958    | 803.7  | 1082.6 | 1093.4 | 1630.6 |
| C6ORF134 | 111.2  | 136    | 94.9   | 81.2   | 82.4   | 93.5   | 100.9  | 116.1  |
| C6ORF134 | 94.6   | 102.3  | 115.5  | 93.4   | 92.5   | 97.9   | 83.7   | 104.2  |
| C6ORF134 | 93.3   | 92.5   | 96.1   | 91.2   | 83.2   | 78.7   | 85.7   | 92.4   |
| C6ORF136 | 509.3  | 565.8  | 210.6  | 179.8  | 146    | 144.2  | 495.1  | 530.2  |
| C6ORF139 | 636.5  | 838.7  | 313.3  | 267.8  | 262.5  | 422.8  | 462.7  | 948.7  |
| C6ORF142 | 90.3   | 97.3   | 90.4   | 87.8   | 78.9   | 86.2   | 97.3   | 94.1   |
| C6ORF143 | 83.3   | 89.2   | 104.8  | 99.7   | 88.3   | 100.9  | 82     | 83.9   |
| C6ORF145 | 127.7  | 128.7  | 82.4   | 83.9   | 73.7   | 79.5   | 122.1  | 166.2  |
| C6ORF146 | 80.2   | 91.7   | 94.6   | 84     | 74.4   | 87     | 80.1   | 78.8   |
| C6ORF148 | 258.9  | 317.9  | 217.9  | 162    | 139.5  | 171.3  | 243.5  | 356.6  |
| C6ORF149 | 239.5  | 296.2  | 146    | 165.8  | 149.7  | 177.9  | 220.6  | 318.9  |
| C6ORF15  | 98.5   | 99.4   | 90     | 82.1   | 78.3   | 81.3   | 88     | 97.8   |
| C6ORF150 | 445.8  | 603.8  | 187.7  | 192.4  | 166.7  | 149    | 339.9  | 477.1  |
| C6ORF151 | 114.4  | 127.1  | 90.4   | 107.3  | 105.3  | 107.6  | 115.9  | 172.4  |
| C6ORF152 | 124.1  | 147.1  | 98.2   | 104.8  | 91.5   | 101.5  | 118    | 142    |
| C6ORF153 | 3266.6 | 4208   | 885.9  | 862.9  | 704.8  | 897    | 2892.6 | 2975.5 |
| C6ORF154 | 104.4  | 113.5  | 84.4   | 79.3   | 82.7   | 82.2   | 101.9  | 121.7  |

|          |         |         |         |         |         |         |         |         |
|----------|---------|---------|---------|---------|---------|---------|---------|---------|
| C6ORF157 | 164.2   | 181.9   | 112.3   | 101     | 97.7    | 111.6   | 142.5   | 259.1   |
| C6ORF159 | 96.7    | 108.9   | 109.9   | 99.2    | 97      | 92.6    | 92.7    | 91      |
| C6ORF162 | 215.6   | 293.1   | 171.8   | 204.8   | 167.2   | 252.6   | 178.6   | 243.9   |
| C6ORF162 | 215.4   | 287.3   | 146.5   | 179     | 165     | 212.4   | 170.5   | 219.1   |
| C6ORF165 | 108.2   | 124.5   | 96.1    | 94.3    | 87.6    | 101.7   | 112     | 122.9   |
| C6ORF165 | 82.2    | 97.2    | 96.6    | 86.9    | 84.3    | 86.5    | 91.2    | 90.3    |
| C6ORF165 | 89.4    | 107.8   | 105.6   | 105.5   | 99.7    | 103.6   | 93.5    | 100.1   |
| C6ORF166 | 1221    | 1497.4  | 1156.4  | 1173.8  | 814.5   | 1394.8  | 1534.4  | 3842.7  |
| C6ORF167 | 321.8   | 484.3   | 159.8   | 141.7   | 130.2   | 163.2   | 292.9   | 499.3   |
| C6ORF168 | 94.9    | 106.9   | 104.9   | 83.4    | 84.8    | 90.2    | 96.4    | 100.3   |
| C6ORF170 | 288.4   | 337.9   | 215.5   | 237.9   | 225.1   | 245.9   | 282.8   | 338.4   |
| C6ORF173 | 2684.3  | 2890.6  | 1229.3  | 1098    | 810.7   | 1169.4  | 2834.7  | 4001.1  |
| C6ORF174 | 83.9    | 84.1    | 109.9   | 104.2   | 99.7    | 101.1   | 79.6    | 80.9    |
| C6ORF182 | 135.6   | 157     | 118.7   | 108.9   | 102     | 106.4   | 130.3   | 170.1   |
| C6ORF188 | 74.8    | 77.1    | 101.4   | 92.9    | 92.5    | 98.1    | 77.6    | 87.6    |
| C6ORF190 | 117.4   | 121.9   | 99.4    | 98.5    | 124.1   | 112     | 117     | 120.7   |
| C6ORF191 | 96.9    | 121.2   | 87      | 92.3    | 80.7    | 85.4    | 99.6    | 111.4   |
| C6ORF192 | 74.4    | 90.2    | 102.3   | 84.8    | 84.4    | 83.9    | 72      | 82.1    |
| C6ORF194 | 82.3    | 85.4    | 94.9    | 76.1    | 77.3    | 77.6    | 82.2    | 86.9    |
| C6ORF195 | 84.8    | 98.3    | 97.5    | 100.3   | 95.3    | 87.7    | 87.7    | 98.6    |
| C6ORF199 | 89.6    | 98      | 91.3    | 87.7    | 78.2    | 93.5    | 87.8    | 100.6   |
| C6ORF201 | 82.2    | 98.6    | 99.2    | 80.1    | 86.1    | 94.8    | 87      | 97.6    |
| C6ORF203 | 283.5   | 337.9   | 136     | 119.2   | 112.8   | 130     | 251.6   | 463.7   |
| C6ORF204 | 120.2   | 138.9   | 96.8    | 103.9   | 103     | 102.8   | 140.6   | 128     |
| C6ORF204 | 150.5   | 185.6   | 99.7    | 114.5   | 91      | 94.7    | 153.9   | 204.4   |
| C6ORF205 | 289.1   | 350.4   | 132.4   | 111.9   | 110.7   | 129.3   | 254     | 430.8   |
| C6ORF205 | 94.4    | 97.7    | 96.5    | 84.6    | 94.9    | 97.6    | 90.8    | 93.4    |
| C6ORF206 | 80      | 88.1    | 86.1    | 85.5    | 84.1    | 91.2    | 69.6    | 85.7    |
| C6ORF208 | 121.1   | 129.5   | 101.7   | 89.5    | 90.5    | 91.8    | 107.4   | 122.6   |
| C6ORF21  | 123.5   | 134.3   | 96.1    | 89.4    | 94.5    | 89.6    | 113.1   | 120.3   |
| C6ORF211 | 187     | 215.5   | 121.3   | 141.9   | 111.2   | 150.2   | 195.2   | 285.1   |
| C6ORF213 | 95.1    | 109.6   | 107.8   | 103     | 89.8    | 93.8    | 95.3    | 96.5    |
| C6ORF25  | 115.1   | 144     | 131     | 118.6   | 101.7   | 109.9   | 112.2   | 126.4   |
| C6ORF25  | 89.6    | 104.6   | 93.7    | 89.7    | 91.2    | 96.5    | 86.4    | 95.2    |
| C6ORF25  | 128.3   | 134.9   | 102.9   | 83.5    | 83.2    | 87.9    | 118.9   | 141.8   |
| C6ORF25  | 94.7    | 108.3   | 89.9    | 85.9    | 85.2    | 87.3    | 102.8   | 109.6   |
| C6ORF26  | 248.6   | 258     | 167.5   | 197.1   | 205.3   | 324.7   | 178.7   | 218.3   |
| C6ORF27  | 96.1    | 113.9   | 100     | 101     | 104.5   | 93.5    | 90.6    | 112.2   |
| C6ORF32  | 102.3   | 109.4   | 94      | 98      | 86.3    | 88.1    | 89.6    | 88.8    |
| C6ORF35  | 119.7   | 128.4   | 90.6    | 100.2   | 79.3    | 94.5    | 121.7   | 140.9   |
| C6ORF47  | 556.5   | 737.6   | 247.8   | 287     | 310.2   | 305.2   | 485.6   | 444.7   |
| C6ORF48  | 152.1   | 191.5   | 123.3   | 102.4   | 100.5   | 110     | 163.7   | 155.1   |
| C6ORF48  | 14402.4 | 17704.9 | 11827.8 | 12646.7 | 10498.1 | 12360.7 | 14481.4 | 18019.1 |
| C6ORF49  | 11879.2 | 14474.7 | 5476.9  | 3566.6  | 3103.7  | 5279.7  | 10349.9 | 11845.6 |
| C6ORF51  | 92.7    | 107.4   | 87.2    | 86.9    | 84      | 82.8    | 97.4    | 108.2   |
| C6ORF55  | 580.6   | 737.2   | 505.3   | 676.8   | 478.4   | 870.2   | 436.5   | 641     |
| C6ORF57  | 912.5   | 1150    | 514.4   | 500.8   | 425     | 417.7   | 768.6   | 1079.3  |
| C6ORF59  | 117.8   | 132.2   | 83.5    | 97.5    | 95.4    | 106.7   | 121.5   | 141.6   |
| C6ORF60  | 171.2   | 222.2   | 179.2   | 175.4   | 174.3   | 239.7   | 177.3   | 197.1   |
| C6ORF62  | 84.8    | 106.1   | 102     | 94.7    | 80.1    | 91.7    | 92.1    | 94.6    |



|          |        |        |        |        |        |        |        |        |
|----------|--------|--------|--------|--------|--------|--------|--------|--------|
| C6ORF64  | 319.3  | 413.6  | 224.3  | 253.3  | 242.9  | 245.5  | 278.5  | 247.1  |
| C6ORF65  | 133.4  | 157.8  | 158.7  | 162.2  | 141.3  | 194.4  | 183.9  | 297.4  |
| C6ORF66  | 597.9  | 608.2  | 209    | 197    | 137.7  | 201.5  | 548.1  | 933.7  |
| C6ORF69  | 926.3  | 1140.9 | 912.1  | 1096.9 | 835.3  | 1171.7 | 928.2  | 1496.3 |
| C6ORF70  | 556.4  | 794.7  | 423.2  | 535.9  | 481.5  | 774.5  | 444    | 721.8  |
| C6ORF71  | 66.2   | 82.6   | 94.3   | 89.3   | 79.8   | 88.1   | 77.5   | 73.2   |
| C6ORF72  | 484    | 677.2  | 167.3  | 126.4  | 118    | 133.7  | 405.2  | 691.1  |
| C6ORF75  | 78.2   | 86.5   | 89.5   | 82.5   | 76     | 81     | 70.6   | 95.3   |
| C6ORF75  | 85.7   | 92.2   | 91.3   | 86.9   | 85.8   | 94.3   | 87.5   | 87.6   |
| C6ORF75  | 953.1  | 1286.3 | 544.7  | 532.4  | 397.1  | 853.5  | 658.3  | 1013.5 |
| C6ORF78  | 87.4   | 93.2   | 103.9  | 91.5   | 87.6   | 93.7   | 93.9   | 100.3  |
| C6ORF79  | 586    | 644.1  | 406.5  | 369.7  | 257.7  | 355.8  | 514.6  | 1010.8 |
| C6ORF81  | 94.6   | 120.2  | 92.7   | 98.6   | 90.4   | 91     | 101.5  | 112.3  |
| C6ORF84  | 231.2  | 247.1  | 187.8  | 183.9  | 183.1  | 294.7  | 177.6  | 243.8  |
| C6ORF85  | 95.8   | 99.5   | 101.2  | 104.8  | 99.3   | 101.8  | 92.3   | 103.3  |
| C6ORF89  | 308.1  | 434.7  | 241.8  | 205.9  | 177.7  | 244.4  | 231.2  | 395.6  |
| C6ORF96  | 420.8  | 497.3  | 217.2  | 224.4  | 171.5  | 244.8  | 353.5  | 590.9  |
| C7       | 96.5   | 110.2  | 79.3   | 73.6   | 68.2   | 83.8   | 95.1   | 106.1  |
| C7ORF10  | 116.9  | 136.3  | 112.9  | 103    | 94.7   | 98.5   | 122.1  | 139.1  |
| C7ORF11  | 243.9  | 249.8  | 149.5  | 173.5  | 120.1  | 150.4  | 234    | 484.7  |
| C7ORF16  | 87.1   | 96.4   | 101.6  | 89.3   | 87.9   | 98.3   | 88.7   | 87.3   |
| C7ORF20  | 546.6  | 696.9  | 439.4  | 369.5  | 365.5  | 443.6  | 484.1  | 626.5  |
| C7ORF20  | 261    | 348.6  | 166    | 168.2  | 154.6  | 145.1  | 210.4  | 247.7  |
| C7ORF21  | 778.5  | 993.5  | 881.8  | 706.3  | 556.8  | 775.9  | 807.9  | 1672   |
| C7ORF24  | 2816.9 | 3298.4 | 1201.1 | 876.3  | 781.8  | 1459.3 | 1849.2 | 2862.2 |
| C7ORF25  | 329.4  | 484.2  | 211.7  | 182.3  | 184.3  | 227.2  | 270.4  | 414.6  |
| C7ORF26  | 572    | 635.8  | 690.7  | 520.8  | 426.8  | 614.9  | 446.5  | 1034.4 |
| C7ORF27  | 1817.8 | 2033.5 | 1013.2 | 810.7  | 628.8  | 837.8  | 1277   | 1004.7 |
| C7ORF28A | 210.8  | 309.7  | 151.1  | 127    | 118.7  | 121.2  | 197.5  | 205.8  |
| C7ORF28B | 1188.1 | 1468.8 | 698.4  | 648.5  | 538.9  | 810.2  | 1118.6 | 1663.3 |
| C7ORF29  | 124.2  | 126.3  | 111.3  | 111.9  | 98.3   | 120    | 116.2  | 120.9  |
| C7ORF30  | 3814.2 | 4874   | 3376.6 | 3061   | 2102.8 | 2638.2 | 3975.6 | 5258   |
| C7ORF31  | 85.6   | 90.3   | 97.8   | 94.9   | 86.2   | 88.4   | 87.2   | 99.2   |
| C7ORF33  | 75.1   | 86.6   | 102.8  | 86.4   | 86.6   | 94.8   | 82.5   | 86.3   |
| C7ORF34  | 81.1   | 97.2   | 85.1   | 87.3   | 81     | 86.3   | 91.8   | 93.6   |
| C7ORF36  | 432.9  | 494.9  | 202.7  | 202.4  | 146.1  | 226.8  | 426.8  | 739.2  |
| C7ORF44  | 2066.3 | 2487.9 | 1229.3 | 1484.3 | 1220.1 | 1696   | 1845.6 | 2153.3 |
| C7ORF9   | 97.9   | 108    | 91.3   | 84.3   | 86.5   | 94.4   | 95.7   | 112.8  |
| C8A      | 90.6   | 93.1   | 91.4   | 83.1   | 76.3   | 91.5   | 103.6  | 93.9   |
| C8B      | 83.9   | 88.5   | 90.4   | 76.4   | 83     | 91.5   | 89.2   | 94.2   |
| C8G      | 125.1  | 139.7  | 105.8  | 90.1   | 90.8   | 100.7  | 122.2  | 127.5  |
| C8ORF1   | 646.3  | 832.6  | 242.4  | 222.1  | 199.1  | 323.2  | 534.7  | 914.9  |
| C8ORF13  | 103.6  | 105.6  | 94.7   | 79.1   | 78.5   | 101.2  | 103.2  | 108.5  |
| C8ORF15  | 87.8   | 121    | 99     | 89.2   | 90     | 94.1   | 96.9   | 96.1   |
| C8ORF22  | 86.7   | 90.2   | 92     | 93.7   | 87.9   | 92.1   | 88.2   | 86.3   |
| C8ORF30A | 93.9   | 131.3  | 87.6   | 92.6   | 85.2   | 84.3   | 108.6  | 138.1  |
| C8ORF31  | 93.7   | 116.9  | 108.9  | 92.2   | 88.6   | 82.1   | 103.1  | 117.2  |
| C8ORF32  | 664.5  | 855.9  | 439.1  | 286.6  | 220.4  | 300.7  | 572.1  | 915.7  |
| C8ORF33  | 1858.6 | 2413.3 | 1070.6 | 880.9  | 596.5  | 837.9  | 1645.1 | 1802.7 |
| C8ORF34  | 115.6  | 125.8  | 144.4  | 125.7  | 125.9  | 117.7  | 116.3  | 103.2  |

|           |        |        |        |        |        |        |        |        |
|-----------|--------|--------|--------|--------|--------|--------|--------|--------|
| C8ORF35   | 2411.1 | 2834.1 | 1376.7 | 1097.3 | 988.4  | 1785   | 1800   | 2647.6 |
| C8ORF36   | 729.5  | 949.8  | 545.7  | 406.9  | 432.2  | 584    | 702.5  | 725.3  |
| C8ORF37   | 3914.2 | 4581.5 | 1629.1 | 2478.5 | 2855.7 | 1743.4 | 3588.3 | 4595.7 |
| C8ORF38   | 913.6  | 1039.9 | 400.1  | 298.1  | 221.4  | 399.6  | 793.3  | 1445   |
| C8ORF4    | 88.1   | 100.6  | 83.9   | 79.8   | 73.2   | 89.9   | 85.5   | 113.1  |
| C8ORF40   | 3694.6 | 4459.8 | 1735.2 | 1362   | 932.9  | 1241   | 3099   | 3507.5 |
| C8ORF41   | 522    | 599.7  | 247.6  | 185.5  | 168.7  | 203    | 450.6  | 592.7  |
| C8ORF42   | 78     | 89.7   | 81.4   | 86.6   | 88.8   | 92.4   | 86.5   | 76.6   |
| C8ORF44   | 145.7  | 165.4  | 132.8  | 130.1  | 132.8  | 115.2  | 127.2  | 149.5  |
| C8ORF45   | 1765.3 | 1776.5 | 515.1  | 691.5  | 838.9  | 666.5  | 1617.3 | 2325.3 |
| C8ORF46   | 78.6   | 78.3   | 102.3  | 104.7  | 83.5   | 88.8   | 79.9   | 86.3   |
| C8ORF47   | 127.7  | 163.9  | 116.6  | 83.6   | 90.3   | 92     | 142.1  | 171.5  |
| C8ORF48   | 111.5  | 134.1  | 98.9   | 89.7   | 91.5   | 92.7   | 118.1  | 121.3  |
| C8ORF49   | 74.4   | 92.5   | 89.4   | 90.4   | 81.7   | 76.9   | 82.8   | 83.8   |
| C8ORF52   | 859.4  | 988.2  | 260.6  | 241.2  | 195.3  | 248.2  | 795    | 1453.6 |
| C8ORF53   | 184.3  | 184.1  | 136.6  | 114.8  | 117    | 124.7  | 189.2  | 308.8  |
| C8ORF55   | 1182.5 | 1627.2 | 643.5  | 461.4  | 377.8  | 418.9  | 914    | 608.5  |
| C8ORF58   | 122.1  | 147.2  | 115.8  | 109.8  | 101.4  | 115.5  | 138.4  | 171.7  |
| C8ORF61   | 101.7  | 106.6  | 115.2  | 113.5  | 103.1  | 115.9  | 102.9  | 148.7  |
| C8ORF70   | 127.1  | 157.1  | 123.6  | 96     | 90.8   | 98.9   | 144    | 167.8  |
| C8ORF72   | 146.6  | 192.9  | 124.2  | 118.7  | 118    | 120.8  | 127.4  | 151.7  |
| C8ORF74   | 78.6   | 84.5   | 102.4  | 80.2   | 88.8   | 88.7   | 79.8   | 82.2   |
| C8ORF76   | 2483.9 | 3006.2 | 1826   | 1430.5 | 1069   | 1579.3 | 2721   | 3188.7 |
| C8ORFK32  | 101.6  | 136.2  | 98.8   | 93.5   | 94.2   | 84.4   | 112.3  | 116.4  |
| C8ORFK36  | 111.1  | 142    | 94.2   | 81.4   | 87.1   | 82.3   | 114.9  | 113.9  |
| C8ORFK36  | 73.2   | 88.9   | 87.8   | 91     | 85.8   | 83.5   | 80.4   | 73.9   |
| C9        | 76.8   | 89.3   | 95.8   | 85.2   | 78.7   | 89.3   | 82.8   | 90     |
| C9ORF100  | 269.4  | 330.6  | 189.9  | 106.7  | 114.5  | 136.9  | 197.3  | 164.8  |
| C9ORF100  | 562.1  | 641.7  | 287.7  | 238.1  | 161.7  | 245.8  | 421.3  | 630.4  |
| C9ORF102  | 256.7  | 288.4  | 232.9  | 263.6  | 234.9  | 321.2  | 226.9  | 304.8  |
| C9ORF103  | 605.7  | 711.8  | 486.4  | 406.3  | 327.5  | 388.1  | 485.1  | 625    |
| C9ORF106  | 113.3  | 118.9  | 113.1  | 106.4  | 106.1  | 118.2  | 92.6   | 116.2  |
| C9ORF100! | 493.8  | 622.5  | 263.3  | 211.6  | 165.5  | 326.2  | 374    | 629.3  |
| C9ORF11   | 77.9   | 84.6   | 105.4  | 93.2   | 87.5   | 84.5   | 80.8   | 84.1   |
| C9ORF111  | 406.3  | 410.7  | 392.3  | 432.5  | 546.5  | 440.2  | 314.4  | 255.3  |
| C9ORF112  | 178.8  | 214.5  | 161.4  | 131    | 118.1  | 133.1  | 162    | 201.2  |
| C9ORF114  | 1181.5 | 1642.3 | 932.6  | 532.2  | 414    | 498.6  | 949.6  | 796.6  |
| C9ORF116  | 396.7  | 518.5  | 275.5  | 156.5  | 149.7  | 155.7  | 321    | 350.6  |
| C9ORF116  | 385.4  | 535.4  | 252.4  | 173.4  | 136.2  | 173.8  | 285.9  | 383.3  |
| C9ORF117  | 83.5   | 120.4  | 75.9   | 85.9   | 80.6   | 74.7   | 106.9  | 106.6  |
| C9ORF121  | 88.2   | 102.5  | 90.3   | 88.9   | 82.9   | 85.2   | 85.9   | 82.8   |
| C9ORF123  | 223.4  | 243.5  | 182.8  | 220.4  | 166.9  | 218.4  | 172.1  | 232.4  |
| C9ORF125  | 238.8  | 291.8  | 193.4  | 142.9  | 113    | 167.5  | 183.9  | 269    |
| C9ORF126  | 102.9  | 116.4  | 100.5  | 86.2   | 84.1   | 98.1   | 95.4   | 122.5  |
| C9ORF127  | 206    | 242.3  | 178.4  | 158.1  | 128.1  | 166.7  | 187.9  | 193.5  |
| C9ORF127  | 121.7  | 134.1  | 89.4   | 75.3   | 77.6   | 85.9   | 119.7  | 163.4  |
| C9ORF128  | 95.7   | 108.1  | 94.3   | 91.4   | 94     | 90.6   | 88.6   | 104.2  |
| C9ORF132  | 122.3  | 121.3  | 100.5  | 92.7   | 85.4   | 96.9   | 124    | 143.9  |
| C9ORF138  | 89.4   | 89     | 90.9   | 96.4   | 97.4   | 86     | 84.3   | 93.9   |
| C9ORF140  | 1056.6 | 1250.7 | 1849.3 | 835.3  | 734.3  | 1265.6 | 979.7  | 2447   |

|          |        |        |        |        |        |        |        |        |
|----------|--------|--------|--------|--------|--------|--------|--------|--------|
| C9ORF142 | 3833.2 | 4655.8 | 4028.1 | 2075.9 | 1794.7 | 2548.8 | 3145.9 | 4764.1 |
| C9ORF150 | 95.3   | 93.2   | 105.1  | 91.6   | 80.5   | 83.5   | 89.3   | 96.7   |
| C9ORF152 | 98.5   | 111.6  | 81.4   | 82     | 78.4   | 80.9   | 99     | 108.3  |
| C9ORF153 | 83.8   | 93     | 88.3   | 74.9   | 78.8   | 80.3   | 85.6   | 91.2   |
| C9ORF156 | 506.3  | 700.7  | 440.6  | 314.7  | 282.2  | 357.2  | 512.6  | 701.1  |
| C9ORF157 | 83.7   | 90     | 81.5   | 72     | 79.5   | 85.6   | 81.5   | 87.8   |
| C9ORF16  | 205.3  | 249.9  | 146.9  | 128.8  | 113    | 117.6  | 164.5  | 213.3  |
| C9ORF166 | 112.5  | 132.5  | 87     | 88     | 80.7   | 92.3   | 110.3  | 121.1  |
| C9ORF18  | 87.7   | 81.1   | 93     | 89.6   | 81.3   | 83     | 91.4   | 85     |
| C9ORF19  | 2309.7 | 3095.3 | 1765.6 | 1442.7 | 1057.6 | 1473.7 | 1987.6 | 2073.7 |
| C9ORF21  | 427.3  | 522.2  | 241.8  | 175.5  | 165.5  | 281.5  | 406.8  | 608.7  |
| C9ORF23  | 389.2  | 513.8  | 249.3  | 179.4  | 147.1  | 164.8  | 298.4  | 395.1  |
| C9ORF23  | 262.2  | 298.1  | 206.5  | 126.8  | 126.5  | 128.6  | 182.4  | 211.9  |
| C9ORF23  | 1013.1 | 1295.4 | 791.2  | 483.7  | 356.3  | 511.2  | 946    | 1029.4 |
| C9ORF24  | 100.6  | 115.8  | 118.5  | 103.4  | 102.6  | 105.6  | 98.8   | 97     |
| C9ORF24  | 117.9  | 123.9  | 118.5  | 108.8  | 103.4  | 110.1  | 119.2  | 110.8  |
| C9ORF24  | 83.9   | 91.5   | 91.2   | 81.8   | 86.1   | 109.5  | 80.3   | 84.9   |
| C9ORF25  | 127.8  | 117.2  | 114.2  | 118.3  | 114.9  | 119    | 123.4  | 141.9  |
| C9ORF28  | 394.6  | 452.3  | 634.3  | 687.5  | 532.7  | 812.6  | 380.2  | 782    |
| C9ORF3   | 102.9  | 120.6  | 101.5  | 101.3  | 97.4   | 98.1   | 109.4  | 108.8  |
| C9ORF30  | 507.3  | 616.4  | 220.6  | 178.1  | 161.4  | 263.5  | 488.1  | 888.4  |
| C9ORF32  | 535.7  | 655.4  | 293.6  | 194.9  | 183.2  | 273.6  | 461.4  | 527.5  |
| C9ORF36  | 72.9   | 79.2   | 96.7   | 89.2   | 92.3   | 95.5   | 74.7   | 83.5   |
| C9ORF37  | 278.9  | 308.8  | 143.5  | 141.9  | 137.7  | 133.1  | 176.6  | 196.9  |
| C9ORF39  | 257.2  | 336.3  | 222.8  | 231    | 207    | 350.2  | 231.7  | 274.4  |
| C9ORF4   | 86.6   | 105.5  | 93.1   | 81.4   | 82.2   | 90.8   | 82.9   | 94.9   |
| C9ORF40  | 784.3  | 952.2  | 456.1  | 274.9  | 215.9  | 332.5  | 609.1  | 733.6  |
| C9ORF41  | 95.8   | 105.3  | 110.1  | 99.1   | 90.4   | 97.6   | 96.1   | 94.4   |
| C9ORF43  | 127.4  | 152.5  | 95.8   | 82.8   | 74.5   | 88.6   | 121.9  | 144.4  |
| C9ORF45  | 184.6  | 254.3  | 189.3  | 275.3  | 271.5  | 347.9  | 167.8  | 172.6  |
| C9ORF46  | 1909.3 | 2551.9 | 1449.2 | 1631   | 1157.4 | 1838   | 1515.4 | 2645.3 |
| C9ORF47  | 102.4  | 115.9  | 90.8   | 81.7   | 80     | 81.6   | 104.9  | 122.2  |
| C9ORF48  | 161.5  | 194.3  | 166.7  | 137.8  | 123.4  | 205    | 151.5  | 211.9  |
| C9ORF5   | 497.4  | 661.8  | 243.9  | 330.4  | 208    | 295.3  | 595.4  | 1700.8 |
| C9ORF50  | 103.6  | 109.9  | 98.3   | 96.5   | 91.5   | 82.3   | 100.6  | 91     |
| C9ORF52  | 84.5   | 88.8   | 91.7   | 82.8   | 77.2   | 78     | 85.7   | 94.9   |
| C9ORF58  | 111.3  | 110.7  | 96     | 97.6   | 81.3   | 85     | 104.7  | 122.3  |
| C9ORF58  | 102.3  | 102    | 87.5   | 81.2   | 81.1   | 79.3   | 99.6   | 111.2  |
| C9ORF6   | 634.2  | 784.9  | 501.9  | 440.9  | 364.8  | 634.3  | 484.1  | 1031.7 |
| C9ORF61  | 80.8   | 100.3  | 108.4  | 96.8   | 88.6   | 79.6   | 88.3   | 109    |
| C9ORF64  | 326.2  | 471.8  | 237.4  | 232.6  | 201.8  | 309.8  | 274.8  | 412.8  |
| C9ORF66  | 464.4  | 590    | 320.7  | 327.6  | 267.9  | 296.3  | 339.3  | 400.5  |
| C9ORF68  | 91     | 92.3   | 88.5   | 93.4   | 78.3   | 85.2   | 83.6   | 87.2   |
| C9ORF7   | 128.7  | 151.7  | 125    | 123.7  | 123.5  | 156.6  | 122.1  | 146.6  |
| C9ORF71  | 88.6   | 78.9   | 83.5   | 88.2   | 80.3   | 86.3   | 85.3   | 77.8   |
| C9ORF72  | 86.6   | 93.3   | 101.3  | 88.6   | 92.3   | 90.1   | 93.3   | 100.4  |
| C9ORF72  | 74.1   | 88.5   | 84.8   | 81.4   | 82.3   | 87.9   | 79.6   | 87.8   |
| C9ORF72  | 107.1  | 130.3  | 94.8   | 94     | 91.3   | 95.5   | 113    | 126.2  |
| C9ORF74  | 2450.6 | 2949.1 | 1800.8 | 1148.2 | 898.5  | 1245.9 | 2106.3 | 2070   |
| C9ORF75  | 210.9  | 250.2  | 163.6  | 121.9  | 119.4  | 143.3  | 195.6  | 223    |

|         |        |         |        |        |        |        |         |         |
|---------|--------|---------|--------|--------|--------|--------|---------|---------|
| C9ORF77 | 444.2  | 597.1   | 215.1  | 118.9  | 110.2  | 133.9  | 338     | 464.9   |
| C9ORF77 | 108.6  | 138.4   | 122.3  | 110.7  | 109.3  | 116    | 110.4   | 129.5   |
| C9ORF77 | 424.5  | 557.1   | 215.1  | 174.3  | 164.7  | 181.5  | 398.3   | 765.4   |
| C9ORF78 | 3827.6 | 4772.3  | 2342.6 | 2320.4 | 1638.7 | 3016.7 | 3114.8  | 4547    |
| C9ORF79 | 107.8  | 110     | 108.5  | 97.8   | 96.4   | 92.5   | 99.8    | 114.5   |
| C9ORF80 | 5620.8 | 6020.8  | 2255.6 | 4356.3 | 4012.5 | 2749.9 | 5292.8  | 5707.7  |
| C9ORF82 | 288.7  | 386     | 195.9  | 188.8  | 137    | 209.5  | 229.9   | 312.5   |
| C9ORF84 | 110.9  | 97.3    | 116.1  | 97.9   | 98.8   | 106.6  | 91.2    | 85.8    |
| C9ORF84 | 77     | 78.5    | 90.2   | 85.4   | 83.6   | 82.2   | 72.5    | 84.3    |
| C9ORF85 | 225.3  | 263.8   | 120.7  | 117.7  | 90.5   | 111.4  | 232.6   | 443.8   |
| C9ORF85 | 127.4  | 151.4   | 88.1   | 93.2   | 79.9   | 87.9   | 146.2   | 174     |
| C9ORF86 | 609.7  | 781.2   | 765.6  | 682.1  | 612.3  | 1159.8 | 562.4   | 952.8   |
| C9ORF88 | 1642.5 | 2265.6  | 1073.1 | 642.8  | 443.7  | 552    | 1498.3  | 1444    |
| C9ORF89 | 553.3  | 697.8   | 463.2  | 300    | 258.5  | 362.9  | 709.1   | 1033.4  |
| C9ORF9  | 113.9  | 142.7   | 108.8  | 101.2  | 102.2  | 96.3   | 104.2   | 106.3   |
| C9ORF90 | 682.3  | 831.9   | 559.2  | 436.8  | 381.5  | 424.2  | 652.2   | 599.8   |
| C9ORF91 | 421.4  | 591     | 376.9  | 254.1  | 222.2  | 260.9  | 405.2   | 419.4   |
| C9ORF93 | 118.5  | 139.4   | 127.4  | 115.9  | 119    | 156.3  | 114.5   | 113.9   |
| C9ORF95 | 223.8  | 226.6   | 112.3  | 127.7  | 116.5  | 130.7  | 206     | 280.7   |
| C9ORF96 | 77.9   | 87.4    | 96.1   | 86     | 88.9   | 89.4   | 86.3    | 102.9   |
| C9ORF97 | 147.9  | 190.2   | 164.8  | 139    | 130.1  | 135.6  | 130.9   | 168.3   |
| C9ORF98 | 112    | 117.3   | 96.1   | 89     | 81.8   | 100.8  | 104.9   | 135.6   |
| CA1     | 84.8   | 98.8    | 88.5   | 101.7  | 88     | 82.7   | 87.7    | 96.5    |
| CA10    | 90.6   | 90.1    | 84.7   | 83.8   | 81.6   | 80.3   | 90      | 102.8   |
| CA11    | 279.8  | 330.5   | 194.5  | 107    | 118.6  | 116.1  | 237.4   | 303.2   |
| CA12    | 92.8   | 99.4    | 97.2   | 81.5   | 83     | 92     | 97.4    | 96.8    |
| CA12    | 79.5   | 85.9    | 83.5   | 79.1   | 64.9   | 79.2   | 76.1    | 89.1    |
| CA13    | 158    | 204.1   | 125.6  | 95     | 100.1  | 98.2   | 132     | 157.7   |
| CA14    | 86.8   | 97.3    | 92.3   | 93.4   | 87.4   | 83.2   | 92.1    | 99.6    |
| CA2     | 17262  | 18585.3 | 8786.3 | 6970.2 | 3838.9 | 6598.2 | 15256.1 | 21638.2 |
| CA3     | 80     | 88.6    | 100.5  | 95.6   | 91.3   | 100.2  | 75.5    | 83.3    |
| CA4     | 102.4  | 124.9   | 116.5  | 107.5  | 100.4  | 105.8  | 108.6   | 96.5    |
| CA5A    | 85     | 89.7    | 87.5   | 85.7   | 86.6   | 79.5   | 86.5    | 82.8    |
| CA5B    | 142.5  | 165.5   | 135.4  | 118.7  | 100.6  | 128    | 139.8   | 206.8   |
| CA6     | 126.3  | 132.2   | 113.5  | 104    | 107    | 104    | 112.5   | 126.3   |
| CA7     | 102.3  | 125.9   | 99.4   | 82     | 83.2   | 85.2   | 100.6   | 116.8   |
| CA7     | 94     | 96      | 99.4   | 91.6   | 85.5   | 88.4   | 80.2    | 87.2    |
| CA8     | 86.3   | 92.7    | 87     | 95.2   | 88.4   | 92.1   | 85.3    | 101.5   |
| CA9     | 104    | 133.8   | 96.7   | 101    | 92.1   | 90.7   | 111.4   | 126.4   |
| CAB39   | 3791.8 | 4762    | 2715.2 | 3444.5 | 2476.7 | 4157.6 | 3432.7  | 4492.5  |
| CAB39L  | 230.2  | 283.1   | 176.8  | 161.7  | 160.9  | 185.6  | 214.7   | 248.7   |
| CAB39L  | 73.2   | 88.7    | 100.2  | 84.8   | 75.4   | 85     | 78.5    | 84.6    |
| CAB39L  | 143.2  | 174     | 111.4  | 88.4   | 85.9   | 102.2  | 133.4   | 147.7   |
| CABC1   | 1635.6 | 2020.7  | 1243.8 | 1073.4 | 889.8  | 1294.6 | 1581.1  | 2318.7  |
| CABIN1  | 161.4  | 184.3   | 241.2  | 206.2  | 197.9  | 225.8  | 164.2   | 260.4   |
| CABLES1 | 254.5  | 313     | 163.2  | 127.4  | 108.1  | 124.6  | 244.4   | 252.1   |
| CABLES2 | 268.1  | 362.3   | 247.3  | 200.8  | 191    | 204.8  | 262.2   | 344.7   |
| CABP1   | 93.3   | 98.1    | 80.2   | 87.1   | 88.1   | 87.6   | 108.6   | 103.3   |
| CABP1   | 81.2   | 83.9    | 92.4   | 96.3   | 98.5   | 99.5   | 83.3    | 85.1    |
| CABP1   | 80.8   | 88.9    | 92.4   | 82.1   | 77.3   | 96.4   | 84.7    | 86.6    |

|          |        |        |       |       |       |       |       |       |
|----------|--------|--------|-------|-------|-------|-------|-------|-------|
| CABP2    | 87.7   | 118.3  | 100.2 | 89.5  | 91.1  | 92.7  | 96.1  | 108.1 |
| CABP2    | 94.8   | 109.1  | 96.1  | 95.3  | 82.9  | 97.3  | 96.4  | 97.1  |
| CABP2    | 100.5  | 136.6  | 96.2  | 85.6  | 91.5  | 96.2  | 101.4 | 115.2 |
| CABP4    | 78.7   | 88.3   | 88.1  | 87.3  | 87.2  | 89    | 74.8  | 85.3  |
| CABP5    | 98.2   | 94.3   | 82    | 81.2  | 84.3  | 85    | 90.6  | 91.6  |
| CABP7    | 144.1  | 154.7  | 102.2 | 103.5 | 97.9  | 88    | 126.3 | 138.9 |
| CABYR    | 87.7   | 87.1   | 75.6  | 81.4  | 80.2  | 78.1  | 80.6  | 80.4  |
| CABYR    | 107.8  | 116.6  | 104.3 | 89.5  | 87    | 94.5  | 98.6  | 98.1  |
| CACHD1   | 113.7  | 127    | 109.6 | 94.7  | 98.3  | 112.8 | 103   | 133   |
| CACNA1A  | 78.4   | 93.2   | 87.8  | 89.4  | 76.9  | 82.1  | 84.5  | 92.6  |
| CACNA1A  | 76.4   | 94.2   | 90.4  | 80.2  | 82.4  | 86.7  | 91.8  | 95    |
| CACNA1B  | 240.8  | 298    | 141.8 | 144.7 | 129.4 | 159.2 | 282.7 | 323.1 |
| CACNA1C  | 107.4  | 127.2  | 91.4  | 86.4  | 81.2  | 83    | 99.8  | 111.2 |
| CACNA1D  | 109.6  | 121.9  | 111.6 | 101.6 | 131.3 | 117.1 | 101.7 | 95.7  |
| CACNA1E  | 109.5  | 118.2  | 115.2 | 114.6 | 105.7 | 135.1 | 104.4 | 95.9  |
| CACNA1F  | 82.2   | 102.6  | 80.2  | 79.1  | 82.7  | 87.2  | 89.8  | 100.1 |
| CACNA1G  | 76.6   | 94.4   | 87.5  | 87.1  | 86.6  | 90.3  | 88.9  | 90.1  |
| CACNA1G  | 77.1   | 87     | 99.6  | 91.1  | 90    | 91.6  | 77.8  | 78.1  |
| CACNA1G  | 89.1   | 93.5   | 97.7  | 91.7  | 79.6  | 86.2  | 84.2  | 97.8  |
| CACNA1G  | 91.6   | 101.1  | 85.1  | 91.1  | 82.2  | 83.8  | 95.5  | 91.6  |
| CACNA1H  | 102.4  | 103.8  | 109.7 | 97.7  | 101.5 | 104.3 | 87.6  | 91.1  |
| CACNA1H  | 79.2   | 78.4   | 97    | 92.4  | 83.8  | 89.2  | 75    | 77.3  |
| CACNA1I  | 81.8   | 95.7   | 93.6  | 85.2  | 79.5  | 89.6  | 81.7  | 82.5  |
| CACNA1I  | 86.2   | 90.8   | 94.3  | 82.9  | 83.8  | 80.1  | 87.1  | 91.1  |
| CACNA1S  | 90.4   | 109    | 84.4  | 75.9  | 74.9  | 85.2  | 99.5  | 108.6 |
| CACNA2D1 | 97.6   | 100.1  | 87.9  | 92.2  | 88.2  | 92.8  | 86.6  | 87.4  |
| CACNA2D2 | 138.4  | 185.7  | 100   | 103.2 | 98.8  | 96.1  | 135.5 | 148.6 |
| CACNA2D2 | 94.6   | 130.4  | 108.2 | 97.3  | 91.1  | 103.3 | 93.5  | 101.5 |
| CACNA2D3 | 1124.1 | 1436.3 | 527.7 | 637.5 | 506.9 | 733.5 | 656.2 | 667.8 |
| CACNA2D4 | 124    | 151.9  | 111   | 98.2  | 93.6  | 106.2 | 117.6 | 117.6 |
| CACNA2D4 | 411.1  | 496.8  | 277.1 | 204.7 | 187.6 | 260.2 | 347   | 511.1 |
| CACNB1   | 96.1   | 111.1  | 96.7  | 100.3 | 93    | 83.3  | 111.9 | 114.1 |
| CACNB1   | 96     | 102.2  | 96.8  | 87    | 83.6  | 101.9 | 90.7  | 93.3  |
| CACNB1   | 75.9   | 74.5   | 86.6  | 89.2  | 76.4  | 85.1  | 66.8  | 77.8  |
| CACNB1   | 79     | 81.1   | 100.4 | 91.7  | 92.2  | 82.2  | 86.8  | 91    |
| CACNB2   | 76.6   | 96.2   | 100.7 | 91.3  | 92.4  | 85.1  | 82.9  | 80.2  |
| CACNB2   | 98.1   | 105.7  | 82.9  | 95.6  | 78.4  | 80.6  | 93.9  | 113.4 |
| CACNB2   | 95     | 113.1  | 88.8  | 87.5  | 79.6  | 78.5  | 97.4  | 104.7 |
| CACNB2   | 80     | 92.2   | 97    | 90    | 83.2  | 93.9  | 84.1  | 96    |
| CACNB2   | 68.2   | 87.6   | 85.9  | 79.4  | 75.7  | 81.8  | 76.5  | 81.5  |
| CACNB3   | 198.4  | 218.5  | 192.7 | 161.4 | 154.6 | 178.3 | 136.5 | 126.5 |
| CACNB4   | 122.8  | 141.1  | 105.9 | 93.9  | 98.8  | 107.1 | 123.9 | 149.1 |
| CACNB4   | 89     | 108.9  | 92.4  | 71.5  | 78.9  | 80.6  | 80.9  | 87.9  |
| CACNB4   | 90.6   | 102.1  | 88.6  | 81.4  | 87.2  | 87.4  | 85.6  | 93.4  |
| CACNG1   | 83.9   | 95.1   | 92.5  | 81.1  | 81    | 87.4  | 85    | 90.6  |
| CACNG2   | 78     | 88.4   | 99.1  | 83.4  | 90.3  | 76.7  | 87.4  | 86.7  |
| CACNG3   | 106.7  | 111.5  | 98.5  | 88.3  | 91    | 98.7  | 119   | 108   |
| CACNG4   | 115.8  | 142.6  | 94    | 101   | 99    | 98.3  | 105.7 | 116.7 |
| CACNG5   | 101.7  | 107.6  | 91.2  | 82.9  | 88.1  | 85.1  | 100.3 | 110.2 |
| CACNG5   | 99.5   | 130    | 103.4 | 92.3  | 85.6  | 93.5  | 103.6 | 115.8 |

|          |         |         |        |        |        |        |         |         |
|----------|---------|---------|--------|--------|--------|--------|---------|---------|
| CACNG5   | 91.3    | 113.9   | 87.8   | 86.3   | 74.7   | 74.5   | 102.3   | 95.3    |
| CACNG6   | 90.3    | 95.8    | 91     | 87     | 81.3   | 87.7   | 95      | 88.8    |
| CACNG6   | 83.6    | 94.3    | 93.8   | 81.2   | 87.4   | 93.4   | 83.4    | 81.8    |
| CACNG6   | 112.3   | 133.3   | 95.7   | 81.4   | 82     | 84     | 104     | 127     |
| CACNG7   | 80.9    | 91.2    | 85.1   | 86.2   | 77.3   | 79.2   | 79.9    | 77.1    |
| CACNG8   | 112.7   | 135     | 118.2  | 104.7  | 97.7   | 104.4  | 116.8   | 116.2   |
| CACYBP   | 3103.5  | 3666.7  | 1857.8 | 1115.2 | 1047.5 | 1556.8 | 2272.5  | 2546.6  |
| CACYBP   | 529.7   | 713.6   | 231.5  | 209.4  | 184.8  | 225.5  | 504     | 696.1   |
| CACYBP   | 96.3    | 102.6   | 80     | 84.1   | 78.7   | 73.9   | 101     | 113.4   |
| CAD      | 210.1   | 241.2   | 278    | 292.5  | 196.5  | 346.2  | 165.8   | 219.5   |
| CADPS    | 78.6    | 90      | 89.3   | 87.6   | 90.4   | 83.6   | 88.8    | 82.6    |
| CADPS    | 109.5   | 115.9   | 107.1  | 95.6   | 93.6   | 105.4  | 94.4    | 124.5   |
| CADPS    | 78.1    | 89.2    | 90.8   | 70.2   | 78.2   | 79.6   | 93.5    | 91.6    |
| CADPS2   | 67.8    | 88.7    | 91.2   | 91.8   | 82.5   | 95.4   | 81.1    | 86.8    |
| CADPS2   | 120.1   | 167.5   | 133.2  | 100.2  | 88.8   | 106.2  | 122.3   | 129.3   |
| CAGE1    | 103.2   | 120.5   | 116.5  | 118.3  | 104.5  | 110.7  | 111.6   | 117     |
| CALB1    | 78.7    | 98.7    | 94.9   | 95.3   | 89.2   | 88.1   | 89.5    | 102.3   |
| CALB2    | 106.7   | 130.5   | 129.4  | 106    | 111.7  | 97.9   | 113.4   | 136     |
| CALB2    | 83      | 86.3    | 92.9   | 88.8   | 77     | 79.9   | 82.4    | 87.5    |
| CALCA    | 96.6    | 102.2   | 84.8   | 87.2   | 86     | 81.2   | 98.4    | 104.9   |
| CALCA    | 98      | 107.3   | 97.3   | 102.2  | 87     | 91.6   | 93.4    | 102.5   |
| CALCA    | 73.6    | 93.1    | 79.5   | 76.1   | 86.7   | 79.6   | 75.9    | 85.9    |
| CALCB    | 82.9    | 102.5   | 106.6  | 95.7   | 83.3   | 92.5   | 93.2    | 87.4    |
| CALCOCO1 | 101.9   | 124.9   | 104.7  | 103.1  | 109.1  | 126.6  | 100.4   | 107.1   |
| CALCOCO2 | 261.7   | 342.8   | 174.1  | 231.9  | 186.1  | 216.6  | 273.1   | 307.2   |
| CALCR    | 101.6   | 109.7   | 92.8   | 95.9   | 80.6   | 86.1   | 98.8    | 110.7   |
| CALCRL   | 85.7    | 81.9    | 82.1   | 80.8   | 75.1   | 84.3   | 87.1    | 94.9    |
| CALD1    | 122.1   | 153.1   | 88.4   | 92.4   | 86.3   | 94.7   | 124.3   | 140.7   |
| CALM1    | 1539.5  | 2028.2  | 1543   | 1340.3 | 997.8  | 1756.4 | 1253.1  | 2407.3  |
| CALM2    | 14024.8 | 16461.9 | 7145.4 | 7967.3 | 5629.2 | 7235.2 | 13730.5 | 17642.2 |
| CALM3    | 11063.9 | 13497.1 | 7042.3 | 5405.1 | 4433.7 | 5071.9 | 9649.1  | 9005.2  |
| CALML3   | 94      | 98.1    | 119.4  | 103.1  | 96.2   | 97.5   | 94.2    | 94.7    |
| CALML4   | 93.5    | 127.1   | 100.1  | 87.2   | 80.3   | 89.4   | 91.1    | 97.6    |
| CALML4   | 168.6   | 160.4   | 118.6  | 107.9  | 112.8  | 127    | 173.4   | 179.4   |
| CALML4   | 1596    | 1684.8  | 757.6  | 700.2  | 651.2  | 847    | 1592.6  | 1428.8  |
| CALML4   | 418.5   | 551.4   | 293.2  | 408.7  | 347.1  | 560.2  | 348.9   | 458.3   |
| CALML5   | 143     | 171.5   | 98.2   | 89.4   | 86.1   | 89.6   | 118.6   | 154.6   |
| CALML6   | 92.9    | 98.1    | 92.1   | 85.3   | 94.4   | 91.1   | 83      | 92      |
| CALN1    | 131.1   | 165     | 91.6   | 92.5   | 89.9   | 89.5   | 138.1   | 138.2   |
| CALN1    | 265.5   | 385.2   | 196.8  | 182.1  | 150.8  | 205.4  | 279.8   | 335.8   |
| CALN1    | 85.5    | 82.3    | 110.5  | 116.8  | 113.4  | 110.8  | 78.7    | 90.8    |
| CALR     | 1692.6  | 2023.6  | 1002.6 | 1094.5 | 1018.4 | 1387.4 | 1446.8  | 2148.4  |
| CALR3    | 84.9    | 97.8    | 105.7  | 103.7  | 93.4   | 99.4   | 86.3    | 86.6    |
| CALU     | 643.4   | 827.3   | 469.7  | 544    | 359.1  | 753.8  | 555.6   | 932.9   |
| CAMK1    | 780.7   | 938.4   | 789.4  | 991.4  | 691.7  | 1119.2 | 585.2   | 879.5   |
| CAMK1D   | 227     | 313.9   | 210.6  | 142.2  | 124    | 131.6  | 196.8   | 238.1   |
| CAMK1D   | 73.6    | 85.9    | 76.6   | 85.1   | 75.9   | 82     | 73.9    | 88.2    |
| CAMK1D   | 88.8    | 98.1    | 93.1   | 79.4   | 88.7   | 88.1   | 86.9    | 87.6    |
| CAMK1G   | 107.8   | 136.1   | 96.1   | 94.2   | 87.1   | 98.5   | 105.8   | 131.5   |
| CAMK2A   | 89.7    | 107.6   | 89.3   | 84.7   | 82.9   | 86     | 88.9    | 105.9   |

|          |         |         |         |        |         |         |         |         |
|----------|---------|---------|---------|--------|---------|---------|---------|---------|
| CAMK2B   | 103.8   | 121.6   | 99.4    | 90.4   | 90.7    | 102.8   | 102.4   | 134     |
| CAMK2B   | 147.2   | 170.8   | 194     | 191.4  | 171.8   | 170.2   | 134.5   | 213     |
| CAMK2B   | 133.8   | 134.3   | 125.2   | 123.3  | 95.8    | 115.2   | 120.6   | 125     |
| CAMK2B   | 108.1   | 136.9   | 98.9    | 83.1   | 84.4    | 80.9    | 107.8   | 123.1   |
| CAMK2D   | 310.8   | 399.1   | 181.6   | 124.2  | 99.6    | 139.1   | 242.8   | 308.2   |
| CAMK2D   | 233.7   | 312.7   | 131.2   | 113.4  | 108.8   | 124.2   | 201.1   | 242.6   |
| CAMK2D   | 97.8    | 117.3   | 101.7   | 96.6   | 94.3    | 96.5    | 100     | 114.8   |
| CAMK2D   | 86.5    | 98.8    | 83.8    | 77.4   | 75.2    | 81.1    | 84.9    | 95      |
| CAMK2G   | 300.7   | 335.3   | 192     | 210    | 207.4   | 262.3   | 260.5   | 326     |
| CAMK2G   | 159.1   | 193.4   | 107.8   | 107.3  | 105.5   | 121.4   | 167.2   | 192.5   |
| CAMK2N1  | 94.2    | 103     | 99.1    | 80.2   | 78.6    | 79      | 102.8   | 103.2   |
| CAMK2N2  | 88      | 97.9    | 97.1    | 86.7   | 85      | 88.7    | 83.6    | 99.3    |
| CAMK4    | 84.9    | 92      | 88.2    | 90     | 73.9    | 73.7    | 92.3    | 92.6    |
| CAMKK1   | 99      | 107.3   | 100.2   | 89.4   | 91.6    | 89.4    | 97.8    | 112.5   |
| CAMKK1   | 94.2    | 89.7    | 97.6    | 94.5   | 95.1    | 92.9    | 91.5    | 98.8    |
| CAMKK2   | 133.1   | 135.2   | 118.3   | 99.1   | 95.7    | 98.2    | 109     | 130.7   |
| CAMKK2   | 133.4   | 158.1   | 103.9   | 96.7   | 93.4    | 92      | 124.6   | 157.6   |
| CAMKV    | 178.4   | 218.6   | 123.5   | 209.4  | 248.9   | 308.9   | 152.5   | 160.9   |
| CAMP     | 231.7   | 236.8   | 198.4   | 353    | 231.9   | 355.2   | 195.4   | 236.8   |
| CAMSAP1  | 517.4   | 762.6   | 475.1   | 574.3  | 529.8   | 741     | 558.3   | 662.5   |
| CAMSAP1L | 385.5   | 444.7   | 245.1   | 151.4  | 143.8   | 211     | 249.1   | 340     |
| CAMTA1   | 186     | 205.8   | 140.7   | 132.5  | 130.2   | 157.4   | 156.8   | 292.4   |
| CAMTA2   | 77.3    | 97.4    | 86.9    | 83.5   | 74.3    | 84      | 69.6    | 87.6    |
| CAND1    | 248.8   | 300.5   | 119.4   | 139    | 108.6   | 147.5   | 226.5   | 345.6   |
| CAND2    | 89.2    | 91.1    | 100.1   | 100.1  | 96.1    | 87.1    | 85      | 85.2    |
| CAND2    | 267.6   | 343.1   | 180.8   | 163.7  | 143.5   | 158     | 228.4   | 244.1   |
| CANT1    | 401.9   | 515     | 516.1   | 601.7  | 449.2   | 845.2   | 358.5   | 811.3   |
| CANX     | 4133.5  | 5473.6  | 3568.2  | 5608.7 | 3838.6  | 6194.2  | 4179    | 5906.8  |
| CAP1     | 33785.1 | 33512.5 | 41694.5 | 41598  | 36355.3 | 50115.7 | 31902.8 | 31433.4 |
| CAP2     | 185.3   | 206.6   | 134.3   | 129.8  | 119.9   | 145.5   | 162.9   | 205.5   |
| CAPG     | 738.3   | 951.2   | 248.5   | 171    | 147     | 172.7   | 843.1   | 1124.1  |
| CAPN1    | 2262.2  | 2598.1  | 1096.2  | 851.5  | 700.9   | 781.8   | 1707.1  | 1674.9  |
| CAPN10   | 372.4   | 456.5   | 195.3   | 161.8  | 155.1   | 209.7   | 361.1   | 457.8   |
| CAPN10   | 77.6    | 86.4    | 94      | 89     | 92.3    | 88.4    | 85.5    | 78.4    |
| CAPN10   | 88.9    | 105.1   | 93.6    | 91     | 82.3    | 94.6    | 94.3    | 110.9   |
| CAPN10   | 80.1    | 94.6    | 93.2    | 86     | 88      | 90.8    | 86.6    | 106     |
| CAPN11   | 119     | 114.3   | 91.9    | 96.6   | 90.5    | 100.7   | 103.7   | 110.3   |
| CAPN12   | 94.1    | 100.8   | 92.8    | 97.5   | 111.4   | 102.9   | 94.5    | 101     |
| CAPN13   | 105     | 125.9   | 93      | 77.9   | 73.8    | 87.2    | 113.9   | 118     |
| CAPN2    | 433.7   | 560.5   | 214.3   | 259.6  | 203.9   | 277     | 350.6   | 421.3   |
| CAPN3    | 123.5   | 145.5   | 91.6    | 94.6   | 92.9    | 90.2    | 121.6   | 129.8   |
| CAPN3    | 89.3    | 92.2    | 79.8    | 83.9   | 80.4    | 83.6    | 83.5    | 97.9    |
| CAPN3    | 196.3   | 211.2   | 198.2   | 167.7  | 169.9   | 206.1   | 147.3   | 223     |
| CAPN3    | 124.8   | 132.2   | 144.9   | 127.2  | 141.2   | 155.6   | 109.6   | 132.4   |
| CAPN5    | 104.6   | 120.7   | 98.6    | 115.7  | 121.3   | 120.9   | 89.5    | 100.6   |
| CAPN7    | 201.7   | 244.3   | 113.7   | 120.9  | 106.8   | 134.4   | 180.6   | 231.6   |
| CAPN9    | 83.7    | 93.2    | 96.3    | 94.8   | 84.5    | 89.7    | 74.9    | 95.3    |
| CAPN9    | 80.2    | 92.3    | 89.7    | 90.5   | 79.9    | 89.8    | 93.9    | 91.7    |
| CAPNS1   | 2116.2  | 2879.4  | 2458.5  | 1580   | 1203.7  | 1804.3  | 2226.1  | 4097.7  |
| CAPNS1   | 1220.2  | 1620.7  | 656.6   | 433.8  | 369.7   | 455.4   | 1194.5  | 1778.2  |

|         |        |        |        |        |        |        |        |        |
|---------|--------|--------|--------|--------|--------|--------|--------|--------|
| CAPNS2  | 90.9   | 109.9  | 91.5   | 95.6   | 92.3   | 91.7   | 95.6   | 99.5   |
| CAPS    | 100.5  | 125.1  | 96.1   | 82.4   | 84.9   | 101.7  | 114.2  | 120.8  |
| CAPS    | 184.7  | 179.8  | 108.6  | 118.2  | 135.5  | 125.7  | 162.7  | 174.2  |
| CAPS2   | 65.8   | 81     | 85     | 87.3   | 81     | 76.4   | 74.2   | 77.7   |
| CAPSL   | 116.1  | 123.8  | 96.5   | 82.5   | 97.7   | 87.8   | 99.9   | 134    |
| CAPSL   | 101.6  | 107.5  | 91.6   | 87.7   | 90.1   | 84.5   | 97.3   | 98     |
| CAPSL   | 86.7   | 96.7   | 95.1   | 96.9   | 88.5   | 99     | 91.5   | 93.8   |
| CAPZA2  | 2832.6 | 3537.2 | 2605.2 | 2840.3 | 2010.6 | 4153.8 | 2464.6 | 4785.6 |
| CAPZA3  | 71.2   | 80.9   | 96.6   | 84.1   | 82.3   | 86.3   | 79.8   | 76.7   |
| CAPZB   | 310.1  | 361    | 241.3  | 160.8  | 164.4  | 219.4  | 334.3  | 470.2  |
| CARD10  | 149.1  | 180.4  | 179.1  | 160.9  | 132.9  | 153.7  | 153    | 184.5  |
| CARD11  | 151.2  | 193.6  | 117.3  | 134.2  | 129.2  | 132.3  | 155.3  | 154.4  |
| CARD12  | 139.1  | 172.4  | 136.2  | 153.9  | 141.6  | 163.8  | 116.1  | 154.3  |
| CARD14  | 118.6  | 122.7  | 101.4  | 87.5   | 86.2   | 92.3   | 110.3  | 142    |
| CARD14  | 77.2   | 108.4  | 91.5   | 76     | 78     | 74.3   | 82.1   | 101.7  |
| CARD14  | 87.8   | 95.1   | 96.8   | 90.4   | 81.6   | 88.7   | 78.4   | 108.2  |
| CARD15  | 187.6  | 209.2  | 208.2  | 243.8  | 310.5  | 275.2  | 156.1  | 229.8  |
| CARD6   | 116.4  | 135.8  | 113    | 107.8  | 96.2   | 108.5  | 114.8  | 138.8  |
| CARD8   | 785.9  | 1064.1 | 541.4  | 629.1  | 572.6  | 721.8  | 770.4  | 1005.1 |
| CARD9   | 5060.4 | 5671.5 | 3676.9 | 2976.7 | 2533.8 | 3561   | 3163.3 | 3742.5 |
| CARF    | 563.1  | 828.3  | 363.5  | 324.3  | 275.7  | 486.6  | 433.9  | 703.4  |
| CARHSP1 | 3887.9 | 4757.9 | 2358.1 | 1549.6 | 1396.9 | 1401.9 | 3869.7 | 3684.9 |
| CARKL   | 392.4  | 470.6  | 405.8  | 487    | 449.5  | 548.3  | 284.2  | 323.4  |
| CARM1   | 2693.6 | 3504   | 2089.6 | 1466.9 | 1231.1 | 1842.1 | 2486.4 | 2778.5 |
| CARS    | 171.4  | 233.4  | 123.9  | 107.8  | 100.2  | 118.6  | 177.9  | 308.1  |
| CARS    | 824    | 1235.6 | 417.4  | 297.3  | 290.5  | 393.1  | 932.2  | 1216.2 |
| CART    | 146.5  | 161.6  | 105.6  | 108.4  | 97.8   | 104.4  | 139.1  | 144.9  |
| CART1   | 151.9  | 194.2  | 124.8  | 177.8  | 169.7  | 276.5  | 125.2  | 185.7  |
| CASC1   | 71.3   | 85     | 96.1   | 89.3   | 82.8   | 91.6   | 86.7   | 87.5   |
| CASC2   | 131    | 151.5  | 115.5  | 111.6  | 102.8  | 121.7  | 140.9  | 149.9  |
| CASC2   | 127.5  | 149.7  | 109.6  | 104.1  | 101.1  | 102.1  | 121.4  | 149.4  |
| CASC3   | 424.1  | 596    | 375.2  | 381.5  | 302.7  | 505.8  | 384.5  | 502.7  |
| CASC4   | 242.1  | 266    | 158.6  | 145.1  | 146.1  | 146.1  | 166.3  | 210.8  |
| CASC4   | 824.2  | 1063.9 | 551.8  | 659.3  | 529.2  | 1119.3 | 769.3  | 1054.4 |
| CASC5   | 127.2  | 149.1  | 97.8   | 103.3  | 90.5   | 99.4   | 114.3  | 114.2  |
| CASC5   | 252.4  | 378.4  | 140.2  | 164.6  | 141.8  | 176.6  | 228.9  | 302.6  |
| CASD1   | 219    | 225.8  | 140.8  | 132.1  | 116.1  | 174.8  | 155.8  | 199.6  |
| CASK    | 99.6   | 114.9  | 86.2   | 91.3   | 79.5   | 83.1   | 107.5  | 116.9  |
| CASKIN1 | 105.5  | 102.4  | 94.1   | 91.9   | 88.6   | 88.6   | 93.8   | 103.2  |
| CASKIN2 | 105.3  | 125.8  | 87.4   | 82.2   | 78.6   | 78.5   | 109.3  | 127.9  |
| CASP1   | 1864.5 | 2319.2 | 1056.5 | 931.4  | 611.2  | 1228.3 | 1395.6 | 1772.7 |
| CASP1   | 79.2   | 80.5   | 98.3   | 74.5   | 85.5   | 83.5   | 80.3   | 84.4   |
| CASP1   | 1700.8 | 2187.7 | 674.6  | 675.3  | 446.9  | 776.2  | 1116.2 | 1469   |
| CASP10  | 130.3  | 133.5  | 119.5  | 110.7  | 113.8  | 116.6  | 122.1  | 136    |
| CASP10  | 97.9   | 106.7  | 89.9   | 90.1   | 84.3   | 80.2   | 98.6   | 114.7  |
| CASP12  | 84.1   | 104.6  | 91     | 85.3   | 76.5   | 96.1   | 87.9   | 95.2   |
| CASP14  | 83.1   | 94.5   | 85.9   | 88     | 77.6   | 93.5   | 83.3   | 91.7   |
| CASP2   | 302.8  | 379.3  | 152    | 148.4  | 124.6  | 99.8   | 198.5  | 257.7  |
| CASP2   | 4234.1 | 5424.3 | 3426.8 | 3532.7 | 2851.3 | 3206.8 | 4173.6 | 5633   |
| CASP2   | 482.1  | 616.8  | 423.1  | 413.5  | 338.2  | 464.9  | 415.5  | 696.2  |



|          |        |        |        |        |       |        |        |        |
|----------|--------|--------|--------|--------|-------|--------|--------|--------|
| CASP3    | 867.5  | 1260.2 | 630.3  | 523    | 401   | 561.7  | 899.5  | 1291.4 |
| CASP3    | 173.8  | 219.3  | 133.7  | 117.5  | 100.8 | 115.1  | 151.4  | 182.6  |
| CASP4    | 85.5   | 87.9   | 86     | 70.4   | 74.8  | 80.4   | 80.5   | 83.4   |
| CASP4    | 1287.7 | 1720.5 | 454.2  | 459.4  | 327.6 | 433.8  | 1450.3 | 1941.2 |
| CASP4    | 97.6   | 113.9  | 91.7   | 83     | 86.9  | 85     | 104    | 106.6  |
| CASP4    | 146.4  | 177.9  | 117.6  | 103.6  | 98.4  | 102.5  | 125.7  | 156.2  |
| CASP5    | 85.1   | 83.9   | 101.6  | 95     | 88.3  | 93.6   | 82.3   | 81.7   |
| CASP6    | 415.3  | 494.5  | 163.2  | 164.4  | 134.4 | 176.4  | 383    | 554    |
| CASP6    | 197.4  | 233.8  | 111.5  | 98.6   | 106.6 | 119.8  | 208.9  | 230.3  |
| CASP6    | 182.8  | 201.2  | 111    | 118.8  | 93.9  | 88.3   | 189.4  | 271.4  |
| CASP7    | 179.8  | 253.4  | 198.5  | 149.9  | 141.9 | 199    | 185.1  | 235.1  |
| CASP7    | 122.4  | 118.2  | 92.7   | 83.5   | 87.9  | 89.3   | 112.5  | 151.1  |
| CASP7    | 88.8   | 108.2  | 91.1   | 85.8   | 79.9  | 87.7   | 88.2   | 102.8  |
| CASP8    | 152.3  | 166.6  | 97.9   | 98.9   | 77.1  | 100.4  | 125.3  | 180.7  |
| CASP8    | 100.3  | 107.9  | 90.7   | 86     | 82.5  | 87.2   | 95.1   | 102.5  |
| CASP8    | 297.7  | 320.7  | 104.3  | 106.2  | 91.1  | 94.3   | 191.2  | 266.7  |
| CASP8    | 316.7  | 390.5  | 137.1  | 115.6  | 108.5 | 96.8   | 233.6  | 304.9  |
| CASP8AP2 | 99.1   | 101.6  | 95.5   | 86.5   | 80.7  | 80.5   | 95     | 102.4  |
| CASP9    | 170.1  | 198.8  | 110.2  | 110    | 102.6 | 103    | 165.1  | 163.8  |
| CASP9    | 260    | 319.2  | 224.7  | 187.6  | 184.4 | 218.4  | 223.6  | 309.1  |
| CASQ1    | 89.5   | 106    | 93.6   | 89.2   | 84.6  | 83.9   | 90.2   | 92.5   |
| CASQ2    | 80.4   | 96.5   | 95     | 82.5   | 80.8  | 83.6   | 76.7   | 90.5   |
| CASR     | 87.6   | 90.8   | 90.6   | 87     | 75.3  | 85.6   | 79.6   | 84.9   |
| CAST     | 376.8  | 534.2  | 173.1  | 195.1  | 175.9 | 302.2  | 341.8  | 513.6  |
| CAST     | 104.3  | 117.1  | 94.3   | 103.1  | 88.8  | 93.3   | 106.2  | 137.8  |
| CAST     | 88     | 93.2   | 91.5   | 99.9   | 86.8  | 83.8   | 85.6   | 94.1   |
| CAST     | 445.4  | 518.4  | 235.5  | 348.9  | 270.4 | 577.2  | 428.8  | 580.1  |
| CAST1    | 83.7   | 93.3   | 86.3   | 81.7   | 84.5  | 87.1   | 84.5   | 97.9   |
| CASZ1    | 299.2  | 332.3  | 222.9  | 212.4  | 188.2 | 208    | 216.9  | 267.7  |
| CASZ1    | 94     | 105.8  | 89.8   | 90.4   | 83.4  | 86     | 89.3   | 98.7   |
| CASZ1    | 79.1   | 91.4   | 91.5   | 90.6   | 84.4  | 75.6   | 78.5   | 84.9   |
| CAT      | 2388.1 | 2706.5 | 656.9  | 714.7  | 411.2 | 687.8  | 2468.2 | 4420.1 |
| CATSPER1 | 536.6  | 613.9  | 311.1  | 219.2  | 176   | 249.8  | 466.1  | 591.6  |
| CATSPER2 | 110.3  | 127.5  | 103.1  | 102.8  | 93.1  | 120.9  | 118    | 118.3  |
| CATSPER3 | 114.7  | 132    | 99.8   | 76.8   | 78.2  | 79.5   | 95.3   | 113.7  |
| CATSPER4 | 98.8   | 113.3  | 88.4   | 85.4   | 88.5  | 86.8   | 105.8  | 103.9  |
| CAV1     | 147.3  | 185.8  | 135.7  | 248.9  | 218.7 | 329.1  | 172.8  | 220.1  |
| CAV2     | 150.8  | 189.7  | 109.5  | 128.2  | 111.3 | 132.7  | 135.7  | 169.9  |
| CAV2     | 109.6  | 136.8  | 102.2  | 94.2   | 92.7  | 97.7   | 113.2  | 130.6  |
| CAV3     | 104.7  | 112.3  | 103.8  | 99.2   | 89.4  | 94.2   | 111.9  | 110.5  |
| CAV3     | 112.6  | 115.7  | 90.1   | 82.5   | 72.8  | 79.7   | 111.6  | 132.3  |
| CBARA1   | 267.9  | 362.4  | 279    | 311.2  | 209.1 | 421.2  | 233.9  | 419.7  |
| CBFA2T2  | 168.4  | 202.9  | 129.6  | 147.1  | 134.1 | 161.7  | 158.3  | 190.8  |
| CBFA2T2  | 102.4  | 124.6  | 96.2   | 99.8   | 83.3  | 98.2   | 105.5  | 107.9  |
| CBFA2T2  | 124.1  | 114.1  | 98     | 97.1   | 90.3  | 100.9  | 107.9  | 111.7  |
| CBFA2T3  | 128.1  | 149.6  | 94.2   | 90.5   | 93.5  | 90.9   | 114.4  | 141.5  |
| CBFA2T3  | 101    | 120.2  | 118.4  | 115.5  | 119.2 | 111.2  | 106.4  | 119.6  |
| CBFA2T3  | 106.1  | 127.7  | 91     | 86.1   | 89.6  | 86.7   | 116.5  | 110.8  |
| CBFB     | 2451.8 | 2857.9 | 1254.2 | 1120.7 | 620.9 | 1427.4 | 1903.8 | 4617.5 |
| CBFB     | 132.3  | 149.8  | 86.7   | 87.5   | 77.8  | 88     | 111.5  | 143.2  |

|         |        |        |        |        |       |        |        |        |
|---------|--------|--------|--------|--------|-------|--------|--------|--------|
| CBL     | 396.2  | 595.6  | 190    | 230.2  | 252.9 | 378.6  | 456.1  | 1213   |
| CBLB    | 204.9  | 238.5  | 154.2  | 222.6  | 206.5 | 296.6  | 206.2  | 249.9  |
| CBLC    | 129    | 150.4  | 98.2   | 96.2   | 85.1  | 97.8   | 136    | 147.8  |
| CBLL1   | 1433.2 | 1763.9 | 626.3  | 605.3  | 480.1 | 517.5  | 1191.8 | 1660.6 |
| CBLN1   | 76.5   | 85.3   | 92.2   | 95.4   | 85.6  | 103.6  | 85     | 84.1   |
| CBLN2   | 92.4   | 103.3  | 76.5   | 70.9   | 64.8  | 71.4   | 83     | 103.3  |
| CBLN3   | 158.8  | 180.8  | 126    | 112.5  | 128.5 | 118.6  | 131.1  | 159    |
| CBLN4   | 88     | 85.9   | 96.3   | 93.6   | 87.9  | 91.9   | 88.6   | 88.3   |
| CBR1    | 300.9  | 400.4  | 184.4  | 152.5  | 146.2 | 161.6  | 300.6  | 355.5  |
| CBR3    | 183.3  | 227.3  | 148.6  | 151.4  | 139.9 | 170.3  | 245.3  | 367    |
| CBR4    | 378.3  | 442.5  | 285.8  | 353.8  | 264.7 | 431.2  | 240.6  | 401.7  |
| CBS     | 2647   | 3183   | 1823   | 883    | 799.5 | 1108.6 | 2165.3 | 2670.7 |
| CBWD1   | 118.3  | 127.7  | 89.4   | 90.3   | 86.7  | 92.6   | 109.4  | 163.9  |
| CBWD2   | 83.7   | 94.6   | 87.9   | 93.1   | 86.2  | 81.9   | 103.7  | 89.7   |
| CBWD5   | 3788   | 4854.9 | 1134.2 | 721.5  | 604.1 | 1007.7 | 2788.8 | 4015.3 |
| CBX1    | 488.1  | 761.5  | 151.7  | 128.5  | 117.8 | 166.8  | 499.7  | 448    |
| CBX2    | 127.1  | 163.6  | 91.6   | 83.3   | 91.9  | 114.2  | 117.4  | 135.2  |
| CBX2    | 80.6   | 94.8   | 87.8   | 88.5   | 77.5  | 77     | 93.5   | 92.9   |
| CBX2    | 642.3  | 860.8  | 546.4  | 363    | 279.8 | 325.5  | 554.9  | 690    |
| CBX3    | 236.8  | 277.6  | 155    | 152.3  | 130.1 | 146    | 210.6  | 238.2  |
| CBX3    | 1809.8 | 2148.8 | 961.2  | 1198.4 | 957.3 | 1171.4 | 1392.9 | 1687.9 |
| CBX3    | 79.8   | 85.5   | 90.4   | 81.2   | 77.7  | 86.4   | 75.8   | 82.3   |
| CBX4    | 408.2  | 445.2  | 294.9  | 281.7  | 253   | 387.6  | 380.1  | 792.3  |
| CBX5    | 1684.2 | 2207.9 | 645.7  | 489.1  | 379.6 | 532.9  | 1285.6 | 1502.6 |
| CBX6    | 1364.3 | 1794.4 | 801.3  | 716.8  | 577   | 866.9  | 982.9  | 1123.2 |
| CBX7    | 174.8  | 203.8  | 199.6  | 177.6  | 177.9 | 225.6  | 155    | 215.7  |
| CBX8    | 156.4  | 197.1  | 145.4  | 132.8  | 122.7 | 165.2  | 161.3  | 176.5  |
| CBY1    | 91.6   | 104.6  | 97.5   | 85.7   | 88.8  | 96     | 95.8   | 101.1  |
| CC2D1A  | 136.6  | 145.6  | 130.5  | 96.3   | 104.3 | 113.9  | 133.4  | 183.1  |
| CC2D1B  | 444.7  | 441.3  | 311    | 448.4  | 368.4 | 353.5  | 372.3  | 496.7  |
| CCBE1   | 442.3  | 412.2  | 191.8  | 256.5  | 248.5 | 212.3  | 457.1  | 657.3  |
| CCBL1   | 176.2  | 229.8  | 129.9  | 120.1  | 121.4 | 128.4  | 149    | 161.9  |
| CCBL2   | 568.6  | 746.1  | 207.8  | 209.6  | 238.2 | 296.1  | 506.5  | 693.1  |
| CCBL2   | 229.9  | 327.2  | 138.2  | 158.7  | 130.6 | 169.1  | 173    | 210.4  |
| CCBP2   | 422.2  | 555.1  | 285.1  | 237.8  | 199.5 | 227.3  | 286.8  | 257.8  |
| CCDC104 | 103.3  | 110.9  | 101.8  | 87     | 86.2  | 87     | 120.5  | 115.2  |
| CCDC108 | 76.6   | 87     | 89.4   | 80.7   | 79.2  | 86.7   | 80.4   | 88.5   |
| CCDC108 | 97.7   | 107.9  | 86.6   | 79.4   | 84.1  | 81.9   | 90.6   | 120.8  |
| CCDC11  | 97.2   | 107.4  | 116.2  | 101.5  | 93.5  | 105    | 93.1   | 107.1  |
| CCDC110 | 79.3   | 86.2   | 110.8  | 102.4  | 87.8  | 94.5   | 89.4   | 82.4   |
| CCDC117 | 99.3   | 115.9  | 96.9   | 100.8  | 86.6  | 111.8  | 98.7   | 104.7  |
| CCDC12  | 1800.9 | 2390.9 | 1282.6 | 1216.7 | 976   | 1336.2 | 1769.3 | 1682.3 |
| CCDC121 | 138    | 170.6  | 102.9  | 95.5   | 91.1  | 105.7  | 116.7  | 141.4  |
| CCDC127 | 279.7  | 402.9  | 166.4  | 181.2  | 157.8 | 217.5  | 294    | 457.6  |
| CCDC129 | 120.3  | 127.1  | 95.5   | 82.2   | 90.3  | 86.8   | 111.4  | 128.7  |
| CCDC13  | 90.1   | 103.5  | 102.1  | 96.2   | 86.8  | 94.9   | 95.7   | 107.2  |
| CCDC14  | 1790.7 | 1697   | 815.4  | 860.8  | 743.4 | 1527.8 | 1064.7 | 1416.5 |
| CCDC16  | 1474.5 | 1815.6 | 747.3  | 738.9  | 657   | 1148.4 | 926.9  | 1566.4 |
| CCDC17  | 93.1   | 92.3   | 105.1  | 103.3  | 97.4  | 105.3  | 93.3   | 99.1   |
| CCDC18  | 127.4  | 132.2  | 107.1  | 97.8   | 96.8  | 100.1  | 108.4  | 104.6  |

|         |        |        |        |        |        |        |        |        |
|---------|--------|--------|--------|--------|--------|--------|--------|--------|
| CCDC21  | 465.6  | 571.9  | 337.6  | 335.4  | 283.3  | 337.4  | 446.1  | 361.8  |
| CCDC22  | 162.9  | 204    | 113    | 105.8  | 94.7   | 123.9  | 169.1  | 201.9  |
| CCDC23  | 2845.9 | 3667   | 2682.8 | 2643.8 | 2131.2 | 3008.7 | 2818.3 | 4169.4 |
| CCDC24  | 186    | 202.5  | 125    | 109.3  | 102    | 119.5  | 154.5  | 169.9  |
| CCDC25  | 724.8  | 933.6  | 258.7  | 286.9  | 206.4  | 308.2  | 610.4  | 920.4  |
| CCDC25  | 1232.3 | 1505.4 | 1006.3 | 1151.5 | 1040.2 | 1460   | 949.2  | 1104.1 |
| CCDC27  | 157.4  | 171.3  | 111.3  | 100.9  | 108.9  | 104.3  | 144    | 165.2  |
| CCDC28A | 1534.7 | 2047.9 | 939.1  | 1234   | 929.9  | 1283.6 | 1497.2 | 2084.5 |
| CCDC28B | 204.2  | 230.5  | 133.9  | 126.5  | 123.3  | 142.5  | 187.6  | 221.9  |
| CCDC3   | 92.1   | 115.6  | 102.8  | 93.6   | 95.7   | 98.6   | 87.6   | 107.6  |
| CCDC32  | 437    | 594    | 186.7  | 169.6  | 173.6  | 223.1  | 414.4  | 461.8  |
| CCDC32  | 2222.7 | 3000   | 1938.4 | 2025.9 | 1604.4 | 2354.7 | 2019.2 | 2749.3 |
| CCDC33  | 95.4   | 106.9  | 102.8  | 101.9  | 96.6   | 98.7   | 83.9   | 92.3   |
| CCDC34  | 78.4   | 81.1   | 84.5   | 91.2   | 87.1   | 77.7   | 77.7   | 78.6   |
| CCDC34  | 747    | 926.9  | 390.9  | 352.1  | 397.5  | 969.1  | 469.5  | 701.1  |
| CCDC34  | 2842.7 | 3582.2 | 2063.3 | 1962.7 | 1733.6 | 2775.1 | 2159.2 | 2686.2 |
| CCDC36  | 122.9  | 128.6  | 101.9  | 100.7  | 84.9   | 94.6   | 122.2  | 142.3  |
| CCDC37  | 85     | 92.4   | 94.7   | 83.9   | 85.5   | 85.2   | 82.4   | 87     |
| CCDC38  | 85.5   | 93.6   | 89.9   | 92.9   | 79.9   | 95.4   | 87.2   | 96.1   |
| CCDC4   | 118.6  | 163.1  | 159.2  | 115.4  | 115.5  | 125.8  | 110.3  | 157.6  |
| CCDC4   | 200.8  | 233.4  | 126.4  | 117.1  | 101.4  | 114    | 184.8  | 194.1  |
| CCDC41  | 113    | 126    | 105.6  | 96.6   | 93.7   | 114.5  | 101.8  | 126.6  |
| CCDC41  | 302.8  | 352    | 189.5  | 256.7  | 199.1  | 422.8  | 228.2  | 305.9  |
| CCDC42  | 76.6   | 74     | 75     | 78.6   | 78.6   | 71.7   | 75.3   | 82.8   |
| CCDC43  | 431.4  | 575.5  | 163.9  | 187.9  | 143.7  | 164.2  | 369.7  | 503.1  |
| CCDC44  | 1392.7 | 1775.1 | 753.1  | 685.4  | 550.9  | 774.3  | 1099.9 | 1060.9 |
| CCDC45  | 755.5  | 852.4  | 358.9  | 459.3  | 381.3  | 628.9  | 625.9  | 677.5  |
| CCDC46  | 89.8   | 89.4   | 90     | 87     | 81.1   | 88.2   | 81.8   | 85     |
| CCDC46  | 73.8   | 93.1   | 88.5   | 74.6   | 78.9   | 79.2   | 81     | 83.3   |
| CCDC47  | 327.5  | 437.9  | 214.7  | 249.4  | 178.8  | 289.4  | 289.3  | 492.3  |
| CCDC48  | 105    | 137.1  | 94.3   | 76.6   | 77     | 88     | 110.6  | 137.7  |
| CCDC49  | 617.4  | 717.9  | 386.1  | 354.5  | 352.6  | 427    | 474.6  | 650.5  |
| CCDC5   | 1469.8 | 1755.1 | 610.2  | 603.9  | 487.4  | 928.6  | 1041.5 | 1095.2 |
| CCDC50  | 1539.3 | 1835.3 | 904.3  | 932.3  | 832.5  | 1259.4 | 1427.6 | 1856.6 |
| CCDC50  | 94.3   | 108.5  | 82.5   | 86.9   | 80.7   | 77.8   | 86     | 101.4  |
| CCDC51  | 428.7  | 531.9  | 270.5  | 249.3  | 194    | 276.5  | 352.6  | 360    |
| CCDC52  | 79.2   | 91.8   | 94.6   | 105.3  | 93     | 90.5   | 87.4   | 93.3   |
| CCDC53  | 1019.1 | 1303.1 | 731.2  | 570.2  | 470    | 760.6  | 976.3  | 1472.4 |
| CCDC54  | 84.6   | 103.7  | 101.6  | 90.8   | 84.6   | 82.1   | 95.9   | 88     |
| CCDC55  | 491.5  | 598    | 168.3  | 182.1  | 163.8  | 288.2  | 415.3  | 738    |
| CCDC56  | 3513.7 | 4792.7 | 2297.1 | 2086.8 | 1628.9 | 1966.8 | 3207.9 | 3041.1 |
| CCDC57  | 76.3   | 82.9   | 104.8  | 93.1   | 85.6   | 98.2   | 76.6   | 83.7   |
| CCDC58  | 1607.8 | 1934   | 732.1  | 628.1  | 461.3  | 1098.1 | 1276.1 | 2075.4 |
| CCDC59  | 3145.3 | 3375.4 | 2476.2 | 2934.2 | 2443.6 | 5183.9 | 2665.8 | 4864.7 |
| CCDC6   | 1136   | 1579.6 | 1406.6 | 1276.3 | 906.6  | 1470.5 | 1099.2 | 1444.6 |
| CCDC60  | 107.2  | 102.7  | 91.3   | 93.9   | 93.3   | 87.4   | 101.7  | 103.7  |
| CCDC62  | 128.9  | 164.7  | 95.6   | 99.3   | 90.9   | 107.2  | 127.8  | 186.1  |
| CCDC62  | 109.6  | 126.2  | 100.7  | 87.3   | 82     | 89.1   | 107    | 121    |
| CCDC63  | 113    | 128.2  | 91.2   | 89     | 86.3   | 87.3   | 105.5  | 120.1  |
| CCDC64  | 87.2   | 94.8   | 88.8   | 89.8   | 91.4   | 92.5   | 91.8   | 85.7   |

|         |        |         |        |        |        |        |        |        |
|---------|--------|---------|--------|--------|--------|--------|--------|--------|
| CCDC65  | 95     | 125.2   | 90     | 76     | 82.3   | 79.9   | 104    | 101.1  |
| CCDC66  | 242    | 278.9   | 149.9  | 146.3  | 137.6  | 204.3  | 191    | 267.5  |
| CCDC67  | 102.9  | 124.3   | 96.6   | 91.2   | 88     | 90.6   | 100.7  | 126.5  |
| CCDC68  | 108.1  | 107.6   | 101.2  | 88.6   | 92.5   | 95.7   | 95.9   | 101.8  |
| CCDC69  | 157.8  | 163.1   | 103.2  | 107.4  | 80.2   | 95.5   | 148.9  | 204.6  |
| CCDC7   | 102.1  | 118.8   | 114.6  | 93.9   | 100.6  | 93.8   | 100.7  | 105.6  |
| CCDC7   | 83     | 90.9    | 92.9   | 77.3   | 76.4   | 90.4   | 78.8   | 86.3   |
| CCDC7   | 92.4   | 111.4   | 91.4   | 87.9   | 85.1   | 90.2   | 101    | 98.4   |
| CCDC70  | 136.3  | 174.3   | 94.7   | 79.2   | 89.1   | 89.8   | 139.6  | 163.5  |
| CCDC71  | 386.5  | 666.1   | 340.7  | 326.4  | 253.8  | 367.3  | 445.8  | 522    |
| CCDC72  | 9415.6 | 11022.4 | 4209.4 | 4223   | 4283.5 | 7286.2 | 7363   | 8059.5 |
| CCDC74A | 125.2  | 129.7   | 97.2   | 87.6   | 89.4   | 92.6   | 111.8  | 113.7  |
| CCDC74B | 94.5   | 111.8   | 97.6   | 101.9  | 84.7   | 92     | 97.5   | 104.1  |
| CCDC75  | 130.3  | 136.5   | 98.2   | 108.3  | 103.4  | 97.9   | 112.8  | 111.7  |
| CCDC76  | 739.5  | 864     | 432.5  | 294.4  | 240.9  | 556.3  | 480.5  | 1051.7 |
| CCDC77  | 496.9  | 596.6   | 300.3  | 337.5  | 298.5  | 439.8  | 587.6  | 751.3  |
| CCDC8   | 113.5  | 127.8   | 91.2   | 94.5   | 98.2   | 95.5   | 122.7  | 121.4  |
| CCDC85A | 77.1   | 85.7    | 90     | 88.2   | 80.9   | 87.9   | 78.4   | 83.9   |
| CCDC9   | 89     | 112.5   | 115.7  | 95     | 91.5   | 106.1  | 99.2   | 101.9  |
| CCDC90B | 2559.4 | 3148.1  | 1899.3 | 2232.3 | 1614.8 | 2488.8 | 2316.9 | 3943.9 |
| CCDC91  | 117.4  | 145.2   | 99.9   | 91.2   | 86.3   | 101.7  | 116.7  | 156.6  |
| CCHCR1  | 98.7   | 129.3   | 92.4   | 76.4   | 79.7   | 74.1   | 99     | 112.8  |
| CCIN    | 93.3   | 98.7    | 100.8  | 93.1   | 79.4   | 94.8   | 87.3   | 99.1   |
| CCK     | 89.8   | 96.8    | 99.2   | 89.4   | 78.1   | 87.4   | 83.6   | 83.9   |
| CCKAR   | 90.1   | 110.2   | 97.4   | 98.5   | 87.7   | 96.5   | 98.3   | 99.3   |
| CCKBR   | 88.4   | 103.6   | 84.3   | 97.5   | 83.7   | 91.8   | 87.7   | 99.8   |
| CCL1    | 92.6   | 98.9    | 85.7   | 79.3   | 82.6   | 83.6   | 85.3   | 94.6   |
| CCL11   | 77.4   | 92.9    | 93.7   | 78.3   | 89.2   | 90     | 79.2   | 88.4   |
| CCL13   | 133.3  | 146.9   | 101.8  | 106.9  | 99.3   | 115.6  | 131.2  | 140.3  |
| CCL15   | 89.7   | 106.2   | 84.5   | 90.6   | 81.2   | 86.8   | 84.9   | 85.6   |
| CCL15   | 75.3   | 85.9    | 91.2   | 81.2   | 81.7   | 83.7   | 75.2   | 83.8   |
| CCL16   | 137    | 172.5   | 101.3  | 91.9   | 87.1   | 94.4   | 131.1  | 128.6  |
| CCL17   | 78.5   | 92.9    | 96.9   | 85     | 79.2   | 89.7   | 80     | 79.1   |
| CCL18   | 114    | 134.8   | 76.3   | 84.9   | 73.9   | 76     | 110.3  | 131.5  |
| CCL19   | 109.5  | 124.9   | 116    | 102.3  | 91.7   | 99.2   | 104.9  | 111.1  |
| CCL2    | 191.4  | 245.9   | 141.5  | 164.8  | 151.1  | 178.8  | 227.1  | 269.9  |
| CCL20   | 138.6  | 174.6   | 98.8   | 107.3  | 102.8  | 110.5  | 132.6  | 167.5  |
| CCL21   | 92.3   | 109.3   | 107.4  | 90.5   | 92.7   | 95.8   | 97.5   | 107.6  |
| CCL22   | 174.2  | 182.7   | 134.3  | 151.7  | 120.9  | 143.2  | 167.2  | 219    |
| CCL23   | 236.1  | 324.8   | 208.6  | 226.5  | 188.9  | 236.8  | 239.6  | 345.6  |
| CCL23   | 1464.2 | 1861.9  | 967    | 979.1  | 794.5  | 881.5  | 1375.5 | 1450.7 |
| CCL24   | 90.3   | 97.1    | 84.4   | 85.3   | 78.8   | 81.5   | 88.9   | 87     |
| CCL25   | 91.3   | 100     | 85.8   | 84.8   | 82.3   | 96.1   | 98.4   | 100.4  |
| CCL25   | 114.1  | 123.8   | 91     | 83.1   | 88.7   | 86.6   | 97.4   | 107.2  |
| CCL26   | 113.3  | 139.6   | 103.1  | 90.2   | 91.2   | 92.9   | 118.4  | 128.4  |
| CCL27   | 100.4  | 94.4    | 94.8   | 84.8   | 87.1   | 86.3   | 89.3   | 92.4   |
| CCL28   | 172.4  | 186.3   | 103.1  | 95.4   | 87.6   | 94.3   | 152.4  | 167.1  |
| CCL3    | 100.8  | 108.8   | 102.5  | 90.9   | 108.9  | 94.7   | 94.2   | 107.7  |
| CCL3L1  | 124.2  | 162.3   | 100.5  | 98     | 99.9   | 103    | 139.2  | 137.2  |
| CCL3L3  | 170.7  | 191.6   | 162.1  | 151.6  | 227.8  | 173.2  | 177.8  | 224.7  |

|          |         |         |        |        |        |        |         |         |
|----------|---------|---------|--------|--------|--------|--------|---------|---------|
| CCL4L1   | 89.3    | 107.7   | 96.3   | 96.2   | 100.3  | 83.6   | 101     | 100.3   |
| CCL5     | 8668.9  | 10435   | 5098.7 | 3628   | 2945   | 2726.7 | 6921.8  | 6119.3  |
| CCL7     | 81.7    | 88.5    | 88     | 83.6   | 79.6   | 85     | 78.6    | 88      |
| CCL8     | 90      | 114.5   | 99.2   | 91.9   | 86.3   | 89     | 95.5    | 104.1   |
| CCM2     | 207.6   | 331.7   | 130    | 101.7  | 96.7   | 89.2   | 243.4   | 288.5   |
| CCM2     | 192     | 244.5   | 135.1  | 142.7  | 125.9  | 102.4  | 221.1   | 347     |
| CCM2     | 1442.2  | 1805.7  | 1047.4 | 1429.2 | 1494.6 | 1268   | 1634.1  | 1635.6  |
| CCNA1    | 1391.9  | 1989.9  | 1171.6 | 409.1  | 401.4  | 668.7  | 1008.7  | 1444    |
| CCNA2    | 3366.7  | 4764.7  | 2129.7 | 1252.4 | 943.3  | 1567.2 | 2456.9  | 3712.9  |
| CCNB1    | 870.9   | 1104.8  | 310.3  | 184.8  | 168.9  | 174.3  | 769.1   | 1442.9  |
| CCNB1IP1 | 3375.5  | 4443.1  | 2044.1 | 1143.5 | 986.4  | 1420.2 | 3299.2  | 4157.4  |
| CCNB1IP1 | 144.1   | 179.5   | 112    | 97.2   | 88.7   | 97.8   | 137.3   | 160.2   |
| CCNB1IP1 | 90.9    | 102.7   | 96.7   | 97.8   | 86     | 86.5   | 98      | 106     |
| CCNB1IP1 | 1513.4  | 1903.1  | 1031.6 | 596.5  | 447.2  | 727.9  | 1425.9  | 1841.7  |
| CCNB2    | 4712.6  | 6057.8  | 2763.5 | 1570.2 | 1321.7 | 1684.2 | 4339.6  | 5027.5  |
| CCNB3    | 95.6    | 99.5    | 95     | 92     | 85.9   | 90.9   | 100.2   | 105.8   |
| CCNB3    | 90      | 102.1   | 90.7   | 88.5   | 73.1   | 94.1   | 87.6    | 97.4    |
| CCNB3    | 81.5    | 89.7    | 100.2  | 90.4   | 87.7   | 92.9   | 85.1    | 81.4    |
| CCNC     | 1678.5  | 2162.7  | 644.1  | 691.5  | 524.2  | 827.2  | 1010.4  | 1370.4  |
| CCNC     | 2042.9  | 2659.4  | 793.8  | 926.5  | 578.7  | 1323.5 | 1496.7  | 2262.5  |
| CCNC     | 1013    | 1378.1  | 244.9  | 269.6  | 225.8  | 288.9  | 906.6   | 1555.6  |
| CCND1    | 436.1   | 555.9   | 317.7  | 302.6  | 205.2  | 305.8  | 321.5   | 339.1   |
| CCND2    | 98.5    | 121.5   | 98.3   | 99.2   | 100.5  | 110.5  | 87.2    | 112.1   |
| CCND3    | 12868.2 | 15695.4 | 10279  | 7658.3 | 5257   | 6361.6 | 12926.7 | 12894.7 |
| CCNDBP1  | 186.8   | 232.4   | 108.9  | 95.2   | 92.6   | 133.6  | 146.7   | 162.8   |
| CCNDBP1  | 101.3   | 112.5   | 96.2   | 95.2   | 92.5   | 98.1   | 97.9    | 102.1   |
| CCNDBP1  | 3770.1  | 4624.4  | 2653.5 | 2687.6 | 2480.3 | 3472.7 | 3006.1  | 4328.1  |
| CCNE1    | 968     | 1322.4  | 720.9  | 691.5  | 565.3  | 717.1  | 779.9   | 999.9   |
| CCNE1    | 119.1   | 145.4   | 107.4  | 81.8   | 89.3   | 85.2   | 114.7   | 112.5   |
| CCNE2    | 86.4    | 87.9    | 89.2   | 82.8   | 85.6   | 83.6   | 88      | 109.5   |
| CCNE2    | 1646    | 2065.4  | 1072.2 | 845.6  | 618.4  | 1473.3 | 893.2   | 1647.1  |
| CCNF     | 1472.4  | 2087.2  | 1434.5 | 914.1  | 735.5  | 816.5  | 1350.7  | 1306.1  |
| CCNG1    | 2649    | 2891.1  | 814.3  | 981.6  | 826.9  | 918.9  | 2774.6  | 4087.2  |
| CCNG1    | 84.7    | 105.8   | 92.1   | 87.1   | 75.4   | 76.6   | 93.7    | 110.6   |
| CCNG2    | 272.5   | 334.6   | 132.2  | 210.7  | 220.2  | 310.3  | 297.1   | 417     |
| CCNH     | 764.6   | 891.3   | 276.6  | 243.8  | 195.2  | 267    | 710.8   | 1245.3  |
| CCNI     | 10736.6 | 14213.7 | 7900.1 | 7761.1 | 5504.3 | 7401.8 | 8815.6  | 10664.3 |
| CCNJ     | 139.8   | 154.8   | 108.6  | 98.6   | 87.7   | 102.3  | 119.5   | 148     |
| CCNK     | 1056.1  | 1405.2  | 716.8  | 1037   | 667.9  | 1184.4 | 976     | 2389.8  |
| CCNL1    | 941.6   | 1125.7  | 594    | 693.4  | 713.1  | 996.7  | 694.9   | 1070    |
| CCNL2    | 201.8   | 239.9   | 119.1  | 122.2  | 98.4   | 112.9  | 160.6   | 196.8   |
| CCNT1    | 157.1   | 191.8   | 134.1  | 120    | 106.8  | 127.3  | 137.5   | 187.5   |
| CCNT2    | 142.9   | 176.2   | 115    | 104.4  | 89.4   | 105.6  | 114.7   | 144.9   |
| CCNT2    | 325.7   | 365.2   | 252.8  | 261.6  | 238.7  | 522.9  | 245.2   | 473.5   |
| CCNT2    | 108.4   | 123.4   | 97.7   | 104    | 88.9   | 89.8   | 102.2   | 102     |
| CCNY     | 1271.8  | 1857.7  | 913.2  | 1236.6 | 1037.6 | 924.7  | 1317.1  | 1367.3  |
| CCNYL1   | 474.9   | 478.5   | 244.2  | 331.9  | 239.7  | 361.2  | 367.9   | 641.6   |
| CCPG1    | 102.1   | 96.7    | 95     | 93.7   | 96.1   | 102.4  | 114.1   | 155.1   |
| CCPG1    | 316.7   | 428.2   | 279.2  | 278.4  | 248.7  | 434.8  | 515.1   | 844.8   |
| CCR1     | 383.9   | 454.2   | 334.4  | 363.7  | 302.1  | 559.8  | 343     | 551.6   |

|         |         |         |        |         |         |         |         |         |
|---------|---------|---------|--------|---------|---------|---------|---------|---------|
| CCR10   | 96.1    | 96.2    | 90.5   | 87.3    | 85.1    | 93      | 88.2    | 95.8    |
| CCR2    | 77.4    | 96.5    | 91.2   | 85.5    | 81      | 88.6    | 98.3    | 93      |
| CCR2    | 394.5   | 563.6   | 242.9  | 244.8   | 170.7   | 291.6   | 265.2   | 300.4   |
| CCR3    | 93.7    | 107.5   | 101.6  | 95.7    | 88.6    | 92.4    | 96.3    | 105.9   |
| CCR3    | 85.3    | 86.7    | 104.7  | 91      | 81.1    | 87.1    | 100.7   | 90.9    |
| CCR4    | 74.5    | 90.2    | 87     | 80.8    | 73.8    | 81.6    | 83.3    | 79.9    |
| CCR5    | 85.5    | 102.6   | 84.8   | 82.9    | 85.6    | 79.1    | 87      | 102.4   |
| CCR6    | 19499.4 | 20698   | 9726.6 | 14017.2 | 14050.1 | 10744.1 | 18157.4 | 20824.2 |
| CCR6    | 82.1    | 85.6    | 86.7   | 94.7    | 82.8    | 89.8    | 80.2    | 85.4    |
| CCR7    | 85.3    | 102.1   | 94.7   | 86.1    | 89.6    | 83.1    | 85.2    | 98.5    |
| CCR8    | 76.2    | 89.9    | 101    | 89.5    | 93.5    | 91      | 84.3    | 85.3    |
| CCR9    | 154     | 172.4   | 103.2  | 90.4    | 84.7    | 98.6    | 129.3   | 146.9   |
| CCR9    | 65      | 73.5    | 78.7   | 72.1    | 79.7    | 75.5    | 67.4    | 78.4    |
| CCRK    | 701.4   | 778.5   | 557.8  | 357.1   | 355.1   | 495.7   | 434.1   | 424.5   |
| CCRK    | 258.3   | 284.6   | 215.8  | 169.5   | 169.4   | 254.9   | 175.5   | 260.3   |
| CCRL1   | 91.1    | 87.3    | 93.8   | 82.7    | 83.5    | 82.3    | 92.5    | 89.1    |
| CCRL1   | 92.9    | 90.2    | 95.2   | 98.5    | 92.2    | 94.9    | 92.7    | 95.3    |
| CCRL1   | 85      | 84.2    | 102.6  | 89.7    | 90      | 86.3    | 84.3    | 89      |
| CCRL2   | 85.2    | 91.4    | 102.2  | 89.4    | 85.5    | 95.3    | 84.7    | 86      |
| CCRN4L  | 513.3   | 820     | 406.2  | 387.7   | 296.7   | 265.8   | 427.8   | 473.3   |
| CCS     | 537.9   | 682.4   | 336.9  | 243.6   | 220.8   | 146.1   | 424.7   | 486.9   |
| CCS     | 368.9   | 438.5   | 218    | 217.6   | 184.2   | 195.1   | 310.2   | 307.1   |
| CCT2    | 4750.1  | 6001.7  | 4111.7 | 3903.9  | 3123.3  | 6056.9  | 3303.2  | 5992.3  |
| CCT3    | 1367.6  | 1907.2  | 295.8  | 277.5   | 298.7   | 279.6   | 1375.3  | 1355.1  |
| CCT3    | 4965    | 6590    | 3842.8 | 2335.1  | 2105.1  | 3952.1  | 4173.2  | 5116.4  |
| CCT4    | 676     | 860.8   | 390.3  | 441.6   | 291.1   | 470.6   | 552.9   | 782.3   |
| CCT5    | 288.8   | 349.3   | 144.6  | 141.8   | 123.3   | 187.2   | 269.3   | 373.3   |
| CCT6A   | 3612.9  | 4790.8  | 841.3  | 801.4   | 543.9   | 834.7   | 2453.5  | 3936.5  |
| CCT6A   | 2159.3  | 2612.7  | 849.9  | 632.2   | 477.8   | 910.8   | 1550.5  | 3620.5  |
| CCT6AP1 | 3002.1  | 3726.8  | 1285.8 | 1248.1  | 913.7   | 1590.1  | 2292.1  | 5209.7  |
| CCT6B   | 251.7   | 338.3   | 158.1  | 166.2   | 128     | 162.6   | 222.3   | 402.3   |
| CCT7    | 8603.1  | 11200.8 | 7257.3 | 6245.3  | 5065    | 8335.2  | 8166.1  | 11526.4 |
| CCT7    | 2464.2  | 3374.2  | 496.4  | 512.7   | 486.5   | 854.8   | 2423    | 3412    |
| CCT7    | 4315.1  | 5288.3  | 1925.4 | 1376.1  | 1076.9  | 1667.7  | 3573.6  | 4674.5  |
| CCT8    | 13112.4 | 16248.3 | 8583   | 6220.8  | 4090.8  | 8113.8  | 9980.8  | 16051.3 |
| CD109   | 120     | 138.6   | 117    | 103.1   | 106.9   | 113.8   | 124.3   | 138.2   |
| CD14    | 365.9   | 459.3   | 311.2  | 1626.7  | 1013.4  | 1225.5  | 326.9   | 318.3   |
| CD14    | 143.1   | 152.2   | 124    | 231.6   | 190.2   | 254.5   | 118.5   | 133.2   |
| CD151   | 653.8   | 963.8   | 386.2  | 374.6   | 276.2   | 202.3   | 601.8   | 836.5   |
| CD151   | 6235.5  | 7969.2  | 4205.6 | 3770.1  | 2789.5  | 3602.8  | 5984.5  | 7544.1  |
| CD151   | 219     | 297.4   | 127.9  | 124.7   | 114.5   | 149     | 218.3   | 323.3   |
| CD160   | 129.6   | 166.3   | 105    | 96      | 82.3    | 93.8    | 133.1   | 150.9   |
| CD163   | 93.3    | 112.8   | 93.9   | 96.3    | 78.3    | 91.3    | 98.3    | 103.9   |
| CD163   | 87.6    | 93.1    | 95.4   | 95.1    | 81.3    | 92.3    | 91.7    | 97.4    |
| CD164   | 262.7   | 290.1   | 130.3  | 160.8   | 120.2   | 161.2   | 276.2   | 445.7   |
| CD164L2 | 77.2    | 83.2    | 83.8   | 79.5    | 74.8    | 77.8    | 84.5    | 80.5    |
| CD177   | 99.9    | 119.8   | 100.3  | 94.6    | 92.9    | 85.9    | 110.6   | 126.9   |
| CD180   | 99.6    | 115.4   | 97.5   | 88.5    | 89      | 86.9    | 98.1    | 112.4   |
| CD19    | 186.7   | 267.7   | 210.4  | 135.7   | 129.1   | 128     | 166.5   | 230.8   |
| CD1A    | 88.8    | 106.6   | 100.5  | 87.6    | 81.4    | 97.6    | 94.7    | 98.9    |

|         |        |        |        |        |        |        |        |        |
|---------|--------|--------|--------|--------|--------|--------|--------|--------|
| CD1B    | 76.3   | 78.7   | 90.4   | 94.5   | 88.3   | 100.2  | 78     | 80.5   |
| CD1C    | 101.9  | 126.1  | 103.9  | 98.8   | 93.4   | 82.8   | 103.7  | 104.7  |
| CD1D    | 881.8  | 1062.1 | 436.4  | 348.6  | 173.3  | 473.7  | 561.3  | 1152.1 |
| CD1E    | 103.7  | 112.4  | 108.5  | 100.5  | 98.5   | 103.1  | 106.7  | 110.5  |
| CD1E    | 113.5  | 135.3  | 89     | 82.1   | 77.2   | 84     | 127.9  | 108.5  |
| CD2     | 76.5   | 92.6   | 86.3   | 79.9   | 87.6   | 85.6   | 79.6   | 82.3   |
| CD200   | 162.6  | 194.8  | 114.6  | 112.6  | 112.6  | 114.4  | 144.2  | 161.5  |
| CD200   | 71.6   | 88.1   | 74.2   | 74.1   | 70.8   | 81.7   | 78.6   | 81.1   |
| CD200R1 | 84.5   | 84.2   | 92.1   | 88.5   | 81.6   | 88.4   | 77.5   | 82.3   |
| CD200R2 | 86     | 106.2  | 87.3   | 88.2   | 93     | 77.8   | 89.7   | 92.1   |
| CD207   | 80     | 87.8   | 98.8   | 95.4   | 90.3   | 89.9   | 87.8   | 93.2   |
| CD209   | 434.1  | 615.1  | 446.6  | 344.9  | 282.9  | 402.3  | 350.2  | 597.6  |
| CD22    | 94.9   | 103.2  | 90.7   | 86.6   | 90.1   | 88.2   | 86.1   | 97.9   |
| CD226   | 77     | 89     | 78.4   | 79.9   | 80.3   | 74.6   | 84.1   | 81.7   |
| CD24    | 110.2  | 120.2  | 116.6  | 195.2  | 178.8  | 168.5  | 109.8  | 125.6  |
| CD244   | 219.6  | 288.1  | 195    | 131.1  | 116.9  | 177.6  | 219.3  | 209.4  |
| CD247   | 183.1  | 231.6  | 129.1  | 95.2   | 94.4   | 114    | 121.9  | 133.7  |
| CD247   | 211.2  | 214    | 137.4  | 116.7  | 94.5   | 111.5  | 148    | 155.4  |
| CD248   | 81.1   | 92.3   | 85.7   | 88.3   | 80.6   | 81.7   | 79.9   | 84.1   |
| CD274   | 86.5   | 88.6   | 91.9   | 89.5   | 88     | 89.9   | 80.1   | 82.7   |
| CD276   | 427.8  | 588.9  | 469    | 652.9  | 452.6  | 786.8  | 400    | 693.7  |
| CD276   | 146.2  | 163.1  | 123.6  | 114.8  | 104.8  | 87.7   | 141.7  | 152.2  |
| CD2AP   | 261.4  | 280.8  | 129.4  | 129.5  | 104.7  | 148.8  | 183    | 265.9  |
| CD2BP2  | 2404   | 3021.9 | 1713.9 | 1252.3 | 1137.6 | 1361.2 | 1966.5 | 2187.8 |
| CD300A  | 268.3  | 356.3  | 205.7  | 308.9  | 250.9  | 453    | 247.2  | 296.7  |
| CD300C  | 392.6  | 540.3  | 203.4  | 215.5  | 153.3  | 177.7  | 276.4  | 213.3  |
| CD300E  | 94.3   | 109.1  | 95.8   | 89.2   | 84     | 91.5   | 108.5  | 107    |
| CD300LB | 94.9   | 101.7  | 100.6  | 92     | 91.8   | 83.8   | 85.6   | 101.7  |
| CD300LF | 687.3  | 881    | 514.8  | 657.9  | 540.5  | 775.4  | 713.3  | 597.9  |
| CD300LG | 207.3  | 264.9  | 135.6  | 338    | 148.8  | 306.4  | 211.8  | 315.5  |
| CD302   | 91.6   | 119.7  | 92     | 93.3   | 77.7   | 96.9   | 101.9  | 108.4  |
| CD320   | 494    | 650.8  | 523.6  | 332.6  | 271.6  | 352.4  | 442.1  | 649.6  |
| CD33    | 2451.9 | 2752.3 | 1332.6 | 1039.9 | 761.3  | 1174.3 | 2018.9 | 2545.9 |
| CD33L3  | 96.1   | 100.4  | 97.7   | 88.2   | 89.3   | 90.5   | 92.4   | 108.2  |
| CD34    | 118.1  | 127.9  | 97.7   | 93.2   | 90.2   | 99     | 114.1  | 134.4  |
| CD34    | 87.2   | 100.3  | 95     | 86.9   | 79.5   | 90.1   | 93.4   | 97.5   |
| CD34    | 84     | 85.2   | 92.2   | 95.7   | 96     | 96.4   | 83.7   | 86.6   |
| CD34    | 85.9   | 105.3  | 95.6   | 78.5   | 76.7   | 80.8   | 97.9   | 111.1  |
| CD36    | 366.7  | 470.6  | 220.4  | 418.4  | 356.1  | 624    | 282.8  | 443.5  |
| CD36    | 664.3  | 885.5  | 351    | 613.5  | 483.9  | 883.2  | 583.5  | 1088.7 |
| CD36    | 81.1   | 92.6   | 82.6   | 97.5   | 82.6   | 87     | 73.2   | 87.2   |
| CD37    | 1480.8 | 2059   | 1092.9 | 640.8  | 540    | 605.2  | 1344.1 | 2020.2 |
| CD37    | 2509.6 | 3264   | 1465.9 | 776.5  | 641.6  | 811.2  | 2350.3 | 4023.9 |
| CD38    | 356.2  | 517.7  | 189.9  | 132.4  | 121.3  | 136.3  | 330.5  | 424.5  |
| CD3D    | 110    | 126.7  | 90.4   | 99.1   | 82.1   | 99.2   | 98.9   | 117.5  |
| CD3D    | 82.9   | 89.5   | 88.3   | 91.5   | 81.8   | 83.7   | 83.9   | 91.7   |
| CD3E    | 92.3   | 115.4  | 103.9  | 97     | 88.5   | 98.7   | 92.5   | 102.5  |
| CD3EAP  | 233.8  | 280.4  | 126.7  | 108.6  | 107.1  | 126.3  | 186.3  | 189.4  |
| CD3G    | 108.7  | 134.1  | 87.6   | 88.8   | 87     | 92.1   | 113.8  | 125.2  |
| CD4     | 158.5  | 230.6  | 203.1  | 189.6  | 158.8  | 213.2  | 148.6  | 233.9  |

|        |         |         |         |         |         |         |         |         |
|--------|---------|---------|---------|---------|---------|---------|---------|---------|
| CD40   | 99.5    | 105.8   | 89.3    | 87.3    | 82.4    | 87.1    | 108     | 115.6   |
| CD40   | 115.5   | 146.7   | 102.7   | 114.5   | 122.5   | 125.6   | 118.9   | 157.9   |
| CD40LG | 78.6    | 93.2    | 98.5    | 86.5    | 90.5    | 89.7    | 80.7    | 85.5    |
| CD44   | 112.4   | 126.5   | 121.4   | 101.3   | 110.9   | 122.3   | 101.9   | 105.7   |
| CD44   | 249.8   | 403.2   | 221.1   | 228.7   | 192.8   | 385.5   | 244.5   | 415.8   |
| CD44   | 2650.2  | 3370.6  | 1839.1  | 2856.2  | 1914.4  | 2930.6  | 2199.4  | 2992.3  |
| CD46   | 1469.2  | 1826.6  | 1039.7  | 1018.5  | 816.1   | 1514    | 1057.5  | 1967.5  |
| CD47   | 692.4   | 777.5   | 455.4   | 622.2   | 462.8   | 626.9   | 493.4   | 657.6   |
| CD47   | 83.8    | 98.3    | 108.4   | 90.3    | 92.9    | 93.7    | 87.9    | 97.5    |
| CD48   | 94.4    | 109.1   | 91.3    | 98.1    | 90.9    | 95.1    | 103.4   | 107.6   |
| CD5    | 89.8    | 96      | 91.1    | 99.6    | 88.4    | 104.2   | 81.7    | 102.9   |
| CD52   | 780.8   | 826.5   | 530.4   | 5138.9  | 3828    | 4470.7  | 733.5   | 792.6   |
| CD53   | 722.1   | 1099.3  | 263.6   | 234.4   | 172.7   | 301.4   | 580.5   | 769.6   |
| CD53   | 750.4   | 966.8   | 387.2   | 281.5   | 233.8   | 381.3   | 562.5   | 843.1   |
| CD55   | 391.3   | 538.1   | 185.4   | 145     | 124.2   | 189.2   | 420.1   | 681.9   |
| CD58   | 1447.4  | 1559.5  | 718     | 401.1   | 302.1   | 412.3   | 1355.8  | 2837.5  |
| CD59   | 106     | 125.7   | 93.3    | 102.3   | 99.3    | 99.7    | 107.7   | 126.9   |
| CD59   | 111     | 131.6   | 85.1    | 89      | 82.9    | 88.8    | 120.1   | 134.1   |
| CD5L   | 106.1   | 131.3   | 85      | 80.2    | 75.5    | 89.5    | 107.4   | 112.7   |
| CD6    | 134.1   | 136     | 145.5   | 153.8   | 122.9   | 147.3   | 105.5   | 101.9   |
| CD63   | 768.2   | 902.3   | 328.8   | 386.3   | 326.6   | 440.2   | 741.1   | 602.3   |
| CD68   | 748.8   | 927.7   | 568.2   | 1260.7  | 911.4   | 1705.1  | 736.4   | 1296.8  |
| CD68   | 267.6   | 367.1   | 202     | 443.2   | 419.1   | 239.5   | 280.8   | 383.6   |
| CD69   | 77.6    | 95.8    | 89.4    | 87.7    | 79.9    | 81.8    | 86.7    | 95.1    |
| CD7    | 101.3   | 92.9    | 96.1    | 98.6    | 88.9    | 91.1    | 87      | 97.2    |
| CD72   | 140.4   | 141.3   | 103.3   | 98.6    | 95.4    | 99      | 140.9   | 150.1   |
| CD74   | 1176.6  | 1602.2  | 1082.8  | 883.7   | 762.8   | 902.8   | 1127.9  | 2109.2  |
| CD74   | 104.1   | 111.9   | 107.1   | 92.1    | 100.4   | 91.9    | 92.9    | 120.2   |
| CD74   | 509.6   | 790.9   | 412.3   | 366.9   | 272.2   | 353.2   | 505.9   | 929     |
| CD79A  | 103.2   | 108.2   | 92.5    | 96.8    | 92.3    | 93.3    | 109.1   | 101.1   |
| CD79A  | 127.3   | 140.3   | 126.6   | 114.2   | 95.8    | 113.3   | 136.9   | 136.7   |
| CD79A  | 108.4   | 115.2   | 86      | 76.2    | 83.4    | 84.4    | 99.7    | 132.5   |
| CD79B  | 233.7   | 309.2   | 169.2   | 135.1   | 124.1   | 137.5   | 216     | 234.2   |
| CD79B  | 125.7   | 139.8   | 136.7   | 124.8   | 111.4   | 108.6   | 114.6   | 123.3   |
| CD79B  | 115.4   | 127.9   | 102.5   | 85.9    | 92.4    | 94.4    | 115.2   | 119.1   |
| CD80   | 98.8    | 104.1   | 90.2    | 83.3    | 88.7    | 92      | 101.5   | 114.3   |
| CD81   | 22401.6 | 26994.8 | 17987.8 | 14865.5 | 11778.7 | 12648.4 | 22086.7 | 21098.7 |
| CD82   | 193.7   | 234.6   | 217     | 255.3   | 254.3   | 255.4   | 172.8   | 290.7   |
| CD82   | 199.7   | 285.5   | 128.4   | 118.8   | 129.1   | 130.9   | 203.3   | 231.7   |
| CD83   | 277.2   | 342.8   | 185.5   | 145.3   | 178.4   | 157.6   | 273.7   | 441.2   |
| CD83   | 185.3   | 280.4   | 140.7   | 98.8    | 101.7   | 114.6   | 166.3   | 250.7   |
| CD84   | 134.2   | 167.4   | 99.7    | 86.4    | 92.5    | 97.1    | 118.3   | 166     |
| CD86   | 148.2   | 187.5   | 98.4    | 136.5   | 118.4   | 160.6   | 134.7   | 168.2   |
| CD86   | 130     | 149.9   | 132.5   | 387.8   | 335.4   | 420.8   | 127.9   | 129.4   |
| CD86   | 76.7    | 90.8    | 101.9   | 94      | 90.1    | 85.2    | 81.8    | 75      |
| CD8A   | 100.1   | 103.4   | 91.8    | 85.3    | 80.5    | 82      | 96.5    | 95      |
| CD8A   | 96.3    | 101.1   | 96.2    | 90.1    | 86.8    | 97.1    | 91.1    | 106.7   |
| CD8A   | 80.9    | 95.8    | 101.3   | 86.6    | 80.6    | 93.7    | 82.5    | 96.5    |
| CD8B   | 83.5    | 100.4   | 86.3    | 82.1    | 82      | 77.5    | 93.1    | 94.2    |
| CD8B1  | 94.5    | 112.4   | 92      | 93.3    | 93.4    | 83.7    | 104.4   | 107.5   |



|          |         |         |         |        |        |        |         |         |
|----------|---------|---------|---------|--------|--------|--------|---------|---------|
| CD8B1    | 76.7    | 85.9    | 96      | 87.9   | 82.8   | 88.7   | 80.7    | 85.4    |
| CD8B1    | 78.1    | 81.6    | 94.9    | 88.1   | 87.3   | 86.7   | 74.3    | 81.3    |
| CD9      | 117.6   | 119.2   | 101.1   | 99.2   | 100.1  | 109.7  | 120.4   | 131.1   |
| CD96     | 88.9    | 93.2    | 90.7    | 76     | 82.4   | 91.8   | 90.9    | 96.1    |
| CD96     | 99.4    | 109     | 88.3    | 97.5   | 83.3   | 86.3   | 88.9    | 107.9   |
| CD97     | 152.7   | 163.4   | 125.7   | 113.9  | 105.4  | 137.3  | 128.5   | 152.3   |
| CD97     | 1671.2  | 2054.6  | 1511.4  | 1013   | 804.6  | 833.8  | 1263.1  | 1474.5  |
| CD99     | 801.6   | 1119.4  | 424.6   | 453.2  | 379.8  | 498    | 786.4   | 1115    |
| CD99L2   | 330     | 478.5   | 264.4   | 309.5  | 230.7  | 350.7  | 367.4   | 608.2   |
| CD99L2   | 2563.3  | 3195.4  | 2164.2  | 2753.7 | 2192.6 | 2805.3 | 2183.7  | 2643.4  |
| CDA      | 229.9   | 295.9   | 178.1   | 124.4  | 109.2  | 126.4  | 224     | 267.3   |
| CDADC1   | 108.4   | 115.7   | 108.1   | 104.4  | 93.7   | 104.4  | 105.3   | 140.7   |
| CDAN1    | 467.5   | 448.2   | 365.3   | 389.7  | 295.9  | 411.7  | 349.1   | 470.3   |
| CDAN1    | 6472.3  | 8058.3  | 2445.2  | 4196.7 | 4271.7 | 3647.3 | 6872.2  | 5805.3  |
| CDC14A   | 106.8   | 116.3   | 105.3   | 99.3   | 91.4   | 99.6   | 107.6   | 108     |
| CDC14A   | 126.3   | 126.3   | 99.1    | 88.4   | 89.9   | 80.7   | 101.1   | 118.8   |
| CDC14A   | 80.6    | 85.3    | 101.5   | 76.2   | 88.6   | 96.5   | 85.1    | 80.6    |
| CDC14A   | 109.7   | 119.1   | 89.4    | 92     | 98.1   | 99.1   | 89      | 134.5   |
| CDC14B   | 175.2   | 215.5   | 141.4   | 116.2  | 105.6  | 145.9  | 176     | 227.5   |
| CDC14B   | 338.5   | 372.8   | 349.1   | 360.2  | 239.3  | 473.4  | 326.5   | 485.8   |
| CDC14B   | 181.1   | 238.4   | 210.6   | 3277.5 | 2556.4 | 262.9  | 356.4   | 187.9   |
| CDC16    | 3658.9  | 5005.2  | 1537.8  | 1199.3 | 933.4  | 1565.2 | 3124.2  | 3496.8  |
| CDC16    | 2025.9  | 2472.1  | 692.5   | 536.6  | 443    | 833.8  | 1623    | 1933.9  |
| CDC16    | 3271.7  | 4259.1  | 2306.2  | 1778.9 | 1448.7 | 2387.9 | 3020    | 3256.8  |
| CDC2     | 2802    | 3525.9  | 1106.8  | 689.7  | 573.3  | 955.7  | 1915.9  | 2629.2  |
| CDC2     | 438.9   | 624.4   | 227.9   | 193.5  | 170.4  | 233.2  | 335.7   | 530.4   |
| CDC20    | 18354.6 | 20738.2 | 9863.5  | 6687.2 | 5588.9 | 6211.7 | 14822.7 | 12412.5 |
| CDC23    | 1616.7  | 1991.7  | 881.5   | 1176.2 | 775.3  | 1385.1 | 1325.5  | 2197.4  |
| CDC25A   | 913     | 1211.9  | 753.5   | 475.4  | 349.6  | 590.2  | 731     | 932.1   |
| CDC25A   | 247.1   | 279.2   | 162     | 186.3  | 151.8  | 147.6  | 175.4   | 248.6   |
| CDC25B   | 448.5   | 543.7   | 619.3   | 384.9  | 344.2  | 495.4  | 424.9   | 763.4   |
| CDC25C   | 539     | 729.7   | 363.2   | 287.7  | 257.9  | 274.6  | 408.7   | 486.5   |
| CDC25C   | 573     | 728.2   | 304.3   | 221.8  | 188.9  | 301.4  | 466.6   | 530.8   |
| CDC25C   | 411.5   | 598.3   | 309.3   | 228.3  | 216.1  | 295.5  | 310.6   | 386     |
| CDC26    | 3417.4  | 4247    | 1695.9  | 1128.9 | 797.7  | 1027.3 | 3169.5  | 4160.1  |
| CDC27    | 100.9   | 113.3   | 103.3   | 93.4   | 93.3   | 93.2   | 101.4   | 110.2   |
| CDC2L1   | 69.9    | 78.8    | 85.9    | 77.3   | 78.5   | 84.5   | 77.3    | 79.8    |
| CDC2L2   | 181.8   | 210.9   | 96.4    | 113.7  | 97.6   | 85.1   | 160.5   | 197.1   |
| CDC2L5   | 515.4   | 727.4   | 312     | 318.9  | 313    | 365.8  | 445.2   | 534.1   |
| CDC2L5   | 593.5   | 850.3   | 388.6   | 479    | 413.2  | 534.1  | 564.9   | 653.1   |
| CDC2L6   | 1460.3  | 2418.1  | 1118.4  | 1812.3 | 1679.1 | 2045.8 | 1656.8  | 1546.4  |
| CDC34    | 396.3   | 508.3   | 256.7   | 165.1  | 152.2  | 164.6  | 398.3   | 647.3   |
| CDC37    | 13230.3 | 15273.8 | 12258.4 | 9090.9 | 8471.4 | 8366.4 | 11101.3 | 11487.6 |
| CDC37L1  | 96.8    | 114.9   | 93      | 87.6   | 83.3   | 91.9   | 105.5   | 114.8   |
| CDC40    | 1789.7  | 2423.9  | 1117.9  | 1581.4 | 1137.9 | 2341.4 | 1619.8  | 2175.8  |
| CDC42    | 109.8   | 141.5   | 94.8    | 91.7   | 84.4   | 85.5   | 119.3   | 141.2   |
| CDC42    | 78.8    | 80.3    | 92.5    | 85.2   | 84.1   | 80.8   | 72.6    | 77      |
| CDC42    | 536.3   | 805.7   | 319.6   | 234.6  | 197.4  | 234.9  | 434.4   | 536     |
| CDC42    | 1385.3  | 1695.1  | 467.5   | 398.9  | 303.8  | 350.5  | 1282.2  | 2176.6  |
| CDC42BPA | 171.3   | 222.9   | 135.2   | 96     | 90     | 92.2   | 199.2   | 205.2   |

|          |        |        |        |        |        |        |        |        |
|----------|--------|--------|--------|--------|--------|--------|--------|--------|
| CDC42BPA | 97.4   | 103.1  | 84     | 79.8   | 77.2   | 84.2   | 84.3   | 101.7  |
| CDC42BPB | 93.9   | 128    | 122.4  | 133.3  | 128.2  | 185.5  | 106.4  | 136.8  |
| CDC42BPG | 83.5   | 98.6   | 85.8   | 77.6   | 78.6   | 84.8   | 86.5   | 92     |
| CDC42EP1 | 110.3  | 138    | 99.7   | 92.8   | 83.6   | 83.1   | 114.2  | 124.3  |
| CDC42EP1 | 172.3  | 246.8  | 134.6  | 99.5   | 100.7  | 105.3  | 171.6  | 200.6  |
| CDC42EP2 | 94.1   | 123.4  | 120.5  | 98.6   | 87.8   | 88.1   | 112.8  | 128.2  |
| CDC42EP3 | 274.8  | 406.1  | 203.8  | 143.9  | 126.8  | 149.5  | 258.8  | 330.8  |
| CDC42EP4 | 457.8  | 539.3  | 495.8  | 709.4  | 673.3  | 690.7  | 567.2  | 659.9  |
| CDC42EP5 | 88.5   | 97.7   | 106.7  | 81.3   | 86.3   | 84.5   | 101.5  | 100    |
| CDC42SE1 | 606    | 769.3  | 457.5  | 241.3  | 204.3  | 242.6  | 476.3  | 922.8  |
| CDC42SE1 | 248.1  | 315    | 153.8  | 139.6  | 108.1  | 126    | 212.2  | 321.3  |
| CDC42SE2 | 355.9  | 435.7  | 128.7  | 150.6  | 118.9  | 160.3  | 225    | 337.8  |
| CDC42SE2 | 1323.1 | 1688.4 | 715.8  | 1141.2 | 783.4  | 1192.4 | 1189.4 | 1541.9 |
| CDC45L   | 3729.2 | 4619.6 | 2464.7 | 2639.5 | 2064   | 3163.1 | 2374   | 2424.8 |
| CDC5L    | 1068.9 | 1317   | 431.5  | 500.1  | 383.4  | 1009.7 | 875    | 1918.4 |
| CDC6     | 153.2  | 207.8  | 147.8  | 122.2  | 114.3  | 135.7  | 145.3  | 178.7  |
| CDC7     | 715.6  | 735.6  | 242    | 318.6  | 249.7  | 304.3  | 495.6  | 814.3  |
| CDC73    | 112.1  | 155.1  | 94.6   | 101.4  | 99.2   | 102    | 109.5  | 126.7  |
| CDC91L1  | 837.8  | 933.8  | 349.6  | 315.2  | 302.3  | 290.6  | 646.5  | 708.1  |
| CDCA1    | 376    | 529.3  | 147    | 142.4  | 161.1  | 140.3  | 250.4  | 293.9  |
| CDCA2    | 807.1  | 1091.5 | 590.4  | 340.8  | 315.1  | 576    | 669    | 838.5  |
| CDCA3    | 601.2  | 726.7  | 300.4  | 224.9  | 200.5  | 242.4  | 555.8  | 974.1  |
| CDCA4    | 157.5  | 207.9  | 121.6  | 108.6  | 95.2   | 117.8  | 144.9  | 210    |
| CDCA4    | 863.9  | 1299.2 | 628.1  | 393.6  | 356.1  | 520    | 728.7  | 983.8  |
| CDCA4    | 1102.4 | 1439.3 | 504.7  | 284.3  | 266.9  | 315.7  | 950.4  | 1006.7 |
| CDCA5    | 3270.7 | 3660   | 2708.3 | 1728.6 | 1521   | 1925.8 | 2386.1 | 3777   |
| CDCA7    | 6646   | 9032.2 | 4805.2 | 3416.2 | 2477.8 | 3272.4 | 3576.5 | 3851.8 |
| CDCA7    | 125.2  | 124.5  | 98.1   | 89.9   | 81     | 83.4   | 86.1   | 106.3  |
| CDCA7L   | 784.4  | 1053.8 | 490.2  | 329.6  | 278.7  | 385    | 441.9  | 621.8  |
| CDCA8    | 987.9  | 1328.8 | 765.4  | 585.4  | 531.1  | 688.5  | 822.1  | 1269.1 |
| CDCP1    | 99.2   | 116.4  | 108.9  | 109.2  | 104.9  | 91.1   | 95.9   | 97.8   |
| CDCP1    | 98.5   | 102.1  | 82.9   | 98.6   | 91.4   | 89.7   | 108.2  | 102    |
| CDCP1    | 96.4   | 99.9   | 91.9   | 90.1   | 79.7   | 85.1   | 83.9   | 93.1   |
| CDCP2    | 80.4   | 95.9   | 97.5   | 85     | 88.9   | 89.7   | 82.7   | 84.2   |
| CDGAP    | 91.3   | 101.5  | 92.1   | 85.1   | 78.1   | 79.2   | 88     | 112.2  |
| CDH1     | 82.6   | 84.5   | 91.2   | 88.7   | 89.6   | 88.1   | 80.9   | 85     |
| CDH10    | 83.5   | 90.4   | 94.3   | 96.7   | 86     | 77     | 83.4   | 88.5   |
| CDH11    | 94.1   | 100.5  | 114    | 100.9  | 104.4  | 92.7   | 101.8  | 107.6  |
| CDH12    | 68.5   | 79.9   | 80.8   | 83.6   | 80.5   | 80.7   | 72.1   | 81.7   |
| CDH12P   | 103.4  | 110.1  | 101.8  | 93.5   | 85.2   | 85.1   | 103    | 135.4  |
| CDH13    | 84.1   | 83.7   | 93.9   | 79.1   | 83.7   | 84.4   | 80.1   | 84.6   |
| CDH15    | 109.4  | 133.5  | 98.5   | 112.1  | 100.3  | 119.6  | 131.9  | 141.6  |
| CDH16    | 92     | 94.6   | 107.5  | 114.1  | 88.7   | 106.9  | 87.1   | 80.3   |
| CDH17    | 80.7   | 89     | 94.6   | 90.6   | 77.9   | 82.6   | 83.3   | 87.9   |
| CDH18    | 79.3   | 82.9   | 79.9   | 75     | 69.7   | 77.2   | 82.2   | 80.1   |
| CDH19    | 77.9   | 98.9   | 90     | 72.3   | 84.4   | 88.1   | 82.9   | 90.8   |
| CDH2     | 956.2  | 1143.2 | 595.5  | 692.7  | 560.7  | 573.6  | 734    | 954.1  |
| CDH20    | 147.1  | 187.9  | 104.4  | 96.2   | 94.6   | 87.5   | 152.5  | 167.6  |
| CDH22    | 91.4   | 103.3  | 84.3   | 88.2   | 90.7   | 81.9   | 98.3   | 93.7   |
| CDH23    | 159.7  | 190.4  | 117.2  | 133    | 122.6  | 132.1  | 152    | 169.9  |

|          |        |        |        |        |        |        |        |        |
|----------|--------|--------|--------|--------|--------|--------|--------|--------|
| CDH23    | 143.1  | 164.9  | 108.1  | 103.8  | 98.8   | 119.4  | 119.4  | 140.5  |
| CDH23    | 100.7  | 119.4  | 119    | 127    | 117.6  | 152.2  | 99.1   | 103.3  |
| CDH24    | 99.7   | 116.7  | 96.2   | 90.5   | 78.2   | 86.1   | 104    | 128.5  |
| CDH24    | 126.8  | 124.6  | 94.1   | 87.9   | 95.5   | 98.8   | 112.5  | 138.4  |
| CDH24    | 82.7   | 83.7   | 83.1   | 81.6   | 82.6   | 79.1   | 82.8   | 90.7   |
| CDH26    | 91     | 108.2  | 109.5  | 97.3   | 103.5  | 105.2  | 98.8   | 95.3   |
| CDH26    | 103    | 118.7  | 92.4   | 108.8  | 83     | 86.9   | 103.3  | 125    |
| CDH3     | 89.4   | 88.9   | 94.8   | 94.9   | 85.4   | 86.3   | 86.4   | 91.1   |
| CDH4     | 88.4   | 109.6  | 92     | 80.4   | 86.9   | 86.9   | 93.8   | 112.2  |
| CDH5     | 82.5   | 90.5   | 91.7   | 86.5   | 88.1   | 84.3   | 111.7  | 128    |
| CDH6     | 81.6   | 94.4   | 73.2   | 78.4   | 81.5   | 83.5   | 77.6   | 87.1   |
| CDH7     | 148.1  | 169.4  | 95.4   | 92.5   | 90.2   | 102.3  | 137    | 141.3  |
| CDH7     | 87.7   | 112.7  | 91.2   | 94     | 85     | 89.4   | 97.7   | 103.2  |
| CDH7     | 86.4   | 105    | 90     | 95.1   | 90.9   | 91.8   | 84.2   | 96.7   |
| CDH8     | 84     | 91     | 76.8   | 75.6   | 77.2   | 81.8   | 86.7   | 97.5   |
| CDH9     | 99.4   | 126.8  | 129.6  | 113.9  | 114    | 119.2  | 103    | 104.7  |
| CDIPT    | 245.9  | 254.9  | 128.1  | 112.6  | 111.8  | 154.1  | 264.8  | 359.1  |
| CDK10    | 1674.9 | 1529.9 | 1179.2 | 1113.2 | 1293.4 | 1504.7 | 924.9  | 890.8  |
| CDK10    | 130    | 185.1  | 115.9  | 99.1   | 89.4   | 122.1  | 126.8  | 163.7  |
| CDK2     | 530.7  | 652.1  | 243.4  | 231.8  | 217    | 230.1  | 385.5  | 444.6  |
| CDK2     | 1517.4 | 2123.3 | 1015   | 869.8  | 816    | 1251.5 | 1132.5 | 1697.6 |
| CDK2AP2  | 341.3  | 425.7  | 202.6  | 123.2  | 113.4  | 133.9  | 351.9  | 503.9  |
| CDK3     | 113.2  | 124.4  | 109.7  | 105    | 103.2  | 116.1  | 104.6  | 112.8  |
| CDK4     | 3732.9 | 4581.1 | 1779.5 | 1373.8 | 1152.3 | 1438.7 | 3339.1 | 4193.3 |
| CDK5     | 550.1  | 768.3  | 285.1  | 311.2  | 258.5  | 330    | 379.7  | 502.3  |
| CDK5R1   | 111.3  | 110    | 92.3   | 96.9   | 100.2  | 108.9  | 98.5   | 160.2  |
| CDK5R2   | 92.9   | 106.2  | 99.8   | 88.7   | 87.7   | 90.3   | 97.7   | 101.9  |
| CDK5RAP1 | 872.1  | 1100   | 491.6  | 525    | 477.1  | 655.8  | 693.9  | 875.3  |
| CDK5RAP1 | 172.2  | 177    | 116.6  | 102.1  | 92.8   | 89.1   | 150.2  | 154.7  |
| CDK5RAP2 | 207.7  | 297.8  | 163.7  | 163.8  | 164.2  | 245.5  | 455.3  | 637.7  |
| CDK5RAP2 | 1101.3 | 1626   | 918    | 961.5  | 917.7  | 1312.3 | 1452.4 | 1672.4 |
| CDK5RAP2 | 99.6   | 92.2   | 109.7  | 107.8  | 116.7  | 137.1  | 95.7   | 104.9  |
| CDK5RAP3 | 1401.8 | 1468.1 | 1213.9 | 1154.1 | 1340.3 | 1866   | 841.2  | 1180.7 |
| CDK5RAP3 | 496.8  | 478.3  | 310    | 178.6  | 221.5  | 191.7  | 272.2  | 492.8  |
| CDK5RAP3 | 1452.8 | 1556.7 | 1261.9 | 1203.2 | 1365.7 | 1819   | 1064.8 | 1341.7 |
| CDK6     | 2158.4 | 3887   | 1355.2 | 2066   | 1812.3 | 2365.1 | 2789.6 | 3242.7 |
| CDK7     | 780.9  | 998.7  | 296.4  | 267.9  | 281.4  | 422.1  | 642.7  | 986.4  |
| CDK8     | 179.8  | 238.1  | 137.9  | 150.2  | 131    | 169.9  | 165    | 217.7  |
| CDK9     | 605.6  | 749.7  | 398    | 374.4  | 353.3  | 438.6  | 490.5  | 626.5  |
| CDKAL1   | 196.5  | 276.7  | 160.3  | 163.7  | 125.2  | 157.5  | 165.5  | 188.2  |
| CDKL1    | 128.1  | 165.1  | 119.7  | 108    | 99.4   | 110.4  | 125.5  | 136.2  |
| CDKL2    | 75.2   | 90.8   | 79.8   | 79.8   | 71.7   | 78.4   | 79.7   | 88.7   |
| CDKL3    | 348.4  | 439.7  | 223.4  | 206.7  | 173.3  | 242.2  | 354.4  | 509.1  |
| CDKL4    | 95.1   | 102    | 99.8   | 105.1  | 92.7   | 96.9   | 88.4   | 105.7  |
| CDKL5    | 74.7   | 84.9   | 88.5   | 93.6   | 83     | 83.2   | 88.7   | 95.8   |
| CDKL5    | 103.2  | 100.9  | 97.4   | 104    | 81.8   | 91.4   | 102.6  | 100.1  |
| CDKL5    | 83.6   | 91.7   | 89.8   | 85.2   | 89.2   | 93.9   | 89.9   | 87     |
| CDKN1A   | 362    | 393.3  | 214    | 269.9  | 244.1  | 294.5  | 533.9  | 605.7  |
| CDKN1A   | 98.5   | 134.5  | 101.8  | 80.7   | 92.4   | 88.5   | 105.1  | 114.9  |
| CDKN1B   | 363.6  | 438.5  | 247.6  | 256.7  | 238.5  | 417.8  | 319.7  | 510.7  |

|          |        |        |        |        |        |        |        |         |
|----------|--------|--------|--------|--------|--------|--------|--------|---------|
| CDKN1C   | 96     | 110.3  | 93.6   | 110.1  | 89.8   | 113.7  | 104.3  | 122.8   |
| CDKN2A   | 119.9  | 165.2  | 103.2  | 95.5   | 89.6   | 95.7   | 125.8  | 141     |
| CDKN2A   | 80.4   | 92.9   | 105.3  | 96.2   | 85.8   | 94.1   | 78.4   | 97.6    |
| CDKN2A   | 98.9   | 108.3  | 97.5   | 83.1   | 89.5   | 94.2   | 94.9   | 95.4    |
| CDKN2B   | 193    | 235.5  | 127.6  | 127.2  | 118.4  | 128    | 161.2  | 176.6   |
| CDKN2B   | 86.3   | 88.3   | 113.8  | 85.9   | 88.4   | 90.8   | 81.4   | 91.5    |
| CDKN2C   | 1300.4 | 1644.9 | 799.7  | 846.1  | 811.8  | 1486.9 | 858.4  | 930.1   |
| CDKN2C   | 117    | 124.4  | 92.3   | 81.9   | 79.2   | 92.8   | 114.6  | 122.3   |
| CDKN2C   | 237.5  | 301.6  | 130.3  | 109.8  | 101.3  | 95.6   | 286    | 305.4   |
| CDKN2D   | 116.2  | 119.9  | 99.8   | 93.1   | 85.3   | 96.1   | 111.7  | 131.3   |
| CDKN2D   | 301.6  | 392.7  | 245.7  | 153.9  | 183.2  | 182.9  | 287.4  | 425.1   |
| CDKN3    | 2738.3 | 3298.3 | 1005.9 | 613    | 521.1  | 712.3  | 2186.1 | 3667.7  |
| CDO1     | 297.9  | 333.5  | 156.8  | 127.4  | 110.7  | 125.1  | 241.4  | 377.9   |
| CDON     | 104.6  | 106.3  | 94.9   | 78.9   | 87.4   | 92.8   | 103.2  | 100     |
| CDON     | 92.2   | 124.1  | 88.2   | 94.3   | 80.3   | 104.9  | 113.8  | 116.7   |
| CDR1     | 95.8   | 112.6  | 108.4  | 96.9   | 86     | 98.9   | 91.9   | 95.4    |
| CDR2     | 590.3  | 799.4  | 326    | 283.2  | 221    | 327.6  | 529.9  | 698.7   |
| CDR2L    | 378.3  | 455.7  | 284.6  | 257    | 224.1  | 239.5  | 327.1  | 359.7   |
| CDRT1    | 86.1   | 93.8   | 94.7   | 91     | 88     | 93.2   | 87.9   | 89.9    |
| CDRT15P  | 138.3  | 155.6  | 97.1   | 94.7   | 76.2   | 87.1   | 132.7  | 142     |
| CDS1     | 203.3  | 278.4  | 149.5  | 113    | 110.1  | 118.6  | 192.5  | 241.2   |
| CDS2     | 178.9  | 230.4  | 185    | 183.5  | 159.1  | 170.2  | 210.8  | 330.5   |
| CDSN     | 95.9   | 118.1  | 87.8   | 86.3   | 87.8   | 89.4   | 90.4   | 117.8   |
| CDT1     | 2074.7 | 2737.4 | 1144.3 | 571.3  | 544.7  | 486.2  | 1609.8 | 1053.7  |
| CDV3     | 1563.5 | 2264.9 | 638.7  | 751.3  | 687.8  | 1467.9 | 1513.7 | 2808.5  |
| CDV3     | 2035.1 | 2872.5 | 888.2  | 1180.9 | 791.6  | 1687.7 | 1875.2 | 2881.1  |
| CDX1     | 83.4   | 91.5   | 86.1   | 86     | 76.9   | 86     | 88.7   | 87.8    |
| CDX2     | 135.6  | 146.7  | 86.3   | 81.7   | 76.2   | 87.2   | 111    | 124.2   |
| CDX4     | 85.8   | 117    | 97.9   | 82.3   | 88.1   | 91.3   | 95.7   | 108     |
| CDY1     | 102.9  | 106.2  | 94.4   | 86.2   | 83.5   | 88.5   | 100.4  | 110.7   |
| CDY1     | 87     | 89.5   | 88.8   | 77.1   | 85.1   | 88.5   | 79.5   | 98.2    |
| CDY1B    | 78     | 90.3   | 102.3  | 93.5   | 101.2  | 91.9   | 82.3   | 84.2    |
| CDY2A    | 72.7   | 81.9   | 92.9   | 82.2   | 80.7   | 88.7   | 73.8   | 79.5    |
| CDY2B    | 118.4  | 137    | 96.4   | 86     | 83.2   | 82.7   | 108.6  | 122.2   |
| CDYL     | 193.6  | 252.2  | 133.3  | 128.3  | 124.9  | 154.6  | 167.3  | 247     |
| CDYL     | 78.6   | 92     | 96.1   | 79.5   | 81     | 78.6   | 90     | 87.6    |
| CDYL2    | 102    | 107.6  | 99.6   | 92.4   | 101.9  | 87.9   | 97.7   | 109.3   |
| CEACAM1  | 140.4  | 159.2  | 112.7  | 119.3  | 100    | 109.4  | 163.3  | 171.7   |
| CEACAM1  | 138.2  | 135.2  | 103.8  | 94.9   | 95     | 102.3  | 125.7  | 143.5   |
| CEACAM1  | 86.6   | 95.6   | 88.1   | 81     | 80.1   | 96     | 91.9   | 110.6   |
| CEACAM19 | 116.6  | 133.7  | 99.4   | 91.2   | 90.7   | 102.6  | 115.1  | 140     |
| CEACAM20 | 92.2   | 103.3  | 84.1   | 80.3   | 88.1   | 82.7   | 96     | 98.4    |
| CEACAM21 | 119.7  | 128.7  | 120.1  | 109.1  | 103.6  | 99.8   | 118.4  | 124.7   |
| CEACAM3  | 89     | 117.7  | 96.7   | 86.8   | 88.5   | 92.8   | 103.6  | 113.7   |
| CEACAM4  | 118.8  | 144.6  | 109.5  | 114.1  | 89.8   | 102.7  | 120.8  | 129.2   |
| CEACAM5  | 105.5  | 114.8  | 90.9   | 97.4   | 84.8   | 99.1   | 97.2   | 107.7   |
| CEACAM6  | 435.5  | 535.1  | 353.3  | 181.5  | 138.7  | 189.2  | 335.3  | 678.4   |
| CEACAM7  | 78.8   | 75.4   | 102.2  | 92.4   | 88.3   | 99.4   | 78.9   | 79.4    |
| CEACAM8  | 72.3   | 89.5   | 98.3   | 82.8   | 77.2   | 83.7   | 76.6   | 76.4    |
| CEBPA    | 4194.9 | 5271.9 | 4896   | 3509.9 | 2929.3 | 6341.4 | 4925.4 | 10897.5 |

|         |        |        |        |        |        |        |        |        |
|---------|--------|--------|--------|--------|--------|--------|--------|--------|
| CEBPB   | 1846.4 | 2240.7 | 1540.8 | 2040.1 | 1640.7 | 2567.6 | 1774.6 | 2137.3 |
| CEBPD   | 1908   | 2441.5 | 1577.2 | 1519.2 | 1103.7 | 1892.5 | 1680.4 | 3026   |
| CEBPE   | 168.7  | 191.7  | 147.3  | 118.3  | 109.7  | 132.8  | 166.4  | 159.9  |
| CEBPG   | 1251.5 | 1507.2 | 829    | 843.8  | 692.3  | 1023.3 | 1054.4 | 1956.8 |
| CEBPZ   | 3311.3 | 4031.7 | 1528.1 | 1681.3 | 1215   | 2959.4 | 2716.2 | 4071.3 |
| CECR1   | 140.6  | 156.3  | 109.8  | 130.3  | 127.4  | 104.4  | 117    | 104.9  |
| CECR1   | 632    | 827.5  | 782.4  | 1828.1 | 1459.8 | 1908.5 | 577.9  | 1074.2 |
| CECR1   | 97.6   | 133.2  | 95.7   | 85.8   | 79.6   | 92     | 98.4   | 110.3  |
| CECR5   | 241.8  | 299    | 190    | 186.9  | 174.7  | 267.7  | 202.5  | 277.8  |
| CECR5   | 3363.6 | 4421.8 | 1793.9 | 2159.2 | 1521.2 | 2353   | 2458.7 | 2362.4 |
| CECR6   | 337.6  | 393.3  | 387.4  | 350.9  | 286.1  | 447.5  | 262.2  | 547.6  |
| CEECAM1 | 172    | 230    | 180.7  | 144.4  | 133    | 178    | 161.4  | 252.6  |
| CEI     | 105    | 105.2  | 104.6  | 89     | 89.4   | 100.5  | 90.2   | 97.7   |
| CEL     | 130.1  | 118.1  | 126.3  | 106.3  | 95.8   | 115.7  | 112.9  | 202.7  |
| CELSR1  | 214.2  | 224.9  | 141.4  | 109    | 110.9  | 123.3  | 209.9  | 211.7  |
| CELSR2  | 160.9  | 209.8  | 123.3  | 121.8  | 115.6  | 131.3  | 164.5  | 262.9  |
| CELSR3  | 137.4  | 161.5  | 131.5  | 102.5  | 103.3  | 123.3  | 127.8  | 163.4  |
| CEMP1   | 123    | 148.6  | 98.9   | 85.8   | 86.2   | 87.3   | 127.7  | 156.5  |
| CENPA   | 2126.7 | 2825.1 | 1141.7 | 799.6  | 683.3  | 902.3  | 1811.6 | 2215.9 |
| CENPA   | 1081.2 | 1405.8 | 519.9  | 315.1  | 285.6  | 345    | 823.7  | 928.9  |
| CENPB   | 4574.5 | 5534.4 | 2646.5 | 2065.4 | 1660.5 | 2067   | 3996.2 | 3792.9 |
| CENPC1  | 185.4  | 206.4  | 105.4  | 108    | 93.5   | 105.9  | 161.9  | 226.6  |
| CENPE   | 441.4  | 510.4  | 165.2  | 177.8  | 167.2  | 286.1  | 330.3  | 385.8  |
| CENPF   | 600.9  | 869.6  | 560.2  | 629    | 618.7  | 993.4  | 485.8  | 472    |
| CENPH   | 95.8   | 118.2  | 102.7  | 100.2  | 90.3   | 86.8   | 103    | 79.7   |
| CENPI   | 83.5   | 93     | 97.9   | 85.7   | 81.1   | 80.7   | 86.6   | 87.9   |
| CENPJ   | 575.9  | 613.7  | 222.5  | 229.5  | 251    | 333.3  | 621.6  | 1018.5 |
| CENPM   | 1972.6 | 2600.7 | 1318.8 | 1043   | 861.2  | 821.2  | 1608.6 | 1903.5 |
| CENPM   | 861.3  | 1169.8 | 482.1  | 327.5  | 318.9  | 275.6  | 657.9  | 679.4  |
| CENPO   | 134.3  | 167    | 125.6  | 113.1  | 109.5  | 111.1  | 138.6  | 151.2  |
| CENTA1  | 3892.7 | 4568.4 | 3149.6 | 2500.8 | 2285.7 | 2936.3 | 3296.5 | 3472.8 |
| CENTA2  | 740.8  | 1041.6 | 439.9  | 363.9  | 289.6  | 339.7  | 495.3  | 573.1  |
| CENTB1  | 105    | 115    | 103.8  | 183    | 175.5  | 253.1  | 96.3   | 121.2  |
| CENTB2  | 356.5  | 413.7  | 161.1  | 264.1  | 200.3  | 308    | 382    | 636.8  |
| CENTB5  | 99.9   | 115.8  | 102.6  | 97.3   | 90.3   | 93.7   | 107.8  | 109.5  |
| CENTD1  | 261.2  | 301.3  | 149.8  | 146.2  | 131.5  | 141.2  | 281.8  | 413.3  |
| CENTD1  | 86.3   | 85.6   | 77.7   | 85.1   | 74.4   | 81.1   | 82.9   | 87.4   |
| CENTD2  | 108.7  | 119    | 93.2   | 85.5   | 77.7   | 74.7   | 100.3  | 136.4  |
| CENTD2  | 159.6  | 192.8  | 157.1  | 170.1  | 143.5  | 246.2  | 130.7  | 189.8  |
| CENTD3  | 240.9  | 250.5  | 197.9  | 206.5  | 186.9  | 202.3  | 181.9  | 207.3  |
| CENTG1  | 92     | 106.5  | 90.5   | 84     | 87.5   | 87.6   | 94.5   | 104.7  |
| CENTG2  | 89     | 110.6  | 90.1   | 94.9   | 88.7   | 94.3   | 89.9   | 105.6  |
| CENTG2  | 253    | 299.5  | 186.2  | 222.4  | 186.5  | 240.1  | 220.6  | 309.5  |
| CENTG2  | 81     | 101.3  | 97.3   | 87.9   | 85.6   | 80.1   | 77.4   | 93.3   |
| CENTG3  | 126.9  | 149.3  | 101.6  | 104.6  | 95.4   | 95.7   | 117.6  | 132.3  |
| CENTG3  | 188.3  | 232.1  | 130.7  | 110.7  | 107.4  | 103.9  | 181.7  | 223.8  |
| CENTG3  | 235.4  | 300.8  | 307.5  | 374.1  | 383.3  | 545.2  | 217.2  | 530.9  |
| CEP1    | 641.5  | 856.7  | 490.1  | 534    | 489.4  | 963.4  | 432    | 608.8  |
| CEP135  | 667.3  | 769    | 528.2  | 518.3  | 495.4  | 755.9  | 513.6  | 696.4  |
| CEP152  | 363.3  | 379.2  | 254.8  | 284    | 287.5  | 448.2  | 248.5  | 445.9  |

|        |         |         |        |        |        |         |         |         |
|--------|---------|---------|--------|--------|--------|---------|---------|---------|
| CEP164 | 182.2   | 209.6   | 305.9  | 278.1  | 250.5  | 374.1   | 175.1   | 271.8   |
| CEP170 | 133.7   | 191.2   | 142.5  | 142.8  | 134.8  | 146     | 120.8   | 147.1   |
| CEP170 | 130.6   | 176.6   | 101.6  | 107.3  | 90.5   | 87.9    | 119.2   | 128.2   |
| CEP192 | 620.3   | 928.9   | 370.3  | 588.2  | 530.2  | 857.3   | 542.9   | 542.1   |
| CEP250 | 126.7   | 166.4   | 103.7  | 105.8  | 97.8   | 108.6   | 116.5   | 144.9   |
| CEP250 | 141.7   | 167.5   | 133.6  | 114.9  | 114.7  | 146     | 153.6   | 155.6   |
| CEP27  | 632.6   | 705.7   | 272.9  | 343.2  | 356.6  | 250.3   | 510.8   | 640.7   |
| CEP290 | 128     | 138     | 134.1  | 154.7  | 124.8  | 195.9   | 119.2   | 172.3   |
| CEP55  | 1074.6  | 1428.1  | 532.5  | 347.9  | 331.5  | 542.8   | 684.1   | 1339.9  |
| CEP57  | 209.5   | 228.1   | 150.9  | 128.6  | 132.3  | 172.4   | 163.2   | 384.7   |
| CEP63  | 1380.1  | 1649.6  | 788.8  | 1026.3 | 846.1  | 1519.4  | 975.8   | 1608.4  |
| CEP63  | 94.4    | 105.5   | 95.2   | 89.8   | 91.2   | 93.2    | 90      | 109.8   |
| CEP63  | 85.5    | 101.5   | 107.3  | 94.9   | 92.3   | 98.6    | 85.6    | 87.5    |
| CEP63  | 122.1   | 137.1   | 105.9  | 100.1  | 97.3   | 108.1   | 111.2   | 126.4   |
| CEP68  | 144     | 183.5   | 122.2  | 127.7  | 100.7  | 117.9   | 122.8   | 160.8   |
| CEP70  | 313.2   | 376.4   | 172.3  | 152.8  | 160.1  | 189.1   | 226.9   | 255.3   |
| CEP72  | 144.4   | 168.3   | 163.5  | 134    | 144.7  | 172.5   | 145.1   | 197.5   |
| CEP76  | 137.4   | 174     | 134.2  | 122.8  | 116.1  | 123.5   | 132.9   | 188.6   |
| CEPT1  | 153.2   | 156.5   | 98.6   | 98.4   | 95.7   | 88.5    | 127.6   | 137     |
| CEPT1  | 974.7   | 1161.3  | 280.6  | 169.6  | 156.2  | 173.5   | 529     | 781.7   |
| CEPT1  | 1697.9  | 2297.9  | 746.9  | 419.7  | 326.2  | 576.3   | 1367.8  | 2232.5  |
| CER1   | 93.4    | 105.4   | 104    | 85.6   | 80.3   | 83.4    | 98.8    | 99.2    |
| CERK   | 892.8   | 1054.8  | 689    | 893.8  | 687.1  | 927.2   | 899.8   | 1338.8  |
| CERK   | 758.7   | 879.9   | 366.6  | 444.2  | 358.6  | 443.4   | 636.6   | 1063.7  |
| CERK   | 163.4   | 200.6   | 130.5  | 123.4  | 100.3  | 127.4   | 148.3   | 156.6   |
| CERKL  | 106.8   | 143.7   | 109.5  | 93     | 93.9   | 96.9    | 93.9    | 122.8   |
| CERKL  | 67.5    | 98.1    | 91     | 85.7   | 79.9   | 84.7    | 77.3    | 85.3    |
| CERKL  | 85.2    | 101.6   | 106.8  | 89.6   | 85.2   | 87.5    | 83.7    | 98.4    |
| CERKL  | 94.6    | 113.7   | 94.3   | 87.7   | 95.1   | 85.3    | 96.8    | 100.3   |
| CES1   | 2982.2  | 3501.9  | 1536.3 | 3395.8 | 2516.2 | 3652    | 3638.3  | 4796    |
| CES2   | 1813.2  | 2115.6  | 1185.3 | 863.4  | 748.7  | 712     | 1484.4  | 2355.2  |
| CES2   | 228.7   | 234.2   | 157.8  | 155.8  | 141.4  | 154.1   | 179.5   | 296.1   |
| CES3   | 124.3   | 119.2   | 96.6   | 94.6   | 89.2   | 100.6   | 111.3   | 128.5   |
| CES4   | 1129.7  | 1449.3  | 522.1  | 627.8  | 604.6  | 417.6   | 1085.8  | 1173.1  |
| CES7   | 98      | 126.9   | 93     | 89.5   | 86.7   | 89.1    | 97.8    | 107     |
| CESK1  | 75.2    | 81      | 79.6   | 82.2   | 82.5   | 86.1    | 78.4    | 87.9    |
| CETN1  | 81.5    | 97.5    | 94.1   | 86.6   | 78.2   | 79.2    | 86.3    | 86.3    |
| CETN2  | 2804.9  | 3658.8  | 2114.1 | 1700.1 | 1263.8 | 1778.8  | 2352.7  | 3539.6  |
| CETN3  | 101.8   | 111.2   | 100.5  | 86     | 80.4   | 84.5    | 110.4   | 117.5   |
| CETP   | 188.8   | 231.8   | 146.9  | 163.9  | 145.8  | 190.4   | 174.6   | 192.8   |
| CFB    | 90      | 93.2    | 95.9   | 105    | 108.5  | 116.3   | 85.8    | 90.3    |
| CFC1   | 81.2    | 96.5    | 97.5   | 82.6   | 83     | 89.2    | 82.9    | 89.1    |
| CFD    | 11184.2 | 13777.4 | 6526.1 | 9733.4 | 7985.4 | 11803.3 | 10259.6 | 13854.9 |
| CFDP1  | 548.5   | 800.3   | 161.8  | 135.8  | 118.5  | 153.2   | 473.9   | 473.1   |
| CFH    | 81.7    | 92.9    | 93.4   | 88.7   | 89.4   | 79.4    | 85.7    | 94.8    |
| CFH    | 109.6   | 120.1   | 118.8  | 115.9  | 109.5  | 113.9   | 110.2   | 106.7   |
| CFH    | 100.6   | 119.3   | 82.6   | 85.9   | 83.2   | 86.7    | 91.9    | 117.1   |
| CFHR1  | 105.2   | 118.5   | 118.6  | 98.6   | 76.5   | 83.1    | 106.3   | 113.7   |
| CFHR2  | 119.9   | 136.5   | 110.9  | 101.3  | 102.9  | 110.3   | 124.5   | 127     |
| CFHR3  | 88.2    | 82.4    | 86.7   | 92.8   | 81.2   | 92.6    | 87.4    | 85.8    |

|         |         |         |        |        |        |        |         |         |
|---------|---------|---------|--------|--------|--------|--------|---------|---------|
| CFHR4   | 79.6    | 94.7    | 88.2   | 77.7   | 85.2   | 82     | 81      | 91.6    |
| CFHR5   | 111.8   | 126.4   | 95.8   | 84.1   | 82.7   | 77.2   | 108     | 116.4   |
| CFI     | 120.2   | 135.9   | 99.1   | 75.7   | 81.3   | 89.3   | 111.8   | 127.9   |
| CFL1    | 10478.3 | 14410.5 | 7139.6 | 5508.4 | 4455.6 | 4674.6 | 10456.7 | 13270.5 |
| CFL2    | 139.3   | 154.1   | 99.7   | 93.8   | 83.2   | 80.8   | 101.2   | 128.2   |
| CFL2    | 80.9    | 85.8    | 89.3   | 81.5   | 87.5   | 84.9   | 80.5    | 84      |
| CFLAR   | 488.4   | 647.8   | 226.4  | 433.3  | 453    | 352.8  | 454.9   | 624.8   |
| CFTR    | 121.8   | 153.2   | 103.1  | 92.7   | 81.5   | 90     | 120.1   | 131.9   |
| CG018   | 187.8   | 246.5   | 119.5  | 146    | 133.9  | 193    | 187.4   | 304.5   |
| CG018   | 107.1   | 118.7   | 87.3   | 80     | 74.9   | 76     | 115.8   | 114.8   |
| CG018   | 170.7   | 226.2   | 120.1  | 186.6  | 145.5  | 192.4  | 199.8   | 288.7   |
| CGA     | 110.5   | 138.9   | 96.7   | 83.1   | 75.8   | 85.3   | 116.8   | 131.1   |
| CGB     | 122.9   | 131.1   | 114.1  | 96.3   | 93.7   | 96.5   | 116.8   | 111.8   |
| CGB1    | 84.4    | 100.9   | 107.4  | 94     | 91.2   | 101.1  | 94.4    | 94.5    |
| CGB2    | 75.8    | 82.7    | 83.2   | 88.4   | 78.5   | 82.6   | 78.2    | 64.9    |
| CGB5    | 95.2    | 86.1    | 90     | 89.1   | 89.7   | 93.4   | 92.3    | 88.8    |
| CGB7    | 124.7   | 138     | 91.8   | 78.6   | 87.9   | 81.1   | 116.1   | 138.4   |
| CGGBP1  | 1183.5  | 1490.9  | 717.7  | 580.6  | 498.3  | 573.4  | 1040.5  | 1260.4  |
| CGGBP1  | 83.9    | 95.9    | 89     | 89.4   | 77     | 79.7   | 81.1    | 88.5    |
| CGGBP1  | 2568.4  | 3272.6  | 1671.5 | 2100.1 | 1691.6 | 3123.1 | 2221.4  | 3166    |
| CGI-09  | 138.7   | 155.6   | 99.2   | 78.8   | 78.7   | 99.1   | 123.6   | 163.1   |
| CGI-115 | 2209.8  | 2722.6  | 1045.3 | 854.2  | 586.2  | 1058.4 | 1807.8  | 2920.1  |
| CGI-38  | 81.8    | 92      | 94     | 89.9   | 89.5   | 86.6   | 83.2    | 85.8    |
| CGI-38  | 88.4    | 102.6   | 94.9   | 82.5   | 78.9   | 82.9   | 94.2    | 99.1    |
| CGI-69  | 4942.1  | 5818    | 3581.6 | 3251.8 | 2502.9 | 2975   | 3941.4  | 5116.7  |
| CGI-96  | 1919.2  | 2624.3  | 1267.1 | 827.6  | 638.5  | 884.6  | 1579.5  | 2141    |
| CGI-96  | 629.2   | 803.5   | 189    | 156.5  | 153.2  | 169.1  | 484     | 615.3   |
| CGN     | 122.4   | 137     | 116.8  | 106.1  | 97     | 94.6   | 103.5   | 115.1   |
| CGNL1   | 161     | 213     | 127.7  | 158    | 134    | 192.4  | 130     | 156     |
| CGREF1  | 97.3    | 113.9   | 93.1   | 90.6   | 95.2   | 99.3   | 95.6    | 104.2   |
| CGRRF1  | 346.6   | 411.9   | 189.8  | 167.9  | 144.5  | 174.7  | 376.9   | 536     |
| CH25H   | 87.9    | 93.2    | 94.7   | 80.8   | 80.7   | 88.5   | 87.6    | 92.5    |
| CHAC1   | 149.6   | 214.1   | 118.6  | 98     | 91     | 95.7   | 164.7   | 190.7   |
| CHAC2   | 298.2   | 349.1   | 158    | 112.3  | 102.2  | 128    | 207.4   | 316.2   |
| CHAD    | 102.3   | 126.1   | 102.7  | 87.8   | 94.5   | 96.3   | 110.8   | 97.2    |
| CHAF1A  | 331.9   | 382.6   | 180.1  | 159.2  | 130    | 172.8  | 245.4   | 250.2   |
| CHAF1B  | 918.4   | 1182.6  | 481.6  | 400.1  | 319.1  | 390.8  | 602.4   | 731.2   |
| CHAT    | 142.8   | 171.2   | 117.7  | 96.7   | 105.8  | 101.2  | 127.5   | 162.9   |
| CHAT    | 89.4    | 99.8    | 94.5   | 88.4   | 91     | 89     | 91.9    | 81.9    |
| CHAT    | 75.4    | 88.2    | 89.8   | 93.4   | 77.4   | 83.3   | 81      | 85.7    |
| CHAT    | 72      | 92.6    | 84     | 77.7   | 75     | 78.6   | 84.2    | 88.4    |
| CHCHD1  | 457.8   | 592.9   | 246.9  | 191.8  | 192.2  | 210.3  | 363.4   | 592.1   |
| CHCHD2  | 16186.1 | 18022.1 | 8073.8 | 6055   | 4842.7 | 6920.4 | 16798.5 | 18118.2 |
| CHCHD3  | 1484.7  | 1947    | 510.5  | 502.8  | 469.4  | 819.5  | 1167.8  | 1915.1  |
| CHCHD4  | 2129.1  | 3005.1  | 1136.6 | 936.2  | 746    | 1086   | 1566.6  | 1399.2  |
| CHCHD5  | 956.6   | 1237.5  | 837.2  | 626.8  | 466.5  | 669.3  | 911.5   | 1068.7  |
| CHCHD6  | 230.3   | 325.9   | 181.2  | 144.7  | 144.7  | 228.2  | 239.2   | 238.5   |
| CHCHD7  | 384.1   | 421.4   | 132.7  | 98     | 98.3   | 109.1  | 267.8   | 363.5   |
| CHCHD7  | 1000.1  | 1246.4  | 580.1  | 317.7  | 241.6  | 362.7  | 696.8   | 1091.6  |
| CHCHD8  | 487     | 621.8   | 326.3  | 240.2  | 184.6  | 247.6  | 400.4   | 461.5   |

|        |        |        |        |        |        |        |        |        |
|--------|--------|--------|--------|--------|--------|--------|--------|--------|
| CHD1   | 833.1  | 937.9  | 289.3  | 372.1  | 312.5  | 567.4  | 704.4  | 1054.9 |
| CHD1L  | 821.9  | 1160.7 | 542.7  | 441.3  | 420.8  | 708    | 616.9  | 943.9  |
| CHD2   | 169.8  | 239.8  | 111.1  | 124.6  | 118.7  | 141    | 142.1  | 214.2  |
| CHD3   | 137.9  | 158.7  | 93.6   | 82.2   | 83.6   | 99.9   | 127.1  | 156.6  |
| CHD3   | 130    | 150.8  | 99.9   | 98.5   | 92.1   | 102.5  | 106.7  | 110.5  |
| CHD4   | 854.5  | 1244.4 | 1018.4 | 1132.2 | 1004.2 | 1197.2 | 741.6  | 1306.8 |
| CHD5   | 104    | 120.3  | 102.5  | 93.4   | 90.3   | 98.9   | 107.3  | 100.4  |
| CHD6   | 137    | 196.8  | 110.9  | 130.7  | 131.4  | 166.2  | 143.2  | 171.3  |
| CHD7   | 363.7  | 603    | 416    | 395.7  | 324    | 562.6  | 403.8  | 479.7  |
| CHD8   | 495.7  | 725.2  | 536.8  | 762.8  | 679.5  | 849.9  | 558.1  | 640.8  |
| CHD9   | 524.2  | 934.7  | 536.2  | 710.6  | 649.1  | 1345.4 | 691.7  | 879.7  |
| CHDH   | 78.2   | 92.8   | 89.6   | 77.8   | 79.4   | 82.2   | 73.5   | 87     |
| CHEK1  | 1523.4 | 2037.3 | 942.6  | 502    | 392.1  | 607.2  | 1103.8 | 1563.9 |
| CHEK2  | 607.5  | 813.4  | 282.9  | 264    | 315.9  | 432.5  | 465.8  | 780.3  |
| CHEK2  | 85.1   | 105.1  | 92     | 93.9   | 81     | 94.2   | 82.8   | 91.6   |
| CHERP  | 235.1  | 309.7  | 197    | 172.9  | 153.5  | 203.3  | 231.2  | 286.1  |
| CHES1  | 702.1  | 963.7  | 516.3  | 677    | 517.4  | 750.9  | 673.4  | 1215.8 |
| CHFR   | 1127   | 1345.4 | 1309.1 | 1196.2 | 1038.8 | 1568.2 | 978.2  | 1424.9 |
| CHGA   | 89.3   | 115.7  | 104.5  | 99.7   | 95.5   | 103.5  | 98.4   | 98     |
| CHGB   | 106.1  | 108    | 85.5   | 93.5   | 77.9   | 82.5   | 97.9   | 107.5  |
| CHGN   | 96.7   | 99     | 96.1   | 92.3   | 81.8   | 100.5  | 98.7   | 98.4   |
| CHI3L1 | 101.3  | 111.5  | 114.7  | 123.7  | 116    | 132.1  | 94.8   | 115.1  |
| CHI3L2 | 86.4   | 85     | 104.9  | 106.9  | 106.1  | 98     | 88.2   | 86.5   |
| CHI3L2 | 83.7   | 96.3   | 95.1   | 90.7   | 82.3   | 89     | 85.2   | 93.6   |
| CHIA   | 84.8   | 89.5   | 90.9   | 80.4   | 79.6   | 79.2   | 83.3   | 89.6   |
| CHIA   | 96.5   | 91.3   | 104    | 91.1   | 84.3   | 96.8   | 84.7   | 99.9   |
| CHIC1  | 124.6  | 146.9  | 103.9  | 95.2   | 88.8   | 94.8   | 110.8  | 123    |
| CHIC1  | 104.9  | 117.5  | 97.4   | 88.1   | 90     | 87.4   | 98.2   | 97     |
| CHIC2  | 1457.1 | 1732.5 | 1069.3 | 961    | 778    | 1078.4 | 1569.4 | 2901.6 |
| CHID1  | 97.8   | 136.7  | 89.6   | 84.4   | 88.1   | 91.7   | 88.6   | 103.5  |
| CHKA   | 883.6  | 1069.6 | 610    | 628.1  | 540.6  | 684.3  | 817.4  | 1145.9 |
| CHKA   | 230.5  | 310.3  | 158.8  | 160    | 170.7  | 186.3  | 218.8  | 354.1  |
| CHKB   | 791.6  | 724.4  | 700.1  | 585.7  | 631.1  | 1167.8 | 495.3  | 962.4  |
| CHKB   | 93     | 114.4  | 80.5   | 82.4   | 82.1   | 84.5   | 101    | 141.6  |
| CHL1   | 98.3   | 104.5  | 104.3  | 99.6   | 99.8   | 99.2   | 99.5   | 105    |
| CHM    | 132.2  | 141.9  | 94.9   | 88.6   | 83.4   | 86.7   | 109.3  | 131.9  |
| CHML   | 185.5  | 204.1  | 132.3  | 137    | 120.8  | 147.1  | 164.2  | 177.9  |
| CHMP1B | 1072.2 | 1375.8 | 602.5  | 691.6  | 626.4  | 966.3  | 858.4  | 1149.5 |
| CHMP2A | 257.7  | 342.8  | 203.2  | 184.8  | 138.7  | 181.4  | 237.4  | 222    |
| CHMP2A | 471.3  | 684.8  | 264.6  | 182.5  | 163.8  | 191.7  | 491.7  | 488.8  |
| CHMP2A | 2574.3 | 3442.7 | 1372   | 1130.3 | 929.6  | 1223.9 | 2253.8 | 2503.5 |
| CHMP2B | 584.7  | 775.3  | 288.4  | 359.7  | 257.4  | 458    | 557.9  | 1023.6 |
| CHMP4A | 1415.8 | 1935   | 665.1  | 516.1  | 429.3  | 513.4  | 1202.6 | 1416.6 |
| CHMP4B | 904.6  | 1155.7 | 800.6  | 822.6  | 636.3  | 892.3  | 895.9  | 1294.5 |
| CHMP4C | 88.4   | 95.7   | 91.6   | 83.3   | 88.3   | 89.5   | 92.7   | 110.3  |
| CHMP5  | 1519.3 | 2012.1 | 542    | 528    | 436.6  | 866.7  | 1078.8 | 1338   |
| CHMP6  | 432.9  | 591.2  | 297.5  | 283.9  | 243    | 302.5  | 425.5  | 452.6  |
| CHMP6  | 211    | 266.2  | 119    | 117.9  | 107.7  | 116.2  | 181.2  | 178.6  |
| CHMP7  | 201.8  | 239.7  | 148.1  | 129.4  | 125.1  | 168.6  | 189.2  | 259.1  |
| CHN1   | 123.4  | 142.3  | 124.6  | 101    | 94.6   | 107.8  | 144.5  | 152.8  |



|           |        |        |        |        |        |        |        |        |
|-----------|--------|--------|--------|--------|--------|--------|--------|--------|
| CHN1      | 78.1   | 79.2   | 98.7   | 94.1   | 84.4   | 84.3   | 70.9   | 82.8   |
| CHN2      | 108.9  | 137.2  | 126    | 110.7  | 114.9  | 124.5  | 95.3   | 107.4  |
| CHN2      | 158.5  | 225.4  | 142.1  | 136.9  | 154.6  | 146.7  | 108.2  | 115.4  |
| CHN2      | 98     | 116    | 84.7   | 80.2   | 74.6   | 87     | 89.6   | 113.5  |
| CHODL     | 154.1  | 170.9  | 103.4  | 96.8   | 88.4   | 109.4  | 134    | 151.3  |
| CHORDC1   | 97.5   | 103.9  | 89.4   | 79.8   | 76.7   | 87.7   | 94.8   | 119.1  |
| CHP       | 1007.9 | 1060.1 | 321    | 313    | 233.2  | 258.5  | 993.5  | 1601.5 |
| CHPF      | 144.4  | 173.9  | 189.2  | 185.8  | 165.7  | 241.5  | 140.2  | 178.2  |
| CHPT1     | 395.6  | 448.7  | 168    | 171.3  | 148.5  | 181.4  | 349.3  | 659.5  |
| CHR415SYT | 67.8   | 85.7   | 92.2   | 82.5   | 86     | 84.5   | 73.7   | 80.2   |
| CHRAC1    | 345.8  | 474.3  | 265.6  | 213.7  | 171.8  | 206.7  | 290.2  | 555.9  |
| CHRD      | 86.8   | 103.8  | 93.3   | 98.1   | 87.4   | 80.4   | 85.4   | 92.8   |
| CHRD1     | 76     | 80.6   | 84.5   | 80     | 81.4   | 81.1   | 76.7   | 86.1   |
| CHRD2     | 92     | 105.9  | 82.8   | 81.5   | 70.8   | 71.8   | 93.6   | 105.9  |
| CHRFAM7A  | 114.2  | 120.7  | 95.9   | 89.3   | 82.6   | 94.7   | 101.9  | 124.5  |
| CHRFAM7A  | 80.5   | 90.4   | 93.4   | 94.9   | 86.3   | 96.8   | 87.4   | 81.9   |
| CHRFAM7A  | 78.3   | 86.7   | 80.4   | 90.8   | 76.2   | 77.5   | 76     | 81.3   |
| CHRM1     | 98.5   | 102.3  | 87.6   | 88.6   | 82.4   | 84.9   | 95.4   | 105.8  |
| CHRM2     | 80.8   | 86.2   | 84.1   | 91.1   | 86.7   | 88.1   | 90.4   | 88.5   |
| CHRM2     | 86.3   | 94.6   | 90.8   | 88.6   | 82.3   | 81.9   | 90.9   | 92.5   |
| CHRM4     | 73.3   | 79.1   | 97.4   | 85     | 87.9   | 91.2   | 84     | 79.7   |
| CHRM5     | 95.2   | 101    | 86.4   | 82.3   | 78     | 81.1   | 94.7   | 98.3   |
| CHRNA1    | 77.4   | 97.1   | 90.6   | 78.7   | 84.2   | 83.6   | 91.1   | 86.5   |
| CHRNA1    | 145.6  | 156.8  | 110.7  | 114.7  | 105    | 90.7   | 119.3  | 132.2  |
| CHRNA1    | 76.4   | 76     | 84.1   | 86.2   | 79.6   | 78.1   | 77.3   | 88.9   |
| CHRNA10   | 126.3  | 150.6  | 102.5  | 81.8   | 76.6   | 87.3   | 117    | 156.1  |
| CHRNA2    | 104.5  | 114.6  | 103.3  | 97     | 98.6   | 96.4   | 94.7   | 107    |
| CHRNA3    | 107.9  | 103.6  | 121    | 108.9  | 96.7   | 96     | 99.7   | 97.6   |
| CHRNA4    | 101.4  | 117.5  | 105.8  | 89.6   | 94.6   | 99     | 103    | 114.9  |
| CHRNA5    | 1563.5 | 1246   | 1273.3 | 1935.2 | 1752.9 | 1397.1 | 1526.9 | 2902.1 |
| CHRNA6    | 115.4  | 137.3  | 111    | 105.7  | 105.2  | 109.3  | 112.7  | 126.1  |
| CHRNA7    | 107.4  | 114.4  | 96.5   | 95.5   | 86.1   | 106    | 100    | 107.6  |
| CHRNA9    | 78.2   | 103.8  | 98.4   | 98.9   | 90.5   | 88.7   | 81.7   | 92.2   |
| CHRN1     | 181.8  | 294.6  | 178.9  | 167    | 135.8  | 219.6  | 203.9  | 294.7  |
| CHRN2     | 89.5   | 83.7   | 81.6   | 84.1   | 82.8   | 83.2   | 84.4   | 88     |
| CHRN3     | 114.6  | 129.3  | 99.1   | 83.9   | 79.1   | 81.2   | 106    | 127.6  |
| CHRN4     | 96.3   | 112    | 96.2   | 81.2   | 81     | 82.6   | 91.4   | 111.1  |
| CHRN5     | 100.4  | 113.6  | 100.2  | 87.9   | 92.6   | 96     | 103.8  | 117.7  |
| CHRN6     | 78.9   | 91.1   | 91.3   | 84     | 83.8   | 83.4   | 85.1   | 91.9   |
| CHST1     | 107    | 114.2  | 93.4   | 86.3   | 81.3   | 94.3   | 109    | 114.3  |
| CHST10    | 257.2  | 363.4  | 254    | 213    | 174    | 269.9  | 248.1  | 393.9  |
| CHST11    | 110.7  | 123.4  | 94.5   | 88.5   | 86.2   | 85.8   | 116.5  | 119.8  |
| CHST12    | 343.8  | 414.8  | 232.6  | 250.3  | 229.8  | 238.2  | 207.5  | 208.9  |
| CHST13    | 3015.2 | 3738.7 | 1846.7 | 1165.1 | 1007.6 | 1125.7 | 2758.4 | 2012.1 |
| CHST2     | 134.4  | 165.5  | 101.4  | 86.7   | 88.5   | 99.6   | 124    | 163.5  |
| CHST3     | 154.5  | 191.8  | 153.9  | 131.3  | 128.9  | 129.2  | 154    | 203    |
| CHST4     | 184.5  | 206.1  | 162.8  | 110.1  | 100.9  | 117.1  | 121.3  | 121.2  |
| CHST5     | 81.9   | 97.4   | 89.4   | 81.1   | 85.9   | 88.5   | 75.1   | 81.3   |
| CHST5     | 81.1   | 102.3  | 102    | 81.9   | 86.7   | 85.4   | 91.4   | 91     |
| CHST6     | 101.3  | 108.8  | 115.6  | 104.3  | 92.3   | 98.4   | 94.1   | 113.1  |

|           |        |        |        |        |        |        |        |        |
|-----------|--------|--------|--------|--------|--------|--------|--------|--------|
| CHST7     | 161.5  | 224.2  | 166.2  | 135.1  | 122.1  | 143.3  | 160.4  | 188.8  |
| CHST8     | 88.9   | 102.7  | 93     | 96.9   | 86.6   | 96.9   | 92.5   | 92.6   |
| CHST9     | 78.7   | 86.5   | 84.7   | 84.1   | 87.2   | 83.5   | 80.8   | 89.1   |
| CHSY1     | 2657.9 | 3225.6 | 1420.1 | 2161.4 | 1516.2 | 2827.3 | 2277.8 | 3184.1 |
| CHTF18    | 332.3  | 324.2  | 487    | 345.9  | 312    | 579.4  | 224.2  | 473.1  |
| CHUK      | 510.2  | 627.1  | 386.1  | 328.9  | 246.7  | 345.3  | 560.9  | 878.7  |
| CHURC1    | 715.7  | 818.2  | 423.4  | 495.6  | 408.3  | 722.2  | 578.2  | 880    |
| CHX10     | 112.6  | 145.5  | 109.9  | 93.6   | 94.8   | 95.1   | 116.3  | 118.1  |
| CIAO1     | 2008.3 | 2119.2 | 1095.5 | 1128.4 | 849    | 1132   | 1595.1 | 2321.5 |
| CIAPIN1   | 580.3  | 675.3  | 286.4  | 202.8  | 167.9  | 324.7  | 520.8  | 966.8  |
| CIAS1     | 1744   | 1994.1 | 1231.7 | 1028.3 | 822.7  | 1192.8 | 1452.4 | 1902.8 |
| CIAS1     | 296.5  | 349    | 176.7  | 149.2  | 137    | 147.8  | 264.8  | 334.4  |
| CIB1      | 4426.8 | 5679.3 | 4555.5 | 4408.8 | 3723.7 | 4399.3 | 3746.9 | 4111.1 |
| CIB2      | 104.9  | 133.4  | 84.8   | 85.5   | 90.2   | 104.2  | 119.1  | 124.9  |
| CIB3      | 263.8  | 320.9  | 177.4  | 115.7  | 114.5  | 129.7  | 236    | 224.2  |
| CIB4      | 79.9   | 82.5   | 82.2   | 82.8   | 83.3   | 84.5   | 73.2   | 82.1   |
| CIC       | 210    | 246.4  | 150.5  | 161.4  | 131    | 171.8  | 198.3  | 293.9  |
| CICE      | 129.5  | 141.5  | 101.4  | 100.2  | 87.7   | 95.5   | 116.6  | 140.5  |
| CICK0721Q | 121.5  | 124    | 100.8  | 95     | 95.2   | 92.2   | 118.2  | 124    |
| CIDEA     | 109    | 119    | 88.4   | 95.7   | 90     | 90.6   | 94.4   | 110.9  |
| CIDEA     | 88.5   | 124.8  | 88.1   | 86.5   | 78.7   | 81.4   | 89     | 145.4  |
| CIDEB     | 178.3  | 203.3  | 130.4  | 134.3  | 132.6  | 139.6  | 146    | 192    |
| CIDEC     | 92.1   | 106    | 115.6  | 96.3   | 91.2   | 80.9   | 98.6   | 99.7   |
| CIITA     | 114.3  | 119.1  | 87.4   | 87.5   | 89.8   | 86     | 115.5  | 111.3  |
| CILP      | 81.5   | 89.4   | 88.5   | 82.5   | 84.4   | 79.9   | 77.6   | 75.7   |
| CILP2     | 101.6  | 119.9  | 88.4   | 91.5   | 83.7   | 90.1   | 101.6  | 114    |
| CINP      | 184.9  | 283.1  | 146.9  | 123.7  | 107.6  | 120.1  | 195    | 235.4  |
| CIP29     | 5742.2 | 6517.7 | 3473.1 | 2690.8 | 2365.9 | 3427.8 | 4664   | 5457.1 |
| CIR       | 408.8  | 539.2  | 120.3  | 134.3  | 134.1  | 217.7  | 424    | 562.3  |
| CIRBP     | 3245.8 | 4505.1 | 1775   | 773.7  | 597.5  | 793.9  | 2543.8 | 3656.3 |
| CIRH1A    | 2385.4 | 2953.5 | 1506.2 | 1020.8 | 797.8  | 1070.2 | 1960.4 | 2365.2 |
| CISH      | 88.8   | 110.5  | 106.6  | 90.1   | 90.4   | 107.5  | 94.4   | 119.2  |
| CIT       | 107.1  | 117.9  | 105.2  | 87.9   | 92     | 93.4   | 107.5  | 113.1  |
| CITED1    | 104.1  | 126.2  | 98.2   | 91.6   | 85.5   | 83     | 98.3   | 118.1  |
| CITED2    | 3825.7 | 4990.6 | 1824.6 | 2113.7 | 1129.8 | 2452.4 | 2813.8 | 3513.3 |
| CITED4    | 3259.1 | 4551.6 | 3418.4 | 2768.1 | 2051.5 | 2725.2 | 2261.1 | 3749.9 |
| CIZ1      | 114.5  | 124.7  | 112.1  | 100.7  | 104.7  | 104.1  | 104.7  | 120.8  |
| CKAP1     | 1526.9 | 1884.7 | 784.4  | 515.5  | 458.4  | 666.2  | 1415   | 1854.6 |
| CKAP2     | 682.2  | 768.5  | 266.6  | 273.1  | 268.6  | 379.3  | 581.4  | 889.7  |
| CKAP4     | 1116.3 | 1549.2 | 1329.7 | 953.9  | 706.6  | 1671   | 1006.8 | 1715.2 |
| CKAP5     | 1665.5 | 2242.2 | 2210.5 | 2552.1 | 2324.8 | 3492.1 | 1597.6 | 2610.7 |
| CKAP5     | 269.5  | 350.4  | 161    | 126.4  | 127.3  | 132.9  | 220.2  | 279.9  |
| CKB       | 239.7  | 336.1  | 219.7  | 127.5  | 120.4  | 145.8  | 211.9  | 288.7  |
| CKLF      | 6015.4 | 6754.8 | 4530.7 | 3872.7 | 2762.8 | 4047.2 | 4425.5 | 4618.2 |
| CKLF      | 3838.9 | 4793.5 | 2023.2 | 1712.4 | 1381   | 1835.5 | 2926   | 3316.6 |
| CKLF      | 87.7   | 101.1  | 83.4   | 70.4   | 67.6   | 74.4   | 86.4   | 103.8  |
| CKLFSF4   | 85     | 104.6  | 97.1   | 94.7   | 96.9   | 93.3   | 99     | 99     |
| CKM       | 398.5  | 482.4  | 234.9  | 206.9  | 164.4  | 197.3  | 413.8  | 639.2  |
| CKMT1A    | 89.6   | 105.1  | 98.8   | 97.2   | 82.2   | 98     | 90.6   | 99.3   |
| CKMT1B    | 78.8   | 98.8   | 94.1   | 79.9   | 76.4   | 85.6   | 83.7   | 84.6   |

|        |        |        |        |        |        |        |        |        |
|--------|--------|--------|--------|--------|--------|--------|--------|--------|
| CKMT2  | 93.1   | 113.5  | 94.6   | 82.8   | 83.6   | 92.9   | 99.4   | 113.9  |
| CKS1B  | 3954.5 | 4712.2 | 2233   | 1358.1 | 1194.8 | 1302.6 | 3764.4 | 4535.3 |
| CKS2   | 6675.5 | 7850.4 | 4096.4 | 2676.8 | 2074.9 | 3265.3 | 6321.7 | 8486.2 |
| CLASP1 | 370    | 563.2  | 332    | 482    | 389.9  | 584.7  | 358.9  | 610.5  |
| CLASP2 | 449.6  | 756.2  | 359.5  | 421.5  | 375.2  | 701.1  | 482.1  | 619.6  |
| CLC    | 110.4  | 142.4  | 103.1  | 92.9   | 76.4   | 95.6   | 126.8  | 117.2  |
| CLCA1  | 93     | 104.1  | 84.9   | 78.9   | 78.7   | 85.5   | 96.2   | 97     |
| CLCA2  | 89.9   | 98.1   | 95.7   | 82     | 75.9   | 85.6   | 94.4   | 87     |
| CLCA3  | 69.5   | 86.5   | 87.7   | 90.2   | 82.4   | 89.2   | 80.1   | 78.3   |
| CLCA4  | 102.4  | 101.1  | 86.7   | 77.3   | 82.1   | 90.1   | 94.6   | 104.8  |
| CLCC1  | 97.1   | 107.8  | 93.5   | 84.1   | 87.2   | 88     | 97.5   | 91.4   |
| CLCC1  | 162    | 212.9  | 132.8  | 107.1  | 100.9  | 103.4  | 183.1  | 228.4  |
| CLCF1  | 116.4  | 140    | 95     | 95     | 88.2   | 112.6  | 127.9  | 159.1  |
| CLCN1  | 99.7   | 102.1  | 91.9   | 89.1   | 80.1   | 85.2   | 93     | 105.4  |
| CLCN2  | 144.4  | 151.8  | 97.6   | 92.5   | 87     | 93.4   | 128.9  | 153.9  |
| CLCN3  | 87.3   | 94     | 89.8   | 87.5   | 83.8   | 86.2   | 86.5   | 103    |
| CLCN3  | 476.8  | 568.3  | 290.6  | 310.9  | 223.5  | 311.1  | 428.3  | 617.7  |
| CLCN4  | 94.8   | 121.4  | 96.9   | 102.6  | 94.3   | 96     | 86.2   | 89.7   |
| CLCN5  | 103.1  | 122.1  | 97.6   | 102.5  | 89.5   | 94.3   | 101.8  | 113.4  |
| CLCN6  | 172.6  | 180.3  | 113.9  | 101.3  | 88.3   | 105.8  | 151.9  | 180    |
| CLCN6  | 183    | 209    | 161.6  | 254.4  | 267.3  | 278.9  | 170.5  | 180.1  |
| CLCN6  | 168.8  | 202.9  | 171    | 262    | 248.4  | 316.8  | 164.4  | 233.8  |
| CLCN7  | 3200.2 | 3695.8 | 3382.5 | 3505.5 | 2932.1 | 3390.7 | 2601.6 | 2709.8 |
| CLCNKA | 104.7  | 117.5  | 103.4  | 105.6  | 105.1  | 123.1  | 98.5   | 103.5  |
| CLCNKA | 99.4   | 108.9  | 115.1  | 118.1  | 113    | 147.6  | 94.2   | 90.3   |
| CLCNKB | 99.8   | 108.5  | 105.2  | 94.1   | 86.5   | 99.6   | 95.7   | 107.5  |
| CLDN1  | 85.1   | 106.9  | 105.1  | 106.1  | 107.7  | 102.7  | 104.3  | 105.6  |
| CLDN10 | 143.2  | 185.8  | 126.7  | 91.9   | 87.2   | 93     | 145.9  | 149.4  |
| CLDN10 | 76.9   | 79.7   | 89.8   | 76.8   | 77.4   | 86     | 78.1   | 93.8   |
| CLDN10 | 110.5  | 130.4  | 120.3  | 107.3  | 88.5   | 99.5   | 105.3  | 111.2  |
| CLDN12 | 263    | 301.4  | 151.8  | 182.8  | 153.8  | 242.9  | 175.7  | 242.8  |
| CLDN14 | 368    | 479.5  | 234.9  | 225.8  | 207.2  | 253.3  | 327.9  | 338.5  |
| CLDN14 | 91.6   | 95.6   | 81.9   | 74.8   | 73.4   | 84.3   | 91.5   | 98.6   |
| CLDN14 | 103.6  | 113.2  | 81.5   | 82.6   | 86.1   | 82.6   | 97.3   | 111.4  |
| CLDN15 | 85.1   | 90.4   | 110    | 94.3   | 85.3   | 103.2  | 89.1   | 83.3   |
| CLDN15 | 554.2  | 533.2  | 397.8  | 301.1  | 399.7  | 345.5  | 376.4  | 527.4  |
| CLDN15 | 106.5  | 121.4  | 119.1  | 107.2  | 101.9  | 108.8  | 107.3  | 119.4  |
| CLDN16 | 90     | 105.9  | 96.7   | 91.6   | 86.2   | 89.5   | 90.5   | 99.4   |
| CLDN17 | 97.9   | 108.3  | 82.9   | 86.1   | 74.8   | 89.3   | 90.7   | 111.5  |
| CLDN18 | 87.1   | 99.3   | 98.2   | 91.3   | 81.9   | 103.4  | 79.3   | 87.7   |
| CLDN18 | 169.8  | 174.7  | 132.7  | 101.1  | 119.6  | 118.8  | 158.6  | 166.3  |
| CLDN18 | 81.9   | 82.5   | 105.3  | 96.3   | 92.9   | 103.6  | 85.4   | 101    |
| CLDN18 | 106.8  | 137.6  | 91     | 90.2   | 90     | 90.7   | 114.9  | 125.1  |
| CLDN19 | 133    | 131.1  | 104.8  | 99.8   | 93.7   | 106    | 122.2  | 123.2  |
| CLDN2  | 102.1  | 102.1  | 103.9  | 90.7   | 93     | 85     | 98     | 100.5  |
| CLDN20 | 197.4  | 234    | 128.5  | 103.6  | 98     | 105.6  | 183.8  | 200.5  |
| CLDN23 | 901.3  | 1023.3 | 625.2  | 624.9  | 385.1  | 613.9  | 995.2  | 1506.4 |
| CLDN3  | 104.6  | 119.6  | 87     | 84.7   | 85.4   | 76.3   | 106.8  | 125.1  |
| CLDN4  | 129.9  | 135.6  | 85.8   | 95.4   | 87.3   | 96.6   | 114.1  | 119    |
| CLDN5  | 99.3   | 128.3  | 84.4   | 81.4   | 69.5   | 92.1   | 94.5   | 106.1  |

|          |        |         |         |        |        |         |         |         |
|----------|--------|---------|---------|--------|--------|---------|---------|---------|
| CLDN6    | 81.6   | 103.1   | 92      | 83.9   | 93.7   | 86.6    | 88.1    | 101.1   |
| CLDN7    | 128.1  | 126     | 124.7   | 116.1  | 129.9  | 164.4   | 108.3   | 122.2   |
| CLDN8    | 84.4   | 90.7    | 87.4    | 84.7   | 79.5   | 81.5    | 83.9    | 85.7    |
| CLDN9    | 111.2  | 137     | 100     | 93.9   | 99.5   | 107.8   | 109.8   | 120.6   |
| CLDND1   | 1051.8 | 1297.7  | 458     | 395.3  | 399.1  | 675.4   | 825.8   | 1605.9  |
| CLDND1   | 945.7  | 1176.6  | 564.2   | 591.8  | 439.2  | 835.9   | 835.5   | 1599.2  |
| CLDND2   | 241.1  | 236.2   | 246     | 183.2  | 209.4  | 186.4   | 198.2   | 211.5   |
| CLEC10A  | 128.1  | 127.2   | 106.7   | 118.6  | 111.2  | 121.5   | 105.9   | 119.3   |
| CLEC10A  | 89.9   | 111.7   | 99.6    | 101.9  | 101.9  | 105.5   | 94.9    | 101.8   |
| CLEC10A  | 104    | 112.1   | 107.7   | 136.8  | 114.4  | 140.2   | 90.6    | 104     |
| CLEC11A  | 5788.5 | 7794.9  | 7714.6  | 2577.7 | 2220.6 | 2580    | 5305    | 11795.1 |
| CLEC12A  | 384.5  | 476.9   | 193     | 530.2  | 409.9  | 718.1   | 236.5   | 275.4   |
| CLEC12A  | 334.5  | 410.4   | 196.5   | 387.7  | 337.1  | 484.1   | 228.2   | 255     |
| CLEC12A  | 188.5  | 209.6   | 111.7   | 141.4  | 125.1  | 180.9   | 146.4   | 158.7   |
| CLEC12B  | 113.2  | 147.8   | 94.2    | 94.4   | 86.6   | 102.9   | 127.3   | 155.8   |
| CLEC14A  | 107.9  | 127.5   | 106.2   | 79.1   | 83.9   | 101.9   | 123.8   | 136.8   |
| CLEC1A   | 88.4   | 97.2    | 90.1    | 91.2   | 84.7   | 92.7    | 87.9    | 94.6    |
| CLEC1B   | 87.2   | 89.8    | 96.4    | 86.7   | 90.4   | 79.6    | 82.9    | 101.7   |
| CLEC2B   | 123.7  | 129.8   | 92.6    | 85.1   | 83.1   | 89.5    | 111.4   | 112.5   |
| CLEC2D   | 75.7   | 79      | 91.5    | 81.4   | 83.1   | 99.8    | 81.8    | 87.5    |
| CLEC2D   | 222.1  | 239.9   | 190.9   | 164.2  | 141.2  | 191.3   | 147.4   | 170.4   |
| CLEC3A   | 86.1   | 85.4    | 93.7    | 91.1   | 95.8   | 87.7    | 89.5    | 99      |
| CLEC3B   | 175.8  | 210.8   | 116     | 133.1  | 116.2  | 125.4   | 140.3   | 153.4   |
| CLEC4A   | 94.6   | 114.9   | 92.5    | 110.2  | 100.8  | 101.1   | 96.6    | 105.6   |
| CLEC4C   | 87.1   | 97.6    | 91.1    | 84.9   | 84.4   | 93.5    | 93.1    | 96.3    |
| CLEC4C   | 99.1   | 96.3    | 90.2    | 91.7   | 77.1   | 98.2    | 90.1    | 97.3    |
| CLEC4D   | 135.8  | 148     | 92.1    | 95.6   | 85.6   | 84.1    | 122.3   | 140.5   |
| CLEC4E   | 94.9   | 123.6   | 92.3    | 94.7   | 85.9   | 81.7    | 92.8    | 102.4   |
| CLEC4F   | 75.1   | 82      | 97.8    | 85.2   | 82.9   | 80.9    | 84.6    | 76.6    |
| CLEC4G   | 118.8  | 139.7   | 107.3   | 89.4   | 84.7   | 93.4    | 121.1   | 136.6   |
| CLEC4M   | 80.2   | 77.5    | 89.4    | 84.3   | 74.9   | 84.4    | 80.6    | 70.7    |
| CLEC5A   | 125.4  | 134.5   | 108.8   | 111.5  | 88.5   | 118.3   | 114.4   | 142.8   |
| CLEC6A   | 105.9  | 121.5   | 94.3    | 94.3   | 82.2   | 88.5    | 96.6    | 110.5   |
| CLEC7A   | 85.7   | 91.7    | 106.6   | 103.1  | 96.2   | 91.1    | 87.3    | 88.2    |
| CLEC7A   | 86.7   | 100.2   | 97.7    | 93.9   | 86.1   | 91.2    | 98.8    | 94.2    |
| CLEC7A   | 89.7   | 89.3    | 104     | 101.9  | 85.7   | 88.6    | 86      | 94      |
| CLEC9A   | 93.5   | 97.9    | 105.6   | 101.7  | 101.9  | 101.8   | 89.7    | 96.9    |
| CLGN     | 170.2  | 195.9   | 127.2   | 136.1  | 119.8  | 170.3   | 146.7   | 208.2   |
| CLIC1    | 19662  | 25449.5 | 11556.4 | 10238  | 7202.6 | 11182.1 | 18465.6 | 23228   |
| CLIC2    | 182.5  | 228.3   | 101.8   | 104.4  | 97.6   | 109.1   | 179.8   | 192.7   |
| CLIC3    | 90.2   | 107.2   | 92.1    | 82.2   | 82.3   | 89.7    | 91.8    | 102     |
| CLIC4    | 1605.4 | 1956.8  | 568.1   | 760    | 639.5  | 977.9   | 1662.8  | 3318.9  |
| CLIC5    | 97.2   | 117.3   | 101.5   | 93.7   | 97.7   | 102.8   | 95.8    | 105     |
| CLIC6    | 271.6  | 307.9   | 242.5   | 230.7  | 195.9  | 196.8   | 269.6   | 406.5   |
| CLIP1    | 589.6  | 679.4   | 284.9   | 317.2  | 308.8  | 523     | 770.3   | 1325.6  |
| CLIP2    | 101.2  | 122.5   | 127.6   | 119.4  | 109.1  | 153.8   | 91.6    | 116.3   |
| CLIP2    | 104.8  | 125.8   | 144.4   | 138.8  | 137.4  | 202.4   | 118.5   | 140.4   |
| CLIPR-59 | 117.1  | 107.1   | 100.3   | 103.4  | 113.3  | 111.3   | 99.9    | 116.1   |
| CLK1     | 347.3  | 325.5   | 175.5   | 133.4  | 167.4  | 184.9   | 305.3   | 628.1   |
| CLK1     | 291.1  | 307.7   | 121.1   | 114.4  | 103    | 126.6   | 241     | 388.2   |

|         |         |         |         |         |         |         |        |        |
|---------|---------|---------|---------|---------|---------|---------|--------|--------|
| CLK2    | 562     | 627     | 284.9   | 245.2   | 280     | 312.8   | 380.9  | 540    |
| CLK2    | 654.7   | 689.4   | 483.4   | 507.5   | 493.9   | 721.9   | 428.8  | 840.7  |
| CLK2P   | 79.6    | 87.2    | 96.9    | 94.5    | 93.2    | 94      | 84     | 92.5   |
| CLK3    | 393.3   | 507.6   | 244.7   | 179.5   | 179.1   | 201.1   | 351.9  | 415.8  |
| CLK3    | 1021.4  | 1221.2  | 745.5   | 838.5   | 812.9   | 969.3   | 934.7  | 694.8  |
| CLK3    | 197.6   | 260.4   | 106.6   | 122.1   | 126.8   | 135.2   | 216.4  | 245.8  |
| CLK4    | 250     | 240.1   | 171.8   | 194.2   | 147.1   | 258.7   | 197.4  | 507.3  |
| CLLU1   | 89.6    | 102.8   | 84.6    | 82      | 76.5    | 79.9    | 93.2   | 96.1   |
| CLLU1OS | 107.1   | 120.7   | 92.5    | 87.1    | 85.2    | 92      | 101.3  | 114.2  |
| CLMN    | 118.7   | 146.5   | 96.1    | 92      | 82.6    | 96.1    | 123.7  | 135.8  |
| CLN3    | 286.9   | 388.7   | 249.5   | 273.3   | 232.5   | 375.9   | 228    | 378.5  |
| CLN3    | 240.6   | 259.6   | 215.5   | 247.6   | 214.8   | 304.7   | 204.7  | 363.6  |
| CLN5    | 356.6   | 414.5   | 240.2   | 359.2   | 269.2   | 449.2   | 311.1  | 558.6  |
| CLN6    | 292.4   | 391.1   | 220.1   | 230.7   | 171.5   | 272.3   | 229.2  | 347.8  |
| CLN8    | 127.1   | 122     | 122.6   | 119.6   | 85.6    | 89.6    | 98.5   | 134.8  |
| CLNS1A  | 5511.7  | 7492    | 3163    | 2742.4  | 2396.1  | 4332.8  | 4701.1 | 5777.3 |
| CLOCK   | 108.2   | 133.2   | 103.6   | 97.4    | 96.9    | 103.2   | 118.2  | 106.5  |
| CLPB    | 106.7   | 114.9   | 107.1   | 110.7   | 103.4   | 103.5   | 107.2  | 109.4  |
| CLPP    | 1110.6  | 1493.3  | 769.7   | 408.8   | 365.6   | 425.7   | 914.3  | 1120.3 |
| CLPS    | 79.8    | 83.5    | 89.4    | 88.2    | 80.6    | 86.9    | 77.3   | 75.2   |
| CLPTM1  | 548     | 703.9   | 889.9   | 572.4   | 487.7   | 527.4   | 520.1  | 1193.7 |
| CLPX    | 963.5   | 1245.4  | 591.5   | 575     | 464.1   | 817.5   | 849.3  | 1815.4 |
| CLRN3   | 119.2   | 153.2   | 87.5    | 96.6    | 87.5    | 88.8    | 122.8  | 139.7  |
| CLSPN   | 157.9   | 224.1   | 115.3   | 94.6    | 87.1    | 86.9    | 139.2  | 180.5  |
| CLSTN1  | 968.9   | 1304.4  | 1444    | 1906.2  | 1371.1  | 1984.6  | 1009.1 | 2052.7 |
| CLSTN1  | 119.9   | 150.8   | 115.9   | 110.6   | 102     | 103.3   | 107    | 107    |
| CLSTN2  | 392.9   | 471.8   | 326.9   | 147.6   | 122.2   | 156     | 358.1  | 649.6  |
| CLSTN3  | 91.1    | 90      | 98.3    | 93      | 92.3    | 87.6    | 84.6   | 95.4   |
| CLTA    | 3702.3  | 4643.3  | 2589.6  | 1630    | 1379.7  | 2167.3  | 2824.2 | 4003.1 |
| CLTA    | 82      | 93.1    | 101     | 89.4    | 88.1    | 84.4    | 74.5   | 83.5   |
| CLTA    | 2821.2  | 3657.8  | 1782.2  | 1157.6  | 1067.2  | 1696.9  | 2224.2 | 2956.1 |
| CLTB    | 3464.9  | 4448.9  | 2333.8  | 1903.1  | 1583.8  | 2505.3  | 3411.3 | 4532.5 |
| CLTB    | 106.4   | 128     | 94.3    | 85.8    | 78      | 87.6    | 102.7  | 127.2  |
| CLTC    | 224.1   | 323.9   | 152.2   | 169.1   | 170.5   | 205.8   | 293.8  | 417.3  |
| CLTCL1  | 327.2   | 346.4   | 289.7   | 258.4   | 251.9   | 288.6   | 187.4  | 236.8  |
| CLTCL1  | 190.3   | 218.9   | 128     | 107.3   | 121.5   | 134.1   | 170.9  | 184.6  |
| CLU     | 71.2    | 81.7    | 85.1    | 73.5    | 67.9    | 65.5    | 71.1   | 69.7   |
| CLU     | 104     | 113.8   | 104.7   | 85.9    | 82.3    | 81.2    | 111.1  | 103.1  |
| CLU     | 91.1    | 99.3    | 95.7    | 87.4    | 79.4    | 81.2    | 90     | 95.7   |
| CLUAP1  | 347     | 475.7   | 175.4   | 147.2   | 133.1   | 147.8   | 259.4  | 292.8  |
| CLUAP1  | 29932.4 | 28501.7 | 18430.5 | 27535.8 | 26687.1 | 21602.5 | 28920  | 29730  |
| CLUAP1  | 481.9   | 645.1   | 358.6   | 269.4   | 206     | 356.3   | 339.9  | 385.2  |
| CLUL1   | 80      | 84.7    | 91.7    | 84.8    | 84.3    | 83.7    | 82.3   | 84.2   |
| CLUL1   | 108     | 123.5   | 101.6   | 110.7   | 95.5    | 106.4   | 110.9  | 108.2  |
| CLUL1   | 99.5    | 121.1   | 86.3    | 84.2    | 77.8    | 86.4    | 97.7   | 112.9  |
| CLYBL   | 769.8   | 1024.9  | 407.6   | 510.4   | 361.6   | 503.2   | 766.5  | 1073.2 |
| CLYBL   | 613.9   | 761.7   | 306.3   | 324.7   | 276     | 346.2   | 552.1  | 607.1  |
| CMA1    | 87.8    | 101.7   | 100.5   | 93.6    | 89.8    | 94.6    | 88.1   | 93.7   |
| CMAH    | 100.5   | 117.1   | 97.8    | 87.1    | 93.9    | 93.8    | 89.9   | 99.1   |
| CMAS    | 1724.4  | 2551.6  | 1252.7  | 1175.3  | 897.7   | 1562.1  | 1661.4 | 2446.3 |

|        |        |         |        |        |        |        |        |         |
|--------|--------|---------|--------|--------|--------|--------|--------|---------|
| CMIP   | 1876.8 | 2272.4  | 1235.1 | 948.6  | 845.3  | 1504.4 | 1690   | 2133.5  |
| CMIP   | 107.6  | 119.6   | 91     | 96     | 92.5   | 88.3   | 93     | 96.8    |
| CMIP   | 109.7  | 130.6   | 92.9   | 83.9   | 84.3   | 88.1   | 111.9  | 117.9   |
| CMKLR1 | 94.7   | 111.5   | 94.7   | 90.6   | 85.6   | 95.3   | 93.8   | 98.2    |
| CMKOR1 | 150.9  | 174.8   | 121    | 167.1  | 126.1  | 165.5  | 115.8  | 127.9   |
| CML2   | 88.9   | 92.8    | 101.2  | 87     | 90.5   | 96.7   | 87.9   | 84.7    |
| CMPK   | 987.5  | 1078.3  | 804.3  | 862.9  | 694.6  | 1169.8 | 1103.3 | 2528.7  |
| CMTM1  | 92.7   | 105     | 106.4  | 95     | 104.7  | 92.3   | 101.6  | 99.7    |
| CMTM1  | 128.3  | 147.1   | 93.7   | 96.8   | 87.7   | 90.4   | 113.5  | 130.8   |
| CMTM1  | 95.2   | 114.9   | 100.5  | 88.2   | 74.3   | 90.7   | 103    | 103.6   |
| CMTM2  | 81.5   | 86.3    | 80.7   | 79.2   | 70.7   | 69.5   | 78.6   | 77      |
| CMTM3  | 113.9  | 125.3   | 87.6   | 83.1   | 78.2   | 87.3   | 111.9  | 130.1   |
| CMTM3  | 2284.9 | 2716.5  | 1701.6 | 1566.1 | 1363   | 1542.2 | 2086.6 | 2755.7  |
| CMTM3  | 128    | 141.3   | 111.2  | 102.9  | 102.5  | 108.3  | 125.1  | 135.7   |
| CMTM3  | 606.6  | 840.3   | 476.4  | 414.5  | 367.1  | 467.3  | 515.4  | 803.4   |
| CMTM4  | 646.5  | 792     | 390.4  | 369.9  | 324.5  | 381    | 515.8  | 502.4   |
| CMTM4  | 102.9  | 128.7   | 105.7  | 104.4  | 93.5   | 105.5  | 107.9  | 111.3   |
| CMTM5  | 103.6  | 125.9   | 88.2   | 93     | 81.5   | 90.5   | 107.5  | 117.4   |
| CMTM7  | 6734.4 | 8086.5  | 4255.4 | 3397   | 2239.1 | 3027.8 | 5595.8 | 5930.8  |
| CMTM7  | 405.4  | 506.6   | 276.5  | 197.6  | 153.3  | 192.8  | 343.8  | 381.3   |
| CMTM7  | 883.2  | 1145.9  | 360    | 311.3  | 220.4  | 286    | 727.4  | 1574.1  |
| CMTM8  | 189.7  | 174.2   | 140.8  | 213.1  | 195.6  | 202.5  | 176.6  | 384.9   |
| CMYA1  | 70.3   | 81.7    | 81.1   | 72.6   | 73.6   | 69.8   | 81.4   | 83.8    |
| CMYA3  | 88     | 100.4   | 93.7   | 88.2   | 82.7   | 87.5   | 88.9   | 86.7    |
| CMYA3  | 90.8   | 100.8   | 92.5   | 85.1   | 82.4   | 80.8   | 88     | 97.2    |
| CMYA5  | 277.3  | 335.7   | 195.4  | 261.6  | 194.5  | 370.1  | 282.6  | 329.1   |
| CNAP1  | 1231.7 | 1272.1  | 910.5  | 762.1  | 664.9  | 701.1  | 804.7  | 1032.4  |
| CNBD1  | 73.1   | 85.8    | 89.1   | 84.4   | 79.2   | 83     | 75.6   | 73.4    |
| CNBP   | 3366.8 | 3862.4  | 1344.4 | 1365.7 | 978.6  | 1832.7 | 2709.1 | 6307.1  |
| CNDP1  | 93.3   | 104.3   | 105.3  | 99.4   | 90     | 108.9  | 96.2   | 100.5   |
| CNDP2  | 2821.1 | 3664    | 1780.7 | 1971.6 | 1365.9 | 2406.7 | 2014.8 | 2401.2  |
| CNFN   | 518.8  | 652.1   | 467.1  | 279.4  | 211.7  | 228    | 570.8  | 702.1   |
| CNGA1  | 83.9   | 89.4    | 88.8   | 77.4   | 76.6   | 84.8   | 87.2   | 96.3    |
| CNGA2  | 83.3   | 98.7    | 102.9  | 98.2   | 94.7   | 93.6   | 76.4   | 80.6    |
| CNGA3  | 75.4   | 88      | 103.9  | 93.8   | 89.3   | 105.9  | 84.6   | 87.5    |
| CNGA3  | 81.1   | 90.4    | 87.9   | 84.4   | 78     | 81.5   | 85.1   | 100.8   |
| CNGA3  | 166    | 185.6   | 115    | 102.1  | 102.5  | 107.9  | 154.3  | 151.5   |
| CNGA4  | 90.9   | 104.1   | 104.2  | 85.5   | 83.5   | 84.6   | 96.9   | 96.1    |
| CNGB1  | 156.3  | 198.4   | 118.5  | 123.7  | 115.7  | 121.1  | 152.7  | 133.2   |
| CNGB3  | 85.2   | 90.3    | 82.7   | 80.4   | 91     | 81.1   | 82.7   | 89      |
| CNIH   | 3111.2 | 3469    | 1485.8 | 1427.6 | 911.3  | 1276.2 | 2612.3 | 4525    |
| CNIH   | 2471.8 | 2882.9  | 1213.6 | 1026.9 | 701.8  | 1151.1 | 1719   | 2769    |
| CNIH2  | 88.5   | 99.1    | 88.7   | 84.6   | 76.5   | 94.2   | 91     | 87.7    |
| CNIH2  | 85.8   | 95.4    | 106.3  | 96.8   | 103.1  | 89.8   | 86     | 92.5    |
| CNIH3  | 122.7  | 144.6   | 97     | 94.1   | 92.6   | 123.1  | 112.8  | 135.5   |
| CNIH4  | 8915.9 | 10275.9 | 2873.9 | 2257.3 | 1517.2 | 2752   | 8748.1 | 10190.1 |
| CNKS1  | 97.5   | 115.7   | 100.7  | 95.8   | 92.1   | 91.1   | 95     | 99.7    |
| CNKS2  | 105.9  | 125.9   | 95.8   | 87     | 100.3  | 100.2  | 96.4   | 103.6   |
| CNKS3  | 235.6  | 320.8   | 193.9  | 236.7  | 203    | 316.5  | 266    | 366.7   |
| CNN1   | 77     | 88.3    | 88.2   | 75.8   | 73     | 79.8   | 88.2   | 98.6    |

|         |        |        |        |        |        |        |        |        |
|---------|--------|--------|--------|--------|--------|--------|--------|--------|
| CNN2    | 217.4  | 317.9  | 129.3  | 142.2  | 120.4  | 106.2  | 192    | 291.9  |
| CNN2    | 2778   | 3766.8 | 1394.4 | 1298.9 | 1085.7 | 1009   | 2336.4 | 2412.7 |
| CNN3    | 678.6  | 892.6  | 501.5  | 339.2  | 276.5  | 462.3  | 506.2  | 708.3  |
| CNNM1   | 112.3  | 123.2  | 123.7  | 102.9  | 120.2  | 113.9  | 108.8  | 108.5  |
| CNNM2   | 103.1  | 104.6  | 89.8   | 84.6   | 87.1   | 90.6   | 94.4   | 93.7   |
| CNNM2   | 127.7  | 140.6  | 102.4  | 110.6  | 101.1  | 114.9  | 125.8  | 139.8  |
| CNNM2   | 135.6  | 160.8  | 96.5   | 81.8   | 81.7   | 90.8   | 140.9  | 186.5  |
| CNNM3   | 393.9  | 436.8  | 201    | 202.2  | 181.4  | 190.3  | 318.4  | 394.8  |
| CNNM4   | 92.5   | 115.5  | 137.3  | 115.8  | 113.1  | 124.7  | 103.3  | 116.1  |
| CNO     | 849.4  | 1207.2 | 412.9  | 299.9  | 305.9  | 336.6  | 825.4  | 962.5  |
| CNOT1   | 110.6  | 127.5  | 110.2  | 107.5  | 101.9  | 104.5  | 104.3  | 130    |
| CNOT1   | 3145   | 4624   | 3263.7 | 4640.9 | 3502.6 | 5653.9 | 3273.4 | 4005.1 |
| CNOT10  | 580.8  | 777    | 527.6  | 506.4  | 419.1  | 781.6  | 445.3  | 552.2  |
| CNOT2   | 1270.6 | 1839.1 | 676.1  | 903.3  | 745.3  | 1296.5 | 1010.2 | 1247.3 |
| CNOT3   | 174.1  | 252.2  | 281.7  | 196    | 197.4  | 262.4  | 152    | 313.3  |
| CNOT4   | 644.6  | 806.2  | 576.3  | 583.8  | 469.5  | 614.3  | 715.8  | 1279.3 |
| CNOT4   | 123.6  | 131.5  | 113.5  | 118    | 95.3   | 107.3  | 107.9  | 122.3  |
| CNOT4   | 116.7  | 130.8  | 112.2  | 106.8  | 98.7   | 110.6  | 122.3  | 124.3  |
| CNOT6   | 704.4  | 1023.2 | 576.7  | 782.6  | 618.1  | 971.1  | 650.7  | 1040.2 |
| CNOT6L  | 166    | 221    | 162.8  | 148.1  | 159.2  | 182.3  | 149.2  | 213.4  |
| CNOT7   | 3081.9 | 4173   | 1073.4 | 709.6  | 485.4  | 639.3  | 2503.1 | 3338.9 |
| CNOT7   | 2150.1 | 2737   | 1491.9 | 1354.6 | 863.6  | 2218   | 1750.1 | 2842.1 |
| CNOT7   | 128.1  | 144.9  | 95.6   | 107.8  | 77.8   | 73.8   | 109.2  | 130.5  |
| CNOT8   | 1243.7 | 1670.3 | 410.4  | 587.7  | 590.3  | 798    | 1075.6 | 1426.8 |
| CNP     | 93.3   | 95.4   | 90.6   | 87.8   | 89.6   | 89.6   | 100.4  | 100.2  |
| CNR1    | 116.1  | 153.1  | 99.3   | 99.4   | 93.9   | 104.6  | 106.7  | 132.2  |
| CNR2    | 80.4   | 93.5   | 100.5  | 98.5   | 88.8   | 99.2   | 88.1   | 92.5   |
| CNTD    | 75.6   | 74.6   | 102.7  | 94.1   | 95.2   | 102.7  | 79.7   | 82     |
| CNTF    | 95.8   | 110.2  | 84.7   | 90.3   | 78.7   | 85     | 95.2   | 101.8  |
| CNTFR   | 93.7   | 108.3  | 98.9   | 87.8   | 81.5   | 94.9   | 85.5   | 98.6   |
| CNTFR   | 82.3   | 100.1  | 92     | 93.6   | 91.6   | 92.2   | 90.1   | 100    |
| CNTFR   | 82.6   | 86.6   | 92.8   | 86.6   | 76.3   | 84.4   | 85     | 89.6   |
| CNTN1   | 82.2   | 100.2  | 92.4   | 90.1   | 82.8   | 87.9   | 87.9   | 92.2   |
| CNTN1   | 77.3   | 90.6   | 93.8   | 74.5   | 75.3   | 82.7   | 82.3   | 84.4   |
| CNTN2   | 80.3   | 91.4   | 96.8   | 94     | 84.4   | 95.4   | 77.2   | 82.9   |
| CNTN3   | 85.3   | 106    | 94.3   | 78.2   | 78.8   | 82.8   | 89.2   | 88.9   |
| CNTN4   | 114.9  | 159.2  | 95.6   | 85.6   | 82.4   | 97.3   | 114.2  | 155.2  |
| CNTN4   | 80.1   | 86.3   | 87.2   | 79.8   | 90.7   | 82.6   | 80.6   | 85.3   |
| CNTN4   | 203.2  | 264.6  | 147    | 124    | 113.1  | 170.7  | 191.9  | 265.3  |
| CNTN5   | 77.8   | 96.8   | 83.1   | 80.6   | 83.4   | 89.6   | 80.3   | 81     |
| CNTN5   | 93.7   | 101.8  | 100.4  | 84.4   | 87.6   | 91.2   | 92.2   | 96.2   |
| CNTN6   | 98.2   | 118.1  | 98.2   | 101.4  | 86.4   | 95.6   | 99.7   | 110.5  |
| CNTNAP1 | 108.3  | 97.4   | 102.5  | 92.4   | 82.1   | 88.4   | 111.8  | 117.1  |
| CNTNAP2 | 81.1   | 91.8   | 96.2   | 87.6   | 82     | 82.3   | 84.2   | 78.3   |
| CNTNAP3 | 104.4  | 123.5  | 100.5  | 96.1   | 87.2   | 104.5  | 116.5  | 128.6  |
| CNTNAP4 | 82.3   | 101.1  | 100.7  | 95.7   | 93.4   | 88.9   | 87.7   | 91.6   |
| CNTNAP4 | 85.1   | 104.3  | 86.4   | 79.7   | 83.5   | 92.6   | 90.3   | 98.1   |
| CNTNAP5 | 135.1  | 156.9  | 109.6  | 92.8   | 100.3  | 100.1  | 137.1  | 136.9  |
| CNTNAP5 | 81.1   | 90.5   | 113.5  | 101.5  | 100.2  | 106.9  | 82     | 78.7   |
| CNTROB  | 112.3  | 131.2  | 119.1  | 110    | 109.3  | 131.8  | 110.2  | 124.3  |

|         |        |        |        |        |        |        |        |        |
|---------|--------|--------|--------|--------|--------|--------|--------|--------|
| COASY   | 2477.3 | 3071.9 | 1176.9 | 1149.4 | 955.6  | 993.9  | 1712.9 | 1645.9 |
| COASY   | 467.4  | 542.7  | 258    | 218.4  | 204.6  | 227.1  | 337.2  | 589    |
| COBL    | 98.9   | 106.9  | 92.8   | 87.1   | 97.8   | 89     | 100.4  | 125.9  |
| COBLL1  | 85     | 83.1   | 94     | 89.4   | 95.8   | 93.1   | 95     | 94.8   |
| COBRA1  | 440.3  | 623.5  | 208.1  | 170.1  | 142.3  | 113.1  | 323.3  | 502.5  |
| COBRA1  | 918.8  | 1396.4 | 1331.4 | 837    | 773.4  | 1247   | 818.3  | 1895.6 |
| COBRA1  | 1348.4 | 1669.8 | 1843.3 | 1405.4 | 1108.6 | 1800.6 | 1292   | 2865.1 |
| COCH    | 137.2  | 152.3  | 101.4  | 106.4  | 102    | 115.2  | 129.3  | 157.3  |
| COG1    | 175.6  | 223.6  | 159.4  | 178.2  | 150.1  | 187.2  | 156.3  | 196.8  |
| COG2    | 925.2  | 1219.3 | 799.4  | 757.6  | 609.4  | 968.2  | 781.9  | 846.7  |
| COG3    | 173.9  | 209.1  | 138.5  | 161.9  | 150.1  | 188.4  | 183    | 306.1  |
| COG4    | 199    | 226.4  | 128.6  | 133.1  | 126.9  | 178.3  | 161.2  | 220.2  |
| COG5    | 193.1  | 239    | 128    | 143.2  | 129.4  | 154.5  | 145.9  | 210.1  |
| COG5    | 257.3  | 302.3  | 139.3  | 151.1  | 136.6  | 204.3  | 225.6  | 387.1  |
| COG6    | 262.3  | 353.1  | 187.8  | 214.2  | 184    | 313.2  | 227.2  | 293.7  |
| COG7    | 172.3  | 213.8  | 175.5  | 156.2  | 124.4  | 165.2  | 167    | 264.7  |
| COG8    | 227.2  | 304.1  | 168.9  | 120.6  | 113.2  | 121.2  | 193.9  | 249.6  |
| COIL    | 1206.8 | 1730.1 | 799.9  | 937.2  | 734.4  | 1404.1 | 1008.5 | 1735.1 |
| COL10A1 | 84.5   | 86.6   | 97.5   | 86.1   | 88     | 93.8   | 86.4   | 82     |
| COL11A1 | 129    | 152.6  | 107.6  | 97.1   | 102.7  | 102.3  | 127.5  | 114.9  |
| COL11A1 | 75.2   | 98.3   | 92.1   | 79.9   | 70.6   | 83.8   | 98.7   | 88.8   |
| COL11A1 | 86     | 94.5   | 103.8  | 86.8   | 85.1   | 98.3   | 81.9   | 102.1  |
| COL11A1 | 94.4   | 100    | 95.9   | 91.9   | 82.4   | 88.2   | 100.9  | 127.2  |
| COL11A2 | 116.8  | 121.5  | 97.3   | 92.4   | 94.3   | 96.5   | 118    | 123.1  |
| COL11A2 | 95.8   | 117.6  | 102.1  | 89.8   | 86.6   | 97.5   | 99.5   | 119.3  |
| COL12A1 | 159.8  | 187.8  | 124.1  | 106.5  | 104.9  | 113.9  | 150.4  | 170.9  |
| COL12A1 | 119.1  | 139.9  | 96.6   | 97.6   | 85.9   | 86.4   | 127.8  | 150.5  |
| COL13A1 | 103.7  | 108.9  | 113.4  | 101.5  | 93.9   | 102.4  | 97.5   | 98.7   |
| COL13A1 | 120.4  | 118.5  | 97.3   | 94.7   | 93.1   | 89.8   | 107.8  | 122    |
| COL15A1 | 124.3  | 155.2  | 122.4  | 141    | 103.2  | 171.7  | 121    | 167.3  |
| COL16A1 | 111.7  | 115.6  | 97.4   | 78.4   | 77.7   | 90.9   | 109.5  | 110    |
| COL17A1 | 90.2   | 110.4  | 82     | 79.1   | 84.2   | 84     | 102    | 104.6  |
| COL17A1 | 107.3  | 117.6  | 86     | 81.4   | 93.5   | 80.9   | 100.3  | 127.9  |
| COL18A1 | 107.8  | 129.1  | 99.3   | 187.2  | 152.4  | 186    | 107.4  | 112.4  |
| COL18A1 | 114.1  | 117.6  | 87.4   | 86.6   | 80.8   | 82.6   | 104.3  | 131.2  |
| COL19A1 | 68.6   | 80     | 88.9   | 89.5   | 86.8   | 80.2   | 86.6   | 81     |
| COL1A1  | 101.8  | 114.6  | 99.4   | 114.3  | 120.1  | 119.2  | 103.2  | 112.6  |
| COL1A2  | 102.5  | 108.7  | 89.1   | 85     | 84.4   | 92.1   | 95     | 119.7  |
| COL20A1 | 106.4  | 110.1  | 96.8   | 93.9   | 89.2   | 98.3   | 106.8  | 119.7  |
| COL21A1 | 77.2   | 77.7   | 91.3   | 78.8   | 76.5   | 85.5   | 80.2   | 77.3   |
| COL22A1 | 104.1  | 147.5  | 103.7  | 92.7   | 85.8   | 95     | 103    | 125    |
| COL23A1 | 210.9  | 250.9  | 219.9  | 268.4  | 239.2  | 393.9  | 184.8  | 366.5  |
| COL24A1 | 116.7  | 144.3  | 124.3  | 161.6  | 156.1  | 240.1  | 139.5  | 195.2  |
| COL25A1 | 95.7   | 114.1  | 93.2   | 83     | 86.8   | 82.5   | 111.1  | 128.6  |
| COL25A1 | 82.6   | 94.3   | 87.9   | 75.6   | 79.1   | 85.6   | 81     | 94.3   |
| COL25A1 | 101.5  | 133.2  | 91.8   | 92.3   | 74.3   | 82.4   | 99.1   | 107.6  |
| COL27A1 | 127.1  | 131.2  | 113.4  | 102.1  | 97     | 117.9  | 96.8   | 116.9  |
| COL2A1  | 143.7  | 175.6  | 92.5   | 90.2   | 82.8   | 93.4   | 131.5  | 173.7  |
| COL2A1  | 101.4  | 114.7  | 92.5   | 87.4   | 88.3   | 90.7   | 101.6  | 95.8   |
| COL3A1  | 86.4   | 90.4   | 94.1   | 86.2   | 84.4   | 76.2   | 88     | 90.1   |



|          |         |         |        |        |        |        |        |         |
|----------|---------|---------|--------|--------|--------|--------|--------|---------|
| COL4A1   | 371.5   | 487.7   | 239.9  | 478.4  | 403.6  | 547.7  | 311.7  | 377     |
| COL4A2   | 152     | 172.7   | 96.5   | 94.7   | 104.3  | 152.7  | 139.2  | 161.4   |
| COL4A3   | 72.2    | 82.4    | 82.3   | 77.8   | 77.9   | 74.4   | 79.3   | 86.1    |
| COL4A3   | 110.1   | 110.8   | 99.8   | 93.8   | 86.2   | 82.5   | 104    | 109.4   |
| COL4A3BP | 152.4   | 161     | 97.5   | 99.7   | 98.4   | 96.1   | 131.8  | 179.2   |
| COL4A3BP | 589.7   | 677.1   | 284.3  | 436.1  | 375.8  | 409.7  | 474    | 728.4   |
| COL4A4   | 81.9    | 92.9    | 90.3   | 88.2   | 86.7   | 81.5   | 82.2   | 95.5    |
| COL4A5   | 173.6   | 197.7   | 143.1  | 106.5  | 100.8  | 119.2  | 155.1  | 170.9   |
| COL4A5   | 71.6    | 69.5    | 89.2   | 85.3   | 83.2   | 81.4   | 71.7   | 79.2    |
| COL4A6   | 89.8    | 85.1    | 89.3   | 90     | 88.5   | 82.9   | 71.1   | 77.8    |
| COL4A6   | 88.7    | 93.4    | 91.3   | 80.3   | 83.2   | 85.9   | 94.1   | 100.5   |
| COL4A6   | 111.3   | 101.1   | 95.1   | 80.6   | 75.2   | 84.2   | 94.9   | 100     |
| COL5A1   | 103.3   | 107.1   | 105.3  | 96.4   | 80.9   | 83.6   | 107.5  | 123.7   |
| COL5A2   | 102     | 125.3   | 101.4  | 118    | 92.7   | 100.7  | 104.4  | 133.8   |
| COL5A3   | 79.4    | 92.9    | 91.5   | 83.8   | 70.5   | 78.9   | 88.2   | 82.3    |
| COL6A1   | 131     | 153.7   | 142.4  | 196.7  | 213.1  | 239.8  | 121.5  | 182.5   |
| COL6A2   | 107.8   | 109.5   | 108.5  | 102.4  | 88.3   | 104.1  | 107.6  | 107     |
| COL6A2   | 95.3    | 106.5   | 119.1  | 119    | 95     | 111.1  | 89.4   | 116.5   |
| COL6A2   | 184.9   | 208.4   | 111.4  | 97     | 97.2   | 107.7  | 163.9  | 188.2   |
| COL6A3   | 70.4    | 74.2    | 92     | 82.6   | 73.3   | 82.7   | 77.4   | 78.8    |
| COL6A3   | 104.9   | 118.5   | 100.1  | 107.4  | 93.9   | 102.8  | 109.1  | 106     |
| COL7A1   | 136.4   | 132.2   | 159.9  | 154.1  | 170.9  | 194.4  | 117.5  | 177.6   |
| COL8A1   | 121     | 133.8   | 105.8  | 100.8  | 111.6  | 131.9  | 140.6  | 158     |
| COL8A1   | 79.3    | 83.9    | 81     | 87     | 76.5   | 85.4   | 96.2   | 96      |
| COL8A1   | 98.2    | 98.5    | 94.8   | 88.6   | 89.3   | 85.1   | 97.2   | 99.5    |
| COL8A2   | 404.5   | 504.9   | 234.1  | 220.4  | 185.1  | 282.8  | 194.7  | 248.1   |
| COL9A1   | 112.1   | 137.8   | 106.8  | 106.9  | 98.9   | 98.8   | 116.2  | 117.6   |
| COL9A1   | 110.6   | 124.3   | 89.3   | 88.1   | 78     | 91.4   | 104.2  | 137.8   |
| COL9A1   | 126.2   | 197.4   | 94.5   | 81.2   | 78.3   | 84.6   | 132    | 162.5   |
| COL9A1   | 81.5    | 83.9    | 85.6   | 80.7   | 81.1   | 91.1   | 81.9   | 92.9    |
| COL9A2   | 2082.5  | 2566    | 3521.2 | 3667.1 | 4133.6 | 7382   | 1978.6 | 4095    |
| COL9A3   | 162.3   | 177.5   | 98.5   | 98.8   | 91.1   | 103.8  | 143.9  | 151.1   |
| COLEC10  | 75.1    | 78.8    | 97.3   | 84.5   | 76.9   | 81.5   | 70.4   | 79.6    |
| COLEC11  | 85.3    | 91.6    | 93.5   | 85     | 79.5   | 85.1   | 81     | 98.4    |
| COLEC11  | 76.9    | 76.4    | 90.5   | 88.9   | 83     | 81.3   | 77.4   | 78      |
| COLEC11  | 125.8   | 172     | 100.5  | 94.8   | 85.3   | 79.9   | 127.9  | 143.8   |
| COLEC12  | 77.8    | 91.9    | 98.5   | 91.9   | 102.9  | 96.6   | 84.4   | 93      |
| COLEC12  | 95.9    | 91.4    | 79.1   | 81.4   | 76.7   | 86     | 98.5   | 89      |
| COLQ     | 147.7   | 157.1   | 103.6  | 87.1   | 83.1   | 94.6   | 122.6  | 156.6   |
| COLQ     | 91.3    | 106.2   | 94.9   | 89     | 90.5   | 81.4   | 86     | 94.4    |
| COLQ     | 89.7    | 88.6    | 108.9  | 92.3   | 92.3   | 101.3  | 87.9   | 96.6    |
| COLQ     | 90.1    | 108.9   | 110.8  | 98.5   | 106.8  | 98.8   | 85.4   | 85.6    |
| COMMD1   | 1550.6  | 1619.8  | 1041.9 | 1030.1 | 756.4  | 894.4  | 1356.7 | 1554.9  |
| COMMD10  | 1239.6  | 1550.1  | 739.9  | 737.9  | 516.3  | 1157   | 955.9  | 1325.3  |
| COMMD2   | 1127.2  | 1329.5  | 711.8  | 597.1  | 457.8  | 535    | 1079.9 | 1493.3  |
| COMMD3   | 10250.7 | 12167.3 | 8388.2 | 5889.9 | 5337.6 | 7111.9 | 8319.6 | 10001.4 |
| COMMD4   | 2480.7  | 3052.8  | 1829.6 | 1356.5 | 1200.7 | 1382.1 | 2455   | 3144.1  |
| COMMD5   | 2029.6  | 2676.5  | 1153.6 | 616.1  | 536.3  | 746.9  | 1914.3 | 2220.3  |
| COMMD5   | 254.5   | 330.3   | 189.1  | 133.5  | 117.4  | 115.1  | 254.8  | 250.4   |
| COMMD6   | 7635.1  | 9364.6  | 4527.6 | 5574.9 | 4412.6 | 6271.7 | 6775.4 | 7703.8  |

|        |         |         |         |        |        |        |         |         |
|--------|---------|---------|---------|--------|--------|--------|---------|---------|
| COMMD6 | 88.1    | 89.5    | 86.9    | 93.9   | 79     | 88.3   | 72.4    | 85.7    |
| COMMD7 | 4457.7  | 5116.4  | 3312    | 2208.8 | 1759.6 | 2595.8 | 4000.4  | 4756.3  |
| COMMD8 | 178.3   | 182     | 129.2   | 107.7  | 100.8  | 118.2  | 170.7   | 278.1   |
| COMMD9 | 841.9   | 1114.2  | 486.3   | 378.9  | 364.7  | 486.4  | 770.7   | 997.6   |
| COMP   | 91.6    | 103     | 92.5    | 72.5   | 79     | 92.9   | 96      | 101.7   |
| COMT   | 1014    | 1310.4  | 339.9   | 216.4  | 212.7  | 191.1  | 895.5   | 975.9   |
| COMT   | 10564.8 | 13092.5 | 11818.5 | 7448.1 | 6512.7 | 7148.7 | 11619.1 | 12140.8 |
| COMTD1 | 224.9   | 290     | 209.2   | 158.7  | 149.5  | 156.2  | 171.9   | 269.7   |
| COP1   | 161.8   | 184.1   | 105.5   | 108.2  | 90.8   | 104.3  | 159.7   | 186.6   |
| COP1   | 105.6   | 131.5   | 105.6   | 94.5   | 92.6   | 99.7   | 106.1   | 127.2   |
| COPA   | 4069.6  | 4592.8  | 2770.4  | 2827.3 | 2212.6 | 2804.7 | 3951.7  | 4846.5  |
| COPB   | 1730.5  | 2162.3  | 1185.9  | 1319.4 | 904.3  | 2030.9 | 1396.8  | 3172.2  |
| COPB2  | 2116.7  | 2658.2  | 1772.4  | 2299   | 1878.5 | 3259.3 | 1536.4  | 2247.8  |
| COPE   | 2169.1  | 2892.5  | 1783.4  | 1110.9 | 879    | 985.6  | 1992.7  | 2639.5  |
| COPE   | 3604.6  | 4603.8  | 1824.1  | 1051.3 | 869.9  | 1275.4 | 3351.9  | 4605.9  |
| COPG   | 626.6   | 915.8   | 552.6   | 501.7  | 391.4  | 529    | 510.9   | 813.8   |
| COPG2  | 226.4   | 330     | 190.1   | 269    | 245.5  | 408.4  | 218.6   | 245     |
| COPS2  | 89.2    | 106.2   | 90.5    | 95.6   | 93.6   | 87.8   | 89.2    | 110     |
| COPS3  | 2917.1  | 3717.4  | 2137.5  | 1941.3 | 1493.6 | 2381.5 | 2664.7  | 3454.5  |
| COPS4  | 1468.2  | 1932.2  | 654.7   | 627.3  | 407    | 692.4  | 1190.4  | 1851.4  |
| COPS5  | 6839.5  | 8697.7  | 5087.6  | 3182.8 | 2519.9 | 4071.2 | 5648.9  | 9319.7  |
| COPS6  | 930.5   | 1185.1  | 726.7   | 636.6  | 518.3  | 706.2  | 813.3   | 927.7   |
| COPS7A | 1473.2  | 1812.2  | 993.5   | 1164.7 | 876.1  | 1531.7 | 1241.2  | 1604.8  |
| COPS7B | 1134.5  | 1389.1  | 938.4   | 694.6  | 553.8  | 739.3  | 926.8   | 1174.5  |
| COPS8  | 105.3   | 118.6   | 98.7    | 85.2   | 83.7   | 78.9   | 89.8    | 98      |
| COPS8  | 485.2   | 698.4   | 218     | 177.9  | 154.4  | 274.7  | 438.3   | 618     |
| COPZ1  | 1722    | 2348.1  | 1306.9  | 898.4  | 698.2  | 1232.9 | 1513.6  | 1785.5  |
| COPZ2  | 225.5   | 281     | 163.4   | 178.7  | 163.3  | 201.1  | 179     | 267.3   |
| COQ10A | 302.5   | 354.2   | 224.3   | 196.3  | 178.4  | 221.6  | 217     | 278     |
| COQ10B | 1239.4  | 1845.2  | 990.5   | 934.7  | 868.6  | 1306.6 | 1087.2  | 1572.3  |
| COQ2   | 3162.1  | 4361.6  | 2273    | 1794.4 | 1198.7 | 1884.3 | 2985.7  | 4458.3  |
| COQ3   | 1265.7  | 1616.7  | 517.1   | 501    | 344.9  | 512.7  | 1026.5  | 1137.7  |
| COQ5   | 2239.8  | 2968.6  | 1809.6  | 1607.6 | 1284.5 | 1981   | 2040.2  | 2363.1  |
| COQ6   | 320.4   | 403.8   | 193.3   | 135.8  | 147.2  | 172.2  | 258.2   | 309.5   |
| COQ6   | 627.3   | 783.4   | 563.2   | 490.2  | 385.7  | 628.6  | 527.4   | 736.4   |
| COQ7   | 215.4   | 275.8   | 182.6   | 179.8  | 144    | 160.3  | 194.8   | 210.2   |
| COQ9   | 1221.2  | 1569.8  | 962.4   | 660.3  | 512.4  | 935.5  | 999.6   | 1769    |
| CORIN  | 79.4    | 90.8    | 92.7    | 81.7   | 81.3   | 79.3   | 82.5    | 85.7    |
| CORO1A | 3119.2  | 4513.5  | 2324.9  | 1160.4 | 897.1  | 1322.9 | 2563.2  | 4210.7  |
| CORO1B | 214.1   | 263.8   | 196.8   | 140.5  | 139.4  | 174.2  | 201.1   | 307.7   |
| CORO1B | 1191.2  | 1442.7  | 1133.6  | 996    | 798    | 1157.3 | 1194.1  | 2136.9  |
| CORO1C | 572.3   | 722.6   | 356.8   | 428.8  | 339    | 613.4  | 482.7   | 786.6   |
| CORO2A | 645.4   | 825.5   | 645.5   | 721.8  | 604.9  | 908.6  | 478     | 723.2   |
| CORO2A | 180.9   | 210.1   | 143.4   | 150.9  | 151.1  | 188.8  | 139.8   | 146.6   |
| CORO2A | 105.3   | 125.9   | 75      | 74.2   | 73.3   | 72.8   | 102.9   | 138.5   |
| CORO2B | 85.2    | 88.3    | 90.1    | 88.6   | 94.5   | 91     | 86.3    | 85.1    |
| CORO6  | 118.8   | 132.7   | 124.5   | 108.3  | 113.6  | 132.2  | 103.7   | 129.4   |
| CORO7  | 301.4   | 375.7   | 401.9   | 392.4  | 316.7  | 628    | 264.4   | 435.2   |
| CORT   | 94.1    | 111.6   | 109.9   | 98.2   | 88.1   | 91.2   | 101.1   | 109.8   |
| COTL1  | 166.9   | 213     | 113.8   | 127.7  | 117.5  | 108.9  | 151.2   | 292.1   |

|        |         |         |         |         |         |         |         |         |
|--------|---------|---------|---------|---------|---------|---------|---------|---------|
| COVA1  | 420.2   | 594.4   | 316.8   | 360     | 280.4   | 431.2   | 322.2   | 492.2   |
| COVA1  | 85.1    | 95.2    | 109.9   | 92.4    | 89.7    | 103.6   | 85.5    | 94.2    |
| COVA1  | 124.9   | 150.4   | 136.8   | 140.6   | 132.3   | 167.1   | 122.3   | 170.3   |
| COX10  | 785.5   | 933.6   | 497.9   | 552     | 453.1   | 688.6   | 632.6   | 667.1   |
| COX11  | 134.6   | 186.8   | 113.5   | 112.2   | 99      | 123.5   | 141.4   | 168.7   |
| COX11P | 76      | 89.8    | 84.1    | 78.2    | 86.4    | 84.6    | 79.4    | 88.4    |
| COX15  | 113.2   | 147.3   | 99.5    | 84.5    | 78.7    | 85.5    | 112.9   | 105.9   |
| COX15  | 283.6   | 349.8   | 273.1   | 203.9   | 167.5   | 205     | 254.7   | 257.1   |
| COX17  | 7569.2  | 8334.1  | 6117    | 4901.5  | 3732.8  | 5275.1  | 6269.3  | 9058.5  |
| COX4I1 | 23064.6 | 26137.6 | 19719.6 | 16467.1 | 14186.9 | 17369.1 | 22685.3 | 24290.8 |
| COX4I2 | 91.8    | 97.9    | 100.9   | 90.2    | 89.7    | 100.2   | 89.8    | 99.9    |
| COX4NB | 524.5   | 836.9   | 372.7   | 283.8   | 203.4   | 359     | 503.4   | 821.7   |
| COX5A  | 15347.9 | 19242.9 | 12127.7 | 11240.9 | 8386.3  | 10247.4 | 18591   | 22280.4 |
| COX5B  | 11071   | 13636.2 | 7002.2  | 6464.1  | 5217.7  | 7138.3  | 8792.9  | 9013.4  |
| COX6A1 | 2693.9  | 3486.4  | 1392.3  | 1287    | 1062.7  | 1782.8  | 2273.4  | 2660.1  |
| COX6A2 | 65.6    | 84.4    | 98.7    | 88.9    | 86.5    | 79.4    | 81.9    | 81.7    |
| COX6B1 | 11901   | 13314.5 | 11909.1 | 9604.6  | 6761.4  | 10801.1 | 9809.5  | 13223.5 |
| COX6B2 | 92.3    | 97.3    | 108.1   | 96.7    | 89.4    | 91.2    | 88.7    | 102.8   |
| COX6C  | 18535.2 | 20638.5 | 9394.7  | 8141.5  | 7128.6  | 8207.5  | 16396   | 17475.7 |
| COX7A1 | 103.6   | 115.2   | 92.5    | 79.7    | 79.3    | 94.2    | 116.6   | 122.3   |
| COX7A2 | 28119.8 | 28869.4 | 19677.1 | 19190.9 | 14926.2 | 21582.9 | 24397.7 | 27397.2 |
| COX7B  | 5090.7  | 5193.9  | 1710.4  | 2332.2  | 1521.5  | 2565.4  | 4540.6  | 7497.7  |
| COX7B2 | 85      | 89.6    | 84.5    | 79.1    | 73.3    | 75      | 85.2    | 87.3    |
| COX7C  | 24601.8 | 28685.7 | 22098.2 | 19831.7 | 15180.4 | 20907.1 | 22665.4 | 26627   |
| COX8A  | 14637.1 | 17349.7 | 11430.1 | 6174    | 5450.9  | 6057.1  | 12180   | 13337.3 |
| COX8C  | 118.7   | 130.5   | 94.8    | 93.8    | 83.2    | 83.5    | 105.8   | 120     |
| CP     | 86.1    | 104     | 99.8    | 95.7    | 86.1    | 90.4    | 87.9    | 87.3    |
| CP110  | 1557.5  | 1874.1  | 742.8   | 623.6   | 595.4   | 1065.3  | 978.1   | 1461.9  |
| CPA1   | 90.5    | 98.9    | 77.6    | 79.4    | 74.7    | 80.4    | 87.5    | 94.9    |
| CPA2   | 79.8    | 91.4    | 95.4    | 78.4    | 78.3    | 85.8    | 85.5    | 91.4    |
| CPA3   | 107     | 125.4   | 91.7    | 93.1    | 84.7    | 95.8    | 117.2   | 125.5   |
| CPA4   | 78.6    | 90.3    | 93.1    | 94.1    | 82.9    | 85.6    | 92.7    | 83.3    |
| CPA5   | 112.4   | 118.5   | 96      | 83.3    | 89.6    | 88.3    | 112.7   | 130.8   |
| CPA6   | 84.3    | 80.7    | 86.8    | 73.6    | 70.1    | 75.6    | 84.2    | 88.9    |
| CPAMD8 | 83.4    | 102     | 86.4    | 86.4    | 82.9    | 89.5    | 90.9    | 111.6   |
| CPB1   | 129.2   | 129.4   | 93.8    | 87.5    | 90.9    | 83.7    | 120.1   | 167.9   |
| CPB2   | 101.2   | 131.3   | 84.7    | 83.9    | 87.5    | 86.1    | 102.1   | 114.6   |
| CPB2   | 81.1    | 81.6    | 85.8    | 85.9    | 77      | 86.5    | 76.6    | 86.2    |
| CPB2   | 80.9    | 89      | 119.2   | 107.9   | 94.2    | 99.1    | 84.2    | 87.1    |
| CPD    | 775.9   | 1201    | 458.3   | 1378    | 1018.4  | 1868.7  | 841.1   | 977.8   |
| CPE    | 253.7   | 277.1   | 165.5   | 112     | 96.6    | 107.4   | 247.2   | 464.4   |
| CPEB1  | 98.8    | 128.9   | 80.1    | 94.2    | 80.8    | 91.2    | 115.3   | 121.9   |
| CPEB1  | 91      | 96.4    | 95.8    | 91.5    | 81.5    | 86.3    | 90.7    | 106.6   |
| CPEB1  | 95.1    | 109.9   | 99.4    | 93.9    | 91.4    | 99.8    | 85      | 100     |
| CPEB2  | 130.1   | 166     | 95.6    | 80.9    | 71.7    | 88.1    | 114.2   | 157.4   |
| CPEB2  | 364.8   | 492.9   | 339     | 446.1   | 332.4   | 632.1   | 366.5   | 738.2   |
| CPEB3  | 90.4    | 91.4    | 93      | 97.9    | 93.5    | 88.8    | 99.8    | 113.6   |
| CPEB4  | 116.1   | 140.1   | 81.9    | 97      | 85.4    | 93.7    | 126.9   | 141.8   |
| CPLX1  | 80.2    | 89.5    | 86.4    | 99.2    | 81.5    | 79.2    | 81.1    | 88.9    |
| CPLX2  | 113.6   | 165.5   | 106.1   | 97.5    | 75.4    | 76.7    | 113.3   | 139.7   |

|        |        |        |        |        |        |        |        |        |
|--------|--------|--------|--------|--------|--------|--------|--------|--------|
| CPLX2  | 91.7   | 94.1   | 97.6   | 89.1   | 88.5   | 81     | 92.8   | 103.6  |
| CPLX3  | 83.8   | 100.8  | 93.2   | 86.2   | 82.7   | 86     | 85.9   | 94.6   |
| CPM    | 90.2   | 107.8  | 102.9  | 101.7  | 89.8   | 108.8  | 89.4   | 90.9   |
| CPM    | 282    | 381.1  | 176.1  | 151.9  | 123.4  | 196.1  | 220.9  | 284.3  |
| CPN1   | 84.1   | 93.1   | 95.4   | 84.4   | 84.9   | 87.7   | 83     | 96.2   |
| CPN2   | 125.5  | 158    | 101    | 90.8   | 86.5   | 98.7   | 123.9  | 125.2  |
| CPN2   | 95.7   | 90.3   | 103.3  | 97.2   | 90.3   | 95.7   | 89.6   | 91.6   |
| CPNE1  | 181.2  | 218.1  | 100.6  | 107.3  | 77.9   | 88.5   | 149.9  | 195.6  |
| CPNE1  | 1439.5 | 1945.9 | 886.4  | 739.2  | 614.7  | 834.9  | 1281.5 | 2049.2 |
| CPNE1  | 1183.7 | 1490.1 | 1018.4 | 632.4  | 569.8  | 792.9  | 966.4  | 1203   |
| CPNE2  | 141.1  | 193.2  | 145.6  | 111.5  | 103.3  | 126.9  | 145.3  | 169.7  |
| CPNE3  | 1317   | 1711.9 | 1226.8 | 1056.5 | 808.8  | 1438.2 | 1222.8 | 2523.6 |
| CPNE4  | 91.4   | 97.3   | 110.9  | 104.6  | 90.8   | 100.4  | 94.8   | 97.2   |
| CPNE5  | 89.1   | 106.5  | 103.1  | 92.9   | 83.3   | 93.9   | 93.1   | 100.3  |
| CPNE6  | 83.5   | 90.5   | 90.5   | 84.4   | 86.6   | 92     | 83.4   | 96.9   |
| CPNE7  | 98.4   | 127.7  | 92.3   | 87.5   | 82.9   | 93.5   | 100.9  | 124.6  |
| CPNE8  | 1301.6 | 1611.9 | 504.2  | 637.5  | 499.9  | 739.3  | 910.4  | 1246.9 |
| CPNE9  | 124.9  | 129.6  | 94.9   | 97.5   | 78.5   | 87.8   | 115.4  | 125.3  |
| CPO    | 117.3  | 123.8  | 84.9   | 81.6   | 80.8   | 91.3   | 107    | 107.1  |
| CPS1   | 173    | 244    | 181    | 90.9   | 89     | 103    | 200.5  | 246.2  |
| CPSF1  | 1190.2 | 1237.3 | 1094.4 | 666.9  | 661.3  | 740.2  | 787.1  | 759.7  |
| CPSF2  | 561.4  | 899    | 462.8  | 381.7  | 355.3  | 432.4  | 498.3  | 521.5  |
| CPSF3  | 4174.4 | 6216.2 | 1621.6 | 1783.7 | 1083.9 | 2080.4 | 4070.1 | 4733.5 |
| CPSF3L | 233.2  | 339.6  | 193.6  | 188.8  | 180.4  | 210.4  | 229.8  | 310.9  |
| CPSF3L | 180.5  | 228.5  | 142.7  | 147.7  | 135.8  | 160.7  | 190.9  | 241.9  |
| CPSF4  | 3366.1 | 4108.7 | 2672.4 | 2214.2 | 1971.2 | 2452.4 | 2975.4 | 3234   |
| CPSF4  | 140.1  | 177.5  | 118.7  | 95.9   | 102.2  | 119    | 143.6  | 188.3  |
| CPSF6  | 201.3  | 226.8  | 129.8  | 127.3  | 117.8  | 165.9  | 160    | 271.1  |
| CPT1A  | 117.3  | 151.8  | 103.6  | 94.5   | 85.1   | 83.6   | 121.7  | 126.7  |
| CPT1A  | 117    | 122.8  | 111.3  | 95.3   | 97.8   | 96.8   | 119.4  | 141.8  |
| CPT1A  | 255.8  | 328.1  | 220.3  | 226.1  | 185.1  | 189.6  | 225    | 362.8  |
| CPT1B  | 193.2  | 220.6  | 190.7  | 182.6  | 173.9  | 285.2  | 180    | 276.9  |
| CPT1B  | 124.3  | 131.7  | 112.9  | 125.8  | 111.1  | 107.5  | 102.4  | 110.6  |
| CPT1C  | 88.7   | 97.3   | 98.9   | 91     | 97.8   | 90.8   | 89.6   | 93.4   |
| CPT2   | 1479.3 | 1840.5 | 1242.7 | 1337   | 959.8  | 1174.1 | 1293.7 | 1844.2 |
| CPVL   | 2095.4 | 2711.5 | 1682.5 | 2278.6 | 1701.2 | 2363.9 | 1710.7 | 2765.2 |
| CPVL   | 1104.2 | 1582.2 | 581.9  | 706.8  | 572.2  | 901.8  | 823.8  | 1228.6 |
| CPXCR1 | 110    | 125.1  | 89.9   | 83.2   | 88.6   | 82.1   | 99.1   | 118.6  |
| CPXM   | 123.2  | 141.1  | 100.2  | 100.4  | 87.1   | 82.8   | 124.4  | 136.6  |
| CPXM2  | 84.6   | 100.3  | 105.3  | 99.1   | 103.1  | 97.2   | 89.8   | 95.6   |
| CPZ    | 104.5  | 115.6  | 92.1   | 94.2   | 85.4   | 92     | 93.6   | 99.7   |
| CPZ    | 91.4   | 99.8   | 92.1   | 87.8   | 95.4   | 90.7   | 85.7   | 90.4   |
| CPZ    | 80     | 84.7   | 91.3   | 89.1   | 90.8   | 95.5   | 84.6   | 84.2   |
| CR1    | 90.5   | 97.9   | 92.8   | 94.7   | 81.5   | 97.8   | 91.4   | 97.8   |
| CR1    | 81.1   | 95.8   | 88.8   | 81     | 72.7   | 77.8   | 83     | 89.4   |
| CR1    | 89.7   | 84.7   | 73.6   | 80.6   | 76.6   | 76.2   | 86.9   | 98.8   |
| CR2    | 80.4   | 93.8   | 86     | 73.2   | 71.6   | 82.1   | 83.8   | 93     |
| CR2    | 86.9   | 94     | 101.2  | 103.2  | 99.7   | 104.6  | 93.9   | 84.2   |
| CRABP1 | 934.1  | 1354.4 | 705.7  | 542.6  | 409.1  | 670    | 1016.3 | 1617.3 |
| CRABP2 | 133.2  | 155.7  | 105.7  | 92.3   | 94.9   | 100.8  | 130.5  | 142    |

|         |        |        |        |        |        |        |        |        |
|---------|--------|--------|--------|--------|--------|--------|--------|--------|
| CRADD   | 364.8  | 469.2  | 286    | 288.4  | 234.1  | 281.6  | 376.5  | 449.3  |
| CRAMP1L | 237.2  | 322.6  | 263.2  | 238.7  | 231.1  | 305.5  | 235.5  | 428.4  |
| CRAT    | 139.5  | 136.4  | 133.2  | 145    | 107.6  | 136.3  | 134.3  | 167.2  |
| CRAT    | 103.3  | 128.1  | 100.9  | 94.6   | 93.5   | 99.4   | 114.6  | 118.7  |
| CRB1    | 82.4   | 101.4  | 100.7  | 95.5   | 88.7   | 91.6   | 99.3   | 90.7   |
| CRB2    | 102.5  | 110.7  | 88.1   | 84.7   | 84.6   | 83.2   | 97     | 93.8   |
| CRB3    | 97.7   | 95.4   | 91.8   | 87     | 93.7   | 77.9   | 82.7   | 89.7   |
| CRB3    | 96.5   | 103    | 99.6   | 86.5   | 96.1   | 102.7  | 96.5   | 98.8   |
| CRB3    | 81.1   | 109.8  | 96.1   | 101.3  | 95.1   | 89.3   | 90     | 97.5   |
| CRBN    | 579.1  | 738    | 336.1  | 291.8  | 273.3  | 487.9  | 551.7  | 813.4  |
| CREB1   | 2142.7 | 1796.6 | 1330.3 | 1763.7 | 1499.3 | 1284   | 2112.6 | 3433.2 |
| CREB3   | 140.8  | 178.9  | 95.9   | 98.3   | 83.4   | 76.8   | 139.1  | 165.7  |
| CREB3L1 | 106.3  | 124.6  | 99.5   | 94.9   | 91.2   | 89     | 96.7   | 127.6  |
| CREB3L2 | 678.2  | 1004.7 | 698.9  | 939.6  | 795.9  | 1143.8 | 762.2  | 1265.7 |
| CREB3L3 | 80.9   | 92.5   | 91     | 82.7   | 80     | 79.7   | 79.6   | 82.9   |
| CREB3L4 | 137.8  | 167.7  | 98.5   | 90.1   | 87.3   | 94.6   | 116.5  | 140.3  |
| CREB5   | 101.5  | 115.7  | 83.8   | 72.8   | 74.4   | 80.1   | 97.7   | 113    |
| CREB5   | 79.4   | 84.7   | 84.7   | 83     | 79.1   | 87.5   | 74.7   | 77     |
| CREB5   | 85.4   | 99.9   | 90.9   | 97.5   | 95.5   | 94.9   | 86.5   | 89.4   |
| CREB5   | 94.8   | 121.4  | 94.8   | 87.3   | 87.3   | 73.5   | 103    | 122    |
| CREB5   | 104.8  | 112.1  | 95.9   | 92     | 87.5   | 102.8  | 106.3  | 115.4  |
| CREBBP  | 92.8   | 117.5  | 120.2  | 113.5  | 111    | 110.8  | 99.4   | 112.6  |
| CREBBP  | 796.1  | 1007.5 | 614.7  | 860.9  | 621.7  | 987.5  | 685    | 1385.1 |
| CREBL1  | 132.8  | 196.7  | 119.8  | 120.1  | 101.8  | 100.5  | 135.1  | 154    |
| CREBL2  | 103.9  | 119.3  | 90.6   | 82.1   | 80     | 89.2   | 102    | 119.9  |
| CREG1   | 1966.9 | 2728.7 | 1128.5 | 1191.6 | 993.2  | 1590.7 | 2314.9 | 4668   |
| CREG2   | 91.8   | 106.6  | 99.1   | 96.2   | 91     | 87.9   | 92.2   | 88.3   |
| CRELD1  | 95.7   | 116.4  | 115.9  | 93.2   | 93.3   | 98.2   | 90.3   | 98.2   |
| CRELD1  | 93.7   | 108.2  | 101.8  | 86.8   | 79.5   | 87.5   | 95.4   | 117.7  |
| CRELD1  | 497.7  | 515.9  | 469.7  | 377.7  | 341.4  | 515.6  | 395.7  | 528    |
| CRELD1  | 79.1   | 85.6   | 88.9   | 90.1   | 84.6   | 91     | 82.3   | 83.4   |
| CRELD2  | 2363   | 2636.4 | 1783.9 | 2512.7 | 2059.6 | 2923.3 | 2441.9 | 2734.3 |
| CREM    | 86.3   | 90     | 104.6  | 77.4   | 86.7   | 88.1   | 70.5   | 92.6   |
| CRH     | 125.4  | 151.3  | 116.1  | 99.6   | 95.7   | 114.4  | 117.5  | 144.9  |
| CRHBP   | 87.3   | 96     | 86.5   | 101.7  | 82.3   | 84.3   | 80.3   | 91.7   |
| CRHR1   | 170    | 221.5  | 143.5  | 143.7  | 127.6  | 145.2  | 146.7  | 180.7  |
| CRHR1   | 70.4   | 92.3   | 95.7   | 90.1   | 91     | 89.6   | 81.7   | 82.3   |
| CRHR2   | 68.1   | 81.8   | 80.6   | 78.3   | 78     | 81.5   | 70.7   | 78.3   |
| CRI1    | 199.3  | 237.6  | 171.7  | 202.5  | 192.9  | 239.2  | 162.1  | 225.8  |
| CRI2    | 452.8  | 645.1  | 215.1  | 198.8  | 163.8  | 204.6  | 379.7  | 562.3  |
| CRIM1   | 138.1  | 150.5  | 108.6  | 106.3  | 98.1   | 105.6  | 119.6  | 130    |
| CRIP1   | 4467.2 | 4920   | 2004.4 | 1142.8 | 956.3  | 1204   | 4133.5 | 5089.8 |
| CRIP2   | 94.8   | 96     | 91.6   | 77.3   | 72.7   | 81.1   | 100.7  | 138.3  |
| CRIP3   | 119.3  | 136.3  | 92     | 84.2   | 89.3   | 98.4   | 117.8  | 129.1  |
| CRIPAK  | 133.6  | 130.7  | 146.6  | 156.6  | 177.6  | 199.6  | 130.2  | 166.4  |
| CRIPT   | 675.5  | 939.5  | 556    | 422.7  | 360.8  | 439.9  | 726.4  | 820.3  |
| CRISP1  | 72.2   | 76.6   | 85.9   | 90.6   | 86.7   | 90.7   | 79.6   | 88.9   |
| CRISP1  | 93.5   | 88.8   | 91.1   | 85.6   | 78.6   | 85     | 87.8   | 101.6  |
| CRISP2  | 107.7  | 123.3  | 101.6  | 103    | 96.4   | 92.4   | 105    | 111.9  |
| CRISP3  | 93     | 99.1   | 116.8  | 105.6  | 109.9  | 95.6   | 84.9   | 91.8   |

|          |        |        |        |        |        |        |        |        |
|----------|--------|--------|--------|--------|--------|--------|--------|--------|
| CRISPLD1 | 185.7  | 206.2  | 104.9  | 103.5  | 104.8  | 151.3  | 144    | 191.9  |
| CRISPLD2 | 82.6   | 84.8   | 91.8   | 127.1  | 97     | 128.6  | 81.1   | 85.8   |
| CRK      | 554.7  | 796.3  | 338    | 314.6  | 298.6  | 368.8  | 518.7  | 796.7  |
| CRK      | 265.7  | 330.5  | 146    | 127.8  | 111.9  | 129.9  | 246.5  | 341.6  |
| CRKL     | 2804.3 | 4065.4 | 2753.6 | 2909.9 | 2099.1 | 3604.6 | 2481.9 | 2941.7 |
| CRKRS    | 274.5  | 393.9  | 269.8  | 384.8  | 275.1  | 413.7  | 260.7  | 410.7  |
| CRLF1    | 102.8  | 104.6  | 108.3  | 96.3   | 100.6  | 108.5  | 95     | 96.3   |
| CRLF2    | 102.7  | 112    | 91.6   | 86.1   | 83.5   | 99.4   | 100.4  | 99.4   |
| CRLF3    | 316    | 389.6  | 219.5  | 324.5  | 285.9  | 419.9  | 345.1  | 544.8  |
| CRMP1    | 130.1  | 138.6  | 101.6  | 103.3  | 101.3  | 109.4  | 96.4   | 133.6  |
| CRMP1    | 112.8  | 143.3  | 115.6  | 100.8  | 87.9   | 94.8   | 119.3  | 129.5  |
| CRMP1    | 89.5   | 95.3   | 103.1  | 84     | 94.4   | 97.4   | 86.9   | 94.8   |
| CRNKL1   | 111    | 129.2  | 119.6  | 128.1  | 108.9  | 150.8  | 105.3  | 134.6  |
| CRNN     | 210.2  | 293    | 151.7  | 191    | 184.3  | 302.7  | 197.8  | 227.1  |
| CROCC    | 168.6  | 191.4  | 121.1  | 112.2  | 104.9  | 110.8  | 155    | 178.2  |
| CROP     | 444    | 373.5  | 170.4  | 193.7  | 149.1  | 258    | 230.8  | 485.3  |
| CROP     | 1337.8 | 1380.3 | 582.8  | 677.1  | 529.9  | 1088.4 | 885    | 1893.8 |
| CROT     | 155.1  | 177.1  | 122.4  | 144.2  | 114.4  | 152.5  | 138.6  | 215.2  |
| CRP      | 88.5   | 93.8   | 85.5   | 90.9   | 82.7   | 95.5   | 84.2   | 95.1   |
| CRR9     | 2232.6 | 3277.1 | 2317.5 | 1982.5 | 1648.3 | 2414.4 | 1948.3 | 3699.7 |
| CRSP2    | 90.2   | 92.1   | 92.5   | 97.7   | 92.4   | 97.4   | 81.5   | 88.4   |
| CRSP3    | 356.2  | 426.1  | 229.9  | 296.2  | 261.8  | 423.5  | 306.6  | 571.4  |
| CRSP3    | 129    | 152.1  | 116.1  | 111.1  | 101.7  | 120.2  | 114.1  | 151.7  |
| CRSP6    | 103.7  | 150.1  | 106.7  | 101.2  | 104.4  | 105    | 115.4  | 123.2  |
| CRSP7    | 190.7  | 252.8  | 167.4  | 146.6  | 133.3  | 168.5  | 186.6  | 215.1  |
| CRSP9    | 130.2  | 143.1  | 98.5   | 84.2   | 82.3   | 105.7  | 115.9  | 173.5  |
| CRTAC1   | 100.6  | 105.6  | 89.2   | 78.2   | 78.6   | 88.5   | 98.1   | 106.9  |
| CRTAM    | 82.6   | 94     | 94.9   | 83.3   | 80.6   | 80.7   | 84.8   | 98.6   |
| CRTAP    | 1992.2 | 3237.1 | 1074   | 1212.3 | 932.9  | 554.2  | 1647.3 | 2105.4 |
| CRTAP    | 233    | 285.9  | 191.7  | 288.8  | 271.5  | 274.2  | 197.5  | 266.1  |
| CRTC1    | 85.2   | 97.1   | 124.9  | 105.8  | 101.7  | 115.5  | 85.8   | 100.6  |
| CRTC2    | 148.8  | 167.4  | 110    | 106    | 91.8   | 109    | 156.4  | 328.6  |
| CRX      | 129.2  | 146.8  | 98.1   | 87     | 91.6   | 95.7   | 128.8  | 129.2  |
| CRY1     | 255.6  | 291.6  | 161.9  | 156.7  | 125.7  | 196.9  | 219.1  | 366.9  |
| CRY2     | 209.8  | 252.8  | 147.5  | 135.8  | 117.4  | 137.8  | 185.3  | 284.1  |
| CRYAA    | 94.1   | 109.4  | 91.7   | 83.8   | 78     | 84.6   | 107.9  | 115.4  |
| CRYAB    | 84     | 93.2   | 91.4   | 83     | 83.1   | 85.2   | 76.7   | 83.7   |
| CRYBA1   | 80.7   | 88.8   | 92.2   | 89.9   | 84.2   | 85.9   | 82.7   | 93.9   |
| CRYBA2   | 89.9   | 90.6   | 95     | 95.2   | 85.3   | 87.9   | 89.4   | 90.6   |
| CRYBA2   | 87.6   | 98.3   | 103.4  | 99.1   | 98.5   | 97.9   | 78.8   | 93.4   |
| CRYBA4   | 95.4   | 99.2   | 95.2   | 90.1   | 88     | 88.2   | 96.5   | 95.1   |
| CRYBB1   | 131.3  | 173.3  | 112.5  | 105.2  | 99.6   | 107    | 120.9  | 153.2  |
| CRYBB2   | 511.2  | 645.7  | 395.4  | 307.7  | 273.1  | 386.5  | 452.5  | 505.6  |
| CRYBB3   | 79.8   | 85     | 85.3   | 74.8   | 80.3   | 81.5   | 83.7   | 86.6   |
| CRYGA    | 131.7  | 146.1  | 119.3  | 110.1  | 109.8  | 116.1  | 117.3  | 126.4  |
| CRYGB    | 116.5  | 118.5  | 89.1   | 83.3   | 75.5   | 75.3   | 101.5  | 118.4  |
| CRYGC    | 91     | 95.1   | 94.6   | 80.2   | 82.9   | 85.4   | 91.4   | 90.6   |
| CRYGD    | 82.9   | 84.8   | 96.2   | 80     | 78.8   | 83.5   | 81.2   | 82.5   |
| CRYGN    | 114.1  | 126.9  | 93.2   | 81.7   | 84.3   | 84.5   | 118.1  | 136.4  |
| CRYGS    | 145.5  | 174.9  | 114.6  | 132    | 122.4  | 144.3  | 132.4  | 179.3  |

|          |        |        |        |        |        |        |        |        |
|----------|--------|--------|--------|--------|--------|--------|--------|--------|
| CRYL1    | 196.2  | 254    | 180.6  | 238.2  | 236.7  | 288.8  | 179.9  | 252.8  |
| CRYM     | 138.8  | 181.7  | 97.6   | 86.1   | 90     | 95.8   | 123.9  | 146    |
| CRYM     | 87.3   | 87.6   | 115.3  | 106    | 106.7  | 102.7  | 94.4   | 88     |
| CRYM     | 79.5   | 87.3   | 80.4   | 72.1   | 80.5   | 75.4   | 82.3   | 87.3   |
| CRYZ     | 394.5  | 521.4  | 235    | 256.8  | 224.7  | 313.8  | 400.2  | 614.8  |
| CRYZL1   | 1230.8 | 1475   | 754.8  | 750.2  | 611.7  | 836.7  | 954.2  | 1327.8 |
| CS       | 110    | 132    | 101.8  | 99.6   | 96.1   | 91.3   | 95.5   | 107    |
| CS       | 3412.2 | 4266.7 | 4153.4 | 4407.6 | 3022.5 | 4861.2 | 3137.5 | 4730.1 |
| CS       | 462.1  | 745.7  | 511.1  | 489    | 364.9  | 642.7  | 361.4  | 698.7  |
| CSAD     | 204.6  | 196.1  | 169.2  | 225.7  | 212.5  | 273.2  | 147.9  | 325.2  |
| CSAG1    | 85.3   | 90.2   | 102.7  | 88.6   | 84.3   | 90.6   | 79.5   | 98.9   |
| CSAG1    | 101.1  | 100.4  | 102.8  | 84.8   | 84.8   | 80.1   | 83.9   | 90.9   |
| CSAG2    | 89.3   | 106.4  | 92.3   | 87.9   | 81.9   | 77.9   | 93.7   | 97.1   |
| CSAG2    | 102.9  | 116    | 107.7  | 97.8   | 87.6   | 92.7   | 112.8  | 109.2  |
| CSAG2    | 78.2   | 71.1   | 92.2   | 79.3   | 73.1   | 86.4   | 80.7   | 74.7   |
| CSAG3A   | 94.9   | 106.9  | 108.8  | 97.7   | 100.3  | 90.8   | 101    | 106.7  |
| CSDA     | 7378   | 8488   | 3052.9 | 2332.1 | 1746.4 | 1872.7 | 5815   | 7368.6 |
| CSDC2    | 81     | 86.5   | 102.1  | 102.2  | 92.5   | 95.6   | 90.5   | 85.2   |
| CSDE1    | 654.3  | 762.7  | 244.2  | 240.5  | 180.5  | 184.8  | 507.1  | 483.2  |
| CSDE1    | 362    | 488.4  | 144.2  | 174    | 170.7  | 126.5  | 232.8  | 401.8  |
| CSE1L    | 3985   | 5347.2 | 2321.4 | 2012.9 | 1230.8 | 2740.6 | 2964.2 | 5031.5 |
| CSE1L    | 5035   | 6246.4 | 3511.8 | 2915.6 | 2218.6 | 4123   | 3707   | 6608.7 |
| CSEN     | 173.2  | 171.4  | 118.4  | 97.9   | 93     | 105.5  | 138.9  | 146.1  |
| CSF1     | 89     | 115.8  | 94.7   | 94.4   | 89.8   | 85.5   | 102.8  | 103.4  |
| CSF1     | 87.9   | 89     | 94.7   | 84.3   | 89.9   | 92     | 86.7   | 85.2   |
| CSF1     | 75.3   | 70     | 88.5   | 89.5   | 78.8   | 84.2   | 75.5   | 77.1   |
| CSF1R    | 1838.7 | 2198.4 | 1244.7 | 3332.6 | 2486.6 | 3168   | 1503.3 | 1601.3 |
| CSF2     | 88.3   | 97.4   | 89.1   | 84.4   | 92.6   | 82.6   | 88.2   | 107.7  |
| CSF2RA   | 559.8  | 701.1  | 269.8  | 335    | 298.7  | 381.5  | 580.6  | 873.9  |
| CSF2RA   | 2386.1 | 2455.9 | 1016.6 | 1612   | 1319.8 | 1359   | 2322   | 2741   |
| CSF2RA   | 622.2  | 835.7  | 447.6  | 615.3  | 483    | 699.5  | 579    | 981.5  |
| CSF2RB   | 90.8   | 100.9  | 88.8   | 88.7   | 77.7   | 84.8   | 85.4   | 105.2  |
| CSF3     | 95.5   | 122.8  | 111.3  | 101.7  | 96.3   | 94.3   | 96.4   | 103.5  |
| CSF3     | 99.7   | 140.3  | 83.4   | 85     | 85.3   | 82.7   | 107.1  | 130.6  |
| CSF3     | 96.9   | 109.8  | 93.9   | 92.4   | 89     | 100.7  | 93.2   | 123    |
| CSF3R    | 130.5  | 148.5  | 147.6  | 173.6  | 151.6  | 201.2  | 105.9  | 170.9  |
| CSF3R    | 1689.5 | 1848.8 | 1223.6 | 2202.5 | 1997.4 | 1961   | 1231.4 | 1190.1 |
| CSSLCA-T | 192.9  | 201.1  | 198.6  | 193    | 155.9  | 196.8  | 187.6  | 371.5  |
| CSH1     | 80.1   | 79.4   | 95     | 84.3   | 83.9   | 88.9   | 74.2   | 79.1   |
| CSH1     | 96.8   | 99.4   | 92.7   | 100.7  | 79     | 89.6   | 87.6   | 94     |
| CSH2     | 93.8   | 111.3  | 89.9   | 89.8   | 86.4   | 95.3   | 95.3   | 126.6  |
| CSH2     | 73.1   | 77.4   | 89.4   | 78.8   | 84.9   | 88.4   | 77.1   | 80.7   |
| CSHL1    | 102.9  | 117    | 96.7   | 97.1   | 75.3   | 92     | 93.4   | 119.3  |
| CSHL1    | 118.6  | 135.8  | 96     | 86.3   | 82.3   | 84.8   | 104.8  | 134.9  |
| CSK      | 1814.2 | 2303.8 | 2019.2 | 1569.4 | 1263.9 | 1796.5 | 1432.8 | 2411.8 |
| CSMD1    | 65.2   | 79.1   | 78     | 81.4   | 74.8   | 79     | 73.5   | 78     |
| CSMD2    | 102.5  | 129.9  | 94.5   | 92.2   | 78.5   | 85.7   | 110.4  | 128.9  |
| CSMD3    | 76.5   | 91.1   | 77.7   | 86.4   | 82.5   | 92.3   | 83.5   | 85.2   |
| CSMD3    | 91     | 92.5   | 85.4   | 85.8   | 82.7   | 87.3   | 94.3   | 93.2   |
| CSMD3    | 73.8   | 86.3   | 87.8   | 82.2   | 82.2   | 82.2   | 80.8   | 88.2   |

|           |         |         |         |         |        |        |         |         |
|-----------|---------|---------|---------|---------|--------|--------|---------|---------|
| CSN1S1    | 92.8    | 111.2   | 105.2   | 84.7    | 83.3   | 101.2  | 93.6    | 102     |
| CSN1S1    | 98.2    | 106.8   | 88.2    | 102.6   | 82.9   | 88.6   | 101.8   | 101.5   |
| CSN2      | 81      | 95.3    | 87.4    | 81.5    | 75.4   | 75.7   | 84      | 98.7    |
| CSN3      | 80.9    | 86.2    | 91.4    | 81.6    | 80.1   | 81.4   | 77.4    | 86.3    |
| CSNK1A1   | 544.7   | 826.5   | 177     | 125.6   | 138.3  | 205.6  | 473.9   | 562.4   |
| CSNK1A1   | 134.9   | 141.4   | 117.8   | 102.3   | 103.3  | 113.3  | 123.1   | 159.4   |
| CSNK1A1   | 831.8   | 1108.8  | 492.7   | 565.3   | 459.4  | 654.4  | 670.6   | 854.3   |
| CSNK1A1L  | 82.3    | 92.2    | 100     | 87.6    | 83.5   | 80.6   | 80.9    | 98.3    |
| CSNK1D    | 2184.7  | 2597.7  | 1243.6  | 1238    | 1194.1 | 1311.7 | 2028.1  | 2029.1  |
| CSNK1D    | 565.5   | 701     | 618.5   | 638.5   | 519.1  | 741.3  | 509.7   | 1121.6  |
| CSNK1E    | 2765.9  | 3379.2  | 1267.9  | 1046.2  | 916.8  | 1306.1 | 2513.7  | 2333.6  |
| CSNK1E    | 99.1    | 115.1   | 113.3   | 110.7   | 105.2  | 114.4  | 96.4    | 106.9   |
| CSNK1E    | 421.1   | 535.7   | 378.8   | 154.5   | 180.7  | 209.2  | 348.5   | 674.1   |
| CSNK1G1   | 353.4   | 486     | 227.1   | 250.2   | 221.5  | 286.3  | 371.3   | 422.6   |
| CSNK1G1   | 100.5   | 111.8   | 101.4   | 99.7    | 100.8  | 87.3   | 89.1    | 102.9   |
| CSNK1G2   | 3042.1  | 3721.2  | 556.2   | 456.8   | 385.7  | 648.2  | 2592.5  | 3343.7  |
| CSNK1G3   | 91.5    | 113.3   | 96.2    | 100.1   | 92.4   | 93.9   | 93.9    | 96.8    |
| CSNK1G3   | 356.4   | 429     | 257     | 340.9   | 264.9  | 568.9  | 285.3   | 451.7   |
| CSNK1G3   | 285     | 330.2   | 148.2   | 151.2   | 130.1  | 223.5  | 252.6   | 440.6   |
| CSNK2A1   | 623.2   | 825     | 325     | 259.6   | 236.5  | 333.4  | 439.4   | 604.7   |
| CSNK2A1   | 568.2   | 754.7   | 314     | 320.3   | 217.5  | 281.7  | 384.4   | 525.5   |
| CSNK2A1   | 152.9   | 199.6   | 111.7   | 101.2   | 108.8  | 100.2  | 129.5   | 157     |
| CSNK2A1P  | 410.8   | 552     | 174.4   | 158     | 126.3  | 148.2  | 319.9   | 421.4   |
| CSNK2A2   | 502.2   | 566.1   | 460.9   | 329     | 258.6  | 300    | 452.9   | 831.8   |
| CSNK2B    | 8966.8  | 11252.2 | 8173.8  | 4798.1  | 3634.2 | 5137.1 | 7562.4  | 10775.9 |
| CSPG2     | 216.5   | 337.1   | 141.4   | 557     | 234.5  | 679.2  | 221.4   | 270.2   |
| CSPG3     | 127.8   | 139.7   | 126.4   | 111.5   | 104.3  | 115.1  | 115.6   | 141.9   |
| CSPG4     | 170.3   | 210.1   | 153.9   | 87.1    | 88.6   | 86.4   | 129     | 144.5   |
| CSPG4LYP2 | 87      | 94      | 82.4    | 88.6    | 80.6   | 85.4   | 88.5    | 88.5    |
| CSPG5     | 164.5   | 202.6   | 167.3   | 214     | 187.6  | 277.3  | 139.2   | 245     |
| CSPP1     | 687.4   | 715.1   | 405.5   | 417.7   | 380.3  | 649.7  | 487.2   | 704.7   |
| CSPP1     | 173.2   | 214.9   | 131.5   | 138.8   | 111.8  | 154    | 156.2   | 206.2   |
| CSRP1     | 1421    | 2106.7  | 1335.8  | 753.9   | 554.3  | 1118.3 | 1326.1  | 1864.2  |
| CSRP2     | 116.3   | 140.3   | 88.7    | 84.4    | 81.7   | 88.5   | 109.6   | 166.7   |
| CSRP2BP   | 125.2   | 152.4   | 120.8   | 111.6   | 103.4  | 121.2  | 111.2   | 149.8   |
| CSRP2BP   | 759.6   | 921.7   | 474     | 425.2   | 329.8  | 427.7  | 568.7   | 728.8   |
| CSRP2BP   | 86.8    | 99.4    | 92.5    | 88.4    | 88.5   | 84.3   | 96.9    | 88.2    |
| CSRP3     | 73.1    | 83.3    | 89.5    | 78.4    | 81.7   | 88.2   | 70.7    | 75.4    |
| CSS3      | 178.2   | 223.6   | 173.6   | 189.5   | 144.7  | 217.7  | 151.8   | 198     |
| CST1      | 89.1    | 93.2    | 95.8    | 87.7    | 78.4   | 96.2   | 91.6    | 90.7    |
| CST11     | 74.5    | 88.1    | 98.8    | 90.6    | 77.8   | 81     | 79.3    | 78.4    |
| CST11     | 96      | 107.6   | 78.8    | 86      | 78.9   | 81.3   | 93.6    | 94      |
| CST2      | 102.6   | 117.7   | 78.9    | 82      | 81.6   | 80.4   | 100.5   | 118.3   |
| CST3      | 13279.9 | 15923.6 | 12461.3 | 11759.7 | 9685.3 | 13544  | 11156.6 | 17292.3 |
| CST4      | 73.3    | 90.1    | 106.1   | 101.1   | 97.4   | 99     | 86.9    | 96.2    |
| CST5      | 100     | 120     | 89.9    | 84.7    | 80.1   | 77.6   | 102.2   | 112.1   |
| CST6      | 78      | 93.5    | 88.9    | 85.1    | 83.5   | 83.6   | 77.7    | 81      |
| CST6      | 94.9    | 90.7    | 92.5    | 100.2   | 84.3   | 84.1   | 98.3    | 96.4    |
| CST7      | 506.4   | 617.6   | 357     | 175.1   | 174.9  | 209    | 484.9   | 811.5   |
| CST8      | 82.8    | 95.8    | 90.1    | 83.2    | 81     | 87     | 81.8    | 93      |



|         |        |        |        |        |        |        |        |        |
|---------|--------|--------|--------|--------|--------|--------|--------|--------|
| CST9    | 198    | 289.5  | 126.6  | 128.2  | 122.8  | 144.7  | 201.8  | 203.7  |
| CST9L   | 86.8   | 100.2  | 82.1   | 78.8   | 80.9   | 85.8   | 85.8   | 88.9   |
| CSTA    | 232    | 286.1  | 170.4  | 176.6  | 136.1  | 157.3  | 187.4  | 256.1  |
| CSTB    | 4946.3 | 6252.5 | 3795.6 | 3725.1 | 3187.1 | 4158.2 | 4378.4 | 5517.5 |
| CSTF1   | 191.4  | 223.3  | 116.1  | 110.4  | 91.3   | 91.1   | 160.1  | 177.6  |
| CSTF1   | 108.5  | 129.6  | 95.7   | 109.4  | 92.3   | 97.4   | 102.6  | 117.1  |
| CSTF1   | 142.4  | 156    | 94.8   | 98.1   | 91.5   | 75.9   | 110.3  | 153.5  |
| CSTF1   | 97.4   | 125.9  | 109.7  | 99.9   | 93.8   | 89.4   | 93.6   | 98.4   |
| CSTF2   | 1425.5 | 1642.9 | 830.4  | 827.7  | 560.8  | 997.1  | 1220.1 | 1714.7 |
| CSTF2T  | 224.5  | 273.7  | 130.8  | 113.8  | 110.8  | 133.3  | 173    | 217.3  |
| CSTF3   | 1027.8 | 1318.8 | 536.1  | 585.9  | 456.5  | 647    | 673.3  | 888.1  |
| CSTF3   | 236.7  | 252.2  | 167.4  | 191.3  | 184.2  | 217.4  | 152.9  | 157    |
| CSTF3   | 3692.1 | 4510.2 | 2665.9 | 2248.7 | 1990.4 | 2568.7 | 2618.9 | 3690.5 |
| CSTF3   | 738.3  | 896.1  | 224.6  | 244.9  | 210.2  | 245    | 473    | 761.8  |
| CSTL1   | 90.1   | 97.3   | 87.8   | 79.9   | 82     | 85.6   | 91.5   | 92.5   |
| CT45-1  | 107.1  | 120.2  | 95.6   | 80.6   | 75.5   | 94.4   | 100    | 114.7  |
| CT45-4  | 80.8   | 97.6   | 91.3   | 89.3   | 81.1   | 86.7   | 84.9   | 88.4   |
| CT45-5  | 78.2   | 79.3   | 86.8   | 84.7   | 76.7   | 84.3   | 81.9   | 83.2   |
| CT45-5  | 86.9   | 93.1   | 86.5   | 84.7   | 79.3   | 92     | 88.5   | 97.9   |
| CT45-5  | 90.5   | 95.8   | 102.4  | 93.5   | 85.1   | 95.1   | 88     | 95.9   |
| CT47.1  | 82     | 88.4   | 104.6  | 102.1  | 99.9   | 109.1  | 85.1   | 87.9   |
| CT47.6  | 92.7   | 110.9  | 83.6   | 86.8   | 84.8   | 88.8   | 92.1   | 101.6  |
| CT47.7  | 97.1   | 100.4  | 116.9  | 91.9   | 94.8   | 106.4  | 94.3   | 101.6  |
| CTAG1A  | 152.1  | 172.8  | 97.6   | 96     | 80.2   | 93.9   | 128    | 173.7  |
| CTAG1B  | 74.4   | 82.7   | 99.3   | 88.8   | 83.2   | 86.8   | 75.3   | 77.1   |
| CTAG2   | 96.7   | 116    | 99.8   | 108.8  | 97.5   | 95.4   | 94.5   | 108.7  |
| CTAG2   | 94.5   | 105.5  | 95.7   | 87.8   | 74.1   | 82.8   | 90     | 90.1   |
| CTAGE1  | 86.2   | 97.1   | 91.9   | 90.4   | 86     | 90.4   | 85.9   | 86.6   |
| CTAGE5  | 130.6  | 138.8  | 99.7   | 86.5   | 73.2   | 92     | 115.3  | 140.3  |
| CTAGE5  | 85.9   | 100.2  | 93.4   | 86.2   | 76.5   | 86.2   | 87.1   | 104.9  |
| CTAGE5  | 79.8   | 88.3   | 89.2   | 84.8   | 84.6   | 85.7   | 79.1   | 84     |
| CTAGE5  | 103.8  | 119.4  | 98.5   | 114    | 96.3   | 111.2  | 113.1  | 99.6   |
| CTBP1   | 329.3  | 449.5  | 182.3  | 213.9  | 217.2  | 125.4  | 208    | 381.4  |
| CTBP1   | 182.9  | 251.7  | 191.1  | 154.9  | 137.3  | 210.3  | 144    | 224.6  |
| CTBP1   | 1381.9 | 1623.3 | 625.8  | 480.3  | 443.1  | 552    | 1083.7 | 1798.1 |
| CTBP2   | 175.1  | 230.3  | 113.9  | 95     | 103.1  | 92.5   | 150.4  | 174.7  |
| CTBP2   | 99.3   | 126.1  | 105.6  | 86.7   | 89.9   | 93.8   | 112.3  | 112.2  |
| CTBS    | 688.2  | 988.1  | 360.4  | 507    | 389.7  | 402.4  | 643.9  | 809    |
| CTCF    | 561.1  | 736    | 633.5  | 490.9  | 462.6  | 684.6  | 430.8  | 676.6  |
| CTCFL   | 70.1   | 87.7   | 100.7  | 95.2   | 89.2   | 91.7   | 84.6   | 79.1   |
| CTDP1   | 145    | 214.7  | 136.7  | 128.4  | 108.5  | 170.3  | 147.4  | 229.4  |
| CTDP1   | 97.3   | 128.7  | 95.8   | 92.7   | 93.5   | 98.7   | 105.7  | 101.7  |
| CTDP1   | 188.3  | 254.5  | 151.6  | 144.4  | 131.7  | 152.1  | 162.8  | 178    |
| CTDSP1  | 830.1  | 1054.4 | 445.9  | 433.4  | 340.8  | 385.9  | 698.3  | 994.7  |
| CTDSP1  | 134    | 200.7  | 149.6  | 147.9  | 138.9  | 115.5  | 126.5  | 201.7  |
| CTDSP2  | 1069.4 | 1456.2 | 1017.6 | 1026.4 | 1090.1 | 1009.7 | 1017.5 | 1047.8 |
| CTDSPL  | 610.1  | 854.2  | 624.4  | 480.6  | 387    | 525.1  | 457.3  | 611.6  |
| CTDSPL2 | 677.4  | 973    | 225.5  | 184.3  | 168.5  | 286.5  | 481.2  | 842.3  |
| CTF1    | 149.9  | 162    | 99.3   | 97.6   | 94.7   | 113.8  | 139.5  | 159.6  |
| CTF8    | 170.8  | 197    | 107.1  | 114.4  | 111.3  | 86.3   | 139.8  | 164    |

|          |         |         |         |        |         |         |         |         |
|----------|---------|---------|---------|--------|---------|---------|---------|---------|
| CTGF     | 153.9   | 173.5   | 101.5   | 101.7  | 107     | 111.5   | 251.6   | 319.8   |
| CTGLF1   | 113.2   | 122.9   | 102.3   | 95.2   | 91.1    | 113.2   | 111.8   | 117.2   |
| CTGLF3   | 980.2   | 912.9   | 638.9   | 788.3  | 714.6   | 1028.3  | 629.3   | 880.6   |
| CTGLF4   | 144.9   | 174.7   | 114.5   | 96.9   | 106     | 99.6    | 121.7   | 160.5   |
| CTH      | 131.7   | 178.4   | 108.5   | 117.5  | 109.5   | 161.4   | 166.3   | 248.2   |
| CTH      | 103.4   | 111.6   | 110.9   | 109.7  | 105.8   | 95.8    | 109.5   | 109.8   |
| CTHRC1   | 79.5    | 82.9    | 88.5    | 89     | 72.7    | 84.4    | 81.6    | 92.3    |
| CTLA4    | 78.3    | 87.2    | 89.3    | 75.1   | 78.2    | 84.9    | 75.5    | 85      |
| CTLA4    | 120.4   | 147.2   | 93.2    | 93.3   | 82      | 91.2    | 126.8   | 129.3   |
| CTLA4    | 114.8   | 145.5   | 96.8    | 81.6   | 80.2    | 77.4    | 123.6   | 139.2   |
| CTNNA1   | 1667.2  | 2317.5  | 1270.3  | 1691.8 | 1200.5  | 1935.4  | 1454.4  | 1742.2  |
| CTNNA2   | 98.7    | 108.2   | 105     | 87.3   | 96.7    | 94.9    | 98.7    | 109.6   |
| CTNNA3   | 87.1    | 99.4    | 89.1    | 87.4   | 78      | 82      | 82.9    | 83.9    |
| CTNNAL1  | 576     | 736.2   | 290.3   | 423    | 242.9   | 578.3   | 466.4   | 1117.5  |
| CTNNB1   | 1164.9  | 1539.8  | 550.2   | 533.3  | 444.2   | 575.8   | 685.9   | 1062.9  |
| CTNNB1   | 86.8    | 97.8    | 90.4    | 84.7   | 79.7    | 82.7    | 77.9    | 72      |
| CTNNBIP1 | 139.5   | 134.7   | 153.5   | 189.4  | 130.2   | 180.4   | 144.4   | 175.5   |
| CTNNBIP1 | 88.7    | 104.4   | 95.8    | 98.3   | 89.8    | 100     | 89.7    | 100.7   |
| CTNNBL1  | 1025.5  | 1520.7  | 524.2   | 470    | 435.9   | 757.8   | 798.2   | 1027.5  |
| CTNND1   | 93.8    | 114.4   | 99      | 94     | 92.2    | 98      | 100.6   | 98.8    |
| CTNND1   | 124.8   | 153.6   | 108.8   | 93.3   | 92.9    | 91.8    | 107.8   | 131.7   |
| CTNND2   | 109     | 127     | 89.4    | 83.6   | 79.1    | 86.8    | 105.3   | 121.7   |
| CTNS     | 98      | 86.1    | 90.7    | 74     | 71.7    | 89.8    | 81.5    | 99.8    |
| CTNS     | 311.9   | 358     | 181.8   | 172.3  | 150.5   | 173.7   | 254.4   | 259.2   |
| CTNS     | 112.5   | 129.7   | 112     | 99     | 95.2    | 96.8    | 92      | 100.7   |
| CTPS     | 4226.9  | 5286.8  | 2990.8  | 2637.4 | 1872.7  | 3759.1  | 2946.1  | 5797.9  |
| CTPS2    | 95.2    | 96.9    | 99.1    | 86.4   | 80.7    | 94.4    | 78.9    | 106.1   |
| CTPS2    | 709.5   | 905.4   | 635.2   | 942.5  | 814.4   | 1127.1  | 567     | 645     |
| CTPS2    | 234.6   | 273.5   | 107.2   | 108.4  | 101.8   | 133.5   | 192.7   | 275.8   |
| CTPS2    | 177.6   | 244.5   | 162.3   | 184.3  | 163.8   | 234.9   | 151.6   | 187.7   |
| CTR9     | 93.5    | 106.1   | 100.2   | 96.4   | 92.8    | 118.2   | 106.8   | 161.3   |
| CTRB1    | 95.8    | 98.7    | 86.2    | 84.1   | 77.2    | 78.7    | 87.1    | 95.2    |
| CTRB1    | 96.4    | 101     | 84.7    | 85.4   | 77.8    | 89.1    | 90      | 108.4   |
| CTRB2    | 117.6   | 120.8   | 91.8    | 93.5   | 86.8    | 105.7   | 113.6   | 109.6   |
| CTRC     | 126     | 135.6   | 125.2   | 107.8  | 110.8   | 116.9   | 124.2   | 128.9   |
| CTRL     | 152.7   | 164.9   | 129.5   | 119.7  | 102.6   | 112.9   | 133.2   | 148.8   |
| CTSB     | 1539.6  | 1774.1  | 1103.9  | 1852.6 | 1670.6  | 1283.4  | 1380    | 1275.4  |
| CTSC     | 108.2   | 134.4   | 94.1    | 94     | 102.1   | 95      | 119.7   | 143.7   |
| CTSC     | 1254.4  | 1635    | 577.4   | 436.8  | 376.3   | 484.8   | 870.3   | 875.1   |
| CTSC     | 2091.1  | 2752.8  | 1035    | 1237.4 | 817.7   | 1429.4  | 1801.3  | 3203.7  |
| CTSD     | 383     | 509.1   | 412.7   | 552.6  | 374.1   | 665.4   | 383.7   | 673.9   |
| CTSE     | 142.4   | 168     | 109     | 110    | 101.4   | 109.5   | 159.8   | 166.3   |
| CTSE     | 82      | 95.5    | 93.9    | 86     | 92.1    | 89.2    | 94.1    | 93.9    |
| CTSE     | 149.2   | 183.1   | 101.3   | 91.6   | 88      | 112.2   | 137.3   | 155.9   |
| CTSF     | 147.8   | 184.5   | 139.3   | 118.3  | 120.9   | 133.5   | 151.6   | 176.3   |
| CTSG     | 27864.3 | 26131.7 | 36062.1 | 35386  | 32256.9 | 34549.9 | 30449.6 | 28641.7 |
| CTSH     | 3617.1  | 4643.7  | 2550.8  | 2772.1 | 2519    | 3786.6  | 3069.2  | 4965.8  |
| CTSH     | 246.8   | 320     | 131.2   | 133.5  | 126.1   | 180.8   | 210.7   | 283.5   |
| CTSK     | 139.7   | 147.8   | 118     | 111.6  | 108.2   | 109.8   | 127.5   | 177.7   |
| CTSL     | 310.7   | 397.7   | 187.7   | 200.4  | 170.4   | 205.4   | 286     | 298.2   |

|           |        |        |        |        |        |        |        |        |
|-----------|--------|--------|--------|--------|--------|--------|--------|--------|
| CTSL1     | 2421.6 | 3180.8 | 1381.5 | 2030.9 | 1641.2 | 2369   | 2621.5 | 2695.9 |
| CTSL1     | 2375.9 | 3000.7 | 1144   | 1566.2 | 1408.3 | 1864.1 | 2560.9 | 2896.5 |
| CTSL2     | 523.2  | 700.6  | 186.4  | 191.9  | 179.5  | 252.2  | 491.6  | 588.3  |
| CTSO      | 490.8  | 575.1  | 225.8  | 273.1  | 230.8  | 358.5  | 434.8  | 746.4  |
| CTSS      | 218.1  | 240.4  | 178.1  | 176.3  | 140.6  | 181.2  | 194.7  | 270.6  |
| CTSW      | 130.4  | 164.2  | 101.2  | 114.3  | 112.6  | 117.9  | 136.3  | 166.9  |
| CTSZ      | 1047.4 | 1830.7 | 721.3  | 1468.9 | 1322.7 | 1797.9 | 1746.1 | 2584   |
| CTTN      | 157.1  | 199.4  | 173.3  | 88.7   | 93.7   | 97.4   | 158.5  | 218.5  |
| CTTN      | 157    | 203    | 150.2  | 103.1  | 98.7   | 102.6  | 138.5  | 163.8  |
| CTTN      | 75.1   | 87.1   | 85.4   | 79.9   | 78.3   | 92.8   | 75.9   | 74.9   |
| CTTNBP2   | 77.8   | 89.9   | 95.2   | 81.1   | 91.3   | 93.7   | 84.6   | 98.5   |
| CTTNBP2NI | 126.5  | 183.6  | 109.4  | 98.7   | 93.1   | 107.9  | 128.4  | 157.9  |
| CTXN1     | 355.6  | 419.3  | 250.5  | 117.8  | 89.6   | 117.7  | 310    | 443.6  |
| CTXN3     | 84.9   | 84     | 92.3   | 85.3   | 86.9   | 89     | 79.1   | 90.2   |
| CUBN      | 80.6   | 83.2   | 97.6   | 81.9   | 82     | 80.6   | 78.1   | 83.4   |
| CUEDC1    | 372.8  | 427.2  | 249.3  | 265.6  | 234.5  | 184.4  | 377    | 340.7  |
| CUEDC2    | 1314.9 | 1775.3 | 801.7  | 429.4  | 354.4  | 617.7  | 1346.7 | 2157   |
| CUGBP1    | 216.5  | 336.6  | 128.3  | 163.9  | 142.4  | 149.4  | 169.2  | 234.5  |
| CUGBP1    | 175    | 281.8  | 118.2  | 139.9  | 100.6  | 109.8  | 139.9  | 238.9  |
| CUGBP2    | 152.3  | 186.4  | 98.3   | 93.9   | 84.6   | 88.5   | 138.8  | 172.9  |
| CUGBP2    | 397.8  | 638.7  | 338.4  | 435.7  | 350.5  | 534.4  | 348.4  | 557    |
| CUGBP2    | 378.6  | 560.6  | 215.4  | 216.2  | 197.4  | 249.2  | 308.9  | 410.3  |
| CUL1      | 1002.6 | 1350   | 326.8  | 333.1  | 244.4  | 474.3  | 602.9  | 857.4  |
| CUL2      | 741.4  | 1137.9 | 593.4  | 597.2  | 490.6  | 746    | 724.4  | 1073.6 |
| CUL3      | 91.9   | 106.8  | 97.3   | 92.8   | 91.1   | 94.5   | 74.9   | 111.3  |
| CUL4A     | 119.2  | 129.2  | 91.2   | 81.5   | 77.8   | 91.2   | 93.5   | 117.7  |
| CUL4A     | 1221.7 | 1610   | 764.5  | 768.5  | 671.7  | 876    | 1085.8 | 1861   |
| CUL4B     | 186.2  | 211.1  | 129.1  | 153.5  | 148    | 207.2  | 156.4  | 222    |
| CUL4B     | 202.6  | 226.1  | 126.2  | 130.1  | 105.1  | 136.7  | 142.1  | 195.8  |
| CUL5      | 1263   | 1573.1 | 619.2  | 777.1  | 590    | 942.7  | 1178   | 1871.2 |
| CUL7      | 114.6  | 114.4  | 100.7  | 95.8   | 98.5   | 102.9  | 109.7  | 104.7  |
| CUTA      | 7340.7 | 8378   | 6558.9 | 6272   | 4609   | 4947.5 | 6628.6 | 7562.4 |
| CUTA      | 3012.6 | 4316.2 | 2226.4 | 2012.8 | 1571.9 | 1703.6 | 3048   | 3710.6 |
| CUTA      | 160.3  | 198.7  | 119.3  | 95.7   | 98.5   | 102    | 157.1  | 168.1  |
| CUTC      | 809.2  | 989.5  | 502.1  | 354.9  | 290.5  | 479.6  | 630.5  | 1258.8 |
| CUTL1     | 94.8   | 97.8   | 91     | 94.9   | 81.1   | 93.3   | 98.5   | 95.3   |
| CUTL1     | 285.2  | 363.4  | 290.9  | 532.1  | 420.6  | 875.1  | 301.7  | 565    |
| CUTL1     | 85.8   | 92     | 104.8  | 97.3   | 98.4   | 92.2   | 85     | 82.5   |
| CUTL2     | 132.3  | 175.6  | 135.2  | 143    | 125    | 162.4  | 112.4  | 133.5  |
| CUZD1     | 127.3  | 147.7  | 128.2  | 98.4   | 104.6  | 125.1  | 123.8  | 140    |
| CWF19L1   | 1867.5 | 2378.8 | 1323.8 | 968.8  | 788.8  | 1148.4 | 1999   | 2948.7 |
| CWF19L2   | 343.1  | 467    | 292    | 298.9  | 252    | 477.5  | 306.7  | 481.4  |
| CX36      | 86.4   | 105.2  | 84.8   | 86.9   | 87.5   | 81.5   | 86.3   | 90.4   |
| CX3CL1    | 94.7   | 101.7  | 92.2   | 77.6   | 70.6   | 85.3   | 85.5   | 94.4   |
| CX3CR1    | 1459.6 | 1759   | 1013.5 | 1363.3 | 1276.4 | 1477   | 1224.5 | 1788.5 |
| CX40.1    | 87.5   | 108.5  | 85.1   | 83.2   | 76.7   | 84.7   | 90.7   | 94.8   |
| CX62      | 77.9   | 87.9   | 89.4   | 81.2   | 84.3   | 89.5   | 85.5   | 87.7   |
| CXADR     | 79.3   | 101.6  | 89.9   | 83.2   | 72.8   | 86.8   | 88.4   | 92.1   |
| CXCL1     | 125.8  | 136.2  | 92.2   | 90.9   | 86.4   | 71.7   | 103.6  | 147.8  |
| CXCL10    | 95.6   | 127.2  | 99.4   | 80.4   | 90.8   | 90.4   | 98.7   | 104.7  |

|          |        |        |        |        |        |        |        |        |
|----------|--------|--------|--------|--------|--------|--------|--------|--------|
| CXCL11   | 83.5   | 87.1   | 93.6   | 89.4   | 76.5   | 88.1   | 87.9   | 88.1   |
| CXCL12   | 139.3  | 175.3  | 120.2  | 118.9  | 109.5  | 109.6  | 134.5  | 159.5  |
| CXCL12   | 104.8  | 111.6  | 102.8  | 91.6   | 84.7   | 96.1   | 95.2   | 101.4  |
| CXCL13   | 99.7   | 111.7  | 91.3   | 87.4   | 80.3   | 83.1   | 102.3  | 96.1   |
| CXCL14   | 95.5   | 103.9  | 91.7   | 85.5   | 83     | 82.1   | 92.2   | 101.6  |
| CXCL16   | 145    | 158.5  | 120.3  | 124.5  | 108    | 113.9  | 132.9  | 138.2  |
| CXCL2    | 82.2   | 95.4   | 90.4   | 99.3   | 77     | 88.6   | 82.5   | 98.2   |
| CXCL3    | 114.9  | 128.2  | 86.6   | 90.4   | 82.5   | 97.1   | 115.5  | 125.7  |
| CXCL5    | 79.8   | 103.7  | 83.8   | 84.9   | 80.2   | 77.6   | 83.3   | 103.4  |
| CXCL6    | 101.9  | 113.3  | 94     | 90.5   | 83.1   | 93     | 98.1   | 112.2  |
| CXCL9    | 93     | 114    | 98.9   | 83.2   | 80.3   | 82     | 97.5   | 109    |
| CXCR3    | 179.5  | 212.9  | 99.9   | 94.1   | 91.9   | 93.7   | 142.6  | 149.6  |
| CXCR4    | 968.1  | 1501.8 | 334.1  | 515.6  | 395.6  | 779.5  | 746.4  | 922.1  |
| CXCR4    | 100.3  | 120.7  | 88.3   | 81.8   | 72.3   | 78.1   | 110.4  | 108.4  |
| CXCR4    | 3194   | 4569   | 1515.6 | 1749   | 1767.7 | 2010.4 | 2578.5 | 2372.1 |
| CXCR6    | 81.7   | 97.8   | 91.1   | 85.3   | 82.9   | 91.1   | 82.2   | 85     |
| CXCR7    | 84.9   | 104.9  | 91.2   | 113.2  | 103.6  | 100    | 82.6   | 91.5   |
| CXORF1   | 101.4  | 115.3  | 93.4   | 96.1   | 88.9   | 87.2   | 111.7  | 106.4  |
| CXORF12  | 257.1  | 319.2  | 201.4  | 189.4  | 189.8  | 217.4  | 231.1  | 222    |
| CXORF15  | 138    | 189.2  | 121.1  | 118.8  | 120.8  | 109.8  | 112.4  | 136.2  |
| CXORF2   | 109    | 135.1  | 98.2   | 86.1   | 88.9   | 85.2   | 113.1  | 114    |
| CXORF20  | 84.1   | 95.3   | 91.8   | 87.2   | 89.3   | 85.9   | 83.8   | 95.9   |
| CXORF21  | 262.4  | 270.6  | 132.3  | 150.9  | 106    | 130.7  | 191    | 393.1  |
| CXORF22  | 85.6   | 79.7   | 83.8   | 82.6   | 88     | 88     | 77.8   | 88.6   |
| CXORF23  | 123.5  | 142.5  | 114.6  | 118.8  | 110.3  | 127.5  | 133.8  | 181.2  |
| CXORF26  | 1905.8 | 2317   | 604.9  | 516.2  | 398.4  | 684.4  | 1816.4 | 2720.4 |
| CXORF33  | 253.4  | 336.6  | 166.9  | 160.1  | 136.2  | 153.3  | 257.4  | 303.1  |
| CXORF34  | 91.2   | 95.9   | 102.3  | 83.8   | 83     | 86.9   | 83     | 100    |
| CXORF36  | 116.2  | 155.2  | 97.3   | 84.6   | 77.9   | 78     | 126.5  | 183.5  |
| CXORF38  | 632.9  | 820.9  | 396.8  | 424.5  | 315.1  | 412    | 514    | 713.1  |
| CXORF39  | 208.7  | 259.8  | 171.2  | 169.7  | 143.1  | 193.7  | 208.1  | 358    |
| CXORF40A | 825.2  | 1044.2 | 488.7  | 501.8  | 407.3  | 442.4  | 690    | 1163.1 |
| CXORF40B | 526.7  | 713.6  | 309.4  | 297.9  | 266.6  | 313.9  | 483.6  | 931.2  |
| CXORF41  | 81.8   | 89.7   | 86.9   | 93.3   | 82.3   | 93.5   | 85.1   | 91.2   |
| CXORF43  | 103.8  | 139.9  | 104.1  | 95.1   | 97.1   | 93.7   | 113.4  | 113.8  |
| CXORF44  | 162.1  | 176.4  | 136.7  | 155.7  | 136.1  | 161.5  | 131.1  | 158.7  |
| CXORF45  | 139.1  | 154.6  | 157.2  | 183    | 193.1  | 304.1  | 131.2  | 188.1  |
| CXORF48  | 80.7   | 87.5   | 93.5   | 94.7   | 85.5   | 95.2   | 86.2   | 84.4   |
| CXORF48  | 78     | 88.2   | 86.9   | 84.1   | 75.3   | 84.9   | 77.9   | 90.8   |
| CXORF53  | 581.9  | 720.9  | 454.8  | 533    | 437.7  | 957.5  | 475.5  | 703.5  |
| CXORF55  | 93.4   | 105.3  | 100    | 88.6   | 78.2   | 88.9   | 104.4  | 107.2  |
| CXORF56  | 299    | 420.3  | 145.2  | 143.6  | 124.6  | 113.7  | 312.3  | 421.9  |
| CXORF6   | 119    | 139.7  | 94.2   | 74.9   | 79.5   | 85.8   | 105.3  | 129.5  |
| CXORF9   | 247.5  | 304.2  | 250.8  | 325.4  | 257    | 542.1  | 181.8  | 224    |
| CXX1     | 1020.3 | 1290.2 | 767.9  | 543.9  | 394.1  | 544.6  | 946    | 1345.1 |
| CXXC1    | 2061.5 | 2461.9 | 1574.4 | 1391.3 | 1277   | 1418.8 | 1632.5 | 1668.7 |
| CXXC4    | 122    | 169.3  | 103.1  | 93.8   | 93.9   | 87.8   | 118.2  | 174.9  |
| CXXC5    | 1906   | 2524.5 | 2240.6 | 2004.6 | 1640.9 | 2774.8 | 1942.9 | 4442.5 |
| CXXC6    | 117.5  | 136.5  | 109.8  | 101.9  | 91     | 128    | 91.6   | 103    |
| CXYORF3  | 1972.2 | 2281.8 | 1774.5 | 2529.8 | 2550.1 | 3559.1 | 1894.2 | 2618.9 |

|          |         |        |         |         |        |         |         |         |
|----------|---------|--------|---------|---------|--------|---------|---------|---------|
| CYB561   | 190.4   | 196.2  | 142     | 110.8   | 115.7  | 113.5   | 147.7   | 175.7   |
| CYB561   | 182.2   | 230.2  | 144.5   | 116.6   | 121.2  | 126     | 161.5   | 192.9   |
| CYB561   | 105     | 115.6  | 114.2   | 106.9   | 102.2  | 98.3    | 102.3   | 114.2   |
| CYB561D2 | 612     | 794.7  | 542.3   | 482     | 387.9  | 517.3   | 563.6   | 685.5   |
| CYB5A    | 1651.2  | 2044.1 | 1013.8  | 1035.9  | 847.5  | 1132.3  | 1489.3  | 1993.4  |
| CYB5A    | 893.8   | 1175.8 | 343.7   | 364     | 297.1  | 409.6   | 775.7   | 772.9   |
| CYB5D1   | 235.2   | 310.5  | 208     | 205.6   | 166.7  | 245.4   | 181.8   | 236.4   |
| CYB5D2   | 177.7   | 214    | 153.3   | 205.4   | 192.3  | 238.1   | 164     | 246.2   |
| CYB5-M   | 7115.9  | 8516   | 4410.2  | 3572.8  | 2693.5 | 3741.2  | 6159.3  | 8530.1  |
| CYB5R1   | 475.4   | 562.9  | 256.2   | 277.3   | 234.6  | 276.8   | 529.4   | 775.3   |
| CYB5R2   | 446.9   | 557    | 222.2   | 178.2   | 162.7  | 201     | 397.9   | 374.6   |
| CYB5R3   | 462.6   | 711    | 336.8   | 320.1   | 265    | 293.1   | 467.4   | 895.6   |
| CYB5R3   | 10136.7 | 12022  | 6004.4  | 4919.8  | 3674.4 | 3943.5  | 9275.2  | 10354.2 |
| CYB5R4   | 800     | 1048.7 | 362.6   | 452.7   | 323.8  | 633.2   | 586.7   | 908.3   |
| CYBA     | 17034   | 21230  | 13552.4 | 10738.9 | 8390.6 | 10681.6 | 14723.7 | 17927   |
| CYBASC3  | 561     | 770.3  | 590.1   | 484.1   | 478.9  | 578     | 512.6   | 733.3   |
| CYBB     | 118     | 135.6  | 104.7   | 552.3   | 479.8  | 704     | 102.6   | 124.1   |
| CYBRD1   | 381.9   | 481.8  | 341.3   | 346.3   | 343.7  | 468.8   | 363.6   | 686.1   |
| CYC1     | 9933    | 11412  | 8527.3  | 5268.8  | 4734.4 | 6058.8  | 8909.8  | 10832.4 |
| CYCS     | 262.6   | 346.5  | 232.6   | 315.1   | 243.2  | 382.3   | 207.3   | 362.3   |
| CYCSL1   | 140.9   | 165.1  | 116.1   | 121.8   | 115.7  | 119.9   | 140.6   | 164.9   |
| CYFIP1   | 95.6    | 122.7  | 109.5   | 115.9   | 102.4  | 109.3   | 95      | 100.2   |
| CYFIP1   | 535.5   | 726.5  | 743     | 1000.7  | 839.9  | 1365.2  | 426.2   | 672.8   |
| CYFIP1   | 117     | 126    | 88.2    | 78.8    | 88     | 87.3    | 116.2   | 137.8   |
| CYFIP2   | 102     | 103.1  | 101.3   | 92.1    | 84.2   | 85.2    | 99.9    | 114.2   |
| CYFIP2   | 101     | 117.9  | 107.4   | 115.6   | 108.6  | 130.9   | 92      | 112.8   |
| CYFIP2   | 222.8   | 277.8  | 200.8   | 168.8   | 151    | 180.5   | 198.3   | 164.3   |
| CYGB     | 78.8    | 99.3   | 96.2    | 80.2    | 69.9   | 82.5    | 91.8    | 91.8    |
| CYHR1    | 157.9   | 182.6  | 122.2   | 100     | 103.5  | 139.8   | 132.6   | 152.5   |
| CYLC1    | 78.7    | 86.1   | 84.4    | 75.4    | 85.2   | 78.8    | 79.9    | 91.8    |
| CYLC2    | 160.6   | 159.6  | 90.8    | 98.5    | 88.5   | 94.8    | 146     | 136.4   |
| CYLD     | 82.1    | 88.5   | 105.7   | 96.4    | 88.2   | 81.6    | 83.3    | 90.7    |
| CYLD     | 126.4   | 184.8  | 147     | 165.5   | 174.2  | 167.8   | 127.1   | 135     |
| CYLN2    | 95.6    | 112.6  | 86.8    | 89.5    | 87.9   | 89.4    | 101.2   | 107.6   |
| CYORF14  | 178.3   | 186.3  | 130.2   | 151     | 140    | 193.1   | 166.5   | 175     |
| CYORF15A | 590.1   | 768.4  | 369.4   | 481.8   | 342.1  | 612.9   | 402.3   | 613     |
| CYORF15B | 177.2   | 204    | 138.3   | 141.1   | 133.8  | 173.5   | 123.1   | 161.1   |
| CYP11A1  | 131.9   | 147    | 111.4   | 133.9   | 108.3  | 134.2   | 122     | 141.8   |
| CYP11B1  | 81.9    | 101.2  | 78.3    | 81      | 81.5   | 80.7    | 91.1    | 104.8   |
| CYP11B2  | 91.7    | 120.9  | 96.2    | 83.8    | 94.2   | 95.5    | 109.5   | 128     |
| CYP17A1  | 101.1   | 97.5   | 90.6    | 87.3    | 81.9   | 83.4    | 90.3    | 103     |
| CYP19A1  | 97.7    | 117.2  | 98.7    | 88.2    | 91.3   | 89.7    | 96.8    | 95.4    |
| CYP19A1  | 82.8    | 96.9   | 99.3    | 97.4    | 101.5  | 83.9    | 82.6    | 85.5    |
| CYP19A1  | 105.9   | 118.2  | 98.6    | 84      | 94.9   | 78.5    | 99.4    | 130.8   |
| CYP1A1   | 105.7   | 111.4  | 101.2   | 87.1    | 94.3   | 91.3    | 94.7    | 110     |
| CYP1A2   | 82.7    | 86.9   | 98      | 88.9    | 82.9   | 86.6    | 81.8    | 87.2    |
| CYP1B1   | 194     | 248.9  | 141.4   | 357.9   | 225.9  | 608.5   | 523.2   | 1232.3  |
| CYP20A1  | 555.2   | 684.4  | 328     | 375.7   | 293.7  | 437.7   | 482.7   | 784.8   |
| CYP20A1  | 96.6    | 113.4  | 98      | 92.9    | 81.5   | 82.9    | 101.4   | 100.7   |
| CYP21A2  | 91      | 104.9  | 106.1   | 90.6    | 88.4   | 102.3   | 94.4    | 104.6   |

|          |       |       |       |       |       |       |       |       |
|----------|-------|-------|-------|-------|-------|-------|-------|-------|
| CYP24A1  | 87.1  | 97.1  | 87.8  | 85.7  | 73.6  | 81.9  | 76.4  | 93    |
| CYP26A1  | 89.4  | 112.9 | 90.1  | 86.6  | 81.1  | 79.4  | 96.4  | 107.8 |
| CYP26A1  | 102.5 | 111.8 | 91.5  | 90.6  | 86.3  | 87.9  | 96.3  | 105   |
| CYP26A1  | 82.5  | 84.9  | 93.2  | 85.9  | 82.7  | 89.2  | 74.1  | 85.7  |
| CYP26B1  | 111.7 | 133.3 | 100   | 90.8  | 79.8  | 91.6  | 120   | 142.1 |
| CYP26C1  | 95.3  | 130.3 | 85.6  | 79.9  | 69.4  | 81.9  | 104.3 | 103.9 |
| CYP27A1  | 124.1 | 144.2 | 132.5 | 158.4 | 159.6 | 159.2 | 121.1 | 143.4 |
| CYP27B1  | 136.7 | 169.8 | 155.8 | 117.1 | 116.5 | 120.6 | 126.7 | 128.8 |
| CYP2A13  | 91.2  | 94    | 94.1  | 83.7  | 79.4  | 89.1  | 93.4  | 97.9  |
| CYP2A6   | 76.6  | 79.2  | 91.4  | 84.6  | 80.8  | 81.5  | 75.7  | 79.4  |
| CYP2A7   | 86.2  | 99.2  | 112.6 | 104   | 105.9 | 104.1 | 91.5  | 105.6 |
| CYP2B6   | 75.6  | 84.6  | 96.6  | 85.4  | 84.5  | 90.1  | 82.7  | 87.7  |
| CYP2B7P1 | 80.6  | 87.6  | 95.5  | 90.3  | 81.2  | 81.1  | 81.7  | 93.6  |
| CYP2C18  | 84    | 88.6  | 103.1 | 94.1  | 94.3  | 95.4  | 90.6  | 98.8  |
| CYP2C19  | 95.1  | 102.6 | 94.9  | 85.6  | 84.1  | 97.5  | 90.3  | 111.8 |
| CYP2C8   | 114.6 | 124.2 | 92.9  | 86.9  | 89.4  | 89.2  | 109.2 | 134.1 |
| CYP2C9   | 69.8  | 84.8  | 102.4 | 105.4 | 84.3  | 87.4  | 75.4  | 85.7  |
| CYP2D6   | 129.1 | 171   | 88.9  | 97.6  | 87    | 94    | 122.7 | 126.9 |
| CYP2D7P1 | 97.3  | 111.8 | 120.7 | 114.9 | 110.1 | 123.5 | 89.1  | 96.7  |
| CYP2E1   | 109   | 120.2 | 97.6  | 92.8  | 102.9 | 100.3 | 107.3 | 112.1 |
| CYP2F1   | 85.5  | 90.1  | 95.3  | 88.3  | 80    | 86.2  | 78.9  | 101   |
| CYP2J2   | 164.9 | 188.2 | 147.8 | 161.9 | 126.3 | 184.1 | 107.3 | 143.1 |
| CYP2R1   | 191.1 | 221.1 | 181.6 | 166.6 | 146   | 200.2 | 182.1 | 226.8 |
| CYP2S1   | 158.5 | 182   | 144   | 110.3 | 103.1 | 113.9 | 145   | 174.8 |
| CYP2S1   | 389.7 | 518.9 | 394.4 | 332.7 | 261.1 | 299.8 | 365.7 | 625.6 |
| CYP2U1   | 130.4 | 147.4 | 98    | 90.3  | 81.4  | 100   | 113.6 | 168.6 |
| CYP2W1   | 144.4 | 162.2 | 88.8  | 93.2  | 74.4  | 86.9  | 163.5 | 188   |
| CYP39A1  | 75.1  | 79.5  | 91.1  | 88.4  | 81.2  | 85.7  | 72.4  | 83.3  |
| CYP3A4   | 91.4  | 99.3  | 94.1  | 86.9  | 93    | 83.3  | 94.7  | 102.3 |
| CYP3A43  | 94.9  | 111.8 | 96.4  | 87.4  | 92    | 88.1  | 94.1  | 97.1  |
| CYP3A43  | 78.3  | 81.1  | 92    | 94.5  | 97.4  | 89    | 82    | 78.4  |
| CYP3A5   | 79.8  | 85.9  | 95.7  | 87.9  | 91    | 90.2  | 89.2  | 82.6  |
| CYP3A7   | 96.4  | 111.8 | 91.1  | 90.6  | 82.2  | 94    | 94.3  | 107.9 |
| CYP46A1  | 117.5 | 123.5 | 108   | 97.3  | 94.9  | 108.4 | 93.1  | 111.3 |
| CYP4A11  | 119.4 | 137.5 | 89    | 82.3  | 82.3  | 85.8  | 112.7 | 122.1 |
| CYP4A22  | 87.1  | 96.1  | 101.9 | 83.5  | 87.1  | 86    | 97.7  | 96.5  |
| CYP4B1   | 112.1 | 116.3 | 97.3  | 93.8  | 86.9  | 91.2  | 103.2 | 115.5 |
| CYP4F11  | 103.1 | 102.9 | 101.1 | 87.4  | 84    | 93    | 102.5 | 91.7  |
| CYP4F12  | 82.7  | 90    | 87.2  | 85.8  | 84    | 87.8  | 93    | 95.9  |
| CYP4F2   | 77.9  | 94.5  | 101.5 | 89.7  | 94    | 95.2  | 86.7  | 90.5  |
| CYP4F3   | 84.9  | 85.6  | 82.3  | 84.5  | 86.1  | 84.4  | 83.9  | 92.8  |
| CYP4F8   | 117.1 | 107.3 | 95.6  | 94.7  | 82.5  | 86.1  | 106.3 | 108.6 |
| CYP4V2   | 453.3 | 533.8 | 360.1 | 682.6 | 477.6 | 755   | 331.1 | 400.9 |
| CYP4X1   | 79.6  | 88    | 84.7  | 70.1  | 79.2  | 81.6  | 82.7  | 87.8  |
| CYP4Z1   | 82.2  | 84.8  | 101.9 | 85.3  | 91.6  | 90.9  | 79.8  | 90.3  |
| CYP4Z1   | 93.3  | 96.9  | 83.5  | 72.2  | 74    | 80.5  | 84.6  | 99.2  |
| CYP4Z1   | 78.7  | 80    | 87.3  | 81.1  | 75.2  | 82.9  | 79.3  | 83.2  |
| CYP4Z2P  | 97.1  | 99.1  | 92.5  | 91    | 83.9  | 97.5  | 93.7  | 101.8 |
| CYP51A1  | 372.5 | 487.4 | 192.8 | 199.1 | 177   | 235.4 | 460.7 | 808.3 |
| CYP7A1   | 106.7 | 101.1 | 93.3  | 90.2  | 93.9  | 82.9  | 92.7  | 103.4 |

|           |         |         |        |        |        |         |        |         |
|-----------|---------|---------|--------|--------|--------|---------|--------|---------|
| CYP7B1    | 112.3   | 124.3   | 91.3   | 91.7   | 89.4   | 89.7    | 112.4  | 128.3   |
| CYP8B1    | 94.2    | 113.3   | 90.2   | 88.9   | 86.7   | 86.3    | 97.2   | 101.3   |
| CYR61     | 102.6   | 107.1   | 86.5   | 96.1   | 87.7   | 100.6   | 107.4  | 122.6   |
| CYS1      | 94.5    | 98.2    | 87     | 90.7   | 83.9   | 90.9    | 95.6   | 108.8   |
| CYS1      | 102.4   | 104.8   | 83     | 90.2   | 88.1   | 85.5    | 88.6   | 108.2   |
| CYSLTR1   | 954.6   | 1328.4  | 636.4  | 704.1  | 554    | 806.4   | 617.8  | 749.7   |
| CYSLTR2   | 113.7   | 128.6   | 86.6   | 72.2   | 70.2   | 89.8    | 123.8  | 141.1   |
| CYTL1     | 77.4    | 83.3    | 82.9   | 70.6   | 74.3   | 75      | 83.5   | 86      |
| CYR1      | 85.9    | 97.4    | 99.5   | 91.7   | 93.8   | 95.4    | 94.7   | 98.1    |
| D15WSU75  | 971.4   | 1317.9  | 809.2  | 592    | 459.2  | 758.8   | 700.5  | 969.9   |
| D21S2056E | 98.6    | 123.2   | 79.5   | 86.9   | 68.5   | 74.8    | 97.9   | 115.9   |
| D2HGDH    | 761     | 793.8   | 615.8  | 941.7  | 1116.8 | 1302.4  | 452.3  | 419.6   |
| D4S234E   | 135.9   | 146.5   | 104.7  | 96.1   | 90.1   | 93.8    | 144    | 140.2   |
| D4ST1     | 280.4   | 370.4   | 380.3  | 315.5  | 234.5  | 299.1   | 257.4  | 445.1   |
| DAAM1     | 107     | 153.2   | 100.4  | 100.8  | 102    | 126.6   | 135.1  | 166     |
| DAAM2     | 100     | 136.6   | 102.9  | 91.7   | 90.3   | 89.9    | 107.4  | 124.4   |
| DAB1      | 71.5    | 75.9    | 83.3   | 79.4   | 67.6   | 77.6    | 81.3   | 71.6    |
| DAB2      | 266.8   | 305.6   | 173.6  | 335.1  | 313.6  | 307     | 259.4  | 335.6   |
| DAB2IP    | 85.2    | 110.6   | 102.9  | 82.7   | 87.1   | 90      | 89.8   | 102.5   |
| DAB2IP    | 87.1    | 95.8    | 92.4   | 78.8   | 84.3   | 88.9    | 91.7   | 87.2    |
| DAB2IP    | 88.9    | 103.4   | 87.8   | 87.6   | 68.6   | 89.4    | 91.8   | 101.2   |
| DACH1     | 100.8   | 111.7   | 97.3   | 89.7   | 84.6   | 89.6    | 95     | 108.8   |
| DACH1     | 108.2   | 110.7   | 96.7   | 102.3  | 94.9   | 99.3    | 90.2   | 92.9    |
| DACH1     | 382.9   | 487.5   | 220    | 380.9  | 312.7  | 459.1   | 212.9  | 380.7   |
| DACT1     | 88.2    | 90.8    | 100.1  | 89.7   | 92.3   | 91.1    | 87.9   | 91.9    |
| DACT1     | 96.2    | 101.8   | 108.4  | 100.8  | 95.6   | 93.2    | 100.4  | 97.9    |
| DACT1     | 105.8   | 114.7   | 105.7  | 103    | 94.2   | 86.2    | 102.4  | 102.9   |
| DACT2     | 92.4    | 95.4    | 96.2   | 93.8   | 84.7   | 83.6    | 87.8   | 104     |
| DAD1      | 7030.7  | 8993.3  | 4727.8 | 3531.1 | 2654.2 | 3867.3  | 6535   | 7297.1  |
| DAG1      | 314.8   | 396.6   | 281.2  | 284    | 233    | 343.9   | 327.6  | 545.3   |
| DAK       | 152.8   | 166.3   | 145.7  | 113    | 113.1  | 124     | 132.6  | 212.3   |
| DALRD3    | 236.7   | 290.2   | 147.5  | 114.2  | 110    | 102     | 187.6  | 207.4   |
| DALRD3    | 88.9    | 106.3   | 91.7   | 77.7   | 79.8   | 85.9    | 87     | 108.7   |
| DAND5     | 92.5    | 90.7    | 100.5  | 98.2   | 87.1   | 102.9   | 92.5   | 104.5   |
| DAO       | 91.4    | 106     | 91.1   | 97.9   | 87.6   | 86.9    | 96.7   | 112.3   |
| DAOA      | 76.2    | 95.7    | 88.1   | 89.2   | 84.8   | 85.7    | 88.9   | 99      |
| DAP       | 723.9   | 884.7   | 526.6  | 478.1  | 365.6  | 562.5   | 585.3  | 1163.2  |
| DAP3      | 3020.7  | 4027.8  | 1894   | 1782.5 | 1366.4 | 2378.8  | 2765.8 | 4965.7  |
| DAPK1     | 152.8   | 201     | 119.2  | 165.6  | 140.7  | 235.4   | 155.3  | 175.1   |
| DAPK2     | 124.3   | 118.6   | 124    | 93.4   | 88.5   | 96.7    | 97.5   | 128.9   |
| DAPK3     | 228.5   | 304.1   | 166.8  | 113.9  | 124.3  | 152.1   | 204.5  | 299.9   |
| DAPP1     | 3429.5  | 3829.6  | 1556   | 1790   | 2019.4 | 2160.8  | 3002.2 | 2935.8  |
| DARC      | 109.2   | 153     | 92.2   | 85     | 69.8   | 78      | 109.6  | 135.4   |
| DARS      | 10040.7 | 12852.8 | 7708.4 | 7995.2 | 6496   | 11106.7 | 8812.2 | 10774.3 |
| DARS2     | 1028.9  | 1311.3  | 566    | 499.3  | 406.8  | 583     | 778.7  | 903.3   |
| DAXX      | 395.4   | 505.5   | 297.1  | 241    | 204.4  | 268.2   | 370.2  | 484.3   |
| DAZ1      | 86.4    | 84.6    | 79.1   | 79     | 74.1   | 82.8    | 88.1   | 93.6    |
| DAZ2      | 86.3    | 97.4    | 84.2   | 90.3   | 89.6   | 82.5    | 102.7  | 97.5    |
| DAZ2      | 94.3    | 95      | 105.1  | 94.6   | 86.7   | 99      | 95.4   | 87.1    |
| DAZ4      | 92.7    | 118.6   | 87.5   | 86.4   | 89.1   | 94.9    | 92.6   | 105.9   |

|         |         |         |        |         |        |         |         |         |
|---------|---------|---------|--------|---------|--------|---------|---------|---------|
| DAZAP1  | 91.8    | 106.8   | 93.3   | 84.3    | 88.9   | 93.7    | 101     | 117.9   |
| DAZAP1  | 1436.7  | 1561.2  | 710.6  | 437.8   | 394    | 324.7   | 1140.4  | 1570.3  |
| DAZAP2  | 13603.2 | 16805.5 | 9633.5 | 11248.7 | 8091.8 | 12199.6 | 11943.1 | 13899.2 |
| DAZL    | 83.3    | 93.1    | 94     | 91      | 85.1   | 91.9    | 82.9    | 95      |
| DBC1    | 74.7    | 91.7    | 90.3   | 88.1    | 81.7   | 86.2    | 84.9    | 91.2    |
| DBF4    | 132.5   | 150.8   | 97.5   | 97.7    | 94.9   | 98.3    | 130.7   | 157.7   |
| DBF4B   | 122.4   | 125.2   | 109.4  | 108.5   | 103.8  | 98.3    | 123.7   | 121.1   |
| DBF4B   | 78      | 82.8    | 96.7   | 93.9    | 93.3   | 102.1   | 72.2    | 92.6    |
| DBH     | 89.3    | 124.9   | 90.1   | 88.7    | 80     | 76.6    | 95.9    | 113.6   |
| DBI     | 11657.6 | 14012.5 | 7883   | 7064.5  | 6419.5 | 8827.3  | 9337.3  | 15379.4 |
| DBI     | 2171    | 2677.5  | 862.9  | 799.8   | 724.8  | 1096.5  | 1755    | 2062.3  |
| DBN1    | 1071.8  | 1433.3  | 706    | 516.5   | 308.5  | 492.4   | 886.6   | 831.2   |
| DBN1    | 103.4   | 135.2   | 106.5  | 99.2    | 89.3   | 85.4    | 104.6   | 134.1   |
| DBNDD1  | 210.4   | 284.4   | 118.4  | 112.7   | 99.2   | 103.5   | 205.5   | 245.9   |
| DBNDD2  | 79.6    | 92.8    | 84.3   | 81.1    | 89.5   | 78.1    | 68.6    | 83      |
| DBNL    | 4747.2  | 6058    | 3851.4 | 3448.9  | 2754.4 | 3785.1  | 3674.1  | 3789.5  |
| DBNL    | 596.7   | 779.4   | 505.4  | 424.3   | 368.1  | 557.4   | 539.1   | 674.9   |
| DBP     | 198.6   | 242.2   | 130.1  | 138.9   | 114.1  | 129.5   | 173.8   | 210.8   |
| DBR1    | 368     | 399.3   | 179    | 199.4   | 138.9  | 215.2   | 333.7   | 445.7   |
| DBT     | 1649.6  | 1903.3  | 1068.6 | 958.7   | 823.9  | 811.2   | 1459.7  | 1915.2  |
| DBX1    | 113     | 113.8   | 91.5   | 96.4    | 91.9   | 84.5    | 106.4   | 129.2   |
| DBX2    | 112.4   | 131.2   | 107.9  | 94.3    | 94.8   | 92.8    | 112.4   | 123.2   |
| DC2     | 1559.5  | 1773.1  | 312.9  | 290.7   | 241.9  | 327.8   | 1577.5  | 2864.8  |
| DCAKD   | 1252.2  | 1571.8  | 951.6  | 1114.4  | 963.7  | 844.1   | 1005.6  | 1030.7  |
| DCAL1   | 91.8    | 88.6    | 94.7   | 90.1    | 78.4   | 94.2    | 101.3   | 98.8    |
| DCAMKL1 | 163.4   | 209.6   | 115.1  | 101.5   | 104    | 110.8   | 162.5   | 179.4   |
| DCAMKL2 | 86.2    | 98.7    | 109.5  | 100.1   | 93.1   | 99.5    | 101.6   | 94.4    |
| DCAMKL2 | 86      | 89      | 85     | 86.2    | 79     | 83.5    | 83      | 88.1    |
| DCBLD1  | 298.5   | 357.9   | 170.4  | 191.7   | 157.8  | 153.2   | 245.9   | 423.5   |
| DCBLD2  | 570.4   | 716.9   | 388.1  | 401.3   | 368.5  | 485.6   | 518.8   | 840.8   |
| DCC     | 91.1    | 105.2   | 103.1  | 90.1    | 90     | 93.4    | 97      | 98.2    |
| DCC1    | 417.2   | 492.3   | 150.1  | 126.9   | 130.6  | 137.1   | 300.2   | 382.8   |
| DCD     | 93.5    | 108.5   | 88.2   | 81.5    | 83.7   | 93.2    | 90.7    | 100.8   |
| DCDC1   | 75.8    | 93.1    | 90.1   | 89.7    | 82.9   | 90.1    | 83.3    | 85.9    |
| DCDC2   | 84.6    | 83.6    | 92.1   | 90.5    | 81.9   | 82.6    | 78.8    | 81.8    |
| DCDC5   | 470     | 614     | 289.3  | 228.5   | 210.7  | 235.7   | 492.4   | 429.7   |
| DCHS1   | 172.3   | 264.1   | 120.2  | 112.4   | 102.4  | 103     | 173.5   | 196.1   |
| DCHS2   | 83.5    | 94      | 79.3   | 83.7    | 77.4   | 73.2    | 81.9    | 88.6    |
| DCI     | 646.3   | 954.8   | 266.8  | 170.3   | 174    | 205.7   | 525.4   | 564.8   |
| DCK     | 105.1   | 128.8   | 149.7  | 139.5   | 125.7  | 129.8   | 106.3   | 149     |
| DCLRE1A | 375.8   | 538.9   | 242    | 191.1   | 209.2  | 285.5   | 343.4   | 413.2   |
| DCLRE1B | 201.5   | 277.8   | 136.8  | 114.3   | 97.8   | 133.9   | 173     | 251.2   |
| DCLRE1C | 267.7   | 301     | 271.1  | 268.5   | 257.6  | 305.1   | 269.3   | 390.9   |
| DCLRE1C | 138.1   | 165.7   | 106.8  | 105.5   | 109.9  | 117.1   | 137     | 158.9   |
| DCLRE1C | 366.9   | 421.6   | 251.9  | 384.4   | 399.6  | 326.7   | 344.2   | 400.5   |
| DCN     | 108.5   | 88.9    | 100.3  | 93.4    | 87.2   | 94.2    | 88.8    | 106.3   |
| DCN     | 94.4    | 97      | 86.3   | 85.8    | 101.6  | 91.2    | 87.3    | 98.6    |
| DCN     | 107.6   | 119.5   | 111.4  | 88.1    | 82.5   | 83      | 97.7    | 100.2   |
| DCP1A   | 366.7   | 446.1   | 236.6  | 252.6   | 241.8  | 331.9   | 397     | 642.2   |
| DCP1B   | 131.1   | 139     | 104.2  | 110.2   | 95.1   | 105.8   | 112.7   | 134.9   |



|         |        |        |        |        |        |        |        |        |
|---------|--------|--------|--------|--------|--------|--------|--------|--------|
| DCP2    | 1525   | 2196.2 | 935.5  | 2004.8 | 1316.8 | 2969.5 | 1574.7 | 2186.6 |
| DCPS    | 977.5  | 1261.1 | 839.1  | 328.1  | 295.4  | 449.9  | 863.6  | 841.1  |
| DCST1   | 106.8  | 111.4  | 100.7  | 124.6  | 94.9   | 93.5   | 111.7  | 129.6  |
| DCST2   | 77     | 79.9   | 90.9   | 74.9   | 74.8   | 79.8   | 78.8   | 88.2   |
| DCT     | 90.7   | 110.7  | 99     | 94     | 92.4   | 92.9   | 93.3   | 98.5   |
| DCTD    | 476.7  | 706.3  | 186.9  | 141.8  | 115    | 143.4  | 406.5  | 556.5  |
| DCTD    | 1725.6 | 2434.3 | 1732.6 | 1158.6 | 856    | 1337.1 | 1510   | 2594.3 |
| DCTN1   | 725.4  | 877.7  | 571.6  | 597.2  | 488.4  | 559.7  | 515.7  | 927.4  |
| DCTN1   | 139.6  | 157.2  | 90     | 84.3   | 89.4   | 101.7  | 130.8  | 167.6  |
| DCTN1   | 120.7  | 145.6  | 168.1  | 137.2  | 128.7  | 171.2  | 121.6  | 173.2  |
| DCTN2   | 2362.4 | 3019.7 | 1742.4 | 1650.5 | 1257.5 | 1749.2 | 2290.6 | 3122.6 |
| DCTN3   | 113.5  | 126.1  | 95.6   | 89.8   | 86.9   | 99.5   | 108.4  | 121.3  |
| DCTN3   | 3845.4 | 4529.5 | 3679.8 | 2400.1 | 2137.7 | 3213.2 | 3322.2 | 4406.4 |
| DCTN4   | 614.2  | 744.8  | 306.4  | 360.6  | 280.4  | 450.9  | 697.6  | 1080.5 |
| DCTN5   | 1627.9 | 2345.6 | 1538.4 | 1122.4 | 786.9  | 1304.9 | 1389.2 | 1998.3 |
| DCTN6   | 150.6  | 163.1  | 133.7  | 105.8  | 104.7  | 98.6   | 158.3  | 289.5  |
| DC-UBP  | 368    | 506.5  | 295.6  | 225.1  | 215.7  | 245.2  | 272.9  | 343.7  |
| DCUN1D1 | 86.6   | 95.4   | 80.8   | 88.8   | 80.5   | 90.7   | 97.7   | 99.3   |
| DCUN1D2 | 137.5  | 201.2  | 127.8  | 113.1  | 101.1  | 137.3  | 134.2  | 175.4  |
| DCUN1D3 | 173.8  | 243.9  | 151.1  | 146.1  | 143    | 161.3  | 197    | 191.7  |
| DCUN1D4 | 548.5  | 673.9  | 172.1  | 196.7  | 151.1  | 243    | 417.9  | 476.1  |
| DCUN1D4 | 489.7  | 596.6  | 400.7  | 403.7  | 312.6  | 545.9  | 439.2  | 638.5  |
| DCUN1D5 | 1719.7 | 1948.8 | 1099.3 | 903.3  | 575.7  | 1343.1 | 1541   | 3196.1 |
| DCX     | 98.2   | 107    | 112    | 108.5  | 97.3   | 109.4  | 100.4  | 115.5  |
| DCX     | 88.9   | 103.5  | 100.6  | 87.4   | 82     | 90.9   | 103.5  | 104.6  |
| DCXR    | 2124.8 | 2705   | 1569.8 | 1099.8 | 818.9  | 1068.1 | 1968.7 | 2596.8 |
| DDA1    | 1663.7 | 1975   | 1251.5 | 837.5  | 726.1  | 758    | 1597.1 | 1960.4 |
| DDAH1   | 223.8  | 211.5  | 133    | 181.6  | 120    | 212.2  | 170.3  | 324    |
| DDAH2   | 192.8  | 190.7  | 109.1  | 112    | 100.3  | 119.4  | 161.8  | 217.1  |
| DDB1    | 5888.2 | 7562.6 | 5392.4 | 4963.4 | 3833   | 5278.9 | 5283.5 | 5821.9 |
| DDB1    | 224.2  | 223    | 120.3  | 132.6  | 127.5  | 110.5  | 169.4  | 206.6  |
| DDB2    | 183.3  | 202.6  | 102.8  | 102.3  | 89.3   | 87.7   | 156.8  | 211.3  |
| DDC     | 80.1   | 97.3   | 110.3  | 93     | 102.7  | 97.5   | 88     | 92.2   |
| DDEF1   | 231.8  | 314.9  | 175.6  | 222.7  | 247.2  | 306.6  | 200.5  | 638    |
| DDEF2   | 205.9  | 256.4  | 133.4  | 111.5  | 119.6  | 149.4  | 203.8  | 275.3  |
| DDEFL1  | 133    | 165.1  | 110.2  | 100.6  | 86.5   | 90.7   | 125.3  | 155.5  |
| DDHD1   | 93.4   | 96.2   | 89.2   | 88.6   | 91.5   | 90.5   | 89.5   | 90.3   |
| DDHD2   | 208    | 254.1  | 144.4  | 118.8  | 112.5  | 124.4  | 180.6  | 218    |
| DDI1    | 123.9  | 156.7  | 92.4   | 80.2   | 89.1   | 96.3   | 115.6  | 158    |
| DDI2    | 90.1   | 109.5  | 101.3  | 88.6   | 84.9   | 85.3   | 98.4   | 91.6   |
| DDIT3   | 485    | 601.9  | 319.1  | 331.6  | 319.5  | 584.5  | 496.1  | 743.8  |
| DDIT4   | 541.1  | 723.3  | 308.8  | 637    | 719.5  | 1105   | 697.5  | 966.6  |
| DDIT4L  | 120.2  | 155.4  | 104.8  | 121    | 96.2   | 132.6  | 139.4  | 200.4  |
| DDN     | 84.5   | 99.1   | 93.3   | 90.9   | 85.3   | 91.9   | 97.1   | 97.4   |
| DDO     | 78.9   | 87.6   | 102.1  | 88.8   | 94.7   | 94.4   | 81.8   | 96.2   |
| DDO     | 95.3   | 106.1  | 108.1  | 96.7   | 85.6   | 94.9   | 103.7  | 111.7  |
| DDOST   | 5808.4 | 7924   | 2439.2 | 2877.4 | 1916   | 2648.2 | 5791.6 | 7092.7 |
| DDR1    | 119.2  | 136.7  | 104.6  | 98.7   | 95.6   | 96.6   | 110.7  | 136.6  |
| DDR1    | 115.1  | 157.4  | 101.8  | 94.1   | 81     | 95.3   | 126.8  | 128.4  |
| DDR1    | 90.4   | 103.1  | 103    | 88.1   | 95.2   | 103.3  | 99.2   | 97.6   |

|        |        |        |        |        |        |        |        |        |
|--------|--------|--------|--------|--------|--------|--------|--------|--------|
| DDR2   | 105    | 128.5  | 93     | 82.5   | 90.1   | 93.7   | 97.8   | 111.2  |
| DDR2   | 87.1   | 114.6  | 99.3   | 103.2  | 86.1   | 102.9  | 94     | 98.2   |
| DDT    | 5857.5 | 7144   | 3842.1 | 4060.9 | 3402.8 | 4892.9 | 5584   | 6045.6 |
| DDX1   | 3927.3 | 4591.6 | 3790.7 | 3332.5 | 2619.8 | 5137.2 | 2982.5 | 5183.5 |
| DDX10  | 920.8  | 1340.6 | 770.3  | 607.9  | 405.4  | 978.3  | 667    | 1182.8 |
| DDX11  | 120.6  | 147    | 115.4  | 98.2   | 93.2   | 94.5   | 119.7  | 130.9  |
| DDX11  | 166.4  | 162.5  | 151.8  | 127.1  | 124.3  | 150.5  | 139.1  | 253.1  |
| DDX11  | 94     | 116.5  | 98.7   | 89.1   | 86.8   | 101.9  | 98.8   | 127.2  |
| DDX17  | 1729.2 | 1860.9 | 586.2  | 868.4  | 548.3  | 992.5  | 1683.5 | 3226.1 |
| DDX17  | 232.5  | 360.5  | 171.2  | 231.1  | 245.9  | 156.2  | 174.7  | 223    |
| DDX17  | 675.2  | 886.8  | 352.7  | 634.6  | 553.1  | 279.1  | 514.2  | 880.6  |
| DDX18  | 2829.7 | 3822.5 | 2308.3 | 2515.8 | 1868.6 | 3408.5 | 2165.9 | 3232.8 |
| DDX19A | 531.9  | 658.7  | 577.7  | 543.5  | 443.9  | 675.5  | 410.8  | 570.5  |
| DDX19B | 2190.8 | 2757.6 | 1212.2 | 1121.2 | 908.6  | 1364.3 | 1669.3 | 1772.5 |
| DDX20  | 208.4  | 229.7  | 136.2  | 111.8  | 106.4  | 125.1  | 171    | 237.5  |
| DDX21  | 3169.4 | 3698.8 | 2216.1 | 1545.4 | 903.1  | 3161.3 | 2424.8 | 5949.4 |
| DDX23  | 554.9  | 700.1  | 623.9  | 364.6  | 321.3  | 425.7  | 466.4  | 907.4  |
| DDX24  | 1261.9 | 1616.9 | 1104.1 | 789.7  | 597.5  | 1281.1 | 1079.2 | 1846.5 |
| DDX25  | 81.1   | 86.9   | 85.5   | 91.2   | 85.9   | 94.2   | 77     | 90.7   |
| DDX26  | 1128.2 | 1706.3 | 896.2  | 984.3  | 906.8  | 1372.7 | 1088.6 | 1510.6 |
| DDX26B | 153.4  | 186.2  | 109.4  | 104.3  | 91.6   | 106.3  | 149.4  | 174.4  |
| DDX27  | 859.3  | 1251.6 | 260.7  | 265.1  | 231.2  | 310.5  | 840.7  | 995.5  |
| DDX28  | 285    | 394.4  | 172.7  | 144    | 130.8  | 169.5  | 257.3  | 364.7  |
| DDX31  | 393.4  | 497    | 306.3  | 245.3  | 182.1  | 278.3  | 289.4  | 334.8  |
| DDX31  | 84.4   | 95.9   | 98.7   | 91     | 92.7   | 82.1   | 85.7   | 85.5   |
| DDX31  | 182.9  | 210.4  | 139.2  | 119    | 97.5   | 107.2  | 138.4  | 168    |
| DDX39  | 7382.7 | 9110.3 | 4370.2 | 2831.3 | 2510.3 | 3418.8 | 6670.2 | 8785.3 |
| DDX3X  | 93.4   | 106.9  | 94.7   | 91.1   | 85.3   | 96.1   | 94.8   | 113.2  |
| DDX3X  | 1609.1 | 2267.4 | 1319.9 | 1516.9 | 1099.9 | 2444.4 | 1287.4 | 2761.2 |
| DDX3Y  | 90     | 108    | 91.1   | 89.9   | 77     | 87.3   | 88.9   | 126.5  |
| DDX4   | 81.2   | 85.6   | 89.3   | 80.1   | 82.3   | 90.4   | 82.1   | 77.5   |
| DDX41  | 734.5  | 972.1  | 540.9  | 475.2  | 406.2  | 666.6  | 647.4  | 943    |
| DDX42  | 116.7  | 125    | 110.8  | 129.5  | 123.9  | 100.2  | 116.1  | 148.4  |
| DDX42  | 1565.6 | 1950.3 | 1160.4 | 1467.5 | 1116.9 | 1875.3 | 1157.5 | 1579.2 |
| DDX43  | 87     | 114.8  | 100.2  | 90     | 87.6   | 88.1   | 97.3   | 108.8  |
| DDX46  | 1415.1 | 1923   | 741.7  | 1041   | 847.6  | 1341.8 | 1122.3 | 1316.4 |
| DDX47  | 886.4  | 1165.7 | 474.3  | 314.5  | 237.5  | 381    | 709.6  | 919.8  |
| DDX47  | 2042.4 | 2923.8 | 870.7  | 679.7  | 563.7  | 774.4  | 1760.1 | 2190.2 |
| DDX48  | 5779.1 | 7648.4 | 4325.1 | 3732   | 2756.9 | 4892.2 | 4584.4 | 6253.8 |
| DDX49  | 221.3  | 232.1  | 120.1  | 127.6  | 100.2  | 117.5  | 165.3  | 180    |
| DDX5   | 8049.7 | 8871.7 | 6406.7 | 6334.9 | 4932.9 | 8738   | 5296.6 | 9373.9 |
| DDX50  | 774    | 1125.1 | 349.1  | 259.4  | 224.5  | 386.2  | 617.5  | 764.5  |
| DDX51  | 4178.8 | 4104.1 | 1971.6 | 2940   | 2801.3 | 1721.8 | 3569.4 | 5731.2 |
| DDX52  | 137.3  | 159.6  | 112.4  | 109.7  | 104.9  | 104.7  | 124.2  | 190.3  |
| DDX53  | 114.2  | 140.9  | 96.7   | 90.5   | 85.8   | 89.6   | 105.8  | 122.4  |
| DDX54  | 277.2  | 329.3  | 221.2  | 245.7  | 208.2  | 252.3  | 283.3  | 379.5  |
| DDX55  | 1398.1 | 1428.4 | 852.1  | 747.2  | 666.4  | 953.9  | 1088.2 | 1422.9 |
| DDX56  | 1728.4 | 1957.5 | 1524.1 | 1108.4 | 817.2  | 1414   | 1254   | 1927.9 |
| DDX58  | 137.6  | 180.7  | 129.7  | 129.4  | 124.4  | 122.6  | 129.4  | 146.2  |
| DDX59  | 759.8  | 924.8  | 507.3  | 516.7  | 410.6  | 719.8  | 716.6  | 1331.2 |

|          |        |        |        |       |       |       |        |        |
|----------|--------|--------|--------|-------|-------|-------|--------|--------|
| DDX59    | 104.4  | 108.1  | 89.7   | 86.1  | 76    | 77.3  | 108.3  | 116.2  |
| DDX59    | 147    | 165    | 120.3  | 110.6 | 94.1  | 156   | 143    | 240.6  |
| DDX6     | 126.2  | 142.3  | 123.9  | 101.2 | 99    | 102.9 | 122.7  | 127.4  |
| DEADC1   | 119.4  | 131.4  | 113.7  | 118.4 | 104.9 | 130.5 | 106.3  | 107.9  |
| DEAF1    | 232.3  | 291.4  | 159.1  | 129.3 | 118.1 | 158.4 | 182.5  | 236    |
| DEAF1    | 96.3   | 115.5  | 102.1  | 94.2  | 100   | 86.4  | 107.4  | 101.3  |
| Dec-01   | 96.2   | 98.4   | 96.3   | 82.5  | 73    | 75.8  | 96.6   | 100.3  |
| DECR1    | 5809.1 | 7584.7 | 1404.2 | 662.2 | 539   | 479.7 | 5450.5 | 6165.3 |
| DECR2    | 882.3  | 999.4  | 695.4  | 474.8 | 398.3 | 423.1 | 788    | 823.8  |
| DEDD     | 579.3  | 685.3  | 542.4  | 522.4 | 424   | 735.4 | 523.5  | 1025.1 |
| DEDD     | 120.1  | 179    | 94.8   | 94.5  | 84.9  | 99.9  | 130.1  | 163.6  |
| DEDD     | 267.8  | 347.6  | 246.3  | 189.3 | 169.5 | 223.6 | 242.6  | 321.3  |
| DEDD2    | 1150.2 | 1587.4 | 436.1  | 309   | 320.9 | 333.5 | 1260.4 | 1531   |
| DEF6     | 1018.9 | 1325.1 | 433.7  | 460.1 | 430.3 | 592.6 | 767.6  | 741.2  |
| DEFA1    | 83.8   | 83     | 88.3   | 80.5  | 85.7  | 90.4  | 87.6   | 99.7   |
| DEFA3    | 95.3   | 91.8   | 89     | 84.8  | 76.2  | 81.8  | 84.3   | 96.2   |
| DEFA4    | 108.3  | 129.5  | 110.7  | 118.5 | 104.4 | 117.1 | 108.7  | 112.8  |
| DEFA5    | 97.5   | 102.8  | 96.7   | 95.1  | 89.6  | 94.9  | 99.8   | 92.4   |
| DEFA6    | 75.3   | 90.6   | 89.3   | 83.8  | 80.4  | 79.5  | 80.9   | 85.7   |
| DEFB1    | 538.3  | 620.6  | 447.5  | 665.3 | 507   | 852.9 | 447.8  | 549.8  |
| DEFB103A | 87.8   | 95.7   | 106.1  | 100   | 101.7 | 105.2 | 84.1   | 86     |
| DEFB104B | 89.1   | 102.6  | 82.5   | 87.7  | 81.5  | 83.3  | 85.2   | 86.2   |
| DEFB105A | 84.7   | 108.1  | 101.2  | 85    | 81.1  | 83.6  | 88.4   | 95.3   |
| DEFB106A | 71.3   | 82.4   | 84     | 83.4  | 78.6  | 76.8  | 71.9   | 75.6   |
| DEFB106B | 95.2   | 86.9   | 103.4  | 95.1  | 111.4 | 99.2  | 94.4   | 91.9   |
| DEFB107A | 100.8  | 102.5  | 110.6  | 108.4 | 105.7 | 109.4 | 100.1  | 105.6  |
| DEFB108B | 119.5  | 126.8  | 89.3   | 88    | 83.6  | 83.5  | 97.3   | 115.1  |
| DEFB109  | 86.4   | 111.2  | 94.1   | 88.4  | 71.7  | 92.9  | 95.5   | 105.8  |
| DEFB110  | 90     | 101.1  | 89.6   | 84.8  | 85.2  | 79.3  | 92.6   | 91.2   |
| DEFB111  | 92.1   | 107.1  | 86     | 84.4  | 84.3  | 84.7  | 85.2   | 90.9   |
| DEFB112  | 91.6   | 104.8  | 87.8   | 80.3  | 75.8  | 87.9  | 91.1   | 100    |
| DEFB114  | 94.3   | 110.3  | 93.1   | 85.9  | 82.9  | 81.8  | 98.8   | 108.8  |
| DEFB118  | 103    | 102.9  | 89.5   | 82.9  | 93.6  | 93.3  | 100.9  | 102.9  |
| DEFB119  | 217.2  | 262.4  | 135.1  | 120.4 | 107.8 | 129.1 | 188.4  | 213.7  |
| DEFB119  | 72.7   | 78.8   | 91     | 80    | 82.5  | 75.8  | 73.1   | 83.5   |
| DEFB121  | 77.6   | 79.9   | 82.5   | 84.3  | 74.9  | 71.5  | 80.3   | 83.6   |
| DEFB122  | 99     | 118.6  | 101.5  | 98.4  | 90.5  | 104.7 | 98     | 107.3  |
| DEFB123  | 118.1  | 111.1  | 97.6   | 94.3  | 78.1  | 101.8 | 104.1  | 122.5  |
| DEFB124  | 83.9   | 111.1  | 94.4   | 93.5  | 89.4  | 77.5  | 93.3   | 91.1   |
| DEFB125  | 149.4  | 163.2  | 103    | 93.9  | 84.6  | 96.5  | 129.2  | 169.9  |
| DEFB126  | 78     | 105.5  | 92.3   | 81.4  | 80.5  | 79.8  | 83.1   | 100.7  |
| DEFB127  | 84.9   | 90.8   | 88.4   | 81.7  | 80    | 81.6  | 78.2   | 88.2   |
| DEFB128  | 110    | 119.9  | 97.9   | 93.6  | 92.3  | 88.7  | 97.7   | 102.1  |
| DEFB129  | 112.2  | 123.2  | 86.7   | 83.8  | 72.3  | 78.8  | 133.2  | 116.1  |
| DEFB131  | 133.2  | 192.6  | 110.8  | 101.8 | 87.7  | 102.8 | 151.7  | 187.8  |
| DEFB134  | 81.2   | 86.9   | 88.6   | 80.1  | 77.2  | 85.9  | 81.7   | 85.8   |
| DEFB136  | 80.8   | 86.6   | 95.4   | 84.7  | 81.7  | 83    | 89.7   | 81.6   |
| DEFB137  | 96.2   | 113.2  | 90.8   | 83.7  | 80.7  | 90.8  | 95     | 93.2   |
| DEFB32   | 90.6   | 92.8   | 94     | 79.5  | 88.6  | 89.5  | 80.9   | 89.3   |
| DEFB4    | 93.3   | 102.7  | 94.4   | 83.9  | 82    | 86.4  | 87.1   | 96     |

|         |        |        |        |        |        |        |        |         |
|---------|--------|--------|--------|--------|--------|--------|--------|---------|
| DEGS1   | 7923   | 8968.8 | 3039.9 | 3343.7 | 2944.8 | 3814.6 | 7410.8 | 10044.5 |
| DEGS1   | 2958.1 | 4112.6 | 1599.2 | 1327.9 | 1041.4 | 1708.8 | 2790.7 | 6479.1  |
| DEGS2   | 92.5   | 108.4  | 99.2   | 96.1   | 90.4   | 89.4   | 93.7   | 91.6    |
| DEK     | 2782.5 | 3461.5 | 1621   | 1611.3 | 1280.1 | 2530.6 | 2429.6 | 4201.3  |
| DENND1A | 1088.7 | 1555.1 | 632.8  | 1108.8 | 919.6  | 1504.5 | 958.3  | 870.3   |
| DENND1A | 116.4  | 126.4  | 107.5  | 108.1  | 103.9  | 123    | 120.4  | 140.6   |
| DENND1A | 367    | 419    | 208.3  | 304.5  | 244.8  | 368.3  | 302.6  | 488.5   |
| DENND1B | 89     | 84.5   | 97.5   | 97     | 91.7   | 91.9   | 75.6   | 89.7    |
| DENND1C | 122    | 139.5  | 111.7  | 119.7  | 105.9  | 116    | 118.9  | 127.5   |
| DENND2A | 93.3   | 104.2  | 87.8   | 84.6   | 87.5   | 82.4   | 90.6   | 95.1    |
| DENND2C | 101.4  | 125.3  | 89.5   | 82.4   | 81.5   | 89     | 103.3  | 132     |
| DENND2D | 348.1  | 424    | 275.2  | 306    | 223.6  | 306.1  | 277.5  | 374.4   |
| DENND3  | 252.2  | 298.2  | 235.2  | 215.7  | 222.7  | 345.6  | 227.2  | 420.9   |
| DENND4A | 392.7  | 554.4  | 187.2  | 190.2  | 160.3  | 252.9  | 354.4  | 540.7   |
| DENND4C | 263.3  | 373.5  | 168.9  | 250.5  | 191.6  | 314.2  | 296.7  | 316.4   |
| DENR    | 255.9  | 273.5  | 165.3  | 239.1  | 273    | 238.2  | 253    | 329.2   |
| DEPDC1  | 74.7   | 79.2   | 98.5   | 76     | 69.1   | 77.4   | 79.2   | 80.2    |
| DEPDC1B | 848.6  | 828.2  | 260.8  | 197.8  | 183.2  | 276.6  | 664.4  | 1036.5  |
| DEPDC2  | 76.2   | 84.8   | 87.8   | 86.3   | 81.5   | 93.7   | 81.5   | 88.8    |
| DEPDC2  | 80.2   | 83.4   | 91.5   | 91.7   | 88.7   | 95.9   | 75.3   | 84.7    |
| DEPDC4  | 135.5  | 142.8  | 106.7  | 94.5   | 98.3   | 101.8  | 129.1  | 149     |
| DEPDC5  | 172.1  | 206    | 185.2  | 217.6  | 182.6  | 240.4  | 154.4  | 208.1   |
| DEPDC5  | 98.4   | 113.7  | 101.2  | 94     | 90.9   | 91.9   | 106.8  | 103.2   |
| DEPDC5  | 77.1   | 83.3   | 86.2   | 73     | 70.8   | 80.8   | 78.1   | 77.2    |
| DEPDC6  | 220.6  | 281.3  | 138.9  | 157.9  | 145.4  | 170.7  | 200.4  | 336.3   |
| DEPDC7  | 210.6  | 278.4  | 125.6  | 99.4   | 89.5   | 105    | 160.4  | 207.5   |
| DEPDC7  | 102.5  | 119.9  | 100.9  | 91.6   | 91.3   | 99.9   | 101.3  | 118.3   |
| DERA    | 2692.2 | 3145.4 | 1673.9 | 1890.9 | 1180   | 1851.5 | 2094.9 | 2324.3  |
| DERL1   | 1385   | 2026.7 | 996.2  | 842.6  | 627    | 1142.7 | 1095.3 | 2109.3  |
| DERL2   | 371.8  | 478.4  | 200.7  | 172    | 186.5  | 203.5  | 444.3  | 526.3   |
| DERL3   | 91.8   | 95.5   | 113.2  | 93.2   | 89     | 95.6   | 93.1   | 96.8    |
| DERL3   | 133.3  | 139.6  | 87.5   | 88.5   | 88.5   | 100    | 116.9  | 119     |
| DERPC   | 113.2  | 127.2  | 84.4   | 78.5   | 85     | 85.7   | 117.3  | 147.4   |
| DERPC   | 151.1  | 191.9  | 138.2  | 159.9  | 145.1  | 108.1  | 139.8  | 151.4   |
| DES     | 86.8   | 104.2  | 99.8   | 97.2   | 92.7   | 92.2   | 89.4   | 97.2    |
| DET1    | 348.4  | 466.4  | 215.8  | 225.7  | 195    | 287.6  | 314.3  | 465     |
| DEXI    | 2563.3 | 3421.7 | 1043.5 | 858.5  | 679.5  | 830.3  | 2387.7 | 2335.5  |
| DFFA    | 479.9  | 503    | 314.7  | 407.1  | 327.9  | 226.5  | 352    | 415     |
| DFFA    | 288.4  | 364.1  | 140.7  | 116.9  | 126.5  | 128.9  | 276.9  | 287.7   |
| DFFB    | 79.7   | 92.5   | 93     | 82.2   | 83.6   | 93.9   | 88.1   | 93.8    |
| DFFB    | 273.1  | 318.3  | 243.9  | 259.2  | 224.9  | 293.2  | 271.7  | 324     |
| DFNA5   | 384.4  | 456.2  | 213.6  | 317.9  | 267.9  | 425.9  | 386.4  | 534.2   |
| DFNB31  | 94.9   | 109.4  | 105.7  | 92     | 93.5   | 103    | 105.3  | 103.8   |
| DFNB59  | 103.3  | 128.4  | 99.3   | 96.3   | 89.5   | 93.9   | 110.3  | 125.7   |
| DGAT1   | 562.4  | 671    | 472.5  | 446.8  | 360.3  | 469.7  | 441.7  | 663.6   |
| DGAT2   | 172    | 245.5  | 113.8  | 107    | 85.4   | 109.2  | 153    | 216.7   |
| DGAT2L3 | 85.1   | 90.9   | 106.3  | 93.3   | 99.6   | 115.3  | 89     | 79.3    |
| DGAT2L4 | 77.5   | 84.2   | 97.2   | 99     | 93.7   | 97     | 82.9   | 80.6    |
| DGAT2L6 | 81     | 82.8   | 88     | 78     | 81.9   | 77.5   | 79.5   | 82.1    |
| DGCR13  | 133.4  | 145    | 122.7  | 110.9  | 92.7   | 123.1  | 119.1  | 166.5   |

|         |        |        |        |        |        |        |        |        |
|---------|--------|--------|--------|--------|--------|--------|--------|--------|
| DGCR14  | 420.4  | 552.5  | 189.3  | 148.6  | 136.5  | 130.8  | 381    | 538.1  |
| DGCR2   | 228.6  | 292.3  | 314.2  | 304.5  | 262.6  | 402.5  | 228.9  | 351.1  |
| DGCR5   | 91.7   | 103.2  | 98.2   | 90.6   | 86     | 95.8   | 87.5   | 92.6   |
| DGCR6   | 193.9  | 272.4  | 167.9  | 164    | 166.7  | 197.7  | 158.6  | 201.6  |
| DGCR8   | 335.1  | 429.2  | 468.8  | 348.5  | 324.3  | 477.2  | 339.9  | 719.7  |
| DGKA    | 83.2   | 90.3   | 89.9   | 86.8   | 80.9   | 84.5   | 81.7   | 79.9   |
| DGKA    | 88.2   | 88.5   | 93.3   | 94.1   | 81     | 93.2   | 81.9   | 103.1  |
| DGKA    | 143.5  | 167.7  | 120    | 110.2  | 99.4   | 126.5  | 127.4  | 156.2  |
| DGKA    | 119.7  | 122.2  | 81.3   | 96.7   | 81.3   | 81.9   | 118    | 129.9  |
| DGKA    | 135.3  | 150.2  | 113.3  | 82.9   | 90.6   | 107.2  | 115    | 181.1  |
| DGKB    | 77.6   | 104.5  | 86.7   | 97.6   | 80.9   | 80.7   | 89.6   | 100    |
| DGKB    | 99     | 129.7  | 94.4   | 82.9   | 85.1   | 85.7   | 104.9  | 121.7  |
| DGKB    | 74.2   | 91.1   | 94.8   | 85.5   | 83     | 87.7   | 87.1   | 82.3   |
| DGKD    | 174.5  | 195.1  | 104    | 102.2  | 74.9   | 105.4  | 163.1  | 194.5  |
| DGKD    | 129.3  | 159.9  | 114.9  | 121.2  | 107.5  | 110.5  | 130.6  | 168.9  |
| DGKD    | 86.7   | 87.7   | 80.4   | 80.4   | 73.7   | 84.2   | 78.9   | 88.7   |
| DGKE    | 114.1  | 145.7  | 91.8   | 83     | 85.4   | 99     | 118.5  | 142.2  |
| DGKG    | 108.9  | 129.6  | 107.2  | 104.1  | 96.2   | 102.6  | 127.5  | 171.6  |
| DGKH    | 130.9  | 140.7  | 95.4   | 80.7   | 89.4   | 87.1   | 123.6  | 135.9  |
| DGKH    | 116.1  | 155.9  | 94.3   | 83     | 91.6   | 88.3   | 123.1  | 153.7  |
| DGKI    | 85.1   | 101.8  | 93.6   | 91     | 83.6   | 88.2   | 86.5   | 94.7   |
| DGKK    | 78.5   | 79.3   | 99.4   | 85.4   | 91.4   | 88     | 77.3   | 81.3   |
| DGKQ    | 444.4  | 468.7  | 578.6  | 519.1  | 364.5  | 659.4  | 371.9  | 791.5  |
| DGKZ    | 93.8   | 103.5  | 85     | 78.5   | 85.2   | 84.8   | 86.3   | 103.5  |
| DGKZ    | 94.9   | 116.5  | 99.6   | 85.4   | 90.2   | 85.8   | 91.8   | 101.8  |
| DGKZ    | 171.7  | 152.9  | 126.5  | 136.6  | 134.5  | 97     | 119.9  | 163.2  |
| DGUOK   | 4358.5 | 5369.1 | 2836.5 | 2527.6 | 1945.6 | 2246.4 | 4045   | 4548   |
| DGUOK   | 4213.1 | 5153.9 | 2996.2 | 2576.5 | 1803.1 | 2486.1 | 4317.5 | 5723   |
| DGUOK   | 510.8  | 623.1  | 305.7  | 337.8  | 278.7  | 387.4  | 422.7  | 512.4  |
| DHCR24  | 430.2  | 559    | 428    | 407.4  | 341.7  | 365.4  | 429.3  | 564    |
| DHCR7   | 313.8  | 405.5  | 296.2  | 284.3  | 314.1  | 359.5  | 282    | 380.3  |
| DHDDS   | 219.1  | 277.5  | 238.9  | 255.8  | 191.6  | 329.2  | 215.9  | 305.4  |
| DHDDS   | 208.5  | 240.9  | 140.4  | 154.1  | 135    | 178.5  | 188.5  | 273.9  |
| DHDH    | 112.4  | 130.4  | 106.4  | 103.1  | 98.5   | 120.8  | 106.6  | 108.2  |
| DHFR    | 481.4  | 590.3  | 186.1  | 184.6  | 151.7  | 124.3  | 337.7  | 573.6  |
| DHFRL1  | 112.4  | 115.8  | 106.4  | 99.5   | 98.6   | 103.3  | 109.3  | 133.8  |
| DHH     | 90.8   | 107.9  | 109    | 95.1   | 85.5   | 89     | 106.6  | 113.4  |
| DHODH   | 134.2  | 167.8  | 130.8  | 104.9  | 96.7   | 115.7  | 105.7  | 129.9  |
| DHODH   | 255.5  | 283.9  | 139.8  | 118.6  | 96.6   | 105.1  | 177.2  | 196.4  |
| DHPS    | 1187.8 | 1435.5 | 922.2  | 510.1  | 410.4  | 667.9  | 881.8  | 1217.7 |
| DHPS    | 938.3  | 1138.1 | 808.2  | 429.1  | 412.5  | 618.6  | 671    | 908.4  |
| DHPS    | 1943.3 | 2164.1 | 1223.7 | 969.1  | 729.3  | 1289.7 | 1713.3 | 2711.2 |
| DHRS1   | 444.8  | 633.6  | 277.5  | 291.4  | 274.3  | 250.8  | 395.4  | 408.3  |
| DHRS10  | 101.7  | 108.2  | 104.6  | 100.4  | 90.3   | 94.3   | 101.7  | 92.6   |
| DHRS2   | 134.2  | 135.2  | 106.1  | 94.9   | 87.7   | 93.6   | 120.7  | 123.1  |
| DHRS2   | 88.3   | 97.6   | 103.7  | 78.7   | 75.2   | 79.2   | 91.6   | 94.6   |
| DHRS3   | 105.2  | 106.4  | 99.3   | 103.5  | 112.6  | 118.1  | 104.1  | 109.6  |
| DHRS4   | 3308.8 | 4448.3 | 3095.5 | 2889.1 | 2320.7 | 3779.8 | 2737.3 | 4548.8 |
| DHRS4L2 | 538    | 782.4  | 321.7  | 291.3  | 276.9  | 380.7  | 455.4  | 479.6  |
| DHRS7   | 1628.9 | 2112.6 | 703    | 414.2  | 327.5  | 444.3  | 1738.8 | 2592.2 |

|        |         |         |        |        |        |        |        |        |
|--------|---------|---------|--------|--------|--------|--------|--------|--------|
| DHRS7B | 366.9   | 481.5   | 218.9  | 200.8  | 178.4  | 196.4  | 385.9  | 479.7  |
| DHRS8  | 1413.2  | 2103.3  | 497.2  | 356.6  | 281.5  | 496    | 1269.7 | 1881.9 |
| DHRS9  | 11074.3 | 13820.3 | 9400.6 | 8376.9 | 6898.3 | 7079.7 | 7069.1 | 5133.2 |
| DHRS9  | 489.7   | 471.8   | 356.7  | 647.7  | 433.6  | 695.7  | 432.3  | 544.5  |
| DHRS9  | 100.9   | 106.1   | 99.8   | 93.5   | 92.7   | 90.7   | 102    | 98     |
| DHRS9  | 5771.8  | 7873.2  | 2541   | 2071.7 | 1543.3 | 2722.4 | 2963.6 | 3594.4 |
| DHRSX  | 148     | 162.4   | 134.6  | 138.7  | 126.6  | 153.7  | 143.2  | 191    |
| DHTKD1 | 216.6   | 238.8   | 117.1  | 144.4  | 118.3  | 155.6  | 188.4  | 264.8  |
| DHX15  | 9623.4  | 11553.2 | 5316.5 | 4361.3 | 3292.2 | 5324   | 7869.2 | 9947.8 |
| DHX16  | 535.9   | 623.1   | 547.1  | 629.5  | 517.5  | 855.7  | 463.9  | 650.9  |
| DHX29  | 894.2   | 1300.1  | 947    | 1026.5 | 840.9  | 1981.2 | 931.2  | 2056.9 |
| DHX30  | 592.7   | 688     | 710.9  | 668.7  | 503.6  | 1051.5 | 506.9  | 995.6  |
| DHX30  | 109.4   | 127     | 93     | 89.9   | 89.7   | 83.1   | 104.7  | 103.6  |
| DHX30  | 264.9   | 367.3   | 279.1  | 271.1  | 216.6  | 354.2  | 233.2  | 466.7  |
| DHX32  | 676.7   | 825.7   | 418.4  | 266    | 235.9  | 327    | 470.2  | 542.3  |
| DHX33  | 479.7   | 623.9   | 431.5  | 435.8  | 354.9  | 498.4  | 330.5  | 562.4  |
| DHX34  | 221.3   | 237.4   | 192.4  | 169.9  | 175.1  | 186.8  | 181.9  | 193.8  |
| DHX35  | 255.5   | 349.6   | 236.9  | 233.4  | 217.7  | 319.8  | 215.2  | 292    |
| DHX36  | 363.8   | 530.8   | 220.2  | 220.9  | 219.3  | 330.2  | 342.2  | 762.3  |
| DHX37  | 868.4   | 1190.2  | 773.6  | 715    | 548.7  | 652.4  | 569.1  | 712.7  |
| DHX38  | 248.1   | 258.6   | 218.6  | 194.1  | 182.8  | 272.6  | 216.9  | 369.1  |
| DHX40  | 633     | 728.9   | 415.8  | 478.4  | 387.9  | 590.1  | 543.7  | 668.7  |
| DHX40  | 340.1   | 368.3   | 185    | 198.4  | 174.8  | 222.2  | 293.4  | 373.1  |
| DHX57  | 98      | 106.3   | 90.7   | 99.1   | 110.4  | 95.9   | 100.7  | 107.5  |
| DHX57  | 94.2    | 94.6    | 96.6   | 90.5   | 91.2   | 86.9   | 103.2  | 96.5   |
| DHX8   | 210.9   | 237.4   | 163    | 185.7  | 162.1  | 209.1  | 197.4  | 234.7  |
| DHX9   | 945.3   | 1328.4  | 537.4  | 528.2  | 429.1  | 523.6  | 577.2  | 852.2  |
| DIABLO | 2344.8  | 3163.5  | 2051.2 | 2271   | 1631.2 | 2460.1 | 2394   | 3279.7 |
| DIABLO | 480.4   | 650.1   | 351.4  | 332.8  | 265.9  | 408.7  | 437.6  | 468.7  |
| DIABLO | 333.7   | 494.8   | 207.8  | 162.9  | 149.6  | 151.5  | 281    | 323    |
| DIAPH1 | 291.7   | 426.1   | 347.4  | 257.4  | 200.2  | 274.7  | 260.9  | 516.8  |
| DIAPH1 | 914     | 1218.2  | 1348.8 | 1269.6 | 891.9  | 1442.6 | 927.9  | 1861.9 |
| DIAPH2 | 499.2   | 648.6   | 292.8  | 464    | 395    | 612.3  | 462.4  | 635.9  |
| DIAPH3 | 315.4   | 437     | 220.4  | 151.7  | 133.5  | 182.8  | 247.3  | 317.3  |
| DIAPH3 | 277.1   | 384.6   | 210.8  | 156.1  | 145    | 169.5  | 232.8  | 295.1  |
| DIAPH3 | 318.9   | 540.8   | 225.8  | 173.7  | 152.2  | 218.2  | 310.8  | 358.3  |
| DICER1 | 86.7    | 100     | 92.3   | 83.1   | 88.5   | 84.7   | 80.9   | 86.2   |
| DICER1 | 121.1   | 146.3   | 98.1   | 89     | 81.4   | 90.2   | 121.4  | 136.8  |
| DICER1 | 125.2   | 170.5   | 101.2  | 108    | 108.7  | 137.3  | 146.1  | 223.5  |
| DIDO1  | 151.1   | 189     | 140.8  | 119.4  | 117.6  | 126.1  | 118.9  | 126.2  |
| DIDO1  | 181.5   | 190.4   | 150.6  | 170.4  | 148.7  | 199.8  | 141.5  | 168.4  |
| DIDO1  | 155.5   | 186     | 109    | 112.2  | 94.5   | 96.5   | 150    | 168    |
| DIO1   | 89.8    | 100.2   | 91.3   | 89.6   | 89.2   | 84     | 84     | 100.9  |
| DIO1   | 86.9    | 108.3   | 98.2   | 90.8   | 86.9   | 90.1   | 99.4   | 107.6  |
| DIO1   | 87.2    | 96.6    | 78.1   | 79.8   | 73.9   | 82.2   | 89.2   | 92.6   |
| DIO2   | 169     | 160.8   | 98.6   | 90     | 85.9   | 88.3   | 137.5  | 144.6  |
| DIO2   | 89.3    | 110.6   | 95.3   | 78.3   | 90     | 77.8   | 94.8   | 96.3   |
| DIO3   | 96.7    | 99.9    | 90.5   | 93.6   | 84.3   | 94.7   | 99.6   | 92.7   |
| DIP    | 747.7   | 928.7   | 1033.9 | 1110.8 | 952.7  | 1473.4 | 664.5  | 988.7  |
| DIP13B | 227.2   | 273.8   | 245.7  | 221.9  | 199.9  | 323.6  | 215.9  | 339.1  |

|            |        |        |        |        |        |        |        |        |
|------------|--------|--------|--------|--------|--------|--------|--------|--------|
| DIP2A      | 90.7   | 101    | 91.9   | 87.7   | 86.8   | 80.5   | 87.8   | 110.3  |
| DIP2A      | 88.2   | 97.4   | 97.8   | 95.1   | 86.7   | 89.2   | 86.9   | 94.9   |
| DIP2A      | 213.5  | 334.7  | 150.2  | 145.7  | 134.4  | 155.1  | 217.1  | 253.6  |
| DIP2A      | 130.8  | 138    | 125.4  | 102    | 109.1  | 117.2  | 113.6  | 169.7  |
| DIP2A      | 136    | 164.5  | 138    | 178.6  | 164.1  | 204.7  | 136.3  | 204.9  |
| DIP2B      | 403.5  | 559.3  | 404    | 803.8  | 577.9  | 994.5  | 445.9  | 642.4  |
| DIP2C      | 84.7   | 89.8   | 90.5   | 93.2   | 81.8   | 79.1   | 92.3   | 100.1  |
| DIPA       | 174.8  | 213.2  | 107.7  | 91.7   | 88.9   | 92.6   | 130.2  | 166.3  |
| DIRAS1     | 99.4   | 136.3  | 100.1  | 90.7   | 85.7   | 102.3  | 100.1  | 130    |
| DIRAS2     | 77.1   | 86.4   | 86.9   | 76.3   | 76.3   | 74.8   | 87.4   | 86.1   |
| DIRAS3     | 98.3   | 114.1  | 86.1   | 90.7   | 98     | 94.2   | 94.4   | 101.7  |
| DIRC1      | 85.5   | 93.3   | 90.4   | 83.2   | 79.1   | 89.2   | 84.7   | 88.9   |
| DIRC2      | 344.2  | 460    | 259    | 234.2  | 210.6  | 281.2  | 292.4  | 408.2  |
| DISC1      | 92.3   | 110.3  | 108    | 220.1  | 222.3  | 143.1  | 104.2  | 90.4   |
| DISC1      | 80     | 100    | 93.3   | 86.7   | 77.3   | 91.7   | 88.4   | 96.1   |
| DISC1      | 112.6  | 143.5  | 85.9   | 89.1   | 89.1   | 85.7   | 111.9  | 151    |
| DISC1      | 76.1   | 90.5   | 93.7   | 106.7  | 89.5   | 101.1  | 78.1   | 83     |
| DISP1      | 207    | 253.7  | 149    | 137.4  | 109    | 140.2  | 220.3  | 325.8  |
| DISP2      | 101.3  | 112.9  | 108    | 104.3  | 98.6   | 106.4  | 104.7  | 105.9  |
| DIXDC1     | 126.5  | 165.8  | 124.5  | 120.4  | 119.4  | 136.2  | 106.8  | 181.7  |
| DIXDC1     | 83.1   | 87     | 88.1   | 86.4   | 79.8   | 82.4   | 94.3   | 92.2   |
| DIXDC1     | 129.4  | 185.6  | 124.1  | 102.1  | 94.5   | 134.3  | 119.2  | 134.9  |
| DJ12208.2  | 2255.2 | 2861.2 | 1406.2 | 1595.7 | 1331   | 1902.3 | 1793.9 | 1835.2 |
| DJ222E13.2 | 182.2  | 200    | 164.1  | 145.3  | 119.3  | 139.3  | 137.4  | 238.4  |
| DKC1       | 5492.4 | 6975.9 | 3996.2 | 3663.2 | 2612.8 | 5228.7 | 4012.7 | 6093.4 |
| DKFZP434A  | 85.6   | 95.1   | 89     | 84     | 84.1   | 88.9   | 87     | 93.7   |
| DKFZP434A  | 279.4  | 318.5  | 132.2  | 132.3  | 136.6  | 119.7  | 207    | 239.1  |
| DKFZP434E  | 149    | 181.1  | 151.1  | 156.1  | 138    | 169.1  | 137    | 281.1  |
| DKFZP434E  | 83.3   | 87.9   | 98.5   | 86.2   | 89     | 85.9   | 74     | 87     |
| DKFZP434I  | 92     | 104.2  | 102.6  | 97.9   | 97.1   | 111.6  | 89.6   | 95.3   |
| DKFZP434K  | 599.8  | 844.3  | 432    | 313.1  | 278.1  | 356.6  | 565    | 492.3  |
| DKFZP434C  | 69.6   | 88.7   | 83.3   | 84.7   | 77.6   | 84.6   | 74     | 86.9   |
| DKFZP434C  | 147.3  | 183.4  | 102.9  | 104.3  | 82.7   | 101.1  | 135.2  | 162.5  |
| DKFZP547C  | 177.5  | 208    | 164.3  | 163.4  | 145.5  | 227.9  | 185.6  | 333.1  |
| DKFZP547C  | 227.1  | 331.8  | 215.8  | 197.4  | 196.1  | 274    | 239.2  | 319.6  |
| DKFZP547F  | 86.9   | 99.9   | 106    | 110.6  | 100.8  | 100    | 86.1   | 87.8   |
| DKFZP564E  | 496    | 554.7  | 341.4  | 254    | 223    | 285.6  | 367    | 486.8  |
| DKFZP564J  | 1379.6 | 1704.9 | 875.2  | 860.6  | 647.6  | 1047   | 1313.7 | 1377.7 |
| DKFZP564J  | 84.9   | 97.9   | 90     | 80.1   | 80.6   | 80.9   | 88.7   | 88.7   |
| DKFZP564J  | 86.8   | 103.5  | 82.8   | 81.7   | 88.6   | 91     | 108.5  | 118.8  |
| DKFZP564K  | 1219   | 1189.7 | 809.6  | 1303.9 | 1254.7 | 945.4  | 1125.1 | 1923.7 |
| DKFZP564N  | 100.3  | 118.2  | 91.6   | 92     | 84.4   | 86.1   | 95.9   | 117.2  |
| DKFZP564C  | 329.1  | 423.5  | 202.2  | 157.3  | 152.6  | 182.8  | 303.4  | 387.3  |
| DKFZP564C  | 103.6  | 106.9  | 110.6  | 98.2   | 91.8   | 109    | 94.3   | 98.8   |
| DKFZP566N  | 100.9  | 128    | 81.4   | 87.8   | 73.6   | 87.3   | 100.1  | 124.3  |
| DKFZP586E  | 1022   | 1210.9 | 785.7  | 1073.9 | 770.9  | 999.5  | 781.4  | 1052.9 |
| DKFZP586E  | 97.6   | 118    | 90     | 102.8  | 106.1  | 94.4   | 89.4   | 101    |
| DKFZP586F  | 85     | 86.8   | 85.5   | 84     | 88.2   | 83     | 82.7   | 84.3   |
| DKFZP586F  | 71.9   | 99.2   | 82.3   | 75.6   | 72.7   | 76.2   | 83.2   | 88.1   |
| DKFZP586I  | 168.5  | 202.6  | 117.6  | 213.7  | 199.5  | 267.1  | 137.8  | 230.1  |

|           |        |        |       |       |       |       |        |        |
|-----------|--------|--------|-------|-------|-------|-------|--------|--------|
| DKFZP586P | 104.7  | 119.8  | 95.7  | 100.9 | 97.4  | 98.6  | 105.1  | 112    |
| DKFZP666C | 73.3   | 81.3   | 91.4  | 80.9  | 79.9  | 74.3  | 74.2   | 81.5   |
| DKFZP667C | 107.4  | 128.5  | 88.9  | 89.3  | 86.7  | 100.5 | 107.4  | 112.3  |
| DKFZP686A | 77.5   | 94.1   | 82.8  | 81.1  | 77.7  | 86.7  | 82.5   | 93     |
| DKFZP686A | 140.2  | 154.7  | 94.8  | 87.1  | 81.4  | 86    | 133    | 160.6  |
| DKFZP686C | 84.8   | 102.2  | 90.2  | 73.6  | 74.8  | 74.9  | 95.6   | 88.8   |
| DKFZP686E | 131.1  | 154.5  | 134.2 | 124.5 | 117.2 | 121.3 | 115.2  | 139.7  |
| DKFZP686I | 98.5   | 105.5  | 100   | 87.5  | 92.3  | 92.4  | 92.8   | 104.5  |
| DKFZP686I | 188.1  | 270.8  | 132.8 | 118.1 | 122.3 | 124.7 | 199    | 241.5  |
| DKFZP686K | 156.1  | 191.8  | 130.9 | 188.3 | 147.9 | 140.8 | 143    | 284.2  |
| DKFZP686L | 540.5  | 646.5  | 273.5 | 323.6 | 244.5 | 310.1 | 564.4  | 798.2  |
| DKFZP761E | 96.1   | 112    | 84.7  | 100.9 | 92.5  | 79.2  | 92.3   | 104.9  |
| DKFZP761E | 146.5  | 138.4  | 115.8 | 114.4 | 101.3 | 102.1 | 127.8  | 185.5  |
| DKFZP761F | 84.4   | 90.6   | 93.7  | 80.8  | 81.7  | 88.7  | 78.3   | 96.1   |
| DKFZP761I | 242.7  | 229.2  | 202.1 | 228.9 | 254.3 | 210.4 | 204.7  | 246.6  |
| DKFZP762E | 791.4  | 1121.5 | 591.5 | 412.6 | 459.7 | 748.7 | 567    | 732.4  |
| DKFZP762I | 567.7  | 581.2  | 259.3 | 373   | 386.1 | 273.6 | 508.1  | 543    |
| DKFZP779E | 132.3  | 162.2  | 103.6 | 91.5  | 90.5  | 103.9 | 129.1  | 141.5  |
| DKFZP779C | 103.8  | 115.5  | 83.6  | 88.9  | 79.7  | 84.3  | 106.3  | 112.7  |
| DKFZP779C | 114    | 124.1  | 97.5  | 104.4 | 98.6  | 89.5  | 117.2  | 116    |
| DKFZP781I | 138    | 152.6  | 119.3 | 105.5 | 98.7  | 120   | 119.3  | 167.3  |
| DKK1      | 73.3   | 77.9   | 97.5  | 72.9  | 73.6  | 84.4  | 69.4   | 78.6   |
| DKK2      | 130.6  | 167    | 114.9 | 91.8  | 86.5  | 105.4 | 109.8  | 150.4  |
| DKK3      | 117.7  | 135.1  | 86.7  | 89.9  | 83.6  | 85.5  | 104.3  | 121.5  |
| DKK3      | 81.4   | 89.6   | 99    | 89.2  | 84.5  | 91.4  | 106.3  | 105    |
| DKK3      | 88.8   | 102.2  | 88.5  | 90.4  | 89.3  | 86.8  | 97.1   | 86.4   |
| DKK3      | 139.4  | 168.3  | 87.4  | 85.8  | 81    | 97.9  | 171.6  | 186.4  |
| DKK4      | 84     | 94.8   | 105.9 | 100.5 | 89.5  | 78.8  | 87.7   | 88.4   |
| DKKL1     | 122.6  | 148.1  | 128.3 | 107.7 | 92.1  | 109.3 | 125.9  | 151.2  |
| DLAT      | 801.7  | 1061.5 | 512.5 | 579.2 | 425.1 | 820.3 | 695    | 1185.2 |
| DLC1      | 91.8   | 107.3  | 85.9  | 91.2  | 83.2  | 90.6  | 95.2   | 103.2  |
| DLC1      | 120.7  | 146.9  | 97.2  | 82.6  | 74.3  | 83.4  | 132.6  | 153.7  |
| DLD       | 1610.7 | 2189.3 | 409.4 | 547.1 | 397.8 | 683.8 | 1651.6 | 3056.7 |
| DLEC1     | 116.8  | 151.2  | 99.2  | 97.1  | 77.9  | 98.6  | 137    | 141.2  |
| DLEC1     | 78     | 90.4   | 94.7  | 82.9  | 86.2  | 98.5  | 79.2   | 93.9   |
| DLEU1     | 164.9  | 199.9  | 102.3 | 101.5 | 83.7  | 102.7 | 149.9  | 226.1  |
| DLEU1     | 548.8  | 722.5  | 312   | 377.7 | 268   | 449.3 | 384.4  | 602.3  |
| DLEU2L    | 94.1   | 115.6  | 98.1  | 104   | 91.1  | 95.8  | 91.6   | 122.9  |
| DLEU7     | 111.2  | 131    | 105.6 | 98.5  | 98.8  | 91.7  | 107.1  | 118.3  |
| DLG1      | 129    | 158.1  | 86.8  | 76.6  | 75.6  | 96.5  | 110.4  | 130.4  |
| DLG2      | 77.9   | 96.2   | 115.5 | 104.8 | 98.6  | 104.1 | 85.2   | 88.3   |
| DLG3      | 120.2  | 133.6  | 97.9  | 88.6  | 91.1  | 94.2  | 126.8  | 123.1  |
| DLG3      | 75.2   | 73.8   | 83.1  | 79.1  | 74    | 87.7  | 77.7   | 79.2   |
| DLG3      | 82.4   | 92     | 101.5 | 87.2  | 84.8  | 91.6  | 85.7   | 80.9   |
| DLG4      | 143.1  | 166.7  | 146   | 126.2 | 128.9 | 136.5 | 122.8  | 172.6  |
| DLG5      | 110.3  | 134.3  | 92.2  | 88.4  | 85.1  | 86.5  | 116.8  | 142.1  |
| DLG7      | 1522.7 | 1790.1 | 659.6 | 365.6 | 324   | 751.5 | 1053.4 | 1831.6 |
| DLGAP1    | 80.6   | 94.2   | 88.5  | 90.6  | 77.8  | 88.9  | 82.3   | 95.4   |
| DLGAP1    | 100    | 107    | 90.8  | 90    | 81.4  | 81    | 107.7  | 114.7  |
| DLGAP2    | 190.4  | 217.2  | 126.8 | 117.1 | 113.3 | 136.9 | 177.7  | 207.3  |



|        |        |        |        |        |        |        |        |        |
|--------|--------|--------|--------|--------|--------|--------|--------|--------|
| DLGAP3 | 82.5   | 96.6   | 93.3   | 76.6   | 83.8   | 88.1   | 75.1   | 93.4   |
| DLGAP4 | 81.3   | 94.9   | 94.5   | 89.5   | 95.3   | 78.4   | 84.5   | 84.2   |
| DLGAP4 | 75     | 81.2   | 84     | 75.7   | 79.3   | 80.9   | 83.1   | 85.5   |
| DLGAP4 | 139    | 161.5  | 160.9  | 168.1  | 141.1  | 197.1  | 147.7  | 282.3  |
| DLK1   | 94.9   | 109.2  | 86.6   | 89.8   | 80.5   | 88.5   | 97.9   | 104.6  |
| DLK1   | 88.1   | 103.4  | 99.1   | 82.5   | 79.9   | 89.2   | 87.6   | 91.6   |
| DLL1   | 167.5  | 229.8  | 185.3  | 273.8  | 255.1  | 327.8  | 155.5  | 214.1  |
| DLL3   | 81.6   | 83.7   | 90.9   | 80.7   | 84.1   | 74.9   | 81.7   | 93.4   |
| DLL3   | 308.1  | 341.2  | 269.2  | 110.4  | 87.5   | 105.2  | 235.6  | 332.6  |
| DLL4   | 111.6  | 120.5  | 92.4   | 89.2   | 82.7   | 85.4   | 90.1   | 109.3  |
| DLNB14 | 387.2  | 408.4  | 285    | 272.6  | 284.1  | 309.4  | 328.2  | 501.2  |
| DLST   | 437.5  | 640.5  | 432    | 425.9  | 367.6  | 548.1  | 450.7  | 739.1  |
| DLX1   | 211.1  | 217    | 139.9  | 106.2  | 103.9  | 107.5  | 136    | 181    |
| DLX1   | 707.4  | 764.9  | 506.6  | 379.9  | 302.6  | 401.2  | 562.8  | 788.7  |
| DLX2   | 104.8  | 146.6  | 86.8   | 86.5   | 81.7   | 83.3   | 101    | 99.9   |
| DLX3   | 166.1  | 187.4  | 114.1  | 116.9  | 95.4   | 108.2  | 191.1  | 232.8  |
| DLX4   | 105.7  | 129.1  | 115.3  | 114.9  | 95.3   | 92.7   | 91.4   | 112.1  |
| DLX4   | 98.9   | 108.3  | 98.5   | 93.3   | 91.8   | 88     | 103.5  | 97.8   |
| DLX4   | 86.2   | 90     | 103.8  | 93.4   | 84.3   | 103.7  | 81.2   | 83.6   |
| DLX5   | 73.8   | 82.4   | 85.6   | 86.9   | 86.8   | 86.6   | 77.3   | 77.7   |
| DLX6   | 81.5   | 89     | 100.1  | 94.7   | 90.7   | 84.5   | 86.4   | 87.6   |
| DMAP1  | 644.5  | 842.6  | 552.6  | 552.3  | 523.6  | 684    | 618.6  | 734.6  |
| DMAP1  | 416.3  | 569.6  | 252.6  | 241    | 224.4  | 287.9  | 385.1  | 374.7  |
| DMBT1  | 77     | 86.7   | 88     | 87.9   | 82.6   | 94     | 82.7   | 81.4   |
| DMBX1  | 82.4   | 101.3  | 95.2   | 93.3   | 94.3   | 92.6   | 85.2   | 94.5   |
| DMC1   | 2392.4 | 2254.1 | 1212.8 | 1934.1 | 1746.1 | 1644.4 | 2183.1 | 3020.1 |
| DMD    | 114.2  | 150.6  | 99.5   | 85     | 85.9   | 85.9   | 115.5  | 114.9  |
| DMD    | 78.4   | 84.2   | 95     | 86.9   | 89.3   | 87.4   | 80     | 89.7   |
| DMD    | 168.2  | 199.4  | 168.5  | 167.2  | 165.9  | 176.9  | 139.1  | 173.6  |
| DMD    | 91.8   | 100.2  | 93.5   | 96.6   | 86.7   | 93.2   | 92.6   | 106.6  |
| DMD    | 84.1   | 80.4   | 95.3   | 84.6   | 79.2   | 89.9   | 84.4   | 82.3   |
| DMD    | 93.7   | 108.6  | 95     | 88     | 72.1   | 87.7   | 109.7  | 98.7   |
| DMD    | 133.5  | 182.9  | 117.5  | 118.3  | 108.5  | 118.3  | 137.6  | 168.8  |
| DMD    | 92.2   | 110.4  | 86.5   | 73.2   | 87.2   | 76.7   | 98.3   | 108.4  |
| DMGDH  | 92.3   | 104.8  | 103.2  | 98.3   | 93.5   | 95.3   | 86.9   | 100    |
| DMN    | 177.2  | 201    | 164.4  | 172.7  | 137.5  | 166.8  | 183.6  | 235.9  |
| DMN    | 88.8   | 114.4  | 87.3   | 79.7   | 78.6   | 91.6   | 90.4   | 94.4   |
| DMP1   | 73.3   | 85.4   | 86.2   | 91.2   | 78.2   | 85     | 75.8   | 78.8   |
| DMPK   | 91.2   | 108.9  | 116.6  | 93.9   | 94.6   | 90     | 94.3   | 100.3  |
| DMPK   | 85.2   | 95.9   | 95.7   | 92.2   | 82.7   | 91.8   | 93.4   | 103.8  |
| DMRT1  | 148.8  | 161.7  | 134.3  | 101.9  | 101.7  | 105.5  | 111.7  | 159.6  |
| DMRT2  | 284.6  | 332.8  | 174.6  | 195    | 170.7  | 227.2  | 172.6  | 209.6  |
| DMRT2  | 81     | 102    | 102.5  | 96.1   | 83.4   | 98.8   | 89.9   | 100.8  |
| DMRT3  | 154    | 177.9  | 126.8  | 132.6  | 136.9  | 169.7  | 128.4  | 122.4  |
| DMRTA1 | 91.6   | 106.1  | 91.5   | 92.8   | 77.7   | 87.5   | 94.1   | 97.7   |
| DMRTB1 | 86     | 98.9   | 98.2   | 90.8   | 97.5   | 86.8   | 87.9   | 83.1   |
| DMRTC2 | 91.1   | 102.7  | 91.8   | 78.9   | 79.8   | 79.4   | 94     | 99.4   |
| DMTF1  | 429.4  | 551.9  | 295.5  | 442.1  | 387.2  | 681.7  | 372.2  | 520    |
| DMWD   | 131.9  | 130    | 102.3  | 92.4   | 93     | 95.3   | 121.8  | 154.3  |
| DMXL1  | 86.3   | 98.4   | 94.8   | 99.8   | 97.2   | 123    | 101.9  | 107.5  |

|         |         |         |        |        |        |        |         |        |
|---------|---------|---------|--------|--------|--------|--------|---------|--------|
| DMXL2   | 160.6   | 182.3   | 142.9  | 220.1  | 222.8  | 285.3  | 131.4   | 146.8  |
| DNA2L   | 283.7   | 324.6   | 182.3  | 149.2  | 145.7  | 212    | 236.6   | 265.7  |
| DNA2L   | 297.1   | 356.8   | 186.1  | 165.8  | 155.2  | 168.8  | 203.2   | 252.3  |
| DNAH1   | 150.4   | 164.7   | 140.5  | 150.1  | 145.7  | 176    | 120.5   | 147.9  |
| DNAH10  | 91.1    | 101     | 103.9  | 103.6  | 91.6   | 95     | 89.7    | 92     |
| DNAH11  | 76.9    | 87.6    | 88.1   | 82.3   | 79.4   | 81.9   | 77.7    | 73.9   |
| DNAH17  | 83.4    | 87.6    | 91.7   | 84.6   | 85.3   | 92.4   | 85.6    | 89.8   |
| DNAH3   | 99.2    | 105.6   | 96.8   | 81.2   | 84.4   | 83.4   | 97.1    | 100.3  |
| DNAH5   | 116.7   | 137.5   | 108    | 95.2   | 87.2   | 87.7   | 118.3   | 154.3  |
| DNAH7   | 87.9    | 93.1    | 108.7  | 101.3  | 97.5   | 105    | 91.2    | 92.4   |
| DNAH8   | 121.6   | 142.2   | 95.6   | 83.9   | 87.4   | 96.6   | 119     | 129    |
| DNAH9   | 117.6   | 122.5   | 111.9  | 82.2   | 87.9   | 97.7   | 116.6   | 127.3  |
| DNAH9   | 104.8   | 112.4   | 88.1   | 77.5   | 75     | 83.8   | 100.3   | 130.7  |
| DNAH9   | 89.6    | 99.8    | 87.2   | 88.6   | 79.6   | 88.7   | 89.3    | 105.1  |
| DNAHL1  | 101.4   | 98.8    | 80.9   | 73.2   | 65.5   | 81.5   | 94.8    | 114.6  |
| DNAI1   | 103.3   | 119.5   | 100.4  | 104.6  | 84.3   | 94.6   | 108.6   | 98.9   |
| DNAI2   | 212     | 287.2   | 136.4  | 144.2  | 144.5  | 181.4  | 208.2   | 214    |
| DNAJA1  | 12715.4 | 15080.6 | 8951.6 | 5887.6 | 5359.3 | 9207.5 | 10739.2 | 15656  |
| DNAJA2  | 3272    | 4096.5  | 1678.2 | 1575.1 | 1071.8 | 2149.6 | 2789.7  | 4889.7 |
| DNAJA3  | 3332.2  | 4447    | 2836.1 | 1484.6 | 1136.1 | 1813.4 | 2612.1  | 3337.8 |
| DNAJA4  | 1470.6  | 1791.9  | 1136.8 | 707.6  | 558.2  | 890    | 1206.3  | 1983.1 |
| DNAJA5  | 144.5   | 192.6   | 128.5  | 113.3  | 104.5  | 126.2  | 136.2   | 142.6  |
| DNAJA5  | 85.2    | 84.9    | 97.1   | 90.3   | 87.7   | 89.2   | 85.4    | 95.7   |
| DNAJB1  | 1236.3  | 1760.5  | 953    | 496.1  | 411.5  | 672    | 1227.1  | 2508.3 |
| DNAJB11 | 5680    | 7354.7  | 4827.5 | 5049.2 | 3770.4 | 6339.8 | 6048    | 8432.7 |
| DNAJB12 | 200.7   | 250     | 109.8  | 104    | 111.4  | 119.7  | 204     | 249.5  |
| DNAJB12 | 212.2   | 296.1   | 151.7  | 128.8  | 138.2  | 145    | 218.4   | 183    |
| DNAJB12 | 312.4   | 385.7   | 177.4  | 142.6  | 110.1  | 121.8  | 228.2   | 282.8  |
| DNAJB13 | 120.8   | 144     | 102.6  | 82.4   | 79.5   | 85.8   | 113.9   | 131.6  |
| DNAJB14 | 167.1   | 245.9   | 98     | 93.2   | 91.4   | 87.6   | 156.2   | 210.4  |
| DNAJB14 | 504.4   | 599.2   | 187.1  | 284.4  | 254.2  | 241.5  | 440.8   | 820.3  |
| DNAJB14 | 91.3    | 89      | 91.9   | 87.9   | 86.8   | 93     | 88.8    | 97     |
| DNAJB2  | 106.7   | 110.3   | 96.1   | 100.3  | 95.1   | 104.2  | 99.2    | 109.9  |
| DNAJB2  | 305.4   | 385.5   | 275.9  | 285.4  | 245.7  | 373.1  | 315.5   | 522.7  |
| DNAJB4  | 108.3   | 106.2   | 98.7   | 81     | 80.7   | 100.1  | 105.7   | 171.8  |
| DNAJB5  | 89.8    | 99.1    | 100.9  | 95.4   | 97.3   | 92.6   | 88.6    | 102.1  |
| DNAJB5  | 85.4    | 94.2    | 90.3   | 91.3   | 85.8   | 96.9   | 86.7    | 95.2   |
| DNAJB6  | 1812.5  | 2480.9  | 898.8  | 801.6  | 687.6  | 928.8  | 1450    | 2013   |
| DNAJB6  | 1415    | 2006.3  | 1287.1 | 1480.3 | 1310.9 | 2352.3 | 1354.7  | 2621.5 |
| DNAJB7  | 97      | 100.1   | 95.3   | 92.6   | 92     | 92.8   | 103.6   | 99.1   |
| DNAJB8  | 140.1   | 170     | 118.5  | 92.4   | 97.8   | 107.1  | 148.1   | 166.6  |
| DNAJB9  | 323.7   | 407.2   | 276.2  | 239.3  | 241.7  | 315    | 339.7   | 629.6  |
| DNAJC1  | 170.1   | 210     | 158.3  | 128.4  | 114.5  | 145.3  | 179.6   | 292.7  |
| DNAJC10 | 1013.2  | 1179.7  | 471.8  | 599.5  | 365.6  | 769.1  | 867.4   | 1247   |
| DNAJC11 | 213.1   | 280.7   | 123.7  | 118.5  | 111.4  | 118.7  | 193     | 268.4  |
| DNAJC12 | 102.9   | 112.9   | 94.4   | 84.6   | 98.4   | 88.4   | 96.3    | 97.5   |
| DNAJC12 | 78      | 97      | 84.4   | 80     | 81.6   | 76.5   | 75.6    | 99     |
| DNAJC12 | 114.5   | 125.9   | 79.2   | 86.2   | 80.5   | 80     | 99.9    | 142.4  |
| DNAJC13 | 259     | 380.6   | 258.8  | 238.9  | 250.9  | 328.3  | 269.4   | 281.2  |
| DNAJC14 | 270.2   | 367.9   | 256.5  | 367.1  | 261.7  | 523.6  | 251.6   | 393.4  |

|          |        |         |        |        |        |        |        |        |
|----------|--------|---------|--------|--------|--------|--------|--------|--------|
| DNAJC15  | 817.9  | 1028.6  | 431.7  | 506.1  | 373.4  | 652.4  | 619.7  | 938.1  |
| DNAJC16  | 114.9  | 134.2   | 99.2   | 100.7  | 97.5   | 103.2  | 109.1  | 124.9  |
| DNAJC17  | 447.7  | 582.6   | 259.2  | 250.6  | 257.9  | 340.6  | 393.2  | 379.8  |
| DNAJC18  | 150.2  | 164.6   | 124    | 120.7  | 114.3  | 125    | 124.7  | 139.4  |
| DNAJC19  | 304.6  | 370.2   | 212.4  | 206.9  | 152.1  | 216.1  | 242.8  | 379.9  |
| DNAJC3   | 295.1  | 331.3   | 157.4  | 152.4  | 117.3  | 143.2  | 344.1  | 512    |
| DNAJC4   | 131    | 144.4   | 122.8  | 116.7  | 104.8  | 108.5  | 134.7  | 132    |
| DNAJC5   | 270.6  | 355.6   | 276.9  | 240.2  | 193.7  | 248    | 244.7  | 369.3  |
| DNAJC5B  | 121.1  | 151.4   | 102.3  | 113.3  | 114.9  | 120.6  | 120.2  | 156.1  |
| DNAJC5G  | 121.6  | 125.6   | 98     | 88.6   | 89.7   | 90.5   | 109    | 118.3  |
| DNAJC6   | 82.3   | 93.6    | 89.3   | 85.8   | 74.5   | 99.2   | 74.8   | 86.6   |
| DNAJC7   | 2145.2 | 3061.5  | 734.7  | 611.6  | 573.2  | 788.9  | 2059.2 | 2922.1 |
| DNAJC8   | 8585.9 | 10701.5 | 6498.8 | 7082.4 | 6886.3 | 10007  | 7897.9 | 8292.3 |
| DNAJC9   | 4135.1 | 5349.4  | 2188.9 | 1260.8 | 999.2  | 1527   | 3285.7 | 4048.9 |
| DNAL1    | 125.6  | 131.5   | 96.2   | 91.5   | 88.2   | 90.6   | 112.3  | 129.2  |
| DNAL4    | 537.4  | 676.3   | 478.9  | 529.9  | 425.2  | 530.6  | 481.4  | 848.4  |
| DNALI1   | 179.4  | 212.6   | 107.6  | 100.1  | 89.8   | 105.4  | 182.8  | 198.9  |
| DNAPTP6  | 590.7  | 824.6   | 476.4  | 478.8  | 431.2  | 828.9  | 543    | 1334.8 |
| DNASE1   | 121.2  | 137.4   | 101.9  | 101.3  | 103    | 108.6  | 114.1  | 127.8  |
| DNASE1L1 | 355.3  | 488.7   | 310.7  | 383.4  | 293.6  | 526.9  | 334.2  | 662.5  |
| DNASE1L1 | 95.9   | 93.4    | 93.2   | 83.8   | 75.7   | 88.5   | 91.2   | 103.9  |
| DNASE1L1 | 242.7  | 264.6   | 143.4  | 150.7  | 130.4  | 138.5  | 205.4  | 240    |
| DNASE1L1 | 100.2  | 108.8   | 96.8   | 81.6   | 91     | 91.7   | 102.3  | 107.9  |
| DNASE1L2 | 98.5   | 109.3   | 120.2  | 96.5   | 106.1  | 128.4  | 92.7   | 126.5  |
| DNASE1L3 | 78.5   | 92.1    | 108.9  | 99.7   | 84.9   | 78.2   | 79.3   | 79.4   |
| DNASE2   | 1601.8 | 1718.9  | 915.7  | 1469.9 | 866.9  | 1463.4 | 1850.7 | 2353   |
| DNASE2B  | 151.1  | 175.3   | 101.3  | 97.7   | 86.2   | 98.4   | 168.9  | 161.8  |
| DNASE2B  | 84.2   | 101.2   | 99.2   | 103.1  | 87     | 83.7   | 85.1   | 100.3  |
| DNASE2B  | 81.6   | 86.6    | 110.4  | 106.7  | 100.2  | 100.7  | 81     | 81.6   |
| DNCL2A   | 1586.3 | 2177.2  | 837.5  | 398.7  | 348.1  | 391.4  | 1622.8 | 2329.1 |
| DNCL2A   | 819.7  | 1023.2  | 405.4  | 261.2  | 229.1  | 265.9  | 757.4  | 1032.6 |
| DND1     | 93.5   | 87.6    | 103.4  | 99.7   | 101.3  | 100.4  | 80.1   | 90.3   |
| DNER     | 79.6   | 97.7    | 89.4   | 88.8   | 74.2   | 81.9   | 86.8   | 90.1   |
| DNHD1    | 156.9  | 162     | 112.1  | 111.5  | 113.3  | 135.1  | 145.3  | 164.2  |
| DNHD2    | 80.9   | 85.7    | 87.7   | 82.6   | 81.3   | 83.4   | 84.3   | 96.5   |
| DNHD3    | 76.7   | 82.7    | 93.4   | 79.6   | 79.5   | 88.1   | 76.6   | 81.2   |
| DNM1     | 116.5  | 133     | 147.3  | 118.8  | 109.2  | 111.8  | 126.8  | 175.1  |
| DNM1L    | 758.2  | 1010.6  | 617.3  | 837.6  | 667.6  | 926.2  | 646    | 1265.6 |
| DNM1L    | 479.4  | 591.3   | 228.3  | 190    | 141.7  | 243.7  | 378.8  | 726.6  |
| DNM2     | 130.7  | 151.2   | 170.4  | 149.5  | 134    | 165.7  | 139.2  | 176.6  |
| DNM2     | 238.1  | 297.6   | 305.7  | 202.7  | 230    | 298.3  | 226.7  | 375.2  |
| DNM3     | 88.9   | 100.1   | 101.1  | 96.6   | 89.5   | 102.9  | 90.6   | 107.1  |
| DNMBP    | 90     | 102.8   | 99.3   | 99.7   | 88.8   | 95.8   | 98.1   | 106.5  |
| DNMT1    | 7009.2 | 8969.1  | 6141.1 | 5136.9 | 4751.7 | 6030.1 | 5239.8 | 4862.9 |
| DNMT2    | 126.7  | 153.2   | 111.4  | 92.1   | 84.2   | 106.3  | 104    | 133.9  |
| DNMT3A   | 87.1   | 97.5    | 99.7   | 91     | 83.3   | 97.1   | 88.2   | 105    |
| DNMT3A   | 110.4  | 119.1   | 95.5   | 86.2   | 84.7   | 86.7   | 116.9  | 115.6  |
| DNMT3A   | 122.9  | 138.3   | 93.3   | 84.3   | 85.8   | 97     | 111.2  | 116.7  |
| DNMT3B   | 101.3  | 130.6   | 102.5  | 101.1  | 103.7  | 101.9  | 99.4   | 107.4  |
| DNMT3B   | 182.5  | 213.4   | 125.1  | 114.9  | 98.2   | 140.4  | 144.3  | 204.2  |

|         |        |        |        |        |        |        |        |        |
|---------|--------|--------|--------|--------|--------|--------|--------|--------|
| DNMT3B  | 92     | 94.9   | 97.5   | 91.6   | 101.9  | 94.1   | 92     | 95.8   |
| DNMT3L  | 82.9   | 107.5  | 82.8   | 84.5   | 80.1   | 82.5   | 88.3   | 96.3   |
| DNMT3L  | 97.4   | 109.3  | 103.5  | 103    | 97.6   | 108.6  | 101.7  | 93.8   |
| DNPEP   | 256.5  | 260.5  | 159.1  | 117    | 102.3  | 125.7  | 209.3  | 268.1  |
| DNTT    | 93.7   | 88.7   | 94.1   | 88.9   | 95     | 84     | 93.2   | 98     |
| DNTT    | 87.7   | 95.9   | 95.7   | 90.7   | 90.1   | 88.5   | 78.3   | 79.5   |
| DNTTIP1 | 1570.6 | 2272.3 | 726.1  | 761.2  | 726.5  | 1159.2 | 1898.1 | 2361.1 |
| DNTTIP2 | 88.3   | 104.4  | 95.8   | 89.8   | 86.8   | 84.9   | 93.2   | 125.6  |
| DOC1    | 304    | 361.4  | 237.9  | 372.7  | 255.8  | 653.8  | 213.1  | 292.7  |
| DOC1    | 260.4  | 353.4  | 245.7  | 356.1  | 268.4  | 669.7  | 221.4  | 303.8  |
| DOC1    | 93.5   | 117.6  | 87.8   | 91.2   | 80.4   | 87.9   | 98.6   | 106.5  |
| DOC2A   | 109.3  | 125.1  | 96.5   | 89.8   | 88.8   | 94.6   | 98.5   | 116.7  |
| DOC2B   | 85.1   | 99.7   | 100.5  | 93.3   | 102.3  | 93     | 88.1   | 94.7   |
| DOCK1   | 103.9  | 117.6  | 106.2  | 87.7   | 89.2   | 99.3   | 117.4  | 113    |
| DOCK10  | 1416.7 | 1844.1 | 943.4  | 1699.5 | 1066.7 | 2599.6 | 1131.6 | 1654.6 |
| DOCK11  | 798    | 1206.5 | 411.8  | 666.5  | 496.8  | 915.4  | 814.6  | 1096.7 |
| DOCK2   | 3518.5 | 4696.8 | 3109.1 | 6026.9 | 4992.4 | 6665.8 | 3408.2 | 2884.6 |
| DOCK3   | 82.9   | 86.3   | 92.5   | 94.1   | 83.7   | 82.6   | 83.4   | 84.2   |
| DOCK4   | 87.8   | 111.2  | 87.3   | 83     | 76     | 76.2   | 91.8   | 112.1  |
| DOCK5   | 156.4  | 192    | 118    | 113.2  | 103.5  | 132.1  | 153.7  | 198.8  |
| DOCK6   | 144.7  | 160.3  | 190.6  | 145.2  | 140    | 174.1  | 125.9  | 193    |
| DOCK7   | 85.9   | 99.7   | 91.2   | 80.5   | 79.9   | 92.7   | 92.6   | 91.7   |
| DOCK8   | 1565.7 | 2174.5 | 1176.8 | 1570.6 | 1115.1 | 2523.6 | 1614.2 | 3158.4 |
| DOCK9   | 109.3  | 121.6  | 96.5   | 96.1   | 84.1   | 105.2  | 102    | 111.8  |
| DOK1    | 115.6  | 133.3  | 100.6  | 92.5   | 80.9   | 81.1   | 117.7  | 141.5  |
| DOK2    | 178.3  | 225.6  | 98     | 94.3   | 108.5  | 86.7   | 182.9  | 316.8  |
| DOK2    | 379.7  | 495.3  | 150.6  | 121.2  | 112.4  | 118.2  | 388.3  | 628.1  |
| DOK3    | 114.5  | 116.5  | 104    | 127.3  | 114.6  | 152.7  | 101.6  | 130.9  |
| DOK4    | 158.9  | 194.7  | 113.9  | 101.1  | 88.8   | 106.7  | 166.3  | 197    |
| DOK5    | 82.3   | 90.5   | 95.4   | 75.9   | 80.2   | 74.4   | 83     | 90.6   |
| DOK6    | 81.2   | 84.8   | 102.8  | 100.2  | 91.7   | 102.5  | 83.2   | 84.3   |
| DOLPP1  | 376.5  | 440.9  | 251.1  | 177.9  | 149.7  | 189.9  | 378.6  | 426.9  |
| DOM3Z   | 455.2  | 533.3  | 405.5  | 372.5  | 348    | 522.2  | 361.2  | 479.4  |
| DONSON  | 875.1  | 1154.4 | 599.9  | 522.2  | 404.8  | 777.4  | 617.5  | 1404.6 |
| DONSON  | 336    | 476.9  | 171.2  | 144.1  | 128.3  | 206.1  | 225.4  | 350.8  |
| DOPEY1  | 144.3  | 177.8  | 147.4  | 168.1  | 159.3  | 232.2  | 130.2  | 169.8  |
| DOPEY2  | 583.9  | 713.5  | 440.1  | 699.9  | 585.9  | 686.8  | 522.8  | 672.7  |
| DOT1L   | 128.6  | 149.8  | 104    | 103.5  | 92.1   | 110.3  | 123.3  | 141.9  |
| DP58    | 81.1   | 92.8   | 89     | 86.9   | 88.5   | 79.7   | 79.2   | 84.8   |
| DPAGT1  | 520.1  | 625.5  | 244.5  | 138.2  | 118.3  | 115    | 390.9  | 479.5  |
| DPAGT1  | 1292.8 | 1540.6 | 737.8  | 521.2  | 423.8  | 535.7  | 1078   | 1250.9 |
| DPCR1   | 93.5   | 119.6  | 101.7  | 97.2   | 99.8   | 94.9   | 115.7  | 106.8  |
| DPEP1   | 103.3  | 108.8  | 88.2   | 83.4   | 87.2   | 88.2   | 95.8   | 108.7  |
| DPEP2   | 79.1   | 99.6   | 103.5  | 99.1   | 100.8  | 109.8  | 92     | 86.2   |
| DPEP3   | 106    | 116.1  | 102.2  | 91.9   | 95.2   | 97.6   | 106.8  | 119.2  |
| DPF1    | 107.1  | 114.4  | 130.2  | 100.6  | 100.5  | 103.8  | 104.4  | 107.3  |
| DPF2    | 1039.6 | 1401.6 | 770.5  | 473.5  | 404.9  | 485.2  | 1011   | 1177.5 |
| DPF3    | 91.7   | 97.1   | 104    | 94.9   | 96.7   | 95.5   | 80.1   | 105.5  |
| DPH1    | 118.7  | 141.7  | 113.3  | 97.7   | 99.4   | 96.9   | 115.7  | 138.2  |
| DPH2    | 243.4  | 332    | 169.4  | 132.9  | 115    | 99.7   | 182.2  | 243.4  |

|         |        |        |        |        |        |        |        |        |
|---------|--------|--------|--------|--------|--------|--------|--------|--------|
| DPH2    | 141.8  | 161.9  | 131.5  | 111.3  | 102.8  | 105.5  | 111.7  | 131.7  |
| DPH2    | 1827.7 | 2288.2 | 940.4  | 842.2  | 538    | 928.1  | 1266.8 | 1607.9 |
| DPH3    | 642    | 722.9  | 465.7  | 423.2  | 299.1  | 393.7  | 564.7  | 751.6  |
| DPH3    | 256.4  | 273.8  | 162.5  | 149.2  | 130.2  | 172.3  | 177.1  | 203.1  |
| DPH5    | 1686.7 | 2288   | 990.2  | 465.5  | 356.4  | 685    | 1271.2 | 1273.1 |
| DPH5    | 1352.7 | 1778.9 | 719.3  | 307.7  | 231.9  | 398    | 1260.2 | 1456.7 |
| DPM1    | 4614.3 | 4629.7 | 1946   | 2069.5 | 1267.6 | 2038.7 | 4279   | 6674.3 |
| DPM2    | 570.6  | 752    | 482.2  | 215.7  | 182.1  | 204.5  | 537.5  | 610    |
| DPM3    | 1659.5 | 2070.6 | 1107.9 | 826.8  | 851.7  | 978.1  | 1754.1 | 2082.1 |
| DPM3    | 2009.2 | 2335.6 | 1922.1 | 1607.7 | 1472.8 | 1769   | 2198.1 | 2443   |
| DPP10   | 84.6   | 100.1  | 102.2  | 93.9   | 87.4   | 87.4   | 88.8   | 100.4  |
| DPP10   | 96.9   | 115.2  | 88.7   | 93.7   | 83.4   | 88.4   | 101.4  | 112.8  |
| DPP3    | 271.3  | 348.1  | 184    | 149.1  | 141.4  | 209.9  | 243    | 340.7  |
| DPP3    | 242.3  | 336.6  | 196.2  | 150.1  | 124.4  | 191.9  | 190    | 268.8  |
| DPP3    | 401.2  | 561.6  | 359.1  | 312    | 275.1  | 497.9  | 357.3  | 494.4  |
| DPP4    | 116    | 116.4  | 107    | 94.9   | 94.5   | 93.5   | 99.5   | 109.3  |
| DPP6    | 130.3  | 161    | 85.7   | 77.7   | 78.4   | 83.5   | 112.9  | 161    |
| DPP6    | 76.8   | 82.9   | 87.8   | 86.1   | 73.3   | 87.7   | 82     | 86.4   |
| DPP7    | 1033.9 | 1417.8 | 739.2  | 605.9  | 563.5  | 897.8  | 940    | 1284.4 |
| DPP7    | 3277.1 | 4052.7 | 1081.8 | 768.5  | 813    | 754.5  | 3673   | 1782.7 |
| DPP8    | 358    | 491.8  | 136.2  | 196.2  | 170.7  | 266.6  | 338    | 495.9  |
| DPP8    | 467.8  | 645.6  | 308.2  | 404    | 297    | 583.9  | 437.4  | 732.2  |
| DPP8    | 92.1   | 107.7  | 90.1   | 75.1   | 71.8   | 89.3   | 90.7   | 104.4  |
| DPP9    | 419.9  | 529.8  | 517    | 315.6  | 317.3  | 514.7  | 406.2  | 645.9  |
| DPPA2   | 108.1  | 123.1  | 93.1   | 83.6   | 85.5   | 84.5   | 116.1  | 118.1  |
| DPPA3   | 90.1   | 106.5  | 97.6   | 99.4   | 88.2   | 94.9   | 93     | 99.7   |
| DPPA4   | 92.3   | 103.7  | 91.3   | 84.4   | 83.8   | 84.7   | 98     | 100.9  |
| DPPA5   | 86.4   | 91.5   | 94.5   | 93.5   | 87.4   | 85.8   | 84.8   | 80.8   |
| DPRX    | 75.5   | 78.2   | 89.3   | 81.7   | 76.8   | 90.8   | 79.9   | 78.9   |
| DPRXP4  | 99.8   | 105.4  | 101.6  | 80.6   | 82.6   | 91.9   | 99.7   | 110.7  |
| DPT     | 111.2  | 130.8  | 93.3   | 90.7   | 92.5   | 94.5   | 98.4   | 121.4  |
| DPY19L2 | 111.1  | 115.7  | 113.1  | 89.1   | 87     | 96.5   | 91.8   | 91.4   |
| DPY19L3 | 175.3  | 223.4  | 121.4  | 103.4  | 101.8  | 102.4  | 133.2  | 185.7  |
| DPY19L4 | 443.2  | 523.9  | 211.5  | 200.9  | 161.1  | 255.6  | 303.3  | 438.3  |
| DPYD    | 286.3  | 335.6  | 185.2  | 249.4  | 173.8  | 330.2  | 229.3  | 461.1  |
| DPYS    | 92.6   | 97.4   | 90     | 91.7   | 78.1   | 95.5   | 89     | 87.6   |
| DPYSL2  | 4499.7 | 6019.2 | 4934.4 | 4301.3 | 3773.1 | 5338.7 | 3971.6 | 5090.3 |
| DPYSL3  | 103.9  | 116.2  | 106.2  | 99.5   | 88.9   | 106.6  | 117.3  | 147.9  |
| DPYSL4  | 133.5  | 177.2  | 129.1  | 90.7   | 83.5   | 85.5   | 140    | 137.2  |
| DPYSL5  | 90.7   | 117.8  | 98.4   | 91.7   | 86.4   | 86.3   | 95.1   | 117.5  |
| DQX1    | 107.6  | 134.8  | 101.2  | 99.4   | 95.6   | 93.2   | 117.3  | 125.4  |
| DR1     | 1293.1 | 1463.9 | 485.3  | 540.3  | 408.1  | 644.9  | 904.1  | 1878.8 |
| DRAP1   | 1354.5 | 1524.3 | 1699.1 | 1661.2 | 1452.1 | 2869.4 | 1275.6 | 3002.3 |
| DRB1    | 619.3  | 819.3  | 289.7  | 251    | 182.9  | 293.1  | 451.1  | 680.6  |
| DRD1    | 90.1   | 104.9  | 95.4   | 89.6   | 73.7   | 77.1   | 91     | 107.6  |
| DRD1IP  | 84.7   | 86.5   | 90.1   | 83.4   | 83.3   | 79.4   | 85.9   | 94.9   |
| DRD2    | 81.3   | 83.2   | 95.2   | 83.3   | 83.6   | 81.8   | 93.1   | 91.9   |
| DRD2    | 97     | 109.1  | 92.7   | 81     | 80.3   | 78.7   | 101.1  | 121.2  |
| DRD2    | 126    | 138.5  | 93.7   | 82.7   | 83.9   | 78.9   | 109.8  | 121    |
| DRD3    | 115.3  | 126.9  | 100.8  | 91.7   | 85.3   | 88.2   | 109.6  | 126.8  |

|         |        |        |        |        |        |        |        |        |
|---------|--------|--------|--------|--------|--------|--------|--------|--------|
| DRD3    | 100.6  | 104.3  | 101.1  | 89.4   | 85     | 91.8   | 97.2   | 105.6  |
| DRD3    | 97.7   | 105.8  | 96.8   | 87.5   | 86.8   | 90.5   | 96     | 117.8  |
| DRD4    | 84.2   | 87.4   | 101.1  | 119.7  | 124.6  | 129.1  | 99.1   | 103.3  |
| DRD5    | 81     | 95.8   | 106.3  | 90.7   | 92     | 94.9   | 84.9   | 89     |
| DREV1   | 159    | 209.4  | 163.1  | 187.9  | 151.4  | 254.2  | 167.1  | 402.8  |
| DRG1    | 3048.1 | 4264.3 | 2017.5 | 1688   | 1239   | 2348.8 | 2317.8 | 4077   |
| DRG2    | 232.3  | 273.1  | 207.7  | 185.8  | 145.1  | 177    | 198.4  | 383.2  |
| DRP2    | 71     | 74.7   | 82.1   | 78.4   | 72.8   | 76.9   | 74.6   | 81.1   |
| DSC1    | 93.7   | 110    | 95.5   | 96     | 86.9   | 95.1   | 100.3  | 103.8  |
| DSC2    | 252.5  | 320.4  | 174.8  | 301.8  | 249.8  | 358.3  | 205.5  | 270.8  |
| DSC2    | 121    | 144.5  | 102.5  | 111.8  | 106.5  | 122.3  | 112.4  | 109.8  |
| DSC3    | 99.5   | 120.8  | 96.6   | 91     | 82.7   | 78.5   | 110.3  | 104.9  |
| DSCAM   | 133.2  | 149.7  | 146.3  | 121.9  | 136.5  | 130.6  | 132.5  | 134.7  |
| DSCAM   | 135.3  | 148.2  | 97.5   | 94.5   | 81.4   | 96.1   | 126.2  | 139.2  |
| DSCAM   | 183.7  | 167.6  | 96.2   | 94.3   | 88.5   | 97.8   | 123.3  | 166.5  |
| DSCAML1 | 78.5   | 84.2   | 92.5   | 76.9   | 84.5   | 88.2   | 80.7   | 78.1   |
| DSCR1   | 114.1  | 132.6  | 89.1   | 90.9   | 87.2   | 78.7   | 120    | 121.9  |
| DSCR1   | 129.7  | 175.1  | 103.5  | 89.2   | 78     | 81.6   | 123.7  | 132    |
| DSCR1   | 578.7  | 853.1  | 415.6  | 368.5  | 273.9  | 526.3  | 465.3  | 778.9  |
| DSCR10  | 143    | 166.5  | 106.7  | 112.8  | 101.5  | 104.1  | 137.7  | 148.1  |
| DSCR1L1 | 105.5  | 99.2   | 107.1  | 107.8  | 91.8   | 105.3  | 88.1   | 104.6  |
| DSCR1L2 | 154.4  | 198.3  | 115.8  | 114.2  | 112.2  | 123.7  | 138.7  | 171.2  |
| DSCR2   | 2705.2 | 3390.9 | 1338.3 | 1251.3 | 910.7  | 1334.2 | 2143.4 | 3439   |
| DSCR2   | 2289.3 | 3049.2 | 969.9  | 755.1  | 523.6  | 1164.2 | 1700.6 | 2485.2 |
| DSCR3   | 468.9  | 582.8  | 477.8  | 544.8  | 498    | 706.1  | 462.5  | 830.2  |
| DSCR4   | 127.9  | 143.4  | 83.8   | 81.1   | 71.2   | 84     | 112.1  | 143.5  |
| DSCR5   | 694.3  | 918.2  | 514.5  | 395.9  | 285.5  | 357.3  | 537.7  | 608.6  |
| DSCR5   | 2327.5 | 2955.9 | 1611.7 | 1439   | 1083.6 | 1598.8 | 2002.4 | 3744.1 |
| DSCR5   | 128.3  | 142    | 94.5   | 101.7  | 88.5   | 93     | 120.6  | 131.8  |
| DSCR6   | 148.9  | 173.7  | 119.4  | 88.3   | 89.5   | 104.1  | 129.8  | 159.4  |
| DSCR8   | 91.9   | 113.5  | 106.4  | 95.4   | 92.4   | 106.2  | 91.1   | 99.4   |
| DSCR8   | 112.2  | 129.2  | 104.8  | 101.8  | 93.6   | 99.8   | 108.1  | 111.4  |
| DSCR8   | 86.7   | 100.4  | 88.2   | 93     | 85     | 88.6   | 84.5   | 93.1   |
| DSCR9   | 93.7   | 110.1  | 95.9   | 81.6   | 81.5   | 81.5   | 98.7   | 89.5   |
| DSEL    | 86.8   | 98.7   | 102.3  | 98     | 100.2  | 118    | 96.9   | 91.8   |
| DSG1    | 103.8  | 117.7  | 87.4   | 85     | 84.6   | 85.8   | 112    | 120.1  |
| DSG2    | 97.2   | 123    | 111    | 159.8  | 143.3  | 143.9  | 97.9   | 115.5  |
| DSG3    | 93.3   | 103.7  | 89.7   | 82.3   | 82.9   | 83.9   | 89.7   | 107.9  |
| DSG4    | 134.4  | 152.8  | 105.9  | 111    | 89.6   | 103    | 131.6  | 177.3  |
| DSP     | 100.4  | 119.1  | 94.4   | 83.6   | 90.4   | 89.2   | 99.3   | 109.2  |
| DSPG3   | 80.2   | 76.5   | 88.7   | 82.5   | 75.9   | 87.2   | 77.8   | 87.3   |
| DSPP    | 102.1  | 110.7  | 116.6  | 93.6   | 92     | 92.9   | 96.8   | 94.3   |
| DST     | 91.2   | 110.7  | 110.3  | 99.5   | 93.7   | 95.9   | 83.8   | 99.5   |
| DST     | 85     | 91.4   | 85.5   | 85.7   | 75.1   | 80.4   | 84.1   | 96.7   |
| DST     | 90.3   | 101.1  | 114.1  | 93     | 92.1   | 91.9   | 99.7   | 108.3  |
| DST     | 84.3   | 86     | 107.5  | 95.9   | 88.8   | 104    | 71.6   | 86.3   |
| DST     | 78     | 104.9  | 92.2   | 94.4   | 87.7   | 97.6   | 85.8   | 123.3  |
| DSTN    | 773.8  | 969.8  | 332.4  | 484.7  | 265.5  | 425.4  | 794.5  | 1555.1 |
| DSTN    | 180    | 221    | 108    | 118.6  | 105.2  | 108    | 181.5  | 189.6  |
| DSTN    | 766.7  | 1088.7 | 369.4  | 518    | 347.6  | 548.3  | 768    | 1465.2 |

|         |        |        |        |        |        |        |        |        |
|---------|--------|--------|--------|--------|--------|--------|--------|--------|
| DSU     | 103.4  | 112.3  | 98.5   | 91.4   | 88.4   | 87.9   | 89.2   | 98.6   |
| DTL     | 642.4  | 779.2  | 435.1  | 403.9  | 304.5  | 481    | 394.9  | 757.8  |
| DTNA    | 268.3  | 293.4  | 208.5  | 160.4  | 128.4  | 166.7  | 200.4  | 242.3  |
| DTNA    | 1073.5 | 1455.3 | 733.2  | 400.9  | 254.9  | 455.4  | 878.6  | 1172   |
| DTNA    | 265.5  | 335    | 207.2  | 138.8  | 127.1  | 152    | 194.8  | 245.5  |
| DTNB    | 134.2  | 165.1  | 120.9  | 116.2  | 108    | 110    | 130.3  | 126.1  |
| DTNBP1  | 89.9   | 101    | 110.1  | 106.3  | 105    | 110.2  | 89.2   | 93.6   |
| DTNBP1  | 213.5  | 241.6  | 165.3  | 141    | 143.2  | 177.4  | 179.5  | 266.6  |
| DTNBP1  | 107.1  | 129.1  | 106.6  | 98.5   | 101.5  | 102.9  | 107.3  | 120.8  |
| DTWD1   | 90.3   | 95.8   | 91     | 76.6   | 96.4   | 96.2   | 91.8   | 102.7  |
| DTWD2   | 723.4  | 855.5  | 373.2  | 627    | 594.6  | 457.9  | 717.6  | 953.6  |
| DTX1    | 101    | 126.4  | 86.3   | 84.2   | 81     | 84.5   | 108.4  | 121    |
| DTX2    | 850.1  | 1274.3 | 575.8  | 612.9  | 624.4  | 605.7  | 703.8  | 627.4  |
| DTX3    | 88.2   | 93.9   | 98.2   | 87.2   | 87.9   | 97.7   | 91.8   | 103.4  |
| DTX3L   | 140.2  | 200.7  | 115.7  | 120.1  | 118.1  | 120.6  | 123.1  | 106.4  |
| DTYMK   | 84.6   | 104.7  | 96.4   | 102.9  | 85.8   | 92.2   | 81.6   | 105.6  |
| DUB3    | 90     | 104.7  | 93.8   | 86.7   | 80.6   | 96.1   | 88.2   | 99.8   |
| DULLARD | 208.7  | 271.1  | 186.4  | 204.4  | 159.1  | 238.5  | 207    | 400    |
| DUOX1   | 84.3   | 91.2   | 89     | 89.4   | 80.9   | 82.4   | 98.1   | 98.6   |
| DUOX1   | 97.5   | 111.9  | 104.1  | 96.5   | 84.8   | 99.2   | 105.4  | 104.5  |
| DUOX1   | 82.1   | 101.2  | 97.3   | 91.7   | 84.3   | 84.9   | 79.4   | 85.6   |
| DUOX2   | 78.8   | 94.5   | 89.3   | 87.4   | 83.8   | 79.5   | 75     | 100.2  |
| DUPD1   | 79.1   | 95     | 100.4  | 89.8   | 88.8   | 89.8   | 83.2   | 97.9   |
| DUS1L   | 352.1  | 361.5  | 246.2  | 194.6  | 169.8  | 283.8  | 244.8  | 453.1  |
| DUS2L   | 520.5  | 637.6  | 273.6  | 226.8  | 180.1  | 197.7  | 409    | 388.1  |
| DUS3L   | 1057.3 | 1249.2 | 943.2  | 460.7  | 386.2  | 575.6  | 826.6  | 1430.2 |
| DUS4L   | 521.8  | 653.3  | 318.5  | 431.5  | 313    | 434.2  | 418.6  | 528.8  |
| DUSP1   | 137.8  | 140.3  | 146.3  | 116.5  | 114.2  | 156.3  | 165.5  | 212.4  |
| DUSP10  | 250    | 307.6  | 160.3  | 158.7  | 161.2  | 189.2  | 189.4  | 248.1  |
| DUSP10  | 90.8   | 102.7  | 84.7   | 76.3   | 79.9   | 84.2   | 90.3   | 105.1  |
| DUSP10  | 362.4  | 408.1  | 243.7  | 499.3  | 324.8  | 707.7  | 303.7  | 548.9  |
| DUSP11  | 145    | 171.9  | 116.2  | 99.9   | 96.3   | 126    | 148.5  | 185.9  |
| DUSP12  | 2462.9 | 3175.5 | 1698   | 1245.2 | 1032.3 | 1597.5 | 2039   | 3883   |
| DUSP13  | 97.8   | 129    | 97.3   | 96.2   | 82.2   | 92.1   | 105.6  | 118.7  |
| DUSP13  | 78.3   | 88.1   | 101.6  | 81.9   | 85.5   | 86.8   | 76.5   | 88.4   |
| DUSP13  | 123.3  | 155.7  | 103.3  | 101.9  | 98.7   | 96.5   | 119.9  | 128.9  |
| DUSP13  | 81.3   | 98.6   | 103.4  | 91.9   | 89.8   | 92.8   | 86.8   | 95.1   |
| DUSP14  | 482.9  | 655.9  | 286.3  | 180.5  | 186.1  | 218.8  | 463.7  | 736    |
| DUSP15  | 120.4  | 124.9  | 91.9   | 88.9   | 98     | 81.6   | 110.1  | 128.1  |
| DUSP15  | 80.7   | 95     | 86.4   | 75.3   | 83.6   | 86.9   | 80.6   | 86.3   |
| DUSP15  | 92.6   | 112.1  | 87.8   | 74     | 83     | 75.4   | 97.2   | 96.9   |
| DUSP16  | 101    | 126.4  | 108.3  | 93.9   | 93.9   | 102.1  | 104.8  | 118.6  |
| DUSP18  | 194.6  | 232.2  | 171.7  | 201.9  | 196.7  | 237.7  | 188    | 255.2  |
| DUSP19  | 2596.8 | 2060.9 | 1752.9 | 2742.2 | 2851.1 | 2299.3 | 2519.1 | 4287   |
| DUSP2   | 171.3  | 230.1  | 150.4  | 110.2  | 95.3   | 127.2  | 148.9  | 206.7  |
| DUSP21  | 83.5   | 92.1   | 102.6  | 91.4   | 92.1   | 92.4   | 90.5   | 87     |
| DUSP22  | 129.8  | 167.4  | 102.8  | 133.9  | 128.4  | 133.9  | 114.4  | 140.9  |
| DUSP22  | 233.5  | 282.5  | 201.1  | 266    | 240    | 288.1  | 201.6  | 264.6  |
| DUSP23  | 5221   | 6606   | 3349.1 | 2502.8 | 1892.9 | 2566.4 | 4498.8 | 4055.4 |
| DUSP26  | 193.4  | 229.1  | 143.3  | 150.9  | 118    | 141.5  | 187.5  | 197.1  |

|          |        |         |        |        |        |        |        |        |
|----------|--------|---------|--------|--------|--------|--------|--------|--------|
| DUSP27   | 106.7  | 136.5   | 90.3   | 100.2  | 92.6   | 78     | 109.8  | 130    |
| DUSP27   | 127    | 160.3   | 110.1  | 97.4   | 91.3   | 90.9   | 103.2  | 134    |
| DUSP3    | 2184   | 2783.6  | 1759.9 | 2314.4 | 1918.1 | 2733.2 | 1781.3 | 2933.5 |
| DUSP4    | 85.3   | 87.6    | 91.7   | 82.7   | 81.5   | 88.7   | 79.7   | 88.2   |
| DUSP4    | 95     | 104.6   | 100.6  | 95.5   | 96     | 90.4   | 105.5  | 160.6  |
| DUSP5    | 195.1  | 260.3   | 166.7  | 132.6  | 114.3  | 136.6  | 218.5  | 399.6  |
| DUSP5P   | 233.2  | 247.3   | 168.6  | 144.5  | 145    | 146.4  | 152.5  | 193.1  |
| DUSP6    | 208.3  | 269.3   | 117.4  | 131.6  | 90.4   | 109.3  | 211.6  | 442.5  |
| DUSP6    | 128.4  | 141.9   | 98.3   | 100.1  | 99.4   | 107.1  | 116.7  | 128.1  |
| DUSP7    | 110.6  | 135.8   | 116.4  | 126.1  | 123.5  | 94.5   | 103.3  | 120.1  |
| DUSP8    | 111.1  | 121.7   | 116.5  | 97.7   | 99.6   | 91.4   | 102.6  | 150.2  |
| DUSP9    | 146.1  | 183.6   | 99.9   | 87.7   | 87.5   | 104.3  | 127.3  | 161.6  |
| DUT      | 321.1  | 482.7   | 170.6  | 178.6  | 159    | 145.8  | 280.5  | 315.5  |
| DUT      | 1416.2 | 2121.4  | 423.2  | 372.4  | 355.1  | 471.3  | 1099.2 | 1375.5 |
| DUT      | 1294.8 | 1793.5  | 727.5  | 679.1  | 545.9  | 649.7  | 1105.8 | 1338.3 |
| DUX1     | 110.7  | 122.7   | 101.2  | 93     | 90.6   | 102.3  | 112.9  | 116.7  |
| DUX2     | 117.4  | 120.6   | 107.9  | 83.2   | 80.7   | 90.2   | 102    | 116.7  |
| DUX3     | 94.7   | 96.8    | 104    | 106.9  | 95.6   | 99     | 84.1   | 84.5   |
| DUX4     | 88.9   | 101     | 72     | 96.2   | 77.2   | 78.3   | 80.5   | 91.7   |
| DUX4C    | 94.6   | 114     | 83.9   | 84.8   | 85.1   | 88.9   | 94.1   | 100.1  |
| DUX5     | 89.3   | 113.2   | 87.6   | 80.7   | 87.7   | 81     | 96.7   | 114.3  |
| DUXA     | 83.6   | 95.3    | 84.4   | 81.2   | 87.2   | 81.1   | 79     | 83.6   |
| DUXAP3   | 1862.8 | 1688.9  | 602.1  | 1130.5 | 838.4  | 796.2  | 1727.2 | 2303.8 |
| DVL1     | 96.5   | 105.4   | 125.3  | 139.6  | 136.3  | 128.8  | 88.2   | 99.7   |
| DVL2     | 198.8  | 235.5   | 207    | 216.3  | 213.6  | 268.5  | 175.9  | 278.3  |
| DVL3     | 356.3  | 473     | 325.8  | 291.9  | 267.5  | 462.9  | 345.4  | 495.5  |
| DXS9879E | 2970.7 | 3654.3  | 2113.4 | 1254.5 | 881.5  | 1174.1 | 2814.9 | 3221.4 |
| DYDC1    | 87.1   | 95.6    | 99.5   | 89     | 86.8   | 83.3   | 94.4   | 102.4  |
| DYM      | 972    | 1158.4  | 954.9  | 844.4  | 727.2  | 1281.7 | 695.6  | 1483.9 |
| DYNC1H1  | 425.8  | 644.5   | 355.5  | 604.5  | 575.9  | 940.2  | 421    | 509.9  |
| DYNC1I1  | 110.9  | 107.9   | 90.7   | 77.5   | 82.3   | 81     | 102.4  | 115.3  |
| DYNC1I2  | 1379.6 | 2000.4  | 1068.6 | 1148.2 | 992    | 2221.1 | 1167.3 | 1699.3 |
| DYNC1LI1 | 119.7  | 140.4   | 112.8  | 118.4  | 107.5  | 111.7  | 122.7  | 196.1  |
| DYNC1LI2 | 1815   | 2083.2  | 1337.3 | 1714   | 1546.1 | 2004.1 | 1219.5 | 1747.4 |
| DYNC2H1  | 202.8  | 248.9   | 120.6  | 106    | 109    | 153.9  | 169.2  | 228.6  |
| DYNC2LI1 | 72.6   | 84.9    | 91.5   | 82     | 82     | 88.1   | 78.3   | 74.8   |
| DYNC2LI1 | 628.3  | 761.7   | 345.4  | 256.3  | 234.8  | 341.9  | 366.8  | 473.7  |
| DYNC2LI1 | 111.2  | 120.5   | 104.5  | 114.4  | 97.3   | 125.8  | 104.9  | 128.8  |
| DYNLL1   | 8690.8 | 10535.3 | 6540.9 | 3877.6 | 2860.5 | 4702.2 | 6629.2 | 8867   |
| DYNLL2   | 525.4  | 693.6   | 385.4  | 468.5  | 407.8  | 410.4  | 563.1  | 480.8  |
| DYNLRB1  | 2842.4 | 3616.3  | 1690.6 | 971    | 772.8  | 938.5  | 2973.7 | 3691.9 |
| DYNLRB2  | 139.5  | 167.5   | 103.7  | 92.5   | 85     | 96.3   | 135.2  | 163.2  |
| DYNLT1   | 1708.9 | 1787    | 1151.1 | 950.8  | 780    | 1203.5 | 1427.7 | 2056.1 |
| DYNLT3   | 84.4   | 87.2    | 112.4  | 93.8   | 85.1   | 100    | 82.4   | 88.1   |
| DYRK1A   | 1098.9 | 983.6   | 347.8  | 510    | 358.5  | 777.2  | 586.8  | 1014.2 |
| DYRK1A   | 101.2  | 127.8   | 92     | 85     | 88.9   | 84     | 118.7  | 115    |
| DYRK1A   | 976.8  | 863.4   | 490.7  | 598.9  | 425.6  | 926.2  | 543.7  | 945.8  |
| DYRK1A   | 127.1  | 152.7   | 96.1   | 91.3   | 74.9   | 93.5   | 121    | 151.8  |
| DYRK1B   | 80.2   | 94.9    | 94.9   | 90.3   | 86.6   | 102.6  | 92     | 97.1   |
| DYRK1B   | 77.9   | 89.5    | 106.1  | 108.7  | 95.8   | 84.3   | 77.3   | 75.9   |



|          |        |        |        |        |        |        |        |        |
|----------|--------|--------|--------|--------|--------|--------|--------|--------|
| DYRK2    | 434.3  | 514.1  | 261.7  | 475.9  | 393.8  | 383    | 325.8  | 538.3  |
| DYRK2    | 100.3  | 109.1  | 118.6  | 110.4  | 102    | 105.9  | 97.4   | 107.5  |
| DYRK3    | 101.7  | 113    | 102.6  | 104.5  | 85.9   | 85.3   | 104    | 114.3  |
| DYRK3    | 103.4  | 106.6  | 92.9   | 87.1   | 90.8   | 86.4   | 88.7   | 100.5  |
| DYRK3    | 77.9   | 81.1   | 91.5   | 93.3   | 80.8   | 89.3   | 76.6   | 81.6   |
| DYRK4    | 329    | 438.6  | 231.1  | 188.6  | 175    | 224.1  | 244.5  | 295.6  |
| DYSF     | 116.5  | 160.4  | 100.9  | 95.8   | 87     | 92.9   | 131.8  | 154.2  |
| DYSFIP1  | 4418.7 | 5342.8 | 2091   | 384.2  | 341.3  | 421.7  | 4255.8 | 5015   |
| DYX1C1   | 88.2   | 92.5   | 98.3   | 95.4   | 83.1   | 96.2   | 85.9   | 85.5   |
| DYX1C1   | 79.4   | 84     | 103.7  | 89.6   | 78.9   | 87.2   | 86     | 89.2   |
| DZIP1    | 124.8  | 182.5  | 109.1  | 93.6   | 89.9   | 94.7   | 121.9  | 124.1  |
| DZIP1    | 80.5   | 96.8   | 97.3   | 86.7   | 88.5   | 91.9   | 80.3   | 80.3   |
| DZIP1L   | 198.6  | 259.9  | 109    | 115.8  | 108.6  | 126.1  | 191.7  | 205.4  |
| DZIP3    | 96.4   | 115.8  | 96.6   | 94.3   | 92.1   | 90.8   | 108.3  | 98.7   |
| E2F1     | 121.9  | 152.2  | 99.4   | 91.6   | 92.1   | 85.4   | 112.8  | 142.2  |
| E2F2     | 1028.7 | 1234.2 | 947.9  | 1225.5 | 961    | 910.6  | 779.9  | 818.8  |
| E2F3     | 1265.7 | 1535.1 | 811    | 936.2  | 650.6  | 808.6  | 1233.9 | 1925.4 |
| E2F4     | 1581.8 | 1863.1 | 1375.4 | 860.4  | 630.8  | 829.4  | 1191.6 | 1843.8 |
| E2F5     | 421.2  | 529.6  | 331    | 207.5  | 159.1  | 250.9  | 261.2  | 382.9  |
| E2F6     | 97.3   | 117.9  | 104.1  | 97.5   | 101.3  | 104.5  | 96.1   | 112.6  |
| E2F6     | 702.2  | 996.5  | 515.6  | 386.3  | 325.9  | 480.7  | 809.1  | 989.7  |
| E2F7     | 323.4  | 415.1  | 273    | 336.1  | 253.7  | 391.2  | 299.8  | 422.1  |
| E2F8     | 199.9  | 242    | 117.7  | 98.6   | 93.2   | 112    | 167.7  | 167.6  |
| E4F1     | 1863.2 | 2108.4 | 1229.9 | 1006.6 | 1069.9 | 983.3  | 1515.7 | 1182.2 |
| EAF1     | 276.8  | 340.1  | 139.6  | 133.1  | 101    | 176.8  | 278.2  | 486.5  |
| EAF2     | 1576.1 | 1820.6 | 831.4  | 1058.4 | 797.9  | 1177.5 | 1084.5 | 1874.1 |
| EBAG9    | 2867.3 | 3688.1 | 1897   | 1587.7 | 1269.8 | 1979.9 | 2629.7 | 4410.1 |
| EBAG9    | 123.7  | 158.2  | 126.5  | 108.3  | 106.1  | 110.6  | 133.7  | 124.3  |
| EBAG9    | 259.3  | 353.4  | 139.1  | 133.2  | 112.4  | 112.7  | 184    | 219    |
| EBF      | 118.1  | 128.2  | 93.3   | 100.6  | 91.7   | 92.2   | 132.9  | 134.6  |
| EBF2     | 73.5   | 80.4   | 81.5   | 84.7   | 81.8   | 77.8   | 77.6   | 74.2   |
| EBF3     | 360.4  | 524.2  | 237.3  | 245    | 258.1  | 286.1  | 423.5  | 381.6  |
| EBI2     | 388.4  | 535.6  | 188.1  | 346.6  | 300.3  | 443.9  | 495    | 672.8  |
| EBI3     | 98.2   | 108.4  | 112.9  | 119.6  | 158.4  | 114.1  | 97.9   | 112    |
| EBNA1BP2 | 5672.9 | 6785.4 | 4048.5 | 4043.9 | 3022.1 | 5060.9 | 4412.9 | 5672.8 |
| EBP      | 1699   | 2279.2 | 1005.8 | 665.4  | 703.7  | 794.2  | 1683.1 | 1764.3 |
| ECAT1    | 84.8   | 101.5  | 90.8   | 93.1   | 75.2   | 82.9   | 76     | 92.9   |
| ECAT11   | 115.6  | 144.4  | 88.7   | 81.7   | 83.2   | 94     | 125.9  | 138.1  |
| ECD      | 453    | 714.8  | 239.8  | 201.8  | 152.4  | 276.8  | 402.1  | 651.7  |
| ECE1     | 112.3  | 116.2  | 104.9  | 99.2   | 87.6   | 110.1  | 96.4   | 109.7  |
| ECE2     | 470.8  | 667.8  | 325.2  | 192.8  | 154.8  | 196.4  | 381    | 454    |
| ECE2     | 104.3  | 108.3  | 93.5   | 89     | 74.1   | 79.8   | 98.8   | 100.9  |
| ECE2     | 85.1   | 87.5   | 95.9   | 95     | 77.1   | 91.1   | 88.9   | 93.8   |
| ECEL1    | 92     | 102.5  | 107.5  | 120.4  | 109.6  | 119.8  | 86.4   | 91     |
| ECGF1    | 2884.9 | 3580   | 2186.6 | 2427.5 | 1879.6 | 2375.4 | 2280   | 3375   |
| ECH1     | 5462.5 | 6936.9 | 5124.1 | 3667.4 | 3360.9 | 4574.4 | 5416.8 | 6693.4 |
| ECHDC1   | 962.6  | 1081   | 327.8  | 412.6  | 339.4  | 519    | 631.3  | 1059   |
| ECHDC2   | 2518.3 | 3222.5 | 1591.6 | 1475   | 1483.8 | 2121.9 | 1858.5 | 2029.5 |
| ECHDC3   | 359.8  | 453.8  | 237.8  | 171.3  | 170.2  | 168.5  | 379.3  | 450.3  |
| ECHS1    | 1955.5 | 2606.8 | 1187.9 | 929.7  | 759.2  | 750.1  | 2008.4 | 1849.6 |

|         |         |         |         |         |         |         |         |         |
|---------|---------|---------|---------|---------|---------|---------|---------|---------|
| ECM1    | 231.9   | 286     | 289.3   | 222.6   | 190.9   | 260.4   | 225.3   | 381.6   |
| ECM1    | 446.2   | 494.1   | 158.2   | 117.2   | 96.7    | 112.2   | 442.5   | 579.3   |
| ECM2    | 70.3    | 94.2    | 89.9    | 81.5    | 79.2    | 78.7    | 76.6    | 91      |
| ECOP    | 236.6   | 302.4   | 224.4   | 239.5   | 202.9   | 203.2   | 189.6   | 275.8   |
| ECRG4   | 83.4    | 97      | 80.5    | 85.4    | 87.5    | 83.1    | 83.1    | 94.2    |
| ECSIT   | 187.3   | 231.2   | 143.1   | 127.7   | 114.5   | 133     | 164.7   | 229.6   |
| EDA     | 162.7   | 175.6   | 94.4    | 98      | 83.2    | 85.2    | 171.8   | 169.5   |
| EDA     | 99.7    | 102.6   | 98.5    | 96.8    | 92.5    | 99.7    | 103.6   | 108.4   |
| EDA     | 105.2   | 119.6   | 98.6    | 96.7    | 88.6    | 87.3    | 99.3    | 110.4   |
| EDA     | 84.9    | 96.3    | 98.3    | 91.8    | 83.2    | 103.6   | 97      | 95.8    |
| EDA     | 88.7    | 87.2    | 91.3    | 84.3    | 87.2    | 90.2    | 85.4    | 83.2    |
| EDA2R   | 81.2    | 97.6    | 90.6    | 85.3    | 80.5    | 84.8    | 90      | 88.3    |
| EDAR    | 78.5    | 97.8    | 102.8   | 97.3    | 74.2    | 91      | 91.2    | 98.9    |
| EDARADD | 103.2   | 110.4   | 92.7    | 86.7    | 90.9    | 87.2    | 98.7    | 102.3   |
| EDARADD | 114.3   | 152.3   | 126.7   | 119.3   | 122     | 125.1   | 120.5   | 117.6   |
| EDARADD | 99.8    | 109.5   | 84.9    | 74.3    | 75.8    | 73.9    | 87.3    | 97.4    |
| EDD1    | 657.1   | 954.2   | 305.3   | 486.6   | 356.3   | 562     | 726.9   | 1119.2  |
| EDEM1   | 865.3   | 1289.2  | 341.6   | 402.4   | 409.9   | 588     | 929.5   | 1214.9  |
| EDEM3   | 621.7   | 761.1   | 323.1   | 345.4   | 255.6   | 394.5   | 559.6   | 1232.1  |
| EDF1    | 3146.3  | 3764.6  | 812.4   | 623     | 477.9   | 772.4   | 2825.2  | 4476.4  |
| EDF1    | 11003.8 | 13192.2 | 8191.9  | 7482.3  | 5690.4  | 7385.8  | 10735   | 14453.6 |
| EDG1    | 135.4   | 189.9   | 90.2    | 93      | 89.3    | 96.5    | 126.8   | 163.5   |
| EDG2    | 464.6   | 651.2   | 378.2   | 214.5   | 168.1   | 241.6   | 477.2   | 655.3   |
| EDG2    | 115.1   | 134.5   | 98.3    | 78.7    | 80.9    | 85.6    | 110.3   | 126.5   |
| EDG3    | 281.8   | 368.1   | 197.8   | 129.8   | 112.3   | 140.8   | 298.6   | 471.3   |
| EDG4    | 685.1   | 591.8   | 422.3   | 455.2   | 468.9   | 558.1   | 502.6   | 756.7   |
| EDG5    | 87.3    | 93.8    | 100.9   | 91.2    | 98.5    | 91.8    | 86.1    | 86.1    |
| EDG6    | 87.2    | 91.9    | 89.9    | 85.8    | 86.8    | 84.2    | 89      | 97.6    |
| EDG7    | 96.3    | 90.8    | 106.9   | 87.2    | 84      | 95.9    | 85.7    | 97.9    |
| EDG8    | 211.3   | 233.3   | 183.3   | 190.9   | 176     | 201.4   | 184.2   | 201.5   |
| EDIL3   | 101.9   | 99.8    | 92.4    | 98.3    | 86.5    | 92.4    | 98      | 107.5   |
| EDN1    | 126.1   | 147     | 101.9   | 93.4    | 95.1    | 100.2   | 159.4   | 175.6   |
| EDN2    | 105.5   | 115     | 101     | 96.9    | 91.2    | 83.4    | 85.6    | 107.7   |
| EDN3    | 102.3   | 110.7   | 98.1    | 91.2    | 85.3    | 86.2    | 104.1   | 109.3   |
| EDN3    | 84.3    | 99.2    | 85.7    | 88.9    | 77.5    | 82.3    | 82.3    | 92.8    |
| EDNRA   | 90.9    | 94.3    | 82.5    | 88.4    | 82.5    | 94      | 95.6    | 98.9    |
| EDNRB   | 168.7   | 192.5   | 116.4   | 106.5   | 106.7   | 110.3   | 181.6   | 244.5   |
| EDNRB   | 82.6    | 80      | 93.1    | 84.8    | 75.6    | 82.5    | 79.2    | 86.8    |
| EDNRB   | 71.4    | 84.3    | 93.4    | 83.4    | 78.3    | 83.4    | 71      | 77.5    |
| EEA1    | 121.7   | 146.7   | 126.4   | 119.5   | 124.7   | 187.1   | 108.6   | 129.7   |
| EED     | 110.1   | 106.6   | 107.1   | 105     | 96.4    | 108.9   | 98.7    | 91      |
| EED     | 416.7   | 555.8   | 227.9   | 197.1   | 142.1   | 219.9   | 376.3   | 813.7   |
| EED     | 219     | 272.3   | 125.6   | 109.7   | 93.6    | 106     | 206.3   | 258     |
| EEF1A1  | 32574.7 | 34364.2 | 58560.2 | 56366.3 | 55294.1 | 51504   | 31077   | 32683   |
| EEF1A1  | 30986.7 | 30960.6 | 53310.5 | 46243.3 | 40456   | 53855.6 | 31701.3 | 30467.3 |
| EEF1A2  | 2999.4  | 3795.8  | 2248.4  | 464.4   | 310.6   | 373.2   | 2626.2  | 3828.4  |
| EEF1B2  | 1643.8  | 2128.7  | 793     | 545.7   | 410.4   | 718.8   | 1191.4  | 1401.1  |
| EEF1B2  | 24210   | 26978.9 | 13818.7 | 14394.3 | 11107   | 13803.1 | 27053   | 27658.5 |
| EEF1B2  | 1374.8  | 1719.3  | 872.5   | 761.6   | 612.1   | 1052.8  | 1095    | 1213.4  |
| EEF1B2  | 20799   | 22732.3 | 17758.5 | 15665   | 13731   | 22037.3 | 16403.3 | 17598.7 |

|        |         |         |        |         |         |         |         |         |
|--------|---------|---------|--------|---------|---------|---------|---------|---------|
| EEF1D  | 6781.3  | 9218.5  | 3023.2 | 2040.7  | 1928    | 2770.7  | 7031    | 7924.8  |
| EEF1D  | 78.8    | 97.4    | 84.2   | 81.1    | 79.7    | 86.8    | 91.3    | 96.4    |
| EEF1E1 | 84      | 108.6   | 93.6   | 80.9    | 74.4    | 82      | 84.5    | 104.3   |
| EEF1G  | 21166.1 | 26586   | 14747  | 12883.9 | 11757.1 | 17245.4 | 20393.1 | 24828.6 |
| EEF2   | 12949.3 | 17439.1 | 9720.4 | 9744.5  | 7009.7  | 10966.5 | 12458.7 | 13576.8 |
| EEF2K  | 1028.5  | 1467.5  | 738.8  | 920.3   | 721.8   | 886.3   | 695.2   | 642.6   |
| EEFSEC | 122.6   | 130     | 103.5  | 94.8    | 81.7    | 105.6   | 112.1   | 139.9   |
| EFCAB1 | 82.8    | 98.9    | 101.8  | 91.9    | 87.2    | 92.1    | 90.6    | 97.3    |
| EFCAB2 | 84.4    | 115.7   | 96.7   | 80.5    | 76.8    | 75.3    | 93.1    | 141.1   |
| EFCAB3 | 96.5    | 121.1   | 94.5   | 103.7   | 95.6    | 84.3    | 102.9   | 113     |
| EFCBP1 | 91      | 115.1   | 96.5   | 87.3    | 84.3    | 87.3    | 92.8    | 88.3    |
| EFCBP2 | 188.2   | 193.2   | 172    | 110.4   | 112     | 113.3   | 171.6   | 194.4   |
| EFEMP1 | 88.9    | 111.2   | 95.4   | 96.7    | 86      | 90.2    | 115.6   | 162.6   |
| EFEMP1 | 97.5    | 102.7   | 100.5  | 95.1    | 95.5    | 91.8    | 111.3   | 118.3   |
| EFEMP1 | 89.6    | 94.6    | 91.8   | 93.6    | 81.1    | 92.9    | 197     | 261.7   |
| EFEMP2 | 704.1   | 736.1   | 473.6  | 333.7   | 306.5   | 360.7   | 591     | 479.4   |
| EFHA1  | 1724.2  | 1917.6  | 620.8  | 866.7   | 521.5   | 1119.8  | 1612.9  | 2980.4  |
| EFHA2  | 77.7    | 84      | 90.8   | 77.7    | 79.8    | 80.5    | 89.7    | 94.8    |
| EFHB   | 82.5    | 95.1    | 95.3   | 92.8    | 91.5    | 89.2    | 84.6    | 96.6    |
| EFHC1  | 144.2   | 154.3   | 108.8  | 123.2   | 108.6   | 138.6   | 119.7   | 173.7   |
| EFHC2  | 93      | 102.6   | 93.8   | 81.5    | 73.4    | 86.7    | 88.7    | 92.3    |
| EFHD1  | 359.4   | 401.6   | 211.1  | 277.9   | 147.7   | 253.9   | 221.2   | 278.3   |
| EFHD2  | 3311.6  | 4347.2  | 3061.1 | 2520.8  | 1799.6  | 2900.6  | 2493.5  | 3548.1  |
| EFNA1  | 88      | 101.9   | 89.8   | 86.2    | 89.7    | 87      | 93.4    | 99.6    |
| EFNA1  | 93.8    | 103     | 98.2   | 88      | 96.4    | 89.3    | 96.4    | 102.6   |
| EFNA2  | 81.3    | 92.4    | 81.3   | 85.6    | 81.1    | 76.9    | 77.9    | 80.7    |
| EFNA3  | 94.6    | 99.6    | 87.1   | 86.7    | 85.8    | 82.6    | 98.5    | 106.3   |
| EFNA4  | 160.7   | 188.1   | 110.4  | 95.6    | 92.4    | 100.1   | 143.7   | 193.6   |
| EFNA4  | 300.9   | 396.3   | 311.8  | 251.3   | 236     | 260.7   | 334.1   | 374.6   |
| EFNA5  | 80.1    | 85.5    | 94.9   | 92.2    | 78.7    | 87.8    | 90.6    | 91.7    |
| EFNB1  | 127.3   | 147.6   | 110.5  | 106.4   | 100.1   | 114     | 132.6   | 135.2   |
| EFNB2  | 139.8   | 151.7   | 115.6  | 107.8   | 100.6   | 105.2   | 146.6   | 171.8   |
| EFNB3  | 68.2    | 88.3    | 89.2   | 90.4    | 80.8    | 79.4    | 79.2    | 84.1    |
| EFS    | 124.2   | 125.2   | 98.7   | 91.6    | 93.9    | 95.6    | 108.1   | 119.5   |
| EFS    | 100.9   | 104.2   | 95     | 81.5    | 78.5    | 96.6    | 89.1    | 114     |
| EFTUD1 | 228.3   | 321.8   | 197.6  | 194.2   | 167.9   | 289.5   | 191.1   | 281.5   |
| EFTUD1 | 248.6   | 372.5   | 222.2  | 258.6   | 231.5   | 358.5   | 197.1   | 287.8   |
| EFTUD1 | 111.1   | 122     | 88.1   | 100.1   | 75.3    | 89.4    | 98.6    | 101.6   |
| EFTUD2 | 1825.3  | 2513.5  | 1855.4 | 1790.8  | 1309.8  | 2244.7  | 1466.3  | 2572.9  |
| EGF    | 117     | 114.6   | 97.1   | 86.6    | 95.9    | 88.8    | 106.2   | 123.9   |
| EGFL5  | 74.3    | 88.7    | 92.9   | 92.3    | 87.1    | 86.3    | 82.3    | 86.4    |
| EGFL6  | 78.4    | 99.8    | 97.1   | 93.7    | 91.5    | 94.9    | 77.7    | 82.8    |
| EGFL7  | 174.7   | 213.9   | 127.2  | 119.6   | 112.6   | 117.7   | 162.3   | 247.6   |
| EGFL7  | 139.4   | 182.6   | 108.3  | 99.2    | 84.2    | 99.6    | 148.1   | 159.3   |
| EGFL8  | 99.3    | 111.6   | 79.1   | 81.8    | 71.2    | 67.6    | 103.3   | 101     |
| EGFL9  | 84.7    | 101.9   | 91.5   | 82.4    | 86.5    | 90.3    | 100.3   | 98.2    |
| EGFL9  | 108.6   | 140.1   | 109.3  | 103.3   | 95.9    | 90.9    | 107.1   | 115.8   |
| EGFL9  | 186     | 216.5   | 114.8  | 88.3    | 89.1    | 98.5    | 183.2   | 193     |
| EGFLAM | 224.1   | 286.5   | 157.9  | 192.8   | 174.1   | 192.6   | 220.3   | 305.7   |
| EGFR   | 101     | 99.5    | 95.8   | 94      | 80.4    | 92.7    | 91.7    | 96      |

|         |        |        |        |        |        |        |        |        |
|---------|--------|--------|--------|--------|--------|--------|--------|--------|
| EGFR    | 78.3   | 83.6   | 94.3   | 91     | 88.7   | 90.6   | 83.6   | 92.1   |
| EGFR    | 71.3   | 77     | 88.1   | 88.5   | 77.7   | 76.6   | 83.2   | 86.9   |
| EGFR    | 113.1  | 131.3  | 98.7   | 87.9   | 92.4   | 89.8   | 96.3   | 119    |
| EGLN1   | 381.4  | 516.8  | 214.6  | 199.3  | 188.9  | 253.1  | 298.6  | 501.1  |
| EGLN2   | 103.4  | 104.7  | 80.9   | 88.1   | 88.3   | 83.6   | 108.6  | 110.7  |
| EGLN2   | 3501.9 | 4311.4 | 2137.4 | 1912.2 | 1708   | 1855.9 | 3317.2 | 3094.2 |
| EGLN3   | 87.2   | 99.7   | 86.8   | 89.4   | 86.8   | 96.2   | 92.5   | 102.1  |
| EGR1    | 237.5  | 285.3  | 212.6  | 151.1  | 124.4  | 159.2  | 222.7  | 354.2  |
| EGR2    | 111.4  | 110.7  | 111.3  | 107    | 98.3   | 111.5  | 104.6  | 115.4  |
| EGR3    | 128.4  | 146.5  | 98.3   | 96.1   | 93.9   | 96.1   | 122    | 135.4  |
| EGR3    | 140.9  | 175    | 119    | 117.4  | 104.7  | 103.8  | 152.7  | 188.7  |
| EGR4    | 104    | 109.3  | 78.8   | 84.6   | 82.3   | 88.8   | 104.8  | 111.8  |
| EHBP1   | 1013.8 | 1324.9 | 691.6  | 758.2  | 568.9  | 908.3  | 843.4  | 1411.8 |
| EHD1    | 1521.8 | 2011.7 | 1089.7 | 911.3  | 707.8  | 732.3  | 1301.3 | 1294.7 |
| EHD2    | 108.7  | 129.1  | 95.3   | 94.4   | 90.9   | 99.5   | 114.7  | 134.2  |
| EHD3    | 95     | 107.8  | 101.1  | 84.1   | 79.5   | 78.7   | 93.7   | 117.8  |
| EHD4    | 438.5  | 516.1  | 499.1  | 687.8  | 512.9  | 734    | 297.4  | 420.9  |
| EHF     | 80.7   | 103.9  | 93.5   | 87.2   | 82.7   | 88.3   | 84.8   | 89.2   |
| EHHADH  | 261.8  | 418.1  | 261.5  | 334.8  | 251.5  | 511.8  | 246.9  | 291.3  |
| EHMT1   | 116.8  | 144.2  | 126.8  | 113.4  | 111.7  | 119.5  | 108    | 129.3  |
| EHMT2   | 191.6  | 246.5  | 172.8  | 160    | 168.3  | 152.9  | 179.1  | 255.2  |
| EHMT2   | 103.4  | 121.2  | 84     | 85.2   | 72.1   | 89.7   | 97.5   | 122.9  |
| EI24    | 5110.4 | 6370.7 | 2680.8 | 1727.3 | 1282.9 | 1763.9 | 4404.2 | 5202.8 |
| EI24    | 1585.8 | 2162.9 | 631.6  | 400    | 274.1  | 416.7  | 1354.6 | 2771.8 |
| EID2B   | 3183.4 | 2774.8 | 1237.1 | 1688.2 | 1392.3 | 1277.3 | 2695.3 | 4741.3 |
| EID3    | 94.6   | 98.6   | 84.6   | 86.7   | 80.7   | 80.4   | 101.3  | 135.7  |
| EIF1    | 3640.3 | 4768   | 2199.5 | 2035.2 | 1557.5 | 2690.4 | 3655.4 | 6104.7 |
| EIF1AX  | 112.7  | 120.8  | 105.2  | 95.5   | 100.2  | 98.9   | 111.8  | 113.7  |
| EIF1AX  | 1851.3 | 2194   | 863.6  | 923.7  | 549.2  | 755.3  | 2118.4 | 3799.5 |
| EIF1AX  | 172.6  | 203.2  | 143.7  | 151    | 127.5  | 174.5  | 163.8  | 199.9  |
| EIF1AY  | 370    | 459.3  | 219.5  | 278.3  | 207.3  | 296.8  | 347.6  | 542.1  |
| EIF1B   | 1470.3 | 1950.3 | 478.6  | 398.7  | 357.2  | 449.3  | 2032.9 | 3085.3 |
| EIF2A   | 3490.3 | 4596.3 | 2175.8 | 2213.2 | 1686.9 | 3073.9 | 3227.7 | 5301.1 |
| EIF2AK1 | 5268.8 | 6982.8 | 2705.8 | 3231.3 | 2363.4 | 3384.3 | 4771.9 | 5926.7 |
| EIF2AK2 | 1247   | 1992.9 | 674.5  | 772.6  | 758.2  | 784.7  | 1383.9 | 1579.9 |
| EIF2AK4 | 406.6  | 497.9  | 227.8  | 337.5  | 328.6  | 354.1  | 360    | 366.9  |
| EIF2B1  | 1147.8 | 1259.5 | 809.2  | 761.9  | 629    | 1059.2 | 802.4  | 1060.2 |
| EIF2B2  | 1358   | 1796.7 | 1043   | 948.7  | 700.7  | 1116.7 | 1031.9 | 1345.7 |
| EIF2B4  | 2528.7 | 2966.9 | 2175.5 | 1813.9 | 1560   | 2391.5 | 2038.8 | 2520.7 |
| EIF2B4  | 2037.2 | 2643.6 | 1494.1 | 1312.7 | 1162.6 | 1806   | 1678.4 | 2218   |
| EIF2B4  | 96     | 106.8  | 108.2  | 103.2  | 95.8   | 97.4   | 93.2   | 101    |
| EIF2B5  | 1411.2 | 1950.1 | 623.9  | 545.2  | 495.6  | 678.3  | 1196.5 | 1180.1 |
| EIF2C1  | 250.2  | 352.9  | 219.3  | 293.9  | 221    | 325.2  | 248.8  | 326    |
| EIF2C2  | 757.8  | 1630   | 563.8  | 1184.9 | 1098   | 712.2  | 1095.6 | 986    |
| EIF2C3  | 141.8  | 198.2  | 115.2  | 119    | 107.6  | 129.8  | 141.5  | 181    |
| EIF2C3  | 118    | 140.7  | 120.5  | 133    | 118    | 129    | 112.9  | 130.6  |
| EIF2C4  | 182.2  | 231.7  | 125.8  | 129    | 115.9  | 129.7  | 168.5  | 199.7  |
| EIF2S1  | 440.2  | 605.7  | 219.5  | 192.1  | 176.9  | 186.2  | 365.5  | 542.2  |
| EIF2S2  | 384.8  | 485.9  | 332    | 385.5  | 272.6  | 482.7  | 294.6  | 554    |
| EIF2S3  | 5371.7 | 6274.7 | 4700   | 4989.6 | 4167.1 | 5776.2 | 4396.5 | 7129.4 |

|           |         |         |         |         |         |         |         |         |
|-----------|---------|---------|---------|---------|---------|---------|---------|---------|
| EIF3S1    | 1055    | 1396.2  | 546.2   | 480.6   | 372.5   | 977.3   | 844.2   | 1676    |
| EIF3S10   | 1402.8  | 1657.2  | 498.3   | 636.8   | 542     | 975     | 1074.6  | 1522.1  |
| EIF3S12   | 7880    | 9322.3  | 3556.2  | 3133.7  | 2352.3  | 3606.3  | 7573.2  | 11009   |
| EIF3S2    | 3556.8  | 4619    | 2134.5  | 2278.4  | 1792.6  | 2676.5  | 2966.4  | 4152.9  |
| EIF3S3    | 8151    | 10410   | 5614.1  | 4460.1  | 3718    | 5653.4  | 7304.1  | 9768.1  |
| EIF3S4    | 3640.2  | 4610.7  | 2432.6  | 1463.3  | 1290.9  | 1873.1  | 3948.1  | 5113.1  |
| EIF3S5    | 7496    | 9062.3  | 5134.8  | 4280.3  | 3109.7  | 4558.2  | 6803.4  | 8890.2  |
| EIF3S6    | 30314.1 | 31749.7 | 20056.5 | 18102.8 | 13923   | 16891.7 | 27503   | 30027.2 |
| EIF3S6IP  | 8205.8  | 11264.5 | 5812.3  | 4772.9  | 3911.7  | 6082.8  | 7095.3  | 10370.9 |
| EIF3S7    | 5973.5  | 7657.5  | 4887.7  | 4872.6  | 3820.3  | 6575.4  | 4894.9  | 10290.7 |
| EIF3S8    | 177.9   | 210     | 106.8   | 102.9   | 93.5    | 115.7   | 162     | 184.7   |
| EIF3S9    | 9427.2  | 11985   | 7846.3  | 8801.7  | 7549    | 9265.8  | 7263.1  | 7281.1  |
| EIF3S9    | 441.3   | 598.3   | 571.9   | 468     | 392.3   | 639.3   | 350.4   | 520.1   |
| EIF3S9    | 1694.1  | 2320.5  | 2146.6  | 2195.4  | 1872.8  | 3173.9  | 1460.9  | 2619.1  |
| EIF4A1    | 20690.7 | 25346.7 | 17993.7 | 16305.2 | 11766.1 | 19510.9 | 19220.3 | 26974.7 |
| EIF4A2    | 7004.1  | 7813.8  | 4286.6  | 5005.9  | 3727.7  | 7135.6  | 4709.5  | 6369.5  |
| EIF4B     | 3979.6  | 5962.5  | 4129.7  | 4072.4  | 3017    | 6721.2  | 3727.4  | 5030.9  |
| EIF4E     | 252.6   | 283.5   | 121.1   | 125.4   | 106.6   | 129.6   | 234.4   | 545.7   |
| EIF4E2    | 1718.5  | 2401.5  | 758.2   | 545.9   | 432.1   | 628.4   | 1407.2  | 1823.1  |
| EIF4E3    | 174.9   | 247.8   | 148     | 167     | 137.8   | 193.1   | 174.1   | 258.6   |
| EIF4EBP1  | 355.1   | 446     | 238.4   | 164.4   | 135.9   | 173.4   | 348.4   | 497.9   |
| EIF4EBP2  | 931     | 1365.1  | 784.5   | 566.4   | 475.3   | 807.3   | 707     | 1043.3  |
| EIF4EBP3  | 98.9    | 97.8    | 97.7    | 84.6    | 95.3    | 87.3    | 93.1    | 98.4    |
| EIF4ENIF1 | 468.7   | 560.7   | 413.3   | 489.2   | 398.6   | 576.6   | 432.8   | 803.9   |
| EIF4G1    | 867.2   | 1077.6  | 896.3   | 1036.2  | 870.6   | 1153.5  | 770.6   | 987.2   |
| EIF4G1    | 83.4    | 91.5    | 82      | 77.2    | 77.9    | 86.6    | 76.1    | 92.3    |
| EIF4G1    | 1616.6  | 2197    | 2945.4  | 3224.3  | 2588.5  | 3412.9  | 1524.5  | 2093.6  |
| EIF4G1    | 102.5   | 116.6   | 97      | 93.3    | 87.3    | 87.2    | 106.9   | 109.7   |
| EIF4G2    | 7863.8  | 9167.7  | 3816.5  | 3046    | 2236.7  | 3077.6  | 6799.1  | 12003   |
| EIF4G2    | 1383.6  | 1848.1  | 600.6   | 430.1   | 320.4   | 561     | 837.6   | 1188.8  |
| EIF4G2    | 7012.2  | 8615.1  | 6295.4  | 4776.5  | 3347.6  | 8335.6  | 5918.7  | 9952.9  |
| EIF4G3    | 944.2   | 1505.2  | 825.5   | 1133.4  | 852.9   | 1611.9  | 964.1   | 977     |
| EIF4H     | 3943.7  | 5281.3  | 2721.5  | 2302.4  | 1896.5  | 2914    | 3188.4  | 5151.1  |
| EIF5      | 140.1   | 168.1   | 92.5    | 96.2    | 100.8   | 109.1   | 138     | 183     |
| EIF5      | 2426.7  | 3349.7  | 1584.6  | 1512.6  | 1125.3  | 1227.7  | 3017.4  | 3731.5  |
| EIF5      | 110     | 126     | 103.4   | 89.8    | 89.9    | 91.3    | 91      | 108.4   |
| EIF5A     | 1939.7  | 2290.5  | 1178.7  | 906.1   | 661.4   | 570.1   | 1741.5  | 2186.9  |
| EIF5A2    | 102.2   | 110.1   | 90.9    | 86.5    | 92.3    | 84.3    | 114.2   | 118.8   |
| EIF5B     | 549.1   | 857.8   | 453     | 568.9   | 522     | 1072.9  | 394.9   | 722.5   |
| ELA1      | 93.1    | 101.1   | 88.9    | 128.3   | 118     | 128.8   | 102.4   | 104.3   |
| ELA2      | 32115.9 | 31639.8 | 27789.5 | 27450.4 | 24268.3 | 23376.7 | 31004.4 | 30970.5 |
| ELA2A     | 98.3    | 107.4   | 91.8    | 79      | 79.3    | 92.5    | 100.1   | 99.7    |
| ELA2B     | 101.9   | 139.1   | 109.8   | 89.8    | 97.5    | 94.8    | 120.8   | 138.5   |
| ELA3A     | 80.8    | 86.9    | 87.3    | 83.1    | 77.2    | 88.6    | 86.6    | 87.7    |
| ELA3B     | 90.9    | 94.3    | 100.8   | 87.7    | 89.9    | 91.7    | 90.6    | 100     |
| ELAC1     | 198.4   | 254.8   | 203.3   | 197.5   | 164.7   | 196.1   | 159.8   | 241.7   |
| ELAC2     | 225.3   | 252.3   | 240.9   | 272.9   | 235.8   | 326.5   | 226.7   | 306.9   |
| ELAVL1    | 200.1   | 253.9   | 163     | 150.8   | 153.7   | 168.9   | 194.4   | 231.3   |
| ELAVL2    | 107.2   | 133.5   | 105.6   | 101.4   | 89.8    | 96.9    | 100.2   | 119.4   |
| ELAVL3    | 100.7   | 109.7   | 93.7    | 94.4    | 86.4    | 91.3    | 88.1    | 111.3   |

|         |        |        |        |        |        |        |        |        |
|---------|--------|--------|--------|--------|--------|--------|--------|--------|
| ELAVL3  | 97.2   | 122.8  | 99.4   | 92.3   | 95.2   | 99.9   | 96.8   | 104.5  |
| ELAVL4  | 97.1   | 108.6  | 102.8  | 83.8   | 81.2   | 94.6   | 93     | 101.3  |
| ELF1    | 5563.1 | 7124.7 | 2751.3 | 3204.8 | 2198.8 | 3635.5 | 4849.8 | 5477.4 |
| ELF2    | 207.9  | 293.7  | 131.9  | 135.3  | 135.2  | 123.5  | 207.7  | 310.2  |
| ELF2    | 1020.2 | 1377.1 | 743.4  | 748.2  | 675    | 1212.1 | 844.3  | 1451.5 |
| ELF2    | 282.1  | 361.8  | 170.9  | 169.3  | 149.2  | 129.2  | 239.1  | 290.2  |
| ELF3    | 107.9  | 137.4  | 94.5   | 95.1   | 91.8   | 85.2   | 97.7   | 109.6  |
| ELF4    | 885.2  | 1040.6 | 774    | 666.8  | 552.2  | 660.6  | 858    | 1095.6 |
| ELF5    | 70.1   | 88     | 82.5   | 86     | 76.8   | 75.6   | 71.5   | 82.3   |
| ELF5    | 81     | 93.1   | 95.2   | 84.7   | 89.5   | 85     | 86.4   | 94.7   |
| ELK1    | 180.6  | 180.4  | 127.9  | 154.7  | 153.6  | 172.4  | 168.9  | 222.1  |
| ELK3    | 113.6  | 128.9  | 98.8   | 103.6  | 89.4   | 102.6  | 103.8  | 113.8  |
| ELK4    | 185    | 233.7  | 130.6  | 102.2  | 105.4  | 112.7  | 186.4  | 247    |
| ELK4    | 109.2  | 121.5  | 92     | 94     | 83.1   | 84.4   | 99.6   | 112.4  |
| ELK4    | 133.2  | 183.3  | 114.1  | 105.4  | 98.1   | 96.8   | 138.9  | 167.8  |
| ELL     | 320.3  | 442.9  | 317.7  | 257.1  | 215.8  | 255.3  | 326.6  | 506.3  |
| ELL3    | 119.4  | 123.4  | 112.1  | 106    | 94.2   | 108    | 106.8  | 122    |
| ELLS1   | 373.3  | 450.1  | 229.4  | 584.4  | 427.5  | 583.4  | 335.7  | 427.3  |
| ELMO1   | 105    | 122.3  | 113.3  | 86.3   | 81.7   | 90.7   | 105.1  | 124.5  |
| ELMO1   | 255.3  | 343.9  | 377    | 580.7  | 491.9  | 870.9  | 280.8  | 543.4  |
| ELMO1   | 101.6  | 95.5   | 92     | 86.6   | 80.6   | 88.8   | 100.8  | 117.4  |
| ELMO1   | 141.5  | 154.5  | 115.9  | 115    | 115.1  | 107.2  | 115.6  | 175.1  |
| ELMO2   | 120.6  | 148.1  | 99.5   | 118.3  | 109.6  | 126.3  | 113.5  | 151.4  |
| ELMO2   | 392.6  | 494.3  | 404.8  | 527    | 484.2  | 713.1  | 335.5  | 587.2  |
| ELMO2   | 84.4   | 97.3   | 95.1   | 93.9   | 90.8   | 93     | 83.8   | 96.4   |
| ELMO3   | 130.2  | 146.5  | 135.4  | 97     | 104.3  | 135.2  | 113.1  | 154.3  |
| ELMOD1  | 85.2   | 93.7   | 104.1  | 97.9   | 88.3   | 102    | 95.1   | 98.6   |
| ELMOD2  | 251.9  | 326.6  | 167.3  | 120.2  | 107.1  | 141.1  | 221.4  | 325.4  |
| ELN     | 121    | 138.4  | 85.2   | 80.9   | 74.6   | 81.7   | 111.1  | 135.6  |
| ELN     | 129.9  | 154.2  | 96.2   | 101.3  | 79.3   | 88.7   | 132.1  | 135.5  |
| ELOF1   | 374.1  | 496.9  | 158.7  | 121.4  | 118.4  | 139.1  | 356.4  | 420.8  |
| ELOVL1  | 521.7  | 636.4  | 276.6  | 228.3  | 171.9  | 230.3  | 514.7  | 826.5  |
| ELOVL2  | 110.5  | 129.3  | 107.2  | 88.2   | 92.5   | 105.3  | 117.5  | 114.2  |
| ELOVL3  | 130    | 135.2  | 118.1  | 104    | 98.3   | 103.4  | 115.4  | 122    |
| ELOVL4  | 140    | 141.7  | 113    | 121.5  | 94.8   | 116.6  | 137.4  | 164.8  |
| ELOVL5  | 2349.9 | 2732   | 1386.3 | 1579.8 | 1045.8 | 1880.6 | 2258.8 | 4350.4 |
| ELOVL6  | 122    | 133.7  | 111    | 99.2   | 83     | 92.7   | 113.7  | 104.9  |
| ELOVL7  | 83.2   | 88.6   | 90.2   | 83     | 85.6   | 90.9   | 81.6   | 91.5   |
| ELP3    | 1395.5 | 1944.4 | 953.6  | 880.1  | 730    | 1247.1 | 1235   | 1462.8 |
| ELP4    | 468.7  | 582.1  | 297.8  | 259.4  | 223.8  | 318.7  | 324.9  | 484    |
| ELSPBP1 | 84.6   | 84.3   | 85.3   | 88.8   | 81.1   | 93.6   | 71.5   | 84.2   |
| EMCN    | 116.9  | 131.4  | 101.8  | 89.7   | 87.3   | 91.9   | 118.1  | 124.6  |
| EMD     | 83.5   | 94.3   | 100.4  | 89.2   | 94.9   | 91.9   | 96.7   | 108.1  |
| EME1    | 294.7  | 389.5  | 166.1  | 150.3  | 154    | 209.7  | 233.6  | 278.8  |
| EME2    | 108.3  | 137.6  | 100.1  | 99     | 91.4   | 101.5  | 114.5  | 133.4  |
| EMG1    | 1677.2 | 2189.3 | 1149.8 | 893.3  | 629.6  | 1345.6 | 1524.6 | 1917.5 |
| EMID1   | 87     | 90.7   | 107.6  | 104.9  | 98.9   | 110.5  | 92.2   | 97.5   |
| EMILIN1 | 85     | 84.5   | 90.5   | 88.2   | 92     | 90.5   | 78     | 84.4   |
| EMILIN2 | 2783   | 3752.1 | 1742.6 | 1568.9 | 1287.1 | 1406.8 | 2531.4 | 2171.2 |
| EMILIN3 | 103.7  | 120.7  | 93.2   | 99.3   | 83     | 97.6   | 107.9  | 110    |

|         |         |         |         |        |         |         |         |         |
|---------|---------|---------|---------|--------|---------|---------|---------|---------|
| EML1    | 207.7   | 316.6   | 186     | 123.9  | 106.5   | 152.8   | 167.1   | 250.6   |
| EML1    | 84.3    | 86.7    | 86.1    | 84.9   | 83      | 84.6    | 79.6    | 79.6    |
| EML1    | 160     | 201.9   | 171.1   | 118.7  | 100.7   | 125.4   | 139.6   | 181.8   |
| EML3    | 1550.2  | 1781.9  | 1152.5  | 783.2  | 712.4   | 810     | 977.2   | 1136.8  |
| EML4    | 478.2   | 678.8   | 270.6   | 317.6  | 263.9   | 339.3   | 438     | 636.9   |
| EML5    | 89.4    | 96.1    | 91.3    | 89     | 76.7    | 88.2    | 96.1    | 98.3    |
| EMP1    | 127.8   | 123.4   | 114     | 94.7   | 83.2    | 110.1   | 150.9   | 251.6   |
| EMP2    | 132.9   | 169.2   | 98.4    | 93.3   | 86.8    | 104.7   | 137.9   | 143.5   |
| EMP3    | 5732.3  | 7847.8  | 4421.4  | 2675.3 | 1900.4  | 2646.7  | 5375.7  | 6685.9  |
| EMR1    | 78.8    | 87.7    | 91.9    | 106.5  | 91      | 119.1   | 77.5    | 94      |
| EMR2    | 186.8   | 253.1   | 156     | 512.6  | 412.7   | 528.4   | 171.1   | 201.8   |
| EMR3    | 72.4    | 80.2    | 77.1    | 74.4   | 72.7    | 73.4    | 78.5    | 87.7    |
| EMR3    | 96.8    | 116.2   | 96.8    | 82.9   | 89.8    | 85.8    | 103.3   | 111.1   |
| EMR4    | 99.6    | 117.6   | 106.5   | 99     | 95.1    | 94.2    | 91.4    | 99.5    |
| EMR4    | 99      | 99.6    | 95.4    | 101    | 88.7    | 96.1    | 85      | 95.2    |
| EMX1    | 110.9   | 122.2   | 103.1   | 85.2   | 91.9    | 82.7    | 109.2   | 117.5   |
| EMX1    | 87.1    | 101.1   | 87.7    | 81.2   | 81.1    | 79.3    | 90.3    | 96.4    |
| EMX2    | 125     | 139.4   | 86.8    | 86     | 90.3    | 85.7    | 116.8   | 126.9   |
| EN1     | 99.7    | 104.7   | 100.3   | 91.4   | 94.1    | 90.5    | 94.3    | 111.5   |
| EN2     | 107.8   | 131.2   | 78.3    | 82     | 72.4    | 95      | 102.1   | 135.6   |
| ENAH    | 87.4    | 111.6   | 88.4    | 73.6   | 81.2    | 77.8    | 76.8    | 86.1    |
| ENAH    | 89.8    | 117.1   | 92.8    | 76.9   | 81.7    | 86.6    | 88.3    | 101.9   |
| ENAH    | 80.8    | 89.6    | 101.7   | 81.8   | 74.2    | 77.9    | 84.3    | 85.1    |
| ENAM    | 79.2    | 93.1    | 89.7    | 91.2   | 89.2    | 88.6    | 82.4    | 83.2    |
| ENC1    | 151.9   | 178.3   | 144.5   | 166.3  | 140.5   | 174.1   | 155.1   | 222.3   |
| ENDOG   | 805.1   | 1120.2  | 474.1   | 277.4  | 223.7   | 286.1   | 671.9   | 853.3   |
| ENDOGL1 | 182.6   | 212.3   | 117.4   | 106.5  | 97.5    | 104.6   | 201.6   | 239.2   |
| ENG     | 371.6   | 516.4   | 400.6   | 312.8  | 199.5   | 373.1   | 312.1   | 565.1   |
| ENO1    | 20041.8 | 24067.5 | 16440.9 | 13657  | 10282.4 | 13413.8 | 20952.6 | 23640.2 |
| ENO2    | 126.7   | 127.3   | 95.9    | 86.4   | 90.3    | 102.5   | 112.2   | 136.7   |
| ENO3    | 246     | 238.2   | 175.7   | 173.3  | 163.6   | 204.6   | 171.4   | 168.4   |
| ENO3    | 86.8    | 119.6   | 108.1   | 110.7  | 102.8   | 109     | 94.6    | 98.8    |
| ENOSF1  | 1121.1  | 1200.7  | 427.1   | 465.7  | 438.3   | 657.8   | 759.7   | 1222.7  |
| ENPEP   | 78.4    | 80.4    | 83.7    | 82.3   | 85.1    | 87      | 78.6    | 84.3    |
| ENPP1   | 119.7   | 142.7   | 111     | 102.5  | 109.5   | 103.1   | 110.4   | 114.9   |
| ENPP2   | 81.8    | 101.9   | 106.3   | 98.7   | 89      | 92.4    | 94.5    | 97.5    |
| ENPP2   | 86.1    | 101.4   | 81.2    | 80.9   | 79.9    | 78.9    | 88.7    | 95.8    |
| ENPP3   | 91.8    | 93.7    | 98      | 87.4   | 85.9    | 94.1    | 87.1    | 92      |
| ENPP4   | 247.7   | 294.9   | 188.5   | 277.5  | 185.2   | 440.7   | 205.4   | 353.8   |
| ENPP5   | 97      | 109.7   | 98.1    | 96.9   | 105.6   | 94.6    | 109.4   | 111.1   |
| ENPP6   | 81.1    | 79.2    | 91.2    | 83.2   | 74.8    | 92.9    | 74.8    | 86.9    |
| ENPP7   | 99.4    | 121.3   | 96.9    | 93     | 87.8    | 100.7   | 96.6    | 115.8   |
| ENSA    | 106.7   | 108.8   | 93.9    | 88.6   | 86.5    | 91.2    | 101.3   | 115.1   |
| ENSA    | 2040.1  | 3166.6  | 667.3   | 702.8  | 670.5   | 651.2   | 1956.3  | 2325.6  |
| ENTH    | 3083.3  | 3730.9  | 1988    | 3226.2 | 2485.2  | 5318.7  | 1823.7  | 3576.5  |
| ENTPD1  | 274.1   | 276.9   | 139.2   | 138.9  | 107.9   | 148.2   | 249.2   | 257.4   |
| ENTPD2  | 71.6    | 79.5    | 85.3    | 88.5   | 81.7    | 78.8    | 80.5    | 86.3    |
| ENTPD2  | 96.9    | 115.5   | 90.7    | 86.8   | 76.8    | 79.1    | 94      | 108.1   |
| ENTPD3  | 87.7    | 107.6   | 107.5   | 82.1   | 66      | 82.2    | 101.9   | 113.8   |
| ENTPD4  | 232.7   | 257.5   | 207.3   | 136.9  | 149.4   | 131     | 182     | 251.8   |

|          |        |         |        |        |        |        |        |         |
|----------|--------|---------|--------|--------|--------|--------|--------|---------|
| ENTPD5   | 128.6  | 157.9   | 101.8  | 94.1   | 88.6   | 95.5   | 119.4  | 123.1   |
| ENTPD6   | 445.9  | 496.1   | 448.9  | 318.8  | 307.6  | 461.5  | 355.6  | 563.8   |
| ENTPD7   | 180.3  | 216.7   | 134.3  | 108.5  | 100.5  | 119.1  | 131.9  | 196     |
| ENTPD8   | 84.8   | 97.3    | 85.6   | 86.8   | 87.8   | 87.2   | 88     | 91.7    |
| ENTPD8   | 135.5  | 136.2   | 96.9   | 84     | 82.2   | 89.9   | 112.8  | 161.2   |
| ENTPD8   | 94.1   | 106.8   | 89     | 83.7   | 83.7   | 89.1   | 90.7   | 103.3   |
| ENY2     | 9037.4 | 10279.4 | 5292.7 | 3734.3 | 2990.7 | 4655.5 | 8237.7 | 12238.4 |
| EOMES    | 152.7  | 187.5   | 111.7  | 95.1   | 85     | 95.2   | 118.4  | 167.7   |
| EP300    | 212.8  | 270.2   | 264.7  | 644.4  | 562.9  | 658.3  | 216.4  | 520.3   |
| EP400    | 409.2  | 589     | 394.6  | 912.2  | 591.3  | 909.8  | 436.8  | 745.6   |
| EP400NL  | 88.8   | 94.9    | 101.3  | 80.3   | 84.8   | 90.4   | 87.3   | 91.3    |
| EPAG     | 90.9   | 102.7   | 90.8   | 89.5   | 88     | 99.4   | 89.5   | 98.6    |
| EPAS1    | 270.5  | 326     | 295.7  | 838.8  | 861.6  | 868.7  | 360.8  | 674.6   |
| EPB41    | 127.6  | 153.8   | 91.6   | 81.8   | 77.8   | 84.5   | 109.6  | 160.2   |
| EPB41    | 76.8   | 78      | 96.6   | 86.1   | 83.8   | 81.1   | 79.6   | 75.6    |
| EPB41    | 111.8  | 128.4   | 94.1   | 97.9   | 91.1   | 103.8  | 105.2  | 129.1   |
| EPB41L1  | 93.7   | 92.7    | 95.4   | 96.9   | 99     | 97     | 92     | 99.4    |
| EPB41L1  | 112.7  | 131.9   | 98.5   | 84.1   | 76.7   | 87     | 116.8  | 118.5   |
| EPB41L2  | 124.2  | 134     | 87.6   | 94.1   | 80.3   | 102.2  | 118.4  | 148.5   |
| EPB41L3  | 318.5  | 425.9   | 383.4  | 1176   | 648.7  | 1971.8 | 406.5  | 844.9   |
| EPB41L4B | 150.1  | 183.2   | 98.6   | 99.3   | 96.1   | 98.9   | 140.3  | 172.8   |
| EPB41L4B | 124.7  | 167.2   | 88.5   | 90.2   | 93.9   | 87.7   | 138.2  | 158.5   |
| EPB41L5  | 89.5   | 125.6   | 83.9   | 84.9   | 72.1   | 83.6   | 91.6   | 135.4   |
| EPB42    | 77.7   | 88      | 84.1   | 81.3   | 82     | 82.9   | 75.9   | 93.3    |
| EPB49    | 109.5  | 129     | 116    | 101.2  | 105.8  | 117.8  | 103.6  | 118.9   |
| EPC1     | 177.1  | 217.5   | 149.7  | 141.4  | 130.9  | 147    | 150.8  | 165.8   |
| EPC2     | 122.2  | 163.7   | 94.3   | 96     | 102.1  | 127    | 122.8  | 144.8   |
| EPDR1    | 2755.3 | 3845.4  | 2290   | 2292.8 | 1656.8 | 2537.3 | 3139.1 | 5130.1  |
| EPGN     | 319.9  | 439.4   | 149.7  | 122.2  | 109    | 146.2  | 277.6  | 293.3   |
| EPHA1    | 131.3  | 158.8   | 156.4  | 120.9  | 99.6   | 135    | 118.8  | 125.1   |
| EPHA10   | 105.9  | 115.1   | 121.1  | 105.2  | 104.9  | 123.8  | 99.3   | 109.2   |
| EPHA10   | 97     | 97.8    | 100.9  | 86.5   | 90.9   | 92.9   | 87.6   | 98.6    |
| EPHA2    | 92.8   | 97.3    | 90.5   | 85.2   | 85.8   | 87.2   | 90     | 104     |
| EPHA3    | 96.4   | 108     | 95.6   | 91.9   | 85.8   | 86.3   | 86.2   | 97.5    |
| EPHA3    | 77.2   | 85.1    | 99.9   | 95.8   | 98.7   | 102.4  | 83.2   | 79.4    |
| EPHA3    | 94.8   | 97.1    | 84.4   | 79.6   | 76.7   | 87     | 85     | 103.1   |
| EPHA4    | 83.4   | 93      | 93.8   | 90.9   | 88.4   | 87.8   | 94     | 86.4    |
| EPHA5    | 110.7  | 112.4   | 84.3   | 80.8   | 87     | 85.2   | 100.4  | 123.2   |
| EPHA5    | 81.1   | 79.8    | 84.4   | 76     | 78.2   | 72.8   | 78.2   | 86.3    |
| EPHA5    | 122.8  | 135.5   | 85.4   | 87.2   | 80.8   | 84     | 111.2  | 135.8   |
| EPHA6    | 84.6   | 95.5    | 88     | 85.4   | 82.1   | 80.2   | 84.4   | 94      |
| EPHA6    | 117.3  | 129.9   | 120.8  | 107.9  | 102.1  | 108    | 111.9  | 117.5   |
| EPHA7    | 84.1   | 96.7    | 100.7  | 102.1  | 96.1   | 90.7   | 87.8   | 87.8    |
| EPHA8    | 124.3  | 139.1   | 115.7  | 125.9  | 103    | 101.7  | 112.8  | 128     |
| EPHA8    | 78.1   | 81      | 96.8   | 89.6   | 90.3   | 87     | 76.1   | 82.5    |
| EPHB1    | 207.8  | 254.1   | 223    | 495.7  | 317.3  | 697.2  | 191.5  | 395     |
| EPHB2    | 107.9  | 143.5   | 106    | 87.8   | 89.8   | 88.6   | 109.2  | 128.2   |
| EPHB2    | 100.6  | 110.6   | 84     | 80.1   | 82.5   | 86.7   | 99.9   | 94.9    |
| EPHB3    | 112.5  | 130.6   | 125.3  | 121.6  | 107.8  | 114.4  | 94.4   | 122.9   |
| EPHB4    | 152.1  | 180.6   | 175.8  | 172.4  | 150.6  | 195.5  | 125.6  | 181.8   |



|          |        |         |        |        |        |        |        |        |
|----------|--------|---------|--------|--------|--------|--------|--------|--------|
| EPHB6    | 110.1  | 123.5   | 138.9  | 100.8  | 93.6   | 123.4  | 106.6  | 160.9  |
| EPHX1    | 196.7  | 258.9   | 168.6  | 132.7  | 127.2  | 137    | 242.7  | 357.3  |
| EPHX2    | 159.7  | 195.6   | 100.8  | 107.7  | 98.5   | 131.9  | 149.7  | 178.9  |
| EPIM     | 114.9  | 148.5   | 91.1   | 86.3   | 85.3   | 95     | 105.8  | 132.5  |
| EPM2A    | 176    | 195.4   | 103.4  | 99.2   | 106.1  | 101.1  | 157.2  | 211.2  |
| EPM2A    | 96.2   | 92.3    | 101    | 91.9   | 91.4   | 94.4   | 89     | 97.5   |
| EPM2AIP1 | 410.4  | 531.4   | 399.8  | 437.7  | 347.7  | 557.6  | 298.6  | 702    |
| EPN1     | 6023   | 8023.4  | 4871.5 | 3119.2 | 2589.3 | 3017.8 | 5668.1 | 7782.2 |
| EPN2     | 80.5   | 98.4    | 92.2   | 99.3   | 85.5   | 88.2   | 86.1   | 99.4   |
| EPN2     | 84     | 91.4    | 97.2   | 99.4   | 84.3   | 99     | 84.8   | 83.8   |
| EPN2     | 91.7   | 99.6    | 104.6  | 111.9  | 99.4   | 96.2   | 84.3   | 108.1  |
| EPN3     | 105    | 123.6   | 104    | 87.1   | 78.8   | 84     | 107.3  | 112.2  |
| EPO      | 84.1   | 86.6    | 91.4   | 81.7   | 79.2   | 85.9   | 91     | 91     |
| EPOR     | 193.6  | 213.3   | 131.4  | 128.3  | 110    | 132.1  | 181    | 254.8  |
| EPPB9    | 114.8  | 128     | 104.1  | 92.4   | 80     | 93.6   | 108.7  | 133.4  |
| EPR1     | 133.9  | 175.7   | 127.1  | 100.3  | 109.6  | 96.4   | 106.4  | 109.5  |
| EPRS     | 8622.3 | 10916.9 | 5391   | 5064.9 | 4112.9 | 7097   | 6963   | 8737   |
| EPS15    | 243.7  | 303.5   | 191.8  | 209.1  | 178.1  | 277.6  | 247.3  | 307.8  |
| EPS15L1  | 175.3  | 211.3   | 167    | 162.3  | 148.5  | 153.1  | 165.3  | 198.8  |
| EPS8L1   | 86     | 97.3    | 103.9  | 98.7   | 96.1   | 90.7   | 88.4   | 105.7  |
| EPS8L1   | 124.6  | 140.1   | 127.6  | 107    | 98.7   | 106.9  | 133.2  | 169.4  |
| EPS8L1   | 79.7   | 87.5    | 98.1   | 91.8   | 82.5   | 81.1   | 80.3   | 84.1   |
| EPS8L1   | 121.2  | 149.5   | 97.6   | 79.6   | 81.7   | 76     | 111.5  | 143    |
| EPS8L2   | 109.9  | 125.8   | 88.3   | 79.6   | 85     | 78.6   | 102.6  | 123.3  |
| EPS8L3   | 111.9  | 141.5   | 93.6   | 89.1   | 88.9   | 92.9   | 110.8  | 111.5  |
| EPS8L3   | 151    | 140     | 102.5  | 83.7   | 96.4   | 109.5  | 139.2  | 154.1  |
| EPSTI1   | 214.4  | 300.2   | 210.8  | 188.4  | 191.8  | 212.2  | 190.7  | 216.3  |
| EPX      | 120.6  | 136.9   | 97.4   | 83.8   | 78.5   | 89.2   | 105.7  | 128.7  |
| ERAF     | 105.4  | 139.2   | 92.7   | 94.8   | 87.3   | 90.1   | 114.8  | 114.1  |
| ERAL1    | 1577.2 | 1794.8  | 1096.6 | 843.4  | 605.4  | 1049.3 | 1350.7 | 2400.6 |
| ERAS     | 89.8   | 98.6    | 87.9   | 99.4   | 83.9   | 88.6   | 84.7   | 104.1  |
| ERBB2    | 96.1   | 99.8    | 79     | 81.2   | 75     | 68.7   | 96.3   | 111.6  |
| ERBB2    | 103    | 128.3   | 111.4  | 99.1   | 97.9   | 102.2  | 106.1  | 111.6  |
| ERBB2    | 97.7   | 118.6   | 117.5  | 122.2  | 118.8  | 145.9  | 99.7   | 106.1  |
| ERBB2IP  | 193    | 253.8   | 131.8  | 124.9  | 123.4  | 142.2  | 156.3  | 174.3  |
| ERBB2IP  | 105.2  | 127.2   | 107    | 109.9  | 111.5  | 118.6  | 109.4  | 121.8  |
| ERBB3    | 114    | 133.7   | 119.3  | 91.2   | 98.3   | 98.7   | 117.3  | 120.7  |
| ERBB3    | 88.5   | 92.2    | 94.6   | 94.5   | 89.2   | 91.2   | 81.6   | 91     |
| ERBB3    | 102.5  | 111.2   | 94.1   | 82.5   | 86.5   | 96.4   | 105.1  | 99.5   |
| ERBB4    | 118.1  | 149.3   | 141.8  | 134.6  | 128.7  | 134.7  | 136.7  | 119.2  |
| ERC1     | 103.8  | 123.4   | 93.9   | 86.1   | 92     | 88.2   | 105.9  | 123.4  |
| ERCC1    | 1265.5 | 1673    | 1339.4 | 1077.4 | 833.2  | 1245.7 | 1175.5 | 1786.8 |
| ERCC1    | 2104.9 | 2796.6  | 1476.6 | 1062.5 | 771.1  | 985.1  | 2044.9 | 2111.3 |
| ERCC1    | 124.5  | 151.6   | 101.9  | 99.1   | 92.7   | 107.3  | 119.6  | 143.4  |
| ERCC2    | 530.6  | 715.6   | 353.7  | 261.1  | 256.7  | 298.1  | 501.9  | 464.3  |
| ERCC3    | 508.7  | 659.2   | 437.9  | 465.9  | 454.2  | 761.2  | 466.9  | 697    |
| ERCC4    | 146.8  | 162.2   | 118.8  | 119.2  | 99.2   | 100.3  | 124.4  | 138.6  |
| ERCC5    | 1003.4 | 1188.6  | 804.4  | 1099.2 | 943.9  | 1682.8 | 731.1  | 1395.9 |
| ERCC6    | 103.3  | 108.9   | 95.9   | 85.3   | 91.6   | 88.1   | 96.2   | 125.2  |
| ERCC8    | 66.6   | 81.8    | 89.7   | 86.3   | 86.5   | 85.2   | 79.2   | 78.6   |

|        |         |         |        |        |        |         |         |         |
|--------|---------|---------|--------|--------|--------|---------|---------|---------|
| ERCC8  | 326.3   | 440.1   | 177.3  | 180.6  | 153.7  | 184.6   | 262.7   | 351.5   |
| ERCC8  | 76.8    | 87.5    | 93.5   | 82.5   | 80.9   | 85.2    | 75.4    | 85.2    |
| ERCC8  | 277.7   | 346.9   | 155.4  | 154    | 121    | 183.5   | 207.2   | 295.1   |
| EREG   | 103.9   | 109.8   | 99.2   | 96.7   | 100.4  | 95.4    | 103.4   | 116.3   |
| ERF    | 252.8   | 314.8   | 194    | 131.9  | 134.3  | 158.4   | 237.3   | 363.6   |
| ERG    | 71.7    | 99.4    | 93.6   | 90.1   | 78.7   | 82.7    | 78.3    | 81.3    |
| ERG    | 96.3    | 107.1   | 94.7   | 92.4   | 91.6   | 85.7    | 90.9    | 111.2   |
| ERG    | 128     | 157.7   | 113.6  | 107.4  | 96     | 98.1    | 138.2   | 138.4   |
| ERGIC1 | 406.9   | 589.3   | 186.2  | 211.4  | 184    | 221.2   | 342.4   | 486.7   |
| ERGIC1 | 157.3   | 205.9   | 103.7  | 105.8  | 109.3  | 96.3    | 129.7   | 164.3   |
| ERGIC1 | 134.9   | 149.2   | 97.1   | 114.2  | 99.3   | 100.2   | 131.2   | 160.1   |
| ERGIC2 | 680.1   | 776     | 231.7  | 245.2  | 181    | 238.2   | 611.5   | 1173.5  |
| ERGIC3 | 1657.8  | 2377.5  | 925.8  | 665.6  | 626    | 662.7   | 1612.8  | 1909.4  |
| ERGIC3 | 4474.2  | 6189.2  | 3939.2 | 2985.3 | 2494.6 | 3718.3  | 4368.4  | 6024.6  |
| ERH    | 5636.6  | 7685.8  | 2472.3 | 1925   | 1652.8 | 2234.9  | 4989    | 5164.2  |
| ERICH1 | 1603.9  | 1994.6  | 931.6  | 904.4  | 706.8  | 1192.4  | 1271.2  | 1712.2  |
| ERLIN2 | 209.7   | 238.9   | 139.3  | 142    | 135    | 146.2   | 171.1   | 181.8   |
| ERMAP  | 144.4   | 169.8   | 101    | 158.5  | 143.9  | 111.2   | 112     | 124.9   |
| ERMAP  | 747.2   | 888.5   | 350.9  | 458.7  | 385.9  | 521     | 684     | 977.5   |
| ERN1   | 221.3   | 310.5   | 168.1  | 175.5  | 158.3  | 191     | 186.3   | 199     |
| ERN1   | 79.3    | 85.4    | 85.6   | 85.6   | 79.9   | 78.5    | 86.4    | 85      |
| ERN2   | 134.7   | 145.7   | 96.6   | 89.8   | 90.5   | 99      | 130.7   | 156.9   |
| ERO1L  | 415.5   | 540.7   | 274.8  | 244.7  | 199    | 294.8   | 333.7   | 472.5   |
| ERO1LB | 160.2   | 183.2   | 128.7  | 114.2  | 102.2  | 133.2   | 160.2   | 299.6   |
| ERP29  | 2601.9  | 3891.3  | 1729.1 | 1620.2 | 1385.7 | 1050.2  | 2311.1  | 2954.7  |
| ERP29  | 10623.9 | 12747.9 | 8717.3 | 9618.2 | 8848.4 | 12274.9 | 10033.6 | 12038.7 |
| ERRFI1 | 217.4   | 265.8   | 137.5  | 154.5  | 151    | 202.1   | 213.6   | 341     |
| ERV3   | 95.9    | 109.6   | 109.1  | 149.7  | 131.5  | 141     | 96.1    | 98.3    |
| ERVWE1 | 110.7   | 117.5   | 98.4   | 85.6   | 94.1   | 89      | 98.4    | 108.7   |
| ESAM   | 121.8   | 110.1   | 101.7  | 93.5   | 91     | 95.5    | 121.1   | 137.9   |
| ESCO1  | 150.2   | 176.8   | 104.5  | 120.9  | 103    | 139.4   | 142.3   | 247.5   |
| ESCO2  | 184.8   | 246     | 106.9  | 84.6   | 94.1   | 92.6    | 168.1   | 267.9   |
| ESD    | 848.2   | 952.7   | 188.7  | 201.8  | 144.3  | 205.6   | 674.6   | 880.7   |
| ESM1   | 87.3    | 100.9   | 84.6   | 80     | 80.5   | 78.9    | 107.5   | 124.5   |
| ESPL1  | 240.5   | 308.8   | 251.3  | 226.8  | 192.5  | 270.3   | 243.3   | 325.2   |
| ESPN   | 160.1   | 176.3   | 116.5  | 102.2  | 99.9   | 104.7   | 159.1   | 170.6   |
| ESPNL  | 82.1    | 78.5    | 79     | 82.4   | 76     | 81.1    | 80.3    | 86.5    |
| ESR1   | 84.8    | 91.6    | 83.7   | 84.2   | 86.1   | 89.1    | 85.9    | 86.4    |
| ESR2   | 98.7    | 109.3   | 90.4   | 90.3   | 81.1   | 90.3    | 101.5   | 119.9   |
| ESR2   | 90.2    | 101     | 98.7   | 94.7   | 88.7   | 91.8    | 90.1    | 94.9    |
| ESRRA  | 314     | 412.3   | 314.1  | 188.4  | 153.4  | 298.7   | 237.1   | 371.9   |
| ESRRB  | 102.3   | 116.7   | 102.7  | 94.3   | 95.5   | 90.2    | 110.1   | 112.5   |
| ESRRG  | 142.2   | 151.6   | 98.9   | 101.1  | 101.3  | 95.2    | 140.7   | 137.8   |
| ESRRG  | 86.3    | 103.8   | 96.5   | 88.6   | 87.1   | 90.1    | 85.5    | 99.5    |
| ESRRG  | 68.4    | 73.6    | 73.3   | 72.2   | 69.3   | 76.1    | 63.5    | 74.2    |
| ESSPL  | 74.1    | 82.8    | 78.6   | 84     | 72.6   | 77.1    | 76.7    | 86.2    |
| ESTRRA | 398.1   | 433.8   | 206.7  | 168.8  | 149.1  | 181     | 357.4   | 361.5   |
| ESX1   | 90.6    | 99.4    | 96.4   | 84.2   | 83.2   | 81.3    | 92.8    | 106.8   |
| ET     | 306.8   | 367.4   | 260.1  | 406.7  | 391.5  | 349.7   | 328.7   | 468.5   |
| ETAA16 | 98.2    | 108.9   | 101.1  | 98.2   | 86.2   | 93      | 90.3    | 122.4   |

|        |        |        |        |        |        |        |        |        |
|--------|--------|--------|--------|--------|--------|--------|--------|--------|
| ETF1   | 4445.7 | 5827.1 | 2074.3 | 2001.1 | 1413.8 | 2289   | 4844   | 7641.4 |
| ETFA   | 6319.8 | 8894.7 | 4757.4 | 4905.8 | 3852.5 | 6867.5 | 5109.7 | 7207.4 |
| ETFB   | 70.8   | 77.8   | 76.6   | 79.5   | 72.7   | 76.1   | 72.5   | 69.8   |
| ETFB   | 3371.3 | 4303.5 | 2249.8 | 1933.6 | 1785.2 | 2022.4 | 3412.6 | 3734.6 |
| ETFB   | 2601.3 | 3388.8 | 1554.6 | 1917.1 | 1605.3 | 1969.9 | 2587.6 | 2651.5 |
| ETFDH  | 634.4  | 893.6  | 528.5  | 473.6  | 380.3  | 705.7  | 551.2  | 890.9  |
| ETHE1  | 127.7  | 151.9  | 100.6  | 101.1  | 87.3   | 95.5   | 111.3  | 146    |
| ETNK1  | 99.6   | 106    | 96.4   | 97.1   | 96.9   | 101.9  | 93.5   | 113.8  |
| ETNK1  | 242.2  | 309.3  | 134.2  | 138.5  | 116.9  | 150    | 223.5  | 365.8  |
| ETNK1  | 305    | 366.8  | 170.3  | 190.2  | 140.4  | 203.1  | 305.6  | 519.7  |
| ETNK2  | 85.1   | 107.7  | 101.9  | 85.9   | 77.3   | 82.7   | 90.3   | 90.9   |
| ETS1   | 419.6  | 527.7  | 230.2  | 225.2  | 192.4  | 288.9  | 367.6  | 480.1  |
| ETS2   | 446.1  | 587.5  | 513.1  | 543.5  | 567.9  | 675.6  | 305.9  | 529.6  |
| ETV1   | 79.3   | 77.9   | 81.4   | 77.2   | 75.8   | 80     | 75.6   | 79.7   |
| ETV2   | 148.5  | 149.9  | 95     | 88.4   | 91     | 87.8   | 131.8  | 166.2  |
| ETV3   | 137.1  | 141.7  | 107.1  | 126.3  | 119    | 100.4  | 123.9  | 159    |
| ETV4   | 161.8  | 172.6  | 152.6  | 109.7  | 102.8  | 154.2  | 143.3  | 188.5  |
| ETV4   | 111    | 148.1  | 113.8  | 91.9   | 82.7   | 109.3  | 122.1  | 148    |
| ETV5   | 468    | 609.7  | 450.1  | 523.3  | 353.7  | 488.8  | 549    | 755.1  |
| ETV5   | 139.2  | 174.4  | 101.8  | 112.7  | 92.7   | 95.5   | 148.9  | 180.9  |
| ETV6   | 466    | 606.1  | 250.8  | 268.4  | 234.8  | 261.3  | 417    | 426.3  |
| EVA1   | 107.5  | 119.1  | 101.8  | 85.9   | 83.7   | 86.5   | 112.4  | 111.3  |
| EVA1   | 128.3  | 149.8  | 96.8   | 98.4   | 94.2   | 95.7   | 122    | 149.5  |
| EVA1   | 76.9   | 70.3   | 92.2   | 82.7   | 72.8   | 78.7   | 67.6   | 75     |
| EVC    | 117.2  | 149.5  | 103.5  | 103    | 95.1   | 91     | 114    | 111    |
| EVC    | 121.9  | 150    | 103.9  | 93.4   | 78.3   | 100.3  | 117.1  | 153.1  |
| EVC2   | 118.8  | 160.9  | 103.7  | 104.7  | 93.5   | 106.7  | 126    | 146    |
| EVI1   | 78.2   | 84.1   | 93.9   | 76.8   | 89.7   | 92.2   | 84.5   | 88.5   |
| EVI2A  | 240    | 295.4  | 129.9  | 137.9  | 121.9  | 154.4  | 237.6  | 327.5  |
| EVI2A  | 109.1  | 130.3  | 102.5  | 87.3   | 95.7   | 103.6  | 113    | 125.1  |
| EVI2B  | 109.8  | 136.1  | 93.5   | 95     | 84.1   | 89.6   | 107    | 121.3  |
| EVI5L  | 498.5  | 703.8  | 405.1  | 318.9  | 295    | 348.4  | 497.3  | 516.4  |
| EVL    | 3444.2 | 3978.4 | 2110.8 | 1847.4 | 1874.4 | 1907.3 | 2805.1 | 2652.3 |
| EVPL   | 88.3   | 100.8  | 91.6   | 104    | 91.2   | 85.2   | 95.4   | 91     |
| EVX1   | 135.8  | 132.1  | 87.4   | 92.7   | 79.7   | 82     | 114.7  | 142.7  |
| EVX2   | 118.1  | 119.4  | 94.9   | 82.7   | 82.7   | 83.8   | 96.8   | 122.4  |
| EWSR1  | 2795   | 3104.6 | 1603.1 | 2190   | 1679.8 | 2986.6 | 2696.8 | 3086   |
| EWSR1  | 260.5  | 268    | 124.3  | 98.5   | 97.5   | 129.5  | 201.7  | 265.3  |
| EWSR1  | 2689.3 | 3653.9 | 2292.3 | 2690.6 | 2073   | 3937.8 | 2173.8 | 3536.3 |
| EXDL1  | 109.2  | 119.5  | 94.6   | 78.1   | 81.2   | 80.1   | 107.1  | 111.8  |
| EXDL2  | 279.1  | 345.2  | 310.3  | 282.4  | 226.2  | 332.1  | 246.1  | 425.4  |
| EXO1   | 1978.1 | 2680.2 | 904.6  | 884.1  | 719.8  | 1185.7 | 1411.1 | 1515.8 |
| EXO1   | 350.3  | 488.8  | 232.6  | 170.1  | 161.5  | 255.5  | 224.4  | 273.7  |
| EXO1   | 91.9   | 129.6  | 88.2   | 89.1   | 88.5   | 83.8   | 89.6   | 103.6  |
| EXOC1  | 147.2  | 182.2  | 140.2  | 152.4  | 154.8  | 121.7  | 160.5  | 151.6  |
| EXOC1  | 387.5  | 435.1  | 151.2  | 157.4  | 133.7  | 223.5  | 267    | 422.5  |
| EXOC1  | 505.7  | 683.4  | 369.2  | 426.5  | 344.4  | 699.3  | 419.7  | 1066   |
| EXOC2  | 160.7  | 171.6  | 132.1  | 164.2  | 121.1  | 207.2  | 128.2  | 174.7  |
| EXOC3L | 88.6   | 96.5   | 103    | 86.9   | 86.4   | 93     | 89.3   | 100.8  |
| EXOC4  | 192.5  | 271.6  | 115.9  | 158    | 149.8  | 144.2  | 155.3  | 175.2  |

|         |        |        |        |        |       |        |        |        |
|---------|--------|--------|--------|--------|-------|--------|--------|--------|
| EXOC6   | 106.7  | 129.8  | 113.2  | 95.3   | 94.6  | 107.7  | 108.1  | 110.2  |
| EXOC6   | 438.1  | 530.2  | 273.8  | 216.7  | 196.2 | 311.5  | 373.3  | 601.5  |
| EXOC6   | 116.4  | 106.5  | 92.1   | 85.7   | 100.1 | 83.7   | 105.7  | 126.2  |
| EXOC7   | 770    | 839.3  | 911.6  | 661.7  | 582.4 | 851.1  | 715.8  | 1029.8 |
| EXOC7   | 139.7  | 159.9  | 128.6  | 146.2  | 112.4 | 134.6  | 121.7  | 142.8  |
| EXOC8   | 116.1  | 127.4  | 116.2  | 94.5   | 92.1  | 100.2  | 136.6  | 135.9  |
| EXOSC1  | 3016.7 | 3893.1 | 2161.2 | 1505   | 1127  | 1753.3 | 2755.7 | 3076.5 |
| EXOSC10 | 975.2  | 1109.2 | 555.2  | 525.4  | 406.5 | 646.5  | 882.8  | 1325.9 |
| EXOSC10 | 2634.5 | 3246.9 | 896.4  | 861.6  | 819.5 | 1032.2 | 2131   | 2390.7 |
| EXOSC10 | 956.5  | 1350.4 | 683.1  | 571.5  | 515.8 | 907.5  | 661.4  | 843.3  |
| EXOSC2  | 1243.2 | 1641.8 | 851.6  | 643.1  | 502.9 | 617.3  | 889.1  | 1142.3 |
| EXOSC3  | 4182.3 | 5411.8 | 2028.2 | 1263.7 | 886.5 | 1584.7 | 3277.5 | 5178.2 |
| EXOSC3  | 5859.9 | 7377.5 | 2395.2 | 1659.4 | 1275  | 1930.3 | 5241   | 6455.6 |
| EXOSC4  | 982.3  | 1368.2 | 630.4  | 405.4  | 321.9 | 458.3  | 909.9  | 1177   |
| EXOSC5  | 1154.2 | 1561   | 771.7  | 482.2  | 380.3 | 600.7  | 1006.4 | 1034   |
| EXOSC6  | 1074.7 | 1523.5 | 971.4  | 700.5  | 538   | 645.6  | 1195.1 | 1518.5 |
| EXOSC7  | 1844.2 | 2383.8 | 1245.6 | 1023.2 | 744.4 | 1081.3 | 1623.1 | 2020.9 |
| EXOSC8  | 2753.4 | 3066.6 | 963.5  | 907.7  | 656.1 | 987.9  | 2667.3 | 3601.2 |
| EXOSC9  | 826.7  | 1119.7 | 232.8  | 169.2  | 146.2 | 213    | 734.1  | 1223.4 |
| EXOSC9  | 1468.5 | 1973.4 | 516.4  | 324.6  | 269.2 | 471.8  | 1194.1 | 2277.8 |
| EXPH5   | 108.3  | 112.4  | 100.5  | 94.5   | 85.7  | 82.4   | 110.5  | 115.9  |
| EXT1    | 132.1  | 158.9  | 138.1  | 116.2  | 110.3 | 110.3  | 122.5  | 151.8  |
| EXT2    | 74     | 78.3   | 80.6   | 80.4   | 85.1  | 81.7   | 77.4   | 92.7   |
| EXT2    | 470.7  | 617.2  | 332.1  | 268.4  | 237.6 | 358.5  | 396.6  | 484.4  |
| EXT2    | 307.7  | 398.9  | 204.4  | 183.7  | 142.7 | 201.3  | 283.6  | 364.1  |
| EXTL1   | 128.6  | 150.3  | 107.9  | 93.3   | 96.8  | 103.4  | 122.4  | 129.1  |
| EXTL2   | 302.5  | 386.9  | 160    | 125.4  | 115.9 | 111.7  | 212.8  | 360    |
| EXTL2   | 454    | 530    | 376.3  | 251.8  | 196.9 | 303.5  | 336.3  | 776.9  |
| EXTL3   | 160.8  | 213.1  | 236.9  | 208.3  | 180.8 | 246.4  | 179.3  | 220.6  |
| EYA1    | 109.7  | 136.3  | 102.9  | 81.2   | 88.1  | 89.5   | 93.7   | 125.4  |
| EYA1    | 74.3   | 90.6   | 78.9   | 75.1   | 73    | 82     | 78.2   | 93.5   |
| EYA1    | 90.9   | 99     | 88.6   | 86.4   | 89    | 87.6   | 79.4   | 111.8  |
| EYA2    | 116    | 150.1  | 104.8  | 107.5  | 91.4  | 96.8   | 134.6  | 135.8  |
| EYA2    | 84.7   | 96.9   | 87.4   | 94.4   | 80    | 95.6   | 84.3   | 90.5   |
| EYA2    | 90.3   | 98.5   | 91     | 97.8   | 87.5  | 91.3   | 98     | 106.1  |
| EYA2    | 87.3   | 84.5   | 94.4   | 99.8   | 92    | 95.8   | 78     | 88.7   |
| EYA2    | 88.7   | 102.3  | 93.2   | 73     | 77.5  | 76.7   | 89.2   | 92     |
| EYA3    | 122    | 140.6  | 115.8  | 114.1  | 111.3 | 117.1  | 104.6  | 126.8  |
| EYA3    | 73.3   | 85     | 93.4   | 97.3   | 84.3  | 75.3   | 93.7   | 94.5   |
| EYA4    | 94.7   | 114    | 88.4   | 95     | 84.4  | 85.2   | 104.2  | 115.7  |
| EYA4    | 85     | 97.4   | 100.8  | 93.3   | 82    | 88.3   | 85.5   | 93.9   |
| EYA4    | 94.8   | 101.4  | 100.3  | 89.1   | 93.7  | 90.8   | 102.2  | 92.1   |
| EZH1    | 99.4   | 120.9  | 115    | 113    | 99.1  | 101.3  | 103.5  | 105.6  |
| EZH2    | 829    | 1259.2 | 354.5  | 341.8  | 327.2 | 228.9  | 670.9  | 986.9  |
| EZH2    | 567.8  | 610.4  | 317.3  | 238.1  | 244.6 | 355.8  | 459.3  | 663    |
| EZH2    | 778.5  | 1083.9 | 577.3  | 456.9  | 484.1 | 687.1  | 541.4  | 703.8  |
| F10     | 78.4   | 90.5   | 89.9   | 84.1   | 83    | 93.6   | 74.3   | 87.2   |
| F11     | 95.3   | 105.2  | 105.6  | 96.2   | 97.4  | 97.4   | 90.1   | 90.4   |
| F11     | 97.4   | 100.5  | 89.7   | 86     | 85.5  | 91.7   | 86.7   | 88.6   |
| F11R    | 97.2   | 111.1  | 127.3  | 99.3   | 97.5  | 128.4  | 101    | 107.7  |

|         |         |         |         |         |         |        |         |         |
|---------|---------|---------|---------|---------|---------|--------|---------|---------|
| F11R    | 121.3   | 118.6   | 95.3    | 86.1    | 88      | 94.5   | 105.3   | 106.2   |
| F11R    | 246.5   | 300.7   | 119     | 157.8   | 133.2   | 193.2  | 260.9   | 304.7   |
| F12     | 194.7   | 226.1   | 147.3   | 104.7   | 105.1   | 114.7  | 165.7   | 163.3   |
| F13A1   | 97.6    | 144.6   | 107.4   | 233.5   | 185.5   | 296.7  | 97.1    | 136.8   |
| F13B    | 84.2    | 88.9    | 87.3    | 90.4    | 78.4    | 86.5   | 78.3    | 82.8    |
| F25965  | 150.2   | 170.3   | 113     | 107.5   | 95.2    | 105.9  | 140.3   | 187.5   |
| F2R     | 27023.9 | 28483.7 | 19804.1 | 25167.9 | 27558.7 | 23013  | 27042.7 | 29726.1 |
| F2RL1   | 83.9    | 85.3    | 85.4    | 88.2    | 80.3    | 89.8   | 86.9    | 100.4   |
| F2RL2   | 91.7    | 105.9   | 83.6    | 74.5    | 77.9    | 79.8   | 93      | 106.4   |
| F2RL3   | 143     | 175.7   | 120.2   | 109.6   | 100.1   | 106.3  | 159     | 144     |
| F3      | 166     | 157.8   | 110.9   | 124.9   | 135     | 144.9  | 184.6   | 269.6   |
| F5      | 141.7   | 142.8   | 101.1   | 100.3   | 84.6    | 98.4   | 121.5   | 139.4   |
| F7      | 73.7    | 80.7    | 85.9    | 78.4    | 80.3    | 77.7   | 78.2    | 74.9    |
| F7      | 126.1   | 115.9   | 97.8    | 92.4    | 94.6    | 98.7   | 108.2   | 115.2   |
| F7      | 108.6   | 120.9   | 84.1    | 87.1    | 80.9    | 94.1   | 108.5   | 125.1   |
| F8      | 112.1   | 126.9   | 98      | 95.2    | 97.1    | 99.1   | 112.8   | 106.9   |
| F8      | 86.2    | 87      | 99.5    | 94.9    | 94.6    | 91.3   | 89.8    | 81      |
| F8      | 93.8    | 124.5   | 86.8    | 83.2    | 85.3    | 88.6   | 104.7   | 114.2   |
| F8A1    | 513     | 690.5   | 465.8   | 328.8   | 275.4   | 376.1  | 485.4   | 774     |
| F8A3    | 123.4   | 157.9   | 94.2    | 83.5    | 88.3    | 94.6   | 123.7   | 141.5   |
| F9      | 97.1    | 102.9   | 112.4   | 102.7   | 98.5    | 88.1   | 102.1   | 98.9    |
| FA2H    | 72.4    | 90.6    | 90.6    | 84.7    | 81      | 77.3   | 90.8    | 100     |
| FAAH    | 101.3   | 140.4   | 108     | 94.2    | 96.9    | 125.3  | 103     | 140     |
| FABP1   | 86.7    | 87.2    | 96.5    | 84.7    | 85      | 84.6   | 82.9    | 89.4    |
| FABP2   | 93.1    | 96.1    | 107.2   | 107     | 97.7    | 97.7   | 90.8    | 89      |
| FABP3   | 126.8   | 141.9   | 95.3    | 87.9    | 75.4    | 87.6   | 119.5   | 132.7   |
| FABP4   | 113.2   | 135.9   | 92.3    | 94.6    | 86.9    | 98.9   | 90.6    | 130.9   |
| FABP5   | 120.4   | 134.6   | 93.1    | 95.9    | 93.5    | 86.4   | 117.8   | 143.3   |
| FABP5L3 | 107     | 138.1   | 120.6   | 99.7    | 95.1    | 101.8  | 118.1   | 122.4   |
| FABP6   | 83.8    | 95.1    | 84.4    | 76.1    | 81.2    | 88.8   | 95.3    | 89.7    |
| FABP6   | 102.8   | 106.4   | 88.3    | 83.8    | 83.1    | 93     | 110.5   | 105.6   |
| FABP7   | 179.8   | 208.5   | 119.3   | 118.2   | 96      | 107.6  | 173     | 193.8   |
| FADD    | 1358.4  | 1990.5  | 776.3   | 653     | 600.1   | 826.1  | 1412.4  | 1488.3  |
| FADS1   | 990.1   | 1540.3  | 1100.6  | 952.8   | 1094.7  | 1254.9 | 1031.6  | 2148.2  |
| FADS2   | 170     | 228.2   | 161.8   | 130.5   | 140.8   | 134.2  | 154.7   | 218.5   |
| FADS3   | 152.3   | 157.5   | 97      | 91.7    | 91.4    | 84.6   | 142.1   | 163.3   |
| FADS6   | 130.5   | 145.5   | 97.1    | 86.2    | 81.7    | 92.5   | 134.1   | 157.5   |
| FAF1    | 1311.6  | 1691.3  | 707.5   | 719.1   | 664.4   | 937.6  | 1249.9  | 1584.6  |
| FAF1    | 1477.5  | 2315    | 654.5   | 420.7   | 340.4   | 672.6  | 1014    | 1565.3  |
| FAH     | 1060.4  | 1530.6  | 583.2   | 543.5   | 467.4   | 776.7  | 1184.9  | 1757.4  |
| FAHD1   | 611.7   | 723.7   | 224.1   | 229     | 190.2   | 325.7  | 420.3   | 614.7   |
| FAHD1   | 346.6   | 515.8   | 169.6   | 153.5   | 121.3   | 167.8  | 339.3   | 507.3   |
| FAHD1   | 95      | 95.6    | 91.6    | 91.1    | 87.2    | 85.6   | 91.9    | 110.7   |
| FAHD2A  | 157.4   | 192.9   | 116     | 109.8   | 121.5   | 121.5  | 141.8   | 155.7   |
| FAHD2B  | 391.1   | 466.4   | 300.1   | 306.8   | 276     | 433.8  | 324.1   | 420.5   |
| FAIM    | 122     | 145.3   | 94.8    | 89.7    | 80.8    | 87.2   | 119.8   | 169.9   |
| FAIM    | 70.7    | 74.6    | 96.2    | 84.2    | 95      | 88.8   | 78.8    | 78      |
| FAIM    | 112     | 142.2   | 97.8    | 92.2    | 79.4    | 91.4   | 111.7   | 126.7   |
| FAIM    | 108.7   | 112.2   | 101.2   | 91      | 87.5    | 97.5   | 98.4    | 97.4    |
| FAIM    | 513.9   | 601     | 313.9   | 179     | 176.5   | 233.1  | 334.3   | 442.1   |

|          |        |        |        |        |        |        |        |        |
|----------|--------|--------|--------|--------|--------|--------|--------|--------|
| FAIM2    | 83.4   | 96     | 105.4  | 93.5   | 85.4   | 96.8   | 94.6   | 90.5   |
| FAIM3    | 89.1   | 93.6   | 95.1   | 87.1   | 84.2   | 90     | 86.1   | 90.1   |
| FALZ     | 99.2   | 109.7  | 103.5  | 103.8  | 93.7   | 101.5  | 97.3   | 96.6   |
| FALZ     | 162.7  | 222.2  | 113.9  | 127.5  | 114.2  | 138.8  | 173.3  | 208.3  |
| FALZ     | 97.8   | 111.4  | 93.4   | 101.9  | 102.4  | 127.6  | 92.4   | 104.9  |
| FAM100A  | 140.4  | 183.3  | 246.8  | 176    | 157.9  | 234.6  | 139.1  | 260.4  |
| FAM100B  | 154.7  | 235.3  | 175.3  | 149.2  | 139.5  | 184.4  | 203.5  | 349.3  |
| FAM101A  | 97.5   | 130.8  | 94.3   | 87     | 78.9   | 85     | 119    | 124.5  |
| FAM101B  | 365.4  | 543.2  | 288.1  | 432.2  | 285.1  | 275.8  | 379.2  | 612.7  |
| FAM102A  | 179.1  | 198.6  | 115.7  | 116.7  | 113    | 110.6  | 143.6  | 167.8  |
| FAM102A  | 85.9   | 101.9  | 89     | 96.3   | 89.6   | 88.3   | 80.8   | 99.1   |
| FAM102B  | 674.8  | 904.2  | 259.5  | 280.2  | 189.7  | 418.9  | 714.8  | 1345.1 |
| FAM103A1 | 519.5  | 627.5  | 240.7  | 321    | 227.8  | 458.1  | 518.9  | 963.9  |
| FAM104A  | 1537   | 2193.3 | 953    | 1005.9 | 860.6  | 1603.4 | 1312.7 | 1881   |
| FAM105A  | 499.2  | 709.3  | 169.4  | 147.2  | 151.9  | 259.3  | 342.8  | 363.1  |
| FAM105B  | 515.4  | 702.7  | 495.5  | 467.6  | 377.8  | 529.3  | 547.7  | 743.4  |
| FAM107A  | 87.8   | 114.3  | 93     | 85.9   | 88.5   | 79     | 103.9  | 102.3  |
| FAM107B  | 2260.4 | 3232.3 | 1189.1 | 1213   | 890.6  | 1060.3 | 1640   | 2069.2 |
| FAM108A1 | 75.9   | 88.9   | 80.1   | 79.9   | 73.3   | 81.2   | 72.2   | 78.5   |
| FAM108A2 | 590.8  | 923.2  | 513.5  | 287    | 291    | 203.3  | 497.9  | 466.9  |
| FAM108A2 | 232.7  | 292.5  | 152.7  | 103.1  | 106.2  | 112.6  | 194    | 270.1  |
| FAM109A  | 98.4   | 125.2  | 111.9  | 108.7  | 110    | 118.1  | 103.7  | 136.1  |
| FAM109B  | 83.1   | 88.6   | 115.3  | 103.1  | 102.7  | 99.3   | 89.5   | 83.5   |
| FAM10A4  | 123    | 164.9  | 84.2   | 84.4   | 73.5   | 81.2   | 104.9  | 132.6  |
| FAM10A6  | 85.8   | 90.2   | 103.1  | 94.2   | 90.9   | 84.9   | 85.2   | 85.5   |
| FAM10A7  | 463.8  | 596    | 167.9  | 156.6  | 133.1  | 213.5  | 346.6  | 566.4  |
| FAM110C  | 100.4  | 101.6  | 90.4   | 87.2   | 83.4   | 81.6   | 96.3   | 94     |
| FAM111A  | 2618.2 | 3082.4 | 1109.8 | 1038.6 | 962.2  | 1036.5 | 1739.9 | 2119.6 |
| FAM111A  | 941.4  | 1233.3 | 643.2  | 636.2  | 586.6  | 947.1  | 649.6  | 891    |
| FAM111B  | 163.6  | 197.2  | 119.4  | 118.1  | 97.4   | 118.2  | 155    | 172.7  |
| FAM112A  | 112    | 124    | 101.8  | 85.1   | 90.8   | 89.3   | 114.1  | 115.5  |
| FAM112A  | 68.8   | 75.2   | 97.8   | 86.9   | 80.9   | 83.5   | 71.7   | 75.3   |
| FAM112B  | 5480.8 | 7115.9 | 1301   | 1194.4 | 906.1  | 1760.4 | 4941.3 | 6575.4 |
| FAM113A  | 239.6  | 252.7  | 134.4  | 150.3  | 135.2  | 204.4  | 187.6  | 250    |
| FAM113B  | 242.5  | 330.6  | 170.8  | 167.6  | 144.2  | 167.9  | 171.2  | 145.3  |
| FAM119A  | 2422.4 | 2288.7 | 1353.9 | 1754.3 | 1334.4 | 1443.2 | 2162.9 | 4156.6 |
| FAM120A  | 5211.1 | 5785.9 | 2016.3 | 2189.7 | 1428.4 | 1882.7 | 4449.7 | 7297.1 |
| FAM120C  | 91.3   | 98.4   | 101.9  | 93.9   | 80.2   | 90.2   | 93.1   | 109.2  |
| FAM122A  | 148.4  | 181.5  | 93.8   | 90.5   | 89.6   | 99     | 138.5  | 155.9  |
| FAM122B  | 786.1  | 915.4  | 646.3  | 760.3  | 628.6  | 1333.8 | 512.7  | 931.2  |
| FAM122C  | 98.4   | 121.9  | 109.6  | 92.3   | 97.6   | 99.5   | 109.7  | 119.6  |
| FAM123A  | 87.8   | 94.4   | 97.3   | 91.5   | 83.8   | 85     | 82.3   | 98.6   |
| FAM125A  | 1353.5 | 1802.8 | 722.1  | 373.3  | 318.5  | 353.6  | 1315.7 | 1280   |
| FAM125B  | 145.9  | 166.4  | 110    | 98.2   | 94     | 99     | 131.9  | 161.5  |
| FAM125B  | 70.8   | 76.9   | 85.1   | 85.4   | 85     | 91.7   | 74.2   | 79.9   |
| FAM126A  | 73.9   | 84.9   | 96.8   | 90.4   | 83.6   | 81.4   | 75.7   | 83.9   |
| FAM126B  | 79.2   | 85.1   | 97.5   | 87.5   | 82.4   | 83.7   | 81.3   | 86.6   |
| FAM127B  | 91.5   | 101.9  | 94.5   | 98.7   | 94     | 99.9   | 96.6   | 97.9   |
| FAM127C  | 135.7  | 148    | 102.3  | 91.8   | 83.2   | 99.4   | 125.4  | 154.9  |
| FAM129B  | 112.2  | 124    | 105.2  | 85.3   | 83     | 86.1   | 96     | 116.1  |

|          |        |        |        |        |        |       |        |        |
|----------|--------|--------|--------|--------|--------|-------|--------|--------|
| FAM129B  | 135.9  | 151.8  | 144.3  | 103.7  | 90.9   | 107.7 | 143    | 223.3  |
| FAM12A   | 102.9  | 123.2  | 135.5  | 115.1  | 115    | 118.6 | 102.7  | 105.4  |
| FAM12B   | 94.4   | 94.1   | 104.1  | 96.4   | 107.8  | 94    | 91.8   | 104.9  |
| FAM130A1 | 160.3  | 176.8  | 152.8  | 163.6  | 148.1  | 180.3 | 155.2  | 283.1  |
| FAM130A2 | 71.7   | 81.7   | 98.6   | 86.8   | 82.7   | 96.4  | 76.4   | 83     |
| FAM13A1  | 106.5  | 113.2  | 86.3   | 89.9   | 73.3   | 79.6  | 122.9  | 119.5  |
| FAM13A1  | 92.8   | 110.6  | 93.3   | 89.4   | 83     | 81.7  | 104.8  | 113.7  |
| FAM13A1  | 95.7   | 110.1  | 101.9  | 88.7   | 79.9   | 88.4  | 98.9   | 118.7  |
| FAM13C1  | 91.9   | 108.9  | 85.6   | 85.7   | 79.3   | 86.2  | 90.7   | 100.7  |
| FAM13C1  | 72.3   | 82.7   | 84.7   | 80.4   | 79.9   | 86.1  | 77.9   | 84.2   |
| FAM13C1  | 86.5   | 87     | 86.2   | 87.1   | 73.4   | 78.2  | 88.3   | 94.5   |
| FAM14A   | 798.9  | 936    | 253.1  | 215.5  | 207.9  | 221.3 | 788.8  | 842.9  |
| FAM14B   | 164.7  | 205.7  | 127.4  | 105    | 106.3  | 112.4 | 173.8  | 174    |
| FAM18B   | 336.1  | 435.7  | 148.9  | 151.7  | 127.7  | 203.5 | 316.6  | 555.8  |
| FAM18B   | 546.9  | 681.4  | 274.9  | 332.7  | 267    | 489.3 | 490    | 1052.2 |
| FAM18B2  | 104.6  | 116.5  | 111.8  | 89.3   | 90.5   | 90.3  | 97.7   | 101.7  |
| FAM19A1  | 76     | 86.8   | 90.8   | 86     | 82.8   | 79.6  | 76.5   | 85     |
| FAM19A2  | 81.4   | 93.3   | 102.6  | 90.9   | 96.7   | 98.6  | 75.7   | 83.6   |
| FAM19A3  | 81.7   | 91.6   | 86.8   | 80.8   | 76     | 83.1  | 82.8   | 99.4   |
| FAM19A3  | 138.5  | 191.4  | 91.7   | 101.8  | 92.3   | 93.2  | 119.6  | 146.5  |
| FAM19A3  | 69.4   | 90.8   | 80.9   | 73     | 70     | 75    | 84     | 89.4   |
| FAM19A4  | 120.9  | 148.9  | 115.5  | 111.2  | 104.1  | 107.1 | 119.7  | 136.8  |
| FAM19A4  | 88     | 102    | 101    | 83.8   | 86.2   | 93.9  | 90.7   | 107.2  |
| FAM19A4  | 95     | 104.7  | 93.9   | 93.6   | 84.2   | 109.8 | 99.3   | 111.7  |
| FAM19A5  | 103.6  | 108.6  | 91.8   | 86.3   | 83.7   | 91.7  | 99.8   | 97.3   |
| FAM20A   | 85.5   | 89.6   | 89.6   | 83.9   | 82     | 91.6  | 79.9   | 95.6   |
| FAM20B   | 1271.2 | 1549.9 | 690.4  | 750.9  | 556.9  | 864   | 1006.4 | 1516.8 |
| FAM20C   | 95.9   | 107.5  | 100.9  | 85.7   | 85.9   | 90.1  | 89.6   | 94.4   |
| FAM20C   | 230.2  | 317.6  | 264.3  | 160.4  | 135.3  | 185.8 | 235.2  | 402.6  |
| FAM20C   | 140.2  | 175.6  | 125.7  | 128.1  | 95.2   | 107   | 145.6  | 163.6  |
| FAM21C   | 145.2  | 183.1  | 125.7  | 114.1  | 108.9  | 114.3 | 132.3  | 156    |
| FAM22G   | 86     | 103    | 79.6   | 83.3   | 81.5   | 87.1  | 88.1   | 97.4   |
| FAM24A   | 83.9   | 104.4  | 93.2   | 81.4   | 86.1   | 90    | 79.8   | 95.1   |
| FAM24B   | 370    | 436.1  | 246.6  | 221    | 169    | 217.1 | 333.8  | 357    |
| FAM26B   | 159    | 177.7  | 120.9  | 109.1  | 104.7  | 108   | 143.3  | 208.5  |
| FAM26C   | 185.7  | 252.9  | 119.9  | 107.6  | 113.9  | 137.5 | 199.6  | 243.7  |
| FAM27L   | 112.2  | 122    | 84     | 94.3   | 74.7   | 91.7  | 99.8   | 117.9  |
| FAM29A   | 88.9   | 95     | 92.4   | 86.6   | 78.4   | 85.7  | 91.1   | 104.9  |
| FAM29A   | 115.4  | 122.3  | 108.7  | 116.6  | 88.1   | 125.8 | 105.2  | 146.8  |
| FAM33A   | 770.1  | 950.1  | 433.7  | 324.5  | 267.5  | 342   | 705    | 1031   |
| FAM35A   | 314.5  | 423.4  | 155.3  | 144.3  | 128.5  | 226.2 | 247.5  | 411.7  |
| FAM36A   | 444    | 521.1  | 147.7  | 181.9  | 130.7  | 167.6 | 391.2  | 580.6  |
| FAM38A   | 870.2  | 1020.9 | 1456.8 | 1394.8 | 1316.4 | 2258  | 759.9  | 1210.4 |
| FAM38B   | 142.3  | 170.6  | 141.2  | 132.9  | 128.4  | 131.9 | 141.8  | 155.1  |
| FAM3A    | 873.2  | 988.4  | 722.3  | 679.2  | 576    | 703.3 | 802.6  | 1162.8 |
| FAM3B    | 82.2   | 98.2   | 86.3   | 78.6   | 82.1   | 83.5  | 91.9   | 115.2  |
| FAM3B    | 86.1   | 101.7  | 92.2   | 89.4   | 86.2   | 87.9  | 98.1   | 106.1  |
| FAM3C    | 412.7  | 560.4  | 271.5  | 254.9  | 190.8  | 335.3 | 333.4  | 555.2  |
| FAM3C    | 469.9  | 625.8  | 236.3  | 261.2  | 169    | 294.2 | 364.8  | 607.3  |
| FAM3D    | 91.1   | 110.9  | 99.9   | 97.5   | 83.7   | 93.7  | 97.1   | 105.9  |

|         |         |         |        |         |        |         |         |         |
|---------|---------|---------|--------|---------|--------|---------|---------|---------|
| FAM40A  | 363.9   | 428.1   | 214.9  | 166.3   | 147.6  | 164.9   | 342.4   | 387.8   |
| FAM40B  | 240.4   | 270.9   | 145.9  | 246.1   | 247.3  | 174.2   | 223.4   | 260.4   |
| FAM43A  | 1872.7  | 2217.6  | 1466.7 | 1278.7  | 1009   | 1466.5  | 1773.9  | 2161.2  |
| FAM43B  | 84.9    | 113     | 99.4   | 90.2    | 88     | 94.1    | 99.3    | 96      |
| FAM44A  | 84.2    | 92.1    | 94.9   | 88.3    | 75.7   | 88.9    | 93.7    | 87.3    |
| FAM44B  | 992.3   | 1249.2  | 516.8  | 658.4   | 516.4  | 772.5   | 768.8   | 940.2   |
| FAM45A  | 1571.9  | 1609.3  | 607    | 588.2   | 570.8  | 731.7   | 1479.9  | 2942.5  |
| FAM45B  | 102.2   | 140.9   | 108.4  | 95.1    | 90     | 92.1    | 110.3   | 124     |
| FAM46A  | 12692.1 | 17940.4 | 7778.8 | 11207.5 | 9785.1 | 13988.3 | 12062.9 | 13583.9 |
| FAM46B  | 99.7    | 107.5   | 103.6  | 108.1   | 91.8   | 88      | 100.2   | 113.4   |
| FAM46C  | 113.8   | 129.7   | 112.3  | 174.4   | 203    | 261.3   | 115.9   | 131.8   |
| FAM46D  | 77.1    | 88.8    | 89.8   | 87.6    | 83.9   | 95.7    | 88.3    | 92.1    |
| FAM47A  | 89.6    | 94.9    | 92.1   | 85.1    | 86.2   | 82.4    | 92.9    | 83.8    |
| FAM47B  | 88.5    | 100.2   | 95.3   | 84.8    | 75.1   | 85.3    | 97      | 102     |
| FAM47C  | 84.5    | 106.9   | 105    | 84.2    | 84.2   | 95.4    | 96.3    | 99.9    |
| FAM48A  | 401.4   | 416.1   | 311.5  | 381.8   | 341.8  | 577.1   | 291.5   | 441.5   |
| FAM48A  | 90.1    | 95.3    | 93.5   | 89.6    | 87.5   | 83.5    | 84.2    | 98.5    |
| FAM49A  | 114.6   | 149.8   | 105.3  | 90.9    | 87.9   | 96.1    | 108.2   | 122.1   |
| FAM49B  | 1109.3  | 1186.5  | 280.8  | 292.8   | 197.4  | 396.9   | 1075.7  | 2241.6  |
| FAM50A  | 3120    | 3910.6  | 2557.8 | 2483.9  | 2283.7 | 2742.1  | 2468.2  | 2962.9  |
| FAM50B  | 78.4    | 91.8    | 105.3  | 98.2    | 93.9   | 96.7    | 88.5    | 90.1    |
| FAM51A1 | 139.7   | 176.6   | 139.4  | 116.3   | 109.1  | 133.2   | 111.4   | 149     |
| FAM53A  | 135.7   | 145.5   | 94.4   | 102.8   | 91.4   | 105     | 135.1   | 157.8   |
| FAM53B  | 158.8   | 175.8   | 108.6  | 94.9    | 82.1   | 98.5    | 151.4   | 171.7   |
| FAM53C  | 1528.5  | 2000.3  | 833.1  | 839.3   | 754.6  | 849.7   | 1371.6  | 1072.1  |
| FAM54A  | 242.3   | 296.7   | 118.3  | 135.6   | 114.2  | 128.5   | 201.9   | 304.4   |
| FAM55A  | 81.5    | 73.4    | 96.7   | 83.9    | 79     | 86.8    | 83.4    | 78.2    |
| FAM55B  | 75.8    | 86.9    | 91     | 81.8    | 76.4   | 86.6    | 80.1    | 74.3    |
| FAM55C  | 277.2   | 411.8   | 193.6  | 199     | 152.9  | 151.4   | 236.3   | 303.6   |
| FAM55D  | 96.1    | 101     | 87.8   | 83.4    | 89     | 87.2    | 90.6    | 94.9    |
| FAM55D  | 91.1    | 95.1    | 92.4   | 91.7    | 85.6   | 91.2    | 98.2    | 98.7    |
| FAM55D  | 80.6    | 86.2    | 96.5   | 80.5    | 77.9   | 84      | 86.8    | 89.4    |
| FAM57A  | 269.1   | 324.6   | 282.4  | 155.5   | 157    | 171.3   | 236.3   | 352.4   |
| FAM58A  | 946.5   | 1176    | 788.1  | 598.3   | 509.9  | 618.3   | 1014.4  | 1207    |
| FAM59A  | 129.8   | 140.8   | 112.6  | 112.1   | 101.9  | 116.5   | 117.7   | 139.7   |
| FAM5B   | 106.1   | 126.6   | 96.6   | 95      | 81.7   | 89.7    | 108.3   | 111.7   |
| FAM5C   | 107.6   | 138.2   | 93     | 87.9    | 88.9   | 88      | 113.9   | 129.2   |
| FAM62A  | 1296.7  | 1763    | 991    | 1195.7  | 917    | 1505.7  | 1058.7  | 1797.5  |
| FAM62B  | 2429.8  | 3629.2  | 4103.4 | 5426.7  | 4416.2 | 6267.4  | 2257.9  | 3321.7  |
| FAM62C  | 126.4   | 137     | 124.1  | 102.1   | 99.6   | 115.6   | 99.1    | 139.4   |
| FAM63A  | 442.7   | 441.1   | 341    | 405.8   | 314.2  | 352.8   | 420     | 812.6   |
| FAM63B  | 149.2   | 196.3   | 98.7   | 101.9   | 99.7   | 105.4   | 148.6   | 176.9   |
| FAM64A  | 387.2   | 442.9   | 343.2  | 141.5   | 127.4  | 151.6   | 324.7   | 451.4   |
| FAM65A  | 990.7   | 1257.4  | 715.4  | 578.3   | 540.9  | 612.5   | 792.9   | 700.8   |
| FAM69A  | 206.2   | 248.3   | 154.7  | 147.8   | 132.4  | 141.2   | 171.8   | 189.5   |
| FAM69B  | 898.7   | 1088.9  | 483.2  | 424.6   | 355.8  | 463     | 678.6   | 714.3   |
| FAM69B  | 123.5   | 141.1   | 91     | 77.2    | 74.3   | 84      | 114.4   | 160.8   |
| FAM70A  | 80.1    | 76.2    | 94.2   | 83      | 82.8   | 80      | 85.2    | 83.2    |
| FAM70B  | 100.8   | 116     | 97.8   | 104.3   | 87.9   | 87.7    | 100.4   | 103.9   |
| FAM71A  | 106.5   | 116.2   | 94.4   | 90.5    | 84.1   | 95.5    | 111.6   | 92.7    |



|         |        |        |        |        |        |        |        |         |
|---------|--------|--------|--------|--------|--------|--------|--------|---------|
| FAM71C  | 91.4   | 99.3   | 108    | 88.9   | 95.1   | 92.2   | 91.6   | 99.4    |
| FAM72A  | 1050.7 | 1108.7 | 223.1  | 228.9  | 169.7  | 241    | 917.8  | 1696.1  |
| FAM73A  | 113.2  | 115.2  | 94.9   | 85.7   | 85.1   | 87.7   | 110.1  | 115.1   |
| FAM73B  | 155.6  | 179.6  | 155.1  | 139.3  | 134.4  | 208.7  | 139.1  | 220.2   |
| FAM76A  | 97.6   | 128    | 107    | 102.6  | 96.9   | 108.8  | 106.3  | 117.3   |
| FAM76B  | 292.1  | 380.3  | 226.3  | 232.1  | 194.3  | 343.8  | 210.4  | 522.2   |
| FAM77C  | 99.9   | 115.5  | 91.3   | 94.1   | 88.3   | 88.1   | 108.5  | 104.5   |
| FAM77D  | 112.1  | 155.8  | 106.5  | 103    | 99.3   | 101.9  | 120.2  | 130.5   |
| FAM78A  | 114.4  | 139.5  | 156.8  | 124.1  | 117.2  | 141    | 110.3  | 156     |
| FAM78B  | 86.9   | 103.9  | 94.9   | 99.3   | 94.2   | 92.8   | 86.1   | 95.9    |
| FAM79A  | 1024.6 | 1385.7 | 614.6  | 664.7  | 661.5  | 725.1  | 952    | 1012.2  |
| FAM79B  | 81     | 94.2   | 111.4  | 96.6   | 96.8   | 95.2   | 87.1   | 88.7    |
| FAM7A2  | 481    | 476.9  | 186.4  | 292.7  | 285.5  | 192.4  | 305.4  | 406.5   |
| FAM80A  | 121.6  | 142.4  | 111.2  | 103.9  | 107.2  | 119.6  | 131.2  | 146.9   |
| FAM80B  | 96.9   | 95.2   | 102.5  | 102.5  | 86.4   | 122.3  | 93.4   | 106.3   |
| FAM81A  | 163.2  | 180.6  | 140.3  | 99.3   | 88.9   | 110.3  | 112.5  | 163.3   |
| FAM81B  | 142    | 171.4  | 103.5  | 96.7   | 91.8   | 91.3   | 136.3  | 147.3   |
| FAM82A  | 80.1   | 88.9   | 95.8   | 94.2   | 93.8   | 92.4   | 80     | 87      |
| FAM82C  | 750.9  | 959.7  | 480    | 552.8  | 393.8  | 713.3  | 678.5  | 1313.5  |
| FAM83A  | 78.6   | 92.1   | 96.8   | 90.3   | 83.5   | 86.5   | 78.5   | 90.9    |
| FAM83A  | 84.4   | 98.2   | 93.8   | 86.9   | 83.3   | 84.2   | 95.8   | 93.4    |
| FAM83A  | 85.8   | 91.1   | 98     | 96.7   | 84.1   | 92.1   | 80.8   | 88.7    |
| FAM83E  | 79     | 93.8   | 89.4   | 81.1   | 77.1   | 88     | 85.6   | 101.7   |
| FAM83F  | 108.6  | 139.9  | 92.2   | 90.2   | 89.9   | 86.2   | 112.7  | 129.5   |
| FAM83G  | 94.6   | 101.1  | 99.7   | 87.1   | 87.2   | 82.3   | 97.6   | 111.8   |
| FAM84A  | 99.9   | 113    | 104.5  | 84.8   | 86.9   | 94.5   | 105.5  | 110.4   |
| FAM84B  | 286.8  | 400.2  | 283.1  | 244.2  | 202.1  | 293.1  | 357.2  | 520.5   |
| FAM86A  | 710.9  | 879.5  | 396.7  | 241.6  | 161.8  | 294.2  | 512.5  | 842     |
| FAM86A  | 412.4  | 500.3  | 228.1  | 141    | 116.8  | 155.5  | 276    | 285.2   |
| FAM89A  | 405    | 539.5  | 264    | 233    | 202.2  | 271.9  | 399.8  | 503     |
| FAM89A  | 1037.8 | 1372.6 | 932.4  | 816.3  | 647.1  | 1172.5 | 1153.7 | 1736.6  |
| FAM89B  | 348.8  | 455.8  | 339.9  | 217.4  | 213    | 263    | 321    | 502.1   |
| FAM8A1  | 153.3  | 167.3  | 131.5  | 126.2  | 110.9  | 137.2  | 141.8  | 188.6   |
| FAM90A1 | 95.9   | 104.4  | 107.9  | 105.8  | 110.2  | 109.8  | 93.8   | 108.4   |
| FAM91A1 | 418.6  | 513.5  | 231.4  | 187.2  | 162.3  | 254.1  | 301.1  | 463.9   |
| FAM92B  | 101.2  | 108.8  | 83.5   | 79.5   | 73.8   | 81.4   | 91.6   | 124.5   |
| FAM96A  | 8072   | 8790.9 | 5473.9 | 5817.4 | 4958.7 | 6151.3 | 7034.2 | 10129.7 |
| FAM96A  | 1903   | 2363.1 | 447.6  | 267.6  | 287.3  | 531.1  | 1802   | 2521.6  |
| FAM96B  | 1710.4 | 2144.1 | 1238.2 | 794.5  | 801.4  | 735.5  | 1717.6 | 1815.7  |
| FAM98A  | 1206   | 1304.5 | 507.8  | 459.6  | 273    | 504.8  | 1000.5 | 1552.5  |
| FAM98B  | 106.3  | 124.2  | 84.6   | 90.6   | 79.6   | 86.4   | 98.9   | 122.8   |
| FAM98B  | 103.5  | 153.3  | 108.9  | 186.1  | 149.8  | 119.8  | 125.2  | 119.9   |
| FAM98C  | 202.5  | 229.8  | 189.6  | 138.6  | 148.7  | 179    | 172.2  | 198.9   |
| FAM9A   | 69.5   | 70.2   | 88.2   | 89.5   | 81.8   | 83     | 83.1   | 79.3    |
| FAM9B   | 76.1   | 81.2   | 93.5   | 90.9   | 79.6   | 84     | 79.5   | 80.5    |
| FAM9C   | 100.7  | 119.8  | 105    | 89.7   | 99.7   | 99.5   | 106.4  | 112.3   |
| FANCA   | 94.1   | 119.9  | 114    | 99.6   | 98.8   | 103.8  | 86.6   | 108.8   |
| FANCA   | 100.7  | 131.3  | 94.4   | 91.4   | 82.9   | 88.6   | 93.4   | 124.6   |
| FANCA   | 93.3   | 123    | 100.6  | 98.3   | 97.8   | 93     | 92.3   | 101.5   |
| FANCB   | 319.2  | 394.5  | 133.5  | 162.3  | 138.1  | 150.2  | 264.7  | 368.2   |

|         |         |         |         |         |         |         |        |         |
|---------|---------|---------|---------|---------|---------|---------|--------|---------|
| FANCB   | 192.8   | 257.3   | 146.2   | 125.5   | 138.2   | 127.3   | 166.7  | 252     |
| FANCC   | 156.6   | 176.1   | 95.2    | 95.1    | 96.1    | 95.4    | 134.3  | 144.2   |
| FANCD2  | 1443.6  | 1560.5  | 853.7   | 935.5   | 1004.8  | 1105.9  | 1042.9 | 1264.7  |
| FANCD2  | 142.8   | 143     | 125.9   | 116.1   | 116.3   | 108.4   | 121.1  | 145.6   |
| FANCD2  | 212.2   | 287.5   | 145.3   | 142.4   | 113.7   | 133.4   | 201.9  | 228.2   |
| FANCE   | 946.7   | 1293.7  | 512.8   | 653.9   | 640     | 769     | 684.6  | 630.3   |
| FANCF   | 104.3   | 123.2   | 103     | 98.4    | 82.7    | 100.6   | 107    | 121.1   |
| FANCG   | 1296.4  | 1652.7  | 712.7   | 398.5   | 346.4   | 320.4   | 888.5  | 977     |
| FANCL   | 79      | 84.3    | 110.9   | 98.7    | 90.5    | 106.1   | 84.5   | 80.8    |
| FANCM   | 110.6   | 154.6   | 94.7    | 90.4    | 81.7    | 89.9    | 115.7  | 128.6   |
| FANK1   | 109.2   | 129.5   | 98.6    | 100.6   | 91.8    | 98.8    | 114.9  | 110     |
| FAP     | 80.1    | 88.1    | 117.8   | 101.9   | 94.4    | 103.6   | 72.5   | 87.7    |
| FARP1   | 95.4    | 100.1   | 100.2   | 94.4    | 88.3    | 86.7    | 102.2  | 103     |
| FARP1   | 113.7   | 121     | 88.6    | 84.1    | 89.4    | 87.5    | 97.4   | 115.5   |
| FARP1   | 131.1   | 143.2   | 132.8   | 97.1    | 101.5   | 91.8    | 109.8  | 113.2   |
| FARP2   | 99.2    | 112.1   | 124     | 124.8   | 117.5   | 114.8   | 92.8   | 100.7   |
| FARS2   | 451.1   | 689     | 357.6   | 321     | 261.6   | 371.9   | 378.4  | 511.8   |
| FARSB   | 133.3   | 126.1   | 133.5   | 140.5   | 129.8   | 126     | 119.9  | 131     |
| FARSLA  | 734     | 836.8   | 559.2   | 291.6   | 275.2   | 332.4   | 626    | 790.5   |
| FAS     | 93.3    | 104     | 89.9    | 89.4    | 78.2    | 94.2    | 94.3   | 88.9    |
| FAS     | 73.3    | 81.3    | 89.1    | 86.4    | 76.4    | 82.3    | 80.4   | 100.3   |
| FASLG   | 100.9   | 124.9   | 101.5   | 88.5    | 98.9    | 88.5    | 107.9  | 105.7   |
| FASN    | 7719.7  | 9292.7  | 7584.9  | 6120.1  | 5881.6  | 6645.8  | 6258.7 | 7610.4  |
| FASTK   | 887.4   | 1003.3  | 391.5   | 410.8   | 321.5   | 416.9   | 624.5  | 752.1   |
| FASTK   | 327.5   | 408.4   | 270     | 196.1   | 168     | 149.6   | 226.1  | 349.3   |
| FASTK   | 272.1   | 336.2   | 232.6   | 208.6   | 194.2   | 256.7   | 234.9  | 393.8   |
| FASTKD2 | 253.1   | 333.7   | 193.6   | 159.8   | 117.9   | 176.1   | 201.5  | 289.3   |
| FASTKD3 | 458     | 559.6   | 286.1   | 249.7   | 191.1   | 317     | 284.7  | 465.7   |
| FAT     | 710.1   | 1047.6  | 365.7   | 601.4   | 469.9   | 762.5   | 761.6  | 1052.9  |
| FAT2    | 67.6    | 70.6    | 89      | 85.4    | 77      | 83.9    | 70.4   | 76.2    |
| FAT4    | 122.4   | 145.8   | 83.6    | 100.8   | 89.7    | 85      | 102.1  | 157.6   |
| FATE1   | 97.1    | 115.1   | 104.9   | 87.7    | 78.3    | 84.7    | 105.7  | 117.3   |
| FAU     | 18903.3 | 23036.5 | 15885.6 | 12195.1 | 10555.3 | 14268.8 | 16048  | 18731.5 |
| FBF1    | 122.4   | 119.9   | 113.9   | 96.7    | 94.1    | 98.6    | 100.8  | 111.9   |
| FBL     | 4767.1  | 6490.5  | 2846    | 1859    | 1531.1  | 2002.6  | 4373.3 | 4452.7  |
| FBLIM1  | 110.4   | 122.1   | 84.7    | 87.6    | 81.5    | 79.3    | 102.5  | 105.5   |
| FBLIM1  | 97.1    | 111.1   | 111.7   | 97.6    | 101.6   | 96.1    | 86.1   | 98.1    |
| FBLN1   | 100.3   | 113.6   | 94.1    | 96      | 74      | 85.7    | 89.6   | 91.6    |
| FBLN1   | 100.9   | 124.8   | 116.2   | 101.5   | 98.9    | 91.7    | 102    | 127.4   |
| FBLN1   | 427.5   | 598.3   | 313     | 135.7   | 125     | 146.4   | 323.4  | 353.5   |
| FBLN1   | 85.3    | 92.1    | 85.9    | 87.4    | 84.4    | 81.2    | 87.8   | 85.4    |
| FBLN1   | 119.8   | 143.5   | 105.7   | 90.9    | 82.3    | 93.4    | 119.7  | 120.6   |
| FBLN2   | 64.9    | 79.8    | 88      | 91.5    | 80.1    | 87      | 72.3   | 78.7    |
| FBLN2   | 107.1   | 134     | 96      | 85.8    | 81.7    | 89.4    | 108.1  | 123.2   |
| FBLN2   | 102     | 115.8   | 95.5    | 90.7    | 85.8    | 87.1    | 115.1  | 123.1   |
| FBLN5   | 132.9   | 159.3   | 108.1   | 99.7    | 98.5    | 104.2   | 111.6  | 137.8   |
| FBN1    | 107.6   | 116.2   | 104.3   | 95.3    | 92.4    | 85.8    | 103.7  | 124.2   |
| FBN2    | 529.1   | 874.1   | 563.5   | 1165.8  | 907.3   | 1103.7  | 486.6  | 604.2   |
| FBN3    | 88.5    | 98.6    | 99.7    | 99.5    | 88.8    | 101.5   | 87.1   | 86.2    |
| FBP1    | 656.3   | 815.9   | 508.2   | 353     | 252     | 341.2   | 502.9  | 615.8   |

|          |        |        |        |        |        |        |        |        |
|----------|--------|--------|--------|--------|--------|--------|--------|--------|
| FBP2     | 80.4   | 82.9   | 99.7   | 96.5   | 93     | 87.1   | 81.9   | 82.6   |
| FBS1     | 123.3  | 133.5  | 132.3  | 123    | 110.7  | 134.2  | 121.1  | 159.3  |
| FBXL10   | 125    | 134.1  | 91.2   | 79.3   | 84.5   | 82.4   | 108.3  | 145.9  |
| FBXL10   | 3172.3 | 4123.9 | 2148.2 | 2867.4 | 2685.6 | 3814.1 | 2709.3 | 3537.3 |
| FBXL10   | 116.4  | 148.7  | 94.4   | 99.1   | 88.1   | 92.4   | 102.3  | 121.7  |
| FBXL12   | 284.3  | 347.9  | 151.3  | 140.1  | 118.5  | 131.8  | 243.7  | 298.9  |
| FBXL13   | 95.3   | 118.6  | 94.3   | 85.2   | 92.7   | 102    | 101    | 103.5  |
| FBXL14   | 84.8   | 81.1   | 88     | 98.5   | 93.8   | 90.7   | 84.2   | 91.2   |
| FBXL15   | 304.9  | 393.1  | 301    | 210.1  | 214.5  | 264.3  | 245    | 304.3  |
| FBXL16   | 83.3   | 92.2   | 103.7  | 96.5   | 83.5   | 85.3   | 91.6   | 90.8   |
| FBXL17   | 160.2  | 183    | 115.7  | 108.5  | 95.2   | 145.2  | 121.9  | 170.3  |
| FBXL18   | 106.8  | 122.6  | 91.1   | 87.5   | 86.3   | 88.1   | 107    | 118.2  |
| FBXL2    | 115.7  | 134.8  | 105.6  | 92.3   | 86.8   | 102.9  | 104.2  | 121.9  |
| FBXL20   | 441.2  | 598.8  | 265.4  | 241.1  | 243.5  | 294.6  | 381.2  | 366.7  |
| FBXL21   | 159.9  | 183.9  | 95     | 106.6  | 80.9   | 92.6   | 152.6  | 160.7  |
| FBXL22   | 84.7   | 78.9   | 82.9   | 89.8   | 86     | 92.7   | 75.9   | 81.5   |
| FBXL3    | 85.7   | 97.4   | 83     | 93.2   | 84.1   | 76.7   | 85.2   | 108.1  |
| FBXL4    | 83.5   | 77.7   | 100.1  | 94.3   | 91.8   | 88.4   | 75.5   | 80.4   |
| FBXL5    | 98.6   | 107.6  | 90.9   | 84.9   | 75.1   | 86.4   | 99.1   | 95.2   |
| FBXL5    | 200.5  | 237.1  | 123.1  | 120.3  | 109.9  | 119.6  | 179.6  | 269.3  |
| FBXL5    | 921.5  | 1200.7 | 597.3  | 557    | 440    | 851.8  | 726.6  | 1086.3 |
| FBXL6    | 633.9  | 688.1  | 598.4  | 315.5  | 290.3  | 498.1  | 402.2  | 711.4  |
| FBXL7    | 123.1  | 164.1  | 96.2   | 94.8   | 82.7   | 97.3   | 111.8  | 172.9  |
| FBXL8    | 102.4  | 107.6  | 101.1  | 101.7  | 84.9   | 102.3  | 99     | 113.7  |
| FBXO10   | 86.4   | 93.9   | 94.6   | 95.1   | 93.1   | 89.6   | 80.6   | 102.7  |
| FBXO10   | 134.1  | 154.3  | 172.6  | 140.6  | 121.4  | 148.3  | 121.6  | 216    |
| FBXO11   | 206.1  | 242.9  | 155.6  | 180    | 135.8  | 186.5  | 177.2  | 204.1  |
| FBXO11   | 1326.1 | 1860.7 | 714.7  | 956.8  | 841.6  | 1577.7 | 1167.2 | 1665.2 |
| FBXO11   | 126.1  | 130.7  | 105.7  | 91.7   | 95.9   | 98.9   | 117.9  | 143    |
| FBXO11   | 180    | 278.8  | 169.1  | 168.1  | 164.2  | 205    | 161.9  | 242.4  |
| FBXO15   | 448.4  | 587.8  | 344.8  | 176.5  | 154.7  | 172.9  | 428.5  | 458.5  |
| FBXO16   | 129.2  | 135.1  | 102    | 103.5  | 102.8  | 95.6   | 110.3  | 137.6  |
| FBXO17   | 74.7   | 85.5   | 81.5   | 78.2   | 76.6   | 73.8   | 68.4   | 81.3   |
| FBXO17   | 136.6  | 133.9  | 96.4   | 78.4   | 81.7   | 88.3   | 121.3  | 147.6  |
| FBXO17   | 84     | 94.2   | 97.5   | 78.3   | 75.8   | 86.7   | 80     | 90.6   |
| FBXO18   | 102.8  | 113.1  | 100.2  | 95.7   | 85.1   | 96.4   | 102.2  | 100.9  |
| FBXO18   | 598    | 743    | 409.1  | 355.2  | 308.8  | 426.3  | 538.5  | 524.2  |
| FBXO2    | 106.2  | 112.2  | 95.1   | 88.6   | 88.1   | 91     | 106.4  | 105.4  |
| FBXO21   | 191.3  | 235.8  | 131.4  | 133    | 131.8  | 140.2  | 194.7  | 230.9  |
| FBXO21   | 632.7  | 849.8  | 404.5  | 375.2  | 294.2  | 393.2  | 555.7  | 764.4  |
| FBXO22   | 215.5  | 251.7  | 157.2  | 144.4  | 130.6  | 153    | 181.3  | 243    |
| FBXO22   | 72.8   | 83.8   | 83.6   | 74.8   | 75.2   | 81.9   | 77     | 75.7   |
| FBXO22   | 758.1  | 1034.2 | 393.6  | 318.3  | 255.1  | 432.2  | 542.2  | 655.8  |
| FBXO22OS | 91.1   | 100.9  | 102.4  | 96.6   | 94.2   | 101    | 101.1  | 120.2  |
| FBXO24   | 108.8  | 119.9  | 94.8   | 99.8   | 86.5   | 88.6   | 101.7  | 117.6  |
| FBXO24   | 89.4   | 113.2  | 97.8   | 93.8   | 85.1   | 94.8   | 89.2   | 102.3  |
| FBXO24   | 87.4   | 110.8  | 97.2   | 101.2  | 90.5   | 93.6   | 90.5   | 89.9   |
| FBXO25   | 102.5  | 108.6  | 84.3   | 77.5   | 78.1   | 77.7   | 108    | 121.6  |
| FBXO27   | 89.5   | 89.7   | 92.8   | 91.8   | 85.9   | 90     | 90.1   | 85.9   |
| FBXO28   | 1927.8 | 2755.5 | 986.1  | 814    | 618.3  | 972.9  | 1756.9 | 2634.8 |

|        |        |        |       |        |       |        |        |        |
|--------|--------|--------|-------|--------|-------|--------|--------|--------|
| FBXO3  | 83.4   | 107    | 104.2 | 98.1   | 86.8  | 101.2  | 104.8  | 105.8  |
| FBXO3  | 520.4  | 696.4  | 247.1 | 180.8  | 170.5 | 262    | 391.5  | 553    |
| FBXO3  | 152.9  | 179.4  | 138.3 | 109.7  | 107.4 | 111    | 122.4  | 165.3  |
| FBXO30 | 192.1  | 230.7  | 145   | 159.4  | 141.7 | 209.4  | 301.1  | 685.1  |
| FBXO31 | 293.2  | 371.5  | 273.1 | 230.3  | 181.9 | 254.3  | 289.8  | 444.2  |
| FBXO32 | 171.1  | 193.2  | 113.6 | 111.1  | 106.8 | 110.5  | 156.9  | 192.7  |
| FBXO32 | 93.9   | 103.2  | 109   | 105.1  | 90.8  | 96     | 96.2   | 106.5  |
| FBXO32 | 179.5  | 214.8  | 149.7 | 152.8  | 138.6 | 201.3  | 177.7  | 233.2  |
| FBXO33 | 1076.5 | 1362.7 | 814.9 | 817.7  | 599   | 949.4  | 1076.1 | 1540.3 |
| FBXO34 | 542.3  | 681.2  | 435.1 | 405.8  | 341.1 | 642.6  | 420.5  | 779.3  |
| FBXO36 | 107.6  | 125.4  | 82.5  | 80.2   | 85.2  | 81.5   | 111.5  | 114.6  |
| FBXO38 | 113.6  | 133    | 111.3 | 98.6   | 88.7  | 100.5  | 109.3  | 116.3  |
| FBXO38 | 165    | 184.7  | 115.1 | 122.7  | 116.1 | 148.8  | 173.8  | 244.5  |
| FBXO39 | 84.7   | 90.3   | 91.6  | 80.2   | 90.5  | 88.3   | 84.8   | 89.5   |
| FBXO4  | 1441.9 | 1946.1 | 978.9 | 707.2  | 562   | 1137.7 | 962.2  | 1376.1 |
| FBXO4  | 330.5  | 493    | 131.4 | 143.4  | 111.3 | 157.7  | 274.3  | 411.4  |
| FBXO40 | 116.9  | 139    | 94    | 84.9   | 80.9  | 86     | 111.4  | 128.3  |
| FBXO42 | 102.3  | 157.3  | 90.7  | 87.1   | 76.6  | 91.5   | 105.4  | 165.1  |
| FBXO43 | 172.3  | 190.9  | 131.4 | 102.3  | 115.6 | 124.1  | 136.5  | 142.5  |
| FBXO43 | 182.6  | 204.5  | 147.3 | 126.9  | 129.1 | 133.4  | 131.5  | 144.5  |
| FBXO44 | 100.9  | 121.3  | 109.9 | 104.2  | 103.6 | 100.7  | 96.9   | 113.7  |
| FBXO44 | 125.3  | 134.3  | 97.9  | 86.4   | 90    | 93.5   | 111.4  | 135.3  |
| FBXO44 | 78.7   | 86.7   | 89.5  | 76.7   | 82.9  | 79.7   | 76.2   | 86.5   |
| FBXO46 | 143.7  | 199.7  | 171   | 158.9  | 144.1 | 156    | 157.9  | 207.1  |
| FBXO47 | 72.9   | 76.4   | 90.7  | 87.3   | 84.8  | 85.9   | 76.2   | 77.8   |
| FBXO5  | 202.3  | 239.7  | 133.3 | 161.2  | 144.2 | 202    | 178.4  | 259.1  |
| FBXO6  | 400.8  | 546.4  | 231.4 | 253.9  | 222.4 | 256.3  | 324.7  | 341.1  |
| FBXO7  | 606.9  | 738.6  | 295.4 | 196.1  | 157.2 | 185.3  | 450.7  | 564.4  |
| FBXO7  | 171.4  | 211    | 117.7 | 97.1   | 94.7  | 106.1  | 153.2  | 173.2  |
| FBXO7  | 944.6  | 1269.3 | 651.3 | 589.2  | 472.2 | 830.4  | 818.9  | 1124.1 |
| FBXO8  | 421.7  | 596.2  | 208.3 | 228.6  | 205.1 | 267    | 413.6  | 646.5  |
| FBXO9  | 91.5   | 99.7   | 89.2  | 87.1   | 88.1  | 90.9   | 86.8   | 88.7   |
| FBXO9  | 380.2  | 495.2  | 171.6 | 136.7  | 123.2 | 119.2  | 308.3  | 304.6  |
| FBXO9  | 97.6   | 124.4  | 95.7  | 83.9   | 84    | 89.2   | 105    | 116.1  |
| FBXO9  | 108.1  | 110.2  | 97.1  | 82.6   | 82.2  | 83.5   | 90.6   | 103.8  |
| FBXW10 | 110.3  | 123.5  | 86    | 83.2   | 81.9  | 87     | 98.6   | 107.1  |
| FBXW11 | 82.3   | 88.1   | 92.1  | 93.3   | 80.2  | 89.1   | 79.3   | 90.5   |
| FBXW11 | 97.1   | 106.7  | 87.2  | 89.5   | 86.4  | 85.7   | 103.9  | 109    |
| FBXW11 | 1146.2 | 1349.4 | 832.9 | 1009.5 | 773.9 | 1157.8 | 902    | 1621.1 |
| FBXW12 | 86.9   | 106    | 94.2  | 82.8   | 78.6  | 74.7   | 90.9   | 88     |
| FBXW2  | 258.2  | 365.4  | 214.9 | 201.4  | 188.7 | 241.4  | 235.1  | 315    |
| FBXW4  | 360.4  | 449.6  | 252.2 | 196    | 192.7 | 188.5  | 299.9  | 344    |
| FBXW5  | 496.8  | 660.1  | 431.6 | 352.6  | 335.6 | 473.8  | 445.6  | 896.2  |
| FBXW7  | 216.9  | 235    | 139.8 | 145.1  | 127   | 125.3  | 193.2  | 212.7  |
| FBXW7  | 115.8  | 126.4  | 100   | 90.7   | 88.2  | 97.5   | 103.8  | 131    |
| FBXW7  | 559.5  | 592.4  | 271.9 | 326.1  | 239.7 | 403.9  | 446    | 868.3  |
| FBXW7  | 68.4   | 84.7   | 91.3  | 82.1   | 78.8  | 82.3   | 80.7   | 82.9   |
| FBXW8  | 81.7   | 93.9   | 111.2 | 99.8   | 91.1  | 92     | 80.4   | 88.7   |
| FBXW8  | 97.3   | 95     | 105.8 | 103    | 95.3  | 96.5   | 91.2   | 90.1   |
| FBXW8  | 419.6  | 413.9  | 214.6 | 228.6  | 171.4 | 215.6  | 368.2  | 366.3  |

|        |        |         |        |        |        |        |         |         |
|--------|--------|---------|--------|--------|--------|--------|---------|---------|
| FBXW9  | 409.8  | 551.3   | 281.4  | 209.7  | 182.2  | 222.1  | 279.2   | 268.9   |
| FCAMR  | 109.5  | 131     | 89.2   | 91.8   | 89.5   | 90.2   | 104.2   | 130.2   |
| FCAR   | 497.2  | 463.6   | 440.5  | 658.8  | 601.7  | 481    | 554.9   | 974.1   |
| FCAR   | 109.3  | 111.2   | 98.8   | 83.4   | 82.3   | 81     | 98.1    | 99.2    |
| FCAR   | 92.8   | 97.2    | 98.7   | 98.5   | 103.1  | 98.1   | 86.7    | 90      |
| FCER1G | 11910  | 15217.3 | 9275.5 | 8566.4 | 5941.9 | 9223.7 | 10595.1 | 12807.4 |
| FCER2  | 112.1  | 140.8   | 119.8  | 86.7   | 86.9   | 104.8  | 125.1   | 143.1   |
| FCF1   | 288.6  | 369     | 179.8  | 136.1  | 124.5  | 102.9  | 230.6   | 348.4   |
| FCGBP  | 121.6  | 142.6   | 86.3   | 90.8   | 83.9   | 92.4   | 117.7   | 141     |
| FCGBP  | 90.7   | 93.1    | 101.9  | 91.3   | 109.3  | 97.3   | 82.2    | 98.1    |
| FCGR1A | 1536.7 | 2291.2  | 592.4  | 316.9  | 252.7  | 417.5  | 1178.8  | 1424.1  |
| FCGR1B | 3545.5 | 4509.8  | 1715.2 | 840.6  | 625.6  | 1005.7 | 2209.9  | 2482.2  |
| FCGR1B | 3239.4 | 4351.2  | 1792   | 931.9  | 667.9  | 1216.9 | 2243    | 2276.5  |
| FCGR2A | 652    | 928.6   | 260.1  | 292.2  | 205.7  | 333.3  | 478.5   | 704.8   |
| FCGR2A | 573.7  | 829.4   | 279.8  | 250.3  | 211.4  | 196.8  | 444.4   | 508.8   |
| FCGR2B | 114.8  | 123.2   | 104.7  | 142.6  | 116.2  | 193.8  | 100.9   | 120.1   |
| FCGR2C | 90     | 109.3   | 90.2   | 79.2   | 80.2   | 85.5   | 93.9    | 87.4    |
| FCGR3A | 81     | 95.9    | 84.5   | 82     | 85.5   | 87.7   | 80.8    | 88.3    |
| FCGR3B | 138.5  | 180.9   | 118.4  | 112    | 99     | 117.9  | 126.9   | 174.3   |
| FCGRT  | 2163.8 | 2755    | 1861.3 | 1761.1 | 1533.2 | 2623.8 | 1839.9  | 2909.8  |
| FCHO1  | 159.3  | 204.4   | 168.2  | 123.9  | 108.8  | 143    | 145.6   | 178.5   |
| FCHO2  | 178.5  | 184.8   | 125.8  | 111.2  | 106.2  | 145.5  | 169.5   | 233.3   |
| FCHSD1 | 105.4  | 114.8   | 87.8   | 90.8   | 83.9   | 96     | 111.7   | 105.8   |
| FCHSD2 | 396.7  | 568.6   | 287    | 262.9  | 265    | 367.4  | 306.3   | 373.6   |
| FCMD   | 8152.3 | 8812.4  | 3758.1 | 3866.1 | 4423.4 | 4311.4 | 7200.3  | 8720.8  |
| FCMD   | 129.8  | 163.5   | 123.9  | 100.8  | 87.3   | 98     | 112.3   | 126.6   |
| FCN1   | 98.9   | 102.1   | 98.8   | 84.7   | 88.7   | 93.4   | 102.7   | 106.5   |
| FCN2   | 86.7   | 98      | 86.2   | 83.1   | 87.2   | 88.1   | 89      | 107     |
| FCN2   | 114    | 115.4   | 88.4   | 92.9   | 79.7   | 84     | 112.3   | 108.6   |
| FCN3   | 100.7  | 115     | 85.3   | 86.1   | 72.6   | 82.4   | 100.5   | 117.3   |
| FCN3   | 110    | 134     | 85.3   | 77.1   | 70.3   | 81     | 110.4   | 126.1   |
| FCRL1  | 91.5   | 95.7    | 92.2   | 86.8   | 77.9   | 91.5   | 98.3    | 92      |
| FCRL2  | 90.6   | 98.5    | 79.7   | 76     | 87.6   | 89.9   | 83.6    | 93.8    |
| FCRL2  | 95     | 108.9   | 116    | 101.2  | 105.1  | 102.6  | 92.3    | 94.5    |
| FCRL2  | 82.6   | 98.2    | 100.7  | 82.8   | 85.5   | 84     | 82.2    | 87.5    |
| FCRL3  | 94.8   | 103.4   | 91.2   | 87.1   | 81.9   | 91.7   | 87.5    | 96.9    |
| FCRL3  | 151.7  | 134.2   | 88.7   | 89.6   | 89.6   | 98.1   | 117.9   | 124.6   |
| FCRL4  | 78.4   | 80.9    | 81.7   | 80.6   | 83.4   | 65.4   | 74.4    | 79.8    |
| FCRL5  | 123.1  | 129.1   | 100.1  | 104.7  | 96.5   | 99.6   | 110.1   | 120.3   |
| FCRL6  | 69.1   | 79.8    | 93.6   | 84.9   | 82.1   | 83.3   | 76.6    | 75.4    |
| FCRLM1 | 103.9  | 114.6   | 90.2   | 88.1   | 81.2   | 83.8   | 98.9    | 111.8   |
| FCRLM2 | 341.6  | 397.4   | 213.1  | 165.3  | 122.9  | 168.2  | 337.8   | 470     |
| FDFT1  | 9215.3 | 13278.4 | 6253.9 | 6395.4 | 6401.7 | 7069.7 | 9755.6  | 11375.6 |
| FDX1   | 117    | 136.6   | 108.1  | 96.8   | 88.4   | 103.2  | 121.1   | 176.1   |
| FDXR   | 118.2  | 136.9   | 92.1   | 96.6   | 88.9   | 94.4   | 90.6    | 130.2   |
| FDXR   | 138.2  | 134.9   | 92.9   | 100.6  | 79.7   | 91.7   | 105.5   | 135.3   |
| FECH   | 119.8  | 120.5   | 94.4   | 97.4   | 99.5   | 102.1  | 108.1   | 144.1   |
| FECH   | 330.9  | 452     | 217.6  | 322.5  | 241.1  | 387.2  | 361.7   | 432.8   |
| FEM1A  | 1114.1 | 1548.4  | 1338   | 1114   | 842.4  | 1130.1 | 871.9   | 961.1   |
| FEM1B  | 231.2  | 299.9   | 196.1  | 177.6  | 178.5  | 229.6  | 233.2   | 278.9   |

|        |        |        |        |        |        |        |        |        |
|--------|--------|--------|--------|--------|--------|--------|--------|--------|
| FEM1C  | 400.3  | 537.5  | 306.1  | 346.8  | 275.6  | 577.8  | 332.3  | 646.6  |
| FEN1   | 5865.9 | 6945.8 | 4783.7 | 3482.9 | 2805.1 | 3455.8 | 4218.1 | 5428.1 |
| FER    | 130.8  | 179.9  | 124.4  | 125.6  | 101.8  | 108.9  | 131.5  | 174.3  |
| FER1L3 | 337    | 407.1  | 290.1  | 199.5  | 188.1  | 256.5  | 320.9  | 360.7  |
| FER1L3 | 160.5  | 222.9  | 152.3  | 100.1  | 110.7  | 106.6  | 165.1  | 156.8  |
| FER1L4 | 87.5   | 85.8   | 81.4   | 93     | 88.8   | 97.8   | 84.7   | 84.4   |
| FERD3L | 84.4   | 95     | 104.2  | 97.2   | 89.5   | 89     | 83.2   | 88.3   |
| FES    | 2469.6 | 2870.5 | 2962.7 | 1837.6 | 1699   | 2228.3 | 2191.5 | 2576.8 |
| FETUB  | 112.3  | 124.8  | 95.9   | 91.2   | 90.1   | 96.9   | 104    | 114.7  |
| FEV    | 94.4   | 105.9  | 103.6  | 80.6   | 80.4   | 85.3   | 101.9  | 118    |
| FEZ1   | 230.3  | 320    | 137.3  | 113    | 105.1  | 115.1  | 192.4  | 219.4  |
| FEZ1   | 173.5  | 211    | 193.8  | 167.2  | 187.6  | 171.8  | 155.4  | 178.5  |
| FEZ1   | 560.2  | 673.1  | 434.5  | 283.5  | 392.3  | 313    | 475.5  | 626.3  |
| FEZ2   | 1387.5 | 1862.3 | 1187.1 | 1634.1 | 1074   | 2086.5 | 1118.9 | 3055.8 |
| FEZ2   | 2778.3 | 3335.1 | 2367   | 3249.6 | 2085.2 | 3815.1 | 2554.3 | 5369.4 |
| FFAR1  | 117.9  | 139.8  | 105.8  | 96.7   | 109.2  | 102    | 108.4  | 110.4  |
| FFAR2  | 118.8  | 128.6  | 94.5   | 98.3   | 91.7   | 103.2  | 121.8  | 121    |
| FFAR3  | 97.6   | 105.6  | 99.4   | 98.3   | 94.1   | 101.2  | 91.6   | 91.2   |
| FGA    | 80.5   | 91.3   | 89.8   | 79.4   | 72.9   | 88     | 86.3   | 89.4   |
| FGA    | 289.6  | 284.7  | 165.3  | 157.7  | 158    | 155.1  | 257.8  | 313.5  |
| FGA    | 88.9   | 112.3  | 81.4   | 82.6   | 82.9   | 81.4   | 99.6   | 103.1  |
| FGB    | 101.4  | 125.9  | 88.3   | 93     | 88.5   | 85.1   | 96.4   | 105.2  |
| FGD1   | 98.6   | 128.4  | 122.6  | 99.9   | 95.8   | 107.3  | 97.8   | 111.5  |
| FGD2   | 107.3  | 105.6  | 88.5   | 92.9   | 85.1   | 77.6   | 97.4   | 96.1   |
| FGD3   | 997    | 1254.4 | 641.2  | 556.5  | 583.8  | 654    | 979.3  | 979.1  |
| FGD4   | 109.8  | 125.2  | 107.8  | 92.1   | 80.4   | 84.7   | 101.5  | 117.4  |
| FGD5   | 93.2   | 97.6   | 106.5  | 94.2   | 88.6   | 93.6   | 94.9   | 102    |
| FGD6   | 82.2   | 82.9   | 92.7   | 94.7   | 85.6   | 89.4   | 82.7   | 77.5   |
| FGF1   | 111.8  | 115.5  | 107.4  | 96.5   | 90.3   | 96.4   | 107.9  | 102.7  |
| FGF1   | 115.5  | 118.9  | 99     | 79.1   | 79.1   | 82.3   | 103.1  | 129.1  |
| FGF10  | 85.7   | 116.2  | 87.8   | 75.7   | 82.8   | 81.2   | 91.6   | 89     |
| FGF11  | 99.5   | 115.2  | 99.9   | 94.1   | 81.4   | 85.7   | 106.5  | 110.2  |
| FGF12  | 131.3  | 118.1  | 89.6   | 83.1   | 82.2   | 88     | 114.5  | 117.1  |
| FGF12  | 90     | 89.9   | 94.8   | 86.7   | 87.1   | 87.8   | 83.1   | 93     |
| FGF12  | 101.7  | 118.1  | 99.6   | 81.3   | 86     | 88.6   | 92.4   | 97.8   |
| FGF13  | 89.9   | 113.9  | 102.9  | 86.9   | 83.2   | 93.4   | 98.1   | 106.8  |
| FGF13  | 76.8   | 91.9   | 83.4   | 76.7   | 76     | 75.2   | 86.7   | 91.4   |
| FGF13  | 87.1   | 91     | 92.8   | 83.2   | 79.2   | 86.5   | 86.3   | 105.7  |
| FGF14  | 89.6   | 95.2   | 94.8   | 82.7   | 82.3   | 93.8   | 97.9   | 103.2  |
| FGF14  | 84.1   | 100.7  | 93.4   | 78.6   | 80.2   | 77.9   | 83.5   | 90.9   |
| FGF16  | 97.9   | 87.9   | 83.5   | 77.8   | 74.8   | 85     | 82     | 94.5   |
| FGF17  | 110.8  | 128.2  | 110.9  | 91.7   | 101.5  | 87.5   | 107.6  | 124.2  |
| FGF18  | 138.3  | 172.7  | 145.9  | 127.9  | 117.1  | 117.1  | 135    | 165.6  |
| FGF18  | 70.7   | 93.5   | 99.1   | 93.8   | 74.8   | 91.9   | 83.8   | 85.1   |
| FGF19  | 104.9  | 127.2  | 103.8  | 88.2   | 90.5   | 83.7   | 93.8   | 122.2  |
| FGF2   | 129.4  | 145.4  | 112.8  | 92.7   | 80.9   | 102.5  | 116.8  | 126.3  |
| FGF20  | 151.9  | 176.8  | 109.9  | 100.4  | 94     | 117.5  | 140.9  | 153.6  |
| FGF21  | 129.3  | 134.1  | 96.6   | 97.2   | 100.1  | 96.1   | 115.4  | 118.3  |
| FGF22  | 81.9   | 105    | 96     | 83.3   | 81.8   | 84.1   | 98.6   | 99.3   |
| FGF23  | 82.8   | 96     | 96.9   | 93.9   | 88.3   | 93     | 78     | 93     |

|          |        |        |        |        |        |       |        |        |
|----------|--------|--------|--------|--------|--------|-------|--------|--------|
| FGF3     | 96.1   | 105.9  | 91.8   | 99.5   | 85.7   | 90.1  | 103.1  | 107.3  |
| FGF4     | 92.2   | 109.1  | 83.9   | 73.4   | 67.4   | 76.6  | 94.6   | 122    |
| FGF5     | 91.8   | 115.5  | 105.3  | 100.1  | 89.2   | 90.5  | 97.7   | 104.9  |
| FGF5     | 92.1   | 101.4  | 97.9   | 91.2   | 87.7   | 84.8  | 89.6   | 112.6  |
| FGF6     | 85.5   | 114.3  | 86.9   | 79.6   | 69.7   | 81.3  | 97.3   | 100.5  |
| FGF7     | 74.1   | 81.3   | 96.9   | 75.7   | 78.8   | 80.7  | 80.6   | 81.4   |
| FGF8     | 98.8   | 106.6  | 102.1  | 92.2   | 91.9   | 89.9  | 105.6  | 94.8   |
| FGF8     | 82.6   | 87.5   | 92.5   | 82.1   | 80.3   | 82.4  | 80.3   | 81.3   |
| FGF9     | 80.4   | 97.3   | 83.8   | 85.5   | 77.6   | 87.9  | 77.4   | 97     |
| FGFBP1   | 81.7   | 93.1   | 90.1   | 81.8   | 78.9   | 85.4  | 88.4   | 92.7   |
| FGFR1    | 92.7   | 111.8  | 94     | 97.7   | 92.9   | 93.6  | 87.9   | 95.9   |
| FGFR1    | 96.3   | 127.5  | 89.1   | 82.2   | 71.1   | 87.1  | 94.5   | 114.3  |
| FGFR1OP  | 529    | 692.3  | 345.7  | 374.3  | 332.2  | 478.9 | 412.9  | 599    |
| FGFR1OP2 | 201.5  | 261.5  | 126.8  | 108    | 110.2  | 143.7 | 184.2  | 272.1  |
| FGFR2    | 78.2   | 96.2   | 92.5   | 82.1   | 81.1   | 77.5  | 95.4   | 88.2   |
| FGFR3    | 177.5  | 203.1  | 93     | 97.4   | 78.3   | 89    | 155.6  | 155.8  |
| FGFR3    | 260.6  | 305.8  | 250.2  | 263.4  | 195.3  | 306.6 | 239.7  | 360.7  |
| FGFR4    | 114.6  | 142.4  | 117.2  | 108    | 105.1  | 125.5 | 106.9  | 138.7  |
| FGFR4    | 79.6   | 106.2  | 86.6   | 88.6   | 84.9   | 92.9  | 75.8   | 82.3   |
| FGFR4    | 93     | 109.7  | 95.5   | 98.1   | 92.9   | 103   | 89.9   | 101.2  |
| FGFRL1   | 292.4  | 301.6  | 395.7  | 338    | 278.3  | 465.1 | 348    | 1010.7 |
| FGFRL1   | 120.8  | 138.9  | 137.4  | 119.4  | 104.8  | 177.1 | 124.2  | 220.5  |
| FGG      | 77.3   | 89.9   | 89.4   | 83.6   | 83.4   | 93.8  | 79.5   | 95.3   |
| FGG      | 92.8   | 116.6  | 88.3   | 82     | 92.6   | 90.6  | 97.6   | 107.3  |
| FGG      | 92     | 102.5  | 98.4   | 86.2   | 76.8   | 79.7  | 90.1   | 101.1  |
| FGL1     | 104.4  | 111.9  | 91     | 85.4   | 80.8   | 85.9  | 101    | 98.5   |
| FGL1     | 88.9   | 103.1  | 98     | 95.3   | 94.9   | 96.6  | 85.1   | 93.1   |
| FGL2     | 177.6  | 235.3  | 118    | 460.5  | 346.1  | 526.5 | 135.6  | 164.3  |
| FGR      | 241.2  | 309.1  | 180.8  | 147.5  | 119.9  | 150.3 | 197.4  | 300.3  |
| FGR      | 166.6  | 157    | 102.4  | 92.9   | 91.7   | 91.8  | 139    | 175.5  |
| FGR      | 675.1  | 772    | 427.1  | 328    | 238.8  | 309.1 | 407.1  | 562.5  |
| FH       | 6437   | 7979.9 | 2660.3 | 2173.2 | 1288.5 | 2275  | 6012.3 | 8629.6 |
| FHIT     | 98.5   | 100.7  | 100    | 83.4   | 88.3   | 93.8  | 100.6  | 92.7   |
| FHL1     | 138.8  | 151.9  | 122    | 134.2  | 129.9  | 126   | 144.6  | 180.1  |
| FHL2     | 509    | 699.4  | 289.4  | 205.3  | 188    | 286   | 562.8  | 746.8  |
| FHL2     | 299.3  | 387.8  | 230.4  | 193.8  | 190.5  | 234.9 | 274.4  | 384.7  |
| FHL2     | 92.7   | 85.6   | 102.7  | 99.4   | 101.1  | 96.5  | 90     | 89     |
| FHL2     | 85.7   | 99.4   | 91.6   | 82.7   | 88.2   | 90.7  | 82.3   | 96.1   |
| FHL3     | 363.3  | 467.8  | 258.9  | 259.1  | 211.2  | 234   | 349    | 445.7  |
| FHL5     | 90.8   | 98.9   | 97.8   | 86.6   | 85.9   | 82.2  | 87.5   | 97.9   |
| FHOD1    | 497.7  | 636.9  | 701.1  | 493.3  | 388.5  | 703.7 | 439.9  | 819.9  |
| FHOD3    | 82.3   | 87.9   | 99.7   | 96.5   | 88.7   | 101.9 | 89.2   | 85.5   |
| FIBCD1   | 269.1  | 319.7  | 249.8  | 139.9  | 126.2  | 134.2 | 187.3  | 258.7  |
| FIBP     | 2147.1 | 2594.8 | 1407.8 | 1040.3 | 883.6  | 810.9 | 2096   | 1735.1 |
| FIBP     | 321.9  | 399.9  | 211.6  | 159.3  | 162.7  | 163.3 | 283.7  | 282.8  |
| FIGF     | 103    | 130.5  | 101.6  | 81.9   | 91.3   | 91.5  | 105.1  | 128.6  |
| FIGLA    | 112.2  | 142.9  | 101.8  | 84.9   | 85     | 80    | 121.2  | 129.6  |
| FIGN     | 96     | 97.9   | 98     | 81.7   | 86.9   | 92.4  | 92.8   | 89     |
| FIGNL1   | 453.4  | 571.4  | 294.9  | 250.1  | 182.3  | 307.8 | 338.2  | 432.3  |
| FIGNL1   | 552.3  | 724.3  | 277.7  | 269.8  | 230.2  | 337.3 | 384.2  | 526.2  |

|          |        |        |        |        |        |        |        |        |
|----------|--------|--------|--------|--------|--------|--------|--------|--------|
| FILIP1   | 94.2   | 118.7  | 116.1  | 120.7  | 105.4  | 122.2  | 103.2  | 105.6  |
| FILIP1L  | 201.9  | 251.9  | 158.1  | 229.8  | 166.2  | 370.8  | 187.4  | 189.4  |
| FIP1L1   | 86     | 87.2   | 97.9   | 78.5   | 85.2   | 80.3   | 80.5   | 92.2   |
| FIS1     | 1157.4 | 1515.7 | 647.6  | 490.1  | 438.1  | 639.4  | 1137.5 | 1323.4 |
| FJX1     | 99.4   | 115.2  | 109.6  | 99.4   | 87.3   | 105.6  | 97.6   | 102.3  |
| FKBP10   | 115.3  | 128.4  | 102.4  | 89.8   | 83.5   | 101.7  | 100.7  | 117.4  |
| FKBP11   | 245.9  | 253    | 177.3  | 252.6  | 326.7  | 311.7  | 160.6  | 193.9  |
| FKBP14   | 1062.7 | 1029.1 | 720.3  | 1241.6 | 1313.4 | 901.7  | 987.7  | 2239   |
| FKBP1A   | 389.7  | 502.2  | 388.3  | 269.7  | 245.3  | 292.4  | 380.4  | 545.5  |
| FKBP1A   | 683.9  | 897.4  | 528.2  | 864.8  | 669.9  | 1042.1 | 548.6  | 850.1  |
| FKBP1A   | 1457.3 | 2160.9 | 1445.4 | 1269.5 | 999.3  | 1839.5 | 1082.6 | 2370.7 |
| FKBP1B   | 114.5  | 129.8  | 92.6   | 84.5   | 92.3   | 93.5   | 114.5  | 125    |
| FKBP2    | 672    | 790.8  | 308.7  | 266.8  | 232.9  | 255.9  | 667.2  | 745.9  |
| FKBP2    | 166.8  | 188.5  | 98     | 96.1   | 83.6   | 103.5  | 148.8  | 198.1  |
| FKBP2    | 209.6  | 238.6  | 162.6  | 152.1  | 137.6  | 134.4  | 183.9  | 207.5  |
| FKBP3    | 1340.8 | 1618   | 301.7  | 290.7  | 204.9  | 336.5  | 1132.2 | 2038.8 |
| FKBP4    | 540.3  | 712.9  | 325.8  | 162.5  | 138.7  | 157.8  | 431.5  | 550.6  |
| FKBP5    | 982.3  | 1194.2 | 581.3  | 660    | 650    | 736.5  | 848.3  | 896.8  |
| FKBP6    | 82.6   | 88     | 85.5   | 87.2   | 83.7   | 91     | 75.7   | 87.2   |
| FKBP7    | 119.1  | 134.2  | 91.8   | 79.9   | 90.3   | 87.5   | 88.1   | 117    |
| FKBP8    | 170.6  | 217.2  | 111.5  | 117.8  | 104.5  | 114.2  | 177.6  | 229.2  |
| FKBP9    | 84.9   | 89.6   | 107.8  | 101.1  | 98.4   | 104.4  | 84.2   | 87.3   |
| FKBP9L   | 606.3  | 771.8  | 484.7  | 619.3  | 470.1  | 775.3  | 516.4  | 878.2  |
| FKBPL    | 161.4  | 220.8  | 163.5  | 126    | 126.2  | 143.9  | 177.5  | 169    |
| FKHL18   | 74.2   | 88.4   | 94.2   | 82.4   | 84.9   | 90     | 89.3   | 86.6   |
| FKRP     | 131.7  | 134.5  | 140.1  | 130.3  | 113.5  | 112.8  | 128.3  | 202.3  |
| FKRP     | 123.7  | 155.5  | 110.7  | 98.2   | 94     | 97     | 126.5  | 154.6  |
| FKSG14   | 1001.8 | 1221.7 | 438.1  | 565.8  | 415.8  | 991.1  | 651.5  | 945.9  |
| FKSG2    | 93.9   | 93.9   | 90.2   | 94.6   | 83.8   | 88.8   | 85.4   | 104.8  |
| FKSG24   | 213    | 222    | 132.4  | 104.7  | 102.6  | 112.4  | 210.3  | 220.3  |
| FKSG30   | 88.3   | 84.5   | 91.8   | 91.1   | 86.9   | 91.6   | 84.3   | 96.1   |
| FKSG44   | 80.2   | 81.2   | 92.7   | 88.7   | 89.5   | 92.3   | 80.1   | 78.4   |
| FLAD1    | 202.1  | 244.1  | 110.7  | 98.7   | 94.7   | 89.3   | 175.5  | 201.4  |
| FLAD1    | 1155.9 | 1297.1 | 798.9  | 525.4  | 413.2  | 529.4  | 891.9  | 930.1  |
| FLCN     | 90.5   | 103.1  | 103    | 111.8  | 93.2   | 102.8  | 99     | 113.7  |
| FLCN     | 88     | 105.1  | 96     | 91     | 83.5   | 89.3   | 91.3   | 106.3  |
| FLCN     | 113.2  | 134.3  | 113.1  | 101    | 87.6   | 93.4   | 128.4  | 131.2  |
| FLG      | 77.3   | 76.3   | 85.9   | 77.6   | 80.9   | 86.7   | 77.8   | 77.5   |
| FLG2     | 81.2   | 90.6   | 100.1  | 92.4   | 83.8   | 82.7   | 77.5   | 90.4   |
| FLI1     | 217.7  | 247.5  | 99.7   | 98.9   | 90.5   | 90.9   | 205.3  | 249.5  |
| FLII     | 239.2  | 281.4  | 316.6  | 306.2  | 279.6  | 479.6  | 246.5  | 329.8  |
| FLJ00060 | 83     | 89.7   | 97.6   | 92     | 92.9   | 83.7   | 85.8   | 99.2   |
| FLJ10006 | 844.2  | 1344.4 | 593.7  | 601.2  | 517.9  | 1108.2 | 670.9  | 903.9  |
| FLJ10081 | 446.7  | 531    | 437    | 406.1  | 369.1  | 556.7  | 404.1  | 819.5  |
| FLJ10099 | 949.9  | 1328   | 590.7  | 593.7  | 429.4  | 787.5  | 975.2  | 1557.6 |
| FLJ10120 | 133.8  | 159.5  | 141.1  | 173.4  | 174.4  | 219.3  | 117.8  | 134.2  |
| FLJ10120 | 117    | 124.9  | 107.7  | 105.8  | 98.3   | 96.3   | 105    | 136.6  |
| FLJ10154 | 3369.6 | 3766.6 | 1890.6 | 1845.7 | 1755.2 | 3301.4 | 2320.1 | 3619.9 |
| FLJ10159 | 196.9  | 240.3  | 128.4  | 120.3  | 122.5  | 125.8  | 164.2  | 149.5  |
| FLJ10178 | 247.1  | 285.6  | 252.7  | 102    | 98.5   | 123.8  | 201.5  | 298.5  |



|          |        |        |        |        |        |        |        |        |
|----------|--------|--------|--------|--------|--------|--------|--------|--------|
| FLJ10213 | 260.2  | 248.2  | 150.5  | 234.8  | 214.9  | 247.3  | 189    | 249.9  |
| FLJ10241 | 1575.9 | 2202.5 | 1674.5 | 992.8  | 712.8  | 1153.3 | 1470.1 | 2815.2 |
| FLJ10260 | 141.1  | 171.7  | 107    | 109.8  | 89     | 105.6  | 134.5  | 142.1  |
| FLJ10292 | 151.2  | 183.6  | 120.6  | 117.8  | 110.6  | 115.5  | 127.7  | 206.7  |
| FLJ10324 | 84.2   | 90.2   | 116.6  | 91.9   | 97.9   | 94.3   | 85.4   | 107.7  |
| FLJ10357 | 106.4  | 142.8  | 107.7  | 103.9  | 113.2  | 112.3  | 108.3  | 126.7  |
| FLJ10374 | 237.7  | 325    | 125.2  | 121.9  | 113.9  | 120    | 265.4  | 204.6  |
| FLJ10379 | 458.9  | 594.1  | 409.1  | 517    | 381.8  | 708.1  | 377.9  | 612.7  |
| FLJ10490 | 102.5  | 107.3  | 111.9  | 102.7  | 91.2   | 99.6   | 98.3   | 116.7  |
| FLJ10661 | 250.7  | 283.7  | 198.5  | 138.5  | 122.8  | 153    | 192.4  | 268.9  |
| FLJ10726 | 362.3  | 458.8  | 227.5  | 226.6  | 194.4  | 315.4  | 272.3  | 451.7  |
| FLJ10769 | 639.9  | 931.5  | 557.5  | 587.2  | 552    | 802.2  | 597.5  | 931.9  |
| FLJ10781 | 114.1  | 107.2  | 91.9   | 90.2   | 88.1   | 79.8   | 92.5   | 123.3  |
| FLJ10786 | 78.5   | 88.1   | 80.4   | 82     | 74.2   | 82     | 70     | 84.4   |
| FLJ10815 | 101.9  | 135.1  | 95.5   | 98.9   | 77.6   | 99.5   | 107.1  | 125.2  |
| FLJ10847 | 144.9  | 182.1  | 133.2  | 177.2  | 163    | 193.3  | 164.9  | 190.5  |
| FLJ10916 | 205.1  | 232.5  | 163.6  | 198.2  | 191.8  | 198.9  | 179.3  | 176.7  |
| FLJ10922 | 160.2  | 177.2  | 161.3  | 156.6  | 116.7  | 140.9  | 138.9  | 184.5  |
| FLJ10925 | 161    | 163.4  | 155.6  | 150.1  | 142    | 180.1  | 130.1  | 195    |
| FLJ10945 | 125.5  | 150.9  | 98.5   | 97.7   | 79.5   | 96     | 134.9  | 145.1  |
| FLJ10986 | 450    | 619.7  | 407.2  | 501.8  | 434.3  | 639.4  | 422.1  | 622.7  |
| FLJ10996 | 109.8  | 123.1  | 99.2   | 98.7   | 79.8   | 120.3  | 101.3  | 115.4  |
| FLJ11000 | 153    | 186.7  | 114.5  | 119    | 116.6  | 127.9  | 144.7  | 147.9  |
| FLJ11017 | 118.1  | 146.2  | 106.5  | 103.9  | 97.2   | 107.4  | 119.6  | 153.5  |
| FLJ11151 | 160.4  | 176.4  | 107.8  | 121.4  | 113.8  | 122.1  | 156.6  | 205.3  |
| FLJ11155 | 358.1  | 412.7  | 181.6  | 224.9  | 163.9  | 233    | 318.3  | 427.5  |
| FLJ11171 | 328.5  | 369.5  | 239.4  | 191.7  | 156.8  | 262.5  | 290.1  | 590.2  |
| FLJ11184 | 146.5  | 155.8  | 105.5  | 98.6   | 95.4   | 105.7  | 124.6  | 180.6  |
| FLJ11193 | 247.3  | 356.5  | 135.7  | 125.4  | 120.2  | 145.4  | 236.4  | 318.8  |
| FLJ11200 | 434.1  | 537    | 210.1  | 182.7  | 156.4  | 185.5  | 365.2  | 576.8  |
| FLJ11259 | 179.4  | 234.9  | 179.4  | 134.2  | 155.7  | 159.7  | 149.5  | 232.1  |
| FLJ11286 | 222.3  | 249.8  | 150.5  | 131.7  | 132.2  | 144.9  | 190.3  | 185.4  |
| FLJ11305 | 4282.2 | 5710.9 | 3407.5 | 2818.4 | 2276.6 | 3241.3 | 3562.9 | 4061   |
| FLJ11331 | 83.7   | 97.8   | 91.5   | 90.6   | 85.9   | 89.4   | 85.7   | 96.1   |
| FLJ11712 | 1150.6 | 1002.2 | 370.9  | 406.1  | 291.8  | 502.4  | 1080   | 1865.2 |
| FLJ11783 | 106.8  | 116.7  | 85.8   | 90.9   | 92.4   | 96.9   | 105.4  | 112    |
| FLJ11795 | 187.1  | 230.8  | 161.4  | 201.8  | 169.1  | 240.6  | 112.7  | 122.6  |
| FLJ11806 | 113.7  | 127.7  | 96.3   | 75.1   | 78.8   | 91     | 111.5  | 124.4  |
| FLJ11806 | 175.4  | 205.8  | 157.8  | 121.4  | 101.3  | 141.7  | 144.5  | 160    |
| FLJ11806 | 78     | 75.3   | 94.5   | 87.4   | 85.5   | 96.1   | 91.8   | 85.3   |
| FLJ11806 | 177.1  | 205.8  | 159.1  | 143.9  | 116.2  | 166.4  | 147.4  | 333    |
| FLJ12056 | 91.3   | 111.7  | 90.1   | 86.7   | 91     | 91.6   | 85.9   | 102.6  |
| FLJ12118 | 439.3  | 486.6  | 151.5  | 171    | 132.5  | 174.2  | 358.2  | 364.4  |
| FLJ12331 | 71.3   | 92.3   | 92.8   | 89.5   | 85.8   | 81.5   | 77.3   | 90.1   |
| FLJ12505 | 115    | 145.3  | 97.8   | 97.4   | 98.9   | 97.1   | 97.6   | 102.6  |
| FLJ12529 | 94.6   | 121.4  | 108.7  | 91.1   | 86.8   | 100.5  | 101.3  | 118.1  |
| FLJ12571 | 223.9  | 280.7  | 180.4  | 137.7  | 106.7  | 144.8  | 170.3  | 196.8  |
| FLJ12681 | 101.9  | 106.3  | 93.5   | 94.8   | 86     | 90.4   | 110.3  | 102.8  |
| FLJ12684 | 277.7  | 337.7  | 203.6  | 122.2  | 98.1   | 137.9  | 166.9  | 191    |
| FLJ12716 | 405.4  | 547.8  | 271.6  | 286.3  | 222.6  | 404.2  | 300.7  | 339.6  |

|          |        |        |       |       |       |        |        |        |
|----------|--------|--------|-------|-------|-------|--------|--------|--------|
| FLJ12716 | 620.1  | 839.9  | 242.8 | 289.1 | 283.8 | 358.9  | 568    | 773.2  |
| FLJ12788 | 576.7  | 584.6  | 547.6 | 527.3 | 508.4 | 727.9  | 391.6  | 519.9  |
| FLJ12886 | 268.2  | 290.8  | 227.1 | 175.5 | 137.9 | 175.5  | 223.5  | 374.6  |
| FLJ12949 | 219    | 262.1  | 154.7 | 134   | 126.1 | 145    | 183    | 222.1  |
| FLJ12949 | 389.9  | 457.7  | 479.6 | 301   | 252   | 325.4  | 300.7  | 424.6  |
| FLJ12998 | 155    | 179.3  | 157   | 130.5 | 139.6 | 173.8  | 137.9  | 201.2  |
| FLJ13096 | 167.5  | 205.2  | 124.3 | 109.3 | 99.7  | 129.1  | 143.4  | 193.4  |
| FLJ13149 | 565.3  | 719.9  | 412   | 406.1 | 342.6 | 460.8  | 496.3  | 587.2  |
| FLJ13231 | 105.9  | 115    | 99    | 87.7  | 85.7  | 93.3   | 96.5   | 111.3  |
| FLJ13236 | 124    | 163.2  | 110.7 | 99.9  | 89.2  | 92     | 123.7  | 126.9  |
| FLJ13265 | 94.3   | 124.2  | 104.8 | 95.9  | 91    | 100.5  | 94.7   | 111.2  |
| FLJ13273 | 175.7  | 211.9  | 122.9 | 125.6 | 117.2 | 105.3  | 130.3  | 171.2  |
| FLJ13273 | 933.4  | 1143.5 | 331.3 | 272.2 | 197.9 | 244.3  | 935.3  | 1146.4 |
| FLJ13305 | 169    | 209.3  | 119.2 | 117   | 108.3 | 112    | 119.7  | 135.8  |
| FLJ13391 | 88.3   | 91.4   | 89.5  | 74.2  | 85.5  | 84.3   | 98.5   | 103    |
| FLJ13576 | 338.1  | 357.4  | 192.8 | 203.8 | 168.1 | 241.5  | 212.5  | 274.5  |
| FLJ13611 | 109.7  | 118.6  | 92.8  | 83.6  | 89.1  | 83.2   | 109    | 124.5  |
| FLJ13614 | 130.4  | 166.5  | 104.2 | 93.7  | 92.1  | 90.9   | 125.9  | 139.1  |
| FLJ13639 | 193    | 207.7  | 144.5 | 138.2 | 124.9 | 152.2  | 173.4  | 200.1  |
| FLJ13639 | 109.1  | 120.3  | 131.4 | 114.4 | 99.5  | 110.4  | 100.3  | 117.5  |
| FLJ13639 | 161.4  | 222.8  | 144.9 | 143.9 | 119   | 161.8  | 166.7  | 162.6  |
| FLJ13841 | 87.4   | 95.5   | 95    | 85.2  | 90.4  | 83.8   | 93.1   | 105.6  |
| FLJ13909 | 769.5  | 838.2  | 520.1 | 325.3 | 265.3 | 295.1  | 537.8  | 533.2  |
| FLJ13910 | 126.9  | 159.8  | 122   | 110.9 | 98.4  | 110.2  | 117.6  | 158.9  |
| FLJ13912 | 1235.3 | 1660.3 | 791   | 506.8 | 408.4 | 576.1  | 935.7  | 1110.2 |
| FLJ13946 | 125.1  | 130.8  | 98.6  | 89.6  | 85.3  | 97.4   | 102.2  | 124.7  |
| FLJ13984 | 123.2  | 148    | 114.4 | 99.8  | 89.5  | 111.7  | 130.5  | 138.1  |
| FLJ14054 | 87.8   | 104.7  | 104.5 | 90.4  | 78.9  | 90.5   | 86.2   | 90.1   |
| FLJ14107 | 93.8   | 111.7  | 103.9 | 83.6  | 101.5 | 106.7  | 94.3   | 119    |
| FLJ14154 | 190.1  | 257    | 161.4 | 122.9 | 110.9 | 125.7  | 187.5  | 320.9  |
| FLJ14166 | 100.1  | 123.2  | 90.8  | 96.2  | 78.5  | 89.3   | 104.2  | 132.1  |
| FLJ14213 | 108.9  | 123.3  | 104.8 | 98.8  | 83.5  | 93.5   | 94.1   | 110    |
| FLJ14346 | 128.6  | 119.1  | 93.1  | 82.6  | 80.8  | 81.7   | 124.6  | 174.8  |
| FLJ14397 | 91.3   | 102.5  | 99.6  | 87.9  | 82.2  | 87.1   | 100.1  | 121.6  |
| FLJ14466 | 220.9  | 263.3  | 224.1 | 184.4 | 140.6 | 181.7  | 221.8  | 291.8  |
| FLJ14640 | 152.7  | 196.3  | 128   | 117.6 | 103.8 | 141.9  | 150    | 184.2  |
| FLJ14668 | 2113.8 | 2551.9 | 1179  | 942.4 | 782.4 | 1152.5 | 1516.9 | 1665.6 |
| FLJ14768 | 198.9  | 240.7  | 167.4 | 141.6 | 134.2 | 153.2  | 195.6  | 239.3  |
| FLJ14803 | 1079   | 1380.6 | 743.2 | 832.3 | 554.7 | 1195.4 | 960.1  | 2134.3 |
| FLJ14816 | 74     | 88.1   | 94    | 86.1  | 91.3  | 75     | 79.8   | 86.6   |
| FLJ14834 | 76.6   | 80.1   | 96    | 80.7  | 79    | 84     | 79.1   | 79.7   |
| FLJ16008 | 137.9  | 157.3  | 94.9  | 99.1  | 84.1  | 92.6   | 120.8  | 146.2  |
| FLJ16124 | 75     | 70.1   | 90.9  | 81.9  | 84.8  | 88.9   | 80.2   | 81.2   |
| FLJ16165 | 112.6  | 108.7  | 100.7 | 88    | 102   | 100.4  | 106.2  | 136.6  |
| FLJ16231 | 178.5  | 227.5  | 152.1 | 118.5 | 101.3 | 146.1  | 155    | 192.3  |
| FLJ16237 | 129.4  | 140.9  | 96.8  | 86.6  | 89.2  | 93.3   | 122.8  | 127.3  |
| FLJ16331 | 104.1  | 133.8  | 109.7 | 103.1 | 100.9 | 86.7   | 105.1  | 119.4  |
| FLJ16478 | 86.1   | 84     | 88.4  | 90    | 85.7  | 82.4   | 87     | 87.6   |
| FLJ16542 | 122.1  | 146.6  | 102.1 | 101.5 | 86    | 96.2   | 120.4  | 175.4  |
| FLJ16636 | 110.1  | 128    | 99.4  | 93.9  | 84.8  | 101.8  | 107.8  | 125.7  |

|          |        |        |       |        |        |        |        |        |
|----------|--------|--------|-------|--------|--------|--------|--------|--------|
| FLJ16641 | 107.2  | 128.9  | 97.5  | 86.3   | 92.6   | 92     | 109.3  | 123.4  |
| FLJ16734 | 134.2  | 157    | 110.5 | 99.1   | 98.4   | 100.2  | 130.1  | 144.5  |
| FLJ16793 | 112.9  | 135    | 114.6 | 100    | 94.3   | 106.5  | 99.9   | 107.5  |
| FLJ20032 | 126.5  | 128    | 97    | 88.6   | 86.8   | 82.9   | 97.4   | 120.2  |
| FLJ20035 | 197.5  | 254.1  | 188.9 | 197.7  | 168.6  | 290.9  | 160.7  | 210.9  |
| FLJ20054 | 489.5  | 665.2  | 465.7 | 873.5  | 699.1  | 1394.8 | 365.9  | 516    |
| FLJ20097 | 175.4  | 191.6  | 117.1 | 141.3  | 118.2  | 160.5  | 168    | 225.2  |
| FLJ20097 | 131.6  | 127.4  | 125.5 | 107.8  | 114.2  | 104.5  | 105.7  | 127.5  |
| FLJ20097 | 69     | 79.7   | 84.4  | 80.7   | 74.7   | 83.6   | 73.5   | 80.9   |
| FLJ20105 | 154    | 204.2  | 117.8 | 105.5  | 99.4   | 116.1  | 145    | 203.5  |
| FLJ20105 | 211.1  | 288.3  | 190.3 | 145.3  | 123.1  | 193    | 179.1  | 203.4  |
| FLJ20125 | 251.5  | 339.5  | 181.7 | 164.2  | 124.7  | 243.4  | 202.3  | 320.3  |
| FLJ20130 | 180.2  | 239.8  | 151.7 | 88.6   | 79.2   | 83     | 137.3  | 157.6  |
| FLJ20152 | 105.5  | 133.3  | 99    | 89.6   | 80.2   | 100.9  | 95.2   | 119.7  |
| FLJ20152 | 161.6  | 221.9  | 125.7 | 102.4  | 89.8   | 112.4  | 162.8  | 168.8  |
| FLJ20152 | 272.4  | 324    | 183.9 | 157.4  | 125.3  | 199.1  | 226.1  | 369.5  |
| FLJ20160 | 158.8  | 210.5  | 147.6 | 168.1  | 151.1  | 188.1  | 167    | 265.3  |
| FLJ20184 | 86.9   | 108.2  | 93.5  | 80.9   | 84.5   | 75.8   | 104.9  | 109.7  |
| FLJ20186 | 568    | 777.7  | 275.1 | 195.2  | 189.5  | 226    | 611.4  | 684.7  |
| FLJ20186 | 541.6  | 712.3  | 194.6 | 162.6  | 138.2  | 158.8  | 593.5  | 930.2  |
| FLJ20186 | 775    | 759.9  | 804.3 | 608.1  | 540.5  | 747.7  | 574.6  | 782.3  |
| FLJ20232 | 1416.2 | 2104.9 | 833.4 | 702.8  | 533.2  | 693.1  | 1185.8 | 1385.3 |
| FLJ20245 | 316.4  | 395    | 494.3 | 361.1  | 295.5  | 630.8  | 291.7  | 645.2  |
| FLJ20254 | 249.6  | 293.1  | 170.1 | 124.3  | 115.2  | 135.1  | 217.5  | 339.7  |
| FLJ20272 | 1207   | 1674.6 | 457.2 | 393.1  | 287.8  | 439.5  | 825    | 1095.7 |
| FLJ20273 | 171.9  | 224.4  | 135.5 | 170.5  | 167.6  | 267.9  | 209.9  | 371.6  |
| FLJ20280 | 402.9  | 535.9  | 291.4 | 280.8  | 216.7  | 252.9  | 299    | 408.6  |
| FLJ20294 | 118.2  | 135.4  | 113.9 | 106.5  | 94.6   | 91.9   | 108.9  | 126.9  |
| FLJ20297 | 156.5  | 168.9  | 130.4 | 131    | 117.6  | 119.2  | 140.5  | 158.8  |
| FLJ20298 | 103.1  | 109.3  | 90.1  | 76.2   | 76.2   | 79     | 104.3  | 116    |
| FLJ20298 | 94.4   | 116.5  | 106.1 | 95.3   | 80.3   | 93.7   | 98.7   | 99.6   |
| FLJ20309 | 78.6   | 85.1   | 98.8  | 107.4  | 96     | 93.9   | 102.5  | 100.6  |
| FLJ20323 | 485.8  | 607.5  | 316.1 | 455.7  | 328.4  | 718.8  | 365.5  | 594.1  |
| FLJ20364 | 1598.4 | 1781.5 | 840.4 | 816.1  | 658.4  | 1177   | 1128.7 | 1641   |
| FLJ20366 | 88.2   | 98.5   | 81    | 96.1   | 71     | 77.6   | 90     | 95.6   |
| FLJ20397 | 88.8   | 108.5  | 97.1  | 77.7   | 82.3   | 90.3   | 100.7  | 106    |
| FLJ20422 | 189.6  | 241.2  | 138.1 | 123.6  | 111.6  | 148.8  | 172.5  | 215.2  |
| FLJ20433 | 88     | 91.9   | 88.5  | 85     | 84     | 94.3   | 80.3   | 87.5   |
| FLJ20489 | 188.8  | 199    | 168.2 | 143.8  | 126.4  | 155.8  | 403.2  | 712.6  |
| FLJ20512 | 2180.3 | 2930.1 | 2060  | 1335   | 1032.3 | 1290.3 | 2129.7 | 2107.8 |
| FLJ20516 | 1103.3 | 1551.8 | 487.6 | 286.3  | 203.2  | 373.4  | 802.4  | 1361.4 |
| FLJ20534 | 948    | 1398.7 | 479.4 | 384.3  | 290.1  | 503.9  | 760.5  | 1595   |
| FLJ20551 | 259    | 309.3  | 188.8 | 181.3  | 173.3  | 230.2  | 227.9  | 306.7  |
| FLJ20558 | 416.6  | 602.2  | 204.4 | 195.2  | 148.3  | 219.6  | 341.7  | 474.4  |
| FLJ20581 | 112.2  | 127.8  | 119.4 | 110.1  | 107.6  | 101.7  | 111.6  | 109.2  |
| FLJ20582 | 610.9  | 864.9  | 331.9 | 333.8  | 257.5  | 367.9  | 584.5  | 818.3  |
| FLJ20625 | 1997.6 | 2315   | 1987  | 1577.7 | 1266.2 | 1404.9 | 1876.7 | 2461.9 |
| FLJ20628 | 403.3  | 457.1  | 203.8 | 186.9  | 162.7  | 220    | 345.5  | 508.6  |
| FLJ20643 | 1083   | 1451.1 | 727.1 | 412.5  | 372.3  | 520.7  | 1035   | 1151.2 |
| FLJ20647 | 835.5  | 1069   | 408.7 | 339.9  | 284.3  | 377.4  | 751    | 1091.3 |

|          |        |        |       |       |       |        |        |        |
|----------|--------|--------|-------|-------|-------|--------|--------|--------|
| FLJ20674 | 104.6  | 138.5  | 90.7  | 80.6  | 79.3  | 90.6   | 99.4   | 118.7  |
| FLJ20674 | 404.2  | 559.1  | 253.4 | 248.4 | 220.4 | 195.8  | 324.5  | 388.3  |
| FLJ20699 | 367.7  | 505.1  | 223.5 | 217.3 | 173.7 | 256.7  | 301.4  | 499.8  |
| FLJ20701 | 103.4  | 130.6  | 105   | 119.6 | 104.8 | 119.9  | 104.3  | 110.2  |
| FLJ20718 | 685.2  | 968.9  | 537.6 | 383.7 | 298.1 | 232.2  | 426.5  | 746.6  |
| FLJ20718 | 102.3  | 127.9  | 116.3 | 97.4  | 89.9  | 90.8   | 98.2   | 120.3  |
| FLJ20758 | 113.2  | 135    | 107.9 | 92.3  | 99.4  | 117    | 104.7  | 133.3  |
| FLJ20850 | 124.3  | 145    | 119.5 | 101   | 82.5  | 103.8  | 131    | 136.8  |
| FLJ20920 | 128.2  | 155.5  | 103.1 | 98.6  | 99.6  | 111.5  | 120    | 158    |
| FLJ21062 | 98.4   | 99.3   | 101.4 | 104.1 | 82.6  | 106    | 93.8   | 95     |
| FLJ21075 | 88.5   | 105.8  | 93.2  | 86.5  | 81.5  | 90     | 85.8   | 95.1   |
| FLJ21103 | 205.2  | 276    | 146.2 | 104   | 110.3 | 113.3  | 210.8  | 223.1  |
| FLJ21106 | 250.1  | 295.3  | 238.5 | 249.4 | 232.4 | 242.3  | 239.4  | 335.1  |
| FLJ21125 | 246.7  | 318.5  | 275.3 | 267.7 | 220.2 | 343.1  | 189.3  | 325.4  |
| FLJ21127 | 531.6  | 759.5  | 313.9 | 312   | 267.2 | 320.3  | 492.5  | 496.6  |
| FLJ21159 | 113.4  | 132.9  | 102.8 | 79.8  | 76.3  | 104.4  | 104.8  | 130.9  |
| FLJ21511 | 83.9   | 87.3   | 106.8 | 108.8 | 104.8 | 108.3  | 81     | 75.3   |
| FLJ21687 | 113.6  | 132.5  | 101.9 | 88.2  | 81.6  | 90.2   | 118.2  | 148.5  |
| FLJ21742 | 183.1  | 209.5  | 136.9 | 103   | 111.4 | 109.5  | 144    | 133.2  |
| FLJ21749 | 242.8  | 326.1  | 201.4 | 177.9 | 158.5 | 210.4  | 226.6  | 284.7  |
| FLJ21816 | 309.6  | 419.4  | 302.2 | 226   | 196.5 | 338.4  | 252.2  | 319.5  |
| FLJ21820 | 414.2  | 572.9  | 373.3 | 338.2 | 280.1 | 447.8  | 327.8  | 583.3  |
| FLJ21827 | 258.8  | 336    | 189.2 | 109.7 | 109.7 | 129.9  | 199.1  | 299.2  |
| FLJ21839 | 304.4  | 387.8  | 323.9 | 264.2 | 250.5 | 444.4  | 244.6  | 379.9  |
| FLJ21839 | 120.7  | 148.1  | 158.2 | 184.7 | 152.4 | 243.2  | 115.8  | 156.8  |
| FLJ21865 | 166.9  | 177.7  | 287.9 | 281.2 | 276.5 | 443.8  | 137.6  | 233.3  |
| FLJ21901 | 597.9  | 603.6  | 262.7 | 279.8 | 225.8 | 395    | 423    | 688.5  |
| FLJ21908 | 90.2   | 114    | 87.8  | 95.4  | 91.2  | 82.9   | 98.5   | 106.9  |
| FLJ21945 | 424.1  | 538.4  | 326   | 302.2 | 239.8 | 293.4  | 337.3  | 394.6  |
| FLJ21963 | 94.9   | 116.9  | 87.2  | 81.1  | 84.9  | 98.1   | 92     | 119.5  |
| FLJ21986 | 90.7   | 94.6   | 98.2  | 106.9 | 100.9 | 130.2  | 84     | 97.3   |
| FLJ22104 | 317.2  | 362.4  | 185.5 | 239.3 | 177.8 | 240.9  | 302.5  | 563.8  |
| FLJ22167 | 132    | 157    | 142.8 | 112.6 | 103.7 | 122.7  | 99.2   | 117    |
| FLJ22184 | 88.5   | 102    | 98.8  | 89.4  | 89.9  | 97.1   | 86     | 95.2   |
| FLJ22184 | 110.9  | 123.8  | 96.2  | 107.2 | 111.4 | 99.8   | 117.5  | 121.7  |
| FLJ22222 | 132.5  | 152.9  | 133.7 | 118.3 | 114.6 | 133    | 137.7  | 179.4  |
| FLJ22222 | 504.4  | 692    | 492.1 | 511.4 | 445.4 | 650.5  | 495.3  | 689.4  |
| FLJ22222 | 174.3  | 218.1  | 125.7 | 120.2 | 100.6 | 143.9  | 166.7  | 209.3  |
| FLJ22318 | 217    | 267    | 194.7 | 171.5 | 164.5 | 212.6  | 190.6  | 231.6  |
| FLJ22349 | 154.6  | 190.9  | 123.8 | 111.1 | 103.8 | 117.9  | 154.4  | 145.4  |
| FLJ22374 | 137.3  | 171.8  | 122.6 | 114.5 | 87.5  | 103.8  | 130.1  | 133.1  |
| FLJ22386 | 237    | 314    | 231.1 | 192.2 | 188   | 282.9  | 206.8  | 312    |
| FLJ22471 | 965.1  | 1210.2 | 508.1 | 520.8 | 400.4 | 432.5  | 993.1  | 778.2  |
| FLJ22531 | 179.1  | 239.4  | 135.9 | 136.9 | 140.2 | 129.1  | 171.3  | 172    |
| FLJ22555 | 1528   | 2128.9 | 959.9 | 986.3 | 669.8 | 1080.9 | 1375.3 | 2493.6 |
| FLJ22624 | 1303.8 | 1590.1 | 709   | 563.2 | 435.1 | 730    | 958.5  | 1746.2 |
| FLJ22639 | 110.9  | 124.5  | 109   | 112.1 | 95.9  | 127.7  | 101.8  | 118.1  |
| FLJ22662 | 127.6  | 141.6  | 133.8 | 330   | 254.4 | 443.2  | 123.1  | 157.7  |
| FLJ22671 | 81.9   | 90.8   | 96.7  | 87.8  | 85.1  | 84.3   | 77.9   | 89.9   |
| FLJ22688 | 103.5  | 116.8  | 120   | 102.7 | 92.1  | 86.1   | 96.2   | 109.7  |

|          |       |       |       |       |       |       |       |       |
|----------|-------|-------|-------|-------|-------|-------|-------|-------|
| FLJ22709 | 568.1 | 584.5 | 463.1 | 347.3 | 308.8 | 339   | 505   | 515.4 |
| FLJ22746 | 265.9 | 322.2 | 207.3 | 198.3 | 154.1 | 216   | 248.1 | 258.8 |
| FLJ22795 | 106.4 | 110.1 | 120.1 | 104.6 | 97.9  | 97.6  | 107.7 | 110.6 |
| FLJ23049 | 159.7 | 189.4 | 115   | 118.3 | 113.1 | 108.7 | 165.7 | 155.4 |
| FLJ23191 | 91.6  | 97.2  | 84    | 71.7  | 74.5  | 80.7  | 97.2  | 96.2  |
| FLJ23356 | 96.8  | 121.5 | 84.6  | 103.5 | 80.1  | 80.2  | 105.8 | 125.9 |
| FLJ23436 | 157.4 | 190.5 | 95.4  | 100.6 | 97.6  | 125.4 | 125.9 | 189   |
| FLJ23447 | 101.7 | 106.2 | 96.4  | 88.4  | 99.1  | 95.8  | 101.9 | 105.2 |
| FLJ23514 | 106.3 | 116.3 | 98.4  | 93.1  | 86.2  | 94.9  | 93.6  | 106.1 |
| FLJ23518 | 92.1  | 94.8  | 93.2  | 81.5  | 78.9  | 90.1  | 90.8  | 96.2  |
| FLJ23577 | 86.7  | 94.6  | 108.5 | 104.6 | 94.2  | 93.9  | 90.1  | 96.1  |
| FLJ23577 | 166.3 | 184   | 107.1 | 100.2 | 91    | 99.7  | 137.4 | 172.3 |
| FLJ23577 | 97.6  | 116.5 | 86.4  | 85.2  | 86.3  | 90.1  | 96.8  | 114.6 |
| FLJ23584 | 307.4 | 375.8 | 302.2 | 298.9 | 282   | 401.1 | 266.1 | 371.6 |
| FLJ23588 | 86.5  | 94.7  | 93    | 88.8  | 84.9  | 88    | 88.3  | 94.6  |
| FLJ23588 | 105.6 | 91.6  | 87.1  | 80.6  | 87.7  | 82.7  | 88.4  | 100.1 |
| FLJ23588 | 115.1 | 143.8 | 98    | 90.1  | 94.4  | 91.3  | 115   | 136.9 |
| FLJ23657 | 86.3  | 96.7  | 87    | 80.9  | 84.3  | 84.2  | 93.8  | 103.6 |
| FLJ23834 | 80.3  | 89.5  | 99.6  | 99.8  | 85.9  | 105.3 | 87.3  | 88.9  |
| FLJ23861 | 98.3  | 121.8 | 96.9  | 90.4  | 89.8  | 97.3  | 104.9 | 112.6 |
| FLJ23878 | 87.4  | 99.2  | 91.8  | 87.4  | 79.7  | 98.5  | 95.3  | 100.1 |
| FLJ25006 | 217.7 | 215.8 | 149.2 | 229.9 | 219.7 | 314.8 | 135.9 | 181.3 |
| FLJ25067 | 175   | 244.3 | 165.6 | 161.6 | 137.4 | 188.4 | 180.6 | 241.7 |
| FLJ25084 | 87.9  | 91.4  | 104.6 | 95    | 96.4  | 106.1 | 95.5  | 95.5  |
| FLJ25102 | 136.2 | 185.6 | 113.8 | 108   | 114.6 | 103.7 | 140.8 | 153.2 |
| FLJ25143 | 165.9 | 176.8 | 100   | 81.4  | 87.7  | 95.7  | 162.5 | 191.3 |
| FLJ25222 | 750.1 | 775.4 | 442.1 | 423.6 | 471.3 | 619.6 | 601.6 | 1235  |
| FLJ25328 | 83.5  | 88.3  | 80    | 79.7  | 86.5  | 92.9  | 83.2  | 90.8  |
| FLJ25369 | 75.7  | 83.1  | 88.7  | 83.7  | 80.2  | 82.2  | 70.2  | 80.8  |
| FLJ25371 | 88.6  | 96.4  | 101.5 | 90.6  | 84.7  | 87.5  | 80.9  | 88.6  |
| FLJ25410 | 128.6 | 150.4 | 103   | 106.7 | 98.8  | 113.7 | 129.8 | 165.4 |
| FLJ25416 | 695.6 | 800.9 | 468.8 | 382.1 | 267.6 | 451.8 | 497.8 | 940.7 |
| FLJ25421 | 123.9 | 136.4 | 97.9  | 83.3  | 80.9  | 89.3  | 124.2 | 154.5 |
| FLJ25439 | 89    | 105.2 | 100.2 | 97.7  | 93.1  | 93.7  | 95.2  | 99.8  |
| FLJ25444 | 79.7  | 88.3  | 91.7  | 85.8  | 75.1  | 86    | 90.1  | 90.9  |
| FLJ25476 | 577.3 | 794.5 | 434.8 | 403.1 | 346.1 | 425.1 | 507.5 | 648   |
| FLJ25477 | 104.1 | 124.7 | 106.5 | 90    | 98    | 106.4 | 108.3 | 116.1 |
| FLJ25660 | 113.9 | 117.1 | 92.2  | 84.6  | 80.4  | 81.1  | 117.2 | 115.6 |
| FLJ25680 | 84.8  | 108.9 | 101.2 | 98.4  | 98    | 96.3  | 95.6  | 99.1  |
| FLJ25770 | 82    | 95.1  | 83.4  | 81.4  | 78.4  | 79.5  | 74.9  | 90.9  |
| FLJ25773 | 99.8  | 120.1 | 84.9  | 83.1  | 75.1  | 78.2  | 101.8 | 107.6 |
| FLJ25791 | 95.4  | 98.5  | 118.4 | 105.6 | 90.2  | 101.2 | 98.6  | 109.1 |
| FLJ25801 | 84.5  | 96    | 95.5  | 93.7  | 85.7  | 91.9  | 89.5  | 90    |
| FLJ25976 | 86.1  | 102.4 | 82.1  | 86.6  | 79.1  | 75.3  | 87.2  | 90.1  |
| FLJ25996 | 87.4  | 92.9  | 90.9  | 76.1  | 76.2  | 92.3  | 87.8  | 98.7  |
| FLJ26175 | 125.2 | 135.6 | 111.9 | 95.4  | 106.1 | 110.5 | 108.5 | 142.4 |
| FLJ26443 | 95.4  | 104.3 | 94.2  | 89.8  | 90.8  | 90.9  | 99.3  | 102.5 |
| FLJ26850 | 170.7 | 235.3 | 105   | 95    | 91.1  | 100.8 | 166.1 | 199.7 |
| FLJ27465 | 91.7  | 101.4 | 130.2 | 123.9 | 124.7 | 113.9 | 91.9  | 96.8  |
| FLJ27465 | 99.6  | 103.8 | 86.1  | 95    | 84.2  | 90.9  | 102.8 | 99.2  |

|          |        |        |       |        |        |        |       |        |
|----------|--------|--------|-------|--------|--------|--------|-------|--------|
| FLJ27505 | 80.5   | 83     | 89.2  | 81.9   | 84     | 88.9   | 81.9  | 89.7   |
| FLJ27523 | 105.6  | 129.9  | 99.6  | 98.8   | 89.9   | 95.1   | 110.5 | 110.6  |
| FLJ30046 | 1650.4 | 2017.1 | 694   | 424.5  | 295.7  | 450.5  | 890   | 1294.5 |
| FLJ30046 | 533.7  | 768.9  | 243.5 | 163.7  | 135.5  | 209.4  | 288   | 372.1  |
| FLJ30058 | 152.2  | 162.7  | 123.9 | 93.9   | 90.7   | 114.7  | 146.9 | 158.6  |
| FLJ30277 | 110.9  | 130.4  | 91.8  | 90.4   | 80.1   | 82.3   | 107.6 | 110.3  |
| FLJ30294 | 97.4   | 104.6  | 89.2  | 89.6   | 84.4   | 89.5   | 92.4  | 129.9  |
| FLJ30313 | 82.4   | 88.5   | 109.3 | 90.6   | 86.8   | 97.3   | 96.1  | 87.9   |
| FLJ30596 | 266    | 354.8  | 140.2 | 140.4  | 108    | 148.5  | 188.9 | 321.3  |
| FLJ30655 | 275.9  | 354    | 140.6 | 126.9  | 120.2  | 188.4  | 218.7 | 303.6  |
| FLJ30707 | 80.4   | 96.9   | 86    | 79.2   | 77.7   | 82.2   | 90.5  | 97.6   |
| FLJ30834 | 132.2  | 154.1  | 104.2 | 94.5   | 95.8   | 94.7   | 121.6 | 136.5  |
| FLJ30851 | 74.2   | 80.4   | 98.4  | 89.3   | 83.7   | 93.4   | 79.5  | 78.4   |
| FLJ30934 | 152.1  | 196.2  | 106.1 | 98.1   | 94.5   | 95.3   | 146.2 | 151.7  |
| FLJ30990 | 142.8  | 163.2  | 113.1 | 111.5  | 90.1   | 98.7   | 114.5 | 145.1  |
| FLJ31196 | 95.8   | 116    | 86.7  | 83.5   | 67.9   | 79.1   | 98.3  | 111.1  |
| FLJ31204 | 113.6  | 148.7  | 111.3 | 96.8   | 85.2   | 91.4   | 110.9 | 130.7  |
| FLJ31401 | 94.5   | 97.7   | 85    | 93.9   | 83.6   | 82.2   | 86.8  | 91.9   |
| FLJ31413 | 778.8  | 976.6  | 572.7 | 539.6  | 506.8  | 557.7  | 982.6 | 1253.8 |
| FLJ31438 | 155.8  | 167.9  | 102.2 | 112.8  | 98.6   | 137.5  | 126.5 | 179.5  |
| FLJ31568 | 99     | 104.5  | 96    | 97.8   | 91.4   | 88.8   | 88.2  | 101.4  |
| FLJ31659 | 86.6   | 98.7   | 113.2 | 104.4  | 98.3   | 96.7   | 82.2  | 86.7   |
| FLJ31846 | 89.5   | 96.7   | 113.6 | 110.8  | 99.8   | 100.6  | 90.6  | 91.9   |
| FLJ32011 | 111.7  | 154    | 110.8 | 109.2  | 93.1   | 105.7  | 121.5 | 129.7  |
| FLJ32063 | 88.8   | 89.7   | 99.1  | 91.6   | 87     | 86.4   | 86.6  | 92.1   |
| FLJ32110 | 95.7   | 105.2  | 88.2  | 91.4   | 82.9   | 82.6   | 95.3  | 107.7  |
| FLJ32130 | 101.7  | 113.3  | 106.1 | 106.1  | 92.9   | 95     | 89    | 105.2  |
| FLJ32206 | 120.4  | 146.9  | 91.4  | 94.9   | 98.5   | 92.5   | 122.1 | 118.3  |
| FLJ32312 | 139.3  | 168.6  | 109   | 106.4  | 96.7   | 122.7  | 134.3 | 144.1  |
| FLJ32447 | 172.4  | 183.2  | 135.5 | 133.4  | 141    | 135.7  | 164.6 | 153.7  |
| FLJ32549 | 176.2  | 252.2  | 104.4 | 96.3   | 88.8   | 92.2   | 171.3 | 188.8  |
| FLJ32569 | 107.5  | 111.6  | 87.5  | 85.4   | 81.1   | 79.1   | 95    | 98.6   |
| FLJ32569 | 77.2   | 79.6   | 91.2  | 91.1   | 84.1   | 89.5   | 84.2  | 82.7   |
| FLJ32658 | 95.6   | 119.1  | 100.7 | 94.4   | 86.7   | 99.5   | 97    | 100.5  |
| FLJ32679 | 98.3   | 103.5  | 94.6  | 93.7   | 81.5   | 99     | 80.6  | 93.3   |
| FLJ32745 | 365.1  | 459.6  | 261.3 | 226.4  | 190.7  | 297    | 264   | 386.4  |
| FLJ32771 | 118.9  | 137.7  | 99.1  | 93.4   | 89.5   | 93.4   | 110   | 127    |
| FLJ32784 | 83.8   | 95.9   | 96.2  | 88.7   | 95     | 96.2   | 84.4  | 84.8   |
| FLJ32786 | 97.3   | 110.8  | 103.1 | 95.3   | 89.7   | 94.2   | 99.6  | 105.1  |
| FLJ32867 | 78.6   | 94     | 99.4  | 101.2  | 90.8   | 95.2   | 82.6  | 87.1   |
| FLJ32871 | 76.4   | 89.5   | 87.9  | 79.6   | 76.5   | 83     | 80    | 89.1   |
| FLJ32894 | 125.1  | 125.2  | 118.6 | 99.2   | 96     | 99.4   | 118.1 | 115.8  |
| FLJ32926 | 83.1   | 85.3   | 90.7  | 84.2   | 82.2   | 84.3   | 78.1  | 85.6   |
| FLJ33360 | 87.4   | 94.1   | 85.2  | 76.8   | 74.9   | 89.3   | 84.6  | 89.1   |
| FLJ33590 | 86.8   | 92.5   | 105.8 | 89.9   | 100.2  | 89.3   | 88    | 101.4  |
| FLJ33641 | 1534.6 | 2041.6 | 884.9 | 2787.1 | 2083.3 | 3682.6 | 975.1 | 1357.2 |
| FLJ33718 | 146.5  | 214.7  | 108.8 | 99.8   | 88.7   | 104    | 143.8 | 165.4  |
| FLJ33790 | 507.4  | 573.9  | 310   | 248.1  | 195.3  | 247.8  | 361.2 | 303.8  |
| FLJ33860 | 140.8  | 153.6  | 133.6 | 438.7  | 319.3  | 670    | 114.9 | 156.5  |
| FLJ34306 | 71.5   | 86     | 89.5  | 91.9   | 82     | 88.2   | 81.5  | 86.7   |

|          |        |        |        |        |       |        |        |        |
|----------|--------|--------|--------|--------|-------|--------|--------|--------|
| FLJ34503 | 112.1  | 106.4  | 90.6   | 88.3   | 82.2  | 91.3   | 99     | 104.4  |
| FLJ34931 | 129.9  | 145.7  | 95.6   | 111.4  | 87.1  | 97.8   | 113.3  | 128.8  |
| FLJ34969 | 592.1  | 656.8  | 356.7  | 521.9  | 391.5 | 593.5  | 552.7  | 1592.6 |
| FLJ35119 | 157.6  | 154.4  | 147.2  | 147.8  | 135.6 | 131.5  | 121.3  | 189.3  |
| FLJ35220 | 108.3  | 127.2  | 104.4  | 108.5  | 116.5 | 121.8  | 110.9  | 112.3  |
| FLJ35409 | 88.5   | 86.4   | 77     | 81.5   | 83.5  | 86.3   | 88.1   | 93.4   |
| FLJ35695 | 79.1   | 77.4   | 90.6   | 81.4   | 81.3  | 83.8   | 79     | 83     |
| FLJ35725 | 103.3  | 133.2  | 120    | 95.4   | 102.3 | 106.4  | 113.4  | 134    |
| FLJ35725 | 113.6  | 167.7  | 105.3  | 86.6   | 82.7  | 77.2   | 125.1  | 143.4  |
| FLJ35767 | 212.4  | 264.3  | 140.9  | 101.9  | 99.2  | 106.6  | 273.9  | 302.7  |
| FLJ35773 | 97     | 123.4  | 85.1   | 86.2   | 83.4  | 89.7   | 99.5   | 110.3  |
| FLJ35776 | 81.8   | 87     | 102.2  | 90.8   | 83.6  | 85.2   | 85.4   | 85.6   |
| FLJ35784 | 82     | 85.5   | 92.2   | 101.8  | 92.7  | 95.5   | 74     | 84     |
| FLJ35816 | 84.4   | 89.8   | 96.4   | 102.2  | 90.3  | 95.8   | 94.4   | 103.8  |
| FLJ35834 | 95.1   | 111.2  | 107.2  | 93.4   | 98.7  | 95     | 98.1   | 101.3  |
| FLJ35848 | 86     | 87.6   | 82.1   | 81     | 79.3  | 83.1   | 86.1   | 91.6   |
| FLJ35880 | 98     | 110.2  | 96.7   | 91.6   | 101.6 | 90.7   | 100.5  | 107.8  |
| FLJ35894 | 80     | 87.5   | 84.1   | 83.8   | 79.6  | 82     | 81.7   | 92.5   |
| FLJ36004 | 76.2   | 81.3   | 83.8   | 83.6   | 85.5  | 71.4   | 75     | 84.7   |
| FLJ36031 | 87.8   | 101.7  | 84.9   | 80.4   | 89.4  | 84.4   | 100.8  | 104.5  |
| FLJ36046 | 113.3  | 116.2  | 118    | 96.6   | 98.4  | 103.2  | 107.5  | 105.3  |
| FLJ36070 | 106.9  | 121.4  | 114    | 94.2   | 92.3  | 92.3   | 112.4  | 112.9  |
| FLJ36090 | 169.6  | 232.3  | 110.8  | 119.1  | 111.3 | 158.4  | 179.8  | 254.8  |
| FLJ36166 | 121.6  | 100.8  | 110.9  | 94.6   | 99.6  | 113.1  | 81.2   | 109.4  |
| FLJ36180 | 118.1  | 127.4  | 113.5  | 99     | 88.4  | 97.8   | 114.5  | 115.9  |
| FLJ36208 | 149.2  | 178.7  | 124.6  | 105.7  | 102.9 | 114.1  | 139    | 155.5  |
| FLJ36268 | 82.2   | 95.7   | 88     | 90.7   | 75.9  | 95     | 87.3   | 98.3   |
| FLJ36445 | 93.7   | 114.2  | 84.5   | 85.7   | 86.5  | 84.9   | 100.2  | 104.4  |
| FLJ36492 | 92.6   | 101.4  | 82     | 84.2   | 83.1  | 86.6   | 91.4   | 94     |
| FLJ36492 | 87.1   | 91.6   | 83.4   | 80.8   | 87.2  | 79.7   | 88.9   | 86     |
| FLJ36748 | 106.2  | 109.3  | 115    | 112.1  | 100.3 | 99.2   | 97.4   | 95.5   |
| FLJ36779 | 90.8   | 113.9  | 92     | 88.8   | 86.5  | 105    | 90.1   | 99.2   |
| FLJ36874 | 1601.2 | 2232.8 | 1178.6 | 1103.5 | 903.4 | 1213.3 | 1514.5 | 2221.7 |
| FLJ36888 | 110.8  | 152.9  | 106.8  | 103.9  | 94.2  | 111.9  | 112.9  | 150.8  |
| FLJ36980 | 119.3  | 130.9  | 93.6   | 84.5   | 88.5  | 82.4   | 118.4  | 136.8  |
| FLJ37078 | 97     | 109    | 97.3   | 97.8   | 101   | 94.8   | 91.9   | 119.8  |
| FLJ37266 | 86.4   | 92.7   | 87.7   | 78.5   | 82.9  | 90.9   | 93.3   | 98.5   |
| FLJ37357 | 87.8   | 97.4   | 96.5   | 93.1   | 89    | 98     | 84.7   | 88.7   |
| FLJ37440 | 106.2  | 111.6  | 116.7  | 90.4   | 83.8  | 88.2   | 107.6  | 119.3  |
| FLJ37464 | 150.2  | 139.4  | 103.9  | 103.6  | 96.7  | 98.5   | 141.4  | 133.2  |
| FLJ37538 | 107.8  | 138.4  | 103.3  | 88.7   | 82.4  | 101.7  | 115.9  | 122.6  |
| FLJ37562 | 190.8  | 234.6  | 148.2  | 171.3  | 135.7 | 199.4  | 181.6  | 277.2  |
| FLJ37927 | 99.7   | 105.6  | 109.6  | 108.6  | 100.8 | 112.5  | 101.5  | 95.5   |
| FLJ37953 | 89     | 96.3   | 99.1   | 97.2   | 89.7  | 88.3   | 88.5   | 116.8  |
| FLJ37970 | 137.4  | 158.4  | 162.4  | 167.9  | 195.1 | 240.9  | 134.1  | 192.3  |
| FLJ38020 | 96.9   | 104.1  | 90.1   | 86.7   | 88.3  | 87.7   | 104.9  | 112.3  |
| FLJ38159 | 230.3  | 274.8  | 130.2  | 139.6  | 111.1 | 131.4  | 210.9  | 252.7  |
| FLJ38288 | 153.5  | 228.3  | 124.9  | 101.5  | 102.4 | 111.8  | 180.2  | 234.8  |
| FLJ38377 | 97.4   | 104.9  | 92.2   | 86.2   | 88.2  | 94     | 95.7   | 100    |
| FLJ38451 | 246.4  | 269.6  | 188.4  | 179.3  | 149.2 | 174.9  | 226.9  | 253.6  |

|          |        |        |       |       |       |       |        |        |
|----------|--------|--------|-------|-------|-------|-------|--------|--------|
| FLJ38482 | 1185.5 | 1287.1 | 804.9 | 868.6 | 531.6 | 690.4 | 1209.8 | 1861.8 |
| FLJ38596 | 77     | 103.9  | 78.8  | 83.2  | 75.2  | 73.3  | 88     | 88.9   |
| FLJ38663 | 507.1  | 576.2  | 249.2 | 225.9 | 156.8 | 240.5 | 421.4  | 428.3  |
| FLJ38723 | 88.7   | 91.2   | 101.8 | 95.1  | 92    | 87.4  | 82.2   | 86.3   |
| FLJ38725 | 138.3  | 162    | 85    | 87    | 78.8  | 79.2  | 137.3  | 161.7  |
| FLJ38964 | 85.3   | 89.7   | 95.8  | 83.4  | 80.9  | 83.2  | 86.2   | 96.3   |
| FLJ38973 | 143.4  | 156.8  | 96.7  | 101.1 | 87    | 86.7  | 116.3  | 200.2  |
| FLJ38984 | 229.9  | 271.6  | 174.7 | 161.4 | 149.3 | 187.5 | 253    | 322.3  |
| FLJ38991 | 106    | 127.2  | 107.5 | 108   | 103.7 | 100.9 | 92     | 115.4  |
| FLJ38991 | 111.5  | 135.1  | 108.3 | 100.7 | 94.8  | 104.5 | 117.3  | 128.5  |
| FLJ39061 | 118.8  | 114.2  | 92.9  | 88.8  | 87.6  | 85.8  | 111.5  | 113.7  |
| FLJ39155 | 96.6   | 110.6  | 88    | 81.7  | 87.3  | 87.8  | 96.1   | 110.6  |
| FLJ39155 | 84.6   | 90.3   | 102.5 | 96.7  | 82.3  | 92.9  | 88.4   | 104.6  |
| FLJ39155 | 74.8   | 83.3   | 88.5  | 87.9  | 79.7  | 85.7  | 77.2   | 76.2   |
| FLJ39237 | 96.6   | 99.5   | 90.8  | 91    | 93.1  | 99.6  | 98.4   | 104.6  |
| FLJ39378 | 93.9   | 106.2  | 111.5 | 98.4  | 86.8  | 89.7  | 97     | 116.4  |
| FLJ39501 | 106.1  | 120.6  | 91.7  | 97.9  | 91.7  | 103.6 | 97.3   | 111.5  |
| FLJ39502 | 100.5  | 89.5   | 94.7  | 81.6  | 84.4  | 90.6  | 84.9   | 96.5   |
| FLJ39531 | 99.8   | 129.5  | 94.2  | 78.7  | 81.2  | 88.6  | 95.5   | 123.2  |
| FLJ39575 | 124.9  | 138.4  | 109.6 | 103.9 | 122.7 | 118.4 | 116.6  | 164.7  |
| FLJ39599 | 171.2  | 238.6  | 121.4 | 117.1 | 108.6 | 115.9 | 175    | 213.4  |
| FLJ39660 | 124.3  | 142    | 108.4 | 97    | 99.9  | 96.9  | 119.6  | 130.3  |
| FLJ39743 | 92.1   | 107.5  | 86.2  | 86    | 84.4  | 83.5  | 94.7   | 99.6   |
| FLJ39779 | 113.8  | 137    | 90.2  | 99    | 88.3  | 98.4  | 104.7  | 140.1  |
| FLJ39822 | 144.6  | 167.9  | 91    | 90.1  | 74.4  | 93.5  | 142.4  | 173.6  |
| FLJ39827 | 438.3  | 548    | 424   | 463.8 | 378.8 | 506.1 | 329.4  | 357.5  |
| FLJ40113 | 79.3   | 97.8   | 86.8  | 78.8  | 76.8  | 82.8  | 82.9   | 85.2   |
| FLJ40125 | 124.2  | 140.8  | 111.3 | 97.8  | 103.6 | 120.2 | 97.4   | 110.7  |
| FLJ40142 | 225.2  | 295.5  | 207.7 | 273.2 | 296.8 | 300.2 | 184.8  | 241.8  |
| FLJ40172 | 101.7  | 128.3  | 85.7  | 82    | 77.9  | 88    | 109.1  | 116    |
| FLJ40235 | 90     | 102.6  | 101.1 | 92.6  | 84.6  | 89.5  | 86.3   | 105.6  |
| FLJ40243 | 79.3   | 86.5   | 77.3  | 73.7  | 75.5  | 79    | 73.4   | 90.7   |
| FLJ40244 | 71.8   | 79     | 90.1  | 79.4  | 73.1  | 80.2  | 68.5   | 75.2   |
| FLJ40288 | 103.4  | 129.1  | 104   | 90.4  | 80.8  | 86.8  | 111.9  | 116.9  |
| FLJ40296 | 81.3   | 82.4   | 99    | 90.7  | 88    | 100   | 68.4   | 84.1   |
| FLJ40298 | 75.9   | 83.5   | 91.6  | 76.8  | 75.2  | 78    | 78.5   | 90.2   |
| FLJ40365 | 88.6   | 91.7   | 97.9  | 84.7  | 80.2  | 94.2  | 82.3   | 94.9   |
| FLJ40411 | 161    | 205.5  | 126.4 | 105.5 | 84.5  | 102.3 | 164.5  | 179.1  |
| FLJ40448 | 119.6  | 146.4  | 120.5 | 98.8  | 95.2  | 117.9 | 125.7  | 139.2  |
| FLJ40453 | 94.5   | 103.5  | 97    | 89.5  | 81.2  | 79    | 101.2  | 118    |
| FLJ40504 | 100.2  | 100.9  | 94.7  | 99.7  | 93.3  | 91.7  | 108.9  | 105.3  |
| FLJ40629 | 957.3  | 1197.8 | 718.8 | 653.9 | 552.9 | 757   | 833.6  | 1143.2 |
| FLJ40722 | 111.8  | 136.5  | 96.6  | 83.9  | 85.4  | 94.6  | 98.6   | 121    |
| FLJ40852 | 106    | 141.4  | 113.2 | 98.5  | 100.7 | 104.4 | 107    | 114.1  |
| FLJ40869 | 97     | 117.9  | 90.4  | 80.4  | 76.5  | 97.3  | 93.1   | 111.9  |
| FLJ40919 | 88.8   | 93.9   | 95.6  | 82.3  | 78.3  | 78.4  | 88     | 104.5  |
| FLJ41046 | 86.1   | 106.8  | 92.4  | 92.6  | 86.9  | 85.5  | 95.6   | 104.3  |
| FLJ41131 | 508    | 563.2  | 273.5 | 284.4 | 251   | 269.7 | 349.5  | 356.2  |
| FLJ41170 | 80.8   | 96.2   | 103.8 | 88.8  | 83.9  | 87.4  | 83.5   | 87.7   |
| FLJ41423 | 485.9  | 554.5  | 251.3 | 276.9 | 326.5 | 288.7 | 473.7  | 430.9  |



|          |       |        |        |        |        |        |        |        |
|----------|-------|--------|--------|--------|--------|--------|--------|--------|
| FLJ41603 | 75.5  | 83.1   | 92     | 97.6   | 80     | 94.4   | 94.6   | 83.3   |
| FLJ41649 | 114   | 145.4  | 93.1   | 97.2   | 84.7   | 87.2   | 108.6  | 131.5  |
| FLJ41733 | 104.1 | 117.8  | 94.4   | 86.3   | 89.4   | 89.5   | 90     | 103.6  |
| FLJ41821 | 88.1  | 96.4   | 79.6   | 80.5   | 83.7   | 84.9   | 85.5   | 90.2   |
| FLJ41841 | 79.8  | 86.9   | 100    | 101.1  | 98.2   | 85.5   | 75.6   | 83.9   |
| FLJ41993 | 97    | 112.3  | 97.3   | 93.2   | 79.9   | 87.5   | 103.5  | 105.5  |
| FLJ42102 | 82.9  | 90.5   | 79.6   | 73.3   | 84.8   | 74.6   | 80.8   | 91.2   |
| FLJ42117 | 120.8 | 143.7  | 107.2  | 98.2   | 86.9   | 89     | 116.7  | 129.9  |
| FLJ42133 | 80.5  | 87.4   | 102.3  | 106.2  | 98.6   | 109    | 87.9   | 93.5   |
| FLJ42177 | 84.5  | 91.2   | 89.8   | 82.4   | 87.4   | 97.4   | 81.6   | 91.2   |
| FLJ42258 | 96.7  | 97     | 99.5   | 96.5   | 95.5   | 91.1   | 97.3   | 94.5   |
| FLJ42280 | 77.4  | 100.8  | 96.1   | 93.3   | 90.9   | 90.6   | 92.2   | 95.7   |
| FLJ42289 | 94.8  | 108    | 91.9   | 87.8   | 80.4   | 87.3   | 106    | 120.8  |
| FLJ42461 | 72.8  | 81.8   | 75     | 78.6   | 79.8   | 73.2   | 78.4   | 76.5   |
| FLJ42486 | 126.9 | 136.4  | 101    | 88.9   | 82.5   | 101.9  | 114.3  | 124.5  |
| FLJ42953 | 96.1  | 95.6   | 95.4   | 83.4   | 87.8   | 90.1   | 93.7   | 95.4   |
| FLJ42957 | 76    | 89.4   | 87.4   | 88.9   | 84.4   | 95.7   | 71.2   | 89.7   |
| FLJ42986 | 275.3 | 259.1  | 220.1  | 153.5  | 187.7  | 207.9  | 204.1  | 371.4  |
| FLJ43093 | 1337  | 1352.7 | 1398.6 | 1706.5 | 1657.7 | 2336.2 | 741.3  | 710.1  |
| FLJ43276 | 99.7  | 116.6  | 99     | 95.1   | 94.9   | 109.9  | 102.8  | 97.8   |
| FLJ43339 | 263.5 | 281.3  | 177.9  | 187.4  | 193.7  | 207.6  | 165.1  | 181.4  |
| FLJ43374 | 160.8 | 174.3  | 113.4  | 159.5  | 139.3  | 166.2  | 110.2  | 122.1  |
| FLJ43505 | 78.6  | 88.4   | 96.2   | 82.9   | 83     | 73.9   | 78.2   | 95.1   |
| FLJ43692 | 383.5 | 526.5  | 271    | 282.5  | 230.4  | 329.4  | 340.4  | 438.3  |
| FLJ43752 | 114   | 119.6  | 118.8  | 98.2   | 97.4   | 108.9  | 108.3  | 118    |
| FLJ43763 | 91.7  | 93.6   | 91.7   | 83.7   | 79.7   | 85.1   | 89.2   | 76.6   |
| FLJ43806 | 102   | 118    | 98.5   | 93.2   | 84.8   | 87     | 94.5   | 108.1  |
| FLJ43855 | 80    | 86.6   | 82.6   | 83.5   | 88.2   | 85.7   | 85.9   | 89.1   |
| FLJ43855 | 124.9 | 144.1  | 160.1  | 174.3  | 200    | 253.9  | 134.8  | 189.3  |
| FLJ43860 | 88.6  | 107.9  | 100.5  | 87.1   | 84.5   | 93.4   | 100.8  | 102.6  |
| FLJ43860 | 114.6 | 139.7  | 94.3   | 89.6   | 88.1   | 91.9   | 107.3  | 111.2  |
| FLJ43980 | 93.8  | 108.2  | 90.6   | 80.5   | 78     | 85.6   | 97     | 97.2   |
| FLJ43987 | 97.4  | 109    | 87.9   | 84.2   | 79.5   | 95.9   | 86.4   | 105.5  |
| FLJ43987 | 92.6  | 96.4   | 106    | 101.1  | 94.2   | 106.1  | 93.5   | 97.4   |
| FLJ44048 | 93.6  | 103.9  | 90.3   | 94.1   | 84.7   | 92.1   | 98.5   | 98.4   |
| FLJ44060 | 82.1  | 79     | 87.4   | 86.4   | 81.5   | 82.6   | 86.3   | 83     |
| FLJ44076 | 89.8  | 103.3  | 101.9  | 81.6   | 92.5   | 92.6   | 86     | 92.2   |
| FLJ44112 | 93.1  | 105.3  | 85.4   | 94.1   | 82.5   | 84.4   | 90.8   | 106.1  |
| FLJ44124 | 2332  | 2355.5 | 829.5  | 1134.1 | 1222.7 | 1010.9 | 2162.4 | 2453.4 |
| FLJ44216 | 788   | 1043.7 | 838.7  | 801.5  | 647.7  | 1023.2 | 561    | 926.8  |
| FLJ44216 | 94.9  | 103.2  | 85.4   | 80.9   | 92     | 78.9   | 88     | 104    |
| FLJ44290 | 88.7  | 99.9   | 95.2   | 86.1   | 84.4   | 82.7   | 88.4   | 91.5   |
| FLJ44379 | 114   | 137.7  | 90.2   | 81.9   | 84.5   | 89.3   | 116.7  | 135.8  |
| FLJ44635 | 111.6 | 114.7  | 87.8   | 88.2   | 78.1   | 89.1   | 120.2  | 120.3  |
| FLJ44635 | 86.8  | 85.6   | 95.7   | 84.4   | 88.8   | 83.4   | 82     | 91.8   |
| FLJ44653 | 95.3  | 116.2  | 101.1  | 89.9   | 89.8   | 92.2   | 90.7   | 103.5  |
| FLJ44691 | 86.4  | 98.9   | 94.3   | 87.6   | 71.9   | 89.5   | 86.8   | 95.4   |
| FLJ44815 | 91.8  | 114.3  | 105.8  | 92.8   | 87.4   | 91.8   | 90.4   | 94.9   |
| FLJ44894 | 100.1 | 112.2  | 85.4   | 87.4   | 76.8   | 80.6   | 105.2  | 106.8  |
| FLJ44955 | 118   | 143.6  | 89.1   | 79.4   | 80.2   | 79.9   | 108.9  | 126    |

|          |        |        |       |        |        |       |        |        |
|----------|--------|--------|-------|--------|--------|-------|--------|--------|
| FLJ44968 | 133.1  | 147.4  | 103.1 | 105.6  | 102.5  | 129.7 | 110.2  | 149.1  |
| FLJ45032 | 146.1  | 183.1  | 148.9 | 155    | 130.1  | 143.2 | 145.7  | 174.2  |
| FLJ45079 | 104.7  | 124.5  | 90.1  | 108    | 95.2   | 82.4  | 101.8  | 111.3  |
| FLJ45121 | 89.1   | 88.1   | 88.6  | 81.5   | 81.2   | 87.6  | 88.4   | 95.5   |
| FLJ45139 | 83.2   | 92.7   | 88.4  | 86.2   | 78.2   | 84.9  | 89.4   | 90.7   |
| FLJ45224 | 98.1   | 108.9  | 100.8 | 93.3   | 86     | 94    | 93.7   | 99.2   |
| FLJ45256 | 109.6  | 113.1  | 116.7 | 118.8  | 102.1  | 109.9 | 101.2  | 98.8   |
| FLJ45337 | 121.8  | 155.7  | 118.3 | 123.3  | 118.2  | 124.4 | 120.9  | 141.4  |
| FLJ45422 | 107.7  | 130.8  | 93.1  | 87.2   | 85.9   | 80.2  | 107.2  | 136.9  |
| FLJ45445 | 90.9   | 110.8  | 100.1 | 93.7   | 97.7   | 91.4  | 88.3   | 102.9  |
| FLJ45455 | 105.9  | 119.8  | 100.6 | 95.9   | 95.6   | 92.2  | 101.9  | 106.1  |
| FLJ45530 | 73.6   | 87.4   | 93.8  | 92.2   | 86.5   | 89    | 81     | 87.5   |
| FLJ45537 | 71.9   | 79     | 95.9  | 96.6   | 87.3   | 89.5  | 77.3   | 76.5   |
| FLJ45557 | 165.7  | 233.8  | 141.6 | 127.1  | 115.1  | 147.2 | 177    | 249.1  |
| FLJ45645 | 83.7   | 107.3  | 99.2  | 97.7   | 89.7   | 95    | 81.5   | 93.6   |
| FLJ45717 | 88.4   | 113.3  | 109.7 | 94.8   | 86.2   | 93.7  | 97.4   | 101    |
| FLJ45721 | 76.8   | 92.1   | 94.6  | 83.3   | 89.7   | 79.2  | 83.6   | 104    |
| FLJ45803 | 77.3   | 87.9   | 98.7  | 83.4   | 82.3   | 89.6  | 85.3   | 91     |
| FLJ45831 | 84.9   | 89.2   | 103.9 | 100.3  | 79.8   | 85.9  | 87.8   | 92.9   |
| FLJ45850 | 162.4  | 205.8  | 117.8 | 91.9   | 86     | 95.6  | 140.4  | 158.2  |
| FLJ45909 | 284.7  | 318.2  | 229.5 | 212.2  | 197.2  | 171.5 | 273.6  | 343.1  |
| FLJ45910 | 91.6   | 108.6  | 102.1 | 91.7   | 85     | 98.4  | 93.7   | 95.4   |
| FLJ45964 | 99.4   | 104.8  | 95.5  | 89.9   | 81.5   | 98.5  | 90.3   | 86.6   |
| FLJ45966 | 107.5  | 127.3  | 109.2 | 90.1   | 89.4   | 100   | 108.9  | 118.3  |
| FLJ45974 | 109.6  | 129.6  | 102.4 | 92.9   | 95.6   | 96.9  | 107.5  | 118.1  |
| FLJ45983 | 109.8  | 115.8  | 91.5  | 85.6   | 85.9   | 84.3  | 110.4  | 111.4  |
| FLJ46010 | 80.2   | 83.3   | 89.9  | 90.6   | 91.2   | 101.1 | 86.5   | 87.3   |
| FLJ46072 | 253    | 279.6  | 291.7 | 253.9  | 192.2  | 292.4 | 235    | 412.4  |
| FLJ46082 | 79.7   | 91.3   | 95.9  | 80.4   | 84.3   | 83.9  | 83.8   | 83     |
| FLJ46109 | 76.7   | 90.1   | 95.9  | 102    | 95.7   | 91.6  | 78.3   | 90.3   |
| FLJ46109 | 186.5  | 225    | 124.1 | 150.1  | 156.2  | 134   | 201.9  | 226.8  |
| FLJ46210 | 94     | 112.7  | 89.4  | 85.1   | 74.6   | 83.6  | 93.3   | 100.3  |
| FLJ46247 | 111.3  | 121.2  | 86.6  | 82.5   | 82.5   | 91    | 104.5  | 118.2  |
| FLJ46247 | 87.6   | 118.4  | 100.4 | 80.5   | 74.4   | 89.5  | 91.2   | 108.3  |
| FLJ46247 | 71.5   | 90.3   | 106.3 | 108.4  | 88     | 92.3  | 79.9   | 93.9   |
| FLJ46257 | 80.6   | 89.1   | 91.1  | 88.3   | 79.6   | 94.6  | 77.8   | 86.1   |
| FLJ46266 | 85.2   | 105.2  | 112.3 | 92.7   | 89.1   | 101.2 | 89.3   | 92.6   |
| FLJ46309 | 2887.4 | 2947.9 | 785.3 | 1368.5 | 1241.7 | 899.3 | 2577.1 | 4200.3 |
| FLJ46321 | 79.1   | 81.4   | 86.7  | 84.1   | 82.3   | 87.3  | 81.4   | 87.7   |
| FLJ46347 | 101.2  | 107.4  | 90.4  | 89.4   | 78.3   | 81.8  | 98.2   | 99.6   |
| FLJ46385 | 72.8   | 80.6   | 85.2  | 83.9   | 80.2   | 84.4  | 84.3   | 90.3   |
| FLJ46481 | 128.8  | 159.1  | 119.8 | 120.2  | 110.3  | 104.5 | 127.3  | 127.6  |
| FLJ46536 | 87.8   | 103.6  | 92.6  | 100.8  | 87.2   | 103.8 | 89.1   | 113.3  |
| FLJ46688 | 92.8   | 116.1  | 112.1 | 100.5  | 96.9   | 97.2  | 96.8   | 99.3   |
| FLJ46831 | 91.1   | 107.4  | 100.7 | 94.1   | 90.8   | 83.5  | 93.8   | 97.9   |
| FLJ46836 | 138.2  | 161.3  | 103.9 | 93.1   | 78.8   | 97.3  | 113.2  | 163.1  |
| FLJ46838 | 113.9  | 135.9  | 95.9  | 93.7   | 89.9   | 85.9  | 111.3  | 120.7  |
| FLJ90013 | 236.8  | 321.6  | 147   | 139.7  | 125.9  | 161.1 | 231    | 420    |
| FLJ90166 | 96.4   | 101.8  | 93.9  | 85.6   | 82.2   | 87.2  | 90     | 97.3   |
| FLJ90396 | 460.5  | 510.7  | 179.8 | 211.9  | 162.5  | 270.2 | 384.9  | 789.2  |

|          |        |        |        |        |        |        |        |        |
|----------|--------|--------|--------|--------|--------|--------|--------|--------|
| FLJ90575 | 125.8  | 136.3  | 113.3  | 89.4   | 94.4   | 109.8  | 103.9  | 136.3  |
| FLJ90586 | 83.1   | 96.2   | 84.5   | 75.3   | 83.3   | 83.5   | 88.5   | 94     |
| FLJ90650 | 104.1  | 121.6  | 79     | 83.4   | 84.8   | 85.5   | 96.4   | 112.6  |
| FLJ90652 | 465.4  | 592.8  | 486.1  | 254.9  | 235.9  | 373.3  | 369.3  | 747.8  |
| FLJ90709 | 374.6  | 441.9  | 208.2  | 321.7  | 235.7  | 348.8  | 329.9  | 481.5  |
| FLJ90757 | 195.1  | 230.7  | 191.7  | 240.5  | 186.3  | 203.8  | 156.5  | 211.9  |
| FLJ90805 | 531.1  | 556.9  | 329.9  | 245.9  | 243.8  | 245.7  | 310    | 372.3  |
| FLJ90834 | 87.1   | 88.3   | 91.7   | 92.6   | 90.3   | 90.9   | 84.9   | 89.6   |
| FLNA     | 151.5  | 187    | 84.8   | 89     | 89.3   | 88     | 131.1  | 169.2  |
| FLNB     | 260.4  | 441.6  | 461.2  | 693.7  | 743.2  | 1090.2 | 315.6  | 527.8  |
| FLNC     | 101.1  | 106.8  | 95.8   | 92.3   | 78     | 85.8   | 95     | 119.4  |
| FLOT1    | 202.1  | 254.7  | 186.2  | 123.6  | 125.4  | 190.4  | 202.4  | 232.6  |
| FLOT2    | 6908.5 | 8693.4 | 5099.7 | 7080.9 | 5390.1 | 7116.1 | 5088.2 | 5454.9 |
| FLRT1    | 164.5  | 178.1  | 126.7  | 116.9  | 103.8  | 129.6  | 180.9  | 213.7  |
| FLRT2    | 113.7  | 127.7  | 103.9  | 98.1   | 94.6   | 94.1   | 115.8  | 114.2  |
| FLRT3    | 93.2   | 103.6  | 82.5   | 86.9   | 86.5   | 86.6   | 70.7   | 87.2   |
| FLRT3    | 77.3   | 99.8   | 96     | 87.3   | 86     | 87.5   | 80.7   | 98     |
| FLT1     | 103.5  | 110.5  | 88     | 76.4   | 87     | 93     | 99.8   | 116.2  |
| FLT3     | 444.7  | 622.2  | 338.9  | 250.8  | 219    | 291.7  | 367.4  | 635    |
| FLT3LG   | 116    | 132.5  | 127.9  | 105.6  | 96.8   | 113.4  | 115    | 135.3  |
| FLT4     | 92.3   | 101.5  | 96.3   | 87.7   | 93     | 87.9   | 101.6  | 97.1   |
| FLT4     | 75.5   | 91.7   | 82.8   | 79.6   | 78.5   | 88.1   | 87.8   | 84.6   |
| FLVCR    | 321.9  | 410.2  | 158.6  | 130.3  | 138.6  | 156.9  | 286.5  | 396.9  |
| FLYWCH1  | 152.5  | 160.6  | 111    | 97.8   | 97.8   | 101.4  | 123.4  | 128.4  |
| FLYWCH1  | 97.3   | 105.5  | 104.3  | 92.6   | 88.1   | 95.7   | 105.5  | 97.7   |
| FMN2     | 87.4   | 100.3  | 96.2   | 81.7   | 88.2   | 92.2   | 92.6   | 86.1   |
| FMNL1    | 110.5  | 123    | 107    | 108.5  | 109.4  | 124.2  | 111.7  | 119.3  |
| FMNL2    | 109.4  | 121.8  | 107.1  | 90.6   | 85.5   | 96.6   | 101.1  | 114.6  |
| FMNL3    | 85.4   | 101.1  | 91.5   | 101    | 94.5   | 97.6   | 87.8   | 92     |
| FMNL3    | 92.2   | 109.2  | 100.2  | 97.4   | 84.1   | 95.5   | 88.4   | 103.2  |
| FMNL3    | 88.4   | 85.5   | 96     | 85.7   | 82.1   | 86.5   | 85.8   | 100.2  |
| FMO1     | 94.1   | 102.4  | 99.9   | 91.9   | 90.5   | 92.6   | 96.2   | 110.7  |
| FMO2     | 113.6  | 102    | 104.8  | 103.2  | 108.9  | 101.1  | 98.4   | 112.7  |
| FMO3     | 73.7   | 87.1   | 82.7   | 74.5   | 77.7   | 79.2   | 72.7   | 80.5   |
| FMO3     | 92.1   | 97     | 87.7   | 84.9   | 82.9   | 95.2   | 88.2   | 102.3  |
| FMO4     | 164.8  | 187.4  | 153.4  | 155.1  | 142.1  | 175.1  | 168.7  | 262.2  |
| FMO5     | 177.3  | 210.9  | 122.7  | 130.8  | 133.6  | 176.7  | 151.8  | 200.6  |
| FMO6     | 166.8  | 183.5  | 164.5  | 132.3  | 146    | 155.7  | 154.3  | 172.2  |
| FMO6P    | 112.8  | 138.1  | 91     | 91.1   | 83     | 85.5   | 101.7  | 119.9  |
| FMOD     | 99.7   | 115.4  | 101.5  | 87.1   | 91.5   | 94.8   | 97.9   | 109.2  |
| FMR1     | 83     | 91.3   | 93.2   | 87.3   | 91.1   | 86.8   | 86     | 88.7   |
| FMR1NB   | 87.9   | 92.4   | 107.8  | 90.1   | 79.4   | 95.8   | 88.4   | 91.2   |
| FN1      | 135    | 132.1  | 90.2   | 80.3   | 90.7   | 83.8   | 112    | 136.6  |
| FN1      | 73.9   | 89.6   | 96.4   | 84.9   | 87     | 87.1   | 81.2   | 86.1   |
| FN1      | 106.7  | 113.5  | 92.8   | 82.3   | 75.2   | 91.8   | 115.1  | 121.5  |
| FN3K     | 103.8  | 109    | 109.7  | 98.2   | 96.8   | 87.1   | 100.2  | 101    |
| FN3KRP   | 2234.1 | 2739   | 756.2  | 678.4  | 694.5  | 886.5  | 1600.8 | 1537.8 |
| FN5      | 992.6  | 1254   | 361.1  | 364.9  | 296.9  | 352.8  | 1042.2 | 1111.3 |
| FNBP1    | 1727.3 | 2173.8 | 1162.6 | 1913.7 | 1696.5 | 1937.9 | 1557.8 | 1571.4 |
| FNBP1L   | 84.8   | 89.7   | 92.1   | 91.6   | 85.7   | 83.3   | 81.3   | 85.3   |

|         |        |        |        |        |        |        |        |        |
|---------|--------|--------|--------|--------|--------|--------|--------|--------|
| FNBP1L  | 172.2  | 227.4  | 107.6  | 117.8  | 121.9  | 129.8  | 150.5  | 173.9  |
| FNBP4   | 1463.3 | 1597.8 | 1446.8 | 1679.8 | 1731   | 2373.4 | 1005.7 | 1774.7 |
| FNDC1   | 77.3   | 90.5   | 88.3   | 75.9   | 79.6   | 85.2   | 81.4   | 84.3   |
| FNDC3A  | 238.1  | 255.1  | 142.4  | 159.6  | 142.7  | 234.4  | 228.9  | 421.6  |
| FNDC3A  | 99.9   | 102.3  | 105    | 89.7   | 94.4   | 85.9   | 101.3  | 106.1  |
| FNDC3A  | 230.2  | 260.8  | 156.9  | 214.7  | 170.6  | 305.4  | 225.8  | 415.9  |
| FNDC4   | 98.9   | 111.8  | 111.7  | 90.1   | 82.4   | 90.2   | 90.7   | 98.2   |
| FNDC5   | 83.2   | 89.2   | 97.6   | 92.5   | 88.9   | 90.3   | 82.2   | 86.5   |
| FNDC6   | 129.6  | 138.9  | 120    | 111.4  | 105.5  | 108.2  | 127    | 158.1  |
| FNDC7   | 86.3   | 83.1   | 101.3  | 94     | 94     | 96.6   | 88.6   | 83     |
| FNDC8   | 78     | 109.4  | 95     | 95.2   | 81.4   | 95.3   | 89.2   | 94.9   |
| FNTA    | 1399.3 | 1914.2 | 740    | 561.2  | 485.3  | 766.7  | 929    | 1140.1 |
| FNTA    | 106.9  | 132.5  | 93.6   | 78.2   | 77.2   | 77.7   | 109.8  | 136.5  |
| FNTA    | 3260   | 4288.7 | 2668.3 | 2012.9 | 1416.8 | 2983.8 | 2566.7 | 4669.1 |
| FNTB    | 474    | 595.9  | 364.2  | 318.6  | 265.1  | 297.7  | 362.5  | 409.3  |
| FOLH1   | 76.4   | 93.6   | 97.3   | 95.1   | 94     | 102.2  | 90.1   | 96     |
| FOLH1   | 121.2  | 127.8  | 129.3  | 132.4  | 131.7  | 113.8  | 104.5  | 110.8  |
| FOLR1   | 85.2   | 97.7   | 92.6   | 88.2   | 77     | 87.9   | 87.5   | 85.9   |
| FOLR1   | 107.3  | 127    | 95.8   | 90.5   | 88.3   | 85.6   | 105.5  | 119.4  |
| FOLR1   | 87.4   | 93.2   | 92.5   | 93.6   | 84.6   | 92.3   | 91.4   | 94.6   |
| FOLR1   | 86.3   | 91.2   | 111.4  | 110.7  | 113    | 108.4  | 88.8   | 83.9   |
| FOLR2   | 145.9  | 169.1  | 117.1  | 105.5  | 99.7   | 88.5   | 137.9  | 154.7  |
| FOLR3   | 98.8   | 110.2  | 95.2   | 91     | 85.9   | 94.5   | 96.8   | 99.2   |
| FOS     | 591.4  | 727.5  | 323.6  | 312.1  | 249.5  | 316.3  | 547.2  | 987.9  |
| FOSB    | 118.6  | 139.5  | 123.6  | 110.4  | 112.5  | 113.4  | 127.6  | 141    |
| FOSL1   | 145.3  | 191.6  | 143.6  | 111.6  | 100.9  | 107.8  | 163.1  | 374.3  |
| FOSL2   | 152.4  | 194.7  | 103.7  | 86.3   | 82.1   | 94.7   | 149.6  | 162.8  |
| FOXA1   | 87.4   | 94.8   | 92.6   | 81.9   | 87.5   | 81.6   | 86.2   | 117    |
| FOXA2   | 91.5   | 94.7   | 96.3   | 91.5   | 95.1   | 93.5   | 83.1   | 86.5   |
| FOXA2   | 79.6   | 89     | 83.3   | 77     | 85     | 78     | 73.3   | 84.2   |
| FOXA2   | 79.9   | 87.2   | 91     | 84.8   | 86.4   | 83.6   | 80.5   | 89     |
| FOXA3   | 80.5   | 93.2   | 104.7  | 111    | 99.7   | 108.1  | 89     | 85.5   |
| FOXB1   | 92.5   | 127.4  | 103.1  | 88.4   | 85.5   | 99.5   | 99.4   | 109.1  |
| FOXC1   | 459.9  | 626.1  | 331.3  | 133.2  | 122.7  | 105.3  | 391    | 354.6  |
| FOXC2   | 128.3  | 163.6  | 104    | 105.9  | 99.7   | 100.9  | 136.4  | 139.3  |
| FOXD1   | 1710.2 | 2103.9 | 1278.6 | 1299.5 | 1183.7 | 1324.9 | 1552.5 | 1927.3 |
| FOXD2   | 379.1  | 421.7  | 273.7  | 276.3  | 230.2  | 212.5  | 310.8  | 509.1  |
| FOXD3   | 107.6  | 124.1  | 87.8   | 88.2   | 88.1   | 91     | 108.7  | 112.4  |
| FOXD4   | 519.5  | 655    | 611.1  | 446.2  | 408.8  | 534.5  | 434.6  | 897.8  |
| FOXD4L1 | 512.7  | 605.8  | 187.3  | 170.2  | 158.7  | 179    | 390.8  | 340    |
| FOXD4L2 | 82.8   | 93.5   | 87.5   | 80.3   | 86.2   | 81.8   | 87.8   | 94.1   |
| FOXD4L3 | 128    | 141.2  | 93.3   | 91.4   | 86.8   | 93.4   | 123.9  | 159.3  |
| FOX E1  | 127.1  | 156.8  | 109    | 111.1  | 91.6   | 92.7   | 120.9  | 134.2  |
| FOX E3  | 98.3   | 101.7  | 100    | 94.2   | 87     | 81.9   | 99.4   | 105.8  |
| FOX E3  | 104.6  | 143.6  | 101    | 83.5   | 77.5   | 92.9   | 104.9  | 111.2  |
| FOX F1  | 102.7  | 118.7  | 103.8  | 87.4   | 85.2   | 89.6   | 110.1  | 118    |
| FOX F2  | 167.2  | 203.1  | 132.5  | 95.8   | 94.1   | 100.8  | 142.8  | 279.4  |
| FOX G1B | 105    | 108.5  | 91.4   | 83.1   | 83.4   | 80.3   | 97.4   | 116    |
| FOX H1  | 99.3   | 118.7  | 105.6  | 87.5   | 91.3   | 98.6   | 101.5  | 106.2  |
| FOX I1  | 83     | 99.3   | 84.8   | 81.4   | 86.7   | 82.2   | 83.5   | 104.4  |

|         |        |        |        |        |        |        |        |        |
|---------|--------|--------|--------|--------|--------|--------|--------|--------|
| FOXI1   | 97.8   | 111    | 116    | 103    | 88.4   | 100.6  | 95.1   | 111.4  |
| FOXJ1   | 138.3  | 159.5  | 98.2   | 90.8   | 82.3   | 78.1   | 122.8  | 157.4  |
| FOXJ2   | 578.3  | 750.9  | 586.7  | 627.9  | 585.4  | 561.8  | 561.3  | 595.1  |
| FOXJ3   | 2471.6 | 2911.5 | 2157.1 | 3017.5 | 2213.9 | 3526.4 | 2267.2 | 3445.3 |
| FOXK1   | 741.7  | 1143.4 | 835.9  | 980.2  | 739    | 1203.8 | 917.1  | 1644.8 |
| FOXK2   | 122.4  | 134.4  | 87.4   | 90.4   | 84.4   | 93.7   | 110.5  | 133.8  |
| FOXK2   | 127.6  | 152.2  | 119.9  | 110.8  | 87.1   | 111.2  | 119.8  | 155.1  |
| FOXL1   | 98.3   | 108.3  | 89.5   | 90.2   | 86.7   | 88.5   | 97.6   | 108.1  |
| FOXL2   | 95.9   | 126.2  | 109.9  | 91.4   | 83.5   | 96.8   | 103    | 142    |
| FOXL2   | 192.6  | 221.8  | 220.6  | 107.4  | 84.5   | 98.3   | 192    | 479.6  |
| FOXM1   | 222.2  | 304.7  | 309.8  | 254.5  | 221.7  | 320.4  | 229.2  | 400.5  |
| FOXM1   | 177.1  | 217.3  | 205.7  | 200.1  | 173.3  | 219.1  | 152.6  | 242    |
| FOXN1   | 107.5  | 119.1  | 93.8   | 91.9   | 96.3   | 89.1   | 115.9  | 110.3  |
| FOXN4   | 81.6   | 96.5   | 96.3   | 86.7   | 85.2   | 85.6   | 92.3   | 96.5   |
| FOXO1A  | 114.9  | 171.2  | 118.2  | 147.5  | 132.7  | 156.9  | 122.8  | 148.6  |
| FOXO3A  | 80.1   | 90.8   | 89.3   | 82.8   | 74     | 85.7   | 85.3   | 91.1   |
| FOXO3A  | 1052   | 1784.3 | 945.3  | 2013.9 | 1975.3 | 1898.8 | 1124.4 | 1005   |
| FOXP1   | 116.8  | 148.7  | 104.4  | 86.8   | 92.9   | 103.4  | 110.1  | 156    |
| FOXP1   | 142.7  | 174.4  | 105.9  | 95.3   | 90.7   | 92.5   | 129    | 151.2  |
| FOXP1   | 128.7  | 150.3  | 101    | 86.1   | 97.8   | 89.6   | 125.1  | 144.5  |
| FOXP2   | 201.7  | 299.5  | 131.4  | 167.7  | 131.6  | 196.6  | 159.4  | 164.3  |
| FOXP2   | 188    | 281.9  | 128.6  | 173.2  | 141.9  | 226.9  | 159.3  | 171.2  |
| FOXP3   | 106.2  | 132.8  | 88.8   | 91.2   | 84.2   | 89.2   | 110.9  | 133.6  |
| FOXP4   | 119.8  | 159.8  | 130.9  | 120.8  | 127.8  | 135.9  | 133.2  | 189.4  |
| FOXP4   | 97.8   | 108.1  | 100.6  | 88.2   | 98.3   | 91     | 97.8   | 109.1  |
| FOXQ1   | 94.7   | 110.1  | 118.2  | 96.7   | 96.6   | 83.9   | 93.2   | 103.1  |
| FOXR1   | 73.3   | 97.6   | 102.6  | 94.3   | 92.5   | 89.4   | 90.6   | 91.1   |
| FOXR1   | 84.2   | 87.3   | 96.3   | 91.1   | 92.1   | 97.1   | 83.6   | 97.6   |
| FOXR2   | 84.1   | 89.6   | 90.1   | 83.2   | 82.2   | 84     | 83.4   | 89.1   |
| FOXRED1 | 1313.5 | 1438.1 | 722.6  | 585.9  | 461.1  | 552.6  | 996.1  | 1074   |
| FOXRED2 | 585.1  | 673.1  | 428.1  | 549.8  | 429.7  | 397    | 501    | 400.3  |
| FPGS    | 127.9  | 125.7  | 103.2  | 98.2   | 99.8   | 111    | 112.5  | 132.1  |
| FPGS    | 140.4  | 162.8  | 91.6   | 79.1   | 79.3   | 90.7   | 116.7  | 164.3  |
| FPGS    | 91.7   | 103.9  | 102    | 103.9  | 98.9   | 87.9   | 82     | 104.9  |
| FPGT    | 78.5   | 97     | 89.9   | 86.3   | 89.2   | 90.7   | 76.1   | 95.8   |
| FPR1    | 106.6  | 113.5  | 95.3   | 134.2  | 100.6  | 153.7  | 104.4  | 110.6  |
| FPRL1   | 96.4   | 104.9  | 106.1  | 108    | 91.2   | 105.6  | 91     | 87     |
| FPRL1   | 99.7   | 101    | 94.5   | 110.7  | 91.9   | 123.8  | 93.4   | 98.2   |
| FPRL2   | 90.5   | 98.2   | 101.5  | 85.8   | 92     | 91.4   | 89.1   | 87.1   |
| FRAG1   | 818.2  | 1054.7 | 300.3  | 271.3  | 216.2  | 289.2  | 580.6  | 639.1  |
| FRAP1   | 454.1  | 640.8  | 551.3  | 641.6  | 550.3  | 894.1  | 469.5  | 721.2  |
| FRAS1   | 77.7   | 78.4   | 92     | 81.3   | 84.8   | 87     | 76     | 72     |
| FRAT1   | 172.8  | 219.8  | 135.3  | 129.2  | 123.3  | 122.7  | 144.9  | 156.3  |
| FRAT1   | 119    | 146.4  | 124.4  | 112    | 99     | 107.6  | 95.5   | 116.4  |
| FRAT2   | 1828.9 | 2524.8 | 1530.5 | 1185.7 | 919.3  | 1243.3 | 1675.8 | 2056.4 |
| FREM1   | 101.1  | 120.7  | 88.7   | 72.8   | 80     | 81.7   | 104.8  | 114.3  |
| FREM2   | 122.6  | 144.9  | 110.8  | 92.5   | 95.3   | 98.9   | 135.4  | 131.1  |
| FREQ    | 276.5  | 314.9  | 323.7  | 205.2  | 165.2  | 285.2  | 210.6  | 256.7  |
| FRG1    | 2144.3 | 2630.9 | 381.3  | 394.4  | 327.3  | 463.8  | 2147.8 | 3589.4 |
| FRG2    | 72.5   | 76     | 87.5   | 80.5   | 73.7   | 79.6   | 77.5   | 66.3   |

|        |        |        |        |        |        |        |        |        |
|--------|--------|--------|--------|--------|--------|--------|--------|--------|
| FRK    | 87.5   | 95.6   | 86.2   | 79     | 82.5   | 89.4   | 91.9   | 93     |
| FRMD1  | 85.1   | 100    | 89.6   | 95.9   | 79.2   | 95.4   | 84     | 97.3   |
| FRMD4A | 114.5  | 140.8  | 104    | 112.2  | 103    | 142.9  | 109.9  | 120.7  |
| FRMD5  | 92.5   | 100.3  | 96.5   | 91.9   | 83.5   | 91.1   | 93.9   | 99.8   |
| FRMD6  | 103.2  | 130.8  | 89.8   | 83     | 89.2   | 84.3   | 113.6  | 123.5  |
| FRMD6  | 102.7  | 108.4  | 104.4  | 96.8   | 102.3  | 91.3   | 91.9   | 112.1  |
| FRMD6  | 144.9  | 167.8  | 111.8  | 97.4   | 89.9   | 98.9   | 122.5  | 155.4  |
| FRMPD1 | 116.8  | 147.6  | 98.9   | 92.6   | 83.9   | 102.4  | 102.6  | 144.6  |
| FRMPD2 | 90.3   | 89.2   | 101.7  | 93     | 85.3   | 78.8   | 86.8   | 85.3   |
| FRMPD2 | 82.9   | 101.2  | 93.8   | 87.7   | 84.6   | 84.1   | 90.7   | 96.4   |
| FRMPD2 | 90.4   | 102.6  | 97.9   | 93.3   | 84.6   | 88.6   | 86.9   | 89.7   |
| FRMPD2 | 85.6   | 97.6   | 101.8  | 99.3   | 89.4   | 96.5   | 93.7   | 89.7   |
| FRMPD2 | 77.3   | 80.7   | 102.8  | 88.5   | 91.1   | 78.8   | 89.7   | 83.1   |
| FRMPD2 | 79.4   | 86.7   | 92.1   | 88.2   | 80.1   | 93.3   | 85.5   | 88.3   |
| FRMPD4 | 117.6  | 134.8  | 107.4  | 104.4  | 92.9   | 111.5  | 125.6  | 120    |
| FRRS1  | 131.7  | 158.6  | 113.8  | 92.2   | 100.7  | 104.9  | 134.8  | 153.8  |
| FRS2   | 99.9   | 104.9  | 96.8   | 102.1  | 95.8   | 98.6   | 98.1   | 119.4  |
| FRS2   | 96.8   | 124.1  | 97.8   | 95.1   | 86.4   | 79.6   | 92.5   | 113.9  |
| FRS2   | 77.5   | 71.5   | 88.3   | 84.4   | 79     | 83.5   | 73.6   | 83.6   |
| FRS3   | 338.4  | 361.9  | 210.5  | 220.5  | 205.7  | 244.4  | 239.9  | 239.2  |
| FRY    | 169.4  | 201.8  | 124    | 130.5  | 124.9  | 177.1  | 154.6  | 195.1  |
| FRYL   | 104.3  | 137.1  | 108.6  | 102.9  | 91.4   | 99     | 103.9  | 119.8  |
| FRZB   | 118.5  | 136.8  | 98.7   | 95.9   | 94.6   | 100.8  | 114.1  | 138.1  |
| FSCN1  | 5962.4 | 8190.8 | 4918.4 | 4302.6 | 3069.1 | 4132.7 | 5381.3 | 7676.7 |
| FSCN2  | 87.1   | 95.2   | 76.7   | 80.8   | 75.6   | 84.2   | 84.9   | 99     |
| FSCN2  | 79.1   | 81     | 100.1  | 83.7   | 79.5   | 93.6   | 89     | 83.4   |
| FSCN3  | 93.8   | 108.3  | 106.7  | 89.1   | 92.4   | 92.3   | 92.8   | 102.7  |
| FSD1   | 107.1  | 106.8  | 92.9   | 85.4   | 92.2   | 96.6   | 90.9   | 118.2  |
| FSD1   | 80.5   | 99.3   | 98.4   | 74.2   | 75.1   | 78.8   | 100.8  | 113.5  |
| FSD1   | 98.1   | 103.6  | 105.9  | 105.9  | 102.9  | 107.8  | 96.3   | 83.1   |
| FSD1CL | 101.6  | 92.4   | 95.7   | 90.4   | 90.4   | 91.6   | 95.3   | 97.7   |
| FSD1NL | 134.3  | 149.9  | 104.1  | 119.9  | 109.6  | 107.1  | 119.8  | 143.2  |
| FSD2   | 84     | 84.2   | 103.9  | 87.5   | 86.8   | 87.2   | 83.1   | 84     |
| FSHB   | 74.1   | 87.5   | 98.2   | 92.5   | 87     | 87     | 74.2   | 81.1   |
| FSHB   | 122.3  | 146.3  | 105.4  | 80.7   | 80.2   | 94.4   | 109.3  | 157.3  |
| FSHR   | 79.7   | 91.1   | 90.7   | 82     | 77.9   | 87.9   | 80.1   | 86.8   |
| FSHR   | 83.7   | 86.5   | 100.5  | 108.4  | 101.9  | 96.2   | 78.3   | 80.3   |
| FSIP1  | 87.8   | 126.9  | 98.2   | 90.9   | 93.8   | 94.2   | 90.6   | 95.5   |
| FSIP2  | 100.4  | 116.9  | 96.2   | 93.8   | 84.8   | 89.8   | 111.7  | 110.4  |
| FST    | 126.4  | 123.9  | 83.3   | 89.9   | 80.2   | 88.6   | 112.2  | 133    |
| FST    | 290.6  | 353.4  | 177.9  | 211.9  | 154.4  | 242.2  | 258.5  | 318.4  |
| FSTL1  | 177.2  | 198.6  | 119.6  | 99.4   | 91.8   | 103.5  | 160.8  | 250.9  |
| FSTL3  | 163.6  | 168.2  | 122.8  | 97.3   | 113.4  | 127.3  | 133.5  | 195.6  |
| FSTL4  | 69     | 80.5   | 94.6   | 81.9   | 79.6   | 85.1   | 68.1   | 87.4   |
| FSTL5  | 68.8   | 75.1   | 81.5   | 83.6   | 72.8   | 81.6   | 71.8   | 78.3   |
| FTCD   | 88     | 84.3   | 96.3   | 84.8   | 77.9   | 89.6   | 79.1   | 92     |
| FTCD   | 81.5   | 102.8  | 93.5   | 78.5   | 77.8   | 79.9   | 99.6   | 108.7  |
| FTHL11 | 204.7  | 271.3  | 123.8  | 136.8  | 155.3  | 167    | 446    | 804.6  |
| FTHL12 | 1167.7 | 1526.5 | 484.6  | 593.9  | 441.7  | 649.4  | 3154.3 | 7256.4 |
| FTHL17 | 90.1   | 123.5  | 85.8   | 87.6   | 79.8   | 80.4   | 96.5   | 116.6  |

|        |         |         |        |         |         |        |         |         |
|--------|---------|---------|--------|---------|---------|--------|---------|---------|
| FTHL2  | 104.4   | 135.8   | 91.3   | 90.4    | 96.9    | 97     | 134.6   | 212.8   |
| FTHL3  | 266.1   | 387.4   | 170.7  | 204.9   | 240.5   | 228.7  | 613.6   | 1230.5  |
| FTHL7  | 6895.3  | 9212.8  | 4401.8 | 6447.4  | 6004.6  | 6613.9 | 16568   | 24031.7 |
| FTHL8  | 108.1   | 127.7   | 84.9   | 78.2    | 93      | 87.4   | 116.7   | 121.5   |
| FTL    | 27813.9 | 29051.4 | 47906  | 48185.5 | 42681.3 | 49295  | 29530.8 | 30029.7 |
| FTMT   | 75      | 81.2    | 92.6   | 79.1    | 81.8    | 88.3   | 79.3    | 83.2    |
| FTO    | 171.6   | 247.9   | 163.5  | 149.4   | 116.2   | 146.2  | 172.5   | 256.9   |
| FTS    | 142.7   | 204.1   | 102.9  | 87.1    | 81.6    | 107.9  | 126.7   | 184.3   |
| FTSJ1  | 994.6   | 1146    | 458.4  | 458.7   | 392.4   | 631.4  | 728.9   | 1226.3  |
| FTSJ1  | 108.8   | 113.2   | 112    | 98.3    | 95.4    | 91.3   | 94.6    | 109.8   |
| FTSJ2  | 469     | 586.5   | 223.7  | 141.4   | 136.5   | 165.7  | 314     | 485.5   |
| FTSJ3  | 222.2   | 316.5   | 129.6  | 140.9   | 122.7   | 156.7  | 202     | 227.2   |
| FUBP1  | 350.3   | 475     | 244.1  | 246.2   | 203.1   | 324.5  | 291.5   | 430.3   |
| FUBP3  | 2436.8  | 3256.1  | 1603.8 | 1933.2  | 1440.5  | 2613.2 | 1875.7  | 3652.6  |
| FUCA1  | 410.7   | 479     | 291.3  | 371.9   | 262.7   | 390.3  | 349.9   | 475.5   |
| FUCA2  | 190.4   | 219.6   | 132.7  | 123.2   | 107.5   | 145.3  | 141.1   | 217     |
| FUK    | 252.4   | 299.9   | 189.7  | 178.3   | 164.3   | 216.2  | 184.1   | 213.2   |
| FUNDC1 | 97.9    | 114.4   | 96.5   | 90.2    | 81.4    | 88.2   | 100.7   | 104     |
| FUNDC2 | 124.1   | 149.8   | 99.7   | 87      | 90.7    | 105.7  | 115.3   | 130.1   |
| FURIN  | 138.6   | 154.3   | 137.4  | 130.9   | 120.9   | 151.4  | 134.4   | 174.3   |
| FUS    | 418.8   | 496.4   | 221.1  | 196.1   | 171.6   | 169.9  | 337.3   | 414.3   |
| FUSIP1 | 78      | 83.3    | 84.6   | 76.1    | 77      | 81     | 81.1    | 80.5    |
| FUSIP1 | 859.8   | 1053    | 439.7  | 287.6   | 246.5   | 253.9  | 489.1   | 473.4   |
| FUT1   | 109.2   | 124.1   | 88.6   | 82.8    | 74      | 79.6   | 113.3   | 136.4   |
| FUT10  | 89.5    | 121.4   | 116.8  | 111.7   | 98      | 116.2  | 95.6    | 110.5   |
| FUT11  | 130.3   | 137.5   | 81.1   | 81.2    | 82.2    | 81.9   | 105     | 150.9   |
| FUT2   | 72.9    | 81.7    | 75.2   | 71.1    | 72.1    | 70.3   | 78.9    | 71.3    |
| FUT3   | 89.4    | 111.1   | 95.8   | 93.9    | 82      | 91.7   | 99.3    | 109.1   |
| FUT4   | 3483.4  | 4498    | 3072.9 | 3794.3  | 2867.9  | 4327.9 | 2462    | 2714.9  |
| FUT5   | 108.7   | 112.9   | 94.9   | 92.4    | 87.9    | 89     | 110.3   | 104     |
| FUT6   | 148.5   | 148.4   | 121.8  | 123.2   | 98      | 139.6  | 134.2   | 201     |
| FUT6   | 91.1    | 95.6    | 110.8  | 99.5    | 99.7    | 91.9   | 86.5    | 89.3    |
| FUT7   | 220     | 270.1   | 161.1  | 135.5   | 146.5   | 162.8  | 187.4   | 275.2   |
| FUT8   | 390.7   | 521.5   | 188.1  | 152.1   | 118.5   | 173.3  | 279.8   | 509     |
| FUT8   | 74.2    | 83      | 89.8   | 89.9    | 93.9    | 98.4   | 71.1    | 81.6    |
| FUT9   | 77.6    | 83.4    | 84.4   | 80.9    | 84.5    | 72.2   | 87.2    | 89.5    |
| FVT1   | 562.1   | 769.1   | 329.5  | 345.9   | 266     | 401    | 573.3   | 1148.2  |
| FXC1   | 393.3   | 487.6   | 256.1  | 222.1   | 175.9   | 222.8  | 299.4   | 413.4   |
| FXN    | 185.8   | 242     | 121.8  | 132.2   | 102.7   | 132.9  | 173.4   | 194.3   |
| FXN    | 119.3   | 145.7   | 100.8  | 89.7    | 87.6    | 107.6  | 104.7   | 121.7   |
| FXR1   | 1394.2  | 1709.9  | 973.9  | 771.2   | 716.6   | 1320.8 | 1229.5  | 2142.6  |
| FXR1   | 100.5   | 124.3   | 92.9   | 94.8    | 84.3    | 90     | 111.1   | 122.5   |
| FXR1   | 1513.6  | 2027.7  | 735.9  | 801.3   | 705.9   | 1162.2 | 1279    | 1657.7  |
| FXR2   | 145     | 148.2   | 140.8  | 162.8   | 159.5   | 220.3  | 128.7   | 207     |
| FXYD1  | 115.1   | 129.8   | 108    | 94.9    | 87.8    | 98.3   | 113.1   | 114.3   |
| FXYD1  | 118.3   | 144.4   | 101.6  | 85.5    | 85.2    | 92.1   | 112.3   | 133.2   |
| FXYD1  | 145.2   | 171.1   | 101.5  | 99.2    | 88.3    | 92.3   | 127.4   | 147.8   |
| FXYD2  | 167.2   | 194.8   | 110.3  | 104.6   | 103.5   | 115.4  | 167.1   | 169     |
| FXYD2  | 80      | 78.8    | 80.4   | 81.4    | 79.4    | 79.9   | 85.8    | 76.9    |
| FXYD2  | 118.5   | 139.3   | 91     | 92.2    | 79.9    | 88.3   | 117.6   | 124.6   |

|        |        |        |        |        |        |        |        |        |
|--------|--------|--------|--------|--------|--------|--------|--------|--------|
| FXVD2  | 94.8   | 103.7  | 93.6   | 85.3   | 91.3   | 92.9   | 90.7   | 96.3   |
| FXVD3  | 91.9   | 113.8  | 97.5   | 90.6   | 91.7   | 89.6   | 96.2   | 96.4   |
| FXVD3  | 85.8   | 107.4  | 87.7   | 82.9   | 82.7   | 86.9   | 90.6   | 101.8  |
| FXVD3  | 91.7   | 90.6   | 95.1   | 87.9   | 97.1   | 85.8   | 89.2   | 95.1   |
| FXVD4  | 83.7   | 104.3  | 91.2   | 85.9   | 86.8   | 79.9   | 81.1   | 94     |
| FXVD5  | 2004   | 2250   | 1123.9 | 607.5  | 455.8  | 456.5  | 2431.1 | 3199.3 |
| FXVD5  | 119.4  | 132.3  | 133.8  | 115.8  | 114.4  | 122.9  | 97.1   | 111.8  |
| FXVD5  | 4565.5 | 5965.8 | 2736.6 | 1601.1 | 1483   | 1286.6 | 4838.7 | 5921   |
| FXVD6  | 105.5  | 115.7  | 107    | 95.3   | 93.7   | 96.9   | 98.4   | 99.5   |
| FXVD7  | 92.5   | 112    | 100    | 92.1   | 79.1   | 95.9   | 91.6   | 95     |
| FYB    | 94.2   | 100.6  | 105.8  | 104.9  | 98.7   | 107.3  | 94.1   | 118.6  |
| FYB    | 306.6  | 323.3  | 221.1  | 671.7  | 543.4  | 1140.8 | 217    | 440.3  |
| FYCO1  | 242.4  | 318.7  | 183.3  | 234.8  | 201.8  | 283    | 261.9  | 294    |
| FYN    | 218.3  | 283.5  | 170.9  | 179.2  | 147.2  | 236.2  | 248.5  | 449.9  |
| FYN    | 129.4  | 199.8  | 126.1  | 129    | 113.8  | 142.2  | 140.7  | 182.9  |
| FYN    | 265    | 348    | 157.8  | 129.5  | 116.5  | 143.6  | 231.6  | 300.5  |
| FYN    | 110.6  | 124.5  | 117.1  | 138.8  | 115.6  | 161.4  | 101.7  | 111.9  |
| FYTTD1 | 153.7  | 146.8  | 105    | 111.8  | 110.7  | 94.5   | 137.8  | 189.3  |
| FYTTD1 | 584.4  | 716.2  | 188.5  | 171.2  | 162.4  | 245.3  | 564.8  | 997    |
| FYTTD1 | 238.1  | 278.1  | 116.3  | 106.6  | 113.1  | 113.9  | 168.6  | 284.5  |
| FZD1   | 130.6  | 188.6  | 108.7  | 129.1  | 124.4  | 167.1  | 151.6  | 163.3  |
| FZD10  | 119.8  | 128    | 95.6   | 86.7   | 84.9   | 94.2   | 114.7  | 118.8  |
| FZD2   | 416    | 626    | 322.2  | 377.8  | 303.8  | 404    | 392.8  | 513.4  |
| FZD3   | 141.7  | 207.2  | 143.7  | 113.5  | 106.5  | 122.9  | 136.7  | 170.9  |
| FZD4   | 129.1  | 148.5  | 126.7  | 126.1  | 113.6  | 133.8  | 137.5  | 147    |
| FZD5   | 87.4   | 107.5  | 101.9  | 89.3   | 87.5   | 92.5   | 107.3  | 133.4  |
| FZD6   | 255.9  | 268.8  | 125.6  | 121.9  | 99.8   | 126.4  | 211    | 351    |
| FZD7   | 248.9  | 291.1  | 241    | 209.1  | 201.7  | 183.4  | 228    | 247.4  |
| FZD8   | 87.9   | 99.8   | 94.1   | 88.5   | 81.6   | 86.9   | 86.9   | 101.3  |
| FZD9   | 530.8  | 651.1  | 376.6  | 275.8  | 213.4  | 254.6  | 561.6  | 625.1  |
| FZR1   | 160.1  | 182.7  | 114.7  | 95.2   | 95.7   | 97     | 155.7  | 170.8  |
| G0S2   | 120.1  | 153.6  | 97.4   | 97.8   | 99.3   | 99.6   | 130.7  | 128.7  |
| G10    | 3642.7 | 4055.1 | 2207.4 | 1551.9 | 1158.8 | 1635.7 | 3916.8 | 6419.5 |
| G1P3   | 2082.6 | 2570.6 | 1647.6 | 1204.9 | 1089.8 | 756.5  | 2028.6 | 2077.3 |
| G3BP1  | 443.9  | 554.8  | 363.8  | 361.2  | 354.7  | 454.3  | 382.1  | 920.2  |
| G3BP1  | 530.9  | 743.5  | 233.3  | 226.3  | 172    | 251.1  | 408.9  | 526    |
| G3BP2  | 136.6  | 158.2  | 101.3  | 84.7   | 100.4  | 99.4   | 115.9  | 147.5  |
| G3BP2  | 2396.4 | 3033.7 | 1457.1 | 1556.7 | 956.6  | 2280.6 | 1795.5 | 3511.6 |
| G6PC   | 93.1   | 97.6   | 88.9   | 88.2   | 84.4   | 89.7   | 85.2   | 92.7   |
| G6PC2  | 126.1  | 132.1  | 103.3  | 97     | 95.7   | 96.9   | 115.3  | 123.3  |
| G6PC2  | 87     | 100.2  | 90.9   | 91.6   | 82.9   | 86.5   | 93.6   | 100    |
| G6PC2  | 78.3   | 94.7   | 82     | 83.9   | 75.8   | 77.6   | 83.9   | 88.6   |
| G6PC3  | 482.7  | 632.9  | 436.3  | 337.4  | 272.7  | 366.3  | 429.6  | 709.5  |
| G6PD   | 282.6  | 323.9  | 350.3  | 373.6  | 269.2  | 433.8  | 354.2  | 715.6  |
| G6PD   | 1523.4 | 2121   | 1021.9 | 1158.7 | 926.2  | 1005.3 | 2018   | 2900.5 |
| G6PD   | 103.6  | 108.7  | 94.1   | 92.4   | 82.6   | 87.2   | 99.7   | 112.8  |
| GAA    | 261.2  | 299.7  | 386.4  | 309.6  | 278    | 591.8  | 248.6  | 401.9  |
| GAA    | 173.6  | 204.5  | 181.3  | 173.1  | 167.9  | 285.1  | 145.7  | 271.2  |
| GAB1   | 70.4   | 79.3   | 87.7   | 84.6   | 79.1   | 90.1   | 74.9   | 81.4   |
| GAB1   | 111.1  | 136.6  | 94.6   | 106.4  | 87.8   | 91.4   | 110    | 123.7  |



|           |       |       |       |       |       |        |       |        |
|-----------|-------|-------|-------|-------|-------|--------|-------|--------|
| GAB1      | 95    | 126.4 | 89.2  | 81.8  | 78.4  | 90     | 96.5  | 119.3  |
| GAB2      | 251.9 | 334.5 | 192   | 290.1 | 274.9 | 465.2  | 268.6 | 342    |
| GAB2      | 116.3 | 118.3 | 96.4  | 106.4 | 103.4 | 90.1   | 108.8 | 122    |
| GAB2      | 96.4  | 115.2 | 86.3  | 84.2  | 78.1  | 88.4   | 100.9 | 107.7  |
| GAB3      | 121.8 | 143.7 | 121.6 | 139.3 | 124.6 | 137.5  | 108   | 166.1  |
| GABARAP   | 181   | 198.2 | 121.6 | 127.7 | 104.2 | 104.6  | 164.8 | 175.3  |
| GABARAPL  | 124.7 | 131.4 | 119.2 | 119.2 | 122.9 | 132.1  | 246.8 | 443.3  |
| GABARAPL  | 272   | 284.4 | 121.6 | 112.1 | 102.6 | 118    | 283.7 | 434.2  |
| GABBR1    | 109.9 | 120.1 | 117.2 | 99    | 104.9 | 118    | 91.3  | 91     |
| GABBR1    | 99.1  | 111.1 | 85.6  | 92.9  | 78.4  | 81.8   | 95.7  | 104.2  |
| GABBR1    | 83.6  | 99.5  | 99    | 91.6  | 97.5  | 96.9   | 92.6  | 92.1   |
| GABBR2    | 242.8 | 329.6 | 273.8 | 797.6 | 788.3 | 1030.4 | 220.8 | 435.1  |
| GABPA     | 78.1  | 77.8  | 84.5  | 76.9  | 84.3  | 89.3   | 72.1  | 92.3   |
| GABPB2    | 68.7  | 83.6  | 82.2  | 86.1  | 80.8  | 80.9   | 83.3  | 78.2   |
| GABPB2    | 736.9 | 953.8 | 308.3 | 227.5 | 184.6 | 281.3  | 594.4 | 1014.9 |
| GABRA1    | 71.5  | 82    | 84    | 82.7  | 76.3  | 85.9   | 77.8  | 73.4   |
| GABRA2    | 89.3  | 128.2 | 97.1  | 88.1  | 87    | 101.5  | 93.6  | 107.2  |
| GABRA3    | 94.6  | 115.3 | 93.3  | 91.5  | 74.9  | 81.4   | 99.2  | 99.4   |
| GABRA4    | 86.9  | 88.9  | 98.4  | 92.6  | 89.9  | 81.7   | 83.3  | 77.8   |
| GABRA5    | 93.8  | 105.6 | 84.2  | 83.1  | 89.3  | 84.5   | 92.5  | 99     |
| GABRA6    | 107.6 | 127.2 | 96.2  | 84.6  | 84.2  | 89     | 106.8 | 118.5  |
| GABRB1    | 71.7  | 78.7  | 93.2  | 84.1  | 85.8  | 83.9   | 70.3  | 86.2   |
| GABRB2    | 92.5  | 99.2  | 91.9  | 92.2  | 86.6  | 75.2   | 94.8  | 99     |
| GABRB2    | 80.4  | 92.7  | 101.9 | 86.5  | 88.2  | 86.7   | 83.2  | 95.7   |
| GABRB3    | 78.7  | 82.8  | 98.5  | 96.1  | 77    | 84.6   | 94.6  | 90.3   |
| GABRB3    | 99.3  | 100.4 | 103.7 | 90.5  | 90.3  | 94.5   | 96.7  | 103.6  |
| GABRB3    | 104.6 | 111.5 | 104.7 | 89    | 84.7  | 97.9   | 107   | 120    |
| GABRB3    | 107.5 | 109.2 | 98.2  | 92.7  | 85.8  | 80.7   | 103.4 | 106    |
| GABRD     | 114   | 128.6 | 93.6  | 89    | 84.6  | 96.5   | 115.2 | 135    |
| GABRE     | 97.5  | 113   | 104.5 | 94.5  | 103   | 104.1  | 94.7  | 104.8  |
| GABRE     | 104.6 | 131.1 | 86.1  | 83.9  | 79.7  | 91     | 113.1 | 124.3  |
| GABRE     | 121.6 | 117   | 122.1 | 108.7 | 106.4 | 102.8  | 102.7 | 118.1  |
| GABRG1    | 93    | 95    | 100.6 | 82    | 78.7  | 90.5   | 103.4 | 95.7   |
| GABRG2    | 120.7 | 131.6 | 109   | 118.8 | 97.8  | 118.1  | 118.4 | 131.9  |
| GABRG2    | 169.5 | 195.2 | 157.6 | 145.6 | 152.4 | 155    | 174.7 | 221.3  |
| GABRG3    | 88.2  | 104.5 | 96.9  | 86.1  | 85.5  | 97.8   | 102.1 | 115.8  |
| GABRQ     | 77    | 95.1  | 80.9  | 76.5  | 75.3  | 75.2   | 91.3  | 91.2   |
| GABRR1    | 77.9  | 82.6  | 94    | 86    | 84.7  | 85.6   | 67.7  | 86.4   |
| GABRR2    | 89.5  | 97.7  | 81.8  | 79.4  | 84.4  | 87.4   | 94    | 107.4  |
| GAD1      | 71.8  | 90.2  | 82.5  | 79.3  | 78.7  | 80.3   | 73    | 76.3   |
| GAD1      | 97    | 103.8 | 100.3 | 91.2  | 89    | 95.8   | 92.5  | 109.3  |
| GAD1      | 92.6  | 93.3  | 85.7  | 86.4  | 66.8  | 87.5   | 83.4  | 88.2   |
| GAD2      | 87.4  | 101   | 100   | 96.9  | 97.8  | 92     | 82.1  | 90.6   |
| GADD45A   | 595.7 | 714.4 | 321.9 | 329.9 | 294.9 | 405.8  | 821.6 | 1191   |
| GADD45B   | 240.5 | 281.1 | 135.5 | 128.8 | 127.4 | 132.7  | 213.6 | 279.7  |
| GADD45G   | 83.6  | 87.4  | 85.5  | 93.5  | 93.6  | 94.8   | 85.7  | 83.2   |
| GADD45GII | 138.4 | 149.9 | 98.4  | 95    | 88.9  | 90.1   | 141.6 | 214.3  |
| GADL1     | 70.7  | 79.9  | 102.2 | 95.7  | 96.1  | 90.6   | 77.3  | 82.9   |
| GAGE1     | 100.8 | 127.4 | 91.8  | 91.3  | 94.7  | 84.8   | 113.6 | 122.2  |
| GAGE1     | 94.2  | 106.8 | 98.6  | 98.9  | 85.6  | 93     | 95.7  | 111.4  |

|           |        |        |        |        |        |        |        |        |
|-----------|--------|--------|--------|--------|--------|--------|--------|--------|
| GAGE1     | 86.1   | 91.1   | 116.3  | 105.3  | 104.6  | 115.3  | 83.3   | 82.6   |
| GAGE2     | 81.8   | 80.5   | 112.6  | 105.4  | 94.9   | 103.8  | 83.3   | 86.9   |
| GAGE4     | 118.6  | 122.9  | 101.4  | 84.9   | 98     | 87.9   | 106.3  | 119.2  |
| GAGE5     | 77.3   | 96.3   | 85     | 86.9   | 84     | 82.6   | 83.1   | 87.6   |
| GAGE6     | 104.1  | 121.5  | 92.1   | 91.7   | 79.8   | 86.7   | 110.1  | 113.4  |
| GAGE7     | 91.3   | 108.3  | 106.4  | 90.4   | 88.9   | 100.7  | 96.2   | 107    |
| GAGE7B    | 81.3   | 89     | 95.2   | 83.1   | 86.3   | 78.9   | 83.5   | 85.7   |
| GAGE8     | 88.7   | 99.8   | 84.6   | 78.3   | 79.2   | 79.8   | 89.1   | 95.6   |
| GAK       | 2048.1 | 2340.9 | 2192.4 | 1815.6 | 1696.1 | 2028.9 | 1546.8 | 1620.7 |
| GAL       | 1211.8 | 1414.7 | 1046   | 665.4  | 427.6  | 670.2  | 1182.8 | 2134.2 |
| GAL3ST1   | 94.8   | 101.8  | 98.4   | 85.7   | 90.4   | 81.3   | 92.2   | 98.6   |
| GAL3ST2   | 163    | 167.6  | 138.3  | 111.7  | 107.2  | 126.7  | 138.9  | 160.3  |
| GAL3ST3   | 89.8   | 93.7   | 95.3   | 95.1   | 89.7   | 85.5   | 89     | 104.6  |
| GAL3ST4   | 124.2  | 133.1  | 91.8   | 81.3   | 78.7   | 91     | 112.6  | 136.9  |
| GALC      | 292.6  | 344.3  | 164    | 140.2  | 114.4  | 139    | 226.6  | 291.2  |
| GALC      | 826.7  | 944.7  | 694.8  | 960.3  | 620    | 1055.4 | 611.9  | 948.1  |
| GALE      | 84.9   | 95.4   | 93.4   | 91.6   | 84.4   | 89.6   | 87.2   | 90.9   |
| GALE      | 274.6  | 285.7  | 207.7  | 230.8  | 171.9  | 206.9  | 234.5  | 190.6  |
| GALE      | 102.6  | 99.5   | 95.6   | 97.8   | 97     | 101.8  | 94.6   | 95.7   |
| GALGT     | 134.5  | 174.6  | 100.2  | 89.4   | 87.2   | 98.1   | 162.5  | 191.9  |
| GALIG     | 91.2   | 109.3  | 92.2   | 91.3   | 92.2   | 85.9   | 95.1   | 106.2  |
| GALK1     | 5118.5 | 6576.4 | 3880.3 | 3386.9 | 2688.1 | 2916.4 | 4594.4 | 4650.8 |
| GALK2     | 566.1  | 773.9  | 298.9  | 225.2  | 204.6  | 252.5  | 468.2  | 691.4  |
| GALK2     | 194.8  | 303.9  | 159.6  | 227.1  | 197.7  | 236.3  | 205.8  | 273.1  |
| GALK2     | 179.3  | 216    | 105.6  | 107.6  | 96.7   | 105.3  | 149.6  | 161.9  |
| GALM      | 366.8  | 494.5  | 335    | 411.7  | 361.4  | 604.5  | 366.5  | 500.7  |
| GALNAC4S- | 74.9   | 93.5   | 76     | 83.8   | 71.5   | 76.3   | 89.9   | 109.3  |
| GALNACT-2 | 134.4  | 169.1  | 92.5   | 88.1   | 76.8   | 92.2   | 116.8  | 166    |
| GALNS     | 155.1  | 188.9  | 103.5  | 102.4  | 96.8   | 108.7  | 149.3  | 187.4  |
| GALNT1    | 76.1   | 95.1   | 108.4  | 93.2   | 87.4   | 84.9   | 75.5   | 81.1   |
| GALNT10   | 104.8  | 150.3  | 89.5   | 88.5   | 86.9   | 87.3   | 131.2  | 126    |
| GALNT10   | 125    | 172.2  | 128.9  | 133.9  | 126.2  | 166.5  | 110.1  | 163.1  |
| GALNT10   | 115.7  | 132    | 117.9  | 109.2  | 103.4  | 121.5  | 100.3  | 145.1  |
| GALNT11   | 422.3  | 548.5  | 248.3  | 254.2  | 207.3  | 422.1  | 407.6  | 619    |
| GALNT12   | 512.4  | 677.9  | 316.5  | 377.4  | 310.7  | 494.7  | 386    | 524.1  |
| GALNT13   | 83.5   | 84.7   | 102.5  | 97.5   | 94     | 82.7   | 79.7   | 75.4   |
| GALNT14   | 149.5  | 198    | 106.1  | 86.7   | 76     | 97     | 154    | 196    |
| GALNT17   | 100.3  | 124.2  | 97.3   | 99.3   | 88.2   | 98.1   | 115    | 122.6  |
| GALNT2    | 116.7  | 136    | 108.2  | 107    | 99.3   | 110.8  | 103.8  | 124.4  |
| GALNT3    | 222.4  | 217.7  | 158.6  | 176.7  | 175.6  | 153.8  | 193.9  | 262.4  |
| GALNT4    | 157.9  | 194    | 99.7   | 105    | 102.1  | 101.6  | 152.8  | 193.8  |
| GALNT5    | 75.8   | 83.6   | 89.7   | 79.4   | 79.9   | 80     | 81.6   | 76.3   |
| GALNT6    | 174.7  | 195.5  | 132.1  | 131.2  | 119.7  | 129.5  | 153.1  | 206.7  |
| GALNT7    | 87.7   | 105.3  | 91.1   | 86.3   | 80.8   | 85.2   | 79.9   | 99     |
| GALNT8    | 104.4  | 136    | 101.7  | 90.3   | 84.4   | 83.8   | 112.4  | 125    |
| GALNT9    | 131.9  | 149    | 97.8   | 74.1   | 84.7   | 88.1   | 116.4  | 123.8  |
| GALNT9    | 79.6   | 102.6  | 79.6   | 70.4   | 70.4   | 67.5   | 87.9   | 98     |
| GALNTL1   | 79.1   | 92.9   | 108.7  | 99.1   | 93.3   | 90.7   | 81.6   | 84.8   |
| GALNTL2   | 99.6   | 113.7  | 94.4   | 90.3   | 76.8   | 85.9   | 100.3  | 111    |
| GALNTL4   | 99.9   | 120.5  | 96.6   | 80.4   | 83.5   | 79.2   | 98.6   | 106.3  |

|         |         |         |        |        |        |        |         |         |
|---------|---------|---------|--------|--------|--------|--------|---------|---------|
| GALNTL5 | 72.7    | 87.5    | 87.6   | 84.2   | 80     | 83.5   | 75.9    | 78.3    |
| GALP    | 81      | 88.1    | 89.8   | 88.4   | 76     | 89.4   | 79.9    | 92.5    |
| GALR1   | 90.4    | 91.5    | 96.6   | 80.8   | 84.6   | 92.8   | 89      | 84.2    |
| GALR2   | 1143.6  | 1567.7  | 696    | 282.4  | 253.2  | 261.8  | 890.6   | 547.6   |
| GALR3   | 102.6   | 110.1   | 101.8  | 84.6   | 83.3   | 84.4   | 99.6    | 99      |
| GALT    | 1267.6  | 1427.1  | 626.3  | 506.4  | 489.6  | 547.6  | 1073.9  | 887.2   |
| GALT    | 373.7   | 420.7   | 310.9  | 206.8  | 214.5  | 235.4  | 268.9   | 311.3   |
| GAMT    | 2256.7  | 2850.2  | 1862.1 | 1378.3 | 1182.6 | 1337.6 | 2206.7  | 2174.7  |
| GAMT    | 118.7   | 146.2   | 84.3   | 84.3   | 73.2   | 87.7   | 98.7    | 124.6   |
| GAMT    | 1358.5  | 1880.6  | 1114   | 695.7  | 550.1  | 674.9  | 1182.9  | 1727.5  |
| GAN     | 126.6   | 131     | 96.8   | 96.8   | 88.7   | 96.5   | 122.1   | 134.1   |
| GANAB   | 448.3   | 513.3   | 414.9  | 398    | 358.9  | 383.3  | 443.7   | 579.5   |
| GANC    | 95.6    | 112.7   | 104.8  | 90.3   | 90.2   | 103.1  | 90.1    | 124.4   |
| GAP43   | 90.8    | 120.3   | 90.4   | 86.2   | 84.1   | 81.7   | 92.3    | 100.6   |
| GAPDH   | 5031    | 6904.7  | 2742.7 | 2418.3 | 1472.3 | 2170.7 | 4072.8  | 6066    |
| GAPDH   | 2544.7  | 3316.8  | 728    | 449.2  | 404.2  | 715.7  | 2368.9  | 3421.8  |
| GAPDH   | 12859.3 | 16555.4 | 9670.7 | 5166.5 | 3760.7 | 5378.3 | 11280.8 | 13497.7 |
| GAPDHS  | 91.6    | 93.4    | 97.3   | 84.6   | 80.9   | 84.3   | 85.8    | 93.9    |
| GAPVD1  | 1272.1  | 1917.2  | 774.1  | 971.5  | 782.6  | 1238.9 | 1402.8  | 1789.8  |
| GARNL1  | 262.7   | 333.9   | 169.1  | 167.4  | 159.9  | 224.3  | 286.5   | 376.3   |
| GARNL3  | 94.5    | 108.1   | 94.5   | 95.7   | 99.4   | 97     | 83.8    | 92.6    |
| GARNL4  | 138.4   | 187.2   | 146.6  | 130.6  | 158.1  | 169    | 138.5   | 165.8   |
| GARS    | 4218.1  | 5981.4  | 3056.1 | 1760   | 1196.9 | 2356.3 | 4978.1  | 9277.3  |
| GART    | 1759.8  | 2379.3  | 1748.5 | 1659   | 1122.3 | 1938.7 | 1371.4  | 2049.2  |
| GART    | 1100.5  | 1617.5  | 432.9  | 315.3  | 238.4  | 330.4  | 777.4   | 907.6   |
| GART    | 108.1   | 124.7   | 101.5  | 100.5  | 89.4   | 94.8   | 103.8   | 107.3   |
| GAS1    | 134     | 158.1   | 120.7  | 100.2  | 96.7   | 100.3  | 130.5   | 164.6   |
| GAS2    | 82.5    | 78.5    | 96     | 91.7   | 86     | 78.4   | 75.6    | 80.6    |
| GAS2    | 91.2    | 97      | 85.7   | 88.1   | 80.8   | 78     | 76.3    | 99.8    |
| GAS2L1  | 106     | 121     | 111.4  | 100    | 92.1   | 105.6  | 112.7   | 124.7   |
| GAS2L1  | 89.7    | 103.5   | 99.8   | 90.2   | 88.9   | 102.6  | 79.9    | 104.8   |
| GAS2L1  | 92.5    | 115.5   | 95.8   | 85.1   | 74.8   | 88.6   | 83.3    | 108     |
| GAS2L2  | 133.9   | 177.2   | 92.4   | 84.3   | 84.3   | 96.8   | 144.1   | 159.9   |
| GAS2L3  | 198.8   | 239.9   | 152.6  | 217.3  | 188.6  | 194.3  | 186.7   | 198.9   |
| GAS6    | 852.2   | 1043.3  | 891.6  | 1450.7 | 1183   | 1983   | 708.9   | 1365.4  |
| GAS6    | 826.2   | 1067    | 887.5  | 1498.8 | 1168.6 | 1948.4 | 699.7   | 1406.5  |
| GAS6    | 165     | 208.6   | 138    | 162.3  | 142.2  | 112.7  | 145.6   | 170.5   |
| GAS7    | 94.5    | 101.7   | 98.1   | 87.2   | 86.5   | 85.9   | 88.6    | 102.4   |
| GAS7    | 153.9   | 208.4   | 157.2  | 224.8  | 229    | 316.2  | 163.1   | 193.5   |
| GAS7    | 86.9    | 96.5    | 93.6   | 104.6  | 93.6   | 92     | 82.1    | 90.9    |
| GAS7    | 85.4    | 85.3    | 117.5  | 107    | 104.3  | 106.7  | 76.9    | 91.5    |
| GAS8    | 168.8   | 193.4   | 214.9  | 165.2  | 169.8  | 193.2  | 150.5   | 239.3   |
| GAST    | 121.4   | 143     | 122.3  | 110.7  | 111.8  | 120    | 113.8   | 135.2   |
| GATA1   | 87.4    | 95.5    | 97.5   | 92.5   | 91     | 90.9   | 85.3    | 91.6    |
| GATA2   | 212.6   | 286.6   | 228.7  | 132.8  | 113.8  | 136.4  | 217.5   | 324     |
| GATA3   | 92.7    | 89.9    | 94.6   | 98.7   | 85     | 97.4   | 100.5   | 87.1    |
| GATA4   | 84.3    | 95.4    | 94.8   | 86.7   | 87.1   | 85.6   | 87.1    | 93      |
| GATA5   | 87.7    | 93.9    | 99.8   | 94.2   | 92.9   | 83.1   | 87.4    | 87.6    |
| GATA6   | 96      | 107.7   | 85.5   | 89.6   | 82.1   | 87.2   | 97.4    | 99.8    |
| GATAD1  | 237.4   | 369.9   | 143.9  | 152.7  | 152.7  | 223.9  | 233.5   | 383.3   |

|         |        |        |        |        |        |        |        |        |
|---------|--------|--------|--------|--------|--------|--------|--------|--------|
| GATAD2A | 1763.3 | 2271.4 | 1636.3 | 1504.5 | 1111.8 | 1592.7 | 1667.5 | 1842.7 |
| GATAD2B | 240.2  | 352.7  | 208.8  | 250.4  | 234.8  | 353.7  | 223.2  | 427.4  |
| GATM    | 390.3  | 601.8  | 269.8  | 259.1  | 255.5  | 409.4  | 257.9  | 370    |
| GATS    | 166.6  | 229.8  | 147.7  | 177.5  | 177.8  | 161    | 154.1  | 158.8  |
| GBA     | 938.3  | 1291   | 950.6  | 828    | 673.9  | 856    | 807.9  | 1174.6 |
| GBA2    | 201.6  | 247.4  | 225.1  | 155.8  | 142.2  | 203.7  | 184.5  | 253.4  |
| GBA3    | 77.2   | 84     | 99.9   | 93.5   | 90     | 95.9   | 78.7   | 82.9   |
| GBAS    | 1022.6 | 1181.4 | 640.5  | 775.4  | 516.7  | 1046.3 | 862.5  | 1584.3 |
| GBE1    | 947.4  | 1357.6 | 500.1  | 763    | 566    | 1243.7 | 741.6  | 1200.1 |
| GBF1    | 181.7  | 235.5  | 181.8  | 196.6  | 172.1  | 253.2  | 169.6  | 201.4  |
| GBGT1   | 470.6  | 536    | 269.3  | 120.7  | 110.3  | 131.7  | 295.3  | 292    |
| GBL     | 467.6  | 550.1  | 373.7  | 282.8  | 224.9  | 339.9  | 433.3  | 830.4  |
| GBP1    | 94.6   | 108.3  | 89.4   | 90.6   | 96     | 96.5   | 100.5  | 101.9  |
| GBP2    | 220.1  | 277.6  | 163.7  | 243.8  | 235.5  | 312.1  | 212.2  | 220.1  |
| GBP3    | 195    | 229.2  | 133.7  | 124.3  | 113.2  | 145.6  | 168.3  | 187.5  |
| GBP4    | 146.4  | 173.5  | 112.9  | 117.7  | 115.3  | 122.6  | 130.6  | 153.7  |
| GBP5    | 126.1  | 147.2  | 105.5  | 141.2  | 125.8  | 162.8  | 119.8  | 133.1  |
| GBP6    | 121.8  | 135.5  | 90.3   | 76.9   | 77.6   | 87.1   | 106.8  | 124.7  |
| GBP7    | 83.4   | 90.5   | 92.7   | 84.5   | 78.1   | 81.4   | 82.4   | 88.1   |
| GBX2    | 138.2  | 175    | 104.8  | 101.3  | 96.8   | 110.7  | 126.5  | 155.3  |
| GC      | 88.1   | 104.6  | 93.6   | 78     | 78.5   | 81     | 89.3   | 89.3   |
| GCA     | 917.6  | 1090.5 | 477.1  | 551.4  | 427.9  | 629.2  | 633.1  | 1103.9 |
| GCAT    | 340.6  | 443    | 209.2  | 221.3  | 214.4  | 275.6  | 320.7  | 488.1  |
| GCC1    | 453.2  | 588.8  | 266.9  | 250.4  | 246.8  | 363.9  | 464.1  | 615.9  |
| GCC2    | 109.6  | 127.3  | 101.1  | 94.2   | 91.3   | 98.1   | 104.6  | 116.2  |
| GCC2    | 73.9   | 80.6   | 83.4   | 86.3   | 86     | 82     | 72.4   | 78.2   |
| GCC2    | 111.9  | 129.4  | 94.8   | 88.3   | 82     | 110.3  | 105.2  | 121.9  |
| GCDH    | 206.1  | 233.3  | 169.6  | 146.4  | 131.9  | 196.3  | 173.3  | 218.2  |
| GCDH    | 544.5  | 674.8  | 253.1  | 219.6  | 174.2  | 257.3  | 425.2  | 527.7  |
| GCET2   | 112.4  | 118    | 91.7   | 80.6   | 82.2   | 80.4   | 109.5  | 104.4  |
| GCET2   | 136.4  | 137    | 90     | 81.7   | 87.1   | 88.9   | 110.4  | 131.3  |
| GCG     | 95.4   | 112.8  | 97     | 97.8   | 89.2   | 99.9   | 97.8   | 102.3  |
| GCGR    | 90.6   | 97.3   | 89.9   | 93.8   | 90     | 88.1   | 92.7   | 85.2   |
| GCH1    | 136.7  | 162.8  | 102    | 104    | 96.2   | 96     | 124.4  | 148    |
| GCH1    | 115.5  | 134.8  | 104.9  | 103    | 89.6   | 93.3   | 95.9   | 116    |
| GCH1    | 147.9  | 149.8  | 89.4   | 83.9   | 84.5   | 87.3   | 122.6  | 183    |
| GCHFR   | 631.2  | 760.8  | 505.1  | 365.4  | 355    | 464.1  | 539.4  | 557.3  |
| GCK     | 97.3   | 100.7  | 84.7   | 77.5   | 80.9   | 87.7   | 97.8   | 105.2  |
| GCK     | 79.6   | 91.5   | 89     | 80.5   | 86.5   | 91.6   | 78.9   | 84.9   |
| GCK     | 103.6  | 112.8  | 88.3   | 84.7   | 79.3   | 83.8   | 104.6  | 114    |
| GCKR    | 90     | 110.9  | 105.9  | 89.3   | 91.4   | 98.5   | 92.5   | 97.1   |
| GCLC    | 87.5   | 87.7   | 89.8   | 82.5   | 80.3   | 88.5   | 81.3   | 99.3   |
| GCLM    | 163.8  | 188.7  | 154.9  | 157.3  | 133.1  | 134    | 561.9  | 1602.3 |
| GCM1    | 105.3  | 114.7  | 95.6   | 91.4   | 92.7   | 92.7   | 99.5   | 117    |
| GCM2    | 74.9   | 86.5   | 108.3  | 94     | 87     | 87.5   | 86.8   | 85.8   |
| GCN1L1  | 697.8  | 914    | 296.1  | 316.9  | 266.3  | 471.1  | 675.3  | 713.2  |
| GCN5L2  | 1778.4 | 2115.8 | 931.4  | 1017.8 | 932.3  | 1160.2 | 970.9  | 998.4  |
| GCNT1   | 88     | 114.2  | 86.7   | 85.2   | 87.2   | 93.2   | 92.5   | 100.5  |
| GCNT2   | 83.3   | 86.6   | 90     | 72.9   | 97.9   | 81.3   | 85.7   | 87.3   |
| GCNT2   | 88.2   | 94.6   | 97.9   | 87.6   | 90.1   | 90.6   | 87.6   | 95.8   |

|           |        |        |        |       |       |       |        |        |
|-----------|--------|--------|--------|-------|-------|-------|--------|--------|
| GCNT2     | 119.1  | 144    | 105.7  | 111.8 | 111.6 | 115.9 | 131.1  | 164.1  |
| GCNT2     | 90.2   | 107.2  | 98.7   | 91.7  | 87.7  | 93.1  | 90.6   | 97.3   |
| GCNT3     | 71.5   | 85.6   | 98     | 78.6  | 80.8  | 86.3  | 73.9   | 87.9   |
| GCOM1     | 96.7   | 100.5  | 98.6   | 88.4  | 97    | 88.1  | 94.7   | 97.9   |
| GCOM1     | 106.7  | 118.4  | 93.6   | 93.5  | 88.8  | 96.1  | 101.5  | 125.6  |
| GCOM1     | 98.9   | 101.8  | 94.2   | 94.5  | 86.8  | 94.3  | 87.9   | 95.2   |
| GCOM1     | 89.7   | 110.8  | 107.8  | 111.1 | 95.6  | 102.3 | 85.1   | 101    |
| GCS1      | 232.3  | 296.2  | 231.1  | 191   | 143.6 | 202.3 | 168.7  | 271.4  |
| GCSH      | 598.2  | 759.2  | 280.7  | 271.4 | 213.9 | 251.4 | 449.5  | 513.8  |
| GDA       | 91.9   | 92.2   | 94.4   | 78.2  | 80    | 80.2  | 101.5  | 98.5   |
| GDAP1     | 125.7  | 167.9  | 102.9  | 89.3  | 80    | 89.8  | 108.2  | 119.6  |
| GDAP1     | 168.8  | 214.2  | 115.8  | 104.1 | 95.3  | 91.7  | 126.3  | 127.6  |
| GDAP1L1   | 111.1  | 127.3  | 104.7  | 94.1  | 81.6  | 86    | 105.5  | 124.7  |
| GDAP2     | 239.7  | 336.6  | 203    | 172.9 | 144.1 | 217.7 | 202.6  | 264    |
| GDDR      | 106.1  | 120.4  | 106.4  | 97.5  | 95.2  | 92.5  | 94.8   | 122.1  |
| GDF1      | 107.4  | 115.2  | 95     | 92.2  | 84.2  | 91    | 101    | 136.3  |
| GDF10     | 90.5   | 93.1   | 83.8   | 83.9  | 86.4  | 81.7  | 85.9   | 91.9   |
| GDF11     | 130.7  | 180.8  | 94.2   | 81.7  | 79.7  | 88.5  | 127    | 153.9  |
| GDF15     | 91.3   | 103.6  | 116.3  | 100.5 | 92.8  | 101.1 | 98.3   | 101.3  |
| GDF2      | 78.8   | 77.9   | 98.1   | 78.1  | 84.2  | 87.9  | 85.1   | 80.3   |
| GDF3      | 89.8   | 92.6   | 105.3  | 112.6 | 90    | 97.2  | 89     | 91.7   |
| GDF5      | 99.1   | 113    | 97.1   | 97.8  | 89.8  | 89.1  | 97.5   | 90.8   |
| GDF6      | 94.2   | 96.6   | 91.6   | 79.3  | 75.3  | 73.2  | 86.4   | 97.2   |
| GDF7      | 147.1  | 143    | 101.1  | 89.3  | 92.6  | 87.5  | 136.4  | 144.1  |
| GDF8      | 89.7   | 98.3   | 92.9   | 86.7  | 90.8  | 90.4  | 86.6   | 102.6  |
| GDF9      | 96.2   | 108    | 104.5  | 94.8  | 92.7  | 99.2  | 88.5   | 86.5   |
| GDI1      | 265.8  | 285    | 207.1  | 173.9 | 198.9 | 282.7 | 228.8  | 606.4  |
| GDI2      | 3342.9 | 4710.9 | 1116.7 | 952.1 | 622.9 | 1347  | 2917.3 | 5812.2 |
| GDNF      | 92     | 104.7  | 99.7   | 101.9 | 89.8  | 89.8  | 94.8   | 100.8  |
| GDNF      | 95     | 112.6  | 85.5   | 83.2  | 81.5  | 73.5  | 84.8   | 98.3   |
| GDNF      | 136.6  | 156.9  | 93.6   | 82.9  | 85.3  | 85    | 134    | 144    |
| GDPD1     | 223.1  | 245.8  | 137.5  | 153.6 | 149.2 | 169.2 | 206.1  | 307.2  |
| GDPD2     | 102.6  | 137.5  | 99.9   | 82.9  | 88.5  | 96.7  | 99.6   | 104.2  |
| GDPD3     | 121.1  | 149.4  | 112.4  | 101.5 | 112.9 | 114.1 | 125.9  | 149.6  |
| GDPD3     | 82.8   | 104.3  | 96.8   | 81.9  | 78.8  | 91.1  | 93.2   | 112.1  |
| GDPD4     | 113.2  | 139.5  | 99.7   | 85.5  | 79.1  | 84.7  | 108.8  | 132.2  |
| GDPD5     | 156.1  | 190.3  | 177.7  | 189.4 | 164.5 | 254.6 | 140.2  | 253.4  |
| GEFT      | 105.7  | 114.8  | 92.2   | 95.4  | 89    | 84    | 102.6  | 131.5  |
| GEFT      | 107.2  | 122.8  | 100.5  | 87.3  | 80    | 94    | 105.4  | 111.4  |
| GEFT      | 105.8  | 125.7  | 112.8  | 103   | 96.1  | 109.8 | 101.8  | 106.8  |
| GEM       | 98     | 117.9  | 90.8   | 90.8  | 83.2  | 78.6  | 95.5   | 115.7  |
| GEM       | 105.1  | 116.9  | 97.1   | 101.5 | 94.3  | 99.9  | 108.7  | 129.1  |
| GEMIN4    | 1401.3 | 1837.5 | 1063.4 | 895.3 | 620.5 | 785.2 | 940.6  | 918.2  |
| GEMIN5    | 305.4  | 413.5  | 287.4  | 183.1 | 146.9 | 268.8 | 223    | 278    |
| GEMIN6    | 1743.2 | 2135.1 | 1152.7 | 672.4 | 496.3 | 813.7 | 1288.3 | 1465.8 |
| GEMIN7    | 122    | 147.8  | 92.6   | 87.2  | 79.1  | 81.6  | 121.2  | 144.8  |
| GEMIN7    | 84.9   | 93.3   | 98.8   | 95.6  | 90.4  | 92.6  | 95.7   | 97.7   |
| GEMIN8    | 145.7  | 185.5  | 134    | 113.9 | 95.8  | 123.3 | 129.4  | 156.4  |
| GENX-3414 | 185.2  | 240.2  | 131    | 106.3 | 106.1 | 125.7 | 188.1  | 243.9  |
| GFAP      | 100.7  | 113.9  | 97.3   | 91.4  | 82.5  | 91.5  | 99.2   | 103.9  |

|        |         |         |         |         |         |         |         |         |
|--------|---------|---------|---------|---------|---------|---------|---------|---------|
| GFER   | 138.9   | 144.6   | 86.3    | 88.7    | 79.9    | 89.4    | 111     | 173.4   |
| GFI1   | 2555.8  | 3003.9  | 2099.2  | 1492.1  | 1028.3  | 1856.9  | 1611.3  | 2441.4  |
| GFI1B  | 90.6    | 96.2    | 89.6    | 89      | 91.3    | 102.9   | 85.1    | 91.1    |
| GFM1   | 1534.1  | 1906    | 771.4   | 881.1   | 641.4   | 1198.5  | 1236.7  | 1815.5  |
| GFM2   | 155.5   | 199.4   | 103.4   | 84.5    | 85.1    | 142.4   | 136.2   | 187.5   |
| GFOD1  | 227.3   | 273.3   | 140     | 146     | 142.9   | 175.2   | 186.1   | 228.5   |
| GFPT1  | 389.9   | 521     | 215.1   | 264.7   | 243.1   | 330     | 397.8   | 741.2   |
| GFPT2  | 85.5    | 92.9    | 104     | 99.5    | 104.2   | 109     | 78.2    | 90.5    |
| GFRA1  | 130.7   | 136.9   | 90.1    | 86.6    | 81.5    | 94.4    | 104.5   | 122.9   |
| GFRA1  | 96.6    | 121.5   | 93.3    | 92.9    | 101.4   | 91.6    | 106.3   | 100.9   |
| GFRA1  | 117.3   | 124.7   | 105     | 101.8   | 94      | 92.7    | 102.3   | 111.3   |
| GFRA2  | 183.2   | 207.2   | 167.9   | 201.3   | 190.6   | 243.8   | 154.6   | 190.5   |
| GFRA3  | 83.4    | 88.9    | 106.3   | 105.4   | 94.5    | 110     | 81.5    | 110.3   |
| GFRA4  | 80      | 86      | 93.1    | 93.5    | 80.9    | 88.5    | 82.2    | 86.1    |
| GFRA4  | 109.7   | 121.6   | 133.2   | 103.3   | 105.1   | 125     | 114.2   | 123.7   |
| GGA1   | 115     | 112     | 108.2   | 116     | 103.1   | 97.1    | 102     | 113.4   |
| GGA1   | 24053.9 | 23155.8 | 13798.9 | 18055.8 | 16391.7 | 14077.1 | 21515.5 | 28720.8 |
| GGA1   | 124.9   | 131.4   | 108.8   | 105.5   | 95.5    | 92.3    | 115.4   | 137     |
| GGA1   | 132.8   | 134.8   | 90.4    | 92.9    | 112.8   | 88.7    | 120.7   | 135.2   |
| GGA2   | 621.3   | 810.3   | 467.2   | 810.6   | 696.8   | 928.1   | 489     | 533     |
| GGA3   | 243.6   | 268.2   | 221.3   | 176     | 180.8   | 228.5   | 209.6   | 330.6   |
| GGA3   | 280.3   | 357     | 234.5   | 239.7   | 198.2   | 250.5   | 263.3   | 454.1   |
| GGA3   | 109.9   | 131.3   | 95.2    | 81.6    | 71.6    | 86.1    | 113.5   | 168.5   |
| GGCX   | 151.4   | 187.7   | 152.7   | 200.4   | 158.3   | 215.5   | 139.2   | 167.3   |
| GGH    | 529     | 602.4   | 290.6   | 197.2   | 173.2   | 240.9   | 493.8   | 1009.8  |
| GGN    | 75.4    | 84.3    | 90.7    | 82.5    | 80.6    | 85.3    | 75.9    | 80.2    |
| GGPS1  | 141.5   | 178.9   | 132.3   | 131.4   | 122.9   | 139.2   | 134.2   | 165.4   |
| GGPS1  | 2043.7  | 2590.9  | 1002.4  | 984.3   | 658.6   | 1289.1  | 1739    | 3447.5  |
| GGT1   | 78.2    | 91.1    | 93.7    | 105.6   | 102.6   | 99.1    | 81.8    | 99.2    |
| GGT1   | 189.3   | 261.3   | 214.8   | 209.4   | 202.5   | 291.4   | 171.5   | 226.5   |
| GGT3   | 128     | 163.1   | 106.2   | 106.8   | 101.7   | 109.4   | 134.4   | 153.3   |
| GGT6   | 87.8    | 94.8    | 103.6   | 101.5   | 90      | 98.8    | 97.2    | 98.4    |
| GGTA1  | 88.1    | 97.9    | 86.1    | 89.5    | 83.8    | 88.8    | 81.3    | 85.6    |
| GGTL3  | 122.4   | 132.4   | 93.5    | 88.7    | 92.3    | 102.9   | 120.1   | 121.6   |
| GGTL4  | 155.3   | 182.8   | 154.8   | 147.4   | 124.5   | 189.9   | 140.5   | 180.9   |
| GGTLA1 | 118.6   | 111.9   | 93.2    | 88.3    | 85.8    | 94.4    | 115.7   | 116.1   |
| GGTLA4 | 93.9    | 100.8   | 100.7   | 95      | 101.5   | 101.8   | 85.5    | 104.9   |
| GGTLA4 | 141     | 171.4   | 107.5   | 103.2   | 107.9   | 106     | 129.4   | 133.3   |
| GGTLA4 | 121.9   | 133.2   | 103.7   | 101.1   | 100.2   | 89.7    | 119.6   | 112.2   |
| GH1    | 86.7    | 81      | 90.6    | 92.4    | 93      | 91.5    | 82.5    | 89.4    |
| GH1    | 77.9    | 89      | 81.5    | 78.8    | 73.4    | 83.3    | 81.2    | 88.2    |
| GH2    | 75.7    | 85.8    | 92.1    | 89      | 80.9    | 84.8    | 85.4    | 94      |
| GH2    | 80.5    | 97.3    | 93.2    | 89.8    | 79.7    | 88.5    | 86.4    | 94.4    |
| GH2    | 88.4    | 106.8   | 96.1    | 91.5    | 85.8    | 88.1    | 89.8    | 93.3    |
| GHITM  | 7486.3  | 10109.9 | 5256.1  | 5136.5  | 3625.9  | 5678.4  | 7799.3  | 8920.7  |
| GHR    | 110.1   | 129.5   | 90.8    | 93      | 76.7    | 92.9    | 93      | 90.8    |
| GHRH   | 90      | 93.1    | 91      | 93.1    | 88.9    | 80.6    | 89.1    | 95.1    |
| GHRHR  | 75.8    | 87.3    | 90.6    | 82.4    | 78.4    | 85.5    | 82.6    | 91.9    |
| GHRHR  | 96      | 139.9   | 93.2    | 84.5    | 86.2    | 91.8    | 115.4   | 122     |
| GHRHR  | 89.4    | 103.4   | 82.3    | 77.8    | 74.9    | 73.3    | 91.1    | 105.2   |

|        |        |       |        |        |        |        |        |        |
|--------|--------|-------|--------|--------|--------|--------|--------|--------|
| GHRL   | 150    | 179.3 | 125.5  | 151.3  | 254    | 139.7  | 131.1  | 132.8  |
| GHSR   | 82.5   | 96.8  | 89.3   | 84.3   | 77.7   | 86     | 103.8  | 112.8  |
| GHSR   | 94.7   | 111.8 | 93     | 94     | 92.4   | 95.1   | 106.5  | 95.2   |
| GIF    | 94.9   | 98.8  | 90.6   | 88.9   | 89.1   | 80.8   | 94.2   | 103.6  |
| GIMAP1 | 137.5  | 180   | 91.1   | 89.8   | 78.2   | 101    | 159.9  | 177.7  |
| GIMAP2 | 354.5  | 382.7 | 164.1  | 169.9  | 117.1  | 187    | 256    | 418.9  |
| GIMAP4 | 81.7   | 97.9  | 97.1   | 143.5  | 117.5  | 140.9  | 75.1   | 91.9   |
| GIMAP5 | 204.4  | 261.9 | 179.7  | 143.5  | 136.4  | 199.2  | 177.9  | 262.2  |
| GIMAP6 | 132.3  | 154.7 | 88.2   | 93.2   | 76.8   | 88.5   | 121.9  | 154.5  |
| GIMAP6 | 457.4  | 682.3 | 366.6  | 332.5  | 237.3  | 401    | 422.3  | 480.3  |
| GIMAP7 | 103.8  | 136.5 | 96.7   | 80.7   | 78.8   | 87.6   | 113.1  | 126.9  |
| GIMAP8 | 189.3  | 241.6 | 134.1  | 148.4  | 141.7  | 182    | 179.4  | 208.8  |
| GIOT-1 | 97.9   | 104.1 | 91.4   | 81     | 79.6   | 85.8   | 87.3   | 88.8   |
| GIP    | 96.2   | 99.3  | 90.7   | 90.7   | 80.6   | 85     | 95.6   | 100.6  |
| GIPC1  | 106.9  | 121.8 | 85     | 76.8   | 89.6   | 91.6   | 125.4  | 122.4  |
| GIPC1  | 569.1  | 774.6 | 658.9  | 519.9  | 389    | 591.1  | 508.4  | 1119   |
| GIPC2  | 98.1   | 111.9 | 95.3   | 87.7   | 82.3   | 84     | 102.5  | 103.5  |
| GIPC3  | 72.8   | 79.9  | 82.6   | 79.1   | 74.1   | 79.7   | 78     | 81.8   |
| GIPR   | 95     | 104.3 | 90.5   | 83     | 79     | 83.5   | 95.5   | 104.3  |
| GIT1   | 143    | 179   | 154.3  | 146    | 140.8  | 176    | 141    | 180.9  |
| GIT2   | 560.2  | 806.5 | 263    | 329.7  | 290.8  | 424    | 407.4  | 463.7  |
| GIT2   | 268    | 359.8 | 178.8  | 169.8  | 165.9  | 176.2  | 221.9  | 263.3  |
| GIYD1  | 522.1  | 601.9 | 216.1  | 155.4  | 136.6  | 150.8  | 348.3  | 498.8  |
| GIYD1  | 254.3  | 355.5 | 183.2  | 116.8  | 120.4  | 103.1  | 197.8  | 226.1  |
| GIYD2  | 77     | 86.6  | 86     | 76.3   | 75.8   | 82.7   | 77.3   | 80.4   |
| GJA1   | 85     | 97.1  | 82.7   | 79.1   | 81.7   | 80     | 102    | 111.6  |
| GJA10  | 77.4   | 89.2  | 92.9   | 94.3   | 97     | 78.9   | 76.6   | 92.3   |
| GJA12  | 126.1  | 158.5 | 119.3  | 99.2   | 101.2  | 109.9  | 131.7  | 114.2  |
| GJA3   | 88.3   | 89.1  | 100.3  | 91.4   | 90.8   | 87     | 71.8   | 89.9   |
| GJA4   | 87     | 97    | 88.4   | 88.2   | 80.8   | 92.2   | 89.2   | 95.8   |
| GJA5   | 165.2  | 192.1 | 108.1  | 98.5   | 87.2   | 87.9   | 154.2  | 151.9  |
| GJA5   | 103.7  | 111.9 | 100.8  | 101.8  | 102.5  | 96.7   | 93.1   | 105.7  |
| GJA7   | 154.3  | 179.2 | 94     | 87.4   | 85.8   | 97.2   | 117.5  | 173.6  |
| GJA7   | 8942.4 | 9033  | 3738.8 | 7031.9 | 6975.8 | 4497.7 | 7583.8 | 8977.9 |
| GJA8   | 111.3  | 117.2 | 109    | 99.8   | 86.1   | 99.9   | 115    | 113.2  |
| GJB1   | 116.8  | 151   | 102.7  | 95.8   | 82.3   | 87.7   | 123.6  | 131.8  |
| GJB2   | 87.6   | 92.3  | 99.7   | 91.8   | 81.6   | 90.3   | 87.6   | 97.2   |
| GJB3   | 135.5  | 190.8 | 85.3   | 90.9   | 82.4   | 93.6   | 142.9  | 170.5  |
| GJB3   | 76.9   | 87.2  | 98.6   | 84.2   | 84.9   | 78.7   | 83.7   | 89     |
| GJB3   | 82.1   | 90.2  | 102.8  | 92     | 87.6   | 89.4   | 90.2   | 84.4   |
| GJB4   | 107    | 148   | 84.9   | 80.4   | 82.7   | 93.6   | 106.7  | 119.9  |
| GJB5   | 85.5   | 117.1 | 90.9   | 84.8   | 75.3   | 81.8   | 85.8   | 112.2  |
| GJB6   | 82.2   | 96.7  | 93.1   | 78.8   | 83.2   | 82.4   | 75.1   | 80     |
| GJB7   | 89.3   | 94.6  | 89.2   | 90.7   | 93.2   | 88.9   | 87.1   | 93.8   |
| GJC1   | 157.9  | 195.5 | 155.2  | 180.7  | 135.3  | 206.5  | 166.3  | 198.5  |
| GJE1   | 106    | 122.8 | 88     | 93     | 76.1   | 88.2   | 101.5  | 122.5  |
| GK     | 390.1  | 545.7 | 232.7  | 220.9  | 238.4  | 283.3  | 324.4  | 426.6  |
| GK2    | 335.8  | 424.9 | 172.4  | 162.9  | 148.6  | 155    | 351.2  | 466.2  |
| GKAP1  | 94.2   | 116.3 | 93.3   | 87.3   | 91     | 94.4   | 99.6   | 122.5  |
| GKN1   | 110.3  | 115   | 105.1  | 93.8   | 88.1   | 95.2   | 99.1   | 116.3  |

|         |         |         |         |         |         |         |        |         |
|---------|---------|---------|---------|---------|---------|---------|--------|---------|
| GLA     | 5038.6  | 6595.1  | 3564    | 2868.8  | 2400.8  | 3007.2  | 5575.1 | 6696.8  |
| GLB1    | 2653    | 3311.3  | 2384.3  | 3067.6  | 2417.3  | 3071.2  | 2407.9 | 3109.7  |
| GLB1    | 105.7   | 96      | 91.3    | 89.5    | 88      | 86.6    | 100.6  | 91.2    |
| GLB1    | 1728.1  | 2261.8  | 2009.4  | 2945.3  | 2170.6  | 2744.7  | 1635.6 | 2575.6  |
| GLB1L   | 135.7   | 160     | 107.3   | 100.8   | 100.4   | 105.6   | 121.6  | 127.8   |
| GLCCI1  | 209.7   | 219.7   | 157.9   | 186.6   | 174.2   | 214.4   | 175.7  | 243.1   |
| GLCE    | 278.2   | 391.5   | 183.9   | 223.3   | 168.7   | 257.5   | 248.1  | 383.2   |
| GLDC    | 579.4   | 737.9   | 560.3   | 135.7   | 117.3   | 156.9   | 365.7  | 438.2   |
| GLDN    | 77.5    | 85.7    | 88.5    | 84      | 86.9    | 82.4    | 79.9   | 91.3    |
| GLE1L   | 2014.9  | 2405.8  | 1395.2  | 1056    | 878.9   | 1267.3  | 1507.2 | 1854.6  |
| GLE1L   | 384.7   | 498     | 243.4   | 159.5   | 140.1   | 179.9   | 289.5  | 313.7   |
| GLG1    | 2054.3  | 2630.8  | 995.9   | 1002.9  | 854.7   | 1142.6  | 1745.1 | 1821.9  |
| GLI1    | 141.6   | 172.4   | 139.3   | 110.3   | 117     | 117.7   | 136.5  | 149     |
| GLI2    | 90.2    | 94.5    | 81.1    | 91.4    | 88.6    | 81.1    | 105.3  | 105.9   |
| GLI3    | 113.5   | 121.8   | 105.5   | 104.5   | 96.8    | 99.5    | 115.9  | 112.3   |
| GLI4    | 112.9   | 125.8   | 135     | 112.2   | 104     | 113.5   | 100.5  | 124     |
| GLIPR1  | 531     | 676.3   | 256.6   | 511.4   | 457.4   | 482.4   | 447.7  | 486.6   |
| GLIS1   | 74      | 91      | 94.9    | 99      | 84.9    | 89.8    | 81.3   | 83.8    |
| GLIS2   | 78.7    | 85.1    | 96.3    | 73.6    | 86      | 85.8    | 85.2   | 82      |
| GLIS3   | 97.3    | 95.7    | 98.9    | 88.6    | 88.6    | 87.5    | 99.9   | 101.2   |
| GLIS3   | 94.4    | 106.4   | 92.9    | 82      | 84.1    | 88.6    | 102.2  | 90.6    |
| GLIS3   | 83.5    | 97.8    | 87.7    | 97.3    | 86.9    | 88.9    | 84.4   | 91.8    |
| GLMN    | 90.8    | 96.1    | 95.8    | 94      | 93.4    | 96.8    | 90.9   | 88.8    |
| GLMN    | 1216    | 1474.4  | 592.1   | 750.9   | 589.7   | 1038.7  | 934.1  | 1317.2  |
| GLO1    | 16875.4 | 19985.5 | 17599.4 | 17196.1 | 11837.8 | 25030.3 | 13422  | 20951.3 |
| GLOXD1  | 274.2   | 331.7   | 247.4   | 145.9   | 125.9   | 140.8   | 194.5  | 217.5   |
| GLP1R   | 84      | 95.1    | 99.1    | 94      | 85.5    | 86.2    | 88.2   | 88.6    |
| GLP2R   | 79.9    | 92.9    | 78.2    | 85.4    | 78.9    | 78.3    | 89.8   | 92.2    |
| GLRA1   | 95.7    | 102.3   | 89.3    | 87.9    | 92.4    | 86.1    | 112    | 107.2   |
| GLRA2   | 102.4   | 95.7    | 83.1    | 78.6    | 82.6    | 87.2    | 104.9  | 117.6   |
| GLRA3   | 79.3    | 96.8    | 89.8    | 93.8    | 83.1    | 89      | 91.9   | 95.9    |
| GLRA3   | 81.2    | 98.2    | 86.1    | 78.4    | 81.1    | 87.6    | 91.8   | 92.9    |
| GLRB    | 218.9   | 275.2   | 172.7   | 169.3   | 154.4   | 204.4   | 180.1  | 324.3   |
| GLRX    | 961.2   | 1070.9  | 243.9   | 446.4   | 321.6   | 548.2   | 926.4  | 1114.1  |
| GLRX2   | 433.7   | 580.9   | 440.7   | 337.7   | 267.1   | 411.1   | 412    | 401.2   |
| GLRX2   | 127.6   | 157.9   | 102     | 100     | 92.6    | 98.9    | 133.7  | 136.8   |
| GLRX2   | 991.3   | 1189.9  | 323.9   | 260.8   | 226.3   | 310.3   | 1077.9 | 1810.7  |
| GLRX5   | 8591.9  | 11601.8 | 5045.8  | 4421.3  | 3423.5  | 4631.9  | 7929.7 | 8658.9  |
| GLS     | 318.9   | 406.4   | 187.3   | 185.9   | 176.3   | 235.6   | 278.8  | 372.7   |
| GLS2    | 92.4    | 104.7   | 92.3    | 78      | 85.2    | 81.1    | 88.4   | 94      |
| GLS2    | 76      | 86.8    | 91.5    | 88.5    | 86.8    | 79.9    | 74.4   | 84.2    |
| GLT1D1  | 122.7   | 135.1   | 78.7    | 82.6    | 76.3    | 80.1    | 103.6  | 143.2   |
| GLT25D1 | 2827.5  | 3604.5  | 3777.2  | 2855.2  | 2510.5  | 3180.9  | 2384   | 3356.6  |
| GLT25D2 | 120     | 146.7   | 136     | 113.2   | 110     | 124.3   | 112.9  | 127.8   |
| GLT6D1  | 93.3    | 93.5    | 87.7    | 87.8    | 88.4    | 93.5    | 99.1   | 93.6    |
| GLT8D1  | 380.5   | 458.6   | 135.9   | 144.1   | 130.2   | 141.5   | 276.3  | 364.8   |
| GLT8D1  | 91.9    | 100.2   | 101     | 89      | 84.4    | 89.5    | 80.9   | 87.2    |
| GLT8D1  | 163.2   | 199.5   | 116.8   | 93      | 91.1    | 112     | 141.9  | 227.8   |
| GLT8D1  | 128.1   | 150.5   | 114.2   | 102.2   | 84.3    | 96      | 119.8  | 114.4   |
| GLT8D2  | 91.1    | 102     | 101.5   | 87.7    | 93.8    | 94      | 97.3   | 102.7   |



|         |         |         |        |        |        |         |         |         |
|---------|---------|---------|--------|--------|--------|---------|---------|---------|
| GLTP    | 1172.2  | 1537.3  | 938.9  | 799.8  | 600.8  | 869.1   | 1126    | 1472.2  |
| GLTSCR1 | 245.5   | 314.2   | 227.8  | 183.4  | 197.4  | 196.5   | 238     | 256.7   |
| GLTSCR2 | 10992.3 | 14523.8 | 9153.3 | 8099   | 7818.6 | 10174.4 | 11775.6 | 12934.6 |
| GLUD1   | 2304    | 3224.4  | 1580.9 | 1114.3 | 979.9  | 1713.1  | 1997.2  | 2969.9  |
| GLUD2   | 238.9   | 268.6   | 132.7  | 139.3  | 104.1  | 126.6   | 175.8   | 245.3   |
| GLUL    | 212.7   | 276.5   | 136.8  | 107.1  | 104.9  | 98.2    | 188.3   | 227.8   |
| GLUL    | 81.5    | 95.1    | 104.5  | 96.9   | 94.8   | 96.7    | 77.8    | 80.2    |
| GLUL    | 85.3    | 106.2   | 101    | 93.3   | 93.1   | 91.7    | 90.8    | 90.6    |
| GLULD1  | 87.7    | 88.2    | 84.4   | 86.9   | 79.2   | 85      | 85.2    | 88.9    |
| GLYAT   | 95.2    | 110.5   | 98.5   | 82.1   | 86.2   | 84.2    | 106.3   | 100.7   |
| GLYAT   | 97.7    | 109.4   | 96.6   | 92.8   | 80.8   | 98.8    | 93.5    | 113.7   |
| GLYAT   | 121     | 154.2   | 84.4   | 80.9   | 79.3   | 83.1    | 120.4   | 142     |
| GLYATL1 | 96.9    | 103.8   | 101.9  | 88.4   | 96.6   | 95      | 92.2    | 99.4    |
| GLYATL2 | 77.9    | 92.6    | 87.7   | 82.1   | 86.7   | 83.4    | 82.1    | 85.6    |
| GLYCAM1 | 81.8    | 88.3    | 85.8   | 88.1   | 81     | 89.2    | 83.9    | 94.9    |
| GLYCTK  | 170.1   | 202.5   | 144.8  | 114.5  | 116.4  | 136.6   | 147.1   | 165.7   |
| GM2A    | 191     | 269.1   | 151.7  | 184.2  | 141.3  | 147.2   | 173     | 234.6   |
| GM632   | 323.4   | 358.8   | 230.8  | 238.5  | 199.7  | 225.5   | 222.4   | 203.7   |
| GMCL1   | 931.6   | 1190.2  | 363.4  | 490.5  | 338.1  | 435.5   | 686.2   | 1190.4  |
| GMCL1L  | 79.5    | 76      | 100.7  | 89.3   | 82.5   | 99.8    | 74.7    | 77.2    |
| GMDS    | 1093.3  | 1382.7  | 764.2  | 747.3  | 618.9  | 675.4   | 896.2   | 912.9   |
| GMEB1   | 286.8   | 376.8   | 179.9  | 205.9  | 182.9  | 212.5   | 236.4   | 375     |
| GMEB1   | 270.9   | 389.5   | 207.2  | 208.6  | 161.7  | 192.2   | 202.5   | 335.7   |
| GMEB2   | 547.2   | 598.8   | 456.8  | 527.1  | 400.5  | 541.3   | 459     | 582.8   |
| GMFB    | 2294.9  | 3068.5  | 1845.2 | 1773.7 | 1472   | 2138.8  | 1957.7  | 3022.3  |
| GMFG    | 5293.7  | 6462.4  | 1875.9 | 1425.3 | 1204   | 1798.6  | 5177.9  | 6408.8  |
| GMIP    | 142.9   | 181     | 192.3  | 230.3  | 186    | 270     | 159.3   | 291.2   |
| GML     | 114.2   | 108.5   | 80.4   | 81     | 80.4   | 91.4    | 97.7    | 137.4   |
| GMNN    | 768.5   | 929.8   | 305.7  | 312.5  | 257.3  | 402.5   | 670     | 1268.9  |
| GMPPA   | 578.5   | 733.2   | 552.1  | 398.8  | 334.1  | 493.9   | 492.9   | 763.6   |
| GMPPA   | 210.1   | 257.2   | 110.4  | 112.6  | 97.4   | 110.2   | 204.8   | 248.2   |
| GMPPB   | 514.3   | 626.9   | 413.6  | 245.4  | 219.6  | 290.5   | 431.1   | 444.3   |
| GMPPB   | 256.7   | 291.9   | 153.6  | 137.4  | 122.5  | 143.2   | 222.8   | 231.9   |
| GMPPB   | 95.2    | 96.9    | 98.7   | 100.3  | 85.3   | 87.4    | 89.4    | 91.7    |
| GMPR    | 114.5   | 125.1   | 98.7   | 97.4   | 91.9   | 99.7    | 108.9   | 113.6   |
| GMPR2   | 1013.8  | 1260.2  | 395.5  | 235    | 263    | 328.6   | 857.9   | 1307.2  |
| GMPR2   | 151.6   | 191.1   | 110.4  | 93.9   | 89     | 85.6    | 144.8   | 158.1   |
| GMPR2   | 1923.7  | 2373.2  | 728.9  | 667    | 546.9  | 894.8   | 1844.7  | 2437.1  |
| GNA11   | 139.6   | 195.5   | 187.1  | 182.4  | 182.5  | 209.6   | 133.9   | 176.9   |
| GNA12   | 553.3   | 656.6   | 437.2  | 512.7  | 379.8  | 486.8   | 460     | 579.1   |
| GNA13   | 430     | 512.6   | 190.5  | 201.7  | 193    | 273.7   | 383.1   | 780.4   |
| GNA14   | 129.6   | 169.6   | 126.8  | 117.9  | 117.1  | 135.1   | 123.7   | 139.6   |
| GNA15   | 996.2   | 1205.9  | 922    | 867.1  | 909    | 871     | 1128.8  | 1264.4  |
| GNAI1   | 97.5    | 105.2   | 96.6   | 82     | 89.9   | 91      | 93.5    | 110.9   |
| GNAI2   | 2162.4  | 3025.8  | 2061.7 | 2118.3 | 1798.7 | 2603.1  | 2049.3  | 5185.4  |
| GNAI3   | 532.6   | 719.2   | 245.8  | 234.8  | 182.1  | 259.2   | 500.1   | 819.6   |
| GNAL    | 98.5    | 124.9   | 93.7   | 87.3   | 90.3   | 90.4    | 91.1    | 107.8   |
| GNAL    | 81.6    | 91.5    | 98.7   | 96.8   | 100    | 93.3    | 91.9    | 97.1    |
| GNAO1   | 87.5    | 102.9   | 101.3  | 87.2   | 74.1   | 89.4    | 91.4    | 88.3    |
| GNAO1   | 98.6    | 105.8   | 108.8  | 94.4   | 83.6   | 93.9    | 99.6    | 95.6    |

|         |         |         |         |         |        |         |         |         |
|---------|---------|---------|---------|---------|--------|---------|---------|---------|
| GNAO1   | 97.7    | 106.4   | 97.5    | 89.3    | 81.9   | 91.7    | 102.4   | 100.6   |
| GNAQ    | 404     | 590.6   | 245.2   | 268.2   | 255.8  | 434.6   | 258.5   | 407.2   |
| GNAS    | 170.1   | 211.2   | 122.9   | 110.1   | 104.4  | 107.8   | 156.7   | 188.7   |
| GNAS    | 84.8    | 80.8    | 87.3    | 80.9    | 77.4   | 88.7    | 78      | 86.6    |
| GNAS    | 12308.9 | 17489   | 11285.1 | 10667.2 | 9130.4 | 14240.3 | 10876.6 | 18444.2 |
| GNAT1   | 106     | 132.2   | 102.1   | 95.6    | 97.4   | 100     | 110.8   | 130.4   |
| GNAT1   | 106.3   | 125.2   | 102.6   | 102.5   | 92.6   | 96.8    | 107.9   | 113.2   |
| GNAT2   | 112.9   | 126.4   | 90.1    | 86.7    | 87.9   | 93.7    | 106.9   | 153.4   |
| GNAZ    | 113.7   | 121.5   | 97.9    | 88.6    | 85     | 84.3    | 104.3   | 126.2   |
| GNB1    | 6125.8  | 7617.9  | 4051.6  | 4277.2  | 3407.9 | 4875.8  | 5711.4  | 6138.8  |
| GNB1L   | 213.6   | 294.4   | 142.4   | 95.9    | 91.5   | 100.3   | 234.9   | 240.1   |
| GNB2    | 203.5   | 270.7   | 206.6   | 150.6   | 129    | 174.5   | 182     | 402.1   |
| GNB2L1  | 26198.1 | 25237.2 | 19745   | 18548.9 | 15417  | 18606.8 | 27742.7 | 24569.4 |
| GNB3    | 101.4   | 120     | 96      | 91.8    | 86.9   | 86      | 103.9   | 115.3   |
| GNB4    | 210.5   | 328.5   | 155.9   | 111.6   | 107.8  | 89.4    | 271.3   | 308.4   |
| GNB5    | 737     | 1082.4  | 338.6   | 381.3   | 357.8  | 277.5   | 680.3   | 999     |
| GNB5    | 166.2   | 229.2   | 160.2   | 165.3   | 146.5  | 146.8   | 192.3   | 273.9   |
| GNB5    | 105.1   | 105     | 92      | 88.3    | 71.2   | 89.2    | 100.8   | 112.3   |
| GNE     | 925.9   | 1230.7  | 259.7   | 333.5   | 282.6  | 394.8   | 860.5   | 1237.5  |
| GNG10   | 2519    | 3560.5  | 1028.8  | 729.2   | 589.9  | 819.2   | 1776.3  | 2099.5  |
| GNG11   | 122.7   | 165.1   | 119.1   | 87.9    | 81.4   | 93.8    | 179     | 221.8   |
| GNG12   | 116.6   | 130.8   | 110.7   | 95.9    | 97.5   | 108.7   | 111.3   | 137.6   |
| GNG13   | 80.7    | 87.7    | 90.9    | 84.8    | 88.7   | 85.7    | 78      | 82.4    |
| GNG2    | 85      | 98.2    | 96.7    | 92.7    | 92.1   | 96.6    | 87.4    | 96.4    |
| GNG3    | 110.6   | 140.4   | 98      | 80.2    | 90.3   | 92.2    | 103.7   | 136.9   |
| GNG4    | 407.3   | 545.6   | 387.3   | 161.5   | 128.1  | 169.2   | 361     | 554.9   |
| GNG5    | 832.4   | 961.5   | 417.1   | 436.4   | 295.8  | 404.6   | 742.8   | 1628.3  |
| GNG7    | 171.7   | 215     | 136.2   | 151.5   | 151.6  | 189.2   | 167.9   | 187.7   |
| GNG8    | 84.2    | 88.7    | 88      | 86.4    | 81     | 83.3    | 95.3    | 88.5    |
| GNGT1   | 109.6   | 135.9   | 97.3    | 87.4    | 92.1   | 99.5    | 108     | 120.1   |
| GNGT2   | 101.7   | 126.7   | 87.1    | 82.5    | 85.5   | 89.1    | 106.8   | 119.2   |
| GNL1    | 541.3   | 789.1   | 336.2   | 218.6   | 194    | 232.8   | 407.6   | 360.3   |
| GNL2    | 4315.4  | 5430.6  | 1724.3  | 1734.4  | 1429.9 | 2984.6  | 3458.1  | 4272.6  |
| GNL3    | 2699.9  | 3312.7  | 800.8   | 690.6   | 625.2  | 1223.6  | 1866.3  | 2934.1  |
| GNL3    | 4325.9  | 5607.8  | 2439.6  | 1774.4  | 1326.3 | 3071.1  | 2708.2  | 3540.1  |
| GNL3    | 155.9   | 175.8   | 115     | 102     | 109.3  | 93.8    | 145     | 157.3   |
| GNL3L   | 2056.1  | 2495.3  | 1066.9  | 1071.7  | 790.7  | 316.2   | 1737.6  | 2442.3  |
| GNLY    | 108.6   | 124.5   | 87.6    | 90.1    | 77.2   | 88      | 126.3   | 115.4   |
| GNLY    | 96.7    | 102.8   | 97      | 101.8   | 105.4  | 111.7   | 95.9    | 114.5   |
| GNLY    | 87.1    | 105.7   | 81.6    | 81.2    | 82.3   | 95      | 88.1    | 93.4    |
| GNMT    | 97.1    | 104.2   | 109.5   | 104.5   | 116.4  | 119.3   | 98.9    | 102.9   |
| GNPAT   | 2612.1  | 3288.3  | 1447.1  | 1486.9  | 1086   | 2449.5  | 2073    | 3239.5  |
| GNPDA1  | 1959.2  | 2460.4  | 1551.2  | 1673.2  | 1166.7 | 1712.2  | 1896.2  | 2098.4  |
| GNPDA2  | 98.8    | 109     | 90      | 80.1    | 84.8   | 79.9    | 99.8    | 118.7   |
| GNPNAT1 | 141.3   | 166     | 104.4   | 95.1    | 78     | 95.3    | 120.5   | 177.5   |
| GNPTAB  | 113.5   | 126.1   | 89.1    | 95.2    | 84.2   | 94      | 108.8   | 121.8   |
| GNPTG   | 828.6   | 929.8   | 869.2   | 1038    | 995.3  | 1164.1  | 749.5   | 803.6   |
| GNRH1   | 184.3   | 183.6   | 134.7   | 132.4   | 122.1  | 146.3   | 171.3   | 214.3   |
| GNRH2   | 83      | 97.3    | 89.7    | 85.9    | 84.1   | 86.5    | 74.6    | 94      |
| GNRH2   | 107.8   | 131.1   | 93.4    | 94.2    | 84.1   | 87.5    | 122     | 168.9   |

|           |        |        |        |        |        |        |        |        |
|-----------|--------|--------|--------|--------|--------|--------|--------|--------|
| GNRHR     | 76.5   | 75.7   | 87.8   | 81.6   | 92.7   | 87.5   | 77.4   | 70.9   |
| GNRHR2    | 104.5  | 113.7  | 95.1   | 84.3   | 71.7   | 81.6   | 94     | 123.1  |
| GNS       | 2167.4 | 2850.2 | 1875   | 4323.3 | 3574   | 4418.7 | 1742.9 | 2072.8 |
| GOLGA     | 116.6  | 135    | 108.3  | 101.7  | 103.6  | 104.3  | 108.1  | 118.1  |
| GOLGA1    | 163    | 187.8  | 130.7  | 172.8  | 173.4  | 245    | 143.8  | 175.4  |
| GOLGA2    | 263.2  | 384.2  | 180.1  | 218.9  | 196.3  | 244.8  | 294.9  | 392.9  |
| GOLGA2L1  | 97.5   | 134.3  | 83.7   | 93     | 87.2   | 92.6   | 109.8  | 131.6  |
| GOLGA2LY: | 108.8  | 119.2  | 112.7  | 83.5   | 85.3   | 89.5   | 105.9  | 123.1  |
| GOLGA3    | 916.7  | 1268.3 | 595.9  | 955    | 770.4  | 1330.7 | 916.4  | 1752.6 |
| GOLGA4    | 136.3  | 197.7  | 126.1  | 129.3  | 115.7  | 162.2  | 137.5  | 213.4  |
| GOLGA6    | 83.3   | 97.2   | 103.5  | 94.9   | 93.8   | 93.9   | 86.2   | 94.6   |
| GOLGA7    | 3519.7 | 5095.4 | 2505.8 | 2376.5 | 2076.7 | 3625.7 | 2991.2 | 5206.2 |
| GOLGA7    | 139.6  | 143    | 90.3   | 91.3   | 88.1   | 87.7   | 116.6  | 125.8  |
| GOLGA7    | 206.6  | 244.1  | 108.3  | 96.8   | 91.3   | 95.7   | 205.3  | 225.7  |
| GOLGA8A   | 267.3  | 150.7  | 142.2  | 128.2  | 147.5  | 121.3  | 128.2  | 176.8  |
| GOLGA8B   | 903.7  | 787.7  | 698.3  | 1182.8 | 1131.5 | 2241.9 | 476.5  | 939    |
| GOLGA8E   | 82.1   | 100.6  | 96.7   | 93.2   | 82.6   | 94.1   | 82.4   | 85.4   |
| GOLGA8F   | 86.7   | 86.7   | 101.9  | 83     | 90.9   | 89.8   | 85.4   | 84     |
| GOLGA8G   | 95.6   | 94.8   | 99.8   | 97.3   | 94.1   | 88.4   | 87.4   | 97.1   |
| GOLGB1    | 106.8  | 111.2  | 86     | 88.3   | 84.3   | 115.8  | 101    | 107.6  |
| GOLPH2    | 489.9  | 666.6  | 278.8  | 230.9  | 190.1  | 270.5  | 406.8  | 741.9  |
| GOLPH2    | 150.2  | 216.4  | 94.8   | 96.4   | 84.9   | 88.9   | 141.7  | 166.8  |
| GOLPH3    | 2077.9 | 2769.3 | 871.5  | 1136.3 | 812.7  | 1816.5 | 1628.1 | 3091.8 |
| GOLPH3L   | 421.4  | 489.9  | 338.2  | 363.4  | 264.9  | 425    | 408.6  | 756    |
| GOLPH4    | 343.5  | 515.5  | 349.6  | 411.3  | 312.2  | 424.4  | 298.4  | 523.6  |
| GOLT1A    | 80.5   | 92.4   | 89.8   | 81.9   | 82.1   | 91.6   | 87.9   | 85.7   |
| GOLT1B    | 328.4  | 407.8  | 141.7  | 120.7  | 113.8  | 145.2  | 259.8  | 486.6  |
| GON4      | 98.8   | 134.6  | 90.4   | 84.1   | 82     | 82.3   | 104.7  | 112.9  |
| GOPC      | 502.2  | 558.8  | 209.1  | 182.6  | 182.6  | 203.7  | 375.3  | 786    |
| GORASP1   | 467    | 507.9  | 461.3  | 492.5  | 396.1  | 644.4  | 394.7  | 953    |
| GORASP2   | 1191.9 | 1511.8 | 632.1  | 700.9  | 508.3  | 685.1  | 1070.9 | 1423.6 |
| GOSR1     | 201.1  | 226.6  | 166    | 122.3  | 117.6  | 123.6  | 193.6  | 259.2  |
| GOSR1     | 154.6  | 218    | 113.1  | 106.3  | 97     | 110.5  | 152.1  | 209.6  |
| GOSR2     | 164.9  | 198    | 129    | 119.6  | 123.6  | 132.8  | 162.6  | 216.1  |
| GOSR2     | 600    | 751.1  | 285.2  | 255.8  | 208.2  | 280    | 461.2  | 559.2  |
| GOSR2     | 104.3  | 156.3  | 117.1  | 99.8   | 90.4   | 98     | 104.7  | 120.2  |
| GOT1      | 660.2  | 788.6  | 412.4  | 401.3  | 258.9  | 420.9  | 525.6  | 910.2  |
| GOT1L1    | 96.9   | 112.6  | 105.7  | 94.6   | 85.8   | 88.9   | 94.4   | 94.9   |
| GOT2      | 1417.3 | 1886.5 | 1422.2 | 1108.9 | 737.3  | 1308.9 | 1047.4 | 1804   |
| GP1BA     | 188    | 206.9  | 143.3  | 136.7  | 132.5  | 141.3  | 191.1  | 203.8  |
| GP2       | 128.8  | 164.9  | 92     | 81.2   | 86.1   | 92     | 115.4  | 155.7  |
| GP6       | 114.8  | 142.2  | 108.5  | 122.2  | 96.5   | 128.8  | 122.4  | 128.2  |
| GP9       | 287.5  | 353    | 147.4  | 146.4  | 134.1  | 133.2  | 260.3  | 212.2  |
| GPA33     | 147.3  | 165.7  | 134.2  | 153.4  | 165.9  | 191.8  | 125.2  | 142.6  |
| GPAA1     | 2249.9 | 3345.5 | 2491.8 | 1071.3 | 768.5  | 977    | 1954.7 | 3068.1 |
| GPAM      | 184.2  | 204.3  | 120.8  | 115.3  | 86.5   | 121.6  | 163.1  | 272.7  |
| GPATC1    | 340.5  | 445.8  | 250.3  | 245.9  | 210.7  | 322.7  | 328.5  | 461.3  |
| GPATC2    | 380.7  | 464.4  | 301.1  | 342.4  | 309.6  | 569.9  | 314.5  | 598.5  |
| GPATC3    | 188.1  | 238.7  | 145    | 148.6  | 132.3  | 181.5  | 200.9  | 266.9  |
| GPATCH4   | 285.5  | 316.3  | 125.6  | 110    | 97.6   | 88.6   | 201.8  | 279.6  |

|         |        |        |        |        |       |        |        |        |
|---------|--------|--------|--------|--------|-------|--------|--------|--------|
| GPATCH4 | 2032.1 | 2630.6 | 1288.1 | 1050.2 | 882.1 | 1484.5 | 1475.7 | 1846.6 |
| GPATCH4 | 1030.9 | 1331.6 | 583    | 477.7  | 349.5 | 731.7  | 834.5  | 1110.9 |
| GPBAR1  | 109.2  | 119    | 102.4  | 98.1   | 101.8 | 102.4  | 98.4   | 119    |
| GPBAR1  | 113.1  | 126.7  | 99.9   | 128.5  | 103.7 | 114.8  | 117.2  | 103.4  |
| GPBP1   | 344    | 441    | 139.5  | 153.9  | 127.3 | 193.7  | 323.9  | 786.9  |
| GPBP1L1 | 226.6  | 230.9  | 127    | 149.2  | 132.2 | 178.8  | 187.5  | 296.2  |
| GPC1    | 109.5  | 134.8  | 115.5  | 101.9  | 96.1  | 112.7  | 115    | 141.2  |
| GPC2    | 160.2  | 200    | 116.8  | 116.1  | 107.8 | 121.5  | 157.6  | 177.9  |
| GPC3    | 551.7  | 764.2  | 360.6  | 392.8  | 319.2 | 525.6  | 468.9  | 661.1  |
| GPC4    | 322.8  | 408.7  | 263.9  | 305.2  | 242.3 | 353.7  | 251.7  | 390.4  |
| GPC5    | 105.9  | 102.6  | 107    | 109.7  | 106.1 | 126.7  | 103.8  | 114.3  |
| GPC6    | 205.9  | 225.9  | 149.9  | 147.5  | 131.2 | 151.9  | 174    | 244.1  |
| GPD1    | 84.5   | 81.8   | 89.7   | 79     | 82.2  | 85.7   | 89.8   | 88.1   |
| GPD1L   | 1242.4 | 1756.2 | 764.2  | 910.7  | 633.2 | 952.9  | 861.8  | 899    |
| GPD2    | 97.1   | 101.4  | 95.3   | 88.6   | 78.3  | 86.5   | 107.8  | 114.1  |
| GPHA2   | 112.9  | 156.5  | 82.2   | 87     | 85.3  | 99.2   | 138    | 163    |
| GPHB5   | 110.3  | 118.2  | 116    | 117.2  | 114.3 | 115.1  | 104.6  | 102.2  |
| GPHN    | 367.7  | 482.3  | 268.8  | 271.7  | 216   | 292.5  | 302.1  | 311.5  |
| GPHN    | 137.3  | 171.1  | 117    | 105.3  | 94.2  | 102    | 113.5  | 148    |
| GPI     | 2132.5 | 2600.4 | 1943.1 | 1035.3 | 824.3 | 1285.1 | 1762.2 | 2744.6 |
| GPIAP1  | 149    | 162.2  | 108.2  | 110.2  | 87.4  | 115.8  | 125.2  | 152.6  |
| GPIAP1  | 1434.9 | 1927.8 | 909.5  | 732.4  | 556.1 | 943.9  | 1159.6 | 1791.8 |
| GPIAP1  | 1453.5 | 2115.4 | 604.5  | 538.4  | 482.5 | 957.7  | 892.4  | 1234.1 |
| GPKOW   | 438.8  | 587.8  | 134.7  | 141.2  | 132.9 | 143.6  | 415.4  | 494.3  |
| GPLD1   | 95.2   | 95     | 90.4   | 77.6   | 82.9  | 86.4   | 87.7   | 92.7   |
| GPLD1   | 81.1   | 94.3   | 94     | 95.6   | 88.6  | 80.4   | 88.1   | 85.2   |
| GPM6A   | 95.3   | 102.1  | 99.9   | 93.7   | 96.2  | 94.6   | 88.1   | 103.4  |
| GPM6A   | 89.2   | 97.6   | 93.3   | 91.6   | 84.3  | 89.6   | 98.1   | 103.3  |
| GPM6A   | 149.4  | 180.1  | 123.2  | 97.8   | 125.8 | 107.8  | 160.3  | 167.9  |
| GPM6B   | 182.7  | 216.7  | 137.7  | 192.1  | 171.1 | 190.4  | 129.5  | 175.6  |
| GPM6B   | 96.4   | 94.1   | 97     | 95.6   | 84.1  | 93.7   | 93.8   | 94.3   |
| GPM6B   | 152    | 191.9  | 109.8  | 152.5  | 131.4 | 166.1  | 121.4  | 142.4  |
| GPNMB   | 109.1  | 137.4  | 107.6  | 224.8  | 230.2 | 403.4  | 115.5  | 125.4  |
| GPNMB   | 108.5  | 138.2  | 113.5  | 522.4  | 434.6 | 930.4  | 105.7  | 163.8  |
| GPR1    | 683.5  | 678.6  | 273.9  | 400.5  | 490.9 | 328.4  | 672.6  | 904.8  |
| GPR101  | 105.7  | 117.7  | 95.4   | 93     | 92    | 89.1   | 106.1  | 105.2  |
| GPR103  | 87.4   | 87.7   | 100.3  | 90.6   | 102.7 | 89.4   | 80     | 86.9   |
| GPR107  | 110.5  | 117.1  | 109.9  | 99.5   | 90.3  | 95.9   | 103.6  | 133.1  |
| GPR108  | 356.9  | 451.4  | 239.9  | 181.7  | 199.3 | 248.6  | 344    | 452.7  |
| GPR109A | 78     | 82.1   | 112    | 82.8   | 81.5  | 79.6   | 89.9   | 91     |
| GPR109B | 86.7   | 92.3   | 99.2   | 94.3   | 92.5  | 98     | 85.5   | 92.3   |
| GPR110  | 86.6   | 83.2   | 87.1   | 87.7   | 83.1  | 94.4   | 86.5   | 92.6   |
| GPR110  | 83.8   | 84.4   | 81.6   | 79.3   | 77.4  | 85.4   | 74.7   | 86.9   |
| GPR110  | 89.8   | 95.4   | 96.1   | 94.7   | 90.5  | 91.9   | 97.3   | 92.9   |
| GPR111  | 101    | 112.8  | 99.4   | 85.3   | 83.4  | 85.5   | 95.9   | 107.5  |
| GPR112  | 125.3  | 132.7  | 89.4   | 92.3   | 86.7  | 80.8   | 115.7  | 123.4  |
| GPR113  | 110.7  | 121.6  | 125.9  | 105.7  | 109.7 | 105.1  | 113.8  | 117.5  |
| GPR114  | 714.5  | 862.1  | 662.2  | 287.6  | 245.7 | 274.8  | 383.4  | 419.3  |
| GPR115  | 80.6   | 85.8   | 98.6   | 80.1   | 79.2  | 75.6   | 76.7   | 83     |
| GPR116  | 131    | 126.3  | 92.2   | 84.8   | 90.3  | 87.2   | 120.7  | 134.7  |

|         |        |        |        |        |        |        |        |        |
|---------|--------|--------|--------|--------|--------|--------|--------|--------|
| GPR119  | 175.5  | 214.3  | 104.6  | 107.4  | 93     | 108.1  | 143.6  | 186.7  |
| GPR12   | 81.9   | 85.4   | 94.1   | 82.1   | 76.8   | 72.9   | 91.3   | 82.1   |
| GPR120  | 90     | 97.3   | 90.5   | 80.9   | 68.9   | 84.4   | 85.9   | 102.3  |
| GPR123  | 77.2   | 95     | 75     | 90.6   | 88     | 92     | 82.6   | 84.9   |
| GPR124  | 443.1  | 556.2  | 415.3  | 524    | 396.8  | 689.8  | 394.3  | 711.3  |
| GPR125  | 140.4  | 153.3  | 101.2  | 85.4   | 87.4   | 93.1   | 135    | 148.2  |
| GPR126  | 107.7  | 139.6  | 84.8   | 80.4   | 77.3   | 84.1   | 100.8  | 118.3  |
| GPR128  | 94.4   | 106.9  | 93.1   | 93.4   | 90.1   | 86     | 97.2   | 105.1  |
| GPR132  | 123.2  | 145.1  | 178.8  | 170.9  | 170.8  | 202.6  | 123.8  | 155.8  |
| GPR133  | 104    | 117.7  | 97.9   | 92     | 90.5   | 89.5   | 99.5   | 111.2  |
| GPR135  | 100.8  | 113.1  | 91.8   | 91.3   | 87     | 92.7   | 105.2  | 114.4  |
| GPR137  | 755.4  | 946.6  | 610.5  | 492.8  | 444.9  | 466.4  | 735.9  | 797.1  |
| GPR137B | 222.7  | 279.2  | 190.9  | 182.6  | 160.4  | 197.1  | 207.6  | 331.2  |
| GPR139  | 93.8   | 96.5   | 93.2   | 101.6  | 96.6   | 100.4  | 112.9  | 103.8  |
| GPR141  | 99.7   | 125.4  | 99.2   | 104    | 97.7   | 96.3   | 102    | 106.8  |
| GPR142  | 101.8  | 102.5  | 94.5   | 96.7   | 79     | 85.4   | 91.5   | 106.7  |
| GPR143  | 118.8  | 138.2  | 113.5  | 97.8   | 86.9   | 98.7   | 115.4  | 174.4  |
| GPR146  | 123.7  | 143    | 108.9  | 114.9  | 112.2  | 125.9  | 117.3  | 138    |
| GPR148  | 125.5  | 149.9  | 98.8   | 84.8   | 85.3   | 89.3   | 121.3  | 135.6  |
| GPR149  | 68.6   | 86.2   | 77.6   | 79.7   | 81.2   | 83.9   | 81.4   | 79.1   |
| GPR149  | 144.3  | 192.8  | 96.8   | 89.5   | 86.8   | 89.9   | 153.3  | 165.1  |
| GPR15   | 92     | 90.2   | 101.3  | 99.6   | 82.7   | 93.4   | 85     | 93.2   |
| GPR150  | 86.7   | 89.7   | 92.5   | 92     | 88.8   | 85.7   | 102.5  | 106.1  |
| GPR151  | 85.4   | 97.5   | 92.7   | 90.9   | 74.8   | 84.4   | 83.3   | 99.9   |
| GPR152  | 85.6   | 84.3   | 79.1   | 85.4   | 80.7   | 87.3   | 78.8   | 88.2   |
| GPR153  | 151.4  | 167.3  | 105.5  | 99.8   | 94.6   | 106.7  | 128.6  | 133.2  |
| GPR154  | 102.3  | 120.9  | 97.4   | 83.9   | 70.4   | 90.1   | 103.1  | 111.2  |
| GPR154  | 84.2   | 92.6   | 101.7  | 87.7   | 85.7   | 86     | 82.8   | 87.4   |
| GPR154  | 252    | 366.3  | 150.3  | 107.5  | 113.8  | 123.4  | 252.9  | 223.2  |
| GPR155  | 95     | 105.9  | 88.8   | 73.5   | 75.7   | 76.6   | 89     | 97.9   |
| GPR155  | 80     | 91.9   | 87.1   | 92.9   | 84.1   | 88.7   | 81.4   | 91.3   |
| GPR156  | 128    | 158.8  | 102.2  | 101.3  | 101.4  | 87     | 121.4  | 133.5  |
| GPR157  | 76.7   | 82.7   | 84.9   | 79.5   | 76.3   | 83.9   | 82.9   | 80.9   |
| GPR158  | 103.8  | 111    | 96.2   | 82.8   | 76.5   | 82.1   | 116.7  | 133.9  |
| GPR160  | 1747.8 | 2223.3 | 841    | 2221.7 | 1585.4 | 2499.8 | 1795.8 | 2755.6 |
| GPR161  | 93.5   | 106.2  | 115    | 101.4  | 93.2   | 96.4   | 98.9   | 90.7   |
| GPR161  | 87.9   | 104.3  | 101    | 96.6   | 72.8   | 81.4   | 83.5   | 113    |
| GPR162  | 284.3  | 363.1  | 224.8  | 320.9  | 414.4  | 315.6  | 327.6  | 305.2  |
| GPR162  | 79.4   | 82.9   | 91.4   | 97.5   | 91     | 87.6   | 82.5   | 90.3   |
| GPR17   | 102.3  | 115.6  | 100.8  | 87.1   | 75     | 90.4   | 104.2  | 116.7  |
| GPR171  | 103.1  | 114.3  | 95.2   | 92.8   | 83.2   | 89.7   | 98.6   | 119.1  |
| GPR172A | 1256.8 | 1589.5 | 1428.3 | 833    | 698.6  | 883.1  | 1517.4 | 2958.2 |
| GPR172B | 77.1   | 89     | 79.9   | 91.8   | 82.1   | 93.6   | 80.9   | 81.4   |
| GPR173  | 96     | 111.9  | 101.9  | 92.9   | 92.7   | 87.1   | 100.3  | 112.4  |
| GPR173  | 94.9   | 103.5  | 100.2  | 92.1   | 93     | 93.6   | 92.5   | 97.1   |
| GPR174  | 84.2   | 95.3   | 88.4   | 82.8   | 82.6   | 91.7   | 81.4   | 88.1   |
| GPR175  | 407.4  | 460.5  | 352.1  | 258.2  | 214.4  | 290.2  | 420.6  | 864.8  |
| GPR176  | 97     | 120.2  | 96.1   | 100.3  | 92.8   | 96.4   | 95.3   | 106.9  |
| GPR177  | 126.7  | 158.7  | 121    | 104.6  | 95.6   | 109    | 128.6  | 165    |
| GPR177  | 315.3  | 425.5  | 252.7  | 247.5  | 217.9  | 350.5  | 294.9  | 379.8  |

|         |       |       |       |       |       |       |       |       |
|---------|-------|-------|-------|-------|-------|-------|-------|-------|
| GPR177  | 181.8 | 235.3 | 124.1 | 112.5 | 106.3 | 113.1 | 165.7 | 223.8 |
| GPR179  | 104.8 | 114.9 | 119.8 | 104.1 | 108.6 | 103.3 | 104.6 | 106.1 |
| GPR18   | 874.2 | 1269  | 609   | 508.6 | 369.8 | 631.3 | 394.2 | 445.7 |
| GPR19   | 85.2  | 83    | 85.3  | 91.8  | 87.8  | 78.7  | 85.4  | 97.9  |
| GPR20   | 117.1 | 126.1 | 92.6  | 93.4  | 86.4  | 89.1  | 111   | 128   |
| GPR21   | 104.1 | 116.1 | 106.1 | 93.9  | 89.4  | 97.4  | 99.7  | 102.1 |
| GPR22   | 91.2  | 105.9 | 102.8 | 101.1 | 94.3  | 94.2  | 85.7  | 98.3  |
| GPR23   | 432.8 | 565.6 | 236.4 | 228.1 | 196.3 | 171.4 | 360.5 | 470.1 |
| GPR24   | 92.3  | 99.8  | 104.6 | 85.3  | 81.4  | 93.5  | 97.8  | 101.4 |
| GPR25   | 84.5  | 88.3  | 87.9  | 82.3  | 89    | 78.1  | 76.8  | 93.5  |
| GPR26   | 112.4 | 135.4 | 98.7  | 94.2  | 81.8  | 82.6  | 109.3 | 126.9 |
| GPR27   | 252.3 | 290.2 | 169.9 | 125.6 | 120.9 | 143.5 | 229.4 | 267.7 |
| GPR3    | 119.6 | 137.4 | 115.8 | 108   | 92.5  | 110   | 112.8 | 126.9 |
| GPR30   | 85.4  | 103.3 | 90.8  | 131   | 133.2 | 142.4 | 90.2  | 89.7  |
| GPR30   | 138.4 | 157.7 | 98.2  | 128.4 | 123.4 | 117.8 | 121   | 149.1 |
| GPR30   | 102.1 | 136.6 | 92.4  | 91.9  | 82.4  | 88.3  | 103.2 | 115.9 |
| GPR31   | 88.1  | 102.7 | 85.7  | 89.7  | 81.9  | 91.3  | 106.2 | 105.6 |
| GPR32   | 80.6  | 94.8  | 85.4  | 86.3  | 81.9  | 89.1  | 86.3  | 93.9  |
| GPR34   | 97.9  | 99.7  | 84.2  | 81.3  | 81.4  | 84.3  | 103.5 | 102.7 |
| GPR34   | 83.7  | 85.5  | 88.3  | 95.7  | 86.5  | 87.6  | 82.2  | 86.7  |
| GPR34   | 95.1  | 116.5 | 87.1  | 84.9  | 84.9  | 86.3  | 98.7  | 113.7 |
| GPR35   | 143.7 | 165.2 | 99.3  | 94.9  | 96.4  | 105.8 | 166.4 | 259.9 |
| GPR37   | 108   | 114.2 | 116.6 | 106.7 | 107.3 | 113.4 | 92.8  | 109.7 |
| GPR37L1 | 75.8  | 78.8  | 90.5  | 83.5  | 86    | 85.8  | 73.9  | 87.4  |
| GPR39   | 90.7  | 96    | 94.8  | 93.6  | 93.2  | 87.9  | 91.4  | 87    |
| GPR4    | 91.2  | 110.4 | 82.7  | 93    | 79.6  | 90.6  | 88.9  | 95.6  |
| GPR42   | 80.1  | 78.7  | 87.7  | 85.7  | 82.5  | 86.9  | 80.8  | 72.8  |
| GPR44   | 76.3  | 94    | 81.6  | 78.7  | 88.1  | 78.1  | 75.2  | 89.3  |
| GPR45   | 74.2  | 90.1  | 90.6  | 87.1  | 89.5  | 84.1  | 81.3  | 79.2  |
| GPR50   | 98.1  | 97.3  | 89.7  | 84.2  | 84.9  | 83.3  | 87.7  | 97.1  |
| GPR52   | 122.5 | 136   | 95.8  | 88    | 79.3  | 86.8  | 120.3 | 133.4 |
| GPR55   | 136.3 | 151.3 | 101.3 | 98.1  | 103.3 | 108.7 | 113   | 130.7 |
| GPR56   | 142.7 | 180.9 | 99.9  | 93.8  | 98.8  | 95.8  | 143.6 | 165.1 |
| GPR56   | 79    | 83.8  | 110.3 | 107.1 | 106.2 | 109.1 | 91.9  | 97.2  |
| GPR56   | 101.3 | 118.3 | 99.4  | 92.5  | 87.3  | 94.9  | 108   | 112   |
| GPR6    | 118.9 | 132.3 | 101.4 | 90.3  | 97.4  | 93.1  | 118.4 | 116.5 |
| GPR61   | 98.8  | 116.4 | 86.6  | 79    | 77.2  | 83.5  | 104.9 | 114.5 |
| GPR62   | 77.4  | 89.4  | 91.8  | 79.8  | 75.5  | 87    | 93.5  | 90.8  |
| GPR63   | 330.9 | 454.6 | 243.4 | 193.6 | 173.2 | 196.1 | 278.8 | 260.8 |
| GPR64   | 85.8  | 92.3  | 104.2 | 106.1 | 101.7 | 93.8  | 97.3  | 87.2  |
| GPR64   | 83.3  | 96.2  | 86.9  | 84    | 77.8  | 74.1  | 89.9  | 80.6  |
| GPR65   | 238.3 | 271   | 136.6 | 127.4 | 112.3 | 133.4 | 221.5 | 350.1 |
| GPR68   | 106.3 | 103.9 | 90    | 94.8  | 83    | 89.5  | 103   | 96.3  |
| GPR75   | 83.7  | 90    | 86.5  | 96    | 84.4  | 93.8  | 80.8  | 93.7  |
| GPR77   | 78.5  | 83.8  | 86.2  | 81.4  | 82.4  | 71.9  | 72.3  | 83.3  |
| GPR78   | 121.3 | 135.6 | 105.8 | 90.9  | 95.1  | 98.4  | 118.9 | 127.5 |
| GPR81   | 79.9  | 98.7  | 102.1 | 105.1 | 87.8  | 90.1  | 89    | 92.6  |
| GPR82   | 83.8  | 96.5  | 103.1 | 92.4  | 90.2  | 85.7  | 85.3  | 81.7  |
| GPR83   | 85.9  | 103.5 | 93.7  | 91.7  | 91.8  | 93.2  | 84.3  | 97.1  |
| GPR84   | 346   | 427.9 | 245   | 108.7 | 92.9  | 114.9 | 272.7 | 411.5 |

|         |         |         |         |        |        |         |         |         |
|---------|---------|---------|---------|--------|--------|---------|---------|---------|
| GPR85   | 100.5   | 116     | 95.6    | 102.5  | 112.4  | 107.1   | 97.5    | 105.6   |
| GPR87   | 103.7   | 116.4   | 107.5   | 105.7  | 95.7   | 111.2   | 100.6   | 114     |
| GPR88   | 83.9    | 97.1    | 98      | 106.8  | 91.8   | 93.3    | 84.6    | 96.9    |
| GPR89A  | 548.1   | 723.2   | 250.2   | 204.1  | 171.2  | 207.2   | 362.4   | 492.7   |
| GPR92   | 247.4   | 336.9   | 241.3   | 361.7  | 258.3  | 383.1   | 174.9   | 196.7   |
| GPR97   | 94.6    | 99.1    | 88.1    | 80.9   | 80.1   | 84.8    | 84.1    | 96      |
| GPR97   | 81.8    | 110.7   | 90.2    | 92.2   | 75.6   | 87.9    | 95.6    | 105.1   |
| GPR98   | 88.5    | 105.7   | 98      | 86.6   | 79.4   | 94.7    | 99.8    | 99.6    |
| GPRASP1 | 113.8   | 131.7   | 96.4    | 89.7   | 84     | 84      | 112.6   | 126.4   |
| GPRASP2 | 287     | 341.7   | 251.3   | 244.5  | 193.7  | 324.8   | 225.2   | 430.2   |
| GPRASP2 | 120.6   | 143.3   | 100.2   | 90     | 88.6   | 95.5    | 119.7   | 145.9   |
| GPRC5A  | 99.1    | 106.7   | 94.7    | 78.4   | 82.5   | 86      | 97.8    | 103.2   |
| GPRC5B  | 130.4   | 146.7   | 102.9   | 99.8   | 88.9   | 94.4    | 122.9   | 132.5   |
| GPRC5C  | 136.3   | 160.9   | 109.6   | 104.9  | 116.9  | 112.7   | 133.6   | 150.5   |
| GPRC5C  | 139.7   | 157.6   | 103     | 93.2   | 86.6   | 108.9   | 124.1   | 156.4   |
| GPRC5C  | 348.2   | 405.2   | 164.6   | 157.7  | 165.7  | 222.3   | 274.3   | 256.3   |
| GPRC5D  | 85.7    | 99.8    | 84.2    | 84.6   | 86.5   | 83.3    | 84.6    | 92.4    |
| GPRC6A  | 103.4   | 107.9   | 111.6   | 94.4   | 92.8   | 101.4   | 98.8    | 97.9    |
| GPS1    | 124.5   | 142.1   | 124.7   | 121.2  | 119.1  | 101.4   | 124.7   | 125.4   |
| GPS1    | 2430.3  | 2935.5  | 1561.5  | 1362.7 | 1154   | 1500.5  | 2010.5  | 2030    |
| GPS1    | 331.5   | 487.8   | 234.6   | 179.4  | 178.7  | 209     | 297     | 384.4   |
| GPS2    | 315.5   | 402.8   | 272.6   | 203.1  | 206.8  | 252.2   | 326.5   | 478.9   |
| GPSM1   | 91.7    | 117.7   | 106.4   | 83.4   | 87.5   | 76.9    | 88.5    | 121.9   |
| GPSM2   | 1144.1  | 1580.8  | 840.5   | 393.9  | 334.3  | 506.2   | 823     | 1171.9  |
| GPSM3   | 787.6   | 915.4   | 649.9   | 502    | 383.6  | 437.9   | 704.5   | 1505.3  |
| GPSN2   | 9762.1  | 13204   | 8018.3  | 4221.6 | 3446.5 | 3907.1  | 8109.7  | 11837.7 |
| GPT     | 116.3   | 129.3   | 120.1   | 99.8   | 99.1   | 102.6   | 116.3   | 117.6   |
| GPT2    | 849.4   | 1179.4  | 842.2   | 436.3  | 402.1  | 480.1   | 779.2   | 1030.4  |
| GPX1    | 15038.8 | 16767.4 | 11341.8 | 8434.6 | 6860.7 | 10736.2 | 10910.6 | 15125.6 |
| GPX1    | 206.8   | 176.4   | 122.4   | 93.9   | 89.5   | 108.7   | 149.6   | 174.9   |
| GPX2    | 86.6    | 101.2   | 101.1   | 97.3   | 93.3   | 105.9   | 87.4    | 76.7    |
| GPX3    | 90      | 93      | 87.3    | 78.5   | 75.5   | 87.3    | 94.2    | 107.4   |
| GPX4    | 5952    | 7741.3  | 2305.1  | 2058.5 | 1539.3 | 2714.4  | 4774    | 5937.8  |
| GPX4    | 12118   | 13576.4 | 10023.3 | 9089.7 | 6909.7 | 9859.6  | 9101.5  | 13344.5 |
| GPX5    | 93.3    | 99.1    | 85.7    | 84.8   | 85.3   | 80.2    | 87.6    | 100.9   |
| GPX5    | 79.3    | 89.4    | 100.8   | 89.9   | 81.9   | 82.7    | 73.7    | 78.5    |
| GPX6    | 84.7    | 95.8    | 108     | 98.7   | 97.2   | 94.5    | 83.9    | 92.6    |
| GPX7    | 2200.7  | 2662    | 1262.9  | 1738.1 | 1093.7 | 2060.1  | 1692.7  | 2727.6  |
| GRAMD1A | 497.9   | 612.6   | 305     | 208.6  | 205.5  | 253.8   | 395.6   | 307.2   |
| GRAMD1C | 75.6    | 81.3    | 89.5    | 86     | 96.7   | 84      | 82.9    | 78.4    |
| GRAMD2  | 83      | 93.9    | 90      | 87.7   | 84     | 78.4    | 88.9    | 88.5    |
| GRAMD3  | 299.7   | 348.1   | 220.4   | 361.4  | 326.3  | 437.8   | 241     | 373.1   |
| GRAP    | 117.1   | 122.7   | 94.4    | 93.8   | 86.4   | 84.7    | 107.6   | 116.9   |
| GRAP    | 706.1   | 898.1   | 466.7   | 423    | 357.1  | 400.3   | 678.5   | 761.5   |
| GRAP2   | 75      | 80.7    | 89.6    | 84.1   | 72.7   | 73.9    | 78.4    | 85.3    |
| GRASP   | 92.1    | 110.5   | 117.6   | 104.3  | 96.4   | 110.6   | 87.9    | 96.5    |
| GRB10   | 84.9    | 83.4    | 105.3   | 90.3   | 86.2   | 95.3    | 85      | 85.4    |
| GRB10   | 226.3   | 295.1   | 172.7   | 134.4  | 132    | 128.9   | 260     | 324.3   |
| GRB10   | 116.1   | 111.9   | 97.5    | 91.2   | 90.4   | 87.8    | 114     | 128     |
| GRB10   | 124.9   | 154     | 152     | 117.9  | 111.9  | 105.5   | 136.2   | 215.2   |

|         |        |        |        |        |       |        |        |        |
|---------|--------|--------|--------|--------|-------|--------|--------|--------|
| GRB14   | 92     | 98.1   | 100.3  | 93.5   | 83.4  | 91.6   | 93.9   | 87.9   |
| GRB14   | 96.6   | 111.5  | 85.4   | 80.5   | 80    | 81.4   | 120.9  | 121.3  |
| GRB2    | 868.3  | 1152.1 | 834.6  | 796.3  | 673.8 | 1245.1 | 763.2  | 1679.9 |
| GRB2    | 2436.8 | 3441.3 | 1152.2 | 1129.8 | 912.5 | 625.8  | 2181.3 | 2951.4 |
| GRB7    | 94.3   | 107.6  | 107    | 87.3   | 93.7  | 94.1   | 105.3  | 120.1  |
| GRB7    | 91.9   | 95     | 89.2   | 85.4   | 73.7  | 79.3   | 89.7   | 91.4   |
| GRB7    | 91.5   | 127.9  | 97.1   | 94.6   | 85.9  | 86.2   | 84.9   | 84.8   |
| GREB1   | 87     | 106.7  | 88.5   | 79.7   | 79.3  | 88.7   | 98.6   | 108.9  |
| GREB1   | 95.9   | 105.7  | 106    | 99.3   | 103.3 | 98.8   | 96.8   | 93.9   |
| GREB1   | 103    | 107    | 106.2  | 83.7   | 83    | 87.5   | 110.9  | 114.7  |
| GREB1   | 124.8  | 144.1  | 103.3  | 88     | 90.2  | 93.7   | 114.5  | 167    |
| GREM1   | 88     | 96.6   | 96.6   | 99.5   | 92.5  | 94.3   | 93.6   | 105.8  |
| GREM2   | 78.9   | 92.3   | 96.5   | 86.8   | 90    | 78.2   | 88.8   | 82     |
| GRHL1   | 166.4  | 196.7  | 104.5  | 95.3   | 88.3  | 95.7   | 167.3  | 165    |
| GRHL1   | 106.3  | 132.3  | 100.5  | 82.3   | 90.4  | 92.1   | 110.6  | 124.5  |
| GRHL1   | 84.6   | 82     | 94.7   | 93.1   | 81.7  | 95.6   | 85.9   | 84     |
| GRHL2   | 94.7   | 100.6  | 93.5   | 87.8   | 89    | 82.9   | 95.5   | 94.5   |
| GRHL3   | 82.1   | 96.2   | 98.2   | 90.9   | 86.5  | 89.5   | 84.6   | 86.1   |
| GRHL3   | 71.1   | 80.6   | 100.3  | 95.3   | 86.4  | 86     | 79.1   | 83.2   |
| GRHL3   | 88.9   | 113.1  | 105.8  | 104.8  | 94.5  | 90.9   | 93     | 93.9   |
| GRHPR   | 800.5  | 959.2  | 360.7  | 340.5  | 255.8 | 377.6  | 750.1  | 1105.7 |
| GRIA1   | 113.9  | 150.8  | 91.2   | 89.9   | 79.8  | 85.7   | 108.6  | 113.3  |
| GRIA2   | 108.6  | 111.6  | 94.5   | 93.4   | 88.5  | 82.2   | 100.2  | 104.8  |
| GRIA3   | 117.2  | 157.3  | 92.8   | 85.2   | 86.2  | 99     | 118.4  | 119.4  |
| GRIA3   | 96.9   | 112.1  | 98.6   | 95.3   | 79.5  | 96.9   | 93.9   | 102.6  |
| GRIA3   | 106.9  | 113.6  | 121.7  | 105.8  | 111.8 | 108    | 102.9  | 102.7  |
| GRIA4   | 120.6  | 127.2  | 100.7  | 96.9   | 95.5  | 88     | 113.3  | 125.9  |
| GRIA4   | 80.8   | 83.5   | 88     | 81     | 71    | 77.6   | 77.9   | 81.4   |
| GRID1   | 90.5   | 87.9   | 82.8   | 93.5   | 83.5  | 92.4   | 89.9   | 94.6   |
| GRID2   | 71.9   | 88.1   | 87.9   | 78.3   | 76.9  | 78.9   | 78.3   | 85.5   |
| GRIK1   | 105.6  | 110.7  | 82.2   | 83.2   | 79.8  | 82.4   | 108.3  | 130.4  |
| GRIK1   | 83.4   | 89.9   | 97.4   | 89     | 82    | 96.3   | 95.7   | 104    |
| GRIK1   | 81.7   | 77.3   | 87.5   | 86.6   | 79.9  | 81.4   | 83.8   | 82.1   |
| GRIK2   | 102.6  | 104.9  | 84.6   | 88.1   | 83.6  | 86.2   | 99.5   | 98.6   |
| GRIK2   | 78.7   | 89.1   | 99.1   | 93     | 90.9  | 82.6   | 74.4   | 88.5   |
| GRIK3   | 111.7  | 138.3  | 110.7  | 107.5  | 98.1  | 97.5   | 117.4  | 114.3  |
| GRIK4   | 102.7  | 116.9  | 84.8   | 82.5   | 73    | 83.5   | 106.2  | 116.7  |
| GRIK5   | 92.2   | 105.4  | 108.3  | 91.4   | 89.3  | 90.8   | 95.1   | 108.7  |
| GRIN1   | 82.9   | 89.3   | 95.9   | 98.7   | 86.9  | 85.8   | 83.3   | 86.1   |
| GRIN1   | 81.2   | 95.2   | 89.5   | 88     | 91    | 89.6   | 85.9   | 90.7   |
| GRIN1   | 409.8  | 421.6  | 212.5  | 181    | 179.5 | 194.7  | 395.4  | 380.3  |
| GRIN2A  | 106.1  | 126.1  | 109    | 95.7   | 87.7  | 94.1   | 117.5  | 143.6  |
| GRIN2B  | 120.4  | 127    | 78.9   | 84     | 78.5  | 82.9   | 118.4  | 161.2  |
| GRIN2C  | 123    | 161    | 101.5  | 96.2   | 96.6  | 88.2   | 128.5  | 151.1  |
| GRIN2D  | 84.2   | 85.5   | 98.6   | 85.4   | 84.9  | 94.1   | 87.8   | 86.1   |
| GRIN3A  | 85.7   | 100.3  | 85.4   | 85.3   | 76.3  | 90.6   | 96.7   | 112.9  |
| GRIN3B  | 202    | 211.4  | 188.8  | 216.3  | 189.6 | 206.7  | 164.4  | 161.2  |
| GRINA   | 285    | 367.1  | 430.6  | 332.3  | 308.7 | 327.7  | 270.5  | 512.6  |
| GRINA   | 868.2  | 1066.4 | 755    | 751.8  | 463   | 468.4  | 942.1  | 1886   |
| GRINL1A | 75.1   | 88.7   | 82.1   | 71.5   | 77    | 77     | 73.6   | 80.2   |



|         |        |        |        |        |        |        |        |        |
|---------|--------|--------|--------|--------|--------|--------|--------|--------|
| GRINL1A | 252.6  | 311.8  | 152.3  | 130.3  | 139.7  | 145.1  | 275.1  | 353.9  |
| GRINL1A | 346.4  | 468.4  | 129.3  | 137    | 126    | 164.5  | 258.1  | 329    |
| GRIP1   | 84.5   | 97.6   | 105.8  | 84.9   | 86.8   | 94.6   | 75.8   | 77.4   |
| GRIP2   | 75.8   | 82.7   | 86.4   | 91     | 80.4   | 87.8   | 80.7   | 77.6   |
| GRIPAP1 | 276.1  | 347    | 249.5  | 252.9  | 237.6  | 338.3  | 243.1  | 306.4  |
| GRIPAP1 | 170.7  | 255.8  | 148.7  | 135.6  | 135.6  | 156    | 172.6  | 195.4  |
| GRIPAP1 | 1740.1 | 1464.3 | 1259.8 | 1840.9 | 1743.4 | 1369.5 | 1514.4 | 2756.1 |
| GRK1    | 122.3  | 131.8  | 101.4  | 115.6  | 100.6  | 111.7  | 112.6  | 118.1  |
| GRK4    | 98.5   | 108.1  | 88.6   | 88.3   | 78.9   | 88     | 95.8   | 93.1   |
| GRK4    | 93     | 96.7   | 95.9   | 98.9   | 91     | 107.4  | 95.9   | 94.3   |
| GRK4    | 97     | 124.4  | 92.7   | 86     | 93.6   | 98.2   | 97.8   | 111    |
| GRK5    | 154.2  | 189.4  | 107    | 90.6   | 87.2   | 98.7   | 138.8  | 161.2  |
| GRK6    | 187.2  | 241.5  | 202.3  | 166.2  | 158.6  | 172.7  | 143.3  | 201.6  |
| GRK6    | 204.9  | 283.3  | 186    | 150.6  | 148.1  | 200.6  | 193.6  | 260.3  |
| GRK7    | 81.8   | 83.3   | 88.9   | 75.1   | 79.4   | 78     | 78.8   | 90.3   |
| GRLF1   | 136.8  | 146.6  | 98.3   | 92.2   | 101.2  | 96.1   | 125.6  | 152.8  |
| GRM1    | 86.2   | 96     | 85.4   | 78.5   | 84.7   | 94.8   | 84.9   | 95.7   |
| GRM2    | 133.2  | 156    | 135.3  | 98.3   | 99     | 97.1   | 128.7  | 167    |
| GRM3    | 83.2   | 107.7  | 86.1   | 85.1   | 78.2   | 84.7   | 93.7   | 98.6   |
| GRM4    | 116.7  | 127.8  | 111.4  | 95.9   | 90     | 96.7   | 110.5  | 118.8  |
| GRM5    | 124.3  | 152.8  | 89.4   | 76.7   | 77.7   | 79.5   | 112.7  | 144.1  |
| GRM6    | 92.1   | 99.3   | 86.8   | 88.9   | 69.9   | 74.5   | 86.5   | 96.9   |
| GRM7    | 76.4   | 78.3   | 99     | 102.6  | 95.6   | 97.4   | 82.5   | 83.3   |
| GRM7    | 83.7   | 93.9   | 102.7  | 88.4   | 93.4   | 94.6   | 84.2   | 83     |
| GRM7    | 97.6   | 109    | 88.9   | 91     | 93.8   | 94.8   | 102.8  | 100.6  |
| GRM8    | 95.8   | 114.5  | 93.2   | 99.8   | 99.2   | 105    | 93.1   | 122.8  |
| GRN     | 1776.8 | 2267.1 | 1458.4 | 1856.5 | 1347.4 | 1985   | 1491.1 | 2671.5 |
| GRN     | 2055.8 | 2828.6 | 825.3  | 1419.6 | 1112   | 1035.7 | 1740.5 | 2080.4 |
| GRP     | 83.7   | 92     | 80.8   | 86.2   | 79.9   | 82.1   | 90.4   | 93.1   |
| GRP     | 105.4  | 114.2  | 95.3   | 91.5   | 85.7   | 93.5   | 93.7   | 108.5  |
| GRPEL1  | 1483.1 | 1934.7 | 821.7  | 666.9  | 440.1  | 762    | 1309.1 | 2822.6 |
| GRPEL2  | 1121.1 | 1356.2 | 727    | 790.1  | 533.7  | 970    | 1052.6 | 1575.5 |
| GRPR    | 95.1   | 116.4  | 90.8   | 99.4   | 97.4   | 103.4  | 97     | 121    |
| GRRP1   | 92     | 100.1  | 97.5   | 80.9   | 77.8   | 84.4   | 86.6   | 92.6   |
| GRSF1   | 1643.8 | 2207   | 1145.9 | 980.1  | 687.7  | 1103.5 | 1318.9 | 2115.8 |
| GRTP1   | 99.2   | 105.7  | 112.7  | 112.9  | 105.3  | 97.9   | 98.5   | 105.9  |
| GRWD1   | 985.2  | 1419.8 | 853.6  | 361.4  | 293    | 456.3  | 967.6  | 1712.3 |
| GSC     | 112.4  | 148.2  | 100.4  | 95.1   | 86     | 74.2   | 114.2  | 145.9  |
| GSCL    | 81.3   | 93.4   | 98.8   | 76.4   | 79.8   | 88.7   | 90.4   | 96.5   |
| GSDM1   | 150.5  | 175.4  | 123.5  | 106.7  | 96     | 122.5  | 138.4  | 126.2  |
| GSDMDC1 | 2012.7 | 2200   | 1043.5 | 707.6  | 692.6  | 799.7  | 1356.1 | 947    |
| GSDML   | 128.2  | 136.7  | 113.3  | 116.2  | 126.2  | 115.1  | 114.7  | 138.2  |
| GSDML   | 131.1  | 166.4  | 102.4  | 111.7  | 111.3  | 95.5   | 135.9  | 177.1  |
| GSDML   | 175.5  | 184.1  | 130.5  | 138.6  | 150.1  | 151.4  | 154.3  | 190    |
| GSG1    | 92.1   | 93.5   | 83     | 79.8   | 70.7   | 86.8   | 87.5   | 99.1   |
| GSG1    | 103.1  | 118.5  | 103.3  | 99.8   | 96.3   | 99.2   | 104.5  | 109.9  |
| GSG1    | 102.7  | 108.5  | 112.3  | 107    | 98.3   | 107    | 93.3   | 112.2  |
| GSG2    | 211.7  | 281.9  | 173.9  | 135.8  | 132.5  | 148    | 185.5  | 206.2  |
| GSH1    | 109.4  | 141.3  | 86.6   | 77.5   | 86.9   | 82.4   | 114.7  | 121.9  |
| GSH2    | 75.7   | 89.9   | 79.4   | 73.5   | 71.2   | 82.3   | 77.6   | 89.6   |

|        |         |         |        |        |        |        |         |         |
|--------|---------|---------|--------|--------|--------|--------|---------|---------|
| GSK3A  | 151.6   | 203.5   | 115.1  | 105.6  | 92.8   | 98.5   | 129.6   | 166.1   |
| GSK3B  | 711.2   | 897.6   | 423.6  | 546.5  | 435.3  | 441    | 645.7   | 688.8   |
| GSN    | 499.2   | 836     | 439.7  | 275.4  | 233.6  | 391.4  | 448.6   | 657.6   |
| GSN    | 102.1   | 98.8    | 83.3   | 85.3   | 78.4   | 79.3   | 89.3    | 99.1    |
| GSPT1  | 7458.8  | 8110.4  | 5027   | 4256.3 | 2975.5 | 4312.4 | 6764    | 7449    |
| GSPT2  | 512.5   | 751.4   | 346.4  | 315.3  | 241.3  | 402.4  | 398.7   | 477.1   |
| GSR    | 185.7   | 214.2   | 127.6  | 117.2  | 96.4   | 103.6  | 186.3   | 185.9   |
| GSS    | 597.7   | 779.3   | 549.1  | 420.3  | 414    | 703.8  | 509.9   | 664.6   |
| GSTA1  | 78.1    | 91.7    | 91.9   | 76.8   | 79.5   | 85.7   | 84.3    | 85.7    |
| GSTA2  | 73.2    | 79.6    | 89     | 92.2   | 91.3   | 91.6   | 82.7    | 85.7    |
| GSTA3  | 92.5    | 89.5    | 102.1  | 96.5   | 92.9   | 97.8   | 81.8    | 89.5    |
| GSTA4  | 180.1   | 224     | 119.2  | 135.2  | 99.9   | 104.7  | 159.1   | 226.3   |
| GSTA5  | 77.5    | 118.7   | 91.6   | 88.9   | 82.7   | 83.7   | 92.6    | 106.2   |
| GSTCD  | 106.8   | 102.4   | 113.4  | 127.1  | 120.8  | 109.8  | 99.2    | 110.6   |
| GSTK1  | 3411.2  | 4206.1  | 2363.7 | 2758.5 | 1996.4 | 3665.4 | 2406.6  | 3453.6  |
| GSTM1  | 1834.9  | 2258.4  | 1766.4 | 653.8  | 545.7  | 589.8  | 1579.8  | 2969.3  |
| GSTM1  | 10295.1 | 12590.3 | 7494.2 | 3989.2 | 3019.9 | 2911.6 | 9686.1  | 11480   |
| GSTM1L | 76.7    | 85.4    | 92.7   | 88.5   | 88.5   | 87.2   | 71.1    | 76.4    |
| GSTM2  | 10681.6 | 13817.6 | 7511.5 | 3600.5 | 2866.8 | 2874.6 | 10189   | 12547.8 |
| GSTM3  | 346.1   | 430.1   | 223.1  | 287.3  | 277.6  | 364.9  | 317.1   | 392.2   |
| GSTM4  | 265.5   | 367.7   | 213.9  | 135.4  | 118.3  | 120.9  | 244     | 343.7   |
| GSTM4  | 350.5   | 404.8   | 214.8  | 133.2  | 131.2  | 187.9  | 311.7   | 441.9   |
| GSTM5  | 96.1    | 114     | 93.3   | 84.5   | 90     | 93     | 104.5   | 107.4   |
| GSTO1  | 5018.1  | 5280.6  | 2326   | 1915.8 | 1320.2 | 1900.6 | 4799.7  | 5953    |
| GSTO2  | 117.1   | 120.9   | 99.7   | 96.8   | 81.1   | 87     | 105     | 107.4   |
| GSTP1  | 9421.1  | 12084.6 | 8001.1 | 6042.5 | 5435.5 | 5179   | 11451.5 | 11385   |
| GSTT1  | 77.3    | 75.9    | 81.4   | 68.8   | 73     | 73.2   | 78.1    | 71.2    |
| GSTT2  | 120.5   | 137.3   | 97.5   | 91.3   | 88     | 95.6   | 132.1   | 129.3   |
| GSTT2  | 93.9    | 103.6   | 104.2  | 96.1   | 95.5   | 97.1   | 94.6    | 95.3    |
| GSTZ1  | 116.3   | 140.6   | 95.9   | 78.6   | 81.8   | 86.9   | 102.7   | 159.4   |
| GSTZ1  | 396.1   | 555.4   | 262.7  | 325.9  | 265.6  | 303.5  | 356     | 339.7   |
| GSTZ1  | 99.3    | 96.4    | 97.4   | 94.8   | 87.1   | 89.9   | 87.7    | 97.2    |
| GTDC1  | 210.7   | 254.6   | 119.4  | 107.7  | 97.6   | 115.2  | 157.4   | 210.2   |
| GTDC1  | 261.7   | 305.9   | 153.5  | 125.5  | 127    | 176.5  | 182.6   | 317.4   |
| GTDC1  | 95.8    | 118.8   | 107.6  | 103.7  | 95.8   | 105    | 101.8   | 108.4   |
| GTF2A1 | 104.9   | 118.8   | 87     | 89.1   | 84.4   | 78.6   | 102.9   | 108.4   |
| GTF2A1 | 99.5    | 113.6   | 100.9  | 111.7  | 99.3   | 88.1   | 97.2    | 93.9    |
| GTF2A1 | 163.7   | 197.9   | 101.8  | 104.1  | 112.9  | 104.1  | 174.1   | 168.5   |
| GTF2A2 | 3305.1  | 4302.7  | 1248.3 | 1502.6 | 1006.5 | 1830.9 | 2501.1  | 3689.8  |
| GTF2B  | 1285.6  | 1704.2  | 788.1  | 700.3  | 597.7  | 787.2  | 1008.5  | 1544.5  |
| GTF2E1 | 562.6   | 756.9   | 455.8  | 446.8  | 320.2  | 662.4  | 483.6   | 1016.9  |
| GTF2E2 | 3044.6  | 4072.5  | 2416.6 | 1363.3 | 1168.7 | 1577.2 | 2926    | 3180.2  |
| GTF2F1 | 705     | 896.7   | 711.9  | 775.6  | 711.4  | 1136.2 | 655.9   | 1268.8  |
| GTF2F2 | 2615.2  | 3123.8  | 1492.7 | 1514.3 | 1069.3 | 1959.2 | 2307.6  | 3485.3  |
| GTF2H1 | 163.2   | 204.6   | 110.6  | 106.7  | 100.1  | 136.6  | 155     | 241.1   |
| GTF2H2 | 252     | 274.8   | 130.6  | 102.4  | 95.6   | 131.9  | 209.9   | 330.1   |
| GTF2H3 | 911.4   | 1170.4  | 341.3  | 321.7  | 246.7  | 286.6  | 684.6   | 892.8   |
| GTF2H4 | 323.8   | 375     | 296.5  | 276    | 251.8  | 336.5  | 232.5   | 284.5   |
| GTF2H5 | 3764.7  | 4970.7  | 2173.7 | 2259.5 | 1643.5 | 3055.6 | 3405.2  | 4304.6  |
| GTF2I  | 703.4   | 808.6   | 263.2  | 238.1  | 193.2  | 148.2  | 327.4   | 476.5   |

|           |        |        |        |        |        |        |        |        |
|-----------|--------|--------|--------|--------|--------|--------|--------|--------|
| GTF2I     | 187.2  | 186.3  | 116.9  | 92.4   | 94.4   | 94.9   | 142.2  | 206.4  |
| GTF2IRD1  | 147.1  | 176.4  | 158.8  | 164.1  | 151.1  | 196.9  | 156.7  | 251    |
| GTF2IRD1  | 98     | 113.5  | 114.3  | 107.2  | 95.4   | 95.5   | 99.1   | 99.9   |
| GTF2IRD2B | 88.3   | 102.5  | 114.8  | 101.6  | 89.3   | 102.4  | 95.5   | 93.3   |
| GTF2IRD2P | 89.9   | 95.4   | 107.6  | 90.9   | 89.9   | 95     | 93.2   | 97.4   |
| GTF3C1    | 191.1  | 223.8  | 257.2  | 220.4  | 184.8  | 315.3  | 171.9  | 280.9  |
| GTF3C2    | 1705.8 | 2063.4 | 1201.2 | 1453.4 | 1124.8 | 1980.3 | 1456.8 | 2401.2 |
| GTF3C2    | 409.4  | 499.9  | 216.3  | 233.8  | 209.2  | 248    | 291.3  | 405.3  |
| GTF3C3    | 1289.7 | 1556.3 | 640.1  | 749.6  | 435.1  | 820.2  | 1018.8 | 1676.2 |
| GTF3C4    | 111.8  | 140.2  | 88     | 90.2   | 84     | 97.4   | 101    | 138.7  |
| GTF3C5    | 529.9  | 708    | 547.9  | 324.2  | 269    | 465.2  | 404.1  | 617.9  |
| GTPBP1    | 113.6  | 136.5  | 116.6  | 96.4   | 105.9  | 111.3  | 111.4  | 126.1  |
| GTPBP10   | 131.6  | 150.4  | 115.1  | 124.9  | 105.8  | 115    | 119.6  | 137.1  |
| GTPBP2    | 136.6  | 153.7  | 131    | 137.2  | 122.8  | 152.3  | 131.7  | 180.7  |
| GTPBP3    | 209    | 282    | 154.8  | 126    | 116.1  | 138.1  | 159.5  | 165.7  |
| GTPBP3    | 73.7   | 90.7   | 87.7   | 90.3   | 83     | 90.3   | 86     | 90.1   |
| GTPBP3    | 1661.9 | 2143.7 | 1468.4 | 881.7  | 791.3  | 1071.9 | 1147.3 | 1222.5 |
| GTPBP4    | 3288.3 | 4582.6 | 1903.9 | 1511.4 | 1106.7 | 1989.3 | 2663.8 | 4176   |
| GTPBP5    | 115    | 130.1  | 100.3  | 95.3   | 86.3   | 86.4   | 105.2  | 138.2  |
| GTPBP6    | 2803.9 | 3606.1 | 1608.3 | 1947.5 | 1763.2 | 1968.7 | 2068.2 | 1805.5 |
| GTPBP8    | 838.2  | 1133.1 | 501.4  | 557.6  | 477.7  | 554.7  | 694.2  | 1001.3 |
| GTPBP8    | 451.8  | 480.4  | 235.2  | 272.4  | 229.3  | 225.4  | 377.3  | 789.3  |
| GTPBP8    | 458.2  | 593.4  | 211.2  | 165.7  | 168.6  | 173.6  | 376.6  | 493.1  |
| GTPBP9    | 85.6   | 96.8   | 91.4   | 85.2   | 84.6   | 86.4   | 90     | 97.3   |
| GTSE1     | 543.9  | 611    | 463.4  | 287    | 282.8  | 321.1  | 529.8  | 687    |
| GUCA1A    | 112.7  | 127.5  | 113.3  | 112.6  | 101    | 101.7  | 100.8  | 119.8  |
| GUCA1B    | 139.7  | 152.6  | 124.1  | 125.8  | 114.5  | 132.1  | 133.4  | 210.9  |
| GUCA1C    | 111.3  | 127.8  | 121.5  | 110.6  | 100    | 112.1  | 111.6  | 108.4  |
| GUCA2A    | 120.5  | 143.8  | 98.2   | 91.9   | 87.2   | 90.8   | 102    | 128.5  |
| GUCA2B    | 106.8  | 112.9  | 98.4   | 85.2   | 82.2   | 89.2   | 94.8   | 119.9  |
| GUCY1A2   | 86.1   | 108.9  | 101.3  | 94.6   | 92.8   | 98.4   | 99.2   | 107.5  |
| GUCY1A3   | 92     | 102.4  | 91.8   | 89.1   | 81.5   | 83.5   | 114.3  | 97.4   |
| GUCY1B3   | 129.6  | 132    | 112.6  | 97.7   | 99.1   | 100.6  | 116.1  | 115.3  |
| GUCY2C    | 88.5   | 98.8   | 90.3   | 84.6   | 68.3   | 75.8   | 90.8   | 95.6   |
| GUCY2D    | 114.8  | 122.5  | 101    | 91.5   | 84.4   | 91.6   | 98.8   | 115.7  |
| GUCY2F    | 124.6  | 117.8  | 93.9   | 90.1   | 87.5   | 87.7   | 113.1  | 125    |
| GUF1      | 565    | 764    | 311    | 218.1  | 198.8  | 255.4  | 415.6  | 563.8  |
| GUK1      | 3054.4 | 3816.5 | 2147.6 | 1790.5 | 1590.1 | 2590.7 | 2767.8 | 4614.9 |
| GULP1     | 88.6   | 100.5  | 96.2   | 94.4   | 83.2   | 90.1   | 85.9   | 84.2   |
| GUP1      | 205.5  | 264.7  | 99.6   | 93     | 93.2   | 94.4   | 195.6  | 201.1  |
| GUSB      | 2567.9 | 2987.1 | 2131.7 | 2306.9 | 1902.9 | 2736.6 | 2260.3 | 2820.6 |
| GUSBL2    | 363.4  | 472.1  | 206.4  | 341.8  | 290.5  | 240.8  | 262    | 370.8  |
| GYG1      | 2524.7 | 3442.6 | 1362.1 | 824.3  | 610.2  | 1250.7 | 1930.1 | 4204.6 |
| GYG2      | 586.9  | 826.6  | 491.1  | 596.9  | 422.3  | 567.8  | 373.2  | 348.9  |
| GYG2      | 82.6   | 90.9   | 86.2   | 84     | 83     | 84.5   | 87     | 86.4   |
| GYG2      | 139.5  | 182.2  | 138    | 141.8  | 122.6  | 131.1  | 121.4  | 129.8  |
| GYLTL1B   | 90.6   | 100.2  | 94.5   | 90.9   | 81.3   | 82.8   | 86.4   | 99.8   |
| GYPA      | 73.2   | 86.8   | 80.6   | 80     | 76.7   | 74.3   | 80.5   | 92.1   |
| GYPB      | 80.7   | 88.5   | 88     | 88.1   | 83.1   | 85.1   | 75.3   | 81.6   |
| GYPC      | 1710.2 | 2198.7 | 914.2  | 1107.2 | 949.4  | 1303.5 | 1492.6 | 1845.5 |

|        |         |         |         |         |         |         |         |         |
|--------|---------|---------|---------|---------|---------|---------|---------|---------|
| GYPC   | 1753.2  | 2128    | 904.8   | 1207.7  | 852.7   | 1372.7  | 1641.3  | 2126    |
| GYPE   | 94.1    | 122.7   | 88.9    | 86.3    | 94.2    | 90.1    | 110.6   | 106.3   |
| GYPE   | 105.5   | 131.5   | 88.1    | 87.7    | 82.1    | 80.1    | 96.9    | 123.3   |
| GYPE   | 69.4    | 81.8    | 91.5    | 94.9    | 88.2    | 88.8    | 71.1    | 77.5    |
| GYS1   | 211.6   | 286.4   | 216     | 236.6   | 179.7   | 321.4   | 190.7   | 278.3   |
| GYS2   | 100.8   | 107     | 101.8   | 111     | 96.5    | 107.3   | 93.6    | 99.6    |
| GZMA   | 125.9   | 133.9   | 93.5    | 91.8    | 81.8    | 86      | 120     | 128.3   |
| GZMB   | 77.8    | 88.5    | 92      | 81.4    | 87.3    | 88.5    | 81.8    | 87.1    |
| GZMH   | 86.2    | 93.2    | 99.4    | 115.7   | 111.4   | 101.7   | 82.6    | 86.5    |
| GZMK   | 86.3    | 94.8    | 78.2    | 90.5    | 83.4    | 84.8    | 90.7    | 98.3    |
| GZMM   | 85.6    | 94.3    | 100.2   | 86.9    | 83.3    | 90.5    | 90.4    | 85.3    |
| H19    | 101.2   | 116.8   | 94.3    | 83.1    | 82.8    | 93.6    | 97.4    | 100.4   |
| H1F0   | 3574    | 4368.5  | 2597.8  | 1596.6  | 1454.5  | 2622.5  | 2511.6  | 4552.5  |
| H1FOO  | 80.9    | 81.2    | 90.1    | 83.3    | 97.2    | 78.6    | 81.5    | 81.7    |
| H1FX   | 346.9   | 487.8   | 420     | 282.6   | 273.7   | 390.5   | 245.9   | 448.2   |
| H1T2   | 110     | 128.9   | 109.2   | 97.1    | 98.4    | 100.6   | 121.6   | 116.7   |
| H2AFB1 | 83.7    | 102.6   | 83.8    | 90.9    | 93.3    | 90      | 85.2    | 91.6    |
| H2AFB2 | 104.9   | 137     | 98      | 99.2    | 86.3    | 84.7    | 97.4    | 116.7   |
| H2AFB3 | 73.2    | 81      | 90.2    | 74.1    | 80.6    | 87.4    | 84.3    | 86.5    |
| H2AFJ  | 100.7   | 92.8    | 89.3    | 85.3    | 89.6    | 84.7    | 81.1    | 99.2    |
| H2AFJ  | 774.2   | 1052.8  | 409     | 320.6   | 255.8   | 327.4   | 718.3   | 784.2   |
| H2AFV  | 218.1   | 319.4   | 129.7   | 125.1   | 112.4   | 122     | 196.7   | 253.2   |
| H2AFX  | 311.9   | 423.6   | 325.6   | 144.4   | 117.6   | 144.5   | 245.5   | 498.5   |
| H2AFY  | 622.5   | 805     | 227.3   | 147.5   | 147.3   | 121.4   | 468.3   | 598.1   |
| H2AFY  | 3671    | 4902.1  | 1734    | 1662    | 1432.1  | 1795.9  | 2791.8  | 3970.9  |
| H2AFY  | 27047.1 | 29976.7 | 21523.6 | 20153.2 | 18810.5 | 23330.8 | 23777.7 | 27104.6 |
| H2AFY2 | 639.9   | 832.6   | 594.8   | 485.8   | 357.9   | 572.2   | 477.4   | 578.3   |
| H2AFZ  | 26880.7 | 30074.5 | 20969.1 | 16695.4 | 12729.9 | 15215.1 | 24824.3 | 28271.9 |
| H2BFS  | 270     | 386.6   | 185.6   | 244.5   | 216.4   | 195.3   | 225.7   | 234.6   |
| H2BFWT | 81.4    | 101.5   | 95.4    | 83.4    | 78.3    | 86.6    | 87.9    | 81      |
| H2BFXP | 83.8    | 103.9   | 87      | 86.9    | 86.7    | 91.6    | 85.5    | 82.9    |
| H3F3A  | 30987.2 | 32776.1 | 36142.8 | 28586.7 | 23956   | 24334.1 | 31007.9 | 31500.6 |
| H3F3B  | 1108.8  | 1399.8  | 772.8   | 1000.4  | 753.6   | 1222.2  | 1082.4  | 2229.3  |
| H6PD   | 100.8   | 115.8   | 95.8    | 88.9    | 90.3    | 91      | 95.4    | 107.3   |
| HAAO   | 127.4   | 146.4   | 106.9   | 98.9    | 101.5   | 105.9   | 136.4   | 152.7   |
| HABP2  | 85.8    | 91.1    | 88.7    | 82.2    | 78.8    | 85.8    | 87.1    | 86      |
| HABP4  | 255.5   | 338.5   | 143     | 150.4   | 124.2   | 173.2   | 263.5   | 441.6   |
| HACE1  | 170     | 198     | 111     | 102.9   | 91.2    | 114.6   | 165.9   | 202     |
| HADH2  | 617.3   | 822.1   | 541.2   | 430.6   | 363.1   | 512     | 636.1   | 759.8   |
| HADH2  | 966.8   | 1248.1  | 701.6   | 578.4   | 469.5   | 710.4   | 870     | 1179    |
| HADHA  | 875.1   | 1212.3  | 700.9   | 555.5   | 525.5   | 637.5   | 728.7   | 728.2   |
| HADHB  | 900     | 1169    | 213.2   | 229.9   | 214.3   | 311.1   | 732.7   | 1094.3  |
| HADHSC | 3982.3  | 5046.8  | 2428.7  | 2264.9  | 1602.5  | 2459.6  | 3060.6  | 3772    |
| HAGH   | 300.6   | 391.5   | 225.5   | 151.3   | 161.6   | 183.4   | 331.1   | 369.5   |
| HAGH   | 1348.1  | 1559.8  | 968.1   | 776.4   | 683.5   | 748.1   | 1350.1  | 1318.5  |
| HAGHL  | 201.3   | 221.7   | 208.8   | 185.3   | 185.1   | 261.2   | 138.4   | 222.2   |
| HAGHL  | 191.3   | 253.2   | 107.7   | 94.7    | 94.5    | 99.2    | 192.6   | 229.7   |
| HAGHL  | 390.1   | 425.6   | 335.1   | 315.8   | 292.8   | 440.4   | 303.1   | 451.9   |
| HAK    | 108.8   | 141.5   | 100.4   | 91.9    | 84.9    | 78.5    | 116.6   | 127     |
| HAL    | 186.1   | 220.5   | 128.6   | 228     | 176.9   | 301     | 140.1   | 139.9   |

|         |        |        |        |        |       |        |         |         |
|---------|--------|--------|--------|--------|-------|--------|---------|---------|
| HAMP    | 96.2   | 94.7   | 89.9   | 86.7   | 89.1  | 87.6   | 92.4    | 97.8    |
| HAND1   | 100.4  | 95.5   | 93     | 80     | 79.8  | 91.6   | 85.3    | 116.4   |
| HAND2   | 113    | 109.8  | 99.8   | 98.7   | 87.5  | 96.9   | 101.6   | 104.8   |
| HAO1    | 115.2  | 142.7  | 101.2  | 88     | 84    | 95.1   | 127     | 133.4   |
| HAO2    | 106.3  | 127.6  | 89.3   | 89.1   | 78.5  | 82.9   | 111.6   | 117.2   |
| HAO2    | 105.6  | 131.2  | 93.1   | 89.4   | 90.2  | 81.6   | 101.7   | 109.5   |
| HAP1    | 94.7   | 93.6   | 93.5   | 91     | 80.9  | 93.1   | 104.1   | 100.3   |
| HAP1    | 127.1  | 151.7  | 107.1  | 96.4   | 99.5  | 101.3  | 142     | 121.5   |
| HAP1    | 96.3   | 96.5   | 89.1   | 96.9   | 90    | 86.1   | 81.4    | 91.8    |
| HAPLN1  | 74.7   | 79.9   | 87.3   | 81.1   | 73.6  | 84.9   | 82.4    | 83.8    |
| HAPLN2  | 96.5   | 113.9  | 113.1  | 104.3  | 101.8 | 96.1   | 97.5    | 103.1   |
| HAPLN3  | 116.3  | 141.2  | 114.1  | 98     | 85.5  | 98.2   | 101.5   | 136     |
| HAPLN4  | 91.3   | 92.9   | 108.5  | 105.3  | 95.5  | 103.8  | 88      | 83.3    |
| HARS    | 1477.2 | 1817.1 | 944.3  | 818.3  | 675   | 903.2  | 1353.3  | 1330.7  |
| HARS2   | 390.7  | 625.6  | 348.6  | 291.6  | 255.4 | 430    | 328.5   | 457.8   |
| HARSL   | 1717.9 | 2011.7 | 1052.2 | 1257   | 851.8 | 1325.7 | 1471.2  | 2473.2  |
| HAS1    | 86.7   | 99.8   | 80.7   | 83.1   | 85.5  | 86.7   | 86.2    | 105.3   |
| HAS2    | 82.9   | 91.1   | 94.9   | 91     | 89.1  | 92     | 87.1    | 77      |
| HAS2    | 77.4   | 96.9   | 87.2   | 84     | 79.6  | 78.6   | 88.2    | 85.9    |
| HAS3    | 103.7  | 117.2  | 98.3   | 85     | 85.5  | 96.4   | 107.9   | 124.4   |
| HAS3    | 92.3   | 104.7  | 109.9  | 112.3  | 93    | 105.7  | 99.5    | 109.3   |
| HAT1    | 2443.7 | 2579   | 768.3  | 647.3  | 450.8 | 933.6  | 1984.7  | 4552.2  |
| HAT1    | 1070.7 | 1343.8 | 210.8  | 193.6  | 176.6 | 283.3  | 848.7   | 1445.4  |
| HAVCR1  | 85.1   | 110.7  | 87.3   | 79.5   | 80    | 91.1   | 93.7    | 101.4   |
| HAVCR2  | 127.3  | 142.9  | 130.3  | 127.5  | 113.3 | 146.1  | 147.4   | 207.4   |
| HAX1    | 1497.2 | 1701.1 | 624.1  | 373.1  | 367.9 | 552.4  | 1566.6  | 1956    |
| HAX1    | 451.7  | 658.6  | 341.6  | 248.7  | 227   | 298    | 437     | 485.8   |
| HAX1    | 431.3  | 529.7  | 234.1  | 177.4  | 168.6 | 230.1  | 449.8   | 671.4   |
| HB-1    | 104.7  | 126    | 86.6   | 77.8   | 81.9  | 88.5   | 109.8   | 119.7   |
| HBA2    | 119    | 115.1  | 106.6  | 90     | 85.3  | 92.6   | 117.3   | 110.6   |
| HBB     | 98.6   | 108.8  | 88.5   | 100.5  | 97.9  | 100.2  | 97.4    | 92.7    |
| HBD     | 93     | 93.6   | 98.4   | 89.9   | 91.7  | 84.3   | 87.2    | 90.2    |
| HBE1    | 86.4   | 92.9   | 90.8   | 83.5   | 81.4  | 81.6   | 89.1    | 98.3    |
| HBEGF   | 245.1  | 275.3  | 172.6  | 148.5  | 111.1 | 157.6  | 229.1   | 454.4   |
| HBG1    | 114.3  | 136.3  | 90.9   | 87.1   | 89.3  | 91.3   | 113.7   | 127     |
| HBG2    | 76.5   | 93.4   | 100.4  | 98.5   | 85.4  | 94.6   | 76.3    | 85.3    |
| HBM     | 92.5   | 94.8   | 86.8   | 88.3   | 87.5  | 91.7   | 90.1    | 95.5    |
| HBP1    | 291.4  | 391.5  | 220.7  | 279.6  | 258.2 | 340.9  | 348.7   | 422.5   |
| HBQ1    | 152.6  | 177.9  | 126.4  | 88.2   | 90.5  | 89.3   | 144     | 144.1   |
| HBS1L   | 99.9   | 108.9  | 92     | 85.3   | 74.6  | 97     | 106.5   | 102.2   |
| HBXAP   | 132.7  | 151.1  | 94.4   | 85     | 92.7  | 87.7   | 119.3   | 163.5   |
| HBXIP   | 9676.9 | 11482  | 7424.8 | 4444.8 | 3331  | 5146.4 | 10136.4 | 12353.5 |
| HBZ     | 99.3   | 117.4  | 97.3   | 85.8   | 84.2  | 80.5   | 98.6    | 108.5   |
| HCA112  | 90.2   | 112.7  | 91.9   | 94.6   | 103.1 | 96.3   | 94      | 101.3   |
| HCAP-D3 | 561.4  | 803    | 618    | 540.3  | 520.5 | 783.7  | 531.3   | 845.2   |
| HCAP-G  | 2290   | 2332.1 | 811.6  | 715.1  | 583.2 | 947.4  | 1742.5  | 2648.8  |
| HCAP-H2 | 345.5  | 406.4  | 205.1  | 186.3  | 143.2 | 230.7  | 293.5   | 375.6   |
| HCAP-H2 | 112.3  | 128.4  | 104.3  | 90.7   | 92.2  | 90     | 108.9   | 141.4   |
| HCAP-H2 | 293.4  | 382.5  | 172.1  | 129.3  | 131.9 | 125.2  | 259.7   | 318.4   |
| HCCA2   | 204.1  | 235    | 171.5  | 141.7  | 137.4 | 160    | 214.7   | 301.4   |

|          |         |         |        |        |        |        |         |         |
|----------|---------|---------|--------|--------|--------|--------|---------|---------|
| HCCS     | 157.1   | 157.7   | 101.2  | 100.4  | 91.1   | 102    | 138     | 188.5   |
| HCFC1    | 3129.3  | 4154.3  | 2001.2 | 2376.9 | 1775   | 2104.2 | 3020.2  | 3793    |
| HCFC1R1  | 371.5   | 400.1   | 163.9  | 141    | 121.6  | 116.9  | 301.9   | 138.7   |
| HCFC1R1  | 1152.7  | 1317.6  | 839.3  | 755.2  | 518.8  | 607.5  | 1108    | 1980.4  |
| HCFC2    | 148.1   | 189.3   | 131.2  | 140.6  | 121.1  | 191.7  | 132     | 217.8   |
| HCG27    | 128.5   | 128.6   | 106.7  | 102.6  | 93.1   | 110.3  | 113     | 110.5   |
| HCG2P7   | 2746.7  | 2793    | 1676.6 | 2904   | 2659.5 | 2059   | 3276.5  | 4875.3  |
| HCG3     | 108.6   | 116.2   | 94.7   | 95.9   | 94.6   | 93.8   | 95      | 140.3   |
| HCG4     | 98.4    | 109.3   | 92.7   | 83.2   | 80.5   | 85.3   | 93.4    | 102.4   |
| HCG9     | 82.9    | 89.1    | 88.2   | 81.9   | 79.7   | 83.3   | 87      | 89.9    |
| HCK      | 414.6   | 525.9   | 383.5  | 557.7  | 574.9  | 743.4  | 419.9   | 714.8   |
| HCLS1    | 7042.3  | 8611.2  | 5309.4 | 5197.3 | 4194.8 | 6947.8 | 6909.5  | 9371.6  |
| HCN1     | 103.9   | 106.2   | 101    | 86.5   | 85.1   | 91.4   | 107     | 102.7   |
| HCN2     | 96.7    | 104.3   | 93.8   | 73.8   | 79.1   | 84.8   | 87      | 93.9    |
| HCN3     | 138.2   | 142.5   | 151.6  | 114.4  | 136.8  | 136.8  | 118.5   | 126.9   |
| HCN4     | 97      | 122.9   | 110.7  | 106.2  | 107.8  | 105.6  | 93.6    | 111     |
| HCP1     | 98.2    | 123.3   | 124.9  | 119.4  | 114    | 106.9  | 95.8    | 110.6   |
| HCP5     | 252.6   | 326.5   | 220.4  | 142.3  | 137.1  | 161    | 165.5   | 166.8   |
| HCRT     | 98.1    | 102.7   | 129.5  | 112.5  | 120.5  | 117.7  | 102     | 101.5   |
| HCRTR1   | 92.7    | 102.8   | 97.3   | 94.8   | 81.2   | 89.5   | 93.1    | 97      |
| HCRTR2   | 104.9   | 110.1   | 113.6  | 108.7  | 99.2   | 102.1  | 97.1    | 116.2   |
| HCST     | 2940.6  | 3665.4  | 2695.4 | 1212.9 | 1018   | 983.1  | 3382.1  | 4677.6  |
| HCST     | 314.4   | 389     | 225.9  | 146.4  | 143    | 135.2  | 402.4   | 417.9   |
| HCTSL-S  | 109     | 129.2   | 101.2  | 91.6   | 86.7   | 84.1   | 96.8    | 120.4   |
| HDAC1    | 7949.3  | 9426    | 4756.1 | 4461.8 | 3803.2 | 5131   | 6978.3  | 6750.4  |
| HDAC10   | 127.4   | 136     | 139.7  | 124.1  | 108.7  | 137.1  | 104.3   | 126.9   |
| HDAC11   | 121.2   | 126.4   | 88.7   | 91.2   | 80.5   | 92.1   | 109.1   | 143.7   |
| HDAC2    | 5830.6  | 7138.4  | 2322   | 2547.4 | 1548.9 | 3323.2 | 3873    | 9008.9  |
| HDAC3    | 1150.2  | 1406.2  | 874.7  | 845.4  | 681.8  | 990.1  | 883.9   | 1735.9  |
| HDAC4    | 396.1   | 519.5   | 240.4  | 287.1  | 232.1  | 272.1  | 317.6   | 433.2   |
| HDAC5    | 144.1   | 163.8   | 112.5  | 84.2   | 77.2   | 86.8   | 157.1   | 149.3   |
| HDAC5    | 98.9    | 103.3   | 110.1  | 105.7  | 97     | 104.5  | 90.1    | 114.7   |
| HDAC6    | 229     | 273.3   | 245.7  | 288.5  | 252.2  | 368.1  | 203.1   | 287.7   |
| HDAC7A   | 80.1    | 93.4    | 89.3   | 85.7   | 88.6   | 93.3   | 86.6    | 88.7    |
| HDAC7A   | 100.1   | 120     | 98.8   | 82.1   | 85.1   | 90.5   | 100     | 120.5   |
| HDAC8    | 276.5   | 388.3   | 185.4  | 166    | 140.9  | 202.2  | 244.1   | 268.5   |
| HDAC9    | 140     | 172     | 107.6  | 98.7   | 89.1   | 100.4  | 131.3   | 156.9   |
| HDAC9    | 106.5   | 138.7   | 88.5   | 103.1  | 99.8   | 172.5  | 98      | 107.5   |
| HDAC9    | 94      | 91.4    | 100.9  | 98.5   | 92.3   | 109.1  | 89.5    | 103     |
| HDAC9    | 84.3    | 77      | 74.9   | 82.2   | 78     | 94     | 89.1    | 83.8    |
| HDAC9    | 108.7   | 119.6   | 87     | 106.6  | 97.2   | 131.5  | 84.7    | 97.5    |
| HDC      | 90.8    | 111.7   | 81.9   | 81.9   | 77.6   | 82.9   | 89.9    | 98.9    |
| HDCMA18F | 1421.8  | 1697.7  | 552.7  | 518.4  | 441.7  | 995    | 1219.9  | 2106.4  |
| HDDC2    | 11039.3 | 12048.7 | 4451.2 | 4798.7 | 3993.7 | 5479.6 | 10270.9 | 12080.8 |
| HDDC3    | 1040.5  | 1312.4  | 776    | 562.5  | 427.6  | 655.6  | 776     | 1075    |
| HDGF     | 2015.1  | 2549.2  | 2084.7 | 866    | 757.2  | 1115.4 | 1582.2  | 3749.6  |
| HDGF2    | 686.9   | 802.1   | 322.1  | 246.2  | 220.1  | 287.4  | 634.7   | 889.5   |
| HDGF2    | 395.2   | 532.3   | 379.7  | 367.2  | 354.7  | 467.1  | 339.1   | 394.8   |
| HDGFL1   | 108     | 94.2    | 100.3  | 93.3   | 84.9   | 95.8   | 84.8    | 102.2   |
| HDGFRP3  | 93.3    | 120.8   | 89.5   | 93.5   | 87.3   | 75.8   | 106     | 127.4   |

|          |        |        |        |        |        |        |        |        |
|----------|--------|--------|--------|--------|--------|--------|--------|--------|
| HDHD1A   | 632.9  | 903.8  | 397.4  | 341.9  | 250.3  | 313.6  | 520.3  | 565.8  |
| HDHD2    | 592.8  | 714.7  | 166.9  | 189.5  | 194.2  | 216.6  | 479.6  | 527.5  |
| HDHD3    | 213.4  | 277.8  | 167.8  | 121.5  | 128.7  | 127.9  | 200.4  | 294.3  |
| HDLBP    | 165.8  | 221    | 104.7  | 151.9  | 137.4  | 122.6  | 154.5  | 178.6  |
| HDLBP    | 97.1   | 124.4  | 106.3  | 101.3  | 93.9   | 87.7   | 98.7   | 108.1  |
| HDLBP    | 98.2   | 96.9   | 108.9  | 116.3  | 110.3  | 94.4   | 97.9   | 101.8  |
| HEAB     | 543.4  | 739    | 353.6  | 326.2  | 266.1  | 338    | 466.2  | 704.1  |
| HEATR1   | 2098.8 | 2927.3 | 1638.7 | 1343.2 | 945.5  | 1593   | 1517.4 | 1484   |
| HEATR5B  | 360.9  | 612.8  | 317.6  | 412.8  | 342.8  | 582.3  | 304.5  | 493.1  |
| HEBP1    | 784    | 1064.5 | 276.2  | 411.2  | 252.2  | 443.3  | 1116.5 | 1544.3 |
| HEBP2    | 3553.6 | 4055.1 | 1284.9 | 1395.7 | 1042.6 | 1815.8 | 3585.2 | 5148.1 |
| HECA     | 202.8  | 267.1  | 131.6  | 180.8  | 158.1  | 264.7  | 246.6  | 391.9  |
| HECTD1   | 958.6  | 1560.7 | 1246.9 | 2125.2 | 1798.1 | 3647.9 | 1051.2 | 1821.7 |
| HECTD2   | 104.8  | 123.9  | 86.5   | 91.8   | 83.7   | 86.8   | 100.8  | 123    |
| HECTD2   | 109.8  | 105.9  | 95     | 83.2   | 78.2   | 87.6   | 84.5   | 102.9  |
| HECTD2   | 157.3  | 209.1  | 101.4  | 111.4  | 102    | 109.5  | 146.4  | 166.9  |
| HECTD3   | 252.9  | 308    | 221.2  | 216.3  | 201.6  | 203.4  | 209.2  | 261.1  |
| HECW1    | 97.4   | 106.8  | 84.7   | 81.5   | 74.3   | 71     | 94.2   | 100.1  |
| HECW2    | 98.2   | 117.2  | 106    | 99     | 104.4  | 98.4   | 101.6  | 105.7  |
| HEL308   | 324.5  | 395    | 269.9  | 263    | 210.4  | 376.9  | 273.8  | 510.4  |
| HELB     | 135.7  | 169.6  | 109    | 109.3  | 111.3  | 116.8  | 122.1  | 146.6  |
| HELLS    | 549.5  | 730.6  | 245.5  | 178.7  | 168.7  | 233.2  | 402.5  | 610.7  |
| HELT     | 79.2   | 86.9   | 87.3   | 91.9   | 86.2   | 88.7   | 87.5   | 92.4   |
| HELZ     | 230.6  | 378.6  | 252.5  | 568.8  | 508.9  | 782.8  | 254.1  | 466.1  |
| HEM1     | 661.3  | 819.7  | 313.7  | 532.3  | 469.2  | 475.9  | 662.9  | 654.4  |
| HEMGN    | 99.7   | 113.6  | 96.1   | 92.6   | 89.2   | 83.2   | 99.9   | 108.8  |
| HEMGN    | 77.2   | 88.5   | 101.5  | 89.7   | 90.3   | 86.1   | 78.1   | 91.7   |
| HEMGN    | 76     | 87.5   | 87.2   | 84.5   | 84.9   | 86.8   | 76.6   | 73.5   |
| HEMK1    | 161.5  | 172.9  | 151.9  | 194.5  | 174.4  | 235.8  | 142    | 162.1  |
| HEPACAM  | 87.6   | 85.9   | 89.2   | 81.8   | 81.2   | 84.9   | 90.4   | 88.3   |
| HEPH     | 65.7   | 71     | 87.7   | 79.3   | 83.2   | 81.4   | 85.3   | 85.2   |
| HEPH     | 80.9   | 100.4  | 80.5   | 76.3   | 79.9   | 83.2   | 76.5   | 86.7   |
| HERC1    | 257.6  | 409.2  | 318    | 669    | 630.7  | 1121.6 | 258.1  | 327.3  |
| HERC2    | 438.1  | 586.9  | 361    | 584.6  | 557    | 760.5  | 453.2  | 499.5  |
| HERC2P2  | 118.2  | 159    | 112.4  | 102.7  | 115.1  | 103.8  | 115.3  | 120.5  |
| HERC2P4  | 89.7   | 102.4  | 91.4   | 82.3   | 83.9   | 80.4   | 90     | 94.9   |
| HERC3    | 225.7  | 325.3  | 175.9  | 167.1  | 148    | 258    | 194.5  | 266.1  |
| HERC4    | 168.3  | 191.8  | 126    | 127.8  | 106    | 122.5  | 163    | 230.5  |
| HERC4    | 131.5  | 151.3  | 105.2  | 90.3   | 81.3   | 99.5   | 129.8  | 189.9  |
| HERC4    | 612.9  | 816.3  | 467    | 343.5  | 289.6  | 587.4  | 498.2  | 952.7  |
| HERC5    | 573    | 700.8  | 384    | 314.5  | 277    | 369.6  | 445.5  | 477.9  |
| HERC6    | 174.7  | 208.3  | 187.8  | 173    | 149.4  | 204.9  | 158.2  | 230.5  |
| HERPUD1  | 1153.1 | 1448.6 | 595    | 367.7  | 266.1  | 427.4  | 1553.2 | 2881.1 |
| HERPUD2  | 119.7  | 121.4  | 105.7  | 102.9  | 102.5  | 112.3  | 128    | 179.1  |
| HERV-FRD | 124.4  | 124.2  | 100.4  | 109.6  | 98.1   | 95.8   | 98.6   | 114.9  |
| HES1     | 84.5   | 97.5   | 93.5   | 85.7   | 77     | 81.9   | 89.5   | 106.5  |
| HES2     | 91.2   | 109.2  | 79     | 86.5   | 86.2   | 82.2   | 91.7   | 119.1  |
| HES4     | 154.6  | 181.7  | 123.2  | 94.9   | 102.9  | 101.3  | 139.8  | 152.6  |
| HES6     | 1980.9 | 2173.1 | 974.2  | 912.5  | 893.9  | 1065.6 | 1480.8 | 1674.7 |
| HES7     | 71.9   | 77.1   | 81.5   | 62.5   | 71.7   | 82.4   | 76.8   | 85.7   |

|         |        |         |        |         |         |         |        |         |
|---------|--------|---------|--------|---------|---------|---------|--------|---------|
| HESX1   | 161.3  | 216.9   | 147.5  | 137.3   | 152.2   | 178.3   | 174.3  | 218.5   |
| HEXA    | 117.6  | 152.2   | 103.8  | 98.3    | 94.8    | 112.8   | 122.5  | 136.8   |
| HEXB    | 9393.1 | 11805.3 | 8756.9 | 14033.1 | 11485.9 | 17228.2 | 8208.5 | 12713.4 |
| HEXDC   | 151    | 181.8   | 114.1  | 104.4   | 102.5   | 104.4   | 134.4  | 136.9   |
| HEXIM1  | 132.3  | 138     | 107.1  | 100.1   | 93.7    | 100.8   | 106    | 140.1   |
| HEXIM2  | 172.7  | 228.7   | 140.2  | 141.1   | 126.8   | 149.6   | 149.3  | 154.6   |
| HEY1    | 109    | 113.2   | 84.3   | 77.5    | 83.8    | 87.7    | 105.5  | 106.4   |
| HEY1    | 89.4   | 106.1   | 103.4  | 92.4    | 94.5    | 92.3    | 93.7   | 109.8   |
| HEY2    | 95.9   | 98.8    | 97.2   | 88.1    | 79.4    | 83.5    | 96.7   | 126.6   |
| HEYL    | 606.7  | 802.1   | 564.3  | 524.8   | 426.8   | 562.3   | 488.2  | 582.2   |
| HFE     | 82.7   | 93.2    | 101.8  | 85.8    | 83.5    | 78.4    | 81.9   | 92.9    |
| HFE     | 90.4   | 102.2   | 94.2   | 86      | 89.4    | 91.1    | 100    | 101.5   |
| HFE     | 125.5  | 134.7   | 106.2  | 84.1    | 81.2    | 94.9    | 105.2  | 127.7   |
| HFE2    | 80.5   | 101.5   | 89.3   | 82.4    | 81.9    | 84.1    | 90.7   | 104.2   |
| HFE2    | 81.6   | 98      | 89     | 92.2    | 86.6    | 83.1    | 81.4   | 86      |
| HFE2    | 82.9   | 87.2    | 91.9   | 92      | 76.4    | 83.4    | 79.6   | 84.6    |
| HGD     | 118.6  | 131.5   | 108.4  | 91.4    | 94.1    | 102.2   | 143.7  | 179     |
| HGF     | 106.4  | 113.6   | 78.9   | 74.5    | 72.9    | 89.2    | 100.2  | 124     |
| HGF     | 167.6  | 174.2   | 108.3  | 106     | 95.1    | 112     | 145.7  | 179.9   |
| HGF     | 97.7   | 102.4   | 88.5   | 81      | 80.9    | 94      | 94     | 108.6   |
| HGFAC   | 86.2   | 101.4   | 94.3   | 76      | 75      | 82.6    | 89.8   | 105.3   |
| HGS     | 3171.4 | 3667.4  | 2873.8 | 2035.9  | 2002.3  | 2214.2  | 2816.4 | 3126.1  |
| HHAT    | 114.1  | 132.9   | 92.6   | 90.2    | 84.5    | 84.2    | 114.6  | 133.7   |
| HHEX    | 605.7  | 813.7   | 161.1  | 132.3   | 125.9   | 155.8   | 677.7  | 1082.7  |
| HHIP    | 78.7   | 91.7    | 88.7   | 85.8    | 80      | 89.2    | 85.4   | 93.9    |
| HHLA1   | 97.1   | 95.1    | 94.3   | 95      | 92.9    | 95.9    | 89.1   | 95      |
| HHLA2   | 84.2   | 100.9   | 99.3   | 86      | 79.7    | 79.1    | 77.7   | 86.9    |
| HHLA3   | 135.5  | 170.5   | 140.6  | 106.4   | 112.1   | 117.5   | 123.1  | 160.3   |
| HHLA3   | 85.7   | 104.6   | 98.1   | 79.5    | 84.8    | 82.9    | 91     | 105.4   |
| HHLA3   | 109.5  | 117.1   | 98.5   | 80.2    | 81.7    | 82.5    | 91.1   | 116.8   |
| HIAT1   | 181.5  | 200.7   | 118.7  | 91.1    | 98.5    | 100.3   | 182.7  | 303.7   |
| HIATL1  | 1332.7 | 1607.7  | 1193.7 | 1040.2  | 684.6   | 1798.9  | 1055.9 | 1676.2  |
| HIBADH  | 1022   | 1414.5  | 718.1  | 920.6   | 750.9   | 1367.8  | 756.5  | 1025.2  |
| HIBCH   | 766.8  | 992.3   | 557.6  | 538.2   | 380.8   | 664.9   | 585.3  | 936.4   |
| HIC1    | 88.5   | 98.2    | 123.4  | 99.6    | 102.4   | 107.4   | 84.6   | 90.6    |
| HIC2    | 736.4  | 935.7   | 582.7  | 497.3   | 466     | 497.1   | 649.4  | 804     |
| HIF1A   | 209.5  | 213.8   | 118.8  | 146.1   | 123.4   | 172.4   | 212.7  | 309.6   |
| HIF1A   | 318    | 396.7   | 167.4  | 163.2   | 122.9   | 204     | 255.8  | 395.5   |
| HIF1AN  | 221.9  | 261.9   | 183.7  | 143     | 126     | 153.9   | 217.3  | 254.9   |
| HIF3A   | 97.8   | 102.2   | 105.2  | 85.4    | 89.3    | 85.8    | 110.6  | 96.8    |
| HIF3A   | 100.7  | 136.7   | 99.6   | 88.1    | 87      | 82.7    | 115.1  | 129.3   |
| HIF3A   | 97.5   | 94.4    | 93.4   | 90      | 85.4    | 83.8    | 94.5   | 102.3   |
| HIF3A   | 97     | 101.9   | 103.5  | 90.7    | 93      | 92.1    | 98.2   | 111.3   |
| HIF3A   | 79.5   | 86.5    | 93.8   | 84.6    | 81.1    | 82.5    | 84.8   | 99.4    |
| HIG2    | 349.5  | 429.5   | 150.3  | 161.4   | 158.8   | 216.4   | 272.5  | 278.2   |
| HIGD1A  | 1612.5 | 1657.9  | 789.7  | 783.9   | 488     | 795.7   | 1640.4 | 3449.4  |
| HIGD1B  | 86.6   | 101.8   | 90.3   | 81.8    | 86.8    | 88.6    | 102.2  | 115.6   |
| HIGD2A  | 3577.1 | 4834.4  | 2086.8 | 1978.9  | 1496.4  | 1934.1  | 3360.3 | 4895.6  |
| HIGD2BP | 79.1   | 88.4    | 92.2   | 84.1    | 95.5    | 88.5    | 83.3   | 89.2    |
| HIGD2BP | 100.6  | 104.5   | 85.3   | 83.8    | 81.6    | 84.5    | 96.3   | 100     |



|           |         |         |         |         |         |         |         |         |
|-----------|---------|---------|---------|---------|---------|---------|---------|---------|
| HILS1     | 92.1    | 108.3   | 98.2    | 86.5    | 87.4    | 92.4    | 93.1    | 88.8    |
| HINT1     | 13339.9 | 15559.5 | 11174.4 | 12263.4 | 10279.1 | 13228.4 | 11203.9 | 16302.2 |
| HINT2     | 1482.2  | 1675.2  | 1136.7  | 1085.3  | 861     | 1021.1  | 1407.4  | 1872.6  |
| HINT3     | 91.6    | 102.3   | 91.3    | 91.6    | 93.3    | 89.4    | 92.4    | 89      |
| HIP1      | 197.4   | 354.9   | 218.9   | 133.6   | 133.2   | 167.9   | 238.5   | 297.2   |
| HIP1R     | 88.9    | 123.9   | 104.2   | 101.7   | 92.8    | 97.1    | 93.5    | 116     |
| HIP1R     | 102     | 119.5   | 98      | 88.5    | 80.7    | 95.4    | 97.7    | 121.5   |
| HIP1R     | 108.2   | 106.7   | 103.6   | 88.8    | 99      | 98.9    | 96.1    | 114.3   |
| HIP2      | 101.9   | 110.9   | 86.7    | 85      | 84.8    | 91.7    | 99.2    | 118     |
| HIPK1     | 70.5    | 88.5    | 94.9    | 83.3    | 81.5    | 80.1    | 82      | 82.4    |
| HIPK1     | 79.5    | 92.8    | 94.2    | 87.4    | 80      | 95.1    | 88      | 83.3    |
| HIPK1     | 100.1   | 104.4   | 105     | 102.5   | 93.6    | 90.2    | 98.5    | 112.4   |
| HIPK1     | 93      | 120.7   | 92.1    | 81.7    | 84.2    | 89      | 96.3    | 108.3   |
| HIPK2     | 168     | 226.8   | 115     | 224.4   | 146.9   | 158.6   | 224.4   | 297.5   |
| HIPK3     | 155.9   | 214     | 131.9   | 96.6    | 110.7   | 134.1   | 117.8   | 124.5   |
| HIPK3     | 195.2   | 256.8   | 116.2   | 112.2   | 99.9    | 120.2   | 153.8   | 213.6   |
| HIPK4     | 86.7    | 103.8   | 96.8    | 82.8    | 83.9    | 91.8    | 87.8    | 99.2    |
| HIRA      | 131.7   | 162.6   | 98      | 92.4    | 94.2    | 102.6   | 115.2   | 145.1   |
| HIRIP3    | 1464.1  | 1959.2  | 888.5   | 580.7   | 508.7   | 598.4   | 1019.5  | 694.1   |
| HISPPD1   | 90.3    | 91.4    | 94.5    | 91.3    | 85.5    | 90.3    | 87.2    | 102.6   |
| HISPPD2A  | 220.7   | 286.1   | 359.2   | 406.7   | 329.6   | 555.3   | 212.3   | 300.6   |
| HISPPD2A  | 72.4    | 79.5    | 88.8    | 87.5    | 94.3    | 82.9    | 86.9    | 77      |
| HISPPD2A  | 89      | 114.1   | 103.5   | 98.9    | 97.6    | 89.7    | 92.3    | 96.2    |
| HIST1H1A  | 103.6   | 117.9   | 112.2   | 104.2   | 106.6   | 110.3   | 102.4   | 95      |
| HIST1H1B  | 86.2    | 97.4    | 110.1   | 103.1   | 92.8    | 98.3    | 88.4    | 89.8    |
| HIST1H1C  | 263.7   | 313.1   | 120.5   | 138     | 118.1   | 117.8   | 267     | 314.1   |
| HIST1H1D  | 92.4    | 111     | 101.2   | 99.1    | 96.3    | 93.3    | 92.7    | 99.1    |
| HIST1H1E  | 75      | 82.6    | 88      | 86.7    | 80      | 76.3    | 83.6    | 76.1    |
| HIST1H1T  | 90.1    | 105.6   | 93.8    | 98.9    | 88.4    | 87.6    | 91.6    | 100     |
| HIST1H2AA | 96.5    | 101.8   | 110.1   | 96.9    | 97.8    | 96      | 93.7    | 99.2    |
| HIST1H2AB | 112.1   | 112.7   | 81      | 86.9    | 86.1    | 76.9    | 94.1    | 113.9   |
| HIST1H2AC | 91.7    | 116.9   | 83.2    | 98.7    | 96.1    | 96.2    | 101     | 103.8   |
| HIST1H2AC | 80.8    | 83.1    | 87.5    | 79.4    | 78.7    | 80      | 77.2    | 79.1    |
| HIST1H2AE | 83.3    | 91.1    | 89.3    | 91.8    | 90.8    | 87.7    | 88      | 85.9    |
| HIST1H2AC | 75.3    | 75.8    | 90.4    | 78.1    | 77.5    | 82      | 81.9    | 76.8    |
| HIST1H2AF | 91.9    | 94.1    | 95      | 98.5    | 90.3    | 92.3    | 88.5    | 89.3    |
| HIST1H2AI | 106.8   | 118.8   | 94.5    | 96.3    | 90.6    | 96.7    | 107.1   | 112.1   |
| HIST1H2AJ | 94.7    | 96.9    | 87.8    | 92.7    | 84.6    | 91.7    | 92.9    | 95.7    |
| HIST1H2AK | 94.3    | 115.7   | 93.5    | 81.5    | 80.4    | 81.3    | 85.6    | 106.5   |
| HIST1H2AN | 106.7   | 104     | 101.5   | 106.6   | 109.8   | 94.4    | 101.7   | 102.5   |
| HIST1H2BA | 77.9    | 80.9    | 93.7    | 78.3    | 80.6    | 92.5    | 80.1    | 78.6    |
| HIST1H2BB | 89      | 101.2   | 91      | 89.9    | 84.6    | 85.8    | 88.6    | 96      |
| HIST1H2BC | 122.9   | 138.5   | 102.1   | 98      | 88.8    | 99.9    | 135.5   | 147.4   |
| HIST1H2BD | 143.8   | 187     | 138.4   | 130.6   | 133.5   | 135.6   | 152.1   | 175.5   |
| HIST1H2BD | 133.5   | 146.2   | 114.2   | 140.5   | 117.2   | 110.5   | 116.8   | 128.6   |
| HIST1H2BD | 78      | 77.1    | 95.1    | 84.8    | 75.9    | 86      | 72      | 81.7    |
| HIST1H2BE | 119.6   | 139.2   | 108.2   | 100.8   | 103.1   | 96.9    | 117.8   | 133.7   |
| HIST1H2BF | 111.8   | 129     | 112.5   | 157.7   | 161     | 113.3   | 112.2   | 125.3   |
| HIST1H2BG | 129.7   | 160.7   | 100.1   | 107.7   | 105     | 109.8   | 129.6   | 133.3   |
| HIST1H2BH | 763.5   | 960.2   | 269.3   | 281.7   | 221.5   | 238.3   | 674.9   | 782.4   |

|           |         |         |         |         |         |        |         |        |
|-----------|---------|---------|---------|---------|---------|--------|---------|--------|
| HIST1H2BI | 72.3    | 84.2    | 89.6    | 80.5    | 77.6    | 77.7   | 79.5    | 81.6   |
| HIST1H2BJ | 840.6   | 833     | 415.3   | 339.4   | 335.5   | 378    | 749.3   | 790.2  |
| HIST1H2BK | 1486.7  | 2117.4  | 944.3   | 1848    | 1268.5  | 1826.5 | 1483.6  | 1868.2 |
| HIST1H2BL | 85.6    | 92.9    | 86.4    | 81.4    | 87.1    | 96.2   | 89.3    | 94.1   |
| HIST1H2BN | 128.7   | 144.9   | 104.3   | 93.6    | 90.1    | 96.1   | 108.2   | 126.5  |
| HIST1H2BC | 79.7    | 88.5    | 93.8    | 90.3    | 83.2    | 82.3   | 81.8    | 83.2   |
| HIST1H3A  | 131.9   | 152     | 105.4   | 98.9    | 96.4    | 108.8  | 126.6   | 143.3  |
| HIST1H3B  | 97.1    | 103.5   | 91.4    | 93.8    | 80.9    | 90.5   | 91.7    | 86.8   |
| HIST1H3C  | 155.1   | 193.1   | 120.1   | 128.4   | 102.8   | 135    | 167.3   | 174.5  |
| HIST1H3D  | 131     | 154.5   | 117.6   | 102.4   | 110     | 109.7  | 135.3   | 143.6  |
| HIST1H3F  | 119.5   | 151.1   | 100     | 106.3   | 91.7    | 97.2   | 116.9   | 150.4  |
| HIST1H3G  | 99.7    | 134.6   | 105.5   | 98.4    | 94.8    | 102.2  | 115.5   | 135.2  |
| HIST1H3H  | 104.4   | 94.2    | 100.8   | 109.2   | 95.1    | 111.9  | 105.4   | 106.1  |
| HIST1H3I  | 101.4   | 107.9   | 114.6   | 117.9   | 99.1    | 110.6  | 108.6   | 105.9  |
| HIST1H3J  | 113.1   | 133.9   | 103.1   | 120.6   | 121.1   | 134.3  | 124     | 118.1  |
| HIST1H4A  | 94.7    | 125.4   | 96.6    | 92.3    | 80.1    | 92     | 102.4   | 127.1  |
| HIST1H4B  | 90.9    | 101.3   | 115.7   | 127     | 119     | 103.7  | 99.8    | 101.2  |
| HIST1H4C  | 23877.8 | 23647.7 | 17831.1 | 14033.3 | 13444.7 | 6926.8 | 19749.8 | 19253  |
| HIST1H4D  | 72      | 85.2    | 95.2    | 72.2    | 77.1    | 89.8   | 73      | 80     |
| HIST1H4E  | 86.5    | 102.6   | 96      | 106.5   | 94.9    | 103.3  | 107.2   | 107.9  |
| HIST1H4F  | 79.4    | 98.5    | 92.8    | 99.7    | 91.7    | 104.1  | 87      | 85.8   |
| HIST1H4G  | 84.8    | 88.5    | 96.8    | 86.7    | 79.6    | 89.5   | 84.6    | 88.6   |
| HIST1H4H  | 110.1   | 122.2   | 90.6    | 91.9    | 95.7    | 77.2   | 109.9   | 114.7  |
| HIST1H4I  | 90.8    | 96.7    | 98.6    | 90.2    | 85.8    | 94.7   | 94.4    | 103.1  |
| HIST1H4J  | 100.6   | 106.7   | 94.5    | 79.6    | 88.1    | 96.9   | 102.4   | 111.8  |
| HIST1H4L  | 81.8    | 92.8    | 89.6    | 83.9    | 79.4    | 82.1   | 89      | 91     |
| HIST2H2AA | 390.3   | 521.2   | 272.9   | 368.3   | 261.2   | 316.1  | 393.3   | 518.9  |
| HIST2H2AB | 134.4   | 148.7   | 106.4   | 111     | 94      | 109.9  | 133     | 136.8  |
| HIST2H2AC | 1100.4  | 1297.1  | 973.2   | 898.7   | 717.8   | 843.5  | 1126    | 1269.4 |
| HIST2H2BE | 132.8   | 145.2   | 98      | 101.7   | 93.1    | 104.7  | 128.2   | 166.5  |
| HIST2H2BF | 189.2   | 270.5   | 140.5   | 142.4   | 132.9   | 112.8  | 157     | 171.3  |
| HIST2H3C  | 122.9   | 135.3   | 99.8    | 126.1   | 119.5   | 109.2  | 114.3   | 124.7  |
| HIST2H4A  | 140.4   | 167.7   | 118.4   | 124.9   | 117     | 112.1  | 153.7   | 163.9  |
| HIST3H2A  | 218.4   | 301.6   | 159.2   | 116.5   | 119     | 143.6  | 198.4   | 243.8  |
| HIST3H2BB | 96.3    | 101.1   | 101.8   | 99.8    | 88.4    | 96.7   | 98.1    | 97.9   |
| HIST3H3   | 98.1    | 122.4   | 98.2    | 92.2    | 86.5    | 85.6   | 93.7    | 106.2  |
| HIST4H4   | 90.4    | 91.1    | 91      | 87.2    | 86.1    | 89.1   | 76.9    | 85.8   |
| HIVEP1    | 104.1   | 124.2   | 102.1   | 99.7    | 97.2    | 111.6  | 112.5   | 120.5  |
| HIVEP2    | 247.4   | 293.1   | 175.5   | 144.6   | 136.8   | 157.6  | 262.6   | 288    |
| HIVEP3    | 104.1   | 119.1   | 111.2   | 106.5   | 99.4    | 109.2  | 97.9    | 121.4  |
| HK1       | 1486    | 1829.2  | 1872.3  | 2137.3  | 1463.1  | 2298.2 | 1138    | 1801.7 |
| HK1       | 102.6   | 124.5   | 97.4    | 110.8   | 90.2    | 86.5   | 100.4   | 104.7  |
| HK1       | 86.6    | 104.1   | 89.6    | 88.8    | 79.4    | 78.5   | 95.4    | 96.5   |
| HK1       | 77.6    | 88      | 94.7    | 96      | 84.6    | 87     | 87.6    | 78.8   |
| HK2       | 380.4   | 489.4   | 153.1   | 182.1   | 158.4   | 251.9  | 311.8   | 504.2  |
| HK3       | 159.9   | 186.9   | 228.2   | 201.4   | 184.7   | 332.9  | 130.4   | 197.3  |
| HKDC1     | 116.3   | 136.1   | 81.3    | 77.3    | 78.2    | 80.9   | 109.7   | 121.4  |
| HKR1      | 134.8   | 201.2   | 114.7   | 106.4   | 110     | 127.9  | 141.2   | 132.9  |
| HKR2      | 107.3   | 119.1   | 112     | 99      | 91.4    | 106.3  | 94.5    | 125.8  |
| HKR3      | 702.5   | 768.6   | 590     | 478.3   | 493.1   | 586.7  | 602.8   | 837.4  |

|          |         |         |        |        |        |        |        |         |
|----------|---------|---------|--------|--------|--------|--------|--------|---------|
| HLA-A    | 10010.9 | 13684.9 | 9065.6 | 7121.3 | 5332.4 | 9270.9 | 8049.4 | 13220.6 |
| HLA-C    | 69.9    | 70.8    | 87.5   | 77.5   | 74     | 75.7   | 71.2   | 74.7    |
| HLA-DMA  | 579.9   | 708.7   | 390.9  | 505.1  | 502.4  | 441.7  | 535.4  | 492.8   |
| HLA-DMB  | 150.3   | 145.9   | 124.3  | 199.3  | 169.1  | 222.7  | 119.4  | 137.4   |
| HLA-DOA  | 81.5    | 88.1    | 81     | 78.7   | 86.1   | 78.1   | 76.2   | 92.6    |
| HLA-DOB  | 102.2   | 115     | 108.6  | 100.1  | 90.1   | 94.4   | 96.5   | 110.7   |
| HLA-DPA1 | 179.2   | 210.7   | 138    | 147.4  | 127.6  | 150.2  | 160.8  | 179     |
| HLA-DPB1 | 76.1    | 86.9    | 85.2   | 82.6   | 78.2   | 86.1   | 81.4   | 83.4    |
| HLA-DPB2 | 80.9    | 91.5    | 92.4   | 77.6   | 84     | 87.8   | 83.2   | 82.3    |
| HLA-DQA1 | 81      | 84.2    | 89.2   | 92.9   | 83.2   | 90.6   | 79.2   | 83.4    |
| HLA-DQA2 | 109.4   | 118.1   | 93.5   | 84.6   | 95.5   | 92.1   | 101    | 123.8   |
| HLA-DQB1 | 92.3    | 98.8    | 102.4  | 90.6   | 80.6   | 97.1   | 93.8   | 97.3    |
| HLA-DQB2 | 86      | 93.8    | 108.3  | 103.2  | 95.2   | 85.7   | 100    | 88.7    |
| HLA-DRA  | 655.8   | 841.3   | 421.4  | 362.5  | 344.8  | 458.4  | 561.3  | 1112.6  |
| HLA-DRB1 | 1887.5  | 2580    | 579.7  | 813    | 623.6  | 746    | 1699.1 | 2150.9  |
| HLA-DRB3 | 454.6   | 565.2   | 220.2  | 206.8  | 186.6  | 292.5  | 402.4  | 522.1   |
| HLA-DRB4 | 85.4    | 100.4   | 105.9  | 98     | 94.8   | 82.8   | 91.9   | 104     |
| HLA-DRB5 | 1012.4  | 1333.2  | 663.2  | 395    | 320.9  | 449.2  | 837.4  | 1165.2  |
| HLA-DRB6 | 571.3   | 839.3   | 241.4  | 233.9  | 192.9  | 224.2  | 635.8  | 698.5   |
| HLA-E    | 366.4   | 473.4   | 177.1  | 137.4  | 129.9  | 187.3  | 335.5  | 450.5   |
| HLA-F    | 781     | 1060.1  | 401.8  | 394.1  | 347.7  | 466.5  | 604.4  | 803.8   |
| HLA-G    | 186.4   | 225.5   | 130.9  | 109    | 106.4  | 115.7  | 185.5  | 263.4   |
| HLA-H    | 2670.2  | 3737.7  | 1637.9 | 1288.6 | 1144.3 | 1786.3 | 2225.3 | 2687.6  |
| HLCS     | 92.6    | 107     | 81.7   | 90.1   | 82.9   | 86.2   | 84.5   | 108     |
| HLF      | 108.1   | 113     | 100.3  | 92     | 89.2   | 90     | 95.9   | 107.7   |
| HLRC1    | 190.4   | 234.4   | 103.5  | 92.6   | 86.7   | 94.1   | 179.9  | 315     |
| HLX1     | 523.2   | 744.9   | 474.8  | 371.9  | 345.7  | 478    | 420.3  | 750.1   |
| HLXB9    | 107.3   | 117.2   | 100.2  | 108.4  | 105.4  | 107.9  | 115.8  | 139.9   |
| HM13     | 78.4    | 100     | 91.4   | 92.4   | 90.1   | 87.3   | 85.2   | 86.1    |
| HM13     | 876.6   | 1142.2  | 574.9  | 408.6  | 348.2  | 336.2  | 799.2  | 1029.4  |
| HM13     | 130.6   | 137.7   | 110.9  | 118    | 113.4  | 106.2  | 115.9  | 134.6   |
| HMBOX1   | 278.3   | 383.5   | 143.3  | 161.5  | 140.6  | 188.1  | 309.4  | 488.1   |
| HMBS     | 117.9   | 135.5   | 89     | 93.5   | 93.8   | 90.4   | 115.5  | 151     |
| HMBS     | 1783.1  | 2649    | 811.8  | 488.4  | 412.3  | 531.7  | 1324.2 | 1511.8  |
| HMBS     | 2485.1  | 3534.3  | 1489.1 | 962.2  | 731.8  | 1140.5 | 1951.9 | 1641.4  |
| HMCN1    | 80.2    | 80.7    | 85.3   | 88.1   | 89.9   | 93.9   | 83.2   | 85      |
| HMFN0839 | 215     | 294.3   | 157.8  | 297.6  | 156.3  | 264.3  | 509.1  | 1082.7  |
| HMG1L1   | 1108.6  | 1483.9  | 271.6  | 233.6  | 185.4  | 317.9  | 996.6  | 1660.5  |
| HMG20A   | 194.7   | 298     | 180.2  | 201.2  | 162.9  | 307.2  | 174.9  | 233.8   |
| HMG20B   | 2223.2  | 2588.2  | 1466.6 | 1287.1 | 1390.2 | 1604.4 | 1902.1 | 1948.2  |
| HMG2L1   | 201.6   | 274.4   | 135.5  | 103.4  | 114    | 145.8  | 165.8  | 204.5   |
| HMG2L1   | 125.4   | 134.3   | 94.9   | 95.9   | 90.7   | 105.5  | 127.4  | 164     |
| HMG4L    | 92.4    | 95.9    | 88.4   | 92.6   | 84.4   | 79.9   | 89.8   | 93.9    |
| HMGA1    | 131.5   | 167.7   | 99.6   | 100    | 87.9   | 90.5   | 127.2  | 160.8   |
| HMGA1    | 80.7    | 95.7    | 96.8   | 86.5   | 87.7   | 92.4   | 84.6   | 92.7    |
| HMGA1    | 108.1   | 129.8   | 97.5   | 85     | 94.5   | 82.9   | 106.7  | 114.7   |
| HMGA1    | 2388    | 3564.7  | 3826.3 | 3296   | 2595.5 | 4527.3 | 2082.5 | 5094.7  |
| HMGA2    | 106.1   | 126     | 85.8   | 85.9   | 79.9   | 88.9   | 107.9  | 131.6   |
| HMGA2    | 119.9   | 125.2   | 105.2  | 97.3   | 84.4   | 92.4   | 106.3  | 112.8   |
| HMGB1    | 478.8   | 515.8   | 179    | 217    | 173    | 209.4  | 400.5  | 814.8   |

|           |         |         |         |         |         |         |         |         |
|-----------|---------|---------|---------|---------|---------|---------|---------|---------|
| HMGB2     | 6584.9  | 6214.5  | 2560.5  | 1938.3  | 1923.9  | 3172.8  | 4879.7  | 8225.2  |
| HMGB3     | 659.8   | 965.2   | 462.1   | 425.7   | 316.5   | 508.1   | 627.4   | 820.5   |
| HMGB4     | 94.5    | 107.3   | 102.5   | 104.5   | 97.4    | 93.2    | 88.9    | 98      |
| HMGB4     | 90.5    | 102.6   | 96.1    | 87.6    | 85.8    | 84.7    | 87.3    | 83.5    |
| HMGCL     | 225.7   | 298.6   | 183.3   | 208.2   | 192     | 216.1   | 227.1   | 270.5   |
| HMGCLL1   | 83.2    | 88.7    | 95.6    | 93.4    | 88.8    | 93.2    | 71.1    | 88      |
| HMGCLL1   | 99.7    | 114.9   | 93.3    | 88.7    | 78      | 98.5    | 102.9   | 109.4   |
| HMGCLL1   | 92.3    | 110.2   | 91.9    | 91.1    | 87.6    | 88      | 84.5    | 85.9    |
| HMGCR     | 1329.3  | 2087.4  | 1082.8  | 1935.8  | 1662.1  | 2269.7  | 1162    | 1545.7  |
| HMGCS1    | 1313.4  | 1725.4  | 754.4   | 1980.5  | 1729.6  | 2133.3  | 1265.7  | 1913.9  |
| HMGCS2    | 104.9   | 130.5   | 105.2   | 87.3    | 76.1    | 84.4    | 105.9   | 135.3   |
| HMGN1     | 22238.1 | 27720.2 | 18888.1 | 22561.6 | 19496.6 | 26935   | 19703.6 | 25793.6 |
| HMGN2     | 10364.9 | 13797.1 | 3482.2  | 1828.9  | 1237.1  | 2010.5  | 10171.3 | 11088.5 |
| HMGN3     | 142.7   | 174.8   | 85.4    | 104.4   | 93.8    | 96.4    | 162.4   | 199.3   |
| HMGN4     | 1179.7  | 1524.1  | 563.4   | 565.3   | 426.6   | 710.4   | 1133.4  | 1525.5  |
| HMHA1     | 352.8   | 370.8   | 250.9   | 184.3   | 201     | 210.1   | 293.7   | 221.9   |
| HMMR      | 2005.6  | 2204.9  | 755.4   | 547.8   | 465.5   | 899.6   | 1674.1  | 2487.1  |
| HMMR      | 2584.9  | 2895.6  | 1302.9  | 940.5   | 946.5   | 2044.2  | 1810.4  | 2538.6  |
| HMOX1     | 108.6   | 119.4   | 126.3   | 99      | 90.4    | 85.6    | 4005.1  | 17776.5 |
| HMOX2     | 116.7   | 138.8   | 90.5    | 84.6    | 78.2    | 97.6    | 109.2   | 154.5   |
| HMP19     | 108.7   | 138.3   | 99.2    | 80      | 79.1    | 90.4    | 106.3   | 137.7   |
| HMX1      | 83.1    | 93.6    | 105.6   | 86.9    | 93.2    | 96.3    | 87.8    | 87.7    |
| HMX2      | 164.6   | 207.5   | 228.4   | 108.4   | 111.9   | 117     | 154.1   | 272.4   |
| HN1       | 681.4   | 941.3   | 256.2   | 159.3   | 108.3   | 178.3   | 543.5   | 808.1   |
| HNF4A     | 108.2   | 128.7   | 98.2    | 98      | 80      | 90.9    | 117.3   | 121.8   |
| HNF4A     | 88.3    | 110.2   | 103.3   | 92.2    | 92      | 85.6    | 95.5    | 97.7    |
| HNF4G     | 261.7   | 346.1   | 241     | 168.4   | 139.3   | 267.4   | 208.5   | 287.3   |
| HNMT      | 2690.8  | 3518.4  | 863.6   | 818.3   | 505.6   | 986.8   | 2053.9  | 2957.9  |
| HNMT      | 526.2   | 655.7   | 419.5   | 321.5   | 257.4   | 355.4   | 581.4   | 764.8   |
| HNMT      | 511.5   | 615.5   | 276.3   | 286.3   | 200.2   | 379.4   | 322.4   | 464.9   |
| HNMT      | 103.1   | 132     | 103.7   | 112.1   | 100.5   | 116.4   | 95      | 108.7   |
| HNRNPG-T  | 76.8    | 89      | 84.7    | 85.2    | 74.6    | 85.2    | 83.6    | 94.1    |
| HNRPA0    | 1901.6  | 2532.9  | 1135.4  | 1074.6  | 660.9   | 1418.9  | 1222.9  | 2142.7  |
| HNRPA1    | 737     | 1194.4  | 358     | 274.4   | 210.8   | 268.2   | 484.7   | 534.6   |
| HNRPA1    | 440.2   | 522     | 181.5   | 139.1   | 128.2   | 153.1   | 369.8   | 365.8   |
| HNRPA1L-2 | 3068.7  | 4701.8  | 666.2   | 482     | 461     | 706.4   | 2728    | 3000.7  |
| HNRPA2B1  | 18268.1 | 20637.9 | 10452.2 | 9257.5  | 7070    | 11786.3 | 17253.2 | 22817.5 |
| HNRPA3    | 1764.2  | 3015.8  | 555.1   | 962.6   | 802.8   | 618.2   | 1594.1  | 1541.2  |
| HNRPA3P1  | 262.2   | 351.1   | 112.2   | 159.4   | 125.5   | 125.4   | 260.2   | 312.1   |
| HNRPAB    | 2015.4  | 2696    | 1422.2  | 989.6   | 806.6   | 1375.2  | 1489.5  | 1817.3  |
| HNRPAB    | 5277.6  | 7233.2  | 2829.7  | 2215.6  | 1503.3  | 2563.9  | 4346.3  | 6171.2  |
| HNRPAB    | 14130   | 18255.7 | 13586   | 9281.8  | 7474.8  | 10403.1 | 12462   | 17974.1 |
| HNRPC     | 953.2   | 1281.8  | 283.3   | 252.2   | 209.9   | 395     | 768.8   | 1060.7  |
| HNRPC     | 1173.2  | 1565.7  | 789.3   | 642.7   | 503.1   | 765     | 900.8   | 1102    |
| HNRPCL1   | 109.7   | 123.8   | 96.2    | 88.5    | 81.1    | 87.2    | 105.7   | 117.7   |
| HNRPD     | 19824.4 | 25063.8 | 9978.7  | 8956.8  | 6429.9  | 9660.6  | 19233.2 | 22441.3 |
| HNRPDL    | 891.7   | 1158.6  | 333     | 382.1   | 256.3   | 420.3   | 656.3   | 956.4   |
| HNRPDL    | 1582.8  | 1615.2  | 957.5   | 642.9   | 768.3   | 920.5   | 740.6   | 774.7   |
| HNRPF     | 295.7   | 344.7   | 177.3   | 172.4   | 137.1   | 204.4   | 263     | 361.8   |
| HNRPH1    | 95.9    | 114.5   | 83.4    | 92.1    | 95.9    | 99.5    | 80.6    | 99.3    |

|           |        |         |        |        |        |        |        |         |
|-----------|--------|---------|--------|--------|--------|--------|--------|---------|
| HNRPH2    | 638    | 1027.4  | 238.6  | 272.4  | 190.6  | 296.2  | 550.6  | 692.3   |
| HNRPH3    | 949.7  | 990.5   | 313    | 285.7  | 212.5  | 426.9  | 736.9  | 1214.4  |
| HNRPH3    | 86.4   | 92      | 92.9   | 85.6   | 80.8   | 90.7   | 85.6   | 94.3    |
| HNRPK     | 6096.7 | 7699.1  | 4835.8 | 4005.1 | 3058.6 | 6511.2 | 4494.1 | 8175.8  |
| HNRPL     | 1593.5 | 2294.4  | 1812   | 1302.4 | 1312   | 1344.7 | 1441.8 | 3670.1  |
| HNRPLL    | 355.6  | 392.2   | 132.7  | 139.6  | 126.1  | 192.9  | 316.8  | 547.8   |
| HNRPM     | 308.5  | 466.1   | 132.1  | 116.5  | 116.4  | 103.8  | 248.5  | 342.7   |
| HNRPM     | 9850.6 | 12718.6 | 6407.4 | 5699.2 | 4444.8 | 6839.1 | 8281.4 | 10906.6 |
| HNRPR     | 3148   | 4987    | 2572.3 | 2671.4 | 2279.7 | 3195.2 | 3269.2 | 3430.4  |
| HNRPU     | 620.1  | 684.2   | 422.8  | 713.7  | 563.1  | 506    | 639.9  | 925.9   |
| HNRPU     | 687.8  | 969.5   | 595.4  | 906.8  | 756.9  | 946.6  | 523.8  | 728.1   |
| HNRPUL1   | 2460.6 | 2984.5  | 2009.2 | 1697.5 | 993.9  | 1940.6 | 2286.2 | 5325.6  |
| HNRPUL1   | 5201.1 | 5915.1  | 5309.7 | 3034.8 | 2710.1 | 2774.9 | 5101.6 | 5595.7  |
| HNRPUL2   | 905.8  | 1018.2  | 374.9  | 396.6  | 366.9  | 356    | 740.8  | 932.3   |
| HNT       | 68.9   | 78.5    | 99.1   | 90.7   | 91.3   | 85.3   | 75.5   | 75.1    |
| HNT       | 102.7  | 103.2   | 101.9  | 98.4   | 90.1   | 95.3   | 98.5   | 103.4   |
| HNT       | 109.8  | 120.5   | 96.2   | 87.4   | 78.3   | 79.3   | 110.4  | 122.1   |
| HOMER1    | 134    | 151.1   | 127.2  | 108.1  | 85.6   | 126.8  | 110.2  | 173.1   |
| HOMER2    | 104.4  | 117.4   | 113.7  | 118.9  | 113.3  | 129.5  | 101.5  | 116.8   |
| HOMER2    | 168.5  | 197.6   | 137.7  | 168.2  | 136.4  | 192.8  | 151.1  | 190.2   |
| HOMER3    | 525.1  | 726.6   | 457.4  | 315.9  | 240.2  | 307.8  | 459.8  | 634.8   |
| HOM-TES-1 | 100.4  | 105.9   | 96.4   | 96.4   | 84     | 86.2   | 88.7   | 122.6   |
| HOM-TES-1 | 137.4  | 151.1   | 108.9  | 104.9  | 100.9  | 113    | 133.2  | 148.8   |
| HOM-TES-1 | 937.3  | 1007.5  | 494.2  | 411.4  | 444.1  | 502.1  | 635.4  | 716.3   |
| HOOK1     | 94.7   | 116.5   | 102.3  | 89.4   | 91.6   | 90.2   | 102.9  | 100.3   |
| HOOK2     | 265.2  | 268.1   | 209.2  | 152.8  | 155.3  | 208.3  | 204.5  | 308.2   |
| HOOK3     | 203.5  | 333.7   | 124.4  | 116.2  | 115.7  | 114.5  | 183.3  | 227.3   |
| HOP       | 123.2  | 122.3   | 105.7  | 90.1   | 84.7   | 89.6   | 119.8  | 118.3   |
| HOP       | 112.2  | 136.3   | 80.8   | 88.8   | 89.4   | 77     | 108.9  | 128.6   |
| HOP       | 69.8   | 77.5    | 81.7   | 81.8   | 81     | 88     | 80.7   | 86.6    |
| HORMAD1   | 89.9   | 89.3    | 99.6   | 82.4   | 88.4   | 83     | 90     | 91.8    |
| HORMAD2   | 79.4   | 99.2    | 89.3   | 87.7   | 100.2  | 87.8   | 85.1   | 86.4    |
| HOXA1     | 79.5   | 92.2    | 103.7  | 89.7   | 88.2   | 93.2   | 83.2   | 85.4    |
| HOXA1     | 107    | 111.1   | 108.6  | 96.7   | 100.3  | 96.5   | 96.2   | 105     |
| HOXA10    | 935.6  | 1161.8  | 425.6  | 463.4  | 356.1  | 433    | 954.8  | 1800.1  |
| HOXA10    | 180.2  | 197.2   | 137.6  | 95.1   | 92.6   | 93.4   | 174.2  | 183.5   |
| HOXA10    | 250.4  | 285.3   | 122.6  | 107.3  | 105.6  | 92.1   | 240.6  | 331.7   |
| HOXA11    | 163.2  | 217.6   | 139    | 148.1  | 138.3  | 151.8  | 141.4  | 212.1   |
| HOXA13    | 558.5  | 673.7   | 373.6  | 439.4  | 373.5  | 387.8  | 420.6  | 906.3   |
| HOXA2     | 97.5   | 104.4   | 89.7   | 87.2   | 80.8   | 82.1   | 101.3  | 105.8   |
| HOXA3     | 112.5  | 125.1   | 90.7   | 89.8   | 83.4   | 92.8   | 125    | 116.7   |
| HOXA3     | 91.9   | 99.4    | 100.7  | 93.3   | 91.2   | 95.5   | 95.9   | 104.1   |
| HOXA3     | 81.5   | 94      | 91.7   | 79.6   | 90.8   | 93.9   | 77.9   | 85.6    |
| HOXA3     | 75     | 87.1    | 84.5   | 83.8   | 81.6   | 85.9   | 78.2   | 92.6    |
| HOXA4     | 92.5   | 105.8   | 107.5  | 103.6  | 106.8  | 114    | 99     | 139.7   |
| HOXA5     | 537.5  | 760.1   | 402.4  | 284.2  | 276.7  | 355.5  | 575.1  | 617.1   |
| HOXA6     | 132.9  | 142.7   | 112.3  | 101.6  | 102.8  | 101    | 124.3  | 156.9   |
| HOXA7     | 105.4  | 113.4   | 98.3   | 96.2   | 87.9   | 86.8   | 112.3  | 113.1   |
| HOXA9     | 2572.4 | 2967.3  | 1145.7 | 1228.9 | 939.1  | 1516.1 | 2837.3 | 3946.1  |
| HOXA9     | 161.9  | 178.1   | 130.8  | 100.5  | 102.6  | 123.6  | 130.9  | 161.2   |

|        |        |        |        |        |        |        |        |        |
|--------|--------|--------|--------|--------|--------|--------|--------|--------|
| HOXB1  | 275.5  | 342.8  | 163.2  | 155.6  | 137.3  | 195.1  | 225    | 264.8  |
| HOXB13 | 76.2   | 92.5   | 93.6   | 99.2   | 77.4   | 80.3   | 76.2   | 86.5   |
| HOXB2  | 86.7   | 84.1   | 88.1   | 87.4   | 84.4   | 82.1   | 82.4   | 85.2   |
| HOXB3  | 88.7   | 88.1   | 106.4  | 86.7   | 95.2   | 90.8   | 83     | 86.1   |
| HOXB4  | 112.4  | 124.2  | 114.9  | 104    | 90.6   | 104.5  | 101.3  | 103.9  |
| HOXB5  | 124.1  | 150.5  | 103.8  | 78.3   | 87.9   | 86.7   | 116.2  | 138    |
| HOXB6  | 136.9  | 160.9  | 142.2  | 133.7  | 133.1  | 129.6  | 113    | 137    |
| HOXB6  | 195.2  | 217.6  | 141.2  | 113.6  | 118.1  | 96.2   | 188.1  | 247    |
| HOXB7  | 195    | 283.3  | 222.3  | 109.8  | 104.7  | 118.3  | 210.7  | 248.8  |
| HOXB8  | 99.4   | 94.2   | 78.2   | 88.5   | 79.7   | 79.3   | 85.8   | 103.5  |
| HOXB9  | 105.3  | 118.3  | 92.9   | 79.8   | 77.3   | 85.3   | 96.5   | 112.1  |
| HOXC10 | 102.7  | 103.2  | 93.9   | 98.1   | 86.9   | 94.3   | 88.2   | 100.1  |
| HOXC11 | 230.4  | 242.3  | 97.8   | 118.3  | 114.8  | 136.8  | 208    | 251    |
| HOXC12 | 88.8   | 98.5   | 90.3   | 79.4   | 76.7   | 84.1   | 87     | 98.9   |
| HOXC13 | 101    | 118.6  | 86.5   | 90.5   | 80.5   | 85.1   | 94.6   | 117.1  |
| HOXC4  | 87.4   | 92.4   | 113.1  | 95.3   | 91.1   | 95.5   | 85.8   | 88.9   |
| HOXC4  | 85     | 109.7  | 79.5   | 84.7   | 88.9   | 95.7   | 96     | 94.6   |
| HOXC5  | 94.3   | 96.7   | 99.5   | 86.1   | 94.3   | 84.9   | 93.8   | 97.7   |
| HOXC6  | 86.2   | 99     | 90.9   | 99.8   | 96.3   | 101.9  | 83.9   | 89.9   |
| HOXC6  | 98.2   | 110.2  | 104.7  | 101.6  | 94.9   | 89.6   | 90.3   | 99.9   |
| HOXC6  | 157.6  | 199.7  | 125.5  | 108.6  | 109.1  | 104.2  | 141.3  | 196.1  |
| HOXC8  | 112.7  | 116.7  | 96.1   | 101.6  | 95.8   | 90.5   | 101.9  | 111.4  |
| HOXC9  | 95.2   | 117.9  | 92.8   | 81.2   | 85.8   | 82.8   | 89.8   | 112    |
| HOXD1  | 79.2   | 85.5   | 102.9  | 87.2   | 86.8   | 87.6   | 88.2   | 87     |
| HOXD10 | 87     | 98.7   | 89.6   | 86.1   | 76.6   | 84.9   | 93.7   | 96.9   |
| HOXD11 | 124.9  | 152.1  | 96.3   | 79     | 75.6   | 91.4   | 98.8   | 137.4  |
| HOXD12 | 175.4  | 242.1  | 140.5  | 116.6  | 103.4  | 117.8  | 181.6  | 202.4  |
| HOXD13 | 289.8  | 324.6  | 151    | 136.1  | 125.5  | 141.6  | 275.6  | 292    |
| HOXD3  | 117.4  | 147.5  | 124.8  | 113.6  | 103.6  | 121.7  | 122.9  | 129.6  |
| HOXD4  | 124    | 139.9  | 100.1  | 93.5   | 86.2   | 98.4   | 127.3  | 130    |
| HOXD8  | 119.3  | 119    | 103.5  | 96.6   | 92.9   | 91.4   | 119    | 116.8  |
| HOXD9  | 85.2   | 93.3   | 89.8   | 87.4   | 85     | 90.1   | 78.7   | 81.3   |
| HP     | 125.3  | 148.9  | 108    | 150.2  | 114.5  | 189.1  | 116.8  | 120.8  |
| HP1BP3 | 304.4  | 400.3  | 168.1  | 151.6  | 136.9  | 139.9  | 232.6  | 283.3  |
| HPCA   | 84.2   | 95.4   | 98.7   | 89.4   | 96.5   | 89     | 79.7   | 88.9   |
| HPCAL1 | 105.9  | 121.7  | 106.4  | 86.4   | 90.6   | 87.5   | 119.9  | 149    |
| HPCAL1 | 3243.9 | 4600.6 | 2113.2 | 1730.3 | 1648.6 | 2226.7 | 5324.2 | 5378.6 |
| HPCAL1 | 156.6  | 185.1  | 91.8   | 89.6   | 83.6   | 80.7   | 142.8  | 212.1  |
| HPCAL4 | 112.1  | 124.6  | 91.4   | 78.3   | 82.4   | 81.2   | 94.8   | 129.7  |
| HPD    | 119.8  | 148.2  | 91.2   | 88.3   | 84.5   | 85.2   | 127.3  | 122.3  |
| HPGD   | 117.3  | 123.8  | 87.1   | 90.1   | 93.8   | 88.8   | 116.4  | 120.8  |
| H-PLK  | 88     | 97.3   | 90.8   | 92.5   | 87.5   | 92.8   | 81.7   | 90.8   |
| HPN    | 79.9   | 96.2   | 97.8   | 89     | 92.3   | 89.7   | 89.3   | 86.7   |
| HPN    | 104.7  | 114.7  | 102    | 89     | 89.2   | 97.7   | 102.4  | 112.4  |
| HPN    | 84.2   | 91.7   | 92.5   | 90.6   | 88.9   | 78.4   | 74.3   | 78.8   |
| HPR    | 125.7  | 151.3  | 97.7   | 97.9   | 86.1   | 89.5   | 129.3  | 132.1  |
| HPRT1  | 5340.1 | 6129.5 | 3468.3 | 3434.5 | 2526.9 | 3651.8 | 5041.1 | 8023.6 |
| HPS1   | 153.9  | 194.6  | 183.2  | 184.3  | 154.8  | 160.5  | 158.1  | 198.9  |
| HPS1   | 328.7  | 370.1  | 308.1  | 216.5  | 183.9  | 253.7  | 334.6  | 409.1  |
| HPS1   | 129.9  | 166.8  | 127.4  | 123.4  | 113.1  | 124.2  | 133.5  | 138.8  |

|           |        |        |       |       |       |        |        |        |
|-----------|--------|--------|-------|-------|-------|--------|--------|--------|
| HPS3      | 359.4  | 539.9  | 247.3 | 181.9 | 147.9 | 279.8  | 280.9  | 369.9  |
| HPS4      | 95.1   | 121.3  | 93    | 84.2  | 77.3  | 85.1   | 97.2   | 118.4  |
| HPS4      | 123.8  | 131.2  | 115   | 122.1 | 117.2 | 135.6  | 112.5  | 116.9  |
| HPS4      | 209.2  | 218.4  | 186.7 | 215.9 | 182.4 | 214.2  | 159.5  | 160.6  |
| HPS4      | 111.8  | 135.2  | 101.3 | 87.4  | 100.7 | 81.4   | 104.5  | 127.3  |
| HPS5      | 567.5  | 641.8  | 474.1 | 460.9 | 371.1 | 559.5  | 439.7  | 775.6  |
| HPS5      | 87     | 97.7   | 98.1  | 91.8  | 90.2  | 87.3   | 87     | 91.9   |
| HPS6      | 1963.9 | 2346.7 | 1530  | 952.3 | 811.2 | 855.4  | 1732.9 | 1705.3 |
| HPSE      | 293.2  | 392.8  | 155.9 | 153.9 | 126.5 | 173.5  | 259.9  | 413.2  |
| HPSE2     | 81.8   | 83.6   | 87    | 86.1  | 85.6  | 82.8   | 82.4   | 86.4   |
| HPX       | 112    | 126.4  | 93.3  | 79.4  | 80.9  | 92.4   | 113.6  | 123.9  |
| HR        | 65.6   | 78.3   | 82.5  | 79.3  | 75.9  | 66.7   | 71.5   | 66.5   |
| HR        | 85.3   | 104.7  | 85.6  | 79.3  | 74.7  | 79.3   | 104.6  | 106.7  |
| HRAS      | 669.1  | 755.3  | 370.1 | 248.3 | 221.7 | 228.6  | 648.2  | 1049.3 |
| HRAS      | 105.7  | 121.1  | 93.1  | 94.7  | 82.5  | 94.5   | 108.4  | 120.8  |
| HRASLS    | 84.3   | 106.6  | 96.6  | 91    | 87.7  | 93.2   | 87.4   | 88.4   |
| HRASLS2   | 116.4  | 130.3  | 97.7  | 83.9  | 86    | 93.8   | 111.4  | 135.9  |
| HRASLS3   | 73.5   | 82.3   | 99.2  | 97.8  | 84.3  | 103.6  | 82.6   | 83.9   |
| HRASLS5   | 74.9   | 80.6   | 102.9 | 91.3  | 96.9  | 85.3   | 76.9   | 85.1   |
| HRB       | 89.9   | 109.4  | 97    | 86.5  | 94.5  | 99.5   | 91.8   | 93.4   |
| HRB2      | 217.5  | 262.3  | 175.2 | 170.4 | 151.4 | 209.9  | 165    | 245.7  |
| HRBL      | 146.7  | 176.4  | 113.5 | 108.9 | 102.4 | 108.9  | 151.3  | 167.3  |
| HRC       | 106.2  | 119.9  | 124.5 | 113.6 | 113.4 | 116.4  | 108.1  | 135.6  |
| HRG       | 77.7   | 96.2   | 92.2  | 82.3  | 89.6  | 79.9   | 96.5   | 77     |
| HRH1      | 120.4  | 159.8  | 100.2 | 99    | 80.3  | 93.5   | 105.9  | 145.2  |
| HRH2      | 102.7  | 112.7  | 87.3  | 94.5  | 91.6  | 81.6   | 106.9  | 109.6  |
| HRH3      | 97.1   | 132.5  | 98.8  | 95.9  | 84.5  | 82     | 91.3   | 108.7  |
| HRH4      | 101.8  | 118.2  | 90.9  | 88.5  | 79.4  | 90.1   | 101.6  | 116.9  |
| HRIHFB212 | 232.8  | 262.7  | 177.5 | 166.2 | 161   | 174.5  | 175.6  | 179.7  |
| HRIHFB212 | 125.1  | 149.7  | 116.1 | 117.9 | 131.6 | 136.8  | 125.9  | 128.8  |
| HRIHFB212 | 767.2  | 861.1  | 660.4 | 535.7 | 460.1 | 533    | 688.9  | 951.8  |
| HRK       | 71.1   | 79.3   | 80.3  | 77.4  | 75.2  | 76.4   | 80.4   | 79     |
| HRNR      | 98     | 104.5  | 84.8  | 94.3  | 79.1  | 86.5   | 101.5  | 110.3  |
| HRSP12    | 291.9  | 351.5  | 180.1 | 152.7 | 132.3 | 137.5  | 277.4  | 483.1  |
| HS1BP3    | 206.3  | 295.8  | 215.5 | 168.2 | 147.6 | 208.2  | 215.1  | 351.9  |
| HS2ST1    | 173.1  | 175.2  | 108   | 108.4 | 98.8  | 131    | 138.4  | 214.8  |
| HS3ST1    | 108.9  | 113.7  | 96.3  | 88.3  | 88.4  | 94.9   | 98.7   | 99.9   |
| HS3ST2    | 93.8   | 100.7  | 98.7  | 98.1  | 89.1  | 99.1   | 86.2   | 94.1   |
| HS3ST3A1  | 222.9  | 248.4  | 161.8 | 126.9 | 110.6 | 129.5  | 178.4  | 259.6  |
| HS3ST3B1  | 102.1  | 118.3  | 95.9  | 93    | 90.3  | 93.9   | 115.6  | 113.2  |
| HS3ST4    | 110.6  | 138.3  | 89.3  | 98.4  | 92.3  | 80.6   | 120.3  | 114.9  |
| HS3ST5    | 95.8   | 103.3  | 85.5  | 84.3  | 78.3  | 80.8   | 92.8   | 114.2  |
| HS3ST6    | 85.5   | 89.3   | 96.5  | 85.2  | 82.2  | 87.8   | 88.3   | 103.3  |
| HS6ST1    | 127.9  | 142.5  | 112.4 | 106.7 | 110   | 101.9  | 116.4  | 126.3  |
| HS6ST2    | 77.3   | 87     | 92.1  | 91.4  | 86    | 92.4   | 76     | 87.8   |
| HS6ST2    | 109    | 121.8  | 90.2  | 84.4  | 78.1  | 85.8   | 103.4  | 121.8  |
| HS6ST2    | 98.7   | 108.7  | 92.9  | 84.1  | 81.2  | 82.2   | 104    | 116.3  |
| HS6ST3    | 84.7   | 109    | 93.8  | 92.6  | 95.3  | 91.3   | 93.5   | 94.3   |
| HS747E2A  | 74.3   | 83.8   | 83.4  | 80.4  | 73.6  | 72.2   | 88.6   | 87.6   |
| HSA9761   | 2246.5 | 2993.4 | 889.6 | 820.1 | 618.2 | 1026.1 | 1685   | 2150.7 |

|           |         |         |         |         |         |         |        |         |
|-----------|---------|---------|---------|---------|---------|---------|--------|---------|
| HSBP1     | 2308.9  | 3095.2  | 1907.7  | 1772.4  | 1463.7  | 1833    | 2096.3 | 2517.9  |
| HSCARG    | 1948.6  | 2637.4  | 818.4   | 753.2   | 594.4   | 765     | 1721.5 | 1407.1  |
| HSCB      | 601.2   | 753     | 350.3   | 290.2   | 325.3   | 348.1   | 676.8  | 756.9   |
| HSD11B1   | 1772.2  | 2342.1  | 1002.4  | 526.6   | 359.1   | 713.1   | 1075.9 | 1192.1  |
| HSD11B1   | 1766.1  | 2366.8  | 1341.7  | 637.5   | 466.7   | 858.2   | 1118.9 | 1468    |
| HSD11B1   | 1598.9  | 1993.8  | 586.7   | 307.8   | 239.8   | 389.2   | 1075.5 | 1024.4  |
| HSD11B1L  | 121.6   | 143     | 118.1   | 110.1   | 97.8    | 102     | 118.2  | 123.8   |
| HSD11B2   | 85.6    | 104.5   | 99.5    | 83.4    | 82.3    | 79.2    | 90.3   | 82.3    |
| HSD17B1   | 92.4    | 104.9   | 101.8   | 91.3    | 80.3    | 94.1    | 93.9   | 97.1    |
| HSD17B12  | 6833.4  | 9195.1  | 3273.2  | 4240.5  | 2641.1  | 3875.6  | 7010   | 10246.5 |
| HSD17B13  | 92.9    | 114.1   | 96.6    | 96.9    | 82.6    | 87.2    | 99.2   | 111.2   |
| HSD17B2   | 80.6    | 91      | 86.4    | 83.1    | 92.2    | 89.5    | 84.5   | 89.3    |
| HSD17B3   | 117.5   | 122     | 94.8    | 91      | 89.5    | 107     | 109.9  | 114.2   |
| HSD17B4   | 1791.7  | 2339.8  | 1092.3  | 1780.5  | 1239.4  | 2655.1  | 1385.3 | 2309.3  |
| HSD17B6   | 181.2   | 238.5   | 160.8   | 123.6   | 110.2   | 125.7   | 187.6  | 245     |
| HSD17B8   | 301.3   | 392.8   | 228.8   | 228.3   | 214.6   | 274.4   | 277.5  | 298.9   |
| HSD3B1    | 113.4   | 108.7   | 90.4    | 90.8    | 74.5    | 92.6    | 108.5  | 121     |
| HSD3B2    | 87.6    | 112.5   | 99.4    | 93.5    | 90.8    | 88      | 88.5   | 99.9    |
| HSD3B7    | 97.9    | 130.3   | 116.3   | 95.5    | 102.1   | 105     | 109.6  | 135.8   |
| HSDL1     | 154.9   | 178.7   | 153.3   | 140.9   | 139.8   | 171.7   | 137.8  | 188.8   |
| HSDL2     | 556     | 680.5   | 293     | 358.8   | 250.4   | 470.7   | 498.9  | 1047.3  |
| HSF1      | 151.1   | 212.5   | 143.2   | 135.1   | 127.2   | 92.1    | 138.6  | 167.2   |
| HSF2      | 691.6   | 863.9   | 427.3   | 461.7   | 354.9   | 732     | 459.8  | 874.4   |
| HSF2BP    | 140.9   | 150.2   | 135.2   | 177.7   | 156.2   | 192.6   | 121.2  | 150.7   |
| HSF4      | 78.5    | 95.9    | 92.6    | 90.7    | 98.9    | 121.2   | 80.8   | 92.3    |
| HSF4      | 100.8   | 126.3   | 96.1    | 69.7    | 70.3    | 100.5   | 102.1  | 125.3   |
| HSF5      | 79.6    | 93.5    | 83.1    | 88.3    | 77.3    | 81.3    | 90.5   | 92.4    |
| HSFX1     | 88.8    | 93.2    | 97.8    | 88.4    | 84.6    | 93.7    | 99.5   | 86.1    |
| HSFY1     | 101.9   | 117.1   | 96.1    | 90.6    | 94.5    | 88.4    | 98.3   | 116.5   |
| HSFY1     | 76.1    | 85.8    | 90.2    | 86.4    | 80.2    | 84.5    | 72.4   | 82.1    |
| HSFY2     | 73.3    | 89.2    | 99.4    | 85.3    | 95.6    | 96.6    | 74.2   | 85      |
| HSFY2     | 81.6    | 105.1   | 86.8    | 74      | 67.7    | 83.3    | 93.9   | 107.4   |
| HSH2D     | 302.5   | 381.9   | 282.6   | 184.2   | 229.6   | 273.7   | 181.4  | 223.6   |
| HSMPP8    | 449.8   | 572.4   | 398.5   | 461.9   | 498.6   | 644.4   | 360.6  | 491.9   |
| HSN2      | 93.5    | 107.9   | 92.8    | 113.5   | 111.5   | 107.6   | 88.5   | 93.2    |
| HSP90AA1  | 105.4   | 119.5   | 99.8    | 95.1    | 93.6    | 88.9    | 109.4  | 125.4   |
| HSP90AA1  | 22620.8 | 25999.7 | 14055.7 | 10703.6 | 10639.8 | 17785.9 | 24382  | 28577.8 |
| HSP90AB1  | 8537.4  | 11904.8 | 8066    | 6135.5  | 4935.1  | 8968.4  | 6834.9 | 12789   |
| HSP90AB2f | 136.4   | 166.3   | 112.2   | 95.8    | 87.3    | 104     | 131    | 157.3   |
| HSP90AB4f | 80.1    | 103.1   | 88.2    | 87.4    | 79.6    | 80.7    | 93.2   | 82.6    |
| HSP90B1   | 9768.1  | 12067.2 | 8413.1  | 12301.3 | 11464.7 | 15709.4 | 8349.6 | 8740.8  |
| HSP90B3P  | 84.9    | 105     | 107.3   | 87.6    | 79.8    | 81.8    | 100.4  | 97.8    |
| HSPA12A   | 76.1    | 87.9    | 97.9    | 77.6    | 85.8    | 94.2    | 86.3   | 89.3    |
| HSPA12B   | 91      | 100.9   | 94      | 95      | 95.7    | 101     | 94     | 111.9   |
| HSPA14    | 1991.1  | 2670.8  | 1046.4  | 513.4   | 448.4   | 666.4   | 1657.1 | 2617.6  |
| HSPA1A    | 117.7   | 145.1   | 113.4   | 125.7   | 122.5   | 138.4   | 141.5  | 269.7   |
| HSPA1B    | 2273.9  | 3118.6  | 2489.9  | 1646.1  | 1193.4  | 1554.6  | 3079   | 6950    |
| HSPA1L    | 217.8   | 241.1   | 171.5   | 174.6   | 158.4   | 206.1   | 214.4  | 297.6   |
| HSPA2     | 108.1   | 123.1   | 108.4   | 115.4   | 94.4    | 107.4   | 104    | 144.1   |
| HSPA4     | 640     | 877.8   | 208.5   | 171.6   | 184.1   | 263.8   | 619.5  | 1416    |



|          |         |         |         |        |        |         |         |         |
|----------|---------|---------|---------|--------|--------|---------|---------|---------|
| HSPA4    | 260.6   | 348.8   | 149.9   | 140.3  | 142.6  | 171.2   | 210.7   | 284.8   |
| HSPA4    | 4317.3  | 5648.3  | 1903.1  | 2112.6 | 1498.1 | 2928    | 4292.7  | 5376.3  |
| HSPA4L   | 494.4   | 646.1   | 260.8   | 197.5  | 167.3  | 305.6   | 350.1   | 627.5   |
| HSPA5    | 1318.3  | 1744.5  | 810.4   | 1315.9 | 783.4  | 1345.4  | 1360.9  | 1947.3  |
| HSPA8    | 19480.6 | 21992.2 | 14986.5 | 9871.1 | 7221.3 | 13691.2 | 17390.1 | 26770.3 |
| HSPA8    | 18126.5 | 22556.1 | 11694.6 | 5996.8 | 4879.7 | 8730.4  | 16991.9 | 28266.6 |
| HSPA9B   | 3844.3  | 5477.7  | 2777.3  | 2078.2 | 1753.7 | 4027.4  | 3097.9  | 5385.2  |
| HSPB1    | 10535.5 | 11969.5 | 3861.7  | 2672.9 | 2166.9 | 2908.6  | 10956.6 | 13352.7 |
| HSPB2    | 133.4   | 143.7   | 105.2   | 94.8   | 94.8   | 95.7    | 114.8   | 119.5   |
| HSPB3    | 86.4    | 107.8   | 107.7   | 90.7   | 83.6   | 95      | 91.2    | 88      |
| HSPB6    | 121.2   | 159     | 112.4   | 116.2  | 99.7   | 100     | 122     | 134.4   |
| HSPB7    | 109.1   | 141     | 135.1   | 142.5  | 135    | 198.6   | 107.6   | 113.5   |
| HSPB8    | 82.2    | 90.2    | 82.5    | 78.5   | 83.2   | 83.2    | 84.3    | 93.1    |
| HSPB9    | 91.1    | 109.9   | 90.8    | 90     | 84.7   | 80.6    | 93.4    | 100.4   |
| HSPBAP1  | 374.6   | 483.7   | 212.3   | 193.6  | 173.2  | 228.9   | 276.4   | 323.4   |
| HSPBP1   | 209     | 294.6   | 132.7   | 118.3  | 113.6  | 111.1   | 207.2   | 223.5   |
| HSPBP1   | 268.4   | 338.6   | 152.4   | 110.9  | 107.5  | 114.2   | 215.9   | 297.1   |
| HSPC023  | 2004.2  | 2348.3  | 1570.1  | 1292.8 | 1115.5 | 1441.5  | 2118.2  | 2371.6  |
| HSPC049  | 728.6   | 954.5   | 809.4   | 556.4  | 418.9  | 725.5   | 338.9   | 710.9   |
| HSPC065  | 99.3    | 114.1   | 97.6    | 96.2   | 85.6   | 89.1    | 89.4    | 112.1   |
| HSPC072  | 93.8    | 103.5   | 81.1    | 79     | 78.3   | 85.4    | 90.7    | 102.3   |
| HSPC105  | 97.7    | 106.2   | 89.9    | 88.1   | 80.8   | 88.1    | 89.8    | 104.9   |
| HSPC111  | 1272.2  | 1439.4  | 558.5   | 447.3  | 316.4  | 570.9   | 893.2   | 1176.5  |
| HSPC117  | 1682.9  | 2230.9  | 1126.6  | 1050   | 886.7  | 1469.5  | 1379.6  | 1198.7  |
| HSPC142  | 775.8   | 1151.5  | 441.6   | 352.3  | 369.9  | 349.7   | 818.4   | 903     |
| HSPC142  | 1957.4  | 2517.9  | 1738.5  | 1413.6 | 1141.5 | 1586.6  | 1928    | 2660.7  |
| HSPC148  | 2738.4  | 3157.2  | 1256.6  | 1113.7 | 933.3  | 1399    | 2218.9  | 2662.6  |
| HSPC152  | 4672.4  | 6256    | 1720.2  | 1090.9 | 814    | 1199.5  | 4238.9  | 5273.9  |
| HSPC159  | 197.4   | 246.8   | 128.3   | 93.6   | 86     | 101.2   | 161     | 192.8   |
| HSPC171  | 779.8   | 994.1   | 592     | 531.5  | 379.2  | 549.2   | 772.9   | 1320.6  |
| HSPC176  | 3051.1  | 3814.2  | 2668.3  | 1980.8 | 1801.7 | 2159.8  | 3093.1  | 2957.5  |
| HSPC196  | 768.5   | 891.2   | 473.4   | 428.8  | 393.4  | 491.6   | 668.3   | 741.1   |
| HSPC268  | 707.8   | 734.1   | 442.4   | 564.6  | 586.5  | 450.6   | 763.4   | 1315.1  |
| HSPD1    | 17128.7 | 18243.2 | 7533.1  | 6648.2 | 4664.6 | 7871    | 14451.3 | 18930.9 |
| HSPD1    | 106.8   | 107.4   | 103.4   | 97     | 91.8   | 98.3    | 96.6    | 103.3   |
| HSPD1    | 451.6   | 533.2   | 182.4   | 145    | 120.1  | 141.8   | 293.6   | 393.7   |
| HSPE1    | 4784.6  | 5478.7  | 1153.2  | 1130.8 | 719.4  | 1447.6  | 4258.7  | 6511.8  |
| HSPG2    | 111.4   | 118.6   | 103.5   | 93.8   | 83.4   | 95.1    | 112.4   | 126.7   |
| HSPH1    | 6044.6  | 7574.2  | 3340    | 2382.2 | 1752.5 | 3506.6  | 6031.3  | 9368.7  |
| HSU79303 | 1883.7  | 2304.9  | 1095.7  | 413    | 367.5  | 319     | 1414.3  | 1164.8  |
| HSZFP36  | 642.9   | 740.8   | 457.6   | 395    | 316.4  | 492.8   | 539.8   | 852.4   |
| HSZFP36  | 446     | 590.9   | 236.6   | 206.5  | 216.6  | 308.5   | 376.3   | 481.9   |
| HTATIP   | 113.6   | 159.3   | 112.2   | 111.1  | 100.1  | 107     | 119.7   | 131.8   |
| HTATIP   | 169.8   | 192.5   | 108.5   | 83.9   | 82.1   | 90.7    | 174.6   | 193.7   |
| HTATIP2  | 1930.1  | 2589.9  | 1243.1  | 763.3  | 631.2  | 928.8   | 2637.3  | 3485.7  |
| HTATSF1  | 92.4    | 119.6   | 91.2    | 97.3   | 79.5   | 91.8    | 87.3    | 110.8   |
| HTF9C    | 146.2   | 198.5   | 111.9   | 105.5  | 100.4  | 109.4   | 156.3   | 173.7   |
| HTF9C    | 131.1   | 156.6   | 113.8   | 111.5  | 107    | 98.1    | 117.7   | 146.2   |
| HTF9C    | 108.6   | 128.9   | 112.3   | 118    | 99.6   | 127     | 105.3   | 114.5   |
| HTLF     | 1250.1  | 1627.2  | 722.9   | 878    | 647.6  | 1324.5  | 1199.4  | 1980.2  |

|       |        |        |        |        |       |        |        |        |
|-------|--------|--------|--------|--------|-------|--------|--------|--------|
| HTN1  | 74.6   | 85.5   | 85.5   | 83.9   | 79.8  | 76.9   | 77.4   | 84.2   |
| HTN3  | 121.3  | 128.6  | 114.1  | 100.1  | 93.7  | 96     | 121.6  | 128.4  |
| HTR1A | 83.9   | 93.1   | 89.6   | 96.1   | 75.1  | 83.7   | 83.6   | 91.9   |
| HTR1B | 78.8   | 85.5   | 87.1   | 91.6   | 88.4  | 75.9   | 74.9   | 84     |
| HTR1D | 112.3  | 121.1  | 99.1   | 92.7   | 84.5  | 98.9   | 104.1  | 111.5  |
| HTR1E | 152.6  | 176.5  | 122.8  | 100.3  | 100.1 | 99.2   | 143.2  | 177.8  |
| HTR1F | 75.7   | 73.6   | 84.9   | 85.7   | 86.5  | 94.5   | 82.1   | 79.1   |
| HTR2A | 1632   | 2019.4 | 522.4  | 493.7  | 524.3 | 630.1  | 1602.5 | 2234   |
| HTR2B | 88.7   | 106.2  | 103.5  | 93.3   | 90    | 93.8   | 83.5   | 97.2   |
| HTR2C | 79.7   | 77.5   | 109.4  | 103.2  | 105.2 | 102.7  | 78.8   | 82.2   |
| HTR3A | 99     | 94.7   | 108.3  | 96.2   | 87.5  | 91.1   | 95.9   | 105.3  |
| HTR3A | 96.6   | 118.2  | 84.9   | 85.7   | 91.4  | 89.2   | 96.7   | 109.3  |
| HTR3A | 91.8   | 106.7  | 91.2   | 89.3   | 93    | 88.7   | 94.1   | 86.8   |
| HTR3B | 103.4  | 122.4  | 93.2   | 96.2   | 86.3  | 93.1   | 91.5   | 98.6   |
| HTR3C | 94.3   | 103    | 98.4   | 104.6  | 90.7  | 85.6   | 86.9   | 91.4   |
| HTR3D | 85.9   | 92     | 90.9   | 91.2   | 84.4  | 90.9   | 82.2   | 89.7   |
| HTR3E | 90.2   | 83.2   | 92.5   | 84.8   | 84.6  | 87.5   | 88.6   | 82.9   |
| HTR4  | 78.2   | 86.3   | 76.2   | 69.2   | 70    | 78.2   | 77.9   | 96.3   |
| HTR4  | 83     | 96     | 95.5   | 85.3   | 93.2  | 88.7   | 84.4   | 91.6   |
| HTR4  | 125.4  | 144.2  | 103.3  | 101.1  | 106.2 | 93.3   | 112.8  | 112.6  |
| HTR4  | 96.2   | 125    | 88.6   | 86.3   | 73.7  | 85.7   | 103    | 123.2  |
| HTR5A | 84.2   | 87.9   | 82.1   | 72.3   | 74.8  | 85.3   | 85.2   | 90.3   |
| HTR6  | 134.6  | 160.6  | 95.3   | 96.7   | 90.2  | 94.2   | 133.7  | 160.3  |
| HTR7  | 100.8  | 115.8  | 92.5   | 85.1   | 93.5  | 96     | 111.6  | 125.5  |
| HTR7  | 141.9  | 180.8  | 107.9  | 107.2  | 99.3  | 98.1   | 138.2  | 170.9  |
| HTR7P | 124.8  | 132    | 99.2   | 85.3   | 90.1  | 94.6   | 124.5  | 141.3  |
| HTRA1 | 87.9   | 91     | 87.8   | 78.5   | 94.4  | 91.7   | 99.9   | 106.6  |
| HTRA2 | 671.1  | 902.7  | 338.6  | 209.3  | 199.9 | 277.5  | 464.5  | 816.6  |
| HTRA2 | 353.3  | 437.6  | 207.1  | 185.2  | 174.7 | 257.9  | 300.5  | 380.7  |
| HTRA3 | 96.3   | 111.7  | 94.4   | 98.6   | 90.6  | 84.1   | 90.7   | 99.2   |
| HTRA4 | 95.8   | 101.3  | 96.7   | 97.8   | 92.8  | 105.8  | 97.4   | 100.5  |
| HUNK  | 84.4   | 93.7   | 102.5  | 97.6   | 92.5  | 93.6   | 85.9   | 96.8   |
| HUS1  | 76.3   | 99     | 96.9   | 84.1   | 83    | 84.8   | 84.4   | 78.2   |
| HUS1B | 259.9  | 303.4  | 106.7  | 117.3  | 108.7 | 134.3  | 195.6  | 259.4  |
| HUWE1 | 153.6  | 228.1  | 137.1  | 176.9  | 165.6 | 277.4  | 155.9  | 195.8  |
| HYAL1 | 112.2  | 116.5  | 93.5   | 89     | 90.3  | 92.9   | 101.7  | 112.6  |
| HYAL1 | 82.8   | 89.6   | 86.3   | 84.6   | 81.2  | 88.2   | 86.4   | 93.5   |
| HYAL1 | 104.4  | 128.4  | 98.5   | 90.7   | 89    | 88.8   | 101.2  | 102.3  |
| HYAL1 | 93.6   | 108.8  | 87.9   | 83.5   | 83.6  | 84.5   | 86     | 105.9  |
| HYAL2 | 120.9  | 135.9  | 86.2   | 82.4   | 79.8  | 94     | 131.1  | 144.9  |
| HYAL2 | 233.4  | 264.8  | 184.6  | 176.2  | 151.4 | 250    | 168.9  | 231.4  |
| HYAL2 | 96.1   | 105    | 82.5   | 80     | 77.1  | 75     | 84.6   | 123.8  |
| HYAL3 | 1480.5 | 1962.7 | 1112.8 | 1108.5 | 991.4 | 1397.6 | 1318.4 | 1982.8 |
| HYAL4 | 104.5  | 120.8  | 87.7   | 84.9   | 84.2  | 81.8   | 102.8  | 122.4  |
| HYDIN | 86.4   | 90.1   | 97.9   | 91.4   | 91.9  | 93     | 83.8   | 94     |
| HYDIN | 104    | 106.4  | 94.9   | 83.4   | 83.7  | 86.2   | 115.2  | 105    |
| HYDIN | 79     | 90.8   | 88.7   | 85.1   | 80.6  | 75.8   | 88.4   | 85.6   |
| HYDIN | 97.4   | 109.3  | 97.4   | 91.1   | 87.3  | 95.9   | 100.6  | 103.7  |
| HYI   | 272.2  | 337.4  | 210    | 190    | 164.4 | 213.5  | 224.8  | 298.7  |
| HYLS1 | 1242.9 | 1593.3 | 736.4  | 396.6  | 328.1 | 526    | 957.9  | 1461.6 |

|         |        |        |        |        |        |        |        |        |
|---------|--------|--------|--------|--------|--------|--------|--------|--------|
| HYOU1   | 332.2  | 415.7  | 453.2  | 355.9  | 268.2  | 488.8  | 332.1  | 608.1  |
| HYPB    | 705.5  | 1062.4 | 636.3  | 1011.9 | 902.8  | 1477.9 | 772.2  | 923.2  |
| HYPE    | 212.9  | 290    | 136.6  | 164    | 130.8  | 119.4  | 226.9  | 327.3  |
| HYPK    | 2242.3 | 2365.1 | 1598.5 | 2817.4 | 2587.9 | 2020.6 | 2273.5 | 3309.9 |
| IAH1    | 2429.1 | 3217.6 | 1870   | 1788.7 | 1284.9 | 2159.9 | 1848.7 | 4084.4 |
| IAPP    | 108.8  | 113.4  | 99.8   | 90.8   | 93.1   | 100    | 93.7   | 101.5  |
| IARS    | 2024.2 | 2881.7 | 1580.8 | 1210.6 | 828    | 1931.8 | 1647.1 | 2695.7 |
| IARS    | 116.9  | 124.8  | 97.7   | 84.4   | 77.4   | 84.6   | 95.9   | 110.3  |
| IARS2   | 3721   | 4946.9 | 2142   | 2159   | 1665.6 | 3474.4 | 2796.8 | 4400.5 |
| IBRDC1  | 129.3  | 120.6  | 119.9  | 106.1  | 96.2   | 126.6  | 110.7  | 143.4  |
| IBRDC2  | 106.4  | 117.4  | 100.3  | 147.3  | 151.6  | 156.2  | 98.4   | 103.1  |
| IBRDC3  | 99.4   | 132.9  | 131.5  | 123.5  | 128.3  | 193.2  | 114.4  | 182.1  |
| IBSP    | 101.4  | 120.5  | 100.8  | 102.8  | 96.5   | 104.8  | 107    | 122.8  |
| IBTK    | 1114.6 | 1256.5 | 471.7  | 742.7  | 455.4  | 920.6  | 957.5  | 1732.7 |
| ICA1    | 314.3  | 386.6  | 221.1  | 271.7  | 240.9  | 328.9  | 314.1  | 436.9  |
| ICA1    | 429.2  | 606.7  | 337    | 455.4  | 402.1  | 502    | 428.7  | 498.2  |
| ICA1    | 124.9  | 130.1  | 104.6  | 98.9   | 86.2   | 98.1   | 114.9  | 150.2  |
| ICA1L   | 96.5   | 95.6   | 98.3   | 97.3   | 95.2   | 100.1  | 104.3  | 101.7  |
| ICA1L   | 133.5  | 153.6  | 115.2  | 99.2   | 91.3   | 105.3  | 110.6  | 141.7  |
| ICAM1   | 123.9  | 145.1  | 98.7   | 80.4   | 81     | 93.2   | 120.9  | 163.8  |
| ICAM2   | 239.4  | 330.4  | 231    | 267.2  | 233.8  | 291.2  | 233.4  | 247.6  |
| ICAM3   | 914.8  | 1082.9 | 1083.5 | 1421.2 | 1195.3 | 1782.4 | 777.6  | 875.3  |
| ICAM4   | 92.8   | 114.9  | 110.2  | 100.5  | 106.3  | 119.3  | 100.7  | 100.5  |
| ICAM4   | 113.4  | 121.6  | 112    | 110.3  | 107.9  | 104.5  | 113.3  | 124.2  |
| ICAM4   | 86.2   | 98.8   | 87.2   | 95     | 95.8   | 100.5  | 82.9   | 92.7   |
| ICAM5   | 90.5   | 102.7  | 93.9   | 79.3   | 82     | 91.1   | 83.9   | 108.7  |
| ICEBERG | 92.7   | 90.7   | 92     | 78.5   | 81.9   | 83.1   | 80.2   | 98.3   |
| ICK     | 139.1  | 169.1  | 105.2  | 95     | 82     | 90.2   | 140    | 171.3  |
| ICK     | 73.7   | 73.2   | 83.8   | 82.5   | 84     | 82.7   | 78.9   | 85.3   |
| ICMT    | 670.7  | 972    | 491.4  | 474.7  | 391.7  | 606.2  | 555.2  | 918.2  |
| ICOS    | 131.8  | 140.1  | 114    | 98.9   | 93.4   | 109.7  | 121.3  | 132.7  |
| ICOSLG  | 167.1  | 206.3  | 144.9  | 155.2  | 122.2  | 194.1  | 163.6  | 204.6  |
| ICT1    | 1259.5 | 1666.1 | 565    | 415.8  | 373.4  | 668.9  | 1119.7 | 1604.6 |
| ID1     | 156.4  | 123.6  | 123.7  | 94.5   | 81.9   | 89     | 115.5  | 128.8  |
| ID1     | 667.9  | 711.9  | 321.8  | 249    | 140.9  | 260.6  | 586.9  | 1087   |
| ID2     | 1546.5 | 1724.3 | 717.4  | 697.8  | 650.6  | 833.7  | 1619.8 | 2961.8 |
| ID3     | 492.3  | 633.3  | 340.3  | 297.8  | 176.7  | 313.4  | 671.4  | 987.3  |
| ID4     | 80.9   | 89     | 85.4   | 75.7   | 77.6   | 80     | 83.2   | 94.5   |
| IDE     | 409.1  | 563.2  | 272.1  | 204.3  | 171.8  | 241.1  | 440.9  | 622.2  |
| IDH1    | 2651.3 | 3314.8 | 1779.4 | 1459.1 | 1164.4 | 1956.5 | 2150.2 | 4106.8 |
| IDH2    | 2211.6 | 3185.8 | 1934.4 | 1331.6 | 1194.2 | 2021   | 1948.8 | 2755.3 |
| IDH3A   | 546.5  | 699.8  | 521.2  | 562.6  | 432.6  | 853.6  | 460.8  | 572.2  |
| IDH3B   | 2228.5 | 2931.2 | 1434.3 | 1034   | 860.6  | 1282   | 1925.5 | 2381.2 |
| IDH3B   | 95.5   | 92.5   | 103    | 103.5  | 90     | 92.2   | 84.9   | 105.6  |
| IDH3B   | 1214.4 | 1865   | 989.2  | 659.7  | 651.5  | 868.4  | 1111.1 | 1414.9 |
| IDH3G   | 113.1  | 140.7  | 103.5  | 98     | 92.5   | 97.4   | 105.8  | 171.8  |
| IDH3G   | 1083.7 | 1312   | 998.6  | 717    | 695.7  | 773.2  | 973    | 1100.8 |
| IDI1    | 611.3  | 720.4  | 205.4  | 237.8  | 201.9  | 278.8  | 555.7  | 1122.4 |
| IDI2    | 73.9   | 81.6   | 86.3   | 84.5   | 85.4   | 80.7   | 80.4   | 78.7   |
| IDS     | 349    | 419.4  | 305    | 351.1  | 305    | 438.6  | 330.8  | 504    |

|         |        |        |        |        |        |        |        |        |
|---------|--------|--------|--------|--------|--------|--------|--------|--------|
| IDS     | 152.9  | 161.7  | 107.3  | 122.5  | 94.3   | 116.3  | 148.9  | 204.1  |
| IDS     | 338    | 483    | 259.2  | 237.1  | 200.2  | 277.5  | 359.9  | 688.6  |
| IDUA    | 165.6  | 162.8  | 191.3  | 187.6  | 154.1  | 354.6  | 120.5  | 202.1  |
| IER2    | 135.7  | 182.6  | 112.6  | 93.7   | 95.1   | 93     | 146.3  | 166.1  |
| IER3    | 115.5  | 116.5  | 90.4   | 89.5   | 87.1   | 86.2   | 105    | 119.7  |
| IER3IP1 | 1096.8 | 1261.9 | 432.4  | 288.4  | 287.3  | 287.2  | 1048.2 | 2022.6 |
| IER5    | 336.8  | 456.1  | 306.6  | 212.9  | 210.7  | 257.6  | 386    | 758.8  |
| IER5L   | 139.3  | 165.5  | 145    | 107.7  | 112.3  | 124.6  | 153.8  | 230.9  |
| IFI16   | 374.9  | 465.8  | 177.6  | 166.5  | 152.2  | 284.8  | 263.6  | 345.4  |
| IFI27   | 121.6  | 145.6  | 119.1  | 90.2   | 89.5   | 87     | 164    | 188    |
| IFI30   | 127.4  | 164.9  | 105.7  | 197.1  | 182    | 233.2  | 120.6  | 133.2  |
| IFI35   | 978.3  | 1230.8 | 680.7  | 638.2  | 568.6  | 734.6  | 921.4  | 1136.7 |
| IFI44   | 181.4  | 241.5  | 153.9  | 133.6  | 114.1  | 138.3  | 191.1  | 294.4  |
| IFI44L  | 94.9   | 108.2  | 96.1   | 87.4   | 88.6   | 88.6   | 90     | 91.9   |
| IFI6    | 356    | 418.6  | 218.8  | 140.5  | 144    | 113.7  | 289.1  | 368.9  |
| IFIH1   | 352.7  | 339.2  | 162.1  | 154.8  | 150.5  | 150.7  | 280.1  | 367.5  |
| IFIT1   | 160.7  | 192    | 128.2  | 101.1  | 100.6  | 98     | 156.7  | 174.1  |
| IFIT1L  | 82     | 90.7   | 74.9   | 81.6   | 78.2   | 80.6   | 91.6   | 80.7   |
| IFIT2   | 213.1  | 248.1  | 185    | 114.2  | 108.2  | 125    | 215.2  | 256.4  |
| IFIT3   | 160.7  | 186.8  | 121.9  | 99.8   | 88.8   | 95.9   | 163.8  | 165.9  |
| IFIT3   | 125.2  | 153.1  | 121.3  | 99     | 116    | 111.7  | 128.6  | 133.8  |
| IFIT3   | 86.3   | 102.1  | 93.6   | 92.6   | 86.3   | 85     | 97.5   | 95.9   |
| IFIT5   | 104.6  | 132.8  | 97.8   | 98.2   | 91.7   | 84     | 115.6  | 127.1  |
| IFITM1  | 721.5  | 1014.4 | 693.9  | 246.4  | 247.2  | 205.8  | 677.7  | 824.9  |
| IFITM2  | 4643.4 | 5454.6 | 3438.7 | 1910.9 | 1723.8 | 1566.1 | 5493.3 | 6410.4 |
| IFITM3  | 2201.8 | 2581   | 1413.2 | 839    | 617.6  | 649    | 2325.1 | 3787.7 |
| IFITM4P | 80.9   | 93.4   | 100    | 85.7   | 86.5   | 84.1   | 89.5   | 90.3   |
| IFITM5  | 82.1   | 97.1   | 90.3   | 90.4   | 92.1   | 89.5   | 92.9   | 83.3   |
| IFNA1   | 89.6   | 104.2  | 87.7   | 88     | 86.8   | 88.7   | 88.8   | 100.1  |
| IFNA10  | 165.9  | 174.4  | 117.9  | 110.2  | 98.6   | 108.9  | 157.8  | 161.4  |
| IFNA13  | 90.7   | 108    | 101.1  | 83.9   | 82.1   | 77     | 102.9  | 106.7  |
| IFNA14  | 93.4   | 108    | 104.4  | 102.7  | 85.5   | 102.6  | 90.8   | 100.3  |
| IFNA16  | 88.4   | 96.9   | 104.9  | 98.7   | 93.4   | 100.4  | 82.1   | 83.5   |
| IFNA17  | 82.5   | 89.1   | 88.5   | 75.7   | 88.8   | 85.1   | 75.7   | 77.2   |
| IFNA2   | 83.1   | 97.9   | 91.6   | 79.3   | 83.2   | 89.5   | 99.1   | 99.4   |
| IFNA21  | 101.8  | 114    | 111.5  | 102.5  | 100.4  | 109.5  | 96.4   | 112.5  |
| IFNA4   | 81.8   | 89.9   | 86.3   | 84     | 82     | 79.2   | 82.1   | 89.2   |
| IFNA5   | 90.8   | 108.4  | 101.9  | 79.1   | 85.7   | 85     | 96.6   | 100.1  |
| IFNA6   | 79.4   | 83.8   | 84.5   | 73.1   | 74.7   | 84.9   | 80.9   | 84.7   |
| IFNA7   | 113.5  | 121.2  | 92.2   | 96.8   | 86.5   | 90.5   | 111.4  | 129.4  |
| IFNA8   | 322    | 436.9  | 192.9  | 158.6  | 149.2  | 177.5  | 342.5  | 375.7  |
| IFNAR1  | 306.8  | 424.6  | 306.6  | 397.3  | 354.9  | 452.3  | 305.5  | 381.1  |
| IFNAR2  | 353.5  | 432.1  | 245.4  | 406.8  | 345.3  | 233    | 397.6  | 666.3  |
| IFNAR2  | 1236   | 1748.3 | 867    | 908.2  | 663.1  | 1183.2 | 969.6  | 1541.7 |
| IFNAR2  | 107.2  | 140.7  | 91.5   | 82.2   | 76.2   | 86.3   | 104    | 101.9  |
| IFNB1   | 82.2   | 110.9  | 87.6   | 72.1   | 75.2   | 71.7   | 91.3   | 89.2   |
| IFNE1   | 78.6   | 82.5   | 101    | 101    | 91.8   | 98.6   | 88.3   | 89.7   |
| IFNG    | 85.3   | 91.8   | 99.6   | 90.6   | 95     | 98.2   | 84.8   | 84.2   |
| IFNGR1  | 2192.5 | 2831.2 | 1499.9 | 2091.9 | 1360.8 | 2672.1 | 2033   | 2668   |
| IFNGR2  | 4217   | 4798.3 | 2952.4 | 3327.8 | 2862.7 | 4601.3 | 3230.3 | 4176.3 |

|         |        |        |        |        |        |        |        |        |
|---------|--------|--------|--------|--------|--------|--------|--------|--------|
| IFNK    | 101.9  | 118.1  | 92.8   | 83.4   | 76.5   | 81.8   | 113.6  | 115.7  |
| IFNW1   | 71     | 85.6   | 87.2   | 90     | 90.6   | 94.1   | 84.3   | 93.6   |
| IFRD1   | 561.6  | 677.1  | 189.5  | 207.7  | 150.3  | 246.8  | 624.3  | 994.3  |
| IFRD1   | 107.5  | 104.2  | 83.6   | 81.7   | 92.9   | 90.6   | 132.4  | 196.2  |
| IFRD2   | 628.9  | 860.7  | 527.8  | 364.7  | 277.8  | 389    | 510    | 619.7  |
| IFRG15  | 119.4  | 136.7  | 112.5  | 95.6   | 85.4   | 90.1   | 102.2  | 129.6  |
| IFT122  | 85.8   | 117.3  | 89.2   | 74.7   | 84.5   | 82.7   | 88.2   | 109.4  |
| IFT122  | 221.2  | 295.6  | 204.4  | 231.4  | 196.5  | 259    | 227.2  | 330.6  |
| IFT122  | 421.6  | 587.4  | 357.4  | 351.9  | 344.3  | 350.2  | 376.2  | 373.6  |
| IFT140  | 102    | 111.2  | 102.5  | 86.7   | 94.4   | 99.2   | 96.7   | 114.5  |
| IFT172  | 151.6  | 167.9  | 125.8  | 125.4  | 118.6  | 135    | 140.4  | 151    |
| IFT52   | 326.8  | 464.2  | 186.6  | 204.7  | 150.9  | 289.3  | 342.3  | 613.8  |
| IFT57   | 186.2  | 210.2  | 145.9  | 139.4  | 113.7  | 154.6  | 146.9  | 169.6  |
| IFT74   | 656.2  | 866.6  | 192.2  | 172.8  | 204.4  | 267.2  | 543.4  | 707.6  |
| IFT80   | 94.9   | 112.7  | 92.7   | 79.2   | 79.3   | 79.4   | 93.3   | 96.9   |
| IFT81   | 92     | 93.2   | 123.1  | 108.9  | 108.6  | 109.7  | 89.2   | 90     |
| IFT81   | 131.7  | 134.7  | 98.3   | 97.7   | 97.6   | 100.9  | 111.5  | 133.5  |
| IFT81   | 183.2  | 207.6  | 127.4  | 102.3  | 100.1  | 111.1  | 159.5  | 179.7  |
| IFT88   | 183.9  | 236.8  | 132.6  | 121.7  | 111.1  | 150.1  | 161.5  | 233.7  |
| IGBP1   | 1044.9 | 1351.9 | 439.8  | 468.5  | 378.7  | 597.9  | 1025.4 | 1757.9 |
| IGF1    | 89.1   | 99.4   | 89.6   | 88.9   | 76.7   | 80.1   | 93.3   | 96     |
| IGF1R   | 103.4  | 109.9  | 93.3   | 94.8   | 87.5   | 91.2   | 93.1   | 95.6   |
| IGF2    | 77.3   | 83.6   | 87.3   | 83.3   | 83.1   | 82.1   | 70.5   | 76.4   |
| IGF2    | 80.9   | 89.7   | 98.7   | 84.3   | 84.3   | 94.2   | 81     | 94.2   |
| IGF2AS  | 93     | 117.5  | 86.1   | 78.1   | 86.3   | 81.1   | 93.5   | 106    |
| IGF2BP1 | 115.1  | 126.1  | 97.9   | 96.1   | 84.2   | 87     | 106.4  | 151.5  |
| IGF2BP2 | 2606.8 | 2721.5 | 1341.9 | 1855.1 | 1488.8 | 2084.8 | 2389.6 | 5550.2 |
| IGF2BP3 | 118.4  | 140.2  | 113    | 127.1  | 120.7  | 140.5  | 131.6  | 180.8  |
| IGF2R   | 2017.5 | 3254.4 | 1701.5 | 4537   | 3587.5 | 4465.7 | 2589.5 | 2769.8 |
| IGFALS  | 110.4  | 100.5  | 97     | 96.8   | 100.1  | 90.2   | 94.8   | 110.6  |
| IGFBP1  | 135.8  | 151.2  | 103.2  | 81.3   | 80.5   | 91.9   | 135.8  | 142.2  |
| IGFBP2  | 312.6  | 472    | 371.4  | 637.7  | 549.2  | 897.1  | 292    | 454.6  |
| IGFBP3  | 86.2   | 99.2   | 95     | 81.9   | 80.5   | 87.3   | 88.9   | 103.3  |
| IGFBP3  | 98.4   | 124.7  | 102.8  | 93.2   | 88.8   | 91.9   | 102.1  | 109.3  |
| IGFBP4  | 301.7  | 403    | 437.9  | 224.8  | 197    | 412.6  | 248    | 430.2  |
| IGFBP5  | 116.9  | 100.3  | 88.9   | 89.2   | 80.8   | 92     | 93.7   | 111.8  |
| IGFBP6  | 108.9  | 107.7  | 93.5   | 103    | 100.7  | 91.8   | 90.9   | 100.9  |
| IGFBP7  | 3249.7 | 4141.6 | 2575.6 | 1992.5 | 1661   | 2165.5 | 2850.6 | 5382.6 |
| IGFBPL1 | 115.6  | 145    | 83.8   | 89.8   | 86.3   | 87.7   | 112.3  | 140.9  |
| IGFL1   | 79.7   | 81.7   | 95.9   | 87.8   | 87.8   | 92.1   | 84     | 83.1   |
| IGFL2   | 78     | 84.5   | 102.9  | 90.7   | 90.5   | 88.3   | 78.7   | 81.3   |
| IGFL3   | 125.8  | 138.1  | 97.4   | 82.7   | 84.2   | 84.1   | 100.8  | 125.1  |
| IGFL4   | 84.2   | 95.1   | 91.3   | 79.9   | 88.8   | 81.1   | 86.8   | 88.6   |
| IGHMBP2 | 130.1  | 149.9  | 146.1  | 123.5  | 130.6  | 143.1  | 113.4  | 145.4  |
| IGJ     | 97.7   | 101.6  | 93.7   | 86.4   | 79.3   | 78.2   | 98.8   | 96.5   |
| IGLL1   | 90.7   | 99.8   | 96.6   | 90     | 81.1   | 92     | 88.3   | 107.9  |
| IGLL1   | 93     | 109.9  | 102.4  | 98.3   | 94.5   | 100.6  | 88.4   | 91     |
| IGSF1   | 105.4  | 130.8  | 127.6  | 96.9   | 83.7   | 106.1  | 109.6  | 148.3  |
| IGSF1   | 170.4  | 205.1  | 110.9  | 83.5   | 91.5   | 96.4   | 157    | 218.6  |
| IGSF1   | 98.3   | 102.6  | 116.6  | 102.5  | 101.3  | 94.2   | 99.5   | 97.8   |

|         |        |         |        |        |        |        |        |        |
|---------|--------|---------|--------|--------|--------|--------|--------|--------|
| IGSF10  | 99     | 131.8   | 81.5   | 78.9   | 75.5   | 82.7   | 97.8   | 119.3  |
| IGSF11  | 84.3   | 99.5    | 91.8   | 85.4   | 77.5   | 84.6   | 87.7   | 95.4   |
| IGSF11  | 100.9  | 102.4   | 103.3  | 93.5   | 87.9   | 89.8   | 94.1   | 112.2  |
| IGSF11  | 114    | 140.5   | 105.5  | 104.5  | 102.4  | 105.1  | 109.9  | 113.3  |
| IGSF2   | 103.3  | 114.9   | 100.8  | 98.8   | 96.5   | 102.6  | 98.2   | 105.8  |
| IGSF21  | 76.4   | 76.6    | 93.1   | 77.9   | 83.9   | 88.8   | 78.9   | 91.2   |
| IGSF22  | 75.9   | 84.1    | 79.4   | 82.1   | 74.4   | 72.9   | 82.5   | 82.5   |
| IGSF3   | 293.9  | 474.7   | 288.8  | 245.8  | 185.3  | 236    | 309.7  | 442.5  |
| IGSF3   | 145.4  | 181.2   | 90.4   | 98.2   | 86.4   | 85.8   | 126.8  | 157.1  |
| IGSF4   | 96     | 114.4   | 102.3  | 110.2  | 92.4   | 110.2  | 86.8   | 111.3  |
| IGSF4B  | 81     | 92.4    | 86     | 84.4   | 86.3   | 86.3   | 81.3   | 93.5   |
| IGSF4C  | 74.8   | 94.8    | 83     | 86.3   | 74.5   | 71.4   | 84.8   | 86.9   |
| IGSF4D  | 75.1   | 86.9    | 85.1   | 93.6   | 83     | 83.5   | 76.1   | 86     |
| IGSF6   | 345.2  | 493.7   | 158.3  | 199.9  | 158.3  | 164.3  | 212.4  | 227.1  |
| IGSF8   | 108.8  | 137.9   | 97.1   | 94.4   | 94.8   | 98.9   | 110.2  | 117.5  |
| IGSF9   | 96.8   | 113.3   | 90.5   | 76.3   | 79.1   | 79.6   | 99.5   | 107.4  |
| IHH     | 101.6  | 115.4   | 99.4   | 79.6   | 74.9   | 88.9   | 96.7   | 101.8  |
| IHPK1   | 143.6  | 160.7   | 92.4   | 84.9   | 88.8   | 88.8   | 140.1  | 150.8  |
| IHPK1   | 855.7  | 1189.1  | 594.9  | 475    | 453.9  | 520.1  | 802.4  | 750.8  |
| IHPK1   | 523.1  | 696.5   | 823.2  | 655.5  | 544.7  | 726.9  | 584.9  | 1126.4 |
| IHPK2   | 382.4  | 519.7   | 215.6  | 197.7  | 187.2  | 211.6  | 315.1  | 422.7  |
| IHPK2   | 288.5  | 366.7   | 150.7  | 133.9  | 120.5  | 155.1  | 223    | 279.1  |
| IHPK3   | 113.5  | 133.7   | 106    | 105.4  | 100.3  | 108.4  | 113.5  | 133    |
| IIP45   | 272.3  | 351     | 297.8  | 189.4  | 172.9  | 249.5  | 274.5  | 369.2  |
| IIP45   | 100.4  | 118.5   | 120.4  | 110.4  | 93.2   | 105.3  | 84.2   | 119.9  |
| IK      | 1673.5 | 2676.1  | 853    | 902    | 787    | 1492.3 | 1406.5 | 2012.6 |
| IKBKAP  | 115.4  | 136.1   | 116.6  | 120.3  | 112.6  | 118.2  | 105.4  | 110.8  |
| IKBKB   | 113    | 130.1   | 101.9  | 108.7  | 90.8   | 103.9  | 118.3  | 151.5  |
| IKBKE   | 259.3  | 292.7   | 250.2  | 166.2  | 182.2  | 195.2  | 189.2  | 259.1  |
| IKBKG   | 1586.5 | 2000.1  | 927.6  | 894.7  | 746.9  | 932.5  | 1825.4 | 1925.2 |
| IKIP    | 211.5  | 306.9   | 148.6  | 172    | 153.3  | 192.3  | 196.2  | 196    |
| IKIP    | 168.3  | 218.3   | 122.4  | 128.4  | 111.3  | 143.2  | 144.1  | 166.7  |
| IKIP    | 201    | 226.3   | 124.5  | 135.3  | 135.1  | 156    | 168.3  | 191.7  |
| IKZF3   | 83.9   | 95.5    | 85     | 83.4   | 74.6   | 77.5   | 90.6   | 95     |
| IL10    | 1832.3 | 2043.9  | 513.1  | 929.1  | 976.8  | 560.7  | 1534.4 | 1479.3 |
| IL10RA  | 155.3  | 167.8   | 134    | 142.2  | 139.4  | 137.7  | 158.4  | 201.7  |
| IL10RB  | 8046.4 | 10162.9 | 5328.4 | 4755.7 | 3745.8 | 3745.1 | 8375.8 | 9387.8 |
| IL11    | 111.5  | 139.3   | 81.7   | 80.6   | 79.3   | 76.5   | 115.9  | 114    |
| IL11RA  | 154.4  | 181.2   | 153.4  | 137.6  | 137.2  | 145.9  | 143.5  | 173.3  |
| IL11RA  | 704.4  | 843.9   | 651.8  | 547.6  | 595.4  | 634    | 538.2  | 571.2  |
| IL11RA  | 101.7  | 105.3   | 89.2   | 98.6   | 86.1   | 93.7   | 98.1   | 106.8  |
| IL12A   | 132.1  | 132.2   | 109    | 86.9   | 87.4   | 92.3   | 121.4  | 127.6  |
| IL12B   | 94     | 108.5   | 94     | 97.5   | 92.9   | 87.4   | 94.7   | 91.1   |
| IL12RB1 | 120.8  | 150.7   | 103.7  | 93.9   | 92.3   | 99.3   | 127.3  | 120.4  |
| IL12RB1 | 176.6  | 232.3   | 148.3  | 123.4  | 113    | 107.6  | 178.6  | 195.1  |
| IL12RB1 | 293.8  | 391.6   | 165.4  | 128.7  | 110.5  | 113.3  | 255.2  | 263.2  |
| IL12RB2 | 214.1  | 292.6   | 128.2  | 134.2  | 126.6  | 171.1  | 199.8  | 247.7  |
| IL13    | 85     | 110     | 76.2   | 83.1   | 71.4   | 69.1   | 87.8   | 102.6  |
| IL13RA1 | 1418.8 | 1598.9  | 1074   | 1976   | 1588.6 | 2202   | 1097.9 | 1672.1 |
| IL13RA2 | 76.4   | 81.6    | 87.5   | 79.1   | 74.2   | 83.3   | 74.6   | 85.5   |

|         |        |        |        |        |        |        |        |        |
|---------|--------|--------|--------|--------|--------|--------|--------|--------|
| IL15    | 71.5   | 101.8  | 93.2   | 83.2   | 83.5   | 81     | 90.7   | 91.7   |
| IL15    | 82.1   | 85.6   | 93.8   | 79.1   | 80.1   | 82.1   | 82.5   | 94     |
| IL15    | 162.8  | 192.5  | 121.6  | 111.4  | 104.1  | 120.9  | 147.3  | 209    |
| IL15RA  | 90.7   | 94.6   | 85.6   | 85.5   | 81.3   | 86.3   | 86.2   | 91.4   |
| IL15RA  | 136.7  | 160.5  | 98.5   | 89.5   | 90.7   | 95.4   | 115.1  | 134.4  |
| IL15RA  | 89     | 101.9  | 82.4   | 105.9  | 88.9   | 90.6   | 91.5   | 92.4   |
| IL16    | 84.6   | 89.5   | 88.1   | 100.7  | 91.3   | 97.2   | 97     | 93     |
| IL16    | 101.9  | 129.4  | 111.9  | 126.1  | 116.2  | 147.1  | 111.8  | 133.2  |
| IL17    | 80     | 82.7   | 86.5   | 81.3   | 77     | 81.1   | 86.9   | 78.6   |
| IL17B   | 104.6  | 98.6   | 91.4   | 82.7   | 88.2   | 84.7   | 89.2   | 97.7   |
| IL17C   | 101.5  | 122    | 106.1  | 87.9   | 92.1   | 95.9   | 103.4  | 121.4  |
| IL17D   | 190.6  | 250.9  | 163    | 163.8  | 139.7  | 165.9  | 177.2  | 185.4  |
| IL17E   | 130.7  | 139.7  | 112.7  | 95.8   | 89.6   | 95.2   | 107.6  | 120.6  |
| IL17F   | 88     | 97.3   | 90.8   | 84.9   | 83.1   | 80     | 82.8   | 81     |
| IL17R   | 330.2  | 473.1  | 348.6  | 381    | 281.5  | 452.5  | 321.2  | 598.1  |
| IL17RB  | 107.6  | 115    | 103.7  | 84.8   | 85.4   | 90.7   | 88.6   | 97.1   |
| IL17RC  | 86.6   | 101.4  | 85.1   | 78.5   | 72.6   | 83.8   | 87.9   | 98.4   |
| IL17RC  | 99.9   | 105.4  | 96.7   | 90.7   | 86.4   | 94.1   | 92.6   | 109.7  |
| IL17RC  | 116.3  | 129.5  | 89.1   | 84.4   | 87.2   | 82.6   | 110.8  | 126.4  |
| IL17RD  | 112.9  | 114.7  | 87.6   | 91.9   | 82     | 82.5   | 119.7  | 111.4  |
| IL17RD  | 772.9  | 762.7  | 403.8  | 665.5  | 666.1  | 534    | 722.8  | 892.1  |
| IL17RD  | 73.1   | 78     | 91.6   | 79.6   | 81.5   | 80.8   | 73.5   | 78.9   |
| IL17RE  | 114    | 137.9  | 100    | 85.3   | 78.1   | 89.7   | 111.6  | 135.2  |
| IL17RE  | 99.3   | 100.7  | 96     | 87.6   | 87.2   | 91.9   | 94.8   | 104.2  |
| IL17RE  | 81     | 96.5   | 85.7   | 80     | 79.7   | 83.9   | 88.6   | 104.6  |
| IL18    | 8058.5 | 9217.5 | 3462.3 | 5350.5 | 5519.4 | 4659.6 | 7311.1 | 7604.4 |
| IL18BP  | 89.1   | 90.6   | 93.5   | 87.9   | 88.5   | 88.7   | 83.2   | 88.6   |
| IL18BP  | 494.5  | 599    | 351.4  | 770.8  | 491.9  | 640.8  | 485.6  | 654    |
| IL18R1  | 91.2   | 95.6   | 98.7   | 96.4   | 85.9   | 105.5  | 90.5   | 94.6   |
| IL18RAP | 112.2  | 142.8  | 108.3  | 97.9   | 99.8   | 107.1  | 97     | 103.2  |
| IL19    | 81.4   | 96.7   | 81.6   | 79.6   | 78.8   | 74.5   | 89.8   | 89.2   |
| IL19    | 133.8  | 156.2  | 117.8  | 110.2  | 103.3  | 105.4  | 125.2  | 139.8  |
| IL1A    | 90.2   | 100.9  | 98.7   | 88.6   | 79     | 88.5   | 88.1   | 108.1  |
| IL1B    | 157.3  | 191.9  | 144.1  | 128.7  | 138.2  | 143.5  | 201.2  | 282.6  |
| IL1F10  | 75.2   | 80.7   | 89.1   | 94.5   | 83.8   | 87.9   | 81.8   | 72.4   |
| IL1F10  | 92.1   | 88.8   | 88.5   | 92.3   | 84.1   | 86.1   | 91.9   | 93.2   |
| IL1F5   | 103.2  | 117.3  | 91.2   | 85     | 88.4   | 86     | 91.6   | 116.3  |
| IL1F5   | 91.3   | 84.8   | 114.6  | 90.2   | 98.1   | 92.9   | 80.4   | 93.5   |
| IL1F6   | 90.2   | 107.6  | 104.4  | 84.4   | 92.8   | 86.1   | 88.6   | 89.7   |
| IL1F7   | 82.4   | 102.5  | 100.7  | 102.8  | 93.3   | 98.8   | 95.3   | 93.3   |
| IL1F7   | 340.8  | 405.1  | 138.7  | 160.4  | 134    | 155.3  | 283.2  | 336.3  |
| IL1F7   | 74.4   | 93.1   | 95.3   | 85.1   | 75.8   | 95.3   | 86.5   | 88.5   |
| IL1F8   | 75.7   | 81.8   | 85.7   | 83.6   | 84.2   | 79     | 85     | 103    |
| IL1F8   | 110.1  | 121.2  | 95.3   | 88.2   | 96.3   | 100.7  | 103.7  | 122.3  |
| IL1F8   | 84.7   | 96.9   | 99.8   | 98.9   | 88.4   | 86.1   | 82.4   | 89.6   |
| IL1F9   | 83.9   | 97.8   | 94.4   | 83.2   | 82.3   | 89.5   | 87.2   | 85.7   |
| IL1R1   | 102.9  | 140    | 85     | 89.6   | 73.9   | 82.8   | 114.5  | 165.2  |
| IL1R2   | 85.8   | 86     | 83.9   | 84.3   | 78.1   | 93.2   | 85.4   | 95.8   |
| IL1R2   | 135.9  | 163.1  | 93.3   | 87.1   | 76.4   | 90.6   | 126.7  | 137.7  |
| IL1R2   | 89.4   | 86.5   | 97.1   | 90.1   | 88     | 96.7   | 87.2   | 88.1   |

|          |       |        |       |       |       |       |       |        |
|----------|-------|--------|-------|-------|-------|-------|-------|--------|
| IL1RAP   | 130.2 | 128.7  | 103.1 | 112.3 | 100.6 | 112.7 | 121.2 | 131.3  |
| IL1RAP   | 83.7  | 95.6   | 85.8  | 84.5  | 84.3  | 94.3  | 83.7  | 101.5  |
| IL1RAP   | 176   | 209.9  | 121.4 | 134.2 | 107.3 | 152.5 | 167   | 306.4  |
| IL1RAPL1 | 78.9  | 89.6   | 93.5  | 88.1  | 89    | 87    | 80.3  | 82.7   |
| IL1RAPL2 | 80.1  | 100.7  | 94.2  | 90.1  | 83.1  | 84.4  | 86.4  | 96.7   |
| IL1RL1   | 80.2  | 82.1   | 99.4  | 96.1  | 89.9  | 97.4  | 83.4  | 89.6   |
| IL1RL1   | 136.7 | 188.7  | 93.9  | 92.3  | 87.6  | 94.1  | 146.7 | 180.1  |
| IL1RL1   | 77.7  | 82     | 95    | 88.9  | 89.2  | 96.8  | 110.6 | 132.8  |
| IL1RL2   | 95.8  | 101.7  | 101.2 | 94.7  | 84.1  | 97.6  | 102.1 | 120.4  |
| IL1RN    | 112   | 118.2  | 111.3 | 79.7  | 84.1  | 92.3  | 112.9 | 131.9  |
| IL1RN    | 543.6 | 719.6  | 376.2 | 176   | 146.4 | 143.2 | 446.5 | 559.8  |
| IL1RN    | 830   | 1068.5 | 796.8 | 431.3 | 290.9 | 456.9 | 971.4 | 1773.9 |
| IL2      | 83.5  | 93.9   | 87.9  | 85.6  | 84.4  | 84.1  | 80.2  | 85     |
| IL20RA   | 133.6 | 156.4  | 99.4  | 94.1  | 84.2  | 95.3  | 139.9 | 155    |
| IL21     | 97.7  | 106.2  | 88.9  | 93.1  | 84.4  | 88.4  | 107.7 | 99.3   |
| IL21R    | 138.6 | 163.4  | 117.6 | 100.6 | 97.4  | 107   | 132.7 | 154.7  |
| IL21R    | 128.3 | 143.9  | 113.1 | 101.8 | 105.3 | 116.2 | 130.4 | 126.3  |
| IL21R    | 109.2 | 129.4  | 97.4  | 95.9  | 94.6  | 87.8  | 109.9 | 123    |
| IL21R    | 103.4 | 114.5  | 78.9  | 69.9  | 68.9  | 70.5  | 85.2  | 113.6  |
| IL22     | 82.1  | 76     | 90.1  | 92    | 89.6  | 91.9  | 79.2  | 81.3   |
| IL22RA1  | 109.9 | 118    | 95.2  | 79.7  | 81.3  | 86.6  | 99.7  | 124.9  |
| IL22RA2  | 139   | 145.8  | 96.3  | 93.1  | 89.5  | 86.8  | 122.9 | 147.7  |
| IL22RA2  | 81.8  | 97.6   | 85.6  | 79.5  | 78.4  | 95.4  | 87.2  | 86.8   |
| IL23A    | 123.4 | 140.9  | 131.5 | 121.5 | 116.5 | 141.5 | 110.8 | 141.5  |
| IL23R    | 90    | 94.1   | 94.4  | 90.5  | 83.4  | 86    | 99.9  | 88.5   |
| IL24     | 77.1  | 101.4  | 79.7  | 83.1  | 80.2  | 79.8  | 88.1  | 92.8   |
| IL24     | 75.4  | 75.8   | 87.1  | 83.4  | 87.6  | 92.2  | 81    | 87.2   |
| IL24     | 97.4  | 118.9  | 88.3  | 86.2  | 80.8  | 87.9  | 92.8  | 90.9   |
| IL25     | 90.8  | 104.9  | 96.4  | 91.9  | 94.3  | 87.7  | 87.3  | 102.3  |
| IL25     | 110.7 | 123.5  | 79.2  | 91.4  | 81.2  | 84.6  | 109.6 | 120.9  |
| IL26     | 85.1  | 86     | 93.3  | 85.4  | 94.6  | 90.9  | 80.5  | 83.9   |
| IL27     | 85    | 90.2   | 86    | 87.7  | 78.7  | 77.9  | 90.2  | 88.5   |
| IL27RA   | 754.6 | 801.3  | 736.1 | 430.3 | 319.5 | 368   | 846.3 | 1895   |
| IL28A    | 84    | 85.8   | 94    | 86.5  | 84.2  | 86.2  | 91.6  | 100.7  |
| IL28B    | 102.6 | 109.8  | 96.5  | 85.2  | 90.4  | 89.8  | 97.4  | 103.5  |
| IL28RA   | 81.9  | 105.3  | 92.6  | 83.7  | 81.7  | 92.9  | 95.6  | 97.3   |
| IL29     | 103.4 | 117.5  | 86.1  | 84.9  | 78.9  | 86.4  | 97.5  | 104.1  |
| IL2RA    | 112.1 | 125.6  | 85.8  | 89.4  | 87.9  | 85.5  | 96    | 136.1  |
| IL2RB    | 212.3 | 250.1  | 178.2 | 155.1 | 123.2 | 151.9 | 163.4 | 217.3  |
| IL2RG    | 79.9  | 88.1   | 94.1  | 90.9  | 81.2  | 78.7  | 88.7  | 84.9   |
| IL3      | 80.7  | 84.8   | 86.6  | 87.8  | 93.3  | 87.6  | 79    | 86.4   |
| IL31     | 93.7  | 86.3   | 82.4  | 74.4  | 81.9  | 85.3  | 88.3  | 98.3   |
| IL31RA   | 90    | 99.5   | 102.5 | 93    | 91.3  | 95.7  | 85    | 92.5   |
| IL32     | 129.6 | 145.9  | 91    | 92.6  | 78.4  | 86.3  | 116.5 | 146.2  |
| IL32     | 86.4  | 101.1  | 97.5  | 106.5 | 86.9  | 103.8 | 85.8  | 90.7   |
| IL33     | 78.1  | 104.8  | 94.1  | 96.1  | 84.5  | 85.8  | 80.2  | 87.8   |
| IL3RA    | 155.5 | 204.7  | 138.1 | 133.1 | 108.3 | 116.5 | 156.4 | 181    |
| IL4      | 80.4  | 83.8   | 94.9  | 84.7  | 82.2  | 78.9  | 77.9  | 83.4   |
| IL4      | 93.5  | 103.3  | 99.7  | 95.4  | 95    | 96.4  | 86.8  | 105.5  |
| IL4I1    | 111.9 | 124.7  | 103.7 | 112.9 | 139.5 | 108.4 | 114.9 | 131.4  |



|        |         |         |         |         |         |         |         |         |
|--------|---------|---------|---------|---------|---------|---------|---------|---------|
| IL4I1  | 79.2    | 89.9    | 91.6    | 80.9    | 83.9    | 89.4    | 86.9    | 93.3    |
| IL4R   | 87.3    | 99.1    | 100     | 101     | 93.2    | 97.3    | 83.4    | 88.3    |
| IL4R   | 270     | 343.8   | 177.4   | 164.5   | 121.6   | 142.6   | 240.7   | 329.4   |
| IL5    | 81.9    | 89.5    | 95.6    | 96.2    | 80.7    | 84.3    | 83.1    | 92.9    |
| IL5RA  | 132.9   | 156.8   | 123     | 115.4   | 119.7   | 108.8   | 113.9   | 144.4   |
| IL5RA  | 118.1   | 141.9   | 92      | 88.9    | 88.8    | 91.9    | 114.6   | 99      |
| IL6    | 103.3   | 123.9   | 93.1    | 89.8    | 88      | 88.9    | 106.2   | 127.7   |
| IL6R   | 289.3   | 387.5   | 214.4   | 263.8   | 266.5   | 234     | 217.7   | 268.7   |
| IL6R   | 634.1   | 965.6   | 405.5   | 366.3   | 339.8   | 343.7   | 540.2   | 649.9   |
| IL6ST  | 77.8    | 94      | 84.7    | 83.8    | 102.6   | 90.2    | 84.1    | 82.3    |
| IL6ST  | 102.5   | 116.6   | 97.1    | 96.2    | 88      | 90.8    | 102.3   | 138.1   |
| IL7    | 73.7    | 83.4    | 99.9    | 81.8    | 78.8    | 87.9    | 72.2    | 81.1    |
| IL7R   | 99.1    | 118.8   | 108.1   | 80.3    | 99.1    | 83.7    | 119.6   | 129     |
| IL8    | 556.5   | 644.7   | 369.4   | 579.4   | 519.4   | 625.8   | 1063    | 2361.4  |
| IL8RA  | 101.3   | 134.1   | 97.5    | 81.8    | 75.2    | 76.8    | 100     | 132.2   |
| IL8RB  | 385.6   | 531.3   | 256.5   | 280     | 245.9   | 275.7   | 355     | 386.6   |
| IL9    | 94.2    | 109     | 93.3    | 87.7    | 90.1    | 86.7    | 103     | 100.7   |
| IL9R   | 74.4    | 78.2    | 93.6    | 80.6    | 85.4    | 89.5    | 83.3    | 91      |
| ILDR1  | 98      | 114     | 96.6    | 92.9    | 81.3    | 91.7    | 108.1   | 103.4   |
| ILF2   | 7862.4  | 11219.3 | 5416.2  | 3770.5  | 3064.7  | 5965.2  | 5910.9  | 8725.7  |
| ILF3   | 667.7   | 784.8   | 745.1   | 638.4   | 531.6   | 958.3   | 564.6   | 1054.2  |
| ILF3   | 207.3   | 295.7   | 124.4   | 117     | 90.6    | 99.9    | 176.3   | 242     |
| ILF3   | 1170.1  | 1742.6  | 972.2   | 649.7   | 542.8   | 1021.1  | 767.4   | 1215    |
| ILK    | 79.5    | 93.1    | 96.5    | 89.1    | 82.4    | 92.9    | 85.8    | 96.4    |
| ILK    | 2969.4  | 3926.6  | 1890.1  | 1534.4  | 1447.9  | 1831.5  | 2434.9  | 3508.9  |
| ILK    | 278.6   | 330.4   | 141.3   | 121.1   | 127.5   | 156.5   | 275.6   | 397.5   |
| ILKAP  | 825.3   | 983     | 446.2   | 427.6   | 331.9   | 491     | 691.1   | 748.2   |
| ILKAP  | 91.6    | 97.2    | 95.2    | 87.9    | 92.7    | 96.7    | 83.1    | 100.5   |
| ILVBL  | 834.4   | 1057.9  | 543.4   | 356.9   | 321     | 418.8   | 688.2   | 1027.3  |
| ILVBL  | 1330.4  | 1733.4  | 958.6   | 772.9   | 660.7   | 821.8   | 1131.7  | 943.3   |
| IMAA   | 121.2   | 127.8   | 100.5   | 106.6   | 105.5   | 87.7    | 105.3   | 108.8   |
| IMAA   | 28995.5 | 27083.3 | 26964.2 | 34250.2 | 33390.9 | 28596.1 | 28551.4 | 29995.1 |
| IMMP2L | 453.5   | 566.9   | 296.2   | 368.9   | 311     | 433.3   | 394.1   | 571     |
| IMMT   | 2053    | 2394.8  | 670.5   | 725.7   | 545.9   | 968.2   | 1647.2  | 3091.6  |
| IMP3   | 5543.9  | 6832.1  | 3874.6  | 3302.5  | 2275.2  | 3534.8  | 4770.4  | 5443.8  |
| IMP4   | 4514.1  | 6071.8  | 3335.9  | 2276.7  | 1525.4  | 2231.4  | 3480.3  | 3057.6  |
| IMP5   | 118.9   | 145.4   | 101.5   | 88.3    | 83.1    | 89.7    | 109.8   | 138.8   |
| IMPA1  | 1563.2  | 1691.9  | 453.2   | 372     | 332.8   | 544.7   | 1318.9  | 2218.5  |
| IMPA2  | 1260.1  | 1582.4  | 1353.7  | 1570.4  | 1387.1  | 1772.6  | 1294.7  | 1983.6  |
| IMPACT | 119.9   | 182.3   | 126.1   | 112.9   | 115.4   | 136.3   | 107.6   | 131.2   |
| IMPAD1 | 889.1   | 1210.8  | 379.2   | 307.5   | 243.7   | 341.9   | 787.5   | 1049.4  |
| IMPDH1 | 2403.3  | 2873.6  | 2104.9  | 1664.9  | 1423    | 1674.9  | 2073.1  | 2163.2  |
| IMPDH1 | 118.8   | 127.4   | 102     | 86.3    | 90.2    | 91.2    | 108     | 129.4   |
| IMPDH1 | 98.6    | 119     | 81.6    | 80.7    | 79.6    | 81.5    | 106.2   | 128.8   |
| IMPDH2 | 5507.7  | 6900.3  | 3516.2  | 2465.8  | 1691.4  | 2503.4  | 4292.1  | 6490.5  |
| IMPG1  | 79.4    | 89.3    | 84.1    | 87      | 78.9    | 102.1   | 84.2    | 90.2    |
| IMPG2  | 133.5   | 148.2   | 128.5   | 122.4   | 113.6   | 117.9   | 134.2   | 143.6   |
| INA    | 97.7    | 115.3   | 111.1   | 96.9    | 98.3    | 96.5    | 110.1   | 110.6   |
| INADL  | 156.3   | 205.8   | 96.4    | 83.3    | 82      | 82.4    | 132     | 151.4   |
| INADL  | 90.7    | 94.6    | 108.1   | 79.4    | 91.6    | 89.8    | 90.8    | 109.4   |

|          |        |        |        |        |        |        |        |        |
|----------|--------|--------|--------|--------|--------|--------|--------|--------|
| INCA     | 85.8   | 102.7  | 99.6   | 93.5   | 87.1   | 96     | 93     | 93.5   |
| INCA1    | 95.3   | 90.5   | 83.9   | 78     | 76.4   | 78.4   | 82.9   | 100.4  |
| INCENP   | 483.9  | 518.2  | 339.5  | 369.1  | 317.9  | 299.5  | 352.3  | 403.6  |
| INDO     | 66.1   | 88.7   | 95.1   | 89.8   | 97.7   | 79     | 76.2   | 80.5   |
| ING1     | 82.9   | 93.8   | 88.9   | 91.3   | 93.8   | 85.1   | 86.6   | 95.3   |
| ING1     | 313    | 447.2  | 297.8  | 286.6  | 218.2  | 365.3  | 254.1  | 460.7  |
| ING1     | 135.6  | 145.7  | 96.9   | 81.4   | 77.9   | 90     | 114.9  | 122    |
| ING1     | 88.7   | 114.8  | 78.7   | 80.7   | 74.9   | 85.8   | 102.5  | 114.4  |
| ING2     | 735.6  | 970.6  | 353.9  | 332.6  | 220.8  | 348.1  | 743.3  | 1397.4 |
| ING3     | 358.5  | 482    | 219.4  | 219.9  | 192.5  | 203.9  | 272.7  | 304.9  |
| ING3     | 113.3  | 116.3  | 106.3  | 85.6   | 80.8   | 95.3   | 103.1  | 125.1  |
| ING3     | 993.9  | 1223.6 | 924.7  | 1021.5 | 829.6  | 1280.7 | 839.1  | 1438.4 |
| ING4     | 149.7  | 174.9  | 118.9  | 118.6  | 102.5  | 112.8  | 145.4  | 179.3  |
| ING5     | 137.7  | 202.6  | 102.9  | 103.4  | 93.3   | 103.5  | 125.5  | 163    |
| ING5     | 81.1   | 94.3   | 106.6  | 93.3   | 82.9   | 81.3   | 90.4   | 99.9   |
| INGX     | 112.1  | 113    | 110.8  | 91.6   | 87.3   | 83.6   | 107    | 107.2  |
| INHA     | 85.5   | 93     | 84.7   | 81.4   | 75     | 81.4   | 90     | 98.5   |
| INHBA    | 94.6   | 108.3  | 87.8   | 90.8   | 78.2   | 96.6   | 98.5   | 105.3  |
| INHBB    | 126.7  | 146.7  | 112.7  | 102.3  | 90.4   | 104.3  | 131.7  | 138.8  |
| INHBC    | 82.2   | 100.4  | 93.1   | 77.1   | 80.4   | 83.6   | 84.7   | 92     |
| INHBE    | 126.6  | 164.6  | 99.5   | 104.3  | 90.8   | 93.6   | 134.4  | 153.3  |
| INMT     | 84.6   | 98.6   | 78.9   | 85.5   | 89.6   | 71.1   | 77.4   | 93.8   |
| INOC1    | 126.7  | 167    | 90.3   | 80.2   | 80.5   | 95.9   | 133.5  | 144.9  |
| INOC1    | 238    | 325.6  | 242.6  | 256.1  | 224.2  | 317.4  | 241.1  | 357.1  |
| INPP1    | 1447.9 | 1810.1 | 804.7  | 510.5  | 470.1  | 575.8  | 1304.1 | 1211.4 |
| INPP4A   | 69     | 77.3   | 83.9   | 73.6   | 76.5   | 77.9   | 63.7   | 87.1   |
| INPP4A   | 127.3  | 153.6  | 113.5  | 116.8  | 96     | 139.5  | 112.8  | 129.5  |
| INPP4A   | 109.1  | 137.8  | 81.4   | 85.3   | 85.1   | 87.5   | 117.4  | 119.8  |
| INPP4B   | 495.7  | 606.7  | 306.1  | 303    | 218.3  | 418.2  | 371.7  | 687.9  |
| INPP5A   | 298.2  | 387.2  | 223.2  | 192.8  | 172.7  | 233.5  | 308.7  | 679.6  |
| INPP5B   | 265.2  | 334.5  | 218.6  | 228.2  | 192.5  | 222.4  | 246.5  | 306.6  |
| INPP5D   | 664.5  | 814.8  | 499.2  | 407.5  | 364.4  | 399.8  | 557    | 765.3  |
| INPP5E   | 428.3  | 390.3  | 317.9  | 285.7  | 269.8  | 315    | 323.7  | 759.3  |
| INPP5F   | 96.8   | 95.7   | 73     | 76.6   | 75     | 78.7   | 96.6   | 95.6   |
| INPP5F   | 104.7  | 121.1  | 107.3  | 103.2  | 92.8   | 96.5   | 107.3  | 101.3  |
| INPP5F   | 168.5  | 170.8  | 164.7  | 148.6  | 161.4  | 151.7  | 150.8  | 181.5  |
| INPPL1   | 1421.8 | 1760   | 1729.5 | 1351.4 | 1352.1 | 1947   | 1277.4 | 1075.8 |
| INS      | 135.7  | 149.3  | 96     | 89.2   | 91.3   | 92.3   | 125.8  | 123.4  |
| INSC     | 115.6  | 132.5  | 97.6   | 94.8   | 74.3   | 86.1   | 122.3  | 132.8  |
| INSIG1   | 322.2  | 422.4  | 202.3  | 280.8  | 263.7  | 228.7  | 285.9  | 715.3  |
| INSIG2   | 327.5  | 495.5  | 298.4  | 345.2  | 271.7  | 431.3  | 318.2  | 541    |
| INS-IGF2 | 82.8   | 87.7   | 85.3   | 87.5   | 85.2   | 90.6   | 87     | 92.9   |
| INS-IGF2 | 73.3   | 87.4   | 78.5   | 82.8   | 83.8   | 77.3   | 83.2   | 85     |
| INSL3    | 72     | 75.8   | 87.7   | 78.2   | 75.5   | 83.1   | 80.8   | 75.5   |
| INSL4    | 86.2   | 99.9   | 91.6   | 84.1   | 85.5   | 98.4   | 88.5   | 88.3   |
| INSL5    | 116.8  | 126.8  | 102.9  | 92     | 85     | 79.8   | 100.2  | 117.7  |
| INSL6    | 76.3   | 87.5   | 90.3   | 85.8   | 75.7   | 88.6   | 87.2   | 83     |
| INSM1    | 145.2  | 160.7  | 98.7   | 97.9   | 105.4  | 94.9   | 131.4  | 153.2  |
| INSM2    | 81.9   | 86     | 83.4   | 86.7   | 82.5   | 84.2   | 85.2   | 86     |
| INSR     | 141    | 170.4  | 109.5  | 93.6   | 94.3   | 88.7   | 122.2  | 163.5  |

|          |        |        |        |        |        |        |        |        |
|----------|--------|--------|--------|--------|--------|--------|--------|--------|
| INSRR    | 121.4  | 151.2  | 87.8   | 87.2   | 81.8   | 83.5   | 130    | 134.4  |
| INT1     | 157.8  | 214.9  | 215.4  | 214.4  | 198.2  | 280.8  | 158.6  | 234.7  |
| INT4     | 447.5  | 601.7  | 321.2  | 331.2  | 288.6  | 400.6  | 379.3  | 520.1  |
| INTS1    | 653.2  | 757.9  | 452.2  | 484.7  | 429.5  | 508.2  | 473.9  | 367.7  |
| INTS6    | 132.7  | 141.6  | 102.2  | 92.5   | 95.7   | 96.3   | 105    | 130    |
| INTU     | 146.3  | 140.5  | 113.1  | 102.2  | 82.7   | 147.6  | 113    | 142.7  |
| INVS     | 110.5  | 154.6  | 109    | 103.5  | 84     | 133.9  | 99.7   | 132.8  |
| INVS     | 353.4  | 476.4  | 428.3  | 326.7  | 274.7  | 501.6  | 331.7  | 498.3  |
| INVS     | 124.6  | 153.4  | 108.9  | 108.7  | 99.2   | 102.8  | 113.4  | 129    |
| IPF1     | 108.7  | 122.3  | 106.3  | 94.2   | 85.4   | 86     | 105.1  | 112    |
| IPMK     | 108.3  | 132.9  | 90.5   | 92.7   | 81     | 87.8   | 140.4  | 140.7  |
| IPO11    | 976.4  | 1101.7 | 891.3  | 1036.4 | 731.6  | 1133   | 651.6  | 760.4  |
| IPO13    | 174.2  | 218.4  | 171.2  | 185.1  | 135.8  | 205.1  | 149.8  | 247.6  |
| IPO4     | 243.9  | 319.1  | 311.2  | 215.3  | 173.3  | 295.6  | 196.4  | 265.3  |
| IPO7     | 428.4  | 544.8  | 242.8  | 304.5  | 231    | 268.2  | 313.4  | 408.9  |
| IPO8     | 194.4  | 260.3  | 139.3  | 168.7  | 131.6  | 177.7  | 169.2  | 215.4  |
| IPO9     | 554.5  | 670.2  | 364.8  | 376.8  | 290.9  | 455.7  | 418.2  | 680.8  |
| IPP      | 170.8  | 201.6  | 105.3  | 109.2  | 108.4  | 100.9  | 144.9  | 198.7  |
| IPPK     | 115.1  | 159.8  | 109.6  | 98.3   | 90.9   | 92.3   | 121.6  | 147.1  |
| IQCA     | 75.8   | 83.5   | 95     | 86.5   | 84.6   | 78.8   | 73.4   | 79.3   |
| IQCB1    | 114.6  | 128.4  | 100.5  | 85.3   | 77.2   | 106.9  | 115.8  | 132    |
| IQCB1    | 885.6  | 1123.4 | 427.6  | 408.9  | 418.1  | 848    | 575.6  | 825.3  |
| IQCC     | 284.2  | 359    | 143.9  | 116.4  | 115    | 120.2  | 197.8  | 212.3  |
| IQCD     | 117.7  | 136.7  | 127.8  | 128.9  | 117.5  | 157.2  | 99.6   | 104.7  |
| IQCE     | 98.3   | 114    | 122.2  | 109    | 111.4  | 127.6  | 103.5  | 120.4  |
| IQCF1    | 70.4   | 90.8   | 88.2   | 76.6   | 74.1   | 85.9   | 83     | 92.7   |
| IQCF2    | 76.3   | 88.4   | 95     | 88.4   | 98.1   | 95.1   | 90.1   | 92.2   |
| IQCG     | 141.9  | 150.8  | 101.7  | 86.6   | 91.7   | 94.6   | 120.1  | 150.9  |
| IQCH     | 74.3   | 79.4   | 86.2   | 82.3   | 82.2   | 88     | 76.8   | 78.4   |
| IQCH     | 104.9  | 111.6  | 105.5  | 86.4   | 87.8   | 93.2   | 108.4  | 113.5  |
| IQCK     | 329.3  | 412    | 200.1  | 158.5  | 123.7  | 147.1  | 263.9  | 361.4  |
| IQGAP1   | 685.9  | 1033.2 | 353.5  | 477.5  | 350.7  | 826.9  | 750.8  | 1987.2 |
| IQGAP2   | 116.7  | 139.1  | 119.3  | 105    | 113.1  | 129.8  | 109.5  | 131.2  |
| IQGAP3   | 135.1  | 153.9  | 128.3  | 132.4  | 118.4  | 128.3  | 130.7  | 121.9  |
| IQSEC1   | 168.5  | 209.6  | 154.7  | 242.2  | 187    | 266.4  | 154.6  | 195.1  |
| IQSEC2   | 118.7  | 123    | 112.1  | 98.3   | 102.3  | 108.1  | 112.3  | 126.8  |
| IQSEC3   | 110.7  | 121.9  | 85.7   | 88.7   | 78.3   | 85.2   | 114.9  | 122.9  |
| IQWD1    | 1183.8 | 1564.1 | 896.9  | 894.9  | 879.9  | 1355.7 | 1069.3 | 1990.2 |
| IQWD1    | 147.4  | 182.4  | 122.9  | 102.9  | 108.6  | 111.6  | 113    | 152.1  |
| IQWD1    | 141.6  | 181.9  | 100.5  | 103.2  | 112.2  | 127.4  | 142.8  | 261.2  |
| IRAK1    | 1792   | 1987.9 | 1346.2 | 1153.3 | 1145.1 | 2010.2 | 1599.2 | 3732.1 |
| IRAK1BP1 | 298.1  | 358.1  | 187.6  | 185.5  | 131.2  | 181.6  | 230.6  | 336.6  |
| IRAK2    | 186.7  | 245.4  | 153.8  | 132.2  | 133.5  | 143.4  | 201.2  | 237.5  |
| IRAK3    | 1031.1 | 1364.5 | 687.4  | 855.7  | 697.6  | 1440.4 | 1094.9 | 1592.5 |
| IRAK4    | 271.3  | 357.7  | 207.6  | 161.9  | 158.2  | 186.2  | 216.1  | 308.1  |
| IREB2    | 851.7  | 1214.1 | 532.7  | 612    | 473.8  | 621.7  | 752.4  | 946.9  |
| IRF1     | 515.5  | 636.4  | 385.9  | 320.5  | 329    | 251.7  | 588.8  | 559.7  |
| IRF2     | 82.6   | 92.5   | 89.4   | 89.7   | 78.5   | 92.7   | 92.5   | 108.4  |
| IRF2BP1  | 119.9  | 158    | 157.6  | 128.3  | 134    | 178.4  | 127.9  | 160.3  |
| IRF2BP2  | 1209.2 | 1871.9 | 937.4  | 1351.6 | 939.8  | 1573.1 | 1096.6 | 1643.5 |

|         |         |         |         |         |        |         |         |         |
|---------|---------|---------|---------|---------|--------|---------|---------|---------|
| IRF2BP2 | 772.4   | 912.9   | 751.5   | 941     | 820    | 1038.1  | 793.2   | 1168.1  |
| IRF3    | 384.4   | 441.5   | 399     | 268     | 244    | 360.9   | 343.7   | 521     |
| IRF4    | 157.9   | 164.5   | 95.5    | 79.1    | 78.3   | 85      | 139.9   | 190     |
| IRF5    | 1207.4  | 1382.8  | 709.7   | 629     | 662.6  | 722.2   | 960.4   | 644.9   |
| IRF6    | 89.4    | 103     | 84.7    | 82.6    | 82.3   | 78      | 95.3    | 96.9    |
| IRF7    | 125.3   | 135.7   | 136.5   | 93.9    | 91.7   | 112.7   | 122.4   | 161.5   |
| IRF7    | 90.4    | 112.9   | 98.1    | 97.2    | 88.2   | 93.5    | 98      | 99.7    |
| IRF7    | 380.6   | 440.5   | 280.9   | 204.6   | 220.2  | 222     | 317.7   | 292.4   |
| IRF8    | 17805.8 | 20287.3 | 13073.2 | 11602.3 | 9073.9 | 14317.7 | 12753.9 | 11117.3 |
| IRGC    | 87.3    | 103.3   | 88.9    | 80.2    | 85.3   | 90.7    | 91.4    | 106     |
| IRGQ    | 68.8    | 74.4    | 89.4    | 87.2    | 81.1   | 84.2    | 75.9    | 81.6    |
| IRS1    | 94.5    | 113.4   | 89.6    | 92.1    | 83.5   | 101.8   | 101.9   | 105.6   |
| IRS2    | 540.3   | 753.3   | 475.2   | 518.3   | 441.2  | 772.2   | 395.4   | 797.4   |
| IRS4    | 114     | 142.2   | 101.1   | 104.6   | 98.1   | 100     | 112.7   | 117.7   |
| IRX1    | 149.2   | 165.2   | 111.7   | 103.1   | 97.3   | 92.4    | 146.3   | 161.5   |
| IRX2    | 91.8    | 105.8   | 90.6    | 89.2    | 79.6   | 87.1    | 91.6    | 94.7    |
| IRX3    | 13741.4 | 16575.9 | 13311.1 | 8813.2  | 8109.7 | 6536.4  | 10147.3 | 10551.9 |
| IRX4    | 100.7   | 118.5   | 111.5   | 109.2   | 93.9   | 109.5   | 104.7   | 112.3   |
| IRX5    | 532.5   | 700.1   | 210.5   | 210.9   | 143.1  | 168.1   | 432     | 495.5   |
| IRX6    | 127.6   | 149.6   | 109.6   | 96.8    | 86.8   | 91.1    | 108.2   | 138     |
| IRXL1   | 74.5    | 95.7    | 79.6    | 82      | 75.9   | 71.7    | 72.6    | 90.3    |
| ISCA1   | 411.9   | 548.1   | 140.1   | 138.8   | 115.6  | 197.5   | 404.1   | 935     |
| ISCA2   | 397.1   | 508.8   | 300.5   | 247.5   | 196    | 249     | 337.4   | 440     |
| ISCU    | 1676.1  | 2097.5  | 1313.6  | 1044.6  | 918    | 1042.7  | 1470    | 1704.6  |
| ISG15   | 370.3   | 385.3   | 233.2   | 193.6   | 169.1  | 203.1   | 334.8   | 318.6   |
| ISG20   | 184.8   | 223.6   | 132.2   | 112     | 111.8  | 124.3   | 195.1   | 213.2   |
| ISG20L1 | 1027.6  | 1133.4  | 565.9   | 492.5   | 323.2  | 468.8   | 735.1   | 800.6   |
| ISG20L2 | 1547.5  | 1908.3  | 1127.7  | 761.7   | 513.5  | 626.3   | 1309.6  | 2205.2  |
| ISGF3G  | 717.4   | 868     | 498.6   | 327.4   | 307.9  | 402     | 732.2   | 1216.2  |
| ISL2    | 191.9   | 239.2   | 122.9   | 100     | 95.1   | 107.4   | 184.6   | 243.4   |
| ISLR    | 88.9    | 108.6   | 87.3    | 79.3    | 78.3   | 76.1    | 86      | 92.5    |
| ISLR    | 81.1    | 84.7    | 92.9    | 92.1    | 78.2   | 85      | 90.5    | 84.1    |
| ISLR    | 99.3    | 110.3   | 93.9    | 88.9    | 88.6   | 86.4    | 97.3    | 97.8    |
| ISLR2   | 91.9    | 102     | 103.9   | 90.4    | 86.5   | 85.8    | 94.1    | 103.9   |
| ISOC1   | 648.7   | 833.4   | 299.8   | 252.4   | 248.8  | 320.2   | 510.1   | 912.6   |
| ISOC2   | 1040.2  | 1287.7  | 317.7   | 360.9   | 213.8  | 350.8   | 827.6   | 1350.7  |
| ISYNA1  | 113     | 128.7   | 114.6   | 117.9   | 98.8   | 119.1   | 110.1   | 134.6   |
| ITCH    | 313.1   | 391.1   | 231.5   | 316.6   | 258.8  | 331.1   | 286.1   | 434.4   |
| ITFG1   | 101.2   | 117.6   | 90.6    | 94.1    | 81.9   | 81.5    | 96      | 109.9   |
| ITGA1   | 88.2    | 94      | 85      | 77.7    | 82.2   | 81.5    | 85.4    | 91.6    |
| ITGA10  | 92      | 101.1   | 100.3   | 108.7   | 109.1  | 104.9   | 94.6    | 100.2   |
| ITGA11  | 81.6    | 91.3    | 108.7   | 107.9   | 102.2  | 112.5   | 92.9    | 99.5    |
| ITGA11  | 101     | 116.7   | 112.4   | 103.7   | 90.2   | 111.2   | 101.5   | 119     |
| ITGA2   | 169.3   | 216.7   | 106.4   | 98.3    | 94.3   | 95.7    | 144.1   | 186.1   |
| ITGA2B  | 106.3   | 120.5   | 86.4    | 71.4    | 79     | 89.3    | 101.1   | 117.7   |
| ITGA3   | 111.8   | 153.9   | 96.9    | 100.8   | 88.8   | 99.2    | 112.4   | 116.1   |
| ITGA3   | 333.9   | 376.4   | 196.9   | 207.7   | 156.1  | 204.9   | 361.4   | 359.8   |
| ITGA4   | 384.8   | 530.7   | 249.1   | 309.6   | 267.4  | 486.1   | 287.1   | 473.4   |
| ITGA5   | 567.4   | 737.3   | 434.5   | 446.5   | 400.7  | 481.4   | 536.6   | 691.4   |
| ITGA6   | 107.4   | 140.3   | 98.8    | 90.7    | 85     | 94.4    | 105.5   | 136.1   |

|          |         |         |         |         |         |         |         |         |
|----------|---------|---------|---------|---------|---------|---------|---------|---------|
| ITGA6    | 81      | 79.1    | 93      | 78.3    | 82.5    | 87      | 73.4    | 86.3    |
| ITGA7    | 108.8   | 129.4   | 103.7   | 114.9   | 101.6   | 110.7   | 104     | 105.5   |
| ITGA8    | 70.8    | 81.9    | 93.2    | 79.7    | 84      | 77.7    | 69.7    | 74.2    |
| ITGAD    | 105.5   | 126.2   | 93.7    | 86.1    | 81.7    | 83      | 98.8    | 124     |
| ITGAE    | 964.6   | 1123    | 366.5   | 345.7   | 281.7   | 414.2   | 1089.8  | 1598.4  |
| ITGAL    | 633.4   | 771.8   | 688.6   | 386     | 310.9   | 493.1   | 566.6   | 1218.4  |
| ITGAM    | 290     | 297.7   | 211     | 486.9   | 390.7   | 607.7   | 209.5   | 434.4   |
| ITGAV    | 255.9   | 314.5   | 168.7   | 186.3   | 166.8   | 304     | 265     | 546.4   |
| ITGAX    | 195     | 198.9   | 239.6   | 301.5   | 293.5   | 385.2   | 180.3   | 267.4   |
| ITGAX    | 82.9    | 101.8   | 100.7   | 100.1   | 95.8    | 95.1    | 89.1    | 99.9    |
| ITGB1    | 731.7   | 1178.2  | 431.4   | 347.7   | 297.6   | 552.8   | 596     | 752.6   |
| ITGB1    | 2905.9  | 3870.4  | 1296.7  | 1487.3  | 1319.2  | 2363.7  | 2985.2  | 4001.9  |
| ITGB1    | 1417.4  | 2139.7  | 882.2   | 824.4   | 668.5   | 1432.2  | 1219.5  | 1659.5  |
| ITGB1    | 98.9    | 115.6   | 100.6   | 99      | 89.9    | 89.8    | 97.5    | 100.9   |
| ITGB1    | 110.1   | 113.1   | 98.9    | 72.5    | 81.6    | 85.8    | 95.6    | 111.5   |
| ITGB1    | 77.7    | 81.5    | 89.1    | 96      | 87.6    | 89.7    | 89.4    | 79.6    |
| ITGB1BP1 | 125.1   | 144.7   | 118.3   | 98.4    | 84.9    | 101.8   | 96.9    | 136.2   |
| ITGB1BP1 | 2687.2  | 3035.6  | 922.6   | 701.1   | 562.9   | 703.6   | 2370.2  | 3625.5  |
| ITGB1BP2 | 120.6   | 155.8   | 105.3   | 106.1   | 90.4    | 101.4   | 121.7   | 135.3   |
| ITGB1BP3 | 141.6   | 169.9   | 99      | 102.9   | 94.8    | 90.9    | 145.6   | 130.2   |
| ITGB1BP3 | 83.6    | 99      | 97.1    | 97.1    | 80.3    | 90.5    | 90.4    | 96.2    |
| ITGB2    | 17389.2 | 20645   | 17616   | 25831.6 | 23029.2 | 25459.5 | 15292.6 | 18598   |
| ITGB3    | 101.1   | 106.6   | 90.3    | 94.3    | 89.6    | 85.4    | 102.7   | 94.5    |
| ITGB3BP  | 691.7   | 814.3   | 320     | 328.4   | 217.1   | 359.7   | 679.4   | 934.9   |
| ITGB4    | 90      | 88.9    | 107     | 96.9    | 100.8   | 96.4    | 88.4    | 93.5    |
| ITGB4    | 86.8    | 94.3    | 80.8    | 80.9    | 88      | 84.1    | 83.8    | 84.5    |
| ITGB4    | 95      | 120.7   | 97.1    | 102.9   | 86      | 82      | 91.3    | 103.4   |
| ITGB4    | 109.6   | 125.4   | 93.6    | 85.6    | 80.2    | 83.2    | 106.5   | 124.3   |
| ITGB4BP  | 2319.6  | 2724.6  | 1620.3  | 1205.6  | 935.2   | 1340.9  | 2104.5  | 2812.7  |
| ITGB4BP  | 133.5   | 150.9   | 90.9    | 81.6    | 79.1    | 88.4    | 112.1   | 137.7   |
| ITGB4BP  | 3967    | 5398.9  | 3086.3  | 1782.3  | 1223.1  | 1993.6  | 3858.9  | 4424.4  |
| ITGB5    | 438.9   | 593     | 218.1   | 143.8   | 128     | 142.4   | 399.9   | 489     |
| ITGB5    | 655.9   | 915.8   | 604.7   | 291.1   | 257.2   | 335.4   | 578     | 701.5   |
| ITGB6    | 101.5   | 113.2   | 84.3    | 86      | 83      | 80.4    | 98.4    | 106.6   |
| ITGB7    | 415.1   | 564.5   | 528.1   | 809.4   | 585.7   | 1307.5  | 344.3   | 562.1   |
| ITGB8    | 109.1   | 107.4   | 91.5    | 92.3    | 89.6    | 87.1    | 102.1   | 101.3   |
| ITGBL1   | 123.3   | 146.2   | 93.1    | 77.4    | 83.6    | 100.7   | 128.4   | 126.4   |
| ITIH1    | 110     | 122.3   | 96.2    | 96.3    | 80      | 92.5    | 104.8   | 127.8   |
| ITIH2    | 92      | 114     | 94      | 76.5    | 74.9    | 87      | 99.5    | 96.5    |
| ITIH3    | 126.9   | 146.7   | 97.5    | 84      | 79.4    | 79.3    | 115.2   | 145.1   |
| ITIH4    | 87.7    | 101.9   | 84.8    | 89      | 96.7    | 105.4   | 90      | 106.6   |
| ITIH5    | 97.2    | 99.9    | 87.6    | 81.3    | 86.6    | 87.1    | 81      | 89      |
| ITIH5    | 25800.1 | 25432.9 | 12767.1 | 19777.5 | 17199   | 14843.8 | 23210.1 | 26492.1 |
| ITIH5    | 111.8   | 125.3   | 96.2    | 81.5    | 77.9    | 96.2    | 109.7   | 113.7   |
| ITIH5    | 83.3    | 90.6    | 100.2   | 94.7    | 91.9    | 95.3    | 79.2    | 85.2    |
| ITIH5L   | 75.4    | 87.4    | 88.5    | 86.9    | 77      | 82.2    | 84      | 83      |
| ITK      | 100.6   | 126.7   | 103.3   | 103.9   | 105.9   | 102.8   | 90.5    | 103.9   |
| ITLN1    | 85.3    | 93.4    | 120.5   | 103.1   | 102.5   | 109.8   | 86.8    | 87.9    |
| ITLN2    | 103.6   | 110.5   | 83.3    | 89.9    | 89.3    | 84.9    | 99.4    | 96.6    |
| ITM2A    | 97.1    | 107.1   | 103.9   | 89.8    | 87      | 96.7    | 96.9    | 102     |

|          |        |        |        |        |        |        |        |        |
|----------|--------|--------|--------|--------|--------|--------|--------|--------|
| ITM2B    | 79.9   | 84.7   | 92.2   | 85.9   | 78.8   | 85.7   | 84.6   | 101.7  |
| ITM2C    | 1803.7 | 2293.2 | 1453.1 | 2229.5 | 2016.9 | 3039.6 | 1725.7 | 3087.6 |
| ITM2C    | 2321.6 | 3494.6 | 2084.5 | 3736.5 | 3270   | 4949.9 | 2200.8 | 2936.6 |
| ITPA     | 585.6  | 760.9  | 311.7  | 247.2  | 197.2  | 268.2  | 463.5  | 579.2  |
| ITPA     | 590.3  | 773.3  | 361.2  | 389.8  | 294.2  | 386.1  | 536.4  | 547.7  |
| ITPK1    | 194.5  | 224.6  | 178    | 210.6  | 169.5  | 302.2  | 172.6  | 279.7  |
| ITPKA    | 371.2  | 489.4  | 275.3  | 326    | 395    | 376.5  | 386.5  | 323.9  |
| ITPKB    | 261.2  | 334.3  | 242.4  | 202.5  | 177.7  | 238.6  | 235.9  | 338.5  |
| ITPKC    | 106.9  | 127.4  | 111.5  | 88.8   | 102.1  | 91.6   | 119.9  | 152.6  |
| ITPR1    | 777.8  | 1381.4 | 686.2  | 1218.5 | 892.6  | 2009.1 | 765.2  | 1672.4 |
| ITPR2    | 117.3  | 150.9  | 117.8  | 135.4  | 115.4  | 147.5  | 125.9  | 131.2  |
| ITPR3    | 997.1  | 1164.4 | 1184.1 | 896.2  | 893    | 851.1  | 537.1  | 528.9  |
| ITR      | 437.4  | 547.1  | 281.3  | 225.2  | 167.1  | 241.6  | 343.2  | 734.9  |
| ITSN1    | 90.5   | 94     | 106.8  | 93.7   | 91.7   | 98.3   | 82     | 88     |
| ITSN1    | 96.1   | 115.1  | 84.2   | 85.4   | 90.1   | 100.8  | 94.9   | 103.2  |
| ITSN1    | 297.7  | 401.5  | 287.9  | 267.2  | 275.3  | 284.2  | 251.8  | 235.8  |
| ITSN2    | 144.6  | 152.3  | 101.4  | 89.5   | 74.8   | 79.2   | 153.7  | 151.2  |
| ITSN2    | 141.2  | 182.3  | 95.9   | 86.7   | 77.7   | 100.9  | 144.3  | 170.6  |
| IVD      | 467.3  | 664    | 297.8  | 319.9  | 238.4  | 341.1  | 332    | 466.7  |
| IVL      | 114    | 117    | 88     | 91.6   | 80.8   | 77.4   | 105.5  | 118.1  |
| IVNS1ABP | 518.7  | 665.8  | 334.3  | 347.4  | 245.4  | 552.1  | 324.6  | 519.8  |
| IVNS1ABP | 522    | 575.5  | 244.5  | 330.3  | 232.3  | 460.9  | 391    | 569.6  |
| IVNS1ABP | 144.2  | 163.7  | 110.8  | 95.2   | 99.2   | 98.3   | 126.3  | 139.3  |
| IXL      | 685.3  | 791.3  | 383.1  | 385.1  | 315.9  | 356.6  | 586.7  | 576.9  |
| IZUMO1   | 90     | 104.8  | 101.6  | 98.4   | 95.5   | 90.7   | 99.5   | 96.1   |
| JAG1     | 104.2  | 121.7  | 103    | 92.6   | 95.9   | 102.7  | 103.3  | 128.1  |
| JAG2     | 331.5  | 359.3  | 365.8  | 263.3  | 196.8  | 334.4  | 276    | 347.2  |
| JAG2     | 109.8  | 127.4  | 77.6   | 81.1   | 83.9   | 94.5   | 107.9  | 112.8  |
| JAG2     | 178.4  | 226.2  | 233.3  | 135.8  | 126.9  | 172.9  | 149.3  | 185.3  |
| JAK1     | 356.4  | 536.9  | 264    | 233.4  | 200.2  | 325.9  | 307.7  | 451.6  |
| JAK2     | 282.8  | 366.2  | 197.3  | 207.8  | 202.6  | 391.2  | 231.2  | 388.1  |
| JAK3     | 101.1  | 104.5  | 104.9  | 97.7   | 80     | 75.8   | 93.1   | 111.4  |
| JAKMIP1  | 88.7   | 120.5  | 95.7   | 79     | 75.2   | 83.6   | 88.7   | 105.7  |
| JAKMIP2  | 82.1   | 112.8  | 95     | 93.3   | 82.2   | 90.2   | 94.4   | 103.5  |
| JAM2     | 91.2   | 111.8  | 100.4  | 94.7   | 93.1   | 100.5  | 96.3   | 103    |
| JAM3     | 129.7  | 157.6  | 99.8   | 95     | 91.3   | 101.5  | 113.5  | 147.2  |
| JARID1A  | 68.6   | 74.7   | 78.3   | 82.3   | 69.5   | 75.4   | 66.1   | 78.7   |
| JARID1B  | 564.8  | 747.8  | 559.4  | 760.4  | 618.7  | 1127.9 | 458.7  | 685.3  |
| JARID2   | 711.2  | 830.6  | 535.8  | 758.7  | 616.7  | 1013.6 | 601.1  | 852.8  |
| JAZF1    | 218.8  | 263.4  | 122.3  | 120.2  | 96.2   | 140    | 201.1  | 240    |
| JDP2     | 147    | 202.9  | 118.8  | 96.1   | 80.1   | 105.8  | 146.9  | 189.9  |
| JM11     | 136.4  | 165    | 120.2  | 130.6  | 113.3  | 121.3  | 148.7  | 150.5  |
| JMJD1A   | 209.2  | 221.7  | 131.2  | 149    | 145.1  | 237.4  | 203.3  | 434.2  |
| JMJD1B   | 373.1  | 534.5  | 328.5  | 457.9  | 414.1  | 691    | 345.4  | 495.6  |
| JMJD1C   | 1669.6 | 2158.7 | 787.6  | 1422.1 | 1098.1 | 2154.6 | 1407.8 | 2460.5 |
| JMJD1C   | 861.3  | 1431.8 | 584.8  | 764.8  | 628.3  | 1636.2 | 710.8  | 1203.5 |
| JMJD2A   | 307.8  | 389    | 241.1  | 269.2  | 223.4  | 327.7  | 265.2  | 291.9  |
| JMJD2B   | 91.3   | 108.8  | 94.8   | 78.7   | 82.7   | 89.4   | 94     | 112.7  |
| JMJD2C   | 139.6  | 173.6  | 118.5  | 114.7  | 102.2  | 128.7  | 123.9  | 156.7  |
| JMJD2D   | 111.9  | 110.8  | 88.1   | 82.2   | 85.8   | 84.7   | 103.8  | 120.5  |

|           |         |         |         |         |        |         |         |         |
|-----------|---------|---------|---------|---------|--------|---------|---------|---------|
| JMJD3     | 82.6    | 87      | 85.5    | 82.6    | 79.8   | 88.1    | 76.5    | 82.1    |
| JMJD4     | 276.4   | 366.4   | 267.8   | 229     | 178.1  | 247.3   | 218.3   | 347.6   |
| JMJD5     | 111.3   | 135     | 95.7    | 91.8    | 85.9   | 96.1    | 100.7   | 121.4   |
| JMY       | 118.4   | 132.2   | 107     | 94.4    | 91.6   | 116     | 110.1   | 136.9   |
| JOSD1     | 395.8   | 526.6   | 185.8   | 179.2   | 163.9  | 195.7   | 347.5   | 452.7   |
| JOSD2     | 227.7   | 302.3   | 181.7   | 144.5   | 122.3  | 151.8   | 231     | 359.8   |
| JOSD3     | 175     | 190.8   | 127     | 97.7    | 103.5  | 129.6   | 173.1   | 265.1   |
| JOSD3     | 340.9   | 308.3   | 184.5   | 127.1   | 117.3  | 199.8   | 197.6   | 316.4   |
| JPH1      | 176.6   | 194.4   | 158.1   | 105.7   | 102.3  | 121.4   | 131.3   | 179.7   |
| JPH2      | 140.3   | 175.5   | 115.2   | 105.1   | 87.8   | 103.4   | 148.1   | 179.3   |
| JPH2      | 115     | 132.4   | 102     | 96.8    | 93.9   | 98.8    | 132.3   | 122.5   |
| JPH2      | 86.4    | 87.8    | 99.6    | 99.3    | 83     | 93.6    | 84.9    | 90.8    |
| JPH3      | 122.5   | 157.6   | 100.6   | 93.5    | 89.3   | 94.7    | 125.2   | 136     |
| JPH4      | 97.4    | 102.6   | 93.2    | 88.3    | 86.2   | 89.4    | 102.4   | 106.8   |
| JRK       | 143.2   | 189.1   | 144.3   | 128     | 130.2  | 125.3   | 132.7   | 144.7   |
| JRKL      | 169     | 243.1   | 118.3   | 113.8   | 105.6  | 119.5   | 148.5   | 183.3   |
| JSRP1     | 77.7    | 77.6    | 91.1    | 87.7    | 84.2   | 98.5    | 79.4    | 85.5    |
| JTB       | 12717   | 14727.3 | 15041.1 | 11254.7 | 7986.6 | 10991.3 | 11500.4 | 17409.1 |
| JTV1      | 4230.3  | 6020.1  | 2591.6  | 1755.9  | 1375.3 | 1857.9  | 3834.2  | 3801.8  |
| JUB       | 107.2   | 135.1   | 96.6    | 91.5    | 86.8   | 95.1    | 107.1   | 147.2   |
| JUB       | 88.4    | 111.4   | 86.2    | 82.4    | 75.1   | 84.5    | 88.1    | 95.5    |
| JUB       | 101     | 105.5   | 92.7    | 97.1    | 84.8   | 87.5    | 91      | 107.7   |
| JUN       | 218.9   | 225.1   | 186.3   | 236.7   | 242.3  | 372.9   | 246.1   | 426.4   |
| JUNB      | 142.5   | 180.8   | 140.1   | 132.8   | 123.7  | 143.7   | 142.9   | 185.7   |
| JUND      | 5073.9  | 6370.9  | 5228.4  | 2849.7  | 2433.9 | 3465.2  | 5359.6  | 10095.8 |
| JUP       | 116.3   | 116.8   | 97.2    | 98.6    | 80.3   | 77.4    | 119.6   | 120.1   |
| JUP       | 89.1    | 105.8   | 100.2   | 88.6    | 107.7  | 97.6    | 96.2    | 95.6    |
| JUP       | 101.7   | 119.2   | 130.5   | 180.8   | 196.9  | 188.3   | 113.9   | 134.9   |
| K5B       | 101.6   | 105.9   | 106.8   | 90.7    | 82     | 90.8    | 95.1    | 108.2   |
| K6HF      | 98.7    | 106.2   | 96.6    | 98.2    | 86.5   | 91.3    | 109.9   | 130.8   |
| K6IRS2    | 96.7    | 110.9   | 106.2   | 100.9   | 94.9   | 94.4    | 102.7   | 109.5   |
| K6IRS3    | 100.9   | 100.6   | 93.1    | 85.3    | 93.9   | 86.9    | 90.4    | 100.9   |
| K6IRS4    | 96.9    | 116     | 88.3    | 86.6    | 75.2   | 78.2    | 109.5   | 115.1   |
| KA21      | 72.4    | 94.7    | 90.2    | 82.3    | 86     | 78.7    | 80.6    | 86.6    |
| KAAG1     | 84.6    | 92.6    | 90.1    | 86.4    | 94.9   | 93.3    | 83      | 95      |
| KAL1      | 200.8   | 238.3   | 142.1   | 207.5   | 174.8  | 264.4   | 160.9   | 181.4   |
| K-ALPHA-1 | 31032.9 | 29480.8 | 22526.2 | 19323.3 | 17266  | 17744.1 | 29774   | 29132.7 |
| KALRN     | 126.9   | 126.4   | 96.3    | 90      | 81.6   | 78.7    | 98.2    | 136.4   |
| KALRN     | 86.9    | 90.9    | 94.4    | 93.6    | 91.9   | 87.7    | 81.7    | 86.1    |
| KALRN     | 81.6    | 102.4   | 89.4    | 85.9    | 83.8   | 95.1    | 92.5    | 84.4    |
| KARCA1    | 85.6    | 96.9    | 82.6    | 84.4    | 78.6   | 87.9    | 80.2    | 97.3    |
| KARCA1    | 72.3    | 76.8    | 86.2    | 78.6    | 74.3   | 85      | 70.7    | 82.7    |
| KARS      | 1039.6  | 1383.2  | 649.9   | 744.3   | 518.2  | 978.3   | 807.1   | 1432.1  |
| KATNA1    | 2148.9  | 2458.7  | 1582.4  | 1483.6  | 1208   | 2218.6  | 1909.1  | 2869    |
| KATNAL1   | 142.3   | 179.8   | 109.7   | 88.7    | 97.9   | 107.8   | 144.1   | 150.4   |
| KATNAL1   | 134.4   | 187.2   | 116.4   | 138     | 120.2  | 134.2   | 197.3   | 266.9   |
| KATNAL1   | 99.1    | 109.7   | 106.2   | 92.3    | 89.4   | 94.7    | 93.8    | 102.2   |
| KATNAL2   | 196.3   | 232     | 153.9   | 143.4   | 118.4  | 185.8   | 170.2   | 202.7   |
| KATNAL2   | 130.2   | 144.3   | 106.8   | 87.8    | 80.1   | 89.1    | 111     | 150     |
| KATNB1    | 609.9   | 712.8   | 441.5   | 333     | 303.2  | 408.4   | 540.5   | 546.3   |

|         |        |        |       |        |        |        |        |        |
|---------|--------|--------|-------|--------|--------|--------|--------|--------|
| KAZALD1 | 101.8  | 114.2  | 106.1 | 87.4   | 93.6   | 97.7   | 103.6  | 109.4  |
| KBTBD1  | 111.9  | 117.9  | 97.9  | 84.9   | 78.9   | 89.1   | 95.5   | 134.4  |
| KBTBD10 | 86.8   | 106.4  | 87.2  | 84.8   | 82.6   | 83.5   | 82     | 95.5   |
| KBTBD11 | 4261.3 | 4790.7 | 2700  | 2336.3 | 1607.7 | 2524.7 | 2812.9 | 3031.3 |
| KBTBD2  | 967.9  | 1255.2 | 627.1 | 626.8  | 529.5  | 848.9  | 919.7  | 1331.7 |
| KBTBD3  | 100.8  | 108    | 98.6  | 96.6   | 100.7  | 106.8  | 95.6   | 108.1  |
| KBTBD3  | 191.7  | 215    | 160.3 | 168.3  | 133.9  | 160.9  | 181.7  | 256.4  |
| KBTBD4  | 89.3   | 111    | 82    | 84.1   | 75.5   | 82.9   | 89.4   | 112.1  |
| KBTBD4  | 127.6  | 168.2  | 122.6 | 119    | 96.3   | 135.5  | 114.6  | 130    |
| KBTBD5  | 65.7   | 80     | 92.9  | 92.4   | 81.8   | 90     | 75.2   | 79.1   |
| KBTBD6  | 118.3  | 131.6  | 95.6  | 95     | 80.8   | 82.8   | 115.1  | 153.7  |
| KBTBD7  | 251.5  | 282.2  | 154.6 | 205.8  | 167.5  | 206.8  | 217.2  | 356.3  |
| KBTBD8  | 247.6  | 289.7  | 172   | 133.7  | 122.8  | 172.2  | 228.1  | 390.9  |
| KCMF1   | 191.7  | 202.8  | 102.2 | 88.2   | 91.1   | 94.5   | 158.4  | 176.2  |
| KCMF1   | 153.6  | 197.7  | 103.6 | 96.8   | 85.5   | 96.7   | 136.5  | 198.7  |
| KCMF1   | 232.2  | 319.4  | 173.1 | 153.9  | 124.9  | 166.7  | 213.8  | 290.2  |
| KCNA1   | 98.4   | 113.3  | 97.9  | 101.1  | 83.1   | 92.5   | 94.9   | 109.3  |
| KCNA10  | 83     | 95     | 89.5  | 89.1   | 85     | 82.3   | 77.5   | 87.2   |
| KCNA2   | 74.6   | 79.2   | 82.1  | 71.7   | 75.1   | 78     | 77.5   | 73.3   |
| KCNA3   | 81.1   | 88.5   | 87.7  | 84     | 83.9   | 82.1   | 74.2   | 78.8   |
| KCNA4   | 84.2   | 88.3   | 94.9  | 82.8   | 72     | 77.4   | 78.9   | 81.4   |
| KCNA5   | 85.8   | 101.2  | 84.7  | 74.3   | 74     | 77.9   | 90.4   | 84.7   |
| KCNA6   | 97.1   | 122.2  | 88.9  | 73.2   | 79.2   | 87.6   | 100.4  | 116    |
| KCNA7   | 87.6   | 120    | 94.3  | 84.1   | 83.5   | 81.1   | 91.7   | 116.5  |
| KCNAB1  | 103    | 135.5  | 78.3  | 92.7   | 85.4   | 103.2  | 97.7   | 104.6  |
| KCNAB1  | 87.3   | 91.9   | 84.5  | 82.5   | 83.2   | 97.7   | 99.5   | 101.5  |
| KCNAB1  | 85.3   | 96     | 96.2  | 90.5   | 84.9   | 100.8  | 85.1   | 82.3   |
| KCNAB1  | 98     | 116.4  | 95.1  | 91.5   | 85.6   | 95.7   | 96.7   | 105.6  |
| KCNAB2  | 118.1  | 144.6  | 133.4 | 123.5  | 127.1  | 141.7  | 112    | 130.1  |
| KCNAB2  | 99.3   | 122.5  | 125.1 | 106.9  | 99.1   | 111.8  | 100.1  | 109.8  |
| KCNAB3  | 85.7   | 84.3   | 103.4 | 97.1   | 89.3   | 97.2   | 78.2   | 89.9   |
| KCNB1   | 84.8   | 110    | 100.7 | 79.5   | 81.6   | 87.4   | 94.5   | 99     |
| KCNB2   | 94.2   | 115.2  | 93.4  | 80.6   | 82.7   | 92.7   | 100.6  | 106.2  |
| KCNC1   | 72.2   | 88     | 93    | 87.4   | 82.3   | 87.8   | 85.2   | 95     |
| KCNC2   | 73.5   | 91.8   | 74.3  | 81.6   | 83.5   | 83.2   | 80.7   | 83.4   |
| KCNC2   | 84.3   | 91.9   | 91.8  | 85.7   | 82.2   | 81.6   | 82.3   | 86.4   |
| KCNC3   | 88     | 107.9  | 86.2  | 88.3   | 85     | 96.3   | 86.8   | 98.5   |
| KCNC4   | 93     | 101.5  | 94.5  | 91.2   | 82     | 96.4   | 93.2   | 95.1   |
| KCNC4   | 97.2   | 121    | 97.6  | 86.8   | 86.3   | 96.2   | 94.2   | 102.1  |
| KCNC4   | 86.3   | 93.9   | 100   | 91.7   | 83.3   | 91.6   | 89.3   | 91.8   |
| KCNC4   | 82.9   | 100.7  | 100.4 | 91.8   | 90.2   | 94.4   | 89.6   | 94.2   |
| KCND1   | 120.1  | 119.4  | 102.5 | 87.4   | 91.9   | 103.7  | 107.9  | 131.3  |
| KCND2   | 78.7   | 95.5   | 96.8  | 105.4  | 92.7   | 96.6   | 78.8   | 86.5   |
| KCND3   | 83.8   | 108.5  | 86.9  | 95.9   | 73.3   | 79.1   | 87.7   | 94     |
| KCND3   | 146.6  | 158.3  | 123   | 113.6  | 92.6   | 114.6  | 118.5  | 161.3  |
| KCND3   | 90.7   | 113.3  | 98.3  | 92.8   | 87.3   | 91.7   | 95     | 99.2   |
| KCNE1   | 98.1   | 100.6  | 82.8  | 78.8   | 84.8   | 84.7   | 85.6   | 114.3  |
| KCNE1L  | 116.6  | 149.2  | 101.8 | 96.4   | 105.2  | 95.3   | 110.9  | 124.6  |
| KCNE2   | 86.4   | 96.8   | 93.4  | 87.8   | 79.5   | 80.8   | 96.5   | 94.3   |
| KCNE3   | 90.1   | 104.4  | 87.5  | 93.4   | 87.7   | 92.7   | 100.6  | 108.1  |



|        |        |        |        |        |        |       |        |        |
|--------|--------|--------|--------|--------|--------|-------|--------|--------|
| KCNE4  | 83     | 94.1   | 94     | 80.6   | 77.4   | 75.7  | 79.6   | 90.9   |
| KCNF1  | 113.5  | 120.1  | 111.3  | 106.5  | 107.1  | 102.4 | 101.2  | 106.2  |
| KCNG1  | 562.8  | 728.5  | 347.1  | 201.8  | 173.7  | 202.8 | 495.3  | 501.8  |
| KCNG1  | 130.3  | 155    | 95.3   | 90     | 87     | 88.5  | 121.2  | 139.3  |
| KCNG1  | 97.8   | 105.8  | 112.3  | 96.1   | 92.7   | 96.7  | 93.3   | 97.3   |
| KCNG2  | 101.9  | 110.8  | 117.4  | 114.4  | 100.5  | 112.5 | 117.1  | 110.6  |
| KCNG3  | 87.9   | 93.6   | 93.3   | 80.3   | 71.9   | 86.6  | 82.4   | 94.8   |
| KCNG3  | 97.2   | 104.8  | 113.8  | 86.6   | 100.2  | 97.2  | 90.6   | 98.9   |
| KCNG4  | 75.6   | 76.4   | 77.1   | 78.3   | 71     | 76.8  | 76.5   | 78     |
| KCNG4  | 80.3   | 100.5  | 82.8   | 76.4   | 79.8   | 78.4  | 88.4   | 84.7   |
| KCNH1  | 89.3   | 97.8   | 90.2   | 83.2   | 87.4   | 92.1  | 82.9   | 114.5  |
| KCNH1  | 83.1   | 87.5   | 98.7   | 85.6   | 91.6   | 96.7  | 74.4   | 94.4   |
| KCNH2  | 101.1  | 101.4  | 108.2  | 89.9   | 99.9   | 97.6  | 105.8  | 98.4   |
| KCNH2  | 112.3  | 127.6  | 90.4   | 85.7   | 88     | 83    | 117.2  | 124.3  |
| KCNH2  | 132    | 153.1  | 115.3  | 108.7  | 102.1  | 128.7 | 118.2  | 130.8  |
| KCNH2  | 90.1   | 102.2  | 95.1   | 85.5   | 80     | 87.1  | 95.1   | 101.4  |
| KCNH3  | 80.8   | 93.2   | 95.4   | 88.2   | 98.8   | 94.9  | 86.1   | 85.6   |
| KCNH4  | 117.1  | 112.5  | 119.9  | 112.7  | 111    | 106.8 | 100.8  | 99     |
| KCNH5  | 92.9   | 110.8  | 91.6   | 88     | 83.7   | 91.5  | 100.7  | 105.2  |
| KCNH5  | 86.6   | 89.7   | 92     | 83     | 86.3   | 88.7  | 86.4   | 93.1   |
| KCNH6  | 86.3   | 99.1   | 91     | 82.8   | 88.8   | 84.1  | 86.9   | 89.5   |
| KCNH6  | 5745.1 | 5300.4 | 2264.3 | 4057.1 | 3945.1 | 2792  | 4520.3 | 7337.4 |
| KCNH7  | 86     | 93.7   | 87.5   | 82.8   | 81.5   | 84.3  | 90.3   | 103    |
| KCNH7  | 86.6   | 103.6  | 91.5   | 77.5   | 81.9   | 90.5  | 86.3   | 111.7  |
| KCNH7  | 103.8  | 113.8  | 88.4   | 76.4   | 75.8   | 84.4  | 95.6   | 114.1  |
| KCNH8  | 112.8  | 140.8  | 110.2  | 99.7   | 91.9   | 110   | 109.9  | 123.2  |
| KCNIP1 | 100.3  | 112.3  | 100.2  | 95.4   | 88.5   | 95.5  | 106.2  | 105.8  |
| KCNIP1 | 76     | 88.6   | 84.3   | 93     | 80.3   | 92.1  | 80.3   | 80.7   |
| KCNIP1 | 80.9   | 89.5   | 96.3   | 88.3   | 82.7   | 80.9  | 86.3   | 91.9   |
| KCNIP2 | 100.4  | 109.9  | 87.8   | 88.1   | 82.6   | 82.8  | 106.1  | 105.5  |
| KCNIP2 | 99.5   | 128.5  | 98.1   | 90.1   | 85.7   | 92.2  | 101    | 125.5  |
| KCNIP3 | 101.6  | 127.4  | 101.9  | 94.9   | 93.4   | 94.1  | 94.5   | 107.7  |
| KCNIP3 | 276.7  | 342.2  | 192.3  | 159.9  | 148.6  | 161.4 | 300.5  | 307.6  |
| KCNIP4 | 88     | 96.5   | 101.2  | 79     | 81.9   | 85.7  | 81.8   | 82     |
| KCNIP4 | 86.9   | 90.1   | 84.2   | 96.5   | 86.1   | 89.7  | 82.6   | 106.4  |
| KCNIP4 | 84     | 96.5   | 78.9   | 81.4   | 77.3   | 81.3  | 81.4   | 95.1   |
| KCNIP4 | 75.6   | 83.4   | 94.7   | 81.4   | 82.4   | 79.3  | 81     | 86     |
| KCNIP4 | 87.1   | 113    | 95.8   | 86.8   | 75.2   | 87    | 92.9   | 95.7   |
| KCNIP4 | 111    | 128.4  | 92.6   | 84.1   | 87.5   | 83.3  | 104.1  | 111.6  |
| KCNJ1  | 92.6   | 108.3  | 102.1  | 86.5   | 79.7   | 87.1  | 106.9  | 100.6  |
| KCNJ1  | 82.3   | 105.2  | 102.6  | 102.7  | 92.7   | 97.9  | 88.2   | 87.7   |
| KCNJ1  | 86.2   | 97     | 101.9  | 105.2  | 92.9   | 92.4  | 91.7   | 86.8   |
| KCNJ10 | 105.5  | 126    | 91.3   | 95.3   | 88.1   | 92.1  | 100    | 118    |
| KCNJ11 | 76.1   | 88.7   | 91.7   | 85.4   | 86.2   | 81.9  | 82.9   | 85.4   |
| KCNJ12 | 71.3   | 83.3   | 86.7   | 81.9   | 76.3   | 73.7  | 75.6   | 80.8   |
| KCNJ13 | 115    | 138.9  | 95.3   | 97.7   | 91.1   | 103   | 105    | 129.5  |
| KCNJ14 | 155.3  | 195.7  | 95.3   | 93     | 95.8   | 97.4  | 153.9  | 160.2  |
| KCNJ14 | 87     | 97.7   | 99     | 84     | 88.2   | 88.1  | 95.5   | 98.5   |
| KCNJ14 | 112.8  | 116    | 107.8  | 107.3  | 95.1   | 95    | 111.3  | 105.5  |
| KCNJ15 | 107.7  | 139.1  | 91.8   | 88.4   | 88     | 98.1  | 109.4  | 106    |

|        |        |        |        |        |        |        |        |        |
|--------|--------|--------|--------|--------|--------|--------|--------|--------|
| KCNJ15 | 82.7   | 95.6   | 95.8   | 96.9   | 96.1   | 91.1   | 96.3   | 96.3   |
| KCNJ15 | 83.6   | 88.7   | 104.4  | 89.5   | 89.7   | 91.4   | 90     | 99.9   |
| KCNJ16 | 91.7   | 107.1  | 104.2  | 99.5   | 104.8  | 100.3  | 99.7   | 98.7   |
| KCNJ2  | 107    | 121.2  | 104    | 138    | 127.9  | 130    | 103.3  | 140.7  |
| KCNJ3  | 83     | 90.2   | 101.3  | 88.5   | 83.1   | 91.1   | 80.8   | 92.5   |
| KCNJ4  | 104.7  | 118.8  | 90.6   | 80     | 74     | 79.3   | 113.1  | 123.6  |
| KCNJ4  | 74.9   | 102.8  | 91.3   | 81.1   | 80.8   | 89     | 92.1   | 100    |
| KCNJ4  | 80.3   | 83.7   | 96.7   | 93.3   | 85.7   | 92.8   | 83.1   | 89.1   |
| KCNJ5  | 123.6  | 134.2  | 111.8  | 87.2   | 106    | 111.8  | 111.1  | 108.9  |
| KCNJ6  | 101.5  | 109.6  | 96.1   | 83.6   | 78.5   | 80.3   | 101.3  | 109.8  |
| KCNJ8  | 117.2  | 138.1  | 101.2  | 93.3   | 85.3   | 97     | 100.8  | 124.5  |
| KCNJ9  | 93.4   | 103.8  | 96.2   | 92.7   | 82.9   | 86.4   | 88.6   | 88.5   |
| KCNK1  | 119.7  | 144.9  | 113.7  | 87.5   | 90.6   | 92.9   | 130.8  | 143.9  |
| KCNK10 | 102.2  | 101.6  | 100.9  | 92.7   | 82.8   | 85.5   | 98.2   | 101.9  |
| KCNK10 | 153.8  | 182.8  | 122.9  | 103.5  | 116.8  | 119.6  | 130.2  | 170.9  |
| KCNK10 | 86.8   | 98.5   | 94.4   | 77.4   | 86.5   | 93.2   | 91.9   | 92.6   |
| KCNK10 | 146.6  | 174.8  | 101.1  | 98.4   | 88.2   | 91.5   | 127    | 149.3  |
| KCNK12 | 310.4  | 343    | 213.6  | 197.5  | 165.2  | 170.8  | 299.2  | 322.8  |
| KCNK13 | 196    | 235    | 137.5  | 95.8   | 88.2   | 121.4  | 183.5  | 271.6  |
| KCNK15 | 130.9  | 128.3  | 96.3   | 75.2   | 79.4   | 86.8   | 115.9  | 149.9  |
| KCNK16 | 104.4  | 116.3  | 114.5  | 94.3   | 87.9   | 93.4   | 108    | 112    |
| KCNK17 | 106.3  | 125    | 98.7   | 93.2   | 97     | 84.2   | 108.6  | 116.1  |
| KCNK18 | 122.8  | 146.1  | 109.5  | 102.4  | 91.6   | 101.5  | 127.9  | 127.1  |
| KCNK2  | 91.3   | 93.3   | 99.3   | 93.1   | 82.6   | 95.3   | 88     | 88.6   |
| KCNK2  | 87     | 110.4  | 95.3   | 92.1   | 85     | 94     | 94.7   | 96.3   |
| KCNK2  | 74.6   | 81.5   | 88.4   | 82.3   | 81.4   | 80.6   | 75.4   | 75.2   |
| KCNK2  | 134.6  | 174.6  | 101.7  | 95.8   | 92.7   | 100.1  | 148.8  | 147.5  |
| KCNK3  | 111.1  | 163.8  | 117.3  | 101.5  | 95.5   | 91.6   | 107.7  | 142.9  |
| KCNK4  | 83.4   | 88.8   | 98     | 99.4   | 95.1   | 93.8   | 88.1   | 90.1   |
| KCNK4  | 91.5   | 92.5   | 99     | 88.7   | 86     | 91.7   | 83.6   | 96.8   |
| KCNK5  | 146.5  | 182.7  | 118.6  | 103.7  | 90.8   | 122.7  | 138.5  | 187.8  |
| KCNK6  | 140.1  | 137.7  | 124.8  | 119.2  | 123.3  | 150    | 136.8  | 192.3  |
| KCNK7  | 112    | 101.7  | 116.2  | 97.9   | 100    | 108.4  | 118.3  | 102    |
| KCNK7  | 97.6   | 101    | 95.5   | 86.5   | 89.4   | 87     | 87.9   | 103.7  |
| KCNK9  | 107.7  | 132.1  | 102.4  | 87.5   | 84.3   | 94.6   | 123.8  | 136.1  |
| KCNMA1 | 91.9   | 95.7   | 91.7   | 94.2   | 84.6   | 85.2   | 92.7   | 99.8   |
| KCNMA1 | 118.9  | 123.2  | 96.8   | 91.8   | 92.8   | 90.7   | 107.8  | 138.2  |
| KCNMA1 | 80.7   | 90     | 89.6   | 91.1   | 84.7   | 85.2   | 88.5   | 86.3   |
| KCNMB1 | 790.6  | 1036.3 | 545.5  | 828    | 610.3  | 878.6  | 593.8  | 692.3  |
| KCNMB2 | 154    | 162.4  | 101.3  | 91.2   | 87     | 97.2   | 143.4  | 155.2  |
| KCNMB2 | 76.3   | 87.1   | 91.5   | 84.8   | 92.2   | 87.3   | 81.7   | 78.6   |
| KCNMB2 | 94.9   | 113    | 105.7  | 90.8   | 86.2   | 87.7   | 97.1   | 109    |
| KCNMB3 | 77.3   | 77.4   | 80.8   | 88.3   | 80.7   | 84.8   | 73.1   | 76.6   |
| KCNMB3 | 96.5   | 103.3  | 98.3   | 94.7   | 85     | 97.9   | 92.5   | 110.7  |
| KCNMB3 | 251.4  | 324.4  | 224    | 257.5  | 242    | 328.6  | 218.9  | 353.6  |
| KCNMB4 | 92.7   | 120.3  | 85     | 85.2   | 86.7   | 89.2   | 91     | 118.6  |
| KCNN1  | 122.5  | 125    | 95.1   | 105.5  | 93.9   | 96.5   | 122.4  | 132    |
| KCNN2  | 340.2  | 500.3  | 241    | 207.3  | 202.5  | 229.6  | 251.3  | 310.6  |
| KCNN2  | 1619.3 | 2011.8 | 1214.3 | 1476.6 | 1330.5 | 1792.6 | 1429.8 | 1465.3 |
| KCNN3  | 108.1  | 107.8  | 100.6  | 94.9   | 89.4   | 89.7   | 107.1  | 109.7  |

|         |        |        |        |        |        |        |        |        |
|---------|--------|--------|--------|--------|--------|--------|--------|--------|
| KCNN3   | 155.6  | 179.2  | 110.6  | 102.1  | 91.6   | 100.5  | 154.4  | 138.6  |
| KCNN4   | 321.8  | 421.8  | 205.5  | 164.6  | 156.1  | 168.4  | 344.3  | 409.6  |
| KCNQ1   | 94     | 104.6  | 86.2   | 92.9   | 84.2   | 91.9   | 95     | 92.2   |
| KCNQ1   | 257.3  | 309    | 168.4  | 160.9  | 141.7  | 149.6  | 246.6  | 275.3  |
| KCNQ1   | 98.1   | 112.6  | 99.2   | 87.9   | 83.6   | 90.7   | 111.4  | 105    |
| KCNQ1DN | 85.1   | 87.2   | 88.5   | 81     | 75.4   | 87.4   | 88.7   | 89.2   |
| KCNQ2   | 77.3   | 82.6   | 89.5   | 83.3   | 82.4   | 84     | 79     | 81.7   |
| KCNQ2   | 147.1  | 173.9  | 99.9   | 107.8  | 89.2   | 103.3  | 153.1  | 154.9  |
| KCNQ2   | 109.8  | 125.5  | 100.1  | 94.2   | 89     | 104.5  | 111.3  | 123.4  |
| KCNQ3   | 139.6  | 172.4  | 129.9  | 122.1  | 106.1  | 138    | 148.2  | 144.6  |
| KCNQ4   | 107.4  | 128.2  | 95.5   | 91.3   | 81.7   | 94.2   | 106.4  | 122.7  |
| KCNQ4   | 79     | 84.1   | 78.4   | 82.2   | 79.7   | 80.8   | 85.7   | 86.9   |
| KCNQ4   | 131.1  | 139.5  | 112.2  | 93.1   | 83     | 83.2   | 128.4  | 143.7  |
| KCNQ5   | 90.5   | 101.8  | 96.8   | 90.2   | 90.1   | 86.4   | 80.9   | 84.4   |
| KCNRG   | 87.5   | 92     | 113.3  | 116.6  | 102    | 113.6  | 85.9   | 86.5   |
| KCNRG   | 93.3   | 110.5  | 98.9   | 111.7  | 108.6  | 114.5  | 92.9   | 105    |
| KCNS1   | 171.1  | 224.5  | 169    | 103.6  | 95.2   | 99.2   | 144.3  | 142.8  |
| KCNS2   | 87.8   | 105.1  | 89.5   | 99.1   | 91.7   | 95.9   | 93     | 86     |
| KCNS3   | 92.6   | 112    | 93.5   | 84.5   | 81.6   | 87.6   | 106.1  | 108    |
| KCNT1   | 75.3   | 77.7   | 87.3   | 78.7   | 83.2   | 87     | 75     | 77.1   |
| KCNT2   | 77.7   | 82     | 84.3   | 75.7   | 77.7   | 87.2   | 78.1   | 80     |
| KCNV1   | 78     | 78.1   | 100.3  | 99.5   | 85.4   | 93.9   | 81.7   | 87.5   |
| KCR1    | 153    | 197.4  | 120.1  | 101.6  | 97.6   | 108.4  | 152.5  | 200.7  |
| KCTD1   | 128.2  | 157.6  | 103.9  | 88.9   | 91.1   | 89.4   | 140.6  | 152.4  |
| KCTD10  | 239.8  | 325.7  | 154.3  | 217.5  | 173.8  | 210.6  | 289.8  | 316.8  |
| KCTD11  | 141.7  | 159.4  | 117.1  | 110.5  | 117.5  | 109.6  | 131    | 147.7  |
| KCTD12  | 208.8  | 214.7  | 121.5  | 137.8  | 115.5  | 159.9  | 171.5  | 258.8  |
| KCTD13  | 251.3  | 283.2  | 248.3  | 191.4  | 182.6  | 247.4  | 264.9  | 556.5  |
| KCTD14  | 85.4   | 108.7  | 102.4  | 97.6   | 82.8   | 85.1   | 90     | 98.2   |
| KCTD15  | 264.4  | 340.5  | 226.4  | 153.5  | 144    | 165.2  | 204.3  | 234.1  |
| KCTD16  | 79.7   | 104.9  | 93.9   | 84     | 76.6   | 81.7   | 84.5   | 91.2   |
| KCTD17  | 131.4  | 170.6  | 89.3   | 102.6  | 88.1   | 100.1  | 113.4  | 136.6  |
| KCTD18  | 296.2  | 341.4  | 189.7  | 141.4  | 132.3  | 201.5  | 220.4  | 363.9  |
| KCTD2   | 90.4   | 102.6  | 103.5  | 106.6  | 102.3  | 89.3   | 90.9   | 107.5  |
| KCTD2   | 155.1  | 170.5  | 155.9  | 131.9  | 122.1  | 145.1  | 148    | 186.3  |
| KCTD3   | 1353.3 | 1716.3 | 708.1  | 789    | 568.6  | 1155.9 | 1173.7 | 1863.3 |
| KCTD4   | 78     | 89.8   | 91.7   | 97     | 82.6   | 91.2   | 80.8   | 80     |
| KCTD5   | 1569.4 | 1933.8 | 1391.2 | 1209.1 | 1060.4 | 1343.6 | 1515.3 | 1976.3 |
| KCTD6   | 463.9  | 539    | 306    | 261.5  | 202.7  | 256.2  | 498.3  | 877.8  |
| KCTD7   | 89.8   | 96.3   | 88     | 86.5   | 84.8   | 87.7   | 93.7   | 104.2  |
| KCTD8   | 140.2  | 192.6  | 103.9  | 107.3  | 92.1   | 108.3  | 139.4  | 166.7  |
| KCTD9   | 492.8  | 550.3  | 346.5  | 322.7  | 219.2  | 397    | 559.9  | 1194.4 |
| KDELC1  | 125.8  | 169.9  | 98.2   | 104.5  | 92.9   | 104.6  | 143.8  | 190.1  |
| KDELC2  | 619.7  | 890.9  | 337.9  | 379.4  | 300.6  | 581.2  | 515.3  | 1137.4 |
| KDELR1  | 2016.1 | 2358.8 | 1096.3 | 1008.1 | 756    | 774.5  | 2233.4 | 2301   |
| KDELR2  | 2550.8 | 3069.2 | 1585.5 | 1247.6 | 869.2  | 1241.7 | 1901.3 | 3526.4 |
| KDELR3  | 448.2  | 648.7  | 287.8  | 257.7  | 189.5  | 306.2  | 343.7  | 412    |
| KDELR3  | 327.2  | 423.2  | 178.4  | 210.6  | 135.8  | 195.3  | 247.3  | 370.6  |
| KDELR3  | 136.1  | 177.4  | 124.9  | 120.4  | 89.9   | 93.8   | 126    | 160.8  |
| KDR     | 99.7   | 121    | 100.9  | 96.7   | 84.5   | 88.5   | 106.2  | 122.2  |

|           |         |         |        |        |         |         |         |         |
|-----------|---------|---------|--------|--------|---------|---------|---------|---------|
| KEAP1     | 816.5   | 1314.6  | 618.5  | 432.2  | 358     | 636.3   | 1128    | 1844.8  |
| KEAP1     | 87.2    | 101.3   | 98     | 86.7   | 84.6    | 91.1    | 84.4    | 105.3   |
| KEAP1     | 1098.1  | 1494.9  | 715.2  | 461.3  | 404.8   | 810.2   | 1310.3  | 2268.3  |
| KEL       | 80.2    | 91.5    | 90.9   | 87.4   | 82.3    | 90.1    | 72.7    | 81.8    |
| KENAE     | 232.9   | 310.2   | 149.1  | 170.8  | 136.6   | 151.1   | 194.4   | 209.9   |
| KERA      | 138.1   | 139.9   | 97.8   | 86.1   | 83.7    | 90.6    | 131.7   | 138.6   |
| KGFLP1    | 74.1    | 88.5    | 88.1   | 81.7   | 84.4    | 79.1    | 77.6    | 76.2    |
| KHDRBS1   | 6789.8  | 7677.5  | 4224.4 | 4810.5 | 3278.7  | 4744.2  | 7100    | 11032.2 |
| KHDRBS2   | 109.4   | 124     | 90.8   | 87.9   | 80.1    | 90.5    | 105.3   | 121     |
| KHDRBS3   | 102     | 110.4   | 84.4   | 97.4   | 82.6    | 80      | 92.9    | 125.2   |
| KHK       | 147.6   | 175.6   | 132.2  | 108.6  | 98.9    | 125.7   | 123.8   | 155.6   |
| KHK       | 138.4   | 150.5   | 109.8  | 98.4   | 99.1    | 102.4   | 149.4   | 168.4   |
| KHK       | 138.9   | 191.2   | 125    | 101    | 104.4   | 99.6    | 116.1   | 118.6   |
| KHSRP     | 1303.8  | 1681    | 1145.5 | 721    | 732.2   | 631.8   | 909.1   | 895.4   |
| KIAA0020  | 2899    | 3488.3  | 2537.9 | 2180.2 | 1630.6  | 3696.5  | 1974.7  | 3416.7  |
| KIAA0082  | 108.9   | 155.2   | 98.9   | 110.9  | 99.5    | 108.2   | 111.6   | 121.2   |
| KIAA0090  | 453.8   | 574.6   | 324.2  | 521.5  | 361.6   | 508     | 402.1   | 584.6   |
| KIAA0100  | 149     | 197.3   | 106.3  | 97.3   | 91.3    | 101.5   | 159.7   | 168.9   |
| KIAA0101  | 10111.8 | 12217.6 | 7596.7 | 5701.1 | 4758.2  | 6412.1  | 9116.2  | 9505.5  |
| KIAA0101  | 936.3   | 1104.3  | 663.5  | 697.3  | 537.2   | 726.1   | 993.4   | 1355.7  |
| KIAA0101  | 24148   | 23601.2 | 10398  | 12935  | 14399.6 | 13034.5 | 23489.4 | 25326.9 |
| KIAA0103  | 208.5   | 274     | 138.9  | 109.6  | 108     | 127     | 212.1   | 282     |
| KIAA0133  | 336.2   | 477.1   | 314.8  | 147.8  | 120.9   | 157.9   | 290.1   | 346.4   |
| KIAA0141  | 319.6   | 413.9   | 334.4  | 456.8  | 404.1   | 640.4   | 250.9   | 445.4   |
| KIAA0143  | 1507.5  | 2082    | 1217.3 | 1046.4 | 761.4   | 1211.6  | 1311.2  | 2140.4  |
| KIAA0152  | 1585.9  | 2368.5  | 1953.3 | 2012.6 | 1351.9  | 3385.6  | 1355.2  | 2432.3  |
| KIAA0157  | 1364    | 1882    | 804.4  | 658    | 545.9   | 682.2   | 1225    | 1669.2  |
| KIAA0174  | 3312.2  | 4233.1  | 1991.8 | 1637.1 | 1335.2  | 1615.3  | 2434.6  | 3002.4  |
| KIAA0179  | 291.8   | 387     | 285    | 327.7  | 219.3   | 424.6   | 222.5   | 462.3   |
| KIAA0182  | 658.8   | 915.7   | 587.1  | 921.3  | 796.3   | 1013.4  | 657.6   | 901.6   |
| KIAA0195  | 138.2   | 172.4   | 269.2  | 251.9  | 235.6   | 332.7   | 120.6   | 194.1   |
| KIAA0196  | 1712.3  | 2467.4  | 1693.8 | 1416.8 | 1137.5  | 1892.4  | 1359.9  | 2304.3  |
| KIAA0232  | 212.3   | 243.7   | 148    | 175.9  | 147.7   | 159.6   | 214.9   | 322     |
| KIAA0240  | 582.8   | 760.7   | 405.3  | 681.5  | 565.5   | 775.3   | 675.4   | 912.6   |
| KIAA0241  | 157.3   | 228.4   | 134.7  | 141.3  | 130.8   | 168.3   | 147.2   | 196.3   |
| KIAA0247  | 270.3   | 392.8   | 204.2  | 248.5  | 215.7   | 288     | 290.7   | 490.6   |
| KIAA0251  | 240     | 358.4   | 146.2  | 142.2  | 147.6   | 135.9   | 189.1   | 217.1   |
| KIAA0256  | 173.9   | 204.5   | 136.6  | 193.8  | 175.8   | 228.4   | 190.7   | 244.8   |
| KIAA0258  | 97      | 109.6   | 95.2   | 93     | 93.7    | 88.4    | 89.8    | 100.5   |
| KIAA0261  | 430.8   | 628.8   | 258.8  | 248.3  | 207.7   | 417.4   | 324.9   | 472.1   |
| KIAA0265  | 121.3   | 154.5   | 117.2  | 106.2  | 106.5   | 134.4   | 117.9   | 147.8   |
| KIAA0274  | 458     | 545.8   | 380.8  | 481.8  | 408.6   | 676.6   | 378.7   | 481.1   |
| KIAA0280  | 107.6   | 119.2   | 98.9   | 82.7   | 80.4    | 96.9    | 101.9   | 108.4   |
| KIAA0284  | 92.2    | 103.2   | 100.8  | 102.1  | 87.8    | 108.2   | 91.1    | 105.9   |
| KIAA0286  | 466     | 660.8   | 400.1  | 428.4  | 325.8   | 593.9   | 532.9   | 1010.7  |
| KIAA0310  | 1043.7  | 1169.3  | 1338.5 | 1657.7 | 1308.6  | 1862.3  | 1208.5  | 1877.6  |
| KIAA0319  | 74.6    | 90.1    | 81.3   | 83.4   | 81.7    | 83.8    | 80.7    | 87.4    |
| KIAA0319L | 190.7   | 236.2   | 155.5  | 173.1  | 159.6   | 168.2   | 169.7   | 196.2   |
| KIAA0319L | 172     | 210.3   | 199.8  | 217.5  | 188.4   | 230.3   | 168.2   | 404.4   |
| KIAA0319L | 119.4   | 126.4   | 96.3   | 96.2   | 101.9   | 104.3   | 112.3   | 115.1   |

|          |        |        |        |        |        |        |        |        |
|----------|--------|--------|--------|--------|--------|--------|--------|--------|
| KIAA0323 | 208.6  | 199.3  | 250.8  | 171.9  | 207.4  | 232.3  | 209.7  | 353.9  |
| KIAA0329 | 88.4   | 93.3   | 104    | 91.8   | 87.6   | 82.5   | 77.7   | 92.1   |
| KIAA0350 | 546.2  | 742.2  | 629.4  | 664.5  | 607.2  | 645.2  | 458.8  | 555.2  |
| KIAA0355 | 202.6  | 237.2  | 174.8  | 182.9  | 202.5  | 236.7  | 269.6  | 322.1  |
| KIAA0367 | 97.5   | 112.8  | 95.9   | 93.6   | 91.5   | 99.1   | 95.5   | 106.2  |
| KIAA0368 | 120.3  | 144.8  | 131.7  | 132.5  | 116.4  | 138.5  | 123.3  | 148.5  |
| KIAA0372 | 601.3  | 723.5  | 294    | 572.1  | 413    | 778.3  | 492.8  | 711    |
| KIAA0376 | 1208.7 | 1651.8 | 1294.6 | 1744.2 | 1337.9 | 2125.2 | 1112.5 | 1341.2 |
| KIAA0391 | 1005.2 | 1295.5 | 516.8  | 449.7  | 323.7  | 500.2  | 810.7  | 1004.7 |
| KIAA0404 | 170.7  | 206.3  | 209.8  | 230.7  | 204.3  | 226.3  | 180.9  | 234.9  |
| KIAA0406 | 228.8  | 284.1  | 157.2  | 179.2  | 147    | 247.6  | 206.8  | 261.1  |
| KIAA0408 | 184.2  | 189.9  | 120.8  | 120.1  | 111.7  | 116    | 155.6  | 215.1  |
| KIAA0409 | 561.9  | 718.3  | 286.5  | 196.5  | 161.8  | 252.3  | 478.7  | 519.8  |
| KIAA0415 | 136.6  | 163.9  | 130.6  | 134.3  | 122.5  | 146.4  | 149.6  | 208.1  |
| KIAA0423 | 201.8  | 242.8  | 146.9  | 132.7  | 130.2  | 162.7  | 168.9  | 232.7  |
| KIAA0427 | 116.5  | 128.9  | 166.3  | 185.3  | 156.3  | 216.1  | 115.5  | 160.6  |
| KIAA0446 | 1159.2 | 1394.2 | 456.1  | 372.4  | 302.4  | 404.7  | 1005.3 | 1193.4 |
| KIAA0460 | 125    | 158.3  | 131.4  | 137.9  | 130.4  | 241.9  | 102.2  | 154.7  |
| KIAA0467 | 112    | 116.4  | 77.8   | 94.1   | 80.5   | 78.5   | 107    | 123.9  |
| KIAA0494 | 742.1  | 1088.7 | 568.7  | 880.7  | 685.5  | 1242.4 | 647.3  | 1026.9 |
| KIAA0495 | 138.2  | 161.8  | 114.3  | 111.8  | 95.5   | 117.2  | 136.1  | 147.3  |
| KIAA0513 | 89     | 102.4  | 102.7  | 95.7   | 96.3   | 108.3  | 96.2   | 135.4  |
| KIAA0514 | 76.3   | 80.1   | 87.7   | 78     | 63.8   | 81     | 71.9   | 69.8   |
| KIAA0523 | 115.9  | 144.9  | 84.1   | 70.5   | 89.1   | 78.6   | 146.3  | 141.1  |
| KIAA0528 | 1139.7 | 1492.1 | 455.9  | 434.8  | 323.9  | 539.1  | 821.1  | 1111.6 |
| KIAA0553 | 92.8   | 122.2  | 105.1  | 94.7   | 97.6   | 118.3  | 109.6  | 125.6  |
| KIAA0556 | 222.6  | 270.1  | 162.8  | 183.8  | 153.3  | 196.3  | 200.6  | 235.8  |
| KIAA0562 | 122.4  | 138    | 159.2  | 144.4  | 145    | 163.5  | 117.5  | 164.4  |
| KIAA0564 | 199    | 220.3  | 167.9  | 177.1  | 149.5  | 212.3  | 172.5  | 274.3  |
| KIAA0564 | 143.2  | 189.7  | 109.9  | 121    | 112.3  | 142.7  | 143.9  | 189.8  |
| KIAA0586 | 405.9  | 545.7  | 240.4  | 214.3  | 216    | 302.5  | 325.5  | 324.5  |
| KIAA0644 | 100.6  | 117.5  | 94.8   | 91.9   | 89.1   | 95.6   | 96.6   | 106.5  |
| KIAA0649 | 141.6  | 167.1  | 129.8  | 112.5  | 111.8  | 154.9  | 148.4  | 142.7  |
| KIAA0652 | 112.6  | 126.2  | 96.1   | 107.4  | 92     | 111.7  | 104.2  | 125.7  |
| KIAA0664 | 188    | 204.5  | 264.5  | 236.4  | 185.3  | 404.6  | 169.4  | 191.8  |
| KIAA0672 | 137.9  | 168.2  | 178.2  | 145.5  | 144.8  | 152.9  | 111.8  | 104.4  |
| KIAA0683 | 445.4  | 481.1  | 337.8  | 300    | 264.4  | 327.1  | 367.9  | 297.3  |
| KIAA0690 | 425.2  | 485.1  | 412.4  | 277.2  | 183.2  | 326.9  | 305.5  | 527.8  |
| KIAA0701 | 114.5  | 141.8  | 130.9  | 110.5  | 110.2  | 124.3  | 113.8  | 111.4  |
| KIAA0703 | 77.5   | 92.3   | 88.8   | 86.6   | 89     | 93     | 85.7   | 88.3   |
| KIAA0738 | 4883.7 | 5356.1 | 1829.5 | 3071.5 | 2562.5 | 2636.9 | 4546.2 | 5356.7 |
| KIAA0746 | 643.1  | 898.5  | 405.8  | 335.7  | 341.3  | 465.5  | 712.6  | 923.8  |
| KIAA0753 | 139.6  | 160.3  | 100.9  | 115.5  | 91.8   | 121.8  | 126    | 167.6  |
| KIAA0773 | 225.2  | 278    | 129.7  | 123.4  | 99.5   | 115.9  | 205.1  | 250.2  |
| KIAA0773 | 105.6  | 134    | 117.8  | 112.9  | 110.7  | 107.3  | 121.4  | 113.6  |
| KIAA0773 | 81.2   | 85.9   | 101.1  | 91.4   | 87.8   | 90     | 82     | 86.1   |
| KIAA0774 | 98.8   | 118.7  | 101.3  | 92.2   | 91     | 99.2   | 95.3   | 96.7   |
| KIAA0774 | 88.8   | 79.8   | 79.4   | 83.3   | 77.2   | 80.3   | 82.3   | 87.8   |
| KIAA0774 | 84.8   | 97.7   | 103.6  | 82.8   | 76.6   | 80.7   | 91.8   | 123.5  |
| KIAA0776 | 295.8  | 338.8  | 154.8  | 155.7  | 141.4  | 153.4  | 219.7  | 354.8  |

|          |        |        |        |        |        |        |        |        |
|----------|--------|--------|--------|--------|--------|--------|--------|--------|
| KIAA0789 | 112    | 141.1  | 116.9  | 88.3   | 78.8   | 103.7  | 119.7  | 121.9  |
| KIAA0802 | 82.1   | 103    | 98.8   | 103.2  | 88.3   | 106.7  | 86.1   | 87.3   |
| KIAA0828 | 141.3  | 171.8  | 144.2  | 159.5  | 135.7  | 186    | 127.8  | 179    |
| KIAA0831 | 326.5  | 401.5  | 173.7  | 182.5  | 166.7  | 208.7  | 334.6  | 594.8  |
| KIAA0853 | 92.9   | 120.1  | 90.6   | 91     | 82.5   | 85.6   | 87.9   | 100.5  |
| KIAA0859 | 578.9  | 678.6  | 472.8  | 432.4  | 334.7  | 534.2  | 385.1  | 540.6  |
| KIAA0859 | 2350.1 | 2913.1 | 1960.8 | 1579.3 | 1243.8 | 1961.5 | 1538.1 | 1980.9 |
| KIAA0892 | 443.6  | 465.7  | 368.9  | 275.8  | 252.7  | 282    | 436.8  | 682.3  |
| KIAA0895 | 94.1   | 106.7  | 88.4   | 74.9   | 75.9   | 77.9   | 87.8   | 106.5  |
| KIAA0907 | 1880.8 | 2058.9 | 631.6  | 655.6  | 575.1  | 1169.3 | 1456.3 | 2365   |
| KIAA0913 | 198.4  | 239.2  | 255    | 268.4  | 298.9  | 384.3  | 188.7  | 310.9  |
| KIAA0922 | 417.2  | 552.6  | 420.5  | 367.4  | 325.7  | 466.6  | 300.6  | 410    |
| KIAA0961 | 132.8  | 138.1  | 129.9  | 91.6   | 88.9   | 103.1  | 107    | 224.3  |
| KIAA0963 | 130.9  | 146.9  | 158.9  | 114.3  | 112.8  | 150    | 123.2  | 223.3  |
| KIAA0980 | 117.5  | 140.6  | 110.1  | 107.9  | 103.8  | 114.8  | 107.8  | 149.2  |
| KIAA0999 | 457.7  | 648.2  | 220    | 247.9  | 260.4  | 319.9  | 450.9  | 511.4  |
| KIAA1005 | 110.8  | 116.4  | 109.3  | 97.9   | 86     | 101.8  | 108.5  | 117.2  |
| KIAA1008 | 189    | 243.8  | 143.4  | 140.5  | 143    | 172.3  | 151.1  | 196.4  |
| KIAA1012 | 1322.6 | 1787.8 | 1036.4 | 1599.3 | 1273.2 | 2100.3 | 1495.5 | 2110.9 |
| KIAA1024 | 126.1  | 151.7  | 113.3  | 116.3  | 113.7  | 120.3  | 137.1  | 163.2  |
| KIAA1026 | 123.1  | 121.6  | 117.9  | 113.8  | 99.1   | 108.6  | 112.4  | 120.5  |
| KIAA1026 | 127.1  | 172.2  | 101.2  | 96.9   | 95.9   | 104.6  | 131.6  | 140.2  |
| KIAA1026 | 95.3   | 109.4  | 92.9   | 88.5   | 89.6   | 85.7   | 88.9   | 105    |
| KIAA1026 | 137.5  | 162.7  | 143.4  | 108.3  | 105.2  | 113    | 119.3  | 155.3  |
| KIAA1026 | 94.3   | 103.4  | 92.9   | 90.9   | 80.4   | 82.2   | 96.7   | 101.3  |
| KIAA1033 | 110.7  | 141.6  | 88.3   | 74.9   | 85     | 108.8  | 130.3  | 156.3  |
| KIAA1128 | 145    | 178.4  | 164.8  | 150.6  | 145.3  | 237.9  | 158.4  | 223.9  |
| KIAA1143 | 78.5   | 81.6   | 94.5   | 90.1   | 82.7   | 84.9   | 84.8   | 82.1   |
| KIAA1147 | 291.8  | 393.3  | 301.9  | 525.8  | 409.8  | 571.5  | 293    | 417    |
| KIAA1160 | 1249   | 1652.9 | 419.4  | 312.9  | 297.5  | 329.4  | 862.5  | 1150.8 |
| KIAA1161 | 128.4  | 158.5  | 89.4   | 92.9   | 83.1   | 93.7   | 126.9  | 138    |
| KIAA1166 | 112.3  | 150.7  | 115.8  | 95.6   | 100.8  | 103.4  | 122    | 135.2  |
| KIAA1171 | 83.5   | 90.6   | 80.6   | 85.6   | 72.8   | 78.9   | 95.4   | 103    |
| KIAA1189 | 101.7  | 131.4  | 110.8  | 99.7   | 86.3   | 100.4  | 95.7   | 106.2  |
| KIAA1189 | 80.8   | 92.4   | 85.8   | 78.4   | 80.8   | 84.8   | 81.2   | 85.8   |
| KIAA1189 | 88.4   | 100.2  | 89.1   | 88.4   | 82.4   | 90.4   | 99     | 105.1  |
| KIAA1191 | 899    | 1084.3 | 695.1  | 840.9  | 653    | 828.5  | 777.5  | 1266.1 |
| KIAA1191 | 913    | 1342.2 | 459.2  | 510.7  | 441.4  | 635.2  | 824.1  | 1198.1 |
| KIAA1193 | 111.4  | 138    | 101.8  | 90.6   | 84.2   | 91.1   | 117.4  | 158.7  |
| KIAA1199 | 82.5   | 96.3   | 91.2   | 89.9   | 85.9   | 93.8   | 85.2   | 96.7   |
| KIAA1212 | 226.2  | 296    | 145.7  | 174.7  | 160.7  | 267.5  | 227.9  | 331.7  |
| KIAA1217 | 83.5   | 98.7   | 82.9   | 80.5   | 73.8   | 89.1   | 82.7   | 103.9  |
| KIAA1219 | 254.2  | 353.6  | 260.3  | 234.8  | 178.5  | 324.9  | 229.3  | 304    |
| KIAA1244 | 109.6  | 117.2  | 105.2  | 98.5   | 89.5   | 81.8   | 100.2  | 119.3  |
| KIAA1267 | 788    | 872.4  | 548.1  | 703.1  | 594.4  | 961.4  | 728.2  | 1182.6 |
| KIAA1274 | 131.8  | 168.6  | 100.3  | 96.4   | 80.7   | 96.5   | 116.7  | 164.4  |
| KIAA1279 | 106.4  | 131.2  | 99.9   | 95.6   | 100.5  | 92.6   | 120.2  | 143.7  |
| KIAA1285 | 150.4  | 216.1  | 108.7  | 85.6   | 88.6   | 105    | 140.8  | 184.9  |
| KIAA1287 | 477.8  | 478.3  | 231.8  | 316.8  | 236.6  | 339.4  | 399.1  | 526.2  |
| KIAA1324 | 90.1   | 107.8  | 96.9   | 91.5   | 85.7   | 88.4   | 92.7   | 102.9  |

|           |       |        |       |       |       |        |       |       |
|-----------|-------|--------|-------|-------|-------|--------|-------|-------|
| KIAA1324L | 267.5 | 350.7  | 227.9 | 239.8 | 210   | 346.5  | 222   | 301.9 |
| KIAA1328  | 179.5 | 187.8  | 122.9 | 124.1 | 108.1 | 137.7  | 153.1 | 171.7 |
| KIAA1333  | 207   | 242.6  | 116.7 | 114.2 | 116.5 | 146.6  | 179.3 | 270.8 |
| KIAA1344  | 152.3 | 186.5  | 119.6 | 114.2 | 93.9  | 130.7  | 121.6 | 182.2 |
| KIAA1345  | 71.9  | 73.4   | 94.1  | 90.3  | 93.8  | 91.1   | 76.5  | 82.4  |
| KIAA1370  | 139   | 144.5  | 112   | 125.6 | 127.6 | 152.3  | 142.8 | 230.5 |
| KIAA1377  | 85.2  | 106.1  | 90.4  | 87    | 74.2  | 97.4   | 87.7  | 97.5  |
| KIAA1407  | 102.5 | 113.6  | 110.7 | 104.9 | 104.4 | 122    | 96.6  | 113.9 |
| KIAA1409  | 108.4 | 110.2  | 94.6  | 104.6 | 99.5  | 103.7  | 98.4  | 103.3 |
| KIAA1411  | 302.9 | 335.4  | 195.5 | 203.2 | 186   | 254    | 269.2 | 410.7 |
| KIAA1429  | 352.8 | 518.5  | 209.7 | 236   | 205.9 | 286.4  | 243.2 | 304.7 |
| KIAA1432  | 89.4  | 118.8  | 91.2  | 94.4  | 86.9  | 97.2   | 100.4 | 97.1  |
| KIAA1434  | 318.5 | 326    | 157.6 | 336.7 | 250.5 | 492.8  | 267.1 | 471.1 |
| KIAA1443  | 121.2 | 136.4  | 92.3  | 90.4  | 88.1  | 87.5   | 104.8 | 134.8 |
| KIAA1446  | 165.8 | 188.8  | 213.1 | 162.8 | 141.6 | 185.4  | 159.2 | 202.9 |
| KIAA1456  | 92.8  | 101.5  | 95.7  | 97.8  | 85    | 94.4   | 93.1  | 98.1  |
| KIAA1467  | 150.1 | 191.5  | 148.9 | 107.7 | 103.7 | 123.1  | 167.8 | 236.3 |
| KIAA1468  | 339.5 | 406    | 185.4 | 221.4 | 159.3 | 325.3  | 300.6 | 478   |
| KIAA1505  | 88.7  | 100.8  | 115.6 | 104.4 | 99.7  | 127.1  | 89.5  | 96.3  |
| KIAA1522  | 107.5 | 140.2  | 111.1 | 108.1 | 108   | 134.7  | 139.9 | 213.2 |
| KIAA1524  | 77.2  | 93.1   | 93.5  | 83.9  | 77.9  | 88.9   | 88.7  | 87    |
| KIAA1529  | 76.7  | 90.9   | 75.1  | 83.7  | 78.6  | 87.8   | 77.9  | 86.5  |
| KIAA1530  | 200.7 | 214.2  | 176.9 | 214.8 | 200   | 231.3  | 171.9 | 241.2 |
| KIAA1530  | 122.2 | 152.4  | 101   | 97.1  | 90.8  | 94.7   | 143   | 139.2 |
| KIAA1539  | 152.6 | 167.8  | 153.5 | 206.6 | 179.8 | 233.3  | 139.6 | 315.6 |
| KIAA1542  | 94.6  | 99.9   | 91.2  | 92.9  | 80.8  | 83.4   | 84.8  | 110   |
| KIAA1543  | 96.1  | 104.6  | 97.2  | 99.9  | 88.5  | 99.9   | 97.1  | 122   |
| KIAA1543  | 83.2  | 87     | 96.8  | 98.2  | 92.8  | 85.1   | 96.9  | 100.9 |
| KIAA1553  | 123   | 134.8  | 94.1  | 82.3  | 90.8  | 94     | 108.9 | 153.1 |
| KIAA1553  | 147.2 | 240.8  | 191.9 | 176.9 | 142.7 | 180.7  | 137.4 | 186   |
| KIAA1559  | 119.9 | 141.7  | 83.6  | 98.9  | 98.4  | 89.5   | 126.6 | 158.3 |
| KIAA1576  | 467.6 | 543.4  | 169.3 | 126.7 | 111.3 | 139.8  | 407.4 | 549.5 |
| KIAA1586  | 194.2 | 247.2  | 115.5 | 145.2 | 127.7 | 187.5  | 170.8 | 233.2 |
| KIAA1598  | 428.4 | 548    | 330.5 | 416   | 322.3 | 658.4  | 369.1 | 640.6 |
| KIAA1600  | 220   | 259.7  | 212.2 | 168.1 | 140.4 | 211.4  | 228.9 | 477.6 |
| KIAA1604  | 168.2 | 163.8  | 98.8  | 103   | 88.8  | 132.5  | 145.3 | 298.1 |
| KIAA1609  | 100.7 | 129.4  | 110.4 | 106.6 | 101.6 | 94.7   | 102.3 | 118.4 |
| KIAA1618  | 224   | 286.6  | 191.6 | 186.7 | 169.2 | 214.7  | 213.3 | 254.6 |
| KIAA1622  | 83    | 90     | 94    | 83.3  | 78.5  | 94.9   | 80.7  | 85.3  |
| KIAA1622  | 84    | 82.6   | 90.5  | 83.2  | 88.7  | 88.2   | 86.9  | 72.1  |
| KIAA1622  | 76.4  | 70.9   | 85.3  | 84.9  | 74.2  | 78.1   | 74.7  | 77.4  |
| KIAA1627  | 262.3 | 311.8  | 110.1 | 121.4 | 120.8 | 135.1  | 223.3 | 234.6 |
| KIAA1632  | 110.6 | 140.4  | 97.4  | 109.3 | 109.5 | 114.2  | 100.6 | 110.7 |
| KIAA1641  | 129.6 | 149.3  | 122.6 | 106.6 | 93.4  | 116.6  | 120.6 | 129.4 |
| KIAA1683  | 109.2 | 167    | 85.8  | 90.6  | 82.9  | 89.9   | 120   | 106.8 |
| KIAA1688  | 107   | 99     | 105.5 | 90.3  | 81.8  | 95.6   | 91.5  | 110.4 |
| KIAA1698  | 248.1 | 340.3  | 320.6 | 224.1 | 183.7 | 233    | 234.8 | 436.1 |
| KIAA1704  | 87.2  | 112    | 83.1  | 82.7  | 78.8  | 81.9   | 89.1  | 91.9  |
| KIAA1706  | 104.2 | 134.4  | 130.6 | 135.3 | 151.5 | 143.9  | 128.8 | 151.9 |
| KIAA1712  | 952.7 | 1113.5 | 723.4 | 742.6 | 705.9 | 1181.2 | 715.6 | 898.2 |

|           |        |        |        |        |        |        |        |        |
|-----------|--------|--------|--------|--------|--------|--------|--------|--------|
| KIAA1715  | 340.7  | 541.7  | 372.7  | 590.7  | 430    | 615.4  | 342.8  | 497.3  |
| KIAA1727  | 115.6  | 126.9  | 98.7   | 97.4   | 89.7   | 111.4  | 116.1  | 121.7  |
| KIAA1729  | 494.2  | 594.9  | 437.2  | 204.5  | 173.7  | 242.1  | 436.8  | 818.6  |
| KIAA1737  | 448.4  | 533.9  | 304.4  | 329.7  | 252.7  | 387.9  | 375.9  | 656.2  |
| KIAA1751  | 962.4  | 980.5  | 436.1  | 524.4  | 548.4  | 443.2  | 858.4  | 1542.6 |
| KIAA1754  | 292.7  | 338.3  | 239.4  | 188.2  | 181.4  | 224.4  | 294.6  | 435.5  |
| KIAA1754L | 91     | 104.3  | 93.4   | 87.5   | 79.3   | 87.5   | 90.5   | 93.3   |
| KIAA1754L | 106.7  | 122.5  | 92.4   | 94.6   | 81.8   | 85.3   | 100.4  | 123.6  |
| KIAA1754L | 86.9   | 97.6   | 87.7   | 88.7   | 86.8   | 88.5   | 88     | 85.2   |
| KIAA1755  | 122.5  | 144.1  | 93.1   | 85.4   | 88.2   | 85.9   | 115.9  | 145.5  |
| KIAA1772  | 76     | 89.5   | 97.2   | 88.2   | 92.9   | 96.7   | 80.2   | 87.2   |
| KIAA1787  | 135    | 132.2  | 188.4  | 184    | 166.3  | 247.6  | 129.8  | 140.3  |
| KIAA1794  | 761.8  | 931.8  | 215    | 196.5  | 161.9  | 333.2  | 626.5  | 847.9  |
| KIAA1797  | 280.6  | 365.1  | 227.4  | 220.4  | 181.5  | 263.4  | 243.6  | 379.3  |
| KIAA1799  | 80.2   | 98.3   | 110    | 93.6   | 93.8   | 91.1   | 88.8   | 106.3  |
| KIAA1804  | 177.8  | 208.4  | 119.3  | 123.7  | 110.3  | 145.4  | 147.4  | 297.9  |
| KIAA1815  | 255.8  | 340.4  | 169.2  | 189.2  | 184.8  | 247.7  | 227.5  | 273    |
| KIAA1822  | 92.3   | 103.5  | 99.8   | 102.4  | 93.9   | 89.9   | 91.1   | 105.9  |
| KIAA1822L | 110.8  | 142.9  | 94.7   | 80.6   | 79.8   | 89.8   | 122.9  | 129    |
| KIAA1826  | 824.6  | 1022   | 619.5  | 523.7  | 392.9  | 791.3  | 619.6  | 938.8  |
| KIAA1838  | 1380.3 | 1953.8 | 1299.9 | 1921.3 | 1556.7 | 2095.9 | 1104.6 | 1297.5 |
| KIAA1840  | 488.8  | 641.8  | 386.2  | 841.5  | 694    | 1243.6 | 461.7  | 799.3  |
| KIAA1841  | 67.9   | 72.8   | 74.1   | 74.2   | 68.4   | 72.9   | 72.4   | 77     |
| KIAA1853  | 97.4   | 107.5  | 90.2   | 77.8   | 74.8   | 91.9   | 94.7   | 120.7  |
| KIAA1862  | 112.1  | 139.5  | 140.8  | 126.9  | 122.4  | 135.6  | 106.8  | 128    |
| KIAA1875  | 111.6  | 151.2  | 125.7  | 96.2   | 116.3  | 130    | 99.4   | 121    |
| KIAA1893  | 122.3  | 132.3  | 109.3  | 112.6  | 105.1  | 129.8  | 106.1  | 131.9  |
| KIAA1900  | 88.2   | 92.5   | 92.2   | 92.4   | 86.7   | 93.7   | 88     | 102.4  |
| KIAA1904  | 120    | 143.8  | 97.6   | 89.7   | 80.5   | 87.7   | 108    | 144.2  |
| KIAA1909  | 76.5   | 86.1   | 77.4   | 80.4   | 73.5   | 74.5   | 74.2   | 87.2   |
| KIAA1912  | 89.8   | 94.1   | 103    | 83.2   | 76.7   | 83     | 86.5   | 106.5  |
| KIAA1913  | 81.1   | 87.1   | 108.2  | 118.5  | 104.9  | 116.7  | 84.1   | 86.6   |
| KIAA1914  | 91.6   | 107.7  | 108.7  | 114.7  | 102.6  | 106.3  | 94.4   | 99.3   |
| KIAA1919  | 91     | 110    | 122    | 108    | 98.1   | 98.4   | 97.2   | 99.1   |
| KIAA1920  | 99.9   | 115.9  | 108.8  | 96.9   | 96.1   | 101.1  | 98.8   | 109.1  |
| KIAA1924  | 108.2  | 130.1  | 84     | 76.4   | 68.6   | 86.7   | 107.7  | 126.5  |
| KIAA1944  | 81.7   | 88.6   | 93     | 82.5   | 79.5   | 90.8   | 78.1   | 85.5   |
| KIAA1946  | 124.6  | 149.7  | 94     | 86.4   | 84.8   | 95     | 121.1  | 147.2  |
| KIAA1958  | 175.9  | 249.4  | 128.1  | 104.6  | 110.9  | 106.1  | 163.9  | 161.6  |
| KIAA1961  | 82.8   | 93.7   | 87.5   | 79.5   | 75.9   | 81.8   | 83.3   | 98.2   |
| KIAA1961  | 402.8  | 667.4  | 390.4  | 497.6  | 483.3  | 778.4  | 434.8  | 745.3  |
| KIAA1967  | 461.2  | 648.4  | 401.7  | 296.8  | 247.9  | 497.2  | 377.2  | 607    |
| KIAA1967  | 146.2  | 159.7  | 121.7  | 143.3  | 120.2  | 88.3   | 104    | 135.6  |
| KIAA1967  | 131.7  | 138.5  | 105.6  | 97.7   | 81.6   | 88.5   | 124.8  | 166.6  |
| KIAA1970  | 451.5  | 590.7  | 432.6  | 356.9  | 225.2  | 505.9  | 308.4  | 542.4  |
| KIAA1984  | 95.6   | 105.3  | 106.7  | 97.3   | 93.2   | 97.2   | 100    | 103    |
| KIAA2010  | 100.7  | 119.9  | 99.4   | 89.7   | 81.6   | 81     | 104.4  | 115.9  |
| KIAA2010  | 938.1  | 1271.6 | 691.3  | 500.2  | 411.7  | 843.8  | 776.5  | 1134.6 |
| KIAA2013  | 614.4  | 822.4  | 475.5  | 443.8  | 409.9  | 593.9  | 582.9  | 897.2  |
| KIAA2018  | 81.7   | 95.3   | 84.8   | 84.6   | 79.4   | 79.4   | 92.7   | 98.8   |



|           |        |        |        |        |       |        |        |        |
|-----------|--------|--------|--------|--------|-------|--------|--------|--------|
| KIAA2022  | 83.2   | 100.3  | 88.9   | 102.3  | 95.5  | 100.2  | 92.9   | 111.3  |
| KIAA2026  | 269.8  | 383.8  | 334.8  | 441.2  | 384   | 716.1  | 300.1  | 539.6  |
| KIDINS220 | 783.4  | 1132.6 | 663.8  | 1101.9 | 847.9 | 1922.5 | 809.4  | 2011.2 |
| KIF11     | 758.9  | 911.2  | 441.5  | 319.2  | 288.9 | 499    | 726.8  | 1377.2 |
| KIF12     | 86.9   | 92.9   | 102.5  | 100.6  | 87.9  | 98.2   | 90.6   | 92.9   |
| KIF13A    | 87.5   | 95     | 105.6  | 93.2   | 85.8  | 95.5   | 93.3   | 90.1   |
| KIF13B    | 176.8  | 236.9  | 231.5  | 229.8  | 201.6 | 299.9  | 187.2  | 344.2  |
| KIF14     | 843.3  | 986.9  | 466.1  | 426.2  | 417.3 | 618.1  | 797.9  | 1195.5 |
| KIF15     | 992.4  | 1169.3 | 612    | 715.6  | 611   | 1078.7 | 667.8  | 1091.2 |
| KIF17     | 306.7  | 410.9  | 329.3  | 212.1  | 174.3 | 220.1  | 283.7  | 484.3  |
| KIF18A    | 289.7  | 326.4  | 153.3  | 131    | 116.9 | 155.4  | 235.2  | 333    |
| KIF19     | 83.7   | 92     | 98.8   | 97.8   | 89.9  | 96.1   | 93.7   | 106.1  |
| KIF1A     | 84.9   | 89.8   | 85.2   | 78.9   | 76.2  | 81.2   | 80.1   | 93.2   |
| KIF1B     | 113.6  | 128.8  | 102.8  | 92.7   | 96.8  | 97.1   | 111.2  | 113.7  |
| KIF1B     | 116.5  | 160.5  | 96.9   | 93.8   | 99.9  | 120.2  | 160.3  | 148.7  |
| KIF1B     | 192.5  | 266.5  | 169.4  | 310.2  | 229.3 | 351    | 197.7  | 227.6  |
| KIF1C     | 129.6  | 127.3  | 97.5   | 101.1  | 89.7  | 129.9  | 109    | 161.2  |
| KIF2      | 740    | 1030.5 | 686.7  | 687.5  | 520.9 | 1012.2 | 624    | 1115.4 |
| KIF20A    | 1078   | 1338.7 | 977.2  | 913    | 884.2 | 1225   | 729.3  | 1016   |
| KIF21A    | 150.3  | 175.9  | 105.9  | 98.8   | 87.9  | 132.9  | 153.2  | 204    |
| KIF21B    | 78.3   | 72.4   | 94.6   | 88.4   | 80.7  | 77.7   | 74.5   | 88.4   |
| KIF21B    | 155.6  | 210.3  | 129.6  | 108.1  | 95.3  | 98     | 193.3  | 271.7  |
| KIF23     | 140    | 180.2  | 102.4  | 93.8   | 92.5  | 99     | 121.8  | 145.2  |
| KIF23     | 683.7  | 813.4  | 249.9  | 242    | 218.4 | 295.7  | 441.1  | 674.2  |
| KIF25     | 69.6   | 82.9   | 91.3   | 90.8   | 83.8  | 85.9   | 76.4   | 78.3   |
| KIF25     | 134.6  | 166.7  | 112.7  | 96.8   | 93.2  | 116.2  | 132.5  | 148.8  |
| KIF26B    | 78.4   | 83.4   | 100.6  | 85     | 75.2  | 90.4   | 80     | 80.4   |
| KIF27     | 120.5  | 131    | 115.8  | 100.9  | 111.2 | 114.3  | 115.6  | 134.5  |
| KIF27     | 107.3  | 113.1  | 93.2   | 93.5   | 79.8  | 89.8   | 87.5   | 102    |
| KIF2B     | 87.6   | 89     | 96.1   | 94     | 91.1  | 84.5   | 84.9   | 93.5   |
| KIF2C     | 1094.9 | 1328.5 | 762.2  | 608.5  | 571.5 | 722.3  | 866.6  | 1055.6 |
| KIF3A     | 81.1   | 91.3   | 89.2   | 79.2   | 80.8  | 86.9   | 83.4   | 81.9   |
| KIF3B     | 293.9  | 395.4  | 289.1  | 318.2  | 272.5 | 406.5  | 251.1  | 525.5  |
| KIF3C     | 102.3  | 116.4  | 108.5  | 98.2   | 96.1  | 109.6  | 112.9  | 138.9  |
| KIF4A     | 356.7  | 501.6  | 308.3  | 371.4  | 355.5 | 626.1  | 311.9  | 445.1  |
| KIF5A     | 87.8   | 101.9  | 103.4  | 84.5   | 91    | 100.3  | 94.6   | 93.9   |
| KIF5B     | 657.6  | 960.2  | 414.2  | 352.4  | 282.7 | 621.6  | 549.4  | 701    |
| KIF5C     | 100.9  | 115.8  | 99.8   | 108.9  | 84.1  | 92.6   | 85.6   | 117.4  |
| KIF6      | 190.7  | 202.2  | 115.5  | 117.3  | 101.5 | 119.2  | 164.8  | 183.7  |
| KIF7      | 121.3  | 130.4  | 127.3  | 200.8  | 110.6 | 245.4  | 107    | 139    |
| KIF9      | 97.4   | 111.4  | 98.8   | 90.8   | 83.6  | 86.7   | 110.3  | 106.9  |
| KIFAP3    | 384.5  | 460.7  | 238.9  | 245.7  | 189.2 | 262.6  | 325.5  | 375.4  |
| KIFC1     | 2097.7 | 2732   | 2445.8 | 2532   | 2419  | 3338.3 | 1880.1 | 2528.6 |
| KIFC2     | 315.1  | 261.5  | 243.9  | 179    | 196.1 | 279.2  | 251.3  | 451.3  |
| KIFC3     | 120.9  | 135.9  | 100.4  | 95     | 87.3  | 91.1   | 113.4  | 130.9  |
| KIN       | 93.1   | 116.7  | 112.7  | 106.9  | 103.3 | 106    | 93.6   | 99     |
| KIR2DL1   | 98.6   | 102.4  | 87.3   | 97.4   | 90.4  | 91.9   | 95.2   | 97.8   |
| KIR2DL3   | 81.6   | 92     | 101.9  | 100.1  | 92    | 99.2   | 82.6   | 89.2   |
| KIR2DL3   | 131.3  | 171.5  | 118.1  | 92.9   | 86.1  | 104.9  | 130    | 153.4  |
| KIR2DL4   | 89.9   | 107.9  | 99.1   | 89.1   | 86.4  | 91.6   | 84.1   | 97.1   |

|          |       |        |       |       |       |        |       |        |
|----------|-------|--------|-------|-------|-------|--------|-------|--------|
| KIR2DL5A | 95.1  | 106.5  | 91.2  | 90.6  | 88.2  | 95.8   | 97.9  | 104.2  |
| KIR2DL5A | 90.4  | 89.7   | 101   | 94.6  | 86.1  | 91.2   | 80.3  | 95.2   |
| KIR2DL5A | 89.1  | 87.6   | 96.2  | 84.9  | 86.5  | 84.2   | 81.2  | 88.4   |
| KIR2DL5B | 85.7  | 105.5  | 88.5  | 79.4  | 76.3  | 81.5   | 83.2  | 113.8  |
| KIR2DS1  | 84.2  | 80.8   | 91.3  | 81.3  | 91.1  | 87.4   | 75.4  | 81.6   |
| KIR2DS3  | 75.5  | 81.5   | 103.2 | 91.1  | 82.6  | 87.2   | 80.4  | 80.4   |
| KIR2DS4  | 127   | 144    | 90.6  | 89.2  | 79.2  | 99.8   | 133.6 | 143.2  |
| KIR2DS5  | 94.5  | 102.1  | 96.5  | 92.3  | 89.4  | 82.7   | 92    | 96.6   |
| KIR3DL1  | 103.4 | 107    | 96.8  | 89    | 85.7  | 97.2   | 105.6 | 114.3  |
| KIR3DL2  | 93.7  | 98.9   | 98.3  | 94.1  | 86.1  | 94.3   | 100.1 | 98.4   |
| KIR3DL3  | 98    | 105.2  | 97.9  | 86.3  | 86.9  | 88.3   | 95.4  | 106.9  |
| KIR3DP1  | 118.4 | 134.7  | 104.5 | 97.7  | 88    | 102.5  | 121.3 | 138.1  |
| KIRREL   | 96    | 96.6   | 95.3  | 88.3  | 86.1  | 88.6   | 100.4 | 115.5  |
| KIRREL2  | 113.3 | 119.8  | 114.8 | 88.6  | 91    | 88.5   | 110.4 | 156    |
| KIRREL2  | 107.9 | 131.1  | 110.8 | 98.3  | 86.9  | 98.2   | 105   | 114.7  |
| KIRREL2  | 86.3  | 82.4   | 122.5 | 103   | 114   | 96.4   | 78.8  | 93.5   |
| KIRREL3  | 91.7  | 92.2   | 88.4  | 76.5  | 83.8  | 86.1   | 81.9  | 97     |
| KISS1    | 93.4  | 98.8   | 100.3 | 102.4 | 95.8  | 102.3  | 86.3  | 89     |
| KISS1R   | 108.5 | 132.2  | 99.1  | 95    | 101.3 | 94.9   | 101.4 | 102.6  |
| KIT      | 157   | 169    | 128.9 | 138.6 | 126.8 | 163.4  | 138.9 | 169.4  |
| KITLG    | 140   | 171.6  | 111.8 | 139.7 | 96.6  | 157.1  | 192.7 | 372.2  |
| KITLG    | 84.6  | 97.5   | 95.1  | 85.5  | 87.2  | 92.6   | 85.3  | 93.7   |
| KL       | 115.7 | 141    | 118.7 | 125.8 | 111.5 | 128.5  | 120.1 | 150.7  |
| KLB      | 108.5 | 134.5  | 104.6 | 109.1 | 88.3  | 100.1  | 112.1 | 123.3  |
| KLC2     | 86.1  | 96.3   | 97.3  | 82.7  | 81.6  | 87     | 93.3  | 94.3   |
| KLC2     | 116.4 | 110.7  | 115.5 | 100.6 | 99.6  | 103.1  | 106.7 | 109.7  |
| KLC3     | 103.4 | 114.9  | 85.2  | 84.5  | 80.6  | 88.4   | 95.5  | 109    |
| KLC3     | 83.7  | 99.4   | 90.5  | 87.8  | 85.7  | 85.5   | 80.7  | 102.4  |
| KLC4     | 118.3 | 155.8  | 97.7  | 103.5 | 92.8  | 91.3   | 122.3 | 130.9  |
| KLC4     | 92.1  | 108.5  | 80.5  | 80.7  | 80.4  | 83     | 97    | 103.7  |
| KLC4     | 101.4 | 130.9  | 89.5  | 84.3  | 74.8  | 80.8   | 111.5 | 135.8  |
| KLF1     | 104.8 | 116    | 100.7 | 100.7 | 89.9  | 97.8   | 108.4 | 127.2  |
| KLF10    | 142.8 | 165.3  | 115.1 | 140.3 | 147.8 | 163.9  | 132.2 | 166.4  |
| KLF10    | 154.7 | 199.5  | 109.7 | 106   | 100.6 | 114.1  | 160   | 217.4  |
| KLF10    | 194   | 236.3  | 116.4 | 129   | 100.4 | 104.5  | 171.5 | 230.7  |
| KLF11    | 239.4 | 311.3  | 141.4 | 141   | 128.2 | 156    | 255.2 | 315.8  |
| KLF11    | 926.8 | 1244.7 | 622   | 786.8 | 706.9 | 626    | 843.7 | 911.2  |
| KLF12    | 121.6 | 135.7  | 92.4  | 117.2 | 102.4 | 136.1  | 106.5 | 136.8  |
| KLF12    | 77.6  | 92.2   | 98.2  | 96.5  | 93.4  | 97.5   | 79.5  | 83.3   |
| KLF13    | 500   | 679.8  | 538.4 | 827.8 | 658.6 | 1147.3 | 486.9 | 603    |
| KLF14    | 84    | 90.4   | 86.1  | 93.8  | 85.9  | 81.3   | 90.3  | 91.4   |
| KLF15    | 146.6 | 173.2  | 140.1 | 107.2 | 104.7 | 119.3  | 133.4 | 124.7  |
| KLF16    | 91.1  | 96.3   | 86.5  | 82.5  | 83.6  | 83.6   | 80.8  | 91.8   |
| KLF17    | 95.2  | 102.9  | 91.8  | 91.6  | 88.5  | 86     | 101.7 | 113.6  |
| KLF2     | 452.6 | 557.6  | 254.9 | 146.3 | 162.1 | 143.1  | 441.6 | 662.5  |
| KLF3     | 96.5  | 111.9  | 97.7  | 88.2  | 82.6  | 101.9  | 101.2 | 111.9  |
| KLF4     | 360.2 | 401.8  | 306.8 | 280.5 | 215.5 | 372.7  | 244.8 | 711.7  |
| KLF5     | 87.4  | 94.7   | 84.9  | 87    | 96.7  | 91.6   | 93.8  | 102.6  |
| KLF6     | 318.1 | 490.4  | 137.4 | 151.4 | 156.6 | 183.7  | 404.9 | 487.5  |
| KLF6     | 526.2 | 799.8  | 351.2 | 376.5 | 359.3 | 385.7  | 749   | 1125.2 |

|         |        |        |        |        |        |        |        |        |
|---------|--------|--------|--------|--------|--------|--------|--------|--------|
| KLF7    | 104.3  | 126.1  | 94.5   | 84.8   | 80.9   | 96.3   | 106    | 122.4  |
| KLF8    | 200.2  | 228.6  | 146.2  | 128    | 117.6  | 136    | 158.4  | 187.4  |
| KLF9    | 782.1  | 1006.2 | 580.1  | 643.5  | 532.7  | 692.5  | 852    | 1095.2 |
| KLHDC1  | 78.6   | 79.2   | 99.5   | 85.9   | 83     | 76.1   | 81.9   | 82     |
| KLHDC2  | 668.3  | 889.8  | 288.5  | 264.2  | 232.3  | 315.5  | 583.8  | 684.4  |
| KLHDC3  | 5370.7 | 6447.1 | 2652.1 | 1994.9 | 2093.8 | 2228.9 | 4806.9 | 6216.2 |
| KLHDC4  | 446.6  | 636.7  | 298.5  | 184.6  | 167.5  | 217.9  | 428.8  | 607    |
| KLHDC5  | 822.4  | 953.1  | 454.6  | 528    | 400.8  | 671.7  | 702.1  | 1215.7 |
| KLHDC6  | 91.9   | 94.3   | 89.2   | 75.7   | 79.9   | 79.1   | 87.1   | 82.1   |
| KLHDC7A | 105.9  | 122.7  | 103.7  | 101    | 108.5  | 98.1   | 82.5   | 98.1   |
| KLHDC7B | 79.1   | 88.5   | 92     | 89.4   | 83.4   | 77.1   | 86.5   | 97     |
| KLHDC8A | 109.9  | 132.4  | 81.8   | 76.1   | 72.9   | 83.4   | 103.2  | 122.3  |
| KLHDC8B | 133    | 154.3  | 161.7  | 239    | 269.3  | 366.6  | 157.5  | 179.4  |
| KLHL1   | 89.5   | 106.4  | 105.1  | 94.9   | 91.4   | 96     | 91.2   | 94.7   |
| KLHL10  | 85.8   | 101.6  | 96.3   | 91.4   | 89.3   | 92     | 91.1   | 95.9   |
| KLHL11  | 90.2   | 101.9  | 111.3  | 93     | 95.6   | 98.3   | 89.3   | 94.8   |
| KLHL12  | 1781.7 | 2276.7 | 1139   | 1086.7 | 849.3  | 1499.1 | 1592.6 | 2162.1 |
| KLHL13  | 127.5  | 142.1  | 103.5  | 92.1   | 94.6   | 112    | 110.3  | 118.2  |
| KLHL14  | 83.6   | 88.2   | 91.4   | 78.1   | 84.7   | 89.2   | 87.9   | 84.9   |
| KLHL15  | 99.6   | 106.7  | 101.1  | 96.6   | 90.7   | 104.8  | 98     | 104.9  |
| KLHL17  | 89.4   | 103.7  | 103.6  | 95.4   | 81.8   | 88.7   | 93.9   | 105.9  |
| KLHL17  | 137.9  | 181.3  | 153.9  | 132.6  | 128.3  | 204.2  | 107.1  | 169.4  |
| KLHL18  | 198    | 189.7  | 131    | 137.2  | 108.4  | 133    | 192.1  | 271.2  |
| KLHL2   | 311.6  | 366.8  | 177.4  | 169.1  | 129.3  | 182.4  | 320.6  | 606.2  |
| KLHL20  | 410.3  | 509.8  | 249.7  | 322.7  | 287.8  | 443.4  | 357.8  | 709.1  |
| KLHL21  | 149.6  | 155.8  | 155.3  | 133.6  | 101.8  | 166.2  | 155.2  | 243.7  |
| KLHL22  | 717    | 952.3  | 508.7  | 524.6  | 473.5  | 483    | 563.7  | 408.6  |
| KLHL23  | 146.8  | 228.5  | 118.9  | 106.1  | 100.9  | 92     | 132.2  | 155    |
| KLHL25  | 133.2  | 136.1  | 98.7   | 93.2   | 88.7   | 91.5   | 120.3  | 136.9  |
| KLHL26  | 139    | 147.3  | 136.5  | 133.1  | 99.7   | 123.8  | 127.7  | 187.2  |
| KLHL3   | 183.2  | 225.7  | 178.8  | 189.1  | 174.1  | 235.9  | 164.5  | 173.3  |
| KLHL4   | 75.9   | 88.1   | 86     | 77.1   | 74.9   | 85.6   | 77.2   | 93.3   |
| KLHL4   | 95.3   | 94.8   | 108.1  | 92.2   | 92.5   | 90.4   | 91.6   | 95.9   |
| KLHL5   | 93.5   | 113.6  | 97.8   | 91.9   | 93.5   | 87.3   | 106.7  | 105.1  |
| KLHL5   | 497.7  | 666.6  | 544.1  | 520.6  | 523.5  | 722.4  | 522.8  | 937.1  |
| KLHL5   | 329.8  | 464.6  | 227.4  | 197.2  | 212.5  | 270.5  | 283.1  | 419.7  |
| KLHL7   | 189.9  | 240.7  | 166.7  | 175    | 167.2  | 253.3  | 181.5  | 245.9  |
| KLHL7   | 111    | 136.9  | 109.1  | 114.1  | 98.6   | 114.1  | 106.4  | 132.4  |
| KLHL8   | 873.9  | 1246   | 673.3  | 707.8  | 581.6  | 797.8  | 1052.5 | 1112.2 |
| KLHL9   | 94.9   | 94.6   | 90.4   | 86.5   | 75.8   | 86.5   | 97     | 84.4   |
| KLK1    | 201.1  | 253.9  | 177.1  | 127.5  | 113.1  | 134.6  | 178.4  | 228.4  |
| KLK10   | 87.7   | 87.1   | 82.5   | 80.7   | 74.5   | 84.7   | 83.5   | 91.5   |
| KLK10   | 124.3  | 106.6  | 111.1  | 99.3   | 103.1  | 89.3   | 91     | 108.6  |
| KLK11   | 107.8  | 120.7  | 99.6   | 98.6   | 94     | 98.8   | 99     | 113.6  |
| KLK11   | 96.6   | 96.7   | 97.2   | 97.9   | 87.6   | 85.1   | 105    | 96.6   |
| KLK12   | 128.9  | 167.7  | 94.5   | 80.7   | 89.8   | 90.1   | 132    | 137.5  |
| KLK12   | 91.4   | 108.1  | 85.3   | 75.3   | 81.4   | 76     | 96     | 120.9  |
| KLK13   | 83.9   | 76.8   | 88.5   | 82.6   | 94.8   | 74     | 73.8   | 84.7   |
| KLK14   | 89.9   | 97.5   | 102    | 89.1   | 86.4   | 97.6   | 96.9   | 104.2  |
| KLK15   | 99.8   | 96.8   | 89.2   | 97.1   | 86.3   | 87.7   | 97.6   | 104.6  |

|        |         |         |        |        |        |        |         |         |
|--------|---------|---------|--------|--------|--------|--------|---------|---------|
| KLK15  | 81.6    | 89.9    | 99     | 83.8   | 81.3   | 88.9   | 84.9    | 93.7    |
| KLK15  | 103.8   | 120.8   | 91.4   | 87.9   | 91.7   | 87     | 98      | 115.6   |
| KLK2   | 117.2   | 129.5   | 91.2   | 99.1   | 91.8   | 93.4   | 117.9   | 122.1   |
| KLK2   | 104.8   | 138.3   | 101    | 84.6   | 92     | 94.3   | 106.1   | 138.5   |
| KLK3   | 78.6    | 90.9    | 86.3   | 71.9   | 75.3   | 77.2   | 85.1    | 97.5    |
| KLK3   | 87.7    | 99.8    | 80.3   | 88.6   | 76.1   | 77.4   | 91.9    | 105.7   |
| KLK3   | 104.8   | 127.5   | 92.8   | 81.4   | 86.3   | 81.8   | 96.7    | 135.9   |
| KLK4   | 86.7    | 99.3    | 88.9   | 83.8   | 84.5   | 84.4   | 83.1    | 85.8    |
| KLK5   | 94      | 101.8   | 81     | 83.3   | 87     | 83.1   | 84.4    | 102.1   |
| KLK5   | 101.6   | 128.7   | 84.5   | 77.2   | 84.8   | 80.9   | 90.6    | 134.3   |
| KLK5   | 89.1    | 98      | 100.3  | 89.6   | 91.2   | 80.8   | 88.7    | 106.7   |
| KLK6   | 90.2    | 90.9    | 96.9   | 86.7   | 81.3   | 83.3   | 90.7    | 79.3    |
| KLK6   | 129.5   | 140.7   | 93.5   | 86.7   | 79     | 87.2   | 115.5   | 149.4   |
| KLK7   | 103.4   | 109     | 104.1  | 96     | 96.7   | 89.4   | 106     | 97.4    |
| KLK7   | 117.8   | 129.2   | 125.9  | 113.1  | 112.6  | 125.7  | 113.3   | 125.6   |
| KLK8   | 94.4    | 120.2   | 98.5   | 84.4   | 88.4   | 96.3   | 101     | 98.9    |
| KLK8   | 96.7    | 118.5   | 95.8   | 92.7   | 83.8   | 92.4   | 105.2   | 113.1   |
| KLK9   | 85.6    | 93.1    | 86.7   | 88.3   | 74     | 80.7   | 80.7    | 85.3    |
| KLKB1  | 130.1   | 154.9   | 86.8   | 85.4   | 91.5   | 92.3   | 116.6   | 120.1   |
| KLKBL4 | 82.7    | 81.5    | 82.3   | 85.5   | 78.2   | 83.1   | 88.8    | 95.1    |
| KLKP1  | 89.3    | 100.3   | 88.9   | 91.1   | 85     | 80.8   | 87.5    | 100.9   |
| KLP1   | 295.6   | 412.4   | 170.3  | 112.9  | 127.6  | 156.8  | 252.6   | 312.5   |
| KLRA1  | 99.4    | 131.6   | 91.5   | 105.5  | 90.2   | 103    | 106.7   | 125.9   |
| KLRB1  | 75.4    | 87.5    | 93.6   | 78.9   | 91.6   | 89.4   | 75.3    | 84.1    |
| KLRC1  | 78.6    | 86.6    | 103.9  | 85.2   | 78.9   | 90.6   | 76.1    | 95.1    |
| KLRC2  | 115.6   | 154.3   | 93.5   | 85.3   | 77.4   | 81.6   | 117     | 129.6   |
| KLRC3  | 78.8    | 87.4    | 95.6   | 80.8   | 92.4   | 87.9   | 86.7    | 88.8    |
| KLRC3  | 82.4    | 96.4    | 103.1  | 85.5   | 91.1   | 95.6   | 87.6    | 87.5    |
| KLRC3  | 76.4    | 89.6    | 85.7   | 87.8   | 77.1   | 93     | 85.8    | 88      |
| KLRC4  | 122.1   | 129.6   | 114.9  | 94.1   | 94     | 96.4   | 125.6   | 123.8   |
| KLRD1  | 83.8    | 90.3    | 85.1   | 83.2   | 79     | 83.9   | 81.8    | 88.5    |
| KLRD1  | 86      | 86.6    | 93.2   | 84.2   | 89.5   | 91.1   | 89.2    | 95.4    |
| KLRF1  | 118.9   | 124.4   | 105    | 117.4  | 102.5  | 123.8  | 108.4   | 114.4   |
| KLRG1  | 83.8    | 103.2   | 94.4   | 91.6   | 78.9   | 85     | 100.6   | 88.2    |
| KLRG2  | 159.9   | 209.3   | 139.9  | 115.9  | 110.8  | 122.6  | 131.5   | 167.8   |
| KLRK1  | 130.2   | 139.7   | 100.5  | 99.7   | 106.5  | 105.3  | 119.4   | 117.3   |
| KMO    | 127     | 175.9   | 99.5   | 113.6  | 103.5  | 110    | 137.4   | 163.1   |
| KNDC1  | 102.7   | 121     | 91     | 93.3   | 94.3   | 83.9   | 107.7   | 115.8   |
| KNDC1  | 100     | 114.7   | 103.3  | 92.9   | 84.1   | 88.7   | 90.4    | 100.8   |
| KNG1   | 93.8    | 103.5   | 98.9   | 98.7   | 90.4   | 96.1   | 99      | 106.8   |
| KNS2   | 235.9   | 322.1   | 183.3  | 162.9  | 134.1  | 175.1  | 224.5   | 225.3   |
| KNS2   | 392.7   | 552     | 316.3  | 247.5  | 219.8  | 309.1  | 402.2   | 550     |
| KNTC1  | 987.1   | 1117.6  | 770.2  | 1189.3 | 1125.1 | 1529.7 | 779.3   | 870.6   |
| KNTC2  | 968     | 1132.5  | 423.6  | 395.6  | 296.6  | 550.4  | 866.7   | 1409.2  |
| KPNA2  | 306.6   | 390.8   | 163.9  | 143.6  | 147.2  | 140.3  | 258.6   | 520.9   |
| KPNA3  | 663.3   | 894.1   | 316.8  | 393.5  | 269    | 534.1  | 568     | 1682.1  |
| KPNA4  | 1568    | 1867.3  | 1097.3 | 1138.2 | 850.7  | 2029.2 | 1438.5  | 2011.3  |
| KPNA5  | 157.8   | 172.9   | 117.1  | 122.5  | 129.4  | 123.5  | 133.8   | 173.1   |
| KPNA6  | 400.1   | 538.4   | 617.9  | 986.8  | 822.1  | 1601.3 | 368.2   | 846.6   |
| KPNB1  | 11805.9 | 13311.6 | 6479.3 | 7015.9 | 5211.1 | 9771.3 | 11353.9 | 14420.8 |

|           |       |        |        |        |        |        |        |        |
|-----------|-------|--------|--------|--------|--------|--------|--------|--------|
| KPTN      | 110.8 | 124.3  | 97.7   | 88.2   | 84.1   | 86.9   | 96.3   | 115.1  |
| KRAS      | 322.7 | 415.5  | 275.3  | 237    | 208.2  | 293.8  | 312.4  | 531.2  |
| KRAS      | 92.6  | 107.3  | 100.2  | 85.6   | 94.7   | 91.1   | 92     | 110    |
| KRCC1     | 549.8 | 720.6  | 223.1  | 204.2  | 171.3  | 336.8  | 503.9  | 987.1  |
| KREMEN1   | 120.1 | 129.8  | 92.5   | 85.8   | 77.6   | 79.2   | 120    | 132.8  |
| KREMEN1   | 207.9 | 265.2  | 140.3  | 119.1  | 109.9  | 126.6  | 209.4  | 256.3  |
| KREMEN2   | 107.5 | 129    | 93.2   | 85.9   | 79.2   | 81.8   | 92.5   | 133.4  |
| KREMEN2   | 233.6 | 282.8  | 245    | 156.2  | 144.1  | 183.5  | 161.1  | 196.3  |
| KRIT1     | 84.8  | 104.5  | 96     | 103.1  | 86.5   | 103.4  | 89.9   | 96.4   |
| KRT1      | 80    | 93.1   | 82.3   | 84.3   | 83.2   | 85.6   | 88.6   | 84.1   |
| KRT10     | 1767  | 2324.4 | 1339.7 | 1223.9 | 1004.6 | 1408.6 | 1755.9 | 2070.3 |
| KRT12     | 110.5 | 138.1  | 113    | 89.5   | 85.2   | 89.6   | 109.2  | 134.4  |
| KRT13     | 89.5  | 106    | 91.3   | 93.5   | 91     | 92.1   | 100.8  | 98.1   |
| KRT14     | 77.8  | 83.1   | 107.6  | 88.7   | 85.2   | 84.6   | 76.7   | 81     |
| KRT15     | 104   | 106.6  | 97.5   | 94.2   | 95.6   | 79     | 94.9   | 105.6  |
| KRT16     | 110   | 113.3  | 96.8   | 102.5  | 89.4   | 89.8   | 116.2  | 142.9  |
| KRT17     | 94.4  | 97.6   | 93.1   | 136    | 142.5  | 163.8  | 94.4   | 101.3  |
| KRT18     | 74.3  | 88.4   | 81.2   | 76     | 89.7   | 77.7   | 78.4   | 82.1   |
| KRT18     | 92.3  | 90.3   | 98.4   | 82.4   | 91.7   | 97.8   | 90     | 100.7  |
| KRT19     | 90.9  | 83.8   | 97.2   | 77.9   | 79.5   | 88.3   | 87.5   | 93.3   |
| KRT1B     | 73.1  | 94     | 90.6   | 84.2   | 90.1   | 87.9   | 92.3   | 86.8   |
| KRT20     | 82.3  | 95.2   | 87.4   | 81.3   | 81.6   | 80.4   | 81.9   | 85.8   |
| KRT23     | 205.6 | 238.2  | 118.4  | 121.7  | 103.4  | 123.4  | 179.5  | 184.3  |
| KRT24     | 148.7 | 192.9  | 111.1  | 91.4   | 91.2   | 99.9   | 134.1  | 163.1  |
| KRT25A    | 100.8 | 118.7  | 83.5   | 75.8   | 77.8   | 84.8   | 98.7   | 104.4  |
| KRT25C    | 83.1  | 98     | 88.4   | 83.6   | 76.8   | 88.9   | 82.5   | 91.5   |
| KRT25D    | 79.9  | 89.7   | 99.7   | 90.2   | 82.8   | 89.7   | 76.2   | 80.7   |
| KRT26     | 108.2 | 112.5  | 91.8   | 87.7   | 85.7   | 86.1   | 92     | 104.5  |
| KRT2A     | 79.1  | 95.1   | 88.7   | 78.9   | 79.2   | 78.9   | 91.3   | 98.7   |
| KRT2B     | 78.8  | 85.2   | 98.2   | 96.8   | 98.9   | 89.5   | 84.3   | 85.7   |
| KRT3      | 92.5  | 112.5  | 105.2  | 92.7   | 90.7   | 94.4   | 92.4   | 96.5   |
| KRT33A    | 97.4  | 101.4  | 112.1  | 94.7   | 99.3   | 95.6   | 97.1   | 103.9  |
| KRT39     | 80.8  | 79     | 96     | 85.9   | 75     | 87.7   | 80.9   | 74.3   |
| KRT4      | 102.9 | 113.6  | 89.4   | 94     | 78.7   | 82.7   | 87.3   | 111.1  |
| KRT40     | 79.7  | 87.9   | 81.2   | 79.2   | 76.1   | 82     | 91.7   | 88.7   |
| KRT5      | 77.2  | 81.7   | 95.3   | 84.2   | 88.7   | 86.6   | 79.6   | 88.6   |
| KRT6A     | 103.5 | 105.6  | 100.5  | 94.9   | 94.3   | 98.7   | 98.3   | 96.8   |
| KRT6B     | 75.8  | 83.2   | 98.1   | 90.6   | 85.5   | 80.9   | 81.6   | 96.7   |
| KRT6E     | 78.9  | 83.2   | 96.2   | 92.3   | 81.7   | 82.1   | 71.3   | 75     |
| KRT6IRS   | 91.2  | 108.9  | 88.5   | 87.3   | 85.4   | 82.2   | 91.5   | 101.7  |
| KRT6L     | 79.7  | 82.3   | 96.6   | 94.4   | 99.6   | 87.4   | 74.8   | 88.1   |
| KRT7      | 86.4  | 97.8   | 93.1   | 87.3   | 86.5   | 87.4   | 102.9  | 101.1  |
| KRT8      | 80.2  | 104.9  | 96.9   | 90.4   | 80.5   | 103.3  | 94     | 92     |
| KRT86     | 78.2  | 84.8   | 91.1   | 100.6  | 90     | 95.1   | 83     | 89.3   |
| KRT9      | 111.2 | 122.8  | 121.7  | 116.3  | 102.8  | 106.7  | 101.4  | 124.2  |
| KRTAP10-1 | 80.2  | 101.2  | 87.4   | 87.1   | 81.6   | 91.6   | 79.9   | 96.6   |
| KRTAP10-1 | 99.2  | 104.4  | 121.2  | 100.4  | 102.2  | 104    | 105.1  | 114.4  |
| KRTAP10-1 | 128.9 | 140.4  | 99.6   | 97.6   | 101.9  | 116.8  | 122.9  | 152.1  |
| KRTAP10-1 | 79.5  | 89.5   | 88.5   | 76.1   | 76.9   | 79.5   | 74.2   | 92.1   |
| KRTAP10-2 | 129.7 | 131.9  | 104.2  | 107.7  | 89.3   | 96.3   | 124.3  | 125.4  |

|           |       |       |       |       |       |       |       |       |
|-----------|-------|-------|-------|-------|-------|-------|-------|-------|
| KRTAP10-2 | 68.5  | 83.5  | 97.3  | 81.5  | 78.6  | 85.5  | 78.4  | 84.7  |
| KRTAP10-3 | 80.9  | 81.4  | 95.5  | 93.2  | 83.1  | 96    | 87.8  | 90.1  |
| KRTAP10-4 | 114.4 | 124.4 | 95.6  | 85.4  | 88.5  | 89.4  | 105.9 | 124.4 |
| KRTAP10-5 | 133.6 | 162   | 78.4  | 87.9  | 88.2  | 79.9  | 122   | 152.7 |
| KRTAP10-7 | 87.5  | 89.9  | 92.4  | 77.5  | 78.1  | 80.9  | 83.2  | 84.5  |
| KRTAP10-8 | 98.5  | 96.5  | 87    | 88    | 81.2  | 87.6  | 90.6  | 84.5  |
| KRTAP10-9 | 100.9 | 117.6 | 112.8 | 111.3 | 104.2 | 105.2 | 96.2  | 102   |
| KRTAP1-1  | 76.7  | 85.6  | 83.8  | 83.6  | 80.3  | 73.1  | 90.7  | 87.6  |
| KRTAP11-1 | 95.8  | 104.3 | 90.1  | 77.4  | 84.6  | 80.5  | 91.7  | 111.1 |
| KRTAP12-1 | 82.6  | 93    | 108.7 | 97.2  | 86.8  | 93.4  | 82.6  | 85.2  |
| KRTAP12-2 | 93.9  | 110   | 94.6  | 88.2  | 80    | 94.6  | 96    | 104.3 |
| KRTAP12-3 | 82.9  | 94.4  | 98.6  | 88.5  | 83.1  | 79.2  | 85.7  | 93.7  |
| KRTAP12-4 | 108   | 109.2 | 106.4 | 89.9  | 92.9  | 91.3  | 108.9 | 107.2 |
| KRTAP1-3  | 95.2  | 99.9  | 102.3 | 95.7  | 85.7  | 92.4  | 94.3  | 105.5 |
| KRTAP13-1 | 75.9  | 95.8  | 99.8  | 94.6  | 84.1  | 94.3  | 77.9  | 85.9  |
| KRTAP13-2 | 86.6  | 94.6  | 89.4  | 83.6  | 86.1  | 78.2  | 90.4  | 100.2 |
| KRTAP13-3 | 80.7  | 98.4  | 89.2  | 98.9  | 81    | 91.1  | 88.4  | 88.6  |
| KRTAP13-4 | 81.2  | 95.5  | 100.3 | 89.4  | 81.6  | 91.7  | 92.9  | 95    |
| KRTAP15-1 | 96.8  | 98.1  | 96    | 75.9  | 86.4  | 87.2  | 93    | 94.4  |
| KRTAP17-1 | 97    | 106.2 | 95.3  | 83.5  | 93.7  | 87.6  | 99.1  | 105.1 |
| KRTAP19-1 | 97.3  | 106.7 | 90.9  | 84    | 83.6  | 79.6  | 94.8  | 99.6  |
| KRTAP19-2 | 92.2  | 106.4 | 90.4  | 88.4  | 85.5  | 85    | 97.1  | 87.5  |
| KRTAP19-3 | 80.9  | 99.3  | 101.5 | 87    | 77.5  | 83.8  | 89.9  | 97    |
| KRTAP19-4 | 94.5  | 105.2 | 99.6  | 87.5  | 97    | 87.6  | 91.9  | 100.4 |
| KRTAP19-5 | 93.9  | 135.4 | 83.9  | 81.9  | 75.6  | 85.1  | 107.4 | 131.2 |
| KRTAP19-6 | 208.6 | 234   | 134.1 | 120.1 | 107.6 | 122.8 | 186.3 | 225.5 |
| KRTAP19-7 | 117   | 133.2 | 90.6  | 101.1 | 81    | 93.3  | 119.7 | 123.8 |
| KRTAP20-1 | 78.6  | 90    | 91    | 83.2  | 76.9  | 82.2  | 83.1  | 82.3  |
| KRTAP20-2 | 116.7 | 140.4 | 95.8  | 93.5  | 90.9  | 96.9  | 105.5 | 112.3 |
| KRTAP21-1 | 95.6  | 94.4  | 100.2 | 104.1 | 92.1  | 92.7  | 83.1  | 90.7  |
| KRTAP21-2 | 87.2  | 87.8  | 98.1  | 98.3  | 96.7  | 91.2  | 84.8  | 84.3  |
| KRTAP22-1 | 94    | 110   | 92.9  | 86.7  | 98.8  | 86.1  | 96.6  | 113.8 |
| KRTAP23-1 | 88.6  | 106.8 | 98.8  | 89.3  | 91    | 83.6  | 92.1  | 99    |
| KRTAP26-1 | 83.4  | 99.9  | 96.6  | 94.8  | 87.9  | 92.5  | 79.6  | 96.1  |
| KRTAP27-1 | 89.1  | 96    | 97.2  | 87.6  | 93    | 87.8  | 96.5  | 93.3  |
| KRTAP3-1  | 78    | 78.4  | 88.5  | 75.9  | 80.6  | 79.8  | 77.5  | 80    |
| KRTAP3-2  | 88.4  | 104.6 | 86.9  | 89.6  | 80.1  | 80.3  | 88.5  | 97.8  |
| KRTAP4-10 | 88.4  | 110   | 94    | 90.7  | 101.1 | 89.7  | 86.4  | 86.8  |
| KRTAP4-12 | 99.3  | 117.4 | 97.1  | 104   | 82.5  | 96.6  | 104.9 | 112.6 |
| KRTAP4-14 | 81.4  | 84.4  | 93.5  | 91.3  | 84.7  | 92.3  | 91.9  | 89.4  |
| KRTAP4-2  | 78.8  | 79.4  | 89    | 84.6  | 75.1  | 87.8  | 76.8  | 88    |
| KRTAP4-4  | 84.6  | 100.9 | 91.1  | 90.6  | 82.4  | 81.7  | 83.2  | 102.5 |
| KRTAP4-5  | 78.2  | 82.1  | 87.9  | 88.2  | 71    | 80.5  | 82.4  | 90.8  |
| KRTAP4-7  | 110.3 | 115   | 90.8  | 89    | 84.2  | 86.3  | 109.8 | 119.7 |
| KRTAP5-1  | 99.4  | 124.4 | 82.6  | 79    | 85.2  | 92.4  | 105.9 | 106.8 |
| KRTAP5-10 | 83.7  | 97.1  | 87.6  | 87    | 81    | 79    | 93.5  | 99.2  |
| KRTAP5-11 | 121.4 | 122.2 | 93.7  | 89.5  | 86.4  | 91    | 99.6  | 116.4 |
| KRTAP5-2  | 78.5  | 87.1  | 91.1  | 82.1  | 83.2  | 86.2  | 89.6  | 96.5  |
| KRTAP5-3  | 88.2  | 88.9  | 88.5  | 80.5  | 70.4  | 81.6  | 84.7  | 107.3 |
| KRTAP5-4  | 88.4  | 94.5  | 85.2  | 79.7  | 88.3  | 83.4  | 87.4  | 101.5 |

|          |        |        |        |        |        |        |        |        |
|----------|--------|--------|--------|--------|--------|--------|--------|--------|
| KRTAP5-5 | 77.7   | 86.8   | 78.9   | 78.6   | 84.6   | 82.1   | 82.1   | 83.3   |
| KRTAP5-6 | 77.3   | 98.7   | 83.9   | 81.2   | 72.9   | 87.8   | 86.6   | 85.3   |
| KRTAP5-7 | 81.4   | 96.6   | 96.3   | 99.3   | 82.8   | 92.3   | 75.7   | 95.3   |
| KRTAP5-8 | 78.1   | 87.1   | 87     | 91     | 75.9   | 79.2   | 79.2   | 86.2   |
| KRTAP5-9 | 95.8   | 113.7  | 91.4   | 86.8   | 90.8   | 88.5   | 97     | 130.7  |
| KRTAP6-1 | 95     | 117.5  | 90.6   | 94     | 86.1   | 93.3   | 101.5  | 107.1  |
| KRTAP6-2 | 97.5   | 103.8  | 95.9   | 89.4   | 89.1   | 97.2   | 96.2   | 105.4  |
| KRTAP6-3 | 94.6   | 103.3  | 90.7   | 82.4   | 84.4   | 81.5   | 94.9   | 99.3   |
| KRTAP8-1 | 91.7   | 97.5   | 87.7   | 83.9   | 80.1   | 78.4   | 86.5   | 97.6   |
| KRTAP9-3 | 73.8   | 79.7   | 99     | 82.9   | 84.4   | 93.4   | 77.8   | 83.4   |
| KRTAP9-4 | 92.5   | 113.7  | 98.7   | 96.3   | 94.7   | 95.7   | 93.8   | 105.5  |
| KRTCAP2  | 9013   | 9874.3 | 5885.7 | 3963.1 | 3518.9 | 3440.2 | 9703.6 | 7431.4 |
| KRTCAP3  | 139.7  | 176.9  | 104.5  | 93.5   | 81.3   | 91.7   | 145.1  | 164.5  |
| KRTHA2   | 99.6   | 118.5  | 83     | 82     | 84     | 92     | 116.4  | 106.5  |
| KRTHA3B  | 83.9   | 92.1   | 93.7   | 90.7   | 79.1   | 81.8   | 90.4   | 97.1   |
| KRTHA4   | 93.8   | 93.1   | 105.3  | 92.2   | 88.6   | 84.1   | 87.8   | 97.8   |
| KRTHA5   | 80.8   | 81.6   | 91.2   | 95.2   | 86.4   | 91.7   | 65.9   | 81.6   |
| KRTHA6   | 108.3  | 123.9  | 96.3   | 95.8   | 87.4   | 95.2   | 112.5  | 124.1  |
| KRTHA7   | 136.7  | 144    | 91.5   | 82.8   | 82.2   | 77.3   | 130    | 144.3  |
| KRTHA8   | 79.5   | 102.3  | 101    | 92.5   | 96.9   | 87.6   | 81     | 87.1   |
| KRTHB1   | 134    | 152    | 97.4   | 94.9   | 88     | 86.1   | 124.7  | 133.6  |
| KRTHB2   | 85.7   | 90.8   | 89.4   | 87.2   | 81.1   | 85.8   | 90.3   | 96.6   |
| KRTHB3   | 95.7   | 100.7  | 124    | 106.7  | 112.1  | 114.6  | 85.6   | 91.1   |
| KRTHB4   | 89.8   | 98.4   | 89.8   | 81.3   | 86.9   | 81.5   | 87.9   | 101.2  |
| KRTHB5   | 83.7   | 95.9   | 99.6   | 85     | 89.3   | 99.5   | 93.6   | 88.4   |
| KSP37    | 97.3   | 102.7  | 96.6   | 90.3   | 85     | 92.9   | 94.6   | 110.9  |
| KSR1     | 104.8  | 119.8  | 101.1  | 95.4   | 85.4   | 95.6   | 108.7  | 114.9  |
| KSR2     | 91.6   | 111.7  | 100.5  | 89.3   | 82.6   | 79.8   | 85.1   | 95.9   |
| KTI12    | 647.2  | 844.9  | 322.4  | 262.9  | 220.5  | 412.3  | 550.5  | 874.4  |
| KTN1     | 1030.8 | 1470.2 | 461.7  | 564.2  | 338.9  | 1170.3 | 912.4  | 1833.6 |
| KTN1     | 175.5  | 218.2  | 175    | 207.9  | 174.2  | 351.3  | 162.8  | 243.9  |
| KUA      | 822.8  | 982    | 444.9  | 415.5  | 365.1  | 431.9  | 732.1  | 840.7  |
| KUA-UEV  | 637.8  | 864.8  | 122.1  | 123.9  | 91.6   | 123.4  | 515.4  | 667.7  |
| KY       | 204.9  | 252.7  | 124.5  | 117.9  | 98.8   | 119.8  | 198.5  | 184.7  |
| KYNU     | 1222.1 | 1603.1 | 566.9  | 1164   | 1216.7 | 1716.6 | 1035.6 | 2040.2 |
| KYNU     | 643.3  | 982.2  | 343.8  | 539.1  | 552.4  | 836.3  | 462.3  | 640.6  |
| L1CAM    | 131.5  | 151.3  | 106.7  | 109.2  | 96.5   | 101.7  | 138    | 159.7  |
| L1CAM    | 248.1  | 271.4  | 141.1  | 131.6  | 110.2  | 119.1  | 214.5  | 234.5  |
| L3MBTL   | 101.6  | 115.1  | 98.5   | 86.7   | 95.8   | 96.3   | 98.5   | 99.6   |
| L3MBTL   | 87.7   | 93.9   | 89.6   | 85.7   | 88.4   | 85.7   | 86.3   | 97.5   |
| L3MBTL   | 83.5   | 99.6   | 112.3  | 81.7   | 87.1   | 91.1   | 91.8   | 99.5   |
| L3MBTL   | 127.8  | 141.3  | 102    | 96     | 86.2   | 109    | 111.6  | 121.8  |
| L3MBTL2  | 83     | 91.5   | 107    | 94.1   | 82.9   | 87     | 88.6   | 86.3   |
| L3MBTL2  | 843.8  | 1048.4 | 1356   | 1055.4 | 799.4  | 1255.7 | 691.3  | 1260.1 |
| L3MBTL3  | 248.1  | 284.1  | 188.7  | 193.9  | 154.5  | 234.7  | 208.9  | 293.4  |
| L3MBTL3  | 123.6  | 149.2  | 102.5  | 91.7   | 95.6   | 79.4   | 119    | 119.1  |
| L3MBTL3  | 92.3   | 87.4   | 94.1   | 85.9   | 78.2   | 77.3   | 87.4   | 86.4   |
| L3MBTL4  | 85.8   | 92.3   | 93.1   | 85.9   | 87     | 78.1   | 87.7   | 88.3   |
| LACE1    | 147.2  | 173.9  | 129.6  | 128.7  | 116.8  | 141.7  | 144.9  | 170.3  |
| LACRT    | 93.3   | 104.9  | 100.7  | 89.4   | 92     | 91.9   | 91.9   | 92.4   |

|         |         |         |         |         |         |         |         |         |
|---------|---------|---------|---------|---------|---------|---------|---------|---------|
| LACTB   | 282.2   | 330.1   | 130.5   | 133.2   | 110.4   | 142.4   | 260.3   | 418.7   |
| LACTB   | 934.1   | 1291.8  | 776.5   | 1010.8  | 891.2   | 1202.3  | 998.6   | 1334.5  |
| LACTB   | 135.9   | 164.7   | 116.8   | 131.3   | 115.3   | 142.7   | 124.9   | 177.3   |
| LACTB2  | 1355.6  | 1810.6  | 672.7   | 525.7   | 361.5   | 515.1   | 1190.6  | 1307.1  |
| LAD1    | 110.1   | 125.3   | 93.1    | 75.8    | 85.9    | 91.8    | 108.8   | 106.6   |
| LAD1    | 80      | 86.6    | 99.6    | 88      | 89.5    | 95.1    | 86.4    | 86.7    |
| LAG3    | 109.3   | 119.9   | 105     | 102.8   | 95.5    | 94.9    | 111.2   | 109     |
| LAIR1   | 760.7   | 920.1   | 422.5   | 264.9   | 221.8   | 214.5   | 527.9   | 590.2   |
| LAIR1   | 27318.6 | 28776.3 | 30366.3 | 31560.6 | 33932.1 | 30124.6 | 32913.4 | 30387.7 |
| LAIR2   | 180.3   | 220.4   | 126.3   | 128.7   | 102.9   | 120.4   | 151.2   | 217.7   |
| LAIR2   | 226.4   | 275.4   | 166.4   | 175.2   | 164.3   | 195.8   | 178     | 234.9   |
| LALBA   | 83.7    | 99.3    | 92.1    | 88.2    | 88.9    | 86.9    | 97.5    | 99.5    |
| LAMA1   | 92.7    | 100.5   | 95.2    | 83.4    | 80.2    | 85.5    | 84.3    | 105     |
| LAMA1   | 73.5    | 85.5    | 86.6    | 76.7    | 74.9    | 70.9    | 70.4    | 80.8    |
| LAMA2   | 116     | 138.8   | 113     | 114.4   | 103.5   | 106.9   | 111.7   | 111.9   |
| LAMA2   | 105.7   | 148.8   | 101.3   | 104.2   | 90.1    | 93      | 103     | 113.6   |
| LAMA3   | 94.7    | 107.9   | 93      | 94.9    | 91.3    | 100.5   | 97.1    | 114.4   |
| LAMA3   | 81.8    | 79.4    | 96.4    | 88.6    | 84.5    | 85      | 76.7    | 87.3    |
| LAMA3   | 105.4   | 128     | 105.3   | 95.6    | 95.8    | 110.8   | 108     | 108.8   |
| LAMA3   | 104.3   | 127.9   | 104.7   | 101.8   | 102.5   | 124     | 100     | 121.4   |
| LAMA4   | 94.3    | 102.2   | 85.9    | 79.4    | 87.3    | 86.5    | 107.5   | 114.6   |
| LAMA5   | 477.3   | 520.4   | 457.3   | 356.8   | 404.1   | 457.1   | 367.5   | 555.3   |
| LAMB1   | 91.4    | 105     | 96.3    | 97.9    | 81      | 96.8    | 99.7    | 112.5   |
| LAMB2   | 121.5   | 126.8   | 85.4    | 88.9    | 83.1    | 82.4    | 113.3   | 128.3   |
| LAMB3   | 129.9   | 148.7   | 130.9   | 144.9   | 121.3   | 154.7   | 126.1   | 142.5   |
| LAMB3   | 94.8    | 111.4   | 94.4    | 94.8    | 86.8    | 88      | 101.6   | 110.2   |
| LAMB3   | 86.9    | 96.2    | 82.3    | 90.3    | 83.9    | 87.6    | 86.6    | 92.4    |
| LAMB4   | 96.5    | 107.4   | 92.4    | 97.6    | 91.9    | 88.7    | 96.6    | 85.2    |
| LAMC1   | 1083.9  | 1811.7  | 904.6   | 1664.3  | 1095.2  | 1744.9  | 1501.2  | 1750.4  |
| LAMC2   | 120.6   | 141.5   | 105.8   | 93.5    | 83.6    | 103.8   | 124.9   | 123     |
| LAMC2   | 82.3    | 91.8    | 93.5    | 76.3    | 80.5    | 90.7    | 84.9    | 96.5    |
| LAMC2   | 108.2   | 110.2   | 98.7    | 85.8    | 85.4    | 95.8    | 102.5   | 101.5   |
| LAMC3   | 102.8   | 108.3   | 90      | 89.2    | 83.8    | 91.3    | 92.9    | 100.5   |
| LAMP1   | 4229.2  | 6487.7  | 3408.7  | 4074.9  | 3177.9  | 4378.1  | 3991.8  | 5885.6  |
| LAMP2   | 4920.4  | 5866.2  | 3726.1  | 6180.9  | 4683.4  | 7099    | 4720.5  | 7039.5  |
| LAMP2   | 1535.1  | 1917.1  | 666     | 943.8   | 629.7   | 1051.7  | 1282.9  | 2264.2  |
| LAMP2   | 1366.8  | 1803.9  | 583.3   | 650.7   | 612.7   | 832.3   | 1413.6  | 1872.1  |
| LAMP3   | 69.2    | 86.6    | 83.1    | 75.7    | 83.7    | 85      | 76.6    | 78.9    |
| LANCL1  | 1396.5  | 1930.4  | 750.2   | 621.8   | 440.3   | 842     | 1313.9  | 1494.3  |
| LANCL2  | 334.3   | 432.3   | 215.9   | 291.9   | 238     | 316.1   | 275.5   | 354.9   |
| LANCL3  | 82.3    | 86.6    | 88.1    | 85.9    | 77.3    | 89.2    | 83.1    | 87.9    |
| LAP3    | 1844.3  | 2048.6  | 669.5   | 645.6   | 470.1   | 730.8   | 1393.5  | 2538.8  |
| LAPTM4A | 266.6   | 318.5   | 124.5   | 125.9   | 113.4   | 134.2   | 281.1   | 373.7   |
| LAPTM4B | 3788.5  | 5187.9  | 2677.8  | 1591.9  | 1071.1  | 1748.6  | 3250.1  | 5818.4  |
| LAPTM5  | 1865.6  | 2928    | 1434.8  | 1576.2  | 1142.3  | 1511.8  | 1808.5  | 3502.6  |
| LARGE   | 93.4    | 103     | 103.9   | 103.6   | 88.7    | 95.9    | 89.9    | 94.6    |
| LARGE   | 81.2    | 96.1    | 80.7    | 85.1    | 80.6    | 80.7    | 86.2    | 95.6    |
| LARGE   | 84.3    | 94.5    | 89.7    | 78.4    | 77.6    | 79.1    | 87.6    | 88      |
| LARP1   | 103.1   | 99.2    | 94.9    | 85.4    | 86.5    | 80.4    | 96.9    | 106.7   |
| LARP1   | 606.8   | 886.6   | 649.5   | 723.5   | 519.5   | 1175.7  | 551.4   | 1463.1  |



|          |        |        |        |        |        |        |        |        |
|----------|--------|--------|--------|--------|--------|--------|--------|--------|
| LARP2    | 169    | 200.8  | 104.9  | 96.5   | 92.2   | 99     | 152    | 224.6  |
| LARP2    | 219    | 265    | 181.8  | 233.7  | 190.9  | 331.8  | 204.1  | 307.5  |
| LARP2    | 101.8  | 120.1  | 103.2  | 99     | 96.1   | 102.5  | 101.6  | 107    |
| LARP2    | 675.5  | 768.9  | 315.3  | 317.3  | 277.9  | 386.7  | 637.8  | 993.2  |
| LARP4    | 132.8  | 143.6  | 142.2  | 118.4  | 123.9  | 132.2  | 117.8  | 131.5  |
| LARP4    | 347.6  | 445.3  | 197.7  | 209.8  | 150.9  | 245    | 362.7  | 606.4  |
| LARP5    | 894.6  | 1245.8 | 858.1  | 884.2  | 725.9  | 1278.5 | 913.5  | 1208.3 |
| LARP6    | 131.6  | 147.8  | 138.6  | 126.5  | 111.2  | 130.5  | 170    | 173.7  |
| LARP6    | 176    | 173.3  | 146    | 141.9  | 126    | 129.6  | 171.5  | 233.2  |
| LARP7    | 2136.6 | 2749   | 1482.7 | 1452.6 | 1325.2 | 3030.7 | 1673.3 | 2588.1 |
| LARS     | 1884.2 | 2580.6 | 1113.9 | 1184.6 | 903.8  | 1670.1 | 1386.8 | 1742.6 |
| LARS2    | 260.4  | 338.1  | 288.1  | 298.4  | 223.4  | 413.2  | 260.2  | 306.1  |
| LAS1L    | 811.3  | 1029.4 | 470.6  | 508.6  | 379.4  | 585.7  | 663.5  | 759.9  |
| LASP1    | 5667.9 | 7633.1 | 4438.1 | 4809.7 | 3917.8 | 4441.8 | 4786.1 | 4981   |
| LASS1    | 92.3   | 105.5  | 94.8   | 81.2   | 88.5   | 96.5   | 87.4   | 94.5   |
| LASS1    | 170.2  | 197.2  | 138    | 110.6  | 103.7  | 112.2  | 170.4  | 195.2  |
| LASS1    | 79.6   | 97.2   | 93.5   | 80.8   | 90.6   | 80.4   | 85.1   | 92.1   |
| LASS2    | 819.1  | 1152.7 | 464.5  | 379.2  | 258.7  | 423.1  | 664.5  | 1075.4 |
| LASS2    | 1512.7 | 2007   | 822.3  | 588.7  | 499.1  | 770.6  | 1157   | 1704.6 |
| LASS3    | 85.1   | 86.8   | 95.3   | 77     | 84.2   | 75.4   | 75.5   | 88.3   |
| LASS4    | 106.3  | 135.7  | 95.4   | 94.7   | 98     | 106.7  | 113.6  | 122.5  |
| LASS5    | 213.6  | 301.9  | 165.3  | 218.6  | 204.7  | 251.9  | 203.3  | 246.7  |
| LASS6    | 2449.2 | 3477.9 | 2747.6 | 4505.3 | 3646.6 | 5011.3 | 2131.3 | 4578.5 |
| LAT      | 184.4  | 204.9  | 159.8  | 158.6  | 138.9  | 182.1  | 165.4  | 220.3  |
| LAT      | 136.2  | 132.1  | 118.5  | 121.1  | 103.9  | 131.4  | 114.8  | 132.9  |
| LAT      | 90.6   | 106.6  | 99.3   | 93.8   | 77.6   | 85.5   | 84.7   | 85.7   |
| LAT      | 84.4   | 104    | 99.8   | 98.8   | 94.7   | 91     | 94.1   | 92     |
| LAT1-3TM | 839.7  | 885.9  | 338.2  | 296    | 257.1  | 396.1  | 692.7  | 1236.4 |
| LAT1-3TM | 109.8  | 120.5  | 114.4  | 92.9   | 96.3   | 98     | 109.4  | 113.6  |
| LAT1-3TM | 96     | 110.9  | 84.9   | 91     | 90.8   | 80.3   | 90.9   | 114.6  |
| LAT2     | 2171.4 | 2671.6 | 1565.8 | 1089.9 | 860.9  | 1439.4 | 2135.7 | 2832.6 |
| LAT2     | 2274.9 | 3020.6 | 1197.1 | 823.7  | 695.6  | 1163.3 | 2200.2 | 3658.1 |
| LAT2     | 481.8  | 658.6  | 195.8  | 173.1  | 168.8  | 137.7  | 458.3  | 586.3  |
| LATS1    | 93.2   | 110.1  | 97.4   | 82.1   | 89.6   | 85.9   | 95.4   | 103.5  |
| LATS2    | 110.7  | 112.4  | 120.3  | 117.5  | 124.3  | 122.3  | 103.3  | 128.8  |
| LAX1     | 165.7  | 232.4  | 116.5  | 111.6  | 120.7  | 120.6  | 154.7  | 146.8  |
| LAYN     | 100.5  | 115.5  | 102    | 93.8   | 85.1   | 95.1   | 100.6  | 99.8   |
| LBH      | 104.5  | 114.9  | 93.8   | 85.5   | 76.6   | 73.4   | 98     | 102.9  |
| LBH      | 143.1  | 194.5  | 126.3  | 103.2  | 95.6   | 109.2  | 121.6  | 168.6  |
| LBP      | 119.1  | 136.7  | 93.5   | 78.7   | 81.2   | 87     | 112.2  | 148.5  |
| LBR      | 639.8  | 750.7  | 230.5  | 141.7  | 138.4  | 110.6  | 413    | 565.4  |
| LBR      | 1669.9 | 2195.4 | 869.1  | 663.5  | 577.6  | 616    | 1566.2 | 2004.5 |
| LBR      | 109.3  | 121.8  | 92.3   | 86.3   | 85     | 79     | 116.1  | 136.5  |
| LBX1     | 80.3   | 99.8   | 86.9   | 75.5   | 74.9   | 81.8   | 80.7   | 96     |
| LBX2     | 109.1  | 126.5  | 136.8  | 95.6   | 98.6   | 110.2  | 114.1  | 126.5  |
| LBXCOR1  | 110.6  | 142.1  | 92.2   | 94.4   | 88.3   | 91.4   | 116.3  | 135.2  |
| LCAP     | 100.2  | 108.6  | 108.9  | 101.4  | 99.2   | 93.5   | 98.7   | 103    |
| LCAT     | 125.6  | 141.9  | 108.6  | 92     | 86.3   | 96.3   | 105.6  | 139.2  |
| LCE1A    | 81.8   | 93.2   | 91.5   | 88.1   | 88.7   | 83     | 92.3   | 99.5   |
| LCE1B    | 91     | 106.3  | 100.2  | 95.8   | 94.7   | 92.1   | 94.1   | 100.5  |

|         |         |         |         |         |         |         |         |         |
|---------|---------|---------|---------|---------|---------|---------|---------|---------|
| LCE1D   | 85.7    | 83      | 104.7   | 95.2    | 91.7    | 94.7    | 92      | 88.6    |
| LCE1E   | 103.5   | 123.7   | 96.7    | 87.3    | 83.7    | 93.7    | 101.7   | 130.7   |
| LCE1E   | 80      | 85      | 89.6    | 84.6    | 78.1    | 91.3    | 84.8    | 87.5    |
| LCE1F   | 96.5    | 116.3   | 92.3    | 88.9    | 79.1    | 94.7    | 98.5    | 112.7   |
| LCE2A   | 81.7    | 98.7    | 81.2    | 86.2    | 83.1    | 94      | 96.3    | 83.6    |
| LCE2B   | 81.9    | 98.3    | 92.9    | 82      | 82.6    | 88      | 81.8    | 95.2    |
| LCE2C   | 83.7    | 98.5    | 104.6   | 86.7    | 84.8    | 92.5    | 81.1    | 89.7    |
| LCE2D   | 76.3    | 79.8    | 94.2    | 86.3    | 84      | 91.7    | 86.2    | 82.1    |
| LCE3A   | 93      | 108.3   | 84.8    | 74.8    | 82.4    | 89.2    | 92      | 108.6   |
| LCE3B   | 87.6    | 95.5    | 98      | 83.9    | 84.2    | 80.9    | 84.2    | 98.8    |
| LCE3C   | 80.9    | 87.3    | 93.9    | 88.2    | 86.6    | 84.4    | 77.6    | 90.3    |
| LCE3D   | 89.3    | 105.7   | 90.8    | 79.7    | 77.3    | 88.6    | 91.7    | 101.2   |
| LCE3E   | 87      | 88.4    | 99      | 85      | 91.1    | 89      | 77.7    | 76.6    |
| LCE5A   | 110.2   | 139.5   | 109.8   | 86.3    | 89.6    | 93.8    | 113.6   | 130.4   |
| LCK     | 160.7   | 173.7   | 113.1   | 100.8   | 101.5   | 104.9   | 157.2   | 150.3   |
| LCK     | 100.5   | 90.7    | 93.2    | 89.5    | 87.8    | 90.9    | 91.7    | 106.7   |
| LCK     | 85.1    | 96.8    | 93.9    | 93.8    | 90.6    | 92.8    | 93      | 97.1    |
| LCMT1   | 1140.5  | 1559    | 643.6   | 506     | 380.4   | 450.5   | 1003.3  | 859.7   |
| LCMT1   | 642.5   | 831.2   | 393.3   | 280.3   | 256.9   | 273.2   | 478.3   | 588.9   |
| LCMT1   | 416.4   | 549.7   | 321.6   | 239.4   | 186.8   | 211.8   | 341.6   | 401.8   |
| LCMT2   | 732.7   | 946.9   | 682.7   | 705.7   | 507.1   | 956.9   | 539.1   | 1046.5  |
| LCN1    | 119.2   | 138     | 89.3    | 92.2    | 94.9    | 100.6   | 116.8   | 130.4   |
| LCN10   | 93.5    | 113     | 92.6    | 85.7    | 74.2    | 79.8    | 109.7   | 102.4   |
| LCN12   | 83      | 90.2    | 83.8    | 78.8    | 83.4    | 84.4    | 82.4    | 97.8    |
| LCN2    | 108.8   | 101.8   | 85.1    | 79.6    | 85.9    | 78.5    | 103     | 105.1   |
| LCN6    | 79.4    | 80.8    | 91.2    | 79.2    | 78.6    | 83.2    | 81.8    | 88.3    |
| LCN8    | 81      | 86.9    | 91.7    | 91      | 77.7    | 76.5    | 86.3    | 95.5    |
| LCN9    | 90      | 92.5    | 88.4    | 80.6    | 85.8    | 87.3    | 86.4    | 97.2    |
| LCOR    | 142.2   | 171     | 124     | 147.8   | 145.9   | 180.8   | 156.1   | 221     |
| LCORL   | 70.7    | 82.5    | 87.1    | 75      | 71.6    | 74.6    | 68.3    | 81.8    |
| LCP1    | 15942.4 | 19579   | 11088.5 | 17119.6 | 12481.1 | 21326   | 14405.7 | 16587   |
| LCP2    | 168.1   | 201.9   | 142.2   | 169.4   | 136.4   | 182.7   | 149.9   | 142.5   |
| LCT     | 91.6    | 86      | 101.7   | 94.5    | 92.3    | 91.3    | 92      | 91.9    |
| LCTL    | 155.2   | 188.9   | 101.6   | 99.6    | 83.6    | 109.1   | 133.9   | 177.1   |
| LDB1    | 111.2   | 131.6   | 91.8    | 92.5    | 85.7    | 87.5    | 112.6   | 136.2   |
| LDB2    | 105.8   | 134.4   | 95.3    | 83.7    | 73.5    | 85.8    | 105.7   | 121.1   |
| LDB3    | 108.6   | 122.5   | 111.7   | 91      | 100.3   | 102.1   | 96.3    | 110.6   |
| LDB3    | 80.6    | 89.7    | 74.4    | 73.9    | 81.9    | 76.9    | 80.4    | 94.9    |
| LDB3    | 76.5    | 78.6    | 90.3    | 90.7    | 81.3    | 92.1    | 73.8    | 79.8    |
| LDHA    | 15279   | 17540.2 | 11517.1 | 10629.1 | 7051.6  | 13786.1 | 13479   | 23395.3 |
| LDHAL6A | 97.8    | 107.5   | 100.3   | 90.8    | 98.2    | 98.1    | 92.5    | 124.5   |
| LDHAL6B | 73.9    | 78.3    | 94.1    | 82.4    | 86.8    | 79.7    | 83.5    | 78.3    |
| LDHB    | 8741.6  | 10129   | 2143.4  | 1425.8  | 1302.2  | 2597    | 7395.4  | 12131.3 |
| LDHC    | 115.9   | 129.4   | 97.2    | 94.1    | 84.3    | 100.7   | 103.8   | 117.9   |
| LDHC    | 79.7    | 82.1    | 88.1    | 87.5    | 78.9    | 85.9    | 88.5    | 99      |
| LDHD    | 103.2   | 107.1   | 92.3    | 92.7    | 79.2    | 84.3    | 92.1    | 103.2   |
| LDHD    | 97      | 142.7   | 114.8   | 112     | 127     | 138.6   | 100     | 116     |
| LDLR    | 1987.6  | 2642.7  | 1068    | 1535.3  | 1477.3  | 1511.9  | 1804.8  | 1439.5  |
| LDLRAD1 | 92.2    | 98.9    | 100.7   | 88.7    | 88.1    | 96.4    | 86.2    | 96.6    |
| LDLRAD2 | 76.9    | 93.6    | 97.4    | 91.9    | 89.3    | 92.3    | 81      | 92      |

|          |         |         |         |         |         |         |         |         |
|----------|---------|---------|---------|---------|---------|---------|---------|---------|
| LDLRAD3  | 132.1   | 126.7   | 95.4    | 114.2   | 84.9    | 104.4   | 102.1   | 107.9   |
| LDLRAP1  | 99.3    | 135.1   | 125.8   | 123.8   | 134     | 146.7   | 121.8   | 135.8   |
| LDOC1    | 106     | 114.2   | 101.2   | 87.8    | 96.9    | 92.8    | 105.1   | 141.7   |
| LDOC1L   | 485.7   | 564.7   | 396.7   | 476.4   | 276.6   | 566.8   | 432.6   | 1089    |
| LEAP2    | 205.8   | 235     | 144.1   | 149.3   | 136.2   | 148     | 170.3   | 222.5   |
| LECT1    | 94.8    | 112.9   | 117.8   | 117     | 109     | 117.6   | 99.9    | 94.8    |
| LECT2    | 74.8    | 83.8    | 102.7   | 80.9    | 80.1    | 85.7    | 79.7    | 81.8    |
| LEF1     | 192.7   | 230.2   | 160.5   | 97.9    | 83.4    | 108.8   | 146.1   | 254.2   |
| LEFTY1   | 77.1    | 89.8    | 87.2    | 90.6    | 84.6    | 89      | 88.4    | 98      |
| LEFTY2   | 88.7    | 98.9    | 92.7    | 85.8    | 88.7    | 86.1    | 85.1    | 96.8    |
| LELP1    | 92.8    | 114.9   | 91.4    | 97.1    | 87.7    | 81.6    | 100.1   | 102.4   |
| LEMD1    | 82.4    | 107.1   | 90.6    | 85.3    | 76.8    | 90.2    | 95.5    | 100.5   |
| LEMD2    | 697.1   | 835.3   | 395.8   | 385.7   | 366.5   | 415     | 599.4   | 661     |
| LEMD3    | 1047.6  | 1492.1  | 645     | 831.1   | 555.7   | 995.5   | 1123.1  | 1821.3  |
| LENEP    | 74.8    | 86.9    | 85      | 86.5    | 76.6    | 75.2    | 84.1    | 89.3    |
| LENG1    | 187     | 222.9   | 113.2   | 100.3   | 94.5    | 101.7   | 170.1   | 207.5   |
| LENG4    | 277.2   | 355.2   | 297.5   | 290.5   | 255     | 355.6   | 255.2   | 627.2   |
| LENG8    | 132.1   | 155.3   | 121.7   | 99.2    | 105.2   | 111.8   | 121.2   | 167     |
| LENG9    | 98.5    | 120.9   | 104.7   | 97.1    | 98.9    | 108.9   | 99.8    | 114.4   |
| LEO1     | 360     | 498.3   | 120.3   | 117     | 97.3    | 122.4   | 282.6   | 429.6   |
| LEP      | 300.7   | 330.9   | 136.3   | 202.4   | 150.9   | 130.1   | 285     | 333.4   |
| LEPR     | 107.2   | 139.8   | 84.2    | 77      | 86.3    | 89.6    | 109.7   | 122.9   |
| LEPR     | 167.3   | 214.7   | 139.1   | 142.7   | 138.1   | 166.2   | 175.4   | 236.9   |
| LEPR     | 92.7    | 100.2   | 102.9   | 95.3    | 86.2    | 97.2    | 85.8    | 98.2    |
| LEPRE1   | 900.1   | 1143.4  | 848     | 1218.9  | 1072.1  | 1297.7  | 829.8   | 1243.4  |
| LEPREL1  | 122.5   | 144     | 106.6   | 100.9   | 92.5    | 106.9   | 116.5   | 113.6   |
| LEPREL2  | 92.4    | 101     | 94.9    | 88.6    | 99.3    | 94.7    | 92      | 93.6    |
| LEPROT   | 1596    | 2143.7  | 810.5   | 1066.8  | 858.8   | 873.1   | 1653.1  | 1882.1  |
| LEPROTL1 | 1309.1  | 2014.1  | 714.3   | 459     | 417.1   | 650.6   | 1418.6  | 1851.4  |
| LETM1    | 200.3   | 242.3   | 168.2   | 143     | 121.9   | 141     | 162.5   | 219.5   |
| LETM2    | 127.2   | 140.2   | 100     | 103.9   | 86.8    | 86      | 118.7   | 130.2   |
| LETMD1   | 200.1   | 215.6   | 141.6   | 127.9   | 139.9   | 120.5   | 149.6   | 181.3   |
| LETMD1   | 436.2   | 511.6   | 387.8   | 559.4   | 461.4   | 603.2   | 325.4   | 461.4   |
| LFNG     | 102.8   | 120.1   | 95      | 81      | 85.8    | 84.2    | 89.9    | 104     |
| LFNG     | 98.9    | 111.9   | 104.9   | 106     | 93.3    | 108.7   | 86.8    | 92.5    |
| LFNG     | 300.8   | 382.6   | 275     | 245     | 214.6   | 227.8   | 308.1   | 451.1   |
| LGALS1   | 25073.1 | 29319.5 | 17224.8 | 15764.9 | 12627.4 | 13705.8 | 25374.4 | 25663.4 |
| LGALS12  | 145.5   | 162     | 128.2   | 108.8   | 109.7   | 106.6   | 122.2   | 147.9   |
| LGALS13  | 99.7    | 111.2   | 96.4    | 86.2    | 76      | 92      | 99.5    | 119.2   |
| LGALS14  | 154.4   | 165.4   | 112.4   | 97.5    | 93.9    | 105     | 116.3   | 150.9   |
| LGALS14  | 84.1    | 104.9   | 78.4    | 88.5    | 82.3    | 82      | 86.4    | 107.5   |
| LGALS2   | 152.1   | 173.4   | 96.6    | 91.6    | 87.4    | 105.2   | 144.9   | 192.6   |
| LGALS3   | 160.4   | 192.8   | 117.2   | 195.6   | 150.7   | 229.3   | 158.5   | 205.6   |
| LGALS3BP | 110.6   | 136.3   | 102.9   | 104.1   | 99.5    | 104.1   | 113     | 127.1   |
| LGALS4   | 83.1    | 97.5    | 97.9    | 89      | 103.8   | 98.5    | 84.3    | 98.2    |
| LGALS7   | 107.5   | 116.4   | 95.3    | 77.5    | 89.4    | 85.2    | 104.9   | 134.1   |
| LGALS8   | 92.5    | 113.5   | 97.5    | 96.4    | 86.9    | 86      | 100.1   | 99.8    |
| LGALS8   | 967.3   | 1192.7  | 271.5   | 272.3   | 256     | 386.9   | 917.9   | 1432.4  |
| LGALS8   | 121.1   | 135.3   | 84.8    | 85.2    | 75.9    | 83.7    | 110.7   | 143.4   |
| LGALS8   | 1431.1  | 1654.2  | 525.9   | 575.1   | 433.6   | 596.7   | 1305    | 1833.7  |

|        |        |       |        |       |       |       |        |        |
|--------|--------|-------|--------|-------|-------|-------|--------|--------|
| LGALS9 | 554    | 859.9 | 609    | 569.3 | 391.8 | 504.4 | 416.5  | 984    |
| LGALS9 | 230.7  | 310.8 | 287.7  | 223.4 | 191.7 | 253.1 | 217.3  | 365.4  |
| LGI1   | 93     | 90.9  | 87.9   | 76.6  | 79.6  | 76.1  | 85.3   | 90.5   |
| LGI2   | 131.4  | 150.8 | 111.6  | 97.8  | 92.4  | 97.7  | 147.3  | 153.2  |
| LGI3   | 88.4   | 98.5  | 86.3   | 82.1  | 73.8  | 83.2  | 96.8   | 98.4   |
| LGI4   | 119.2  | 152.5 | 89.4   | 95.4  | 78    | 84.9  | 114.2  | 146.9  |
| LGICZ1 | 111.2  | 120.4 | 88.6   | 85.7  | 85.1  | 95.2  | 112    | 134.4  |
| LGMN   | 78.7   | 90.8  | 97.8   | 86.6  | 85.1  | 92.6  | 88.8   | 89.3   |
| LGMN   | 119.7  | 135.2 | 105.8  | 100.3 | 101   | 91.5  | 120.3  | 144.6  |
| LGMN   | 120.8  | 126.2 | 114.9  | 87.3  | 94    | 97    | 113.4  | 132.7  |
| LGP1   | 363.6  | 463.4 | 417.6  | 407   | 331.7 | 611.1 | 281.1  | 575.8  |
| LGP2   | 120.9  | 126.4 | 107.5  | 131.5 | 136   | 151.3 | 101.8  | 124.9  |
| LGR4   | 199.6  | 250.6 | 140.9  | 132.4 | 136.1 | 157.3 | 142.4  | 147.4  |
| LGR5   | 88.1   | 103.4 | 92.9   | 84.5  | 89.8  | 96.5  | 92.3   | 95     |
| LGR6   | 109.5  | 111.4 | 95.1   | 77.9  | 78.1  | 85.6  | 94.2   | 108.8  |
| LGR6   | 128.3  | 140.3 | 95.9   | 86.8  | 95.1  | 98.1  | 105.8  | 129.4  |
| LGR6   | 117.3  | 117.1 | 85.3   | 75.5  | 73.9  | 79.2  | 93.9   | 130.9  |
| LGR6   | 80.9   | 84.1  | 81.2   | 75.8  | 65.7  | 79.6  | 85.4   | 79.2   |
| LGR7   | 220    | 261.9 | 134.6  | 120.2 | 118.7 | 149.7 | 137.1  | 197.7  |
| LGR8   | 76     | 79.4  | 89.4   | 78    | 80.8  | 83.1  | 80.9   | 77     |
| LGTN   | 607.1  | 766.8 | 583.6  | 692.6 | 634.7 | 932.3 | 505    | 775.9  |
| LHB    | 100.5  | 102.5 | 91.4   | 86.2  | 87.8  | 83.6  | 93     | 94     |
| LHCGR  | 98.9   | 97.4  | 97.7   | 88.1  | 77.3  | 82.8  | 94.9   | 100.4  |
| LHFP   | 141    | 159.2 | 107.4  | 94    | 91.9  | 97    | 129.5  | 162.8  |
| LHFPL1 | 94.2   | 129.7 | 102.9  | 96.2  | 81.1  | 83.1  | 106.4  | 148.5  |
| LHFPL2 | 145.9  | 198.2 | 144    | 147.5 | 139.3 | 163.6 | 142.6  | 155.1  |
| LHFPL3 | 118.3  | 122.4 | 109.9  | 102   | 89.3  | 111.2 | 104.6  | 128.5  |
| LHFPL5 | 78.1   | 80.8  | 81.1   | 83.7  | 72.6  | 82.1  | 78.6   | 86     |
| LHPP   | 93.1   | 100.6 | 90.6   | 83    | 84.4  | 91.3  | 83.7   | 98.7   |
| LHX1   | 103.8  | 123.8 | 107    | 92.9  | 100.3 | 96.1  | 110.2  | 108.2  |
| LHX2   | 1347.8 | 1684  | 1085.3 | 441.7 | 405.2 | 431.8 | 1269.6 | 2012.3 |
| LHX3   | 78.4   | 89.3  | 97.8   | 90.9  | 85    | 94.4  | 79.2   | 80.1   |
| LHX3   | 133.4  | 137.1 | 99.3   | 92.3  | 81.5  | 88.7  | 124.1  | 145.6  |
| LHX3   | 88.4   | 110.7 | 85.3   | 92.3  | 78.6  | 89.8  | 99.3   | 118.6  |
| LHX3   | 107.1  | 116.7 | 81.3   | 82.1  | 76    | 78.3  | 127.8  | 105.2  |
| LHX3   | 84     | 91.9  | 95.2   | 87.2  | 86.4  | 88    | 76.4   | 84.6   |
| LHX4   | 122    | 154.4 | 110    | 104.8 | 92.6  | 110.6 | 118.9  | 148.9  |
| LHX5   | 100.2  | 116.4 | 92.1   | 95.5  | 89.3  | 89.3  | 112    | 102.3  |
| LHX6   | 191.6  | 256.5 | 119.6  | 111.1 | 110.2 | 131.3 | 197.1  | 255.8  |
| LHX6   | 101.6  | 98    | 95.6   | 84.4  | 74.2  | 91    | 91.7   | 85.8   |
| LHX8   | 85.6   | 88.3  | 91.9   | 86.7  | 75.4  | 82.6  | 92.6   | 102.6  |
| LHX9   | 68.6   | 71.4  | 84.2   | 75.1  | 71.4  | 81.8  | 75.6   | 82.7   |
| LHX9   | 77.9   | 94.6  | 94     | 86.1  | 83    | 80.6  | 78.4   | 82.8   |
| LIAS   | 201.2  | 264.2 | 154.4  | 124.7 | 110.3 | 122.1 | 184.3  | 225.7  |
| LIAS   | 486.5  | 677   | 285.6  | 280.6 | 223.6 | 321.5 | 460.6  | 759.1  |
| LIF    | 92.8   | 113.2 | 93.7   | 93    | 86.1  | 87    | 82.9   | 89.2   |
| LIFR   | 86.8   | 100.4 | 98.4   | 82.2  | 88.6  | 94.3  | 95.5   | 90.2   |
| LIG1   | 548.5  | 712.4 | 585    | 541.3 | 507.8 | 851.3 | 434.3  | 630.4  |
| LIG3   | 99.2   | 123.3 | 86.1   | 85.5  | 80.5  | 89.3  | 92.9   | 103.8  |
| LIG3   | 148.2  | 220.2 | 124.4  | 115.6 | 105.5 | 120.2 | 133.3  | 151.5  |

|        |         |         |        |         |         |         |        |         |
|--------|---------|---------|--------|---------|---------|---------|--------|---------|
| LIG3   | 353.1   | 476.6   | 276.1  | 270.7   | 222.7   | 344.4   | 246.2  | 251.7   |
| LIG4   | 88.5    | 110     | 89.7   | 94.7    | 82.7    | 96.7    | 93.5   | 132.8   |
| LIG4   | 103     | 123.2   | 98.6   | 87.5    | 77.7    | 82.5    | 112.4  | 118.8   |
| LILRA1 | 106.1   | 98.1    | 92.3   | 82.2    | 88.4    | 87.5    | 92.6   | 104     |
| LILRA2 | 1265.7  | 1680.9  | 453.9  | 474.1   | 422     | 538.7   | 1108.2 | 853.1   |
| LILRA3 | 177.4   | 207     | 159.1  | 106.5   | 121.3   | 130     | 162.9  | 185.1   |
| LILRA3 | 75.1    | 79.2    | 95.1   | 80.3    | 86.2    | 84.4    | 85.3   | 89      |
| LILRA4 | 127     | 151     | 85.9   | 87.5    | 85.5    | 101     | 131.6  | 154.1   |
| LILRA5 | 81      | 105.4   | 81.7   | 79.5    | 74.7    | 82.7    | 90.8   | 97.1    |
| LILRA5 | 112.8   | 138.2   | 103.3  | 168.2   | 152.6   | 124.9   | 106.3  | 101.5   |
| LILRA5 | 77.4    | 87.3    | 94.2   | 89.5    | 93.3    | 83.3    | 77.9   | 82      |
| LILRA6 | 92.3    | 104.6   | 85.3   | 87.5    | 86.9    | 90.2    | 90.2   | 98      |
| LILRB1 | 76.2    | 88.8    | 109.5  | 87.5    | 90.2    | 91.4    | 83     | 90.3    |
| LILRB1 | 4814.1  | 5443.4  | 2104.3 | 3466    | 3641.7  | 2585.7  | 4291.2 | 3876.6  |
| LILRB2 | 158.7   | 172.7   | 158    | 218.4   | 194.6   | 259.7   | 131.5  | 169     |
| LILRB3 | 96.7    | 116.6   | 88.6   | 97.8    | 93      | 86.8    | 95.2   | 108.3   |
| LILRB3 | 13669.8 | 14875.5 | 9802.1 | 14269.1 | 14807.6 | 10060.7 | 11263  | 11715.2 |
| LILRB4 | 1185.3  | 1602.3  | 502.3  | 281.7   | 210.8   | 273     | 1130.5 | 1351.8  |
| LILRB5 | 74.3    | 80.5    | 89.4   | 80.5    | 76.3    | 87.2    | 80     | 82.1    |
| LILRB5 | 101.5   | 122.1   | 101.2  | 98      | 93.9    | 96.5    | 106.9  | 120.3   |
| LIM2   | 71.4    | 90.2    | 90     | 78.1    | 77.1    | 89.2    | 70.3   | 85.9    |
| LIMA1  | 315.7   | 402.2   | 249.9  | 323.8   | 266.7   | 672.1   | 202.5  | 401.6   |
| LIMD1  | 76.8    | 93.8    | 88     | 84.1    | 86.7    | 93.1    | 80.4   | 85.8    |
| LIMD2  | 87.5    | 120.1   | 90.4   | 86.1    | 80      | 90.5    | 103.6  | 108.8   |
| LIME1  | 367.6   | 348.3   | 294.9  | 258     | 276.3   | 348.3   | 269.6  | 414.9   |
| LIMK1  | 116.2   | 120.1   | 106    | 104.2   | 89.7    | 124.7   | 110.7  | 142.6   |
| LIMK1  | 86.7    | 92.1    | 101.1  | 99      | 85.7    | 97.4    | 92     | 92.6    |
| LIMK2  | 201     | 260.1   | 157.3  | 120.6   | 115.4   | 120.1   | 154.2  | 182     |
| LIMK2  | 158     | 205.2   | 123.1  | 87.3    | 89.9    | 100.6   | 117.2  | 162.2   |
| LIMK2  | 211.2   | 215.8   | 128.9  | 100.9   | 100.5   | 128.2   | 178.3  | 284.3   |
| LIMK2  | 111.8   | 128.8   | 96.9   | 102.8   | 99.8    | 90.5    | 100.8  | 103.9   |
| LIMS1  | 529.4   | 753.5   | 194.2  | 282.8   | 224.2   | 160.7   | 454.2  | 515.4   |
| LIMS1  | 93.7    | 116.1   | 86.7   | 83.4    | 80.1    | 89.4    | 97.2   | 110.5   |
| LIMS2  | 116     | 132.5   | 98.2   | 88.1    | 84.3    | 90.3    | 116.8  | 127.3   |
| LIMS3  | 87.9    | 102.7   | 93     | 99.7    | 85.9    | 92.4    | 83     | 106.4   |
| LIN10  | 155.9   | 195.6   | 160.4  | 143.7   | 144.4   | 159.2   | 148.5  | 207.9   |
| LIN28  | 79.7    | 89.5    | 79.4   | 82.2    | 79.2    | 79.8    | 79.8   | 96.9    |
| LIN28B | 113     | 120.8   | 95.5   | 86.5    | 81.9    | 84      | 106.3  | 117.3   |
| LIN7A  | 245.4   | 310.5   | 202.3  | 231.9   | 213.1   | 326.7   | 248.4  | 322.8   |
| LIN7B  | 222.9   | 235.2   | 159    | 128.7   | 124.8   | 153.7   | 185.5  | 261.7   |
| LIN7C  | 132.7   | 134.1   | 114.1  | 133     | 107     | 139.6   | 126.9  | 188     |
| LIN9   | 590.8   | 736.3   | 357.5  | 340.7   | 274.7   | 596.8   | 466    | 1173.1  |
| LINCR  | 80.2    | 81.1    | 101.3  | 89.8    | 87.2    | 92.7    | 81.8   | 88.3    |
| LINGO4 | 84.9    | 89.5    | 110.1  | 108.6   | 114.4   | 107.2   | 82     | 95.7    |
| LINS1  | 200.3   | 257.9   | 118    | 119.9   | 102.2   | 140.2   | 174.4  | 273.8   |
| LINS1  | 135.8   | 177.9   | 101.8  | 92.3    | 96.7    | 95.8    | 108.8  | 122.6   |
| LIPA   | 1641    | 2131.5  | 1330.3 | 1587.2  | 1031    | 1535.4  | 1704.6 | 2991.5  |
| LIPC   | 77.2    | 84.4    | 88.4   | 74.5    | 83.4    | 80.7    | 87.3   | 88.4    |
| LIPE   | 109.7   | 116.9   | 108.4  | 106     | 92.4    | 103.4   | 106.7  | 106.8   |
| LIPF   | 98      | 103.9   | 122.6  | 110.7   | 108.4   | 107.8   | 86.6   | 91.6    |

|           |        |        |        |        |        |        |        |        |
|-----------|--------|--------|--------|--------|--------|--------|--------|--------|
| LIPG      | 90     | 83.7   | 98.8   | 95.4   | 94.6   | 93.9   | 86.9   | 87.5   |
| LIPH      | 115    | 139.7  | 88.5   | 92.8   | 93.8   | 92.6   | 107.8  | 111.1  |
| LIPI      | 89.8   | 94.2   | 88.5   | 80.7   | 83.9   | 80.7   | 84.8   | 94.6   |
| LIPK      | 109.8  | 124.4  | 108.2  | 94.7   | 91.3   | 98.7   | 99.2   | 120.1  |
| LIPL1     | 97.3   | 120.3  | 108.4  | 109.5  | 96.3   | 106.4  | 97.3   | 103.3  |
| LIPT1     | 449.2  | 582.9  | 305    | 302.2  | 213.7  | 434.5  | 330.2  | 493.9  |
| LIPT1     | 210.8  | 266.4  | 122.5  | 124.2  | 119.4  | 137.1  | 190.5  | 207.1  |
| LITAF     | 2515.6 | 2946.3 | 2832   | 2244.1 | 1462.3 | 2319.3 | 2831.3 | 7781   |
| LIX1      | 105.5  | 122    | 99.8   | 106    | 92.7   | 93.9   | 106.3  | 124.3  |
| LIX1L     | 384.8  | 534.7  | 220.7  | 185.3  | 176.3  | 205.3  | 295.1  | 309.5  |
| LKAP      | 684.7  | 994.9  | 808.9  | 1526.4 | 1262.5 | 1691   | 783.2  | 1082.8 |
| LLGL1     | 184.8  | 223.2  | 196.4  | 250    | 210.1  | 291.8  | 201.7  | 209.4  |
| LLGL2     | 101.2  | 119.8  | 93.4   | 94.5   | 91.8   | 94     | 108.7  | 113.6  |
| LMAN1     | 246.2  | 308.5  | 101.4  | 102.2  | 98.4   | 116.8  | 180.2  | 261.5  |
| LMAN1L    | 143.2  | 164.3  | 98.8   | 94.3   | 94.1   | 103.1  | 137.1  | 153.1  |
| LMAN2     | 269.5  | 292.1  | 166.5  | 173.1  | 147.1  | 164.4  | 262.5  | 309    |
| LMAN2L    | 605.8  | 778.4  | 286.7  | 289.7  | 201.7  | 248    | 501    | 712.4  |
| LMBR1     | 941.4  | 1353.8 | 629.9  | 637.2  | 458.2  | 801.4  | 776.7  | 1133.8 |
| LMBR1L    | 124.6  | 172    | 109.6  | 111.6  | 104.5  | 109.1  | 124.5  | 141.3  |
| LMBRD1    | 2138.6 | 2584.7 | 1012.8 | 1187.6 | 1106.8 | 1623.7 | 1907.9 | 2742.5 |
| LMBRD2    | 129.3  | 135    | 99.8   | 95.4   | 98.4   | 107.6  | 112.8  | 138.9  |
| LMCD1     | 105.7  | 120.2  | 90.8   | 77.9   | 76     | 89.7   | 101.4  | 98     |
| LMLN      | 135.1  | 158.3  | 103.7  | 99     | 87.6   | 95.8   | 112.9  | 133.4  |
| LMNA      | 750.6  | 1008.5 | 767.6  | 805.6  | 516.4  | 833    | 845.7  | 1402.4 |
| LMNA      | 3202.6 | 4053.4 | 1912.7 | 1632.4 | 1126.7 | 1701.6 | 3109.2 | 2452.4 |
| LMNB1     | 2476.8 | 4709.8 | 1392.1 | 1542.1 | 1218.1 | 2194.7 | 2676.7 | 2641.3 |
| LMNB2     | 1956.8 | 2533.4 | 2741.3 | 2461.3 | 1998.1 | 2745.8 | 1761   | 2608.4 |
| LMO1      | 96.9   | 101.6  | 86.4   | 78.3   | 75.8   | 72.3   | 87.9   | 114.5  |
| LMO2      | 3263.8 | 4395.3 | 910.6  | 762.8  | 900.3  | 1001.8 | 2660.3 | 4267.9 |
| LMO3      | 93.7   | 111.4  | 88.8   | 89.6   | 83.9   | 93.6   | 83     | 93.5   |
| LMO3      | 86.6   | 95.5   | 116.1  | 97.3   | 101.1  | 100.8  | 86.2   | 97     |
| LMO3      | 75.3   | 81.8   | 86.6   | 80.3   | 81.5   | 78.5   | 81.1   | 83     |
| LMO4      | 2350.4 | 2518.8 | 1419   | 2068.7 | 1682.7 | 2169.9 | 2555.4 | 4727.9 |
| LMO6      | 98.8   | 126.3  | 112.5  | 96     | 99.7   | 100    | 107.2  | 143.6  |
| LMO7      | 92.9   | 113.2  | 107.7  | 103.1  | 94.9   | 103.4  | 92.8   | 111.5  |
| LMOD1     | 108.8  | 126.5  | 90     | 94.9   | 85     | 90.7   | 110.6  | 105.9  |
| LMOD3     | 585.5  | 518.3  | 388.8  | 605.2  | 559.8  | 375.4  | 548.3  | 924.4  |
| LMTK2     | 108.6  | 137    | 99.5   | 97.2   | 84.8   | 82.6   | 117.2  | 133.5  |
| LMTK3     | 202.4  | 246.7  | 138.6  | 102    | 109.6  | 110.4  | 180.8  | 271.9  |
| LMX1A     | 73.8   | 90.8   | 89.9   | 78.9   | 80.3   | 77.1   | 71.1   | 85.5   |
| LMX1A     | 85     | 94.6   | 89.8   | 85     | 74.1   | 77.7   | 94.8   | 98     |
| LMX1A     | 83.4   | 91.9   | 100.5  | 100.7  | 86.2   | 93.3   | 72.7   | 84     |
| LMX1A     | 90.3   | 105    | 94.1   | 85.8   | 85.3   | 81.8   | 86.9   | 103.6  |
| LMX1B     | 112.3  | 113.8  | 102.7  | 90.2   | 88.4   | 91.2   | 103.8  | 123.1  |
| LNK       | 629.2  | 905.4  | 832.8  | 850.7  | 735.5  | 1348.5 | 698.2  | 1300   |
| LNPEP     | 90     | 110.6  | 120.7  | 102.4  | 104.3  | 107.2  | 82.4   | 98.7   |
| LNPEP     | 315.7  | 464.9  | 204.5  | 226.5  | 211.5  | 246.6  | 272.2  | 336.2  |
| LNX1      | 81.2   | 92.9   | 86.7   | 89.5   | 87.2   | 92     | 84.4   | 87.3   |
| LNX2      | 151.4  | 186.5  | 132.7  | 143.8  | 117.6  | 163.6  | 131.8  | 237.4  |
| LOC112703 | 142.5  | 165.1  | 131.2  | 101.7  | 95.5   | 121.7  | 137.7  | 178.4  |

|           |        |        |        |        |        |        |        |        |
|-----------|--------|--------|--------|--------|--------|--------|--------|--------|
| LOC112714 | 153.4  | 176.1  | 98.8   | 109.5  | 98.8   | 108.7  | 138.4  | 194.9  |
| LOC112869 | 179.8  | 220    | 133.3  | 124.1  | 102.4  | 130.5  | 167.2  | 205.1  |
| LOC112869 | 309    | 392.3  | 231.8  | 194.7  | 166.9  | 199.1  | 312.5  | 309.3  |
| LOC113179 | 181.7  | 252.1  | 211.4  | 127.9  | 135    | 134.7  | 180.3  | 278.5  |
| LOC113386 | 916.9  | 1224.8 | 724.8  | 433.5  | 414.6  | 542.5  | 768.3  | 822.1  |
| LOC113444 | 313.8  | 461.3  | 206.9  | 245.5  | 212.2  | 283.1  | 315.1  | 395    |
| LOC114984 | 261    | 317.9  | 216.8  | 192.9  | 187.5  | 253.8  | 257.3  | 394    |
| LOC115098 | 251.3  | 300.7  | 196.9  | 159.7  | 149    | 182.1  | 255.1  | 320.7  |
| LOC116143 | 676.3  | 726.2  | 343.5  | 345.7  | 276.5  | 284.3  | 494.6  | 551.9  |
| LOC116236 | 404.6  | 509.4  | 189.4  | 208.8  | 176.9  | 303.2  | 356.2  | 559.1  |
| LOC119710 | 827.2  | 1020.3 | 644.5  | 571.1  | 463.4  | 676.1  | 858.5  | 1146.3 |
| LOC120379 | 86.5   | 93.5   | 89     | 81.3   | 73.3   | 73.7   | 75.5   | 99.5   |
| LOC122258 | 130.9  | 139.7  | 94.6   | 75.5   | 72.9   | 79.8   | 120.5  | 111.8  |
| LOC123688 | 132.1  | 168.3  | 150.6  | 185.4  | 164.2  | 160.2  | 165.4  | 218.2  |
| LOC123876 | 80.1   | 85.1   | 73     | 70.3   | 74.6   | 85.7   | 85.9   | 88.1   |
| LOC124220 | 85.8   | 90.1   | 92.4   | 83.5   | 76.9   | 81.9   | 91.9   | 93.2   |
| LOC124446 | 1160.1 | 1483.7 | 1044.4 | 826.5  | 703.5  | 909.4  | 1006.5 | 1864.5 |
| LOC124512 | 319.7  | 439.1  | 237.9  | 249.2  | 191.1  | 243.3  | 243.1  | 292.2  |
| LOC124512 | 642.7  | 826.3  | 183.1  | 191.9  | 166.6  | 216.3  | 491.8  | 690.7  |
| LOC124512 | 365.1  | 447.4  | 233.1  | 210.6  | 166.4  | 203.4  | 250.6  | 302.5  |
| LOC124751 | 95.1   | 124.3  | 87.2   | 91.4   | 87.6   | 87.4   | 104.3  | 121.3  |
| LOC124842 | 103.1  | 120    | 90.1   | 79.9   | 89.1   | 83.9   | 95.4   | 108    |
| LOC125893 | 621.9  | 803.1  | 499.7  | 394.2  | 298.6  | 478.5  | 444    | 676.8  |
| LOC126075 | 100.2  | 102.7  | 88.7   | 84     | 78.9   | 88.9   | 87.6   | 85.2   |
| LOC126147 | 72.3   | 86     | 103.4  | 77.7   | 82.1   | 86.9   | 76.6   | 94.7   |
| LOC126208 | 1848.9 | 2072.4 | 1324.9 | 1114.9 | 1023.1 | 1132.5 | 1715.6 | 1759.1 |
| LOC126248 | 107.6  | 129.9  | 83.8   | 74.4   | 67.5   | 79.5   | 105    | 131.3  |
| LOC126295 | 191.6  | 218.4  | 118.1  | 114.7  | 99.4   | 117.7  | 151.7  | 186.3  |
| LOC126536 | 115.1  | 125.2  | 119.3  | 110.6  | 102.2  | 117.7  | 108.6  | 116.2  |
| LOC128153 | 100.9  | 118.4  | 89.8   | 87.5   | 85.4   | 98.5   | 101.3  | 113.7  |
| LOC128439 | 274    | 336.9  | 207.2  | 149.5  | 154.4  | 157.7  | 248.6  | 210.5  |
| LOC128977 | 270.5  | 331.3  | 244.8  | 247.8  | 210.4  | 276.7  | 229.3  | 259.6  |
| LOC129138 | 543.6  | 721    | 424.7  | 354.1  | 298.9  | 499.9  | 485    | 653    |
| LOC129285 | 414.8  | 549.8  | 228.6  | 275.9  | 201.5  | 344    | 340.9  | 368.6  |
| LOC129530 | 115.7  | 122.9  | 120.1  | 99.7   | 101.7  | 111.9  | 99.7   | 122.9  |
| LOC129531 | 1511.2 | 1848.7 | 837    | 963.5  | 935.6  | 1332.2 | 1348   | 1757.3 |
| LOC129607 | 170.7  | 208.2  | 132.5  | 116.3  | 93.6   | 137.8  | 145.2  | 190.2  |
| LOC130074 | 229.2  | 356.1  | 204.6  | 273.2  | 230.7  | 303.4  | 210.2  | 356.1  |
| LOC130355 | 494.3  | 607.3  | 243.8  | 171.2  | 163.3  | 244.8  | 594.2  | 1101.8 |
| LOC130576 | 100.6  | 125.7  | 110.8  | 93.8   | 96.1   | 94.1   | 108.7  | 118    |
| LOC130940 | 81.1   | 85.2   | 89.9   | 95.8   | 91.1   | 83.3   | 80.4   | 83.5   |
| LOC130951 | 123.8  | 142.4  | 104    | 100.4  | 89     | 97.5   | 126.6  | 160    |
| LOC131149 | 102.6  | 102.3  | 85.8   | 88     | 80.9   | 83.3   | 87.9   | 118.8  |
| LOC132203 | 78.6   | 92.3   | 94     | 84.8   | 91     | 90.6   | 86     | 85.6   |
| LOC132241 | 129.6  | 130.1  | 100.2  | 90.8   | 102.7  | 91.1   | 109.7  | 133.7  |
| LOC132321 | 267.9  | 332.8  | 123    | 122.8  | 98     | 169.7  | 243.5  | 403.9  |
| LOC133308 | 225.3  | 267.4  | 138.1  | 106.3  | 98     | 113.5  | 170.3  | 250    |
| LOC133619 | 826.2  | 1154.3 | 379.8  | 607.9  | 432.7  | 633.6  | 924.5  | 1451.2 |
| LOC134145 | 87.8   | 91.7   | 94.9   | 92.4   | 95     | 86.6   | 74     | 91.3   |
| LOC134147 | 107.7  | 115.6  | 119    | 163.2  | 130.5  | 152.5  | 105.9  | 152.1  |

|           |         |         |        |        |        |       |       |         |
|-----------|---------|---------|--------|--------|--------|-------|-------|---------|
| LOC134997 | 22056.5 | 24809.7 | 9566.6 | 5620.6 | 4031.8 | 7847  | 19180 | 23462.1 |
| LOC136242 | 98      | 114     | 92.2   | 94.2   | 82.7   | 79.2  | 108.5 | 105.8   |
| LOC136263 | 130.1   | 156.1   | 98.7   | 84     | 93.2   | 95.3  | 115   | 130.3   |
| LOC136306 | 78.1    | 88.8    | 83.2   | 89.4   | 85.4   | 94.1  | 77.5  | 90.7    |
| LOC138046 | 74.3    | 83.1    | 70.4   | 68.9   | 75.7   | 70.7  | 66.3  | 73.4    |
| LOC138255 | 95.8    | 105.5   | 93.4   | 97.9   | 89.6   | 92.4  | 89.8  | 100.1   |
| LOC139886 | 706     | 775.7   | 469.3  | 610.8  | 398.7  | 707.2 | 512.8 | 804.6   |
| LOC143188 | 113.1   | 119.8   | 82.4   | 71.4   | 80.1   | 78.6  | 95.1  | 110.2   |
| LOC143543 | 371.9   | 400.5   | 189.2  | 167.7  | 146.6  | 188.8 | 270.3 | 443.9   |
| LOC143941 | 81      | 104.1   | 118.1  | 111.7  | 97.8   | 113.2 | 89.6  | 89.1    |
| LOC144097 | 130     | 146     | 94.5   | 95.3   | 82.1   | 89    | 128.9 | 182     |
| LOC144233 | 537.2   | 686.3   | 380    | 356.5  | 264.1  | 394.7 | 501.2 | 629.4   |
| LOC144363 | 706.6   | 855.6   | 498.9  | 619.4  | 432.5  | 618   | 619.2 | 1050.4  |
| LOC144404 | 94.4    | 112.8   | 100.6  | 80.6   | 83.2   | 91.4  | 81.3  | 92.6    |
| LOC144404 | 100.9   | 127.2   | 111.7  | 127.2  | 107.8  | 108.2 | 98.8  | 104.8   |
| LOC144501 | 115.2   | 144.8   | 77.6   | 81.9   | 80.7   | 84.4  | 105   | 125.2   |
| LOC144501 | 87      | 107     | 98.5   | 75.1   | 78.4   | 85.7  | 98.4  | 102.6   |
| LOC144983 | 139.5   | 201.4   | 102.3  | 93.2   | 84.6   | 102.9 | 147.1 | 150.1   |
| LOC144983 | 71.7    | 83.1    | 76.2   | 82.6   | 83.7   | 76    | 75.5  | 85      |
| LOC146167 | 97.3    | 127.2   | 94     | 92.3   | 91.4   | 86.3  | 111   | 107.2   |
| LOC146325 | 97.9    | 93.7    | 77.8   | 79.4   | 79.8   | 78.6  | 88.8  | 96.4    |
| LOC146562 | 92.2    | 104     | 94.1   | 89.5   | 90.3   | 88.2  | 92.6  | 105.7   |
| LOC146713 | 94.1    | 113.1   | 83.7   | 85.8   | 95.1   | 87.4  | 104   | 116.4   |
| LOC146909 | 99.4    | 114.9   | 90.8   | 105.4  | 98.3   | 87    | 90.7  | 109.8   |
| LOC146909 | 97.1    | 109.6   | 105.5  | 106.2  | 95.6   | 108.5 | 103   | 106.9   |
| LOC147808 | 167.9   | 198.3   | 143.2  | 130.6  | 132.4  | 122.3 | 184.3 | 183.3   |
| LOC148898 | 100.4   | 114.9   | 111.3  | 98     | 97.3   | 98.9  | 96.9  | 91.9    |
| LOC149643 | 90.7    | 99.8    | 104.5  | 96.3   | 91.8   | 104.6 | 89.5  | 97      |
| LOC149950 | 106.1   | 123.7   | 97     | 89.7   | 82.9   | 82.8  | 104.7 | 115.2   |
| LOC150084 | 98.4    | 97.4    | 113    | 102.5  | 96.5   | 97.9  | 95.2  | 102.2   |
| LOC150223 | 521.7   | 640.3   | 300    | 223    | 166.9  | 232.3 | 341.6 | 483.3   |
| LOC150297 | 94      | 93.5    | 87.2   | 86.7   | 86.1   | 86.2  | 92.2  | 102     |
| LOC150383 | 92.3    | 94.9    | 84.1   | 94.4   | 79.7   | 79.1  | 91.2  | 100.8   |
| LOC150383 | 213.3   | 290.3   | 208.6  | 160.1  | 160.4  | 194.2 | 188   | 236.9   |
| LOC150383 | 122.7   | 143.5   | 103.3  | 87.5   | 84.4   | 108.6 | 111.6 | 121.4   |
| LOC150763 | 152     | 172.9   | 102.6  | 95.6   | 91.4   | 95.9  | 137.2 | 187.5   |
| LOC150786 | 87.1    | 96.8    | 85.8   | 86.8   | 79     | 86.2  | 88.7  | 86.8    |
| LOC151121 | 87.1    | 100.5   | 96.1   | 80.6   | 85.2   | 74.9  | 84.3  | 86.5    |
| LOC152195 | 111.5   | 122.7   | 108.4  | 145    | 132.7  | 154.6 | 108.3 | 98.8    |
| LOC152485 | 124     | 137.4   | 116.1  | 99     | 98.3   | 97.6  | 125.1 | 119.7   |
| LOC152573 | 118     | 142.5   | 134.4  | 129.6  | 107.5  | 143.6 | 93    | 120.2   |
| LOC152667 | 77      | 91.4    | 98.9   | 80.7   | 89.2   | 92.7  | 78    | 93.5    |
| LOC153222 | 170.4   | 180     | 166.6  | 266.4  | 228.6  | 257.8 | 198.8 | 406.8   |
| LOC153328 | 166.6   | 206.8   | 135.1  | 113.9  | 111.6  | 107.3 | 167.3 | 176     |
| LOC153364 | 166     | 209     | 147.7  | 164    | 138.2  | 194.6 | 147.8 | 209     |
| LOC154907 | 80.6    | 88.4    | 84.7   | 84.5   | 82.8   | 79.2  | 76.8  | 80.2    |
| LOC155100 | 90.1    | 100.8   | 90.6   | 84.3   | 82.5   | 82.3  | 88.8  | 83.2    |
| LOC158160 | 633.4   | 731.3   | 210.6  | 198.7  | 180.5  | 228.2 | 533.9 | 670.7   |
| LOC158160 | 95.2    | 104.2   | 80     | 89.1   | 85.4   | 99.7  | 94.1  | 102.1   |
| LOC158160 | 195.9   | 236.5   | 122.5  | 111.2  | 123.4  | 120.8 | 181.6 | 219.8   |



|           |        |        |        |        |        |        |        |        |
|-----------|--------|--------|--------|--------|--------|--------|--------|--------|
| LOC158381 | 108.9  | 128.3  | 108.5  | 99.3   | 107.6  | 100.4  | 116.7  | 124.5  |
| LOC15883C | 106.1  | 120.6  | 99.3   | 90.8   | 87.4   | 85.6   | 100.4  | 115.9  |
| LOC161247 | 108.2  | 116.2  | 101.6  | 94.8   | 86.2   | 91.7   | 94     | 109.5  |
| LOC161931 | 96.5   | 122.7  | 86.9   | 85.5   | 81.9   | 84.4   | 109.2  | 121.8  |
| LOC162073 | 104.7  | 116.3  | 91.3   | 84.9   | 81.4   | 82.7   | 121.9  | 110.6  |
| LOC162427 | 129    | 130.5  | 94     | 83.8   | 94.1   | 92.1   | 122.2  | 141.7  |
| LOC163131 | 105.8  | 123.7  | 98.8   | 84     | 88.1   | 90.2   | 102.7  | 115    |
| LOC16438C | 75.8   | 85.3   | 86.1   | 88.1   | 88.2   | 84.1   | 77.4   | 82.4   |
| LOC164714 | 97.7   | 115.8  | 107.5  | 90.8   | 96.8   | 92.9   | 111.1  | 109.5  |
| LOC165186 | 116.1  | 142.7  | 94.7   | 96.8   | 83.5   | 92.8   | 92.8   | 129.1  |
| LOC168474 | 144.6  | 165.4  | 110.3  | 118.7  | 95     | 112.9  | 114.6  | 147.1  |
| LOC16885C | 644.4  | 862.3  | 513.2  | 626.7  | 453.2  | 690.4  | 582.3  | 1026   |
| LOC196264 | 162.4  | 188.6  | 104.3  | 91.3   | 84.3   | 88.2   | 150.8  | 165.2  |
| LOC196394 | 112.7  | 133.9  | 100    | 87.8   | 83     | 112.6  | 112.1  | 136.7  |
| LOC196463 | 118.5  | 151.8  | 154.6  | 226.5  | 162    | 223.2  | 132.3  | 252.2  |
| LOC196541 | 87.3   | 102.6  | 85.2   | 80.6   | 80.9   | 87.7   | 94.5   | 104.8  |
| LOC196913 | 88.5   | 99.1   | 93.9   | 105.7  | 81     | 86.8   | 87.3   | 102.3  |
| LOC197322 | 314.4  | 360.8  | 235.3  | 216.6  | 201.1  | 228.4  | 266.1  | 287.6  |
| LOC197336 | 350.5  | 339.9  | 348.2  | 266.6  | 220    | 296.1  | 228    | 283.3  |
| LOC198437 | 116    | 128.8  | 111.3  | 89.2   | 84.5   | 88.8   | 100.9  | 126.1  |
| LOC200312 | 97.5   | 122.9  | 101.5  | 103.5  | 99.6   | 113.3  | 94.1   | 138.3  |
| LOC20042C | 117.9  | 132.4  | 110.3  | 90.3   | 91.6   | 97.2   | 116.7  | 137.7  |
| LOC20081C | 110.8  | 121.6  | 103.8  | 101.2  | 90.5   | 94.9   | 98.5   | 105.9  |
| LOC201164 | 232    | 344.9  | 231.3  | 171.5  | 136.1  | 204.4  | 135.8  | 148    |
| LOC201175 | 212.9  | 282.2  | 150.5  | 126.8  | 107.4  | 119.1  | 202.7  | 178.6  |
| LOC201181 | 110.6  | 135.1  | 100.8  | 92.7   | 78.4   | 88.6   | 98.8   | 109.3  |
| LOC201229 | 107.1  | 116.7  | 92.2   | 92.8   | 88.4   | 104.5  | 95     | 116.3  |
| LOC201229 | 95.3   | 108.1  | 107.4  | 106.9  | 96.1   | 111.5  | 97.2   | 95.2   |
| LOC201725 | 424.3  | 486.7  | 188.9  | 192    | 126.8  | 189.3  | 352.9  | 687.2  |
| LOC202134 | 188.2  | 239    | 120.6  | 141    | 140.2  | 131.1  | 177.6  | 182.9  |
| LOC202459 | 110.6  | 151    | 96     | 94.8   | 80.9   | 102.1  | 127.5  | 144.2  |
| LOC203076 | 99     | 114.4  | 102.8  | 97.9   | 97     | 90.3   | 99.6   | 112.7  |
| LOC203413 | 88.4   | 105.9  | 91.4   | 80     | 90.2   | 86.5   | 80.9   | 92.9   |
| LOC203547 | 2869.4 | 3745   | 1733.8 | 2175.6 | 1523.8 | 2463.4 | 2361.6 | 2666.1 |
| LOC205251 | 495.9  | 612.4  | 176.3  | 152.6  | 131.2  | 179.3  | 318.9  | 292.3  |
| LOC219854 | 1976.9 | 2340.5 | 1057.3 | 798.2  | 637.7  | 873.2  | 1496.3 | 1949.4 |
| LOC220115 | 79.8   | 91.2   | 80.6   | 79.3   | 74     | 82.4   | 79.7   | 77.3   |
| LOC220115 | 81.2   | 103.9  | 99.1   | 92.6   | 82.9   | 76.8   | 77.4   | 100.9  |
| LOC220429 | 86     | 106.8  | 95.9   | 83.5   | 87.5   | 90.5   | 96.3   | 103.9  |
| LOC221091 | 84.7   | 109.5  | 83.8   | 82.2   | 82.8   | 86.1   | 92.9   | 84.8   |
| LOC221091 | 80.9   | 85.4   | 96.8   | 86.4   | 87.7   | 86.3   | 84.4   | 83     |
| LOC221143 | 994    | 1087.5 | 481.9  | 475.7  | 335    | 510.9  | 809.1  | 1089.4 |
| LOC221711 | 106.5  | 110.5  | 105.2  | 100.2  | 108.9  | 106.2  | 96.2   | 99.9   |
| LOC221955 | 857.4  | 1075.9 | 517.5  | 656.6  | 530.6  | 595.5  | 662.1  | 753.2  |
| LOC222967 | 94     | 91.5   | 94.7   | 88.2   | 86.2   | 94.7   | 98.9   | 109.1  |
| LOC222967 | 116.8  | 138.8  | 94.3   | 89.3   | 83.3   | 87.5   | 122.2  | 121.9  |
| LOC253012 | 95.3   | 119.3  | 92.7   | 86.3   | 83.8   | 82.5   | 101.1  | 114.5  |
| LOC253012 | 94.2   | 105.9  | 119.4  | 100.7  | 102.2  | 104.9  | 96.9   | 94.2   |
| LOC253012 | 73.2   | 83.5   | 71.6   | 88.3   | 79.7   | 80.2   | 76.9   | 74.9   |
| LOC255374 | 97     | 123.4  | 99.4   | 82     | 79.8   | 90.4   | 102.6  | 107.9  |

|           |        |        |       |       |       |        |        |        |
|-----------|--------|--------|-------|-------|-------|--------|--------|--------|
| LOC25735E | 94     | 99     | 89.6  | 89.3  | 87.9  | 85.1   | 100.1  | 101.1  |
| LOC26033E | 85.3   | 105.5  | 99.9  | 90.4  | 93.7  | 93.1   | 99.2   | 103    |
| LOC260341 | 88.9   | 101.7  | 91.3  | 85.9  | 86.3  | 96.5   | 82.8   | 94.1   |
| LOC28312E | 88.5   | 92.2   | 87.4  | 84.1  | 89.2  | 85.6   | 84.6   | 93.2   |
| LOC28312E | 87.2   | 99.3   | 92.8  | 82.7  | 79.6  | 85.8   | 96.1   | 96.2   |
| LOC28313C | 91.9   | 113.9  | 98.9  | 88.5  | 79    | 83.8   | 100.1  | 122.1  |
| LOC283152 | 102.9  | 112.4  | 95.8  | 86.3  | 89.3  | 87.4   | 89.4   | 106.9  |
| LOC283152 | 84.5   | 92.4   | 96.2  | 86.9  | 90.4  | 99.3   | 75.7   | 93.7   |
| LOC283174 | 91.1   | 99.1   | 106.4 | 104.7 | 100.3 | 97.1   | 99.7   | 91     |
| LOC28321E | 663.2  | 724.6  | 429.1 | 316.4 | 283.1 | 371.3  | 695.9  | 703.9  |
| LOC28334E | 823    | 1066.3 | 475.7 | 359.6 | 291   | 411.8  | 630.9  | 1190.5 |
| LOC283377 | 141.8  | 190.9  | 121.7 | 108.9 | 96.8  | 110.9  | 142.7  | 151.7  |
| LOC283392 | 96.7   | 91.6   | 100.2 | 93.9  | 100   | 93.6   | 86.9   | 82.8   |
| LOC283514 | 109.6  | 140.1  | 92    | 90.4  | 91.6  | 89.4   | 95.5   | 117.4  |
| LOC283537 | 301    | 431.6  | 309.2 | 339.6 | 255.7 | 433.5  | 265.5  | 532.3  |
| LOC283551 | 83.7   | 97.9   | 95    | 88.9  | 80    | 89.5   | 94.7   | 87.2   |
| LOC283677 | 90.5   | 97.1   | 94.7  | 85.1  | 86.5  | 79.4   | 96     | 111.5  |
| LOC28375E | 82.8   | 91.2   | 87    | 77.8  | 83.7  | 91.4   | 78.2   | 84.7   |
| LOC283871 | 198.8  | 225.6  | 211.3 | 175.6 | 157.3 | 193.8  | 163.2  | 306.3  |
| LOC283874 | 193    | 210.2  | 132.9 | 114.9 | 122.8 | 138.1  | 170.6  | 211    |
| LOC283951 | 1353.1 | 1849.2 | 955.4 | 733.1 | 562.8 | 921.9  | 1158.6 | 1803.5 |
| LOC28400E | 75.8   | 89.6   | 93.7  | 87.3  | 83.8  | 83.1   | 95.6   | 94.6   |
| LOC284194 | 173.5  | 197.6  | 162   | 127.9 | 108.7 | 124.6  | 159.5  | 207.4  |
| LOC284274 | 94.5   | 126.6  | 89.6  | 91.6  | 80    | 79.3   | 100.1  | 101.6  |
| LOC28432E | 106.7  | 116.4  | 90    | 84.5  | 83.6  | 86.4   | 95.1   | 110.6  |
| LOC284361 | 84.3   | 81.3   | 91    | 83.9  | 76.9  | 91.2   | 79.1   | 92.6   |
| LOC284361 | 136.4  | 172.2  | 127.5 | 99    | 96.2  | 110.4  | 144.2  | 241.9  |
| LOC28437E | 81.8   | 88.8   | 116.8 | 102.8 | 102.9 | 102.9  | 79.1   | 81.2   |
| LOC284402 | 94.3   | 114.5  | 101.1 | 85.9  | 81.8  | 93.7   | 95.1   | 100.5  |
| LOC284434 | 80.1   | 84.3   | 86.4  | 80.2  | 80.2  | 80.1   | 76.8   | 78     |
| LOC284441 | 87.1   | 91.9   | 101.3 | 87.5  | 90.5  | 86.1   | 89     | 91.2   |
| LOC28473E | 91.5   | 106    | 86    | 83.1  | 83    | 86.5   | 89.9   | 94.4   |
| LOC284751 | 89.5   | 106.3  | 86.9  | 86.9  | 69.2  | 82.9   | 87.1   | 110.7  |
| LOC284757 | 100.6  | 119.2  | 86.5  | 140.2 | 155.2 | 122.7  | 112.4  | 108.6  |
| LOC284912 | 120.2  | 138    | 95.8  | 82.8  | 84.2  | 95     | 126.1  | 135.2  |
| LOC28494E | 88.5   | 87.3   | 100.2 | 84    | 82    | 93.3   | 83.6   | 92.5   |
| LOC28501E | 120.7  | 138.7  | 102.7 | 102.4 | 98.3  | 100.9  | 119.1  | 119.6  |
| LOC28503E | 105.7  | 112.9  | 91.5  | 87.9  | 97.3  | 106.4  | 104.4  | 127.9  |
| LOC285074 | 672.9  | 1035.7 | 433.5 | 484.2 | 413.6 | 602.3  | 704.8  | 983.8  |
| LOC28519E | 471.7  | 629.4  | 431.1 | 450.2 | 375   | 473.8  | 430.1  | 558.1  |
| LOC28535E | 167.2  | 212.5  | 103.8 | 100.9 | 79.2  | 89.8   | 170    | 221.8  |
| LOC285382 | 188.7  | 239.5  | 128.9 | 102.5 | 108.2 | 111    | 157.7  | 179.1  |
| LOC28542E | 128.2  | 138.6  | 106.1 | 110.9 | 98.1  | 128.3  | 129.8  | 146.1  |
| LOC28545E | 156.9  | 218.3  | 129.4 | 102.9 | 92.6  | 113.8  | 155.9  | 159.4  |
| LOC28549E | 176.3  | 217.4  | 127.1 | 154.4 | 141   | 162.9  | 147.7  | 172.3  |
| LOC28551E | 94.7   | 96.3   | 98.5  | 80.3  | 85.5  | 86     | 93.7   | 90.8   |
| LOC285527 | 90.5   | 109.8  | 87.8  | 97.4  | 95    | 92.3   | 90.3   | 102    |
| LOC28563E | 686.5  | 887.8  | 517.1 | 603.6 | 488   | 1124.8 | 489.5  | 961.2  |
| LOC28573E | 88.2   | 99.1   | 92.5  | 85.2  | 77.6  | 81.2   | 94.1   | 96.1   |
| LOC28590E | 134.9  | 162.7  | 122.9 | 159.4 | 165.4 | 168.1  | 129.6  | 141.2  |

|           |        |        |        |        |        |        |        |        |
|-----------|--------|--------|--------|--------|--------|--------|--------|--------|
| LOC28598E | 605.7  | 698.5  | 347.3  | 572.2  | 539.8  | 741.7  | 497.9  | 599.9  |
| LOC28598E | 125.3  | 137    | 102.7  | 96.9   | 101.9  | 104.5  | 104.8  | 107.1  |
| LOC28598E | 352.7  | 427    | 225    | 437.3  | 383    | 448.8  | 282.3  | 360.9  |
| LOC28607E | 97.5   | 105.3  | 84.7   | 88.6   | 84.6   | 79.1   | 89.6   | 112    |
| LOC286187 | 92.7   | 98.4   | 87.4   | 79.2   | 83.2   | 92.8   | 83     | 112.3  |
| LOC28652E | 94.3   | 93.5   | 101.8  | 86.4   | 85     | 86.7   | 91.7   | 95.7   |
| LOC33832E | 91.4   | 114.8  | 91.2   | 76.7   | 80.1   | 79.6   | 100.8  | 116    |
| LOC33832E | 86     | 85.9   | 98.7   | 91.8   | 91.2   | 90.2   | 86.7   | 94.9   |
| LOC33879E | 104.2  | 109.4  | 140.9  | 105.1  | 110.1  | 132.7  | 84.4   | 100.1  |
| LOC33912E | 4930.9 | 6164.1 | 3252.2 | 2439.5 | 2093   | 2208.3 | 4267.5 | 3396.6 |
| LOC33922E | 2296.1 | 3065.4 | 1901.3 | 1594.7 | 1412.3 | 1720.2 | 1867.8 | 1714.1 |
| LOC33922E | 269.6  | 312    | 229.4  | 169.5  | 159.5  | 200.1  | 194.4  | 226.2  |
| LOC33924C | 92.3   | 108.2  | 88     | 84.7   | 73.2   | 81.4   | 101.1  | 101.8  |
| LOC339344 | 1448.1 | 1633.2 | 1095.5 | 770.2  | 642    | 748    | 1198.4 | 1707.2 |
| LOC339457 | 105.6  | 114.2  | 101.8  | 94.4   | 92.2   | 98.3   | 108.4  | 108.1  |
| LOC33974E | 120.8  | 131.6  | 119.1  | 103.5  | 91.7   | 118.3  | 120.2  | 158.3  |
| LOC339977 | 96.1   | 109.2  | 90.9   | 79.7   | 87.6   | 82.4   | 93     | 126.7  |
| LOC34006E | 95.9   | 103.7  | 91.6   | 87.3   | 88     | 90.5   | 96     | 88.6   |
| LOC34015E | 96.3   | 121.1  | 95.2   | 92.2   | 86.1   | 95     | 109.9  | 111    |
| LOC34026C | 89     | 111.6  | 86.9   | 80.7   | 83     | 85.6   | 105.3  | 97.6   |
| LOC340527 | 160.4  | 187.2  | 90.2   | 90     | 94.5   | 83.3   | 146.2  | 170.5  |
| LOC340527 | 142.3  | 154    | 114    | 102.6  | 93.3   | 108.3  | 113.5  | 137.6  |
| LOC340527 | 83     | 97     | 97.4   | 93.6   | 86.2   | 83     | 85     | 94.5   |
| LOC34052E | 106.4  | 113.5  | 95     | 79.8   | 85.9   | 89.6   | 110.4  | 120    |
| LOC34057E | 114.3  | 166.6  | 107.1  | 113.9  | 105.3  | 106.4  | 113    | 142.7  |
| LOC340602 | 87.7   | 94.6   | 88.5   | 98     | 87.7   | 93.5   | 89.5   | 82     |
| LOC34084E | 96.4   | 107.1  | 100.4  | 92.9   | 82     | 97.4   | 99.7   | 105.3  |
| LOC342897 | 114.2  | 117.5  | 95.4   | 95.4   | 88.3   | 94     | 104.5  | 108.2  |
| LOC34306E | 105.4  | 124.5  | 90.7   | 84.6   | 81.2   | 89.8   | 88.7   | 112.1  |
| LOC343521 | 135.3  | 156.7  | 97.2   | 93.5   | 96.3   | 97.6   | 122.2  | 133.8  |
| LOC34440E | 114.4  | 131.5  | 106.8  | 101.3  | 92     | 102.5  | 109.2  | 115    |
| LOC34440E | 127.5  | 145    | 103.2  | 98.2   | 103.1  | 103.1  | 117.4  | 136.3  |
| LOC344657 | 101.4  | 106.2  | 91.2   | 82.2   | 81     | 78     | 88.7   | 97.5   |
| LOC345222 | 122.9  | 141.7  | 92.9   | 85.9   | 79.7   | 81     | 138.3  | 123.3  |
| LOC345222 | 102.9  | 105.5  | 97.6   | 96.4   | 88.4   | 87.2   | 95.4   | 98.9   |
| LOC346157 | 82.7   | 101.6  | 93.1   | 78.9   | 79.6   | 87.1   | 86     | 99.5   |
| LOC34665E | 92.4   | 99.6   | 98.8   | 84.8   | 82.2   | 89.2   | 95     | 100.5  |
| LOC34667E | 99.1   | 118.7  | 101.4  | 86.9   | 93     | 100.5  | 88.4   | 99.5   |
| LOC34727E | 119.1  | 138.1  | 104.6  | 101.3  | 100    | 104.4  | 112.3  | 128.6  |
| LOC347487 | 92.4   | 103.5  | 81.5   | 74.1   | 73.6   | 81.5   | 89.3   | 110.9  |
| LOC348174 | 99.6   | 113    | 98.6   | 81.8   | 86.1   | 87.2   | 102.2  | 124.4  |
| LOC34818C | 125.1  | 171.1  | 117.4  | 100.4  | 100.4  | 106    | 126.2  | 136    |
| LOC34818C | 173.1  | 241.7  | 162.1  | 124.2  | 127.2  | 136.6  | 143.6  | 217.7  |
| LOC34818C | 140.9  | 163.2  | 92.5   | 68.7   | 73.8   | 83.9   | 130    | 142.4  |
| LOC348262 | 327.6  | 456    | 272.9  | 190.5  | 161.3  | 183.7  | 316.3  | 573.3  |
| LOC34864E | 103.2  | 126.2  | 104.6  | 186.3  | 171.7  | 116.2  | 104.4  | 108.3  |
| LOC34884C | 193.3  | 203.7  | 112.5  | 95.7   | 96     | 90.2   | 173.2  | 187.5  |
| LOC349114 | 190.6  | 181.4  | 154    | 153.7  | 146.8  | 213.7  | 183.5  | 259.7  |
| LOC34913E | 98.7   | 121.8  | 99.2   | 96.6   | 85.2   | 91.9   | 109    | 110.1  |
| LOC34923E | 79.3   | 100.5  | 88.4   | 90.5   | 99.5   | 97.8   | 92.1   | 85.7   |

|           |         |         |         |         |         |         |         |         |
|-----------|---------|---------|---------|---------|---------|---------|---------|---------|
| LOC34933E | 267.2   | 293.2   | 195.5   | 182.2   | 199.4   | 281.8   | 232.9   | 334.2   |
| LOC35290E | 86.6    | 113     | 94.5    | 88.3    | 80.8    | 88.9    | 88.7    | 106     |
| LOC37439E | 5276.7  | 6135.5  | 3793.7  | 3018.3  | 2234.8  | 2482.1  | 5224    | 6937    |
| LOC374491 | 76.3    | 86.7    | 97.2    | 90.3    | 78.2    | 96.6    | 78.4    | 79.2    |
| LOC374491 | 91.7    | 105     | 123.5   | 104.4   | 106.7   | 101.6   | 90.7    | 98.9    |
| LOC37492C | 192.6   | 212     | 114.2   | 114.4   | 106.2   | 118.8   | 186.4   | 192.2   |
| LOC37532E | 88.7    | 103.3   | 113.4   | 102.4   | 100.8   | 101.7   | 93.8    | 92.2    |
| LOC37544E | 113.3   | 147.4   | 91.4    | 89.6    | 92.6    | 86.2    | 112.3   | 120.6   |
| LOC37574E | 97.5    | 114.6   | 92.9    | 93.5    | 91      | 91.5    | 91.3    | 106.9   |
| LOC387601 | 82.2    | 97.5    | 90.1    | 89.1    | 82.9    | 83.4    | 81.9    | 91.2    |
| LOC38764E | 81.6    | 102.9   | 99.9    | 99.1    | 84      | 99.2    | 93.1    | 92.7    |
| LOC38768C | 109.6   | 154.9   | 104.2   | 99.7    | 98.7    | 102.4   | 111.3   | 130.7   |
| LOC38775E | 101.4   | 100.6   | 93.5    | 90.2    | 87.3    | 88.3    | 102.6   | 97.7    |
| LOC38775E | 90.3    | 102.8   | 90.5    | 86.2    | 85      | 90      | 92.7    | 102.5   |
| LOC38777E | 92.2    | 110.4   | 90.2    | 83.8    | 84.2    | 88      | 90.3    | 92.4    |
| LOC38777E | 103.9   | 120.5   | 91.3    | 77.3    | 85.5    | 92.8    | 107.4   | 116.1   |
| LOC38777E | 104.5   | 116.7   | 103     | 98.4    | 102.4   | 101.6   | 109.7   | 105.4   |
| LOC38785E | 99.5    | 107.1   | 91      | 89.7    | 79      | 78.9    | 104.6   | 106.4   |
| LOC38785E | 88.7    | 103.2   | 81.5    | 77.7    | 80.4    | 81.9    | 91.2    | 99.6    |
| LOC38785E | 118.4   | 116.6   | 105.5   | 113.8   | 93.3    | 97      | 106.9   | 127.9   |
| LOC387911 | 92.6    | 110.2   | 92      | 82.8    | 79      | 81.4    | 118.7   | 100.9   |
| LOC387921 | 136.2   | 168.1   | 109.7   | 99.5    | 98.2    | 109.5   | 117.3   | 132.1   |
| LOC387921 | 400.4   | 459.4   | 320.2   | 359.1   | 311.6   | 548.6   | 255.2   | 437.9   |
| LOC38813E | 111.8   | 113.1   | 102.5   | 87.2    | 88.4    | 100.1   | 101.9   | 103.2   |
| LOC38819E | 80      | 86      | 95.5    | 89.3    | 77.8    | 80.3    | 78.5    | 88.3    |
| LOC388284 | 154.7   | 198.8   | 127.4   | 107.9   | 95.6    | 110.1   | 121.1   | 152.7   |
| LOC38832E | 79.9    | 94.7    | 84      | 73.8    | 79.6    | 81.6    | 90.3    | 94.2    |
| LOC38833E | 80.2    | 97.2    | 108.9   | 97.5    | 106     | 101.6   | 82.2    | 86.3    |
| LOC38838E | 138.1   | 161.7   | 138.4   | 113.1   | 104.3   | 117.4   | 160     | 180.5   |
| LOC388407 | 96.7    | 122.1   | 105.1   | 99      | 92.9    | 93.7    | 104.6   | 108.5   |
| LOC38841E | 88.1    | 104.5   | 86.3    | 85.3    | 83.2    | 79.8    | 88.4    | 101.9   |
| LOC38850E | 124.3   | 146.4   | 106.5   | 96.4    | 103.3   | 109.7   | 104.2   | 121.6   |
| LOC388524 | 32434.7 | 32864.7 | 33410.8 | 22590.5 | 19594.3 | 22152.2 | 34308.2 | 32545.1 |
| LOC38859E | 84.3    | 86.7    | 92.2    | 91.6    | 84.8    | 89.8    | 81.9    | 89.1    |
| LOC38861C | 133.3   | 159.5   | 132.8   | 113.3   | 104.3   | 127.8   | 128.9   | 142.5   |
| LOC388692 | 137.8   | 134.4   | 133.7   | 165.9   | 165.8   | 232.8   | 118     | 140.9   |
| LOC388882 | 107.5   | 106.6   | 89.7    | 93.9    | 90.6    | 85.4    | 90.9    | 111.5   |
| LOC38888E | 133.5   | 162.8   | 110.5   | 115.7   | 103.2   | 157.8   | 123.4   | 186.2   |
| LOC38891C | 75.8    | 86.7    | 92.3    | 83.6    | 84      | 86      | 77.8    | 80.4    |
| LOC38891E | 71.9    | 69.6    | 91      | 78.4    | 81.2    | 82      | 70.5    | 70.3    |
| LOC388931 | 88.1    | 90.8    | 97.9    | 93.1    | 83.4    | 90.3    | 86.4    | 93.2    |
| LOC38895E | 109.6   | 113.7   | 107.8   | 97.5    | 94.8    | 100     | 101.1   | 122.4   |
| LOC38896E | 105     | 97.1    | 103.9   | 88      | 84.4    | 88.7    | 96.3    | 114.8   |
| LOC389031 | 168     | 195.6   | 111.7   | 108.3   | 95.9    | 105.4   | 187.1   | 163.3   |
| LOC389072 | 85.5    | 107.7   | 95.1    | 102.7   | 76.3    | 92.3    | 91.3    | 93.3    |
| LOC38911E | 132     | 142.2   | 104.1   | 87.5    | 73.6    | 93.4    | 112.9   | 149.6   |
| LOC389151 | 82.2    | 92.1    | 84.1    | 83.1    | 88.7    | 80.8    | 85.8    | 91      |
| LOC389257 | 77      | 85.1    | 100.5   | 107.9   | 95      | 89      | 83      | 87      |
| LOC389257 | 79.4    | 95.3    | 94.7    | 88.3    | 82.1    | 90.4    | 91.7    | 85.5    |
| LOC38928E | 388.3   | 570.9   | 225.2   | 204     | 240.1   | 144.8   | 292.7   | 185.2   |

|           |        |        |        |        |         |       |        |         |
|-----------|--------|--------|--------|--------|---------|-------|--------|---------|
| LOC389293 | 74.3   | 92.6   | 95.4   | 80.9   | 79.2    | 87.9  | 85.6   | 83.7    |
| LOC389429 | 86.4   | 97.3   | 88.5   | 86.6   | 87      | 84.5  | 86.1   | 97.3    |
| LOC389432 | 84     | 98     | 95.1   | 90.1   | 79.9    | 92.2  | 87.4   | 90.8    |
| LOC389458 | 100.5  | 135.3  | 94.4   | 90.5   | 78.4    | 96    | 94.5   | 110.6   |
| LOC389517 | 70.8   | 75.4   | 82.3   | 82.9   | 69.1    | 79.9  | 78.9   | 86.6    |
| LOC389541 | 1501.2 | 1599.1 | 590.7  | 677.4  | 656.6   | 895.5 | 1208.7 | 1302.8  |
| LOC389549 | 78.9   | 81.1   | 102.3  | 93.4   | 88      | 94.1  | 76.8   | 77.6    |
| LOC389607 | 86.7   | 104.4  | 95.5   | 98.3   | 83.9    | 91.7  | 95.7   | 110.3   |
| LOC389813 | 78.4   | 85.8   | 98.5   | 94.1   | 84.7    | 86.2  | 73.3   | 91.1    |
| LOC389816 | 1904.6 | 2552.4 | 1425   | 1035   | 899.4   | 715.1 | 966    | 938.8   |
| LOC389816 | 1610.2 | 2001.4 | 1268.6 | 1010.7 | 855.1   | 640.9 | 763.3  | 787.4   |
| LOC389827 | 82.2   | 89.8   | 94.4   | 94.4   | 88      | 93.8  | 77.9   | 90.5    |
| LOC389827 | 93.5   | 104.8  | 100.2  | 91.8   | 92.2    | 100.8 | 97     | 116.5   |
| LOC389832 | 113.6  | 128.6  | 106.5  | 81.2   | 85      | 91    | 107.3  | 121.6   |
| LOC389834 | 87.9   | 90     | 95.4   | 89.3   | 79.8    | 95.4  | 87.8   | 97      |
| LOC389936 | 92.5   | 101    | 84.7   | 75.6   | 77.1    | 83.6  | 85     | 89      |
| LOC390110 | 109.5  | 128.2  | 106    | 100.4  | 88.5    | 97    | 108.9  | 119.5   |
| LOC390243 | 97.2   | 95.5   | 90.6   | 80.8   | 70.9    | 76    | 88.6   | 100.6   |
| LOC390243 | 82.7   | 84.9   | 86.8   | 96.4   | 85.5    | 86.7  | 74.3   | 78.9    |
| LOC390637 | 129.8  | 153.8  | 113.9  | 99     | 100.2   | 101.7 | 124.6  | 106     |
| LOC390667 | 122.8  | 139.2  | 94.1   | 92.6   | 80.7    | 101.7 | 114.4  | 135.6   |
| LOC390688 | 112.2  | 124.1  | 92.8   | 89.6   | 95.4    | 93    | 104.5  | 135.5   |
| LOC390748 | 83.3   | 103    | 89.8   | 84.2   | 88      | 90.6  | 88.2   | 96.7    |
| LOC390748 | 103.9  | 120.3  | 108.9  | 98.5   | 92.2    | 104.3 | 116.1  | 105.9   |
| LOC390927 | 107.1  | 104.5  | 99     | 99.8   | 89.9    | 100.2 | 102.9  | 118     |
| LOC390999 | 96.6   | 101.4  | 95.9   | 95.2   | 78.1    | 90.3  | 88.8   | 98.8    |
| LOC391356 | 531.4  | 690.7  | 356.4  | 378.7  | 287.9   | 331.3 | 567.4  | 607.8   |
| LOC392196 | 76     | 79.1   | 93.7   | 88.1   | 83.9    | 94.4  | 81.2   | 75.4    |
| LOC392395 | 81.7   | 97.4   | 86.7   | 84.4   | 76.1    | 89.2  | 84.3   | 92.1    |
| LOC392465 | 102.9  | 136.4  | 96.6   | 87.2   | 79      | 87.3  | 101.6  | 137.5   |
| LOC399706 | 85.4   | 100.6  | 85.4   | 79.8   | 75.2    | 80    | 81     | 92.1    |
| LOC399744 | 125    | 159.5  | 97.7   | 112.8  | 104.2   | 118.2 | 143.4  | 167.5   |
| LOC399818 | 96.5   | 112.6  | 109.4  | 110.4  | 103.3   | 102.2 | 92.9   | 102.8   |
| LOC399898 | 85.1   | 110.9  | 108    | 92.6   | 94.4    | 96.4  | 84.7   | 91.7    |
| LOC399900 | 7410.1 | 7648.5 | 6271.1 | 10404  | 10102.5 | 7359  | 8496   | 12156.9 |
| LOC399947 | 83.4   | 85.8   | 105    | 91.9   | 86.1    | 99.2  | 77.9   | 89.3    |
| LOC400120 | 114.6  | 133.9  | 127.3  | 118.7  | 110.9   | 123.6 | 105.2  | 108.2   |
| LOC400258 | 136.2  | 141    | 101.8  | 95.1   | 87.1    | 93.6  | 132.2  | 128.1   |
| LOC400451 | 339.4  | 461.2  | 241.7  | 193.7  | 172.6   | 178.7 | 341.4  | 313.4   |
| LOC400464 | 186.9  | 223.1  | 159.9  | 234.5  | 225.2   | 276.1 | 161.9  | 178.9   |
| LOC400464 | 125.6  | 140.2  | 117    | 212    | 238.1   | 214   | 124.2  | 133     |
| LOC400499 | 86.7   | 88.7   | 102.1  | 99.5   | 99.6    | 95.4  | 89     | 94.9    |
| LOC400506 | 273.5  | 384.1  | 184.1  | 148.7  | 137.4   | 192.9 | 246.1  | 250.8   |
| LOC400566 | 438.8  | 522.7  | 289.3  | 252.7  | 187.2   | 239.9 | 289.9  | 439.3   |
| LOC400566 | 898.9  | 1145.9 | 504.5  | 465.9  | 340.4   | 431.9 | 562.9  | 568.3   |
| LOC400657 | 637.2  | 749.1  | 427.9  | 364.4  | 295.6   | 499.6 | 455.5  | 891.1   |
| LOC400707 | 119.3  | 123.6  | 96.8   | 86.9   | 79.2    | 84.8  | 94.9   | 108.2   |
| LOC400891 | 90.6   | 112.2  | 97     | 93     | 91.1    | 91.6  | 87     | 80.7    |
| LOC400924 | 125.6  | 156.3  | 98.7   | 112.3  | 100.8   | 101.8 | 139.7  | 164.3   |
| LOC400965 | 84.1   | 86.3   | 95.7   | 89.9   | 83.5    | 93.5  | 81.1   | 90.3    |

|           |         |         |         |         |        |         |         |         |
|-----------|---------|---------|---------|---------|--------|---------|---------|---------|
| LOC40098E | 79      | 100     | 86.7    | 86.1    | 84.3   | 90.9    | 83.8    | 85.3    |
| LOC40098E | 256.6   | 264.4   | 107.7   | 157.5   | 143.8  | 158.6   | 129.3   | 378.7   |
| LOC40101C | 177.7   | 230.5   | 123.9   | 102.6   | 92.6   | 104     | 155.1   | 199.1   |
| LOC40101E | 28822.9 | 27757.2 | 14698.9 | 8843.2  | 6344.3 | 9041.8  | 28683.3 | 28664.5 |
| LOC401052 | 245.5   | 283.1   | 181.7   | 205.7   | 184.2  | 246.3   | 212.8   | 248.4   |
| LOC401072 | 96.9    | 98.8    | 105.6   | 102.3   | 91.2   | 93.5    | 83.7    | 98.7    |
| LOC401137 | 92.9    | 120     | 101.9   | 89.5    | 92.6   | 90.6    | 111.7   | 121.1   |
| LOC401152 | 400.6   | 498.1   | 268.4   | 285.6   | 243.1  | 278.3   | 392.5   | 601.9   |
| LOC40123E | 196.3   | 259.5   | 126.5   | 217.3   | 167    | 302.3   | 226.4   | 375     |
| LOC401252 | 99.3    | 103.7   | 93.2    | 87.4    | 76.9   | 88.1    | 91.9    | 107.9   |
| LOC40128E | 88.9    | 100.1   | 98.6    | 89.6    | 77.5   | 96.2    | 90      | 97.6    |
| LOC40129E | 102.2   | 110.9   | 117.3   | 109.3   | 112.9  | 110.4   | 91.7    | 99.1    |
| LOC401357 | 424.8   | 481     | 312.4   | 298.7   | 313.2  | 362     | 409.4   | 393     |
| LOC401387 | 71      | 104.8   | 94.3    | 88.7    | 79     | 87.1    | 82.9    | 100.1   |
| LOC40139E | 100.7   | 131.6   | 82      | 90.1    | 79.9   | 89.8    | 94.4    | 106.7   |
| LOC40141C | 91.6    | 84.7    | 92.5    | 84.9    | 83.6   | 80.3    | 80.3    | 91.6    |
| LOC401431 | 108.2   | 137.5   | 134.8   | 107.7   | 105.6  | 115.7   | 99.4    | 109.6   |
| LOC40149E | 77.3    | 96.7    | 88      | 80.8    | 78.5   | 78.9    | 79.7    | 86.2    |
| LOC401551 | 164.1   | 198.5   | 127.3   | 98.2    | 93.8   | 104.5   | 155.1   | 177.4   |
| LOC40156E | 91.6    | 112.2   | 102     | 96.4    | 92.3   | 90.8    | 101.4   | 108.2   |
| LOC40158E | 136.2   | 170.1   | 99.1    | 102.8   | 95.9   | 92.9    | 135.1   | 169.7   |
| LOC40189E | 101     | 119.8   | 102.9   | 96.8    | 85.1   | 82.1    | 100.5   | 107.6   |
| LOC40205E | 595.1   | 727.9   | 198.4   | 155     | 143.6  | 200.5   | 405.8   | 628.9   |
| LOC402057 | 227.9   | 278.6   | 131.6   | 128.3   | 120.8  | 132     | 241.2   | 812.9   |
| LOC40211C | 97.8    | 113.1   | 97.9    | 74.9    | 91     | 81.6    | 101.9   | 103.6   |
| LOC402117 | 90.7    | 101.6   | 92.2    | 81.4    | 79.2   | 88.9    | 87.9    | 92.7    |
| LOC40217E | 86.2    | 100.7   | 106.9   | 102.1   | 99     | 97.3    | 94.2    | 109.3   |
| LOC40257E | 106.2   | 109.3   | 94.1    | 89.8    | 83.9   | 87.4    | 106.6   | 120.5   |
| LOC402682 | 137.5   | 166.1   | 94.2    | 86.8    | 90.8   | 92.3    | 135.6   | 159.7   |
| LOC40575E | 85.2    | 104.7   | 95.3    | 88.5    | 85.5   | 89.8    | 89.5    | 96.6    |
| LOC40783E | 603.9   | 860.1   | 625.4   | 505.2   | 383.9  | 591.4   | 520.6   | 1021.6  |
| LOC43236E | 16838.9 | 18997.9 | 13317   | 11007.2 | 9198.4 | 12355.7 | 13466.6 | 15664   |
| LOC43998E | 80.9    | 89.3    | 98.8    | 93.3    | 89.7   | 86.3    | 80.7    | 85.2    |
| LOC44005E | 75.8    | 84.3    | 78.7    | 80      | 78     | 76.7    | 78.4    | 98.9    |
| LOC440087 | 98.4    | 113.7   | 97.1    | 88      | 87.5   | 87      | 94.7    | 113     |
| LOC44009E | 91.7    | 105.8   | 97.2    | 89.1    | 85.5   | 85.2    | 93.6    | 117.3   |
| LOC44014E | 508     | 613.2   | 223.3   | 213.1   | 170.2  | 237.6   | 419.6   | 813.8   |
| LOC44014E | 496     | 639.5   | 213.3   | 226.3   | 167.2  | 257     | 436.9   | 884.4   |
| LOC440157 | 254.3   | 259.3   | 178.3   | 199.4   | 189.9  | 220.9   | 183.7   | 218.9   |
| LOC44024E | 100.6   | 102.1   | 105.9   | 100.9   | 98.2   | 96.2    | 97      | 101.2   |
| LOC44029E | 93.1    | 102.1   | 92.2    | 88      | 76.6   | 79.3    | 88.4    | 93.2    |
| LOC44031E | 87.3    | 109.5   | 91.8    | 88.8    | 88.9   | 87.5    | 98.6    | 100.3   |
| LOC44034E | 325.4   | 379.7   | 262.7   | 229     | 244.8  | 317.1   | 275.3   | 463     |
| LOC44035C | 130     | 110.9   | 110.2   | 122.6   | 106.2  | 144.1   | 92.4    | 115.6   |
| LOC440354 | 145     | 169.4   | 112.4   | 123.7   | 126.7  | 108     | 127.5   | 157     |
| LOC44039E | 140.7   | 179.8   | 111.9   | 100.6   | 94.9   | 103.8   | 129.5   | 156.2   |
| LOC44050E | 90.7    | 89.5    | 97.2    | 100.1   | 87.9   | 84.8    | 84.9    | 95.2    |
| LOC44050E | 78.3    | 86.7    | 85.8    | 81.6    | 84.6   | 85.7    | 83.4    | 82.4    |
| LOC44055E | 76.9    | 73.6    | 93      | 92      | 90.3   | 88.5    | 75.8    | 88.3    |
| LOC44057C | 88.3    | 92.9    | 93.9    | 78.4    | 86.1   | 89.5    | 87      | 81.9    |

|           |       |        |        |        |        |        |        |        |
|-----------|-------|--------|--------|--------|--------|--------|--------|--------|
| LOC44068E | 223.1 | 226.9  | 140.4  | 207.1  | 159.1  | 161.7  | 198.9  | 545.1  |
| LOC44074Z | 93.4  | 104.2  | 89.5   | 92.4   | 78.2   | 78.7   | 102.9  | 95.3   |
| LOC44079E | 95    | 124.2  | 86.7   | 88.3   | 102.7  | 93     | 104.4  | 106.4  |
| LOC44083E | 88.5  | 108.1  | 96.4   | 94.5   | 87.9   | 91.1   | 91.7   | 92.8   |
| LOC44092E | 108.7 | 101.1  | 97.1   | 96.6   | 86.2   | 86     | 92.5   | 101.4  |
| LOC44092E | 842.8 | 881.5  | 409.3  | 420    | 297.9  | 357.7  | 848.5  | 1816.2 |
| LOC44094A | 95.3  | 109.8  | 96.2   | 93.1   | 82.3   | 83.2   | 94.8   | 105.2  |
| LOC44104E | 101.4 | 98     | 97     | 98     | 94.2   | 84.8   | 97.7   | 102.7  |
| LOC44107C | 97.5  | 134.8  | 81.7   | 76     | 69     | 76.9   | 102.9  | 138.3  |
| LOC44110E | 92.3  | 99.9   | 96.2   | 82.8   | 83     | 92.4   | 94     | 93.9   |
| LOC44112C | 83.9  | 109.7  | 99.8   | 83.5   | 79     | 86     | 95.1   | 114.9  |
| LOC44115C | 199   | 260.5  | 175.4  | 147.8  | 161.3  | 151.3  | 192.7  | 208.6  |
| LOC441161 | 83.8  | 90.9   | 95.4   | 85.7   | 83.9   | 89.1   | 74.3   | 89.8   |
| LOC44116E | 109.8 | 126.2  | 117.2  | 112.5  | 105.4  | 117.1  | 107.8  | 102.6  |
| LOC441177 | 81.6  | 83.6   | 87.1   | 84     | 77.6   | 86     | 90.6   | 78.2   |
| LOC44117E | 98    | 96.2   | 95     | 96.2   | 88.2   | 83.1   | 92.4   | 104.9  |
| LOC44120E | 103.7 | 122.4  | 91.7   | 96.9   | 85.8   | 88.7   | 103.6  | 110.1  |
| LOC44123E | 81.3  | 88     | 96.8   | 75.2   | 84.4   | 89.7   | 70.9   | 86.6   |
| LOC44124Z | 293.3 | 388.2  | 238.8  | 232.1  | 179.7  | 287.2  | 251.2  | 500.1  |
| LOC44124A | 205.6 | 266.4  | 115.2  | 98.9   | 105.1  | 133.3  | 167.6  | 264.1  |
| LOC441251 | 96.9  | 111.6  | 95.1   | 80.7   | 80.7   | 86.4   | 112.4  | 116.6  |
| LOC441257 | 82    | 80.7   | 89.9   | 85.4   | 78.4   | 88.1   | 83.7   | 81.6   |
| LOC44126E | 136.7 | 155.1  | 114.2  | 118.3  | 135.6  | 119.5  | 132.4  | 147.7  |
| LOC44128Z | 89.5  | 102.7  | 99.6   | 87.3   | 90.1   | 91.9   | 92.4   | 105.8  |
| LOC44129A | 97.8  | 127.9  | 113.7  | 116.8  | 107.2  | 125.4  | 104.9  | 126.2  |
| LOC44137E | 97.5  | 94.3   | 88.1   | 83     | 92.4   | 89.4   | 89.9   | 98     |
| LOC44142E | 81.4  | 88.5   | 88.9   | 80     | 81.8   | 88.8   | 82.4   | 93.4   |
| LOC44147E | 83.7  | 95.3   | 87.9   | 91.4   | 82.1   | 92.9   | 84.7   | 94.3   |
| LOC441581 | 88.6  | 94     | 95.6   | 96.7   | 80.1   | 94     | 81     | 81.4   |
| LOC441581 | 91.7  | 103.2  | 93.7   | 81.8   | 81.3   | 95.2   | 94.7   | 100.7  |
| LOC441601 | 83.3  | 88.5   | 92.4   | 84.1   | 78.9   | 82.3   | 81     | 89.8   |
| LOC44173A | 83.4  | 85.9   | 91.3   | 92.7   | 95.4   | 83.4   | 82.2   | 93     |
| LOC44174E | 242.7 | 261.4  | 156.3  | 155.2  | 130.4  | 152.3  | 219.1  | 255.6  |
| LOC441931 | 78.5  | 101.6  | 101.1  | 101.4  | 87.3   | 96.5   | 86.1   | 92.4   |
| LOC44195E | 84.7  | 89.2   | 91.8   | 84.4   | 88.3   | 86.5   | 84.4   | 91.7   |
| LOC44195E | 86.7  | 106.3  | 96.5   | 93.4   | 96.6   | 96.2   | 87.8   | 84.4   |
| LOC44221E | 128.9 | 161.7  | 116.3  | 98.5   | 106.2  | 115.1  | 129    | 138.8  |
| LOC44224E | 94.6  | 105.3  | 113.1  | 101.5  | 97.6   | 101.5  | 91.6   | 101.3  |
| LOC44242A | 80    | 79.4   | 87.6   | 83.5   | 77.8   | 86.1   | 83     | 81.1   |
| LOC44242E | 115.5 | 140.4  | 92.7   | 86.9   | 79     | 86.4   | 101.6  | 132.3  |
| LOC44257E | 1518  | 1546.4 | 1026.7 | 1394.4 | 1385.8 | 1318.1 | 1228.9 | 1723.1 |
| LOC44258Z | 168.2 | 151    | 95.7   | 96.3   | 89.9   | 96.1   | 122.4  | 189.2  |
| LOC44271E | 93.9  | 105.7  | 97.9   | 88.2   | 80.2   | 91.1   | 90.2   | 95     |
| LOC49230E | 81.2  | 95.8   | 86.7   | 85.3   | 79.2   | 87     | 84.1   | 90.1   |
| LOC492311 | 214.5 | 299.2  | 151.6  | 221.6  | 208.2  | 272.1  | 210    | 302.9  |
| LOC49382E | 103.3 | 144.6  | 94.9   | 93.7   | 83.2   | 81.8   | 104.9  | 121.1  |
| LOC49385E | 480.1 | 586    | 231.8  | 193.2  | 181.2  | 241.8  | 447.5  | 793.7  |
| LOC49386C | 86.8  | 86.7   | 95.9   | 84.5   | 79.4   | 87.9   | 80.9   | 99.1   |
| LOC49386E | 102.2 | 107.3  | 100.8  | 103.9  | 86.7   | 91.4   | 90.1   | 110.6  |
| LOC49719C | 132.7 | 140.6  | 100.3  | 96.5   | 96     | 105.5  | 126.2  | 120.4  |

|           |        |        |        |        |        |        |        |        |
|-----------|--------|--------|--------|--------|--------|--------|--------|--------|
| LOC497661 | 153.5  | 180.1  | 103.3  | 113.4  | 97.5   | 115.2  | 147.9  | 242    |
| LOC51035  | 3104.1 | 3848.2 | 1976.8 | 1597.2 | 1396.8 | 1666.7 | 3140   | 3992   |
| LOC51057  | 102.3  | 107.3  | 91.7   | 94.1   | 83.6   | 94.4   | 98.1   | 108.7  |
| LOC51057  | 104.4  | 131.8  | 108.8  | 82.4   | 83.6   | 82.3   | 104.3  | 144    |
| LOC51136  | 744.6  | 941.2  | 356.4  | 377.6  | 352.1  | 557.5  | 465.7  | 757    |
| LOC51149  | 192.8  | 239.1  | 119.9  | 117.2  | 105.9  | 127.7  | 176.7  | 194.3  |
| LOC51149  | 79     | 101.6  | 92.1   | 84     | 76.3   | 78     | 83.8   | 95.8   |
| LOC51233  | 85.7   | 92.3   | 89.1   | 85     | 83.8   | 85.2   | 82.8   | 90.6   |
| LOC51252  | 107.4  | 113.4  | 94.9   | 92.2   | 87.8   | 99.9   | 118.8  | 111.6  |
| LOC51255  | 2666.1 | 3372   | 1619.7 | 1848.3 | 1552.8 | 2290.9 | 2871.6 | 4210.8 |
| LOC51333  | 119    | 131.1  | 96.5   | 97.3   | 97.3   | 100.1  | 119.1  | 132.4  |
| LOC51334  | 167.2  | 199.8  | 137.1  | 127.3  | 118.2  | 131.7  | 161.2  | 187.2  |
| LOC54103  | 153.4  | 162.5  | 101.5  | 97.5   | 95.3   | 96.8   | 139.2  | 209.2  |
| LOC541469 | 119.7  | 125.7  | 87.4   | 87.7   | 88.7   | 89.9   | 110.5  | 146.2  |
| LOC541473 | 85.6   | 101.6  | 81.6   | 88.9   | 89.5   | 92.4   | 101.9  | 100.1  |
| LOC550631 | 91.7   | 91.6   | 104.7  | 99.1   | 86.1   | 90     | 87.2   | 95.3   |
| LOC552891 | 74.5   | 85.1   | 107.5  | 90     | 100.7  | 86.3   | 68.9   | 83.5   |
| LOC554226 | 84.2   | 96.7   | 85.5   | 76.7   | 73.6   | 83.4   | 93.1   | 88.8   |
| LOC554235 | 89.7   | 103    | 98.2   | 94.7   | 85.4   | 90.1   | 87.1   | 94.9   |
| LOC554251 | 99.4   | 101.8  | 87.3   | 86.7   | 78.5   | 82.5   | 86.1   | 94.4   |
| LOC55565  | 234.4  | 273.8  | 197.5  | 161.1  | 166.5  | 186.5  | 205.5  | 175.5  |
| LOC55908  | 146    | 184.4  | 109.9  | 97.6   | 101.8  | 108.2  | 145.1  | 148.7  |
| LOC56901  | 122.2  | 151.1  | 123.1  | 100.4  | 90.8   | 101.9  | 129.2  | 180.2  |
| LOC56902  | 1069.5 | 1202.6 | 397.6  | 345.2  | 209.4  | 444.8  | 802.4  | 1176.4 |
| LOC56964  | 81.9   | 91.4   | 88.2   | 86.8   | 80.3   | 88.2   | 85.1   | 88.9   |
| LOC57149  | 980.1  | 1251.2 | 610.2  | 672.1  | 482.5  | 812.7  | 905.6  | 1111.6 |
| LOC57228  | 88.9   | 93.7   | 95.8   | 87.6   | 93.7   | 99.7   | 85.2   | 101    |
| LOC57228  | 121.4  | 137.7  | 111    | 124.8  | 114.1  | 144.5  | 117.6  | 136.5  |
| LOC57228  | 95.8   | 97.9   | 80.2   | 83.1   | 90     | 86.2   | 96.4   | 101.5  |
| LOC57228  | 93.2   | 89.9   | 104.1  | 98.2   | 96.6   | 95.2   | 86.9   | 89.8   |
| LOC594834 | 72.1   | 82     | 84.8   | 76.5   | 69.6   | 79.2   | 72     | 79.4   |
| LOC594834 | 101.3  | 114.3  | 83.7   | 90.6   | 74.7   | 80.1   | 102.9  | 116.2  |
| LOC594834 | 87.6   | 93.7   | 85.8   | 70     | 79.2   | 75.6   | 90.4   | 95.5   |
| LOC595101 | 131.5  | 153.5  | 105.9  | 102.2  | 96.9   | 105.4  | 104.9  | 141.2  |
| LOC606495 | 159.7  | 194.1  | 109.9  | 101.7  | 109.4  | 129.2  | 140.1  | 166.9  |
| LOC606724 | 1514.2 | 1951   | 1033.4 | 630.2  | 520.2  | 823.7  | 1228.4 | 1786.1 |
| LOC613037 | 728.5  | 917.6  | 464.7  | 685.8  | 706.1  | 1195.1 | 741.2  | 1009.9 |
| LOC613212 | 81.1   | 89.3   | 93.1   | 98     | 89.4   | 86.3   | 80.4   | 75.7   |
| LOC619207 | 91.9   | 99.9   | 80.8   | 85.9   | 85.1   | 82.3   | 95.7   | 94.9   |
| LOC619208 | 102.9  | 105.8  | 86.4   | 84.4   | 86.3   | 85     | 98.5   | 103.4  |
| LOC63920  | 232.7  | 247.5  | 204.4  | 196.4  | 156.9  | 216.3  | 179.2  | 228.9  |
| LOC63928  | 110.1  | 122    | 94.4   | 78.1   | 78.8   | 85.6   | 100.6  | 111.7  |
| LOC641522 | 109.5  | 132.7  | 112.8  | 104.2  | 94.8   | 102.4  | 103    | 120.7  |
| LOC641847 | 83     | 89     | 91.7   | 87.3   | 84.3   | 94.7   | 87.2   | 86.2   |
| LOC641949 | 134.2  | 147.2  | 113.4  | 113.3  | 101.6  | 121.8  | 107.1  | 126.2  |
| LOC642090 | 411.6  | 566.7  | 352.7  | 546    | 438.1  | 728.4  | 429.8  | 777.2  |
| LOC642181 | 97.6   | 99     | 86.8   | 79.7   | 82.8   | 82.1   | 80.3   | 93.6   |
| LOC642201 | 126.9  | 133.1  | 85.8   | 85.9   | 80.1   | 86.2   | 112.3  | 118    |
| LOC642265 | 73.4   | 80.2   | 88.9   | 79.7   | 82     | 81.1   | 74.6   | 86.9   |
| LOC642293 | 72.4   | 76.6   | 81     | 76.6   | 86.7   | 82.8   | 68.7   | 78.1   |



|           |         |         |         |         |         |        |         |         |
|-----------|---------|---------|---------|---------|---------|--------|---------|---------|
| LOC642316 | 92.1    | 92.6    | 92.6    | 98.3    | 91.4    | 88.8   | 102.3   | 88.2    |
| LOC642323 | 373.8   | 476.3   | 197.3   | 240.7   | 179.8   | 210.2  | 216.4   | 309.7   |
| LOC642782 | 100.5   | 102.3   | 94.2    | 88.6    | 87.6    | 83.5   | 87.7    | 93.6    |
| LOC642944 | 89.7    | 96.8    | 90.2    | 87.8    | 93.2    | 100.5  | 96.4    | 82.7    |
| LOC642947 | 8623.3  | 9226    | 3949.4  | 7518.6  | 7689.1  | 5385.6 | 7399.5  | 9082.8  |
| LOC642968 | 131     | 145.8   | 93.6    | 86.4    | 88.4    | 90.5   | 132.9   | 153.6   |
| LOC642980 | 97      | 122.8   | 92      | 97.5    | 83.9    | 102.9  | 92.4    | 114.7   |
| LOC642980 | 95.8    | 112.6   | 95.6    | 93.3    | 82.2    | 97.6   | 100.4   | 117.1   |
| LOC643057 | 28616.1 | 26888.2 | 36978.8 | 37493.4 | 30824.1 | 35396  | 28119.6 | 28790.7 |
| LOC643165 | 85.6    | 109.6   | 90.8    | 96      | 81.9    | 90.4   | 101     | 99.5    |
| LOC643196 | 91      | 105.8   | 99.3    | 90.1    | 82.6    | 80.3   | 93.8    | 102.1   |
| LOC643226 | 79.4    | 85.3    | 103.5   | 103.8   | 93.2    | 108.1  | 77.4    | 76.3    |
| LOC643226 | 73.9    | 81.2    | 87      | 77      | 78.6    | 73     | 81      | 77.2    |
| LOC643253 | 90.7    | 86.8    | 94.7    | 95.6    | 85.9    | 91.9   | 87.5    | 95.3    |
| LOC643298 | 114.6   | 128.5   | 107.6   | 95.7    | 98.9    | 107.8  | 108.8   | 137.8   |
| LOC643366 | 103.6   | 114     | 95.9    | 95.6    | 88.5    | 102.9  | 99.2    | 114     |
| LOC643394 | 77.5    | 89.4    | 84.9    | 86.5    | 93.3    | 88.1   | 78      | 96.1    |
| LOC643414 | 87.7    | 91.3    | 88.4    | 86.5    | 81.3    | 79.3   | 83.1    | 85.7    |
| LOC643425 | 78.9    | 93.5    | 87      | 101.1   | 85.7    | 88.3   | 88.2    | 82.7    |
| LOC643516 | 8167.1  | 10078.8 | 3182.6  | 2481.6  | 1884.4  | 2537.1 | 7227    | 8481.1  |
| LOC643542 | 83.8    | 84.1    | 92.8    | 83.3    | 75.8    | 76.1   | 88.2    | 101.1   |
| LOC643591 | 303     | 348.1   | 137.8   | 180.6   | 167.6   | 145.1  | 194     | 290.7   |
| LOC643668 | 7361.4  | 9690.1  | 3496    | 3218.5  | 2571.7  | 3696.9 | 6829    | 8895.3  |
| LOC643736 | 94.7    | 106.7   | 104.4   | 98.6    | 88.4    | 92.4   | 105.2   | 108.1   |
| LOC643812 | 90.6    | 95.3    | 107.5   | 100.4   | 99.8    | 99.7   | 89.4    | 97.6    |
| LOC643842 | 107.2   | 133.1   | 103.5   | 93.9    | 91.7    | 94.3   | 104.3   | 118.6   |
| LOC643853 | 126.6   | 192.9   | 100     | 96.7    | 93.7    | 95.2   | 128.6   | 141     |
| LOC643853 | 124.6   | 163.5   | 149.2   | 149.5   | 126.2   | 162.8  | 122.1   | 184.3   |
| LOC643866 | 96      | 105.9   | 91      | 82.3    | 82.3    | 88.2   | 99.3    | 103.7   |
| LOC643905 | 128.9   | 130.1   | 99.7    | 80.8    | 81.2    | 105.3  | 103.1   | 107.7   |
| LOC643923 | 105.5   | 108.3   | 102.6   | 97.5    | 91.2    | 90.9   | 106.7   | 111     |
| LOC643923 | 95.3    | 94.3    | 81.1    | 91.2    | 87.5    | 84.8   | 93.9    | 96.7    |
| LOC643940 | 2594.7  | 3105.4  | 1315.6  | 1180.8  | 722.5   | 1241.2 | 2336.7  | 3437    |
| LOC643995 | 2559.9  | 3588.1  | 658.6   | 355.5   | 244.9   | 528.2  | 2104.4  | 2558.5  |
| LOC644076 | 76      | 84.4    | 83.7    | 75.2    | 82.2    | 87.5   | 78.7    | 82.4    |
| LOC644096 | 641.8   | 825.9   | 483.3   | 339.3   | 282.1   | 396.6  | 614.2   | 961.4   |
| LOC644168 | 114.4   | 133.4   | 111.2   | 92.3    | 95.9    | 97.3   | 120.2   | 113.2   |
| LOC644376 | 91.2    | 94.2    | 97.6    | 95.4    | 90      | 99.2   | 91.1    | 95.6    |
| LOC644398 | 130.5   | 152.4   | 100.8   | 94.5    | 80.4    | 93.9   | 136.4   | 158.6   |
| LOC644407 | 98.6    | 112.1   | 103.9   | 96.9    | 88.6    | 92.5   | 98.3    | 106     |
| LOC644529 | 93.2    | 103.7   | 106.9   | 99.7    | 87.6    | 102.1  | 90.5    | 91.7    |
| LOC644613 | 90.6    | 105.3   | 92.6    | 87.2    | 76.7    | 84.8   | 97.7    | 107.8   |
| LOC644615 | 562.3   | 832.6   | 354.9   | 252.8   | 234.6   | 319.1  | 521.5   | 717.3   |
| LOC644685 | 128.9   | 166.1   | 95.4    | 85.5    | 84      | 85.1   | 107.6   | 174.2   |
| LOC644784 | 101     | 108.8   | 91.4    | 86      | 82.4    | 86.1   | 99.5    | 101.3   |
| LOC644792 | 98.7    | 104.3   | 92.6    | 85.8    | 87.9    | 86.4   | 103.5   | 112.5   |
| LOC644890 | 113.5   | 123.8   | 105.9   | 95.2    | 99.7    | 95.2   | 112.5   | 131     |
| LOC644943 | 87.4    | 95.4    | 92.5    | 98.7    | 84.1    | 91.5   | 96.5    | 91.2    |
| LOC644997 | 102.3   | 121.3   | 96.1    | 93.9    | 92.5    | 86.6   | 105.8   | 104.7   |
| LOC644997 | 165.6   | 203.3   | 113.2   | 102.3   | 96.1    | 97.9   | 152.8   | 160.1   |

|           |         |         |         |         |         |        |        |         |
|-----------|---------|---------|---------|---------|---------|--------|--------|---------|
| LOC64503E | 90.1    | 112.8   | 101.9   | 87.9    | 89.9    | 94.1   | 98.5   | 97.7    |
| LOC645437 | 95.9    | 96      | 95.9    | 85.9    | 78.8    | 88.9   | 94.9   | 112.7   |
| LOC645562 | 129.3   | 149.7   | 106.9   | 97.4    | 77.5    | 85.3   | 98.8   | 120.1   |
| LOC64584E | 83.3    | 89.1    | 90.1    | 81.4    | 85      | 87.7   | 77.1   | 90.1    |
| LOC645922 | 70.9    | 82.2    | 96.6    | 90.1    | 75.1    | 81.1   | 80.4   | 82      |
| LOC645974 | 86.9    | 89.8    | 98.1    | 87.8    | 84.7    | 96.4   | 81.2   | 90.2    |
| LOC645974 | 110.3   | 125.4   | 96.3    | 96.3    | 82      | 82.8   | 97.9   | 130.2   |
| LOC646182 | 94.6    | 94.1    | 94.7    | 87.6    | 86.4    | 99.6   | 86     | 96.6    |
| LOC64620C | 21347.9 | 25021.7 | 11621.4 | 13387.3 | 10084.8 | 13926  | 20719  | 24838.8 |
| LOC64648C | 75.6    | 86.2    | 90.7    | 91.8    | 79      | 85.2   | 75.4   | 83      |
| LOC64660C | 77.7    | 81.2    | 87.6    | 100.2   | 90.6    | 88.2   | 73.4   | 82.6    |
| LOC646962 | 77.9    | 90.4    | 88.1    | 77.4    | 78.4    | 83.7   | 80.1   | 101.3   |
| LOC64704E | 101     | 142.7   | 94.3    | 83.8    | 89.5    | 81.8   | 115.7  | 127.8   |
| LOC647141 | 88      | 105.1   | 90      | 86.3    | 85.8    | 79.2   | 85.7   | 95.6    |
| LOC64764E | 80.1    | 86.2    | 100.2   | 87.1    | 88      | 86.3   | 82     | 81.6    |
| LOC64764E | 76.2    | 80.8    | 100.2   | 89.3    | 94.4    | 93.9   | 75.8   | 81      |
| LOC64776C | 154.4   | 173.7   | 115.4   | 108.6   | 94.9    | 115    | 143.3  | 156.8   |
| LOC647881 | 89.3    | 92      | 78.4    | 77.2    | 66.5    | 80.1   | 85.5   | 95.4    |
| LOC64814E | 137.9   | 148.3   | 89.9    | 80.9    | 80.5    | 94.4   | 116.9  | 150.2   |
| LOC64829E | 837.1   | 1171    | 752.4   | 884.9   | 687.9   | 1230.1 | 788.8  | 1301.8  |
| LOC64830E | 93.4    | 102.9   | 84      | 89.4    | 82.8    | 90.3   | 93.5   | 100.7   |
| LOC648367 | 82.4    | 107.8   | 98.5    | 83.8    | 86.4    | 85.5   | 102.4  | 99.5    |
| LOC648832 | 110.1   | 126.4   | 111.6   | 104.2   | 87.5    | 96.8   | 106.9  | 122.6   |
| LOC64901E | 107.2   | 111.7   | 93.8    | 103     | 89.9    | 101.3  | 108.2  | 108.7   |
| LOC64915E | 76.2    | 86.6    | 91.7    | 79.7    | 82.8    | 83.4   | 82.1   | 80.8    |
| LOC64915E | 150.5   | 179.4   | 111.5   | 95.2    | 76.2    | 90     | 143.4  | 184.2   |
| LOC64923C | 99      | 97.1    | 89.3    | 82.3    | 80.6    | 83.2   | 95.9   | 97.6    |
| LOC649377 | 122.9   | 151.8   | 91.4    | 80.7    | 78.9    | 89.6   | 119.6  | 143.6   |
| LOC649387 | 122.6   | 147.3   | 83.4    | 88.2    | 77.4    | 86.3   | 113.3  | 139.3   |
| LOC649387 | 78.6    | 83      | 94.4    | 80.6    | 81.4    | 81.4   | 80     | 83.4    |
| LOC649431 | 78.3    | 84      | 97.2    | 95.6    | 92.9    | 101.8  | 80.8   | 85.1    |
| LOC64944E | 88      | 88.7    | 94.9    | 89.3    | 68.7    | 80.7   | 85.3   | 93.3    |
| LOC64951E | 98.3    | 120.8   | 94.1    | 102     | 104.1   | 97.9   | 96.8   | 111.9   |
| LOC64955E | 101.8   | 118.2   | 95.6    | 79.8    | 77.1    | 91.8   | 96.6   | 118.8   |
| LOC64958E | 85      | 96.8    | 83.8    | 67.7    | 69.2    | 84.3   | 99     | 101.6   |
| LOC64970E | 303.6   | 366.5   | 147.8   | 125.4   | 122.5   | 124.6  | 267.2  | 370.9   |
| LOC64985E | 2374.8  | 2978.8  | 1544.2  | 1004.3  | 864.1   | 1000.2 | 1949.3 | 2758.3  |
| LOC64994E | 2434.1  | 3181.1  | 1206    | 984.6   | 808.9   | 1072.9 | 2278.3 | 5106.1  |
| LOC65000C | 78.2    | 88.4    | 95      | 82.9    | 81.5    | 92.1   | 77.4   | 88.6    |
| LOC65004C | 142     | 169.4   | 100.9   | 98.8    | 99.2    | 101.1  | 140    | 164.1   |
| LOC650137 | 90.2    | 99.2    | 92.7    | 90.7    | 81.3    | 90.5   | 92.2   | 97      |
| LOC650137 | 71.3    | 85.8    | 88.4    | 84.7    | 76.9    | 89.4   | 76.1   | 77.7    |
| LOC65023E | 101.5   | 118     | 100.2   | 96.1    | 94      | 106.1  | 95.5   | 99.5    |
| LOC650254 | 95      | 95      | 94.3    | 81.4    | 78      | 84.2   | 86.9   | 102.4   |
| LOC65029E | 81.2    | 89.1    | 96.7    | 101.2   | 84.1    | 90     | 75.2   | 77      |
| LOC65058E | 127     | 154.5   | 100.8   | 93      | 90.2    | 97.6   | 119.9  | 131.3   |
| LOC65064E | 102.9   | 113.1   | 97.6    | 80.2    | 78.1    | 84.8   | 85.7   | 117.4   |
| LOC65069E | 80.8    | 82.5    | 93.7    | 93.1    | 89.9    | 87.9   | 74.3   | 77.5    |
| LOC65079E | 138.1   | 153.2   | 89.1    | 97.2    | 77.5    | 79.8   | 140.5  | 155.9   |
| LOC65107E | 249.4   | 287.2   | 161.4   | 120.9   | 104.6   | 155.4  | 209.6  | 261     |

|           |         |         |        |        |        |        |         |         |
|-----------|---------|---------|--------|--------|--------|--------|---------|---------|
| LOC651137 | 85.3    | 97.3    | 82.6   | 83     | 81.1   | 85.2   | 78.2    | 88.6    |
| LOC651321 | 107.3   | 117.8   | 114.9  | 110.1  | 107.9  | 107.1  | 95.9    | 107.6   |
| LOC651423 | 325.9   | 446.4   | 192.8  | 194.5  | 161.9  | 171.7  | 255.5   | 280.5   |
| LOC651503 | 93.2    | 104     | 112    | 100.9  | 103.3  | 103.4  | 89.1    | 99.6    |
| LOC652020 | 85.6    | 86.9    | 97     | 85.5   | 89.1   | 92.7   | 89.8    | 86.7    |
| LOC652236 | 97.2    | 108.6   | 112.4  | 90.6   | 89.1   | 91.9   | 100.3   | 117.9   |
| LOC652461 | 104.5   | 114.9   | 108.6  | 88.1   | 81.9   | 90.6   | 104.5   | 122.9   |
| LOC652480 | 77.4    | 71.5    | 96.6   | 90.5   | 84     | 87.4   | 76.4    | 86.3    |
| LOC652705 | 82.7    | 110.7   | 80.6   | 85     | 68.5   | 79.3   | 92.5    | 101.5   |
| LOC652744 | 91.2    | 103.1   | 98.6   | 77.3   | 77.6   | 76.2   | 91.4    | 96.9    |
| LOC652870 | 91.9    | 97.9    | 99.6   | 96.2   | 93.6   | 90.9   | 97.6    | 88.3    |
| LOC652888 | 89.6    | 98.6    | 91.5   | 88.5   | 87.5   | 86.8   | 88.3    | 85.7    |
| LOC652924 | 329.4   | 422.2   | 192.6  | 260.9  | 198.4  | 235.9  | 280.8   | 366.4   |
| LOC652968 | 165.6   | 180.8   | 133.1  | 114.6  | 104.8  | 117.3  | 153.9   | 199.3   |
| LOC653033 | 116.5   | 124.3   | 103    | 89.7   | 94.6   | 94.8   | 104.8   | 114.7   |
| LOC653056 | 93.1    | 95.5    | 96.7   | 86.8   | 88     | 96.5   | 90.1    | 99.7    |
| LOC653062 | 89.2    | 95.9    | 89.4   | 88.2   | 74.2   | 90.4   | 88.6    | 97.6    |
| LOC653084 | 138.3   | 154.6   | 113.3  | 90     | 86.4   | 90.3   | 117.1   | 123.3   |
| LOC653098 | 142     | 165.1   | 127.9  | 109.7  | 98.3   | 112    | 141.7   | 160.6   |
| LOC653101 | 119.8   | 149.1   | 96.7   | 91.4   | 87.6   | 96.4   | 120.8   | 180     |
| LOC653122 | 86.4    | 78.6    | 94.9   | 84.5   | 90.1   | 98.2   | 79.1    | 85.9    |
| LOC653131 | 100.1   | 112.5   | 88.3   | 85.7   | 86.3   | 96.8   | 103.9   | 122.8   |
| LOC653133 | 199.9   | 247.6   | 141.9  | 221.8  | 197.4  | 143.5  | 170.2   | 219     |
| LOC653142 | 71.9    | 86.9    | 80.3   | 75.4   | 77.9   | 87.7   | 78      | 77.3    |
| LOC653150 | 144.2   | 145.3   | 99.6   | 98.1   | 89     | 90.2   | 112.5   | 169.3   |
| LOC653152 | 129.7   | 183.4   | 107.8  | 94.7   | 88     | 91.2   | 130.9   | 149.8   |
| LOC653170 | 105.7   | 117.4   | 97.4   | 84.2   | 88.2   | 93.3   | 98.6    | 124.1   |
| LOC653179 | 110.8   | 127     | 106    | 121.9  | 97     | 101.3  | 119.2   | 117.5   |
| LOC653216 | 88.8    | 95.7    | 95.4   | 96.7   | 100.5  | 95     | 87.1    | 94.4    |
| LOC653216 | 102     | 105.6   | 121.9  | 121.7  | 123.5  | 125.7  | 92.6    | 90.5    |
| LOC653216 | 72.2    | 85.6    | 100.5  | 97.3   | 93.9   | 88.2   | 77.4    | 84.5    |
| LOC653281 | 97      | 116.1   | 99.1   | 85.1   | 85.8   | 90.8   | 100.9   | 106.8   |
| LOC653282 | 166.9   | 195.3   | 115.8  | 111.8  | 107.9  | 121.4  | 150.6   | 182.9   |
| LOC653285 | 101     | 118.5   | 100.1  | 102.4  | 89.7   | 99.5   | 99.2    | 100.3   |
| LOC653314 | 12223.5 | 12792.3 | 3933.5 | 3062.2 | 2837.3 | 3051   | 11714   | 12224.5 |
| LOC653316 | 79.7    | 91.3    | 91.5   | 87.5   | 78.5   | 80.8   | 76.5    | 92.2    |
| LOC653319 | 108.8   | 125.3   | 115.4  | 97.6   | 90.3   | 94.3   | 96.3    | 121.2   |
| LOC653328 | 9670.5  | 10994.4 | 4627.5 | 3491.7 | 2699.9 | 3648.9 | 10710.3 | 13358.1 |
| LOC653375 | 256.9   | 382.2   | 236.1  | 189.3  | 185.5  | 248.4  | 241.7   | 354.6   |
| LOC653386 | 113.1   | 122.2   | 102.1  | 88.8   | 88.1   | 99     | 108.7   | 149.5   |
| LOC653417 | 137.3   | 148.7   | 114    | 96.9   | 87.5   | 95.7   | 119.2   | 136.2   |
| LOC653419 | 95      | 109.6   | 95.6   | 92.5   | 90     | 80.9   | 99.8    | 128     |
| LOC653423 | 120.9   | 130.3   | 96.9   | 82.3   | 90     | 101.4  | 116.6   | 134.6   |
| LOC653466 | 98.7    | 102.8   | 86.9   | 85.9   | 84.1   | 95.5   | 98.5    | 101.8   |
| LOC653484 | 95.8    | 97.5    | 91.7   | 91.1   | 88     | 102.2  | 106.9   | 104.4   |
| LOC653490 | 101.3   | 111.8   | 107.3  | 108.6  | 93     | 107.2  | 98.3    | 92.3    |
| LOC653499 | 92.5    | 93      | 101.4  | 93.5   | 89     | 83.4   | 100.3   | 103.1   |
| LOC653502 | 97.3    | 117.3   | 83.9   | 81.7   | 83.8   | 85.6   | 94.4    | 111.5   |
| LOC653517 | 87.7    | 81.9    | 94.1   | 88.6   | 81.6   | 87.6   | 89.9    | 84.2    |
| LOC653542 | 724.1   | 438.2   | 215.7  | 227.7  | 178.3  | 270.8  | 239.8   | 530.4   |

|           |        |        |       |       |       |       |        |        |
|-----------|--------|--------|-------|-------|-------|-------|--------|--------|
| LOC65354E | 92.9   | 97.2   | 83.9  | 92.7  | 83.2  | 84.9  | 94     | 88.7   |
| LOC65355E | 140.8  | 125.3  | 101.9 | 101.8 | 96.6  | 102.2 | 108.1  | 135.4  |
| LOC65356E | 2081.7 | 2710.2 | 577.5 | 540.8 | 413   | 559.2 | 2196.3 | 2983.7 |
| LOC65356E | 84.6   | 95.2   | 81.3  | 82.8  | 76.2  | 79.2  | 91.9   | 98.2   |
| LOC65360C | 83.5   | 92.1   | 88.6  | 94    | 85    | 88.5  | 82.4   | 76.3   |
| LOC653602 | 103.2  | 122.7  | 104.6 | 96.6  | 92.7  | 91.7  | 110.4  | 106.5  |
| LOC65361E | 70.6   | 81.5   | 80.8  | 86.7  | 77.5  | 75.5  | 82.5   | 78.4   |
| LOC653614 | 87.2   | 101.5  | 95    | 101.1 | 88.8  | 85.6  | 89.1   | 99     |
| LOC65362C | 101.6  | 121.6  | 85.4  | 86.8  | 79.7  | 90    | 94.3   | 104.2  |
| LOC65362E | 91.5   | 101.6  | 106.6 | 97.9  | 91.8  | 92.6  | 81.9   | 91.2   |
| LOC65362E | 166    | 201.3  | 148.1 | 183.1 | 142.3 | 273.6 | 219.6  | 410    |
| LOC65365E | 96.3   | 137.4  | 90.2  | 86.9  | 79.4  | 79.8  | 104.9  | 127.4  |
| LOC65368E | 71.5   | 91.3   | 88    | 87.3  | 83.7  | 78.7  | 79.2   | 89     |
| LOC65368E | 76.5   | 82.4   | 89.5  | 85.5  | 90.2  | 84    | 73.5   | 80.1   |
| LOC65369E | 105.3  | 134.9  | 109.8 | 95.2  | 97    | 108.4 | 115.6  | 131.8  |
| LOC653697 | 83.3   | 93.1   | 88.9  | 89.2  | 90    | 87.9  | 85.4   | 91.6   |
| LOC65370E | 95.6   | 109.6  | 101.4 | 94.3  | 89.4  | 98.7  | 99.1   | 111.6  |
| LOC65370E | 183.5  | 209    | 144.8 | 114.8 | 105.7 | 125.1 | 177.4  | 217.2  |
| LOC65370E | 258.8  | 284.7  | 127.2 | 114.6 | 114.8 | 134.9 | 237.7  | 446.3  |
| LOC65371E | 84.5   | 97     | 73.1  | 76.9  | 76    | 74    | 92.8   | 96.3   |
| LOC65372E | 106.8  | 119.5  | 98.7  | 98.6  | 83.7  | 82.1  | 92.4   | 117.5  |
| LOC653742 | 97.4   | 110.7  | 110.1 | 103.5 | 95.7  | 99.7  | 102.8  | 105.6  |
| LOC653744 | 158    | 207.8  | 103   | 93.8  | 80.6  | 78.1  | 144.7  | 162    |
| LOC65374E | 103    | 127.5  | 98.7  | 104   | 105.3 | 98.8  | 95.3   | 106.7  |
| LOC65374E | 92.5   | 106.4  | 88.2  | 81.6  | 79.8  | 88.8  | 79.8   | 97.4   |
| LOC65374E | 80     | 92.6   | 85.9  | 75.2  | 79.9  | 76.8  | 82.8   | 90.8   |
| LOC653757 | 87.6   | 109    | 102.5 | 85.7  | 90.7  | 97.9  | 93.8   | 102.8  |
| LOC65375E | 82.8   | 83.6   | 82    | 78.4  | 77.1  | 83.4  | 84     | 89.8   |
| LOC653762 | 103    | 97.3   | 102.9 | 97.1  | 82.4  | 98.2  | 98.3   | 105.9  |
| LOC653767 | 86.4   | 95.7   | 104.5 | 94.2  | 85.3  | 97.9  | 93.5   | 91.9   |
| LOC653771 | 80.5   | 84.1   | 86.1  | 85.9  | 85.2  | 82.3  | 79.2   | 91.7   |
| LOC653792 | 79.1   | 86     | 94.1  | 79.7  | 93.2  | 85.8  | 79.3   | 82.6   |
| LOC65379E | 86.2   | 89.7   | 86.6  | 89.1  | 75.9  | 79.5  | 84.7   | 95.5   |
| LOC653797 | 92.6   | 111.3  | 92.5  | 87.4  | 86.8  | 88.8  | 94.7   | 95.1   |
| LOC65380E | 185.5  | 210.6  | 126.8 | 137   | 117   | 114.8 | 125.9  | 140    |
| LOC65381E | 79.9   | 90.6   | 79.5  | 80.9  | 86    | 81.5  | 79.1   | 90.3   |
| LOC653814 | 70.5   | 85.2   | 85.1  | 85.1  | 72.1  | 81.3  | 68.4   | 76     |
| LOC653827 | 72.7   | 89.5   | 85.9  | 76.9  | 88.9  | 82.1  | 70.3   | 83.2   |
| LOC65386E | 72.1   | 95.3   | 96.3  | 91    | 93.6  | 97.9  | 86.7   | 93.8   |
| LOC65390E | 109    | 112.4  | 96.6  | 76.6  | 80.6  | 84.9  | 109.3  | 118.4  |
| LOC65395C | 129    | 151.5  | 111.3 | 200.4 | 191.8 | 194.1 | 120.5  | 134.4  |
| LOC65398C | 78.1   | 73.5   | 82.4  | 76.9  | 78.3  | 79.5  | 75.8   | 76.8   |
| LOC65398C | 91.1   | 106.2  | 100.5 | 87.5  | 91    | 91.5  | 100.3  | 103.8  |
| LOC654017 | 308.5  | 339.5  | 218.4 | 242.9 | 202.3 | 305.9 | 264.1  | 488.3  |
| LOC654052 | 109.9  | 123    | 102.8 | 108.9 | 108.6 | 103.8 | 124.6  | 139.4  |
| LOC654084 | 93.9   | 112.8  | 93.4  | 109.8 | 92.7  | 116.8 | 95.6   | 102.8  |
| LOC65411E | 83.2   | 91.5   | 95.9  | 85.2  | 82.7  | 101.8 | 76.6   | 92.4   |
| LOC65412E | 160.1  | 176.5  | 143.8 | 138.4 | 133.1 | 143.7 | 148.9  | 161.3  |
| LOC65412E | 87.7   | 95.6   | 100   | 103   | 96.5  | 96.5  | 92.8   | 92     |
| LOC65412E | 88     | 110.9  | 99.3  | 99.3  | 92.2  | 96.8  | 90.8   | 88.5   |

|           |         |         |         |        |         |         |         |         |
|-----------|---------|---------|---------|--------|---------|---------|---------|---------|
| LOC65414E | 104.8   | 107.5   | 109.8   | 98.9   | 94.5    | 93.1    | 93.1    | 103.9   |
| LOC654151 | 88.5    | 91.5    | 91.3    | 92.9   | 91.9    | 91.3    | 91.7    | 102.4   |
| LOC654182 | 93.1    | 98.6    | 88.1    | 77.9   | 79.9    | 78.5    | 88      | 97      |
| LOC65422E | 135.4   | 141.7   | 96.1    | 108.9  | 78.3    | 101.1   | 128.3   | 142.7   |
| LOC65434E | 94.4    | 104.8   | 73.1    | 69.8   | 74.2    | 70.2    | 90.9    | 118.2   |
| LOC723972 | 1228.6  | 1815.5  | 292.6   | 271.5  | 253.9   | 290.6   | 1000.8  | 1156.7  |
| LOC72793E | 99.8    | 99.6    | 92.1    | 87.3   | 86.3    | 90.1    | 98.9    | 102.6   |
| LOC728137 | 114.9   | 113.9   | 91.6    | 85.9   | 81.4    | 77.3    | 98.3    | 130.5   |
| LOC72821E | 81.5    | 84.9    | 85.4    | 74     | 80.1    | 77.3    | 85.6    | 84      |
| LOC72826E | 94.7    | 115.4   | 93.5    | 92.8   | 79.7    | 88.2    | 95.4    | 111.3   |
| LOC72848E | 1228    | 1543    | 941.5   | 679.3  | 593.2   | 694.8   | 1142.3  | 1220.6  |
| LOC728621 | 81.1    | 82.9    | 90      | 78.6   | 80.2    | 74      | 80.6    | 81.9    |
| LOC72863E | 149.5   | 183.3   | 108.3   | 103.4  | 95.1    | 101.3   | 116.7   | 128.9   |
| LOC72864E | 2641.8  | 4147.4  | 743.4   | 642.5  | 477.4   | 793.2   | 2514.4  | 4006.8  |
| LOC72875E | 140.4   | 176.5   | 138.7   | 203.8  | 195.8   | 192     | 133.7   | 168.6   |
| LOC729164 | 89.9    | 104.6   | 95.2    | 95.3   | 96.3    | 89.3    | 97.5    | 95.6    |
| LOC72944C | 127.2   | 152.7   | 92.6    | 77.1   | 81.6    | 97.6    | 109.5   | 131.4   |
| LOC72960E | 9398.9  | 10336.4 | 3666.9  | 7699.9 | 7297.2  | 4731.4  | 8594    | 8983.4  |
| LOC81558  | 128.6   | 135.2   | 96.5    | 104.6  | 99.8    | 105.6   | 98.7    | 146.5   |
| LOC81691  | 844.7   | 1023.3  | 763.6   | 611.9  | 574.6   | 692.5   | 583.3   | 701.6   |
| LOC84661  | 3311.2  | 3989.9  | 2325.8  | 2574.2 | 1775    | 2730    | 3122    | 4973.8  |
| LOC89944  | 90.6    | 89.3    | 98.5    | 85.5   | 84      | 88.3    | 83      | 86.6    |
| LOC90167  | 81.1    | 97.4    | 81.7    | 79     | 72.7    | 82.5    | 83.4    | 94.5    |
| LOC90321  | 131.7   | 175.1   | 94.5    | 92     | 78.2    | 92.2    | 134.4   | 166.1   |
| LOC90355  | 231.3   | 287.8   | 194.5   | 202.7  | 165.3   | 245.6   | 215.4   | 267.1   |
| LOC90379  | 128.9   | 159.1   | 120.1   | 103.9  | 99      | 98.1    | 125.5   | 157.7   |
| LOC90379  | 272.2   | 320     | 284.1   | 219.2  | 209.8   | 292.1   | 227     | 431.7   |
| LOC90580  | 715.9   | 960     | 643.9   | 403.9  | 305.6   | 442.3   | 663     | 1102.7  |
| LOC90586  | 1776.9  | 1768.5  | 1079.3  | 1607   | 1896.3  | 1393.2  | 1468.2  | 2173    |
| LOC90639  | 545.7   | 539.7   | 320.6   | 380.6  | 375.1   | 458.5   | 410.9   | 431.8   |
| LOC90693  | 170.6   | 181.8   | 109.1   | 101.2  | 88.9    | 109.4   | 151.2   | 243.8   |
| LOC90826  | 352.4   | 463.9   | 207.2   | 196.5  | 169.6   | 228.8   | 287.2   | 374.8   |
| LOC90835  | 1924.8  | 2303.2  | 1462.3  | 757.5  | 721.8   | 793.7   | 1436.4  | 1352.9  |
| LOC90925  | 97.3    | 122.2   | 93.6    | 87.6   | 99.1    | 97.3    | 108.7   | 119.3   |
| LOC91137  | 1390.2  | 1721.5  | 545.7   | 636.1  | 430.7   | 933.2   | 1146.3  | 1740.5  |
| LOC91353  | 103.6   | 124     | 112.6   | 92.9   | 89.6    | 90.9    | 113.5   | 119.9   |
| LOC91431  | 204.4   | 251.1   | 115     | 117.6  | 104.5   | 157.8   | 166.8   | 285.4   |
| LOC91461  | 114.5   | 126.1   | 130.3   | 108.7  | 110.4   | 115.6   | 102.2   | 167.7   |
| LOC91561  | 31902.9 | 31382.2 | 51947.2 | 45655  | 44710.4 | 48656.4 | 29830.2 | 29939.5 |
| LOC91614  | 181.5   | 244.6   | 125.8   | 119.4  | 104.2   | 126     | 150.4   | 222.2   |
| LOC91689  | 316.9   | 396.1   | 215.5   | 213    | 183.3   | 214.7   | 249.6   | 327.1   |
| LOC92017  | 84.6    | 123     | 96.8    | 132.2  | 127.5   | 124.4   | 94.7    | 90.7    |
| LOC92196  | 93.2    | 109.2   | 87.8    | 91.2   | 97.5    | 96.5    | 94.7    | 105.9   |
| LOC92270  | 151.4   | 176     | 125.7   | 123.9  | 119.6   | 150     | 141.3   | 166.2   |
| LOC92345  | 259.3   | 302.2   | 216.7   | 173    | 144     | 202.4   | 212.5   | 290.7   |
| LOC92689  | 111     | 134.2   | 103.5   | 90.4   | 95.3    | 88.3    | 108.8   | 130.2   |
| LOC92691  | 128     | 144.9   | 117.4   | 94.4   | 93.5    | 101.9   | 124.8   | 135.7   |
| LOC93081  | 3120.2  | 3739.6  | 1257    | 1365.6 | 1166.2  | 1430.8  | 2977.8  | 3963.7  |
| LOC93349  | 119.8   | 138.3   | 104.6   | 88.8   | 92.2    | 93.1    | 103.8   | 127.4   |
| LOC93622  | 637.2   | 862.9   | 408.5   | 328.7  | 267.8   | 367.6   | 564     | 779.9   |

|           |        |        |        |        |        |        |        |        |
|-----------|--------|--------|--------|--------|--------|--------|--------|--------|
| LOH11CR2/ | 108.3  | 137.1  | 104.3  | 93     | 101.6  | 108.4  | 111.3  | 122.1  |
| LOH11CR2/ | 138.5  | 181.6  | 99.7   | 93.4   | 94.4   | 92.8   | 134.5  | 175.8  |
| LOH12CR1  | 182.3  | 218.7  | 103.8  | 111    | 99.5   | 112.9  | 180.6  | 212.9  |
| LOH3CR2A  | 87     | 91.2   | 87.4   | 80.9   | 78     | 82.7   | 79.8   | 84.9   |
| LONP2     | 159.4  | 172.6  | 107.4  | 118.2  | 110.9  | 129.1  | 155.5  | 141.5  |
| LONRF1    | 258.1  | 345.4  | 231.3  | 192.4  | 178    | 244.8  | 274    | 478.1  |
| LONRF2    | 91.6   | 100.5  | 89.5   | 82.2   | 84.2   | 88     | 84.1   | 104.6  |
| LONRF3    | 161.5  | 203.5  | 151.2  | 131.3  | 119.4  | 167.2  | 163.1  | 275.4  |
| LONRF3    | 98.7   | 105.3  | 86     | 86.3   | 90.6   | 77.2   | 89.8   | 102    |
| LOR       | 76.6   | 83.9   | 88.5   | 84.8   | 78.5   | 76.1   | 71.8   | 75.3   |
| LOX       | 93.1   | 90.9   | 77     | 84.7   | 88.2   | 81.8   | 91.7   | 92.8   |
| LOXHD1    | 129.4  | 138.7  | 102.9  | 97.9   | 84.5   | 91.7   | 114.7  | 147.4  |
| LOXL1     | 68     | 81.6   | 83.2   | 80.1   | 77.2   | 73.3   | 69.2   | 83.7   |
| LOXL1     | 89.5   | 95.9   | 103.4  | 96.7   | 91     | 80.6   | 94.3   | 96     |
| LOXL2     | 78     | 87.3   | 84     | 76.5   | 74.2   | 79.1   | 83.5   | 92.1   |
| LOXL3     | 139.3  | 146.1  | 154.1  | 138.4  | 125.2  | 151.8  | 133.4  | 142.6  |
| LOXL4     | 101.8  | 105.8  | 96.6   | 97.6   | 95.8   | 97.1   | 89.2   | 107.7  |
| LPA       | 95.7   | 116.4  | 105.3  | 102.2  | 84.1   | 83.7   | 104    | 110.4  |
| LPA       | 83.5   | 86.3   | 100.6  | 93.5   | 104.5  | 95.7   | 87.5   | 82.1   |
| LPAL2     | 78.4   | 95.7   | 98.3   | 89.5   | 86.9   | 97.1   | 80.3   | 106.9  |
| LPAL2     | 93     | 94.7   | 91.2   | 93.3   | 80.8   | 88.2   | 83.4   | 89.8   |
| LPAL2     | 78.2   | 84.9   | 96.1   | 95.8   | 85.9   | 97.3   | 77.4   | 92.8   |
| LPGAT1    | 134.7  | 166.9  | 110.3  | 104.7  | 92.5   | 101.3  | 124.5  | 130    |
| LPHN1     | 250.9  | 360    | 381.3  | 284    | 237.8  | 428.2  | 269.2  | 497.7  |
| LPHN1     | 145.9  | 157.3  | 99.7   | 83.6   | 96.3   | 98.2   | 156.3  | 154.1  |
| LPHN2     | 685.9  | 1011.5 | 432.6  | 573.3  | 474.3  | 748.3  | 624.4  | 1129   |
| LPHN3     | 268.3  | 362    | 143.9  | 300.5  | 223.7  | 408    | 241.9  | 608    |
| LPIN1     | 929.1  | 1127.5 | 580.7  | 890.6  | 781.7  | 1039.4 | 933.2  | 1430.2 |
| LPIN2     | 183.7  | 236.4  | 144.8  | 117.6  | 97.1   | 119.6  | 169.4  | 185.4  |
| LPIN3     | 139.5  | 131.6  | 110.4  | 97.4   | 106.5  | 105.6  | 120.9  | 141.2  |
| LPL       | 622.4  | 700.8  | 277.6  | 418.6  | 265.1  | 548.5  | 333.9  | 428.8  |
| LPO       | 85.4   | 101.7  | 93.8   | 93.3   | 95.9   | 100.9  | 88.8   | 103.7  |
| LPP       | 724.8  | 1352.8 | 374.1  | 1074.1 | 967.1  | 1548.3 | 859.8  | 833.4  |
| LPPR2     | 146.8  | 223.7  | 163.2  | 202.6  | 139.6  | 225.9  | 150.9  | 242.3  |
| LPPR4     | 91     | 97.2   | 94.6   | 94     | 81.1   | 87.1   | 85     | 109.6  |
| LPXN      | 1936.4 | 2374.7 | 976.9  | 1026.2 | 820.9  | 966.5  | 2621.6 | 3809.7 |
| LRAP      | 5193.5 | 4597.2 | 3634.9 | 4437.3 | 4467.2 | 3387.6 | 4544.2 | 7925.5 |
| LRAT      | 89.6   | 95.1   | 87.5   | 88.1   | 80.8   | 97.3   | 96.2   | 98.1   |
| LRBA      | 250.1  | 314.6  | 281.5  | 420.7  | 330.1  | 479.5  | 245.8  | 304.9  |
| LRCH1     | 92.9   | 99.8   | 86.3   | 86.8   | 87.5   | 78.8   | 97.3   | 99.3   |
| LRCH2     | 104.7  | 119.7  | 94     | 90     | 86.4   | 89.9   | 104.1  | 116.9  |
| LRCH3     | 235    | 291.1  | 166.8  | 186.9  | 168.1  | 178.3  | 189.5  | 248.5  |
| LRCH4     | 1263.4 | 1608   | 676.6  | 642.4  | 680.8  | 620.6  | 970.9  | 651    |
| LRDD      | 244.9  | 249.7  | 373.1  | 240.6  | 244.6  | 424    | 170    | 290.1  |
| LRDD      | 204.1  | 210.6  | 218.5  | 177    | 176.3  | 263    | 194.5  | 213.5  |
| LRDD      | 83.4   | 100.2  | 89.4   | 76.3   | 79.7   | 79.5   | 76.5   | 89.1   |
| LRFN2     | 73.1   | 83.1   | 93.2   | 80.5   | 84.1   | 81.3   | 83.2   | 75.3   |
| LRFN3     | 561.4  | 727.7  | 456.1  | 330    | 282.4  | 325.4  | 485    | 493.9  |
| LRFN4     | 170.8  | 204.5  | 210.5  | 169.5  | 143.1  | 240.7  | 168.1  | 320.7  |
| LRFN5     | 83.6   | 96.7   | 92.9   | 92     | 88.6   | 96.2   | 95     | 98     |

|        |        |        |       |        |        |        |        |        |
|--------|--------|--------|-------|--------|--------|--------|--------|--------|
| LRG1   | 1230.7 | 1583.6 | 493.2 | 336.7  | 354.3  | 374    | 942.9  | 702.5  |
| LRIG1  | 428    | 630.1  | 366.8 | 611.8  | 587.5  | 875.3  | 428.7  | 902.7  |
| LRIG2  | 230.1  | 259.4  | 174.4 | 133.4  | 120.8  | 163.1  | 178.6  | 246    |
| LRIG3  | 90.4   | 99.1   | 94.1  | 84.9   | 88     | 92.4   | 91.2   | 93.9   |
| LRMP   | 496    | 611    | 402.9 | 494.8  | 529.3  | 670.6  | 354.1  | 516.4  |
| LRP1   | 109.7  | 124.7  | 92.7  | 87.5   | 84.3   | 92.8   | 128.2  | 145.1  |
| LRP10  | 521.6  | 553.3  | 215.7 | 162.9  | 167.7  | 165.2  | 586.8  | 939.2  |
| LRP11  | 504.1  | 671.6  | 239.5 | 386.4  | 288    | 543.2  | 403.7  | 696.7  |
| LRP12  | 125.4  | 127.8  | 99.5  | 98.5   | 113.4  | 95     | 118.3  | 134.8  |
| LRP16  | 101.9  | 123.8  | 98.4  | 80.5   | 86.6   | 87.7   | 99     | 111.7  |
| LRP1B  | 85.1   | 96.6   | 92.2  | 96.9   | 82.2   | 86.6   | 92.7   | 88.1   |
| LRP2   | 80.5   | 92.5   | 92.5  | 84     | 85.1   | 93     | 78.3   | 82.4   |
| LRP2BP | 124.2  | 147.4  | 104.7 | 90.2   | 87.4   | 99.4   | 132.5  | 140.4  |
| LRP3   | 2350   | 2880.3 | 1798  | 1551.7 | 1131.2 | 1350.5 | 1806.7 | 1992.4 |
| LRP4   | 89     | 91.6   | 102.5 | 103.1  | 84.8   | 102.7  | 78.3   | 91.4   |
| LRP5   | 97.3   | 107.5  | 132.2 | 130.2  | 115.2  | 133.2  | 94.4   | 105    |
| LRP5L  | 255.2  | 249.7  | 162.9 | 245.8  | 262.6  | 295.4  | 189.2  | 192.1  |
| LRP6   | 121.5  | 140.6  | 117.2 | 117.4  | 111.1  | 122.1  | 132    | 125.6  |
| LRP8   | 166.9  | 165.3  | 112   | 110.5  | 93.1   | 115.3  | 197.1  | 411.9  |
| LRP8   | 782.6  | 896.7  | 586.6 | 811.2  | 609.3  | 1179.2 | 1141.7 | 2225.5 |
| LRPAP1 | 521.9  | 745.3  | 360.6 | 307.7  | 270.9  | 396.9  | 542.5  | 634.3  |
| LRPPRC | 735.7  | 1127.6 | 704.5 | 788    | 588.1  | 979.3  | 589.2  | 929    |
| LRRC1  | 150.6  | 178.5  | 99.2  | 90     | 85.3   | 86.9   | 118.9  | 175.2  |
| LRRC1  | 435.1  | 490.7  | 263.7 | 312.2  | 218    | 325.4  | 386.3  | 557.5  |
| LRRC10 | 83.7   | 87.3   | 93.8  | 95.2   | 87.5   | 81.3   | 90.7   | 82.7   |
| LRRC14 | 723.4  | 750.9  | 445.8 | 252.4  | 237.6  | 262.2  | 453.2  | 518.9  |
| LRRC15 | 153.1  | 241.1  | 118.3 | 108.9  | 102.8  | 108.9  | 182.2  | 184.5  |
| LRRC16 | 118.4  | 132.1  | 106.6 | 104.3  | 94.8   | 93.8   | 99.4   | 107.6  |
| LRRC17 | 236.6  | 259.6  | 176.7 | 211.4  | 186.8  | 246.4  | 152.6  | 181.5  |
| LRRC17 | 90.1   | 111.9  | 96.4  | 97.5   | 91.4   | 101.9  | 96.2   | 103.4  |
| LRRC17 | 121.7  | 157.7  | 104.4 | 108.7  | 98.8   | 129.9  | 101.3  | 128.6  |
| LRRC18 | 97.8   | 115.1  | 92.6  | 82.1   | 86     | 87.8   | 96.9   | 100.1  |
| LRRC19 | 116.5  | 140.6  | 100.6 | 95.4   | 92.3   | 78.8   | 112.6  | 131.4  |
| LRRC2  | 89.6   | 101.6  | 82.5  | 82.9   | 77.7   | 85.7   | 93.4   | 97.2   |
| LRRC20 | 69.2   | 76.4   | 88    | 83.2   | 81.9   | 80     | 75.9   | 82.1   |
| LRRC20 | 731    | 950    | 492.3 | 368.4  | 294.1  | 333    | 500    | 400.8  |
| LRRC20 | 133    | 188    | 182.6 | 163.5  | 135.5  | 174.7  | 125.2  | 152.9  |
| LRRC21 | 85.9   | 103.5  | 93.4  | 86.3   | 80.6   | 87     | 91.3   | 119.2  |
| LRRC22 | 79.2   | 89     | 99.4  | 93.9   | 93.5   | 81.8   | 78.5   | 78.1   |
| LRRC23 | 104.4  | 112.9  | 105.6 | 100.9  | 99.3   | 109    | 106.4  | 113.9  |
| LRRC23 | 90     | 99     | 107   | 90.7   | 96.2   | 86.9   | 91.6   | 97.3   |
| LRRC24 | 92.3   | 103.3  | 96.5  | 92.6   | 86.3   | 79.6   | 87.4   | 107.7  |
| LRRC25 | 84.5   | 93.6   | 104.4 | 101.4  | 91.6   | 94.6   | 82.9   | 86.1   |
| LRRC27 | 98.6   | 111.8  | 91.8  | 89.7   | 82.3   | 83     | 101.8  | 99     |
| LRRC28 | 343.3  | 459.1  | 209.5 | 236.2  | 204.5  | 229.3  | 342.7  | 351.9  |
| LRRC29 | 91     | 103.2  | 98.8  | 96.6   | 91     | 95.7   | 84.5   | 86.1   |
| LRRC29 | 144    | 188    | 131.4 | 126.7  | 114.1  | 118.8  | 146.8  | 195.4  |
| LRRC3  | 193.5  | 234.7  | 121.7 | 159.1  | 117.4  | 141    | 180.2  | 213    |
| LRRC31 | 112.7  | 123.4  | 104.3 | 110.1  | 110.7  | 113.4  | 105.5  | 128.1  |
| LRRC32 | 90.4   | 97.6   | 84.4  | 94.5   | 87     | 85.9   | 93     | 85.5   |

|          |        |        |        |        |       |        |        |        |
|----------|--------|--------|--------|--------|-------|--------|--------|--------|
| LRRC33   | 767.4  | 1017.6 | 992.9  | 880    | 711.3 | 1421.6 | 721.9  | 1587.6 |
| LRRC34   | 220.6  | 283.3  | 105.8  | 98.3   | 83.6  | 94.3   | 160.6  | 233.8  |
| LRRC35   | 108.7  | 149.5  | 99.4   | 84.6   | 82.4  | 86     | 112    | 128.2  |
| LRRC36   | 94.7   | 110.1  | 93.5   | 87.5   | 80.8  | 90.4   | 89.4   | 106.9  |
| LRRC37A2 | 91.4   | 115.5  | 94     | 91.8   | 99.1  | 88.3   | 89.6   | 104.8  |
| LRRC37B  | 579.2  | 724.9  | 353.3  | 608.6  | 520   | 645.2  | 535.9  | 851.8  |
| LRRC39   | 112.6  | 129.8  | 95.9   | 90.3   | 86.5  | 91.6   | 105    | 139.8  |
| LRRC3B   | 102.1  | 115.2  | 115.5  | 100.3  | 98.6  | 110.6  | 128.1  | 182.4  |
| LRRC4    | 88.5   | 110.1  | 86.2   | 83.2   | 82.6  | 84     | 79.6   | 110.2  |
| LRRC40   | 131.8  | 140.7  | 124.6  | 117.4  | 103.6 | 120.7  | 122.9  | 192.3  |
| LRRC41   | 670.9  | 859.5  | 251.9  | 200.1  | 171.2 | 210.4  | 536.3  | 487.8  |
| LRRC42   | 1003.9 | 1232.2 | 625.7  | 845    | 648.7 | 730    | 1036.7 | 1396.7 |
| LRRC43   | 97.1   | 101.3  | 106.7  | 105.8  | 107.2 | 115.7  | 87.1   | 94.3   |
| LRRC45   | 202.7  | 227.5  | 365.2  | 337.7  | 338.6 | 579.2  | 137.5  | 178.8  |
| LRRC45   | 153.2  | 169.1  | 142.2  | 144.5  | 120.2 | 177    | 110.8  | 126.7  |
| LRRC46   | 108.5  | 151.4  | 93.8   | 101.5  | 79.9  | 97.8   | 122.1  | 154.3  |
| LRRC47   | 539.8  | 649.4  | 319.5  | 400.5  | 279   | 365.9  | 445.4  | 609.4  |
| LRRC48   | 105    | 110.9  | 100.8  | 102    | 89.7  | 84.6   | 98.7   | 149.1  |
| LRRC48   | 80.7   | 88.7   | 104.1  | 98.6   | 91.1  | 90.4   | 78.5   | 80.6   |
| LRRC49   | 95.8   | 104.8  | 90.7   | 101.2  | 89.4  | 96.5   | 94.9   | 111.4  |
| LRRC4B   | 94.3   | 111.6  | 92.6   | 91.9   | 87.9  | 83.5   | 94.4   | 110.6  |
| LRRC4C   | 97.5   | 92     | 90.9   | 89.4   | 98.4  | 81.5   | 87.5   | 92.9   |
| LRRC50   | 106.5  | 121.9  | 98.8   | 96.1   | 82    | 86.5   | 98.1   | 114.2  |
| LRRC51   | 99.7   | 108.9  | 90.7   | 104    | 96.8  | 100.4  | 93.6   | 85.9   |
| LRRC52   | 91.3   | 93.3   | 90.6   | 83.6   | 85.1  | 90.1   | 94.5   | 108.2  |
| LRRC54   | 217.6  | 264.6  | 199.4  | 117.7  | 103.3 | 116    | 210.8  | 346.7  |
| LRRC55   | 86.8   | 95.7   | 93.8   | 93.4   | 89.5  | 92.8   | 99.7   | 92.2   |
| LRRC56   | 169.6  | 205.8  | 128.8  | 106.6  | 108.6 | 115.3  | 144    | 132.2  |
| LRRC57   | 435.5  | 507.1  | 207.1  | 174.8  | 157.7 | 215.2  | 447.3  | 606.6  |
| LRRC59   | 159.7  | 224.3  | 112.3  | 86.1   | 79.9  | 99.6   | 147.4  | 200.8  |
| LRRC6    | 110.4  | 124.5  | 101.5  | 85.6   | 85.7  | 87.3   | 103    | 111.3  |
| LRRC61   | 88.9   | 101    | 92.2   | 82.7   | 81.6  | 80.5   | 86.4   | 112.7  |
| LRRC7    | 74.6   | 82.7   | 89.2   | 81.7   | 86.6  | 79.2   | 71.8   | 74.6   |
| LRRC8A   | 286.9  | 314.3  | 192.1  | 156.3  | 150.5 | 145.5  | 322.3  | 386.1  |
| LRRC8B   | 98.7   | 107.2  | 91.6   | 84.4   | 88.1  | 85.8   | 98.8   | 110    |
| LRRC8C   | 375.1  | 559.8  | 245.5  | 235.2  | 214.5 | 333.7  | 329.4  | 608.3  |
| LRRC8D   | 480.2  | 662.8  | 299.6  | 320.5  | 232.2 | 360.3  | 421.9  | 580.6  |
| LRRC8E   | 122.3  | 147.9  | 92     | 82     | 86.8  | 97.6   | 108.9  | 133.7  |
| LRRCC1   | 130.7  | 115.4  | 104.1  | 89.2   | 82.3  | 92.3   | 128.8  | 138.7  |
| LRRCC1   | 2095.8 | 2700.4 | 676.3  | 591.8  | 525.3 | 823.1  | 1381.6 | 2450.4 |
| LRRCC1   | 116.4  | 118.4  | 104.4  | 104.4  | 96.6  | 91.9   | 95.3   | 121.8  |
| LRRFIP1  | 1437.6 | 1564.3 | 1753.4 | 2697.3 | 2033  | 3003.2 | 1849.8 | 4019.7 |
| LRRFIP2  | 77.7   | 92.6   | 84     | 81.4   | 80.6  | 78.1   | 71.5   | 90     |
| LRRFIP2  | 453.5  | 681.6  | 447.1  | 562.7  | 497.4 | 802    | 587.7  | 1092.5 |
| LRRFIP2  | 507.1  | 644.4  | 270.3  | 288.3  | 287.6 | 415.8  | 515.4  | 667.8  |
| LRRIQ1   | 81.3   | 84.3   | 84.4   | 88.3   | 80    | 77.9   | 80.9   | 77.1   |
| LRRIQ2   | 78.6   | 87.6   | 93.8   | 85.8   | 87.7  | 85.4   | 87     | 90.7   |
| LRRK1    | 151.9  | 157.5  | 101    | 118.9  | 93.7  | 116.9  | 147.8  | 202.6  |
| LRRK2    | 87.6   | 109.2  | 95.5   | 87.9   | 78.5  | 83.7   | 92.1   | 90.9   |
| LRRK2    | 94.9   | 128.6  | 94.3   | 91.5   | 87.1  | 97.4   | 95.5   | 122.3  |



|           |        |         |        |        |        |        |        |        |
|-----------|--------|---------|--------|--------|--------|--------|--------|--------|
| LRRN1     | 92     | 112.1   | 98.8   | 83.6   | 87.3   | 92.6   | 88.9   | 106.1  |
| LRRN3     | 100.8  | 112.4   | 96.3   | 89.5   | 85.1   | 83.7   | 106.7  | 118.2  |
| LRRN5     | 99.3   | 113.7   | 95.5   | 100.3  | 96     | 104.8  | 95.2   | 103.2  |
| LRRN5     | 97.6   | 112.7   | 92.6   | 98.7   | 83.9   | 78.2   | 98.4   | 97.4   |
| LRRN5     | 118.6  | 127.3   | 90.6   | 90.3   | 81.5   | 83.9   | 104.8  | 123.3  |
| LRRN6A    | 108.3  | 115     | 97.9   | 90.2   | 85.4   | 87.9   | 105    | 124.8  |
| LRRN6C    | 80.8   | 95.9    | 93.1   | 86.2   | 89.7   | 92.1   | 91.4   | 79.9   |
| LRRTM1    | 120    | 126.5   | 93.5   | 83.2   | 85     | 84.6   | 121.9  | 119.7  |
| LRRTM2    | 95.3   | 101.9   | 99.2   | 93.1   | 97.6   | 86.9   | 90.8   | 96.6   |
| LRRTM3    | 83.3   | 97.5    | 99.4   | 85.1   | 76.4   | 87.4   | 85.7   | 94.4   |
| LRRTM4    | 165    | 194.1   | 106.6  | 102    | 102.8  | 93.9   | 158    | 173.5  |
| LRSAM1    | 80.5   | 84.8    | 91.5   | 85.1   | 86.5   | 78.8   | 81.6   | 84.1   |
| LRSAM1    | 471.7  | 542.9   | 373.9  | 236    | 233.3  | 263.6  | 373.1  | 398.4  |
| LRSAM1    | 94.7   | 113.8   | 94.8   | 84     | 85.4   | 90.8   | 109.5  | 119.7  |
| LRTM1     | 94.4   | 112.4   | 97.9   | 93.5   | 88     | 84.2   | 93.5   | 121.2  |
| LRTM2     | 133.5  | 149.1   | 107.1  | 91.7   | 91     | 94     | 102.6  | 141.9  |
| LSAMP     | 116.3  | 130.4   | 112.2  | 106.7  | 106.8  | 115.8  | 102    | 131.2  |
| LSDP5     | 183.4  | 209.4   | 119.5  | 124.4  | 134    | 110    | 158.2  | 212.4  |
| LSG1      | 383.3  | 378     | 247.2  | 235.6  | 167    | 259.5  | 299    | 575.3  |
| LSM1      | 8780.3 | 10885.9 | 8180.7 | 6172.5 | 4479.2 | 6418   | 7948.2 | 9325.7 |
| LSM10     | 654.5  | 802.3   | 368.7  | 278.9  | 236.1  | 345.6  | 583.1  | 661    |
| LSM11     | 123.7  | 129.9   | 120    | 98.1   | 95.2   | 88.3   | 99.7   | 110.8  |
| LSM12     | 1014.1 | 1438    | 499.5  | 416    | 308.1  | 419.6  | 798.9  | 1344.2 |
| LSM14A    | 2826.9 | 3575.8  | 2200.7 | 2168   | 1761.6 | 2180.4 | 2793.2 | 2669.3 |
| LSM14B    | 230.5  | 314.9   | 120.6  | 115.8  | 116.6  | 122.2  | 230.8  | 267    |
| LSM16     | 177.6  | 206.9   | 209.9  | 203.4  | 175.6  | 256.4  | 173.7  | 285.6  |
| LSM2      | 7100.9 | 8186.4  | 3623   | 3281.4 | 2623.6 | 3394.7 | 6710   | 6877.2 |
| LSM3      | 4968.3 | 4953.9  | 3075.4 | 3556   | 2279   | 3410.7 | 5310.7 | 9075.6 |
| LSM4      | 3310.2 | 4785.6  | 2758.1 | 1228.9 | 1067.5 | 1705.3 | 2794.7 | 3222.9 |
| LSM5      | 575.6  | 660.2   | 342    | 332.7  | 225    | 279.3  | 541.1  | 977.9  |
| LSM6      | 466.8  | 530.4   | 183.5  | 142.3  | 106.3  | 123.5  | 459.5  | 852.8  |
| LSM7      | 7076.8 | 8379.7  | 4293.7 | 3049.5 | 2853.8 | 4236   | 6434.6 | 6821   |
| LSM8      | 680.6  | 855.7   | 416.7  | 386.1  | 316.3  | 408.7  | 495.3  | 665.5  |
| LSMD1     | 767.2  | 1040.6  | 361.5  | 392    | 273    | 464    | 710.5  | 932.2  |
| LSP1      | 129.9  | 131.3   | 117.5  | 169.8  | 160.4  | 222    | 113.7  | 168.9  |
| LSP1      | 85.7   | 94.1    | 96     | 93.7   | 94     | 91.8   | 86.2   | 102.9  |
| LSP1      | 91.2   | 100.7   | 98.7   | 210.2  | 190.7  | 173.3  | 96     | 93     |
| LSP1      | 108.5  | 131.4   | 96.7   | 90     | 76     | 78.2   | 95.1   | 128.6  |
| LSR       | 86.8   | 90      | 105.5  | 91.4   | 91.8   | 101.5  | 93.4   | 93     |
| LSR       | 109.9  | 140.4   | 94.7   | 101.9  | 85.9   | 99.2   | 101.6  | 119.7  |
| LSR       | 126.5  | 145.7   | 89.6   | 79.1   | 89.7   | 100.8  | 108.4  | 179.2  |
| LSS       | 101.2  | 127.7   | 98     | 106.5  | 113.9  | 122.2  | 105.4  | 121.7  |
| LSS       | 135.9  | 152.8   | 113.4  | 123    | 115.6  | 117.1  | 123    | 137.4  |
| LSS       | 291.6  | 383     | 386.5  | 529    | 702.3  | 773.6  | 226.5  | 377.1  |
| LST1      | 4088   | 4779.5  | 3766.7 | 1740.5 | 1479.4 | 2045.5 | 3381.1 | 3416.7 |
| LST1      | 253.5  | 293.6   | 245    | 154.9  | 137.8  | 143.6  | 190.2  | 274.2  |
| LST1      | 3544.2 | 4178    | 1752.4 | 1095.1 | 911    | 1385.5 | 2991.1 | 3506.4 |
| LST1      | 3412.9 | 4359.3  | 1645.7 | 1320.1 | 1026.4 | 1189.7 | 3137.5 | 3405.9 |
| LST-3TM12 | 102.5  | 105.8   | 93.7   | 87.9   | 91.3   | 84.7   | 99.9   | 117.2  |
| LTA       | 188.5  | 163.7   | 112.9  | 109.1  | 99.7   | 105.6  | 167.1  | 185.9  |

|        |        |        |        |        |        |        |        |        |
|--------|--------|--------|--------|--------|--------|--------|--------|--------|
| LTA4H  | 2506   | 3268.2 | 1111.9 | 1775.2 | 1299.8 | 2121.7 | 2055.7 | 2687.5 |
| LTB    | 533.3  | 715.1  | 337.5  | 279.7  | 221.5  | 219.4  | 717.9  | 800.9  |
| LTB    | 165.8  | 231.3  | 139.4  | 129.2  | 123.4  | 118.7  | 220.8  | 265.9  |
| LTB4DH | 985.9  | 1484.7 | 672.5  | 534.1  | 413.3  | 583.4  | 978.4  | 1246.5 |
| LTB4R  | 159.9  | 168.8  | 167    | 177.4  | 153.6  | 254.2  | 144.9  | 158.3  |
| LTB4R2 | 94     | 102    | 102.5  | 92.5   | 92.1   | 97.7   | 89.1   | 99.5   |
| LTBP1  | 103.4  | 126.6  | 93.5   | 80.7   | 74.8   | 82.6   | 112.3  | 124.5  |
| LTBP1  | 102.2  | 120.7  | 93.8   | 92     | 87.3   | 91     | 117.2  | 108.4  |
| LTBP3  | 101.8  | 110.6  | 90.4   | 96.8   | 92.7   | 87.8   | 99.3   | 97.8   |
| LTBP3  | 97.2   | 95     | 88.5   | 79.7   | 80.7   | 81.5   | 93.8   | 99.3   |
| LTBP3  | 217.9  | 281.9  | 178.9  | 119.8  | 116.5  | 141.5  | 233.4  | 285.4  |
| LTBP4  | 98.7   | 101.8  | 101.4  | 97.8   | 90.9   | 99.2   | 98.9   | 102    |
| LTBP4  | 195.3  | 232.9  | 183.6  | 181.7  | 162.3  | 193.1  | 211.5  | 332.4  |
| LTBR   | 309.6  | 430.8  | 455.2  | 434.9  | 355.4  | 549.8  | 366.1  | 1224.1 |
| LTC4S  | 793.2  | 1062.9 | 489.8  | 598.5  | 487.3  | 397.4  | 659.3  | 677.7  |
| LTF    | 105.8  | 113.3  | 99.1   | 81.6   | 86.7   | 85.4   | 90.2   | 120.3  |
| LTK    | 137.2  | 136.5  | 89.8   | 97.7   | 90.4   | 97.7   | 122.9  | 161.7  |
| LTK    | 87.9   | 110.6  | 97.8   | 98.1   | 86     | 85.7   | 100.6  | 101.6  |
| LTV1   | 3029.3 | 4055.1 | 981.2  | 717.7  | 642.9  | 1197.9 | 2508.8 | 3741.5 |
| LUC7L  | 124    | 126.6  | 99.9   | 89.9   | 97     | 100.1  | 117.1  | 138.6  |
| LUC7L  | 447.5  | 582.1  | 297.3  | 310.1  | 280.8  | 399.1  | 349.9  | 443.2  |
| LUC7L2 | 184.1  | 196.6  | 145.1  | 172.1  | 157.3  | 181.2  | 156.2  | 176    |
| LUM    | 85.3   | 91.5   | 102.6  | 94.9   | 89     | 97.8   | 82.2   | 89.4   |
| LUZP1  | 567    | 843.1  | 567.1  | 725.8  | 621.9  | 914.3  | 533.2  | 607.9  |
| LUZP2  | 102.4  | 129.3  | 111.1  | 106.9  | 107.1  | 101.1  | 94.6   | 99.9   |
| LUZP4  | 73.8   | 82.1   | 74.8   | 81.5   | 80.5   | 75.4   | 80.2   | 82.2   |
| LXN    | 86.4   | 97.8   | 99.5   | 86.6   | 87.7   | 84.1   | 97.1   | 101.6  |
| LY6D   | 85.5   | 108    | 92.1   | 78     | 92.1   | 82.6   | 99.8   | 102    |
| LY6E   | 889.3  | 1234.9 | 876.7  | 193    | 197.8  | 249.2  | 725.4  | 1439.8 |
| LY6G5B | 104.8  | 119.9  | 104.6  | 101.4  | 98.7   | 96.9   | 92.2   | 116.9  |
| LY6G5C | 221.7  | 257.2  | 140.8  | 133.9  | 115.5  | 104.9  | 199.6  | 240.3  |
| LY6G5C | 109.9  | 135.7  | 94.6   | 88.3   | 77.5   | 83.3   | 102.4  | 114.1  |
| LY6G5C | 79.1   | 79.8   | 98.4   | 86.6   | 86.3   | 87.4   | 81.2   | 75     |
| LY6G6C | 119.4  | 148.7  | 91.9   | 79.9   | 76.3   | 85.5   | 107.6  | 151.8  |
| LY6G6D | 87.2   | 95.6   | 103.8  | 84.2   | 88.6   | 82.8   | 84.1   | 103    |
| LY6H   | 276.3  | 321.3  | 195.4  | 126.7  | 138.1  | 159.5  | 257.2  | 266.3  |
| LY6H   | 97.4   | 128.9  | 84.3   | 88.4   | 88.5   | 88.2   | 98.6   | 115.4  |
| LY6K   | 85.6   | 100.6  | 88.4   | 84.5   | 82.7   | 87.5   | 77.5   | 95.2   |
| LY75   | 82.9   | 89.8   | 95.8   | 82.7   | 92.3   | 84.1   | 84.8   | 100.4  |
| LY86   | 1600.7 | 2115.5 | 1276.7 | 1467.9 | 1205.6 | 1457.2 | 1611.5 | 1871.2 |
| LY9    | 107.5  | 147.2  | 106.6  | 85.8   | 79.3   | 82.7   | 108.5  | 115.8  |
| LY9    | 84.5   | 97.9   | 113.9  | 101.6  | 102.4  | 102.1  | 82.6   | 89.4   |
| LY9    | 104.9  | 130.4  | 95.5   | 91.4   | 82     | 92.8   | 103.5  | 130.5  |
| LY96   | 188.8  | 230    | 176.2  | 277.1  | 246.5  | 356.6  | 253.6  | 311.5  |
| LYAR   | 2379   | 2880.5 | 609.6  | 590.9  | 539.6  | 949.4  | 1626.4 | 2542.4 |
| LYCAT  | 103.3  | 123.4  | 89.6   | 91.3   | 82.7   | 92.2   | 100.8  | 114.2  |
| LYCAT  | 927    | 1178.3 | 615.4  | 578.5  | 413.8  | 700.1  | 730.1  | 1250.5 |
| LYG2   | 100.6  | 116.1  | 95.5   | 88.8   | 83.1   | 100.4  | 100.5  | 126.8  |
| LYK5   | 82.4   | 90.2   | 89.2   | 78.5   | 76.9   | 88     | 82.6   | 108.4  |
| LYK5   | 1380.1 | 1817.1 | 711.3  | 725.8  | 676.8  | 705.4  | 1134.1 | 1146.9 |

|          |        |         |        |        |        |        |        |        |
|----------|--------|---------|--------|--------|--------|--------|--------|--------|
| LYK5     | 171.4  | 208.9   | 151.6  | 138.6  | 127.6  | 172    | 164.2  | 254.9  |
| LYL1     | 2771.8 | 3467.8  | 1448.1 | 1621.5 | 1539   | 1838.3 | 2016   | 2010.8 |
| LYN      | 3651   | 4842.6  | 3235.6 | 3193.4 | 2302.9 | 2945.9 | 3160.7 | 5917.9 |
| LYNX1    | 86.4   | 81.1    | 91     | 80     | 79     | 82.4   | 87.9   | 94.7   |
| LYNX1    | 87.3   | 111.9   | 86.1   | 75.8   | 76.4   | 83.9   | 99.5   | 106.6  |
| LYNX1    | 92.7   | 103.6   | 81.2   | 77     | 74.6   | 69.2   | 100.6  | 103.9  |
| LYPD1    | 95.6   | 117.1   | 84.7   | 87.5   | 75.4   | 95     | 100.6  | 100.1  |
| LYPD1    | 140.2  | 179.9   | 131.9  | 113.1  | 107.4  | 115.2  | 121.1  | 153.5  |
| LYPD2    | 120.1  | 140.2   | 101.1  | 106.1  | 99.5   | 110.5  | 119    | 134.8  |
| LYPD3    | 95     | 108.2   | 94.5   | 89.1   | 88.1   | 85.1   | 92.1   | 103.4  |
| LYPD4    | 136.3  | 148.4   | 96.2   | 77     | 78.7   | 93     | 114.1  | 133.4  |
| LYPD5    | 75.4   | 83.8    | 70.7   | 75.1   | 75.8   | 70.2   | 85     | 77.4   |
| LYPD5    | 137.5  | 202.3   | 126.1  | 102    | 106.2  | 105.7  | 130    | 143.9  |
| LYPD5    | 105.9  | 123.5   | 107.2  | 92.6   | 89.4   | 90.2   | 108.4  | 111    |
| LYPLA1   | 103.4  | 113.1   | 91.9   | 89.4   | 80.2   | 88.9   | 111.3  | 163.5  |
| LYPLA2   | 245.5  | 358.4   | 205.3  | 163.6  | 130.5  | 148.9  | 221.1  | 288.6  |
| LYPLA2P1 | 133.5  | 168.8   | 106.7  | 94.6   | 87.8   | 104.1  | 139.6  | 145.6  |
| LYPLA3   | 197.4  | 260.5   | 167    | 144    | 141.9  | 160.8  | 211.3  | 372.8  |
| LYPLAL1  | 2534.1 | 2799.6  | 1378.3 | 1244.6 | 975.6  | 1170.8 | 2258.6 | 3495.6 |
| LYSMD1   | 103.4  | 114.7   | 107.2  | 103    | 93.5   | 105.8  | 102.8  | 118.3  |
| LYSMD2   | 1269.8 | 1593.4  | 751    | 854.8  | 672.3  | 891.8  | 1247.8 | 1765.8 |
| LYSMD3   | 153.7  | 193     | 90.9   | 91.4   | 79.1   | 93.3   | 171.3  | 206    |
| LYSMD3   | 102.1  | 109.2   | 92.8   | 84.8   | 83     | 83.3   | 92.4   | 109.7  |
| LYSMD4   | 373.5  | 435.7   | 276.1  | 303.1  | 332    | 379.6  | 285.8  | 328.7  |
| LYST     | 1135.6 | 1559.1  | 755.8  | 1341   | 954.6  | 2449.8 | 954.8  | 1844.5 |
| LYST     | 114.5  | 134     | 92.5   | 96.4   | 87.3   | 94.2   | 103.6  | 114.9  |
| LYST     | 92.7   | 109.6   | 97.5   | 86     | 81.7   | 79.1   | 102.3  | 102.2  |
| LYZ      | 419.2  | 631.5   | 334.8  | 416.9  | 370.3  | 529    | 368.5  | 350.8  |
| LYZL1    | 81.9   | 92.6    | 87.4   | 89.1   | 79.7   | 88.3   | 89.4   | 95     |
| LYZL2    | 86.8   | 83.9    | 107.3  | 106    | 99     | 110.5  | 87.1   | 80.1   |
| LYZL4    | 74.6   | 83.3    | 103.8  | 96.6   | 86.5   | 89.1   | 86.5   | 90.2   |
| LYZL6    | 97.5   | 114.9   | 118.4  | 104.9  | 101.1  | 101    | 98.1   | 101.4  |
| LZIC     | 297.1  | 369.9   | 174.3  | 162.2  | 130.5  | 183.7  | 244.9  | 316.9  |
| LZTFL1   | 280    | 319.6   | 193    | 209.6  | 170.6  | 238.8  | 215.3  | 424.5  |
| LZTR1    | 729.5  | 799.8   | 861.1  | 686    | 628.3  | 936.8  | 515.4  | 774.1  |
| LZTR2    | 106.3  | 116.4   | 90.6   | 89.7   | 82.7   | 73     | 100.1  | 128.4  |
| LZTS1    | 136.5  | 140.7   | 158.3  | 99.8   | 96.5   | 112.9  | 120.2  | 167.9  |
| LZTS2    | 158.2  | 168.6   | 139.5  | 129.1  | 115.5  | 145.6  | 142.6  | 228.1  |
| M160     | 1090.7 | 1164.1  | 989.4  | 1179   | 729.4  | 1168.5 | 969.8  | 1080.8 |
| M6PR     | 2093.8 | 3047.9  | 1051.2 | 934.8  | 737.2  | 1071.3 | 1566.3 | 1950.5 |
| M6PRBP1  | 8192   | 11078.5 | 2993.1 | 2533.3 | 2063.4 | 2459.8 | 7848.1 | 8632.7 |
| MAB21L1  | 100.5  | 123     | 100.2  | 93.4   | 83.1   | 92.9   | 106.3  | 112    |
| MAB21L2  | 82.3   | 82.5    | 92.9   | 88.9   | 78.8   | 92.4   | 93     | 84.2   |
| MAB21L2  | 95.1   | 137.2   | 95.4   | 85.7   | 83.6   | 84.6   | 98.5   | 107.2  |
| MACF1    | 119.6  | 137.8   | 109.1  | 116.7  | 111.4  | 102.4  | 126.5  | 134.6  |
| MACF1    | 91.1   | 93.3    | 93.8   | 88.5   | 96.8   | 88.4   | 94     | 103.8  |
| MACF1    | 292.5  | 435     | 266.4  | 611.4  | 503.2  | 783.5  | 316.9  | 400.4  |
| MAD1L1   | 569.5  | 774.7   | 435.5  | 287.2  | 267.2  | 400.1  | 545.5  | 667.6  |
| MAD2L1   | 262.4  | 256.6   | 146    | 126.7  | 106.8  | 121.3  | 209.6  | 367.6  |
| MAD2L1BP | 92.8   | 94.6    | 112.1  | 95     | 95.5   | 100.7  | 84.5   | 92     |

|          |        |        |        |        |        |        |        |        |
|----------|--------|--------|--------|--------|--------|--------|--------|--------|
| MAD2L1BP | 877    | 1043.1 | 359    | 287.6  | 226.5  | 239.7  | 665.2  | 710.3  |
| MAD2L1BP | 1530.1 | 2022.9 | 909.3  | 640.6  | 532.1  | 788.7  | 1501.2 | 2491   |
| MAD2L2   | 3166.3 | 4087   | 2534.3 | 2045.9 | 1597.2 | 2558.1 | 2786   | 3885.1 |
| MADCAM1  | 79.1   | 97.9   | 93.8   | 88.9   | 85.1   | 94.9   | 90.7   | 91.1   |
| MADCAM1  | 89.7   | 112    | 114.1  | 90.9   | 93.7   | 86.9   | 84     | 88.1   |
| MADD     | 80.7   | 91.7   | 96.6   | 99.6   | 96.7   | 91.6   | 81.8   | 82.9   |
| MADD     | 167.7  | 176.5  | 197.1  | 202.8  | 183    | 287.2  | 152.7  | 199.6  |
| MADD     | 277.4  | 328    | 180.3  | 186.5  | 196.1  | 189.2  | 260.5  | 273.1  |
| MAEA     | 1229.6 | 1545.9 | 739.8  | 271.9  | 247.4  | 255.7  | 931.8  | 1567.8 |
| MAEA     | 604.3  | 748.8  | 243.9  | 185.5  | 161.3  | 119.6  | 532.5  | 682.1  |
| MAEL     | 74     | 83.5   | 92.7   | 86.9   | 93.2   | 84.2   | 81.6   | 89.2   |
| MAF      | 90     | 125.9  | 86.6   | 92.9   | 81.1   | 86.2   | 97.4   | 114.4  |
| MAF      | 84.8   | 84.5   | 97.9   | 103.6  | 103.6  | 104.9  | 84.9   | 84.4   |
| MAF1     | 306.9  | 411.3  | 259.7  | 181    | 164.7  | 222.1  | 287.7  | 472    |
| MAFA     | 212.9  | 241.1  | 146.1  | 121.8  | 111.4  | 126.8  | 214.8  | 207.7  |
| MAFB     | 222.6  | 275.6  | 145.4  | 282.7  | 221.7  | 322.5  | 270    | 431    |
| MAFF     | 95.2   | 112.5  | 98.1   | 103.8  | 87.7   | 93.4   | 97.5   | 112.1  |
| MAFF     | 691.4  | 944.6  | 230.7  | 189.8  | 165    | 178.2  | 630.3  | 935.6  |
| MAFF     | 113.1  | 129.5  | 94.8   | 87.8   | 94.7   | 100.2  | 107.5  | 146.2  |
| MAFG     | 238.3  | 258    | 258.4  | 255.1  | 250.2  | 309.6  | 357.2  | 653.1  |
| MAFG     | 213.8  | 244.7  | 129.7  | 121.6  | 113.4  | 108.7  | 250.7  | 428.5  |
| MAFK     | 112.4  | 137.1  | 95.2   | 94.8   | 86.1   | 90.1   | 100.7  | 131.9  |
| MAG      | 82.6   | 91     | 97.1   | 91.7   | 91.6   | 93.6   | 83     | 103.3  |
| MAG      | 81     | 85.1   | 94.1   | 91.8   | 79.9   | 88.1   | 93.7   | 82.6   |
| MAGEA1   | 127.3  | 124.8  | 89.5   | 87.4   | 73.3   | 85.7   | 119.1  | 133.2  |
| MAGEA10  | 82.4   | 82.8   | 78.4   | 87.4   | 87.2   | 80.4   | 84.9   | 79.8   |
| MAGEA10  | 93     | 119    | 102    | 89.1   | 77     | 78.2   | 94.1   | 109.7  |
| MAGEA11  | 107.3  | 109.9  | 83     | 86     | 79.6   | 81.2   | 102.4  | 134    |
| MAGEA11  | 74.6   | 79.4   | 90     | 87.4   | 75.3   | 77.7   | 78.6   | 88.6   |
| MAGEA11  | 175.9  | 199.7  | 111    | 98     | 100.2  | 102.4  | 179.2  | 174.9  |
| MAGEA11  | 86.4   | 118.3  | 93     | 77.2   | 72.7   | 74.1   | 102.2  | 114.3  |
| MAGEA12  | 90.5   | 111.4  | 95.9   | 93     | 89.4   | 100.4  | 103.3  | 94.2   |
| MAGEA2   | 107.6  | 110.6  | 90.2   | 80.6   | 88.9   | 80.3   | 111.4  | 103.8  |
| MAGEA2   | 79.3   | 71.5   | 90.3   | 92.3   | 84.4   | 87     | 71.7   | 87.3   |
| MAGEA2B  | 80.1   | 93.1   | 86.5   | 89.3   | 77.8   | 77.3   | 84.9   | 84.2   |
| MAGEA3   | 87.8   | 94.5   | 93.8   | 90.8   | 86.9   | 85.9   | 80.5   | 90.1   |
| MAGEA4   | 81.3   | 91.8   | 96.6   | 88     | 103.3  | 100.2  | 82.7   | 93.5   |
| MAGEA5   | 96.3   | 107.9  | 93.2   | 95.9   | 95.9   | 104.4  | 90.8   | 110.3  |
| MAGEA6   | 112.1  | 123.1  | 101.8  | 103.2  | 86.1   | 101.7  | 111.3  | 120.3  |
| MAGEA8   | 72.8   | 81.2   | 92.6   | 85.1   | 87.2   | 86.8   | 76.7   | 78.9   |
| MAGEB1   | 77.8   | 85.2   | 83.9   | 82.7   | 78.8   | 85     | 80.5   | 77.9   |
| MAGEB1   | 85.6   | 93.9   | 85.7   | 84.8   | 77.7   | 84     | 99.4   | 96.1   |
| MAGEB10  | 96.4   | 103.3  | 82.2   | 82.6   | 77.3   | 79.6   | 94.4   | 111.5  |
| MAGEB18  | 94.3   | 104    | 93.9   | 88     | 77.8   | 82.9   | 100.3  | 104.8  |
| MAGEB2   | 97.2   | 126.8  | 81.6   | 78.1   | 72.1   | 85.1   | 92.1   | 125.3  |
| MAGEB3   | 140    | 178.2  | 91.3   | 86.1   | 89     | 87.8   | 134.2  | 149.4  |
| MAGEB4   | 77.9   | 83.7   | 86     | 76.2   | 78.4   | 88.1   | 79     | 90.2   |
| MAGEB6   | 106.6  | 122.2  | 101.5  | 82.6   | 90.6   | 86.9   | 100.6  | 99.4   |
| MAGEC1   | 88.4   | 88.2   | 93.9   | 79.4   | 82.5   | 84.4   | 89.2   | 84.1   |
| MAGEC1   | 82.4   | 83.7   | 84.2   | 72     | 76.5   | 80.6   | 78.9   | 90.9   |

|        |        |        |       |        |       |        |        |        |
|--------|--------|--------|-------|--------|-------|--------|--------|--------|
| MAGEC2 | 84.3   | 103.9  | 84    | 73.3   | 74    | 83.1   | 90.7   | 95.9   |
| MAGEC3 | 81.3   | 88.4   | 90.8  | 93.7   | 76.8  | 99.2   | 80.7   | 90.1   |
| MAGEC3 | 84.4   | 99.4   | 88.1  | 77     | 82.3  | 80.2   | 93.9   | 89.9   |
| MAGEC3 | 83.9   | 92.5   | 78.9  | 85     | 80.5  | 82.4   | 92.8   | 89.5   |
| MAGED1 | 389.3  | 465.6  | 289.2 | 1271.3 | 864.4 | 1204   | 329.3  | 433.3  |
| MAGED1 | 174.7  | 196.2  | 140.7 | 297.8  | 234.9 | 330.4  | 169.5  | 200.6  |
| MAGED1 | 102.3  | 105.4  | 96.2  | 101.2  | 101.6 | 84.3   | 101.5  | 115.8  |
| MAGED1 | 94     | 102    | 90.3  | 91.3   | 82.9  | 92.8   | 88.1   | 97.4   |
| MAGED2 | 224.8  | 284.6  | 121.7 | 131.7  | 120.8 | 107.5  | 186.5  | 230.4  |
| MAGED2 | 143.5  | 155.9  | 97.1  | 98.6   | 98.4  | 102.5  | 125.4  | 147.7  |
| MAGED2 | 197.5  | 259.6  | 129.4 | 122    | 104   | 138.8  | 176.3  | 223.7  |
| MAGED2 | 163.9  | 189.6  | 96.8  | 85.3   | 87.9  | 91.5   | 142.9  | 192.5  |
| MAGED4 | 103.1  | 125.9  | 109   | 106.5  | 102.9 | 99     | 110.4  | 121.5  |
| MAGEE1 | 170.6  | 213.5  | 164.3 | 169.7  | 146.9 | 207.4  | 144.3  | 184.3  |
| MAGEE2 | 103.7  | 111.7  | 98    | 87.7   | 88.2  | 93.1   | 104.9  | 102.7  |
| MAGEF1 | 234.6  | 325.1  | 131.1 | 125    | 126.5 | 155.3  | 171.1  | 169    |
| MAGEH1 | 145.7  | 162.8  | 131.2 | 138.9  | 130.8 | 123.8  | 141.3  | 161.1  |
| MAGI1  | 80.6   | 89.8   | 89.3  | 92.4   | 79.7  | 79.3   | 85.6   | 86.4   |
| MAGI1  | 73.5   | 86.3   | 78.1  | 76.6   | 78.8  | 75.4   | 78.6   | 86.9   |
| MAGI1  | 109.8  | 130.8  | 83.3  | 82.2   | 84.2  | 87.8   | 119.8  | 139.5  |
| MAGI2  | 87.3   | 103.6  | 88.2  | 83.2   | 75.5  | 83.1   | 100.3  | 100.3  |
| MAGI3  | 83.3   | 92.6   | 98.9  | 86.1   | 86.6  | 92.2   | 88.3   | 81.2   |
| MAGI3  | 82.5   | 89.7   | 95.1  | 90.3   | 97.8  | 92.5   | 84.6   | 97     |
| MAGMAS | 1830.6 | 2039.6 | 1598  | 933.2  | 729.2 | 1550.6 | 1453.7 | 1782.1 |
| MAGOH  | 1573.3 | 2251.9 | 852.8 | 820.4  | 738.1 | 851.3  | 1369.7 | 1495.7 |
| MAK    | 87.3   | 90.2   | 93.2  | 89.4   | 87    | 82.2   | 84.9   | 88.3   |
| MAK10  | 203.5  | 228.4  | 120.2 | 97.1   | 80.2  | 110.9  | 185.7  | 304    |
| MAL    | 113.4  | 122.1  | 96.3  | 92.5   | 89.9  | 93.5   | 113.5  | 126.6  |
| MAL    | 102.9  | 110.8  | 116.7 | 94.5   | 89.3  | 103.9  | 102.7  | 101.2  |
| MAL2   | 78     | 104.6  | 83.5  | 82.1   | 79.4  | 73.8   | 91.8   | 103.2  |
| MALAT1 | 113    | 109.9  | 81.3  | 84.5   | 83    | 83     | 101.5  | 96.6   |
| MALL   | 89.9   | 96.8   | 105.3 | 102.9  | 87.2  | 95.7   | 88.6   | 94.2   |
| MALT1  | 267.8  | 372.5  | 143.8 | 159.9  | 147.3 | 175.9  | 308.4  | 406.9  |
| MALT1  | 85.9   | 103    | 86.2  | 84.1   | 83.2  | 85.6   | 86.4   | 100.7  |
| MAMDC1 | 84     | 99.3   | 93.6  | 98.4   | 85.9  | 95.9   | 86.4   | 88.6   |
| MAMDC2 | 71.5   | 87.5   | 91    | 78.5   | 73.8  | 93.9   | 81.7   | 98.4   |
| MAMDC4 | 102.6  | 110.5  | 121.3 | 116.3  | 122.2 | 145.9  | 88.8   | 112.7  |
| MAML1  | 82.6   | 87.6   | 94.9  | 89.3   | 90.6  | 89.8   | 84.4   | 89.3   |
| MAML1  | 145.3  | 194.7  | 166.3 | 178    | 161.9 | 224    | 149.1  | 189.7  |
| MAML2  | 81.1   | 100.9  | 84.4  | 89.8   | 79.4  | 86.1   | 88.1   | 103.1  |
| MAML3  | 90.6   | 100.7  | 82.8  | 82.6   | 67.6  | 73.4   | 94.3   | 103.3  |
| MAN1A1 | 308.5  | 378.4  | 181.8 | 151.8  | 154.3 | 147.8  | 270.6  | 352.2  |
| MAN1A2 | 143.7  | 182    | 109.5 | 97     | 96    | 123.1  | 121.9  | 189    |
| MAN1B1 | 1022.8 | 1404.1 | 834.2 | 938.2  | 789.3 | 1002.3 | 876.1  | 846.2  |
| MAN1C1 | 193.4  | 243.2  | 190.6 | 159.9  | 145   | 164.2  | 183.5  | 307.1  |
| MAN2A1 | 88.1   | 115.5  | 90.5  | 90.5   | 82.6  | 93.1   | 99     | 104.4  |
| MAN2A2 | 147    | 155.4  | 136.4 | 188.8  | 181   | 230.3  | 140.6  | 216.3  |
| MAN2B1 | 358.3  | 479.2  | 395.3 | 398.2  | 334   | 487.9  | 310.1  | 484.6  |
| MAN2B2 | 1257.4 | 1790.9 | 292.9 | 316.6  | 254.6 | 349.4  | 1179.9 | 1164.5 |
| MAN2C1 | 251.5  | 282.2  | 424   | 427    | 436.6 | 674.4  | 165.7  | 276.6  |

|           |        |        |        |        |        |        |        |        |
|-----------|--------|--------|--------|--------|--------|--------|--------|--------|
| MANBA     | 331    | 452.6  | 220.3  | 324.2  | 302.3  | 488.8  | 275.7  | 449    |
| MANBAL    | 846.6  | 1088.5 | 715.2  | 658.4  | 541.3  | 776.4  | 798.5  | 1089.1 |
| MANBAL    | 103.4  | 112    | 113.5  | 86.2   | 94.1   | 101.5  | 96.4   | 106.2  |
| MANBAL    | 337.9  | 389.9  | 153.4  | 135.7  | 121.5  | 137.2  | 340.9  | 333.2  |
| MANEA     | 78.4   | 91.7   | 82.3   | 80.8   | 79.3   | 87     | 88.6   | 88.3   |
| MANEA     | 460.1  | 606.2  | 217.6  | 227.4  | 195.1  | 223.4  | 308.9  | 453.1  |
| MANEAL    | 78.4   | 84.8   | 92.4   | 99.3   | 99.9   | 90.2   | 87.4   | 103.1  |
| MANEAL    | 106.2  | 113.3  | 95.7   | 82.1   | 82.5   | 80.3   | 95.7   | 89.5   |
| MANEAL    | 97     | 110.8  | 94.9   | 85.3   | 84.8   | 75.7   | 95.8   | 110.8  |
| MANSC1    | 109.2  | 133.6  | 101.7  | 101.5  | 90.1   | 107    | 113.3  | 123.7  |
| MAOA      | 81.9   | 100.9  | 87.3   | 92.6   | 84.5   | 91.2   | 86.4   | 94.3   |
| MAOB      | 112.3  | 117.2  | 95.9   | 85.7   | 87.4   | 90.7   | 94.9   | 106    |
| MAP1A     | 109.1  | 117.3  | 137.1  | 139.8  | 136    | 133.2  | 103.2  | 112.3  |
| MAP1B     | 88.1   | 102.6  | 94.5   | 88.3   | 82     | 83.2   | 85.9   | 87.3   |
| MAP1B     | 119.1  | 151.1  | 135    | 155    | 165.7  | 171.5  | 141.3  | 211.4  |
| MAP1B     | 92.8   | 126.7  | 88.3   | 85.4   | 91.2   | 88.4   | 115.7  | 151    |
| MAP1D     | 134.4  | 153.9  | 92.7   | 94.3   | 85.8   | 85     | 112.2  | 150.2  |
| MAP1LC3A  | 87.1   | 93.8   | 91.2   | 91.6   | 79.5   | 78.5   | 82.8   | 84.8   |
| MAP1LC3A  | 92.9   | 100.3  | 89.3   | 91.2   | 93.4   | 97     | 96.9   | 95.9   |
| MAP1LC3A  | 933.9  | 1264.8 | 1004.5 | 968.8  | 843    | 803.5  | 1015.6 | 1813.8 |
| MAP1LC3B  | 603.6  | 739.4  | 391.6  | 334.6  | 252.2  | 394.5  | 593.5  | 1279.5 |
| MAP1LC3C  | 119.3  | 155.7  | 113.7  | 101.9  | 112.9  | 97.8   | 117.8  | 115.7  |
| MAP2      | 80.8   | 82.1   | 90.9   | 82.2   | 79     | 85.9   | 80.9   | 95.8   |
| MAP2      | 102.2  | 104.5  | 88.7   | 80.4   | 81.3   | 80.3   | 97.7   | 116.2  |
| MAP2      | 95     | 101.2  | 98.9   | 87     | 84.2   | 94.8   | 99     | 105.8  |
| MAP2      | 104.7  | 125.1  | 96.9   | 92.6   | 86.3   | 107    | 101    | 106.3  |
| MAP2K1    | 865    | 1076.3 | 529.2  | 695.8  | 510.7  | 754.9  | 863.5  | 1554.4 |
| MAP2K1IP1 | 1568.3 | 1894.4 | 755.8  | 902.6  | 592.8  | 1224.8 | 1400.3 | 2591.5 |
| MAP2K3    | 89.2   | 95.8   | 88.2   | 84.3   | 81.6   | 79.5   | 75.6   | 103.9  |
| MAP2K3    | 102.7  | 130.7  | 109.1  | 94     | 90.9   | 95.7   | 118.2  | 124.2  |
| MAP2K3    | 85.6   | 97.6   | 94.7   | 90.1   | 85.3   | 96.5   | 88.7   | 91.7   |
| MAP2K3    | 122.2  | 161.1  | 87.9   | 86.7   | 92.1   | 86.9   | 117.3  | 135.1  |
| MAP2K4    | 228.2  | 298.2  | 197.6  | 233.3  | 177.2  | 269.7  | 220    | 486.2  |
| MAP2K5    | 258.7  | 305.7  | 232.2  | 275.1  | 216.2  | 289.7  | 261.7  | 379.9  |
| MAP2K5    | 155.7  | 172    | 117.9  | 128.1  | 114.9  | 150.4  | 152.4  | 220.9  |
| MAP2K6    | 153.4  | 184    | 95.1   | 117.8  | 102.9  | 126.7  | 94.3   | 89.8   |
| MAP2K7    | 133.6  | 162.3  | 137.1  | 120.5  | 118.5  | 146.2  | 133.6  | 176    |
| MAP3K10   | 115.3  | 111.1  | 91.8   | 78.8   | 73.4   | 80.9   | 100.6  | 127.1  |
| MAP3K11   | 241.5  | 297.3  | 374.7  | 299    | 251    | 317.4  | 227.2  | 514.9  |
| MAP3K12   | 140.6  | 144.9  | 97.9   | 90.6   | 75.7   | 86.7   | 118.3  | 174.5  |
| MAP3K13   | 85.3   | 90.8   | 91     | 94.9   | 93.4   | 91.2   | 80.3   | 99.3   |
| MAP3K14   | 118.7  | 126.9  | 108.7  | 105    | 105.1  | 115.3  | 110.5  | 120.4  |
| MAP3K15   | 108.3  | 109.4  | 96.9   | 90.8   | 93.1   | 102.6  | 105.9  | 108    |
| MAP3K2    | 187.9  | 235.8  | 119.9  | 141.4  | 133.2  | 149.9  | 205.2  | 280    |
| MAP3K3    | 118.8  | 125.1  | 88.2   | 108.2  | 85.3   | 94.3   | 102.4  | 116.3  |
| MAP3K4    | 101.5  | 107.9  | 101.2  | 97.1   | 85     | 91.2   | 104.6  | 108.1  |
| MAP3K4    | 814.1  | 1117.3 | 1156.4 | 1021   | 998.8  | 1591.3 | 740.6  | 978.2  |
| MAP3K6    | 499.5  | 572.6  | 330.6  | 254.5  | 233.6  | 320.6  | 334.7  | 342.5  |
| MAP3K7    | 647.4  | 968    | 251.7  | 220.5  | 204.7  | 316    | 507.1  | 670.7  |
| MAP3K7    | 2092.5 | 2715.8 | 1275.1 | 1556.3 | 1088.9 | 2341.6 | 1716.9 | 3216.4 |

|           |        |        |        |        |        |        |        |        |
|-----------|--------|--------|--------|--------|--------|--------|--------|--------|
| MAP3K7IP1 | 114.5  | 120    | 93.7   | 101.1  | 85.9   | 95.8   | 117.6  | 116.5  |
| MAP3K7IP1 | 244.3  | 270.7  | 285.6  | 242.4  | 194.5  | 267    | 264.7  | 534.5  |
| MAP3K7IP1 | 92.3   | 98     | 92.6   | 82.5   | 88.4   | 85.2   | 108.4  | 112.2  |
| MAP3K7IP2 | 158.3  | 198.1  | 105.5  | 102.3  | 109    | 125.1  | 144.3  | 229.8  |
| MAP3K8    | 159.7  | 182.5  | 128.6  | 128.4  | 141.7  | 155.4  | 140.3  | 250.8  |
| MAP3K9    | 92.9   | 106.4  | 90.3   | 84.8   | 81.2   | 88.2   | 95.1   | 108    |
| MAP4      | 135.4  | 193.7  | 110.4  | 147.2  | 124.7  | 114.5  | 135.4  | 171.5  |
| MAP4      | 92.5   | 91.2   | 95.1   | 90.1   | 86.1   | 88.9   | 93.5   | 99.8   |
| MAP4      | 97.5   | 111.8  | 94.1   | 92     | 78.4   | 92.1   | 95.3   | 111.3  |
| MAP4K1    | 2017.3 | 2431.1 | 1381   | 670.8  | 522.8  | 726.5  | 1563.6 | 2154.6 |
| MAP4K1    | 491.7  | 636.2  | 744    | 388.4  | 325.5  | 459.5  | 430.8  | 896.3  |
| MAP4K2    | 2457.8 | 3103.4 | 1803.5 | 1501.4 | 1350.1 | 1462.5 | 1892.9 | 1773.5 |
| MAP4K3    | 224.8  | 263.8  | 122.5  | 119.1  | 116.3  | 171.4  | 178    | 232    |
| MAP4K4    | 105    | 104.5  | 100.2  | 97.4   | 82.2   | 97     | 99     | 110.7  |
| MAP4K4    | 236.2  | 295.7  | 178.4  | 254.9  | 215.2  | 351.5  | 198.6  | 379.8  |
| MAP4K5    | 205.1  | 250.4  | 113.6  | 85.7   | 88.2   | 99.4   | 184.9  | 253.6  |
| MAP4K5    | 293    | 339.6  | 165.3  | 162.2  | 139.2  | 217.2  | 255.6  | 386.5  |
| MAP6      | 84.9   | 99.4   | 94.6   | 83.5   | 92     | 88.1   | 83.6   | 94.8   |
| MAP6      | 86.5   | 83.8   | 90     | 84.4   | 81.9   | 87.2   | 79.4   | 85.5   |
| MAP6      | 101.1  | 123.7  | 89.6   | 85.4   | 76     | 83.8   | 107.2  | 112.1  |
| MAP6D1    | 511.7  | 748.1  | 355.1  | 345    | 275.3  | 356.1  | 450.2  | 435.8  |
| MAP7      | 138.8  | 187.4  | 119.5  | 128.8  | 123    | 170.5  | 132.7  | 154.4  |
| MAP7D2    | 75.5   | 87.8   | 87.5   | 81.9   | 82.4   | 95.9   | 81.9   | 88     |
| MAPBPIP   | 4205.1 | 5255.9 | 2341.9 | 1896.2 | 1469.1 | 1872.4 | 3727.6 | 4126.8 |
| MAPK1     | 129.4  | 175.1  | 107.8  | 136    | 115.3  | 141.8  | 118.6  | 140.5  |
| MAPK1     | 1283.8 | 1696.1 | 843.3  | 797.7  | 632.2  | 866.6  | 1277.4 | 1727.8 |
| MAPK1     | 587.3  | 757.7  | 393.6  | 335.4  | 284.7  | 396.9  | 487.1  | 833.8  |
| MAPK10    | 69.5   | 85.5   | 86.5   | 80.5   | 74.8   | 76.2   | 84.5   | 83.1   |
| MAPK10    | 103.7  | 118.7  | 111.5  | 94.1   | 86.5   | 93     | 91.3   | 101.1  |
| MAPK10    | 99.4   | 114.8  | 105.9  | 94.6   | 97.9   | 100.9  | 103.6  | 103.4  |
| MAPK10    | 75.3   | 91.8   | 95.9   | 86.7   | 80.8   | 81.6   | 81.9   | 91.3   |
| MAPK10    | 100.3  | 100.5  | 95     | 81.2   | 83.1   | 87.1   | 96.5   | 99.6   |
| MAPK11    | 145.8  | 181.3  | 139.5  | 137.8  | 113.5  | 162.8  | 137.5  | 162.8  |
| MAPK11    | 96.2   | 103.1  | 97.3   | 93.3   | 93.6   | 97.8   | 93.1   | 103.3  |
| MAPK12    | 342.5  | 464.7  | 224.2  | 170    | 153.5  | 233    | 270.2  | 425.2  |
| MAPK13    | 156.2  | 195.4  | 131.5  | 158.8  | 141.4  | 161.4  | 133.7  | 139.6  |
| MAPK14    | 107.5  | 126.6  | 98.3   | 96.4   | 85.2   | 89.9   | 96.2   | 113.3  |
| MAPK14    | 266.8  | 297.2  | 167.7  | 203.9  | 158    | 151.3  | 191.4  | 288.2  |
| MAPK14    | 192.7  | 261.4  | 142.5  | 176.2  | 154.3  | 142.4  | 132.2  | 179.7  |
| MAPK15    | 104.6  | 138.2  | 90.4   | 87.2   | 87.8   | 91.9   | 104.2  | 112    |
| MAPK3     | 1200.9 | 1495.4 | 752.2  | 474.9  | 423    | 434.9  | 1096   | 1032.5 |
| MAPK3     | 441.2  | 486.6  | 327.5  | 253.8  | 230.5  | 288.7  | 452.1  | 845.9  |
| MAPK4     | 84     | 95.3   | 100    | 89.9   | 91.6   | 81.6   | 79.8   | 101.5  |
| MAPK6     | 2051.2 | 2540.5 | 1499.2 | 1864.9 | 1447.4 | 2539.6 | 1753.1 | 3240.7 |
| MAPK7     | 126.7  | 143.6  | 102.2  | 114.5  | 82.4   | 97.9   | 123.4  | 143.3  |
| MAPK7     | 145.3  | 161.4  | 186.7  | 227.4  | 189    | 239.9  | 148.7  | 272.3  |
| MAPK7     | 105.2  | 109    | 97.3   | 99.6   | 94.7   | 102.3  | 102    | 96.4   |
| MAPK8     | 112.8  | 136.8  | 106.6  | 92.3   | 80.3   | 98.6   | 99.1   | 104.3  |
| MAPK8     | 107.7  | 136    | 90.6   | 82.8   | 85.4   | 85.4   | 103    | 109.8  |
| MAPK8IP1  | 81.2   | 94.7   | 85.9   | 88.9   | 85.2   | 80.8   | 78.4   | 84.1   |

|          |        |        |        |        |        |        |        |        |
|----------|--------|--------|--------|--------|--------|--------|--------|--------|
| MAPK8IP2 | 106.3  | 145    | 86.7   | 89.5   | 86.5   | 82.9   | 105.5  | 125.9  |
| MAPK8IP2 | 79.3   | 79.8   | 88.4   | 87     | 88.2   | 79.5   | 76.8   | 86.7   |
| MAPK8IP2 | 91.4   | 105.6  | 93.2   | 95.4   | 84.8   | 93.6   | 95.7   | 94.7   |
| MAPK8IP2 | 96.8   | 100.8  | 97.1   | 94.4   | 94.4   | 82.8   | 94.4   | 95.2   |
| MAPK8IP3 | 101    | 104.9  | 93.7   | 78.5   | 90.2   | 90.7   | 103.8  | 120.7  |
| MAPK8IP3 | 192.7  | 202.1  | 259    | 239.3  | 272.4  | 370.4  | 171.8  | 380.3  |
| MAPK9    | 1478.7 | 2370.8 | 1204.9 | 1114.1 | 885.5  | 1709.2 | 1340.4 | 2112.4 |
| MAPKAP1  | 237.7  | 291.8  | 182.7  | 254.2  | 213.6  | 290.8  | 199.2  | 242.6  |
| MAPKAP1  | 789.3  | 1057.4 | 478.5  | 406.1  | 306.4  | 425.8  | 624.2  | 807.3  |
| MAPKAPK2 | 104.1  | 124.4  | 99.3   | 85.3   | 77.7   | 97.8   | 122    | 124.2  |
| MAPKAPK2 | 215.3  | 299.2  | 153.6  | 124.9  | 120.2  | 151.6  | 225.7  | 414.2  |
| MAPKAPK3 | 4723.7 | 6022.4 | 3336.9 | 3059.1 | 2373.1 | 2367.7 | 3927.3 | 3197   |
| MAPKAPK5 | 1050.6 | 1269.3 | 342    | 288.7  | 281.8  | 451.3  | 936.3  | 1589.8 |
| MAPKBP1  | 96.4   | 99.2   | 99.7   | 119.8  | 111.4  | 132.2  | 86.6   | 106    |
| MAPRE1   | 4500.7 | 6726.9 | 2839.2 | 3341.6 | 2305.3 | 3633.6 | 4355.1 | 6249.5 |
| MAPRE2   | 1007.4 | 1667.4 | 767.7  | 735.8  | 611.3  | 955.4  | 813.7  | 1232.5 |
| MAPRE3   | 120.7  | 139.5  | 121    | 110.1  | 97.9   | 111.3  | 132.5  | 171.2  |
| MAPT     | 98.4   | 126.5  | 109.9  | 86.5   | 76.7   | 82.9   | 104.9  | 119.4  |
| MAPT     | 75.2   | 88.7   | 95.8   | 85.4   | 80.4   | 87     | 75.8   | 79.4   |
| MAPT     | 74.9   | 92.6   | 100.5  | 100.7  | 92.8   | 106.7  | 81.3   | 85.2   |
| Mar-01   | 87.2   | 98.9   | 95.4   | 101.2  | 84.8   | 103.9  | 88.3   | 88.6   |
| Mar-02   | 245.4  | 276.4  | 192.6  | 165.3  | 157.8  | 214.9  | 209.7  | 302.8  |
| Mar-02   | 125.1  | 151.3  | 135.8  | 138    | 120.9  | 128.1  | 123.9  | 164.2  |
| Mar-02   | 181.4  | 190.9  | 97.8   | 102.7  | 94.3   | 111    | 150.3  | 189.9  |
| Mar-02   | 109.3  | 111.5  | 100.9  | 84.3   | 85.1   | 94     | 99.9   | 108.1  |
| Mar-03   | 197.3  | 278.1  | 144.4  | 144.9  | 145.3  | 134.2  | 153.8  | 173.6  |
| Mar-03   | 471.1  | 622.2  | 360.9  | 525.7  | 459.6  | 610    | 344.2  | 472.3  |
| Mar-03   | 482.9  | 658.1  | 356.4  | 480.4  | 433.2  | 589.8  | 345    | 421.4  |
| Mar-04   | 93.6   | 98.7   | 92.1   | 80.1   | 82.3   | 81.3   | 84.7   | 88.5   |
| Mar-05   | 262.8  | 377.9  | 119.8  | 129.7  | 113.1  | 134.4  | 330.3  | 511.8  |
| Mar-06   | 250.7  | 303.6  | 268.9  | 598.1  | 586.8  | 414.3  | 242.4  | 299.2  |
| Mar-07   | 3079.8 | 3087.5 | 2504.9 | 2933.2 | 2438.4 | 4420.3 | 2183.1 | 3618.2 |
| Mar-08   | 88.7   | 93.6   | 85.6   | 85.9   | 80.4   | 83.4   | 82.2   | 88.9   |
| Mar-08   | 92.5   | 111    | 94.1   | 78.9   | 85     | 83.7   | 106.2  | 106    |
| Mar-08   | 79.9   | 83.2   | 77.4   | 79.4   | 75.1   | 81.1   | 75.8   | 76.8   |
| Mar-09   | 106.9  | 110.6  | 113.2  | 99.1   | 95.7   | 103.1  | 97.1   | 93.9   |
| MARCKS   | 1629.7 | 1788.8 | 812.4  | 2707.3 | 2232.7 | 3024.8 | 907.3  | 1188.2 |
| MARCKSL1 | 702.6  | 973.3  | 611.8  | 770.5  | 448.7  | 742.5  | 569.5  | 1156.5 |
| MARCO    | 111.1  | 132    | 115.2  | 102    | 108.2  | 118.4  | 119.6  | 133.9  |
| MARK1    | 90.4   | 99.9   | 104.7  | 98.9   | 104.7  | 105.1  | 93.5   | 104.4  |
| MARK2    | 99.4   | 116.3  | 96.4   | 102    | 102.1  | 91.7   | 102.2  | 118.6  |
| MARK2    | 86.8   | 92.3   | 88.9   | 90     | 80.2   | 94.3   | 83.7   | 95.9   |
| MARK2    | 142.3  | 165.9  | 131    | 134.5  | 117.4  | 130.5  | 120.8  | 197.6  |
| MARK3    | 263.7  | 361.4  | 256.9  | 213.7  | 207    | 265    | 248.2  | 421    |
| MARK4    | 119.5  | 142.4  | 99.6   | 88.6   | 74.6   | 86.2   | 118    | 150.4  |
| MARS     | 401    | 521.1  | 195.5  | 188.6  | 177.5  | 278.2  | 398.4  | 703.9  |
| MARS2    | 144.1  | 165.2  | 110.6  | 103.8  | 102.5  | 103.1  | 132.2  | 180.5  |
| MARVELD2 | 81.5   | 93.2   | 87.5   | 82.5   | 80.2   | 75.6   | 92.7   | 98.9   |
| MARVELD2 | 78.7   | 91.7   | 97.9   | 81.6   | 85     | 85.7   | 84.7   | 89.3   |
| MARVELD2 | 75.5   | 94.6   | 85.1   | 79.5   | 78.7   | 74.4   | 78.5   | 77     |



|          |        |        |        |        |        |        |        |        |
|----------|--------|--------|--------|--------|--------|--------|--------|--------|
| MARVELD3 | 89.2   | 92.6   | 83.7   | 88     | 87     | 84.4   | 93.1   | 91.1   |
| MARVELD3 | 101.7  | 112.1  | 95.8   | 95.2   | 83.8   | 95.2   | 104.2  | 111.8  |
| MARVELD3 | 74.8   | 94.2   | 107.9  | 105    | 82     | 97.2   | 82.3   | 79     |
| MAS1     | 90     | 99.8   | 102.3  | 92.3   | 92     | 87.4   | 84.6   | 93     |
| MAS1L    | 104.8  | 120.5  | 100    | 97.4   | 93.8   | 88.1   | 103.8  | 119.7  |
| MASA     | 3538   | 4358.4 | 1607.9 | 1562.5 | 1042.2 | 1750.1 | 2537.7 | 3351.7 |
| MASK     | 1474.1 | 1884.5 | 545    | 653.7  | 526.8  | 775.6  | 1228.6 | 2165.5 |
| MASK-BP3 | 137.3  | 166.9  | 136.6  | 120.3  | 126.2  | 157.7  | 131.1  | 164    |
| MASP1    | 80.2   | 92.7   | 88.4   | 84.4   | 84.2   | 93.9   | 78.4   | 86.2   |
| MASP1    | 91.4   | 117.8  | 93     | 89.9   | 79.6   | 83.6   | 101    | 105.6  |
| MASP1    | 111.5  | 132.1  | 79.3   | 72.2   | 78.8   | 80.3   | 109.5  | 131.6  |
| MASP1    | 86.6   | 98.4   | 99.8   | 96.2   | 97.1   | 95.7   | 83.8   | 91.6   |
| MASP2    | 94.1   | 100.4  | 96     | 77.5   | 91.9   | 87.3   | 93     | 95.7   |
| MASP2    | 79.4   | 84     | 89.3   | 82     | 89.1   | 82.8   | 74.7   | 75.4   |
| MASP2    | 91.7   | 100.4  | 101.4  | 94.7   | 93.7   | 86.7   | 88.3   | 105.8  |
| MASS1    | 92     | 113.6  | 82.6   | 85.6   | 75.2   | 91.4   | 94.3   | 93.9   |
| MAST1    | 74.8   | 88.4   | 100.3  | 88.1   | 85.7   | 89.8   | 81.1   | 102.9  |
| MAST2    | 131.3  | 165.3  | 100    | 99.5   | 89.5   | 99.3   | 120.2  | 161.4  |
| MASTL    | 222.1  | 249.5  | 124.9  | 132.9  | 142.6  | 156.9  | 147.3  | 311    |
| MAT1A    | 75.1   | 89.8   | 85.9   | 87.1   | 72.3   | 73.7   | 80.3   | 87.6   |
| MAT2A    | 6136.3 | 7305.8 | 6285.8 | 4516.4 | 3952.9 | 5382.4 | 3878.6 | 5354.2 |
| MAT2B    | 3280.9 | 3927.4 | 1690.9 | 2073.7 | 1515.6 | 2403.7 | 3232.8 | 5390.9 |
| MAT2B    | 277.8  | 340.1  | 131.7  | 110.3  | 115.7  | 160.9  | 217.6  | 250.6  |
| MAT2B    | 452.3  | 536.9  | 182.9  | 152.7  | 155.2  | 182.8  | 291.6  | 310.6  |
| MATK     | 122.7  | 133.7  | 94.2   | 97.5   | 92     | 88.4   | 129.2  | 136.3  |
| MATK     | 2382.3 | 2919   | 1185.7 | 556.7  | 406.4  | 437.5  | 1481.7 | 982.6  |
| MATK     | 203.2  | 293.9  | 142.8  | 101.7  | 92.8   | 89.9   | 153.6  | 180    |
| MATN1    | 107.7  | 118.3  | 92.9   | 83.4   | 84.9   | 93.6   | 106.1  | 108.3  |
| MATN2    | 94.8   | 115.2  | 97.5   | 93.5   | 87.6   | 91.1   | 91.1   | 105.1  |
| MATN2    | 293.2  | 351.6  | 229.5  | 261.7  | 208.3  | 324.6  | 235.7  | 360.9  |
| MATN3    | 92     | 103    | 98.9   | 92.5   | 80.8   | 97.7   | 90.3   | 105.5  |
| MATN4    | 66.3   | 80.8   | 90.7   | 77.2   | 78.3   | 80.5   | 75.8   | 71.5   |
| MATN4    | 84     | 87.6   | 86.3   | 82.5   | 87.8   | 85.3   | 84.9   | 85.4   |
| MATN4    | 79.1   | 96.6   | 73.6   | 74.1   | 80.6   | 81     | 81.7   | 84.9   |
| MATR3    | 338.4  | 426    | 170.6  | 231.2  | 183.7  | 136.1  | 212.8  | 252.5  |
| MATR3    | 265.8  | 307.2  | 99.6   | 103.1  | 100.3  | 95     | 160.1  | 220.7  |
| MATR3    | 6388   | 7029   | 1959.6 | 2188.2 | 1593.4 | 3201.8 | 5654   | 7743.4 |
| MATR3    | 1326.6 | 1915.3 | 477.8  | 414.3  | 328.8  | 424.9  | 785.6  | 1277.9 |
| MAWBP    | 85.3   | 107.7  | 79.2   | 81.2   | 82.4   | 86.6   | 88.2   | 110.5  |
| MAWBP    | 102.6  | 117.6  | 98.3   | 81.9   | 79.5   | 86.2   | 100.2  | 108.2  |
| MAWBP    | 123.3  | 135.1  | 114.5  | 101.2  | 100.5  | 93     | 100.6  | 109.7  |
| MAX      | 252    | 335.2  | 193.1  | 173.8  | 156.4  | 172.3  | 245.1  | 251    |
| MAX      | 338.4  | 443.5  | 136.9  | 102.5  | 97.1   | 108.6  | 310    | 442.3  |
| MAX      | 270.3  | 363.1  | 173.8  | 135    | 123.4  | 121.8  | 253.1  | 284    |
| MAX      | 102.7  | 108.9  | 107.3  | 82.2   | 78.1   | 93.2   | 98.1   | 97.2   |
| MAX      | 76.7   | 91.9   | 92     | 88.8   | 84.1   | 84.7   | 76.3   | 84.4   |
| MAZ      | 116.7  | 130.9  | 126.9  | 102.6  | 97.4   | 100.5  | 106.7  | 131.3  |
| MAZ      | 107.7  | 115.6  | 122.9  | 101.3  | 99.3   | 104.6  | 105.1  | 116.7  |
| MAZ      | 254.6  | 294.7  | 198    | 271.8  | 233.2  | 443.8  | 176.8  | 355.7  |
| MB       | 101.9  | 126.4  | 103.7  | 97.8   | 90.1   | 96     | 96.3   | 120.2  |

|        |        |        |        |        |        |        |        |        |
|--------|--------|--------|--------|--------|--------|--------|--------|--------|
| MB     | 91.2   | 92.5   | 89.9   | 83     | 85.6   | 81.7   | 73.5   | 90.1   |
| MB     | 99.5   | 114.7  | 91.8   | 96.1   | 89.4   | 100.8  | 107.8  | 115.3  |
| MB     | 85.1   | 92.6   | 90.2   | 80.8   | 82.4   | 80.7   | 83.1   | 80.5   |
| MBD1   | 268.5  | 352.7  | 235    | 205.7  | 187.1  | 294.2  | 252.4  | 336.4  |
| MBD1   | 293.6  | 334.9  | 259.2  | 248.1  | 255.6  | 355.5  | 266.2  | 366.6  |
| MBD2   | 83.3   | 92.3   | 97     | 81.2   | 86.8   | 85.2   | 83.4   | 93.3   |
| MBD2   | 95     | 99.4   | 88.6   | 88     | 77     | 88.5   | 96.3   | 90.2   |
| MBD2   | 88.6   | 99.5   | 84.5   | 87.8   | 85.6   | 78.6   | 96.8   | 92.5   |
| MBD3   | 282.4  | 358.7  | 265.4  | 166.4  | 182.6  | 253.4  | 267.7  | 600.9  |
| MBD3L1 | 83.5   | 89.1   | 84.7   | 74.5   | 76.4   | 74.9   | 85.7   | 98.8   |
| MBD3L2 | 96.9   | 115.3  | 88.4   | 87.8   | 81.5   | 83.8   | 94.3   | 102    |
| MBD4   | 1224.6 | 1322.6 | 1111.8 | 1857.5 | 1681.3 | 1494.8 | 1206.4 | 1990.5 |
| MBD5   | 79.4   | 101.7  | 96.8   | 84.2   | 87.9   | 99.5   | 83.6   | 90.9   |
| MBD6   | 644.7  | 577.3  | 605.9  | 625.7  | 718.1  | 693.7  | 522.9  | 548.2  |
| MBIP   | 360.8  | 449.6  | 217    | 248.8  | 189.6  | 335.5  | 320.5  | 634.7  |
| MBL2   | 82.7   | 89     | 101.6  | 88.7   | 86.6   | 80.2   | 78.2   | 91.9   |
| MBNL1  | 1448.5 | 1561.6 | 535.1  | 808.6  | 523.1  | 939    | 1099.4 | 2532.9 |
| MBNL1  | 4158.7 | 4428.3 | 1533.8 | 2497.6 | 1237.8 | 1655.7 | 3027.4 | 4482.4 |
| MBNL1  | 119.1  | 137.7  | 94.3   | 85.4   | 90.1   | 91.4   | 92.4   | 104.9  |
| MBNL2  | 87.6   | 88.5   | 94.9   | 93.3   | 86.1   | 88.5   | 80.5   | 80.4   |
| MBNL2  | 82.4   | 86.7   | 96.3   | 81.6   | 87.8   | 91.6   | 82.7   | 89.1   |
| MBNL2  | 80.9   | 97.5   | 90.4   | 89.6   | 94.8   | 91.9   | 87.9   | 90.3   |
| MBNL3  | 112.3  | 132.6  | 93.4   | 102    | 87.3   | 88.9   | 110.6  | 133.9  |
| MBNL3  | 92.8   | 111.7  | 83.4   | 85.3   | 78.4   | 82.4   | 87.3   | 87.2   |
| MBOAT1 | 121.1  | 143.6  | 89.4   | 77.9   | 77.3   | 87.5   | 121.7  | 130.6  |
| MBOAT2 | 149.1  | 162.5  | 127.4  | 130.7  | 117.8  | 128.2  | 146.7  | 219.4  |
| MBP    | 521.4  | 697.6  | 307.8  | 506.4  | 460.4  | 329.8  | 506.7  | 588.6  |
| MBP    | 2350.9 | 3406.5 | 1959.3 | 3741   | 2946.4 | 4537.5 | 2250.6 | 2416.3 |
| MBP    | 405.4  | 517    | 278.8  | 430.1  | 372.5  | 264.7  | 386.2  | 438.8  |
| MBTD1  | 149.1  | 160.8  | 114    | 155.9  | 127.4  | 113.6  | 135.3  | 153    |
| MBTPS1 | 621.3  | 846.6  | 826.9  | 939.9  | 806.2  | 1495.8 | 531.1  | 1070.1 |
| MBTPS1 | 179.8  | 206.7  | 156.3  | 138.7  | 114.3  | 201.6  | 136.2  | 182.1  |
| MBTPS2 | 225.8  | 277    | 158.3  | 152.6  | 139.2  | 188.2  | 164.5  | 217.6  |
| MC1R   | 313.3  | 430    | 196.1  | 202.4  | 173.5  | 170.1  | 275.2  | 208.2  |
| MC2R   | 75.1   | 87.8   | 90     | 86.6   | 76.6   | 85.4   | 79.6   | 79.5   |
| MC3R   | 80.8   | 91.9   | 89.8   | 74.7   | 82.3   | 75.9   | 89.1   | 84.9   |
| MC4R   | 98.2   | 104.1  | 85.1   | 81.2   | 80.2   | 89.2   | 100.7  | 96.9   |
| MC5R   | 102.1  | 111.1  | 89.2   | 86.3   | 79.5   | 80.6   | 96     | 98.6   |
| MCAM   | 101.1  | 118.8  | 100.3  | 84.2   | 76.7   | 86.9   | 104.4  | 110.8  |
| MCART1 | 206    | 257.8  | 115.7  | 115.8  | 99.7   | 108.9  | 207.1  | 272.6  |
| MCART2 | 80.2   | 88.3   | 89.9   | 84.8   | 74.9   | 89.5   | 82     | 85.6   |
| MCART6 | 86.5   | 82.6   | 101    | 103.8  | 94.4   | 90.8   | 86.7   | 86.4   |
| MCC    | 119.1  | 133.3  | 98.2   | 85.3   | 86.6   | 90.6   | 113.6  | 117.8  |
| MCCC1  | 1076.9 | 1426.8 | 730.3  | 857.7  | 740.3  | 1295.7 | 844.7  | 1340.9 |
| MCCC2  | 321.5  | 426.7  | 231.1  | 116.9  | 129.7  | 137.3  | 266.1  | 353.9  |
| MCCD1  | 127.8  | 168.5  | 108.9  | 108.1  | 104.1  | 111.9  | 134.9  | 139.5  |
| MCEE   | 852.9  | 1108.6 | 650.6  | 860.6  | 695    | 852.4  | 735.1  | 826    |
| MCEMP1 | 4837   | 6198.8 | 4775.3 | 2579.9 | 1814.8 | 3390.3 | 4218   | 4938.1 |
| MCF2   | 109.2  | 112.6  | 93.5   | 85.1   | 80.9   | 85.3   | 111.2  | 125.5  |
| MCF2L  | 86     | 82.7   | 105    | 96.5   | 84.7   | 91.5   | 87.1   | 85     |

|         |         |         |         |         |         |         |         |         |
|---------|---------|---------|---------|---------|---------|---------|---------|---------|
| MCF2L2  | 94.8    | 115.1   | 90.5    | 81.4    | 90.4    | 86.7    | 95.4    | 90.5    |
| MCFD2   | 129.6   | 157.3   | 118     | 131.4   | 111.4   | 139.8   | 146.2   | 184.8   |
| MCHR2   | 94      | 105.6   | 94.7    | 93.1    | 80.3    | 97.6    | 95.9    | 104.1   |
| MCHR2   | 113.2   | 162.8   | 108.2   | 110.4   | 94.1    | 107.5   | 141.3   | 141.4   |
| MCL1    | 570.3   | 756.8   | 235.7   | 254.9   | 216.8   | 281.3   | 511.3   | 998.5   |
| MCL1    | 556.7   | 747.7   | 225.5   | 198.7   | 182.2   | 180.7   | 428.4   | 642     |
| MCM10   | 364     | 456.3   | 301.9   | 267.3   | 205     | 286.3   | 258.5   | 402.6   |
| MCM10   | 1671.4  | 1841.6  | 1476.6  | 960.6   | 724.8   | 1068.2  | 1165.1  | 1826.5  |
| MCM2    | 1583.6  | 2108.6  | 2807.8  | 1366.1  | 909.7   | 1726.4  | 1092.1  | 2127.1  |
| MCM3    | 14251.1 | 18500.1 | 14692   | 15942.6 | 11129.4 | 20027.1 | 9330    | 12200   |
| MCM3AP  | 775.9   | 956.1   | 501.5   | 584.5   | 529.2   | 593.8   | 697.7   | 761.9   |
| MCM3APA | 172.3   | 217.9   | 173.5   | 247.2   | 208.3   | 267.6   | 145.4   | 183     |
| MCM4    | 2126.3  | 2712.9  | 1172.7  | 873.5   | 546.8   | 789.4   | 1548.2  | 2497.8  |
| MCM4    | 6369.2  | 8166.9  | 5604.3  | 3314.4  | 2981.3  | 3193.6  | 4069.5  | 5033.3  |
| MCM5    | 2062.7  | 3221.3  | 2231.5  | 980.2   | 818     | 1195.4  | 2423.5  | 4198    |
| MCM6    | 9585.7  | 12544   | 10192.6 | 8252    | 6887.9  | 9409.1  | 6528.5  | 8516.8  |
| MCM7    | 1622.2  | 2219.5  | 707.2   | 450     | 511.1   | 177.3   | 912.4   | 1019.1  |
| MCM7    | 12610.2 | 15011.7 | 6369.2  | 5396    | 4549.3  | 5837.2  | 8903    | 8903.1  |
| MCM7    | 280.1   | 306.3   | 160.2   | 131.3   | 136.8   | 109.6   | 172.5   | 183.1   |
| MCM8    | 210     | 271.7   | 147.7   | 127.1   | 135.1   | 147.3   | 160.1   | 251     |
| MCM8    | 79.7    | 93.1    | 93.6    | 97.2    | 76.8    | 80.9    | 88.4    | 90.3    |
| MCM8    | 2820    | 3317.6  | 902.6   | 1491.6  | 1440.2  | 932.9   | 2369.1  | 2716.7  |
| MCMDC1  | 150.6   | 171.5   | 109.3   | 137.4   | 120.3   | 127.1   | 125.3   | 166.3   |
| MCOLN1  | 234.8   | 274.4   | 242     | 193.1   | 170.4   | 215.7   | 229.3   | 408.1   |
| MCOLN2  | 2687.1  | 3106.7  | 2296.4  | 1808.9  | 1713.6  | 2114.6  | 2272.8  | 3681.1  |
| MCOLN3  | 142.7   | 135.6   | 148.3   | 214.8   | 193.8   | 267.1   | 122     | 166.6   |
| MCPH1   | 230.7   | 334.9   | 194.6   | 149.1   | 143.3   | 152     | 213.1   | 254.2   |
| MCRS1   | 1462.5  | 2197.2  | 1290.5  | 916.4   | 777.2   | 934.4   | 1292.3  | 1733.3  |
| MCRS1   | 348.5   | 463.7   | 231.9   | 155.4   | 144.6   | 98.6    | 282.7   | 345.5   |
| MCTP1   | 81.5    | 104     | 77.2    | 74.2    | 75.1    | 82.3    | 85.4    | 94.6    |
| MCTP1   | 312.3   | 391.9   | 236.5   | 246.6   | 195.6   | 257.3   | 242.5   | 274.5   |
| MCTP1   | 80.8    | 90.6    | 92.8    | 88.5    | 85.5    | 76.6    | 81.5    | 96.8    |
| MCTP2   | 75.2    | 90.9    | 87.4    | 76.7    | 72.9    | 78.4    | 83.7    | 81.5    |
| MCTS1   | 812.5   | 987.9   | 292.9   | 300.6   | 196     | 305.1   | 697.6   | 1049.4  |
| MDAC1   | 81.7    | 93.6    | 84.3    | 84.7    | 75.2    | 82      | 77.9    | 87.4    |
| MDC1    | 578.2   | 721.3   | 254.2   | 291.3   | 287.5   | 380.3   | 493     | 806.5   |
| MDFI    | 141.8   | 167.5   | 88.5    | 84.4    | 87.1    | 91.3    | 116.5   | 173.5   |
| MDFIC   | 396.4   | 510.7   | 195.7   | 214     | 156.1   | 296.3   | 264.3   | 383.1   |
| MDGA1   | 151.5   | 178.7   | 113.6   | 96.9    | 102.5   | 107.6   | 153.3   | 174.1   |
| MDH1    | 12876.3 | 16466.4 | 9841.5  | 10421.7 | 8545.1  | 13301.5 | 10796.4 | 15368.2 |
| MDH1B   | 99.5    | 109.2   | 93.8    | 78.1    | 81.8    | 86.7    | 101     | 106.6   |
| MDH2    | 18216.5 | 25839.1 | 15625.8 | 15110.7 | 11640.4 | 13961.2 | 18449.4 | 22268   |
| MDK     | 91.7    | 115.9   | 109.7   | 87.3    | 95.3    | 90.6    | 90.2    | 104.9   |
| MDK     | 87.9    | 107.2   | 91.6    | 89.3    | 90.4    | 82.6    | 86.9    | 102.2   |
| MDK     | 246.3   | 207.4   | 268.6   | 214.9   | 197.4   | 276.5   | 164     | 247.5   |
| MDK     | 98.5    | 130.3   | 84.6    | 81.1    | 89.4    | 78.1    | 101.8   | 129.4   |
| MDK     | 85.9    | 102.8   | 90.9    | 80.3    | 76.2    | 77.6    | 83.4    | 90.2    |
| MDM1    | 93.2    | 106.1   | 95.1    | 96.7    | 81.5    | 88.8    | 88.7    | 99.1    |
| MDM1    | 144.9   | 187.3   | 112.8   | 95.6    | 92.5    | 103.2   | 128     | 171     |
| MDM1    | 181.6   | 253.2   | 140.8   | 120.2   | 109.5   | 113.4   | 140.5   | 166.1   |

|         |        |        |        |        |        |        |        |        |
|---------|--------|--------|--------|--------|--------|--------|--------|--------|
| MDM2    | 163.2  | 222.1  | 130.4  | 140.2  | 117.4  | 160.6  | 144.2  | 162.6  |
| MDM2    | 88     | 99.5   | 105.1  | 97.2   | 88.6   | 99.9   | 89.6   | 95.3   |
| MDM4    | 219.6  | 281.1  | 121.2  | 127.7  | 150.6  | 115.9  | 173.7  | 243    |
| MDN1    | 130    | 187.4  | 122.2  | 132.8  | 127.9  | 129.6  | 125.6  | 123.7  |
| MDP-1   | 403.2  | 457.3  | 187    | 147.9  | 124.7  | 155.7  | 340.3  | 394.5  |
| MDS028  | 243.8  | 336.7  | 227.7  | 266.5  | 222.8  | 352    | 246.7  | 320.9  |
| MDS032  | 297.3  | 340.4  | 156.9  | 138.3  | 126.7  | 143.7  | 264.7  | 275    |
| MDS1    | 120    | 131    | 90.5   | 79.2   | 78.4   | 84.7   | 109.1  | 118.4  |
| ME1     | 642.6  | 759.5  | 269.6  | 235.2  | 193.8  | 309.7  | 1495.9 | 3875.6 |
| ME2     | 1661.9 | 2037.3 | 648.4  | 667.1  | 524.4  | 1003.7 | 1389.2 | 1930.6 |
| ME3     | 118.7  | 153.3  | 108.4  | 104.1  | 97.3   | 110    | 113.8  | 124.9  |
| ME3     | 256.6  | 257.5  | 180.2  | 181.8  | 183.6  | 286.8  | 173.2  | 234.5  |
| ME3     | 78.2   | 92.4   | 86.2   | 84.4   | 79.5   | 93.2   | 71.4   | 81.3   |
| MEA1    | 790.2  | 1004.7 | 491.7  | 427.2  | 331.7  | 549.6  | 676.3  | 881.6  |
| MECP2   | 92.7   | 125.3  | 102    | 101.6  | 107.9  | 127.9  | 93.4   | 112.7  |
| MECR    | 142.2  | 177.1  | 105.9  | 106.4  | 96.3   | 85.8   | 127.7  | 130.1  |
| MECR    | 171.3  | 206    | 166.3  | 139.8  | 127.4  | 166.4  | 182.3  | 305.7  |
| MED12   | 131.6  | 162.6  | 169.4  | 289.4  | 245.7  | 386.3  | 131.5  | 147.8  |
| MED12L  | 91     | 82     | 89.5   | 82.9   | 76.1   | 77.4   | 89.4   | 101.2  |
| MED18   | 123.5  | 133    | 89.9   | 87     | 89.4   | 80.6   | 113.6  | 138.5  |
| MED19   | 617.1  | 752.3  | 518.4  | 422.5  | 410.2  | 474.4  | 581.5  | 552    |
| MED25   | 379.3  | 431    | 382.4  | 237.5  | 216    | 222    | 378.1  | 599.6  |
| MED28   | 1927.5 | 2762.3 | 1315.3 | 794.6  | 611.7  | 772.9  | 1740.8 | 2528.5 |
| MED31   | 100.7  | 128.8  | 88.9   | 86.7   | 77.1   | 78     | 102.1  | 129.4  |
| MED4    | 967.3  | 1385.9 | 786.1  | 819.3  | 666    | 1066.2 | 865    | 1325.9 |
| MED6    | 3346.3 | 4178.9 | 2116.8 | 1878.8 | 1359.5 | 1683.7 | 3644.2 | 3981.1 |
| MED8    | 873.2  | 1024.2 | 462.2  | 405.4  | 409.8  | 397.7  | 780    | 874.7  |
| MED8    | 1160.1 | 1568.1 | 445.3  | 352.6  | 314    | 393.3  | 1100.2 | 1334   |
| MED8    | 515.6  | 879.4  | 430.7  | 321.9  | 266.5  | 339.4  | 488.2  | 686    |
| MED9    | 191.9  | 222.6  | 122.8  | 111.3  | 96.3   | 116.4  | 180.4  | 225.2  |
| MEF2A   | 154.2  | 194.9  | 108    | 123.9  | 110.2  | 129.1  | 134.6  | 163.3  |
| MEF2B   | 101.5  | 98.9   | 92.5   | 98     | 113.6  | 97.3   | 93.1   | 99.7   |
| MEF2C   | 845.5  | 1246.4 | 481.8  | 682    | 518.5  | 493.3  | 690.7  | 775.3  |
| MEF2D   | 2418.2 | 2855.3 | 1869.5 | 1804.9 | 1665.5 | 1375.3 | 1926   | 1648.1 |
| MEFV    | 123.9  | 165.7  | 109.9  | 110.7  | 119.9  | 139    | 124    | 140.7  |
| MEG3    | 99.4   | 113.5  | 87.8   | 97.2   | 82.9   | 87.6   | 95.8   | 110.1  |
| MEG3    | 99.8   | 111.1  | 94.2   | 87.4   | 86.5   | 79.7   | 96.5   | 104.1  |
| MEGF10  | 77.9   | 92.5   | 89.1   | 85.4   | 82.4   | 88.7   | 77.9   | 91.7   |
| MEGF11  | 97.8   | 100.2  | 89.5   | 80.1   | 75.6   | 83.1   | 91.3   | 98.6   |
| MEGF8   | 137.3  | 168.1  | 132.6  | 130.7  | 103.7  | 98     | 141.3  | 174.3  |
| MEGF9   | 147.6  | 168.2  | 95.2   | 86.3   | 74.4   | 95.7   | 123.4  | 194.1  |
| MEI1    | 141.4  | 150.5  | 122    | 140.3  | 115.1  | 130.8  | 145.5  | 157.2  |
| MEIG1   | 74.4   | 85.4   | 77.9   | 66.3   | 65.5   | 69.7   | 73.7   | 84.9   |
| MEIS2   | 447.6  | 633.5  | 404.7  | 281.1  | 242.6  | 366.7  | 318.5  | 482.9  |
| MEIS2   | 104.3  | 127.2  | 82.2   | 88     | 80.4   | 88.3   | 87     | 103.6  |
| MEIS2   | 97.3   | 114.7  | 96.2   | 88     | 74.5   | 86.7   | 93     | 114.2  |
| MEIS2   | 121.6  | 137.6  | 82.9   | 83.1   | 88.7   | 100.5  | 122.9  | 147.3  |
| MEIS3   | 125.6  | 128.7  | 98.6   | 83.2   | 79.7   | 84.2   | 116.8  | 132.8  |
| MEIS3P1 | 558.6  | 628    | 270.7  | 229.5  | 217.7  | 290    | 501.7  | 778.6  |
| MELK    | 1306.9 | 1602.6 | 1170.2 | 846.9  | 810.1  | 1241.4 | 1237.5 | 1716   |

|          |        |        |        |        |        |        |        |        |
|----------|--------|--------|--------|--------|--------|--------|--------|--------|
| MEN1     | 118.8  | 127.4  | 123.5  | 115.5  | 99.4   | 125.2  | 113    | 150.4  |
| MEN1     | 112.3  | 124    | 96.2   | 96.2   | 92.3   | 87.7   | 113.8  | 123.1  |
| MEN1     | 121.9  | 136.8  | 102    | 88.7   | 80.9   | 94.5   | 118.6  | 130.8  |
| MEN1     | 227.4  | 267    | 266    | 201.2  | 178.7  | 258.4  | 184.5  | 301.9  |
| MEOX1    | 105.5  | 130.3  | 99.6   | 87.7   | 86.1   | 89.7   | 118.1  | 117.3  |
| MEOX1    | 83.4   | 91.3   | 85.5   | 81.9   | 83     | 82.1   | 90.5   | 79.4   |
| MEOX1    | 92.7   | 115.3  | 100.8  | 91.4   | 89.2   | 88.5   | 91.3   | 110.2  |
| MEOX2    | 82.5   | 78.8   | 78.8   | 75     | 82.6   | 86.9   | 76.6   | 84.1   |
| MEP1A    | 96.8   | 114.4  | 103.9  | 110.1  | 98     | 105.7  | 95.2   | 96.6   |
| MEP1B    | 148.6  | 190.8  | 89.7   | 94.7   | 94.3   | 92.8   | 164.6  | 196.1  |
| MEPE     | 98.6   | 121.2  | 94.9   | 85.6   | 81     | 84.7   | 97.7   | 101.8  |
| MERTK    | 110.4  | 126.3  | 116    | 211.8  | 196.3  | 302.1  | 117.5  | 120.2  |
| MESDC1   | 101.7  | 116.2  | 120.9  | 114.4  | 95.6   | 145    | 101.6  | 172    |
| MESDC2   | 97.8   | 111.1  | 99.1   | 93.9   | 79     | 84.3   | 97.8   | 95.9   |
| MESP1    | 257.3  | 322.4  | 143.9  | 140.2  | 125.8  | 125.9  | 225.6  | 232.1  |
| MEST     | 96.8   | 119    | 95.1   | 81.6   | 82.7   | 92.4   | 94     | 116.2  |
| MEST     | 356    | 436.4  | 155.1  | 120.4  | 111.8  | 116.4  | 201.3  | 278    |
| MEST     | 74.9   | 82.7   | 101.8  | 94.8   | 88.8   | 84     | 82.4   | 85.8   |
| MET      | 101    | 123.5  | 92.3   | 85.1   | 79.2   | 75.1   | 97.5   | 119.5  |
| METAP1   | 2663.9 | 3444.3 | 2282   | 1690.1 | 1081.9 | 2160.8 | 2204.2 | 4012.4 |
| METAP2   | 4089.5 | 4598.9 | 1797   | 2074.5 | 1532.6 | 2790.8 | 3113.9 | 5901.4 |
| METRNL   | 169.5  | 204.1  | 157.3  | 136.4  | 100.8  | 130    | 155.7  | 211.3  |
| METRNL   | 168.5  | 211.6  | 147.1  | 125.9  | 115.3  | 116.1  | 205.5  | 295    |
| METRNL   | 102.5  | 102.2  | 91.9   | 84.6   | 82.6   | 95.1   | 115.9  | 120.4  |
| METRNL   | 129.5  | 144.3  | 109.6  | 104.4  | 92.4   | 93.5   | 134.1  | 199.6  |
| METT10D  | 269.5  | 336.9  | 147.1  | 173.7  | 172.9  | 181.6  | 275.8  | 238    |
| METT11D1 | 100.8  | 111.4  | 102.2  | 93.9   | 94.6   | 94.6   | 95.8   | 101.6  |
| METT11D1 | 284.4  | 302.2  | 138.2  | 127.3  | 106.7  | 124.5  | 194.3  | 351.7  |
| METT5D1  | 220.8  | 243    | 115.4  | 103.9  | 96.4   | 117.8  | 192.9  | 216.5  |
| METTL1   | 490.8  | 623.1  | 254    | 228.6  | 159.3  | 200.7  | 413    | 408    |
| METTL1   | 102.1  | 117.1  | 93.4   | 81.2   | 78.4   | 85.6   | 93.8   | 122.1  |
| METTL2A  | 282.5  | 291.3  | 166.3  | 199.6  | 142.6  | 134.5  | 251.9  | 429.9  |
| METTL2A  | 115.3  | 138.5  | 118.8  | 105.1  | 103.7  | 109    | 103.3  | 124.3  |
| METTL2B  | 133.5  | 154.8  | 107.2  | 99.1   | 106.8  | 103.5  | 126.7  | 142.3  |
| METTL3   | 1078.5 | 1324.7 | 738.8  | 607.3  | 490.3  | 998.1  | 696.4  | 1287.1 |
| METTL4   | 210.8  | 204.9  | 196.1  | 164    | 145.5  | 196.9  | 173.1  | 264    |
| METTL5   | 3593   | 4048.3 | 2084.7 | 1871.3 | 1218.6 | 1951.9 | 3158.3 | 6129.4 |
| METTL6   | 293.4  | 366.4  | 115.1  | 115.5  | 96.6   | 125.6  | 243.5  | 361.5  |
| METTL7A  | 135.1  | 151.9  | 126.6  | 106    | 106.5  | 124.7  | 122.7  | 138.4  |
| METTL7B  | 824.7  | 1062.3 | 827.4  | 761.4  | 663.3  | 1184.7 | 575.6  | 826.9  |
| METTL9   | 158.1  | 177    | 114    | 109.8  | 100    | 121.7  | 156.5  | 219.2  |
| MFAP1    | 868.8  | 1108.4 | 319.8  | 361    | 288.6  | 432.5  | 725.1  | 1181   |
| MFAP2    | 97.9   | 105.3  | 83.7   | 80.6   | 79.7   | 81.9   | 103.3  | 109.1  |
| MFAP2    | 106.1  | 128.6  | 83.4   | 89.7   | 84.5   | 81     | 92.2   | 112.3  |
| MFAP2    | 86.6   | 88.1   | 92.1   | 85.7   | 81.2   | 92.9   | 86.8   | 88.4   |
| MFAP3    | 276.3  | 357    | 215.4  | 143.1  | 143.6  | 153.4  | 220.8  | 306.6  |
| MFAP3L   | 101.7  | 106.6  | 84.7   | 84.6   | 87.9   | 80.8   | 99.9   | 113.3  |
| MFAP3L   | 102    | 122.9  | 95.2   | 79.9   | 77.2   | 81     | 118    | 120.3  |
| MFAP3L   | 74.3   | 80.3   | 95.7   | 85.4   | 83.7   | 82.9   | 86.2   | 80.8   |
| MFAP4    | 136.8  | 151.6  | 115.7  | 205.8  | 205.1  | 194.8  | 152.8  | 145.6  |

|          |        |        |        |        |        |        |        |        |
|----------|--------|--------|--------|--------|--------|--------|--------|--------|
| MFAP5    | 95.9   | 108.8  | 102.8  | 102.5  | 108.3  | 106.5  | 105    | 103.8  |
| MFGE8    | 595.1  | 748.1  | 366.6  | 471.4  | 439.9  | 418.2  | 517.3  | 446.3  |
| MFHAS1   | 146.7  | 244    | 161.9  | 160.9  | 164.9  | 223.1  | 143.1  | 192.6  |
| MFI2     | 108.4  | 126.2  | 99.3   | 107.4  | 99.8   | 100.8  | 111.4  | 98     |
| MFI2     | 160.6  | 200.6  | 137.2  | 129.1  | 131.5  | 132.6  | 132.3  | 141.6  |
| MFI2     | 104.9  | 124.3  | 106.9  | 91.9   | 83.3   | 86     | 109.9  | 118.8  |
| MFN1     | 73.6   | 101.6  | 94.8   | 84.2   | 78     | 91.5   | 77.9   | 89.9   |
| MFN1     | 123.5  | 171.8  | 123.2  | 109.7  | 107.3  | 110.8  | 117.9  | 145.4  |
| MFN2     | 317.2  | 455.7  | 312.9  | 304.2  | 266.3  | 455.8  | 279.3  | 481.2  |
| MFNG     | 1770.6 | 2217   | 940.3  | 367.7  | 259.6  | 370.5  | 1308.2 | 1588.4 |
| MFRP     | 71.6   | 85.3   | 92.7   | 88.9   | 82.8   | 76     | 76.3   | 81.3   |
| MFSD1    | 6073.3 | 6575.1 | 2927.2 | 4456.4 | 3073.9 | 5342.7 | 6267.7 | 9376.2 |
| MFSD2    | 400.6  | 547.9  | 277.4  | 224    | 199.6  | 287.7  | 311.8  | 455.1  |
| MFSD3    | 2240.1 | 3415.3 | 1604.5 | 701.3  | 543.4  | 658.1  | 1752   | 1197.7 |
| MFSD4    | 80.5   | 104.7  | 85.5   | 82     | 78.6   | 87.5   | 91.6   | 100.1  |
| MFSD5    | 681.7  | 821.5  | 476    | 420.4  | 294.8  | 378.2  | 674    | 899.7  |
| MFSD7    | 124    | 131    | 104.9  | 96.1   | 90.2   | 101.5  | 105.8  | 114.9  |
| MFSD8    | 287.7  | 362.6  | 282.3  | 268.6  | 235.8  | 288.1  | 262.2  | 410.8  |
| MGA      | 288.4  | 408.5  | 170.6  | 201.9  | 175.8  | 282.6  | 334.5  | 471.1  |
| MGAM     | 110.7  | 144.5  | 90.3   | 100.3  | 83.8   | 102.4  | 96.8   | 128.1  |
| MGAM     | 105.8  | 120.5  | 75.6   | 79.9   | 70.9   | 88     | 103.4  | 123.1  |
| MGAT1    | 922.6  | 1151.2 | 828.8  | 975.6  | 872.9  | 1527.7 | 945.4  | 2076.5 |
| MGAT2    | 2753.3 | 3112.2 | 1186.8 | 1103.1 | 926.4  | 1146.6 | 2295.8 | 3576.5 |
| MGAT2    | 162.7  | 192.5  | 97.4   | 99.5   | 81.9   | 86.7   | 156.7  | 196.2  |
| MGAT3    | 83.7   | 84.4   | 94.1   | 84.7   | 79.4   | 81.7   | 70.6   | 84.9   |
| MGAT4A   | 386.6  | 474.7  | 262    | 356.6  | 266.1  | 372.7  | 343.9  | 553.5  |
| MGAT4B   | 143.8  | 204.7  | 161    | 145.8  | 142    | 107.7  | 144.2  | 199.2  |
| MGAT4B   | 84     | 104.2  | 86.8   | 80.3   | 83.5   | 79.1   | 85.4   | 95.4   |
| MGAT4B   | 288.8  | 420.1  | 300.7  | 213.3  | 214.2  | 302.4  | 220.9  | 462.8  |
| MGAT4C   | 84.7   | 88.4   | 90.9   | 87.6   | 83.4   | 83.2   | 82.4   | 83.1   |
| MGAT5    | 99     | 122    | 102.6  | 102.5  | 98.2   | 103    | 119.3  | 121.1  |
| MGAT5B   | 142.5  | 173.7  | 109.4  | 100.7  | 99.9   | 98.4   | 138.4  | 165.7  |
| MGAT5B   | 106.3  | 113.7  | 84.8   | 83.8   | 77.6   | 83.7   | 104.3  | 111    |
| MGC10334 | 154.6  | 190.7  | 163.6  | 147.6  | 118.1  | 168    | 143.5  | 215.7  |
| MGC10433 | 1073.2 | 1364.2 | 1013   | 704.9  | 486    | 964.3  | 1034.2 | 2322.4 |
| MGC10471 | 2507.7 | 2513.2 | 1915   | 1257.7 | 1379.8 | 1626.8 | 1976.2 | 2274   |
| MGC10911 | 406.6  | 553.9  | 252.6  | 222.7  | 212.2  | 279.9  | 317.1  | 376.2  |
| MGC10992 | 418.3  | 486.9  | 302.3  | 153.9  | 177.5  | 159.1  | 303.8  | 321.1  |
| MGC10993 | 925.9  | 1293   | 781.8  | 396.5  | 315.8  | 436.3  | 743.8  | 1051.4 |
| MGC10997 | 2316.1 | 3353.3 | 1568.2 | 1730.7 | 1502.4 | 1843.1 | 2120.6 | 2365   |
| MGC11102 | 146.7  | 152.4  | 100.1  | 86.7   | 89.3   | 99.3   | 130.1  | 176.8  |
| MGC11257 | 4376.6 | 5505.1 | 2919.6 | 2597.8 | 2178   | 2628.1 | 4015.2 | 4459.7 |
| MGC11271 | 91.5   | 100.8  | 99.5   | 86.4   | 87.9   | 90.1   | 95     | 104.8  |
| MGC11332 | 101.6  | 102.5  | 101.5  | 87.6   | 87.8   | 89.2   | 101.9  | 129.2  |
| MGC11335 | 329.4  | 429.1  | 188.9  | 130.3  | 134.8  | 138.3  | 329.1  | 274.4  |
| MGC11929 | 102.3  | 138.1  | 97     | 77.3   | 91.1   | 82.8   | 102.9  | 130.6  |
| MGC12965 | 106.6  | 95.1   | 95.6   | 90.7   | 88.7   | 99     | 100.4  | 125.7  |
| MGC12966 | 98.6   | 99.3   | 89.7   | 88.9   | 91     | 91.8   | 96.1   | 121.5  |
| MGC12966 | 1286.3 | 1675.8 | 980.6  | 972.3  | 774    | 1301.6 | 962.3  | 1691.8 |
| MGC12981 | 793.3  | 1145.1 | 569.1  | 510.2  | 354.7  | 659.4  | 702.9  | 1130.8 |

|          |         |         |        |         |         |         |         |         |
|----------|---------|---------|--------|---------|---------|---------|---------|---------|
| MGC13017 | 9431.8  | 9086    | 5601   | 7321.8  | 7626.3  | 4870.3  | 8292.7  | 13508.7 |
| MGC13024 | 100.8   | 123.9   | 113.4  | 114.8   | 120.9   | 124.1   | 99.1    | 134.3   |
| MGC13034 | 138.4   | 156.2   | 107.1  | 85.7    | 77.1    | 82.9    | 123.4   | 149.2   |
| MGC13057 | 86.8    | 84.7    | 86.2   | 92.9    | 79.2    | 87.2    | 84.2    | 87.8    |
| MGC13057 | 90.3    | 109.7   | 100.3  | 99.8    | 103.6   | 99.9    | 96.8    | 102.9   |
| MGC13096 | 445.5   | 606     | 359.4  | 208.9   | 169.8   | 230.1   | 289.9   | 347.8   |
| MGC13114 | 1150.4  | 1397.3  | 868    | 498.9   | 368.1   | 525.5   | 1005.2  | 1647.7  |
| MGC13114 | 237     | 312.5   | 140.8  | 112.5   | 112.3   | 103.3   | 233.8   | 229.8   |
| MGC13125 | 377.9   | 521.7   | 236    | 180.9   | 181.3   | 204.4   | 311     | 422     |
| MGC13138 | 125     | 137     | 104.1  | 95.8    | 91.9    | 104.3   | 115.3   | 152.8   |
| MGC13170 | 135.7   | 192.3   | 135.4  | 98.1    | 94.6    | 95.9    | 141.1   | 142.7   |
| MGC13170 | 2917.7  | 3794.8  | 1668.9 | 1059    | 911.8   | 1096.1  | 2567.9  | 3529.7  |
| MGC13379 | 1226.5  | 1644.2  | 700.3  | 471.2   | 377.3   | 494.5   | 1127.2  | 1164.2  |
| MGC14141 | 1006.3  | 1338.5  | 403.8  | 369     | 324.3   | 375.9   | 854.1   | 767.8   |
| MGC14327 | 2774.9  | 3446.9  | 2241.5 | 1864.9  | 1392.1  | 2293.9  | 1860.2  | 2709.3  |
| MGC14376 | 97.7    | 94.9    | 101.9  | 108.3   | 98.4    | 102.8   | 101.5   | 164.4   |
| MGC15416 | 747.8   | 1042.9  | 380.4  | 241.2   | 181.5   | 329.8   | 551.4   | 687.5   |
| MGC15476 | 140.4   | 158.8   | 135.2  | 144.1   | 144.4   | 137.7   | 124     | 156.7   |
| MGC15523 | 188.1   | 204.2   | 222.2  | 209.8   | 209.4   | 352     | 151.4   | 189.8   |
| MGC15523 | 92.9    | 99.7    | 95.6   | 93.3    | 91.9    | 83      | 96.9    | 113.9   |
| MGC15523 | 573.8   | 757.8   | 539.3  | 415.2   | 358.3   | 517.8   | 521.3   | 859     |
| MGC15619 | 220.8   | 318.3   | 161    | 149.3   | 161.9   | 185     | 190.4   | 218.6   |
| MGC15619 | 303.3   | 465.1   | 204.8  | 232.6   | 222.5   | 247.2   | 266.9   | 315.8   |
| MGC15763 | 312.4   | 492.9   | 214.6  | 198.9   | 179     | 282.7   | 221.9   | 308.3   |
| MGC15875 | 232.2   | 292.3   | 236.8  | 284     | 275.5   | 380     | 196.4   | 264.9   |
| MGC15875 | 139.7   | 165.1   | 106.1  | 97.3    | 99.1    | 108.6   | 116.4   | 156     |
| MGC15912 | 387.9   | 516.3   | 141.3  | 251.7   | 226     | 218.9   | 326.9   | 394.8   |
| MGC16028 | 291.8   | 337.2   | 184.4  | 191     | 167.6   | 223.4   | 244.4   | 303.6   |
| MGC16169 | 325.2   | 404.6   | 203.1  | 238.6   | 193.5   | 366.6   | 269.1   | 338.6   |
| MGC16186 | 108     | 123.2   | 105.3  | 104     | 103     | 95.2    | 105.2   | 101     |
| MGC16291 | 84.7    | 86.2    | 84.6   | 92.5    | 79.5    | 82.7    | 80      | 82      |
| MGC16372 | 80.2    | 95.1    | 90.9   | 85.5    | 77.2    | 78.5    | 78.6    | 85.8    |
| MGC16703 | 18933.2 | 19867.6 | 9667.6 | 12755.3 | 12637.7 | 10637.7 | 17910.6 | 20914.8 |
| MGC16824 | 139.3   | 186.4   | 105.3  | 117.1   | 109.5   | 130.9   | 131.6   | 228.8   |
| MGC16943 | 132.1   | 156.3   | 100    | 84.8    | 85.2    | 97      | 139.7   | 156     |
| MGC17330 | 123.9   | 158.6   | 127.4  | 107.1   | 118.1   | 114.3   | 144.9   | 146.6   |
| MGC17624 | 170.4   | 178     | 115.1  | 127.7   | 126.3   | 149.9   | 135.1   | 123.1   |
| MGC17839 | 321.1   | 393.1   | 236    | 131.1   | 103.4   | 126.9   | 282.2   | 368.9   |
| MGC18079 | 224.8   | 390.8   | 150.5  | 132.4   | 122.2   | 146.4   | 226.5   | 382.9   |
| MGC18216 | 101.4   | 128     | 86     | 81.4    | 76.4    | 83.4    | 101.5   | 106.8   |
| MGC19604 | 314.8   | 350.9   | 256.2  | 178.2   | 164.3   | 179.9   | 266.8   | 349.8   |
| MGC19764 | 88.7    | 101.4   | 101.7  | 84.6    | 88.6    | 97      | 89.7    | 108.5   |
| MGC20255 | 352.1   | 463.1   | 342.6  | 286.9   | 216.7   | 348.8   | 343.5   | 876.2   |
| MGC20470 | 84.2    | 100.4   | 91.6   | 81.9    | 79.7    | 86.9    | 84      | 82.1    |
| MGC20983 | 132.6   | 162.9   | 136.9  | 124.4   | 107.2   | 108.5   | 128.7   | 139     |
| MGC21644 | 81.8    | 96.6    | 93.1   | 87.6    | 84.3    | 88.8    | 93.6    | 92.7    |
| MGC21675 | 126.8   | 124.7   | 104.2  | 97.3    | 89.3    | 85.1    | 115.7   | 126.9   |
| MGC21830 | 171     | 180.1   | 148    | 142.1   | 149.3   | 175.9   | 149.1   | 186.8   |
| MGC22001 | 92.8    | 97.6    | 94.4   | 93.6    | 95.4    | 95.5    | 96.2    | 101.4   |
| MGC22793 | 1125.5  | 1367.6  | 724.4  | 721.4   | 522     | 813.4   | 920.3   | 1257.4  |

|          |         |         |        |        |        |        |        |        |
|----------|---------|---------|--------|--------|--------|--------|--------|--------|
| MGC23280 | 169.6   | 221.8   | 103.1  | 102.8  | 85.9   | 100    | 148.6  | 173.3  |
| MGC23909 | 828.6   | 1056.5  | 306.2  | 323.3  | 197.3  | 351    | 785.2  | 1502.8 |
| MGC23985 | 86      | 87.3    | 101.9  | 93.3   | 85.5   | 82     | 87     | 98.8   |
| MGC24039 | 125.7   | 137.1   | 110.8  | 109.1  | 114    | 115.7  | 109    | 191.2  |
| MGC2408  | 603.5   | 702.5   | 324.2  | 272.4  | 186.4  | 233.2  | 526.9  | 706.9  |
| MGC24381 | 224.7   | 232.3   | 133.8  | 116.2  | 105.9  | 140.9  | 207.1  | 323.7  |
| MGC2463  | 77.4    | 78      | 101.2  | 93     | 83.2   | 88.1   | 73.6   | 72.5   |
| MGC24665 | 1148.7  | 1709.1  | 659    | 458    | 442.2  | 540.9  | 807    | 994.2  |
| MGC2474  | 121.5   | 151.6   | 110.8  | 92.8   | 96.7   | 101.1  | 126.5  | 144.8  |
| MGC24975 | 130.6   | 146.3   | 115.4  | 111.1  | 107.6  | 121    | 117.5  | 141.7  |
| MGC2654  | 572.9   | 713.4   | 400.4  | 366.4  | 295.5  | 472.9  | 520.1  | 806.1  |
| MGC26647 | 89      | 103.6   | 92.2   | 88.7   | 86.2   | 83.9   | 93.6   | 107.8  |
| MGC26718 | 84      | 91.5    | 106.5  | 106.3  | 87.2   | 97.2   | 79.1   | 100.1  |
| MGC26733 | 98.2    | 119.5   | 112.5  | 107.5  | 98.1   | 98.6   | 98.6   | 101.7  |
| MGC26816 | 74.1    | 81.1    | 88.7   | 76.7   | 82.3   | 85.8   | 79     | 81.6   |
| MGC26856 | 103.6   | 103.8   | 108    | 100.6  | 93.4   | 92.8   | 96.5   | 104.6  |
| MGC26885 | 407.4   | 526.8   | 184.8  | 132.1  | 134.8  | 161    | 415.9  | 534.9  |
| MGC26963 | 89.7    | 94.7    | 91.2   | 86.2   | 80.8   | 84.3   | 92     | 90.6   |
| MGC27016 | 69.4    | 75.4    | 87.5   | 72.1   | 83.1   | 71.1   | 72.8   | 73.3   |
| MGC27121 | 81.9    | 89.2    | 111.9  | 102.8  | 102.9  | 109.5  | 91.4   | 91.2   |
| MGC2747  | 980.1   | 1386.9  | 502.3  | 338.9  | 299.8  | 348.8  | 860.8  | 1229.6 |
| MGC2749  | 1027.8  | 1062.9  | 512.8  | 277.1  | 229.2  | 283.9  | 957.9  | 1636.1 |
| MGC2752  | 166.3   | 221.3   | 140    | 106    | 107.4  | 119.2  | 147.3  | 226.9  |
| MGC2803  | 2118.8  | 3084.9  | 433.7  | 341.4  | 430.9  | 530.8  | 2031.9 | 3089.6 |
| MGC29506 | 98.3    | 100.2   | 89     | 98.4   | 85.6   | 89.6   | 93.8   | 95.6   |
| MGC29671 | 304.3   | 314.5   | 208.8  | 151.5  | 161.1  | 217.4  | 248.7  | 356.5  |
| MGC29891 | 10832.5 | 11365.3 | 3631.3 | 4786.2 | 5153.6 | 3960.4 | 9747.8 | 9834.4 |
| MGC3101  | 84.4    | 104     | 97.2   | 90.3   | 83.3   | 84.2   | 97.1   | 111    |
| MGC3121  | 2165.7  | 2475.3  | 1047.2 | 621.5  | 585.1  | 669.9  | 1736.2 | 1477.2 |
| MGC3123  | 161.9   | 188.3   | 107.3  | 105.3  | 96     | 102.6  | 134.3  | 165.3  |
| MGC3196  | 392.7   | 495.1   | 304.4  | 246.2  | 197.3  | 268.9  | 338.6  | 601.6  |
| MGC3196  | 207.6   | 271.6   | 174.7  | 150.3  | 128.2  | 155.8  | 191.4  | 324.1  |
| MGC31967 | 187.2   | 238.2   | 141.8  | 109.4  | 100.4  | 122.3  | 184.4  | 226.2  |
| MGC3207  | 899.3   | 1097    | 876.9  | 733.1  | 620.1  | 828.1  | 713.5  | 1341.5 |
| MGC3207  | 125.6   | 130.2   | 86.6   | 96.6   | 81.3   | 79.3   | 111.2  | 142.6  |
| MGC3207  | 295.5   | 329     | 229.6  | 174.3  | 143.4  | 157.6  | 215.6  | 282.8  |
| MGC3207  | 2040.2  | 2295    | 1237.6 | 1010.4 | 746    | 1070.3 | 1472.7 | 1897.7 |
| MGC3265  | 209.6   | 236.3   | 117.3  | 109.5  | 89.5   | 120.2  | 186    | 291.5  |
| MGC33212 | 359.2   | 457     | 305.8  | 213    | 195.5  | 226.7  | 382.2  | 483.6  |
| MGC33212 | 1374.3  | 1581.8  | 1168.2 | 943.9  | 728.3  | 873.4  | 1371   | 1938.6 |
| MGC33214 | 158.3   | 180     | 123    | 93     | 85.4   | 109.3  | 134.6  | 169.8  |
| MGC33407 | 99.7    | 100.4   | 89.2   | 91.9   | 83.1   | 85.1   | 102.1  | 119.3  |
| MGC33486 | 86.8    | 102.3   | 94.2   | 78.2   | 83.7   | 80.1   | 94.4   | 110.2  |
| MGC33530 | 84.7    | 88.3    | 103.1  | 102    | 95.5   | 93.9   | 97.8   | 92.2   |
| MGC33556 | 1978    | 2264.4  | 1251.5 | 413.7  | 396.5  | 677.1  | 1376.2 | 2527.1 |
| MGC33584 | 173.6   | 210.9   | 139.1  | 151.4  | 136.2  | 215.9  | 180.8  | 260.7  |
| MGC33600 | 85.7    | 96.2    | 78.7   | 90.1   | 83.9   | 76.2   | 77.9   | 93.1   |
| MGC33648 | 331.7   | 419.5   | 254.9  | 292.4  | 210.8  | 362.3  | 279.3  | 444.4  |
| MGC33657 | 94.3    | 121.1   | 99.5   | 95     | 96     | 92.3   | 101.5  | 91.7   |
| MGC33692 | 688.9   | 959.6   | 495.6  | 614.5  | 491.1  | 484.4  | 642.2  | 803    |



|          |        |        |        |        |       |        |       |       |
|----------|--------|--------|--------|--------|-------|--------|-------|-------|
| MGC33846 | 134.2  | 154.7  | 123.9  | 117    | 100.8 | 105.7  | 149.3 | 139.9 |
| MGC33887 | 130.4  | 169.3  | 113.1  | 103    | 93.7  | 107.5  | 125.1 | 157.8 |
| MGC33894 | 73.7   | 82.5   | 86.8   | 87.3   | 80.2  | 72.4   | 76.6  | 89.7  |
| MGC34646 | 87.6   | 89     | 97.6   | 80     | 87.2  | 80.6   | 82.5  | 88    |
| MGC34647 | 77.7   | 80.1   | 101.8  | 93.7   | 88.1  | 93.9   | 81.1  | 83.4  |
| MGC34725 | 95.4   | 101.1  | 81.4   | 95.3   | 80.7  | 83.8   | 85.4  | 103.3 |
| MGC34732 | 80.7   | 90.4   | 86.6   | 78.4   | 78.4  | 83.8   | 81.8  | 85.5  |
| MGC34761 | 155.7  | 162.1  | 95.5   | 88.8   | 86.8  | 86.5   | 138.2 | 161.9 |
| MGC34774 | 81.2   | 99.4   | 95.7   | 88.4   | 81.2  | 89.2   | 88.8  | 95.8  |
| MGC34821 | 88.2   | 98.5   | 97.5   | 90.6   | 90.5  | 97.2   | 88.6  | 89.5  |
| MGC34824 | 113.6  | 132.9  | 92.7   | 87.1   | 90.9  | 94.5   | 124.5 | 119.5 |
| MGC34830 | 81.3   | 87.9   | 102.7  | 87.6   | 93.5  | 96.1   | 79.3  | 82    |
| MGC35043 | 88     | 109.8  | 95.3   | 80.8   | 87    | 94     | 96.7  | 97.7  |
| MGC35154 | 82     | 92.4   | 106.2  | 94     | 93.9  | 88.7   | 87.7  | 88.2  |
| MGC35206 | 167.9  | 181.4  | 92.5   | 96.8   | 83.1  | 96.9   | 146   | 188.3 |
| MGC35212 | 3523.4 | 4240.6 | 2472.3 | 1594.6 | 1189  | 2207.1 | 2211  | 2760  |
| MGC35295 | 94.7   | 105.1  | 96.5   | 88.7   | 86.7  | 85.2   | 95.9  | 104   |
| MGC35308 | 120.6  | 155.2  | 115.9  | 100.1  | 100.5 | 100.9  | 113.7 | 124.5 |
| MGC35361 | 172.6  | 245.1  | 138.8  | 135.9  | 121.9 | 165.4  | 136.7 | 177   |
| MGC35402 | 88.9   | 90.4   | 99.4   | 102.6  | 103.5 | 91.9   | 83    | 88.3  |
| MGC35440 | 132.4  | 167.1  | 97.5   | 90.8   | 84.9  | 90.7   | 127.8 | 157   |
| MGC39497 | 90.2   | 118.1  | 92     | 91.7   | 85.5  | 96.5   | 88.7  | 114.7 |
| MGC39581 | 110.1  | 116.7  | 96     | 91.5   | 86.2  | 92.1   | 100.8 | 111.5 |
| MGC39606 | 94.5   | 95.9   | 89.7   | 85.4   | 71.1  | 89.2   | 89.7  | 95.8  |
| MGC39633 | 325.4  | 389.5  | 186.3  | 244.4  | 226.8 | 509.1  | 233.5 | 327.6 |
| MGC39662 | 81.2   | 82.5   | 92.4   | 95.1   | 86.8  | 78.6   | 81.6  | 85.1  |
| MGC39681 | 110    | 120.8  | 98.8   | 96.1   | 84.1  | 91.1   | 124.6 | 112.3 |
| MGC39715 | 102.1  | 101.4  | 101.2  | 97.5   | 87.7  | 94.3   | 100.5 | 104.7 |
| MGC39900 | 975.4  | 1127.9 | 497.3  | 347.4  | 291.8 | 350.4  | 698   | 732.3 |
| MGC39900 | 119.7  | 137.5  | 104.6  | 100    | 89.3  | 101.1  | 108.8 | 142.1 |
| MGC39900 | 900.5  | 1146.7 | 509.8  | 360.4  | 293.8 | 424.3  | 740.5 | 796.4 |
| MGC40069 | 99.2   | 95     | 97.4   | 87.5   | 86.5  | 95.4   | 86.4  | 95.6  |
| MGC40222 | 87.5   | 121.4  | 86.6   | 96.6   | 84.3  | 90.4   | 94.9  | 100.9 |
| MGC40405 | 1079.5 | 1080.2 | 288.7  | 354.5  | 368.5 | 469.3  | 969.1 | 1384  |
| MGC40405 | 579.4  | 727.2  | 376    | 367    | 351.8 | 517.3  | 455.4 | 736.7 |
| MGC40499 | 135.7  | 175.1  | 105.7  | 99.3   | 90.3  | 93.4   | 123.8 | 134.4 |
| MGC40499 | 318.7  | 364    | 146.7  | 125.5  | 116.8 | 141.9  | 235.1 | 363   |
| MGC40579 | 232.6  | 313.2  | 176.7  | 247.4  | 198.7 | 184.4  | 201.2 | 227.4 |
| MGC4093  | 352.3  | 434.9  | 193    | 156.2  | 157.3 | 160.9  | 306.6 | 336   |
| MGC4172  | 290    | 370.1  | 211.3  | 240    | 177.2 | 217.6  | 207.4 | 266.8 |
| MGC41945 | 119.9  | 136.7  | 110.3  | 96.6   | 87.6  | 92.4   | 99.1  | 125.4 |
| MGC41945 | 103    | 115.8  | 89.3   | 85.3   | 88.2  | 90     | 99.3  | 119.7 |
| MGC42090 | 81     | 85.2   | 97.2   | 93.8   | 96    | 88.7   | 83.1  | 84.8  |
| MGC42105 | 121.2  | 132.3  | 103.3  | 109.5  | 92    | 111.8  | 123.5 | 130.6 |
| MGC42174 | 168.7  | 209.5  | 214    | 192    | 177.3 | 219.6  | 143.4 | 170.9 |
| MGC42367 | 151    | 161.4  | 149.5  | 256.6  | 218.8 | 284.5  | 123.4 | 163   |
| MGC4266  | 95.7   | 105.2  | 89.6   | 78.1   | 81.4  | 84.6   | 80.8  | 100.3 |
| MGC4268  | 353.5  | 421.1  | 165.5  | 164.2  | 152.2 | 195.7  | 300.7 | 477.8 |
| MGC4399  | 88.8   | 100    | 96.1   | 92.9   | 82    | 96     | 96.1  | 110.5 |
| MGC44328 | 88.6   | 96     | 100.2  | 85.7   | 80.7  | 95.8   | 82.9  | 98.6  |

|          |        |        |        |        |        |        |        |        |
|----------|--------|--------|--------|--------|--------|--------|--------|--------|
| MGC44505 | 94.3   | 100.2  | 106.2  | 100.5  | 101    | 100.4  | 84.2   | 87     |
| MGC45438 | 125.6  | 136.9  | 96     | 95.6   | 87.9   | 92.5   | 120.3  | 137.6  |
| MGC45491 | 86     | 121    | 96.5   | 89.4   | 75.5   | 84.4   | 106.5  | 105.2  |
| MGC4562  | 1552.4 | 1813.5 | 997.7  | 811.2  | 610.2  | 768    | 1180.5 | 1452.8 |
| MGC45800 | 92.8   | 100.2  | 106.7  | 90.5   | 94.4   | 95.8   | 103.8  | 101.1  |
| MGC45840 | 298.7  | 308.4  | 224.5  | 344.8  | 393    | 499.4  | 241.2  | 283.3  |
| MGC4618  | 864.5  | 872.4  | 488.8  | 371.8  | 419.6  | 497.2  | 645.8  | 624.4  |
| MGC46496 | 84.7   | 95.9   | 103.9  | 100.5  | 98.6   | 96.7   | 95.1   | 90.8   |
| MGC4655  | 91.8   | 99.1   | 94.1   | 85.4   | 77     | 85.2   | 80.6   | 92.6   |
| MGC4677  | 83.2   | 89.5   | 81.6   | 78.9   | 77.2   | 84.3   | 79.7   | 92.5   |
| MGC4677  | 3153.5 | 3397.3 | 2719.9 | 2662.5 | 1974.8 | 2841.6 | 3777.8 | 3737.4 |
| MGC4728  | 409.4  | 592.4  | 298.2  | 246.9  | 219.3  | 234.4  | 440.9  | 647.6  |
| MGC4825  | 425.2  | 589    | 199.6  | 170.2  | 139.3  | 188    | 352.2  | 532.5  |
| MGC48595 | 82.1   | 96.4   | 86.2   | 86.3   | 80.1   | 81.8   | 87.9   | 99.1   |
| MGC48628 | 87.2   | 106    | 88     | 83.2   | 82.9   | 93.9   | 91.6   | 109.1  |
| MGC48915 | 79     | 83.5   | 85.3   | 79.1   | 87.7   | 78.5   | 81.3   | 71.2   |
| MGC50273 | 71.8   | 79.1   | 84.2   | 83.5   | 80.5   | 75.3   | 79     | 77     |
| MGC50372 | 85.1   | 89     | 93.8   | 91.5   | 82.1   | 83.5   | 81.9   | 88.2   |
| MGC50559 | 112.8  | 111.4  | 90.2   | 85.3   | 80.7   | 100.5  | 113.7  | 127.8  |
| MGC50721 | 103.4  | 113.2  | 83.1   | 85.6   | 84     | 86.6   | 106.2  | 103.7  |
| MGC50722 | 88     | 107.3  | 109.7  | 91.9   | 103.4  | 102.3  | 92.9   | 94     |
| MGC50811 | 99.3   | 104.9  | 84.3   | 92.5   | 79.3   | 94.2   | 92.5   | 94.6   |
| MGC51025 | 76.4   | 91.8   | 86.7   | 87.8   | 82.8   | 90     | 86.4   | 81.7   |
| MGC5139  | 186.7  | 206.7  | 107.9  | 98.2   | 90.4   | 97.3   | 147.6  | 177.2  |
| MGC52057 | 142.8  | 176.4  | 125.1  | 108.2  | 89.2   | 108.5  | 138.3  | 149.9  |
| MGC52110 | 746.2  | 843.8  | 355.2  | 478.3  | 454.5  | 661.1  | 470.7  | 669.8  |
| MGC5242  | 935.9  | 1139.2 | 350.5  | 312.6  | 283    | 390    | 715    | 1046.4 |
| MGC52498 | 114.6  | 112.7  | 110.4  | 110.8  | 95.3   | 108.4  | 85.6   | 99.8   |
| MGC5509  | 542.6  | 710.8  | 296.8  | 290.4  | 245    | 391.6  | 469.6  | 543.4  |
| MGC57359 | 93.8   | 101.3  | 110.7  | 101.8  | 90.4   | 100.7  | 87.3   | 79.1   |
| MGC57359 | 114.1  | 118.6  | 82.1   | 80.5   | 76.5   | 81     | 95.6   | 124.2  |
| MGC59937 | 110.1  | 131.4  | 110.5  | 100.3  | 84.3   | 91.8   | 107.5  | 114.7  |
| MGC61571 | 1182.5 | 1344   | 726.8  | 556.2  | 481.6  | 701.7  | 790.6  | 948.3  |
| MGC61598 | 87.4   | 83.9   | 87.1   | 84.6   | 90.2   | 90     | 74.8   | 93.8   |
| MGC62100 | 86.5   | 95.7   | 105    | 93     | 96     | 92.8   | 84.2   | 93.2   |
| MGC7036  | 2032   | 2847   | 1198.9 | 830.9  | 781.4  | 991.5  | 1809.3 | 2684.1 |
| MGC70857 | 314.8  | 386.5  | 294.7  | 271.8  | 244.2  | 298    | 352.4  | 646.2  |
| MGC70863 | 86.9   | 93.5   | 94.8   | 96     | 85.6   | 91.3   | 92.5   | 86.9   |
| MGC70863 | 154.9  | 202.1  | 130    | 131.2  | 120.1  | 132.2  | 126.9  | 131.4  |
| MGC70870 | 94.9   | 125.9  | 86.7   | 100.8  | 94     | 87     | 105.3  | 106.6  |
| MGC70924 | 137.8  | 168.7  | 110.5  | 94.8   | 89.3   | 92.2   | 116.5  | 143.8  |
| MGC71993 | 1699.2 | 2201.7 | 1251.8 | 760.5  | 620.1  | 660    | 1601.1 | 2371.7 |
| MGC72075 | 91.5   | 104.4  | 113.4  | 106    | 93.7   | 120    | 83.4   | 91.8   |
| MGC72080 | 258.5  | 362.3  | 135    | 127.3  | 114.8  | 143.5  | 248.4  | 312.3  |
| MGC75360 | 78.2   | 105.9  | 89.4   | 79.1   | 78.5   | 87.4   | 82     | 94.5   |
| MGC87631 | 131    | 139    | 114.4  | 100    | 94.9   | 100.2  | 104.4  | 109.2  |
| MGC88374 | 74.7   | 85     | 86.5   | 85.5   | 75.5   | 81.9   | 86.5   | 90.7   |
| MGC88387 | 162.8  | 175.7  | 119.7  | 101.9  | 99.3   | 100.9  | 160.6  | 157.8  |
| MGC9712  | 114.4  | 141.4  | 91.1   | 82.7   | 81     | 87.6   | 122.9  | 120.8  |
| MGC9850  | 857.1  | 1287.7 | 631.3  | 694.1  | 505.5  | 876.1  | 890    | 1550.5 |

|          |         |         |        |        |        |        |         |        |
|----------|---------|---------|--------|--------|--------|--------|---------|--------|
| MGC99813 | 96.6    | 115     | 104.6  | 103.5  | 107.8  | 135    | 97.4    | 109.1  |
| MGEA5    | 1014.8  | 1387    | 759.9  | 919.9  | 987.7  | 1551.8 | 1032.7  | 1209.8 |
| MGLL     | 96.5    | 101.4   | 91.2   | 124.5  | 115.4  | 124.6  | 81      | 99.8   |
| MGLL     | 89.8    | 107.8   | 93.5   | 99     | 88.4   | 88.3   | 87.8    | 85.8   |
| MGLL     | 100.5   | 98.1    | 112.1  | 139    | 120.3  | 147.2  | 89.9    | 101.3  |
| MGMT     | 1146.7  | 1460.5  | 593.4  | 471.6  | 460.4  | 497.4  | 1245.7  | 1357   |
| MGP      | 92.2    | 97      | 102.8  | 86.1   | 80.5   | 88.1   | 128.9   | 152.3  |
| MGRN1    | 186     | 271.8   | 329.5  | 199.4  | 167.1  | 290    | 173     | 348.1  |
| MGST1    | 76.9    | 88.8    | 83     | 80.8   | 80.7   | 74.1   | 80.3    | 90.2   |
| MGST1    | 454.9   | 546.7   | 288.6  | 350.7  | 223.6  | 388.8  | 588.6   | 598.3  |
| MGST1    | 287.1   | 366.3   | 159.8  | 235.2  | 175    | 291.2  | 296.7   | 351    |
| MGST1    | 1666.1  | 2491.4  | 1160.3 | 1332.3 | 945.2  | 1588.5 | 2308.3  | 3221.7 |
| MGST2    | 5455.9  | 6595    | 4146.6 | 3088.5 | 2190.6 | 3257.2 | 4475    | 6520.2 |
| MGST3    | 4825.1  | 6290.6  | 4221   | 3220.1 | 2364.1 | 3090.4 | 4436.9  | 6543.1 |
| MIA      | 106     | 122.4   | 90.1   | 80.3   | 79.8   | 77.7   | 105.6   | 138.5  |
| MIA2     | 77.5    | 75.9    | 88.8   | 85.6   | 76     | 74.8   | 72.1    | 73.1   |
| MIA3     | 158.7   | 175     | 145    | 119.9  | 117.5  | 135.9  | 149.4   | 163.3  |
| MIB1     | 158.7   | 218.1   | 133.2  | 165.5  | 124.2  | 225.7  | 144.7   | 267.2  |
| MIB2     | 207.1   | 206     | 254.9  | 202    | 214.9  | 343.5  | 168.6   | 228    |
| MIB2     | 170.7   | 170.5   | 196.8  | 152.4  | 157.6  | 241.1  | 147     | 211.2  |
| MICA     | 138.6   | 153.8   | 101.4  | 97.4   | 96.1   | 107.2  | 126.3   | 133.1  |
| MICAL1   | 824.5   | 961.2   | 1273.1 | 920.3  | 940.5  | 1673.8 | 748.5   | 1375.9 |
| MICAL2   | 124.6   | 160.7   | 93.7   | 103.6  | 87.9   | 89.4   | 125.7   | 137.8  |
| MICALCL  | 80.5    | 90.7    | 98.5   | 132.9  | 112.1  | 133.9  | 82.5    | 104.7  |
| MICAL-L1 | 121     | 186.2   | 161.8  | 135.6  | 133.5  | 159.8  | 135.6   | 166.5  |
| MICAL-L2 | 93.4    | 99.5    | 106.5  | 108.3  | 110.3  | 102.2  | 88.7    | 98     |
| MICAL-L2 | 121.5   | 142.4   | 103.4  | 91.1   | 103.5  | 107.6  | 142     | 155.1  |
| MICB     | 387.3   | 552.1   | 295.3  | 247.2  | 231.4  | 251.7  | 412.5   | 399    |
| MID1     | 243     | 297.7   | 182.1  | 176    | 152    | 200.2  | 196.8   | 226.6  |
| MID1     | 75.3    | 77.7    | 80.4   | 81.1   | 82.5   | 93.9   | 74.2    | 83.3   |
| MID1     | 92.6    | 88.3    | 94.4   | 84.5   | 85.8   | 93.9   | 87.6    | 97.8   |
| MID1IP1  | 690     | 858.4   | 389.7  | 494.6  | 462.9  | 737.9  | 516.6   | 819.5  |
| MID2     | 103.9   | 143     | 104.5  | 117.7  | 103.4  | 108.1  | 101.4   | 116.3  |
| MID2     | 86      | 99.8    | 116.2  | 109.1  | 109.8  | 101.9  | 90.9    | 86.1   |
| MID2     | 122     | 155.1   | 112.7  | 136.9  | 122    | 164.6  | 124.6   | 146    |
| MIDN     | 387.7   | 423.1   | 360    | 321.8  | 317.8  | 255.2  | 397.5   | 663.7  |
| MIER1    | 78.8    | 92.8    | 96.3   | 95.1   | 88     | 81     | 93.2    | 87     |
| MIER1    | 770.8   | 1044.3  | 421.2  | 414.5  | 355.7  | 535    | 710.3   | 905.9  |
| MIF      | 14456.4 | 17211.8 | 6968.5 | 5012   | 3817.1 | 6340.7 | 13956.7 | 17742  |
| MIF4GD   | 796.7   | 974.4   | 233.3  | 278.9  | 241.2  | 245.7  | 530.4   | 538.7  |
| MIMITIN  | 2078.3  | 2529.4  | 1452.4 | 1630.5 | 1272.4 | 2533.9 | 1992.1  | 2502.2 |
| MINA     | 232.6   | 303.1   | 132.6  | 125    | 112.8  | 124.9  | 179     | 191.1  |
| MINA     | 131.3   | 147.7   | 85.7   | 86.6   | 78.8   | 89.8   | 110.4   | 135.5  |
| MINK1    | 104.3   | 99.3    | 101.8  | 86.7   | 88.4   | 95.1   | 78      | 115.8  |
| MINK1    | 104.7   | 142.6   | 93     | 73.1   | 73.5   | 86     | 124.5   | 130.1  |
| MINPP1   | 214.4   | 267.7   | 130.9  | 136.1  | 104.7  | 144.2  | 225.9   | 355    |
| MIOX     | 80      | 96.6    | 90.9   | 95.7   | 89.7   | 89.6   | 77.6    | 90     |
| MIP      | 93.2    | 99.5    | 85.2   | 83.9   | 85.8   | 85.9   | 88.1    | 96.9   |
| MIPEP    | 238.1   | 295.3   | 170.7  | 172    | 128    | 187.8  | 169.9   | 255    |
| MIPOL1   | 95.4    | 103.5   | 93.1   | 91.7   | 81.2   | 86.2   | 93      | 98.4   |

|         |        |        |        |        |        |        |        |        |
|---------|--------|--------|--------|--------|--------|--------|--------|--------|
| MIR16   | 484.6  | 606.5  | 499.3  | 366.7  | 292.3  | 354.6  | 414.1  | 1046.5 |
| MIS12   | 523.7  | 721.9  | 303.8  | 259.7  | 240.2  | 281.6  | 506.9  | 806.8  |
| MIST    | 83.2   | 87     | 98.1   | 94.6   | 85.6   | 92.1   | 91.1   | 92.6   |
| MITF    | 130    | 151.2  | 107.5  | 112.9  | 106.6  | 119.6  | 123    | 155.9  |
| MITF    | 85.4   | 87.5   | 89.2   | 81.2   | 72.6   | 87     | 77.6   | 84.1   |
| MITF    | 270.6  | 318.9  | 144.6  | 124.3  | 111.1  | 134.3  | 262    | 375    |
| MIXL1   | 78.9   | 79.1   | 89.4   | 74.3   | 76.7   | 77.7   | 82.8   | 85.4   |
| MIZF    | 160.3  | 166.3  | 109.9  | 98.4   | 95.6   | 109.6  | 133.4  | 141.7  |
| MIZF    | 376.6  | 472    | 336.2  | 286.4  | 231.8  | 332.6  | 371.8  | 556.7  |
| MIZF    | 509.2  | 681.9  | 322.2  | 235.5  | 203.5  | 267.3  | 431.8  | 499.1  |
| MKI67   | 136.6  | 159    | 129.4  | 106.9  | 118.4  | 149.1  | 131.6  | 149.2  |
| MKI67IP | 3159.7 | 3701.2 | 1490.2 | 1375.5 | 968    | 1822   | 2226.6 | 3387   |
| MKKS    | 287.9  | 332    | 168.6  | 184.9  | 159.3  | 224.3  | 223.8  | 270.8  |
| MKKS    | 917.4  | 1059.8 | 480.6  | 466.8  | 405.5  | 504.9  | 742    | 870.9  |
| MKKS    | 110.1  | 120.7  | 91.5   | 84.2   | 84.4   | 82.9   | 114.6  | 131.5  |
| MKL1    | 275.1  | 373    | 490.1  | 463.9  | 358.3  | 660.6  | 226.5  | 378.8  |
| MKL2    | 115.4  | 133.8  | 99.5   | 102.2  | 95.5   | 109.4  | 107.4  | 157.5  |
| MKLN1   | 801    | 1207.9 | 657.4  | 1048.3 | 908.7  | 1436.7 | 743.6  | 1116.2 |
| MKNK1   | 104.3  | 113.7  | 105.4  | 100.7  | 90     | 98     | 90.9   | 104.9  |
| MKNK1   | 583.5  | 746.1  | 537    | 530    | 513.5  | 947.4  | 472    | 1112.1 |
| MKNK2   | 1246.6 | 1328.4 | 727.1  | 631    | 600.4  | 532.6  | 1235.6 | 1726.2 |
| MKNK2   | 153.2  | 181.8  | 175.2  | 166.8  | 149.9  | 193.4  | 147.2  | 218.9  |
| MKRN1   | 2611.9 | 3248.7 | 2031   | 2644.6 | 2169   | 3159.8 | 2207.9 | 3337.6 |
| MKRN2   | 1062.4 | 1498   | 988.8  | 1055.7 | 866.4  | 1750.5 | 929.1  | 1365.8 |
| MKRN3   | 136.7  | 150.3  | 99.2   | 99.9   | 116.8  | 106.3  | 136.3  | 146.7  |
| MKS1    | 154.5  | 171.2  | 137.9  | 133.3  | 126.1  | 164.1  | 106.2  | 125    |
| MLANA   | 72.4   | 73.4   | 78.4   | 77.4   | 71.9   | 79.4   | 79     | 77     |
| MLC1    | 268.6  | 274.7  | 153.2  | 152.3  | 141    | 105.4  | 213.7  | 275.3  |
| MLC1    | 354.7  | 513.3  | 253.9  | 150.3  | 143.4  | 199    | 236    | 407.9  |
| MLC1    | 432.6  | 523.5  | 235.5  | 259.2  | 221.5  | 132.8  | 303.1  | 436.9  |
| MLC1SA  | 2014.5 | 2456.5 | 1380   | 1153.1 | 1052.3 | 1167.8 | 1941.3 | 1698.4 |
| MLCK    | 92.5   | 105    | 89.5   | 83.7   | 83.8   | 81.3   | 93.5   | 101.9  |
| MLF1    | 109.3  | 146.8  | 98.1   | 95.3   | 89.1   | 101.9  | 126.9  | 165.3  |
| MLF1IP  | 283.3  | 300.4  | 138.1  | 135.1  | 142.7  | 172.5  | 243.4  | 357.9  |
| MLF2    | 471.9  | 673.6  | 421.7  | 299.7  | 278    | 408.5  | 433.4  | 845.9  |
| MLH1    | 971.1  | 1240.2 | 455.7  | 525.1  | 411.1  | 612.1  | 702    | 1138.8 |
| MLH3    | 191.5  | 236.6  | 132.8  | 116.7  | 121.4  | 110.2  | 161.5  | 204.2  |
| MLH3    | 109.7  | 146.1  | 140.7  | 112.4  | 109.1  | 126.2  | 108.1  | 113.1  |
| MLKL    | 1384.4 | 1848.6 | 446.4  | 267.8  | 231.5  | 340.6  | 928.2  | 1054.8 |
| MLKL    | 322.8  | 386.5  | 187.1  | 132.8  | 125.4  | 144.1  | 229.9  | 291.2  |
| MLL     | 116.6  | 139.2  | 122.8  | 118.9  | 110.4  | 147.3  | 111.3  | 126    |
| MLL2    | 181.5  | 187.2  | 100.2  | 103.2  | 80.1   | 87.5   | 159.3  | 170.8  |
| MLL3    | 144.2  | 215.5  | 96.5   | 122.9  | 108.6  | 121.5  | 132.2  | 176.3  |
| MLL3    | 134.3  | 186.1  | 95.9   | 125.6  | 110.5  | 115.3  | 141.6  | 178    |
| MLL3    | 102.9  | 121.6  | 109.3  | 88.8   | 98.9   | 100.8  | 93.4   | 117.5  |
| MLL3    | 267.2  | 368    | 186.1  | 228.7  | 195.7  | 236.9  | 249.4  | 329.9  |
| MLL4    | 243.6  | 285    | 224.8  | 181    | 189.6  | 258.1  | 203    | 334.1  |
| MLL5    | 117.4  | 147.8  | 113.9  | 145.7  | 149.5  | 263.3  | 120.6  | 137.7  |
| MLL5    | 123.6  | 142.5  | 109.8  | 114.4  | 114.9  | 163.4  | 134.7  | 125.7  |
| MLL5    | 365.4  | 563.7  | 154.4  | 282.6  | 327.4  | 259.8  | 377    | 407.4  |

|        |        |        |       |       |       |       |       |        |
|--------|--------|--------|-------|-------|-------|-------|-------|--------|
| MLLT1  | 86.3   | 104.7  | 101.3 | 88.2  | 88.1  | 90.7  | 95.8  | 100.2  |
| MLLT10 | 114    | 134.3  | 89.1  | 82.8  | 78.7  | 80.3  | 101.9 | 105.2  |
| MLLT10 | 686.2  | 919.1  | 397.8 | 509.9 | 436.1 | 710.1 | 570.3 | 680.5  |
| MLLT11 | 118.5  | 134.1  | 105.2 | 105.5 | 100.6 | 136.5 | 151.1 | 229.3  |
| MLLT3  | 104.6  | 111.3  | 84.5  | 89.4  | 84.8  | 91.2  | 104.1 | 127.4  |
| MLLT6  | 534.3  | 564    | 520.5 | 375.8 | 419.7 | 418.3 | 365.2 | 474.4  |
| MLLT7  | 181.5  | 218.3  | 107.5 | 98.2  | 112.1 | 118.3 | 237.5 | 361.2  |
| MLN    | 84.5   | 106.6  | 91.8  | 86.8  | 77.8  | 84.7  | 102.1 | 104.1  |
| MLN    | 112.4  | 122.5  | 117.7 | 85.7  | 84.3  | 78.6  | 111.1 | 128.3  |
| MLNR   | 90     | 103.8  | 93.7  | 99.3  | 85.4  | 97.8  | 89.7  | 95.4   |
| MLPH   | 119.4  | 137.9  | 108.1 | 84.5  | 88.9  | 87.7  | 115   | 117.8  |
| MLSTD1 | 705    | 849.6  | 313   | 283.3 | 233.4 | 328.4 | 440.3 | 648.5  |
| MLSTD2 | 560.2  | 734.6  | 496.4 | 700.3 | 523.5 | 831.9 | 467.3 | 1044.9 |
| MLX    | 118.2  | 125.7  | 105.9 | 103.6 | 97.4  | 106.3 | 96.2  | 116    |
| MLX    | 534.6  | 660.1  | 255.2 | 215.7 | 177.5 | 256.3 | 380.7 | 517.2  |
| MLXIP  | 87.5   | 94.7   | 105.4 | 98.8  | 100.8 | 92.1  | 91.8  | 90.7   |
| MLXIPL | 134.6  | 135.7  | 123.7 | 103.2 | 99.5  | 100.3 | 101.7 | 108.8  |
| MLYCD  | 225.6  | 301.3  | 148.9 | 124.4 | 122   | 146.8 | 192.1 | 215.5  |
| MLZE   | 98     | 101.9  | 96    | 84.9  | 84.1  | 85.4  | 95.7  | 99.9   |
| MMAA   | 131.6  | 177.9  | 96.3  | 90    | 80    | 90.8  | 146.3 | 159.9  |
| MMAB   | 134.9  | 179.9  | 153.8 | 191.7 | 195.5 | 201.4 | 156.8 | 166.6  |
| MMACHC | 874.1  | 1119.1 | 524.8 | 446.9 | 286.7 | 384.9 | 492.8 | 539    |
| MMD    | 1026.9 | 1210.3 | 563   | 547.7 | 436   | 660.2 | 899.6 | 1813.7 |
| MMD2   | 68.9   | 78.9   | 82.4  | 81.7  | 83.7  | 80.7  | 74.1  | 78.3   |
| MME    | 93.2   | 103.4  | 97.6  | 95.6  | 81.5  | 89.4  | 88    | 88.3   |
| MME    | 91.8   | 112.3  | 85.5  | 84.8  | 87.3  | 77.3  | 91.7  | 101.1  |
| MME    | 89.9   | 93.1   | 79.2  | 85.2  | 76.3  | 78.4  | 80.6  | 103.1  |
| MME    | 82.2   | 85.1   | 89.4  | 74.2  | 75.1  | 82.4  | 80.3  | 91.7   |
| MMEL1  | 95.4   | 120.1  | 92.3  | 79.2  | 72.1  | 87    | 105.3 | 111.4  |
| MMP1   | 113.5  | 120.3  | 90    | 94.3  | 85    | 81.9  | 107.7 | 112.2  |
| MMP10  | 82.2   | 104.8  | 87.4  | 86.5  | 75.6  | 85.4  | 91.3  | 104.8  |
| MMP11  | 82.5   | 103    | 108.7 | 115.5 | 101.5 | 115.6 | 93.2  | 97.4   |
| MMP12  | 80.6   | 82.3   | 96.5  | 88.5  | 76.3  | 86.8  | 76.7  | 78.2   |
| MMP13  | 82     | 96.8   | 94.7  | 87.8  | 87.9  | 88.9  | 87.7  | 92.4   |
| MMP14  | 128    | 157.8  | 112.7 | 97.9  | 95.4  | 109.5 | 131.3 | 145.7  |
| MMP15  | 121.7  | 146.3  | 144.1 | 133.1 | 133.1 | 144   | 121.4 | 118.7  |
| MMP16  | 75     | 84.4   | 102.4 | 90.9  | 85.4  | 88.9  | 72.7  | 67.9   |
| MMP16  | 71.6   | 85.7   | 85.5  | 79.8  | 84.6  | 82.7  | 84    | 83.2   |
| MMP16  | 119.3  | 149.4  | 93    | 95.3  | 80.8  | 96.1  | 120.9 | 136.1  |
| MMP17  | 87.3   | 95     | 98.7  | 83    | 86.2  | 90.8  | 92.1  | 110.6  |
| MMP19  | 91.9   | 106.7  | 102.4 | 96.4  | 96.5  | 93.8  | 94.9  | 104.1  |
| MMP19  | 121.1  | 147.6  | 92.5  | 94.7  | 91.9  | 91.7  | 120.5 | 118    |
| MMP2   | 138.7  | 163    | 118.1 | 122.1 | 118.3 | 118.9 | 147.1 | 141.6  |
| MMP20  | 87.7   | 92.6   | 90.2  | 88.7  | 89.8  | 105.4 | 84.3  | 95.7   |
| MMP21  | 83.6   | 87.9   | 84.1  | 81.6  | 80.3  | 98.4  | 81.9  | 88.5   |
| MMP23A | 94.7   | 91.9   | 82.3  | 89.1  | 75.8  | 84.5  | 104.3 | 107.6  |
| MMP23B | 123.2  | 131.5  | 119.4 | 118.2 | 116.7 | 119.1 | 96.8  | 109.9  |
| MMP24  | 115.4  | 132.9  | 95    | 86.9  | 83    | 102.8 | 105   | 123.6  |
| MMP25  | 79.3   | 85.9   | 101.9 | 98.2  | 86.6  | 89.3  | 87.5  | 82     |
| MMP25  | 180.1  | 191.3  | 144.7 | 124.1 | 131.5 | 123.1 | 174.3 | 170.6  |

|        |        |        |       |       |       |        |        |        |
|--------|--------|--------|-------|-------|-------|--------|--------|--------|
| MMP26  | 84.7   | 88.4   | 95.2  | 88.9  | 76.6  | 87.7   | 89.4   | 89.3   |
| MMP27  | 102.6  | 125.2  | 96.4  | 96.4  | 91    | 90.7   | 94.2   | 106.3  |
| MMP28  | 99.7   | 108.7  | 86.5  | 83.9  | 85.3  | 90.7   | 98.5   | 109.6  |
| MMP28  | 79.6   | 106.5  | 93.1  | 79.9  | 79.6  | 90.6   | 87.7   | 91.3   |
| MMP3   | 172    | 199.7  | 113.1 | 92.6  | 97.4  | 99.5   | 145.8  | 183.7  |
| MMP7   | 79.9   | 80.3   | 85.7  | 83.3  | 78.1  | 75.1   | 79.9   | 90.2   |
| MMP8   | 76.1   | 85.9   | 87    | 70.4  | 78.8  | 78.7   | 78.4   | 86.7   |
| MMP9   | 107.3  | 130.1  | 121.4 | 444.8 | 481.5 | 473.1  | 112.7  | 161.4  |
| MMRN1  | 93.6   | 105.6  | 85.9  | 91.7  | 84.7  | 85.6   | 98.9   | 114    |
| MMRN2  | 125.1  | 130.2  | 94.2  | 89.1  | 81.4  | 87.9   | 117.5  | 113.2  |
| MMS19L | 720.2  | 965.4  | 821.8 | 729   | 588.3 | 907.8  | 537    | 788    |
| MN1    | 97.2   | 110.7  | 102.8 | 93.4  | 93.4  | 89.6   | 100.5  | 116.9  |
| MNAB   | 193.6  | 254.5  | 149.3 | 139.9 | 119.7 | 169.1  | 194    | 296.8  |
| MNAT1  | 437.5  | 505.1  | 147.9 | 132.9 | 106   | 178    | 291.6  | 634.2  |
| MND1   | 1207.9 | 1505.9 | 544.2 | 378.7 | 286.2 | 344.8  | 1043.5 | 1216.1 |
| MNDA   | 1969.2 | 2683.2 | 834.8 | 808.7 | 608.5 | 1366.4 | 1249.3 | 1507.9 |
| MNS1   | 611.7  | 717.8  | 260.9 | 239.8 | 230.9 | 427.5  | 384.8  | 455.4  |
| MNT    | 232.1  | 262.5  | 215.4 | 253.5 | 218.2 | 265.4  | 195.7  | 302.1  |
| MOAP1  | 329.3  | 391.6  | 246.7 | 279.4 | 241.9 | 419.5  | 330.7  | 703.9  |
| MOBK1B | 122.8  | 184.6  | 94.7  | 86.7  | 92.6  | 104.8  | 135.9  | 169.4  |
| MOBK1A | 152.1  | 163.4  | 82    | 89.2  | 85.5  | 88.5   | 158.9  | 204.9  |
| MOBK2A | 519.9  | 697.5  | 298.7 | 292.2 | 251.6 | 268.3  | 571.1  | 457.6  |
| MOBK2B | 77.9   | 83.2   | 88.8  | 84.2  | 74.2  | 87.2   | 86.6   | 85.6   |
| MOBK2C | 107.6  | 116.9  | 98.2  | 100.4 | 88.8  | 88.2   | 106    | 107.4  |
| MOBK2C | 327.3  | 426.3  | 233.2 | 291.2 | 303.3 | 333.6  | 326.5  | 329.4  |
| MOBK2C | 90.2   | 103    | 93.9  | 89.7  | 80    | 80.9   | 81.1   | 88.3   |
| MOBP   | 74.9   | 84.2   | 87.7  | 79.7  | 75.2  | 80.4   | 83.3   | 85.3   |
| MOBP   | 84.3   | 102.2  | 95.6  | 88    | 78.4  | 89.5   | 93.6   | 97.3   |
| MOBP   | 83.4   | 103.3  | 98.1  | 87.1  | 89.3  | 87.5   | 91     | 111.9  |
| MOBP   | 83.2   | 100.1  | 95.9  | 89.2  | 87.7  | 84     | 91     | 97.5   |
| MOCOS  | 192.4  | 249    | 222.6 | 204   | 157.3 | 210.4  | 188.7  | 252.1  |
| MOCS1  | 291.1  | 295.5  | 162.6 | 180.4 | 142.8 | 180.9  | 253.1  | 248.8  |
| MOCS1  | 90.9   | 142.3  | 107.2 | 88.3  | 84.8  | 94.5   | 100.7  | 118.2  |
| MOCS1  | 423    | 529.5  | 207.4 | 116.6 | 101.9 | 119.5  | 375.9  | 521.8  |
| MOCS2  | 88.4   | 96     | 92.2  | 83.6  | 82.3  | 85.6   | 103.3  | 94.4   |
| MOCS2  | 142.8  | 165.6  | 97.6  | 106.9 | 91.9  | 100.1  | 145.2  | 161    |
| MOCS2  | 472.7  | 612.2  | 271.4 | 276.6 | 213.4 | 449    | 337.1  | 480.9  |
| MOCS3  | 126    | 164.2  | 117.4 | 130   | 110   | 143.8  | 114.6  | 121    |
| MOG    | 81.8   | 91.1   | 88.1  | 84    | 88.3  | 85.7   | 82.9   | 88.4   |
| MOGAT1 | 87.7   | 103.6  | 107.8 | 89.6  | 89.5  | 94.3   | 86.3   | 88.7   |
| MOGAT2 | 99.6   | 107.1  | 103.2 | 91.6  | 86.6  | 90.2   | 102.6  | 106.6  |
| MOGAT3 | 85.9   | 88.5   | 96.9  | 92.7  | 90    | 87.4   | 85     | 89.1   |
| MON1A  | 175.6  | 238.6  | 118   | 111.9 | 92.2  | 98.8   | 163.3  | 238.9  |
| MON1B  | 223    | 286.2  | 254.5 | 222.4 | 192.6 | 251.2  | 195.8  | 307    |
| MON2   | 384.5  | 458.8  | 291.8 | 414.6 | 371   | 567.5  | 366    | 515.2  |
| MORC1  | 101.3  | 112.2  | 87.5  | 98.2  | 92    | 93.6   | 96.7   | 105.5  |
| MORC2  | 386.9  | 479.8  | 421.3 | 386.3 | 296.2 | 443.7  | 304.1  | 568.7  |
| MORC3  | 294.9  | 337.3  | 167.9 | 171.8 | 157.5 | 293.2  | 244.4  | 438.9  |
| MORC4  | 127.8  | 144.1  | 108.6 | 108.2 | 92.2  | 86.2   | 118    | 168.8  |
| MORF4  | 96.5   | 104.5  | 99.9  | 85.4  | 81.1  | 90.6   | 88.7   | 105.4  |

|          |        |        |        |        |        |        |        |        |
|----------|--------|--------|--------|--------|--------|--------|--------|--------|
| MORF4L1  | 4991.1 | 6260.4 | 1498.4 | 1514.7 | 1095.9 | 2087.6 | 3779.8 | 6805.7 |
| MORF4L1  | 98.4   | 113.9  | 91.4   | 87.4   | 87.6   | 90.2   | 101    | 111.1  |
| MORG1    | 323.9  | 395.5  | 196.5  | 169.8  | 156.6  | 176    | 311.8  | 270.2  |
| MORN1    | 94.9   | 115.6  | 86.5   | 85.1   | 84.4   | 89     | 94.2   | 122.3  |
| MORN3    | 111.7  | 131.3  | 91.1   | 91.2   | 82     | 92.5   | 108.7  | 113.3  |
| MOS      | 96.7   | 118.5  | 85     | 82.1   | 76.7   | 76.5   | 94.2   | 108.7  |
| MOSC1    | 960    | 1182.8 | 715.1  | 1376.8 | 909.8  | 1819.6 | 532.5  | 697.5  |
| MOSC2    | 154.5  | 166.2  | 102.6  | 205.4  | 127.9  | 193.5  | 135.1  | 187    |
| MOSPD2   | 191.9  | 207.1  | 98.7   | 114.3  | 98.8   | 122    | 192.5  | 303.4  |
| MOSPD3   | 354.2  | 434.8  | 337.4  | 302.7  | 265.4  | 333.3  | 360.9  | 474.6  |
| MOSPD3   | 285.3  | 364.6  | 296.8  | 222.8  | 179.3  | 246.8  | 259.8  | 412.4  |
| MOV10    | 285.6  | 310.7  | 273.6  | 197.9  | 219.8  | 283    | 222.5  | 319.8  |
| MOV10L1  | 97.5   | 120.4  | 95.8   | 105.1  | 82.7   | 88.6   | 101.3  | 118.4  |
| MOXD1    | 182.1  | 224.4  | 163.7  | 189.4  | 177    | 229.1  | 162.7  | 248.3  |
| MOXD1    | 118.9  | 142.6  | 112.9  | 130.6  | 135.2  | 144.9  | 96.1   | 128    |
| MPDU1    | 372.8  | 463.4  | 196    | 165.7  | 133.3  | 145.2  | 320.7  | 418.9  |
| MPDZ     | 89.7   | 112.7  | 92     | 94.8   | 72.1   | 88.1   | 89.1   | 115.1  |
| MPFL     | 145.7  | 186.2  | 111.6  | 102.4  | 102.2  | 94.4   | 151.9  | 163.5  |
| MPG      | 82.8   | 82.2   | 93.3   | 91.2   | 81.4   | 94.4   | 80.5   | 89.1   |
| MPG      | 131.3  | 149.5  | 119.7  | 106.3  | 97.3   | 103.8  | 121.9  | 135.6  |
| MPG      | 92.7   | 106.1  | 106.8  | 95.6   | 97.1   | 108.1  | 99.2   | 89.1   |
| MPHOSPH1 | 1699.4 | 2312.7 | 923.9  | 696.4  | 694.1  | 1407.1 | 1258.9 | 1740.9 |
| MPHOSPH1 | 98     | 129.9  | 92.3   | 84.2   | 86.1   | 94.6   | 109.5  | 161.9  |
| MPHOSPH1 | 549.7  | 685.3  | 167.2  | 145    | 127.1  | 171.4  | 403.8  | 704.2  |
| MPI      | 174.5  | 219.6  | 144.9  | 158.5  | 139.4  | 169.9  | 127.7  | 144.2  |
| MPL      | 100.3  | 94.8   | 97.6   | 90.5   | 85.9   | 92.7   | 89.3   | 104.1  |
| MPN2     | 86.7   | 84     | 109.6  | 94.4   | 83.4   | 92.2   | 83     | 84.7   |
| MPND     | 165.2  | 171    | 143    | 133.9  | 113.2  | 139.8  | 121.6  | 156.3  |
| MPO      | 142.4  | 170.9  | 179.8  | 252.3  | 211.2  | 257    | 129    | 167.4  |
| MPP1     | 650.4  | 928.2  | 397.9  | 418.7  | 334.1  | 534.2  | 582.9  | 831.7  |
| MPP2     | 129.5  | 152    | 131.7  | 103.3  | 91.5   | 109.1  | 115.1  | 128.8  |
| MPP3     | 122    | 120.9  | 130.3  | 129.4  | 127.6  | 146.7  | 108.8  | 136.6  |
| MPP4     | 74.4   | 75.7   | 81.7   | 82.6   | 83.2   | 77.4   | 73.8   | 78.2   |
| MPP5     | 229.8  | 285    | 207.7  | 239.2  | 170    | 318.5  | 197.7  | 325.4  |
| MPP6     | 416.8  | 587    | 344.7  | 203.5  | 165.3  | 242.9  | 339.3  | 521.3  |
| MPP7     | 98.9   | 110.1  | 82.9   | 86.4   | 84.7   | 82.9   | 98     | 95.7   |
| MPPE1    | 1583   | 1972.5 | 1039.9 | 945.4  | 771.2  | 1225.5 | 1298.6 | 1743.4 |
| MPPED1   | 113.5  | 115.8  | 108.1  | 91.3   | 83.7   | 85.9   | 114.1  | 115.3  |
| MPPED2   | 98.1   | 107.5  | 94.2   | 77.3   | 82.2   | 77.4   | 103.3  | 102.6  |
| MPST     | 141.4  | 173.7  | 110.3  | 107.2  | 101.2  | 101.4  | 129.1  | 154.8  |
| MPST     | 545.6  | 696.2  | 331.7  | 272.4  | 230.2  | 292.6  | 510.6  | 703.5  |
| MPST     | 166.7  | 207.4  | 110.8  | 110.1  | 96.1   | 133.8  | 157.9  | 201.9  |
| MPV17    | 990.2  | 1286.6 | 768.4  | 499.7  | 413.1  | 593    | 833.5  | 958.6  |
| MPZ      | 101.2  | 125    | 100.8  | 86     | 90.5   | 103.3  | 99.3   | 125.3  |
| MPZL1    | 85.1   | 111.6  | 92.3   | 81.7   | 86.7   | 83.8   | 89.1   | 102.3  |
| MPZL1    | 150.5  | 199.4  | 149.9  | 167.5  | 149.9  | 170.3  | 152    | 187    |
| MR1      | 768.7  | 1076.6 | 501.6  | 320    | 318.5  | 451.4  | 606.5  | 878.8  |
| MRAP     | 93.4   | 101.3  | 79     | 83.6   | 72     | 81.4   | 83.1   | 98.9   |
| MRAP     | 102.6  | 98.5   | 95.1   | 107.2  | 94.9   | 97.9   | 91.8   | 95.5   |
| MRAS     | 170.2  | 216.9  | 199.9  | 134.2  | 98.4   | 124.8  | 159.1  | 227.3  |

|          |         |         |         |         |        |         |         |         |
|----------|---------|---------|---------|---------|--------|---------|---------|---------|
| MRC1     | 79.3    | 86.1    | 84.1    | 82.6    | 75     | 85.1    | 74.9    | 74.6    |
| MRC1L1   | 81.2    | 93.1    | 82.1    | 75.8    | 84     | 89.3    | 95.7    | 101.1   |
| MRC2     | 141.9   | 162.9   | 142.4   | 182.9   | 145.4  | 159     | 119.5   | 146.6   |
| MRCL3    | 18385.5 | 18884.5 | 13379.2 | 17134.4 | 9383.9 | 15876.9 | 19818.5 | 26397.1 |
| MRE11A   | 151.8   | 171.1   | 137.1   | 116.4   | 115.2  | 103.8   | 130.5   | 163     |
| MRE11A   | 319.1   | 416.5   | 151.3   | 172.6   | 160.5  | 162.4   | 250     | 261.2   |
| MRE11A   | 532.7   | 686.2   | 251.4   | 223.6   | 192.1  | 368.1   | 357.8   | 518.9   |
| MRFAP1   | 4446.8  | 6096.8  | 3077.3  | 2627.6  | 1995.8 | 3283.7  | 3749    | 5330.8  |
| MRFAP1L1 | 2489.4  | 3293.2  | 1519.7  | 1506.9  | 1330.3 | 2232.7  | 2273.2  | 2832.1  |
| MRFAP1L1 | 171.3   | 209.8   | 144.2   | 125.4   | 130.9  | 127.6   | 153.8   | 192.3   |
| MRFAP1L1 | 207.1   | 219.7   | 114.7   | 95      | 102.8  | 104.3   | 152.8   | 173.9   |
| MRGPRD   | 93.6    | 109.9   | 99.1    | 93.5    | 90.6   | 96.3    | 100.8   | 91.8    |
| MRGPRE   | 86.2    | 99.8    | 116.2   | 91.7    | 90.1   | 89      | 96.3    | 105.9   |
| MRGPRF   | 77.7    | 100.6   | 112.1   | 104.3   | 95.3   | 92.5    | 83.3    | 84.7    |
| MRGPRX1  | 79.9    | 85.1    | 75.3    | 89.1    | 77.1   | 81.9    | 73.9    | 81      |
| MRGPRX2  | 91.9    | 104.1   | 97.1    | 89.3    | 84     | 86.9    | 93.8    | 103.6   |
| MRGPRX3  | 156.2   | 168     | 117.7   | 97.8    | 87.8   | 102.5   | 146     | 150.1   |
| MRGPRX4  | 87.8    | 101.9   | 97.8    | 84.3    | 80.8   | 94.4    | 88.1    | 94.2    |
| M-RIP    | 103.1   | 127.5   | 113.2   | 98.3    | 92.5   | 102.5   | 105.3   | 109.1   |
| M-RIP    | 317.2   | 398.8   | 336     | 420.1   | 336    | 509.8   | 293.8   | 461.2   |
| MRLC2    | 9336    | 12085.5 | 6621    | 5446.9  | 3766.3 | 6164.7  | 7780.8  | 10573.3 |
| MRM1     | 141     | 171.3   | 105.8   | 88.2    | 84.9   | 96.5    | 114     | 127.9   |
| MRO      | 76.4    | 87.5    | 84.3    | 78.1    | 78.9   | 82.6    | 81.6    | 81.5    |
| MRP63    | 340.4   | 376.9   | 211.5   | 219.1   | 200.9  | 244.4   | 286.9   | 467.7   |
| MRPL1    | 990.1   | 1120.4  | 257.2   | 226     | 200.6  | 299.6   | 718.5   | 1322.6  |
| MRPL10   | 445.8   | 544.7   | 140.8   | 143     | 138.1  | 157.4   | 446.7   | 642.4   |
| MRPL10   | 98      | 129.9   | 105.4   | 106.5   | 94.3   | 103.4   | 91.7    | 117.9   |
| MRPL11   | 1852.5  | 2182.7  | 660.9   | 710     | 589    | 750.5   | 1831.8  | 1604.6  |
| MRPL11   | 157.4   | 190.8   | 105.4   | 103.4   | 91.8   | 104     | 145.8   | 168.5   |
| MRPL11   | 2237.2  | 2895.1  | 1963.1  | 1613.1  | 1506.7 | 2204.6  | 1805.2  | 2300.1  |
| MRPL12   | 1830.1  | 2119.4  | 1558.2  | 1171.4  | 943    | 1587.3  | 1294.2  | 1731.4  |
| MRPL13   | 2844.7  | 3266.4  | 1010.7  | 941.2   | 531    | 638.9   | 2832.5  | 3470.8  |
| MRPL14   | 2637.7  | 3141.6  | 2582.9  | 2297.9  | 1873.3 | 2446.4  | 2439.2  | 2518.4  |
| MRPL15   | 3645    | 4177.6  | 923     | 872.2   | 591.1  | 920.2   | 3207.2  | 4050.9  |
| MRPL16   | 732.2   | 1070    | 242.1   | 224.5   | 198.2  | 185.1   | 617.5   | 814.5   |
| MRPL17   | 2412.2  | 3107.6  | 1286.9  | 814     | 813.1  | 809.1   | 2054.5  | 1816.9  |
| MRPL18   | 8278.9  | 9268.4  | 2068    | 2491.3  | 1764.5 | 3633.5  | 8519    | 14156   |
| MRPL19   | 433.5   | 553.9   | 145.7   | 111.6   | 124.8  | 110.9   | 371     | 540     |
| MRPL2    | 520.9   | 692.5   | 582.6   | 394.8   | 301.1  | 506.2   | 503.8   | 834.1   |
| MRPL20   | 1489.9  | 1938.7  | 803.6   | 710.2   | 507.5  | 695.1   | 1122.2  | 1281.8  |
| MRPL21   | 2560.8  | 3282.6  | 1143.1  | 998.8   | 782.1  | 1530.8  | 1728.5  | 1722.7  |
| MRPL21   | 2550.2  | 2782.9  | 1533.4  | 1535.9  | 998.1  | 1878.3  | 1947.1  | 3106    |
| MRPL22   | 2486.6  | 3312.8  | 1278.7  | 943.6   | 835.9  | 1484.1  | 2245.6  | 2425.2  |
| MRPL22   | 4129.7  | 4968.9  | 2258.1  | 1793    | 1655.6 | 2196.7  | 3811.5  | 3962.5  |
| MRPL23   | 5260.3  | 6284    | 3772    | 2517.7  | 2024.2 | 2469.1  | 4232    | 5376.6  |
| MRPL24   | 997.3   | 1208.2  | 450.9   | 367.2   | 279.4  | 573     | 807.9   | 917     |
| MRPL24   | 4100.2  | 5152.4  | 2755.9  | 2430.7  | 1672.2 | 3523.2  | 3095.8  | 3638.2  |
| MRPL27   | 1459.5  | 1840.9  | 860.8   | 815.6   | 642.6  | 1003.2  | 1331.2  | 1509.8  |
| MRPL27   | 120.1   | 114.3   | 94.3    | 89.4    | 84.9   | 90.3    | 98.1    | 109.2   |
| MRPL27   | 219.2   | 235.3   | 123     | 118.4   | 123.5  | 127.1   | 177.7   | 250.5   |



|          |        |         |        |        |        |        |        |        |
|----------|--------|---------|--------|--------|--------|--------|--------|--------|
| MRPL28   | 428    | 496.7   | 271.7  | 179.9  | 167.3  | 168    | 360.7  | 430.2  |
| MRPL3    | 156.6  | 165.1   | 112.7  | 105.8  | 99.3   | 112    | 148.6  | 221.9  |
| MRPL30   | 250.5  | 325.2   | 111.8  | 101.3  | 104.9  | 116.5  | 202.6  | 298.5  |
| MRPL30   | 904.6  | 1197.5  | 363.8  | 256.4  | 244    | 299.5  | 805.3  | 1194.9 |
| MRPL32   | 1442   | 1839.7  | 507.6  | 520.9  | 394.9  | 560.6  | 1184.4 | 1654   |
| MRPL33   | 4247.5 | 4995.9  | 1951.3 | 2018.8 | 1156.6 | 2512.2 | 2714.3 | 4323.7 |
| MRPL33   | 8477.7 | 10029.8 | 7418.6 | 6313.4 | 5356.7 | 8723.7 | 5940.8 | 6270.8 |
| MRPL34   | 1323.3 | 1526.7  | 729.4  | 559.7  | 422.1  | 635.8  | 945.4  | 910    |
| MRPL35   | 3530.3 | 4368.1  | 2580.7 | 2061.3 | 1369.8 | 2440.4 | 2830   | 4106.9 |
| MRPL35   | 577.3  | 782     | 353.8  | 330.6  | 288    | 423    | 468.1  | 517.3  |
| MRPL35   | 514.2  | 590.3   | 239.4  | 236    | 175.2  | 325.7  | 393.1  | 599.1  |
| MRPL36   | 2807.6 | 3419.8  | 1971.8 | 1600.8 | 1231.5 | 1681.9 | 2318.8 | 2480.7 |
| MRPL37   | 7852.1 | 10363.5 | 5948.2 | 4861.1 | 4141.4 | 4692.8 | 7146.1 | 6719.7 |
| MRPL38   | 877.6  | 1022    | 263.8  | 215.9  | 191.7  | 285.8  | 796.4  | 1373.2 |
| MRPL39   | 88.5   | 98.5    | 108.1  | 102.9  | 98.2   | 104.3  | 89.1   | 102    |
| MRPL39   | 2286.6 | 2827.4  | 1136.5 | 1081.5 | 758.7  | 1327.8 | 1792.8 | 2488.4 |
| MRPL4    | 87.2   | 92.3    | 104.5  | 84.2   | 89.3   | 82.4   | 86.4   | 99.9   |
| MRPL4    | 371.4  | 468.9   | 240.2  | 120.2  | 119.9  | 183.1  | 307.2  | 430.3  |
| MRPL4    | 221.1  | 322.9   | 220.5  | 149.8  | 133.4  | 157.6  | 181.4  | 263.9  |
| MRPL40   | 1348.9 | 1854.7  | 791.7  | 855.8  | 612.3  | 1080.4 | 1157.1 | 1802.3 |
| MRPL41   | 2711   | 3157.7  | 2221   | 1368.9 | 1067   | 1596.9 | 1740.8 | 1829.8 |
| MRPL42   | 559.8  | 788.5   | 192.5  | 175.6  | 151.1  | 209.2  | 411.1  | 775.2  |
| MRPL42P5 | 95     | 115.3   | 101.3  | 98.3   | 96.1   | 89.1   | 92.5   | 128.5  |
| MRPL43   | 994.2  | 1379.3  | 849.3  | 600.6  | 449    | 755.5  | 749.2  | 1112   |
| MRPL43   | 118.7  | 140.2   | 124.4  | 103    | 93.1   | 101.3  | 98.3   | 101.9  |
| MRPL43   | 428.3  | 534.3   | 254.1  | 175.5  | 132    | 173.3  | 324.8  | 364.5  |
| MRPL44   | 97.6   | 104.5   | 97     | 87.5   | 85.5   | 84.5   | 105.7  | 114.2  |
| MRPL45   | 1880.4 | 2694.8  | 608    | 543.6  | 455.8  | 748.2  | 1778.7 | 2918.7 |
| MRPL45   | 1369.4 | 1986.3  | 520.7  | 443.5  | 333.8  | 511.1  | 1246.9 | 1754.4 |
| MRPL46   | 1393   | 1966.4  | 935.3  | 775.4  | 670.5  | 1151.8 | 1261.4 | 1868.3 |
| MRPL47   | 433.8  | 587.8   | 196.7  | 168.5  | 139.4  | 202.7  | 389.9  | 661.7  |
| MRPL47   | 584.5  | 684.4   | 279    | 258.1  | 232.4  | 319.2  | 523.1  | 673.3  |
| MRPL48   | 779.9  | 984.4   | 381.7  | 248    | 220.9  | 313.5  | 667.3  | 817.1  |
| MRPL49   | 338.3  | 458.4   | 331.1  | 210.6  | 195    | 230.1  | 343.5  | 532.8  |
| MRPL50   | 2859.6 | 3140.1  | 1140.9 | 589.5  | 358.1  | 675.6  | 2567.1 | 3913.9 |
| MRPL51   | 2664.5 | 3499.2  | 1758.5 | 1489.1 | 1178.6 | 1595.5 | 2608.7 | 3677.4 |
| MRPL52   | 1143.6 | 1285.5  | 688.1  | 450.1  | 337.4  | 407.5  | 909.5  | 1101.2 |
| MRPL52   | 760.1  | 887.6   | 421.6  | 295.8  | 201.9  | 280.5  | 681.3  | 839.7  |
| MRPL53   | 893.5  | 1025.3  | 459    | 389.1  | 296.3  | 438.4  | 821.1  | 1039.7 |
| MRPL54   | 1972.8 | 2501.8  | 1194.1 | 798.9  | 714.9  | 1012.2 | 1564.3 | 2106.7 |
| MRPL55   | 2391.6 | 2655.9  | 805    | 777.5  | 519.7  | 743.5  | 2243.8 | 2786.8 |
| MRPL55   | 913.6  | 1249.1  | 852.3  | 596.7  | 503.9  | 686.4  | 747.8  | 906    |
| MRPL55   | 1347.6 | 1626.2  | 1139.1 | 938.5  | 677.7  | 991.1  | 1082.3 | 2282.3 |
| MRPL9    | 757.5  | 1113.5  | 536.8  | 415.2  | 356.6  | 593.5  | 692.8  | 1167.4 |
| MRPS10   | 4600.1 | 5710.8  | 2753.5 | 2781.6 | 1925.5 | 2983.8 | 4160   | 5509.2 |
| MRPS11   | 1513.4 | 1790.6  | 1275.1 | 1402.4 | 1103.4 | 1667.4 | 1151.2 | 1503.9 |
| MRPS11   | 848.8  | 1039.5  | 635.8  | 674.5  | 519.4  | 796.6  | 701.6  | 661    |
| MRPS12   | 4444.4 | 5868.4  | 2134.3 | 1393.8 | 997.4  | 1158.8 | 4071   | 3778.7 |
| MRPS12   | 90.7   | 118.5   | 87.2   | 91.1   | 84.3   | 93.2   | 98.7   | 103.6  |
| MRPS12   | 958.9  | 1266.7  | 796.6  | 508.3  | 357.8  | 510.2  | 798.9  | 1154.3 |

|         |        |        |        |        |        |        |        |        |
|---------|--------|--------|--------|--------|--------|--------|--------|--------|
| MRPS12  | 243.2  | 342.3  | 196.9  | 115    | 127.8  | 125.6  | 186.6  | 251.3  |
| MRPS14  | 233.5  | 277.3  | 165.9  | 133.5  | 109.6  | 139.2  | 173.1  | 221.6  |
| MRPS15  | 1621.9 | 2043.7 | 1341.9 | 1452.6 | 1083.9 | 1982.2 | 1338.1 | 2527.6 |
| MRPS16  | 974.7  | 1254.1 | 521.7  | 430.4  | 367.5  | 526    | 787.7  | 937.7  |
| MRPS17  | 2390.2 | 2856.8 | 1048.2 | 963.2  | 593.3  | 758.2  | 1843.6 | 2316.7 |
| MRPS18A | 550.4  | 702.7  | 340.9  | 326.9  | 302.3  | 398.2  | 595.1  | 555.6  |
| MRPS18B | 1087.6 | 1328.7 | 521.2  | 546.6  | 383.4  | 449.1  | 985.1  | 1239.2 |
| MRPS18C | 113.4  | 118.7  | 97.6   | 85.6   | 92.6   | 84.9   | 104.1  | 119.4  |
| MRPS2   | 772    | 1060.8 | 725.9  | 389.6  | 315    | 462.1  | 646.9  | 1054.2 |
| MRPS21  | 6725.1 | 7999.9 | 2119.6 | 1804.6 | 1509.3 | 1907.2 | 5379.1 | 6884.9 |
| MRPS21  | 1420.9 | 1516.3 | 889.2  | 605    | 551    | 845    | 889.4  | 1117.4 |
| MRPS22  | 3267   | 4122.3 | 2472.9 | 2188.4 | 1940.1 | 2848.7 | 2940.1 | 3996.8 |
| MRPS23  | 1203.1 | 1467.3 | 389.1  | 419    | 291.1  | 491.7  | 947.2  | 1157.4 |
| MRPS24  | 3321.3 | 4423.6 | 2768.5 | 2121.4 | 1753.8 | 2727   | 3247.8 | 4151.5 |
| MRPS26  | 835.1  | 904.3  | 380.1  | 302    | 268.9  | 354.9  | 660.3  | 626    |
| MRPS27  | 1635.9 | 2187.2 | 984.8  | 776.1  | 607.1  | 1201.9 | 1376.8 | 2299.9 |
| MRPS28  | 1549.9 | 2010.8 | 634.6  | 548    | 406    | 673    | 1410.6 | 1943   |
| MRPS30  | 2608.4 | 3315.3 | 1946   | 1639.9 | 1198.9 | 2068.4 | 2027.2 | 3570.2 |
| MRPS31  | 1370   | 1712.8 | 846.4  | 860.9  | 744.5  | 1054.7 | 1098.1 | 1363.1 |
| MRPS33  | 2856.1 | 3484.8 | 1889.8 | 1984.1 | 1238.2 | 2298.7 | 2176.5 | 3073.4 |
| MRPS33  | 280.7  | 388.1  | 157    | 168.2  | 139.2  | 212.5  | 231.5  | 294.8  |
| MRPS34  | 674.2  | 951.3  | 331.4  | 225.1  | 179.5  | 188.5  | 515.2  | 600.4  |
| MRPS35  | 1313   | 2003.7 | 446.5  | 378.4  | 304.7  | 530.3  | 1065.6 | 1872.8 |
| MRPS36  | 171.8  | 227.8  | 144.9  | 183.3  | 146.5  | 182.1  | 171.7  | 237.2  |
| MRPS5   | 936.4  | 1128.4 | 606.4  | 613    | 606.8  | 958    | 732.3  | 1069.1 |
| MRPS6   | 5644.5 | 7833.2 | 3896.3 | 4478.5 | 3965.9 | 5344.1 | 5397.4 | 6795.8 |
| MRPS7   | 1763.2 | 2149.5 | 698.7  | 603.1  | 552.1  | 844.3  | 1403.5 | 1488.4 |
| MRPS9   | 1265.1 | 1900.4 | 1378.1 | 1091.8 | 830    | 1401.9 | 1099.9 | 2042.3 |
| MRRF    | 775.3  | 936.2  | 626.4  | 383.9  | 329.6  | 479.9  | 611.2  | 729    |
| MRRF    | 1598.5 | 2254   | 940    | 561.8  | 462.6  | 709.3  | 1347.9 | 1629.7 |
| MRRF    | 196.4  | 217.1  | 126    | 111.7  | 91     | 103.5  | 168.1  | 178.4  |
| MRS2L   | 342.6  | 435.8  | 174.5  | 175.5  | 134.3  | 211.2  | 278.8  | 433.4  |
| MRVI1   | 86     | 98.3   | 87.4   | 83.5   | 82.4   | 81     | 85.5   | 94.8   |
| MRVI1   | 92.4   | 102.9  | 114.1  | 116    | 107.3  | 104.2  | 84.3   | 86.9   |
| MS4A1   | 127.1  | 153.4  | 100.1  | 95     | 95.8   | 95.2   | 119.6  | 138.1  |
| MS4A1   | 89     | 90.3   | 88.1   | 78.7   | 74.3   | 84.7   | 88.5   | 91.1   |
| MS4A1   | 82.1   | 91     | 87.9   | 84.3   | 77.7   | 87.7   | 80.3   | 82.7   |
| MS4A10  | 67.2   | 81.5   | 76.8   | 74.5   | 81.6   | 82.6   | 72.1   | 80.2   |
| MS4A12  | 83.7   | 96.1   | 90.7   | 82.7   | 88.1   | 81.6   | 91.6   | 93.6   |
| MS4A13  | 114.9  | 131.2  | 99.3   | 86.5   | 87.9   | 85.7   | 115.4  | 118.9  |
| MS4A2   | 104.2  | 112.8  | 92.2   | 94.8   | 89.2   | 105.8  | 100.2  | 113.1  |
| MS4A3   | 1428.2 | 1853.6 | 786.6  | 3619.7 | 2311.1 | 4550.4 | 802.4  | 1070.6 |
| MS4A3   | 149.9  | 175.1  | 103.3  | 162.7  | 117.6  | 174.2  | 112.8  | 158.8  |
| MS4A3   | 2903.2 | 3378.4 | 2196.3 | 7444.2 | 5206.3 | 8646.9 | 2263.1 | 2997.1 |
| MS4A4A  | 91     | 101.4  | 93     | 89.2   | 81.2   | 83.5   | 93.1   | 93.9   |
| MS4A4A  | 77.6   | 97     | 83.5   | 76.9   | 80.2   | 83.2   | 76.4   | 86.3   |
| MS4A4A  | 171.2  | 190.4  | 121.3  | 160.9  | 121.1  | 186.7  | 145.9  | 176.3  |
| MS4A5   | 85.4   | 88.1   | 78.8   | 85.3   | 86.3   | 95     | 87.2   | 104.4  |
| MS4A6A  | 3196.4 | 4174.3 | 2215.2 | 6547.6 | 5116.6 | 8774.9 | 2137.7 | 2750   |
| MS4A6A  | 2267.7 | 2830.6 | 794.1  | 2789.7 | 1830.9 | 3151.9 | 1423.4 | 1912.8 |

|        |         |         |        |         |         |        |         |         |
|--------|---------|---------|--------|---------|---------|--------|---------|---------|
| MS4A6A | 978.9   | 1360.8  | 655.4  | 1880.5  | 1478.5  | 2465.8 | 576.3   | 621.8   |
| MS4A6E | 85.5    | 86.1    | 95     | 85.3    | 76.6    | 80.3   | 75      | 88.3    |
| MS4A7  | 3620.6  | 4191.9  | 2196.6 | 3945.6  | 2741.7  | 4695.6 | 2370.1  | 3443.9  |
| MS4A8B | 80.9    | 93.7    | 93.8   | 88.5    | 89.1    | 94.6   | 81.3    | 89      |
| MSC    | 126.3   | 186.1   | 134.2  | 98.9    | 101.9   | 101.7  | 999.9   | 2067.8  |
| MSH2   | 130.8   | 144.8   | 103.9  | 96      | 95.7    | 99     | 113.6   | 164.2   |
| MSH3   | 19345.7 | 19094.5 | 9055.2 | 11214.8 | 11412.6 | 9928.4 | 19118.7 | 21375.5 |
| MSH4   | 88.4    | 114.1   | 94.8   | 96.9    | 87.7    | 89.5   | 90.8    | 94.2    |
| MSH5   | 251.2   | 245.8   | 137.7  | 133.9   | 119.8   | 106.9  | 165.7   | 205.6   |
| MSH5   | 398.7   | 495.3   | 284.5  | 183.6   | 226.5   | 329.7  | 346.4   | 425.9   |
| MSH5   | 344.1   | 374.8   | 292.9  | 212.8   | 260.5   | 319.4  | 262.9   | 345.2   |
| MSH5   | 163.3   | 189.2   | 122    | 113.8   | 109.5   | 114.6  | 144.8   | 163.6   |
| MSH5   | 263.1   | 332.6   | 267.2  | 193.3   | 203     | 272.3  | 226.4   | 243.4   |
| MSH6   | 3097.3  | 3851.1  | 2035.6 | 2549.1  | 1884.5  | 3155.6 | 2446.8  | 2825.5  |
| MSI1   | 86.1    | 95.7    | 106.6  | 103.1   | 105.2   | 96.9   | 85.4    | 91      |
| MSI2   | 105.5   | 128.8   | 95.4   | 88      | 85.2    | 82.4   | 113.1   | 120.6   |
| MSI2   | 182.9   | 244.9   | 146    | 112     | 123.2   | 122.5  | 177     | 214.6   |
| MSI2   | 192.8   | 245.1   | 180.9  | 176.1   | 169.3   | 203.7  | 173.6   | 203.9   |
| MSL2L1 | 131.3   | 150.6   | 97     | 93.3    | 81.2    | 98.8   | 121.9   | 151.8   |
| MSL3L1 | 529.6   | 471.6   | 201.5  | 436.8   | 321.6   | 210.8  | 381.1   | 672.6   |
| MSL3L1 | 79.2    | 91.5    | 79.8   | 73.3    | 74.6    | 86     | 83.6    | 85.1    |
| MSL3L1 | 192.8   | 276     | 133    | 159.7   | 186.1   | 242.5  | 162     | 198.5   |
| MSL3L1 | 208.2   | 256.6   | 167.9  | 213.2   | 201.1   | 237.2  | 178.5   | 187     |
| MSLN   | 85.1    | 103.8   | 105.1  | 99.5    | 97      | 91.1   | 87.3    | 88.9    |
| MSMB   | 99.3    | 114     | 86.1   | 90      | 72      | 84.1   | 93.5    | 104.3   |
| MSMB   | 89.2    | 104.6   | 96     | 91.7    | 79.2    | 85.3   | 83.7    | 98.8    |
| MSMB   | 74.5    | 84.7    | 79.4   | 84.8    | 83.8    | 85.9   | 83.5    | 76.9    |
| MSN    | 3171.7  | 4824.9  | 3931.3 | 7622.3  | 6292.8  | 9344   | 2907.7  | 4692.4  |
| MSR1   | 91.1    | 107.3   | 93.4   | 81.2    | 84      | 84.1   | 78.3    | 101.9   |
| MSR1   | 133.5   | 141.6   | 92.2   | 87      | 89.1    | 82.7   | 131.8   | 152.5   |
| MSR1   | 118.1   | 138.4   | 103.1  | 89.7    | 81.7    | 82.9   | 119.4   | 110.6   |
| MSRA   | 1616.4  | 1931.7  | 1294.9 | 789.3   | 603     | 716.3  | 1412.9  | 1803.1  |
| MSRB2  | 4173.7  | 5126.6  | 2686.4 | 1838.2  | 1595.4  | 1643.1 | 3477    | 3133.3  |
| MSRB3  | 86.7    | 94.9    | 102.6  | 122.7   | 110.3   | 142.6  | 86.9    | 97      |
| MSRB3  | 92      | 88.1    | 101.6  | 186.4   | 177     | 229.9  | 89.9    | 95      |
| MSRB3  | 83      | 90.8    | 95.6   | 86.8    | 88.2    | 88.8   | 79.4    | 82      |
| MST150 | 238.4   | 332.2   | 169.3  | 144.8   | 130.1   | 147    | 236.2   | 286.9   |
| MST1R  | 78.2    | 94.1    | 98.4   | 77.2    | 76.1    | 82     | 91.9    | 95.1    |
| MST4   | 930.6   | 1163.1  | 419.5  | 559     | 378.9   | 814.6  | 671.7   | 1781.2  |
| MSTP9  | 133.9   | 149     | 90.5   | 102.1   | 86.2    | 94.5   | 121.8   | 139.3   |
| MSX1   | 708.5   | 810     | 495.1  | 254     | 222.1   | 320    | 741.7   | 1329.1  |
| MSX2   | 99.3    | 134.9   | 97     | 83      | 83.1    | 104.1  | 99.7    | 135.4   |
| MSX2P  | 87.4    | 104.8   | 98.8   | 90      | 76.2    | 96     | 86.1    | 92.7    |
| MT     | 559.9   | 805.5   | 464.3  | 342.4   | 250     | 278.5  | 377.8   | 466     |
| MT     | 133.6   | 167.1   | 98.9   | 88.5    | 89.9    | 86     | 114.8   | 157.8   |
| MT1A   | 4285.9  | 5364.6  | 3097.1 | 1248.6  | 966.2   | 1306.7 | 3271.8  | 3678.4  |
| MT1B   | 98      | 104     | 101.2  | 107.4   | 90.4    | 102.5  | 102.5   | 106.8   |
| MT1E   | 5929.1  | 6262.8  | 3187.9 | 992.2   | 1008.7  | 949.5  | 4229    | 4242.8  |
| MT1F   | 7404.9  | 8649.2  | 5295.1 | 2586.9  | 2029.3  | 1949.7 | 6649    | 8414.7  |
| MT1G   | 1662.1  | 2053.3  | 1278.7 | 250.1   | 184.5   | 204.9  | 1272.5  | 1707.2  |

|         |        |         |        |        |        |        |        |         |
|---------|--------|---------|--------|--------|--------|--------|--------|---------|
| MT1H    | 551    | 593     | 235.1  | 123.4  | 120.4  | 118.2  | 392.9  | 383.7   |
| MT1M    | 98     | 120.5   | 97.2   | 85.8   | 79.6   | 79.5   | 116.6  | 146     |
| MT1P2   | 110.4  | 114     | 95.3   | 85.2   | 78.2   | 82.8   | 100.8  | 118.4   |
| MT1X    | 3733.2 | 4685.8  | 3282.2 | 1182.3 | 753.2  | 1020.4 | 2391.8 | 2382.2  |
| MT2A    | 919.5  | 997.5   | 818.3  | 494.6  | 415.1  | 422.8  | 781.6  | 1036.3  |
| MT3     | 92.4   | 104.9   | 113.9  | 103.8  | 102.2  | 94.3   | 91.3   | 94.5    |
| MT4     | 74.4   | 87.6    | 88.1   | 80.6   | 83.6   | 74.5   | 74.2   | 80.2    |
| MTA1    | 532.3  | 706.4   | 568.1  | 502    | 402.3  | 687.9  | 439    | 1029.4  |
| MTA2    | 1019.6 | 1162.8  | 833.5  | 497.2  | 459.6  | 377.6  | 752.3  | 1365.7  |
| MTA3    | 271.1  | 388.5   | 209.4  | 172.4  | 143.3  | 193.4  | 263.5  | 324.9   |
| MTAC2D1 | 69.2   | 81.6    | 82     | 78.2   | 73.9   | 89.1   | 73.5   | 73.3    |
| MTAP    | 74.6   | 91      | 103.7  | 101.5  | 82.7   | 98.2   | 82.8   | 92.5    |
| MTBP    | 272.1  | 343.4   | 222.4  | 176.8  | 149.1  | 252    | 242.2  | 419.1   |
| MTCH1   | 9024.9 | 10985.3 | 6859.9 | 7082.3 | 5371.9 | 7817.8 | 8476.3 | 11118.3 |
| MTCH2   | 165.7  | 178.7   | 113.1  | 100.6  | 101.9  | 117    | 136.9  | 169.7   |
| MTCP1   | 764    | 889.4   | 545.9  | 733.8  | 530.3  | 763.5  | 608.4  | 1209.5  |
| MTDH    | 2466.1 | 2846.7  | 464.7  | 502.8  | 377.5  | 817.4  | 2144.9 | 5397.3  |
| MTE     | 561.7  | 680.1   | 393.5  | 189.3  | 166.9  | 205    | 436.3  | 584.5   |
| MTERF   | 151.4  | 157.6   | 93.2   | 88.5   | 88     | 82.7   | 148.2  | 148.8   |
| MTERFD1 | 2322.1 | 3079.3  | 1065.6 | 589.1  | 452    | 720.4  | 1951.5 | 2828.3  |
| MTERFD2 | 110.9  | 132.9   | 103.8  | 100.6  | 103.5  | 110.8  | 125.2  | 128.4   |
| MTERFD3 | 111.5  | 118.9   | 90.3   | 91.5   | 89     | 93.1   | 96.4   | 89.5    |
| MTERFD3 | 88.6   | 101.7   | 108.4  | 98     | 93.8   | 101.8  | 80.3   | 105.4   |
| MTF1    | 273.1  | 402.4   | 348.2  | 492    | 404.6  | 550.4  | 254.2  | 656.4   |
| MTF2    | 673.9  | 660.8   | 293.8  | 213.5  | 242.7  | 279.6  | 598    | 817.9   |
| MTFMT   | 80.2   | 101.4   | 97.2   | 91.1   | 92.3   | 96.6   | 87.9   | 89.8    |
| MTFR1   | 721.5  | 897.5   | 551.9  | 554.4  | 378.9  | 702    | 701.4  | 1632.6  |
| MTG1    | 183.4  | 214.2   | 165    | 130.2  | 121.4  | 130.8  | 126.6  | 152.7   |
| MTHFD1  | 345.3  | 464.5   | 287.6  | 201.8  | 196.8  | 373.1  | 229.7  | 341.7   |
| MTHFD1L | 1029.5 | 1663.9  | 1018.8 | 771.3  | 536.6  | 1097.6 | 900.1  | 1747.4  |
| MTHFD2  | 2126.5 | 2880.8  | 780.7  | 534.1  | 423.3  | 501.9  | 2005.1 | 2872    |
| MTHFD2  | 81.3   | 97.7    | 90.6   | 81.4   | 75.4   | 83.4   | 86.8   | 91.1    |
| MTHFD2  | 3540.3 | 4899.8  | 2180.6 | 1804.4 | 1478.1 | 3097.1 | 3128.5 | 5289.2  |
| MTHFD2L | 297.9  | 337.1   | 196.7  | 206.8  | 175.5  | 239.9  | 284.3  | 479.3   |
| MTHFR   | 136.4  | 148     | 134.5  | 164.7  | 170.3  | 185    | 133.9  | 151.7   |
| MTHFS   | 516    | 622.4   | 418.3  | 474.7  | 350.6  | 514.8  | 516.9  | 972     |
| MTIF2   | 2400.9 | 2719.7  | 896.3  | 1076.9 | 870.6  | 1687   | 1560.3 | 2292.8  |
| MTIF2   | 96.3   | 102.7   | 91.6   | 77.7   | 86.5   | 83.9   | 88.4   | 99.2    |
| MTIF3   | 1143.8 | 1544.6  | 359.7  | 392.2  | 304.8  | 481    | 1017.7 | 1292.7  |
| MTL5    | 573.6  | 791.5   | 344    | 294.3  | 255.6  | 277    | 485.1  | 452.8   |
| MTL5    | 133.9  | 144.8   | 107.6  | 106.3  | 102.6  | 112.5  | 118.3  | 161.6   |
| MTM1    | 578.7  | 797.7   | 475.5  | 398.8  | 306.1  | 643.1  | 396.1  | 624.3   |
| MTMR1   | 76.9   | 83.5    | 94.9   | 89.1   | 84.8   | 88.4   | 81.2   | 83.6    |
| MTMR11  | 1114.7 | 1588.2  | 597.7  | 290.9  | 232.1  | 306.7  | 924.2  | 989.3   |
| MTMR12  | 189.7  | 253.6   | 175.8  | 191.2  | 154.9  | 303.4  | 174.3  | 194     |
| MTMR14  | 310.4  | 363     | 204.4  | 224.6  | 173.8  | 223.7  | 263    | 354.7   |
| MTMR15  | 267.8  | 301.2   | 249.3  | 215.3  | 207.2  | 280.4  | 221.5  | 379     |
| MTMR2   | 96.5   | 136.5   | 106.6  | 88.4   | 77.5   | 99.6   | 94.5   | 140.5   |
| MTMR2   | 218.3  | 287.2   | 182.4  | 197.5  | 151.8  | 193.5  | 208.8  | 193.8   |
| MTMR3   | 403.5  | 468.6   | 376.9  | 606.5  | 465.5  | 900.7  | 379.8  | 759.6   |

|        |        |        |        |        |        |        |        |        |
|--------|--------|--------|--------|--------|--------|--------|--------|--------|
| MTMR3  | 86     | 97.4   | 87.4   | 91.6   | 89.1   | 87.4   | 92.5   | 88.5   |
| MTMR3  | 117.8  | 166.7  | 109.5  | 119.4  | 94.6   | 122.5  | 120.5  | 150.5  |
| MTMR4  | 470    | 554.8  | 315.6  | 341.9  | 274    | 506.4  | 444.3  | 782.6  |
| MTMR6  | 578.1  | 785    | 251.8  | 249.3  | 202.5  | 365.3  | 590.9  | 1080.5 |
| MTMR7  | 93.6   | 116.8  | 91.4   | 77.7   | 84.5   | 84.3   | 93.2   | 110    |
| MTMR8  | 113    | 128.2  | 101.6  | 92.4   | 89.4   | 94.3   | 108.5  | 109.7  |
| MTMR9  | 682.3  | 939.4  | 511.6  | 470.4  | 372.1  | 515.8  | 671.6  | 919.4  |
| MTNR1A | 80.6   | 88.2   | 95.9   | 95.1   | 85.7   | 80.1   | 79.5   | 85.8   |
| MTNR1B | 76.4   | 108    | 91.3   | 93.2   | 90.7   | 89.5   | 82.6   | 85.2   |
| MTO1   | 143.3  | 167.5  | 117.6  | 103.3  | 100.1  | 108.6  | 130.9  | 175.1  |
| MTO1   | 2570   | 3266.9 | 1836.5 | 1636.3 | 1251.7 | 2216.6 | 2110.2 | 3472.2 |
| MTP18  | 355.9  | 514.1  | 233.6  | 152.3  | 168.4  | 195.2  | 290.6  | 375.7  |
| MTP18  | 219.6  | 285.5  | 183.9  | 134.1  | 129.2  | 148.8  | 173.4  | 192.1  |
| MTP18  | 2000.3 | 2381.3 | 943.1  | 647.5  | 531.6  | 700    | 1635.6 | 1475.5 |
| MTPN   | 6030.4 | 7145.5 | 3309.5 | 4123.1 | 2970.9 | 5012.8 | 5386.8 | 9830.4 |
| MTR    | 670.4  | 814.9  | 192.5  | 279.1  | 140.1  | 289.3  | 559.8  | 837.5  |
| MTRF1  | 251.4  | 262.7  | 126.7  | 104.5  | 110.5  | 131.4  | 189.8  | 263.5  |
| MTRF1L | 1168.7 | 1765.6 | 519.5  | 530.2  | 415.1  | 671.9  | 1128.5 | 1436.5 |
| MTRR   | 111.6  | 152.2  | 89.1   | 93.2   | 72     | 89.3   | 127.9  | 136.1  |
| MTRR   | 307.8  | 360.4  | 133.5  | 128.9  | 116.7  | 157.7  | 199.3  | 252.7  |
| MTRR   | 1838.2 | 2515.8 | 1077.4 | 1282.2 | 790.5  | 1427.8 | 1411.5 | 2024.1 |
| MTSS1  | 188.3  | 217.6  | 107.1  | 113.7  | 133.5  | 144.9  | 177.3  | 221.4  |
| MTTP   | 77.4   | 87.5   | 91.2   | 89.1   | 87.4   | 81.3   | 81.3   | 93.3   |
| MTUS1  | 74     | 83.4   | 85.1   | 79.9   | 79.2   | 81.2   | 81.3   | 84.6   |
| MTUS1  | 128.5  | 141.9  | 82.6   | 69.4   | 82.3   | 84.6   | 126.1  | 134.4  |
| MTUS1  | 96     | 104.5  | 87.9   | 79.9   | 71.9   | 97.2   | 94.8   | 117.8  |
| MTUS1  | 74.9   | 76     | 91.8   | 76     | 69.3   | 78.6   | 78.9   | 76.1   |
| MTUS1  | 80.9   | 92.4   | 87     | 87.7   | 86.2   | 80.6   | 89.3   | 90.7   |
| MTX1   | 755.8  | 998.1  | 452.2  | 277.5  | 247.3  | 244    | 635.7  | 662.7  |
| MTX1   | 1031   | 1270.3 | 755.4  | 575.3  | 457.4  | 575.7  | 967.6  | 1134.1 |
| MTX2   | 1551.2 | 1962.5 | 834.5  | 912.1  | 636.3  | 987.9  | 1205.9 | 2216   |
| MTX2   | 82     | 96.4   | 91.8   | 95.4   | 83     | 89.2   | 81.3   | 88.1   |
| MTX3   | 453.2  | 565.5  | 367.3  | 438.6  | 358.8  | 628.3  | 366    | 660.2  |
| MUC1   | 95.2   | 107.8  | 111    | 94.8   | 95     | 101    | 97     | 109.2  |
| MUC1   | 128.1  | 161    | 138.3  | 150.1  | 167.5  | 179.8  | 129    | 145.1  |
| MUC1   | 320.2  | 341.4  | 198.6  | 224.8  | 220.7  | 224.9  | 231.6  | 237.9  |
| MUC13  | 104.8  | 140.8  | 85.2   | 78.4   | 67.7   | 79.2   | 106.7  | 121    |
| MUC15  | 92.6   | 108.2  | 87.5   | 87.5   | 80.6   | 83.5   | 99.7   | 101.3  |
| MUC16  | 136.7  | 166    | 101.6  | 87.8   | 82.4   | 90     | 124.9  | 152.4  |
| MUC17  | 95.8   | 107.9  | 93.5   | 92.2   | 87     | 99.1   | 94.1   | 101.9  |
| MUC2   | 115.3  | 127    | 99.8   | 91.6   | 96.1   | 100.4  | 92.8   | 110.8  |
| MUC20  | 78.6   | 83.3   | 86.7   | 86.2   | 88.1   | 88.6   | 81.2   | 74.7   |
| MUC4   | 115.1  | 137.7  | 91     | 78     | 79.1   | 85.5   | 115.5  | 129.1  |
| MUC4   | 107.7  | 113.8  | 107.7  | 102    | 95.2   | 105.8  | 100.8  | 101.7  |
| MUC4   | 72.8   | 82.2   | 82.1   | 93.1   | 78.9   | 82.6   | 69.3   | 78     |
| MUC4   | 129.5  | 179.9  | 94.4   | 92     | 80.9   | 91.2   | 122.6  | 151.9  |
| MUC7   | 83     | 87.2   | 85.1   | 82.3   | 78.8   | 88.2   | 79.4   | 89.4   |
| MUCDHL | 84.2   | 93.2   | 89.7   | 85.8   | 83.5   | 87.3   | 76.4   | 87     |
| MUCDHL | 103.4  | 111.8  | 106.5  | 84.8   | 92.9   | 92.6   | 92.1   | 116    |
| MULK   | 649.6  | 850.4  | 432.1  | 466.3  | 369.3  | 651.8  | 517.8  | 736.5  |

|         |         |         |        |        |        |        |        |        |
|---------|---------|---------|--------|--------|--------|--------|--------|--------|
| MUM1    | 1198.3  | 1402.8  | 1299.9 | 1167.2 | 980.6  | 1374.8 | 878.6  | 1271.2 |
| MUM1L1  | 75.8    | 82.3    | 89.4   | 82.2   | 86.3   | 81.4   | 90.5   | 88.3   |
| MUS81   | 432.9   | 524.3   | 292.3  | 299.2  | 291.6  | 443.9  | 305.3  | 612.6  |
| MUSK    | 223.2   | 291.5   | 146    | 136.2  | 134.9  | 164.2  | 222.7  | 292.3  |
| MUSTN1  | 93.6    | 126.7   | 103.9  | 102.5  | 91.9   | 104.3  | 98.5   | 105.5  |
| MUT     | 86.8    | 89.6    | 95.5   | 97.7   | 90     | 89.6   | 89     | 93.1   |
| MUTED   | 634     | 851.5   | 346.5  | 298.8  | 227.7  | 372.8  | 514.5  | 797.1  |
| MUTYH   | 127     | 166.4   | 125.3  | 111.5  | 96.1   | 111.7  | 122.9  | 154.1  |
| MUTYH   | 994.5   | 1088.6  | 671.6  | 390.3  | 364.8  | 483.5  | 700.7  | 718.6  |
| MUTYH   | 137.8   | 148.6   | 102.4  | 101.5  | 90.4   | 99.9   | 130    | 158.7  |
| MVD     | 188.1   | 280.2   | 183.4  | 145.3  | 164.6  | 215.7  | 228.3  | 346.7  |
| MVK     | 136.9   | 157     | 116.2  | 130.9  | 120.5  | 126.7  | 125.1  | 150.6  |
| MVP     | 150     | 219.7   | 158.5  | 131.2  | 109    | 190.2  | 166.8  | 241.2  |
| MVP     | 296.4   | 380.7   | 335.5  | 255.7  | 251.8  | 380.4  | 272.2  | 427    |
| MX1     | 417.9   | 562.8   | 410.4  | 338.4  | 352.8  | 316.2  | 323.3  | 314.1  |
| MX2     | 246.3   | 329.4   | 334.4  | 529.4  | 396    | 609.5  | 239.9  | 279.7  |
| MXD1    | 169.6   | 210.6   | 164    | 221.5  | 221.3  | 281.5  | 225.6  | 366.8  |
| MXD3    | 328.7   | 391.8   | 222.9  | 235.3  | 210.4  | 283.7  | 253.8  | 265.3  |
| MXD4    | 997.6   | 1223.9  | 913.5  | 1117.8 | 1167.5 | 1024.5 | 1018.3 | 1059.7 |
| MXI1    | 105.4   | 133.4   | 92.2   | 84.9   | 83.2   | 82.6   | 105.3  | 100.8  |
| MXI1    | 77.6    | 83.1    | 92.9   | 74     | 84.8   | 80.7   | 76.8   | 79.5   |
| MXI1    | 130.6   | 193.4   | 112.3  | 109    | 97.5   | 127    | 129.6  | 132.7  |
| MXI1    | 157.7   | 203.3   | 114.7  | 112.5  | 109.3  | 113.5  | 139.7  | 140.9  |
| MXRA5   | 143.2   | 171.5   | 122.1  | 95.7   | 106.3  | 113.8  | 129.6  | 155.3  |
| MXRA7   | 160     | 181.8   | 107.9  | 94.2   | 86.1   | 97.2   | 147.7  | 181.2  |
| MXRA7   | 211.3   | 292.9   | 153.3  | 128.3  | 122.4  | 146.7  | 165.2  | 204.5  |
| MXRA7   | 108.8   | 122.2   | 101.4  | 96.1   | 81     | 95     | 101.1  | 131.7  |
| MXRA8   | 75.5    | 87.7    | 89.3   | 82.8   | 81.5   | 85     | 80.6   | 84.6   |
| MYADM   | 81.6    | 88.7    | 102.7  | 86.8   | 86.9   | 93.3   | 79.2   | 78     |
| MYADM   | 238.5   | 346.7   | 129.9  | 131.6  | 114.5  | 115.9  | 199.5  | 384.9  |
| MYADM   | 2815.2  | 3756.9  | 2517   | 2293.2 | 1992.3 | 2524.7 | 1950.3 | 2730.8 |
| MYADML  | 118.9   | 122.9   | 98.6   | 89.4   | 88.3   | 90.5   | 98.8   | 111.5  |
| MYB     | 11286.9 | 13381.3 | 9184.3 | 7672.6 | 5933   | 9639.4 | 6697.5 | 7202.9 |
| MYBBP1A | 136.9   | 179.6   | 133.6  | 119.3  | 86.8   | 113.6  | 120.4  | 150.7  |
| MYBL2   | 114.6   | 140.8   | 102.5  | 88.2   | 82.6   | 92.6   | 109.2  | 133.7  |
| MYBPC1  | 81.7    | 89.4    | 80     | 74.4   | 65.1   | 82.1   | 78.9   | 92     |
| MYBPC1  | 96.6    | 107     | 89.7   | 87.2   | 90.2   | 94.9   | 94.5   | 132.1  |
| MYBPC1  | 116.1   | 120.7   | 98.7   | 89.1   | 96.6   | 99.4   | 102.9  | 108.8  |
| MYBPC1  | 88      | 102.6   | 93.1   | 84.9   | 88.1   | 97.5   | 92.1   | 102.8  |
| MYBPC2  | 81.2    | 91.1    | 100.6  | 89.9   | 78.7   | 90.4   | 83.4   | 82.2   |
| MYBPC3  | 104.7   | 108.4   | 123.4  | 116.9  | 130.9  | 134.4  | 97.4   | 103.8  |
| MYBPH   | 895.4   | 1216.1  | 537.8  | 404.2  | 406.6  | 373.1  | 410.8  | 311    |
| MYBPHL  | 77      | 98.9    | 83.6   | 109.4  | 116.2  | 110.1  | 88.8   | 96.8   |
| MYC     | 2203.5  | 2887.4  | 630.4  | 773.7  | 487.8  | 725    | 1631.1 | 2355.4 |
| MYCBP   | 190.5   | 238.2   | 132    | 130.5  | 106.7  | 159    | 156.2  | 176.1  |
| MYCBP2  | 556.5   | 917.7   | 544.1  | 1118.1 | 847.6  | 1344.7 | 637    | 1178.3 |
| MYCBPAP | 115.8   | 125.2   | 98.4   | 102.6  | 101.9  | 116.5  | 100.6  | 124.3  |
| MYCL1   | 96.6    | 120.9   | 82.2   | 77.7   | 90.5   | 98.5   | 94.1   | 103.9  |
| MYCL1   | 141.7   | 162.4   | 107.7  | 100.6  | 97.2   | 105.1  | 131.4  | 161.4  |
| MYCL1   | 108.7   | 135.3   | 97.8   | 86     | 80.1   | 82     | 116.7  | 138.2  |

|         |         |         |         |         |         |         |         |         |
|---------|---------|---------|---------|---------|---------|---------|---------|---------|
| MYCN    | 107     | 113.2   | 93      | 73.7    | 80.8    | 93      | 105.2   | 122.9   |
| MYCT1   | 120.7   | 123.5   | 86.2    | 93.3    | 95      | 93.6    | 113.9   | 119.4   |
| MYD88   | 391.5   | 534.9   | 365.4   | 370.9   | 280.9   | 484.7   | 298.1   | 541.4   |
| MYEF2   | 118.4   | 141.3   | 91.3    | 90.2    | 72.2    | 81.8    | 93.6    | 131     |
| MYEOV   | 108.5   | 109.8   | 88.5    | 93.2    | 92.8    | 90.7    | 105.4   | 107.4   |
| MYEOV2  | 137.1   | 161.7   | 95.6    | 96.8    | 87.2    | 90.8    | 112     | 137.9   |
| MYF5    | 91.6    | 92.4    | 96.3    | 95.3    | 95.1    | 88.4    | 83.1    | 92.2    |
| MYF6    | 96.7    | 104.4   | 97.3    | 89.8    | 81      | 86.4    | 99.1    | 106.3   |
| MYH1    | 99.3    | 109.1   | 89.3    | 92.2    | 92.4    | 85.6    | 101.4   | 104.1   |
| MYH10   | 232.3   | 313.6   | 200     | 509.3   | 442.7   | 648.3   | 190.3   | 243.3   |
| MYH11   | 89      | 97.7    | 85.1    | 84.7    | 76      | 80.2    | 90.7    | 95.5    |
| MYH11   | 85.5    | 81.2    | 100.4   | 92.3    | 83.1    | 96.1    | 84.4    | 75.3    |
| MYH13   | 78.2    | 88.2    | 82.5    | 88.6    | 73.2    | 80.5    | 87.3    | 85      |
| MYH14   | 98.6    | 120.8   | 103.2   | 85.9    | 87.3    | 103.2   | 98      | 117     |
| MYH14   | 102     | 101.9   | 95.4    | 99.2    | 95.6    | 85.7    | 89.5    | 101.2   |
| MYH16   | 161.1   | 179.3   | 106.1   | 82.6    | 87.6    | 92.5    | 168.3   | 168.2   |
| MYH2    | 82.3    | 84.4    | 88.3    | 81.9    | 73      | 88      | 79      | 78.4    |
| MYH3    | 84.6    | 86.4    | 89.9    | 89      | 95.4    | 90.7    | 83.1    | 88.2    |
| MYH4    | 227.1   | 279     | 143.2   | 149.9   | 121.7   | 153     | 224.2   | 213.9   |
| MYH6    | 95.3    | 114.5   | 114.2   | 96.4    | 102.6   | 93.9    | 99.6    | 94.3    |
| MYH7    | 105.3   | 130.3   | 110.8   | 101.3   | 96.9    | 97.5    | 107.2   | 113.1   |
| MYH7B   | 103.1   | 112.3   | 87.6    | 88.9    | 86.4    | 84.3    | 100.1   | 108.3   |
| MYH8    | 81.4    | 85.5    | 88.7    | 78.9    | 81.9    | 95.2    | 79.8    | 94.8    |
| MYH9    | 3329.5  | 4621.7  | 5077.8  | 8189.8  | 6160.5  | 10539.1 | 3155.4  | 6721.3  |
| MYL1    | 97.3    | 118.8   | 101.9   | 100.2   | 87.3    | 103.2   | 99.6    | 117.5   |
| MYL1    | 80.2    | 87.2    | 87.8    | 90.9    | 86      | 81.3    | 80.7    | 89.6    |
| MYL2    | 100.5   | 102.4   | 103.5   | 99.9    | 87.2    | 92.4    | 97.9    | 97.1    |
| MYL4    | 83.1    | 94.1    | 84.3    | 82      | 76.7    | 73.9    | 76.2    | 90      |
| MYL4    | 90.8    | 98.2    | 87.7    | 88.7    | 87.1    | 86.1    | 91.3    | 91.1    |
| MYL5    | 396.2   | 502.9   | 351.1   | 297.8   | 294.2   | 366.2   | 319.8   | 555.7   |
| MYL6    | 21063.2 | 22029.7 | 17678.2 | 24265.7 | 21386   | 27961.4 | 20469   | 21099.6 |
| MYL6    | 18703.4 | 19723.4 | 17854   | 24623.3 | 21415.4 | 30714   | 18813.5 | 21850.3 |
| MYL7    | 115.7   | 142     | 102     | 89.3    | 94.1    | 102.7   | 110.9   | 116.3   |
| MYL9    | 122.5   | 138.8   | 94.4    | 89.1    | 97.8    | 77.8    | 117.1   | 131.5   |
| MYL9    | 105.6   | 125.1   | 124.8   | 161.7   | 131.3   | 192.4   | 102.8   | 140.9   |
| MYLC2PL | 97.7    | 93.4    | 91.7    | 83.8    | 84.9    | 76.8    | 85.7    | 88.9    |
| MYLIP   | 772.3   | 967.5   | 414.1   | 720.8   | 672.6   | 1169.8  | 542.3   | 747.3   |
| MYLK    | 84.7    | 89.8    | 124.6   | 126.4   | 117.2   | 117.1   | 92      | 94.3    |
| MYLK    | 93.3    | 118.5   | 89      | 87.9    | 84.3    | 91.8    | 83.7    | 110.6   |
| MYLK2   | 132     | 143.3   | 113.4   | 91.6    | 99.7    | 91.7    | 115.3   | 117.6   |
| MYLPF   | 96.8    | 108.7   | 93.2    | 81.4    | 80.7    | 84.7    | 97.4    | 105.7   |
| MYNN    | 92.7    | 89.7    | 90.8    | 90.5    | 90.4    | 88.5    | 83.3    | 94.3    |
| MYO10   | 171.7   | 219.3   | 132.9   | 136.4   | 135.8   | 196.7   | 171.9   | 196.5   |
| MYO15A  | 106.2   | 111     | 85.9    | 85      | 78.3    | 79.2    | 100.3   | 118.6   |
| MYO18A  | 187.9   | 208.2   | 157     | 172.8   | 191.2   | 205.2   | 164.2   | 194.5   |
| MYO18A  | 112.8   | 144.5   | 94.3    | 94.2    | 88.4    | 99.4    | 130.2   | 151.2   |
| MYO18B  | 75.6    | 85.7    | 86.8    | 84.1    | 75.8    | 89      | 79      | 82.7    |
| MYO1A   | 108.5   | 123     | 113     | 117.4   | 109.8   | 103.2   | 116.1   | 113.5   |
| MYO1B   | 105     | 131.9   | 95      | 90.9    | 102.7   | 108.1   | 104     | 125     |
| MYO1C   | 104.7   | 111.1   | 136     | 110.7   | 103.3   | 101.4   | 104.4   | 154.4   |

|          |         |         |        |        |        |        |         |         |
|----------|---------|---------|--------|--------|--------|--------|---------|---------|
| MYO1C    | 70.9    | 78.1    | 81.3   | 85.2   | 80.4   | 78.2   | 75.8    | 87.6    |
| MYO1C    | 104.2   | 132.2   | 130    | 120.9  | 123.3  | 151.4  | 106.2   | 125.5   |
| MYO1D    | 78.7    | 90.3    | 83.7   | 92.5   | 76.1   | 90.4   | 76.9    | 86      |
| MYO1E    | 136.1   | 163     | 103.4  | 93.3   | 84.9   | 94.3   | 135.3   | 136.9   |
| MYO1F    | 386.1   | 477     | 484.4  | 368.4  | 288.3  | 708.1  | 308.8   | 509     |
| MYO1G    | 725.1   | 871.3   | 757.8  | 834.7  | 773.3  | 1363.5 | 663.2   | 1169.7  |
| MYO3A    | 81.6    | 93.1    | 87     | 89.3   | 86     | 82.8   | 81.6    | 88.4    |
| MYO3B    | 168.7   | 172.6   | 152.6  | 158.8  | 165.8  | 151    | 167.9   | 260.2   |
| MYO5A    | 258     | 328.9   | 159.1  | 212.8  | 166.8  | 211.1  | 296.6   | 403.5   |
| MYO5B    | 83.1    | 100.3   | 100.6  | 87.3   | 87.3   | 95.1   | 89.5    | 94.8    |
| MYO5C    | 108.6   | 118.9   | 104.9  | 169    | 125.8  | 227.8  | 111.3   | 104.4   |
| MYO6     | 265     | 342.6   | 164.8  | 210.8  | 187.3  | 222.2  | 262.5   | 299.8   |
| MYO7A    | 89.4    | 99      | 99     | 130.3  | 109.4  | 152    | 89      | 97.5    |
| MYO7B    | 87.1    | 99.4    | 94.1   | 85.5   | 90.7   | 90.6   | 94      | 95.9    |
| MYO9A    | 188.3   | 247.7   | 225.9  | 409.3  | 381    | 631.6  | 199.4   | 220.2   |
| MYO9B    | 225.3   | 246.1   | 265.7  | 235.6  | 243.4  | 258.2  | 242.7   | 449     |
| MYOC     | 81      | 94.5    | 96.3   | 75.3   | 81.8   | 74.6   | 95.1    | 88.1    |
| MYOCD    | 95.7    | 112     | 111.9  | 97.8   | 83     | 98.3   | 90.1    | 101.1   |
| MYOD1    | 80.6    | 89.9    | 109.2  | 98.4   | 88.7   | 98.5   | 91      | 88.6    |
| MYOG     | 100.1   | 123.8   | 91.9   | 87.5   | 81.7   | 84.6   | 100.3   | 121.3   |
| MYOHD1   | 128.4   | 148.9   | 93.7   | 91     | 95.2   | 90.4   | 117     | 123.5   |
| MYOHD1   | 99.5    | 106.8   | 105.4  | 101    | 94.5   | 97.3   | 96.1    | 99.3    |
| MYOHD1   | 208     | 255.4   | 211.2  | 185.2  | 159.8  | 199.5  | 176.9   | 253.3   |
| MYOM1    | 83.2    | 85.6    | 101.3  | 97.3   | 88.7   | 94.8   | 81.7    | 85.6    |
| MYOM2    | 118.9   | 143.9   | 113.5  | 104.6  | 94.7   | 106.9  | 128.6   | 142     |
| MYOM3    | 86.9    | 106.3   | 101.6  | 99.6   | 89.7   | 85     | 94.7    | 92.9    |
| MYOT     | 94.4    | 103.8   | 95.6   | 100.6  | 92.6   | 93.4   | 89.4    | 94.3    |
| MYOZ1    | 204.2   | 274.8   | 177.1  | 153.2  | 122.2  | 146.4  | 175.7   | 187.8   |
| MYOZ2    | 77.6    | 84.4    | 93.3   | 85.5   | 86.1   | 95.2   | 83.8    | 74.5    |
| MYOZ3    | 107.4   | 128     | 112.8  | 103.1  | 105    | 100.9  | 101.4   | 97.6    |
| MYPN     | 79.5    | 81.8    | 98.8   | 84.2   | 88     | 90.3   | 89.2    | 85.5    |
| MYR8     | 99.2    | 98.8    | 88.5   | 84.8   | 77.5   | 85     | 92      | 98.7    |
| MYRIP    | 78.7    | 88.7    | 91     | 80.3   | 73.3   | 72.9   | 80.3    | 82.7    |
| MYST1    | 651     | 874.9   | 431.2  | 324.3  | 279.8  | 388.1  | 582.8   | 552.9   |
| MYST2    | 131.6   | 163.9   | 110.9  | 105.2  | 95.2   | 120.2  | 122.4   | 177.7   |
| MYST3    | 556.6   | 881.2   | 671.8  | 949.3  | 686.1  | 1745.4 | 644.2   | 1627.2  |
| MYST4    | 91.8    | 100.1   | 100.2  | 108.7  | 95.9   | 115.3  | 89.5    | 103.9   |
| MYT1     | 88.8    | 102.3   | 92.8   | 80.7   | 80     | 82.4   | 98.2    | 89.9    |
| MYT1L    | 76.2    | 92.6    | 90.3   | 77.8   | 76.8   | 94.1   | 87      | 96.8    |
| N4BP1    | 180.8   | 184.7   | 135.5  | 148.4  | 129.5  | 150.5  | 165.8   | 190.2   |
| N4BP2    | 929.1   | 1022.3  | 417.2  | 640.4  | 635.9  | 422.4  | 747.3   | 834.9   |
| N4BP3    | 78.7    | 89.8    | 88.2   | 78.5   | 84.8   | 86.1   | 86.1    | 90      |
| N6AMT1   | 144     | 167.9   | 149.1  | 169.7  | 151.7  | 208.8  | 121.6   | 134.8   |
| NAALAD2  | 129.9   | 130.2   | 93.5   | 90.5   | 75.1   | 88.1   | 117.2   | 159.2   |
| NAALADL1 | 85.2    | 84.1    | 90.9   | 88.1   | 83.9   | 92.5   | 88.2    | 95      |
| NAALADL2 | 125.6   | 146     | 82.3   | 92     | 83.1   | 83     | 116.2   | 147.7   |
| NAB1     | 384.8   | 410.2   | 246.9  | 280    | 233.1  | 420.9  | 310.2   | 646.9   |
| NAB2     | 144.6   | 144.3   | 109    | 98     | 105    | 100.8  | 129.1   | 235     |
| NACA     | 17721.2 | 19124.9 | 5577.7 | 6626.7 | 5294.3 | 8353.4 | 15198.8 | 20216.2 |
| NACAL    | 102     | 116.8   | 79.6   | 75.6   | 78.4   | 75.7   | 96.1    | 114.2   |



|          |         |         |         |         |         |         |         |         |
|----------|---------|---------|---------|---------|---------|---------|---------|---------|
| NACAP1   | 545.6   | 705.7   | 215.9   | 143.4   | 152     | 227.1   | 502.1   | 734.3   |
| NADSYN1  | 409.2   | 418.7   | 253.9   | 258.6   | 215.4   | 297.8   | 340.6   | 586.1   |
| NAG      | 154.7   | 182     | 135.4   | 154.9   | 130.4   | 165.9   | 156.3   | 162.8   |
| NAG18    | 22709.4 | 23369.2 | 10716.8 | 15659.9 | 13054.3 | 10952.8 | 23618.5 | 23809.7 |
| NAG6     | 211.3   | 220.7   | 166.6   | 165.6   | 176.9   | 203.9   | 165.7   | 157.2   |
| NAG8     | 165.8   | 219.6   | 116.9   | 363.7   | 300.7   | 316.9   | 219.3   | 213.6   |
| NAGA     | 305     | 375.6   | 278.1   | 314.7   | 244.3   | 386.8   | 213.3   | 327     |
| NAGK     | 448.8   | 596.8   | 319     | 359.6   | 361.8   | 476.6   | 351.7   | 497.3   |
| NAGLU    | 209     | 319.4   | 155.9   | 150.6   | 127.1   | 186.9   | 195.3   | 302.2   |
| NAGPA    | 314.8   | 447.7   | 320.5   | 229.4   | 205.7   | 273     | 318.6   | 506.7   |
| NAGS     | 125.8   | 157.6   | 98.1    | 87.2    | 87.4    | 96      | 119.6   | 146.2   |
| NAIP     | 118.3   | 124.7   | 87.5    | 89.8    | 89      | 94.2    | 120.6   | 147.6   |
| NAIP     | 126.7   | 165.8   | 102.7   | 162.7   | 166.4   | 122.8   | 118.8   | 131.1   |
| NALP1    | 99.2    | 119.4   | 96.7    | 92.2    | 86.7    | 96.1    | 108.1   | 116.2   |
| NALP10   | 161.4   | 182     | 111.8   | 107.8   | 107.7   | 108.9   | 142     | 148.2   |
| NALP11   | 87.2    | 105     | 84.8    | 86.5    | 81.5    | 82.7    | 89.5    | 104.5   |
| NALP12   | 121.5   | 134.1   | 101.6   | 87.7    | 83.6    | 93.4    | 102.5   | 128.4   |
| NALP12   | 240.9   | 242     | 246.3   | 172.6   | 120.8   | 217.6   | 324.3   | 697.3   |
| NALP12   | 95      | 120.2   | 114.7   | 96.6    | 86.6    | 96      | 111.4   | 116.5   |
| NALP13   | 84.6    | 88.6    | 92.1    | 90.9    | 96.5    | 87.4    | 88.7    | 88.4    |
| NALP14   | 83.1    | 80.4    | 90.1    | 87.4    | 76.9    | 89      | 76      | 78.8    |
| NALP2    | 90.3    | 129.1   | 92.2    | 176.3   | 166.4   | 202.3   | 93.3    | 96.7    |
| NALP4    | 101     | 109.6   | 86.2    | 74.9    | 78      | 86.7    | 85.2    | 92.6    |
| NALP5    | 95.3    | 119.9   | 94.1    | 95.5    | 90.7    | 94.5    | 103.4   | 98      |
| NALP6    | 87.1    | 97.1    | 87.8    | 81.6    | 81.4    | 79.4    | 86.5    | 95.5    |
| NALP7    | 116.7   | 142.4   | 89      | 104.6   | 92.4    | 95.7    | 129.7   | 148.5   |
| NALP7    | 89.7    | 97.2    | 83.4    | 82.4    | 82.8    | 94.9    | 92      | 108.3   |
| NALP7    | 90.1    | 88.9    | 91.9    | 98.5    | 85.2    | 85.3    | 88.4    | 101.7   |
| NALP9    | 87.4    | 95.7    | 83.3    | 83.8    | 72.7    | 75.2    | 91.7    | 96      |
| NANOG    | 87      | 92.5    | 93.9    | 84.7    | 88.6    | 85.8    | 85.7    | 97.4    |
| NANOS1   | 118     | 150.7   | 111.4   | 108.8   | 98.5    | 102.6   | 116.1   | 135.6   |
| NANOS1   | 86.6    | 92.5    | 97.7    | 95      | 83.4    | 93.8    | 94.5    | 100.5   |
| NANOS1   | 97.1    | 107.4   | 87.2    | 85.9    | 80.8    | 84.1    | 94.8    | 100.1   |
| NANOS2   | 96.7    | 109.5   | 93.9    | 79.6    | 79.4    | 84.6    | 89.4    | 96.2    |
| NANP     | 210.1   | 291.4   | 110.9   | 105     | 104.1   | 129.1   | 187.6   | 264.7   |
| NANS     | 934.2   | 1169.3  | 299.3   | 163.7   | 139.8   | 203.9   | 800.9   | 1079.3  |
| NAP1L1   | 552.1   | 758.2   | 269.9   | 260.4   | 258.3   | 455.9   | 415.9   | 813.6   |
| NAP1L1   | 98.6    | 108.5   | 83.3    | 81.9    | 75.3    | 88.1    | 100.1   | 128.9   |
| NAP1L2   | 87      | 110.4   | 103.7   | 97.7    | 94.7    | 88.3    | 87.9    | 90      |
| NAP1L3   | 139.7   | 170.8   | 117.9   | 103.7   | 102.1   | 129.6   | 132.7   | 160.1   |
| NAP1L4   | 2889.2  | 4140.3  | 2442.1  | 2050.9  | 1757.5  | 3110.9  | 2451.4  | 3670.5  |
| NAP1L5   | 430.6   | 487.2   | 322.9   | 273.2   | 204.3   | 335.3   | 354.7   | 516.7   |
| NAP5     | 75.3    | 81.9    | 107.3   | 84.7    | 82.9    | 97.1    | 70.4    | 83      |
| NAP5     | 121.4   | 121.3   | 83.1    | 80.4    | 76.3    | 79.1    | 101.5   | 138.6   |
| NAP5     | 70.2    | 88.4    | 84      | 73.8    | 68.3    | 69.1    | 79.1    | 85.1    |
| NAPA     | 159.5   | 198.1   | 142.8   | 107.9   | 108.6   | 106.8   | 152.9   | 234.8   |
| NAPB     | 246.1   | 251.1   | 199.5   | 315.5   | 263     | 320.8   | 214     | 287.5   |
| NAPE-PLD | 178.4   | 244.1   | 126.2   | 83.5    | 97.9    | 112.4   | 170     | 216.9   |
| NAPG     | 235.2   | 292.8   | 121.7   | 110.1   | 112.7   | 129.6   | 204.1   | 326.8   |
| NAPRT1   | 4263.1  | 5204.5  | 2276.6  | 1827.7  | 1708.9  | 1991.8  | 3361.6  | 3022.8  |

|          |        |        |        |        |        |        |        |        |
|----------|--------|--------|--------|--------|--------|--------|--------|--------|
| NAPSA    | 240.5  | 299.7  | 202.4  | 157.6  | 162.3  | 202.7  | 208.5  | 228.3  |
| NAPSB    | 1656.3 | 2090   | 1444   | 1260.8 | 1067.3 | 1582.5 | 1080.7 | 1644.7 |
| NARF     | 508.3  | 683.4  | 436.4  | 505.2  | 524.6  | 668.7  | 638.9  | 848.1  |
| NARFL    | 266.1  | 307.5  | 180.1  | 146.3  | 125.3  | 211.1  | 265.6  | 315.1  |
| NARG1    | 375.8  | 454    | 269.3  | 271.9  | 212    | 383.8  | 307.1  | 459.3  |
| NARG1L   | 414.9  | 400.2  | 212.3  | 243.4  | 214.8  | 267.7  | 311.8  | 546.5  |
| NARG1L   | 246.8  | 320.9  | 161.5  | 139.6  | 130.9  | 158.4  | 186.4  | 222.5  |
| NARG1L   | 97.1   | 114.8  | 104.4  | 95     | 95.9   | 97     | 96.9   | 115    |
| NARG2    | 176.2  | 210.8  | 109.1  | 100.4  | 91.9   | 108    | 177.6  | 227.4  |
| NARG2    | 238.6  | 273.6  | 124.3  | 151.9  | 110.5  | 129.7  | 167.3  | 264.2  |
| NARG2    | 108.1  | 143.7  | 115.9  | 129.1  | 111.8  | 133.7  | 123.3  | 159.4  |
| NARS     | 4799.3 | 6514.6 | 1738.7 | 2436.5 | 1478   | 3200.7 | 4278.2 | 5956.5 |
| NARS2    | 443.6  | 545.6  | 210.4  | 210.8  | 183.5  | 301    | 312.4  | 529.6  |
| NASP     | 114.6  | 126.3  | 95.3   | 88.8   | 98.7   | 94.6   | 111    | 127.1  |
| NASP     | 829.6  | 1105.6 | 518    | 638.5  | 620.1  | 839.5  | 648.3  | 751.4  |
| NAT1     | 200.1  | 213.2  | 119.1  | 95.8   | 88.3   | 113.5  | 142.3  | 186    |
| NAT1     | 763.5  | 1078.1 | 430.2  | 296.7  | 253.3  | 420.8  | 571.4  | 780.4  |
| NAT10    | 2109.5 | 2744.6 | 1668.5 | 1496.4 | 1162   | 1600.4 | 1729.1 | 1570.5 |
| NAT11    | 132.6  | 145.3  | 137.4  | 114    | 103.7  | 129.6  | 122.5  | 154.9  |
| NAT12    | 237.1  | 287.5  | 122.6  | 119    | 95.4   | 139.5  | 207.1  | 299.2  |
| NAT13    | 413.2  | 525.1  | 175.9  | 152.1  | 133.1  | 184.6  | 367.8  | 791.8  |
| NAT2     | 85.5   | 89.3   | 92.2   | 90.3   | 84.2   | 90.3   | 88.2   | 93.4   |
| NAT5     | 4799.4 | 6584.9 | 3754   | 4230.6 | 3124.9 | 4801.6 | 3968   | 4296   |
| NAT5     | 79.5   | 97.7   | 101.1  | 88     | 92.4   | 88.7   | 88.4   | 79.5   |
| NAT5     | 3022   | 4132.4 | 2139.2 | 2175.2 | 1547.9 | 2761.4 | 2300.2 | 2856.3 |
| NAT6     | 239.1  | 280    | 257.4  | 352.5  | 282.4  | 378.3  | 209.4  | 383.4  |
| NAT8     | 86.2   | 90.1   | 90.7   | 95     | 96     | 92.7   | 82     | 79.3   |
| NAT9     | 576.7  | 590.1  | 452.3  | 381.9  | 347.3  | 498.6  | 456    | 628.8  |
| NAV1     | 114.6  | 150.3  | 110.1  | 103.1  | 90     | 115.7  | 109.1  | 124.3  |
| NAV2     | 101.2  | 120.6  | 95.4   | 99.1   | 91.5   | 87     | 105.3  | 99.4   |
| NAV2     | 123.8  | 158.6  | 113.1  | 92.7   | 90.9   | 94.2   | 109.1  | 131.5  |
| NAV3     | 210.8  | 257.7  | 157.2  | 258.4  | 216.9  | 412.1  | 145.4  | 164.2  |
| NBEA     | 80.6   | 68.4   | 113.7  | 93.3   | 67.7   | 76.8   | 92.7   | 93     |
| NBEAL1   | 83.6   | 85.3   | 86.8   | 91.8   | 78     | 92     | 74.7   | 89.5   |
| NBL1     | 362.1  | 455.3  | 542.1  | 318.7  | 236.4  | 331.8  | 409.5  | 710.5  |
| NBL1     | 214.6  | 304.5  | 197.6  | 145.7  | 135    | 183.9  | 230.8  | 381    |
| NBLA1038 | 86.6   | 107.9  | 88.3   | 102.8  | 101.5  | 116.6  | 99.5   | 123.3  |
| NBN      | 96.3   | 120.1  | 88.9   | 83.3   | 82.8   | 85.6   | 92.2   | 88.3   |
| NBN      | 163.9  | 226.8  | 126.8  | 113.1  | 96.6   | 139.8  | 149.2  | 188.2  |
| NBPF1    | 188.9  | 216.3  | 128.7  | 133.3  | 147.2  | 124.3  | 146.7  | 202.8  |
| NBPF1    | 120.8  | 143.1  | 108.6  | 89.5   | 88     | 97.7   | 113.2  | 138.7  |
| NBPF10   | 2090.9 | 4045.3 | 798.3  | 1590   | 1819.7 | 1646.3 | 2368.8 | 2981.7 |
| NBPF11   | 691.9  | 874.2  | 491.6  | 615    | 592.1  | 1100.8 | 534.7  | 973.7  |
| NBPF14   | 171.5  | 212.3  | 141.4  | 134.1  | 156.7  | 207.4  | 139.1  | 172.3  |
| NBPF15   | 79.8   | 99.1   | 83.7   | 84.5   | 73.6   | 77     | 87.1   | 84     |
| NBPF20   | 1809.4 | 4017.6 | 1066.4 | 2865.5 | 2979.9 | 2239.8 | 2229   | 2215.9 |
| NBPF3    | 257.7  | 324.7  | 212.3  | 236.3  | 234.6  | 353.3  | 201.1  | 396.4  |
| NBPF3    | 108.3  | 123.4  | 108.9  | 100.8  | 88.5   | 92.3   | 104.1  | 120.5  |
| NBPF7    | 89.5   | 105.7  | 94     | 93     | 83.6   | 87     | 98.1   | 95.4   |
| NBPF9    | 93     | 103.1  | 97.5   | 111.2  | 107.6  | 92.9   | 94.5   | 93     |

|         |        |         |        |        |        |        |        |         |
|---------|--------|---------|--------|--------|--------|--------|--------|---------|
| NBR1    | 115.8  | 140.5   | 106.7  | 123.2  | 120.2  | 92.7   | 105.5  | 113.9   |
| NBR1    | 84     | 100.2   | 100.2  | 95.1   | 95     | 90.3   | 78.5   | 92.2    |
| NBR2    | 225.6  | 286     | 105.9  | 102    | 92.9   | 105.1  | 196.8  | 232.7   |
| NCALD   | 492.7  | 630.2   | 412.6  | 655.9  | 558.3  | 773.3  | 328.3  | 351.2   |
| NCALD   | 322.6  | 400.7   | 287.7  | 487.4  | 431.7  | 541.5  | 273.3  | 255.2   |
| NCALD   | 83.5   | 79.9    | 88.3   | 94.4   | 83     | 91.7   | 82.2   | 82.9    |
| NCAM1   | 111.2  | 114.5   | 84.9   | 78.3   | 82.8   | 88.4   | 102.1  | 112.3   |
| NCAM1   | 139.1  | 171.5   | 103.2  | 101    | 95.7   | 101    | 141.2  | 140.9   |
| NCAM1   | 256.3  | 298.1   | 217.7  | 108.5  | 100.9  | 118.3  | 249.1  | 266.5   |
| NCAM2   | 599.2  | 800.4   | 403.5  | 1293.7 | 1154.3 | 2408   | 509.6  | 722.6   |
| NCAPG2  | 1233.1 | 2050.9  | 1221.7 | 1168.7 | 948.9  | 1744.9 | 1014.1 | 1368.8  |
| NCBP1   | 1367   | 1681    | 566.4  | 520.2  | 324.6  | 566.9  | 1087.7 | 1440.9  |
| NCBP2   | 1964.4 | 2451.5  | 753.3  | 779.4  | 459.5  | 1011.8 | 1395.1 | 2366.8  |
| NCBP2   | 142.9  | 167     | 120.9  | 126.3  | 104.7  | 111.9  | 118    | 162.6   |
| NCBP2   | 759.9  | 938.5   | 353.5  | 401    | 350.8  | 444.5  | 545.8  | 742.9   |
| NCDN    | 109.6  | 140.3   | 96.7   | 99.2   | 73.8   | 94.5   | 107.7  | 145.1   |
| NCDN    | 107.3  | 118.2   | 129.3  | 116.7  | 112.4  | 116.9  | 104.6  | 110     |
| NCDN    | 117.5  | 131.9   | 160.4  | 132.6  | 120.4  | 164.4  | 116.4  | 130.9   |
| NCF1    | 909.6  | 1255.3  | 546.9  | 368.3  | 371.2  | 259.4  | 779.7  | 1031.2  |
| NCF1B   | 105.3  | 109.7   | 100.7  | 94.5   | 94     | 92.3   | 97.8   | 107.3   |
| NCF1C   | 412.3  | 583.4   | 258.3  | 200.6  | 219.7  | 224.5  | 385.7  | 513.8   |
| NCF2    | 159.3  | 205.9   | 95.4   | 101    | 89.5   | 105.5  | 159.2  | 209.7   |
| NCF4    | 934.9  | 1113.3  | 295.4  | 247.8  | 304.5  | 303.1  | 774    | 691.5   |
| NCF4    | 267.8  | 293.5   | 210.9  | 198.4  | 230.2  | 291.2  | 210.6  | 362.7   |
| NCF4    | 1762.6 | 2289.4  | 1444.6 | 1024.2 | 962.6  | 1342.3 | 1396.1 | 1575.2  |
| NCK1    | 989.4  | 1317.1  | 616.7  | 776.1  | 627.2  | 1212.2 | 724    | 1569.5  |
| NCK2    | 145.4  | 170.3   | 96.1   | 96.4   | 85     | 98.2   | 113.2  | 164     |
| NCKAP1  | 83.4   | 90.4    | 92.5   | 88.2   | 80.9   | 94.2   | 77.1   | 96.4    |
| NCKAP1  | 85.8   | 93.2    | 102.2  | 92.1   | 93.2   | 94.9   | 81.9   | 99.3    |
| NCKIPSD | 125.4  | 170.5   | 94.7   | 96.2   | 91.1   | 91.8   | 127.4  | 150.9   |
| NCKIPSD | 731.8  | 906.9   | 313.5  | 257.4  | 233.2  | 284.5  | 453.7  | 429.1   |
| NCL     | 9705.7 | 11703.1 | 4192.6 | 4488   | 3152.8 | 6878.8 | 8741.1 | 11271.6 |
| NCOA1   | 524.8  | 694.9   | 282.1  | 398    | 358.7  | 475.7  | 465.7  | 465.6   |
| NCOA1   | 99.7   | 124.2   | 107    | 122.8  | 107.8  | 122.5  | 101    | 115.3   |
| NCOA1   | 103.3  | 105.7   | 102.3  | 96.5   | 95.1   | 98.3   | 105    | 123.7   |
| NCOA2   | 133.5  | 166.9   | 102.4  | 111.9  | 88.9   | 103.7  | 119.9  | 147.7   |
| NCOA3   | 104.3  | 121.8   | 101.6  | 109    | 97.2   | 106.8  | 103.5  | 120.9   |
| NCOA3   | 415.9  | 557.1   | 270.9  | 451.8  | 321.1  | 533.2  | 471.5  | 799     |
| NCOA4   | 5969.1 | 7457.8  | 4586.2 | 6284.3 | 5380.3 | 8045.9 | 4696.5 | 5558.3  |
| NCOA5   | 520.4  | 685.6   | 788.8  | 599.1  | 554.1  | 738.1  | 489.1  | 1103.4  |
| NCOA6   | 739.1  | 909.9   | 516.7  | 858.4  | 672.1  | 843.3  | 660.2  | 890.8   |
| NCOA6IP | 527.7  | 572.6   | 297.4  | 202.7  | 191.8  | 227.6  | 373.7  | 344.8   |
| NCOA7   | 529.4  | 713.8   | 413.4  | 553.3  | 430.7  | 724.8  | 663.2  | 964.1   |
| NCOR1   | 190.5  | 270.4   | 160.7  | 167.2  | 176    | 237.3  | 202.2  | 266.3   |
| NCOR2   | 365.1  | 521     | 363.9  | 421.5  | 319.8  | 694    | 367.7  | 617.5   |
| NCOR2   | 784.3  | 1058.8  | 1263.2 | 1276.5 | 912.9  | 1795.5 | 763.1  | 1593.6  |
| NCOR2   | 86.3   | 91.2    | 114.4  | 97.1   | 102    | 108    | 88.9   | 92.8    |
| NCR1    | 122.7  | 159.4   | 91.6   | 80.6   | 80.8   | 72.4   | 128    | 142     |
| NCR2    | 89.6   | 107.7   | 97.5   | 85.6   | 86     | 83.2   | 91.3   | 97.6    |
| NCR3    | 136.8  | 163.7   | 149.2  | 120.8  | 98.8   | 119.6  | 148.8  | 157.3   |

|         |         |         |         |         |         |         |         |         |
|---------|---------|---------|---------|---------|---------|---------|---------|---------|
| NCSTN   | 4815.4  | 5731.4  | 4040.8  | 4703.8  | 3820.7  | 4111.5  | 4002    | 4699.8  |
| NDE1    | 486.1   | 641.8   | 246     | 171.2   | 196.1   | 181.7   | 505     | 598.1   |
| NDEL1   | 705.3   | 1013.2  | 665.5   | 748.1   | 584.9   | 867.1   | 890.6   | 1133.2  |
| NDEL1   | 107.6   | 132.3   | 122.1   | 127.4   | 101.2   | 129.6   | 117.4   | 147     |
| NDFIP1  | 254.4   | 314.4   | 170.3   | 214.9   | 168.8   | 262.2   | 207.7   | 322.2   |
| NDFIP2  | 1833    | 2279.3  | 1369    | 1845.4  | 1273.8  | 2346    | 1607.8  | 2421.2  |
| NDN     | 77.8    | 86      | 94.7    | 86.4    | 85.4    | 91.2    | 81.1    | 83.6    |
| NDNL2   | 167.6   | 212     | 112.7   | 95.9    | 95.6    | 97.9    | 157.3   | 199.6   |
| NDOR1   | 110.1   | 121.5   | 84      | 81.5    | 77.3    | 83      | 116.6   | 136.6   |
| NDP     | 120.8   | 134.3   | 96.7    | 88.2    | 92.1    | 105.8   | 120.7   | 128.3   |
| NDRG1   | 333.7   | 387.6   | 158.4   | 209.5   | 219.6   | 234.3   | 242.7   | 300.9   |
| NDRG2   | 147     | 169.5   | 106.3   | 85.3    | 86.5    | 88.5    | 126.7   | 181.2   |
| NDRG2   | 545.1   | 751.1   | 427.3   | 308.7   | 217.3   | 281.2   | 503.7   | 620.8   |
| NDRG3   | 342.9   | 437.2   | 183.2   | 226.2   | 178     | 248.3   | 290     | 472.2   |
| NDRG3   | 182.7   | 280.4   | 160     | 125.7   | 106.4   | 130.8   | 151.6   | 195.3   |
| NDRG4   | 100     | 127.3   | 91.1    | 83.2    | 80.3    | 84.8    | 99.1    | 139.7   |
| NDRG4   | 89.4    | 96.6    | 109.6   | 100.1   | 99.6    | 106.8   | 92.2    | 93.5    |
| NDRG4   | 102.2   | 105.7   | 111.1   | 92.3    | 96.7    | 101     | 94.2    | 98.5    |
| NDST1   | 129.2   | 177     | 152.6   | 124.4   | 109.1   | 183.6   | 144.2   | 175.8   |
| NDST2   | 316.9   | 356.9   | 325.3   | 229.4   | 217.7   | 232.2   | 234.6   | 244.5   |
| NDST3   | 89.8    | 89.7    | 92.9    | 93.1    | 91.6    | 86.2    | 92.6    | 90.8    |
| NDST4   | 84.1    | 72.8    | 102.6   | 97.6    | 99.5    | 107.8   | 73.9    | 75.2    |
| NDUFA1  | 17621.2 | 21291.1 | 15453.1 | 14270.6 | 12193.4 | 15645.6 | 14346.2 | 18259.6 |
| NDUFA10 | 750.9   | 928     | 326.7   | 183.1   | 193.1   | 214.8   | 528.8   | 642.6   |
| NDUFA11 | 4830.8  | 5363.1  | 4025.8  | 2437    | 2129.9  | 2919.6  | 3729.6  | 3619.3  |
| NDUFA12 | 4499.8  | 5149    | 3216.4  | 2679.6  | 2277.9  | 2963    | 3727.3  | 3991.6  |
| NDUFA13 | 3345.1  | 3793.1  | 2545.3  | 2216.5  | 1870.1  | 2479.4  | 3157.5  | 3695.9  |
| NDUFA3  | 6834.1  | 7236.6  | 6173.1  | 3987.5  | 2857.4  | 3258.7  | 5788    | 7186.5  |
| NDUFA4  | 14974.9 | 16206.7 | 7919.9  | 9984.9  | 6011.9  | 8765.2  | 16890   | 20907.9 |
| NDUFA5  | 96.6    | 103.6   | 98.9    | 84.8    | 81.2    | 99.7    | 96.1    | 116     |
| NDUFA7  | 1461.7  | 1793.4  | 1170.7  | 736.3   | 526.5   | 622.6   | 1449.4  | 1680.1  |
| NDUFA8  | 4823.4  | 6444.6  | 3815.3  | 2965.9  | 2244.7  | 2709.4  | 4174.7  | 4896.1  |
| NDUFA9  | 931.2   | 1399.7  | 575.4   | 469.2   | 373.8   | 508.6   | 808.8   | 1126.4  |
| NDUFAB1 | 7759.7  | 8362.7  | 3978    | 3318.3  | 1999.2  | 3027.8  | 7449.4  | 10240.7 |
| NDUFAB1 | 646.3   | 974.3   | 397.7   | 357.2   | 286.3   | 443.7   | 604.5   | 818.1   |
| NDUFB1  | 141     | 172.6   | 153.7   | 122.4   | 119.2   | 135.8   | 120.4   | 146.9   |
| NDUFB10 | 5210.8  | 5559.4  | 1114.4  | 946.4   | 939.7   | 888.6   | 5090.6  | 5628.7  |
| NDUFB11 | 5786.2  | 7591.4  | 4297.6  | 3653.8  | 2799.8  | 3637    | 5786.2  | 8339.3  |
| NDUFB2  | 6099    | 7422.9  | 4210.5  | 5093.5  | 4153    | 5336.7  | 5199.7  | 6032.7  |
| NDUFB3  | 7733.8  | 8643.9  | 4600.5  | 4537.1  | 3274.2  | 5557.2  | 7474.6  | 10581.8 |
| NDUFB4  | 75.3    | 84.2    | 84.7    | 83.5    | 77      | 84.9    | 81.5    | 83.9    |
| NDUFB5  | 7169.3  | 9398.9  | 7050.3  | 8801.3  | 6792.8  | 8957.7  | 7601.7  | 9136.9  |
| NDUFB6  | 2243.7  | 2571.6  | 1334    | 1242.1  | 945.9   | 1052.4  | 2216.8  | 2090.6  |
| NDUFB7  | 3573.8  | 4213.2  | 2663.6  | 2062.9  | 2044.7  | 2655.2  | 3265.7  | 3517    |
| NDUFB8  | 12029.3 | 15230.3 | 11548.2 | 8017.2  | 6944.1  | 9216.1  | 12017.3 | 13603.6 |
| NDUFC1  | 1876.5  | 2122    | 1273.6  | 832.4   | 656.1   | 799.3   | 2131.9  | 3797.1  |
| NDUFC2  | 111.9   | 119.9   | 109.7   | 108     | 109.2   | 92.5    | 106.1   | 102.4   |
| NDUFS1  | 223.3   | 261.7   | 154.2   | 196.4   | 163.6   | 162.9   | 187     | 259     |
| NDUFS2  | 324.9   | 385.2   | 156     | 145.1   | 154.8   | 136.9   | 300     | 315.9   |
| NDUFS3  | 6268.3  | 7106.8  | 2986.2  | 2617.7  | 2453.3  | 2295.8  | 5339.9  | 5238.4  |

|        |         |         |         |         |        |         |        |         |
|--------|---------|---------|---------|---------|--------|---------|--------|---------|
| NDUFS4 | 5268.7  | 6178.6  | 2634.2  | 2728.1  | 1897.1 | 2539.5  | 4994.3 | 6294.2  |
| NDUFS5 | 9042.4  | 11335.7 | 6015.2  | 4908.3  | 3632.9 | 5104.1  | 8521.2 | 10673.8 |
| NDUFS6 | 97.5    | 105.7   | 89.9    | 92.9    | 81.1   | 81.1    | 99.4   | 104.2   |
| NDUFS7 | 3625.3  | 4764.2  | 3018.9  | 1975.7  | 1690.5 | 1721.3  | 3576.5 | 3232.8  |
| NDUFS8 | 6082.9  | 7865.3  | 3650.4  | 2788.1  | 2087.2 | 2676.8  | 6536.6 | 6792.4  |
| NDUFV1 | 2293.1  | 3025.4  | 1960.8  | 1862.6  | 1562.2 | 2536.3  | 2292.2 | 2757.4  |
| NDUFV2 | 4416.5  | 4845.5  | 3397.7  | 3862.9  | 2217.1 | 3292.1  | 4246.3 | 7609.9  |
| NDUFV3 | 136.5   | 183.7   | 118.6   | 108.8   | 99.3   | 108.8   | 148.2  | 133.7   |
| NDUFV3 | 514.6   | 610.7   | 256.4   | 192.1   | 146.3  | 222.5   | 379.9  | 561.6   |
| NEB    | 119.1   | 153.3   | 98.7    | 92      | 88     | 100.1   | 111.1  | 138.8   |
| NEBL   | 106.5   | 137.2   | 98.6    | 93.3    | 88.1   | 90.7    | 121.6  | 125.9   |
| NEBL   | 81.2    | 87.9    | 81.2    | 74      | 75.3   | 78.6    | 89.2   | 93.9    |
| NEBL   | 108.3   | 141.3   | 95.8    | 86.9    | 81.8   | 95      | 117.5  | 123.4   |
| NECAP1 | 344.3   | 395.9   | 256.2   | 254.5   | 240.8  | 352     | 290.8  | 432.6   |
| NECAP2 | 863     | 1191.1  | 802.1   | 702.8   | 719.8  | 881.7   | 770.3  | 1121.3  |
| NEDD1  | 94.6    | 113.5   | 99.4    | 98      | 93.3   | 98.2    | 94.4   | 125     |
| NEDD4  | 177.5   | 215.8   | 103.4   | 116     | 100.5  | 109.4   | 180.2  | 190     |
| NEDD4  | 81.5    | 93      | 90.1    | 83.1    | 84.3   | 85.5    | 77.8   | 93.6    |
| NEDD4  | 214.1   | 307.7   | 194.9   | 212.2   | 184.8  | 273.7   | 203.4  | 216.7   |
| NEDD4L | 115     | 149.9   | 138.3   | 126.6   | 126    | 145.1   | 118.1  | 152.4   |
| NEDD8  | 14633.3 | 18714.6 | 13038.3 | 10139.6 | 8543   | 10700.5 | 15604  | 17933.4 |
| NEDD9  | 105.2   | 123.3   | 84.5    | 89.8    | 96.6   | 88.5    | 101.4  | 91.5    |
| NEDD9  | 144.8   | 186.5   | 106.7   | 114.1   | 96.9   | 125.4   | 142.4  | 189     |
| NEDD9  | 122     | 158     | 86.5    | 72.5    | 90.5   | 87.6    | 136    | 152.8   |
| NEFH   | 726.7   | 1112    | 531.8   | 261.3   | 214.1  | 302.2   | 581    | 655.7   |
| NEFL   | 108.1   | 111.7   | 97.7    | 83.3    | 89.7   | 75.8    | 109.3  | 131.7   |
| NEFM   | 110.2   | 111.4   | 104.5   | 89.3    | 96.2   | 93.1    | 96.4   | 102     |
| NEGR1  | 81.2    | 87.1    | 91.5    | 97      | 82.1   | 85.5    | 90.9   | 91.3    |
| NEIL1  | 157.9   | 178.1   | 108.8   | 110.8   | 105.9  | 106.8   | 142    | 142.5   |
| NEIL2  | 286.3   | 379.1   | 189     | 133     | 119.6  | 139.4   | 244.3  | 392.5   |
| NEIL3  | 87.7    | 104.8   | 86.4    | 76.4    | 76.8   | 74.9    | 82.5   | 104.2   |
| NEK1   | 173.9   | 213.5   | 178.5   | 225.5   | 197.4  | 339.4   | 167.7  | 229     |
| NEK10  | 101.5   | 113.5   | 105.9   | 98.3    | 106.4  | 109.3   | 84.7   | 93.9    |
| NEK10  | 123.6   | 138.7   | 96.6    | 84.1    | 79.5   | 90.2    | 112.5  | 131.5   |
| NEK11  | 95      | 118.9   | 97.8    | 93.9    | 85.1   | 98.5    | 98.8   | 102.2   |
| NEK11  | 147.8   | 144.2   | 102.9   | 94.9    | 84.5   | 106.1   | 121.6  | 129.4   |
| NEK2   | 946     | 1171.7  | 525.2   | 412.8   | 356.8  | 494.3   | 757.8  | 1339    |
| NEK3   | 97.8    | 107.7   | 94      | 87.9    | 78.7   | 77      | 101    | 112.6   |
| NEK3   | 403.9   | 518     | 180.1   | 174.2   | 158.3  | 209.7   | 343.3  | 499     |
| NEK3   | 97.5    | 105.5   | 89.8    | 94.1    | 89.5   | 87.5    | 101.9  | 109.2   |
| NEK4   | 131.9   | 170.2   | 104.6   | 109.9   | 110    | 123     | 122.3  | 124.4   |
| NEK5   | 78.8    | 96      | 84.2    | 78.6    | 75.2   | 81.7    | 85.7   | 89.3    |
| NEK6   | 497.8   | 655.5   | 432.2   | 360.5   | 291.3  | 395.3   | 502.2  | 714.4   |
| NEK7   | 237.7   | 311.5   | 109.5   | 92.4    | 92.5   | 98.5    | 168.4  | 216.5   |
| NEK8   | 174.4   | 188.1   | 146.3   | 193.4   | 198.9  | 179     | 130.3  | 143.5   |
| NEK9   | 102.5   | 112.9   | 104.3   | 96.7    | 87.3   | 98.6    | 100.9  | 104.3   |
| NELF   | 1517.3  | 1600.5  | 539.1   | 478.8   | 376.6  | 556.8   | 1151.4 | 878.9   |
| NELL1  | 196.6   | 207.9   | 120.1   | 124.6   | 108.3  | 124     | 174.6  | 200.3   |
| NELL2  | 127.4   | 148.8   | 126.1   | 130.4   | 102.7  | 138.5   | 101.3  | 127     |
| NENF   | 4663.7  | 5974.8  | 2902.3  | 3510.3  | 2842.8 | 2886.8  | 4484.8 | 3881    |

|          |        |        |       |        |       |        |        |        |
|----------|--------|--------|-------|--------|-------|--------|--------|--------|
| NEO1     | 200.3  | 243.3  | 125.6 | 152.6  | 156.7 | 161.6  | 192.4  | 229.9  |
| NES      | 102.5  | 120.6  | 98.2  | 91.8   | 87.9  | 99.2   | 111.7  | 121.2  |
| NET1     | 1195.7 | 1553.3 | 792.4 | 561.6  | 411.2 | 725.7  | 1306.2 | 2466.3 |
| NET1     | 134.5  | 150.8  | 90.5  | 86.9   | 89.2  | 94     | 126.1  | 129.5  |
| NET1     | 377.8  | 491.3  | 218.7 | 142.1  | 163.5 | 170    | 316.5  | 355.9  |
| NETO1    | 79.2   | 94.4   | 94.1  | 91.1   | 90.4  | 84.7   | 82.2   | 85.7   |
| NETO1    | 74.8   | 85.2   | 104   | 98.2   | 87.4  | 94.5   | 81     | 87.2   |
| NETO1    | 83     | 88.8   | 90.2  | 77.5   | 80.6  | 81.3   | 84.4   | 91.5   |
| NETO1    | 75.1   | 71.1   | 90.9  | 83.7   | 84.9  | 92.3   | 77.8   | 66.4   |
| NETO2    | 775.1  | 902    | 552.4 | 344.8  | 290.9 | 505.9  | 594.5  | 999.8  |
| NEU1     | 764.1  | 1043.3 | 608.7 | 785.8  | 695.4 | 1057.2 | 823.8  | 1158.6 |
| NEU2     | 80.5   | 92.4   | 95.1  | 94.1   | 92    | 89     | 76.6   | 88.5   |
| NEU3     | 131.2  | 140.4  | 111.3 | 103.9  | 95    | 92.3   | 113.8  | 131.1  |
| NEU4     | 111.9  | 142.7  | 92.5  | 86.4   | 82.2  | 85.7   | 103.6  | 125.4  |
| NEURL    | 104.3  | 120.9  | 108.5 | 104.8  | 90.3  | 99.6   | 101.7  | 109.7  |
| NEURL2   | 126.1  | 127    | 119.6 | 94.3   | 104.5 | 107.8  | 106.7  | 116.1  |
| NEUROD1  | 94.5   | 112.9  | 101.8 | 87.9   | 90.8  | 98.2   | 100.2  | 99.9   |
| NEUROD2  | 90     | 100    | 95.3  | 93.2   | 98.1  | 94.1   | 95.5   | 86.6   |
| NEUROD4  | 95     | 124.9  | 91.9  | 89.7   | 83.1  | 86.4   | 104.4  | 114.1  |
| NEUROD6  | 99     | 119.3  | 98.3  | 101.8  | 87.1  | 89.9   | 109.1  | 114.5  |
| NEUROG1  | 95.1   | 112    | 98.4  | 98.5   | 102.2 | 96     | 102.9  | 114.3  |
| NEUROG2  | 130.9  | 134.2  | 96.6  | 94.1   | 90.1  | 104.3  | 129.1  | 136.9  |
| NEUROG3  | 125.6  | 141.8  | 94.9  | 95.4   | 92.4  | 94.8   | 111.7  | 133.4  |
| NEXN     | 287.6  | 373.2  | 148.5 | 105.5  | 95.6  | 117.6  | 160.9  | 207.9  |
| NF1      | 111.9  | 148.2  | 101.1 | 113.3  | 108.4 | 137.3  | 118.8  | 129.1  |
| NF2      | 127.7  | 187.6  | 110.3 | 129.3  | 114.2 | 102.5  | 122.1  | 150.8  |
| NF2      | 105.3  | 137    | 92.4  | 96     | 95.3  | 83.6   | 105.3  | 104.6  |
| NF2      | 112.5  | 131.2  | 111.2 | 101.8  | 103.2 | 108.5  | 109.9  | 111.6  |
| NFAM1    | 126.9  | 143.6  | 93    | 95.4   | 86    | 91.2   | 114.8  | 175.9  |
| NFASC    | 112.3  | 126.4  | 90.8  | 85.7   | 80.9  | 88.4   | 106.3  | 131.9  |
| NFAT5    | 123.8  | 144.8  | 96.5  | 104.7  | 101.6 | 93.7   | 122    | 129.1  |
| NFAT5    | 129.5  | 153    | 96.4  | 104.8  | 109.8 | 91.8   | 124.9  | 141.8  |
| NFAT5    | 77.5   | 106.1  | 89.6  | 89.3   | 81    | 87.2   | 81.9   | 86     |
| NFATC1   | 354.9  | 493.5  | 154.2 | 142.3  | 128   | 148.6  | 306    | 367.8  |
| NFATC1   | 117.1  | 127.2  | 85.9  | 81.5   | 75.1  | 90.3   | 104.6  | 150.2  |
| NFATC1   | 81.6   | 94.2   | 93.6  | 83     | 78.6  | 92.2   | 75.8   | 87.4   |
| NFATC1   | 118.3  | 152.4  | 109.3 | 79.7   | 70.4  | 81.3   | 106.9  | 155    |
| NFATC2   | 74.9   | 80.8   | 79.4  | 86.8   | 79    | 72.8   | 73.2   | 74.1   |
| NFATC2   | 84.3   | 93.7   | 95.9  | 92.7   | 88.9  | 86.9   | 82.8   | 90.4   |
| NFATC2IP | 308.5  | 325.7  | 148.8 | 150.7  | 157.2 | 150.3  | 256.7  | 356.3  |
| NFATC2IP | 145.9  | 169.1  | 108.8 | 88     | 93.2  | 95.9   | 122.5  | 162.3  |
| NFATC3   | 243.5  | 346    | 199.7 | 227.9  | 207.1 | 246.3  | 216.9  | 271.3  |
| NFATC3   | 75     | 89.1   | 94.3  | 91     | 88.5  | 95     | 83     | 85.6   |
| NFATC3   | 198.8  | 282.3  | 157.9 | 159.5  | 172.2 | 203.5  | 183    | 197    |
| NFATC3   | 134.7  | 184.8  | 141.2 | 156.1  | 131.1 | 179.2  | 141.9  | 162.9  |
| NFATC3   | 99     | 121.7  | 112   | 112.6  | 97.9  | 109.8  | 99.9   | 109    |
| NFATC4   | 79     | 102.1  | 90.7  | 85.9   | 70.6  | 86.1   | 82     | 86.1   |
| NFE2     | 494.2  | 682.3  | 297   | 586.4  | 597.5 | 570.2  | 338.2  | 287    |
| NFE2L1   | 333.9  | 449.9  | 365.8 | 393.2  | 364.7 | 642.4  | 375.8  | 544.6  |
| NFE2L2   | 1567.4 | 2051   | 935.5 | 1035.4 | 809.8 | 1437.1 | 1516.5 | 4306.2 |

|           |        |        |        |        |        |        |        |        |
|-----------|--------|--------|--------|--------|--------|--------|--------|--------|
| NFE2L3    | 307.3  | 411    | 183.2  | 197.1  | 238.4  | 240.7  | 240    | 286.6  |
| NFIA      | 92.7   | 96.1   | 90.9   | 91.5   | 74.7   | 84.4   | 96.6   | 107.2  |
| NFIB      | 161.2  | 145.8  | 91     | 92     | 84.4   | 87.9   | 110.6  | 115.5  |
| NFIC      | 114.1  | 117.8  | 102.4  | 90.4   | 80.4   | 96.1   | 110.1  | 139.6  |
| NFIC      | 93.5   | 93.7   | 104.4  | 100.5  | 94.6   | 98.2   | 93.3   | 106.8  |
| NFIC      | 105.4  | 116.2  | 105.5  | 100.1  | 91.4   | 103.5  | 103.2  | 116.9  |
| NFIL3     | 321.5  | 383.9  | 134.9  | 139.3  | 104.3  | 141.6  | 325.7  | 522.9  |
| NFIX      | 361.4  | 415.9  | 358.5  | 222.1  | 146.3  | 203.2  | 338.6  | 975.7  |
| NFKB1     | 2961.2 | 3825.7 | 2449.9 | 1879.7 | 1640.8 | 1815.7 | 2336.8 | 3114.3 |
| NFKB2     | 115.9  | 138.9  | 113.3  | 96.9   | 97.3   | 105.4  | 116.1  | 129    |
| NFKB2     | 99.3   | 124.2  | 114.9  | 107.3  | 103.3  | 106.2  | 116.7  | 120.5  |
| NFKB2     | 92.5   | 100    | 90.4   | 86.3   | 78     | 81.7   | 79.1   | 92.6   |
| NFKBIB    | 226.4  | 278.3  | 146.2  | 116.3  | 102.2  | 113.7  | 221.3  | 290.5  |
| NFKBIB    | 142.1  | 183.6  | 102    | 92.5   | 91.5   | 84.3   | 147.9  | 193.9  |
| NFKBIB    | 183.9  | 240.6  | 172.9  | 137.8  | 127.7  | 137.9  | 198.5  | 286.1  |
| NFKBIE    | 659.7  | 780.3  | 299.4  | 230.5  | 245.3  | 246.4  | 511.6  | 686.5  |
| NFKBIL1   | 158.4  | 185.9  | 101    | 109.8  | 89.8   | 104.2  | 143    | 195.5  |
| NFKBIL2   | 150.7  | 152    | 176.2  | 124.1  | 122.3  | 138.1  | 111.7  | 141.8  |
| NFKBIZ    | 130.7  | 163.5  | 110.6  | 111.1  | 108.5  | 108.3  | 122.6  | 136.3  |
| NFKBIZ    | 391.1  | 396    | 301.6  | 450.3  | 518.9  | 525.7  | 317.6  | 481.4  |
| NFRKB     | 156.2  | 185.4  | 174.2  | 111.5  | 126.5  | 148    | 141    | 208.3  |
| NFS1      | 200.4  | 234.6  | 118.7  | 104.9  | 101.4  | 107.1  | 175.5  | 190.6  |
| NFS1      | 1594.4 | 1962.8 | 576.6  | 382.5  | 341.6  | 298.8  | 1277.4 | 1037.8 |
| NFU1      | 1635.4 | 1793.4 | 1211.2 | 1084.7 | 834.4  | 1602.9 | 1395.5 | 2408.5 |
| NFX1      | 355.7  | 477.8  | 174.1  | 160.6  | 163.9  | 158.8  | 296.6  | 288.1  |
| NFX1      | 636.8  | 950    | 325.8  | 236.7  | 211.8  | 275.6  | 431.8  | 590.9  |
| NFX1      | 157.9  | 138.8  | 131.9  | 122.6  | 131.2  | 115.9  | 131.5  | 180.2  |
| NFX1      | 2503.2 | 2359.3 | 726.6  | 735.7  | 558.2  | 818.1  | 2014.6 | 2994.5 |
| NFXL1     | 374    | 414.7  | 216.2  | 244.9  | 224.9  | 374.8  | 370.4  | 560.3  |
| NFYA      | 457.1  | 678.3  | 310.8  | 260.4  | 199.9  | 399.6  | 278.3  | 320.4  |
| NFYA      | 89.9   | 113.9  | 100.8  | 100.2  | 89.7   | 91.5   | 89.8   | 112.5  |
| NFYB      | 140.9  | 151.3  | 116.1  | 129.6  | 121.7  | 133.2  | 114.3  | 125    |
| NFYC      | 2893.3 | 4112.4 | 2369.4 | 1972.9 | 1456   | 2679.8 | 2068.8 | 3487.1 |
| NGB       | 165.6  | 193.9  | 115.5  | 110.5  | 113.1  | 124.4  | 156.5  | 172.2  |
| NGDN      | 140.8  | 166.1  | 111.4  | 130.2  | 122.7  | 133.4  | 141.4  | 166.8  |
| NGDN      | 2128.6 | 2700   | 897.6  | 818.2  | 555.2  | 1020   | 1831.7 | 2700.2 |
| NGEF      | 91.8   | 105    | 97.4   | 81.5   | 76.3   | 88     | 97.6   | 97.8   |
| NGFB      | 131.3  | 147.3  | 122.3  | 112.4  | 116    | 119.7  | 118.6  | 115.8  |
| NGFR      | 117.6  | 124.8  | 87.6   | 76.6   | 78.9   | 96.5   | 108.9  | 154.4  |
| NGFRAP1   | 270.7  | 235.9  | 163.1  | 124.5  | 118.7  | 128.3  | 163.6  | 215    |
| NGFRAP1   | 1174.7 | 1737.2 | 555.3  | 329.6  | 264.4  | 360.4  | 1042.1 | 1404.6 |
| NGFRAP1   | 6623.4 | 7943.8 | 3659.4 | 2092.2 | 1558.3 | 1758.4 | 6312   | 7958.5 |
| NGFRAP1L: | 333.9  | 457.2  | 232.5  | 91.8   | 85.6   | 95.5   | 295.4  | 426.2  |
| NGLY1     | 836.6  | 924.4  | 316.5  | 381.4  | 333.2  | 457.2  | 632.9  | 1105.4 |
| NGRN      | 3797.3 | 5289.4 | 2836.7 | 2661   | 1859.1 | 3261.8 | 3590.7 | 4412.1 |
| NGRN      | 717.8  | 975.9  | 422.9  | 247.6  | 210.5  | 213.4  | 520    | 639.1  |
| NHLH1     | 78.8   | 91.1   | 96     | 87.2   | 89.4   | 86.5   | 83.3   | 93.9   |
| NHLH2     | 95.1   | 110.1  | 90.5   | 89.2   | 83.5   | 89.2   | 101.5  | 113.1  |
| NHLRC1    | 85.4   | 89.2   | 94.1   | 84.1   | 79     | 82.8   | 76.7   | 91.2   |
| NHLRC2    | 230.5  | 317    | 203.9  | 150.9  | 159.1  | 202.2  | 208.4  | 239.1  |

|           |        |         |        |        |        |        |        |         |
|-----------|--------|---------|--------|--------|--------|--------|--------|---------|
| NHN1      | 234.3  | 249.1   | 194.2  | 149.5  | 157.9  | 178.1  | 200.1  | 281.3   |
| NHP2L1    | 3999.1 | 4938.3  | 2018.2 | 1748.3 | 1320.6 | 1562   | 3206.4 | 3246.1  |
| NHP2L1    | 1463.5 | 2136.8  | 1113.2 | 819    | 621.6  | 732.7  | 1248.7 | 1508.7  |
| NHP2L1    | 1074.7 | 1508.9  | 569.5  | 401.1  | 270.1  | 447.1  | 852.5  | 932.9   |
| NHS       | 88.5   | 93.8    | 94.7   | 82.5   | 77.4   | 83.7   | 82.5   | 98      |
| NIBP      | 121.8  | 142.8   | 170.2  | 127.4  | 113.4  | 178.4  | 119.1  | 196.2   |
| NICN1     | 933.4  | 1061.4  | 649.6  | 639.1  | 539.4  | 600.6  | 609.6  | 652.5   |
| NID1      | 177.4  | 226.1   | 157.3  | 138.7  | 139.8  | 161.8  | 153.4  | 189.1   |
| NID2      | 83.7   | 94.6    | 107.4  | 99     | 89.6   | 81     | 85.3   | 88.6    |
| NIF3L1    | 2691.6 | 3465.6  | 1861.1 | 1692   | 1196.5 | 1941.9 | 2409.3 | 2881.3  |
| NIF3L1BP1 | 9770.9 | 11232.2 | 6060.9 | 5643.2 | 4460.7 | 6129.9 | 8335.6 | 10336.6 |
| NIFIE14   | 3394.8 | 4158.6  | 2779.9 | 1612.1 | 1258.3 | 2005.6 | 3020.9 | 4527.5  |
| NIFUN     | 373.5  | 525.1   | 228.1  | 177.6  | 162.8  | 194.9  | 401.4  | 459.4   |
| NIN       | 308.8  | 490.1   | 228    | 191.8  | 222.8  | 288.7  | 318.2  | 375.1   |
| NIN       | 216.1  | 325.8   | 215.8  | 226    | 242.3  | 377.1  | 234.7  | 295.4   |
| NIN       | 72     | 75.7    | 91.4   | 85.4   | 80     | 88.5   | 72.3   | 79.1    |
| NIN       | 562.1  | 790.4   | 476.7  | 902.4  | 789.2  | 1475.2 | 572    | 761.6   |
| NINJ1     | 1215.6 | 1475.2  | 856.8  | 701.6  | 502.7  | 541.8  | 2132.9 | 3136.8  |
| NINJ2     | 1664.9 | 1950    | 1063.1 | 1271.3 | 946.3  | 1021.4 | 1559.4 | 1268    |
| NIP       | 85.2   | 86      | 85.2   | 78.1   | 81.8   | 87.5   | 94.2   | 92.7    |
| NIP30     | 351    | 480.3   | 338.4  | 354.9  | 304.7  | 482.4  | 281.9  | 438     |
| NIP7      | 3180.3 | 3622.7  | 1622.8 | 1183.9 | 709.9  | 1243.5 | 2254.7 | 2782.3  |
| NIPA1     | 179.4  | 233.1   | 130.9  | 146.8  | 138.3  | 152.2  | 200.4  | 291.7   |
| NIPA2     | 237.8  | 269.3   | 101.8  | 97.9   | 91.5   | 97.7   | 172.3  | 202.7   |
| NIPA2     | 4410.6 | 5720.8  | 3494.9 | 2595.8 | 1800.3 | 2645.8 | 3448.6 | 4987.1  |
| NIPBL     | 77.1   | 76.4    | 91.2   | 75.3   | 76.1   | 84.3   | 72.4   | 70.9    |
| NIPBL     | 208.7  | 302.5   | 147.9  | 175.3  | 166.8  | 243.5  | 226    | 270.6   |
| NIPBL     | 434    | 615.6   | 369.9  | 721.9  | 681.6  | 1221.6 | 433.7  | 528.6   |
| NIPSNAP1  | 712.4  | 897.1   | 383.7  | 347.1  | 278.6  | 395.7  | 681    | 1069.2  |
| NIPSNAP3A | 77.6   | 86.6    | 93.3   | 88.5   | 89.1   | 89.4   | 80     | 84.9    |
| NIPSNAP3E | 114.6  | 126.7   | 82.1   | 90.8   | 93.9   | 93.2   | 90.6   | 137.1   |
| NISCH     | 531.2  | 623.2   | 493.4  | 587    | 490.4  | 788.8  | 483.4  | 619.6   |
| NIT1      | 137.6  | 162.4   | 108.4  | 105.9  | 100.1  | 114.2  | 119.3  | 139.4   |
| NIT2      | 1401.6 | 1779.5  | 679.6  | 662.7  | 529.1  | 699.3  | 1143.5 | 1313.9  |
| NKAP      | 181.9  | 227.4   | 116.9  | 108.2  | 91.7   | 146.6  | 148.8  | 238.2   |
| NKD1      | 101    | 111.8   | 125.7  | 117.5  | 101.4  | 130.6  | 110.9  | 120.2   |
| NKD2      | 1200.9 | 1390.4  | 855.8  | 593.8  | 651.9  | 620.6  | 1342.7 | 1662.3  |
| NKG7      | 1092.9 | 1484.9  | 1075.3 | 638.8  | 503.2  | 621.5  | 1120.6 | 1483.1  |
| NKIRAS1   | 268.5  | 340.3   | 174.9  | 190.6  | 174.6  | 224.8  | 228.2  | 335.6   |
| NKIRAS2   | 120.8  | 125.4   | 98.8   | 100.8  | 98.7   | 90.6   | 112.8  | 123.5   |
| NKIRAS2   | 85.7   | 100.9   | 90.1   | 88.2   | 90.2   | 86.8   | 93.8   | 111.5   |
| NKIRAS2   | 292.9  | 329.3   | 187.3  | 201.7  | 152.2  | 172.1  | 297.1  | 605.1   |
| NKPD1     | 96.6   | 95.1    | 89     | 90.3   | 78.5   | 89.3   | 82.9   | 106.4   |
| NKRF      | 732.9  | 849.7   | 428.8  | 455.3  | 328.4  | 507.8  | 516.5  | 771.2   |
| NKTR      | 231.8  | 306.8   | 164.2  | 206.9  | 221.3  | 294.5  | 205.1  | 246.5   |
| NKTR      | 1039.5 | 1168.3  | 731.5  | 1491.9 | 1447.2 | 2378.8 | 725.8  | 930.4   |
| NKX2-2    | 115.1  | 151.8   | 125.6  | 194.6  | 186.3  | 195.7  | 111.8  | 138.6   |
| NKX2-3    | 89.5   | 102     | 101.2  | 90.9   | 90.6   | 81.9   | 92     | 86.6    |
| NKX2-5    | 73.3   | 78.3    | 94.5   | 80.7   | 84     | 87.7   | 79.1   | 82.2    |
| NKX2-8    | 122.1  | 142.6   | 101.1  | 102.4  | 83.1   | 97.8   | 118.4  | 141.3   |



|          |         |         |         |        |        |         |         |         |
|----------|---------|---------|---------|--------|--------|---------|---------|---------|
| NKX3-1   | 138.2   | 158.6   | 110.4   | 95.1   | 91.6   | 97.2    | 136.4   | 212     |
| NKX6-1   | 112.5   | 103.9   | 90.9    | 80     | 83.7   | 83.4    | 111.1   | 108.6   |
| NKX6-2   | 92.5    | 106.5   | 95.1    | 85.2   | 82.4   | 87.5    | 87.5    | 99.1    |
| NKX6-3   | 139.1   | 180.3   | 116.8   | 102.7  | 93.1   | 112     | 149.5   | 160.5   |
| NLE1     | 137.9   | 166.4   | 117.2   | 100.4  | 91.6   | 104.6   | 129.9   | 170.8   |
| NLE1     | 107.7   | 145.3   | 129.1   | 112.4  | 110.4  | 109.8   | 113.9   | 126.2   |
| NLF1     | 77.6    | 84.3    | 87.4    | 79.9   | 80.8   | 78.6    | 77.6    | 76      |
| NLF2     | 91.3    | 102     | 83.8    | 83.9   | 78.8   | 80.9    | 87.9    | 91.5    |
| NLF2     | 96.9    | 113     | 100.6   | 84     | 83.4   | 92.2    | 79.2    | 94.1    |
| NLGN1    | 97.9    | 108.4   | 95.7    | 97     | 94.4   | 107.4   | 99.4    | 98.2    |
| NLGN2    | 111.4   | 129.9   | 120     | 107.7  | 110.3  | 98.4    | 109.1   | 136.8   |
| NLGN3    | 79.9    | 90.7    | 85.7    | 81.6   | 79.1   | 87.2    | 86.9    | 92.2    |
| NLGN4X   | 78.2    | 75      | 85.4    | 92.7   | 82.7   | 93      | 80.7    | 74.3    |
| NLGN4X   | 85.7    | 95.8    | 101.9   | 88.2   | 86.9   | 91.8    | 85.4    | 87.2    |
| NLGN4Y   | 197.9   | 261.9   | 151.2   | 146.5  | 121.5  | 152.9   | 182.9   | 260.2   |
| NLK      | 220     | 244.7   | 137.2   | 143.9  | 117.1  | 165.4   | 203.6   | 300.9   |
| NLN      | 319.9   | 448.6   | 254.1   | 160.2  | 130.6  | 225.5   | 360.7   | 471.7   |
| NLRP1    | 78.4    | 86.6    | 81.2    | 82.5   | 87.3   | 74      | 81.2    | 91.8    |
| NLRP3    | 981.2   | 1289.6  | 871.6   | 777    | 679.6  | 984.1   | 879.6   | 1205.2  |
| NLRP8    | 2301    | 2284.6  | 1059.3  | 2194.4 | 2102.3 | 1368.8  | 2358.8  | 3055.5  |
| NMB      | 640.8   | 816.2   | 539.9   | 250.3  | 210.3  | 273.4   | 532.3   | 894.7   |
| NMBR     | 85.1    | 93.9    | 93.2    | 83.3   | 83.1   | 85.6    | 82      | 90.6    |
| NMD3     | 1401.9  | 1836.5  | 484.3   | 349.5  | 338.9  | 763.2   | 957.4   | 1724.2  |
| NME1     | 18991.4 | 22163.1 | 11396.7 | 9470.2 | 6925.4 | 12190.8 | 15403.2 | 17875.2 |
| NME1     | 403.2   | 494.5   | 234.7   | 184.6  | 159.2  | 194.2   | 326.1   | 354.7   |
| NME1     | 878.6   | 1174.7  | 503.4   | 415.4  | 386.4  | 468.1   | 728.2   | 818.9   |
| NME1-NMI | 416.2   | 507.8   | 264.7   | 154.9  | 163.3  | 169.7   | 369.1   | 402.3   |
| NME2     | 85.3    | 86      | 89.7    | 80.5   | 94.2   | 80.6    | 86.7    | 88      |
| NME2     | 411.5   | 510     | 315.7   | 212.2  | 180.1  | 221.5   | 319.5   | 329.5   |
| NME2     | 110     | 129     | 102.8   | 101    | 78.3   | 95.9    | 130     | 208.6   |
| NME2     | 442.9   | 491.7   | 190.6   | 174.5  | 159.3  | 180.9   | 403.3   | 349.1   |
| NME2P1   | 95.8    | 103     | 104.2   | 96.2   | 90.5   | 101.1   | 102.5   | 98.9    |
| NME3     | 1400.1  | 1588.4  | 1080.6  | 886.8  | 820.1  | 1172.2  | 1071.1  | 1534.3  |
| NME4     | 3366.3  | 4400.7  | 3262.9  | 2410.3 | 1809.1 | 2552.1  | 3013    | 5438.7  |
| NME5     | 75.4    | 91.6    | 80      | 76.7   | 75.4   | 77.9    | 85.2    | 85.1    |
| NME6     | 444.3   | 569.5   | 322.7   | 264.4  | 217    | 269     | 455     | 507.1   |
| NME7     | 221.5   | 292.7   | 131.3   | 103    | 105.1  | 95.2    | 189.5   | 304.8   |
| NME7     | 638.9   | 767.7   | 303.2   | 205.2  | 173.4  | 223.5   | 466.9   | 648.5   |
| NMI      | 2846.9  | 3305    | 862     | 698.3  | 598.1  | 993.2   | 2413.1  | 4256.5  |
| NMNAT1   | 231     | 312.4   | 153     | 154.8  | 146    | 136.1   | 210.2   | 275.1   |
| NMNAT2   | 97.2    | 123.6   | 99.1    | 96.5   | 97.8   | 92.9    | 99      | 121.6   |
| NMNAT2   | 105.2   | 111.8   | 92.4    | 82.8   | 81.8   | 83.8    | 100.1   | 103.4   |
| NMNAT2   | 75.8    | 90.4    | 88.6    | 93.4   | 85.3   | 99.3    | 80.7    | 86.9    |
| NMNAT3   | 638.3   | 859.3   | 320.5   | 261.6  | 257    | 311.1   | 362.4   | 337.7   |
| NMS      | 95.6    | 105.8   | 85      | 82.7   | 91.6   | 88      | 97.1    | 101.2   |
| NMT1     | 260     | 292.4   | 218.2   | 225.4  | 233.4  | 244.7   | 228.1   | 212.3   |
| NMT2     | 109.2   | 127.3   | 105.5   | 117.8  | 87.2   | 114.8   | 111.2   | 169     |
| NMU      | 81.4    | 102.8   | 96.7    | 81.9   | 82     | 76.9    | 82.5    | 99      |
| NMUR1    | 83.3    | 89.4    | 114.3   | 105.9  | 102.2  | 108.4   | 88.7    | 90.2    |
| NMUR2    | 85.1    | 90.4    | 93.4    | 76.9   | 86.4   | 87.6    | 82.9    | 94.1    |

|          |         |         |        |        |        |        |         |         |
|----------|---------|---------|--------|--------|--------|--------|---------|---------|
| NNAT     | 88.2    | 85.1    | 80.6   | 87.6   | 88.5   | 86.9   | 79.9    | 85.3    |
| NNAT     | 102.3   | 111     | 111.3  | 94.6   | 103.9  | 94.5   | 95.3    | 108.2   |
| NNMT     | 218.3   | 256.4   | 143    | 132.6  | 121.2  | 135.2  | 242.7   | 310.8   |
| NNT      | 85.3    | 102.1   | 86.4   | 86.8   | 91.6   | 86.9   | 76.7    | 86.6    |
| NNT      | 975.1   | 1402.6  | 558.2  | 760.2  | 415    | 1031.9 | 904.6   | 1757.6  |
| NNT      | 696.2   | 854.5   | 344.8  | 367.1  | 296.8  | 556.7  | 661.4   | 929.1   |
| NOB1P    | 414.1   | 481.4   | 235.9  | 154    | 151.1  | 222.6  | 332.6   | 512.3   |
| NOBOX    | 86      | 94.1    | 92.7   | 83.4   | 85.7   | 84.1   | 86.6    | 96.2    |
| NOBOX    | 100.4   | 118.2   | 95.4   | 93     | 104.3  | 82.7   | 108.6   | 115.4   |
| NOC2L    | 166.5   | 204     | 139.7  | 134.1  | 97.6   | 171.7  | 130.5   | 171.7   |
| NOC3L    | 1185.5  | 1375.8  | 765.7  | 685    | 480.1  | 1057.8 | 689.8   | 1113.2  |
| NOC4L    | 278.7   | 397.9   | 210.5  | 130.6  | 109.5  | 106.5  | 208.4   | 329.7   |
| NOC4L    | 294.8   | 375.3   | 247.5  | 194.5  | 159.2  | 246.6  | 237.5   | 275.7   |
| NOD1     | 151     | 183.2   | 215.4  | 197.9  | 181.8  | 265.7  | 154.6   | 167.2   |
| NOD27    | 174.2   | 188.7   | 158.1  | 117.6  | 118.3  | 124.7  | 126.7   | 142.9   |
| NOD3     | 94.2    | 100.6   | 105.7  | 107.9  | 103.8  | 102    | 95.7    | 96.4    |
| NOD9     | 1352.2  | 1775.2  | 917    | 528.7  | 425.7  | 528.5  | 987.5   | 936.3   |
| NOD9     | 182.1   | 207.8   | 197.2  | 137.7  | 126.5  | 140.5  | 165.2   | 271.4   |
| NODAL    | 143.3   | 155.5   | 106.6  | 103.5  | 97.4   | 104.5  | 130.6   | 137.1   |
| NOG      | 90.3    | 93.5    | 97.4   | 108.6  | 94.3   | 93.5   | 82.2    | 97.4    |
| NOL1     | 1781.9  | 2191.2  | 1127.1 | 808.9  | 626.3  | 1017.1 | 1190.7  | 1317.7  |
| NOL1     | 117.8   | 134.9   | 92.6   | 82.3   | 86     | 78.9   | 111.6   | 119.2   |
| NOL1     | 273.6   | 293     | 110    | 111.5  | 84.9   | 136.6  | 190.5   | 280.5   |
| NOL10    | 177.7   | 206.9   | 130.2  | 144.8  | 148.1  | 167.3  | 140.1   | 165.1   |
| NOL11    | 2773.3  | 3674.2  | 1082.4 | 932.7  | 663.4  | 1246   | 1942.8  | 2667.8  |
| NOL12    | 633.7   | 604     | 380.9  | 341.3  | 334.1  | 427.3  | 421     | 470.2   |
| NOL3     | 115.6   | 122.7   | 106.1  | 100.1  | 107.9  | 118.5  | 107.1   | 124.9   |
| NOL4     | 105.6   | 106.1   | 116.1  | 101.5  | 95.3   | 92.9   | 94.4    | 100.4   |
| NOL5A    | 4017.6  | 4508.9  | 1039.5 | 700.4  | 625.2  | 1177.5 | 3050.4  | 3243.9  |
| NOL6     | 2553    | 2944.4  | 1844   | 1288.9 | 905.2  | 1347.5 | 1519    | 1802.6  |
| NOL6     | 142.4   | 168.9   | 162.1  | 143.4  | 123.8  | 114.5  | 107.5   | 136     |
| NOL7     | 5764.8  | 7564.5  | 3183.2 | 2844.6 | 2398.9 | 3232.7 | 4895.8  | 6373.2  |
| NOL8     | 400     | 429.2   | 276    | 273.7  | 236.3  | 452.9  | 317     | 744.7   |
| NOL9     | 135.2   | 167.9   | 132.6  | 127.6  | 111.6  | 99.8   | 126.9   | 140.7   |
| NOLA1    | 679.1   | 1033.9  | 358.1  | 274.4  | 242.8  | 189.2  | 563.8   | 639.8   |
| NOLA1    | 4987.1  | 5544.8  | 4144.3 | 3035.4 | 2076.2 | 3308.7 | 3817    | 4891.3  |
| NOLA1    | 887.6   | 1230.2  | 619.9  | 427.2  | 326.9  | 513.5  | 724.2   | 803.7   |
| NOLA2    | 2575.9  | 3518.1  | 980.6  | 893.2  | 752    | 1242.2 | 2569.9  | 3158.9  |
| NOLA2    | 2077.1  | 2591.3  | 828.1  | 665.5  | 518    | 737.2  | 1861.8  | 2605.7  |
| NOLA3    | 11806.7 | 14210.8 | 8874   | 8256.1 | 5611   | 7515   | 11500.1 | 13221.6 |
| NOLC1    | 694     | 1019.8  | 587.7  | 307.9  | 262.4  | 421.9  | 507.9   | 797.3   |
| NOM1     | 86.2    | 95.1    | 103.5  | 90.9   | 91.6   | 95.4   | 85.4    | 88.7    |
| NOMO1    | 408.5   | 485.5   | 277.6  | 253    | 222.3  | 355.7  | 337.6   | 476.6   |
| NOMO2    | 84.3    | 99.4    | 91.7   | 85.6   | 83.7   | 97.3   | 85.4    | 93.3    |
| NOMO3    | 373.5   | 424.3   | 180.9  | 165.8  | 162.2  | 106.9  | 181     | 284.5   |
| NONO     | 9610.8  | 10330.4 | 5253.2 | 5741   | 5332.4 | 6927   | 8063.6  | 10187.7 |
| NOP5/NOP | 2555.3  | 2699.3  | 350.9  | 278.9  | 248.1  | 412.5  | 2030.8  | 3077.9  |
| NOPE     | 135.8   | 165.7   | 97     | 98.2   | 104.4  | 101.1  | 135.6   | 144     |
| NOS1     | 87.4    | 75.4    | 88.9   | 82.1   | 85.1   | 86.5   | 80.2    | 83.1    |
| NOS1AP   | 82      | 96.6    | 97.6   | 85.8   | 90.3   | 91.8   | 87.8    | 98.1    |

|          |        |         |        |        |        |        |        |         |
|----------|--------|---------|--------|--------|--------|--------|--------|---------|
| NOS2A    | 91.2   | 99.1    | 95.8   | 93.4   | 85.2   | 92.7   | 85.9   | 101.6   |
| NOS2A    | 86.9   | 99.4    | 86.7   | 88.7   | 77.6   | 84.7   | 87.7   | 100     |
| NOS3     | 289.1  | 348.9   | 205.2  | 170.8  | 129.6  | 142.5  | 220.6  | 168.3   |
| NOSIP    | 2226.8 | 3157.7  | 1200   | 673.8  | 610.5  | 946.7  | 2114.7 | 2904.7  |
| NOSTRIN  | 77.1   | 86.4    | 91.9   | 91.5   | 96.6   | 88.4   | 87.9   | 91.2    |
| NOTCH1   | 959.1  | 1344.1  | 750.6  | 1039.3 | 848.5  | 932.5  | 919.4  | 752.5   |
| NOTCH2   | 169.6  | 222.4   | 160.6  | 211.9  | 179.3  | 206.3  | 164.5  | 198.9   |
| NOTCH2NL | 124.8  | 127.9   | 97.7   | 89.9   | 83     | 94.1   | 123.9  | 118.2   |
| NOTCH3   | 83.7   | 88.1    | 99.1   | 97.5   | 94.9   | 98.5   | 90.3   | 82.6    |
| NOTCH4   | 99.2   | 108.4   | 104.1  | 97     | 97     | 90.2   | 92.8   | 101.2   |
| NOTUM    | 117.5  | 136.3   | 113.6  | 106.4  | 87.1   | 100.8  | 101.4  | 112.5   |
| NOV      | 86.5   | 91.6    | 114    | 95.3   | 88.4   | 93.5   | 92.1   | 102.4   |
| NOVA1    | 97.7   | 104.1   | 108.8  | 93.1   | 87.8   | 91.5   | 109.6  | 102.9   |
| NOVA1    | 87.3   | 104.3   | 86.4   | 75.9   | 74.5   | 77     | 87.1   | 102.1   |
| NOVA2    | 147.5  | 181.5   | 98     | 99.3   | 89.4   | 98.9   | 153    | 150.3   |
| NOX1     | 85.3   | 88.5    | 94.5   | 83.5   | 77.5   | 84.2   | 92.6   | 92.7    |
| NOX1     | 102.9  | 101.6   | 92     | 86.5   | 88.6   | 93.7   | 90.9   | 99.2    |
| NOX1     | 98.7   | 106.8   | 101.2  | 93.9   | 96.4   | 93.4   | 98     | 107.3   |
| NOX3     | 77.5   | 83.7    | 102.6  | 86.7   | 90.2   | 88.4   | 90.8   | 75.9    |
| NOX4     | 107.8  | 108.3   | 101.1  | 95.9   | 92.6   | 99.5   | 99.2   | 111.6   |
| NOX5     | 105.7  | 129.5   | 90.6   | 82.8   | 77.1   | 93.8   | 95     | 107.2   |
| NOXA1    | 195.1  | 255.6   | 248.3  | 207.7  | 267.4  | 350.4  | 178.7  | 256.2   |
| NOXO1    | 114.8  | 134.5   | 89.1   | 83.4   | 83.7   | 80.9   | 103.1  | 139.9   |
| NOXO1    | 78.1   | 90.2    | 85.5   | 83.5   | 76.6   | 85.3   | 84.5   | 90      |
| NOXO1    | 109.4  | 130     | 110.7  | 103.7  | 98     | 96.4   | 102.3  | 117.3   |
| NP       | 3024.9 | 4533.8  | 2728   | 1446.8 | 1055.5 | 1754.6 | 2635.7 | 2996.9  |
| N-PAC    | 668.9  | 840     | 477.2  | 415.6  | 346.6  | 554.4  | 652    | 1436.5  |
| NPAL1    | 86.7   | 97.6    | 88     | 86.6   | 79.1   | 77.5   | 86.3   | 84.7    |
| NPAL2    | 111.7  | 121.3   | 102.6  | 95.6   | 93.1   | 104.3  | 92.1   | 120     |
| NPAL3    | 304.2  | 380.9   | 289.7  | 360.4  | 281.2  | 336.3  | 266.7  | 437.2   |
| NPAS1    | 133.6  | 165.6   | 126    | 115.2  | 116.7  | 111.2  | 116.6  | 131.8   |
| NPAS2    | 125.3  | 140.5   | 112.5  | 100.8  | 101.7  | 103.4  | 117.1  | 136.3   |
| NPAS3    | 110.9  | 130.8   | 84.2   | 84.6   | 83.8   | 84.2   | 130.9  | 138.5   |
| NPAS3    | 83.6   | 98.7    | 84.5   | 85.3   | 85.6   | 85     | 87.2   | 90.7    |
| NPAS3    | 74.6   | 88.4    | 90.2   | 83.3   | 83.5   | 81.2   | 83.3   | 85      |
| NPAS4    | 82.3   | 96      | 119.3  | 96.1   | 97.4   | 102    | 89.9   | 88.2    |
| NPAT     | 152.6  | 202.2   | 124    | 131    | 123    | 133.9  | 135    | 179.8   |
| NPB      | 97.4   | 122.6   | 98.1   | 80     | 76.5   | 83.3   | 90.9   | 105.1   |
| NPBWR1   | 78     | 85.9    | 85.6   | 80.6   | 78.9   | 79.4   | 76     | 83.2    |
| NPBWR2   | 99.6   | 109.4   | 121.9  | 97     | 107.4  | 103.3  | 101.7  | 102.6   |
| NPC1     | 346.8  | 465.3   | 389.2  | 448.3  | 392.3  | 650.6  | 504.1  | 866     |
| NPC1L1   | 107.9  | 134.2   | 94.1   | 97.8   | 87.2   | 93.4   | 117.4  | 122.8   |
| NPC2     | 8401.7 | 10901.4 | 7477.5 | 7686   | 6213   | 7056.2 | 8461.2 | 10614.2 |
| NPDC1    | 198.6  | 228.2   | 183.6  | 160.9  | 130.5  | 172.1  | 153.7  | 245.7   |
| NPEPL1   | 450.9  | 536.8   | 323.2  | 405.3  | 387.6  | 419.5  | 325.7  | 319.2   |
| NPEPPS   | 572    | 778.9   | 387.5  | 554.2  | 431.8  | 803.4  | 567.4  | 1351.1  |
| NPFF     | 115.5  | 114.4   | 92.3   | 91.7   | 83.8   | 97.4   | 110.3  | 133.8   |
| NPFFR1   | 106    | 113.4   | 92.3   | 80.3   | 79.9   | 84.9   | 104.2  | 110.6   |
| NPFFR2   | 88.3   | 105     | 93.8   | 90.7   | 83.3   | 89.2   | 88.3   | 108.1   |
| NPFFR2   | 92.4   | 107     | 109.7  | 90.5   | 99     | 107.8  | 98.3   | 116.8   |

|        |        |        |        |        |        |        |        |        |
|--------|--------|--------|--------|--------|--------|--------|--------|--------|
| NPHP1  | 92.4   | 98.9   | 90.4   | 84.1   | 83.5   | 94.9   | 102.2  | 88.4   |
| NPHP1  | 107    | 121.8  | 107.6  | 85.6   | 85.1   | 98.5   | 110.5  | 124.8  |
| NPHP1  | 87.5   | 102.5  | 83.3   | 79.7   | 78.5   | 85.5   | 91.8   | 101.9  |
| NPHP3  | 175.9  | 204.4  | 186.3  | 252.1  | 225.4  | 340.7  | 155.1  | 231.5  |
| NPHP4  | 173.8  | 191.2  | 175.4  | 176.5  | 145.2  | 213.1  | 137.2  | 211.2  |
| NPHS1  | 88.1   | 90.5   | 87.2   | 89.4   | 82.6   | 98.2   | 84.2   | 87.7   |
| NPHS2  | 115.8  | 149.4  | 88     | 80.1   | 82.7   | 88.1   | 117.1  | 123.8  |
| NPIP   | 249.9  | 298.1  | 228    | 206.5  | 192.3  | 315.1  | 259.6  | 494.9  |
| NPL    | 273.9  | 332.8  | 195.4  | 172    | 148.4  | 207.9  | 241.2  | 391.5  |
| NPLOC4 | 253.7  | 314.6  | 301.7  | 224.6  | 232.5  | 372.8  | 264.9  | 450.5  |
| NPM1   | 106.3  | 120.7  | 105.3  | 95.2   | 91.9   | 81.8   | 97.2   | 103.2  |
| NPM2   | 156.2  | 204.4  | 119.3  | 131.8  | 123.7  | 169.2  | 141.4  | 153.3  |
| NPM3   | 1616.1 | 1879.2 | 1515.7 | 748    | 475.8  | 799    | 1350.5 | 1628.8 |
| NPNT   | 102.8  | 110.9  | 92.6   | 89.9   | 79.4   | 89     | 90.4   | 110    |
| NPPA   | 84.3   | 89.7   | 96.5   | 84.5   | 92.9   | 94.9   | 86.7   | 89.1   |
| NPPB   | 90.6   | 111.7  | 86.3   | 89.2   | 83.7   | 84.8   | 89.5   | 95     |
| NPPC   | 99.2   | 121.7  | 100.2  | 85.7   | 91.7   | 93.1   | 93.3   | 109    |
| NPR1   | 159.6  | 193.9  | 94.6   | 106.7  | 93.6   | 93.8   | 152    | 168.6  |
| NPR2   | 124.8  | 126.2  | 107.7  | 107.7  | 97.3   | 118.4  | 104.8  | 136.4  |
| NPR3   | 117    | 125.2  | 91.9   | 89.9   | 80.8   | 87.2   | 120.5  | 127.4  |
| NPTN   | 3086.6 | 3986.5 | 2582.9 | 3208.7 | 2332.3 | 3835.8 | 2889.4 | 5453.6 |
| NPTX1  | 83     | 87.4   | 83.9   | 84.2   | 84.8   | 92.3   | 83.7   | 96.7   |
| NPTX1  | 165.1  | 170.1  | 146.8  | 286.4  | 120.4  | 267.9  | 197.7  | 376.4  |
| NPTX2  | 573.9  | 736.9  | 623.4  | 249    | 183.1  | 305.9  | 363.6  | 822.7  |
| NPTXR  | 106    | 114.7  | 97.7   | 98.9   | 93.3   | 96.9   | 94.3   | 112.2  |
| NPY    | 201.5  | 249.1  | 165.8  | 95.1   | 89.2   | 94.3   | 213.2  | 280.8  |
| NPY2R  | 85.7   | 90     | 93.2   | 88.9   | 86.1   | 89     | 84.3   | 92.1   |
| NPY5R  | 105.1  | 107.4  | 101.3  | 77.4   | 82.7   | 79.4   | 91.5   | 111.1  |
| NPY6R  | 117.5  | 137.1  | 103.3  | 96.1   | 94.1   | 98.8   | 124.8  | 112.9  |
| NQO1   | 92.6   | 110.6  | 99.5   | 92.5   | 85.3   | 93     | 133.7  | 202.2  |
| NQO1   | 1318.1 | 1978.7 | 886.5  | 590.9  | 445    | 628.8  | 4420.4 | 6381.8 |
| NQO2   | 253.1  | 314.5  | 117.7  | 135.7  | 93.4   | 136.4  | 407.8  | 721.5  |
| NR0B1  | 95.4   | 110.1  | 94.6   | 94     | 79.5   | 89.5   | 95.4   | 98.7   |
| NR0B2  | 81.3   | 91.5   | 88.9   | 88.8   | 83.1   | 90.8   | 91.2   | 82.2   |
| NR1D1  | 94     | 108.4  | 98.6   | 85.4   | 88.1   | 86.6   | 104.4  | 101.6  |
| NR1D2  | 123.3  | 134.9  | 109.9  | 108.3  | 103.3  | 114.9  | 127.3  | 145.7  |
| NR1H2  | 205.9  | 235.1  | 224.9  | 183.9  | 170.6  | 216.4  | 261.1  | 295.1  |
| NR1H3  | 655.2  | 785.7  | 243.8  | 247.6  | 209.2  | 252.9  | 486.1  | 410.9  |
| NR1H4  | 95.8   | 122.4  | 96.1   | 86.4   | 95     | 97.1   | 108.2  | 108.9  |
| NR1I2  | 98.9   | 123.7  | 91     | 93.1   | 84.2   | 91.8   | 93.9   | 101.7  |
| NR1I2  | 119.9  | 142.1  | 96.5   | 96.7   | 89.1   | 94.7   | 119    | 126.8  |
| NR1I3  | 85.3   | 106.7  | 97.8   | 99.1   | 99.4   | 92.8   | 94.8   | 91.1   |
| NR1I3  | 79.3   | 84.9   | 99.8   | 75.8   | 76.7   | 85.8   | 82.9   | 89.4   |
| NR2C1  | 245.7  | 269    | 122.2  | 149    | 128.1  | 188.1  | 196.5  | 289.7  |
| NR2C1  | 148.6  | 176.3  | 115.3  | 133.8  | 107.8  | 141    | 144.6  | 164.5  |
| NR2C1  | 295.8  | 383.3  | 192.6  | 226.4  | 217.1  | 290.6  | 205    | 260.1  |
| NR2C2  | 198.8  | 252.6  | 160.3  | 168.7  | 160.4  | 178.2  | 187.7  | 236.5  |
| NR2E1  | 86.9   | 99     | 98.9   | 93.9   | 86.8   | 100.1  | 82.6   | 86.1   |
| NR2E3  | 96.7   | 99.4   | 93.2   | 87     | 81.8   | 87.4   | 94.6   | 106.7  |
| NR2E3  | 75.8   | 94.1   | 92.9   | 78.9   | 76     | 81.6   | 76.9   | 85.1   |

|       |        |        |        |        |       |        |        |        |
|-------|--------|--------|--------|--------|-------|--------|--------|--------|
| NR2E3 | 80.8   | 90.8   | 95.6   | 88.2   | 97.8  | 88.8   | 93.6   | 89.1   |
| NR2F1 | 109.6  | 117.4  | 107.7  | 103.8  | 98.6  | 101.1  | 101.7  | 122.8  |
| NR2F2 | 159.6  | 173.6  | 113.9  | 93.7   | 76.5  | 98.5   | 147.8  | 226.9  |
| NR2F6 | 383.4  | 418    | 360.2  | 304.8  | 252.2 | 340.3  | 380.7  | 412.8  |
| NR3C1 | 166.7  | 208.9  | 123.8  | 156.1  | 139.3 | 180.2  | 148.5  | 169.1  |
| NR3C1 | 96.1   | 101.2  | 104.3  | 105.2  | 95.9  | 85.4   | 96.5   | 96.5   |
| NR3C1 | 115.6  | 140.1  | 92     | 100.1  | 83.5  | 83.2   | 123.6  | 139.9  |
| NR3C2 | 103.1  | 136.2  | 105.2  | 94.5   | 84    | 96.6   | 105.1  | 112.1  |
| NR4A1 | 118.5  | 128.4  | 75.7   | 85.6   | 82.7  | 88.4   | 105.2  | 122    |
| NR4A1 | 89.4   | 89.8   | 93.6   | 88.3   | 82.4  | 85.6   | 84.6   | 91.2   |
| NR4A1 | 114.8  | 110    | 87.5   | 89.8   | 72.2  | 87.7   | 104.6  | 106.5  |
| NR4A2 | 91.3   | 95.9   | 90.5   | 87.3   | 83.4  | 85.8   | 94.8   | 106.2  |
| NR4A3 | 94.1   | 100.1  | 104.7  | 93.3   | 94.1  | 90.9   | 85     | 94.8   |
| NR4A3 | 88.1   | 100.3  | 79.8   | 84     | 74.9  | 84.2   | 91     | 103.8  |
| NR4A3 | 78.6   | 93.7   | 86.9   | 87.9   | 78    | 81.1   | 84.2   | 97.5   |
| NR4A3 | 97.1   | 101.3  | 107.7  | 82.5   | 86.7  | 100.2  | 87.8   | 100.3  |
| NR4A3 | 81.7   | 89.8   | 96     | 91.1   | 91.1  | 90.5   | 88.7   | 89.3   |
| NR5A1 | 83.5   | 88.9   | 97.4   | 83.2   | 91    | 85.3   | 88.1   | 86.3   |
| NR5A2 | 99.9   | 107.2  | 91.8   | 88.8   | 89.4  | 84.5   | 91.5   | 109.2  |
| NR5A2 | 91.3   | 100.7  | 87.2   | 87.5   | 86.8  | 86.5   | 91.5   | 101.9  |
| NR5A2 | 96.5   | 112.1  | 86.1   | 81.2   | 92.1  | 75     | 93.7   | 116.3  |
| NR6A1 | 83.2   | 121.7  | 97.9   | 104.4  | 106.5 | 108.8  | 91.6   | 99.8   |
| NR6A1 | 124.9  | 118.7  | 92.5   | 89.9   | 85.9  | 85.5   | 114.8  | 119.7  |
| NRAP  | 72.4   | 83.2   | 99.7   | 90.1   | 89    | 94.4   | 78     | 80.7   |
| NRAP  | 69.3   | 82.3   | 91.4   | 79.9   | 84.6  | 86.1   | 80.9   | 76.2   |
| NRAS  | 1186.3 | 1337.7 | 665    | 479.7  | 323.4 | 567.1  | 874.6  | 1444.2 |
| NRBP1 | 184.6  | 226.8  | 124    | 119.2  | 102.8 | 142.7  | 156.1  | 211.9  |
| NRBP2 | 487.4  | 418.4  | 384.1  | 484.4  | 439.9 | 587.6  | 280.3  | 362.8  |
| NRCAM | 106.5  | 107.7  | 94.3   | 91     | 85.3  | 92.4   | 108    | 117.4  |
| NRCAM | 117.4  | 108.2  | 85.6   | 72.9   | 75.6  | 88.2   | 128.9  | 135.7  |
| NRD1  | 2695.6 | 3911.1 | 2901.4 | 3282.9 | 2399  | 5581.3 | 2334   | 4190.4 |
| NRF1  | 93.7   | 116.5  | 96.4   | 101.1  | 97.3  | 86.6   | 91.7   | 110.3  |
| NRF1  | 107.9  | 120    | 104    | 103.4  | 90.5  | 97.7   | 90.7   | 111.3  |
| NRF1  | 99.3   | 106.6  | 105.1  | 95.5   | 83.5  | 89.7   | 89.2   | 99.3   |
| NRG1  | 82     | 91.3   | 92.7   | 84.1   | 78.3  | 82.7   | 91.1   | 88.2   |
| NRG1  | 79.1   | 97.3   | 91.2   | 94     | 92.8  | 89.3   | 90.7   | 88.5   |
| NRG1  | 103.9  | 111.7  | 92.3   | 99.9   | 90.9  | 98     | 99.7   | 116.9  |
| NRG1  | 105.5  | 104.4  | 99     | 92.1   | 75.4  | 91.6   | 89.4   | 115.8  |
| NRG2  | 100.4  | 125.2  | 98.4   | 96     | 76.2  | 98.2   | 97.6   | 127.7  |
| NRG2  | 83.1   | 84.3   | 95.8   | 100.8  | 85.6  | 94.2   | 81.8   | 85.5   |
| NRG3  | 97.8   | 100.3  | 99.1   | 86.6   | 90.5  | 86.9   | 90.1   | 105.6  |
| NRG4  | 253.2  | 295.4  | 186.1  | 121.4  | 110.9 | 119.5  | 137.4  | 150.9  |
| NRGN  | 329.2  | 467    | 275.7  | 183.1  | 160.7 | 191    | 243.4  | 538.9  |
| NRIP1 | 383.1  | 476.7  | 379.9  | 386.1  | 327.9 | 620.9  | 329.9  | 641.5  |
| NRIP2 | 121.7  | 154.1  | 97.7   | 96.5   | 101.5 | 99.4   | 121.7  | 137.5  |
| NRIP3 | 1120.7 | 1824.9 | 598.2  | 367.3  | 284.1 | 207.2  | 1385.9 | 1804.3 |
| NRK   | 120.6  | 143    | 118.6  | 121.1  | 103.5 | 114.6  | 108    | 125.7  |
| NRL   | 80     | 89     | 108    | 87.9   | 87.1  | 89     | 82.5   | 88.9   |
| NRM   | 220.7  | 251.9  | 175.4  | 178.2  | 135.8 | 140.5  | 216.9  | 353.8  |
| NRN1  | 167.7  | 263.5  | 105.1  | 97.7   | 84.6  | 87.9   | 147.9  | 162.6  |

|         |        |        |        |        |        |        |        |        |
|---------|--------|--------|--------|--------|--------|--------|--------|--------|
| NRP1    | 122    | 143    | 96.7   | 88.4   | 82.7   | 93.7   | 117.5  | 138.1  |
| NRP1    | 184.3  | 287.6  | 166.1  | 139.4  | 128    | 177    | 175.8  | 281.5  |
| NRP2    | 98.4   | 115.2  | 99.5   | 86.5   | 76.5   | 86.5   | 107.2  | 108.9  |
| NRP2    | 161.8  | 194.4  | 91.6   | 98.1   | 86.9   | 92.9   | 142.5  | 159.6  |
| NRP2    | 87.3   | 101.9  | 90.7   | 81.7   | 80.4   | 84.3   | 96.1   | 104.2  |
| NRTN    | 91.6   | 103.5  | 107.8  | 86.5   | 89.4   | 94.2   | 91.6   | 113    |
| NRXN1   | 87.6   | 106.8  | 84.3   | 75.7   | 71.7   | 68.3   | 87.6   | 107.6  |
| NRXN1   | 101    | 113    | 84.8   | 71.5   | 73.3   | 88.2   | 107.9  | 108    |
| NRXN1   | 87.9   | 104.5  | 87.4   | 84.8   | 81.1   | 78.8   | 96.6   | 96.6   |
| NRXN2   | 87.7   | 95.3   | 100.7  | 91.5   | 89.8   | 89.8   | 89.2   | 91.4   |
| NRXN2   | 97.3   | 114.3  | 113.5  | 106.9  | 97.4   | 106.8  | 89.8   | 103.7  |
| NRXN3   | 84.2   | 90.9   | 92     | 82.1   | 77.9   | 83.3   | 90.3   | 85.4   |
| NRXN3   | 72.9   | 77.4   | 100.3  | 92.2   | 89.8   | 92.4   | 78.5   | 83.5   |
| NRXN3   | 107.1  | 124.4  | 90.1   | 88.9   | 81.5   | 83     | 116.2  | 130.5  |
| NS4ATP2 | 1071   | 1283   | 313.3  | 257.3  | 203    | 364.6  | 1074.9 | 1339   |
| NSBP1   | 68.8   | 75.7   | 95.2   | 83     | 78.7   | 83.1   | 72.6   | 71.2   |
| NSD1    | 121.8  | 159.6  | 100.1  | 105.3  | 100.3  | 109    | 123.2  | 147.2  |
| NSD1    | 133.6  | 162.1  | 118.8  | 139.6  | 135.3  | 118.3  | 129.1  | 142.1  |
| NSDHL   | 882.1  | 1239.8 | 562.7  | 624.5  | 543.8  | 764.1  | 790.7  | 850.9  |
| NSF     | 299.2  | 402.9  | 129.7  | 176.7  | 146.6  | 120.4  | 186.7  | 279.1  |
| NSF     | 735.1  | 1099.9 | 515.2  | 581.4  | 443.3  | 930.4  | 595.6  | 968.5  |
| NSF     | 4924.3 | 6624.8 | 3778   | 5060.4 | 3771.4 | 6079.4 | 4056.4 | 5554.1 |
| NSFL1C  | 327.9  | 382.3  | 313.8  | 301.7  | 248.8  | 346.6  | 327.4  | 610.5  |
| NSFL1C  | 396.1  | 500.6  | 334.3  | 355.6  | 276    | 356.5  | 386.6  | 471.6  |
| NSL1    | 162.9  | 196.6  | 100.2  | 95.6   | 88.8   | 98.1   | 143.8  | 178.6  |
| NSL1    | 124.7  | 145.9  | 98.9   | 94.1   | 88.8   | 81.1   | 127.4  | 136.6  |
| NSMAF   | 4008.4 | 4722.2 | 3093.1 | 2424.1 | 1828.9 | 3059.5 | 3295.6 | 4640.8 |
| NSMCE1  | 1211.6 | 1501.1 | 615.2  | 492.4  | 407    | 493.5  | 1375.4 | 1403.8 |
| NSUN2   | 2724.1 | 3731.4 | 1252.5 | 1599.3 | 1162.9 | 2028.1 | 2419.8 | 3644.4 |
| NSUN3   | 244.8  | 308.3  | 176.8  | 137    | 118.1  | 156.1  | 237.9  | 336.4  |
| NSUN4   | 884.1  | 1122.6 | 643.4  | 814    | 537    | 832.1  | 770.1  | 978.4  |
| NSUN5   | 593.4  | 620.4  | 298.7  | 232    | 238.7  | 324.8  | 449.3  | 607    |
| NSUN5   | 156.1  | 134.4  | 141.2  | 117.6  | 127.4  | 145.8  | 140.5  | 153.2  |
| NSUN5   | 366.1  | 496.7  | 317.9  | 179.4  | 167.4  | 214.9  | 299.9  | 417.7  |
| NSUN5B  | 685    | 861.7  | 411.3  | 285.7  | 264.6  | 334    | 483.1  | 623.2  |
| NSUN5C  | 127.5  | 142.5  | 95.1   | 91.2   | 77.6   | 79.7   | 108    | 157.9  |
| NSUN5C  | 161.1  | 201.5  | 117    | 111.9  | 101.5  | 103.8  | 173.3  | 207.7  |
| NSUN6   | 159.7  | 184.1  | 97.6   | 89.5   | 85     | 102.6  | 138.7  | 157.4  |
| NSUN7   | 113.5  | 131    | 97     | 90.1   | 76.8   | 89     | 108.6  | 116.2  |
| NT5C    | 2723.9 | 3113.3 | 1347.8 | 975.6  | 829.7  | 979.6  | 1986.2 | 1737.4 |
| NT5C1A  | 83.4   | 97.1   | 103.4  | 93.5   | 83.8   | 92.9   | 85.4   | 95.4   |
| NT5C1B  | 77.4   | 80.5   | 102    | 91.2   | 90.3   | 90.5   | 84     | 82.6   |
| NT5C1B  | 76.6   | 91.4   | 87.3   | 85.4   | 84.3   | 90     | 77.2   | 86.2   |
| NT5C2   | 999.6  | 1298.6 | 392.4  | 431.5  | 252.1  | 503.2  | 1042.9 | 1371.2 |
| NT5C3   | 2030.7 | 2630.4 | 1201   | 1039   | 716.5  | 1207.1 | 1821.3 | 3522.9 |
| NT5C3L  | 674.2  | 904.8  | 439    | 320.8  | 277.8  | 348.1  | 637.5  | 700.4  |
| NT5DC1  | 127.7  | 121.8  | 102.5  | 102.5  | 100.1  | 108.5  | 112.3  | 142.6  |
| NT5DC2  | 430.6  | 526.2  | 458.3  | 244.6  | 188.8  | 263.2  | 357.4  | 628.1  |
| NT5DC3  | 91     | 105.6  | 98.5   | 107.1  | 112.4  | 99.2   | 91.4   | 100.5  |
| NT5DC3  | 812.8  | 980.9  | 522.8  | 687.4  | 578.5  | 818.9  | 577.7  | 785.2  |

|          |        |        |        |        |        |        |        |         |
|----------|--------|--------|--------|--------|--------|--------|--------|---------|
| NT5E     | 159.4  | 204.1  | 117.9  | 116.8  | 113.8  | 130.4  | 136.2  | 192.9   |
| NT5M     | 95.2   | 120.8  | 102.4  | 99.1   | 102.7  | 103.3  | 89.9   | 104.3   |
| NTAN1    | 961.2  | 1150.1 | 564.9  | 465.9  | 367.3  | 579.1  | 883.4  | 1618.4  |
| NTE      | 506.8  | 662.8  | 609.7  | 407.7  | 317.6  | 533    | 403.1  | 737.6   |
| NTF3     | 85.4   | 109.9  | 101.3  | 88.5   | 90.8   | 92.9   | 102.7  | 95.4    |
| NTF5     | 94.2   | 107.6  | 92.4   | 80.5   | 93.2   | 94.3   | 100.7  | 98.2    |
| NTHL1    | 671.7  | 739.3  | 460    | 268.8  | 225.6  | 339.2  | 451.9  | 564     |
| NTN1     | 90.8   | 111.1  | 102.6  | 84.4   | 90.5   | 85.3   | 88.4   | 93.8    |
| NTN2L    | 85.7   | 95.4   | 89     | 81     | 71.6   | 77.6   | 84.6   | 91.9    |
| NTN4     | 76.1   | 87.7   | 89.1   | 87     | 80.7   | 85.7   | 86.6   | 91.7    |
| NTNG1    | 72.2   | 74.5   | 85.4   | 79.6   | 70.6   | 79.8   | 78.6   | 84      |
| NTNG2    | 112.9  | 124    | 93.4   | 87.4   | 87.3   | 87     | 100.1  | 107.4   |
| NTRK1    | 125.3  | 140.6  | 96.8   | 88     | 88.8   | 89.8   | 117.6  | 129.6   |
| NTRK1    | 92.5   | 115.5  | 104.4  | 103.6  | 95.6   | 102    | 91.3   | 94.4    |
| NTRK1    | 91     | 92.8   | 89.4   | 87.8   | 85.5   | 82.6   | 94.1   | 96.4    |
| NTRK2    | 91.5   | 97.2   | 88.4   | 93.1   | 86.6   | 85     | 94     | 105.9   |
| NTRK2    | 100.1  | 107.3  | 95.4   | 89.2   | 91.3   | 89.2   | 94.8   | 95.4    |
| NTRK2    | 88.5   | 92     | 88.8   | 81.8   | 77.4   | 86.2   | 87     | 87.7    |
| NTRK3    | 96.1   | 97.3   | 103.1  | 92.5   | 88.2   | 101.2  | 89.7   | 101.4   |
| NTRK3    | 89.8   | 114.7  | 93.1   | 84.5   | 80.4   | 87.7   | 87.7   | 105.1   |
| NTS      | 74.9   | 85.5   | 80.8   | 82.3   | 77.5   | 84.9   | 71.1   | 81.6    |
| NTSR1    | 271.6  | 325.2  | 190    | 158.3  | 138.5  | 155    | 209.7  | 223.8   |
| NTSR2    | 94.1   | 99.7   | 90.8   | 96.3   | 83.7   | 84     | 85     | 95.9    |
| NTSR2    | 96.7   | 117.2  | 103.9  | 101.5  | 85     | 93     | 98.8   | 110.1   |
| NUAK1    | 170.5  | 179.5  | 123.9  | 109.8  | 98.5   | 103.5  | 148.3  | 198.7   |
| NUAK2    | 82.1   | 94.3   | 89.5   | 83.7   | 83.4   | 84.5   | 96.2   | 85.2    |
| NUB1     | 89.3   | 101.5  | 101.2  | 79     | 89.6   | 102.2  | 88.3   | 87.3    |
| NUBP1    | 382.5  | 467.6  | 350.9  | 279.8  | 270.8  | 337.4  | 345.1  | 440.2   |
| NUBP2    | 310.1  | 383.2  | 245.2  | 161.5  | 137.1  | 191.5  | 272.1  | 345.8   |
| NUBPL    | 696    | 799.7  | 478.6  | 829.5  | 825.1  | 612.4  | 602.4  | 695     |
| NUCB1    | 6281.4 | 8418.7 | 6733.7 | 6980.3 | 5767.3 | 7560.7 | 6772.2 | 10082.4 |
| NUCB2    | 5053.3 | 5943.5 | 2407.3 | 1770.9 | 1394.8 | 2456.4 | 4868.5 | 10249.2 |
| NUCKS1   | 704.8  | 750.5  | 169    | 199.2  | 178.3  | 197.8  | 536.9  | 739     |
| NUDC     | 4803.1 | 6141.8 | 4141.6 | 3935.3 | 2793.5 | 3863.2 | 4198.4 | 4390.4  |
| NUDCD1   | 179.3  | 223.1  | 135.3  | 114    | 110.3  | 141    | 152.4  | 214.7   |
| NUDCD2   | 350.4  | 380.2  | 153.6  | 147.7  | 112.7  | 171.3  | 324.6  | 458.6   |
| NUDCD3   | 279.6  | 383.3  | 350.6  | 281.5  | 249.7  | 351    | 235.5  | 356.7   |
| NUDT1    | 384.3  | 473.8  | 172.2  | 141.9  | 129.4  | 139.7  | 375.9  | 359.2   |
| NUDT1    | 3719.1 | 4228.5 | 3118.4 | 2400.4 | 2066   | 2356.2 | 3179.3 | 3084.4  |
| NUDT10   | 93.7   | 100.4  | 71.6   | 73     | 67.9   | 79.6   | 97     | 110.5   |
| NUDT11   | 165.3  | 186.3  | 140.9  | 105.7  | 96.1   | 127.1  | 131.8  | 203     |
| NUDT12   | 75.6   | 104.4  | 91.5   | 78.3   | 78.2   | 81.5   | 84     | 106     |
| NUDT13   | 145.7  | 181.4  | 114.1  | 100.4  | 104.1  | 122.2  | 151.2  | 162.4   |
| NUDT14   | 1965.1 | 2286.7 | 1928.9 | 1587.1 | 1194.3 | 1646.1 | 1916   | 3068.5  |
| NUDT15   | 327.2  | 353.4  | 140.1  | 170    | 126.2  | 136.7  | 271.3  | 412.3   |
| NUDT16   | 231    | 318.9  | 185.5  | 167.7  | 157.8  | 238.5  | 179.3  | 212.8   |
| NUDT16L1 | 896.3  | 1204.5 | 753.4  | 336.4  | 326.9  | 370.9  | 793    | 1193.4  |
| NUDT17   | 109.4  | 135.7  | 96.3   | 83.1   | 89.6   | 90.8   | 95     | 109.3   |
| NUDT18   | 1025.7 | 1343.9 | 799.3  | 519.3  | 382.9  | 643.8  | 740.6  | 956     |
| NUDT2    | 685.7  | 826.2  | 417.9  | 441.8  | 360.5  | 545.6  | 599.1  | 680.2   |

|         |        |        |        |        |        |        |        |        |
|---------|--------|--------|--------|--------|--------|--------|--------|--------|
| NUDT2   | 1429.1 | 1748.3 | 975    | 1020.3 | 807.9  | 1396.2 | 1233.2 | 1774.6 |
| NUDT21  | 102.1  | 115.9  | 102.7  | 101    | 92.8   | 106.6  | 106.7  | 117.5  |
| NUDT22  | 442.1  | 504.4  | 278.9  | 197.9  | 167    | 216.2  | 352.1  | 579.3  |
| NUDT3   | 2674.6 | 3615.2 | 1935.5 | 1522.9 | 1352   | 2303.3 | 2280.6 | 2616.5 |
| NUDT4   | 83     | 95.5   | 85.5   | 84.6   | 87.8   | 73.2   | 80.7   | 85.7   |
| NUDT4P1 | 117.3  | 132.9  | 83.9   | 77.4   | 74.4   | 83.7   | 103.6  | 112.6  |
| NUDT5   | 2802.1 | 3682.3 | 1221.2 | 564.3  | 399.8  | 520.4  | 2645.9 | 3530.9 |
| NUDT6   | 174.4  | 218.6  | 113.1  | 92.1   | 88.7   | 114.9  | 143.1  | 123.1  |
| NUDT6   | 314.9  | 379.2  | 203.7  | 150.1  | 145.1  | 215.5  | 215.6  | 257.5  |
| NUDT6   | 190.5  | 210.3  | 138.6  | 110.9  | 105.8  | 115.7  | 137.6  | 149.1  |
| NUDT8   | 92.8   | 120.9  | 100    | 100.4  | 94.8   | 97.1   | 94     | 93.1   |
| NUDT9   | 209.7  | 285.7  | 115.2  | 100.4  | 103.7  | 103.7  | 214.1  | 210.2  |
| NUDT9   | 1036.7 | 1368   | 640.7  | 497.6  | 438.1  | 558.4  | 957    | 1445.4 |
| NUDT9   | 137.9  | 154.8  | 111.8  | 97.6   | 86.8   | 98.8   | 132.5  | 131    |
| NUDT9P1 | 78.2   | 88.2   | 87.9   | 84.6   | 79.8   | 92.1   | 70.8   | 86.7   |
| NUF2    | 190.9  | 237.1  | 130.3  | 124.4  | 106.7  | 135.8  | 171.3  | 350.8  |
| NUF2    | 87.5   | 91.8   | 104.5  | 109.1  | 90.4   | 106.6  | 87.4   | 93.5   |
| NUFIP1  | 132.9  | 153.3  | 111.1  | 97.6   | 88.2   | 95.4   | 119.6  | 151    |
| NUFIP2  | 1137.4 | 1347.2 | 382.6  | 488.8  | 373.1  | 564.9  | 1001.7 | 1396.5 |
| NULP1   | 2442.5 | 3271.7 | 1264.6 | 1151.4 | 1064.7 | 1346.1 | 2140.6 | 1953.4 |
| NUMA1   | 202.1  | 278.5  | 252.2  | 305    | 254.7  | 408.2  | 228.5  | 366.8  |
| NUMB    | 1499.9 | 1777.4 | 995.1  | 993.1  | 754    | 1019   | 1329.6 | 1873.3 |
| NUMBL   | 130.6  | 141.9  | 100    | 86.6   | 87.4   | 89.8   | 122.8  | 170    |
| NUP107  | 1585.1 | 1805.8 | 514.7  | 531.6  | 571.8  | 913.9  | 1081.8 | 1356.2 |
| NUP133  | 1331.2 | 1677.3 | 1298.8 | 837.8  | 644.4  | 1171.2 | 979.5  | 1829   |
| NUP153  | 349.6  | 461.5  | 287.5  | 388.2  | 303.9  | 684.4  | 380.6  | 632.7  |
| NUP155  | 159    | 203.5  | 109.2  | 130    | 112    | 87.1   | 122.8  | 126.3  |
| NUP155  | 1305.6 | 1647.5 | 1411.7 | 1538.8 | 1066   | 2036.1 | 948.8  | 1693.1 |
| NUP160  | 1351.1 | 1751.5 | 1638.5 | 1968.2 | 1268   | 2851.5 | 1326.9 | 2320.6 |
| NUP188  | 275    | 320.5  | 403.3  | 377.8  | 289    | 412    | 254.4  | 534.7  |
| NUP205  | 1841.3 | 2472.8 | 1701   | 1950   | 1421.6 | 2362.7 | 1811.1 | 2704.2 |
| NUP210  | 425.3  | 642.4  | 418.8  | 432.2  | 379    | 576    | 364.5  | 567    |
| NUP210L | 79.5   | 80.2   | 108.3  | 94.9   | 92.7   | 93.4   | 79.7   | 90.1   |
| NUP214  | 1290   | 1714.7 | 1001   | 1033.8 | 822.1  | 1392.9 | 1282.1 | 1828.5 |
| NUP35   | 969.1  | 1244.2 | 337.7  | 228.9  | 186.8  | 298.3  | 721.4  | 991.5  |
| NUP35   | 680.7  | 892.1  | 182.7  | 129.7  | 104.5  | 172    | 497.4  | 732.7  |
| NUP37   | 4404.1 | 6093.9 | 3107.4 | 2443.2 | 1790.4 | 2546.3 | 3509.4 | 4129.1 |
| NUP43   | 230.3  | 281.2  | 140.7  | 174.6  | 137.5  | 117.6  | 207.6  | 333.5  |
| NUP50   | 1602.9 | 1944.9 | 819.6  | 703.1  | 651.1  | 919.1  | 1313.2 | 1686.7 |
| NUP50   | 139.2  | 165.5  | 92.1   | 94.4   | 92.6   | 89.2   | 120.2  | 124.2  |
| NUP50   | 162.3  | 218.5  | 137.1  | 125.2  | 140.7  | 122.2  | 137.4  | 150.7  |
| NUP54   | 1719.3 | 2202.8 | 1095.9 | 1040.9 | 814.8  | 1442.3 | 1441.8 | 2913.6 |
| NUP62   | 623.2  | 793    | 208.4  | 156    | 148    | 167.2  | 476.9  | 995.6  |
| NUP62   | 8521   | 9788.5 | 5794.6 | 4216.3 | 3665.3 | 3642.6 | 5717.9 | 6631.3 |
| NUP85   | 2941.5 | 3966.3 | 2172.1 | 1588.9 | 1336.1 | 2225.7 | 2218.5 | 3122.2 |
| NUP88   | 2618.9 | 3124.4 | 1257.2 | 1265.8 | 988    | 1739.1 | 2242.9 | 2716.8 |
| NUP93   | 1469.9 | 2130.9 | 1470.9 | 1188.6 | 828.8  | 1598.2 | 1044.2 | 1563.8 |
| NUP98   | 190.7  | 229.1  | 123.5  | 105.1  | 108.2  | 114.2  | 148.7  | 153.4  |
| NUP98   | 221    | 263.4  | 197.7  | 146    | 133.6  | 158.2  | 173.5  | 251.5  |
| NUP98   | 143.6  | 158.9  | 92.4   | 94.8   | 99.7   | 104.5  | 135.6  | 162.1  |



|           |        |        |        |        |        |        |        |        |
|-----------|--------|--------|--------|--------|--------|--------|--------|--------|
| NUPL1     | 84.1   | 97.3   | 90.1   | 82.8   | 84.3   | 97.4   | 79     | 84.6   |
| NUPL1     | 223.5  | 242.1  | 112.9  | 109.1  | 102.6  | 98.4   | 172.9  | 240.7  |
| NUPL1     | 278.6  | 387.1  | 157.8  | 127.9  | 147.2  | 134.9  | 234.4  | 297    |
| NUPL2     | 1296.1 | 1684.1 | 711.5  | 870.1  | 724.8  | 1131.5 | 868.1  | 1210   |
| NUPR1     | 189.7  | 240.3  | 146.7  | 173.5  | 196.1  | 318.7  | 270.5  | 312.2  |
| NUS1      | 169.9  | 199.8  | 111.2  | 129.6  | 120.1  | 132.9  | 156.3  | 226.4  |
| NUSAP1    | 7527.3 | 7922.3 | 4558.7 | 3771.1 | 3087   | 4765.4 | 5945.2 | 7203.2 |
| NUSAP1    | 2456.8 | 2955.8 | 812    | 515.4  | 417.2  | 863.3  | 1807.4 | 2494   |
| NUT       | 90.8   | 112    | 97.4   | 109.2  | 95     | 104.4  | 103.7  | 103.4  |
| NUTF2     | 428.8  | 539.4  | 156.2  | 118.3  | 110.9  | 116.5  | 348.3  | 434.8  |
| NVL       | 105.2  | 101    | 97.1   | 87.8   | 89.4   | 82.4   | 90.3   | 105.2  |
| NVL       | 684.4  | 925.7  | 427.5  | 390.1  | 383.2  | 615.6  | 494    | 547.4  |
| NXF1      | 1036.9 | 1288.5 | 987.4  | 623    | 641.4  | 878.4  | 925.6  | 1952.2 |
| NXF1      | 895.2  | 1057   | 853.9  | 669.4  | 613.2  | 716.1  | 787.3  | 1261   |
| NXF2      | 106.9  | 108.9  | 99.8   | 94.1   | 93.3   | 89.6   | 96.6   | 102.3  |
| NXF2      | 73.8   | 78.2   | 90.9   | 95.4   | 84.9   | 80.3   | 77.2   | 83.6   |
| NXF3      | 500.4  | 533.9  | 231.8  | 228.5  | 268.9  | 291.6  | 392.9  | 391.8  |
| NXF4      | 114.4  | 133.5  | 100.5  | 91.8   | 82.9   | 99.5   | 106    | 115.4  |
| NXF5      | 92.8   | 103.9  | 93.8   | 91.4   | 83.6   | 88.1   | 99     | 100.7  |
| NXN       | 242.1  | 281.5  | 199.7  | 303.5  | 265    | 325.6  | 226.1  | 270.9  |
| NXPH1     | 92.6   | 102.9  | 105.4  | 100.1  | 93.3   | 97.7   | 87.5   | 104.2  |
| NXPH2     | 91.1   | 92.3   | 82.3   | 79.1   | 85.1   | 78.8   | 95.3   | 90.2   |
| NXPH3     | 101.8  | 115.6  | 104    | 93     | 89     | 93.3   | 104.1  | 111.7  |
| NXPH4     | 86.6   | 102.1  | 109.4  | 89.2   | 83.5   | 82.2   | 85.4   | 107    |
| NXPH4     | 99.7   | 93.7   | 101.5  | 101.5  | 86     | 97.4   | 91.6   | 103.2  |
| NXT1      | 2915.3 | 3899.8 | 2161.5 | 1504.7 | 1101.8 | 1627.1 | 2548.1 | 2728   |
| NXT2      | 1054.9 | 1145.9 | 341.2  | 252.7  | 230    | 302.4  | 711    | 1403.4 |
| NYD-SP14  | 78.2   | 97.3   | 107.7  | 105.2  | 89.4   | 99.3   | 93.4   | 95.4   |
| NYD-SP18  | 96.1   | 103.4  | 90.4   | 80.5   | 77.3   | 75     | 89.4   | 88.8   |
| NYD-SP21  | 368.8  | 390.7  | 197.4  | 171.2  | 164.9  | 271.3  | 269.9  | 467    |
| NYD-SP21  | 250.1  | 304.3  | 151.7  | 137.5  | 138.8  | 152.4  | 201.4  | 295.2  |
| NYD-SP26  | 91.5   | 100.8  | 97     | 93     | 87.8   | 93.5   | 93.9   | 92.5   |
| NY-REN-7  | 91.1   | 94.3   | 95.6   | 88.9   | 93.2   | 106.4  | 97.2   | 96     |
| NY-SAR-48 | 272.3  | 350.2  | 139.8  | 118.4  | 105.3  | 131.4  | 271.8  | 314.2  |
| NY-SAR-48 | 341.2  | 432.1  | 254    | 173.7  | 163.9  | 204.4  | 346.7  | 471.1  |
| NYX       | 94.4   | 115.1  | 90.8   | 80.1   | 79.9   | 87.3   | 104    | 123.1  |
| OACT2     | 133.3  | 179.2  | 103.8  | 99.7   | 88.5   | 103.8  | 142.2  | 148.9  |
| OACT5     | 363    | 493.5  | 231.4  | 232.8  | 172.7  | 273.5  | 326.6  | 465.8  |
| OAF       | 1566.5 | 1905.8 | 1961.6 | 720.7  | 520.8  | 872.8  | 1132   | 2761.3 |
| OAS1      | 76.5   | 83.8   | 97.1   | 78.8   | 76.3   | 77.7   | 73.7   | 87.3   |
| OAS1      | 172.6  | 220.3  | 126    | 104.9  | 112.5  | 122.8  | 174.1  | 160.5  |
| OAS1      | 182.6  | 229.3  | 140.5  | 112.4  | 128.1  | 126.9  | 173.4  | 168.8  |
| OAS1      | 171    | 193.6  | 106.8  | 88.1   | 93     | 90.2   | 158.6  | 183    |
| OAS2      | 100.9  | 126.9  | 113.9  | 96.3   | 92.7   | 105.8  | 102.2  | 102.5  |
| OAS2      | 101.2  | 103.8  | 101.3  | 90.8   | 88.8   | 94.3   | 95.6   | 115.9  |
| OAS2      | 104    | 108.6  | 83.7   | 84.4   | 75.4   | 79.9   | 97.3   | 104.4  |
| OAS2      | 324.1  | 437.3  | 306.7  | 275.7  | 275.8  | 247    | 263.2  | 271.4  |
| OAS3      | 86.7   | 98.7   | 87.4   | 77.4   | 87.9   | 87.4   | 80.7   | 98.3   |
| OASL      | 81.5   | 87.2   | 91.1   | 81.7   | 79.7   | 85.6   | 85.2   | 83.1   |
| OASL      | 130.5  | 164.5  | 104.3  | 79.3   | 71.6   | 88.3   | 127.7  | 178.1  |

|        |         |         |         |         |         |         |         |         |
|--------|---------|---------|---------|---------|---------|---------|---------|---------|
| OAT    | 1468.8  | 2240.2  | 1201.4  | 1024.5  | 858.2   | 1489.2  | 998.4   | 1431.6  |
| OATL1  | 114.8   | 132.1   | 103.5   | 106.3   | 103.9   | 93.2    | 103.1   | 109.7   |
| OATL1  | 87.5    | 108.2   | 97.5    | 104.8   | 95.5    | 109.5   | 99.2    | 113.1   |
| OAZ1   | 33343.2 | 31823.3 | 48060.3 | 35773.8 | 32694.3 | 36220.9 | 32546.9 | 35268.7 |
| OAZ3   | 163.5   | 175.4   | 102.2   | 115.5   | 109.3   | 122.7   | 150.8   | 171.3   |
| OBFC1  | 373.5   | 466.8   | 301.6   | 279     | 253     | 390.7   | 340.8   | 403.6   |
| OBFC2A | 404.2   | 463.7   | 239.7   | 271.8   | 253.2   | 338.3   | 330.8   | 465.3   |
| OBFC2B | 402.2   | 515.5   | 520.9   | 426.6   | 334     | 528.3   | 349.3   | 647.8   |
| OBP2A  | 85.4    | 98.3    | 102.2   | 92      | 90.7    | 88      | 90.6    | 112     |
| OBSCN  | 103.2   | 106     | 98      | 88.5    | 93.2    | 102.1   | 101.3   | 119.4   |
| OC90   | 86.5    | 98.1    | 94.5    | 88.2    | 91.1    | 81.5    | 85      | 101.4   |
| OCA2   | 84.2    | 91.7    | 105.2   | 89.5    | 80.8    | 84.7    | 82.3    | 98      |
| OCIAD1 | 2983.8  | 3061.2  | 1250.4  | 2530.4  | 2637.4  | 1658.3  | 2860.3  | 3625.8  |
| OCIAD1 | 3897.5  | 4775.1  | 2375.2  | 2275.9  | 1509.4  | 3109.8  | 3000.6  | 6290.8  |
| OCIAD2 | 711.1   | 921.9   | 438.6   | 265.9   | 233.9   | 265.3   | 701.4   | 872     |
| OCIAD2 | 2041.3  | 2531.6  | 1825    | 1443.1  | 1155.6  | 1372.4  | 2300.1  | 2854.9  |
| OCLM   | 117.6   | 128.8   | 94.9    | 90.4    | 89.5    | 85.2    | 111.4   | 126.2   |
| OCLN   | 81.3    | 89.8    | 100.6   | 86.9    | 87.7    | 77.6    | 77.1    | 85.1    |
| OCLN   | 82.9    | 95.5    | 108     | 106.5   | 84.9    | 84.8    | 82.7    | 84.5    |
| OCM    | 79.2    | 71.8    | 90.2    | 87.1    | 86.4    | 89.7    | 72.2    | 83.2    |
| OCRL   | 320.5   | 451.9   | 314.9   | 472     | 397.4   | 717.4   | 251.3   | 452.3   |
| OCRL   | 223.6   | 299.4   | 168.6   | 221.6   | 156.7   | 287     | 180.9   | 232.9   |
| ODC1   | 4203.9  | 5386.7  | 3250.5  | 2275.3  | 1701.6  | 3566.5  | 2885.7  | 5256.4  |
| ODF1   | 82.8    | 98.9    | 87.2    | 92.4    | 85.1    | 90.4    | 85.7    | 94.2    |
| ODF2   | 342.8   | 459.3   | 270.8   | 247.9   | 182.1   | 243.9   | 323.8   | 457.5   |
| ODF2   | 164.5   | 208.5   | 141.2   | 122.5   | 101.8   | 117.7   | 153.6   | 175.9   |
| ODF2   | 855.4   | 1187.6  | 810     | 655.3   | 545.4   | 1063.1  | 732.7   | 1427    |
| ODF2L  | 96.3    | 110.5   | 101.6   | 102.1   | 97.5    | 99.7    | 117.4   | 97.8    |
| ODF2L  | 106.3   | 107.9   | 90.8    | 79.5    | 93.6    | 85.2    | 95.7    | 97      |
| ODF3L1 | 109     | 110.1   | 110.6   | 90.4    | 88.6    | 100.5   | 103.1   | 102.9   |
| ODF4   | 112.1   | 130.7   | 94      | 92.6    | 84.9    | 84.7    | 117.8   | 112.3   |
| ODZ1   | 79.7    | 79.7    | 89.1    | 86.9    | 83      | 80      | 74.7    | 73.6    |
| ODZ2   | 104     | 109.9   | 106.3   | 101     | 101.4   | 104.8   | 104.4   | 101.7   |
| ODZ3   | 116.8   | 160.7   | 134.9   | 95.5    | 93.8    | 108.7   | 145.1   | 146.4   |
| OFCC1  | 81.1    | 96.5    | 86.8    | 79.3    | 84.7    | 82.8    | 81      | 95.3    |
| OFD1   | 299     | 311.8   | 164.9   | 205.6   | 180.8   | 292     | 239.9   | 408.5   |
| OGDH   | 112.6   | 130.3   | 111.5   | 107.6   | 101.3   | 105.3   | 102     | 105.1   |
| OGDH   | 89.7    | 96.1    | 84.7    | 93.2    | 88      | 90.1    | 84.7    | 101.8   |
| OGDH   | 196.3   | 247.8   | 234.1   | 301.6   | 231.4   | 461.5   | 152.8   | 215.7   |
| OGDHL  | 116.9   | 121.1   | 129.8   | 93.9    | 85.4    | 92.7    | 89.2    | 114.4   |
| OGFOD1 | 171.2   | 219.4   | 99.7    | 87.5    | 74.4    | 88.8    | 135.4   | 183.9   |
| OGFOD1 | 756.9   | 904.4   | 499.6   | 334.7   | 256.8   | 513     | 674.4   | 1109    |
| OGFOD1 | 1434.7  | 1747.6  | 1043.1  | 719     | 507.8   | 683.6   | 1107.8  | 1563.2  |
| OGFOD2 | 115.3   | 120.9   | 107.6   | 106.5   | 92.1    | 94.6    | 109.5   | 119.8   |
| OGFR   | 402.5   | 505.9   | 642     | 409.1   | 369.4   | 467.1   | 365.4   | 637.3   |
| OGFRL1 | 903.1   | 1214.8  | 314.4   | 290.8   | 216     | 368.9   | 801.4   | 1391.8  |
| OGG1   | 222     | 294.7   | 120     | 121.7   | 131.9   | 116     | 163     | 185.6   |
| OGG1   | 455.6   | 567.4   | 269.8   | 242.3   | 202     | 208.7   | 267.8   | 320.3   |
| OGN    | 107.5   | 109.4   | 94.1    | 87      | 90.9    | 82.3    | 106.9   | 109.7   |
| OGN    | 77.9    | 84.4    | 93.1    | 99      | 91.9    | 85      | 79.2    | 80.5    |

|         |        |        |        |        |        |        |        |        |
|---------|--------|--------|--------|--------|--------|--------|--------|--------|
| OGN     | 74.1   | 82.9   | 91.1   | 83.2   | 83.3   | 81.1   | 70.3   | 80.7   |
| OGT     | 1588.6 | 2197.5 | 1271.2 | 1649.2 | 1397.7 | 2116   | 1121   | 1213.6 |
| OGT     | 631.1  | 919.8  | 422.3  | 457.2  | 391.8  | 458.5  | 437.4  | 498.7  |
| OIP5    | 2518.3 | 2886.5 | 1898.8 | 1463.7 | 1123.3 | 1312.7 | 2251.2 | 3330.6 |
| OIT3    | 112.1  | 132.3  | 83.4   | 86.5   | 77.8   | 94.6   | 105.4  | 133    |
| OLFM1   | 107.5  | 119    | 91.9   | 87.8   | 83.9   | 85.8   | 117.2  | 121.8  |
| OLFM1   | 78.6   | 94.1   | 93     | 81.6   | 82.8   | 78.4   | 77.8   | 85.2   |
| OLFM1   | 123.1  | 149.8  | 101.3  | 93.8   | 83.2   | 101.3  | 116.9  | 155    |
| OLFM2   | 94.3   | 107.9  | 86.7   | 69.7   | 96.9   | 79.7   | 92     | 105.3  |
| OLFM3   | 81.7   | 78.1   | 84.5   | 84.1   | 70.5   | 73.3   | 82.4   | 82.3   |
| OLFM4   | 89.2   | 89.3   | 89.1   | 84.2   | 85     | 81.9   | 82.7   | 89.3   |
| OLFML1  | 78.9   | 90.2   | 103.9  | 93.3   | 86.2   | 86.8   | 84.4   | 92.5   |
| OLFML2A | 81.8   | 93.4   | 86.9   | 80.9   | 84     | 91.4   | 86.8   | 94.6   |
| OLFML2B | 100.8  | 98.7   | 96.1   | 89.5   | 86.2   | 95.6   | 96.8   | 98.6   |
| OLFML3  | 211.7  | 275.7  | 181.3  | 237    | 190.5  | 361.1  | 203.1  | 293.3  |
| OLIG2   | 415.5  | 603.7  | 423.3  | 397.7  | 396.5  | 459.5  | 388.8  | 481.3  |
| OLIG3   | 104.7  | 104.2  | 90.4   | 101.8  | 93.6   | 99.3   | 94.8   | 107.2  |
| OLR1    | 86.2   | 106.2  | 85.4   | 88.3   | 90.9   | 101.3  | 84.6   | 95.1   |
| OMA1    | 149.5  | 161.7  | 97.7   | 101.5  | 82.8   | 105.6  | 142.8  | 173.2  |
| OMD     | 113.5  | 139.4  | 97     | 99.5   | 86.7   | 94.1   | 118.8  | 129    |
| OMG     | 98.4   | 103.3  | 85.4   | 81.3   | 87.8   | 82.8   | 87.4   | 104    |
| OMP     | 82.9   | 80     | 87.9   | 89.8   | 78     | 81.1   | 76.4   | 85     |
| ONECUT1 | 116    | 119.3  | 97.2   | 78.5   | 76.3   | 86.9   | 110.5  | 125.5  |
| ONECUT2 | 125.6  | 140.8  | 113.7  | 147.9  | 131.9  | 114.6  | 100.5  | 115.1  |
| ONECUT3 | 72.6   | 86.2   | 99.3   | 88.1   | 82     | 92.5   | 73     | 81.8   |
| OPA1    | 682    | 888.9  | 495.5  | 708.5  | 451    | 866.9  | 562.9  | 1067.3 |
| OPA1    | 94.1   | 91.2   | 95.8   | 91.1   | 81.8   | 90     | 88.8   | 100.1  |
| OPA3    | 136.4  | 160.1  | 94.6   | 96.3   | 94.8   | 86.6   | 133.3  | 143.8  |
| OPA3    | 595.9  | 741.2  | 269.6  | 397.3  | 295.3  | 221    | 523.4  | 492.5  |
| OPCML   | 90.4   | 99.1   | 87.5   | 78.2   | 76.9   | 82.2   | 86.2   | 93.7   |
| OPCML   | 119.5  | 130.8  | 101.9  | 112.9  | 97.6   | 111.2  | 113.5  | 122.9  |
| OPHN1   | 83.3   | 99.4   | 98.1   | 88.5   | 88.3   | 88.1   | 92.4   | 98.2   |
| OPLAH   | 137.2  | 158.6  | 116.9  | 118.2  | 100.3  | 114.6  | 122.4  | 158.8  |
| OPLAH   | 563.8  | 648    | 501.7  | 576.5  | 480.7  | 622.9  | 426.9  | 575.5  |
| OPN1LW  | 99.3   | 101.2  | 89.9   | 84.6   | 80.9   | 83.6   | 106.9  | 105.4  |
| OPN1MW  | 77.6   | 80.8   | 91.7   | 87.7   | 77.1   | 87.9   | 78.2   | 83.3   |
| OPN1SW  | 99.3   | 113.5  | 110.2  | 104.9  | 103.8  | 92.5   | 103.7  | 103.7  |
| OPN3    | 535.3  | 796.7  | 387    | 294.5  | 237.8  | 353.2  | 426.2  | 644.5  |
| OPN3    | 179    | 226.5  | 134.3  | 98.9   | 98.8   | 122.1  | 144.5  | 170.9  |
| OPN3    | 242.4  | 307.5  | 152.2  | 119.7  | 106.2  | 121.6  | 186.4  | 236.7  |
| OPN4    | 83.7   | 98     | 88.1   | 78.3   | 86.4   | 86.9   | 84.6   | 95.2   |
| OPN4    | 83.9   | 97.4   | 93.9   | 82.9   | 84.8   | 94.1   | 88.8   | 98.7   |
| OPN5    | 87.7   | 98.1   | 98.5   | 93.1   | 92.8   | 90.5   | 87.4   | 92.1   |
| OPN5    | 117.1  | 127.6  | 104.7  | 93.3   | 90     | 94     | 116    | 124.9  |
| OPRD1   | 141.6  | 176.9  | 107.4  | 90.2   | 91.7   | 102    | 143.7  | 140.1  |
| OPRK1   | 131.1  | 149.6  | 99.2   | 103.6  | 98.4   | 93.8   | 127.5  | 124.1  |
| OPRL1   | 345.9  | 366.7  | 263.4  | 312.7  | 264.4  | 351.3  | 251.5  | 273.4  |
| OPRL1   | 105.3  | 141.4  | 89     | 89.3   | 92.4   | 88.8   | 123.2  | 139.6  |
| OPRL1   | 81.8   | 94.6   | 81.9   | 75.5   | 79     | 74.5   | 87.2   | 94.5   |
| OPRM1   | 166.5  | 194    | 115.5  | 115.6  | 99.2   | 115.2  | 144.8  | 166.1  |

|         |        |       |       |       |       |       |       |        |
|---------|--------|-------|-------|-------|-------|-------|-------|--------|
| OPRM1   | 66.1   | 79    | 86.5  | 81.5  | 87.3  | 84.1  | 78.8  | 74     |
| OPRM1   | 155.2  | 159   | 118.4 | 101.5 | 103.1 | 112.6 | 148.4 | 158.8  |
| OPRM1   | 78.5   | 91    | 85.6  | 79.9  | 80.6  | 81.8  | 83.1  | 85.5   |
| OPRM1   | 71.9   | 78.6  | 79.1  | 79    | 72.7  | 78.8  | 75.9  | 76.8   |
| OPRM1   | 78.3   | 96.4  | 89.7  | 89    | 84.6  | 93.4  | 89    | 97.7   |
| OPRS1   | 233.5  | 345.3 | 217.3 | 198.8 | 185.6 | 300.5 | 212.2 | 564.1  |
| OPRS1   | 1213.8 | 1457  | 686.9 | 443.2 | 345   | 650.9 | 936   | 1884.6 |
| OPTC    | 93.7   | 102.9 | 98.9  | 96.5  | 94.2  | 96.2  | 101.8 | 96     |
| OPTN    | 140.3  | 156.5 | 147.2 | 165.6 | 202.4 | 180.6 | 130.8 | 165.9  |
| OR10A2  | 83.2   | 96.9  | 88    | 83.7  | 83.3  | 87.3  | 92    | 96.4   |
| OR10A3  | 82.6   | 90.4  | 94.1  | 80.8  | 78.6  | 84.3  | 84.7  | 88     |
| OR10A4  | 79.9   | 87.5  | 86.4  | 87.5  | 81.9  | 76.9  | 87.3  | 88.2   |
| OR10A5  | 73.2   | 83.2  | 83    | 74.8  | 73.6  | 74.8  | 71.7  | 73.6   |
| OR10A6  | 97.4   | 119.5 | 90.3  | 88.7  | 93.1  | 89.9  | 100.5 | 95     |
| OR10A7  | 101.3  | 110   | 96.1  | 93    | 97.1  | 92.1  | 94.1  | 116.8  |
| OR10AD1 | 97.5   | 101   | 105.6 | 99.5  | 93    | 98.2  | 101.8 | 111.2  |
| OR10AG1 | 102.9  | 114.1 | 81.9  | 79.9  | 80.2  | 87.1  | 103.5 | 95.8   |
| OR10C1  | 75     | 77    | 94.4  | 91.5  | 87.1  | 90.8  | 81.1  | 77.8   |
| OR10G2  | 90.4   | 116.6 | 95.3  | 86.5  | 83.1  | 81.6  | 97    | 97.9   |
| OR10G3  | 81.2   | 98.7  | 98.1  | 94.1  | 91.8  | 97.6  | 82.4  | 94     |
| OR10G4  | 83.7   | 99.2  | 92.2  | 83.7  | 89.5  | 91.4  | 91.9  | 97.9   |
| OR10G7  | 100.3  | 111   | 97.2  | 94.6  | 86.1  | 89    | 97.9  | 101.3  |
| OR10G8  | 79.8   | 93.5  | 103.7 | 89.3  | 82.5  | 90.7  | 82.9  | 87.3   |
| OR10G9  | 77.9   | 81.8  | 93.7  | 82.6  | 81.3  | 77.7  | 78.9  | 84.3   |
| OR10H1  | 70.9   | 84    | 83.4  | 76.9  | 76.9  | 79    | 73.8  | 82.1   |
| OR10H2  | 88.5   | 95    | 87.3  | 79.5  | 79    | 83.9  | 88.2  | 93     |
| OR10H3  | 82     | 89.4  | 95.9  | 90.1  | 88.4  | 94.5  | 90.6  | 87.7   |
| OR10H4  | 77.5   | 73.8  | 93.9  | 84.2  | 76.3  | 81.8  | 77.3  | 77.9   |
| OR10H5  | 96.3   | 95.8  | 90.4  | 85.4  | 87.4  | 78.7  | 84.3  | 103    |
| OR10J1  | 117.5  | 128.1 | 116.6 | 111.4 | 96.1  | 101.8 | 124.3 | 120.3  |
| OR10J3  | 75.6   | 89    | 97.5  | 88.5  | 79.8  | 86.5  | 78.8  | 80     |
| OR10J5  | 74.3   | 88.2  | 99.9  | 95.6  | 83.5  | 88.7  | 86.6  | 88.4   |
| OR10K1  | 82.1   | 90    | 99.5  | 93.6  | 87.9  | 85.3  | 82.7  | 78.2   |
| OR10K2  | 72.9   | 80.7  | 98.6  | 82.4  | 88.1  | 87.8  | 80.4  | 93.3   |
| OR10P1  | 79     | 87.7  | 98.9  | 84.7  | 84.3  | 88.5  | 87.7  | 80.3   |
| OR10Q1  | 68.6   | 81.6  | 91.8  | 82.2  | 76.5  | 83.5  | 72.6  | 81.5   |
| OR10R2  | 93.7   | 90.7  | 104.8 | 88.5  | 87.9  | 96.2  | 87.1  | 89.6   |
| OR10S1  | 86.7   | 98.2  | 107.2 | 97.8  | 97.7  | 100.5 | 83.3  | 95.6   |
| OR10T2  | 81.1   | 95.5  | 89.6  | 83.8  | 86.3  | 84.5  | 94.6  | 101.8  |
| OR10V1  | 82.8   | 103.5 | 79.4  | 91.9  | 79.6  | 91.4  | 85.2  | 108.9  |
| OR10W1  | 89.9   | 93.1  | 94.4  | 96.2  | 87.8  | 103.4 | 83    | 87.9   |
| OR10X1  | 82.7   | 96.2  | 94.8  | 82.6  | 80.7  | 80.4  | 86.6  | 99.1   |
| OR10Z1  | 81.7   | 92.5  | 86.6  | 86.3  | 74    | 86.8  | 92.6  | 95.4   |
| OR11A1  | 89     | 105   | 93.1  | 89.2  | 79.6  | 74    | 85.4  | 88.5   |
| OR11G2  | 104.2  | 124.7 | 89.7  | 80.8  | 89.6  | 78.6  | 98.4  | 100.7  |
| OR11H1  | 89.6   | 109.9 | 90.5  | 83.7  | 76.4  | 77.4  | 89    | 106    |
| OR11H12 | 92.8   | 108.3 | 98.2  | 96.8  | 88.3  | 90.3  | 89.8  | 95.3   |
| OR11H12 | 141.2  | 156   | 102.5 | 95.5  | 89.5  | 93.3  | 140.8 | 146.1  |
| OR11H4  | 104.2  | 106.1 | 107.2 | 87.5  | 96.5  | 103.9 | 97.4  | 107.3  |
| OR11H6  | 85.2   | 82.4  | 86.7  | 81.5  | 79.2  | 88.7  | 89.5  | 86.6   |

|         |       |       |       |       |       |       |       |       |
|---------|-------|-------|-------|-------|-------|-------|-------|-------|
| OR11L1  | 176.1 | 201.5 | 137.1 | 114.3 | 92.4  | 116.6 | 143.3 | 179.6 |
| OR12D2  | 100.1 | 113.8 | 104.9 | 98.2  | 89.2  | 97.9  | 101.2 | 102.9 |
| OR12D3  | 78.4  | 93.8  | 85.3  | 82.4  | 80.4  | 87.4  | 91.7  | 95.3  |
| OR13A1  | 94.3  | 103.2 | 108.5 | 107.8 | 80.7  | 97.2  | 99.1  | 112.8 |
| OR13C2  | 97.8  | 90.8  | 104.4 | 86.7  | 88.4  | 92.6  | 91.4  | 94.7  |
| OR13C3  | 96.4  | 93.4  | 92    | 87.3  | 85.4  | 76    | 81    | 87    |
| OR13C4  | 74.8  | 98.4  | 82.1  | 84.5  | 88.5  | 81.6  | 78.8  | 97.6  |
| OR13C5  | 78.4  | 82.9  | 86.7  | 84.1  | 87.3  | 81.9  | 87.9  | 82.4  |
| OR13C8  | 82.1  | 87.7  | 96.7  | 94.3  | 77.8  | 85    | 89.7  | 86.9  |
| OR13C9  | 98.6  | 122.3 | 103.9 | 88.5  | 89.6  | 93.9  | 101.1 | 98.9  |
| OR13D1  | 76    | 92.4  | 101.9 | 80.1  | 87.6  | 94.4  | 78.3  | 84.2  |
| OR13F1  | 84    | 88.9  | 91.7  | 77.9  | 77.8  | 85    | 79.6  | 80.5  |
| OR13G1  | 82.4  | 92.2  | 101.6 | 98    | 88.5  | 97.3  | 85.4  | 85.8  |
| OR13H1  | 98.6  | 111.6 | 88.7  | 88.4  | 77.6  | 93    | 100.1 | 109.2 |
| OR13J1  | 81.3  | 99.9  | 92.8  | 94.8  | 89.5  | 89.6  | 84    | 70.8  |
| OR1A1   | 81.7  | 99.4  | 95.1  | 91.6  | 80.7  | 89.8  | 86.9  | 102.3 |
| OR1A2   | 91    | 111.4 | 107.2 | 93.1  | 93.5  | 91.1  | 93.4  | 112.7 |
| OR1B1   | 85.9  | 93.7  | 93.2  | 89.6  | 93    | 86.9  | 91    | 101.6 |
| OR1C1   | 92.1  | 101.8 | 93.4  | 90.4  | 84    | 96.3  | 95    | 94.3  |
| OR1D2   | 135   | 176.6 | 100.7 | 93.7  | 92.3  | 88.8  | 145.6 | 159.9 |
| OR1D4   | 102.3 | 115.3 | 103.1 | 96.6  | 89.6  | 89.2  | 112.2 | 102.7 |
| OR1E1   | 93.9  | 123.4 | 91.4  | 88    | 88.6  | 88.7  | 106.1 | 113.7 |
| OR1E2   | 77.5  | 85    | 82.6  | 78.1  | 75    | 78.8  | 79.9  | 79.5  |
| OR1F1   | 84.8  | 97.4  | 90.7  | 90.5  | 83.8  | 81.1  | 92.2  | 90.9  |
| OR1F2   | 81.6  | 80.2  | 90.8  | 97.3  | 88.3  | 84.1  | 89.3  | 91.7  |
| OR1G1   | 109   | 141.3 | 94.6  | 92.6  | 89.2  | 89.3  | 110.1 | 102   |
| OR1I1   | 95.9  | 121.1 | 93.1  | 86.4  | 79.4  | 86.3  | 91.8  | 114.9 |
| OR1J1   | 92.5  | 98.8  | 99.1  | 98.4  | 92.6  | 93.2  | 94    | 106.8 |
| OR1J2   | 103.2 | 127.4 | 102.9 | 91.3  | 88    | 105.2 | 100.2 | 106.1 |
| OR1J4   | 99.4  | 108.9 | 99.4  | 95.8  | 84.4  | 89.6  | 92.6  | 107.2 |
| OR1K1   | 100.6 | 130.4 | 78.4  | 91.7  | 83.5  | 78.8  | 93.4  | 119   |
| OR1L1   | 81.4  | 93.3  | 100.4 | 98.4  | 87.3  | 87.9  | 91.9  | 101.2 |
| OR1L3   | 71    | 80.5  | 92.5  | 78.5  | 76.2  | 72.9  | 76.4  | 83.7  |
| OR1L4   | 88.7  | 94.2  | 98.6  | 94.4  | 84.1  | 87.3  | 93.3  | 106.4 |
| OR1L6   | 106.9 | 127.6 | 84.5  | 92.4  | 78.9  | 93.6  | 99.4  | 118.2 |
| OR1L8   | 108.5 | 127.6 | 93.5  | 89.8  | 82.3  | 92.3  | 111.5 | 112.5 |
| OR1M1   | 81.2  | 88    | 86.8  | 90.1  | 83.5  | 89.1  | 86.7  | 78.3  |
| OR1N1   | 97.9  | 110.6 | 99.8  | 102   | 96.2  | 90.2  | 95.4  | 96    |
| OR1N2   | 110.9 | 113.1 | 98.5  | 93.8  | 86.4  | 96.5  | 112.2 | 114.5 |
| OR1Q1   | 85.7  | 85.1  | 82    | 77.2  | 77.5  | 78.9  | 80.2  | 83.1  |
| OR1S1   | 80.7  | 83.9  | 87.4  | 85.1  | 79.8  | 79.5  | 80.8  | 77.3  |
| OR1S2   | 68    | 83.7  | 90.4  | 83.3  | 85.6  | 83.8  | 74.5  | 85.4  |
| OR2A1   | 128.4 | 172.5 | 124.4 | 118.6 | 114.9 | 112.4 | 130.4 | 145.9 |
| OR2A12  | 87.5  | 93.5  | 91.3  | 85.7  | 75.9  | 87.5  | 86.9  | 88.2  |
| OR2A14  | 106.4 | 128.4 | 95.3  | 87.3  | 85.3  | 78.2  | 110.4 | 130.7 |
| OR2A2   | 103.2 | 114.3 | 88.3  | 93.1  | 79.5  | 88.8  | 100   | 110   |
| OR2A20P | 115.2 | 150.3 | 98.7  | 86.4  | 77.8  | 88.2  | 112.8 | 153.7 |
| OR2A25  | 93.5  | 116.2 | 94.8  | 79.9  | 83.7  | 95.3  | 96.9  | 112.3 |
| OR2A42  | 100.1 | 101.5 | 82    | 80.8  | 76.8  | 80    | 100.1 | 133.8 |
| OR2A5   | 140.3 | 167.5 | 103.3 | 105.5 | 94.4  | 107.8 | 136   | 156.1 |

|        |       |       |       |       |       |       |       |       |
|--------|-------|-------|-------|-------|-------|-------|-------|-------|
| OR2A7  | 85.5  | 107.2 | 98.6  | 89.6  | 74.6  | 86.2  | 86    | 96.4  |
| OR2A9P | 226.8 | 338.3 | 220.1 | 194.5 | 170.6 | 208.1 | 230.4 | 388.1 |
| OR2AE1 | 81.4  | 92.9  | 87.8  | 81.2  | 79.8  | 86    | 80    | 88.8  |
| OR2AG1 | 88.2  | 101.2 | 107.9 | 99.5  | 109.5 | 110   | 85.1  | 97.1  |
| OR2AG2 | 88.6  | 109.1 | 99.3  | 82.5  | 95    | 90.4  | 98.6  | 98.9  |
| OR2AK2 | 130.5 | 135.2 | 91.5  | 93.2  | 79.8  | 93.7  | 130.9 | 135.6 |
| OR2AT4 | 88.9  | 97.2  | 77.6  | 80.1  | 73.7  | 77.7  | 99.9  | 91.3  |
| OR2B11 | 87.6  | 99.4  | 92.2  | 91    | 93.3  | 92.3  | 88.5  | 89.4  |
| OR2B2  | 96.6  | 131.4 | 99.5  | 92    | 92.3  | 93.2  | 99.2  | 116.7 |
| OR2B3  | 85.6  | 99.7  | 83.8  | 91.3  | 81    | 78.4  | 95.7  | 108   |
| OR2B6  | 85.1  | 85.9  | 102.7 | 97.7  | 98.8  | 89.8  | 90.1  | 87.8  |
| OR2C1  | 107.4 | 113.3 | 93.6  | 86.3  | 81.4  | 92.5  | 88.2  | 112   |
| OR2C3  | 95.2  | 107.7 | 86.1  | 97.9  | 84.6  | 92.3  | 89.8  | 104.1 |
| OR2D2  | 91.6  | 93.4  | 86.2  | 88.3  | 85.2  | 84    | 84.6  | 94.7  |
| OR2D3  | 87.6  | 106.8 | 98.8  | 85.8  | 90.4  | 79.9  | 87.9  | 83.1  |
| OR2F1  | 82.1  | 99.7  | 84.8  | 78    | 82.9  | 85.7  | 82.4  | 91.7  |
| OR2F2  | 88.6  | 109.7 | 92.9  | 88.2  | 84.8  | 83.5  | 92.8  | 96.7  |
| OR2G2  | 90    | 100.8 | 90.2  | 89.9  | 83.3  | 92    | 93.5  | 99.8  |
| OR2G3  | 99.9  | 102.8 | 102   | 94.9  | 103.4 | 98.5  | 98.1  | 87.8  |
| OR2G6  | 82.4  | 91.5  | 80.7  | 86.1  | 81.6  | 82.7  | 78.8  | 92    |
| OR2H1  | 79.3  | 81.1  | 101.1 | 87.5  | 80    | 82.1  | 75    | 82.5  |
| OR2H2  | 179.2 | 226.3 | 118.4 | 106.2 | 88.6  | 106.6 | 170.1 | 195.2 |
| OR2J2  | 79.2  | 79.5  | 89.2  | 83.5  | 87.6  | 82.6  | 79.6  | 83.7  |
| OR2J3  | 95.5  | 90.2  | 101.4 | 87.6  | 85.6  | 82.1  | 93.2  | 99    |
| OR2K2  | 73.1  | 80.7  | 84.4  | 83.5  | 74.7  | 76.6  | 71.8  | 74    |
| OR2L13 | 83.7  | 102.7 | 93.8  | 87.2  | 86.1  | 86.8  | 86.5  | 89.2  |
| OR2L1P | 75.7  | 82.3  | 97.2  | 95.5  | 75.7  | 82.5  | 76.6  | 82.1  |
| OR2L2  | 81.1  | 82.6  | 92.6  | 83.9  | 76.6  | 83.6  | 73.6  | 76.9  |
| OR2L3  | 135.2 | 146.1 | 105.8 | 102.2 | 89.3  | 94.9  | 117.6 | 158.4 |
| OR2L8  | 94.5  | 101.1 | 90.3  | 84.6  | 72.9  | 87    | 99.7  | 100.5 |
| OR2M1P | 87.5  | 100.7 | 80.4  | 78.7  | 87.9  | 90.6  | 80.5  | 95.3  |
| OR2M2  | 109.6 | 110.5 | 95.5  | 78.7  | 80.6  | 87.2  | 110.7 | 107.3 |
| OR2M3  | 78.2  | 94.4  | 93.5  | 84.7  | 81.9  | 91.8  | 84    | 89    |
| OR2M4  | 90.2  | 88.5  | 89.8  | 88.3  | 88.2  | 95.9  | 79.9  | 88.1  |
| OR2M5  | 88.4  | 112.4 | 97.9  | 88.2  | 84.4  | 89.4  | 103   | 110.6 |
| OR2M7  | 81.6  | 91.3  | 99.1  | 83.4  | 84.9  | 91.7  | 85.7  | 89    |
| OR2S2  | 83.5  | 91.3  | 101.2 | 89.5  | 86.9  | 86    | 84.2  | 97.3  |
| OR2T1  | 116   | 139.1 | 90.3  | 82.2  | 83.3  | 92.4  | 113.4 | 137.9 |
| OR2T10 | 80.3  | 95.7  | 86.9  | 88.4  | 90.8  | 69.9  | 72.9  | 80.2  |
| OR2T11 | 112.4 | 125.5 | 95.5  | 92.3  | 94.2  | 106.3 | 109   | 123.3 |
| OR2T12 | 76.6  | 85.2  | 87.9  | 68.1  | 82    | 79    | 79.3  | 78.9  |
| OR2T27 | 71.9  | 94.8  | 87.1  | 81.7  | 83.9  | 79.6  | 81.2  | 82.6  |
| OR2T3  | 84.7  | 79.9  | 86.7  | 82.8  | 87.8  | 74.6  | 75.3  | 78.7  |
| OR2T33 | 106.6 | 120.1 | 94.4  | 98.3  | 97.4  | 89.8  | 116.7 | 101.4 |
| OR2T35 | 95.2  | 109.6 | 94.2  | 82.6  | 78.5  | 92.1  | 106.4 | 102.1 |
| OR2T4  | 82.5  | 90.9  | 86.1  | 80.3  | 77.5  | 78.7  | 78.6  | 95.5  |
| OR2T5  | 85.5  | 85.7  | 89.3  | 84.2  | 91.3  | 87.5  | 82.9  | 85.7  |
| OR2T6  | 88.4  | 104.1 | 104.2 | 97.8  | 90.5  | 98.6  | 95.1  | 108.9 |
| OR2T8  | 105.8 | 134.4 | 90.7  | 78.1  | 72.7  | 79.1  | 114.8 | 125.2 |
| OR2V2  | 89.9  | 96.7  | 99.5  | 96.6  | 94.5  | 90.8  | 96.5  | 101.8 |

|        |       |       |       |       |       |       |       |       |
|--------|-------|-------|-------|-------|-------|-------|-------|-------|
| OR2W1  | 81.4  | 100   | 78.2  | 70.9  | 70    | 78.4  | 85    | 95.1  |
| OR2W3  | 129.9 | 153   | 97.1  | 107.7 | 114.2 | 94.9  | 126.4 | 116.7 |
| OR2W5  | 102.3 | 121.9 | 125.2 | 112.3 | 98.2  | 122.3 | 89.4  | 103.3 |
| OR2Y1  | 75.8  | 81.6  | 99.3  | 96.8  | 86.8  | 94.5  | 68.7  | 86.2  |
| OR2Z1  | 87.3  | 103.9 | 86.3  | 93.3  | 92    | 82.2  | 89.8  | 98.9  |
| OR3A1  | 111.8 | 132.1 | 93.6  | 88.4  | 86.6  | 88.1  | 101.3 | 140   |
| OR3A2  | 104.1 | 107.4 | 102.7 | 101.1 | 89.8  | 99.6  | 100.1 | 107   |
| OR3A3  | 76.4  | 93.2  | 92.7  | 78.7  | 79.4  | 79.3  | 81.2  | 88.1  |
| OR3A4  | 199.9 | 290.3 | 146.2 | 180   | 152.6 | 191.9 | 203.9 | 252.7 |
| OR4A15 | 148.4 | 160.7 | 106   | 85.2  | 77.1  | 91.1  | 148.7 | 165.6 |
| OR4A16 | 98.9  | 104.4 | 85.9  | 88.6  | 75    | 82.2  | 88    | 110.7 |
| OR4A47 | 80.2  | 97.2  | 96.1  | 79.6  | 82.4  | 81.5  | 75.9  | 94.4  |
| OR4A5  | 67    | 84.7  | 93    | 87    | 81.5  | 90.7  | 76.8  | 87.1  |
| OR4B1  | 87.2  | 101.3 | 105.6 | 89    | 93.8  | 87.7  | 89    | 89.2  |
| OR4C11 | 105.4 | 114.1 | 99.7  | 91.6  | 91.6  | 98.2  | 100.5 | 109.5 |
| OR4C12 | 81.9  | 96.4  | 83.7  | 80    | 88.4  | 86.6  | 78.4  | 85.4  |
| OR4C13 | 100.4 | 113.4 | 78.5  | 88.2  | 84    | 93.3  | 98.5  | 116.7 |
| OR4C15 | 115.8 | 142.6 | 92.1  | 89.8  | 95.8  | 92.7  | 119.2 | 117.7 |
| OR4C16 | 153.6 | 176.2 | 92.3  | 92.8  | 87.8  | 96.4  | 153.6 | 183.7 |
| OR4C3  | 79.6  | 81.8  | 92.9  | 83.5  | 87.7  | 94.6  | 79.1  | 84.1  |
| OR4C45 | 101.2 | 115.6 | 101   | 99.8  | 100.8 | 99.9  | 96.8  | 88.9  |
| OR4C46 | 134   | 158.5 | 90.1  | 88.8  | 77.9  | 94.1  | 120.4 | 135.3 |
| OR4C6  | 91.3  | 109.6 | 87.6  | 91.4  | 83.7  | 85.5  | 86.2  | 96    |
| OR4D1  | 179.7 | 218.5 | 120.7 | 95.8  | 89.8  | 101.7 | 160.8 | 204.7 |
| OR4D10 | 81.7  | 111.2 | 90.6  | 81.1  | 85.4  | 86.4  | 102.5 | 89.7  |
| OR4D11 | 103.8 | 118.5 | 108.3 | 100.4 | 92.7  | 103.9 | 98.9  | 117.5 |
| OR4D2  | 127.2 | 147.8 | 88.6  | 79.4  | 74.8  | 84.1  | 106.3 | 119.9 |
| OR4D5  | 103.7 | 115.5 | 88.9  | 84    | 83.1  | 85.9  | 107.3 | 107.8 |
| OR4D6  | 91.6  | 118.2 | 104.3 | 98    | 89.4  | 98.5  | 104.5 | 99.1  |
| OR4D9  | 75.4  | 84.7  | 93.1  | 89.6  | 80.4  | 78.5  | 86.1  | 91    |
| OR4E2  | 90.8  | 92.6  | 97.8  | 89.1  | 89.7  | 87.3  | 93.8  | 98.6  |
| OR4F15 | 81.9  | 92.5  | 85.2  | 89.4  | 76.9  | 87.6  | 85.2  | 91.6  |
| OR4F21 | 98.8  | 113.4 | 99.2  | 97.2  | 86.8  | 102   | 96.4  | 105.5 |
| OR4F3  | 84.4  | 99.3  | 102.7 | 90.4  | 93    | 88.8  | 90.5  | 84.3  |
| OR4F4  | 104   | 126.9 | 107.4 | 103.8 | 91.6  | 102.6 | 101.5 | 111.7 |
| OR4F5  | 86.4  | 96.8  | 101.5 | 98.1  | 99.3  | 98.5  | 87.4  | 93.8  |
| OR4F6  | 82.8  | 85.1  | 101.9 | 85.1  | 90.3  | 83.6  | 85    | 88.3  |
| OR4K1  | 102.6 | 105.2 | 85.5  | 84.2  | 79.3  | 87.5  | 99    | 95.3  |
| OR4K13 | 97.3  | 114.1 | 99.4  | 92.2  | 93.9  | 85.6  | 92.9  | 100.1 |
| OR4K14 | 94.1  | 106.1 | 107.5 | 94.1  | 88.1  | 88.2  | 89.4  | 102.3 |
| OR4K15 | 76.9  | 81.3  | 92.6  | 82.9  | 79.7  | 91.6  | 79    | 80.8  |
| OR4K17 | 77.4  | 89.1  | 94.9  | 89.7  | 82    | 85.3  | 90.3  | 100.4 |
| OR4K2  | 76.3  | 82.4  | 89.4  | 97.8  | 97.5  | 93.8  | 78    | 83.5  |
| OR4K5  | 83.6  | 91.5  | 85.9  | 89.6  | 90.2  | 89    | 78.7  | 86.2  |
| OR4L1  | 121.1 | 135.9 | 101.9 | 77.5  | 83.6  | 85    | 112.5 | 126.9 |
| OR4M1  | 88    | 90.3  | 83.1  | 86.4  | 81.5  | 85.8  | 85.7  | 86.9  |
| OR4M2  | 89    | 95.5  | 90.3  | 74.4  | 78.8  | 86    | 84.4  | 102.8 |
| OR4N2  | 103.9 | 104.2 | 94.8  | 86.6  | 81    | 83.9  | 90.2  | 103.9 |
| OR4N4  | 74.4  | 81.2  | 94.6  | 81.7  | 79.5  | 88    | 84.1  | 78.9  |
| OR4N5  | 83.6  | 84.2  | 101.3 | 89.4  | 86.3  | 91.7  | 87.3  | 81.1  |

|        |       |       |       |       |       |       |       |       |
|--------|-------|-------|-------|-------|-------|-------|-------|-------|
| OR4P4  | 119.5 | 167.2 | 102.6 | 101.9 | 91.3  | 110.5 | 120.1 | 132.1 |
| OR4Q3  | 68.3  | 75.1  | 96.9  | 83.9  | 88.1  | 94.9  | 73.1  | 83.7  |
| OR4S1  | 115.4 | 160.5 | 88.6  | 88.3  | 88    | 91.6  | 116   | 133.6 |
| OR4S2  | 82.2  | 89    | 87.1  | 88.6  | 94    | 92.3  | 85.1  | 89.8  |
| OR4X1  | 89.8  | 109.7 | 99.7  | 89.2  | 94.4  | 81.1  | 99.8  | 98.1  |
| OR4X2  | 83.9  | 85.2  | 94.3  | 74.8  | 80    | 87.2  | 83.1  | 91.1  |
| OR51A2 | 85.4  | 90.1  | 94.3  | 79.2  | 78    | 83.8  | 80.3  | 92    |
| OR51A4 | 71.6  | 79.9  | 87.8  | 84.9  | 78.6  | 76.8  | 76.7  | 73.8  |
| OR51A7 | 96.3  | 103   | 95.2  | 96.6  | 88.4  | 95.5  | 100.6 | 99.5  |
| OR51B2 | 96.2  | 115.1 | 94.1  | 87.7  | 76.8  | 91.1  | 89.7  | 103.4 |
| OR51B4 | 85.5  | 100.4 | 88.2  | 79.4  | 75.9  | 87.1  | 86.1  | 95.1  |
| OR51B5 | 79.8  | 107   | 96.3  | 81.4  | 76    | 81.8  | 82.2  | 83.9  |
| OR51B6 | 89.8  | 117.5 | 91.1  | 82    | 77.8  | 82.4  | 87.3  | 95.7  |
| OR51D1 | 86.7  | 93.4  | 106.9 | 97.1  | 93.8  | 99.4  | 81.3  | 86    |
| OR51E1 | 73.2  | 80.7  | 93.3  | 85.8  | 91.5  | 83.8  | 79.8  | 88.5  |
| OR51E2 | 83.8  | 90.8  | 99.6  | 102.3 | 98.9  | 86.3  | 82.2  | 86.3  |
| OR51F1 | 81.5  | 86.7  | 96.7  | 84.9  | 85.8  | 81.4  | 75    | 83.8  |
| OR51F2 | 73.7  | 80.9  | 90.9  | 82.4  | 83.2  | 75.1  | 75.5  | 74.6  |
| OR51G1 | 89.2  | 90.9  | 90.8  | 80.8  | 80.6  | 76.3  | 85.9  | 83.4  |
| OR51G2 | 93.1  | 101.8 | 105.6 | 91.6  | 85.9  | 92    | 82.5  | 109.5 |
| OR51I1 | 85    | 100.2 | 102.6 | 97.1  | 103.2 | 103.2 | 86    | 92.1  |
| OR51I2 | 90.4  | 101.7 | 92.1  | 82.5  | 85.1  | 82.5  | 89.5  | 96.2  |
| OR51L1 | 82.9  | 94.3  | 89    | 85.5  | 79.1  | 81    | 87.2  | 83    |
| OR51M1 | 93.5  | 107.3 | 96.8  | 95.9  | 97.8  | 95.9  | 95.3  | 104.9 |
| OR51Q1 | 122   | 131.2 | 96.6  | 97.5  | 95.6  | 90.7  | 122.3 | 134.7 |
| OR51S1 | 83.1  | 94.3  | 93.2  | 89.6  | 85.4  | 78.9  | 81.5  | 89.4  |
| OR51T1 | 262.6 | 287.9 | 111.2 | 124.8 | 101.2 | 123.1 | 271.4 | 332.5 |
| OR51V1 | 71.4  | 86.9  | 87.6  | 81    | 75.1  | 84    | 74.8  | 80.9  |
| OR52A1 | 73.5  | 85.5  | 86.9  | 76.3  | 78.2  | 83.6  | 95.7  | 97.6  |
| OR52A4 | 76    | 89.2  | 86.1  | 91.7  | 86.6  | 88.1  | 81.6  | 86.7  |
| OR52A5 | 142.7 | 174.2 | 123.3 | 119.5 | 103   | 115.9 | 133.6 | 149.7 |
| OR52B2 | 94    | 106.9 | 90.2  | 80.8  | 87.8  | 89.8  | 93.7  | 103.5 |
| OR52B4 | 82.4  | 86.3  | 83.8  | 85.7  | 76.6  | 78.6  | 78.3  | 83.6  |
| OR52B6 | 118.9 | 130.4 | 108.9 | 92.5  | 89.9  | 99.4  | 125.2 | 118.5 |
| OR52D1 | 133.7 | 159.8 | 100.5 | 97.2  | 95    | 83.9  | 148.1 | 158.6 |
| OR52E2 | 96.6  | 89.4  | 87.1  | 85.8  | 79.5  | 87.1  | 90.4  | 93.2  |
| OR52E4 | 77.8  | 76.9  | 102.9 | 104   | 94.1  | 91.7  | 83.7  | 87.5  |
| OR52E6 | 86.5  | 106.5 | 111   | 92.7  | 94.3  | 93.8  | 93.3  | 97.8  |
| OR52E8 | 79    | 82    | 94.3  | 82.8  | 80.2  | 81.4  | 74.8  | 84.8  |
| OR52H1 | 87.4  | 92.5  | 99.7  | 93.2  | 93.6  | 91    | 91.7  | 85.7  |
| OR52I1 | 89.9  | 87.5  | 88    | 87.3  | 89.7  | 97.7  | 82.4  | 87.7  |
| OR52I2 | 82.2  | 84.9  | 91    | 84.1  | 79.4  | 79.3  | 77.1  | 87.2  |
| OR52J3 | 88.3  | 88.5  | 95.9  | 87.7  | 82    | 82.4  | 84.3  | 80.9  |
| OR52K1 | 115.5 | 136.6 | 118.1 | 96.4  | 104   | 108.2 | 124.3 | 119.2 |
| OR52K2 | 106   | 100.6 | 96.4  | 85.8  | 76.2  | 95.5  | 95.9  | 96.6  |
| OR52L1 | 80.6  | 90.5  | 100.2 | 94.7  | 92.9  | 92.9  | 84.8  | 87.7  |
| OR52M1 | 86.8  | 93.8  | 94    | 97.2  | 90    | 83.9  | 82.4  | 90    |
| OR52N1 | 102.8 | 106.9 | 99.4  | 79.2  | 83.1  | 105.7 | 99.3  | 105.6 |
| OR52N2 | 132.8 | 159.1 | 114.7 | 100.4 | 105.5 | 103.5 | 116.2 | 135.3 |
| OR52N4 | 76.9  | 88.6  | 105.7 | 80.9  | 84.3  | 81.9  | 84.4  | 89.9  |



|        |       |       |       |       |       |       |       |       |
|--------|-------|-------|-------|-------|-------|-------|-------|-------|
| OR52N5 | 101.8 | 119.5 | 102   | 97.6  | 88.8  | 100.6 | 107.9 | 126.1 |
| OR52R1 | 95.9  | 113.2 | 93.5  | 88.6  | 82    | 78.6  | 95.8  | 117.1 |
| OR52W1 | 113.7 | 119.5 | 89.7  | 84.4  | 81.1  | 78.3  | 113.8 | 120.6 |
| OR56A1 | 82.7  | 86.5  | 113   | 103.9 | 101.8 | 101.3 | 88.9  | 81.2  |
| OR56A3 | 74.2  | 84.1  | 79.6  | 84.2  | 86.3  | 88.1  | 80.7  | 79.7  |
| OR56A4 | 102   | 109.2 | 96.7  | 84.5  | 86.8  | 93.1  | 102   | 99.9  |
| OR56B1 | 116.7 | 137.2 | 86.2  | 88.9  | 89.4  | 90.4  | 121.6 | 136.3 |
| OR56B4 | 101.7 | 121.2 | 99.1  | 100.2 | 97    | 103.6 | 102.4 | 113.4 |
| OR5A1  | 91.3  | 94    | 80    | 82.4  | 82.6  | 78.4  | 84.1  | 99    |
| OR5A2  | 91.6  | 99.5  | 84.1  | 78.9  | 68    | 78.5  | 79.8  | 88    |
| OR5AC2 | 84.5  | 101.3 | 106.5 | 92    | 87.5  | 86.2  | 83.5  | 88.2  |
| OR5AK2 | 82.9  | 89.5  | 81.2  | 73.7  | 79.6  | 86.8  | 82.2  | 87.2  |
| OR5AN1 | 100.7 | 102   | 99.5  | 91.6  | 88    | 92    | 92.3  | 101.2 |
| OR5AP2 | 98.8  | 103.1 | 91.4  | 77.2  | 79.5  | 82.4  | 94.2  | 101.5 |
| OR5AR1 | 89.1  | 100.8 | 98.2  | 85    | 85    | 87    | 94.3  | 108.6 |
| OR5AS1 | 93.1  | 107.3 | 83.5  | 87.5  | 82.9  | 85    | 93    | 105.5 |
| OR5AT1 | 81.9  | 104.9 | 91.8  | 85.2  | 92.2  | 94.5  | 80    | 94.9  |
| OR5AU1 | 94.2  | 96.2  | 89.5  | 92.8  | 85.3  | 84.4  | 88.9  | 107.4 |
| OR5AY1 | 87.6  | 109   | 91.4  | 86.1  | 88.7  | 89.8  | 87.6  | 103.5 |
| OR5B12 | 119.9 | 138.3 | 100.5 | 103.3 | 89.6  | 89.1  | 110.5 | 114.8 |
| OR5B17 | 83.1  | 85.2  | 87.5  | 83.9  | 87.9  | 92.6  | 82.2  | 87.3  |
| OR5B2  | 108.3 | 116.6 | 94.3  | 91.5  | 86.1  | 94.4  | 105.9 | 109.2 |
| OR5B21 | 88    | 108.1 | 93.6  | 85.7  | 87.3  | 93.4  | 90.8  | 102.3 |
| OR5B3  | 86    | 89.9  | 103.3 | 91.9  | 88.6  | 84.3  | 90.3  | 98.9  |
| OR5BF1 | 93.3  | 95.4  | 85.7  | 90.2  | 88.7  | 88.7  | 94.8  | 88.8  |
| OR5BU1 | 80.6  | 112.1 | 91.7  | 80.5  | 87.7  | 81.3  | 85.5  | 81.7  |
| OR5C1  | 91.8  | 113.2 | 90.1  | 100.7 | 84    | 93    | 90.7  | 102.2 |
| OR5D13 | 81.9  | 93.5  | 97.5  | 95.8  | 79.6  | 93.5  | 89.2  | 102.2 |
| OR5D14 | 98.6  | 101.8 | 99.6  | 88.1  | 82.3  | 93.8  | 90.6  | 106.9 |
| OR5D16 | 90.5  | 104.8 | 105.3 | 94    | 95.8  | 107.3 | 91.9  | 97.7  |
| OR5D18 | 74.5  | 81    | 87.9  | 73.6  | 71.2  | 73.6  | 76.4  | 78    |
| OR5F1  | 87.3  | 98.6  | 97.7  | 89.6  | 87.9  | 75.6  | 92.2  | 87.5  |
| OR5H1  | 88.5  | 88.7  | 95.1  | 87.7  | 85.2  | 90.2  | 89.6  | 92.1  |
| OR5H14 | 75.7  | 80.7  | 83.4  | 65.3  | 71.9  | 80.3  | 78.1  | 81.8  |
| OR5H15 | 82.3  | 83.9  | 88    | 83.5  | 79.6  | 84.2  | 84.7  | 82.8  |
| OR5H2  | 88    | 86.3  | 90.2  | 81.7  | 81.8  | 83.9  | 84    | 94.3  |
| OR5H6  | 82    | 88.5  | 94.9  | 83.5  | 83.4  | 84.6  | 82.8  | 87.2  |
| OR5I1  | 74.7  | 88.3  | 92.3  | 84.7  | 90.1  | 89.1  | 78.1  | 86.4  |
| OR5J2  | 85.9  | 94.4  | 82.3  | 83.7  | 70.9  | 73.5  | 81.6  | 96.4  |
| OR5K1  | 76.6  | 93.3  | 94.8  | 87.1  | 76.4  | 86.2  | 83.6  | 73.3  |
| OR5K2  | 81.7  | 103.6 | 105.2 | 89.7  | 86.2  | 106.6 | 89.8  | 112.9 |
| OR5K3  | 87.2  | 91.3  | 82.6  | 83.6  | 79    | 88    | 83.6  | 93.7  |
| OR5K4  | 84.6  | 95    | 97.2  | 82.8  | 78.7  | 92.4  | 85    | 90.4  |
| OR5L1  | 106.3 | 121.9 | 93.2  | 88.9  | 83.8  | 93.3  | 102.8 | 107.4 |
| OR5L2  | 77.1  | 80.1  | 84.3  | 86.7  | 73.7  | 89.6  | 72.3  | 81.6  |
| OR5M10 | 94.2  | 97.9  | 94.8  | 91.3  | 83.9  | 92    | 93.6  | 98.3  |
| OR5M11 | 76.6  | 87.1  | 90    | 86.9  | 88    | 82.7  | 78.4  | 81.3  |
| OR5M3  | 124   | 164.8 | 104.7 | 97.9  | 92.5  | 84.5  | 122.2 | 145.4 |
| OR5M8  | 96.7  | 114.8 | 99.9  | 91.2  | 83.9  | 92.7  | 92.3  | 101.6 |
| OR5M9  | 116.8 | 145.2 | 94.3  | 84.1  | 80.9  | 98.6  | 107.8 | 135.2 |

|          |       |       |       |       |       |       |       |       |
|----------|-------|-------|-------|-------|-------|-------|-------|-------|
| OR5P2    | 76.8  | 80.6  | 92.8  | 80.9  | 67.1  | 79.4  | 74.7  | 80.3  |
| OR5P3    | 93    | 117.7 | 105   | 95.6  | 97.3  | 92.8  | 94.3  | 96.3  |
| OR5R1    | 91.3  | 119.8 | 95.2  | 80.9  | 77.4  | 112.1 | 93.8  | 108   |
| OR5T1    | 85    | 91.9  | 82.6  | 73.1  | 75.2  | 78.8  | 85.7  | 85.1  |
| OR5T2    | 78.1  | 85.1  | 80.7  | 92.2  | 83.3  | 91.9  | 83.2  | 80.6  |
| OR5T3    | 94.2  | 106.1 | 92.4  | 95.1  | 87.6  | 93.1  | 95.5  | 102   |
| OR5U1    | 83.7  | 98.9  | 105.4 | 95    | 87.6  | 89.7  | 91.2  | 99.3  |
| OR5V1    | 85.1  | 96    | 107.4 | 92.5  | 94.5  | 96.5  | 85.3  | 100.2 |
| OR5W2    | 94.4  | 110.9 | 85.7  | 78.1  | 75.4  | 86.9  | 89.4  | 106.3 |
| OR6A2    | 92.4  | 95    | 95.8  | 92.6  | 83    | 98.6  | 87.6  | 99    |
| OR6B1    | 98    | 108   | 94.3  | 84.5  | 80.1  | 73.1  | 99.1  | 97.6  |
| OR6B2    | 94    | 108.9 | 89.6  | 91.4  | 89.1  | 91.5  | 84.7  | 96.8  |
| OR6B3    | 83.7  | 105.5 | 98.7  | 93.5  | 82.4  | 81    | 88.5  | 100.2 |
| OR6C1    | 98.2  | 105.2 | 86.2  | 75.1  | 80.6  | 88.6  | 89    | 96.2  |
| OR6C2    | 80.4  | 85.5  | 87.1  | 95.3  | 89.3  | 82    | 85.2  | 87.1  |
| OR6C3    | 134.2 | 139.3 | 96.3  | 87.4  | 81.7  | 87.7  | 119.8 | 121   |
| OR6C4    | 98.7  | 111.2 | 89.7  | 85.6  | 87    | 85.8  | 92.9  | 113.3 |
| OR6C6    | 84.9  | 92.2  | 92.7  | 84.7  | 82.8  | 85.6  | 85    | 89.4  |
| OR6C65   | 92.7  | 103.3 | 101.6 | 89    | 83.8  | 98.9  | 89.9  | 89.4  |
| OR6C68   | 87.6  | 91.7  | 85.5  | 73.3  | 75.5  | 77.1  | 82.1  | 90.2  |
| OR6C70   | 82    | 78.2  | 91.7  | 92.4  | 83.7  | 94.9  | 77.2  | 75.6  |
| OR6C74   | 75.1  | 90.2  | 95.9  | 93.8  | 89.3  | 74.6  | 86.6  | 89.3  |
| OR6C75   | 88.9  | 90.5  | 91.9  | 83.3  | 87    | 78.4  | 88.1  | 98.6  |
| OR6C76   | 91.9  | 109.5 | 86.8  | 83.3  | 77.8  | 86.6  | 79    | 110   |
| OR6F1    | 96    | 108.1 | 97.2  | 86.4  | 78.3  | 89.3  | 110.5 | 106.4 |
| OR6K2    | 91    | 91.9  | 93.4  | 88.4  | 89.1  | 96.6  | 80    | 82.3  |
| OR6K3    | 93.1  | 96.5  | 88.7  | 83.7  | 84.6  | 82.8  | 85.6  | 101.6 |
| OR6K6    | 81.3  | 80.2  | 94.2  | 79.8  | 85    | 81.3  | 83.2  | 92.1  |
| OR6M1    | 84.9  | 104.3 | 87.5  | 88.4  | 91.5  | 75.4  | 87.2  | 105.6 |
| OR6N1    | 90.1  | 94    | 88.7  | 91.7  | 87    | 86.7  | 95.7  | 100.3 |
| OR6N2    | 94.3  | 118.7 | 94.6  | 94    | 87.2  | 78    | 95.4  | 100.8 |
| OR6Q1    | 85.6  | 99    | 95.5  | 82    | 88.9  | 96    | 88.5  | 86.2  |
| OR6S1    | 104.7 | 113   | 93.3  | 85.4  | 76.4  | 80    | 105.7 | 117.4 |
| OR6T1    | 72.5  | 82.8  | 87.3  | 86.6  | 82.7  | 79.7  | 78.9  | 78.5  |
| OR6V1    | 137.8 | 151.1 | 92.9  | 94.3  | 100.2 | 107.4 | 131.3 | 138   |
| OR6W1P   | 88.9  | 89.1  | 101.1 | 81.6  | 85    | 93.8  | 91.5  | 91.2  |
| OR6X1    | 73.6  | 77    | 86.2  | 90.6  | 87.8  | 102.6 | 82.6  | 83    |
| OR6Y1    | 81.6  | 94    | 99.7  | 89.7  | 91.6  | 98.1  | 89.3  | 86.9  |
| OR7A10   | 87.7  | 96.7  | 90.1  | 91    | 81.9  | 92    | 90.8  | 96.9  |
| OR7A17   | 117   | 129.2 | 105.6 | 85.8  | 86.9  | 84.3  | 110.2 | 132.9 |
| OR7A5    | 80    | 80.9  | 88.4  | 84.3  | 81.8  | 89.3  | 84    | 83.9  |
| OR7C1    | 72.1  | 82.5  | 96.9  | 84.6  | 85.6  | 84.4  | 75.1  | 89.7  |
| OR7C2    | 111.1 | 119.7 | 99.6  | 95.1  | 82.3  | 96.1  | 104   | 117.3 |
| OR7D2    | 84.1  | 96    | 88.6  | 82.8  | 78.5  | 83    | 86.9  | 92.9  |
| OR7D4    | 80.6  | 101.2 | 106.8 | 85.3  | 81.9  | 87.3  | 88.4  | 94.5  |
| OR7E156P | 134.8 | 169.7 | 121   | 119.8 | 103.8 | 121.4 | 152.6 | 149.8 |
| OR7E24   | 139.2 | 164   | 96.1  | 100.8 | 90.1  | 95    | 124.2 | 130   |
| OR7E37P  | 79.9  | 90.3  | 85.8  | 80.2  | 77.6  | 78.5  | 81.9  | 92.2  |
| OR7E91P  | 86    | 90.5  | 85.6  | 85    | 78.6  | 80.8  | 80.5  | 86.2  |
| OR7G1    | 115.6 | 120   | 90.2  | 88.3  | 81.1  | 80.4  | 93    | 110   |

|           |         |         |         |         |         |         |         |         |
|-----------|---------|---------|---------|---------|---------|---------|---------|---------|
| OR7G2     | 119.2   | 119.3   | 87.1    | 75.9    | 82.3    | 78.1    | 113.3   | 122.4   |
| OR7G3     | 101     | 121.4   | 102.6   | 96.1    | 92.1    | 109.2   | 109.6   | 113.2   |
| OR8A1     | 95.7    | 97.1    | 101     | 85.9    | 91.5    | 81.2    | 89.9    | 95      |
| OR8B12    | 132.4   | 160.1   | 91.9    | 95.2    | 96.5    | 94.4    | 133.6   | 136.8   |
| OR8B2     | 84.5    | 94.9    | 96.5    | 82.7    | 87.3    | 96.5    | 83.3    | 91.7    |
| OR8B3     | 85.1    | 79.6    | 80      | 79      | 82      | 86.3    | 80.7    | 84.4    |
| OR8B4     | 90.9    | 102.9   | 92.6    | 85.3    | 79.3    | 88.3    | 97.6    | 99.3    |
| OR8B8     | 80.5    | 85.4    | 80.7    | 77.8    | 80.5    | 80.4    | 80.6    | 91.6    |
| OR8D1     | 80.5    | 109.8   | 97.1    | 89.5    | 75.3    | 90.2    | 87.6    | 101.1   |
| OR8D2     | 99.4    | 95.6    | 112.7   | 98.2    | 89.5    | 94.2    | 101.8   | 87.1    |
| OR8D4     | 83.3    | 91.2    | 103.2   | 95.1    | 84.3    | 83.9    | 87.4    | 93.4    |
| OR8G1     | 96.3    | 114.2   | 94.9    | 88.9    | 89.7    | 91.2    | 93.4    | 97      |
| OR8G2     | 99.4    | 119.2   | 98.8    | 96.5    | 86.9    | 99.8    | 105.1   | 114.7   |
| OR8G5     | 89.8    | 86.3    | 87.3    | 92.5    | 83.6    | 88.3    | 89.8    | 92.1    |
| OR8H1     | 103.5   | 102.4   | 97      | 96.7    | 85.9    | 85.6    | 95.6    | 113     |
| OR8H2     | 77.4    | 82.8    | 95.4    | 80.4    | 81.4    | 88.5    | 82.4    | 82.1    |
| OR8H3     | 165.3   | 189.6   | 109.2   | 105.7   | 92.1    | 99.5    | 154.7   | 189.6   |
| OR8I2     | 83.5    | 102.2   | 77.4    | 84.2    | 63.1    | 76      | 94.4    | 89.7    |
| OR8J1     | 84.6    | 76.4    | 94.5    | 84.5    | 81.8    | 87.9    | 80.1    | 77.7    |
| OR8J3     | 90.9    | 101.2   | 101.8   | 83.8    | 91.1    | 88.5    | 94.9    | 94.2    |
| OR8K1     | 77.2    | 91.7    | 97.4    | 93.7    | 83.8    | 85.1    | 77.5    | 81.6    |
| OR8K3     | 83.8    | 94.3    | 90.7    | 93.2    | 91.2    | 82.2    | 96.3    | 103.2   |
| OR8K5     | 101.2   | 130.4   | 94      | 84.6    | 83.9    | 93.1    | 117.8   | 132.8   |
| OR8S1     | 95.4    | 98.5    | 86.8    | 82.6    | 89      | 82.9    | 88.3    | 102.4   |
| OR8U1     | 106.5   | 114.5   | 93.5    | 91.2    | 80.1    | 96.4    | 105.1   | 106.4   |
| OR8U8     | 86      | 73.5    | 85.7    | 85      | 80.2    | 76.1    | 69.8    | 74.4    |
| OR8U9     | 78.6    | 81.6    | 85.5    | 85.8    | 79.3    | 76.7    | 72.5    | 79.8    |
| OR9A2     | 105.2   | 110.4   | 100.4   | 93.3    | 87.9    | 102.1   | 103.3   | 108.4   |
| OR9A4     | 127.5   | 140.2   | 80.6    | 84.6    | 75.9    | 69.1    | 106.3   | 130.3   |
| OR9G1     | 90.6    | 98      | 86.4    | 93.8    | 82.9    | 79.6    | 88.8    | 94      |
| OR9G4     | 79.8    | 80.3    | 88.5    | 87.4    | 82      | 87.6    | 83.5    | 87.9    |
| OR9G9     | 87      | 91.2    | 102.9   | 94.2    | 94.4    | 96.3    | 89.4    | 92      |
| OR9I1     | 95.8    | 92.8    | 117.8   | 96.5    | 107.8   | 107.4   | 86.1    | 90.1    |
| OR9K2     | 85      | 90.2    | 89.6    | 82.1    | 81.3    | 80.9    | 86.2    | 90.3    |
| OR9Q1     | 92.6    | 82.9    | 82.9    | 75.9    | 69.5    | 67.3    | 81      | 87.3    |
| OR9Q2     | 83.9    | 88.2    | 92.3    | 83.9    | 82.5    | 86.4    | 83.6    | 95.6    |
| ORAQV1    | 423.2   | 492.1   | 322.9   | 279     | 277.9   | 321.4   | 365.4   | 321.7   |
| ORC1L     | 400.2   | 581.2   | 457.3   | 293     | 241.1   | 264.5   | 287.3   | 477.2   |
| ORC2L     | 744.4   | 835     | 515.9   | 516.2   | 337     | 706.1   | 570.6   | 926.4   |
| ORC3L     | 1268.4  | 1588.7  | 523.8   | 674.3   | 455.3   | 1075.5  | 1019    | 2239.1  |
| ORC4L     | 118.4   | 133.2   | 106.8   | 113.2   | 104.7   | 117.2   | 106.9   | 140.2   |
| ORC5L     | 1284.9  | 1759.7  | 969.4   | 1056.6  | 771.3   | 1110.2  | 1178.8  | 1900    |
| ORC5L     | 209.8   | 290.4   | 108.2   | 93.7    | 87.1    | 117.1   | 192.9   | 283.4   |
| ORC5L     | 79.1    | 85.8    | 97.7    | 86.9    | 86.8    | 95.7    | 75      | 81.2    |
| ORC6L     | 21583.6 | 23486.3 | 11879.2 | 15510.4 | 14600.1 | 11623.6 | 20971.6 | 22980.4 |
| ORF1-FL49 | 316.9   | 339.8   | 213.4   | 175.6   | 150.7   | 166.9   | 238.5   | 341.3   |
| ORM1      | 527.9   | 671.8   | 366.7   | 416.8   | 366.3   | 573.2   | 460.6   | 693.6   |
| ORM2      | 96.7    | 114.8   | 101.3   | 117.7   | 116.3   | 124.7   | 94.7    | 89.4    |
| ORMDL1    | 251.9   | 283.9   | 140.4   | 132.2   | 131.2   | 156.8   | 191.7   | 264.5   |
| ORMDL2    | 125.8   | 144.6   | 104.3   | 91.9    | 102.4   | 93.5    | 110.1   | 137.3   |

|          |        |        |        |        |        |        |        |        |
|----------|--------|--------|--------|--------|--------|--------|--------|--------|
| ORMDL3   | 137.5  | 155.6  | 110.5  | 100.2  | 107    | 102.1  | 121.3  | 188.4  |
| OS9      | 198.9  | 246.1  | 154.8  | 160    | 140.9  | 192.9  | 177.8  | 290.5  |
| OSAP     | 88.9   | 97     | 100.8  | 90.3   | 86.2   | 86.3   | 81.4   | 115.6  |
| OSBP     | 1500.8 | 2144.2 | 1076.7 | 1255.4 | 1056.5 | 1708.2 | 1659.9 | 1910.1 |
| OSBP2    | 97.4   | 104.9  | 99.5   | 90.6   | 85.6   | 101.3  | 89.9   | 108    |
| OSBPL10  | 91.4   | 99.5   | 92.8   | 85.8   | 87.9   | 87.9   | 84.8   | 108.1  |
| OSBPL11  | 131.7  | 150    | 112.1  | 117.9  | 106.9  | 125.8  | 148.3  | 208.7  |
| OSBPL1A  | 357.6  | 447.4  | 147.7  | 199.6  | 170.6  | 218.8  | 279.2  | 338.7  |
| OSBPL1A  | 91.3   | 111.7  | 101.6  | 102.6  | 93.8   | 92.6   | 88.7   | 85.2   |
| OSBPL1A  | 1112.7 | 1286.9 | 443    | 788.5  | 628.8  | 967.4  | 778.2  | 780.2  |
| OSBPL2   | 108.3  | 134.7  | 93.3   | 105.6  | 92.9   | 120.8  | 108.3  | 153.1  |
| OSBPL2   | 344.1  | 440.2  | 157.7  | 178.7  | 162.7  | 220.1  | 313.5  | 412.8  |
| OSBPL3   | 113.9  | 160.4  | 109.9  | 97.2   | 85.8   | 104.6  | 132.5  | 138.3  |
| OSBPL3   | 134.5  | 167    | 139.6  | 165.5  | 122.3  | 195.9  | 119    | 171.2  |
| OSBPL5   | 430.1  | 524.7  | 540.4  | 597.8  | 624    | 716.3  | 387.9  | 596.3  |
| OSBPL5   | 457.3  | 586.2  | 447.1  | 529.1  | 538    | 595.1  | 426.6  | 425.1  |
| OSBPL6   | 246.3  | 246.1  | 144.5  | 137.9  | 126.6  | 117    | 240.9  | 236.4  |
| OSBPL6   | 107.5  | 111.7  | 104.5  | 89.1   | 85.1   | 88.1   | 124    | 141.4  |
| OSBPL7   | 357.1  | 351.8  | 295.5  | 273.9  | 281.1  | 343.7  | 264.2  | 415.4  |
| OSBPL7   | 122.8  | 142.9  | 124.7  | 102    | 97.5   | 110.7  | 117.7  | 147    |
| OSBPL8   | 379    | 491.8  | 195.2  | 199    | 172.7  | 218.3  | 312.6  | 399.6  |
| OSBPL8   | 439.1  | 487.8  | 192.5  | 237.9  | 197.4  | 400.1  | 414.4  | 805    |
| OSBPL9   | 88.3   | 97.1   | 91.4   | 86.2   | 90.5   | 90.7   | 82.3   | 96.2   |
| OSBPL9   | 1644.8 | 2217   | 1227.6 | 1875.6 | 1626.6 | 2778.4 | 1445.5 | 1973.4 |
| OSCAR    | 102.8  | 117.5  | 118    | 122.5  | 118.5  | 132.3  | 91.7   | 104.8  |
| OSCAR    | 248.6  | 280.6  | 159.5  | 231.9  | 160    | 193.3  | 197.9  | 231.5  |
| OSGEP    | 870.5  | 1096.5 | 405.7  | 360.7  | 320.4  | 454.8  | 604.8  | 657.9  |
| OSGEPL1  | 412.1  | 506    | 253.2  | 258.7  | 208.9  | 315.6  | 304    | 578.5  |
| OSGIN1   | 144.4  | 178.1  | 118.1  | 108.2  | 92.5   | 92.5   | 237.4  | 530.5  |
| OSGIN1   | 81.7   | 81.5   | 94.9   | 82.8   | 85.5   | 87.4   | 81.1   | 79.4   |
| OSM      | 126.1  | 140.5  | 110.5  | 96     | 96     | 102.1  | 118.8  | 126.5  |
| OSMR     | 76.4   | 84     | 98.6   | 96.2   | 100    | 82.9   | 82.8   | 79.1   |
| OSR1     | 81.1   | 88     | 77.7   | 77.9   | 80.9   | 82     | 78.8   | 86.1   |
| OSR2     | 125.3  | 139.8  | 107.9  | 93.3   | 94.8   | 89.9   | 114.9  | 131.6  |
| OSR2     | 192    | 233.7  | 151.4  | 152.1  | 133.7  | 168.5  | 154.2  | 255    |
| OSRF     | 180.2  | 185.7  | 123.4  | 119.3  | 112.3  | 154.5  | 138.8  | 254.4  |
| OSTALPHA | 154.8  | 167    | 103.6  | 127.4  | 130.8  | 151.3  | 129.8  | 143.7  |
| OSTBETA  | 75.9   | 83.2   | 90.5   | 79.6   | 85     | 87.2   | 79.9   | 88.5   |
| OSTF1    | 3771.4 | 4769.3 | 2855.8 | 2603.3 | 2146.6 | 3413.3 | 2965.7 | 4491.2 |
| OSTM1    | 298    | 334    | 219.9  | 329.9  | 264.2  | 498.7  | 254.9  | 532.3  |
| OSTN     | 81.1   | 82.1   | 97.9   | 90.5   | 83     | 91.5   | 89.2   | 83.4   |
| OTC      | 79.8   | 89     | 94.1   | 90.8   | 76.6   | 85.7   | 95.7   | 86.9   |
| OTEX     | 87.9   | 94.1   | 93.9   | 89.1   | 81.8   | 90.1   | 89.4   | 93.5   |
| OTOA     | 71.3   | 88     | 85.5   | 87.4   | 82.6   | 78.6   | 80     | 82.3   |
| OTOA     | 77.6   | 92.5   | 107.7  | 109.1  | 95.5   | 103.3  | 83.7   | 91.4   |
| OTOA     | 96.3   | 113.3  | 106.5  | 98.8   | 97     | 99     | 82.9   | 92.1   |
| OTOF     | 84.4   | 85.7   | 90.9   | 94.7   | 74.9   | 78.2   | 79.3   | 83.3   |
| OTOF     | 89.8   | 83.1   | 93.9   | 88.9   | 100.9  | 92.5   | 86.3   | 95.5   |
| OTOF     | 101.5  | 105.2  | 87.4   | 86.8   | 79.9   | 77.8   | 90.3   | 109    |
| OTOP1    | 114.1  | 133.7  | 99.7   | 97.3   | 90.5   | 93.3   | 126.2  | 140    |

|        |        |        |        |        |        |        |        |        |
|--------|--------|--------|--------|--------|--------|--------|--------|--------|
| OTOP2  | 86.7   | 108.4  | 91.9   | 84.5   | 82.3   | 85.2   | 88.3   | 104.6  |
| OTOP3  | 101    | 109.8  | 98.5   | 88.7   | 81.8   | 77.2   | 93.5   | 99.2   |
| OTOR   | 74.7   | 79.5   | 83.5   | 75.3   | 67.7   | 80.2   | 81.4   | 83.4   |
| OTOS   | 79.5   | 79.7   | 85.4   | 79.8   | 79.7   | 84.4   | 83.1   | 78.7   |
| OTP    | 190.3  | 235.5  | 127.8  | 104.2  | 107.3  | 99     | 169.9  | 176.4  |
| OTUB1  | 90     | 93.6   | 96.2   | 101.3  | 86.6   | 90.1   | 95.6   | 96.9   |
| OTUB1  | 187.3  | 220    | 157.2  | 112.6  | 114.3  | 182.4  | 199.4  | 295.2  |
| OTUB1  | 280.8  | 341.6  | 190.7  | 170.2  | 150.8  | 168.8  | 244.3  | 284.7  |
| OTUB2  | 151.3  | 184    | 142.8  | 119.4  | 112    | 136.1  | 150.8  | 139.4  |
| OTUD4  | 384.5  | 547.9  | 382.4  | 320.4  | 257.7  | 508.1  | 332.1  | 418.8  |
| OTUD4  | 88.8   | 97.7   | 105.1  | 95     | 87.7   | 87     | 98.5   | 106.4  |
| OTUD4  | 96.3   | 100.3  | 108.5  | 100.1  | 98.3   | 93.4   | 82.1   | 98.7   |
| OTUD5  | 134.1  | 168.4  | 100.4  | 82.5   | 91.9   | 94     | 126    | 138.4  |
| OTUD6A | 97.9   | 108.5  | 107.9  | 101.9  | 96.9   | 104.1  | 97.7   | 102.3  |
| OTUD6B | 508.9  | 625.2  | 274.9  | 255.3  | 185.3  | 282.7  | 328.8  | 605.3  |
| OTUD7  | 80.5   | 86.7   | 91.8   | 85.4   | 73.1   | 85.8   | 78.6   | 80.9   |
| OTUD7A | 108    | 102.7  | 102.4  | 91.9   | 82.2   | 90.2   | 107.6  | 105.6  |
| OTX1   | 1382.7 | 1600.2 | 412.3  | 498.4  | 336.7  | 288.6  | 867.3  | 1298.3 |
| OTX2   | 90.7   | 91.6   | 95.6   | 89.2   | 82     | 82.9   | 86.2   | 88.3   |
| OTX2   | 98.3   | 109.7  | 112.8  | 99.3   | 88.1   | 101.4  | 100.6  | 97.5   |
| OTX2   | 112.1  | 134.5  | 100    | 91.6   | 98.9   | 95.1   | 116.3  | 128.6  |
| OVCA2  | 138.3  | 163.3  | 100.9  | 81.4   | 102.1  | 101.1  | 120    | 142.2  |
| OVCH1  | 102.6  | 115.2  | 86.9   | 72.8   | 74.7   | 82.1   | 102.8  | 108    |
| OVCH2  | 84.7   | 100.1  | 83.4   | 75.3   | 86.3   | 77.7   | 95.5   | 94.2   |
| OVGP1  | 317.7  | 397.8  | 177.8  | 194.9  | 181.5  | 261.8  | 293.3  | 410.9  |
| OVOL1  | 84.9   | 99.2   | 88     | 86.8   | 75.2   | 76.4   | 85.7   | 96.8   |
| OVOL2  | 565.9  | 734.3  | 499.1  | 314.7  | 268.3  | 305.6  | 454.2  | 549    |
| OVOS2  | 76.6   | 75.2   | 81.8   | 84.4   | 80.4   | 74     | 85.6   | 78     |
| OVOS2  | 144    | 154.5  | 118.6  | 103.9  | 114.4  | 110.3  | 135.7  | 149.8  |
| OXA1L  | 2003.7 | 2804.8 | 1139.8 | 692.2  | 598.5  | 1039.8 | 1792.5 | 2406.4 |
| OXCT1  | 335.3  | 464.3  | 169.7  | 161.9  | 159.3  | 228.6  | 216.3  | 341.8  |
| OXCT2  | 585.5  | 658.7  | 508.7  | 382.9  | 356.1  | 438.7  | 304.8  | 282    |
| OXER1  | 109.3  | 124.1  | 97.8   | 90.2   | 92.9   | 102.7  | 105.7  | 124.6  |
| OXGR1  | 82.6   | 88     | 84.8   | 79.9   | 79.1   | 81.3   | 87.8   | 89.1   |
| OXR1   | 1388.1 | 1733.7 | 1529.7 | 1573.8 | 1229.5 | 2247.4 | 1355.8 | 2710.9 |
| OXSM   | 250.6  | 346.6  | 134.5  | 141.2  | 122    | 178.2  | 252.9  | 326.7  |
| OXSR1  | 910.7  | 1179.3 | 851.6  | 1092.5 | 944.8  | 1741   | 913.8  | 1334   |
| OXT    | 89.8   | 106.7  | 94.5   | 79.4   | 80.1   | 84.1   | 87.4   | 100.6  |
| OXTR   | 125.1  | 145    | 97     | 89     | 86     | 82.1   | 128.3  | 147.6  |
| P11    | 94.6   | 103.1  | 113.5  | 109.2  | 101.1  | 96.2   | 96.7   | 103.8  |
| P15RS  | 2145.2 | 2827.5 | 1749.6 | 2501.6 | 1715.7 | 2931.5 | 1745.2 | 2431.8 |
| P18SRP | 265.7  | 366.3  | 168.8  | 170.1  | 147    | 195    | 189.1  | 264.7  |
| P2RX1  | 227.4  | 238.6  | 182.6  | 219.2  | 236.7  | 283.2  | 169.7  | 233.5  |
| P2RX2  | 78.7   | 89.3   | 98.1   | 86.1   | 84.8   | 97.5   | 86.6   | 90.1   |
| P2RX2  | 80.3   | 86.7   | 91.2   | 96.2   | 82.4   | 88.3   | 85.8   | 81.2   |
| P2RX2  | 95     | 98.9   | 102.1  | 103.5  | 89.5   | 95.4   | 93.3   | 103.9  |
| P2RX2  | 104    | 116.5  | 105.7  | 97     | 97.7   | 102    | 101.7  | 128.4  |
| P2RX3  | 130.9  | 140.4  | 90.2   | 84.3   | 92.5   | 89.4   | 124.6  | 130.2  |
| P2RX3  | 83.5   | 96.3   | 85.1   | 82.2   | 74.1   | 89.4   | 78.9   | 84.8   |
| P2RX4  | 375.7  | 484    | 426.2  | 306.2  | 282.3  | 326.9  | 314.1  | 520.6  |

|         |        |        |        |        |        |         |        |         |
|---------|--------|--------|--------|--------|--------|---------|--------|---------|
| P2RX5   | 89.9   | 98.3   | 104.6  | 92.7   | 86.8   | 88.3    | 90.5   | 86.2    |
| P2RX5   | 118.1  | 141.5  | 85     | 90.9   | 88.6   | 86.7    | 110.6  | 123.1   |
| P2RX7   | 253    | 268.8  | 178.4  | 331    | 424.7  | 467.5   | 209.3  | 314.6   |
| P2RXL1  | 92.8   | 110.4  | 94.9   | 79.5   | 74.9   | 81.6    | 101.6  | 105     |
| P2RY1   | 104.8  | 125.2  | 99.2   | 92.8   | 84.5   | 97.3    | 104    | 123.6   |
| P2RY10  | 89.7   | 102.3  | 92.7   | 78.5   | 65     | 82.8    | 97     | 99.2    |
| P2RY10  | 153.7  | 191.8  | 90.5   | 87     | 79.3   | 95.4    | 153.7  | 185.4   |
| P2RY11  | 529.2  | 587.6  | 436    | 259.8  | 267.4  | 242.4   | 431.3  | 394.9   |
| P2RY13  | 107.7  | 102.7  | 95.8   | 93     | 81.5   | 97.2    | 95.5   | 108     |
| P2RY13  | 92.6   | 110.4  | 109.4  | 101.1  | 92.6   | 98.4    | 92.2   | 94.8    |
| P2RY13  | 73.1   | 74.3   | 82.2   | 79     | 82.3   | 75.8    | 78.7   | 76.3    |
| P2RY14  | 77     | 87     | 95.9   | 78.7   | 81.6   | 82.5    | 87.9   | 81.9    |
| P2RY14  | 91.9   | 91.8   | 85.4   | 85.2   | 86     | 87.4    | 85.3   | 101.5   |
| P2RY14  | 86     | 102.2  | 81.7   | 78.7   | 73.6   | 84.1    | 83.7   | 81.8    |
| P2RY2   | 82     | 98.9   | 99.7   | 97.9   | 84.5   | 96.6    | 83.9   | 100.5   |
| P2RY2   | 380.5  | 470.6  | 307.9  | 397.8  | 294.5  | 597.4   | 292.5  | 371.2   |
| P2RY2   | 1385.6 | 1871.8 | 674.2  | 893.6  | 755.2  | 1200.3  | 964.3  | 879.8   |
| P2RY2   | 152.5  | 191.1  | 116.6  | 128.2  | 111.2  | 100.8   | 125.2  | 150.7   |
| P2RY4   | 137.9  | 131    | 93.1   | 94.7   | 87.1   | 96.9    | 113.9  | 135.8   |
| P2RY5   | 176.3  | 190.1  | 129.3  | 350.2  | 265.9  | 561     | 134.3  | 190.5   |
| P2RY6   | 115.1  | 145.2  | 109.3  | 101    | 94.8   | 104.9   | 94.5   | 126.3   |
| P2RY6   | 320.8  | 380.2  | 196.1  | 136.8  | 129.7  | 154     | 347.7  | 541.3   |
| P2RY6   | 152.1  | 144.2  | 106.4  | 84     | 85.5   | 89      | 130.3  | 164.5   |
| P2RY8   | 1716.5 | 2293.1 | 2375.3 | 2620.6 | 2152.8 | 3158    | 1353.4 | 2483.7  |
| P4HA1   | 127.7  | 158.3  | 110.8  | 100.5  | 99.1   | 109.7   | 124.1  | 173.8   |
| P4HA1   | 483.3  | 663.7  | 193.4  | 166.7  | 174.5  | 316.9   | 395.6  | 723.9   |
| P4HA2   | 207.4  | 256.5  | 155    | 157.1  | 128.5  | 169.6   | 208.4  | 286.7   |
| P4HA2   | 148.5  | 169.9  | 93.8   | 86.2   | 87.5   | 86      | 138.8  | 147     |
| P4HA3   | 93.6   | 103.5  | 86.7   | 82.8   | 91.4   | 91.8    | 92.4   | 102.8   |
| P518    | 99.5   | 100.6  | 95.9   | 81.4   | 80     | 86.6    | 90.4   | 113.5   |
| P53AIP1 | 87.3   | 95.9   | 93.3   | 74.2   | 79.3   | 84.6    | 85.2   | 89      |
| P8      | 198.1  | 222    | 112.5  | 119.2  | 141.2  | 223.9   | 234.7  | 282.1   |
| PA2G4   | 1984.4 | 2496.3 | 1187.9 | 984.6  | 826.4  | 1701.3  | 1648   | 3485.6  |
| PA2G4P4 | 113.6  | 153.9  | 96     | 81.1   | 81.9   | 92.2    | 116.4  | 150.6   |
| PABPC1  | 5624.3 | 5121.1 | 1407.5 | 1164.8 | 650.2  | 1161.7  | 5797.4 | 13281.6 |
| PABPC3  | 72.8   | 78.8   | 89.6   | 79.6   | 71.6   | 74      | 68.3   | 78.1    |
| PABPC4  | 5790.3 | 6729   | 8405.6 | 9871   | 7984.5 | 11670.3 | 4792.3 | 7629.6  |
| PABPC5  | 87.6   | 88.4   | 80.1   | 84.1   | 77.3   | 75.9    | 84     | 89.4    |
| PABPC5  | 93.9   | 91.9   | 83.2   | 88.1   | 86.3   | 80.2    | 89     | 102.3   |
| PABPC5  | 81.4   | 86.4   | 96     | 89.2   | 87     | 95.8    | 79.4   | 90.3    |
| PABPN1  | 1812.1 | 2316.8 | 1520.6 | 1699.1 | 1469.2 | 2309    | 1299.7 | 1678.1  |
| PACRG   | 96.7   | 100.7  | 88.8   | 83.7   | 79.2   | 80.3    | 96.3   | 104.9   |
| PACRG   | 114    | 137.8  | 104.7  | 93.6   | 86     | 77.9    | 111    | 138.3   |
| PACRG   | 105.5  | 124.2  | 80.9   | 81.7   | 66.2   | 85.5    | 105.1  | 114.7   |
| PACRG   | 86.1   | 90.9   | 106.1  | 111.8  | 104    | 104.1   | 77.4   | 86.3    |
| PACS1   | 96.3   | 110.2  | 137.8  | 153.9  | 125    | 159.5   | 105.1  | 111.4   |
| PACS2   | 183.4  | 196.3  | 155.9  | 132.7  | 129.4  | 160     | 145.4  | 188.6   |
| PACSIN1 | 94.7   | 99.6   | 107.9  | 126.8  | 121.2  | 129.5   | 92.7   | 88.9    |
| PACSIN2 | 2618.4 | 3262.9 | 1968.8 | 2399.6 | 1935   | 2607.1  | 3409.8 | 3281.4  |
| PACSIN3 | 212.4  | 212.9  | 120.1  | 134.3  | 102.7  | 134.5   | 176.2  | 210.8   |

|           |        |        |        |        |        |        |        |        |
|-----------|--------|--------|--------|--------|--------|--------|--------|--------|
| PADI1     | 95.6   | 120.9  | 109.9  | 89.7   | 90.9   | 97.4   | 94.7   | 111.1  |
| PADI2     | 105.5  | 147.3  | 90.4   | 84.4   | 77.2   | 94.7   | 106.5  | 161.3  |
| PADI3     | 101.2  | 125.6  | 89.9   | 91.5   | 81.3   | 93.2   | 103.8  | 111.4  |
| PADI4     | 88.7   | 100.1  | 94     | 92.3   | 85.9   | 88.4   | 94.1   | 102.8  |
| PADI6     | 152.9  | 167    | 100    | 98.3   | 88.9   | 98.4   | 151.1  | 173.2  |
| PAEP      | 82.3   | 83.2   | 88.4   | 94.2   | 81.6   | 83.4   | 80.7   | 81.8   |
| PAEP      | 92.6   | 123.7  | 88     | 83.2   | 77.3   | 77.9   | 103.8  | 114.9  |
| PAF1      | 902.3  | 1000.2 | 438.7  | 340.4  | 286.9  | 409.3  | 675.6  | 741.1  |
| PAFAH1B1  | 461.1  | 596.7  | 310.5  | 315.1  | 311.2  | 334.3  | 455.5  | 559.2  |
| PAFAH1B2  | 181.3  | 252.8  | 121.9  | 106.8  | 104.5  | 103.8  | 166.5  | 221.6  |
| PAFAH1B3  | 3060.5 | 3823.8 | 2260.1 | 652.7  | 659.6  | 1125.2 | 2427.5 | 2408.8 |
| PAFAH2    | 251.8  | 356.4  | 208.1  | 197.2  | 152    | 257.9  | 231.7  | 379.5  |
| PAG1      | 718.1  | 972.7  | 288.9  | 361.1  | 278.3  | 385.9  | 606    | 891.9  |
| PAGE1     | 81.5   | 84.2   | 98.9   | 97     | 87.4   | 95.2   | 78.6   | 94.7   |
| PAGE2     | 82.9   | 84.4   | 86.8   | 86.4   | 80.7   | 84.4   | 86.1   | 90.5   |
| PAGE2B    | 78.6   | 107.3  | 87.7   | 84.5   | 83.9   | 86.3   | 103.6  | 93.7   |
| PAGE3     | 93.5   | 106.7  | 96.3   | 90.2   | 86.4   | 88.7   | 100    | 102    |
| PAGE4     | 95.2   | 119.5  | 91.8   | 83.1   | 79.7   | 81.4   | 101.3  | 113.2  |
| PAGE5     | 80.6   | 90.4   | 96.6   | 89.1   | 86.1   | 84.5   | 95     | 94.1   |
| PAGE5     | 83.1   | 88.7   | 84.9   | 79.7   | 86.6   | 75.8   | 87.8   | 94     |
| PAH       | 79.1   | 95.1   | 91.2   | 88.3   | 81.7   | 82.2   | 83.4   | 88.5   |
| PAICS     | 5469.6 | 7753   | 3776.3 | 3040.7 | 2211.4 | 3697.2 | 4455.7 | 7395.4 |
| PAICS     | 205.1  | 217.7  | 125.1  | 113.3  | 101.7  | 105.1  | 131.7  | 158.5  |
| PAICS     | 6156.1 | 8438.9 | 4779.5 | 4002.3 | 2816.9 | 4446.4 | 4746   | 7446.2 |
| PAIP1     | 149.1  | 183.7  | 124.2  | 134.5  | 118.5  | 122.1  | 114.1  | 168.5  |
| PAIP1     | 125.2  | 141.1  | 101.1  | 93.8   | 88.6   | 92.7   | 107.3  | 135.9  |
| PAIP2     | 4703.9 | 5786.4 | 3132.9 | 3413.6 | 2694   | 4132.8 | 4077.5 | 7981.1 |
| PAIP2     | 92.4   | 105.8  | 82.1   | 90.5   | 87.7   | 90.1   | 90.6   | 91.5   |
| PAIP2     | 177.4  | 218.9  | 107.7  | 106    | 103.6  | 99.4   | 186.7  | 225.2  |
| PAK1      | 569.3  | 669.8  | 355.7  | 396.3  | 318.4  | 465.1  | 454.3  | 732.6  |
| PAK1IP1   | 246.9  | 267.6  | 108    | 116.4  | 106.4  | 127.9  | 195.8  | 274.3  |
| PAK2      | 1050.7 | 1591.9 | 566.4  | 1088.6 | 684.3  | 1195.1 | 932.5  | 1691.2 |
| PAK2      | 330.2  | 648.8  | 206.4  | 328    | 231.5  | 176.6  | 484.4  | 426.5  |
| PAK3      | 80.4   | 86.3   | 108.5  | 102.6  | 99.6   | 94.6   | 81.6   | 79.3   |
| PAK4      | 84.7   | 96.6   | 92.9   | 89.7   | 82.8   | 99.9   | 83.7   | 109.4  |
| PAK4      | 108.1  | 115    | 94.6   | 89.5   | 85.4   | 100    | 91     | 120.1  |
| PAK4      | 289.9  | 313.1  | 198.6  | 183.2  | 168.6  | 181.2  | 247.5  | 347.5  |
| PAK6      | 103.2  | 110.3  | 94.6   | 85.7   | 82.8   | 89.3   | 96.9   | 102.5  |
| PAK7      | 94.5   | 102.5  | 98.6   | 92.3   | 92     | 93.3   | 91.8   | 106.4  |
| PAK7      | 123.2  | 145.7  | 102.5  | 95.5   | 90.9   | 107.5  | 112    | 127.3  |
| PALLD     | 108.3  | 120.6  | 81.9   | 88.4   | 88.4   | 86.4   | 120.2  | 134.9  |
| PALM      | 110.6  | 141.1  | 92.8   | 96.3   | 82.3   | 83.5   | 115.7  | 131.2  |
| PALM      | 100.3  | 126.5  | 134.2  | 116.4  | 109.8  | 146.7  | 118    | 149.4  |
| PALM      | 465.2  | 619.3  | 376.9  | 254.2  | 271.2  | 218.5  | 394.3  | 453.9  |
| PALM2     | 84.1   | 105.7  | 89.2   | 75.7   | 73.5   | 83.4   | 83.2   | 97.2   |
| PALM2     | 80.3   | 92     | 93.6   | 81.4   | 79.2   | 81.8   | 89.5   | 105.9  |
| PALM2-AK/ | 81     | 78.7   | 93.1   | 90.7   | 101.6  | 88.6   | 85.4   | 89.9   |
| PALM2-AK/ | 84.6   | 91.7   | 96.6   | 86.5   | 84.3   | 85.7   | 81.7   | 78.8   |
| PALMD     | 119    | 119.4  | 100.4  | 100.7  | 91.7   | 97.4   | 108.7  | 110    |
| PAM       | 976.9  | 1320.9 | 790    | 724.3  | 624.6  | 996.1  | 801.2  | 1054.7 |

|        |        |        |        |        |        |        |        |        |
|--------|--------|--------|--------|--------|--------|--------|--------|--------|
| PAMCI  | 87.7   | 93     | 94.2   | 91     | 84.4   | 98.9   | 90.6   | 99.2   |
| PAN3   | 1133.9 | 1305.8 | 790.9  | 1052   | 894.7  | 1530.5 | 996.2  | 2029.1 |
| PANK1  | 90.9   | 101.8  | 107.5  | 98.6   | 88.8   | 86.8   | 85.8   | 88.6   |
| PANK1  | 374.2  | 530.2  | 245.1  | 194.9  | 159.5  | 237    | 324.1  | 443    |
| PANK2  | 850.5  | 1037.1 | 607.7  | 737.6  | 557.6  | 868.3  | 723.7  | 1183.2 |
| PANK2  | 545.2  | 744.9  | 319    | 347.4  | 269.9  | 441.1  | 452.7  | 824.9  |
| PANK2  | 86.5   | 81.4   | 91.4   | 80.4   | 84.2   | 83.6   | 79     | 77.2   |
| PANK3  | 159.3  | 202.6  | 132.7  | 134.6  | 125    | 154.1  | 145.9  | 162.6  |
| PANK4  | 145    | 170.5  | 151.2  | 149.4  | 133.5  | 191.4  | 133.2  | 173.9  |
| PANX1  | 156.7  | 232.1  | 142.9  | 133.7  | 106.9  | 140.2  | 165.4  | 260    |
| PANX2  | 185    | 221.4  | 120.5  | 143    | 152    | 149.2  | 538.1  | 812.3  |
| PANX3  | 103.9  | 127.5  | 112.9  | 116    | 110.5  | 102.8  | 96.7   | 103    |
| PAOX   | 122.5  | 141    | 117.9  | 106.5  | 106.6  | 119.8  | 108.8  | 135.5  |
| PAOX   | 358.6  | 469.7  | 203    | 171.7  | 166    | 184.4  | 259.6  | 258.1  |
| PAOX   | 109.7  | 150.7  | 88.7   | 78.1   | 71.5   | 88     | 109.2  | 133.7  |
| PAP2   | 89.3   | 93.5   | 99.3   | 95.3   | 90     | 89.2   | 101    | 102    |
| PAP2D  | 83.3   | 83.3   | 97     | 76.8   | 97.3   | 78     | 79.2   | 85.6   |
| PAPD1  | 1104   | 1409.1 | 693.3  | 547.3  | 376.2  | 497    | 853.7  | 1233.5 |
| PAPD4  | 1527.9 | 1888.9 | 950.2  | 1158.8 | 1010.9 | 1784.6 | 1241.4 | 2785   |
| PAPD5  | 464.5  | 635.8  | 174.7  | 188.2  | 147.9  | 135.8  | 406.3  | 496.9  |
| PAPLN  | 183.2  | 204.9  | 119.7  | 180.7  | 172.1  | 202.4  | 137.9  | 184.5  |
| PAPOLA | 3204.9 | 3915.6 | 1682.1 | 1807.6 | 1223.5 | 2721.7 | 2329.1 | 3705.1 |
| PAPOLB | 84.3   | 92.8   | 94.9   | 77     | 72.8   | 83.6   | 86.4   | 91.2   |
| PAPOLG | 123.9  | 138.3  | 121.9  | 115    | 113.6  | 111.3  | 119.2  | 120.6  |
| PAPPA  | 78.4   | 78.5   | 88.3   | 80.2   | 85     | 87.9   | 79.6   | 79.5   |
| PAPPA2 | 71     | 78.9   | 94.4   | 89.5   | 91     | 78.1   | 84.6   | 80.6   |
| PAPPA2 | 84.1   | 105.4  | 94.5   | 92.9   | 88.3   | 85.6   | 88.8   | 80.8   |
| PAPSS1 | 122.6  | 129.3  | 120    | 130.5  | 120.1  | 160    | 109.2  | 145    |
| PAPSS2 | 207.5  | 268.1  | 178.2  | 228.8  | 201.9  | 212.9  | 171.9  | 241.2  |
| PAQR3  | 475.8  | 578.9  | 294.9  | 285.3  | 200.9  | 373.5  | 387.3  | 731.7  |
| PAQR4  | 2358.8 | 3145.9 | 1521.2 | 865.6  | 708.4  | 819.7  | 1648.9 | 1637.9 |
| PAQR5  | 80.6   | 84.6   | 86.8   | 103.3  | 84.1   | 78.8   | 77.1   | 81.2   |
| PAQR6  | 122.8  | 136.1  | 91.4   | 93.1   | 83.9   | 90     | 109.9  | 145.8  |
| PAQR6  | 110.3  | 109.4  | 109.3  | 105.9  | 100.4  | 118.6  | 104.1  | 95.5   |
| PAQR6  | 100.4  | 106.2  | 111.1  | 106.6  | 107.9  | 146.4  | 84     | 103.4  |
| PAQR7  | 156.3  | 207.4  | 130.5  | 94.8   | 101.2  | 117.5  | 157.1  | 186.1  |
| PAQR8  | 2372.6 | 3226.3 | 1032.2 | 1999.9 | 922.8  | 2142.7 | 1245.6 | 1340.5 |
| PAQR9  | 88.8   | 113.1  | 97.9   | 96.7   | 92.7   | 94.5   | 91.9   | 112.4  |
| PARC   | 180.1  | 184.2  | 130.2  | 123.1  | 120.7  | 144.2  | 129.9  | 201.9  |
| PARD3  | 114.3  | 129.7  | 93.3   | 98.3   | 90.6   | 85.8   | 113.4  | 119.5  |
| PARD3B | 102.5  | 108.2  | 97.8   | 85.1   | 88.8   | 90.5   | 94.3   | 101.8  |
| PARD6A | 153.3  | 164.8  | 109.8  | 95.4   | 86.4   | 96.8   | 132.4  | 157.5  |
| PARD6A | 112.9  | 126.7  | 100.3  | 101.3  | 87.4   | 88.4   | 117.8  | 138.5  |
| PARD6B | 120.8  | 119.7  | 92.5   | 100.5  | 87.2   | 94     | 118    | 124.7  |
| PARD6G | 130.8  | 168.2  | 103.2  | 110.7  | 100.5  | 114.8  | 120.7  | 163.5  |
| PARD6G | 100.1  | 128.3  | 106.5  | 101.6  | 93.2   | 103.5  | 107.3  | 119.7  |
| PARG   | 133    | 169    | 114.3  | 91.2   | 90.5   | 104.5  | 115.1  | 168    |
| PARK2  | 89.8   | 91.5   | 86.4   | 90.1   | 95     | 90.5   | 87.3   | 92     |
| PARK2  | 85.8   | 97.7   | 96.4   | 84.3   | 90.8   | 94.9   | 88.3   | 92     |
| PARK7  | 7728.3 | 9210.9 | 4400.1 | 4230   | 3403.1 | 4098.4 | 7242.1 | 8483.4 |



|        |        |         |        |        |        |        |        |         |
|--------|--------|---------|--------|--------|--------|--------|--------|---------|
| PARL   | 4275.9 | 5251.9  | 3489   | 4068.9 | 3531.3 | 5139.6 | 3675.7 | 5016.9  |
| PARL   | 2215.4 | 3759.8  | 924.3  | 1149.5 | 1008.5 | 1462.3 | 2219.1 | 2689.2  |
| PARN   | 790.5  | 1090.1  | 310.7  | 244.3  | 216.8  | 288.3  | 765.7  | 706     |
| PARP1  | 9381.7 | 10265.8 | 6258.2 | 5547.2 | 4443.6 | 7475.8 | 7598.7 | 10102.7 |
| PARP10 | 152.4  | 169.3   | 112.2  | 115.1  | 91.2   | 130.2  | 129.8  | 152.8   |
| PARP10 | 361.8  | 383.7   | 200.3  | 166    | 176.1  | 192.9  | 204.8  | 224.8   |
| PARP11 | 107    | 139.3   | 106.9  | 132.2  | 120.7  | 162.2  | 107.9  | 137.6   |
| PARP12 | 186.2  | 211.1   | 179.8  | 151.5  | 157.2  | 174.6  | 152.7  | 221.1   |
| PARP14 | 282.1  | 369.1   | 183.1  | 139.4  | 143    | 164.4  | 274.2  | 292.3   |
| PARP15 | 121.2  | 136.7   | 97.1   | 90.5   | 84.2   | 85.2   | 105.1  | 135.1   |
| PARP16 | 145.9  | 173.6   | 133.3  | 176.1  | 125.2  | 174.3  | 129.9  | 186.3   |
| PARP2  | 833.8  | 1042.1  | 458    | 370.3  | 290.7  | 475    | 721.3  | 1398.6  |
| PARP2  | 426.1  | 543.4   | 275.3  | 166.2  | 171.5  | 214    | 307.2  | 466.7   |
| PARP3  | 131.6  | 139.4   | 93.6   | 101.3  | 91.8   | 90.8   | 111.9  | 127.4   |
| PARP3  | 576    | 640.1   | 393.3  | 386    | 326.7  | 459.5  | 417.4  | 528     |
| PARP3  | 157.5  | 175.1   | 148.5  | 157    | 147.7  | 181.6  | 112.9  | 175.2   |
| PARP4  | 1515.5 | 1954.5  | 1493.8 | 1960.3 | 1667.5 | 2205.8 | 1559.2 | 1472.7  |
| PARP6  | 134.7  | 168.4   | 115.4  | 124.9  | 125.3  | 105.5  | 120.6  | 152.4   |
| PARP6  | 232.6  | 274.5   | 138.1  | 146.8  | 130.9  | 188.3  | 191.8  | 297.1   |
| PARP6  | 105.4  | 106.5   | 106.2  | 104.8  | 97.4   | 106.5  | 82.6   | 95.3    |
| PARP8  | 1772.1 | 2019.7  | 605.9  | 659.2  | 516.4  | 608.4  | 1150.5 | 1318.9  |
| PARP9  | 140    | 162.1   | 106.8  | 87.4   | 96.2   | 103.8  | 135.2  | 175.8   |
| PARS2  | 117    | 166.3   | 106.2  | 88.4   | 97.2   | 98.5   | 119.6  | 151.5   |
| PART1  | 81.7   | 97.8    | 89.8   | 88.7   | 92.2   | 94     | 94.7   | 99.5    |
| PARVA  | 125.3  | 142.9   | 130.2  | 127    | 109.3  | 130.8  | 124.9  | 161.5   |
| PARVB  | 689.6  | 872.9   | 856.3  | 865.1  | 634    | 1354.7 | 660.7  | 1792    |
| PARVB  | 105.3  | 145.3   | 101.6  | 118.4  | 109.5  | 117.7  | 108.3  | 129.3   |
| PARVB  | 183.9  | 185.6   | 116.2  | 114.9  | 105.2  | 88.3   | 144.1  | 174.2   |
| PARVG  | 3121.2 | 4272.8  | 3715.6 | 2950.8 | 2702.9 | 4558.1 | 2809.2 | 4371.1  |
| PASD1  | 82.4   | 87.9    | 87.5   | 92.8   | 82.3   | 86.2   | 78     | 78.9    |
| PASK   | 194.2  | 215.5   | 192.5  | 142.7  | 145.7  | 178.8  | 161.1  | 186.9   |
| PATE   | 116.3  | 136.2   | 107.1  | 98.8   | 96.6   | 99     | 108.8  | 114     |
| PATZ1  | 135.2  | 165     | 98.9   | 88.7   | 83.5   | 82.1   | 107.7  | 145.1   |
| PAX1   | 100.5  | 110.3   | 98.2   | 88.7   | 87.3   | 92.3   | 102.9  | 102.4   |
| PAX2   | 97.5   | 101.3   | 121.7  | 97.3   | 110.3  | 97.2   | 91.7   | 90.7    |
| PAX2   | 80.1   | 86.8    | 86.1   | 83.1   | 82.1   | 89.3   | 82.8   | 88.3    |
| PAX2   | 103.4  | 126.8   | 97.9   | 103.8  | 94     | 95.6   | 107.3  | 117.6   |
| PAX3   | 89.7   | 116.3   | 90.6   | 94.1   | 84.5   | 90.8   | 104.2  | 98.3    |
| PAX3   | 132.3  | 153.5   | 88.6   | 82.8   | 75.7   | 83.6   | 118    | 153     |
| PAX3   | 91.9   | 100.3   | 84.8   | 78.9   | 73.6   | 101.2  | 100.2  | 103.9   |
| PAX3   | 110.6  | 97.8    | 93.6   | 92.2   | 92.6   | 92.4   | 100.1  | 112.3   |
| PAX4   | 100.6  | 123.5   | 116.4  | 90.8   | 98.6   | 90.8   | 107.6  | 122.1   |
| PAX5   | 82.9   | 90.6    | 89.2   | 74.6   | 74.6   | 80.4   | 80     | 97.4    |
| PAX6   | 78.6   | 79.6    | 93.4   | 77.7   | 76     | 86.9   | 79.1   | 82.3    |
| PAX6   | 124.5  | 163.7   | 94.7   | 73.5   | 77.7   | 78.3   | 113.5  | 152.5   |
| PAX7   | 457.8  | 484.9   | 268.2  | 243.3  | 203.8  | 266.3  | 394.8  | 497     |
| PAX8   | 136.1  | 159.2   | 98.4   | 96.8   | 86.7   | 101.8  | 138.4  | 172.5   |
| PAX8   | 98     | 102.2   | 111.5  | 86.9   | 89     | 91.8   | 93.9   | 95.2    |
| PAX8   | 83.3   | 87.1    | 95.6   | 88.5   | 74.9   | 80.1   | 76.4   | 88.3    |
| PAX9   | 106.6  | 155     | 107    | 84.4   | 83.8   | 92.8   | 121.8  | 127     |

|         |         |         |        |        |        |        |        |         |
|---------|---------|---------|--------|--------|--------|--------|--------|---------|
| PAXIP1  | 1018.8  | 1321.3  | 791.5  | 837.6  | 729.2  | 889.3  | 710.4  | 734.5   |
| PB1     | 87.7    | 111.8   | 118.7  | 102.6  | 100.2  | 116.8  | 92.9   | 102     |
| PB1     | 231.1   | 300.2   | 183.6  | 205.7  | 175    | 203.9  | 199.5  | 210.9   |
| PB1     | 199.2   | 198.8   | 157.8  | 159.2  | 157.6  | 207.9  | 165.8  | 321.6   |
| PBEF1   | 340.4   | 481.2   | 135.4  | 97     | 102.6  | 144.8  | 363.8  | 532.8   |
| PBEF1   | 255.6   | 327.8   | 143.8  | 118.2  | 115.6  | 138.2  | 219.2  | 289.5   |
| PBK     | 2200.2  | 2952.8  | 1003.3 | 549    | 532.8  | 645.8  | 1441.3 | 1925.2  |
| PBOV1   | 90      | 115.2   | 93     | 85.2   | 83     | 98.2   | 93.4   | 108.7   |
| PBX1    | 89.7    | 102.8   | 95     | 95.3   | 77.7   | 89.5   | 98.6   | 90.4    |
| PBX2    | 483.1   | 576.8   | 276.3  | 432    | 434.1  | 432.9  | 433.3  | 385.8   |
| PBX3    | 8971.6  | 10367.6 | 6778   | 6249.7 | 5030.2 | 6213.2 | 7991.1 | 8750.5  |
| PBX4    | 115.6   | 126.3   | 123.3  | 112.7  | 99.1   | 112.7  | 113.8  | 155.8   |
| PBXIP1  | 105     | 138.2   | 111.4  | 96.6   | 108.1  | 111.5  | 101.2  | 125.7   |
| PC      | 87.4    | 98.3    | 91.3   | 84.5   | 81.3   | 87.3   | 81.4   | 95.9    |
| PC      | 78.3    | 99.1    | 100.2  | 85.5   | 92.8   | 89.2   | 90.2   | 106.2   |
| PC      | 81.9    | 100.6   | 135.1  | 109.1  | 104.1  | 125.5  | 85.3   | 102.7   |
| PC-3    | 96.8    | 102.6   | 89.7   | 83.9   | 87     | 85.6   | 101    | 107.4   |
| PCAF    | 98.7    | 107.6   | 90.7   | 94.5   | 91.5   | 103.2  | 107.7  | 116.2   |
| PCBD1   | 529.6   | 694.8   | 359.8  | 271.1  | 232.5  | 303.4  | 452.6  | 655.7   |
| PCBD1   | 527.6   | 665.4   | 432.8  | 310    | 277.3  | 318.2  | 496.9  | 583.6   |
| PCBD2   | 231.3   | 272.6   | 156.7  | 175.1  | 170.5  | 190    | 204.8  | 252.1   |
| PCBP1   | 10573.4 | 13058.9 | 5369   | 5207.7 | 3403.7 | 5251.5 | 8631.6 | 10444   |
| PCBP2   | 8839.5  | 11180.2 | 5106   | 5712.6 | 4830.2 | 6922.9 | 7816.5 | 13307.8 |
| PCBP2   | 3105.4  | 4449.7  | 2405.7 | 2971.9 | 2554.6 | 3716.4 | 2855.8 | 4165.8  |
| PCBP3   | 90.7    | 94.5    | 93.9   | 95.6   | 90.8   | 84.3   | 78.8   | 105.1   |
| PCBP4   | 677.2   | 945.9   | 212.6  | 203.6  | 184.5  | 288.8  | 581.6  | 772.9   |
| PCBP4   | 104.9   | 123.8   | 103.1  | 101.9  | 92.4   | 84.7   | 101.8  | 107.8   |
| PCBP4   | 105.9   | 134.8   | 95.4   | 102.7  | 84.9   | 92.8   | 110.4  | 138.9   |
| PCBP4   | 422.7   | 551.1   | 252.1  | 233.9  | 225.5  | 349.2  | 433.7  | 495.4   |
| PCCA    | 1104.8  | 1346.9  | 525.6  | 515.4  | 452.1  | 657.6  | 932.2  | 1588.4  |
| PCCB    | 4605.6  | 5757.8  | 3606.4 | 2778.3 | 2241.2 | 3311.3 | 3808.6 | 4894.7  |
| PCDH1   | 87      | 99      | 91.3   | 87.9   | 76.9   | 83.5   | 87.4   | 96.5    |
| PCDH1   | 95.4    | 112.5   | 101.7  | 94.4   | 92.4   | 80.2   | 106.4  | 111.6   |
| PCDH10  | 80.9    | 97.7    | 80.7   | 79.6   | 80.8   | 83.5   | 90.8   | 91.6    |
| PCDH10  | 126.9   | 158     | 91.7   | 91.7   | 80.2   | 85.3   | 110.2  | 132.1   |
| PCDH10  | 85.9    | 97.7    | 90.8   | 92.9   | 85.9   | 90.7   | 113.2  | 90.6    |
| PCDH11X | 98.4    | 115.1   | 99.8   | 90.2   | 100.7  | 104.9  | 113.2  | 106.3   |
| PCDH11X | 87.2    | 91.5    | 97.8   | 87.6   | 96.9   | 84.7   | 94     | 89.2    |
| PCDH11X | 78      | 90.8    | 100.5  | 92.4   | 94.6   | 97.8   | 83.9   | 89.2    |
| PCDH11Y | 68.6    | 80.6    | 90.2   | 81.5   | 84.5   | 88.2   | 71.2   | 84.5    |
| PCDH11Y | 87.1    | 78.5    | 88.4   | 78.6   | 83     | 89.7   | 78.7   | 83      |
| PCDH11Y | 87.8    | 110.3   | 89.5   | 93.1   | 84.7   | 88.9   | 101.9  | 102.5   |
| PCDH12  | 134.8   | 165.7   | 93.7   | 93.8   | 85     | 88     | 149.1  | 160.4   |
| PCDH15  | 79.4    | 94.3    | 98.2   | 98.8   | 89     | 91.7   | 87.1   | 92.2    |
| PCDH17  | 91.6    | 99      | 110    | 93.3   | 87.3   | 88.8   | 85.4   | 92.6    |
| PCDH18  | 95.3    | 113.3   | 114.3  | 106.6  | 86.5   | 93.5   | 99.6   | 104.1   |
| PCDH19  | 89.4    | 92.2    | 101.4  | 99.7   | 92     | 95     | 82     | 84      |
| PCDH20  | 227.3   | 218.5   | 157.9  | 160.6  | 133.3  | 164.1  | 200.5  | 288.2   |
| PCDH21  | 132.2   | 170.9   | 92.6   | 85.7   | 77.8   | 97.7   | 144.8  | 172.7   |
| PCDH7   | 86.2    | 109.8   | 92.2   | 119.5  | 101.3  | 109.3  | 93.2   | 92.8    |

|         |        |        |       |       |       |       |       |        |
|---------|--------|--------|-------|-------|-------|-------|-------|--------|
| PCDH7   | 87.2   | 95.2   | 84.9  | 77.7  | 81.3  | 83.4  | 85.7  | 91     |
| PCDH7   | 91.6   | 88.5   | 96.8  | 96    | 90    | 103.5 | 82.5  | 102.8  |
| PCDH7   | 84.4   | 87.6   | 88.3  | 90.2  | 92.4  | 93.1  | 81.1  | 92.5   |
| PCDH8   | 90.4   | 102.4  | 114.6 | 91.1  | 97.1  | 95.3  | 91.1  | 101.9  |
| PCDH8   | 106.5  | 108.6  | 95.1  | 81.1  | 80.4  | 86.9  | 92.8  | 117.6  |
| PCDH9   | 82.3   | 96     | 87.1  | 87.7  | 82.9  | 88.7  | 79.8  | 88.5   |
| PCDH9   | 87.1   | 93.4   | 90.6  | 95.8  | 85.9  | 78.7  | 82.3  | 92.8   |
| PCDH9   | 127.8  | 156.8  | 93.7  | 91.6  | 76.9  | 106.8 | 119.8 | 164.8  |
| PCDHA1  | 94.8   | 103.6  | 97.9  | 83.1  | 85.2  | 92.3  | 90.3  | 96     |
| PCDHA1  | 75.4   | 84.2   | 93    | 77.9  | 86.5  | 101.6 | 84.3  | 80     |
| PCDHA1  | 76.3   | 77     | 105.6 | 93.9  | 88.7  | 101.8 | 77    | 81.9   |
| PCDHA10 | 92.8   | 89.5   | 99.8  | 85.5  | 82.2  | 91.7  | 81.9  | 97.4   |
| PCDHA10 | 75.5   | 91.7   | 90.3  | 77.9  | 79.8  | 86.2  | 81.2  | 85.8   |
| PCDHA11 | 141.4  | 160.2  | 106.4 | 105.1 | 91.2  | 96.7  | 133.4 | 140.6  |
| PCDHA12 | 98.2   | 107.5  | 87.7  | 80.5  | 75    | 95.1  | 90.6  | 108.2  |
| PCDHA12 | 81.3   | 83.4   | 92.6  | 98.8  | 89.6  | 95.1  | 87.1  | 84     |
| PCDHA13 | 90.4   | 99.4   | 84.2  | 81.8  | 83.4  | 81.5  | 93.4  | 102.9  |
| PCDHA2  | 77.2   | 86.5   | 88.5  | 71.8  | 74.1  | 84.3  | 88.8  | 88.1   |
| PCDHA3  | 97.7   | 122.9  | 85.8  | 80.5  | 80    | 87.5  | 93.3  | 109.8  |
| PCDHA3  | 80.7   | 97.4   | 88.3  | 84.7  | 81.4  | 86.6  | 82.8  | 83.9   |
| PCDHA3  | 89.4   | 98.7   | 95.9  | 88.3  | 82.3  | 89.2  | 87.4  | 88.5   |
| PCDHA4  | 93.3   | 98.7   | 102.4 | 106.2 | 83.7  | 117.4 | 91.9  | 100.9  |
| PCDHA5  | 144    | 193    | 115.9 | 101.8 | 103.9 | 112.3 | 144.7 | 187.1  |
| PCDHA6  | 77.2   | 80.5   | 98.8  | 90.5  | 90    | 91.6  | 79.4  | 85.8   |
| PCDHA6  | 108    | 139    | 95.2  | 91.1  | 87.5  | 90.9  | 113.2 | 127    |
| PCDHA7  | 89.7   | 92.5   | 96.2  | 80.6  | 86.5  | 90.1  | 82.5  | 92.7   |
| PCDHA7  | 123.2  | 141.3  | 122.8 | 111.2 | 107.1 | 106.4 | 116.3 | 121.9  |
| PCDHA7  | 79.1   | 86.8   | 90    | 83.5  | 82.5  | 85.6  | 73.5  | 85.8   |
| PCDHA8  | 99     | 118.7  | 95.7  | 87.2  | 82.8  | 82.4  | 93.5  | 118.5  |
| PCDHA9  | 85.5   | 89.4   | 101.8 | 93.8  | 94.4  | 84.3  | 84.1  | 100.6  |
| PCDHA9  | 78     | 86.8   | 86    | 81.2  | 81.6  | 87.6  | 79.7  | 83.5   |
| PCDHAC1 | 90     | 95     | 95.3  | 87.2  | 82.3  | 82.2  | 85.6  | 84.3   |
| PCDHAC1 | 75.3   | 82.6   | 83.6  | 83.9  | 84.9  | 87.3  | 72.7  | 76.1   |
| PCDHAC2 | 117.2  | 134.5  | 86.8  | 79.8  | 90.4  | 108.8 | 111.4 | 137.6  |
| PCDHAC2 | 89.2   | 97     | 93.6  | 90.9  | 78.2  | 87.7  | 90.8  | 105    |
| PCDHAC2 | 105.4  | 136.3  | 99.4  | 121.5 | 101.1 | 118   | 110.5 | 127.6  |
| PCDHB1  | 77.8   | 73.9   | 95.9  | 79.5  | 79.4  | 78.5  | 72.8  | 78.5   |
| PCDHB10 | 93.9   | 89.2   | 103.3 | 103   | 89.6  | 102.4 | 88.1  | 115.4  |
| PCDHB11 | 71.2   | 78     | 93.7  | 83.5  | 72.6  | 74.6  | 70.3  | 83     |
| PCDHB12 | 108.1  | 118.4  | 98.9  | 83.8  | 89.6  | 97.3  | 101.1 | 110.6  |
| PCDHB13 | 92.8   | 100.8  | 90    | 96.3  | 90.8  | 93.8  | 98    | 105.8  |
| PCDHB14 | 105.3  | 124.5  | 107.5 | 100   | 96.9  | 104.3 | 98.4  | 113.7  |
| PCDHB15 | 73.6   | 83.3   | 91    | 79.8  | 74.2  | 85.7  | 71.6  | 80.1   |
| PCDHB16 | 91.7   | 100.6  | 92    | 95.7  | 81.5  | 91.2  | 87.8  | 98.2   |
| PCDHB17 | 209.7  | 249.6  | 171.5 | 131   | 126.5 | 147.9 | 192.7 | 287.5  |
| PCDHB18 | 88.3   | 96.7   | 94.3  | 83.4  | 85.4  | 82.3  | 86.5  | 97.5   |
| PCDHB2  | 1133.7 | 1396.4 | 841.8 | 563.2 | 420   | 579.8 | 992.7 | 1284.7 |
| PCDHB3  | 94.8   | 108.2  | 94.5  | 80.6  | 81.2  | 86.1  | 109.4 | 97.4   |
| PCDHB4  | 97.8   | 104    | 92    | 93.1  | 95.9  | 102   | 89.5  | 119.7  |
| PCDHB5  | 303    | 384.9  | 239   | 201.6 | 165.7 | 221.8 | 255   | 421.7  |

|          |       |        |        |        |        |        |        |        |
|----------|-------|--------|--------|--------|--------|--------|--------|--------|
| PCDHB6   | 71.2  | 82.4   | 85.2   | 79.5   | 77.6   | 79.8   | 65.9   | 77.1   |
| PCDHB7   | 71.5  | 88     | 88.6   | 86.9   | 79.1   | 84.2   | 71.8   | 77.8   |
| PCDHB8   | 89.7  | 104.4  | 97.2   | 94.4   | 81.2   | 85.1   | 85.9   | 103.2  |
| PCDHB9   | 248.9 | 303.1  | 152.5  | 213.8  | 228.8  | 160.7  | 252.1  | 255.1  |
| PCDHGA1  | 109.3 | 134.5  | 94.3   | 90.2   | 83.1   | 93.7   | 104.3  | 120.2  |
| PCDHGA1  | 96    | 104.8  | 95.7   | 95.5   | 90.9   | 95.8   | 94.5   | 100.2  |
| PCDHGA1  | 80.8  | 83.8   | 90.2   | 93.8   | 86.8   | 83.5   | 76.5   | 87.6   |
| PCDHGA10 | 97.9  | 123.5  | 98.8   | 88.2   | 100.1  | 88.2   | 103.4  | 105.4  |
| PCDHGA11 | 84.8  | 106.2  | 92.9   | 84.9   | 83.7   | 84     | 100    | 103.9  |
| PCDHGA11 | 81.7  | 88.5   | 90.9   | 82.4   | 82.9   | 84     | 84.2   | 84.3   |
| PCDHGA12 | 85.5  | 94.3   | 89.4   | 84.9   | 93.8   | 88.4   | 83.2   | 94.5   |
| PCDHGA2  | 81.2  | 85.7   | 90.6   | 84.8   | 78     | 90.4   | 84.2   | 79.4   |
| PCDHGA3  | 82.9  | 90     | 88     | 97.6   | 80.3   | 80.7   | 83.7   | 97.2   |
| PCDHGA3  | 84.3  | 90.2   | 87.1   | 90.3   | 90.6   | 99.4   | 89     | 86     |
| PCDHGA4  | 72.1  | 85.6   | 78.4   | 75.3   | 74     | 70.3   | 74.7   | 74.6   |
| PCDHGA4  | 90.8  | 94.5   | 76.6   | 72.4   | 76.6   | 73.5   | 76.9   | 86.8   |
| PCDHGA5  | 93.2  | 110.5  | 95.5   | 93     | 87     | 102    | 93.1   | 107.7  |
| PCDHGA5  | 87.5  | 100.2  | 88.5   | 102.5  | 74.7   | 84.3   | 89.5   | 110.4  |
| PCDHGA6  | 85.7  | 86.1   | 105.7  | 98.7   | 92.5   | 106.2  | 80.8   | 74.8   |
| PCDHGA7  | 79.8  | 86.6   | 93.8   | 89.7   | 85.6   | 87.3   | 79.7   | 86     |
| PCDHGA7  | 72.1  | 74.4   | 84.8   | 76.5   | 72.8   | 76.8   | 70.4   | 76.2   |
| PCDHGA8  | 82.9  | 91.7   | 93.7   | 81.1   | 82.1   | 79.7   | 81.6   | 97.5   |
| PCDHGA9  | 134.6 | 158.3  | 91.8   | 77.2   | 76.5   | 82.6   | 123.1  | 165    |
| PCDHGA9  | 139.3 | 180.4  | 96.7   | 88     | 98.7   | 97     | 141.7  | 155.2  |
| PCDHGB1  | 106.4 | 122    | 99.3   | 90.7   | 94.5   | 90.7   | 107.1  | 112.4  |
| PCDHGB2  | 89.7  | 99.2   | 100.6  | 86.2   | 91.3   | 102.9  | 86.6   | 94.8   |
| PCDHGB3  | 84.8  | 99.2   | 101.1  | 95.9   | 94.8   | 92.1   | 92.3   | 102.6  |
| PCDHGB4  | 140.7 | 168.3  | 106    | 96.8   | 96.3   | 95.7   | 116.2  | 143.3  |
| PCDHGB5  | 79.5  | 85.4   | 96.3   | 98.9   | 92.6   | 94.8   | 82.5   | 81.3   |
| PCDHGB6  | 87.4  | 91.5   | 91.4   | 96.7   | 93.6   | 87.4   | 85.1   | 95.1   |
| PCDHGB6  | 192.2 | 204.6  | 122.8  | 110.1  | 112.2  | 122.9  | 176.7  | 212.8  |
| PCDHGB7  | 79.3  | 100.6  | 95.3   | 85.9   | 89.6   | 93.5   | 86.4   | 93.7   |
| PCDHGB7  | 73.3  | 78     | 90     | 88.8   | 87.3   | 78.9   | 69.6   | 88.4   |
| PCDHGC3  | 97.3  | 120    | 95.3   | 86.4   | 92.7   | 88.4   | 96.2   | 115.5  |
| PCDHGC3  | 104.9 | 110    | 109    | 101.2  | 104.6  | 102.5  | 100.3  | 101    |
| PCDHGC3  | 146.9 | 169.7  | 106.1  | 110.6  | 105.2  | 105.2  | 133.7  | 150.5  |
| PCDHGC4  | 108.3 | 110.9  | 105.1  | 94.5   | 84.4   | 89.9   | 98.3   | 114.6  |
| PCDHGC4  | 82.5  | 81.2   | 78.2   | 78.6   | 77.2   | 75     | 70.4   | 85.4   |
| PCDHGC5  | 77.6  | 88     | 85.7   | 89.3   | 90.8   | 91.8   | 77.8   | 92.1   |
| PCDHGC5  | 76.4  | 84.8   | 101.5  | 90.8   | 95.4   | 109.4  | 84     | 82.4   |
| PCF11    | 378.9 | 439.6  | 262.1  | 288.1  | 231.9  | 360.6  | 300.3  | 681.3  |
| PCGF1    | 391.7 | 485.6  | 334.1  | 307.8  | 240.9  | 476.6  | 361.6  | 596.1  |
| PCGF2    | 166.1 | 215.6  | 172.4  | 110.5  | 89.8   | 105.1  | 166.2  | 232.8  |
| PCGF3    | 109   | 129.4  | 110.1  | 90.1   | 90.3   | 98.4   | 110.5  | 114.7  |
| PCGF4    | 5136  | 5831.1 | 2398.5 | 1823.5 | 1333.5 | 2257.5 | 3935.7 | 5733.3 |
| PCGF5    | 127.1 | 132.8  | 113.5  | 103.6  | 80.4   | 104.2  | 129.4  | 211.5  |
| PCGF6    | 383.9 | 475    | 201.8  | 164.7  | 154.8  | 172.5  | 358.7  | 629.4  |
| PCGF6    | 427.6 | 554.4  | 223.3  | 180.4  | 144.1  | 175.7  | 301.9  | 471.5  |
| PCID1    | 2464  | 3383.9 | 898.4  | 687.6  | 543.4  | 762.4  | 2456   | 4263.9 |
| PCK1     | 75.5  | 81.3   | 80.3   | 87.8   | 80.4   | 90.9   | 79.5   | 78.5   |

|         |        |        |        |        |        |        |        |        |
|---------|--------|--------|--------|--------|--------|--------|--------|--------|
| PCK2    | 190.6  | 276.3  | 182.3  | 113.8  | 116.2  | 112.3  | 167    | 247.9  |
| PCK2    | 1180.6 | 1415   | 973.1  | 499.2  | 426.9  | 634.1  | 1037.9 | 1769.7 |
| PCK2    | 146.9  | 174.5  | 114.7  | 89.2   | 85.7   | 87.3   | 133.1  | 203.9  |
| PCLKC   | 176.6  | 199.8  | 135.8  | 111.8  | 114    | 113.8  | 154.7  | 158.6  |
| PCM1    | 2468.7 | 2926.9 | 1085.8 | 1447.3 | 1134.6 | 1982.4 | 2057.3 | 3082.8 |
| PCMT1   | 5402   | 6485.7 | 3689.2 | 3872.6 | 3132.5 | 4468   | 5028.7 | 6625.8 |
| PCMTD1  | 406.7  | 524.9  | 173.4  | 204    | 167.3  | 255.5  | 434.9  | 770.5  |
| PCMTD2  | 427.1  | 515.5  | 399.7  | 519.1  | 499.4  | 883.8  | 359.1  | 604.4  |
| PCNA    | 150.5  | 172.8  | 107.5  | 97.5   | 90.4   | 98.7   | 131.3  | 158.8  |
| PCNA    | 172.6  | 226.6  | 129.2  | 132.5  | 125.5  | 133.6  | 149    | 167.5  |
| PCNA    | 3786.3 | 4737.8 | 1280.7 | 1098.2 | 741.7  | 1118.8 | 2853.6 | 5640.9 |
| PCNP    | 4006.6 | 4469.6 | 3051.4 | 3750.9 | 2866.8 | 4574.4 | 3714.8 | 6016.3 |
| PCNT2   | 504.7  | 658.4  | 506.5  | 850.6  | 902.3  | 1271.3 | 447.2  | 500.4  |
| PCNX    | 402.9  | 531.6  | 324.2  | 355    | 348.6  | 468.8  | 411    | 347.9  |
| PCNXL2  | 123.6  | 133.5  | 103.3  | 103.3  | 90.2   | 116.2  | 119.9  | 131.8  |
| PCNXL2  | 102.1  | 119.9  | 110.3  | 117.7  | 103.8  | 117.3  | 98.8   | 107.3  |
| PCNXL2  | 97.1   | 101.1  | 117.2  | 118.8  | 120.1  | 120.9  | 93.6   | 90.6   |
| PCOLCE  | 108.1  | 125.8  | 113.2  | 97.5   | 98.2   | 114.5  | 100.7  | 145.6  |
| PCOLCE2 | 186.8  | 211.2  | 120.5  | 239.5  | 146.5  | 244.6  | 157.6  | 195    |
| PCOLN3  | 396.9  | 551.2  | 401.5  | 297.3  | 236.1  | 402    | 383.4  | 837    |
| PCP2    | 111.4  | 124.8  | 116.3  | 96.8   | 96.2   | 101    | 105.6  | 124.5  |
| PCP4    | 79.2   | 77.6   | 101.6  | 92     | 80.6   | 88.3   | 86.9   | 82.4   |
| PCQAP   | 115.8  | 148    | 136.3  | 150.6  | 126.3  | 184.8  | 116.6  | 164.7  |
| PCQAP   | 119    | 125.6  | 142.3  | 126.4  | 122.1  | 127    | 98.9   | 110.9  |
| PCSK1   | 85.7   | 107.4  | 84.6   | 75.9   | 76.4   | 86.6   | 96.1   | 104    |
| PCSK1N  | 108.6  | 134.8  | 92.6   | 75.3   | 75.7   | 79.5   | 95.6   | 125.8  |
| PCSK2   | 79.3   | 90     | 84.5   | 81.5   | 80.7   | 85.2   | 93.6   | 79.9   |
| PCSK4   | 120.3  | 129.1  | 101.8  | 94.4   | 98.8   | 98.7   | 113.1  | 111.6  |
| PCSK6   | 105.9  | 113.1  | 85.3   | 89.3   | 81.1   | 88.7   | 95     | 103.6  |
| PCSK6   | 93.2   | 113.1  | 90.9   | 92.4   | 78.9   | 91.4   | 93.5   | 103    |
| PCSK6   | 123    | 166.9  | 115.3  | 108.4  | 104.3  | 106.5  | 127.2  | 133.5  |
| PCSK6   | 86.4   | 99.3   | 104.7  | 106    | 91.7   | 97.5   | 90.3   | 94.1   |
| PCSK6   | 92     | 117.7  | 86.2   | 97.8   | 94.3   | 92.6   | 96.7   | 107.1  |
| PCSK7   | 341.6  | 382.1  | 292.8  | 292.8  | 236.1  | 340    | 292.6  | 414.2  |
| PCSK9   | 107.1  | 113.2  | 103.1  | 91.6   | 82.9   | 101.2  | 108.6  | 119    |
| PCTK1   | 107.4  | 126.9  | 115.3  | 100.9  | 91.3   | 83.6   | 91.5   | 113    |
| PCTK1   | 72.5   | 85.4   | 91.3   | 83.2   | 85     | 83.2   | 76.1   | 77.6   |
| PCTK2   | 132.9  | 147.7  | 102.9  | 98     | 78.6   | 95.5   | 130.6  | 155.4  |
| PCTK3   | 113.8  | 136    | 117.4  | 113.6  | 120    | 123.7  | 108.9  | 135.2  |
| PCTK3   | 124    | 135.7  | 79.7   | 86.1   | 78.3   | 86.4   | 115.9  | 121.8  |
| PCTK3   | 132.3  | 120.3  | 93.6   | 95.2   | 77.9   | 90.2   | 112    | 127.3  |
| PCTK3   | 81.5   | 87     | 87.7   | 78.2   | 82.6   | 92     | 79.1   | 86.2   |
| PCTP    | 375.8  | 484    | 167.3  | 154.3  | 115.8  | 188.7  | 318.7  | 520.1  |
| PCYOX1  | 425.6  | 491.4  | 307    | 541.1  | 506.7  | 465    | 366.9  | 611.9  |
| PCYT1A  | 108.2  | 129    | 98.3   | 91.7   | 97.4   | 84.1   | 112.4  | 120.8  |
| PCYT1B  | 96.2   | 99.4   | 96.3   | 100    | 79     | 91.7   | 93.4   | 91.7   |
| PCYT2   | 166    | 193.3  | 93.6   | 96.5   | 96.3   | 107.2  | 153.9  | 178    |
| PDAP1   | 131.3  | 174.1  | 80.9   | 79.7   | 70.6   | 84.1   | 110.3  | 148.4  |
| PDC     | 88.6   | 87.4   | 101.5  | 99.8   | 85.6   | 103.4  | 85.4   | 89.9   |
| PDC     | 79.2   | 86.7   | 93     | 79.2   | 82.9   | 86.2   | 84.6   | 90.1   |

|          |         |         |        |        |        |        |         |         |
|----------|---------|---------|--------|--------|--------|--------|---------|---------|
| PDCD1    | 75.9    | 92.2    | 99.1   | 89.8   | 83.9   | 81.5   | 86.7    | 80.1    |
| PDCD10   | 362.7   | 448.7   | 141.6  | 168.6  | 140.5  | 213.4  | 269.4   | 357.4   |
| PDCD10   | 190.4   | 233.2   | 108    | 102.2  | 104.5  | 105.6  | 189.5   | 162.4   |
| PDCD10   | 2308.9  | 2724.9  | 889.4  | 960.6  | 749.8  | 1357.3 | 2028.2  | 3070.2  |
| PDCD10   | 212.6   | 237.6   | 132.1  | 117.5  | 103.8  | 159.4  | 196.9   | 334.8   |
| PDCD1LG2 | 65.1    | 84.7    | 81.7   | 72.9   | 75.4   | 73.3   | 74.7    | 79.4    |
| PDCD2    | 1222.6  | 1584.1  | 1163.3 | 1073.7 | 870.6  | 1281.4 | 810.4   | 1489.8  |
| PDCD2    | 2669.8  | 3282.2  | 2175.6 | 2397.5 | 1946.8 | 2838.7 | 1787.1  | 2612.6  |
| PDCD4    | 1338.4  | 1690.2  | 946.5  | 1627.5 | 1596.9 | 1682.8 | 1345.6  | 1739.9  |
| PDCD5    | 2135.7  | 2483.7  | 1189.5 | 1069.2 | 802.7  | 1065.8 | 1816.6  | 2851.9  |
| PDCD6    | 5777.5  | 7168.1  | 3347.6 | 4023.9 | 3191   | 4813.6 | 4379    | 6444.1  |
| PDCD6IP  | 79.2    | 84.8    | 92.1   | 86.7   | 80.4   | 81     | 76      | 83.5    |
| PDCD7    | 13614.1 | 14439.6 | 4694.7 | 6330.3 | 6700.1 | 5043.3 | 12793.3 | 14632.8 |
| PDCD8    | 483.2   | 667.3   | 205.5  | 134.6  | 133.1  | 141.1  | 439.9   | 558.4   |
| PDCD8    | 530.6   | 799.3   | 334.4  | 284.7  | 249.8  | 375.2  | 473.2   | 588.3   |
| PDCD8    | 99.3    | 134     | 97.4   | 91.4   | 79.1   | 78.8   | 100.7   | 128     |
| PDCL     | 335.2   | 446.3   | 161.8  | 137.3  | 112.8  | 125.2  | 302.1   | 390.1   |
| PDCL2    | 82.7    | 102.9   | 94.5   | 84.8   | 89.1   | 83.9   | 91.2    | 95.6    |
| PDCL3    | 1286.8  | 1855.1  | 559.4  | 596.5  | 424.5  | 662.1  | 1069.3  | 1149.9  |
| PDDC1    | 145.4   | 183     | 144.5  | 130.3  | 114.5  | 120    | 126.6   | 154     |
| PDDC1    | 411.3   | 379.6   | 276.5  | 230.8  | 209.2  | 263.1  | 222.7   | 325.2   |
| PDE10A   | 79.3    | 83.2    | 98.3   | 79.9   | 78.1   | 85     | 84.4    | 95.4    |
| PDE11A   | 78.6    | 89.9    | 88.8   | 86.2   | 76.7   | 80.7   | 85.1    | 85.5    |
| PDE11A   | 79.6    | 92.9    | 103.2  | 102.6  | 93.4   | 104.1  | 83.5    | 77.8    |
| PDE11A   | 88.9    | 97.6    | 114.1  | 101    | 98.6   | 98     | 85.4    | 93.3    |
| PDE1A    | 89      | 92.3    | 97.3   | 93     | 86.1   | 90.9   | 90.8    | 88      |
| PDE1A    | 80.4    | 83.1    | 100.6  | 94.5   | 96     | 93.4   | 79.5    | 88.6    |
| PDE1A    | 97.7    | 102.2   | 99.5   | 87.8   | 97.4   | 103.6  | 87.6    | 105.3   |
| PDE1B    | 124.6   | 134.2   | 125.2  | 160.9  | 150.3  | 224.4  | 112.3   | 164.5   |
| PDE1C    | 82.2    | 88.6    | 91.4   | 91.3   | 84.3   | 88.1   | 84.4    | 91      |
| PDE2A    | 84.7    | 101.2   | 88.7   | 97     | 84.5   | 92.9   | 90.3    | 85.6    |
| PDE3A    | 105.5   | 120.6   | 89.2   | 84.3   | 90     | 85     | 108.2   | 111.7   |
| PDE3B    | 466     | 597     | 385.1  | 542.9  | 440.4  | 896.9  | 522.2   | 808     |
| PDE4A    | 127.3   | 145.4   | 86.4   | 92     | 85.3   | 90.9   | 120.7   | 160.1   |
| PDE4B    | 106.7   | 113.9   | 114.9  | 216.6  | 134.6  | 281.2  | 97.2    | 110     |
| PDE4B    | 84      | 98.2    | 86.9   | 90.7   | 91.8   | 104.6  | 89.5    | 87.6    |
| PDE4B    | 77.4    | 94.3    | 92.6   | 93.2   | 86.9   | 88.9   | 77.4    | 93.8    |
| PDE4B    | 93.5    | 137.7   | 86.9   | 83.3   | 80.8   | 89.5   | 93      | 101.4   |
| PDE4C    | 79.6    | 89.1    | 93.6   | 87.5   | 87.1   | 96.8   | 83.5    | 97.2    |
| PDE4D    | 151.5   | 196.4   | 130.8  | 129.2  | 109.3  | 177.4  | 159.3   | 215.3   |
| PDE4DIP  | 92.5    | 94.9    | 104.8  | 95.9   | 94.6   | 87.9   | 79.2    | 97.4    |
| PDE4DIP  | 160     | 169.3   | 78.7   | 85.4   | 83.6   | 83.4   | 150.4   | 159.2   |
| PDE4DIP  | 79.1    | 85.8    | 86.7   | 82.6   | 81.1   | 79.2   | 76.8    | 82.6    |
| PDE5A    | 85.8    | 84.7    | 103.8  | 87.8   | 93.9   | 88.7   | 80.3    | 90.3    |
| PDE5A    | 91.1    | 122.6   | 107.3  | 99.8   | 91.8   | 93.3   | 97      | 106.1   |
| PDE5A    | 80.9    | 102.6   | 84.7   | 90.1   | 94.4   | 81.9   | 87.3    | 93      |
| PDE5A    | 72.3    | 83      | 87.8   | 76.8   | 75.8   | 78.7   | 82.2    | 91.1    |
| PDE5A    | 77.4    | 93.2    | 96.1   | 90     | 82.7   | 82.8   | 84.7    | 85.5    |
| PDE6A    | 107.4   | 127.2   | 99.6   | 86     | 77.8   | 83.9   | 111.3   | 118.8   |
| PDE6B    | 86.4    | 85.6    | 81.6   | 92.5   | 70.4   | 78.1   | 86.4    | 89.3    |

|        |        |        |        |        |        |        |        |        |
|--------|--------|--------|--------|--------|--------|--------|--------|--------|
| PDE6C  | 84.5   | 99.4   | 91.6   | 82.5   | 67.6   | 78.5   | 86.6   | 105.5  |
| PDE6D  | 613.1  | 968    | 267.4  | 198.6  | 173.2  | 227.7  | 627.1  | 766.6  |
| PDE6G  | 124.2  | 141.9  | 108.6  | 106.7  | 98.4   | 105.7  | 117.5  | 125.6  |
| PDE6H  | 174.1  | 183.2  | 104    | 100.7  | 92.9   | 90.9   | 171.5  | 174.9  |
| PDE7A  | 622.9  | 884.5  | 310.3  | 253.8  | 246    | 384.9  | 486.6  | 683.9  |
| PDE7A  | 425.4  | 497.7  | 287.2  | 590.7  | 700.8  | 706.8  | 363.9  | 439.9  |
| PDE7A  | 100.5  | 109    | 108.2  | 104.5  | 89     | 104.9  | 95.5   | 117.6  |
| PDE7B  | 409.4  | 588.4  | 267.5  | 207.7  | 172.4  | 177.8  | 301    | 249.8  |
| PDE8A  | 306    | 372.8  | 167.6  | 153.8  | 135    | 163.4  | 312    | 380.7  |
| PDE8A  | 107.6  | 116.3  | 102.4  | 95.2   | 95.3   | 108.3  | 101.8  | 110.8  |
| PDE8A  | 97.9   | 112.4  | 91.3   | 90.2   | 83.7   | 92.7   | 100.6  | 106.8  |
| PDE8B  | 120.5  | 133.1  | 110.5  | 95     | 91.9   | 103.6  | 101.5  | 113.5  |
| PDE8B  | 82.5   | 92.6   | 93.9   | 92.5   | 92.3   | 78.6   | 78.4   | 82.1   |
| PDE9A  | 91     | 98     | 107    | 99.2   | 95.5   | 91.5   | 91.9   | 105.8  |
| PDE9A  | 135.1  | 164.3  | 115.2  | 116.1  | 131.1  | 120.1  | 122.7  | 138.3  |
| PDE9A  | 128.2  | 148.3  | 90     | 105.7  | 85.6   | 92.3   | 113.8  | 134.2  |
| PDE9A  | 91.1   | 105.7  | 89     | 91.8   | 88     | 87.9   | 84.4   | 101.1  |
| PDF    | 82.4   | 83.4   | 99.8   | 94.6   | 93.4   | 86.4   | 87.9   | 101.1  |
| PDGFA  | 155.8  | 142.4  | 90.5   | 78.6   | 80.3   | 81.9   | 120    | 137.2  |
| PDGFA  | 112    | 106.4  | 93.9   | 91.9   | 82.9   | 90.5   | 109    | 114.8  |
| PDGFB  | 99.6   | 115.9  | 94.3   | 89     | 87.3   | 87.9   | 94.3   | 106.7  |
| PDGFB  | 95.9   | 103.7  | 93.5   | 94     | 89.2   | 90.5   | 97.6   | 109.2  |
| PDGFB  | 117.4  | 128    | 101.8  | 108.9  | 102.2  | 107    | 108.6  | 119.5  |
| PDGFC  | 183.3  | 237.1  | 117.5  | 114.3  | 90.9   | 125.3  | 164.8  | 236.6  |
| PDGFD  | 130.9  | 158.6  | 106.8  | 134.9  | 121.5  | 189.2  | 111.3  | 129.5  |
| PDGFD  | 166.5  | 210.9  | 125.2  | 138.5  | 111.1  | 164.5  | 120.9  | 163.3  |
| PDGFRA | 235.2  | 286.9  | 160.9  | 161.7  | 151.5  | 159.9  | 245.4  | 289.3  |
| PDGFRB | 120.8  | 147.2  | 103.4  | 115.7  | 111    | 137.2  | 113.2  | 129.3  |
| PDGFRL | 132.4  | 159.6  | 127.9  | 108.6  | 113.6  | 108.3  | 144    | 133.8  |
| PDHA1  | 1284.2 | 1700.8 | 465.7  | 516.1  | 435.6  | 514    | 1145.1 | 1390.8 |
| PDHA2  | 81.9   | 82.5   | 88.6   | 83.3   | 81     | 87     | 90     | 88.3   |
| PDHB   | 5371.5 | 6648.3 | 3850.7 | 4134.1 | 3308.4 | 4984.4 | 4283.9 | 5095.8 |
| PDHX   | 991.9  | 1141.6 | 454.6  | 549.2  | 358.1  | 656.8  | 888.1  | 1746.6 |
| PDIA2  | 100.3  | 104.1  | 90.5   | 90.9   | 87.9   | 90.5   | 93     | 98.1   |
| PDIA3  | 112.8  | 129.5  | 99.7   | 85.8   | 85.8   | 90.3   | 101.8  | 126.1  |
| PDIA3P | 632.9  | 818.2  | 226.6  | 211    | 215.3  | 260.9  | 565.6  | 998.1  |
| PDIA4  | 188.2  | 204.7  | 127.2  | 132.9  | 108.4  | 158.6  | 161.8  | 282.5  |
| PDIA5  | 571.6  | 757.3  | 434    | 626    | 530.7  | 873.7  | 503.3  | 735.1  |
| PDIA6  | 2029.2 | 2857   | 1049.5 | 933.4  | 775.9  | 943.6  | 1940.2 | 2387.9 |
| PDIK1L | 242.8  | 301.5  | 201.1  | 204.2  | 158.1  | 265.7  | 228.7  | 371.1  |
| PDILT  | 78.4   | 88.5   | 92     | 90.5   | 82.1   | 82.9   | 85.4   | 86.5   |
| PDK1   | 114.9  | 138    | 109.1  | 97.2   | 95.7   | 102    | 107.9  | 137.6  |
| PDK2   | 121.7  | 153.7  | 115.5  | 100.1  | 102.4  | 95.5   | 124.7  | 136.7  |
| PDK3   | 311.2  | 458.4  | 194    | 140.4  | 127.4  | 176    | 285.4  | 351.5  |
| PDK4   | 99     | 120.2  | 101.6  | 101.3  | 104.5  | 125.7  | 107    | 160    |
| PDLIM1 | 807.3  | 1215.3 | 685.1  | 266.2  | 212.3  | 248.4  | 829.4  | 1201   |
| PDLIM2 | 93.2   | 97.9   | 94.9   | 90.9   | 80.3   | 85     | 95.7   | 100.7  |
| PDLIM2 | 80.5   | 104.2  | 80     | 70.6   | 79     | 72.8   | 83.9   | 94.3   |
| PDLIM3 | 102    | 116.3  | 90.2   | 89.2   | 98.1   | 92.7   | 98     | 115.6  |
| PDLIM4 | 73.7   | 81.4   | 95.4   | 88     | 87.2   | 79.7   | 81.6   | 80     |

|          |        |        |        |        |        |        |        |        |
|----------|--------|--------|--------|--------|--------|--------|--------|--------|
| PDLIM5   | 194.8  | 237.2  | 133.5  | 110.5  | 113.1  | 113.5  | 142.6  | 172    |
| PDLIM5   | 128.2  | 150    | 110.3  | 88.4   | 94     | 97.5   | 98.1   | 131.9  |
| PDLIM5   | 149.9  | 182.1  | 103.5  | 94.1   | 87.6   | 88.1   | 121.8  | 139.8  |
| PDLIM7   | 151.9  | 201.5  | 159.2  | 130.7  | 113.8  | 136.6  | 123.5  | 163.7  |
| PDLIM7   | 517.3  | 576.3  | 253.5  | 245.5  | 208    | 230.4  | 447    | 584.9  |
| PDLIM7   | 313.4  | 405.1  | 265.1  | 190.2  | 151    | 166.2  | 321.2  | 411    |
| PDP2     | 152.9  | 157.7  | 128.6  | 107.4  | 105.6  | 95.4   | 160.3  | 200.8  |
| PDPK1    | 91.6   | 110.7  | 95.6   | 106    | 98.1   | 89.1   | 97.7   | 110.9  |
| PDPK1    | 694.4  | 853.8  | 275.6  | 293.6  | 301.9  | 234.5  | 536.8  | 961.9  |
| PDPK1    | 698.8  | 879.8  | 659.6  | 939.2  | 716.1  | 1219.5 | 772.9  | 1553.4 |
| PDPN     | 160.2  | 205.7  | 154.2  | 89.7   | 94.9   | 98     | 140.3  | 146    |
| PDPN     | 108.9  | 94.2   | 89.4   | 95     | 83.4   | 93.2   | 105.5  | 103.8  |
| PDPR     | 219.2  | 315.6  | 189    | 221.4  | 222    | 247.8  | 213.4  | 285    |
| PDPR     | 365.3  | 504.8  | 335.7  | 409.2  | 377.2  | 412.2  | 385.7  | 488    |
| PDPR     | 121.9  | 152    | 98.5   | 86.5   | 82.3   | 86.2   | 108.6  | 124.6  |
| PDRG1    | 603.9  | 834.3  | 475    | 360.8  | 303    | 494.8  | 574.2  | 755.2  |
| PDSS1    | 1078   | 1411.9 | 533.9  | 400.4  | 297.2  | 454.5  | 763.6  | 1301.3 |
| PDSS2    | 1593.6 | 1872.5 | 723    | 875    | 824.4  | 935.6  | 1418.5 | 1622.5 |
| PDXK     | 1171.5 | 1584.1 | 1328   | 2061.3 | 1665.8 | 2184   | 1207.5 | 1138.6 |
| PDXP     | 2433.8 | 3370.3 | 1470.4 | 1164.2 | 980.7  | 1183.6 | 2194   | 1879.9 |
| PDYN     | 151.5  | 172.6  | 98.7   | 95.7   | 86.9   | 85.2   | 155.1  | 160.9  |
| PDZD11   | 93.5   | 111.1  | 83.5   | 89     | 82.2   | 96.2   | 94     | 97     |
| PDZD3    | 115.4  | 140.8  | 87.2   | 84.1   | 84.8   | 89.9   | 107.1  | 124.4  |
| PDZD4    | 111.4  | 126.1  | 100.3  | 105.5  | 93.3   | 98.3   | 108.6  | 122.7  |
| PDZD7    | 129.5  | 146.3  | 163.3  | 112.6  | 109    | 125.5  | 126.3  | 179.2  |
| PDZD8    | 219.2  | 295.4  | 143    | 132.6  | 132.1  | 165.4  | 209.2  | 279    |
| PDZK1    | 90.3   | 99     | 98.3   | 86.1   | 90.5   | 80.4   | 89.1   | 92.5   |
| PDZK1IP1 | 81.7   | 99.1   | 84.2   | 81.8   | 81.6   | 81.8   | 84.4   | 90.2   |
| PDZK3    | 80.9   | 85.6   | 101.5  | 92.2   | 82.9   | 89.8   | 82.2   | 94.4   |
| PDZK3    | 90.5   | 92.3   | 85.4   | 83.3   | 80.9   | 88.1   | 92     | 96.1   |
| PDZK5B   | 91.7   | 100.6  | 90.6   | 87.5   | 95.2   | 92.1   | 97.4   | 96.6   |
| PDZK5B   | 105.2  | 119.5  | 89.8   | 87.5   | 87     | 84.6   | 94.6   | 106.2  |
| PDZK5B   | 77.2   | 80.7   | 87.7   | 79.1   | 84.1   | 75.6   | 79.8   | 84.5   |
| PDZRN3   | 91.6   | 106.1  | 86.1   | 91     | 85.8   | 88.6   | 93     | 105.3  |
| PDZRN3   | 79     | 86.5   | 92.7   | 83.8   | 91.6   | 86.8   | 80.7   | 84.9   |
| PDZRN3   | 90.1   | 94.7   | 82.1   | 81.5   | 75.7   | 82.6   | 83.1   | 92.8   |
| PDZRN4   | 109.6  | 107.2  | 92.9   | 93.6   | 91.5   | 88.5   | 99.7   | 103.9  |
| PEA15    | 2717.1 | 3571.3 | 1983.8 | 1346.7 | 1195.6 | 1668.4 | 2553.2 | 2888.5 |
| PEAR1    | 95.4   | 105.8  | 108.5  | 102.3  | 88.5   | 103.4  | 93.2   | 104.8  |
| PEBP1    | 1902.9 | 2065.5 | 674.4  | 612.5  | 441.6  | 723.7  | 1733   | 4309.7 |
| PEBP4    | 114.5  | 120.9  | 90.4   | 86.8   | 82.6   | 91.5   | 110.2  | 116.9  |
| PECAM1   | 1074.8 | 1552.7 | 688.9  | 710.8  | 569.2  | 1223.5 | 754.8  | 1165.2 |
| PECI     | 553.1  | 762.2  | 179.6  | 237.5  | 154.8  | 234.5  | 535.3  | 790.2  |
| PECI     | 376.1  | 495.1  | 223.4  | 223.7  | 174.7  | 242.4  | 349.3  | 502.9  |
| PECR     | 415.1  | 550.5  | 359.7  | 289.2  | 243.8  | 334.3  | 392.2  | 413.2  |
| PEF1     | 369.5  | 511.8  | 270.4  | 302.9  | 220.6  | 346.5  | 353.9  | 475.4  |
| PEG10    | 114.9  | 123    | 94.1   | 83     | 79.5   | 75     | 108.2  | 122.7  |
| PEG3     | 103.1  | 90     | 88.3   | 88.4   | 86.6   | 90.1   | 95.9   | 92.8   |
| PELI1    | 187.8  | 221.4  | 144.2  | 151.2  | 140.3  | 181.6  | 192    | 276.9  |
| PELI2    | 403.6  | 525.9  | 313.9  | 361.2  | 280.4  | 560    | 497.1  | 934.2  |



|         |        |        |        |        |        |        |        |        |
|---------|--------|--------|--------|--------|--------|--------|--------|--------|
| PELI3   | 98.1   | 105.9  | 99.2   | 111.9  | 98.9   | 126.1  | 105.1  | 117.2  |
| PELO    | 1286.7 | 1641.2 | 980.8  | 777.3  | 633.3  | 936.1  | 1470.2 | 2243.9 |
| PELP1   | 307.3  | 344.9  | 256.1  | 179.4  | 157.1  | 219.7  | 276.8  | 474.2  |
| PEMT    | 394.2  | 503.9  | 342.2  | 272.7  | 218.1  | 234.9  | 393    | 591.9  |
| PEMT    | 100.9  | 112.4  | 90.1   | 85.4   | 89.3   | 84.6   | 115    | 108.4  |
| PEMT    | 87     | 102.9  | 93.8   | 88.3   | 79.9   | 86.4   | 98.4   | 85.3   |
| PEMT    | 165.9  | 180.2  | 110.4  | 98.5   | 97.3   | 88.5   | 137.2  | 157.2  |
| PENK    | 1348.7 | 2101.1 | 786.1  | 436.1  | 393.2  | 490.7  | 1236.2 | 1153.4 |
| PEO1    | 263.8  | 343.6  | 235.5  | 181.7  | 133    | 197.1  | 206.5  | 293.9  |
| PEPD    | 984.4  | 1332.3 | 718.5  | 653.9  | 493.6  | 857.8  | 867.4  | 1333.8 |
| PER1    | 107.5  | 133.1  | 86.4   | 75.4   | 81     | 89.3   | 97.6   | 113.9  |
| PER2    | 87.8   | 87.8   | 90.1   | 67.9   | 80     | 80.3   | 79     | 87.6   |
| PER2    | 1581.9 | 1937.2 | 1077.4 | 1136.4 | 740.4  | 956.3  | 1312.8 | 1682.5 |
| PERF15  | 87.4   | 88.8   | 101.4  | 91.4   | 96.8   | 93.3   | 86.6   | 93     |
| PERLD1  | 559.2  | 620.4  | 404.7  | 428.6  | 341.6  | 435.7  | 457.2  | 403    |
| PERP    | 276.4  | 286.1  | 136.7  | 122.2  | 93.6   | 123.1  | 183.4  | 483.9  |
| PERQ1   | 108.2  | 136.1  | 128.2  | 132.8  | 125    | 118.2  | 111.3  | 131    |
| PES1    | 279.8  | 355.2  | 145.7  | 134.6  | 110.4  | 143.8  | 242.4  | 207.9  |
| PET112L | 531.2  | 700.6  | 285    | 194.6  | 212.7  | 249.9  | 450.3  | 425.2  |
| PEX1    | 162    | 210    | 145    | 156.1  | 125.1  | 221.6  | 127.2  | 210.4  |
| PEX10   | 114.1  | 152.4  | 90.1   | 78.8   | 81.8   | 87     | 102.2  | 140.7  |
| PEX10   | 86.2   | 101    | 88.4   | 90.3   | 97.4   | 82.8   | 85.5   | 87.6   |
| PEX11A  | 188.2  | 248.6  | 104.5  | 96.4   | 95.8   | 95.2   | 173.7  | 232.3  |
| PEX11B  | 1498.7 | 1905.9 | 975.5  | 635.6  | 646.3  | 884.9  | 1206.8 | 1705   |
| PEX11G  | 143.6  | 173    | 106.9  | 78.8   | 87.5   | 99.9   | 123.5  | 134.2  |
| PEX12   | 101.5  | 122.7  | 98.4   | 84.6   | 79     | 87.8   | 102    | 114.1  |
| PEX13   | 90.2   | 96.1   | 90.5   | 79.5   | 73.7   | 83.6   | 91.4   | 100.7  |
| PEX14   | 179.1  | 202.6  | 181.9  | 167.4  | 128.9  | 181.6  | 201.7  | 468.4  |
| PEX16   | 1042.3 | 1409.7 | 511.4  | 496.3  | 434.7  | 491.8  | 998.4  | 976.4  |
| PEX16   | 146.3  | 156    | 125.1  | 109.4  | 99.5   | 115.7  | 135.7  | 174.9  |
| PEX16   | 884.1  | 1324.8 | 851.7  | 600.4  | 455.5  | 551.5  | 904    | 1207.7 |
| PEX19   | 680.8  | 873.4  | 498.9  | 646.9  | 475.8  | 758.8  | 625.1  | 881.8  |
| PEX26   | 110.6  | 126.2  | 100.8  | 107.8  | 102.5  | 110.7  | 106.2  | 120.1  |
| PEX3    | 87     | 97.4   | 94.5   | 103.2  | 92     | 113.6  | 90.4   | 105.2  |
| PEX5    | 670.6  | 890.8  | 493.7  | 589.8  | 459.1  | 636.5  | 560.3  | 717.9  |
| PEX5L   | 88.5   | 120.4  | 93.2   | 92.9   | 92.3   | 86.9   | 92.1   | 121.8  |
| PEX6    | 192.8  | 257.8  | 160.2  | 144.6  | 141.4  | 202.6  | 197.7  | 244.1  |
| PEX7    | 547.5  | 768.3  | 353    | 425.4  | 317.9  | 424.8  | 519.5  | 767.7  |
| PF4     | 84     | 95.3   | 103.3  | 92.3   | 89.1   | 91.7   | 80.7   | 86.7   |
| PF4V1   | 104.3  | 122.3  | 99.8   | 99     | 89.1   | 96.7   | 109.1  | 110.1  |
| PFAAP5  | 345.3  | 435.5  | 260.6  | 294.4  | 289.5  | 374    | 265    | 303.2  |
| PFAS    | 733.2  | 844.3  | 411.9  | 420.5  | 337.9  | 502.3  | 533.5  | 682.6  |
| PFC     | 166.3  | 236.9  | 168.4  | 282.7  | 204.7  | 263.7  | 139.5  | 210.4  |
| PFDN1   | 1868.4 | 2470.1 | 1612.7 | 1352.6 | 1056.8 | 1666.4 | 1698.5 | 1908.3 |
| PFDN2   | 135.3  | 170.7  | 116.3  | 88.8   | 92.9   | 89.5   | 138.8  | 167.8  |
| PFDN4   | 131.6  | 162.9  | 114.3  | 112.2  | 111.6  | 130.1  | 142.8  | 170.1  |
| PFDN5   | 9171.6 | 10502  | 3185.3 | 3882.8 | 3578.9 | 4540   | 7785.4 | 10287  |
| PFDN5   | 7943   | 8933.9 | 2057.9 | 2509.2 | 1785.3 | 3395.3 | 6636.1 | 9266   |
| PFDN6   | 1204.1 | 1480   | 508    | 529.4  | 505.7  | 657.4  | 1372.1 | 1055.2 |
| PFKFB1  | 98.3   | 104.8  | 98     | 89.4   | 86.8   | 95.4   | 88.3   | 108.6  |

|         |         |         |        |         |         |         |         |        |
|---------|---------|---------|--------|---------|---------|---------|---------|--------|
| PFKFB2  | 99.6    | 121.6   | 91.2   | 97.7    | 94.5    | 94.6    | 101.5   | 113.4  |
| PFKFB2  | 83.4    | 93.8    | 103.4  | 89.9    | 94.3    | 101     | 98.4    | 105.1  |
| PFKFB2  | 99.5    | 107.9   | 102.8  | 92      | 98.5    | 102.9   | 90.5    | 102.4  |
| PFKFB3  | 695.8   | 883.3   | 701    | 505.4   | 475.1   | 722.8   | 716.5   | 1213.2 |
| PFKFB4  | 399.5   | 472.8   | 437.3  | 586.2   | 689     | 696.4   | 321.7   | 349.3  |
| PFKL    | 103.6   | 127.3   | 94.4   | 85      | 86.2    | 98.1    | 95.8    | 111.5  |
| PFKL    | 535.3   | 749.4   | 622.4  | 700     | 623.6   | 846.7   | 483.5   | 1148.1 |
| PFKM    | 154.8   | 174.1   | 109.2  | 126.4   | 128.5   | 140.3   | 139     | 138.8  |
| PFKP    | 1379.5  | 1595.7  | 1198.8 | 518.4   | 420.2   | 766.9   | 1226.8  | 2062.5 |
| PFN1    | 24770.6 | 26397.8 | 21373  | 20190.1 | 15690.6 | 20187.2 | 23437.6 | 25363  |
| PFN2    | 82.6    | 85.9    | 95.9   | 92.8    | 85.1    | 99      | 87.9    | 87.4   |
| PFN2    | 102.8   | 118.3   | 100.7  | 105.2   | 93.8    | 105.2   | 91.2    | 121.3  |
| PFN3    | 122.6   | 137.3   | 82.3   | 73.2    | 86.3    | 93.7    | 119.2   | 137.3  |
| PFN4    | 144     | 148.2   | 115.4  | 121.3   | 117.9   | 113.1   | 124.1   | 147.3  |
| PFS2    | 3764.1  | 5473.1  | 1958.6 | 1100.5  | 929.5   | 1132    | 2815.4  | 2580.5 |
| PFTK1   | 141.9   | 177.1   | 151.2  | 160.1   | 124.9   | 198.1   | 132.6   | 203.7  |
| PGA3    | 82.8    | 90.5    | 93.5   | 99      | 93.1    | 92.6    | 89      | 98.6   |
| PGA4    | 91.5    | 105.1   | 88.8   | 94.1    | 87.7    | 92.5    | 113.1   | 103.6  |
| PGA5    | 111.5   | 124.3   | 105.7  | 125.9   | 109.3   | 116.6   | 107.7   | 114.3  |
| PGAM1   | 4333.4  | 6005.8  | 2738.2 | 1359.5  | 1122.5  | 1381.7  | 3380.3  | 4274.8 |
| PGAM2   | 100.8   | 119.5   | 102.8  | 92.3    | 81.3    | 88.9    | 93.5    | 116    |
| PGAM4   | 107.4   | 132     | 99.4   | 89.2    | 78.2    | 87.8    | 96.9    | 132.5  |
| PGAM5   | 82      | 94.1    | 102    | 94.4    | 96.5    | 84.4    | 77.2    | 93     |
| PGAP1   | 101.2   | 107.9   | 100.5  | 82.9    | 86.4    | 103.4   | 123.5   | 117.9  |
| PGBD1   | 148.4   | 180.2   | 130.3  | 117     | 120.5   | 137.3   | 147.3   | 167.6  |
| PGBD2   | 265.3   | 299     | 191.1  | 186.9   | 191.9   | 225.7   | 195     | 311.3  |
| PGBD2   | 142.6   | 149.3   | 101.5  | 103.2   | 106.6   | 102.4   | 109.8   | 133.9  |
| PGBD3   | 128.8   | 157     | 102.9  | 100     | 82.2    | 111     | 121     | 143.4  |
| PGBD4   | 144.5   | 166.1   | 100.9  | 108.8   | 100.1   | 124.1   | 119.5   | 125.5  |
| PGBD5   | 183.8   | 200.3   | 209.5  | 180.6   | 160.9   | 251.7   | 185.5   | 359.3  |
| PGC     | 81.3    | 78.1    | 93.7   | 100.6   | 85.5    | 81.1    | 79.4    | 84.3   |
| PGCP    | 1148.5  | 1539    | 713.1  | 629.1   | 488.9   | 867.7   | 1175.6  | 1408.2 |
| PGD     | 2543.2  | 3597.7  | 1717.3 | 1405.7  | 1178.3  | 1800.2  | 4915    | 7517.4 |
| PGDS    | 90.6    | 94.1    | 84.9   | 94.9    | 81.3    | 91.1    | 84      | 94.1   |
| PGEA1   | 395.7   | 568     | 329    | 303.2   | 263.9   | 358.8   | 359.4   | 450.8  |
| PGEA1   | 113.1   | 139.6   | 101.3  | 98.1    | 102.7   | 103.4   | 107.5   | 114.5  |
| PGF     | 98.5    | 99.8    | 78.2   | 74.2    | 70.8    | 80.2    | 106.5   | 112    |
| PGGT1B  | 396.2   | 455.3   | 250.5  | 260.6   | 240.5   | 297.7   | 293.6   | 394.5  |
| PGK1    | 2512.2  | 3513.8  | 1304.9 | 1483.3  | 972.8   | 1819.4  | 2238.5  | 3488.8 |
| PGK2    | 87.3    | 91.5    | 77.5   | 77.1    | 73.9    | 75.6    | 81.1    | 96.7   |
| PGLS    | 2147.5  | 2710.8  | 1818.4 | 1354.6  | 1073.8  | 1536    | 1567.6  | 2873.1 |
| PGLYRP1 | 102.3   | 116.5   | 107.1  | 89.7    | 97      | 92.4    | 107.7   | 111.7  |
| PGLYRP2 | 93.9    | 100.7   | 89.9   | 88.9    | 82      | 88.4    | 91.5    | 99.6   |
| PGLYRP3 | 85      | 94.9    | 91.7   | 91.7    | 87.3    | 86.8    | 87.6    | 85.4   |
| PGLYRP4 | 137.9   | 166.6   | 106.3  | 107.3   | 99.5    | 116.8   | 133.1   | 151.2  |
| PGM1    | 1165.4  | 1595.7  | 1091.6 | 1362.6  | 1019.7  | 1584.8  | 888.9   | 1288.7 |
| PGM2    | 944.2   | 1035.2  | 620.6  | 498.9   | 384.7   | 696.9   | 655.6   | 962.4  |
| PGM2L1  | 101.6   | 114.8   | 97.5   | 98.4    | 91.6    | 111.1   | 115.2   | 137.2  |
| PGM3    | 305.3   | 386.6   | 193.5  | 179.4   | 135.8   | 201.5   | 251.7   | 398.7  |
| PGM5    | 74.1    | 73.9    | 99.2   | 94.3    | 82.2    | 89.7    | 76.4    | 83.5   |

|         |        |        |        |        |        |        |        |        |
|---------|--------|--------|--------|--------|--------|--------|--------|--------|
| PGM5    | 90.9   | 104.3  | 115.4  | 97.9   | 93.3   | 94.7   | 86.4   | 103    |
| PGM5    | 84.6   | 89.6   | 106.1  | 96.9   | 89.4   | 102.5  | 85.1   | 96     |
| PGM5P2  | 84.4   | 86.5   | 91.7   | 79.7   | 82.9   | 83.5   | 82.5   | 77.6   |
| PGM5P2  | 137.7  | 151.1  | 87.8   | 83.8   | 80     | 83.6   | 121.7  | 147.1  |
| PGPEP1  | 107.4  | 131.9  | 102.8  | 95.8   | 91.5   | 106.3  | 131.2  | 128.9  |
| PGR     | 79.9   | 94.6   | 92.5   | 90.1   | 89.5   | 95.1   | 78.2   | 93.4   |
| PGRMC1  | 3714   | 4630.2 | 2177.5 | 1881.9 | 1392.7 | 2268.2 | 3171.1 | 4182.5 |
| PGRMC2  | 2744   | 3965.2 | 1855   | 1515.7 | 1205.3 | 1640.2 | 2483.2 | 3103.1 |
| PGS1    | 501.3  | 577.5  | 416.5  | 434.6  | 396.9  | 548.8  | 439.3  | 831.3  |
| PH-4    | 113.8  | 124.2  | 105.8  | 100.4  | 102.9  | 95.8   | 97     | 124    |
| PH-4    | 202.5  | 231.3  | 144.8  | 128.2  | 112.4  | 134.2  | 187.6  | 237.5  |
| PH-4    | 465    | 648.6  | 426    | 316.7  | 326.5  | 370.5  | 404.7  | 325.1  |
| PHACS   | 225.9  | 227.8  | 234.4  | 254.8  | 273    | 379.5  | 162.8  | 170.3  |
| PHACTR1 | 209.7  | 282.1  | 147    | 258.9  | 257.4  | 248.4  | 187.8  | 195.6  |
| PHACTR2 | 760.1  | 1034.9 | 514.7  | 884.5  | 654.5  | 718.9  | 716    | 1051.5 |
| PHACTR3 | 94     | 100.4  | 78.6   | 83.7   | 84     | 79.6   | 91.3   | 96.5   |
| PHACTR3 | 4160.3 | 5194.8 | 2621.1 | 2513.5 | 1976   | 2902.1 | 3014.4 | 3271.9 |
| PHACTR3 | 879.8  | 1392.3 | 377.2  | 334.8  | 244.9  | 479.2  | 583.3  | 698.1  |
| PHACTR4 | 1348.8 | 1862.3 | 979.3  | 1189.3 | 1155.7 | 1396.6 | 1291.2 | 1522.3 |
| PHACTR4 | 103.5  | 125.4  | 90.1   | 79.2   | 86.8   | 94.7   | 118.2  | 117.9  |
| PHACTR4 | 74.4   | 95.6   | 83.2   | 88     | 85.2   | 84.3   | 76.1   | 94.2   |
| PHB     | 1027.9 | 1471.8 | 675.9  | 735.1  | 512.5  | 861.4  | 800.2  | 838    |
| PHB2    | 1314.4 | 1595.5 | 472.4  | 326    | 307.8  | 438.4  | 1058.8 | 1636.3 |
| PHC1    | 110.5  | 132.8  | 123    | 107.7  | 108.8  | 125.7  | 117.8  | 118.4  |
| PHC2    | 88.8   | 114.1  | 86.8   | 87.1   | 87.8   | 88.9   | 100.6  | 113.1  |
| PHC2    | 149.9  | 195.9  | 142.7  | 140.4  | 128.8  | 132.9  | 143    | 176.6  |
| PHC2    | 77.1   | 94     | 93.5   | 105.5  | 88.4   | 101    | 77.3   | 91.2   |
| PHC3    | 187.8  | 235.4  | 133.6  | 163    | 149.4  | 198.5  | 162.7  | 230.9  |
| PHCA    | 383.2  | 560    | 302.5  | 316.9  | 281.6  | 276.6  | 438.7  | 497.4  |
| PHEX    | 106.3  | 122.3  | 102.9  | 91.5   | 82.8   | 75.8   | 108.8  | 111.9  |
| PHF1    | 97.3   | 118.2  | 96.8   | 91.5   | 85.1   | 120.7  | 102.3  | 125.3  |
| PHF1    | 134    | 168.8  | 130.4  | 128.2  | 134.7  | 159.7  | 137    | 227.7  |
| PHF1    | 192.6  | 248.6  | 199.2  | 170.6  | 171.4  | 276.3  | 231.1  | 378.2  |
| PHF10   | 2269.6 | 2802.7 | 1156.5 | 826.6  | 741.1  | 1115   | 1501.5 | 2711.6 |
| PHF11   | 1564.5 | 1984.1 | 866.9  | 647.3  | 498    | 769.9  | 1429   | 1643.7 |
| PHF11   | 1920.7 | 2484.6 | 1387.9 | 1011.1 | 886.2  | 1229.6 | 1807.8 | 2070.5 |
| PHF11   | 131.8  | 165.9  | 98.9   | 87.6   | 84.9   | 85.9   | 130.5  | 134.3  |
| PHF12   | 81.2   | 101.1  | 103.6  | 103.8  | 104.9  | 109.1  | 92.7   | 93.7   |
| PHF12   | 163.8  | 202.9  | 179.6  | 192.7  | 178.8  | 253.7  | 164.6  | 260.8  |
| PHF12   | 81.3   | 89.9   | 91.6   | 77     | 79.1   | 80.8   | 78.4   | 96.3   |
| PHF13   | 503.7  | 698.7  | 433    | 360.2  | 286.8  | 346.9  | 545.9  | 847    |
| PHF14   | 96.9   | 127.3  | 92.6   | 85.2   | 91.8   | 92.4   | 106.2  | 113.9  |
| PHF14   | 169.4  | 191    | 141.7  | 130.4  | 121    | 160.9  | 145.3  | 167.1  |
| PHF14   | 816.6  | 1096.3 | 295.8  | 257.3  | 223.6  | 435.4  | 595.8  | 862.5  |
| PHF15   | 318.7  | 418.5  | 468.4  | 347.8  | 354.7  | 373.9  | 345.6  | 377.9  |
| PHF16   | 371.1  | 492.2  | 262    | 298.8  | 258.1  | 390.1  | 362.7  | 463.4  |
| PHF16   | 108    | 123.1  | 93.2   | 80.8   | 80.7   | 89.9   | 106.1  | 140.3  |
| PHF17   | 130.3  | 192.6  | 126.8  | 121.7  | 106.2  | 125.9  | 127.9  | 148.5  |
| PHF17   | 508.5  | 667.9  | 526.1  | 374.6  | 307.7  | 447.8  | 433    | 479.2  |
| PHF17   | 232.8  | 263.3  | 140.4  | 126.6  | 113.3  | 140.1  | 181.1  | 238.5  |

|          |         |         |         |        |        |        |         |         |
|----------|---------|---------|---------|--------|--------|--------|---------|---------|
| PHF19    | 520     | 560.9   | 327.3   | 233.1  | 226.8  | 313    | 389.5   | 465.4   |
| PHF19    | 380.3   | 421.9   | 293.6   | 223.8  | 198.5  | 209.5  | 385.6   | 347.4   |
| PHF19    | 302.2   | 405.8   | 265.5   | 171.6  | 147.4  | 164.8  | 288     | 522.2   |
| PHF2     | 109.5   | 133.8   | 97.4    | 84.7   | 91.1   | 83.6   | 104.1   | 128.3   |
| PHF2     | 318.1   | 446.1   | 328.7   | 299.3  | 259    | 441.1  | 322.5   | 501.4   |
| PHF20    | 220.2   | 327.8   | 170.8   | 195.8  | 214.2  | 294.3  | 220.2   | 348.2   |
| PHF20L1  | 341.1   | 472.6   | 127.4   | 117.2  | 120.3  | 168.6  | 301.4   | 463.4   |
| PHF20L1  | 869     | 1169.6  | 769.3   | 808.6  | 688.5  | 1678.1 | 693.7   | 1485.3  |
| PHF20L1  | 119.8   | 129.5   | 108.2   | 120    | 98.3   | 107.3  | 100     | 128.3   |
| PHF20L1  | 99.5    | 117.1   | 94.8    | 103.9  | 91.7   | 104.2  | 108.4   | 120.4   |
| PHF20L1  | 344.9   | 494.3   | 206.6   | 217.2  | 185.1  | 245.3  | 346.4   | 495.7   |
| PHF21A   | 1095.8  | 1563.3  | 856     | 1013.4 | 962.4  | 1216.8 | 990.6   | 1192.4  |
| PHF21B   | 106.5   | 119.4   | 92.8    | 93.4   | 102.3  | 92.1   | 100     | 105.7   |
| PHF22    | 1410.3  | 1643    | 977     | 816.1  | 684.1  | 1134.5 | 1105.7  | 1619.3  |
| PHF23    | 276.1   | 343.7   | 133.3   | 155.9  | 111.1  | 131.3  | 250.8   | 330.1   |
| PHF3     | 153.3   | 206.6   | 117.6   | 116.7  | 117.1  | 160.2  | 159.6   | 208.8   |
| PHF5A    | 3654.2  | 4859.2  | 2174.2  | 1516.1 | 1244.7 | 1590.2 | 3250    | 3597.2  |
| PHF6     | 124.2   | 136     | 107.1   | 87.2   | 87.5   | 91.5   | 112.6   | 119.9   |
| PHF6     | 66.5    | 86      | 93.6    | 82.6   | 83.5   | 80.7   | 68.6    | 79.3    |
| PHF7     | 193     | 217.2   | 137.3   | 141.1  | 173.4  | 240.5  | 144     | 149.8   |
| PHF7     | 83.2    | 85.2    | 98.6    | 94.4   | 91.6   | 108.9  | 83.7    | 89      |
| PHF7     | 113.2   | 126.7   | 113.6   | 110.1  | 104.6  | 115.6  | 102.9   | 109.9   |
| PHF8     | 102.1   | 101.9   | 94.8    | 80.7   | 79.8   | 91.1   | 94.2    | 97.9    |
| PHGDH    | 12489.7 | 17242.2 | 11269.3 | 3597   | 2950.8 | 3439.4 | 14014.2 | 13524.2 |
| PHGDHL1  | 1366.3  | 1836.5  | 538.2   | 625.9  | 568.8  | 568.2  | 1309.7  | 1216.7  |
| PHIP     | 2384.6  | 3039.5  | 883.3   | 1169.5 | 1080.1 | 2522   | 2011.8  | 2548.5  |
| PHKA1    | 140.5   | 169.1   | 145.4   | 150.1  | 129.2  | 155.8  | 124.4   | 126.8   |
| PHKA2    | 324.3   | 359.2   | 339.5   | 470.6  | 521.5  | 585.8  | 237.4   | 359.6   |
| PHKB     | 247.4   | 315     | 230.7   | 264    | 207.2  | 331    | 272.6   | 485.4   |
| PHKB     | 169.2   | 236.3   | 102.7   | 92     | 91.8   | 107.1  | 142.4   | 184.1   |
| PHKB     | 663.4   | 885.2   | 585.4   | 623.9  | 472.7  | 889.1  | 626.9   | 910.4   |
| PHKG1    | 99      | 115.9   | 106.9   | 109.5  | 93.3   | 111.1  | 99.4    | 122.7   |
| PHKG2    | 270.4   | 349.7   | 144.5   | 117.2  | 123.3  | 142.2  | 220.6   | 265.5   |
| PHLDA1   | 102.4   | 117.5   | 128.1   | 105.3  | 96.3   | 114.9  | 128.3   | 179.2   |
| PHLDA2   | 133.2   | 159.3   | 112     | 94.1   | 95.8   | 98.3   | 136.1   | 154.8   |
| PHLDA3   | 107.5   | 133.4   | 91.2    | 92.5   | 84     | 85.7   | 124.2   | 144.1   |
| PHLDB1   | 311.4   | 385.9   | 300.7   | 191.2  | 209    | 195.4  | 311.6   | 288     |
| PHLDB2   | 80.5    | 98.8    | 90.8    | 76.4   | 78.5   | 86.1   | 84.3    | 90.8    |
| PHLDB3   | 113.7   | 129.8   | 85.7    | 87.8   | 80.5   | 82.3   | 111.1   | 142.6   |
| PHLPP    | 206.4   | 290.8   | 188.1   | 229.8  | 197.6  | 327.8  | 185.4   | 240.8   |
| PHLPPL   | 114.8   | 138.5   | 124.8   | 108.9  | 98.2   | 119.4  | 115.6   | 193.1   |
| PHOSPHO1 | 86.7    | 100.1   | 92      | 85.7   | 81.8   | 89.8   | 85.1    | 83.6    |
| PHOSPHO2 | 74.5    | 73.5    | 88.2    | 84.1   | 76.7   | 85.6   | 71.7    | 79.1    |
| PHOX2A   | 77.2    | 84.7    | 90.1    | 95.7   | 91.5   | 92.2   | 87.2    | 89.2    |
| PHOX2B   | 97.6    | 114.7   | 93.3    | 80.8   | 73.7   | 82.6   | 99.3    | 103     |
| PHPT1    | 4194.8  | 4963    | 1911.6  | 1747.2 | 1420.3 | 1928.7 | 3819.7  | 4828.6  |
| PHTF1    | 665.9   | 787.7   | 427     | 292    | 233.1  | 402.9  | 753.2   | 1595.4  |
| PHTF2    | 141.8   | 131.1   | 103.2   | 96     | 90.6   | 102.5  | 120     | 142.7   |
| PHYH     | 194.2   | 279.9   | 143.7   | 118.8  | 128.1  | 155.6  | 194.3   | 231.4   |
| PHYH     | 709.6   | 1007.1  | 381.1   | 261.2  | 278.1  | 315.1  | 611.3   | 688.2   |

|         |        |        |        |        |        |        |        |        |
|---------|--------|--------|--------|--------|--------|--------|--------|--------|
| PHYH    | 1736   | 2404.7 | 743.9  | 605    | 481.5  | 650.6  | 1416.5 | 2045.4 |
| PHYH2   | 1734.6 | 2238.4 | 1055.4 | 1362.4 | 1005.9 | 1438   | 1463   | 1674   |
| PHYHD1  | 82.5   | 84.2   | 84.8   | 80     | 77.6   | 84.1   | 77.8   | 97.2   |
| PHYHIP  | 123.4  | 150.1  | 119.2  | 121.3  | 96.7   | 109.2  | 106.7  | 120.9  |
| PHYHIPL | 89.5   | 104.6  | 97.9   | 82.8   | 73.6   | 83.8   | 95.2   | 92.3   |
| PI15    | 227.1  | 235.8  | 136.9  | 117.3  | 91.5   | 143.6  | 201.4  | 224.1  |
| PI16    | 95.8   | 110.2  | 99.5   | 95.6   | 80.6   | 89.1   | 89     | 94.2   |
| PI3     | 94.6   | 112.9  | 94.4   | 85.5   | 86.1   | 86.8   | 99     | 94.4   |
| PI4K2B  | 123.7  | 118.3  | 121.7  | 112.1  | 98.1   | 119.6  | 114.4  | 185.7  |
| PI4KII  | 140.9  | 154.7  | 130.2  | 111.6  | 99.8   | 128.9  | 125.1  | 152.9  |
| PIAS1   | 1169.6 | 1643.5 | 540    | 693.7  | 557.2  | 913.8  | 938.4  | 1351.7 |
| PIAS2   | 77.1   | 74.1   | 80.3   | 79.8   | 76.3   | 77.7   | 75.9   | 80.3   |
| PIAS2   | 572.6  | 776.2  | 372.2  | 317.4  | 239.8  | 359.3  | 468.3  | 752.8  |
| PIAS2   | 206.2  | 252.1  | 144.6  | 106.8  | 104.7  | 116.1  | 168.8  | 273.2  |
| PIAS3   | 138.2  | 161.4  | 129    | 115.2  | 125.4  | 122.7  | 123.5  | 211    |
| PIAS4   | 1017.9 | 1368.4 | 685.5  | 661.1  | 615.6  | 637.7  | 1106.6 | 965.4  |
| PIB5PA  | 193.4  | 181.3  | 133.7  | 96.3   | 97.2   | 99.8   | 173.9  | 171.8  |
| PIB5PA  | 114.6  | 152.2  | 90.1   | 79.5   | 78.8   | 82.2   | 105.4  | 114.1  |
| PICALM  | 144.3  | 154.6  | 93.6   | 96.2   | 81.3   | 91     | 117.6  | 168    |
| PICALM  | 833    | 1110.4 | 366.6  | 375.9  | 318.6  | 671.9  | 712.7  | 1223.5 |
| PICK1   | 230.2  | 257.6  | 159.3  | 156.3  | 158.9  | 178.3  | 211.6  | 249.6  |
| PIF1    | 185.4  | 185.8  | 145.9  | 122.2  | 134.9  | 148.7  | 142.8  | 162    |
| PIG38   | 122.6  | 147.5  | 89.1   | 74.1   | 74.7   | 82.7   | 116.6  | 126.2  |
| PIGA    | 867.9  | 1036.7 | 546.4  | 751.5  | 536.4  | 890.6  | 798.9  | 1321.1 |
| PIGA    | 122.3  | 159.9  | 87.3   | 86.3   | 77.2   | 84.4   | 112.4  | 153.2  |
| PIGA    | 197.2  | 226.4  | 125.7  | 113    | 113.1  | 130.7  | 161.5  | 221.6  |
| PIGB    | 1333.9 | 1802.8 | 746.4  | 852.2  | 641.4  | 1131.8 | 900.7  | 1380.9 |
| PIGC    | 1332.5 | 1789.9 | 948.3  | 808.7  | 657.9  | 1061.3 | 964.2  | 1625.7 |
| PIGC    | 459.1  | 650.4  | 293.7  | 231.7  | 206.9  | 282.2  | 360    | 410.1  |
| PIGF    | 1045.8 | 1473.5 | 649.3  | 690.5  | 471.3  | 711.5  | 812.3  | 1529.6 |
| PIGF    | 158.7  | 192.9  | 101.5  | 115.7  | 100.7  | 137.4  | 139.6  | 173.1  |
| PIGG    | 281.3  | 390.2  | 194.2  | 141.7  | 132.3  | 197.4  | 256.8  | 352.8  |
| PIGH    | 385.2  | 507.4  | 188    | 154.9  | 133.6  | 207.1  | 396.9  | 641.6  |
| PIGK    | 832.8  | 1166.4 | 392.9  | 372.2  | 270.8  | 445.8  | 675.9  | 1130.7 |
| PIGL    | 114.5  | 127.3  | 109.2  | 99.3   | 94     | 95.1   | 111.9  | 126.1  |
| PIGM    | 639.3  | 839.3  | 196.7  | 206    | 204.6  | 304.4  | 447.3  | 652.4  |
| PIGN    | 139.1  | 139    | 92.7   | 93     | 85     | 77.5   | 106.7  | 119.3  |
| PIGN    | 490.5  | 690.7  | 397.5  | 446.3  | 378    | 570.4  | 438.1  | 490.6  |
| PIGN    | 478.2  | 707.7  | 485.7  | 700.2  | 539.3  | 980.5  | 422.4  | 644    |
| PIGO    | 182.8  | 221    | 142.9  | 108.3  | 93.9   | 113.3  | 158    | 253.1  |
| PIGO    | 287    | 350.9  | 249.3  | 183.1  | 163.5  | 200.9  | 252    | 369.9  |
| PIGO    | 98.7   | 115.9  | 127.5  | 112    | 98.4   | 106.5  | 103.3  | 111.8  |
| PIGQ    | 637.1  | 740.4  | 369    | 239.9  | 215.3  | 268.5  | 372.3  | 274.2  |
| PIGR    | 82     | 89.8   | 99.1   | 96.3   | 88.2   | 89     | 77.1   | 82.3   |
| PIGS    | 610.3  | 801.4  | 526    | 714    | 572.4  | 818.8  | 619.6  | 1068   |
| PIGT    | 1247.4 | 1718.4 | 886.4  | 801.9  | 688.6  | 866.8  | 1038.1 | 2363.5 |
| PIGV    | 382.2  | 464.4  | 199.1  | 255.1  | 207.4  | 276.7  | 263.9  | 412.6  |
| PIGW    | 106.7  | 105.3  | 81.9   | 90.5   | 81.2   | 85.2   | 106.7  | 107.6  |
| PIGX    | 225.6  | 271.2  | 109.8  | 128.8  | 109.8  | 117.5  | 212.3  | 285    |
| PIGY    | 4806.1 | 6246.5 | 2675.1 | 2518.6 | 1511.4 | 2693   | 3839.5 | 6604.5 |

|         |        |        |        |        |        |        |        |        |
|---------|--------|--------|--------|--------|--------|--------|--------|--------|
| PIGZ    | 132.6  | 148.1  | 135.3  | 189.9  | 183    | 236.4  | 119.2  | 149.1  |
| PIK3AP1 | 362.8  | 412.9  | 157.2  | 130.5  | 146.3  | 152.6  | 427.5  | 648.7  |
| PIK3C2A | 158    | 214    | 116.1  | 137.9  | 118.2  | 158    | 145.9  | 201.9  |
| PIK3C2B | 110.5  | 150    | 106.6  | 103.5  | 100.2  | 114    | 124.7  | 131.2  |
| PIK3C2G | 75.7   | 89.1   | 85.6   | 89.5   | 85.9   | 91.5   | 84.6   | 69.9   |
| PIK3C3  | 254.8  | 275.3  | 122.9  | 110.1  | 102.2  | 142.6  | 229    | 324.5  |
| PIK3CA  | 146.6  | 160.8  | 103.8  | 104.3  | 92.7   | 111.8  | 127.6  | 199.7  |
| PIK3CB  | 527.2  | 685.1  | 242.8  | 201.5  | 178.2  | 367.2  | 423    | 609.3  |
| PIK3CD  | 492.6  | 689    | 488.5  | 404.8  | 394.1  | 523.4  | 355.8  | 443    |
| PIK3CG  | 496.4  | 629.8  | 263.2  | 328.4  | 236.1  | 322.5  | 377.3  | 606.9  |
| PIK3R1  | 846.4  | 1063.6 | 348.8  | 670.4  | 558.3  | 674.4  | 694.8  | 1090   |
| PIK3R1  | 73     | 82.8   | 83.1   | 81.5   | 78.4   | 74.2   | 75.5   | 76     |
| PIK3R1  | 129.2  | 150.8  | 97     | 91.4   | 83.9   | 95.6   | 119.3  | 158.9  |
| PIK3R1  | 101.7  | 112.1  | 103    | 83.9   | 93.4   | 92.2   | 106.5  | 116.9  |
| PIK3R1  | 114.9  | 147.3  | 111.6  | 102.1  | 109.5  | 126.4  | 116.4  | 161.8  |
| PIK3R2  | 1640.3 | 2114.6 | 1306.6 | 1625.3 | 1273.8 | 1372.5 | 1080.2 | 923.9  |
| PIK3R3  | 124.1  | 146.4  | 94.1   | 89.6   | 91.2   | 98.4   | 126.6  | 145.2  |
| PIK3R4  | 201.5  | 254.2  | 144.6  | 187.5  | 153.8  | 270.4  | 200.9  | 255.6  |
| PIK3R5  | 116.2  | 133.7  | 103.3  | 99.6   | 87.2   | 94.8   | 118.1  | 137.2  |
| PIK4CA  | 1872.7 | 2113.6 | 1151.5 | 1541.9 | 1327.9 | 1640.8 | 1427.5 | 1560.6 |
| PIK4CB  | 477.2  | 550.7  | 613.8  | 477    | 391.9  | 498.5  | 396.2  | 619    |
| PILRA   | 143.9  | 152.9  | 121.6  | 168.4  | 156.1  | 153.6  | 153.4  | 203.3  |
| PILRA   | 123.9  | 152.7  | 101.5  | 98.7   | 84.6   | 95     | 115.5  | 128.8  |
| PILRA   | 115.7  | 118.1  | 122.4  | 119.6  | 114.7  | 129.7  | 114.3  | 115.8  |
| PILRB   | 107.1  | 93.8   | 107.5  | 104.6  | 103.2  | 98     | 92.3   | 105.1  |
| PILRB   | 434.7  | 391.5  | 403.5  | 462.8  | 437.7  | 609.2  | 313.5  | 541.3  |
| PILRB   | 82.7   | 97.7   | 84.5   | 79.6   | 81.5   | 80     | 86.7   | 94.5   |
| PILRB   | 105    | 117.3  | 95     | 122    | 128.7  | 91.4   | 102.2  | 118.2  |
| PIM1    | 213.7  | 289.7  | 202    | 197.8  | 188    | 190.6  | 286.1  | 633.4  |
| PIM2    | 624.2  | 936.4  | 506.2  | 490.2  | 371.4  | 402.1  | 492.5  | 677    |
| PIM3    | 199.6  | 271    | 198.1  | 167.1  | 150.4  | 187.3  | 212.1  | 429.6  |
| PIM3    | 117.6  | 115.1  | 93.7   | 92.2   | 87     | 84.3   | 105.9  | 132.8  |
| PIN1    | 3934.5 | 4614.2 | 2559.3 | 1993.4 | 1623.5 | 2218   | 3401.4 | 3590.8 |
| PINK1   | 233.9  | 295.5  | 144.4  | 106.1  | 114.6  | 126.4  | 245.6  | 357.3  |
| PINX1   | 272.7  | 352.7  | 224.9  | 183.2  | 146.9  | 193.4  | 252.7  | 319.7  |
| PIP     | 82.9   | 98.1   | 90     | 101.6  | 88.8   | 78.6   | 86.2   | 89.7   |
| PIP3-E  | 471.4  | 671.5  | 247.5  | 275.4  | 211.7  | 311.6  | 601.2  | 821.3  |
| PIP5K1A | 135.7  | 176.6  | 110    | 100.9  | 97.8   | 93.9   | 133    | 151.9  |
| PIP5K1B | 110.6  | 110.9  | 92.2   | 95.6   | 87.1   | 95.6   | 101.9  | 96.6   |
| PIP5K1C | 265.3  | 369.9  | 428    | 350.3  | 298    | 439.1  | 286.3  | 581.7  |
| PIP5K2A | 139.4  | 163.1  | 140.1  | 132.6  | 117.2  | 133.1  | 135.5  | 218.1  |
| PIP5K2B | 204.4  | 252.3  | 166.5  | 285    | 245.6  | 148.8  | 167.6  | 221.6  |
| PIP5K2B | 172.8  | 244.5  | 112.4  | 96.6   | 96.8   | 101.3  | 160.2  | 207.3  |
| PIP5K2C | 177.1  | 225.7  | 120.9  | 113.1  | 99     | 117.9  | 169    | 212.5  |
| PIP5K3  | 91.7   | 101.7  | 103.8  | 102.5  | 106.1  | 97.2   | 105.1  | 100.8  |
| PIP5K3  | 81.6   | 107.6  | 95.6   | 91.7   | 87.9   | 102.2  | 82.4   | 98.5   |
| PIP5K3  | 103.8  | 112.7  | 97.5   | 110.9  | 99.4   | 95.7   | 110.8  | 104.4  |
| PIP5KL1 | 101.4  | 114.8  | 128.9  | 121.2  | 118.1  | 124.1  | 104.1  | 109.9  |
| PIPOX   | 145.1  | 185.5  | 130.7  | 121.9  | 112.8  | 126.8  | 139.8  | 196.1  |
| PIR     | 350.9  | 493.5  | 161.6  | 153.6  | 142.9  | 251.8  | 748.6  | 976.6  |

|         |        |        |        |        |        |        |        |        |
|---------|--------|--------|--------|--------|--------|--------|--------|--------|
| PIR     | 473.7  | 536.2  | 201.8  | 187.2  | 152    | 266.7  | 1019   | 1881.8 |
| PISD    | 489.3  | 640.6  | 351.2  | 340.9  | 299.5  | 519    | 363.2  | 621.7  |
| PITPNA  | 201.6  | 260.5  | 136.6  | 126.9  | 125.9  | 148.9  | 223.1  | 230.8  |
| PITPNB  | 451.7  | 639.7  | 412.7  | 357.1  | 313.1  | 515    | 401.9  | 651.3  |
| PITPNC1 | 203.9  | 282.5  | 216.7  | 198.5  | 152.2  | 267.1  | 225.8  | 383.9  |
| PITPNC1 | 118.3  | 140.8  | 87.8   | 88.9   | 75.2   | 91.4   | 115.1  | 146.6  |
| PITPNM1 | 285.7  | 346.7  | 561.7  | 524.8  | 440.2  | 835.6  | 258.3  | 481.9  |
| PITPNM2 | 163    | 211.6  | 155.6  | 140.6  | 138.9  | 148.5  | 129.6  | 147.4  |
| PITPNM3 | 79.8   | 79.4   | 85.1   | 81.5   | 79.6   | 82.5   | 77.5   | 84.4   |
| PITRM1  | 327    | 415.7  | 262.1  | 243.3  | 201    | 355.3  | 266.9  | 352.9  |
| PITX1   | 1539.7 | 1965.3 | 1290   | 543.2  | 419.1  | 467.2  | 1188.8 | 1496.1 |
| PITX2   | 109.1  | 112.2  | 105.1  | 106.5  | 92.9   | 100.4  | 106.4  | 116.6  |
| PITX2   | 171.7  | 229.4  | 125.4  | 97     | 94.9   | 115.5  | 172.9  | 187.9  |
| PITX2   | 71.3   | 84     | 97.2   | 96.2   | 88     | 91.2   | 86.4   | 86.3   |
| PITX3   | 96.1   | 117.2  | 87.5   | 86.7   | 76.8   | 81.9   | 99.3   | 102.5  |
| PIWIL1  | 96.6   | 109.3  | 102.9  | 86.7   | 92.6   | 82.6   | 88     | 107.3  |
| PIWIL2  | 74.5   | 89.4   | 94.1   | 85     | 81.1   | 81.4   | 83.1   | 96.9   |
| PIWIL2  | 86     | 89     | 109.1  | 96.4   | 91.8   | 85.9   | 83.2   | 83.4   |
| PIWIL3  | 96.3   | 108.3  | 85.3   | 89.3   | 87.2   | 81     | 109    | 111.2  |
| PIWIL4  | 499.9  | 604.1  | 240.8  | 214.7  | 194.2  | 257.1  | 368.9  | 556.9  |
| PJA1    | 92.7   | 124.8  | 106.6  | 98.8   | 102.7  | 98     | 91.8   | 112.2  |
| PJA1    | 242.1  | 406.9  | 216.9  | 217.2  | 188.6  | 266    | 209.4  | 295.1  |
| PJA1    | 95.4   | 111.5  | 93.2   | 82.7   | 73.8   | 84.8   | 105.6  | 107.8  |
| PJA2    | 2511.5 | 3204.9 | 1216.3 | 2008.8 | 1519.7 | 3224   | 2420.9 | 3877.3 |
| PJCG6   | 97.1   | 110.8  | 110.1  | 108.3  | 96     | 98.5   | 89.5   | 98.5   |
| PKD1    | 111.9  | 147.1  | 157.4  | 173.8  | 201.8  | 307.4  | 130.2  | 164.1  |
| PKD1    | 105.7  | 121.5  | 135.1  | 138.2  | 114.6  | 176.8  | 116.1  | 131.6  |
| PKD1L1  | 107.1  | 126.5  | 97.2   | 92     | 92.9   | 99.9   | 103.7  | 116.7  |
| PKD1L2  | 80.7   | 76.3   | 89.7   | 83.9   | 85.1   | 84.7   | 75.7   | 81.9   |
| PKD1L2  | 81.7   | 94.6   | 85.7   | 79.8   | 84.2   | 96     | 75.4   | 88.7   |
| PKD1L2  | 92.9   | 97.6   | 97.3   | 92.3   | 82.1   | 92.1   | 83.9   | 87     |
| PKD1L2  | 78.5   | 87.8   | 95.9   | 95.9   | 96.9   | 91.4   | 78.2   | 84.4   |
| PKD1L3  | 127.7  | 134.8  | 74.6   | 88.5   | 80.6   | 84.9   | 116.2  | 128.2  |
| PKD2    | 275.7  | 330.1  | 170.6  | 204.6  | 169.2  | 300.9  | 278.8  | 639.3  |
| PKD2L1  | 81.8   | 91.9   | 96.6   | 82.8   | 86.5   | 91.8   | 88.7   | 108.4  |
| PKD2L2  | 95.6   | 102.6  | 98     | 96.1   | 88.1   | 101    | 96.2   | 90.6   |
| PKDREJ  | 104    | 104.3  | 94.1   | 86.4   | 81.4   | 86.2   | 100.5  | 132.7  |
| PKHD1   | 87.8   | 98.3   | 84     | 93.5   | 91.2   | 87.6   | 87.5   | 96.2   |
| PKHD1   | 79.1   | 91.4   | 95.6   | 71.7   | 78.1   | 88.4   | 94.2   | 94.3   |
| PKHD1   | 136.3  | 129.8  | 103.2  | 93.8   | 95.9   | 103.4  | 109.8  | 142.2  |
| PKHD1L1 | 126.5  | 147.7  | 95.9   | 90.4   | 89     | 90.2   | 119.2  | 143.7  |
| PKIA    | 156.6  | 194.7  | 150.8  | 111.8  | 93.8   | 92     | 159.2  | 176.3  |
| PKIA    | 87.3   | 95.9   | 86.9   | 88.4   | 87.6   | 84.6   | 83.7   | 99     |
| PKIA    | 112.9  | 118.4  | 105    | 92.3   | 105    | 100.6  | 116.1  | 133.7  |
| PKIB    | 128.2  | 142.4  | 90.6   | 115.6  | 101.1  | 116.1  | 101    | 125.2  |
| PKIB    | 2591.7 | 3223.6 | 1403.3 | 1527.1 | 1100.5 | 1726.8 | 1403.5 | 1443.1 |
| PKIG    | 106.2  | 118.2  | 93.5   | 96.6   | 88.7   | 94.1   | 96.4   | 125.6  |
| PKIG    | 145.6  | 181.2  | 95.2   | 88.1   | 86.8   | 96.7   | 142.9  | 163.4  |
| PKIG    | 123.2  | 135    | 93.9   | 100    | 85.3   | 84.4   | 123.9  | 143.1  |
| PKLR    | 78.4   | 85.3   | 99.8   | 87.8   | 84.2   | 91     | 77.4   | 80.7   |

|          |       |        |        |        |        |        |        |        |
|----------|-------|--------|--------|--------|--------|--------|--------|--------|
| PKLR     | 91.3  | 98.1   | 98.1   | 83.5   | 79.6   | 76.6   | 88.5   | 85.9   |
| PKLR     | 147.8 | 174.1  | 118.2  | 94.2   | 94.4   | 105.6  | 153.3  | 144.7  |
| PKLR     | 93.1  | 102.4  | 84.2   | 93.5   | 92.7   | 92.9   | 94.9   | 105.4  |
| PKM2     | 937.3 | 1203.2 | 1475.7 | 1422.4 | 1167.6 | 2158.4 | 1044.5 | 2384.5 |
| PKM2     | 395.1 | 488.4  | 417.6  | 328.2  | 352    | 580.4  | 373.2  | 865.4  |
| PKM2     | 290.3 | 416    | 434    | 448.9  | 391    | 345.3  | 282.9  | 591.6  |
| PKMYT1   | 197.8 | 220.2  | 201.5  | 110.7  | 107.4  | 142    | 187.4  | 271.7  |
| PKN1     | 81.4  | 95.6   | 92.8   | 86.3   | 74.6   | 72.3   | 88.2   | 89.9   |
| PKN1     | 157.4 | 187.2  | 127.8  | 106.4  | 102    | 139.2  | 154.1  | 192.5  |
| PKN1     | 162.3 | 238.3  | 150.9  | 118.4  | 104.9  | 154    | 142.8  | 252    |
| PKN1     | 131.4 | 152.3  | 98.7   | 79.6   | 84.3   | 98.8   | 128.7  | 189    |
| PKN2     | 137.9 | 159    | 109    | 111    | 111.8  | 99.2   | 131.9  | 186.1  |
| PKN3     | 228.5 | 269.9  | 272.3  | 138.3  | 144    | 200.5  | 181.3  | 369.8  |
| PKNOX1   | 227.4 | 280.2  | 138.4  | 160.2  | 124.3  | 144.5  | 185.9  | 226.4  |
| PKNOX1   | 115.5 | 148.1  | 108.3  | 107.9  | 97.3   | 98.9   | 120.8  | 122.7  |
| PKNOX2   | 108.7 | 119.3  | 103.3  | 82.8   | 92     | 90.4   | 89.3   | 110.9  |
| PKP1     | 101.7 | 122.2  | 112.2  | 91.2   | 92.6   | 102    | 110.2  | 104.4  |
| PKP1     | 105.3 | 121.3  | 85.1   | 84.2   | 81.5   | 94.2   | 99.8   | 116.6  |
| PKP2     | 92.5  | 96.1   | 107.3  | 112.3  | 105.4  | 122    | 85.3   | 86.6   |
| PKP3     | 115.8 | 160.7  | 86.2   | 84.7   | 87.4   | 84.9   | 114.4  | 139.2  |
| PKP4     | 165.3 | 197.6  | 141.6  | 133.7  | 131.1  | 181.2  | 133.8  | 132    |
| PKP4     | 1676  | 1917.8 | 1151.4 | 871    | 691.2  | 1169   | 1165.8 | 1312.3 |
| PLA1A    | 81.5  | 90.3   | 95.5   | 104    | 84.4   | 105.5  | 85.1   | 91.1   |
| PLA2G10  | 99.4  | 97     | 96.3   | 99.3   | 82.8   | 92.8   | 85.2   | 107.3  |
| PLA2G12A | 110.1 | 118.6  | 97.5   | 91     | 85.9   | 94.3   | 97.2   | 113    |
| PLA2G12B | 114.8 | 141.8  | 108.2  | 94.8   | 87.8   | 95.4   | 118.2  | 122.9  |
| PLA2G1B  | 82.7  | 88.4   | 86.4   | 81.3   | 80.1   | 84     | 82     | 88.4   |
| PLA2G2A  | 98.1  | 108.4  | 102.5  | 87.2   | 86.9   | 91.7   | 88.7   | 105.6  |
| PLA2G2D  | 277.2 | 314.4  | 160    | 234.5  | 222.7  | 175    | 240.3  | 223.3  |
| PLA2G2E  | 90.7  | 94.6   | 99.4   | 95.2   | 88.6   | 86.3   | 97.8   | 103    |
| PLA2G2F  | 108.2 | 108    | 81.8   | 90.9   | 76.9   | 79.9   | 98.9   | 107.4  |
| PLA2G3   | 74.3  | 92.2   | 96.9   | 91.6   | 88.6   | 83.9   | 82.9   | 88.6   |
| PLA2G4A  | 141.3 | 142    | 137.8  | 130.8  | 123.3  | 166.7  | 133.8  | 183.4  |
| PLA2G4B  | 437.3 | 462.3  | 481.3  | 391    | 439    | 499.2  | 341.5  | 419.2  |
| PLA2G4C  | 240.7 | 295.9  | 174.2  | 126.8  | 131.9  | 138.9  | 197.5  | 215.8  |
| PLA2G4D  | 94.8  | 106.1  | 85.2   | 92.7   | 90.5   | 90.3   | 102.5  | 100.8  |
| PLA2G4E  | 83    | 96     | 88     | 85.2   | 93.4   | 88.8   | 80.3   | 87.9   |
| PLA2G4F  | 82.2  | 95     | 85.1   | 85.5   | 80.5   | 81.8   | 78.3   | 88.9   |
| PLA2G5   | 92.2  | 94.6   | 87.4   | 84.6   | 78.4   | 90.3   | 88.7   | 89.6   |
| PLA2G6   | 102.8 | 125.4  | 104.8  | 94.1   | 98.8   | 91.7   | 98.7   | 111.8  |
| PLA2G6   | 102.4 | 117    | 107.2  | 88.8   | 86.6   | 86.6   | 112.4  | 113.8  |
| PLA2G7   | 87.4  | 95.7   | 96.9   | 515.7  | 402    | 873.9  | 94.1   | 102.7  |
| PLA2R1   | 90.8  | 92.6   | 99.8   | 86.7   | 83.1   | 94.4   | 83     | 96.7   |
| PLA2R1   | 78.2  | 88.3   | 95.7   | 80.4   | 80.9   | 96.1   | 76.4   | 82.5   |
| PLAA     | 91.1  | 110.6  | 116.8  | 103.8  | 105.7  | 111.9  | 101.5  | 103.1  |
| PLAA     | 177.4 | 226.7  | 113.4  | 89.8   | 93.2   | 98.6   | 165.1  | 173.2  |
| PLAA     | 242.2 | 277.4  | 112.3  | 107.7  | 110.6  | 104    | 256    | 278    |
| PLAC1    | 94.6  | 105.8  | 92.6   | 96.5   | 92.4   | 88.7   | 97.8   | 108.5  |
| PLAC2    | 147.4 | 188.1  | 107.5  | 111.6  | 80.8   | 120.4  | 152    | 185.1  |
| PLAC4    | 126.4 | 143.1  | 96.5   | 93.8   | 83.7   | 91.2   | 111.5  | 124.6  |



|         |         |         |        |        |        |        |        |         |
|---------|---------|---------|--------|--------|--------|--------|--------|---------|
| PLAC8   | 13095.5 | 15767.6 | 6839.7 | 8871.5 | 4869.6 | 8051.6 | 9709.7 | 13594.6 |
| PLAC8L1 | 104.5   | 124.3   | 114.6  | 100.6  | 94.1   | 102.1  | 102.1  | 137.2   |
| PLAC9   | 91.1    | 112.7   | 108.9  | 92.6   | 89.4   | 82.9   | 96.2   | 102.8   |
| PLAG1   | 101.5   | 111.2   | 91.5   | 89.4   | 75.3   | 85.3   | 101.6  | 107     |
| PLAG1   | 105.2   | 109.8   | 95     | 92.5   | 90.7   | 94.2   | 101.2  | 121.8   |
| PLAGL1  | 212.3   | 252.8   | 206.8  | 320.5  | 265.1  | 445    | 166.4  | 286.5   |
| PLAGL1  | 167.7   | 164     | 130.6  | 132.3  | 121.6  | 141.3  | 161.4  | 220.1   |
| PLAGL2  | 551.1   | 678.6   | 633    | 596.4  | 512.6  | 649.9  | 499.2  | 747.9   |
| PLAT    | 85      | 97.8    | 84     | 81.4   | 79.2   | 81.5   | 92.9   | 87.2    |
| PLAU    | 716.5   | 902.7   | 479    | 287.4  | 259.7  | 453.2  | 727.5  | 1052    |
| PLAUR   | 471.8   | 660.7   | 250.6  | 222.6  | 167    | 225.6  | 509.1  | 495.9   |
| PLAUR   | 238.2   | 313.8   | 160.2  | 135.8  | 130.4  | 132.3  | 283.7  | 353.6   |
| PLAUR   | 563.6   | 776.2   | 429.8  | 375.5  | 310.8  | 410.5  | 648.8  | 795.9   |
| PLB1    | 227.1   | 276.5   | 135.2  | 123.7  | 114.3  | 150.7  | 166.5  | 190.3   |
| PLCB1   | 130.3   | 143.2   | 96.5   | 101.4  | 88.4   | 122    | 128.1  | 159.3   |
| PLCB1   | 105.7   | 108.1   | 98.3   | 99.3   | 84     | 86.3   | 97.5   | 110.1   |
| PLCB2   | 323.4   | 303.4   | 372.2  | 344.5  | 319.4  | 401.5  | 194.9  | 325.5   |
| PLCB3   | 146.3   | 165.6   | 96.5   | 98.3   | 89.9   | 104.5  | 140.4  | 145.2   |
| PLCB4   | 97.3    | 114.2   | 107.3  | 96.2   | 100.9  | 105.4  | 88.5   | 104     |
| PLCB4   | 83.2    | 87      | 87.1   | 75.9   | 77.6   | 73.9   | 83.7   | 84.5    |
| PLCD1   | 112.8   | 133.5   | 106.1  | 94.2   | 92.4   | 115.6  | 114.8  | 118.6   |
| PLCD3   | 103     | 111.8   | 98.9   | 79     | 88.2   | 71.3   | 99.3   | 119.1   |
| PLCD4   | 91.1    | 118.7   | 101.2  | 83.9   | 81     | 86.9   | 99.7   | 96.3    |
| PLCE1   | 102     | 105.5   | 78.7   | 82.7   | 84.5   | 93.1   | 86     | 101.2   |
| PLCG1   | 152.3   | 121.8   | 117.3  | 105.5  | 103.8  | 116.2  | 119.3  | 220.7   |
| PLCG1   | 323.3   | 324     | 167.7  | 170    | 160.8  | 195.6  | 206.3  | 396.5   |
| PLCG2   | 2953.9  | 3430.3  | 2100.8 | 2595.7 | 2186.5 | 3034.3 | 2234.6 | 2678.8  |
| PLCH1   | 77.6    | 80.1    | 95.4   | 90.3   | 85.3   | 87.4   | 75     | 81.8    |
| PLCH2   | 146.2   | 167.3   | 111.4  | 100.6  | 97.8   | 98.8   | 134.8  | 153.5   |
| PLCL1   | 149.4   | 187.7   | 102.2  | 84.8   | 74.8   | 93.8   | 123.3  | 175.4   |
| PLCL2   | 396.6   | 549.6   | 275.6  | 341.2  | 236.4  | 338    | 353.5  | 452     |
| PLCXD1  | 837.1   | 783.1   | 637    | 826    | 686    | 960.4  | 611.9  | 1246.9  |
| PLCXD2  | 115.7   | 120.3   | 79.3   | 76.8   | 75.4   | 79.8   | 104.2  | 119.9   |
| PLCXD3  | 83      | 85.2    | 102.5  | 81.8   | 90.7   | 88.6   | 79.1   | 90.9    |
| PLCZ1   | 92.8    | 117     | 97.2   | 85.4   | 80.1   | 89     | 91.5   | 98.7    |
| PLD1    | 190.7   | 208.9   | 132.8  | 142.3  | 134.9  | 181.8  | 163.1  | 170.5   |
| PLD2    | 93.6    | 107     | 100.5  | 97.6   | 97.8   | 103.1  | 99.2   | 110.3   |
| PLD3    | 112.9   | 136.9   | 94.7   | 81.8   | 84.5   | 78.2   | 115.6  | 133.3   |
| PLD3    | 1261.5  | 1555.1  | 763.9  | 2765.8 | 2408.1 | 1800.9 | 1180.9 | 1395.8  |
| PLD3    | 100     | 141.2   | 113.4  | 101.4  | 92.9   | 103.4  | 100.1  | 116.2   |
| PLD4    | 145.8   | 173     | 141.1  | 133.5  | 134.8  | 133.4  | 129.3  | 170.1   |
| PLD5    | 76.1    | 78.8    | 82.4   | 81.3   | 85.7   | 78.8   | 73.4   | 74.5    |
| PLDN    | 1279    | 1504.7  | 728.5  | 788.9  | 718.7  | 918    | 1227.7 | 2588.1  |
| PLEC1   | 126.4   | 168     | 195    | 194.3  | 146.6  | 243    | 137.5  | 185.9   |
| PLEC1   | 81.1    | 99.2    | 86.1   | 89.2   | 83.5   | 87.1   | 96.2   | 94.8    |
| PLEC1   | 109.3   | 110.9   | 106.1  | 92.6   | 84.6   | 89.7   | 110    | 120.7   |
| PLEC1   | 95      | 98.3    | 101.1  | 94.5   | 85.4   | 94.6   | 92.1   | 96.1    |
| PLEC1   | 87.5    | 99.8    | 94.6   | 89.1   | 88     | 94.1   | 87.7   | 94.9    |
| PLEC1   | 82.4    | 105.6   | 94.7   | 94.1   | 86.5   | 87.3   | 85.3   | 100.8   |
| PLEC1   | 93.9    | 100.5   | 88     | 90.6   | 85.1   | 86.4   | 90.3   | 107.4   |

|         |        |        |        |        |        |        |        |        |
|---------|--------|--------|--------|--------|--------|--------|--------|--------|
| PLEC1   | 108.7  | 115.1  | 99.6   | 95.5   | 98.5   | 91.5   | 98.6   | 106.7  |
| PLEK    | 3105.1 | 4045.1 | 2340   | 2855.7 | 3330.6 | 3521.2 | 2648.4 | 2519.5 |
| PLEK2   | 102.4  | 123.2  | 95.3   | 85.2   | 88     | 91.7   | 92.7   | 125.7  |
| PLEKHA1 | 81.1   | 96.5   | 101    | 88.2   | 82.9   | 94     | 93.6   | 118.3  |
| PLEKHA1 | 82.1   | 103.5  | 99.3   | 89.1   | 83.6   | 87.4   | 88.9   | 115.2  |
| PLEKHA3 | 287.4  | 405.3  | 187.9  | 186.6  | 163.1  | 249.8  | 265.6  | 343.8  |
| PLEKHA4 | 123.7  | 154.5  | 117.1  | 103.8  | 103.3  | 100.5  | 118.4  | 170    |
| PLEKHA5 | 120.1  | 146.6  | 108.7  | 112.5  | 101.1  | 97.1   | 113.6  | 139.1  |
| PLEKHA6 | 91.3   | 104    | 105.6  | 94.8   | 88.9   | 95.8   | 94.3   | 100.2  |
| PLEKHA7 | 96.1   | 114.1  | 106.9  | 109.2  | 98     | 112.9  | 101.8  | 96.7   |
| PLEKHA8 | 119.7  | 129.5  | 106.1  | 85.4   | 92.1   | 96.2   | 101.4  | 108.3  |
| PLEKHA9 | 597.3  | 837.6  | 362.9  | 402.8  | 324.1  | 437.9  | 450.7  | 524.1  |
| PLEKHB1 | 118.7  | 119    | 115.2  | 95.3   | 105.2  | 119    | 103.2  | 116.3  |
| PLEKHB2 | 689.3  | 827.7  | 351.6  | 366.6  | 282.7  | 263.2  | 651.6  | 1041.5 |
| PLEKHB2 | 1995.6 | 2521.5 | 865.9  | 671    | 546.9  | 395.9  | 1659.5 | 2166.2 |
| PLEKHB2 | 96.1   | 97.6   | 81.7   | 91.5   | 91.7   | 95.2   | 85.6   | 93.6   |
| PLEKHC1 | 111.3  | 126.6  | 101.6  | 89     | 88.8   | 95.7   | 119.1  | 155.7  |
| PLEKHF1 | 307.1  | 399.6  | 244.9  | 138.4  | 131.1  | 136.7  | 389.8  | 322.1  |
| PLEKHF2 | 437.2  | 584.4  | 178.2  | 125.5  | 116.3  | 166.6  | 322.5  | 360.3  |
| PLEKHG1 | 80.6   | 80.7   | 97.3   | 84.2   | 89.3   | 79.9   | 84.7   | 82.6   |
| PLEKHG2 | 131.4  | 146.3  | 132.3  | 105    | 98.2   | 148.3  | 128.1  | 193.5  |
| PLEKHG3 | 257.7  | 309.9  | 268.3  | 249.6  | 231.3  | 280.2  | 222.6  | 268.5  |
| PLEKHG4 | 182.2  | 202.8  | 212.6  | 153.2  | 141.2  | 174.9  | 134.6  | 153.2  |
| PLEKHG5 | 75.4   | 89.8   | 100.2  | 88.3   | 88.9   | 93.1   | 74.3   | 77.2   |
| PLEKHG5 | 123.6  | 135.8  | 95     | 92.3   | 84.4   | 84.7   | 102.6  | 129.6  |
| PLEKHG5 | 126.2  | 145.2  | 82     | 77.6   | 80.7   | 88.4   | 132.3  | 125.8  |
| PLEKHG5 | 92.5   | 90.6   | 102.5  | 84.3   | 96     | 81.6   | 89.5   | 98.5   |
| PLEKHG5 | 107.5  | 107.9  | 101.9  | 93.6   | 88.2   | 86.8   | 101.3  | 101.6  |
| PLEKHG6 | 87.5   | 90.7   | 90.2   | 85     | 85.8   | 87.7   | 92.4   | 104.3  |
| PLEKHH1 | 117.9  | 143.5  | 104.9  | 116.9  | 109.1  | 142.6  | 104    | 144    |
| PLEKHH2 | 78.4   | 92.9   | 87.5   | 86.5   | 95.2   | 86.6   | 86.5   | 88.5   |
| PLEKHH3 | 225.6  | 261.9  | 136    | 121.8  | 125    | 126    | 233.4  | 273.1  |
| PLEKHJ1 | 233    | 303.6  | 180    | 163.4  | 147.4  | 184    | 197.2  | 220.7  |
| PLEKHM1 | 165.8  | 196.2  | 181.7  | 160.7  | 144.9  | 172.3  | 170.8  | 285.6  |
| PLEKHN1 | 185.3  | 220.2  | 125.2  | 121.6  | 105.7  | 122.4  | 180.9  | 209    |
| PLEKHO1 | 221.2  | 265.6  | 131.9  | 143.1  | 198.3  | 157.1  | 265    | 317.7  |
| PLEKHQ1 | 146.2  | 175    | 126.9  | 120.3  | 121.1  | 157.5  | 162.4  | 356.7  |
| PLG     | 92     | 96.4   | 89.1   | 92.7   | 77.5   | 86.9   | 87.1   | 103.6  |
| PLGLB1  | 118.1  | 151.4  | 125.5  | 126.9  | 132.9  | 138.9  | 117    | 153    |
| PLIN    | 85.2   | 88.2   | 89.6   | 76.9   | 82.5   | 75.8   | 88.1   | 84     |
| PLK1    | 583    | 636.7  | 496.1  | 262    | 233.6  | 275.6  | 513.7  | 939    |
| PLK2    | 102.5  | 117.8  | 93.4   | 88.3   | 79.6   | 87.8   | 97.5   | 120.7  |
| PLK3    | 120.5  | 133.1  | 100    | 79.9   | 78.1   | 89.9   | 125.4  | 155.7  |
| PLK4    | 1552.9 | 1906.9 | 1225.3 | 864.2  | 781.9  | 1588.4 | 1032.6 | 1848.1 |
| PLN     | 119    | 123    | 96.9   | 87.9   | 87.3   | 86.5   | 112.4  | 109.7  |
| PLOD1   | 1249.9 | 1568   | 875.1  | 1081.1 | 905.4  | 1087.1 | 1028.8 | 1044.1 |
| PLOD2   | 129.3  | 144.7  | 90.1   | 87.2   | 81.4   | 97.7   | 111.5  | 140.1  |
| PLOD2   | 134.6  | 131.5  | 98.1   | 104.4  | 84.6   | 92.7   | 121.1  | 147.3  |
| PLOD2   | 389.4  | 485.6  | 352.5  | 249    | 225.9  | 339.9  | 310.9  | 612.5  |
| PLOD3   | 2676.9 | 2965.5 | 2906.8 | 2303.1 | 1636.3 | 2119.9 | 2402.7 | 4049.2 |

|         |        |        |        |        |        |        |        |        |
|---------|--------|--------|--------|--------|--------|--------|--------|--------|
| PLP1    | 117.3  | 119.9  | 101.1  | 94.8   | 86.5   | 100.1  | 112.8  | 128.5  |
| PLP1    | 96.8   | 114.5  | 85.4   | 76.4   | 80.5   | 97.2   | 100.6  | 105.4  |
| PLP1    | 116.9  | 141.2  | 93.3   | 82.4   | 85.1   | 88.8   | 109.8  | 129.5  |
| PLP2    | 268.7  | 383.7  | 170    | 135.3  | 140.9  | 164.4  | 264.5  | 334.6  |
| PLRG1   | 2090.5 | 2718.2 | 960.9  | 793.4  | 579.4  | 1166.8 | 1730.1 | 2439.7 |
| PLS1    | 113.9  | 129.7  | 122    | 96.5   | 98.5   | 112.6  | 108.6  | 145.9  |
| PLS3    | 826.6  | 1033   | 377.8  | 297.5  | 255.3  | 368.5  | 950    | 1732.1 |
| PLSCR1  | 292.8  | 355.6  | 141.1  | 149.9  | 125.1  | 146.7  | 228.1  | 264.8  |
| PLSCR2  | 89.7   | 109.4  | 100.8  | 98.4   | 98.6   | 97.4   | 93.4   | 95.5   |
| PLSCR3  | 928.2  | 1120.6 | 630.7  | 560.1  | 472.1  | 445.8  | 780.4  | 846.7  |
| PLSCR4  | 130.5  | 174.5  | 105.5  | 101.2  | 100.8  | 119.4  | 130.5  | 167.4  |
| PLTP    | 238.1  | 341.8  | 178.2  | 150.5  | 142.6  | 118.9  | 204.1  | 287.3  |
| PLTP    | 829.2  | 907.6  | 502.1  | 590.8  | 457.7  | 837.6  | 622.8  | 938    |
| PLUNC   | 84.9   | 88.5   | 97.6   | 85.1   | 78.4   | 87.7   | 84.9   | 85.1   |
| PLVAP   | 95.4   | 95.6   | 95.6   | 96.4   | 86.3   | 84.6   | 98.6   | 93     |
| PLXDC1  | 124.4  | 141.6  | 112.7  | 101    | 104.8  | 103.7  | 117.7  | 125    |
| PLXDC2  | 228    | 276    | 130.8  | 128.3  | 111.1  | 145.5  | 168.8  | 241.1  |
| PLXNA1  | 157.9  | 168.3  | 176.4  | 134.4  | 123    | 135.1  | 137.8  | 180.5  |
| PLXNA2  | 133.4  | 185.7  | 95.8   | 87.1   | 81.8   | 94.8   | 123.5  | 135.4  |
| PLXNA3  | 110.7  | 115.2  | 136.2  | 139.4  | 124    | 181.7  | 104.2  | 148    |
| PLXNA4B | 88.3   | 99.7   | 82.6   | 86.3   | 77.6   | 76.2   | 88.7   | 93.7   |
| PLXNB1  | 111.6  | 125.6  | 135.4  | 116.4  | 107.3  | 127    | 110.8  | 130.2  |
| PLXNB3  | 87.2   | 92     | 86.5   | 88.1   | 84.3   | 87.6   | 88.1   | 91.9   |
| PLXNC1  | 79.5   | 91.1   | 106.4  | 115.3  | 100.6  | 110.2  | 86.1   | 85.2   |
| PLXND1  | 110.7  | 134.6  | 84.4   | 80.5   | 97.3   | 88.5   | 94.9   | 151    |
| PMAIP1  | 395.7  | 451.4  | 188.9  | 160.6  | 136.6  | 191.2  | 499.9  | 1060.7 |
| PMCH    | 74.3   | 78.1   | 94     | 95.3   | 92.8   | 87.4   | 83.2   | 82.8   |
| PMCHL1  | 99.1   | 110.3  | 104    | 90.9   | 93.2   | 93.5   | 107.2  | 117.2  |
| PMFBP1  | 117.3  | 141.2  | 95.2   | 101.1  | 85.1   | 95.7   | 114.3  | 123.2  |
| PML     | 85.7   | 147    | 97.4   | 90.9   | 97.3   | 86.4   | 111.4  | 131    |
| PML     | 91.7   | 96.1   | 105.8  | 90.3   | 93.2   | 99.3   | 87     | 99.7   |
| PML     | 156.4  | 181.8  | 120.1  | 117.6  | 97.4   | 106.3  | 149    | 172.6  |
| PML     | 104.7  | 164.7  | 106.9  | 104.3  | 87.1   | 86.9   | 124.3  | 143.5  |
| PML     | 108.2  | 125.1  | 102.7  | 104.5  | 92.9   | 105.1  | 106    | 104.7  |
| PMM1    | 1463.4 | 1932.5 | 1055.5 | 1003.4 | 823.3  | 1098   | 1356.9 | 1647.2 |
| PMM2    | 586.6  | 689    | 418.7  | 317.7  | 223.1  | 336.8  | 588.4  | 595.4  |
| PMP2    | 76     | 91.6   | 85.6   | 88.2   | 73.5   | 86     | 81.9   | 84.8   |
| PMP22   | 84.2   | 82.1   | 100.8  | 92.1   | 88.8   | 88.1   | 85.8   | 90.2   |
| PMP22   | 100.4  | 112.2  | 91.2   | 80     | 92.3   | 93.8   | 97     | 115.9  |
| PMP22   | 160.9  | 206.1  | 120.9  | 127.7  | 123.8  | 126.7  | 172.7  | 178.9  |
| PMP22CD | 96.1   | 104.4  | 102    | 95.7   | 87.2   | 90.7   | 91.9   | 113.6  |
| PMPCA   | 1440.7 | 1715.8 | 1211.1 | 1049.9 | 835.1  | 1287.7 | 1256.1 | 1388.6 |
| PMPCB   | 2438   | 3278.1 | 1394.7 | 1398.6 | 1130.7 | 1753.6 | 2055.6 | 2518.1 |
| PMS1    | 182.6  | 192.1  | 126.6  | 143.7  | 106.2  | 179    | 141.3  | 243.8  |
| PMS2    | 486    | 600.9  | 221.2  | 181.8  | 158    | 208.5  | 352    | 401    |
| PMS2    | 174.2  | 232.4  | 135.4  | 113.5  | 120    | 101.3  | 148.4  | 151.3  |
| PMS2CL  | 171.4  | 206.5  | 134.2  | 125.5  | 130.9  | 130.4  | 124.1  | 118.2  |
| PMS2CL  | 99.2   | 104.9  | 75.2   | 90.3   | 80.8   | 92.2   | 93.9   | 105.1  |
| PMS2L2  | 112.6  | 144.9  | 103.2  | 101.9  | 86     | 94.3   | 121.8  | 132.2  |
| PMS2L3  | 291.6  | 348.5  | 171.1  | 169    | 176.3  | 189.6  | 242.2  | 314.5  |

|          |        |        |        |        |        |        |        |        |
|----------|--------|--------|--------|--------|--------|--------|--------|--------|
| PMS2L5   | 458.6  | 623.5  | 205.3  | 167.5  | 147.2  | 178.8  | 393.5  | 601.9  |
| PMVK     | 434.8  | 653.9  | 204.3  | 181    | 170.8  | 205.3  | 457.6  | 442    |
| PNCK     | 130.7  | 140.4  | 110.9  | 234.4  | 302.3  | 455.7  | 114.3  | 132.1  |
| PNKD     | 231.3  | 256.3  | 344.5  | 303.7  | 326.8  | 406    | 192.8  | 342.3  |
| PNKD     | 144    | 180.4  | 97.2   | 94.6   | 104.2  | 111.2  | 151.4  | 162.2  |
| PNKD     | 302.3  | 338.6  | 196    | 171.1  | 173.2  | 249.5  | 244.3  | 240.1  |
| PNKP     | 847.6  | 998.1  | 694.9  | 493.2  | 420.5  | 586.2  | 725.2  | 1173.8 |
| PNLDC1   | 86.9   | 105.1  | 86.8   | 80.3   | 80.2   | 80.2   | 85.8   | 103.5  |
| PNLIP    | 106.3  | 121.6  | 91.5   | 93.7   | 89.1   | 90.6   | 117.8  | 123.1  |
| PNLIPRP1 | 87.1   | 107.5  | 95.2   | 84.7   | 89.5   | 85.5   | 87.8   | 94.4   |
| PNLIPRP2 | 80.8   | 82.6   | 81.5   | 79.2   | 74.8   | 84     | 73.2   | 86.4   |
| PNLIPRP3 | 75.1   | 80.2   | 86.8   | 77.9   | 87.6   | 84.2   | 81.6   | 84.6   |
| PNMA1    | 222.3  | 263.8  | 161.2  | 154    | 131.1  | 160.2  | 160.2  | 271.7  |
| PNMA2    | 141.3  | 163    | 135.8  | 437.3  | 419    | 524.9  | 132.6  | 120.7  |
| PNMA3    | 407.9  | 483.5  | 253.1  | 144.2  | 131.6  | 143.5  | 230.9  | 247.1  |
| PNMA5    | 83.9   | 104.6  | 82.5   | 77.5   | 83.3   | 84.9   | 74.6   | 84.2   |
| PNMA6A   | 147.6  | 183.9  | 110.4  | 89.7   | 99     | 99.8   | 121.9  | 175.6  |
| PNMT     | 78.9   | 95.1   | 90.2   | 92.3   | 97.7   | 99     | 83.9   | 81.9   |
| PNN      | 2655.6 | 2638.7 | 1140.8 | 1134.3 | 1032.3 | 1974.2 | 2063.2 | 3944.3 |
| PNOC     | 159.6  | 175.3  | 129.7  | 87.1   | 86.7   | 93.3   | 144    | 178.2  |
| PNPLA1   | 162.4  | 178.8  | 123.2  | 101.2  | 92     | 110.9  | 188.3  | 217.6  |
| PNPLA1   | 116.7  | 131.5  | 102    | 91.5   | 87.9   | 106.8  | 127.5  | 182.9  |
| PNPLA2   | 190.8  | 252.4  | 167.4  | 153.1  | 151.1  | 212.9  | 178.2  | 318.5  |
| PNPLA4   | 95.7   | 114.9  | 103.8  | 92.8   | 93.3   | 105.5  | 88.6   | 113.2  |
| PNPLA5   | 90.6   | 106    | 91.9   | 81.4   | 80.2   | 79.4   | 84.4   | 90.2   |
| PNPLA8   | 108.5  | 137    | 92.5   | 102.3  | 92.1   | 116    | 113.5  | 164.7  |
| PNPO     | 2445.6 | 3107.9 | 1180.3 | 1073   | 812.8  | 1237.6 | 1885.4 | 2031   |
| PNPT1    | 8251.1 | 8696.1 | 3214.2 | 6019.3 | 5554.3 | 4159.3 | 6632.6 | 7613.5 |
| PNRC1    | 111.4  | 113.8  | 106.4  | 99.9   | 97     | 100.6  | 96.9   | 121.6  |
| PNRC2    | 3659.5 | 4463.8 | 1423.4 | 1802.1 | 1376.5 | 2096.4 | 2724.2 | 3901.1 |
| PODN     | 89.2   | 97.4   | 99.7   | 98.1   | 99     | 88.9   | 88.7   | 109.7  |
| PODXL    | 175.5  | 217.8  | 173.7  | 162.7  | 132    | 179.4  | 158.1  | 187.6  |
| PODXL    | 77.2   | 86.8   | 100.8  | 94.2   | 91.1   | 87.2   | 81     | 83.2   |
| PODXL    | 119.8  | 124.2  | 100.9  | 95.4   | 92.8   | 107.6  | 114.2  | 131.6  |
| PODXL2   | 290.2  | 320.7  | 373.7  | 382.3  | 303.3  | 488.7  | 220.1  | 343.1  |
| POF1B    | 129.5  | 139.5  | 93.6   | 79.8   | 87.7   | 97.2   | 103.3  | 147.7  |
| POFUT1   | 2066   | 2369.7 | 935.6  | 1560.7 | 1631.5 | 1280.6 | 2379   | 3775.7 |
| POFUT1   | 104.8  | 136.1  | 105    | 109.2  | 94.2   | 93.9   | 108.7  | 121.8  |
| POFUT1   | 99.7   | 122    | 92.3   | 96.6   | 95     | 85.6   | 89.1   | 106.7  |
| POFUT2   | 300.5  | 323.9  | 284.8  | 308.2  | 282.5  | 368.2  | 267.6  | 461.7  |
| POFUT2   | 221.5  | 284.7  | 144.8  | 139.1  | 108.5  | 143.3  | 194.1  | 272.9  |
| POFUT2   | 262    | 266.5  | 274    | 306.3  | 249.6  | 396.3  | 251.6  | 467    |
| POGK     | 2266.1 | 3422.6 | 2445   | 1476.2 | 1125.2 | 1973.8 | 1880.5 | 2609   |
| POGZ     | 228    | 297.3  | 179.2  | 207.4  | 222.1  | 190.1  | 218    | 223.1  |
| POGZ     | 146.5  | 174.7  | 126.1  | 108.6  | 109.8  | 105.7  | 119.3  | 162.3  |
| POGZ     | 115.4  | 149.3  | 114.2  | 123.4  | 108.8  | 109.7  | 110.6  | 120.7  |
| POL3S    | 125.4  | 120.2  | 114.8  | 110    | 111.5  | 125.3  | 98.3   | 120.9  |
| POLA1    | 490.7  | 671.4  | 305.2  | 327.7  | 270.6  | 367    | 408    | 458    |
| POLA2    | 1765.9 | 2368.4 | 1245.7 | 1183   | 854.8  | 1104.1 | 1226.7 | 1311.4 |
| POLB     | 1038.5 | 1363   | 637    | 588.2  | 495.2  | 670.3  | 1007.1 | 1133.1 |

|         |        |         |        |        |        |        |        |        |
|---------|--------|---------|--------|--------|--------|--------|--------|--------|
| POLD1   | 416.1  | 498     | 460.5  | 360.1  | 316.9  | 513.8  | 304.6  | 569.8  |
| POLD3   | 93.3   | 115.8   | 101.8  | 96.2   | 102.6  | 107.5  | 110.9  | 97.5   |
| POLD4   | 286.7  | 327.7   | 157.4  | 175.6  | 158.6  | 211.2  | 199.6  | 286.7  |
| POLDIP2 | 379.1  | 500.3   | 344.8  | 304.7  | 242.5  | 379.4  | 328.5  | 456    |
| POLDIP3 | 935.3  | 1117.3  | 816.9  | 646.3  | 494.5  | 714.2  | 863.7  | 1591.5 |
| POLDIP3 | 174.1  | 250.3   | 153.9  | 232    | 197.1  | 111.2  | 156.3  | 189.7  |
| POLE    | 260.5  | 343     | 419.1  | 328.3  | 328.7  | 592.5  | 229.6  | 356.4  |
| POLE2   | 1783.6 | 2296.3  | 908.8  | 500.5  | 396.2  | 550.2  | 1443.4 | 1700.8 |
| POLE3   | 8712.9 | 11767.1 | 6097.8 | 4629.2 | 3333.3 | 4481.2 | 7052.8 | 8474.2 |
| POLE4   | 5693   | 7235.5  | 5125.9 | 4903.5 | 4166   | 5511.5 | 5309.6 | 7514.2 |
| POLG    | 420.8  | 535.5   | 432.6  | 371.4  | 331.3  | 459.9  | 360.2  | 573.5  |
| POLG2   | 380.1  | 371     | 139.8  | 130.8  | 101.2  | 143.1  | 285.7  | 365.7  |
| POLH    | 98.7   | 118.7   | 104    | 104.5  | 86.9   | 83.3   | 101.3  | 131.4  |
| POLI    | 88.2   | 90.8    | 95.2   | 95.7   | 78.7   | 81.7   | 91.1   | 97.4   |
| POLK    | 77.9   | 87.1    | 85.1   | 83.5   | 85.7   | 81.1   | 77.6   | 90.6   |
| POLL    | 128.4  | 137.6   | 104.9  | 100.3  | 88     | 104.6  | 107.9  | 146    |
| POLM    | 253.6  | 304.3   | 281.1  | 230.8  | 183    | 266.3  | 215.9  | 438.1  |
| POLN    | 113.4  | 108.3   | 102.5  | 92.7   | 79.2   | 88     | 97.8   | 115.1  |
| POLQ    | 1270.3 | 1887.1  | 988.4  | 1220.5 | 1096.1 | 1751.7 | 1011.8 | 1233.3 |
| POLR1A  | 126.8  | 144.1   | 103.5  | 106.2  | 83     | 88.5   | 127.7  | 128.3  |
| POLR1B  | 135    | 150.8   | 111.3  | 106.2  | 98.5   | 110.1  | 113.4  | 144.8  |
| POLR1C  | 2601.7 | 3161.6  | 1398.4 | 1055.7 | 802.2  | 1297   | 2094.7 | 2313.3 |
| POLR1C  | 1241.8 | 1662.9  | 854.9  | 668.9  | 460.4  | 858.5  | 1204.8 | 1643.1 |
| POLR1D  | 5628.6 | 6473.8  | 4020.4 | 4094.6 | 3194.7 | 4053.6 | 4781.9 | 6627.1 |
| POLR1E  | 3136.5 | 3802.2  | 1146.8 | 826.4  | 775.4  | 1020.2 | 2655   | 3226.2 |
| POLR2A  | 778.7  | 930.6   | 953.6  | 1347   | 1076.8 | 1517.7 | 808.5  | 1276.7 |
| POLR2B  | 1256.3 | 1766.8  | 562.9  | 558.6  | 354.4  | 731.3  | 904.8  | 1506   |
| POLR2C  | 346.3  | 506.7   | 178.7  | 138.3  | 129.5  | 163.1  | 317    | 430.2  |
| POLR2C  | 1809.2 | 2432.9  | 1407   | 955.3  | 727.6  | 1411.8 | 1476.8 | 2260.1 |
| POLR2D  | 1477.9 | 2218.3  | 1238.5 | 822.1  | 656.2  | 1076.6 | 1121   | 2179.4 |
| POLR2F  | 5343.1 | 6444.6  | 4668.9 | 4166.8 | 3346.1 | 5329   | 4962.5 | 6085.1 |
| POLR2G  | 3032   | 3634.6  | 1497.1 | 1199.7 | 905.3  | 1242.7 | 2900.3 | 3829.6 |
| POLR2H  | 2975.6 | 3499.7  | 1329.7 | 997.8  | 806.8  | 1123.4 | 2244.3 | 2847.2 |
| POLR2I  | 2230.1 | 2712.9  | 1098.5 | 673.1  | 520.3  | 709.4  | 1594.2 | 2254.5 |
| POLR2J  | 322    | 443.3   | 224.5  | 194.9  | 171.3  | 212.3  | 301    | 460.9  |
| POLR2J2 | 95.8   | 109     | 103.1  | 101.2  | 93.5   | 85.3   | 93.8   | 97.8   |
| POLR2J2 | 125.1  | 125.9   | 102    | 96.4   | 99.3   | 101.7  | 119.3  | 135.2  |
| POLR2J3 | 2467.1 | 3148.1  | 523.2  | 418.5  | 374.7  | 480.2  | 2283.8 | 2899.8 |
| POLR2K  | 236.8  | 265.4   | 147.3  | 120.2  | 116.3  | 130    | 237.2  | 369.3  |
| POLR2L  | 217.9  | 256.4   | 198.3  | 167.4  | 136.6  | 147.9  | 219.1  | 292.9  |
| POLR3A  | 278.4  | 349.3   | 353.3  | 300    | 259.2  | 354.6  | 263.7  | 463.1  |
| POLR3B  | 433.1  | 578.6   | 342.1  | 370.4  | 250.1  | 436.1  | 309.5  | 476.9  |
| POLR3C  | 2388.1 | 2954.7  | 1677.6 | 1444.7 | 987.7  | 1734.4 | 2167.1 | 2736.3 |
| POLR3D  | 178.3  | 242.6   | 184    | 124    | 112.2  | 132.3  | 166.4  | 229.3  |
| POLR3F  | 191.1  | 223.1   | 112.8  | 101.7  | 100.4  | 119.9  | 165.3  | 186.8  |
| POLR3G  | 161.6  | 193.2   | 132    | 100.1  | 86.3   | 96.5   | 144.1  | 127.2  |
| POLR3GL | 2686.3 | 3096.5  | 1325.7 | 1343.1 | 964.3  | 1554.6 | 2181.8 | 3121.6 |
| POLR3H  | 701    | 943.9   | 641.8  | 408.6  | 363    | 401    | 601.2  | 567.5  |
| POLR3H  | 114.9  | 117.6   | 108.5  | 86.4   | 78.3   | 88.3   | 100.3  | 117    |
| POLR3H  | 109.5  | 144.9   | 98.5   | 90.6   | 96.2   | 92.9   | 103.6  | 128.1  |

|          |         |         |        |        |        |        |         |         |
|----------|---------|---------|--------|--------|--------|--------|---------|---------|
| POLR3K   | 1551.7  | 1686.6  | 713.6  | 486.7  | 365.3  | 486.8  | 1346.8  | 1503.6  |
| POLRMT   | 397.4   | 441     | 568.9  | 346.1  | 277    | 427.8  | 296.7   | 525.9   |
| POLS     | 427     | 503.8   | 278.4  | 302.3  | 299.2  | 355.4  | 443.9   | 586     |
| POM121   | 92.4    | 97.9    | 97.8   | 173.5  | 133.7  | 97.9   | 91.6    | 99.6    |
| POMC     | 118.7   | 152.8   | 115.6  | 114.5  | 98.1   | 127.7  | 119.1   | 123.1   |
| POMC     | 102     | 124.7   | 93.6   | 90.4   | 89.8   | 96.6   | 111.4   | 117.3   |
| POMGNT1  | 684.3   | 829     | 312.8  | 334.3  | 295.4  | 361.9  | 501.8   | 527.9   |
| POMP     | 83.1    | 84      | 91.5   | 88.6   | 81.8   | 84.6   | 73.2    | 86.4    |
| POMT1    | 110.4   | 134.7   | 96.6   | 92.1   | 97.2   | 89.2   | 105.6   | 135.3   |
| POMT1    | 338.9   | 411.8   | 266.2  | 212.7  | 211.3  | 300.2  | 270.1   | 482.9   |
| POMT2    | 142.3   | 156.4   | 132.8  | 143.6  | 123.7  | 181.1  | 138.9   | 201.3   |
| POMZP3   | 98.9    | 107.6   | 112    | 95.9   | 100.2  | 103.8  | 95      | 149.1   |
| PON1     | 93.8    | 108     | 82.6   | 79.1   | 78.9   | 81.2   | 97.6    | 120.5   |
| PON2     | 1273.5  | 1392.4  | 584.4  | 767.2  | 480.8  | 679.5  | 1022.1  | 1660.8  |
| PON3     | 123.2   | 112.5   | 101.3  | 92.3   | 91.5   | 95.7   | 93.4    | 108.3   |
| POP1     | 541.8   | 742.2   | 392.9  | 234.8  | 202.6  | 285.5  | 470     | 773.1   |
| POP4     | 513.5   | 642.1   | 157.9  | 138.5  | 146.4  | 163.8  | 466.2   | 733.2   |
| POP5     | 878.4   | 977.3   | 495    | 569.7  | 481.2  | 654.4  | 569.7   | 674.4   |
| POP7     | 705.7   | 838.4   | 571.9  | 328.8  | 328.1  | 390.8  | 622.7   | 642.6   |
| POPDC2   | 100.8   | 125.2   | 99.1   | 95.7   | 87.6   | 92     | 110.6   | 112.2   |
| POPDC3   | 96.2    | 110.8   | 90.1   | 92.5   | 90.3   | 96.7   | 100.7   | 126.3   |
| POR      | 249.3   | 346.5   | 229.9  | 226.5  | 176.2  | 288    | 242.7   | 325.1   |
| PORCN    | 87.9    | 111.3   | 89.1   | 86.8   | 86.7   | 106.6  | 84.8    | 101.7   |
| PORCN    | 146.6   | 171.4   | 91.3   | 97.6   | 87.1   | 91.4   | 153.6   | 165.1   |
| POSTN    | 91      | 94      | 93.8   | 84.9   | 81.7   | 91     | 94.1    | 100     |
| POT1     | 100.8   | 114     | 93.3   | 87.8   | 89.8   | 95.8   | 107.2   | 135.8   |
| POT1     | 342     | 460     | 178.6  | 157.8  | 126.1  | 243.2  | 234     | 319.7   |
| POT1     | 87.3    | 87      | 90.4   | 95.9   | 90.7   | 93.7   | 80.9    | 95      |
| POTE15   | 106     | 119.3   | 92.6   | 95.1   | 85.6   | 93.6   | 104.3   | 131.4   |
| POTE2    | 82.5    | 96.2    | 88.3   | 81.3   | 85.2   | 75.7   | 78.1    | 94.2    |
| POTE8    | 88.1    | 101.3   | 104.4  | 92.8   | 89.7   | 95.4   | 97.5    | 121.1   |
| POU1F1   | 77.3    | 83.5    | 92.5   | 85.2   | 79.9   | 81.7   | 74      | 80.1    |
| POU2AF1  | 109.8   | 139.3   | 89.6   | 81.2   | 86     | 92.9   | 103.1   | 117.4   |
| POU2F1   | 161.9   | 232.1   | 122.7  | 143.7  | 147.2  | 168.2  | 158.5   | 195     |
| POU2F2   | 90.7    | 101.5   | 86.9   | 79     | 84.4   | 89     | 92.9    | 99.1    |
| POU2F3   | 91.1    | 114.7   | 100.4  | 92.3   | 89.5   | 98.2   | 100.9   | 100.8   |
| POU3F1   | 77.9    | 87.9    | 92.4   | 80.3   | 82.8   | 89.7   | 87.3    | 93.3    |
| POU3F2   | 132.4   | 142.4   | 91     | 87     | 82.5   | 96.9   | 126.8   | 122     |
| POU3F3   | 89.8    | 86.1    | 84     | 82.9   | 73.2   | 81.5   | 94.3    | 98.6    |
| POU3F4   | 98.4    | 96.8    | 93     | 92.6   | 99.4   | 85.5   | 94.7    | 93.2    |
| POU4F1   | 130.9   | 154.8   | 140.9  | 112.1  | 104.8  | 113.4  | 105.3   | 139.1   |
| POU4F2   | 113.3   | 141.9   | 122.1  | 341.6  | 249    | 354.5  | 91.5    | 91.2    |
| POU4F3   | 90.9    | 93.8    | 109.6  | 98.1   | 82.2   | 95.3   | 84.7    | 88.6    |
| POU5F1   | 81.5    | 87.5    | 94.3   | 84.1   | 91.6   | 82.5   | 70.2    | 85.5    |
| POU5F1P1 | 85.4    | 110.9   | 84.3   | 88.2   | 84.3   | 84.6   | 89.4    | 96.2    |
| POU6F1   | 107.9   | 135.5   | 103.2  | 100.9  | 100.7  | 100.5  | 106.7   | 120.8   |
| POU6F2   | 72.4    | 87.7    | 85.4   | 80.1   | 84.4   | 77.4   | 74.7    | 77.8    |
| PP2447   | 5864    | 6158.3  | 4072.2 | 3651.8 | 3734.1 | 4445.5 | 3558.2  | 3412.7  |
| PP8961   | 83      | 110.5   | 84.8   | 89.7   | 89.2   | 88.2   | 82.2    | 84.4    |
| PPA1     | 11244.7 | 13186.7 | 7360.3 | 6769.2 | 5151.3 | 7985.4 | 10213.8 | 12810.7 |

|           |        |        |        |        |        |        |        |        |
|-----------|--------|--------|--------|--------|--------|--------|--------|--------|
| PPA2      | 5172   | 6306.4 | 1880.6 | 1275.1 | 892.5  | 1612.8 | 4546.8 | 5703.7 |
| PPA2      | 2471.1 | 2625.5 | 1353.6 | 2723.3 | 2898.3 | 1725   | 2119   | 2437.8 |
| PPA2      | 76.9   | 97.2   | 88.5   | 84.1   | 80.6   | 78.1   | 83.2   | 93.7   |
| PPAN      | 456.8  | 636.8  | 406.6  | 276.8  | 238.2  | 332.4  | 397.8  | 458.3  |
| PPAN-P2RY | 164.9  | 180.6  | 114.9  | 100.8  | 104.2  | 98.7   | 144.9  | 169.4  |
| PPAP2A    | 84.5   | 98.5   | 90.9   | 84.5   | 85     | 86.9   | 82.1   | 94.1   |
| PPAP2A    | 105.1  | 124.2  | 114.8  | 106.2  | 101.8  | 94.4   | 104.9  | 100.9  |
| PPAP2A    | 101    | 101.9  | 108.2  | 109.5  | 100.1  | 109.1  | 101.1  | 128.1  |
| PPAP2B    | 114.3  | 119.5  | 105.3  | 91.5   | 93.1   | 92.1   | 107.5  | 137.8  |
| PPAP2B    | 77.5   | 90.6   | 104.2  | 85.8   | 81     | 84.8   | 76.5   | 83.1   |
| PPAP2C    | 132.2  | 137    | 91.1   | 90.7   | 93.9   | 76.2   | 107.8  | 146.7  |
| PPAP2C    | 100.3  | 138.5  | 101.5  | 88.4   | 91.5   | 98.2   | 107.1  | 126.1  |
| PPAP2C    | 81.2   | 94.2   | 105.6  | 103    | 90.9   | 96.8   | 82.9   | 83.8   |
| PPAPDC1A  | 108.6  | 131.4  | 81     | 73.5   | 82.8   | 93.6   | 106.8  | 118.4  |
| PPAPDC1B  | 470.5  | 554.2  | 176.2  | 121.5  | 127    | 139.9  | 370.5  | 530.8  |
| PPAPDC2   | 447.9  | 590.3  | 292.2  | 290.8  | 230.1  | 369.3  | 344.9  | 661.1  |
| PPAPDC3   | 187    | 220.2  | 169.6  | 126.3  | 107.4  | 130.2  | 199    | 267.7  |
| PPARA     | 111.3  | 139.5  | 105.5  | 99.1   | 105.5  | 110.4  | 132.7  | 138    |
| PPARA     | 120.7  | 134.7  | 92.3   | 95     | 84.5   | 88.7   | 125    | 142.9  |
| PPARBP    | 581.9  | 753.4  | 158.8  | 238.5  | 186.3  | 228.1  | 632.1  | 956.7  |
| PPARD     | 101.6  | 109.5  | 98.4   | 94.2   | 96.9   | 105.8  | 91     | 115.7  |
| PPARD     | 107.3  | 139.2  | 151.6  | 163.9  | 147.8  | 223.7  | 124.5  | 149.2  |
| PPARG     | 100.9  | 105.3  | 100.7  | 91.8   | 93     | 91.9   | 89.7   | 99.5   |
| PPARG     | 886.6  | 1123   | 561.8  | 1062.7 | 706.1  | 1299.6 | 706    | 829.6  |
| PPARG     | 192.9  | 226.5  | 105.8  | 124.8  | 115.6  | 144.8  | 174.9  | 263    |
| PPARG     | 111.6  | 133.5  | 90.3   | 82.5   | 76.9   | 86.9   | 106.2  | 137.7  |
| PPARGC1A  | 79.2   | 91.8   | 96.8   | 95.5   | 85.1   | 96.8   | 84.2   | 92.6   |
| PPARGC1B  | 182.2  | 206.6  | 142.6  | 169.1  | 125.3  | 131.9  | 152    | 261.5  |
| PPAT      | 688.7  | 891.3  | 423.7  | 335.1  | 229.5  | 361.6  | 534.4  | 1018.8 |
| PPBP      | 91.7   | 99.1   | 91     | 91.6   | 82.6   | 106    | 102    | 116.5  |
| PPCDC     | 96.7   | 116.9  | 104.1  | 94.7   | 83.6   | 98.3   | 104    | 118.9  |
| PPCS      | 2913.1 | 3079.4 | 1307.5 | 1906.2 | 1415.7 | 2505.3 | 2119.7 | 4636.5 |
| PPCS      | 5477.4 | 5805.8 | 2878.7 | 4668.5 | 3135.4 | 5323.7 | 4389.3 | 6425.9 |
| PPEF1     | 92.5   | 103    | 84.7   | 89.8   | 83.9   | 87.3   | 97.5   | 111.2  |
| PPEF1     | 89.1   | 100.1  | 85.9   | 97.6   | 87.2   | 97.7   | 87.3   | 99.5   |
| PPEF2     | 87.2   | 96.9   | 87.3   | 87.5   | 76.8   | 82.7   | 87.6   | 89.9   |
| PPFIA1    | 1016   | 1289.3 | 594.9  | 651.1  | 597    | 1026   | 981.5  | 1383.7 |
| PPFIA1    | 197.4  | 224.4  | 165.2  | 146.3  | 141    | 162.7  | 168.4  | 182.6  |
| PPFIA1    | 290.3  | 377.6  | 181.8  | 157.4  | 135.2  | 209.2  | 257.5  | 335.4  |
| PPFIA2    | 85.7   | 100.5  | 90.1   | 88.4   | 84.5   | 103.4  | 92     | 97.9   |
| PPFIA3    | 121.2  | 118.2  | 92.3   | 97.4   | 87.2   | 95.3   | 103.3  | 121.8  |
| PPFIA4    | 137.6  | 145.6  | 155.3  | 129.3  | 146.2  | 166.9  | 110.6  | 116.6  |
| PPFIBP1   | 92.6   | 105.7  | 93.2   | 96.1   | 87.7   | 84.5   | 88.9   | 91.7   |
| PPFIBP1   | 147.6  | 158.5  | 104.2  | 103.8  | 99     | 88.1   | 120.2  | 145.4  |
| PPFIBP1   | 93.6   | 101.7  | 94.2   | 79.7   | 85.3   | 85.3   | 103.2  | 92.4   |
| PPFIBP2   | 459.7  | 568.1  | 327.4  | 363.5  | 402.3  | 471.3  | 347.5  | 350.3  |
| PPGB      | 557.1  | 669.4  | 414.7  | 424.1  | 329.8  | 479.8  | 516    | 792    |
| PPHLN1    | 1682.5 | 2159.5 | 870    | 753.7  | 609.3  | 811.7  | 1664.9 | 2320.4 |
| PPHLN1    | 107.3  | 121.7  | 113.3  | 110.8  | 108.9  | 113.4  | 101.7  | 114.1  |
| PPHLN1    | 124.8  | 136    | 119.7  | 101    | 121.4  | 124.7  | 105.7  | 121.1  |

|         |        |         |        |        |        |        |        |        |
|---------|--------|---------|--------|--------|--------|--------|--------|--------|
| PPHLN1  | 1748.1 | 2564.2  | 1280   | 1099.7 | 812.2  | 1105.4 | 1674.5 | 2084.7 |
| PPIA    | 471.2  | 718.7   | 152.1  | 132.9  | 99.2   | 143.5  | 354.3  | 481    |
| PPIB    | 197.6  | 229.9   | 119.9  | 116.2  | 123    | 142.5  | 199.1  | 266.3  |
| PPIC    | 2134.6 | 2683.5  | 1254   | 1923.1 | 1416   | 2461.2 | 1927   | 3105.4 |
| PPID    | 91     | 106.6   | 89.4   | 78     | 86.7   | 87     | 104.3  | 97.7   |
| PPIE    | 3208.7 | 4259.8  | 1705.4 | 1367.3 | 1155.4 | 1977.2 | 2640.1 | 3506.2 |
| PPIE    | 129.9  | 133     | 121.3  | 102.5  | 100.9  | 106.5  | 117.3  | 136.5  |
| PPIF    | 176.3  | 227.4   | 145.5  | 146.9  | 112.3  | 126.4  | 206.6  | 294.7  |
| PPIG    | 104.8  | 115.1   | 102    | 86.3   | 89.2   | 105.4  | 95.5   | 149.9  |
| PPIH    | 8457.8 | 10157.2 | 4553.1 | 2630   | 2256.2 | 3344.2 | 7410   | 9776.5 |
| PPIL1   | 1579   | 2074.8  | 1050.4 | 844.6  | 479.7  | 1049.6 | 1174.4 | 2752.3 |
| PPIL2   | 95.3   | 111.4   | 91.7   | 86.9   | 81.6   | 88.2   | 86.2   | 95.8   |
| PPIL2   | 89.2   | 110.7   | 107.5  | 101.1  | 107.6  | 96.9   | 88.8   | 98.6   |
| PPIL2   | 81.6   | 98.1    | 88.6   | 96.5   | 79.7   | 80.2   | 95.9   | 100.6  |
| PPIL3   | 148    | 162.9   | 104.8  | 91.3   | 88.8   | 85.6   | 124.2  | 145.1  |
| PPIL3   | 94.4   | 126.9   | 93.3   | 78.9   | 77.1   | 84.5   | 104.7  | 108.9  |
| PPIL3   | 3542.3 | 4686.8  | 2174.8 | 1904.8 | 1500.6 | 2216.2 | 3184   | 3879.6 |
| PPIL3   | 149.9  | 190.9   | 117.6  | 116    | 113.6  | 122.4  | 157.8  | 195.2  |
| PPIL4   | 82.9   | 98.9    | 92.9   | 90     | 83.7   | 92.8   | 87.3   | 95.7   |
| PPIL5   | 2928.3 | 3679    | 1799.4 | 1085.4 | 802.2  | 1183.7 | 2332.5 | 3858.4 |
| PPIL5   | 94.9   | 107.2   | 89.9   | 92.3   | 90.2   | 78.8   | 91.3   | 88.9   |
| PPIL5   | 175.5  | 214.3   | 108.9  | 92.9   | 95.3   | 101.8  | 136.6  | 242.7  |
| PPIL6   | 111.2  | 130.2   | 106.3  | 86.5   | 85.5   | 85.1   | 112    | 135.9  |
| PPL     | 96.6   | 120.2   | 96.8   | 84.2   | 77.8   | 82.8   | 103    | 105.6  |
| PPM1A   | 113.8  | 103.6   | 90.9   | 90     | 84.3   | 85.6   | 96.2   | 124.4  |
| PPM1A   | 316.3  | 480.2   | 172.8  | 189.9  | 178.7  | 181.1  | 271.1  | 341.6  |
| PPM1A   | 138.7  | 165.3   | 118    | 96.8   | 86.8   | 113.5  | 122.2  | 150    |
| PPM1A   | 214.1  | 231     | 127.2  | 124.6  | 115.2  | 115.9  | 152.5  | 206.3  |
| PPM1B   | 149.5  | 197.9   | 91.7   | 98.4   | 82.7   | 73.3   | 138.7  | 162.3  |
| PPM1B   | 1083.2 | 1378.7  | 690.2  | 929.6  | 795.7  | 1236.8 | 1005.3 | 1550.6 |
| PPM1B   | 121.7  | 123     | 99     | 156.5  | 162.1  | 103.7  | 122.6  | 115.4  |
| PPM1B   | 150.6  | 164.3   | 104.8  | 109.1  | 110.6  | 108.5  | 130    | 223    |
| PPM1B   | 80.5   | 81.9    | 84.1   | 81.5   | 85.3   | 90.4   | 75.7   | 80.3   |
| PPM1D   | 475.8  | 651     | 233    | 214.8  | 193.3  | 275.7  | 462    | 648.4  |
| PPM1E   | 166    | 235.3   | 161.8  | 143.9  | 134.7  | 170.2  | 152.6  | 184.3  |
| PPM1F   | 1090.6 | 1390.7  | 1153.8 | 940.8  | 805.6  | 867.1  | 1029.5 | 636.6  |
| PPM1G   | 257.9  | 376.2   | 154.2  | 102.4  | 103.3  | 96.4   | 165.1  | 211.7  |
| PPM1G   | 8312.5 | 10434.2 | 5645.2 | 4643.8 | 4141.8 | 4748   | 6387.6 | 6497.1 |
| PPM1J   | 90.3   | 98.9    | 102.6  | 89.2   | 79.4   | 81.4   | 85.4   | 94.8   |
| PPM1K   | 222.3  | 250.4   | 150.9  | 203.1  | 212.6  | 185    | 249.3  | 327.4  |
| PPM1L   | 92.8   | 107.5   | 84.7   | 89.4   | 98.3   | 85     | 95.6   | 100.9  |
| PPM1M   | 261.8  | 287.1   | 251.2  | 190.8  | 171.6  | 214.4  | 208.2  | 261.4  |
| PPM2C   | 99.7   | 127.6   | 105.8  | 97.5   | 86.4   | 106.3  | 109.4  | 150.1  |
| PPME1   | 352.7  | 425.7   | 275.3  | 244    | 197.9  | 301.6  | 336.3  | 535.3  |
| PPOX    | 415.6  | 450.7   | 310.4  | 217.9  | 218.4  | 278    | 277.2  | 287.1  |
| PPP1CA  | 451.7  | 718.6   | 374.3  | 270.9  | 231.8  | 305.4  | 480.8  | 663.6  |
| PPP1CB  | 1126.5 | 1355.6  | 581.8  | 728.8  | 544.5  | 862    | 784.4  | 1608.2 |
| PPP1CC  | 7764.5 | 9916.2  | 3559.7 | 3817.4 | 3553   | 5714.6 | 6152.5 | 6938   |
| PPP1R10 | 246.2  | 323.6   | 182.7  | 198.6  | 184.3  | 257.5  | 205.5  | 365.4  |
| PPP1R11 | 1449.9 | 1714.6  | 874.6  | 773.3  | 583    | 775.2  | 1306.7 | 1422.1 |



|          |        |        |        |        |        |        |        |        |
|----------|--------|--------|--------|--------|--------|--------|--------|--------|
| PPP1R12A | 244.5  | 262.6  | 130.6  | 134.7  | 145.1  | 192.4  | 191.9  | 364.7  |
| PPP1R12B | 288    | 358.1  | 196.8  | 185.7  | 162.7  | 176.4  | 265.7  | 329.7  |
| PPP1R12C | 193.7  | 214.9  | 121.5  | 109.4  | 131    | 154.4  | 174.4  | 213.9  |
| PPP1R13B | 182.4  | 219.7  | 166.1  | 145.1  | 152.1  | 164.7  | 180.7  | 194.5  |
| PPP1R13L | 122.2  | 133.9  | 108.2  | 94.1   | 99.9   | 106.5  | 120.3  | 138.4  |
| PPP1R14A | 167    | 183.8  | 147.2  | 114.9  | 122    | 107.7  | 146    | 170.1  |
| PPP1R14B | 2852.9 | 3311.1 | 3294.1 | 2403.7 | 1983   | 2589   | 2202.7 | 3579.3 |
| PPP1R14C | 159.8  | 209.1  | 146.9  | 136.8  | 124.1  | 157.4  | 200.2  | 321.5  |
| PPP1R14D | 150.2  | 182.1  | 110.2  | 115.9  | 101.8  | 104.8  | 138.7  | 162.9  |
| PPP1R15A | 870.4  | 1060.3 | 539.2  | 452.9  | 489.5  | 577.8  | 1189   | 1717.6 |
| PPP1R15B | 114.8  | 115.6  | 115.3  | 91.4   | 84.6   | 100    | 110.5  | 159.1  |
| PPP1R16A | 496.5  | 610.2  | 231.1  | 152.5  | 116    | 146.8  | 364.8  | 360.1  |
| PPP1R16B | 108    | 119.7  | 129.5  | 115.2  | 105.7  | 136.1  | 109.7  | 137.5  |
| PPP1R1A  | 95.6   | 96.1   | 97.6   | 94.4   | 84.6   | 88.7   | 88.4   | 96     |
| PPP1R1B  | 100.4  | 103.7  | 90.6   | 84.1   | 88.1   | 85.9   | 98     | 112.2  |
| PPP1R1B  | 79     | 91.4   | 92.6   | 100.8  | 96.5   | 104.9  | 92.1   | 88.1   |
| PPP1R1B  | 127.4  | 149.4  | 113.9  | 117.9  | 87.7   | 103.1  | 134.6  | 150.9  |
| PPP1R1C  | 96.4   | 109.9  | 88.2   | 94     | 78     | 90.1   | 98.6   | 104.9  |
| PPP1R2   | 305.3  | 393.3  | 262.5  | 245.7  | 197.2  | 277    | 268    | 422.8  |
| PPP1R2P3 | 82.4   | 97.9   | 100.4  | 95.1   | 80.7   | 91.1   | 89.4   | 102.3  |
| PPP1R2P9 | 86.8   | 96.8   | 95.3   | 88.7   | 77.5   | 86.4   | 92.8   | 105.8  |
| PPP1R3A  | 87.4   | 87.8   | 94.8   | 86.5   | 94.5   | 91.1   | 85.4   | 92     |
| PPP1R3B  | 82.2   | 97.4   | 95     | 82.6   | 77.9   | 79.5   | 92.2   | 93.1   |
| PPP1R3C  | 120.8  | 144.2  | 116.1  | 108.8  | 95.8   | 129.5  | 117.2  | 132.9  |
| PPP1R3D  | 257.7  | 326.3  | 194.6  | 201.8  | 147.8  | 211.7  | 212.5  | 355.9  |
| PPP1R3F  | 119.2  | 139.8  | 102.9  | 106.4  | 95.5   | 107.5  | 118.4  | 148.4  |
| PPP1R7   | 1038   | 1317.3 | 558.8  | 549.7  | 460    | 674.9  | 963.4  | 1256.4 |
| PPP1R8   | 540.2  | 686.4  | 304.5  | 250.9  | 217.5  | 288.1  | 450.5  | 565.4  |
| PPP1R8   | 179.8  | 236.6  | 114.7  | 108    | 89.8   | 123.6  | 162.9  | 218.6  |
| PPP1R8   | 88.3   | 95.6   | 104.2  | 81.6   | 82     | 89.1   | 97.3   | 105.9  |
| PPP1R9A  | 96.6   | 90.6   | 112.4  | 102.6  | 100.6  | 99.3   | 85.9   | 84     |
| PPP1R9B  | 106.6  | 120    | 104.8  | 115.2  | 98.5   | 111.2  | 107.6  | 133.4  |
| PPP2CA   | 2293.9 | 3145.3 | 1578.2 | 1980.6 | 1412.5 | 2156.6 | 1847.1 | 2868.5 |
| PPP2CB   | 228.2  | 234.2  | 136.5  | 114.5  | 129.6  | 103.5  | 199.6  | 286.6  |
| PPP2CB   | 288.4  | 353.8  | 173    | 148.2  | 123.9  | 213.8  | 329.8  | 720.9  |
| PPP2R1A  | 2951.7 | 3807.3 | 2491.3 | 1915.4 | 1419.5 | 3031.3 | 2329.1 | 3669.7 |
| PPP2R1B  | 117    | 148.8  | 113.7  | 104.9  | 104.7  | 103.1  | 112.2  | 132.1  |
| PPP2R1B  | 197.8  | 266.3  | 113.1  | 104.4  | 95.9   | 105.9  | 162.2  | 225.4  |
| PPP2R1B  | 488.7  | 660.4  | 209.8  | 177    | 142.7  | 223    | 408.9  | 536.5  |
| PPP2R2A  | 1841.8 | 2362.8 | 1797.6 | 1209.9 | 885.8  | 1415   | 1854.9 | 2814.3 |
| PPP2R2B  | 422.2  | 484.6  | 208.4  | 214    | 204.1  | 224    | 406.6  | 443.9  |
| PPP2R2B  | 81.4   | 88.7   | 85     | 85.8   | 81.4   | 76.8   | 73.8   | 82.2   |
| PPP2R2B  | 99.2   | 110.5  | 93.5   | 85.5   | 91.2   | 85     | 99.3   | 106.4  |
| PPP2R2B  | 117.3  | 130.6  | 98.5   | 111.1  | 92.1   | 89.3   | 133.4  | 130.1  |
| PPP2R2B  | 120.6  | 149.7  | 122.7  | 129.3  | 106.1  | 127.2  | 129.2  | 149.3  |
| PPP2R2B  | 78.2   | 87.7   | 95.6   | 82.5   | 77.7   | 82.6   | 87     | 106    |
| PPP2R2C  | 87.9   | 103.1  | 92.5   | 93.6   | 80.5   | 83.4   | 108.7  | 101.5  |
| PPP2R2C  | 88.7   | 98.4   | 110.7  | 91.8   | 90.3   | 98.4   | 87.6   | 94.3   |
| PPP2R2C  | 102.9  | 112    | 80.8   | 91     | 71.1   | 78.4   | 102.6  | 116.8  |
| PPP2R2C  | 96.2   | 111.1  | 90.8   | 94.6   | 85.4   | 91.2   | 101.6  | 106    |

|         |         |         |         |         |         |        |         |         |
|---------|---------|---------|---------|---------|---------|--------|---------|---------|
| PPP2R2D | 304.1   | 394.1   | 149.2   | 100.5   | 105.1   | 112    | 247.2   | 334.1   |
| PPP2R2D | 94.9    | 113.4   | 108.9   | 94.6    | 89.8    | 95.6   | 91.3    | 104.1   |
| PPP2R2D | 588     | 774.3   | 394.5   | 277.3   | 256.4   | 325.9  | 531.2   | 797.2   |
| PPP2R3A | 89.7    | 100.6   | 95.9    | 93.1    | 94.2    | 97.7   | 89.4    | 97.3    |
| PPP2R3A | 97      | 111.1   | 107.9   | 94.9    | 79.6    | 84.9   | 101.2   | 109.4   |
| PPP2R3A | 103.4   | 124     | 114.7   | 105.2   | 112.6   | 109.2  | 89.4    | 142.9   |
| PPP2R3B | 132.3   | 166.8   | 122.4   | 112.3   | 110.2   | 120    | 125.6   | 175     |
| PPP2R3B | 120.6   | 135.1   | 127.1   | 125.4   | 119.4   | 162.1  | 118.4   | 133     |
| PPP2R3B | 86.9    | 91      | 108.2   | 101.9   | 114.3   | 183.4  | 83.8    | 99.1    |
| PPP2R3C | 2057.5  | 2408.3  | 817.8   | 628.1   | 455.9   | 708.3  | 1801.5  | 2515.7  |
| PPP2R4  | 96.3    | 101.5   | 107.1   | 102.2   | 86.7    | 90.1   | 90.4    | 105.6   |
| PPP2R4  | 110.7   | 141.6   | 93.4    | 85.9    | 86      | 80.4   | 104.1   | 134.2   |
| PPP2R4  | 124.4   | 134.9   | 107.1   | 107.2   | 95.4    | 112.9  | 124.4   | 130.3   |
| PPP2R4  | 1167.5  | 1344.4  | 852.2   | 505.3   | 403.6   | 449.3  | 1024    | 1401.9  |
| PPP2R5A | 710.4   | 1037.5  | 687.3   | 506.7   | 423.5   | 725.8  | 678.5   | 1021.3  |
| PPP2R5B | 105.8   | 129     | 109.5   | 115.9   | 100.7   | 121.8  | 104.5   | 144.5   |
| PPP2R5C | 2086.6  | 2921.1  | 1460.3  | 967.7   | 797.3   | 1364.8 | 1815.6  | 2353.1  |
| PPP2R5C | 193.5   | 217.9   | 116.3   | 123.5   | 100.5   | 100.7  | 148.3   | 186.8   |
| PPP2R5C | 128.8   | 131.7   | 119.8   | 105.7   | 95.6    | 99.8   | 118.5   | 173.8   |
| PPP2R5D | 248     | 341.2   | 131.9   | 110     | 115.3   | 93.7   | 218     | 285.5   |
| PPP2R5D | 166     | 230     | 195.7   | 193.8   | 159.6   | 221.8  | 172.4   | 294.3   |
| PPP2R5D | 533.4   | 659.6   | 436.5   | 291     | 236.9   | 398.8  | 521.4   | 1184.2  |
| PPP2R5E | 1915.7  | 2552.7  | 1304.1  | 1300.9  | 935     | 1409.9 | 1517.3  | 2064.9  |
| PPP3CA  | 353.3   | 441.5   | 156.7   | 151     | 128.7   | 169.6  | 367.9   | 559.5   |
| PPP3CB  | 903.6   | 1089.6  | 965.5   | 822.9   | 597     | 919.2  | 773.3   | 1246    |
| PPP3CC  | 465.4   | 593.5   | 285.3   | 188.4   | 203.3   | 262.8  | 420.5   | 651.8   |
| PPP3R1  | 1243.4  | 2196.6  | 1156.4  | 1081.5  | 731.4   | 1061   | 1280.7  | 1766.3  |
| PPP3R2  | 96.2    | 111.7   | 101.5   | 92.3    | 86.9    | 94.5   | 90.8    | 85.7    |
| PPP4R1  | 768     | 940.6   | 414.7   | 449.7   | 359.1   | 600.1  | 715.6   | 1380.6  |
| PPP4R1  | 415.6   | 539.3   | 315.7   | 268.5   | 265.6   | 436.3  | 369.2   | 721.2   |
| PPP4R1L | 100.1   | 115.8   | 94      | 90.6    | 80.8    | 83.6   | 109.7   | 133.8   |
| PPP4R2  | 126.6   | 127.3   | 95.1    | 91.6    | 88.8    | 103.3  | 103.4   | 148.3   |
| PPP5C   | 121.3   | 133.7   | 93.2    | 88.6    | 87.1    | 89.5   | 104.2   | 154     |
| PPP6C   | 4557.3  | 5990.4  | 2286.4  | 2111.5  | 1460.5  | 2646   | 4606.5  | 6489.3  |
| PPRC1   | 675.1   | 793.7   | 616.8   | 437.8   | 308.2   | 465.8  | 529.6   | 569.7   |
| PPT1    | 24887.1 | 26364.9 | 14382.4 | 14403.6 | 11392.9 | 13626  | 24558.4 | 27677.1 |
| PPT2    | 86.1    | 98.6    | 90.2    | 91.5    | 85.1    | 83.9   | 86.2    | 91.2    |
| PPT2    | 90.9    | 105.7   | 95.5    | 95.9    | 101.9   | 113.1  | 90.7    | 98.3    |
| PPWD1   | 849     | 1015.3  | 484.1   | 452.4   | 404.4   | 783.3  | 563     | 881.8   |
| PPY     | 93.8    | 104.5   | 97.3    | 88.8    | 81.1    | 84.3   | 91.8    | 98.8    |
| PPY2    | 99.1    | 129.3   | 85.3    | 81      | 72.7    | 90     | 107.5   | 137.1   |
| PPYR1   | 83.3    | 90.4    | 91      | 85.7    | 86.8    | 80.2   | 79.6    | 90.6    |
| PQBP1   | 361.1   | 497.8   | 148.3   | 143.5   | 123.6   | 180.6  | 425.6   | 446.6   |
| PQBP1   | 1248    | 1458.8  | 716.9   | 586.9   | 517     | 726.1  | 1219.5  | 1449    |
| PQBP1   | 139.3   | 159.4   | 107.7   | 104.7   | 104.6   | 101    | 113.1   | 135.5   |
| PQLC1   | 2828.5  | 3576.8  | 2431.3  | 2478.4  | 2060.9  | 2561.7 | 2448.7  | 3271.5  |
| PQLC2   | 156.9   | 172.6   | 116.9   | 106.1   | 101.6   | 101.4  | 139.1   | 172.7   |
| PQLC2   | 100.9   | 118     | 92.2    | 86.5    | 75.5    | 83     | 100.7   | 123.4   |
| PQLC3   | 1326.7  | 1877.8  | 826.2   | 1212.1  | 844.3   | 1674.4 | 1035.6  | 1896.2  |
| PRAC    | 97.2    | 110     | 98.4    | 89.5    | 85.5    | 85.1   | 93.8    | 103.1   |

|          |        |         |        |        |        |        |         |         |
|----------|--------|---------|--------|--------|--------|--------|---------|---------|
| PRAF2    | 98.1   | 110     | 95.7   | 78.9   | 86.8   | 84.3   | 107.4   | 112.9   |
| PRAM1    | 219.7  | 236.4   | 258.9  | 259.5  | 193.5  | 255.4  | 127.6   | 183.1   |
| PRAME    | 136.9  | 145.3   | 108.2  | 89.6   | 88.6   | 90.4   | 101.1   | 131.1   |
| PRAME    | 594.3  | 760.1   | 477.9  | 310.4  | 286.3  | 368    | 452.9   | 533.8   |
| PRAME    | 735.7  | 1026.3  | 574.6  | 440.3  | 409    | 697.4  | 609.8   | 905.3   |
| PRAMEF1  | 72     | 78.3    | 104.6  | 98.6   | 87.4   | 91.8   | 74      | 77      |
| PRAMEF10 | 124    | 136.3   | 112.2  | 102.7  | 101.8  | 101.4  | 115.5   | 135.3   |
| PRAMEF10 | 86.7   | 87.8    | 82.6   | 77.4   | 78.4   | 75.9   | 80.9    | 88      |
| PRAMEF10 | 84.9   | 83.2    | 86.5   | 79.4   | 76.7   | 83.4   | 86.2    | 79.4    |
| PRAMEF16 | 79.1   | 88      | 104    | 86.7   | 85.4   | 92.3   | 83.4    | 78.1    |
| PRAMEF4  | 110.5  | 127.5   | 89.8   | 83.3   | 79.9   | 86.6   | 103.6   | 124.9   |
| PRAMEF5  | 188.1  | 204.3   | 145.1  | 124.1  | 130.3  | 135.4  | 184.7   | 199.9   |
| PRAMEF6  | 81.6   | 83.3    | 104.9  | 93.6   | 91.8   | 90.5   | 85.6    | 81.9    |
| PRAMEF7  | 89.5   | 92.4    | 94     | 92.8   | 89.5   | 92.3   | 87.7    | 101.6   |
| PRAMEF8  | 92.3   | 99      | 102    | 96.4   | 93.7   | 93.9   | 97      | 103.5   |
| PRAMEF9  | 115.3  | 140.1   | 84.2   | 84.6   | 80.5   | 83.9   | 100.3   | 128.3   |
| PRAP1    | 88.8   | 90.7    | 87.8   | 93.6   | 87.7   | 99.2   | 96.8    | 97.7    |
| PRB1     | 113.1  | 130.3   | 95.6   | 87.3   | 94.7   | 90.3   | 116.2   | 127.9   |
| PRB1     | 117    | 113.9   | 122.3  | 103.6  | 104.8  | 104.5  | 101.3   | 113.6   |
| PRB2     | 109.2  | 121.8   | 105.7  | 94     | 99.9   | 92.8   | 115.8   | 121.6   |
| PRB3     | 105.5  | 125.7   | 104.9  | 107.3  | 98.2   | 98.9   | 99.5    | 97.8    |
| PRB4     | 90.6   | 103.2   | 91.2   | 86.2   | 79.4   | 92.3   | 94.1    | 94.4    |
| PRC1     | 3032.2 | 3566.9  | 2805.2 | 3026.9 | 2403.5 | 4065.3 | 2610.7  | 4848.5  |
| PRCC     | 227    | 241.2   | 167.6  | 138.6  | 129.7  | 184    | 174.5   | 294.3   |
| PRCC     | 431.7  | 477.2   | 374.8  | 339.7  | 273.3  | 348.1  | 360.3   | 478.2   |
| PRCP     | 2447.4 | 3231.2  | 1556.4 | 2237.3 | 1600.1 | 2026.3 | 2414.8  | 3262.5  |
| PRCP     | 724.7  | 1020    | 406.7  | 543.8  | 385.6  | 607.4  | 691.5   | 1145.6  |
| PRDM1    | 167.1  | 203.3   | 98.5   | 90.8   | 93     | 94.3   | 149.2   | 164.7   |
| PRDM1    | 87.2   | 93.5    | 86     | 92.4   | 87.1   | 97.9   | 91.5    | 112.6   |
| PRDM1    | 120    | 117.7   | 91.5   | 103.1  | 107.2  | 84.9   | 101.4   | 122.4   |
| PRDM1    | 249.3  | 281.7   | 162.2  | 478.1  | 419.1  | 642.6  | 336.6   | 516.3   |
| PRDM10   | 353.6  | 512.6   | 286.9  | 372.6  | 295.8  | 489.8  | 393.1   | 518.5   |
| PRDM11   | 88.2   | 88.7    | 96.3   | 81.8   | 81.9   | 88.8   | 87.4    | 84.2    |
| PRDM12   | 87.5   | 105.2   | 79.6   | 78.2   | 81.5   | 82.9   | 90.4    | 99.8    |
| PRDM13   | 111    | 137.5   | 92.5   | 91.1   | 90.3   | 79.3   | 101.7   | 124.5   |
| PRDM14   | 82.5   | 93.3    | 82.5   | 81.1   | 92     | 90.3   | 78.6    | 87.9    |
| PRDM15   | 90.4   | 102.2   | 100.5  | 89.8   | 88.6   | 90.4   | 92      | 97.1    |
| PRDM16   | 84.7   | 99.7    | 98.1   | 88.3   | 84.7   | 76.8   | 97      | 98.1    |
| PRDM16   | 75.7   | 85.4    | 84.3   | 87.5   | 84.4   | 86.6   | 72.7    | 71.9    |
| PRDM16   | 87.6   | 85.4    | 95.7   | 90.5   | 86.3   | 85.3   | 80.2    | 92.3    |
| PRDM2    | 106.3  | 123.6   | 119.2  | 120.1  | 103.2  | 105.7  | 106.1   | 122.1   |
| PRDM2    | 81.3   | 91.5    | 87.6   | 90.7   | 79.4   | 79.1   | 82.6    | 87.9    |
| PRDM4    | 383.9  | 493.4   | 195.5  | 218.2  | 181.9  | 242.1  | 300.4   | 370     |
| PRDM5    | 86.2   | 100.6   | 96.6   | 87.9   | 94.2   | 94.6   | 88.9    | 100.4   |
| PRDM7    | 88.7   | 100.2   | 95.2   | 98.2   | 94.7   | 88.3   | 85.3    | 86.8    |
| PRDM8    | 227.7  | 296.6   | 190.3  | 187.5  | 151    | 237.1  | 215.3   | 304.2   |
| PRDM9    | 127.6  | 133.6   | 131    | 104.6  | 97.9   | 121.4  | 110.3   | 129.3   |
| PRDX1    | 9957.1 | 12541.5 | 8034.1 | 7651.4 | 5982   | 7064.6 | 11176.8 | 14699.2 |
| PRDX1    | 6400.8 | 8554.7  | 2857.6 | 2824.1 | 2034.7 | 3085.8 | 6424.4  | 9552.7  |
| PRDX2    | 82     | 89.3    | 85.5   | 89.9   | 91.6   | 89.5   | 87.4    | 83.9    |

|          |        |         |        |        |        |        |        |        |
|----------|--------|---------|--------|--------|--------|--------|--------|--------|
| PRDX2    | 3122.1 | 3943.4  | 1518.8 | 694.2  | 732.9  | 707.8  | 2869.2 | 2952.3 |
| PRDX3    | 7860.7 | 10730.3 | 5060.5 | 3418.1 | 2542.2 | 4190.8 | 6102.4 | 7820.1 |
| PRDX4    | 6718.9 | 9069.3  | 3248.8 | 2488.3 | 2169.9 | 2720.8 | 5899.3 | 7778.8 |
| PRDX5    | 2789.9 | 3578.2  | 2060.9 | 2179.5 | 2231.8 | 3084.8 | 2981.1 | 3036.2 |
| PRDX5    | 7014.7 | 8389.8  | 5583.9 | 5828.2 | 4788.4 | 9281.6 | 7139.6 | 9157   |
| PRDX5    | 6595.1 | 7985.2  | 5540   | 5967.5 | 5285.3 | 7507.8 | 7114.7 | 9294.6 |
| PRDX6    | 6739.8 | 8712.9  | 4680.4 | 4788.6 | 3373.7 | 4915.5 | 7039.8 | 8120.6 |
| PREB     | 671.7  | 788.2   | 460.3  | 459.5  | 354.1  | 473.6  | 539.8  | 1147.3 |
| PRED57   | 109.7  | 140.4   | 98.1   | 96.1   | 84.7   | 94.8   | 116.1  | 140    |
| PREI3    | 790.4  | 1102.5  | 552.3  | 507.2  | 435.1  | 628.7  | 689.2  | 1075.6 |
| PREI3    | 339.1  | 434.7   | 156.4  | 166.4  | 186.3  | 220.1  | 300.7  | 353.4  |
| PREI3    | 75.9   | 84.8    | 91.2   | 80.2   | 78.8   | 77.6   | 83.2   | 79.6   |
| PRELID1  | 1921.3 | 2695.3  | 2083   | 1974.2 | 1595.4 | 2156.8 | 1836.9 | 2656   |
| PRELID2  | 140.4  | 150.5   | 104.7  | 99.6   | 91.4   | 91.5   | 126.9  | 168.7  |
| PRELP    | 92.2   | 112.9   | 92.8   | 96.8   | 86.1   | 97.6   | 92.3   | 108.1  |
| PREP     | 1198   | 1753    | 610.6  | 534.2  | 400.4  | 573.7  | 811    | 1127.5 |
| PREPL    | 306.3  | 409.5   | 267.1  | 324.2  | 267    | 575    | 212    | 327.8  |
| PREX1    | 167    | 247.3   | 152    | 240    | 231.8  | 350.1  | 181.3  | 221.6  |
| PRF1     | 81.6   | 92.7    | 109.2  | 101    | 98.4   | 90.2   | 90.1   | 97.1   |
| PRG2     | 621.4  | 871.6   | 929.5  | 683.6  | 509.3  | 592.1  | 524.4  | 811.3  |
| PRG2     | 297.6  | 385.2   | 214.9  | 158.4  | 131.5  | 152.5  | 253.4  | 272.2  |
| PRG3     | 82.5   | 92.1    | 95.6   | 96.1   | 84.4   | 88.5   | 84.9   | 95     |
| PRG-3    | 117.5  | 132.1   | 122.2  | 112    | 105.6  | 121.7  | 131.6  | 143.3  |
| PRG-3    | 79.3   | 92      | 84.2   | 78     | 82     | 89     | 74.1   | 93.2   |
| PRG-3    | 111.7  | 116.7   | 88.2   | 84.8   | 83.9   | 88.1   | 99.7   | 107    |
| PRH1     | 98.9   | 122.5   | 103.3  | 78.9   | 85.8   | 92.5   | 98.7   | 123.4  |
| PRH2     | 106.4  | 119     | 90     | 97.6   | 84     | 85.8   | 111.2  | 109.6  |
| PRIC285  | 638.1  | 801.2   | 438.3  | 397.7  | 386.3  | 369.5  | 624.8  | 760.2  |
| PRICKLE1 | 952.1  | 1150.5  | 755.6  | 706.1  | 594.3  | 521.2  | 565.8  | 464.4  |
| PRICKLE2 | 90.2   | 96.5    | 105.1  | 104.7  | 88.3   | 92     | 90.8   | 102.2  |
| PRIM1    | 2546.8 | 3626.9  | 1457.4 | 1142.4 | 896.4  | 1173.8 | 1778.5 | 2681.1 |
| PRIM2A   | 142.1  | 203.5   | 130.9  | 107.7  | 100.2  | 136.9  | 126.9  | 118.2  |
| PRIMA1   | 96     | 110.4   | 97.9   | 85.9   | 84.9   | 85     | 88.4   | 112.5  |
| PRKAA1   | 192.5  | 214.3   | 160.8  | 238.8  | 191.8  | 286.8  | 173.5  | 219    |
| PRKAA1   | 617.4  | 736.3   | 256    | 374.1  | 351.4  | 542.2  | 454.3  | 743.9  |
| PRKAA2   | 80.6   | 85.6    | 96.6   | 83     | 77.2   | 84.2   | 82.4   | 87.8   |
| PRKAB1   | 259.7  | 379.9   | 202.4  | 191.8  | 180.2  | 230.8  | 242.7  | 359.3  |
| PRKAB2   | 177.8  | 211.7   | 156.2  | 149.7  | 148.5  | 213.2  | 179    | 302    |
| PRKACA   | 108.1  | 142.1   | 98.5   | 90.4   | 87.1   | 98     | 110.6  | 112.4  |
| PRKACA   | 109.6  | 143.9   | 103.9  | 92     | 87.1   | 95.1   | 104.4  | 143.3  |
| PRKACB   | 103    | 108     | 92.1   | 89.2   | 82.3   | 90.1   | 109.4  | 120.9  |
| PRKACB   | 223.1  | 267.8   | 135.5  | 139.5  | 115.7  | 143.8  | 167.3  | 201.1  |
| PRKACB   | 103.3  | 132.2   | 79.4   | 83.8   | 74.1   | 75     | 104.3  | 131    |
| PRKACB   | 83.8   | 101     | 103.3  | 91.3   | 95.5   | 102.5  | 88.9   | 102.2  |
| PRKACG   | 93.3   | 104     | 108.3  | 99.9   | 89.8   | 96.2   | 91.7   | 94.1   |
| PRKAG1   | 373.9  | 480.8   | 191.2  | 169.6  | 155.9  | 215.4  | 317.3  | 394.8  |
| PRKAG1   | 302    | 441.8   | 307.8  | 322.9  | 268.4  | 460.9  | 289.1  | 381.3  |
| PRKAG2   | 378    | 505.4   | 266.4  | 321.5  | 275.5  | 380.7  | 376.9  | 592.5  |
| PRKAG2   | 240.6  | 296     | 126.6  | 136.6  | 121.2  | 162.8  | 227.9  | 318    |
| PRKAG2   | 113.7  | 134.7   | 105.8  | 94     | 93.4   | 92.5   | 111.8  | 150.9  |

|         |        |        |        |        |        |        |        |        |
|---------|--------|--------|--------|--------|--------|--------|--------|--------|
| PRKAG3  | 75.2   | 92.7   | 105.6  | 95.9   | 85.1   | 98     | 82.4   | 89.2   |
| PRKAR1A | 113    | 127.4  | 96.2   | 102.5  | 85.3   | 93.4   | 100.1  | 112    |
| PRKAR1A | 1325.6 | 1661.8 | 578.1  | 479.7  | 436.1  | 548.7  | 1323.3 | 2113   |
| PRKAR1B | 252.8  | 312.4  | 202.9  | 246.6  | 222    | 254.3  | 192.5  | 244.6  |
| PRKAR2A | 254.5  | 386.6  | 210.2  | 305.5  | 259.9  | 167.9  | 237.4  | 274.1  |
| PRKAR2B | 95.9   | 108.6  | 99.4   | 100.6  | 85.7   | 92.5   | 96.2   | 98.7   |
| PRKCA   | 322.1  | 475.1  | 292.5  | 769.6  | 521.2  | 1001   | 306.7  | 593.9  |
| PRKCABP | 112.6  | 128.2  | 117.1  | 100.4  | 103.1  | 117    | 111.9  | 130.1  |
| PRKCB1  | 341.1  | 363.1  | 116.5  | 173    | 102.4  | 150.8  | 275.2  | 447.7  |
| PRKCB1  | 370.6  | 560.2  | 195.2  | 322.6  | 195.1  | 411.9  | 341.7  | 494.3  |
| PRKCB1  | 3457.2 | 4102.9 | 2240.7 | 2356.1 | 2318.7 | 2628.4 | 3121.8 | 4060.6 |
| PRKCBP1 | 287.1  | 392.4  | 203.4  | 213    | 185.6  | 273.4  | 193.6  | 267.1  |
| PRKCBP1 | 99.9   | 108.2  | 90.9   | 98.8   | 84.4   | 97.4   | 95.5   | 101.4  |
| PRKCD   | 3297.8 | 4357   | 2943.2 | 2967.5 | 2924.6 | 3285.8 | 3166.5 | 4259.9 |
| PRKCD   | 117.5  | 161.5  | 101.9  | 100.7  | 99.3   | 93.9   | 107.6  | 144.1  |
| PRKCDBP | 193    | 253.4  | 156.6  | 284.9  | 216.9  | 282.4  | 183.9  | 163.9  |
| PRKCE   | 111.7  | 145    | 107.7  | 100.6  | 95.7   | 109.2  | 100.3  | 116.7  |
| PRKCG   | 80.7   | 102.4  | 100.4  | 96.1   | 84.9   | 92.6   | 89.5   | 104.1  |
| PRKCH   | 281.3  | 386.5  | 229.6  | 143.1  | 121.2  | 170.2  | 245.1  | 333.7  |
| PRKCI   | 191.3  | 206.8  | 112.5  | 110.9  | 100.6  | 140.1  | 181.2  | 313.3  |
| PRKCQ   | 1065.7 | 1363.3 | 493.1  | 405.1  | 327.3  | 553.9  | 871.6  | 1503.8 |
| PRKCSH  | 1412.8 | 1888.6 | 884.1  | 700.6  | 566    | 592.6  | 1196.3 | 1756.3 |
| PRKCSH  | 202.8  | 282.9  | 133.1  | 116.3  | 126.5  | 121.7  | 207.7  | 337.7  |
| PRKCZ   | 196.9  | 253.2  | 111.1  | 92.2   | 93.7   | 103    | 197.5  | 209.9  |
| PRKCZ   | 89     | 96.3   | 108.7  | 93.5   | 89.5   | 93.4   | 100.3  | 97.6   |
| PRKCZ   | 314.3  | 406.2  | 171.4  | 209.2  | 179.4  | 199.8  | 284.7  | 284.9  |
| PRKCZ   | 87.8   | 101.2  | 97.4   | 90.5   | 95.5   | 91.2   | 86.8   | 91.6   |
| PRKD1   | 68.7   | 89.9   | 77.2   | 76.5   | 76.8   | 66.7   | 78.3   | 79.6   |
| PRKD2   | 148.1  | 185.4  | 129.2  | 111    | 115.6  | 111.7  | 162.2  | 233.8  |
| PRKD2   | 118.6  | 121.4  | 120.5  | 92.9   | 91.4   | 104.7  | 107.5  | 122.7  |
| PRKD3   | 123.4  | 168    | 94.1   | 90.9   | 92.6   | 93.6   | 123.1  | 143.4  |
| PRKDC   | 1262   | 2412.1 | 1052.1 | 1538.7 | 1311.6 | 1644.6 | 1043   | 784.2  |
| PRKDC   | 188.5  | 286.6  | 131.2  | 161    | 132.5  | 255.6  | 187.1  | 247.5  |
| PRKDC   | 236.8  | 434.7  | 132.8  | 151.2  | 150.6  | 170.3  | 221.1  | 256.1  |
| PRKG1   | 72.2   | 77.9   | 90.2   | 79     | 81.2   | 76.2   | 77.8   | 78     |
| PRKG2   | 83.7   | 100.7  | 90.9   | 79.8   | 81.6   | 77.5   | 86.4   | 80.4   |
| PRKRIP1 | 481.6  | 537.6  | 332.1  | 369.8  | 344.7  | 413.7  | 364.9  | 388    |
| PRKRIR  | 2796.3 | 3196.2 | 1786.4 | 1903.4 | 1346.8 | 2432.8 | 2011.4 | 3228.2 |
| PRKX    | 177.1  | 248.9  | 175.9  | 177.8  | 151.6  | 195.2  | 160.6  | 211.3  |
| PRKY    | 125.6  | 134.6  | 78.7   | 82.2   | 91.5   | 109.3  | 113.8  | 126.6  |
| PRL     | 74.4   | 84.5   | 89     | 92.3   | 85     | 88.6   | 88.2   | 88.1   |
| PRLH    | 78.5   | 85.1   | 96.4   | 91.7   | 87.1   | 84.4   | 80.4   | 84.9   |
| PRLHR   | 93.8   | 90.1   | 95.4   | 87.1   | 94     | 85.8   | 107.1  | 101.2  |
| PRLR    | 98.9   | 131.2  | 88.9   | 82.7   | 82.5   | 83.7   | 99.2   | 101.7  |
| PRM1    | 104.6  | 117.2  | 97     | 86.8   | 84.3   | 87.9   | 99     | 100.4  |
| PRM2    | 84.5   | 91.4   | 89.3   | 78     | 78.6   | 82.7   | 87.1   | 83.4   |
| PRM3    | 90.4   | 110.2  | 97     | 90.1   | 79.3   | 79.2   | 87     | 85.9   |
| PRM3    | 97.3   | 127.3  | 98.3   | 97.1   | 95     | 93.6   | 105.2  | 111.4  |
| PRMT1   | 178.6  | 227.6  | 114.8  | 100.5  | 99.9   | 92.9   | 169.1  | 161.2  |
| PRMT1   | 2591.6 | 3978.9 | 1801.2 | 1070.6 | 961.2  | 1260.4 | 2310.5 | 2675.9 |

|           |        |        |        |        |        |        |        |        |
|-----------|--------|--------|--------|--------|--------|--------|--------|--------|
| PRMT1     | 5874.4 | 7433.6 | 4141.9 | 2457.7 | 2213.1 | 3266.6 | 5670.6 | 7002.4 |
| PRMT2     | 340.8  | 378.2  | 211.9  | 233.6  | 226.5  | 303.5  | 315.9  | 413.6  |
| PRMT2     | 163    | 185.3  | 102.7  | 112.7  | 113.5  | 106.9  | 119.6  | 160.9  |
| PRMT2     | 338.6  | 400.2  | 255    | 280.9  | 294.4  | 394.7  | 263.6  | 469.1  |
| PRMT5     | 1452.6 | 1918.6 | 606.4  | 386.8  | 316.3  | 635.3  | 966.8  | 1366.8 |
| PRMT5     | 1321   | 1606   | 685.2  | 525.3  | 366.3  | 585.1  | 897.2  | 1366.2 |
| PRMT6     | 3151.2 | 4020.1 | 1654.5 | 721.2  | 611.7  | 1121.1 | 2516.3 | 3964.4 |
| PRMT7     | 355.8  | 453.9  | 210.2  | 158.3  | 130.9  | 161.7  | 281.8  | 300.1  |
| PRMT8     | 84.1   | 97.4   | 97.6   | 92.4   | 86.8   | 83.1   | 90.3   | 86.1   |
| PRND      | 78     | 80.1   | 94.3   | 90.6   | 92.2   | 89.9   | 76     | 91.3   |
| PRNP      | 560.4  | 813.8  | 322    | 396    | 294.9  | 607    | 525.7  | 841.8  |
| PRNP      | 1743.4 | 2058.7 | 1132   | 1504.1 | 1094.3 | 1832.1 | 1634.4 | 3143.7 |
| PRNPIP    | 124    | 205.4  | 97.1   | 93.1   | 76.4   | 89.2   | 124    | 153.2  |
| PRNT      | 89.9   | 87.7   | 83     | 83.9   | 83.3   | 91.2   | 84     | 93.2   |
| PRO0149   | 479.7  | 650.6  | 369.5  | 335.8  | 283.6  | 376.5  | 505.4  | 879.7  |
| PRO0611   | 92.1   | 113.8  | 85.9   | 81.5   | 78.1   | 88.3   | 95.2   | 112.7  |
| PRO0628   | 114.4  | 138.8  | 120.6  | 154.4  | 152.3  | 117.7  | 123.5  | 148.2  |
| PRO1853   | 203.2  | 251    | 116.4  | 122.5  | 108.8  | 114.7  | 197.3  | 278.1  |
| PRO1853   | 190.2  | 193.7  | 123.9  | 118.7  | 117.9  | 139.2  | 143.9  | 196.3  |
| PROC      | 77.5   | 81     | 90.1   | 98     | 94.8   | 108.2  | 78.4   | 99.9   |
| PROCA1    | 125    | 132.2  | 95.4   | 93.7   | 86.4   | 95.6   | 109.6  | 121.1  |
| PROCR     | 292.5  | 387.9  | 189.2  | 141.8  | 134.8  | 164.2  | 251.7  | 347.3  |
| PRODH     | 77.4   | 88.4   | 84.1   | 84     | 79.5   | 85.9   | 82.1   | 89.5   |
| PRODH2    | 98.6   | 112.6  | 93.4   | 81     | 79.2   | 72.5   | 85.1   | 125.8  |
| PROK1     | 106    | 135.2  | 95.5   | 79.9   | 82.2   | 80.7   | 107.3  | 127.4  |
| PROK2     | 128.3  | 160.6  | 117.2  | 105.2  | 95.7   | 114.2  | 144    | 214.6  |
| PROKR1    | 77.9   | 80.9   | 84.4   | 82.4   | 83     | 75.8   | 74.1   | 74.3   |
| PROKR2    | 86.8   | 98     | 101.1  | 94.8   | 88.9   | 90     | 88.3   | 96.7   |
| PROL1     | 89.7   | 100.8  | 87.2   | 86.2   | 87     | 88.6   | 95.5   | 95.8   |
| PROM1     | 77.7   | 78.7   | 80.4   | 76.4   | 79.1   | 77.7   | 77.9   | 79.4   |
| PROM2     | 91.1   | 112.5  | 82.1   | 93.4   | 72.1   | 83.3   | 95.7   | 112.2  |
| PROP1     | 124.5  | 151.1  | 89.2   | 84     | 91.2   | 100.6  | 132.8  | 147.6  |
| PROS1     | 1706.5 | 2168.5 | 1229.9 | 1621.2 | 1254.4 | 2105.8 | 1472.2 | 2014.6 |
| PROSAPIP1 | 76.7   | 80     | 91.5   | 88     | 93.4   | 84.8   | 79.2   | 94.3   |
| PROSC     | 2701.5 | 3720.5 | 2807.1 | 2168.4 | 1651.8 | 2894.7 | 2420.2 | 5133.2 |
| PROX1     | 77.8   | 84     | 85.1   | 82.7   | 81.8   | 80.7   | 83.9   | 84.3   |
| PROZ      | 78.4   | 75.4   | 87.1   | 76     | 71     | 88.2   | 78.9   | 79.9   |
| PRP2      | 86.1   | 102.1  | 91.9   | 85.7   | 84.9   | 87.6   | 91.2   | 99     |
| PRPF18    | 436.3  | 524.5  | 229.7  | 204.4  | 148.5  | 221    | 394.4  | 648.7  |
| PRPF19    | 992.5  | 1335.7 | 446.4  | 470.4  | 300.9  | 545.8  | 867.4  | 1394.6 |
| PRPF3     | 2393.5 | 2727.7 | 1370.9 | 948.8  | 912.3  | 1582.3 | 1736.6 | 3069.8 |
| PRPF31    | 1514.7 | 1905.7 | 862.4  | 688.3  | 523.4  | 806.1  | 1252.5 | 1991.5 |
| PRPF38A   | 908.6  | 1095.2 | 471.9  | 514.9  | 415.3  | 715.7  | 707.7  | 1059.4 |
| PRPF38A   | 385.4  | 525.5  | 141.8  | 160.6  | 118.1  | 179.1  | 335.8  | 472.8  |
| PRPF38B   | 437.3  | 545.5  | 310.4  | 229.3  | 177.9  | 352    | 363.7  | 765.9  |
| PRPF39    | 132    | 136.3  | 107.7  | 101.2  | 88     | 102.2  | 119.3  | 152    |
| PRPF4     | 2792.8 | 3260.5 | 2488.7 | 1730.1 | 1183.5 | 1784.5 | 2521.3 | 4368.6 |
| PRPF40B   | 85.5   | 102.1  | 99.4   | 91     | 92.8   | 93.4   | 94.1   | 92.2   |
| PRPF40B   | 74.4   | 73.9   | 95     | 86     | 84.6   | 83     | 69.2   | 80.7   |
| PRPF4B    | 124.3  | 120.5  | 106.1  | 114.6  | 87.4   | 119.9  | 106.3  | 141.5  |

|         |         |         |         |         |        |         |         |        |
|---------|---------|---------|---------|---------|--------|---------|---------|--------|
| PRPF4B  | 68.2    | 79.9    | 86      | 83.3    | 73.8   | 74.5    | 73.6    | 84.3   |
| PRPF4B  | 183.6   | 189.2   | 172.6   | 205.8   | 200    | 366.4   | 141.8   | 235.5  |
| PRPF8   | 1405    | 1852.3  | 1498.2  | 1465.4  | 1151.7 | 1916.8  | 1535.3  | 2073   |
| PRPH    | 152.2   | 185.2   | 128.8   | 110.9   | 107.6  | 117.1   | 135.2   | 172.2  |
| PRPS1   | 1758.3  | 2525.2  | 1022.7  | 776.5   | 566.6  | 1124.2  | 1573.1  | 2207.7 |
| PRPS1L1 | 101.7   | 133.1   | 90.6    | 92.4    | 86.1   | 86.9    | 98.6    | 117.8  |
| PRPS2   | 899.8   | 1318.5  | 252.7   | 287.6   | 304.7  | 370.9   | 706.3   | 849.9  |
| PRPS2   | 1696.4  | 2016.1  | 685.8   | 738.9   | 524.5  | 791.3   | 1299.6  | 1536.7 |
| PRPSAP1 | 1384.6  | 1748.4  | 933.8   | 994.4   | 889.7  | 1143.6  | 1286.7  | 1960.6 |
| PRPSAP2 | 470.9   | 661.5   | 336.5   | 343.1   | 295    | 390.4   | 468.7   | 666.9  |
| PRR11   | 724.6   | 1011.4  | 358.6   | 339.4   | 333.5  | 258.8   | 680.1   | 855.2  |
| PRR13   | 17848.9 | 22696.1 | 13332.5 | 13730.6 | 9639   | 13586.8 | 16414.6 | 17569  |
| PRR15   | 132.5   | 147.4   | 85.2    | 89.4    | 84     | 88.1    | 123.4   | 166.3  |
| PRR3    | 210.8   | 261.3   | 117.1   | 88.8    | 91.7   | 99.2    | 197     | 173.3  |
| PRR3    | 180.4   | 293.1   | 103.9   | 110.8   | 87.2   | 105.6   | 179.2   | 168.8  |
| PRR4    | 115.7   | 119.2   | 120.4   | 105.9   | 94.8   | 118     | 111.4   | 170.3  |
| PRR5    | 100     | 114.8   | 94.8    | 100.9   | 86.3   | 85.5    | 93.4    | 95.9   |
| PRR5    | 343.8   | 466.9   | 353.1   | 239.9   | 242.1  | 334.1   | 229.6   | 429.4  |
| PRR5    | 177.9   | 201.1   | 171.1   | 147.6   | 121.9  | 167.4   | 164.2   | 213    |
| PRR6    | 1567.7  | 1946.6  | 1294.9  | 1004.8  | 897.6  | 1018.9  | 1622.4  | 1084.9 |
| PRR7    | 123.8   | 162.5   | 110.2   | 101.3   | 85.3   | 99.3    | 111.8   | 169    |
| PRR8    | 124.6   | 138.9   | 82.6    | 96.2    | 93.1   | 104.2   | 116.6   | 151.4  |
| PRRG1   | 316.9   | 391.3   | 271.3   | 252.6   | 224.9  | 320.2   | 303.6   | 435.6  |
| PRRG2   | 109.8   | 112.9   | 96.8    | 87.7    | 86.1   | 85.8    | 105.8   | 99.7   |
| PRRG3   | 84.5    | 101.9   | 88.7    | 87.8    | 86.2   | 85.3    | 88.2    | 101    |
| PRRG4   | 205.9   | 184.2   | 135.2   | 142.8   | 128.1  | 110.9   | 195.1   | 307.2  |
| PRRT1   | 128.6   | 136.6   | 105.2   | 101.8   | 95.3   | 102.8   | 126.7   | 155.6  |
| PRRT2   | 107.5   | 128.3   | 95.6    | 81.1    | 87     | 86.7    | 103     | 126    |
| PRRT3   | 172.9   | 188.4   | 117.8   | 100.3   | 96.9   | 105.1   | 209     | 298.5  |
| PRRX1   | 80      | 89.7    | 106     | 86.1    | 87.3   | 93.1    | 92      | 83.9   |
| PRRX1   | 98.4    | 112.9   | 101.9   | 95.9    | 80.6   | 84.9    | 92.1    | 107.5  |
| PRRX2   | 123.5   | 137.5   | 89.3    | 82.6    | 87.8   | 85      | 109.4   | 130.9  |
| PRSS1   | 102     | 116.7   | 99      | 86.6    | 80     | 80.8    | 87.6    | 110.4  |
| PRSS12  | 247.4   | 328.2   | 217.6   | 210.9   | 178.8  | 267.2   | 189.9   | 237.6  |
| PRSS15  | 1339.4  | 1588    | 1436.9  | 1119.3  | 958.4  | 1911.2  | 1184.9  | 2695   |
| PRSS16  | 101.1   | 126.8   | 101.3   | 93.7    | 94.3   | 101.6   | 96.9    | 116    |
| PRSS2   | 104.3   | 123.4   | 92      | 87.5    | 73     | 74.7    | 107.7   | 117.9  |
| PRSS21  | 129.5   | 156.3   | 91.5    | 92.3    | 87     | 93.2    | 117.3   | 148.1  |
| PRSS21  | 92.9    | 88.6    | 85.9    | 82.5    | 82.1   | 81.9    | 84.9    | 90.1   |
| PRSS22  | 98.5    | 118.6   | 97.8    | 94.2    | 81.1   | 87.1    | 105.4   | 120    |
| PRSS23  | 90.6    | 104.6   | 95.3    | 82      | 93.4   | 85.8    | 110.5   | 131.8  |
| PRSS27  | 92.4    | 117.3   | 105.4   | 108.2   | 106.8  | 115.7   | 100     | 104.4  |
| PRSS3   | 88.7    | 103.3   | 103.2   | 102.3   | 95.6   | 98.3    | 93.2    | 105.5  |
| PRSS33  | 78.4    | 92.1    | 89.3    | 90.2    | 77.5   | 81.9    | 86.4    | 84     |
| PRSS35  | 109.5   | 133.3   | 83.7    | 91.2    | 79.3   | 95.7    | 125.5   | 136.1  |
| PRSS7   | 179.7   | 217.3   | 136.8   | 110.6   | 113.6  | 122.9   | 151.8   | 191.6  |
| PRSS8   | 102.4   | 121.5   | 79.6    | 80.9    | 80.8   | 82.3    | 113.9   | 130.3  |
| PRSSL1  | 126.4   | 153.7   | 110.7   | 95.4    | 101.2  | 100.3   | 121.7   | 152.1  |
| PRTFDC1 | 121.4   | 151.6   | 99.8    | 72.7    | 82.9   | 79.3    | 120.6   | 145.5  |
| PRTG    | 84.9    | 113.6   | 95      | 95.1    | 78.6   | 85.9    | 87.8    | 108.8  |

|           |         |         |        |        |        |        |        |         |
|-----------|---------|---------|--------|--------|--------|--------|--------|---------|
| PRTG      | 76.3    | 80.1    | 101.9  | 86     | 84.7   | 80     | 71     | 83.9    |
| PRTN3     | 10640.9 | 14488.1 | 8668.7 | 7386.6 | 5570.3 | 8987.4 | 7950.2 | 13062.6 |
| PRUNE     | 297.3   | 409.4   | 216.2  | 230.3  | 200.4  | 294.2  | 287.6  | 471.4   |
| PRUNE2    | 107.2   | 110.2   | 99     | 95     | 83.6   | 83.4   | 105.8  | 114.6   |
| PRX       | 106.2   | 96      | 101.9  | 90.1   | 89.4   | 95.9   | 93.4   | 105.9   |
| PRX       | 120.2   | 122.6   | 109.3  | 97.3   | 87.5   | 90     | 115.8  | 118.1   |
| PRX       | 93.2    | 104.6   | 108.2  | 100.7  | 107.6  | 108.4  | 89.2   | 99.2    |
| PRY       | 96.8    | 102.9   | 87     | 83.8   | 85.4   | 78.1   | 96.8   | 105.1   |
| PSAP      | 3654.8  | 4925.7  | 1774.5 | 3618.9 | 3107   | 3769.3 | 3365.5 | 3154.1  |
| PSAP      | 3446.1  | 4377.7  | 1770.4 | 3412   | 3135.3 | 3794.9 | 3095.6 | 3149.3  |
| PSARL     | 4334.4  | 5867.3  | 3564.8 | 4504.1 | 3720.8 | 5724.7 | 4345.9 | 5256    |
| PSAT1     | 3253    | 3763.6  | 2614   | 969.9  | 680.5  | 1062.6 | 3856.2 | 5798.4  |
| PSAT1     | 78.7    | 82.8    | 88.9   | 86.4   | 80.7   | 76.5   | 78.2   | 77.1    |
| PSCA      | 116.7   | 130     | 98.8   | 96.3   | 92.9   | 90.5   | 122    | 113.6   |
| PSCD1     | 170.2   | 200.9   | 127.8  | 112    | 124.8  | 147.9  | 165.4  | 248.9   |
| PSCD1     | 551.9   | 757.5   | 734.4  | 844.7  | 850.4  | 1224.5 | 499.8  | 907.4   |
| PSCD2     | 204.2   | 279.5   | 136.4  | 121.9  | 117.3  | 130.2  | 228    | 289.1   |
| PSCD2     | 129.5   | 141     | 117.7  | 105.5  | 87.1   | 107.8  | 134.1  | 151.4   |
| PSCD3     | 125.1   | 149.7   | 140.8  | 133.1  | 138.2  | 173.5  | 136.6  | 196.7   |
| PSCD4     | 886     | 1002.3  | 892.5  | 1027.1 | 1021.2 | 1065.3 | 765.5  | 615.2   |
| PSCDBP    | 71.1    | 86      | 78.3   | 78.3   | 71.7   | 78.9   | 86.1   | 88.2    |
| PSD       | 93.8    | 102.4   | 94.3   | 84.9   | 83.6   | 88.3   | 99.4   | 101.8   |
| PSD2      | 87.8    | 102.5   | 89.2   | 94.3   | 85.1   | 81     | 87.5   | 89.3    |
| PSD3      | 120.2   | 133.5   | 106    | 104.5  | 94.6   | 98.9   | 106.1  | 117.2   |
| PSD3      | 177.3   | 189.8   | 108.1  | 97.3   | 92.5   | 111    | 159.7  | 172.6   |
| PSD3      | 160     | 220.4   | 162    | 167.8  | 148.2  | 231.6  | 132.7  | 155.9   |
| PSD4      | 340.6   | 367.4   | 499.1  | 442.1  | 352.5  | 502.7  | 301.8  | 346.6   |
| PSEN1     | 233.3   | 252.9   | 132.3  | 140    | 131.5  | 110.8  | 206.7  | 239.9   |
| PSEN1     | 254.3   | 338.9   | 108.7  | 97.1   | 95.3   | 105.9  | 236.8  | 327.9   |
| PSEN2     | 330.7   | 451.8   | 265.6  | 241.1  | 167.5  | 258.5  | 297.2  | 346.3   |
| PSEN2     | 489     | 588.8   | 361.3  | 313.4  | 240.7  | 331.9  | 433.9  | 549.1   |
| PSENEEN   | 315.5   | 389.6   | 189    | 142.6  | 117.8  | 122.9  | 271.4  | 400.8   |
| PSF1      | 118.6   | 162.4   | 96     | 84.3   | 79     | 94.9   | 102.2  | 133.6   |
| PSG1      | 87.3    | 93.5    | 87.5   | 79.6   | 77.9   | 78.6   | 86.3   | 94.9    |
| PSG11     | 83.8    | 82.1    | 94.3   | 79.6   | 79.5   | 87.4   | 88.1   | 89.1    |
| PSG2      | 75.5    | 76.7    | 96.1   | 96.8   | 92.7   | 95.8   | 85.8   | 84.3    |
| PSG3      | 81.6    | 99.4    | 81.6   | 75.6   | 68.5   | 74.1   | 93.3   | 103.9   |
| PSG4      | 82.5    | 82.3    | 96.4   | 86.3   | 91.8   | 92.6   | 82.9   | 85.8    |
| PSG4      | 107.2   | 138.6   | 100.1  | 83.2   | 81.4   | 90.9   | 114.7  | 108.5   |
| PSG4      | 67.3    | 87.1    | 95.8   | 80.8   | 83.3   | 89.4   | 76.4   | 78.2    |
| PSG5      | 71.1    | 81.5    | 96.4   | 90.8   | 80.9   | 87.6   | 74.8   | 79.7    |
| PSG6      | 81      | 82.9    | 101.4  | 76.8   | 78.8   | 87     | 81.7   | 86.2    |
| PSG6      | 83.6    | 97.6    | 100.5  | 98.5   | 98.8   | 102.7  | 81     | 97.7    |
| PSG6      | 84.2    | 89.2    | 92.8   | 91     | 84.4   | 84.5   | 81.7   | 89.5    |
| PSG7      | 99.1    | 106.2   | 91.6   | 85     | 79.7   | 91.4   | 89.8   | 98.3    |
| PSG8      | 80.6    | 82      | 100.7  | 93.3   | 90.3   | 87.7   | 79.2   | 79.3    |
| PSG9      | 82.2    | 105.4   | 81.2   | 89.5   | 77.5   | 83.5   | 88.8   | 92.3    |
| PSIP1     | 101.5   | 114.9   | 93.3   | 91.5   | 87.9   | 81.4   | 95.2   | 105.3   |
| PSIP1     | 1068.8  | 1225.7  | 557.3  | 555.3  | 554.8  | 912.8  | 653.5  | 1223.5  |
| PSITPTE22 | 85.5    | 91.7    | 83.5   | 87.4   | 72.6   | 81.1   | 87.1   | 92.8    |



|         |         |         |        |         |        |         |         |         |
|---------|---------|---------|--------|---------|--------|---------|---------|---------|
| PSKH1   | 92      | 107.7   | 89.2   | 92      | 86.8   | 82.3    | 92.1    | 113.3   |
| PSKH2   | 82.7    | 87.9    | 76.2   | 69.7    | 70.9   | 76.9    | 82.2    | 100.9   |
| PSMA1   | 145.8   | 165.7   | 95.1   | 98.5    | 84.4   | 89.6    | 125.6   | 146.1   |
| PSMA1   | 986     | 1249.5  | 447.6  | 371.2   | 236.8  | 334.5   | 933.6   | 1049.2  |
| PSMA1   | 8527.7  | 9706.9  | 4720.9 | 3416    | 2471.1 | 4005.9  | 8172    | 12064   |
| PSMA2   | 709.5   | 864.9   | 408.5  | 410.3   | 307.8  | 416.1   | 657.9   | 1152.7  |
| PSMA3   | 4583    | 5719.8  | 1407.9 | 881     | 783.2  | 1171.9  | 4763.3  | 6641.9  |
| PSMA3   | 1880.5  | 2739.3  | 427.5  | 280.2   | 241    | 383.7   | 2248.7  | 3566.4  |
| PSMA4   | 6191.2  | 6741.6  | 1755.7 | 1295.1  | 1200.3 | 1807    | 5261.2  | 6957.8  |
| PSMA5   | 12532.4 | 15627.2 | 8517.7 | 4276.8  | 3105.5 | 4305.7  | 12127.5 | 17370.5 |
| PSMA6   | 14777.5 | 15794.6 | 12192  | 11068.8 | 8695.9 | 12823.5 | 13468.6 | 17822.2 |
| PSMA8   | 80.1    | 89.8    | 94.2   | 91.6    | 82.9   | 79.9    | 75.2    | 78      |
| PSMAL   | 87.7    | 100.3   | 87.9   | 95.2    | 83.9   | 81.5    | 85      | 93.2    |
| PSMB1   | 17851.5 | 21391.3 | 9520   | 8541.3  | 7328   | 9771.9  | 18266.6 | 21205.2 |
| PSMB10  | 12459.4 | 14881.1 | 6535.7 | 4996.3  | 4643.7 | 5411.8  | 12011.5 | 11142.8 |
| PSMB2   | 3361.8  | 4835.2  | 2521.9 | 1998.6  | 1568.8 | 1964.4  | 3042.1  | 3413.8  |
| PSMB3   | 9383.6  | 10799   | 8467.9 | 7044.8  | 5296.5 | 7643.6  | 8265    | 10998.1 |
| PSMB4   | 4929.5  | 5820.4  | 4165.9 | 3141.1  | 2423.5 | 3427.2  | 5139.8  | 8149.7  |
| PSMB5   | 3188    | 4529.7  | 1525.6 | 1023.6  | 807.2  | 1242.6  | 2880.8  | 3605.8  |
| PSMB6   | 5573.5  | 6664.3  | 3812.5 | 3208.3  | 2737.4 | 2788    | 5896.7  | 4851.1  |
| PSMB7   | 6176.8  | 9526.8  | 5013.5 | 4008.4  | 3381.6 | 4886.6  | 7500.1  | 8388.3  |
| PSMB8   | 3016.7  | 4200.2  | 968.5  | 998     | 861.4  | 1293.4  | 2176.9  | 2294.3  |
| PSMB8   | 1205.6  | 1526    | 252.6  | 308     | 239.9  | 388.1   | 944.7   | 1084.8  |
| PSMB8   | 95.6    | 113.3   | 106.7  | 94      | 86.2   | 94.7    | 100     | 105.3   |
| PSMB8   | 4146    | 5782.8  | 3392.6 | 3212.2  | 2812.5 | 3942.5  | 3267    | 3569.2  |
| PSMB9   | 1049.3  | 1321    | 678.4  | 525.6   | 450    | 598.2   | 794.3   | 770.9   |
| PSMB9   | 158.2   | 193.8   | 100.6  | 91.8    | 89.9   | 102.5   | 147.3   | 152     |
| PSMC1   | 9804.3  | 12863.8 | 7770.7 | 6874.2  | 5706.9 | 9065.5  | 9912.6  | 12409.6 |
| PSMC2   | 4723.5  | 6466.4  | 2840.8 | 3292.9  | 2602.6 | 4080.3  | 4830.1  | 7781.6  |
| PSMC3   | 3424.3  | 4501.1  | 1650.5 | 1627.9  | 1215.4 | 1583.5  | 3596.9  | 3717.1  |
| PSMC3IP | 356.3   | 407.9   | 162.9  | 109.4   | 105.3  | 109.6   | 288     | 375.6   |
| PSMC3IP | 365.8   | 482.1   | 283    | 234     | 203.7  | 219.2   | 277.8   | 396.1   |
| PSMC4   | 1435.5  | 1822.5  | 674.6  | 351.2   | 310.7  | 314.1   | 1086.9  | 1352.1  |
| PSMC4   | 1200.9  | 1568.3  | 488.7  | 274.5   | 258.1  | 278.4   | 1015.4  | 1061.7  |
| PSMC5   | 3972.1  | 5126.7  | 976.6  | 818.1   | 786.3  | 1288.9  | 3759    | 4848.4  |
| PSMC6   | 124.5   | 129.7   | 104.4  | 104.2   | 86.1   | 109.2   | 111.4   | 220.4   |
| PSMD1   | 1401.5  | 1565.4  | 1341.5 | 1666.4  | 1243.1 | 2204.8  | 1629.7  | 3186.7  |
| PSMD10  | 1997.2  | 2772.2  | 1234.8 | 1373.3  | 920.8  | 1889.8  | 1645    | 2541    |
| PSMD10  | 268.7   | 348.3   | 106    | 102     | 97.7   | 126.5   | 231.9   | 317.6   |
| PSMD10  | 790.2   | 1034.3  | 333.9  | 424.8   | 328.7  | 565.9   | 643.1   | 831.3   |
| PSMD11  | 244.2   | 306.1   | 152.9  | 141.8   | 102.7  | 146.5   | 252.7   | 385.6   |
| PSMD12  | 2082.8  | 2354.3  | 1299.4 | 1533.8  | 898.8  | 1760.9  | 1917.3  | 3495.7  |
| PSMD13  | 188.6   | 257.5   | 120    | 113.9   | 95.1   | 104.2   | 204.2   | 200.4   |
| PSMD13  | 273.1   | 348.2   | 174.7  | 165.5   | 150    | 193.3   | 226.8   | 285.4   |
| PSMD14  | 3086.3  | 3887.6  | 1214.5 | 995.9   | 580.8  | 1348.6  | 3174.8  | 5566.6  |
| PSMD2   | 1365.1  | 1608.9  | 991.2  | 953.2   | 859.6  | 1194.3  | 1206    | 1636.8  |
| PSMD3   | 234.8   | 336.2   | 179.7  | 172.4   | 168.6  | 201.2   | 263.9   | 366.1   |
| PSMD4   | 163.9   | 192     | 179.4  | 146.9   | 150.6  | 125.7   | 160.4   | 276.3   |
| PSMD4   | 2999.9  | 4410.1  | 1851.2 | 1520.2  | 1166.4 | 2060.8  | 3248.8  | 3109.2  |
| PSMD4   | 4166.1  | 5420    | 3413.6 | 2729.7  | 2234.5 | 3514.5  | 4306.3  | 4233.3  |

|          |         |         |         |         |         |         |         |         |
|----------|---------|---------|---------|---------|---------|---------|---------|---------|
| PSMD5    | 390.6   | 467.9   | 251.6   | 141.9   | 132     | 166.5   | 319.7   | 346.8   |
| PSMD6    | 4831.1  | 6108.3  | 2371.8  | 2125.8  | 1593.8  | 3040.7  | 4468.9  | 8132.1  |
| PSMD7    | 2780.7  | 3611.6  | 2393.6  | 1787.1  | 1493.6  | 2506.3  | 2632.9  | 5467.8  |
| PSMD8    | 1502    | 1963.4  | 779.7   | 513     | 482.4   | 576.3   | 1636.6  | 1428.4  |
| PSMD9    | 204     | 250.8   | 175.6   | 180.1   | 139.5   | 180.5   | 188.1   | 262.6   |
| PSME1    | 7223.4  | 9185.7  | 4726.4  | 3057.8  | 2266.4  | 3178.6  | 5918.6  | 9385.8  |
| PSME1    | 143.9   | 163.5   | 98      | 98.6    | 98.2    | 91.4    | 132     | 182.5   |
| PSME2    | 5620.2  | 6928.6  | 1988.4  | 1382.1  | 1128.2  | 1574.2  | 5198.9  | 5434.6  |
| PSME3    | 1207.6  | 1454.3  | 639.7   | 886.9   | 546.8   | 783.9   | 850.7   | 1004.1  |
| PSME3    | 851.9   | 1034.3  | 699.4   | 928.3   | 603.5   | 1029.3  | 664.7   | 1202.6  |
| PSME4    | 1488    | 2033.2  | 889.2   | 1072.1  | 756.5   | 1340.9  | 1639.3  | 1872.1  |
| PSMF1    | 115.5   | 126.7   | 90.9    | 87.4    | 86.3    | 88.3    | 117.8   | 144.1   |
| PSMF1    | 1497.8  | 2004.3  | 1000.6  | 1164.6  | 896     | 1187.5  | 1188.7  | 1308.5  |
| PSORS1C1 | 209.9   | 266     | 121.5   | 154.4   | 118     | 143     | 177.8   | 201     |
| PSORS1C2 | 97.7    | 106.6   | 113.2   | 94.7    | 95.8    | 101.3   | 100.7   | 104.6   |
| PSPC1    | 964.9   | 1116.5  | 303.8   | 224.8   | 170     | 290.8   | 728.7   | 1146.7  |
| PSPH     | 219.1   | 337.6   | 148.3   | 122.7   | 104.8   | 135.3   | 234.5   | 188.9   |
| PSPN     | 77.1    | 100.1   | 87.9    | 75.5    | 75.6    | 78.6    | 90.1    | 111.6   |
| PSRC1    | 1757.8  | 1914.5  | 1071.3  | 359.8   | 346.6   | 431.9   | 1281    | 1339.1  |
| PSRC1    | 239.7   | 357.1   | 122.9   | 83.1    | 96.7    | 116.5   | 228.8   | 329.2   |
| PSRC1    | 111     | 116.9   | 118.4   | 104.4   | 101.9   | 104.6   | 94.8    | 110.2   |
| PSRC2    | 148.7   | 165.6   | 124.6   | 131.3   | 120.8   | 172.5   | 114     | 145     |
| PSTPIP1  | 324.6   | 340.5   | 242.4   | 247.4   | 223.6   | 277.1   | 243.5   | 285.7   |
| PSTPIP2  | 357     | 427.1   | 154.7   | 161.5   | 159.6   | 230.3   | 248.3   | 312     |
| PTAFR    | 131.2   | 141.7   | 80      | 87.8    | 89.6    | 99.4    | 130.4   | 143.2   |
| PTBP1    | 10043.9 | 12257.8 | 7389.3  | 6925.4  | 4647.6  | 6384.2  | 9195.2  | 10049.9 |
| PTBP1    | 15256.4 | 18095.3 | 14117.1 | 12594.3 | 10041.7 | 13843.1 | 13175.1 | 14724.3 |
| PTBP2    | 317.3   | 349     | 187.4   | 217.8   | 217.9   | 307.7   | 240.7   | 460.4   |
| PTCD1    | 1104.9  | 1382.9  | 783     | 513.5   | 400.5   | 545.4   | 871.2   | 848.6   |
| PTCD2    | 547.4   | 758.3   | 372.4   | 315.6   | 263.2   | 375.3   | 442.5   | 622.9   |
| PTCH     | 110     | 119     | 124.1   | 112.8   | 110.2   | 116.9   | 113.3   | 121.8   |
| PTCH2    | 114.8   | 143.2   | 96.8    | 95      | 89.8    | 90.2    | 123.5   | 139.5   |
| PTCHD1   | 81.1    | 89.7    | 86      | 83.7    | 80.6    | 80.9    | 80.5    | 83      |
| PTCHD3   | 103.8   | 114.7   | 103.4   | 102.2   | 103.6   | 102.3   | 102.4   | 110.6   |
| PTCRA    | 112.8   | 128     | 103.9   | 102.5   | 91.5    | 91      | 118.4   | 117.1   |
| PTD004   | 87.7    | 95.2    | 93.6    | 93.7    | 84.6    | 87.7    | 101.3   | 93.7    |
| PTD004   | 107.4   | 121.4   | 97      | 110.3   | 113.1   | 138     | 93.3    | 132.7   |
| PTD008   | 3196.5  | 3775.3  | 1713.9  | 1269.4  | 953.4   | 1033.1  | 3413.5  | 3669.4  |
| PTD015   | 737.8   | 949.1   | 337.7   | 319.9   | 277.6   | 289.6   | 690.6   | 719.8   |
| PTDSR    | 97.9    | 123.2   | 96.7    | 91.1    | 88      | 78.6    | 99      | 103.7   |
| PTDSR    | 230.3   | 246.4   | 151.2   | 122.2   | 121     | 187     | 234.7   | 304.2   |
| PTDSS1   | 4877    | 6329.2  | 4779    | 2705.8  | 1771.1  | 3324.3  | 3713.5  | 6226.6  |
| PTDSS2   | 160.2   | 182.2   | 152.4   | 113.8   | 99.1    | 148.7   | 177.1   | 219.3   |
| PTEN     | 82.6    | 85.5    | 97.7    | 170.7   | 149.1   | 190.2   | 85.4    | 91.6    |
| PTER     | 76.5    | 83.6    | 81.5    | 82.5    | 78.4    | 78.7    | 85.9    | 91      |
| PTER     | 93.7    | 98.1    | 99.3    | 89.2    | 95.3    | 91      | 100.9   | 113.5   |
| PTER     | 124.1   | 159.4   | 108.6   | 109.7   | 97.3    | 105.8   | 114.5   | 123.5   |
| PTF1A    | 102.1   | 108.5   | 93.2    | 103.9   | 81.3    | 84.9    | 94.4    | 109.7   |
| PTGDR    | 70.2    | 82.4    | 96      | 91.3    | 93.6    | 95.1    | 75.4    | 87.3    |
| PTGDS    | 93.2    | 105.2   | 87.4    | 202.9   | 171.1   | 174.6   | 93.3    | 108.1   |

|         |        |        |        |        |        |        |        |        |
|---------|--------|--------|--------|--------|--------|--------|--------|--------|
| PTGER1  | 148.4  | 178.2  | 115.2  | 111.7  | 96     | 101.2  | 152.2  | 146.9  |
| PTGER2  | 97.7   | 102.2  | 105.2  | 103.9  | 101.5  | 103.6  | 84.7   | 93.5   |
| PTGER3  | 108.9  | 124.3  | 94     | 88     | 89.3   | 86.8   | 89.7   | 96.6   |
| PTGER3  | 96.6   | 105.5  | 92     | 87.1   | 81.5   | 91.1   | 95.2   | 95.5   |
| PTGER3  | 92.1   | 95.6   | 112.3  | 101    | 90.4   | 99.3   | 87.2   | 93.7   |
| PTGER3  | 77.1   | 73.3   | 90.9   | 75.3   | 82.9   | 75.2   | 73.3   | 80.4   |
| PTGER3  | 88.1   | 98     | 82.9   | 88.9   | 74.9   | 82.1   | 93.8   | 109.4  |
| PTGER3  | 90.5   | 93.4   | 89.5   | 91.2   | 86     | 90.6   | 79.6   | 96.1   |
| PTGER4  | 1386.2 | 1844.7 | 528.8  | 968.9  | 864.5  | 1104   | 992.4  | 1309.7 |
| PTGES   | 77.8   | 85.1   | 85.7   | 83.7   | 80     | 93.5   | 77.1   | 84.6   |
| PTGES2  | 746.6  | 1078.5 | 648.5  | 316.5  | 268.4  | 381.1  | 652.3  | 830.4  |
| PTGES2  | 1483.8 | 2118.4 | 993.6  | 538    | 430.6  | 582.9  | 1276.1 | 1134.3 |
| PTGES3  | 2506.7 | 2577.7 | 1642.3 | 1418.8 | 943.6  | 1723.7 | 2174.2 | 4366.7 |
| PTGFR   | 100.7  | 131.1  | 88.4   | 80.7   | 80.6   | 82.1   | 110.5  | 121.4  |
| PTGFR   | 103.1  | 125.5  | 95.4   | 87.6   | 85.5   | 84.3   | 106.6  | 123.4  |
| PTGFRN  | 139.8  | 179.7  | 92.3   | 85.4   | 78.7   | 93.2   | 146.7  | 253    |
| PTGIR   | 96.2   | 105.8  | 104.2  | 97.7   | 100.9  | 115.4  | 85.9   | 99.7   |
| PTGIS   | 76.5   | 89.2   | 90.5   | 80.9   | 74.6   | 78.4   | 77.2   | 77.7   |
| PTGS1   | 303.6  | 317    | 202.7  | 224.5  | 180.2  | 246.9  | 247    | 318.8  |
| PTGS1   | 136.9  | 184.4  | 119.3  | 94.2   | 93.2   | 93.2   | 126.1  | 158.2  |
| PTGS2   | 188.3  | 210.3  | 160.1  | 154.3  | 135.1  | 152.6  | 196.9  | 292.9  |
| PTH     | 95.2   | 95.4   | 76.3   | 74.7   | 66.7   | 76     | 93.2   | 102.2  |
| PTHLH   | 95.9   | 102.8  | 76.3   | 93.6   | 88.5   | 82.2   | 100.3  | 118.3  |
| PTHLH   | 95.7   | 107.6  | 95.1   | 87.2   | 82.1   | 92.1   | 90.9   | 99.3   |
| PTHR1   | 113.1  | 128.1  | 112.1  | 109.9  | 112.6  | 98.7   | 97.5   | 111.6  |
| PTHR2   | 93.7   | 88.6   | 93.7   | 82.4   | 83.2   | 87.8   | 88.6   | 99.2   |
| PTK2    | 1167.7 | 1575.6 | 917.9  | 219.1  | 157.2  | 253.8  | 1076.1 | 1311.7 |
| PTK2    | 94.3   | 107    | 89.4   | 88.1   | 78.1   | 83.2   | 95.5   | 95.2   |
| PTK2B   | 174.8  | 222    | 116.2  | 104.2  | 102.3  | 114.3  | 156.6  | 179.8  |
| PTK2B   | 307.3  | 346.1  | 182.1  | 168.7  | 148.5  | 212.9  | 234.2  | 362.5  |
| PTK2B   | 97.8   | 111.8  | 101.1  | 85.6   | 94.2   | 104.4  | 98.5   | 98.5   |
| PTK6    | 143.1  | 142    | 145.8  | 135    | 138    | 135.4  | 112.2  | 124.5  |
| PTK7    | 92.4   | 108.7  | 115.7  | 107.3  | 105.3  | 103.5  | 85     | 98.3   |
| PTK7    | 141.6  | 153.4  | 106.4  | 107.9  | 80.2   | 102.9  | 132.1  | 166.3  |
| PTK9    | 111.9  | 130.6  | 97     | 88.4   | 91     | 103.9  | 108.2  | 127.9  |
| PTK9    | 194.5  | 233.2  | 114.8  | 103.8  | 92.1   | 104.4  | 160.9  | 223.3  |
| PTK9L   | 830.8  | 1144.1 | 949.3  | 639.7  | 553    | 785.6  | 903.4  | 1273.2 |
| PTMA    | 1889.9 | 2581.8 | 907.4  | 776.3  | 696.4  | 1231.8 | 2437   | 5538.4 |
| PTMS    | 149.4  | 182.5  | 182.4  | 182.7  | 141.8  | 193.8  | 155.3  | 302.1  |
| PTN     | 520.9  | 752.1  | 226.9  | 232.6  | 191    | 261.1  | 503.3  | 598.4  |
| PTOV1   | 1809.9 | 2012.7 | 1655.1 | 1197.3 | 933.4  | 1205.5 | 1813.4 | 4222.1 |
| PTP4A1  | 134.9  | 151.7  | 86.5   | 93.1   | 93.2   | 100.8  | 127.7  | 169.4  |
| PTP4A2  | 4278.6 | 5363.8 | 2785.4 | 4196.2 | 3175.8 | 4095.6 | 4156.8 | 5142.4 |
| PTP4A3  | 221.3  | 288.7  | 169.3  | 133.9  | 123    | 139.6  | 191    | 239    |
| PTP4A3  | 218.1  | 296.4  | 178.3  | 163.9  | 144.2  | 122.5  | 181.6  | 229.8  |
| PTPDC1  | 89.8   | 95.7   | 98     | 89.5   | 84.6   | 82.4   | 87.3   | 87.9   |
| PTPDC1  | 143.6  | 174.1  | 149    | 153.3  | 126.2  | 200.3  | 148    | 201.3  |
| PTPDC1  | 85.2   | 78.9   | 84.8   | 81.9   | 90.8   | 81.5   | 80.6   | 89.5   |
| PTPLA   | 627.6  | 815.3  | 576.8  | 384.4  | 282.9  | 442.6  | 591.6  | 1139   |
| PTPLAD1 | 1982.3 | 2316.7 | 1241.4 | 1192.6 | 886.8  | 1017.1 | 1396.9 | 2743.3 |

|         |        |        |        |        |        |        |        |        |
|---------|--------|--------|--------|--------|--------|--------|--------|--------|
| PTPLAD2 | 560.3  | 609.6  | 277.4  | 366.3  | 399.5  | 334.9  | 520.1  | 608.3  |
| PTPLB   | 1264.5 | 1484.5 | 811.4  | 973.6  | 666.2  | 1046.6 | 1091.5 | 1778.7 |
| PTPN1   | 836.4  | 1094.5 | 741.2  | 1204.3 | 973.9  | 1311   | 747.4  | 1066.3 |
| PTPN11  | 2224.2 | 2743.4 | 1044.9 | 1560.3 | 1009.7 | 1989.6 | 2109.3 | 2947.5 |
| PTPN12  | 1647   | 2115.6 | 737.6  | 1166.7 | 958.7  | 1918.8 | 1474.6 | 1964.4 |
| PTPN13  | 71     | 80.4   | 87.9   | 93     | 83.5   | 97.5   | 74.2   | 80.6   |
| PTPN14  | 82.5   | 88.4   | 101.2  | 97.5   | 89.5   | 99.7   | 80.9   | 92.5   |
| PTPN18  | 155    | 192.6  | 107    | 98.3   | 93.1   | 100    | 151.2  | 190.3  |
| PTPN2   | 95.2   | 90.7   | 83.5   | 73.8   | 74.5   | 85.2   | 82.2   | 98     |
| PTPN2   | 802    | 979.3  | 429.2  | 448.1  | 408.6  | 621.1  | 429.3  | 589.3  |
| PTPN20A | 70.7   | 75.5   | 74.2   | 79.4   | 77.5   | 71.2   | 70.8   | 73.2   |
| PTPN20B | 73.1   | 76.8   | 85.7   | 82.5   | 82.7   | 82.9   | 74.6   | 75.3   |
| PTPN21  | 83.7   | 87.6   | 88.4   | 81.1   | 78     | 82.3   | 79.2   | 92.3   |
| PTPN22  | 181.3  | 216.7  | 139.5  | 113.6  | 105.1  | 127    | 102.8  | 113.6  |
| PTPN22  | 80.7   | 93.8   | 85.4   | 79.4   | 77.4   | 86.7   | 90.4   | 90.2   |
| PTPN22  | 291.4  | 338    | 172.4  | 154.4  | 124.5  | 200.3  | 164.7  | 205.7  |
| PTPN23  | 104    | 128.6  | 146    | 146    | 134.8  | 166.3  | 103.4  | 126    |
| PTPN3   | 157    | 191    | 111.4  | 113.7  | 105.8  | 116.2  | 138.3  | 170.4  |
| PTPN4   | 192.5  | 191.8  | 146.6  | 179.3  | 133.9  | 196.6  | 157.6  | 215.6  |
| PTPN5   | 119.2  | 158.5  | 98.5   | 94.2   | 82.4   | 84.2   | 131.7  | 150.1  |
| PTPN5   | 114.2  | 143.2  | 99.4   | 91.5   | 91.7   | 82.2   | 119.2  | 152.3  |
| PTPN6   | 108.6  | 126.8  | 78.5   | 90.7   | 83     | 83.4   | 108.4  | 136.4  |
| PTPN6   | 1284.1 | 1671.2 | 1446.6 | 865.1  | 708.3  | 1607.2 | 1147.1 | 1786.6 |
| PTPN7   | 122.3  | 133.1  | 117.1  | 117.1  | 106.4  | 122.1  | 127.7  | 135.1  |
| PTPN7   | 1224.7 | 1438.9 | 1330.6 | 722    | 572.2  | 937.1  | 1051.9 | 2105.1 |
| PTPN9   | 137.1  | 176    | 178.7  | 150.7  | 145.1  | 185.7  | 144.6  | 259.9  |
| PTPN9   | 121.3  | 141.4  | 104.3  | 93.5   | 97.7   | 95.6   | 103.1  | 121.7  |
| PTPNS1  | 1635.6 | 1975.4 | 735.5  | 857.4  | 897.3  | 969.2  | 1433.8 | 1995.8 |
| PTPNS1  | 165.6  | 248.3  | 193.6  | 241.2  | 201.5  | 337.9  | 161.4  | 237    |
| PTPRA   | 92.3   | 106.6  | 104.4  | 91.4   | 87.4   | 93.6   | 88.7   | 110.3  |
| PTPRA   | 289.7  | 384.7  | 211.7  | 251.4  | 228.2  | 314.9  | 260.8  | 317.9  |
| PTPRA   | 276.4  | 321.6  | 159.1  | 184.6  | 157.4  | 217.9  | 235.8  | 431.4  |
| PTPRA   | 182.1  | 204.8  | 124.6  | 109.7  | 109.9  | 119.5  | 168.4  | 176.2  |
| PTPRB   | 98.1   | 116.7  | 98     | 96     | 86.9   | 101.6  | 95.8   | 94.2   |
| PTPRC   | 75.6   | 82.9   | 90.3   | 75.7   | 79.3   | 75.8   | 80.9   | 74.9   |
| PTPRC   | 294.9  | 392.2  | 119.9  | 115.1  | 106.8  | 93.6   | 226.5  | 255.7  |
| PTPRC   | 377.4  | 517.3  | 109.7  | 119.6  | 113.7  | 85.6   | 268.9  | 347.9  |
| PTPRC   | 147.2  | 174.6  | 111.7  | 93     | 89.3   | 80.6   | 136.9  | 149.5  |
| PTPRCAP | 118.5  | 138.9  | 112.7  | 102.7  | 96.3   | 106    | 119.4  | 138.1  |
| PTPRD   | 91.7   | 96.9   | 97.3   | 84.4   | 90.3   | 91.1   | 99.4   | 109.6  |
| PTPRD   | 83.1   | 79.8   | 101.9  | 87.9   | 91     | 86.9   | 77.7   | 85.3   |
| PTPRE   | 437.6  | 558    | 499.1  | 771.1  | 595.7  | 907.9  | 546.5  | 1219.1 |
| PTPRE   | 129.7  | 131.6  | 99.7   | 107.5  | 97.8   | 93.8   | 123    | 144.7  |
| PTPRE   | 147.3  | 148    | 112.9  | 97.6   | 85.5   | 97.2   | 128.6  | 159.2  |
| PTPRF   | 2120   | 3050.2 | 839.8  | 1054.3 | 1079.6 | 1261.6 | 1943.7 | 1887.2 |
| PTPRF   | 448.5  | 624.5  | 620    | 983.1  | 812.5  | 1120.1 | 434.7  | 793.9  |
| PTPRG   | 155.2  | 160    | 104.2  | 93.3   | 96.3   | 104.8  | 136.2  | 169.3  |
| PTPRH   | 133.5  | 151    | 101.3  | 90     | 90.4   | 98.2   | 124.7  | 138.8  |
| PTPRK   | 303.5  | 330.1  | 277.4  | 316.1  | 232.1  | 408.1  | 257.2  | 357.9  |
| PTPRM   | 75.1   | 83.9   | 93.6   | 80.1   | 77.8   | 87.2   | 72.3   | 82.6   |

|         |        |         |        |        |        |        |        |        |
|---------|--------|---------|--------|--------|--------|--------|--------|--------|
| PTPRN   | 78.4   | 87.6    | 95.8   | 81.8   | 82.5   | 88.7   | 81.1   | 94     |
| PTPRN2  | 319.7  | 387.4   | 208.1  | 210.8  | 161.5  | 269.8  | 266.4  | 385.4  |
| PTPRO   | 162.2  | 208.7   | 146.1  | 156.5  | 120.9  | 154.7  | 166.6  | 268.7  |
| PTPRO   | 204    | 250.6   | 168.4  | 179.9  | 131    | 243.9  | 200.3  | 316.4  |
| PTPRR   | 87.6   | 102.4   | 100.3  | 84.6   | 92.9   | 85.1   | 94.3   | 107.3  |
| PTPRR   | 118.1  | 138.8   | 125.4  | 115    | 117.9  | 121.1  | 119.7  | 116    |
| PTPRS   | 99     | 109.6   | 91.4   | 85.4   | 83     | 97.6   | 111.1  | 113.8  |
| PTPRS   | 76.4   | 96      | 92.1   | 86.7   | 97.2   | 91.3   | 87.1   | 107.1  |
| PTPRT   | 91.4   | 102.7   | 87.1   | 89.2   | 77.9   | 80.5   | 103.8  | 106.9  |
| PTPRT   | 143.3  | 176.3   | 89.1   | 90.7   | 90     | 86.4   | 128.1  | 155.1  |
| PTPRT   | 90.1   | 97.5    | 71.8   | 83.6   | 84.6   | 81.2   | 82.2   | 93.1   |
| PTPRU   | 123.1  | 122.2   | 103.5  | 100.9  | 79.4   | 101.8  | 95.6   | 120.8  |
| PTPRU   | 86.3   | 134.5   | 84.1   | 90     | 79.9   | 76.4   | 103.3  | 114.5  |
| PTPRZ1  | 127.8  | 137     | 87.8   | 90.8   | 95.1   | 89.6   | 122.4  | 127.5  |
| PTRF    | 117.6  | 147.1   | 80.8   | 81.8   | 75.8   | 87.6   | 153.6  | 187.2  |
| PTRH1   | 380.2  | 492.9   | 265    | 186.9  | 173.2  | 182.6  | 310.7  | 304.5  |
| PTRH2   | 1818.6 | 2104.8  | 1284.5 | 1326.1 | 911.8  | 1376.6 | 1546.7 | 2213.3 |
| PTRH2   | 220.2  | 269.3   | 168.5  | 139.2  | 133.1  | 171.5  | 177.4  | 233.3  |
| PTS     | 1151   | 1361.8  | 531.8  | 534.2  | 421.6  | 649.7  | 1241.1 | 2035.9 |
| PTTG1   | 7755.5 | 10025.4 | 5527.5 | 2401.2 | 1668.8 | 1808.9 | 6876.2 | 7355.2 |
| PTTG1IP | 3952.1 | 5116.5  | 1986.2 | 3123.8 | 2442.4 | 3329.7 | 3544.9 | 5063.1 |
| PTTG2   | 380.2  | 465     | 209    | 199.6  | 171.4  | 186.6  | 321.6  | 381.8  |
| PTTG3   | 3691.9 | 4790.8  | 1818   | 649.3  | 543.4  | 648.7  | 3604.2 | 4870.8 |
| PTX3    | 95.4   | 101.9   | 93.6   | 90.8   | 76.3   | 81.4   | 84.6   | 95.4   |
| PUM1    | 1423.8 | 1903.1  | 1389.5 | 2247.5 | 1634.4 | 2412.6 | 1277.2 | 1682.1 |
| PUM1    | 2145   | 2551.1  | 1442.7 | 1810.8 | 1339.4 | 1632.3 | 2136.5 | 2946.1 |
| PUM2    | 1087.8 | 1542    | 1085.5 | 1230.1 | 896.9  | 1865   | 1038.4 | 2072.9 |
| PUNC    | 76     | 86.9    | 83.6   | 81.4   | 73.8   | 82.5   | 77.7   | 97.3   |
| PURA    | 495.3  | 636.5   | 372.9  | 423.4  | 288    | 669.3  | 454.5  | 1062.1 |
| PURB    | 1429   | 1889.6  | 1124.4 | 2282.4 | 1777.7 | 2468.3 | 1212.9 | 2388.1 |
| PURG    | 109.6  | 115.6   | 155.9  | 152    | 140    | 154.3  | 107.1  | 126.5  |
| PURG    | 105.3  | 107.2   | 78.7   | 81.5   | 79.8   | 89.5   | 88.4   | 115.6  |
| PUS1    | 3772   | 4490.1  | 2569.9 | 1355   | 1194.5 | 1457.7 | 2795   | 2670.6 |
| PUS1    | 124.6  | 163.4   | 109.6  | 95.7   | 91.2   | 101.6  | 130.8  | 137.6  |
| PUS1    | 569.3  | 661.6   | 405.9  | 204.2  | 203.9  | 209.5  | 473.7  | 697.9  |
| PUS3    | 407.4  | 500.6   | 162.1  | 121.9  | 113.4  | 172.7  | 382.4  | 710.6  |
| PUS7    | 1187   | 1604.8  | 684.7  | 676.6  | 453.2  | 968.5  | 920.8  | 1096.5 |
| PUS7L   | 283.9  | 316.5   | 275.9  | 241.5  | 156.7  | 299.7  | 231.4  | 397.9  |
| PUSL1   | 300.9  | 383.1   | 274.9  | 227.2  | 183.3  | 240.3  | 283.2  | 483.9  |
| PVALB   | 77.3   | 80.1    | 80.8   | 80.2   | 82.2   | 90.9   | 74.2   | 78.9   |
| PVR     | 241.3  | 280.6   | 149.4  | 137.9  | 116.8  | 164.3  | 228.9  | 282.9  |
| PVRL1   | 105.2  | 148.3   | 97.8   | 106.6  | 90.2   | 99.1   | 96.9   | 118.3  |
| PVRL1   | 132.6  | 154.8   | 106.8  | 95     | 94.5   | 102.4  | 130.5  | 205.8  |
| PVRL1   | 94.6   | 93.7    | 103.6  | 79.4   | 77.9   | 92.3   | 108.1  | 103    |
| PVRL1   | 79.4   | 78.5    | 81.3   | 87.6   | 82.9   | 78.3   | 79.2   | 87     |
| PVRL2   | 314    | 402     | 241.6  | 122.9  | 127.3  | 113.6  | 342.8  | 530    |
| PVRL2   | 344.5  | 483.4   | 387.2  | 171.7  | 169    | 210.6  | 383.2  | 624    |
| PVRL2   | 120.1  | 145.1   | 121.8  | 95.1   | 97.8   | 99.4   | 112.4  | 151.9  |
| PVRL3   | 144.2  | 133.6   | 101.7  | 97     | 83.4   | 95.9   | 123.7  | 163.3  |
| PVRL4   | 102.2  | 119.1   | 90.5   | 77.3   | 85.9   | 96     | 97     | 104.3  |

|         |         |         |         |        |        |         |         |         |
|---------|---------|---------|---------|--------|--------|---------|---------|---------|
| PWP1    | 2065.9  | 2473.8  | 1210.1  | 1319.4 | 859.1  | 1618.8  | 1589.7  | 2565.5  |
| PWP2H   | 139     | 155.2   | 104.7   | 91.4   | 88.9   | 94.6    | 148.4   | 150.2   |
| PWWP2   | 208.4   | 285.5   | 270.4   | 189.9  | 201.9  | 262.7   | 224.8   | 416.5   |
| PWWP2   | 109.7   | 142.4   | 117.6   | 89.1   | 93.6   | 103.2   | 116.8   | 165.1   |
| PXDN    | 113.4   | 136.9   | 83.6    | 88.8   | 83.8   | 84.9    | 108.5   | 155.7   |
| PXDNL   | 83.5    | 96.5    | 93.4    | 82.6   | 87.9   | 89.3    | 84.5    | 85.3    |
| PXK     | 335.1   | 497.9   | 228.1   | 287.5  | 294.3  | 448.8   | 485.5   | 648.3   |
| PXMP2   | 1853.1  | 2437.1  | 1653.3  | 1461.8 | 1142.3 | 1554.5  | 1408.1  | 2078.2  |
| PXMP2   | 794.1   | 987.6   | 550.1   | 467.6  | 389    | 484.4   | 584.6   | 668.2   |
| PXMP3   | 1494.6  | 1872.1  | 877.3   | 683.9  | 477.8  | 1013.2  | 1223.2  | 1890.2  |
| PXMP4   | 222.9   | 263.6   | 158.7   | 150.4  | 130.7  | 129.7   | 177.3   | 222     |
| PXMP4   | 158.1   | 170.8   | 144.9   | 168.4  | 132.8  | 118.8   | 154.6   | 183.7   |
| PXN     | 98.1    | 105.4   | 109.9   | 106.2  | 100.7  | 107.4   | 100     | 110.8   |
| PXT1    | 76.2    | 84.4    | 89.4    | 84.7   | 75.9   | 78.8    | 75.2    | 77.1    |
| PYCARD  | 852     | 1006.4  | 444.5   | 336.2  | 311    | 361.1   | 674.7   | 670.1   |
| PYCARD  | 8221.2  | 9958.5  | 7944.8  | 6685.1 | 5248   | 7214.8  | 6498.5  | 7475.6  |
| PYCR1   | 89.9    | 114.4   | 99.2    | 84     | 77     | 87.2    | 97.8    | 110.3   |
| PYCR2   | 2209.1  | 2762.1  | 1336    | 1004.5 | 819.2  | 1130.7  | 1700.7  | 2678.3  |
| PYCR1   | 143.9   | 173.8   | 98.8    | 103.4  | 81.2   | 94.3    | 121.2   | 188.6   |
| PYDC1   | 88.6    | 94.2    | 96.5    | 87.1   | 87.8   | 85.3    | 96.5    | 100     |
| PYGB    | 372.9   | 486.8   | 394.6   | 245.6  | 204.7  | 358.6   | 344.7   | 592.1   |
| PYGL    | 2096.6  | 2504.2  | 594.1   | 434.4  | 380.9  | 693.4   | 1563.9  | 2857.1  |
| PYGM    | 111.4   | 133.8   | 96.9    | 90.2   | 92     | 98.9    | 109.4   | 128.5   |
| PYGO1   | 93.9    | 107.8   | 109.2   | 104    | 107.4  | 101     | 96      | 104.7   |
| PYGO2   | 121.4   | 162.1   | 146     | 129.4  | 112.3  | 134.4   | 124.9   | 178.7   |
| PYHIN1  | 111.5   | 127     | 103.3   | 95.2   | 92.8   | 104.1   | 118.5   | 119     |
| PYHIN1  | 105.4   | 124.2   | 101.8   | 110.1  | 105.6  | 123.2   | 107     | 104     |
| PYHIN1  | 120.6   | 163.7   | 131.3   | 132.4  | 130.1  | 157.4   | 116.1   | 121.7   |
| PYY     | 81      | 91.5    | 87.6    | 88.4   | 88     | 84      | 86.6    | 94.6    |
| PYY2    | 67.7    | 80.1    | 70.4    | 76.7   | 72     | 80.8    | 80.6    | 73.6    |
| PZP     | 103.7   | 122.1   | 92.9    | 91     | 90.9   | 91.3    | 97.1    | 107.2   |
| QARS    | 8919.2  | 11544.4 | 5075.3  | 5000.4 | 3673.4 | 5575.7  | 7576.9  | 7489.8  |
| QDPR    | 2124.1  | 2841.3  | 1391.6  | 998.9  | 747.2  | 1059.3  | 1839.5  | 2397.9  |
| QIL1    | 3544.5  | 4453.4  | 2147.1  | 1542.7 | 1220.9 | 1960.6  | 2822.5  | 3279.2  |
| QKI     | 290.2   | 409.9   | 96.6    | 103.8  | 90.1   | 93.3    | 245.7   | 318     |
| QKI     | 297.5   | 435     | 144.7   | 136.2  | 144.6  | 171.9   | 217.2   | 263.1   |
| QKI     | 291.7   | 414.1   | 141.3   | 162.3  | 148.5  | 169     | 223.2   | 262.8   |
| QP-C    | 13735.8 | 15677.8 | 11830.8 | 10985  | 8794.4 | 12597.4 | 11023.8 | 14170.4 |
| QPCT    | 263.8   | 304.4   | 165.1   | 156.9  | 127    | 234.6   | 229.4   | 370.9   |
| QPCTL   | 151.7   | 178     | 144.9   | 147.5  | 134.5  | 99.4    | 138.8   | 179.3   |
| QPRT    | 4186.9  | 4905.7  | 2835.7  | 2805.9 | 2696   | 2996    | 3678.1  | 3623    |
| QRICH1  | 124     | 152.2   | 106.8   | 88.6   | 84.6   | 98.9    | 109     | 156.5   |
| QRICH1  | 71.8    | 90.6    | 93.5    | 88.7   | 82.8   | 81.4    | 82.6    | 86.7    |
| QRICH1  | 1652.3  | 2381.1  | 1807.1  | 2147.5 | 1855.8 | 2587.8  | 1382.8  | 1710    |
| QRICH2  | 75.9    | 84.5    | 94.5    | 84.5   | 78.3   | 77.8    | 76.5    | 90.1    |
| QRSL1   | 214.1   | 231.2   | 136.6   | 155.1  | 122.3  | 157.5   | 164.7   | 242.5   |
| QSCN6   | 1348.4  | 1449.9  | 711.5   | 542.7  | 405    | 710.9   | 1263.8  | 1786    |
| QSCN6   | 219     | 305.7   | 242.2   | 221.9  | 170.2  | 346.6   | 184     | 301.5   |
| QSCN6L1 | 407.7   | 480.6   | 350.8   | 265.6  | 254.2  | 320.3   | 294.6   | 347     |
| QSER1   | 224.6   | 275     | 115.9   | 117.5  | 91.3   | 107.4   | 217.2   | 268.5   |

|           |        |        |        |        |        |        |        |        |
|-----------|--------|--------|--------|--------|--------|--------|--------|--------|
| QTRT1     | 347.5  | 398.8  | 163.2  | 119.7  | 121.4  | 159.2  | 277.9  | 337.2  |
| QTRTD1    | 520.4  | 642.2  | 193    | 178    | 143.2  | 279.9  | 419.1  | 580.9  |
| R3HDM1    | 191    | 234.8  | 133.3  | 124.3  | 114    | 156.6  | 184.2  | 276.3  |
| R3HDM2    | 134.3  | 170.8  | 122.3  | 126.9  | 118.7  | 127.4  | 139.2  | 152.3  |
| R3HDML    | 89.4   | 93.3   | 88.9   | 91.7   | 82.4   | 78.4   | 91.6   | 109.8  |
| RAB10     | 4399.5 | 5465.6 | 2718.5 | 3722.1 | 2395.5 | 4200.5 | 4050.4 | 5490.1 |
| RAB11A    | 3555.9 | 5122.9 | 2879.5 | 3004.3 | 2102.3 | 3198.5 | 3041.9 | 3978.5 |
| RAB11B    | 116.5  | 155.1  | 116.7  | 93.1   | 107.1  | 85.9   | 111    | 150.8  |
| RAB11FIP1 | 100.4  | 113.3  | 100.9  | 81.3   | 86.6   | 85.3   | 99.1   | 125.1  |
| RAB11FIP1 | 144.2  | 198    | 115.1  | 119.5  | 104    | 107.9  | 147.6  | 284.8  |
| RAB11FIP1 | 2327   | 2846.1 | 1455.7 | 2342.5 | 1792.6 | 2599.5 | 2174.3 | 2847   |
| RAB11FIP2 | 460.7  | 536.4  | 299.3  | 295.8  | 250.7  | 376.8  | 329.1  | 633.1  |
| RAB11FIP3 | 420.8  | 515.8  | 399.6  | 349.4  | 358    | 468.9  | 346.4  | 386.7  |
| RAB11FIP4 | 82.6   | 93.8   | 89     | 80.9   | 90.9   | 87.6   | 84.9   | 97.3   |
| RAB11FIP5 | 373    | 426.2  | 338.2  | 242.7  | 241.9  | 251.6  | 371.2  | 385.5  |
| RAB12     | 109.5  | 130    | 101.6  | 85.2   | 87.8   | 92.7   | 104.8  | 128    |
| RAB13     | 329.4  | 390.5  | 159.3  | 131.7  | 124.7  | 116.8  | 357    | 360    |
| RAB14     | 110.2  | 120.3  | 115.8  | 106    | 89.4   | 100.3  | 110.9  | 134.1  |
| RAB15     | 140    | 198.4  | 104.1  | 97     | 92.7   | 95.8   | 147    | 204.4  |
| RAB17     | 292.2  | 358    | 260.8  | 184.8  | 178.6  | 221.9  | 237.3  | 174.9  |
| RAB18     | 155    | 168.2  | 121.4  | 113.1  | 103.1  | 151.4  | 137.3  | 294.5  |
| RAB19B    | 83.4   | 97     | 87.7   | 86.4   | 84.7   | 88.5   | 89.1   | 96.8   |
| RAB1A     | 428.1  | 588.9  | 268.9  | 375.2  | 259    | 383.8  | 392.6  | 552.1  |
| RAB1B     | 246.5  | 322.3  | 203.4  | 187.7  | 190.4  | 161.3  | 245.1  | 430.2  |
| RAB2      | 870.5  | 1217.9 | 462.4  | 428.1  | 301.9  | 403.5  | 796    | 1280.7 |
| RAB20     | 132.6  | 169.3  | 116.7  | 118.1  | 114.7  | 118.8  | 139.7  | 161.3  |
| RAB21     | 782.7  | 1003.9 | 327.8  | 365.8  | 267.8  | 463.2  | 730.2  | 1223.2 |
| RAB22A    | 605.9  | 942    | 423.1  | 996.2  | 705.8  | 1034   | 559.1  | 644.4  |
| RAB23     | 84.2   | 84.3   | 87.7   | 81.6   | 81.7   | 85.9   | 83     | 86.5   |
| RAB23     | 101.9  | 125.5  | 88.5   | 86.2   | 80.9   | 87.4   | 108.1  | 125.3  |
| RAB23     | 1119.4 | 1471.2 | 784.5  | 698.6  | 548.7  | 818    | 922.8  | 1457.5 |
| RAB24     | 246    | 268.8  | 175.1  | 181.1  | 177.7  | 218.6  | 189    | 191.8  |
| RAB24     | 820.4  | 1009.7 | 669.9  | 728.8  | 707.5  | 1221   | 644.2  | 857.2  |
| RAB24     | 596.3  | 661.7  | 240    | 346.1  | 331.9  | 444.7  | 497.7  | 604.5  |
| RAB24     | 171.7  | 242.5  | 113.9  | 120.4  | 110.5  | 113.6  | 170.1  | 178.5  |
| RAB25     | 134.1  | 122.7  | 89.1   | 93.9   | 94     | 91     | 107.6  | 121.2  |
| RAB26     | 149.1  | 168    | 114.8  | 110.5  | 96.7   | 105    | 130.5  | 133.8  |
| RAB27A    | 335.7  | 317.3  | 282.2  | 301.3  | 223.5  | 327.9  | 342.6  | 429.2  |
| RAB27A    | 143.7  | 182.4  | 116.4  | 110.5  | 105    | 117.5  | 141    | 128.2  |
| RAB27A    | 122.4  | 156.1  | 94.4   | 109.4  | 91.6   | 109.4  | 93.9   | 114    |
| RAB27B    | 106    | 120.3  | 90.1   | 90.7   | 87.3   | 93.6   | 108.6  | 116    |
| RAB28     | 393.4  | 636.2  | 251.2  | 190.4  | 162.2  | 236.2  | 349.7  | 505.5  |
| RAB28     | 341.2  | 461.5  | 275.8  | 232.4  | 193.7  | 269.1  | 263.2  | 349.6  |
| RAB2B     | 1217.7 | 1524.8 | 820.3  | 647.6  | 640.6  | 789.4  | 1248   | 1853.5 |
| RAB30     | 80.7   | 111.2  | 90.8   | 75.8   | 86.5   | 86.3   | 85.7   | 99.8   |
| RAB31     | 4002.5 | 4722.9 | 3484.8 | 6705   | 4221.8 | 7524.6 | 3625.2 | 5231.1 |
| RAB32     | 2558.1 | 3298.5 | 2561.3 | 2301.9 | 1935.5 | 3077.5 | 1854.1 | 3262.8 |
| RAB33A    | 401.9  | 543.3  | 319.3  | 258.1  | 246.8  | 352.7  | 348.7  | 370.4  |
| RAB33B    | 146.3  | 148.5  | 102.5  | 109.3  | 101.8  | 118.5  | 139.5  | 192.5  |
| RAB34     | 79.2   | 87.9   | 83.4   | 85.8   | 80.3   | 84.3   | 82.2   | 88.3   |

|          |        |        |        |        |        |        |        |        |
|----------|--------|--------|--------|--------|--------|--------|--------|--------|
| RAB35    | 852.8  | 1089.1 | 436.1  | 402.1  | 363.9  | 425    | 820.5  | 680.1  |
| RAB36    | 84.9   | 99.5   | 80.5   | 85     | 75.2   | 82.6   | 84.9   | 104.8  |
| RAB37    | 130    | 111    | 118.9  | 208    | 219.4  | 271.3  | 116.5  | 144    |
| RAB37    | 103.6  | 107.9  | 105.6  | 151.5  | 157.9  | 155.5  | 100.5  | 110.8  |
| RAB37    | 117.4  | 132.7  | 96.5   | 97.2   | 88     | 85.7   | 117    | 139    |
| RAB38    | 150.6  | 201.1  | 126.5  | 126.2  | 110.6  | 131.8  | 167    | 232.3  |
| RAB39    | 92.1   | 117.3  | 101.3  | 88.8   | 85.2   | 92.6   | 95.2   | 104.1  |
| RAB39B   | 74.9   | 79     | 85.1   | 77.6   | 73.2   | 80.4   | 71.5   | 77.5   |
| RAB3A    | 105.6  | 111    | 92.6   | 74     | 81.1   | 83.8   | 103.5  | 123.9  |
| RAB3B    | 102.9  | 132.7  | 106.6  | 97.7   | 94.5   | 87.2   | 103.3  | 109.7  |
| RAB3C    | 123.6  | 155.4  | 113.5  | 256.8  | 223.3  | 367.2  | 130.7  | 128.8  |
| RAB3D    | 110.7  | 137.4  | 102.5  | 115.3  | 86.2   | 105.1  | 123.1  | 115.9  |
| RAB3GAP1 | 1078.7 | 1521.9 | 1018   | 1714.9 | 1358.6 | 1809.6 | 962.2  | 1581.8 |
| RAB3IL1  | 834.6  | 1152.3 | 667.3  | 393    | 311.5  | 430.2  | 752.7  | 836.7  |
| RAB3IP   | 236.2  | 268.8  | 162.1  | 216.3  | 224.3  | 232.5  | 185.3  | 196.7  |
| RAB3IP   | 244.5  | 324.9  | 235.9  | 267.8  | 217.6  | 252.8  | 242.4  | 331.5  |
| RAB40A   | 68.2   | 79.8   | 94.1   | 99.2   | 91.6   | 91     | 81.4   | 82.1   |
| RAB40B   | 552.8  | 676.4  | 345.3  | 532.7  | 453.4  | 598.7  | 508    | 622.8  |
| RAB40C   | 2632.5 | 3392.6 | 2010.4 | 1508.2 | 1450.4 | 1593.7 | 2046.5 | 2074.5 |
| RAB41    | 100.7  | 117.9  | 101.3  | 86.5   | 86.3   | 89     | 103.5  | 116.3  |
| RAB42    | 100.6  | 110.9  | 116.4  | 111.4  | 102    | 101.4  | 92.7   | 92.6   |
| RAB43    | 153.4  | 173.4  | 138.6  | 168.1  | 159.1  | 207.2  | 146.5  | 208.1  |
| RAB4A    | 912.6  | 1257.8 | 623.4  | 523.8  | 398.6  | 633.8  | 666.4  | 1253.1 |
| RAB4B    | 229.6  | 281.3  | 202    | 165.5  | 171.7  | 185.9  | 219    | 286.1  |
| RAB5A    | 772.6  | 1029   | 380.1  | 387.6  | 290.3  | 537.8  | 687.8  | 1180.5 |
| RAB5B    | 1027.6 | 1418.1 | 1021.2 | 1259.8 | 1240   | 1329.7 | 890.4  | 1266.3 |
| RAB5C    | 1089   | 1428.3 | 547.3  | 556.6  | 492.5  | 893.5  | 859.9  | 1868   |
| RAB5C    | 804.1  | 1180.5 | 430    | 379    | 339.3  | 521    | 749.4  | 1170.8 |
| RAB6A    | 132.9  | 162.5  | 89.2   | 91.4   | 90.3   | 108.3  | 128.7  | 217.2  |
| RAB6B    | 173.3  | 203.2  | 115.3  | 121.5  | 121.7  | 128.7  | 154.2  | 186    |
| RAB6C    | 83.3   | 86.3   | 86.3   | 87.3   | 81.6   | 82.7   | 84     | 92.6   |
| RAB6IP1  | 432.6  | 555.6  | 520.8  | 542    | 539    | 839.9  | 621.9  | 1350.2 |
| RAB6IP2  | 96.3   | 110    | 78.7   | 81.3   | 77.3   | 80.6   | 94.9   | 104    |
| RAB7     | 5158.6 | 6251.2 | 3032.6 | 4258.5 | 3239.1 | 5765.5 | 4539.5 | 5286   |
| RAB7B    | 503.6  | 589.3  | 385.9  | 469.2  | 485.1  | 517.5  | 560.8  | 781.5  |
| RAB7L1   | 592.9  | 847.3  | 591.5  | 393.3  | 325.1  | 563.7  | 471.1  | 892    |
| RAB8A    | 2359.2 | 3260.6 | 1693.1 | 1480   | 1086.9 | 1604.8 | 2153.3 | 3018.7 |
| RAB8B    | 1008.7 | 1367.3 | 346.2  | 577.4  | 581.9  | 884.2  | 1048.3 | 1748.3 |
| RAB9A    | 1109.7 | 1345.3 | 650.7  | 946.3  | 729.9  | 1114.4 | 924.5  | 1508.7 |
| RAB9B    | 193.6  | 257.8  | 142.9  | 169.8  | 149.7  | 151.9  | 173.2  | 185.5  |
| RABAC1   | 414.4  | 529.6  | 336.3  | 307.3  | 237.8  | 303.5  | 430.7  | 588.5  |
| RABEP1   | 368.9  | 543.9  | 437.4  | 512.4  | 379.8  | 946.9  | 277    | 505.1  |
| RABEP2   | 93.6   | 115.5  | 91.1   | 79     | 87.7   | 83.9   | 93.5   | 113.7  |
| RABEP2   | 103.9  | 125    | 89.4   | 92.1   | 84.8   | 85.8   | 107.6  | 130.2  |
| RABEPK   | 1507   | 2016   | 644.7  | 542.8  | 338.7  | 550.4  | 1199.1 | 1500.4 |
| RABGAP1  | 324.5  | 420.2  | 362.7  | 468.5  | 468.6  | 507.5  | 376.2  | 516    |
| RABGEF1  | 124.7  | 131.6  | 100    | 102.1  | 94.7   | 98.6   | 122.3  | 165.7  |
| RABGGTA  | 123.6  | 132.7  | 118.8  | 98.2   | 103.3  | 112.6  | 115.4  | 115    |
| RABGGTA  | 138.8  | 188.6  | 134.9  | 111.1  | 100.7  | 124    | 140.1  | 171.6  |
| RABGGTB  | 613.8  | 759.6  | 295.2  | 242    | 210.9  | 336.8  | 477.3  | 781.3  |



|          |         |         |        |        |        |        |         |         |
|----------|---------|---------|--------|--------|--------|--------|---------|---------|
| RABIF    | 129.6   | 148.5   | 102.9  | 92.5   | 93.8   | 115.6  | 116.4   | 153.6   |
| RABL2A   | 117.7   | 137.5   | 115.4  | 113.7  | 104.6  | 105.5  | 120.3   | 147.8   |
| RABL2A   | 158     | 195.4   | 122.3  | 126.9  | 102.4  | 130.3  | 129.4   | 148.8   |
| RABL2B   | 585.1   | 674.5   | 318.8  | 295.6  | 275.8  | 352.9  | 346.8   | 372.6   |
| RABL3    | 912.4   | 1189.6  | 417    | 381.6  | 313.9  | 543.1  | 694     | 925.2   |
| RABL4    | 369.3   | 495     | 256.4  | 240.1  | 188.3  | 260.5  | 349.7   | 487.4   |
| RABL5    | 98      | 117.2   | 92.6   | 79.7   | 82.4   | 79     | 98.5    | 112.9   |
| RAC1     | 8535.4  | 10709.4 | 6588   | 5254.6 | 4030.6 | 5255.8 | 7570.3  | 12274   |
| RAC1     | 121.1   | 137.4   | 88.9   | 96.7   | 85.7   | 91.4   | 109.1   | 142.5   |
| RAC1     | 75.2    | 84.5    | 85.8   | 82.2   | 77.4   | 82.3   | 77.7    | 76.2    |
| RAC2     | 10545.6 | 12764.2 | 6463   | 4591.2 | 4553.6 | 4828.8 | 10480.6 | 12373.2 |
| RAC3     | 251.1   | 282.2   | 256.3  | 201.9  | 208.9  | 293.1  | 203.9   | 307.6   |
| RACGAP1  | 866.9   | 1051.7  | 638    | 636.1  | 498.5  | 725.8  | 739     | 1130.7  |
| RAD1     | 270.1   | 320     | 170.5  | 161.4  | 148.1  | 146.9  | 226     | 334.8   |
| RAD1     | 76.8    | 105.1   | 92.2   | 87.5   | 80.6   | 82.7   | 86.7    | 91.2    |
| RAD17    | 90.4    | 102.1   | 92.8   | 89     | 77.6   | 86.7   | 89.5    | 104.1   |
| RAD17    | 201.9   | 251.3   | 181.9  | 175    | 157.7  | 209.4  | 174.7   | 244.4   |
| RAD17    | 112.2   | 130.2   | 95     | 94.1   | 89.9   | 76.5   | 102.3   | 134.7   |
| RAD18    | 99.6    | 108.5   | 111.8  | 111.7  | 90     | 105.9  | 96      | 108.9   |
| RAD21    | 3109.2  | 3293.6  | 978.7  | 892.9  | 539.5  | 1136.5 | 2613.8  | 4527.1  |
| RAD23A   | 1468.5  | 1993.1  | 1116.6 | 671.9  | 533.7  | 865.6  | 1473.5  | 3123.3  |
| RAD23B   | 730.5   | 909.8   | 675.6  | 827.9  | 489.4  | 902    | 776.7   | 1560.7  |
| RAD50    | 267.6   | 413.8   | 249.1  | 367.5  | 328.7  | 589.3  | 246.5   | 314.4   |
| RAD50    | 94.9    | 92      | 93.7   | 87.1   | 78.5   | 90.9   | 94.9    | 99.3    |
| RAD51    | 448.9   | 602.7   | 295.7  | 302.9  | 236.5  | 335.3  | 378.8   | 485.3   |
| RAD51    | 310.6   | 374     | 188.3  | 125.7  | 143.7  | 154.4  | 245.4   | 348.5   |
| RAD51    | 600.1   | 783.9   | 210.2  | 150.2  | 152.1  | 178.5  | 393.9   | 476.9   |
| RAD51AP1 | 1302.7  | 1490.2  | 692    | 793.7  | 673    | 1043.2 | 1085.7  | 1651.3  |
| RAD51C   | 1815.2  | 2253.6  | 1094.7 | 791    | 626.5  | 843.1  | 1536    | 2618.9  |
| RAD51C   | 77.6    | 77.9    | 96.9   | 89.8   | 78.2   | 90.2   | 74.8    | 85.9    |
| RAD51C   | 2478.7  | 3072.6  | 1273.2 | 864.7  | 766.9  | 1013   | 1979.2  | 2421.3  |
| RAD51L1  | 105.7   | 121.1   | 91     | 83.8   | 80.4   | 88.2   | 101     | 101.5   |
| RAD51L1  | 132.5   | 171.7   | 97.1   | 81.2   | 85.5   | 90.5   | 127     | 150.4   |
| RAD51L1  | 103.7   | 145.9   | 96.1   | 85.4   | 78.3   | 97.5   | 129.8   | 137.2   |
| RAD51L3  | 217.5   | 266.5   | 185    | 138.8  | 127.6  | 140.4  | 188.3   | 189     |
| RAD51L3  | 106.5   | 120     | 98.3   | 94.7   | 86.1   | 83.9   | 97.4    | 96.9    |
| RAD51L3  | 187.8   | 239.5   | 145.8  | 122.5  | 118    | 127.1  | 160.5   | 162.9   |
| RAD52    | 97.9    | 105.7   | 99.1   | 94.2   | 84.5   | 98.3   | 98.9    | 113.8   |
| RAD52B   | 108.4   | 130.9   | 84.6   | 88.4   | 83.5   | 82.7   | 114.9   | 130.4   |
| RAD54B   | 80.2    | 82.3    | 85.8   | 86.2   | 77     | 79.8   | 79.5    | 86.1    |
| RAD54B   | 537     | 696.9   | 334    | 287.3  | 214.5  | 425.4  | 332.6   | 534     |
| RAD54L   | 485.5   | 520.9   | 230.9  | 189.1  | 158.2  | 233.7  | 342     | 494.3   |
| RAD9A    | 321.2   | 334.1   | 306.3  | 235.9  | 209.4  | 231.2  | 310.5   | 670.4   |
| RAD9B    | 94.6    | 108.5   | 93.1   | 89.3   | 89.3   | 98     | 89.4    | 96.9    |
| RAE1     | 358.6   | 409.7   | 180.7  | 120.6  | 114.5  | 94     | 303.9   | 315.8   |
| RAE1     | 76.4    | 76.4    | 78.3   | 79.9   | 83.6   | 72.5   | 77.7    | 75.8    |
| RAE1     | 1441.5  | 2174.6  | 1632.9 | 1111.5 | 916.3  | 1201.2 | 1285.9  | 2267.2  |
| RAET1E   | 100.4   | 119.3   | 110.3  | 85.4   | 80.8   | 95     | 104.9   | 96      |
| RAET1G   | 90.3    | 95      | 96.6   | 93.8   | 76.5   | 88.7   | 85.7    | 99.5    |
| RAET1L   | 79.4    | 86.1    | 86.3   | 82.4   | 91     | 94.6   | 89.3    | 95.2    |

|          |        |        |        |        |        |        |        |        |
|----------|--------|--------|--------|--------|--------|--------|--------|--------|
| RAF1     | 692.5  | 877.6  | 556.5  | 666.5  | 577.6  | 930.1  | 599.4  | 1069.6 |
| RAFTLIN  | 799.9  | 1092.8 | 303.2  | 338.3  | 231.7  | 421.1  | 682.4  | 759    |
| RAG1     | 88.9   | 96.6   | 83.7   | 90.7   | 78.2   | 81.3   | 91.8   | 101.4  |
| RAG1AP1  | 208.8  | 250.7  | 116.2  | 107.8  | 112.5  | 118.4  | 194.1  | 268.4  |
| RAG2     | 80.1   | 94     | 87     | 82.1   | 80.5   | 74.9   | 76.4   | 83.5   |
| RAGE     | 163.4  | 197.6  | 142.4  | 112.5  | 110.4  | 131.9  | 142.1  | 172.6  |
| RAI1     | 241    | 310.2  | 255.6  | 283.2  | 227.8  | 294    | 228.6  | 350.4  |
| RAI14    | 580.7  | 624    | 494    | 356.5  | 276.1  | 398    | 381.8  | 519.9  |
| RAI16    | 196.3  | 207.3  | 116.3  | 106.6  | 98.6   | 114.9  | 178.9  | 237    |
| RAI17    | 824.4  | 1178.1 | 518.3  | 541    | 461.5  | 613.2  | 910.7  | 1265.7 |
| RALA     | 2196.8 | 2637.4 | 1343.5 | 1892.1 | 1558.9 | 2399.2 | 1921.9 | 2376.4 |
| RALB     | 2647   | 3568.2 | 2124.9 | 1661.3 | 1232.8 | 1784.9 | 2056.4 | 2969.8 |
| RALBP1   | 470.8  | 604.5  | 239.8  | 374.8  | 315.4  | 481.1  | 447.3  | 617.7  |
| RALGDS   | 77.1   | 83.9   | 86.3   | 78.5   | 88.1   | 90.1   | 85.3   | 78.1   |
| RALGDS   | 1926.2 | 2302.7 | 1346.8 | 939.8  | 892.3  | 1164.4 | 1553.1 | 1485.2 |
| RALGPS1  | 96.8   | 101.1  | 98.8   | 107.1  | 104.3  | 114.7  | 87.9   | 101.6  |
| RALGPS2  | 103.7  | 111.9  | 106.9  | 107.6  | 94     | 103    | 95.2   | 111    |
| RALGPS2  | 90.7   | 89.3   | 98     | 96.3   | 80.3   | 86.3   | 87.5   | 97.1   |
| RALGPS2  | 72     | 88     | 88.4   | 83.8   | 80.3   | 97.9   | 87.2   | 87.8   |
| RALY     | 1015.5 | 1383   | 870.5  | 944.4  | 835.2  | 1007.8 | 820.4  | 1235.9 |
| RALY     | 1425.6 | 1831   | 1662.6 | 1974   | 1584.4 | 2507.2 | 1462   | 2405.9 |
| RAMP1    | 76.3   | 94.4   | 98.4   | 95     | 78.5   | 93.3   | 83.6   | 90     |
| RAMP2    | 114    | 133.1  | 132.5  | 111    | 101    | 113.7  | 113.8  | 123.2  |
| RAMP3    | 83.5   | 101.9  | 103.2  | 89.3   | 86.4   | 92.9   | 84.9   | 103.4  |
| RAN      | 1576.3 | 1931.4 | 662.7  | 723.6  | 490.7  | 743.3  | 1045.5 | 1583.8 |
| RANBP1   | 8156.7 | 9198   | 2906.4 | 2357.5 | 1464.6 | 2103.6 | 7159.4 | 9077.4 |
| RANBP10  | 211.8  | 255.2  | 210.4  | 235.3  | 202.4  | 376.1  | 195.2  | 346    |
| RANBP17  | 88.7   | 93.7   | 88.9   | 85.3   | 91.7   | 102.9  | 84.7   | 95.1   |
| RANBP2   | 115.1  | 131.3  | 89.9   | 108.2  | 99.6   | 97     | 115.2  | 146.9  |
| RANBP3   | 717.8  | 984.3  | 482.4  | 409.9  | 342.2  | 438.9  | 662.9  | 973.3  |
| RANBP3   | 229.6  | 276.9  | 226.1  | 165.5  | 124.1  | 178.3  | 274.7  | 403.3  |
| RANBP3L  | 85.9   | 96.4   | 91.1   | 90.2   | 84.8   | 94.5   | 87.4   | 90.4   |
| RANBP5   | 294.8  | 429.8  | 239.5  | 205.1  | 156.7  | 289.6  | 233.2  | 287.3  |
| RANBP6   | 134.9  | 146    | 105.5  | 104.6  | 102    | 96.2   | 122    | 167.4  |
| RANBP9   | 175.5  | 196.5  | 110.7  | 111.6  | 105.1  | 95.8   | 156    | 176    |
| RANGAP1  | 3217.4 | 3839.6 | 2356.3 | 1321.4 | 1165.6 | 1487.5 | 2710.4 | 1899.9 |
| RANGNRF  | 103.3  | 102.7  | 96.5   | 91.2   | 76.4   | 83.3   | 92.3   | 115.4  |
| RAP1A    | 249.8  | 290.1  | 169    | 138.9  | 111.1  | 160.1  | 187.8  | 287.4  |
| RAP1A    | 419.1  | 610.3  | 170.5  | 172.5  | 137.9  | 155.2  | 280.1  | 420.4  |
| RAP1B    | 100.5  | 113.1  | 81.7   | 92.5   | 85.7   | 104.9  | 106.1  | 131.7  |
| RAP1B    | 447.3  | 492.3  | 255.1  | 245.7  | 186.9  | 289.4  | 374    | 749.2  |
| RAP1GA1  | 223    | 250.6  | 214.3  | 203.3  | 190.8  | 230.2  | 161.6  | 186.4  |
| RAP1GDS1 | 530.9  | 692.3  | 323.4  | 270.3  | 189.7  | 316.5  | 437.8  | 880.1  |
| RAP2A    | 255.1  | 323.1  | 250.7  | 86.5   | 92     | 95.2   | 248.2  | 450.3  |
| RAP2B    | 90.7   | 107.5  | 84.6   | 92.2   | 90.7   | 112.1  | 88.2   | 113.7  |
| RAP2C    | 419.4  | 495.1  | 192.8  | 216.3  | 156.8  | 242.6  | 371.6  | 732.9  |
| RAP80    | 2077.7 | 2612.7 | 1248.6 | 1468.7 | 1475.6 | 1923   | 1623.2 | 1508.2 |
| RAPGEF1  | 94.7   | 99     | 107.7  | 101.4  | 96.5   | 99.5   | 96.8   | 99.6   |
| RAPGEF1  | 783.8  | 1002.5 | 756    | 817.7  | 771.5  | 811.4  | 1091.3 | 1023.5 |
| RAPGEF1  | 76.3   | 87.2   | 78     | 106.3  | 109.8  | 87.4   | 83.6   | 82.2   |

|          |        |        |        |        |        |        |        |        |
|----------|--------|--------|--------|--------|--------|--------|--------|--------|
| RAPGEF3  | 115.5  | 120.6  | 95.7   | 88.1   | 94     | 92.2   | 97.1   | 122.8  |
| RAPGEF4  | 138.1  | 186.5  | 95.5   | 87.2   | 85.3   | 88.3   | 130.6  | 155.5  |
| RAPGEF6  | 302    | 391.7  | 296.6  | 513.7  | 380.9  | 790.8  | 283.6  | 481    |
| RAPGEFL1 | 148.6  | 155.8  | 126.2  | 122    | 130.9  | 123.5  | 134.2  | 158.5  |
| RAPH1    | 89     | 100.5  | 93.4   | 82     | 75     | 86.4   | 87.4   | 93.6   |
| RAPH1    | 97.5   | 104.3  | 95.6   | 92.2   | 89.3   | 97     | 94.5   | 85.6   |
| RAPH1    | 80.2   | 90.1   | 96.4   | 86.2   | 89.3   | 84.5   | 88.6   | 89.3   |
| RAPH1    | 84.4   | 81.9   | 87.7   | 95.2   | 89.8   | 96.8   | 81.6   | 85.9   |
| RAPSN    | 155.9  | 219.5  | 107.2  | 113    | 113.9  | 110.4  | 144.1  | 172.4  |
| RAPSN    | 101.8  | 122.4  | 99     | 96.1   | 84.7   | 93.6   | 109.3  | 115.7  |
| RAPTOR   | 93.4   | 99.8   | 102.3  | 109.7  | 87     | 94.2   | 102.5  | 93.1   |
| RARA     | 104.7  | 119.4  | 125.1  | 114.1  | 101.1  | 110.7  | 107.7  | 111.9  |
| RARA     | 759.8  | 844.7  | 663.6  | 987    | 766.2  | 778.6  | 756.7  | 1525.6 |
| RARA     | 85.1   | 104    | 95.3   | 93.1   | 79.1   | 88.5   | 89.4   | 99.2   |
| RARB     | 106.9  | 126.4  | 111.6  | 109.4  | 104.2  | 101.2  | 94.1   | 105.6  |
| RARB     | 77.8   | 96.2   | 84     | 69.9   | 84.4   | 84.7   | 83.5   | 91.4   |
| RARB     | 81.1   | 96.8   | 98.6   | 91.6   | 88.9   | 86.3   | 85.6   | 85.3   |
| RARG     | 106.4  | 106.3  | 100.8  | 101.9  | 93.2   | 93.7   | 97     | 98.8   |
| RARRES1  | 119.4  | 156.9  | 90.9   | 81.6   | 75.6   | 92.4   | 103.3  | 106.8  |
| RARRES1  | 126.9  | 140.8  | 116.5  | 104.7  | 100.4  | 118.2  | 111.2  | 118.7  |
| RARRES1  | 83.2   | 102.4  | 102.5  | 91.3   | 96.5   | 104.9  | 86.1   | 88.2   |
| RARRES2  | 86.5   | 97.2   | 96     | 101.1  | 89.4   | 99.2   | 82.4   | 87.2   |
| RARRES3  | 138    | 176.7  | 148.4  | 145.4  | 146.2  | 177.2  | 137    | 168.1  |
| RARS     | 3625.5 | 4435.6 | 2146.2 | 2218.9 | 1443.8 | 2638.5 | 2919.6 | 4179.8 |
| RARSL    | 1281.7 | 1656.6 | 976.1  | 1110.9 | 1020.2 | 1578.1 | 1094   | 1583.9 |
| RASA1    | 87.6   | 111.2  | 89.3   | 77     | 85.6   | 83.9   | 93.1   | 101.4  |
| RASA1    | 659.9  | 980.3  | 501.3  | 781.7  | 700.1  | 1090.7 | 527.1  | 710.7  |
| RASA1    | 102.7  | 124.1  | 89.6   | 86     | 93.9   | 94.2   | 110.5  | 114.8  |
| RASA2    | 175.5  | 216.6  | 129.5  | 105.4  | 105.2  | 106.5  | 146.8  | 175.6  |
| RASA3    | 172.9  | 211    | 154    | 149.8  | 134.8  | 210.3  | 178.7  | 228.8  |
| RASA4    | 73.3   | 91     | 92.2   | 102.8  | 103    | 95.5   | 84.3   | 89.1   |
| RASAL1   | 100.8  | 109.7  | 104.5  | 93     | 94.6   | 100.7  | 94.6   | 104.6  |
| RASAL2   | 237    | 322.8  | 137.7  | 157    | 148    | 131.6  | 202.9  | 244.6  |
| RASAL2   | 107.8  | 133    | 86.4   | 90.8   | 99.9   | 104.8  | 98.7   | 108.5  |
| RASAL2   | 79.1   | 91     | 82.7   | 78.9   | 79.7   | 75.5   | 81.6   | 84.5   |
| RASD1    | 103.7  | 119.8  | 103.6  | 92.6   | 84.2   | 99.1   | 108    | 120.3  |
| RASD2    | 160.4  | 181.2  | 131.3  | 112.3  | 102.3  | 117.5  | 149.8  | 171.6  |
| RASEF    | 85     | 100.2  | 97.6   | 86.9   | 87.2   | 86.7   | 82     | 98.2   |
| RASGEF1A | 91.8   | 101.8  | 86.7   | 86.9   | 80.6   | 90.8   | 80.3   | 80.2   |
| RASGEF1B | 91.7   | 119.2  | 91.2   | 83.3   | 84.4   | 84.8   | 104.7  | 117.5  |
| RASGEF1C | 103.2  | 103.6  | 95.6   | 101.4  | 85.6   | 94.8   | 90.6   | 100.4  |
| RASGEF1C | 73.2   | 83.3   | 90.1   | 89     | 82.3   | 81.9   | 81.8   | 81.3   |
| RASGEF1C | 99     | 106    | 97.1   | 94.2   | 87.4   | 95.5   | 104    | 97.1   |
| RASGRF1  | 99.5   | 112.9  | 105.7  | 101.3  | 101.4  | 102.6  | 103.1  | 109.4  |
| RASGRF1  | 104.2  | 117.4  | 89.6   | 91     | 81.4   | 92.2   | 89.2   | 101.6  |
| RASGRF2  | 87.5   | 90.5   | 91.7   | 90.7   | 76.1   | 86.6   | 86.4   | 86.7   |
| RASGRP1  | 135.6  | 143.6  | 97.8   | 94.5   | 88.4   | 91     | 126.6  | 140.3  |
| RASGRP2  | 1041.8 | 1107.2 | 868.1  | 660.9  | 685.7  | 953.8  | 690.2  | 1105.3 |
| RASGRP2  | 1169.7 | 1402.4 | 521.7  | 455.9  | 386.8  | 563.4  | 761.3  | 998.4  |
| RASGRP2  | 276.4  | 354    | 181.5  | 119.1  | 114.8  | 100.5  | 226.5  | 242.4  |

|         |        |        |        |        |        |        |        |        |
|---------|--------|--------|--------|--------|--------|--------|--------|--------|
| RASGRP3 | 88.1   | 96.3   | 91.9   | 89     | 97.4   | 100.2  | 91.6   | 91.9   |
| RASGRP4 | 112.5  | 109.1  | 102.6  | 98.2   | 91.2   | 103.6  | 99.7   | 106.7  |
| RASGRP4 | 102.9  | 130.2  | 111.6  | 95.1   | 93     | 111.3  | 98.6   | 116.8  |
| RASGRP4 | 73.8   | 97.7   | 80.7   | 84.7   | 75.8   | 77     | 80.1   | 95.6   |
| RASIP1  | 102.7  | 109.4  | 110.8  | 100.8  | 90.6   | 102.3  | 99.9   | 112.5  |
| RASL10B | 84.2   | 89.8   | 87.5   | 93.4   | 75.6   | 88     | 81.5   | 78.9   |
| RASL11A | 134.9  | 141.3  | 124.2  | 103    | 97     | 104.4  | 113.2  | 125.3  |
| RASL11B | 195.2  | 233.5  | 202.5  | 111.3  | 98.8   | 117.5  | 154.7  | 181.8  |
| RASL12  | 107.3  | 101.8  | 92.1   | 92.7   | 86.8   | 89.6   | 101.5  | 112.7  |
| RASSF1  | 500.1  | 647.4  | 490.6  | 322.4  | 315.5  | 405.3  | 471    | 677.5  |
| RASSF1  | 862.8  | 996.4  | 655.4  | 433.9  | 398.1  | 552.9  | 658.2  | 1156.3 |
| RASSF1  | 88.6   | 90.3   | 85     | 86.9   | 75.5   | 81.5   | 87.6   | 85.5   |
| RASSF1  | 290    | 329.4  | 179.5  | 151.8  | 145.5  | 134.9  | 278.1  | 334.9  |
| RASSF2  | 413.1  | 532    | 387.2  | 662.5  | 489    | 947.3  | 491.1  | 1256.3 |
| RASSF2  | 138.2  | 158.4  | 90.3   | 102.7  | 95.6   | 94.6   | 132.6  | 148.4  |
| RASSF2  | 1326.8 | 1583.9 | 885.3  | 1847.1 | 1356.8 | 2045   | 1557.8 | 2210   |
| RASSF3  | 118.2  | 139.4  | 83.4   | 96     | 82.8   | 93.6   | 114.9  | 124.7  |
| RASSF4  | 497.9  | 647.1  | 255.7  | 179.8  | 188.2  | 224.4  | 345.6  | 314.7  |
| RASSF4  | 179.5  | 239    | 108.5  | 94.7   | 94.8   | 95.4   | 156.5  | 181.3  |
| RASSF5  | 171.9  | 255.6  | 98.9   | 100.4  | 99.4   | 83.5   | 143.3  | 181.2  |
| RASSF5  | 175.5  | 216    | 91.1   | 103.4  | 94.9   | 79.7   | 151.4  | 174.6  |
| RASSF5  | 1086.5 | 1459.3 | 968.5  | 832.1  | 534.2  | 990.5  | 965.8  | 2410.1 |
| RASSF6  | 229.7  | 257.9  | 133.5  | 129    | 151    | 141.2  | 204.9  | 273.2  |
| RASSF6  | 101    | 95.5   | 82     | 85.6   | 85.4   | 81.3   | 93.7   | 99.2   |
| RASSF6  | 86.2   | 97.6   | 87.9   | 90.1   | 79.5   | 82.2   | 91.3   | 100    |
| RASSF7  | 1329.8 | 1441.5 | 997.2  | 910.9  | 939.3  | 1187.2 | 1154.4 | 1355.1 |
| RASSF8  | 129.2  | 163.8  | 105.8  | 98.5   | 86.1   | 91.6   | 128.2  | 144.5  |
| RAVER1  | 318.2  | 460.7  | 583    | 457.1  | 365.9  | 644.3  | 372.8  | 719.9  |
| RAVER2  | 172    | 193.3  | 157.9  | 146.7  | 131.2  | 192.4  | 151.4  | 165.4  |
| RAX     | 90.5   | 108.9  | 101    | 93.4   | 82.9   | 95.3   | 84.3   | 90.9   |
| RAXL1   | 348.7  | 495.4  | 195.1  | 380.3  | 349    | 265.9  | 457.8  | 364    |
| RAXLX   | 93.1   | 81.1   | 85.4   | 94.3   | 89.1   | 91.8   | 80.5   | 89.3   |
| RB1     | 456.3  | 592.5  | 263.5  | 277.1  | 227.9  | 494.1  | 337.7  | 477.9  |
| RB1CC1  | 851.2  | 1004.1 | 442.8  | 597.8  | 520.6  | 929.3  | 840.4  | 1590.2 |
| RBAF600 | 1108.3 | 1529.3 | 800.8  | 752.6  | 606.3  | 805.8  | 1021.1 | 1247.8 |
| RBAK    | 143.5  | 168.7  | 115.4  | 117.2  | 100.5  | 129.2  | 119.8  | 135.3  |
| RBBP4   | 175.3  | 204.3  | 139.6  | 136.6  | 123.7  | 178.2  | 147.1  | 215    |
| RBBP5   | 793    | 926.5  | 461.7  | 459.2  | 311.4  | 445.6  | 645.6  | 999.6  |
| RBBP6   | 73.9   | 85.3   | 87.8   | 82.2   | 80.2   | 79.2   | 77.3   | 81.8   |
| RBBP6   | 103.1  | 107.7  | 96     | 86.7   | 83.4   | 83.5   | 97.5   | 121.8  |
| RBBP6   | 79.9   | 92.1   | 93.7   | 89.9   | 89.9   | 88.1   | 81.6   | 95.5   |
| RBBP7   | 2156.7 | 2211.6 | 429.9  | 409.9  | 401.4  | 613.3  | 1730.3 | 3655.6 |
| RBBP8   | 142.1  | 164.5  | 109.2  | 94.6   | 93.8   | 97.2   | 118.4  | 151    |
| RBBP8   | 100.6  | 111.2  | 76.2   | 87.5   | 78.9   | 84.7   | 102.2  | 94.3   |
| RBBP8   | 1650.9 | 1896   | 1059.3 | 1129.5 | 890.2  | 1669.1 | 1219.5 | 2071.4 |
| RBBP9   | 147    | 205.4  | 100.2  | 102.3  | 87.8   | 91.8   | 135.9  | 194.1  |
| RBBP9   | 264.1  | 281.8  | 160.8  | 198.8  | 163.4  | 196.4  | 182.8  | 215.9  |
| RBCK1   | 741.6  | 880.7  | 426    | 275    | 258.9  | 310.9  | 601.9  | 765.7  |
| RBCK1   | 338.6  | 380.2  | 336.4  | 258.4  | 221.8  | 373.4  | 301    | 553.9  |
| RBED1   | 126.3  | 135.4  | 125.7  | 113.7  | 111.2  | 146.4  | 130.1  | 208.8  |

|        |        |        |        |        |        |        |        |        |
|--------|--------|--------|--------|--------|--------|--------|--------|--------|
| RBJ    | 221.7  | 277.3  | 165.1  | 167.1  | 132.2  | 182.9  | 196.1  | 235.1  |
| RBKS   | 459.6  | 527.4  | 227    | 271.3  | 253.4  | 335.4  | 355.7  | 421.2  |
| RBL1   | 98.8   | 107.8  | 105.7  | 98.6   | 99.6   | 96.5   | 100.8  | 105.9  |
| RBL1   | 403.4  | 635.3  | 309.4  | 248.1  | 225.4  | 373.6  | 336.2  | 361.4  |
| RBL2   | 866.9  | 1233.1 | 769    | 906    | 881.4  | 1634.5 | 700.6  | 773.9  |
| RBM10  | 253.6  | 327.4  | 235.2  | 216.4  | 203.2  | 284.2  | 243.7  | 387.4  |
| RBM10  | 3005   | 3348.1 | 2317.1 | 2481   | 1998.5 | 2566   | 2357   | 3232   |
| RBM10  | 99.2   | 95.9   | 89.4   | 98.2   | 95.3   | 87.6   | 90.7   | 96.3   |
| RBM11  | 104.1  | 126.7  | 96.1   | 98.8   | 84.7   | 90.6   | 102.3  | 118    |
| RBM12  | 384.9  | 550.7  | 212.6  | 272.8  | 191.8  | 319.4  | 278.6  | 314.7  |
| RBM12  | 946.4  | 1090.6 | 765.8  | 701.2  | 461.3  | 841.5  | 655.7  | 1051.3 |
| RBM12B | 564.1  | 617.8  | 219.5  | 233.9  | 195.5  | 203.1  | 414.1  | 705.2  |
| RBM13  | 1873.9 | 2270.7 | 813.9  | 536.4  | 344.6  | 706.5  | 1271.8 | 1890.2 |
| RBM14  | 3761.1 | 4599   | 3408.3 | 2385.5 | 1701.8 | 2284   | 2317.7 | 2174.9 |
| RBM15  | 1499   | 2043.5 | 786.6  | 826.9  | 643.6  | 1027.6 | 1397.9 | 1926.4 |
| RBM15B | 153.3  | 198.6  | 135.6  | 121    | 91.5   | 119.2  | 148.6  | 196.3  |
| RBM17  | 712    | 913.3  | 626.3  | 527.3  | 444.1  | 687.8  | 642.9  | 1331   |
| RBM18  | 436.4  | 522    | 293.3  | 256.8  | 204.9  | 290.9  | 342.8  | 598    |
| RBM19  | 111.1  | 137    | 109    | 98.2   | 93.4   | 99.9   | 131.3  | 127.1  |
| RBM21  | 249.1  | 276.3  | 226.2  | 178.6  | 159.8  | 205.2  | 258.4  | 408.7  |
| RBM22  | 5299.7 | 6979   | 4263.5 | 3673.2 | 2866.2 | 4575.7 | 4572   | 5830.1 |
| RBM23  | 1522.8 | 1935   | 813.7  | 681.7  | 463.1  | 682.7  | 1340.6 | 1974   |
| RBM23  | 1895.3 | 2596.7 | 1568.4 | 1152.5 | 922.8  | 1600.5 | 1536.1 | 2647.1 |
| RBM24  | 95.7   | 111.9  | 98     | 76.9   | 80.7   | 78.3   | 104.9  | 99.4   |
| RBM25  | 1942.8 | 2307.5 | 523.7  | 580.8  | 716.2  | 1102.1 | 1438.8 | 2187.6 |
| RBM28  | 396    | 475.7  | 362.7  | 313    | 332.6  | 556.5  | 281.5  | 463.7  |
| RBM3   | 180.2  | 163    | 107.1  | 95.2   | 77.4   | 93.8   | 119.9  | 152.4  |
| RBM3   | 203.8  | 223.6  | 114.1  | 114.5  | 102.4  | 87.3   | 167.9  | 222    |
| RBM33  | 543.3  | 670.7  | 402.1  | 660.4  | 740.9  | 826.3  | 395.5  | 514.7  |
| RBM34  | 1739.3 | 2069.8 | 363    | 388.2  | 299.8  | 655.3  | 1642.8 | 2752   |
| RBM35B | 87.2   | 104.4  | 97.3   | 95.3   | 87.8   | 86.1   | 88.2   | 89     |
| RBM38  | 280.6  | 364    | 297.1  | 245.2  | 173.5  | 318.6  | 311.4  | 679.9  |
| RBM39  | 1199.6 | 1498.6 | 747.5  | 1016.7 | 951.4  | 738    | 1044.6 | 1603.5 |
| RBM4   | 989.3  | 1228.8 | 366.7  | 347    | 299.9  | 346.5  | 809.5  | 943.3  |
| RBM4   | 2218.8 | 3149   | 1044.9 | 911.2  | 761.3  | 957.3  | 1792.8 | 2441.9 |
| RBM4   | 551.8  | 706.5  | 287.3  | 174.1  | 185    | 201    | 417    | 434.8  |
| RBM41  | 100.2  | 106.2  | 93.3   | 91.4   | 77.5   | 93.3   | 94.1   | 118.1  |
| RBM4B  | 949.8  | 1267.8 | 638.1  | 481.4  | 469.4  | 566.9  | 790    | 1085.2 |
| RBM5   | 1941.4 | 2004.1 | 1341.9 | 1366.7 | 1460.3 | 1863.3 | 1420.5 | 2128.7 |
| RBM6   | 510.6  | 618.5  | 320.1  | 409.6  | 355.1  | 738.4  | 370.8  | 594.8  |
| RBM7   | 417.1  | 501.2  | 182.1  | 198.9  | 138.2  | 177.6  | 376.1  | 680    |
| RBM8A  | 125    | 152.2  | 104.7  | 94.4   | 97.4   | 98.2   | 122.8  | 138.7  |
| RBM9   | 358.7  | 456    | 279.3  | 260.7  | 233.4  | 228.9  | 325.4  | 493.4  |
| RBM9   | 132    | 149.9  | 91.7   | 91.7   | 92.5   | 91.9   | 123.1  | 138.4  |
| RBMS1  | 911.3  | 1252.1 | 542.4  | 640.6  | 487.9  | 542.1  | 837.4  | 1094.6 |
| RBMS1  | 85.9   | 94.3   | 95.3   | 87.6   | 83.5   | 88.4   | 84.3   | 74.4   |
| RBMS2  | 116.4  | 158.7  | 105.5  | 89.5   | 87.7   | 100.6  | 126.9  | 128.2  |
| RBMS3  | 85.5   | 84.8   | 92.5   | 94.4   | 78.8   | 89     | 86.6   | 86.2   |
| RBMS3  | 91.7   | 105.7  | 89.1   | 88.1   | 88.4   | 89.7   | 91.9   | 103.7  |
| RBMS3  | 86.8   | 93.4   | 89.6   | 73.6   | 75.8   | 88.7   | 90.2   | 106.9  |

|          |        |        |        |        |        |        |        |        |
|----------|--------|--------|--------|--------|--------|--------|--------|--------|
| RBMX     | 3649.7 | 4989.1 | 2051.4 | 1344.4 | 991.7  | 1961.6 | 2368.1 | 3442.2 |
| RBMX2    | 488.5  | 653.4  | 211.4  | 208.2  | 164.5  | 284.6  | 419.1  | 934.5  |
| RBMXL1   | 75.8   | 107.6  | 91.4   | 89.7   | 80.2   | 101.9  | 91.4   | 106.2  |
| RBMY1A1  | 73.9   | 87     | 78.9   | 70.7   | 77.9   | 81.2   | 76.6   | 80.7   |
| RBMY1A1  | 76.2   | 78.5   | 87.1   | 94.2   | 86.4   | 86.1   | 73.6   | 77.3   |
| RBMY1A3P | 84.3   | 88.3   | 104.3  | 90.1   | 79.6   | 92.9   | 85     | 98.7   |
| RBMY1B   | 79.2   | 86.8   | 99.8   | 85.1   | 74.9   | 83.5   | 78.4   | 89     |
| RBMY1E   | 78.5   | 88.8   | 89.5   | 94.6   | 82.6   | 85.9   | 82.9   | 86.9   |
| RBMY1F   | 79.7   | 87     | 101.9  | 83     | 87.6   | 90.5   | 81.1   | 71.7   |
| RBMY1J   | 80.1   | 90.1   | 95.7   | 89.8   | 86.6   | 96.8   | 87.6   | 93.9   |
| RBMY2EP  | 79.5   | 88.3   | 87.1   | 95     | 87.4   | 95.1   | 82.4   | 84.5   |
| RBMY2FP  | 89.8   | 85.5   | 88.3   | 91.2   | 97.3   | 87.4   | 86     | 89.1   |
| RBP1     | 103.1  | 113    | 92.7   | 87.7   | 86.8   | 91     | 103.1  | 95.3   |
| RBP2     | 99.5   | 117.9  | 107.1  | 94.2   | 93.4   | 94.8   | 93.4   | 92.5   |
| RBP3     | 82     | 99     | 81.6   | 71.4   | 85     | 84.1   | 101    | 96.1   |
| RBP4     | 94.9   | 111.8  | 99.7   | 88.9   | 83.6   | 89     | 101.5  | 104.1  |
| RBP5     | 172.6  | 205.9  | 109.1  | 104.5  | 90.7   | 96.5   | 160.8  | 171.5  |
| RBP7     | 120.9  | 148.8  | 104.4  | 111.4  | 90.4   | 126.9  | 119.8  | 163.2  |
| RBPJ     | 144.1  | 167.6  | 96.2   | 87.8   | 87.1   | 98.8   | 115.4  | 130.7  |
| RBPMS    | 104.6  | 111.7  | 102.2  | 88.8   | 86.5   | 96.3   | 103.1  | 104.9  |
| RBPMS    | 110    | 110.3  | 96.7   | 92.4   | 89     | 87.1   | 98.4   | 116.7  |
| RBPMS    | 76.7   | 93.6   | 94     | 88.2   | 83.8   | 89.9   | 72.6   | 78.2   |
| RBPMS2   | 221.8  | 307.3  | 168.9  | 181    | 163.4  | 198.8  | 209.7  | 214    |
| RBPSUH   | 157.5  | 210.2  | 98.5   | 96.5   | 89.5   | 92.1   | 127    | 168.1  |
| RBPSUH   | 1965.4 | 2355.7 | 837.5  | 795.5  | 611.9  | 468.6  | 1394   | 2064.3 |
| RBPSUHL  | 109.8  | 103.3  | 132.6  | 113.4  | 108.2  | 119.8  | 93.6   | 121.3  |
| RBX1     | 5360.3 | 6200.2 | 2003.9 | 1775.8 | 1438.8 | 2279.4 | 5326.3 | 6787.3 |
| RC3H1    | 104.8  | 123    | 92.3   | 65.8   | 82.7   | 87     | 86.5   | 129    |
| RC74     | 1506   | 1957.7 | 1074.5 | 807    | 563.2  | 712.7  | 1353.1 | 1598.9 |
| RCBTB1   | 167.9  | 190    | 129    | 123.3  | 111.8  | 145.6  | 159.3  | 219.9  |
| RCBTB2   | 406.2  | 449.2  | 275.1  | 476.3  | 343.1  | 749.4  | 322.1  | 705.8  |
| RCC1     | 374.4  | 426.8  | 229.4  | 184.9  | 165    | 145.9  | 241.5  | 272.3  |
| RCC2     | 5643.7 | 6516.7 | 4311.5 | 5306.1 | 3919   | 4990.6 | 4141.8 | 3904.8 |
| RCCD1    | 143.8  | 188.8  | 118.8  | 112.6  | 100.8  | 118.5  | 122    | 137.1  |
| RCCD1    | 101.5  | 113.4  | 106.5  | 86.5   | 89.7   | 86.3   | 94.5   | 105.8  |
| RCCD1    | 513.9  | 453.1  | 291    | 292.2  | 273.2  | 371.7  | 270.4  | 348.8  |
| RCD-8    | 1129.1 | 1488.8 | 1476   | 1177   | 1004.7 | 1132.9 | 886.6  | 997.7  |
| RCE1     | 508.8  | 614.5  | 463    | 316.3  | 247.2  | 362.1  | 512.7  | 893.7  |
| RCE1     | 158.6  | 196.2  | 183.6  | 139.1  | 128.4  | 155.5  | 154.2  | 224.3  |
| RCHY1    | 244.9  | 288.4  | 195.2  | 145.4  | 133.8  | 193.4  | 149.9  | 223.6  |
| RCHY1    | 122.7  | 139.2  | 92.8   | 85.2   | 80.8   | 92.2   | 121.3  | 152.9  |
| RCL1     | 598    | 841    | 445.5  | 394    | 299.5  | 472.5  | 412.6  | 655.7  |
| RCN1     | 80.9   | 84.8   | 120.2  | 100.8  | 104.7  | 116.8  | 79.7   | 92.6   |
| RCN2     | 83.6   | 90.3   | 95.8   | 89.6   | 79.4   | 90.7   | 88     | 94.8   |
| RCN3     | 123.6  | 133.9  | 123.6  | 143.1  | 147    | 167.9  | 124.1  | 126.7  |
| RCOR1    | 82.9   | 101.5  | 98.9   | 110.4  | 103.1  | 94.4   | 91.3   | 91.6   |
| RCOR2    | 198.9  | 223.2  | 196.5  | 147.2  | 127.8  | 139.6  | 151.1  | 122.9  |
| RCOR3    | 533.9  | 708.6  | 481.1  | 617.6  | 572.4  | 1006.6 | 486.4  | 838.3  |
| RCP9     | 1579.4 | 1636.7 | 590.6  | 682.7  | 861.4  | 519.6  | 1458.9 | 1671.5 |
| RCP9     | 148.1  | 160.6  | 105.7  | 101    | 93.4   | 85.7   | 109    | 127.3  |

|        |        |        |        |        |        |        |        |        |
|--------|--------|--------|--------|--------|--------|--------|--------|--------|
| RCP9   | 77.3   | 76.2   | 83.5   | 78.3   | 74.6   | 74.5   | 84.9   | 95.1   |
| RCSD1  | 695    | 946.5  | 409.7  | 319.4  | 280.4  | 473.6  | 516    | 585.5  |
| RCV1   | 92.4   | 94.8   | 97.9   | 91.9   | 89.6   | 79.3   | 85.4   | 89.3   |
| RDBP   | 580.7  | 730.2  | 366.6  | 329.7  | 310.6  | 325.7  | 493.8  | 392.6  |
| RDH10  | 522.8  | 576.6  | 435.9  | 344.1  | 241.2  | 422.4  | 432.9  | 902.7  |
| RDH11  | 571.6  | 622.7  | 240.9  | 194.3  | 190.8  | 216.9  | 571.1  | 920.7  |
| RDH12  | 93     | 93.8   | 94.2   | 85.1   | 81     | 84.8   | 90.3   | 88.9   |
| RDH13  | 365.7  | 447.1  | 332.9  | 261.6  | 199.7  | 247.3  | 360.3  | 472.2  |
| RDH14  | 2159.5 | 2434   | 1621.5 | 1407.8 | 1172.5 | 1609.7 | 1804.2 | 3038   |
| RDH16  | 86.2   | 91.2   | 88     | 79.8   | 78.8   | 84.4   | 89.3   | 89.1   |
| RDH5   | 219.5  | 247.6  | 182.9  | 168    | 187.4  | 159.7  | 179.8  | 179    |
| RDH8   | 125    | 164.5  | 88.5   | 91.2   | 88.4   | 86     | 130.1  | 134.9  |
| RDHE2  | 113    | 138    | 97.3   | 93.7   | 85     | 87.6   | 96.4   | 108.5  |
| RDM1   | 101.2  | 111    | 119.3  | 119.9  | 98.9   | 123.9  | 103.5  | 94.2   |
| RDS    | 91.6   | 108.9  | 115.2  | 101.6  | 90.3   | 106.4  | 93.5   | 96.8   |
| REC8L1 | 240.9  | 234.1  | 214    | 157.3  | 186.3  | 208.3  | 241.1  | 332.9  |
| REC8L1 | 113.8  | 119.1  | 109.3  | 98.2   | 114.4  | 107.3  | 103.4  | 123.7  |
| RECK   | 260.5  | 329.9  | 184.3  | 194.9  | 132.4  | 208.6  | 244.2  | 381.2  |
| RECQL  | 352.1  | 453.7  | 250.1  | 233.6  | 203.9  | 300.9  | 274.3  | 375.9  |
| RECQL  | 722    | 832.3  | 278.2  | 309.7  | 233.5  | 350.8  | 545    | 898.8  |
| RECQL4 | 349.3  | 393    | 445.1  | 299.5  | 294.3  | 561.6  | 280.4  | 419.2  |
| RECQL5 | 118.8  | 134.7  | 118.6  | 104.4  | 94.8   | 105.6  | 112.5  | 117    |
| RECQL5 | 155.6  | 177.7  | 125.3  | 152.8  | 139    | 165.8  | 126.5  | 158.6  |
| RECQL5 | 110.6  | 132.6  | 116.2  | 97.9   | 94.3   | 104.8  | 104.4  | 113.9  |
| REEP1  | 107.1  | 116.4  | 110.4  | 102.2  | 86.6   | 96.6   | 91.7   | 130.2  |
| REEP2  | 96.2   | 107.5  | 86.4   | 83.5   | 74.2   | 82.9   | 93.3   | 103.5  |
| REEP3  | 176.7  | 219.2  | 126.4  | 99.4   | 106.3  | 108.6  | 134    | 186.5  |
| REEP4  | 298.4  | 405.5  | 294.5  | 163.8  | 157.7  | 205    | 264.9  | 426.8  |
| REEP5  | 1456.9 | 1779.6 | 635.6  | 674.8  | 564.9  | 812.4  | 1253.3 | 1679.6 |
| REEP6  | 503.7  | 616    | 375.4  | 469.7  | 345.1  | 351.4  | 468.6  | 410.5  |
| REG1A  | 89.3   | 97     | 90.1   | 93.9   | 85.1   | 87.5   | 91.1   | 104.4  |
| REG1B  | 87.4   | 97.9   | 96.7   | 85.3   | 86     | 84.2   | 86.4   | 96.1   |
| REG3A  | 111.7  | 121.6  | 95.1   | 91.5   | 90.3   | 80     | 105.8  | 134    |
| REG3A  | 88.8   | 94.6   | 101.5  | 93.7   | 83.4   | 86.2   | 85.3   | 102.1  |
| REG3G  | 79.3   | 83.8   | 97.1   | 93.1   | 86.8   | 95.6   | 81.9   | 86.1   |
| REG3G  | 91.9   | 96.4   | 105.5  | 91.5   | 85.9   | 91.4   | 92.7   | 92.1   |
| REG4   | 98     | 122.1  | 95.1   | 97.3   | 84.7   | 95.8   | 106.9  | 115.8  |
| REL    | 145.6  | 186.2  | 116.7  | 101.7  | 97.8   | 121.5  | 146.5  | 208.9  |
| RELA   | 151.3  | 228.1  | 171.8  | 150.5  | 114.9  | 134.2  | 160.8  | 246.4  |
| RELB   | 119.1  | 161.2  | 145.5  | 128.2  | 156.9  | 147.6  | 130.1  | 176.3  |
| RELN   | 96.8   | 110.9  | 90.9   | 78.6   | 71.7   | 81.9   | 102.6  | 111.3  |
| RELN   | 140.4  | 131.8  | 99.9   | 98     | 97.9   | 105.2  | 132.4  | 144.2  |
| REM1   | 88.2   | 99.3   | 80.8   | 88.3   | 83.6   | 86.1   | 89.5   | 104    |
| REN    | 108.2  | 120.6  | 99.8   | 90.3   | 81.3   | 90.7   | 102.3  | 131    |
| RENBP  | 366.5  | 500    | 379.2  | 557.9  | 487.3  | 730.4  | 373    | 520.6  |
| RENT1  | 256.2  | 300.5  | 317.8  | 195.9  | 176.3  | 296.7  | 240.1  | 430.2  |
| REP15  | 80.6   | 103.7  | 96.1   | 95.1   | 88.2   | 98.7   | 85.4   | 96     |
| REPIN1 | 171.8  | 217.8  | 106.7  | 94.6   | 86.2   | 96.7   | 158.4  | 192.7  |
| REPIN1 | 101.1  | 136.5  | 109.3  | 114    | 116.4  | 108.3  | 105    | 107.5  |
| REPIN1 | 2284.4 | 2846.2 | 1445.1 | 1739.8 | 1726.9 | 2258.7 | 1317.4 | 1091.5 |

|         |        |        |        |        |        |        |        |        |
|---------|--------|--------|--------|--------|--------|--------|--------|--------|
| REPS1   | 156.6  | 175.5  | 169    | 161.7  | 145.2  | 202.3  | 140.6  | 194.2  |
| REPS2   | 90     | 98.4   | 110.8  | 108.1  | 103.9  | 97.2   | 104    | 94.5   |
| REPS2   | 89.1   | 101.9  | 106.6  | 107.9  | 99.8   | 105.9  | 93.2   | 103.6  |
| REPS2   | 84.8   | 104.5  | 99.7   | 93.8   | 90.4   | 94.9   | 90.8   | 96     |
| REPS2   | 91     | 110.4  | 98.5   | 131.9  | 139.7  | 144.8  | 98.3   | 104.6  |
| REPS2   | 98.1   | 110.8  | 101.9  | 86     | 76.7   | 91.7   | 87.8   | 94.7   |
| RER1    | 261.6  | 325.8  | 130.9  | 109.4  | 106    | 131.7  | 223.3  | 254    |
| RERE    | 168.2  | 236.2  | 182.7  | 300.6  | 275.2  | 354.5  | 164.3  | 243.4  |
| RERE    | 100.4  | 110.2  | 94.1   | 86.3   | 79.6   | 80.7   | 95.5   | 105.8  |
| RERE    | 100.7  | 136.6  | 112.6  | 132.6  | 133.9  | 145.9  | 114.6  | 131.7  |
| REGG    | 78.9   | 91.3   | 87.2   | 84.7   | 73.6   | 87.7   | 91.1   | 84.5   |
| RESP18  | 93.3   | 87.2   | 92.1   | 81.4   | 84     | 92.2   | 89.2   | 96.7   |
| REST    | 128.1  | 147.4  | 108.3  | 114.9  | 98.6   | 100.2  | 121.5  | 160.3  |
| RET     | 1794.5 | 2549.4 | 1403.6 | 877.3  | 746.3  | 770.3  | 1480.1 | 1335.4 |
| RET     | 306.5  | 468.6  | 233.3  | 234.1  | 196.2  | 290.5  | 214.7  | 217.9  |
| RET     | 803.7  | 1142.5 | 857.6  | 397.9  | 350.8  | 613.1  | 638.4  | 1221.8 |
| RETN    | 81     | 83.3   | 96.3   | 81.9   | 78     | 83.1   | 86     | 83.3   |
| RETNLB  | 101.9  | 108.9  | 100.7  | 93.5   | 97.3   | 93     | 95.8   | 102.5  |
| RETSAT  | 176    | 250.9  | 123    | 123.9  | 114.3  | 144.4  | 164.8  | 195.8  |
| REV1    | 686.9  | 756    | 301.2  | 359.1  | 265.2  | 352.9  | 536.7  | 823.2  |
| REV1L   | 738.4  | 810.3  | 353.2  | 411.8  | 376    | 625.1  | 601.1  | 891.8  |
| REV3L   | 140.2  | 203.7  | 156.8  | 170.7  | 154.3  | 226.4  | 128.2  | 151.4  |
| REXO1   | 229.3  | 241.7  | 228.8  | 177.6  | 183.7  | 166.4  | 237.1  | 308.8  |
| REXO1L1 | 87.5   | 116.7  | 81.2   | 78.7   | 72.9   | 77.7   | 96.8   | 110    |
| REXO2   | 1707.6 | 1965   | 1070.3 | 964.1  | 648.9  | 1036.9 | 1421.6 | 2212.7 |
| REXO4   | 1003.3 | 1364   | 443.7  | 367    | 286    | 341    | 854.2  | 631    |
| RFC1    | 911.4  | 1251.6 | 511.2  | 620.5  | 460.4  | 1039.9 | 809.3  | 975.1  |
| RFC2    | 255.8  | 333.7  | 173.7  | 163.5  | 151.3  | 153.7  | 239.7  | 267.7  |
| RFC2    | 1051.4 | 1214.7 | 349.3  | 241.9  | 189.8  | 297    | 817.9  | 1133.2 |
| RFC3    | 1597.1 | 2173.7 | 593.5  | 462.4  | 311.4  | 483    | 904.1  | 1501.8 |
| RFC3    | 778.6  | 1042.3 | 465.8  | 368    | 285.7  | 376.2  | 475.3  | 672.5  |
| RFC3    | 323.9  | 429.8  | 217.2  | 154.6  | 146.4  | 169.5  | 297.6  | 457.6  |
| RFC4    | 3333.9 | 3940.3 | 1096.7 | 1044.7 | 854.1  | 1072.9 | 2496.9 | 3645.7 |
| RFC4    | 3506.2 | 4682.6 | 2161.1 | 1786.9 | 1556.9 | 2934.1 | 2613.9 | 3766.6 |
| RFC5    | 2182.8 | 3040.9 | 1176.2 | 1080.9 | 851.4  | 1191.2 | 1749.9 | 2223   |
| RFC5    | 98.7   | 101    | 102.5  | 94     | 84.5   | 91.7   | 102.8  | 100.2  |
| RFESD   | 245.8  | 317.3  | 191.9  | 184.5  | 147    | 205.6  | 214.3  | 252.7  |
| RFFL    | 103.9  | 123.2  | 78.2   | 86.5   | 74     | 85.5   | 99.6   | 121.1  |
| RFFL    | 94.4   | 105.2  | 81.1   | 84.6   | 75.7   | 85.9   | 83.4   | 98.7   |
| RFK     | 143.4  | 157.5  | 99.3   | 88.1   | 80.3   | 94     | 120.8  | 181.1  |
| RFNG    | 117.9  | 133.5  | 128.8  | 105.9  | 100.7  | 105.8  | 114.8  | 136.2  |
| RFNG    | 503.4  | 610.9  | 552.2  | 439.8  | 417.1  | 538.8  | 405.5  | 885.7  |
| RFNG    | 98.4   | 115.3  | 88.3   | 84.1   | 82.6   | 93.2   | 95.9   | 113.1  |
| RFP     | 238.9  | 334.7  | 186.9  | 181.5  | 154.9  | 211.9  | 180.4  | 289.5  |
| RFP2    | 124.3  | 135.8  | 101.6  | 89.1   | 103.4  | 97.3   | 94.8   | 109.7  |
| RFPL1S  | 101.1  | 136.9  | 112.6  | 106.9  | 102.1  | 97.7   | 113.5  | 129.9  |
| RFPL3S  | 116.4  | 105.6  | 93.8   | 82     | 80.2   | 91.3   | 105.2  | 126.3  |
| RFPL3S  | 91.5   | 103.8  | 91.3   | 88.7   | 79.8   | 96.7   | 93.7   | 99.3   |
| RFPL4B  | 79.2   | 90.3   | 87.8   | 85.4   | 83.7   | 84.4   | 83.1   | 97.9   |
| RFT1    | 122.6  | 132.9  | 98.9   | 91.1   | 87     | 88.7   | 116    | 132    |



|         |        |        |        |        |        |        |        |        |
|---------|--------|--------|--------|--------|--------|--------|--------|--------|
| RFWD2   | 3198.9 | 3909.8 | 2051.9 | 1952.8 | 1642.8 | 2611   | 2688.9 | 3537.8 |
| RFWD2   | 94.9   | 99.3   | 93.2   | 86     | 92.9   | 92.6   | 93.3   | 89.1   |
| RFWD2   | 2670   | 3592.7 | 1562.8 | 1434.7 | 1084.3 | 2056.1 | 2439.6 | 2967.4 |
| RFWD3   | 1993.5 | 2758.8 | 1206.6 | 696.7  | 603.1  | 766.4  | 1544.6 | 1711.2 |
| RFX1    | 239.7  | 270.4  | 232.2  | 138.2  | 149.5  | 169.4  | 204.8  | 302.6  |
| RFX2    | 112.8  | 130.9  | 149.5  | 114.8  | 120.4  | 148.8  | 98.2   | 121.7  |
| RFX2    | 107.2  | 112.5  | 129.7  | 115.3  | 118.3  | 141.4  | 93.4   | 112.2  |
| RFX3    | 79.3   | 96.1   | 92.3   | 92.9   | 89     | 83.8   | 87.9   | 96.9   |
| RFX3    | 102.8  | 114.2  | 119.4  | 96.1   | 93.9   | 110.5  | 121.5  | 119.1  |
| RFX3    | 89.2   | 120.7  | 105    | 90.7   | 90     | 102    | 90.9   | 110.2  |
| RFX4    | 75.8   | 80.3   | 95.6   | 87.8   | 78.5   | 95     | 82.9   | 80.8   |
| RFX4    | 97.8   | 140.4  | 89.6   | 85.7   | 78.5   | 78.4   | 106.2  | 135.9  |
| RFX4    | 110.2  | 105.4  | 85.9   | 90.4   | 86.5   | 98.9   | 108.2  | 117.3  |
| RFX4    | 81.5   | 92.8   | 106.5  | 83.4   | 85     | 80.9   | 96.1   | 101.8  |
| RFX5    | 90.6   | 116.6  | 82.8   | 73.9   | 83.2   | 83.3   | 96.1   | 115.9  |
| RFX5    | 1983.9 | 2222.9 | 1905.4 | 1850   | 1678.1 | 2574.8 | 1351.5 | 2312.2 |
| RFXANK  | 996.6  | 1258.5 | 509.8  | 334.8  | 284.7  | 365.3  | 903.6  | 958.4  |
| RFXANK  | 431.9  | 521.5  | 213.6  | 146.3  | 136.6  | 164.3  | 334.7  | 365.4  |
| RFXANK  | 1975.9 | 2885.4 | 1749.8 | 1356.7 | 1061.7 | 1463.1 | 2374.5 | 2798.3 |
| RFXAP   | 158.1  | 188.6  | 95.8   | 87     | 97.5   | 91.8   | 136.4  | 171    |
| RFXDC1  | 100    | 112.1  | 113.2  | 89.5   | 101.8  | 98.7   | 98.3   | 100.1  |
| RFXDC2  | 113.9  | 121.2  | 103.9  | 116.3  | 96.2   | 114.2  | 116.2  | 136.3  |
| RG9MTD1 | 602    | 691    | 277.5  | 247.6  | 220.7  | 313.9  | 540.2  | 1075.5 |
| RG9MTD2 | 221.4  | 272.7  | 123    | 130.7  | 124.7  | 147    | 175.1  | 271    |
| RG9MTD3 | 216.7  | 243    | 178.9  | 157.9  | 157.2  | 145.2  | 188.8  | 250.4  |
| RGAG1   | 106.3  | 115.2  | 94.5   | 80     | 78.1   | 85.4   | 104.1  | 104.5  |
| RGAG4   | 89.3   | 108.5  | 105.4  | 102.7  | 84.7   | 101.6  | 92.5   | 100.9  |
| RGAG4   | 224.6  | 260.8  | 125.9  | 93.2   | 91.2   | 106.3  | 199.2  | 232.8  |
| RGC32   | 537    | 676.1  | 452.3  | 359.8  | 288.8  | 417.9  | 482.7  | 737.7  |
| RGL1    | 123.3  | 151.5  | 117.4  | 173.6  | 199.1  | 211.1  | 153    | 186.9  |
| RGL2    | 233.3  | 265    | 180.2  | 159.9  | 192.8  | 241.4  | 201.5  | 421.1  |
| RGL3    | 133.2  | 143.4  | 89.4   | 81.4   | 82.6   | 80.7   | 123.2  | 154.6  |
| RGMA    | 192.1  | 207.3  | 189.3  | 190.9  | 180.2  | 195.4  | 130.2  | 147.9  |
| RGMB    | 98.3   | 105.3  | 104.3  | 91.9   | 90.8   | 92.3   | 91.9   | 100.5  |
| RGMB    | 82.2   | 88.7   | 85.6   | 81.9   | 86     | 93.6   | 83.2   | 90.4   |
| RGMB    | 101.4  | 121.3  | 100    | 95     | 100.2  | 84.6   | 113    | 124.8  |
| RGN     | 106.5  | 119    | 116.8  | 92.6   | 97     | 101.3  | 113    | 129.2  |
| RGN     | 120.3  | 120.2  | 90.3   | 88.9   | 77.1   | 84.3   | 108    | 134.7  |
| RGNEF   | 107.8  | 128.5  | 97.5   | 84.1   | 83.8   | 87.2   | 104.8  | 131.4  |
| RGNEF   | 75     | 85.1   | 95.1   | 89.1   | 84.1   | 87.3   | 70.5   | 78.5   |
| RGPD1   | 179.4  | 227    | 175.6  | 240.6  | 273.8  | 296.3  | 148.9  | 165.3  |
| RGPD2   | 182.5  | 225.1  | 114.1  | 112    | 104.4  | 119.1  | 157.6  | 190.9  |
| RGPD5   | 88.6   | 92.2   | 97.4   | 86.8   | 79.6   | 82.5   | 92.5   | 86.9   |
| RGPD5   | 104    | 130.8  | 105.4  | 103.1  | 92     | 102.1  | 114.3  | 124.5  |
| RGPD5   | 80.1   | 89.9   | 87.5   | 92.4   | 86.3   | 80.1   | 79.5   | 89.4   |
| RGPD7   | 100.1  | 115.9  | 99.7   | 88.3   | 98     | 86.2   | 97.7   | 118.9  |
| RGR     | 79     | 88.1   | 91.9   | 87.1   | 80.6   | 86.9   | 84.1   | 88.9   |
| RGR     | 130.9  | 146.9  | 117.9  | 108.4  | 113.4  | 113    | 126    | 135.2  |
| RGR     | 115.7  | 121.4  | 114.2  | 103.1  | 111.1  | 100.1  | 116.3  | 121.7  |
| RGS1    | 97     | 101.3  | 85.1   | 77.7   | 83.2   | 89.1   | 90.9   | 104.9  |

|        |        |        |        |        |        |        |        |        |
|--------|--------|--------|--------|--------|--------|--------|--------|--------|
| RGS10  | 771.9  | 1014.4 | 529.6  | 293    | 208    | 329.7  | 478.5  | 504.6  |
| RGS10  | 3111.5 | 3955.1 | 1026   | 753    | 542.9  | 772.1  | 2891.1 | 3450.8 |
| RGS10  | 117.7  | 131.8  | 97.3   | 73     | 77.2   | 82.8   | 108.1  | 121    |
| RGS11  | 106.4  | 121.5  | 94.2   | 95.8   | 86.7   | 94.8   | 96.1   | 119.4  |
| RGS11  | 115.9  | 133    | 100.2  | 85.4   | 84.9   | 89.6   | 112.5  | 124.5  |
| RGS12  | 101.9  | 114.6  | 106.1  | 94.4   | 87.2   | 88.5   | 103.5  | 101.1  |
| RGS12  | 339    | 427.3  | 365    | 329    | 352.1  | 393    | 299.9  | 439.5  |
| RGS12  | 117.1  | 130    | 81.7   | 89.7   | 85.2   | 81.2   | 110.7  | 109.3  |
| RGS13  | 88.7   | 93.2   | 94.6   | 85.4   | 92.2   | 94.5   | 93.4   | 94     |
| RGS14  | 147.6  | 176.9  | 136.1  | 142.5  | 131.5  | 186.6  | 127.3  | 164.2  |
| RGS16  | 120.5  | 126.2  | 144.1  | 128    | 142.8  | 164    | 112.8  | 150.5  |
| RGS17  | 96.9   | 112.3  | 123.1  | 108.8  | 109.4  | 110.8  | 101.4  | 109.4  |
| RGS18  | 1438.6 | 1754.2 | 826.4  | 684.2  | 469.4  | 990.9  | 700    | 1251.5 |
| RGS19  | 1476.3 | 1857.1 | 1285.4 | 1380.2 | 1086.8 | 1833.3 | 1211   | 2470   |
| RGS2   | 220.2  | 274.8  | 181.4  | 170.7  | 174.4  | 214    | 265    | 489.9  |
| RGS20  | 72.7   | 88.5   | 90.6   | 84.7   | 85.2   | 85.9   | 82.2   | 83.1   |
| RGS20  | 101.4  | 103.5  | 90.1   | 115.5  | 117.6  | 122.1  | 107.8  | 137.2  |
| RGS22  | 77.6   | 90.3   | 92.6   | 80.1   | 80.5   | 84.4   | 88.7   | 86.7   |
| RGS3   | 92.5   | 106.2  | 96.3   | 89.6   | 83.5   | 90.7   | 85.5   | 88     |
| RGS3   | 124.5  | 136.2  | 93.5   | 91.5   | 88.8   | 91.2   | 105.7  | 130.7  |
| RGS3   | 106.6  | 109.8  | 93.4   | 84.9   | 81     | 81.5   | 96.5   | 101.2  |
| RGS3   | 72.3   | 85.7   | 80.9   | 77.9   | 80.1   | 75.8   | 79.5   | 80.6   |
| RGS3   | 90.4   | 104.7  | 85.2   | 87.1   | 74.6   | 85.9   | 98.8   | 115.9  |
| RGS3   | 105.4  | 106.2  | 109.7  | 103.5  | 114.4  | 106.7  | 103    | 112.6  |
| RGS4   | 103.6  | 113.6  | 94     | 88.9   | 91.4   | 97     | 109.1  | 113.4  |
| RGS5   | 91.7   | 93     | 101.4  | 104.5  | 88.8   | 99.5   | 90.2   | 103.7  |
| RGS6   | 112.5  | 123.4  | 111.9  | 93.1   | 101.9  | 107.2  | 118.6  | 127    |
| RGS7   | 87.7   | 103.5  | 87     | 84.1   | 77.5   | 80.4   | 90.3   | 90.3   |
| RGS8   | 91.2   | 124.8  | 87.2   | 84.9   | 81.1   | 81.6   | 96.3   | 104.6  |
| RGS9   | 89.7   | 98.9   | 88.8   | 77.1   | 87     | 78.3   | 84.2   | 103.3  |
| RGS9   | 79.7   | 89.5   | 86.9   | 77.2   | 79.4   | 83     | 88     | 84.9   |
| RGS9BP | 91.4   | 100.9  | 111.5  | 93.3   | 95.4   | 87.6   | 94.3   | 99.3   |
| RHAG   | 81.1   | 87.7   | 96.6   | 88.5   | 83.1   | 89.4   | 82.2   | 89.3   |
| RHBDD1 | 300.4  | 385.2  | 226.8  | 253.7  | 217.2  | 278.3  | 296    | 338.7  |
| RHBDD2 | 743.5  | 923.6  | 983.3  | 494    | 349.9  | 446.7  | 829.3  | 1609.7 |
| RHBDD2 | 865    | 1074.1 | 1074.8 | 632.3  | 435.7  | 506.9  | 906.4  | 1874.2 |
| RHBDD3 | 231.6  | 317.7  | 200.6  | 157.1  | 145    | 208.3  | 214.1  | 408.7  |
| RHBDF1 | 685.9  | 758.7  | 447.1  | 521.9  | 515.9  | 536    | 449.4  | 494.3  |
| RHBDF2 | 311.6  | 367.3  | 342    | 392.5  | 369.9  | 373    | 194.7  | 200.3  |
| RHBDF2 | 110.2  | 131    | 96.6   | 90.7   | 90.8   | 97     | 111    | 131.8  |
| RHBDF2 | 363.2  | 440    | 281.9  | 319.1  | 247.4  | 301.4  | 253.5  | 292.2  |
| RHBDF2 | 77.4   | 85.2   | 93.4   | 82     | 80.6   | 79.5   | 80.6   | 82.1   |
| RHBDL1 | 206.4  | 240.1  | 188.6  | 172.1  | 187.5  | 193.1  | 147    | 238.2  |
| RHBDL2 | 162.7  | 172.5  | 104.1  | 99.8   | 93.3   | 103.8  | 162.5  | 195.9  |
| RHBDL3 | 121.6  | 130.1  | 115.7  | 105.3  | 98.6   | 113.9  | 117.1  | 123.3  |
| RHBG   | 70.1   | 84     | 87.2   | 82.5   | 70.5   | 81.4   | 76.2   | 85.6   |
| RHCE   | 139.8  | 163.9  | 101    | 94.7   | 86.8   | 94.7   | 127.2  | 146.6  |
| RHCE   | 81.4   | 97.1   | 91.1   | 89.7   | 84.9   | 83.5   | 85.1   | 84.6   |
| RHCG   | 82     | 116.6  | 79.4   | 77.6   | 69.3   | 82.8   | 103.4  | 108.7  |
| RHD    | 81.6   | 96.3   | 84.7   | 97.3   | 77.8   | 85.9   | 76.3   | 104.7  |

|         |         |         |        |        |        |        |         |         |
|---------|---------|---------|--------|--------|--------|--------|---------|---------|
| RHEB    | 5090.2  | 6662.8  | 2516.8 | 2437.1 | 1603.4 | 2917.8 | 4617.2  | 6867.1  |
| RHEBL1  | 126.9   | 143.8   | 102.2  | 88.1   | 94.5   | 89.1   | 104.4   | 118     |
| RHO     | 75.5    | 89.9    | 87.4   | 94.5   | 80     | 89.1   | 93.8    | 89.1    |
| RHOA    | 12931.6 | 14487.6 | 4475.3 | 5408.2 | 2906.5 | 3674.1 | 13494.4 | 18977.1 |
| RHOB    | 116.4   | 132.2   | 94.6   | 96.2   | 94     | 90.7   | 125.9   | 189.3   |
| RHOBTB1 | 106.9   | 94.2    | 100.4  | 89.9   | 85.7   | 91.6   | 84.1    | 141     |
| RHOBTB1 | 92.4    | 91.5    | 93.9   | 92.3   | 91     | 88.4   | 85.3    | 77.6    |
| RHOBTB1 | 98      | 113.9   | 94     | 81.7   | 80.8   | 83.2   | 95.7    | 109.9   |
| RHOBTB1 | 103.4   | 116.2   | 106.2  | 87.9   | 83.1   | 89.2   | 95      | 106.8   |
| RHOBTB2 | 152.6   | 177.2   | 137.8  | 153.9  | 136.5  | 157.9  | 143.2   | 247.9   |
| RHOBTB3 | 195.2   | 232.1   | 207.6  | 294    | 244.2  | 362.9  | 239.6   | 314.9   |
| RHOC    | 2423.3  | 3051.7  | 1008.5 | 592.4  | 425.5  | 736.6  | 2792.7  | 4319.9  |
| RHOC    | 1060.7  | 1303.8  | 357.3  | 223.4  | 212.1  | 214.8  | 1181.7  | 959     |
| RHOD    | 78.7    | 82      | 95.4   | 85.1   | 82.7   | 88.3   | 82.2    | 81.5    |
| RHOF    | 97      | 111.8   | 105.6  | 84.4   | 94     | 99.4   | 103     | 126.1   |
| RHOG    | 2266.1  | 3166.8  | 2265.2 | 1613.6 | 1128.9 | 1485.4 | 2569.8  | 4315    |
| RHOH    | 96.8    | 116.8   | 90.6   | 94     | 76.2   | 72.9   | 99.2    | 117.1   |
| RHOJ    | 79.7    | 85.8    | 101.1  | 82.2   | 93.6   | 81     | 89.2    | 90.9    |
| RHOQ    | 1479.6  | 2004.4  | 946.6  | 1256.6 | 985.8  | 1019.4 | 1746.6  | 2015.2  |
| RHOT1   | 694.4   | 928.3   | 389.8  | 608.6  | 447    | 982    | 475.9   | 696.8   |
| RHOT1   | 1402.8  | 1887.3  | 734    | 1103.9 | 946.9  | 1543.8 | 1145.8  | 1670.8  |
| RHOT1   | 201.4   | 269.1   | 113    | 102.7  | 108.6  | 141.2  | 172.9   | 235.8   |
| RHOT2   | 580.2   | 635.7   | 634.2  | 468    | 431.3  | 743.9  | 387.4   | 794.2   |
| RHOV    | 100.8   | 117.5   | 84.4   | 80.1   | 77.1   | 80.6   | 97.5    | 123.8   |
| RHPN1   | 143     | 172.8   | 128.7  | 96.1   | 93.4   | 118.5  | 143.7   | 172.5   |
| RHPN2   | 101.6   | 120.3   | 107.1  | 104.9  | 100.1  | 107.6  | 99.3    | 116.8   |
| RIBC1   | 149.8   | 159.1   | 111.3  | 89.9   | 88     | 99.7   | 118     | 152.7   |
| RIBC1   | 101.3   | 125.4   | 82     | 85.1   | 80.2   | 82.3   | 99.8    | 103.8   |
| RIBC2   | 86.7    | 97.5    | 96.1   | 91.1   | 81.6   | 88     | 86.5    | 94.3    |
| RIC3    | 80.4    | 92.3    | 86.2   | 80.7   | 86.9   | 82.8   | 80.2    | 85.9    |
| RIC8A   | 867     | 1116.4  | 815.8  | 679.6  | 570    | 837.2  | 816.2   | 1495.6  |
| RIC8B   | 169.1   | 203.4   | 99.9   | 99.1   | 85.1   | 97.3   | 162.2   | 221.9   |
| RICS    | 192.1   | 297.9   | 236.8  | 289    | 260.9  | 444.8  | 189.8   | 345.7   |
| RICTOR  | 126.3   | 142.6   | 100.3  | 91.2   | 88.9   | 93.4   | 112     | 134.2   |
| RIF1    | 399.5   | 592.6   | 253.8  | 296.3  | 246.5  | 520.6  | 371.8   | 506.2   |
| RILP    | 287.3   | 321.5   | 155.4  | 180.2  | 135.8  | 189.1  | 241.4   | 354.3   |
| RIMBP2  | 96      | 99.9    | 106.4  | 99.9   | 97.9   | 88.8   | 95.7    | 96.2    |
| RIMS1   | 83.3    | 85.2    | 94     | 91.1   | 89.2   | 88.1   | 86.7    | 88.3    |
| RIMS2   | 132.7   | 138.1   | 86.2   | 77.5   | 79.1   | 82.2   | 126.2   | 134.5   |
| RIMS3   | 1462.5  | 1679.5  | 1694   | 2126.8 | 2084.6 | 1993.2 | 1360.6  | 1339.9  |
| RIMS4   | 135.7   | 155.4   | 100.4  | 89.9   | 81.3   | 92.1   | 136.8   | 156.3   |
| RIN1    | 209.5   | 271.6   | 145.7  | 107.8  | 92.4   | 135    | 196.8   | 259.3   |
| RIN2    | 76.6    | 85.7    | 99.8   | 94.8   | 84.2   | 90.6   | 75.3    | 90.2    |
| RIN3    | 109.2   | 119     | 107.4  | 100.6  | 85.4   | 98     | 93.1    | 124.7   |
| RING1   | 5437.3  | 6929.7  | 3270.5 | 2759.9 | 2371.7 | 3395.8 | 4545.1  | 5999.3  |
| RINT-1  | 262     | 343.2   | 223.4  | 223.8  | 214    | 267.8  | 215.1   | 355     |
| RIOK1   | 479.4   | 635.3   | 321.8  | 301.9  | 228.9  | 373    | 384.5   | 494.5   |
| RIOK1   | 88.8    | 87.9    | 89.9   | 77.3   | 80.2   | 83.4   | 87.6    | 98.2    |
| RIOK1   | 331.4   | 457     | 152.8  | 119.1  | 108.6  | 121.7  | 264     | 374.5   |
| RIOK2   | 1462.7  | 1972.5  | 816.2  | 645.3  | 469.4  | 1140.6 | 1050.3  | 1679.4  |

|          |         |         |         |         |         |         |         |         |
|----------|---------|---------|---------|---------|---------|---------|---------|---------|
| RIOK3    | 923     | 1073.1  | 451.9   | 492.4   | 428.5   | 491.5   | 679     | 926     |
| RIOK3    | 1637.4  | 1851    | 958.5   | 1562.8  | 1271    | 2041.2  | 1478    | 2604.7  |
| RIOK3    | 78.1    | 95.5    | 100.6   | 90.3    | 81.3    | 88.5    | 82.7    | 94.5    |
| RIP      | 970.7   | 1285.9  | 827.7   | 913.2   | 801.8   | 1231    | 751.7   | 892.7   |
| RIPK1    | 137.4   | 159.7   | 205.4   | 210.3   | 213.8   | 245.2   | 160.4   | 197.5   |
| RIPK2    | 992.6   | 1337.3  | 687.5   | 457.1   | 339.2   | 549.4   | 794.8   | 1321.4  |
| RIPK3    | 344.5   | 431.8   | 215.8   | 180.6   | 166.3   | 187.4   | 285.1   | 317.4   |
| RIPK4    | 150.4   | 166.4   | 124.1   | 110.5   | 115     | 115.6   | 150.1   | 149     |
| RIPK5    | 135.1   | 166.4   | 134.7   | 123.3   | 122.2   | 146     | 128.6   | 149     |
| RIPK5    | 569.3   | 751.6   | 381.3   | 418.7   | 294.3   | 401.6   | 562.9   | 736.3   |
| RIS1     | 2018.1  | 2611.9  | 1310.9  | 1083.9  | 707.7   | 1033.9  | 1580.7  | 2227.9  |
| RIT1     | 287     | 376.8   | 159.1   | 128.6   | 134.5   | 172.8   | 823.7   | 1486.4  |
| RIT2     | 80.2    | 91.3    | 86.7    | 83.2    | 73.9    | 78.1    | 80.1    | 91.1    |
| RKHD1    | 89.2    | 95.4    | 85.6    | 81.8    | 78.4    | 80      | 90.6    | 100.3   |
| RKHD2    | 537.5   | 664.9   | 276.7   | 352.6   | 260.3   | 369.6   | 506.7   | 934.6   |
| RKHD3    | 98.1    | 93.6    | 94.7    | 80.6    | 83.7    | 93      | 97.7    | 126.4   |
| RLBP1    | 87.7    | 90.1    | 101     | 97.4    | 88.2    | 89      | 95.2    | 91      |
| RLF      | 758.2   | 1027.9  | 276.7   | 478.2   | 363.3   | 767.4   | 856.8   | 1322.9  |
| RLN1     | 87      | 92.4    | 100.8   | 86.2    | 83.4    | 81.8    | 88.3    | 90.8    |
| RLN2     | 81.7    | 93.9    | 83.5    | 80.9    | 79.7    | 75.9    | 88.1    | 97.5    |
| RLN2     | 95.6    | 102.7   | 92      | 90      | 90.1    | 89.6    | 93.8    | 101.1   |
| RLN3     | 85.2    | 98.9    | 86.5    | 85.5    | 86.5    | 85.6    | 97.2    | 99.2    |
| RLN3R1   | 111.5   | 124.7   | 100.6   | 95.1    | 88.5    | 97.5    | 108     | 112.5   |
| RLN3R2   | 124.4   | 136.7   | 90.7    | 83.3    | 86.8    | 82.4    | 117.6   | 118.1   |
| RLTPR    | 87.1    | 102.2   | 94.4    | 84.4    | 80.7    | 79      | 89.1    | 100.4   |
| RMI1     | 1941.6  | 2336.6  | 977.3   | 936.5   | 581     | 1038.1  | 1502.1  | 2347.7  |
| RN7SK    | 645.4   | 736.2   | 407.1   | 1005.4  | 899.5   | 369.5   | 740.6   | 766.7   |
| RN7SL1   | 26300.9 | 25051.8 | 12468   | 18143.7 | 18257.6 | 14028.5 | 24924.1 | 26195.5 |
| RNASE1   | 131.8   | 145     | 106.3   | 101.6   | 99.7    | 107.5   | 114.5   | 134.1   |
| RNASE1   | 109.2   | 110.9   | 91      | 105     | 101.1   | 105.8   | 110.5   | 108.4   |
| RNASE10  | 116.8   | 137.4   | 117     | 111.2   | 100.2   | 113.5   | 106.8   | 117.4   |
| RNASE11  | 87.6    | 113.3   | 93.3    | 83.9    | 85.4    | 91.9    | 101     | 107     |
| RNASE12  | 72.3    | 87.3    | 96.8    | 86.3    | 80.6    | 80.9    | 78      | 80.1    |
| RNASE13  | 90.2    | 98.3    | 98      | 86.4    | 84.6    | 85.3    | 93      | 92.7    |
| RNASE2   | 26554.4 | 27065.9 | 14332.3 | 11237.8 | 8614    | 12275.8 | 24729.7 | 32036.4 |
| RNASE3   | 1368    | 1771.8  | 1058.6  | 1125.4  | 909.1   | 1240    | 1149.3  | 2012.6  |
| RNASE4   | 76.7    | 86.7    | 96.3    | 96.3    | 89.5    | 91.7    | 79.5    | 87.2    |
| RNASE4   | 90.3    | 110.8   | 94.5    | 107.1   | 102     | 96.3    | 94.3    | 100.4   |
| RNASE4   | 99.9    | 113.1   | 122.6   | 129.7   | 112.2   | 127.5   | 101.6   | 132.1   |
| RNASE4   | 138.1   | 144.4   | 105.1   | 92.2    | 97.3    | 105     | 143.8   | 148.8   |
| RNASE6   | 259.2   | 390     | 245     | 209.3   | 213.2   | 254.6   | 212.2   | 254.1   |
| RNASE7   | 85      | 93.5    | 73.5    | 76.6    | 80.3    | 88.2    | 84.9    | 94.3    |
| RNASE8   | 83.8    | 84.3    | 83.7    | 73.7    | 78.2    | 87.1    | 88      | 85.3    |
| RNASE9   | 74.7    | 81      | 88.7    | 80.8    | 74.8    | 76.6    | 75.4    | 80.3    |
| RNASEH1  | 1609.9  | 1911.4  | 1238.5  | 1339.9  | 990.3   | 1036.4  | 1289.9  | 2272.5  |
| RNASEH2A | 1019.8  | 1304.4  | 667.4   | 390.4   | 332.4   | 401.6   | 875.2   | 1030    |
| RNASEL   | 721.6   | 845.4   | 335     | 393     | 312.2   | 527.3   | 661.3   | 1069.6  |
| RNASEN   | 114.5   | 126.7   | 91.4    | 84      | 89.8    | 98.6    | 112.7   | 120.5   |
| RNASET2  | 21168.6 | 26141.3 | 14469.3 | 15846.3 | 13014.4 | 15950.5 | 19279.1 | 19466   |
| RND1     | 92.5    | 92.7    | 90.9    | 92.3    | 86.4    | 104     | 90.4    | 94.5    |

|          |        |        |       |       |       |       |        |        |
|----------|--------|--------|-------|-------|-------|-------|--------|--------|
| RND2     | 115    | 124.6  | 120.2 | 106.8 | 96.3  | 105.2 | 106.4  | 124.8  |
| RND3     | 108    | 127.5  | 90.4  | 92    | 86.4  | 98.5  | 106.3  | 137.5  |
| RNF10    | 200.7  | 263    | 197.9 | 200.3 | 154   | 227.2 | 200.6  | 342.8  |
| RNF11    | 84.2   | 101    | 103.1 | 95.4  | 103.5 | 95.8  | 89.2   | 90.1   |
| RNF111   | 112.1  | 125.7  | 98.4  | 89.5  | 83.6  | 94.8  | 109.2  | 141.4  |
| RNF113A  | 765.3  | 961.6  | 373.6 | 386.9 | 336.5 | 440.2 | 684.9  | 693.3  |
| RNF113B  | 127.3  | 155.9  | 103.5 | 91.7  | 98.7  | 97.1  | 119.3  | 128.8  |
| RNF12    | 73.8   | 81.1   | 86.6  | 97.9  | 80.7  | 81.6  | 79.3   | 97.6   |
| RNF12    | 86.7   | 91.9   | 89.9  | 88.7  | 83.8  | 87.7  | 99.4   | 100.7  |
| RNF12    | 104.2  | 114.3  | 106.1 | 107.9 | 93.9  | 107.5 | 92.1   | 111.7  |
| RNF121   | 157.9  | 198.8  | 132   | 138.7 | 114   | 137.3 | 158.5  | 185.3  |
| RNF121   | 457.8  | 635.3  | 335.5 | 355.2 | 294.9 | 311.3 | 462.9  | 621.4  |
| RNF122   | 129.6  | 153.1  | 103.3 | 85.6  | 88.2  | 92.7  | 122.6  | 151.2  |
| RNF123   | 238.5  | 272.3  | 223   | 196.1 | 165.3 | 200.1 | 205.5  | 292.8  |
| RNF125   | 157.5  | 203.2  | 127.6 | 115.2 | 105.3 | 100.4 | 145.8  | 172.7  |
| RNF126   | 1042.7 | 1297.9 | 441.9 | 393.4 | 333.4 | 366.6 | 971.5  | 779.2  |
| RNF126   | 308.4  | 449.6  | 301   | 225.4 | 188.4 | 296.3 | 307.3  | 466.9  |
| RNF126P1 | 158.2  | 171.4  | 119.9 | 115.2 | 113.8 | 116.1 | 135.3  | 166.2  |
| RNF126P1 | 108    | 128.1  | 95.7  | 86.2  | 84.5  | 96.9  | 106.6  | 108.4  |
| RNF128   | 111.9  | 132.3  | 97.3  | 87.1  | 94.4  | 90.8  | 112.8  | 126.5  |
| RNF128   | 89.1   | 116.1  | 110.2 | 109   | 103   | 105.8 | 107.8  | 97.4   |
| RNF128   | 123.3  | 164.3  | 119.1 | 108.8 | 104.7 | 105.3 | 123    | 131.1  |
| RNF13    | 498.6  | 669.2  | 282.6 | 423.9 | 338.4 | 613.9 | 515.9  | 1625.9 |
| RNF13    | 110.3  | 124.3  | 90.1  | 105.8 | 100.1 | 93.7  | 103.6  | 106.4  |
| RNF130   | 1146.6 | 1603.9 | 475.3 | 696   | 580.9 | 940.7 | 1137.9 | 2167.9 |
| RNF133   | 98     | 93.4   | 107.6 | 99.5  | 92.2  | 100.7 | 91.1   | 94.4   |
| RNF135   | 472.8  | 643.5  | 333.6 | 336.4 | 224.1 | 411.4 | 521.2  | 1327.8 |
| RNF135   | 231.3  | 331    | 191.5 | 180.9 | 166   | 151.4 | 213.5  | 275.4  |
| RNF135   | 124.3  | 153.3  | 109.7 | 100.3 | 90.1  | 97.1  | 144.9  | 190.8  |
| RNF138   | 436.4  | 513.8  | 255.3 | 323.8 | 233.2 | 408.2 | 350.5  | 586.9  |
| RNF139   | 97.3   | 130.5  | 91.6  | 88.9  | 86.4  | 80.8  | 103.1  | 120.8  |
| RNF14    | 120.6  | 120.5  | 93.4  | 96.9  | 87.6  | 95.7  | 109.4  | 110.2  |
| RNF14    | 1021.2 | 1334.2 | 590.4 | 516.8 | 363.1 | 848.2 | 1013.2 | 1826.2 |
| RNF14    | 571.2  | 808.1  | 368.2 | 327.3 | 249.7 | 496.6 | 517.6  | 828.5  |
| RNF141   | 205    | 220.3  | 114   | 116.7 | 112.3 | 118.6 | 177.1  | 226.8  |
| RNF144   | 454.3  | 625.3  | 357.1 | 357.5 | 305   | 429.7 | 353.9  | 326.6  |
| RNF146   | 785.5  | 1253.5 | 441.8 | 432.6 | 384.1 | 633.2 | 699.3  | 838.9  |
| RNF148   | 125.6  | 136.4  | 129.2 | 109.6 | 106.4 | 116.7 | 117    | 130.7  |
| RNF149   | 129.1  | 165.6  | 100.7 | 115.1 | 108.7 | 99.6  | 133.8  | 184    |
| RNF150   | 104.3  | 120.2  | 108.8 | 114.6 | 102.8 | 140.2 | 99.8   | 105.3  |
| RNF151   | 85.6   | 84.5   | 101.6 | 93.4  | 82.2  | 86.7  | 93.1   | 96.6   |
| RNF151   | 82.5   | 96.7   | 89.6  | 84.1  | 76    | 84.5  | 79.8   | 89.2   |
| RNF152   | 84.9   | 86.8   | 102.8 | 97.8  | 92.2  | 88.2  | 91.7   | 97.9   |
| RNF157   | 113.5  | 141.6  | 107.3 | 99.2  | 89.6  | 99.9  | 122.3  | 136.8  |
| RNF165   | 152.8  | 191.1  | 166.3 | 121.1 | 120   | 125.1 | 112.6  | 144.5  |
| RNF166   | 178.4  | 195.6  | 149.4 | 118.4 | 116.2 | 141.4 | 159.8  | 281.2  |
| RNF167   | 580.3  | 765.1  | 223.6 | 211   | 177.1 | 212.2 | 461    | 688.3  |
| RNF168   | 127.4  | 128.3  | 93    | 96.2  | 92    | 88.9  | 123.7  | 131.8  |
| RNF17    | 75.6   | 78.9   | 90.5  | 82.4  | 82    | 81.4  | 79.9   | 91.3   |
| RNF17    | 91.3   | 98.3   | 92    | 79.3  | 86.8  | 89.9  | 91.5   | 93.8   |

|        |        |        |        |        |        |        |        |        |
|--------|--------|--------|--------|--------|--------|--------|--------|--------|
| RNF170 | 336.9  | 468.5  | 212.6  | 186.1  | 157.4  | 219    | 333.8  | 560.2  |
| RNF175 | 854.7  | 1013.6 | 263.4  | 217.4  | 206.4  | 215.3  | 676.8  | 860.9  |
| RNF180 | 106    | 112.2  | 96.3   | 85.1   | 81.1   | 95.2   | 101    | 101.6  |
| RNF183 | 120    | 166.4  | 101    | 101.5  | 84.3   | 93.8   | 129.8  | 141.6  |
| RNF185 | 106.1  | 117    | 127.2  | 125.4  | 101.8  | 146.5  | 119.7  | 123.7  |
| RNF186 | 99.9   | 123.8  | 93.6   | 86.5   | 78.7   | 91.9   | 101.6  | 137.4  |
| RNF19  | 176.7  | 183.2  | 131    | 143.4  | 140    | 109.4  | 146.1  | 203    |
| RNF19  | 98.1   | 109.7  | 96.6   | 93.5   | 80.6   | 82.9   | 105.9  | 119.9  |
| RNF19  | 654.6  | 860    | 464.5  | 444.9  | 347.5  | 821.1  | 471.5  | 709.3  |
| RNF190 | 75.8   | 86.1   | 90.9   | 79.1   | 83.4   | 91     | 85.9   | 86.9   |
| RNF2   | 116.6  | 111.8  | 94.7   | 89.3   | 93.1   | 89.7   | 94.2   | 113.4  |
| RNF20  | 1014.9 | 1303.8 | 569.7  | 543.4  | 456.9  | 759.5  | 829.3  | 1349.9 |
| RNF24  | 421.5  | 514.4  | 406.7  | 838.5  | 603.1  | 1089.8 | 418.9  | 794.6  |
| RNF25  | 164.3  | 165.2  | 138.4  | 110.9  | 126.2  | 126.9  | 130.8  | 165.6  |
| RNF26  | 549.2  | 728.4  | 379.1  | 285.9  | 214.2  | 267.8  | 507.2  | 994.5  |
| RNF31  | 268.4  | 283.7  | 282.9  | 219.2  | 179.7  | 268.9  | 242    | 386.6  |
| RNF32  | 127.6  | 166.1  | 102.8  | 103.9  | 97.7   | 102.9  | 121.6  | 155.1  |
| RNF34  | 2340.6 | 3297.4 | 1674.3 | 1578.2 | 1351.2 | 1900.2 | 2170.3 | 3092.9 |
| RNF34  | 151.8  | 199.4  | 124.6  | 87.6   | 103.1  | 99.1   | 142.3  | 140.1  |
| RNF34  | 92.4   | 96.4   | 81.9   | 94.6   | 77.1   | 85     | 91.3   | 109.6  |
| RNF36  | 81.8   | 86.5   | 81.3   | 81.9   | 73.7   | 80.3   | 86.7   | 93.6   |
| RNF36  | 125.8  | 154.9  | 101.4  | 95.6   | 96.8   | 92.8   | 112.7  | 130.1  |
| RNF38  | 121    | 152.2  | 85.6   | 85     | 73.6   | 92.7   | 116.3  | 168.4  |
| RNF38  | 211.5  | 332.7  | 172.5  | 156.4  | 135.1  | 145.7  | 205.3  | 221.8  |
| RNF38  | 579.7  | 886.9  | 666.3  | 829.6  | 749.8  | 997.5  | 720.2  | 1068.6 |
| RNF39  | 89.5   | 102.9  | 87.1   | 85.2   | 78.8   | 89.2   | 87.6   | 101.4  |
| RNF39  | 112.6  | 104.8  | 92.1   | 89.5   | 83.9   | 94.5   | 95.7   | 106.9  |
| RNF4   | 361.5  | 484.2  | 275.8  | 223.7  | 196.1  | 322.7  | 285.5  | 544.1  |
| RNF40  | 281.5  | 405.9  | 405.9  | 331.8  | 277.1  | 562.2  | 292.4  | 537    |
| RNF41  | 210.5  | 282.5  | 153.6  | 135.3  | 152.3  | 192    | 225.2  | 260.5  |
| RNF41  | 104.1  | 113    | 101.1  | 104    | 95.8   | 101    | 86.5   | 104.6  |
| RNF43  | 95.9   | 99.7   | 107    | 101.6  | 93.4   | 93.6   | 101.3  | 118.9  |
| RNF44  | 245.4  | 245.5  | 215.4  | 256.8  | 258.5  | 433    | 168.6  | 239.3  |
| RNF5   | 705.3  | 885.8  | 423.7  | 371.4  | 342.3  | 475.3  | 660.1  | 756.6  |
| RNF5P1 | 2336.5 | 3100.3 | 1329.8 | 1278.1 | 1098.1 | 1613.5 | 2203.6 | 2536.1 |
| RNF5P1 | 658.3  | 828.7  | 359.1  | 319.6  | 293.6  | 374.7  | 603.7  | 771.5  |
| RNF6   | 115.2  | 129.2  | 95.1   | 91.7   | 94     | 97.8   | 107.6  | 117.7  |
| RNF6   | 103.2  | 115.3  | 98.5   | 85.8   | 94.4   | 96.2   | 90.3   | 104.1  |
| RNF6   | 262.7  | 285.9  | 119.6  | 126.5  | 107.1  | 111.3  | 160.2  | 241.7  |
| RNF7   | 111.5  | 129.8  | 109.5  | 99.6   | 95.4   | 102.6  | 115.3  | 122.9  |
| RNF8   | 116    | 138.7  | 111.2  | 98.2   | 93.3   | 90.7   | 105.8  | 146.7  |
| RNF8   | 725.2  | 1001.4 | 344.1  | 290.6  | 252.4  | 406.3  | 574.9  | 780.6  |
| RNGTT  | 1406.4 | 1780.8 | 825.1  | 1269.3 | 915.1  | 1291.1 | 1232.8 | 1737.2 |
| RNH1   | 2201.9 | 3035.6 | 2304.3 | 1376.3 | 1191.8 | 1602.9 | 1849.9 | 2567.1 |
| RNH1   | 736    | 944.5  | 379.9  | 300.7  | 259.1  | 427    | 768.4  | 1677.5 |
| RNMT   | 530.1  | 640.6  | 536.2  | 841.3  | 707.7  | 949.8  | 497.6  | 683.7  |
| RNMTL1 | 920.7  | 1308.8 | 504.8  | 401.7  | 378.3  | 433.3  | 817.4  | 893.6  |
| RNPC1  | 178.4  | 234.6  | 202    | 174.5  | 148.5  | 200.7  | 174    | 277.7  |
| RNPC2  | 100.1  | 112.1  | 93.4   | 84.3   | 85     | 95.1   | 101.2  | 112.8  |
| RNPC3  | 386    | 424    | 185.5  | 149.7  | 136.3  | 160.6  | 261.7  | 426.2  |

|            |         |         |        |         |         |         |         |         |
|------------|---------|---------|--------|---------|---------|---------|---------|---------|
| RNPEP      | 1556.3  | 1952.1  | 631.2  | 545.5   | 519.2   | 559.8   | 1251.8  | 950.1   |
| RNPEPL1    | 125.7   | 163.8   | 109.6  | 116.4   | 89.9    | 113.5   | 114.4   | 191.8   |
| RNPS1      | 2621.5  | 3815.6  | 2192   | 1055.8  | 905.6   | 1345.4  | 2193.7  | 3488    |
| RNPS1      | 247     | 380.7   | 208.9  | 126.3   | 116.4   | 128.1   | 227.8   | 333.8   |
| RNU2       | 156.3   | 134.8   | 102.9  | 100.9   | 101.8   | 97.1    | 100.8   | 123.7   |
| RNU3IP2    | 356.8   | 420     | 170.8  | 107.8   | 106.2   | 127.3   | 250.7   | 333.7   |
| RNUT1      | 1241.6  | 1682.6  | 1027.9 | 839.2   | 808.1   | 1073.2  | 1195.7  | 2153.1  |
| RNUXA      | 227.4   | 252.4   | 171.7  | 220.1   | 223.6   | 185.3   | 237.5   | 379.8   |
| ROBO1      | 94.6    | 106     | 94.2   | 94.6    | 86.5    | 95.9    | 91.3    | 98.2    |
| ROBO1      | 137.6   | 143.1   | 101    | 107.6   | 101.3   | 135.2   | 124.5   | 158.4   |
| ROBO1      | 112.4   | 108.1   | 88.9   | 75.6    | 80.5    | 83.2    | 102     | 121.7   |
| ROBO2      | 78.9    | 92.9    | 90.2   | 83.5    | 82.9    | 86.1    | 89.8    | 97.9    |
| ROBO3      | 360.2   | 335.4   | 238.5  | 150.1   | 148.6   | 174.8   | 273.8   | 553.5   |
| ROBO4      | 94      | 128     | 88.4   | 83.3    | 87.5    | 88.7    | 105.7   | 107.1   |
| ROCK1      | 310.5   | 469.1   | 152.2  | 185.6   | 187.5   | 199.5   | 321.6   | 449.2   |
| ROCK2      | 19785.8 | 21470.5 | 9638.2 | 14897.9 | 14645.1 | 10837.4 | 17637.5 | 19091.8 |
| ROD1       | 2879.6  | 3832.5  | 1298.3 | 1593.7  | 1046.1  | 1827.2  | 2839.7  | 4503.4  |
| ROM1       | 174     | 203.3   | 126.3  | 127.9   | 116.7   | 135.7   | 156     | 177.3   |
| ROPN1      | 98.5    | 101.3   | 96.5   | 90.8    | 85.6    | 90.4    | 93.6    | 107.1   |
| ROPN1B     | 104.2   | 103.8   | 96.9   | 88.6    | 97.3    | 85.7    | 99.5    | 108.1   |
| ROPN1B     | 105.6   | 133.1   | 105.5  | 98.2    | 91.9    | 102.9   | 104.1   | 118.3   |
| ROPN1L     | 149.3   | 183.6   | 141.5  | 88.8    | 94.1    | 90.7    | 151.8   | 179.7   |
| ROR1       | 86.8    | 88.5    | 101.2  | 85.7    | 79.7    | 94.4    | 83.8    | 100.2   |
| ROR2       | 94.8    | 102.1   | 94.6   | 93.3    | 87.1    | 86.1    | 98.9    | 102.2   |
| RORA       | 89.1    | 95.9    | 95.1   | 84.8    | 85.4    | 91.5    | 88.8    | 104.2   |
| RORA       | 69      | 86.2    | 88.4   | 79.2    | 85.1    | 77.4    | 78.8    | 77.6    |
| RORA       | 93.9    | 88.1    | 92.1   | 83.3    | 87.6    | 89.5    | 82.8    | 95.2    |
| RORA       | 108.2   | 130.2   | 118    | 106.1   | 95.6    | 114.2   | 125.8   | 133.2   |
| RORA       | 82.1    | 91.2    | 95     | 86.7    | 79.5    | 75.6    | 77.8    | 88.8    |
| RORA       | 87.1    | 96      | 98.2   | 85.5    | 77.9    | 81.2    | 85.6    | 87.5    |
| RORB       | 92.6    | 96.5    | 82.9   | 79.6    | 80.6    | 80.5    | 80.8    | 94.7    |
| RORC       | 80.8    | 94.7    | 91.2   | 81.9    | 77      | 88.9    | 84.8    | 91      |
| RORC       | 96.4    | 113.9   | 94.8   | 87.7    | 72.9    | 93.4    | 94.4    | 116     |
| RORC       | 102.6   | 116.3   | 103    | 92.6    | 98      | 102.6   | 99.9    | 112.9   |
| RORC       | 84.2    | 94.2    | 91.3   | 84.1    | 86      | 90      | 87.8    | 96      |
| ROS1       | 96.6    | 118.4   | 91.1   | 87      | 90.4    | 96.9    | 103.3   | 97.3    |
| RP1        | 80.1    | 106.2   | 98.3   | 97.2    | 96.2    | 98.5    | 82.7    | 81.9    |
| RP1-112K5  | 788.8   | 1014.8  | 402.9  | 312.7   | 272.4   | 345.9   | 766.1   | 913     |
| RP11-19J3. | 276.9   | 347.9   | 245.4  | 198.8   | 178.3   | 224.3   | 217.7   | 307.5   |
| RP11-450P  | 87.2    | 102.7   | 106.3  | 86.2    | 79.5    | 90.7    | 84.3    | 97.3    |
| RP11-529I1 | 269.7   | 285.1   | 174.3  | 140.9   | 128.1   | 169.7   | 208.8   | 244.9   |
| RP11-564C  | 109.1   | 135.8   | 101.7  | 97.8    | 91.5    | 100.3   | 109.9   | 128     |
| RP13-11B7  | 117     | 120.3   | 96.2   | 69.2    | 75.7    | 95.2    | 99.4    | 147.1   |
| RP13-15M1  | 101.5   | 114     | 99.4   | 93.5    | 87      | 90      | 109.9   | 103.6   |
| RP13-15M1  | 112.2   | 134.7   | 141.3  | 126.5   | 114.1   | 130.4   | 105.9   | 131.7   |
| RP1-32F7.2 | 104.5   | 119.8   | 89.9   | 86.4    | 90.7    | 89.4    | 108.7   | 119.3   |
| RP1L1      | 83.3    | 85.8    | 94.4   | 91.9    | 82.5    | 92.4    | 85.9    | 88.5    |
| RP2        | 607.2   | 860.6   | 428.8  | 497.9   | 348     | 536.8   | 449.2   | 717.8   |
| RP9        | 831.2   | 1111.2  | 524.4  | 609.6   | 483.3   | 751.3   | 728.4   | 846.2   |
| RPA1       | 1984.5  | 2669.2  | 775.9  | 938.6   | 574.1   | 978.5   | 1543.1  | 2077.1  |

|           |         |         |         |         |         |         |         |         |
|-----------|---------|---------|---------|---------|---------|---------|---------|---------|
| RPA2      | 2994.6  | 3429.3  | 2137.1  | 1753.8  | 1409.1  | 2002    | 2781.3  | 3348.5  |
| RPA3      | 6403.1  | 6558.7  | 3892.6  | 3546.1  | 2660.4  | 3194.9  | 6115.3  | 8141.3  |
| RPA4      | 110.2   | 123.6   | 95.9    | 122.6   | 120.3   | 134.2   | 108.8   | 113.2   |
| RPAIN     | 1586.8  | 1749.1  | 1389.9  | 1378.2  | 1162.2  | 1721    | 1308.5  | 1757.2  |
| RPAP1     | 186.8   | 210.7   | 171.8   | 192.8   | 173.6   | 176.5   | 175.7   | 234.2   |
| RPE       | 121.2   | 122.3   | 94.7    | 81.4    | 75.7    | 78.6    | 121.3   | 107.3   |
| RPE       | 1880.1  | 2527.2  | 951.3   | 701.8   | 552.3   | 1265.2  | 1241.6  | 1872.4  |
| RPE       | 86.7    | 102.8   | 100.4   | 90.1    | 99.8    | 88.3    | 88.1    | 95.6    |
| RPE65     | 87.7    | 87.4    | 102.4   | 85.4    | 92.4    | 86      | 87.1    | 82.4    |
| RPESP     | 98.4    | 101     | 98.3    | 99.6    | 93.8    | 93.3    | 98.6    | 102.6   |
| RPGR      | 91.6    | 102.7   | 74.9    | 87.7    | 82.5    | 83.4    | 90.2    | 107.3   |
| RPGR      | 274.1   | 327.6   | 139.6   | 128     | 121.4   | 173.5   | 242     | 467.9   |
| RPGR      | 243.8   | 315.8   | 105.6   | 105.5   | 91.2    | 96.2    | 192.4   | 251.2   |
| RPGRIP1   | 79.1    | 92.6    | 78      | 91.2    | 83      | 88.3    | 77.8    | 93.1    |
| RPH3A     | 106.5   | 117.3   | 101.8   | 98.7    | 99.3    | 100.3   | 94.2    | 102.4   |
| RPH3AL    | 92.9    | 112.5   | 109     | 93.6    | 88      | 94.3    | 104.3   | 102.1   |
| RPIA      | 1662.8  | 2237.4  | 589.4   | 512.7   | 375.8   | 568.8   | 1292.2  | 1723.2  |
| RPIB9     | 100     | 112.9   | 77.4    | 82      | 90.4    | 83.1    | 94      | 127.8   |
| RPIP8     | 83.6    | 92.7    | 92.6    | 85.6    | 77.2    | 94.6    | 83.6    | 94.9    |
| RPL10     | 105.2   | 114.6   | 90.1    | 78.5    | 76.7    | 83.5    | 97.3    | 140.7   |
| RPL10A    | 30648   | 30786.2 | 25267.2 | 23645.5 | 19272   | 22396.6 | 30897.2 | 30565.7 |
| RPL10L    | 105.3   | 126.4   | 88.2    | 90.1    | 87      | 89.3    | 106.6   | 133.4   |
| RPL11     | 24792.1 | 26495.5 | 13341.9 | 13653.4 | 13828.9 | 15378.7 | 25019.4 | 27665.1 |
| RPL12     | 31313.3 | 30145.6 | 37481.2 | 27130   | 23619.9 | 30080.6 | 29252   | 29572.2 |
| RPL13     | 347.8   | 417.1   | 216.2   | 140.1   | 118.3   | 112.6   | 279.1   | 305.9   |
| RPL13     | 1219.9  | 1529.9  | 399.5   | 321.1   | 265.4   | 340.5   | 1102.9  | 1343    |
| RPL13A    | 5424.5  | 6952.5  | 2034.9  | 1080.9  | 986.1   | 1390.8  | 4858.8  | 5929.5  |
| RPL14     | 1372.7  | 1617    | 391.9   | 286.4   | 273.7   | 442.9   | 2045    | 2421.7  |
| RPL14     | 2893.7  | 3570.1  | 1509.1  | 1639.3  | 1152.6  | 1623.7  | 2870.5  | 3274    |
| RPL17     | 25241.3 | 27088.6 | 19805.1 | 18397.1 | 16267.1 | 21807.2 | 23925.7 | 25691   |
| RPL17     | 3398.9  | 4331    | 2323.9  | 2825.4  | 2170.7  | 3430.8  | 2811.6  | 3131.6  |
| RPL18     | 30935.2 | 28463.7 | 23895.2 | 17718.8 | 14726.9 | 13940.7 | 29914.5 | 31592.6 |
| RPL18A    | 32081.7 | 27742   | 32118   | 22272.2 | 18694.2 | 19608.9 | 28699   | 28905.3 |
| RPL19     | 31960.8 | 31668   | 24855.9 | 20004.1 | 15769.6 | 25843.2 | 28918.8 | 33417.4 |
| RPL21     | 7680.8  | 8440.9  | 5417.3  | 4518.9  | 2646.6  | 5581    | 5394.9  | 6761    |
| RPL22     | 4577.1  | 5963.6  | 4022.6  | 5127.4  | 3919.1  | 5902.1  | 4631    | 6785.3  |
| RPL23     | 7285.7  | 8192.7  | 2095.6  | 1345.9  | 1730.2  | 1792.6  | 7172.9  | 9503.6  |
| RPL23A    | 1517.1  | 1813.7  | 464.5   | 545.9   | 324.9   | 552.5   | 1391.4  | 2568.6  |
| RPL23AP13 | 190.4   | 248.7   | 131.5   | 123.7   | 120.8   | 132.1   | 196.8   | 295.7   |
| RPL23AP7  | 486.1   | 656.7   | 261.7   | 274.8   | 210.3   | 292.3   | 441.2   | 523.2   |
| RPL24     | 24927.5 | 26878   | 20165.8 | 20274.6 | 14940   | 21911   | 22248.8 | 23292.7 |
| RPL26     | 7059.5  | 7367.1  | 4245.5  | 4973.4  | 3322.2  | 6391.9  | 5598.7  | 6496.9  |
| RPL26L1   | 2131.8  | 2390.5  | 1938.7  | 2236.1  | 1433.7  | 2399.9  | 1850    | 3348    |
| RPL27     | 32218   | 32611.6 | 30375.3 | 33117.3 | 27787.3 | 32030.7 | 29479.5 | 29138.2 |
| RPL27A    | 26638.5 | 28355   | 14528.1 | 12487.2 | 10720   | 16134.4 | 26022.7 | 25864.8 |
| RPL28     | 748.9   | 929.3   | 484.3   | 331.8   | 274.7   | 321.4   | 807.6   | 1136.1  |
| RPL29     | 2299.6  | 2923.1  | 1880.9  | 841.2   | 535.3   | 942     | 1328.7  | 1450.1  |
| RPL29P2   | 121.9   | 140.4   | 132     | 111.4   | 120.6   | 116.5   | 118.4   | 113.6   |
| RPL3      | 25009.7 | 28682.3 | 11175.7 | 8341.9  | 6468.3  | 12961.9 | 24309.9 | 27272.8 |
| RPL3      | 24375.4 | 26092.6 | 11645.7 | 10855.4 | 11223.8 | 10011.3 | 23682.3 | 25828.1 |



|         |         |         |         |         |         |         |         |         |
|---------|---------|---------|---------|---------|---------|---------|---------|---------|
| RPL30   | 30428.5 | 31670.5 | 25841.2 | 19055.2 | 14699.1 | 20377.9 | 26254   | 29012.6 |
| RPL31   | 10142.3 | 12297   | 4063.7  | 5030.9  | 3738    | 5186.7  | 8992.7  | 8668.5  |
| RPL32   | 463     | 603.2   | 420.5   | 343.8   | 258.2   | 318.6   | 444.6   | 731.6   |
| RPL32P3 | 119.6   | 153.6   | 120.6   | 93.1    | 105.5   | 104.1   | 121     | 140.3   |
| RPL34   | 968     | 1333.8  | 848.4   | 1008.3  | 638.7   | 1205    | 754.3   | 1100.1  |
| RPL34   | 2343    | 2914.4  | 1319.1  | 1110.3  | 796.6   | 1416.3  | 1622.1  | 2122.5  |
| RPL35   | 21482.2 | 23405   | 9673.5  | 9419.8  | 7893.6  | 11987.8 | 21050.4 | 21877.3 |
| RPL35A  | 28054.8 | 28787.5 | 28371.3 | 24664.2 | 18667.1 | 28587.2 | 20457.7 | 20233.9 |
| RPL36   | 13204.7 | 15154.2 | 9283.3  | 5913.8  | 4550.5  | 6746    | 11359.4 | 13753.8 |
| RPL36   | 320.3   | 350.6   | 285.8   | 174     | 151.6   | 165.9   | 333.5   | 298.9   |
| RPL36A  | 631.3   | 805.6   | 435.4   | 306.2   | 209.2   | 367.3   | 526.3   | 599.8   |
| RPL36AL | 12416.9 | 15117.1 | 4516.3  | 3281.8  | 3120.6  | 4319.2  | 10948   | 14387.5 |
| RPL37   | 195.1   | 230.4   | 122.1   | 130.9   | 116.5   | 120.5   | 160.4   | 207.6   |
| RPL37A  | 18717.1 | 21602.5 | 7178.8  | 5139.1  | 4983.6  | 5080.4  | 19511.4 | 23841.6 |
| RPL38   | 30320.6 | 29192.7 | 43566.2 | 43735.7 | 35327.9 | 44653.5 | 32022.8 | 31257.5 |
| RPL38   | 31970.3 | 30757.8 | 30029.4 | 30503.7 | 24863.3 | 28324.4 | 33370.8 | 32536.1 |
| RPL39   | 25328.4 | 25888.4 | 24999.6 | 23468.8 | 17335.8 | 27270.6 | 22434   | 23314   |
| RPL39L  | 2770.2  | 3261.5  | 2210.1  | 1751.3  | 1361.6  | 2109.8  | 2093.7  | 3847.6  |
| RPL3L   | 95.6    | 96.7    | 98.6    | 94.8    | 82.9    | 88.9    | 85.8    | 96.4    |
| RPL4    | 15670.9 | 20860   | 10115.4 | 11366.2 | 10161.2 | 14101.9 | 14528.8 | 17026.2 |
| RPL41   | 168.3   | 193.9   | 144.4   | 104.6   | 102.5   | 106.2   | 133.2   | 161.7   |
| RPL41   | 33697.2 | 29331.9 | 34910.9 | 34792.1 | 30763.1 | 35197.7 | 34262   | 32962.2 |
| RPL5    | 16046.2 | 18152.1 | 8166.2  | 8348.5  | 6044.5  | 8508.7  | 14374.5 | 17004.8 |
| RPL6    | 1452.9  | 1809.2  | 819     | 794.3   | 628.9   | 1075.9  | 963.3   | 1157.2  |
| RPL7    | 4036.5  | 5111.1  | 1102.3  | 953.2   | 532.6   | 1302.2  | 4514.6  | 6173.9  |
| RPL7A   | 1342.3  | 1763.7  | 327.6   | 300.9   | 254.1   | 376.8   | 1655.4  | 1815.3  |
| RPL7L1  | 11643.2 | 12704.6 | 6258.6  | 7443.2  | 6714.9  | 5957.1  | 10479.6 | 10632.4 |
| RPL8    | 1261.7  | 1832.1  | 842.8   | 429.5   | 380.6   | 286.7   | 1007.2  | 1190.6  |
| RPL8    | 31319.4 | 29852.1 | 33976.9 | 27360.3 | 22934.4 | 27687.6 | 32545.3 | 28617.4 |
| RPL9    | 1079    | 1520.3  | 568.2   | 551.1   | 422.5   | 686.2   | 776     | 873.8   |
| RPL9    | 7078.1  | 7042.6  | 2670    | 2221.4  | 1844.4  | 2724.8  | 7171.3  | 13426.9 |
| RPLP0   | 117.6   | 115.8   | 87      | 74      | 77.9    | 83.2    | 108.4   | 119.3   |
| RPLP0   | 4236.4  | 5173.2  | 2590.8  | 1869.1  | 1540.7  | 1902    | 3048    | 3520.2  |
| RPLPOP2 | 98.9    | 113.9   | 100.1   | 95.2    | 94.6    | 93.7    | 89.1    | 99.3    |
| RPLP1   | 27832.9 | 28106.5 | 17175   | 13865.2 | 10042.8 | 11605.7 | 27737.1 | 28735.9 |
| RPLP1   | 18952.7 | 21343   | 5820.2  | 6986.2  | 4915.6  | 5607.9  | 17716.9 | 22634.8 |
| RPLP2   | 28011.5 | 27488.5 | 22914   | 18106.6 | 15582.2 | 17323.9 | 26511.3 | 28050.7 |
| RPN1    | 6854.4  | 8684.2  | 6000    | 5843.5  | 5220.5  | 7969.6  | 6075.9  | 7431.9  |
| RPN2    | 1285.6  | 1740.1  | 464.9   | 399.3   | 288.6   | 698.1   | 1198.5  | 2435.9  |
| RPP14   | 132.3   | 135.2   | 85.5    | 73.7    | 76.5    | 94.7    | 129.9   | 144.8   |
| RPP21   | 911.4   | 1111.7  | 729.6   | 656.7   | 534.1   | 580.7   | 895.3   | 872.6   |
| RPP25   | 419.1   | 615.2   | 281.6   | 168     | 157.1   | 226.3   | 367.6   | 653     |
| RPP30   | 88.2    | 94.3    | 98.5    | 88.2    | 88.3    | 86.3    | 83.9    | 96.7    |
| RPP38   | 230.4   | 284     | 203.2   | 130.2   | 122.4   | 144.2   | 186.8   | 242.4   |
| RPP38   | 128.5   | 157.8   | 96.5    | 90.8    | 86      | 95.1    | 144     | 149.3   |
| RPP40   | 1530.8  | 1979.4  | 1113.9  | 1073.5  | 699     | 987.9   | 1355.8  | 1607.5  |
| RPRC1   | 2214.6  | 2691.1  | 1354    | 1477.8  | 1215.8  | 1137.1  | 1939.7  | 2122.1  |
| RPRM    | 89.9    | 106     | 103.4   | 93.9    | 75.2    | 83.8    | 89.4    | 96.4    |
| RPRML   | 161.7   | 200.1   | 117.7   | 112.5   | 97.5    | 102.1   | 137.2   | 148.8   |
| RPS10   | 27516.7 | 27322.5 | 38454.3 | 33903.5 | 31389.6 | 38436.4 | 27100   | 28153.1 |

|          |         |         |         |         |         |         |         |         |
|----------|---------|---------|---------|---------|---------|---------|---------|---------|
| RPS11    | 33058.6 | 31020.8 | 25078.4 | 20985.9 | 19893.6 | 26000.9 | 27934.4 | 31086.1 |
| RPS12    | 30787.3 | 27462.7 | 39228.2 | 38451.4 | 33609.1 | 38997.4 | 33152.4 | 30334.7 |
| RPS13    | 25304.7 | 28068   | 12084   | 10293.6 | 7094.5  | 12253.9 | 21848.3 | 24871.9 |
| RPS14    | 28154.6 | 28175.5 | 19483.6 | 18869.2 | 16902.3 | 18422.7 | 27811.8 | 29578.2 |
| RPS14    | 17416.1 | 20994.4 | 10521.3 | 10401.5 | 8234.7  | 10415   | 17192   | 17884.1 |
| RPS15    | 23238.5 | 25989.9 | 14241.2 | 9449.1  | 7527.3  | 10246.7 | 20729.3 | 22660.2 |
| RPS15A   | 15827.2 | 15333   | 4487.1  | 4901.3  | 3322.6  | 5211.2  | 15662.3 | 16727.3 |
| RPS15A   | 33275   | 29346.2 | 29686.5 | 28841.1 | 24431.4 | 31531.5 | 31511.7 | 25975.7 |
| RPS15A   | 11072.1 | 13752   | 8165.3  | 6349.3  | 4820.8  | 7624.7  | 9974.9  | 9514.9  |
| RPS16    | 26077.9 | 25241.7 | 24526.7 | 20962.1 | 21498.9 | 22222.1 | 27789.2 | 27311.8 |
| RPS17    | 26494.9 | 25276.2 | 25602.6 | 26860.1 | 22126.6 | 24613.4 | 27210.5 | 24210.9 |
| RPS19    | 26978   | 26850.3 | 10745.6 | 8345.7  | 6573.6  | 6288.6  | 25853.3 | 25764.3 |
| RPS19BP1 | 909.6   | 1014.6  | 547     | 450.6   | 403.8   | 708.7   | 739.7   | 1022.2  |
| RPS2     | 26075.7 | 30173.6 | 16874.3 | 9273.4  | 9014.3  | 10322.2 | 25960.5 | 27449.5 |
| RPS20    | 26964.7 | 30128   | 13326.2 | 11435.4 | 8886.4  | 11843.3 | 27622.8 | 27945   |
| RPS21    | 6469.8  | 7473.6  | 5486.8  | 3477.9  | 2571.7  | 4139.3  | 5005.6  | 4854.6  |
| RPS23    | 2404.3  | 2993    | 1734.9  | 2094.7  | 1512.5  | 2045    | 1721.4  | 2397.6  |
| RPS24    | 4195.2  | 5319.9  | 2918.2  | 1705.6  | 1270.4  | 3022.2  | 3194.4  | 3359.3  |
| RPS24    | 10292.4 | 12560.5 | 4359.8  | 3599.1  | 3131.7  | 3669.2  | 10871.1 | 12516.8 |
| RPS25    | 31015.3 | 30888   | 55355.2 | 45035.8 | 39169.1 | 47765.9 | 32488.8 | 32265.5 |
| RPS26    | 7235.3  | 8005.4  | 3547.8  | 3139    | 2104.5  | 3173.5  | 6309.8  | 9867.9  |
| RPS26L   | 4332.8  | 4986.5  | 1848.1  | 1448.7  | 909.8   | 1239.6  | 3943.9  | 6771.8  |
| RPS26L1  | 84.6    | 97.5    | 80.3    | 82.5    | 92.4    | 84.2    | 80.1    | 100.9   |
| RPS27    | 29338.6 | 27373.1 | 47753.2 | 47582.3 | 43591.2 | 47875.8 | 27496.6 | 27941   |
| RPS27A   | 29802.8 | 27052.8 | 39948.9 | 37512.1 | 33862.5 | 34561.7 | 28057.6 | 30952.3 |
| RPS27L   | 84.5    | 91.6    | 102.9   | 88      | 76.2    | 92.4    | 80.4    | 97.1    |
| RPS28    | 9445.7  | 11795.9 | 4195.5  | 2440.6  | 1957.7  | 2410.4  | 9827.7  | 19967.2 |
| RPS29    | 20842.6 | 20283.6 | 13795.7 | 10783.2 | 7389.9  | 11753.9 | 15506.2 | 16204.8 |
| RPS29    | 748.8   | 988.8   | 573.2   | 381.8   | 333.9   | 390.1   | 894.7   | 899.7   |
| RPS29    | 25871.8 | 29176.2 | 43229.1 | 40472.9 | 35846.3 | 39108.1 | 27148.3 | 28533.7 |
| RPS29    | 28727   | 30052.5 | 33541.7 | 30088.1 | 27425   | 30747.5 | 30811.4 | 29613.9 |
| RPS3     | 32242.9 | 32183.6 | 34871.4 | 23603   | 21149.1 | 23723.7 | 33242.7 | 34100.7 |
| RPS3A    | 22943.8 | 24082.3 | 9391.3  | 8286.9  | 5874.2  | 6067.9  | 24091   | 26491.4 |
| RPS4X    | 10312.4 | 14084.8 | 7766.1  | 6660.3  | 5451.1  | 7682.9  | 8604.6  | 8669.6  |
| RPS4Y1   | 10350.8 | 13359.2 | 5819.9  | 6320.2  | 4827.5  | 6708.4  | 8548.1  | 12121.4 |
| RPS4Y2   | 845.3   | 1129.2  | 330.3   | 357.7   | 222.5   | 426.4   | 680.9   | 1087    |
| RPS5     | 28506.7 | 30225.9 | 17958.9 | 13332.5 | 10455.3 | 17032.9 | 24225.1 | 26613.1 |
| RPS6     | 25015.8 | 25591.8 | 9944.7  | 9452.7  | 7768.3  | 10477.3 | 22256   | 25257.9 |
| RPS6KA1  | 114     | 105.1   | 87      | 92      | 81.4    | 87.1    | 106.3   | 101     |
| RPS6KA1  | 639.3   | 723.7   | 540.8   | 627.5   | 541     | 668.2   | 539     | 668.8   |
| RPS6KA2  | 85.6    | 84.7    | 96.2    | 93.5    | 92.7    | 97.4    | 83      | 104.8   |
| RPS6KA2  | 144.2   | 196.6   | 164.7   | 203.1   | 201.2   | 228     | 234.3   | 430.4   |
| RPS6KA2  | 93.8    | 102     | 107.2   | 96.4    | 91      | 109.1   | 88.2    | 99.7    |
| RPS6KA3  | 141.4   | 220.3   | 168.1   | 235     | 198.5   | 220.9   | 188.5   | 192.5   |
| RPS6KA3  | 170.8   | 211.2   | 111.5   | 95.8    | 97.6    | 109.6   | 134.7   | 180.8   |
| RPS6KA3  | 291.2   | 428.8   | 128.1   | 140.1   | 118     | 133.8   | 231.7   | 286     |
| RPS6KA4  | 381.4   | 426     | 314.3   | 311     | 235.9   | 265.4   | 277.1   | 725.2   |
| RPS6KA5  | 165.5   | 190.4   | 147.8   | 195.1   | 192.9   | 256.1   | 165.7   | 296.2   |
| RPS6KA5  | 80.6    | 82.3    | 101.6   | 95.5    | 93.4    | 99.7    | 90.7    | 86.3    |
| RPS6KA6  | 109.7   | 144.8   | 114.7   | 101.4   | 104.8   | 112.6   | 104.3   | 133     |

|         |         |         |         |         |         |         |         |         |
|---------|---------|---------|---------|---------|---------|---------|---------|---------|
| RPS6KB1 | 843.8   | 1074.9  | 492.3   | 679.6   | 510.8   | 969.9   | 723.7   | 968.6   |
| RPS6KB2 | 3173.7  | 3940.6  | 1645.2  | 1259.1  | 1196.6  | 1167.6  | 2823.2  | 2330.3  |
| RPS6KC1 | 138.6   | 165     | 114.8   | 95.2    | 97.4    | 117.1   | 165.8   | 335.9   |
| RPS6KL1 | 128.2   | 136.9   | 141.1   | 107.7   | 103.6   | 117.8   | 109.6   | 130.4   |
| RPS7    | 2189.6  | 2799.7  | 1578.2  | 1186.2  | 837.4   | 1709.8  | 1538.4  | 1672.3  |
| RPS9    | 10622.4 | 13587.7 | 7613.2  | 5985.4  | 5274.6  | 7437.1  | 10595.3 | 10885   |
| RPS9    | 13205.8 | 16659.8 | 10191.8 | 8377.1  | 7506.4  | 10521.2 | 13133.9 | 13801.4 |
| RPSA    | 33204.2 | 33357.8 | 43080.3 | 23205.6 | 20513.5 | 27492.9 | 33473.8 | 33377   |
| RPSA    | 194     | 216     | 122.8   | 104.2   | 113.2   | 117.5   | 194.9   | 270.7   |
| RPUSD1  | 768.5   | 871.1   | 712.1   | 359.4   | 245.8   | 371.7   | 701.2   | 1210.1  |
| RPUSD2  | 1902.1  | 2683.4  | 1474.3  | 1208.5  | 857.1   | 1104.1  | 1446.2  | 1547.8  |
| RPUSD3  | 2078.3  | 2211.7  | 1289.7  | 738.9   | 626.3   | 690.7   | 1598.2  | 1808.4  |
| RPUSD4  | 3505.3  | 4009.6  | 2370.2  | 1293.4  | 903.5   | 1522.9  | 2659.2  | 3182.5  |
| RQCD1   | 1338.8  | 1817.1  | 1122.4  | 987.7   | 760     | 977.1   | 1130.7  | 1582.6  |
| RRAD    | 87.6    | 90.2    | 95.3    | 87.1    | 80.8    | 73.6    | 89.1    | 93.1    |
| RRAGA   | 2781.5  | 3710.2  | 2481.4  | 1620.5  | 1323.1  | 2203.2  | 2207.1  | 3403.8  |
| RRAGB   | 238.9   | 340.7   | 127.8   | 108.8   | 104.8   | 122.9   | 199.1   | 281.2   |
| RRAGB   | 77.9    | 95.6    | 88.4    | 87.9    | 87      | 84.9    | 83.8    | 94.6    |
| RRAGB   | 365.5   | 460.6   | 263.1   | 296.4   | 282.1   | 426.6   | 322.4   | 410.9   |
| RRAGC   | 409.5   | 573.3   | 269.4   | 413.4   | 396.3   | 469.2   | 466.6   | 598.5   |
| RRAGD   | 834.1   | 1189.6  | 512.4   | 837.9   | 796.9   | 878.4   | 774.8   | 1144.1  |
| RRAS    | 508.2   | 654.8   | 357.1   | 251.5   | 241.6   | 287.7   | 549.5   | 567.7   |
| RRAS2   | 401.8   | 506.5   | 218.8   | 247.8   | 182.3   | 281.7   | 351.6   | 537.2   |
| RRBP1   | 155.4   | 143.3   | 117     | 129.6   | 120.2   | 143.7   | 133.2   | 139.1   |
| RRBP1   | 603.5   | 659.4   | 496.4   | 616.4   | 600.3   | 750.4   | 507.6   | 796.9   |
| RRBP1   | 159.2   | 157.9   | 139.8   | 161.7   | 159.6   | 153.7   | 123.4   | 165.5   |
| RREB1   | 86.1    | 100.1   | 108.5   | 92.2    | 93.9    | 88.6    | 82.1    | 91      |
| RREB1   | 165.8   | 262.1   | 146.6   | 166.7   | 144.4   | 195.9   | 149.2   | 165.2   |
| RREB1   | 113     | 117.5   | 111.3   | 95.4    | 106.4   | 98.8    | 102.5   | 98.9    |
| RREB1   | 94.7    | 116.5   | 121.7   | 106.4   | 110.2   | 123.5   | 92.1    | 100.7   |
| RRH     | 81.9    | 90.2    | 90.3    | 89.2    | 77.7    | 81.8    | 79.3    | 90.5    |
| RRM1    | 7206.2  | 8545.1  | 7369.8  | 6607.1  | 4933.9  | 6751.3  | 5887    | 10864.1 |
| RRM2    | 793.1   | 1254.7  | 506.8   | 488.4   | 429.7   | 607.9   | 571.4   | 847.2   |
| RRM2B   | 150.8   | 179.8   | 122.1   | 125.9   | 112.5   | 131.6   | 190.6   | 293.8   |
| RRN3    | 274.8   | 339.8   | 104.7   | 131.5   | 96.9    | 129.2   | 217.5   | 339.8   |
| RRP22   | 243.8   | 256.4   | 151.1   | 118.2   | 108     | 118.9   | 215.9   | 180.4   |
| RRP22   | 117.6   | 122.4   | 93.1    | 100.4   | 82.9    | 100.5   | 117.2   | 132.8   |
| RRS1    | 1814.4  | 2619.8  | 1270.9  | 729.7   | 500.1   | 954.1   | 1276    | 1890.3  |
| RS1     | 95.6    | 98.8    | 93.2    | 91.6    | 80.8    | 84.1    | 86.5    | 101.8   |
| RSAD1   | 238.2   | 258.7   | 129.5   | 117.2   | 115.9   | 133.7   | 166.6   | 238.3   |
| RSAD2   | 145.4   | 190     | 109.3   | 112.2   | 94.9    | 118     | 138.9   | 158.1   |
| RSAFD1  | 405.6   | 548.6   | 267     | 317     | 288.3   | 439.7   | 355.3   | 449.7   |
| RSBN1   | 1295.6  | 1765.7  | 974.5   | 779.5   | 636.8   | 1071.1  | 1141.5  | 1529.5  |
| RSBN1L  | 560.8   | 689.5   | 250.6   | 245.3   | 276.3   | 395.5   | 479.9   | 763.2   |
| RSC1A1  | 147.7   | 184.1   | 136.5   | 119.9   | 111.3   | 148.1   | 135.2   | 179.3   |
| RSHL1   | 82.8    | 104.3   | 93.3    | 97.8    | 81.3    | 98.8    | 85.4    | 98.1    |
| RSHL2   | 355.2   | 471.4   | 233.3   | 356.6   | 270.4   | 391.9   | 349.2   | 413.7   |
| RSHL3   | 77.5    | 82.9    | 114.2   | 102.3   | 99.3    | 105.1   | 75.4    | 79.8    |
| RSL1D1  | 4001.8  | 5840.2  | 2828    | 2274.4  | 2107.8  | 4094.9  | 3112.8  | 4372.3  |
| RSN     | 81.9    | 97.8    | 85.1    | 93.1    | 86.4    | 84.5    | 88.2    | 116.6   |

|         |        |        |        |        |        |        |        |        |
|---------|--------|--------|--------|--------|--------|--------|--------|--------|
| RSNL2   | 116.6  | 141.4  | 127.4  | 132.5  | 124.9  | 141.8  | 120.9  | 153.5  |
| RSPO1   | 99     | 135.6  | 79.8   | 75.1   | 72.4   | 79.2   | 111.6  | 107.9  |
| RSPO2   | 126.3  | 135.3  | 164.7  | 143.5  | 152.5  | 158.5  | 110.3  | 137.5  |
| RSPO3   | 130.4  | 158.3  | 122    | 111.6  | 99.2   | 124    | 134.6  | 166.9  |
| RSPO4   | 101.2  | 108.8  | 96.6   | 90.9   | 81.6   | 90.6   | 91.4   | 109.5  |
| RSPO4   | 89.3   | 96.8   | 106.4  | 94.9   | 90.6   | 90.7   | 91.9   | 87.6   |
| RSPRY1  | 1692.2 | 2164.5 | 1315.4 | 1287.7 | 1076.5 | 781    | 1459.9 | 1774.4 |
| RSRC1   | 1654.3 | 2234.8 | 1060.5 | 1053.9 | 849.3  | 1398.3 | 1417.4 | 2149.1 |
| RSRC2   | 1432.2 | 1754.1 | 350.6  | 457.3  | 275.2  | 539.4  | 1230.7 | 1920.4 |
| RSU1    | 857.6  | 1027.1 | 405.7  | 829.1  | 637.1  | 982.6  | 677.3  | 1071.6 |
| RSU1    | 142.1  | 149.5  | 109    | 113.7  | 99.8   | 148.4  | 119.9  | 155    |
| RTBDN   | 88.3   | 92.7   | 90.3   | 81.8   | 73.7   | 84.1   | 95.7   | 92.8   |
| RTBDN   | 105.7  | 118.7  | 101.7  | 83     | 88.2   | 89.1   | 96.9   | 102.6  |
| RTBDN   | 109.5  | 117.5  | 100.1  | 92.1   | 86.7   | 97.8   | 100.7  | 106.3  |
| RTCD1   | 2540.3 | 3370.3 | 587.8  | 422.2  | 402.5  | 510    | 2357.7 | 3591.9 |
| RTDR1   | 72     | 84.5   | 90.8   | 83.5   | 83.3   | 79.9   | 82.9   | 79.4   |
| RTTEL1  | 183.4  | 193    | 108.7  | 94.6   | 89.1   | 93.9   | 152.4  | 181.6  |
| RTTEL1  | 97.2   | 118.7  | 92.2   | 92     | 84.7   | 82.4   | 101.1  | 117.6  |
| RTF1    | 141.4  | 146.9  | 165.5  | 159.9  | 156.7  | 193.4  | 130.5  | 160.3  |
| RTKN    | 103.2  | 120.7  | 115.6  | 107.3  | 108.3  | 111.9  | 104.3  | 108.3  |
| RTKN    | 502.3  | 634.9  | 266.5  | 221    | 212.9  | 233.2  | 391.6  | 278.1  |
| RTKN    | 129.5  | 155.1  | 103.5  | 96.7   | 79.9   | 86.2   | 125.8  | 144.8  |
| RTKN    | 86.4   | 105    | 92.6   | 86.1   | 85.2   | 86.1   | 90.1   | 106.8  |
| RTN1    | 85.2   | 92     | 90.2   | 84.3   | 82.7   | 85.6   | 92.6   | 95.9   |
| RTN1    | 102.3  | 119.1  | 100.7  | 94.4   | 82     | 98.1   | 101.7  | 111.5  |
| RTN1    | 170    | 209.5  | 198.3  | 97.8   | 93.4   | 110.8  | 147.2  | 225.7  |
| RTN2    | 177.4  | 243.1  | 160.6  | 202.9  | 189.4  | 217.3  | 188.1  | 325.5  |
| RTN2    | 552.9  | 678.2  | 349.8  | 360.4  | 310.2  | 377.7  | 559.1  | 567.1  |
| RTN2    | 119.8  | 181.4  | 87.6   | 84     | 87.6   | 105.8  | 116.9  | 169.2  |
| RTN3    | 678.9  | 933.5  | 281.9  | 293.1  | 267    | 424.6  | 624.1  | 1173.9 |
| RTN3    | 102.7  | 122.6  | 108.4  | 105.6  | 105    | 101.5  | 97.8   | 114    |
| RTN3    | 94.9   | 105.8  | 90     | 92.3   | 83.4   | 94.3   | 86.9   | 104.7  |
| RTN3    | 1635.6 | 2277.4 | 1302.6 | 1458.9 | 1224.1 | 1829.1 | 1356.9 | 1974.4 |
| RTN4    | 785.5  | 895.4  | 409.3  | 560.2  | 385.4  | 695.5  | 955.6  | 2268.4 |
| RTN4    | 87.9   | 82.9   | 90.1   | 81.1   | 77.9   | 81.7   | 88.5   | 87.6   |
| RTN4    | 3995.5 | 4627.3 | 3318   | 3989.9 | 2739.5 | 6035.6 | 4528.2 | 9338.9 |
| RTN4    | 102.4  | 111.5  | 101.8  | 94     | 92.3   | 104.2  | 92.2   | 100.1  |
| RTN4IP1 | 726.9  | 1043.1 | 342.4  | 320    | 238.2  | 297.5  | 579.2  | 846.7  |
| RTN4R   | 148.9  | 197.3  | 104.3  | 105.7  | 97.6   | 97.1   | 142.3  | 139.9  |
| RTN4RL1 | 126.7  | 147.8  | 112.9  | 87.7   | 89.4   | 95.2   | 120    | 135    |
| RTN4RL2 | 88.8   | 97.3   | 87     | 89.9   | 90.8   | 91.8   | 92.3   | 97.7   |
| RTP1    | 104.4  | 114.4  | 104.8  | 91.4   | 100.3  | 89.7   | 106.6  | 111.3  |
| RTP2    | 127.7  | 141.4  | 101.6  | 92.5   | 94.6   | 94.7   | 135.8  | 150.3  |
| RTP3    | 94.1   | 88.4   | 88.3   | 85.1   | 82.3   | 86.6   | 97.6   | 98.3   |
| RTP4    | 230.3  | 294.2  | 171.9  | 150.5  | 147.4  | 196.4  | 203.3  | 278.4  |
| RUFY1   | 106.5  | 119.2  | 95.7   | 103.9  | 93.2   | 99.4   | 99.7   | 107.6  |
| RUFY1   | 422.4  | 556.5  | 304.3  | 308.4  | 314.9  | 476.7  | 335.2  | 609.1  |
| RUFY2   | 121.7  | 136.9  | 103.3  | 97.3   | 89.3   | 92.9   | 109.4  | 146.1  |
| RUFY2   | 141.1  | 172.4  | 123    | 107.6  | 108    | 106.6  | 134.1  | 150.2  |
| RUFY2   | 134.5  | 150.6  | 98.7   | 97.1   | 83.6   | 92.4   | 146.7  | 153.1  |

|         |        |        |        |        |        |        |        |        |
|---------|--------|--------|--------|--------|--------|--------|--------|--------|
| RUFY3   | 131.5  | 149.8  | 90.1   | 91.7   | 91.3   | 92.8   | 126.6  | 150.3  |
| RUFY3   | 100.7  | 142.2  | 104.2  | 103.8  | 104.7  | 138.6  | 111.6  | 167.8  |
| RUFY3   | 115.4  | 135.6  | 103.9  | 95.9   | 100.5  | 92.3   | 128.8  | 118.3  |
| RUNDC1  | 562.8  | 725.6  | 460.1  | 642.4  | 507.5  | 954.4  | 440.7  | 744.1  |
| RUNDC2A | 111    | 116.1  | 105.4  | 98.2   | 98.8   | 102.7  | 113.6  | 119.1  |
| RUNX1   | 136.2  | 171.3  | 95.6   | 94.9   | 86.9   | 95.8   | 134.8  | 147.9  |
| RUNX1   | 96.6   | 98.9   | 103.3  | 111.2  | 102.6  | 118.2  | 98.9   | 99.2   |
| RUNX1   | 599.1  | 862.8  | 480.2  | 719.6  | 608.6  | 781    | 798    | 932.3  |
| RUNX1T1 | 81.4   | 95.5   | 85.7   | 85.2   | 76.1   | 84.5   | 89.9   | 92.1   |
| RUNX1T1 | 105.1  | 124.1  | 86.7   | 85.7   | 79.5   | 88     | 100.9  | 117.5  |
| RUNX1T1 | 89.4   | 89.9   | 88.2   | 84.2   | 85.1   | 87.2   | 83.7   | 96.4   |
| RUNX1T1 | 96.1   | 104    | 110.9  | 96.8   | 94.1   | 100.9  | 93.8   | 96     |
| RUNX1T1 | 99.2   | 108.3  | 86.8   | 83     | 80.4   | 89.6   | 109.1  | 116.2  |
| RUNX2   | 130.1  | 148.4  | 84     | 87.4   | 89.3   | 94.9   | 122    | 141.8  |
| RUNX2   | 663.2  | 878.5  | 397.8  | 444.1  | 355.1  | 681.2  | 339.4  | 494.8  |
| RUNX2   | 88     | 116.5  | 104    | 95.1   | 78.3   | 92     | 90.6   | 89.2   |
| RUNX3   | 1958.4 | 2583.5 | 1219.6 | 1030.7 | 803.5  | 868.5  | 1791.2 | 2114.6 |
| RUNX3   | 115.7  | 117.3  | 104.4  | 107.7  | 102.6  | 95.9   | 112.7  | 122.5  |
| RUSC1   | 2811.2 | 3643.7 | 2015.6 | 1393.4 | 1187.6 | 1267.4 | 2448.8 | 2673.8 |
| RUSC2   | 133.6  | 145.3  | 110.3  | 116.6  | 89.2   | 108    | 131.7  | 159.8  |
| RUTBC1  | 860.5  | 1012   | 900    | 1070.8 | 1058.6 | 1206.2 | 583.8  | 645.4  |
| RUTBC2  | 88.2   | 89     | 98.8   | 90.4   | 90.1   | 95.6   | 85.5   | 104.2  |
| RUTBC3  | 156.5  | 184    | 146.1  | 135.5  | 133.6  | 168.9  | 147.5  | 194.6  |
| RUVBL1  | 1050.8 | 1471.5 | 491    | 303.1  | 251.5  | 345.3  | 650.2  | 779.1  |
| RUVBL2  | 2089.6 | 2832.7 | 1340.1 | 561    | 471.3  | 686.3  | 1878.5 | 2188.7 |
| RWDD1   | 192    | 241.7  | 162.8  | 153.2  | 133.4  | 199.8  | 143.8  | 182.8  |
| RWDD1   | 6552.3 | 7696.5 | 5303.5 | 5895.1 | 4554.8 | 6639.4 | 5628.9 | 9096.6 |
| RWDD2   | 365.3  | 493.8  | 305.2  | 322.4  | 258.4  | 384.8  | 296.6  | 393.3  |
| RWDD4A  | 806.6  | 1075.5 | 464.8  | 416.2  | 356.9  | 520    | 666.2  | 965.6  |
| RXRA    | 2060.9 | 2404.5 | 2829.3 | 2695.2 | 2024.6 | 3074.6 | 2788.7 | 5384.2 |
| RXRB    | 782.1  | 920.2  | 289.2  | 316.7  | 330.3  | 275.7  | 521.5  | 411.1  |
| RXRG    | 83.6   | 90.5   | 93.6   | 89.1   | 75.2   | 77.6   | 79.9   | 93.1   |
| RXRG    | 76.9   | 85.3   | 105.7  | 95.3   | 93.6   | 93.8   | 77.2   | 78.5   |
| RXRG    | 102.9  | 132.2  | 92.4   | 90.3   | 85.5   | 92.1   | 110.1  | 113.7  |
| RY1     | 2005.8 | 2436.7 | 832    | 897.3  | 667.1  | 931.6  | 1803.6 | 2545.3 |
| RYBP    | 869.6  | 1145   | 411.9  | 783.1  | 559.3  | 569.2  | 790.6  | 1219.2 |
| RYK     | 319.2  | 395.8  | 207.2  | 205.9  | 190.6  | 289.6  | 231.6  | 291.6  |
| RYK     | 447.5  | 604.3  | 331.6  | 328    | 278.8  | 494.3  | 373.9  | 464.6  |
| RYK     | 1318.6 | 1733.4 | 710.6  | 896    | 695    | 1121.6 | 1122.8 | 1522.1 |
| RYR1    | 146.2  | 218.8  | 115.6  | 116.6  | 111.8  | 130.7  | 145.4  | 157    |
| RYR1    | 220.9  | 331.2  | 217    | 241.2  | 210.7  | 305.5  | 210    | 326.2  |
| RYR2    | 112.3  | 123.4  | 108.3  | 92.9   | 80.1   | 99.7   | 103.7  | 125.2  |
| RYR3    | 76.9   | 88.1   | 114.5  | 104.5  | 95.8   | 105.9  | 87.7   | 87.3   |
| S100A1  | 94.5   | 127.8  | 97.2   | 104.7  | 100.6  | 99.7   | 102.9  | 128.5  |
| S100A10 | 4400   | 5366.1 | 3666   | 3125.9 | 2008.1 | 2604.1 | 4546.6 | 6960.7 |
| S100A11 | 1591.9 | 1993   | 744.7  | 608.9  | 436.7  | 624.9  | 1370.1 | 2027   |
| S100A12 | 103.1  | 116.6  | 106.5  | 142.8  | 121.2  | 182.2  | 94.4   | 140.1  |
| S100A13 | 89.1   | 99.8   | 110.9  | 93.1   | 89.6   | 109.4  | 95.4   | 104.3  |
| S100A13 | 91.8   | 99     | 87.6   | 99.3   | 103.9  | 87.1   | 92.7   | 102.3  |
| S100A13 | 233.4  | 264.5  | 154.8  | 125.1  | 131.4  | 177.4  | 194.1  | 302.3  |

|          |         |         |         |         |         |         |         |         |
|----------|---------|---------|---------|---------|---------|---------|---------|---------|
| S100A13  | 225.8   | 276.3   | 124.5   | 134.9   | 132.5   | 156.8   | 217.9   | 232.4   |
| S100A13  | 120.8   | 145     | 121.1   | 98.2    | 103.7   | 110     | 117.3   | 138.9   |
| S100A13  | 185.4   | 237.4   | 155.9   | 155.5   | 163.4   | 143.9   | 197.2   | 216.6   |
| S100A14  | 123.7   | 147.1   | 92.8    | 82.9    | 83.4    | 84.5    | 113.2   | 130.8   |
| S100A16  | 101     | 114.6   | 88.8    | 98.1    | 83.6    | 87.6    | 125     | 120.6   |
| S100A2   | 187.8   | 235.8   | 109.7   | 124.6   | 98      | 114.3   | 184.6   | 226.5   |
| S100A3   | 81.7    | 101.3   | 96.3    | 86.1    | 83.4    | 87.2    | 93.6    | 96.4    |
| S100A4   | 17843.5 | 21563   | 13676   | 9960    | 9621.5  | 11364.2 | 14589.1 | 16305.1 |
| S100A4   | 20282.2 | 23844.9 | 19905.8 | 16638.8 | 15105.3 | 15487.4 | 16341.2 | 18131.7 |
| S100A5   | 132.3   | 180.8   | 96.3    | 86.2    | 95.3    | 83.8    | 142.7   | 152.2   |
| S100A6   | 4171.5  | 4793.9  | 2236.5  | 2885.9  | 2523.3  | 2328.4  | 4591.6  | 3867.1  |
| S100A7   | 74.3    | 83.1    | 77.8    | 79      | 75.9    | 79.4    | 85.1    | 85.5    |
| S100A7L1 | 81      | 80.3    | 85      | 94.7    | 91.7    | 82.7    | 74.6    | 82.5    |
| S100A7L2 | 116.9   | 127.9   | 89      | 107     | 90.7    | 94.7    | 111.9   | 105.9   |
| S100A8   | 1632    | 1711.3  | 635.6   | 2845.8  | 2457.1  | 3782.8  | 1597.2  | 1653.9  |
| S100A9   | 2503.4  | 2239.2  | 1514.6  | 3481.5  | 2331.8  | 4018.4  | 2401.2  | 3516.1  |
| S100B    | 74.6    | 86.4    | 84.3    | 77.5    | 77.9    | 76.1    | 81      | 89.4    |
| S100G    | 79      | 90.2    | 89.6    | 90.8    | 73      | 85.2    | 81      | 90.5    |
| S100P    | 325.2   | 358     | 255.8   | 186.6   | 188.2   | 207.5   | 458.5   | 619.6   |
| S100PBP  | 166     | 224.7   | 107.4   | 118.6   | 107     | 103.7   | 158.6   | 210.2   |
| S100PBP  | 276.4   | 402.9   | 143.4   | 142.8   | 125.1   | 165.8   | 247.6   | 348.7   |
| S100Z    | 74.1    | 82.4    | 90.7    | 73.5    | 77      | 79.9    | 83.8    | 81.1    |
| SAA1     | 111.2   | 113     | 89.9    | 86.8    | 72.6    | 98.4    | 124.7   | 130.1   |
| SAA1     | 112.6   | 138     | 93.4    | 95.2    | 82.5    | 89      | 110.4   | 134.1   |
| SAA1     | 85.5    | 104.1   | 100.4   | 93.4    | 98.1    | 106.2   | 89.4    | 88.6    |
| SAA2     | 108.2   | 119.5   | 98.3    | 93.1    | 94.5    | 91.4    | 109.5   | 118     |
| SAA4     | 104.2   | 116.1   | 86      | 77.6    | 79.6    | 88.7    | 101.9   | 135.4   |
| SAAL1    | 2135.1  | 2400.4  | 1081.3  | 861.6   | 665     | 987.6   | 1707.3  | 2404.6  |
| SAC      | 86.3    | 115.8   | 88.7    | 82      | 86.4    | 86.8    | 95.4    | 108     |
| SACM1L   | 1013.9  | 1112.1  | 391.8   | 533.2   | 298.5   | 648.9   | 792.5   | 1725.4  |
| SACS     | 246.9   | 344.6   | 151.3   | 195.4   | 155.2   | 237.8   | 237.8   | 285.4   |
| SAE1     | 9560.4  | 11412.6 | 7876.5  | 5784.7  | 4482.4  | 6233.2  | 8132.3  | 9942.3  |
| SAFB     | 1913.2  | 2644.8  | 1153.1  | 997.3   | 994.8   | 1659.6  | 1480.3  | 1239    |
| SAFB2    | 767.1   | 870.3   | 680.4   | 619.1   | 485.3   | 714.5   | 604.6   | 1304.5  |
| SAG      | 93.6    | 95.9    | 95.1    | 89.5    | 86.7    | 95.2    | 86.1    | 94.1    |
| SAGE1    | 80.1    | 105.5   | 96      | 83.3    | 73.1    | 83.1    | 76.6    | 82.2    |
| SALF     | 83.1    | 95.5    | 91      | 85.4    | 75.8    | 78.8    | 90.9    | 98.6    |
| SALL1    | 82.7    | 91.6    | 90      | 87.7    | 83.1    | 104     | 84.1    | 86.7    |
| SALL2    | 99.6    | 108.8   | 102.7   | 95.2    | 90.8    | 101.5   | 92.8    | 107.6   |
| SALL3    | 234     | 243.1   | 130.3   | 134.2   | 115.9   | 134.7   | 241.4   | 247.9   |
| SALL4    | 102     | 128.3   | 118.5   | 135.1   | 145.4   | 145.4   | 94.1    | 109.5   |
| SAMD1    | 168.9   | 196.9   | 170     | 135     | 115.7   | 142.7   | 141.8   | 248.9   |
| SAMD10   | 112.9   | 121.7   | 109.2   | 93.2    | 85.8    | 99      | 99      | 112.5   |
| SAMD11   | 114     | 123.3   | 118.6   | 118.2   | 102.9   | 122.9   | 111.4   | 117.6   |
| SAMD12   | 87.2    | 88.1    | 104.4   | 92.4    | 85.9    | 85.9    | 89.8    | 92      |
| SAMD13   | 158.5   | 201.7   | 134.7   | 110.5   | 100.4   | 118.6   | 130.7   | 195.9   |
| SAMD14   | 111.4   | 129     | 108.8   | 103.1   | 96.8    | 102.2   | 115.9   | 108.3   |
| SAMD3    | 73.8    | 85.4    | 98.9    | 88      | 88.8    | 84.6    | 80.1    | 74.6    |
| SAMD3    | 130.7   | 155.6   | 102     | 101.9   | 92      | 99.9    | 131.7   | 148.7   |
| SAMD3    | 92.9    | 93.6    | 92.1    | 77.3    | 77.7    | 80.1    | 82.3    | 87.7    |

|          |        |        |        |        |        |        |        |        |
|----------|--------|--------|--------|--------|--------|--------|--------|--------|
| SAMD4A   | 90.6   | 88.2   | 95.7   | 93     | 86.1   | 71.8   | 89.6   | 107.3  |
| SAMD4B   | 116.5  | 162.3  | 150.1  | 165.6  | 129.6  | 188.5  | 126.9  | 208.7  |
| SAMD7    | 177.8  | 189.8  | 105.8  | 91.2   | 88.8   | 97.8   | 166.4  | 172.7  |
| SAMD8    | 101.3  | 117.2  | 100.7  | 93.2   | 85.5   | 103.6  | 111.9  | 106.3  |
| SAMD9    | 553.5  | 736.7  | 299    | 354.5  | 321.8  | 584.7  | 427.5  | 759.9  |
| SAMD9L   | 113.7  | 129.4  | 117.4  | 154.4  | 164.3  | 235.5  | 114.7  | 131    |
| SAMHD1   | 254.9  | 359.6  | 119.4  | 166.8  | 155.7  | 149.7  | 213.1  | 252.9  |
| SAMM50   | 3133.1 | 4075.9 | 2797.6 | 2656.1 | 1832.7 | 2884.8 | 2712.1 | 2834   |
| SAMSN1   | 75.9   | 101.4  | 86.8   | 96.3   | 96.2   | 96.8   | 90.2   | 96     |
| SAP130   | 528.8  | 709.1  | 491.6  | 522.3  | 466.9  | 570.9  | 496    | 721.6  |
| SAP18    | 387.5  | 505.1  | 277.3  | 329.3  | 258.4  | 354.5  | 381.8  | 585.2  |
| SAP30    | 1446.5 | 1538.9 | 706.2  | 485.8  | 355.7  | 576.6  | 1518.7 | 2865.7 |
| SAP30BP  | 148.5  | 170.5  | 155.4  | 143.6  | 129.4  | 151    | 128.9  | 187.2  |
| SAPS1    | 353.6  | 401.7  | 386.7  | 262    | 239.4  | 318.4  | 270.3  | 453.5  |
| SAPS2    | 89.6   | 104.1  | 91.8   | 89.8   | 88.2   | 96.7   | 92.5   | 118.4  |
| SAPS3    | 452.1  | 717.5  | 483    | 520.9  | 461.1  | 697    | 460.3  | 613.7  |
| SAR1A    | 809.7  | 936.2  | 245.6  | 164.8  | 138.9  | 174.6  | 685.4  | 1146.1 |
| SAR1B    | 133.3  | 155.7  | 117.7  | 95.6   | 93.8   | 98.1   | 132.3  | 130.2  |
| SAR1B    | 1843.7 | 2057.7 | 974.9  | 863.9  | 534.5  | 1032.9 | 1772.8 | 3171.9 |
| SAR1B    | 753.6  | 902.2  | 304.5  | 248.5  | 165.2  | 319.8  | 630.2  | 939.4  |
| SARDH    | 74.4   | 76.8   | 91.5   | 84.2   | 83.8   | 87.3   | 75     | 87.7   |
| SARM1    | 78     | 89.7   | 80.7   | 81.9   | 75     | 87.5   | 77.3   | 79.6   |
| SARS     | 1022.8 | 1472.1 | 223.5  | 179.3  | 157.4  | 202.6  | 1113.1 | 1412.4 |
| SARS2    | 639.3  | 702.4  | 364.4  | 250.2  | 230.6  | 277    | 526.3  | 657.6  |
| SART1    | 106.1  | 116.5  | 90.8   | 89.1   | 101.5  | 88.4   | 110.9  | 119.8  |
| SART2    | 90.5   | 94.3   | 90.3   | 83.6   | 81.5   | 86.7   | 86.7   | 96.2   |
| SART2    | 86.7   | 99.9   | 95.2   | 86     | 93     | 84.4   | 88.1   | 91.1   |
| SART2    | 184.7  | 211.5  | 165.2  | 202.7  | 202.5  | 240.4  | 189.2  | 302.8  |
| SART3    | 136.8  | 186.8  | 129.9  | 122.6  | 132.7  | 144.9  | 128.3  | 205    |
| SAS10    | 79.9   | 93.7   | 90.1   | 76.8   | 83     | 82.7   | 87.9   | 90.8   |
| SASH1    | 1019.8 | 1353.8 | 436.5  | 994.2  | 783.1  | 1320.5 | 974.8  | 1391.6 |
| SASS6    | 556.4  | 616.2  | 300.4  | 187.4  | 200.5  | 367.7  | 439.6  | 860.7  |
| SAS-ZFAT | 80.2   | 97.3   | 84.4   | 89     | 80.7   | 77.9   | 84.4   | 95.2   |
| SAT      | 809.9  | 983.4  | 389.6  | 489    | 489.6  | 711.3  | 999.6  | 1427.2 |
| SAT2     | 235    | 279.9  | 130.7  | 131.2  | 128.6  | 154.7  | 265.5  | 414.1  |
| SATB1    | 346.8  | 436.4  | 169.8  | 178.5  | 136.7  | 260.4  | 249.1  | 307.8  |
| SATB2    | 1466.4 | 2007.6 | 1166.9 | 1754.6 | 1324.7 | 2282.4 | 1359.7 | 2147.7 |
| SATL1    | 100.3  | 120.6  | 101.5  | 92.9   | 90.4   | 89.4   | 88.3   | 99.7   |
| SAV1     | 245.1  | 307.3  | 219.6  | 181    | 167.5  | 220.5  | 232.5  | 483.4  |
| SBDS     | 670.2  | 946.9  | 327.7  | 298.4  | 266    | 467.6  | 644.3  | 1109.8 |
| SBDSP    | 442.8  | 628.1  | 198.7  | 191.1  | 161.3  | 229.1  | 339.1  | 504.8  |
| SBEM     | 122    | 139.2  | 99.4   | 91.7   | 83.1   | 94.4   | 117    | 129.1  |
| SBF1     | 496.1  | 571.6  | 560.7  | 576.2  | 466.1  | 657.2  | 389.6  | 447.9  |
| SBF2     | 96.9   | 117.9  | 103    | 101.3  | 100.6  | 118    | 98.8   | 131.2  |
| SBK1     | 80.3   | 113.2  | 79.2   | 75     | 76.4   | 73.6   | 89.2   | 92.4   |
| SBK1     | 167.8  | 193.7  | 130.9  | 107    | 100.1  | 106.7  | 155.4  | 181.5  |
| SBNO1    | 188.5  | 257.1  | 102    | 101.2  | 91.4   | 118.6  | 166.4  | 235.3  |
| SBP1     | 156.7  | 140.4  | 100.9  | 111.3  | 93.7   | 101.7  | 132.5  | 142.4  |
| SBSN     | 90.8   | 97.9   | 106    | 89.3   | 82.9   | 86.4   | 97.2   | 98.8   |
| SC4MOL   | 441.2  | 658.9  | 194.6  | 233.8  | 170.3  | 221.4  | 317.1  | 384    |

|          |        |        |        |        |        |        |        |        |
|----------|--------|--------|--------|--------|--------|--------|--------|--------|
| SC4MOL   | 1106.2 | 1426.4 | 466.2  | 566.8  | 597.8  | 678.3  | 842.5  | 1152.8 |
| SC4MOL   | 90.9   | 109.6  | 106.3  | 86.9   | 86.8   | 85.4   | 104.4  | 101.2  |
| SC5DL    | 682.1  | 851.6  | 453.5  | 443.7  | 417.3  | 496.1  | 705.6  | 831.9  |
| SC65     | 301.4  | 353.8  | 213.2  | 206.6  | 169.3  | 190.3  | 266.9  | 464.7  |
| SCAMP1   | 1480.7 | 1960.3 | 1059.9 | 1437.9 | 1021.3 | 1618.2 | 1131.1 | 1740.5 |
| SCAMP1   | 353.8  | 408.2  | 123.5  | 146.3  | 124.2  | 125.1  | 215    | 350.7  |
| SCAMP2   | 306.7  | 429    | 268.6  | 262.5  | 201.3  | 231.5  | 289.4  | 352.8  |
| SCAMP3   | 214.9  | 279.7  | 151.4  | 124.6  | 106.8  | 133.6  | 207.5  | 300.9  |
| SCAMP3   | 2857.9 | 3457.4 | 2071.9 | 1125.4 | 848.8  | 1058.8 | 2717.1 | 3253.3 |
| SCAMP4   | 138.6  | 154.9  | 125.6  | 127.2  | 112.2  | 128.7  | 133.3  | 175.6  |
| SCAMP5   | 195.9  | 257.5  | 282.3  | 341.3  | 317    | 381.6  | 174.3  | 235.9  |
| SCAND1   | 966.1  | 1290.2 | 611.1  | 459.3  | 412.8  | 465.8  | 760.6  | 936.3  |
| SCAND1   | 376.4  | 467.3  | 214.8  | 164.4  | 144.3  | 121.2  | 335.6  | 408.8  |
| SCAND1   | 1539.4 | 1962.5 | 1088.3 | 774    | 680.6  | 846.7  | 1209.6 | 1459.3 |
| SCAP     | 1288.3 | 1547.9 | 671.2  | 711.6  | 600.3  | 740.9  | 1050.3 | 924.7  |
| SCAP1    | 110.2  | 125    | 86.3   | 80.9   | 74.7   | 82.2   | 105.2  | 118.3  |
| SCARA3   | 110.8  | 110.3  | 96.6   | 87.5   | 85.4   | 93.9   | 102.5  | 108.5  |
| SCARA3   | 83.1   | 78.1   | 89.3   | 90.6   | 81.5   | 90.7   | 80.9   | 85.7   |
| SCARA3   | 85.3   | 98.1   | 103.1  | 77.9   | 81.4   | 79.1   | 89.1   | 93.7   |
| SCARA5   | 84.5   | 106    | 88.7   | 87.5   | 93.4   | 94     | 83.4   | 90.3   |
| SCARB1   | 613.4  | 767.8  | 888.3  | 874    | 708.5  | 1124   | 480.6  | 894.5  |
| SCARB2   | 2012.9 | 2794.7 | 1478.5 | 2425.7 | 1669.4 | 2880   | 1923   | 2441.1 |
| SCARF1   | 102    | 105.5  | 99     | 83.8   | 88.9   | 89.1   | 96.5   | 106.5  |
| SCARF1   | 122.2  | 148.8  | 94.6   | 93.2   | 83.3   | 89.1   | 123.7  | 138.8  |
| SCARF2   | 98     | 112.3  | 105.7  | 94.1   | 75.7   | 79.5   | 96.4   | 119.7  |
| SCARF2   | 78.4   | 93.9   | 80     | 76.1   | 89.2   | 84.1   | 98.6   | 85.5   |
| SCARNA15 | 84.4   | 87.2   | 93.8   | 83.3   | 79.2   | 85.1   | 80.7   | 81.2   |
| SCC-112  | 655.6  | 1032.7 | 423.8  | 413.1  | 309.6  | 722.6  | 506.6  | 1043.9 |
| SCCPDH   | 259.5  | 295.7  | 170.6  | 183.7  | 152.1  | 185    | 205.6  | 319.5  |
| SCD      | 5534.6 | 6952.5 | 4422.4 | 6068.1 | 5337.9 | 5463.7 | 5247   | 7330.1 |
| SCD5     | 161.1  | 200.9  | 121.3  | 109    | 96.4   | 102.8  | 168.9  | 211.1  |
| SCD5     | 109    | 129.6  | 82.8   | 89.2   | 92.1   | 93.9   | 109.5  | 111.5  |
| SCD5     | 300.3  | 408.9  | 255.3  | 133    | 121.3  | 156.6  | 216.4  | 298    |
| SCDR10   | 155.6  | 189.9  | 118.8  | 106.6  | 99.1   | 125.1  | 128.2  | 161.7  |
| SCEL     | 142.8  | 168.3  | 108.7  | 91.4   | 93.2   | 97.2   | 132    | 145.5  |
| SCFD1    | 1407.7 | 1783.7 | 866.1  | 915    | 678.3  | 1115.3 | 1158.6 | 2003.3 |
| SCFD1    | 87     | 85.5   | 88.7   | 88     | 83.1   | 93.1   | 87.2   | 84.4   |
| SCFD2    | 179.6  | 243.4  | 101.1  | 88.5   | 91     | 110    | 162.3  | 206.3  |
| SCG2     | 86.8   | 97.7   | 86.6   | 84.8   | 74.8   | 89.2   | 81.8   | 109.1  |
| SCG3     | 196.7  | 199.7  | 147.9  | 146    | 137.8  | 183.6  | 178.4  | 236.7  |
| SCG5     | 110.7  | 122.9  | 111.5  | 99.7   | 100.1  | 112.8  | 96.4   | 129.9  |
| SCGB1A1  | 99.1   | 115.3  | 93.3   | 88.8   | 83.2   | 94.2   | 99     | 113.3  |
| SCGB1C1  | 88.5   | 125    | 105.9  | 87.3   | 89.7   | 90.5   | 93.2   | 103.1  |
| SCGB1D1  | 159.1  | 209.8  | 132.8  | 108.5  | 91.7   | 108.3  | 155    | 164.4  |
| SCGB1D2  | 87.3   | 101.9  | 95.5   | 84.3   | 81.8   | 84.7   | 90.1   | 91.3   |
| SCGB1D4  | 76.6   | 98     | 94.6   | 81.2   | 79     | 80.8   | 93.1   | 101.6  |
| SCGB2A1  | 83.9   | 86     | 102.1  | 96.9   | 92.8   | 90.6   | 71.7   | 88.2   |
| SCGB2A2  | 85.1   | 102.6  | 95.9   | 87.7   | 86.2   | 95.9   | 93.6   | 101.2  |
| SCGB3A1  | 91.9   | 105.7  | 99.9   | 102.3  | 89.7   | 93.7   | 109.6  | 119    |
| SCGB3A2  | 96.5   | 109.6  | 84.9   | 78     | 79.8   | 82     | 94.7   | 115.3  |



|        |        |        |        |       |        |        |        |        |
|--------|--------|--------|--------|-------|--------|--------|--------|--------|
| SCGN   | 89.4   | 103.1  | 99.2   | 95.1  | 94.5   | 91.7   | 89.7   | 92.8   |
| SCHIP1 | 147    | 163.7  | 133.9  | 107.5 | 109.7  | 123.4  | 151.7  | 156.5  |
| SCIN   | 146.2  | 170.5  | 153.1  | 123.1 | 113.5  | 156.1  | 132.7  | 147.7  |
| SCLY   | 194    | 239.2  | 232.3  | 194.2 | 164.6  | 199.2  | 176.5  | 303.1  |
| SCMH1  | 148.4  | 180.6  | 127.8  | 212.8 | 215.1  | 116.8  | 117.9  | 140.7  |
| SCMH1  | 1900.1 | 2268.9 | 843.7  | 862   | 918.4  | 988.6  | 1432.3 | 1551.7 |
| SCMH1  | 344.5  | 384.3  | 138.6  | 229   | 216.1  | 110.8  | 249.2  | 355.5  |
| SCMH1  | 365.4  | 394.2  | 336.1  | 309.6 | 257.9  | 541.8  | 249.4  | 420.3  |
| SCML1  | 98.6   | 117.1  | 91.8   | 86    | 89.4   | 91.9   | 110.3  | 110.8  |
| SCML1  | 121.3  | 133.6  | 109.4  | 106.7 | 96.4   | 93.6   | 117.4  | 136.8  |
| SCML1  | 82.3   | 81.5   | 89.2   | 80.9  | 77.4   | 83.2   | 75.9   | 88     |
| SCML2  | 241.1  | 320.2  | 223.5  | 143.8 | 140.5  | 177.6  | 224.4  | 370.7  |
| SCML4  | 85.9   | 84.5   | 88.8   | 95.4  | 87.1   | 84.2   | 78.3   | 75.6   |
| SCN10A | 90.8   | 105    | 94     | 81.7  | 87.1   | 95.4   | 84.9   | 92     |
| SCN11A | 79.5   | 100.5  | 90.4   | 95.8  | 67.5   | 80.2   | 84.2   | 93.8   |
| SCN1A  | 93.8   | 107.1  | 89.4   | 81.5  | 72.7   | 86.5   | 96.6   | 102.1  |
| SCN1B  | 93.3   | 89.5   | 103.7  | 102.6 | 99     | 98.4   | 88.8   | 96.3   |
| SCN1B  | 81.1   | 93.3   | 94.9   | 89.6  | 85     | 91.1   | 77.2   | 83.7   |
| SCN2A2 | 72.7   | 88.6   | 93.6   | 91.8  | 86.9   | 94.7   | 71.3   | 78.2   |
| SCN2A2 | 90.3   | 107    | 97.9   | 85.9  | 88     | 85.2   | 94.5   | 104.1  |
| SCN2A2 | 85.8   | 86.2   | 105.9  | 90.1  | 82.5   | 93.4   | 86.6   | 95.9   |
| SCN2B  | 81.2   | 95     | 98.5   | 94.6  | 80.6   | 85.4   | 72.7   | 86.4   |
| SCN3A  | 85.9   | 97.2   | 84     | 83.5  | 76.1   | 78.2   | 81.7   | 96.5   |
| SCN3A  | 580.3  | 726.4  | 328.1  | 308.3 | 208.6  | 362.5  | 466.2  | 538.5  |
| SCN3A  | 111    | 119.8  | 104    | 93    | 92     | 100.8  | 93.7   | 123    |
| SCN3B  | 79.7   | 97.3   | 93     | 83.5  | 80     | 80.7   | 89     | 86.9   |
| SCN3B  | 92.2   | 101.9  | 96.3   | 86.4  | 90.9   | 88.2   | 86.3   | 99.2   |
| SCN4A  | 88.7   | 102    | 105.5  | 95    | 92.2   | 88.6   | 86.4   | 106.5  |
| SCN4B  | 129.4  | 154.7  | 95.2   | 88.2  | 84.9   | 90.5   | 144    | 150.4  |
| SCN5A  | 78.1   | 83.2   | 89.4   | 92.2  | 96.4   | 86.5   | 78.4   | 81.6   |
| SCN5A  | 92.1   | 98     | 81.2   | 78.7  | 79     | 85.3   | 83.4   | 100.2  |
| SCN7A  | 116.6  | 122.2  | 109.9  | 99.1  | 101.4  | 96.9   | 110.6  | 113.7  |
| SCN8A  | 75.5   | 83     | 93.3   | 88.8  | 88.4   | 84.2   | 78.1   | 89.3   |
| SCN9A  | 96.9   | 96.7   | 109.5  | 97.6  | 98.8   | 97.6   | 99.3   | 103.6  |
| SCNM1  | 1380.1 | 1821.9 | 801.9  | 526.6 | 467.4  | 568.5  | 1238.1 | 1519   |
| SCNM1  | 2301.7 | 2874.1 | 1478.7 | 959.6 | 834.8  | 1108.6 | 2178.2 | 1961.8 |
| SCNN1A | 96.9   | 103.4  | 101.3  | 94.5  | 94.1   | 100.1  | 89.3   | 94.5   |
| SCNN1B | 119.3  | 128.2  | 95.6   | 104   | 86.2   | 95.7   | 116.6  | 123.9  |
| SCNN1D | 206    | 191.7  | 153.3  | 129.1 | 161.4  | 172.8  | 141.5  | 160.1  |
| SCNN1G | 88.8   | 106.9  | 91.2   | 84.3  | 91.5   | 85     | 92.9   | 109.6  |
| SCO1   | 1061.8 | 1470.7 | 613.7  | 556.2 | 417.5  | 705.4  | 789.4  | 1016.6 |
| SCO2   | 1193.9 | 1574.9 | 1266.7 | 787.1 | 752.7  | 993.5  | 933.7  | 1147   |
| SCOC   | 1265.6 | 1529.2 | 414.9  | 430   | 335.5  | 764    | 914.9  | 2293.9 |
| SCOTIN | 1967.6 | 2811.8 | 1222   | 830.9 | 602.2  | 862.2  | 1723.2 | 3408.7 |
| SCP2   | 111.4  | 132.9  | 93.9   | 89.5  | 81     | 93.4   | 96.8   | 130.2  |
| SCP2   | 434.6  | 581.5  | 197.2  | 217   | 226.7  | 189.2  | 258.1  | 363    |
| SCPEP1 | 2108.7 | 2690.1 | 1254.9 | 2336  | 2191.6 | 3208.2 | 1654.3 | 2357.3 |
| SCRG1  | 102.7  | 109.3  | 90.5   | 87.8  | 96.2   | 93.8   | 109.4  | 112.5  |
| SCRIB  | 153.9  | 173    | 121.9  | 106.2 | 101.5  | 104.3  | 155.9  | 187.9  |
| SCRIB  | 1343.5 | 1592.5 | 1002   | 660.2 | 535.7  | 635.1  | 1020.6 | 1005.2 |

|          |        |        |        |        |        |        |        |        |
|----------|--------|--------|--------|--------|--------|--------|--------|--------|
| SCRIB    | 100.2  | 122.9  | 128.5  | 110.1  | 113.7  | 136.8  | 90.4   | 106.5  |
| SCRL     | 83.2   | 94     | 87.6   | 89.7   | 95.8   | 87.1   | 85.5   | 91.7   |
| SCRN1    | 121    | 146.1  | 120.2  | 145.8  | 143.2  | 163.6  | 113.2  | 128    |
| SCRN2    | 129.6  | 152    | 120    | 113.9  | 112.5  | 120    | 125.7  | 117.1  |
| SCRN3    | 140.3  | 169.1  | 114.5  | 117.9  | 107.2  | 117.4  | 117.1  | 143.5  |
| SCRT1    | 81.6   | 92.6   | 99.8   | 99.4   | 91.7   | 94.2   | 87.6   | 87.3   |
| SCRT2    | 95.8   | 93.5   | 99.6   | 89.9   | 82.2   | 96     | 81.9   | 102.1  |
| SCT      | 116.5  | 151.9  | 102.9  | 90.1   | 80.2   | 94.4   | 120.1  | 139.8  |
| SCTR     | 108    | 135    | 100.2  | 92.8   | 89.9   | 90.2   | 104.5  | 127.4  |
| SCUBE1   | 102.3  | 111.4  | 118.2  | 103.6  | 98.4   | 123.6  | 98.3   | 123.9  |
| SCUBE2   | 82     | 88.3   | 104    | 98     | 96.1   | 105.2  | 86.2   | 73.3   |
| SCUBE3   | 100    | 117    | 87.1   | 93.8   | 87.3   | 94.7   | 93.8   | 90.6   |
| SCYE1    | 95.3   | 112    | 115.5  | 94.6   | 94.7   | 100.7  | 100.4  | 120.6  |
| SCYL1    | 450.5  | 575.4  | 284.1  | 247.9  | 217.9  | 270.1  | 443.4  | 643.7  |
| SCYL1    | 2310.7 | 2982.8 | 862.7  | 632.1  | 580.4  | 657.7  | 1999   | 1952.5 |
| SCYL1BP1 | 167.7  | 216.8  | 136.1  | 142.7  | 141.8  | 183.1  | 146.2  | 288    |
| SCYL2    | 757.5  | 843.8  | 405.7  | 387.7  | 358    | 562.7  | 736.2  | 1408.7 |
| SCYL3    | 273.9  | 322.4  | 135.8  | 127.5  | 132.9  | 158.7  | 246.2  | 385.1  |
| SCYL3    | 161.6  | 186    | 122.5  | 119.8  | 107.6  | 141.9  | 162.4  | 234.7  |
| SCYL3    | 89.4   | 99.3   | 93.2   | 80.8   | 86.6   | 88.3   | 91.7   | 91.7   |
| SDAD1    | 2823.6 | 3269.6 | 2011.3 | 1416.2 | 1058   | 2550.9 | 2455.4 | 4231   |
| SDC1     | 116.1  | 141.5  | 102.6  | 82.4   | 83.3   | 86.3   | 140.8  | 154.7  |
| SDC1     | 191.9  | 237.8  | 126.8  | 127.8  | 115.1  | 123.9  | 148.7  | 158.5  |
| SDC1     | 72.2   | 80.7   | 105.3  | 90     | 91.2   | 94.5   | 80.4   | 85.6   |
| SDC2     | 362.5  | 492.3  | 149.1  | 108.5  | 100.4  | 120    | 239.4  | 319.5  |
| SDC3     | 121.1  | 134    | 97.6   | 94.7   | 86     | 97.9   | 111.3  | 112.9  |
| SDC3     | 79.1   | 86.8   | 100.6  | 104    | 103.8  | 98     | 85.8   | 75.7   |
| SDC4     | 155.5  | 178.9  | 123.1  | 116.6  | 94.4   | 145.5  | 138    | 204.4  |
| SDCBP    | 2327   | 2965.1 | 1051.5 | 1241.4 | 808.8  | 1763.3 | 2541.5 | 5586.9 |
| SDCBP2   | 107.4  | 110.4  | 97.9   | 92.3   | 86.6   | 84.8   | 112.4  | 112    |
| SDCBP2   | 93.2   | 94     | 92.1   | 80     | 82.4   | 82.8   | 83.6   | 94.5   |
| SDCBP2   | 96.6   | 123.2  | 93.9   | 78.5   | 80.1   | 89.2   | 95.5   | 105.5  |
| SDCBP2   | 97.6   | 111.5  | 87.4   | 83.7   | 73.6   | 77.7   | 100.7  | 99.1   |
| SDCCAG1  | 696.2  | 996.7  | 385.8  | 445.7  | 367.9  | 484.5  | 559.4  | 794.5  |
| SDCCAG10 | 2246.3 | 2837.2 | 859    | 993.2  | 885.1  | 1605.3 | 1521.4 | 2221.1 |
| SDCCAG3  | 1051.7 | 1296.9 | 778.8  | 401.2  | 337.9  | 541.4  | 679.2  | 1090.2 |
| SDCCAG3  | 135.4  | 174.6  | 103.6  | 101.4  | 99.8   | 91     | 115    | 158    |
| SDCCAG3  | 2647.1 | 2923.8 | 1890.8 | 1202.3 | 930.5  | 1500.4 | 1727.2 | 2010.6 |
| SDCCAG33 | 339    | 469.9  | 286.3  | 258.9  | 208.1  | 318.2  | 336.4  | 593.6  |
| SDCCAG8  | 299.6  | 481.9  | 215.8  | 226.3  | 226.7  | 326    | 260.4  | 313.2  |
| SDF2     | 1268.7 | 1538.7 | 854.4  | 893.6  | 740.1  | 1002.6 | 1150.1 | 2065.2 |
| SDF2L1   | 7081.9 | 8541.2 | 5297.7 | 4851.4 | 3736.8 | 4942.6 | 8567.7 | 9641.6 |
| SDF4     | 1242.6 | 1512.7 | 1037.6 | 958.3  | 754.4  | 954.9  | 1178.3 | 2373.5 |
| SDF4     | 100.9  | 114.4  | 105.8  | 91.8   | 84.4   | 90.6   | 93.6   | 117.4  |
| SDF4     | 1011.4 | 1578.6 | 700.7  | 554.2  | 442.7  | 369.7  | 995    | 1768   |
| SDFR1    | 1336.9 | 1434.3 | 382.8  | 370.3  | 221.9  | 531.1  | 1105   | 1934   |
| SDFR1    | 104.7  | 115.3  | 103.2  | 84.1   | 88     | 89.1   | 104.6  | 114.1  |
| SDHA     | 1438.6 | 2095.1 | 1088.6 | 1000.1 | 952.3  | 1431.2 | 1395.2 | 1909   |
| SDHAP3   | 190.2  | 191.4  | 133.8  | 145    | 140.5  | 141.2  | 149.4  | 173.5  |
| SDHB     | 4403   | 5313.4 | 2956.5 | 2904.2 | 2387.1 | 3609.5 | 3492.9 | 4872.7 |

|          |        |         |        |        |        |        |        |         |
|----------|--------|---------|--------|--------|--------|--------|--------|---------|
| SDHC     | 478.4  | 563.8   | 278.8  | 333.9  | 268.8  | 416.1  | 420.6  | 635.5   |
| SDHD     | 2609.3 | 2913.3  | 680.1  | 913    | 555.2  | 973.1  | 2439.4 | 3940.8  |
| SDK1     | 109.9  | 107.2   | 96.3   | 93.7   | 94     | 94.6   | 98.4   | 101     |
| SDK1     | 103.8  | 118     | 109.7  | 99.9   | 105.4  | 102.8  | 113.3  | 122.9   |
| SDK2     | 102.8  | 110.3   | 89.4   | 92.3   | 83.6   | 88.7   | 99.6   | 101.9   |
| SDPR     | 137.9  | 156.7   | 109.4  | 97.3   | 100.8  | 107.1  | 132.8  | 193.6   |
| SDR-O    | 88.7   | 98.4    | 86     | 88.9   | 83.6   | 83.8   | 90     | 115     |
| SDS      | 105.1  | 119.6   | 99.6   | 108.3  | 113.1  | 144.8  | 111.9  | 107.6   |
| SDSL     | 665.6  | 905.8   | 448.4  | 588.5  | 458.2  | 799.3  | 612.6  | 627.2   |
| SEBOX    | 75.6   | 84.9    | 94.2   | 87.7   | 81.2   | 88.4   | 81.4   | 92.4    |
| SEC10L1  | 137.2  | 164.5   | 118.7  | 120.9  | 110.5  | 140.8  | 126.3  | 159     |
| SEC11L1  | 6750.7 | 8974.1  | 4694.7 | 5728.3 | 4968.8 | 6282.9 | 6236.3 | 8058.8  |
| SEC11L3  | 1241.3 | 1287.6  | 260.8  | 356.1  | 257.8  | 329.6  | 1188.3 | 1908.4  |
| SEC14L1  | 101.7  | 136.2   | 111.8  | 116.5  | 102.9  | 116.8  | 111.1  | 159.1   |
| SEC14L1  | 192.7  | 233.2   | 161.4  | 138.6  | 132.6  | 146.5  | 185.7  | 215     |
| SEC14L2  | 79.3   | 101.2   | 97.9   | 91.2   | 90.4   | 92.2   | 87.8   | 95.5    |
| SEC14L3  | 92.4   | 129.8   | 87     | 85     | 77.6   | 87.5   | 92.4   | 90.9    |
| SEC14L4  | 131.4  | 159.2   | 95.2   | 76.9   | 74.4   | 86.9   | 112.5  | 139.3   |
| SEC22C   | 630.9  | 901.3   | 725.2  | 869.4  | 772.3  | 1000.5 | 660.5  | 1201.2  |
| SEC22C   | 427.5  | 572.3   | 307.3  | 249.1  | 244.6  | 280.5  | 380.8  | 418.3   |
| SEC22L1  | 1310.3 | 1458.3  | 735.7  | 583    | 458.1  | 583.9  | 1101.7 | 1579.6  |
| SEC22L2  | 786.6  | 1057.4  | 467.7  | 461.1  | 366.7  | 496.9  | 823.1  | 1070.5  |
| SEC22L3  | 307.2  | 451.2   | 176.7  | 156.1  | 134.9  | 138    | 297.1  | 365.9   |
| SEC23A   | 85.4   | 97.5    | 87.5   | 77.2   | 81.5   | 82.6   | 79.7   | 88.4    |
| SEC23B   | 1234.3 | 1642.9  | 618.7  | 683.1  | 523.5  | 750.4  | 767.3  | 1102.4  |
| SEC23B   | 1409.2 | 1748.8  | 892.1  | 889    | 658.3  | 1210.9 | 823.1  | 1186    |
| SEC23IP  | 562.9  | 695.9   | 412.2  | 379.3  | 272.6  | 536.2  | 479.8  | 919.3   |
| SEC24A   | 156.3  | 202.8   | 111.8  | 129    | 101.4  | 142.9  | 196.9  | 351     |
| SEC24B   | 410.6  | 478.4   | 180.5  | 206.9  | 240.1  | 214.9  | 414.2  | 650.3   |
| SEC24B   | 76     | 81.5    | 83.8   | 76.4   | 73.3   | 81.6   | 69.6   | 78.1    |
| SEC24B   | 213.4  | 273     | 149.3  | 109.4  | 119.9  | 143.9  | 184.3  | 246.5   |
| SEC24B   | 225.2  | 257     | 119    | 98.2   | 90.7   | 104.2  | 166    | 239     |
| SEC24C   | 1030.6 | 1149.6  | 1616.3 | 1063.7 | 917.4  | 1424.8 | 969.1  | 1294.6  |
| SEC24C   | 157.9  | 174.5   | 141.2  | 111.6  | 113.5  | 115.8  | 145.2  | 163.7   |
| SEC24D   | 408    | 470.3   | 191.7  | 185.2  | 148.3  | 284.8  | 426.6  | 1135.2  |
| SEC31L1  | 117.8  | 143.7   | 115.8  | 110    | 92.5   | 100.1  | 107.8  | 110.3   |
| SEC31L1  | 1243.1 | 1844.7  | 542.3  | 601    | 551.3  | 935.6  | 1119.1 | 1847.7  |
| SEC31L2  | 74.3   | 84.9    | 82.8   | 81.6   | 79.4   | 86.1   | 82.1   | 87.8    |
| SEC31L2  | 110.3  | 121     | 90.6   | 91     | 83.6   | 98.6   | 114.2  | 132.6   |
| SEC61A1  | 3540.5 | 5120    | 3130.1 | 3445.9 | 2780.8 | 3614.5 | 3365.7 | 3416.6  |
| SEC61A2  | 95.8   | 121.4   | 108.9  | 98.6   | 105.1  | 118.5  | 97.9   | 118.2   |
| SEC61B   | 8609.2 | 10155.9 | 3248.8 | 3220.7 | 1943.6 | 2732.5 | 9296.8 | 12424   |
| SEC61G   | 8011.4 | 10617.7 | 7320.7 | 5944.5 | 3689.8 | 6039.7 | 7077.3 | 9059.7  |
| SEC61G   | 9932.8 | 11110.9 | 5715.7 | 4638.2 | 3521.8 | 5780.9 | 8311.1 | 12211.5 |
| SEC63    | 223    | 298.2   | 129.6  | 167.5  | 112.9  | 180.5  | 219    | 305.3   |
| SEC6L1   | 488.4  | 608.3   | 586.6  | 451.6  | 460.3  | 726.6  | 450.1  | 717.6   |
| SEC8L1   | 234.5  | 267.6   | 118.1  | 106.7  | 99.4   | 121.7  | 247.9  | 236     |
| SECISBP2 | 408.7  | 528.3   | 307.7  | 401    | 366.7  | 552    | 342.5  | 446.9   |
| SECTM1   | 143.9  | 166.1   | 92.5   | 76     | 78.9   | 89.5   | 141.4  | 156.1   |
| SEDLP    | 703.8  | 866.3   | 286.7  | 255.1  | 242.2  | 354.2  | 628.4  | 826.5   |

|          |        |        |        |        |        |        |        |        |
|----------|--------|--------|--------|--------|--------|--------|--------|--------|
| SEH1L    | 628    | 763.2  | 465.6  | 427.9  | 361.1  | 621.8  | 374    | 548.3  |
| SEH1L    | 468.6  | 600.6  | 264.1  | 297.5  | 189.4  | 360.6  | 308.8  | 554.9  |
| SEH1L    | 1274.1 | 1674.6 | 526.3  | 560.8  | 412.7  | 701    | 797.2  | 1021.8 |
| SEL1L    | 129.7  | 157.7  | 117.6  | 137.1  | 117.2  | 164.2  | 125.8  | 161    |
| SELE     | 110.5  | 125.5  | 96.5   | 89.5   | 95     | 89.6   | 115.2  | 132.7  |
| SELENBP1 | 98.7   | 130.5  | 95.4   | 92.8   | 86.9   | 94.8   | 108.3  | 114.5  |
| SELI     | 211.3  | 313.1  | 212.7  | 226.1  | 195.7  | 241.7  | 200.7  | 293.4  |
| SELK     | 1254.1 | 1527.7 | 629.1  | 502.9  | 442    | 581.1  | 1444.9 | 2084.9 |
| SELL     | 87.4   | 93.5   | 97.4   | 87.6   | 85     | 86.4   | 88.9   | 88.5   |
| SELM     | 93.6   | 103.4  | 103.5  | 96.3   | 94.3   | 95.3   | 97.7   | 115.7  |
| SELO     | 273.1  | 327.4  | 228.5  | 188.9  | 195.1  | 288.1  | 234.8  | 360.6  |
| SELP     | 103.4  | 109    | 95     | 90.5   | 89.9   | 86.4   | 97.4   | 102.2  |
| SELPLG   | 93     | 108.3  | 97.2   | 104    | 110.5  | 91.9   | 89.4   | 96.2   |
| SELS     | 131.3  | 152.6  | 96     | 97     | 91.8   | 97.7   | 119.9  | 150.5  |
| SELS     | 3250.4 | 4169   | 2120.1 | 1786.7 | 1489.6 | 2266.7 | 3811.9 | 4717.3 |
| SELS     | 1005.1 | 1293.5 | 734.2  | 637.2  | 612.4  | 943.4  | 1030.6 | 1188.4 |
| SELT     | 97.6   | 118.6  | 93.9   | 92.5   | 81     | 88.9   | 92.6   | 106    |
| SELV     | 90.8   | 93.8   | 89.9   | 79.3   | 79.4   | 87     | 91.5   | 91.2   |
| SEMA3A   | 124.9  | 162.4  | 93.7   | 98.2   | 102.2  | 107.9  | 110.6  | 123.6  |
| SEMA3B   | 188.7  | 215.9  | 113.9  | 93.9   | 82.2   | 97.8   | 160.2  | 209.5  |
| SEMA3B   | 98.6   | 130.1  | 91.7   | 88.1   | 82     | 93.6   | 103.1  | 124.7  |
| SEMA3C   | 79.4   | 86.1   | 78.2   | 82.9   | 82.3   | 87.1   | 83.3   | 80.5   |
| SEMA3D   | 85.2   | 95.4   | 91     | 79.8   | 73.2   | 81.8   | 91.1   | 86.3   |
| SEMA3E   | 990.4  | 843.4  | 800.7  | 1167   | 896.7  | 817.3  | 980.7  | 1722   |
| SEMA3F   | 132.1  | 147.2  | 118.8  | 116.8  | 103.7  | 122.7  | 110.2  | 153.1  |
| SEMA3G   | 129.6  | 134.5  | 110.1  | 89.7   | 84.5   | 103.6  | 125.9  | 138.8  |
| SEMA4A   | 588.2  | 752.4  | 585.9  | 505.7  | 434.3  | 564.8  | 509.3  | 919.4  |
| SEMA4B   | 121.5  | 133.3  | 164.3  | 147.9  | 150.5  | 199.5  | 118.7  | 171    |
| SEMA4B   | 106.5  | 88.5   | 89     | 84.4   | 82.5   | 93.1   | 99.3   | 93.6   |
| SEMA4C   | 117.4  | 141.2  | 109.9  | 106    | 102.5  | 106.5  | 113.2  | 131.9  |
| SEMA4D   | 356.2  | 507.5  | 514.3  | 659.9  | 535.7  | 693.7  | 352.5  | 513.6  |
| SEMA4F   | 179.8  | 206.3  | 152.4  | 148.2  | 123.7  | 146.4  | 181.6  | 217.5  |
| SEMA4G   | 93.6   | 106.7  | 90.6   | 88.8   | 84.5   | 83.7   | 88     | 90.4   |
| SEMA5A   | 81.6   | 99.9   | 111.6  | 96.1   | 95.9   | 100.9  | 88.6   | 93.1   |
| SEMA5B   | 70.4   | 87.4   | 88.3   | 95.2   | 91.9   | 86.8   | 78.6   | 90.2   |
| SEMA6B   | 118    | 145.6  | 113.8  | 96.3   | 95.1   | 93.9   | 128    | 153.8  |
| SEMA6B   | 85.4   | 101.9  | 98.4   | 91.1   | 80.5   | 88.2   | 85.5   | 99     |
| SEMA6B   | 84.8   | 89.6   | 104.6  | 89.1   | 84     | 85     | 91.2   | 87.9   |
| SEMA6C   | 96.2   | 107.6  | 100.3  | 89.2   | 77     | 84.6   | 96.2   | 124.3  |
| SEMA6D   | 86     | 88.6   | 93     | 90.4   | 87.6   | 96.2   | 82     | 86.1   |
| SEMA6D   | 82.7   | 90     | 89.1   | 85     | 79.2   | 82.1   | 84.2   | 92.2   |
| SEMA6D   | 88.5   | 113.5  | 106.9  | 91.9   | 98.2   | 91.7   | 87.6   | 99.2   |
| SEMA7A   | 95.9   | 110.3  | 96.3   | 86     | 89.2   | 94.8   | 92.1   | 100.9  |
| SEMG1    | 283.7  | 363.5  | 185.5  | 229.5  | 194.8  | 294.9  | 214.4  | 248.6  |
| SEMG1    | 231.9  | 300.3  | 147.1  | 162.3  | 145.8  | 235.1  | 180    | 236.8  |
| SEMG2    | 75.1   | 84.1   | 96.7   | 93.2   | 83.8   | 82.5   | 81.9   | 85.3   |
| SENP2    | 351.3  | 446.9  | 212.8  | 273.1  | 191.6  | 330.5  | 301.4  | 471.3  |
| SENP3    | 128.2  | 153.5  | 100.7  | 94     | 77.1   | 81.2   | 136.2  | 173.9  |
| SENP5    | 210.5  | 242.1  | 133.7  | 124.6  | 115.2  | 149.2  | 179.7  | 213    |
| SENP6    | 90.7   | 106.1  | 90.3   | 98.2   | 90.4   | 98.2   | 99.9   | 107.2  |

|          |         |         |        |        |        |        |         |         |
|----------|---------|---------|--------|--------|--------|--------|---------|---------|
| SENP7    | 123.2   | 146.5   | 88.6   | 75.4   | 80.1   | 91     | 114.8   | 134.2   |
| SENP7    | 254.2   | 318.1   | 171.6  | 157.9  | 161.9  | 179.8  | 215.1   | 289.8   |
| SENP8    | 101.6   | 94.1    | 95.1   | 81.8   | 89.6   | 84.5   | 91.4    | 121     |
| Sep-15   | 5174.3  | 5407.1  | 2332.7 | 2850.5 | 2065.7 | 2959.9 | 5078.8  | 7751.7  |
| SEPHS1   | 1643.2  | 2113.8  | 818.6  | 644.8  | 454.1  | 790.3  | 1090.7  | 1608.6  |
| SEPHS2   | 2045.2  | 2589.2  | 447.3  | 342.2  | 297.4  | 402.3  | 1887.9  | 2155    |
| SEPN1    | 82.4    | 89.9    | 95.1   | 91.7   | 91.2   | 98.3   | 85.1    | 84.8    |
| SEPN1    | 196     | 245.6   | 179.6  | 178.8  | 146.9  | 162.5  | 184.1   | 255.2   |
| SEPN1    | 417.3   | 565.8   | 847.9  | 895.7  | 724.2  | 1200.3 | 396.8   | 875.2   |
| SEPP1    | 90.2    | 90.9    | 91     | 84     | 89.6   | 90.9   | 85.4    | 92.7    |
| Sep-01   | 99.2    | 111     | 87.1   | 88.1   | 91.9   | 85     | 106.4   | 119.6   |
| Sep-10   | 91.2    | 93.6    | 91.8   | 86.7   | 92.2   | 87.5   | 85.1    | 84.5    |
| Sep-10   | 79.8    | 93.9    | 85     | 83.8   | 77     | 79.9   | 83.9    | 78.4    |
| Sep-11   | 883.5   | 1096.8  | 494.8  | 554.5  | 403.4  | 605.4  | 738.4   | 1536.9  |
| Sep-02   | 8934.4  | 11624.7 | 5781.8 | 7496.2 | 5870   | 7854.2 | 7666.2  | 8352.1  |
| Sep-02   | 5899.8  | 7719.1  | 5356.5 | 7516.5 | 4737.5 | 8449.6 | 5262.3  | 9652.3  |
| Sep-02   | 135.9   | 146.3   | 108.8  | 98.2   | 94.3   | 108    | 113.9   | 139.2   |
| Sep-02   | 329     | 432.3   | 112.4  | 113.1  | 102.5  | 109.2  | 245.7   | 358.3   |
| Sep-03   | 823.2   | 937.8   | 467.1  | 553.2  | 499.9  | 614.6  | 587.3   | 760.4   |
| Sep-03   | 262.6   | 327.8   | 206.4  | 248.3  | 174.1  | 266.7  | 229.8   | 415.1   |
| Sep-04   | 117.9   | 132.5   | 117    | 120.8  | 108.2  | 114.3  | 113.9   | 121.3   |
| Sep-04   | 156.7   | 168.2   | 147.4  | 122.8  | 115.1  | 118.1  | 131.1   | 142.4   |
| Sep-04   | 112.7   | 123     | 96.8   | 78     | 79.5   | 89.1   | 103.7   | 124.6   |
| Sep-04   | 135.3   | 154.9   | 96.9   | 85.4   | 76.9   | 88.8   | 116     | 140.2   |
| Sep-05   | 84.1    | 98.2    | 99.2   | 98.9   | 101    | 97     | 91.3    | 92.9    |
| Sep-06   | 94.5    | 114.9   | 91.8   | 93.6   | 89.7   | 94.3   | 105.6   | 125.2   |
| Sep-06   | 123.2   | 163.5   | 159.8  | 196.1  | 219.2  | 306    | 108.5   | 129.6   |
| Sep-06   | 406.8   | 557.1   | 247.1  | 320    | 326.2  | 301.4  | 311.9   | 402.4   |
| Sep-07   | 313.3   | 380.2   | 106.2  | 135.5  | 102.2  | 157.5  | 266.9   | 550.4   |
| Sep-09   | 3558.9  | 4799.5  | 3052.1 | 4047.7 | 2929.8 | 4542.6 | 2652    | 2877.1  |
| SEPW1    | 601.7   | 710.2   | 407.7  | 335.4  | 262.4  | 284    | 570.4   | 971.5   |
| SEPX1    | 3364.6  | 4254.1  | 2967.2 | 2687   | 1887   | 2261.2 | 4754.8  | 7352.6  |
| SERAC1   | 96.9    | 106.9   | 94.8   | 92.9   | 88.5   | 90.9   | 98.6    | 117.2   |
| SERF1A   | 114.4   | 124.2   | 89.2   | 85.3   | 93.5   | 99.7   | 89.7    | 109.9   |
| SERF1A   | 105.1   | 119     | 93     | 86     | 89.3   | 92.1   | 96.5    | 120.9   |
| SERF1B   | 80.1    | 87.8    | 96     | 77.2   | 78.2   | 79.5   | 75.6    | 77.3    |
| SERF2    | 11311.5 | 15595.9 | 7705.9 | 7345   | 6730.5 | 9639.9 | 10973.9 | 11282.9 |
| SERGEF   | 430.5   | 617.1   | 377.7  | 271.4  | 236.6  | 352.2  | 372.5   | 532.1   |
| SERHL    | 112.8   | 125.9   | 105.6  | 96.5   | 98.9   | 103.4  | 95.8    | 110.4   |
| SERHL2   | 107.1   | 112.1   | 98.8   | 98.3   | 95.5   | 98.1   | 104.2   | 107.9   |
| SERINC1  | 659.7   | 745.8   | 270.7  | 457.1  | 335.9  | 513.1  | 710.4   | 1744.2  |
| SERINC2  | 105.6   | 117.9   | 119.4  | 119.9  | 104.9  | 124.5  | 100.6   | 141.7   |
| SERINC3  | 149.1   | 170     | 111    | 129.9  | 113.8  | 126.5  | 143.6   | 177.1   |
| SERINC3  | 157.4   | 172.1   | 91.3   | 109.6  | 97.5   | 95.4   | 153.9   | 251.1   |
| SERINC3  | 1379.7  | 2091.3  | 1183   | 1196.3 | 1115.2 | 1109.5 | 1471    | 2097.8  |
| SERINC4  | 123.8   | 166.3   | 84.6   | 83     | 87.1   | 85.9   | 107.4   | 125.4   |
| SERINC5  | 72.1    | 84.8    | 80.3   | 86     | 78.5   | 83.9   | 76.9    | 73.4    |
| SERP1    | 905     | 1211.8  | 268.1  | 254.1  | 184.7  | 406.6  | 668.9   | 1324.7  |
| SERPINA1 | 159.1   | 208.6   | 119.2  | 136.1  | 132.7  | 171.2  | 151     | 161.8   |
| SERPINA1 | 73.1    | 76.6    | 85.4   | 79.4   | 82.3   | 84.9   | 71      | 76.6    |

|           |        |        |        |        |        |        |        |        |
|-----------|--------|--------|--------|--------|--------|--------|--------|--------|
| SERPINA1  | 89.1   | 111.3  | 93.5   | 122.5  | 102.1  | 135.8  | 88.1   | 106    |
| SERPINA1  | 77.2   | 88.7   | 94.9   | 85.1   | 99.3   | 96.6   | 80     | 89.7   |
| SERPINA10 | 99.9   | 104.3  | 87     | 77.2   | 78.1   | 89     | 118.6  | 102.2  |
| SERPINA11 | 111.5  | 146.4  | 97.5   | 89.8   | 89.8   | 92.3   | 107    | 125.9  |
| SERPINA11 | 75.5   | 88     | 86.5   | 88.2   | 74.4   | 69.2   | 87.5   | 96.8   |
| SERPINA12 | 81.1   | 89     | 90.7   | 94.1   | 85.3   | 86.1   | 77.3   | 80.9   |
| SERPINA13 | 83.3   | 94.7   | 93.3   | 86     | 78     | 83.6   | 84.7   | 87.1   |
| SERPINA3  | 85.4   | 94.8   | 91.8   | 96.9   | 87     | 85.2   | 81.2   | 84     |
| SERPINA4  | 130.7  | 158.8  | 100.5  | 91.6   | 81.8   | 82.1   | 118.5  | 137    |
| SERPINA5  | 96.8   | 117.7  | 88     | 82     | 71.4   | 82.7   | 109.5  | 109.8  |
| SERPINA6  | 85.3   | 92     | 81.7   | 82.5   | 77.9   | 83.3   | 96.7   | 94.7   |
| SERPINA7  | 91.9   | 100.3  | 94.4   | 93.3   | 88.3   | 91.2   | 100.6  | 104.9  |
| SERPINA9  | 97.6   | 98.2   | 105.9  | 106.8  | 95.1   | 100.4  | 88.7   | 94.6   |
| SERPINA9  | 83.2   | 80.6   | 86.3   | 84.2   | 86.8   | 80.5   | 84.1   | 74.2   |
| SERPINB1  | 763.5  | 1092.2 | 408.5  | 509    | 417.1  | 614.1  | 671.1  | 1114.9 |
| SERPINB10 | 447.1  | 603.9  | 226    | 413.7  | 351.4  | 620.3  | 232    | 283.1  |
| SERPINB11 | 89.3   | 102.7  | 108.7  | 92.5   | 96     | 94.4   | 90.1   | 103.2  |
| SERPINB12 | 67.7   | 76.2   | 85.1   | 80.9   | 78     | 78.1   | 66.6   | 66.8   |
| SERPINB13 | 99     | 111.3  | 73.9   | 69.9   | 72.1   | 71.6   | 104.8  | 110.4  |
| SERPINB2  | 2772.5 | 2914.1 | 1007.3 | 1049.3 | 589.7  | 1657.5 | 591.8  | 569.5  |
| SERPINB3  | 91.3   | 93.9   | 83.1   | 92.6   | 75.8   | 79.8   | 89.3   | 87.5   |
| SERPINB4  | 69.4   | 84.5   | 90.7   | 85.2   | 75.1   | 83.4   | 75.9   | 79.3   |
| SERPINB5  | 103.3  | 114.1  | 102.6  | 102.9  | 90.7   | 93.6   | 104.4  | 110.2  |
| SERPINB6  | 2157.3 | 2599.6 | 1356.5 | 893.4  | 747.6  | 846.8  | 1968.2 | 2114.1 |
| SERPINB7  | 83.9   | 112.2  | 84.4   | 81.4   | 79.5   | 88.8   | 91.1   | 102.6  |
| SERPINB7  | 90.6   | 94.7   | 98.3   | 88.2   | 91.3   | 84.8   | 92.8   | 100.4  |
| SERPINB8  | 1636.4 | 2274.7 | 1032.3 | 727.8  | 560.9  | 924.5  | 862.2  | 1090.9 |
| SERPINB8  | 1436.6 | 2203   | 883.8  | 708    | 523    | 888    | 839.4  | 992.8  |
| SERPINB9  | 87.1   | 90.6   | 108.7  | 81.9   | 88.5   | 94     | 82.2   | 91.8   |
| SERPINC1  | 105.5  | 120.1  | 103.1  | 98.9   | 92.5   | 95.8   | 96.5   | 114.1  |
| SERPIND1  | 88.5   | 89.6   | 107.2  | 93.4   | 84.5   | 86.3   | 92     | 96.1   |
| SERPINE1  | 90.7   | 89     | 86.7   | 87.5   | 88.1   | 89.5   | 153.3  | 217.3  |
| SERPINE2  | 807    | 1038.7 | 583.2  | 585.5  | 473.1  | 666.6  | 726.3  | 1020.3 |
| SERPINF1  | 704.7  | 837.1  | 290.8  | 632.7  | 410.5  | 578.6  | 592    | 731.1  |
| SERPINF2  | 99.3   | 109.8  | 85.5   | 83.2   | 80.8   | 90.9   | 92     | 98.7   |
| SERPING1  | 128.2  | 138.7  | 95     | 94.3   | 93.2   | 99.1   | 117.1  | 136    |
| SERPING1  | 126.4  | 139    | 108.8  | 94.4   | 102.7  | 95.6   | 122.4  | 129.3  |
| SERPINH1  | 696.2  | 954    | 491.7  | 371.8  | 272.8  | 498.7  | 669    | 992.7  |
| SERPINI1  | 86.2   | 104.1  | 86.1   | 85     | 85.7   | 90.5   | 99.6   | 116.5  |
| SERPINI2  | 164.6  | 168.3  | 120.4  | 137.4  | 149.8  | 174.1  | 133.3  | 214.8  |
| SERTAD1   | 262.9  | 312.1  | 232.8  | 184.9  | 153.2  | 201    | 385.8  | 614.3  |
| SERTAD2   | 2207.5 | 2739.3 | 1554.1 | 1490.5 | 1291.1 | 1442   | 1863.4 | 2156   |
| SERTAD3   | 470.6  | 657    | 384.1  | 294.5  | 231.9  | 292    | 446.2  | 566.8  |
| SERTAD3   | 126.6  | 149.4  | 103.5  | 86.7   | 79.5   | 84.2   | 123.4  | 125.9  |
| SERTAD3   | 215.8  | 261.6  | 149.6  | 140.7  | 124    | 109.2  | 194.3  | 210.9  |
| SERTAD4   | 96.4   | 111.4  | 101.1  | 94.3   | 95     | 92.9   | 99.9   | 106.2  |
| SESN1     | 369    | 510    | 302.5  | 521.3  | 452.4  | 692.4  | 365.9  | 620.9  |
| SESN2     | 89.1   | 95.2   | 101.3  | 84     | 85     | 93.9   | 91.4   | 113.4  |
| SESN3     | 291.7  | 352.5  | 173.9  | 198.6  | 148.1  | 208.3  | 180.5  | 204    |
| SESTD1    | 472.9  | 585.8  | 324.8  | 310.8  | 275.3  | 403.3  | 342.3  | 589.4  |

|        |        |        |        |        |        |        |        |        |
|--------|--------|--------|--------|--------|--------|--------|--------|--------|
| SET    | 3826.6 | 4163.8 | 1906.6 | 1412   | 864    | 1597.4 | 2892.9 | 5159.5 |
| SET7   | 100.2  | 110.2  | 103.7  | 83.2   | 84     | 88     | 112.5  | 108    |
| SETBP1 | 114.2  | 125.1  | 115.1  | 124.7  | 95.3   | 131.8  | 103.1  | 113.5  |
| SETD1A | 312.9  | 338.7  | 490.8  | 436.1  | 379.8  | 564.9  | 277.3  | 538.3  |
| SETD3  | 307.5  | 481.4  | 162.9  | 139    | 125    | 168.3  | 244.8  | 314.4  |
| SETD3  | 101.4  | 104.3  | 104.8  | 101.7  | 99.4   | 101.4  | 101.4  | 115.2  |
| SETD3  | 3791.8 | 4860.9 | 2937.2 | 2730.1 | 2457   | 3970.1 | 3244.8 | 3933.5 |
| SETD4  | 287.2  | 372.5  | 260.2  | 202.7  | 165.8  | 214.9  | 251.7  | 278    |
| SETD6  | 100.4  | 119.7  | 79.8   | 78.2   | 65.9   | 78.6   | 101.4  | 116.4  |
| SETD8  | 459.9  | 627.6  | 342.9  | 309.4  | 289.6  | 367    | 415.1  | 688.1  |
| SETDB1 | 600.2  | 703    | 621.4  | 554.1  | 442.1  | 748.1  | 445.1  | 898.7  |
| SETDB2 | 864.9  | 1103   | 282.8  | 392.2  | 387.2  | 830    | 692.8  | 912.8  |
| SETMAR | 1097   | 1372.6 | 795.8  | 772.7  | 529.7  | 845.3  | 770.7  | 1066.2 |
| SETX   | 257    | 357.4  | 141.3  | 149.8  | 138.2  | 186.9  | 274.9  | 332.6  |
| SEZ6   | 113.5  | 117.1  | 81.3   | 89.2   | 84.9   | 74.8   | 108.4  | 138.6  |
| SEZ6L  | 67.3   | 83.5   | 81.8   | 75.5   | 78.3   | 70.7   | 71.9   | 78.2   |
| SEZ6L2 | 119.5  | 166.5  | 107    | 96.6   | 104.7  | 100.8  | 133.8  | 149.6  |
| SEZ6L2 | 92.1   | 102.3  | 92.6   | 80     | 81.1   | 91.1   | 88.2   | 94.6   |
| SEZ6L2 | 1695.2 | 2109.2 | 1356   | 2056.2 | 1539.5 | 2016   | 1499.8 | 1634   |
| SF1    | 136.2  | 132.5  | 112.5  | 121.6  | 107.9  | 90.8   | 126.5  | 161    |
| SF1    | 236    | 212.3  | 113.5  | 163    | 159.8  | 85.7   | 153.8  | 233.6  |
| SF1    | 138.9  | 203    | 180.1  | 128.3  | 142.1  | 154.9  | 147.7  | 205.3  |
| SF3A1  | 107.1  | 123    | 105.1  | 109.7  | 106.9  | 96.7   | 114.6  | 116.5  |
| SF3A1  | 421.8  | 575.2  | 434.9  | 528.1  | 438.9  | 653.5  | 385.5  | 795.6  |
| SF3A2  | 2446.4 | 2920.5 | 2128.2 | 1485.8 | 1127.4 | 1434.5 | 2441.6 | 3760.8 |
| SF3A3  | 3890   | 4628.2 | 1825.4 | 2037.5 | 1679.8 | 2218.2 | 2905   | 2161.6 |
| SF3B1  | 107.4  | 117.1  | 103.3  | 97.1   | 94.7   | 102.1  | 97     | 111.5  |
| SF3B1  | 2025.5 | 3119.7 | 1943.9 | 2254.8 | 1896.9 | 4056.3 | 1857   | 3285.9 |
| SF3B1  | 744.6  | 801.6  | 235.5  | 344.3  | 276.8  | 211.3  | 522.9  | 928.7  |
| SF3B14 | 2746.8 | 3191.8 | 845.1  | 594    | 523.1  | 720    | 2656.3 | 4077.4 |
| SF3B2  | 1653.5 | 2213.1 | 1351.6 | 1158.3 | 983.7  | 1734.1 | 1351.9 | 1891.7 |
| SF3B3  | 1219.5 | 1342.7 | 889.4  | 850.6  | 647.3  | 898.2  | 1141.2 | 965.3  |
| SF3B4  | 4540.9 | 5611.1 | 3059.4 | 2270.8 | 1445.7 | 1997.1 | 4350.2 | 7070.9 |
| SF3B5  | 4238.3 | 4494.3 | 3434.3 | 2946.8 | 2037.9 | 3456.8 | 3527.3 | 4277.1 |
| SF4    | 783.7  | 1011.4 | 523.3  | 418.9  | 420.8  | 518.3  | 704.2  | 953.6  |
| SFI1   | 95.5   | 119.4  | 98.3   | 89.3   | 84     | 92.8   | 101.9  | 114.3  |
| SFI1   | 128    | 134.4  | 106    | 106.9  | 100.4  | 104.5  | 104.9  | 126.6  |
| SFI1   | 108.8  | 118.7  | 102.9  | 104.3  | 84.9   | 101.6  | 93.3   | 114    |
| SFMBT1 | 241.1  | 338.6  | 184.4  | 151.6  | 145.7  | 201.4  | 205.2  | 346.1  |
| SFMBT1 | 285.5  | 379.7  | 258    | 191.6  | 189.6  | 244.7  | 246    | 338.9  |
| SFMBT1 | 75.1   | 85.1   | 84.5   | 91.4   | 82.6   | 88.2   | 79.1   | 83.4   |
| SFMBT2 | 134.4  | 218.3  | 184.1  | 387.2  | 333.7  | 151    | 155.5  | 135    |
| SFN    | 85.9   | 94.8   | 90.6   | 91.5   | 84.4   | 91.2   | 87.6   | 102.4  |
| SFPQ   | 320.5  | 372.2  | 150.4  | 124.2  | 106.9  | 156.1  | 333.4  | 440.1  |
| SFRP1  | 262    | 350.8  | 321.7  | 694.7  | 534.9  | 991.6  | 196.5  | 319    |
| SFRP2  | 79.7   | 86.4   | 88.4   | 92.9   | 85.8   | 82.6   | 77.9   | 79.4   |
| SFRP4  | 85.5   | 97.7   | 86.4   | 82     | 82.8   | 90.6   | 88.8   | 81.7   |
| SFRP5  | 74.7   | 79     | 92.7   | 82.2   | 79.2   | 80.8   | 75.4   | 80.6   |
| SFRS1  | 8225.9 | 9547.1 | 2070.5 | 2185.4 | 1193.2 | 2053.4 | 6910.5 | 8473.2 |
| SFRS10 | 5181.8 | 7451.9 | 2945.4 | 2199.5 | 1732.1 | 2471.5 | 4172.1 | 5718   |

|         |         |         |         |         |        |         |         |         |
|---------|---------|---------|---------|---------|--------|---------|---------|---------|
| SFRS11  | 341.9   | 380.5   | 159.4   | 167.3   | 147.5  | 250.5   | 302.7   | 487.4   |
| SFRS12  | 239.9   | 285.2   | 156.3   | 161.5   | 143.1  | 252.5   | 196     | 348.3   |
| SFRS12  | 633.6   | 740     | 259.1   | 322.4   | 283.4  | 474.3   | 461.2   | 852.7   |
| SFRS12  | 173.3   | 234.5   | 127.8   | 131.6   | 117.8  | 96.4    | 133.5   | 124.2   |
| SFRS14  | 1918.6  | 1870.7  | 1167.7  | 1025.8  | 1075.7 | 1406.9  | 1286.7  | 1438.3  |
| SFRS14  | 804.6   | 814.2   | 545     | 476.7   | 507    | 672.9   | 545     | 981.4   |
| SFRS14  | 196     | 186.5   | 236.4   | 172.2   | 195.4  | 150.8   | 141.6   | 235.4   |
| SFRS15  | 363.8   | 541.5   | 355.8   | 531.5   | 382.4  | 567.5   | 394.8   | 599.8   |
| SFRS16  | 194.5   | 223.1   | 167.5   | 133.9   | 138.4  | 210.3   | 153.5   | 237.5   |
| SFRS2   | 14297.3 | 16381.9 | 10494.6 | 7544.3  | 6476.6 | 9358.4  | 10723.2 | 18107.8 |
| SFRS2IP | 831.4   | 1280.7  | 481.3   | 747.3   | 659.8  | 1134.3  | 675.9   | 888.4   |
| SFRS3   | 134.4   | 156.8   | 88      | 84.6    | 91     | 96.1    | 113.6   | 158.1   |
| SFRS4   | 2320.1  | 3084.4  | 1910.5  | 2116    | 1772.7 | 2602.8  | 2269.6  | 3521.7  |
| SFRS5   | 4592.1  | 5533.6  | 3303.4  | 2841.3  | 2874.9 | 3113.7  | 3655.6  | 3973.9  |
| SFRS5   | 5910.4  | 6575.3  | 3499.7  | 2939.5  | 2720.6 | 3180.3  | 4635.5  | 5084.1  |
| SFRS6   | 6566.5  | 8389.4  | 4934.1  | 5165.8  | 3581.4 | 4926.1  | 5168.7  | 6797.5  |
| SFRS7   | 1735    | 2073    | 1180.3  | 1070.7  | 740.3  | 1339.9  | 1257.5  | 1958.6  |
| SFRS8   | 240.8   | 344.1   | 168.3   | 163.2   | 145.9  | 222.2   | 244.7   | 513.3   |
| SFRS9   | 8763.4  | 10922.9 | 6872.9  | 6277    | 5185.9 | 8159.6  | 6816.9  | 10186.3 |
| SFT2D1  | 10210.1 | 12977.1 | 9583.4  | 11123.4 | 9000   | 12525.6 | 9512.4  | 13756   |
| SFT2D2  | 133.1   | 157.8   | 114     | 95.6    | 99.8   | 97.9    | 118     | 152.1   |
| SFT2D3  | 149.1   | 180.5   | 126.2   | 132.4   | 119.1  | 135.8   | 118.2   | 178.6   |
| SFTPA1  | 100     | 96.9    | 95.1    | 74.8    | 82.7   | 77.5    | 93.1    | 104.4   |
| SFTPA2  | 87.4    | 104.7   | 91.6    | 88.9    | 84.2   | 89.4    | 107.5   | 96.6    |
| SFTPb   | 87.3    | 101.2   | 90.3    | 92.5    | 91.9   | 93.9    | 87.5    | 91      |
| SFTPb   | 80.5    | 99.6    | 111     | 103.5   | 91.5   | 99.1    | 94.2    | 89.4    |
| SFTPC   | 83.8    | 84.9    | 98.2    | 89.3    | 90.3   | 89      | 76.8    | 80.2    |
| SFTPD   | 277     | 339.1   | 256.9   | 347     | 291.5  | 396.9   | 241.2   | 294.9   |
| SFTPG   | 112.4   | 135.5   | 105     | 104     | 92.1   | 109.4   | 123.2   | 118.1   |
| SFXN1   | 556.3   | 817     | 485.9   | 439.9   | 292.3  | 366.6   | 442     | 799.6   |
| SFXN2   | 165.1   | 187.6   | 154.3   | 125.2   | 111.2  | 136.2   | 139.7   | 151     |
| SFXN3   | 150.3   | 174.6   | 119.4   | 112.5   | 100    | 97.2    | 137.3   | 201.8   |
| SFXN4   | 1146    | 1685    | 932.3   | 594.1   | 471.4  | 800.2   | 810.2   | 1103.8  |
| SFXN4   | 2004.5  | 2586.2  | 1268.9  | 1054.2  | 825.2  | 1006.3  | 1699.2  | 2135    |
| SFXN4   | 186.9   | 245.7   | 126     | 129.5   | 111.2  | 147.6   | 197.8   | 239.5   |
| SFXN5   | 133.6   | 143.8   | 165.2   | 178     | 183.3  | 237.8   | 133     | 230.8   |
| SGCA    | 101.1   | 108     | 107.2   | 93.6    | 104.5  | 104.5   | 102.8   | 106.8   |
| SGCB    | 129.4   | 163.4   | 99.5    | 104.6   | 98.6   | 103.4   | 133     | 164.1   |
| SGCD    | 86.9    | 101.8   | 86.7    | 80.7    | 81.1   | 91.5    | 87.9    | 101.2   |
| SGCD    | 109     | 112.1   | 105.4   | 94.2    | 90.7   | 89.7    | 98.1    | 104     |
| SGCD    | 98.5    | 123.6   | 105.5   | 92.6    | 83.5   | 88.6    | 98.3    | 108.4   |
| SGCE    | 73.9    | 87.8    | 87.7    | 83.9    | 91.3   | 84.7    | 85.4    | 100.8   |
| SGCG    | 91.8    | 95.5    | 90.3    | 92.3    | 82.8   | 90.9    | 88.7    | 104.3   |
| SGCZ    | 121.9   | 119.7   | 102.1   | 93      | 92.3   | 95.8    | 102.7   | 112.1   |
| SGEF    | 102.2   | 113.8   | 88      | 88.6    | 82.5   | 85.6    | 101.3   | 93.9    |
| SGIP1   | 622.2   | 741.8   | 462.7   | 278.4   | 213.3  | 327.9   | 383.6   | 556.4   |
| SGK     | 180.7   | 197     | 136.4   | 221.7   | 240.4  | 377.1   | 159.4   | 284.3   |
| SGK2    | 87.8    | 103.7   | 84.5    | 85.2    | 86.3   | 80.2    | 85.9    | 95.2    |
| SGK2    | 73.5    | 86.3    | 86.3    | 93.1    | 83     | 87.8    | 70.6    | 76.3    |
| SGK2    | 107     | 138.2   | 96.3    | 84.1    | 83.3   | 83.1    | 107.1   | 121.9   |



|          |        |        |        |        |        |        |        |        |
|----------|--------|--------|--------|--------|--------|--------|--------|--------|
| SGK3     | 93.2   | 120.7  | 104.6  | 86.8   | 87.9   | 84.8   | 96.8   | 104.9  |
| SGK3     | 1490.6 | 1777.7 | 693.2  | 561.1  | 522.2  | 694.5  | 1298.5 | 1832.2 |
| SGK3     | 1144.8 | 1491.7 | 464.6  | 385.2  | 368.3  | 368.4  | 867.7  | 1069.6 |
| SGOL1    | 417.6  | 561.4  | 278.8  | 235.6  | 229.8  | 272.9  | 385.6  | 500.4  |
| SGOL2    | 93.8   | 92.2   | 85.6   | 84     | 83.8   | 85     | 87.3   | 99.3   |
| SGPL1    | 137.4  | 181    | 128.1  | 119.7  | 112.5  | 122.2  | 137.8  | 164.9  |
| SGPP1    | 119.6  | 146.4  | 94.5   | 88.3   | 91.2   | 92.3   | 106.4  | 124    |
| SGPP2    | 96.1   | 105.6  | 119.1  | 91.2   | 95.2   | 89.1   | 101.6  | 98.5   |
| SGPP2    | 83.4   | 83.3   | 98.4   | 85     | 84.6   | 88.8   | 76.6   | 80.6   |
| SGSH     | 126.9  | 154.1  | 163.9  | 138.6  | 123.4  | 164.6  | 132.2  | 211.2  |
| SGTA     | 236.4  | 337    | 151.6  | 115.4  | 113.9  | 168.5  | 218.2  | 395.5  |
| SGTB     | 164.3  | 202.7  | 101    | 104.9  | 97.1   | 120.7  | 194.6  | 248.3  |
| SH2B1    | 197.9  | 200.9  | 261.3  | 192.4  | 157.6  | 224.6  | 161.6  | 381.7  |
| SH2D1A   | 183.3  | 221.8  | 112.7  | 102.2  | 102.6  | 112.7  | 180.3  | 224.5  |
| SH2D1B   | 101.4  | 106.6  | 99.1   | 81.3   | 85.6   | 91.3   | 89.6   | 104.2  |
| SH2D2A   | 138.5  | 180.2  | 96.3   | 92.9   | 95.1   | 100.6  | 149.3  | 142.1  |
| SH2D3A   | 94.8   | 122.2  | 100.9  | 86.9   | 98.6   | 97.6   | 105.5  | 116.9  |
| SH2D3C   | 136.4  | 168.3  | 208.6  | 180    | 157.6  | 183.7  | 136.2  | 231.3  |
| SH2D3C   | 101.4  | 104.6  | 112.3  | 105.8  | 109.1  | 106.2  | 92.3   | 113.4  |
| SH2D3C   | 120.8  | 156.8  | 100.9  | 90.8   | 90.9   | 96.4   | 119.7  | 154.6  |
| SH2D4A   | 222.3  | 284.4  | 148.8  | 176.6  | 143.2  | 228.3  | 200.8  | 189.4  |
| SH2D4B   | 88.8   | 98.6   | 86.3   | 81.1   | 82.8   | 80.4   | 89.1   | 96.3   |
| SH3BGR   | 148.6  | 174.7  | 107.5  | 94.4   | 91.9   | 86.1   | 144.2  | 167.4  |
| SH3BGR   | 174.8  | 227.1  | 112.7  | 123.5  | 106.3  | 126.1  | 170.4  | 183.2  |
| SH3BGRL  | 78.1   | 80     | 88.3   | 77.6   | 77.1   | 72.8   | 79.8   | 80.7   |
| SH3BGRL2 | 166.6  | 214.7  | 157    | 109.9  | 100.7  | 143.2  | 159.7  | 152.9  |
| SH3BGRL3 | 1980.3 | 2574.6 | 1819.9 | 1741.4 | 1232.3 | 1611.4 | 1965.4 | 3366.6 |
| SH3BP1   | 186.7  | 227.2  | 247    | 255.2  | 227.7  | 266    | 171.2  | 320.6  |
| SH3BP2   | 111    | 134.1  | 100.4  | 96.2   | 96.1   | 95.9   | 110.7  | 119.9  |
| SH3BP4   | 99.9   | 122    | 101.2  | 87.7   | 71.9   | 76.4   | 113.7  | 140.4  |
| SH3BP5   | 82.8   | 94.9   | 96.3   | 84     | 86.8   | 86.8   | 95.5   | 103.7  |
| SH3BP5   | 97.1   | 107.3  | 97.9   | 90.2   | 81.7   | 89.6   | 89.4   | 98.9   |
| SH3BP5L  | 251.8  | 310.2  | 325.9  | 367.5  | 352.9  | 468.7  | 264    | 535.8  |
| SH3D19   | 89.2   | 98.4   | 97.3   | 90.9   | 83     | 89.2   | 86.3   | 112.5  |
| SH3GL1   | 365.2  | 475.3  | 187.4  | 138    | 123.1  | 133.1  | 385.5  | 265.2  |
| SH3GL2   | 104.2  | 111.1  | 117.2  | 106.1  | 106    | 98.2   | 102.7  | 103.8  |
| SH3GL3   | 83.3   | 88.8   | 103    | 92.5   | 87     | 91.8   | 89.5   | 86.2   |
| SH3GLB1  | 1204.2 | 1641.1 | 981    | 872.7  | 680.3  | 1281.9 | 1077.1 | 1705.3 |
| SH3GLB2  | 1491.1 | 1926.7 | 1542.2 | 1026.6 | 928.8  | 1315   | 1240.5 | 1566.4 |
| SH3KBP1  | 7384   | 7780.5 | 5454   | 4931.6 | 4196.7 | 5349.6 | 6520.7 | 8508.6 |
| SH3KBP1  | 113.9  | 123.6  | 93.5   | 98.9   | 84.4   | 92     | 109.6  | 113.5  |
| SH3KBP1  | 3377.6 | 4986.7 | 3956.2 | 4749.3 | 4284.5 | 5589.5 | 2965.5 | 5235.7 |
| SH3MD2   | 149.9  | 188.7  | 134.9  | 114    | 105    | 131.5  | 135.1  | 147.9  |
| SH3PX3   | 112.7  | 150.2  | 148.2  | 146.4  | 118.4  | 182.2  | 125    | 166.8  |
| SH3PXD2A | 227.3  | 331.6  | 217.3  | 158.8  | 147.2  | 188.1  | 343.1  | 372.4  |
| SH3PXD2B | 108.9  | 126.8  | 90.1   | 100.8  | 83.9   | 107.4  | 100.9  | 129.6  |
| SH3RF2   | 110.8  | 126.9  | 99.1   | 103.4  | 91     | 86.1   | 124.3  | 117.5  |
| SH3TC1   | 88     | 111.5  | 98.5   | 112.6  | 123.2  | 161.7  | 95.7   | 118    |
| SH3TC2   | 127.2  | 164.7  | 102.4  | 106.1  | 95.5   | 97.6   | 132.9  | 133.5  |
| SH3YL1   | 220.8  | 295.5  | 142.8  | 136.6  | 138.9  | 136.9  | 188.3  | 290.9  |

|          |         |         |         |        |        |         |        |        |
|----------|---------|---------|---------|--------|--------|---------|--------|--------|
| SHANK1   | 85.8    | 88.4    | 103.9   | 94.3   | 85.2   | 93.5    | 81.7   | 90.1   |
| SHANK2   | 104.9   | 125     | 103.6   | 92.9   | 82.3   | 83      | 104.1  | 108.3  |
| SHANK2   | 94.1    | 119.5   | 93.4    | 91.9   | 78.8   | 85.3    | 101    | 111.6  |
| SHANK3   | 140     | 162.5   | 139     | 176.8  | 156.5  | 196.1   | 134.6  | 150.5  |
| SHARPIN  | 330     | 423.5   | 200.4   | 145.2  | 139    | 145.4   | 265.8  | 359.7  |
| SHB      | 114.1   | 130.4   | 135.3   | 115    | 107.5  | 133.7   | 117.1  | 166    |
| SHBG     | 113.9   | 138.7   | 83.6    | 88.4   | 86.4   | 95.8    | 110.8  | 113.9  |
| SHC1     | 136.4   | 158.9   | 124.1   | 111.7  | 106.8  | 114.7   | 141.5  | 173.7  |
| SHC1     | 87.7    | 93.8    | 86.5    | 83.3   | 87.6   | 88.5    | 80.7   | 95     |
| SHC1     | 1275.6  | 1641.8  | 1388.4  | 1048.7 | 793.7  | 1279.5  | 1373.2 | 3399.1 |
| SHC3     | 116.1   | 130.4   | 83.9    | 89.4   | 79.2   | 97.4    | 111    | 134.9  |
| SHC4     | 109     | 117.1   | 122.2   | 98.1   | 94.2   | 104.7   | 105.4  | 129    |
| SHCBP1   | 10492   | 11221.6 | 4942.3  | 7094.3 | 5673.5 | 5861.9  | 9468.8 | 8653.5 |
| SHD      | 84.6    | 90.4    | 90.1    | 87.4   | 87.9   | 90.9    | 89.6   | 82.3   |
| SHE      | 135.1   | 153.4   | 118.1   | 99     | 96.5   | 113.1   | 122.5  | 134.1  |
| SHF      | 110.1   | 118.1   | 103.6   | 90.7   | 95.9   | 97.2    | 105.1  | 122.7  |
| SHFM1    | 12512.2 | 15125.2 | 11674.2 | 9180.5 | 7876.7 | 11266.1 | 11999  | 16140  |
| SHH      | 107.5   | 129.9   | 101.6   | 91     | 90     | 102.3   | 109.4  | 125.3  |
| SHKBP1   | 235.1   | 316     | 253.7   | 188.9  | 151.9  | 246.2   | 244    | 413.6  |
| SHMT1    | 706.8   | 843     | 328.8   | 426.2  | 348.6  | 469.3   | 438.6  | 391.8  |
| SHMT1    | 201.8   | 241.2   | 119.6   | 116.5  | 98.4   | 113     | 202.9  | 262.5  |
| SHMT1    | 150.8   | 208.7   | 119.7   | 121.1  | 113.6  | 119.8   | 156.4  | 183.1  |
| SHMT2    | 5261.3  | 7104.5  | 4671.9  | 3148.3 | 2349.3 | 3305    | 4607.7 | 6411.4 |
| SHOC2    | 403     | 488.7   | 135.7   | 138.3  | 132.6  | 188.5   | 296.1  | 490    |
| SHOX     | 89      | 104.3   | 98      | 90.3   | 80.8   | 95.1    | 99     | 99.9   |
| SHOX     | 94.5    | 97.7    | 101.9   | 96.8   | 83.9   | 92.8    | 84.4   | 99.8   |
| SHOX2    | 315.7   | 407.8   | 188.4   | 272.2  | 283.3  | 353.3   | 299.5  | 463.6  |
| SHOX2    | 120.3   | 149.5   | 89.9    | 95.8   | 97.7   | 89.1    | 112.8  | 126.1  |
| SHPRH    | 145.2   | 168.9   | 117.4   | 148.6  | 147    | 185.5   | 113.7  | 126    |
| SHPRH    | 193.9   | 249.8   | 162.2   | 214.3  | 174.9  | 271.2   | 179.3  | 241.1  |
| SHQ1     | 497.5   | 671     | 262.5   | 220.8  | 174.5  | 291.4   | 385.6  | 550.4  |
| SHRM     | 92.9    | 86.3    | 102.8   | 89.7   | 96.5   | 91.5    | 91.5   | 85.4   |
| SHROOM4  | 979.3   | 911.7   | 811.5   | 1174.3 | 997.9  | 780.9   | 913.4  | 1895.7 |
| SI       | 79.6    | 90      | 95.4    | 88.4   | 77.9   | 82.9    | 89.6   | 93.8   |
| SIAE     | 120.2   | 131.4   | 91.8    | 88     | 78.9   | 95.7    | 111.2  | 132    |
| SIAH1    | 124.2   | 136     | 91      | 88.8   | 92.1   | 102     | 120.8  | 112.5  |
| SIAH1    | 105.4   | 103.8   | 96.7    | 85.1   | 94.1   | 89.5    | 94.9   | 103.5  |
| SIAH1    | 588.5   | 748.8   | 381.5   | 423.3  | 364.6  | 512.1   | 524.1  | 709    |
| SIAH2    | 286.4   | 401.9   | 229.2   | 169.2  | 160.8  | 211     | 246.5  | 399.2  |
| SIAHBP1  | 8810    | 10689   | 6548.8  | 3316.3 | 2993.2 | 3486.7  | 8123.5 | 6605.7 |
| SIDT1    | 97      | 101.7   | 95.9    | 90     | 84.3   | 92.8    | 78.9   | 82     |
| SIDT2    | 678.1   | 824.3   | 561.3   | 485.7  | 398.2  | 530     | 379.3  | 464.6  |
| SIGIRR   | 235.3   | 246.8   | 125.5   | 99.8   | 122.4  | 134.5   | 210.6  | 268.2  |
| SIGIRR   | 186.1   | 264.8   | 147.8   | 161.8  | 161.8  | 141.2   | 172    | 160.2  |
| SIGLEC10 | 169.4   | 207.3   | 127.8   | 120    | 117.4  | 127.8   | 141.7  | 135.1  |
| SIGLEC11 | 131.6   | 126.5   | 94      | 93.8   | 85.6   | 88.3    | 132.1  | 132.2  |
| SIGLEC12 | 118.1   | 144.6   | 108.1   | 118.2  | 97.1   | 98      | 126.7  | 119.6  |
| SIGLEC12 | 154     | 180.2   | 115.9   | 104.8  | 90.5   | 95.7    | 122.8  | 174.8  |
| SIGLEC12 | 93.1    | 117.3   | 83.7    | 77.9   | 85.9   | 83.9    | 99.5   | 115.3  |
| SIGLEC5  | 104.3   | 110.9   | 105.6   | 104.8  | 83.8   | 97.8    | 100.3  | 116.6  |

|           |        |        |        |        |        |        |        |        |
|-----------|--------|--------|--------|--------|--------|--------|--------|--------|
| SIGLEC6   | 165.7  | 229.9  | 167.7  | 107.1  | 92.4   | 103.6  | 154.5  | 161.4  |
| SIGLEC7   | 108.2  | 124.8  | 111.2  | 107.7  | 86.2   | 130.6  | 105    | 135.6  |
| SIGLEC7   | 83.3   | 92.4   | 89.6   | 88.9   | 75.6   | 97.2   | 79.6   | 92.7   |
| SIGLEC7   | 108.2  | 127.4  | 98.1   | 88.3   | 83.7   | 111.1  | 99.3   | 124.7  |
| SIGLEC8   | 134.6  | 142    | 88.8   | 81.5   | 83.9   | 90     | 126    | 140.6  |
| SIGLEC9   | 97.6   | 101.2  | 91.4   | 87.6   | 87.1   | 86.7   | 81.9   | 112    |
| SIGLECP16 | 206.5  | 243.3  | 175.3  | 163.5  | 137.8  | 163.3  | 147.4  | 164.7  |
| SIGLECP3  | 172.9  | 237.2  | 102.8  | 100.6  | 83.3   | 105.6  | 151.7  | 162.3  |
| SIGLECP3  | 151.1  | 166.3  | 135    | 140.1  | 128.2  | 149.1  | 134.5  | 154.3  |
| SIKE      | 240.3  | 337.2  | 138.8  | 109.1  | 107.8  | 112.8  | 187.3  | 267.4  |
| SIL1      | 390    | 534.4  | 245.5  | 341    | 299.1  | 425.2  | 421.4  | 379.5  |
| SIL1      | 140.9  | 170.5  | 108.8  | 108.8  | 94.9   | 96.4   | 129.2  | 134.3  |
| SIL1      | 1069.9 | 1515.2 | 584.7  | 1001.7 | 774.3  | 1035.4 | 1146.8 | 963    |
| SILV      | 92     | 116.3  | 92.6   | 83.8   | 100    | 101.5  | 98.9   | 107.1  |
| SIM1      | 89     | 99.7   | 95     | 88.1   | 86.2   | 89.7   | 79.7   | 87.2   |
| SIM2      | 98.6   | 110.4  | 100.8  | 93.9   | 82.3   | 90.4   | 101.7  | 101.1  |
| SIM2      | 88     | 131.5  | 102    | 87.4   | 92     | 100.8  | 92.5   | 111.2  |
| SIN3A     | 957    | 1504   | 1030.3 | 1382   | 1264.7 | 1872.2 | 957.7  | 1046.5 |
| SIN3B     | 108.8  | 117.5  | 134    | 127.4  | 105.2  | 133.9  | 102.3  | 128.9  |
| SIP1      | 1024.7 | 1363.3 | 834.6  | 525.5  | 417.1  | 714.5  | 821    | 1381.7 |
| SIPA1     | 188.5  | 219.5  | 168.4  | 150.3  | 153.8  | 200    | 134.9  | 208.1  |
| SIPA1     | 1322.1 | 1624.6 | 1115.2 | 948.4  | 851.5  | 916    | 878.7  | 648    |
| SIPA1L1   | 187.3  | 231.4  | 114.6  | 89.1   | 93.4   | 106.1  | 164.3  | 195.9  |
| SIPA1L2   | 176.1  | 224.7  | 118.4  | 154.9  | 129.4  | 191.3  | 179.4  | 209.8  |
| SIPA1L3   | 155.5  | 204.1  | 127.4  | 130    | 104.2  | 125.8  | 145.8  | 190.3  |
| SIRPB1    | 217.5  | 234.2  | 193.8  | 190.6  | 139.7  | 200.8  | 190.7  | 244.2  |
| SIRPB2    | 89.2   | 110.4  | 83.3   | 79.6   | 78.2   | 79.9   | 93.2   | 95.6   |
| SIRPD     | 159.4  | 237.1  | 111.4  | 105.7  | 109.2  | 106.8  | 148.4  | 163.6  |
| SIRPG     | 994.4  | 1132.2 | 383.1  | 392.8  | 308    | 308.8  | 916.2  | 1172.9 |
| SIRPG     | 77.4   | 84.8   | 89.1   | 96.3   | 86.8   | 95.7   | 77.8   | 80.7   |
| SIRT1     | 311    | 395.8  | 205.1  | 213.9  | 214.5  | 342.7  | 306.8  | 664.3  |
| SIRT2     | 162.5  | 220.3  | 101.6  | 95.7   | 94     | 101.6  | 148.7  | 237.4  |
| SIRT2     | 177    | 238.7  | 119.1  | 108.5  | 89.2   | 112.3  | 175.2  | 282.5  |
| SIRT3     | 107.9  | 126.1  | 99.6   | 82.6   | 83.2   | 94.9   | 105.1  | 120.3  |
| SIRT3     | 131.5  | 142    | 81.8   | 77.2   | 83     | 82.9   | 123.9  | 142.6  |
| SIRT4     | 131.9  | 152.4  | 125.1  | 126    | 106.3  | 113.7  | 144.6  | 159    |
| SIRT5     | 100.1  | 131.1  | 100.2  | 102.2  | 102.6  | 125.3  | 105.6  | 120.9  |
| SIRT5     | 122.4  | 144.2  | 106.6  | 117.1  | 101.5  | 108.3  | 127.6  | 117.4  |
| SIRT5     | 219.2  | 323.1  | 191    | 215.3  | 187.4  | 271.7  | 219.7  | 301    |
| SIRT6     | 104.2  | 126.7  | 112.5  | 92.9   | 91.4   | 112.2  | 101    | 136.7  |
| SIT1      | 90.5   | 89.1   | 96.5   | 97.4   | 90.8   | 94.7   | 91.7   | 100.4  |
| SIVA      | 3496.8 | 4067.7 | 2155.1 | 1920.5 | 1862.1 | 1826.5 | 3313.7 | 3006.4 |
| SIVA      | 2296.6 | 2892.7 | 1701.6 | 1174.7 | 1011   | 1477.3 | 1740.5 | 2102.1 |
| SIX1      | 100.7  | 109.5  | 89.2   | 96.3   | 84.4   | 96.8   | 102.8  | 113.9  |
| SIX2      | 100.4  | 125.7  | 102.4  | 90     | 88.8   | 91.2   | 108.7  | 127.4  |
| SIX3      | 133.3  | 149.6  | 101    | 93.8   | 98.5   | 99.9   | 136    | 162.8  |
| SIX4      | 102.1  | 127.5  | 115.6  | 110.5  | 111.8  | 108.8  | 100.6  | 98.6   |
| SIX5      | 513.2  | 598.9  | 360.4  | 259.5  | 257.8  | 264.5  | 424.6  | 407.8  |
| SIX6      | 88.1   | 91.5   | 96.3   | 76.6   | 76.4   | 89.3   | 90.4   | 89.9   |
| SKAP1     | 80.6   | 86.2   | 91.1   | 88.4   | 83.8   | 84.1   | 83.9   | 95.2   |

|         |        |        |        |        |        |        |        |        |
|---------|--------|--------|--------|--------|--------|--------|--------|--------|
| SKAP2   | 394.4  | 502.9  | 186.1  | 199.7  | 141.9  | 247.1  | 365.6  | 843.8  |
| SKI     | 203.3  | 226    | 180.1  | 185    | 165    | 169.5  | 194.7  | 207.6  |
| SKIL    | 71.6   | 86.2   | 84.9   | 80.2   | 76.8   | 81.3   | 76.9   | 82.8   |
| SKIP    | 110.5  | 128.6  | 100.1  | 108.8  | 106.5  | 94.5   | 96.7   | 121.2  |
| SKIP    | 69.3   | 92.8   | 87.9   | 86.2   | 81.7   | 93.1   | 76.4   | 87.9   |
| SKIV2L  | 895.2  | 885.4  | 1023.1 | 1106.4 | 958.1  | 1290.5 | 687.7  | 713.5  |
| SKIV2L2 | 1359.8 | 2076.1 | 682.5  | 555    | 420.3  | 1054.6 | 1137   | 2066.6 |
| SKP1A   | 1602   | 2057.4 | 1100.6 | 1080.5 | 760.5  | 1161   | 1428.2 | 2284.3 |
| SKP1A   | 80.4   | 96.6   | 95.6   | 98.8   | 87.6   | 75.2   | 87.9   | 89.3   |
| SKP2    | 3268.6 | 4069.1 | 2588.7 | 3414.5 | 2064.6 | 3425.3 | 2184   | 3335.4 |
| SKP2    | 1290.7 | 1657.1 | 674.7  | 504.4  | 365.8  | 516.5  | 697.5  | 955    |
| SKP2    | 339.5  | 366.4  | 119.8  | 98.5   | 102.1  | 104.2  | 188.6  | 239.9  |
| SLA     | 147.5  | 183.4  | 120.8  | 126.4  | 109.8  | 100.6  | 127.6  | 139.2  |
| SLA     | 377.1  | 423.3  | 135.8  | 128.8  | 134.2  | 126.8  | 326.2  | 363.8  |
| SLA/LP  | 255.9  | 343.6  | 175.5  | 165.9  | 135.3  | 180.8  | 205.6  | 282.9  |
| SLA/LP  | 141.4  | 174.8  | 120.4  | 101.6  | 93.9   | 104.3  | 126.3  | 180.3  |
| SLA2    | 79.3   | 88.9   | 92     | 86.9   | 85.2   | 83.1   | 90.4   | 87.1   |
| SLA2    | 109.5  | 115.7  | 106.6  | 101.5  | 91     | 101.8  | 107.8  | 108.7  |
| SLAMF1  | 121.9  | 138.7  | 122.7  | 78.3   | 90.7   | 79.4   | 95.1   | 98.1   |
| SLAMF6  | 170.7  | 222.5  | 137.2  | 147.5  | 144.8  | 156.7  | 161.1  | 149.6  |
| SLAMF7  | 90.9   | 133.2  | 89.5   | 88     | 81.5   | 86.6   | 93.8   | 121.4  |
| SLAMF8  | 146.1  | 157.3  | 106.4  | 80.3   | 93.4   | 94.1   | 134.6  | 148.5  |
| SLAMF9  | 147.2  | 161.1  | 102    | 101.4  | 85     | 99.2   | 124.7  | 122.5  |
| SLBP    | 1939.6 | 2452.9 | 553.7  | 454.1  | 348.4  | 455.2  | 1502.7 | 2560.6 |
| SLC10A1 | 75     | 83.3   | 88.3   | 85     | 85.1   | 90.9   | 83.1   | 88.6   |
| SLC10A2 | 85.9   | 94.9   | 92.7   | 86.2   | 90.5   | 84.6   | 85.9   | 83.2   |
| SLC10A3 | 645.7  | 815.2  | 426.2  | 396.3  | 330.2  | 446.7  | 645.9  | 992.4  |
| SLC10A4 | 878.3  | 1024.2 | 362.5  | 282.4  | 197    | 315.5  | 820.9  | 1652   |
| SLC10A5 | 85.4   | 100.2  | 87     | 80.1   | 74.7   | 87.8   | 82.9   | 95.8   |
| SLC10A6 | 67.2   | 92.3   | 80.5   | 80.1   | 75.9   | 83.1   | 82.5   | 86.1   |
| SLC10A7 | 78.9   | 85.7   | 105.7  | 84.3   | 84.6   | 82.4   | 87.7   | 87.1   |
| SLC11A1 | 380.2  | 472    | 312.7  | 251.3  | 177.6  | 220    | 263.2  | 264.5  |
| SLC11A1 | 83.7   | 90.5   | 98.4   | 91.8   | 87.8   | 93.9   | 83.7   | 86.7   |
| SLC11A2 | 264.2  | 330.1  | 221.2  | 346.2  | 338.4  | 506.6  | 231.2  | 326.1  |
| SLC12A1 | 89.4   | 101.1  | 99.3   | 101    | 92.5   | 90.8   | 89.5   | 92.6   |
| SLC12A2 | 145    | 162.8  | 114.5  | 125.3  | 123.6  | 131.5  | 142.3  | 185.1  |
| SLC12A3 | 89.7   | 94.4   | 82.5   | 78.6   | 72.2   | 98.1   | 75.6   | 96.6   |
| SLC12A4 | 149.1  | 189.9  | 109.7  | 94.4   | 95.3   | 103.5  | 127.9  | 171.2  |
| SLC12A5 | 81.6   | 99.4   | 92.6   | 94.7   | 88.8   | 89.9   | 90.6   | 100.5  |
| SLC12A6 | 117.2  | 145.3  | 96.8   | 91.2   | 92.6   | 100.8  | 121.4  | 149.6  |
| SLC12A6 | 94.7   | 129.6  | 92.2   | 76.4   | 78.8   | 85.2   | 95.6   | 96.2   |
| SLC12A7 | 101.1  | 100.1  | 94.8   | 92.3   | 85.9   | 98.9   | 103.5  | 96.4   |
| SLC12A8 | 115.7  | 128.2  | 106    | 102.2  | 91.8   | 99.7   | 131.8  | 163.2  |
| SLC12A9 | 2478.7 | 2593.9 | 1772.6 | 1410.7 | 1164.8 | 1485.1 | 1651.5 | 1329.2 |
| SLC13A1 | 93.6   | 100.3  | 92.9   | 90     | 84.4   | 84.5   | 85.8   | 95.3   |
| SLC13A2 | 100    | 121.2  | 93.5   | 87.4   | 81.4   | 95.1   | 104    | 119.5  |
| SLC13A3 | 168.3  | 185.9  | 145    | 140.1  | 148.1  | 137.2  | 154    | 196.2  |
| SLC13A3 | 88.3   | 91.2   | 89.8   | 82.9   | 77.6   | 83.8   | 86.5   | 92.5   |
| SLC13A3 | 81.4   | 93.3   | 101.7  | 97.5   | 98.1   | 85.2   | 85.3   | 86.2   |
| SLC13A4 | 93.1   | 100    | 106.7  | 113.7  | 91.4   | 88.6   | 89.7   | 97.7   |

|          |        |        |        |        |        |        |        |        |
|----------|--------|--------|--------|--------|--------|--------|--------|--------|
| SLC13A5  | 98.2   | 133    | 93.9   | 76     | 81.3   | 97.3   | 105.1  | 123.9  |
| SLC14A1  | 100.8  | 100.3  | 81.2   | 89.2   | 91.1   | 80.9   | 91.2   | 101.7  |
| SLC14A2  | 95.9   | 104.1  | 109.9  | 102.8  | 103.1  | 102.7  | 88.3   | 94.9   |
| SLC15A1  | 118.2  | 119    | 81.6   | 87.1   | 81.1   | 83.4   | 101.9  | 112.9  |
| SLC15A2  | 123.8  | 126.2  | 132.9  | 155.5  | 144.3  | 199.6  | 104.9  | 115.3  |
| SLC15A3  | 836.1  | 1080.9 | 562.4  | 1267.1 | 833    | 1153.3 | 781.7  | 686.1  |
| SLC15A4  | 671.2  | 806.4  | 359.2  | 552.1  | 462.9  | 745.5  | 568.7  | 862.8  |
| SLC16A1  | 113.2  | 139.5  | 97.2   | 94.6   | 80.2   | 86.8   | 112.7  | 120.1  |
| SLC16A10 | 550.8  | 739.1  | 314.8  | 207.2  | 152    | 233.3  | 352.1  | 533.3  |
| SLC16A11 | 95.1   | 96.6   | 98     | 103.5  | 84.4   | 97.5   | 97.9   | 99.5   |
| SLC16A12 | 7699.6 | 9463.8 | 3156.3 | 5318.6 | 5586.3 | 3704   | 7200   | 8306.9 |
| SLC16A13 | 91     | 122.3  | 105.8  | 96.5   | 96.5   | 89.2   | 106.4  | 113.5  |
| SLC16A14 | 90.8   | 93.9   | 87.3   | 92.5   | 88.4   | 97.5   | 81.7   | 86     |
| SLC16A2  | 108.5  | 153.4  | 117.3  | 117.7  | 108.1  | 134    | 117.6  | 144.7  |
| SLC16A3  | 4706.7 | 5910.5 | 2290.5 | 2235.9 | 1799.3 | 2402.6 | 5370.1 | 6537.9 |
| SLC16A4  | 108.3  | 109.1  | 78.7   | 76.3   | 80.9   | 77.7   | 82.2   | 115.8  |
| SLC16A5  | 315.9  | 438.7  | 272.2  | 263.7  | 270.4  | 278.2  | 243.6  | 262.3  |
| SLC16A6  | 91     | 99.7   | 96.8   | 102.3  | 95.8   | 102.5  | 90.8   | 89.3   |
| SLC16A7  | 105.4  | 124.8  | 92.2   | 97.8   | 89.4   | 96.3   | 104.9  | 114.1  |
| SLC16A8  | 81.6   | 94.5   | 90     | 79.5   | 74.8   | 90.4   | 83.1   | 98.5   |
| SLC16A9  | 290.4  | 297    | 213.8  | 168.8  | 147    | 179    | 231.1  | 348.3  |
| SLC17A1  | 109.2  | 136.9  | 83     | 88.2   | 76.6   | 77.2   | 106.1  | 136.4  |
| SLC17A2  | 96.2   | 110.2  | 91.5   | 88.4   | 83.1   | 78.1   | 91.7   | 98.7   |
| SLC17A3  | 107.7  | 116.8  | 112.3  | 108.5  | 105.9  | 108.2  | 111.1  | 111.7  |
| SLC17A4  | 76.5   | 90.2   | 91.1   | 80.6   | 92.1   | 86.7   | 82.4   | 95.6   |
| SLC17A5  | 121.6  | 126.7  | 102.8  | 89.7   | 92.4   | 89.5   | 114    | 112.9  |
| SLC17A6  | 83.9   | 85.3   | 94     | 86.4   | 81.9   | 85.5   | 84.7   | 97.2   |
| SLC17A7  | 115.4  | 127.2  | 104.9  | 96.6   | 100.3  | 95.2   | 114.1  | 119.6  |
| SLC17A8  | 72.8   | 91.5   | 91.1   | 84.4   | 83.4   | 80.9   | 83.6   | 85.6   |
| SLC18A1  | 100.3  | 115.7  | 114    | 109.4  | 107.5  | 100    | 95.3   | 104.4  |
| SLC18A2  | 78     | 81.4   | 84.7   | 78.2   | 80.5   | 90.8   | 70.3   | 78.1   |
| SLC18A3  | 80.2   | 98.3   | 85.9   | 86.4   | 80.1   | 81     | 82.6   | 91.5   |
| SLC19A1  | 371.2  | 465.1  | 263.9  | 259    | 191.1  | 195.4  | 274.6  | 562.6  |
| SLC19A2  | 102.7  | 124.8  | 117.7  | 112.2  | 102.4  | 107.9  | 103.5  | 121.5  |
| SLC19A3  | 89.5   | 105.5  | 86.5   | 84.1   | 86.6   | 95.4   | 88.4   | 90.2   |
| SLC1A1   | 99.5   | 124.5  | 122.1  | 113.1  | 102.1  | 106.4  | 96.8   | 98.1   |
| SLC1A2   | 98.7   | 130.7  | 94.4   | 84     | 81.9   | 82.6   | 101    | 118.2  |
| SLC1A3   | 374.1  | 463.8  | 207.4  | 367.1  | 285.3  | 450.2  | 213.3  | 229.5  |
| SLC1A4   | 201.3  | 270    | 230.1  | 195.9  | 186.6  | 204.1  | 222.7  | 353.3  |
| SLC1A5   | 737.8  | 883.4  | 580.3  | 444.7  | 304.3  | 452.1  | 686.2  | 1530.4 |
| SLC1A6   | 84.9   | 102.2  | 89.3   | 78.5   | 83.6   | 76.1   | 85.7   | 85.6   |
| SLC1A7   | 129.9  | 139.2  | 93.2   | 94     | 100.8  | 108.8  | 123.4  | 141.6  |
| SLC20A1  | 1941   | 2382.6 | 1967   | 1538.9 | 1062.8 | 2016.9 | 1485.7 | 2760.2 |
| SLC20A2  | 451    | 570.8  | 422.3  | 344    | 239.1  | 387.8  | 448.6  | 498.1  |
| SLC22A1  | 135.7  | 136.2  | 99.1   | 107.7  | 87     | 93.2   | 114.7  | 121.1  |
| SLC22A1  | 96.4   | 111.5  | 85.5   | 80.3   | 90     | 80     | 109.4  | 120.4  |
| SLC22A10 | 105.5  | 129.8  | 83.7   | 89.4   | 82.7   | 88.4   | 111.9  | 108.4  |
| SLC22A11 | 94.5   | 103    | 91.2   | 92.4   | 85.4   | 83.2   | 102    | 97.7   |
| SLC22A12 | 106.2  | 117.8  | 94.7   | 88.2   | 90.6   | 91.1   | 119.8  | 126    |
| SLC22A12 | 79     | 96.3   | 99.2   | 99     | 83.3   | 87.5   | 89.3   | 81.3   |

|           |        |        |        |        |        |        |        |        |
|-----------|--------|--------|--------|--------|--------|--------|--------|--------|
| SLC22A12  | 84.6   | 99.6   | 105.5  | 84.4   | 78.6   | 86.3   | 85.2   | 94.1   |
| SLC22A13  | 94.8   | 98.3   | 96.8   | 96.6   | 93.3   | 93.5   | 93.5   | 92     |
| SLC22A14  | 84.2   | 89     | 103.1  | 91     | 87.7   | 101.5  | 88.8   | 85     |
| SLC22A15  | 1272   | 1442.8 | 972.1  | 530.8  | 422.7  | 909.8  | 957.1  | 1572   |
| SLC22A16  | 2837   | 3498.3 | 1484.3 | 1517.6 | 1239.2 | 1674.1 | 2497.2 | 3102.4 |
| SLC22A17  | 84.8   | 93.3   | 102.3  | 85.2   | 88.1   | 88.9   | 86     | 92.4   |
| SLC22A17  | 170.6  | 208.1  | 132.2  | 132.9  | 104.4  | 138.6  | 166.6  | 289.5  |
| SLC22A18  | 162.4  | 218.9  | 143.2  | 108.5  | 100    | 101.3  | 173.3  | 171.2  |
| SLC22A18  | 332.9  | 441.7  | 475.6  | 462.2  | 385.8  | 466.4  | 370.7  | 617.2  |
| SLC22A18A | 169.9  | 202.8  | 167    | 147.9  | 126.9  | 187    | 157.2  | 200.2  |
| SLC22A2   | 85.4   | 97.8   | 104.7  | 84.3   | 97.4   | 93.6   | 87.3   | 95.7   |
| SLC22A2   | 86.9   | 95.2   | 88.6   | 75.4   | 83     | 82.8   | 91.5   | 97.9   |
| SLC22A3   | 87.4   | 111.6  | 103.7  | 89     | 86.6   | 87.9   | 87.6   | 88.4   |
| SLC22A4   | 360    | 387.8  | 210.8  | 324.9  | 236.1  | 333.9  | 294.6  | 419.3  |
| SLC22A5   | 353.4  | 451.2  | 276    | 295.2  | 193.4  | 327.9  | 271.6  | 379.7  |
| SLC22A6   | 111.6  | 143.1  | 119.9  | 99.4   | 93     | 106.9  | 102.3  | 114.8  |
| SLC22A6   | 80.3   | 79     | 92.5   | 76.2   | 76     | 77.3   | 82.9   | 94.1   |
| SLC22A7   | 79.9   | 92.3   | 92     | 79.8   | 78.8   | 83.8   | 78.8   | 87.9   |
| SLC22A7   | 91.5   | 106.6  | 107.4  | 95.7   | 95.9   | 100.6  | 97.5   | 96.3   |
| SLC22A8   | 79.6   | 89.3   | 83.8   | 86.6   | 84     | 83.4   | 77.7   | 97     |
| SLC22A9   | 81.1   | 89.7   | 91.7   | 84.8   | 79.7   | 82.4   | 81.4   | 89     |
| SLC23A1   | 114.9  | 144.7  | 103.5  | 90.1   | 100.4  | 90.1   | 113.5  | 125.8  |
| SLC23A1   | 145.8  | 172.7  | 112.8  | 94.8   | 90.2   | 104.1  | 146.2  | 153.1  |
| SLC23A2   | 106.2  | 127.5  | 92     | 77.2   | 84.4   | 85.1   | 94.7   | 111.1  |
| SLC23A2   | 155.1  | 183.1  | 161.4  | 182.8  | 195.7  | 290.8  | 157.1  | 206.3  |
| SLC23A2   | 94.9   | 110.3  | 88.6   | 84.7   | 88.7   | 83.5   | 87.2   | 102.3  |
| SLC23A3   | 96.2   | 116.5  | 102.5  | 94.8   | 97.6   | 99.1   | 96.4   | 107.1  |
| SLC24A1   | 169.5  | 197    | 113.4  | 143.8  | 121.9  | 147.5  | 147.6  | 157    |
| SLC24A2   | 95.4   | 107.1  | 102.5  | 92.9   | 82.1   | 89.7   | 96.8   | 95     |
| SLC24A3   | 126.9  | 136.3  | 92.4   | 93.1   | 78.1   | 85.6   | 108.3  | 127.7  |
| SLC24A4   | 107.2  | 107.2  | 106.7  | 95.2   | 104.6  | 104.8  | 104.3  | 129.3  |
| SLC24A4   | 116    | 141.9  | 112.5  | 119.3  | 112.4  | 121.7  | 105.8  | 121.9  |
| SLC24A4   | 116.3  | 139.6  | 119.1  | 119.3  | 125.4  | 123.7  | 117.6  | 116.5  |
| SLC24A5   | 88.8   | 92.5   | 87.8   | 87.3   | 85.7   | 91     | 92.9   | 103.3  |
| SLC24A6   | 467.1  | 608.5  | 344.8  | 403.5  | 290.1  | 345.4  | 448.3  | 447.5  |
| SLC25A1   | 1634.7 | 2238.4 | 2132.8 | 1282.5 | 1056.3 | 1471.6 | 1425.5 | 2384.3 |
| SLC25A10  | 906.8  | 1141   | 412.1  | 348.4  | 324.6  | 475.4  | 709.4  | 385.6  |
| SLC25A11  | 280.5  | 368    | 141.2  | 133.5  | 104.9  | 136.2  | 251.6  | 292.9  |
| SLC25A12  | 243.3  | 283.7  | 191.8  | 172.1  | 129.5  | 205    | 176.2  | 284.9  |
| SLC25A13  | 517.3  | 604.4  | 230    | 301.2  | 239    | 417    | 428.2  | 729    |
| SLC25A14  | 399.4  | 468.4  | 164.5  | 161.5  | 158.3  | 198.5  | 339.4  | 344.5  |
| SLC25A14  | 261.4  | 292.8  | 186.5  | 143.9  | 128.5  | 144.8  | 207.8  | 230.8  |
| SLC25A15  | 375.3  | 463.2  | 237    | 246.1  | 192    | 204.6  | 266.4  | 354.8  |
| SLC25A16  | 99.9   | 107.1  | 91.8   | 91.4   | 86     | 105.2  | 91.1   | 107.6  |
| SLC25A17  | 264.2  | 376.4  | 208.7  | 216.7  | 165.4  | 228    | 251.7  | 315.3  |
| SLC25A18  | 84.3   | 100.5  | 98     | 101.6  | 100.8  | 94.8   | 87.5   | 91.6   |
| SLC25A19  | 1785.3 | 2308.7 | 876.7  | 934.8  | 823.4  | 873.9  | 1509.1 | 849.9  |
| SLC25A2   | 102    | 115.4  | 97.3   | 87.4   | 79.4   | 79.6   | 88.5   | 102.9  |
| SLC25A20  | 279.5  | 403.8  | 134.7  | 107    | 100.2  | 104.9  | 263.8  | 338.3  |
| SLC25A21  | 74.1   | 85.1   | 89.3   | 88.2   | 85.4   | 81.7   | 76.1   | 76.4   |

|          |         |         |         |         |         |         |         |         |
|----------|---------|---------|---------|---------|---------|---------|---------|---------|
| SLC25A22 | 682.9   | 838.2   | 558.6   | 329.3   | 269.7   | 297.8   | 422.2   | 321     |
| SLC25A23 | 2410.5  | 2962    | 2215.9  | 1602.5  | 1225.1  | 1405    | 2202.1  | 2985.9  |
| SLC25A24 | 100.8   | 129.9   | 86.4    | 83.9    | 76.6    | 85.7    | 111.4   | 118.1   |
| SLC25A24 | 130.9   | 166.7   | 117.9   | 92.8    | 88.3    | 92.1    | 135.1   | 141.4   |
| SLC25A24 | 637.5   | 881.9   | 284.8   | 188     | 179     | 254.2   | 455.5   | 674     |
| SLC25A25 | 244.6   | 306.8   | 219.5   | 221.3   | 208.4   | 230.3   | 261.1   | 398.6   |
| SLC25A25 | 78.4    | 99.8    | 89.9    | 91.8    | 78.9    | 88.2    | 88.7    | 99.9    |
| SLC25A25 | 96.9    | 112.9   | 93.2    | 86.6    | 80.6    | 89.3    | 102.3   | 110.2   |
| SLC25A25 | 132.2   | 127.5   | 107.9   | 102     | 101.1   | 98.9    | 129     | 154.3   |
| SLC25A26 | 384.2   | 536.5   | 244.4   | 210.3   | 193.1   | 241.3   | 361.3   | 423.8   |
| SLC25A26 | 178.3   | 235.6   | 122.1   | 119.6   | 119.2   | 145.2   | 149.9   | 186.6   |
| SLC25A26 | 389     | 492.3   | 230.8   | 172.9   | 131.6   | 150.3   | 327.2   | 371     |
| SLC25A27 | 148.5   | 188.8   | 105     | 95.3    | 96.1    | 112.8   | 128.7   | 173.2   |
| SLC25A28 | 1682.1  | 2005.4  | 748.5   | 578.8   | 546.6   | 734.1   | 1288.5  | 1272.4  |
| SLC25A29 | 122.6   | 135.9   | 122.3   | 117.8   | 101.5   | 134.6   | 125.6   | 185.5   |
| SLC25A29 | 140.9   | 164.9   | 142.9   | 124.1   | 124.8   | 173.4   | 138.2   | 184.4   |
| SLC25A3  | 10281.4 | 11792.9 | 5848    | 4637.9  | 2887.5  | 4288.8  | 9663.1  | 15588.7 |
| SLC25A3  | 229.1   | 284.1   | 116.6   | 101.9   | 88.2    | 95.4    | 188.3   | 236     |
| SLC25A30 | 130     | 152.7   | 105.7   | 100.2   | 97.1    | 93.4    | 113.9   | 116.1   |
| SLC25A31 | 102.9   | 104.9   | 100.3   | 86.1    | 86.8    | 75.8    | 100.1   | 125.7   |
| SLC25A32 | 95.6    | 108.4   | 99.6    | 81.9    | 82.3    | 94.8    | 93.8    | 117.5   |
| SLC25A34 | 135.2   | 127.3   | 105.1   | 101.5   | 97.4    | 98      | 105.9   | 110.7   |
| SLC25A35 | 99.7    | 107.8   | 116.6   | 108.5   | 121.1   | 124.3   | 100.7   | 112.2   |
| SLC25A36 | 432.6   | 614.8   | 282.1   | 381.8   | 287.4   | 281.6   | 385.5   | 554.3   |
| SLC25A37 | 551.4   | 663.5   | 513.7   | 426.6   | 412.8   | 625.1   | 482.1   | 930.8   |
| SLC25A4  | 904.3   | 1143.7  | 763.4   | 536.8   | 413.6   | 667.2   | 623.2   | 1056.7  |
| SLC25A40 | 781.8   | 1004.9  | 448.5   | 486.2   | 367.3   | 607.6   | 591.3   | 898.7   |
| SLC25A42 | 577.7   | 740.6   | 511.3   | 423     | 383.3   | 415.9   | 490.4   | 449.1   |
| SLC25A43 | 1640.2  | 2165.5  | 948.6   | 1011.9  | 811.3   | 1317.9  | 1429    | 1599.7  |
| SLC25A45 | 83.8    | 90.3    | 89.3    | 84.7    | 83.5    | 88.2    | 82.6    | 81.3    |
| SLC25A5  | 20192   | 24572.4 | 15949.3 | 12964.1 | 10101.9 | 14900.5 | 20225.7 | 23670.6 |
| SLC26A1  | 133.1   | 148.8   | 105.9   | 102.3   | 84.5    | 90.7    | 126.5   | 156.6   |
| SLC26A1  | 103.4   | 103.4   | 89.3    | 90.4    | 92.1    | 88.3    | 98.5    | 95.3    |
| SLC26A1  | 85.7    | 92.4    | 97.9    | 90      | 84.9    | 90.2    | 85.6    | 84.2    |
| SLC26A10 | 95.5    | 103.5   | 98.3    | 93.1    | 83.1    | 93.1    | 104.5   | 116.5   |
| SLC26A11 | 85.2    | 90.8    | 93.9    | 76.9    | 84.2    | 92.9    | 82.5    | 88.6    |
| SLC26A11 | 85.5    | 116     | 95.4    | 88.1    | 93      | 89.3    | 89.3    | 105.7   |
| SLC26A2  | 200.3   | 241.2   | 108.7   | 105.3   | 101.6   | 111.5   | 172.4   | 210.5   |
| SLC26A3  | 81      | 86.7    | 85.1    | 90.3    | 75.7    | 95.7    | 78.3    | 90.3    |
| SLC26A4  | 99.9    | 117.7   | 87.2    | 84.6    | 76.2    | 93.2    | 102.9   | 105.7   |
| SLC26A5  | 73.7    | 81.1    | 85.8    | 75.3    | 83.5    | 82.7    | 81.6    | 78.3    |
| SLC26A5  | 93.7    | 112.5   | 99.7    | 90.3    | 94.1    | 96.3    | 98      | 106.4   |
| SLC26A5  | 90.1    | 109.5   | 113     | 98.6    | 100.8   | 89.5    | 95.3    | 100     |
| SLC26A6  | 916.4   | 1071.8  | 514     | 455.7   | 485.5   | 539.4   | 758.5   | 607.3   |
| SLC26A6  | 116.3   | 149     | 93.4    | 88.1    | 74.7    | 85.9    | 117.3   | 140.5   |
| SLC26A6  | 179.7   | 192.9   | 117.6   | 100.6   | 101.5   | 119     | 153.9   | 195.4   |
| SLC26A7  | 84.8    | 93.1    | 76.2    | 82.4    | 77.7    | 81.5    | 81.3    | 99.4    |
| SLC26A7  | 82.1    | 89.2    | 103.4   | 94.8    | 91.5    | 89.7    | 79.8    | 91.2    |
| SLC26A8  | 86.1    | 117     | 98.3    | 92.8    | 86.7    | 86.3    | 91.6    | 97.6    |
| SLC26A8  | 82.6    | 89.9    | 81.2    | 87.1    | 89.6    | 78.5    | 80.4    | 84.1    |

|          |        |        |        |        |        |        |        |        |
|----------|--------|--------|--------|--------|--------|--------|--------|--------|
| SLC26A9  | 109.6  | 118.8  | 85.2   | 69.9   | 69.6   | 81.3   | 104.7  | 117.7  |
| SLC26A9  | 137.6  | 132.1  | 92.8   | 90.9   | 83.6   | 101.8  | 129.8  | 173.9  |
| SLC26A9  | 98.7   | 104.1  | 95.3   | 89.9   | 95.2   | 92.4   | 98     | 101.8  |
| SLC27A1  | 189.8  | 206.5  | 202.7  | 231.4  | 208.1  | 262.7  | 165.2  | 203.4  |
| SLC27A2  | 718.1  | 928.1  | 416.1  | 362    | 277.7  | 373.4  | 524.9  | 663.3  |
| SLC27A3  | 442.4  | 498.8  | 244.3  | 252.9  | 261.1  | 261.9  | 327.9  | 283.7  |
| SLC27A4  | 119.5  | 145.4  | 83.2   | 82.4   | 79.3   | 72.2   | 98.7   | 154.7  |
| SLC27A5  | 305.3  | 353.2  | 217.6  | 112.9  | 103.2  | 119.2  | 231.8  | 279.9  |
| SLC27A6  | 112.4  | 134    | 101.3  | 97.6   | 97.8   | 111.6  | 117.1  | 142    |
| SLC27A6  | 99.8   | 103    | 96.5   | 83.7   | 73     | 76.3   | 93.7   | 116.9  |
| SLC28A1  | 78.2   | 89     | 83.3   | 85.7   | 79     | 74.2   | 76.2   | 79.5   |
| SLC28A1  | 121    | 143.3  | 94.2   | 75.9   | 82.1   | 87.5   | 103.5  | 147.1  |
| SLC28A1  | 115.4  | 131.4  | 100.6  | 90.3   | 83.4   | 93     | 117.8  | 123.4  |
| SLC28A3  | 80.8   | 81.5   | 97.3   | 87.5   | 85.2   | 89.6   | 84.5   | 89.7   |
| SLC29A1  | 104.4  | 114.2  | 109.3  | 95.4   | 88.1   | 82.1   | 111.6  | 116.3  |
| SLC29A1  | 775.5  | 1090.4 | 905.7  | 685.5  | 578.3  | 1090.9 | 575.8  | 795.2  |
| SLC29A1  | 565.3  | 774.3  | 531.1  | 484.1  | 366.7  | 653.9  | 379.9  | 706.2  |
| SLC29A2  | 173.9  | 189.9  | 131.8  | 113.5  | 120.8  | 133.9  | 145.9  | 192.8  |
| SLC29A3  | 188.2  | 213    | 170.2  | 146.8  | 109.8  | 134.4  | 210.8  | 306.6  |
| SLC29A4  | 92.2   | 106.4  | 110.1  | 120    | 102.9  | 106.7  | 90.9   | 104.5  |
| SLC2A1   | 1515.6 | 2042.7 | 854.3  | 791    | 709.6  | 1110.5 | 1432.9 | 1426.1 |
| SLC2A10  | 193.5  | 226.5  | 183.4  | 234.5  | 189.4  | 283.6  | 190    | 270.9  |
| SLC2A11  | 83.4   | 88.2   | 99.5   | 96.8   | 95.3   | 99.7   | 78.2   | 90.3   |
| SLC2A11  | 130.9  | 121.4  | 117.4  | 119    | 109.7  | 124.8  | 107.2  | 113.6  |
| SLC2A11  | 154.9  | 214.9  | 127.6  | 115.7  | 123.5  | 129.2  | 146.7  | 172.1  |
| SLC2A12  | 93.3   | 88.9   | 79     | 85.8   | 85.1   | 84.4   | 93.9   | 108.4  |
| SLC2A13  | 83.8   | 96     | 91.1   | 99.6   | 90.1   | 100    | 81.6   | 94.3   |
| SLC2A14  | 110    | 125.5  | 99.9   | 103    | 97     | 98     | 104    | 105.8  |
| SLC2A2   | 83     | 91.9   | 100.6  | 87.5   | 86.3   | 90.5   | 78.8   | 86.4   |
| SLC2A3   | 485.3  | 566.6  | 313.8  | 309    | 295.5  | 402.8  | 465.8  | 729.7  |
| SLC2A4   | 101.8  | 133.9  | 96.4   | 87.1   | 87.5   | 85.6   | 104.7  | 117    |
| SLC2A4RG | 964.5  | 1167.1 | 459.6  | 391.3  | 357.9  | 403.5  | 811.1  | 678.8  |
| SLC2A5   | 2336   | 2872.5 | 2087.6 | 1845.6 | 2047.6 | 2402   | 1660   | 2247.1 |
| SLC2A6   | 969.1  | 1261.5 | 587.9  | 628.3  | 772.1  | 435    | 833.9  | 807    |
| SLC2A7   | 75.6   | 79     | 95.1   | 95.8   | 92     | 95     | 76.3   | 81.5   |
| SLC2A8   | 757.4  | 990    | 479.4  | 492.8  | 429.9  | 482.7  | 757.1  | 634.3  |
| SLC2A9   | 96.9   | 134.4  | 91.6   | 84.5   | 80.6   | 90.4   | 105.6  | 155.6  |
| SLC2A9   | 144.6  | 193    | 113.1  | 102.8  | 92.6   | 83.4   | 147.2  | 148.4  |
| SLC2A9   | 809.9  | 1012   | 637.1  | 524.3  | 545.2  | 732.8  | 577.9  | 815.9  |
| SLC30A1  | 206.6  | 244.4  | 135.3  | 118.8  | 111.7  | 152    | 265.9  | 471.3  |
| SLC30A10 | 85.6   | 107.1  | 95.3   | 94.7   | 85.4   | 88.6   | 90.8   | 85.1   |
| SLC30A2  | 87.8   | 89.4   | 90.8   | 81.7   | 77.6   | 86.8   | 86.8   | 97.5   |
| SLC30A2  | 76.3   | 76.4   | 103    | 104.1  | 88.1   | 92.8   | 74.4   | 82.8   |
| SLC30A3  | 424.8  | 558    | 297.1  | 124.8  | 115.2  | 119.4  | 397.3  | 417    |
| SLC30A4  | 71.2   | 71.6   | 107.5  | 91.9   | 89.7   | 80.1   | 79.7   | 78.7   |
| SLC30A5  | 1444.8 | 1933.3 | 942.5  | 973.9  | 653.1  | 840.5  | 1141.7 | 1781.7 |
| SLC30A5  | 139.2  | 146.9  | 116.5  | 127.2  | 99.1   | 148    | 139.5  | 236.7  |
| SLC30A5  | 104.8  | 116.3  | 98.2   | 101.3  | 86.8   | 102.5  | 110.9  | 109.3  |
| SLC30A6  | 95.3   | 105.8  | 88.6   | 92.1   | 82.3   | 94.5   | 112.3  | 94.7   |
| SLC30A7  | 1345.1 | 1709.6 | 693.6  | 617.5  | 506.2  | 742.3  | 1226.9 | 1704.4 |



|         |        |        |        |        |        |        |        |        |
|---------|--------|--------|--------|--------|--------|--------|--------|--------|
| SLC30A8 | 95.6   | 100.1  | 99.6   | 96.4   | 91.2   | 94.5   | 88.3   | 92.8   |
| SLC30A9 | 1436.1 | 1720.6 | 763.8  | 764.2  | 509.1  | 1132.2 | 1362.8 | 2172.1 |
| SLC31A2 | 324.5  | 397.7  | 263    | 332.8  | 286.1  | 383.5  | 314.2  | 448.1  |
| SLC32A1 | 78     | 75.2   | 94.4   | 90.2   | 81.5   | 86.5   | 71.6   | 78.6   |
| SLC33A1 | 314.4  | 362.3  | 134.1  | 113.3  | 102.7  | 207.5  | 280    | 531.9  |
| SLC34A1 | 126.2  | 158.6  | 85     | 84.8   | 82.4   | 88.6   | 133.2  | 139.5  |
| SLC34A2 | 109.6  | 123.7  | 100.8  | 97.4   | 84     | 94.2   | 113.4  | 120.3  |
| SLC34A3 | 91.5   | 93.8   | 101.6  | 84.1   | 89.2   | 82.4   | 85.9   | 86.8   |
| SLC35A1 | 2483.9 | 2804.1 | 1354.5 | 1790.6 | 1496.5 | 2621.8 | 2059.1 | 2966.7 |
| SLC35A2 | 897.6  | 1116.1 | 761.5  | 592    | 484.5  | 708.7  | 890.6  | 1248.8 |
| SLC35A2 | 138.3  | 152.2  | 130.1  | 120.9  | 110.5  | 121.2  | 135.5  | 142.1  |
| SLC35A2 | 237.2  | 272.1  | 180.9  | 191.7  | 161.1  | 172.2  | 250.9  | 348.3  |
| SLC35A2 | 142    | 178.9  | 158.5  | 141.4  | 129.7  | 166.4  | 146.4  | 193.6  |
| SLC35A3 | 1243.4 | 1558   | 585.5  | 442.8  | 377.2  | 569.1  | 821.3  | 1534.8 |
| SLC35A4 | 423.6  | 640    | 633.2  | 509.6  | 397.3  | 649.8  | 463    | 703.6  |
| SLC35A5 | 1014.8 | 1201.3 | 533.3  | 564.7  | 415.4  | 605.5  | 948    | 1272.6 |
| SLC35B1 | 3789.1 | 4889   | 3391.1 | 2870.7 | 2033.1 | 3183.9 | 3487.9 | 6141.7 |
| SLC35B2 | 948.4  | 1279.2 | 897.7  | 862.4  | 735.8  | 1269.1 | 780.4  | 1135.8 |
| SLC35B3 | 688.9  | 880.8  | 467.6  | 518.7  | 401.5  | 604.9  | 673.4  | 1088.2 |
| SLC35B4 | 195.9  | 226.1  | 169.1  | 200    | 149.4  | 217.5  | 185.5  | 285.3  |
| SLC35C1 | 172.2  | 232.1  | 169.8  | 145.7  | 110.9  | 158.2  | 161    | 250.7  |
| SLC35C2 | 233.1  | 300.6  | 157.8  | 174.9  | 144.3  | 215.9  | 209    | 273.6  |
| SLC35C2 | 424.9  | 521.8  | 249.6  | 236.5  | 196.9  | 232.2  | 356.2  | 462.2  |
| SLC35C2 | 92.7   | 104.3  | 93.3   | 88.8   | 77.6   | 80.7   | 96.2   | 96.6   |
| SLC35D1 | 124.2  | 122.6  | 121.1  | 110.6  | 100.4  | 99.5   | 102.3  | 118.3  |
| SLC35D2 | 181.5  | 232.3  | 167.4  | 162.6  | 156.7  | 209.5  | 172.6  | 271.1  |
| SLC35D3 | 125    | 143.6  | 96.8   | 92.8   | 78.4   | 84.6   | 114.3  | 123.2  |
| SLC35E1 | 1030.8 | 944.9  | 385.5  | 646.2  | 580.5  | 447.1  | 858.9  | 1296.3 |
| SLC35E2 | 96.9   | 121.2  | 107    | 100.6  | 112.8  | 107.4  | 100.4  | 102.5  |
| SLC35E3 | 448    | 489.1  | 296.3  | 379.7  | 310.9  | 379.4  | 358.2  | 552.4  |
| SLC35E4 | 90.6   | 92.9   | 102.8  | 86.7   | 89.6   | 85.1   | 93.6   | 98.9   |
| SLC35F1 | 104    | 123.1  | 116.3  | 115.1  | 92.5   | 123.6  | 109.7  | 118.6  |
| SLC35F2 | 1814.1 | 2091.6 | 939    | 727    | 514.5  | 793.9  | 1391.8 | 1773.5 |
| SLC35F3 | 80.8   | 92.5   | 89     | 80     | 80.8   | 85.8   | 86.9   | 93.2   |
| SLC35F3 | 116.9  | 123.1  | 83.8   | 83.3   | 79.8   | 76.8   | 102.6  | 117.5  |
| SLC35F4 | 81.9   | 94.7   | 94.3   | 94.5   | 88.7   | 93.7   | 83.8   | 83.2   |
| SLC35F5 | 255.7  | 327.1  | 144    | 165.4  | 131    | 190.2  | 228.1  | 463.5  |
| SLC36A1 | 275.6  | 337.2  | 184.6  | 195.2  | 140.6  | 244.3  | 278.5  | 477.5  |
| SLC36A2 | 87.3   | 87     | 86.9   | 73.2   | 81.3   | 80.7   | 84.3   | 83.7   |
| SLC36A3 | 98.7   | 88.8   | 86.6   | 83.5   | 76.5   | 80.9   | 86.7   | 81.1   |
| SLC36A4 | 918.9  | 1089.8 | 455.4  | 462.8  | 351.3  | 351.2  | 891.6  | 1764.9 |
| SLC37A1 | 181.1  | 233.8  | 136    | 117.6  | 125.7  | 116.9  | 180.4  | 214.6  |
| SLC37A2 | 77.1   | 90.7   | 89.6   | 72.7   | 76.1   | 77.4   | 89.3   | 89.1   |
| SLC37A3 | 163.9  | 210.1  | 138    | 110.9  | 112.5  | 140.1  | 157.4  | 207.1  |
| SLC37A3 | 85.4   | 94.8   | 96.8   | 90.6   | 97.3   | 99.8   | 81.8   | 97.4   |
| SLC37A4 | 1472.9 | 1900.6 | 622.2  | 421.5  | 350.9  | 441.8  | 974.4  | 801.9  |
| SLC38A1 | 344.8  | 414.8  | 113.9  | 91.3   | 96.2   | 87.4   | 209.3  | 302.2  |
| SLC38A1 | 1455.2 | 1923.9 | 690.3  | 960.6  | 664.3  | 746.4  | 1234.3 | 2176.5 |
| SLC38A2 | 754.7  | 867.3  | 348.9  | 433.9  | 409.8  | 606.2  | 758.9  | 1431   |
| SLC38A3 | 73     | 79.5   | 94.2   | 102.9  | 92.5   | 88.5   | 79.4   | 88.5   |

|          |        |        |        |        |        |        |        |        |
|----------|--------|--------|--------|--------|--------|--------|--------|--------|
| SLC38A5  | 223.3  | 278.1  | 151.4  | 114.6  | 105.1  | 138.3  | 200.4  | 237.4  |
| SLC38A6  | 276    | 373.2  | 153.8  | 157.3  | 139.3  | 179.9  | 403.5  | 504.5  |
| SLC39A1  | 1551.9 | 1829.6 | 1411.1 | 1345.5 | 1096.8 | 1483.9 | 1507.8 | 2121   |
| SLC39A10 | 262.1  | 355.7  | 169.3  | 246.6  | 181.2  | 369.3  | 216.4  | 476.7  |
| SLC39A11 | 667.6  | 836.4  | 424.9  | 517.2  | 364.2  | 662.7  | 548.2  | 920.5  |
| SLC39A12 | 93     | 107.8  | 102.7  | 91.1   | 93.8   | 90.9   | 88.7   | 99.2   |
| SLC39A13 | 145.1  | 182.1  | 110.5  | 102.3  | 98.2   | 105.3  | 132.4  | 169.9  |
| SLC39A14 | 735.1  | 1031.5 | 545.6  | 241.4  | 190.9  | 273.2  | 665.8  | 1066.7 |
| SLC39A2  | 93.4   | 110.7  | 104.7  | 87     | 94.1   | 93.6   | 96     | 108.7  |
| SLC39A3  | 815    | 1163.5 | 423.2  | 295.7  | 241.2  | 178    | 825.1  | 922    |
| SLC39A3  | 3870.3 | 4967.9 | 2978.5 | 1972.2 | 1705.3 | 1962   | 3356.8 | 3498.9 |
| SLC39A3  | 178.7  | 262.8  | 275.5  | 165.7  | 138.2  | 233.9  | 161.8  | 325.5  |
| SLC39A4  | 71.1   | 82.2   | 90.7   | 86.4   | 82.5   | 86.3   | 78.8   | 71.4   |
| SLC39A4  | 110.3  | 119    | 101.1  | 82.5   | 88.8   | 93.1   | 109.5  | 114.4  |
| SLC39A5  | 115.3  | 131.8  | 90.1   | 86.8   | 82.3   | 82.4   | 110.3  | 131.4  |
| SLC39A6  | 381.4  | 499.6  | 163.5  | 203.6  | 155.2  | 312.7  | 288.6  | 397.2  |
| SLC39A7  | 188.5  | 201.2  | 110.6  | 103.2  | 89.7   | 113.8  | 158.9  | 211    |
| SLC39A7  | 163.2  | 208.3  | 118    | 126.5  | 112    | 141.6  | 181.2  | 185    |
| SLC39A8  | 959.9  | 1090   | 413.9  | 306.5  | 231.7  | 307.9  | 786.8  | 1604   |
| SLC39A9  | 238.7  | 346.7  | 175.6  | 120    | 95.2   | 124.5  | 215.2  | 335.7  |
| SLC3A1   | 84.1   | 89.7   | 87.8   | 81.8   | 75     | 96.5   | 84.4   | 88.7   |
| SLC3A2   | 565.9  | 774.4  | 356.6  | 224.1  | 194.2  | 188.4  | 866.2  | 1242.3 |
| SLC3A2   | 287.7  | 384.3  | 120.7  | 91.2   | 95.4   | 106.6  | 287.1  | 540    |
| SLC3A2   | 928.7  | 1279.8 | 643.2  | 414.6  | 322    | 572.7  | 1407.2 | 3046.7 |
| SLC40A1  | 166.6  | 192.3  | 156.9  | 275.6  | 192.1  | 408.3  | 136    | 230    |
| SLC41A1  | 199.4  | 213.9  | 158    | 137.1  | 132.5  | 154.3  | 203.5  | 302.6  |
| SLC41A2  | 87.6   | 113.3  | 88.3   | 84.3   | 82.6   | 91.9   | 97.1   | 115.2  |
| SLC41A3  | 1112.6 | 1579.5 | 796    | 564.9  | 496.5  | 479.3  | 1070.2 | 915.9  |
| SLC41A3  | 78.3   | 86.3   | 85.3   | 75.6   | 71.6   | 73.7   | 82.8   | 88     |
| SLC41A3  | 1230.8 | 1680.1 | 436.6  | 366.4  | 284.5  | 322.9  | 1114.5 | 1107   |
| SLC43A1  | 199.1  | 181.4  | 119.4  | 95.6   | 98.2   | 103    | 134.3  | 154.9  |
| SLC43A2  | 258.6  | 343.9  | 192.7  | 255.5  | 216.8  | 290.1  | 204.9  | 177.8  |
| SLC43A3  | 1132.4 | 1857.4 | 913.3  | 743.3  | 607.1  | 1196.1 | 931.2  | 1327.5 |
| SLC43A3  | 96.3   | 97.3   | 75.2   | 83.5   | 78     | 92.8   | 88.5   | 115.7  |
| SLC43A3  | 671.2  | 858.9  | 230.1  | 262.8  | 257.8  | 321.2  | 524.4  | 886.9  |
| SLC43A3  | 249.1  | 296    | 134.7  | 124.1  | 117.7  | 110.6  | 185.6  | 283.3  |
| SLC44A1  | 4192.2 | 5077.5 | 2989.3 | 4633.6 | 3393.2 | 4799.4 | 3580.6 | 3615.1 |
| SLC44A1  | 1728.9 | 2187   | 1122   | 1585.6 | 1162.1 | 2150.5 | 1244.5 | 1818   |
| SLC44A2  | 102.9  | 121.9  | 93.4   | 106.4  | 114.2  | 102.9  | 109.4  | 121.7  |
| SLC44A3  | 120.7  | 127.5  | 105.3  | 105.9  | 100.7  | 112.6  | 116.3  | 120.8  |
| SLC44A4  | 121.1  | 137.8  | 97.5   | 97.1   | 95.2   | 100.3  | 125    | 127.3  |
| SLC44A4  | 7056   | 8211.3 | 3186.2 | 3831.7 | 4668   | 3454.3 | 6200.6 | 6071.2 |
| SLC44A4  | 92.2   | 116.9  | 84.3   | 99.1   | 91.6   | 97.2   | 97.6   | 108.6  |
| SLC44A5  | 79.2   | 88.8   | 100.3  | 92.1   | 93     | 91.7   | 87.3   | 79     |
| SLC45A1  | 115.3  | 128.5  | 113.6  | 95.1   | 100.6  | 93.4   | 123.2  | 125.5  |
| SLC45A2  | 107.4  | 148.2  | 93.3   | 92.9   | 74.9   | 84.7   | 126    | 134.4  |
| SLC45A2  | 84.4   | 99     | 100.9  | 95.4   | 77.6   | 85     | 86     | 86.4   |
| SLC45A2  | 108.8  | 149.6  | 95.6   | 85.9   | 89.7   | 90.4   | 123.7  | 129.1  |
| SLC45A3  | 210.5  | 260.1  | 210.3  | 205    | 172.1  | 232.1  | 214.7  | 316.7  |
| SLC45A4  | 165.5  | 248.9  | 243.1  | 205.6  | 179.1  | 274.7  | 186.4  | 245.1  |

|          |       |       |       |       |       |       |       |        |
|----------|-------|-------|-------|-------|-------|-------|-------|--------|
| SLC4A1   | 100.9 | 112.2 | 93.1  | 77.8  | 78.6  | 95.9  | 81.8  | 107.1  |
| SLC4A10  | 90.7  | 99.3  | 86.9  | 87.3  | 81.8  | 82.1  | 94.6  | 96.2   |
| SLC4A11  | 177.6 | 207   | 236.7 | 180.5 | 156.4 | 205.7 | 156.5 | 259.6  |
| SLC4A1AP | 305.8 | 353.9 | 130.5 | 134.9 | 116.1 | 152.5 | 294.5 | 475.2  |
| SLC4A2   | 191.5 | 231.1 | 290   | 179.4 | 173.8 | 279.4 | 185.9 | 323.5  |
| SLC4A3   | 117.6 | 135.4 | 93.3  | 98.4  | 105.4 | 126.8 | 116.1 | 142.2  |
| SLC4A3   | 120.8 | 144.8 | 96.4  | 92.2  | 79.2  | 81.9  | 119.6 | 129.7  |
| SLC4A4   | 92.5  | 99.5  | 89.6  | 82.7  | 87.6  | 89.6  | 90.5  | 91     |
| SLC4A5   | 472   | 662.5 | 272.2 | 456.5 | 551.2 | 337.8 | 445.6 | 457.3  |
| SLC4A5   | 91.5  | 103.7 | 90.8  | 85.3  | 80.1  | 88.5  | 92.8  | 94.6   |
| SLC4A5   | 88.8  | 96.7  | 107.3 | 97.4  | 96.9  | 89.1  | 96.2  | 90.7   |
| SLC4A7   | 574.3 | 733.7 | 343.4 | 442.5 | 289.7 | 583.5 | 497.7 | 680.7  |
| SLC4A8   | 99.6  | 143.7 | 100.5 | 91.8  | 110.1 | 109.2 | 122.8 | 119.3  |
| SLC4A8   | 97.3  | 108   | 91.7  | 90.1  | 84.6  | 97.5  | 93.4  | 100.1  |
| SLC4A9   | 102.6 | 124.1 | 102.2 | 83.1  | 76.7  | 82    | 95    | 104.9  |
| SLC5A1   | 83.1  | 88.3  | 91.6  | 85.8  | 93.3  | 84.1  | 74    | 93.1   |
| SLC5A10  | 125.1 | 141   | 98.1  | 95.4  | 83.4  | 90.2  | 120.7 | 127.4  |
| SLC5A10  | 87.8  | 93.2  | 104.9 | 96.4  | 88.2  | 99.9  | 86.2  | 85.6   |
| SLC5A10  | 78.8  | 92.9  | 82.9  | 80.7  | 79.2  | 75.3  | 73.8  | 78.5   |
| SLC5A10  | 110.8 | 126.3 | 91.2  | 91    | 100.5 | 97.1  | 126.4 | 119    |
| SLC5A11  | 91.2  | 84.8  | 87.6  | 90.6  | 85.7  | 80.6  | 82.9  | 89.5   |
| SLC5A12  | 85.2  | 87.3  | 95.6  | 93.2  | 84.5  | 84.1  | 85    | 88.7   |
| SLC5A12  | 96.6  | 97.8  | 82.8  | 88.5  | 73.9  | 79.5  | 102   | 115.7  |
| SLC5A12  | 93.5  | 106.3 | 84.3  | 82.3  | 74.8  | 83.8  | 93    | 100.3  |
| SLC5A2   | 93.5  | 90.1  | 95.5  | 89.7  | 84.2  | 93.6  | 87.2  | 92.9   |
| SLC5A3   | 113.2 | 129.4 | 80.8  | 92.2  | 84.3  | 85    | 108.7 | 124    |
| SLC5A4   | 105   | 89.9  | 94.6  | 89.6  | 81.5  | 82.7  | 94.1  | 97.8   |
| SLC5A5   | 91.5  | 101.1 | 92.1  | 80.2  | 88.5  | 94.5  | 103.4 | 97.1   |
| SLC5A6   | 805.9 | 964.1 | 937.5 | 521.6 | 384.1 | 695.9 | 542.6 | 1011.2 |
| SLC5A7   | 82.3  | 90    | 90.8  | 86.4  | 84.3  | 88.3  | 77.6  | 84.5   |
| SLC5A8   | 166.9 | 187.3 | 109.9 | 129.4 | 133.1 | 122.6 | 166.1 | 197.6  |
| SLC5A9   | 99.7  | 101.5 | 96.5  | 98.4  | 95.8  | 94.1  | 97.5  | 103.5  |
| SLC6A1   | 86.3  | 90.1  | 86.3  | 81    | 78.3  | 78.6  | 83.2  | 97     |
| SLC6A11  | 100.5 | 114   | 87.8  | 92.8  | 83.8  | 90.2  | 109.6 | 99.5   |
| SLC6A12  | 104   | 117.7 | 112.6 | 96.1  | 95.8  | 99.9  | 110.6 | 110.2  |
| SLC6A13  | 158.6 | 197.2 | 129.8 | 111.3 | 103   | 121.8 | 158.3 | 166.4  |
| SLC6A14  | 81.6  | 84.2  | 99.2  | 84.8  | 91.4  | 88.3  | 80.6  | 83.8   |
| SLC6A15  | 98.6  | 126.3 | 108.2 | 99.1  | 102.1 | 102.1 | 115.4 | 116.1  |
| SLC6A15  | 95.2  | 102.7 | 95.5  | 87.5  | 82.4  | 93.7  | 99.3  | 93.6   |
| SLC6A15  | 78.6  | 81.5  | 88.6  | 90.6  | 88.8  | 91.4  | 85.3  | 74.4   |
| SLC6A16  | 123   | 142.9 | 96.8  | 93.7  | 88.5  | 99.8  | 109.6 | 132.7  |
| SLC6A17  | 87.7  | 108.5 | 94.6  | 82.9  | 80.9  | 79.9  | 100.7 | 93.1   |
| SLC6A18  | 129   | 167.8 | 113.5 | 92.3  | 97.5  | 110.1 | 121.4 | 129.4  |
| SLC6A19  | 96.1  | 103.8 | 83.6  | 84.5  | 72.3  | 76    | 101.2 | 100.4  |
| SLC6A2   | 119   | 136.2 | 102.3 | 111.3 | 88.6  | 104.7 | 119.7 | 135.6  |
| SLC6A20  | 87.8  | 100.2 | 99.7  | 100.1 | 91.4  | 94    | 93.2  | 91.4   |
| SLC6A20  | 97.3  | 89.3  | 80.1  | 80.9  | 76.5  | 81.4  | 85.7  | 94.3   |
| SLC6A20  | 98.2  | 114.2 | 98.2  | 92    | 91.3  | 95.1  | 94.5  | 108.2  |
| SLC6A3   | 110.8 | 125.8 | 109.2 | 93.4  | 91    | 101.8 | 104.7 | 106    |
| SLC6A4   | 73.6  | 84.3  | 98.8  | 91.9  | 79.1  | 87.3  | 83.8  | 87.7   |

|          |        |        |        |        |       |        |        |        |
|----------|--------|--------|--------|--------|-------|--------|--------|--------|
| SLC6A5   | 86.7   | 104.1  | 83.5   | 80.1   | 75.9  | 79.7   | 80.8   | 99.8   |
| SLC6A6   | 80.4   | 113.2  | 104    | 94.5   | 90.8  | 92.7   | 104.9  | 110.1  |
| SLC6A7   | 115.2  | 160.1  | 95     | 79.2   | 77.6  | 82.8   | 114.9  | 128.6  |
| SLC6A8   | 102.5  | 126.7  | 133.2  | 143.8  | 130.9 | 201.8  | 114.3  | 127.7  |
| SLC6A9   | 85.4   | 94     | 110.2  | 93.1   | 91.7  | 90.6   | 85.1   | 94.3   |
| SLC6A9   | 111.4  | 137.8  | 103.3  | 87.2   | 84.8  | 93     | 127.7  | 134    |
| SLC6A9   | 87.5   | 105.1  | 100.7  | 84.5   | 91.6  | 81.9   | 94.8   | 109.7  |
| SLC7A1   | 1771.6 | 2617.9 | 1137.1 | 1288.4 | 856.2 | 1291.2 | 1786.6 | 2084.2 |
| SLC7A10  | 108.6  | 129.1  | 122.3  | 125.9  | 108.6 | 125.8  | 110.7  | 112.6  |
| SLC7A11  | 106.9  | 135.2  | 111.2  | 105.1  | 103.5 | 116.8  | 290.2  | 464.2  |
| SLC7A13  | 74.1   | 92.2   | 94.7   | 77.5   | 81.8  | 82.2   | 81.3   | 82.1   |
| SLC7A14  | 89.8   | 84.6   | 97.8   | 85.6   | 75.7  | 85.2   | 80.1   | 89.7   |
| SLC7A2   | 92.6   | 101.5  | 95     | 85.6   | 77.9  | 84.2   | 95     | 99.9   |
| SLC7A2   | 82     | 103.8  | 85.5   | 89.7   | 78.6  | 77.7   | 91     | 92.7   |
| SLC7A2   | 290.2  | 437.1  | 260.4  | 147    | 108.4 | 138.1  | 242.1  | 384    |
| SLC7A3   | 79.2   | 96.7   | 96.9   | 100.7  | 89.7  | 92.8   | 90.6   | 93.5   |
| SLC7A3   | 92.8   | 110.5  | 92.6   | 89     | 68.9  | 82.8   | 88.5   | 106.5  |
| SLC7A4   | 109.4  | 115.6  | 88.1   | 88.9   | 84.8  | 91.2   | 111.8  | 110.9  |
| SLC7A5   | 2416.9 | 2880.3 | 2245.1 | 1078.3 | 652.4 | 907.7  | 2796.9 | 3378   |
| SLC7A6   | 321.8  | 403.3  | 254.7  | 185.5  | 184.5 | 230.8  | 287.5  | 422.7  |
| SLC7A6   | 324    | 442.4  | 229.3  | 147.1  | 124.9 | 174    | 292.6  | 378.1  |
| SLC7A6OS | 242.1  | 362.9  | 157.4  | 138.6  | 142.9 | 154.6  | 236.8  | 275.5  |
| SLC7A7   | 1001   | 1472.6 | 805.3  | 720.2  | 595.5 | 935.1  | 826.8  | 1314.4 |
| SLC7A8   | 81.4   | 96.7   | 86.4   | 85.8   | 76.7  | 80.9   | 86.3   | 109.2  |
| SLC7A8   | 98.3   | 97.1   | 102.7  | 96.3   | 98.6  | 100.3  | 96.4   | 109.2  |
| SLC7A8   | 135.8  | 161    | 104    | 100.3  | 87.5  | 100.4  | 135.1  | 154.3  |
| SLC7A9   | 173.7  | 174.1  | 126.4  | 118.3  | 134.1 | 131.6  | 146    | 169.6  |
| SLC8A1   | 118.4  | 134.6  | 96.9   | 89.5   | 84    | 98.6   | 104    | 117.3  |
| SLC8A2   | 87.9   | 118.9  | 94.5   | 92.5   | 94.3  | 102.2  | 94.6   | 98.5   |
| SLC8A3   | 89.2   | 98.5   | 95.3   | 85.3   | 83    | 92.5   | 90.5   | 94.9   |
| SLC8A3   | 94.4   | 103.7  | 99.5   | 90.5   | 88.1  | 96.3   | 97.5   | 97.5   |
| SLC8A3   | 73.4   | 81     | 89.3   | 72     | 81.2  | 79.5   | 76.1   | 87.1   |
| SLC9A1   | 473.8  | 613.2  | 477.2  | 391.9  | 373.6 | 407.7  | 475.3  | 477.7  |
| SLC9A10  | 81.6   | 89.9   | 106.8  | 93.6   | 84.8  | 88.3   | 90.8   | 83.2   |
| SLC9A11  | 76.1   | 87.1   | 92.2   | 88.2   | 90.7  | 83.7   | 77.5   | 80.6   |
| SLC9A2   | 110.2  | 127.1  | 85.9   | 91.6   | 81.6  | 90.4   | 103.8  | 132.6  |
| SLC9A3   | 108.5  | 128.8  | 94.6   | 90.5   | 80.6  | 99.8   | 101.2  | 148    |
| SLC9A3R1 | 1055.7 | 1395.9 | 608.8  | 513.5  | 430.9 | 542.8  | 839    | 698.1  |
| SLC9A3R2 | 99.8   | 123.8  | 87.7   | 80.6   | 84.8  | 86.1   | 109.7  | 128.8  |
| SLC9A4   | 556.1  | 389.4  | 738.2  | 195.1  | 149   | 342.5  | 365.7  | 957.3  |
| SLC9A5   | 103    | 113.2  | 101.3  | 95.1   | 89.9  | 95.6   | 108    | 122.9  |
| SLC9A6   | 82.8   | 96.8   | 88     | 79.1   | 81.9  | 79.1   | 91.3   | 109.3  |
| SLC9A6   | 84.8   | 96     | 97.1   | 93     | 95.7  | 93.9   | 86.1   | 96.7   |
| SLC9A6   | 449.3  | 626.6  | 380.6  | 376.2  | 323.6 | 509.5  | 434.7  | 831.2  |
| SLC9A7   | 127.9  | 154.3  | 97.6   | 100.3  | 85.2  | 99.9   | 110.7  | 149.1  |
| SLC9A8   | 146.2  | 166.4  | 171.1  | 148.6  | 129.8 | 162.9  | 147.5  | 233.6  |
| SLC9A9   | 83.6   | 97.4   | 91.3   | 104.5  | 90.1  | 86     | 84.2   | 100.4  |
| SLCO1A2  | 77.5   | 85.4   | 81.3   | 75     | 84.4  | 80.8   | 78.5   | 82.9   |
| SLCO1A2  | 80.8   | 93.9   | 99     | 80.8   | 86.2  | 79.7   | 94.5   | 89.9   |
| SLCO1A2  | 79.1   | 95.7   | 86.7   | 81.9   | 77.8  | 78.1   | 72.7   | 88.3   |

|         |        |        |       |        |       |        |        |        |
|---------|--------|--------|-------|--------|-------|--------|--------|--------|
| SLCO1A2 | 84.9   | 88.7   | 103.8 | 94.3   | 85.7  | 92.4   | 82.6   | 83.4   |
| SLCO1A2 | 122.1  | 136.1  | 86.5  | 81.6   | 76    | 92.8   | 117.8  | 135.7  |
| SLCO1B1 | 69.6   | 81.1   | 89.3  | 77     | 76.7  | 79.5   | 77.3   | 70.3   |
| SLCO1B3 | 91.5   | 91.7   | 83.1  | 82.7   | 73.1  | 74.1   | 77.6   | 89.5   |
| SLCO1C1 | 81.6   | 95.2   | 87.9  | 78.4   | 70.9  | 86.8   | 78.8   | 95     |
| SLCO2A1 | 89     | 98     | 91.1  | 86.5   | 85.5  | 91.7   | 89     | 96.4   |
| SLCO2B1 | 82.8   | 101.5  | 95.8  | 112.3  | 100.7 | 102.6  | 93.7   | 94     |
| SLCO3A1 | 110.1  | 129    | 105.2 | 98.6   | 88    | 88.5   | 113.2  | 134.8  |
| SLCO3A1 | 161.5  | 223.2  | 140.3 | 136.4  | 128.9 | 141.5  | 179.2  | 203.1  |
| SLCO4A1 | 219.5  | 284.6  | 302.7 | 183.1  | 171.5 | 202.4  | 176.7  | 264.6  |
| SLCO4C1 | 97.9   | 99.7   | 96.4  | 99.8   | 104.3 | 125.9  | 104.3  | 109.7  |
| SLCO5A1 | 100.2  | 97     | 107.5 | 98     | 84.1  | 81     | 89.9   | 94.9   |
| SLCO6A1 | 78     | 96.2   | 87.8  | 80.1   | 78.6  | 81.2   | 93.1   | 100.3  |
| SLD5    | 962.5  | 1059.3 | 527.1 | 276.6  | 227.9 | 176.7  | 806.6  | 1085.7 |
| SLFN11  | 679.4  | 859.9  | 328   | 297.3  | 267.4 | 467.6  | 605.7  | 1122.8 |
| SLFN13  | 96.9   | 104.7  | 105.9 | 97.1   | 104.4 | 102.9  | 86.6   | 94.4   |
| SLIC1   | 161.9  | 205.2  | 104.2 | 101.2  | 104.9 | 100.5  | 128.4  | 138.2  |
| SLIC1   | 121.3  | 154.4  | 122   | 113.4  | 108.5 | 104.9  | 109.8  | 103    |
| SLIT1   | 119.4  | 142.8  | 111.9 | 104    | 88.3  | 101.5  | 115    | 133.6  |
| SLIT2   | 110.8  | 135.7  | 111.1 | 88.4   | 83.6  | 97.1   | 98.7   | 115.7  |
| SLIT3   | 72.8   | 77.8   | 100.1 | 94.3   | 86    | 89.2   | 71.7   | 85.4   |
| SLITL2  | 107.3  | 123.2  | 104   | 115    | 108.2 | 108.5  | 112.4  | 138.9  |
| SLITRK1 | 89.5   | 93.2   | 94    | 81.4   | 85.7  | 77.4   | 88.1   | 94.2   |
| SLITRK2 | 98.7   | 114.7  | 84    | 74.5   | 82.4  | 77.4   | 97.2   | 108    |
| SLITRK3 | 97.4   | 112    | 105.9 | 93.8   | 92.9  | 90.7   | 97.4   | 98.4   |
| SLITRK4 | 519.9  | 693.6  | 340.8 | 386.5  | 329.2 | 568.7  | 463.4  | 604.6  |
| SLITRK5 | 188.3  | 218    | 113.5 | 116.2  | 113.3 | 123    | 125.6  | 128.7  |
| SLITRK6 | 95.3   | 102.9  | 95.3  | 95.7   | 100.1 | 93.4   | 98.8   | 99     |
| SLK     | 316.4  | 374.2  | 158.6 | 210.2  | 175.8 | 293    | 296.6  | 464.9  |
| SLMAP   | 962.9  | 1341.8 | 590.8 | 689.9  | 531.2 | 983.1  | 983.1  | 1441.7 |
| SLMO1   | 422.3  | 433.7  | 284.2 | 183.2  | 152.2 | 208.7  | 343.1  | 484.2  |
| SLN     | 85.4   | 103.4  | 94.1  | 95.8   | 88.5  | 91.8   | 87.8   | 109.3  |
| SLPI    | 581.9  | 737.8  | 400.6 | 530.1  | 396.2 | 590.6  | 366.3  | 505.4  |
| SLTM    | 1428.7 | 1675   | 974.2 | 1126.2 | 1089  | 1668.4 | 1140.1 | 1637   |
| SLTM    | 1255.6 | 1573   | 540.6 | 524.1  | 510.8 | 726.6  | 902.5  | 1206.7 |
| SLTM    | 429.8  | 685.5  | 176.7 | 158.8  | 129.6 | 149.8  | 375.8  | 604.7  |
| SLU7    | 664.6  | 810.3  | 527.3 | 613.7  | 492.4 | 1087.3 | 657.4  | 1342.2 |
| SLURP1  | 97.2   | 116.5  | 96.3  | 91.3   | 81.3  | 88.7   | 92.1   | 103.4  |
| SMA4    | 301.2  | 331.7  | 135.9 | 219.9  | 191.8 | 176.3  | 242.1  | 403.5  |
| SMA5    | 89.6   | 101.6  | 95.3  | 84.5   | 84.8  | 83.8   | 96.4   | 107.9  |
| SMAD1   | 127.4  | 160.1  | 103.9 | 91.3   | 86.8  | 88.2   | 119.4  | 138.3  |
| SMAD1   | 87.1   | 94.8   | 80    | 78.2   | 76.7  | 76     | 88.1   | 89.9   |
| SMAD2   | 166.1  | 226.2  | 188.3 | 180.3  | 151.6 | 184.2  | 154.7  | 209.8  |
| SMAD2   | 99.2   | 125.1  | 94.1  | 88.4   | 86.2  | 89.2   | 110.2  | 135.9  |
| SMAD3   | 271    | 347.4  | 240.8 | 394.9  | 355.6 | 549.1  | 214.1  | 314.4  |
| SMAD4   | 1091.2 | 1439.5 | 888.9 | 899.8  | 752.5 | 1271.3 | 989.2  | 1667.3 |
| SMAD5   | 97.1   | 99.7   | 93.6  | 92.2   | 89.9  | 90.1   | 95.9   | 100    |
| SMAD5   | 101.1  | 102.9  | 99.5  | 85.5   | 83.6  | 95.4   | 99.2   | 117.8  |
| SMAD5   | 1062.7 | 1358.8 | 588.7 | 862    | 593.1 | 934.7  | 725.1  | 1236.7 |
| SMAD6   | 513.7  | 651.1  | 290.2 | 317.3  | 255.2 | 349.9  | 492.7  | 518    |

|          |        |         |         |         |         |        |        |         |
|----------|--------|---------|---------|---------|---------|--------|--------|---------|
| SMAD7    | 127.8  | 134.4   | 96.5    | 117.9   | 93      | 109.2  | 121.1  | 177.5   |
| SMAD9    | 100.8  | 112.2   | 88.8    | 86.8    | 82.8    | 87.1   | 93.9   | 124.5   |
| SMAF1    | 119.8  | 134.9   | 102.4   | 92.6    | 95.6    | 93.2   | 111.7  | 125.1   |
| SMAP     | 246    | 298.7   | 126     | 123.2   | 107.4   | 133.1  | 241.1  | 445.6   |
| SMAP1    | 519.3  | 675.6   | 556.7   | 703     | 504.2   | 937    | 452.5  | 819.6   |
| SMAP1    | 276.8  | 329.9   | 137     | 140.1   | 128.6   | 168.8  | 209.8  | 267.2   |
| SMAP1L   | 16273  | 20886.3 | 11637.8 | 12717.8 | 11424.9 | 13460  | 13551  | 13113.8 |
| SMARCA1  | 90.5   | 86.9    | 96.8    | 87.5    | 84.8    | 79.8   | 81.5   | 90.5    |
| SMARCA2  | 87.7   | 103.8   | 99.5    | 89.8    | 83.4    | 88     | 86.2   | 93.8    |
| SMARCA2  | 1951.7 | 2898.9  | 1255.6  | 1679.3  | 1601    | 2900.9 | 1893   | 2407.3  |
| SMARCA3  | 270.1  | 310.7   | 135.7   | 137.5   | 110.4   | 195.2  | 163.7  | 240     |
| SMARCA3  | 607.9  | 697.3   | 437.8   | 619.7   | 478.9   | 1075.6 | 507.7  | 908.2   |
| SMARCA4  | 3320.4 | 4233.4  | 1840.4  | 1443.6  | 1099.6  | 1280   | 2534.6 | 2489.1  |
| SMARCA5  | 627.8  | 718.8   | 209.2   | 183.7   | 138.6   | 306.7  | 534.3  | 1141.1  |
| SMARCAD1 | 299.1  | 368.5   | 230.9   | 224     | 150.9   | 331.8  | 254.1  | 405.4   |
| SMARCAL1 | 480.3  | 629.7   | 381.3   | 396.9   | 336.3   | 465    | 404.9  | 502.8   |
| SMARCB1  | 320.1  | 460.6   | 423.4   | 279.9   | 215.1   | 341.6  | 302.2  | 517     |
| SMARCB1  | 679.5  | 742     | 491.7   | 381.7   | 341     | 582.4  | 526.3  | 1388    |
| SMARCC1  | 1476.5 | 2244.6  | 1140.3  | 1696.5  | 1218.6  | 2671   | 1302.8 | 2575.1  |
| SMARCC2  | 142.7  | 170.6   | 99.5    | 96.1    | 90      | 115.3  | 146.4  | 159.3   |
| SMARCC2  | 335.7  | 333.4   | 449.9   | 818.9   | 644.8   | 682.6  | 291.8  | 498.7   |
| SMARCC2  | 112    | 121.8   | 155.5   | 197.9   | 189     | 239    | 100.1  | 133.7   |
| SMARCD1  | 90.2   | 112.5   | 94.3    | 81.5    | 90.6    | 88     | 96.7   | 108.8   |
| SMARCD1  | 769.6  | 932.9   | 597.4   | 581.3   | 483.3   | 734.2  | 623    | 1011.7  |
| SMARCD2  | 625.9  | 844.4   | 491.7   | 317.5   | 275.6   | 334.7  | 470.7  | 699.1   |
| SMARCD3  | 121.5  | 158.6   | 99.5    | 115.2   | 102.9   | 134.5  | 116.4  | 171.2   |
| SMARCD3  | 93     | 99.9    | 94.7    | 85.2    | 87.8    | 82.9   | 87.9   | 100     |
| SMARCD3  | 295.3  | 361.5   | 219.4   | 260.8   | 232     | 317.8  | 319.6  | 402.9   |
| SMARCE1  | 865.1  | 1119.5  | 307.2   | 418.3   | 272     | 491    | 750.2  | 1160.5  |
| SMBP     | 662.6  | 768.6   | 239.9   | 204.5   | 154.2   | 251.8  | 551.5  | 890.2   |
| SMC1L1   | 98     | 122.6   | 113.8   | 120.8   | 117.9   | 148    | 108.2  | 112.5   |
| SMC1L2   | 109.1  | 121.2   | 112.4   | 110.2   | 99.3    | 109.1  | 112.8  | 124.7   |
| SMC2     | 266.7  | 322.3   | 155     | 138.4   | 130.3   | 122    | 195.8  | 246.1   |
| SMC2     | 712.9  | 836.8   | 458.6   | 484.5   | 392     | 837.7  | 547.8  | 725.4   |
| SMC2L1   | 728.3  | 887.7   | 380.7   | 301.8   | 267     | 601    | 527.5  | 868.8   |
| SMC3     | 144.3  | 166     | 112.2   | 93.9    | 91.3    | 113    | 142.2  | 290.8   |
| SMC4     | 3986.1 | 4789.2  | 1980.6  | 2379.5  | 2043.3  | 3416.2 | 3518.3 | 6633.8  |
| SMC4     | 406.8  | 577     | 136.3   | 111.3   | 129.8   | 113.1  | 432.4  | 524.8   |
| SMC4L1   | 140.8  | 189     | 126.3   | 103.1   | 120.3   | 101.3  | 133    | 168.5   |
| SMC5L1   | 89.3   | 93.1    | 86.8    | 84.2    | 82.8    | 76.4   | 85.3   | 98.4    |
| SMC6L1   | 116    | 123.9   | 90.1    | 94.2    | 85.8    | 85.2   | 106.1  | 132     |
| SMCP     | 116.6  | 163     | 86.8    | 86.1    | 93.6    | 86.4   | 112.2  | 131.2   |
| SMCR7    | 87.1   | 90.7    | 91.8    | 85.6    | 75.7    | 85.1   | 82.3   | 88.2    |
| SMCR7    | 96.9   | 107.2   | 93.5    | 93.1    | 89.3    | 93.9   | 93.9   | 101.2   |
| SMCR8    | 95.7   | 97.2    | 92.8    | 77.9    | 80      | 79.3   | 83.2   | 102     |
| SMCX     | 114.7  | 128.3   | 114.6   | 109.8   | 104.7   | 120.2  | 105    | 139.2   |
| SMCY     | 274.8  | 295.3   | 268.8   | 261.1   | 305.4   | 417.7  | 202.4  | 276.2   |
| SMEK2    | 1381.4 | 1829.7  | 756.4   | 1064.7  | 589.8   | 1207.3 | 1215.4 | 2023.5  |
| SMEK3P   | 88.3   | 95.5    | 99.9    | 87.2    | 84.5    | 86.4   | 91.2   | 92.3    |
| SMG1     | 439.3  | 833.5   | 366.3   | 641.3   | 537     | 1183   | 573.7  | 832.7   |

|         |        |        |        |        |        |        |        |        |
|---------|--------|--------|--------|--------|--------|--------|--------|--------|
| SMG5    | 812    | 915.2  | 559.9  | 443.7  | 368.4  | 572.8  | 806.9  | 1045.3 |
| SMG6    | 118.4  | 120.7  | 106.5  | 95.6   | 90.5   | 94.7   | 101.8  | 117.9  |
| SMG7    | 212.2  | 284.6  | 192.7  | 190    | 181.8  | 203.7  | 219.6  | 252.1  |
| SMG7    | 106.6  | 123.9  | 111.5  | 99.3   | 90.6   | 98     | 101.7  | 92.8   |
| SMG7    | 389.6  | 536.9  | 512    | 773.1  | 565.3  | 1216.2 | 394.7  | 1111.2 |
| SMN1    | 78.2   | 91.5   | 85.4   | 74.3   | 74.3   | 79.5   | 82.3   | 85.6   |
| SMN2    | 188.2  | 206.9  | 146.1  | 131.2  | 118.8  | 131.2  | 164    | 221.1  |
| SMNDC1  | 1195.9 | 1318.5 | 646.5  | 492.5  | 406.3  | 553.8  | 1090.8 | 1926.7 |
| SMO     | 115.1  | 140.6  | 113.5  | 109.3  | 107.5  | 122.3  | 118.6  | 129.7  |
| SMOC1   | 68.2   | 77.7   | 75     | 72.3   | 77.3   | 73.8   | 72.1   | 78.9   |
| SMOC1   | 94.2   | 103    | 97.6   | 91.9   | 86     | 91.2   | 85.7   | 95.5   |
| SMOC2   | 101.5  | 105.3  | 95.3   | 88.9   | 82.6   | 91.9   | 94.8   | 96.5   |
| SMOX    | 171.1  | 201.7  | 131    | 123.4  | 121.4  | 129.8  | 160.8  | 191.5  |
| SMOX    | 108.3  | 115.6  | 109.3  | 90.4   | 87.9   | 110.1  | 125.8  | 161.2  |
| SMOX    | 76.4   | 82.6   | 95.1   | 86.8   | 84.6   | 92.7   | 75.8   | 83     |
| SMPD1   | 153.4  | 226.8  | 152.3  | 133.3  | 122.5  | 130    | 160.9  | 161.1  |
| SMPD1   | 125.8  | 145.6  | 105.1  | 85.8   | 92.1   | 90.4   | 127.5  | 195.3  |
| SMPD2   | 219    | 281.9  | 208.3  | 160.2  | 169.5  | 189.3  | 186.9  | 257.3  |
| SMPD3   | 96.4   | 112.6  | 103.4  | 102.9  | 114.1  | 92     | 102.8  | 99.5   |
| SMPDL3A | 94.5   | 105.7  | 110.6  | 105    | 97.7   | 108.4  | 109.5  | 159.7  |
| SMPDL3B | 93.7   | 96.3   | 103    | 108.2  | 104.6  | 101.9  | 87.4   | 80.5   |
| SMPDL3B | 93.4   | 104.5  | 85.6   | 100.9  | 92.6   | 101.2  | 91.4   | 95.6   |
| SMPDL3B | 108.8  | 124.3  | 100.9  | 88.7   | 93.7   | 90.3   | 107.8  | 114.7  |
| SMPX    | 72.9   | 79.8   | 81.1   | 89.4   | 86.6   | 73.8   | 83.6   | 84.6   |
| SMR3A   | 84.3   | 84.7   | 82.9   | 85.4   | 81.7   | 82.6   | 83.4   | 83.3   |
| SMR3B   | 80.4   | 94.1   | 91.7   | 80     | 84.4   | 91.8   | 83.7   | 90.8   |
| SMS     | 1863.8 | 2485.4 | 924.5  | 997.7  | 746.6  | 1486.1 | 1283.7 | 1794.7 |
| SMTN    | 126.3  | 132.8  | 102.5  | 97.3   | 81.2   | 84.7   | 119    | 136.2  |
| SMTN    | 78.6   | 89.1   | 90.9   | 88.6   | 91.3   | 94.9   | 82.4   | 103.5  |
| SMTN    | 208.7  | 223.2  | 261.8  | 211.8  | 199.6  | 289.8  | 176.8  | 298    |
| SMU1    | 371.1  | 507.5  | 189.8  | 137.4  | 135.6  | 154.8  | 290.4  | 375.4  |
| SMUG1   | 808.4  | 1037.7 | 418.3  | 528.7  | 427.9  | 544.5  | 683.1  | 906.2  |
| SMURF1  | 116    | 125.7  | 115.2  | 104.8  | 104.5  | 121.5  | 96.1   | 104.1  |
| SMURF1  | 94.8   | 93.9   | 105.4  | 93.7   | 81.3   | 93.9   | 96.7   | 104.7  |
| SMURF2  | 107.9  | 129.3  | 111.2  | 109.5  | 85.8   | 102.2  | 102.2  | 122.7  |
| SMYD1   | 75.8   | 82.5   | 72.7   | 65.8   | 74.1   | 78.1   | 73.8   | 79     |
| SMYD2   | 504.9  | 668.6  | 236.5  | 279.1  | 241.6  | 341.2  | 344.7  | 614.1  |
| SMYD3   | 6614.9 | 8255.6 | 2780.4 | 2279.4 | 1709.7 | 2571.3 | 6717.7 | 9427.7 |
| SMYD4   | 269.3  | 315.2  | 223.7  | 220.3  | 196.5  | 261.8  | 246.2  | 426    |
| SMYD5   | 106.7  | 116.1  | 111.2  | 97.2   | 99.9   | 97.9   | 95.8   | 125.3  |
| SN      | 90.8   | 103.8  | 86.5   | 87.3   | 89.4   | 90.3   | 96.2   | 99.5   |
| SNAG1   | 110.2  | 120.4  | 103.7  | 89.4   | 83.4   | 98.2   | 105    | 132.3  |
| SNAI1   | 85.1   | 81     | 87.4   | 88.7   | 81.1   | 86.5   | 75.7   | 87.3   |
| SNAI2   | 103.3  | 114.4  | 104.2  | 82.4   | 85.2   | 89.2   | 108    | 186.3  |
| SNAI3   | 104.1  | 126.5  | 117.9  | 107.4  | 101.8  | 109.2  | 100.9  | 171.9  |
| SNAP23  | 852.3  | 1104.9 | 260    | 287.6  | 222    | 268.8  | 552    | 781.9  |
| SNAP23  | 323.8  | 373.8  | 165.4  | 210.3  | 171.2  | 244    | 316.7  | 509.7  |
| SNAP25  | 157.5  | 187.4  | 107    | 106.3  | 94.3   | 113.8  | 147.9  | 174.7  |
| SNAP25  | 145.5  | 174.2  | 130.9  | 116.7  | 102.4  | 122.5  | 141.1  | 175.1  |
| SNAP29  | 404.5  | 629    | 259.6  | 327.1  | 242.8  | 352.6  | 400.7  | 580.3  |

|          |         |         |         |         |         |         |         |         |
|----------|---------|---------|---------|---------|---------|---------|---------|---------|
| SNAP91   | 115.4   | 120.1   | 96.2    | 152.7   | 167.2   | 180.5   | 102.2   | 108.4   |
| SNAPAP   | 246.4   | 264.9   | 135.7   | 104.6   | 98.9    | 117.1   | 198.3   | 286.3   |
| SNAPC1   | 217.2   | 225.5   | 152.8   | 194.6   | 207.5   | 183.9   | 213.7   | 217.2   |
| SNAPC2   | 534.6   | 649.4   | 359.5   | 270.7   | 253.4   | 234.1   | 592.2   | 656.7   |
| SNAPC3   | 81.9    | 109.1   | 78.6    | 72.7    | 67.4    | 81.5    | 88.4    | 104.4   |
| SNAPC4   | 1289.9  | 1547.1  | 1197.6  | 923.4   | 901.6   | 938.7   | 956.3   | 891.5   |
| SNAPC5   | 449.1   | 567.3   | 193.4   | 183.6   | 149.4   | 210.6   | 375.3   | 472.4   |
| SNCA     | 103     | 115     | 122.2   | 96.5    | 84.2    | 91.7    | 109.8   | 148.4   |
| SNCA     | 85.2    | 87.1    | 92.4    | 87.9    | 80.4    | 83.5    | 90.6    | 98.1    |
| SNCAIP   | 96.5    | 105.1   | 87.5    | 82.4    | 79.7    | 78.3    | 105.4   | 108.5   |
| SNCB     | 92.4    | 108.4   | 93.9    | 70.6    | 87.3    | 82.3    | 89      | 97.8    |
| SNCB     | 92.2    | 98.9    | 104.5   | 96.9    | 87.4    | 84.5    | 90.7    | 93.1    |
| SNCG     | 92.3    | 104.1   | 92.9    | 83.3    | 74.8    | 88.1    | 90.5    | 101     |
| SND1     | 898.7   | 1251.2  | 1149.3  | 1428.7  | 1154    | 1911.8  | 759.7   | 1281.7  |
| SNF1LK   | 116.2   | 144.3   | 113.3   | 114.4   | 108.7   | 112.5   | 113.7   | 147.7   |
| SNF1LK2  | 106.6   | 122.7   | 103.1   | 105.9   | 89.2    | 104.9   | 108.8   | 124.8   |
| SNF8     | 1068    | 1134.5  | 329.7   | 361.6   | 272.7   | 346.2   | 1024.4  | 771     |
| SNFT     | 527.7   | 643.9   | 366.5   | 194.4   | 181.6   | 216.9   | 467.8   | 419.9   |
| SNHG10   | 99.6    | 117.5   | 100.3   | 89.9    | 86.6    | 86.2    | 109.2   | 97.2    |
| SNHG3    | 82.3    | 102.2   | 94.5    | 82.4    | 84.3    | 77      | 93.9    | 100.2   |
| SNHG3-RC | 175.2   | 233.1   | 86      | 78.8    | 89.2    | 84.7    | 153.5   | 185.9   |
| SNHG5    | 11639.1 | 12238.7 | 5947.7  | 6672.9  | 4651.7  | 8341.8  | 8553.7  | 9269.2  |
| SNHG8    | 107.5   | 125.8   | 100.2   | 101     | 83.9    | 91      | 96      | 113.5   |
| SNIP     | 86.5    | 102     | 92.2    | 80.3    | 72.9    | 92.4    | 91.4    | 94.6    |
| SNIP1    | 461.1   | 557.5   | 203.1   | 245.5   | 196.2   | 248.4   | 381.8   | 517.3   |
| SNN      | 174     | 217.8   | 105.2   | 121.2   | 93.7    | 105.8   | 162     | 199.1   |
| SNORA32  | 169.7   | 151     | 131.9   | 122.8   | 106.8   | 169.3   | 114     | 155.7   |
| SNORD107 | 78.5    | 88.3    | 88.3    | 80      | 82.2    | 83.7    | 79.7    | 81.9    |
| SNORD116 | 90.5    | 81.6    | 96.5    | 87.4    | 91.8    | 83.8    | 80.5    | 92.4    |
| SNORD116 | 82.5    | 89.7    | 97.2    | 84.9    | 92.6    | 90.6    | 87.9    | 86.1    |
| SNORD36A | 333.8   | 332.3   | 143.2   | 125.6   | 110.8   | 141.8   | 232.1   | 338.6   |
| SNORD36C | 296.3   | 268.3   | 142     | 123.2   | 104.8   | 151.2   | 181.6   | 337.2   |
| SNORD48  | 496.6   | 409.3   | 266.1   | 180.4   | 203.9   | 174.5   | 258.1   | 331.5   |
| SNORD56  | 250.5   | 266.3   | 224.5   | 177.2   | 160     | 213.9   | 169     | 257.4   |
| SNPH     | 110.3   | 129.3   | 101.4   | 84.7    | 91.1    | 99.9    | 111     | 133.3   |
| SNRK     | 1334.7  | 2008.7  | 846     | 1149.1  | 1057.5  | 1761.8  | 1159.1  | 1724.5  |
| SNRP70   | 543.5   | 704.1   | 335.5   | 262.5   | 238.6   | 344.6   | 458.8   | 718.7   |
| SNRP70   | 4568.7  | 5768.7  | 3288.8  | 2845.3  | 2501.8  | 3350.4  | 4228.1  | 6694.6  |
| SNRP70   | 93.6    | 94.8    | 95.1    | 97.7    | 98.8    | 92.5    | 96.7    | 103.5   |
| SNRPA    | 1261.2  | 1606    | 822.2   | 602.7   | 493     | 713.4   | 1025.1  | 1436.8  |
| SNRPA1   | 7092.9  | 9181.6  | 5084.1  | 3730.4  | 2760.7  | 4158.7  | 5907.6  | 8254    |
| SNRPB    | 5632.5  | 7008.5  | 3511.7  | 1887.4  | 1345.9  | 1473.7  | 6184.9  | 5784.9  |
| SNRPB    | 5210.2  | 6368.1  | 4608.6  | 2402.5  | 1883.9  | 2854.4  | 4671.4  | 6067.6  |
| SNRPB2   | 4534.9  | 5507    | 2885.1  | 2765.9  | 2040.2  | 3263.9  | 3895.2  | 5325.6  |
| SNRPB2   | 1466.4  | 1727.3  | 1033.9  | 899.5   | 695.1   | 997.2   | 1038.3  | 1245.2  |
| SNRPC    | 3725.4  | 4467.2  | 1890.9  | 2001.1  | 1467.1  | 2275.9  | 3024.4  | 5256.4  |
| SNRPD1   | 769     | 990.1   | 271.1   | 223.3   | 192.2   | 235.8   | 573.7   | 845.6   |
| SNRPD2   | 202.1   | 240.6   | 111     | 97.1    | 89.5    | 91      | 223.7   | 191     |
| SNRPD2   | 25875.3 | 27420.5 | 23885.8 | 17904.1 | 16834.9 | 21302.8 | 23077.8 | 23862.7 |
| SNRPD3   | 716.4   | 998     | 356.5   | 273.7   | 241.8   | 164.3   | 629     | 1029.3  |



|       |         |         |         |         |         |         |         |         |
|-------|---------|---------|---------|---------|---------|---------|---------|---------|
| SNRPE | 107.9   | 106.7   | 97.9    | 94.4    | 81.7    | 94.3    | 103.6   | 105.3   |
| SNRPF | 12040   | 14130.9 | 9120    | 8155    | 6418.1  | 8594.5  | 9097.8  | 12691.8 |
| SNRPG | 22486.1 | 22693.1 | 20637.7 | 19053.5 | 11950.8 | 18569.9 | 22128.2 | 25970.1 |
| SNRPN | 3436.2  | 4679.6  | 2088.2  | 1561    | 1383.1  | 1511.4  | 3267.4  | 3416.4  |
| SNRPN | 82.2    | 90.2    | 92.2    | 90.2    | 80.7    | 85.2    | 84.2    | 87.9    |
| SNTA1 | 190     | 231.7   | 172.4   | 177.9   | 161.8   | 203.9   | 194.8   | 248.6   |
| SNTB1 | 926     | 1267.7  | 648.4   | 464.5   | 433     | 611.5   | 712.9   | 847     |
| SNTB2 | 94.3    | 110.1   | 87.1    | 86.7    | 80      | 83.3    | 97.9    | 113.8   |
| SNTB2 | 194.1   | 269     | 153.5   | 130.2   | 116.4   | 127.4   | 232.6   | 299.2   |
| SNTG1 | 70.9    | 82.8    | 84.4    | 77.6    | 76.1    | 85.1    | 76.4    | 74.3    |
| SNTG2 | 79.6    | 95.9    | 98      | 93.9    | 87.4    | 95.2    | 75.4    | 88.4    |
| SNUPN | 1086.8  | 1352    | 754.7   | 561     | 491.5   | 786.6   | 1064.8  | 1804.2  |
| SNURF | 3512.8  | 5106.3  | 2026.8  | 1299.2  | 1222.7  | 1537.7  | 2971.6  | 3380.9  |
| SNURF | 137.4   | 165     | 118.6   | 102.9   | 97.4    | 98.8    | 123.3   | 168.8   |
| SNW1  | 429.6   | 539.7   | 149.9   | 128.4   | 112.7   | 217.5   | 374.2   | 590     |
| SNX1  | 199     | 241.2   | 140.6   | 179.9   | 188.7   | 248.9   | 163.9   | 216.8   |
| SNX10 | 609.7   | 716.4   | 230.7   | 377.9   | 255.1   | 571.4   | 396.2   | 631.6   |
| SNX11 | 820.5   | 1084.8  | 530.1   | 496.7   | 406.8   | 584.5   | 814.3   | 1158.6  |
| SNX11 | 115.9   | 162.6   | 103.6   | 97.2    | 102.2   | 89.4    | 117.6   | 134.3   |
| SNX12 | 222.4   | 297.5   | 107.4   | 122.7   | 119.4   | 91.1    | 218.2   | 252.8   |
| SNX13 | 252.9   | 346.2   | 171.8   | 179.4   | 160.3   | 292.5   | 259.9   | 462.5   |
| SNX14 | 157.1   | 165.6   | 87.8    | 80.8    | 79.5    | 90      | 119.2   | 172.2   |
| SNX14 | 1720.7  | 2092.3  | 486.8   | 542.4   | 382.5   | 989.1   | 1375.9  | 1967.2  |
| SNX15 | 108.2   | 120.7   | 107.4   | 108.7   | 94.3    | 102.4   | 107.4   | 97.1    |
| SNX15 | 107.9   | 120.8   | 102.4   | 96.9    | 101.5   | 97.7    | 107.3   | 110.8   |
| SNX16 | 315.8   | 316.7   | 196.8   | 199.1   | 181     | 290.9   | 255     | 418.1   |
| SNX16 | 83.2    | 92.1    | 76.7    | 87.4    | 88.7    | 83.6    | 81      | 90.6    |
| SNX17 | 1921.6  | 2430.4  | 1584.2  | 1442.9  | 1074    | 1855.6  | 1346.2  | 2159.4  |
| SNX19 | 277.1   | 355.4   | 294.4   | 247.4   | 216.3   | 347     | 251.4   | 476.3   |
| SNX2  | 3012.1  | 3701.1  | 1634.7  | 1808.7  | 1609.1  | 2473.3  | 2811.1  | 3244.2  |
| SNX21 | 80.9    | 89.2    | 84.9    | 80.8    | 80.9    | 83.8    | 80.2    | 79.9    |
| SNX22 | 114.2   | 130.8   | 97.6    | 89.6    | 86.4    | 84.1    | 107.2   | 128.3   |
| SNX24 | 137.9   | 164     | 91.9    | 114.3   | 102.5   | 130.7   | 122.9   | 179.4   |
| SNX25 | 123.3   | 169.4   | 110.7   | 113.9   | 96.1    | 123.4   | 150.2   | 189.7   |
| SNX26 | 786     | 613.2   | 610.9   | 538.2   | 672.8   | 565.3   | 380.6   | 442.4   |
| SNX27 | 1941.6  | 2798.8  | 1520.4  | 1428.2  | 1222.1  | 1694    | 1663.7  | 1488.9  |
| SNX3  | 16474.9 | 17375.9 | 8128.4  | 10677   | 7745.5  | 12046.3 | 14034   | 18517.2 |
| SNX4  | 1403.8  | 1793.5  | 785.2   | 878.4   | 677.5   | 1102.6  | 1165.3  | 1717.9  |
| SNX5  | 939.5   | 1308.2  | 480.5   | 347.8   | 285.7   | 328.4   | 588.7   | 688.8   |
| SNX5  | 510.1   | 623.8   | 318.8   | 343     | 288.6   | 423.8   | 298     | 454.1   |
| SNX6  | 444.2   | 616.9   | 329.9   | 225.8   | 194.5   | 242.4   | 546.8   | 463.8   |
| SNX6  | 109.9   | 137     | 96.6    | 87.1    | 95.8    | 87.3    | 100.9   | 122.9   |
| SNX7  | 93.2    | 107.4   | 85.4    | 80.7    | 83.2    | 87.8    | 86.2    | 91.6    |
| SNX7  | 261.4   | 322.8   | 124.4   | 109.4   | 112.3   | 107.6   | 223.5   | 286.5   |
| SNX7  | 97.7    | 109.1   | 114.9   | 113.1   | 110.7   | 104.1   | 113.7   | 114     |
| SNX8  | 441.9   | 679.8   | 373.4   | 328.6   | 280.2   | 414.3   | 369.7   | 648     |
| SNX9  | 88.3    | 104.1   | 86.9    | 78.2    | 84.1    | 81.3    | 87.7    | 95.9    |
| SOAT1 | 275.1   | 346.9   | 141.1   | 134.5   | 127.3   | 159.2   | 253.3   | 577.3   |
| SOAT2 | 107.2   | 117     | 88.3    | 89.7    | 69.4    | 83.3    | 104.6   | 126.6   |
| SOCS1 | 80.4    | 94.7    | 99.5    | 96.2    | 100     | 91.5    | 87.2    | 105.2   |

|         |         |         |        |        |        |        |         |         |
|---------|---------|---------|--------|--------|--------|--------|---------|---------|
| SOCS2   | 150.8   | 164.2   | 130.6  | 120    | 107.9  | 132.8  | 109.2   | 138     |
| SOCS3   | 108.2   | 111.5   | 94.2   | 84.5   | 88     | 92.6   | 105.2   | 99.3    |
| SOCS4   | 106.4   | 128.5   | 120.6  | 110.2  | 95.6   | 105    | 101.8   | 121.2   |
| SOCS4   | 482.3   | 671.4   | 403.2  | 370.1  | 288.1  | 474.6  | 361.7   | 906.1   |
| SOCS5   | 81      | 96.4    | 76.6   | 75.7   | 74.2   | 73.4   | 77.1    | 88.9    |
| SOCS5   | 91.2    | 95.6    | 86.5   | 81.2   | 77.4   | 91.6   | 94.5    | 95.5    |
| SOCS5   | 147     | 187.5   | 115.5  | 119.3  | 111.3  | 160.3  | 139.4   | 184.5   |
| SOCS6   | 133.2   | 142.1   | 102.8  | 97.2   | 93.8   | 107.7  | 119.9   | 147.6   |
| SOCS7   | 118.6   | 146.1   | 107.8  | 108.9  | 97.8   | 106.5  | 119.7   | 146.7   |
| SOCS7   | 125.9   | 154.1   | 109    | 91.9   | 86.4   | 91.6   | 128.4   | 146.4   |
| SOD1    | 14411.6 | 15722.1 | 5357.9 | 4359.4 | 3693.5 | 5303.7 | 13189.7 | 19103.4 |
| SOD2    | 413.5   | 556.8   | 240.1  | 197.7  | 228.4  | 212.9  | 375.1   | 397.3   |
| SOD2    | 1572.4  | 2202.7  | 1570.2 | 1199.9 | 1061.9 | 1347.8 | 1466.1  | 2368.9  |
| SOD2    | 85.3    | 118     | 103.1  | 87.1   | 90.7   | 85     | 88.3    | 96.7    |
| SOD3    | 87.4    | 97.4    | 88.6   | 81.2   | 82.1   | 82.3   | 90.7    | 92      |
| SOHLH2  | 80.2    | 98.7    | 85.2   | 84.8   | 83.6   | 91.7   | 73.5    | 79.2    |
| SOLH    | 143.4   | 156.9   | 189.5  | 154.5  | 132.7  | 237.9  | 134.2   | 208.2   |
| SON     | 257.7   | 348.4   | 248    | 382.7  | 313.1  | 550.3  | 230.7   | 360.2   |
| SON     | 379.8   | 516.6   | 170.2  | 128.1  | 132    | 117.3  | 253.3   | 378.9   |
| SON     | 484.6   | 750.6   | 268.3  | 303.6  | 297.5  | 304.6  | 365.4   | 443.8   |
| SON     | 3420.5  | 4699.8  | 1928.6 | 2996.5 | 2555.5 | 4040.7 | 3462    | 5241.1  |
| SORBS1  | 75.8    | 78.8    | 108.4  | 94.7   | 94.9   | 90.6   | 77.4    | 82      |
| SORBS1  | 93.1    | 115.3   | 98.6   | 89.5   | 94.6   | 87.2   | 100     | 113.1   |
| SORBS1  | 83.1    | 94.9    | 102    | 93.3   | 88.7   | 87.8   | 87.5    | 89.8    |
| SORBS1  | 79.5    | 83.3    | 89     | 83.2   | 73.4   | 80.4   | 84.6    | 93.9    |
| SORBS1  | 85.9    | 89.1    | 102.8  | 95.2   | 86.7   | 92.9   | 78.4    | 83.9    |
| SORBS2  | 90.4    | 112.7   | 103.4  | 96.7   | 92.4   | 96.4   | 95.3    | 112.1   |
| SORBS2  | 80.2    | 84.8    | 88.5   | 86.5   | 84.4   | 75.5   | 83      | 90.1    |
| SORBS2  | 86.9    | 101.2   | 106.4  | 96.9   | 87.4   | 98.8   | 89.3    | 99.6    |
| SORBS3  | 94.4    | 103.2   | 106.5  | 93     | 87.6   | 82.9   | 94.6    | 98.9    |
| SORBS3  | 107.6   | 120.1   | 99.8   | 115.8  | 97.4   | 97.2   | 98.5    | 109.8   |
| SORBS3  | 958.2   | 1220.7  | 512.1  | 263.6  | 197.6  | 242.7  | 816     | 1232.8  |
| SORCS1  | 81.6    | 89.1    | 84.7   | 77.6   | 81     | 80.7   | 78.9    | 86.9    |
| SORCS1  | 107.5   | 127.4   | 91.2   | 92.5   | 89.7   | 93     | 124.6   | 124.8   |
| SORCS1  | 84.8    | 105     | 92.1   | 86.6   | 88     | 97.5   | 93.4    | 89.9    |
| SORCS2  | 100.9   | 110.5   | 101.1  | 81.9   | 80     | 98.4   | 87.5    | 111.3   |
| SORCS3  | 98.5    | 108.7   | 82.7   | 79.7   | 74.8   | 86.3   | 117.3   | 122.5   |
| SORD    | 361.5   | 457.6   | 138.8  | 132.7  | 111.3  | 115.5  | 215.1   | 296.6   |
| SORD    | 321.2   | 327.2   | 176.5  | 148    | 142.4  | 219.7  | 246.1   | 495.1   |
| SORL1   | 144.9   | 182.7   | 131.4  | 191.1  | 168.1  | 185.2  | 131.1   | 148.5   |
| SORT1   | 140.5   | 187.3   | 171.9  | 142.1  | 150    | 183.4  | 118.4   | 160.1   |
| SOS1    | 134.6   | 148.8   | 126.8  | 135.9  | 121.8  | 126.9  | 135.5   | 150.8   |
| SOS2    | 129.3   | 157.1   | 105.7  | 103.6  | 113.3  | 114.6  | 131.4   | 151.5   |
| SOST    | 101.4   | 92.9    | 84.8   | 77.5   | 82     | 87.8   | 89.2    | 96.4    |
| SOSTDC1 | 139.8   | 149.7   | 116.2  | 101.7  | 104.6  | 112.8  | 141.4   | 140.2   |
| SOX1    | 77.3    | 90.6    | 92.6   | 84.7   | 82.1   | 85.3   | 88.6    | 79.7    |
| SOX10   | 88.2    | 107.1   | 98.5   | 74.6   | 78.9   | 90.4   | 88.4    | 96.1    |
| SOX11   | 96.9    | 96.8    | 85.4   | 89.8   | 80     | 77.9   | 88.8    | 95.1    |
| SOX12   | 110.7   | 127.9   | 130    | 111.5  | 102    | 114.7  | 108.3   | 117.9   |
| SOX13   | 136.6   | 159.5   | 133.1  | 186.9  | 170.7  | 223.7  | 124.1   | 146.9   |

|         |        |        |       |       |       |       |       |       |
|---------|--------|--------|-------|-------|-------|-------|-------|-------|
| SOX14   | 108.6  | 122    | 105.2 | 91.9  | 91.5  | 89.5  | 102.6 | 128.1 |
| SOX15   | 104.5  | 124.2  | 105.8 | 99    | 100.7 | 99.1  | 100   | 107.7 |
| SOX17   | 78.4   | 82.9   | 88.4  | 84    | 86.4  | 83.7  | 79.3  | 91.1  |
| SOX18   | 286.5  | 386.2  | 184.2 | 130.4 | 123.2 | 109.2 | 310.5 | 346.9 |
| SOX2    | 73.2   | 83.4   | 84.1  | 83.1  | 78.8  | 83.4  | 68.7  | 81.4  |
| SOX21   | 87.6   | 110.6  | 107   | 104.6 | 105.7 | 109.5 | 87    | 98.9  |
| SOX3    | 139.1  | 173.2  | 151.6 | 108.8 | 83.9  | 99.6  | 138.8 | 164.5 |
| SOX30   | 95.2   | 95.9   | 87.4  | 87.8  | 75.3  | 87.8  | 91.9  | 108.2 |
| SOX30   | 99.2   | 105.4  | 115.2 | 101.1 | 96.6  | 94    | 94    | 102.2 |
| SOX4    | 248.1  | 308.2  | 142.9 | 115.5 | 119.4 | 151.3 | 201.6 | 261.2 |
| SOX5    | 91.1   | 90.1   | 86.7  | 80.8  | 83.5  | 91.4  | 84.2  | 86.9  |
| SOX5    | 100.7  | 104    | 85.9  | 86.2  | 75.4  | 90.5  | 105.1 | 107.6 |
| SOX5    | 86.3   | 97     | 97.7  | 94.6  | 92.9  | 91.8  | 82.4  | 94.5  |
| SOX6    | 75.1   | 101.1  | 86.5  | 88.3  | 83.5  | 85    | 91.6  | 89.1  |
| SOX6    | 118    | 102    | 104.7 | 99.3  | 89.4  | 87.6  | 94.8  | 97.5  |
| SOX6    | 84.4   | 91     | 83.3  | 84.3  | 84.5  | 89.5  | 77    | 90.7  |
| SOX6    | 77.4   | 89     | 85.4  | 84.4  | 76.1  | 89.3  | 76.5  | 82.6  |
| SOX7    | 98.1   | 111.3  | 97.7  | 90.2  | 87.1  | 96    | 101.7 | 104.1 |
| SOX8    | 99.7   | 126    | 105.2 | 96.6  | 90.3  | 101.3 | 86    | 100.7 |
| SOX9    | 76.6   | 85.1   | 101.6 | 95.6  | 100.2 | 103.6 | 77.4  | 73.6  |
| SP1     | 519.7  | 748.6  | 341.9 | 390.2 | 354.4 | 357.3 | 481.2 | 744.8 |
| SP100   | 185.4  | 248.5  | 173.1 | 168.9 | 167.7 | 231.6 | 192.2 | 259.4 |
| SP100   | 132.2  | 152.3  | 120.7 | 128.6 | 120.9 | 178.9 | 127.9 | 168.4 |
| SP100   | 263.2  | 358.3  | 150.2 | 159.8 | 128.9 | 204.9 | 255.7 | 418.2 |
| SP110   | 1084.4 | 1409.4 | 712.3 | 613   | 508.7 | 833.2 | 757.6 | 961.5 |
| SP110   | 696.5  | 926    | 547.9 | 481.3 | 397.5 | 588.5 | 573.2 | 825   |
| SP110   | 108.2  | 115.6  | 102.6 | 110.3 | 113.1 | 111.9 | 99.6  | 104.7 |
| SP140   | 95.9   | 109    | 96.4  | 90.7  | 74.8  | 91.1  | 89.6  | 97.6  |
| SP140   | 100.6  | 118.2  | 110.8 | 96.7  | 89.3  | 108.1 | 91.5  | 112.6 |
| SP140   | 83.5   | 93.7   | 99.6  | 85.8  | 88.7  | 94    | 84.8  | 99.3  |
| SP2     | 211.4  | 232.6  | 258.3 | 296.8 | 259.1 | 359.9 | 199.2 | 490.6 |
| SP3     | 290.2  | 339.9  | 161.2 | 143.2 | 134.1 | 227.7 | 305.1 | 543.6 |
| SP3     | 92.2   | 110.8  | 103.1 | 91    | 86.7  | 89.2  | 109.9 | 104.5 |
| SP3     | 122.3  | 142.8  | 109.2 | 103.4 | 91.6  | 93.8  | 111.1 | 123.7 |
| SP4     | 198.6  | 262.5  | 109.4 | 102.9 | 106.5 | 117.1 | 179.2 | 279.8 |
| SP5     | 130.1  | 158.1  | 102.5 | 101.2 | 94.3  | 104.8 | 124.9 | 134.1 |
| SP6     | 139.4  | 155.8  | 95.1  | 105.8 | 97.7  | 99.8  | 122.8 | 143.8 |
| SP7     | 82.3   | 105.9  | 94.1  | 84.3  | 88.3  | 81.2  | 100   | 100.5 |
| SP8     | 74.9   | 79.2   | 90.1  | 79.9  | 86.9  | 79.9  | 79.6  | 78.5  |
| SP8     | 99.9   | 106.7  | 93.8  | 92.6  | 95.1  | 97.5  | 89.2  | 94.3  |
| SPA17   | 1010.9 | 1261.6 | 569.7 | 326.8 | 256.1 | 378.2 | 783   | 975.7 |
| SPACA1  | 104.2  | 133.8  | 103.9 | 100.3 | 92.4  | 100   | 105.3 | 103.9 |
| SPACA3  | 128.2  | 129.3  | 104.6 | 94.4  | 93.4  | 102.4 | 127   | 131.3 |
| SPACA4  | 93.9   | 111.6  | 87.4  | 86.1  | 88.6  | 87.3  | 92.4  | 95.2  |
| SPACA5  | 85.3   | 81.6   | 94.5  | 91.3  | 82.5  | 89.2  | 84.1  | 83.2  |
| SPACA5B | 103    | 116.9  | 94.9  | 91    | 82.5  | 76.8  | 98.5  | 108.3 |
| SPAG1   | 287.3  | 302.5  | 147.3 | 137.7 | 117.1 | 145.1 | 241.1 | 397.8 |
| SPAG1   | 123.7  | 120.9  | 116.2 | 109.2 | 117.5 | 101.9 | 111.8 | 119.5 |
| SPAG1   | 122.7  | 130    | 96.7  | 82    | 77.1  | 83    | 104.9 | 105.3 |
| SPAG11  | 80.7   | 92.7   | 89.2  | 83.4  | 79.2  | 76.2  | 86.9  | 85.1  |

|          |        |        |       |       |       |       |        |        |
|----------|--------|--------|-------|-------|-------|-------|--------|--------|
| SPAG11A  | 94.1   | 130.4  | 107.9 | 98.8  | 92.2  | 101   | 97.4   | 105.6  |
| SPAG16   | 88.2   | 108.4  | 84.4  | 85.9  | 74.8  | 80.6  | 89.9   | 99.3   |
| SPAG16   | 141.4  | 165.7  | 108.3 | 86.7  | 88.4  | 88    | 135.4  | 191    |
| SPAG16   | 99.2   | 97     | 105.1 | 94.2  | 90    | 92.7  | 101.9  | 96.5   |
| SPAG17   | 85.3   | 111.3  | 94.2  | 91.6  | 98.8  | 79    | 81.4   | 92.5   |
| SPAG4    | 112.6  | 144.8  | 102.7 | 97.3  | 104.4 | 115.4 | 119.6  | 120.8  |
| SPAG4L   | 97.8   | 105.2  | 97.7  | 99.4  | 92.3  | 103.9 | 87.8   | 103    |
| SPAG5    | 392.2  | 478.8  | 199.1 | 158.2 | 157.2 | 206.7 | 313.2  | 499.2  |
| SPAG6    | 148.1  | 181.5  | 101.4 | 92.9  | 90.1  | 102.4 | 119.8  | 176.6  |
| SPAG6    | 144.7  | 173.4  | 133.6 | 107.7 | 102.8 | 128.6 | 122.9  | 138.4  |
| SPAG7    | 360.4  | 414.8  | 253.4 | 260.1 | 259.8 | 327.9 | 324.8  | 411.3  |
| SPAG8    | 83.7   | 96     | 99.6  | 75.7  | 87.8  | 102.9 | 92.7   | 84.6   |
| SPAG8    | 92     | 104.8  | 89    | 89.4  | 86.4  | 85.3  | 93.4   | 87.6   |
| SPAG9    | 244.4  | 486.3  | 282.1 | 258.6 | 261   | 331   | 327.5  | 390.1  |
| SPAG9    | 191.9  | 254.9  | 107.4 | 119.1 | 116.9 | 168.6 | 176.4  | 281.4  |
| SPAG9    | 1082.6 | 1654.8 | 714.7 | 839.8 | 689   | 1164  | 1203.2 | 1906.1 |
| SPAM1    | 95.5   | 113.8  | 105.7 | 90.9  | 95.1  | 90.8  | 81.7   | 88.2   |
| SPAM1    | 84     | 89.4   | 82.3  | 90    | 100.8 | 79.8  | 81.8   | 87.9   |
| SPANXA1  | 78.9   | 93.5   | 88    | 89.4  | 83.2  | 81    | 85     | 92.6   |
| SPANXB1  | 79.3   | 82.4   | 92.4  | 79.7  | 80.1  | 89.5  | 74.6   | 80.5   |
| SPANXC   | 79.6   | 90.4   | 92.4  | 90.8  | 71.3  | 86.7  | 84.8   | 77.4   |
| SPANXE   | 88.7   | 83.9   | 93.5  | 94.4  | 83.9  | 97.5  | 87.9   | 83     |
| SPANX-N1 | 75.6   | 83.6   | 94.7  | 88.3  | 77.5  | 84    | 79.9   | 84     |
| SPANX-N2 | 81     | 79.8   | 95.9  | 84.2  | 86.2  | 87.1  | 73.9   | 75.7   |
| SPANX-N3 | 82.3   | 89.2   | 82.9  | 79    | 75.7  | 85.7  | 87.1   | 90.9   |
| SPANX-N4 | 74.2   | 81.2   | 84.3  | 79.4  | 75.3  | 81    | 74.1   | 89.5   |
| SPANX-N5 | 79.6   | 88.9   | 91.4  | 88.8  | 79.9  | 75.2  | 80.4   | 84.4   |
| SPARC    | 80.7   | 87.4   | 84.6  | 79.8  | 85.8  | 84.7  | 106.6  | 110.2  |
| SPARCL1  | 85.2   | 92.7   | 83.5  | 82.1  | 83.6  | 81.4  | 82.7   | 89.5   |
| SPAST    | 117    | 145.1  | 112.1 | 139   | 110   | 144.7 | 143.1  | 186.5  |
| SPAST    | 105.7  | 122.6  | 108.5 | 97.6  | 86.9  | 98    | 100.5  | 105.4  |
| SPATA1   | 96.4   | 108    | 98.2  | 100.6 | 81.7  | 85.2  | 95.6   | 101.9  |
| SPATA12  | 83.5   | 101.2  | 101.1 | 87.3  | 79.5  | 91.2  | 92.1   | 93.4   |
| SPATA13  | 123.6  | 130.9  | 99.6  | 92.6  | 90.6  | 90.2  | 116.8  | 125.5  |
| SPATA16  | 93.4   | 101.8  | 90.5  | 95.3  | 83.6  | 74.7  | 96.5   | 91.2   |
| SPATA18  | 81.8   | 79.7   | 94.8  | 95.1  | 100   | 102.5 | 86.5   | 85.4   |
| SPATA19  | 93.1   | 112.4  | 93.1  | 92.3  | 79.9  | 92.7  | 97.2   | 106.4  |
| SPATA2   | 156    | 219.6  | 193.4 | 199.6 | 167.3 | 244.2 | 162.9  | 271    |
| SPATA20  | 693.8  | 895.4  | 555.6 | 548.5 | 527.1 | 705.1 | 469.6  | 509    |
| SPATA21  | 95.4   | 83.5   | 90.8  | 86.9  | 83.4  | 90.8  | 83.8   | 82.5   |
| SPATA22  | 81.2   | 76.6   | 102   | 92.2  | 94.9  | 91.5  | 79.7   | 83.4   |
| SPATA3   | 95.2   | 104.2  | 93.8  | 92.2  | 85.6  | 93.7  | 101.2  | 100.3  |
| SPATA4   | 85.9   | 94.8   | 103.7 | 100.6 | 91.4  | 99.6  | 89.6   | 82.7   |
| SPATA5   | 116.6  | 124.6  | 92.3  | 81    | 87.2  | 79.6  | 103.7  | 118.9  |
| SPATA5L1 | 676.1  | 872.4  | 622.7 | 610   | 442.4 | 866.7 | 574.1  | 1354.9 |
| SPATA6   | 115.8  | 137.4  | 94.3  | 86.4  | 75.5  | 95.8  | 112.3  | 118.8  |
| SPATA7   | 371.8  | 456.1  | 313.4 | 262.5 | 258   | 307.3 | 232.9  | 333.4  |
| SPATA7   | 100.1  | 133.1  | 84.5  | 95.4  | 85.9  | 87.2  | 103    | 112.7  |
| SPATA7   | 144.1  | 172.2  | 112.5 | 106.2 | 98.4  | 124.6 | 116.3  | 135.4  |
| SPATA8   | 89.9   | 90.3   | 110.4 | 101.9 | 103.6 | 106.6 | 84.7   | 85.9   |

|          |        |        |        |        |        |        |        |         |
|----------|--------|--------|--------|--------|--------|--------|--------|---------|
| SPATA9   | 106.6  | 124.3  | 95.1   | 94.3   | 91.1   | 95.7   | 96.6   | 117.7   |
| SPATC1   | 100.6  | 115.3  | 82.6   | 85.6   | 82.1   | 87.4   | 105.6  | 114     |
| SPATC1   | 96.9   | 105.1  | 101    | 92.4   | 95.2   | 100.6  | 102.8  | 105.4   |
| SPATS1   | 72.2   | 84.3   | 80.4   | 78.7   | 67.6   | 78     | 71.2   | 87.2    |
| SPATS2   | 130.8  | 157    | 118.3  | 112.4  | 103.3  | 110.1  | 128    | 166.3   |
| SPC24    | 1767.3 | 2070.4 | 954    | 676    | 560.6  | 467.3  | 1277   | 1203    |
| SPC25    | 332.4  | 325.7  | 268.9  | 107    | 91     | 131.8  | 242.3  | 392.4   |
| SPCS1    | 8818.9 | 11697  | 8739   | 8277   | 5467   | 7830.5 | 7724.1 | 16137.1 |
| SPCS2    | 96.7   | 109.1  | 100.5  | 92.4   | 80.8   | 82.5   | 93.3   | 99.8    |
| SPCS3    | 536.9  | 600.5  | 271.8  | 206.5  | 162.3  | 222.8  | 324.3  | 670.9   |
| SPDEF    | 83.7   | 93.2   | 88.9   | 80.8   | 86.7   | 89.2   | 90.1   | 82.1    |
| SPDY1    | 112.5  | 129.4  | 110    | 105.1  | 106.5  | 101.6  | 113.4  | 110.7   |
| SPDY1    | 86.6   | 87.3   | 98.3   | 85.8   | 91.6   | 89.3   | 86.6   | 89.3    |
| SPDY1    | 69.3   | 78.5   | 88.4   | 88.8   | 84.6   | 82.8   | 71.9   | 78.8    |
| SPECC1   | 121.8  | 161.4  | 108.9  | 94.8   | 94.3   | 94.1   | 130.7  | 142.2   |
| SPECC1   | 109.2  | 128.6  | 107    | 86.9   | 91.4   | 102.3  | 109.4  | 139.3   |
| SPEN     | 628.4  | 893.4  | 652.5  | 1213.2 | 1020.7 | 1403   | 737.9  | 907.7   |
| SPERT    | 98.8   | 113.5  | 102.1  | 105.9  | 91.5   | 93.5   | 91.5   | 104.4   |
| SPESP1   | 81.3   | 100.4  | 94     | 84.1   | 80.8   | 95     | 89.5   | 97.5    |
| SPFH1    | 269.2  | 334.6  | 170.8  | 139.2  | 127.4  | 164.8  | 248.1  | 314.5   |
| SPFH2    | 189.6  | 206.5  | 106.6  | 105.4  | 104    | 106.3  | 146.4  | 163     |
| SPFH2    | 866    | 1093.9 | 579.9  | 745.5  | 481.7  | 887.8  | 673.1  | 897.2   |
| SPG20    | 238.9  | 282.8  | 142.8  | 161.6  | 127.4  | 172.6  | 233.9  | 347.7   |
| SPG21    | 468.1  | 647.7  | 220.8  | 132.9  | 131.3  | 127.1  | 337.1  | 414.4   |
| SPG21    | 1720.9 | 2375.6 | 979    | 809.1  | 701.7  | 773.9  | 1116.9 | 1339.5  |
| SPG3A    | 214.5  | 237.4  | 131.2  | 132.1  | 104    | 141.3  | 178.6  | 257.1   |
| SPG7     | 178    | 195.8  | 215    | 173.4  | 163.7  | 228.3  | 144.3  | 179     |
| SPG7     | 114.1  | 137.8  | 100.1  | 100.3  | 109.6  | 101.2  | 101.4  | 143.5   |
| SPG7     | 1048.6 | 1211.2 | 849.5  | 847.7  | 1008   | 1012.8 | 795.9  | 679.2   |
| SPHAR    | 214.8  | 269.2  | 131.4  | 138.2  | 117.1  | 116.4  | 196.5  | 245.2   |
| SPHK1    | 103    | 131.6  | 116    | 129.6  | 105.2  | 129.3  | 115.3  | 149     |
| SPHK1    | 87.4   | 98.1   | 83.5   | 82.5   | 79.7   | 93.8   | 95.8   | 99.7    |
| SPHK2    | 1777.3 | 2170.5 | 1292.8 | 764.9  | 580.4  | 627.9  | 1454.7 | 1425.8  |
| SPI1     | 596.1  | 799.2  | 413.3  | 276.2  | 226.3  | 363.2  | 592.2  | 1451.8  |
| SPI1     | 1547.9 | 1824.9 | 947.1  | 682.7  | 458.5  | 708.7  | 1387.2 | 2857.7  |
| SPIB     | 155.6  | 182.1  | 174.6  | 112.1  | 109.5  | 114.5  | 127    | 203.3   |
| SPIC     | 83.8   | 99.4   | 95.5   | 93.6   | 91     | 91.2   | 81.4   | 83.7    |
| SPIN     | 320.9  | 462.1  | 188.1  | 239.3  | 197.4  | 125.5  | 316.3  | 458.5   |
| SPIN1    | 1153.4 | 1357.1 | 531.6  | 619.4  | 532.7  | 550.8  | 914.5  | 876.3   |
| SPIN2    | 82.8   | 97.8   | 102.6  | 88.3   | 84.4   | 88.5   | 83.8   | 80.9    |
| SPIN-2   | 108.3  | 151.2  | 87.8   | 79.8   | 81.2   | 98.5   | 112.6  | 169.3   |
| SPIN2B   | 104.7  | 122.7  | 101.8  | 99.6   | 82.1   | 93.2   | 94     | 93.6    |
| SPINK1   | 103.7  | 103    | 101.5  | 80.5   | 82.9   | 84.4   | 96.4   | 99.6    |
| SPINK2   | 93.3   | 103.5  | 87     | 87.4   | 90     | 87.1   | 92.4   | 97.5    |
| SPINK4   | 84.4   | 88     | 85.5   | 77.5   | 89.6   | 81.3   | 81.4   | 80.4    |
| SPINK5   | 111    | 125.1  | 109.7  | 98.7   | 86.6   | 87.3   | 103.3  | 120.9   |
| SPINK5L2 | 82.2   | 90.2   | 94.8   | 90.8   | 95.2   | 89.2   | 82.8   | 89.1    |
| SPINK6   | 87.4   | 102.1  | 93.8   | 94.2   | 87.6   | 98.9   | 89.6   | 94      |
| SPINK7   | 82.7   | 84     | 82.5   | 88.2   | 82.3   | 86.9   | 77.2   | 88      |
| SPINK9   | 96.8   | 114.3  | 114.8  | 95.2   | 97.3   | 96.9   | 112.8  | 105.6   |

|         |        |        |        |        |        |        |        |        |
|---------|--------|--------|--------|--------|--------|--------|--------|--------|
| SPINLW1 | 78.3   | 91.9   | 84.8   | 93.5   | 76.6   | 88.4   | 79.1   | 85     |
| SPINLW1 | 119.9  | 125.1  | 145.5  | 144.8  | 130.7  | 133    | 121.7  | 116.9  |
| SPINLW1 | 95.2   | 109.4  | 90.7   | 87.7   | 84.3   | 81     | 93.2   | 104.1  |
| SPINT1  | 98.7   | 113.1  | 90.2   | 88.1   | 84.3   | 81.7   | 92.2   | 118.6  |
| SPINT1  | 113    | 117.4  | 125.2  | 106    | 101.7  | 123.8  | 101.8  | 126.1  |
| SPINT2  | 213    | 265.3  | 186.3  | 145.5  | 137.4  | 156.5  | 202.6  | 247.1  |
| SPINT4  | 80.6   | 93.4   | 90.8   | 82.6   | 88.8   | 87.4   | 86.4   | 93.9   |
| SPIRE1  | 621.6  | 790.5  | 521    | 457    | 378    | 659.6  | 543.3  | 856.8  |
| SPIRE2  | 101.9  | 111.4  | 123.5  | 90     | 97.6   | 107.5  | 101.9  | 123.2  |
| SPN     | 2127   | 2638.8 | 1708.3 | 1009.4 | 932.8  | 599.2  | 1754.1 | 2724.9 |
| SPN     | 140.5  | 169.3  | 98.5   | 95.2   | 86.4   | 94.7   | 118.1  | 168.4  |
| SPN     | 179.3  | 227.9  | 113.3  | 120.9  | 115.3  | 88.1   | 150.1  | 212.2  |
| SPO11   | 98.5   | 108.2  | 93.1   | 86.1   | 83.3   | 87.8   | 98.7   | 102.6  |
| SPO11   | 109.3  | 128.4  | 118    | 105.1  | 106    | 102.9  | 116.8  | 121.4  |
| SPOCD1  | 183    | 223    | 87.2   | 85.9   | 91.6   | 91.3   | 196.4  | 209.5  |
| SPOCK   | 204.6  | 234.5  | 176.6  | 627.8  | 542.7  | 660.7  | 198.7  | 261.6  |
| SPOCK2  | 105.2  | 123.1  | 105.7  | 104.9  | 101    | 106.8  | 107    | 115.7  |
| SPOCK3  | 77.7   | 83.3   | 82.6   | 75.8   | 74.2   | 78     | 79.2   | 87.8   |
| SPON1   | 81.1   | 96.9   | 94.3   | 89.9   | 86.1   | 100.1  | 85.6   | 103.6  |
| SPON2   | 91.4   | 113    | 84.1   | 88.3   | 79.6   | 83.7   | 93.9   | 109.7  |
| SPOP    | 2451.3 | 3260.3 | 1693.5 | 2112.8 | 1954.3 | 2247.1 | 2253.5 | 2400.6 |
| SPOP    | 87     | 102.3  | 86.1   | 93.5   | 89.7   | 97.4   | 87.4   | 102.7  |
| SPP1    | 121.8  | 157.3  | 106.9  | 114.1  | 127.5  | 193.1  | 110    | 126    |
| SPP1    | 129.2  | 161.3  | 110.2  | 105.5  | 119.4  | 144.7  | 110.4  | 119.4  |
| SPP2    | 84.7   | 89.2   | 96.7   | 85.1   | 76.8   | 79.8   | 88.9   | 89.8   |
| SPPL2A  | 1696.2 | 2191.6 | 1143.8 | 1181   | 1004.9 | 1496.3 | 1355.1 | 2676.2 |
| SPPL2B  | 99.3   | 110    | 111.5  | 105.5  | 105.3  | 99.3   | 94.4   | 113.3  |
| SPPL2B  | 86.8   | 89.8   | 99.8   | 92.8   | 82.8   | 92.9   | 93.5   | 89.6   |
| SPPL2B  | 124.8  | 139.1  | 105.6  | 126.6  | 119.5  | 133.4  | 113.6  | 149.3  |
| SPPL3   | 149.4  | 162    | 88.7   | 100.6  | 92.8   | 92     | 139.3  | 168.1  |
| SPR     | 563.1  | 763.6  | 313.1  | 172    | 146.5  | 253.7  | 540.2  | 727.4  |
| SPRED1  | 316    | 416    | 230.2  | 101.1  | 103.3  | 113.8  | 329.8  | 451.9  |
| SPRED2  | 308    | 402.3  | 220.6  | 233.1  | 195.2  | 239.1  | 286.9  | 289    |
| SPRED3  | 102.3  | 113.8  | 96.7   | 79.4   | 89     | 95.3   | 112.1  | 124.7  |
| SPRED3  | 92.3   | 100.5  | 95.7   | 90.8   | 83     | 90.5   | 85.8   | 96.2   |
| SPRED3  | 88.7   | 95     | 99.1   | 97     | 85.7   | 84.6   | 80.5   | 90     |
| SPRN    | 103.5  | 111    | 101.3  | 94.9   | 98.2   | 99.1   | 96.1   | 113.9  |
| SPRR1A  | 106.3  | 129.3  | 83.7   | 87.7   | 73     | 75.7   | 113.5  | 133.4  |
| SPRR1B  | 147.2  | 160.4  | 117.1  | 117.4  | 108.8  | 111.5  | 137.8  | 136.6  |
| SPRR2A  | 82.6   | 90.8   | 93.1   | 77.5   | 83.6   | 86.4   | 77.1   | 80.3   |
| SPRR2B  | 86.3   | 102.5  | 97     | 96.9   | 87.9   | 96.7   | 85     | 90.2   |
| SPRR2C  | 84.6   | 96.1   | 92.5   | 79.3   | 88.2   | 88.5   | 74.9   | 81.1   |
| SPRR2D  | 78.2   | 87.2   | 88     | 79.5   | 76.7   | 78.5   | 76.4   | 105.1  |
| SPRR2E  | 77.8   | 82.6   | 84.8   | 77.3   | 82.1   | 86.1   | 74.3   | 68.3   |
| SPRR2F  | 124.3  | 134.3  | 90.6   | 80     | 83     | 90.9   | 116.6  | 143.9  |
| SPRR2G  | 82.8   | 112.7  | 102.6  | 98.5   | 91.5   | 90.5   | 87.8   | 109.3  |
| SPRR3   | 112.4  | 130.2  | 108.9  | 84.5   | 95.7   | 106.3  | 101.5  | 110.8  |
| SPRR4   | 100.4  | 120.4  | 94.3   | 89.8   | 87.2   | 83.5   | 103.3  | 115.1  |
| SPRY1   | 87     | 104    | 91.2   | 91.5   | 88.5   | 85.3   | 85.2   | 96.9   |
| SPRY1   | 108.3  | 119.2  | 106.6  | 98     | 94.7   | 105.1  | 98.4   | 95.1   |

|          |        |        |        |        |        |        |        |        |
|----------|--------|--------|--------|--------|--------|--------|--------|--------|
| SPRY2    | 862.7  | 896.5  | 328.5  | 272.2  | 168.7  | 265.9  | 730.5  | 1166.6 |
| SPRY3    | 85.3   | 97.6   | 87.2   | 93.3   | 97.8   | 92.9   | 97.7   | 91.1   |
| SPRY4    | 134    | 150.8  | 157    | 167.8  | 112.9  | 207.3  | 153.1  | 226    |
| SPRYD3   | 512.8  | 689.1  | 292.3  | 228    | 192.8  | 227.7  | 373    | 232.6  |
| SPSB1    | 108.5  | 133.6  | 100    | 100.1  | 96.8   | 112.9  | 124.2  | 179.7  |
| SPSB2    | 133.9  | 135.5  | 160.6  | 146.4  | 153.3  | 191    | 112.2  | 224.8  |
| SPSB3    | 972.7  | 1211.9 | 633.4  | 579.7  | 766.3  | 729.8  | 1005.4 | 649.6  |
| SPSB4    | 113.9  | 141.9  | 101.1  | 90.7   | 97     | 86.3   | 111.4  | 124.5  |
| SPTA1    | 139.5  | 183.1  | 94.2   | 93.8   | 78.3   | 92.8   | 150.6  | 202    |
| SPTAN1   | 182.9  | 233.9  | 266.3  | 300.1  | 283.8  | 407.8  | 171.9  | 284    |
| SPTB     | 103.1  | 110.3  | 102.1  | 88.6   | 87.2   | 88.9   | 105.2  | 123    |
| SPTB     | 103    | 117    | 103.3  | 91     | 86.2   | 83.8   | 111.8  | 109.4  |
| SPTBN1   | 115.6  | 136.2  | 95.4   | 94.5   | 85.1   | 95.8   | 112.8  | 117.3  |
| SPTBN1   | 113.8  | 150.6  | 100.1  | 100.2  | 90.2   | 82.6   | 104.5  | 113.6  |
| SPTBN1   | 166.3  | 261.3  | 191.7  | 149.8  | 150.7  | 206    | 170.1  | 195.4  |
| SPTBN2   | 89.7   | 111.6  | 92.9   | 102.5  | 94.3   | 94.6   | 100.2  | 109.6  |
| SPTBN4   | 83.1   | 107.2  | 88.9   | 87.2   | 91.2   | 94.1   | 90.3   | 99     |
| SPTBN4   | 87.4   | 93.6   | 85.6   | 87.1   | 81.4   | 88.1   | 92.1   | 102.5  |
| SPTBN5   | 91.3   | 115.6  | 95.8   | 85.5   | 85     | 85.7   | 90.4   | 109.7  |
| SPTLC1   | 2999.4 | 3354.5 | 1214.2 | 1491.9 | 1903.2 | 1716.5 | 3006.2 | 4700.7 |
| SPTLC1   | 386.5  | 497.4  | 194.1  | 167.4  | 153.4  | 247.8  | 271.3  | 367.9  |
| SPTLC1   | 675.9  | 843.5  | 301.6  | 222    | 168.5  | 220.3  | 467    | 772.6  |
| SPTLC2   | 159.2  | 216    | 156.3  | 170.9  | 142.6  | 183.9  | 147.4  | 163.1  |
| SPTLC3   | 96.6   | 110.1  | 87.6   | 86.7   | 81     | 85     | 102.5  | 103.2  |
| SPTY2D1  | 190.7  | 341.6  | 177.7  | 171.8  | 137.6  | 148.8  | 273.7  | 350.6  |
| SPZ1     | 85.2   | 91.5   | 90     | 96.6   | 83.1   | 93     | 91.2   | 94.9   |
| SQLE     | 2932.9 | 4622.8 | 1842.3 | 2413.1 | 2216.7 | 3670   | 2801.9 | 5105.7 |
| SQRDL    | 769.5  | 1012.2 | 379.9  | 379    | 272.3  | 420.1  | 991.8  | 1500   |
| SQSTM1   | 1353.3 | 1714   | 596.1  | 545.7  | 469.4  | 455.6  | 2694.5 | 3643.5 |
| SR140    | 1496.1 | 1907.2 | 1044.3 | 1148.9 | 979.7  | 2184.6 | 1147.5 | 1622.9 |
| SRA1     | 296.9  | 365.5  | 188.7  | 191.5  | 159.7  | 226.1  | 289.1  | 352.5  |
| SR-A1    | 98.7   | 112.4  | 113.7  | 106.6  | 104.7  | 105.3  | 89.6   | 121.7  |
| SRC      | 83.8   | 97.1   | 93.6   | 88     | 73.5   | 84.6   | 74.2   | 90.3   |
| SRC      | 127.6  | 148.5  | 103.4  | 99     | 94     | 95.3   | 120.7  | 118.7  |
| SRC      | 170.4  | 238.6  | 178.5  | 153.1  | 154.5  | 203.4  | 171.5  | 270.8  |
| SRCAP    | 107.8  | 136.7  | 94.9   | 89.1   | 91.6   | 97.4   | 111.6  | 145.1  |
| SRCRB4D  | 107.3  | 116.9  | 87.3   | 87.8   | 84.8   | 83.6   | 108.8  | 114.9  |
| SRD5A1   | 102.5  | 131    | 101.7  | 99.3   | 98.2   | 106    | 104.7  | 133.7  |
| SRD5A2   | 110.1  | 130.4  | 92.4   | 90.1   | 84.4   | 89.5   | 106.7  | 111.9  |
| SRD5A2L  | 265.8  | 326.6  | 153.6  | 141.5  | 127.6  | 139.2  | 256.4  | 356.2  |
| SRD5A2L2 | 86.8   | 93     | 88.1   | 79.9   | 80.5   | 86.6   | 79.4   | 84.9   |
| SREBF1   | 296.8  | 337.4  | 284.2  | 262.1  | 275.3  | 325.7  | 258.8  | 479.8  |
| SREBF1   | 120.4  | 108    | 87.3   | 75     | 90.7   | 79.5   | 92.6   | 118.1  |
| SREBF1   | 130.1  | 144.7  | 150.6  | 126    | 136.9  | 178.6  | 111.5  | 144.5  |
| SREBF2   | 160.1  | 215.2  | 105.1  | 111.1  | 100.6  | 102.8  | 168.7  | 180.5  |
| SRF      | 2609.5 | 3153.2 | 1964   | 1703.6 | 1585.7 | 2206.5 | 2251.5 | 2183   |
| SRFBP1   | 571.3  | 837.6  | 338.4  | 496.5  | 363.4  | 358.9  | 453.8  | 681.2  |
| SRGAP1   | 85.7   | 96.5   | 92.7   | 97.5   | 84     | 86.8   | 90.6   | 94.1   |
| SRGAP2   | 362.5  | 452.9  | 249.1  | 253.7  | 265.5  | 359    | 351.2  | 447.8  |
| SRGAP2   | 83.1   | 99.4   | 90.7   | 80.4   | 86.5   | 78.3   | 92.6   | 95.7   |

|         |         |         |        |         |        |         |         |         |
|---------|---------|---------|--------|---------|--------|---------|---------|---------|
| SRGAP2  | 148.5   | 188     | 100.7  | 103.1   | 103.9  | 125.7   | 142.8   | 188.7   |
| SRGAP2  | 84.1    | 108.5   | 102.5  | 85.5    | 83.6   | 91.4    | 106.9   | 111.5   |
| SRGAP3  | 127.7   | 159.2   | 120.2  | 136.7   | 140.5  | 120.5   | 117.3   | 110.5   |
| SRGAP3  | 100     | 115.1   | 114.8  | 112.1   | 91.2   | 107.2   | 106.5   | 113.7   |
| SRGN    | 30551.5 | 29009.4 | 15288  | 13348.4 | 11452  | 13405.7 | 30575.4 | 30312.7 |
| SRI     | 73.2    | 80.9    | 88.1   | 86.2    | 80.8   | 81.6    | 77.1    | 86.1    |
| SRI     | 393.7   | 519     | 243.8  | 200.7   | 170.6  | 238.4   | 342.8   | 341.5   |
| SRI     | 348.4   | 455.2   | 282.6  | 398.9   | 296.2  | 485.3   | 271.6   | 443.2   |
| SRM     | 1111.2  | 1501.7  | 1355.5 | 793     | 560.2  | 738.7   | 1044.8  | 2972.7  |
| SRMS    | 116.2   | 139     | 98.8   | 89.8    | 92.1   | 91.8    | 105.1   | 119.4   |
| SRP14   | 9874.8  | 13040.5 | 6177.7 | 6647    | 5778.3 | 8241.6  | 9565.1  | 10507   |
| SRP14P1 | 5062.3  | 6288.8  | 1440.9 | 1675.3  | 1389.2 | 2016.2  | 4778.4  | 5574.2  |
| SRP19   | 1937.2  | 2025.2  | 929.2  | 852.2   | 684.4  | 1028.8  | 1796.2  | 3006.7  |
| SRP46   | 1081.6  | 1565.2  | 902.8  | 743.7   | 550.7  | 941.2   | 859.9   | 1360.3  |
| SRP54   | 2531.7  | 3645.1  | 1697.4 | 1491.4  | 1151.4 | 2134.9  | 1996.7  | 2958.1  |
| SRP68   | 1626.1  | 2171.5  | 1327   | 1246.4  | 933.2  | 1737.5  | 1491.4  | 1953.4  |
| SRP72   | 929.6   | 1164.6  | 311.9  | 295.1   | 264.3  | 474.4   | 662.2   | 1114.3  |
| SRP9    | 15146.7 | 17213.2 | 7749   | 8468.6  | 6182   | 9583.8  | 13702.9 | 19713.8 |
| SRPK1   | 2745.7  | 3653.6  | 1443.2 | 1752.1  | 1192.5 | 2089.4  | 2154.4  | 3018.3  |
| SRPK2   | 209.9   | 274.3   | 121.7  | 120.2   | 123.2  | 126.3   | 158.8   | 194     |
| SRPK2   | 183.2   | 256.1   | 116.2  | 104.6   | 107.7  | 99.5    | 183.1   | 195.2   |
| SRPK2   | 130.2   | 152.4   | 112.4  | 115.1   | 95.3   | 127.8   | 127.4   | 225     |
| SRPR    | 804.7   | 1072.9  | 766.9  | 361.5   | 288.3  | 459.3   | 696.3   | 1144    |
| SRPRB   | 3823.9  | 5224.8  | 2872   | 1701.5  | 1101.9 | 1811.4  | 3696.6  | 3948    |
| SRPX    | 117.9   | 141.9   | 127.5  | 94.7    | 89.2   | 111.8   | 168.6   | 216.7   |
| SRPX2   | 108.1   | 120.8   | 95.1   | 89      | 75     | 91.9    | 91.7    | 109.4   |
| SRR     | 170.4   | 180.3   | 125.4  | 118.6   | 113.6  | 137.2   | 132.1   | 214.8   |
| SRRM1   | 3610.8  | 4288.2  | 2149.5 | 2561.8  | 1823.6 | 2956    | 2776.3  | 4566.2  |
| SRRM2   | 2124.3  | 1867.6  | 2541.9 | 3198.1  | 2719.3 | 3889    | 1194    | 2306.5  |
| SRRP35  | 136.9   | 172.7   | 103.4  | 101.4   | 95.7   | 131.3   | 133     | 149.3   |
| SRXN1   | 366.6   | 484.2   | 344.9  | 219.1   | 182    | 315     | 864.4   | 2396.1  |
| SRY     | 107.1   | 120.1   | 92     | 80.9    | 82.5   | 89      | 101.2   | 104.6   |
| SS18    | 137.9   | 170.4   | 127.7  | 98      | 101.5  | 108.8   | 147.6   | 109.6   |
| SS18    | 148.3   | 153.6   | 114.3  | 111.1   | 108.7  | 122.5   | 114.6   | 148.6   |
| SS18L1  | 339.1   | 364.4   | 163.7  | 224.6   | 165.3  | 262.8   | 270.4   | 458.6   |
| SS18L1  | 122     | 144.6   | 90.1   | 72.2    | 80.5   | 84.5    | 105.1   | 132.8   |
| SS18L2  | 7943.4  | 9240.7  | 6852.3 | 6345.1  | 4414.1 | 6012.6  | 7404.1  | 9129.2  |
| SSB     | 101.7   | 90.6    | 95.7   | 80.5    | 80     | 89.8    | 92.8    | 114.1   |
| SSBP1   | 6376.1  | 7067.6  | 2613.1 | 2753    | 1547.5 | 3116.6  | 6043.6  | 10039.2 |
| SSBP2   | 477.6   | 609.9   | 329.4  | 371.6   | 379    | 470.4   | 416.2   | 505.1   |
| SSBP3   | 137.1   | 173     | 148.8  | 173.7   | 174.3  | 209.3   | 136.1   | 190.9   |
| SSBP3   | 93.9    | 103.2   | 124.3  | 150.1   | 136.8  | 193.8   | 100.8   | 164.2   |
| SSBP4   | 483.6   | 614.8   | 457.4  | 299.6   | 244.7  | 363.3   | 324.1   | 761.7   |
| SSFA2   | 261.4   | 394.2   | 137    | 159     | 151.5  | 207.8   | 202.8   | 274     |
| SSH1    | 100.1   | 109.9   | 106.2  | 128.6   | 121.4  | 114.7   | 109.3   | 139.5   |
| SSH2    | 341.1   | 531     | 316.9  | 514.7   | 486.3  | 640     | 376     | 452.5   |
| SSH3    | 917     | 1047.2  | 479.6  | 528     | 381.5  | 534.2   | 704.5   | 807.2   |
| SSH3    | 78.9    | 86.3    | 87.6   | 77.3    | 83.8   | 78.4    | 77.5    | 88.8    |
| SSNA1   | 1114.4  | 1488.2  | 931.6  | 588.5   | 572.6  | 773.2   | 1115.3  | 1496    |
| SSPN    | 94.7    | 109.2   | 97.2   | 88.9    | 85.2   | 89.3    | 101.4   | 108.9   |



|         |        |        |        |        |        |        |        |        |
|---------|--------|--------|--------|--------|--------|--------|--------|--------|
| SSR1    | 2029.9 | 2312.1 | 1465.3 | 1746.4 | 1164   | 2285.4 | 1926   | 3434.2 |
| SSR2    | 3497.1 | 4833.7 | 1710.1 | 1117.8 | 1030.7 | 1334.2 | 3230.1 | 3609.5 |
| SSR3    | 263.8  | 371.9  | 153.1  | 124.1  | 123.7  | 132.6  | 230.6  | 354    |
| SSR4    | 7769.1 | 9975.9 | 5608.6 | 5638.6 | 4294.4 | 5227   | 7637.3 | 10895  |
| SSRP1   | 448.2  | 522    | 289.3  | 241.5  | 206.5  | 285.9  | 363.8  | 402.1  |
| SSSCA1  | 294.5  | 324.9  | 207.2  | 130.7  | 111.7  | 137.1  | 269.1  | 304.7  |
| SST     | 76.5   | 83.5   | 85.3   | 82.4   | 83.9   | 77.2   | 81.9   | 80.5   |
| SSTR1   | 88.2   | 111.2  | 89.3   | 88.2   | 78.9   | 74     | 89.4   | 101    |
| SSTR2   | 256.8  | 269.4  | 174.6  | 225.6  | 199.7  | 189.4  | 258.7  | 329.4  |
| SSTR3   | 100.6  | 117.7  | 104.5  | 93.1   | 85.6   | 98.5   | 101.3  | 109.2  |
| SSTR4   | 81.5   | 85.1   | 87.5   | 92     | 89     | 90.2   | 90     | 93.6   |
| SSTR5   | 78     | 84.8   | 89.9   | 93.6   | 85.9   | 83.5   | 80.7   | 83.7   |
| SSU72   | 3573.7 | 5376.6 | 3074   | 2453.8 | 2071.3 | 2273   | 3886.8 | 4392.4 |
| SSX1    | 79.4   | 79.5   | 98.1   | 86.6   | 75.7   | 86.8   | 84.2   | 88.1   |
| SSX2    | 105.7  | 122.3  | 107.5  | 82.1   | 83.4   | 91.2   | 105    | 101.4  |
| SSX2    | 126.2  | 150.1  | 86.1   | 85.8   | 77.2   | 84.7   | 136.9  | 150.4  |
| SSX2IP  | 95.3   | 108    | 105.7  | 106    | 103.9  | 128.8  | 90.7   | 103.8  |
| SSX3    | 86.8   | 92.5   | 92.8   | 87.5   | 85.5   | 97.7   | 85.3   | 85.4   |
| SSX3    | 98.9   | 104.2  | 105.5  | 101.8  | 93.3   | 102    | 101.9  | 111.8  |
| SSX3    | 97.5   | 115.2  | 96.4   | 80.6   | 81.2   | 84     | 112.9  | 117.4  |
| SSX4    | 86     | 83.3   | 97.1   | 92.1   | 72.2   | 87.1   | 80.6   | 86.4   |
| SSX4    | 81.6   | 87.3   | 99     | 94.1   | 86.9   | 81.8   | 87.2   | 93.9   |
| SSX4B   | 100.5  | 115    | 99.2   | 84.9   | 83     | 89.9   | 104.2  | 105    |
| SSX4B   | 116    | 129.8  | 103.3  | 84.5   | 78.8   | 81     | 111    | 128.7  |
| SSX5    | 109.7  | 120.1  | 86.3   | 90.4   | 82.9   | 84.2   | 107.6  | 117.4  |
| SSX5    | 86.4   | 93.5   | 95.1   | 94.5   | 91.2   | 91.8   | 90.3   | 76     |
| SSX6    | 92.8   | 95.5   | 86.9   | 81.7   | 86.8   | 91.2   | 92.5   | 102.9  |
| SSX7    | 84.6   | 90.2   | 94.4   | 84.5   | 94.8   | 89.5   | 82.7   | 88.2   |
| SSX9    | 170    | 215.3  | 112    | 105    | 100    | 100.2  | 178.5  | 167.7  |
| SSX9    | 75.9   | 76.1   | 89.2   | 78.7   | 77.6   | 78     | 72.8   | 90     |
| ST13    | 1377.3 | 1754.6 | 670    | 709.9  | 563.3  | 1099.8 | 1136.2 | 1942.2 |
| ST14    | 445.1  | 585.1  | 524.5  | 369    | 313.4  | 457.2  | 421    | 510.9  |
| ST18    | 79.3   | 83.7   | 84     | 81.1   | 82     | 80.2   | 76.6   | 89.4   |
| ST3GAL1 | 275    | 375.4  | 306.6  | 446.4  | 393.6  | 661.9  | 289.2  | 525.9  |
| ST3GAL1 | 120.7  | 147.9  | 110.1  | 112.6  | 115.6  | 107.6  | 111.4  | 115.2  |
| ST3GAL2 | 114.6  | 143.5  | 111.3  | 115.8  | 114.1  | 129.3  | 113.4  | 103.6  |
| ST3GAL3 | 360.9  | 439.7  | 334    | 238.6  | 234.9  | 260.3  | 298.8  | 337.9  |
| ST3GAL3 | 1313.7 | 1811.4 | 681.7  | 556.2  | 561.3  | 637.9  | 1092   | 1068.4 |
| ST3GAL4 | 383.3  | 495.4  | 332.8  | 210.2  | 178.7  | 272.5  | 342.8  | 668.5  |
| ST3GAL5 | 135.1  | 184.4  | 111.9  | 125.3  | 107.1  | 127.3  | 142.9  | 169.4  |
| ST3GAL5 | 214.4  | 266.3  | 176.8  | 212.4  | 212.2  | 264.6  | 196.5  | 308.7  |
| ST3GAL6 | 739.6  | 874.6  | 381.4  | 459.5  | 312.7  | 602.9  | 597.8  | 889    |
| ST5     | 100.8  | 99.5   | 90.5   | 88.4   | 78.8   | 85.8   | 89.6   | 89.1   |
| ST5     | 161.5  | 221.2  | 114.2  | 111.8  | 98.1   | 113.7  | 149.8  | 176.9  |
| ST5     | 97.7   | 112.8  | 84.9   | 90.2   | 82.5   | 97.6   | 96.6   | 98     |
| ST5     | 109    | 119.5  | 108.2  | 96.3   | 99.8   | 97     | 116.5  | 122.3  |
| ST6GAL1 | 101.3  | 123    | 95.2   | 89.7   | 93.1   | 85.7   | 109    | 126.6  |
| ST6GAL1 | 524.7  | 671.7  | 445.6  | 503.6  | 307.9  | 622.3  | 408.8  | 712.4  |
| ST6GAL1 | 77.6   | 91     | 90.1   | 100.7  | 91.9   | 87.4   | 88.1   | 89.4   |
| ST6GAL2 | 83.4   | 99.5   | 98     | 84.1   | 84.6   | 92.9   | 81     | 90.8   |

|           |        |        |       |       |       |        |        |        |
|-----------|--------|--------|-------|-------|-------|--------|--------|--------|
| ST6GALNAI | 83.9   | 91.5   | 90.7  | 79.8  | 75.5  | 80.2   | 81.7   | 88     |
| ST6GALNAI | 125.4  | 151.3  | 87.3  | 96.2  | 84.6  | 87.3   | 122.1  | 142.6  |
| ST6GALNAI | 105.4  | 124.3  | 96.7  | 85.8  | 83.7  | 91.8   | 113.1  | 143.7  |
| ST6GALNAI | 399.2  | 530.5  | 361.4 | 204   | 166.3 | 257.7  | 354.7  | 659    |
| ST6GALNAI | 126.1  | 160.2  | 123.9 | 106.3 | 95.8  | 95     | 108.8  | 135.9  |
| ST6GALNAI | 294.7  | 403.5  | 208   | 164.7 | 141.6 | 171.7  | 258.3  | 435.6  |
| ST6GALNAI | 96.1   | 118.2  | 99.1  | 88.1  | 79.6  | 92.6   | 114.5  | 119.7  |
| ST6GALNAI | 211.2  | 288.6  | 230.5 | 159   | 158.7 | 237.8  | 192.1  | 229.1  |
| ST7       | 301.8  | 357.9  | 195.9 | 172.2 | 143.3 | 218    | 268.9  | 388.1  |
| ST7       | 266.7  | 314.4  | 141.3 | 125.6 | 110.8 | 143.1  | 242.2  | 288.2  |
| ST7       | 385.2  | 517    | 309.3 | 285.9 | 211.9 | 328.5  | 314.9  | 477.9  |
| ST7L      | 283.2  | 346.8  | 132.4 | 99.9  | 93.9  | 129.8  | 244.1  | 388.7  |
| ST7L      | 287.7  | 332.9  | 185   | 119.3 | 112.8 | 145.2  | 245.4  | 327.8  |
| ST7L      | 106.9  | 117.1  | 106.8 | 96.1  | 88.9  | 95.3   | 105.6  | 114.1  |
| ST8SIA1   | 83.7   | 96     | 91.3  | 83.9  | 79.3  | 83.8   | 79.1   | 91.4   |
| ST8SIA2   | 90.8   | 97.8   | 94    | 91.6  | 86.2  | 92.6   | 89.7   | 99.8   |
| ST8SIA3   | 108.6  | 118.3  | 106   | 108.2 | 97.9  | 98.5   | 107.1  | 110.4  |
| ST8SIA4   | 106.7  | 129.9  | 118.8 | 121.9 | 107.7 | 107.5  | 103.6  | 111.2  |
| ST8SIA4   | 69.6   | 86.2   | 92.4  | 83.4  | 86    | 84.7   | 79.9   | 77.9   |
| ST8SIA4   | 162.9  | 222.2  | 135.9 | 113.4 | 110.4 | 144.9  | 143.8  | 172.8  |
| ST8SIA5   | 188.9  | 256.7  | 131.8 | 110.7 | 104.6 | 108.7  | 192.4  | 196.3  |
| ST8SIA6   | 98     | 96.9   | 97.3  | 97.5  | 99.7  | 90.1   | 88.4   | 92.9   |
| STAB1     | 81.4   | 93.2   | 92.2  | 82.1  | 81.9  | 82     | 82.9   | 83.8   |
| STAB2     | 69.9   | 82.7   | 99.3  | 84.2  | 84.8  | 90.6   | 74.6   | 72.9   |
| STAC      | 107.7  | 137.4  | 93    | 91.4  | 84.5  | 101.4  | 121.2  | 136.3  |
| STAC2     | 113.2  | 141    | 103.3 | 113.4 | 105.5 | 112.1  | 113.6  | 126.8  |
| STAC3     | 176.1  | 235.2  | 126.3 | 114.5 | 104.9 | 115.5  | 162.8  | 186.3  |
| STAG1     | 554.8  | 740.8  | 356   | 328.1 | 276.3 | 414.8  | 440.4  | 594.1  |
| STAG2     | 163.1  | 199.5  | 128.1 | 101.5 | 108.1 | 117    | 153.1  | 179.3  |
| STAG2     | 618    | 858.6  | 378.9 | 561.2 | 455.8 | 1212.7 | 586.1  | 1720.3 |
| STAG2     | 111    | 114.8  | 94.5  | 87.4  | 96.3  | 95.7   | 108.9  | 126.2  |
| STAG3     | 140.2  | 181.5  | 112.2 | 108.7 | 97.9  | 119.4  | 148.4  | 164.5  |
| STAM      | 375.3  | 416.3  | 288.8 | 236.3 | 193.7 | 283    | 290.7  | 464.7  |
| STAM2     | 209.8  | 235.6  | 132.9 | 127   | 133   | 174    | 151.9  | 234.1  |
| STAMBP    | 1887.6 | 2635.7 | 870.2 | 867   | 738.7 | 1149.6 | 1700.2 | 2094.4 |
| STAMBP    | 100.4  | 95.8   | 93.9  | 89.6  | 77.7  | 84.9   | 85.4   | 98.5   |
| STAMBP    | 848.6  | 1301.4 | 474.6 | 436.8 | 367.2 | 710.3  | 704    | 1010.8 |
| STAMBPL1  | 198    | 226.2  | 163.4 | 124   | 109   | 146.2  | 167.6  | 257.8  |
| STAP2     | 99.1   | 107.8  | 99.6  | 89.9  | 92.4  | 94.6   | 99.5   | 116.7  |
| STAP2     | 98.3   | 109.3  | 87.3  | 88.7  | 81.9  | 87.4   | 96.1   | 114.5  |
| STAP2     | 146.5  | 147.7  | 121.8 | 105.7 | 112.9 | 132.6  | 121.6  | 139    |
| STAP2     | 89.4   | 97.3   | 106.3 | 96.2  | 90.2  | 91.7   | 97.8   | 100.9  |
| STAR      | 135.6  | 143.4  | 151   | 121.8 | 121.3 | 124.3  | 114.5  | 166.7  |
| STAR      | 244    | 326.7  | 172.2 | 110.6 | 102.4 | 125.8  | 209.3  | 224.3  |
| STAR      | 122.5  | 134.1  | 159.6 | 132.7 | 134.3 | 128.1  | 117.5  | 129.1  |
| STARD10   | 143.8  | 188.8  | 142.7 | 115.8 | 147.2 | 154.2  | 150    | 186.2  |
| STARD13   | 86.2   | 88.8   | 87.6  | 84.3  | 83.9  | 84.5   | 83.8   | 82.8   |
| STARD13   | 93.7   | 99.7   | 113.2 | 109   | 98.4  | 111.2  | 98.1   | 99.7   |
| STARD13   | 167.5  | 241.9  | 142.4 | 165.5 | 139   | 169.3  | 162.4  | 239    |
| STARD13   | 94.3   | 107    | 116.5 | 98.3  | 110.8 | 107.4  | 95.8   | 91.7   |

|          |        |        |        |        |        |        |        |        |
|----------|--------|--------|--------|--------|--------|--------|--------|--------|
| STARD3   | 172.1  | 187.4  | 128.2  | 118    | 103.5  | 142.6  | 175.7  | 234.7  |
| STARD3NL | 599.6  | 862.1  | 455.3  | 487.5  | 404.9  | 670.7  | 599.6  | 1073.8 |
| STARD4   | 96.5   | 108.6  | 85     | 84.4   | 78.5   | 90.3   | 93.3   | 114.5  |
| STARD5   | 76.4   | 83     | 92.6   | 81.2   | 75.7   | 83.8   | 70.2   | 92.3   |
| STARD5   | 160.7  | 212    | 149.7  | 140.2  | 128    | 136.2  | 159.2  | 199.5  |
| STARD6   | 84     | 82.4   | 86.2   | 83.9   | 81.4   | 80.8   | 83.3   | 87.8   |
| STARD7   | 4874.9 | 6359.2 | 5386.8 | 6077.3 | 5044.1 | 7543.3 | 3597.4 | 6664.9 |
| STARD7   | 1742.6 | 2469.1 | 1020.6 | 1282   | 934.3  | 2075.5 | 1549.5 | 2642.1 |
| STARD7   | 297.6  | 326.5  | 134.5  | 113.9  | 110.4  | 81.8   | 162    | 224.5  |
| STARD8   | 229.5  | 291.6  | 128.5  | 128.3  | 109.4  | 121.2  | 186.6  | 207.1  |
| STAT1    | 474.4  | 606.9  | 247.2  | 191.1  | 181.7  | 278.3  | 485.6  | 788.7  |
| STAT1    | 1107.9 | 1510.1 | 668.9  | 528.9  | 446.7  | 735.3  | 1069.5 | 1520.4 |
| STAT1    | 1782.4 | 2192.9 | 1345.4 | 1705.9 | 1336.3 | 2135.1 | 1773.2 | 2128.5 |
| STAT2    | 544.3  | 684.1  | 527    | 1655.2 | 1507.7 | 1994.5 | 414.4  | 494.6  |
| STAT3    | 515.5  | 718.3  | 618.5  | 803.1  | 674.6  | 1129.8 | 443.6  | 779    |
| STAT4    | 116.9  | 130.7  | 121.5  | 89.3   | 86.8   | 101.9  | 118.3  | 151.3  |
| STAT5A   | 250.5  | 299.3  | 273.5  | 287.5  | 244.4  | 391    | 252.5  | 496.1  |
| STAT5B   | 178    | 213.2  | 211.7  | 223.7  | 211    | 321.3  | 157.3  | 209.6  |
| STAT6    | 415.9  | 498.9  | 396.7  | 432.4  | 422.3  | 544.1  | 386.4  | 512.3  |
| STATH    | 87.2   | 93.5   | 96.3   | 90.4   | 90.5   | 97.4   | 78.1   | 82     |
| STATIP1  | 895    | 1285.3 | 701.8  | 728.4  | 644.4  | 1064.5 | 841.8  | 1194.6 |
| STAU     | 95.6   | 108.8  | 87.6   | 91.3   | 95.2   | 90.6   | 90.6   | 105.2  |
| STAU     | 785.6  | 1028.2 | 633.9  | 642    | 446    | 872.7  | 718.1  | 1621.8 |
| STAU1    | 3721.5 | 4732   | 3631.9 | 4591.7 | 3179.7 | 4237.5 | 3335.1 | 4709.6 |
| STAU2    | 475.6  | 560.1  | 354.4  | 275.1  | 207.4  | 381.3  | 347.3  | 572.2  |
| STC1     | 94.9   | 106.9  | 104    | 89.4   | 90.7   | 98.1   | 83.9   | 102    |
| STC2     | 107    | 134.1  | 113.3  | 76.6   | 84.9   | 85.5   | 127.7  | 173.7  |
| STCH     | 151.8  | 179.8  | 128.1  | 144.9  | 126.3  | 167.6  | 170.5  | 239.2  |
| STEAP1   | 71.3   | 78.9   | 87.9   | 83.2   | 68.8   | 79.3   | 72.4   | 86.4   |
| STEAP2   | 75.6   | 99.7   | 100.7  | 87.5   | 98.2   | 99.3   | 80.5   | 81.1   |
| STEAP2   | 80.9   | 80.5   | 90.5   | 82.3   | 80.5   | 75.6   | 71.9   | 79.7   |
| STEAP2   | 81     | 91.8   | 87.1   | 80.9   | 78.5   | 81.5   | 89.7   | 103.6  |
| STEAP3   | 86     | 110.1  | 85.9   | 77.9   | 81.1   | 79.3   | 86.1   | 98.1   |
| STEAP3   | 479.6  | 570.3  | 475.1  | 628.2  | 397.9  | 697.4  | 341.4  | 432.8  |
| STEAP3   | 82.1   | 82.7   | 85.1   | 73     | 74.2   | 85.2   | 74.2   | 90.6   |
| STEAP4   | 84.5   | 99.4   | 83.7   | 87.7   | 77.9   | 80.2   | 83.9   | 90.6   |
| STGC3    | 85.5   | 101.7  | 90.5   | 90.8   | 78.3   | 79     | 89.7   | 90.2   |
| STH      | 120.3  | 151.4  | 93.2   | 95.5   | 92.2   | 94.8   | 126.9  | 138.5  |
| STIL     | 1581.7 | 1964   | 1443.9 | 1681.7 | 1503.9 | 2250.4 | 1318.5 | 1979   |
| STIM1    | 295.2  | 398    | 189.4  | 222.4  | 191.2  | 276.2  | 274.6  | 388.5  |
| STIM2    | 210.2  | 237.9  | 113.1  | 117.9  | 100.6  | 143.5  | 182.6  | 217.7  |
| STIP1    | 1923   | 2649.7 | 1869.7 | 745.4  | 640.6  | 923.4  | 1698.8 | 2319.2 |
| STK10    | 191    | 270.8  | 267.8  | 253.1  | 217.1  | 291.7  | 196.7  | 290.4  |
| STK11    | 134.7  | 186.7  | 109.3  | 109.8  | 96     | 149.5  | 123.4  | 176.7  |
| STK11P   | 174.8  | 202.7  | 285.7  | 259.7  | 244.3  | 351    | 158.3  | 250    |
| STK16    | 253.4  | 328.3  | 129.7  | 106.7  | 111.3  | 120    | 233.7  | 310.1  |
| STK16    | 158.8  | 186.1  | 128.9  | 106    | 89.7   | 94.1   | 151.5  | 177.4  |
| STK16    | 125.4  | 158.6  | 98.4   | 86.4   | 92.9   | 90.2   | 111.7  | 149.6  |
| STK17A   | 78.7   | 95.4   | 92.5   | 83.3   | 84.2   | 85.3   | 84     | 86.9   |
| STK17B   | 75.5   | 94.9   | 114.5  | 96.4   | 91.9   | 94.4   | 87.8   | 98.5   |

|        |        |        |        |        |        |        |        |        |
|--------|--------|--------|--------|--------|--------|--------|--------|--------|
| STK19  | 758.2  | 906.9  | 549.8  | 568.2  | 516    | 665.9  | 734.7  | 827.1  |
| STK19  | 419.8  | 636.9  | 423.7  | 418.2  | 398.1  | 506.7  | 497.8  | 629.2  |
| STK23  | 98.9   | 124.3  | 119.8  | 101.8  | 96.8   | 101.3  | 103.1  | 107.9  |
| STK24  | 88.7   | 110    | 86.4   | 87.8   | 68     | 89.9   | 85.9   | 111.1  |
| STK24  | 151.6  | 151.8  | 100.7  | 89.1   | 93.8   | 91.2   | 114    | 132.1  |
| STK24  | 5622.2 | 7265.2 | 4061.9 | 3214.4 | 2337.3 | 3007.9 | 4893.6 | 6061.1 |
| STK25  | 559.7  | 655.6  | 445.3  | 473    | 469.9  | 644.2  | 420    | 558    |
| STK3   | 907.1  | 1100.7 | 541.6  | 538.5  | 414.2  | 711.5  | 796.6  | 1616.1 |
| STK31  | 104.5  | 110.8  | 82.2   | 87.9   | 79.9   | 86.6   | 100.2  | 105.9  |
| STK31  | 117.1  | 127.7  | 104    | 108.4  | 98.6   | 94.8   | 121.9  | 124.5  |
| STK31  | 84.6   | 83.3   | 86.5   | 82.9   | 82.9   | 79.6   | 77.4   | 80.9   |
| STK32A | 82.6   | 104.7  | 83.4   | 86.7   | 68.2   | 84.9   | 88.7   | 110.3  |
| STK32B | 101.7  | 113.7  | 97.4   | 92     | 96.7   | 94.6   | 98.8   | 96.9   |
| STK32C | 173    | 176    | 120.2  | 97     | 90.1   | 99.1   | 141    | 161.6  |
| STK33  | 120.2  | 168.4  | 94.8   | 94.8   | 82.4   | 94.7   | 121.9  | 149.5  |
| STK35  | 134.8  | 162.5  | 131.6  | 122.5  | 112.7  | 128.6  | 140.3  | 177.9  |
| STK36  | 359.4  | 388.3  | 448    | 610.8  | 530.6  | 722    | 234.7  | 285.8  |
| STK38  | 571.3  | 840.1  | 641.8  | 742.7  | 651.5  | 1164   | 454.7  | 881.4  |
| STK38L | 114.9  | 122.8  | 106.9  | 99.7   | 97     | 105.2  | 105.6  | 134.4  |
| STK39  | 1103.6 | 1258.9 | 813.4  | 1059   | 782.2  | 1419.8 | 772.4  | 1127   |
| STK4   | 3244.3 | 3794.8 | 1971.2 | 2069.5 | 1574.2 | 3023.7 | 2844.6 | 3792   |
| STK40  | 627.3  | 631.7  | 683.3  | 984.6  | 803.2  | 1180.1 | 796.2  | 1567.6 |
| STK6P  | 100.5  | 124.8  | 109.2  | 98     | 98.3   | 103.9  | 95.7   | 99.8   |
| STMN1  | 103.7  | 124.5  | 116.8  | 108    | 95.8   | 98     | 101.3  | 106.5  |
| STMN1  | 4434.7 | 6069.9 | 3311.6 | 2811.1 | 2190.5 | 3233.4 | 3731   | 5325.3 |
| STMN1  | 527.7  | 681.3  | 371.4  | 265.1  | 245.8  | 289.9  | 420.9  | 499.8  |
| STMN1  | 108.1  | 122    | 95.2   | 76.9   | 67.3   | 75.3   | 110.8  | 102.7  |
| STMN2  | 117.9  | 136.6  | 95.1   | 88.5   | 77     | 83.5   | 119.7  | 136    |
| STMN4  | 88.8   | 103.5  | 87.5   | 80.7   | 83.1   | 82     | 85.5   | 97.7   |
| STOM   | 2128.9 | 2865.3 | 551.4  | 456.3  | 337.3  | 416.4  | 1941.9 | 2434   |
| STOM   | 1101.3 | 1560.3 | 422.3  | 189.9  | 181.4  | 224.9  | 684.9  | 918.4  |
| STOML1 | 108.3  | 147.8  | 111.2  | 108.9  | 104    | 111.2  | 112.3  | 142.4  |
| STOML2 | 5326.3 | 5895.3 | 4373.9 | 2294.2 | 1682.6 | 2774   | 3993.8 | 6327.3 |
| STOML3 | 83.7   | 87.9   | 101.5  | 85.3   | 84     | 88.9   | 81.7   | 79.2   |
| STON1  | 82.5   | 85.9   | 99.5   | 87.4   | 75.4   | 86.1   | 70.6   | 81.6   |
| STON2  | 89.9   | 95.3   | 87     | 82.3   | 77.2   | 90.8   | 83.9   | 81.6   |
| STOX1  | 133.9  | 150.4  | 108.2  | 93.1   | 80.3   | 90.4   | 119.8  | 142.9  |
| STOX2  | 184.8  | 215.8  | 150.1  | 161.1  | 132.2  | 160.4  | 238.5  | 374.7  |
| STRA13 | 3445   | 4576.1 | 2896.6 | 2300.6 | 2164.5 | 2564.6 | 2970.2 | 3454   |
| STRA6  | 76.7   | 78.4   | 88.3   | 92.2   | 91.8   | 85.3   | 78.6   | 76.3   |
| STRAP  | 1396   | 1652.5 | 411.7  | 372.9  | 339.1  | 504.7  | 1192.9 | 2112.9 |
| STRBP  | 496.3  | 579.3  | 423.3  | 477.8  | 417.5  | 818.2  | 390.4  | 722.2  |
| STRC   | 99.9   | 105.1  | 100.9  | 108.8  | 103.2  | 106    | 97.1   | 100.9  |
| STRN   | 155.6  | 202.9  | 115.8  | 116.3  | 109.7  | 126.4  | 140.4  | 207.1  |
| STRN3  | 936.2  | 1206.8 | 570    | 555.7  | 517.1  | 770.6  | 686.6  | 1075.9 |
| STRN4  | 152.7  | 182.2  | 174.7  | 124.5  | 122.5  | 181.9  | 161.5  | 335.5  |
| STRN4  | 155    | 170.5  | 108.6  | 102.4  | 99.2   | 112.7  | 155.9  | 184.7  |
| STS    | 96.3   | 115.3  | 97.8   | 92.1   | 98.2   | 93.1   | 95.9   | 112.6  |
| STS-1  | 379.9  | 475    | 257.2  | 375.1  | 289.6  | 432.7  | 289.6  | 300.4  |
| STT3A  | 3064.5 | 4573   | 1851.8 | 1461.3 | 1117   | 1953.5 | 2436.9 | 3302   |

|         |        |        |        |        |        |        |        |        |
|---------|--------|--------|--------|--------|--------|--------|--------|--------|
| STT3B   | 769.8  | 1097.1 | 275.9  | 335.4  | 256.1  | 466.4  | 554.2  | 922.5  |
| STUB1   | 1528   | 1771   | 1183.1 | 842.9  | 658.6  | 1013.5 | 1222.4 | 1679   |
| STX10   | 680.1  | 869.3  | 737.7  | 727.2  | 701.9  | 999.8  | 641.1  | 715.3  |
| STX11   | 280.1  | 386.3  | 245.1  | 283.3  | 251.3  | 373.5  | 342.2  | 770.4  |
| STX12   | 448.3  | 536.6  | 234.1  | 234.9  | 204.2  | 268.3  | 400    | 536.2  |
| STX16   | 125.4  | 122.6  | 89.4   | 87.4   | 93     | 79.1   | 98.5   | 128.6  |
| STX16   | 2779.3 | 2462.6 | 1712.5 | 2620.7 | 2849.7 | 2908   | 1874.4 | 1965.7 |
| STX17   | 121.2  | 153.6  | 112.9  | 102.9  | 89.6   | 97.1   | 118.1  | 165.2  |
| STX18   | 124.8  | 168.8  | 106.1  | 101.4  | 95     | 118.5  | 110.6  | 137.4  |
| STX19   | 117.6  | 142.6  | 116.5  | 113.1  | 104.7  | 114.2  | 120.4  | 138    |
| STX1A   | 112.3  | 131.3  | 118.2  | 110.2  | 112.6  | 136.8  | 131.3  | 159.3  |
| STX1B2  | 79     | 91.5   | 93.6   | 87.8   | 87.1   | 88.8   | 86.7   | 91.1   |
| STX2    | 406.5  | 427.2  | 326.2  | 338.3  | 348.6  | 449.9  | 295.3  | 362    |
| STX2    | 317.7  | 360.9  | 219.1  | 273.5  | 254.5  | 359    | 286    | 399.9  |
| STX3A   | 516.1  | 621.5  | 252.7  | 291.7  | 240.6  | 401.3  | 631.3  | 950    |
| STX4A   | 1353.1 | 1602.8 | 834.2  | 628.1  | 553.2  | 651    | 1300.7 | 1437.3 |
| STX5A   | 1394.2 | 1827.7 | 1076   | 951.3  | 934.3  | 1004.3 | 1702.9 | 1696.2 |
| STX5A   | 131.7  | 178.3  | 101.9  | 102    | 88.4   | 113.4  | 165.3  | 250.2  |
| STX5A   | 335.6  | 490.2  | 403.3  | 310.2  | 320.5  | 447.5  | 416.7  | 783.4  |
| STX6    | 687.6  | 904.3  | 457.6  | 640.5  | 518.3  | 871.8  | 629.2  | 968.9  |
| STX7    | 89.4   | 94.1   | 97.6   | 80.3   | 85     | 90     | 89.9   | 101.8  |
| STX8    | 594.7  | 837.3  | 246.9  | 214.9  | 190.3  | 292.6  | 544.5  | 626    |
| STXBP1  | 98     | 124.6  | 95.9   | 85.7   | 85     | 93.4   | 95.5   | 123    |
| STXBP1  | 114.7  | 145.8  | 133.9  | 116    | 126    | 124.3  | 116.4  | 150.2  |
| STXBP1  | 111.4  | 121.4  | 99.2   | 91.7   | 82.6   | 93.1   | 106.4  | 100.4  |
| STXBP2  | 1193.7 | 1493.9 | 1677.6 | 981.4  | 812.2  | 1558.8 | 1217.5 | 2696.9 |
| STXBP3  | 1477.3 | 1879.6 | 638.9  | 400.8  | 367.8  | 655.2  | 1277.3 | 2818.6 |
| STXBP5  | 492.2  | 680.3  | 379.6  | 759.6  | 556.3  | 973.1  | 619.4  | 998.6  |
| STXBP6  | 219.1  | 276    | 144.1  | 123    | 115.7  | 118.1  | 160.4  | 185.1  |
| STYK1   | 83.7   | 87.2   | 89.1   | 86.1   | 75.5   | 83.7   | 81.4   | 94.4   |
| STYX    | 75.3   | 86.3   | 94.7   | 83.5   | 86.5   | 79.7   | 76.9   | 87.5   |
| STYXL1  | 1054.2 | 1464.7 | 1104.4 | 1089   | 821.2  | 1330.8 | 938.7  | 1062.9 |
| SUB1    | 1146.3 | 1407   | 574.2  | 557.3  | 393.2  | 698.6  | 1069.7 | 1621.7 |
| SUCLA2  | 1037   | 1420   | 688.5  | 664.6  | 498.1  | 1305   | 700.7  | 1292   |
| SUCLG1  | 1984   | 2687.1 | 1402.2 | 1209.8 | 960.9  | 1592.5 | 1619.6 | 2563.7 |
| SUCLG2  | 1686.6 | 2170.5 | 501.5  | 462.4  | 393.8  | 578    | 1368.5 | 1714   |
| SUDS3   | 114.8  | 138.9  | 94.4   | 86.2   | 80.3   | 90.8   | 119.4  | 135.5  |
| SUFU    | 123.3  | 137.6  | 95.2   | 75.6   | 81.6   | 85.6   | 103.9  | 136.4  |
| SUGT1   | 694.3  | 866.5  | 417.9  | 302.2  | 246.4  | 348.6  | 554.7  | 927.1  |
| SUHW1   | 133.5  | 164.4  | 106.9  | 106.1  | 84.7   | 104.1  | 119.6  | 147    |
| SUHW2   | 148.2  | 191    | 137.3  | 98.7   | 88.6   | 104.4  | 132.8  | 171.7  |
| SUHW3   | 385    | 422.5  | 278.3  | 324.1  | 250.8  | 395.7  | 321    | 510.5  |
| SUHW4   | 200.5  | 242.1  | 165.7  | 172.6  | 141    | 192.8  | 188.8  | 259.4  |
| SUHW4   | 351.8  | 415    | 153.8  | 145.6  | 137.1  | 156.8  | 294.7  | 407    |
| SUHW4   | 174.4  | 185    | 129.7  | 123.4  | 116.8  | 142.3  | 136.8  | 164.1  |
| SULF1   | 77     | 102.7  | 100.1  | 90.1   | 93     | 86.8   | 87.1   | 95.4   |
| SULF2   | 422.1  | 565.8  | 214.6  | 272.8  | 253.2  | 346.2  | 383.6  | 340.7  |
| SULF2   | 83.6   | 93.5   | 89.8   | 104.1  | 109.3  | 132.1  | 81.8   | 94.1   |
| SULT1A1 | 96.2   | 100.3  | 109.5  | 111.8  | 101    | 103    | 89.4   | 97.9   |
| SULT1A1 | 93.9   | 97.7   | 87.2   | 106.3  | 104    | 96.4   | 88.2   | 99.8   |

|         |         |         |        |        |        |         |         |         |
|---------|---------|---------|--------|--------|--------|---------|---------|---------|
| SULT1A1 | 3503.6  | 3731.3  | 1235.2 | 2231.1 | 2237.6 | 1958.3  | 3344.8  | 3692.8  |
| SULT1A1 | 103.9   | 109.8   | 89.5   | 78.9   | 77.5   | 98.2    | 93.3    | 112.6   |
| SULT1A2 | 87.8    | 96.9    | 94.7   | 91.1   | 85.6   | 101.4   | 83.4    | 99.8    |
| SULT1A2 | 352     | 396.2   | 166.1  | 164.6  | 184.4  | 203.5   | 385.2   | 546.7   |
| SULT1A3 | 198.1   | 224.5   | 139.8  | 118.2  | 110.3  | 114.2   | 156     | 186.8   |
| SULT1A4 | 363.3   | 392     | 318    | 264.3  | 274.1  | 330.4   | 362     | 518.7   |
| SULT1C1 | 101.3   | 109.9   | 86.4   | 83.1   | 86.6   | 81      | 98      | 106.3   |
| SULT1C1 | 73.6    | 80.8    | 76.1   | 76.4   | 79.3   | 75.3    | 72.9    | 68.9    |
| SULT1C2 | 96.6    | 118.3   | 93     | 88.4   | 72.5   | 85.9    | 104.6   | 115.8   |
| SULT1C3 | 84.1    | 94.9    | 93.5   | 97.8   | 88.9   | 77.6    | 85.2    | 99.5    |
| SULT1E1 | 103     | 127.7   | 87.9   | 80.3   | 81.6   | 80      | 103.5   | 124.6   |
| SULT2A1 | 82.5    | 94.4    | 94.2   | 99.2   | 90.7   | 92      | 78.9    | 88.1    |
| SULT2B1 | 139     | 169.1   | 128.6  | 95.1   | 87.7   | 101.7   | 156.2   | 139.9   |
| SULT2B1 | 376.3   | 436.9   | 178.8  | 155    | 150.3  | 198.4   | 381.1   | 464.4   |
| SULT2B1 | 112.3   | 142     | 98.1   | 96     | 94.3   | 102.6   | 110.7   | 134     |
| SULT4A1 | 133.9   | 134.4   | 94.6   | 84.4   | 88.3   | 78.3    | 120.6   | 121.8   |
| SULT6B1 | 101.4   | 116.1   | 116.8  | 103.8  | 114.2  | 113.9   | 99.1    | 100     |
| SUMF1   | 495.9   | 632.1   | 244.7  | 274.5  | 222.3  | 256.4   | 394.7   | 475.8   |
| SUMF2   | 588     | 832.1   | 215.9  | 146.3  | 153.1  | 149.4   | 502.8   | 782.4   |
| SUMF2   | 4603.7  | 5899.2  | 3691.3 | 3275.1 | 2681.7 | 2651.5  | 4171.7  | 5182    |
| SUMO1   | 139.4   | 141.6   | 99.4   | 92.3   | 89.8   | 100.7   | 141.7   | 255.2   |
| SUMO1   | 85.2    | 79.8    | 94.2   | 80.4   | 86.9   | 102.4   | 77      | 81.2    |
| SUMO1P1 | 107     | 115.7   | 88.5   | 79.7   | 71.4   | 91.2    | 98      | 113.6   |
| SUMO1P3 | 92.3    | 117.9   | 79.8   | 80.7   | 75.7   | 95.1    | 109.5   | 122.3   |
| SUMO2   | 1607    | 1906    | 553.9  | 464.5  | 366.9  | 414.5   | 1394.8  | 2792    |
| SUMO2   | 7538.9  | 9333.6  | 3910.1 | 3547.6 | 3116.1 | 4117.1  | 5837.3  | 6073    |
| SUMO3   | 12186.5 | 15548.1 | 9138.2 | 9798.9 | 6476.5 | 10289.7 | 10930.2 | 13593.6 |
| SUMO4   | 98.3    | 111     | 101.1  | 92.5   | 89     | 92.2    | 96.6    | 105.1   |
| SUNC1   | 167.3   | 221.2   | 110.4  | 132.1  | 100.4  | 108.7   | 158.3   | 206.1   |
| SUNC1   | 88.8    | 89.8    | 96.3   | 89.5   | 90.2   | 84.5    | 87      | 94.1    |
| SUOX    | 559.5   | 695.1   | 428.7  | 466.6  | 424.3  | 521.6   | 405.9   | 470.1   |
| SUOX    | 101.1   | 108.8   | 86.2   | 90     | 93.2   | 87      | 83.8    | 97.3    |
| SUOX    | 172.2   | 225.8   | 150.7  | 153.3  | 141.8  | 219.1   | 138     | 223.4   |
| SUPT16H | 2333.5  | 3547.8  | 2998.1 | 2739.9 | 2132.1 | 4549.5  | 1877.8  | 3221.3  |
| SUPT3H  | 195.8   | 226.4   | 144.3  | 132.6  | 121.2  | 152.3   | 160.5   | 175.7   |
| SUPT3H  | 226.6   | 323.2   | 155.9  | 123.3  | 104.4  | 130.5   | 211.5   | 263.4   |
| SUPT4H1 | 876.1   | 1131.8  | 658    | 695    | 598.9  | 875.6   | 895.2   | 1530.5  |
| SUPT5H  | 377.6   | 526.5   | 561.7  | 615.3  | 452.3  | 840.2   | 413.2   | 732.4   |
| SUPT6H  | 162.2   | 243.5   | 147.3  | 180.9  | 143.6  | 215     | 157.9   | 244.1   |
| SUPT7L  | 103.9   | 114.6   | 121.2  | 100.1  | 97.4   | 101.9   | 97.6    | 112.4   |
| SUPV3L1 | 340.9   | 415.6   | 313.5  | 286.7  | 210.4  | 362.8   | 273.7   | 333.7   |
| SURB7   | 117.5   | 128.9   | 111.5  | 95.9   | 110.2  | 97.3    | 113.3   | 144.7   |
| SURF1   | 766.3   | 966.6   | 452.2  | 451.3  | 354.6  | 556.8   | 613.9   | 865.9   |
| SURF2   | 180.6   | 197.5   | 153.3  | 122    | 109.9  | 129.9   | 141.6   | 172.7   |
| SURF4   | 1419.7  | 2133.6  | 1172.2 | 686.1  | 593.2  | 1252    | 1357.2  | 2640.9  |
| SURF5   | 187.7   | 235     | 138.3  | 100.9  | 110.7  | 121.5   | 150     | 199     |
| SURF5   | 839.3   | 1028.6  | 600.5  | 416.4  | 356.4  | 456.8   | 621.6   | 600.9   |
| SURF6   | 1665.9  | 1874.1  | 1142   | 1072.3 | 764.9  | 1241.8  | 1187.9  | 1950.7  |
| SUSD1   | 677.9   | 851.9   | 598.1  | 708.6  | 591.4  | 1013.3  | 631.2   | 956.4   |
| SUSD2   | 83      | 93.7    | 91.3   | 97.8   | 84.8   | 93.7    | 87.4    | 89.9    |

|          |        |        |        |        |        |        |        |        |
|----------|--------|--------|--------|--------|--------|--------|--------|--------|
| SUSD3    | 712.6  | 897    | 423.3  | 358.9  | 341.1  | 381.2  | 615.9  | 682.1  |
| SUSD4    | 75.7   | 78.9   | 89.2   | 83.6   | 84.2   | 80.4   | 89     | 89     |
| SUSD4    | 93.9   | 92.6   | 82.3   | 84.4   | 74     | 87.5   | 93.7   | 98.5   |
| SUV39H1  | 2585.2 | 3000.4 | 1912.5 | 1284.4 | 938.8  | 1082.4 | 2027.5 | 2509.8 |
| SUV39H2  | 137.8  | 175.4  | 136.6  | 127    | 142.1  | 130.3  | 128    | 154.2  |
| SUV420H1 | 130.5  | 145.7  | 116.9  | 103.3  | 95     | 103    | 113.7  | 138.6  |
| SUV420H1 | 285    | 467.1  | 185.4  | 168.4  | 155.2  | 208.3  | 208.4  | 265.7  |
| SUV420H1 | 272.9  | 335.2  | 147    | 150    | 126.6  | 200.6  | 229.2  | 394.3  |
| SUV420H2 | 110.7  | 123.3  | 97.1   | 84.6   | 85     | 89.4   | 112.9  | 124.8  |
| SUZ12    | 7260.1 | 8653.9 | 5222.5 | 6746.3 | 5848.1 | 8705.1 | 6765.9 | 9318.6 |
| SV2A     | 128    | 154.5  | 129.7  | 112.1  | 102    | 106.5  | 123.8  | 154.8  |
| SV2B     | 119.7  | 133.6  | 97     | 82     | 86.7   | 99.5   | 94.7   | 119.9  |
| SV2C     | 80.5   | 90.6   | 92.5   | 90.7   | 86.5   | 91.2   | 83.9   | 89.7   |
| SVEP1    | 147.9  | 193.8  | 169.7  | 103.2  | 98.9   | 110.3  | 143.2  | 168.9  |
| SVIL     | 96.6   | 104.5  | 102.9  | 93.1   | 88.9   | 85.5   | 97     | 94.6   |
| SVIL     | 131    | 163.8  | 113.4  | 108.6  | 102.1  | 91.2   | 130.7  | 165.9  |
| SVIL     | 270.5  | 328.5  | 233.9  | 267.4  | 218.4  | 341.4  | 267.9  | 456.5  |
| SVOP     | 93.6   | 109.9  | 97     | 78.2   | 86.2   | 94.4   | 87.6   | 95.2   |
| SWAP70   | 921.1  | 1169   | 579.1  | 737.3  | 626    | 1060.4 | 1118.6 | 1586.7 |
| SYAP1    | 338.3  | 428.3  | 169.8  | 180.3  | 212.4  | 156.1  | 308.5  | 383.1  |
| SYBL1    | 2446   | 3115.5 | 1343.7 | 2330.4 | 1724.9 | 2548.9 | 2275   | 4234.8 |
| SYCE1    | 102.3  | 103.5  | 96.6   | 95.9   | 100.2  | 106.5  | 106.8  | 95.4   |
| SYCE1    | 82.4   | 84.3   | 80.6   | 84.7   | 76.8   | 78.4   | 83.2   | 83.5   |
| SYCN     | 91.7   | 95.9   | 92.4   | 86.6   | 87.9   | 86.7   | 90.4   | 94.9   |
| SYCP1    | 70.8   | 88.1   | 88.6   | 85.5   | 80.5   | 91.2   | 87.2   | 83.9   |
| SYCP2    | 95.3   | 96.3   | 94.6   | 104.7  | 93.9   | 96     | 101.7  | 101.8  |
| SYCP3    | 86.3   | 88.3   | 102.7  | 96.1   | 88.7   | 89.2   | 83.4   | 85.6   |
| SYDE1    | 108.8  | 131.3  | 118.8  | 90.5   | 86.9   | 89.8   | 109.2  | 117.5  |
| SYF2     | 758.4  | 999.7  | 454.8  | 592.9  | 574    | 671.2  | 801.7  | 965.2  |
| SYF2     | 95.2   | 99     | 91.6   | 92.2   | 82.3   | 88.4   | 92.2   | 99.9   |
| SYF2     | 2083.3 | 2987.2 | 1383.3 | 1579.2 | 1568.6 | 2271.5 | 2184.6 | 2672   |
| SYK      | 2749.5 | 3330.6 | 2432.9 | 2390.2 | 1974.1 | 2516.4 | 2076.4 | 3676.6 |
| SYMPK    | 207.7  | 280    | 223.5  | 149    | 132.6  | 198.4  | 206.4  | 293    |
| SYN1     | 81.3   | 98     | 87.8   | 90.5   | 90.6   | 80.4   | 89.4   | 91.5   |
| SYN1     | 80.5   | 93.1   | 99.6   | 94.3   | 90.3   | 93.6   | 92.5   | 98.8   |
| SYN1     | 85.7   | 91.2   | 84.9   | 82.9   | 82     | 76.7   | 93.1   | 89.9   |
| SYN2     | 188.3  | 227.8  | 109.5  | 100.1  | 76.1   | 102.5  | 175.9  | 227.5  |
| SYN2     | 132.8  | 128.9  | 120.1  | 96.2   | 83     | 95.3   | 126.2  | 173.2  |
| SYN3     | 96.1   | 123.6  | 94.7   | 84.5   | 90.8   | 97.8   | 95.8   | 111.1  |
| SYN3     | 90.4   | 96.6   | 96.8   | 98.5   | 80     | 89     | 82.7   | 97.3   |
| SYNC1    | 191.9  | 240.6  | 109.3  | 114.4  | 105.4  | 112.8  | 170.4  | 262.4  |
| SYNCRIP  | 5958.6 | 7455.5 | 2949.2 | 2881.3 | 1861.4 | 2696.8 | 5332.7 | 7837.4 |
| SYNE1    | 81.1   | 109.3  | 93.3   | 82.3   | 82.5   | 93.4   | 98.3   | 93.4   |
| SYNE1    | 92.2   | 86.8   | 84.1   | 90.4   | 77.8   | 80.1   | 84.1   | 94.6   |
| SYNE1    | 139.5  | 179.2  | 110.1  | 102.8  | 88.8   | 105.3  | 138.5  | 166.2  |
| SYNE1    | 82.6   | 76.8   | 87.1   | 79.3   | 74.1   | 84.2   | 73.4   | 75.9   |
| SYNE2    | 92.3   | 89.4   | 84.9   | 77.5   | 76.5   | 86.2   | 85.8   | 93.4   |
| SYNE2    | 80.5   | 87.6   | 100.7  | 81.6   | 78.8   | 84.1   | 78.3   | 89.8   |
| SYNE2    | 118.1  | 128.5  | 109.6  | 95.5   | 93.3   | 100.5  | 112.2  | 128.6  |
| SYNE2    | 75     | 81.2   | 101.8  | 93.1   | 81.2   | 76.8   | 83.5   | 80     |

|         |        |        |       |        |        |        |        |        |
|---------|--------|--------|-------|--------|--------|--------|--------|--------|
| SYNGAP1 | 81.1   | 99     | 86    | 78     | 81.3   | 79     | 85.5   | 96     |
| SYNGR1  | 409.1  | 482.1  | 207.2 | 144.9  | 162.2  | 162.2  | 349.7  | 396.3  |
| SYNGR1  | 104.1  | 103    | 89.7  | 87.5   | 91.7   | 95.5   | 107.2  | 110.8  |
| SYNGR1  | 99.2   | 97.8   | 109.9 | 103.2  | 106.1  | 93.1   | 84.3   | 104.5  |
| SYNGR1  | 220.2  | 272.6  | 233.5 | 189.8  | 172.7  | 218.3  | 177.3  | 249.9  |
| SYNGR2  | 102.2  | 109.2  | 88.6  | 95.8   | 93.5   | 109    | 106.3  | 115.9  |
| SYNGR3  | 78.5   | 94.2   | 105.4 | 90.7   | 98.1   | 100.6  | 75.4   | 92.5   |
| SYNGR4  | 107.4  | 126    | 120.2 | 108.4  | 101.9  | 103.4  | 104.6  | 114.4  |
| SYNJ1   | 210.8  | 267.6  | 145.6 | 163.4  | 149.1  | 211.6  | 206.5  | 378.5  |
| SYNJ1   | 146.2  | 145.9  | 94.6  | 95.4   | 93     | 95.9   | 129.2  | 153.6  |
| SYNJ1   | 81     | 102.2  | 88.2  | 98.7   | 81.3   | 84.5   | 86.9   | 90.2   |
| SYNJ2   | 281.4  | 359.5  | 231.4 | 264.1  | 218.6  | 246    | 205    | 325.2  |
| SYNJ2BP | 445.7  | 559.6  | 249.9 | 321.5  | 254.8  | 265.9  | 345.1  | 416.3  |
| SYNPO   | 136.2  | 148.5  | 104.2 | 87.9   | 87.3   | 89.8   | 127.3  | 136.9  |
| SYNPO2  | 114.8  | 123.1  | 116.8 | 90.6   | 91     | 106.1  | 111.5  | 119.3  |
| SYNPO2  | 106.6  | 114.7  | 92.1  | 87.2   | 89.2   | 96     | 100.9  | 114.5  |
| SYNPO2L | 96.5   | 121.2  | 96.5  | 93.7   | 75.1   | 90.7   | 97.9   | 114.7  |
| SYNPR   | 94.2   | 100.5  | 89.1  | 88.6   | 89.4   | 78.2   | 86.6   | 97.9   |
| SYP     | 91     | 87.2   | 97.2  | 87.9   | 81.6   | 96.8   | 91.7   | 101.3  |
| SYPL1   | 3648.2 | 4697.2 | 2926  | 3134.8 | 2201.6 | 3738.2 | 3232.1 | 5175.3 |
| SYPL1   | 541.7  | 552.7  | 271.9 | 216.4  | 178.6  | 196    | 321.3  | 404.4  |
| SYPL1   | 89.2   | 98.5   | 99.9  | 96.9   | 80.5   | 83.9   | 89.8   | 95.3   |
| SYPL2   | 84.9   | 101.9  | 89.7  | 78.8   | 70.1   | 78.9   | 87.7   | 100.3  |
| SYT1    | 95.3   | 103.7  | 97.8  | 94     | 89.4   | 94.8   | 93.3   | 96.2   |
| SYT10   | 74.1   | 86.9   | 86.6  | 72.2   | 72.5   | 80.3   | 74.7   | 81     |
| SYT11   | 177.3  | 197.8  | 150   | 105.8  | 113.6  | 112    | 159.8  | 152.9  |
| SYT12   | 103.8  | 112.2  | 101.1 | 88     | 87.8   | 91.7   | 96.9   | 105.2  |
| SYT13   | 85.2   | 89.6   | 102.8 | 90.4   | 87.7   | 85.2   | 87.8   | 90.8   |
| SYT14   | 89     | 109.6  | 98.3  | 86     | 89.4   | 93.4   | 106.7  | 99.6   |
| SYT15   | 216    | 270.4  | 193.4 | 119.5  | 114.2  | 117.1  | 218    | 253.1  |
| SYT15   | 108.1  | 133    | 107.3 | 97.6   | 87.2   | 98.6   | 107.4  | 120.2  |
| SYT16   | 122.8  | 156.5  | 93.9  | 98.5   | 93.6   | 92.2   | 117.3  | 165.2  |
| SYT17   | 120.1  | 119.3  | 108.5 | 100.1  | 108.7  | 111.8  | 106.3  | 104.3  |
| SYT2    | 86.5   | 106.3  | 88.3  | 73.8   | 72.7   | 73.7   | 79.4   | 91.9   |
| SYT3    | 132    | 164.6  | 136.2 | 93.9   | 99.8   | 111.1  | 126.7  | 178.4  |
| SYT4    | 118    | 118.3  | 92.8  | 84     | 78.5   | 86.7   | 97.5   | 110.6  |
| SYT5    | 104.5  | 104.2  | 94.7  | 89.1   | 75.4   | 82.3   | 74.7   | 100.7  |
| SYT6    | 97.2   | 103.2  | 93.2  | 94.5   | 94.1   | 90.3   | 93.7   | 94.4   |
| SYT7    | 105.2  | 128.9  | 93.2  | 80.6   | 86.8   | 97.3   | 106.2  | 125.5  |
| SYT7    | 151.2  | 196.7  | 104.2 | 94.7   | 87.9   | 99.6   | 148.7  | 177.6  |
| SYT8    | 76.8   | 86     | 100.9 | 86.4   | 100.8  | 82.5   | 78.1   | 84.5   |
| SYT9    | 93.7   | 97.3   | 105.8 | 94.6   | 93.4   | 98.4   | 93.2   | 94.6   |
| SYTL1   | 167.1  | 214.6  | 139.5 | 121    | 92.2   | 147.8  | 140.3  | 196.3  |
| SYTL2   | 94     | 114.5  | 88.2  | 87.3   | 76.5   | 80.9   | 110.3  | 103.4  |
| SYTL2   | 130.2  | 159.3  | 106.7 | 85.9   | 80.8   | 97     | 129    | 154.2  |
| SYTL2   | 82.8   | 86.1   | 105   | 92     | 78.5   | 91.9   | 82.5   | 86.2   |
| SYTL2   | 104    | 132.1  | 110   | 108.7  | 102.5  | 110.6  | 104.7  | 128.4  |
| SYTL3   | 161.8  | 171.6  | 118   | 101.4  | 92.2   | 104.3  | 151.2  | 175.8  |
| SYTL4   | 196.7  | 240.4  | 172.4 | 154.8  | 150.4  | 198.1  | 166.7  | 186.3  |
| SYTL5   | 103.1  | 120.6  | 98.9  | 95.9   | 85.9   | 93.5   | 105.3  | 111.1  |



|         |        |        |        |        |        |        |        |        |
|---------|--------|--------|--------|--------|--------|--------|--------|--------|
| SYVN1   | 774.7  | 891.7  | 366.6  | 326.2  | 310.9  | 380.2  | 709.9  | 950.2  |
| SYVN1   | 99.1   | 114.2  | 101.9  | 93.7   | 89.4   | 102.4  | 90.4   | 116.3  |
| T       | 92.9   | 90.4   | 83.7   | 89.1   | 77.8   | 83.8   | 85.3   | 89.8   |
| T2R55   | 88.4   | 97.9   | 92     | 87.5   | 79.3   | 80.8   | 93     | 87.1   |
| TAAR1   | 136.9  | 157.9  | 109.3  | 95.8   | 90.7   | 103.6  | 125.6  | 138.1  |
| TAAR2   | 107.2  | 113.5  | 94.2   | 89.8   | 82.2   | 90.2   | 117.5  | 108    |
| TAAR5   | 88.1   | 108.5  | 96.7   | 95.4   | 97.1   | 84.9   | 100.3  | 97.4   |
| TAAR8   | 94.9   | 124.5  | 102.6  | 98.7   | 96.6   | 94.9   | 96     | 109    |
| TAAR9   | 98.8   | 108.2  | 97.8   | 89     | 93.9   | 95.1   | 99.5   | 108.9  |
| TAB3    | 101.5  | 101.8  | 102.9  | 94.6   | 98.7   | 97.8   | 96.4   | 98     |
| TAB3    | 78.5   | 106.3  | 102.7  | 103.3  | 98.1   | 99.3   | 87.7   | 97.6   |
| TAC1    | 81.3   | 105.2  | 84.4   | 79.8   | 85.6   | 81.3   | 90.9   | 91.2   |
| TAC3    | 97.1   | 126.9  | 86.1   | 80.1   | 79.1   | 91.2   | 100.9  | 124.1  |
| TAC3    | 131.1  | 145.4  | 116.6  | 99.9   | 102.1  | 97.1   | 134.4  | 162.1  |
| TAC3    | 71.9   | 82.4   | 85.6   | 79.5   | 77.7   | 90.8   | 78.3   | 80.8   |
| TAC4    | 77.9   | 93     | 86.8   | 86     | 79.3   | 93.7   | 86.1   | 94.6   |
| TAC4    | 137.1  | 170.5  | 98.3   | 100.6  | 91.4   | 91.6   | 154.8  | 139.7  |
| TACC1   | 4559.6 | 6705   | 3650.5 | 2938.4 | 2192.6 | 3512.2 | 4793.3 | 5581.8 |
| TACC2   | 159.5  | 189.8  | 187    | 127.4  | 106.6  | 135.2  | 193.4  | 337.3  |
| TACC2   | 79.6   | 92     | 89.1   | 83.8   | 79.8   | 91.7   | 83.8   | 89.3   |
| TACC2   | 110.5  | 121.6  | 106.8  | 92.7   | 80.7   | 90.6   | 123.3  | 164.1  |
| TACC3   | 614.6  | 770.1  | 382.6  | 215.1  | 192    | 320.6  | 523.2  | 1164.4 |
| TACR1   | 81.6   | 84.6   | 86.1   | 82.4   | 80.3   | 82.6   | 79.6   | 85.1   |
| TACR1   | 88.4   | 94.2   | 99.4   | 92.9   | 95.4   | 79     | 81.2   | 89.6   |
| TACR1   | 89.9   | 94     | 101.8  | 96.1   | 90.9   | 94.4   | 91.2   | 93.4   |
| TACR2   | 90.4   | 102.8  | 94.9   | 77.1   | 83.4   | 91.7   | 90.5   | 104.6  |
| TACR3   | 123.9  | 144.6  | 110    | 106.4  | 101.3  | 102.6  | 113.9  | 123    |
| TACSTD1 | 168.4  | 204.2  | 99.5   | 89.3   | 85.1   | 93.1   | 154.1  | 171    |
| TACSTD2 | 117.8  | 132.2  | 102.3  | 93.3   | 87.5   | 87.8   | 112.1  | 119.3  |
| TADA1L  | 622.6  | 778.5  | 285    | 268.2  | 229.9  | 290.2  | 527.9  | 905.6  |
| TADA2L  | 181.3  | 261.5  | 98.9   | 107.5  | 102.7  | 99.5   | 160.8  | 197.9  |
| TADA2L  | 296.2  | 366.2  | 135.8  | 113.5  | 105.2  | 136.5  | 238.1  | 340.5  |
| TADA2L  | 112.4  | 116    | 107.9  | 95.1   | 93.8   | 97.7   | 102.2  | 109.3  |
| TADA3L  | 377.9  | 466.3  | 266.1  | 243.4  | 201.2  | 292.9  | 327.5  | 536    |
| TADA3L  | 451.7  | 481.5  | 323.9  | 325.8  | 276.5  | 412    | 347.3  | 498.5  |
| TADA3L  | 100.1  | 92.4   | 95.9   | 83.2   | 79.6   | 85.5   | 89     | 107.6  |
| TAF1    | 209.9  | 318.7  | 140.7  | 115.3  | 138    | 117.4  | 201.3  | 239.9  |
| TAF1    | 113.8  | 153.9  | 99.4   | 103.4  | 104.6  | 117    | 118.3  | 125.6  |
| TAF10   | 1674.3 | 2195.9 | 1538.9 | 1117.3 | 930.3  | 1307.1 | 1473.4 | 2508.9 |
| TAF11   | 144.7  | 161.7  | 104.4  | 91.9   | 94.8   | 96.6   | 139.2  | 136    |
| TAF13   | 216.8  | 255    | 143.4  | 118.5  | 106.4  | 99     | 197.6  | 228.6  |
| TAF15   | 4022.5 | 6490.5 | 3449   | 4944.1 | 4093   | 4363.6 | 4622.4 | 5530.3 |
| TAF15   | 642.4  | 1052.6 | 283.1  | 280.4  | 268.5  | 277    | 784.5  | 707.9  |
| TAF1A   | 233.5  | 281.3  | 121.5  | 120.3  | 116.3  | 123    | 179.9  | 243.6  |
| TAF1A   | 101.1  | 103.2  | 88.4   | 76.5   | 79.4   | 92.5   | 91.3   | 106.6  |
| TAF1B   | 777.9  | 825.2  | 243.1  | 256.5  | 226.3  | 266    | 541.3  | 846.6  |
| TAF1C   | 91.4   | 106.5  | 89.4   | 84.9   | 83.5   | 87.1   | 95.7   | 116.9  |
| TAF1C   | 192.5  | 209.9  | 192    | 157.9  | 160.1  | 177    | 159.8  | 207.7  |
| TAF1C   | 1776.6 | 1687.1 | 1555   | 1337.4 | 1040.5 | 1512.8 | 1148.5 | 1584.6 |
| TAF1L   | 271.7  | 431.1  | 188.4  | 233.2  | 224.9  | 321.8  | 231.7  | 243    |

|          |         |         |        |        |        |        |         |        |
|----------|---------|---------|--------|--------|--------|--------|---------|--------|
| TAF2     | 928.8   | 1285.3  | 763.4  | 630.3  | 500.8  | 1072.2 | 810.1   | 1244.4 |
| TAF4     | 1070.1  | 1381    | 830.2  | 1096   | 910.8  | 1300.3 | 1018    | 1216.6 |
| TAF5     | 539.7   | 686.9   | 366.2  | 312.2  | 231.9  | 397.1  | 474.6   | 977.3  |
| TAF5L    | 144.4   | 144.5   | 129.9  | 128.4  | 107.1  | 135.7  | 117.6   | 219.9  |
| TAF5L    | 217.5   | 311.8   | 184.4  | 381.3  | 324.3  | 556    | 237.5   | 300.4  |
| TAF6     | 140.8   | 159     | 170.2  | 127.1  | 118.3  | 126.5  | 115.5   | 162.2  |
| TAF6     | 113.9   | 144.9   | 106    | 99.4   | 92.7   | 96.8   | 110.5   | 157.7  |
| TAF6L    | 464.8   | 629.2   | 398.1  | 331.8  | 319.4  | 368.6  | 401     | 598.2  |
| TAF7     | 1078.4  | 1330.1  | 289    | 284.1  | 237.2  | 456.5  | 766.8   | 1308.5 |
| TAF7L    | 84.6    | 96.2    | 87.1   | 72.4   | 70.6   | 79.2   | 94.9    | 96.1   |
| TAF9     | 632     | 739.7   | 170.3  | 189.2  | 148.8  | 227.6  | 424.5   | 695.8  |
| TAF9     | 503.7   | 695.3   | 152    | 169.9  | 157.3  | 174.2  | 388.9   | 620.6  |
| TAF9B    | 77.1    | 89.9    | 86.8   | 81.9   | 80.9   | 87.7   | 79.9    | 88.7   |
| TAGAP    | 115.7   | 128.4   | 120.5  | 123.6  | 112.5  | 119.1  | 110.3   | 109.3  |
| TAGAP    | 147.6   | 171.8   | 116.4  | 124.1  | 122.6  | 109.4  | 125     | 146.4  |
| TAGAP    | 175.6   | 170.7   | 140.2  | 118.1  | 113.4  | 125    | 130.7   | 155.3  |
| TAGLN    | 187.2   | 218.4   | 168.1  | 171.8  | 146.7  | 169.2  | 190.2   | 227.9  |
| TAGLN    | 111.6   | 139.1   | 102.1  | 93.7   | 85.3   | 96.7   | 123.2   | 156.3  |
| TAGLN    | 77.6    | 91.5    | 89.4   | 88.4   | 85.3   | 86.8   | 86.9    | 90.4   |
| TAGLN2   | 5225.9  | 7653.5  | 6023.9 | 3626.2 | 2768.2 | 4972.8 | 5156.5  | 9006.9 |
| TAGLN3   | 97      | 103.6   | 96.9   | 95.1   | 87.5   | 93.3   | 95.4    | 100.3  |
| TAGLN3   | 89.8    | 88.6    | 91.1   | 79     | 75.2   | 88.5   | 87.9    | 98.3   |
| TAL1     | 111.4   | 133.4   | 102.8  | 92.5   | 96.8   | 92.9   | 108.7   | 130.6  |
| TAL2     | 157.3   | 177.6   | 77.7   | 89.5   | 81.1   | 88     | 135.8   | 144.6  |
| TALDO1   | 10972.2 | 13860.5 | 8224   | 8146.2 | 6281.4 | 9167.4 | 12235.5 | 17860  |
| TANC1    | 197.8   | 254.6   | 173.1  | 165.7  | 166.9  | 290.1  | 172.4   | 343    |
| TA-NFKBH | 113.6   | 137.6   | 119    | 102.5  | 98.7   | 104.1  | 130.7   | 167.6  |
| TANK     | 172.3   | 194.2   | 102.4  | 105.8  | 82.9   | 104.2  | 155.8   | 241.5  |
| TANK     | 98.5    | 107.3   | 88.5   | 80.3   | 77.2   | 93.7   | 94.6    | 112.7  |
| TAOK1    | 155.4   | 229.5   | 209    | 328.6  | 260    | 157.6  | 241.9   | 238    |
| TAOK2    | 144     | 196.4   | 219.9  | 161.5  | 168.3  | 165    | 141.1   | 203.3  |
| TAOK2    | 106.6   | 138.2   | 90.5   | 81     | 93.3   | 91.1   | 112.8   | 150    |
| TAOK2    | 97.5    | 141.3   | 91.5   | 83.1   | 86.4   | 85.9   | 109.6   | 118.2  |
| TAOK3    | 95.8    | 96      | 86.5   | 79.8   | 73.3   | 83.6   | 99.5    | 95.8   |
| TAP1     | 1544.2  | 1791    | 1479.5 | 1532.7 | 1410.9 | 1724.8 | 1056.3  | 1246.3 |
| TAP2     | 433.7   | 574.8   | 261.8  | 228    | 214.6  | 218.9  | 378.6   | 492.8  |
| TAP2     | 498.1   | 615.5   | 479.4  | 486.9  | 372.7  | 641.2  | 399.8   | 824.9  |
| TAPBP    | 1185.8  | 1757.4  | 1724.7 | 2554.5 | 2117   | 2940   | 1114.4  | 1907.2 |
| TAPBP    | 171.6   | 173.1   | 139.6  | 136.7  | 132.8  | 140.2  | 152.8   | 215.6  |
| TAPBP    | 305     | 438.8   | 189.6  | 188.5  | 175    | 134.8  | 231.2   | 417.9  |
| TAPBPL   | 197.8   | 261.8   | 136.7  | 128.5  | 130.8  | 142.4  | 186.2   | 168.6  |
| TA-PP2C  | 338.2   | 427.2   | 227.3  | 212.9  | 175.4  | 184.6  | 324.5   | 457.5  |
| TARBP1   | 568.5   | 752.2   | 404.4  | 640.3  | 630.3  | 900    | 404.9   | 576.6  |
| TARBP2   | 267.5   | 352.2   | 254.7  | 180.1  | 167.8  | 193.4  | 227.3   | 345.8  |
| TARBP2   | 652.5   | 823.5   | 281    | 229.2  | 219.2  | 227.9  | 567.4   | 430    |
| TARDBP   | 211.5   | 263.2   | 123.9  | 125.3  | 127.4  | 150.9  | 179.6   | 264.1  |
| TARP     | 992.4   | 1283    | 281.5  | 249.2  | 165    | 316.8  | 649.6   | 824.8  |
| TARS     | 2174.4  | 2749.2  | 908.1  | 955.7  | 676.4  | 1542.8 | 2013.3  | 4302.7 |
| TARSL1   | 284.7   | 335.4   | 155.9  | 124.4  | 108.5  | 158.4  | 207.9   | 269.3  |
| TAS1R1   | 83.6    | 87.9    | 89.8   | 78.8   | 77     | 86.2   | 90      | 91.1   |

|          |        |        |        |        |        |        |        |        |
|----------|--------|--------|--------|--------|--------|--------|--------|--------|
| TAS1R1   | 85.7   | 100.8  | 88     | 90.3   | 81.3   | 90.9   | 89.9   | 98.8   |
| TAS1R2   | 74.3   | 88.8   | 106    | 94.5   | 90.9   | 96.8   | 83.4   | 88.3   |
| TAS1R3   | 82.2   | 87.2   | 85.1   | 75.7   | 76.8   | 71.1   | 77.3   | 86.7   |
| TAS2R1   | 98.2   | 112.8  | 103.4  | 96.9   | 89.2   | 94.7   | 99.3   | 110.5  |
| TAS2R10  | 93.4   | 97.9   | 97.3   | 96.9   | 93.5   | 93.6   | 95.4   | 99.7   |
| TAS2R13  | 80.4   | 95.3   | 80.8   | 81     | 77.6   | 79.8   | 90.4   | 97.5   |
| TAS2R14  | 98.1   | 110.1  | 97.6   | 85.4   | 91.5   | 84.3   | 99.7   | 106.4  |
| TAS2R16  | 100.7  | 108.2  | 98.9   | 84.9   | 88.6   | 92.7   | 107.3  | 102.8  |
| TAS2R3   | 137.2  | 159.1  | 98.4   | 94.7   | 87.2   | 94.3   | 139.3  | 154.4  |
| TAS2R38  | 106.6  | 129.6  | 89.7   | 92.3   | 86.5   | 89.1   | 104    | 116.5  |
| TAS2R39  | 90.8   | 101.7  | 91.4   | 96     | 97.9   | 93.7   | 87.1   | 90.7   |
| TAS2R4   | 87.1   | 98.9   | 87.8   | 93.2   | 81.1   | 78.7   | 88.4   | 97.6   |
| TAS2R40  | 77.5   | 87.3   | 81.1   | 83.4   | 77.4   | 83.6   | 92.3   | 85     |
| TAS2R43  | 94.9   | 108    | 112.2  | 96.9   | 100.7  | 101.4  | 87.5   | 95.3   |
| TAS2R44  | 82     | 94.1   | 84.6   | 89.2   | 85.8   | 84.7   | 78.9   | 92.8   |
| TAS2R45  | 80.2   | 98.4   | 99.6   | 93.6   | 84.4   | 93.9   | 79     | 82.8   |
| TAS2R46  | 79.3   | 87.7   | 101.1  | 90.6   | 83.5   | 87.6   | 91     | 86.4   |
| TAS2R48  | 91.2   | 93.6   | 96.3   | 90.2   | 87.1   | 92.3   | 97.9   | 98     |
| TAS2R49  | 97.1   | 114.8  | 104.8  | 92.9   | 88.2   | 96.8   | 103.3  | 111.5  |
| TAS2R5   | 93.6   | 101.9  | 106.4  | 84.8   | 79     | 82.2   | 88.5   | 102.9  |
| TAS2R50  | 82.8   | 105.7  | 99.2   | 85.3   | 71     | 82.4   | 81.7   | 104.7  |
| TAS2R60  | 92.9   | 112.1  | 95.5   | 84.3   | 78.6   | 96.3   | 87     | 96.4   |
| TAS2R7   | 84.2   | 88.5   | 92.9   | 82.8   | 82.7   | 82.7   | 81.8   | 93.5   |
| TAS2R8   | 106.5  | 118    | 88.1   | 77.2   | 78.4   | 87.4   | 110.6  | 121.6  |
| TAS2R9   | 97.1   | 122.2  | 94.3   | 88.8   | 94.9   | 97.5   | 96.8   | 103.2  |
| TASP1    | 201.5  | 262.3  | 163.6  | 131    | 133.3  | 179.9  | 157.6  | 195.9  |
| TAT      | 93.9   | 104.9  | 91.7   | 90.1   | 94     | 94.7   | 93.2   | 100.5  |
| TATDN1   | 731.8  | 962.3  | 298.8  | 212.8  | 165    | 243.3  | 825.1  | 1371.4 |
| TATDN2   | 450.2  | 587.7  | 302.6  | 254    | 225.6  | 365.7  | 436.3  | 732.3  |
| TATDN3   | 543.8  | 704.9  | 362.1  | 331.1  | 245.6  | 365.9  | 572.6  | 800.1  |
| TATDN3   | 632.3  | 818.3  | 374    | 326.1  | 255.4  | 419.3  | 555.9  | 725.9  |
| TAX1BP1  | 2198.6 | 3128.7 | 1552.1 | 2650.6 | 2797.5 | 5400.7 | 1971.1 | 3276.6 |
| TAX1BP1  | 3671.9 | 4756.5 | 1968.4 | 3586.7 | 3973   | 6122.3 | 3094.1 | 4427.5 |
| TAX1BP3  | 872.3  | 1177   | 608.8  | 421.2  | 345    | 425.3  | 826.8  | 867.5  |
| TAZ      | 293.1  | 292.4  | 205.7  | 181.4  | 172    | 224.1  | 214.2  | 361.6  |
| TAZ      | 137.6  | 129.7  | 107.6  | 99     | 95.7   | 101.2  | 120.5  | 127.9  |
| TAZ      | 191.4  | 210.6  | 183.5  | 162.4  | 189.7  | 241.2  | 153.1  | 194.8  |
| TBC1D1   | 123.3  | 144.5  | 101.8  | 95.7   | 92.3   | 98.1   | 115.8  | 121    |
| TBC1D10A | 128.2  | 135.4  | 108.9  | 98.3   | 95     | 85     | 122.8  | 175.9  |
| TBC1D10B | 174.6  | 215.7  | 165.8  | 117.3  | 119.2  | 133.9  | 162    | 256    |
| TBC1D10C | 125.6  | 146.1  | 114.1  | 154.3  | 147    | 177.1  | 123    | 153.5  |
| TBC1D13  | 323.1  | 409.7  | 428.1  | 366.2  | 297.3  | 364.1  | 327.1  | 551.4  |
| TBC1D14  | 624    | 939.5  | 903.6  | 821.7  | 760.6  | 1178.6 | 712.9  | 1147.7 |
| TBC1D15  | 865.1  | 1090   | 475.8  | 559    | 486.2  | 823.8  | 701    | 1274.6 |
| TBC1D16  | 312.2  | 390.4  | 270.5  | 251.7  | 232.9  | 282.8  | 277.3  | 267.5  |
| TBC1D17  | 96.1   | 98.7   | 111    | 106.1  | 103.7  | 112.4  | 92.3   | 105.1  |
| TBC1D19  | 157.8  | 190.6  | 115.2  | 99.8   | 93.9   | 106.3  | 132.3  | 184.5  |
| TBC1D2   | 128.5  | 160.6  | 129.3  | 112.7  | 114.5  | 119.2  | 156.3  | 172.9  |
| TBC1D20  | 311.4  | 354.3  | 258.6  | 313.6  | 299    | 405    | 277    | 504.4  |
| TBC1D21  | 122.6  | 156.5  | 85.4   | 88     | 76.9   | 85.4   | 106.4  | 152.4  |

|          |         |         |         |         |         |        |         |         |
|----------|---------|---------|---------|---------|---------|--------|---------|---------|
| TBC1D22A | 118.5   | 139.9   | 98.2    | 92.4    | 90.9    | 99.1   | 108.3   | 129.7   |
| TBC1D22B | 167.4   | 203     | 234.6   | 244.7   | 233     | 322.3  | 163.9   | 232     |
| TBC1D23  | 376.3   | 467.2   | 162.2   | 182.3   | 140.9   | 218.5  | 307.2   | 493     |
| TBC1D24  | 127.9   | 137.7   | 144.4   | 123.1   | 121.2   | 122.1  | 137.8   | 176.4   |
| TBC1D2B  | 359     | 496.6   | 426     | 414.3   | 323.2   | 521.9  | 331.2   | 584.3   |
| TBC1D3   | 91.7    | 103.6   | 96.4    | 85.1    | 79.7    | 79.1   | 92.7    | 97.6    |
| TBC1D3B  | 121.4   | 126.5   | 114.1   | 113.3   | 123.9   | 157.5  | 115.1   | 143.1   |
| TBC1D3C  | 83.6    | 99.2    | 82.6    | 76.1    | 78      | 74.8   | 86.2    | 99.2    |
| TBC1D3G  | 125     | 138.1   | 110.2   | 113.6   | 121.7   | 127.5  | 140.4   | 139.1   |
| TBC1D4   | 106     | 132.3   | 92.6    | 87.8    | 91      | 105.4  | 91.8    | 131.2   |
| TBC1D5   | 150.8   | 188.7   | 132.1   | 122.5   | 113.2   | 139.3  | 146.9   | 155.6   |
| TBC1D7   | 422.2   | 537.4   | 234.8   | 178.2   | 170.1   | 216    | 390     | 594.1   |
| TBC1D8B  | 76.5    | 84.8    | 97      | 91.7    | 86.8    | 85.1   | 82.9    | 76.9    |
| TBC1D9   | 150.9   | 187.8   | 130.6   | 116     | 114.4   | 127.7  | 154     | 214.3   |
| TBC1D9B  | 251.3   | 265.7   | 270.1   | 286.6   | 254.7   | 384.2  | 207.3   | 457.5   |
| TBC1D9B  | 433     | 490.7   | 215.8   | 222.5   | 165.1   | 313.5  | 400.5   | 601.9   |
| TBCA     | 16398.8 | 19625.1 | 12016.1 | 13166.5 | 11211.8 | 15085  | 15175.6 | 20176.5 |
| TBCC     | 687.6   | 869.5   | 501.1   | 361.7   | 304     | 441.5  | 628.3   | 822     |
| TBCCD1   | 98.2    | 108.6   | 122.9   | 102.5   | 100.3   | 98     | 102     | 88.8    |
| TBCD     | 120.1   | 148.2   | 103.3   | 101.5   | 102.9   | 104.3  | 116.2   | 146.7   |
| TBCD     | 354.2   | 447.1   | 449.7   | 508.3   | 399.5   | 728.1  | 333.2   | 465.6   |
| TBCE     | 3368.3  | 4413.8  | 1716.3  | 1593.3  | 1337.7  | 2355.4 | 3564.4  | 4181.6  |
| TBCE     | 1088    | 1465.9  | 269.1   | 303     | 215.6   | 432.1  | 936.5   | 1352.7  |
| TBK1     | 673.2   | 832.6   | 496.1   | 630.3   | 529.2   | 960.5  | 696.5   | 1324.7  |
| TBKBP1   | 104.6   | 117.5   | 101.7   | 97.7    | 93.2    | 90.9   | 103.1   | 126.5   |
| TBL1X    | 415.3   | 533     | 279.5   | 400.4   | 318.6   | 350.5  | 568     | 588     |
| TBL1XR1  | 283.8   | 385.4   | 158.9   | 127.3   | 150.3   | 160.9  | 252.3   | 394.1   |
| TBL1Y    | 102.6   | 113.8   | 96.9    | 94.9    | 83.4    | 90.7   | 87.8    | 101.5   |
| TBL1Y    | 92.9    | 106     | 100.6   | 88.6    | 105.3   | 90.9   | 85.8    | 102.6   |
| TBL2     | 479.3   | 675.9   | 341.1   | 221.3   | 198     | 295.6  | 378.8   | 537.1   |
| TBL3     | 189.1   | 199     | 185.9   | 134.1   | 133.4   | 140.8  | 143.7   | 181.6   |
| TBN      | 113.2   | 138.4   | 100.3   | 92.1    | 82.3    | 82.2   | 119.4   | 138.4   |
| TBP      | 1157.3  | 1653.9  | 961.5   | 927.2   | 806.2   | 1358.2 | 1021.6  | 1340.9  |
| TBPIP    | 83.7    | 87.2    | 98      | 89.3    | 82.5    | 90.3   | 88.5    | 109.4   |
| TBPL1    | 1011.8  | 1290.7  | 674.8   | 661     | 479.8   | 709.7  | 974.4   | 1726.6  |
| TBPL2    | 123.9   | 137.9   | 98.7    | 100.9   | 95.6    | 94.1   | 115     | 137.2   |
| TBR1     | 82.1    | 96.4    | 86.5    | 82.9    | 79      | 85.9   | 88.4    | 94.7    |
| TBRG1    | 126.8   | 151.4   | 93.8    | 102.5   | 93.3    | 90.7   | 113.8   | 112.1   |
| TBRG4    | 559.1   | 676.7   | 480.1   | 426.2   | 348.1   | 529.1  | 437.7   | 599.6   |
| TBRG4    | 1128.6  | 1319.5  | 834.7   | 633     | 507.5   | 1040.9 | 994.1   | 1462.8  |
| TBRG4    | 221.3   | 288.5   | 148     | 138.5   | 107.8   | 111.1  | 198.7   | 196.8   |
| TBX1     | 138.2   | 153.3   | 102.1   | 90.9    | 82.8    | 94.1   | 120.3   | 201.7   |
| TBX1     | 80.9    | 98.6    | 91      | 86.6    | 76.8    | 83.1   | 91.3    | 90.9    |
| TBX1     | 128.7   | 139.8   | 130.2   | 101.4   | 102.3   | 87.8   | 114     | 136.8   |
| TBX1     | 139.6   | 172.9   | 111.2   | 105.9   | 111.1   | 117.4  | 141.3   | 148.4   |
| TBX10    | 93.3    | 111.6   | 102     | 104.6   | 99.6    | 101.1  | 97.4    | 98.4    |
| TBX15    | 90.7    | 119.5   | 102.3   | 113.5   | 104.8   | 140.2  | 95.8    | 112.5   |
| TBX18    | 324.5   | 405.4   | 199.9   | 164.5   | 139.7   | 157    | 248.6   | 321.1   |
| TBX18    | 386.6   | 461.9   | 205.9   | 198.2   | 209.1   | 288.6  | 299.2   | 633.6   |
| TBX19    | 188     | 228     | 146.5   | 130.6   | 132.6   | 143.7  | 188.4   | 228.7   |

|        |        |         |        |        |        |        |        |         |
|--------|--------|---------|--------|--------|--------|--------|--------|---------|
| TBX2   | 132.2  | 145     | 116.5  | 103    | 87.5   | 116.9  | 146.4  | 241.6   |
| TBX20  | 129.2  | 136.8   | 91.2   | 82.9   | 82.8   | 100    | 128.6  | 148.1   |
| TBX20  | 77.8   | 90.1    | 99.4   | 92.6   | 92.5   | 93.8   | 83.4   | 87.2    |
| TBX21  | 120.1  | 143.5   | 94.7   | 83.6   | 78.4   | 86.3   | 113.6  | 170.2   |
| TBX22  | 75.8   | 81.7    | 88.7   | 90.1   | 86.4   | 87.3   | 80.7   | 72.6    |
| TBX3   | 90.9   | 114.5   | 104.1  | 81.3   | 93.4   | 92.2   | 99.9   | 99.8    |
| TBX3   | 146.9  | 171.9   | 130.6  | 107.8  | 98.9   | 109.5  | 129.2  | 139.5   |
| TBX4   | 91.8   | 91.9    | 94     | 93.3   | 88.8   | 101.2  | 94.3   | 94.3    |
| TBX5   | 88.5   | 96.2    | 83.5   | 88.7   | 85     | 93.6   | 84.9   | 91.5    |
| TBX5   | 77.3   | 91.5    | 86.2   | 84.1   | 82.6   | 84.7   | 86.6   | 86.9    |
| TBX5   | 88.5   | 83.6    | 92.4   | 78.2   | 79.5   | 87.2   | 73.6   | 82.8    |
| TBX6   | 103.5  | 112.4   | 100.2  | 93.9   | 94.3   | 100.5  | 100.9  | 107.9   |
| TBX6   | 93.3   | 106.3   | 93.9   | 88.6   | 82.7   | 88.6   | 99.8   | 103.6   |
| TBX6   | 83     | 89.3    | 99.6   | 92.2   | 90.7   | 85.8   | 85.9   | 90.2    |
| TBXA2R | 91.2   | 100.5   | 97.8   | 99.3   | 85.1   | 90.5   | 97.7   | 118.5   |
| TBXA2R | 82.4   | 111.5   | 91.4   | 87.5   | 72     | 68.8   | 100    | 129.8   |
| TBXA2R | 96.5   | 131.1   | 93.1   | 87.6   | 86.4   | 84.6   | 105.5  | 132.6   |
| TBXAS1 | 152.2  | 184.3   | 112.3  | 214.8  | 192    | 309.7  | 217.7  | 217.5   |
| TCAP   | 102.5  | 120.3   | 89.1   | 93.9   | 83.9   | 86.6   | 100.6  | 129.4   |
| TCBA1  | 83.8   | 92      | 93     | 83.8   | 83.1   | 91.9   | 85.5   | 77.4    |
| TCEA1  | 3598.3 | 5657.9  | 1525.7 | 1017.5 | 791.1  | 1603.6 | 2770.9 | 3806    |
| TCEA1  | 600.7  | 706.6   | 159.9  | 145.9  | 131.6  | 137.1  | 355.1  | 681     |
| TCEA1  | 626.5  | 742.8   | 153.4  | 162.6  | 139.5  | 192.9  | 379.9  | 717.5   |
| TCEA2  | 394.6  | 591.5   | 361.6  | 336.9  | 330.2  | 370.5  | 387.7  | 557.9   |
| TCEA2  | 129.5  | 141.9   | 126.6  | 125.4  | 121.9  | 115.9  | 127.1  | 121.1   |
| TCEA2  | 111.6  | 123.1   | 90.8   | 80.2   | 83.3   | 92.3   | 100.5  | 121.3   |
| TCEA3  | 94.8   | 122.6   | 86     | 164.9  | 117.5  | 148.8  | 93.9   | 118     |
| TCEAL1 | 428.2  | 493.2   | 203.2  | 201.8  | 147.6  | 230.3  | 329.1  | 561.1   |
| TCEAL1 | 178.8  | 216.3   | 124    | 137.2  | 110.9  | 139.8  | 156.3  | 188.2   |
| TCEAL2 | 220.8  | 282.9   | 183.8  | 123.6  | 111.7  | 125.4  | 194.7  | 264.1   |
| TCEAL3 | 2475.1 | 3443.5  | 1612.6 | 1250.5 | 1070.8 | 1341.2 | 2349.2 | 2287.3  |
| TCEAL3 | 4854.8 | 6587.8  | 3740.9 | 3017   | 2426.8 | 3100.1 | 4675.9 | 4902.6  |
| TCEAL4 | 122.2  | 144.9   | 109.5  | 89.1   | 89.8   | 97     | 125.9  | 131.7   |
| TCEAL4 | 538.4  | 718.5   | 286.4  | 277.6  | 251.1  | 315.1  | 453    | 576.5   |
| TCEAL4 | 4556.2 | 6065.7  | 3194.8 | 3358.2 | 2707.5 | 3724.7 | 4010.6 | 4468.7  |
| TCEAL5 | 125.3  | 123.8   | 90.7   | 83.6   | 89.3   | 86.5   | 116.9  | 133.6   |
| TCEAL6 | 77.4   | 90.6    | 84.3   | 92     | 92.3   | 88.9   | 81.2   | 84.2    |
| TCEAL7 | 73     | 82.8    | 98.2   | 89.7   | 88.8   | 87.4   | 74.4   | 73.4    |
| TCEAL8 | 1571.8 | 1925.4  | 643.8  | 559    | 439.1  | 616.6  | 1102.2 | 1364.4  |
| TCEAL8 | 1152   | 1441.1  | 406.1  | 316.3  | 255.7  | 317.7  | 821.2  | 1239.9  |
| TCEAL8 | 1606   | 2070.1  | 596.2  | 458.6  | 405.7  | 593.7  | 1439.6 | 1954    |
| TCEB1  | 9298.7 | 10202.3 | 4372.4 | 3114.5 | 2087.6 | 3153.2 | 9046.3 | 11636.4 |
| TCEB2  | 323.3  | 391.6   | 255.9  | 180.3  | 178.8  | 222.4  | 374.2  | 492.5   |
| TCEB2  | 8275.9 | 9957    | 7268.8 | 4928.3 | 4033.3 | 4991.8 | 8142.1 | 9895.5  |
| TCEB3  | 459.2  | 578     | 384    | 363.9  | 331.7  | 398.6  | 391.5  | 370.2   |
| TCEB3B | 75     | 90.3    | 80.2   | 87.4   | 76.1   | 80.6   | 78.4   | 84.9    |
| TCEB3C | 82.7   | 84.8    | 85.7   | 90.2   | 84.1   | 91.2   | 84.3   | 89.1    |
| TCERG1 | 774.5  | 1051.2  | 462.8  | 454.5  | 443.3  | 733.9  | 676.5  | 738.9   |
| TCERG1 | 145.1  | 195     | 108.4  | 109.1  | 107.9  | 96     | 136.4  | 182     |
| TCERG1 | 821.8  | 1085.1  | 299.3  | 304.6  | 315.8  | 441.7  | 653.9  | 1212.8  |

|         |        |        |       |        |       |        |        |        |
|---------|--------|--------|-------|--------|-------|--------|--------|--------|
| TCERG1L | 82.5   | 90.6   | 89.9  | 73.2   | 74.9  | 78.8   | 80     | 85.3   |
| TCF1    | 81.8   | 78     | 86.8  | 91.9   | 82.1  | 78.7   | 90.3   | 88.2   |
| TCF12   | 994.8  | 1342.3 | 698.3 | 1220.4 | 910.4 | 2031.3 | 873.3  | 1278.8 |
| TCF12   | 116.3  | 144.9  | 101.2 | 121.5  | 111.7 | 103.6  | 105.7  | 106    |
| TCF15   | 116.7  | 148.6  | 125.7 | 106.2  | 96.6  | 103.9  | 121.4  | 114.8  |
| TCF19   | 129.6  | 140.1  | 90.5  | 87.4   | 77.5  | 88.9   | 110.6  | 141.9  |
| TCF19   | 130.9  | 158.7  | 105.5 | 97.5   | 91.5  | 96.4   | 107.8  | 145    |
| TCF2    | 84     | 104.4  | 84.6  | 87     | 81.9  | 84.5   | 86.6   | 90.7   |
| TCF2    | 81.9   | 90.4   | 100.3 | 94.5   | 93.5  | 90.7   | 83.6   | 98.6   |
| TCF2    | 81     | 84.5   | 87.8  | 80.8   | 79.3  | 79.2   | 91.8   | 89.6   |
| TCF20   | 246.9  | 356.8  | 152.9 | 189.9  | 152.6 | 183.6  | 244.1  | 306.8  |
| TCF20   | 102.2  | 114.8  | 101   | 91.8   | 96    | 89.7   | 111.1  | 114.7  |
| TCF20   | 500.4  | 674.5  | 375.2 | 629.8  | 587.9 | 774.8  | 515.1  | 658.5  |
| TCF21   | 99     | 102    | 89    | 82.6   | 84.2  | 79     | 82.4   | 94.3   |
| TCF21   | 72.3   | 83.3   | 100.9 | 91.6   | 80.6  | 94.6   | 79.3   | 84.3   |
| TCF21   | 81.5   | 94.8   | 96.5  | 96.8   | 80.2  | 87.9   | 97.6   | 91.7   |
| TCF23   | 118    | 139.7  | 101.7 | 86.4   | 84.8  | 96.4   | 113.5  | 130.1  |
| TCF3    | 290.3  | 430.2  | 358.3 | 295.4  | 262.9 | 386.4  | 276.1  | 578.3  |
| TCF4    | 136.3  | 178.2  | 126.1 | 116.8  | 107.1 | 113.2  | 124.6  | 153.3  |
| TCF7    | 100.2  | 106.4  | 93.2  | 94.4   | 96.8  | 95.2   | 98.7   | 106    |
| TCF7    | 104.9  | 131    | 103.8 | 92.4   | 93.6  | 97.3   | 111.2  | 115.7  |
| TCF7    | 98.7   | 107.2  | 88.1  | 87.2   | 76.9  | 81.7   | 83.1   | 112    |
| TCF7    | 78.2   | 83.6   | 85.8  | 85.1   | 78.9  | 80.1   | 75.2   | 80     |
| TCF7    | 80.7   | 84     | 90.1  | 86.5   | 85.3  | 98.8   | 83.1   | 84     |
| TCF7    | 71.8   | 92.3   | 87.2  | 83.4   | 79.1  | 87.2   | 80     | 100    |
| TCF7L1  | 90.8   | 93.4   | 98.8  | 84.9   | 95.5  | 94.2   | 87.2   | 100.8  |
| TCF7L2  | 95     | 106.7  | 92    | 94.2   | 83.9  | 90.8   | 93     | 105.9  |
| TCF8    | 94.2   | 99     | 102.1 | 98.2   | 85.6  | 104.8  | 83.6   | 94.8   |
| TCFL5   | 790.8  | 927.6  | 762.9 | 1042.5 | 763.6 | 1424.2 | 570.3  | 1339.5 |
| TCHHL1  | 70.5   | 76.6   | 92.9  | 78.5   | 83.8  | 70.8   | 83.1   | 83.4   |
| TCHP    | 264.2  | 375.4  | 168.5 | 137.1  | 131.7 | 165    | 205.4  | 270.1  |
| TCIRG1  | 619.1  | 727.2  | 773.6 | 673.3  | 651   | 1127.8 | 437.7  | 858.7  |
| TCIRG1  | 88.3   | 107.3  | 104.6 | 96.6   | 101.7 | 93.4   | 97     | 94.7   |
| TCIRG1  | 201.8  | 223.8  | 127.8 | 170.6  | 157   | 103.9  | 141.5  | 215    |
| TCL1A   | 89     | 92.4   | 97.4  | 82.3   | 87.4  | 94.1   | 89.6   | 94.4   |
| TCL1B   | 109.4  | 144.7  | 91.4  | 78.6   | 86.7  | 79.1   | 99.5   | 120.8  |
| TCL1B   | 75.7   | 83.2   | 84.9  | 84.9   | 85.1  | 85.1   | 82.5   | 86.5   |
| TCL6    | 70.8   | 77.4   | 75    | 68.9   | 82.2  | 80.5   | 77.6   | 82.4   |
| TCL6    | 150.5  | 178.9  | 101.5 | 89.9   | 91    | 100.3  | 146.8  | 127.7  |
| TCL6    | 98.6   | 107.9  | 94.2  | 99.6   | 88.8  | 97.8   | 100.4  | 98.3   |
| TCN1    | 156.2  | 188.9  | 125.6 | 194.9  | 147.5 | 201.3  | 141.5  | 161.4  |
| TCN2    | 77.3   | 88.6   | 101.9 | 102.9  | 84.5  | 98     | 89.8   | 91.7   |
| TCOF1   | 76.2   | 100.2  | 101.8 | 104.2  | 83.3  | 109.6  | 87.7   | 79     |
| TCOF1   | 118    | 124.2  | 98.2  | 95.6   | 94.8  | 100.3  | 101.6  | 127.6  |
| TCOF1   | 107.8  | 124    | 89.2  | 90.2   | 76.9  | 87.3   | 108.3  | 119.6  |
| TCOF1   | 123.2  | 159.1  | 107.1 | 99.7   | 93.4  | 113.8  | 125.1  | 139.9  |
| TCP1    | 3090.5 | 4010.4 | 582.9 | 493.1  | 378.1 | 520.6  | 1977.7 | 3382.3 |
| TCP1    | 321.9  | 376.2  | 140   | 119    | 123.2 | 158.8  | 226.5  | 338.7  |
| TCP10   | 90.4   | 92.5   | 94.7  | 84.9   | 86.5  | 79.5   | 88.3   | 84.5   |
| TCP10L  | 121.3  | 171    | 109.2 | 88.2   | 95.1  | 97.6   | 151.8  | 167.6  |

|          |        |        |        |        |        |        |        |        |
|----------|--------|--------|--------|--------|--------|--------|--------|--------|
| TCP11    | 90     | 93.2   | 95.9   | 91.5   | 92.2   | 89.4   | 89.5   | 91.6   |
| TCP11L1  | 73.6   | 84     | 88.4   | 83.4   | 79.3   | 82.4   | 70     | 74.7   |
| TCP11L2  | 85.6   | 92.2   | 78.1   | 79     | 83.3   | 77.9   | 88.6   | 97.6   |
| TCTA     | 242.7  | 315.8  | 197.5  | 181.7  | 171.3  | 233.6  | 223.5  | 297.6  |
| TCTEX1D1 | 1189   | 1360.7 | 882    | 673    | 549.9  | 809.3  | 982    | 1628   |
| TDGF1    | 89.2   | 96     | 107.7  | 101.5  | 92     | 88.5   | 96.4   | 102.4  |
| TDGF3    | 91.9   | 100.6  | 82.1   | 82.3   | 76.4   | 86.2   | 89.7   | 101.4  |
| TDH      | 80.5   | 90.4   | 86.5   | 84.3   | 85.9   | 92.4   | 83.5   | 83.3   |
| TDO2     | 78.1   | 92.4   | 92.8   | 85.7   | 89.3   | 84.8   | 78.8   | 88.3   |
| TDP1     | 800.7  | 708.8  | 514.3  | 474.8  | 428.4  | 361.5  | 703.4  | 1111.4 |
| TDP1     | 216.4  | 254.1  | 165.8  | 148.5  | 111.1  | 144    | 171.5  | 178.8  |
| TDP1     | 360.7  | 478.4  | 272.7  | 224.5  | 203.3  | 221.2  | 339.7  | 305.8  |
| TDRD1    | 328.1  | 288.4  | 300.9  | 412.6  | 345.1  | 304.4  | 315.5  | 567.8  |
| TDRD10   | 89.8   | 89.2   | 91.2   | 100.3  | 84.8   | 99.3   | 93.3   | 89.4   |
| TDRD3    | 230.3  | 254.6  | 141.5  | 137.6  | 123.7  | 143    | 180.6  | 284.2  |
| TDRD4    | 83.5   | 87.5   | 99     | 85.4   | 92     | 89.8   | 85.1   | 94.2   |
| TDRD5    | 73.7   | 75.8   | 93.8   | 86.3   | 83.6   | 79.6   | 76.2   | 84     |
| TDRD6    | 121.1  | 141.8  | 104.6  | 94.1   | 91.2   | 87     | 114.9  | 128.8  |
| TDRD7    | 3883.6 | 4556.6 | 2671.8 | 3567.8 | 3069.4 | 4692.3 | 1760.8 | 1995.9 |
| TDRD9    | 179.3  | 225.4  | 97.7   | 97.8   | 91.4   | 94.8   | 172.8  | 171.3  |
| TDRKH    | 111.1  | 124.9  | 109.8  | 102    | 91.1   | 106    | 97.1   | 121.1  |
| TEAD1    | 129.4  | 137.3  | 103.3  | 83.3   | 86.3   | 96.7   | 120.8  | 130.4  |
| TEAD2    | 340.2  | 370.7  | 266.3  | 171    | 165.3  | 168.2  | 273    | 317.9  |
| TEAD3    | 98.4   | 114.4  | 95.7   | 85.7   | 89.2   | 91.9   | 104.9  | 122    |
| TEAD4    | 96.7   | 124.2  | 85.2   | 80.5   | 72.4   | 83.9   | 96.6   | 128.4  |
| TEAD4    | 123.2  | 135.7  | 117.9  | 107.1  | 99.9   | 115.8  | 113.6  | 119.5  |
| TEAD4    | 618.1  | 825.1  | 266.9  | 174.4  | 161.2  | 156.8  | 486.1  | 375    |
| TEC      | 183.8  | 190.1  | 108.2  | 101    | 94.1   | 96.4   | 139.3  | 160.1  |
| TECTA    | 199    | 216.6  | 111.7  | 103.8  | 87.8   | 110    | 200    | 190.9  |
| TCTB     | 77.6   | 116.7  | 95.3   | 83.6   | 85.9   | 84.7   | 94.8   | 94.8   |
| TEDDM1   | 110.9  | 124.7  | 97.6   | 99.7   | 91     | 97.4   | 100.8  | 109.4  |
| TEF      | 272.4  | 349.9  | 201.4  | 202.9  | 161.4  | 197.3  | 266.8  | 435.8  |
| TEGT     | 3821.4 | 4965.8 | 2851.8 | 2593.3 | 2064.1 | 4015.4 | 3493.5 | 5319.3 |
| TEK      | 88.3   | 103.3  | 106.6  | 103.5  | 91.9   | 93.5   | 97.2   | 111    |
| TEKT1    | 109.7  | 124.1  | 100.8  | 104.9  | 93     | 98.6   | 104.1  | 132.4  |
| TEKT2    | 101.2  | 115.5  | 122.1  | 113.3  | 115.7  | 104.9  | 88.3   | 96     |
| TEKT3    | 97.2   | 100.3  | 90.3   | 82.2   | 82.4   | 76.5   | 84.3   | 98.4   |
| TEKT4    | 87.7   | 89.6   | 90.5   | 77.2   | 75.7   | 76.1   | 87.8   | 94.5   |
| TENC1    | 90.9   | 103.8  | 87.4   | 94.8   | 90.1   | 87.9   | 87.6   | 97.2   |
| TENC1    | 100.8  | 114.1  | 88.9   | 89.5   | 81.8   | 84.1   | 93     | 96.3   |
| TENC1    | 101.5  | 114.9  | 100.9  | 95.2   | 91.7   | 90.1   | 99.3   | 112.6  |
| TENC1    | 88.3   | 108.7  | 82     | 90.7   | 82     | 83.7   | 84.5   | 97     |
| TENR     | 87.2   | 90     | 92.5   | 82.3   | 79.5   | 89.7   | 86     | 89     |
| TEP1     | 89.4   | 98.7   | 95.9   | 93.6   | 97.4   | 91.6   | 80.6   | 88.6   |
| TEPP     | 98.1   | 124.7  | 98.1   | 92.8   | 92.9   | 83.2   | 102    | 119.4  |
| TEPP     | 100.7  | 118    | 94.5   | 90     | 88.5   | 92.2   | 98.5   | 120.8  |
| TEPP     | 103.6  | 122.4  | 87.3   | 87.9   | 85.6   | 87     | 115.3  | 115.9  |
| TERF1    | 647.8  | 892    | 238.5  | 250.7  | 222.2  | 251.5  | 731.6  | 1122.3 |
| TERF1    | 77     | 91.4   | 80     | 85.1   | 81.3   | 79.7   | 80.3   | 81.6   |
| TERF1    | 150.6  | 181.6  | 89.1   | 85.4   | 88.7   | 91.4   | 144.6  | 222.7  |

|         |         |         |        |        |        |        |         |         |
|---------|---------|---------|--------|--------|--------|--------|---------|---------|
| TERF2   | 479.1   | 714.5   | 380.3  | 311.5  | 231.9  | 459.9  | 428.5   | 842     |
| TERF2IP | 796.5   | 1204    | 563.3  | 333    | 348.4  | 523.7  | 710.5   | 1177.3  |
| TERT    | 90.1    | 100.1   | 104.5  | 90.3   | 89.1   | 93     | 88.3    | 104.2   |
| TERT    | 112.4   | 130.1   | 92.1   | 87.7   | 86.7   | 98.4   | 114     | 109     |
| TES     | 131.2   | 170.3   | 105.9  | 96     | 92     | 124.4  | 128.7   | 147.8   |
| TES     | 247.5   | 300     | 125.8  | 108.1  | 114.4  | 104.4  | 214.1   | 277.2   |
| TESC    | 793.1   | 1014.8  | 419.9  | 198.9  | 181.2  | 218.3  | 577     | 860.2   |
| TESK1   | 174.5   | 204.9   | 221.7  | 178.3  | 167.1  | 176    | 243.4   | 507.8   |
| TESK2   | 131.6   | 171.3   | 118.9  | 135.8  | 122.3  | 155.4  | 129.2   | 196     |
| TESSP2  | 152     | 166.3   | 93     | 90.7   | 88.7   | 77     | 141.5   | 170     |
| TESSP5  | 130.7   | 139.5   | 108.4  | 92.4   | 96.7   | 95.7   | 112.3   | 116.4   |
| TETTRAN | 13843.1 | 16728.7 | 9946.3 | 7119   | 6180.4 | 6629.6 | 11463.6 | 12861.4 |
| TEX10   | 674.4   | 946.7   | 551.6  | 359    | 299    | 500.1  | 501.6   | 714.8   |
| TEX101  | 91.9    | 106.2   | 96.2   | 81.6   | 78.5   | 80.1   | 103.1   | 100.5   |
| TEX11   | 112.9   | 111.4   | 100    | 93.6   | 86.6   | 88.5   | 112.3   | 103.5   |
| TEX11   | 86      | 81.5    | 96     | 76.3   | 75.7   | 82.2   | 80.6    | 89.1    |
| TEX11   | 74.3    | 82.3    | 82.8   | 80.2   | 83.2   | 77.8   | 73.4    | 79.7    |
| TEX12   | 96.1    | 104.2   | 91.8   | 83     | 77.7   | 84.5   | 95.3    | 91.4    |
| TEX13A  | 128.4   | 146.4   | 107.7  | 95.7   | 100.1  | 102.4  | 123.9   | 136.2   |
| TEX13B  | 91.3    | 91.6    | 91.4   | 85.7   | 94.5   | 92     | 83.1    | 97.9    |
| TEX14   | 100.5   | 109.8   | 90.4   | 90.2   | 82.2   | 88.4   | 93.5    | 97.8    |
| TEX14   | 83.1    | 91.9    | 90     | 86.5   | 79.6   | 80     | 85      | 88.3    |
| TEX15   | 201.1   | 258.5   | 132.9  | 102.1  | 97.5   | 132.3  | 132     | 206.4   |
| TEX2    | 760.1   | 965.9   | 669.2  | 965.3  | 689.7  | 1217.3 | 551.3   | 717.7   |
| TEX261  | 258.7   | 339.5   | 230.2  | 173.8  | 149.9  | 179.4  | 229     | 242.2   |
| TEX264  | 747.6   | 938.4   | 431.6  | 283.9  | 258.9  | 263    | 714.8   | 874.6   |
| TEX9    | 84.3    | 99.7    | 93.2   | 91.4   | 83.7   | 91.6   | 92      | 95.2    |
| TF      | 77.5    | 81.9    | 105.4  | 98     | 87     | 100.7  | 78.6    | 86.7    |
| TFAM    | 1606.1  | 1991.3  | 1149.1 | 941.1  | 638.6  | 1075.2 | 1275.9  | 1914.8  |
| TFAP2A  | 228.6   | 224.2   | 133.9  | 147.6  | 141.8  | 145.1  | 212.7   | 264.9   |
| TFAP2A  | 220.9   | 285.6   | 126.9  | 141.2  | 129.9  | 143.1  | 168.2   | 213.6   |
| TFAP2A  | 113.8   | 127.3   | 90.2   | 86.9   | 85.4   | 82.9   | 118.6   | 120     |
| TFAP2A  | 111.2   | 102.9   | 95.5   | 93.1   | 90.1   | 91.5   | 101.6   | 104.4   |
| TFAP2B  | 86.9    | 96.2    | 91.4   | 88.6   | 79.1   | 79     | 80.7    | 87.4    |
| TFAP2C  | 138.7   | 162.5   | 104    | 244.8  | 209.7  | 257.1  | 168.5   | 217     |
| TFAP2D  | 81.4    | 91      | 104    | 91.9   | 88.1   | 92.6   | 86.5    | 100.4   |
| TFAP2E  | 94      | 96      | 105.2  | 91.2   | 100.1  | 96     | 92.9    | 125.2   |
| TFAP4   | 145.7   | 192.5   | 142.9  | 120.5  | 99     | 136    | 131.4   | 146.8   |
| TFB1M   | 932.8   | 1251.3  | 720.7  | 771.2  | 678.8  | 754.3  | 753     | 852.9   |
| TFB2M   | 2603.7  | 3534.9  | 1552.5 | 1299.6 | 739.6  | 1016.7 | 2100.5  | 3866.6  |
| TFCP2   | 708.8   | 939.7   | 547.9  | 533.5  | 467.2  | 658.3  | 592.2   | 880.4   |
| TFCP2L1 | 75.9    | 89.9    | 88.9   | 89.4   | 81.2   | 85.6   | 88      | 77.4    |
| TFDP1   | 6856.4  | 7973.9  | 4759.2 | 4276.4 | 3165.8 | 4963.2 | 5754.8  | 8939.7  |
| TFDP2   | 199     | 256     | 157.9  | 127.8  | 125.6  | 144.5  | 203     | 237.7   |
| TFDP3   | 81.1    | 90.4    | 101.6  | 99.4   | 97     | 100.9  | 78.9    | 82.3    |
| TFE3    | 135     | 155.3   | 129.2  | 136.2  | 127.8  | 146.7  | 168.8   | 259.8   |
| TFEB    | 92.6    | 98.1    | 114.4  | 100.2  | 92.4   | 109.2  | 88.7    | 109.5   |
| TFEC    | 96      | 122.8   | 109    | 99.9   | 94.9   | 91     | 104.5   | 130.3   |
| TFEC    | 83.1    | 103.2   | 82.3   | 106.7  | 89.2   | 79.6   | 84.7    | 92.9    |
| TFF1    | 84.1    | 105.7   | 99.9   | 89.8   | 79.4   | 101.1  | 93.6    | 108.7   |



|          |        |        |        |        |        |        |        |        |
|----------|--------|--------|--------|--------|--------|--------|--------|--------|
| TFF2     | 85.9   | 98.9   | 98     | 85.5   | 80.7   | 87.6   | 75     | 95.1   |
| TFF3     | 82.1   | 97     | 97.4   | 83.4   | 83.2   | 88.1   | 94     | 91.9   |
| TFG      | 358.8  | 456    | 167.2  | 107.6  | 97.9   | 91.7   | 223.1  | 244.9  |
| TFG      | 4489.5 | 5442.8 | 2092.6 | 2702.6 | 1896.4 | 2731.2 | 4668.9 | 7826.6 |
| TFIP11   | 339.8  | 440.5  | 319.5  | 285.9  | 243.6  | 362.2  | 285.1  | 410.5  |
| TFIP11   | 408.9  | 483.8  | 330.3  | 289.4  | 247.1  | 382.4  | 375.8  | 463    |
| TFIP11   | 249.9  | 317.3  | 190.5  | 212.7  | 174.4  | 198.7  | 239.1  | 284.7  |
| TFPI     | 81.5   | 110.7  | 92.6   | 85.3   | 92.5   | 91.3   | 108    | 116    |
| TFPI     | 79.5   | 87.5   | 91.2   | 93.9   | 87.9   | 91     | 78.7   | 78.5   |
| TFPI     | 98     | 114.5  | 81.5   | 85.9   | 81.4   | 84.8   | 108.8  | 149.2  |
| TFPI2    | 80.3   | 79.7   | 89.7   | 87.1   | 86.1   | 83.6   | 90.5   | 83.8   |
| TFPT     | 747.7  | 854    | 556.9  | 449.8  | 396.8  | 559.1  | 754    | 875.2  |
| TFR2     | 107    | 118    | 91.3   | 95.5   | 87.6   | 100    | 103.9  | 117.8  |
| TFRC     | 5945.6 | 7733.5 | 4376.6 | 4343   | 3190.7 | 5151.2 | 5630.5 | 6765.5 |
| TG       | 79.7   | 100.4  | 97.9   | 93.2   | 97.4   | 94.8   | 94.4   | 82.9   |
| TGDS     | 910.8  | 1243.5 | 483.6  | 492.4  | 342.2  | 552.3  | 761.7  | 1364.9 |
| TGFA     | 87     | 105.6  | 99.3   | 96     | 94.9   | 97.2   | 85.2   | 112.8  |
| TGFB1    | 102.3  | 105.4  | 108.9  | 106.1  | 97.5   | 98     | 91.2   | 114.5  |
| TGFB111  | 107.9  | 115.9  | 94.5   | 89.1   | 87.4   | 87.3   | 104.4  | 115.2  |
| TGFB111  | 121.2  | 160.4  | 108.7  | 99.2   | 89.3   | 94.8   | 124.9  | 151.1  |
| TGFB2    | 89.7   | 95.5   | 95.7   | 80.5   | 78.6   | 86.1   | 80     | 85.1   |
| TGFB3    | 106.4  | 133.4  | 106.3  | 97.7   | 102    | 112.9  | 104    | 131.9  |
| TGFBI    | 2471.3 | 2906.7 | 2324.1 | 7438.3 | 5399.5 | 7900.6 | 2247.9 | 3651   |
| TGFBR1   | 116.1  | 138.4  | 101.6  | 106.3  | 100.4  | 105.7  | 104.7  | 137.8  |
| TGFBR2   | 148.6  | 161    | 124.7  | 109.9  | 114.2  | 108.9  | 142.3  | 157.6  |
| TGFBR2   | 465.8  | 604.6  | 361.9  | 549.9  | 420.7  | 617.4  | 506.3  | 855.6  |
| TGFBR3   | 269    | 390.5  | 220.1  | 250.1  | 243.3  | 365.8  | 221.6  | 266.4  |
| TGFBRAP1 | 255.5  | 330.4  | 216.4  | 199    | 161.3  | 134.5  | 240.8  | 263    |
| TGIF     | 99.6   | 103.9  | 98.8   | 97.9   | 85.9   | 93.9   | 86.1   | 94.5   |
| TGIF     | 99     | 105.1  | 88.2   | 87.7   | 76.7   | 79.2   | 95.7   | 99.4   |
| TGIF     | 98.3   | 102.8  | 105.3  | 100.5  | 95.4   | 97.6   | 99.9   | 105.2  |
| TGIF1    | 98.5   | 125.5  | 90.7   | 75.2   | 79.8   | 81.3   | 105.8  | 107.6  |
| TGIF1    | 433    | 568.7  | 314.6  | 336.6  | 268.5  | 520.7  | 466.7  | 881.8  |
| TGIF1    | 100.1  | 122.2  | 111    | 103    | 92.6   | 94.8   | 108.7  | 122.2  |
| TGIF2    | 488.5  | 616.6  | 251.2  | 252.1  | 214.1  | 274    | 396.7  | 467.7  |
| TGM1     | 85.2   | 94     | 89.1   | 94.5   | 91.7   | 85     | 93.5   | 102.7  |
| TGM2     | 131.9  | 155.4  | 91.7   | 85.2   | 80.9   | 117.6  | 151.2  | 154.5  |
| TGM2     | 113.7  | 127.6  | 117.6  | 98.5   | 94.4   | 94.2   | 104.4  | 101    |
| TGM2     | 151.7  | 152.6  | 95     | 93.7   | 84.5   | 91.3   | 140.7  | 173.1  |
| TGM3     | 124.5  | 153.8  | 92.5   | 87     | 81.4   | 79.3   | 130.9  | 135.7  |
| TGM4     | 111    | 140.8  | 98.3   | 110.2  | 105.8  | 111.6  | 103.3  | 107.1  |
| TGM5     | 666.7  | 849.2  | 489.6  | 514.6  | 398.1  | 689.4  | 415.6  | 559.7  |
| TGM5     | 364.6  | 487    | 263.9  | 268.4  | 206.9  | 312.8  | 239.5  | 294.9  |
| TGM5     | 100.9  | 131.8  | 96     | 86.4   | 82.5   | 80.8   | 98.9   | 104.1  |
| TGM6     | 88.8   | 98.5   | 94.1   | 86     | 76.8   | 80     | 86.3   | 101.5  |
| TGM7     | 173.2  | 189.8  | 102.1  | 92.9   | 100    | 87.6   | 145.6  | 167.6  |
| TGOLN2   | 1898.6 | 2403.5 | 1055.3 | 1275.6 | 1083.2 | 1271.2 | 2001.8 | 1826   |
| TH       | 101.2  | 105.7  | 101.4  | 85.4   | 86.4   | 84.1   | 96.2   | 100.8  |
| TH       | 87.1   | 103.4  | 90.5   | 78.5   | 77     | 80.2   | 84.1   | 106.6  |
| TH1L     | 1743.6 | 2465.7 | 1133.6 | 896    | 804    | 1027.8 | 1712.2 | 2135.6 |

|        |        |        |        |        |       |        |        |        |
|--------|--------|--------|--------|--------|-------|--------|--------|--------|
| THADA  | 310.5  | 376.2  | 314.8  | 358.3  | 265.8 | 444.1  | 246.7  | 272.3  |
| THADA  | 91.5   | 119.1  | 86.6   | 85     | 73.8  | 91.4   | 85.1   | 90     |
| THAP1  | 659.3  | 996.4  | 282.4  | 197.3  | 161.9 | 191.8  | 531.2  | 650.3  |
| THAP1  | 193    | 208    | 111.6  | 123.3  | 107.4 | 132.8  | 162.3  | 322    |
| THAP10 | 486    | 597.7  | 263.5  | 223.9  | 224.9 | 291.4  | 496.2  | 759.3  |
| THAP11 | 2645.4 | 3452.6 | 1788.3 | 1188.5 | 920.1 | 1274.9 | 2231.3 | 2723.9 |
| THAP2  | 75.8   | 76.9   | 101.2  | 92.6   | 95.2  | 98.9   | 71.4   | 89     |
| THAP3  | 97.5   | 135.8  | 108    | 94.1   | 90.9  | 93.9   | 112.4  | 128.8  |
| THAP4  | 197.4  | 234.4  | 133.1  | 116.1  | 108.5 | 88.7   | 161.4  | 175.2  |
| THAP5  | 97.1   | 94.4   | 96.3   | 85.6   | 76.1  | 83.5   | 83.6   | 100.4  |
| THAP6  | 237.3  | 303.5  | 256.4  | 215.4  | 212.5 | 269    | 203.7  | 291.3  |
| THAP7  | 211.4  | 226.8  | 137    | 111.1  | 116.4 | 118.9  | 153.2  | 202.4  |
| THAP7  | 399.8  | 506.3  | 302.4  | 222.2  | 202.1 | 286.2  | 308    | 378.8  |
| THAP7  | 107.2  | 117.4  | 103.2  | 98.3   | 90.2  | 88.4   | 105.3  | 122.9  |
| THAP8  | 78.6   | 97.3   | 84.7   | 78.8   | 73    | 81.4   | 80.6   | 103.8  |
| THAP9  | 86.6   | 96.7   | 96.7   | 91.7   | 84.5  | 100.9  | 91.6   | 109.1  |
| THBD   | 169.7  | 225.6  | 149    | 157.2  | 127.2 | 180.6  | 183    | 216    |
| THBS1  | 75.2   | 81.6   | 93.7   | 87.7   | 78.6  | 87     | 126.3  | 175.9  |
| THBS2  | 93.9   | 121.1  | 106.2  | 84.5   | 85.4  | 102.5  | 94.1   | 113.3  |
| THBS3  | 159.8  | 166.3  | 100    | 93.8   | 82.7  | 98.5   | 145.3  | 146.9  |
| THBS4  | 690.1  | 628.8  | 591.6  | 567    | 486.5 | 819.4  | 354.7  | 427.5  |
| THEDC1 | 106.8  | 124.9  | 98.2   | 86.9   | 93.3  | 96.3   | 99.9   | 123.5  |
| THEG   | 97.5   | 115.4  | 122    | 107.5  | 103.2 | 114.4  | 95.7   | 109.2  |
| THEG   | 99     | 108.6  | 104.6  | 98.2   | 95.1  | 87.8   | 91.6   | 95.1   |
| THEM2  | 665.7  | 788.2  | 474.2  | 514.1  | 388   | 692.7  | 587.1  | 790.3  |
| THEM4  | 112.3  | 127.4  | 95     | 99.6   | 81    | 92.8   | 115.7  | 124.8  |
| THEM5  | 93.7   | 105.2  | 107.6  | 88.6   | 84.1  | 91.8   | 96.9   | 105.1  |
| THEX1  | 109.8  | 129.5  | 75.4   | 76.7   | 73.4  | 85.4   | 96.5   | 139.2  |
| THG1L  | 217.1  | 265.6  | 180.2  | 170.9  | 153.7 | 181.3  | 198.6  | 252.3  |
| THNSL1 | 162.8  | 229.7  | 129    | 121.3  | 114.9 | 153.7  | 134.5  | 190.6  |
| THOC1  | 1024.5 | 1180.1 | 411.3  | 460.4  | 333.1 | 572    | 785.7  | 1316.4 |
| THOC2  | 898.8  | 1262.2 | 282.9  | 480.8  | 428.6 | 463    | 756.1  | 977.1  |
| THOC2  | 220.5  | 301.4  | 164.2  | 138.7  | 121.4 | 136.8  | 204.8  | 283.3  |
| THOC3  | 2283.3 | 3246   | 623.9  | 563.2  | 428.4 | 560.8  | 1723.8 | 2480.1 |
| THOC3  | 1554.1 | 2560.6 | 1097.3 | 965.2  | 773.1 | 1219.7 | 1313.3 | 1289.2 |
| THOC4  | 2833.5 | 3775.8 | 832.5  | 397.5  | 321.2 | 250.7  | 2877.4 | 3751   |
| THOC5  | 850.1  | 1146.7 | 641.9  | 406.1  | 396.9 | 538.9  | 741    | 663.6  |
| THOC5  | 670.8  | 865.1  | 663.7  | 412.2  | 390.6 | 578.6  | 541.2  | 739.8  |
| THOP1  | 818.8  | 980    | 1050.9 | 617    | 500.2 | 693.3  | 699.3  | 1261   |
| THPO   | 91.2   | 83.9   | 83.3   | 81.4   | 85.4  | 82     | 83.9   | 101.3  |
| THRA   | 114    | 128.5  | 114.1  | 125.3  | 100.4 | 85.7   | 124.9  | 113.6  |
| THRA   | 108.7  | 123.4  | 91.5   | 91.3   | 90.9  | 87.4   | 117    | 137.7  |
| THRA   | 106.4  | 120.8  | 110.9  | 100.5  | 103.4 | 92.6   | 103.3  | 110.3  |
| THRAP1 | 103.3  | 141.7  | 104.5  | 85.3   | 81.1  | 95.5   | 117.8  | 140.3  |
| THRAP2 | 133.8  | 170.5  | 118.5  | 130.7  | 133.4 | 168    | 160.5  | 220.2  |
| THRAP3 | 199.7  | 218.9  | 108.2  | 92.5   | 91.7  | 99.8   | 161.7  | 192.7  |
| THRAP4 | 317.8  | 407.7  | 331    | 251    | 213.3 | 331.7  | 317    | 517.6  |
| THRAP4 | 362.1  | 445.2  | 517.8  | 353.6  | 325.1 | 581.8  | 263.6  | 470.1  |
| THRAP5 | 938.2  | 1218   | 417.7  | 401.8  | 264.4 | 276    | 741.7  | 629.7  |
| THRAP5 | 887.4  | 1123.1 | 675    | 619.9  | 457.8 | 505.8  | 696.2  | 822.3  |

|          |        |        |        |        |        |        |        |        |
|----------|--------|--------|--------|--------|--------|--------|--------|--------|
| THRAP5   | 241.7  | 296.8  | 233.4  | 197.8  | 181.9  | 179.4  | 194.5  | 279.1  |
| THRAP6   | 3944.6 | 4392.8 | 3033.8 | 1919.6 | 1600.1 | 2019   | 3994   | 4724   |
| THRB     | 87.1   | 102.3  | 80.3   | 80.1   | 80.8   | 91.1   | 84.2   | 104.6  |
| THRSP    | 74.2   | 82     | 87.9   | 89.9   | 85.6   | 86     | 71.9   | 84.4   |
| THSD1    | 80.2   | 96.7   | 85.9   | 80.9   | 76.5   | 79.1   | 85     | 88.8   |
| THSD1    | 79.5   | 93.6   | 86.9   | 82.6   | 74.8   | 87.1   | 86.6   | 96.3   |
| THSD1    | 94.8   | 116.8  | 93.1   | 91.6   | 82.6   | 91     | 100.3  | 108.6  |
| THSD1P   | 128.9  | 158.2  | 108.7  | 79.6   | 81.8   | 102.4  | 127.4  | 155.8  |
| THSD1P   | 93.7   | 119.4  | 93.5   | 81.5   | 83.2   | 80.1   | 86.9   | 110.3  |
| THSD3    | 118.8  | 139.4  | 85.1   | 79.8   | 74.3   | 77     | 102.8  | 136.4  |
| THSD3    | 101.8  | 121.2  | 97     | 81.2   | 77.5   | 85.1   | 122.2  | 116.1  |
| THSD3    | 83.3   | 103.5  | 93.7   | 80.8   | 89     | 91.8   | 89.4   | 94.2   |
| THSD4    | 97.7   | 100.6  | 99     | 99.1   | 98.6   | 102.1  | 101.9  | 99.6   |
| THSD7B   | 82.4   | 94.8   | 97.2   | 91.1   | 79     | 86.6   | 79.6   | 84.1   |
| THTPA    | 100    | 115.8  | 101.5  | 99.4   | 84.2   | 93.7   | 100.8  | 123.4  |
| THUMPD1  | 777.6  | 969.2  | 412.6  | 366.4  | 343.2  | 647.9  | 652.3  | 1246.4 |
| THUMPD2  | 744.4  | 936.4  | 330.9  | 329.8  | 259.5  | 378.6  | 600    | 897.4  |
| THUMPD3  | 303.5  | 357.9  | 174.1  | 172.1  | 143.7  | 220.2  | 269.2  | 383.6  |
| THY1     | 89     | 93.9   | 94.7   | 76.6   | 79.4   | 81.2   | 96.6   | 97.8   |
| THYN1    | 1493.8 | 1875.3 | 1051.9 | 613.1  | 460    | 881.6  | 942    | 1285.6 |
| THYN1    | 207.1  | 247.2  | 132.2  | 92     | 88.4   | 99.9   | 154.1  | 174.1  |
| THYN1    | 1192.9 | 1525   | 768.2  | 427.2  | 321.6  | 704.8  | 713.6  | 785.5  |
| TIA1     | 1540.1 | 1828.8 | 982.9  | 1001.3 | 856.2  | 1398   | 1162.6 | 1892.8 |
| TIAF1    | 1025.3 | 1288.1 | 885.8  | 1205.3 | 1228.6 | 1323.5 | 830.9  | 1076.1 |
| TIAL1    | 502.7  | 705.4  | 292.3  | 279.2  | 212.1  | 394.9  | 473.5  | 1043.5 |
| TIAL1    | 1099.7 | 1423.4 | 867.8  | 715.6  | 485.3  | 986.2  | 1125.8 | 2605.5 |
| TIAL1    | 448.4  | 448.9  | 183.4  | 174    | 136    | 169.3  | 375.2  | 664.7  |
| TIAM1    | 86.3   | 103.4  | 102.3  | 90.4   | 93.3   | 81.9   | 98     | 96     |
| TIAM2    | 95     | 98.5   | 99.3   | 97.6   | 74.9   | 81.8   | 89.4   | 102.4  |
| TIAM2    | 91.9   | 104.9  | 93     | 107.8  | 107    | 103.9  | 83.9   | 94.7   |
| TICAM1   | 103.1  | 98.1   | 123.8  | 112    | 91.7   | 109.9  | 95.2   | 134.9  |
| TICAM1   | 737.1  | 983.9  | 436    | 380.1  | 356.9  | 381    | 693.9  | 748.2  |
| TICAM2   | 495.5  | 623    | 369.5  | 366.6  | 265.4  | 368.6  | 521.4  | 869.6  |
| TIE1     | 136.8  | 158.6  | 93.7   | 98.5   | 86.7   | 93.9   | 134.1  | 183.7  |
| TIFA     | 182.8  | 248.7  | 137.9  | 132.7  | 109.6  | 136.9  | 143.9  | 150.7  |
| TIGD1    | 102.6  | 127.8  | 98     | 100.9  | 91.8   | 104.9  | 102.7  | 117.5  |
| TIGD2    | 437.8  | 505.7  | 375.5  | 303.1  | 214    | 364.5  | 351.4  | 723.2  |
| TIGD3    | 113.4  | 133.8  | 91.2   | 94.9   | 85.7   | 91.6   | 94.9   | 123.1  |
| TIGD4    | 84.9   | 93.4   | 83.6   | 79.4   | 75.7   | 78.9   | 84.3   | 84.6   |
| TIGD5    | 1380   | 1722.4 | 1142.7 | 608.2  | 505.5  | 718.3  | 1041   | 987.3  |
| TIGD6    | 126.9  | 163.3  | 118.5  | 117    | 121.9  | 123.8  | 113.6  | 130.8  |
| TIGD7    | 252.5  | 282.8  | 159.5  | 157    | 152.6  | 209.3  | 192.1  | 265    |
| TIMD4    | 77.4   | 92.4   | 81.8   | 88.4   | 79.9   | 88     | 82.7   | 82.4   |
| TIMELESS | 1104.7 | 1339.5 | 980.5  | 783.1  | 710.8  | 813.9  | 898.2  | 925.6  |
| TIMM10   | 2771.1 | 3429.5 | 2735.5 | 1735.8 | 1207.1 | 1899.7 | 2525.1 | 3058   |
| TIMM13   | 115.8  | 147.4  | 102.3  | 87     | 78.8   | 89.2   | 135.9  | 164.7  |
| TIMM17A  | 202.3  | 223    | 124.2  | 110.6  | 102.3  | 113    | 178.3  | 218.6  |
| TIMM17B  | 616.9  | 747.6  | 390.1  | 299.7  | 277.2  | 280.9  | 576.9  | 824.2  |
| TIMM22   | 1039.2 | 1473.3 | 680.6  | 572    | 453.8  | 491    | 890.8  | 908.8  |
| TIMM23   | 1372.2 | 1751.4 | 730.9  | 487.8  | 385.5  | 574.3  | 1203.9 | 2279.8 |

|         |         |         |        |        |        |         |         |         |
|---------|---------|---------|--------|--------|--------|---------|---------|---------|
| TIMM23  | 5798    | 6806.4  | 2581.3 | 1734.8 | 1249.7 | 2248.5  | 4518.5  | 6837.8  |
| TIMM23  | 2001.2  | 2681.6  | 1300.5 | 889.4  | 642.1  | 1131.9  | 1466.8  | 1961.3  |
| TIMM44  | 408.5   | 573.6   | 301.2  | 229.8  | 200    | 316.8   | 363.9   | 531.8   |
| TIMM50  | 88.1    | 87.9    | 80.2   | 87.8   | 82.1   | 82.7    | 86.2    | 88.8    |
| TIMM8A  | 426.8   | 545.5   | 165.1  | 146.1  | 129.1  | 144.1   | 344.3   | 408.1   |
| TIMM8B  | 340     | 391.1   | 157.8  | 133.3  | 121.1  | 130.8   | 315.6   | 347.6   |
| TIMM9   | 1008.4  | 1194.7  | 343.7  | 234.3  | 195.8  | 275.1   | 772.9   | 1611.2  |
| TIMP1   | 5067.7  | 6419.4  | 4583   | 5097.1 | 4205.7 | 4194.4  | 5399.4  | 6821.7  |
| TIMP2   | 920.2   | 1375.4  | 1030.1 | 2060.1 | 1716.6 | 2586.5  | 917.6   | 1346.1  |
| TIMP2   | 275.9   | 353.1   | 189.8  | 236.9  | 220.9  | 208.3   | 257.6   | 396.8   |
| TIMP3   | 321.4   | 481.6   | 263.6  | 155.6  | 154.9  | 248.7   | 255.3   | 260.4   |
| TIMP4   | 108.1   | 110.2   | 88.9   | 85.3   | 84.6   | 83      | 95.1    | 102.5   |
| TINAG   | 116.1   | 137.5   | 94.5   | 89.1   | 86.5   | 89.6    | 106.3   | 122.3   |
| TINAGL1 | 79.5    | 96.3    | 90     | 76.6   | 82.1   | 81.7    | 84.7    | 79.8    |
| TINF2   | 819.8   | 1177.6  | 621.6  | 521.2  | 480.1  | 672     | 857.2   | 762.1   |
| TINP1   | 10277.1 | 12800.1 | 7877.8 | 9192.8 | 7668.9 | 12913.1 | 10067.2 | 13278.9 |
| TIP39   | 99.3    | 111.8   | 103    | 102.8  | 95.4   | 88.5    | 95.9    | 98.9    |
| TIPARP  | 651.2   | 810.8   | 383.1  | 519.8  | 431.7  | 739.4   | 819.7   | 1344.7  |
| TIPRL   | 1834.4  | 2349.4  | 789.2  | 662.9  | 510    | 790.7   | 1230    | 2160.2  |
| TIPRL   | 409.1   | 530     | 326.3  | 276.1  | 213.3  | 493.4   | 364.2   | 776.9   |
| TIRAP   | 110.3   | 150.8   | 88.1   | 95.3   | 84.4   | 82.5    | 116.7   | 166.1   |
| TIRAP   | 140     | 170.4   | 103    | 98.1   | 95.2   | 82.8    | 120.2   | 169.7   |
| TIRAP   | 172.8   | 224.8   | 108.2  | 101.9  | 95.1   | 96.9    | 156.5   | 208.9   |
| TITF1   | 76.7    | 82.9    | 82.1   | 83.4   | 73.5   | 78.4    | 81.2    | 79.4    |
| TITF1   | 95.7    | 94.8    | 94.7   | 81.1   | 81.2   | 91.7    | 92.5    | 89.1    |
| TJAP1   | 2444.7  | 2992.3  | 1719.3 | 1521.4 | 1556.6 | 1641.2  | 2121    | 2033.2  |
| TJP1    | 81.1    | 104.6   | 85.3   | 76.2   | 82.6   | 86.8    | 90.7    | 89.2    |
| TJP1    | 115.4   | 142.1   | 97.2   | 90.7   | 80.2   | 97.4    | 122.5   | 122.3   |
| TJP2    | 128.8   | 147.6   | 116.7  | 108.9  | 92.8   | 113.3   | 121.1   | 133.9   |
| TJP2    | 106.2   | 152     | 118.2  | 92.9   | 89.6   | 115.5   | 102.8   | 97.1    |
| TJP3    | 101.9   | 117.3   | 130.5  | 113.8  | 114.3  | 124.1   | 105.7   | 117     |
| TK1     | 3106.1  | 4019.6  | 3174.9 | 1716.8 | 1509.3 | 1627.6  | 2932.3  | 3958.7  |
| TK2     | 205.4   | 258.5   | 166.8  | 138.3  | 135.9  | 166     | 168.8   | 227.4   |
| TKT     | 5411.7  | 7158.1  | 5107.5 | 4888.9 | 4242.8 | 5728.1  | 6812.4  | 9658.4  |
| TKTL1   | 99.4    | 135.7   | 85     | 82.2   | 78.5   | 89.1    | 100.2   | 109.5   |
| TKTL2   | 69      | 93.5    | 88.6   | 88.2   | 75.3   | 91.6    | 80.7    | 77.7    |
| TLCD1   | 123.2   | 151.7   | 120.6  | 115.6  | 92.6   | 106.8   | 123.1   | 136.1   |
| TLE1    | 314.8   | 366.9   | 174.2  | 157.4  | 146    | 157.7   | 253.4   | 274.7   |
| TLE2    | 82.4    | 82.9    | 94.1   | 95.4   | 87.7   | 92.1    | 85      | 91.2    |
| TLE3    | 112.6   | 126.8   | 132.1  | 127.9  | 122.6  | 148.8   | 122.4   | 131.6   |
| TLE4    | 695.3   | 920.9   | 825.5  | 851.7  | 581.6  | 1152.3  | 687.2   | 1427.5  |
| TLE6    | 165.7   | 186.1   | 112.8  | 83.5   | 84.2   | 85.4    | 128     | 165.1   |
| TLK1    | 382.4   | 437.7   | 184.4  | 251.6  | 187.7  | 247.2   | 351.3   | 736.4   |
| TLK2    | 576.3   | 802.9   | 419.3  | 449.1  | 421.1  | 773     | 492     | 718.9   |
| TLL1    | 74.8    | 91.9    | 76.6   | 75.1   | 75.3   | 74.9    | 78.2    | 81.5    |
| TLL2    | 73.8    | 88.7    | 87     | 72.8   | 81     | 80.6    | 72.7    | 79.8    |
| TLN1    | 572.3   | 694     | 473.2  | 603.4  | 467.5  | 516.3   | 537.2   | 717.8   |
| TLN2    | 99.9    | 115.7   | 114.4  | 158.8  | 123    | 175.8   | 103.9   | 117.3   |
| TLOC1   | 314.4   | 477.9   | 240.9  | 561.6  | 398.5  | 573.2   | 301.3   | 411.6   |
| TLR1    | 110.5   | 122.7   | 98.8   | 83.6   | 91.1   | 106     | 121.6   | 152.9   |

|         |        |         |        |        |        |        |        |        |
|---------|--------|---------|--------|--------|--------|--------|--------|--------|
| TLR10   | 94     | 110.1   | 104    | 88.9   | 99.4   | 108.4  | 100.5  | 105.8  |
| TLR10   | 96.4   | 113.7   | 90.3   | 107.7  | 86.7   | 82.3   | 88.9   | 109.8  |
| TLR2    | 109.6  | 136.2   | 98.9   | 124.2  | 108.3  | 114.5  | 96.8   | 106.2  |
| TLR3    | 71.1   | 78.8    | 88.9   | 76.6   | 79.2   | 83.1   | 77.1   | 76.5   |
| TLR4    | 204.2  | 246.5   | 154.7  | 209.1  | 136    | 227    | 171.8  | 207.1  |
| TLR5    | 91.3   | 102.2   | 103.6  | 95.1   | 89.7   | 103.6  | 102.1  | 105.7  |
| TLR6    | 91.7   | 112.7   | 95.5   | 84     | 88.4   | 90.9   | 97.2   | 109.4  |
| TLR7    | 95.4   | 97.4    | 94.9   | 97     | 102.5  | 98.6   | 93.8   | 96.1   |
| TLR8    | 79.5   | 79.9    | 86.7   | 86.9   | 79.1   | 92     | 75.4   | 79.6   |
| TLR8    | 87.2   | 93.6    | 87.7   | 93.7   | 87.1   | 90.4   | 84.1   | 93.1   |
| TLR8    | 74.6   | 87.3    | 85.7   | 93.1   | 94.8   | 92     | 76.7   | 82.9   |
| TLR9    | 97.2   | 120.7   | 101.6  | 101.6  | 93     | 108.4  | 99.6   | 120    |
| TLX1    | 103.5  | 120.7   | 94.4   | 84.1   | 87.5   | 92.7   | 102    | 134.9  |
| TLX2    | 98.9   | 132.9   | 96.5   | 96     | 96     | 99.4   | 93.4   | 108.2  |
| TLX2    | 89.4   | 108.2   | 100.3  | 81     | 84.7   | 83.8   | 91.3   | 81.3   |
| TLX2    | 83.9   | 94.8    | 92.2   | 76.5   | 82.8   | 94.1   | 88.6   | 91.4   |
| TLX3    | 103.4  | 130.7   | 91.7   | 92.4   | 79.8   | 82.5   | 105.4  | 128.6  |
| TM2D1   | 1649.6 | 1936.4  | 875.2  | 889.7  | 726.4  | 1034.3 | 1687.2 | 2705.9 |
| TM2D2   | 326.2  | 424.7   | 251.3  | 214.2  | 167.1  | 273.5  | 310.4  | 637.6  |
| TM2D3   | 232.3  | 292.3   | 152    | 130.9  | 101.1  | 117.1  | 231.7  | 255    |
| TM2D3   | 1267   | 1698.4  | 643.3  | 695.6  | 500.1  | 745    | 1271.6 | 2379.4 |
| TM4SF1  | 93.4   | 98.5    | 93.6   | 89.9   | 82.8   | 89.6   | 162.6  | 231.9  |
| TM4SF11 | 99.6   | 115.6   | 99.1   | 94.3   | 78.2   | 93.1   | 95.7   | 108.8  |
| TM4SF18 | 81.5   | 84.8    | 95.1   | 91.9   | 83.1   | 87.7   | 84.3   | 88.2   |
| TM4SF19 | 88     | 102.4   | 103.3  | 91.3   | 88.6   | 94.8   | 93.6   | 92     |
| TM4SF19 | 89.2   | 85.2    | 90.4   | 94.4   | 82.5   | 79.7   | 91     | 97.3   |
| TM4SF20 | 83     | 75      | 86     | 86.2   | 80.4   | 88.1   | 76.3   | 76.8   |
| TM4SF4  | 81     | 91.2    | 93.6   | 75.8   | 79.8   | 89.6   | 71.8   | 83     |
| TM4SF5  | 77     | 81.9    | 76.2   | 73.9   | 73.4   | 76.2   | 81.4   | 89.7   |
| TM6SF1  | 146.1  | 152.6   | 128.9  | 174.6  | 132.2  | 225    | 126.8  | 171.8  |
| TM6SF2  | 78.2   | 108.1   | 76.9   | 86.9   | 78.5   | 91.2   | 88.3   | 95.1   |
| TM6SF2  | 80.6   | 87.9    | 94.8   | 100.6  | 96     | 91.4   | 86.4   | 92     |
| TM6SF2  | 81.4   | 94.2    | 91.9   | 76.2   | 69.7   | 76.4   | 86.3   | 90.8   |
| TM7SF2  | 516.6  | 721.3   | 456.9  | 231.1  | 269.2  | 325.5  | 515.7  | 660.9  |
| TM7SF3  | 602.1  | 785.3   | 285.6  | 283.9  | 195.4  | 249.9  | 406.4  | 718.7  |
| TM7SF4  | 83.5   | 91.4    | 92.8   | 83.1   | 84.3   | 85.6   | 96.3   | 98.3   |
| TM9SF1  | 390.8  | 554.8   | 332.8  | 268.7  | 212.8  | 248.2  | 330    | 602.2  |
| TM9SF1  | 204.4  | 249.7   | 157.1  | 112.9  | 104.3  | 126    | 160.3  | 205.4  |
| TM9SF1  | 134.7  | 143.4   | 143.7  | 128.6  | 114.7  | 134.4  | 114.6  | 130.5  |
| TM9SF2  | 4077.9 | 5057    | 2227.9 | 2193.5 | 1601.6 | 3132.2 | 3415.8 | 5537.1 |
| TM9SF4  | 712.9  | 790     | 440.9  | 637.5  | 449.6  | 760    | 583.4  | 1300.4 |
| TMBIM1  | 196.5  | 205.8   | 153.4  | 139.1  | 122.5  | 131.3  | 249.6  | 267.2  |
| TMBIM4  | 8012.4 | 10053.3 | 6012.3 | 8860.3 | 6483.9 | 7590.5 | 7793.2 | 8624.2 |
| TMC2    | 96.7   | 119.1   | 84.9   | 87.1   | 85.9   | 91.1   | 100.2  | 141.9  |
| TMC4    | 98.3   | 111.5   | 93     | 88.6   | 85.1   | 98.3   | 93.7   | 108.2  |
| TMC5    | 106    | 124.8   | 93.1   | 79.8   | 93.5   | 89     | 106.3  | 137.8  |
| TMC6    | 613.1  | 742.3   | 519    | 433.6  | 300.9  | 442.3  | 508    | 822.6  |
| TMC7    | 99     | 126.8   | 95.5   | 87.8   | 91.2   | 96.2   | 97.8   | 100.8  |
| TMC8    | 144.7  | 156.9   | 107.6  | 108.7  | 91.1   | 102.6  | 138.7  | 144.9  |
| TMCC1   | 92.1   | 103.8   | 86.4   | 82.2   | 82.5   | 78.7   | 95.9   | 95     |

|          |        |         |        |        |        |        |        |        |
|----------|--------|---------|--------|--------|--------|--------|--------|--------|
| TMCC1    | 103.3  | 125.1   | 98.5   | 99.6   | 93.6   | 102.6  | 129.7  | 141.3  |
| TMCC2    | 92.7   | 107.4   | 92.5   | 81.7   | 71.8   | 104.1  | 100.8  | 104.6  |
| TMCC3    | 115.5  | 130     | 92.7   | 88.5   | 78.7   | 82     | 116.7  | 130.1  |
| TMCO1    | 6867.3 | 8580.6  | 4583.4 | 3745.5 | 2768.1 | 3913.4 | 6708.2 | 8701.1 |
| TMCO2    | 103.9  | 103.1   | 94.2   | 77     | 74.8   | 83.7   | 95.1   | 142.3  |
| TMCO3    | 430.9  | 602.3   | 480.6  | 420.2  | 351.9  | 555.3  | 376.8  | 640.4  |
| TMCO4    | 172.9  | 185.1   | 140.5  | 127.8  | 120.6  | 142.5  | 165.2  | 190.7  |
| TMCO5    | 133.8  | 169.3   | 92.5   | 87.6   | 83.5   | 87.5   | 123.1  | 168.2  |
| TMCO6    | 191.1  | 233.5   | 157.1  | 124.3  | 116.6  | 143.7  | 163.7  | 167.5  |
| TMDCII   | 81.5   | 86.9    | 85.5   | 82     | 88.2   | 88.1   | 92.5   | 93.9   |
| TMED1    | 716    | 879.3   | 291.2  | 184.5  | 234.3  | 257.8  | 691.7  | 738.9  |
| TMED10   | 2137.7 | 3550.3  | 1578.2 | 1787   | 1357.2 | 2677.3 | 2185.9 | 3029.3 |
| TMED10P  | 6085.4 | 7958.9  | 3632.9 | 2294.7 | 2010.5 | 2734.1 | 5895.2 | 7371.2 |
| TMED2    | 2389.1 | 3733.1  | 800.8  | 798.6  | 555    | 1117.4 | 1855.4 | 2736.8 |
| TMED3    | 8156.8 | 10370.3 | 6181.1 | 6514.2 | 4570.8 | 5576.4 | 7909.2 | 7832.4 |
| TMED4    | 1641.5 | 2012.5  | 1232.3 | 1236.2 | 1036.1 | 1011.3 | 1215.4 | 1605.9 |
| TMED5    | 1290.6 | 1571.6  | 769.7  | 823    | 754    | 1186.5 | 1239.3 | 2405.8 |
| TMED6    | 85.7   | 88.2    | 97.2   | 82.9   | 82.2   | 89.1   | 78.1   | 106    |
| TMED7    | 953.2  | 1130.4  | 480.4  | 738.1  | 449.4  | 903.5  | 979.1  | 1695.4 |
| TMED8    | 131.3  | 158.3   | 112.6  | 117.2  | 100    | 91.3   | 113.1  | 141.2  |
| TMED9    | 4318.5 | 6075.4  | 2483.6 | 2371.6 | 1854.7 | 2914.8 | 4486.3 | 7748.7 |
| TMEFF1   | 107.8  | 132.8   | 89.2   | 90.2   | 94.6   | 99.3   | 104.5  | 133.7  |
| TMEFF2   | 78.1   | 81.4    | 81.9   | 83.6   | 79     | 83.8   | 82.9   | 90.1   |
| TMEM1    | 228.9  | 298.6   | 131.9  | 159.9  | 136.4  | 161.7  | 270    | 344.6  |
| TMEM1    | 100.8  | 119.9   | 93.3   | 91.2   | 85.4   | 84.7   | 97.8   | 97.6   |
| TMEM1    | 158.4  | 183.3   | 101.6  | 93.3   | 110.6  | 97.2   | 174.9  | 185.6  |
| TMEM10   | 91.4   | 99.2    | 97.5   | 94.9   | 76.1   | 85     | 88.4   | 96.1   |
| TMEM10   | 71.6   | 86.7    | 98.4   | 87.7   | 88.4   | 84.4   | 76.5   | 78.6   |
| TMEM100  | 110.7  | 111.2   | 107.8  | 95.9   | 95.8   | 108.9  | 96.7   | 113.6  |
| TMEM101  | 1416   | 1938.8  | 1199   | 853.5  | 740.1  | 1126.2 | 1357.8 | 1574.2 |
| TMEM102  | 86.5   | 111.5   | 100.2  | 92.7   | 91.2   | 95.9   | 88.1   | 114.4  |
| TMEM103  | 887.5  | 1106.2  | 517.8  | 960.7  | 806.6  | 1105.5 | 648.2  | 691.7  |
| TMEM103  | 241.3  | 300.3   | 190.1  | 173.1  | 191.5  | 261.3  | 177    | 222.4  |
| TMEM104  | 116.4  | 155.8   | 174.9  | 154.9  | 134.1  | 191.8  | 113.4  | 162.7  |
| TMEM105  | 193    | 226.9   | 151.7  | 103.6  | 122.2  | 122.2  | 175.8  | 151    |
| TMEM106E | 113.1  | 130.5   | 106.7  | 109    | 104    | 121    | 98.4   | 170.9  |
| TMEM106C | 1563.2 | 1902.4  | 596    | 462.4  | 389    | 635.8  | 1256.1 | 1420.1 |
| TMEM107  | 102.5  | 112.3   | 96.5   | 97.4   | 80.7   | 93.6   | 93.5   | 112.6  |
| TMEM108  | 169.7  | 211.5   | 133.6  | 134.9  | 118.9  | 98.4   | 184.7  | 238.2  |
| TMEM109  | 1100.4 | 1484.4  | 875.1  | 780.4  | 556.7  | 862.8  | 905.8  | 1419.5 |
| TMEM11   | 258.1  | 358.5   | 173.1  | 150.1  | 146.9  | 175    | 291.2  | 378.4  |
| TMEM110  | 143.5  | 170.5   | 117.2  | 114.5  | 105.8  | 121.8  | 122.2  | 131.1  |
| TMEM113  | 1079.2 | 1413.3  | 934.4  | 909.8  | 660.6  | 767.3  | 1081.3 | 2163.1 |
| TMEM115  | 740    | 981.3   | 442.8  | 376.2  | 323    | 396.6  | 718.3  | 722.9  |
| TMEM116  | 564.8  | 736.5   | 461.9  | 481.4  | 464.2  | 625.1  | 589    | 851.1  |
| TMEM117  | 168.3  | 231.4   | 115.6  | 119.1  | 98     | 102.3  | 164.2  | 246.9  |
| TMEM118  | 125.3  | 181.7   | 137.4  | 103.3  | 100.8  | 108.8  | 148.9  | 142.2  |
| TMEM119  | 81.5   | 87.6    | 88.8   | 93.8   | 88.6   | 90.8   | 78.2   | 92     |
| TMEM121  | 75.9   | 90.2    | 99.9   | 88.9   | 88.3   | 88.5   | 84     | 82.3   |
| TMEM122  | 80.6   | 97.1    | 90.6   | 95.5   | 83     | 81.2   | 88.2   | 95.7   |

|          |        |        |        |        |        |        |        |        |
|----------|--------|--------|--------|--------|--------|--------|--------|--------|
| TMEM123  | 4012   | 4935.4 | 2486.8 | 2773.4 | 2033.1 | 4509.8 | 2917.5 | 7088.5 |
| TMEM125  | 96.5   | 114.9  | 105.3  | 92     | 86.8   | 88.4   | 85.8   | 109.2  |
| TMEM126/ | 3601   | 4059.2 | 3349.2 | 3110.2 | 2168.4 | 3032.4 | 3479   | 5614.6 |
| TMEM126E | 3271.8 | 3811.1 | 1873.2 | 2072.2 | 1625.7 | 2567   | 2535.9 | 2702.3 |
| TMEM127  | 169.9  | 194.8  | 130    | 163.1  | 150.9  | 171    | 156.5  | 164.7  |
| TMEM128  | 223.2  | 255.9  | 133.6  | 135    | 132.2  | 138    | 228    | 395.3  |
| TMEM129  | 103.8  | 120.2  | 109.3  | 98.4   | 85     | 93     | 87.9   | 128.9  |
| TMEM130  | 98.1   | 109.8  | 90.1   | 90.7   | 85.2   | 91.8   | 97.9   | 100.1  |
| TMEM132/ | 126.8  | 151.6  | 94.1   | 81.2   | 91.1   | 92.3   | 118.7  | 155.9  |
| TMEM134  | 299.6  | 353    | 195    | 149.8  | 134.8  | 204.7  | 243.7  | 267.8  |
| TMEM14A  | 1743.2 | 2145.1 | 981    | 1057.4 | 771.9  | 1162.2 | 1219   | 1882.4 |
| TMEM14B  | 3929.7 | 4647.3 | 1510   | 1202.2 | 1006.9 | 1289.2 | 4007.5 | 4913.4 |
| TMEM14C  | 3614.2 | 4678.7 | 2357.8 | 2599.2 | 2039.4 | 2790.4 | 3573.4 | 4020.7 |
| TMEM15   | 441.5  | 569.3  | 364.1  | 284.1  | 218.1  | 345.8  | 428.9  | 724.4  |
| TMEM150  | 287.2  | 345.5  | 190.2  | 235.9  | 193.1  | 257    | 210.6  | 222.9  |
| TMEM151  | 79.4   | 84.2   | 95.5   | 92.8   | 88.9   | 89.5   | 83.7   | 81.3   |
| TMEM151  | 81.4   | 94.5   | 100.6  | 90.5   | 81.5   | 91.7   | 85.2   | 81.4   |
| TMEM154  | 892.7  | 1060.6 | 347.2  | 423.7  | 374.7  | 399.9  | 768.1  | 1274.2 |
| TMEM156  | 137    | 183.2  | 122.8  | 120    | 120.4  | 127.9  | 134.8  | 140.6  |
| TMEM157  | 126.6  | 146.5  | 101.6  | 96.6   | 78.6   | 100.4  | 137.1  | 173.6  |
| TMEM159  | 119.8  | 164.5  | 120    | 108.8  | 100.9  | 115.5  | 108    | 130.5  |
| TMEM164  | 154.9  | 203.1  | 112    | 99.2   | 94.7   | 103.5  | 138.3  | 166.5  |
| TMEM16A  | 80.2   | 89.5   | 86.1   | 88.8   | 82.2   | 84.2   | 81.5   | 82.1   |
| TMEM16B  | 87.3   | 99.5   | 95.6   | 96.2   | 82.2   | 91     | 86.4   | 82.4   |
| TMEM16C  | 78.9   | 87.5   | 94.1   | 94.9   | 88.1   | 93.8   | 84.4   | 75.3   |
| TMEM16D  | 116.9  | 125.4  | 105.6  | 98.6   | 104.3  | 95.5   | 116.4  | 107.9  |
| TMEM16E  | 91.1   | 101    | 92.4   | 82.3   | 96.7   | 90.8   | 95.9   | 92.9   |
| TMEM16F  | 658.9  | 849.6  | 449.6  | 625    | 593.1  | 767.5  | 600.9  | 886.6  |
| TMEM16G  | 80.7   | 90.9   | 86.2   | 83.4   | 81.7   | 81.1   | 79.8   | 86     |
| TMEM16G  | 127.4  | 181.1  | 111.5  | 113    | 106.3  | 113.3  | 130.2  | 173.7  |
| TMEM16G  | 93.3   | 96.5   | 79.7   | 76.4   | 74.7   | 77.4   | 92.4   | 104.8  |
| TMEM16H  | 122.4  | 125.3  | 109.9  | 110.4  | 109.3  | 130.6  | 109.7  | 128.2  |
| TMEM16J  | 189.2  | 239    | 113.4  | 99.5   | 93.2   | 97.5   | 178.9  | 199.5  |
| TMEM16J  | 82.4   | 77.4   | 84.1   | 88.2   | 76.1   | 82     | 78.3   | 91.8   |
| TMEM16K  | 212.4  | 225.6  | 181.7  | 152.1  | 124.7  | 153    | 172.1  | 285.9  |
| TMEM17   | 3110.4 | 2757.5 | 3179.5 | 4592.6 | 4820.5 | 3399   | 2784.5 | 6612.9 |
| TMEM170  | 488.3  | 597.9  | 256.4  | 208.4  | 155.3  | 160.5  | 444    | 584.7  |
| TMEM173  | 4522.8 | 6171.1 | 3671   | 3558.7 | 3126.9 | 3761.5 | 3958.8 | 4999.6 |
| TMEM176E | 123.1  | 139.3  | 102.3  | 95.7   | 99.5   | 90.8   | 118    | 143.6  |
| TMEM178  | 82.4   | 94.1   | 93.3   | 87.2   | 79.3   | 85.9   | 82     | 96.5   |
| TMEM18   | 252.1  | 290.9  | 193.1  | 211.3  | 168.5  | 229    | 192.4  | 388    |
| TMEM183E | 5408   | 6234.2 | 3442.5 | 3031.2 | 2460   | 4225.7 | 4878.6 | 6723.4 |
| TMEM185/ | 280.8  | 379.2  | 280.2  | 264.8  | 226    | 285.9  | 262.4  | 516.7  |
| TMEM185E | 701    | 1040   | 424.4  | 343.7  | 233.7  | 394.5  | 559.4  | 792.3  |
| TMEM186  | 197.2  | 250.1  | 118.8  | 115.2  | 109.5  | 114.5  | 189.6  | 202.1  |
| TMEM19   | 113.9  | 146.7  | 94.4   | 84.5   | 76.1   | 88.3   | 109.3  | 144.6  |
| TMEM2    | 112.8  | 135    | 120.6  | 109.5  | 106.1  | 113.8  | 152.4  | 205    |
| TMEM20   | 194.8  | 209.8  | 142.3  | 108.9  | 99.1   | 117.5  | 160.5  | 238.5  |
| TMEM22   | 109.5  | 129.5  | 114.3  | 111.6  | 94.8   | 105.8  | 132.5  | 198.7  |
| TMEM23   | 83.3   | 102.7  | 93.1   | 97.4   | 90.2   | 100.6  | 93.7   | 97.4   |

|         |        |        |        |        |        |        |        |        |
|---------|--------|--------|--------|--------|--------|--------|--------|--------|
| TMEM24  | 108.3  | 136    | 134.4  | 124    | 108.6  | 126    | 115    | 162    |
| TMEM25  | 93     | 102.5  | 93.7   | 88.7   | 80.9   | 94.5   | 87.5   | 90     |
| TMEM26  | 100.6  | 119.5  | 100.1  | 86.4   | 81.9   | 86.8   | 104.1  | 107.5  |
| TMEM27  | 106.2  | 119.5  | 90.2   | 103.4  | 96.4   | 96.8   | 94.4   | 109.6  |
| TMEM28  | 106    | 144.8  | 102.9  | 92.2   | 87.2   | 91.6   | 105.3  | 118.5  |
| TMEM29  | 320.2  | 302.6  | 397.3  | 357.3  | 295.2  | 490.9  | 219.8  | 360.7  |
| TMEM30A | 764.9  | 1058.6 | 502.2  | 1075.6 | 830.7  | 1337.8 | 727.3  | 923.5  |
| TMEM30B | 94.1   | 105.5  | 88     | 89.7   | 80.1   | 81.1   | 87.7   | 84.1   |
| TMEM31  | 181.1  | 237.2  | 160.4  | 119.3  | 107.8  | 117.2  | 170.4  | 190.5  |
| TMEM32  | 1694   | 2175.4 | 1596.5 | 2150.7 | 1360.3 | 2129   | 1486.5 | 2993.9 |
| TMEM34  | 146.3  | 178.8  | 117.5  | 102.1  | 102    | 106.1  | 147    | 187.2  |
| TMEM35  | 96     | 106.9  | 125.1  | 105.8  | 107    | 118.2  | 99.4   | 105.8  |
| TMEM37  | 110    | 123.9  | 120.1  | 104.9  | 106.1  | 110.7  | 122.1  | 137.7  |
| TMEM38A | 103.2  | 142.7  | 94.5   | 81.7   | 86.4   | 86.8   | 95.5   | 128.5  |
| TMEM38B | 89.5   | 107.6  | 100.1  | 88.9   | 87.4   | 95.3   | 105.8  | 117    |
| TMEM39A | 272.6  | 337    | 208.6  | 191.8  | 164.2  | 267.2  | 246.8  | 382.1  |
| TMEM39B | 424.3  | 519.7  | 475.7  | 522.4  | 416.4  | 598.1  | 385    | 976.1  |
| TMEM4   | 1674   | 2115.5 | 712.4  | 647.5  | 576.1  | 845    | 1440.6 | 1793.2 |
| TMEM40  | 84.9   | 83.1   | 90     | 97.2   | 96     | 95.3   | 85     | 84.9   |
| TMEM41A | 424.1  | 593.2  | 238.1  | 189.1  | 187.1  | 219.4  | 400.3  | 458.9  |
| TMEM41B | 1057.9 | 1364.9 | 516.6  | 577.2  | 503.9  | 661    | 968.8  | 1505.1 |
| TMEM42  | 659.6  | 793.9  | 542.1  | 469.8  | 419.4  | 558.8  | 479.8  | 467.6  |
| TMEM43  | 1578.9 | 1979.8 | 1289.1 | 1872.1 | 1287.8 | 2324.1 | 1296.7 | 1617.8 |
| TMEM44  | 273.6  | 325.7  | 141.3  | 113.6  | 118.4  | 130.7  | 272.6  | 198.6  |
| TMEM44  | 197.6  | 245.5  | 108.9  | 98.7   | 92.5   | 102.3  | 177.7  | 169.1  |
| TMEM45A | 290.8  | 337.5  | 159.6  | 294.9  | 270.6  | 420.2  | 217.2  | 314.3  |
| TMEM45B | 133.3  | 158.1  | 86.6   | 95.3   | 88.7   | 94.8   | 129    | 143.4  |
| TMEM46  | 80.6   | 86.6   | 99.6   | 87.5   | 79.5   | 84.1   | 81.5   | 84.5   |
| TMEM47  | 108.8  | 117.3  | 116.3  | 122.5  | 108.4  | 111.4  | 110    | 117    |
| TMEM48  | 1132.6 | 1454.9 | 685.4  | 559.3  | 427.6  | 689.2  | 698.2  | 1351.1 |
| TMEM49  | 1627.2 | 2059.2 | 1227.4 | 1511.5 | 1217.5 | 1705.2 | 1455.6 | 1762.4 |
| TMEM5   | 2145.8 | 2317.4 | 1408.3 | 944.6  | 642.1  | 961.5  | 1748   | 2326.8 |
| TMEM50A | 188.1  | 245.6  | 135    | 152.9  | 128.3  | 180.9  | 193.1  | 314.2  |
| TMEM50B | 1706   | 2129.6 | 1084.8 | 1017.3 | 691.7  | 1196.6 | 1288.7 | 1726.4 |
| TMEM51  | 499.7  | 706.8  | 415.2  | 498.5  | 498.7  | 633.5  | 586.5  | 866.9  |
| TMEM52  | 102.2  | 101.5  | 110.4  | 99.7   | 95.6   | 92.5   | 92.2   | 106.1  |
| TMEM53  | 145.9  | 185.9  | 109.8  | 113.2  | 103.5  | 105.9  | 143.1  | 123.8  |
| TMEM54  | 265.1  | 309.9  | 293.4  | 247.6  | 186.8  | 275.8  | 242.8  | 388    |
| TMEM55A | 470.4  | 553.1  | 320    | 363.1  | 288.5  | 423    | 480.2  | 1060.5 |
| TMEM55B | 556.6  | 688.1  | 466.4  | 322.1  | 341.4  | 425.9  | 474.3  | 707.7  |
| TMEM56  | 90.6   | 112.1  | 85.4   | 85.6   | 87.1   | 78.8   | 94.6   | 104    |
| TMEM57  | 198.9  | 267.8  | 176.2  | 168.7  | 152.9  | 201.2  | 210.5  | 302.2  |
| TMEM58  | 140.4  | 166.9  | 108.6  | 92.4   | 87.2   | 89.2   | 141.8  | 143.8  |
| TMEM59  | 5686.7 | 6697.2 | 4428.7 | 4748.9 | 4325.1 | 6271.5 | 5471.7 | 7594.8 |
| TMEM60  | 2345.4 | 3147.6 | 1630.1 | 2261.1 | 2010.7 | 2315.4 | 2120.7 | 2529.3 |
| TMEM61  | 85.9   | 99.5   | 96.9   | 85.2   | 86.4   | 92.4   | 101.7  | 100.1  |
| TMEM62  | 357.2  | 431    | 282.2  | 291    | 241.6  | 415.5  | 274.5  | 417.4  |
| TMEM63A | 127.7  | 140.6  | 150.3  | 170.3  | 154.7  | 200.2  | 115.8  | 142.4  |
| TMEM63B | 148.9  | 173.9  | 96.6   | 85.1   | 84.2   | 102.4  | 142.1  | 172.7  |
| TMEM63C | 126.8  | 123.6  | 87.8   | 93.7   | 89.5   | 98.7   | 116.9  | 123.6  |



|         |        |         |        |        |        |        |        |         |
|---------|--------|---------|--------|--------|--------|--------|--------|---------|
| TMEM64  | 227.6  | 288.3   | 154    | 145.7  | 122.1  | 148.9  | 210.1  | 374.6   |
| TMEM65  | 83.8   | 97.2    | 114.6  | 100.6  | 105.8  | 107.9  | 84.9   | 87.5    |
| TMEM66  | 8356.1 | 10080.8 | 4067.9 | 3232.7 | 2808.3 | 4750.7 | 9045.6 | 12914.7 |
| TMEM67  | 99.9   | 113.6   | 101    | 87.6   | 84.8   | 107.5  | 90.2   | 108.9   |
| TMEM68  | 149.6  | 181.4   | 118.2  | 94.4   | 94.2   | 104.7  | 149.4  | 141.4   |
| TMEM69  | 1517.5 | 2203.8  | 1077.5 | 1078.1 | 909.6  | 1094.5 | 1122.3 | 1197.3  |
| TMEM70  | 282.7  | 342     | 139    | 108.8  | 99.1   | 130    | 246.5  | 470.1   |
| TMEM70  | 526.2  | 722.1   | 356.8  | 254.2  | 178.8  | 245.7  | 471    | 719.4   |
| TMEM71  | 153.8  | 182.4   | 125.5  | 125.9  | 119.1  | 150.9  | 134.4  | 156     |
| TMEM74  | 86.1   | 93.1    | 99.3   | 100.6  | 92.9   | 93.8   | 81.1   | 92.4    |
| TMEM75  | 84.2   | 89      | 88     | 85     | 79.7   | 91.5   | 76.2   | 88.6    |
| TMEM77  | 1175.8 | 1442    | 767.7  | 381.4  | 287.3  | 527.1  | 828.2  | 1690.2  |
| TMEM79  | 562.5  | 654.9   | 430.9  | 285    | 279.8  | 326.2  | 474.6  | 527.8   |
| TMEM8   | 234    | 366.8   | 309.5  | 335    | 258.3  | 450.3  | 251.4  | 482.6   |
| TMEM80  | 255.5  | 301.5   | 167.1  | 221.8  | 173.5  | 215.3  | 204    | 281.3   |
| TMEM80  | 325.7  | 379.3   | 167.4  | 149.4  | 152.3  | 192.9  | 281.7  | 332.1   |
| TMEM80  | 98.1   | 113.3   | 94.3   | 94.6   | 79.9   | 79.3   | 107.4  | 115.1   |
| TMEM81  | 118.6  | 144     | 90.3   | 81.5   | 82.1   | 79.2   | 114.8  | 133.2   |
| TMEM83  | 121.2  | 135     | 94.2   | 83.2   | 79.4   | 78.5   | 117.5  | 138.6   |
| TMEM85  | 4245.4 | 5413.7  | 3234.5 | 3397.9 | 2642.9 | 4172.8 | 3926   | 5738.5  |
| TMEM86A | 100.8  | 123.9   | 99.5   | 96.9   | 91.3   | 107.2  | 125.5  | 124.9   |
| TMEM86B | 255.9  | 233.9   | 370    | 284.2  | 273    | 345.8  | 183.6  | 286.2   |
| TMEM87A | 4570.6 | 5645.8  | 3249.2 | 3652.8 | 2723.4 | 3562.1 | 4189.5 | 4755.9  |
| TMEM87B | 143.7  | 161.6   | 105.7  | 112.2  | 105.9  | 114    | 130.8  | 194.2   |
| TMEM88  | 100.2  | 107.4   | 90     | 93.2   | 83.3   | 90.8   | 88.4   | 100.5   |
| TMEM89  | 91.7   | 97.1    | 120.1  | 95.8   | 99.8   | 93.7   | 85.9   | 95.4    |
| TMEM9   | 468.7  | 572.6   | 364    | 300.7  | 293    | 405.2  | 428    | 606.4   |
| TMEM91  | 347.5  | 394.4   | 183.7  | 222.2  | 238.1  | 192    | 265.2  | 267.7   |
| TMEM92  | 84.4   | 91.8    | 101.1  | 100.1  | 89.1   | 96.8   | 92.4   | 81      |
| TMEM93  | 605.8  | 776.9   | 357.7  | 364.6  | 278.6  | 378.4  | 580.5  | 646     |
| TMEM93  | 143.4  | 195.5   | 119.5  | 115.5  | 105.2  | 109.7  | 147.3  | 154.8   |
| TMEM93  | 1902.3 | 2491.5  | 755.8  | 616.1  | 588.2  | 690.2  | 1931.1 | 1799.8  |
| TMEM95  | 103.8  | 102.2   | 88.4   | 86.8   | 75.9   | 81     | 97.4   | 107     |
| TMEM97  | 3728.3 | 4865.1  | 2017.6 | 2095.8 | 1452.1 | 2073.2 | 2805   | 2994.2  |
| TMEM98  | 95.2   | 120.3   | 98     | 90.7   | 78.7   | 85.5   | 102.9  | 124.5   |
| TMEM98  | 87.8   | 89.8    | 101    | 91.8   | 90     | 92.6   | 84.9   | 105.4   |
| TMEM99  | 1212.3 | 1549.4  | 841.6  | 628.7  | 493.8  | 666.2  | 1246.2 | 1745.1  |
| TMEM9B  | 1435.6 | 1820.7  | 987.8  | 1033.4 | 659.2  | 1133.7 | 1194.4 | 1645.8  |
| TMEPAI  | 74.9   | 95.4    | 89.6   | 81.8   | 89.1   | 85.3   | 77.1   | 82      |
| TMEPAI  | 88.2   | 110.4   | 83     | 89.9   | 73.7   | 80.6   | 98.3   | 103     |
| TMEPAI  | 109.7  | 120.6   | 111.3  | 102.2  | 96.2   | 103.6  | 107.4  | 122.1   |
| TMEPAI  | 94     | 100.3   | 96.8   | 90     | 84.5   | 88     | 91.6   | 104.7   |
| TMF1    | 409.5  | 517.4   | 266.7  | 306.2  | 281.1  | 600.3  | 353.3  | 467.4   |
| TMIE    | 94.7   | 100.7   | 94.8   | 88.7   | 95.5   | 97.5   | 89.1   | 110.6   |
| TMIGD   | 91.7   | 104.8   | 108.2  | 99.3   | 96.8   | 102.1  | 89.1   | 90.9    |
| TMIGD2  | 73.3   | 91.2    | 93.9   | 85.7   | 89.3   | 78.3   | 87.8   | 83.2    |
| TMLHE   | 203.1  | 268.9   | 138.2  | 130.2  | 139.8  | 154.4  | 187.6  | 195.8   |
| TMLHE   | 94.9   | 131.2   | 112.5  | 108.5  | 108.5  | 114.8  | 93.1   | 110     |
| TMOD1   | 402.8  | 537.9   | 274.5  | 327.8  | 305.2  | 370.1  | 312.8  | 314     |
| TMOD2   | 76.2   | 83      | 84.5   | 79.9   | 76.8   | 79.8   | 78.1   | 75.7    |

|           |         |         |        |        |        |        |         |         |
|-----------|---------|---------|--------|--------|--------|--------|---------|---------|
| TMOD3     | 222.4   | 305.6   | 145    | 157.3  | 122.5  | 158.9  | 198.6   | 227.9   |
| TMOD4     | 118.4   | 125.6   | 120.3  | 116.7  | 104.8  | 119    | 102.7   | 113.7   |
| TMPIT     | 316.8   | 438.9   | 146.5  | 147.7  | 162.9  | 183.3  | 334.2   | 400.7   |
| TMPO      | 263.4   | 324     | 120.6  | 108.6  | 102.8  | 95     | 246.6   | 291     |
| TMPO      | 545.6   | 802.4   | 327.4  | 220.8  | 174.3  | 313.6  | 335     | 499.7   |
| TMPO      | 91.4    | 91      | 89.1   | 89.5   | 82.8   | 87.4   | 91.1    | 102.6   |
| TMPRSS11J | 78.7    | 84.3    | 98.4   | 87.3   | 88.9   | 92     | 83      | 89.6    |
| TMPRSS11I | 98.6    | 100     | 96.5   | 88.4   | 91.2   | 96.2   | 90.4    | 100     |
| TMPRSS11I | 97.8    | 100.1   | 93.8   | 86.5   | 81.6   | 101.3  | 96.3    | 85.4    |
| TMPRSS12  | 74.4    | 85.5    | 103.2  | 83.6   | 84.1   | 92.8   | 78.1    | 80.2    |
| TMPRSS13  | 105.8   | 135.5   | 107    | 101.1  | 107.4  | 91.5   | 111.8   | 113.1   |
| TMPRSS2   | 80.8    | 87.3    | 83.7   | 87.4   | 84     | 90.2   | 84.8    | 95.6    |
| TMPRSS3   | 88.2    | 93.2    | 85.1   | 80.5   | 78.4   | 85.9   | 88.6    | 91.2    |
| TMPRSS3   | 84.4    | 112.8   | 83.2   | 86.6   | 75.6   | 81.3   | 98.6    | 117.7   |
| TMPRSS3   | 102.7   | 118.7   | 105.1  | 98.6   | 95.6   | 95.2   | 97.7    | 106.3   |
| TMPRSS3   | 112.6   | 124.8   | 88.7   | 89.3   | 91.4   | 95.9   | 109.7   | 130.8   |
| TMPRSS3   | 101.9   | 118.1   | 78.5   | 70.1   | 75.8   | 73.2   | 90.1    | 103.4   |
| TMPRSS4   | 132.8   | 175.5   | 110    | 100.4  | 88     | 103.4  | 134.3   | 149.2   |
| TMPRSS4   | 100.3   | 113.3   | 77.4   | 85.2   | 78.4   | 83.4   | 100.2   | 103     |
| TMPRSS5   | 78.5    | 86.3    | 103.5  | 93.5   | 92     | 92.1   | 82.8    | 88.4    |
| TMPRSS6   | 83.6    | 95.3    | 92.8   | 82.3   | 82.6   | 80     | 92.2    | 96.8    |
| TMPRSS7   | 130.4   | 157.8   | 106.5  | 93.9   | 89.7   | 100    | 103.8   | 114.1   |
| TMPRSS7   | 83.9    | 98.2    | 96.5   | 90.2   | 86.5   | 86.7   | 78.1    | 86.9    |
| TMPRSS9   | 86.7    | 100.6   | 88.4   | 85.3   | 86.3   | 77.2   | 89.8    | 87.7    |
| TMSB10    | 16066.8 | 18282.5 | 8406.5 | 9050.3 | 6531.1 | 9237.5 | 13426.1 | 16998.6 |
| TMSB4X    | 147.8   | 195     | 105.8  | 105.4  | 91.5   | 104.4  | 151.9   | 174.1   |
| TMSB4Y    | 116.6   | 127.2   | 129.6  | 138.7  | 114.6  | 148.9  | 97.7    | 120.4   |
| TMSL8     | 1448.9  | 1788.1  | 1166.9 | 618.2  | 487.2  | 587.1  | 1377.9  | 1670.6  |
| TMTC2     | 115.1   | 130.8   | 109.9  | 94.3   | 98.8   | 104.1  | 107     | 110     |
| TMTC3     | 223.3   | 253.8   | 132.9  | 138.7  | 116.7  | 124.5  | 169.8   | 253.3   |
| TMTC4     | 362.9   | 524.8   | 235.4  | 254    | 192.3  | 236.6  | 280.2   | 373.1   |
| TMTC4     | 164.4   | 185     | 107.4  | 112.6  | 95.2   | 107.6  | 121.9   | 163     |
| TMTC4     | 494.2   | 595.9   | 315.2  | 343.2  | 231.7  | 331.9  | 433.6   | 816.4   |
| TMUB2     | 274.5   | 371     | 227.8  | 228.2  | 229.3  | 305.5  | 284.1   | 474.9   |
| TMUB2     | 587.3   | 671.3   | 244.1  | 337.3  | 345.3  | 329.6  | 498.7   | 273.4   |
| TNC       | 301.9   | 327.2   | 159.5  | 124.7  | 135    | 136.1  | 266.6   | 299.4   |
| TNF       | 491.5   | 580.8   | 358.5  | 263.4  | 258.5  | 262.8  | 949.7   | 1465.8  |
| TNFAIP1   | 203     | 278.7   | 173.9  | 161    | 151.3  | 235.2  | 178.8   | 348.6   |
| TNFAIP2   | 147.1   | 168.7   | 209.8  | 165.9  | 176.7  | 174.9  | 202     | 296.8   |
| TNFAIP3   | 190.5   | 263.7   | 211.8  | 160.1  | 257.7  | 209.9  | 180     | 299.5   |
| TNFAIP6   | 95.4    | 109.7   | 105.7  | 106.1  | 99     | 96.7   | 97.5    | 100.1   |
| TNFAIP8   | 1346.7  | 1877.3  | 526.6  | 532.7  | 413    | 635.1  | 683.8   | 743.6   |
| TNFAIP8   | 105.5   | 136     | 96     | 91.2   | 79.9   | 94     | 111.2   | 139.1   |
| TNFAIP8L1 | 322     | 415     | 174.6  | 166.7  | 138.8  | 102.1  | 353.8   | 382.2   |
| TNFAIP8L2 | 534.9   | 698.2   | 325    | 262.6  | 203.1  | 332.4  | 430.6   | 553.1   |
| TNFAIP8L3 | 160.6   | 187.2   | 120.2  | 106.9  | 92.9   | 102.5  | 142.7   | 171.7   |
| TNFRSF10A | 290.2   | 414.3   | 257.4  | 226.8  | 195.3  | 219.3  | 298.7   | 493.3   |
| TNFRSF10B | 111     | 123.7   | 117.9  | 84.4   | 94.8   | 89.3   | 105     | 109.1   |
| TNFRSF10B | 97.3    | 108.5   | 102.9  | 90.7   | 86.1   | 99.1   | 98.3    | 104.6   |
| TNFRSF10B | 785.6   | 1016    | 443.5  | 293.1  | 232    | 305.3  | 784.5   | 1130.5  |

|           |        |        |        |        |        |        |        |        |
|-----------|--------|--------|--------|--------|--------|--------|--------|--------|
| TNFRSF10C | 123.6  | 135.5  | 128.5  | 136.3  | 119.3  | 116.3  | 126.8  | 133.9  |
| TNFRSF10C | 111    | 133.1  | 97.1   | 70.7   | 81.7   | 85.7   | 102.6  | 110.9  |
| TNFRSF11A | 85.8   | 96.3   | 95.3   | 83     | 80.2   | 76.1   | 87.2   | 100    |
| TNFRSF11B | 90.5   | 110.5  | 90.2   | 90.2   | 77.2   | 82.1   | 89.2   | 101.7  |
| TNFRSF12A | 107    | 122.2  | 98.1   | 91.8   | 84.1   | 92.3   | 152.4  | 204.8  |
| TNFRSF13B | 81     | 96.2   | 93.8   | 89.8   | 84.2   | 89.1   | 88.8   | 87.3   |
| TNFRSF13C | 148.6  | 186.3  | 114.3  | 99.4   | 99.7   | 124.7  | 148.2  | 185.8  |
| TNFRSF14  | 355.1  | 391.8  | 325.2  | 781    | 729.8  | 869.2  | 190.2  | 166.4  |
| TNFRSF17  | 98     | 98.3   | 99.6   | 81.9   | 80.6   | 90.6   | 87.3   | 94.8   |
| TNFRSF18  | 94.9   | 105.6  | 96.1   | 90.9   | 82.6   | 86.2   | 96.9   | 113.7  |
| TNFRSF18  | 91.2   | 83.3   | 75.6   | 83.9   | 77.8   | 78.7   | 85.4   | 98.3   |
| TNFRSF19  | 83.7   | 93.9   | 97.4   | 88.9   | 76.6   | 88.8   | 85.3   | 98.6   |
| TNFRSF19  | 133.6  | 154.1  | 106.5  | 97.5   | 112.1  | 109.5  | 130.4  | 131.6  |
| TNFRSF19  | 77     | 88.9   | 73.9   | 76.2   | 79.9   | 76.9   | 89.8   | 84.1   |
| TNFRSF19L | 75.4   | 79.8   | 83.5   | 89.8   | 81     | 84.7   | 75.3   | 78.8   |
| TNFRSF19L | 114.8  | 145.3  | 91.8   | 81.1   | 87.6   | 97.2   | 128.1  | 140.7  |
| TNFRSF19L | 102.9  | 102    | 89.6   | 87.9   | 72.6   | 82.7   | 89.9   | 102.8  |
| TNFRSF1A  | 617.7  | 744.9  | 636.8  | 597.8  | 528.8  | 729.3  | 627.6  | 1214.7 |
| TNFRSF1B  | 333.9  | 391.5  | 132.6  | 161    | 147.3  | 154.6  | 257.5  | 214    |
| TNFRSF21  | 789.5  | 1117.5 | 943.7  | 1348.5 | 767.7  | 1649.5 | 687.7  | 1032.4 |
| TNFRSF25  | 105.9  | 128.1  | 90     | 87.6   | 81.9   | 90.6   | 109    | 110.3  |
| TNFRSF25  | 101.7  | 96.3   | 104.2  | 112.3  | 108.9  | 109.2  | 89.3   | 117    |
| TNFRSF4   | 82.2   | 87.9   | 98.7   | 102.1  | 86.6   | 89.4   | 79.3   | 91.3   |
| TNFRSF6B  | 89.3   | 101.6  | 103.2  | 92.7   | 97.2   | 105    | 96.8   | 98.1   |
| TNFRSF6B  | 122.9  | 123.8  | 152.7  | 151.7  | 154.9  | 197.9  | 94.7   | 123.5  |
| TNFRSF7   | 128.4  | 155.5  | 91.2   | 80.8   | 82.1   | 87.5   | 113.9  | 140.2  |
| TNFRSF8   | 81.9   | 84.2   | 93.7   | 89.8   | 88.8   | 87.7   | 85.8   | 84.9   |
| TNFRSF8   | 107.9  | 134    | 97.4   | 88.9   | 77.9   | 99.3   | 109    | 131.6  |
| TNFRSF9   | 111.6  | 158.7  | 86.5   | 100.3  | 103.8  | 104.7  | 101.5  | 125.3  |
| TNFSF10   | 439.5  | 603.3  | 326.4  | 261.4  | 224.4  | 369.8  | 346.9  | 422.7  |
| TNFSF11   | 110    | 134.7  | 92.9   | 94.4   | 91.6   | 96.4   | 113.6  | 124.6  |
| TNFSF11   | 146.5  | 151.6  | 101.1  | 89.7   | 94.3   | 87.3   | 117.2  | 148    |
| TNFSF11   | 76.2   | 79.1   | 91.3   | 82.6   | 79.9   | 83.9   | 76.1   | 73.8   |
| TNFSF12   | 94.6   | 98.4   | 92     | 80.9   | 89.1   | 86.7   | 87.4   | 98.7   |
| TNFSF13   | 93.4   | 113    | 119.1  | 102    | 91.1   | 99.2   | 87     | 96.9   |
| TNFSF13   | 84.6   | 99.9   | 101    | 103.7  | 88.3   | 96.4   | 86.6   | 98.2   |
| TNFSF13B  | 1012.2 | 1296.3 | 286.3  | 412.4  | 431.6  | 526    | 906.7  | 1073.1 |
| TNFSF14   | 396.2  | 505    | 249.2  | 361.9  | 326.2  | 385.3  | 514.9  | 681.7  |
| TNFSF14   | 192.7  | 272.7  | 159.1  | 151.8  | 140.8  | 136.7  | 219.7  | 239.4  |
| TNFSF14   | 723.8  | 890.9  | 248.6  | 374.1  | 423.7  | 337.9  | 754.2  | 786    |
| TNFSF15   | 271.9  | 250    | 199.3  | 272.1  | 272.3  | 231.5  | 270.5  | 419.2  |
| TNFSF18   | 100.8  | 112.7  | 99.5   | 88.6   | 81.2   | 93.4   | 86.7   | 119.9  |
| TNFSF4    | 103.4  | 111.4  | 104.4  | 103.2  | 98.7   | 99.1   | 95     | 123.3  |
| TNFSF5IP1 | 5405.5 | 6976.1 | 4840.6 | 3678.4 | 2707.4 | 4494.3 | 3617.3 | 8347.5 |
| TNFSF7    | 2450.4 | 3143.8 | 1766.7 | 1515.1 | 1346.7 | 2431   | 1967.3 | 1937.4 |
| TNFSF8    | 111.4  | 121.4  | 98.4   | 95.4   | 92.7   | 90.5   | 106.1  | 125.2  |
| TNFSF9    | 205.8  | 278.7  | 168.2  | 140.1  | 120.9  | 174.5  | 253.2  | 390.5  |
| TNIK      | 87.1   | 111    | 99.5   | 104    | 96.9   | 100.7  | 82.4   | 94.6   |
| TNIP1     | 431.1  | 543    | 343.5  | 240.1  | 206.6  | 303.2  | 442.8  | 572.4  |
| TNIP2     | 189.5  | 228.9  | 140.5  | 107.2  | 107.3  | 131.3  | 165    | 200    |

|          |        |        |        |        |        |        |        |        |
|----------|--------|--------|--------|--------|--------|--------|--------|--------|
| TNIP3    | 87.6   | 94.3   | 94     | 98.3   | 97.6   | 92.9   | 88.9   | 96.7   |
| TNK1     | 82.4   | 84.3   | 80.5   | 77.3   | 85.2   | 76.7   | 72.2   | 86.3   |
| TNK2     | 412.5  | 466.3  | 387.5  | 476    | 516.9  | 542    | 389.3  | 392.7  |
| TNK2     | 102.1  | 124.4  | 99.5   | 107.5  | 87.9   | 91.6   | 102.7  | 126.9  |
| TNK2     | 100.3  | 112.7  | 97.8   | 95.3   | 84.4   | 100    | 100.8  | 101.4  |
| TNKS     | 114.9  | 128    | 116.4  | 94.1   | 105.3  | 109.7  | 118.3  | 118    |
| TNKS1BP1 | 133.7  | 174.3  | 136.3  | 129    | 117.7  | 159.8  | 123.4  | 166.9  |
| TNKS2    | 116.7  | 128.4  | 78.6   | 86     | 79     | 91.4   | 102.6  | 138.2  |
| TNMD     | 112    | 115    | 101.2  | 92.9   | 96.3   | 99.3   | 105.8  | 104.1  |
| TNN      | 102.9  | 124.1  | 107.2  | 102.1  | 84.8   | 111.9  | 102.1  | 114.3  |
| TNNC1    | 102.8  | 127.6  | 92.6   | 96     | 76.5   | 94.3   | 103.8  | 118.3  |
| TNNC2    | 95.1   | 103.9  | 95.3   | 81.3   | 88.8   | 80.8   | 86.9   | 101.9  |
| TNNI1    | 90     | 95.5   | 80.8   | 79.3   | 75.3   | 74.9   | 92.3   | 95.5   |
| TNNI2    | 90.8   | 102.9  | 96     | 94.6   | 102.2  | 118.6  | 94.5   | 87.4   |
| TNNI3    | 118    | 151.7  | 94.7   | 92.1   | 97.3   | 107.3  | 113.4  | 136.8  |
| TNNI3K   | 94.6   | 122.1  | 91     | 96.9   | 90.8   | 96.4   | 85.5   | 103.7  |
| TNNT1    | 354.8  | 421.7  | 156.5  | 132.7  | 143.2  | 190.9  | 303.9  | 403.4  |
| TNNT2    | 171.3  | 215    | 109.5  | 110.4  | 100.2  | 112.8  | 157.2  | 194.1  |
| TNNT2    | 118.8  | 140.6  | 101.7  | 91.4   | 90.5   | 103.1  | 130.2  | 140.6  |
| TNNT3    | 112.1  | 154.1  | 87.4   | 77     | 86.9   | 81.8   | 100.3  | 129    |
| TNNT3    | 97     | 102.5  | 91.9   | 76.1   | 88.5   | 82.6   | 92.5   | 93.2   |
| TNP1     | 131.8  | 161.7  | 115.2  | 103.3  | 94.9   | 101.6  | 129.3  | 124.1  |
| TNP2     | 92.5   | 107.8  | 93.3   | 88.6   | 82.7   | 88.9   | 85     | 93.4   |
| TNPO1    | 567.7  | 740.6  | 187.8  | 207.5  | 185.2  | 135.4  | 352.8  | 518.7  |
| TNPO1    | 184.4  | 231.5  | 101.7  | 114.6  | 99.9   | 97.1   | 164.6  | 224.9  |
| TNPO1    | 1649.6 | 2308.4 | 788    | 1421.5 | 1108.8 | 952.4  | 1862.9 | 2567.5 |
| TNPO2    | 1962   | 2249.6 | 1422   | 847.7  | 815.6  | 869.9  | 1720.3 | 2329   |
| TNPO3    | 751.3  | 1035.5 | 796    | 1150.9 | 993.7  | 1565.8 | 644.7  | 949.3  |
| TNR      | 105.1  | 108.8  | 103.6  | 92     | 88.9   | 92     | 112.5  | 103.2  |
| TNRC15   | 353.3  | 569.6  | 387    | 461.8  | 420.9  | 708.8  | 286.6  | 547.9  |
| TNRC4    | 76.9   | 94.8   | 83.2   | 88.1   | 92.9   | 85.8   | 85.6   | 86.5   |
| TNRC5    | 1650.4 | 2172.4 | 1103.1 | 1058.9 | 904.9  | 745    | 1531.3 | 2996.4 |
| TNRC5    | 917.9  | 1294.7 | 728.2  | 634.5  | 513.6  | 737.6  | 944.6  | 1373.7 |
| TNRC6A   | 149.8  | 182.6  | 105.6  | 102    | 95.8   | 100.2  | 148    | 163.7  |
| TNRC6A   | 196.7  | 239.2  | 219.7  | 272    | 270.4  | 424.5  | 214.7  | 359.5  |
| TNRC6A   | 107.5  | 118.2  | 99.9   | 98.7   | 95.3   | 90     | 110.6  | 117.4  |
| TNRC6B   | 495.2  | 800.4  | 396.9  | 726.1  | 686.9  | 428.9  | 524    | 636.5  |
| TNRC6B   | 124    | 122.8  | 95     | 92.1   | 84.7   | 84.3   | 103.8  | 139.3  |
| TNRC6B   | 94.2   | 95.4   | 92.1   | 92.4   | 91.1   | 92.3   | 92.8   | 101.1  |
| TNRC6C   | 73.4   | 77.4   | 94.6   | 88.3   | 81.5   | 79.5   | 70.8   | 73.7   |
| TNRC9    | 79.8   | 87.8   | 75.2   | 87.6   | 75.6   | 87.2   | 84.5   | 93.3   |
| TNS1     | 124.1  | 147.3  | 140.1  | 125.3  | 101.3  | 110.3  | 127.7  | 194.3  |
| TNS3     | 1396.1 | 1929.7 | 1518.8 | 2715.4 | 2026.9 | 2958.5 | 1106.2 | 1288.2 |
| TNS4     | 88.9   | 95.9   | 95     | 89.3   | 89.3   | 92.2   | 90.3   | 93     |
| TNT      | 93.1   | 98.4   | 92.8   | 86.8   | 75.9   | 83.7   | 87     | 90     |
| TNXA     | 109.7  | 135.1  | 94.1   | 86.6   | 79.3   | 84.9   | 110.7  | 118    |
| TNXB     | 78.8   | 96.5   | 116.8  | 90.7   | 89.3   | 98.3   | 82.5   | 84.5   |
| TNXB     | 95     | 104.2  | 101.3  | 95.5   | 81.7   | 81.7   | 99.3   | 105.6  |
| TOB1     | 541.7  | 764    | 348.9  | 462.7  | 415.6  | 438.3  | 558.8  | 774.4  |
| TOB2     | 154.6  | 217.6  | 149.6  | 126.4  | 118.2  | 128.4  | 157.5  | 222.7  |

|          |         |         |         |         |        |         |         |         |
|----------|---------|---------|---------|---------|--------|---------|---------|---------|
| TOE1     | 298.3   | 345.8   | 173.4   | 126.1   | 115.5  | 141.1   | 226.2   | 298.6   |
| TOLLIP   | 176.8   | 220.6   | 225.6   | 201     | 191.6  | 240     | 217.6   | 347.7   |
| TOM1     | 441.4   | 544.6   | 302.9   | 325.1   | 270.4  | 323.6   | 518.8   | 621.6   |
| TOM1L1   | 155.4   | 166.4   | 131.4   | 115.7   | 104.5  | 132.7   | 123.8   | 154.9   |
| TOM1L2   | 86.5    | 91.7    | 93.5    | 93.3    | 96.9   | 88.1    | 87.9    | 97.9    |
| TOM1L2   | 104     | 130.6   | 100     | 96.8    | 96.9   | 101.6   | 102.4   | 115.1   |
| TOM1L2   | 110.8   | 122.9   | 97.8    | 99.9    | 90.4   | 92.9    | 104.6   | 107.7   |
| TOMM20   | 6189.7  | 8267.9  | 4090.1  | 5038.2  | 3349   | 6366.5  | 4431.6  | 9140.3  |
| TOMM22   | 2457.4  | 3083.7  | 1046.6  | 1008.4  | 818.1  | 1091.9  | 2034.7  | 2282.1  |
| TOMM34   | 1834.8  | 2277.3  | 1118    | 770     | 660.3  | 890.9   | 1605.7  | 1609.9  |
| TOMM40   | 6812.5  | 8583.8  | 5331.3  | 2950.6  | 2228.1 | 2768.8  | 5625.2  | 6427.5  |
| TOMM40L  | 593     | 822.7   | 314.8   | 241.1   | 186.8  | 361.5   | 539.4   | 986.3   |
| TOMM7    | 14234.7 | 15506.5 | 10284.4 | 12064.5 | 8925.6 | 12121.4 | 15030.1 | 18413.5 |
| TOMM70A  | 2050.5  | 2553.6  | 1216.2  | 1473.4  | 1142.3 | 2239.2  | 1568.4  | 2404.3  |
| TOP1     | 178.4   | 211.6   | 126.6   | 132     | 127    | 163.3   | 161.5   | 229.8   |
| TOP1MT   | 2241.4  | 2872.9  | 1727.6  | 1567    | 1361.6 | 2213.6  | 1713.2  | 2370.5  |
| TOP1MT   | 782.9   | 965.2   | 599.9   | 485.5   | 412.6  | 694     | 583.7   | 731.4   |
| TOP1MT   | 629.1   | 881.7   | 312.6   | 244.5   | 190    | 239.6   | 522.8   | 542.4   |
| TOP1P1   | 85.6    | 95.3    | 96.1    | 89.5    | 86.9   | 96.3    | 89.3    | 103.8   |
| TOP1P2   | 311.6   | 359.2   | 209.3   | 260.8   | 235.2  | 339.5   | 254.6   | 455.7   |
| TOP2A    | 5259.9  | 5751.4  | 4764.4  | 3893.7  | 3547.3 | 6313.1  | 3823.3  | 6944.2  |
| TOP2B    | 2706.5  | 3993.4  | 3049.1  | 3636.8  | 3453.6 | 6481.7  | 2464.2  | 3651.4  |
| TOP3A    | 314.5   | 348.7   | 217.7   | 273.9   | 244    | 201.6   | 220.5   | 272.6   |
| TOP3B    | 482.3   | 558.4   | 518.5   | 453.5   | 407.6  | 422.9   | 463.7   | 605.5   |
| TOPBP1   | 1558.2  | 1654.5  | 368.9   | 496.2   | 424.1  | 565.2   | 1298.5  | 1566.3  |
| TOPORS   | 84.3    | 99.9    | 87.5    | 89.4    | 79.2   | 84.6    | 80.5    | 108.4   |
| TOR1A    | 687.3   | 882.8   | 331.7   | 225.5   | 199.2  | 293.1   | 504.3   | 767.3   |
| TOR1AIP1 | 1899.2  | 2392.1  | 1115.1  | 1413.2  | 945.3  | 1892.1  | 1385.9  | 3720.8  |
| TOR1AIP2 | 214.2   | 251.8   | 149.6   | 157.1   | 136.3  | 183.9   | 186.6   | 290.1   |
| TOR1B    | 351.2   | 478.6   | 264.8   | 249.5   | 232.5  | 312     | 355     | 555     |
| TOR2A    | 258.3   | 343.9   | 202.5   | 161.4   | 121.9  | 130.2   | 249.9   | 357.3   |
| TOR3A    | 1269.1  | 1947    | 1007.8  | 787.1   | 584.5  | 1025.2  | 1268    | 1839.5  |
| TOX      | 90.6    | 110.8   | 88      | 72.1    | 78     | 78.2    | 97.1    | 98.9    |
| TP53     | 85.9    | 94      | 88.3    | 83.1    | 87.3   | 91.5    | 82.1    | 104.6   |
| TP53BP1  | 306.3   | 420     | 334.1   | 274.9   | 243    | 428     | 256.1   | 362.2   |
| TP53BP2  | 846.4   | 1145.7  | 696.3   | 898.8   | 836.4  | 1025.5  | 894.9   | 953.5   |
| TP53BP2  | 109.1   | 147     | 122     | 104.6   | 95.2   | 113.4   | 121.1   | 114.5   |
| TP53I11  | 104.5   | 129.3   | 128.7   | 117.3   | 110.3  | 137.8   | 101.8   | 112.7   |
| TP53I11  | 107.8   | 125.4   | 94.5    | 90.8    | 74.7   | 93.7    | 105.4   | 111     |
| TP53I13  | 805.3   | 1140.7  | 395.2   | 419.1   | 449.6  | 494.5   | 729.3   | 737.7   |
| TP53I3   | 155.1   | 192     | 153     | 109.3   | 110.4  | 125.6   | 148.7   | 192.2   |
| TP53I3   | 130.6   | 153.1   | 118.3   | 106.9   | 105.9  | 116.6   | 145.1   | 158.1   |
| TP53INP1 | 93.7    | 105.3   | 102.9   | 96.6    | 86.1   | 88.1    | 87.3    | 125.9   |
| TP53INP2 | 297.2   | 359.6   | 221.6   | 235.1   | 195.6  | 231.8   | 287.9   | 410.3   |
| TP53RK   | 357     | 443.3   | 318.4   | 268.5   | 248.7  | 451.6   | 283.8   | 451     |
| TP53TG3  | 90.1    | 99.7    | 102.7   | 94      | 88.6   | 96.4    | 86      | 87.1    |
| TP53TG3  | 91.4    | 88.9    | 104.4   | 87.1    | 85.8   | 99.2    | 80.3    | 90.9    |
| TP73     | 84.7    | 96.9    | 92.2    | 79.4    | 87.3   | 106.6   | 88.6    | 100.3   |
| TP73L    | 81.4    | 97.2    | 98      | 87.3    | 84.9   | 84.8    | 77.5    | 91.6    |
| TPARL    | 372.7   | 417.5   | 172.5   | 148.3   | 158    | 188.4   | 305.3   | 426.5   |

|         |         |         |         |         |         |         |        |         |
|---------|---------|---------|---------|---------|---------|---------|--------|---------|
| TPCN1   | 164.8   | 198.4   | 182     | 205.3   | 186.1   | 195.1   | 136.9  | 195.9   |
| TPCN2   | 418     | 557.4   | 250.1   | 233.7   | 236     | 234     | 351.7  | 296.9   |
| TPD52   | 67.7    | 85.8    | 76      | 74      | 78.9    | 85.6    | 80     | 93.8    |
| TPD52L1 | 106.9   | 101.4   | 119     | 100.1   | 98.8    | 111.8   | 111.8  | 120.6   |
| TPD52L1 | 95.9    | 108.2   | 100.1   | 101     | 88.5    | 76      | 90.8   | 106.7   |
| TPD52L1 | 87.5    | 104.3   | 95      | 84.4    | 85      | 94.6    | 101    | 113.5   |
| TPD52L2 | 437.1   | 565.5   | 277     | 301.6   | 256.1   | 370     | 408.4  | 580.9   |
| TPD52L2 | 2945.7  | 3879.9  | 1740.6  | 2122.3  | 1760.6  | 2243.8  | 2913.4 | 2449    |
| TPD52L3 | 97.9    | 123.3   | 106     | 90.7    | 87.1    | 94      | 106.5  | 126.7   |
| TPD52L3 | 78.8    | 92.2    | 87.8    | 89      | 83.6    | 84      | 78.4   | 79.1    |
| TPD52L3 | 89.7    | 90.4    | 113.5   | 110.9   | 106.6   | 102     | 93.8   | 94      |
| TPH1    | 129.9   | 142.3   | 97.1    | 96.9    | 95      | 100.5   | 110.2  | 122.2   |
| TPH2    | 89.2    | 104.5   | 102.3   | 92.9    | 90.2    | 98.5    | 90.5   | 99.7    |
| TPI1    | 7014.9  | 8813.9  | 5121    | 4571.5  | 3367.2  | 5646.3  | 6664.6 | 11438.7 |
| TPK1    | 963.2   | 1232.1  | 778.6   | 692.3   | 457.6   | 768.8   | 714.6  | 1462    |
| TPK1    | 231.4   | 257.3   | 121.9   | 89.1    | 91.8    | 120.6   | 190.1  | 252     |
| TPM1    | 276.8   | 327.8   | 166.8   | 299.8   | 252.3   | 431.8   | 252.5  | 326     |
| TPM1    | 86.3    | 108.4   | 95.6    | 126.5   | 113.2   | 121.4   | 102.8  | 99.7    |
| TPM1    | 339.1   | 414.9   | 220.1   | 510     | 420.9   | 842.9   | 300.3  | 395.2   |
| TPM2    | 1390.9  | 1131.3  | 826.5   | 993.4   | 1350.2  | 1684.9  | 686    | 857.8   |
| TPM2    | 102.4   | 121.1   | 100.2   | 90.1    | 95.9    | 97      | 97     | 120.3   |
| TPM2    | 507.4   | 475.9   | 406.2   | 480.6   | 549.7   | 942.5   | 323.5  | 616.3   |
| TPM3    | 3971.6  | 5491.2  | 1608.8  | 1038.7  | 950.1   | 738.2   | 3071   | 3590.9  |
| TPM3    | 102.4   | 113.6   | 90.6    | 86.5    | 80.7    | 89.8    | 95.5   | 100.5   |
| TPM3    | 131.1   | 127     | 83.8    | 77.8    | 80.3    | 87.6    | 102.8  | 146.4   |
| TPM4    | 173.6   | 243.4   | 132.9   | 131.1   | 108.4   | 161.2   | 207.3  | 342.1   |
| TPMT    | 308.9   | 368.3   | 304.9   | 568.5   | 435.8   | 507.7   | 277.9  | 335.5   |
| TPO     | 79.4    | 89.4    | 82.4    | 83.5    | 82      | 87.9    | 80.7   | 100     |
| TPO     | 108.1   | 125.6   | 100     | 108.2   | 95.3    | 87.8    | 109    | 122.6   |
| TPP1    | 1515.5  | 1722    | 1546.3  | 2232.5  | 1732.3  | 2166.5  | 1686.3 | 2847.3  |
| TPP2    | 169.7   | 198.1   | 132.1   | 127.2   | 120.6   | 152.4   | 151.3  | 215.6   |
| TPPP    | 112     | 130.8   | 91.7    | 83.5    | 80.9    | 86.4    | 120.1  | 125.8   |
| TPR     | 987.7   | 1487.6  | 1168.3  | 1612.4  | 1537.7  | 3423.1  | 948.9  | 1235.1  |
| TPRKB   | 173.3   | 204.2   | 101.9   | 91.9    | 93.9    | 103.9   | 183.4  | 282     |
| TPRX1   | 116.3   | 109.1   | 86.5    | 88.9    | 86.4    | 84      | 121.7  | 105.5   |
| TPRXL   | 77.8    | 86.7    | 80      | 81.6    | 75.1    | 77.1    | 83.5   | 86.6    |
| TPSAB1  | 85      | 85.1    | 83      | 81.6    | 77.4    | 85.1    | 84.2   | 83.2    |
| TPSD1   | 78.6    | 87.9    | 79.6    | 81.4    | 77.1    | 81.8    | 82.5   | 85      |
| TPSG1   | 101.7   | 106.8   | 98.9    | 90.5    | 87.1    | 93.7    | 98.8   | 100.8   |
| TPST1   | 158.7   | 185.6   | 132.2   | 175.8   | 154.5   | 229     | 185.7  | 258.9   |
| TPST2   | 1460.2  | 2138.7  | 1163    | 1103.2  | 827.9   | 1078.1  | 2296.5 | 2838.1  |
| TPT1    | 30990.4 | 30666.6 | 57260.5 | 53274.2 | 53226.3 | 51629.1 | 31479  | 31554   |
| TPTE    | 81.3    | 83.6    | 86.8    | 84.2    | 78.2    | 77      | 77.1   | 77      |
| TPTE2   | 77.6    | 89.3    | 98.2    | 93.6    | 83.3    | 88.5    | 79.6   | 83.2    |
| TPTE2   | 119.1   | 151.3   | 113.1   | 146     | 154.6   | 153.8   | 105.2  | 110.4   |
| TPTE2   | 81.4    | 97.5    | 87.8    | 93.5    | 88.6    | 97.9    | 85.2   | 93.8    |
| TPX2    | 1122.3  | 1440.2  | 725     | 605.4   | 578.7   | 1080.2  | 746.1  | 1021.2  |
| TR2IT1  | 86.8    | 92.7    | 94      | 82.8    | 79.7    | 80.7    | 89.6   | 88.4    |
| TRA16   | 596.9   | 713.5   | 317.4   | 194.2   | 158.9   | 191.1   | 448.7  | 541     |
| TRA1P2  | 270.3   | 356.9   | 207.1   | 310.8   | 219.3   | 498.5   | 259.4  | 364.3   |

|          |        |        |        |        |        |        |        |        |
|----------|--------|--------|--------|--------|--------|--------|--------|--------|
| TRA2A    | 1081.6 | 1620.7 | 643.4  | 610.5  | 538.2  | 714.8  | 777.3  | 1043.1 |
| TRADD    | 198.9  | 263.1  | 162.7  | 146.6  | 150.2  | 117.6  | 195.9  | 222.4  |
| TRADD    | 259.5  | 331.9  | 203.8  | 164.8  | 150.3  | 187.8  | 221.4  | 319.1  |
| TRAF1    | 100.9  | 116.5  | 105.9  | 96.4   | 105    | 98.5   | 104.4  | 107    |
| TRAF2    | 191.2  | 221.9  | 218.5  | 180.6  | 146.9  | 236.2  | 182.6  | 301    |
| TRAF3    | 201    | 241.3  | 196.7  | 171    | 163.3  | 222.3  | 181.7  | 223.1  |
| TRAF3IP1 | 203.3  | 242    | 167.1  | 173.1  | 150    | 172.4  | 178.3  | 262.8  |
| TRAF3IP2 | 85.5   | 97.7   | 89.4   | 85.8   | 74     | 73.4   | 89.9   | 99.2   |
| TRAF3IP2 | 132.9  | 148.4  | 108.2  | 105.6  | 103.9  | 96.9   | 110    | 140.1  |
| TRAF3IP2 | 898.7  | 1160   | 541.5  | 500.7  | 380    | 561.2  | 825.1  | 731.8  |
| TRAF3IP3 | 505.1  | 695.4  | 397.4  | 350.1  | 396.4  | 555.2  | 316.6  | 372.5  |
| TRAF4    | 109.6  | 122.2  | 107.5  | 99.4   | 88     | 100.6  | 113.4  | 133.6  |
| TRAF4    | 103.6  | 130.6  | 75.8   | 79     | 75.5   | 74.8   | 105    | 135.4  |
| TRAF5    | 71.4   | 87.5   | 87.8   | 89.8   | 90.6   | 87.3   | 72.9   | 82.1   |
| TRAF5    | 93.6   | 89.4   | 81.8   | 83.9   | 74.5   | 82.6   | 84.9   | 84     |
| TRAF5    | 100.5  | 135.9  | 92.5   | 82.6   | 85.6   | 87.1   | 99.2   | 144.9  |
| TRAF5    | 77.1   | 89.3   | 87.5   | 83.4   | 77.7   | 91.2   | 75.4   | 91.1   |
| TRAF5    | 103.1  | 121.4  | 95.2   | 86     | 86     | 86.9   | 94.1   | 116.8  |
| TRAF6    | 87.5   | 84.9   | 97     | 94     | 92.7   | 93.7   | 88.6   | 93.4   |
| TRAF6    | 163.5  | 219.9  | 146.3  | 144.9  | 136.3  | 154.2  | 163.8  | 248.3  |
| TRAF6    | 219.1  | 264.2  | 202    | 165.1  | 138.9  | 183.2  | 191.2  | 302.3  |
| TRAF7    | 224.6  | 292.5  | 245.3  | 231.2  | 166.5  | 215.7  | 203    | 284.1  |
| TRAF7    | 88.9   | 102.5  | 92.5   | 88.8   | 87.6   | 93.7   | 93.3   | 110.3  |
| TRAFD1   | 214.4  | 295    | 215.5  | 201    | 221.5  | 305.7  | 242.4  | 396.7  |
| TRAIP    | 275.9  | 341.4  | 147.8  | 125.3  | 117.8  | 135.5  | 233.2  | 313.7  |
| TRAK1    | 486.6  | 612.5  | 360.7  | 410.3  | 329.4  | 452    | 405    | 548.3  |
| TRAK1    | 325.9  | 425.9  | 381.1  | 447.7  | 417.3  | 694.9  | 329.9  | 631.6  |
| TRAK1    | 142.8  | 192.3  | 179.1  | 233.7  | 241.5  | 275.7  | 131.7  | 192.6  |
| TRAK2    | 385.3  | 493.8  | 258.6  | 330.8  | 245.3  | 373.4  | 379.7  | 449.9  |
| TRAM1    | 6293.9 | 7778.6 | 4270.8 | 4956.4 | 3407.2 | 5749.6 | 6222.1 | 9754.3 |
| TRAM1L1  | 106.7  | 118.4  | 83.2   | 87     | 80.1   | 89.8   | 108.7  | 123.2  |
| TRAM2    | 497.3  | 644.3  | 379.6  | 468.6  | 349.7  | 443.3  | 516.7  | 754.8  |
| TRAP1    | 1083.9 | 1513.6 | 748.8  | 464.8  | 403.8  | 776.3  | 820.3  | 1062.7 |
| TRAPPC1  | 1167.5 | 1437.7 | 630.3  | 548.1  | 441.6  | 529.1  | 1226.8 | 1672   |
| TRAPPC2  | 156.3  | 175    | 116.9  | 131.2  | 110.9  | 97.4   | 118.9  | 144.9  |
| TRAPPC2  | 730.3  | 963.6  | 487.1  | 633.4  | 546.2  | 851.3  | 645.1  | 987.8  |
| TRAPPC2  | 88.3   | 108.7  | 92.1   | 91.4   | 97     | 96.1   | 90.7   | 88.2   |
| TRAPPC3  | 1604.4 | 2254.9 | 1005.7 | 1177.4 | 927.2  | 1249.2 | 1673.9 | 1753.6 |
| TRAPPC4  | 2877.8 | 3935.8 | 1820.5 | 847.1  | 663    | 980.2  | 2482   | 3024.3 |
| TRAPPC5  | 1643.1 | 2013.9 | 873.2  | 736.4  | 574.1  | 976.3  | 1368.8 | 1433.6 |
| TRAPPC6A | 421.8  | 452.5  | 234.7  | 255.5  | 241.7  | 281    | 426.5  | 391.8  |
| TRAPPC6B | 129.9  | 171.7  | 110.3  | 103.9  | 93.6   | 108.8  | 126.5  | 213    |
| TRAPPC6B | 155.5  | 173.7  | 103.7  | 93.9   | 92.4   | 95     | 132.3  | 189.4  |
| TRAPPC6B | 195.9  | 226.2  | 114.6  | 100.1  | 101.5  | 139.8  | 205.6  | 277.2  |
| TRAT1    | 91     | 99.4   | 95.6   | 97.6   | 95.8   | 97.7   | 85.2   | 94.9   |
| TRDMT1   | 156.3  | 200.5  | 135.7  | 118.2  | 114.2  | 126.5  | 134.8  | 141.6  |
| TRDN     | 103.5  | 123.9  | 102.5  | 84.1   | 83.5   | 99.1   | 102.6  | 138.6  |
| TREH     | 113.2  | 117.5  | 91.4   | 86.5   | 84.7   | 83.9   | 111.3  | 108.3  |
| TREM1    | 164    | 197.5  | 88.1   | 87.3   | 87.2   | 98.7   | 139.8  | 164    |
| TREM2    | 295.9  | 341.5  | 153.3  | 170.4  | 142.4  | 169    | 208.4  | 259.5  |

|         |        |        |        |        |        |        |        |        |
|---------|--------|--------|--------|--------|--------|--------|--------|--------|
| TREML1  | 111.8  | 134.7  | 103.6  | 94.6   | 81.4   | 91.9   | 99.3   | 113.6  |
| TREML2  | 91.7   | 119.1  | 95.1   | 94.1   | 94.7   | 103    | 95.1   | 110.3  |
| TREML2P | 107.7  | 138.2  | 85.1   | 93.4   | 80.8   | 89.3   | 113.8  | 122.9  |
| TREML4  | 87.2   | 89.6   | 118    | 109.4  | 104.6  | 118    | 86.3   | 93.8   |
| TRERF1  | 202.1  | 253.1  | 177.2  | 193.5  | 194.8  | 277.3  | 192    | 237.5  |
| TRERF1  | 80.6   | 84.3   | 83.1   | 81.5   | 71.9   | 84.2   | 72.6   | 76.1   |
| TREX1   | 98.6   | 135.8  | 97.3   | 91.9   | 96.6   | 87.8   | 105.7  | 116.6  |
| TREX1   | 451.3  | 563.2  | 479.9  | 402.6  | 346.1  | 500.9  | 374.3  | 541.1  |
| TREX1   | 496.8  | 563.5  | 402.3  | 300.1  | 282.5  | 382.5  | 378.4  | 514.4  |
| TREX1   | 122.4  | 126.2  | 87.7   | 94.7   | 85.5   | 91.8   | 110.3  | 127.1  |
| TREX2   | 83.1   | 104.3  | 90.7   | 90.9   | 83.3   | 90     | 91.8   | 96     |
| TRFP    | 2884.8 | 3784.9 | 1955.2 | 1838.2 | 1487.4 | 2285.2 | 2805.2 | 3399.9 |
| TRG20   | 940.1  | 1247.7 | 792.2  | 853    | 652.6  | 832.4  | 920.2  | 1483.4 |
| TRH     | 89.3   | 90.5   | 87.7   | 78.7   | 84.4   | 80.1   | 89.3   | 82     |
| TRHDE   | 89.1   | 97.2   | 102    | 102.2  | 97.2   | 109.3  | 81.2   | 79.5   |
| TRHR    | 91.5   | 108    | 100.7  | 93.4   | 87.3   | 81.7   | 93     | 97.4   |
| TRIAD3  | 114    | 127.9  | 92.5   | 91.3   | 88.1   | 87.7   | 97.4   | 124.7  |
| TRIAD3  | 879    | 1042.8 | 675.1  | 657.8  | 599.5  | 655.7  | 763.4  | 1117.9 |
| TRIAP1  | 747.9  | 921.1  | 398.9  | 418    | 297.8  | 411    | 694.8  | 760    |
| TRIB1   | 184.1  | 222    | 249.3  | 190.9  | 179.7  | 206.6  | 184.9  | 232.6  |
| TRIB2   | 120.9  | 119.3  | 125.9  | 131.4  | 111.7  | 121.7  | 112.4  | 157.5  |
| TRIB3   | 1376.2 | 1884.3 | 663.7  | 426.1  | 346.7  | 474.7  | 1550.6 | 1972.6 |
| TRIM10  | 80.7   | 92.5   | 80.7   | 79.8   | 83.5   | 76.7   | 83.2   | 84     |
| TRIM10  | 75.1   | 79.3   | 93.7   | 85.6   | 81.8   | 86.4   | 86.9   | 92.1   |
| TRIM10  | 93.6   | 108    | 102.8  | 95.4   | 91.6   | 98.9   | 95.4   | 102.4  |
| TRIM11  | 324.1  | 376.2  | 190.7  | 162.8  | 146    | 167.7  | 293    | 403    |
| TRIM13  | 621.3  | 549.4  | 367.8  | 465.7  | 478.4  | 337.6  | 577.7  | 931.4  |
| TRIM13  | 292.7  | 447    | 221.5  | 239.1  | 222    | 381    | 225.3  | 369.8  |
| TRIM13  | 523.4  | 671.4  | 302.5  | 654.8  | 592.7  | 492.9  | 475.6  | 549.4  |
| TRIM14  | 151.2  | 150.3  | 113.1  | 101.8  | 86.1   | 84     | 128.6  | 125.4  |
| TRIM14  | 84.1   | 92.9   | 100.3  | 87.5   | 89.4   | 88.5   | 88.7   | 96.6   |
| TRIM14  | 134.9  | 161.5  | 112.5  | 105    | 98.2   | 95     | 135.3  | 152.1  |
| TRIM14  | 190.5  | 249.1  | 118.3  | 111.5  | 96.3   | 92.2   | 163.9  | 187.3  |
| TRIM15  | 102    | 110    | 95.6   | 83.9   | 81.3   | 85.2   | 100.8  | 107.4  |
| TRIM15  | 68.9   | 69.7   | 80.3   | 85.5   | 74.4   | 78.5   | 72.4   | 71.3   |
| TRIM15  | 91.4   | 98.6   | 85.7   | 91.8   | 81.4   | 85.6   | 91.8   | 99.9   |
| TRIM16  | 88     | 96     | 79.3   | 83.5   | 77.6   | 77.7   | 121.9  | 134.4  |
| TRIM16L | 88.3   | 106.1  | 87.7   | 84.2   | 79.1   | 85     | 92.3   | 90.6   |
| TRIM17  | 97.2   | 120    | 107.4  | 96.4   | 92     | 91.1   | 99.2   | 122.7  |
| TRIM17  | 78.2   | 81.9   | 84.2   | 86.3   | 83     | 83.1   | 76.5   | 95.4   |
| TRIM2   | 84.5   | 96.4   | 88.8   | 103.5  | 99.3   | 124.7  | 88.7   | 115    |
| TRIM21  | 485.3  | 660.4  | 403.4  | 389.5  | 299.6  | 452.3  | 396.8  | 690.4  |
| TRIM22  | 132.5  | 147.9  | 130    | 154.6  | 140.5  | 221.3  | 106.9  | 109.6  |
| TRIM23  | 298.2  | 389.2  | 177.1  | 216.7  | 174.7  | 195.2  | 221.5  | 375.6  |
| TRIM23  | 118.8  | 150.3  | 93.8   | 86.8   | 89.6   | 91.3   | 132.6  | 134    |
| TRIM24  | 300.6  | 400.6  | 142.3  | 214.3  | 162.2  | 249.5  | 264.9  | 332    |
| TRIM24  | 96.6   | 101.2  | 92.9   | 100.4  | 94.7   | 96.3   | 93.7   | 91.9   |
| TRIM24  | 748.1  | 772.6  | 610.1  | 1038.8 | 793.3  | 1352.7 | 535    | 1177.2 |
| TRIM25  | 487.9  | 655.1  | 735.6  | 644.3  | 582.4  | 739.8  | 537.4  | 1177.8 |
| TRIM26  | 161.3  | 206.1  | 134    | 139.8  | 116    | 161.3  | 190.4  | 273.4  |



|         |        |        |        |        |        |        |        |        |
|---------|--------|--------|--------|--------|--------|--------|--------|--------|
| TRIM28  | 790.3  | 1020.4 | 941.6  | 520.7  | 400.4  | 817.7  | 587.8  | 1161.7 |
| TRIM29  | 83.1   | 92.9   | 92.8   | 88.1   | 77.8   | 81.2   | 83.3   | 88.1   |
| TRIM29  | 179.9  | 223.2  | 127.8  | 114.3  | 114.9  | 121.1  | 153.4  | 172    |
| TRIM3   | 105.5  | 110.6  | 112.4  | 92     | 97.7   | 97.9   | 99.1   | 109.7  |
| TRIM3   | 80.8   | 96.5   | 87.7   | 81.2   | 75.9   | 82.1   | 81.2   | 93     |
| TRIM31  | 114.8  | 132.4  | 99.9   | 88.3   | 81.9   | 86.4   | 116.7  | 147.8  |
| TRIM31  | 123.3  | 146.3  | 91.8   | 92     | 94.3   | 85     | 110.4  | 124.3  |
| TRIM32  | 313.2  | 418.7  | 312.8  | 257.1  | 214    | 372.1  | 268.1  | 449.5  |
| TRIM33  | 714.9  | 913.6  | 507.8  | 354.9  | 318.5  | 508.6  | 730.9  | 998.4  |
| TRIM33  | 1015   | 1562.1 | 865.6  | 968.6  | 748.7  | 1274.9 | 1108.2 | 1857.3 |
| TRIM33  | 76.7   | 85.9   | 85.4   | 79.7   | 80.6   | 75.5   | 76.2   | 87.8   |
| TRIM34  | 81.4   | 79.4   | 96     | 103.5  | 90.3   | 91.7   | 89.5   | 83.3   |
| TRIM34  | 96.3   | 109.4  | 95.5   | 83.6   | 80.4   | 82.2   | 93.8   | 94.4   |
| TRIM34  | 89.6   | 83.1   | 93.2   | 86.2   | 86.7   | 83.4   | 81.8   | 87.5   |
| TRIM34  | 90.5   | 107.1  | 89.6   | 86.8   | 88.6   | 81.3   | 81.9   | 110.5  |
| TRIM35  | 196.8  | 285.3  | 140    | 135.5  | 108.4  | 120.4  | 170.9  | 276.6  |
| TRIM36  | 120.7  | 146    | 110.1  | 90.3   | 83.8   | 96.6   | 124.6  | 159    |
| TRIM36  | 133.6  | 160.8  | 104.8  | 110.5  | 101.7  | 134.1  | 138.6  | 240.2  |
| TRIM36  | 97.7   | 103.7  | 104.2  | 98     | 100.5  | 103.8  | 99.1   | 105.1  |
| TRIM36  | 89.9   | 104.5  | 102.8  | 92.5   | 90.6   | 94.8   | 96     | 116.3  |
| TRIM37  | 146.5  | 130.7  | 112.4  | 113    | 120.7  | 120.6  | 130    | 138.7  |
| TRIM37  | 186.8  | 246    | 191.7  | 149    | 136.4  | 203.1  | 156.9  | 224.8  |
| TRIM38  | 153.5  | 181.4  | 121.3  | 186.2  | 163.8  | 185.1  | 132.6  | 200.9  |
| TRIM39  | 80.5   | 100.1  | 89.3   | 82.9   | 84.6   | 86.9   | 84.8   | 91.2   |
| TRIM39  | 236.6  | 273.7  | 173.5  | 205.7  | 197.6  | 230.6  | 195    | 241.6  |
| TRIM39  | 99.5   | 123.9  | 114.9  | 101.8  | 100.9  | 131.4  | 102.1  | 107.3  |
| TRIM4   | 1177.8 | 1419.4 | 791.6  | 781.1  | 663.3  | 837.4  | 1100.8 | 1535.5 |
| TRIM4   | 127    | 143.4  | 118.1  | 97.4   | 88     | 100.1  | 127.1  | 149.3  |
| TRIM40  | 95.1   | 104.7  | 98.5   | 74.9   | 80     | 95.9   | 99.5   | 124.1  |
| TRIM41  | 448.1  | 508.2  | 323.1  | 311.7  | 307.3  | 407.6  | 422.7  | 743.9  |
| TRIM41  | 132.9  | 162.6  | 116.1  | 104.8  | 112.8  | 119.4  | 124.1  | 169.2  |
| TRIM42  | 90.5   | 102.2  | 95.2   | 83.4   | 81.4   | 85.6   | 93.1   | 104.7  |
| TRIM43  | 98.1   | 125.3  | 87.9   | 88.1   | 74.9   | 86.8   | 93.5   | 123.2  |
| TRIM44  | 1083   | 1497   | 1107.1 | 1736.3 | 1383.9 | 2956.4 | 888.2  | 1282.6 |
| TRIM45  | 272.2  | 357    | 261.8  | 198.7  | 170.5  | 225.6  | 220.3  | 321.3  |
| TRIM46  | 149.2  | 164.6  | 155.8  | 127.8  | 110    | 115.9  | 134.2  | 195    |
| TRIM47  | 93.3   | 95.5   | 79.5   | 78.6   | 86.6   | 96.5   | 90.8   | 99.3   |
| TRIM48  | 95     | 96.5   | 90.6   | 82.2   | 88.6   | 87.8   | 82.6   | 93.5   |
| TRIM49  | 225    | 298.6  | 134.4  | 130.8  | 122.2  | 136.5  | 242.7  | 295.4  |
| TRIM5   | 338.2  | 424.1  | 214.7  | 240.1  | 194.5  | 243.7  | 279.6  | 365.7  |
| TRIM5   | 125.6  | 146.4  | 99.2   | 91.8   | 87.2   | 100.4  | 106.3  | 132.8  |
| TRIM5   | 230.6  | 307.5  | 129.4  | 125.5  | 125.9  | 126.3  | 206.2  | 215.5  |
| TRIM50A | 78.1   | 88.7   | 101.2  | 89.7   | 86.2   | 93.3   | 83.3   | 83.3   |
| TRIM51  | 103.7  | 124.9  | 110.9  | 103.9  | 106.6  | 99.4   | 108.5  | 132.7  |
| TRIM52  | 190.1  | 199    | 129.5  | 141.2  | 129.4  | 127.9  | 153.9  | 213.9  |
| TRIM54  | 108.8  | 129.5  | 96.5   | 97.4   | 88.7   | 91.2   | 103.5  | 115.7  |
| TRIM54  | 87.8   | 93.2   | 98.4   | 76.4   | 82.2   | 84.3   | 87.3   | 94.9   |
| TRIM54  | 81.7   | 86.4   | 96.7   | 85.7   | 89.6   | 85.8   | 77.8   | 89.6   |
| TRIM55  | 90     | 99.5   | 81.7   | 87.2   | 78.4   | 85.9   | 93     | 91.9   |
| TRIM55  | 92.1   | 104.9  | 88.3   | 83.6   | 80     | 88.5   | 90.1   | 88.7   |

|            |        |         |        |        |        |        |         |         |
|------------|--------|---------|--------|--------|--------|--------|---------|---------|
| TRIM55     | 84.6   | 99.7    | 94.3   | 70.9   | 92.8   | 87.2   | 88      | 85.2    |
| TRIM56     | 359.5  | 404.5   | 174.9  | 254.8  | 253.9  | 307.2  | 371.7   | 576     |
| TRIM58     | 174.8  | 195.3   | 129.2  | 135.4  | 135.3  | 158.2  | 156     | 198.6   |
| TRIM59     | 143.7  | 165.8   | 113.5  | 92.5   | 90.2   | 88.4   | 125.3   | 157.1   |
| TRIM6      | 84.8   | 86.7    | 85.9   | 82.5   | 83.2   | 87.6   | 82.6    | 86      |
| TRIM6      | 107.2  | 118.6   | 113    | 134.1  | 107.7  | 157.6  | 100.1   | 106.8   |
| TRIM60     | 77.8   | 74.2    | 90     | 82.5   | 82     | 83.9   | 74.4    | 82.9    |
| TRIM62     | 113.2  | 154     | 92.1   | 77.5   | 76.7   | 87.6   | 111.8   | 153     |
| TRIM63     | 118.4  | 139.9   | 83.6   | 72.5   | 82.6   | 88     | 112.8   | 144.2   |
| TRIM67     | 125.5  | 144.3   | 83.7   | 97.4   | 90.5   | 97.6   | 120.4   | 136.8   |
| TRIM68     | 501.4  | 592.7   | 326.2  | 260.1  | 237.3  | 295.1  | 494.8   | 584.7   |
| TRIM69     | 91     | 117     | 100.6  | 86     | 86.9   | 97.4   | 99.6    | 111     |
| TRIM6-TRIP | 88.2   | 96.3    | 93.8   | 86     | 87.4   | 92.6   | 85.5    | 80.5    |
| TRIM7      | 103.1  | 126.8   | 96.8   | 92.8   | 91.2   | 88.5   | 111.7   | 133     |
| TRIM7      | 102.4  | 128.1   | 104.1  | 97     | 90.6   | 95     | 108     | 107     |
| TRIM7      | 84.2   | 100.2   | 106    | 96.9   | 97.8   | 94     | 88.3    | 99      |
| TRIM71     | 89.7   | 113.9   | 97     | 95.5   | 91.2   | 95.3   | 101     | 108.7   |
| TRIM74     | 87.6   | 98.7    | 87.3   | 91.1   | 86     | 90.3   | 92.4    | 94.3    |
| TRIM8      | 563.6  | 736.4   | 584.7  | 529.6  | 452.8  | 515.8  | 590.3   | 634.5   |
| TRIM9      | 134    | 151.5   | 110.3  | 91.7   | 85.5   | 104.6  | 123     | 149.6   |
| TRIM9      | 219.8  | 284.9   | 194.9  | 128.2  | 116.2  | 146.9  | 180.1   | 197.9   |
| TRIM9      | 160    | 177.9   | 117.7  | 101.4  | 85.3   | 100.2  | 160.2   | 175.6   |
| TRIO       | 102.7  | 110.7   | 114.1  | 100.4  | 102.4  | 101.5  | 107.6   | 106.3   |
| TRIOBP     | 165.5  | 207.5   | 90.1   | 88.1   | 76.4   | 94.2   | 152.8   | 179.9   |
| TRIP10     | 191.4  | 213.4   | 178.9  | 136.2  | 131.5  | 172.3  | 192.9   | 312.2   |
| TRIP11     | 348.4  | 528.3   | 237.9  | 297.9  | 307.3  | 432.8  | 319.5   | 419.1   |
| TRIP12     | 801.1  | 1235.2  | 518.4  | 667.5  | 549.5  | 1153.7 | 771     | 1584.4  |
| TRIP13     | 1637.7 | 2268.3  | 1451.2 | 1299.2 | 924.9  | 1471.2 | 1140.8  | 1749    |
| TRIP4      | 502.6  | 765.6   | 388.9  | 496.4  | 444.5  | 693.7  | 429.2   | 646.1   |
| TRIP6      | 1892.5 | 2267.7  | 1663.5 | 808.2  | 677.5  | 966.2  | 1982.3  | 2884.4  |
| TRIT1      | 2034.9 | 2182.7  | 727.5  | 811.8  | 616.1  | 1230.3 | 1339.6  | 2243.2  |
| TRMT1      | 710.9  | 812.3   | 472.1  | 349.7  | 323    | 519.3  | 513.9   | 567.8   |
| TRMT12     | 661.2  | 779.3   | 219.8  | 204.1  | 181.4  | 253.5  | 528.4   | 664.4   |
| TRMT5      | 15421  | 20204.6 | 6129.5 | 5688   | 3645.1 | 6577.2 | 14024.7 | 17055.7 |
| TRMU       | 187.4  | 242.8   | 128.4  | 121.1  | 116.8  | 151.7  | 173.2   | 237.9   |
| TRNT1      | 108.1  | 142     | 89.3   | 88.9   | 75.4   | 92.4   | 108.6   | 128.3   |
| TRNT1      | 580.1  | 713.1   | 348.5  | 282.5  | 211.6  | 356    | 515.6   | 763.5   |
| TRNT1      | 141.4  | 153.3   | 95.1   | 98.7   | 82     | 94.8   | 118.9   | 178.7   |
| TRO        | 146.4  | 204.7   | 166.2  | 212    | 201.9  | 255.5  | 152.7   | 156.9   |
| TRO        | 96.3   | 102.6   | 113.8  | 103.8  | 110.6  | 121.8  | 97.1    | 105.3   |
| TRO        | 220.9  | 264.8   | 151.6  | 173.7  | 182    | 224.4  | 178     | 217.4   |
| TROAP      | 493.6  | 445.6   | 524.2  | 325    | 311.1  | 398.9  | 400.3   | 728     |
| TROVE2     | 1370.1 | 1788    | 660.9  | 769    | 621.5  | 1112.2 | 1114.5  | 1845.3  |
| TROVE2     | 157.1  | 186.3   | 100    | 102.1  | 84.2   | 119.9  | 145.2   | 285.5   |
| TROVE2     | 834.9  | 1170.2  | 359.1  | 330.5  | 265.1  | 242.6  | 596.1   | 748.5   |
| TROVE2     | 2388.6 | 3483.3  | 1512.3 | 1848.6 | 1312.4 | 1825.3 | 1752.9  | 3282.5  |
| TRPA1      | 92.4   | 94.5    | 95.9   | 95     | 84.1   | 92.7   | 83.2    | 101.2   |
| TRPC1      | 90.9   | 106.2   | 93.4   | 88     | 83.3   | 92.1   | 92.9    | 102.5   |
| TRPC2      | 248.6  | 311.1   | 187.2  | 121.7  | 114.7  | 116.2  | 248.1   | 279.9   |
| TRPC3      | 99.3   | 119     | 95     | 100.9  | 95.9   | 95.1   | 96.7    | 97.7    |

|         |        |        |        |        |        |        |        |        |
|---------|--------|--------|--------|--------|--------|--------|--------|--------|
| TRPC4   | 139.7  | 166.1  | 111.1  | 99     | 86.6   | 98.1   | 130    | 147.6  |
| TRPC4AP | 782.8  | 962.6  | 390    | 349.4  | 354    | 458.7  | 669    | 831.4  |
| TRPC4AP | 868.1  | 1006.6 | 918.6  | 814.6  | 648.5  | 1225.4 | 647.7  | 1011.5 |
| TRPC5   | 123.5  | 159.7  | 103.7  | 84.6   | 76.3   | 85.5   | 118.3  | 176.5  |
| TRPC6   | 97.5   | 99.5   | 103.6  | 97.2   | 96.8   | 98.3   | 92.2   | 96.8   |
| TRPC7   | 82.1   | 99.9   | 98.2   | 86.5   | 94.4   | 90.7   | 93.7   | 93.7   |
| TRPM1   | 82.4   | 81.2   | 91.4   | 80.8   | 80.3   | 81.3   | 78.5   | 80.6   |
| TRPM2   | 236.1  | 289.8  | 126.5  | 124.1  | 109.3  | 178.6  | 204.6  | 218.8  |
| TRPM2   | 85.4   | 88.1   | 116.6  | 101.9  | 101.6  | 103.6  | 81.6   | 80.2   |
| TRPM3   | 98.2   | 107    | 94.1   | 90.8   | 82.9   | 86.7   | 91.1   | 101.7  |
| TRPM3   | 82     | 95     | 82.3   | 78.9   | 83.2   | 77.5   | 81.4   | 91.5   |
| TRPM4   | 1476.2 | 1986.8 | 514.1  | 290.3  | 282.1  | 384.1  | 1552.8 | 1342.8 |
| TRPM5   | 71.5   | 80.2   | 77.3   | 79.6   | 81.8   | 85     | 71.7   | 83.4   |
| TRPM6   | 86.6   | 90.7   | 101.3  | 91.6   | 86     | 85.2   | 82.8   | 86.1   |
| TRPM8   | 81.4   | 100.5  | 85.8   | 96.7   | 95.5   | 104.7  | 85.4   | 100.1  |
| TRPS1   | 189.9  | 220.2  | 101.9  | 98.8   | 96     | 98     | 173    | 233.7  |
| TRPT1   | 70.2   | 76.6   | 81.1   | 77.7   | 78.1   | 80.3   | 70.2   | 71.6   |
| TRPT1   | 2275.2 | 2340.5 | 1611.4 | 1038   | 871.6  | 985.9  | 1681.7 | 1522.4 |
| TRPV1   | 94.8   | 107.9  | 106.1  | 90.6   | 94.4   | 96.8   | 90     | 93.4   |
| TRPV1   | 126.3  | 133.6  | 87.5   | 81     | 76     | 83.4   | 117.4  | 128.9  |
| TRPV1   | 85.7   | 98.9   | 100.5  | 89.8   | 80.9   | 95.2   | 99.6   | 87.7   |
| TRPV1   | 79.2   | 88.6   | 88.4   | 82.9   | 82.7   | 85.1   | 83.4   | 89.9   |
| TRPV1   | 74     | 91     | 98.6   | 89     | 84.7   | 77.5   | 85     | 106.3  |
| TRPV2   | 350.1  | 408.6  | 444.4  | 405.6  | 340.1  | 543.6  | 313.8  | 477.8  |
| TRPV3   | 118.5  | 151.7  | 111.3  | 100.7  | 95.4   | 98.4   | 112.2  | 130.2  |
| TRPV4   | 85.1   | 93.9   | 87.4   | 89     | 83.3   | 92.5   | 88.9   | 103.3  |
| TRPV4   | 86.1   | 84.6   | 100.6  | 99.1   | 99.2   | 99     | 75.8   | 88.4   |
| TRPV5   | 95.3   | 111.8  | 111.8  | 84.4   | 88.6   | 82.4   | 94.8   | 107.9  |
| TRPV6   | 113.6  | 136.8  | 88.3   | 89.3   | 88.4   | 88.8   | 119.7  | 123.6  |
| TRPV6   | 75.9   | 81.2   | 85.1   | 91.2   | 85.9   | 87.6   | 85.9   | 83.5   |
| TRPV6   | 79.5   | 93.3   | 86.7   | 78     | 84.8   | 80.2   | 80.2   | 94.6   |
| TRRAP   | 749.4  | 1186.6 | 1084.2 | 1769.4 | 1551.7 | 2132.5 | 777.2  | 1122.8 |
| TRSPAP1 | 143.6  | 171.8  | 112    | 118.9  | 106.2  | 130.2  | 140    | 208.5  |
| TRSPAP1 | 123.5  | 142.5  | 92.5   | 83.4   | 82.5   | 99.6   | 116.3  | 169    |
| TRUB1   | 196.4  | 221.2  | 123.3  | 112.6  | 91.6   | 112.5  | 142.4  | 173.7  |
| TRUB2   | 193.4  | 300.2  | 133.3  | 113    | 120.7  | 131.6  | 190.5  | 227.6  |
| TRY1    | 119    | 143.7  | 98.9   | 86.3   | 84.3   | 96.9   | 122.3  | 126.5  |
| TRY6    | 103.2  | 110.1  | 90.8   | 84.3   | 77.6   | 86.6   | 107.5  | 111.1  |
| TSC1    | 82.9   | 98.4   | 94.6   | 85.7   | 93     | 87.9   | 88.8   | 112.2  |
| TSC1    | 493.2  | 709.1  | 222.3  | 200.4  | 219.9  | 236.8  | 543.9  | 757.7  |
| TSC1    | 97.4   | 126.5  | 102.1  | 104    | 89.5   | 91.2   | 102    | 118.7  |
| TSC2    | 154.2  | 177.9  | 151.2  | 130.7  | 119.3  | 159.6  | 152.6  | 192.7  |
| TSC2    | 77     | 84.3   | 103.8  | 93.1   | 86.5   | 95.3   | 77.9   | 88.6   |
| TSC22D1 | 165    | 203.4  | 106.9  | 165.1  | 125.8  | 170.7  | 148.7  | 217.7  |
| TSC22D1 | 326.7  | 392.6  | 154.8  | 165.6  | 185.1  | 193.8  | 235.2  | 265.2  |
| TSC22D1 | 83.6   | 108.2  | 107.9  | 102.7  | 99.1   | 98.6   | 84.9   | 93.7   |
| TSC22D2 | 333    | 400.1  | 212.1  | 232.4  | 198    | 275.7  | 299.1  | 593.8  |
| TSC22D3 | 108.9  | 128.7  | 95.7   | 90.1   | 86     | 97.1   | 94.5   | 110.3  |
| TSC22D3 | 235.5  | 406.4  | 192.4  | 180.1  | 207.7  | 263.2  | 279.3  | 377.7  |
| TSC22D3 | 377.9  | 465    | 180.7  | 190.7  | 156.4  | 178.4  | 394.6  | 748    |

|          |        |        |        |        |        |        |        |        |
|----------|--------|--------|--------|--------|--------|--------|--------|--------|
| TSC22D3  | 80     | 95.2   | 94.3   | 85.4   | 81.4   | 77.1   | 83.4   | 88.3   |
| TSC22D3  | 85.7   | 87.4   | 82.9   | 87.3   | 86.1   | 82.4   | 84.4   | 87.5   |
| TSC22D4  | 153.3  | 212.1  | 172.8  | 164    | 163.6  | 257.9  | 161.8  | 262.8  |
| TSCOT    | 178.3  | 198.2  | 93.3   | 105.2  | 79.9   | 94.4   | 208.7  | 259.2  |
| TSEN2    | 993.8  | 1240.7 | 649.9  | 651.4  | 543.6  | 877.3  | 656.7  | 760.9  |
| TSEN34   | 1541.7 | 2078.2 | 745.6  | 798.9  | 628.9  | 784.9  | 1444.1 | 1600   |
| TSEN34   | 603.7  | 740    | 408.6  | 503.2  | 349.3  | 528.3  | 590.8  | 966.8  |
| TSEN54   | 278.1  | 349.6  | 325.9  | 194.5  | 200.5  | 264    | 235.1  | 356    |
| TSFM     | 352.5  | 465.3  | 255.7  | 215.6  | 217.8  | 241.4  | 301.8  | 411.8  |
| TSG101   | 2326   | 2858.7 | 1591.5 | 1250.2 | 932.8  | 1652.2 | 1780.6 | 3420.9 |
| TSGA10   | 100.3  | 122.7  | 116.6  | 121.3  | 113.6  | 142.1  | 93.9   | 123.5  |
| TSGA10   | 108.7  | 131.7  | 108.1  | 107.7  | 90.3   | 108.8  | 106.5  | 104.8  |
| TSGA10   | 100.7  | 103.3  | 96.9   | 107.2  | 96.7   | 98.4   | 106.8  | 114.6  |
| TSGA10IP | 124.4  | 130.2  | 101.1  | 86.8   | 85.8   | 93     | 127.2  | 135.2  |
| TSGA13   | 120    | 116.9  | 96.5   | 87.2   | 93.8   | 87.2   | 108.4  | 125    |
| TSGA14   | 301.9  | 366    | 304    | 207.9  | 169.6  | 213.6  | 269.8  | 511.3  |
| TSGA2    | 106.8  | 117.3  | 86.7   | 93.7   | 84.4   | 91.3   | 103.9  | 105.2  |
| TSHB     | 84.5   | 93.9   | 81.9   | 89.7   | 80.7   | 93.9   | 86.8   | 88.5   |
| TSHR     | 97.5   | 98.5   | 98.2   | 95.1   | 85.7   | 87     | 101.4  | 109.7  |
| TSHR     | 108.5  | 114.4  | 93     | 76.4   | 88.3   | 84.1   | 106.9  | 104.3  |
| TSHR     | 86.4   | 97.5   | 90.1   | 82.1   | 77.8   | 84.5   | 86.4   | 93.4   |
| TSKS     | 95.5   | 104.1  | 96.2   | 87.2   | 84.8   | 93.2   | 94.2   | 95.9   |
| TSLP     | 128.7  | 156.2  | 115.1  | 93     | 89.8   | 100.5  | 126.2  | 144    |
| TSLP     | 110.1  | 133.6  | 102    | 91.5   | 77.3   | 97.2   | 116.6  | 138.5  |
| TSN      | 124.6  | 153.9  | 97.4   | 87.3   | 83.7   | 102.3  | 111.9  | 160.9  |
| TSNARE1  | 108.1  | 129.2  | 96     | 87.6   | 84.2   | 87.8   | 116.8  | 121.3  |
| TSNAX    | 162.4  | 184.7  | 130.4  | 121.4  | 110.6  | 224.9  | 188.7  | 468.4  |
| TSNAXIP1 | 107.1  | 147.3  | 81.1   | 82.9   | 73.3   | 87.4   | 116.3  | 142.7  |
| TSP50    | 94.2   | 100.1  | 86.8   | 83.7   | 80.2   | 84.4   | 103.9  | 112.1  |
| TSPAN1   | 108.9  | 109.1  | 129.9  | 124    | 100.2  | 112.6  | 109.3  | 105.8  |
| TSPAN10  | 166.6  | 204.3  | 120.8  | 129.4  | 127.2  | 142.5  | 134.2  | 139.9  |
| TSPAN11  | 87.1   | 96.3   | 97.3   | 82     | 79.8   | 85.2   | 85.6   | 93.2   |
| TSPAN11  | 84.1   | 98.3   | 96.6   | 79.2   | 83.7   | 74.5   | 87.6   | 90.8   |
| TSPAN12  | 85.9   | 95.9   | 87.8   | 86.7   | 83.9   | 85     | 80.9   | 94.5   |
| TSPAN13  | 98.6   | 111.9  | 87.6   | 88.7   | 84.3   | 89.2   | 101    | 130.2  |
| TSPAN14  | 140.7  | 162.7  | 121.1  | 108.9  | 108.5  | 125.1  | 142.6  | 227.2  |
| TSPAN15  | 110.4  | 120    | 111.3  | 108    | 87.3   | 110.9  | 110.8  | 118.2  |
| TSPAN16  | 89.6   | 108.2  | 110.3  | 90.6   | 93.7   | 98.6   | 93.1   | 93.7   |
| TSPAN17  | 219.5  | 277    | 144.9  | 129.5  | 106.6  | 117.3  | 207    | 248.1  |
| TSPAN17  | 1545.6 | 1782.5 | 1185.6 | 1003.1 | 993.2  | 880.5  | 1282   | 1182   |
| TSPAN18  | 104.2  | 113.9  | 105.9  | 97     | 97.3   | 114.4  | 98.9   | 108.7  |
| TSPAN18  | 96.4   | 116.1  | 114.9  | 102.2  | 93.7   | 95.5   | 89     | 117.7  |
| TSPAN18  | 125.2  | 156.8  | 93.2   | 85.2   | 74     | 96.5   | 121.6  | 148.2  |
| TSPAN2   | 80.3   | 104.1  | 93.3   | 92.5   | 82.1   | 86.9   | 79.3   | 104.7  |
| TSPAN3   | 2220.7 | 2898.7 | 892.5  | 547.8  | 494.4  | 867.1  | 1475.1 | 2320.1 |
| TSPAN3   | 3082.2 | 4545   | 1542.8 | 857.6  | 690.9  | 992.4  | 2053.5 | 2956.4 |
| TSPAN31  | 603.7  | 781.8  | 427    | 470.6  | 400.2  | 431.7  | 556.1  | 565.6  |
| TSPAN32  | 1256   | 1351.8 | 998.1  | 1533.1 | 1752.6 | 1858.4 | 616.6  | 514.6  |
| TSPAN32  | 292.5  | 303.2  | 244.2  | 334.6  | 356.2  | 442.3  | 193.5  | 235.4  |
| TSPAN32  | 298.7  | 299.3  | 237.7  | 291.1  | 333.5  | 224.6  | 182.5  | 205.2  |

|         |        |         |         |         |         |        |         |         |
|---------|--------|---------|---------|---------|---------|--------|---------|---------|
| TSPAN33 | 352.1  | 440.1   | 183.9   | 157.5   | 140     | 146.2  | 237.2   | 206.2   |
| TSPAN4  | 281.8  | 364.7   | 179.9   | 141.4   | 156.6   | 150.7  | 256.1   | 276.5   |
| TSPAN4  | 107.1  | 124.2   | 87.5    | 92.2    | 81.7    | 86.7   | 108.2   | 112.3   |
| TSPAN4  | 172    | 231.3   | 167.4   | 115.2   | 118     | 141.1  | 161.9   | 190.6   |
| TSPAN4  | 93.1   | 110.1   | 90.6    | 76.7    | 71.4    | 81.3   | 91.9    | 106.1   |
| TSPAN5  | 367.9  | 485.9   | 195.6   | 180.8   | 153.3   | 119.4  | 301.8   | 503.6   |
| TSPAN6  | 101    | 118     | 106.7   | 109     | 115.3   | 107.2  | 106.9   | 107.5   |
| TSPAN7  | 81     | 94.3    | 84.6    | 77.8    | 78.5    | 87.3   | 82.6    | 104.8   |
| TSPAN8  | 123.4  | 126     | 83.4    | 89.3    | 79.4    | 85.3   | 111.3   | 139.7   |
| TSPAN9  | 147    | 182.9   | 134.7   | 112.1   | 105.1   | 115.9  | 154.9   | 174.8   |
| TSPO    | 4607.8 | 6874.9  | 3701.2  | 2116.1  | 1728.2  | 1761.9 | 4254.9  | 5756.6  |
| TSPO    | 2110.5 | 2777.8  | 817.3   | 552.1   | 384     | 687.9  | 1888.9  | 2836.5  |
| TSPO    | 21658  | 26639.2 | 22294.1 | 16434.1 | 13111.7 | 14032  | 21132.5 | 21676.8 |
| TSPY1   | 65.9   | 75.6    | 84.3    | 73.4    | 80.6    | 67.8   | 73.8    | 78.5    |
| TSPY2   | 76.4   | 81.4    | 93.9    | 88.7    | 80      | 88.9   | 79.9    | 88.2    |
| TSPYL1  | 1209.9 | 1536.9  | 761.2   | 1065.9  | 712     | 1508.6 | 1019.4  | 1895.7  |
| TSPYL2  | 89.6   | 100.5   | 97.9    | 79.9    | 82.3    | 84.2   | 97.3    | 109.4   |
| TSPYL2  | 109.6  | 120.3   | 109.9   | 92.5    | 85.9    | 91.4   | 94.3    | 161.8   |
| TSPYL2  | 99.8   | 100.4   | 94.5    | 85.5    | 79.5    | 88.8   | 91.7    | 109     |
| TSPYL2  | 122.7  | 128.3   | 126.8   | 106.4   | 101.4   | 115.7  | 108.4   | 170     |
| TSPYL3  | 79.2   | 88.6    | 89.6    | 86.6    | 88.5    | 83     | 84.2    | 81      |
| TSPYL4  | 149    | 175.6   | 126.8   | 116.1   | 107.1   | 116.6  | 138.8   | 170.4   |
| TSPYL5  | 616.6  | 792.7   | 532.2   | 339.9   | 254.1   | 396.5  | 506.6   | 699.3   |
| TSPYL6  | 91.5   | 120.9   | 85.5    | 92.1    | 84.8    | 87.5   | 98.4    | 116.7   |
| TSR1    | 96.7   | 111.6   | 88      | 80.8    | 86.9    | 83.5   | 90.3    | 112.8   |
| TSRC1   | 162.9  | 198.2   | 148     | 190.7   | 161.5   | 188.8  | 159.3   | 143.8   |
| TSRC1   | 84.8   | 98.7    | 96.2    | 99.9    | 91.3    | 124.9  | 85.1    | 92.7    |
| TSRC1   | 161.1  | 188.2   | 131.6   | 151.6   | 127.3   | 158.8  | 134.9   | 127.6   |
| TSSC1   | 973.3  | 1356.5  | 927.2   | 950.7   | 733.8   | 1293.8 | 826.7   | 1210.1  |
| TSSC4   | 841.1  | 1099.7  | 499.8   | 384.2   | 365.2   | 456.4  | 867.2   | 793.1   |
| TSSK1   | 104.4  | 123     | 107.6   | 93.3    | 90.1    | 97     | 110.3   | 113.1   |
| TSSK2   | 82.8   | 100.2   | 96.8    | 91.7    | 84.3    | 101.2  | 95.8    | 85.4    |
| TSSK3   | 132.2  | 149.2   | 98.6    | 101.8   | 90.6    | 102.9  | 112.7   | 134     |
| TSSK4   | 94.9   | 98.9    | 98.2    | 94.8    | 78.1    | 87     | 98.6    | 91.9    |
| TST     | 4907   | 6312.9  | 3308    | 2561.2  | 2314.9  | 2177   | 3822.5  | 3041.1  |
| TSTA3   | 607.2  | 722.6   | 283.6   | 199     | 171     | 267.6  | 456.1   | 731.3   |
| TTBK1   | 84.6   | 108.3   | 97.3    | 91.5    | 84.6    | 90.2   | 86      | 95.4    |
| TTBK2   | 109.3  | 128.6   | 110.5   | 96.9    | 97.4    | 107.9  | 103.7   | 107.7   |
| TTC1    | 1186.9 | 1500.4  | 711.1   | 733.2   | 602.8   | 1120.5 | 934.5   | 1319.2  |
| TTC10   | 121.1  | 130.2   | 111     | 90.9    | 99.5    | 98.3   | 101.7   | 112.2   |
| TTC10   | 245.7  | 338.2   | 178.8   | 161.7   | 156.9   | 212.8  | 198.8   | 288.1   |
| TTC12   | 174.1  | 226.7   | 154.9   | 136.6   | 104.5   | 142.9  | 142     | 209     |
| TTC13   | 1087.7 | 1387.3  | 931.2   | 974.5   | 746.6   | 1388.5 | 801     | 1213.3  |
| TTC13   | 129.5  | 137.3   | 119.1   | 102.5   | 97.2    | 113.9  | 103.1   | 114.9   |
| TTC13   | 524.2  | 689.2   | 374.1   | 323.9   | 288.8   | 433.3  | 421.2   | 508.7   |
| TTC14   | 508.2  | 599.3   | 337.1   | 287.5   | 278.5   | 565.8  | 314.7   | 577.1   |
| TTC14   | 441.9  | 478.8   | 280.5   | 306.7   | 269.9   | 420.6  | 318.7   | 605.4   |
| TTC15   | 638.9  | 866     | 756.1   | 650.1   | 593.4   | 806    | 579.2   | 1074.6  |
| TTC16   | 187.2  | 233.3   | 138.7   | 129.7   | 126.9   | 125.1  | 183.7   | 222.7   |
| TTC17   | 352.1  | 470.4   | 270.9   | 362.1   | 389.6   | 523.2  | 309.2   | 446.8   |

|        |        |        |        |        |        |        |        |        |
|--------|--------|--------|--------|--------|--------|--------|--------|--------|
| TTC18  | 111.3  | 114.2  | 94.5   | 90.9   | 80.7   | 93.2   | 93     | 122.8  |
| TTC19  | 616.9  | 691    | 527.6  | 605.8  | 411.4  | 895.7  | 469    | 789.8  |
| TTC21A | 92.9   | 100.6  | 93.8   | 76.8   | 81.6   | 95.4   | 90.5   | 125.6  |
| TTC21B | 79.5   | 86.7   | 94.2   | 82.2   | 79.3   | 86.2   | 83.6   | 84.3   |
| TTC22  | 83.4   | 81.5   | 90.8   | 97.8   | 90.2   | 93.8   | 77.3   | 90.1   |
| TTC23  | 164.1  | 207.6  | 102.4  | 109.9  | 101.1  | 103    | 167.8  | 224.4  |
| TTC23  | 379.1  | 470.1  | 343.4  | 281    | 267.3  | 350.7  | 364.2  | 480.3  |
| TTC25  | 141.6  | 175.9  | 107    | 111.6  | 87.2   | 108.7  | 133.3  | 160.9  |
| TTC3   | 843.9  | 1100   | 776.3  | 1612.1 | 1100   | 2102.8 | 766.5  | 1661.9 |
| TTC3   | 107.1  | 125.1  | 88.1   | 87.6   | 84.7   | 94.5   | 109.8  | 115.7  |
| TTC32  | 335.7  | 366.4  | 176.2  | 178.4  | 185.3  | 202.7  | 301.6  | 434.8  |
| TTC4   | 2144.1 | 2676   | 1334.1 | 1317.8 | 943.4  | 1559.9 | 1829   | 2494   |
| TTC5   | 404.5  | 593    | 312.1  | 246.4  | 209.8  | 280.4  | 364.4  | 402.2  |
| TTC6   | 73.5   | 81.2   | 93.1   | 87.8   | 69.8   | 74.4   | 72.1   | 79.6   |
| TTC7A  | 228.8  | 275.2  | 250.7  | 311.8  | 275.7  | 393.9  | 172.5  | 223.8  |
| TTC7B  | 109.7  | 123.7  | 109.5  | 108    | 98.2   | 96.6   | 110.3  | 121.1  |
| TTC8   | 164.8  | 205.1  | 101.6  | 103.4  | 86.4   | 100.7  | 146.1  | 151.9  |
| TTC8   | 235.7  | 305.9  | 154.8  | 160.7  | 135.1  | 193.9  | 193.8  | 228.7  |
| TTC9B  | 75.8   | 88.4   | 92.7   | 93.6   | 87.2   | 92.5   | 84.9   | 89.5   |
| TTC9C  | 362.4  | 522.6  | 230.2  | 173.4  | 190.4  | 213.7  | 335.4  | 392.8  |
| TTF1   | 114.9  | 120.8  | 82.6   | 79.1   | 79.1   | 80.8   | 106.9  | 126.5  |
| TTF2   | 2076.9 | 2731.3 | 1453   | 1237.2 | 1038.6 | 1467   | 1655.7 | 1816   |
| TTK    | 2045.2 | 2248.7 | 1136.7 | 1146.1 | 900.1  | 1568.1 | 1535.6 | 2776.1 |
| TTL    | 429.2  | 557.8  | 226.5  | 233    | 219.3  | 249.3  | 398.1  | 490.2  |
| TTLL1  | 98.3   | 111.8  | 99.1   | 80.7   | 91     | 90.3   | 89.8   | 107.7  |
| TTLL1  | 154    | 177.1  | 115.3  | 105.3  | 102.4  | 134.5  | 137.7  | 172.5  |
| TTLL1  | 210.2  | 283.7  | 150.4  | 131.4  | 127.2  | 123.2  | 180.2  | 201.1  |
| TTLL10 | 76.3   | 82.9   | 94.9   | 88.4   | 74.9   | 82.5   | 76.6   | 90.2   |
| TTLL12 | 785    | 1040.4 | 762.8  | 661.5  | 507.9  | 808.8  | 651.4  | 1159.3 |
| TTLL13 | 102.9  | 110.9  | 92     | 89.9   | 79.7   | 85.3   | 93.6   | 98.4   |
| TTLL2  | 74.4   | 80.5   | 89.9   | 82.1   | 78.7   | 84.2   | 75.5   | 78.8   |
| TTLL3  | 214.1  | 220.6  | 243.7  | 257.4  | 251.4  | 338.4  | 163.7  | 300.1  |
| TTLL3  | 93.1   | 102.3  | 120.9  | 104.1  | 97.6   | 98.9   | 93     | 114    |
| TTLL4  | 152.9  | 172.7  | 134.2  | 134.5  | 120.4  | 144.6  | 154    | 231.7  |
| TTLL5  | 308.2  | 407.5  | 231.5  | 216.4  | 192.4  | 231.6  | 254.5  | 266.5  |
| TTLL6  | 100.8  | 100.6  | 101.3  | 86.1   | 92.2   | 92.6   | 100.6  | 96     |
| TTLL7  | 99     | 108.7  | 117.9  | 100.7  | 105.1  | 109.9  | 92.7   | 111.6  |
| TTLL9  | 95.2   | 119.4  | 101.5  | 79.8   | 91.5   | 87.5   | 109.8  | 117.9  |
| TTMA   | 102.9  | 94.2   | 107.8  | 99.2   | 91.6   | 101.6  | 91.9   | 89     |
| TTMB   | 96.5   | 112.1  | 85.3   | 77.8   | 77.4   | 76.2   | 93.9   | 117.2  |
| TTN    | 98.6   | 107.9  | 96.3   | 87     | 87.1   | 95.7   | 90.7   | 114.6  |
| TTN    | 87.1   | 91     | 92.2   | 81.7   | 80.8   | 89.1   | 77     | 94.5   |
| TTN    | 113.1  | 117.9  | 99.5   | 90.9   | 90.6   | 98.7   | 109.4  | 100    |
| TTN    | 96.8   | 107.8  | 91.6   | 86.3   | 81.2   | 87.4   | 97     | 105.9  |
| TPPA   | 71.8   | 77.5   | 94.3   | 79.6   | 81.9   | 90.1   | 76     | 78.7   |
| TTR    | 91.2   | 102.8  | 96     | 96.2   | 101.4  | 108.3  | 93     | 92.2   |
| TTRAP  | 117.6  | 138.4  | 93     | 91.6   | 87.9   | 95.1   | 117.8  | 189.2  |
| TTY1   | 119.3  | 119    | 91.2   | 83.3   | 84.9   | 82.2   | 108.7  | 116.5  |
| TTY10  | 146    | 159.3  | 98.4   | 105.9  | 86.5   | 87.6   | 140.4  | 182.2  |
| TTY11  | 98.1   | 109.9  | 121.6  | 108.6  | 94     | 100.2  | 88.8   | 99.1   |

|         |         |         |         |        |        |        |         |         |
|---------|---------|---------|---------|--------|--------|--------|---------|---------|
| TTY12   | 96.3    | 101.4   | 95.9    | 82.4   | 71.1   | 73.5   | 91.6    | 99.2    |
| TTY13   | 84.7    | 106.6   | 83.5    | 82.7   | 82.1   | 95.1   | 80.9    | 102.8   |
| TTY14   | 147.7   | 199.1   | 97.7    | 90.7   | 83.2   | 91.7   | 138.1   | 165.8   |
| TTY17A  | 101.3   | 107.4   | 81.1    | 78.1   | 92.2   | 85.5   | 92.1    | 100.4   |
| TTY19   | 101.4   | 103.3   | 112.4   | 99.2   | 97.1   | 99.2   | 95.8    | 97.4    |
| TTY2    | 88.8    | 102.9   | 85      | 83.4   | 79.1   | 82.3   | 92.1    | 102.2   |
| TTY21   | 83.5    | 88.7    | 91.7    | 88.8   | 88.5   | 87.5   | 86.3    | 94.9    |
| TTY5    | 96.5    | 103     | 92.9    | 94.7   | 93.6   | 91.5   | 87.5    | 90.8    |
| TTY6    | 109.5   | 118.2   | 95.4    | 94.5   | 89.4   | 83.8   | 101.9   | 113.3   |
| TTY6B   | 83.9    | 100     | 91.3    | 80.1   | 80.2   | 83.6   | 89.7    | 84.7    |
| TTY7    | 87      | 88.1    | 92.7    | 84.8   | 80.8   | 88.8   | 92.1    | 92.8    |
| TTY8    | 89.5    | 102.4   | 91.2    | 85.3   | 93.4   | 92.4   | 98.5    | 100.5   |
| TTY9B   | 87.5    | 104.5   | 99.8    | 89.3   | 86.2   | 91     | 100.3   | 100.2   |
| TYH1    | 97.2    | 119.4   | 93.4    | 84.1   | 71.6   | 80.1   | 90.9    | 104.2   |
| TYH1    | 94.7    | 104.1   | 90.2    | 82.2   | 74.7   | 83.8   | 92.1    | 109.6   |
| TYH2    | 97.1    | 112     | 106.4   | 121.6  | 113.9  | 126.7  | 101     | 100     |
| TYH2    | 97.5    | 108.4   | 119     | 108.7  | 101.2  | 112.3  | 107.3   | 96.9    |
| TYH2    | 107.4   | 116.2   | 91.3    | 84.8   | 87.8   | 94.2   | 91.5    | 110     |
| TYH3    | 304.3   | 401.7   | 458.6   | 528    | 424.6  | 668.4  | 251.2   | 448.8   |
| TUB     | 95.2    | 113.4   | 97.9    | 97     | 82.4   | 95.3   | 93.4    | 96.2    |
| TUB     | 112     | 110.7   | 89.8    | 84.9   | 88.9   | 89.3   | 111.7   | 113.8   |
| TUB     | 138.2   | 141.8   | 97.3    | 96.1   | 84.5   | 85     | 116.3   | 143.5   |
| TUBA1   | 1126.7  | 1273.3  | 452.8   | 363.6  | 296.4  | 415.5  | 1148.4  | 1853.9  |
| TUBA1A  | 16560.4 | 17020.4 | 7758.8  | 6407.7 | 5355.1 | 5446.9 | 14944.4 | 17858.5 |
| TUBA2   | 77.9    | 93.7    | 94.3    | 90.8   | 91     | 90.8   | 76.2    | 87.6    |
| TUBA3D  | 83.9    | 97      | 83.7    | 81.8   | 77.6   | 79.3   | 88      | 90.1    |
| TUBA4   | 72.9    | 81.8    | 84.1    | 87.1   | 78.4   | 82.5   | 83.4    | 77.3    |
| TUBA6   | 22654.3 | 27416.9 | 17397.7 | 8018.5 | 7274.7 | 8899.2 | 16548.3 | 21969.8 |
| TUBA8   | 74      | 87.1    | 89.3    | 86.3   | 89.8   | 81     | 82      | 93.1    |
| TUBAL3  | 80.5    | 89.3    | 101.3   | 97.4   | 90.5   | 88.2   | 75      | 87.8    |
| TUBB    | 123.6   | 131.3   | 88.3    | 87.5   | 82     | 84.3   | 128.5   | 159.8   |
| TUBB    | 7963.1  | 9576.7  | 6559.8  | 6542   | 5243.3 | 7780.1 | 6104.4  | 7265    |
| TUBB2A  | 124.3   | 155.7   | 103.7   | 82.6   | 80.7   | 88.5   | 129.1   | 173.2   |
| TUBB2B  | 141.1   | 122.6   | 91.5    | 84.9   | 89.1   | 84.6   | 114.9   | 142.8   |
| TUBB2C  | 6518.6  | 7628.6  | 3514.7  | 1705.3 | 1187.5 | 1367.2 | 5155.6  | 6641.4  |
| TUBB3   | 251.8   | 281.8   | 181.8   | 124.2  | 118    | 112.8  | 257.4   | 259.1   |
| TUBB4   | 123.2   | 141.3   | 127.6   | 104.7  | 91.2   | 107.7  | 114.7   | 171     |
| TUBB4Q  | 454     | 598     | 195.8   | 158.2  | 118.1  | 141.6  | 432     | 442.9   |
| TUBB6   | 1841.2  | 2352.1  | 629     | 406.2  | 330.3  | 252.9  | 1382.1  | 1508.6  |
| TUBB6   | 1795.4  | 2597.5  | 1356.9  | 1025   | 733.4  | 1300.3 | 1422.8  | 2485.6  |
| TUBB8   | 90.7    | 102.4   | 82.8    | 88.3   | 87.5   | 79.5   | 96.9    | 92.8    |
| TUBD1   | 192.2   | 247.9   | 110     | 101.5  | 97     | 109.5  | 213.2   | 386.1   |
| TUBE1   | 130.8   | 136.1   | 95.2    | 97     | 92.2   | 104.7  | 122.3   | 203.2   |
| TUBG1   | 214.6   | 258.8   | 103.6   | 87.7   | 89.8   | 96.3   | 208.7   | 274.2   |
| TUBG1   | 4091.8  | 5090.8  | 2604.9  | 1950.8 | 1681.3 | 1703.2 | 4038.4  | 2970.2  |
| TUBG1   | 1973.8  | 2463.2  | 1264.1  | 1025.2 | 766.2  | 1158.1 | 1554.5  | 2792    |
| TUBG2   | 340.1   | 381.2   | 229.5   | 230.2  | 209    | 234.8  | 299.4   | 313.2   |
| TUBGCP2 | 495.4   | 728.2   | 542.1   | 439.3  | 417.1  | 579.2  | 428.2   | 602.5   |
| TUBGCP3 | 147.3   | 187.8   | 125.7   | 111.8  | 122.2  | 136.6  | 129     | 148.8   |
| TUBGCP5 | 399     | 425.2   | 218.1   | 209    | 163.9  | 228.5  | 301.7   | 320.4   |

|         |         |         |         |         |         |         |         |         |
|---------|---------|---------|---------|---------|---------|---------|---------|---------|
| TUBGCP6 | 115.2   | 152.5   | 120.7   | 112.3   | 102.8   | 133     | 109.6   | 123.9   |
| TUBGCP6 | 243.9   | 249.1   | 156.2   | 157.5   | 180     | 196.6   | 189.6   | 287.3   |
| TUBGCP6 | 87.9    | 87.8    | 98.8    | 100.2   | 86.5    | 97.3    | 90      | 82.6    |
| TUFM    | 2306.1  | 3173.4  | 1592.4  | 1339.3  | 829.4   | 1638.6  | 1723.9  | 3708.3  |
| TUFT1   | 135.1   | 169.7   | 117.3   | 110.3   | 97.3    | 139.4   | 160.4   | 200.4   |
| TULP1   | 109.8   | 122.9   | 79.1    | 81      | 73.9    | 94      | 104.9   | 122.5   |
| TULP2   | 80.5    | 88.1    | 97.9    | 86.8    | 82.1    | 85.6    | 77.3    | 83.6    |
| TULP3   | 125.2   | 136.6   | 119.6   | 125.5   | 99.7    | 121.7   | 136.4   | 148     |
| TULP4   | 191.5   | 291.2   | 149.8   | 174.2   | 146.9   | 196.9   | 167.9   | 221.9   |
| TULP4   | 298.3   | 451.4   | 254.4   | 329     | 290.4   | 395.3   | 290.5   | 451.1   |
| TULP4   | 99.3    | 121.1   | 92.4    | 95.9    | 81.3    | 87.1    | 109.8   | 116.7   |
| TUSC1   | 325.5   | 452.3   | 302.1   | 246     | 232     | 334.8   | 296.6   | 506.8   |
| TUSC2   | 285     | 404.2   | 195.7   | 155.6   | 149.2   | 192.8   | 241.3   | 361.7   |
| TUSC3   | 82.3    | 79.1    | 93.3    | 85.4    | 84.6    | 79.5    | 69.8    | 86.3    |
| TUSC3   | 85.9    | 97      | 90.9    | 82.5    | 86.2    | 82.9    | 89.4    | 94.4    |
| TUSC4   | 1116.7  | 1529.6  | 716.1   | 666.5   | 615.3   | 882     | 839.7   | 922.1   |
| TUSC5   | 96.7    | 109.2   | 95.3    | 78.7    | 85.9    | 85      | 104.7   | 115.7   |
| TWIST1  | 887.2   | 1361.6  | 654.3   | 432.6   | 433.4   | 693.3   | 629.1   | 814.5   |
| TWISTNB | 474.4   | 602.3   | 231     | 211.4   | 151.4   | 269.9   | 320.8   | 439.2   |
| TWSG1   | 1026.9  | 1251    | 658.9   | 574.6   | 506.2   | 757.1   | 937.4   | 1557.8  |
| TXK     | 81      | 104.7   | 89.6    | 79.2    | 83.1    | 96.6    | 93      | 106.2   |
| TXLNA   | 1802.2  | 2147.8  | 1244.7  | 966.1   | 864.6   | 1231.5  | 1458.8  | 1730.7  |
| TXLNB   | 98.6    | 112.3   | 98      | 90.6    | 85.6    | 93.9    | 96.3    | 101.9   |
| TXN     | 14642.3 | 17851.4 | 6585.2  | 4944.7  | 3190.1  | 4989.2  | 15099.4 | 16445.6 |
| TXN     | 24276.7 | 28077.9 | 18949.1 | 13510.6 | 10374.2 | 14749.8 | 22610.5 | 23544   |
| TXN2    | 133.1   | 177.7   | 100.2   | 97.1    | 92.3    | 95.8    | 127.2   | 166.7   |
| TXNDC   | 4026    | 4883    | 2244.5  | 1879.3  | 1320.4  | 2043.4  | 3575.1  | 4350.3  |
| TXNDC10 | 406.7   | 525     | 270.9   | 402.2   | 318.7   | 713.5   | 357.3   | 924.1   |
| TXNDC11 | 269.4   | 352.7   | 205.2   | 179     | 165.2   | 257.8   | 244.2   | 398.3   |
| TXNDC12 | 5261.6  | 6533.9  | 4567.5  | 4576.3  | 3602.8  | 4741.3  | 5058.5  | 6605.4  |
| TXNDC13 | 447.5   | 599.5   | 221.9   | 290     | 217.5   | 248.3   | 389.4   | 664.6   |
| TXNDC14 | 3283.6  | 4368.4  | 1815    | 1418.6  | 1003.8  | 2011.9  | 2240.7  | 3662.3  |
| TXNDC3  | 80.2    | 95.3    | 97.6    | 84.8    | 87.3    | 98.8    | 81.4    | 83.4    |
| TXNDC4  | 101.7   | 119.1   | 98.4    | 85.1    | 82.7    | 88.3    | 89.9    | 123.9   |
| TXNDC5  | 69.9    | 74.1    | 78.2    | 75.3    | 77.6    | 75      | 69.2    | 83.4    |
| TXNDC5  | 343.4   | 468.5   | 236.6   | 160.6   | 133.3   | 164.6   | 272.3   | 410.8   |
| TXNDC5  | 164.8   | 213     | 111.1   | 121.8   | 99.2    | 102.2   | 128.4   | 165     |
| TXNDC6  | 108.2   | 113.1   | 108.1   | 85.4    | 65.6    | 84.6    | 113.4   | 122.8   |
| TXNDC8  | 83      | 90.8    | 101.5   | 96.8    | 96      | 102.5   | 81      | 90      |
| TXNDC9  | 806.1   | 1085.8  | 370.4   | 293.4   | 253.2   | 304.5   | 724     | 1340.4  |
| TXNIP   | 2025.7  | 2528.1  | 583.4   | 580.7   | 530.4   | 685.3   | 1206    | 1229.8  |
| TXNL1   | 436.9   | 599.5   | 152.8   | 159.5   | 127.2   | 184.5   | 419.2   | 1101.9  |
| TXNL2   | 2708.2  | 3404.4  | 989.7   | 641.1   | 446.8   | 1007.5  | 2176.8  | 3835.3  |
| TXNL4A  | 171.1   | 194     | 130.3   | 147.6   | 130.9   | 128.2   | 148.4   | 175     |
| TXNL4B  | 141.9   | 162.6   | 133     | 135.3   | 111.7   | 132.2   | 147.2   | 188.8   |
| TXNL5   | 5508.2  | 5893.9  | 2984.1  | 3337.1  | 2260.6  | 3131.3  | 5109.4  | 6652.5  |
| TXNL6   | 87.3    | 103.4   | 105.5   | 98.2    | 90.6    | 86.7    | 97      | 107.1   |
| TXNRD1  | 851.5   | 1300.3  | 758.5   | 640.5   | 556.5   | 1004.2  | 2067.8  | 3736.3  |
| TXNRD1  | 705.9   | 1034    | 386.8   | 273.5   | 221.1   | 362.2   | 1346.5  | 2290.7  |
| TXNRD2  | 557.5   | 722.2   | 392.4   | 296.8   | 274.4   | 322     | 473.4   | 540.5   |



|          |         |         |         |         |         |         |         |         |
|----------|---------|---------|---------|---------|---------|---------|---------|---------|
| TYK2     | 2680.1  | 2606    | 1953.7  | 1646.3  | 1667.4  | 2068.3  | 1584.1  | 1464.5  |
| TYMS     | 9396.9  | 11012.2 | 6464    | 5938    | 4414.3  | 6186.4  | 7827.5  | 12804.6 |
| TYR      | 80.9    | 87.6    | 101.9   | 90.2    | 86.1    | 90      | 82.1    | 91.1    |
| TYRO3    | 175.4   | 219.8   | 198.6   | 202.3   | 171.5   | 216.3   | 171     | 325.2   |
| TYRO3P   | 86.3    | 95.8    | 95.1    | 81.2    | 80.5    | 86.3    | 98.9    | 90.3    |
| TYROBP   | 5897.1  | 6533.2  | 5041.5  | 7585.4  | 6099.1  | 8275.1  | 4639.3  | 5652.4  |
| TYRP1    | 81.9    | 91.5    | 80.1    | 89.9    | 79.5    | 77.4    | 86.5    | 76.8    |
| TYSND1   | 1093.1  | 1352.1  | 698.8   | 338.5   | 299.1   | 328.5   | 710.2   | 612.8   |
| TYSND1   | 181.3   | 217.7   | 145.7   | 102.4   | 90.3    | 90.3    | 135.3   | 160.1   |
| TYSND1   | 121.7   | 140     | 121.4   | 111.2   | 98.7    | 130.1   | 102.8   | 137.2   |
| U1SNRNPB | 533.6   | 609.9   | 364.3   | 321     | 304.7   | 292.4   | 459.1   | 450.8   |
| U1SNRNPB | 239.5   | 285.4   | 130     | 118.9   | 114.6   | 123.8   | 228.4   | 241.8   |
| U2AF1    | 1812.5  | 2541.4  | 818.4   | 807.7   | 570.4   | 831.8   | 1825.2  | 2986.1  |
| U2AF1    | 584.9   | 767.9   | 193     | 193.9   | 155.2   | 201.3   | 522.4   | 715.1   |
| U2AF1L2  | 569.2   | 630.2   | 338.9   | 363.7   | 366     | 389.5   | 466     | 547.7   |
| U2AF1L3  | 243.9   | 260.5   | 174.8   | 135.5   | 120.4   | 137     | 215.9   | 306.9   |
| U2AF1L3  | 126.7   | 147.2   | 109.7   | 112.9   | 95.4    | 126.4   | 126.2   | 148.4   |
| U2AF1L4  | 524.8   | 693     | 548     | 499.8   | 405.5   | 455.3   | 471.9   | 597.8   |
| U2AF2    | 4365.6  | 5435.9  | 2693    | 2182.1  | 1840.5  | 1398.8  | 3691.7  | 5669.9  |
| U2AF2    | 212.2   | 302.4   | 141.7   | 143.2   | 128.2   | 99      | 179.7   | 247     |
| UACA     | 76.6    | 87.9    | 87.4    | 92.1    | 82.7    | 88.3    | 80.4    | 79.7    |
| UACA     | 104.5   | 115.8   | 108.5   | 86.5    | 98.7    | 98.3    | 90.1    | 106.4   |
| UACA     | 108.5   | 121.6   | 101.1   | 86.3    | 90.1    | 87.2    | 94.3    | 115.8   |
| UAP1     | 763.3   | 1028.2  | 192.9   | 188     | 152.5   | 203     | 667.7   | 1004.5  |
| UAP1L1   | 264.4   | 382.2   | 441.1   | 432.2   | 438     | 778.9   | 313.4   | 622.4   |
| UBA2     | 299     | 400.9   | 104.8   | 101.5   | 97.4    | 109.9   | 205.5   | 297     |
| UBA52    | 32984.4 | 30541.9 | 50086.7 | 36895   | 31483.7 | 32332.3 | 33008.6 | 32564.6 |
| UBA52    | 517.7   | 640.2   | 325     | 286.9   | 221.6   | 283.7   | 503.6   | 526.8   |
| UBADC1   | 3396.8  | 4473.8  | 3442.3  | 2747.8  | 2253.4  | 3253.2  | 2558.2  | 4257.1  |
| UBAP1    | 641.9   | 824.2   | 574.3   | 501.6   | 380.1   | 653.2   | 614.5   | 1121.1  |
| UBAP2    | 327.9   | 384     | 212.8   | 184.7   | 164.6   | 234.4   | 251.5   | 409     |
| UBAP2L   | 332.5   | 414.5   | 338     | 550.2   | 375.6   | 630.6   | 258.3   | 513.7   |
| UBASH3A  | 119.2   | 149.4   | 99.3    | 79.1    | 76.1    | 78.4    | 122.3   | 126.4   |
| UBASH3A  | 84.5    | 81.6    | 91.1    | 89.7    | 83.1    | 85.9    | 73.9    | 87.1    |
| UBB      | 24053.4 | 27831.6 | 22875.6 | 18796.5 | 15911.6 | 18055.9 | 25208.2 | 25342.5 |
| UBC      | 24496.4 | 28207.6 | 17519.3 | 19244   | 16556.7 | 20068.1 | 27852.6 | 31421.5 |
| UBC      | 23699   | 26699.2 | 18239   | 17643.4 | 15096.5 | 19111.8 | 27178.6 | 32266.3 |
| UBC      | 107.2   | 127.4   | 93.7    | 108     | 106.9   | 103.4   | 121.6   | 128.5   |
| UBD      | 82      | 91.9    | 90.6    | 88.7    | 88      | 86.1    | 84.7    | 89.4    |
| UBE1     | 1163.1  | 1449.5  | 1489    | 1334.1  | 1049.6  | 1672.2  | 869.8   | 1407.5  |
| UBE1     | 283.3   | 291.5   | 146.9   | 140.2   | 126.4   | 85.6    | 160.6   | 197.2   |
| UBE1C    | 926.5   | 1199.1  | 402.3   | 410.6   | 295     | 574.6   | 677.2   | 1212.7  |
| UBE1C    | 272.5   | 286.2   | 120.4   | 124.1   | 109.9   | 131.5   | 243.9   | 356.2   |
| UBE1DC1  | 726.1   | 872.4   | 329.3   | 284.3   | 189.2   | 360.4   | 503.5   | 872.6   |
| UBE1DC1  | 101.6   | 113.7   | 95.6    | 83.1    | 80      | 80.5    | 96.3    | 111.3   |
| UBE1DC1  | 254.1   | 281.7   | 133.6   | 136.4   | 122.5   | 162.3   | 206.6   | 376.5   |
| UBE1L    | 809     | 956.1   | 635.2   | 548.7   | 560.2   | 656     | 585.5   | 630.1   |
| UBE1L2   | 520.9   | 718.6   | 276.4   | 201.4   | 192.2   | 259.1   | 563     | 844     |
| UBE2A    | 124.3   | 141.4   | 100.6   | 87.7    | 84.4    | 85.6    | 105     | 150.5   |
| UBE2A    | 2308.7  | 3086.8  | 2004.4  | 1345.5  | 1042    | 2089.5  | 1909.6  | 3033.8  |

|         |        |         |        |        |        |        |        |         |
|---------|--------|---------|--------|--------|--------|--------|--------|---------|
| UBE2B   | 116.1  | 135.5   | 94.8   | 103.9  | 112    | 106.6  | 126.5  | 148.4   |
| UBE2C   | 4020.8 | 4313.4  | 1955.8 | 996.4  | 760    | 921.8  | 2920.3 | 4283.6  |
| UBE2C   | 2905.4 | 3319.1  | 1749.1 | 906.1  | 620.5  | 926.6  | 2109.2 | 3279.7  |
| UBE2C   | 206.4  | 214.2   | 178.6  | 136.9  | 136.1  | 139    | 136.3  | 180.6   |
| UBE2C   | 86.3   | 91.2    | 91.2   | 81.7   | 85.5   | 80.6   | 79.5   | 82.4    |
| UBE2D1  | 114.7  | 136.2   | 98.5   | 96.6   | 85.4   | 91.8   | 127.6  | 118.7   |
| UBE2D2  | 265.1  | 336.7   | 165.4  | 200.3  | 172.9  | 208.6  | 226    | 344.6   |
| UBE2D2  | 210.3  | 278.4   | 127.4  | 181.2  | 166.3  | 176.8  | 189.7  | 246.4   |
| UBE2D2  | 170.3  | 187.2   | 122.1  | 113.7  | 103.4  | 99.6   | 165    | 208.5   |
| UBE2D3  | 93.1   | 107.6   | 90.3   | 88.1   | 85.5   | 88.5   | 86.6   | 97.4    |
| UBE2D3  | 3217   | 4043    | 1940.1 | 1606.4 | 1446.5 | 2138.4 | 2444.3 | 3757.2  |
| UBE2D3  | 9302.2 | 12584.3 | 5867.3 | 4145   | 3328.8 | 5674.7 | 7922.1 | 10606.7 |
| UBE2D3  | 105.6  | 133.8   | 100.7  | 96.2   | 89.8   | 87.1   | 112.9  | 138.6   |
| UBE2D4  | 648.2  | 742.9   | 419.2  | 357.7  | 259.5  | 370.1  | 554.5  | 797.2   |
| UBE2E1  | 6751.1 | 7852.5  | 3157.7 | 3605   | 2303.9 | 3560.2 | 5773.9 | 8656.8  |
| UBE2E1  | 1245.1 | 1729.1  | 288.5  | 188.5  | 165.7  | 262    | 910.7  | 1004.7  |
| UBE2E2  | 1666.3 | 2218    | 1010.7 | 925.6  | 684.3  | 1045.6 | 1458.4 | 1735.4  |
| UBE2E3  | 708.3  | 860.8   | 312.6  | 246.3  | 225.3  | 353.8  | 504.9  | 581.6   |
| UBE2E3  | 1830.5 | 2386.3  | 1833.8 | 1508.7 | 1175.9 | 1815.2 | 1434.1 | 3759.3  |
| UBE2F   | 1876.4 | 2478.1  | 1653.1 | 1699.8 | 1608.4 | 2317   | 1798.5 | 1868.6  |
| UBE2G1  | 456.9  | 726     | 320.1  | 343.4  | 261.5  | 296.5  | 460.2  | 553.3   |
| UBE2G1  | 709.3  | 979.5   | 314.8  | 282.4  | 219.5  | 363.6  | 552.8  | 868.7   |
| UBE2G2  | 1677.3 | 1710.8  | 1001.6 | 1446.5 | 1087.1 | 1437.7 | 1169.1 | 1790    |
| UBE2G2  | 104.9  | 118.2   | 103.4  | 110.9  | 101.8  | 108.5  | 92.6   | 99.4    |
| UBE2H   | 235.1  | 280.2   | 131    | 121.7  | 131.7  | 119.9  | 226.5  | 423.4   |
| UBE2H   | 328    | 369.1   | 128    | 139.1  | 122.4  | 128    | 307.9  | 486.4   |
| UBE2I   | 7440   | 9770    | 5597.6 | 3292.9 | 2807.6 | 3448.7 | 6916.6 | 8647.7  |
| UBE2I   | 106.3  | 153.7   | 100.7  | 88.9   | 88.6   | 89     | 105.4  | 112.7   |
| UBE2I   | 99.3   | 117.2   | 95.8   | 94.4   | 86.7   | 91.7   | 99.3   | 98.6    |
| UBE2I   | 180.2  | 230.9   | 134.8  | 111.8  | 104.2  | 102.1  | 148.6  | 171.7   |
| UBE2J1  | 939.5  | 1187.5  | 784    | 892.7  | 628.1  | 968.4  | 770.9  | 1003.2  |
| UBE2J2  | 151.7  | 177.2   | 148.2  | 137.6  | 125.4  | 160.5  | 123.2  | 152.6   |
| UBE2J2  | 396.5  | 502.2   | 196.1  | 152.7  | 154    | 187.1  | 343.6  | 307.1   |
| UBE2J2  | 76.7   | 72.4    | 102.6  | 85.9   | 79.6   | 81.1   | 76.9   | 80.6    |
| UBE2L3  | 665.5  | 807.8   | 484.7  | 574.1  | 437    | 421.1  | 604.6  | 659.2   |
| UBE2L3  | 229.2  | 297.2   | 173.5  | 211    | 153.4  | 175.9  | 202.7  | 288.5   |
| UBE2L6  | 87.9   | 92      | 100.9  | 96.2   | 97.1   | 88.7   | 82.7   | 83.5    |
| UBE2L6  | 1126.3 | 1413.9  | 611.5  | 449    | 432.3  | 436    | 1128.2 | 1081    |
| UBE2L6  | 276    | 351.8   | 182.4  | 150.9  | 141.2  | 138.1  | 252.2  | 277.3   |
| UBE2M   | 5620.3 | 7021.8  | 3412.4 | 2400.7 | 2290.5 | 2814.6 | 5053.5 | 5250    |
| UBE2MP1 | 101.9  | 133.3   | 97.7   | 90.9   | 85.4   | 79.3   | 90.2   | 109.9   |
| UBE2N   | 1902   | 2589.4  | 986.6  | 1302.6 | 872    | 1293.8 | 1702.8 | 2077.9  |
| UBE2NL  | 78.9   | 94.5    | 87     | 81.2   | 74.5   | 87.8   | 81.3   | 86.4    |
| UBE2O   | 191.6  | 236.1   | 260.5  | 257.6  | 221.8  | 271.7  | 180.1  | 265.1   |
| UBE2Q1  | 734.3  | 850.1   | 533.5  | 594.7  | 460.9  | 673.3  | 547.5  | 771     |
| UBE2Q2  | 1159.2 | 1216.3  | 509.2  | 542.2  | 367.9  | 570.3  | 956    | 1529    |
| UBE2R2  | 151.7  | 183.2   | 108.6  | 95.7   | 96.6   | 107.9  | 143.4  | 153.5   |
| UBE2S   | 94.7   | 116.6   | 87.2   | 77.1   | 86.1   | 80.6   | 99.4   | 102.4   |
| UBE2T   | 2712   | 3046.7  | 1063.3 | 618.4  | 448.3  | 751.4  | 1943.5 | 2584.9  |
| UBE2U   | 105.8  | 113.9   | 104    | 102.4  | 89.1   | 96     | 104.5  | 103.7   |

|        |        |        |        |        |        |        |        |        |
|--------|--------|--------|--------|--------|--------|--------|--------|--------|
| UBE2V1 | 223.5  | 273.7  | 130    | 123.9  | 125.6  | 117.7  | 194.7  | 240.7  |
| UBE2V1 | 101.6  | 108.2  | 96.4   | 77.6   | 84.2   | 84.3   | 104.2  | 100.7  |
| UBE2V1 | 96.9   | 113.8  | 89.4   | 88.4   | 90.9   | 86.8   | 97.9   | 107.1  |
| UBE2V2 | 75.6   | 88.2   | 84.1   | 80.4   | 81.8   | 80.8   | 82.9   | 80.4   |
| UBE2W  | 103.4  | 118.7  | 93.3   | 87.9   | 84.7   | 93.1   | 117.4  | 112.4  |
| UBE2Z  | 230    | 334.1  | 173.8  | 141    | 130    | 129.2  | 210.5  | 333.6  |
| UBE2Z  | 490.3  | 645.6  | 362.8  | 398.2  | 351.5  | 510.9  | 486.8  | 1058.5 |
| UBE2Z  | 155.2  | 165    | 105.5  | 104.8  | 103.2  | 98.3   | 122.3  | 171.7  |
| UBE3A  | 1589.8 | 2025.4 | 820.6  | 849.2  | 664.5  | 1289.2 | 1237.9 | 1598.2 |
| UBE3A  | 1115.7 | 1423.1 | 560.9  | 559.9  | 403.4  | 722.3  | 959.9  | 1336.2 |
| UBE3A  | 105.4  | 121.1  | 109.9  | 103.7  | 94     | 96.9   | 102    | 121.5  |
| UBE3B  | 137.3  | 173.8  | 112    | 111.3  | 95     | 122.7  | 163.4  | 221.9  |
| UBE3C  | 1763.1 | 2252.8 | 1272   | 1676.8 | 1137.1 | 1953.1 | 1917.2 | 2318.3 |
| UBE4A  | 614.8  | 767.6  | 259.8  | 316.6  | 235.1  | 379    | 574.2  | 892.2  |
| UBE4B  | 311.9  | 426    | 179.1  | 222.5  | 198.4  | 241.4  | 369.5  | 544.3  |
| UBIAD1 | 472.7  | 644.7  | 204.2  | 158.8  | 126    | 139.5  | 452.9  | 565.4  |
| UBL3   | 669.4  | 830.6  | 348.4  | 521    | 362.9  | 624.5  | 537    | 802    |
| UBL4A  | 644.6  | 832.3  | 616.9  | 407.4  | 345.7  | 466.5  | 611    | 630.4  |
| UBL4B  | 98.8   | 107.3  | 86.4   | 78.1   | 83.3   | 86.8   | 97.9   | 113    |
| UBL5   | 384.4  | 421    | 206.5  | 172    | 149.1  | 186.7  | 259.5  | 281.4  |
| UBL5   | 4530.3 | 5095.7 | 1464.2 | 1025   | 745.2  | 1196.5 | 3956.1 | 4619.6 |
| UBL7   | 325.2  | 420.9  | 201.1  | 208.8  | 229.2  | 168.1  | 311.1  | 330.7  |
| UBL7   | 486.8  | 601.5  | 337.2  | 358.9  | 308.7  | 381.8  | 476.6  | 705.2  |
| UBLCP1 | 1082.2 | 1152.7 | 434.5  | 594.6  | 372.2  | 527.7  | 992.3  | 1478.3 |
| UBN1   | 116.6  | 143    | 98.3   | 85     | 78.9   | 87.8   | 112.2  | 142.6  |
| UBN1   | 1260.2 | 1787.4 | 1483.2 | 1666.6 | 1404.2 | 1717.8 | 1354.1 | 1433.9 |
| UBOX5  | 116.7  | 141    | 107.9  | 103.1  | 113.3  | 104.2  | 124.3  | 124.5  |
| UBOX5  | 129.8  | 153.4  | 108.5  | 89.7   | 90.9   | 98.8   | 123.7  | 149.9  |
| UBP1   | 1925.9 | 2446.1 | 1818.2 | 2088.2 | 1707.4 | 3755.4 | 1616.1 | 3291.7 |
| UBPH   | 251.8  | 319.4  | 150.6  | 136.1  | 108.7  | 152    | 243.5  | 325.1  |
| UBQLN1 | 923    | 1237.6 | 474.4  | 366.9  | 288.6  | 467.6  | 819    | 1458.7 |
| UBQLN1 | 2770.9 | 3082.4 | 1829.8 | 1654.4 | 1114.2 | 1966.1 | 2971.6 | 4813.5 |
| UBQLN2 | 1312.2 | 1498.3 | 654.3  | 707.9  | 525.7  | 871.2  | 1069   | 1819.6 |
| UBQLN3 | 168.2  | 197.1  | 136.2  | 115.6  | 114.4  | 126.3  | 161.8  | 191.8  |
| UBQLN4 | 1377.7 | 1704.9 | 973.3  | 944.1  | 687.6  | 935.4  | 1071.2 | 1289.7 |
| UBR1   | 158.1  | 193.3  | 161.9  | 149.5  | 123.5  | 187.7  | 134.2  | 173.2  |
| UBR2   | 750.6  | 897.7  | 465.3  | 621.7  | 482.5  | 885.3  | 663.2  | 838.8  |
| UBTD1  | 196.4  | 233.6  | 229.8  | 200.2  | 167.7  | 236.1  | 182.1  | 318.7  |
| UBTF   | 149.4  | 170.3  | 160.4  | 149    | 111.8  | 172.4  | 147.1  | 247.9  |
| UBTF   | 146.1  | 173.8  | 98     | 94.7   | 84.9   | 90.5   | 125.7  | 151    |
| UBTF   | 205.2  | 240.6  | 197.2  | 174.4  | 152.2  | 248.7  | 145.8  | 224.9  |
| UBTF   | 107.1  | 133.8  | 94.7   | 89.3   | 80.7   | 90     | 113.1  | 123.8  |
| UBXD1  | 418.8  | 532.6  | 402.7  | 323.6  | 298.7  | 333.3  | 426.3  | 601    |
| UBXD2  | 1933.5 | 2275   | 1189   | 1531.3 | 1202.9 | 2455.2 | 1985.8 | 2676.2 |
| UBXD3  | 98.9   | 105.2  | 147.7  | 130.2  | 135.3  | 140.3  | 96     | 105.7  |
| UBXD4  | 570.6  | 712.2  | 474.8  | 453.2  | 393.1  | 546.6  | 523.1  | 738.3  |
| UBXD5  | 88     | 121.4  | 101    | 101.3  | 79.8   | 91.4   | 114.8  | 116.8  |
| UBXD5  | 93.7   | 104.5  | 91.2   | 91.6   | 78.9   | 92.8   | 85.9   | 100.6  |
| UBXD5  | 118.8  | 136.5  | 96.2   | 96.7   | 94.8   | 101.2  | 117.6  | 128.6  |
| UBXD5  | 304.4  | 394.5  | 302.7  | 217    | 205.6  | 376.7  | 234.5  | 336.6  |

|         |        |        |        |        |        |        |        |        |
|---------|--------|--------|--------|--------|--------|--------|--------|--------|
| UBXD5   | 97.4   | 118.8  | 96     | 91.3   | 79.8   | 75.7   | 99.5   | 124.5  |
| UBXD6   | 447.8  | 568.8  | 127.9  | 93.9   | 93.5   | 141.8  | 400.6  | 645    |
| UBXD8   | 2670.2 | 3539.5 | 1909.4 | 2543.7 | 1970.6 | 2947.4 | 2545.7 | 3263.8 |
| UCHL1   | 100.3  | 124.8  | 98.4   | 83.2   | 68.6   | 81.5   | 101    | 107.9  |
| UCHL3   | 2461   | 3158.3 | 1477.4 | 1045.7 | 757.5  | 1094.6 | 1686.9 | 3112.4 |
| UCHL5   | 2557.8 | 3469.9 | 1399.4 | 1587   | 1074.6 | 1893.1 | 2030.5 | 3378.6 |
| UCHL5IP | 1544.8 | 1710.2 | 1127.9 | 1018.1 | 897.5  | 1165.1 | 1219.3 | 1202.4 |
| UCK1    | 147.5  | 162.3  | 133.2  | 120.6  | 112.6  | 118.1  | 144.1  | 169.4  |
| UCK2    | 1551.4 | 1831.9 | 1139.1 | 821.6  | 639    | 1091.3 | 1212.9 | 1405.9 |
| UCKL1   | 844.6  | 975.6  | 888.1  | 1034.4 | 854.5  | 1409.3 | 627.3  | 1405   |
| UCN     | 234    | 229.1  | 157.3  | 134.3  | 129.8  | 135.5  | 155.4  | 193.3  |
| UCN2    | 88.1   | 121.5  | 95.4   | 84     | 86.5   | 86.8   | 94.3   | 117.6  |
| UCN3    | 131.7  | 153.1  | 96.6   | 84.8   | 83.3   | 90.5   | 121.3  | 147.2  |
| UCP2    | 609.7  | 956    | 970    | 744.8  | 583.8  | 660.1  | 607.7  | 1338.5 |
| UCP3    | 92.4   | 108.6  | 89.4   | 86     | 72.5   | 83.7   | 102.6  | 109.3  |
| UCP3    | 118.4  | 130.6  | 101.7  | 100.5  | 103.5  | 110.9  | 114.3  | 125.4  |
| UCP3    | 117.8  | 143.4  | 94.7   | 94.1   | 88     | 108.4  | 123.2  | 157.5  |
| UCRC    | 1027.1 | 1258.9 | 717.5  | 513.8  | 377.4  | 511.5  | 907.1  | 1139.1 |
| UCRC    | 514.9  | 645.8  | 339.9  | 452.6  | 333.1  | 483.6  | 433.9  | 759    |
| UCRC    | 446.7  | 629.5  | 400.7  | 576.2  | 436.3  | 502.6  | 448.5  | 393.5  |
| UEV3    | 285.6  | 343.9  | 114.7  | 111.3  | 103.2  | 130.7  | 245.1  | 349.5  |
| UEVLD   | 154.3  | 187.3  | 101.1  | 96.8   | 90.7   | 95     | 141.7  | 192.6  |
| UFC1    | 5825.4 | 7997.4 | 5117.6 | 3063.2 | 2639.2 | 3677.7 | 5689.5 | 5995.5 |
| UFD1L   | 187.9  | 244.4  | 155    | 135.6  | 136.7  | 142.3  | 184.8  | 245.5  |
| UFD1L   | 150.6  | 202.4  | 135.4  | 102.2  | 105.9  | 109.7  | 143.7  | 196.1  |
| UFM1    | 209.6  | 238.1  | 147.1  | 112.9  | 123.9  | 160    | 209    | 357.8  |
| UGCG    | 518    | 526.7  | 238.3  | 196.9  | 169.2  | 159.9  | 514.2  | 686.7  |
| UGCGL1  | 79.2   | 87.3   | 98.6   | 84.8   | 74.9   | 95.2   | 82.6   | 93.5   |
| UGCGL1  | 161.5  | 242.7  | 145.7  | 222.9  | 212.5  | 189    | 150.8  | 182.8  |
| UGCGL1  | 269.6  | 442.6  | 243.5  | 523.8  | 346.8  | 326.2  | 326.1  | 418.4  |
| UGCGL2  | 266.5  | 346.8  | 205.6  | 178.4  | 181.1  | 244.7  | 231.9  | 259.6  |
| UGDH    | 643.8  | 810.2  | 282.3  | 336.6  | 273.7  | 389.8  | 630.6  | 947.2  |
| UGP2    | 1170.3 | 1237.6 | 557.1  | 679.8  | 388.5  | 845.3  | 1211.8 | 2146.9 |
| UGP2    | 101.9  | 114.6  | 104.2  | 96.8   | 89.9   | 97.9   | 96.3   | 98.5   |
| UGP2    | 3899.1 | 5137.1 | 2064.7 | 2035   | 1578.5 | 2912.9 | 2791.2 | 4799.9 |
| UGT1A1  | 99.4   | 99.6   | 91.2   | 89     | 85.4   | 97.9   | 90.7   | 100.9  |
| UGT1A10 | 87.1   | 96.3   | 82.5   | 78.7   | 70.2   | 82.2   | 77.9   | 80.4   |
| UGT1A3  | 121.3  | 125.1  | 93     | 82.2   | 83.2   | 79.2   | 116.8  | 131.9  |
| UGT1A4  | 89.6   | 107.1  | 88.7   | 80.2   | 74.9   | 84.9   | 85.3   | 104    |
| UGT1A5  | 95.8   | 109.8  | 88.6   | 90.7   | 78.4   | 84.4   | 102.2  | 108.1  |
| UGT1A6  | 82.9   | 96.1   | 88.8   | 93.6   | 84.9   | 81.9   | 83.3   | 95.7   |
| UGT1A6  | 79.2   | 101.3  | 100.3  | 87.5   | 88.8   | 81.7   | 83.7   | 85.9   |
| UGT1A6  | 75.6   | 81.1   | 90.9   | 88.9   | 88.2   | 79.1   | 76.9   | 86.7   |
| UGT1A7  | 86.2   | 90.1   | 79.2   | 82.9   | 76.1   | 89.6   | 87.9   | 82.4   |
| UGT1A8  | 80     | 90     | 84.6   | 90.9   | 83.2   | 85.5   | 86.2   | 88.5   |
| UGT1A9  | 88.3   | 95.2   | 102.9  | 98.4   | 90.3   | 94     | 86     | 91.2   |
| UGT2A1  | 77.2   | 80.3   | 86.6   | 77.6   | 85.5   | 78.5   | 76.4   | 78.9   |
| UGT2A3  | 85.7   | 98.1   | 92.5   | 92.6   | 82.8   | 100.2  | 82.9   | 95.5   |
| UGT2B10 | 88.3   | 103.2  | 94.4   | 84.7   | 80.1   | 80.4   | 90.7   | 85     |
| UGT2B11 | 93.2   | 102.5  | 102.8  | 101.1  | 90.4   | 95.8   | 98.6   | 105.2  |

|         |        |        |        |        |        |        |        |        |
|---------|--------|--------|--------|--------|--------|--------|--------|--------|
| UGT2B15 | 73.5   | 85.4   | 92.8   | 84     | 79     | 86.1   | 74.7   | 81.3   |
| UGT2B17 | 83.4   | 96     | 92.6   | 83.2   | 94     | 86.7   | 87.2   | 79     |
| UGT2B17 | 93.4   | 88.4   | 88.6   | 93.8   | 85.8   | 99.1   | 89.2   | 98     |
| UGT2B28 | 77.1   | 91.5   | 97.7   | 93.6   | 87.8   | 94.2   | 81.2   | 89.3   |
| UGT2B4  | 90.4   | 97.8   | 97.1   | 77.5   | 92.9   | 94.8   | 98.7   | 99.8   |
| UGT2B7  | 86.7   | 83.7   | 90.3   | 85.6   | 85     | 87.5   | 89.9   | 85.8   |
| UGT2B7  | 83.7   | 102.6  | 98.5   | 90.3   | 90.5   | 90.8   | 91.6   | 86.4   |
| UGT3A1  | 90.3   | 93.2   | 110.8  | 111.5  | 100.9  | 111.8  | 82.7   | 85.2   |
| UGT3A2  | 343.3  | 437.8  | 246.5  | 215.7  | 194.9  | 230.6  | 272    | 330.4  |
| UGT8    | 83.4   | 86.8   | 94.7   | 77.1   | 77.4   | 89.9   | 87.6   | 79.8   |
| UHMK1   | 339    | 370.2  | 265.7  | 287.7  | 232.6  | 126    | 271.5  | 383.4  |
| UHRF1   | 279.8  | 410.2  | 232.3  | 143.2  | 142.8  | 114.7  | 167.5  | 166.8  |
| UHRF2   | 478.8  | 622.7  | 217.6  | 199.6  | 222.4  | 356.2  | 323.6  | 454.3  |
| UIP1    | 199    | 222.3  | 148.1  | 121.5  | 114.1  | 156.4  | 148.5  | 174.4  |
| ULBP1   | 133.1  | 160.5  | 120.8  | 102    | 92.6   | 116.6  | 165.3  | 247.3  |
| ULBP3   | 128    | 146.1  | 94.5   | 96     | 93.4   | 95.7   | 118.4  | 144.3  |
| ULK1    | 960.1  | 1191.7 | 958    | 707.3  | 789.4  | 678.1  | 912.1  | 958.1  |
| ULK1    | 1011   | 1258.2 | 874.6  | 608.3  | 693.9  | 627.1  | 926.1  | 913.1  |
| ULK1    | 85.6   | 89.5   | 94.3   | 89.5   | 83.5   | 88.8   | 85.3   | 86.3   |
| ULK2    | 127.7  | 183.8  | 97.7   | 81.7   | 87.5   | 90.6   | 124    | 154.3  |
| ULK3    | 136.4  | 171.8  | 131    | 117.7  | 123    | 164.6  | 129.3  | 163.9  |
| UMOD    | 78.7   | 91.3   | 100.9  | 84.7   | 77.3   | 81.9   | 70.9   | 86.7   |
| UMOD    | 130.7  | 156.5  | 99.5   | 87.4   | 94.6   | 98.2   | 132.6  | 149.7  |
| UMODL1  | 82     | 86.3   | 99.7   | 78.2   | 79.6   | 86.9   | 81.2   | 90.2   |
| UMODL1  | 84.8   | 94.8   | 93.3   | 89.9   | 89.3   | 79.6   | 88.3   | 94.8   |
| UMPS    | 150.1  | 174.6  | 125.7  | 99.9   | 105.7  | 126.5  | 121.6  | 140.6  |
| UNC119  | 157.8  | 151.6  | 113.9  | 93.3   | 98.1   | 103.6  | 124.3  | 177.9  |
| UNC119  | 379.1  | 461.4  | 220.6  | 179.6  | 151.3  | 204.1  | 309.9  | 320.6  |
| UNC13A  | 82.8   | 91.1   | 92.3   | 91.3   | 81.1   | 85.8   | 82.8   | 82.9   |
| UNC13A  | 136.6  | 165.8  | 106.4  | 111.2  | 95.9   | 95.5   | 147.6  | 194.7  |
| UNC13A  | 103.7  | 133.1  | 93.4   | 84.4   | 84.1   | 85.6   | 115.6  | 113.9  |
| UNC13B  | 116    | 143.8  | 105.3  | 100.2  | 95.7   | 114.2  | 106.6  | 141.3  |
| UNC13C  | 85     | 87.4   | 92.2   | 84.9   | 84.4   | 83.5   | 82     | 90.1   |
| UNC13D  | 114.6  | 121.7  | 137    | 131.6  | 126.6  | 184.4  | 100.6  | 112.6  |
| UNC45A  | 794.2  | 943.2  | 428    | 420    | 413.1  | 502.2  | 813.8  | 1339.4 |
| UNC45A  | 193.6  | 215.9  | 116.9  | 106.1  | 107.2  | 101.8  | 186    | 192.7  |
| UNC45A  | 458.7  | 527.1  | 598    | 498.6  | 411.8  | 711.1  | 506.5  | 736.2  |
| UNC45A  | 88.7   | 94.3   | 102.7  | 97.8   | 84.8   | 95     | 87     | 100.5  |
| UNC45B  | 93.6   | 102.3  | 95.8   | 89.4   | 89.7   | 89.1   | 89.6   | 100.6  |
| UNC50   | 4158.4 | 5155.4 | 3123.3 | 2809.5 | 2040.1 | 2956.3 | 3922.3 | 5298.9 |
| UNC5A   | 102.7  | 109.2  | 93.5   | 83.5   | 84.8   | 87.4   | 93.2   | 102.6  |
| UNC5B   | 105.3  | 117.4  | 106.6  | 90.8   | 95.1   | 96.1   | 94.8   | 112.7  |
| UNC5C   | 157.1  | 207.4  | 129.8  | 106.8  | 110.1  | 118.5  | 163.8  | 154.5  |
| UNC5CL  | 84.5   | 117.6  | 79.2   | 86.4   | 78.1   | 86.3   | 92.9   | 92.2   |
| UNC5D   | 74     | 78.4   | 85.7   | 79     | 77.4   | 84.1   | 82.3   | 83.7   |
| UNC84A  | 489.1  | 690.6  | 387.7  | 335.8  | 320.7  | 580.8  | 391.7  | 616.6  |
| UNC84B  | 4607.4 | 6448.6 | 2959.4 | 3039.8 | 2750.7 | 3361   | 4205.5 | 4108   |
| UNC93A  | 93.3   | 109.2  | 99.8   | 84     | 82.6   | 89.8   | 99.8   | 106.2  |
| UNC93B1 | 1038.3 | 1320.8 | 1027.1 | 886.4  | 704.2  | 822    | 804.4  | 1645.5 |
| UNCX4.1 | 88     | 96.6   | 100.6  | 91.5   | 90.9   | 86.1   | 87.1   | 83.1   |

|         |        |        |        |        |        |        |        |        |
|---------|--------|--------|--------|--------|--------|--------|--------|--------|
| UNG     | 185.7  | 218.7  | 101.3  | 88.9   | 82.9   | 87.9   | 136.8  | 160.4  |
| UNG     | 2400.5 | 3085   | 1198.7 | 1029.1 | 871.2  | 1351.2 | 1406.4 | 2209.5 |
| UNG     | 122.2  | 132.2  | 87.7   | 93.6   | 78.6   | 87.5   | 106.2  | 128.5  |
| UNG2    | 255    | 283.4  | 150.7  | 103.2  | 106.9  | 112.4  | 196.9  | 248.4  |
| UNK     | 76.6   | 93.8   | 91.4   | 97.9   | 84.8   | 85     | 84.4   | 91.9   |
| UNKL    | 89.3   | 95.6   | 98.6   | 100.5  | 100.8  | 101.6  | 80.9   | 94.4   |
| UNQ1940 | 135.3  | 146    | 93.4   | 86.7   | 83.8   | 94.8   | 131.9  | 132.9  |
| UNQ2446 | 85.4   | 97.3   | 93     | 84     | 91.8   | 88.2   | 88.8   | 93.4   |
| UNQ2541 | 76.7   | 89.6   | 93.8   | 84.8   | 73.2   | 78.7   | 75.4   | 90.1   |
| UNQ3033 | 87.4   | 101    | 98.5   | 95.2   | 83.8   | 95.1   | 86.8   | 99.4   |
| UNQ3045 | 102.2  | 111.9  | 117.4  | 106.9  | 100.7  | 98.8   | 94.5   | 97.7   |
| UNQ467  | 107.7  | 136.1  | 112.5  | 106    | 99.8   | 108    | 127.7  | 112.8  |
| UNQ470  | 117.1  | 133.9  | 98.3   | 149.5  | 166.1  | 160    | 116.8  | 128.9  |
| UNQ473  | 98.1   | 92.9   | 97.6   | 98     | 88.5   | 88.5   | 95.4   | 108.1  |
| UNQ501  | 3293.4 | 4232   | 2487.2 | 2453.4 | 2176.1 | 2107.9 | 3551.1 | 2965.8 |
| UNQ5783 | 108.4  | 157.2  | 113.7  | 108.9  | 102.3  | 116.8  | 95.4   | 104.6  |
| UNQ5810 | 94.9   | 99.6   | 87.4   | 90.7   | 89.5   | 84.8   | 92.7   | 103    |
| UNQ6411 | 107.4  | 110    | 97.3   | 98     | 84.3   | 93.4   | 109.1  | 117.7  |
| UNQ689  | 80.2   | 79.3   | 97.3   | 83.2   | 82.2   | 83.9   | 76.1   | 87.5   |
| UNQ739  | 144.6  | 161.3  | 100.8  | 94.9   | 93.1   | 95.1   | 132.4  | 158    |
| UNQ830  | 119.7  | 129.1  | 116.9  | 114.1  | 105.4  | 114.5  | 115.7  | 120.2  |
| UNQ846  | 154.8  | 181.3  | 123.1  | 98.7   | 101.8  | 100.7  | 134.7  | 164    |
| UNQ9217 | 123.5  | 146.1  | 101.8  | 105.2  | 84.5   | 118.2  | 117.7  | 137    |
| UNQ9356 | 109.4  | 129.8  | 96     | 92.4   | 87.6   | 92.1   | 107.6  | 142.5  |
| UNQ9391 | 117.2  | 134.1  | 89.5   | 92.2   | 83.3   | 85.2   | 105.6  | 127    |
| UNQ9433 | 144.5  | 176.9  | 90.7   | 108.7  | 87.9   | 114.7  | 166.4  | 221.3  |
| UNQ9438 | 99.7   | 105.7  | 85.7   | 91.7   | 84.8   | 96.6   | 97.3   | 105.4  |
| UPB1    | 97.1   | 117.6  | 99.7   | 101.3  | 95.2   | 100.8  | 103.3  | 94.7   |
| UPF2    | 2036.5 | 2596.8 | 1292.4 | 1446   | 1322.7 | 2383.1 | 1876.9 | 2391.4 |
| UPF2    | 115.9  | 129.7  | 98.4   | 84.2   | 98.5   | 99     | 101.4  | 121.5  |
| UPF2    | 946.2  | 1148.7 | 570.4  | 804.6  | 724.1  | 772.6  | 939.4  | 1056.5 |
| UPF3A   | 528    | 652.3  | 311    | 410.2  | 355.4  | 382.5  | 435.5  | 826.8  |
| UPF3A   | 845.3  | 1072.5 | 550.8  | 549.3  | 506    | 835.2  | 630.1  | 1246   |
| UPF3B   | 806.3  | 1033.3 | 615.3  | 668    | 632.4  | 1085.2 | 739.6  | 1438.8 |
| UPF3B   | 1318.2 | 1752.4 | 687.5  | 708.5  | 653.2  | 1358.1 | 1139.9 | 1689.7 |
| UPK1A   | 97.4   | 111.7  | 88.1   | 97.1   | 92.7   | 88.8   | 87.3   | 107.7  |
| UPK1B   | 110.8  | 119.2  | 92.7   | 82     | 90.4   | 94.4   | 102.3  | 132.2  |
| UPK2    | 92.4   | 103.1  | 103.2  | 92.9   | 89.1   | 102.6  | 87.3   | 90.3   |
| UPK3A   | 129.2  | 167.4  | 101.6  | 86.3   | 92.7   | 100.2  | 134    | 152.1  |
| UPK3B   | 97.1   | 112.8  | 88.7   | 88.4   | 78.6   | 83.5   | 106.8  | 115    |
| UPK3B   | 83.4   | 88     | 98.9   | 75.2   | 88     | 90.5   | 80.1   | 85.5   |
| UPK3B   | 123.6  | 164.8  | 99.7   | 94.2   | 94.8   | 100.8  | 123.4  | 139.8  |
| UPP1    | 102.6  | 119.5  | 89.2   | 93     | 83.9   | 96.6   | 96.8   | 118    |
| UPP1    | 105.6  | 124.6  | 90.4   | 83.5   | 81.7   | 77.4   | 92.8   | 110.2  |
| UPP1    | 225.6  | 279.6  | 164.2  | 155.3  | 146.5  | 162.9  | 234.1  | 247.8  |
| UPP2    | 93.9   | 98.7   | 90.9   | 82.4   | 81.4   | 84.6   | 94.4   | 97.7   |
| UPRT    | 809    | 1071.8 | 409.7  | 462.9  | 376    | 565.1  | 695.5  | 1049   |
| UQCR    | 263    | 304.2  | 178.2  | 129.1  | 107    | 141.7  | 248.1  | 273.6  |
| UQCRB   | 231.1  | 308.1  | 132.7  | 111    | 103.7  | 112.7  | 194.9  | 264    |
| UQCRC1  | 1749.6 | 2519.7 | 1255.5 | 1125.8 | 861.8  | 1259.9 | 1742.7 | 2698.3 |

|         |         |         |         |         |         |         |         |         |
|---------|---------|---------|---------|---------|---------|---------|---------|---------|
| UQCRC2  | 1444.7  | 1957.5  | 394.1   | 362.8   | 223     | 471.1   | 1281.6  | 2093.5  |
| UQCRFS1 | 8711.8  | 11327.8 | 7397.9  | 5326    | 4060.6  | 5663.8  | 6932.3  | 10816.5 |
| UQCRH   | 21129.6 | 22003.5 | 16326.3 | 15549.3 | 14318.3 | 19278.4 | 16413.6 | 17159   |
| URB     | 136.7   | 156.2   | 101.5   | 109     | 101     | 97.7    | 139.5   | 145.9   |
| URB     | 72.1    | 97      | 97.5    | 81.8    | 80.6    | 82.1    | 92.4    | 92.8    |
| URG4    | 292.9   | 366.3   | 307.4   | 241.2   | 261.3   | 329.3   | 311.4   | 401.8   |
| URG4    | 292.5   | 331.7   | 331.8   | 292.4   | 259.2   | 355.2   | 299.1   | 551.1   |
| UROC1   | 103.1   | 134     | 99      | 91.1    | 82      | 90.6    | 107.4   | 116.3   |
| UROD    | 1796.9  | 2570.9  | 1051.9  | 1072.4  | 848.5   | 1219.3  | 1789.7  | 1922.6  |
| UROS    | 3775    | 4588    | 2379    | 1638.5  | 1285.9  | 1638.6  | 3804.2  | 3167.9  |
| URP2    | 850.1   | 944.5   | 1003.5  | 1296.3  | 1191.3  | 1508.5  | 994.8   | 1791.2  |
| URP2    | 278.6   | 362.9   | 265.9   | 235.7   | 215.7   | 321.8   | 289.8   | 516.2   |
| USF1    | 440.4   | 506.9   | 211     | 193.4   | 173.6   | 171.2   | 269.9   | 347.6   |
| USF1    | 650.5   | 868.3   | 346.3   | 309.5   | 286.1   | 312.7   | 516.3   | 613.1   |
| USF2    | 143.8   | 153.1   | 95.7    | 89.9    | 93      | 82.4    | 119.1   | 136.3   |
| USF2    | 281.1   | 397.1   | 358.6   | 274.1   | 283.7   | 355.1   | 243.4   | 416.8   |
| USF2    | 228.8   | 301.9   | 176.2   | 136.8   | 122.4   | 165.9   | 212.4   | 370     |
| USH1C   | 89      | 104.4   | 95.4    | 92.6    | 88.1    | 88.7    | 96.6    | 100.7   |
| USH1C   | 87.6    | 96.6    | 96      | 82.2    | 88.8    | 78.1    | 90.8    | 108.6   |
| USH1G   | 143.6   | 166.8   | 107.2   | 105.7   | 102     | 106.4   | 140.1   | 155.6   |
| USH2A   | 93.4    | 113.6   | 101.8   | 104.3   | 96.9    | 102     | 95.4    | 95.7    |
| USH2A   | 115.9   | 121.1   | 80.3    | 96.6    | 82.2    | 88.4    | 109.2   | 116.3   |
| USH2A   | 81.5    | 97.3    | 95      | 79.2    | 86.8    | 84.3    | 86.8    | 94.8    |
| USH3A   | 116.4   | 152     | 105.8   | 109.2   | 98.7    | 105.2   | 117.2   | 131.7   |
| USH3A   | 84.8    | 78.5    | 98.4    | 97.5    | 93.5    | 91      | 82.2    | 86.6    |
| USHBP1  | 122.2   | 167.1   | 98.3    | 86.9    | 90.5    | 91.2    | 123.1   | 136.8   |
| USMG5   | 237     | 293.8   | 169.6   | 158.7   | 135.7   | 161.6   | 218.3   | 280.7   |
| USP1    | 91.4    | 97.8    | 91      | 97.5    | 83.8    | 82.7    | 87.2    | 98.5    |
| USP1    | 1479.5  | 1766    | 603.6   | 577.3   | 445.1   | 740.9   | 1123.8  | 1783.1  |
| USP1    | 568.3   | 650.4   | 269.2   | 271.1   | 259.9   | 195.8   | 447.8   | 443.2   |
| USP10   | 757.8   | 1097.7  | 297.6   | 264.2   | 216     | 327     | 616.5   | 1074.7  |
| USP11   | 262.7   | 293.2   | 202     | 148.3   | 143.4   | 169.8   | 229.8   | 328.2   |
| USP12   | 183     | 186.5   | 99.8    | 90.4    | 89      | 99.7    | 149.2   | 222.4   |
| USP13   | 506.2   | 689.7   | 292.3   | 427.5   | 330.9   | 500     | 482.3   | 673.2   |
| USP14   | 443.9   | 572.2   | 348.4   | 442.7   | 362.5   | 450.9   | 453.5   | 1108.7  |
| USP14   | 314.8   | 480.4   | 233.3   | 247.6   | 214     | 354.4   | 282.9   | 367.7   |
| USP15   | 179.9   | 201.9   | 125.1   | 125.4   | 112.6   | 175.9   | 151.1   | 179.5   |
| USP16   | 1010.1  | 1220    | 636.4   | 1054.8  | 784.6   | 2144    | 745.4   | 1522.2  |
| USP16   | 84.2    | 97      | 97.3    | 96.9    | 89.5    | 89.5    | 95.8    | 99.9    |
| USP19   | 93.2    | 95.6    | 110.9   | 101.6   | 99.4    | 107.1   | 96      | 105.6   |
| USP2    | 100     | 98.3    | 87.4    | 81      | 80.4    | 87.2    | 83.9    | 93.1    |
| USP2    | 157.4   | 176.9   | 122.6   | 107.5   | 101.8   | 114.1   | 148.7   | 140.1   |
| USP2    | 93.1    | 100     | 104.5   | 90.6    | 95.9    | 94.8    | 99      | 105.1   |
| USP20   | 90.8    | 105.2   | 90.1    | 96.9    | 82.3    | 88.5    | 95      | 99.6    |
| USP20   | 108.6   | 163.9   | 97.4    | 97.9    | 84.3    | 94.7    | 121.6   | 136.4   |
| USP21   | 580     | 792.4   | 507.5   | 249.7   | 210     | 288.8   | 461.8   | 811.3   |
| USP21   | 149.1   | 196.5   | 114.3   | 89      | 89      | 80.9    | 130.9   | 162.1   |
| USP21   | 389.5   | 502.8   | 331.9   | 197.6   | 181.3   | 223.7   | 321.2   | 531.3   |
| USP25   | 108.6   | 110.5   | 107     | 98.8    | 94.6    | 96.1    | 112.2   | 119.3   |
| USP26   | 208.2   | 261.2   | 138.2   | 139.6   | 106.9   | 130.3   | 228.1   | 258.7   |

|        |        |        |        |        |       |        |        |        |
|--------|--------|--------|--------|--------|-------|--------|--------|--------|
| USP28  | 90.7   | 106.3  | 99.5   | 86.2   | 91    | 89.8   | 93     | 96.8   |
| USP29  | 101.1  | 102.7  | 92.8   | 94.9   | 86    | 93.8   | 95.7   | 96.8   |
| USP3   | 1608.6 | 1904.8 | 1179.1 | 1081   | 763.7 | 1156.3 | 1447.1 | 2390.2 |
| USP30  | 119.8  | 138.2  | 103.9  | 94.5   | 88.2  | 93.4   | 101.4  | 130.8  |
| USP31  | 91.2   | 93.9   | 98.5   | 81.1   | 82.6  | 81     | 91     | 97.4   |
| USP32  | 102.7  | 138    | 100.8  | 87.9   | 82.4  | 105.8  | 99.6   | 109.8  |
| USP32  | 138.8  | 161.3  | 101.3  | 144.9  | 151.5 | 184.6  | 117.3  | 150.1  |
| USP33  | 236.2  | 249.9  | 132.1  | 129.9  | 125.7 | 122.2  | 164.4  | 202.1  |
| USP33  | 273.3  | 388.4  | 168.9  | 266.5  | 218.8 | 265.4  | 223.1  | 305    |
| USP34  | 265    | 432.5  | 245.8  | 338.3  | 284.1 | 576.2  | 271.5  | 314    |
| USP37  | 287.3  | 379.1  | 203.3  | 222.6  | 176.9 | 269.8  | 254.8  | 387.4  |
| USP38  | 752.1  | 976.2  | 499.1  | 482.3  | 332.7 | 525.5  | 746.1  | 1083.9 |
| USP39  | 1636.9 | 2313.5 | 1356.5 | 1021.8 | 956.3 | 1694.4 | 1436.1 | 1986   |
| USP4   | 234.4  | 301.8  | 132.8  | 162.1  | 132.7 | 130.8  | 202.9  | 236.7  |
| USP4   | 941.5  | 1208.1 | 619.1  | 685.4  | 508.4 | 690.1  | 901.5  | 1204.9 |
| USP40  | 133.6  | 118    | 104    | 103.4  | 93.4  | 90.2   | 117.6  | 137.2  |
| USP42  | 112.8  | 131.2  | 111.7  | 104.4  | 105.4 | 93.5   | 103.1  | 126.1  |
| USP42  | 575.7  | 715.1  | 529.6  | 585.5  | 509.6 | 657.7  | 509.7  | 829.8  |
| USP43  | 133.7  | 146.7  | 98.3   | 102    | 89    | 91.5   | 130.9  | 140.7  |
| USP44  | 72.6   | 90.2   | 93.8   | 90.1   | 84.1  | 91.5   | 79.4   | 87.4   |
| USP44  | 82.2   | 97.7   | 98.2   | 95.7   | 94.3  | 99.5   | 86     | 94.6   |
| USP45  | 148.3  | 183.3  | 115.1  | 102.7  | 97.9  | 120.9  | 130.7  | 170.4  |
| USP46  | 163.6  | 215.9  | 117.8  | 104.2  | 97.6  | 100.4  | 152.5  | 201.6  |
| USP47  | 165.7  | 208.6  | 119.7  | 159.2  | 117.3 | 161.6  | 153.1  | 238.9  |
| USP48  | 291.6  | 309.4  | 177.3  | 265.7  | 249.7 | 268.7  | 233.1  | 373.5  |
| USP48  | 355.6  | 489.6  | 156.1  | 154.5  | 148.8 | 182.6  | 276.5  | 432.4  |
| USP48  | 781.9  | 1059.8 | 282.3  | 399.7  | 274.7 | 442.1  | 741.7  | 1146.7 |
| USP49  | 1177.5 | 1329.1 | 553    | 1072.5 | 965.5 | 661.9  | 1132.4 | 1662   |
| USP5   | 707.1  | 845.1  | 920.9  | 779.1  | 633.1 | 1318.3 | 639    | 1414.7 |
| USP50  | 75.3   | 92.8   | 85.2   | 79.5   | 80.4  | 85     | 80     | 81.7   |
| USP51  | 96.1   | 94.6   | 93.6   | 101.2  | 88.5  | 90.7   | 92     | 98.2   |
| USP52  | 303.1  | 339.7  | 228.9  | 262.5  | 232.9 | 391.8  | 206.2  | 317.4  |
| USP53  | 128.7  | 127.5  | 102.5  | 95.2   | 89.2  | 96     | 101.9  | 121.9  |
| USP54  | 91.8   | 94.6   | 93.6   | 92.3   | 90.4  | 92.2   | 86.4   | 95.3   |
| USP6   | 96.3   | 122.5  | 85.4   | 78.1   | 97.4  | 114.7  | 84.4   | 116    |
| USP6NL | 221.7  | 226    | 141.6  | 130.2  | 123.5 | 160.2  | 184.8  | 266    |
| USP6NL | 83.5   | 81.1   | 90.5   | 85.3   | 81.1  | 81.1   | 73.7   | 83.7   |
| USP7   | 264.6  | 391.1  | 256.4  | 180.3  | 171.6 | 189.9  | 289.7  | 350.6  |
| USP8   | 347.9  | 497.8  | 180.4  | 200.5  | 180   | 303.5  | 366.9  | 568.3  |
| USP9X  | 109.2  | 117.6  | 100.5  | 98.6   | 95.7  | 91.9   | 105.8  | 120.1  |
| USP9X  | 581.1  | 906.1  | 350.4  | 541.6  | 434.3 | 702.3  | 642.1  | 801.8  |
| USP9Y  | 90.6   | 100.9  | 123.6  | 103.4  | 100.1 | 102.9  | 85.7   | 96.5   |
| USPL1  | 469.8  | 646    | 215    | 187.6  | 192.6 | 253.6  | 442.6  | 724.1  |
| UST    | 115.1  | 146.3  | 128.7  | 96.7   | 107.5 | 123.2  | 118.1  | 161    |
| UTF1   | 91.4   | 112.2  | 99     | 82.9   | 84    | 92.2   | 95.6   | 112.7  |
| UTP11L | 2189   | 2791.8 | 1145.2 | 893.1  | 637.5 | 1004.6 | 1803.5 | 2656.6 |
| UTP14A | 1454.5 | 1954.6 | 1056.7 | 896.8  | 701.6 | 1435.7 | 1049.2 | 1746.3 |
| UTP14C | 707.4  | 925.9  | 466    | 612.2  | 503.8 | 788.6  | 668.8  | 1000   |
| UTP15  | 271.1  | 328    | 176.8  | 169.8  | 126.6 | 209.5  | 229.9  | 293.5  |
| UTP20  | 106.5  | 121.6  | 100.6  | 96.6   | 76.5  | 99.4   | 96.5   | 100.8  |



|        |         |         |        |         |         |         |         |         |
|--------|---------|---------|--------|---------|---------|---------|---------|---------|
| UTRN   | 273.1   | 314.7   | 127.6  | 117     | 115.8   | 138.3   | 261.3   | 238     |
| UTS2   | 172.9   | 201.9   | 126.5  | 112     | 107.5   | 122.1   | 150.8   | 195     |
| UTS2   | 518.3   | 706.9   | 244.8  | 265.9   | 199.6   | 304.6   | 448.9   | 581.5   |
| UTS2   | 355.5   | 499.8   | 219.3  | 200     | 158.3   | 206.1   | 344     | 462.9   |
| UTS2D  | 85.7    | 98.3    | 91.7   | 95.7    | 84      | 88      | 89      | 93.5    |
| UTS2R  | 101.8   | 120.9   | 99.7   | 94.3    | 84.5    | 79.1    | 90.3    | 123.1   |
| UTX    | 74.2    | 94.5    | 92.1   | 89.6    | 79.6    | 78.7    | 78.2    | 88.8    |
| UTY    | 100.9   | 107     | 104.1  | 92.8    | 88.9    | 91.9    | 95.9    | 112.5   |
| UTY    | 171.3   | 171.7   | 97.4   | 120.5   | 114.4   | 143.9   | 143.9   | 180     |
| UTY    | 94.1    | 100.4   | 90.3   | 80.1    | 78.2    | 92.7    | 95.1    | 93.4    |
| UVRAG  | 342.5   | 511.1   | 228.4  | 227.1   | 209.8   | 269.3   | 303.9   | 485.2   |
| UXS1   | 133.8   | 142.8   | 97.4   | 86.1    | 90.1    | 103     | 139.4   | 158.7   |
| UXT    | 4389.5  | 5379.7  | 3466   | 2898.7  | 2274.3  | 3287.4  | 3262.2  | 5864.8  |
| UXT    | 106.8   | 121.4   | 92.8   | 88.7    | 81.3    | 96.5    | 105.5   | 116.8   |
| VAC14  | 102.6   | 127.3   | 111.1  | 89.8    | 95.6    | 92.6    | 116     | 126.9   |
| VAC14  | 146.3   | 176.6   | 162.8  | 133     | 114.8   | 184.3   | 130.5   | 154.3   |
| VAMP1  | 127.2   | 124     | 100.3  | 90.4    | 90.7    | 95.4    | 116.7   | 118.5   |
| VAMP1  | 107.1   | 117.7   | 89.3   | 71.7    | 76.1    | 76.4    | 103.1   | 99.3    |
| VAMP1  | 218.4   | 226.7   | 179.1  | 172.5   | 162.8   | 173.5   | 154.7   | 225.9   |
| VAMP2  | 147.8   | 205.8   | 115.4  | 129.9   | 120.6   | 148.8   | 153.3   | 172.2   |
| VAMP3  | 691.8   | 953.1   | 441.7  | 459.3   | 358.9   | 515.9   | 643.8   | 1266.1  |
| VAMP4  | 238     | 309     | 146.2  | 110.7   | 106.4   | 125.6   | 220.7   | 277.2   |
| VAMP4  | 298.5   | 348.5   | 156.7  | 124.6   | 114.1   | 162.4   | 284.8   | 498.3   |
| VAMP5  | 200     | 250.8   | 191.7  | 208.5   | 183     | 273.7   | 198     | 271.4   |
| VAMP8  | 14953.3 | 18463.1 | 12755  | 12815.3 | 12330.8 | 14674.1 | 15431.2 | 14097.9 |
| VANGL1 | 127.9   | 147.4   | 119.5  | 101.1   | 102.7   | 98      | 123     | 160.3   |
| VANGL2 | 74.6    | 95.1    | 104.1  | 92.9    | 81.2    | 92.2    | 91.6    | 100.1   |
| VAPA   | 115.7   | 128.3   | 97     | 98      | 100     | 135.2   | 120.6   | 163.8   |
| VAPA   | 95.7    | 100.9   | 97     | 97.4    | 82.3    | 99      | 100.2   | 124.1   |
| VAPA   | 410.1   | 660.2   | 285.6  | 268.6   | 216.5   | 317.3   | 325.9   | 420.9   |
| VAPB   | 93.1    | 116.2   | 86.3   | 88.6    | 84.6    | 84.8    | 77.4    | 97      |
| VAR5   | 132.6   | 156.1   | 123.9  | 142.9   | 126.2   | 127     | 134.1   | 161     |
| VAR5   | 2355.4  | 2526.8  | 2007.8 | 1353.6  | 891.3   | 1545.9  | 1881.1  | 3132.5  |
| VARSL  | 304.4   | 351.4   | 282.6  | 185.3   | 158.9   | 227.2   | 238.8   | 197.1   |
| VASH1  | 346.6   | 464.9   | 335.2  | 264.5   | 193.5   | 283.3   | 243.2   | 267.2   |
| VASP   | 185.9   | 280.6   | 131.6  | 122.5   | 98.6    | 112.4   | 164.9   | 277.3   |
| VASP   | 91.5    | 117.8   | 113.5  | 117.1   | 99.5    | 93      | 98.8    | 129.6   |
| VAT1   | 290.8   | 355.1   | 214.3  | 207.6   | 170.6   | 256.4   | 291.7   | 410.2   |
| VAV1   | 499     | 588.5   | 304.8  | 245.8   | 248.3   | 318.2   | 461.9   | 580.4   |
| VAV2   | 163.1   | 178.5   | 116.6  | 107.1   | 104.9   | 118.7   | 164.7   | 161.7   |
| VAV3   | 150.9   | 180.9   | 125.5  | 130.2   | 112.6   | 124.9   | 130.5   | 158.8   |
| VAV3   | 701.2   | 966.4   | 405.3  | 375.7   | 338.6   | 484.2   | 606.8   | 729.4   |
| VAV3   | 2113.4  | 2894.7  | 1618.6 | 1336.1  | 1235.1  | 2192.3  | 1706.7  | 2365.3  |
| VAX1   | 93.2    | 102.1   | 86.7   | 84.2    | 75.2    | 86.3    | 91.4    | 99.2    |
| VAX2   | 98.5    | 114.6   | 105    | 102.8   | 95.5    | 96.6    | 98.1    | 114.4   |
| VBP1   | 4406.1  | 4869.6  | 2605.4 | 2727.4  | 2020.6  | 3436.2  | 4127    | 7698.8  |
| VCAM1  | 85.9    | 86.9    | 90.9   | 75.1    | 85      | 82.3    | 87.4    | 92.2    |
| VCL    | 1907.9  | 2343.9  | 1281.5 | 1114    | 824.2   | 1426    | 1467.1  | 2086.7  |
| VCL    | 181.9   | 227.2   | 144.1  | 135.4   | 114.1   | 145.6   | 143     | 180.2   |
| VCL    | 71.7    | 80.3    | 87.1   | 88.9    | 70.3    | 79.6    | 74.2    | 75      |

|         |         |         |        |        |        |        |         |         |
|---------|---------|---------|--------|--------|--------|--------|---------|---------|
| VCP     | 1595.1  | 2022.8  | 956.4  | 838.2  | 675.6  | 824.3  | 1279.6  | 1599.7  |
| VCPIP1  | 606.8   | 754.2   | 360.6  | 356.3  | 297.9  | 586    | 569.8   | 925.2   |
| VCX     | 97.1    | 113.5   | 93.6   | 111.6  | 111.8  | 127.4  | 94      | 109.6   |
| VCX2    | 81.4    | 73      | 82.2   | 87.2   | 81.3   | 92.2   | 80.6    | 70.6    |
| VCX2    | 87.9    | 104.9   | 102.9  | 88.2   | 83.5   | 100.1  | 93.3    | 85.8    |
| VCX3A   | 107.3   | 108.8   | 95.6   | 97.1   | 80.8   | 88.5   | 113     | 97.4    |
| VCX3A   | 139.3   | 158.8   | 93.5   | 113.7  | 107.7  | 135.3  | 125.9   | 141.3   |
| VCX-C   | 93.8    | 109.9   | 116.5  | 140    | 107.7  | 146.7  | 91.2    | 97.7    |
| VCY     | 103.2   | 96.7    | 81.9   | 96.7   | 83.5   | 99.8   | 90.7    | 100.9   |
| VCY1B   | 77.6    | 92.1    | 91.1   | 78.3   | 71.9   | 83.3   | 77.3    | 90      |
| VDAC1   | 9182.2  | 10460.2 | 8252.6 | 5756.7 | 3760   | 6329.3 | 6598.3  | 14680.1 |
| VDAC2   | 110.9   | 111.6   | 78.3   | 82.8   | 78.4   | 81.1   | 97.3    | 107.4   |
| VDAC3   | 13446.7 | 17073.3 | 10706  | 8633.8 | 6403.3 | 8757   | 12720.2 | 16541.4 |
| VDP     | 1860.5  | 2378.5  | 767.6  | 651.1  | 591.2  | 1133.4 | 1526.8  | 2006.1  |
| VDR     | 85.4    | 106.9   | 94     | 89     | 79.9   | 83.6   | 96.6    | 104.4   |
| VDR     | 121.3   | 184.2   | 143.2  | 110.9  | 103.9  | 123.9  | 136.7   | 191.6   |
| VEGF    | 109.4   | 153.9   | 104.1  | 96.6   | 105    | 103.3  | 119.5   | 116.4   |
| VEGF    | 86.7    | 99.2    | 98.3   | 80.8   | 84.7   | 79.5   | 90.4    | 81.4    |
| VEGFA   | 196.8   | 231.3   | 174.4  | 150.8  | 191.2  | 197    | 191     | 155.9   |
| VEGFB   | 2171.3  | 2916.1  | 1431.2 | 1665.2 | 1442   | 1372.4 | 1870.1  | 1525.9  |
| VEGFB   | 90.7    | 99.9    | 100    | 89.3   | 86.2   | 90.7   | 91.2    | 94.6    |
| VEGFB   | 234.6   | 291.3   | 129.2  | 122.5  | 108.9  | 153.2  | 216.7   | 337.6   |
| VEGFC   | 72.1    | 84.7    | 90.1   | 79.1   | 85.4   | 78.2   | 76.1    | 88      |
| VENTX   | 127.9   | 139.3   | 94.3   | 89.9   | 79.8   | 84.4   | 113.5   | 122.5   |
| VENTXP7 | 92.3    | 106.5   | 91.7   | 86.7   | 80.3   | 84.1   | 111.9   | 109.2   |
| VEPH1   | 85.7    | 102.1   | 97     | 85.3   | 78.3   | 89.7   | 86.8    | 84      |
| VEZT    | 82.1    | 87.7    | 101.7  | 91.7   | 99.3   | 87.3   | 73.8    | 97.4    |
| VGCNL1  | 90.9    | 99.9    | 97.9   | 90     | 99.3   | 91.3   | 96.9    | 92.6    |
| VGf     | 199.8   | 226.9   | 146.4  | 102.2  | 97.4   | 106.7  | 177.9   | 212.1   |
| VGLL1   | 88.1    | 100.9   | 107.4  | 102.9  | 98     | 102    | 98.4    | 85.6    |
| VGLL2   | 95.1    | 106.4   | 102.2  | 96.4   | 80.4   | 92.5   | 94.3    | 114.6   |
| VGLL2   | 92.7    | 112     | 102.3  | 87.9   | 91.9   | 89     | 101.2   | 111.6   |
| VGLL3   | 82.3    | 91.9    | 98.5   | 83.2   | 78.5   | 82.7   | 79.2    | 87.8    |
| VGLL4   | 1015.3  | 1314.8  | 752.2  | 882.5  | 837.4  | 966.8  | 833.6   | 905.6   |
| VHL     | 908.3   | 1082.5  | 286.1  | 323.4  | 241.4  | 242.1  | 829.5   | 1165.8  |
| VHL     | 2298.2  | 2578.2  | 1801.4 | 1806.3 | 1465.7 | 1335.2 | 2101.9  | 3204    |
| VHL     | 606.1   | 720     | 269.4  | 220.4  | 182.3  | 167.3  | 416.6   | 548.7   |
| VHLL    | 90.5    | 103.1   | 95.6   | 84.6   | 85     | 87.1   | 86.9    | 96.2    |
| VIL1    | 104.5   | 122.7   | 81.1   | 75.9   | 75.6   | 92.1   | 103.2   | 126.8   |
| VIL2    | 4761.3  | 6591.5  | 4439.7 | 4385.6 | 4032   | 5949.8 | 4445.2  | 4496.8  |
| VILL    | 112.4   | 128.3   | 122.6  | 130.1  | 121.8  | 137.8  | 96.9    | 111.1   |
| VIM     | 6109.9  | 8096.7  | 2029.8 | 974.8  | 580.6  | 903.8  | 4671.4  | 8859.8  |
| VIP     | 88.5    | 83.8    | 90.4   | 88     | 77.2   | 100.6  | 91.2    | 88.2    |
| VIP     | 89.2    | 105.6   | 103.6  | 88     | 87.5   | 93.2   | 91.6    | 105.1   |
| VIPR1   | 202.6   | 238.8   | 207.9  | 234.9  | 233.5  | 215.5  | 153.7   | 183.5   |
| VIPR2   | 94.6    | 117.7   | 94.4   | 81.3   | 84.3   | 91.2   | 109.6   | 114.3   |
| VISA    | 114.2   | 148.3   | 99.9   | 94     | 92.9   | 103    | 113     | 154.6   |
| VIT     | 118.8   | 148.2   | 93.6   | 96.9   | 108.3  | 112.4  | 116.4   | 121.5   |
| VKORC1  | 6083    | 7194    | 4799   | 4195.9 | 3345.8 | 3760.4 | 6042.2  | 7437.8  |
| VKORC1  | 780.8   | 1039.5  | 293.5  | 280.8  | 262.9  | 384.8  | 813.5   | 1072.4  |

|          |        |        |        |        |        |        |        |        |
|----------|--------|--------|--------|--------|--------|--------|--------|--------|
| VKORC1L1 | 1072.6 | 1307.2 | 832.2  | 634.1  | 474.4  | 617.7  | 1118.6 | 1345.1 |
| VLDLR    | 801.7  | 1017.5 | 459.4  | 477.4  | 419.1  | 783.8  | 687.4  | 1075.9 |
| VLDLR    | 75.8   | 73.2   | 96.4   | 92.3   | 86.5   | 79.1   | 72     | 79.2   |
| VMAC     | 140.3  | 126.8  | 112.8  | 113.1  | 100.5  | 109.9  | 121.7  | 117.2  |
| VMD2     | 289.5  | 284.7  | 223.4  | 174.4  | 151.2  | 222.2  | 193.5  | 267.8  |
| VMD2L1   | 104.9  | 117.9  | 88.9   | 74.7   | 75.4   | 91.3   | 104.9  | 118.5  |
| VMD2L2   | 89     | 95.5   | 95.2   | 91.4   | 88.3   | 84.2   | 86.2   | 89.4   |
| VMD2L3   | 91.1   | 95.1   | 96.6   | 90.7   | 85.4   | 99.5   | 90.8   | 104.8  |
| VMD2L3   | 102.7  | 97.4   | 94.2   | 89     | 78.5   | 92.2   | 87.9   | 99.2   |
| VMO1     | 117.9  | 126.1  | 104.1  | 93.5   | 88.6   | 91.1   | 119    | 115.9  |
| VMP      | 90.3   | 92.1   | 96.1   | 88.3   | 83.2   | 85.8   | 79     | 86.1   |
| VN1R1    | 90.1   | 94.7   | 85.5   | 78.8   | 86.8   | 80.4   | 82     | 93.4   |
| VN1R2    | 96.8   | 103.5  | 113.4  | 99.8   | 83.1   | 96     | 106.3  | 105.6  |
| VN1R4    | 94     | 94.5   | 98.8   | 92.4   | 88.5   | 100    | 92.7   | 107.1  |
| VN1R5    | 114    | 121.9  | 94.9   | 107.1  | 85.4   | 87.4   | 111.3  | 128.5  |
| VNN1     | 85.2   | 100.9  | 97     | 94.3   | 98.6   | 97.1   | 85     | 97.7   |
| VNN2     | 117.3  | 125.7  | 107.7  | 108.3  | 89     | 98.5   | 110.1  | 118.3  |
| VNN2     | 77.8   | 90.6   | 94.2   | 98.4   | 80.3   | 92.5   | 77.5   | 83.7   |
| VNN2     | 76.3   | 85.8   | 91.3   | 73.3   | 85.7   | 86.7   | 85.1   | 85.4   |
| VNN3     | 92.9   | 98.3   | 95.4   | 84.5   | 89.5   | 98.2   | 84.3   | 94.6   |
| VNN3     | 91.9   | 89.9   | 96.6   | 90.9   | 89.2   | 90.9   | 84.9   | 93.2   |
| VNN3     | 96.8   | 106.5  | 101.8  | 80     | 91     | 84.5   | 98.9   | 104.7  |
| VPRBP    | 198.2  | 273.1  | 163.9  | 159.1  | 143.2  | 169.1  | 175.5  | 204.2  |
| VPREB1   | 84.8   | 92.7   | 94.9   | 91.4   | 89.3   | 88.2   | 86.9   | 80.8   |
| VPREB3   | 95.6   | 88.6   | 110.1  | 87.2   | 91.6   | 97.7   | 93.3   | 117.3  |
| VPS11    | 224.9  | 298    | 145.6  | 139.1  | 132.5  | 140.9  | 201    | 211.3  |
| VPS13A   | 78.5   | 88.3   | 93.2   | 88.7   | 76.2   | 88.9   | 80.9   | 77.4   |
| VPS13A   | 184.3  | 228.9  | 141.3  | 136    | 141.5  | 162    | 141.3  | 168.2  |
| VPS13A   | 101.4  | 123.4  | 99.6   | 92.4   | 102.4  | 107.6  | 115    | 119.7  |
| VPS13A   | 164.7  | 214.5  | 113.6  | 148.1  | 111.8  | 156.5  | 154.4  | 182.5  |
| VPS13B   | 85.8   | 88.9   | 82.8   | 82     | 81.5   | 78.2   | 88.4   | 93.9   |
| VPS13B   | 150.3  | 145    | 118.1  | 125.6  | 126.8  | 101.9  | 122.8  | 158.1  |
| VPS13B   | 93.8   | 103.8  | 99.7   | 87.9   | 87.5   | 82.2   | 102.5  | 94.5   |
| VPS13B   | 119.7  | 124    | 99.2   | 95.6   | 97.4   | 84.7   | 98.4   | 123.1  |
| VPS13B   | 113.5  | 119.2  | 101.3  | 95.3   | 93.5   | 99.8   | 96.7   | 119.2  |
| VPS13B   | 156.2  | 159.3  | 117.5  | 132    | 112.8  | 102.5  | 129.4  | 173.6  |
| VPS13C   | 112.3  | 162.4  | 105.6  | 140.2  | 133    | 175.9  | 111.2  | 127.7  |
| VPS13C   | 161.7  | 216.2  | 110.2  | 169.2  | 168    | 120.4  | 140.8  | 166.8  |
| VPS13D   | 83.1   | 90.8   | 88.5   | 103.8  | 85.9   | 92     | 88.3   | 83.2   |
| VPS13D   | 89.3   | 96.6   | 87.6   | 86.2   | 78     | 84.7   | 96.4   | 117.7  |
| VPS13D   | 100.1  | 115.6  | 95.1   | 101.8  | 95     | 100    | 99.3   | 106.5  |
| VPS16    | 139.6  | 158.4  | 105.3  | 101.5  | 92.8   | 110.1  | 125    | 163.3  |
| VPS16    | 762.3  | 913.4  | 406.2  | 423.5  | 443.4  | 490.8  | 573.5  | 441.7  |
| VPS16    | 114.9  | 142.2  | 98.4   | 83.8   | 89.4   | 93.7   | 115.5  | 121.1  |
| VPS18    | 225.3  | 293    | 279.9  | 274.5  | 209.5  | 324.2  | 185.6  | 255.8  |
| VPS24    | 1608.7 | 2001.4 | 996.3  | 661.5  | 588.3  | 856.7  | 1482.9 | 1384   |
| VPS24    | 100.5  | 131.2  | 98.7   | 87.5   | 93     | 95.5   | 94.2   | 112.1  |
| VPS25    | 1044.8 | 1372.9 | 593.2  | 535.2  | 476.4  | 785.4  | 784.3  | 1021.7 |
| VPS26    | 288.6  | 323.8  | 140.7  | 156.2  | 139    | 220.8  | 248.2  | 438.1  |
| VPS26A   | 2633.9 | 3341.8 | 1401.3 | 1411.4 | 1042.6 | 1799.2 | 2225.1 | 3268.4 |

|        |        |        |        |        |        |        |        |        |
|--------|--------|--------|--------|--------|--------|--------|--------|--------|
| VPS26B | 569.2  | 627.3  | 514.6  | 350.9  | 320    | 464.1  | 450.3  | 760.5  |
| VPS28  | 1495.7 | 1978   | 1256.1 | 820.1  | 689.3  | 1111   | 1392.4 | 2255.8 |
| VPS28  | 1195.2 | 1510.3 | 845.9  | 497    | 408.5  | 595.8  | 1064.1 | 1341.6 |
| VPS29  | 5304.8 | 6172   | 3022.1 | 3349   | 2435.5 | 4073.2 | 4573.8 | 5344.1 |
| VPS33A | 241.8  | 318.5  | 227    | 221.7  | 180.3  | 207.3  | 218.2  | 287.7  |
| VPS33B | 470.4  | 607.7  | 374.1  | 374.6  | 305    | 484    | 377.9  | 571.2  |
| VPS35  | 2887.5 | 3431.8 | 1403.3 | 1440.8 | 1143.4 | 1928.6 | 2334.1 | 3211.7 |
| VPS36  | 900.4  | 1067.8 | 444.2  | 583.6  | 475.5  | 966.3  | 683.8  | 1014.6 |
| VPS37A | 697.7  | 812.4  | 306.6  | 267.9  | 244.4  | 347.4  | 640.6  | 1100.3 |
| VPS37B | 252.1  | 337.9  | 307.1  | 267.7  | 215.2  | 319.4  | 254.5  | 620.5  |
| VPS37C | 3417.6 | 3907.1 | 2493.4 | 2337.8 | 1781.6 | 2087.4 | 2549.1 | 3181.6 |
| VPS37D | 296.2  | 370.5  | 157.3  | 141.3  | 127.8  | 151.4  | 286    | 331.1  |
| VPS39  | 158    | 209.2  | 179.6  | 206    | 177.1  | 266.3  | 163.9  | 197.3  |
| VPS41  | 273.3  | 334.2  | 117.6  | 175.4  | 156.2  | 116.5  | 204.9  | 273.2  |
| VPS41  | 368.9  | 416.2  | 221.5  | 293.6  | 250.7  | 217.2  | 299.9  | 301.5  |
| VPS41  | 1417.2 | 1744   | 1204.3 | 1551.1 | 1083.4 | 1688.9 | 1085.6 | 1619   |
| VPS41  | 101    | 114.3  | 103.6  | 95     | 108.3  | 107.2  | 110.3  | 154.6  |
| VPS45A | 649    | 870.5  | 539    | 429    | 395.9  | 693.5  | 463.8  | 736.1  |
| VPS4A  | 260.6  | 345.9  | 245.5  | 185.4  | 157.4  | 233.4  | 237.7  | 481.2  |
| VPS4B  | 1386.1 | 1797.6 | 1198.5 | 1367.3 | 1280.2 | 2499.6 | 1231.5 | 2655.5 |
| VPS52  | 544.2  | 654.2  | 584.5  | 566.6  | 488.3  | 745.1  | 425.6  | 863.1  |
| VPS53  | 97.3   | 110.1  | 97.9   | 88     | 91.9   | 89.9   | 101.2  | 105.9  |
| VPS54  | 183.7  | 211.4  | 131.7  | 115.1  | 102.3  | 155.3  | 154.7  | 241.9  |
| VPS54  | 237.7  | 293.6  | 203.1  | 188    | 156.4  | 246.9  | 237.7  | 392    |
| VPS72  | 678.7  | 808.8  | 464.2  | 298.7  | 247.9  | 343.3  | 564    | 737    |
| VPS8   | 189.1  | 262.1  | 224.7  | 227.4  | 251.8  | 294.5  | 185.1  | 280.1  |
| VPS8   | 92.4   | 109.3  | 81.5   | 83.8   | 83.6   | 94.9   | 99.5   | 111    |
| VRK1   | 1454.5 | 1721.9 | 521.2  | 368.5  | 314.8  | 487.1  | 1320.3 | 2568.4 |
| VRK2   | 460.6  | 528.3  | 183.8  | 169.1  | 125.9  | 212.3  | 352.7  | 632.4  |
| VRK3   | 295.4  | 321.9  | 208.7  | 195.1  | 182.4  | 212.2  | 315.2  | 376    |
| VRK3   | 260    | 405.3  | 166.1  | 172.7  | 152.1  | 141.8  | 222.2  | 307.9  |
| VRK3   | 827.3  | 1092.3 | 595    | 442.3  | 407    | 406.5  | 816.8  | 907.6  |
| VSIG1  | 86.4   | 103.7  | 88.6   | 81.5   | 80.3   | 86.3   | 87.1   | 101.1  |
| VSIG2  | 90.1   | 114.4  | 96.5   | 91.8   | 92.3   | 83.1   | 102.4  | 102.7  |
| VSIG4  | 102.1  | 120.5  | 103.2  | 83.2   | 84.8   | 96.7   | 99.2   | 107.4  |
| VSIG8  | 92.2   | 99.5   | 104.7  | 97.7   | 92     | 86.3   | 94.4   | 98.4   |
| VSIG9  | 107.1  | 122.9  | 86.1   | 91.5   | 93.8   | 90.7   | 93.7   | 114.4  |
| VSNL1  | 83     | 105.2  | 93.5   | 81.8   | 78     | 89.9   | 92.7   | 116.9  |
| VSX1   | 77.4   | 90     | 93.9   | 100.3  | 81.7   | 85.2   | 80     | 83.6   |
| VSX1   | 107.2  | 106.5  | 101.9  | 85.4   | 85     | 101.4  | 104.9  | 107.2  |
| VSX1   | 80.1   | 75.8   | 77.7   | 84.4   | 71.5   | 83.3   | 77.9   | 83.1   |
| VTCN1  | 82.5   | 89.8   | 85.2   | 80.7   | 81.4   | 75     | 83.5   | 96.7   |
| VTI1B  | 489.9  | 696    | 166.4  | 160.2  | 131.9  | 149.6  | 430.2  | 667.1  |
| VTN    | 81.8   | 93.9   | 83     | 81.7   | 78.3   | 76.2   | 81.5   | 76.2   |
| VWA1   | 97.5   | 99.1   | 94.4   | 78.6   | 83.8   | 74.6   | 99.1   | 103.8  |
| VWA1   | 115.1  | 138.1  | 113.6  | 108.4  | 104.3  | 107.8  | 112.7  | 113.2  |
| VWA2   | 81     | 90.2   | 99.3   | 82.9   | 81.7   | 84.4   | 78.4   | 90.5   |
| VWCE   | 98.4   | 108.2  | 102.8  | 95.3   | 81.1   | 89.2   | 102    | 116.9  |
| VWF    | 83.1   | 93.6   | 89.1   | 95     | 89.8   | 92.7   | 98.7   | 132    |
| WAC    | 1226.2 | 1692.9 | 705.1  | 632.6  | 543.8  | 1071.1 | 1030.8 | 1809.1 |

|         |        |        |        |        |        |        |        |        |
|---------|--------|--------|--------|--------|--------|--------|--------|--------|
| WAC     | 173.4  | 211.5  | 100.8  | 96.3   | 93.5   | 85.8   | 122.4  | 157.1  |
| WAC     | 2175.1 | 2654.2 | 1505.4 | 1346.4 | 1149.2 | 2206.5 | 2281.8 | 4550.2 |
| WARS    | 1099.8 | 1458.2 | 1000.1 | 678    | 468.1  | 930.7  | 1118.8 | 1822   |
| WARS    | 1816.3 | 2264.5 | 1287.3 | 1079.6 | 668.1  | 1146.3 | 1929.8 | 2598.2 |
| WARS2   | 113.3  | 130.8  | 107.3  | 102.1  | 92.5   | 97.9   | 98     | 142.1  |
| WAS     | 5709   | 6644.7 | 3946.3 | 3412.5 | 2601.5 | 3626.8 | 4622.7 | 6581.2 |
| WASF1   | 84.1   | 99.1   | 98.1   | 93.4   | 88.5   | 94.8   | 102.4  | 121.4  |
| WASF1   | 121.7  | 139.9  | 115.3  | 95.2   | 104.5  | 117.9  | 128.8  | 136    |
| WASF2   | 197.4  | 277.3  | 244.3  | 284.5  | 299.8  | 475.5  | 211.8  | 332    |
| WASF3   | 89.9   | 86.5   | 110.9  | 99.1   | 88.9   | 91.4   | 86     | 102.8  |
| WASL    | 383.3  | 420.7  | 324.3  | 441.4  | 352.2  | 573.9  | 351.7  | 530.3  |
| WASPIP  | 566.6  | 665.3  | 385.1  | 658.6  | 507.7  | 875.9  | 468.6  | 911.4  |
| WBP1    | 273.4  | 322.3  | 150.7  | 142.8  | 141.2  | 122.7  | 251.4  | 324.9  |
| WBP11   | 1289.9 | 1634   | 1356.9 | 1498.8 | 1164.7 | 1886   | 984.8  | 2841.4 |
| WBP2    | 3211.4 | 3636.7 | 3233.9 | 3727   | 2944.4 | 3606.7 | 3973.6 | 9506   |
| WBP4    | 412.2  | 482.8  | 306.6  | 312.1  | 287.5  | 562.9  | 369.9  | 778.8  |
| WBP5    | 150.7  | 167.2  | 86.7   | 90.9   | 83.9   | 98.1   | 152.6  | 218.8  |
| WBSCR14 | 105.4  | 117.7  | 118.3  | 95.5   | 100.6  | 107.7  | 108.4  | 124.4  |
| WBSCR16 | 267.7  | 370.2  | 161.9  | 115.3  | 112.8  | 96.6   | 255.1  | 327.3  |
| WBSCR17 | 84.7   | 94     | 101.2  | 98.3   | 94.1   | 91.5   | 85.3   | 79.8   |
| WBSCR18 | 255.8  | 339.7  | 199    | 275.2  | 307.6  | 273    | 231.4  | 393.4  |
| WBSCR19 | 83.2   | 99.7   | 100.8  | 89.9   | 85.8   | 88.6   | 84.1   | 93.3   |
| WBSCR19 | 73.5   | 86.8   | 88.2   | 83.7   | 96.4   | 89.1   | 80     | 87.4   |
| WBSCR22 | 1976.7 | 2634.1 | 1520.7 | 1274   | 1067.3 | 1678.3 | 2049.2 | 2129.4 |
| WBSCR23 | 90     | 99.1   | 90.6   | 98.3   | 80.9   | 79.7   | 97.8   | 104.3  |
| WBSCR27 | 105.7  | 132.9  | 105    | 109.2  | 97.2   | 103.6  | 103.9  | 114.1  |
| WBSCR28 | 89.7   | 103.6  | 99.9   | 84.5   | 88     | 81.9   | 90.9   | 97     |
| WDFY1   | 3518.4 | 4599.3 | 2199.2 | 2364.9 | 1769.5 | 3858.4 | 2626.2 | 3105.4 |
| WDFY2   | 581.8  | 774.2  | 494.1  | 660.3  | 585.2  | 849.8  | 387    | 457.9  |
| WDFY3   | 134.7  | 166.2  | 104.8  | 101.3  | 102.1  | 98.8   | 136.1  | 154.3  |
| WDFY3   | 143.2  | 176.2  | 102.8  | 103.7  | 91.5   | 97.5   | 135.5  | 182    |
| WDFY3   | 78.5   | 83.5   | 83.8   | 96.2   | 90.2   | 87.8   | 85.4   | 86.9   |
| WDHD1   | 121.3  | 132.6  | 110.4  | 103.7  | 85.9   | 92.9   | 117.4  | 142.7  |
| WDHD1   | 290    | 358.2  | 177.5  | 180.1  | 135.1  | 250.6  | 234.4  | 329    |
| WDHD1   | 252.7  | 300.5  | 136.1  | 127.9  | 121.5  | 111.3  | 177.8  | 226.7  |
| WDR1    | 656.2  | 934.5  | 347.5  | 341.8  | 304.1  | 212.7  | 524.3  | 767    |
| WDR1    | 7676   | 8781.1 | 6088.5 | 5759.7 | 4088.4 | 7262.5 | 6080   | 9357.3 |
| WDR12   | 2015   | 2488.1 | 972.1  | 947    | 527    | 1174.1 | 1563   | 2594.5 |
| WDR13   | 451.4  | 557.1  | 350.6  | 276.5  | 261.8  | 340.1  | 445.5  | 543.4  |
| WDR16   | 101.3  | 126    | 84.8   | 85.2   | 82.7   | 83.4   | 95.6   | 110.8  |
| WDR16   | 109.5  | 122.4  | 91.3   | 89.5   | 83.6   | 92.9   | 116.7  | 136.7  |
| WDR17   | 109.6  | 112.4  | 98.3   | 93.3   | 84.7   | 91.8   | 125.9  | 118.7  |
| WDR17   | 96.4   | 118.2  | 104.5  | 101.5  | 80.7   | 83.3   | 95.2   | 104.8  |
| WDR18   | 3051.8 | 3784.6 | 2014.6 | 1108.3 | 861    | 895.8  | 2585.5 | 2541.8 |
| WDR19   | 223.7  | 275.4  | 194.2  | 194.4  | 198.4  | 266.4  | 181.7  | 238.7  |
| WDR20   | 361    | 447.7  | 271.8  | 249.1  | 220.6  | 273.9  | 389.5  | 541.9  |
| WDR20   | 273.6  | 382.6  | 182.5  | 152.1  | 159.9  | 202.3  | 261    | 323.9  |
| WDR20   | 191.8  | 248.6  | 136.5  | 116.1  | 110.5  | 124.4  | 188.4  | 217.5  |
| WDR21A  | 400.4  | 473.2  | 339.1  | 296.8  | 218.1  | 404.5  | 288.6  | 460.5  |
| WDR21C  | 142.3  | 139    | 101.4  | 97.3   | 104.6  | 97.3   | 119.5  | 148.3  |

|        |        |        |        |        |        |        |        |        |
|--------|--------|--------|--------|--------|--------|--------|--------|--------|
| WDR22  | 306.9  | 375.1  | 231.5  | 246.3  | 182.9  | 261.5  | 226.2  | 287.6  |
| WDR23  | 172    | 196.4  | 126.5  | 112.3  | 101.1  | 84.5   | 150.3  | 177.2  |
| WDR23  | 321.8  | 327.2  | 226.8  | 309.4  | 267.2  | 276.4  | 241.6  | 281.3  |
| WDR24  | 109.9  | 131.1  | 143.4  | 130.7  | 119.2  | 169.6  | 99.4   | 120.7  |
| WDR25  | 167.7  | 223.5  | 130.6  | 101    | 88.5   | 94.7   | 156.1  | 178.4  |
| WDR26  | 286.1  | 353.6  | 185    | 228.2  | 229.6  | 342.6  | 267.8  | 496.5  |
| WDR27  | 194.5  | 230.1  | 227.8  | 253.2  | 255.1  | 352.5  | 139.8  | 193    |
| WDR3   | 135.2  | 185.8  | 136.5  | 108.8  | 101.8  | 111.5  | 130    | 128.8  |
| WDR31  | 100.4  | 125.9  | 112.1  | 95.2   | 92.4   | 94.4   | 102.6  | 106.8  |
| WDR33  | 134.7  | 151.5  | 121.8  | 202.8  | 186.8  | 276.4  | 113.8  | 117.1  |
| WDR33  | 1532.7 | 2086.1 | 1056.8 | 1096.1 | 840.4  | 1467.6 | 1172.4 | 1488.1 |
| WDR33  | 364.4  | 426.6  | 132.7  | 120.9  | 110.7  | 133.5  | 290.8  | 433    |
| WDR33  | 110.4  | 131.9  | 127.1  | 134.8  | 111.2  | 155.2  | 108.4  | 161.7  |
| WDR34  | 436.8  | 578.1  | 342.4  | 229.1  | 179    | 263.8  | 342.8  | 622.1  |
| WDR35  | 101.1  | 116.8  | 106.7  | 95.2   | 99.5   | 96.6   | 100.4  | 110.4  |
| WDR36  | 512.7  | 768.4  | 511.5  | 652.4  | 437.1  | 726.8  | 432.4  | 673.8  |
| WDR37  | 536.9  | 655.6  | 546.2  | 550.3  | 479.6  | 621.6  | 468    | 978.3  |
| WDR4   | 2534.3 | 3049.5 | 1827.5 | 1660.8 | 1111.4 | 1532   | 1809.2 | 2216.3 |
| WDR4   | 198.5  | 272.4  | 130.6  | 114.4  | 118.3  | 132.9  | 176.1  | 205    |
| WDR4   | 148.3  | 177    | 126    | 124.7  | 112.7  | 123.3  | 129.7  | 175.4  |
| WDR40A | 3308.4 | 4017   | 1674.6 | 1542.4 | 1161.4 | 1747.1 | 2454.9 | 3820.6 |
| WDR40B | 383.1  | 491    | 261.4  | 249.2  | 195.7  | 275.6  | 253.7  | 342.8  |
| WDR41  | 1327.7 | 1717.4 | 615.7  | 459.6  | 376.9  | 485.7  | 1166.4 | 1101.6 |
| WDR42B | 74.9   | 85.4   | 91.2   | 83.6   | 84.3   | 88.2   | 78.6   | 75.8   |
| WDR44  | 106.2  | 110.7  | 89.8   | 98.5   | 91.6   | 102.4  | 109.9  | 114.2  |
| WDR45  | 159.5  | 191.6  | 171.9  | 177.1  | 205.6  | 243.7  | 162.4  | 261.1  |
| WDR45  | 120.9  | 153.9  | 105.7  | 96.4   | 88.7   | 94.9   | 128.3  | 138.1  |
| WDR45  | 178    | 193.7  | 104.8  | 104.2  | 95.2   | 99.7   | 161.6  | 168.6  |
| WDR45L | 467.8  | 535.3  | 356    | 255.7  | 264.1  | 299.8  | 390.4  | 527.3  |
| WDR46  | 1062   | 1249.5 | 946.3  | 1064.2 | 858.5  | 1453.6 | 734    | 990.1  |
| WDR47  | 90.3   | 84.5   | 92.8   | 84     | 81.5   | 91.5   | 89.2   | 97.4   |
| WDR48  | 388.1  | 482.5  | 315.1  | 354.2  | 310.3  | 431.3  | 326.6  | 389.4  |
| WDR49  | 319.1  | 377.2  | 213.6  | 222    | 227.3  | 302.6  | 255    | 334.1  |
| WDR5   | 255.4  | 308.5  | 145.9  | 112.2  | 99.9   | 100    | 198    | 254.2  |
| WDR5   | 785.7  | 900.4  | 1061.8 | 605.9  | 485.9  | 935.3  | 692.2  | 1441.4 |
| WDR50  | 1001.5 | 1305.3 | 392.5  | 260.2  | 286.3  | 546.8  | 699.9  | 1196.6 |
| WDR51A | 2412.7 | 3451.1 | 1853.6 | 1309.6 | 1140.6 | 1239.8 | 1932   | 1693.1 |
| WDR51B | 299.5  | 354.5  | 107.2  | 120.3  | 108.5  | 155.3  | 262.8  | 374.8  |
| WDR52  | 217.7  | 274    | 121.8  | 105.5  | 107.9  | 118.1  | 195.1  | 240.3  |
| WDR53  | 432.5  | 529.5  | 228.7  | 237.7  | 208.7  | 280.3  | 353.4  | 448.2  |
| WDR54  | 2231.2 | 2858.3 | 1749.4 | 1086   | 943.8  | 1193.4 | 2027.8 | 2108.3 |
| WDR55  | 491.3  | 629.5  | 273.8  | 328.1  | 255.4  | 413.2  | 360.2  | 595.5  |
| WDR57  | 2179.5 | 2850.3 | 1859.1 | 1629.5 | 1365.9 | 2477.8 | 1734.2 | 2016.1 |
| WDR58  | 711.4  | 982.8  | 635.2  | 403.1  | 346.9  | 536.5  | 559.4  | 688.6  |
| WDR59  | 701.8  | 816.6  | 544.4  | 652.2  | 541.8  | 751.2  | 601.1  | 879.8  |
| WDR5B  | 145.9  | 142.4  | 132.1  | 154.4  | 134.9  | 158.7  | 102.2  | 144.8  |
| WDR6   | 1295.2 | 1275.5 | 1815.9 | 1440.2 | 1517.3 | 2355.8 | 898    | 1118   |
| WDR60  | 304.8  | 359.1  | 202.6  | 287.5  | 249.1  | 385.6  | 256.1  | 334.1  |
| WDR61  | 3557.6 | 4329.2 | 3100.4 | 3291.5 | 2478.3 | 3971.8 | 3033.9 | 4718.9 |
| WDR62  | 110.2  | 136.9  | 134.6  | 126.4  | 137.8  | 168.9  | 117.7  | 163.3  |

|         |        |        |        |        |        |        |        |        |
|---------|--------|--------|--------|--------|--------|--------|--------|--------|
| WDR63   | 106.2  | 146.2  | 92.1   | 86.4   | 78.3   | 94     | 113.2  | 119.4  |
| WDR64   | 103.1  | 118.6  | 98.1   | 88.7   | 91.6   | 95.7   | 106.3  | 108.3  |
| WDR65   | 119.7  | 143.8  | 84.1   | 88.3   | 81     | 88.2   | 109.5  | 136.2  |
| WDR66   | 88.8   | 104.2  | 100.9  | 94     | 88.6   | 88.5   | 85.7   | 92.2   |
| WDR67   | 1041.1 | 1321.7 | 479.2  | 323.6  | 296    | 398    | 832.6  | 1019   |
| WDR68   | 1971.8 | 2728.1 | 1693.8 | 2362.1 | 1598.9 | 3170.9 | 1849.7 | 4040.5 |
| WDR69   | 75.7   | 83.4   | 81.4   | 85     | 74.2   | 76.7   | 79     | 87.2   |
| WDR7    | 92     | 101.5  | 104.4  | 92.3   | 91.8   | 82.7   | 99.1   | 92.6   |
| WDR7    | 234.8  | 333    | 209.9  | 237.2  | 209.2  | 354.7  | 206    | 282    |
| WDR70   | 1015.1 | 1118.8 | 730    | 1072.1 | 906.3  | 1773.3 | 760.2  | 1266.6 |
| WDR71   | 1316.8 | 1858   | 786.8  | 483.1  | 356.5  | 514.7  | 1073.9 | 1574.6 |
| WDR72   | 82.7   | 87.2   | 92.6   | 79     | 90.4   | 88.9   | 79.3   | 87.3   |
| WDR73   | 447.8  | 492.8  | 343.3  | 318.1  | 297.1  | 238.4  | 393.7  | 511.3  |
| WDR74   | 1154.3 | 1521.4 | 758.7  | 468.8  | 368.4  | 469.5  | 1047.1 | 795.4  |
| WDR74   | 322.1  | 332.7  | 184.2  | 292.8  | 292.3  | 188.9  | 287.2  | 323.1  |
| WDR74   | 560.1  | 755.5  | 277.9  | 185.5  | 131.1  | 192    | 445.2  | 571.9  |
| WDR75   | 2311.3 | 2598.8 | 1461.4 | 1323.5 | 1025.5 | 2075   | 1908.3 | 2764.8 |
| WDR77   | 831.7  | 1007.8 | 657.2  | 366.2  | 281.4  | 435.6  | 619.8  | 843.8  |
| WDR78   | 82.7   | 97.5   | 99.1   | 90.7   | 86.7   | 82.8   | 83.5   | 96.7   |
| WDR78   | 106.2  | 122.4  | 87.2   | 83.4   | 84.3   | 81.5   | 108.9  | 126.2  |
| WDR78   | 90     | 100.5  | 92     | 90.7   | 86.2   | 84.2   | 91.5   | 98.8   |
| WDR79   | 331.1  | 340    | 183.7  | 168.4  | 153.1  | 136.6  | 270.3  | 247.6  |
| WDR8    | 809.9  | 975.9  | 838.6  | 619.4  | 559.2  | 816.4  | 718.6  | 1301.3 |
| WDR81   | 110.3  | 139.5  | 96.1   | 109.5  | 105.1  | 120.1  | 101.8  | 138.3  |
| WDRPUH  | 96.3   | 99.5   | 96.5   | 93.9   | 93     | 89.6   | 95.9   | 106.3  |
| WDSOF1  | 211.6  | 258.8  | 120.2  | 102.5  | 93.7   | 103.2  | 183.1  | 357.5  |
| WDSUB1  | 823.8  | 984.5  | 374.5  | 532.8  | 396.2  | 637.3  | 805.2  | 1217.8 |
| WDTC1   | 108    | 130.2  | 87.4   | 78.1   | 86.3   | 81.8   | 99.7   | 134.3  |
| WEE1    | 666.7  | 879.6  | 438.4  | 353.9  | 303.6  | 461.1  | 494.1  | 967.9  |
| WFDC1   | 86.3   | 89.4   | 98.8   | 98.8   | 87.6   | 94.6   | 89.5   | 107.2  |
| WFDC10A | 90.6   | 90.7   | 116.5  | 110.4  | 103.3  | 101.2  | 86.6   | 83.2   |
| WFDC10B | 76.7   | 99     | 89.5   | 78.8   | 77.1   | 75.5   | 84.1   | 83.7   |
| WFDC10B | 200.7  | 218.9  | 93.5   | 90.7   | 95.2   | 93.8   | 194    | 189.2  |
| WFDC11  | 74.2   | 100    | 89.7   | 89.8   | 95.5   | 92.3   | 87.3   | 88.6   |
| WFDC12  | 71.8   | 84.5   | 91     | 98.9   | 87.1   | 91.3   | 82.3   | 86.5   |
| WFDC13  | 90.9   | 115.5  | 90.3   | 69.7   | 75.1   | 74.6   | 99.6   | 116.7  |
| WFDC2   | 84.8   | 100.9  | 90.5   | 81.1   | 79.9   | 82     | 91.7   | 95.9   |
| WFDC2   | 143.3  | 141.9  | 105.2  | 97.4   | 94.2   | 104.4  | 119.6  | 152.1  |
| WFDC3   | 112.4  | 123.5  | 99.6   | 97.9   | 88.2   | 86.1   | 109.2  | 119.3  |
| WFDC3   | 145.9  | 175.5  | 111.3  | 112.8  | 116.5  | 115.9  | 142.4  | 168.4  |
| WFDC3   | 99.4   | 111.2  | 87.3   | 93.9   | 85.3   | 88.6   | 99.8   | 109    |
| WFDC5   | 81.4   | 95.5   | 92.5   | 90.8   | 79.5   | 83     | 76.8   | 86.8   |
| WFDC6   | 87.3   | 97.7   | 101.6  | 77.7   | 88.8   | 92.5   | 84.2   | 87.2   |
| WFDC8   | 96.9   | 104.7  | 94.1   | 91.9   | 90.3   | 88.8   | 105.6  | 100.7  |
| WFDC8   | 108.6  | 127    | 91.5   | 90.4   | 81.6   | 88.9   | 101.4  | 125.5  |
| WFDC9   | 74.5   | 77.5   | 88     | 88.3   | 81.2   | 91.3   | 77.5   | 84.2   |
| WFIKKN1 | 87.2   | 108    | 100.6  | 81.8   | 82.3   | 82.1   | 85.4   | 102.5  |
| WFIKKN2 | 78.4   | 95.5   | 74.8   | 69     | 73.8   | 86.3   | 79.8   | 91.3   |
| WFS1    | 110.5  | 117    | 112.9  | 100.6  | 98.6   | 102.5  | 109.8  | 129.7  |
| WHDC1   | 172    | 220.7  | 117.7  | 145    | 151.6  | 137.5  | 154    | 192.1  |

|         |       |       |       |       |       |       |       |       |
|---------|-------|-------|-------|-------|-------|-------|-------|-------|
| WHDC1   | 159.6 | 208   | 112   | 104.9 | 90.8  | 127.5 | 160.7 | 203.4 |
| WHSC1   | 98.8  | 128.1 | 92    | 102.7 | 91.3  | 84.8  | 97    | 126.6 |
| WHSC1   | 140.1 | 157.9 | 110.2 | 93.8  | 95.9  | 99.5  | 120.8 | 153.3 |
| WHSC1   | 114.2 | 130.8 | 103.8 | 103.4 | 86.1  | 103.4 | 108.8 | 148.5 |
| WHSC1   | 102.5 | 112.1 | 96.8  | 77.5  | 92.7  | 86.8  | 96.5  | 105.7 |
| WHSC1   | 118.5 | 161.7 | 88.8  | 89.7  | 87.4  | 87.2  | 102.9 | 147.8 |
| WHSC1L1 | 127.8 | 177.2 | 88.8  | 93.8  | 78.2  | 94.7  | 140   | 168   |
| WHSC1L1 | 161.1 | 173.9 | 107.8 | 99.3  | 93.8  | 99.7  | 136.4 | 170.4 |
| WHSC1L1 | 216.4 | 287   | 171.8 | 178.2 | 143.1 | 205.1 | 189   | 251.3 |
| WHSC2   | 149.3 | 202   | 129.6 | 108.5 | 108.4 | 104.6 | 145   | 241.9 |
| WIBG    | 612.7 | 789.6 | 340.3 | 446.7 | 407.1 | 695.4 | 593.5 | 857.4 |
| WIF1    | 127.4 | 164.5 | 97.6  | 85.2  | 88.4  | 82.4  | 123.6 | 151.4 |
| WIPF1   | 83.4  | 93.6  | 92.3  | 99.2  | 100.2 | 118.1 | 85.9  | 86.2  |
| WIPF1   | 304.9 | 414.1 | 157.4 | 179.7 | 151.9 | 201.5 | 256.2 | 414.6 |
| WIPF3   | 82.4  | 88.2  | 96.2  | 89.3  | 82.5  | 94.5  | 78.7  | 83.8  |
| WIPI1   | 105.8 | 114.9 | 115.4 | 123.9 | 124.6 | 148.5 | 121.2 | 160.3 |
| WIPI2   | 352   | 522.9 | 248.5 | 262.4 | 231   | 288.4 | 378.5 | 501.1 |
| WIPI2   | 99.1  | 111.8 | 91.5  | 87.8  | 84.1  | 93.7  | 105.9 | 103.5 |
| WIRE    | 152.3 | 190.6 | 119.4 | 109.1 | 119.4 | 108.8 | 150.7 | 156   |
| WISP1   | 78.8  | 92.9  | 88.9  | 78.6  | 79    | 85.9  | 76.9  | 83.7  |
| WISP1   | 106.4 | 95.8  | 95.1  | 86.4  | 90.3  | 91.6  | 91.7  | 95.8  |
| WISP2   | 93.8  | 101.5 | 94    | 88    | 87.9  | 85.2  | 92.2  | 118.9 |
| WISP3   | 77.1  | 101.4 | 85    | 89.2  | 95.1  | 86.9  | 85.9  | 90.7  |
| WISP3   | 80    | 84.1  | 98.5  | 79.7  | 83.6  | 86.8  | 74.8  | 93.6  |
| WISP3   | 138.9 | 167.4 | 97.9  | 85.8  | 88    | 92.1  | 119.2 | 154.1 |
| WIT-1   | 183.4 | 175.9 | 140.9 | 108.6 | 89.9  | 109.1 | 130.3 | 161   |
| WNK1    | 170.9 | 212.9 | 204.3 | 244.5 | 223.4 | 220.3 | 163.3 | 216.6 |
| WNK2    | 91.8  | 99.3  | 97.1  | 91.2  | 87.3  | 92.6  | 92.1  | 92.5  |
| WNK3    | 125.7 | 136.3 | 96.1  | 94.6  | 80.1  | 93.1  | 103.3 | 125.9 |
| WNK3    | 126.8 | 144.2 | 95.5  | 92.6  | 94.3  | 89.1  | 119   | 134.9 |
| WNK4    | 93.3  | 104.3 | 111.9 | 93.5  | 87.2  | 98.4  | 91.8  | 115.4 |
| WNT1    | 70.5  | 86    | 93.5  | 90.7  | 82.1  | 88    | 73.2  | 81.4  |
| WNT10A  | 112.7 | 119.1 | 101.1 | 88.5  | 85.7  | 93.4  | 109.9 | 127.4 |
| WNT10B  | 109.6 | 131.6 | 103   | 75.1  | 78.1  | 92    | 118.8 | 142.6 |
| WNT11   | 93    | 97.5  | 94.3  | 89.2  | 81.8  | 96.7  | 99    | 95.9  |
| WNT16   | 148.4 | 155.2 | 108.9 | 104.3 | 97.5  | 116.8 | 151.6 | 165.2 |
| WNT16   | 99    | 91.3  | 108.3 | 87.7  | 92.6  | 89.5  | 92.9  | 92    |
| WNT2    | 121.9 | 138.3 | 103.9 | 91.2  | 95.2  | 90.2  | 118.5 | 124.5 |
| WNT2B   | 129.4 | 158.9 | 102.9 | 94.5  | 98.1  | 91.8  | 125.9 | 138.1 |
| WNT2B   | 106.2 | 122.6 | 99    | 91.3  | 82.8  | 79.9  | 96.3  | 111.9 |
| WNT3    | 298.4 | 317.2 | 195.6 | 206.2 | 218.5 | 173.4 | 196.5 | 179.5 |
| WNT3A   | 91.7  | 88.8  | 89    | 86.3  | 86.3  | 88.5  | 78.7  | 94.5  |
| WNT4    | 76.4  | 89.8  | 83.3  | 83    | 81.4  | 93.1  | 76.9  | 86    |
| WNT5A   | 81.1  | 90.9  | 88.1  | 85.5  | 75.3  | 71.2  | 78.4  | 82.1  |
| WNT5B   | 102.7 | 128.6 | 100.3 | 87    | 79.4  | 85.3  | 104.8 | 119.8 |
| WNT5B   | 79.2  | 93.5  | 96    | 84.3  | 77    | 81.4  | 81.8  | 90.6  |
| WNT6    | 125.7 | 166.2 | 104   | 101.9 | 90.2  | 110.1 | 131.3 | 147.2 |
| WNT7A   | 101.8 | 111.5 | 89    | 91.6  | 81.5  | 77.3  | 97.6  | 106.7 |
| WNT7B   | 106.9 | 125.8 | 139.3 | 119.8 | 122.3 | 136   | 105.3 | 112.3 |
| WNT8A   | 82.6  | 97.7  | 100.9 | 90.9  | 92.1  | 92.4  | 83.7  | 96.6  |



|        |        |        |        |        |        |        |        |        |
|--------|--------|--------|--------|--------|--------|--------|--------|--------|
| WNT8A  | 137.6  | 178.5  | 96     | 92.3   | 85.3   | 80.4   | 147    | 162.6  |
| WNT8B  | 78.9   | 78.7   | 88.6   | 81.7   | 79.9   | 83.5   | 67     | 88.9   |
| WNT9A  | 111.6  | 129.9  | 103.4  | 91.3   | 87.6   | 95.3   | 100.7  | 117.4  |
| WNT9B  | 117.1  | 131    | 86     | 82.8   | 77.5   | 77.9   | 104.8  | 135.7  |
| WRB    | 595.8  | 734.6  | 283.5  | 251.8  | 267.3  | 242.5  | 494.1  | 762.2  |
| WRN    | 701.1  | 923.2  | 593.9  | 553.5  | 480.9  | 838.1  | 614.1  | 939.2  |
| WRNIP1 | 205.4  | 329.6  | 161.8  | 124.1  | 121.5  | 110    | 186.4  | 241.3  |
| WRNIP1 | 1014.6 | 1211.4 | 884.5  | 1261.5 | 886.8  | 1595.3 | 907.1  | 1826.6 |
| WSB1   | 915.2  | 972.9  | 368.4  | 365.2  | 349    | 398.6  | 1060   | 1738.6 |
| WSB1   | 893.2  | 837.2  | 440.2  | 520.8  | 471.3  | 664.1  | 742.6  | 1509.2 |
| WSB2   | 231.6  | 285.1  | 127.5  | 111.7  | 103.9  | 142.4  | 234.2  | 371.6  |
| WT1    | 273.7  | 367.2  | 248.4  | 137.9  | 127.8  | 199.4  | 203.2  | 245.2  |
| WT1    | 352.1  | 517    | 275.1  | 161.9  | 125.6  | 195.7  | 266.6  | 389.7  |
| WTAP   | 1730.4 | 2156.1 | 1089.3 | 940.1  | 689.4  | 995.8  | 1377.9 | 2386.2 |
| WTAP   | 164.8  | 176.1  | 121    | 110.8  | 108.3  | 123.3  | 116.2  | 129.2  |
| WTAP   | 165.1  | 194.1  | 128.8  | 111.2  | 111.5  | 135.7  | 152.8  | 174.9  |
| WTIP   | 95.3   | 104.1  | 84.8   | 81.5   | 84.7   | 85.8   | 94.3   | 105.2  |
| WTIP   | 198.2  | 204.1  | 109.4  | 105.6  | 104.1  | 115.3  | 165.7  | 170.2  |
| WWC1   | 463.6  | 581.1  | 277    | 212.1  | 186.4  | 255.4  | 311.1  | 329.3  |
| WWC2   | 123.9  | 140.2  | 112.5  | 89.5   | 95.8   | 105.8  | 114.7  | 134    |
| WWC3   | 130.6  | 142.2  | 156.3  | 159.8  | 136.1  | 179.2  | 110.8  | 136.3  |
| WWOX   | 100.6  | 107.8  | 91.1   | 86.3   | 84.4   | 87.5   | 101.2  | 109    |
| WWOX   | 172.4  | 217.2  | 138.7  | 109.5  | 98.2   | 99.3   | 158.8  | 181.3  |
| WWOX   | 102.1  | 104.8  | 80.7   | 77.8   | 72.8   | 79.3   | 87.9   | 113.6  |
| WWOX   | 200.7  | 285.5  | 129.3  | 103.9  | 108.5  | 94.8   | 195.2  | 209.7  |
| WWP1   | 95.9   | 97.6   | 96.9   | 96.8   | 84.3   | 92.2   | 89     | 109    |
| WWP2   | 82.8   | 102.1  | 81.8   | 84.6   | 88.9   | 89.3   | 75.7   | 80.2   |
| WWP2   | 140    | 192    | 123.1  | 102.1  | 105.5  | 109.2  | 167.6  | 172.6  |
| WWP2   | 420    | 559.6  | 269.6  | 263.9  | 233.2  | 314.5  | 390.5  | 411.7  |
| WWTR1  | 93.3   | 95.7   | 85.6   | 86     | 80.8   | 94.4   | 88.5   | 109.7  |
| XAB1   | 2005.7 | 2716.1 | 1714.7 | 1287.9 | 1016.2 | 1717.7 | 1549   | 2222.3 |
| XAB2   | 773    | 930.6  | 761.9  | 551.4  | 402.6  | 819.2  | 715.3  | 1401.8 |
| XAF1   | 722.6  | 815.8  | 365.6  | 318.4  | 324.7  | 398.1  | 501.2  | 499.6  |
| XAF1   | 180.6  | 182.8  | 108    | 124.6  | 116.6  | 123.3  | 135    | 157.7  |
| XAGE1  | 87.6   | 95.1   | 91.4   | 88.1   | 81.4   | 93.2   | 91.2   | 96.6   |
| XAGE1  | 476.2  | 594.8  | 338.9  | 259.1  | 230    | 218.6  | 396.9  | 400.7  |
| XAGE2  | 81.4   | 85.9   | 94.3   | 90     | 82.5   | 87.7   | 76.3   | 96.4   |
| XAGE3  | 95.2   | 94.9   | 99.5   | 96     | 94.6   | 100.2  | 98     | 103.4  |
| XAGE3  | 97.2   | 105.6  | 87.1   | 84.9   | 86.6   | 80.8   | 91.7   | 95.2   |
| XAGE5  | 71.3   | 90.8   | 88.9   | 72.4   | 80.9   | 76.8   | 78.2   | 84.4   |
| XBP1   | 4412.5 | 6212.9 | 2700.7 | 1602.6 | 1131.3 | 2316.1 | 4510.8 | 8702.4 |
| XBP1   | 5511.1 | 7312.3 | 4597   | 3025.6 | 2286   | 3696.5 | 6129.5 | 8984.1 |
| XCL1   | 94.7   | 95.2   | 91.6   | 89.1   | 81.6   | 87.1   | 83.3   | 93.3   |
| XCR1   | 87.6   | 92.1   | 92     | 90.2   | 82.1   | 85.8   | 86.9   | 95.4   |
| XCR1   | 81.8   | 93.2   | 87     | 84.5   | 82.1   | 86.7   | 92.5   | 105.7  |
| XCR1   | 115    | 135.8  | 102.4  | 109.3  | 102.4  | 109    | 121    | 124.8  |
| XDH    | 84.3   | 109.6  | 91.5   | 76.4   | 68.9   | 81.6   | 92.9   | 114.6  |
| XG     | 69.5   | 69.9   | 85.5   | 90.9   | 79.7   | 69.8   | 69     | 77.3   |
| XK     | 137.3  | 185.6  | 128.2  | 207.6  | 156.9  | 256.2  | 124.5  | 181.4  |
| XKR3   | 86.8   | 102.3  | 93.4   | 88.2   | 71.8   | 89.4   | 89.7   | 100.3  |

|         |         |         |        |        |        |        |         |         |
|---------|---------|---------|--------|--------|--------|--------|---------|---------|
| XKR4    | 72.5    | 78.5    | 86.7   | 87.2   | 81.2   | 82.8   | 77.4    | 85.5    |
| XKR5    | 98.1    | 110.4   | 88.7   | 83.6   | 84.7   | 88.2   | 93.9    | 103.4   |
| XKR6    | 73.2    | 81.2    | 90.6   | 88.9   | 83.9   | 86.8   | 76      | 81.7    |
| XKR6    | 131.5   | 152.6   | 91.5   | 82.8   | 83.8   | 95.4   | 118     | 152     |
| XKR6    | 227.4   | 281.6   | 166.3  | 126.8  | 121.6  | 134.8  | 200.2   | 247.9   |
| XKR7    | 92      | 96.9    | 91.5   | 85.8   | 83.1   | 83.1   | 95.5    | 109.9   |
| XKR8    | 225.2   | 279.4   | 191.7  | 164.3  | 145.8  | 176.3  | 213.5   | 405.9   |
| XKR9    | 77.5    | 88.2    | 86.2   | 87.3   | 80.9   | 87.2   | 83.5    | 87.1    |
| XKRX    | 102.2   | 125.1   | 96.9   | 87.7   | 85.2   | 88.2   | 97.4    | 108.3   |
| XKRY    | 85.7    | 89      | 87     | 82.6   | 77.5   | 80.5   | 80.8    | 86.6    |
| XLF     | 94.4    | 110.8   | 103.2  | 93.5   | 81.6   | 91.9   | 95.9    | 103.7   |
| XLKD1   | 78.6    | 81.2    | 90     | 82.7   | 84.9   | 87.1   | 82.4    | 87.3    |
| XPA     | 125.1   | 153.3   | 92.8   | 84.7   | 77.4   | 90.6   | 119     | 161.9   |
| XPC     | 536.2   | 738.5   | 608    | 769    | 606.4  | 1117.2 | 498.4   | 1045.4  |
| XPNPEP1 | 2379.5  | 3098.6  | 1647.4 | 1127.5 | 852.3  | 1341.5 | 2141.4  | 3200.3  |
| XPNPEP2 | 128.1   | 150.6   | 107.8  | 98.7   | 90.5   | 95.6   | 124.2   | 148.4   |
| XPNPEP3 | 10721.8 | 10983.3 | 6359.8 | 6168.9 | 5981.4 | 4883.4 | 11235.3 | 16905.7 |
| XPO1    | 2757    | 3093.1  | 2558.1 | 3480.7 | 2622.9 | 5669.9 | 2800.1  | 4387.9  |
| XPO4    | 516.4   | 718.6   | 253.1  | 281.7  | 192.2  | 301.5  | 489.4   | 674.1   |
| XPO5    | 850.2   | 1048.3  | 548    | 436.2  | 337.9  | 400.6  | 718.1   | 845.2   |
| XPO6    | 646.5   | 844.9   | 543.7  | 491.5  | 405.8  | 590.7  | 513.1   | 765.3   |
| XPO7    | 773.5   | 1098.9  | 576.6  | 476.7  | 369.8  | 596.2  | 700.4   | 691     |
| XPOT    | 717.8   | 851.8   | 300.2  | 214.1  | 189.4  | 220    | 459.3   | 588.4   |
| XPR1    | 1632.6  | 2144.5  | 1057.5 | 1228.3 | 809.7  | 1581.7 | 1595.8  | 2377.3  |
| XRCC1   | 424.9   | 585.2   | 369.9  | 290.3  | 234    | 330.6  | 424.2   | 482.1   |
| XRCC2   | 918.5   | 721.2   | 631.1  | 1131.6 | 923.8  | 653.9  | 850.3   | 1601.1  |
| XRCC3   | 286.2   | 344.2   | 307.9  | 209.8  | 160    | 276.4  | 242     | 441     |
| XRCC4   | 98.5    | 117.8   | 90.8   | 85.3   | 73.7   | 86.6   | 104.1   | 134.8   |
| XRCC5   | 1609.3  | 2340.8  | 557.8  | 551.1  | 341.8  | 754.1  | 1157.2  | 1983    |
| XRCC6   | 5243.3  | 6454.9  | 4700   | 3608   | 2981.6 | 4811.3 | 4635.4  | 6362.3  |
| XRN1    | 113.3   | 133.7   | 102.2  | 106.9  | 96.8   | 101.8  | 102.4   | 112.4   |
| XRN1    | 310.6   | 472.8   | 252.1  | 486.1  | 388.1  | 628.9  | 365.3   | 511.1   |
| XRN2    | 86      | 89      | 84.9   | 78.5   | 80.6   | 82.3   | 84.2    | 94.1    |
| XTP3TPA | 3400.6  | 4536.7  | 2653.1 | 1352.5 | 952.4  | 1394.5 | 2842.8  | 3280.2  |
| XTP7    | 82.6    | 83.2    | 78.8   | 78.3   | 79.6   | 76.7   | 80      | 94      |
| XYLT1   | 88      | 94.6    | 121.2  | 116.5  | 113    | 110.1  | 86.7    | 93.3    |
| XYLT2   | 727     | 828.4   | 457.6  | 523.7  | 445.1  | 546.8  | 562.6   | 720.5   |
| YAF2    | 212.3   | 267.5   | 105.9  | 112.7  | 99.8   | 110    | 256.1   | 332.5   |
| YAF2    | 97.2    | 91.2    | 100.1  | 94.3   | 90     | 86.9   | 100.2   | 101.8   |
| YAF2    | 161     | 196.2   | 133.1  | 131.8  | 122.4  | 151.7  | 159.4   | 163.7   |
| YAP1    | 99.1    | 100.8   | 93.9   | 105    | 90.3   | 96.7   | 82.9    | 116.1   |
| YARS    | 3793.1  | 5261.1  | 1761.1 | 1897.5 | 1294.4 | 2175.8 | 3710.1  | 4356.3  |
| YARS2   | 1130.2  | 1560    | 577.4  | 399.1  | 348.6  | 457    | 777.9   | 1295.6  |
| YBX1    | 15747.9 | 19670.9 | 5314.8 | 5193.5 | 5677.5 | 6699.4 | 16082.3 | 20846.2 |
| YBX2    | 94.2    | 115.5   | 100.6  | 91.6   | 88.7   | 96.3   | 102.2   | 119.3   |
| YEATS2  | 357.4   | 480.2   | 366    | 536.8  | 443.2  | 803.7  | 389.4   | 633.2   |
| YEATS4  | 1190.8  | 1486    | 604    | 623.7  | 496    | 852.9  | 887     | 2086.6  |
| YES1    | 475.4   | 575.4   | 204.5  | 200.1  | 225.3  | 411    | 453.3   | 867.8   |
| YIF1A   | 1196.5  | 1645.1  | 528.3  | 405.5  | 317.8  | 346.8  | 989     | 951.8   |
| YIF1B   | 307.2   | 381.5   | 167.2  | 122.4  | 96.8   | 103    | 227.6   | 351.8   |

|        |         |         |         |         |        |         |         |         |
|--------|---------|---------|---------|---------|--------|---------|---------|---------|
| YIF1B  | 643.5   | 728.4   | 540.2   | 360.2   | 339.4  | 454.8   | 557.5   | 826.2   |
| YIF1B  | 1667.5  | 1988.9  | 547     | 491     | 349.2  | 511.5   | 1515.6  | 2345.5  |
| YIPF1  | 784.5   | 1038.2  | 496.5   | 566     | 430.5  | 621.1   | 706.7   | 1242.8  |
| YIPF2  | 201.7   | 289.1   | 130.1   | 112.9   | 112.5  | 110.7   | 222.6   | 256.5   |
| YIPF3  | 1718.3  | 2181.6  | 704.7   | 584     | 492.9  | 494.8   | 1680.9  | 2171.9  |
| YIPF4  | 106.8   | 123.8   | 86.7    | 87.3    | 78.7   | 83.7    | 97.7    | 117.5   |
| YIPF5  | 166     | 220.5   | 112.7   | 149.1   | 124.1  | 149.9   | 198.1   | 338.8   |
| YIPF5  | 111.3   | 134     | 98.3    | 88.1    | 89.3   | 92.8    | 113.5   | 113.9   |
| YIPF6  | 947.1   | 1178.7  | 580.9   | 791     | 685.8  | 868.4   | 907.7   | 1281.1  |
| YKT6   | 123.7   | 139.4   | 88.4    | 80.9    | 87.3   | 78.9    | 120     | 152.7   |
| YME1L1 | 1522.4  | 2099.7  | 841.4   | 656.5   | 538.4  | 843.7   | 1194.4  | 1747.7  |
| YOD1   | 90.9    | 84      | 89.9    | 87.6    | 72.3   | 84.6    | 81.9    | 94.8    |
| YPEL1  | 99.4    | 114.6   | 115.5   | 114.1   | 132.4  | 128.7   | 106.8   | 102.6   |
| YPEL2  | 124.1   | 175.9   | 167.5   | 207.2   | 187.9  | 277.1   | 133.6   | 152.6   |
| YPEL3  | 139     | 176.4   | 129.2   | 102.3   | 108.7  | 108.4   | 149.1   | 217.3   |
| YPEL4  | 83.6    | 88.8    | 97.6    | 87.7    | 82.6   | 84.2    | 84.2    | 84.4    |
| YPEL5  | 299.6   | 403.7   | 247.5   | 516.4   | 432.1  | 623.7   | 394.5   | 843.2   |
| YRDC   | 679.8   | 890.5   | 421.3   | 406.6   | 278.5  | 396.6   | 590.4   | 889.1   |
| YSK4   | 90.5    | 89.7    | 98.8    | 94.3    | 79.3   | 83.7    | 84.4    | 92.4    |
| YSK4   | 80.3    | 87      | 92.5    | 87.7    | 84.5   | 83.3    | 77.3    | 81.7    |
| YSK4   | 83      | 93.4    | 102.7   | 91.1    | 90     | 87.3    | 90      | 94.4    |
| YTHDC1 | 139.6   | 174     | 98.6    | 82.8    | 89.6   | 93.1    | 132.1   | 187.7   |
| YTHDC1 | 164.5   | 195.2   | 108.6   | 110.2   | 119.7  | 109.3   | 143.8   | 213.7   |
| YTHDC1 | 2942.2  | 3516.9  | 2135.9  | 2630    | 2083.3 | 3707.3  | 2674.9  | 4217    |
| YTHDC2 | 191     | 230.3   | 141.2   | 143.3   | 132.7  | 198.7   | 157.5   | 218.4   |
| YTHDF1 | 1246.7  | 1476.2  | 809.2   | 642     | 493.2  | 672.7   | 1386    | 1890.5  |
| YTHDF2 | 1336.6  | 1689.7  | 731.9   | 798.6   | 547.1  | 1014.9  | 1095.9  | 2756    |
| YTHDF3 | 485.5   | 620.6   | 205.6   | 200.1   | 155    | 219.2   | 374.1   | 585.3   |
| YWHAB  | 14554.5 | 16402.2 | 9037.3  | 12310.8 | 7876.5 | 10314   | 14374.6 | 19632.8 |
| YWHAB  | 687.6   | 989.2   | 443.5   | 443     | 323    | 418.2   | 572.8   | 660.1   |
| YWHAE  | 368.6   | 494.6   | 321.2   | 199.1   | 166.5  | 299.6   | 308.7   | 635.1   |
| YWHAG  | 3424.8  | 3973.2  | 791.5   | 984.6   | 909.2  | 1299    | 3478.3  | 5620.2  |
| YWHAH  | 10400.2 | 13131.2 | 10002.2 | 9574.5  | 6642.9 | 10042.8 | 9382.7  | 12536.2 |
| YWHAQ  | 13902.1 | 18515.6 | 8363.3  | 7474.7  | 5667   | 8827.4  | 12564.4 | 16587.5 |
| YWHAZ  | 10023.6 | 14046.2 | 7936    | 6638.2  | 4050.1 | 8349    | 7667.2  | 11520.4 |
| YWHAZ  | 811.4   | 1057    | 217.8   | 167.6   | 132.7  | 179.2   | 461.2   | 676.4   |
| YY1    | 1083.6  | 1284.2  | 424     | 382.1   | 294.2  | 533.9   | 1120.1  | 1897.9  |
| YY1AP1 | 2081.4  | 2808.5  | 1210.6  | 1148.2  | 1053   | 1168.5  | 1713.7  | 1997.5  |
| YY2    | 89.2    | 108.7   | 102.3   | 87      | 82.5   | 102.4   | 93.4    | 99.6    |
| ZA20D2 | 3492.7  | 3645.9  | 2529.9  | 2200.6  | 1720.5 | 3293.9  | 3200.4  | 6313.3  |
| ZADH1  | 300.4   | 285.3   | 196.1   | 176     | 173.8  | 164.8   | 238.3   | 377.9   |
| ZADH2  | 387.9   | 501.9   | 236     | 380.8   | 355    | 286.1   | 327.2   | 392     |
| ZAK    | 472.7   | 592.2   | 163.4   | 127.9   | 117.4  | 116.3   | 330.4   | 440.9   |
| ZAK    | 1294.8  | 1434.4  | 969.5   | 848.8   | 588.7  | 956.9   | 1177.7  | 1916.1  |
| ZAN    | 84.9    | 96.7    | 91.1    | 83.2    | 82.3   | 85.5    | 88      | 100     |
| ZAN    | 115.6   | 135.3   | 97      | 105.9   | 91.8   | 107.9   | 127     | 143.6   |
| ZAN    | 91.8    | 120.9   | 90.8    | 87.9    | 88.4   | 84.6    | 99.7    | 109.4   |
| ZAP70  | 96.2    | 101.9   | 90.7    | 85.3    | 97.7   | 88.8    | 82.3    | 90.9    |
| ZAP70  | 94      | 81.8    | 95.3    | 87.4    | 86.4   | 92.3    | 78.5    | 88.5    |
| ZAP70  | 101.7   | 114.9   | 89.6    | 87.3    | 88.1   | 83.5    | 98.3    | 110.3   |

|         |        |        |        |        |        |        |        |        |
|---------|--------|--------|--------|--------|--------|--------|--------|--------|
| ZAR1    | 79.8   | 86.7   | 88.6   | 90     | 82.5   | 71.6   | 84.3   | 88     |
| ZBED1   | 1118.3 | 1565.2 | 1236.2 | 1825.3 | 1873   | 2107.1 | 1042.6 | 1958.7 |
| ZBED2   | 73.1   | 84.9   | 88     | 87.6   | 84.4   | 86.2   | 80.2   | 84.8   |
| ZBED3   | 115.3  | 117.6  | 96     | 84.7   | 79.6   | 79.9   | 104.5  | 125.4  |
| ZBED4   | 471.2  | 628    | 484.5  | 525.2  | 458.9  | 697.8  | 406.5  | 890.1  |
| ZBED5   | 936.5  | 1138.5 | 276.7  | 220.2  | 241.7  | 271.4  | 678.8  | 809.6  |
| ZBP1    | 362.9  | 481.9  | 195.9  | 160.4  | 127.8  | 175.5  | 370.1  | 452.9  |
| ZBTB1   | 87.7   | 93.4   | 99.7   | 94.3   | 91.2   | 103.8  | 89.2   | 89     |
| ZBTB10  | 126.8  | 187.9  | 96.6   | 90.5   | 94.5   | 83.9   | 117.7  | 137.9  |
| ZBTB11  | 106    | 151.7  | 109.7  | 109.9  | 97.7   | 139.9  | 139.7  | 181    |
| ZBTB12  | 95     | 105.5  | 102.8  | 103.3  | 97.9   | 98.7   | 97.2   | 89.1   |
| ZBTB16  | 81.1   | 99.4   | 83.3   | 87.6   | 76.2   | 89.9   | 88.4   | 88.4   |
| ZBTB16  | 79.4   | 87.1   | 96.9   | 92.7   | 97.3   | 95.8   | 77.2   | 77.6   |
| ZBTB16  | 96.7   | 94.9   | 89.4   | 88.3   | 85.8   | 86.6   | 94.3   | 85.9   |
| ZBTB17  | 267    | 316.5  | 293.3  | 213.1  | 194    | 278    | 219.9  | 410.2  |
| ZBTB2   | 153    | 182.7  | 112.3  | 112.1  | 97.2   | 117.7  | 161.3  | 313    |
| ZBTB20  | 110.8  | 123.9  | 104.7  | 153.7  | 166.8  | 167.2  | 105.1  | 110.4  |
| ZBTB24  | 628    | 798    | 370.9  | 399.6  | 339.7  | 496    | 490.6  | 590.6  |
| ZBTB25  | 213.4  | 260.3  | 165.9  | 123.2  | 116    | 159    | 169    | 213    |
| ZBTB26  | 102.8  | 135    | 114.5  | 106.5  | 92.9   | 116.4  | 98.3   | 104.3  |
| ZBTB3   | 228.3  | 282.3  | 111.9  | 113.6  | 101.2  | 108.6  | 199.2  | 237.1  |
| ZBTB32  | 117.7  | 124.7  | 103.1  | 111    | 101.5  | 102.3  | 113.2  | 110.5  |
| ZBTB33  | 2896.3 | 3615.4 | 2104.4 | 3111.3 | 2283.7 | 4409.7 | 2004.1 | 2687.9 |
| ZBTB37  | 88.6   | 96.4   | 81.9   | 87.2   | 78.2   | 85.1   | 82.6   | 88.1   |
| ZBTB38  | 130.3  | 161.3  | 85.9   | 80.1   | 87.9   | 100.3  | 110.4  | 150.3  |
| ZBTB39  | 140.4  | 164.7  | 142.9  | 119.7  | 117.4  | 133.7  | 122.3  | 178.3  |
| ZBTB4   | 382.9  | 433.7  | 348.3  | 441.7  | 351.1  | 542.9  | 367.9  | 597.7  |
| ZBTB40  | 271.4  | 296.3  | 186.9  | 259.4  | 320.2  | 247.2  | 234.9  | 233.4  |
| ZBTB41  | 110.6  | 146.1  | 108.4  | 95.4   | 88.4   | 103    | 107.2  | 124.5  |
| ZBTB44  | 411.3  | 557.5  | 163.7  | 119.9  | 120.1  | 126.8  | 296.5  | 510.8  |
| ZBTB5   | 197.7  | 219.5  | 210.3  | 185.6  | 165.1  | 212.3  | 198.6  | 330.4  |
| ZBTB7A  | 93.7   | 118    | 99.9   | 84.1   | 79.7   | 88.1   | 112.7  | 133.4  |
| ZBTB7B  | 113.4  | 126.8  | 126.2  | 113.7  | 106.2  | 124.9  | 114.5  | 134.8  |
| ZBTB8   | 95.9   | 105    | 93.2   | 86     | 85.9   | 92.8   | 93.7   | 98.4   |
| ZBTB8   | 151.3  | 186.5  | 87.2   | 92.8   | 106.3  | 109.2  | 164.8  | 206.3  |
| ZBTB8OS | 326    | 348.4  | 139.8  | 117.3  | 102    | 118.5  | 262.6  | 448.5  |
| ZBTB9   | 479    | 638.9  | 364.6  | 328.5  | 240    | 390.4  | 368.6  | 626.9  |
| ZC3H10  | 204.9  | 228.1  | 149.5  | 145.2  | 140.4  | 165.7  | 169.7  | 247.9  |
| ZC3H11A | 90.3   | 108.6  | 87.8   | 91.3   | 77.4   | 78.8   | 95.9   | 110.8  |
| ZC3H12A | 143.4  | 154.4  | 157.1  | 118    | 120.7  | 134.1  | 145.2  | 232.6  |
| ZC3H12B | 125.4  | 151.2  | 126.4  | 124.2  | 100.8  | 132.8  | 126.2  | 135.9  |
| ZC3H14  | 519.1  | 684.3  | 329.6  | 324.8  | 243.8  | 404.7  | 351.3  | 547.9  |
| ZC3H15  | 1837.9 | 2246.4 | 520.7  | 460.5  | 339.3  | 798.7  | 1185.5 | 2620   |
| ZC3H3   | 904.7  | 1081.2 | 943.5  | 748    | 592    | 730.6  | 829.5  | 1180.2 |
| ZC3H6   | 207.3  | 240.5  | 139.3  | 137.4  | 117.2  | 159.9  | 169.6  | 241.4  |
| ZC3H7A  | 136.8  | 161.3  | 105.1  | 112.7  | 99.9   | 104.5  | 138.3  | 183.5  |
| ZC3H7B  | 120.6  | 126.5  | 95     | 93.5   | 82     | 102.3  | 121.5  | 142.3  |
| ZC3H8   | 351.5  | 411.1  | 113.2  | 132.9  | 101.1  | 149.9  | 356.8  | 326.7  |
| ZC3HAV1 | 175.9  | 234.9  | 147.8  | 142.5  | 105.8  | 176.4  | 160.8  | 257.6  |
| ZC3HAV1 | 296.1  | 403.7  | 152.1  | 158.5  | 121.1  | 153.6  | 238.9  | 371.8  |

|          |        |        |        |        |        |        |        |        |
|----------|--------|--------|--------|--------|--------|--------|--------|--------|
| ZC3HAV1  | 2220.1 | 3006.7 | 1176.5 | 1288.6 | 976.9  | 1247.1 | 1964.2 | 2230.5 |
| ZC3HAV1L | 108.8  | 120    | 95.9   | 94.4   | 80.4   | 92     | 113.7  | 109.2  |
| ZC3HC1   | 2587.1 | 3266.1 | 1877.9 | 1377.4 | 1233.5 | 1568.5 | 2304.4 | 2543.4 |
| ZCCHC10  | 93.9   | 91     | 106.3  | 97.3   | 88.7   | 90.1   | 81.1   | 100.3  |
| ZCCHC11  | 306    | 374.3  | 238    | 255.6  | 238.3  | 409    | 237.8  | 411    |
| ZCCHC11  | 192.1  | 232.9  | 150.8  | 155.5  | 156.6  | 260.7  | 167.5  | 254.2  |
| ZCCHC12  | 94.2   | 111.4  | 99.7   | 87.6   | 81.3   | 92.5   | 91.3   | 109    |
| ZCCHC13  | 87.9   | 94.2   | 81.1   | 80.8   | 75.7   | 82.4   | 90.8   | 81.4   |
| ZCCHC14  | 323.9  | 461.3  | 299.6  | 397.9  | 347.9  | 459.7  | 318.7  | 492.8  |
| ZCCHC16  | 77.2   | 77.6   | 100.9  | 80.1   | 78.4   | 79.8   | 75.3   | 83.2   |
| ZCCHC17  | 991.8  | 1302.4 | 889.7  | 906.8  | 768.9  | 1331   | 860.5  | 1441   |
| ZCCHC2   | 93.4   | 105    | 97.4   | 89     | 91.6   | 91.7   | 101.5  | 99.3   |
| ZCCHC3   | 379.3  | 519.1  | 373.7  | 335.5  | 266.2  | 467.4  | 317.6  | 548.6  |
| ZCCHC5   | 189.7  | 237.4  | 119.1  | 111    | 97.9   | 99.1   | 152.8  | 147.3  |
| ZCCHC6   | 163    | 212.1  | 105.3  | 105.2  | 99.6   | 113.1  | 156.9  | 180.6  |
| ZCCHC7   | 1449.9 | 1987.9 | 963    | 1036.4 | 833.5  | 1727.1 | 1163.4 | 1723.7 |
| ZCCHC8   | 510.1  | 637.8  | 367.8  | 371.4  | 360.4  | 609.6  | 378.3  | 544.9  |
| ZCCHC9   | 2167.6 | 2859.9 | 1551.2 | 1769.2 | 1326.4 | 2474.9 | 1761.4 | 3116.3 |
| ZCD1     | 3288.2 | 3942.8 | 1965.1 | 1710.2 | 1081.5 | 1458.1 | 3275.6 | 4751.7 |
| ZCRB1    | 206.5  | 248.9  | 160.9  | 177.5  | 132.1  | 198    | 229.7  | 321.1  |
| ZCSL2    | 571    | 649.7  | 389.2  | 323.9  | 242.9  | 294.3  | 456.8  | 653.6  |
| ZCSL3    | 447.8  | 508.5  | 332.4  | 243.6  | 205.1  | 343.9  | 340.4  | 1014.5 |
| ZCWPW1   | 333.5  | 392.1  | 181.2  | 207.6  | 244.8  | 279.8  | 270.9  | 312.1  |
| ZCWPW2   | 165.8  | 211.7  | 121.5  | 131.2  | 115.7  | 141.8  | 166    | 224.7  |
| ZD52F10  | 95     | 110.9  | 88.4   | 85.9   | 79.3   | 75.1   | 88.8   | 105.3  |
| ZD52F10  | 95.2   | 112.9  | 90.2   | 86.1   | 82.8   | 88.7   | 87.5   | 97     |
| ZD52F10  | 87.8   | 94.5   | 102.8  | 91.2   | 94     | 98.1   | 85.5   | 97.5   |
| ZDHHC1   | 246.3  | 263    | 192.6  | 117.6  | 103.7  | 118.3  | 169.2  | 193.6  |
| ZDHHC11  | 144.7  | 165.3  | 107.5  | 128.3  | 156.8  | 189.7  | 139.3  | 148.4  |
| ZDHHC11  | 94.7   | 105    | 115.8  | 93.2   | 88.7   | 99.7   | 96     | 102.3  |
| ZDHHC12  | 481.3  | 631.8  | 501.1  | 374.8  | 313.5  | 470.8  | 403.4  | 755.4  |
| ZDHHC13  | 489.9  | 715.5  | 431.9  | 326.2  | 279    | 474.8  | 436.9  | 606.3  |
| ZDHHC13  | 373.5  | 525.2  | 166    | 158.4  | 140    | 182.7  | 342.9  | 518    |
| ZDHHC13  | 194.9  | 232.1  | 110.5  | 95.7   | 98.2   | 115.7  | 155.1  | 214.8  |
| ZDHHC14  | 308    | 394.2  | 194.5  | 195.9  | 170.5  | 185.6  | 251.1  | 334.7  |
| ZDHHC15  | 85.1   | 91.5   | 84.7   | 76     | 75.7   | 85.1   | 85.6   | 90.8   |
| ZDHHC16  | 547.4  | 666.3  | 444    | 321.2  | 265.9  | 380.4  | 474.9  | 683    |
| ZDHHC16  | 102.5  | 117.9  | 87     | 89.6   | 84.1   | 83.3   | 94.5   | 105.9  |
| ZDHHC16  | 2410.2 | 3302.9 | 1706.5 | 1166   | 987.9  | 1234.1 | 1936.3 | 1828.3 |
| ZDHHC17  | 307.4  | 382.5  | 234.7  | 252.9  | 232.7  | 425.4  | 276.5  | 492.5  |
| ZDHHC18  | 147.3  | 180.2  | 166.8  | 138.1  | 115.8  | 146.9  | 147.7  | 233    |
| ZDHHC19  | 109.8  | 123.1  | 108.3  | 103.8  | 102.1  | 99.5   | 112    | 114.2  |
| ZDHHC2   | 164.6  | 193.6  | 118.9  | 107.7  | 104.7  | 126.7  | 139.2  | 213.2  |
| ZDHHC20  | 165.9  | 189.1  | 103.2  | 110.8  | 106.8  | 103.6  | 137.4  | 183.3  |
| ZDHHC21  | 114.7  | 127.1  | 99     | 96.1   | 83.1   | 95     | 103.8  | 137.9  |
| ZDHHC22  | 123.9  | 147.3  | 90     | 93.1   | 90.7   | 94.2   | 127.1  | 166.6  |
| ZDHHC23  | 144.6  | 209.3  | 108.8  | 103.1  | 98.2   | 123.3  | 143.9  | 156.1  |
| ZDHHC24  | 167.6  | 224.3  | 151.3  | 118.2  | 108.8  | 123.1  | 161.5  | 254.4  |
| ZDHHC3   | 429.5  | 628.7  | 369.4  | 349.7  | 236.6  | 461.3  | 309.3  | 501.4  |
| ZDHHC4   | 104.8  | 124.1  | 89.7   | 87     | 85.6   | 83.3   | 100.4  | 113.4  |

|         |        |        |        |        |        |        |        |        |
|---------|--------|--------|--------|--------|--------|--------|--------|--------|
| ZDHHC5  | 584.4  | 736.3  | 464    | 542.2  | 455.7  | 520.5  | 493.8  | 456.6  |
| ZDHHC6  | 1809.2 | 2239.7 | 1285.4 | 770.4  | 579.8  | 1171.6 | 1424.4 | 2851.9 |
| ZDHHC7  | 969.3  | 1289.5 | 663    | 818.2  | 646.1  | 841.6  | 1013.2 | 1463.9 |
| ZDHHC8  | 1891.5 | 2269.3 | 1977.9 | 2121.7 | 1790.1 | 2372.2 | 1230.1 | 1383   |
| ZDHHC9  | 1337.7 | 1674.7 | 686.7  | 362.2  | 336.8  | 358.1  | 1047.5 | 769    |
| ZDHHC9  | 85.8   | 99.2   | 100.9  | 95.4   | 87.9   | 99.3   | 89.8   | 82     |
| ZDHHC9  | 125.8  | 148.9  | 99.9   | 106.7  | 89.6   | 87.3   | 106    | 126.4  |
| ZF      | 705    | 849.3  | 325.9  | 314.8  | 202.5  | 345    | 518.3  | 819.4  |
| ZFAND1  | 590.9  | 782.1  | 279.9  | 257.5  | 199    | 285.1  | 546.1  | 825.8  |
| ZFAND2A | 1193.4 | 1451.9 | 631.3  | 478.9  | 485.7  | 430.5  | 1236.7 | 1684.7 |
| ZFAND2B | 623    | 717.4  | 537.9  | 484.6  | 428.6  | 415.9  | 686    | 921.4  |
| ZFAND3  | 196    | 255    | 215.9  | 277.9  | 247.5  | 331.9  | 198.6  | 315.7  |
| ZFAND6  | 303.7  | 359.2  | 148.6  | 166.1  | 118.3  | 172.1  | 314.4  | 636.3  |
| ZFHX1B  | 794.6  | 1102   | 606.2  | 789.9  | 679.2  | 1788.6 | 796.3  | 1167.4 |
| ZFHX4   | 75.2   | 83.8   | 88.4   | 78.4   | 78.2   | 82.3   | 83.9   | 84.6   |
| ZFP1    | 131.5  | 179.6  | 94.5   | 108.5  | 93.6   | 109    | 129    | 181.8  |
| ZFP106  | 713.1  | 1331.9 | 610.6  | 1010.3 | 870.3  | 1924   | 705    | 1021.5 |
| ZFP161  | 519.3  | 730    | 342.6  | 341    | 301.7  | 491.9  | 435    | 534.2  |
| ZFP2    | 143.7  | 159.5  | 131.8  | 141.7  | 142.4  | 171.7  | 128.1  | 157.9  |
| ZFP260  | 353.1  | 442.6  | 294    | 355.4  | 306    | 379.3  | 311.6  | 456.8  |
| ZFP28   | 115.3  | 120.8  | 106.4  | 110.2  | 101.1  | 114    | 99.9   | 116.1  |
| ZFP3    | 167.2  | 189.4  | 177.3  | 173.7  | 175.4  | 233.6  | 169    | 184.3  |
| ZFP36   | 1807.5 | 2103.9 | 735    | 685.8  | 594.8  | 607.8  | 1748.6 | 2011.1 |
| ZFP36L1 | 95.5   | 111.5  | 83.7   | 88.4   | 98.7   | 106.2  | 110.5  | 138    |
| ZFP36L2 | 2161.2 | 2572.6 | 887.9  | 711.4  | 752.2  | 995.4  | 1446.5 | 1405.2 |
| ZFP37   | 90.3   | 111.5  | 84.8   | 100.5  | 75.5   | 90.7   | 93.5   | 101.5  |
| ZFP41   | 96     | 134    | 99.8   | 98.1   | 96.2   | 100.8  | 114.3  | 105.4  |
| ZFP41   | 94.2   | 119.7  | 99.4   | 89.9   | 82.2   | 78.1   | 89     | 103.5  |
| ZFP42   | 92.4   | 108.5  | 94.5   | 99.1   | 89.9   | 91.3   | 97.9   | 118    |
| ZFP64   | 119.4  | 132.7  | 122.9  | 123.3  | 118.8  | 129.3  | 111.7  | 130.8  |
| ZFP64   | 131.4  | 171.6  | 123.6  | 110    | 115.5  | 108.6  | 120.9  | 137.3  |
| ZFP90   | 1243.6 | 1360.7 | 538.4  | 643.1  | 459.9  | 626.1  | 869.4  | 1189.9 |
| ZFP91   | 3698.7 | 4674.2 | 2347.8 | 2917.8 | 2370.7 | 4480.7 | 3424.1 | 4723.3 |
| ZFP91   | 328    | 443.2  | 149.7  | 175.9  | 178.7  | 118.1  | 346.1  | 482.8  |
| ZFP95   | 105.7  | 118.4  | 109.5  | 90     | 82.4   | 90.7   | 99.8   | 117    |
| ZFP95   | 107.3  | 134.3  | 89.5   | 88.4   | 82.8   | 88.9   | 105.8  | 117.2  |
| ZFP95   | 150.4  | 183.8  | 148.2  | 146.3  | 138    | 163.5  | 137    | 163.4  |
| ZFPL1   | 195.6  | 230.3  | 169.9  | 146.9  | 123.4  | 155.4  | 175.2  | 285.6  |
| ZFPM1   | 247.1  | 301.8  | 321.1  | 242.8  | 184.8  | 199.9  | 229.6  | 421.7  |
| ZFPM2   | 108.6  | 112.7  | 89.7   | 83.1   | 80.2   | 79.9   | 104.3  | 126.8  |
| ZFR     | 3637.7 | 4508.5 | 1154.3 | 703.5  | 650.1  | 1248.4 | 3093.9 | 5358.2 |
| ZFX     | 164    | 221.3  | 127.1  | 139.1  | 133.9  | 171.6  | 155    | 201.3  |
| ZFY     | 173.5  | 244.8  | 153.5  | 155.5  | 154.3  | 247.7  | 150.6  | 334.7  |
| ZFYVE1  | 171.2  | 188.3  | 107.2  | 111.6  | 103.1  | 104.2  | 164.1  | 145.7  |
| ZFYVE1  | 120.1  | 139.1  | 96.7   | 116.7  | 100.1  | 110.3  | 105.1  | 137.2  |
| ZFYVE16 | 143.3  | 151.7  | 156.4  | 156.3  | 130.3  | 160.2  | 142    | 176.6  |
| ZFYVE19 | 435.7  | 536    | 395.5  | 389.5  | 399    | 631    | 354.6  | 635.7  |
| ZFYVE20 | 899.4  | 1232.7 | 575.4  | 882    | 635.7  | 984.3  | 812.9  | 997.6  |
| ZFYVE21 | 784    | 1351.6 | 715.9  | 541.8  | 492.4  | 680    | 781.5  | 1481.6 |
| ZFYVE26 | 286.7  | 396.9  | 298.5  | 437.3  | 397.2  | 583.8  | 265.6  | 331    |

|          |         |        |         |        |        |         |         |        |
|----------|---------|--------|---------|--------|--------|---------|---------|--------|
| ZFYVE27  | 111.2   | 133.6  | 90.5    | 98.5   | 76.9   | 87.7    | 120.4   | 134.6  |
| ZFYVE27  | 120.2   | 155.6  | 128     | 112.2  | 111.4  | 110.9   | 131.9   | 186.8  |
| ZFYVE28  | 90.4    | 100.2  | 93.3    | 81.3   | 81.6   | 79      | 95.2    | 93.7   |
| ZFYVE9   | 97.9    | 119.5  | 100.7   | 104.8  | 92.5   | 94.1    | 92.3    | 114.3  |
| ZFYVE9   | 88      | 83.5   | 94.4    | 93.5   | 80.4   | 83.4    | 85.7    | 83.1   |
| ZFYVE9   | 80.8    | 97.8   | 97.1    | 93.6   | 82.4   | 91.5    | 89.6    | 92     |
| ZFYVE9   | 93.5    | 103.7  | 94.8    | 98.1   | 89.9   | 89.1    | 86.5    | 91.4   |
| ZGPAT    | 145.3   | 180.1  | 106.7   | 110.5  | 100.4  | 119.3   | 139     | 164.9  |
| ZGPAT    | 110.9   | 141.9  | 94.8    | 93.9   | 82.3   | 86.1    | 111.4   | 123.7  |
| ZGPAT    | 751.5   | 951.1  | 581.9   | 479.3  | 467    | 499.5   | 739.6   | 736    |
| ZGPAT    | 94.5    | 101    | 103.5   | 97.5   | 100.2  | 102.7   | 99.6    | 101.2  |
| ZHX1     | 359     | 448.7  | 161.1   | 133.7  | 128.7  | 230.8   | 281     | 429.1  |
| ZHX1     | 129.4   | 136.2  | 104.9   | 96.7   | 88.9   | 91.1    | 111.8   | 130.9  |
| ZHX1     | 218.1   | 334.3  | 141.2   | 113.9  | 115.3  | 158.1   | 197.6   | 231    |
| ZHX2     | 226.5   | 276.1  | 154.2   | 178.2  | 184.7  | 201.8   | 181.4   | 166.5  |
| ZHX3     | 230.9   | 354.9  | 128.9   | 167    | 135.9  | 181     | 208.4   | 211.1  |
| ZIC1     | 92.1    | 105.3  | 98.6    | 85.8   | 70.4   | 95.1    | 98.7    | 106.9  |
| ZIC2     | 1762    | 1981.9 | 1344.4  | 1317.8 | 977.5  | 1445.4  | 1883    | 2894.3 |
| ZIC3     | 103.1   | 108.8  | 76.3    | 75.2   | 73.5   | 78.6    | 92.1    | 103.2  |
| ZIC4     | 86.1    | 89.8   | 84.1    | 91.3   | 81.5   | 94.1    | 91.6    | 93.3   |
| ZIC5     | 159.1   | 188    | 105.5   | 107.4  | 101.5  | 104     | 144.7   | 167.7  |
| ZIK1     | 92.2    | 92.4   | 82.9    | 87.1   | 81     | 75.9    | 90.5    | 93     |
| ZIM2     | 87.5    | 82.9   | 93.1    | 81     | 83.5   | 84.7    | 86.3    | 98.3   |
| ZIM3     | 109.5   | 137.2  | 93.7    | 82.3   | 81.4   | 82.8    | 103.8   | 124.4  |
| ZKSCAN1  | 111     | 114    | 103.1   | 113.1  | 89.2   | 102.8   | 116.4   | 208.8  |
| ZMAT1    | 112.5   | 132.2  | 105.1   | 101.4  | 94.6   | 86.9    | 112     | 118.3  |
| ZMAT1    | 86.8    | 82.1   | 99.9    | 86.8   | 94.9   | 91.7    | 89.3    | 90.5   |
| ZMAT1    | 94.1    | 107.6  | 87      | 81.2   | 87.5   | 90.6    | 98.2    | 94.3   |
| ZMAT2    | 1638.2  | 2094.8 | 1104.4  | 1058.3 | 885.1  | 1270.6  | 1494.8  | 1838.2 |
| ZMAT3    | 3628.9  | 2868.9 | 1795.9  | 2310.6 | 1893.4 | 1646.1  | 3062.2  | 4867.9 |
| ZMAT5    | 91.9    | 100.8  | 93.4    | 78.6   | 80.8   | 80.2    | 88      | 96.6   |
| ZMAT5    | 297.8   | 377.3  | 208.6   | 172.8  | 126.1  | 162.2   | 280.1   | 344.3  |
| ZMIZ2    | 199.3   | 218    | 137.8   | 129    | 125.7  | 130.2   | 166.4   | 195.8  |
| ZMPSTE24 | 16363.7 | 21376  | 10223.6 | 9635.8 | 5746   | 11071.4 | 15551.9 | 20291  |
| ZMYM1    | 410.7   | 491.5  | 316.6   | 331.9  | 314.8  | 436.6   | 371.3   | 457.5  |
| ZMYM3    | 108.7   | 129.2  | 86.9    | 84.5   | 72.3   | 77.5    | 103.3   | 138.6  |
| ZMYM3    | 219.9   | 291.9  | 162.8   | 195.2  | 200.5  | 252.9   | 192.8   | 249.1  |
| ZMYM3    | 100.6   | 113.5  | 94.8    | 104.4  | 95.1   | 91.9    | 99.4    | 108.9  |
| ZMYM4    | 556.2   | 784.5  | 424.3   | 837.2  | 676.7  | 1464.8  | 484.3   | 707.2  |
| ZMYM5    | 211.6   | 256.7  | 126.5   | 150.3  | 129.9  | 147.9   | 176.4   | 227.5  |
| ZMYM5    | 212.4   | 270    | 124.8   | 135.2  | 130.3  | 134.4   | 179.2   | 236.8  |
| ZMYM6    | 80.7    | 102.6  | 109     | 103.3  | 92     | 82.3    | 90.6    | 84.8   |
| ZMYND10  | 87.6    | 85.5   | 102.7   | 92.3   | 93     | 94.2    | 85.7    | 87     |
| ZMYND11  | 141.6   | 139.2  | 120.5   | 102.5  | 98     | 99.7    | 120.5   | 164    |
| ZMYND11  | 157     | 163.6  | 97      | 94.8   | 89.1   | 83.8    | 158.2   | 144    |
| ZMYND12  | 131.7   | 169.7  | 117.3   | 146.1  | 125.6  | 162     | 122.1   | 150.7  |
| ZMYND15  | 79.6    | 86     | 93.6    | 84.1   | 82.6   | 87.1    | 78.4    | 76.8   |
| ZMYND17  | 113.2   | 111.7  | 108.5   | 104.2  | 89.3   | 102.8   | 105     | 108.2  |
| ZMYND19  | 1933.5  | 2600.1 | 1531.1  | 1149.7 | 1023.1 | 1400.7  | 1622.8  | 1952   |
| ZMYND8   | 286.2   | 406.1  | 185.7   | 178.6  | 151.2  | 233.8   | 229.9   | 261.7  |

|        |        |        |        |        |        |        |        |        |
|--------|--------|--------|--------|--------|--------|--------|--------|--------|
| ZNF10  | 127.3  | 135.5  | 126.2  | 128.6  | 102.1  | 162.7  | 104.3  | 139.8  |
| ZNF100 | 95.4   | 88.7   | 81.9   | 87.3   | 83.6   | 84.9   | 88.4   | 93.3   |
| ZNF101 | 236.3  | 283.7  | 170.1  | 151.7  | 136.5  | 162    | 200.6  | 279.7  |
| ZNF114 | 107.6  | 116.9  | 115.8  | 91.4   | 89.9   | 111    | 105    | 121.5  |
| ZNF117 | 83.7   | 87.8   | 90.9   | 91.9   | 86.3   | 83     | 79.4   | 89.6   |
| ZNF11B | 268.5  | 312.3  | 176.7  | 216.6  | 186.6  | 339.6  | 198.9  | 317.7  |
| ZNF12  | 193.2  | 216.1  | 117.2  | 128.3  | 131.2  | 166.6  | 167.6  | 309.3  |
| ZNF121 | 103.3  | 104.5  | 91.6   | 115.8  | 94.7   | 78.9   | 95.1   | 109.1  |
| ZNF124 | 260.6  | 319.8  | 133.1  | 122.5  | 101.4  | 120.4  | 225.5  | 334.3  |
| ZNF131 | 126.7  | 169.4  | 80.9   | 93.1   | 80.6   | 88.5   | 132    | 142.5  |
| ZNF132 | 147.1  | 153.5  | 109.5  | 91.6   | 82.6   | 101.8  | 129    | 149    |
| ZNF133 | 176    | 224.9  | 173.1  | 207.2  | 234.8  | 311.9  | 157.7  | 183    |
| ZNF134 | 207.5  | 238.3  | 203    | 146.9  | 132.6  | 175.9  | 140.5  | 212.9  |
| ZNF135 | 79.9   | 78.8   | 88.9   | 96.5   | 79.4   | 87.5   | 80.5   | 82.5   |
| ZNF136 | 176.2  | 228.5  | 118.5  | 115.3  | 95     | 116.5  | 154.9  | 219.8  |
| ZNF136 | 237    | 265.7  | 168.4  | 138.1  | 109.4  | 129.7  | 195    | 275.4  |
| ZNF137 | 105.1  | 128.9  | 106.3  | 108.1  | 117.9  | 115.1  | 112.8  | 127.8  |
| ZNF14  | 105.6  | 119.7  | 93.5   | 84.4   | 78.4   | 86.8   | 99.4   | 132    |
| ZNF140 | 175.1  | 207.5  | 115.9  | 91     | 89.6   | 120.5  | 165.6  | 271.8  |
| ZNF141 | 92.9   | 106.3  | 92.7   | 90.2   | 83.6   | 99.6   | 91.6   | 94.9   |
| ZNF142 | 268.3  | 301.2  | 199    | 182.4  | 153.8  | 179    | 259.9  | 302    |
| ZNF143 | 423.6  | 520.5  | 294.5  | 368.2  | 238.2  | 492.7  | 397.4  | 691.5  |
| ZNF146 | 1536.2 | 1705.5 | 779    | 828.5  | 604.9  | 1128.5 | 1309.3 | 2323.1 |
| ZNF148 | 1430   | 2096.5 | 1177.8 | 1572.4 | 1258.8 | 1223.4 | 1207.1 | 2043.6 |
| ZNF155 | 113.1  | 135.9  | 95.3   | 86.8   | 94.4   | 84.9   | 110    | 124.3  |
| ZNF155 | 153.6  | 183.5  | 114.5  | 86.3   | 84.6   | 87.4   | 134.1  | 161.8  |
| ZNF155 | 127.4  | 169.2  | 100.4  | 98     | 92.7   | 94.1   | 113.1  | 120.5  |
| ZNF157 | 94.7   | 114.4  | 86.4   | 85.1   | 79     | 84.1   | 102.1  | 118.6  |
| ZNF16  | 311.2  | 396.7  | 217.7  | 191.2  | 161.6  | 195.5  | 316.9  | 370.6  |
| ZNF16  | 92.1   | 100.5  | 96     | 91.7   | 97.8   | 89.8   | 93.4   | 94.9   |
| ZNF16  | 187    | 210.6  | 142.4  | 117    | 114.4  | 141.1  | 166.5  | 212.6  |
| ZNF160 | 192.4  | 263    | 182.6  | 184.9  | 201    | 214.2  | 168    | 255    |
| ZNF160 | 86.6   | 107.9  | 101.7  | 117.8  | 107    | 95     | 97.1   | 95.8   |
| ZNF160 | 274.7  | 391.3  | 189.5  | 304    | 313.6  | 376.7  | 266.5  | 379.8  |
| ZNF161 | 994.9  | 1357.2 | 771.7  | 1096.7 | 832.8  | 935.6  | 969.3  | 1072.2 |
| ZNF165 | 122.1  | 144.9  | 121.4  | 104.7  | 105.8  | 110.5  | 118.1  | 135.9  |
| ZNF167 | 100.9  | 120.3  | 101.7  | 96.4   | 100.7  | 118.9  | 98     | 103.9  |
| ZNF167 | 92.1   | 100.3  | 97     | 92.7   | 91     | 97.2   | 93.1   | 100.5  |
| ZNF167 | 102.9  | 110.3  | 101.5  | 92     | 88     | 97.4   | 102.8  | 96.8   |
| ZNF169 | 138.4  | 173.1  | 141.1  | 118.9  | 113    | 134.1  | 126.8  | 145.8  |
| ZNF17  | 442.8  | 578.6  | 380.7  | 292.6  | 239.1  | 442.9  | 298.5  | 404.7  |
| ZNF174 | 172.9  | 237.9  | 116.5  | 110.5  | 92.3   | 109.9  | 172.6  | 192    |
| ZNF174 | 138.7  | 176    | 140.3  | 127.9  | 115.8  | 153.3  | 153.1  | 199.6  |
| ZNF174 | 126.9  | 152.1  | 108.6  | 99.5   | 103.6  | 92.6   | 119.6  | 137.7  |
| ZNF175 | 351.4  | 377.6  | 206.1  | 167.1  | 151.5  | 207.3  | 273.8  | 358.1  |
| ZNF177 | 182.7  | 235.9  | 220    | 190.5  | 181.7  | 299.2  | 174.4  | 289.8  |
| ZNF179 | 139.6  | 150.6  | 114.5  | 116.3  | 102.7  | 103.5  | 141.3  | 146.3  |
| ZNF18  | 190.6  | 216.4  | 172.1  | 195.7  | 160.7  | 235    | 157.8  | 243.3  |
| ZNF181 | 138.8  | 148.3  | 116.3  | 92.5   | 104.5  | 115.8  | 134.6  | 181.5  |
| ZNF182 | 260.3  | 321    | 286.9  | 344.8  | 295.3  | 666.5  | 219.3  | 286    |



|        |        |        |        |        |        |        |        |        |
|--------|--------|--------|--------|--------|--------|--------|--------|--------|
| ZNF184 | 153.2  | 194.1  | 100.6  | 107.9  | 83.7   | 122.9  | 148.8  | 203.6  |
| ZNF187 | 92.8   | 119.2  | 98.4   | 98.8   | 79.8   | 80.3   | 105.2  | 105.7  |
| ZNF187 | 193.9  | 225.3  | 111.3  | 128.9  | 96.1   | 129.9  | 176    | 207.1  |
| ZNF189 | 806.4  | 919.3  | 568.5  | 478.1  | 343.1  | 589    | 630.8  | 1048.1 |
| ZNF189 | 79.4   | 93.9   | 101.3  | 86.2   | 83.2   | 88.6   | 85.7   | 91     |
| ZNF19  | 95.7   | 114.3  | 86.7   | 81.6   | 78.6   | 87.9   | 80.2   | 89.1   |
| ZNF192 | 121.6  | 149.6  | 104.9  | 91.5   | 88.1   | 91.1   | 117.1  | 136.7  |
| ZNF193 | 235.7  | 259    | 175    | 171.8  | 171.2  | 224.3  | 188.2  | 259.7  |
| ZNF195 | 820    | 1083.7 | 434.6  | 428.1  | 275.2  | 719.6  | 551.9  | 1066.6 |
| ZNF197 | 209.7  | 272.6  | 152.5  | 141.2  | 136.3  | 176    | 215.7  | 276.7  |
| ZNF197 | 121.9  | 131.2  | 103.7  | 88.7   | 88.2   | 95.9   | 107.8  | 111    |
| ZNF197 | 183.3  | 224.7  | 145.5  | 139.5  | 126.6  | 190.6  | 189.1  | 305.7  |
| ZNF2   | 304.9  | 367.4  | 184.5  | 185    | 166.7  | 162.3  | 246.4  | 283.7  |
| ZNF2   | 95     | 111.4  | 85.1   | 89.7   | 79.1   | 94.5   | 90.7   | 99     |
| ZNF20  | 297.2  | 417.4  | 223.6  | 234.7  | 201.4  | 267.2  | 248    | 311    |
| ZNF200 | 108.1  | 104.1  | 90.2   | 88.3   | 83.1   | 81.2   | 98.6   | 109.5  |
| ZNF200 | 345.6  | 490    | 167.9  | 156.4  | 132.8  | 178.2  | 261.1  | 404.7  |
| ZNF200 | 752.8  | 1100.1 | 511.3  | 523.4  | 393.4  | 503.4  | 679.5  | 747.1  |
| ZNF202 | 196    | 256.2  | 198.6  | 114    | 116    | 148.6  | 170    | 242.9  |
| ZNF204 | 70.4   | 76.4   | 85.5   | 80.4   | 83.2   | 90.7   | 77.3   | 77.8   |
| ZNF205 | 88     | 105.6  | 104.3  | 86.4   | 84     | 91.3   | 94     | 102    |
| ZNF205 | 111.2  | 145.4  | 120.2  | 94.5   | 100.7  | 122.1  | 117.5  | 133.1  |
| ZNF206 | 88.3   | 99.3   | 85.3   | 90.2   | 77.7   | 77.6   | 83.2   | 89.2   |
| ZNF207 | 4706.8 | 5499   | 2752.6 | 2449.3 | 1515.2 | 2486.7 | 3675   | 5284.2 |
| ZNF207 | 4915.8 | 6115.8 | 3189.5 | 2618   | 1902.4 | 2857.9 | 4513.3 | 6282.4 |
| ZNF208 | 81.1   | 100.5  | 80.1   | 79.6   | 83.4   | 91.5   | 89.1   | 94.8   |
| ZNF21  | 123.8  | 142.9  | 116.6  | 100.1  | 93.3   | 95.3   | 139.3  | 139.1  |
| ZNF211 | 307.8  | 324.2  | 220    | 205.5  | 185.8  | 268.2  | 240    | 345    |
| ZNF212 | 305.3  | 418.3  | 200.5  | 259.2  | 210.9  | 293.9  | 334.5  | 429.3  |
| ZNF213 | 313.1  | 384.6  | 318.8  | 217.5  | 184.7  | 188.5  | 303.5  | 351.2  |
| ZNF214 | 77.6   | 90.1   | 95.7   | 92.2   | 86.1   | 85.5   | 78.1   | 86.7   |
| ZNF215 | 222.6  | 238.7  | 141.9  | 117.6  | 105.3  | 131    | 151.6  | 224.1  |
| ZNF217 | 2024.6 | 3037.1 | 725.6  | 1059.9 | 697.6  | 1782.5 | 1682.6 | 2577.7 |
| ZNF218 | 93.1   | 94.6   | 106.7  | 87.5   | 95.5   | 96.5   | 98     | 96.1   |
| ZNF219 | 133.4  | 156.7  | 145.8  | 123.4  | 131.2  | 151.7  | 133.8  | 197.5  |
| ZNF22  | 2270.4 | 2814.9 | 953.1  | 805.9  | 756.6  | 1189.6 | 1686.6 | 2146.9 |
| ZNF221 | 90.8   | 109.1  | 83.7   | 83.3   | 76.7   | 85     | 91.9   | 101.2  |
| ZNF222 | 129.2  | 130.6  | 109.8  | 109.2  | 90.9   | 103.6  | 119.6  | 178.7  |
| ZNF223 | 424.4  | 458    | 228.1  | 349.9  | 361.2  | 260.6  | 362.6  | 382.8  |
| ZNF224 | 219.9  | 254.8  | 163.3  | 142    | 117.9  | 177.2  | 168.8  | 243.4  |
| ZNF225 | 170.5  | 209.3  | 154.7  | 144.1  | 141.1  | 200.7  | 164.1  | 193.5  |
| ZNF226 | 157.1  | 160.3  | 103.6  | 102.4  | 85.1   | 121    | 149.4  | 194.3  |
| ZNF226 | 162    | 174.6  | 119    | 124.6  | 111.3  | 128.2  | 158.2  | 220    |
| ZNF227 | 222    | 252.9  | 133.4  | 127.1  | 108.5  | 136.4  | 229.4  | 343.1  |
| ZNF228 | 121.5  | 121.9  | 98.7   | 96.6   | 91.2   | 94.6   | 110.7  | 113.2  |
| ZNF229 | 80.2   | 93.2   | 98     | 77.9   | 83.4   | 79.1   | 80.7   | 92.8   |
| ZNF23  | 145.1  | 186.4  | 90.4   | 94.6   | 80.1   | 109.7  | 151.6  | 181.9  |
| ZNF230 | 208.7  | 275.6  | 188.5  | 174.6  | 154.3  | 272.4  | 157.9  | 204.3  |
| ZNF232 | 170.6  | 179.5  | 133.5  | 82.6   | 89     | 83.5   | 164.2  | 229    |
| ZNF233 | 80.7   | 86.9   | 87.5   | 88.5   | 75     | 84.1   | 82.4   | 88.2   |

|         |        |        |       |       |       |        |        |        |
|---------|--------|--------|-------|-------|-------|--------|--------|--------|
| ZNF234  | 333.1  | 466.2  | 184.2 | 182   | 178.8 | 155.4  | 304.7  | 386    |
| ZNF235  | 158.1  | 186.8  | 172.8 | 146   | 137.1 | 186.1  | 156.1  | 254.2  |
| ZNF236  | 136.9  | 177.2  | 125.5 | 137.5 | 128.9 | 158.3  | 127.7  | 142.3  |
| ZNF238  | 93.6   | 103.2  | 106.6 | 105.6 | 103   | 106.8  | 88.4   | 98.3   |
| ZNF238  | 80.1   | 94.1   | 83.5  | 82.2  | 78.9  | 76.4   | 83.4   | 81.9   |
| ZNF238  | 121.1  | 133.8  | 120.5 | 107.8 | 97.4  | 108.1  | 113.9  | 140.4  |
| ZNF239  | 366.5  | 406.3  | 249.3 | 205.9 | 150.4 | 262.6  | 241.2  | 287.7  |
| ZNF24   | 239.2  | 338.2  | 185.2 | 148.3 | 136.7 | 225.7  | 187.1  | 265.4  |
| ZNF248  | 156.2  | 174.6  | 107.8 | 90.1  | 100.4 | 121.7  | 139.7  | 162.7  |
| ZNF25   | 682    | 818.4  | 361.5 | 327.9 | 293.5 | 379.6  | 471.5  | 637.5  |
| ZNF250  | 298.5  | 414.2  | 237.9 | 188.6 | 174.5 | 195.8  | 299.2  | 331.8  |
| ZNF253  | 81.7   | 96.6   | 91.5  | 74.9  | 91.5  | 81.5   | 82.5   | 97.6   |
| ZNF254  | 208.3  | 247.6  | 123.8 | 137.8 | 121.2 | 195.9  | 178.1  | 231.2  |
| ZNF256  | 245.8  | 337.1  | 171.3 | 128.6 | 104.7 | 144.8  | 201.1  | 249.1  |
| ZNF257  | 77.8   | 79.7   | 96.9  | 97.3  | 81.8  | 91.4   | 81.5   | 80.1   |
| ZNF259  | 581.3  | 721.6  | 228.3 | 200.1 | 151.6 | 303.9  | 466.4  | 732.4  |
| ZNF26   | 372.6  | 475    | 326.8 | 334   | 310.9 | 539.2  | 282.8  | 418    |
| ZNF263  | 1057.1 | 1140.7 | 484.1 | 349.2 | 323   | 431.2  | 960    | 1401.7 |
| ZNF264  | 329    | 453.9  | 156.4 | 152.4 | 147.1 | 132.8  | 358.2  | 472.2  |
| ZNF265  | 424.5  | 565.3  | 236.7 | 278.2 | 273.2 | 423.2  | 279.3  | 329.8  |
| ZNF265  | 1930.7 | 2202.7 | 759.8 | 941.9 | 686.7 | 1354.8 | 1042.3 | 1724.5 |
| ZNF266  | 359.5  | 456.6  | 178.7 | 194.7 | 172.5 | 191    | 327.8  | 495.5  |
| ZNF266  | 171.7  | 188.2  | 129.7 | 116.4 | 115.4 | 146.6  | 167.8  | 293.3  |
| ZNF266  | 96.3   | 94.6   | 111.9 | 107.8 | 98    | 98.7   | 97.9   | 109.6  |
| ZNF267  | 89.7   | 115    | 93.1  | 73.1  | 78.5  | 83.5   | 88.2   | 103.6  |
| ZNF268  | 88.7   | 95     | 98.7  | 89.5  | 79.3  | 85     | 88.8   | 97.5   |
| ZNF268  | 82.1   | 92.7   | 90.2  | 88.2  | 81.9  | 96.5   | 82     | 87.9   |
| ZNF271  | 495.8  | 580.3  | 276.1 | 247.5 | 227.5 | 402.1  | 429.1  | 523.7  |
| ZNF273  | 181.9  | 202.1  | 119.1 | 135.6 | 109.7 | 181.2  | 162    | 220.2  |
| ZNF273  | 88.2   | 84.3   | 111.7 | 99.6  | 82    | 101.2  | 80.5   | 77     |
| ZNF274  | 1144.7 | 1391.2 | 966.3 | 667.5 | 624.1 | 891.3  | 976.2  | 1539.9 |
| ZNF274  | 250.5  | 317.7  | 94.5  | 93.6  | 96.6  | 98     | 205.2  | 267.2  |
| ZNF274  | 378.4  | 527.1  | 246.9 | 175.5 | 162.5 | 211.4  | 311.9  | 424.4  |
| ZNF275  | 482.5  | 665.7  | 418.7 | 584.7 | 467.5 | 573.4  | 439.7  | 587.8  |
| ZNF275  | 105.4  | 95.1   | 88.3  | 84.4  | 84.4  | 82.2   | 94.5   | 88.5   |
| ZNF276  | 112.5  | 135.2  | 106.3 | 91.3  | 83.2  | 95.7   | 114.6  | 130.2  |
| ZNF277  | 1101.5 | 1510   | 629.7 | 794.7 | 653.8 | 959    | 1062.9 | 1568.7 |
| ZNF278  | 136.2  | 179.1  | 118.4 | 136.6 | 110   | 114.2  | 127.1  | 146    |
| ZNF278  | 78.9   | 94.1   | 83.7  | 77.7  | 76    | 74.2   | 79.8   | 68.1   |
| ZNF28   | 112.8  | 148.6  | 91.2  | 91.9  | 85.1  | 82.1   | 115.9  | 134.3  |
| ZNF284  | 85.9   | 104.2  | 87.9  | 80.1  | 79.5  | 87.1   | 84.3   | 88.8   |
| ZNF285A | 156.4  | 177    | 148   | 125.8 | 108.7 | 122.8  | 129.2  | 150.3  |
| ZNF286  | 140.9  | 167    | 129.4 | 118.6 | 101.8 | 127.6  | 127.6  | 175.7  |
| ZNF287  | 71.6   | 82.9   | 82.8  | 84.6  | 78.1  | 88.4   | 78.5   | 83.9   |
| ZNF289  | 474.5  | 631.6  | 280.4 | 279.7 | 269.2 | 284.7  | 375.5  | 386.5  |
| ZNF291  | 181.3  | 241.7  | 136.4 | 162.6 | 181.7 | 215.8  | 183.9  | 207    |
| ZNF294  | 95.5   | 106.7  | 111.6 | 102.2 | 92.6  | 105.2  | 98.7   | 97     |
| ZNF295  | 231.1  | 284.9  | 223.6 | 215.7 | 186.3 | 288.1  | 215    | 414.3  |
| ZNF297B | 392.5  | 474.5  | 175.8 | 289.9 | 246.1 | 280.5  | 329.8  | 595.6  |
| ZNF3    | 189.2  | 234.3  | 137.2 | 128.7 | 139.3 | 147.3  | 169.1  | 216.8  |

|         |        |        |       |        |       |        |        |        |
|---------|--------|--------|-------|--------|-------|--------|--------|--------|
| ZNF3    | 269.8  | 332.5  | 144.2 | 120.3  | 130.2 | 136    | 263    | 309.4  |
| ZNF3    | 161.9  | 237.4  | 111.8 | 102    | 115.6 | 132.1  | 154.5  | 188.8  |
| ZNF3    | 84     | 88.2   | 91    | 93.3   | 91.4  | 90.5   | 85.7   | 87.9   |
| ZNF30   | 164.9  | 198.8  | 132.9 | 163.1  | 134.9 | 213.8  | 154    | 191.1  |
| ZNF300  | 74.6   | 80.4   | 87.5  | 83.2   | 80.5  | 86.4   | 79.9   | 88.9   |
| ZNF302  | 86.7   | 95     | 90.2  | 85     | 83.5  | 84.9   | 83.7   | 95.1   |
| ZNF304  | 141.4  | 147    | 111.6 | 115.3  | 99.6  | 106.2  | 126.9  | 151.5  |
| ZNF306  | 156.6  | 185.8  | 130.5 | 110.8  | 110.7 | 150.7  | 138.2  | 162.2  |
| ZNF307  | 224.6  | 329.6  | 178.5 | 201.7  | 194.6 | 239.1  | 197.9  | 208.1  |
| ZNF31   | 98.9   | 118.3  | 97.8  | 82.9   | 85.7  | 94.8   | 92     | 107.9  |
| ZNF311  | 104.5  | 116    | 97.5  | 110.3  | 108.5 | 141.6  | 87.3   | 107.7  |
| ZNF312  | 87.7   | 116.8  | 81.3  | 81.6   | 80    | 76.7   | 105.8  | 120.3  |
| ZNF313  | 2229.9 | 2668.8 | 924.5 | 1097.3 | 799.8 | 1133.7 | 2130.8 | 3367.4 |
| ZNF317  | 571.9  | 717.7  | 315.5 | 234.3  | 205.6 | 278.8  | 497.2  | 481.2  |
| ZNF318  | 249.6  | 381.3  | 173.4 | 235.9  | 189.6 | 337.7  | 268.8  | 524.4  |
| ZNF319  | 446.6  | 549.9  | 354.4 | 302.4  | 248   | 316.1  | 432.4  | 635.4  |
| ZNF32   | 117.7  | 142.4  | 92.1  | 85     | 91.6  | 100.7  | 123.9  | 151.8  |
| ZNF32   | 407.4  | 526.4  | 236   | 186.9  | 136.8 | 183    | 318.7  | 487.6  |
| ZNF32   | 290.9  | 317.7  | 184.3 | 141.6  | 130   | 142.8  | 209.9  | 274.5  |
| ZNF320  | 125.3  | 155.2  | 101   | 91.2   | 87.2  | 96.5   | 133.2  | 141.1  |
| ZNF322A | 159.5  | 193.1  | 93.5  | 91.7   | 83.9  | 129.4  | 139.9  | 152.1  |
| ZNF322B | 120.6  | 136.5  | 95.8  | 100.2  | 76.2  | 99.1   | 117.8  | 140.2  |
| ZNF323  | 153.5  | 194.8  | 129.3 | 148.4  | 121.4 | 140.7  | 140.6  | 181.3  |
| ZNF323  | 105.9  | 113.1  | 98.3  | 92.6   | 84.3  | 103.7  | 102.8  | 104.4  |
| ZNF324  | 220.9  | 265.5  | 244.9 | 230.9  | 201.8 | 350.5  | 181.7  | 255.2  |
| ZNF326  | 182.9  | 234.7  | 106   | 102.2  | 104.9 | 92.1   | 158.2  | 215.4  |
| ZNF326  | 87.8   | 89.5   | 92.4  | 95.9   | 93.5  | 88.8   | 82.2   | 87.2   |
| ZNF326  | 280    | 357.1  | 133.1 | 129    | 117   | 104.3  | 216.8  | 275.1  |
| ZNF329  | 230.8  | 259.4  | 197.1 | 156    | 141.4 | 180.1  | 243.3  | 435.4  |
| ZNF330  | 594.1  | 656    | 234.1 | 208.3  | 177.6 | 269.6  | 444.3  | 719.8  |
| ZNF331  | 173.9  | 166.6  | 111   | 100.7  | 95.7  | 105.6  | 135.4  | 183.7  |
| ZNF331  | 139.2  | 180.6  | 104.8 | 82.1   | 85.3  | 92.8   | 133.1  | 163.5  |
| ZNF331  | 112.1  | 117.2  | 88.6  | 91.3   | 82.8  | 101.1  | 91.3   | 119.6  |
| ZNF333  | 164.1  | 194.1  | 127.4 | 120.3  | 119.2 | 158    | 150.4  | 247.5  |
| ZNF334  | 75.5   | 81.3   | 77.8  | 81.4   | 86.9  | 77.6   | 86.2   | 92.3   |
| ZNF334  | 103.5  | 110.4  | 107.4 | 87.7   | 86.2  | 89.2   | 96.8   | 114.6  |
| ZNF335  | 119.1  | 129.2  | 115.9 | 99.7   | 91.6  | 120.9  | 113.6  | 135.8  |
| ZNF336  | 131    | 178.6  | 109.1 | 130.5  | 105.2 | 131.3  | 141    | 158.2  |
| ZNF337  | 288.6  | 325    | 348.3 | 290.2  | 283.9 | 433.1  | 211.9  | 319.3  |
| ZNF33A  | 278.4  | 305.3  | 129.9 | 131.5  | 120.9 | 185.5  | 223.7  | 293.3  |
| ZNF33A  | 116.1  | 132    | 94.4  | 106.8  | 95.6  | 107.7  | 114    | 124.7  |
| ZNF34   | 205.4  | 247.8  | 197.5 | 158.3  | 119.6 | 170    | 187.8  | 217.8  |
| ZNF341  | 174.9  | 172.8  | 181.4 | 184.7  | 152.9 | 190    | 174.3  | 251    |
| ZNF342  | 832.7  | 1106.5 | 569.8 | 448.2  | 350.9 | 351.4  | 731.5  | 811.1  |
| ZNF343  | 138.6  | 145.1  | 100.3 | 78.3   | 75.9  | 104.2  | 114.9  | 144.8  |
| ZNF345  | 94.2   | 99.6   | 104.8 | 87.6   | 93.1  | 94.9   | 90.7   | 94.1   |
| ZNF346  | 129.2  | 137.5  | 136.3 | 136.5  | 137.7 | 162.8  | 122.4  | 137.9  |
| ZNF347  | 97.6   | 107.4  | 93.6  | 91     | 80.8  | 94.7   | 93.9   | 104.1  |
| ZNF35   | 361.6  | 467.5  | 304.7 | 277.2  | 227.3 | 395.1  | 339.9  | 397.1  |
| ZNF350  | 187    | 209    | 187.2 | 138.7  | 143.5 | 174.8  | 159.6  | 196.5  |

|         |        |        |        |        |        |        |        |        |
|---------|--------|--------|--------|--------|--------|--------|--------|--------|
| ZNF354A | 215.8  | 196.8  | 120    | 128.8  | 107.9  | 141    | 177.3  | 224.6  |
| ZNF354B | 79.1   | 91.9   | 84.8   | 88.6   | 95     | 95.4   | 84.2   | 96.4   |
| ZNF354C | 81.5   | 96.5   | 87.8   | 72.7   | 85.2   | 76.9   | 98.8   | 89.4   |
| ZNF358  | 507.2  | 657.9  | 233.6  | 168.5  | 163.4  | 155.8  | 461.5  | 422.1  |
| ZNF364  | 1265.6 | 1575   | 987.4  | 880.6  | 727.1  | 707.5  | 1296.3 | 1582.8 |
| ZNF365  | 80.9   | 102.2  | 84.8   | 87.2   | 85.5   | 90.5   | 83.6   | 90     |
| ZNF365  | 88.4   | 88.5   | 95.7   | 84.5   | 83.9   | 82.9   | 85.4   | 102    |
| ZNF365  | 81.7   | 98.8   | 100.2  | 92.4   | 92.8   | 91     | 85.5   | 91.3   |
| ZNF365  | 84.7   | 86.6   | 93.3   | 88.5   | 87.6   | 76     | 80.6   | 90.5   |
| ZNF366  | 171.2  | 224.2  | 111.9  | 115.2  | 97.1   | 105.3  | 190.9  | 337.6  |
| ZNF367  | 152.6  | 196.6  | 109.5  | 96     | 94     | 102.5  | 122.6  | 137.9  |
| ZNF37A  | 95.3   | 112.4  | 104.8  | 91.2   | 89.5   | 102.4  | 95.6   | 94.4   |
| ZNF37A  | 102.5  | 107.2  | 85.9   | 86.7   | 75.4   | 81.4   | 98.5   | 103.7  |
| ZNF37A  | 125.5  | 133    | 100.8  | 93.2   | 83.7   | 88.3   | 129.7  | 115.2  |
| ZNF382  | 84.3   | 84.5   | 92.5   | 79.9   | 76.1   | 84.5   | 82.8   | 97.6   |
| ZNF383  | 179.1  | 199.4  | 117    | 113.9  | 102.6  | 121.6  | 156.9  | 249.4  |
| ZNF384  | 131.6  | 158.5  | 99.1   | 97.4   | 90.2   | 98.9   | 128.5  | 136    |
| ZNF384  | 162    | 207    | 173.3  | 160.5  | 136.6  | 218.8  | 144.9  | 238.8  |
| ZNF385  | 137.9  | 189.6  | 187.4  | 227    | 205    | 313.2  | 137.8  | 217.9  |
| ZNF394  | 1553.9 | 1492.4 | 1037.8 | 1317.8 | 1319.8 | 1109.3 | 1420.9 | 2655.2 |
| ZNF395  | 338.9  | 446.6  | 307.1  | 399    | 385.8  | 504.1  | 280.6  | 426.9  |
| ZNF396  | 117    | 138    | 108.6  | 106.4  | 97.1   | 122.6  | 122.6  | 132.2  |
| ZNF397  | 150    | 179.7  | 115.9  | 119.1  | 99     | 135.6  | 127.9  | 150.4  |
| ZNF398  | 216    | 255.5  | 110.4  | 97.2   | 92.8   | 102.4  | 190.2  | 256.2  |
| ZNF398  | 227.3  | 244.7  | 211.2  | 177.5  | 163.9  | 229.6  | 217.7  | 359.8  |
| ZNF403  | 1097.4 | 1406   | 1009.1 | 1245.6 | 1107   | 1873.2 | 1022.6 | 1777.9 |
| ZNF404  | 89.9   | 103.9  | 92.1   | 87.1   | 96     | 88.3   | 94.3   | 100.6  |
| ZNF406  | 110.5  | 125.8  | 89.8   | 85.1   | 90.4   | 93.6   | 117    | 108.9  |
| ZNF406  | 120.8  | 135.8  | 92.6   | 83     | 90.7   | 91.9   | 123.3  | 145.4  |
| ZNF407  | 76.1   | 89     | 90.6   | 92.5   | 88.4   | 85     | 76.7   | 82.3   |
| ZNF408  | 141.7  | 166.4  | 152.8  | 138.6  | 109.1  | 124.2  | 142.1  | 233.6  |
| ZNF41   | 97.9   | 111    | 90.2   | 89.4   | 83.3   | 78.6   | 94.8   | 90.1   |
| ZNF41   | 92.2   | 113.3  | 93.7   | 76.7   | 81.8   | 74.4   | 108    | 108.8  |
| ZNF41   | 97.4   | 121.2  | 104.9  | 105.8  | 99.8   | 121.7  | 105.5  | 119.6  |
| ZNF410  | 979.5  | 1258   | 608.3  | 366.9  | 285.5  | 524.2  | 796.5  | 1146.3 |
| ZNF414  | 115.2  | 142.8  | 137.2  | 111.1  | 119.3  | 113    | 118.9  | 166.3  |
| ZNF415  | 93.5   | 109.4  | 113.5  | 102.2  | 104.2  | 100.6  | 96     | 112.6  |
| ZNF416  | 196.8  | 291.8  | 207.8  | 161.2  | 140.3  | 197.6  | 194.8  | 251.8  |
| ZNF417  | 145.8  | 188.7  | 152.4  | 127.8  | 125.6  | 106.3  | 126.1  | 154.2  |
| ZNF418  | 96.6   | 103.1  | 86.4   | 83.8   | 76     | 85.3   | 97.6   | 93.5   |
| ZNF419  | 317.3  | 424.7  | 192.2  | 183.2  | 147.8  | 213.8  | 268.4  | 374.4  |
| ZNF42   | 528.9  | 454.6  | 452.7  | 412.1  | 440.1  | 502.7  | 313.6  | 338.3  |
| ZNF42   | 141.4  | 133.9  | 103.1  | 94     | 88.1   | 81.8   | 103.6  | 127.6  |
| ZNF420  | 108.8  | 116.2  | 98.4   | 92.4   | 87.6   | 91.1   | 92.5   | 138.2  |
| ZNF423  | 80.6   | 84.1   | 99.7   | 91.1   | 83.6   | 88.7   | 82.5   | 93     |
| ZNF425  | 126.3  | 143.6  | 99.4   | 126.5  | 114    | 128.5  | 156.4  | 197.8  |
| ZNF426  | 180    | 209.3  | 144.6  | 152.3  | 121.7  | 151.8  | 158.2  | 211.7  |
| ZNF429  | 174.3  | 212.2  | 108.9  | 98.1   | 96.9   | 96.2   | 138    | 183.7  |
| ZNF43   | 91     | 110.2  | 95.2   | 87.6   | 79     | 82.5   | 90.4   | 105.4  |
| ZNF430  | 4974.3 | 5489.1 | 1573.5 | 2824   | 2400.4 | 1855.5 | 4882.3 | 4861.1 |

|         |       |        |       |       |       |       |       |       |
|---------|-------|--------|-------|-------|-------|-------|-------|-------|
| ZNF431  | 293.9 | 338.4  | 129.4 | 131.7 | 145.4 | 170.6 | 245.4 | 341.5 |
| ZNF432  | 137   | 166.8  | 114.3 | 104.8 | 111.8 | 115.2 | 130.3 | 160.2 |
| ZNF433  | 208.6 | 223.8  | 135.1 | 138.8 | 148.4 | 199.3 | 186.3 | 271.1 |
| ZNF434  | 568.1 | 762    | 383.7 | 343.7 | 280.6 | 468.8 | 576.9 | 846.4 |
| ZNF435  | 154.5 | 179.5  | 121.9 | 114.5 | 112.8 | 131.3 | 129.2 | 215.4 |
| ZNF436  | 136.7 | 172.3  | 94.1  | 90.9  | 84.2  | 95    | 125.3 | 148.4 |
| ZNF436  | 86.8  | 88.5   | 85    | 86.2  | 80.8  | 80.6  | 82.7  | 82.7  |
| ZNF436  | 126.1 | 130.1  | 114.4 | 93.9  | 77.9  | 98.5  | 115.6 | 167.7 |
| ZNF438  | 834.4 | 1164.5 | 499.1 | 372.7 | 283   | 493.7 | 616.4 | 752   |
| ZNF439  | 167.5 | 208.7  | 139.5 | 154   | 145.7 | 202.8 | 143.2 | 190.1 |
| ZNF44   | 83.4  | 84     | 96.5  | 78.5  | 83.2  | 80.4  | 83.5  | 92.9  |
| ZNF440L | 117.4 | 152.2  | 120.3 | 140.7 | 137   | 147.3 | 112.9 | 133   |
| ZNF441  | 114.1 | 126.2  | 110.6 | 93.7  | 82.6  | 104.1 | 105.3 | 136.8 |
| ZNF442  | 176.3 | 208.1  | 138.3 | 140   | 154.3 | 153.1 | 155.4 | 183   |
| ZNF443  | 346.5 | 381.8  | 278.8 | 255.9 | 200.3 | 365.5 | 281.4 | 452   |
| ZNF444  | 196.5 | 227.6  | 152.7 | 133.5 | 126.6 | 138.1 | 184.2 | 483.2 |
| ZNF445  | 91.7  | 89.8   | 88.1  | 87.5  | 83.9  | 87.5  | 87.2  | 97.6  |
| ZNF446  | 157.7 | 196.6  | 207.3 | 149   | 145.7 | 169.3 | 145.6 | 221.8 |
| ZNF447  | 92.9  | 117    | 96.2  | 85.6  | 85.9  | 90.7  | 102.2 | 105.6 |
| ZNF449  | 92.1  | 110    | 108.2 | 96.7  | 91.1  | 102.4 | 111   | 117.4 |
| ZNF45   | 379.7 | 413.2  | 245.8 | 239.1 | 223.4 | 292   | 330.9 | 516.7 |
| ZNF451  | 86.7  | 96.7   | 85    | 81.4  | 79.7  | 80.9  | 85.4  | 102.6 |
| ZNF451  | 516.7 | 724.3  | 313   | 468.3 | 453.3 | 728.3 | 483.4 | 932.2 |
| ZNF451  | 167.6 | 209.2  | 105.8 | 105.1 | 125.6 | 144.8 | 154.7 | 316.2 |
| ZNF452  | 83.4  | 95     | 88.4  | 81.8  | 82.1  | 83.4  | 78.1  | 89.6  |
| ZNF454  | 127.2 | 149.4  | 83.8  | 86.2  | 79.4  | 99    | 105.6 | 145.8 |
| ZNF460  | 149.9 | 167.7  | 109.8 | 103.1 | 88.7  | 106.1 | 144.6 | 196.7 |
| ZNF462  | 133.8 | 157.4  | 145.7 | 90.7  | 100.5 | 99    | 120.3 | 147.9 |
| ZNF467  | 251   | 283.4  | 213.6 | 271.4 | 280.8 | 256.2 | 191.3 | 144.6 |
| ZNF468  | 91.6  | 108.1  | 91.3  | 81.1  | 86.6  | 100   | 95.8  | 112.8 |
| ZNF471  | 76.1  | 94.2   | 96.3  | 83.3  | 85.1  | 90.3  | 77.4  | 96.9  |
| ZNF473  | 395.2 | 525.9  | 401.4 | 310   | 226.4 | 352.1 | 382.4 | 545   |
| ZNF473  | 113.7 | 148.4  | 94.7  | 97.1  | 91.3  | 113.8 | 96.3  | 112.9 |
| ZNF474  | 82.4  | 95.3   | 96.2  | 90.6  | 87.2  | 97.6  | 85.8  | 92.4  |
| ZNF480  | 453.2 | 583.8  | 318.5 | 248.2 | 193.2 | 413.2 | 362.7 | 500.8 |
| ZNF482  | 136.7 | 168.3  | 111.2 | 94.9  | 93.2  | 103.8 | 132.9 | 169.1 |
| ZNF483  | 98.8  | 101.4  | 80.3  | 81.1  | 73.8  | 84.9  | 84.1  | 96.6  |
| ZNF483  | 356.9 | 344.5  | 251.8 | 351.8 | 381.1 | 261.8 | 320.6 | 504   |
| ZNF483  | 125.3 | 144.8  | 106.2 | 93.2  | 87.7  | 96.8  | 109.4 | 139.2 |
| ZNF484  | 139.6 | 171.5  | 137   | 121.6 | 115.2 | 163.5 | 140   | 178.8 |
| ZNF485  | 166.7 | 190.3  | 90.1  | 90.6  | 87.3  | 89.7  | 148.5 | 185.9 |
| ZNF490  | 101.9 | 110.3  | 89    | 84.1  | 85.9  | 90.4  | 106   | 102.3 |
| ZNF491  | 102.8 | 99.2   | 97.6  | 87.4  | 88.9  | 91.8  | 90.4  | 96.1  |
| ZNF493  | 107.5 | 107.3  | 98    | 101.9 | 83.5  | 102.6 | 105.4 | 127.1 |
| ZNF493  | 87    | 92.7   | 97.9  | 93    | 95.1  | 98.5  | 82.9  | 108.6 |
| ZNF496  | 102.7 | 126.4  | 95.8  | 89.1  | 91.9  | 89.8  | 103   | 114.5 |
| ZNF497  | 115.6 | 128.5  | 97.8  | 95.1  | 84.7  | 86.1  | 112.6 | 117.3 |
| ZNF498  | 119.9 | 152.8  | 90.7  | 91.4  | 84.6  | 79.7  | 124.4 | 172.1 |
| ZNF499  | 342.5 | 454.7  | 183.9 | 111   | 111.6 | 113.6 | 307.3 | 290.8 |
| ZNF500  | 218.8 | 244.8  | 216.9 | 221.7 | 205.5 | 345.8 | 176.3 | 279.1 |

|        |        |        |       |        |        |        |        |        |
|--------|--------|--------|-------|--------|--------|--------|--------|--------|
| ZNF501 | 76.8   | 95.9   | 84.4  | 75     | 85.9   | 77.2   | 90.7   | 100.5  |
| ZNF502 | 96.1   | 98.2   | 92.8  | 85.9   | 83.7   | 83.5   | 84.1   | 90.4   |
| ZNF503 | 283.2  | 331.3  | 243   | 178.2  | 163.2  | 218.3  | 317.3  | 505.7  |
| ZNF507 | 151.8  | 162.7  | 117.6 | 139.5  | 116.3  | 133    | 123.8  | 131.5  |
| ZNF508 | 1709.7 | 2091.4 | 1167  | 1069.9 | 740.3  | 1111.1 | 1587.2 | 2169.7 |
| ZNF509 | 124.4  | 129    | 127.8 | 124.7  | 138.2  | 167.8  | 113.6  | 129.3  |
| ZNF510 | 114.1  | 139    | 108.1 | 101.6  | 96.6   | 116.9  | 98.1   | 107.2  |
| ZNF511 | 1618.3 | 2072.9 | 723.3 | 681.5  | 488.5  | 614.7  | 1669.1 | 1831.6 |
| ZNF512 | 874.1  | 1006.6 | 951.2 | 1120.9 | 825.4  | 1646.9 | 620.2  | 1193.4 |
| ZNF513 | 156.3  | 188.7  | 117   | 110.6  | 105.4  | 119.6  | 168.5  | 196.4  |
| ZNF514 | 195.9  | 236.2  | 196.3 | 148.7  | 169    | 184.3  | 150    | 205.5  |
| ZNF517 | 94.6   | 94.7   | 99.4  | 81.4   | 91.2   | 99     | 90.1   | 97.3   |
| ZNF518 | 337.9  | 446    | 194.9 | 237.3  | 207.5  | 318.3  | 323.7  | 449.2  |
| ZNF519 | 122.4  | 138.5  | 98.7  | 89.6   | 84.4   | 92.5   | 107.3  | 129    |
| ZNF519 | 390.6  | 474.7  | 251.9 | 264.7  | 277.9  | 240.8  | 282.7  | 329.2  |
| ZNF521 | 1181.4 | 1372.1 | 470.9 | 400.1  | 426.5  | 587.3  | 954.2  | 1497.9 |
| ZNF524 | 321    | 434.1  | 344.8 | 285.1  | 251    | 322.4  | 354.3  | 491.1  |
| ZNF526 | 300.7  | 315.2  | 125.3 | 118.9  | 111.4  | 135    | 258.7  | 308.5  |
| ZNF528 | 106.8  | 112.1  | 100.9 | 94.5   | 90     | 87.8   | 106.5  | 104.8  |
| ZNF529 | 438.9  | 559.8  | 307.4 | 382.3  | 293    | 414.9  | 376.6  | 546.6  |
| ZNF530 | 114.6  | 126    | 119   | 112.6  | 93     | 107.3  | 120.3  | 124.3  |
| ZNF532 | 191    | 249.8  | 127.5 | 171.9  | 139.2  | 179.9  | 166.5  | 251.2  |
| ZNF533 | 82.9   | 84.7   | 94.7  | 85.7   | 74.6   | 88.1   | 79.5   | 81.1   |
| ZNF536 | 152.2  | 141.3  | 107.6 | 86.5   | 85.7   | 95.5   | 105.3  | 138.6  |
| ZNF537 | 649    | 747    | 404.8 | 367.8  | 293.8  | 431.8  | 526.6  | 644.2  |
| ZNF539 | 142    | 160.9  | 98.6  | 110.2  | 99.9   | 122.7  | 128.7  | 184.5  |
| ZNF540 | 85.2   | 91.2   | 87.1  | 87     | 80.2   | 72.9   | 78.2   | 84.4   |
| ZNF542 | 88.5   | 113.1  | 89.6  | 85.3   | 81.7   | 86.6   | 89     | 99     |
| ZNF543 | 169.1  | 184.4  | 144.1 | 164.8  | 124    | 161.9  | 150.6  | 216    |
| ZNF544 | 102.4  | 110.3  | 90.3  | 88.1   | 78.8   | 81.8   | 96.6   | 112.3  |
| ZNF545 | 223.9  | 271.2  | 189   | 136.6  | 113.5  | 146.9  | 196.7  | 226.6  |
| ZNF546 | 75.5   | 80.5   | 86.2  | 81.5   | 83.5   | 87     | 83.3   | 84.3   |
| ZNF547 | 86.7   | 95.4   | 87.3  | 84.5   | 76.9   | 89     | 80.2   | 85.3   |
| ZNF548 | 288.7  | 323    | 270.1 | 330.9  | 282.4  | 428.4  | 231    | 343.7  |
| ZNF549 | 5723.3 | 5068.3 | 3896  | 5974.5 | 5710.4 | 4118.3 | 4609.4 | 9564.7 |
| ZNF550 | 117.8  | 142.2  | 115.6 | 115.4  | 100.7  | 107.7  | 119.5  | 137.3  |
| ZNF551 | 142.3  | 211.3  | 130.6 | 117.9  | 114.7  | 127.2  | 128.3  | 193.3  |
| ZNF552 | 112.2  | 144.3  | 103.1 | 91.8   | 88.1   | 90.4   | 113.7  | 125.1  |
| ZNF553 | 106.4  | 136.7  | 96.8  | 91.6   | 79.1   | 94.2   | 102.6  | 132.9  |
| ZNF554 | 96.6   | 106.8  | 102.3 | 97.3   | 91.9   | 86.8   | 93.4   | 97.2   |
| ZNF555 | 108.7  | 130.2  | 111.6 | 95.5   | 92.7   | 99.7   | 103.3  | 150.4  |
| ZNF556 | 195.7  | 245.1  | 100.1 | 95.5   | 105.4  | 109.3  | 167.4  | 210.6  |
| ZNF557 | 101.1  | 121.4  | 86.8  | 86.2   | 84.7   | 81.3   | 107.1  | 132.4  |
| ZNF557 | 436.5  | 439.8  | 196.3 | 159.6  | 193.9  | 170.3  | 347    | 524.2  |
| ZNF558 | 146.4  | 171.3  | 113.8 | 150.1  | 105.4  | 175.3  | 115.8  | 207.9  |
| ZNF559 | 448.2  | 600.8  | 217.3 | 203.6  | 155.4  | 244.7  | 369.9  | 552.3  |
| ZNF560 | 102    | 104.3  | 87.8  | 87.3   | 92.4   | 90.7   | 109.1  | 106.1  |
| ZNF561 | 129    | 159.6  | 99.5  | 101.2  | 89.4   | 104.3  | 131.8  | 149.3  |
| ZNF562 | 568.6  | 679    | 317.7 | 373.4  | 270    | 334.3  | 504.6  | 777.1  |
| ZNF563 | 112.4  | 135.3  | 101   | 100.5  | 109.1  | 105.2  | 103.9  | 119.5  |

|         |        |        |        |        |       |        |        |        |
|---------|--------|--------|--------|--------|-------|--------|--------|--------|
| ZNF564  | 337.5  | 449.8  | 419.6  | 358.8  | 283.5 | 506.4  | 307    | 435    |
| ZNF565  | 262.9  | 314.6  | 148.2  | 136.4  | 122.6 | 136.6  | 229.9  | 292    |
| ZNF566  | 150.6  | 177.1  | 141.2  | 125.6  | 120.7 | 125.6  | 114.7  | 158.3  |
| ZNF567  | 78.2   | 83.9   | 86.5   | 85.5   | 71.8  | 77.4   | 81.4   | 86.1   |
| ZNF568  | 97.7   | 104.7  | 102.6  | 88.2   | 94.9  | 96.4   | 91.5   | 103.4  |
| ZNF569  | 99.4   | 113.5  | 96.8   | 91.6   | 86.8  | 92.5   | 107.2  | 109.5  |
| ZNF570  | 113.4  | 123.9  | 102.8  | 93.4   | 86.9  | 100.1  | 105    | 128.4  |
| ZNF571  | 107.3  | 114.4  | 90.2   | 89     | 81.4  | 86.3   | 92.7   | 124.9  |
| ZNF572  | 83.7   | 81.8   | 97.8   | 84.6   | 82.3  | 92.5   | 84.6   | 89.8   |
| ZNF573  | 506.7  | 705    | 281.8  | 386.7  | 337.6 | 369.3  | 414.5  | 494.6  |
| ZNF574  | 106.9  | 119.6  | 137.7  | 109.9  | 97.8  | 114.9  | 115.1  | 150.2  |
| ZNF575  | 96.1   | 100.9  | 94.9   | 85.4   | 86.8  | 95.8   | 97.7   | 127    |
| ZNF576  | 491    | 567.7  | 303.4  | 203.6  | 188.3 | 206.6  | 420.7  | 412.9  |
| ZNF577  | 421.3  | 461    | 272.6  | 407.8  | 417.4 | 360.9  | 453.9  | 804.2  |
| ZNF579  | 131.8  | 166.2  | 94.2   | 83.7   | 98.6  | 99.9   | 123.9  | 208.5  |
| ZNF580  | 129.8  | 119.9  | 103.1  | 79.1   | 93.4  | 81.1   | 113.5  | 139.8  |
| ZNF580  | 182.9  | 188.7  | 193.1  | 138.9  | 134   | 154.6  | 167.3  | 348.1  |
| ZNF580  | 143    | 153.9  | 93.6   | 84.1   | 83.7  | 87.6   | 134.9  | 183.8  |
| ZNF581  | 759    | 1022.3 | 719.4  | 391.7  | 346.3 | 489.3  | 686.4  | 1030.7 |
| ZNF582  | 104.5  | 118    | 92.6   | 75.7   | 91.1  | 86.3   | 105.7  | 115.6  |
| ZNF584  | 135    | 178.7  | 119    | 109.8  | 98.3  | 112.5  | 131.1  | 155.5  |
| ZNF585A | 285.7  | 354.7  | 204.2  | 251.2  | 189.3 | 292.1  | 224.7  | 269.1  |
| ZNF585A | 122.1  | 138    | 113.4  | 110.2  | 118.2 | 113.9  | 107.7  | 128.6  |
| ZNF585B | 96     | 110.5  | 97.8   | 90.1   | 89.1  | 101.6  | 96.5   | 113.6  |
| ZNF586  | 343.9  | 440.7  | 300.2  | 226.8  | 217.3 | 308.4  | 278.6  | 371.1  |
| ZNF586  | 742    | 1032.3 | 535.4  | 427.5  | 373.3 | 589.2  | 560.3  | 621.8  |
| ZNF586  | 151.6  | 194.6  | 117.2  | 94.2   | 86.7  | 90.2   | 121.9  | 138.9  |
| ZNF587  | 98.4   | 126.5  | 94.4   | 107.7  | 99.9  | 95.9   | 100.2  | 115    |
| ZNF588  | 82.8   | 82     | 83.4   | 87     | 79.8  | 92.9   | 86.7   | 83.5   |
| ZNF589  | 259.4  | 271.3  | 284.1  | 316.5  | 236.6 | 476.9  | 196.6  | 297.7  |
| ZNF592  | 117.6  | 127.3  | 98.5   | 84.9   | 95    | 96     | 122.8  | 129.5  |
| ZNF593  | 1195   | 1331.6 | 701.8  | 507.3  | 353.8 | 507.1  | 1139.6 | 1053.9 |
| ZNF595  | 76.8   | 73.6   | 85.2   | 71     | 70.5  | 69.2   | 78.3   | 90.2   |
| ZNF596  | 102.2  | 118.2  | 93.6   | 88.1   | 77.4  | 88.5   | 92.9   | 139.6  |
| ZNF596  | 94.8   | 106.5  | 116    | 90.6   | 90.3  | 105.2  | 99.7   | 113.9  |
| ZNF597  | 163.9  | 210.5  | 139.9  | 129.5  | 118.4 | 130.7  | 127.4  | 180.7  |
| ZNF598  | 1772.8 | 2097.5 | 1464.3 | 1091.8 | 949.2 | 1283.6 | 1365.7 | 1875.8 |
| ZNF599  | 83.6   | 84     | 88.5   | 79.7   | 71.7  | 77.4   | 74.6   | 89     |
| ZNF599  | 86.5   | 93.9   | 85.6   | 82.8   | 77    | 86.8   | 82.5   | 95.5   |
| ZNF6    | 101.9  | 122.6  | 95.5   | 89.6   | 85.4  | 104.1  | 98     | 136.9  |
| ZNF600  | 140.9  | 147    | 96.2   | 98.5   | 99.2  | 103.4  | 130.9  | 142    |
| ZNF606  | 145.3  | 187.6  | 102.9  | 101.2  | 90.9  | 115.5  | 133.4  | 180.5  |
| ZNF607  | 74.9   | 85.7   | 84     | 85.3   | 72.5  | 86.7   | 78.1   | 89.9   |
| ZNF608  | 86     | 99.5   | 111.9  | 108.5  | 93.4  | 96.2   | 89.3   | 93.7   |
| ZNF609  | 118.5  | 158.6  | 142.4  | 131    | 129   | 156.6  | 116.7  | 194.4  |
| ZNF610  | 75.1   | 89.3   | 87.5   | 81.3   | 71.6  | 79.9   | 79.8   | 82.7   |
| ZNF611  | 140.6  | 157.3  | 103.8  | 103.2  | 89.1  | 106.1  | 118.6  | 156.4  |
| ZNF613  | 364.1  | 425.5  | 266.6  | 243.4  | 197.2 | 268.5  | 287.6  | 379.3  |
| ZNF613  | 84.8   | 105    | 90.8   | 90.8   | 88    | 87.6   | 96.8   | 84.3   |
| ZNF614  | 402.1  | 519    | 307.5  | 273.5  | 221.2 | 440.7  | 349.3  | 586.7  |

|         |        |        |       |        |        |        |        |        |
|---------|--------|--------|-------|--------|--------|--------|--------|--------|
| ZNF615  | 302.2  | 401.9  | 249   | 205.5  | 165.3  | 281.7  | 292.7  | 390.9  |
| ZNF616  | 175.4  | 213.1  | 205.7 | 156.5  | 130.4  | 172.8  | 160.3  | 207.1  |
| ZNF618  | 258.6  | 340.2  | 203.4 | 197.1  | 193.4  | 174.7  | 250.6  | 303.2  |
| ZNF619  | 82.3   | 90.6   | 96.2  | 84.2   | 79.4   | 88.4   | 87.1   | 91.7   |
| ZNF620  | 104    | 115.4  | 89.7  | 85.9   | 81     | 93.3   | 103.7  | 115.2  |
| ZNF621  | 742    | 882.6  | 387.3 | 406.6  | 358.9  | 496    | 585.7  | 818.7  |
| ZNF622  | 1851.9 | 2710.7 | 734.1 | 834.7  | 606    | 1083.9 | 1726.1 | 2009   |
| ZNF623  | 86.4   | 108.4  | 86.2  | 81.7   | 86.3   | 85.8   | 91.6   | 96.1   |
| ZNF624  | 98.8   | 122.4  | 107.1 | 99.5   | 87.9   | 109.5  | 103.1  | 135.3  |
| ZNF625  | 92     | 105.3  | 114.2 | 99.4   | 106.7  | 103.6  | 94.6   | 89.5   |
| ZNF626  | 82.1   | 84.2   | 101.2 | 97.7   | 90.8   | 97     | 79.9   | 88.1   |
| ZNF626  | 81.6   | 92.4   | 91.4  | 85.8   | 76.9   | 85.7   | 84     | 85.9   |
| ZNF626  | 156.1  | 211.5  | 106.5 | 106    | 95.1   | 99.4   | 173.4  | 204.6  |
| ZNF627  | 1229.3 | 1516.5 | 719   | 669.4  | 468.6  | 825.7  | 1011.7 | 1458.9 |
| ZNF628  | 94.5   | 103.6  | 90.4  | 84.6   | 90.6   | 94.5   | 98     | 108.4  |
| ZNF629  | 134.8  | 172.1  | 166   | 146    | 130.3  | 160.4  | 149.2  | 172.6  |
| ZNF629  | 206.4  | 318.7  | 160   | 130.9  | 94.2   | 128.4  | 233.6  | 313    |
| ZNF630  | 95.3   | 125    | 106.9 | 96     | 91.5   | 106.7  | 104    | 120.2  |
| ZNF630  | 87.5   | 98.2   | 121.1 | 133.5  | 123.8  | 147    | 90.9   | 98.4   |
| ZNF639  | 111    | 110.8  | 108.2 | 92.3   | 92.7   | 88.2   | 112.9  | 107.1  |
| ZNF641  | 154.8  | 165.3  | 129.9 | 180.1  | 144.8  | 161.8  | 112.5  | 163.1  |
| ZNF642  | 599    | 698.6  | 269.4 | 358.3  | 241.1  | 381.5  | 486.6  | 954.8  |
| ZNF643  | 245.3  | 325.5  | 155.8 | 167.9  | 153.1  | 179.5  | 197.9  | 259.6  |
| ZNF644  | 87.5   | 105    | 95.9  | 90.2   | 89.5   | 83.4   | 99.8   | 101.8  |
| ZNF644  | 586.3  | 673.7  | 326.3 | 396    | 291.4  | 624.7  | 522.1  | 1104.8 |
| ZNF644  | 328.3  | 378.7  | 151.4 | 177.2  | 157.1  | 158.2  | 229.1  | 367.2  |
| ZNF645  | 84.8   | 101.8  | 89.4  | 83.2   | 87.6   | 88.3   | 105.8  | 100.8  |
| ZNF646  | 111.4  | 148.5  | 120.8 | 106.2  | 103.9  | 127.8  | 114.9  | 137.7  |
| ZNF648  | 98.3   | 113.1  | 102.3 | 80.7   | 85.9   | 80     | 91.4   | 107    |
| ZNF649  | 130.1  | 156.2  | 116   | 99.1   | 94.8   | 97.3   | 122.3  | 145.5  |
| ZNF650  | 330.4  | 473    | 338.1 | 393.7  | 330.5  | 471.3  | 321.1  | 411.9  |
| ZNF651  | 176.5  | 213.4  | 149.7 | 150.6  | 148.5  | 168.4  | 165.3  | 160.2  |
| ZNF652  | 1744   | 1979.1 | 715   | 1198.3 | 1378.8 | 794.5  | 1461   | 1671.1 |
| ZNF653  | 314.6  | 354.8  | 262.3 | 184.5  | 199.9  | 180.9  | 299.8  | 265.6  |
| ZNF654  | 157.8  | 184.2  | 112.7 | 130.6  | 123    | 133.6  | 145.7  | 184.1  |
| ZNF654  | 149.9  | 194.8  | 129.2 | 174    | 179.5  | 178.9  | 155    | 246    |
| ZNF654  | 193.2  | 218.3  | 127.7 | 152.6  | 143.2  | 176.8  | 170.8  | 253.2  |
| ZNF654  | 132    | 142.5  | 85.1  | 97.9   | 100.8  | 97     | 133.2  | 192.3  |
| ZNF655  | 173.5  | 182.7  | 97    | 85.6   | 87.2   | 94.5   | 140.2  | 166.6  |
| ZNF655  | 130.8  | 164.9  | 118   | 99.4   | 81.9   | 96.4   | 135.2  | 148.7  |
| ZNF655  | 104.2  | 114.8  | 93.7  | 89.6   | 103    | 97.4   | 93.4   | 97.2   |
| ZNF655  | 330.4  | 349.4  | 185.2 | 200.5  | 212.6  | 172.8  | 299.3  | 268.2  |
| ZNF658  | 260.9  | 314    | 141.1 | 118.8  | 108.8  | 147.3  | 204.3  | 304    |
| ZNF658B | 66.3   | 78.6   | 94.2  | 87.9   | 86.5   | 77.6   | 72.8   | 75.7   |
| ZNF659  | 103.4  | 108.8  | 115.5 | 100.2  | 93.6   | 108.3  | 96.9   | 103.2  |
| ZNF660  | 127    | 140.5  | 140.7 | 127.8  | 120.3  | 113.3  | 131.9  | 169    |
| ZNF662  | 82.2   | 95     | 99    | 86.6   | 85     | 94.9   | 90.5   | 80.1   |
| ZNF664  | 240.1  | 297.1  | 131.8 | 145    | 132    | 156.1  | 198.8  | 247.7  |
| ZNF665  | 73.9   | 91.9   | 87.6  | 82.6   | 67.7   | 86.1   | 91.1   | 95.7   |
| ZNF667  | 114.9  | 132.8  | 92.5  | 80.3   | 83.1   | 89.2   | 112.8  | 135.5  |



|        |        |        |        |        |        |        |        |        |
|--------|--------|--------|--------|--------|--------|--------|--------|--------|
| ZNF668 | 677.7  | 866.4  | 482.8  | 368.3  | 303.6  | 360.4  | 562.2  | 673.3  |
| ZNF669 | 392    | 427.7  | 256.6  | 263.9  | 224.3  | 185.1  | 339    | 439.1  |
| ZNF670 | 623.7  | 733.5  | 329.6  | 236.1  | 153    | 212.3  | 421.4  | 673.1  |
| ZNF671 | 380.1  | 476.4  | 316.8  | 253.2  | 222.2  | 284.5  | 323.7  | 354.3  |
| ZNF672 | 1321.5 | 1585.8 | 1029.9 | 976    | 959.6  | 1079.6 | 1199.8 | 827.4  |
| ZNF673 | 152.1  | 174.8  | 104.6  | 97.2   | 89.9   | 110.1  | 156.1  | 166.4  |
| ZNF675 | 117.2  | 104.2  | 101.2  | 94.1   | 89     | 102.1  | 97.4   | 123.8  |
| ZNF677 | 98.5   | 100.2  | 94.3   | 84.4   | 86.8   | 85.3   | 95.6   | 109.2  |
| ZNF678 | 75.7   | 84.2   | 84.6   | 69.2   | 68.4   | 77.2   | 82     | 85.1   |
| ZNF680 | 288.6  | 326.3  | 111.2  | 151.3  | 107.9  | 173.7  | 209.5  | 340.6  |
| ZNF681 | 179.4  | 189.8  | 122.3  | 124.4  | 103.2  | 162.2  | 165.3  | 327.1  |
| ZNF682 | 102.2  | 103.5  | 102.9  | 92.7   | 79.3   | 91.7   | 102.8  | 121.2  |
| ZNF682 | 184    | 263.7  | 150    | 190.2  | 168.7  | 181.1  | 166.3  | 167.4  |
| ZNF682 | 1978.3 | 1766.8 | 718.5  | 955.6  | 994.8  | 577.2  | 1626.7 | 2573.2 |
| ZNF683 | 107.3  | 125.6  | 98.7   | 85     | 88.3   | 88.3   | 99     | 118.4  |
| ZNF684 | 1424.1 | 1690.6 | 715    | 834.5  | 507.8  | 1175.7 | 1346.2 | 2472.3 |
| ZNF687 | 107.3  | 117    | 95.6   | 106.8  | 86.3   | 104.5  | 105.1  | 131.6  |
| ZNF688 | 173    | 203.4  | 123.5  | 109.5  | 102.4  | 111.2  | 137    | 203.4  |
| ZNF688 | 83.2   | 101.5  | 102    | 104.9  | 95.3   | 87.5   | 83.3   | 90     |
| ZNF689 | 1129.3 | 1445.3 | 765.1  | 656    | 575.5  | 637    | 761.9  | 654.7  |
| ZNF69  | 1247   | 1203.1 | 645.2  | 1207.6 | 1042.7 | 770.8  | 1101.8 | 2098.2 |
| ZNF690 | 167.4  | 199.9  | 119.6  | 106.4  | 111.9  | 110.5  | 155.4  | 163.9  |
| ZNF691 | 203.1  | 249.3  | 189.6  | 180.3  | 146.1  | 242.9  | 173.9  | 246.8  |
| ZNF692 | 490    | 493    | 499    | 471.5  | 510.8  | 791    | 268.3  | 386.3  |
| ZNF694 | 237.6  | 298    | 155.8  | 156.9  | 147.7  | 177.9  | 200.1  | 206.9  |
| ZNF695 | 276.2  | 358.3  | 239.1  | 168.2  | 164.6  | 168.7  | 281.3  | 290.7  |
| ZNF696 | 534.1  | 675.2  | 368.3  | 276.2  | 285.7  | 304.2  | 458.1  | 531    |
| ZNF699 | 165.7  | 216.3  | 106.4  | 99.4   | 99.5   | 113.4  | 159.7  | 170.5  |
| ZNF7   | 647    | 723.8  | 484.1  | 429.8  | 381.6  | 724.7  | 478.9  | 868.8  |
| ZNF70  | 81     | 98.7   | 92.6   | 75.1   | 81.4   | 80.7   | 86.7   | 98.7   |
| ZNF700 | 990.6  | 1315.5 | 926.9  | 1079.3 | 953.9  | 1644.5 | 789.1  | 1157.1 |
| ZNF701 | 131.6  | 151.1  | 103.6  | 107.5  | 94.2   | 111.2  | 118.3  | 152.3  |
| ZNF702 | 81.6   | 100.2  | 97.4   | 87.3   | 73.1   | 84.8   | 90.7   | 97.3   |
| ZNF703 | 99.4   | 107.1  | 92.8   | 80.4   | 70.1   | 85.5   | 98.8   | 100.6  |
| ZNF703 | 89.4   | 80.4   | 89.1   | 87.3   | 77.1   | 79.6   | 93.9   | 104.4  |
| ZNF704 | 103.4  | 112.8  | 102.6  | 104.8  | 98.2   | 103.9  | 92.5   | 115.2  |
| ZNF706 | 233.2  | 288.3  | 177.2  | 165    | 122.6  | 175.7  | 193.8  | 282.3  |
| ZNF706 | 86     | 93.4   | 121.5  | 109    | 98.1   | 108.9  | 84.4   | 92.7   |
| ZNF706 | 289.1  | 339.1  | 223.6  | 187    | 146.4  | 205.9  | 226.5  | 290.9  |
| ZNF707 | 208.4  | 255.4  | 186.7  | 143.1  | 146.3  | 171    | 215.5  | 337.7  |
| ZNF708 | 89.4   | 87.8   | 102.3  | 90.2   | 92.4   | 96.8   | 82.8   | 107.5  |
| ZNF709 | 97.2   | 94     | 89.9   | 88.1   | 89.4   | 88     | 94     | 92.8   |
| ZNF71  | 113.7  | 126.8  | 94.7   | 105.5  | 95.8   | 99     | 104.3  | 121    |
| ZNF710 | 83.9   | 91.4   | 80.5   | 86.5   | 80.5   | 78.9   | 83.1   | 88     |
| ZNF713 | 121    | 111.8  | 106.9  | 101.8  | 98.6   | 100    | 107.7  | 115.4  |
| ZNF714 | 111.2  | 124.1  | 97.5   | 90.9   | 88.9   | 98.4   | 106.8  | 113.7  |
| ZNF718 | 102.8  | 122.4  | 111.1  | 105.2  | 102.9  | 98.1   | 103.1  | 105.8  |
| ZNF721 | 1059   | 1359   | 394    | 298.2  | 279.9  | 431.1  | 905.8  | 1527.7 |
| ZNF74  | 94.7   | 109    | 95.9   | 92.5   | 79     | 89.3   | 91     | 97.5   |
| ZNF74  | 146.4  | 165.7  | 125.4  | 93.2   | 103.5  | 101.5  | 133.7  | 141.2  |

|         |        |        |        |        |        |        |        |        |
|---------|--------|--------|--------|--------|--------|--------|--------|--------|
| ZNF74   | 234.4  | 282.6  | 147.5  | 173.9  | 140.5  | 169.6  | 179.3  | 213.9  |
| ZNF740  | 98.5   | 120.7  | 105.5  | 119.2  | 114.9  | 115.5  | 96.8   | 99.5   |
| ZNF749  | 115.4  | 146    | 99     | 87.3   | 77.6   | 85.2   | 111.5  | 119.4  |
| ZNF75   | 198.2  | 216.7  | 152    | 229.3  | 164.2  | 247.8  | 209.4  | 311.3  |
| ZNF75A  | 339.7  | 388.7  | 165.3  | 131.1  | 109.4  | 154.2  | 317.1  | 445.1  |
| ZNF76   | 179.2  | 222.2  | 213.9  | 182    | 200.9  | 322.8  | 154.1  | 212.2  |
| ZNF765  | 68.8   | 83.1   | 77.8   | 78.7   | 79.5   | 72.9   | 77.5   | 80.4   |
| ZNF767  | 197.5  | 198.9  | 168.4  | 159.1  | 169    | 169.7  | 155.2  | 175.4  |
| ZNF77   | 231.6  | 304.8  | 210.5  | 179    | 158.6  | 239.4  | 216.5  | 325.8  |
| ZNF781  | 95.8   | 114.1  | 82.8   | 87     | 91.9   | 97.1   | 98.9   | 101.1  |
| ZNF79   | 143.8  | 161.7  | 100.2  | 103.2  | 98.8   | 109.8  | 139.4  | 184.1  |
| ZNF8    | 135.1  | 131.5  | 113.7  | 94.4   | 90.7   | 100.7  | 113.8  | 124.5  |
| ZNF80   | 92.6   | 102.7  | 113.6  | 104.8  | 104.3  | 98.6   | 91.5   | 91.2   |
| ZNF805  | 142.7  | 205    | 113.7  | 129.8  | 113.2  | 157.4  | 164.8  | 194.1  |
| ZNF808  | 84.2   | 94.5   | 100.5  | 89.7   | 82.1   | 95.4   | 82.8   | 95.8   |
| ZNF81   | 87.5   | 97.8   | 86.3   | 81.7   | 83.7   | 84.6   | 93.3   | 93.5   |
| ZNF83   | 318.4  | 364    | 170.8  | 167.3  | 171.9  | 244.7  | 218.1  | 390.5  |
| ZNF85   | 149.9  | 145.8  | 106.9  | 83.6   | 90.4   | 132.2  | 110    | 173.8  |
| ZNF91   | 444.6  | 550.3  | 219.6  | 225.2  | 146.7  | 306.4  | 405.7  | 734.9  |
| ZNF92   | 155.5  | 162.6  | 98.6   | 86.6   | 92.1   | 88.9   | 109.9  | 133.2  |
| ZNF92   | 81.4   | 96.9   | 106.9  | 90.4   | 93.1   | 96.2   | 88.5   | 97.5   |
| ZNF93   | 388.8  | 524.3  | 166.8  | 174.4  | 144.4  | 205.3  | 349.6  | 458.5  |
| ZNF93   | 266.3  | 364.8  | 152.2  | 139.8  | 124.1  | 202    | 207.2  | 339.3  |
| ZNF96   | 119    | 143.6  | 108.2  | 96.5   | 82.4   | 105.2  | 109.1  | 136.9  |
| ZNF99   | 110.3  | 109    | 100.9  | 90.1   | 84.4   | 90.6   | 92.1   | 110.1  |
| ZNFN1A1 | 1043.4 | 1203.9 | 438.2  | 496.5  | 437.2  | 431.4  | 516.8  | 554.8  |
| ZNFN1A2 | 165.6  | 166.8  | 111.3  | 107.2  | 93.7   | 107.3  | 145.1  | 141.4  |
| ZNFN1A2 | 108.4  | 143.6  | 104.4  | 88.7   | 82.8   | 89     | 114.2  | 129.6  |
| ZNFN1A3 | 127    | 138    | 102.1  | 95.2   | 95.1   | 86.7   | 126.5  | 147.1  |
| ZNFN1A4 | 155.9  | 194    | 132.6  | 124.3  | 107.8  | 124.2  | 152.6  | 223    |
| ZNFN1A5 | 253.7  | 371.6  | 201.6  | 167.4  | 137.7  | 223.5  | 235.2  | 389.6  |
| ZNFX1   | 310.1  | 414.2  | 339.4  | 250.8  | 184.4  | 248.2  | 260.8  | 517.3  |
| ZNHIT1  | 1747.4 | 2024.1 | 1242.5 | 1273.5 | 1008.4 | 1288.3 | 1738   | 1835.3 |
| ZNHIT2  | 249.9  | 347.1  | 140.5  | 91.8   | 93.9   | 124.6  | 193.1  | 237.3  |
| ZNHIT3  | 3513.6 | 4701.6 | 3037.2 | 3653.3 | 3023.2 | 3581.7 | 3516.3 | 4630.5 |
| ZNHIT3  | 103.8  | 110.3  | 90.9   | 86.4   | 80.9   | 81.8   | 102.4  | 100    |
| ZNHIT3  | 919.8  | 1216.3 | 300.3  | 278.5  | 269.2  | 440.7  | 820.5  | 1075.9 |
| ZNHIT4  | 160.7  | 215    | 131.8  | 129.1  | 115.3  | 110.8  | 157.8  | 179.7  |
| ZNRD1   | 348.8  | 504.6  | 183    | 122.1  | 134.9  | 157.6  | 314.5  | 336.4  |
| ZNRD1   | 498    | 662.3  | 359.2  | 247.7  | 188.8  | 309.6  | 377.9  | 498    |
| ZNRD1   | 457.9  | 556.5  | 264.5  | 203.7  | 163.4  | 231.9  | 356.9  | 423.6  |
| ZNRF1   | 103.5  | 119.6  | 106.5  | 89.6   | 90.1   | 87.5   | 104.6  | 129.8  |
| ZNRF2   | 87.9   | 105.3  | 80.5   | 85.9   | 80.9   | 88.7   | 86.7   | 102.8  |
| ZNRF4   | 78.2   | 91.8   | 91.4   | 82.6   | 83.2   | 87.3   | 74.1   | 82.4   |
| ZP1     | 79.3   | 88.6   | 93.9   | 101.3  | 86.1   | 91.4   | 81.6   | 97.1   |
| ZP2     | 73.8   | 76.6   | 88.3   | 87.3   | 71.4   | 87.1   | 81.9   | 74.7   |
| ZP3     | 158.4  | 187    | 105.1  | 93.3   | 93.8   | 88.1   | 145.9  | 179.9  |
| ZP4     | 79.6   | 87.2   | 90     | 84.7   | 79.8   | 82.6   | 75.1   | 81.1   |
| ZPBP    | 78.9   | 83.3   | 90.5   | 78.5   | 85.5   | 90.1   | 82.1   | 84.2   |
| ZPBP2   | 81.5   | 86.7   | 99.8   | 96.6   | 90.5   | 92     | 80.9   | 83.6   |

|         |        |        |        |        |        |        |        |        |
|---------|--------|--------|--------|--------|--------|--------|--------|--------|
| ZBPB2   | 75.2   | 87.2   | 96.8   | 92.2   | 82.5   | 87.1   | 82.7   | 86.7   |
| ZBPB2   | 82.5   | 96.9   | 97.1   | 79.8   | 86.2   | 90.6   | 82.6   | 95.1   |
| ZPLD1   | 74.1   | 77.1   | 79.5   | 71.3   | 73.4   | 72.8   | 81.8   | 79.2   |
| ZRANB1  | 174.2  | 259.3  | 146.4  | 124.7  | 120.2  | 138.3  | 178    | 252.5  |
| ZRANB3  | 85     | 106.4  | 93.3   | 88.8   | 84.4   | 86.9   | 99.2   | 96.9   |
| ZRF1    | 137.6  | 145.4  | 103.4  | 88.9   | 83.4   | 99.3   | 148.5  | 263.1  |
| ZSCAN1  | 95.2   | 119.6  | 88.8   | 73.4   | 75.2   | 80.8   | 104.8  | 118.1  |
| ZSCAN2  | 140    | 169.7  | 113.3  | 114.5  | 123.7  | 133.3  | 140.1  | 164.5  |
| ZSCAN2  | 298    | 354.1  | 239.9  | 293.1  | 251.6  | 296.6  | 288    | 292.3  |
| ZSCAN2  | 114.4  | 145.4  | 110.3  | 119    | 121.6  | 120.8  | 104.4  | 125.3  |
| ZSCAN2  | 90.8   | 105.7  | 88.8   | 79.3   | 91     | 96.3   | 87     | 93.5   |
| ZSCAN4  | 81.4   | 95.2   | 103.6  | 93.4   | 86.4   | 97     | 93     | 95.5   |
| ZSCAN5  | 302.4  | 399.7  | 183.1  | 169.3  | 134.3  | 156.1  | 251.4  | 310.1  |
| ZSWIM1  | 657.7  | 809    | 381.6  | 442.4  | 389.2  | 380.6  | 609.9  | 677    |
| ZSWIM2  | 78.2   | 84.1   | 97.2   | 82.6   | 84.5   | 91.1   | 78.5   | 79     |
| ZSWIM3  | 113.1  | 137.5  | 96     | 99.1   | 93.1   | 82.1   | 112.3  | 121.8  |
| ZSWIM3  | 197    | 246.8  | 203.1  | 187.5  | 161.3  | 202.8  | 205.5  | 326.4  |
| ZSWIM3  | 112.4  | 130.7  | 102.6  | 108.2  | 87.8   | 97     | 110.9  | 116.6  |
| ZSWIM3  | 136.2  | 148    | 95.7   | 94     | 88.7   | 86.2   | 115    | 118.6  |
| ZSWIM4  | 207.1  | 281.5  | 176.5  | 178.3  | 174.1  | 181.9  | 223.3  | 256.1  |
| ZW10    | 1605   | 2211.8 | 841.8  | 793.1  | 713.6  | 1117.2 | 1370.5 | 1414.6 |
| ZWILCH  | 250.5  | 322.4  | 118.7  | 109.8  | 94.8   | 110.1  | 182.6  | 274.3  |
| ZWILCH  | 256.1  | 292.7  | 115    | 105.6  | 92.1   | 112.6  | 198.9  | 395.3  |
| ZWILCH  | 1945.8 | 2478.6 | 1254.9 | 1005.3 | 891.2  | 1412.1 | 1440.3 | 2419.8 |
| ZWINT   | 167.8  | 194.4  | 145.1  | 102.4  | 93.4   | 102.9  | 130.4  | 169.3  |
| ZWINT   | 924    | 1034.6 | 259.9  | 188.7  | 179.7  | 238.1  | 730.2  | 1003.4 |
| ZWINT   | 156.6  | 181.8  | 100.8  | 101.5  | 78.3   | 90.7   | 142.2  | 160.9  |
| ZXDA    | 120.5  | 133.6  | 120.2  | 106.8  | 104.2  | 113.2  | 121.9  | 126.4  |
| ZXDA    | 108.9  | 117    | 97.2   | 87.1   | 87.3   | 92.8   | 97.1   | 105.9  |
| ZXDB    | 152    | 205.6  | 127.5  | 115.6  | 105.6  | 145.8  | 128.7  | 149    |
| ZXDC    | 125.2  | 157.8  | 111.8  | 123    | 106.2  | 108.7  | 125.9  | 136.8  |
| ZXDC    | 225.5  | 284.1  | 203.8  | 263    | 239.8  | 250.3  | 176.2  | 164.4  |
| ZYG11A  | 99.3   | 105.8  | 99.3   | 85.9   | 95     | 92.8   | 98.2   | 102.1  |
| ZYG11B  | 1147.1 | 1816.9 | 913.6  | 1524.5 | 1215.1 | 1943.8 | 1076.3 | 1504.5 |
| ZYG11BL | 189.3  | 215.6  | 134.3  | 115.3  | 104.3  | 119.6  | 185.4  | 226.3  |
| ZYX     | 536.7  | 765.8  | 657    | 643    | 523.2  | 935.8  | 530.3  | 1280.2 |
| ZYX     | 2901.8 | 3598.2 | 2188.4 | 2607.9 | 2038.3 | 2100   | 2712   | 4414.2 |
| ZZEF1   | 250.9  | 370.9  | 189.9  | 267.9  | 243.6  | 284.1  | 294.2  | 339.1  |
| ZZZ3    | 800.9  | 908.1  | 501.3  | 459.1  | 320.5  | 671.3  | 581.1  | 1116.8 |

TS5, TS6)

| AVG_Signa | AVG_Signa | AVG_Signa | AVG_Signa | ACCESSION      |
|-----------|-----------|-----------|-----------|----------------|
| 188.9     | 169.8     | 156.5     | 139.2     | NM_176818.1    |
| 361.3     | 287.7     | 224.7     | 185       | NM_177966.4    |
| 80.7      | 89.9      | 85.1      | 92.5      | NM_182762.2    |
| 109.7     | 105.1     | 107.7     | 90.9      | NM_130786.2    |
| 89.4      | 85.6      | 84.1      | 80.2      | NM_018723.2    |
| 100.1     | 95.5      | 83.7      | 94.3      | NM_145891.1    |
| 92.5      | 85.4      | 85.1      | 87.5      | NM_145893.1    |
| 100.4     | 93.2      | 75.1      | 85.5      | NM_018723.2    |
| 77.1      | 86        | 80.3      | 89.6      | NM_000014.4    |
| 109.3     | 89        | 86.2      | 92.2      | NM_144670.2    |
| 84.9      | 83.3      | 78.8      | 78.6      | XM_940724.1    |
| 91        | 88.7      | 92.9      | 90.7      | NM_001080438.1 |
| 146.1     | 113       | 130.8     | 109.6     | NM_017436.4    |
| 95.8      | 92.8      | 92.5      | 92.5      | NM_016161.1    |
| 114.9     | 104.4     | 91.4      | 94.7      | NM_207284.1    |
| 103.8     | 103.1     | 99.8      | 95.5      | NM_207290.1    |
| 101       | 86        | 88.6      | 89.5      | NM_207285.1    |
| 76.8      | 66.1      | 69.7      | 71.9      | NM_207289.1    |
| 83.5      | 83.7      | 78.7      | 80.7      | NM_207283.1    |
| 125.2     | 110.7     | 102.8     | 99.8      | NM_015665.3    |
| 169       | 233.5     | 221       | 161.5     | NM_023928.2    |
| 98.3      | 94.7      | 90.7      | 88.1      | NM_001086.2    |
| 159.7     | 151       | 121.2     | 151.7     | NM_020792.3    |
| 89.9      | 88.3      | 84.1      | 85.9      | NM_207365.1    |
| 97.2      | 81.9      | 91.7      | 92.4      | NM_016228.3    |
| 88.5      | 81.3      | 89.9      | 84.8      | NM_182662.1    |
| 84.4      | 82.3      | 84        | 94.9      | NM_182662.1    |
| 87.6      | 92.6      | 96.3      | 89.6      | NM_014911.2    |
| 164.4     | 197.3     | 171.4     | 144.8     | NM_001087.2    |
| 90.1      | 75.6      | 75.4      | 82        | NM_001088.1    |
| 4730.4    | 3964.3    | 3757.5    | 2302      | NM_001605.1    |
| 493.5     | 548.7     | 525.1     | 436.5     | NM_025267.2    |
| 256.7     | 330.2     | 275.3     | 229.6     | NM_020745.1    |
| 302.3     | 308.9     | 263.5     | 255.8     | NM_181806.2    |
| 767.1     | 491.9     | 385.1     | 338.1     | NM_015423.2    |
| 109.1     | 106       | 97.7      | 98.8      | NM_005763.2    |
| 1032.7    | 722.1     | 640.3     | 526.6     | NM_012138.3    |
| 103.4     | 102.3     | 94.9      | 101.3     | XM_927215.1    |
| 76        | 79.3      | 80.6      | 81.5      | NM_001080395.1 |
| 91.2      | 82        | 87        | 86.9      | NM_020686.3    |
| 87.8      | 86.6      | 87.4      | 90.7      | NM_020686.3    |
| 98.6      | 89.9      | 88.9      | 84.1      | NM_000663.3    |

|       |       |       |                      |
|-------|-------|-------|----------------------|
| 138.1 | 156.7 | 153.2 | 113.9 NM_022070.3    |
| 297.6 | 870.1 | 838.7 | 608.4 NM_005502.2    |
| 98.4  | 90    | 99.8  | 95.1 NM_080282.2     |
| 122.6 | 139.9 | 105.4 | 116.1 NR_002451.1    |
| 91    | 80.6  | 81.3  | 86.7 NM_173076.2     |
| 86.8  | 90.4  | 92.4  | 81.1 NM_015657.3     |
| 95.4  | 91.9  | 85.5  | 90.2 NM_152701.2     |
| 89    | 93.9  | 90.1  | 89 NM_212533.1       |
| 131.9 | 146.1 | 124   | 121.4 NM_001606.3    |
| 97.1  | 94.1  | 93.8  | 93.7 NM_001089.1     |
| 143.4 | 131.5 | 136   | 139.4 NM_000350.1    |
| 93.8  | 101.2 | 112.3 | 110.4 NM_172232.1    |
| 83.9  | 90.7  | 82.4  | 89.9 NM_018672.2     |
| 91.7  | 85    | 91.4  | 99 NM_018672.2       |
| 84.7  | 88.8  | 88    | 92.1 NM_172346.1     |
| 106.5 | 120.7 | 106.1 | 96.6 NM_080284.2     |
| 83.9  | 83.9  | 69.6  | 80 NM_019112.2       |
| 203.7 | 265.4 | 272.7 | 222.5 NM_019112.2    |
| 96.5  | 90.2  | 89.7  | 96.5 NM_033308.1     |
| 80.8  | 83.9  | 73.3  | 86.8 NM_007168.2     |
| 98.2  | 97.3  | 85.6  | 87.8 NM_080283.2     |
| 96    | 75.9  | 86.6  | 85.4 NM_080283.2     |
| 87.3  | 85.3  | 78.1  | 80 NM_000927.3       |
| 810.8 | 779.3 | 702.2 | 684.2 NM_012089.1    |
| 94.6  | 100.2 | 95    | 100.9 NM_003742.2    |
| 119.6 | 75.9  | 91.4  | 86.7 NM_000443.2     |
| 82.5  | 84.5  | 79.3  | 74.7 NM_178559.3     |
| 146.3 | 177   | 168.7 | 162.8 NM_005689.1    |
| 381.5 | 352.6 | 341.6 | 393.2 NM_004299.3    |
| 92.8  | 82.5  | 86.8  | 84.7 NM_007188.2     |
| 92.8  | 96.3  | 98.2  | 102.8 NM_203444.1    |
| 136.5 | 129.4 | 119.1 | 134.1 NM_019624.2    |
| 183.2 | 191.1 | 194.5 | 142.6 NM_019624.2    |
| 90.9  | 94.4  | 90.3  | 97.4 NM_019901.1     |
| 126.2 | 124.4 | 112.5 | 119.7 NM_019900.1    |
| 114.2 | 104   | 97.6  | 109.2 NM_033450.2    |
| 78    | 73.7  | 72.1  | 80 NM_145186.2       |
| 113.3 | 102.4 | 99.6  | 86.8 NM_033151.2     |
| 96.3  | 86.7  | 96    | 101.5 NM_145186.1    |
| 115.1 | 105.2 | 99.9  | 109.4 NM_145188.1    |
| 118.4 | 89.7  | 100.3 | 102.2 NM_172025.1    |
| 101.3 | 105.8 | 104.4 | 100.9 NM_172024.1    |
| 114.7 | 98.2  | 93.2  | 94.4 NM_000392.1     |
| 115.9 | 766.7 | 487.8 | 438.4 NM_020037.1    |
| 207.4 | 208   | 156.3 | 173.3 NM_005845.2    |
| 94.6  | 85.6  | 79.6  | 89.5 NM_001023587.1  |
| 194   | 320.6 | 287.3 | 197.4 NM_005688.2    |
| 158.8 | 147.5 | 132.8 | 138.5 NM_001023587.1 |
| 83.1  | 94.6  | 92    | 96.5 NM_001171.2     |
| 77.9  | 81.3  | 83.3  | 95.3 XM_936351.1     |

|        |       |       |                      |
|--------|-------|-------|----------------------|
| 80.9   | 82.9  | 73.7  | 82.3 NM_001079528.1  |
| 88.7   | 87.1  | 96.6  | 96.8 NM_001171.2     |
| 126.4  | 119.1 | 138.3 | 109.9 NM_001079528.1 |
| 91.4   | 92.6  | 88.5  | 89.2 NM_000352.2     |
| 89.3   | 87.7  | 79.5  | 88.5 NM_020297.1     |
| 98.6   | 92.3  | 92.3  | 94.2 NM_020298.2     |
| 222.9  | 212.5 | 183.9 | 212.7 NM_000033.2    |
| 89.5   | 80.4  | 83.6  | 81.4 NM_005164.2     |
| 85.7   | 91.9  | 83.5  | 95.2 NR_003256.1     |
| 116.9  | 111   | 104.5 | 121.1 NM_020323.1    |
| 1314.8 | 635.8 | 444   | 606.8 NM_001040876.1 |
| 1286.7 | 610.6 | 434.7 | 572.4 NM_002940.1    |
| 438.2  | 373.6 | 327.4 | 293.4 NM_001025091.1 |
| 846.6  | 896.8 | 825.2 | 510 NM_001090.2      |
| 103    | 90.8  | 87.8  | 92.8 NM_005692.3     |
| 507.6  | 434.1 | 329.8 | 287.9 NM_005692.3    |
| 185.3  | 168.6 | 143.9 | 146.9 NM_007189.1    |
| 141.1  | 119.8 | 127   | 121.8 NM_018358.1    |
| 98.6   | 96.5  | 105.5 | 108 NM_207629.1      |
| 107    | 102.2 | 92.7  | 95.2 NM_207627.1     |
| 101.3  | 97.3  | 85.9  | 83.1 NM_207630.1     |
| 89.5   | 97.1  | 96.3  | 91.7 NM_016818.2     |
| 96.5   | 92.6  | 91.1  | 97.3 NM_004915.3     |
| 87.2   | 82.2  | 86.4  | 97.9 NM_207174.1     |
| 78     | 75.6  | 74.8  | 76.9 NM_004827.2     |
| 101.3  | 90.2  | 90.4  | 91.7 NM_022169.3     |
| 106.2  | 101.4 | 99.4  | 102.4 NM_022436.2    |
| 93.9   | 91.7  | 83.5  | 93.7 NM_022437.2     |
| 95.6   | 85.1  | 85.2  | 87.5 NM_152870.1     |
| 295.3  | 277.8 | 231.6 | 179 NM_018394.1      |
| 189    | 158.1 | 150.3 | 139.4 NM_148916.2    |
| 92.7   | 87.3  | 81.6  | 80 NM_031295.3       |
| 223.5  | 195.5 | 170.6 | 145.8 NM_148914.2    |
| 232.5  | 239.1 | 197.5 | 203.6 NM_001042472.1 |
| 319.8  | 367.9 | 332.9 | 291.6 NM_001042472.1 |
| 92.2   | 90.6  | 83    | 88.1 NM_032859.2     |
| 467.1  | 308.1 | 321.7 | 210.9 NM_015407.3    |
| 173.5  | 219.5 | 206   | 188.6 NM_032750.1    |
| 120.3  | 118.7 | 113.5 | 107.6 NM_152924.3    |
| 95     | 92.1  | 93.9  | 97.6 NM_007011.4     |
| 93.9   | 92.9  | 92.2  | 93.8 NM_007011.4     |
| 614.6  | 687.3 | 558.4 | 616.4 NM_138340.3    |
| 107.7  | 98.7  | 101.2 | 98.2 NM_022060.2     |
| 168.8  | 134.6 | 121.1 | 129.8 NM_016006.3    |
| 150.8  | 165.2 | 147.6 | 153.8 NM_020676.4    |
| 104.7  | 94.4  | 98    | 83.7 NM_173567.2     |
| 418.5  | 359.4 | 312   | 194.2 NM_024527.3    |
| 103.4  | 93.8  | 86    | 94.5 NM_024794.1     |
| 84.3   | 93.8  | 80.4  | 85.1 NM_005470.2     |
| 201.4  | 138.3 | 109.5 | 131.1 NM_001012751.1 |

|        |        |        |                     |
|--------|--------|--------|---------------------|
| 123.8  | 115    | 96.2   | 101.8 XM_938458.1   |
| 414.1  | 307.8  | 213.7  | 207.9 NM_005759.3   |
| 110.9  | 112.1  | 99.6   | 109.1 NM_005759.3   |
| 86     | 102.9  | 97.6   | 102.5 NM_016428.2   |
| 81.2   | 92.5   | 84.5   | 83.8 NM_015429.2    |
| 512.2  | 413.8  | 428.6  | 233.3 NM_007313.2   |
| 120.5  | 120.6  | 124.9  | 125.6 NM_007313.2   |
| 89.9   | 92.6   | 90.8   | 82.3 NM_005157.3    |
| 99.2   | 93.8   | 91.9   | 92.7 NM_005158.2    |
| 92.3   | 81.2   | 85.8   | 86.5 NM_005158.2    |
| 97.5   | 113.6  | 94     | 100.3 NM_007314.1   |
| 101.3  | 92.8   | 95.3   | 100.6 NM_006720.3   |
| 87.9   | 83.8   | 83.7   | 90.6 NM_006720.3    |
| 92.7   | 90.3   | 86.4   | 87.6 NM_002313.5    |
| 84.1   | 82.9   | 75.6   | 79.9 NM_001003407.1 |
| 105.6  | 85.7   | 91.1   | 92.1 NM_032432.2    |
| 96.9   | 98     | 94.2   | 98.1 NM_014945.1    |
| 84     | 93.1   | 83.8   | 93.1 NM_020469.2    |
| 634.3  | 2090.4 | 2510   | 807.8 NM_001091.2   |
| 1108.3 | 1380.6 | 1341.7 | 522.6 NM_021962.2   |
| 96.1   | 105.3  | 97.9   | 98.6 NM_001092.3    |
| 94.4   | 93.2   | 91.7   | 90.5 NM_021962.2    |
| 84.2   | 82.5   | 90     | 91.7 NM_139166.2    |
| 114.1  | 99.9   | 97.2   | 92.9 NM_013375.2    |
| 178.2  | 221.3  | 272    | 156.5 NM_172027.1   |
| 143.1  | 152.8  | 172.9  | 213.3 NM_172028.1   |
| 154.1  | 169.5  | 141.8  | 134.3 NM_145804.1   |
| 482.9  | 571    | 583.7  | 452.7 NM_001607.2   |
| 189.9  | 174.6  | 161.6  | 119.3 NM_006111.1   |
| 781.9  | 1017.1 | 1158.1 | 767.4 NM_198836.1   |
| 546.1  | 546.9  | 711.6  | 426.9 NM_000664.3   |
| 98.8   | 96.2   | 90.4   | 86.7 NM_198839.1    |
| 226.5  | 368.6  | 455    | 226.7 NM_001093.2   |
| 170.5  | 217.7  | 217.6  | 131.9 NM_025247.3   |
| 236.3  | 271    | 310.4  | 253.1 NM_032169.3   |
| 534.6  | 285.8  | 256.9  | 221.5 NM_014384.2   |
| 680.2  | 660.2  | 688.4  | 413.5 NM_014049.3   |
| 90.3   | 83.7   | 79.2   | 84.5 NM_001608.2    |
| 2002   | 1434.8 | 1525.1 | 1348.8 NM_000016.2  |
| 160.1  | 145.6  | 167.2  | 128.1 NM_000017.1   |
| 104.1  | 112    | 102.2  | 110.5 NM_001609.2   |
| 173.8  | 185.5  | 178    | 168.3 NM_000018.2   |
| 2399.5 | 2384.6 | 2175.5 | 1516.1 NM_000018.2  |
| 683.1  | 840.6  | 672.3  | 594 NM_000018.2     |
| 2721.7 | 2258.3 | 2105.7 | 1509.5 NM_000019.2  |
| 111.6  | 106    | 96.6   | 106 NM_005891.1     |
| 987.9  | 866    | 745.6  | 863.2 NM_022735.3   |
| 94.6   | 92.2   | 86.6   | 84.5 NM_024722.1    |
| 99.6   | 94.9   | 85.6   | 85.8 NM_145698.1    |
| 100.5  | 92.2   | 86.5   | 91.8 NM_145698.1    |

|        |        |        |                      |
|--------|--------|--------|----------------------|
| 100.1  | 96.9   | 87.9   | 92.8 NM_145698.1     |
| 451.6  | 295.1  | 300.6  | 206.5 NM_032360.2    |
| 104.6  | 88.7   | 78.2   | 86.4 XM_928013.1     |
| 77.1   | 89     | 79     | 92.4 NM_001039844.2  |
| 84.9   | 86.3   | 77.5   | 87.5 NM_183377.1     |
| 141.2  | 113    | 128.4  | 106.4 NM_020039.2    |
| 92     | 79.6   | 97     | 86.9 NM_020039.2     |
| 133.7  | 119.4  | 114.3  | 106.4 NM_020322.1    |
| 99.1   | 93     | 93.6   | 90.8 NM_020321.1     |
| 97.3   | 94.9   | 84.1   | 85.7 NM_018674.3     |
| 93     | 86.1   | 85.6   | 82.8 NM_018674.3     |
| 82     | 92.2   | 80.5   | 83.5 NM_018674.3     |
| 83.4   | 83.8   | 87     | 83.8 NM_017419.1     |
| 469    | 255.5  | 257.1  | 200.2 NM_022914.1    |
| 97.9   | 93.7   | 87.3   | 95 NM_152831.1       |
| 89.2   | 81.6   | 73.2   | 79.9 NM_152830.1     |
| 85.5   | 87.1   | 96.6   | 89.9 NM_000789.2     |
| 87.6   | 89.9   | 91.3   | 87.5 NM_021804.1     |
| 81.5   | 87.9   | 84.9   | 96.1 NM_138932.1     |
| 91.2   | 85.6   | 84.3   | 83.1 NM_138933.1     |
| 93.2   | 89.3   | 96     | 95.7 NM_138933.1     |
| 80.7   | 90.6   | 82.8   | 87.1 NM_000665.3     |
| 98.8   | 88.1   | 85.5   | 94.3 NM_015831.1     |
| 634.8  | 563    | 542.4  | 477.2 NM_014977.1    |
| 3227.8 | 2911.6 | 2573.9 | 2197.3 NM_198830.1   |
| 135.2  | 135.6  | 127.5  | 112.6 NM_138326.1    |
| 703.5  | 366.9  | 355.5  | 357.6 NM_020186.1    |
| 1007.5 | 889.4  | 762.6  | 581.4 NM_002197.1    |
| 190.5  | 219.2  | 232.9  | 203.8 NM_001098.2    |
| 98.3   | 87     | 89.1   | 90.5 NM_001037161.1  |
| 155.4  | 132    | 136.7  | 112.5 XM_929560.1    |
| 347.5  | 292.2  | 240.2  | 165.4 NM_147161.2    |
| 113.2  | 100.6  | 103.1  | 113.7 NM_015547.2    |
| 105.4  | 95.3   | 92.2   | 98.7 NM_130767.1     |
| 88.4   | 97.5   | 88.8   | 91.3 NM_006821.3     |
| 492.3  | 248.8  | 207    | 190.8 NM_152331.2    |
| 77.9   | 82.5   | 81.7   | 78.3 NM_001037162.1  |
| 81.4   | 86.1   | 86.5   | 82.8 NM_181865.2     |
| 76.8   | 83     | 79.5   | 79.8 NM_181866.2     |
| 1272.3 | 938.1  | 868.8  | 558.3 NM_181866.2    |
| 87.6   | 91.2   | 84.6   | 82.3 NM_007274.3     |
| 776.9  | 442.8  | 394.5  | 306.1 NM_007274.3    |
| 91.1   | 77.3   | 78.4   | 76.2 NM_181864.2     |
| 138.7  | 140.8  | 132.6  | 119.3 NM_183386.1    |
| 130.4  | 135.9  | 143    | 117.3 NM_001037171.1 |
| 451.5  | 328.2  | 313.4  | 286.5 NM_001033583.1 |
| 210.7  | 169.6  | 146.6  | 163.1 NM_004035.4    |
| 87.7   | 94.6   | 90.3   | 89.9 NM_007292.3     |
| 97.6   | 92.7   | 86.6   | 89.6 NM_004035.4     |
| 261.4  | 246.6  | 214.4  | 158.4 NM_003500.2    |



|         |         |         |         |                |
|---------|---------|---------|---------|----------------|
| 411.8   | 316.4   | 330.5   | 229.1   | NM_003501.1    |
| 91.5    | 82.6    | 77.8    | 76.8    | NM_018308.1    |
| 1410.6  | 984.3   | 1012.9  | 807.9   | NM_007099.2    |
| 3565.8  | 2494.7  | 2426.9  | 1700.3  | NM_001040649.1 |
| 152     | 150.5   | 136.1   | 112.3   | NM_001610.1    |
| 92.5    | 93.8    | 86.9    | 81      | NM_001611.2    |
| 134.8   | 131.5   | 131.5   | 124.6   | NM_016361.2    |
| 119.1   | 103.7   | 92.4    | 99.5    | NM_152282.3    |
| 199.9   | 359.7   | 230.5   | 236.3   | NM_001099.2    |
| 170.6   | 190.4   | 184.9   | 149.3   | NM_033068.2    |
| 96.1    | 79.4    | 86.6    | 91      | NM_033068.2    |
| 94.8    | 85.6    | 97.4    | 90.2    | NM_001097.1    |
| 112.4   | 109.8   | 97.6    | 102     | NM_032489.2    |
| 130.3   | 123.9   | 109.1   | 97.8    | NM_052957.2    |
| 124.9   | 98.2    | 95.4    | 95.1    | NM_001612.4    |
| 94.6    | 87      | 80.1    | 92.3    | NM_020109.3    |
| 88.4    | 86      | 90.6    | 89.5    | NM_015162.3    |
| 93.8    | 96.7    | 85.2    | 105.3   | NM_030924.2    |
| 173.6   | 143.1   | 128.4   | 121.1   | NM_001995.2    |
| 1718    | 1782    | 1608.7  | 1197.6  | NM_203372.1    |
| 164.5   | 151.2   | 154.8   | 160.4   | NM_004457.3    |
| 313.7   | 309.5   | 286.8   | 289.7   | NM_004457.3    |
| 98.2    | 91      | 87.1    | 88.6    | NM_022977.1    |
| 255.8   | 173.6   | 183.2   | 160.3   | NM_022977.1    |
| 783.7   | 845.9   | 806.2   | 613.7   | NM_004458.1    |
| 162.5   | 120.3   | 113.6   | 122.5   | NM_203379.1    |
| 96.7    | 88.4    | 90.2    | 90.4    | NM_203379.1    |
| 95      | 91.6    | 87.7    | 93.1    | NM_203380.1    |
| 96.6    | 96.4    | 87.8    | 96.1    | NM_016234.3    |
| 563.5   | 366.1   | 359.7   | 215.9   | NM_203379.1    |
| 87.7    | 89      | 69.6    | 92.4    | NM_015256.2    |
| 93.9    | 86.7    | 82.4    | 89.3    | NM_001009185.1 |
| 100.1   | 93.7    | 94      | 89.5    | NM_015256.2    |
| 86.7    | 90.4    | 84.4    | 84.4    | NM_052956.1    |
| 82.9    | 91.6    | 84.9    | 86.7    | XM_936876.1    |
| 94.7    | 91.5    | 85.3    | 88      | NM_182617.2    |
| 102.9   | 90.6    | 100.2   | 90.3    | NM_202000.2    |
| 105.1   | 94.4    | 87.2    | 98.1    | NM_202000.2    |
| 105.5   | 99.4    | 109.4   | 101.5   | NM_005622.3    |
| 152.6   | 158     | 187.9   | 171.3   | NM_032501.2    |
| 76.1    | 85.6    | 79.4    | 89.5    | NM_018677.2    |
| 96.9    | 88.7    | 79.6    | 94.2    | NM_001076552.1 |
| 1018.2  | 1215    | 1469    | 828.9   | NM_001076552.1 |
| 1371.9  | 1621.2  | 1822.3  | 1122.8  | NM_139274.1    |
| 99.5    | 96.1    | 102.6   | 89.1    | NM_001100.3    |
| 98.9    | 98.5    | 97.6    | 96.2    | NM_001613.1    |
| 22856.6 | 22728   | 19355.3 | 16778.5 | NM_001101.2    |
| 20773.4 | 17653.2 | 15463.9 | 17648.2 | NM_001101.2    |
| 77.3    | 75.6    | 82.1    | 83.3    | NM_001004053.1 |
| 93.6    | 87.5    | 76.4    | 87.9    | NM_005159.3    |

|         |         |         |         |                |
|---------|---------|---------|---------|----------------|
| 38970.5 | 35004.4 | 31842.7 | 25771.9 | NM_001614.2    |
| 87.3    | 88.9    | 90.3    | 93.8    | NM_001615.3    |
| 3630.6  | 2427.5  | 2094.2  | 1554.3  | NM_177989.1    |
| 956.9   | 639.3   | 541.8   | 495.7   | NM_004301.3    |
| 96.5    | 84.3    | 86.5    | 98      | NM_016188.3    |
| 87.8    | 82.2    | 74.8    | 86      | NM_006687.2    |
| 99.9    | 93.2    | 95.6    | 99      | NM_006686.2    |
| 96.9    | 89      | 94.6    | 90.7    | NM_030812.1    |
| 3204.2  | 3070.2  | 2502.4  | 1799.8  | NM_001102.2    |
| 107.3   | 109.1   | 103.1   | 93.1    | NM_001103.1    |
| 88.1    | 79.1    | 81.9    | 80.4    | NM_001104.1    |
| 815.6   | 882.2   | 677.1   | 587.7   | NM_004924.3    |
| 754.5   | 677.4   | 577.9   | 418.2   | NM_018477.1    |
| 630.6   | 320.9   | 314.3   | 213.6   | NM_005736.2    |
| 297.2   | 387.7   | 365.8   | 295.6   | NM_005735.2    |
| 9327.2  | 6468.4  | 5028.5  | 4967.3  | NM_001005386.1 |
| 999.7   | 733.9   | 607.9   | 694     | NM_005721.3    |
| 133.2   | 116.1   | 98      | 110.9   | NM_020445.4    |
| 87.3    | 86.7    | 81.7    | 97      | NM_020445.4    |
| 111.5   | 94.1    | 87.6    | 97.1    | NM_020445.4    |
| 216.9   | 219.8   | 240.1   | 166.4   | NM_024855.2    |
| 472.5   | 360.8   | 334.1   | 342.1   | NM_022496.2    |
| 180.5   | 167     | 156.4   | 153.9   | NM_022899.3    |
| 113.5   | 112.3   | 112.1   | 101     | NM_138289.1    |
| 330     | 282.1   | 272.9   | 221.4   | NM_001105.2    |
| 97.9    | 99.9    | 97.1    | 92.2    | NM_020327.2    |
| 103.7   | 94.9    | 91.5    | 97.2    | NM_020328.2    |
| 363.5   | 327.5   | 301.7   | 216.6   | NM_004302.3    |
| 83.4    | 91.9    | 78.3    | 92.4    | NM_020327.2    |
| 87      | 85.4    | 95.3    | 95.4    | NM_145259.1    |
| 160.7   | 174.4   | 163.4   | 145     | NM_001616.3    |
| 89.2    | 90.9    | 72.8    | 86.3    | NM_001106.2    |
| 106.9   | 110.3   | 108.5   | 105.2   | NM_000020.1    |
| 836.9   | 538.7   | 454.9   | 403.5   | NM_000666.1    |
| 234.5   | 173.4   | 162     | 207     | NM_001010853.1 |
| 91.7    | 82.3    | 86.6    | 82      | NM_080658.1    |
| 122.3   | 106     | 93.6    | 93.9    | NM_001107.3    |
| 506.5   | 432.9   | 478.5   | 367.2   | NM_203488.1    |
| 118.3   | 100.8   | 104.7   | 108.1   | NM_203488.1    |
| 260.6   | 279.6   | 217.8   | 255.4   | NM_138448.2    |
| 84.7    | 80.1    | 78.1    | 81.5    | NM_032021.2    |
| 380.9   | 479.8   | 472.7   | 331     | NM_000022.2    |
| 127.1   | 146.4   | 134.5   | 138.8   | NM_001012969.1 |
| 99.8    | 90.7    | 90.3    | 91.3    | NM_001110.2    |
| 99.1    | 104     | 106.1   | 102.6   | NM_002390.3    |
| 92.1    | 77.7    | 82.2    | 85.8    | NM_021641.2    |
| 84.5    | 82.8    | 76.8    | 81.7    | NM_003474.3    |
| 81.3    | 79.3    | 84.2    | 79.5    | NM_021641.2    |
| 218.7   | 176.6   | 175.2   | 178.1   | NM_003815.3    |
| 3485.3  | 2506    | 2611.1  | 913.7   | NM_207195.1    |

|       |       |       |                   |
|-------|-------|-------|-------------------|
| 163.3 | 148.9 | 142   | 125.5 XM_937888.1 |
| 299.9 | 414.9 | 345.7 | 285.2 NM_003183.4 |
| 92.6  | 84    | 88.4  | 101.6 NM_014237.1 |
| 97.6  | 88.8  | 84    | 89.4 NM_023038.3  |
| 108.7 | 89.1  | 100.3 | 87.4 NM_023038.3  |
| 103.7 | 123.5 | 101.8 | 106.7 NM_033274.2 |
| 100.9 | 93.5  | 88.1  | 86.1 NM_001464.3  |
| 84.3  | 86.2  | 84.5  | 85.6 NM_003814.4  |
| 108   | 98.1  | 97.6  | 99.4 NM_003813.2  |
| 99.6  | 85.4  | 82.1  | 89.7 NM_004194.2  |
| 83.1  | 79.7  | 86.4  | 89.8 NM_021722.2  |
| 84.1  | 73.6  | 83.3  | 76.5 NM_021721.2  |
| 82.8  | 86.7  | 83.7  | 95.2 NM_003812.2  |
| 79.3  | 95.8  | 84.4  | 101.2 NM_021777.2 |
| 97.7  | 92.3  | 95.9  | 102.8 NM_021777.2 |
| 84.8  | 93.6  | 89.4  | 86.5 NM_014265.3  |
| 92.3  | 99.4  | 94.5  | 85.6 NM_014269.3  |
| 85.2  | 91.6  | 88.3  | 93.5 NM_021794.2  |
| 107.9 | 102.2 | 109.5 | 99.6 XM_940500.1  |
| 94.6  | 86.6  | 83.2  | 80.4 NM_145004.4  |
| 112.4 | 127.3 | 107.5 | 103.6 NM_025220.2 |
| 104.4 | 102.7 | 94    | 85.7 NM_153202.1  |
| 88.7  | 85.7  | 86    | 84.7 NR_001569.1  |
| 103.9 | 100.9 | 96.9  | 94.2 NR_002224.1  |
| 94.3  | 104.4 | 102.2 | 87.1 NM_003817.1  |
| 98.5  | 85.6  | 108.2 | 104.4 NM_001109.2 |
| 182.7 | 142.9 | 129.1 | 140.5 NM_003816.2 |
| 102.8 | 267.8 | 232.1 | 249.1 NM_014479.2 |
| 104.8 | 121.3 | 92.9  | 101.2 NM_006988.3 |
| 83.4  | 89.4  | 84.4  | 83.4 NM_030957.2  |
| 86.1  | 94.6  | 77.9  | 89 NM_030955.2    |
| 72.3  | 83.8  | 69.9  | 79.9 NM_139028.2  |
| 84.1  | 83.1  | 80.2  | 81.4 NM_139025.2  |
| 101.1 | 89.9  | 96.8  | 96.7 NM_139027.2  |
| 100.8 | 92.5  | 83.7  | 94.1 NM_139155.1  |
| 86.2  | 81.4  | 73.7  | 81.6 NM_139155.2  |
| 98.9  | 100.2 | 87.3  | 83.5 NM_139055.1  |
| 104.9 | 96.3  | 100.6 | 95.3 NM_139056.1  |
| 104.8 | 100.5 | 93.1  | 96.1 NM_139057.1  |
| 84.1  | 90.2  | 83.2  | 95.8 NM_139054.2  |
| 91.7  | 86.4  | 87.5  | 92.5 NM_199355.1  |
| 120.1 | 117.8 | 114.6 | 113.7 NM_133638.2 |
| 96.4  | 108.6 | 102.8 | 106.3 NM_014244.1 |
| 150.8 | 207.1 | 192.2 | 184.4 NM_021599.1 |
| 91.2  | 83.7  | 72.1  | 90 NM_175851.1    |
| 80.5  | 86.5  | 78    | 76.8 NM_025003.2  |
| 76.9  | 88.5  | 83.4  | 93.2 NM_014243.1  |
| 94.8  | 100.9 | 93.9  | 96.6 NM_005099.3  |
| 89.6  | 79.8  | 82.8  | 81.4 NM_007038.2  |
| 98.2  | 99    | 90.9  | 85.1 NM_197941.2  |

|        |        |        |                      |
|--------|--------|--------|----------------------|
| 82.4   | 79.8   | 81.7   | 85.6 NM_014272.2     |
| 98.5   | 93.8   | 84.6   | 84.4 NM_007037.3     |
| 102.4  | 106.2  | 92.5   | 86.5 NM_182920.1     |
| 97.9   | 94.6   | 94.3   | 86.5 NM_139264.1     |
| 78.9   | 77.5   | 70.4   | 78.9 NM_139238.1     |
| 103.2  | 89.9   | 92.8   | 93.2 NM_052866.2     |
| 83.1   | 80.9   | 73.7   | 76 NM_052866.2       |
| 91.1   | 93.3   | 80.4   | 86.4 NM_014694.2     |
| 92.6   | 84.5   | 89.2   | 83.3 NM_207517.1     |
| 135.7  | 121.8  | 120.7  | 106.2 NM_213604.1    |
| 1118.2 | 1009.5 | 902.1  | 611.9 NM_015840.2    |
| 87.1   | 89.1   | 101.7  | 92.3 NM_001025107.1  |
| 694.5  | 759.5  | 611.3  | 521.3 NM_015840.2    |
| 115.3  | 95.4   | 95.7   | 91.4 NM_001112.2     |
| 142.4  | 172.2  | 164.5  | 142.1 NM_015833.2    |
| 91.6   | 88.9   | 77.5   | 86.7 NM_001033049.1  |
| 294.8  | 361.7  | 409.6  | 309.8 NM_001033049.1 |
| 90.7   | 84.8   | 84.1   | 81.1 NM_018702.1     |
| 348.2  | 360.4  | 295    | 288.7 NM_012091.2    |
| 101.3  | 99.7   | 95     | 90.6 NM_052998.2     |
| 191.6  | 194.4  | 189.5  | 168 NM_020421.2      |
| 833.9  | 692.5  | 675.2  | 372.8 NM_052853.3    |
| 104.8  | 105.1  | 93.1   | 100.1 NM_024876.2    |
| 173.9  | 166.2  | 150    | 144.1 NM_174922.3    |
| 251    | 756.1  | 577    | 531.5 NM_021116.1    |
| 116.7  | 104    | 93.4   | 95.3 NM_020546.1     |
| 2258.3 | 1565.2 | 1351.4 | 935.8 NM_004036.2    |
| 186    | 186.1  | 233.1  | 176.4 NM_139247.2    |
| 79.7   | 75.7   | 80.2   | 83.7 NM_183357.1     |
| 106.7  | 99.5   | 91.9   | 101.1 NM_020983.2    |
| 123.3  | 131.3  | 120    | 119.6 NM_015270.2    |
| 179.9  | 250.8  | 231.1  | 169.9 NM_001114.2    |
| 94.3   | 97.8   | 84     | 85.2 NM_001115.1     |
| 368.1  | 189.4  | 194    | 181.8 NM_001116.2    |
| 106.7  | 84.4   | 91.7   | 92.2 NM_001117.2     |
| 97.7   | 93.8   | 92.1   | 96.3 NM_001118.3     |
| 100.3  | 101.1  | 94.7   | 91 NM_001119.3       |
| 2272.2 | 1746.1 | 1805.6 | 1302.5 NM_001119.3   |
| 97.3   | 92     | 87.2   | 90.4 NM_017483.2     |
| 91.6   | 89.3   | 92     | 83 NM_017488.2       |
| 89.1   | 82.8   | 81.7   | 91.1 NM_001617.1     |
| 87.1   | 86.8   | 85.5   | 85.5 NM_019903.3     |
| 91.5   | 104.9  | 96.6   | 104.9 NM_016824.3    |
| 200.7  | 205.4  | 173.1  | 214.3 NM_016824.3    |
| 158.6  | 165.3  | 138.9  | 180.4 NM_001121.2    |
| 1763   | 3494.4 | 2156.9 | 1943.7 NM_001122.2   |
| 89     | 88.9   | 85.3   | 87.1 NM_000667.2     |
| 89.1   | 92.7   | 85.4   | 92.5 NM_000668.3     |
| 79     | 77.1   | 82     | 83.7 NM_000669.3     |
| 79.2   | 79.8   | 82.2   | 81.4 NM_000670.3     |

|        |        |        |                     |
|--------|--------|--------|---------------------|
| 113.7  | 107.9  | 104.2  | 92.7 NM_000671.3    |
| 104.4  | 93.1   | 101.1  | 93.3 NM_000672.2    |
| 86.7   | 83.1   | 84.1   | 91.2 NM_000673.3    |
| 103.8  | 87.1   | 95.4   | 88.2 NM_144650.1    |
| 88.3   | 83.8   | 81.8   | 85.1 NM_001077593.1 |
| 102.9  | 91.1   | 91.2   | 106.7 NM_018269.1   |
| 98.5   | 90.9   | 86.4   | 85.5 NM_004797.2    |
| 460    | 518.5  | 409.6  | 373.3 NM_015999.2   |
| 1020.2 | 872.2  | 782.6  | 539 NM_024551.2     |
| 147.4  | 117    | 124.3  | 120.4 NM_006721.2   |
| 92.1   | 80.9   | 83.9   | 92 NM_001123.2      |
| 226.1  | 182    | 174.2  | 164.3 NM_001123.2   |
| 124.5  | 176.1  | 166.2  | 149.1 NM_001124.1   |
| 261.6  | 199.3  | 188.8  | 154.5 NM_024866.3   |
| 98.7   | 90.7   | 87     | 89.1 NM_007264.3    |
| 371.3  | 306.4  | 278.8  | 258.5 NM_181442.1   |
| 118.6  | 167.6  | 159.5  | 179.4 NM_015339.2   |
| 88.2   | 76.3   | 79.3   | 78.6 NM_000674.2    |
| 98.1   | 87     | 82.1   | 95 NM_000674.2      |
| 127    | 115.5  | 108.7  | 117.7 NM_000675.3   |
| 475.6  | 589.6  | 467.2  | 344.6 NM_000676.2   |
| 113.6  | 155.8  | 152.5  | 131.7 NM_020683.5   |
| 183.3  | 174.1  | 158.9  | 117.7 NM_000677.2   |
| 773.2  | 1073   | 846.7  | 657.4 NM_031284.3   |
| 98.3   | 107.8  | 112.9  | 113.9 NM_025225.2   |
| 98.2   | 102.6  | 86.1   | 95.4 NM_001125.2    |
| 89.1   | 81.7   | 85.6   | 89.6 NM_138430.3    |
| 94.5   | 95.6   | 89.8   | 95.4 NM_199162.1    |
| 91.7   | 93.1   | 92.7   | 87.9 NM_138430.3    |
| 192.8  | 191.5  | 212.7  | 139 NM_017825.1     |
| 90.3   | 85.4   | 82.5   | 84.4 NM_000680.1    |
| 84.8   | 79.2   | 81.9   | 86.5 NM_033302.1    |
| 84.4   | 79.9   | 77.5   | 79.5 NM_000680.1    |
| 97.9   | 107.2  | 91.2   | 87.4 NM_033304.1    |
| 106.3  | 90.1   | 84.2   | 92.3 NM_033303.2    |
| 105.5  | 99.8   | 107.9  | 90.4 NM_000679.3    |
| 98.5   | 84.1   | 84.6   | 93.8 NM_000678.2    |
| 96.6   | 97.6   | 93.5   | 94 NM_000681.2      |
| 117.3  | 112.7  | 109.7  | 92.5 NM_000682.4    |
| 103.7  | 110.4  | 100    | 92.5 NM_000683.3    |
| 104.7  | 95.9   | 98.1   | 107.3 NM_000684.1   |
| 147.8  | 136.9  | 170    | 141.4 NM_000024.3   |
| 91.7   | 92.5   | 89.9   | 93.1 NM_000025.1    |
| 86.2   | 86.5   | 89.5   | 93.2 NM_001619.2    |
| 83.9   | 99.5   | 89.7   | 77.5 NM_005160.2    |
| 548.5  | 403.9  | 299.3  | 315.4 NM_175573.1   |
| 1041.3 | 729.9  | 548.6  | 547.4 NM_007002.2   |
| 4595   | 4013.6 | 3579.3 | 2541.6 NM_000026.1  |
| 2597.4 | 1729.4 | 1376.6 | 1374 NM_001126.2    |
| 89.3   | 87     | 84.9   | 90.9 NM_199165.1    |

|        |       |        |                      |
|--------|-------|--------|----------------------|
| 191.5  | 190.2 | 189.3  | 159.7 NM_199165.1    |
| 108.8  | 107.2 | 101.9  | 96.6 NM_152328.3     |
| 87.8   | 79.9  | 72.5   | 83.1 NM_001129.3     |
| 125.1  | 107.6 | 115.3  | 112.3 NM_153207.3    |
| 874.5  | 581.1 | 497.1  | 463.9 NM_198969.1    |
| 493.8  | 316.3 | 261.9  | 310.6 NM_198970.1    |
| 93.9   | 93.8  | 83.3   | 90 NM_198969.1       |
| 82.5   | 95.8  | 99.3   | 89.8 NM_021638.3     |
| 123.9  | 124   | 125.8  | 94 NM_198595.1       |
| 108.7  | 105.1 | 98.2   | 106 NM_198595.1      |
| 90.6   | 92.6  | 79.9   | 86.9 NM_032550.2     |
| 95.1   | 96.1  | 95.8   | 87.8 NM_201252.1     |
| 83     | 86.1  | 84     | 95.5 NR_002796.1     |
| 96     | 96.8  | 88.2   | 90.3 XR_000989.1     |
| 182.6  | 142   | 218.7  | 186.6 NM_005935.1    |
| 105.2  | 110.6 | 108.9  | 111.3 NM_002025.1    |
| 230.2  | 289.6 | 340.5  | 278.4 NM_002285.2    |
| 90.2   | 101.1 | 97.5   | 91.3 NM_001025108.1  |
| 194.3  | 190.1 | 159.4  | 140.9 NM_014423.2    |
| 535    | 499.3 | 407.6  | 446.8 NM_001031805.1 |
| 133.9  | 128   | 150.4  | 123.8 NM_001031805.1 |
| 94.4   | 98.4  | 84.1   | 82.2 NR_003228.1     |
| 85.7   | 87.5  | 94.7   | 93.9 NR_003228.1     |
| 1147.2 | 935.9 | 1168.3 | 635.8 NM_006796.1    |
| 74.4   | 84.6  | 85.5   | 82.7 NM_001133.2     |
| 93.4   | 96.7  | 88     | 90.8 NM_001010982.1  |
| 94.4   | 90.6  | 73.6   | 79.9 NM_001134.1     |
| 134.4  | 102.6 | 130.8  | 112 NM_203437.2      |
| 111.4  | 111.6 | 116.3  | 104.4 NM_203437.2    |
| 204    | 258.2 | 168.4  | 176.8 NM_017657.3    |
| 334.1  | 229.3 | 234.8  | 225.4 NM_000027.2    |
| 83.7   | 91    | 88.8   | 88.7 NM_152336.2     |
| 99.5   | 99.1  | 88     | 84.7 NM_024783.2     |
| 85.8   | 82.6  | 82.2   | 82.5 NM_032785.1     |
| 106.8  | 110.9 | 98.9   | 104.7 NM_001135.1    |
| 81.2   | 77.4  | 73.2   | 90.4 NM_013227.1     |
| 89.4   | 92.7  | 81.6   | 86.2 NM_001136.3     |
| 100.3  | 120.9 | 103.4  | 112.6 NM_001136.3    |
| 802.6  | 945.4 | 774.1  | 616 NM_018046.3      |
| 86     | 90    | 83.3   | 89.9 NM_000642.1     |
| 90.6   | 86.5  | 99.5   | 102.8 NM_000646.2    |
| 357.4  | 298.3 | 284.6  | 312.1 NM_000645.2    |
| 94.5   | 88.7  | 81     | 88.5 NM_000028.1     |
| 91.8   | 101.4 | 97.1   | 86.3 NM_000645.2     |
| 150.9  | 120.3 | 122.7  | 144.9 NM_000645.2    |
| 322.2  | 209.2 | 192.6  | 155.7 NM_024758.3    |
| 88.8   | 82.3  | 83.1   | 82.5 NM_032741.3     |
| 92.7   | 96.1  | 83.7   | 88.4 NM_006411.2     |
| 229    | 313.8 | 236.8  | 293.2 NM_006411.2    |
| 732.6  | 545.3 | 527.2  | 480.2 NM_006412.3    |

|        |        |        |                      |
|--------|--------|--------|----------------------|
| 652.4  | 442.3  | 383.8  | 345.4 NM_006412.3    |
| 442.6  | 342.3  | 299.9  | 231.4 NM_001012727.1 |
| 92.3   | 98.4   | 93.5   | 103.8 NM_020132.4    |
| 166.5  | 200.1  | 192.1  | 168.7 NM_020132.3    |
| 149.9  | 166    | 164.1  | 170.6 NM_001012734.1 |
| 455.7  | 288    | 271    | 206.9 NM_018361.2    |
| 89.3   | 89.9   | 80.2   | 102.6 NM_178819.2    |
| 116.2  | 114.8  | 110.3  | 110.4 NM_153613.1    |
| 1044.1 | 887.1  | 683.4  | 646 NM_003659.1      |
| 88.4   | 78.2   | 70.2   | 82.7 NM_006408.2     |
| 88.5   | 89.4   | 81.3   | 86.3 NM_176813.3     |
| 100.8  | 79.1   | 84.7   | 89.2 NM_198576.2     |
| 86.7   | 82.8   | 76.7   | 89.1 NM_001138.1     |
| 101.1  | 87.2   | 85.5   | 89.1 NM_007316.1     |
| 701.9  | 874.9  | 777.5  | 576.2 NM_000029.2    |
| 96.4   | 100.3  | 81.2   | 105.1 NM_015239.1    |
| 74.6   | 89.2   | 79.2   | 86.4 NM_032049.1     |
| 82.9   | 90.7   | 83.8   | 99.7 NM_004835.3     |
| 88.7   | 109.3  | 92.9   | 79.8 NM_000686.3     |
| 187.4  | 152.4  | 134.4  | 139.1 NM_020350.3    |
| 147.1  | 128.9  | 137.8  | 113.1 NM_001040194.1 |
| 94.3   | 91.4   | 79.1   | 86.1 NM_005161.2     |
| 86.5   | 86.8   | 97.2   | 82 NM_000030.1       |
| 86.9   | 94.9   | 77.6   | 85.7 NM_031900.1     |
| 80.6   | 82.6   | 87     | 81.1 NM_031279.2     |
| 577.8  | 637.6  | 586.3  | 547.3 NM_015446.3    |
| 719.9  | 748.9  | 554.6  | 522.8 XM_942402.1    |
| 5220.2 | 4680   | 3407.4 | 3345.1 NM_000687.1   |
| 1653.7 | 1069.4 | 1023.1 | 833.6 NM_006621.3    |
| 111.3  | 109.2  | 113    | 125.9 NM_001029882.1 |
| 219.4  | 272.6  | 246.3  | 227.4 NM_017651.3    |
| 765.5  | 1641.8 | 1809.9 | 1371.7 NM_001620.1   |
| 140.4  | 111.3  | 121.9  | 113.8 NM_024060.2    |
| 112.4  | 85.1   | 92.4   | 94.8 NM_024060.2     |
| 112.6  | 94.8   | 93.8   | 99.1 NM_001621.3     |
| 105    | 106    | 106.6  | 106.7 NM_020731.2    |
| 1039.4 | 653.4  | 585.9  | 432.1 NM_012111.1    |
| 164.4  | 142.8  | 197.5  | 197.3 NM_152392.1    |
| 101.9  | 89.3   | 88.9   | 89.2 NM_001622.1     |
| 87.3   | 86.3   | 79.3   | 85.4 NM_020661.1     |
| 2692.1 | 4010.6 | 2929.7 | 2272.3 NM_001623.3   |
| 7030.7 | 6045.4 | 4991.4 | 7242.5 NM_001623.3   |
| 105.6  | 102.3  | 96.2   | 111.4 NM_004847.2    |
| 93.5   | 92.3   | 92.5   | 86.5 NM_144704.1     |
| 1039.4 | 1018   | 1044.6 | 674.2 NM_145813.1    |
| 418.3  | 649.2  | 478.8  | 481.2 NM_016108.2    |
| 114.9  | 152    | 122.2  | 117.9 NM_001624.1    |
| 94.2   | 88.3   | 86.4   | 90.4 NM_017977.1     |
| 93.1   | 86.7   | 86.6   | 92.6 NM_004833.1     |
| 896.9  | 752.3  | 702.6  | 561.8 NM_003977.1    |

|        |        |        |                     |
|--------|--------|--------|---------------------|
| 98.9   | 88.6   | 108.5  | 89.6 NM_014336.3    |
| 97.3   | 101.5  | 89.4   | 86.7 NM_001033054.1 |
| 96     | 99.7   | 90.9   | 88.2 NM_000659.1    |
| 2512.8 | 4101.8 | 5157.3 | 2879.1 NM_000383.1  |
| 81.1   | 88.4   | 75.8   | 87.5 NM_018836.2    |
| 84.8   | 91.5   | 71.4   | 87.3 NM_001042478.1 |
| 105    | 103.2  | 100.7  | 98.6 NM_001042478.1 |
| 260.5  | 199.8  | 180.6  | 139.7 NM_000476.1   |
| 344.9  | 229.4  | 272.1  | 221.9 NM_001625.2   |
| 391.6  | 375.8  | 335.4  | 252.6 NM_013411.3   |
| 2658.2 | 1875.9 | 1918.1 | 1269.3 NM_001625.2  |
| 1705.8 | 1252.2 | 1232   | 947.3 NM_016282.2   |
| 515.5  | 464.2  | 394.1  | 407 NM_013410.2     |
| 83.7   | 86.1   | 85     | 82.2 NM_203464.1    |
| 90     | 81.1   | 79.2   | 78.6 NM_174858.1    |
| 85.8   | 94.5   | 80.3   | 83.2 NM_012093.2    |
| 83.2   | 90.8   | 89.6   | 92.1 NM_012093.2    |
| 94.9   | 86.9   | 92     | 87.5 NM_152327.1    |
| 154.7  | 142.7  | 131.5  | 189.9 NM_003488.2   |
| 120.1  | 135.3  | 129.2  | 118.4 NM_007202.2   |
| 80.4   | 80.3   | 71.7   | 79.7 NM_144490.1    |
| 280.3  | 346.8  | 328.2  | 341.7 NM_016248.2   |
| 119    | 127.1  | 123.6  | 120.8 NM_144490.1   |
| 92.5   | 90.8   | 91.3   | 99.3 NM_005100.2    |
| 77.5   | 92.8   | 77.2   | 82.6 NM_144497.1    |
| 151.6  | 139.2  | 102.9  | 112.8 NM_005100.2   |
| 117.5  | 169.2  | 142.3  | 131.9 NM_006738.4   |
| 246.7  | 554.9  | 545.4  | 292.9 NM_007200.3   |
| 85.7   | 70.4   | 89.5   | 77.4 NM_178813.5    |
| 90     | 79.5   | 82.3   | 91.4 NM_001008535.1 |
| 101.3  | 93.5   | 89.3   | 93 NM_001008535.1   |
| 86.5   | 91     | 79.6   | 96.6 NM_001004065.2 |
| 96     | 92.8   | 102.3  | 91.8 NM_006422.2    |
| 90.6   | 93.6   | 78.4   | 89 NM_003886.2      |
| 109.2  | 105.8  | 91.5   | 96.6 NM_139289.1    |
| 101.6  | 106.5  | 95.8   | 92.7 NM_139289.1    |
| 76.2   | 77.4   | 75.7   | 79.7 NM_004857.2    |
| 84.6   | 90.6   | 85.9   | 91.4 NM_004274.3    |
| 81.6   | 81.5   | 73.8   | 77 NM_138633.1      |
| 100.8  | 99.8   | 86.7   | 99.2 NM_016377.2    |
| 796.7  | 664.8  | 676.6  | 601.7 NM_016377.2   |
| 102.8  | 102.6  | 112.2  | 95.5 NM_004842.2    |
| 613.3  | 540.7  | 462.5  | 384.5 NM_005858.2   |
| 227    | 217.9  | 199.9  | 186 NM_014371.2     |
| 87.3   | 87.5   | 83.5   | 92.9 NM_147185.1    |
| 89.9   | 88.5   | 86.2   | 90.6 NM_147166.1    |
| 270.3  | 341.3  | 323.7  | 298.3 NM_030767.2   |
| 1071.8 | 1197.9 | 1236.6 | 939.3 NM_006066.2   |
| 101.4  | 84.2   | 100    | 100.9 NM_006066.2   |
| 824    | 817.4  | 825.4  | 697.3 NM_153326.1   |



|        |        |        |        |                |
|--------|--------|--------|--------|----------------|
| 2421.6 | 1898.3 | 1520.7 | 1336.8 | NM_001628.2    |
| 88.9   | 84.2   | 79.8   | 83.7   | NM_020299.3    |
| 82.9   | 70.5   | 73.3   | 86.3   | NM_001353.5    |
| 542.3  | 551.2  | 378.5  | 272.1  | NM_001354.4    |
| 123.4  | 139.5  | 114.7  | 106.1  | NM_003739.4    |
| 101.3  | 97.2   | 93.1   | 99.1   | NM_001818.2    |
| 107.5  | 105.7  | 96.6   | 92.5   | NM_001007536.1 |
| 94.2   | 85.7   | 88.1   | 81.9   | NM_031436.2    |
| 4109.8 | 7120.3 | 8995   | 5059.1 | NM_005989.2    |
| 2519.7 | 1984.3 | 2145.4 | 1086.6 | NM_003689.2    |
| 545.4  | 417.5  | 358.1  | 287.3  | NM_012067.2    |
| 2932.6 | 2541   | 2126.8 | 1256.8 | NM_001014432.1 |
| 2216.6 | 1540.2 | 1539.9 | 1145.9 | NM_001014431.1 |
| 85.3   | 93.5   | 91.3   | 78.9   | NM_005163.2    |
| 104.4  | 111.5  | 102.6  | 93.8   | NM_032375.2    |
| 113.1  | 114.8  | 107.8  | 100.3  | NM_001626.2    |
| 99.6   | 90.8   | 81.4   | 93     | NM_181690.1    |
| 94.6   | 91.8   | 84.6   | 84.4   | NM_005465.3    |
| 98.1   | 89     | 99.1   | 82.3   | NM_181690.1    |
| 312.3  | 217.6  | 199.2  | 209.7  | NM_001012398.1 |
| 87.9   | 87.4   | 77.6   | 86.5   | NM_000031.4    |
| 412.2  | 491.3  | 414.6  | 284.6  | NM_001003945.1 |
| 91.4   | 81.6   | 78.7   | 85.9   | NM_001003945.1 |
| 106.3  | 103.6  | 94.9   | 112    | NM_000688.4    |
| 122.6  | 110    | 111    | 92.5   | NM_199166.1    |
| 94.5   | 93.6   | 86.6   | 94.7   | NM_000688.4    |
| 87.7   | 91.2   | 86.8   | 85.9   | NM_000032.1    |
| 87.7   | 86.9   | 88.9   | 85.1   | NM_001037968.1 |
| 98.1   | 88.8   | 88     | 98.1   | NM_001037968.1 |
| 95.3   | 104.9  | 91.1   | 90.6   | NM_000477.3    |
| 427    | 600    | 372.7  | 485.3  | NM_001627.2    |
| 375.7  | 262.2  | 231.6  | 224.4  | NM_153329.2    |
| 312    | 281.2  | 234.6  | 163.2  | NM_002860.3    |
| 86.1   | 88.6   | 83.3   | 95.3   | NM_000689.3    |
| 87.8   | 104    | 88.9   | 95.6   | NM_170696.1    |
| 114.9  | 104.1  | 108    | 101.1  | NM_170696.1    |
| 92.4   | 86     | 84.8   | 96.7   | NM_000693.1    |
| 265.1  | 163.8  | 171    | 146.3  | NM_000692.3    |
| 98.2   | 88.7   | 83.8   | 83.8   | NM_012190.2    |
| 89.3   | 92.8   | 83.3   | 88.3   | NM_001034173.1 |
| 831.2  | 1424.5 | 1112.2 | 909.5  | NM_000690.2    |
| 94.8   | 98.2   | 85.2   | 98.2   | NM_000691.3    |
| 102.9  | 114.3  | 100.3  | 96.7   | NM_001031806.1 |
| 171.8  | 234.8  | 214    | 168    | NM_001031806.1 |
| 97.5   | 112.8  | 91.6   | 107    | NM_000694.2    |
| 473.2  | 547.8  | 509.9  | 404.3  | NM_001030010.1 |
| 91     | 93.8   | 96.8   | 89.2   | NM_001031615.1 |
| 73.8   | 82.9   | 72     | 88.8   | NM_000695.3    |
| 87.8   | 81     | 85     | 87.4   | NM_000695.3    |
| 93.4   | 84.8   | 75.9   | 92.7   | NM_003748.2    |

|        |        |        |                      |
|--------|--------|--------|----------------------|
| 111.3  | 121.3  | 111.8  | 98.3 NM_170726.1     |
| 106.7  | 111.5  | 100.3  | 94.7 NM_170726.1     |
| 210.3  | 253.3  | 208.8  | 220.4 NM_001080.3    |
| 103.3  | 94.2   | 96.2   | 96.4 NM_005589.2     |
| 182.9  | 200.8  | 208.3  | 171.9 NM_001182.2    |
| 112.1  | 116.6  | 122.1  | 116.4 NM_022568.2    |
| 83.1   | 81.8   | 90.5   | 89.4 NM_022568.2     |
| 6701.8 | 4413.3 | 4361   | 2614.5 NM_000696.2   |
| 114.9  | 109.5  | 113.7  | 98.5 NM_000034.2     |
| 5466.1 | 4371   | 4071   | 3483.3 NM_184041.1   |
| 107.3  | 108.9  | 99.3   | 90.6 NM_184043.1     |
| 5443.2 | 3654.3 | 3123   | 2319.4 NM_184041.1   |
| 90.3   | 105.7  | 99.2   | 96.6 NM_000035.2     |
| 502.2  | 407.2  | 402.1  | 232.4 NM_005165.2    |
| 100    | 94.2   | 89.8   | 90.7 NM_172196.1     |
| 83.7   | 76.9   | 83     | 85.4 NM_006872.2     |
| 259.4  | 143.9  | 150.4  | 124.1 NM_019109.3    |
| 109.7  | 99.1   | 105.3  | 98 NM_032834.2       |
| 113.6  | 143.6  | 133.1  | 155.4 NM_001004127.1 |
| 120.5  | 111    | 118.8  | 100.9 NM_024105.3    |
| 115    | 94.1   | 93.1   | 102.5 NM_018466.2    |
| 167.3  | 125.7  | 124.2  | 133.7 NM_144988.2    |
| 95.4   | 94.7   | 88.8   | 93.2 NM_033087.2     |
| 915.3  | 615    | 566.2  | 333.4 NM_001006940.1 |
| 1107.6 | 663.8  | 561.5  | 699.9 NM_013338.3    |
| 365.4  | 324    | 263.2  | 283.6 NM_013339.2    |
| 1022   | 595.7  | 499.9  | 551.9 NM_001007027.2 |
| 89.5   | 96     | 94.9   | 96.5 NM_001007027.2  |
| 2198.2 | 1222.8 | 995    | 842.9 NM_001007027.1 |
| 382.1  | 243.8  | 231.9  | 177.4 NM_024740.1    |
| 95.1   | 87.3   | 92.7   | 82 NM_004304.3       |
| 339.7  | 200.1  | 193    | 199 NM_006020.1      |
| 140.7  | 122.1  | 105.4  | 123.9 NM_006020.2    |
| 350.8  | 228.9  | 193.8  | 209.8 NM_006020.2    |
| 227.7  | 164.2  | 162.1  | 134.2 NM_001001655.1 |
| 582.7  | 590.1  | 540.9  | 490.7 NM_139178.1    |
| 152.3  | 163.6  | 120.6  | 121.2 NM_017621.2    |
| 2714.1 | 2720.3 | 2561.5 | 1327.2 NM_017758.2   |
| 316.5  | 289.9  | 313.3  | 199.3 NM_198867.1    |
| 308.9  | 290.5  | 244.3  | 204 NM_032306.2      |
| 194.8  | 164.5  | 158.9  | 129.4 NM_138775.1    |
| 88.2   | 91     | 88.7   | 93.8 NM_199232.1     |
| 87.9   | 74.1   | 73.3   | 80.7 NM_018436.2     |
| 83     | 95.8   | 95.2   | 89.2 NM_018436.2     |
| 154.9  | 175.1  | 164.2  | 151.2 NM_015120.2    |
| 85.1   | 87.6   | 85.4   | 87.4 NM_000697.1     |
| 94     | 86.3   | 85.9   | 84.8 NM_001139.1     |
| 89.7   | 82.3   | 78.5   | 95 NR_002710.2       |
| 107.9  | 92.1   | 99.7   | 99.3 XM_937556.1     |
| 90.1   | 91.7   | 74.4   | 78.7 NM_001140.3     |

|        |        |        |                       |
|--------|--------|--------|-----------------------|
| 96.8   | 90.1   | 77.8   | 82.2 NM_001141.2      |
| 94.8   | 85.6   | 88.3   | 90 NM_001141.1        |
| 102.6  | 97.1   | 112.7  | 86.4 NM_001039131.1   |
| 558.1  | 1147   | 971.5  | 476.2 NM_000698.2     |
| 105.1  | 104.4  | 95.2   | 102 NM_000698.2       |
| 2431.8 | 2480   | 2173.7 | 1535.8 NM_001629.2    |
| 99.9   | 104.7  | 98.7   | 90.8 NM_021628.1      |
| 95.6   | 91.5   | 87.6   | 90.8 NM_001631.2      |
| 213.1  | 198.4  | 178.8  | 184.6 NM_025144.2     |
| 87.3   | 90.5   | 87.2   | 90.8 NM_020778.1      |
| 99.7   | 94.6   | 88.6   | 92.4 NM_000478.2      |
| 1239   | 1989   | 2867.8 | 1895.5 NM_001632.2    |
| 136.9  | 134.3  | 139.6  | 122.4 NM_031313.1     |
| 354    | 491.9  | 413.3  | 352.8 NM_020919.2     |
| 97.4   | 90.5   | 81.1   | 90 NM_147129.2        |
| 100.5  | 93.8   | 82.3   | 93.6 NM_147129.2      |
| 83.9   | 87.3   | 81.8   | 85.6 NM_182775.1      |
| 100.7  | 103.2  | 94     | 90.7 NM_152525.3      |
| 93.4   | 73.7   | 84.6   | 83.2 NM_139163.1      |
| 537.2  | 888    | 772.4  | 723.8 NM_173511.2     |
| 114.6  | 114.4  | 109.2  | 111.1 NM_138468.3     |
| 87.8   | 99     | 94.7   | 99.5 NM_205543.1      |
| 90.7   | 87.5   | 88.3   | 90.7 NM_152526.3      |
| 424.9  | 483.5  | 430.3  | 369.5 NM_018571.4     |
| 387.6  | 275    | 235.2  | 204.2 NM_152388.1     |
| 83.9   | 85.9   | 86.3   | 94.4 NM_139158.1      |
| 118.8  | 100.6  | 101.9  | 99.8 NM_024744.12     |
| 81.1   | 84.4   | 80     | 81.9 NM_006492.2      |
| 88.7   | 87     | 83.7   | 81.7 NM_021926.2      |
| 91.4   | 100.1  | 77.7   | 83 NM_152462.1        |
| 100.7  | 104.5  | 98.2   | 106.9 NM_054028.1     |
| 124.3  | 144.8  | 117.7  | 111.9 NM_014324.4     |
| 132.6  | 141.2  | 121    | 123.6 NM_203382.1     |
| 97.5   | 96.5   | 86.8   | 100.7 NM_016519.4     |
| 89.6   | 81.9   | 84.4   | 91.2 NM_016519.4      |
| 106.9  | 105.4  | 97.2   | 92.5 NM_001633.2      |
| 2575.7 | 1521.5 | 1559.3 | 1048.5 NM_001033059.1 |
| 746.9  | 546.2  | 533.6  | 377.6 NM_001634.4     |
| 99.4   | 105.5  | 101.4  | 90.1 NM_152435.1      |
| 121.5  | 109.3  | 99.1   | 109.5 NM_015944.2     |
| 94.2   | 86.6   | 96.4   | 97.6 NM_001142.2      |
| 109.8  | 100.7  | 105    | 95 NM_001143.1        |
| 393.1  | 331.5  | 236.2  | 240.3 NM_138958.1     |
| 121.2  | 120.1  | 98     | 112.1 NM_001144.3     |
| 93.8   | 79.9   | 78.5   | 92.1 NM_000479.2      |
| 92.1   | 85.9   | 87.4   | 87.2 NM_020547.1      |
| 114.5  | 142.1  | 148.9  | 141.5 NM_153206.1     |
| 148    | 137.6  | 118.3  | 131 NM_032797.4       |
| 93.7   | 109.6  | 89     | 89.2 NM_020703.1      |
| 106.4  | 86.9   | 96.1   | 97.1 NM_181847.2      |

|        |        |        |                      |
|--------|--------|--------|----------------------|
| 87.2   | 83.3   | 99.4   | 92.9 NM_198722.1     |
| 105    | 102.4  | 92.6   | 98.4 NM_015365.2     |
| 211.4  | 198.9  | 175    | 190.4 NM_001025580.1 |
| 199.9  | 174.9  | 149.7  | 152.4 NM_001025580.1 |
| 106.6  | 97.3   | 98.3   | 96.7 NM_030943.1     |
| 106.4  | 121.9  | 96.9   | 101.9 NM_133265.2    |
| 88.1   | 87.6   | 85.2   | 81.1 NM_016201.2     |
| 90.2   | 75     | 84.6   | 85.3 NM_000036.1     |
| 91.1   | 89.2   | 83.2   | 92.7 NM_004037.6     |
| 74     | 85.2   | 79.2   | 85.6 NM_203404.1     |
| 94.2   | 84.4   | 86.8   | 84.8 NM_139156.2     |
| 107.9  | 101.3  | 101.2  | 106.2 NM_001025389.1 |
| 86.5   | 93.8   | 92     | 93.1 NM_000480.2     |
| 110.6  | 96.3   | 84     | 90.6 NM_001025389.1  |
| 96.3   | 87.4   | 77.3   | 98.8 NM_001025390.1  |
| 100.9  | 93.1   | 97.2   | 88.6 NM_001635.2     |
| 88.1   | 94.8   | 87.4   | 85.5 NM_001635.2     |
| 148.7  | 141.4  | 168.4  | 102.5 NM_000481.2    |
| 93.2   | 79.6   | 84.3   | 85.6 NM_001008221.1  |
| 457.3  | 350.7  | 345.2  | 352.1 NM_004038.3    |
| 91.4   | 79.3   | 80.3   | 76.6 NM_004038.3     |
| 86.6   | 92.4   | 80.8   | 83.1 NM_001008218.1  |
| 102    | 95.3   | 87.4   | 84.7 NM_000699.2     |
| 101.9  | 105.9  | 101.2  | 110.8 NM_020978.3    |
| 89.7   | 91.8   | 86.2   | 101.5 NM_133463.1    |
| 96     | 88.2   | 96.3   | 85.4 NM_001033574.1  |
| 1081.1 | 1222.2 | 974.2  | 853.1 NM_016627.4    |
| 1119.6 | 1208.8 | 1106.6 | 718.6 NM_022662.2    |
| 750.6  | 492.7  | 424.9  | 387.9 NM_014885.1    |
| 926.7  | 670.8  | 676.5  | 397.9 NM_001002246.1 |
| 91.5   | 95.3   | 88.7   | 93.3 NM_001002244.1  |
| 819.1  | 807.6  | 810.5  | 464 NM_001002247.1   |
| 2832.6 | 2259.8 | 2158.8 | 1483.2 NM_015391.1   |
| 98.5   | 117.6  | 106.7  | 101 NM_013366.3      |
| 130    | 140.9  | 114.2  | 112.4 NM_013366.3    |
| 741.1  | 705.4  | 712.3  | 448.3 NM_013367.2    |
| 2044.3 | 2175.2 | 1800.3 | 1465.1 NM_016237.3   |
| 199.6  | 147.2  | 141.7  | 152.4 NM_016238.1    |
| 121.9  | 138.6  | 150.5  | 115.2 NM_001145.2    |
| 179.4  | 171    | 148.5  | 159 NM_015305.2      |
| 901.5  | 830.7  | 1070.6 | 778.8 NM_144567.3    |
| 104.5  | 107.2  | 100.3  | 88.2 NM_001146.3     |
| 103.2  | 98.3   | 92.1   | 99.4 NM_001147.1     |
| 78.8   | 80.6   | 81.6   | 85.8 NM_015985.2     |
| 94.7   | 93.4   | 82.7   | 78.3 NM_004673.3     |
| 96     | 92.6   | 79.8   | 75.3 NM_012098.2     |
| 87.8   | 88     | 83.2   | 86.1 NM_014495.2     |
| 91.5   | 88.4   | 78.4   | 86.3 NM_139314.1     |
| 85.6   | 85.9   | 90     | 81.2 NM_001039667.1  |
| 94.3   | 93.5   | 85.5   | 87.3 NM_139314.1     |

|       |       |       |                      |
|-------|-------|-------|----------------------|
| 87.7  | 89.5  | 87.7  | 97 NM_178127.2       |
| 95.3  | 112.8 | 123.6 | 129.9 NM_031917.2    |
| 91.8  | 94.9  | 86.9  | 100.5 NM_021146.2    |
| 100.6 | 98.5  | 88.3  | 90.3 NM_020475.2     |
| 85.6  | 93.7  | 77.4  | 76.6 NM_020480.2     |
| 91.2  | 90.3  | 77.9  | 78.6 NM_020977.2     |
| 98.2  | 85.6  | 90.3  | 91.7 NM_001148.3     |
| 100.4 | 102.6 | 95    | 94.7 NM_001149.2     |
| 105.3 | 103.5 | 98.8  | 82 NM_001149.2       |
| 107.2 | 92.6  | 79.9  | 84.4 NM_020987.2     |
| 93.9  | 88.8  | 86.9  | 94.8 NM_144708.2     |
| 202.3 | 176.2 | 171.9 | 162.7 NM_182703.2    |
| 76.9  | 82.5  | 76.1  | 86.5 NM_153228.1     |
| 165.6 | 277.6 | 249.5 | 169.7 NM_016376.2    |
| 134.9 | 159.2 | 172.1 | 166.7 NM_020740.1    |
| 89.4  | 103.4 | 105   | 101.7 NM_020740.1    |
| 81.3  | 80.3  | 83.6  | 93 NM_054027.3       |
| 115.1 | 117.3 | 129.8 | 112.1 NM_024668.2    |
| 79.5  | 79.1  | 81.4  | 75.1 NM_017978.1     |
| 88.5  | 77.8  | 82.2  | 89.9 NM_178510.1     |
| 240   | 329.1 | 394.2 | 218 NM_016552.2      |
| 86.9  | 94.4  | 80    | 84.9 NM_017844.2     |
| 89.2  | 94.6  | 93.1  | 93.5 NM_016552.2     |
| 433.5 | 356.2 | 341.2 | 288.3 NM_020319.1    |
| 310.3 | 449.6 | 429.8 | 338.7 NM_023039.2    |
| 92.8  | 91.7  | 98.7  | 94.2 NM_014391.2     |
| 412.6 | 321.1 | 384   | 345.7 NM_017664.2    |
| 439.3 | 634.4 | 610.6 | 426.9 NM_013275.4    |
| 275.6 | 494.9 | 479.6 | 405.7 NM_015208.2    |
| 536.2 | 551.6 | 530   | 472.3 NM_033121.1    |
| 111   | 95.8  | 97.4  | 103.1 NM_152345.3    |
| 276.7 | 220.7 | 210   | 221.1 NM_030816.2    |
| 97.5  | 102.3 | 91.3  | 93.5 NM_207354.1     |
| 96.3  | 92.7  | 89.3  | 93.7 NM_015158.2     |
| 89.3  | 88.6  | 73.9  | 94.4 NM_153186.3     |
| 321.9 | 276.7 | 230.4 | 266.6 NM_153186.3    |
| 182.6 | 128.4 | 126.5 | 111.4 NM_001009941.1 |
| 83.1  | 91.3  | 83.2  | 86.4 NM_019046.1     |
| 150.9 | 102.6 | 104.3 | 114.1 NM_001009941.1 |
| 120.9 | 117.3 | 110   | 109.4 NM_032217.3    |
| 231.8 | 249.9 | 246.1 | 206.2 NM_198889.1    |
| 439.2 | 401.2 | 323.1 | 398 NM_198889.1      |
| 90.8  | 97.2  | 82.2  | 81 NM_001010925.1    |
| 90.2  | 100   | 92.5  | 94.8 NM_020349.2     |
| 144.6 | 182.3 | 180.4 | 192.6 NM_032250.1    |
| 90.3  | 96.5  | 90.2  | 90.7 NM_001012419.1  |
| 89.2  | 85.2  | 75.8  | 85.7 NM_001012419.1  |
| 88.8  | 83.5  | 86.7  | 90.2 NR_003366.1     |
| 85.6  | 88.3  | 76.4  | 99.3 XM_934275.1     |
| 87    | 86.7  | 90.9  | 94 NM_174981.2       |

|       |       |       |                      |
|-------|-------|-------|----------------------|
| 85.6  | 76.9  | 76.8  | 80.9 NM_144590.1     |
| 110   | 99.5  | 91.3  | 88.4 NM_144994.7     |
| 79.5  | 80.5  | 89.9  | 83.4 NM_133475.1     |
| 184.9 | 180.8 | 170.5 | 163.5 NM_015493.4    |
| 127.8 | 125.7 | 119.1 | 123.3 NM_014915.1    |
| 143.7 | 113.3 | 104.5 | 127.2 NM_032139.1    |
| 194.8 | 180.9 | 178.8 | 177.6 NM_015199.2    |
| 100.4 | 101.1 | 90.7  | 98.6 NM_173505.2     |
| 103.5 | 83.9  | 84.1  | 84.5 NM_052997.1     |
| 89.7  | 78.3  | 87.3  | 85.7 XM_940707.1     |
| 88.5  | 82.5  | 82.4  | 92.5 NM_001029862.1  |
| 202.1 | 191.6 | 168   | 170.9 NM_032290.2    |
| 225.4 | 307.5 | 249.6 | 185.6 NM_182608.2    |
| 105.9 | 95.6  | 99.8  | 87.9 NM_001039888.2  |
| 87.6  | 82.9  | 81.9  | 79 NM_144698.3       |
| 104.2 | 100   | 105   | 100 NM_198555.3      |
| 88.6  | 80.2  | 87.3  | 94.8 NM_198555.3     |
| 127.5 | 127.8 | 151.8 | 130 NM_198555.3      |
| 119.7 | 202.3 | 171.7 | 174.7 NM_181726.1    |
| 89.7  | 103.9 | 96.5  | 94 NM_181712.2       |
| 334.6 | 231.5 | 209.9 | 192.5 NM_016466.4    |
| 87.5  | 104.2 | 90.4  | 89.4 NM_052855.2     |
| 124.4 | 108.4 | 106.1 | 120.5 NM_152363.2    |
| 88.8  | 88.4  | 95.4  | 85.3 NM_182603.1     |
| 88.8  | 89.4  | 89.8  | 90.7 NM_175873.3     |
| 109.2 | 130.5 | 134.3 | 124.2 NM_153697.1    |
| 88.9  | 82.3  | 83.1  | 95.4 NM_198493.1     |
| 645.8 | 436.1 | 368   | 337 NM_198401.2      |
| 104.7 | 100.2 | 96.9  | 108.9 NM_198471.1    |
| 575   | 405.8 | 343.8 | 429.3 NM_017704.2    |
| 89.2  | 91    | 84.4  | 90.4 NM_022096.4     |
| 81.5  | 80.5  | 76.2  | 79.3 NM_022096.4     |
| 83    | 86.6  | 84.1  | 88.8 NM_198798.1     |
| 280.8 | 309.2 | 288   | 270.4 NM_020337.1    |
| 113.8 | 124   | 110.5 | 106.2 NM_001039935.1 |
| 86.8  | 89.3  | 80.7  | 93.7 NM_001029870.1  |
| 196.1 | 187   | 200.3 | 184.8 NM_014942.2    |
| 100.1 | 98.5  | 98.9  | 85.7 NM_001077708.1  |
| 100.1 | 96.8  | 89.6  | 85.6 NM_019644.1     |
| 687.1 | 575.6 | 516.8 | 280.7 NM_152326.2    |
| 440.1 | 542.6 | 508.2 | 357.4 NM_015245.1    |
| 80.8  | 77    | 78.1  | 80.7 NM_181670.2     |
| 83.7  | 83.8  | 77    | 79.8 NM_152788.3     |
| 93    | 93.8  | 98.5  | 79.5 NM_020140.2     |
| 129.7 | 118.3 | 134.3 | 125.2 NM_133450.1    |
| 81.6  | 94    | 77.1  | 93.5 NM_145865.1     |
| 90.3  | 85.1  | 85    | 87.7 NM_173551.3     |
| 245.2 | 226.2 | 225.2 | 182.9 NM_018089.1    |
| 101.8 | 103.7 | 107.4 | 93.1 NM_018089.1     |
| 100.9 | 97.5  | 109.7 | 114.8 NM_018089.1    |

|         |        |        |        |                |
|---------|--------|--------|--------|----------------|
| 375.7   | 252.8  | 248.7  | 312.7  | NM_018685.2    |
| 106.6   | 113.8  | 102.5  | 99.2   | NM_006305.2    |
| 16167.2 | 9892.3 | 8760.2 | 8050.7 | NM_006401.1    |
| 99.7    | 100.3  | 80.2   | 78.5   | NM_012403.1    |
| 78.6    | 75.6   | 75.8   | 83.3   | NM_012404.2    |
| 84.1    | 88.9   | 74.4   | 85.9   | NM_030920.2    |
| 573.2   | 774.5  | 740.1  | 588.9  | NM_001150.1    |
| 214.9   | 212.2  | 215    | 188.9  | NM_032208.1    |
| 119     | 124.3  | 100.6  | 105.5  | NM_018153.2    |
| 102.2   | 92.9   | 99     | 99.8   | NM_053034.1    |
| 231.3   | 223.5  | 200.6  | 210.5  | NM_058172.3    |
| 88.7    | 86.8   | 81     | 83.7   | NM_174890.1    |
| 5847.5  | 6432.9 | 4329   | 5753.2 | NM_000700.1    |
| 79.9    | 77.3   | 76.3   | 81.6   | NM_007193.3    |
| 209.9   | 154.6  | 151.7  | 155.1  | NM_001157.2    |
| 432.2   | 343.7  | 375    | 253.4  | NM_145868.1    |
| 97.1    | 97.9   | 94     | 105.8  | NM_145869.1    |
| 81.7    | 78.9   | 76     | 88.4   | NM_004306.2    |
| 95.5    | 89.5   | 80.2   | 100.1  | NM_001003954.1 |
| 103.6   | 92.3   | 93.3   | 92.5   | NM_001003954.1 |
| 864.1   | 736.8  | 613.6  | 468.1  | NM_001002857.1 |
| 272.5   | 225.9  | 202.5  | 172.6  | NM_001002857.1 |
| 6137.6  | 6219.9 | 4896.9 | 3439.5 | NM_001002858.1 |
| 833.9   | 804.4  | 604.7  | 792.6  | NR_001562.1    |
| 87.5    | 74.2   | 76.4   | 76.9   | NM_005139.1    |
| 141.9   | 139    | 146.6  | 152.6  | NM_001153.2    |
| 3108.6  | 2971.7 | 2550.9 | 2072.8 | NM_001154.2    |
| 123.7   | 140    | 125.8  | 115.6  | NM_004033.2    |
| 244.8   | 193.7  | 196.4  | 174.7  | NM_001155.3    |
| 87.9    | 83.7   | 86     | 88.1   | NM_004034.1    |
| 1843.1  | 1021.9 | 956.2  | 934.9  | NM_004034.1    |
| 112.9   | 109.8  | 113.5  | 93.1   | NM_001630.2    |
| 116.4   | 107.8  | 86.6   | 92.5   | NM_001040084.1 |
| 85      | 89.3   | 86.5   | 95.5   | NM_003568.1    |
| 106     | 109    | 117.8  | 103.9  | NM_001637.1    |
| 102.6   | 108.9  | 106.2  | 89.9   | NM_009590.2    |
| 106.5   | 88.6   | 87.9   | 93.3   | NM_001158.3    |
| 91.9    | 93.8   | 81.4   | 86.3   | NM_001158.3    |
| 90.1    | 83.2   | 82.9   | 80.1   | NM_003734.2    |
| 81.3    | 90.8   | 85.8   | 85.9   | NM_153042.2    |
| 683.8   | 874.8  | 758.5  | 515.6  | NM_015013.2    |
| 87.2    | 86.4   | 84.8   | 84.5   | NM_001159.3    |
| 116     | 114.8  | 95.7   | 101.8  | NM_145730.1    |
| 513.6   | 515.6  | 502.5  | 245.5  | NM_001127.2    |
| 380.7   | 339    | 240.6  | 268.9  | NM_001128.5    |
| 87.8    | 82.8   | 79.4   | 74     | NM_080545.1    |
| 224.7   | 190.4  | 201.3  | 167    | NM_003917.2    |
| 94.8    | 102    | 98.2   | 93.5   | NM_007247.3    |
| 91.4    | 88.1   | 91.1   | 94.1   | NM_007247.3    |
| 1437.6  | 1028.2 | 974.2  | 409.9  | NM_032493.2    |

|         |         |         |                      |
|---------|---------|---------|----------------------|
| 87.2    | 98.6    | 76.8    | 79.6 NM_005498.3     |
| 428.9   | 389.1   | 406.4   | 278.5 NM_057089.1    |
| 780.5   | 560.7   | 491.8   | 421 NM_001283.2      |
| 4701.3  | 4384.5  | 4048.2  | 3297.1 NM_003916.3   |
| 85      | 81.1    | 78.6    | 85.3 NM_178814.2     |
| 111.7   | 113.4   | 99      | 108.1 NM_130787.2    |
| 110.7   | 95.3    | 110.2   | 94.7 NM_130787.2     |
| 107.6   | 100.6   | 94.7    | 103.1 NM_014203.2    |
| 136.2   | 128.6   | 112.3   | 121.9 NM_012305.2    |
| 137.5   | 148.1   | 132.1   | 125.1 NM_001282.2    |
| 132.9   | 122.8   | 110.6   | 122.4 NM_001282.2    |
| 919.9   | 943.6   | 762.5   | 618.9 NM_004068.3    |
| 868.8   | 927.1   | 896.2   | 753.2 NM_004068.3    |
| 4468.2  | 2088.9  | 2208.1  | 1720.4 NM_004069.3   |
| 20100.6 | 12127.9 | 11993.7 | 7744.1 NM_004069.3   |
| 2650.7  | 2108.2  | 1710.9  | 1543.9 NM_003664.3   |
| 94.3    | 95.6    | 86.1    | 103.9 NM_004644.3    |
| 79.9    | 90.4    | 95.9    | 92.7 NM_001077523.1  |
| 688.2   | 610.3   | 552.6   | 368.3 NM_003938.4    |
| 755.8   | 651.4   | 502.1   | 413.1 NM_001077523.1 |
| 637.4   | 407.5   | 316.7   | 350 NM_012095.4      |
| 98.5    | 94.1    | 80.7    | 101.7 NM_207012.1    |
| 884.5   | 640.1   | 450     | 398.7 NM_207012.1    |
| 413.8   | 280.3   | 286     | 180.3 NM_006803.2    |
| 653.9   | 598     | 615.1   | 503.6 NM_001002924.1 |
| 143.3   | 147.7   | 150.4   | 123.7 NM_005829.3    |
| 1236.2  | 703.6   | 673.9   | 523.2 NM_006594.1    |
| 388.9   | 393.9   | 366.6   | 359.9 NM_007347.3    |
| 97.3    | 112.4   | 115     | 100.6 NM_004722.2    |
| 97.9    | 101.8   | 100.3   | 104.8 NM_007077.2    |
| 680.2   | 920.5   | 839.5   | 849.5 NM_181869.1    |
| 108.6   | 93.9    | 103.4   | 109.8 NM_181869.1    |
| 96      | 88.6    | 96.7    | 98.8 NM_001163.2     |
| 84.1    | 88.6    | 79.1    | 96.4 NM_005503.2     |
| 112.6   | 127.8   | 119     | 110 NM_031232.2      |
| 79.3    | 73.9    | 74.3    | 84.2 NM_031232.2     |
| 95      | 93.7    | 90.3    | 91.2 NM_031232.2     |
| 336.5   | 241.5   | 219.6   | 174.4 NM_004886.3    |
| 76.5    | 89.5    | 78.4    | 74 NM_001164.2       |
| 91.1    | 85      | 71      | 83.9 NM_145689.1     |
| 97.1    | 81      | 78.6    | 81.9 NM_001164.2     |
| 550.7   | 595     | 428.6   | 411.8 NM_019043.3    |
| 96.1    | 86.9    | 90.9    | 89 NM_173075.2       |
| 271.9   | 526.8   | 517     | 295.9 NM_006051.2    |
| 125.2   | 204.1   | 212.7   | 156.5 NM_133173.2    |
| 87      | 79.7    | 76.1    | 85 NM_000038.3       |
| 91      | 98.1    | 94.5    | 98.6 NM_005883.2     |
| 123.5   | 125.4   | 102.4   | 117.5 NM_153000.3    |
| 129.6   | 114.8   | 118.7   | 98.5 NM_001639.2     |
| 819     | 798.3   | 658     | 531 NM_001640.3      |



|        |        |        |        |                |
|--------|--------|--------|--------|----------------|
| 3279.6 | 2467.6 | 2254.3 | 1577.8 | NM_001641.2    |
| 6394.4 | 5136   | 4115.3 | 3888.2 | NM_080649.1    |
| 572.2  | 392.7  | 344.1  | 286.9  | NM_014481.2    |
| 1765.8 | 1363   | 1142.3 | 1073   | NM_016022.1    |
| 173.6  | 172.7  | 129.2  | 168.3  | NM_001077628.1 |
| 488.4  | 343.8  | 368.1  | 256.7  | NM_031301.2    |
| 835.1  | 841    | 543.8  | 686.7  | NM_006595.2    |
| 94.3   | 87.9   | 84.5   | 81.8   | NM_017855.2    |
| 205.7  | 237.1  | 208.2  | 205.2  | NM_015957.1    |
| 117.8  | 105.6  | 103.2  | 106.4  | NM_199295.1    |
| 631.1  | 469.3  | 449.7  | 402.9  | NM_198544.2    |
| 90.3   | 92.3   | 86.1   | 89.1   | NM_017413.3    |
| 92.7   | 83.2   | 81     | 74.1   | NM_005166.3    |
| 107.2  | 88.9   | 80.8   | 95     | NM_005166.3    |
| 93.2   | 95.5   | 96.3   | 84.2   | NM_001642.1    |
| 88.6   | 86.2   | 77.9   | 86.5   | NM_000039.1    |
| 2394.4 | 1508.3 | 1443.6 | 1070.9 | NM_144772.1    |
| 119.7  | 104.5  | 112.9  | 98.8   | NM_001643.1    |
| 84.1   | 71.4   | 76.1   | 78.8   | NM_000482.3    |
| 90     | 87.8   | 81.6   | 88.9   | NM_052968.3    |
| 83.6   | 78.4   | 84     | 86.7   | NM_000384.1    |
| 255.3  | 300.4  | 292    | 231.5  | NM_018690.1    |
| 99.8   | 89.9   | 98.7   | 94.8   | NM_005889.2    |
| 85.6   | 88     | 83.4   | 92.9   | NM_006789.2    |
| 87.5   | 85     | 84.7   | 89.8   | NM_145699.2    |
| 403.1  | 281.1  | 294.4  | 216.4  | NM_004900.3    |
| 146.1  | 161.6  | 135.3  | 145.7  | NM_014508.2    |
| 94.9   | 85.8   | 85.9   | 86.1   | NM_152426.2    |
| 138.6  | 159.2  | 119.4  | 122.5  | NM_001006666.1 |
| 172.8  | 153.5  | 160.9  | 130.4  | NM_001006666.1 |
| 114.6  | 107.6  | 109.6  | 111.1  | NM_145298.4    |
| 199.4  | 199.2  | 170.9  | 159.2  | NM_021822.1    |
| 79.6   | 90.4   | 93.6   | 90.2   | NM_203454.1    |
| 346.6  | 517.9  | 544    | 352.5  | NM_001645.3    |
| 706.4  | 621.5  | 526.6  | 584.6  | NM_000483.3    |
| 95.3   | 90.1   | 86.6   | 85.5   | NM_000040.1    |
| 86.2   | 92.3   | 91.2   | 93.1   | NM_001646.1    |
| 84.8   | 83.9   | 74.2   | 88.5   | NM_001647.2    |
| 171.8  | 1366.8 | 1325.7 | 1130.7 | NM_000041.2    |
| 88.3   | 85.7   | 84.8   | 79.1   | NM_001638.2    |
| 88.1   | 79.4   | 82.9   | 80.8   | NM_000042.1    |
| 99.7   | 105.3  | 89.1   | 115    | NM_145344.1    |
| 88.8   | 82.6   | 83.7   | 81.4   | NM_145343.1    |
| 93     | 83.1   | 80     | 84.3   | NM_030882.2    |
| 94     | 115.5  | 114.9  | 99.8   | NM_145637.1    |
| 100.2  | 99.5   | 97.7   | 84.7   | NM_145637.1    |
| 81.8   | 83.1   | 81.4   | 80     | NM_014349.2    |
| 85.4   | 87.7   | 87.4   | 94.1   | NM_030644.1    |
| 89.9   | 76.5   | 78     | 85.4   | NM_145641.1    |
| 90     | 85.3   | 94.1   | 81.5   | NM_030643.3    |

|        |        |        |                      |
|--------|--------|--------|----------------------|
| 92.7   | 92.2   | 90.7   | 95.2 NM_030643.3     |
| 87.8   | 82.3   | 88     | 85 NM_030642.1       |
| 127.9  | 119.6  | 114    | 112.8 NM_030641.2    |
| 155.8  | 109.9  | 117.8  | 131.8 NM_030817.1    |
| 183.8  | 186.3  | 163.8  | 154.6 NM_019101.2    |
| 937.1  | 1411.2 | 1019.2 | 1151.4 NM_201414.1   |
| 103.4  | 113.4  | 107.6  | 119.4 NM_000484.2    |
| 580.3  | 1110.8 | 825.9  | 718.9 NM_201414.1    |
| 130.1  | 124.5  | 130.6  | 109.4 NM_001018159.1 |
| 2109.1 | 1421.6 | 1157.9 | 816.3 NM_003905.3    |
| 825    | 548.6  | 518.9  | 557.3 NM_001018160.1 |
| 349.5  | 527.9  | 511.3  | 376.3 NM_006380.2    |
| 170.4  | 165.6  | 163    | 175.7 NM_012096.1    |
| 155.9  | 138.3  | 132.1  | 142 NM_015032.1      |
| 346.1  | 390.2  | 354.6  | 358.7 NM_015928.1    |
| 2322.9 | 1457.3 | 1328.2 | 1133.6 NM_000485.2   |
| 1091.9 | 671    | 570.6  | 480.4 NM_001030018.1 |
| 169.3  | 138.5  | 133.7  | 114.7 NM_020979.1    |
| 638    | 502.8  | 465.5  | 337.5 NM_175069.1    |
| 82.4   | 89.9   | 84.1   | 88 NM_017692.2       |
| 244.9  | 230    | 224.1  | 192.7 NM_175073.1    |
| 95.8   | 89.1   | 85.7   | 83.8 NM_001649.2     |
| 94.7   | 89.5   | 93.4   | 89 NM_133456.1       |
| 97.8   | 94.1   | 94.4   | 95.7 NM_000385.3     |
| 96.7   | 86.1   | 81.4   | 87.9 NM_198098.1     |
| 89.7   | 84.8   | 75.8   | 83.9 NM_080429.2     |
| 95.2   | 92.5   | 99.7   | 99.2 NM_173039.1     |
| 101.5  | 94.9   | 99.9   | 97.4 NM_198998.1     |
| 97.5   | 91     | 89.6   | 83.6 NM_000486.3     |
| 81.1   | 83.2   | 80.9   | 79.6 NM_004925.3     |
| 110.5  | 95.1   | 86.7   | 89.8 NM_001650.4     |
| 86.6   | 82.6   | 76.5   | 79.5 NM_004028.3     |
| 86.7   | 87.2   | 89.1   | 74.5 NM_001651.1     |
| 126.9  | 108.3  | 113.2  | 94 NM_001652.2       |
| 88.3   | 82.6   | 82.5   | 95.8 NM_001170.1     |
| 79.4   | 74.8   | 70.3   | 75.4 NR_002823.1     |
| 89.2   | 84.5   | 83.3   | 83.2 NM_001169.2     |
| 99.8   | 99.3   | 89.2   | 89.4 NM_020980.2     |
| 95.2   | 103    | 98.9   | 101.2 NM_014691.2    |
| 141.2  | 167.3  | 166.9  | 163.6 NM_000044.2    |
| 94.2   | 103.8  | 88.9   | 91.9 NM_000044.2     |
| 86.3   | 94.8   | 82.9   | 86.9 NM_001011645.1  |
| 588.5  | 491.9  | 552    | 229 NM_001654.1      |
| 108.1  | 86.5   | 95.7   | 95.1 NM_015193.3     |
| 2170.5 | 1188.6 | 933.7  | 983.2 NM_001655.3    |
| 603    | 444.9  | 459.5  | 304.3 NM_003491.2    |
| 98.9   | 97.2   | 86     | 97.5 NM_001657.2     |
| 390.6  | 263    | 256.1  | 210.8 NM_001024228.1 |
| 4745.6 | 3545.5 | 3250.1 | 1840.2 NM_001658.3   |
| 92.3   | 94.9   | 85.6   | 87.1 NM_001024226.1  |

|        |        |        |        |                |
|--------|--------|--------|--------|----------------|
| 403.3  | 279.3  | 249.2  | 224.5  | NM_001659.1    |
| 390.7  | 402.5  | 259.4  | 242.2  | NM_001660.2    |
| 2534.7 | 2487.7 | 1714.9 | 1777.4 | NM_001660.2    |
| 801.1  | 868.2  | 857.7  | 725.1  | NM_001662.2    |
| 87.2   | 83.9   | 75.2   | 87.8   | NM_001663.2    |
| 99.7   | 82.3   | 89.5   | 92     | NM_175609.1    |
| 260.4  | 285.6  | 307.4  | 177.1  | NM_175609.1    |
| 94.8   | 80.8   | 83.8   | 81.9   | NM_014570.3    |
| 159    | 116.2  | 124.5  | 140.8  | NM_006421.3    |
| 163.2  | 135    | 129.4  | 120.7  | NM_006420.1    |
| 332.2  | 240.8  | 226.3  | 228    | NM_001025593.1 |
| 118.2  | 110.6  | 95.6   | 103.9  | NM_001025595.1 |
| 85     | 85.8   | 75.2   | 87.8   | NM_012402.2    |
| 113.2  | 123.9  | 100.6  | 102    | NM_003224.2    |
| 80.6   | 83.5   | 85.2   | 86.2   | NM_000045.2    |
| 111.2  | 93.6   | 95     | 92.9   | NM_001172.3    |
| 91.7   | 91.6   | 92.3   | 86.4   | NM_175861.1    |
| 89.6   | 88.2   | 82.7   | 86.4   | NM_001012659.1 |
| 94.9   | 84.9   | 78.6   | 92.1   | NR_002222.1    |
| 1452.6 | 807.7  | 771.9  | 492.1  | NM_004308.2    |
| 133.6  | 120.1  | 112.8  | 120.9  | NM_024605.3    |
| 170.2  | 164.3  | 159    | 150.3  | NM_199357.1    |
| 180.2  | 155.2  | 155.6  | 158.6  | NM_014783.2    |
| 105.8  | 106.4  | 103.4  | 105.7  | NM_199357.1    |
| 93.5   | 92.2   | 96.2   | 99.3   | NM_018287.4    |
| 1833.3 | 1795.2 | 1704.7 | 1575.5 | NM_018460.2    |
| 1564.4 | 1210.1 | 1441.6 | 672.4  | NM_018054.4    |
| 234.6  | 204.6  | 195.9  | 190.7  | NM_018054.4    |
| 95.5   | 92     | 88.3   | 98     | NM_001006634.1 |
| 104.6  | 98.7   | 87.4   | 100.8  | NM_033515.2    |
| 638.7  | 539.7  | 396.8  | 369.8  | NM_032900.4    |
| 100.6  | 97     | 78.5   | 97.5   | NM_020809.2    |
| 270.7  | 268.4  | 225.9  | 213.2  | NM_020824.2    |
| 86.4   | 91.8   | 90.8   | 94     | NM_021226.2    |
| 87.6   | 90     | 87.9   | 90.6   | NM_031305.1    |
| 89.3   | 87.8   | 94.4   | 97.7   | NM_001042669.1 |
| 96.5   | 101.3  | 95     | 98.9   | NM_001025616.1 |
| 113.7  | 121.2  | 122.4  | 108    | NM_001025616.1 |
| 96.1   | 88.4   | 92     | 96.3   | NM_001007231.1 |
| 207    | 311.4  | 250.8  | 227.3  | NM_014882.2    |
| 89.6   | 92.7   | 77.3   | 83.2   | NM_014882.2    |
| 112.3  | 109.4  | 121.5  | 106.6  | NM_015071.2    |
| 92.2   | 94.7   | 93.7   | 92.5   | NM_199282.1    |
| 93     | 74.2   | 70.1   | 80.1   | NM_030672.2    |
| 87.9   | 89.7   | 86     | 99.8   | NM_001010000.1 |
| 86.1   | 85.2   | 83.1   | 86.3   | NM_030672.2    |
| 93.3   | 87.6   | 87.7   | 92.8   | NM_004815.2    |
| 748.6  | 419.7  | 398    | 333.6  | NM_181720.2    |
| 1089.6 | 820.9  | 788.8  | 498.8  | NM_181720.2    |
| 319.4  | 241    | 247.4  | 205.3  | NM_001025598.1 |

|        |         |         |                      |
|--------|---------|---------|----------------------|
| 1088.7 | 1033.3  | 1067.5  | 624.2 NM_001666.2    |
| 92.8   | 98.8    | 97.7    | 73.7 NM_001173.2     |
| 99.6   | 93.4    | 101.7   | 83.5 NM_013422.2     |
| 82.1   | 85.3    | 75.6    | 84 NM_013423.1       |
| 94.4   | 81.7    | 84.2    | 80.6 NM_001174.2     |
| 95.9   | 92.6    | 88.3    | 89 NM_006125.1       |
| 86     | 85.4    | 79.3    | 89.9 NM_181335.2     |
| 82.3   | 86.6    | 72.1    | 83.8 NM_001017526.1  |
| 86.8   | 73.2    | 79.5    | 80.4 NM_001017526.1  |
| 1021.2 | 1372.3  | 1409.8  | 1092 NM_032496.1     |
| 245.1  | 337.8   | 364.5   | 361.6 NM_001080156.1 |
| 1044.8 | 723.4   | 651.9   | 629.3 NM_004309.3    |
| 17960  | 15568.3 | 15052.7 | 11472 NM_001175.4    |
| 89.3   | 90      | 81.2    | 84.3 NM_001176.2     |
| 183.8  | 222.1   | 177.1   | 174.2 NM_199002.1    |
| 110.6  | 102.3   | 95.6    | 88.6 NM_199002.1     |
| 108.3  | 116.8   | 117     | 119 NM_199002.1      |
| 629.8  | 375.1   | 357     | 274.9 NM_014629.2    |
| 88.1   | 91.7    | 98.1    | 96.5 NM_001011722.2  |
| 89.4   | 100.3   | 94.2    | 80.4 NM_018125.3     |
| 94.6   | 87.2    | 90.3    | 86.7 NM_001011722.2  |
| 84.5   | 90.3    | 89      | 97.6 NM_198236.1     |
| 120.9  | 113     | 121.9   | 117.3 NM_014784.2    |
| 123.7  | 140.5   | 127.7   | 128.4 NM_014784.2    |
| 113.8  | 90      | 88.4    | 87.6 NM_015313.1     |
| 92.2   | 80.7    | 85.1    | 80 NM_173728.2       |
| 94.6   | 78.6    | 78.5    | 80.5 NM_014448.2     |
| 135.2  | 152.2   | 140.3   | 140.6 NM_014786.2    |
| 1519.3 | 1467.2  | 1599.6  | 984.7 NM_015318.2    |
| 340.4  | 268.5   | 255.7   | 159.5 NM_153213.2    |
| 1795.2 | 1946.1  | 1660.9  | 1130.6 NM_004723.2   |
| 467.5  | 410.6   | 347.2   | 354.1 NM_019555.1    |
| 97.4   | 88      | 80.3    | 83.6 NM_032995.1     |
| 76.9   | 95.3    | 80.3    | 85.8 NM_032995.1     |
| 108.5  | 116     | 101.6   | 102.8 NM_001002861.1 |
| 3346   | 2786.7  | 2824.8  | 1955.5 NM_004840.2   |
| 966.3  | 923.4   | 967.7   | 722.4 NM_003899.2    |
| 90.2   | 79.2    | 79.2    | 81.6 NM_145735.1     |
| 105.2  | 94.3    | 98.1    | 102.9 NM_003899.2    |
| 94.5   | 101.6   | 101.6   | 104.6 NM_015185.1    |
| 90.7   | 88.2    | 85.4    | 98.6 NM_006015.3     |
| 1182.9 | 1461.8  | 1615    | 830.9 NM_139135.1    |
| 94.8   | 107     | 90.6    | 104.5 NM_175863.2    |
| 100.6  | 102.2   | 102.4   | 98.2 NM_020732.2     |
| 191.1  | 149.1   | 175.4   | 158.4 NM_152641.2    |
| 1182   | 1313.9  | 1144.6  | 1171.9 NM_005224.1   |
| 89.2   | 94.9    | 81.2    | 90.6 NM_001017363.1  |
| 136.8  | 152     | 132.5   | 150.7 NM_023000.2    |
| 123    | 136.9   | 119.3   | 131.6 NM_002892.2    |
| 220.2  | 215.7   | 193.2   | 223.1 NM_002892.2    |

|        |        |        |                      |
|--------|--------|--------|----------------------|
| 134    | 131.4  | 130.8  | 132.7 NM_016374.4    |
| 365.8  | 459.2  | 432.2  | 443.3 NM_016374.5    |
| 186.7  | 187.7  | 213    | 178.3 NM_016374.5    |
| 93.6   | 93     | 94.6   | 92.3 NM_212481.1     |
| 94.4   | 91.8   | 94.5   | 102.9 NM_212481.1    |
| 114.3  | 111.2  | 107.4  | 108.2 NM_212481.1    |
| 110.5  | 138.9  | 121.7  | 123.2 NM_032199.1    |
| 254.7  | 302.9  | 303    | 249.6 NM_005744.2    |
| 1173.6 | 1264.6 | 1339.4 | 697.8 NM_006321.1    |
| 476.2  | 411.6  | 402.7  | 340.6 NM_001177.3    |
| 88.7   | 88.5   | 89.9   | 87 NM_173664.3       |
| 99.7   | 93.7   | 91.3   | 95.7 NM_138450.3     |
| 91     | 85.6   | 91.7   | 93.3 NM_001012990.1  |
| 118.5  | 102.4  | 92     | 106.7 NM_144996.2    |
| 105    | 95.6   | 81.3   | 88.8 NM_182896.1     |
| 79.6   | 87.7   | 78.8   | 91.6 NM_025047.1     |
| 104    | 100.9  | 97.4   | 100 NM_019087.1      |
| 736.2  | 780.9  | 1092   | 837.5 NM_001040025.1 |
| 2084.3 | 1230   | 1396.7 | 640.2 NM_001667.1    |
| 1299.9 | 1059.5 | 925.6  | 668.4 NM_012106.3    |
| 126.3  | 108.5  | 103.2  | 94.4 NM_004311.2     |
| 157.6  | 118.1  | 105.4  | 111.2 NM_212460.1    |
| 229.3  | 169.5  | 146    | 163.7 NM_005738.2    |
| 156.3  | 125.8  | 113.6  | 129.3 NM_005738.2    |
| 79.7   | 87.3   | 78     | 85.7 NM_001037164.1  |
| 88.2   | 89.7   | 89.8   | 90.2 NM_005737.3     |
| 102.9  | 97.1   | 98.4   | 95.7 NM_001661.2     |
| 194.9  | 171.5  | 166.8  | 125.1 NM_012097.2    |
| 3744.1 | 3502.7 | 3726.8 | 2680.2 NM_012097.2   |
| 1016.8 | 896.7  | 794.2  | 673.7 NM_001037174.1 |
| 125.4  | 106.2  | 96.2   | 95.6 NM_178815.3     |
| 71     | 73.6   | 76.8   | 87.5 NM_032146.3     |
| 94.4   | 86.9   | 80.1   | 80.6 NM_032146.3     |
| 90.1   | 92.1   | 89.6   | 87.3 NM_177976.1     |
| 127.6  | 98.4   | 93.3   | 99.3 NM_015161.1     |
| 343.9  | 236.2  | 215.9  | 242.7 NM_022374.1    |
| 188.6  | 206.3  | 206    | 174.3 NM_018694.2    |
| 118.4  | 109.7  | 100.5  | 105.8 NM_001002252.1 |
| 276.6  | 314.2  | 303.7  | 256.4 NM_001002251.1 |
| 659.9  | 530.6  | 483.6  | 517.6 NM_006407.3    |
| 86     | 84.4   | 86.5   | 86.8 NM_152522.2     |
| 84.1   | 100.6  | 88     | 91.3 NM_138795.2     |
| 1113.7 | 1273.4 | 1027.1 | 1111.1 NM_018184.2   |
| 96.9   | 94.5   | 83.4   | 85.3 NM_206919.1     |
| 455.1  | 297.3  | 292.5  | 227 NM_018120.3      |
| 1559.1 | 1274.8 | 1176.8 | 1104.5 NM_031905.2   |
| 79.8   | 88.1   | 85.3   | 84.1 NM_032131.3     |
| 99.1   | 109.8  | 110.5  | 95.4 NM_018076.2     |
| 117    | 99.1   | 94.3   | 103.9 NM_024742.1    |
| 189.8  | 160    | 145.6  | 137.5 NM_033415.2    |

|        |        |        |                      |
|--------|--------|--------|----------------------|
| 322.7  | 317.3  | 261.5  | 266.7 NM_024585.2    |
| 110.3  | 107.6  | 102.3  | 94.1 NM_015396.3     |
| 340    | 278.6  | 238    | 196.4 NM_014154.2    |
| 102.7  | 96.8   | 102    | 96.2 NM_213654.1     |
| 96.8   | 96.2   | 80.2   | 86.2 NM_014154.2     |
| 89.8   | 87.6   | 89.5   | 85.5 NM_025139.2     |
| 138.8  | 142.4  | 150    | 146.2 NM_016608.1    |
| 81.9   | 80.2   | 93.3   | 86.5 NM_177949.1     |
| 264.7  | 276.6  | 217.6  | 243.1 NM_177947.2    |
| 87.5   | 79.1   | 84.3   | 83 NM_177948.2       |
| 209.9  | 156.1  | 131.2  | 178.3 NM_022838.2    |
| 377    | 329.1  | 253.7  | 256.1 NM_019007.3    |
| 388.7  | 348    | 257.9  | 251.6 NM_019007.3    |
| 7937.1 | 5858   | 4691.3 | 3277.1 NM_006010.2   |
| 104.1  | 100    | 90.2   | 102.9 NM_001029954.1 |
| 112    | 106.4  | 102.9  | 110.6 NM_178426.1    |
| 88.6   | 95.7   | 92.4   | 89.7 NM_001668.2     |
| 89.4   | 90.7   | 90.1   | 85.6 NM_014862.3     |
| 91.3   | 96.8   | 92.2   | 93.1 NM_001030273.1  |
| 331.2  | 312.6  | 270.1  | 297 NM_001030272.1   |
| 84.9   | 83     | 74.7   | 79.4 NM_020183.3     |
| 106.5  | 100.7  | 91.8   | 96 NM_181773.2       |
| 1893.8 | 1458.4 | 1322.6 | 951.8 NM_006409.2    |
| 1309.3 | 1438.1 | 1252.1 | 909.6 NM_005720.2    |
| 91.9   | 86.6   | 80.1   | 93.7 NM_152862.1     |
| 9396.2 | 7925.9 | 7305.9 | 7422.2 NM_005731.2   |
| 88     | 100.5  | 93.8   | 95.3 NM_005731.2     |
| 9217.3 | 8815.8 | 9354   | 7710.1 NM_005719.2   |
| 98.9   | 108.4  | 93.7   | 95.3 NM_005718.3     |
| 3944   | 2478.4 | 2203.6 | 1435 NM_001024960.1  |
| 1481.1 | 766.6  | 750.4  | 492.6 NM_001024959.1 |
| 3266   | 2130.8 | 1893.5 | 2189.2 NM_005717.2   |
| 1243.6 | 726.7  | 666.9  | 527.2 NM_030978.1    |
| 101.8  | 101.5  | 90.7   | 92.8 NM_032487.2     |
| 92     | 81.3   | 84.9   | 84.7 NM_080431.3     |
| 265.2  | 284.1  | 317.3  | 222.2 NM_006628.4    |
| 92     | 82.3   | 78.8   | 89 NM_016300.4       |
| 86.5   | 85.5   | 83.3   | 81.2 NM_198399.1     |
| 78     | 74     | 80.7   | 81.6 NM_001025068.1  |
| 91.4   | 92.4   | 90.9   | 90.9 NM_001025068.1  |
| 94.7   | 81     | 83.5   | 90.7 NM_004312.1     |
| 196.9  | 174.8  | 152.3  | 173.6 NM_020251.2    |
| 183.9  | 162.9  | 159    | 154.1 NM_004041.3    |
| 93.7   | 101.7  | 98.3   | 91.4 NM_004313.3     |
| 110.5  | 114.6  | 109.2  | 109 NM_199004.1      |
| 120.4  | 135.4  | 154.8  | 143.6 NM_152285.2    |
| 93.9   | 87.3   | 79.7   | 83.5 NM_001025604.1  |
| 92.4   | 87     | 92.8   | 89.2 NM_015683.1     |
| 245.1  | 182.7  | 176.2  | 183.7 NM_015683.1    |
| 209.5  | 274.9  | 227.6  | 207.8 NM_020801.1    |

|        |        |        |        |                |
|--------|--------|--------|--------|----------------|
| 134.8  | 172.7  | 159.6  | 181.8  | NM_183376.1    |
| 82.7   | 87.3   | 81.8   | 85.6   | NM_001080523.1 |
| 4219.2 | 3381.3 | 3371.4 | 1936.9 | NM_015908.4    |
| 86.9   | 80.9   | 77     | 80.2   | NM_182800.2    |
| 125.6  | 128.7  | 146.8  | 94.2   | NM_000487.3    |
| 88.6   | 86     | 85.3   | 83.3   | NM_198709.1    |
| 335.9  | 354.3  | 351.7  | 275    | NM_000046.2    |
| 139.7  | 153.8  | 136.2  | 130    | NM_198709.1    |
| 127.2  | 184.6  | 175.8  | 165.4  | NM_009589.2    |
| 118.1  | 108.4  | 102.1  | 95.1   | NM_009589.2    |
| 707.2  | 972.5  | 719.2  | 733    | NM_001669.2    |
| 80.5   | 79.1   | 82.2   | 87.6   | NM_000047.1    |
| 89.7   | 86.4   | 80.5   | 90.5   | NM_004042.3    |
| 98.7   | 115.2  | 104.9  | 102.5  | NM_014960.2    |
| 89     | 91     | 89.6   | 98.4   | NM_001011719.1 |
| 88.5   | 84.6   | 83.2   | 95.3   | NM_001012301.1 |
| 96.7   | 90.8   | 94.4   | 100.5  | NM_024590.2    |
| 147    | 165.7  | 138.9  | 139.5  | NM_198150.1    |
| 102    | 100.3  | 90.9   | 93.2   | NM_004314.1    |
| 93.5   | 102.9  | 94.5   | 96.7   | NM_001179.2    |
| 101.4  | 100    | 100.1  | 102.8  | NM_021071.2    |
| 83.4   | 85.6   | 81.8   | 89.2   | NM_053017.2    |
| 89.4   | 84.4   | 88.1   | 92.4   | NM_053017.3    |
| 78.8   | 74.4   | 78.3   | 77.9   | NM_057091.1    |
| 84     | 80.6   | 86.8   | 87     | NM_003976.2    |
| 88.6   | 93.8   | 81.3   | 92.9   | NM_057160.1    |
| 104.4  | 94.2   | 92.9   | 93.7   | NM_003976.2    |
| 124.6  | 114.4  | 121.6  | 103.6  | NM_001040458.1 |
| 71.9   | 90.7   | 76.4   | 76.9   | NM_016442.2    |
| 870.1  | 680.4  | 650.2  | 512.8  | NM_022786.1    |
| 88     | 79.7   | 83     | 89.3   | NM_001670.1    |
| 95.3   | 97.8   | 88.3   | 87.3   | NM_001030078.1 |
| 107.8  | 114.3  | 104.2  | 102.6  | NM_139058.1    |
| 109.5  | 98.8   | 94     | 90     | NM_020682.2    |
| 165.6  | 177.9  | 169.4  | 147.4  | NM_177924.1    |
| 92.5   | 101.4  | 92.8   | 94.6   | NM_004315.2    |
| 89.1   | 76.3   | 73.9   | 99     | NM_019893.1    |
| 90.5   | 90.8   | 87.5   | 91.4   | NM_133492.1    |
| 109.6  | 94     | 101.9  | 106.2  | NM_001010887.2 |
| 524.4  | 415.1  | 344.4  | 359.9  | NM_014435.2    |
| 609    | 447.5  | 439.7  | 351.6  | NM_014435.2    |
| 208.4  | 176.8  | 169.6  | 182.7  | NM_014435.2    |
| 95.9   | 98.3   | 84.6   | 95.5   | NM_024769.2    |
| 244.4  | 219.1  | 210.5  | 144.4  | NM_016114.3    |
| 95.8   | 97.7   | 84.7   | 90.6   | NM_080871.2    |
| 81     | 77.5   | 78.2   | 82.9   | NM_001012428.1 |
| 87.7   | 81.7   | 82.2   | 87     | NM_001012428.1 |
| 110.6  | 109.1  | 103.5  | 89.9   | NM_080873.1    |
| 122.1  | 105.8  | 99.4   | 105.7  | NM_130388.2    |
| 318.2  | 215.3  | 199    | 167.9  | NM_024701.2    |

|        |        |        |                      |
|--------|--------|--------|----------------------|
| 84.3   | 88.1   | 89     | 78.2 NM_130387.4     |
| 89.4   | 90.5   | 92.8   | 93.3 NM_080928.2     |
| 85.5   | 89     | 88     | 86.3 NM_080863.4     |
| 91.4   | 95.1   | 89.7   | 80.2 NM_080868.1     |
| 95.9   | 101.4  | 96.1   | 95.1 NM_016150.3     |
| 175.6  | 168    | 172.7  | 159.4 NM_145863.1    |
| 219.1  | 170.4  | 170.5  | 157.9 NM_016115.3    |
| 92.1   | 81     | 78.1   | 81.7 NM_145872.1     |
| 86.4   | 90.5   | 86.4   | 92.6 NM_145872.1     |
| 88.4   | 99     | 93     | 87.3 NM_016116.1     |
| 88.7   | 74.8   | 85.5   | 93.7 NM_080874.2     |
| 85.3   | 79.6   | 70.2   | 85.4 NM_017873.2     |
| 142.2  | 115.4  | 105.8  | 119 NM_177999.1      |
| 155.4  | 117.4  | 116.4  | 103.4 NM_177999.1    |
| 94.4   | 85.5   | 86.5   | 98.9 NM_024708.2     |
| 99.1   | 107.9  | 87.5   | 95.1 NM_198243.1     |
| 126.4  | 122.1  | 103.8  | 99.3 NM_024708.2     |
| 171.1  | 166.4  | 168.6  | 155 NM_024095.3      |
| 86.6   | 84.5   | 85.8   | 87.8 NM_024087.1     |
| 88.5   | 77     | 76     | 85.6 NM_024087.1     |
| 849.2  | 524.6  | 456.2  | 338 NM_015947.2      |
| 1653.2 | 1822   | 1866.4 | 748.5 NM_032204.3    |
| 102.6  | 90.6   | 91.5   | 91.4 NM_022091.3     |
| 135.2  | 153.6  | 154.3  | 139.7 NM_006828.2    |
| 94.8   | 86.1   | 93.3   | 98.1 NM_022091.3     |
| 127.4  | 132.3  | 137.5  | 103.5 NM_014014.2    |
| 118.7  | 124.3  | 119.4  | 126.9 NM_015251.2    |
| 99.6   | 90.5   | 83.6   | 108.1 NM_004316.2    |
| 210.5  | 209.2  | 207.5  | 157.8 NM_005170.2    |
| 96.7   | 82.3   | 79.1   | 77.9 NM_020646.1     |
| 80.3   | 81.2   | 88     | 80.1 NM_203436.1     |
| 1480.3 | 911.8  | 696    | 878.3 NM_014034.1    |
| 379.5  | 286.3  | 279.7  | 161.1 NM_018154.2    |
| 103.2  | 86.1   | 98     | 103.3 NM_001671.2    |
| 90.2   | 82.2   | 78.1   | 84.6 NM_080912.1     |
| 214    | 266.5  | 248.7  | 258.1 NM_080914.1    |
| 143.5  | 157.3  | 146.3  | 129.9 NM_080914.1    |
| 83.3   | 84.6   | 91     | 101.6 NM_018489.1    |
| 2209.1 | 1437.4 | 1262   | 1036 NM_004674.1     |
| 79     | 90.5   | 83.7   | 87.2 NM_001672.2     |
| 91.6   | 80.6   | 88.9   | 91.2 NM_000048.3     |
| 99.2   | 106.1  | 118.8  | 102.3 NM_001024943.1 |
| 155    | 142.9  | 159.7  | 131.4 NM_001024943.1 |
| 91.7   | 90.7   | 93.6   | 90.1 NM_004043.1     |
| 156.6  | 193.7  | 189.2  | 175 NM_004192.1      |
| 90.5   | 89.6   | 88.3   | 79.2 NM_004317.2     |
| 1820.1 | 828.7  | 841.9  | 512.9 NM_133436.1    |
| 178    | 116.5  | 95.5   | 107.9 NM_133436.1    |
| 1782.3 | 1479.2 | 1075.2 | 1103.3 NM_019048.1   |
| 76.3   | 87     | 84.3   | 89.2 NM_000049.2     |



|        |        |        |                      |
|--------|--------|--------|----------------------|
| 113.6  | 114.2  | 103.4  | 114.3 NM_032468.2    |
| 118.7  | 109.8  | 92.7   | 103.6 NM_020164.2    |
| 91.6   | 89.1   | 89.3   | 88 NM_004318.2       |
| 303.7  | 208.5  | 174.2  | 164.9 NM_181718.3    |
| 110.6  | 93.9   | 95     | 81.8 NM_181718.3     |
| 133    | 125.2  | 115.8  | 114.3 NM_020437.3    |
| 1033.7 | 644.6  | 701.7  | 621.3 NM_018136.2    |
| 95.5   | 94.6   | 95     | 99.8 NM_017680.3     |
| 111.3  | 114.7  | 104.7  | 103.8 NM_024083.2    |
| 1774.8 | 1650.8 | 1981.8 | 794.7 NM_024083.2    |
| 103.4  | 95.3   | 116.8  | 114.7 NM_025080.2    |
| 1146.2 | 676.5  | 600    | 730 NM_000050.3      |
| 309    | 269.1  | 229    | 297.1 NM_054012.3    |
| 183.1  | 166    | 162    | 131.1 NM_014065.2    |
| 104.4  | 102.6  | 99.8   | 93.2 NM_001002036.2  |
| 99.6   | 87.3   | 87.9   | 89.2 NM_004319.1     |
| 90.6   | 92.4   | 95.2   | 81.5 NM_207108.1     |
| 90.1   | 90.9   | 86.6   | 87.8 NM_014010.3     |
| 99.3   | 91.9   | 87.5   | 103.9 NM_198188.1    |
| 94.3   | 85.5   | 92.8   | 92.4 NM_198187.2     |
| 261.8  | 324.4  | 285.7  | 221.7 NM_015338.3    |
| 568.9  | 1040.8 | 935.7  | 581.3 NM_018263.3    |
| 84.1   | 76.6   | 73.6   | 81.5 NM_130768.1     |
| 128.7  | 119.5  | 98.5   | 109.4 NM_032810.2    |
| 1401   | 1026.4 | 800.3  | 786.7 NM_014109.2    |
| 295.7  | 271.4  | 224.4  | 211 NM_018188.2      |
| 138.4  | 143.8  | 133.3  | 137.6 NM_031921.4    |
| 96.4   | 96.3   | 96.7   | 102.5 NM_001039211.1 |
| 144.2  | 133.8  | 146.1  | 125.6 NM_024320.2    |
| 87     | 101.9  | 120    | 94.1 NM_006885.2     |
| 89.7   | 88.9   | 92.3   | 93.9 NM_033064.2     |
| 99.4   | 82.1   | 85.8   | 90.1 NM_001001976.1  |
| 86.4   | 86     | 77.3   | 85.3 NM_007041.2     |
| 95.7   | 93.1   | 87.4   | 84.5 NM_007041.2     |
| 102.3  | 98.4   | 103    | 103.9 NM_005171.2    |
| 224.7  | 229.2  | 210.7  | 187.6 NM_001880.2    |
| 147.9  | 119.5  | 100.9  | 118.1 NM_001040619.1 |
| 99.1   | 86.7   | 92     | 94.5 NM_001030287.1  |
| 93.4   | 85.6   | 85.2   | 82.6 NM_004024.3     |
| 6623.3 | 5449.4 | 6156.8 | 4470.6 NM_001675.2   |
| 128.6  | 136.8  | 128.6  | 109.3 NM_001675.2    |
| 384.9  | 220.1  | 258.3  | 193.7 NM_182810.1    |
| 874.4  | 1078.2 | 954    | 575.8 NM_012068.2    |
| 790.2  | 648.1  | 597.7  | 533.8 NM_007348.2    |
| 102.7  | 88.7   | 98     | 88.2 NM_006856.1     |
| 104.6  | 81.2   | 98.2   | 93.6 NM_018179.3     |
| 337.6  | 280.8  | 271.5  | 221.6 NM_024997.2    |
| 206.3  | 215.2  | 206.7  | 223.4 NM_031482.3    |
| 1331.6 | 1145.1 | 1167.8 | 908.6 NM_004707.2    |
| 411.3  | 285.8  | 274.6  | 229.8 NM_030803.5    |

|        |        |        |                       |
|--------|--------|--------|-----------------------|
| 474.9  | 311.5  | 336.5  | 257.8 NM_017974.3     |
| 208.1  | 230.5  | 232.2  | 221.4 NM_033388.1     |
| 123    | 120.2  | 106.4  | 105 NM_022488.3       |
| 221.6  | 236.4  | 225.1  | 157.4 NM_178270.1     |
| 84.3   | 84.6   | 73.8   | 83.4 NM_178271.1      |
| 92.3   | 84.6   | 85.4   | 93.5 NM_013325.4      |
| 771.8  | 521.9  | 500.9  | 377.7 NM_178326.2     |
| 100.2  | 87.2   | 90.8   | 88.6 NM_032852.2      |
| 92.6   | 82.1   | 80.9   | 97 NM_032885.4        |
| 222.7  | 268.6  | 221.6  | 204.6 NM_004849.1     |
| 484.6  | 582.8  | 604    | 374.3 NM_006395.1     |
| 80.7   | 84.7   | 78.5   | 89.9 NM_001077198.1   |
| 349.9  | 403.5  | 315.8  | 325.7 NM_001077198.1  |
| 257.4  | 274.2  | 206.1  | 236.2 NM_024085.2     |
| 88.1   | 89.2   | 96.3   | 91.6 NM_173681.3      |
| 152.5  | 242.6  | 223.4  | 229.8 NM_025092.1     |
| 3942.5 | 2127.7 | 1847.3 | 1329.1 NM_004044.4    |
| 91.4   | 101.3  | 87.6   | 88.1 NM_000051.3      |
| 408.2  | 597.1  | 737.6  | 528.7 NM_000051.3     |
| 79.6   | 76.3   | 72.4   | 79.5 NM_138292.3      |
| 100    | 95.6   | 92.3   | 104.1 NM_001940.3     |
| 154.3  | 140    | 125.7  | 126 NM_001007026.1    |
| 91.9   | 84.5   | 91.8   | 83.9 NM_001007026.1   |
| 89.4   | 88.3   | 88     | 88.3 NM_005172.1      |
| 89.9   | 92     | 90     | 77 NM_145178.2        |
| 88.5   | 85.3   | 79.7   | 83.7 NM_032827.3      |
| 2367.7 | 1565.3 | 1532.8 | 1021.2 NM_004045.3    |
| 89.8   | 96.6   | 78.1   | 79.6 NM_024490.2      |
| 105.5  | 116.6  | 114.6  | 110.4 NM_020453.2     |
| 91     | 87.4   | 89.2   | 84 NM_015205.1        |
| 79.2   | 84.6   | 76     | 71.4 NM_032189.2      |
| 191    | 195.8  | 187.3  | 216.3 NM_014616.1     |
| 132.7  | 133.6  | 112.8  | 112.5 NM_173694.3     |
| 210.5  | 227.2  | 222.9  | 206.6 NM_173694.3     |
| 92.2   | 94.8   | 98.1   | 84.5 NM_001676.3      |
| 435.3  | 363.4  | 360    | 231.5 NM_020410.1     |
| 130.7  | 135.8  | 118.9  | 116.5 NM_022089.1     |
| 77.2   | 80     | 72.8   | 76.9 NM_032279.2      |
| 89.5   | 77     | 78.9   | 85.4 NM_198505.2      |
| 1951.9 | 1495.7 | 1253.4 | 971.4 NM_000701.6     |
| 2432.2 | 2168.9 | 1706.6 | 1656.1 NM_001001586.1 |
| 616.1  | 281.6  | 301.6  | 237.2 NM_000701.6     |
| 84.7   | 79.8   | 76.3   | 94.8 NM_000702.2      |
| 105.9  | 108.9  | 101.1  | 85.3 NM_152296.3      |
| 91.5   | 93.3   | 86.6   | 86.3 NM_144699.2      |
| 93.3   | 86.1   | 84.2   | 88.9 NM_001001734.1   |
| 181.4  | 255    | 207    | 254.1 NM_001001787.1  |
| 331.9  | 670.8  | 467.2  | 582.8 NM_001001787.1  |
| 204.4  | 349.5  | 233.8  | 243.2 NM_001677.3     |
| 171.3  | 245.1  | 222.5  | 153.6 NM_001678.3     |

|         |         |         |                       |
|---------|---------|---------|-----------------------|
| 1638.5  | 1126.9  | 982.6   | 1194.4 XM_945505.1    |
| 366.9   | 291.1   | 259.6   | 238 NM_001679.2       |
| 1080    | 751.9   | 466.2   | 708.7 NM_001679.2     |
| 99.7    | 97.1    | 92.2    | 87.3 NM_012069.2      |
| 93.4    | 81.8    | 90.1    | 85.3 XM_937782.1      |
| 679.4   | 812.2   | 634.7   | 493.4 NM_001681.2     |
| 1276.2  | 1322.8  | 944.6   | 1149.9 NM_001681.2    |
| 626.7   | 702.7   | 499.6   | 372.8 NM_170665.2     |
| 102.5   | 107.6   | 106.8   | 86.1 NM_174958.1      |
| 95.8    | 110.1   | 112     | 111.8 NM_174955.1     |
| 101.5   | 103.5   | 107.1   | 108.2 NM_001001323.1  |
| 82      | 83.7    | 81.2    | 85.9 NM_001001323.1   |
| 88.1    | 82.5    | 85.6    | 85.7 NM_001683.2      |
| 89.4    | 84.2    | 83.3    | 79.9 NM_001001331.1   |
| 85.5    | 82.6    | 85.1    | 82.6 NM_001683.2      |
| 192.7   | 199.5   | 201     | 164.6 NM_021949.2     |
| 90.4    | 108     | 86.4    | 88.4 NM_021949.2      |
| 94.8    | 99      | 93.1    | 99.2 NM_001001344.1   |
| 95      | 122.4   | 138.7   | 114.2 NM_001001396.1  |
| 405     | 836.8   | 707.7   | 639.2 NM_001684.3     |
| 186.6   | 196.3   | 169.4   | 176.4 NM_014382.2     |
| 101.2   | 116.4   | 99.7    | 99 NM_001001487.1     |
| 345     | 359.4   | 272.3   | 290.5 NM_001001486.1  |
| 89.3    | 85.8    | 76.6    | 91.8 NM_000704.2      |
| 93.4    | 92.4    | 85.2    | 94 NM_000705.2        |
| 86.5    | 87.1    | 91      | 90.6 NM_000705.2      |
| 18649.4 | 13361.2 | 10935   | 10059 NM_004046.4     |
| 15731.1 | 12508.8 | 12552.1 | 8930.1 NM_001001937.1 |
| 17414   | 14593   | 13195.1 | 8911.1 NM_001686.3    |
| 2252.2  | 1496.8  | 1218    | 1628.4 NM_005174.2    |
| 474.6   | 337.1   | 302.3   | 252.8 NM_001687.4     |
| 4415.5  | 2272.7  | 1960.5  | 2109.1 NM_001001975.1 |
| 1773.7  | 804.9   | 988.6   | 647.4 NM_001688.3     |
| 9570.7  | 5445.1  | 4747.3  | 4112.7 NM_001688.3    |
| 162.7   | 148.9   | 152.1   | 108.9 NM_005175.2     |
| 4253.7  | 3635.8  | 3336.9  | 2220.9 NM_001002027.1 |
| 87.8    | 92.4    | 81.1    | 89.1 NM_001002031.1   |
| 155.5   | 109.4   | 100.6   | 107 NM_005176.4       |
| 5497.3  | 2552.4  | 2390.6  | 1928.8 NM_005176.4    |
| 228.2   | 212     | 190.2   | 180.6 NM_001002256.1  |
| 6513.3  | 5855.2  | 4842.4  | 4784.8 NM_001003785.1 |
| 8446.8  | 8144.8  | 5858.8  | 6823.5 NM_006356.2    |
| 11051.9 | 8532.7  | 8201.6  | 5778.8 NM_007100.2    |
| 906.8   | 740.9   | 750     | 526 NM_007100.2       |
| 579.7   | 636.4   | 502.5   | 452.9 NM_001003703.1  |
| 9666.1  | 9958    | 7775    | 6000 NM_001685.4      |
| 10913.2 | 10231.8 | 8400.4  | 6890.2 NM_001003696.1 |
| 4183.3  | 3054.5  | 3234.2  | 1956.5 NM_001003714.1 |
| 5929.3  | 4642.8  | 4593.9  | 2851.5 NM_004889.2    |
| 295.2   | 231.2   | 181.8   | 185.1 NM_006476.4     |

|        |        |        |        |                |
|--------|--------|--------|--------|----------------|
| 7183.8 | 6417.6 | 5688.3 | 5486.6 | NM_001697.2    |
| 183.6  | 202.4  | 171.4  | 152.6  | NM_001003803.1 |
| 127.9  | 132.4  | 123.3  | 107.6  | NM_015684.2    |
| 3794.7 | 3891.2 | 4298.6 | 1632.4 | NM_001183.3    |
| 1890.6 | 2428.8 | 2256.8 | 1941.6 | NM_005765.2    |
| 875    | 838    | 869    | 518.1  | NM_005177.2    |
| 329.8  | 273.9  | 256.1  | 190    | NM_012463.2    |
| 83     | 93.5   | 74.8   | 83.9   | NM_020632.1    |
| 96     | 93.5   | 94.7   | 91.7   | NM_130841.1    |
| 85     | 86.2   | 80.9   | 82.7   | NM_130840.1    |
| 92.7   | 96     | 89.4   | 99.5   | NM_130840.2    |
| 6352.3 | 4829.4 | 4742.1 | 3004.8 | NM_004047.2    |
| 162.9  | 194.8  | 164.1  | 163.2  | NM_001039457.1 |
| 425.9  | 294.6  | 274.6  | 227.6  | NM_001694.2    |
| 1105.7 | 751.2  | 680.9  | 450.9  | NM_004691.3    |
| 90.7   | 90.7   | 90     | 88     | NM_152565.1    |
| 4256.6 | 3555.9 | 3688.3 | 2616.1 | NM_003945.3    |
| 834.4  | 664.6  | 660.6  | 309.2  | NM_145230.1    |
| 3751.4 | 4451.2 | 3833.9 | 3368.9 | NM_001690.2    |
| 280.7  | 297.1  | 374.4  | 214.1  | NM_001692.2    |
| 8358.6 | 4509.1 | 3615.4 | 2769.8 | NM_001693.2    |
| 248.8  | 283.3  | 228.7  | 264.9  | NM_001695.3    |
| 95.3   | 100.2  | 83.5   | 100.2  | NM_001695.3    |
| 94.3   | 126.4  | 137.5  | 114.9  | NM_144583.2    |
| 85.6   | 83.8   | 80.7   | 79.8   | NM_144583.3    |
| 1124.1 | 860.3  | 661    | 640.4  | NM_015994.2    |
| 3525.5 | 2949.7 | 2829.2 | 1747.1 | NM_001039367.1 |
| 3233.7 | 2634.6 | 2413.1 | 1475.2 | NM_001696.2    |
| 197.3  | 223    | 215.7  | 181.8  | NM_080653.3    |
| 2918.9 | 2123.3 | 2152.1 | 1329.4 | NM_004231.2    |
| 2315.5 | 2120.2 | 1793   | 1584.7 | NM_004888.2    |
| 128.9  | 103.5  | 101.6  | 97     | NM_130463.2    |
| 89.2   | 99.3   | 84.8   | 94     | NM_130463.2    |
| 98.8   | 80.4   | 81.4   | 84.2   | NM_133262.2    |
| 105.4  | 93.6   | 82     | 82.5   | NM_213620.1    |
| 452.5  | 356.8  | 327.6  | 262.6  | NM_213619.1    |
| 96.9   | 117.7  | 112.3  | 118.6  | NM_000052.2    |
| 104.9  | 89.4   | 96.7   | 97     | NM_000053.2    |
| 115.3  | 188    | 182.1  | 162.2  | NM_000053.2    |
| 90.1   | 85.6   | 80.1   | 83.6   | NM_006095.1    |
| 117.4  | 114.2  | 104.4  | 97.9   | NM_016529.3    |
| 90.2   | 88.3   | 91.2   | 93.8   | NM_005603.2    |
| 100    | 96.9   | 84.1   | 98.4   | NM_001005855.1 |
| 164.5  | 135.7  | 150.3  | 120.9  | NM_020452.2    |
| 176    | 193.8  | 191.9  | 145    | NM_138813.2    |
| 3096.9 | 3938.1 | 4227.9 | 3232.6 | NM_024837.2    |
| 206.7  | 338.6  | 325.3  | 241.2  | NM_006045.1    |
| 134.4  | 129.5  | 116.8  | 111    | NM_198531.3    |
| 482.1  | 361.2  | 304.8  | 244.9  | NM_022745.2    |
| 357.4  | 326.4  | 288    | 201.9  | NM_001042546.1 |

|        |        |        |                      |
|--------|--------|--------|----------------------|
| 120.5  | 115.3  | 115.5  | 93.2 NM_145691.3     |
| 557.9  | 429.3  | 476.7  | 285.7 NM_018066.3    |
| 91.3   | 81.9   | 83     | 85.1 NM_016301.2     |
| 141.9  | 120    | 121.4  | 106.1 NM_145232.2    |
| 131.6  | 97.5   | 106.1  | 101.1 NM_080650.2    |
| 470    | 442.2  | 369.5  | 272.6 NM_016311.3    |
| 108.9  | 105.2  | 106    | 116.6 NM_178191.1    |
| 90.5   | 84     | 79.8   | 97.1 NM_001184.2     |
| 86.3   | 71     | 85.7   | 78.8 NM_001184.2     |
| 94     | 85     | 96.3   | 89.1 NM_001184.2     |
| 98.1   | 128.7  | 112.6  | 129.1 NM_139322.1    |
| 89.5   | 95.8   | 87.9   | 77.6 NM_139321.1     |
| 94.7   | 91     | 83.1   | 86.3 NM_207303.1     |
| 89.5   | 109.7  | 94.3   | 101.2 NM_138270.1    |
| 82     | 76.6   | 77.3   | 80.6 NM_000489.2     |
| 83.4   | 85.2   | 75.4   | 74.7 NM_138271.1     |
| 127.2  | 144.3  | 142.4  | 143.2 NM_000332.2    |
| 103.8  | 108.8  | 101.7  | 103.6 NM_013236.2    |
| 932.6  | 1143.4 | 1200   | 676.4 NM_002973.2    |
| 163.9  | 162.2  | 146.6  | 169.7 NM_007245.2    |
| 97.8   | 114.7  | 115.5  | 123.8 NM_017492.2    |
| 279.8  | 335.2  | 416    | 275.7 NM_030660.2    |
| 115.8  | 115.5  | 116.4  | 122.7 NM_030660.2    |
| 89     | 78.8   | 80     | 80.1 NM_000333.2     |
| 185.2  | 114.3  | 112.7  | 118.3 NM_153340.2    |
| 96.9   | 93.6   | 92     | 85.1 NM_152749.2     |
| 81.6   | 90.7   | 88.8   | 98.7 NR_002717.1     |
| 176    | 187.5  | 175.1  | 150.3 NM_001698.1    |
| 410.6  | 303    | 355.5  | 215.9 NM_012103.2    |
| 2845.1 | 1967.9 | 1668   | 1254.5 NM_198434.1   |
| 2434.3 | 1654.2 | 1417.1 | 1035.6 NM_198434.1   |
| 4058.3 | 3925.1 | 3824.1 | 2070.6 NM_017900.1   |
| 756.5  | 355.7  | 331    | 292.5 NM_004217.1    |
| 86.3   | 89.3   | 80.6   | 83.8 NM_001015878.1  |
| 83.2   | 84.4   | 80.5   | 84 NM_001015878.1    |
| 119.4  | 96.2   | 96     | 83.9 NM_001015879.1  |
| 86.6   | 85.9   | 81.4   | 80.5 NM_015570.1     |
| 144.7  | 119.1  | 123.2  | 145.4 NM_020371.2    |
| 106.9  | 113.2  | 111.9  | 95.7 NM_006576.2     |
| 100.4  | 94.3   | 91.5   | 91.6 NM_000490.3     |
| 254.1  | 327.3  | 245.3  | 183.4 NM_021732.1    |
| 94.9   | 90.3   | 94.7   | 94 NM_000706.3       |
| 82.3   | 81.4   | 78.4   | 77.4 NM_000707.2     |
| 84.2   | 88.9   | 76.2   | 80.5 NM_000054.2     |
| 604.8  | 839.5  | 814.6  | 613.2 NM_001014279.1 |
| 959.9  | 724.6  | 685.8  | 451.2 NM_181050.1    |
| 91.4   | 94.1   | 84.4   | 88.4 NM_003502.2     |
| 106.8  | 85.1   | 84.7   | 90.3 NM_004655.2     |
| 141.5  | 252.6  | 204.8  | 154 NM_001699.3      |
| 153    | 264    | 201.4  | 213.5 NM_021913.2    |

|         |        |        |                      |
|---------|--------|--------|----------------------|
| 348.3   | 396    | 349.4  | 208.9 NM_033027.2    |
| 109     | 110.9  | 104.4  | 92.7 NM_032193.2     |
| 159.2   | 112.6  | 112.8  | 111.4 NM_017839.3    |
| 298.1   | 212.4  | 227.3  | 147.5 NM_024830.3    |
| 94.5    | 89.5   | 88.9   | 87.6 NM_001185.2     |
| 460     | 515.6  | 526.9  | 279 NM_014984.1      |
| 77.3    | 90.5   | 78.4   | 87.2 NM_014984.1     |
| 201.5   | 245.2  | 189.9  | 209.3 NM_022461.2    |
| 3227.7  | 2309.2 | 1996.8 | 1654.8 NM_015878.4   |
| 263.4   | 173.8  | 174.2  | 164.5 NM_015878.4    |
| 159.8   | 108    | 111.9  | 110.2 NM_148174.2    |
| 11310.1 | 8861.1 | 7839.3 | 7459.3 NM_001700.3   |
| 3114.4  | 2683.2 | 2615.6 | 2000 NM_004048.2     |
| 277.9   | 251.5  | 223.6  | 205.9 NM_033168.2    |
| 277     | 195    | 178.9  | 162.1 NM_152490.1    |
| 97      | 113.2  | 111.3  | 96.8 NM_020981.2     |
| 92.2    | 99.2   | 96.7   | 90 NM_003783.2       |
| 120.1   | 115.3  | 124.1  | 120.3 NM_003781.2    |
| 97.1    | 85.7   | 75.7   | 85.4 NM_033169.1     |
| 98.4    | 97.4   | 100.3  | 93.3 NM_033169.1     |
| 97.2    | 111.8  | 98.7   | 108.7 NM_003782.3    |
| 87      | 88.4   | 79.1   | 80 NM_033172.1       |
| 92.1    | 90     | 81.7   | 93.3 NM_006057.1     |
| 90.4    | 86.5   | 87.6   | 87.3 NM_033173.1     |
| 456.5   | 404.9  | 368.5  | 414.9 NM_080605.2    |
| 131.9   | 126.5  | 124    | 116.7 NM_198540.2    |
| 93.7    | 98.6   | 108.4  | 96.6 NM_054025.1     |
| 89      | 88.9   | 86.5   | 91.4 NM_018644.3     |
| 100     | 87.6   | 89.9   | 89.9 NM_054025.1     |
| 95.2    | 95.9   | 85.6   | 100.2 NM_080742.1    |
| 225.7   | 196.7  | 163.3  | 163.5 NM_012200.2    |
| 373     | 264.6  | 217.7  | 176.1 NM_006577.3    |
| 100.6   | 88.6   | 89.1   | 98 NM_014256.2       |
| 85      | 82.3   | 77.9   | 83 NM_030765.2       |
| 112     | 99.6   | 100.9  | 110.3 NM_032047.3    |
| 208.2   | 173.7  | 152.5  | 164.7 NM_006876.1    |
| 87.8    | 94.9   | 80.8   | 89.6 NM_138706.2     |
| 88.5    | 87.4   | 92.3   | 100.3 NM_145236.1    |
| 173.5   | 170.5  | 180.3  | 160.2 NM_001009905.1 |
| 186.8   | 154.5  | 107.5  | 153.8 NM_194318.2    |
| 92.7    | 87     | 84.5   | 85.5 NM_153446.1     |
| 77.2    | 79.9   | 75.7   | 94.6 NM_173593.3     |
| 75.8    | 77.8   | 78.6   | 80.8 NM_178537.3     |
| 146.9   | 148    | 122.9  | 143 NM_001497.2      |
| 99      | 97.9   | 88.9   | 99.9 NM_001005417.1  |
| 102.2   | 107.3  | 92.1   | 103.1 NM_003780.3    |
| 107.5   | 82.1   | 85.8   | 93.2 NM_001005417.1  |
| 1570.9  | 756.6  | 784.7  | 385.5 NM_003779.2    |
| 195.7   | 153.1  | 151.4  | 148.8 NM_003778.3    |
| 141.3   | 129.5  | 133.8  | 131.1 NM_003778.3    |

|        |        |        |                      |
|--------|--------|--------|----------------------|
| 1078.5 | 1044.7 | 900.1  | 608.7 NM_004776.2    |
| 99     | 100.3  | 84.8   | 91.5 NM_004775.2     |
| 428.4  | 411    | 401    | 235.5 NM_007255.1    |
| 198.6  | 158.4  | 131.5  | 134.6 NM_001015882.1 |
| 78.1   | 88.3   | 73     | 76.6 NM_001001663.1  |
| 107.7  | 104.3  | 95     | 99.9 NM_001024372.1  |
| 89.7   | 95.1   | 90     | 89.1 NM_024812.2     |
| 79.1   | 75.2   | 72.1   | 82.9 NM_001701.2     |
| 134.7  | 139.6  | 115.3  | 149.7 NM_138972.2    |
| 101.2  | 102.1  | 86.4   | 81.2 NM_012104.3     |
| 87     | 81.6   | 74.4   | 89 NM_138991.1       |
| 89.4   | 90.5   | 97.6   | 96 NM_012105.3       |
| 106.2  | 106.8  | 111.5  | 103.9 NM_001011545.1 |
| 79.9   | 80.4   | 83.5   | 82.7 NM_206866.1     |
| 80.9   | 85.9   | 82.4   | 91.1 NM_001011545.1  |
| 86.7   | 89.1   | 84.6   | 87.1 NM_021813.1     |
| 98.5   | 97.3   | 94     | 89.5 NM_032989.1     |
| 293.5  | 214.9  | 231.4  | 192.9 NM_004322.2    |
| 98.6   | 94.2   | 91.8   | 103.6 NM_004322.2    |
| 128.2  | 121.2  | 108    | 116.4 NM_004323.3    |
| 874.8  | 396.4  | 443.8  | 245.2 NM_004281.3    |
| 168.8  | 113.1  | 109.7  | 112.4 NM_004874.2    |
| 1416.4 | 985.9  | 963.5  | 757.8 NM_004873.2    |
| 91     | 85.2   | 75.5   | 84.4 NM_001015048.1  |
| 85.5   | 91.7   | 83.7   | 79.6 NM_001015049.1  |
| 241.9  | 235.2  | 206    | 166.8 NM_001015048.1 |
| 98.9   | 92.4   | 92.8   | 95.6 NM_001187.1     |
| 90.2   | 93.3   | 85.4   | 88.2 NM_182482.1     |
| 82.7   | 83.8   | 82.5   | 93.4 NM_182481.1     |
| 88.8   | 89.5   | 82.3   | 87.2 NM_181704.1     |
| 95.4   | 121.5  | 102.9  | 109.6 NM_182484.1    |
| 90.5   | 86.3   | 86.8   | 90.4 NM_014952.2     |
| 109.9  | 88.1   | 91.5   | 85.9 XM_940726.1     |
| 88.9   | 80.9   | 82.5   | 85.1 NM_001702.1     |
| 87.4   | 80.4   | 82.9   | 82.1 NM_001702.1     |
| 77.8   | 80.1   | 79.1   | 87 NM_001703.1       |
| 89.1   | 109.4  | 97.6   | 94.5 NM_001704.1     |
| 144    | 181.6  | 184.9  | 184.8 NM_006340.1    |
| 109.6  | 113.7  | 118.7  | 116.7 NM_017450.1    |
| 92.5   | 98.3   | 89.5   | 105.9 NM_006340.1    |
| 87.8   | 78.5   | 83.7   | 90 NM_017451.1       |
| 117.9  | 101.9  | 112.4  | 121.9 NM_018842.3    |
| 111.3  | 135.1  | 143    | 119.1 NM_025045.3    |
| 79.6   | 78.9   | 77.1   | 85.1 NM_003933.3     |
| 153.3  | 165    | 153.6  | 118 NM_001188.2      |
| 148.8  | 127    | 109.9  | 107 NM_012342.2      |
| 3622.5 | 2468.5 | 2151.9 | 1886.3 NM_003860.2   |
| 251.2  | 291.6  | 264.4  | 222 NM_017935.2      |
| 124.1  | 116.5  | 99.7   | 113.9 NM_017869.3    |
| 286.6  | 269    | 217.3  | 182.5 NM_004656.2    |

|        |        |        |        |                |
|--------|--------|--------|--------|----------------|
| 765.3  | 529.6  | 577.6  | 341.8  | NM_001189.2    |
| 689.4  | 785.2  | 822.4  | 627.5  | NM_000465.1    |
| 97.5   | 88     | 83.8   | 91.3   | NM_020064.2    |
| 89.9   | 86.3   | 86.1   | 81.4   | NM_020063.1    |
| 291.8  | 179.2  | 175.2  | 166.1  | NM_021570.2    |
| 100.9  | 107    | 108.7  | 94.4   | NM_003658.3    |
| 3450.9 | 5204.9 | 3910.8 | 4784   | NM_006317.3    |
| 1868.7 | 1680.4 | 1395.5 | 1815.5 | NM_004640.4    |
| 96.1   | 97.1   | 86     | 85.1   | NM_004640.4    |
| 107    | 115.6  | 86.7   | 93.6   | NM_080598.4    |
| 491.3  | 598.5  | 520.1  | 572.4  | NM_080686.1    |
| 804.9  | 900.9  | 754    | 750.5  | NM_080686.1    |
| 1044   | 1617.2 | 1230.2 | 1340.3 | NM_015172.2    |
| 245.9  | 234    | 217    | 130.9  | NM_080703.1    |
| 285.8  | 262.6  | 256.9  | 197.4  | NM_080703.1    |
| 144.1  | 126.6  | 117.2  | 109.6  | NM_033177.2    |
| 742.2  | 935.1  | 771    | 734.3  | NM_021160.1    |
| 463.1  | 353.5  | 306.5  | 202.5  | NM_006399.2    |
| 98.3   | 90.1   | 96.9   | 95.2   | NM_138456.3    |
| 1509.8 | 1277   | 1132.7 | 1045   | NM_138765.2    |
| 91.4   | 83.7   | 83.5   | 91.9   | NM_138764.2    |
| 169.6  | 180.1  | 138.6  | 159.8  | NM_004324.3    |
| 2263.6 | 1490.4 | 1155   | 1398.8 | NM_182648.1    |
| 337.4  | 343    | 303.5  | 277.2  | NM_013448.2    |
| 659.1  | 840.1  | 577.3  | 680.9  | NM_023005.2    |
| 93.4   | 108.3  | 87.7   | 92.7   | NM_013449.2    |
| 331.5  | 437.2  | 471    | 435.5  | NM_013450.1    |
| 83.3   | 80.7   | 75.5   | 86.6   | NM_014417.2    |
| 99.1   | 88.8   | 78.9   | 88.5   | NM_003986.1    |
| 137.3  | 128.9  | 139.7  | 120.1  | NM_024649.4    |
| 105.6  | 108.4  | 114.8  | 117    | NM_152618.2    |
| 196.9  | 265.8  | 266.5  | 228.6  | NM_031885.2    |
| 248.2  | 280.7  | 247.5  | 202.1  | NM_033028.2    |
| 88.2   | 92.9   | 85     | 101.2  | NM_152384.2    |
| 94.4   | 79.1   | 84.6   | 85.2   | XM_939889.1    |
| 85.8   | 93.6   | 86.9   | 89.2   | NM_152384.2    |
| 96.4   | 98.6   | 89.6   | 95.1   | NM_018190.2    |
| 172.5  | 164.7  | 166.6  | 161.1  | NM_176824.1    |
| 86.4   | 83.7   | 82.6   | 83.1   | NM_018190.2    |
| 91.5   | 91.9   | 89.6   | 82.7   | NM_198428.2    |
| 254.1  | 279.3  | 267    | 269.1  | NM_020235.2    |
| 472.6  | 495.3  | 424.4  | 452.7  | NM_033200.1    |
| 85.2   | 88.5   | 90.9   | 86.5   | NM_001005850.1 |
| 94.3   | 85.6   | 88.8   | 94.6   | NM_005581.3    |
| 86.7   | 85.6   | 78.7   | 81.3   | NM_001013257.1 |
| 110.7  | 104.7  | 101.6  | 95.2   | NM_005581.3    |
| 106.7  | 109.4  | 112.3  | 101.1  | NM_198427.1    |
| 92.3   | 86.4   | 85     | 91.4   | NM_198427.1    |
| 110.4  | 81.6   | 82.8   | 81.7   | NM_021948.3    |
| 361.6  | 319.2  | 292.3  | 298.8  | NM_001008406.1 |



|        |        |        |                      |
|--------|--------|--------|----------------------|
| 90.2   | 99.1   | 84.8   | 93.4 NM_001008407.1  |
| 262.4  | 224.4  | 235.5  | 270.8 NM_018844.2    |
| 105    | 98.4   | 103.8  | 100.1 NM_001008405.1 |
| 255.3  | 247.2  | 221.7  | 202 NM_001008406.1   |
| 3079.5 | 2461.6 | 2456.1 | 1867.3 NM_005745.6   |
| 122.7  | 103.2  | 107    | 102.1 NM_014567.2    |
| 146.9  | 231.3  | 193.2  | 164.8 NM_003567.2    |
| 85.9   | 85.5   | 86.3   | 85.2 NM_003657.1     |
| 90     | 85     | 84.8   | 81.9 NM_005872.2     |
| 97.4   | 88     | 92.9   | 86 NM_017679.2       |
| 115    | 103.5  | 112.4  | 115.2 NM_017843.3    |
| 98.9   | 93.4   | 100.1  | 81.2 NM_017843.3     |
| 111.2  | 102.1  | 102.2  | 107.7 NM_017843.3    |
| 551    | 287.1  | 202.7  | 194.7 NM_005504.4    |
| 442.6  | 257.2  | 255.3  | 199.7 NM_001190.2    |
| 1871.6 | 1188   | 1026.8 | 792.5 NM_078468.1    |
| 487.4  | 380.8  | 275.4  | 317.9 NM_078468.1    |
| 366.2  | 276    | 235.4  | 219.6 NM_016567.2    |
| 92.1   | 87.3   | 84.6   | 77.8 NM_078469.1     |
| 949.2  | 838.1  | 771.5  | 432.8 NM_019606.4    |
| 82.6   | 81.5   | 77.1   | 77.2 NM_001037290.1  |
| 93.7   | 78.4   | 82.7   | 94.6 NM_000055.1     |
| 927.5  | 915.2  | 903.9  | 528.4 NM_000709.2    |
| 201.7  | 202.2  | 207.7  | 180.1 NM_000056.2    |
| 102.5  | 91.8   | 95     | 86.3 NM_183050.1     |
| 1532.7 | 1008.4 | 1057.2 | 489.5 NM_005881.1    |
| 139.6  | 119.4  | 124.6  | 114.5 NM_003921.2    |
| 183    | 161.7  | 130.9  | 148.1 NM_022893.2    |
| 94.9   | 92.7   | 94.3   | 93.8 NM_138559.1     |
| 138.1  | 125.4  | 115.4  | 111.3 NM_138553.1    |
| 88.8   | 82.3   | 84     | 89.4 NM_022898.1     |
| 91.3   | 90.9   | 87.3   | 87 NM_138576.2       |
| 93.2   | 86.4   | 98     | 95.1 NM_000657.2     |
| 87.4   | 78.6   | 80.2   | 82.4 NM_000657.2     |
| 1422.4 | 946    | 744.6  | 879.6 NM_000633.2    |
| 105.5  | 87.5   | 90     | 85.2 NM_004049.2     |
| 697.9  | 532.3  | 434.5  | 457.7 NM_138578.1    |
| 120.8  | 118.4  | 119    | 120.4 NM_138578.1    |
| 90.2   | 82.5   | 76.5   | 82.9 NM_020396.2     |
| 92.3   | 94.3   | 90.4   | 101.8 NM_138625.2    |
| 101.7  | 91     | 97.7   | 87.4 NM_207002.1     |
| 99.3   | 97     | 91.5   | 88.4 NM_006538.3     |
| 183.7  | 149.6  | 131.3  | 135.6 NM_138639.1    |
| 1195.7 | 658.1  | 665.8  | 415 NM_001040668.1   |
| 937.3  | 450    | 480.8  | 305.1 NM_052842.2    |
| 2409.4 | 2621.6 | 2384.1 | 1444.4 NM_015367.2   |
| 94.8   | 95.9   | 86.5   | 90.3 NM_030766.1     |
| 83.9   | 94.1   | 91     | 85 NM_138724.1       |
| 103.3  | 104.6  | 100.7  | 102.4 NM_138723.1    |
| 76.7   | 75.8   | 76.3   | 81 NM_138724.1       |

|        |        |       |                      |
|--------|--------|-------|----------------------|
| 259.8  | 247.5  | 219.6 | 199.2 NM_004050.2    |
| 166.4  | 145.9  | 125.6 | 137.3 NM_005178.2    |
| 81.2   | 81.2   | 80.6  | 82.8 NM_138931.1     |
| 276    | 315.6  | 288   | 229.1 NM_001706.2    |
| 95.4   | 81.3   | 85.9  | 88 NM_181844.2       |
| 88.7   | 85     | 84.9  | 89.8 NM_020993.3     |
| 91.1   | 86.6   | 90.3  | 87.4 NM_020993.3     |
| 98.9   | 92     | 85.8  | 92.6 NM_001024808.1  |
| 262.7  | 227.6  | 232   | 182.3 NM_001707.2    |
| 471    | 355.1  | 377.1 | 190 NM_138707.1      |
| 831.6  | 455.8  | 395.7 | 436.6 NM_004765.2    |
| 149.8  | 141.8  | 123.6 | 118.6 NM_004326.2    |
| 99.7   | 90.5   | 87.3  | 97.5 NM_182557.1     |
| 2057.9 | 1536.3 | 1504  | 1477.5 NM_014739.1   |
| 549.3  | 383.1  | 356.6 | 424.3 NM_014739.2    |
| 84.4   | 77.9   | 76.5  | 75.5 NM_017429.2     |
| 96.9   | 94.8   | 91    | 97.8 NM_173544.2     |
| 631.5  | 769.1  | 585.6 | 678.1 NM_017745.4    |
| 114.4  | 122.5  | 129.2 | 135.1 NM_020926.2    |
| 145.7  | 152.6  | 168.6 | 158.1 NM_020926.2    |
| 113.2  | 137.1  | 126.4 | 126.4 NM_021946.2    |
| 84.4   | 82.2   | 80.1  | 88.3 NM_173700.1     |
| 87.9   | 101.8  | 82.7  | 85.1 NM_004327.2     |
| 90.8   | 103    | 95.1  | 96.1 NM_004327.2     |
| 123.4  | 139.3  | 123.5 | 120.2 NM_021574.2    |
| 389.7  | 349.5  | 301.7 | 217.1 NM_004328.3    |
| 86.9   | 79.4   | 76.7  | 85.5 NM_203314.1     |
| 75.7   | 81.6   | 83.4  | 83.3 NM_203315.1     |
| 152.3  | 119    | 142.8 | 112.3 NM_004051.3    |
| 86     | 81     | 85.5  | 83.9 NM_020139.3     |
| 97.1   | 100.7  | 102.2 | 94.1 NM_000710.2     |
| 80.4   | 79.4   | 84.1  | 96.4 NM_000623.2     |
| 100    | 79.9   | 85.8  | 86.9 NM_170732.3     |
| 103    | 101.5  | 95.3  | 88.2 NM_170731.3     |
| 107.5  | 87.8   | 80.3  | 84.1 NM_170734.2     |
| 107.5  | 103.8  | 101.7 | 78.2 NM_001709.3     |
| 83.9   | 89.1   | 94.6  | 84.6 NM_170735.4     |
| 90     | 92.5   | 87.1  | 85 NM_170733.2       |
| 83.5   | 95.8   | 79.2  | 96.2 NM_001709.3     |
| 104.1  | 121.1  | 134.8 | 125.8 NM_018429.1    |
| 355.9  | 432.8  | 323.7 | 343.1 NM_003766.2    |
| 258.9  | 174.5  | 199   | 177.5 NM_005868.3    |
| 116.3  | 119.5  | 101.5 | 109.9 NM_016526.3    |
| 3890.2 | 596.4  | 635   | 441.8 NM_018476.3    |
| 91.1   | 97.4   | 88.2  | 94.5 NM_032621.2     |
| 129    | 106.7  | 110   | 107.5 NM_001080425.1 |
| 187.9  | 148.4  | 154.4 | 129.7 XM_936467.1    |
| 450.7  | 333.2  | 291.4 | 294.4 NM_016561.1    |
| 101.2  | 84.5   | 88.5  | 86.3 NM_001195.2     |
| 91.4   | 102.3  | 91    | 89.1 NM_003571.2     |

|        |        |        |        |                |
|--------|--------|--------|--------|----------------|
| 116.4  | 119.8  | 110.2  | 107.9  | NM_199173.2    |
| 109.6  | 102    | 99.6   | 100.2  | NM_001711.3    |
| 356.8  | 1509.2 | 1388.7 | 1042.2 | NM_003670.1    |
| 91     | 85.4   | 95.1   | 91     | NM_030762.1    |
| 88.9   | 90.1   | 84.1   | 85.1   | NM_080606.2    |
| 5264.3 | 4158.2 | 3814.3 | 3177   | NM_152414.3    |
| 94.8   | 93     | 97.3   | 97.6   | NM_177455.2    |
| 130.6  | 128    | 130.9  | 121.5  | NM_030639.1    |
| 73.8   | 72.1   | 72.8   | 72.6   | NM_001713.1    |
| 77.2   | 76.8   | 79.5   | 80.7   | NM_017614.3    |
| 94.9   | 95.1   | 86.8   | 92.7   | XM_498431.2    |
| 92.9   | 91.2   | 86.1   | 86.9   | NM_001714.2    |
| 117.6  | 109.9  | 105.3  | 106    | NM_001003398.1 |
| 85.6   | 88     | 79.7   | 91.5   | NM_001003800.1 |
| 756.7  | 815.6  | 742.6  | 608    | NM_001003800.1 |
| 515.5  | 613.7  | 463.5  | 479.7  | NM_197967.1    |
| 344.6  | 429.7  | 378.8  | 326    | NM_001196.2    |
| 83.6   | 84.8   | 77.7   | 83     | NM_197966.1    |
| 340    | 343.6  | 364.6  | 246.5  | NM_001197.3    |
| 292.9  | 360.8  | 329    | 306.1  | NM_139343.1    |
| 415    | 581.2  | 457.3  | 443    | NM_139348.1    |
| 96.2   | 96.6   | 86.2   | 105.6  | NM_016293.2    |
| 148.5  | 133    | 147.1  | 120.4  | NM_018688.3    |
| 89.5   | 94     | 85.3   | 84.8   | NM_004536.1    |
| 110    | 182.7  | 202.1  | 175.4  | XM_936944.1    |
| 584.6  | 466.7  | 420.2  | 555.1  | NM_001166.3    |
| 436.5  | 735.9  | 912    | 806.2  | NM_182962.1    |
| 100.7  | 104.8  | 103    | 123.8  | NM_001165.3    |
| 99     | 92.5   | 86.3   | 92.2   | NM_001165.3    |
| 89.4   | 91.7   | 86     | 87.2   | NM_001167.2    |
| 616.9  | 373.6  | 378.2  | 272.7  | NM_001168.2    |
| 306.9  | 159.2  | 163.8  | 130.1  | NM_001012271.1 |
| 145.3  | 168.2  | 159    | 143.3  | NM_016252.2    |
| 87.8   | 88.3   | 96     | 90.4   | NM_022161.2    |
| 89     | 86.9   | 86.7   | 95.3   | NM_139317.1    |
| 95.3   | 93.7   | 102.9  | 93.4   | NM_033341.3    |
| 471    | 376.7  | 340.1  | 495.8  | NM_017693.2    |
| 284    | 359    | 339    | 297.6  | NM_006698.2    |
| 103.5  | 94.4   | 101.2  | 105.8  | NM_031450.2    |
| 92     | 98.8   | 92.8   | 94.5   | NM_001715.2    |
| 459.7  | 447.3  | 342.5  | 422    | NM_000057.1    |
| 333.5  | 290    | 241.4  | 237.4  | NM_000386.2    |
| 98.3   | 85.4   | 74.5   | 85.7   | NM_013314.2    |
| 343.1  | 335.2  | 314.5  | 344.1  | NM_001487.1    |
| 103.5  | 94.7   | 95.6   | 93.4   | NM_001001342.1 |
| 128.3  | 115.1  | 104.6  | 108    | NM_001001342.1 |
| 86.8   | 82.4   | 96     | 96.6   | NM_212550.1    |
| 82.2   | 79.7   | 80.7   | 84.9   | NM_032966.1    |
| 122.3  | 119.3  | 121.7  | 116.7  | NM_032966.1    |
| 91.6   | 93     | 86.9   | 87.4   | NM_001716.2    |

|        |        |        |                       |
|--------|--------|--------|-----------------------|
| 228.5  | 501.1  | 482.1  | 322.1 NM_000712.3     |
| 146.5  | 198.4  | 207    | 141.5 NM_000713.1     |
| 230.4  | 243.2  | 336.1  | 326.2 NM_003666.2     |
| 100.8  | 93.4   | 90.7   | 93.8 NM_016564.2      |
| 86.9   | 95.4   | 91.5   | 98.4 NM_001003942.1   |
| 92.4   | 89.9   | 91.2   | 91.9 NM_033503.3      |
| 87.3   | 86.2   | 87.7   | 91.5 NM_001003940.1   |
| 83.9   | 100.1  | 90.8   | 109.3 NM_001003943.1  |
| 88.4   | 76.6   | 89.9   | 91.8 NM_006128.1      |
| 109.5  | 89.4   | 92.4   | 92.8 NM_006131.1      |
| 225.4  | 186.1  | 178.1  | 153.9 NM_006129.2     |
| 89.2   | 83.6   | 82.9   | 96.9 NM_014482.1      |
| 103.6  | 95.5   | 93.4   | 90.4 NM_005448.1      |
| 161.8  | 101.4  | 103.7  | 116.7 NM_001200.1     |
| 162.3  | 127.7  | 120.2  | 114.5 NM_017593.3     |
| 114.5  | 109.2  | 102    | 106.2 NM_017593.3     |
| 109.6  | 129.4  | 111.3  | 122.1 NM_198892.1     |
| 85.6   | 83.3   | 77.8   | 81 NM_001201.1        |
| 195.8  | 100    | 96.6   | 105.6 NM_001202.2     |
| 83.2   | 87.1   | 78.6   | 86.6 NM_001202.2      |
| 98.9   | 93.1   | 84.3   | 82.1 NM_130851.1      |
| 90.8   | 107.8  | 86.2   | 87.8 NM_021073.2      |
| 92     | 81.2   | 78.7   | 89 NM_001718.2        |
| 96.2   | 86.7   | 83.5   | 81.6 NM_001719.1      |
| 87.7   | 100.9  | 92.8   | 92.2 NM_181809.1      |
| 405.5  | 220.5  | 223.6  | 210.3 NM_001720.3     |
| 89.9   | 75.2   | 78.8   | 80.8 NM_133468.2      |
| 96.6   | 89.9   | 82     | 88.3 NM_004329.2      |
| 77.7   | 82.9   | 81.5   | 80.6 NM_001203.1      |
| 164.7  | 228.2  | 159.1  | 141.9 NM_001204.5     |
| 828.3  | 690.4  | 566.6  | 380.4 NM_014753.2     |
| 101.7  | 100.9  | 89.5   | 102 NM_001721.4       |
| 93.5   | 94.1   | 94.2   | 88.6 NM_203281.1      |
| 105.7  | 88     | 96.3   | 104.7 NM_001717.2     |
| 85.4   | 83     | 79.5   | 88.2 NM_001717.2      |
| 88.9   | 96.7   | 89.1   | 82.4 NM_017637.4      |
| 177.9  | 123.1  | 138.5  | 117.2 NM_013978.1     |
| 265.4  | 209    | 199.5  | 167.9 NM_013979.1     |
| 1596.6 | 1330.9 | 1162.5 | 1150.1 NM_004330.1    |
| 1513.5 | 1199.1 | 1071.6 | 868.5 NM_004052.2     |
| 94.8   | 103.8  | 104.4  | 123.7 NM_004331.2     |
| 107    | 105.3  | 116    | 94.9 XM_936962.1      |
| 116    | 110.3  | 117.5  | 108.9 NM_138278.1     |
| 83.5   | 84.6   | 80.5   | 79.1 NM_138279.1      |
| 85.1   | 81.8   | 75.6   | 90 NM_033254.2        |
| 125    | 120    | 129.8  | 114.5 NM_032515.3     |
| 105.9  | 99.1   | 96.3   | 95.6 NM_016074.1      |
| 2486.3 | 2046.1 | 1744.5 | 1285.6 NM_001031827.1 |
| 313.7  | 231.5  | 204.4  | 194.9 NM_001031827.1  |
| 4821.8 | 3376.9 | 2894.9 | 2806 NM_212552.1      |

|        |        |        |        |                |
|--------|--------|--------|--------|----------------|
| 5500.5 | 3712.9 | 3740.2 | 3033.7 | NM_212552.2    |
| 83.6   | 88.9   | 87.5   | 91.5   | NM_212552.2    |
| 83.1   | 82     | 77.1   | 80.9   | NM_033030.3    |
| 103.1  | 102.2  | 94.8   | 95.8   | NM_197970.1    |
| 85.1   | 81.1   | 81.8   | 76     | NM_033030.3    |
| 2437.6 | 1385   | 1337.1 | 569    | NM_015201.3    |
| 213.5  | 207.3  | 169.5  | 208.2  | NR_002730.1    |
| 160.7  | 145.1  | 152.9  | 152.4  | NM_001724.3    |
| 90.9   | 90.4   | 87.3   | 87.4   | NM_199186.1    |
| 174    | 171.5  | 175.9  | 143.4  | NM_004332.1    |
| 85.4   | 89.6   | 79     | 89.8   | NM_001725.1    |
| 85     | 81.3   | 82.5   | 81     | NM_025227.1    |
| 95.2   | 93.5   | 83.4   | 90.6   | NM_174932.1    |
| 88.9   | 81.1   | 76.2   | 82.2   | NM_174897.1    |
| 253.5  | 186.1  | 184.1  | 172.6  | NM_006085.3    |
| 85.9   | 89.3   | 91.3   | 94.2   | NM_004678.1    |
| 95.3   | 82.5   | 87.5   | 93.3   | NM_001002760.1 |
| 268.8  | 212.5  | 178.1  | 182.9  | NM_018174.4    |
| 116    | 122.1  | 103.9  | 102.8  | NM_004333.2    |
| 86.8   | 71.2   | 85.8   | 98.8   | NM_006768.2    |
| 336.2  | 344.5  | 316.8  | 231.4  | NM_007304.2    |
| 407.5  | 347.9  | 367.4  | 314.1  | NM_007301.2    |
| 97.5   | 87.9   | 91.9   | 91.3   | NM_007295.2    |
| 104.5  | 103.3  | 91.4   | 113.2  | NM_000059.1    |
| 105.4  | 96.1   | 95.6   | 100.7  | NM_001001786.1 |
| 185.2  | 212.9  | 229.5  | 176.8  | NM_014577.1    |
| 2516.5 | 2689   | 2497.2 | 1330.9 | NM_005104.2    |
| 887.6  | 1032   | 957.7  | 883.7  | NM_007371.2    |
| 92.3   | 92.8   | 102.9  | 100.9  | NM_014299.1    |
| 103.9  | 100.7  | 104.7  | 101.3  | NM_058243.1    |
| 660.1  | 517.4  | 396    | 382.2  | NM_013263.2    |
| 380.6  | 445.4  | 371.3  | 483.4  | NM_183359.1    |
| 85.6   | 87.5   | 81     | 86.8   | NM_139199.1    |
| 1822.7 | 1358   | 1616.2 | 672    | NM_023924.2    |
| 99.1   | 97.8   | 88.9   | 98.8   | NM_023924.2    |
| 97.3   | 90.1   | 89.1   | 99.9   | NM_012108.1    |
| 78.3   | 81.3   | 77.2   | 85.6   | NM_207189.1    |
| 74.9   | 76.5   | 80.1   | 73.8   | NM_001726.2    |
| 88.3   | 85.2   | 74.8   | 92.2   | NM_001726.2    |
| 785    | 541.5  | 487.4  | 416.1  | NM_199191.1    |
| 523.6  | 354    | 352.8  | 263.5  | NM_199191.1    |
| 80.8   | 82.5   | 80.7   | 83.5   | NM_004899.3    |
| 86.2   | 89.1   | 86.7   | 94     | NM_145696.1    |
| 150.6  | 136.9  | 122.8  | 125.4  | NM_145696.1    |
| 110    | 108.5  | 101.1  | 105.1  | NM_001519.2    |
| 806.4  | 542.4  | 472.8  | 456.6  | NM_018310.2    |
| 2438.8 | 2347.2 | 2142.3 | 2394.2 | NM_015379.3    |
| 128.9  | 118.5  | 115    | 124    | NM_080626.5    |
| 676    | 526    | 480.3  | 285.2  | NM_080626.5    |
| 318.6  | 288.1  | 293.4  | 188.6  | XM_941876.1    |

|        |        |        |                      |
|--------|--------|--------|----------------------|
| 102.7  | 95.6   | 94.8   | 99.5 NM_032043.1     |
| 1965.9 | 1554.6 | 1334   | 895.4 NM_001024958.1 |
| 272.4  | 207.2  | 167.8  | 146.3 NM_015399.3    |
| 112.6  | 101.8  | 95.4   | 93.5 NM_032352.3     |
| 1559.5 | 1093   | 952.5  | 810.9 NM_015415.1    |
| 2667.3 | 1944.9 | 2285.4 | 1834.2 NM_016098.1   |
| 226.5  | 268    | 249    | 240.5 NM_001003694.1 |
| 3683   | 3437.3 | 3491.9 | 2429 NM_004634.2     |
| 371.4  | 540.1  | 544.1  | 350.8 NM_015695.1    |
| 92.3   | 87.3   | 83.9   | 87.1 NM_015341.2     |
| 94.8   | 90.1   | 97.8   | 92.3 NM_001727.1     |
| 859.5  | 721.1  | 625.8  | 739.6 NM_032430.1    |
| 87.3   | 87.2   | 89.4   | 81.8 NM_003957.1     |
| 112    | 109.1  | 108.3  | 99.7 NM_020180.2     |
| 80.9   | 85.2   | 85.6   | 88.1 XM_943559.1     |
| 110.7  | 104.4  | 92.3   | 99.8 NM_021938.3     |
| 93.4   | 100.6  | 86.4   | 80.2 NM_052840.3     |
| 75.9   | 73.3   | 73.6   | 83.8 NM_018963.3     |
| 90.1   | 103    | 90.1   | 94.3 NM_001007246.1  |
| 440.7  | 408.3  | 402.3  | 263 NM_001007246.1   |
| 89.6   | 99.8   | 86.3   | 91.6 NM_033656.2     |
| 116.2  | 97.4   | 109.9  | 106 NM_018117.10     |
| 100.7  | 80.3   | 82.4   | 98.1 NM_153252.2     |
| 434.8  | 357.7  | 359.2  | 206.4 NM_032667.4    |
| 240.1  | 292.1  | 290    | 259.7 NM_018045.4    |
| 2451.9 | 2063.4 | 1710.3 | 1758.9 NM_198589.1   |
| 96.6   | 90.7   | 90.7   | 94.8 NM_001728.2     |
| 101.7  | 92.7   | 98.6   | 87.1 NM_003458.1     |
| 91.4   | 88.6   | 86.4   | 91.4 NM_057176.2     |
| 336.7  | 291.4  | 270.2  | 222.6 NM_004334.1    |
| 783.1  | 581.2  | 555.1  | 353.3 NM_004335.2    |
| 818    | 892.2  | 885.9  | 670.4 NM_003972.2    |
| 210.1  | 208.5  | 143    | 187.1 NM_001011885.1 |
| 243    | 186.4  | 143.9  | 152.4 NM_025238.3    |
| 270.4  | 210.1  | 168.9  | 191.2 NM_032320.4    |
| 98.8   | 87.3   | 77.6   | 84.5 NM_152322.2     |
| 90.2   | 88.2   | 82     | 85.4 NM_001017523.1  |
| 98.9   | 81.2   | 81.8   | 82.8 NM_001018072.1  |
| 88.5   | 89     | 80.7   | 87 NM_152322.2       |
| 285.1  | 235.6  | 262.8  | 154.6 NM_032444.2    |
| 275.9  | 202.8  | 207.8  | 138.1 NM_144653.3    |
| 101.3  | 92.9   | 96.9   | 98.2 NM_052876.2     |
| 88.1   | 96.4   | 84.8   | 88.5 NM_181443.1     |
| 128    | 147.2  | 149.2  | 117.4 NM_014962.2    |
| 302.1  | 387.3  | 351.4  | 280.1 NM_025224.2    |
| 182.7  | 295.6  | 257.5  | 233.2 NM_017658.2    |
| 634.3  | 509.9  | 403.3  | 305 NM_033271.1      |
| 355.8  | 377.7  | 357.4  | 329.4 NM_001002860.2 |
| 99.1   | 113.9  | 100.9  | 104.7 NM_018167.3    |
| 163    | 158.2  | 142    | 121.3 NM_018167.3    |

|         |         |        |                        |
|---------|---------|--------|------------------------|
| 81.8    | 85.6    | 88.7   | 88.3 NM_183242.1       |
| 99.6    | 109.5   | 102.3  | 96.4 NM_152733.1       |
| 101.2   | 97.1    | 95.4   | 91.9 NM_001729.1       |
| 119.9   | 118.9   | 122.4  | 107.8 NM_000060.2      |
| 19753.1 | 14893.6 | 13231  | 13206.7 NM_001037637.1 |
| 26470.7 | 19683.2 | 18145  | 17477.5 NM_001207.3    |
| 199.3   | 182.5   | 155.1  | 127.7 NM_001037637.1   |
| 365.7   | 344.2   | 279    | 224 NM_152265.1        |
| 574.8   | 1145.1  | 820.3  | 627.4 NM_001731.1      |
| 165.7   | 197.3   | 149.2  | 193 NM_006763.2        |
| 210     | 160.8   | 149.2  | 197.6 NM_006806.3      |
| 85.4    | 87.1    | 73.9   | 79.9 NM_017589.2       |
| 578.7   | 624.9   | 511.6  | 346.1 NM_000061.1      |
| 100.5   | 96.1    | 88     | 96.7 NM_181780.2       |
| 82.8    | 78.5    | 83.5   | 76.8 NM_001732.1       |
| 97.2    | 83.7    | 81.4   | 91.6 NM_078476.1       |
| 302.8   | 275.7   | 249.6  | 191.4 NM_007049.2      |
| 110.8   | 108.8   | 109    | 112.3 NM_181531.1      |
| 85.1    | 90.4    | 79.2   | 89.1 NM_006995.3       |
| 87.6    | 86.4    | 81.7   | 88.4 NM_024018.1       |
| 86.6    | 92.5    | 83.8   | 79.4 NM_194441.1       |
| 93.2    | 100.7   | 95.6   | 106.5 NM_007048.3      |
| 118.6   | 120.5   | 106.1  | 103.5 NM_007047.3      |
| 99.5    | 94.2    | 90.2   | 88.8 NM_197974.1       |
| 125.2   | 90.2    | 84.9   | 86.1 NM_019602.1       |
| 88.6    | 83.9    | 90.5   | 84.4 NM_197975.1       |
| 102.8   | 88.6    | 79.9   | 80.5 NM_197975.1       |
| 96.2    | 99.8    | 79.6   | 85.2 NM_006707.2       |
| 82.6    | 81.5    | 71.1   | 77.5 NM_024850.1       |
| 95.7    | 91.3    | 85.2   | 87.9 NM_152547.2       |
| 87      | 95.2    | 92     | 81.2 NM_003939.2       |
| 101.2   | 95.5    | 84.3   | 92.1 NM_033637.2       |
| 1213.4  | 703.8   | 565.9  | 540.1 NM_004336.2      |
| 140.5   | 112.6   | 100.4  | 116.6 NM_001211.4      |
| 5885.2  | 2871.7  | 2625.9 | 1742.1 NM_004725.2     |
| 100.5   | 98.5    | 94.4   | 87.9 NM_004725.2       |
| 308.2   | 182.3   | 139.1  | 154.9 NM_001007793.1   |
| 90      | 85.2    | 87.9   | 85.5 NM_147147.2       |
| 99.9    | 86.2    | 87.7   | 78.2 NM_007073.3       |
| 333.4   | 338.8   | 287.8  | 278.4 NM_007073.3      |
| 3021.4  | 2180.6  | 1890.5 | 1593.8 NM_032194.1     |
| 549.5   | 418.7   | 343.9  | 258.4 NM_018321.3      |
| 352.5   | 295.2   | 265.4  | 285 NM_025065.5        |
| 613.3   | 392.7   | 319.5  | 282.9 NM_004053.3      |
| 122.3   | 169.3   | 170.9  | 155.9 NM_004758.1      |
| 80.4    | 77.7    | 78.5   | 80.3 NM_001010873.1    |
| 105.2   | 100.5   | 98.5   | 94.3 NM_014670.2       |
| 2071.4  | 1588.3  | 1268   | 1259.5 NM_014038.1     |
| 104.4   | 99.1    | 86.6   | 96.2 NM_007021.2       |
| 260.6   | 205.4   | 212.2  | 277.4 NM_173473.2      |

|        |        |        |                      |
|--------|--------|--------|----------------------|
| 91.5   | 90.1   | 82.5   | 87.6 NM_173554.1     |
| 222.3  | 195.3  | 185.8  | 168.7 NM_032024.2    |
| 84.7   | 96.6   | 85.4   | 85.2 NM_153244.1     |
| 89     | 82.1   | 83.9   | 79 NM_001010896.1    |
| 113.9  | 119.1  | 110    | 93.4 NM_001010911.1  |
| 111.6  | 103.4  | 103.2  | 105.6 NM_006829.2    |
| 87.3   | 84.9   | 83.4   | 79.6 NM_018017.2     |
| 149.6  | 148.1  | 122.1  | 129.6 NM_024834.1    |
| 113.9  | 93.3   | 90.1   | 97.2 NM_015652.2     |
| 80.9   | 84.1   | 84.1   | 86.9 NM_001010912.1  |
| 275.7  | 159.8  | 145.9  | 134.9 NM_198472.1    |
| 85.5   | 80.5   | 75     | 73.3 NM_207321.1     |
| 108.1  | 107.7  | 95.9   | 103.6 NM_152429.2    |
| 80.7   | 86.7   | 90.5   | 95.1 NM_001001732.1  |
| 92.3   | 104.9  | 91.6   | 90.8 NM_001010917.1  |
| 194.1  | 172.9  | 195.2  | 173.5 NM_015608.2    |
| 448.9  | 294.8  | 259.1  | 260.6 NM_032804.5    |
| 87     | 79.4   | 80.2   | 84.2 NM_001039380.1  |
| 194.7  | 203.5  | 185.5  | 162.5 NM_017787.3    |
| 101    | 98.2   | 94.4   | 84 NM_152710.1       |
| 130.6  | 130.3  | 124.2  | 112.9 NM_014472.3    |
| 88.2   | 84     | 78.5   | 88.8 NM_152751.1     |
| 382.2  | 339.8  | 274.3  | 290.5 NM_144591.1    |
| 214.9  | 150.7  | 160.3  | 141.4 NM_032709.1    |
| 204    | 210.2  | 250.7  | 159.4 NM_145306.1    |
| 92.2   | 83.5   | 87.7   | 83.1 NM_001080827.1  |
| 129.7  | 134.6  | 122.9  | 115 NM_001010924.1   |
| 94.5   | 89.5   | 87     | 91.5 NM_203441.2     |
| 84.8   | 84.9   | 85.5   | 88.4 NM_145246.3     |
| 105.1  | 107.1  | 90.5   | 90.8 NM_203440.2     |
| 102.7  | 98.5   | 89.1   | 98.9 NM_203439.2     |
| 95.6   | 98.4   | 94.5   | 94.4 NM_203438.2     |
| 198.2  | 211.1  | 158.2  | 184.8 NM_138357.1    |
| 125.9  | 95.1   | 98.8   | 105.3 NM_153810.3    |
| 184.9  | 122.3  | 125.7  | 118.3 NM_153256.2    |
| 99.6   | 93.2   | 85.1   | 86.3 NM_145314.1     |
| 98.4   | 90.6   | 89.8   | 94.8 NM_182554.2     |
| 85.4   | 91.3   | 87.6   | 92.2 NM_001042427.1  |
| 98.1   | 96     | 97.3   | 105.7 NM_001042427.1 |
| 288.5  | 293.2  | 252.1  | 167.6 NM_022153.1    |
| 99.5   | 97.9   | 89.6   | 76.5 NM_001001791.1  |
| 257    | 213.2  | 200    | 191.7 NM_153367.1    |
| 182.7  | 176.6  | 146.1  | 135 NM_025125.2      |
| 2010.4 | 1941.1 | 2644.4 | 1308.5 NM_032333.2   |
| 89.3   | 93.7   | 87.2   | 86.6 NM_018363.1     |
| 246    | 187.3  | 178    | 170.8 NM_001031709.1 |
| 129.4  | 122.7  | 110.7  | 109 NM_001031709.1   |
| 457.6  | 500.2  | 553.1  | 369.1 NM_018121.2    |
| 345.1  | 200.5  | 171.9  | 178.8 NM_001013840.1 |
| 76.4   | 88.4   | 87.7   | 90.9 NM_015631.2     |



|         |        |        |                      |
|---------|--------|--------|----------------------|
| 161     | 130.4  | 116.8  | 121.7 NM_001013840.1 |
| 91      | 87.8   | 89.9   | 71.9 NM_001009997.1  |
| 91.7    | 89     | 73     | 88.6 NM_145010.2     |
| 86.4    | 82     | 78     | 79 NM_138413.2       |
| 80.4    | 76.7   | 75.1   | 84.3 NM_153714.1     |
| 85.9    | 84.5   | 84.1   | 75.8 NM_024688.1     |
| 1926.3  | 903.4  | 854.4  | 659.2 NM_006023.1    |
| 81.2    | 75.7   | 81     | 76.6 NM_199459.2     |
| 100.8   | 94.2   | 87.4   | 91.3 NM_001031746.1  |
| 93.1    | 89.8   | 73.7   | 80.9 NM_001031746.1  |
| 92.8    | 90.9   | 82.8   | 81.7 NM_144984.1     |
| 311.5   | 240.2  | 189.5  | 193.2 NM_024541.1    |
| 123.6   | 110.4  | 100    | 100.3 NM_024789.3    |
| 105.6   | 96.1   | 100.8  | 95.9 NM_145247.4     |
| 96.9    | 82.9   | 78.7   | 95.7 NM_025145.4     |
| 98.2    | 102.1  | 98.1   | 108 NM_001008723.1   |
| 96.8    | 104.9  | 90.1   | 103.9 NM_024889.3    |
| 88.2    | 90.6   | 84.8   | 82.7 NM_144661.2     |
| 93.3    | 88.8   | 77.7   | 81.3 NM_178832.2     |
| 109.4   | 102.1  | 103.1  | 97.9 NM_022063.1     |
| 100.6   | 97.4   | 96.4   | 95.3 NM_001012711.1  |
| 1029.5  | 685.1  | 667.3  | 464.7 NM_017615.1    |
| 113.1   | 98.5   | 91.5   | 104.3 NM_144587.2    |
| 107.1   | 102.1  | 97.6   | 95.2 NM_024942.1     |
| 120.4   | 111.1  | 102.3  | 101.1 NM_153336.1    |
| 155.6   | 143    | 133.9  | 139 NM_181698.1      |
| 88.1    | 83.8   | 82     | 82.4 NM_181698.1     |
| 81.6    | 84.3   | 79.7   | 80.5 NM_001004298.2  |
| 101     | 84.9   | 94.8   | 90.8 NM_173541.2     |
| 105.7   | 98.3   | 90.7   | 105 NM_017609.2      |
| 93.9    | 88.5   | 84.5   | 86.8 NM_173572.1     |
| 72.8    | 72.9   | 71.1   | 73.5 XM_945168.1     |
| 98.4    | 97.4   | 98.2   | 100 NM_024886.1      |
| 78.8    | 84.3   | 71.3   | 84.2 NM_198515.1     |
| 261.2   | 193.6  | 193.9  | 194.7 NM_024948.2    |
| 102.9   | 91.1   | 105.9  | 97.1 NM_207373.1     |
| 1164.3  | 736.5  | 547.8  | 719.3 NM_022761.2    |
| 10893.2 | 6273.8 | 5062.5 | 4215.2 NM_014206.1   |
| 157.7   | 164.7  | 149.5  | 109.5 NM_006133.1    |
| 101.8   | 84.8   | 92.7   | 88.3 NM_020643.1     |
| 102.7   | 93.6   | 89.6   | 103.9 NM_020642.3    |
| 973.8   | 574.7  | 587.3  | 437.8 NM_020642.3    |
| 457.1   | 294.5  | 315.3  | 232.5 NM_020642.3    |
| 86.2    | 75.9   | 79.7   | 80.7 NM_182901.1     |
| 1393.8  | 951.9  | 971    | 600.6 NM_020642.3    |
| 1375.2  | 1048.3 | 1160.8 | 490.7 NM_013265.2    |
| 170.6   | 153.2  | 153.2  | 121.3 NM_022338.2    |
| 109.7   | 103.6  | 110.3  | 94.4 NM_020193.3     |
| 196.4   | 152.6  | 156.7  | 159.6 NM_170746.2    |
| 110.4   | 139    | 133.4  | 156.4 NM_173573.1    |

|       |       |       |                      |
|-------|-------|-------|----------------------|
| 80.4  | 87.8  | 82.9  | 85.3 NM_173590.1     |
| 128.2 | 138   | 197.2 | 144.7 NM_212555.1    |
| 97.2  | 85.8  | 87.4  | 85.2 NM_144663.1     |
| 88.9  | 85    | 83.1  | 96.4 NM_173525.1     |
| 91.7  | 88.4  | 87.9  | 94.2 NM_173580.1     |
| 141.9 | 130.3 | 112.3 | 110.8 NM_145013.1    |
| 600.3 | 492.7 | 366.4 | 399.6 NM_152316.1    |
| 108.9 | 127   | 131.4 | 127.9 NM_173589.2    |
| 495.3 | 410   | 330.2 | 271.9 NM_024099.2    |
| 94.2  | 98.7  | 87.2  | 91.3 NM_001003678.1  |
| 113.2 | 109.2 | 106.4 | 104.7 NM_001003678.1 |
| 151.9 | 132.1 | 130.1 | 121 NM_001003677.1   |
| 96.1  | 91    | 91.7  | 98.1 NM_001003676.1  |
| 247.2 | 199.1 | 183.5 | 156.8 NM_014042.1    |
| 96.2  | 102.4 | 93.3  | 88.6 NM_080659.1     |
| 84.8  | 102.7 | 87.7  | 94.9 NM_198498.1     |
| 345   | 376.4 | 360.5 | 389.7 NM_014039.2    |
| 101.9 | 98.6  | 91.5  | 91.6 NM_207428.1     |
| 300.4 | 436.2 | 389.3 | 313.8 NM_032127.1    |
| 120.5 | 98.2  | 88    | 100 NM_024631.1      |
| 97.8  | 94.8  | 90.5  | 89.4 NM_024806.2     |
| 108.9 | 100.3 | 94.3  | 88.3 NM_199124.1     |
| 179.3 | 172.2 | 203.1 | 180.4 NM_199124.1    |
| 89.6  | 95.5  | 88.3  | 94.3 NM_152587.3     |
| 85.6  | 86.6  | 84.7  | 84.4 NM_032930.1     |
| 106.4 | 113.7 | 112.5 | 110.6 NM_019021.1    |
| 89.1  | 82.8  | 70.5  | 82.4 NM_145308.2     |
| 137.3 | 119.8 | 122.8 | 126 NM_173811.2      |
| 92.4  | 87.1  | 77.5  | 87.8 NM_013279.1     |
| 715   | 457.5 | 386.1 | 240.5 NM_021640.2    |
| 96.9  | 100.9 | 93.2  | 104.9 NM_018164.1    |
| 98.6  | 84.3  | 80    | 87 NM_152638.2       |
| 95.7  | 93.5  | 92.5  | 94.2 NM_152261.1     |
| 607.8 | 362.3 | 329.5 | 293 NM_013300.1      |
| 93.5  | 78.9  | 83    | 93.6 NM_032130.1     |
| 354.2 | 359.6 | 360.1 | 316.3 NM_032230.1    |
| 95.8  | 101.9 | 95.9  | 100.9 NM_182530.1    |
| 304.5 | 223.6 | 239.6 | 204.7 NM_001009894.2 |
| 91.3  | 89.1  | 92.8  | 102.2 NM_024953.2    |
| 440.9 | 318.8 | 251.9 | 250.4 NM_032338.2    |
| 387.8 | 357.6 | 303.3 | 272.1 NM_031465.2    |
| 108.8 | 109.6 | 100   | 106.1 NM_032829.1    |
| 125.5 | 141.3 | 137.1 | 157.2 NM_018169.2    |
| 89    | 89.3  | 73.1  | 91.7 NM_182558.1     |
| 80.2  | 79.1  | 78.5  | 79.2 NM_024809.2     |
| 93.6  | 92.3  | 96.4  | 86.8 NM_030572.1     |
| 188.8 | 187   | 176.8 | 190.1 NM_020374.2    |
| 89.5  | 87.3  | 74.5  | 84.3 NM_001031748.1  |
| 84.3  | 76.9  | 81.9  | 80.1 NM_001031748.1  |
| 823   | 682.4 | 615.6 | 438 NM_017822.2      |

|        |        |        |                     |
|--------|--------|--------|---------------------|
| 75.1   | 82.1   | 72.6   | 78.5 NM_198521.1    |
| 177.7  | 122    | 136.5  | 143.9 NM_022895.1   |
| 442.9  | 354.7  | 319.1  | 284 NM_021934.3     |
| 212.8  | 175.5  | 174    | 140.9 NM_152318.1   |
| 165.8  | 180    | 189.6  | 158.7 NM_152321.1   |
| 404.7  | 430.1  | 405.3  | 305.3 NM_016534.2   |
| 347.9  | 251.8  | 248.8  | 220.9 NM_017915.1   |
| 161.3  | 151.7  | 108    | 135.5 NM_024738.1   |
| 123.9  | 119.8  | 100.2  | 109.1 NM_020375.1   |
| 100.8  | 96.2   | 90.7   | 82.9 NM_152589.1    |
| 405.1  | 390.2  | 360.2  | 249.2 NM_032848.1   |
| 92.9   | 87.6   | 78.8   | 93 NM_153685.2      |
| 99.5   | 88.8   | 74.2   | 86.1 NM_152319.2    |
| 1496.3 | 723.7  | 827.2  | 616.2 NM_138425.2   |
| 85.2   | 98.6   | 87.4   | 92.8 NM_024685.2    |
| 91.8   | 88.4   | 84.9   | 86.9 NM_153022.1    |
| 114.5  | 105    | 90     | 89 NM_175874.2      |
| 82.1   | 84.9   | 78.6   | 92.1 NM_175895.2    |
| 139    | 162.3  | 159.5  | 125.6 NM_032901.2   |
| 90.3   | 98.9   | 99.4   | 83.4 NM_173591.1    |
| 154.6  | 149.4  | 151.4  | 140.5 NM_020456.1   |
| 257.3  | 238.1  | 203.2  | 242.8 NM_022118.3   |
| 108.6  | 98.3   | 92.4   | 85.7 NM_152324.1    |
| 656.8  | 716.3  | 703    | 461.9 NM_025113.1   |
| 89.8   | 82.5   | 77.3   | 92.5 NM_001010897.1 |
| 663.3  | 598.5  | 529.7  | 461.4 NM_025138.3   |
| 533.9  | 478.5  | 397.6  | 409.7 NM_025138.3   |
| 86.9   | 87     | 83.4   | 84.7 NM_025138.3    |
| 115.3  | 131.1  | 121.4  | 137.6 NM_006346.2   |
| 80.7   | 75     | 72.4   | 76.7 NM_152325.1    |
| 215.6  | 175.4  | 174.4  | 139 NM_145061.3     |
| 454.5  | 347.4  | 258.4  | 263.2 NM_024546.3   |
| 1661.4 | 1271.7 | 1251.8 | 770.6 NM_032436.1   |
| 94.4   | 87     | 80.9   | 80.7 NM_007176.1    |
| 549.4  | 318.7  | 265    | 361.1 NM_016475.2   |
| 114.2  | 117.6  | 96.1   | 96.2 NM_017799.2    |
| 682.5  | 914.2  | 887.8  | 679.9 NM_017970.2   |
| 258.7  | 296.7  | 287    | 284.4 NM_199043.1   |
| 122.3  | 119.8  | 115.3  | 112.6 NM_018036.4   |
| 184.8  | 141.7  | 133.8  | 127.2 NM_018139.1   |
| 102.9  | 91.5   | 104    | 91.8 NM_018168.1    |
| 1009.9 | 711.3  | 770.4  | 934.5 NM_018353.3   |
| 322.6  | 234.5  | 227.8  | 236.9 NM_018229.2   |
| 93.4   | 93.3   | 90     | 90.3 NM_018453.2    |
| 1395.8 | 948.6  | 731.8  | 698.2 NM_016468.3   |
| 89.8   | 80.4   | 92     | 87.7 NM_018228.1    |
| 106    | 116.8  | 102.1  | 102.7 NM_017926.2   |
| 164.9  | 181.8  | 156.3  | 171.2 NM_017926.2   |
| 94.5   | 98.8   | 90.2   | 97.2 NM_017924.2    |
| 496.8  | 322.8  | 260.7  | 234.2 XM_945152.1   |

|         |        |        |                      |
|---------|--------|--------|----------------------|
| 113.9   | 113.7  | 116.2  | 96.9 NM_138360.2     |
| 186.7   | 139.7  | 134.4  | 116.7 NM_016049.3    |
| 160.4   | 120.1  | 140.1  | 107.5 NM_020195.1    |
| 162.6   | 129.4  | 116.6  | 110.9 NM_080664.1    |
| 164.2   | 121.7  | 102.7  | 121.8 NM_016472.3    |
| 382.3   | 258.4  | 211    | 218.9 NM_175748.1    |
| 605.5   | 484    | 364.7  | 358.3 NM_018108.2    |
| 89.1    | 87.9   | 74.4   | 86.7 NM_175748.1     |
| 533.1   | 508.9  | 557.1  | 335.4 NM_018335.2    |
| 224.2   | 170.8  | 145.3  | 123.7 NM_022067.2    |
| 652.7   | 514.3  | 524    | 443.5 NM_022495.3    |
| 83.8    | 87.9   | 85.8   | 93.9 NM_024558.1     |
| 281     | 190.9  | 185.5  | 149.8 NM_024558.1    |
| 281.6   | 204.4  | 211.5  | 187.6 NM_024558.1    |
| 231     | 213.8  | 213.8  | 168 NM_024633.2      |
| 102.3   | 93.2   | 85.3   | 94 NM_001042430.1    |
| 87      | 83     | 87.3   | 89.5 NM_024643.1     |
| 357.2   | 310.6  | 260.8  | 219 NM_032490.3      |
| 230.9   | 181.1  | 148.1  | 161.2 NM_145231.2    |
| 183.9   | 145.2  | 133.8  | 132.8 NM_152446.2    |
| 440.4   | 497.7  | 493.9  | 384 NM_138288.2      |
| 88.9    | 87.3   | 86.8   | 82.7 NM_138791.1     |
| 237.2   | 162.4  | 161.7  | 182.3 NM_144581.1    |
| 84.6    | 79.1   | 78.3   | 78.8 NM_001008726.1  |
| 112.1   | 104.3  | 103.3  | 90.6 NM_001008726.1  |
| 124.9   | 109.7  | 101.2  | 105 NM_080666.2      |
| 162.9   | 145.8  | 130.8  | 136.1 NM_032714.1    |
| 88.4    | 95.2   | 91.1   | 89.3 NM_138344.2     |
| 1926.1  | 2586.2 | 3066.7 | 3209.3 NM_032374.2   |
| 95.4    | 87.3   | 79.6   | 88.4 NM_032135.2     |
| 10111.1 | 6985.9 | 5480.9 | 5432.7 NM_031210.3   |
| 559.3   | 589    | 605.8  | 433.1 NM_024952.4    |
| 109.4   | 100.6  | 95.1   | 95.4 NM_024764.2     |
| 90.5    | 81.3   | 83.7   | 85.7 NM_020181.1     |
| 722.5   | 582.4  | 442.3  | 432 NM_016039.1      |
| 91.4    | 92.8   | 91.5   | 79.2 NM_001081002.1  |
| 312.4   | 183    | 173    | 175.6 NM_024644.1    |
| 135.1   | 105.7  | 97.8   | 89.5 NM_152307.1     |
| 2334.9  | 2212.9 | 2284.3 | 777.9 NM_022489.2    |
| 205.7   | 205.2  | 188.1  | 174.7 NM_022489.1    |
| 106.5   | 101.7  | 95.5   | 87.1 NR_002937.1     |
| 1150.8  | 974.3  | 764.7  | 732.3 NM_004894.1    |
| 119.8   | 107    | 111    | 103.8 NM_174913.1    |
| 4864.8  | 5427.4 | 8599.9 | 5338.8 NM_173607.2   |
| 125.7   | 111.6  | 106.2  | 95.9 NM_173607.2     |
| 117.4   | 115.3  | 98.9   | 103.3 NM_173607.2    |
| 160.4   | 149.3  | 143.9  | 132.3 NM_001017923.1 |
| 96.1    | 98.7   | 102.6  | 98.9 NM_181533.3     |
| 91.7    | 85.7   | 81.7   | 89.8 NM_181533.3     |
| 968.8   | 721.6  | 653.1  | 544.4 NM_144578.2    |

|        |        |        |                      |
|--------|--------|--------|----------------------|
| 88.1   | 87.7   | 94.1   | 77.7 NM_001001872.2  |
| 91.9   | 85.9   | 83.6   | 86.7 NM_174978.1     |
| 131.5  | 131.3  | 128.8  | 129.5 NM_024496.2    |
| 90.3   | 80.9   | 83.2   | 83.3 NM_194278.3     |
| 222.7  | 190.6  | 192.5  | 145.4 NM_194278.3    |
| 296.9  | 282.6  | 268    | 274.8 NM_194278.2    |
| 93.9   | 85.4   | 87.4   | 85.7 NM_152445.1     |
| 84.3   | 90.9   | 80.3   | 88.5 NM_025057.1     |
| 198.4  | 167    | 160.8  | 157.4 NM_001024674.1 |
| 94.7   | 107.4  | 99.8   | 85.2 NM_152777.2     |
| 105.4  | 101.6  | 92     | 94.1 NM_152592.2     |
| 84.2   | 86.3   | 81.8   | 85.5 NM_172365.1     |
| 87.6   | 86.8   | 80.5   | 83.5 NM_173526.1     |
| 157    | 164.6  | 151.7  | 144.5 NM_017791.1    |
| 87.8   | 87.7   | 79.4   | 83.7 NM_207117.2     |
| 93.3   | 92     | 85     | 89.4 NM_001077594.1  |
| 92.9   | 95.9   | 84.7   | 87.2 XM_941093.1     |
| 158.4  | 123.5  | 119.8  | 103.9 NM_174891.2    |
| 81.8   | 81.6   | 91.2   | 86.4 NM_173846.3     |
| 326    | 219.4  | 223.6  | 137.2 NM_173608.1    |
| 1667.9 | 2381.8 | 2984.3 | 2301.7 NR_002808.1   |
| 108.1  | 111.6  | 96.1   | 105.8 NM_014828.1    |
| 320.3  | 261.3  | 283.5  | 171.9 NM_021944.1    |
| 421    | 335.8  | 292.6  | 258.3 NM_017815.1    |
| 2995.6 | 2610.8 | 2187.4 | 2092.6 NM_016304.2   |
| 323.6  | 317.9  | 287.7  | 245.7 NM_020447.2    |
| 82.5   | 83.7   | 78.7   | 83.4 NM_018958.1     |
| 109    | 96.1   | 97.6   | 108.3 NM_001005269.1 |
| 102.2  | 105.3  | 106.5  | 98.7 NM_001005267.1  |
| 80.4   | 93.3   | 71.4   | 82.5 NM_173609.2     |
| 293.4  | 198.1  | 155.5  | 146.9 NM_033286.2    |
| 3837   | 2961.1 | 2339.4 | 2019.7 NM_020154.2   |
| 83.8   | 88.6   | 83.2   | 77 NM_173528.1       |
| 94.8   | 77.5   | 83.6   | 82.3 NM_152335.1     |
| 105.8  | 110.2  | 91.4   | 90.7 NM_024713.1     |
| 87.9   | 87.4   | 76.6   | 77.9 NM_153040.1     |
| 80.4   | 81.6   | 80.1   | 84.6 NM_152647.1     |
| 90.7   | 95.1   | 80.2   | 85.6 NM_175898.2     |
| 139.8  | 109.6  | 115.9  | 108 NM_182616.1      |
| 203.4  | 249.7  | 207.5  | 146.9 NM_015492.3    |
| 187.8  | 173.7  | 176.1  | 163.5 NM_144597.1    |
| 265.2  | 195    | 159    | 174.1 NM_032499.3    |
| 178.2  | 194.9  | 166.5  | 136.6 NM_152259.2    |
| 92.8   | 83.4   | 80.9   | 88.4 NM_152448.1     |
| 105.3  | 120    | 98.7   | 92.3 NM_030800.1     |
| 302.1  | 204.2  | 190.3  | 165.4 NM_030800.1    |
| 99.7   | 94.4   | 84.2   | 87.6 NM_032413.2     |
| 82.6   | 82.3   | 87.2   | 84.4 NM_032413.2     |
| 94     | 81.9   | 77.8   | 87.9 NM_197955.1     |
| 89.6   | 91.8   | 89.5   | 93.1 NM_030944.1     |

|        |         |        |                      |
|--------|---------|--------|----------------------|
| 464.7  | 470.1   | 418    | 358.6 NM_023933.1    |
| 93.9   | 99.3    | 92.8   | 89.5 NM_173476.2     |
| 88     | 80.3    | 79.2   | 84.6 NM_173476.2     |
| 440.9  | 229.3   | 236.2  | 235.8 NM_023076.2    |
| 94.5   | 93.9    | 84.9   | 88.8 NM_001214.2     |
| 88.6   | 87.8    | 83.4   | 91 NM_024600.1       |
| 3748.2 | 2437.7  | 2160.9 | 1542.1 NM_024571.2   |
| 179.1  | 145.5   | 145.6  | 126.5 NM_144570.2    |
| 78     | 80.7    | 87.4   | 81.4 NM_001077350.1  |
| 630.4  | 483.8   | 503.2  | 266.5 NM_001039476.1 |
| 472    | 343.6   | 335    | 222.5 NM_024731.2    |
| 81.5   | 84.5    | 94.3   | 85.8 NM_033201.1     |
| 90.4   | 90.6    | 86.4   | 97.2 NM_152337.1     |
| 384.7  | 302.6   | 369.1  | 185.6 NM_032140.1    |
| 123.7  | 109.2   | 96.5   | 94.7 NM_013399.1     |
| 110.4  | 103.9   | 103.8  | 97.6 NM_032269.3     |
| 335.4  | 297.2   | 269.5  | 167.2 NM_024516.2    |
| 98.9   | 95.7    | 85.2   | 89.8 NM_175900.2     |
| 91     | 87.6    | 89.4   | 86.9 NM_153025.1     |
| 475.4  | 493.7   | 442    | 476.5 NM_025082.1    |
| 361.3  | 345.4   | 253.7  | 161.9 NM_024598.2    |
| 1405   | 1466.8  | 1466.7 | 612 NM_022744.1      |
| 932.4  | 561.4   | 490.5  | 418.4 NM_018455.3    |
| 2913.2 | 1833.7  | 1640.7 | 1206.1 NM_020188.2   |
| 3613.6 | 1890.7  | 1744.9 | 1919.5 NM_144600.1   |
| 97.5   | 98.6    | 91.9   | 95.6 NM_153261.3     |
| 162.2  | 203.9   | 219.5  | 147.5 NM_004913.1    |
| 93.7   | 81.2    | 75.9   | 81.4 NM_144602.2     |
| 715.5  | 421.8   | 463.4  | 351.1 NM_013242.2    |
| 561.5  | 475.4   | 411.3  | 407 NM_032039.1      |
| 354.9  | 364.9   | 304.6  | 268.8 NM_016080.2    |
| 91.2   | 91.1    | 76.5   | 89.2 NM_020914.3     |
| 101.9  | 92.8    | 86.5   | 88.2 NM_030630.1     |
| 212.6  | 211.3   | 169.2  | 175.7 NM_152464.1    |
| 108.4  | 109.3   | 105.6  | 97.6 NM_032339.3     |
| 96.2   | 100.6   | 95.6   | 91.5 NM_001010855.1  |
| 119.1  | 110.5   | 108    | 93.6 NM_024052.4     |
| 705.7  | 873.2   | 807.9  | 584.6 NM_018428.2    |
| 112.3  | 107.5   | 97.5   | 106 NM_024683.2      |
| 11954  | 10113.9 | 10415  | 6936 NM_152350.1     |
| 106    | 94.4    | 91.8   | 89.1 NM_152343.1     |
| 82.2   | 89.1    | 82.5   | 91.1 XR_000576.1     |
| 105.7  | 93.3    | 91     | 90.9 NM_001038704.1  |
| 154.3  | 142.2   | 122.7  | 121.6 NM_020233.3    |
| 657.5  | 472.4   | 423.2  | 373.8 NM_174893.1    |
| 90.8   | 93.4    | 85.6   | 88.3 NM_145272.2     |
| 590.1  | 416.7   | 440.5  | 217.5 NM_024032.2    |
| 89.3   | 84      | 97.4   | 87 NM_182564.1       |
| 117.8  | 136.8   | 150.4  | 132.3 NM_178519.2    |
| 120.7  | 108.8   | 121.1  | 117.3 NM_144679.1    |

|        |        |        |                      |
|--------|--------|--------|----------------------|
| 84.2   | 94.5   | 92     | 90.3 NM_152347.3     |
| 847.3  | 475.2  | 437.9  | 401.4 NM_181656.1    |
| 603.8  | 410.4  | 361.8  | 335.8 XM_942508.1    |
| 109.2  | 106.8  | 95.5   | 81.7 NM_181656.1     |
| 95     | 93.9   | 91.5   | 93.8 NM_017622.1     |
| 1354.2 | 1423.7 | 1540.2 | 762.7 NM_152766.2    |
| 780.2  | 639.5  | 528.1  | 505.4 NM_001033046.1 |
| 277.8  | 331.2  | 274.6  | 252.6 NM_018182.1    |
| 94.4   | 108.4  | 99     | 105.8 NM_181707.1    |
| 167.1  | 157.7  | 142.1  | 150.6 NM_178542.3    |
| 91.2   | 92.4   | 95.7   | 84.1 NM_152781.2     |
| 151.1  | 157.7  | 169.1  | 125.7 XM_938283.1    |
| 115.1  | 117    | 114.7  | 90.3 NM_025099.2     |
| 79.4   | 78.3   | 79.5   | 78.3 NM_152466.1     |
| 1084.3 | 1046.1 | 1137.4 | 542.3 NM_025161.3    |
| 165.6  | 141.7  | 124.4  | 115.3 NM_018149.5    |
| 118.3  | 107.3  | 108.3  | 99.6 NM_017928.1     |
| 109.6  | 118.1  | 103.2  | 99 NM_175734.3       |
| 121.9  | 102.1  | 104    | 109 NM_022344.2      |
| 103.3  | 93.7   | 100.8  | 103.6 NM_207387.1    |
| 89.9   | 81.8   | 77.4   | 80.2 NM_152460.2     |
| 84.7   | 87     | 83.1   | 86.7 NM_173625.3     |
| 251.2  | 214.9  | 190.6  | 169.5 NM_018405.2    |
| 208.4  | 236.9  | 172.1  | 185.4 NM_017941.3    |
| 123    | 108.9  | 100.6  | 107.8 NM_203413.1    |
| 205    | 206.2  | 160.4  | 154.4 NM_015362.3    |
| 138.5  | 133.1  | 126.1  | 110.9 NM_203413.1    |
| 90.2   | 78.9   | 79.8   | 80.3 NM_203414.1     |
| 89.5   | 95.2   | 91     | 87.4 NM_199339.2     |
| 205.3  | 230.8  | 216.9  | 164.2 NM_018553.1    |
| 88.4   | 87.1   | 76.1   | 89 NM_181483.2       |
| 364.7  | 329.2  | 314.9  | 285.2 NM_015476.2    |
| 80.7   | 91.2   | 82.5   | 93 NM_024781.1       |
| 223.6  | 213    | 220    | 184 NM_153211.1      |
| 210.7  | 187.7  | 183.8  | 154.1 NM_152352.1    |
| 306.4  | 301.4  | 315.1  | 261.4 NM_031446.3    |
| 248    | 206.2  | 195.8  | 190.8 NM_024805.1    |
| 250.3  | 215.2  | 174.6  | 158.1 NM_145060.1    |
| 1190.9 | 1122.6 | 1067.7 | 871.6 NM_001008239.1 |
| 80.1   | 74.7   | 81     | 78.1 NM_145055.2     |
| 79.3   | 70.2   | 90.7   | 80.6 NM_173629.1     |
| 95.3   | 81.4   | 86.9   | 86.7 NM_198995.1     |
| 353.7  | 348.6  | 351.6  | 255.5 NM_194281.2    |
| 112.5  | 113.9  | 120.5  | 104.5 NM_032933.3    |
| 83.3   | 85.1   | 85.1   | 83.7 XM_058931.9     |
| 94.2   | 85.6   | 80.8   | 90.2 NM_001044369.1  |
| 217.2  | 172.8  | 170.5  | 138 NM_173529.3      |
| 2108.3 | 1805.7 | 1526.4 | 1291.3 NM_014177.1   |
| 666.3  | 392.1  | 375.5  | 376.1 NM_001012716.1 |
| 478    | 438.5  | 368.3  | 324.8 NM_013326.2    |

|         |         |        |                        |
|---------|---------|--------|------------------------|
| 1720    | 1069.7  | 996.5  | 686.1 NM_019107.3      |
| 95.6    | 84      | 96.6   | 98.5 NM_001031726.1    |
| 202     | 145.5   | 148.5  | 120.7 NM_001031726.1   |
| 460.7   | 341.7   | 334.1  | 216.4 NM_031448.2      |
| 110.9   | 89.9    | 77.4   | 82.9 NM_001031726.1    |
| 103.6   | 84.9    | 98.6   | 98.6 NM_021185.3       |
| 88.5    | 94.9    | 87.7   | 81.6 NM_152474.2       |
| 92.7    | 88.1    | 78.9   | 88.7 NM_182577.1       |
| 490.3   | 415.2   | 309.7  | 323.4 NM_134447.1      |
| 2768    | 2212.8  | 1802.4 | 1526.4 NM_134447.1     |
| 102.6   | 117.3   | 94.6   | 105 NM_033513.2        |
| 124.2   | 111.2   | 107.2  | 103 NM_173481.2        |
| 904.2   | 660     | 589.7  | 475.6 NM_138774.2      |
| 125.4   | 116.1   | 109.3  | 99.6 NM_152480.1       |
| 370.4   | 257.9   | 216.4  | 180.6 NM_017914.2      |
| 306.9   | 241.5   | 216.9  | 199 NM_152482.1        |
| 85.5    | 91.5    | 89.2   | 82.6 NM_152769.1       |
| 95.4    | 100.4   | 88     | 88 NM_001042680.1      |
| 144.6   | 149.7   | 133.9  | 129.3 NM_174983.2      |
| 163     | 139.7   | 129.1  | 147.2 NM_001080543.1   |
| 117.8   | 117.7   | 100.2  | 101.7 NM_001080543.1   |
| 111.6   | 103     | 97.7   | 93.8 NM_174947.2       |
| 21246.2 | 26244.8 | 27067  | 24882.9 NM_001014373.1 |
| 88.8    | 85.3    | 72.2   | 80.3 NM_033520.1       |
| 76.8    | 79.1    | 78.2   | 86.4 NM_152771.1       |
| 86.9    | 97.8    | 104.7  | 97.2 NM_198532.1       |
| 89.2    | 92.4    | 91.5   | 86.4 NM_001031735.1    |
| 102.7   | 92.1    | 87.5   | 95.6 NM_001039846.1    |
| 1286.8  | 1277.8  | 1236.3 | 683.6 NM_182498.2      |
| 94.4    | 88      | 85.7   | 91.9 NM_012109.1       |
| 188.1   | 218.2   | 177    | 182.1 NM_152266.1      |
| 505.8   | 280.7   | 228.1  | 209.4 NM_199250.1      |
| 94.4    | 92.4    | 94.3   | 91.1 NM_001039887.1    |
| 206.8   | 235.2   | 210.2  | 209.1 NM_001033026.1   |
| 351     | 470.5   | 380.5  | 376.9 NM_001033026.1   |
| 1201.8  | 737.9   | 665.4  | 676.2 NM_015168.1      |
| 101.6   | 90.1    | 84.8   | 94.6 NM_006333.2       |
| 84.9    | 79.2    | 78.7   | 84.3 NM_173177.1       |
| 131.1   | 116.6   | 121.2  | 125.8 NM_020156.1      |
| 90.3    | 81.1    | 75.7   | 84.8 NM_152692.3       |
| 170.6   | 137.4   | 153.5  | 145.6 NM_001011551.1   |
| 93      | 90.8    | 94.5   | 85.6 NM_001012970.1    |
| 142.3   | 179.8   | 167.5  | 170.5 NM_173807.2      |
| 92.7    | 91.5    | 86.4   | 82.6 NM_206837.1       |
| 97      | 91.1    | 88.8   | 94.4 NM_206837.1       |
| 90.1    | 98.2    | 87.3   | 88.8 NM_145047.3       |
| 79      | 87.7    | 87.6   | 83.8 NM_001006945.1    |
| 153     | 112.9   | 108.7  | 121 NM_018372.3        |
| 102     | 97.6    | 92.5   | 80.2 NM_001039517.1    |
| 90.9    | 91.5    | 82.9   | 91.7 NM_139240.2       |



|        |        |        |        |                |
|--------|--------|--------|--------|----------------|
| 789.7  | 307.2  | 242.7  | 168.3  | NM_018265.1    |
| 195.5  | 207.7  | 174.1  | 147.9  | NM_014388.5    |
| 502.7  | 503.4  | 487.7  | 372.8  | NM_024595.1    |
| 105.9  | 98     | 87.9   | 97.8   | NM_024595.1    |
| 438    | 466.8  | 364.9  | 322.4  | XM_941120.1    |
| 423.3  | 320.6  | 267.1  | 256.2  | NM_017850.1    |
| 87.2   | 91.1   | 79.8   | 90.2   | NM_178550.3    |
| 100.5  | 96.5   | 93.7   | 95.5   | NM_182581.1    |
| 560    | 390.4  | 370.6  | 222.6  | NM_018186.2    |
| 102    | 95.4   | 85.6   | 85.4   | NM_024676.3    |
| 80.9   | 75     | 79.9   | 69.2   | NM_021179.1    |
| 119.8  | 159.1  | 130.9  | 131.1  | NM_024709.2    |
| 94.6   | 91.9   | 91.4   | 98.2   | NM_023938.4    |
| 83.8   | 79.6   | 82.6   | 77.3   | NM_182623.1    |
| 79.9   | 80.6   | 82.4   | 74.9   | NM_199343.1    |
| 676.6  | 393.5  | 347.1  | 272.8  | NM_020141.3    |
| 789    | 551.6  | 450.6  | 390.5  | NM_016076.2    |
| 195.6  | 207.3  | 173.7  | 168.4  | NM_198446.1    |
| 822.4  | 988.5  | 932.6  | 583    | NM_017887.1    |
| 440.9  | 290.8  | 246.4  | 264.3  | NM_032018.4    |
| 218.2  | 159.5  | 154    | 159.7  | NM_032018.4    |
| 140.8  | 112.3  | 102.6  | 102.9  | NM_001010984.1 |
| 85.5   | 83.1   | 88.3   | 82.5   | NM_182766.2    |
| 88.9   | 85.1   | 83.6   | 80.2   | NM_144696.3    |
| 95.5   | 82.8   | 84.5   | 89.8   | NM_173507.1    |
| 1176.4 | 1185.1 | 926.3  | 758.4  | NM_020362.2    |
| 91.7   | 96.4   | 84.2   | 87.5   | NM_025063.1    |
| 3072.6 | 2151.3 | 1725   | 1739.9 | NM_152379.2    |
| 297.1  | 198    | 205.3  | 164.3  | NM_024037.1    |
| 92.1   | 78.5   | 81.1   | 88.3   | NM_030933.1    |
| 96.6   | 98.8   | 89.5   | 91.1   | NM_001010913.2 |
| 98     | 94.1   | 83.3   | 95.5   | NM_001013674.1 |
| 190.8  | 183.1  | 156.3  | 153.8  | NM_053052.2    |
| 492.3  | 461.7  | 411.3  | 296.4  | NM_015609.1    |
| 93.7   | 90.6   | 82.4   | 83.5   | NM_001012425.1 |
| 200.4  | 191    | 160.2  | 179.3  | NM_022756.3    |
| 93.9   | 95.2   | 77.9   | 79.8   | NM_145278.1    |
| 93.3   | 92.6   | 85.9   | 95.3   | NM_001032363.1 |
| 92.9   | 90     | 76.2   | 78.2   | NR_003242.1    |
| 722.4  | 390.4  | 321.4  | 322.6  | NM_033319.1    |
| 86.2   | 78.2   | 86.5   | 83.6   | NM_033418.1    |
| 98.9   | 83     | 77.8   | 80.2   | NM_182579.1    |
| 82.2   | 87     | 88     | 88     | NM_152290.1    |
| 185.9  | 179.6  | 189.1  | 156.6  | NM_017891.2    |
| 155.5  | 143.2  | 147.6  | 116.2  | NM_032125.1    |
| 2185.3 | 1749.8 | 1453.4 | 803.6  | NM_174896.2    |
| 281.6  | 269.3  | 249.9  | 157.1  | NM_023077.1    |
| 1018.9 | 740.6  | 752.1  | 321.8  | NM_018150.2    |
| 100.3  | 97.5   | 97.4   | 112.9  | NM_024603.1    |
| 135    | 126.3  | 116.6  | 125.6  | NM_024544.1    |

|        |        |        |                      |
|--------|--------|--------|----------------------|
| 95.3   | 91.1   | 83.9   | 91.8 NM_001004303.2  |
| 259.7  | 244.8  | 163.3  | 194 NM_138467.1      |
| 85.6   | 92.2   | 84.2   | 87.8 NM_152365.1     |
| 95.9   | 90.2   | 88.3   | 104 NM_001002912.2   |
| 93.9   | 106.1  | 98.9   | 94 NM_198547.1       |
| 497    | 638.1  | 704.5  | 739.1 NM_022774.1    |
| 98.8   | 97.9   | 95.3   | 101.2 NM_152607.1    |
| 90.1   | 90.3   | 80.4   | 86.8 NM_001010922.1  |
| 102.6  | 91.8   | 93.1   | 94.6 NM_001029946.1  |
| 90     | 88     | 80.8   | 77.4 NM_176782.1     |
| 644.4  | 701    | 588    | 600 NM_017953.2      |
| 115    | 106    | 95.4   | 109.4 NM_144627.1    |
| 96.3   | 95.5   | 103.2  | 95.1 NM_019099.3     |
| 88.5   | 82.4   | 88.4   | 84.7 NM_198926.1     |
| 110    | 107.1  | 106.4  | 110.5 NM_198926.1    |
| 253.5  | 214    | 171.5  | 166.1 NM_001007544.1 |
| 102.2  | 89     | 89     | 91.3 NM_198545.3     |
| 124.3  | 120    | 123.7  | 120.5 NM_173795.2    |
| 91.7   | 80.8   | 95.4   | 72.1 NM_001010979.1  |
| 1587.6 | 953    | 855.2  | 598.2 NM_052965.1    |
| 106.8  | 91.6   | 86.9   | 80.2 NM_001013615.1  |
| 98.1   | 82     | 89.5   | 84.8 NM_001013625.2  |
| 218    | 231    | 203.3  | 165.6 NM_032800.1    |
| 855.9  | 661    | 724.3  | 333.3 NM_006589.2    |
| 104.8  | 92.4   | 89.5   | 93.4 NM_006589.2     |
| 126.4  | 125.1  | 125.8  | 107.7 NM_198264.1    |
| 105.6  | 89.4   | 85.7   | 97.7 NM_178122.2     |
| 112.2  | 121.5  | 125    | 112.3 NM_030806.3    |
| 95.5   | 87.2   | 90     | 97.2 NM_182517.1     |
| 672.3  | 662.8  | 642.6  | 430.3 NM_022083.1    |
| 91.4   | 87.2   | 82     | 95.9 NM_030934.3     |
| 85.4   | 97.6   | 83.9   | 90.8 NM_017673.4     |
| 101.9  | 77.8   | 83     | 86.2 NM_017847.3     |
| 296.8  | 354    | 275    | 271.1 NM_001012985.1 |
| 98     | 79.7   | 79.6   | 82.9 NM_199351.1     |
| 501.5  | 360.8  | 311.5  | 214.5 NM_016183.2    |
| 83.1   | 90.2   | 82.8   | 89.7 NM_001080494.1  |
| 758    | 589.7  | 564.5  | 491.3 NM_024319.2    |
| 77.9   | 81.6   | 81     | 76.9 NM_183059.1     |
| 3511.9 | 2595.8 | 2285.1 | 1912.9 NM_138391.3   |
| 85.8   | 98.2   | 84.5   | 91.7 NM_004848.1     |
| 2040.8 | 1941.9 | 1745.8 | 1578.8 NM_016126.1   |
| 103.6  | 104.9  | 91.6   | 104.3 NM_019060.1    |
| 799    | 690.1  | 542.8  | 682.9 NM_015449.1    |
| 414.7  | 266.8  | 212    | 251.7 NM_015449.1    |
| 86.7   | 89.5   | 86.5   | 86.3 NM_001025231.1  |
| 2384.5 | 1530   | 1370.9 | 1148.9 NM_015471.2   |
| 97.4   | 81.6   | 88.6   | 95.9 NM_032126.1     |
| 1513.3 | 1710   | 1625.2 | 1057.2 NM_024097.1   |
| 127.2  | 108.5  | 99.4   | 101.4 NM_144697.2    |

|        |        |        |                      |
|--------|--------|--------|----------------------|
| 831.1  | 706.9  | 727.7  | 556 NM_198077.1      |
| 439.2  | 502    | 462.7  | 379.9 NM_001024594.1 |
| 4224.5 | 2629.3 | 2403.8 | 1844.5 NM_024579.1   |
| 612    | 561.8  | 542.4  | 460.9 NM_152608.2    |
| 153.6  | 117.3  | 113.3  | 141.3 NM_017860.3    |
| 1163.6 | 864.3  | 691.8  | 723.1 NM_032324.1    |
| 125.1  | 105.4  | 98.1   | 101.7 NM_144695.1    |
| 2476.5 | 1706.4 | 1486.6 | 1143.8 NM_144584.1   |
| 628.1  | 786.8  | 690.1  | 626.4 NM_023015.3    |
| 92.8   | 86.8   | 86.7   | 90.7 NM_006365.1     |
| 99.8   | 88     | 81.1   | 89.4 NM_152763.3     |
| 155.9  | 158.9  | 195.7  | 193 NM_020317.3      |
| 84.8   | 79.8   | 84     | 87.9 NM_178840.2     |
| 89.1   | 82.9   | 69.2   | 84.1 NM_152610.1     |
| 473.5  | 404.4  | 420.9  | 366 NM_015997.2      |
| 205.5  | 209.1  | 189.6  | 170.6 NM_001010867.1 |
| 1315.9 | 1026.4 | 872.8  | 760.6 NM_152609.1    |
| 242.3  | 181.6  | 212.8  | 168.1 NM_015434.1    |
| 210.8  | 147.1  | 123    | 108.6 NM_152485.2    |
| 85.7   | 88.6   | 91.4   | 85.8 NM_018252.1     |
| 121.2  | 136.3  | 120.6  | 111.9 NM_173509.2    |
| 737.3  | 580.2  | 588.9  | 390.1 NM_015607.2    |
| 108.7  | 107.1  | 103.1  | 101.4 NM_018166.1    |
| 382.4  | 501.1  | 465.6  | 375.3 NM_024813.1    |
| 189.3  | 239.8  | 199.3  | 177.5 NM_153035.1    |
| 129.9  | 123.2  | 135.1  | 125.7 NM_001012960.1 |
| 109.5  | 122.6  | 112.8  | 131.7 NM_001012961.1 |
| 101.2  | 109.3  | 97.8   | 97.2 NM_182518.2     |
| 926.7  | 695.6  | 850.3  | 406.8 NM_144580.1    |
| 397.9  | 336.6  | 322.4  | 307.4 NM_182533.2    |
| 88.9   | 87     | 83.5   | 88.4 NM_152377.1     |
| 89.7   | 102.2  | 93.6   | 95.3 NM_181643.2     |
| 94.8   | 83.2   | 89.2   | 84.6 NM_030907.2     |
| 83.6   | 70.9   | 72.8   | 78.1 NM_014283.2     |
| 84.2   | 93.7   | 99.4   | 88 NM_016227.1       |
| 93.7   | 93.9   | 80.6   | 94.2 NM_014283.2     |
| 85.1   | 78.2   | 82.2   | 83.2 NM_032648.1     |
| 93.4   | 84.3   | 78.8   | 87.8 NM_019118.3     |
| 98.3   | 93.2   | 87.6   | 102.1 NM_144702.1    |
| 99.8   | 94.4   | 93.3   | 94.3 NM_032884.2     |
| 84     | 78.2   | 88.9   | 87 NM_001003665.1    |
| 110.9  | 102.8  | 87.3   | 104.7 NM_145257.2    |
| 550.8  | 453.7  | 424.7  | 485.4 NM_032705.3    |
| 86.3   | 85.7   | 82.6   | 89.4 NM_001012274.1  |
| 91.5   | 111.8  | 80.5   | 95.5 NM_015991.1     |
| 97.2   | 84.7   | 84.2   | 92 NM_000491.2       |
| 3043.1 | 2007.1 | 1605.3 | 1491.6 NM_001212.3   |
| 100.2  | 99.8   | 82.4   | 90.6 NM_172369.2     |
| 136.1  | 143.5  | 134.2  | 131.8 NM_023925.3    |
| 124.1  | 170.7  | 144.2  | 163.8 NM_023925.3    |

|        |        |        |                      |
|--------|--------|--------|----------------------|
| 107.2  | 103.2  | 115.6  | 107.2 XM_371208.3    |
| 110.3  | 101.9  | 98.2   | 100 NM_006688.3      |
| 91.5   | 97.6   | 100    | 99.1 NM_182528.1     |
| 92.4   | 86.1   | 85.9   | 90.2 NM_001010908.1  |
| 88.4   | 95.9   | 86.8   | 83.9 NM_001008223.1  |
| 2985.9 | 1909.7 | 1744.2 | 1237.7 NM_012072.2   |
| 101.1  | 103.1  | 100.1  | 94 NM_198593.1       |
| 83.1   | 77.3   | 78.4   | 84.8 NM_198594.1     |
| 80.8   | 80.2   | 76     | 80.6 NM_030968.2     |
| 98     | 97.4   | 86.6   | 97.3 NM_031908.3     |
| 97.1   | 88.1   | 89.3   | 98.4 NM_181435.4     |
| 77.8   | 84.3   | 78.2   | 78.7 NM_181435.4     |
| 86.1   | 95.1   | 90.4   | 89.1 NM_031909.1     |
| 75.1   | 86.9   | 75.2   | 85.5 NM_015645.2     |
| 86.9   | 88.6   | 94.5   | 90.1 NM_031910.3     |
| 86.5   | 98.9   | 99.5   | 89.8 NM_031910.3     |
| 98.4   | 90.7   | 86.6   | 85.9 NM_182486.1     |
| 94     | 86.7   | 88.6   | 88 NM_031911.3       |
| 86.9   | 93     | 83.1   | 88.5 NM_207419.1     |
| 93.2   | 88.5   | 87.1   | 91.3 NM_001733.4     |
| 121.3  | 177.1  | 176.4  | 149.2 NM_016546.1    |
| 93.2   | 95     | 89.9   | 81.2 NM_201442.1     |
| 90     | 89.2   | 88.7   | 90.9 NM_001734.2     |
| 114.9  | 182.2  | 165.9  | 155.4 NM_000063.3    |
| 88.1   | 94.1   | 79.8   | 89.2 NM_014477.2     |
| 1557.5 | 2360.6 | 2461.6 | 1240.8 NM_032883.1   |
| 97.1   | 91.3   | 90     | 89.6 NM_080607.1     |
| 968.6  | 837.5  | 834.3  | 798.8 NM_012261.2    |
| 120.9  | 109    | 129.1  | 134.4 NM_001012971.2 |
| 113.9  | 132.9  | 135.4  | 128.9 NM_001013646.2 |
| 139.4  | 203.9  | 168    | 226.9 NM_080821.1    |
| 1829.4 | 1619.7 | 1568.2 | 1172.1 NM_017896.2   |
| 1124.5 | 832.3  | 596.7  | 621.5 NM_016470.6    |
| 80.4   | 77     | 81.8   | 79.9 NM_080616.1     |
| 103.7  | 90.3   | 87.7   | 94.7 NM_033197.2     |
| 524.9  | 514.7  | 438.2  | 289.3 NM_023935.1    |
| 333.2  | 393.9  | 360.4  | 360 NM_199181.2      |
| 83.7   | 84     | 80.9   | 87.2 NM_199181.2     |
| 94.8   | 88.5   | 92     | 94.8 NM_080628.1     |
| 159.3  | 149.8  | 158.3  | 126.4 NM_018152.2    |
| 421.4  | 400.8  | 351    | 317.7 NM_024331.3    |
| 216    | 225.9  | 203    | 164 NM_024331.2      |
| 89.3   | 85.2   | 93.2   | 88.3 NM_178468.2     |
| 497    | 251.8  | 190.1  | 176.4 NM_030919.1    |
| 92.4   | 90.5   | 96.5   | 91.8 NM_213631.1     |
| 109.4  | 117.3  | 96.4   | 110.9 NM_213631.1    |
| 96.6   | 81.6   | 87.5   | 95.7 NM_152503.2     |
| 91     | 87.6   | 90.6   | 85.5 NM_001033086.1  |
| 93.7   | 81.5   | 77.5   | 92.1 NM_001033087.1  |
| 98.5   | 85.9   | 85.4   | 85.3 NM_001024675.1  |

|         |         |         |                       |
|---------|---------|---------|-----------------------|
| 95      | 88.8    | 81.9    | 83.4 NM_080622.2      |
| 171     | 169.6   | 132.9   | 147 NM_012469.2       |
| 103.9   | 105.2   | 99.1    | 106 NM_080739.2       |
| 100.1   | 84.4    | 82.9    | 82.1 NM_001080472.1   |
| 89      | 89      | 79.4    | 88.5 NM_080825.2      |
| 224.2   | 176.4   | 200.6   | 189.4 NM_024299.2     |
| 91.3    | 84.3    | 71.4    | 76.9 NM_080833.1      |
| 90.6    | 92.8    | 84.8    | 87.4 NM_080834.1      |
| 1086.8  | 837.1   | 718.8   | 562.4 NM_019095.3     |
| 101.1   | 100.7   | 91.4    | 95.4 NM_080625.2      |
| 94.5    | 81.8    | 86.5    | 90.7 NM_033421.2      |
| 89.8    | 99.8    | 102     | 100.1 NM_033421.2     |
| 84.5    | 81.6    | 78.5    | 83.8 NM_080608.3      |
| 99.1    | 91.7    | 79.7    | 85.2 NM_178463.2      |
| 435.3   | 340.1   | 297.8   | 281.9 NM_024918.2     |
| 79.8    | 80.7    | 71.6    | 87.8 XM_940057.1      |
| 99.5    | 90.1    | 89.8    | 91.5 NM_178457.1      |
| 1443    | 1209.9  | 1159.6  | 977.1 NM_022106.1     |
| 93.3    | 99.3    | 83.5    | 88.2 NM_178477.2      |
| 92.6    | 81.6    | 79.8    | 89.6 NM_178477.2      |
| 90      | 88.9    | 96.3    | 88.6 NM_182658.1      |
| 78.3    | 87.3    | 75.6    | 87.5 NM_182519.1      |
| 90.9    | 95.7    | 97.6    | 97.6 NM_018474.2      |
| 171.5   | 224.1   | 185.8   | 194.5 NM_001039379.1  |
| 103.4   | 97.1    | 84.5    | 99.2 NM_024059.2      |
| 1685.1  | 1646.2  | 1645.9  | 965.8 NM_018270.3     |
| 263.3   | 183.4   | 187.3   | 161.4 NM_015600.2     |
| 101.3   | 104.4   | 95.1    | 96.1 NM_024704.3      |
| 13487.7 | 13339.1 | 11111.9 | 9276.6 NM_018840.2    |
| 16240.6 | 15974.1 | 14022.3 | 11652.2 NM_199485.1   |
| 4876.6  | 4456.7  | 4056.4  | 3105.9 NM_018840.2    |
| 87.7    | 86.7    | 91      | 92.7 NM_015585.2      |
| 683     | 426.5   | 462.4   | 203.1 NM_017874.2     |
| 96.3    | 98      | 88.4    | 88.2 NM_015417.2      |
| 157.6   | 144     | 130.4   | 139.1 NM_018347.1     |
| 373     | 307.1   | 278.1   | 236.5 NM_020531.2     |
| 1211.9  | 1505.7  | 1288    | 909.8 NM_001009923.1  |
| 2045.1  | 2443.1  | 1974.2  | 1506.3 NM_001009924.1 |
| 339.7   | 245.6   | 286.9   | 210.4 NM_018217.1     |
| 90.3    | 93.8    | 80.5    | 93.6 NM_020356.2      |
| 267.5   | 274.4   | 224.6   | 208.9 NM_033542.2     |
| 107.1   | 102     | 97.9    | 99.7 NM_024893.1      |
| 753.5   | 632.3   | 527.6   | 509.5 NM_015511.2     |
| 146.8   | 102.6   | 89.6    | 98.5 NM_017671.3      |
| 3005.4  | 3338.7  | 3059    | 1907.7 NM_016407.1    |
| 271.7   | 225.5   | 169     | 185.1 NM_199487.1     |
| 135.8   | 119.9   | 109.6   | 117.4 NM_018244.3     |
| 598.3   | 563.6   | 503.9   | 403.3 NM_199513.1     |
| 811.9   | 799.9   | 601.9   | 490.3 NM_016045.1     |
| 99.1    | 89.3    | 96.8    | 95.2 NM_018354.1      |

|        |        |        |        |                |
|--------|--------|--------|--------|----------------|
| 6798.4 | 5279.6 | 5367.5 | 3400.7 | NM_080748.1    |
| 86.4   | 94.8   | 74.4   | 85.8   | NM_033409.2    |
| 150.3  | 112.9  | 104.1  | 107.6  | NM_031424.3    |
| 80     | 77.6   | 77.1   | 80.3   | NM_001042353.1 |
| 199.4  | 182.3  | 149.7  | 137.8  | NM_001042353.1 |
| 81     | 84.9   | 80.3   | 87.7   | NM_152864.2    |
| 167.8  | 202.2  | 144.5  | 178.9  | NM_022082.2    |
| 98     | 83.5   | 81.3   | 96.3   | NM_016649.3    |
| 139.2  | 141.7  | 124.4  | 126.9  | NM_022104.3    |
| 95.1   | 97.9   | 97.4   | 86.6   | NM_024120.3    |
| 308.6  | 198.2  | 197.6  | 208.1  | NM_024120.2    |
| 151.3  | 117    | 125.6  | 121.4  | NM_024120.3    |
| 93.9   | 97.5   | 95.4   | 90.4   | NM_080574.2    |
| 93.4   | 83.5   | 82.8   | 85.6   | NM_178466.3    |
| 108.9  | 94.8   | 104    | 95     | NM_178466.2    |
| 76.9   | 84.8   | 81.9   | 77.9   | NM_178466.3    |
| 630.1  | 638.1  | 569.6  | 388.5  | NM_052865.2    |
| 97.2   | 91.7   | 92     | 89.4   | XM_945389.1    |
| 75.9   | 87.3   | 79.8   | 76.2   | NM_020343.2    |
| 98.9   | 92.2   | 89.3   | 94     | NM_152611.2    |
| 94.9   | 95.3   | 88.6   | 90.8   | NM_021215.2    |
| 94.2   | 94.2   | 89.3   | 85.7   | NM_178483.2    |
| 98.2   | 93.2   | 95.3   | 93.1   | NM_178456.2    |
| 96.4   | 88.8   | 88.7   | 88.8   | NM_080674.1    |
| 133.4  | 162.3  | 166.4  | 142.4  | NM_001009608.1 |
| 95.2   | 105.9  | 101.6  | 108.3  | NM_153269.1    |
| 267.4  | 247.4  | 244.9  | 161    | NM_024958.1    |
| 102.5  | 86.5   | 85.8   | 91.3   | NM_145033.1    |
| 120.9  | 115.1  | 121.9  | 109.9  | NM_032910.2    |
| 92.6   | 82     | 73     | 77.8   | NM_199175.1    |
| 224.8  | 194.5  | 212.5  | 200.9  | NM_013240.2    |
| 96.2   | 85.7   | 80.4   | 87.9   | NM_152506.1    |
| 94.9   | 96.9   | 88.8   | 94.5   | NM_152505.3    |
| 319.9  | 422.3  | 435.3  | 211.9  | NM_004928.1    |
| 5047.1 | 7119.7 | 8790.9 | 7260.4 | NM_001001789.1 |
| 154.9  | 147.7  | 159.3  | 149.4  | NM_199050.1    |
| 276.2  | 311.4  | 327.2  | 230.7  | NM_199050.1    |
| 81.6   | 84.5   | 81.3   | 84.1   | NM_144991.2    |
| 449.5  | 456.5  | 443.2  | 379.3  | NM_004649.4    |
| 1342.4 | 1290.2 | 1174.7 | 784.3  | NM_004649.4    |
| 296.5  | 325.5  | 297.2  | 263.8  | NM_198155.1    |
| 92.1   | 87.6   | 93.9   | 95.3   | NM_001005732.1 |
| 90     | 83.6   | 80.8   | 90.9   | NM_001005732.1 |
| 89.9   | 76     | 70.2   | 80.6   | NM_001005734.1 |
| 83.4   | 89.6   | 84.6   | 85.3   | NR_002215.1    |
| 112.5  | 93.1   | 101.8  | 91.5   | NM_018944.2    |
| 92.2   | 90.6   | 77.5   | 91.5   | NM_001006116.1 |
| 357.1  | 433.4  | 383.1  | 370.7  | NM_001042401.1 |
| 177.9  | 189.7  | 174.5  | 167.5  | NM_001042401.1 |
| 91.7   | 94.6   | 90     | 82.6   | NM_017833.3    |

|        |        |        |                      |
|--------|--------|--------|----------------------|
| 102.7  | 87.3   | 93.1   | 92.7 NM_001040192.1  |
| 96.2   | 89.2   | 89.8   | 86.9 NM_017833.3     |
| 221.6  | 159.9  | 152.8  | 146.8 NM_032261.3    |
| 2148.5 | 2492   | 1766.9 | 1734.7 NM_058181.1   |
| 184.2  | 240.6  | 245.7  | 238.5 NM_058181.1    |
| 102.8  | 99.4   | 106.7  | 92.3 NM_001006114.1  |
| 120.1  | 110.2  | 132.3  | 114.7 NM_199071.2    |
| 86.9   | 76.1   | 81.5   | 89.8 NM_058180.3     |
| 107.7  | 92.8   | 91.1   | 99.8 NM_199071.2     |
| 86.3   | 82.7   | 86.1   | 84.5 NM_021254.1     |
| 524.8  | 518.6  | 436.4  | 457 NM_017835.1      |
| 141.5  | 163.9  | 149.9  | 129.8 NM_016940.1    |
| 90.5   | 88.5   | 89.5   | 79.5 NM_019596.2     |
| 106.5  | 88.1   | 98.1   | 96.9 NM_058187.3     |
| 142.1  | 145.7  | 143    | 165.2 NM_016631.3    |
| 117.6  | 123.9  | 108.7  | 111.9 NM_013329.2    |
| 124.3  | 130.4  | 124.3  | 137.1 NM_016631.3    |
| 634.7  | 693.5  | 688.3  | 656.8 NM_016631.3    |
| 92.4   | 91.2   | 88.2   | 82.3 NM_058188.1     |
| 116.6  | 99.6   | 95.7   | 97.8 NM_058189.1     |
| 118    | 109.2  | 104.2  | 103.7 NM_020152.2    |
| 262.7  | 233.5  | 234.6  | 152.1 NM_058190.2    |
| 91.6   | 83.1   | 83.3   | 79.1 XR_001009.1     |
| 87.7   | 76     | 80.5   | 83.1 NM_001040140.1  |
| 87.2   | 79.1   | 90     | 76.7 NM_153754.1     |
| 84.7   | 82.3   | 84     | 82.5 NM_153204.1     |
| 130    | 135.8  | 129    | 111.1 NM_017447.2    |
| 86.6   | 94.1   | 93.7   | 86.9 NM_145180.2     |
| 74     | 73.6   | 77.3   | 82.7 NM_153773.1     |
| 1972.5 | 1989.7 | 2128.4 | 990.7 NM_031444.2    |
| 125.1  | 111.2  | 107.4  | 107.8 NM_182520.1    |
| 2279.8 | 1531.9 | 1293   | 1241.2 NM_213720.1   |
| 496.2  | 372.4  | 373.6  | 246 NM_024053.3      |
| 94.1   | 100.6  | 92.6   | 90.8 NM_032561.2     |
| 227.7  | 224.5  | 209.4  | 232.6 NM_152906.2    |
| 203    | 206.8  | 200.3  | 189.4 NM_012264.3    |
| 148.8  | 134.6  | 130.3  | 129.9 NM_017911.1    |
| 99.5   | 114.6  | 110.7  | 114.9 NM_001009880.1 |
| 656.5  | 817.5  | 823.3  | 497.6 NM_015264.1    |
| 91.9   | 89.9   | 90.1   | 101 NM_015264.1      |
| 102.7  | 127.4  | 110.3  | 97.9 NM_194250.1     |
| 100.1  | 82     | 85.7   | 90.7 NM_144629.1     |
| 91.4   | 89.6   | 86.7   | 89.1 XM_944033.1     |
| 95.2   | 94.4   | 88     | 94.9 NM_173545.1     |
| 91.4   | 101.1  | 95.1   | 104.2 NM_032266.2    |
| 242.6  | 284.7  | 257.3  | 243.4 NM_024293.2    |
| 262.8  | 216.1  | 189.2  | 181.6 NM_017877.2    |
| 100.4  | 99.5   | 93.9   | 83.5 NM_182587.1     |
| 313    | 273.8  | 228.7  | 238.8 NM_015680.3    |
| 3797.1 | 2638.9 | 2277.9 | 2545.4 NM_015702.1   |

|        |        |        |        |                |
|--------|--------|--------|--------|----------------|
| 182.3  | 287.9  | 271.9  | 235.1  | NM_023016.2    |
| 89.8   | 86     | 85.7   | 85.6   | NM_013310.3    |
| 4533.3 | 2874   | 2913.6 | 2080.2 | NM_080592.2    |
| 1834.4 | 1281.7 | 1341.1 | 927.9  | NM_080592.2    |
| 2363.4 | 1735.4 | 1531.8 | 1023.3 | NM_017546.3    |
| 96     | 91.4   | 85.5   | 94.2   | NM_003203.3    |
| 841    | 729    | 572.1  | 591.3  | NM_015701.2    |
| 128    | 132.6  | 114.2  | 114.4  | NM_015463.1    |
| 265.5  | 185.5  | 225.4  | 209.9  | NM_020194.4    |
| 196    | 168.9  | 168.4  | 120    | NM_024766.1    |
| 377.9  | 309.1  | 266.1  | 220.8  | NM_015955.2    |
| 98.2   | 87     | 88.4   | 92.6   | NM_173513.2    |
| 203.7  | 179.3  | 151.1  | 185.6  | NM_032319.1    |
| 86.8   | 96     | 94     | 88.6   | NM_000064.1    |
| 87.8   | 84.2   | 88.6   | 81.3   | NM_004054.2    |
| 172.6  | 195.4  | 171.7  | 174    | NM_016589.3    |
| 923.5  | 949.6  | 951.1  | 633.9  | NM_018462.4    |
| 2052.4 | 1059.7 | 921.3  | 673.7  | NM_020685.3    |
| 95.1   | 91.3   | 84.8   | 87.6   | NM_033364.2    |
| 1359.1 | 1528.8 | 1170.7 | 1216   | NM_015412.3    |
| 93.9   | 100.4  | 89.1   | 100.6  | NM_015412.3    |
| 105.5  | 103.7  | 112.3  | 107.2  | NM_001025072.2 |
| 89.4   | 83.4   | 73.8   | 84.5   | NM_016210.2    |
| 680.9  | 771.4  | 780.8  | 579.9  | NM_016474.3    |
| 83.8   | 86     | 80     | 86.1   | NM_032137.3    |
| 407.8  | 395.9  | 346.1  | 214.5  | NM_152531.3    |
| 105.2  | 105.2  | 90.4   | 98.3   | NM_152533.1    |
| 184.5  | 142.6  | 118.6  | 108.4  | NM_001029839.1 |
| 97.2   | 92.9   | 79     | 81.6   | NM_001029839.1 |
| 116.9  | 100.6  | 98.2   | 94     | NM_001029840.1 |
| 178.6  | 179.1  | 139.4  | 149.6  | NM_173826.1    |
| 89.7   | 95.3   | 85.2   | 92.9   | NM_173472.1    |
| 99.1   | 97.5   | 111.7  | 82.5   | NM_207307.1    |
| 1131.9 | 947.4  | 850.9  | 577.1  | NM_032359.2    |
| 87.5   | 93.8   | 91.9   | 92     | NM_007354.1    |
| 304    | 224.8  | 222.4  | 205.9  | NM_014367.3    |
| 1276.9 | 1374.9 | 1535.8 | 855.6  | NM_022485.2    |
| 320    | 350.4  | 340.1  | 273.1  | NM_022485.2    |
| 88     | 85.4   | 88.2   | 89.5   | NM_152539.1    |
| 479.7  | 273    | 264.5  | 236.6  | NM_138807.2    |
| 102    | 96.5   | 93.1   | 93     | NM_015931.1    |
| 104.2  | 88.1   | 86.4   | 95.1   | NM_173657.1    |
| 176.1  | 180.9  | 183.2  | 172.7  | NM_032898.2    |
| 3469.6 | 4276.5 | 4746.8 | 5048.5 | NM_032898.2    |
| 98.7   | 103    | 93.8   | 97.7   | NM_178342.1    |
| 93.3   | 90.3   | 84.1   | 87.8   | NM_178343.1    |
| 94.4   | 94.4   | 91     | 86.6   | NM_025041.2    |
| 416.4  | 314.7  | 358.8  | 229.1  | NM_020187.2    |
| 93.4   | 86.8   | 89.6   | 97.7   | NM_001006109.1 |
| 663.3  | 481    | 378    | 346.1  | NM_173824.2    |



|        |        |        |                      |
|--------|--------|--------|----------------------|
| 190.6  | 165    | 145.6  | 145.8 NM_032806.4    |
| 164.2  | 151.6  | 157.1  | 110.6 NM_144635.3    |
| 93.1   | 87     | 97.6   | 93.6 XR_001028.1     |
| 98.5   | 91.1   | 86.9   | 98.2 NM_001039102.1  |
| 82.2   | 82.8   | 82.5   | 87.7 NM_153215.1     |
| 90.1   | 89.3   | 89.7   | 93.1 NM_144714.2     |
| 95.5   | 90.3   | 87.2   | 88.3 NM_024616.1     |
| 355    | 277.1  | 273.1  | 178.7 NM_203370.1    |
| 89.8   | 85.5   | 77.6   | 86.6 NM_001007534.1  |
| 94.3   | 87.3   | 83.3   | 89.1 NM_145035.2     |
| 185.2  | 219    | 169.2  | 213.8 NM_173552.2    |
| 110.7  | 102.9  | 100.7  | 101.6 NM_178496.2    |
| 195.2  | 120.4  | 118.3  | 109.2 NM_199074.1    |
| 125.4  | 119.7  | 112.7  | 102.1 NM_199073.1    |
| 91     | 87.1   | 88.4   | 87.7 NM_199417.1     |
| 103    | 116.2  | 102    | 91.6 NM_199073.1     |
| 7145   | 4932.2 | 4915.6 | 2842.8 NM_199069.1   |
| 165.4  | 168    | 157.1  | 145.1 NM_198562.1    |
| 221.5  | 238    | 237.1  | 201.9 NM_015224.1    |
| 202.2  | 154    | 157.2  | 162.6 NM_173654.1    |
| 92.1   | 89.9   | 96.2   | 101.2 NM_001039788.1 |
| 289.3  | 249.2  | 224.3  | 200.2 NM_152305.1    |
| 1057.6 | 925.9  | 838.4  | 660.6 NM_020231.3    |
| 87.6   | 81.3   | 81.4   | 89.4 NM_007293.2     |
| 97.1   | 94.6   | 85.7   | 89.3 NM_000715.3     |
| 88.4   | 93.2   | 94.8   | 81.8 NM_001017367.1  |
| 86.6   | 90.3   | 84     | 92.6 NM_000716.3     |
| 108.6  | 110    | 103.7  | 103.5 NM_001030316.1 |
| 263.6  | 230.7  | 196    | 175.3 NM_001029998.1 |
| 857.1  | 637.6  | 565.7  | 473.5 NM_032313.2    |
| 108.4  | 101    | 107.7  | 97 NM_024511.4       |
| 94.9   | 89.5   | 84.1   | 90.3 NM_018569.2     |
| 87.7   | 82.4   | 78.4   | 82 NM_032149.1       |
| 86     | 90.2   | 83.3   | 92.5 NM_016613.4     |
| 97.7   | 90.3   | 92.9   | 96.8 NM_016613.4     |
| 87.5   | 88.4   | 89.3   | 85.3 NM_001031700.1  |
| 87.1   | 77.9   | 78.3   | 78.2 NM_145048.2     |
| 89.7   | 82.9   | 80.9   | 83.4 NM_152400.1     |
| 174.1  | 242.9  | 270.6  | 183.5 NM_174921.1    |
| 106.7  | 99.4   | 99.7   | 100.6 NM_144645.1    |
| 90.5   | 90.2   | 84.8   | 90 NM_005750.2       |
| 89.9   | 91.9   | 85.3   | 91.9 NM_152997.2     |
| 200.5  | 200.7  | 208.1  | 190 NM_003704.3      |
| 616    | 414.6  | 366.9  | 275.3 NM_003703.1    |
| 749.2  | 726.4  | 730.6  | 600 NM_001735.2      |
| 96.7   | 114.4  | 103.1  | 101.7 NM_001736.2    |
| 1647.4 | 987.6  | 932.2  | 827.6 NM_004772.1    |
| 105.4  | 100.5  | 101.9  | 101.5 NM_024715.2    |
| 1486.6 | 1487.8 | 1447.6 | 903 NM_020199.1      |
| 220.4  | 184.9  | 166.7  | 182.9 NM_173828.3    |

|        |        |        |        |                |
|--------|--------|--------|--------|----------------|
| 310.6  | 342.7  | 334.1  | 265.8  | NM_130848.1    |
| 694.5  | 600.4  | 547.9  | 436.4  | NM_032042.3    |
| 960.9  | 1660.7 | 2376.6 | 1710.2 | NM_022483.3    |
| 156    | 153.4  | 123.8  | 128.8  | NM_018691.1    |
| 97.1   | 108    | 102.7  | 105.8  | NM_198566.1    |
| 89.3   | 77.1   | 79.5   | 84.4   | NM_173665.1    |
| 440.3  | 361.3  | 367.3  | 308.4  | NM_152408.1    |
| 88.3   | 86.2   | 82.9   | 85.4   | NM_016348.1    |
| 89.4   | 83.1   | 72.2   | 85.1   | NM_016348.1    |
| 97.3   | 92.1   | 99.9   | 97.4   | NM_032385.1    |
| 485    | 516    | 607.4  | 534.1  | NM_016603.1    |
| 103.7  | 92.4   | 89.7   | 87.5   | NM_000065.1    |
| 113.8  | 100.8  | 101.9  | 103    | NM_178508.3    |
| 147.2  | 135.8  | 151.1  | 144.6  | NM_001008704.1 |
| 142.6  | 117.2  | 118    | 110.9  | NM_001008703.1 |
| 87.4   | 84.2   | 84.6   | 90.1   | NM_006781.2    |
| 98.7   | 96.4   | 87.2   | 94.3   | NM_032744.1    |
| 146.9  | 182.6  | 166.8  | 155.5  | NM_024294.2    |
| 203.4  | 225    | 208.4  | 168.2  | NM_022758.4    |
| 108.5  | 94.2   | 96.9   | 101.8  | NM_017754.2    |
| 84.6   | 75.3   | 86.4   | 85.7   | NM_199184.1    |
| 3636.1 | 3332.6 | 3036.3 | 2590.9 | NM_199184.1    |
| 946.7  | 1094   | 907    | 1153.7 | NM_032870.1    |
| 484.5  | 392.8  | 348.5  | 375    | NM_145062.1    |
| 75.3   | 70.5   | 80.6   | 76.4   | NM_033069.1    |
| 161.2  | 385.8  | 393.7  | 296.9  | NM_138409.1    |
| 108.2  | 85.7   | 92.7   | 94.9   | NM_144980.1    |
| 187.8  | 171.4  | 167.6  | 168.6  | NM_001029863.1 |
| 92     | 95.4   | 91.2   | 92.3   | NM_207502.1    |
| 3577.9 | 3029.7 | 2708.9 | 2094.2 | NM_032340.1    |
| 101.9  | 97.2   | 94.7   | 103.6  | NM_145316.2    |
| 994.9  | 780.1  | 735.8  | 551.9  | NM_138493.1    |
| 957.9  | 914.8  | 844.5  | 644.8  | NM_145063.2    |
| 96.6   | 86.4   | 88.2   | 88.6   | NM_001031722.1 |
| 108.2  | 96.8   | 97     | 95     | NM_024909.1    |
| 93.7   | 81.8   | 84.1   | 85.9   | NM_001031722.1 |
| 221    | 150.7  | 171.5  | 124.8  | NM_145029.1    |
| 274.7  | 274.1  | 214    | 251.9  | NM_018132.3    |
| 86.4   | 89.8   | 83.4   | 88.9   | NM_138569.1    |
| 96.9   | 93.7   | 93.6   | 98.3   | NM_001010872.1 |
| 81     | 74.9   | 80.4   | 81.7   | NM_183373.2    |
| 94     | 83.7   | 82.5   | 92.5   | NM_173563.1    |
| 201.3  | 183.2  | 143.9  | 141.3  | NM_030568.3    |
| 169.5  | 143.6  | 142.3  | 126.3  | NM_020408.3    |
| 76.2   | 76.2   | 76     | 91.4   | NM_014070.1    |
| 198.2  | 174.7  | 169.3  | 161.1  | NM_138441.1    |
| 96.9   | 111.5  | 100.5  | 105.7  | NM_152551.3    |
| 104.7  | 93.7   | 95.7   | 90.5   | NM_181714.1    |
| 870.7  | 745.5  | 739    | 461.3  | NM_033112.2    |
| 82.2   | 79.8   | 75     | 79.9   | NM_001012974.1 |

|         |         |         |                       |
|---------|---------|---------|-----------------------|
| 109.5   | 88.7    | 94.7    | 107.3 NM_198920.1     |
| 86.8    | 96.1    | 100.9   | 87.2 NM_001009994.1   |
| 151.9   | 177.7   | 176.4   | 155.8 NM_020425.3     |
| 135.2   | 159.8   | 161.5   | 133.3 NM_020425.3     |
| 94.7    | 103.2   | 95.3    | 105.4 NM_001031743.1  |
| 75.9    | 91.9    | 89.4    | 92.4 NM_178823.2      |
| 91.4    | 101.1   | 98      | 96.4 NM_178823.2      |
| 1637.4  | 1566.7  | 1235.8  | 1203.4 NM_018064.2    |
| 157.9   | 157.3   | 120.3   | 125.5 NM_198468.1     |
| 98.6    | 89.9    | 81.8    | 89.6 NM_032511.1      |
| 216.5   | 262.1   | 321.9   | 234.2 NM_152730.4     |
| 1027.3  | 649.5   | 773.3   | 645.5 NM_001012507.1  |
| 94.6    | 93.2    | 99.9    | 104.5 NM_001012279.1  |
| 106.3   | 109     | 93.6    | 103.6 NM_173830.3     |
| 93.2    | 85.5    | 90.3    | 97.8 NM_153711.1      |
| 104.2   | 111.3   | 128.6   | 95.1 NM_001010923.1   |
| 86.7    | 80.8    | 80.6    | 80.6 NM_001010876.1   |
| 81.6    | 86.3    | 91.6    | 80.7 NM_052831.2      |
| 85.6    | 91.7    | 83      | 86.2 NM_001007531.1   |
| 91.9    | 95.2    | 90.4    | 93 NM_152554.1        |
| 83.2    | 88.5    | 85.4    | 93.2 NM_145025.2      |
| 86.1    | 96      | 81.6    | 88.2 NM_206834.1      |
| 114.2   | 117.8   | 109.6   | 118.9 NM_016487.2     |
| 87.8    | 116.6   | 93.6    | 103.1 NM_001042475.1  |
| 101.5   | 96.4    | 101.6   | 107.6 NM_206921.1     |
| 121.4   | 113.9   | 111.4   | 111.4 NM_001010909.1  |
| 99.9    | 97.5    | 86.5    | 97.4 NM_001010909.1   |
| 81.7    | 87.6    | 84.8    | 92.8 NM_152732.2      |
| 90.8    | 99.8    | 88.4    | 92.9 NM_025002.1      |
| 90.3    | 92.5    | 88.6    | 95 NM_001003693.1     |
| 128.8   | 132.3   | 117.2   | 129.9 NM_024573.1     |
| 96.4    | 92.1    | 95.2    | 94.4 NM_001010852.2   |
| 110.4   | 112.8   | 114.2   | 110.4 NM_138276.1     |
| 95.4    | 97.4    | 93.2    | 92.6 NM_138275.1      |
| 81.7    | 88.3    | 84.9    | 85.3 NM_138277.1      |
| 88.5    | 78.1    | 72.3    | 81.8 NM_138274.1      |
| 154.8   | 223.9   | 210.2   | 187.9 NM_001039651.1  |
| 98.3    | 91.6    | 88.3    | 90.5 NM_025258.1      |
| 85.1    | 86.3    | 82.1    | 83.3 NM_015864.2      |
| 87.7    | 91.5    | 92.7    | 91.6 NM_018452.2      |
| 276.2   | 306.2   | 318.2   | 158.3 NM_021184.3     |
| 109.5   | 95.1    | 89.5    | 102.8 NM_001040437.1  |
| 11626.9 | 11244.7 | 11838.9 | 8690.6 NM_001040437.1 |
| 5709.6  | 3445.9  | 2586.1  | 2374.3 NM_013397.3    |
| 87.3    | 80.5    | 77.7    | 85.7 NM_138408.2      |
| 474.6   | 535.5   | 449.6   | 367.8 NM_016485.3     |
| 446     | 444.8   | 354.1   | 330.4 NM_145267.2     |
| 96      | 96.1    | 98.6    | 99.2 NM_024929.1      |
| 152.5   | 201.6   | 197.9   | 163.2 NM_024581.3     |
| 91.1    | 89.4    | 84.1    | 91.1 NM_030939.3      |

|        |        |        |                      |
|--------|--------|--------|----------------------|
| 227.9  | 236    | 276    | 153.9 NM_018322.1    |
| 213.1  | 237.9  | 211.9  | 233.7 NM_152731.1    |
| 188.7  | 146.4  | 138.5  | 162.5 NM_014165.1    |
| 1033.7 | 1117.6 | 939.8  | 1009.9 NM_173562.3   |
| 406.1  | 563.3  | 525.2  | 490.1 NM_018341.1    |
| 85.1   | 82.3   | 78.7   | 89.2 NM_203395.1     |
| 160.7  | 134.5  | 139.9  | 119.9 NM_138785.1    |
| 85.4   | 81.5   | 78.2   | 85.8 NM_021820.1     |
| 88.4   | 83.6   | 86.6   | 92.7 NM_001031712.1  |
| 468.4  | 492.2  | 395.9  | 343.4 NM_001031712.1 |
| 83.3   | 95.6   | 80.7   | 93.3 NM_153036.2     |
| 379.7  | 327.9  | 313.1  | 282.6 NM_022102.1    |
| 90.2   | 88.9   | 88     | 100.7 NM_145028.3    |
| 193.5  | 191.7  | 156.4  | 137.3 NM_014895.1    |
| 107    | 104.9  | 102.9  | 95 NM_021945.4       |
| 245.7  | 212.7  | 178.6  | 148.4 NM_152734.2    |
| 229.6  | 186.8  | 172.6  | 205 NM_017909.1      |
| 74.7   | 85.5   | 74.7   | 84.5 NM_000587.2     |
| 97.7   | 93.6   | 100.6  | 104 NM_024728.1      |
| 146    | 129.4  | 127.8  | 129.7 NM_138701.1    |
| 83.7   | 93.6   | 93.1   | 99.5 NM_006658.2     |
| 449.8  | 465.6  | 387.1  | 385.5 XM_946079.1    |
| 158.9  | 198.6  | 160.2  | 155.8 NM_015949.2    |
| 757.6  | 683.6  | 607.5  | 582.9 NM_031434.2    |
| 995.5  | 886.7  | 869.6  | 778.2 NM_024051.2    |
| 200.8  | 206.8  | 182.1  | 173 NM_024054.1      |
| 630.8  | 488.3  | 467.3  | 393.2 NM_024067.2    |
| 710.6  | 808.6  | 849.2  | 271.8 NM_152743.2    |
| 131.2  | 127    | 138.9  | 117.8 NM_015622.5    |
| 698.3  | 532.1  | 515.2  | 466.8 NM_198097.1    |
| 109.9  | 106.4  | 104.4  | 110.6 NM_138434.2    |
| 3165.9 | 1894.1 | 2007.7 | 1432.8 NM_138446.1   |
| 95.5   | 93.2   | 82.1   | 95.6 NM_138811.3     |
| 96     | 88.3   | 91.8   | 93.5 NM_145304.2     |
| 83.3   | 88.9   | 74.8   | 76.6 NM_178829.2     |
| 186.7  | 172    | 158.2  | 177.2 NM_020192.1    |
| 1045.5 | 1162.2 | 1136.5 | 750.8 NM_018224.2    |
| 91.3   | 98.5   | 92.9   | 76.3 NM_022150.2     |
| 85.7   | 78.8   | 82.9   | 73 NM_000562.1       |
| 90.6   | 74.3   | 94.8   | 86.4 NM_000066.2     |
| 102.3  | 96.9   | 89.2   | 106.9 NM_000606.1    |
| 259.7  | 236.3  | 229.2  | 189.2 NM_004337.1    |
| 89.9   | 88.1   | 86.3   | 92.7 NM_053279.1     |
| 91.7   | 100.1  | 97.8   | 89.9 NM_001033662.1  |
| 97.5   | 91.7   | 86.7   | 106 NM_001007176.1   |
| 101.3  | 86.1   | 83.5   | 78.2 NM_016458.2     |
| 95.1   | 90.2   | 87.1   | 95.9 NM_173687.1     |
| 433.3  | 218.8  | 194    | 193.4 NM_018024.1    |
| 1144.7 | 618.1  | 607.5  | 348.6 NM_023080.1    |
| 128    | 131.5  | 137.3  | 131.6 NM_052958.1    |

|        |        |        |        |                |
|--------|--------|--------|--------|----------------|
| 1385   | 1088   | 916.7  | 725.3  | NM_018142.1    |
| 486    | 478.3  | 393    | 293.7  | NM_173685.1    |
| 1772.1 | 2716.9 | 3449.2 | 2609.2 | NM_177965.2    |
| 375.7  | 200.3  | 231.9  | 247.2  | NM_152416.1    |
| 92.2   | 76.5   | 80.9   | 85.8   | NM_020130.2    |
| 1716   | 945.9  | 1077.1 | 773.1  | NM_138436.2    |
| 255.8  | 197.4  | 169.5  | 164    | NM_025115.1    |
| 84.7   | 92     | 91     | 89.3   | NM_175075.2    |
| 132    | 150.8  | 165.9  | 142    | NM_019607.1    |
| 556.1  | 1480   | 1400.9 | 1081.1 | NM_173518.2    |
| 99     | 96.1   | 88     | 93.3   | NM_152765.2    |
| 103.4  | 94.3   | 81.5   | 88.8   | NM_173549.1    |
| 90.5   | 88.6   | 81.8   | 86.2   | NM_001007090.1 |
| 85.6   | 88     | 83.5   | 84.6   | NM_001031839.1 |
| 245.4  | 189.7  | 169.1  | 213.3  | NM_017864.2    |
| 139.4  | 126.7  | 116.5  | 129.8  | NM_032334.1    |
| 505.1  | 401.4  | 404.2  | 179    | NM_016647.1    |
| 114.1  | 116.8  | 97.2   | 100.3  | NM_001013842.1 |
| 117.2  | 125.3  | 113.9  | 115.9  | NM_001034061.1 |
| 121.6  | 92.5   | 101.6  | 89.9   | NM_016010.1    |
| 127.7  | 137.9  | 133.6  | 106.7  | NM_147189.1    |
| 82     | 87.2   | 80.6   | 88.5   | NM_001040032.1 |
| 2125.5 | 1335.5 | 1322.2 | 1018.2 | NM_032847.1    |
| 95.9   | 89.1   | 84.7   | 99.2   | NM_015912.2    |
| 95.4   | 82.7   | 78.3   | 85.5   | NM_001081675.1 |
| 98.2   | 83.8   | 85.6   | 86.1   | XR_001454.1    |
| 79     | 83.5   | 78.5   | 87.7   | NM_001737.2    |
| 144.5  | 107.6  | 93.1   | 91.6   | NM_001031728.1 |
| 231.7  | 157.4  | 129    | 135.4  | NM_001031728.1 |
| 243.1  | 251.7  | 222.2  | 165.1  | NM_020207.1    |
| 426.3  | 314.9  | 299.3  | 242    | NM_001001551.1 |
| 111.3  | 101.8  | 102.5  | 108    | NM_001012715.1 |
| 273.4  | 214.9  | 181.5  | 194.2  | NM_198841.1    |
| 96.7   | 88.2   | 82.9   | 93.2   | NM_020641.1    |
| 350.3  | 551.8  | 781.3  | 337.9  | NM_152286.2    |
| 158.1  | 125.7  | 105.2  | 125.4  | NM_138778.1    |
| 734.5  | 488.9  | 462.6  | 311.3  | NM_016390.2    |
| 177.8  | 140.6  | 143.6  | 121.3  | NM_144654.1    |
| 214.3  | 141.3  | 124.9  | 124.7  | NM_144654.1    |
| 82.4   | 88.7   | 79.9   | 70.9   | NM_001012502.2 |
| 89.6   | 90.4   | 78.9   | 93.2   | NM_145283.1    |
| 163.3  | 188.8  | 163.2  | 155.3  | NM_033428.1    |
| 167.5  | 123.8  | 118    | 118.7  | NM_032342.1    |
| 105.9  | 99.3   | 90     | 101.4  | NM_173690.1    |
| 176.1  | 156.8  | 173.8  | 120    | NM_016446.2    |
| 90.8   | 79.6   | 72.3   | 76.2   | NM_001042590.1 |
| 104    | 93.1   | 97.8   | 91.9   | NM_001012446.1 |
| 95.8   | 81.2   | 94.6   | 97.2   | NM_203305.1    |
| 86.3   | 85.4   | 84.4   | 78.1   | NM_153707.1    |
| 1744.6 | 829    | 636    | 557.3  | NM_178448.2    |

|        |        |        |        |                |
|--------|--------|--------|--------|----------------|
| 3147.3 | 2147.6 | 1900.7 | 1605.5 | NM_183241.1    |
| 81     | 82     | 88.6   | 93.9   | NM_203403.1    |
| 88.1   | 84.7   | 87.7   | 87     | NM_001012993.1 |
| 91.2   | 76.6   | 78.8   | 86.6   | NM_001010907.1 |
| 386.2  | 293.1  | 295.1  | 223.4  | NM_016481.2    |
| 78.8   | 81.7   | 76.9   | 80.6   | NM_001012415.1 |
| 144.7  | 118.6  | 110.9  | 97.2   | NM_024112.2    |
| 80.8   | 82.7   | 83.1   | 91.2   | NM_001080515.1 |
| 89.3   | 77.1   | 82.4   | 86.8   | NM_198469.1    |
| 1501.7 | 1280.2 | 1314.4 | 716.4  | NM_022343.2    |
| 233.6  | 184.3  | 198.1  | 139.4  | NM_153698.1    |
| 212.3  | 130.9  | 144.5  | 112.9  | NM_148178.1    |
| 178.6  | 117.7  | 123.3  | 125.1  | NM_148179.1    |
| 749.8  | 358.4  | 371.5  | 275.9  | NM_148178.1    |
| 107.2  | 107.7  | 106.1  | 100.2  | NM_147168.1    |
| 100.7  | 107.5  | 101    | 102.8  | NM_147168.1    |
| 87     | 92.1   | 83.4   | 94.8   | NM_032596.3    |
| 119.4  | 121.2  | 112.8  | 100.7  | NM_147202.1    |
| 582.8  | 565.9  | 526.1  | 409.6  | NM_033446.1    |
| 101.2  | 93.7   | 90.3   | 104.4  | NM_032823.3    |
| 193    | 169.8  | 171.8  | 187.7  | NM_080655.1    |
| 210.1  | 201.1  | 178.4  | 155.2  | NM_014064.2    |
| 98     | 84.5   | 86     | 96.4   | NM_015667.1    |
| 141    | 142.4  | 140.3  | 102.8  | NM_032937.3    |
| 177    | 236.8  | 179.7  | 193.5  | NM_017738.1    |
| 93.4   | 79.7   | 89     | 88.7   | NM_014334.1    |
| 443.1  | 239.1  | 226.4  | 200.1  | NM_017998.1    |
| 110.9  | 95.3   | 100    | 109.2  | NM_152420.1    |
| 85     | 89.7   | 87.9   | 75.4   | NM_152786.1    |
| 168.6  | 247    | 306.4  | 186    | NM_030814.4    |
| 1403   | 1443.7 | 1029.5 | 1181.7 | NM_018465.1    |
| 93.3   | 89.6   | 81.5   | 82     | NM_001001938.1 |
| 140.6  | 138.7  | 120.9  | 128    | NM_194313.1    |
| 350.4  | 316.7  | 227.2  | 277.8  | NM_032012.1    |
| 100.3  | 89.3   | 82.9   | 91.3   | NM_199350.1    |
| 85.4   | 74.2   | 76.9   | 82.6   | NM_152574.1    |
| 100    | 87.2   | 95.1   | 91.7   | NM_031426.2    |
| 87.7   | 80.4   | 77.6   | 89.9   | NM_001002260.1 |
| 467.2  | 458.9  | 349.4  | 304.3  | NM_017832.2    |
| 97.2   | 94.5   | 97.5   | 99     | NM_004816.2    |
| 205.6  | 223.5  | 198.2  | 145.3  | NM_032307.2    |
| 240.4  | 189.3  | 232.4  | 169.2  | NM_152569.1    |
| 89.9   | 84.7   | 71.5   | 85.2   | NM_001039395.1 |
| 117.4  | 127.9  | 128.6  | 127.5  | NM_017586.1    |
| 89.5   | 84.6   | 75.9   | 89.4   | NM_153237.1    |
| 104.2  | 89.8   | 84.3   | 90     | NM_018325.1    |
| 90.9   | 80.9   | 77.4   | 88.4   | NM_145005.3    |
| 92.4   | 91.3   | 82.1   | 81.7   | NM_145005.3    |
| 1341.3 | 938.7  | 945    | 487.2  | NM_030914.1    |
| 139.9  | 138.8  | 146.2  | 99.5   | NM_173691.1    |

|        |        |        |                      |
|--------|--------|--------|----------------------|
| 205.7  | 143.7  | 129    | 122 NM_016014.2      |
| 102.6  | 104.6  | 94.3   | 107.1 NM_016014.2    |
| 251.9  | 164.2  | 146    | 141 NM_001025780.1   |
| 2309.9 | 1947.2 | 1716.4 | 1317.2 NM_016482.2   |
| 100.1  | 86.3   | 105.4  | 98.3 NM_178828.3     |
| 2705.7 | 4555.2 | 5504.9 | 3958.5 NM_021218.1   |
| 168.7  | 148.7  | 137.6  | 143.4 NM_024828.2    |
| 108    | 108.1  | 106.7  | 101.3 NM_173521.3    |
| 89.9   | 93.6   | 84.3   | 82.5 NM_173521.3     |
| 135.7  | 101.1  | 101.8  | 98.4 NM_182505.3     |
| 85.4   | 86.7   | 82.2   | 103.2 NM_182505.3    |
| 630.7  | 728.5  | 620    | 639.8 NM_024718.2    |
| 1008.4 | 718.1  | 669.9  | 295.4 NM_022833.2    |
| 554.6  | 441.3  | 404.1  | 344.9 NM_032310.2    |
| 95.5   | 96.6   | 98.3   | 98.9 NM_018956.3     |
| 541.6  | 410.8  | 440.6  | 256.3 NM_197956.1    |
| 374.4  | 258.3  | 255.5  | 190.6 NM_153045.2    |
| 111.6  | 121    | 128.1  | 122.4 NM_173550.2    |
| 121.9  | 134.2  | 148.7  | 130.4 NM_017881.1    |
| 90.6   | 102.3  | 95.6   | 100.5 NM_153710.3    |
| 137.6  | 143.5  | 122.9  | 120.3 NM_139246.3    |
| 94.3   | 76.9   | 81.9   | 96.4 NM_152572.2     |
| 84.9   | 96.1   | 88.7   | 90.4 NM_001738.1     |
| 87.6   | 90.5   | 80.9   | 88.9 NM_020178.3     |
| 178.2  | 106.7  | 112    | 117.9 NM_001217.3    |
| 92.8   | 95.9   | 83.7   | 85.2 NM_001218.3     |
| 78.2   | 80.1   | 75.8   | 76 NM_001218.3       |
| 100.1  | 110.9  | 106.4  | 86.9 NM_198584.1     |
| 89.3   | 87.8   | 80.4   | 82 NM_012113.1       |
| 8784.9 | 3891.1 | 3396   | 3261.7 NM_000067.1   |
| 84.3   | 97.4   | 88.9   | 92.2 NM_005181.2     |
| 110.3  | 102.7  | 96.4   | 103.1 NM_000717.2    |
| 79.9   | 82.7   | 66.8   | 70.9 NM_001739.1     |
| 124.5  | 109.2  | 96.3   | 121.5 NM_007220.2    |
| 102.7  | 99.4   | 102.4  | 94 NM_001215.2       |
| 87.3   | 81.8   | 74.4   | 92 NM_005182.2       |
| 94.6   | 88.9   | 83.7   | 87.4 NM_001014435.1  |
| 82.2   | 96.8   | 96.7   | 99.5 NM_004056.4     |
| 98.1   | 88.6   | 95     | 98.9 NM_001216.1     |
| 2734.9 | 3014.3 | 2542.3 | 1752.8 NM_016289.2   |
| 179.9  | 181.6  | 161.9  | 150.3 NM_001031724.1 |
| 84.1   | 76.7   | 78.4   | 80.5 NM_001031724.1  |
| 99.9   | 98.6   | 100.9  | 89 NM_030925.1       |
| 1309.9 | 1116.6 | 1221.3 | 895.9 NM_020247.3    |
| 210.7  | 185.5  | 159    | 150.6 NM_012295.2    |
| 141.2  | 115    | 110.4  | 109.3 NM_138375.1    |
| 231.5  | 173    | 183.5  | 162.3 NM_031215.1    |
| 97.6   | 90.8   | 92     | 80.9 NM_031205.2     |
| 94.7   | 94.4   | 87.4   | 85.7 NM_001033677.1  |
| 96.2   | 85.3   | 88.8   | 87.7 NM_001033677.1  |

|       |       |       |                      |
|-------|-------|-------|----------------------|
| 102.6 | 89.5  | 85.5  | 85.8 NM_031204.2     |
| 90.2  | 93.5  | 94.6  | 91 NM_031204.2       |
| 85.8  | 97.5  | 89.4  | 78.8 NM_016366.1     |
| 88.5  | 76.2  | 81    | 88.5 NM_145200.2     |
| 90.1  | 81.1  | 79.7  | 86.2 NM_019855.3     |
| 101.9 | 104.8 | 100   | 94.5 NM_182527.1     |
| 71    | 79    | 70.1  | 71.9 NM_153770.1     |
| 108.4 | 99.9  | 100   | 82.6 NM_153768.1     |
| 99.4  | 94.2  | 94.4  | 97.7 NM_020925.1     |
| 86.3  | 82.9  | 80.9  | 77.9 NM_023035.1     |
| 89.2  | 87.1  | 79.5  | 83.3 NM_000068.2     |
| 144.4 | 116.6 | 111   | 131.7 NM_000718.1    |
| 86.6  | 85.3  | 76.9  | 89.2 NM_000719.4     |
| 111   | 108.9 | 89    | 102.1 NM_000720.1    |
| 96.5  | 88.6  | 98.3  | 89.6 NM_000721.2     |
| 86.1  | 86.6  | 76.5  | 85.6 NM_005183.2     |
| 89    | 81.4  | 82.9  | 78.7 NM_198397.1     |
| 85.5  | 97.6  | 85.9  | 98.1 NM_198396.1     |
| 95.3  | 88.8  | 80.5  | 76.5 NM_198376.1     |
| 95    | 86.6  | 82.1  | 77.4 NM_198397.1     |
| 107.4 | 100   | 103   | 97.7 NM_021098.2     |
| 96.7  | 87.4  | 82.3  | 97.8 NM_001005407.1  |
| 82    | 77.3  | 78.9  | 81.8 NM_021096.3     |
| 92.5  | 78.7  | 85.9  | 89.7 NM_001003406.1  |
| 78.9  | 79    | 79.3  | 80 NM_000069.1       |
| 98.8  | 87.2  | 81.6  | 93.1 NM_000722.2     |
| 98.8  | 93.9  | 88    | 85.2 NM_001005505.1  |
| 99.9  | 99.3  | 92    | 96.5 NM_001005505.1  |
| 289.2 | 357.9 | 393.5 | 320.8 NM_018398.2    |
| 99.9  | 96.9  | 100.3 | 104.8 NM_001005737.1 |
| 222.3 | 204.5 | 212   | 143.7 NM_172364.3    |
| 91    | 91    | 88.9  | 81.6 NM_000723.3     |
| 92.9  | 96.6  | 89.4  | 95.9 NM_199247.1     |
| 89.3  | 77.6  | 80.7  | 79.9 NM_199247.1     |
| 82.9  | 79.6  | 87    | 92.5 NM_199247.1     |
| 93.4  | 85.3  | 87.6  | 100.5 NM_201572.1    |
| 80.9  | 78.8  | 80.6  | 82.5 NM_201570.1     |
| 84.4  | 76.3  | 77.9  | 76.9 NM_201590.1     |
| 99.3  | 88.7  | 96.1  | 90.6 NM_201572.1     |
| 84.3  | 78.9  | 76.2  | 82.6 NM_000724.2     |
| 168.1 | 152.3 | 169.1 | 140.7 NM_000725.2    |
| 109   | 98.2  | 93.6  | 95.4 NM_001005747.1  |
| 79.8  | 75.3  | 72.1  | 76.9 NM_000726.2     |
| 82.7  | 83.6  | 83.3  | 82.8 NM_001005746.1  |
| 88.8  | 92.4  | 79.7  | 87.5 NM_000727.2     |
| 96    | 85.8  | 86.8  | 89.6 NM_006078.2     |
| 90.8  | 87.2  | 83.4  | 92.1 NM_006539.2     |
| 92.9  | 98.3  | 91.7  | 88.9 NM_014405.2     |
| 93.8  | 97.5  | 82.9  | 90.7 NM_145811.1     |
| 87.2  | 92.6  | 78.8  | 87.5 NM_014404.1     |



|        |        |        |                      |
|--------|--------|--------|----------------------|
| 90.7   | 84.6   | 77.2   | 89.8 NM_014404.1     |
| 96.3   | 89.6   | 90.1   | 80.8 NM_031897.2     |
| 99.7   | 84.1   | 88.9   | 89.6 NM_145814.1     |
| 82.8   | 84.3   | 80.2   | 78.2 NM_031897.2     |
| 76     | 81.7   | 77.1   | 74.3 NM_031896.3     |
| 110.3  | 111    | 102.9  | 109.4 NM_031895.4    |
| 1756.8 | 1344.2 | 1207   | 874.3 NM_014412.2    |
| 238.3  | 198.8  | 171.4  | 170.2 NM_001007214.1 |
| 77.2   | 81.8   | 77.6   | 76 NM_001007214.1    |
| 219    | 209.4  | 203.6  | 173.8 NM_004341.3    |
| 83.3   | 77.9   | 74.5   | 83.5 NM_183394.1     |
| 115.2  | 112.4  | 104    | 89.5 NM_183394.1     |
| 86.4   | 80.4   | 75.5   | 84.8 NM_003716.2     |
| 86.7   | 74.1   | 78.1   | 77 NM_017954.8       |
| 111.6  | 97.2   | 90.2   | 96.8 NM_017954.8     |
| 115.8  | 133.6  | 108    | 112.5 NM_205864.1    |
| 92.6   | 91.2   | 86.4   | 93.9 NM_004929.2     |
| 121.2  | 93.9   | 102.4  | 98.6 NM_007088.1     |
| 83.6   | 83.7   | 78.7   | 85.8 NM_001740.2     |
| 87.5   | 74.3   | 74.3   | 83 NM_001033952.1    |
| 101.1  | 88.2   | 94.7   | 93.4 NM_001033953.1  |
| 77.4   | 79.6   | 76.8   | 73.6 NM_001741.2     |
| 93.7   | 97.4   | 88.2   | 86.6 NM_000728.3     |
| 106.4  | 124.7  | 107    | 107.9 NM_020898.1    |
| 178.5  | 189    | 186.8  | 196.3 NM_005831.3    |
| 84.5   | 82.7   | 88.2   | 86.7 NM_001742.2     |
| 79.6   | 77.9   | 73.5   | 73.3 NM_005795.2     |
| 90.4   | 82.4   | 89.3   | 85.9 NM_033138.2     |
| 1565.5 | 1282.5 | 999.6  | 936.5 NM_006888.2    |
| 8604.4 | 5019.8 | 4535.2 | 4446.5 NM_001743.3   |
| 6290.7 | 4472.3 | 4224.6 | 2483.9 NM_005184.2   |
| 106.1  | 109.9  | 99.8   | 105.8 NM_005185.2    |
| 92.6   | 84.9   | 86.1   | 92.1 NM_001031733.1  |
| 118.1  | 127.9  | 107.8  | 99.3 NM_001031733.1  |
| 741.9  | 694.2  | 603.6  | 500.5 NM_033429.1    |
| 339.9  | 379.6  | 403.1  | 350.2 NM_001031733.1 |
| 87.8   | 83.6   | 82.9   | 84.2 NM_017422.3     |
| 87.8   | 89.6   | 91.4   | 98.5 NM_138705.2     |
| 103.6  | 96.2   | 84.6   | 90.2 NM_001017440.1  |
| 188.3  | 176    | 159.7  | 142.7 NM_031468.2    |
| 111.8  | 110.5  | 109.4  | 102.2 NM_031468.2    |
| 902.6  | 1066.4 | 806.3  | 820.8 NM_004343.2    |
| 101.5  | 96     | 97.8   | 106 NM_145046.2      |
| 423.5  | 597.2  | 413    | 376.1 NM_001219.2    |
| 673.1  | 719.7  | 674.5  | 579.8 NM_003656.3    |
| 165.7  | 152.1  | 124.3  | 119.8 NM_020397.2    |
| 80.8   | 73.8   | 77.6   | 78.9 NM_153498.2     |
| 90.6   | 85.3   | 81.5   | 93.1 NM_020397.2     |
| 95.9   | 91.8   | 97.4   | 98.9 NM_020439.2     |
| 93.4   | 82.6   | 66.5   | 76 NM_171825.1       |

|        |         |         |                       |
|--------|---------|---------|-----------------------|
| 96     | 98.2    | 94.1    | 87.1 NM_172078.1      |
| 157.8  | 171.5   | 147.5   | 137 NM_172080.1       |
| 116.9  | 101.7   | 108.4   | 106.2 XM_936314.1     |
| 87.1   | 80.1    | 80.7    | 80 NM_001220.3        |
| 156.5  | 126.6   | 117.5   | 112.7 NM_172115.1     |
| 145.8  | 119.3   | 104.7   | 119.9 NM_172128.1     |
| 102.9  | 90.6    | 92.9    | 95.6 NM_001221.2      |
| 91.2   | 74.6    | 80.5    | 88.2 NM_172115.1      |
| 203.1  | 209.9   | 227.9   | 155.6 NM_172169.1     |
| 107    | 132.7   | 108.4   | 112.5 NM_172172.1     |
| 94.6   | 80.2    | 80.3    | 91.4 NM_018584.4      |
| 91.6   | 86.1    | 83.3    | 89.9 NM_033259.2      |
| 84.8   | 80.5    | 75.8    | 81 NM_001744.3        |
| 91.1   | 93.7    | 85.5    | 97.4 NM_172207.1      |
| 101.8  | 93.1    | 94.3    | 88.1 NM_032294.2      |
| 97.1   | 112     | 97.5    | 98.9 NM_172215.1      |
| 86.4   | 91.1    | 82.4    | 89.7 NM_172215.1      |
| 103.4  | 178.7   | 214.1   | 125.8 NM_024046.2     |
| 190.4  | 334     | 247.5   | 189.9 NM_004345.3     |
| 491.6  | 553.5   | 538.2   | 380.8 NM_015447.1     |
| 220.2  | 128.3   | 138.4   | 142.4 NM_203459.1     |
| 170.3  | 152.8   | 142.7   | 137.3 NM_015215.1     |
| 75.3   | 78.2    | 87      | 76.7 NM_015099.2      |
| 104.1  | 100.3   | 98.7    | 113.9 NM_018448.2     |
| 99.7   | 97.7    | 92.7    | 90.6 XM_932503.1      |
| 159.8  | 131     | 132.8   | 118.1 NM_012298.1     |
| 495.5  | 557.2   | 427     | 506.6 NM_138793.2     |
| 4609.1 | 4750.2  | 4190.5  | 3572.5 NM_001024649.1 |
| 38084  | 39426.3 | 32247.2 | 32819.7 NM_006367.2   |
| 127    | 136.3   | 119.8   | 119.5 NM_006366.2     |
| 258.5  | 172.7   | 158.7   | 157.4 NM_001747.2     |
| 984.7  | 629.6   | 730.7   | 344.7 NM_005186.2     |
| 237    | 167.8   | 166.3   | 163.1 NM_023083.2     |
| 89.6   | 89.3    | 97.1    | 93.6 NM_023089.1      |
| 93.1   | 97.6    | 89.2    | 90 NM_021251.2        |
| 85.1   | 93      | 90.1    | 101.1 NM_023083.2     |
| 96.2   | 101.6   | 101.3   | 85.7 NM_007058.2      |
| 112.9  | 100     | 115.8   | 111.8 NM_144691.3     |
| 74.4   | 91.6    | 71      | 80.8 NM_144575.2      |
| 209.1  | 196.2   | 173.5   | 152.1 NM_001748.3     |
| 97.2   | 88.2    | 80.6    | 83.8 NM_212464.1      |
| 88.7   | 85.4    | 79.7    | 87.1 NM_212467.1      |
| 200.4  | 184.7   | 207.6   | 174.9 NM_000070.2     |
| 155.8  | 150.6   | 143.9   | 131 NM_173087.1       |
| 86.4   | 106     | 121.8   | 100.2 NM_004055.3     |
| 122.8  | 117.1   | 118.8   | 124.8 NM_014296.2     |
| 82.5   | 82.5    | 86.4    | 94 NM_016452.1        |
| 83.7   | 81.2    | 81.5    | 82 NM_016452.1        |
| 2482.8 | 1272    | 1144.8  | 978 NM_001003962.1    |
| 754.3  | 453     | 384.4   | 383.1 NM_001749.2     |

|        |        |        |                      |
|--------|--------|--------|----------------------|
| 94.6   | 103.9  | 95.2   | 93.2 NM_032330.1     |
| 92.5   | 95     | 100    | 96.8 NM_004058.2     |
| 116.9  | 133.3  | 146.2  | 95.5 NM_080590.1     |
| 86.8   | 78.5   | 87     | 82.6 NM_032606.2     |
| 88.4   | 78.6   | 86.8   | 86.2 NM_144647.2     |
| 85.1   | 86.6   | 83.2   | 91.5 NM_144647.2     |
| 104.4  | 84.2   | 85.4   | 87.1 NM_144647.2     |
| 2796   | 2185.1 | 1838.9 | 2117.9 NM_006136.2   |
| 86.2   | 88.2   | 81.9   | 96.4 NM_033328.2     |
| 199.8  | 168.6  | 162.6  | 179.2 NM_004930.2    |
| 167.4  | 157.1  | 145.8  | 132.1 NM_014550.3    |
| 120.2  | 138    | 143    | 113 NM_032415.2      |
| 139.4  | 157.7  | 157.7  | 146.3 NM_021209.3    |
| 99.1   | 91.7   | 92.7   | 91.9 NM_052819.1     |
| 78.7   | 76.5   | 74.8   | 75 NM_052819.1       |
| 90.6   | 78.8   | 80.8   | 93.5 NM_024110.2     |
| 185.1  | 288.8  | 251.3  | 251.3 NM_022162.1    |
| 97.2   | 94.9   | 91.4   | 97.5 NM_032587.2     |
| 689.8  | 670.2  | 731    | 644 NM_014959.1      |
| 2792.9 | 2655.2 | 2870.8 | 1340.5 NM_052813.2   |
| 433    | 332.6  | 286    | 308.6 NM_017632.1    |
| 2032.8 | 1217   | 1258.3 | 724.8 NM_014316.1    |
| 320.2  | 349.7  | 354.7  | 206.8 NM_013276.2    |
| 1879.7 | 1350.5 | 1153.4 | 837.8 NM_199141.1    |
| 101.9  | 121.1  | 110.5  | 108.6 NM_001751.4    |
| 421.1  | 350.3  | 368.8  | 261.5 NM_001014438.1 |
| 104.9  | 95.5   | 102.1  | 96.4 NM_004291.2     |
| 113.3  | 182.3  | 177.5  | 214.8 NM_006982.1    |
| 87.1   | 89.9   | 89.8   | 86.4 NM_018272.2     |
| 114.3  | 115.5  | 110.3  | 118.6 NM_178816.2    |
| 101.4  | 112.1  | 85.8   | 95 NM_201377.1       |
| 340.3  | 429.3  | 332.9  | 307.4 NM_007359.3    |
| 156.9  | 147.9  | 137.7  | 153.2 NM_138423.2    |
| 731.6  | 767.2  | 540.7  | 676.3 NM_177974.1    |
| 101.2  | 106.1  | 94.5   | 97.7 NM_144508.2     |
| 194    | 132.8  | 135.6  | 134.8 NM_170589.2    |
| 140.1  | 138.7  | 115    | 122 NM_022900.3      |
| 91.2   | 88.3   | 82.6   | 86.6 NM_003688.1     |
| 91.4   | 85.5   | 85.8   | 96.7 NM_020764.2     |
| 79.5   | 83.3   | 78.1   | 83.1 NM_020753.2     |
| 1015.6 | 686.5  | 602.6  | 484.9 NM_033294.2    |
| 80.3   | 72.9   | 73.8   | 81.5 NM_033292.2     |
| 601.7  | 482.3  | 430    | 353.3 NM_033294.2    |
| 101.6  | 114.1  | 113.2  | 107.2 NM_032974.2    |
| 87.3   | 93.5   | 89.6   | 93.1 NM_001230.4     |
| 93.3   | 85.1   | 85.7   | 88.1 NR_000035.2     |
| 94.9   | 84.5   | 84.6   | 86.6 NM_012114.1     |
| 146.8  | 171    | 155.8  | 133.2 NM_032982.2    |
| 3817.5 | 2918   | 2986.8 | 2572.3 NM_032982.2   |
| 417.1  | 399.9  | 301.5  | 324.5 NM_001224.3    |

|       |       |       |       |                |
|-------|-------|-------|-------|----------------|
| 650.5 | 450.1 | 468.9 | 320.3 | NM_032991.2    |
| 125.2 | 114   | 121.8 | 118.3 | NM_004346.3    |
| 89.2  | 75.3  | 75.2  | 79.7  | NM_033307.2    |
| 391.3 | 479.1 | 316.3 | 332.1 | NM_033306.2    |
| 101.9 | 95.3  | 84.4  | 84.7  | NM_001225.3    |
| 117.5 | 106   | 106   | 97.5  | NM_033306.2    |
| 90.2  | 95.8  | 94.6  | 94.1  | NM_004347.1    |
| 184.4 | 162.1 | 138.6 | 138.7 | NM_032992.2    |
| 113.9 | 100   | 102.1 | 107.2 | NM_001226.3    |
| 114   | 93.1  | 100.7 | 102.6 | NM_032992.2    |
| 197.4 | 161.5 | 154.8 | 144.5 | NM_033339.3    |
| 91.8  | 83.3  | 80.2  | 89    | NM_033338.4    |
| 85.1  | 79.8  | 77.9  | 80.3  | NM_033340.2    |
| 122.5 | 111.8 | 110   | 109.2 | NM_033356.2    |
| 89.4  | 89.7  | 95.5  | 92.9  | NM_001228.3    |
| 110.1 | 104.4 | 101.5 | 94.8  | NM_033355.3    |
| 122.4 | 123.3 | 123.9 | 108.5 | NM_033358.2    |
| 93.7  | 81.3  | 84.1  | 85.9  | NM_012115.2    |
| 116.9 | 103.5 | 106.9 | 100.4 | NM_001229.2    |
| 222.8 | 237.7 | 206.6 | 169.9 | NM_001229.2    |
| 91.8  | 84.3  | 83.2  | 88.5  | NM_001231.2    |
| 92    | 88.2  | 77.1  | 87.8  | NM_001232.1    |
| 89.6  | 86.3  | 83.3  | 89.8  | NM_000388.2    |
| 183.3 | 209.9 | 204.2 | 240.3 | NM_001750.4    |
| 96.1  | 96.2  | 91.6  | 89.2  | NM_001750.4    |
| 87.2  | 91.4  | 84.7  | 77.5  | NM_173061.1    |
| 222.6 | 307.6 | 263.7 | 293.9 | NM_001042442.1 |
| 88.1  | 78.1  | 87.8  | 81.6  | NM_015576.1    |
| 194   | 197.8 | 190.3 | 127.8 | NM_017766.2    |
| 85.1  | 78.7  | 78.1  | 84.6  | NM_001079843.1 |
| 87.7  | 81.6  | 80.7  | 79.2  | NM_001079843.1 |
| 692.1 | 700   | 585.7 | 629.7 | NM_001752.2    |
| 301.3 | 176.1 | 192.9 | 161.5 | NM_053054.2    |
| 93.4  | 113.6 | 96.8  | 96.5  | NM_054020.2    |
| 79.2  | 86.6  | 74.4  | 79.2  | NM_178019.1    |
| 92.5  | 90    | 84.8  | 89.6  | NM_198137.1    |
| 111.4 | 165   | 161.3 | 166.2 | NM_001753.3    |
| 111   | 129.2 | 114.1 | 107.8 | NM_001233.3    |
| 90.1  | 99.3  | 104.9 | 82.2  | NM_001233.3    |
| 103.3 | 85.9  | 79.3  | 102.6 | NM_001234.3    |
| 83.2  | 85.2  | 83.2  | 77.3  | NM_033337.1    |
| 239.4 | 266.6 | 210.7 | 203.9 | NM_006077.1    |
| 117.8 | 142.3 | 149.7 | 125.2 | NM_005093.3    |
| 91.9  | 90.9  | 90.7  | 90    | NM_005093.3    |
| 104   | 99.3  | 99.1  | 108.4 | NM_001032999.1 |
| 94.3  | 93.7  | 83.5  | 94.1  | NM_005187.4    |
| 110.5 | 105.9 | 106.3 | 116.8 | NM_005187.4    |
| 87.7  | 84    | 71.8  | 80.1  | NM_175931.1    |
| 1653  | 870.4 | 475.6 | 723   | NM_001755.2    |
| 100.2 | 79.4  | 74.2  | 89    | NM_001755.2    |

|        |       |       |                      |
|--------|-------|-------|----------------------|
| 243.1  | 173.5 | 209.6 | 212.5 NM_005188.2    |
| 182.2  | 299.1 | 320.1 | 198.7 NM_170662.3    |
| 92.2   | 95.4  | 94    | 87.9 NM_012116.2     |
| 708.6  | 474.3 | 519.6 | 352.6 NM_024814.1    |
| 96.1   | 83.9  | 87.8  | 87 NM_004352.1       |
| 69.9   | 80.8  | 74    | 69.2 NM_182511.2     |
| 122.1  | 115   | 114.1 | 107.1 NM_001039771.2 |
| 95.2   | 90    | 85.8  | 94.3 NM_080617.4     |
| 164.2  | 154.3 | 153.7 | 141.3 NM_001757.2    |
| 210.3  | 161.8 | 159.8 | 138.5 NM_001236.3    |
| 276    | 244   | 257.6 | 215.2 NM_032783.3    |
| 1709.2 | 915.7 | 935.3 | 524.6 NM_000071.1    |
| 97.1   | 82.2  | 79.5  | 87.8 NM_018491.3     |
| 99.1   | 89.5  | 84.5  | 78.7 NM_172003.2     |
| 1103.9 | 661.4 | 546.8 | 506.5 NM_001024916.2 |
| 143.2  | 130.6 | 109.5 | 146.3 NM_006807.3    |
| 88.4   | 91.5  | 90.2  | 94.2 NM_032647.2     |
| 82.7   | 79.7  | 82.6  | 90.6 NM_032647.2     |
| 583.2  | 315.1 | 282.7 | 217.8 NM_005189.1    |
| 155.8  | 146   | 132.9 | 119.5 NM_007276.3    |
| 866.8  | 972.6 | 1034  | 726.5 NM_016587.2    |
| 87.5   | 83.9  | 80.5  | 90.2 NM_007276.3     |
| 310.6  | 363.3 | 313.5 | 236.7 NM_003655.2    |
| 565.4  | 433.3 | 322.2 | 302.2 NM_012117.1    |
| 771.9  | 593.4 | 516.8 | 322.1 NM_014292.3    |
| 179.8  | 196.2 | 188.8 | 169.5 NM_175709.2    |
| 134.5  | 132.9 | 123.3 | 119.2 NM_020649.1    |
| 92     | 92.3  | 90.4  | 86.2 NM_015373.3     |
| 111.1  | 111.6 | 104.2 | 102.7 NM_017721.2    |
| 360.4  | 442.3 | 439   | 373.3 NM_032449.1    |
| 228.3  | 265   | 343.1 | 282.3 NM_133459.1    |
| 117.3  | 143.8 | 145   | 115 NM_004059.3      |
| 232.7  | 215   | 197.1 | 188.8 NM_001008661.1 |
| 147.3  | 134.6 | 139.3 | 145.7 NM_001008661.1 |
| 196.2  | 164.7 | 159.4 | 130.9 NM_001296.3    |
| 99.8   | 97.3  | 85.5  | 95 NM_080667.3       |
| 88.9   | 85.6  | 75.3  | 88.8 NM_152389.2     |
| 83.2   | 80.7  | 68.1  | 77.9 NM_152389.2     |
| 107.5  | 91.5  | 93.9  | 93.4 NM_145020.2     |
| 107.7  | 100.8 | 91.2  | 103.8 NM_152775.1    |
| 97.7   | 97.1  | 96.9  | 91.2 NM_173510.1     |
| 1087.6 | 950.7 | 952.7 | 544.8 NM_144716.1    |
| 87.1   | 90.8  | 89.2  | 90.8 NM_024584.2     |
| 231.9  | 188.1 | 178.1 | 166.1 NM_145265.2    |
| 84.6   | 86.3  | 81.6  | 82.2 NM_194300.1     |
| 89.7   | 89.7  | 88    | 92.8 NM_144719.2     |
| 897    | 833.9 | 877.9 | 800.7 NM_022757.3    |
| 746.9  | 790.3 | 613.7 | 718 NM_052857.2      |
| 108.2  | 106.5 | 100.1 | 104.4 NM_152500.1    |
| 97.4   | 95.3  | 100.1 | 95.2 NM_206886.2     |

|        |        |        |                      |
|--------|--------|--------|----------------------|
| 369.1  | 350.7  | 348    | 161.6 NM_022778.2    |
| 100.6  | 111.9  | 104.2  | 93.5 NM_014008.1     |
| 2412.3 | 2375.6 | 2213.6 | 1902.9 NM_199342.1   |
| 115.5  | 110.9  | 126.4  | 94.9 NM_152499.1     |
| 281.4  | 242.7  | 239.9  | 254.7 NM_001031708.1 |
| 892.5  | 851.3  | 857.5  | 514.9 NM_018246.1    |
| 96.2   | 103    | 107.2  | 102.3 NM_152492.1    |
| 978.7  | 1078.3 | 1230.2 | 844 NM_015439.2      |
| 124.2  | 115.3  | 108.5  | 103.2 NM_024296.3    |
| 98.7   | 94.2   | 94.1   | 92.7 NM_031455.2     |
| 214.2  | 177.6  | 157.3  | 149.7 NM_001080791.1 |
| 1953.9 | 1498.2 | 1427.6 | 934.3 NM_052849.2    |
| 96.7   | 95.8   | 103.5  | 90.3 NM_182791.1     |
| 88.6   | 89.3   | 82.6   | 87.3 NM_080654.2     |
| 338.9  | 344.9  | 356.7  | 291.5 NM_030771.1    |
| 1554.8 | 1658.2 | 1387.8 | 1047.1 NM_030771.1   |
| 92.4   | 81.3   | 79.3   | 87.6 NM_178173.2     |
| 82.1   | 83.7   | 83.3   | 90.2 NM_182628.1     |
| 89.8   | 83.3   | 83.9   | 90.2 NM_182496.1     |
| 142.9  | 102    | 99.7   | 105.6 NM_207406.1    |
| 114    | 114.7  | 100.7  | 101.5 NM_207406.1    |
| 93.2   | 100.2  | 88.8   | 94.1 NM_016122.1     |
| 178.4  | 226.7  | 218.1  | 224.2 NM_016122.1    |
| 74     | 80.7   | 81.7   | 85.3 NM_144681.1     |
| 155.7  | 137.3  | 137.2  | 111.8 NM_144609.1    |
| 725.6  | 622.1  | 535.9  | 360.9 NM_016360.2    |
| 384.3  | 444.4  | 424.8  | 426.3 NM_138363.1    |
| 89.2   | 79.6   | 81.3   | 90.5 NM_145036.2     |
| 82.2   | 81.9   | 76.6   | 78.8 NM_145036.2     |
| 243.2  | 228.1  | 202.9  | 209.4 NM_020198.1    |
| 88.7   | 86.8   | 85.5   | 92.1 NM_024768.1     |
| 403.1  | 413.8  | 354.8  | 305.2 NM_017748.3    |
| 637.4  | 492.2  | 407.6  | 376.9 NM_138443.2    |
| 958.5  | 751.7  | 822.3  | 613.4 NM_174908.2    |
| 79.3   | 80.3   | 78.5   | 81.6 NM_178335.1     |
| 217.2  | 216.6  | 198.6  | 136.5 NM_024661.2    |
| 90.7   | 85.6   | 87.6   | 98.1 NM_144718.2     |
| 717.3  | 543.7  | 429.9  | 577 NM_016053.1      |
| 82.7   | 84.8   | 99.5   | 79.7 NM_032600.2     |
| 184    | 196.7  | 182.8  | 150.5 NM_032141.2    |
| 1839.6 | 1564.3 | 1566.1 | 941.9 NM_001040431.1 |
| 86.8   | 95     | 99.7   | 99.7 NM_198082.2     |
| 785.2  | 525.7  | 409.9  | 464.5 NM_001017928.2 |
| 2986.5 | 3022.7 | 2429.6 | 2565.9 NM_014167.1   |
| 1462.6 | 935    | 864.9  | 636.9 NM_005436.2    |
| 92.3   | 92.4   | 89.9   | 98.5 NM_178499.2     |
| 101.6  | 92.7   | 95.4   | 103.4 NM_201435.2    |
| 91.4   | 87.9   | 81.5   | 85.3 NM_032573.3     |
| 103.5  | 97.5   | 81.6   | 91.8 NM_152591.1     |
| 94.4   | 83.7   | 88.9   | 94.7 NM_207311.1     |

|        |        |        |                      |
|--------|--------|--------|----------------------|
| 74.6   | 80.5   | 79.5   | 74.6 NM_033124.2     |
| 135.6  | 149.7  | 152.4  | 145.8 NM_001012506.1 |
| 93.2   | 100    | 86.3   | 92.2 NM_181645.2     |
| 96.8   | 97.6   | 91.4   | 91.4 NM_025214.1     |
| 91.3   | 90.9   | 90.5   | 101.1 NM_015621.2    |
| 93     | 92     | 89.3   | 90.5 NM_001026383.1  |
| 77.4   | 81.9   | 82.8   | 76.4 NM_001026383.1  |
| 92.4   | 89     | 85.7   | 91.4 NM_145023.4     |
| 89.1   | 81.7   | 87     | 83 NM_031290.1       |
| 212    | 250    | 216.7  | 191.8 NM_022903.2    |
| 3649   | 3795.3 | 4223.2 | 2787 NM_015933.2     |
| 101.1  | 84.1   | 77.8   | 90.1 NM_138770.1     |
| 112.1  | 88.1   | 88.4   | 99.5 NM_207310.1     |
| 95.4   | 103    | 105.9  | 82.3 NM_174931.1     |
| 552.5  | 329.4  | 271.6  | 356.7 NM_019083.1    |
| 388.2  | 472.2  | 423.6  | 369.7 NM_032358.2    |
| 92.1   | 101.8  | 88.5   | 96.6 NM_032040.1     |
| 91.2   | 84     | 78.7   | 82 NM_001080433.1    |
| 98     | 91.6   | 97.4   | 92.9 NM_015603.1     |
| 2224.1 | 1801.6 | 1732.3 | 1489.7 NM_021825.3   |
| 93.2   | 93.8   | 95.3   | 102 NM_018318.3      |
| 86     | 78.5   | 73.3   | 81.7 NM_019052.2     |
| 95.3   | 91.9   | 84.5   | 88.2 NM_005893.1     |
| 88.1   | 82.2   | 86.9   | 80.8 NM_000729.3     |
| 98.1   | 94.2   | 87.2   | 93.1 NM_000730.2     |
| 84.2   | 97.5   | 89.5   | 92 NM_176875.2       |
| 93     | 79.9   | 83.1   | 78.6 NM_002981.1     |
| 81.3   | 81.3   | 78.4   | 80.5 NM_002986.2     |
| 83     | 106.9  | 90.7   | 85.6 NM_005408.2     |
| 86.4   | 86.5   | 87.6   | 87.4 NM_004167.3     |
| 85.8   | 86     | 85.4   | 83.9 NM_032965.2     |
| 89.1   | 93.1   | 89.8   | 89.5 NM_004590.2     |
| 92.2   | 81.8   | 79.3   | 89.5 NM_002987.2     |
| 80.9   | 82.7   | 71.8   | 79.8 NM_002988.2     |
| 104.2  | 102.7  | 91.9   | 93.2 NM_006274.2     |
| 149.7  | 182.1  | 134.8  | 139.4 NM_002982.3    |
| 98.6   | 113.2  | 89.4   | 100.5 NM_004591.1    |
| 94.4   | 90.1   | 88.3   | 95.1 NM_002989.2     |
| 136.1  | 125.3  | 138.9  | 110.7 NM_002990.3    |
| 177.2  | 185.3  | 186.4  | 148.6 NM_005064.3    |
| 841.8  | 664.6  | 723.3  | 419.4 NM_005064.3    |
| 81.5   | 81.4   | 83.7   | 79.2 NM_002991.2     |
| 91.6   | 86.8   | 81.1   | 87.5 NM_148888.1     |
| 87.8   | 72.3   | 83.7   | 83.7 NM_005624.2     |
| 92.2   | 106.7  | 93.9   | 84 NM_006072.4       |
| 90.3   | 87     | 97.1   | 100.1 NM_006664.2    |
| 91.2   | 89.2   | 81.4   | 85.1 NM_148672.2     |
| 100.5  | 99.3   | 91.5   | 100.3 NM_002983.1    |
| 110.9  | 95     | 88.3   | 104 NM_021006.4      |
| 169.3  | 161.2  | 159    | 189.1 NM_001001437.3 |

|         |        |        |                      |
|---------|--------|--------|----------------------|
| 86.9    | 81.8   | 86.6   | 97.5 NM_001001435.2  |
| 4471.3  | 2558.1 | 2883.9 | 1263 NM_002985.2     |
| 81.9    | 83.7   | 85.8   | 86.8 NM_006273.2     |
| 99.2    | 94.6   | 85.1   | 91.5 NM_005623.2     |
| 116.9   | 111    | 101    | 103.8 NM_031443.3    |
| 153.1   | 164.1  | 171.8  | 162.8 NM_001029835.1 |
| 1148.1  | 1443.7 | 1642   | 750.8 NM_031443.3    |
| 993.2   | 328    | 314.8  | 300.2 NM_003914.2    |
| 1883.5  | 949.9  | 617.9  | 613.3 NM_001237.2    |
| 245.7   | 187.8  | 131.5  | 139.7 NM_031966.2    |
| 1998    | 1002.5 | 957.4  | 734.3 NM_182851.1    |
| 98.2    | 86.1   | 91.4   | 101.3 NM_182852.1    |
| 92.4    | 88.6   | 85.5   | 89.2 NM_182851.1     |
| 928.3   | 537.9  | 455.5  | 350.6 NM_021178.2    |
| 2388.3  | 1017.3 | 961.7  | 727.9 NM_004701.2    |
| 90.7    | 84.4   | 79.2   | 85 NM_033031.1       |
| 84.7    | 89.2   | 82     | 94.4 NM_033670.2     |
| 97.4    | 102.6  | 86.8   | 95.8 NM_033031.1     |
| 772.6   | 665.4  | 615.1  | 476.2 NM_005190.3    |
| 963.5   | 858.6  | 626.8  | 808.6 NM_001013399.1 |
| 345.9   | 208.4  | 192.2  | 229.7 NM_005190.3    |
| 278.9   | 186.7  | 165    | 122.6 NM_053056.1    |
| 93.2    | 83.3   | 97.7   | 93.2 NM_001759.2     |
| 10569.5 | 8586.1 | 7850   | 3518.9 NM_001760.2   |
| 98.1    | 104.2  | 93.6   | 89.4 NM_012142.2     |
| 102.6   | 101.4  | 107.9  | 96.3 NM_037370.1     |
| 3038    | 2418.8 | 2419.1 | 1861 NM_037370.1     |
| 731.1   | 628.6  | 615.2  | 425.3 NM_001238.1    |
| 107     | 81.7   | 90.1   | 89 NM_001238.1       |
| 97.3    | 83.9   | 86.6   | 87.7 NM_057749.1     |
| 1234.2  | 909    | 656.4  | 829.2 NM_057735.1    |
| 1219    | 643.5  | 593.6  | 330.4 NM_001761.1    |
| 1084    | 819.2  | 978.5  | 851.2 NM_199246.1    |
| 79.7    | 82.3   | 82.7   | 89.9 NM_199246.1     |
| 173.4   | 173.5  | 186.1  | 175.1 NM_004354.1    |
| 258.9   | 194.6  | 164.7  | 145.3 NM_001239.2    |
| 7880.7  | 6879.3 | 5667.5 | 3188.9 NM_006835.2   |
| 106.4   | 83.2   | 78.1   | 80.9 NM_019084.2     |
| 996.9   | 773.1  | 674    | 686.8 NM_003858.2    |
| 599.1   | 751.1  | 838    | 588.8 NM_020307.2    |
| 114.9   | 119.2  | 128.3  | 110.8 NM_030937.3    |
| 115.8   | 118.1  | 106.1  | 99 NM_001240.2       |
| 110.2   | 100.5  | 89.5   | 106.6 NM_001241.2    |
| 271.4   | 310.2  | 240.9  | 267.7 NM_001241.2    |
| 97.3    | 96.8   | 83.3   | 94.1 NM_058241.1     |
| 1104.4  | 1083.9 | 1117.9 | 571.7 NM_145012.3    |
| 343.7   | 389.1  | 344.6  | 315.8 NM_152523.1    |
| 116.3   | 106.6  | 101.4  | 120.1 NM_020739.2    |
| 538.9   | 593.6  | 493.6  | 525.5 NM_004748.3    |
| 312.5   | 313    | 252.7  | 265.9 NM_001295.2    |



|         |         |         |                       |
|---------|---------|---------|-----------------------|
| 94.4    | 88.7    | 98      | 82.4 NM_016602.1      |
| 93.1    | 94.3    | 83      | 92.2 NM_000647.4      |
| 233.3   | 147.7   | 129.1   | 133.7 NM_000647.4     |
| 93.4    | 96.9    | 95.7    | 94 NM_178329.1        |
| 84.2    | 88.3    | 78.4    | 89.7 NM_001837.2      |
| 82.2    | 79.8    | 76.6    | 80.9 NM_005508.4      |
| 85.3    | 87.2    | 93      | 89 NM_000579.2        |
| 10945.3 | 14244.1 | 18412.4 | 15212 NM_031409.2     |
| 83.2    | 84.1    | 82.1    | 87 NM_031409.2        |
| 82.1    | 90.2    | 90.7    | 94.8 NM_001838.2      |
| 88.5    | 92.5    | 80.1    | 87.7 NM_005201.2      |
| 95.3    | 81.8    | 84.8    | 89.1 NM_031200.1      |
| 77      | 72      | 80.7    | 76.1 NM_031200.1      |
| 412.1   | 340.1   | 402     | 201.6 NM_012119.3     |
| 187.9   | 159.9   | 152.5   | 155.5 NM_178432.1     |
| 95      | 93.6    | 79.3    | 85.3 NM_016557.2      |
| 103.4   | 90.3    | 99.3    | 90.9 NM_178445.1      |
| 93.4    | 87.8    | 82.4    | 100 NM_178445.1       |
| 88.1    | 86.6    | 92.8    | 84.3 NM_003965.4      |
| 309.8   | 250.2   | 221.6   | 182.1 NM_012118.2     |
| 364.3   | 252.1   | 263.3   | 194.8 NM_005125.1     |
| 203.1   | 192.9   | 227.4   | 150.4 NM_005125.1     |
| 3709    | 3264.5  | 2101.4  | 2026.5 NM_006431.2    |
| 281.9   | 235.2   | 287.8   | 177.8 NM_001008800.1  |
| 3390.1  | 2329.7  | 1880.8  | 1398 NM_005998.3      |
| 412.7   | 311.2   | 280.6   | 238.9 NM_006430.2     |
| 157.7   | 134.7   | 130.6   | 116.7 NM_012073.3     |
| 997.2   | 628.3   | 436.9   | 440.8 NM_001762.3     |
| 1082.7  | 628.3   | 483.3   | 533.6 NM_001009186.1  |
| 1371.5  | 997.1   | 706.6   | 818.5 NR_003110.2     |
| 166.2   | 150.8   | 140.1   | 141.6 NM_006584.2     |
| 6622.2  | 5771.5  | 5063.6  | 3462.4 NM_001009570.1 |
| 572.6   | 565     | 561.6   | 453.6 NM_006429.2     |
| 1927.6  | 1526.6  | 1166.6  | 1093.8 NM_006429.2    |
| 7975.9  | 4649.3  | 3718.8  | 4116.6 NM_006585.2    |
| 103.6   | 108.5   | 98.9    | 109.3 NM_133493.1     |
| 277.9   | 1853.9  | 1555.3  | 726.4 NM_001040021.1  |
| 118.7   | 270.8   | 228.3   | 201.5 NM_000591.1     |
| 340.1   | 345.5   | 290.1   | 259.3 NM_004357.3     |
| 3827.6  | 3132.7  | 2805.6  | 1752.5 NM_139030.3    |
| 141.6   | 126.1   | 122.6   | 116.5 NM_139030.2     |
| 95      | 82.3    | 81.1    | 92.3 NM_007053.2      |
| 88.9    | 99.1    | 90.4    | 83.1 NM_203416.1      |
| 96.1    | 97.1    | 82.3    | 93.2 NM_004244.3      |
| 152.1   | 131.5   | 120.4   | 131.2 NM_006016.3     |
| 89.8    | 82.2    | 74.6    | 83.2 NM_207397.1      |
| 87.7    | 86.1    | 86.1    | 86.9 NM_020406.1      |
| 94.9    | 86.1    | 81.4    | 97.8 NM_005582.1      |
| 176.6   | 127.3   | 121.7   | 123.3 NM_001770.3     |
| 87.1    | 80.6    | 81.2    | 78.8 NM_001763.1      |

|        |        |        |                      |
|--------|--------|--------|----------------------|
| 92.5   | 86.7   | 92.8   | 90 NM_001764.1       |
| 105.5  | 101.8  | 94.3   | 94.2 NM_001765.1     |
| 324.3  | 394.9  | 204.5  | 208.2 NM_001766.2    |
| 92.7   | 102.5  | 85.5   | 96.2 NM_030893.1     |
| 87.8   | 91.9   | 80.7   | 83 NM_001042586.1    |
| 90.7   | 85.9   | 81     | 84.3 NM_001767.2     |
| 110.9  | 107.9  | 109.6  | 85.4 NM_001004196.1  |
| 76.5   | 74.5   | 74.2   | 75.8 NM_001004196.1  |
| 103.8  | 79.3   | 80.1   | 85.2 NM_138940.2     |
| 91.6   | 88.7   | 94.5   | 81.8 NM_001008784.1  |
| 89.9   | 91.4   | 85.7   | 91.6 NM_015717.1     |
| 375.3  | 259.5  | 238.7  | 214.4 NM_021155.2    |
| 86.5   | 87.9   | 83.2   | 87.9 NM_001771.1     |
| 85.9   | 78.6   | 71.2   | 83.3 NM_006566.1     |
| 96.1   | 160.2  | 224.4  | 170 NM_013230.2      |
| 183.4  | 153.1  | 135.5  | 117.9 NM_016382.2    |
| 120.2  | 96.2   | 99.7   | 100.8 NM_198053.1    |
| 110    | 97.5   | 101.3  | 105.4 NM_198053.1    |
| 92.4   | 89.8   | 87     | 81 NM_020404.2       |
| 102    | 96.4   | 90.8   | 91.8 NM_014143.2     |
| 422.7  | 475.7  | 392.2  | 383.9 NM_001024736.1 |
| 97.2   | 113.2  | 108    | 103.8 XM_945867.1    |
| 123.4  | 110    | 110.3  | 114.5 NM_012120.1    |
| 1466.3 | 1053   | 1026.6 | 615.9 NM_006110.1    |
| 181.6  | 299.2  | 242.3  | 249.7 NM_007261.2    |
| 161.6  | 146    | 159.5  | 106.4 NM_006678.2    |
| 87     | 94.5   | 93     | 93.3 NM_181449.1     |
| 89     | 100.7  | 89.7   | 87.5 NM_174892.1     |
| 484.7  | 687.6  | 612.2  | 257.6 NM_139018.2    |
| 130.9  | 234.8  | 174.9  | 147 NM_145273.2      |
| 83.4   | 88.8   | 82.1   | 93.3 NM_014880.3     |
| 424.5  | 281.1  | 240.1  | 187.6 NM_016579.2    |
| 1098   | 1016.4 | 789.7  | 607.9 NM_001772.2    |
| 92.8   | 98.1   | 84.3   | 87.5 NM_213602.1     |
| 96.3   | 94.8   | 92.4   | 86.4 NM_001773.2     |
| 85     | 83.7   | 79.5   | 84.2 NM_001773.1     |
| 88.6   | 91.1   | 90.7   | 87.4 NM_001773.2     |
| 76.8   | 81.3   | 81.3   | 75.1 NM_001025109.1  |
| 250.9  | 463.7  | 307.9  | 347.2 NM_001001548.1 |
| 476.5  | 556.5  | 471.6  | 539.3 NM_001001548.1 |
| 84     | 80.4   | 91.2   | 83.3 NM_001001547.1  |
| 1068.9 | 596.9  | 635.8  | 431.1 NM_001774.1    |
| 1353.4 | 733.6  | 722.2  | 784 NM_001774.1      |
| 166    | 122.7  | 122.7  | 116.5 NM_001775.2    |
| 86.7   | 82.5   | 84.6   | 88.5 NM_000732.4     |
| 92.1   | 89.7   | 86.2   | 89.7 NM_001040651.1  |
| 96.2   | 101.7  | 92.1   | 99.5 NM_000733.2     |
| 131.6  | 107.7  | 99.3   | 93.4 NM_012099.1     |
| 87.3   | 79.4   | 81.4   | 88.4 NM_000073.1     |
| 176.2  | 169.6  | 134    | 140.8 NM_000616.2    |

|         |         |         |                       |
|---------|---------|---------|-----------------------|
| 87.2    | 92.6    | 82.7    | 88.6 NM_152854.2      |
| 107.2   | 125.8   | 109.6   | 119.7 NM_001250.3     |
| 90.2    | 86.1    | 85.3    | 85.6 NM_000074.2      |
| 103.3   | 107.3   | 112.2   | 115.4 NM_000610.3     |
| 205     | 252.2   | 200.9   | 226.1 NM_001001392.1  |
| 2135.1  | 2028.8  | 1937.9  | 1438.1 NM_001001390.1 |
| 1064    | 928.2   | 794.8   | 784.4 NM_172358.1     |
| 471.6   | 489.9   | 440.1   | 426.9 NM_001025080.1  |
| 99.6    | 98.1    | 92      | 91.4 NM_001777.3      |
| 93.3    | 91.1    | 87.6    | 79.1 NM_001778.2      |
| 91.9    | 96      | 89.2    | 83.5 NM_014207.2      |
| 475.9   | 3959.8  | 2995.3  | 2247.5 NM_001803.2    |
| 238.3   | 193.7   | 181.7   | 168.9 NM_000560.2     |
| 287.6   | 250.1   | 181.7   | 204.1 NM_000560.2     |
| 220.5   | 186.4   | 146.3   | 160.6 NM_000574.2     |
| 717.3   | 397.2   | 307.3   | 341.3 NM_001779.1     |
| 96.7    | 102.6   | 97.6    | 90.3 NM_203329.1      |
| 98.1    | 95.1    | 85.2    | 85.6 NM_203331.1      |
| 87.9    | 88.6    | 76      | 77.3 NM_005894.1      |
| 116.3   | 128.8   | 124.2   | 110.1 NM_006725.2     |
| 351.2   | 364.9   | 248.4   | 277.9 NM_001780.3     |
| 580.1   | 1287.1  | 1152.5  | 1035.6 NM_001251.2    |
| 217     | 549.7   | 498     | 443.9 NM_001251.2     |
| 88.2    | 90.6    | 86.3    | 86.8 NM_001781.1      |
| 98.6    | 96      | 88.7    | 92.6 NM_006137.6      |
| 100.6   | 98.2    | 96.2    | 102.6 NM_001782.1     |
| 816.3   | 719.3   | 646.5   | 648.9 NM_001025158.1  |
| 98      | 92.3    | 91.9    | 84.2 NM_001025159.1   |
| 319.1   | 227.2   | 225.5   | 248.3 NM_004355.2     |
| 95.3    | 92.7    | 95.1    | 95.9 NM_001783.2      |
| 109.6   | 113.5   | 106.1   | 106.2 NM_001783.2     |
| 80.9    | 87.4    | 86      | 80.1 NM_021601.3      |
| 158.4   | 143.3   | 128.8   | 107.3 NM_001039933.1  |
| 131     | 114.9   | 104.2   | 108.7 NM_021602.1     |
| 108.5   | 92      | 87.4    | 88 NM_000626.1        |
| 88.6    | 95.7    | 90.6    | 85.8 NM_005191.2      |
| 16319.6 | 11597.9 | 11100.7 | 5857.1 NM_004356.3    |
| 178.9   | 242     | 226.3   | 201 NM_001024844.1    |
| 120.9   | 120.5   | 121.9   | 116.4 NM_002231.3     |
| 200.4   | 150.6   | 131.6   | 142.7 NM_004233.2     |
| 132.8   | 98.4    | 97.9    | 107.5 NM_004233.3     |
| 85.1    | 98.9    | 96.9    | 99.2 NM_003874.1      |
| 101.8   | 139.1   | 126.7   | 121.9 NM_175862.2     |
| 110.5   | 359.7   | 294     | 204 NM_175862.2       |
| 102.3   | 93.1    | 93.3    | 99.9 NM_006889.2      |
| 87.1    | 86.4    | 80.3    | 85.3 NM_001768.4      |
| 84.6    | 89.9    | 81.2    | 90.1 NM_001768.4      |
| 80.5    | 81.9    | 94.9    | 79.9 NM_171827.2      |
| 80.7    | 80.8    | 85.1    | 80.3 NM_004931.3      |
| 87.8    | 84.7    | 91      | 97.2 NM_172213.1      |

|         |        |        |        |                |
|---------|--------|--------|--------|----------------|
| 94      | 92.1   | 97.7   | 90.8   | NM_172101.1    |
| 95      | 88.3   | 82.2   | 83.4   | NM_172099.1    |
| 106.4   | 99     | 111.5  | 109.2  | NM_001769.2    |
| 86.3    | 86.1   | 76.6   | 86.3   | NM_198196.1    |
| 105.7   | 85.5   | 83.9   | 84.5   | NM_005816.4    |
| 123.2   | 129.3  | 95     | 109.9  | NM_001784.3    |
| 1141    | 619.3  | 709.3  | 363.1  | NM_078481.2    |
| 384     | 359    | 363.2  | 305.4  | NM_002414.3    |
| 308.7   | 315.2  | 276.7  | 213.2  | NM_134446.2    |
| 2387.1  | 2549.5 | 2380.3 | 1186.3 | NM_134445.2    |
| 151.3   | 114.9  | 122.9  | 109.2  | NM_001785.1    |
| 105.9   | 109.1  | 98     | 107.2  | NM_030911.1    |
| 374.9   | 327.3  | 338.9  | 272.3  | NM_138477.2    |
| 2915.5  | 3888.1 | 5741.1 | 3157.6 | NM_138477.2    |
| 91.8    | 90.2   | 94.9   | 99.5   | NM_003672.2    |
| 101.5   | 91.9   | 92     | 97.7   | NM_033313.1    |
| 91.1    | 81.5   | 85.4   | 84.8   | NM_033312.1    |
| 93.7    | 98.5   | 97     | 115.9  | NM_033313.1    |
| 133.6   | 135.4  | 134.6  | 130.9  | NM_033331.1    |
| 332     | 353.7  | 289.2  | 238.3  | NM_033331.1    |
| 155.6   | 1541.5 | 1533   | 978.5  | NM_003671.2    |
| 1402.6  | 1369.1 | 977.8  | 799.4  | NM_001078645.1 |
| 711     | 561    | 549.6  | 387.1  | NM_003903.2    |
| 2309    | 1665.7 | 1675.8 | 1098   | NM_001078645.1 |
| 999.2   | 483.1  | 524.4  | 323.8  | NM_033379.2    |
| 198.1   | 138.6  | 132.9  | 115.9  | NM_001786.2    |
| 8821.8  | 4493.8 | 4229.4 | 1939.4 | NM_001255.1    |
| 1117.6  | 899    | 744.5  | 709.7  | NM_004661.2    |
| 687     | 454.1  | 342.4  | 320.7  | NM_001789.2    |
| 145.5   | 182.6  | 155    | 139.5  | NM_001789.2    |
| 612.5   | 333.7  | 287.6  | 254.2  | NM_004358.3    |
| 354.7   | 217.8  | 211.6  | 188.6  | NM_001790.3    |
| 265.1   | 200.6  | 221.1  | 167.3  | NM_001790.3    |
| 314.5   | 204    | 199.2  | 167.8  | NM_001790.3    |
| 1708.6  | 1059.6 | 1012.9 | 814.4  | NM_139286.3    |
| 105.7   | 84.9   | 87     | 83.7   | NM_001256.2    |
| 82      | 82     | 74.7   | 81.4   | NM_033487.1    |
| 103.9   | 89.6   | 94     | 90.4   | NM_033531.1    |
| 269.7   | 343.2  | 340.5  | 285.5  | NM_031267.1    |
| 401.5   | 388.9  | 390.3  | 381.1  | NM_003718.2    |
| 1176.2  | 1670.6 | 1880.8 | 1034   | NM_015076.3    |
| 297.3   | 194.7  | 161.3  | 157.7  | NM_004359.1    |
| 10147.2 | 8948.1 | 9193.7 | 5049.2 | NM_007065.3    |
| 91      | 96.4   | 83.6   | 87.4   | NM_017913.2    |
| 1330.9  | 1181.6 | 1088.6 | 930.6  | NM_015891.2    |
| 79.8    | 90.1   | 86     | 81.5   | NM_044472.1    |
| 94.5    | 88.8   | 83.8   | 88     | NM_001039802.1 |
| 285.7   | 217    | 180.8  | 158.3  | NM_044472.1    |
| 423.1   | 329.9  | 269.8  | 336.5  | NM_001791.2    |
| 135.9   | 94.8   | 84.1   | 90.2   | NM_014826.3    |

|        |        |        |                      |
|--------|--------|--------|----------------------|
| 88.3   | 77.5   | 72     | 85.1 NM_003607.2     |
| 116.1  | 136    | 140.2  | 155.9 NM_006035.2    |
| 78.4   | 77.5   | 80.8   | 82.7 NM_017525.1     |
| 98.4   | 97     | 81.3   | 95.8 NM_007061.3     |
| 124.7  | 101    | 100.1  | 105.9 NM_007061.3    |
| 112.3  | 97.7   | 99.2   | 97.5 NM_006779.2     |
| 197.1  | 119.2  | 124.7  | 112.5 NM_006449.3    |
| 615.8  | 881    | 936.1  | 493.4 NM_012121.4    |
| 92     | 98.5   | 85.1   | 86.2 NM_145057.2     |
| 444    | 270.8  | 211.4  | 241.6 NM_001038707.1 |
| 157.7  | 113.8  | 126.2  | 108.7 NM_020239.2    |
| 148    | 126.6  | 126.1  | 126.9 NM_020240.1    |
| 675.3  | 711.1  | 650.3  | 692.9 NM_001038702.1 |
| 1778.1 | 1837.2 | 1736.4 | 1216.9 NM_003504.3   |
| 440.8  | 431.6  | 412.2  | 440.4 NM_001253.2    |
| 140.6  | 125.1  | 116.8  | 124.9 NM_001254.3    |
| 263.4  | 302    | 245.9  | 233.9 NM_003503.2    |
| 97.9   | 91.3   | 100.2  | 94.7 NM_024529.3     |
| 264.2  | 285.4  | 293.5  | 195.7 NM_080476.4    |
| 175.7  | 163.2  | 150.3  | 123 NM_145697.1      |
| 566.4  | 323.2  | 233    | 239.7 NM_152562.2    |
| 242.4  | 153.3  | 147.6  | 177.5 NM_031299.3    |
| 122.6  | 105.4  | 102    | 101.4 NM_145701.1    |
| 577.8  | 326    | 302.9  | 221.2 NM_017955.2    |
| 423.5  | 238.2  | 226.9  | 162.5 NM_017955.2    |
| 2655.9 | 1497.6 | 1411.1 | 868.4 NM_080668.2    |
| 3325.2 | 1935.2 | 2032.2 | 1223.2 NM_145810.1   |
| 87.1   | 81.3   | 88.4   | 87.9 NM_031942.3     |
| 419.5  | 241.9  | 222.8  | 203.4 NM_018719.2    |
| 745.8  | 430.6  | 370    | 337.2 NM_018101.2    |
| 108.4  | 106.8  | 103.1  | 102.1 NM_178181.1    |
| 94.8   | 85     | 87.5   | 91.6 NM_022842.3     |
| 86.7   | 90     | 82.9   | 78.4 NM_178181.1     |
| 86.8   | 85.1   | 69.9   | 82.4 NM_201546.2     |
| 80.6   | 86.2   | 79.2   | 96.8 NM_020754.1     |
| 84.1   | 84     | 83.2   | 77.2 NM_004360.2     |
| 97.5   | 86.8   | 90.4   | 88.6 NM_006727.2     |
| 104.6  | 101.6  | 109    | 97.2 NM_001797.2     |
| 91.6   | 84.8   | 75     | 81.7 NM_004061.2     |
| 107.5  | 101.3  | 94.7   | 91.5 NR_002209.1     |
| 88.2   | 82.6   | 77.9   | 88.5 NM_001257.3     |
| 107.9  | 111.3  | 104.7  | 102.3 NM_004933.2    |
| 95.9   | 98.4   | 101.4  | 83 NM_004062.2       |
| 87.5   | 81.4   | 80.9   | 87.4 NM_004063.2     |
| 79.9   | 75.2   | 72.4   | 80.2 NM_004934.2     |
| 75.7   | 86.6   | 80.4   | 83.1 NM_021153.2     |
| 600.1  | 526.2  | 507.8  | 385.2 NM_001792.2    |
| 100.6  | 100    | 91     | 87 NM_031891.2       |
| 89.6   | 82.6   | 76.3   | 84.4 NM_021248.1     |
| 109.3  | 128.1  | 111.5  | 111 NM_052836.1      |

|        |        |        |                      |
|--------|--------|--------|----------------------|
| 106.4  | 97.3   | 95.1   | 101.4 NM_052836.1    |
| 97.9   | 131.9  | 133.1  | 122.9 NM_022124.2    |
| 103    | 89.9   | 84.3   | 93.6 NM_144985.2     |
| 96.2   | 83.3   | 95.6   | 80.4 NM_022478.2     |
| 79.7   | 81.9   | 70.9   | 85.3 NM_144985.2     |
| 97.3   | 101.8  | 96.9   | 98.3 NM_177980.1     |
| 80.4   | 100.8  | 90.6   | 91.9 NM_021810.3     |
| 99.8   | 80.2   | 86     | 87.7 NM_001793.3     |
| 95.3   | 85     | 80.6   | 81.7 NM_001794.2     |
| 83     | 81.2   | 84.2   | 88.8 NM_001795.2     |
| 81.2   | 90.3   | 76.4   | 79.6 NM_004932.2     |
| 99.4   | 96.2   | 91.2   | 87.1 NM_004361.2     |
| 91.6   | 88.8   | 89.1   | 95.5 NM_033646.1     |
| 98     | 86.3   | 81.3   | 88.8 NM_033646.1     |
| 87     | 73.5   | 85.2   | 82.3 NM_001796.2     |
| 123.6  | 111.2  | 114.6  | 102.3 NM_016279.2    |
| 129    | 116.3  | 114.7  | 110.1 NM_006319.2    |
| 1061.4 | 1250.2 | 1539.7 | 711.5 NM_052988.2    |
| 107.7  | 100.9  | 96.9   | 91.1 NM_003674.2     |
| 252.9  | 220.7  | 209.3  | 170.1 NM_001798.2    |
| 1004.7 | 774.6  | 662.1  | 579.3 NM_001798.2    |
| 219.6  | 179.3  | 165.8  | 145 NM_005851.3      |
| 105.9  | 113.5  | 115.3  | 111.8 NM_001258.1    |
| 1572.3 | 980.7  | 1090.5 | 699.2 NM_000075.2    |
| 188.8  | 262.6  | 238.1  | 168.2 NM_004935.2    |
| 95.3   | 97.8   | 79.7   | 94 NM_003885.2       |
| 86.5   | 93.7   | 85.2   | 81.1 NM_003936.3     |
| 492.3  | 518.6  | 527.2  | 336.2 NM_016408.2    |
| 115.7  | 110.7  | 107.3  | 98 NM_016408.2       |
| 206.2  | 234.5  | 204.3  | 172.4 NM_001011649.1 |
| 1201.1 | 1181   | 1134.4 | 579.1 NM_001011649.1 |
| 112.1  | 101.6  | 101.3  | 105.5 NM_018249.4    |
| 1141.9 | 1475.9 | 1407.5 | 1219.5 NM_025197.2   |
| 280.6  | 301.1  | 287.2  | 275.7 NM_176095.1    |
| 1207.7 | 1513.4 | 1392.9 | 1212.2 NM_176096.1   |
| 1445.9 | 1650.5 | 1766.5 | 974.6 NM_001259.5    |
| 347.1  | 357.3  | 258.6  | 236.9 NM_001799.2    |
| 146    | 156.3  | 123.2  | 126.3 NM_001260.1    |
| 363.9  | 366.5  | 352.8  | 262.1 NM_001261.2    |
| 155    | 155.2  | 127.6  | 115.5 NM_017774.1    |
| 130    | 99.8   | 98     | 97.7 NM_004196.3     |
| 79.1   | 70.3   | 80.2   | 78.6 NM_003948.2     |
| 260.1  | 246.4  | 224.1  | 214.3 NM_016508.2    |
| 85.9   | 94.2   | 88.7   | 87 NM_001009565.1    |
| 88.2   | 95.8   | 81.5   | 86 NM_003159.1       |
| 90.5   | 90     | 92.2   | 83.4 NM_003159.2     |
| 96.6   | 94.7   | 82.2   | 82.4 NM_003159.2     |
| 294.1  | 508    | 391.1  | 264.7 NM_078467.1    |
| 94.1   | 91.4   | 88.8   | 92.5 NM_078467.1     |
| 234.8  | 243.7  | 220.7  | 227.5 NM_004064.2    |

|        |        |        |                      |
|--------|--------|--------|----------------------|
| 94.7   | 122.2  | 102.3  | 110.3 NM_000076.1    |
| 94.8   | 89.8   | 81.4   | 77.1 NM_058197.2     |
| 89.8   | 84.4   | 81.9   | 90.8 NM_058195.2     |
| 86     | 90.4   | 86.4   | 87.5 NM_058197.2     |
| 124.1  | 116.6  | 108.3  | 98.1 NM_078487.2     |
| 92.5   | 85.9   | 81.1   | 89.2 NM_078487.2     |
| 856.2  | 804.7  | 815.4  | 697.1 NM_078626.1    |
| 83.9   | 89.1   | 88.7   | 90.9 NM_001262.2     |
| 126.4  | 111.7  | 94.9   | 93.8 NM_001262.2     |
| 87.9   | 79.9   | 87     | 82.9 NM_001800.3     |
| 219.6  | 173.9  | 159.7  | 143 NM_001800.3      |
| 1069.7 | 507.7  | 442.9  | 420 NM_005192.2      |
| 121.8  | 110.2  | 103.2  | 120.9 NM_001801.2    |
| 99.9   | 84.1   | 68.6   | 77.9 NM_016952.3     |
| 102.1  | 91.9   | 90.6   | 94.6 NM_016952.3     |
| 107.1  | 87.4   | 88.4   | 82.7 NM_004065.2     |
| 292.7  | 278.5  | 258.6  | 186 NM_001802.1      |
| 305.2  | 257.7  | 272.1  | 160.6 NM_014603.1    |
| 87.1   | 93.4   | 91.2   | 96.2 NM_006382.1     |
| 88.2   | 87     | 76.7   | 90.2 NR_003261.1     |
| 144.7  | 117.1  | 133    | 104.5 NM_001263.2    |
| 224.7  | 198.2  | 171.6  | 172.9 NM_003818.2    |
| 90.3   | 82.9   | 83.8   | 80.2 NM_001264.3     |
| 951.4  | 525.2  | 666.8  | 228.3 NM_030928.2    |
| 781.6  | 828.2  | 673.4  | 668.1 XM_945271.1    |
| 819.5  | 993.6  | 670.7  | 765.8 NM_017548.3    |
| 91.5   | 78.1   | 89.7   | 81.5 NM_001804.1     |
| 88.3   | 88.4   | 81     | 85.7 NM_001265.2     |
| 98.8   | 86.4   | 84     | 87.2 NM_005193.1     |
| 85.6   | 88.4   | 82.9   | 85 NM_004680.2       |
| 85.4   | 90.8   | 82.2   | 78.8 NM_004680.2     |
| 87.1   | 93.7   | 90.7   | 102.3 NM_001003894.1 |
| 88.4   | 82.4   | 86.8   | 90.9 NM_004825.2     |
| 85.4   | 80.1   | 83.8   | 80.4 NM_001001722.1  |
| 145.5  | 135.9  | 130.8  | 115 NM_004824.2      |
| 88.2   | 91.4   | 76.7   | 85.4 NM_004824.2     |
| 106.6  | 94.7   | 92     | 98.9 NM_152342.1     |
| 104.9  | 112.6  | 110.3  | 114.2 NM_001024912.1 |
| 103.8  | 95     | 84.7   | 99.8 NM_001712.3     |
| 83.3   | 93.1   | 83.1   | 87.4 NM_001024912.1  |
| 96.5   | 94.3   | 86.1   | 93.5 NM_020219.2     |
| 80     | 76.5   | 72.4   | 79.5 NM_198444.1     |
| 108.2  | 105.9  | 101    | 94.9 NM_033543.2     |
| 102    | 86.1   | 88.7   | 91.9 NM_001815.1     |
| 100.2  | 107.2  | 96.7   | 104.3 NM_001817.2    |
| 101    | 90.2   | 89.2   | 96.6 NM_004363.1     |
| 287.7  | 141.5  | 144.2  | 126.4 NM_002483.3    |
| 88.8   | 84.4   | 84.9   | 85.3 NM_006890.1     |
| 84.5   | 78.8   | 81.8   | 82.7 NM_001816.2     |
| 6172.2 | 3942.8 | 3409.4 | 3648 NM_004364.2     |

|        |        |        |        |                |
|--------|--------|--------|--------|----------------|
| 1591.6 | 2546.5 | 2326.5 | 1249.3 | NM_005194.2    |
| 1236.5 | 1482   | 1181.7 | 1121.3 | NM_005195.2    |
| 110.9  | 111    | 115.4  | 99.4   | NM_001805.2    |
| 951.4  | 805    | 693.6  | 557.7  | NM_001806.2    |
| 1600   | 1601.5 | 1226.5 | 1235   | NM_005760.2    |
| 100.4  | 127.8  | 125.7  | 131.7  | NM_017424.2    |
| 806.9  | 1377.7 | 1466.5 | 926.7  | NM_017424.2    |
| 108.8  | 93.5   | 85.1   | 91.1   | NM_177405.1    |
| 179.6  | 187.4  | 151.9  | 144.8  | NM_017829.5    |
| 1523.8 | 1444.5 | 1428   | 860.9  | NM_017829.5    |
| 439.7  | 278.9  | 253.8  | 218.9  | NM_031890.2    |
| 169.9  | 133.7  | 141.5  | 136.4  | NM_016174.3    |
| 87     | 93.8   | 90.6   | 88.4   | NM_178569.2    |
| 147.8  | 127.6  | 115.8  | 117.9  | NM_001807.2    |
| 127.3  | 113    | 116.6  | 104.7  | NM_014246.1    |
| 125.5  | 115.1  | 113.6  | 104.4  | NM_001408.1    |
| 126.2  | 121.4  | 136.4  | 116.8  | NM_001407.1    |
| 94.4   | 89.8   | 91.1   | 84.1   | NM_001048216.1 |
| 1035.8 | 513.3  | 614.8  | 377.7  | NM_001809.2    |
| 424.8  | 241.1  | 244.3  | 189.2  | NM_001042426.1 |
| 2131   | 1798.3 | 1746   | 775.9  | NM_001810.5    |
| 117.7  | 96.3   | 87.4   | 94.9   | NM_001812.2    |
| 149.3  | 157.1  | 180.4  | 119.8  | NM_001813.2    |
| 514    | 446.4  | 376.6  | 292.1  | NM_016343.3    |
| 93.1   | 84     | 93.5   | 101.2  | NM_022909.3    |
| 90.9   | 84.9   | 73.5   | 83.7   | NM_006733.2    |
| 266.1  | 209.6  | 283.2  | 267.7  | NM_018451.2    |
| 974.5  | 720.8  | 833.7  | 441.5  | NM_001002876.1 |
| 369.8  | 290.8  | 295.4  | 238.1  | NM_001002876.1 |
| 112.3  | 100.3  | 100.2  | 91     | NM_024322.1    |
| 2900.4 | 2344.3 | 2557.3 | 1196.5 | NM_006869.1    |
| 376.9  | 334    | 298.6  | 218.2  | NM_018404.1    |
| 108.6  | 181    | 184.7  | 162.9  | NM_014716.2    |
| 244.2  | 310.2  | 280.8  | 232.9  | NM_012287.3    |
| 92.1   | 103.3  | 84.8   | 99.3   | NM_030649.1    |
| 171.8  | 136.6  | 120.7  | 140    | NM_015230.2    |
| 82.2   | 81.9   | 74     | 75.5   | NM_139182.1    |
| 82.2   | 87.7   | 85.9   | 94.2   | NM_015242.2    |
| 143    | 181.6  | 175.9  | 154.8  | NM_015242.2    |
| 174.8  | 218.8  | 239.8  | 157.8  | NM_022481.5    |
| 96.6   | 83.2   | 90.7   | 87.2   | NM_014770.2    |
| 92.9   | 98.7   | 86     | 98.9   | NM_001037131.1 |
| 194.2  | 179.5  | 170.7  | 166.6  | NM_014914.2    |
| 90     | 87.3   | 86.1   | 89.7   | NM_001037131.1 |
| 93.2   | 101.9  | 93.3   | 106.9  | NM_001042535.1 |
| 123.4  | 104    | 100.1  | 94.9   | NM_001042535.1 |
| 337.2  | 388    | 307.2  | 348.6  | NM_031946.3    |
| 453.1  | 445.2  | 392.6  | 369.6  | NM_007018.3    |
| 552.2  | 481.9  | 465.6  | 349.1  | NM_025009.3    |
| 239.5  | 272.9  | 235.4  | 253.6  | NM_014985.2    |



|        |        |        |                       |
|--------|--------|--------|-----------------------|
| 294.7  | 253.7  | 221.5  | 230.1 NM_014956.3     |
| 137.2  | 141.3  | 142.3  | 134.4 NM_014812.2     |
| 98.4   | 101.5  | 99.2   | 104.7 NM_001042404.1  |
| 345.9  | 533.6  | 511.8  | 369.1 NM_032142.2     |
| 110.7  | 99.2   | 110    | 101.9 NM_001035518.1  |
| 120.7  | 134.3  | 112.2  | 107.6 NM_007186.2     |
| 303.2  | 322.4  | 469    | 273.4 NM_018097.1     |
| 124.4  | 152.2  | 125.3  | 181.9 NM_025114.2     |
| 572.4  | 374.5  | 263    | 269 NM_018131.3       |
| 147.9  | 128.2  | 121.7  | 164.8 NM_014679.3     |
| 750.1  | 924.2  | 890.7  | 766.1 NM_025180.2     |
| 88.9   | 91.1   | 88.4   | 93 NM_001042384.1     |
| 92.3   | 89.9   | 85.7   | 86 NM_001042384.1     |
| 90.1   | 106.7  | 99.6   | 91.4 NM_001042400.1   |
| 124.8  | 110.3  | 98.7   | 112.4 NM_015147.1     |
| 160.7  | 129.9  | 142.9  | 122.9 NM_024491.2     |
| 152.1  | 161.2  | 149    | 128.6 NM_018140.2     |
| 126.9  | 121.2  | 111.1  | 117.2 NM_024899.2     |
| 96.4   | 86.4   | 90.6   | 93.6 NM_001007794.1   |
| 352.7  | 210.2  | 172.8  | 166.6 NM_006090.3     |
| 795.3  | 445.3  | 330.2  | 328.3 NM_006090.3     |
| 90.5   | 80     | 80.7   | 86.4 NM_005454.2      |
| 760.2  | 739.8  | 696.7  | 368 NM_182661.1       |
| 353.8  | 395.3  | 445    | 284 NM_182661.1       |
| 113.9  | 115.3  | 106.7  | 120.2 NM_022766.4     |
| 87.1   | 91.4   | 86.4   | 80.7 NM_201548.3      |
| 81.9   | 79.5   | 78     | 89.2 NM_001030311.1   |
| 89.6   | 94.5   | 90.1   | 85 NM_001030313.1     |
| 92.6   | 86.3   | 91.4   | 85.9 NM_001030311.1   |
| 2040.8 | 4194   | 3143.2 | 2911.1 NM_001025195.1 |
| 1106.2 | 813    | 755.2  | 628.2 NM_198061.1     |
| 134.9  | 168.1  | 150.1  | 143.1 NM_003869.4     |
| 94.2   | 103.9  | 91.3   | 96.3 NM_024922.3      |
| 665    | 1106.6 | 936.6  | 661.3 NR_003276.1     |
| 97     | 103.3  | 83.7   | 94.6 NM_145024.1      |
| 81.1   | 98.2   | 77.9   | 88.7 NM_014406.4      |
| 92     | 85.7   | 79.5   | 89.4 NM_004066.1      |
| 2347   | 1327.3 | 1137.7 | 909.6 NM_004344.1     |
| 92.5   | 88.8   | 89.5   | 97 NM_004365.2        |
| 139.7  | 147.4  | 152.4  | 130.4 NM_000078.1     |
| 97.5   | 111.7  | 112.3  | 119.1 NM_001710.4     |
| 82.6   | 77.2   | 74.2   | 88.4 NM_032545.2      |
| 4921.5 | 8998.6 | 9082.6 | 6178.3 NM_001928.2    |
| 147.2  | 119    | 125    | 119.8 NM_006324.2     |
| 83.6   | 75.2   | 86.5   | 77 NM_000186.2        |
| 105.5  | 118    | 106.2  | 103 NM_001014975.1    |
| 105.6  | 80.3   | 80.6   | 85.7 NM_001014975.1   |
| 90.6   | 88.1   | 86.1   | 87.1 NM_002113.1      |
| 104.9  | 118.9  | 103.4  | 96.5 NM_005666.2      |
| 93     | 78.3   | 84.7   | 89.2 NM_021023.4      |

|        |        |        |                      |
|--------|--------|--------|----------------------|
| 84.9   | 83.9   | 83.3   | 85.2 NM_006684.1     |
| 79.1   | 76.5   | 82.9   | 76.2 NM_030787.1     |
| 91.4   | 80.2   | 83.1   | 81.2 NM_000204.1     |
| 6419.4 | 4642.5 | 4120.8 | 2119.7 NM_005507.2   |
| 94.6   | 80.8   | 86.2   | 92.6 NM_138638.1     |
| 83.4   | 91.6   | 84.7   | 86.5 NM_021914.5     |
| 270.7  | 544.6  | 613.8  | 372.1 NM_003879.3    |
| 103.9  | 83.1   | 80.5   | 79.6 NM_000492.2     |
| 126.5  | 175.3  | 140.9  | 140.5 NM_052818.1    |
| 92.9   | 85     | 75.2   | 80.9 NM_001079691.1  |
| 131.1  | 166    | 164.7  | 152.4 NM_001079691.1 |
| 90.9   | 93.3   | 87     | 82.6 NM_000735.2     |
| 99.9   | 103    | 106.3  | 96.7 NM_000737.2     |
| 96.3   | 79.5   | 94.3   | 89 NM_033377.1       |
| 78.9   | 81.7   | 73.4   | 89.2 NM_033378.1     |
| 87.3   | 89     | 82.4   | 89.2 NM_033043.1     |
| 87.2   | 86.9   | 76.8   | 85.6 NM_033142.1     |
| 794    | 533.3  | 546.4  | 427.2 NM_003663.3    |
| 90.8   | 92.3   | 81.7   | 82 NM_001008390.1    |
| 2077.6 | 1752.8 | 1939.6 | 1538.7 NM_003663.3   |
| 89.4   | 88.2   | 79.5   | 90.1 NM_015939.3     |
| 1212.6 | 655.5  | 543.6  | 449.7 NM_016052.2    |
| 97.1   | 81.8   | 89.5   | 91.4 NM_016140.2     |
| 89.7   | 87.3   | 81.5   | 85.3 NM_015964.2     |
| 3272.9 | 2702.2 | 2500.7 | 1463.6 NM_016016.1   |
| 834.5  | 611.7  | 571.9  | 351.5 NM_015703.3    |
| 159.4  | 156.2  | 132    | 116.8 NM_015703.3    |
| 107.3  | 93.3   | 93     | 83.7 NM_020770.1     |
| 134.3  | 134    | 123.6  | 105.1 NM_032866.3    |
| 109.5  | 92.3   | 87.9   | 98.1 NM_006569.2     |
| 194.4  | 177.7  | 166.3  | 140.5 NM_006568.2    |
| 86.9   | 92.5   | 78.9   | 80.9 NM_003956.2     |
| 100.8  | 94.9   | 86.6   | 94.6 NM_024111.2     |
| 142.2  | 96.4   | 112.4  | 110.5 NM_001008708.1 |
| 90.5   | 95.7   | 95     | 85.5 NM_001267.1     |
| 168.9  | 151.1  | 140.2  | 131.7 NM_005483.2    |
| 381.5  | 352.7  | 334.9  | 203.4 NM_005441.2    |
| 113.2  | 98.4   | 85.2   | 96.4 NM_020549.2     |
| 94.7   | 85.8   | 88.4   | 86.1 NM_020984.1     |
| 87.1   | 83.3   | 76.8   | 96.8 NM_020986.2     |
| 87.4   | 78.8   | 74.9   | 79.9 NM_020984.1     |
| 233.5  | 176    | 158.4  | 144.7 NM_203298.1    |
| 8074.9 | 4939.8 | 4655.3 | 4334.1 NM_016139.2   |
| 465.1  | 524.5  | 393.3  | 485.3 NM_017812.1    |
| 745.7  | 704.6  | 621.1  | 437.9 NM_144636.1    |
| 746.1  | 542    | 530.3  | 353 NM_032309.2      |
| 157.8  | 162    | 142.1  | 123.2 NM_032343.1    |
| 136.3  | 100.7  | 100    | 101 NM_001011670.1   |
| 538.2  | 274.2  | 251.6  | 248.2 NM_001011668.1 |
| 243    | 236.5  | 202.6  | 160.8 NM_016565.2    |

|        |        |       |                     |
|--------|--------|-------|---------------------|
| 331.2  | 373    | 363.8 | 405.6 NM_001270.2   |
| 445    | 444.9  | 350.6 | 302.9 NM_004284.2   |
| 137.7  | 131.7  | 125.7 | 129 NM_001042572.2  |
| 82.5   | 82.2   | 75.5  | 87.3 NM_005852.2    |
| 102    | 92.8   | 95.7  | 94.3 NM_001005273.1 |
| 973.2  | 1077.7 | 998.8 | 783.2 NM_001273.2   |
| 104.6  | 83.3   | 89.8  | 87.6 NM_015557.1    |
| 109.1  | 127.3  | 147.5 | 102.1 NM_032221.3   |
| 406.3  | 419.9  | 318.8 | 321.2 NM_017780.2   |
| 491.8  | 704.8  | 641   | 426.1 NM_020920.1   |
| 502.3  | 785.7  | 724.9 | 668.6 NM_025134.3   |
| 83.4   | 80     | 69.3  | 76.8 NM_018397.1    |
| 870.4  | 426.1  | 358.2 | 306.6 NM_001274.2   |
| 338.1  | 279.9  | 257.6 | 247.5 NM_007194.3   |
| 82.9   | 83.4   | 89.6  | 90.7 NM_001005735.1 |
| 176.5  | 160.9  | 147.3 | 129.7 NM_006387.4   |
| 468.6  | 642    | 462.9 | 487.8 NM_005197.2   |
| 1323.5 | 1165.6 | 1104  | 620.4 NM_018223.1   |
| 97.3   | 94.9   | 95.5  | 101.7 NM_001275.2   |
| 88.8   | 84.6   | 71    | 80.8 NM_001819.1    |
| 85.4   | 86.6   | 78.4  | 87.8 NM_018371.3    |
| 108    | 114.5  | 108.5 | 116.8 NM_001276.1   |
| 100.7  | 101.4  | 89.5  | 106.3 NM_004000.2   |
| 94.9   | 88.9   | 87.1  | 91 NM_001025199.1   |
| 86.3   | 81.5   | 76.2  | 80.2 NM_201653.1    |
| 96.3   | 91.8   | 81.4  | 97.8 NM_021797.2    |
| 87.2   | 95.8   | 89.4  | 95.9 XM_942851.1    |
| 90.9   | 92.4   | 95.2  | 93.5 NM_001039840.1 |
| 1450.6 | 864.7  | 885.8 | 757.5 NM_012110.2   |
| 95.4   | 95.8   | 88.1  | 94 NM_023947.2      |
| 705.4  | 549.9  | 587.6 | 338.1 NM_001277.2   |
| 173.4  | 151.6  | 137.3 | 134.7 XM_942105.1   |
| 692.9  | 748.2  | 723.4 | 663.4 NM_005198.3   |
| 92.5   | 87.8   | 81.4  | 90.5 NM_152253.1    |
| 99.4   | 102.1  | 93.8  | 90.2 NM_006614.2    |
| 93.3   | 92.9   | 79.4  | 88.2 NM_000390.1    |
| 131.8  | 127.3  | 128.2 | 112.8 NM_001821.2   |
| 656.5  | 688.9  | 686.3 | 505.2 NM_020412.3   |
| 188.1  | 173    | 167.7 | 133 NM_198426.1     |
| 235.3  | 203.8  | 188.8 | 148.3 NM_014453.2   |
| 1331.5 | 911.5  | 949   | 575.9 NM_014453.2   |
| 400.7  | 345.9  | 347.9 | 305.3 NM_014043.2   |
| 621.1  | 488.5  | 343.3 | 317.2 NM_014169.2   |
| 817.6  | 667.5  | 566.1 | 437.4 NM_176812.3   |
| 91.2   | 89.7   | 97.3  | 79.2 NM_152284.3    |
| 594.2  | 520.7  | 526.9 | 398.4 NM_016410.2   |
| 246.6  | 224.2  | 218.1 | 146.5 NM_024591.3   |
| 127.4  | 119.9  | 115.5 | 101.4 NM_024591.3   |
| 153.8  | 132.5  | 122   | 116.8 NM_152272.2   |
| 124.4  | 97.2   | 100   | 102.2 NM_001822.3   |

|        |        |        |                     |
|--------|--------|--------|---------------------|
| 83.9   | 89.2   | 85.5   | 91.1 NM_001822.3    |
| 104.9  | 98.3   | 115.1  | 108.6 NM_004067.1   |
| 119.9  | 148.6  | 139.2  | 122.7 NM_004067.1   |
| 83.1   | 86.9   | 78.2   | 75 NM_004067.1      |
| 111.8  | 91.9   | 82.9   | 98.2 NM_024944.2    |
| 88.6   | 85.9   | 79.1   | 81.7 NM_012124.1    |
| 344.1  | 246.2  | 219.7  | 181.5 NM_007236.3   |
| 138    | 176.8  | 161.7  | 173.7 NM_024536.4   |
| 190.9  | 186.3  | 135.4  | 148.2 NM_020244.2   |
| 89     | 90.8   | 94.6   | 83.9 NM_001014372.2 |
| 238.9  | 184.8  | 173.2  | 160.8 NM_017444.3   |
| 84.1   | 94.4   | 84.3   | 92 NM_177978.1      |
| 86.3   | 83.8   | 75.9   | 87.6 NM_145234.2    |
| 76.3   | 76.6   | 82.9   | 78.9 NM_015424.3    |
| 95.8   | 86.9   | 89.2   | 87.8 NM_139320.1    |
| 93.1   | 86.8   | 84.5   | 92.1 NM_139320.1    |
| 76.3   | 78.2   | 81     | 81.3 NM_139320.1    |
| 76.7   | 90.9   | 78.1   | 83 NM_000738.2      |
| 87.5   | 88.4   | 80     | 81.3 NM_001006630.1 |
| 90.8   | 76.8   | 86     | 93.8 NM_001006626.1 |
| 87.1   | 87.2   | 91.3   | 88.9 NM_000741.2    |
| 87.2   | 81.1   | 83.6   | 85.4 NM_012125.2    |
| 79.7   | 83.4   | 81.1   | 81.8 NM_001039523.1 |
| 100.5  | 113.6  | 125.9  | 120.7 NM_000079.1   |
| 86.6   | 86.5   | 80.8   | 81.4 NM_001039523.1 |
| 98.6   | 90.8   | 83.4   | 81.7 NM_020402.2    |
| 97.7   | 99.7   | 100    | 92.6 NM_000742.1    |
| 95.8   | 103.1  | 100.3  | 94.3 NM_000743.2    |
| 105.4  | 93.5   | 94     | 93.1 NM_000744.2    |
| 1864.5 | 2144.5 | 2668.3 | 2904.4 NM_000745.2  |
| 111.2  | 107.9  | 115.5  | 104.7 NM_004198.2   |
| 89.8   | 96.7   | 86.8   | 95.2 NM_000746.2    |
| 96.1   | 93.6   | 87.1   | 93.3 NM_017581.2    |
| 191.6  | 172.4  | 158.8  | 159.7 NM_000747.2   |
| 88.8   | 85.5   | 80.8   | 74.6 NM_000748.1    |
| 89.3   | 92.6   | 74.7   | 78.3 NM_000749.2    |
| 82.8   | 80.1   | 71.7   | 83.4 NM_000751.1    |
| 101.4  | 88.7   | 86.8   | 90.5 NM_000080.2    |
| 84     | 91.2   | 85.1   | 98.4 NM_005199.4    |
| 93.8   | 86.9   | 81.7   | 83.4 NM_003654.2    |
| 255.7  | 199.1  | 175.6  | 182.6 NM_004854.3   |
| 84.5   | 90     | 82.6   | 87.2 NM_018413.2    |
| 144    | 147    | 181.9  | 126.8 NM_018641.2   |
| 1560.7 | 1176.2 | 1167.7 | 570.4 NM_152889.1   |
| 96.3   | 92.3   | 92.3   | 103.2 NM_004267.3   |
| 150    | 123.7  | 116.9  | 113.1 NM_004273.2   |
| 130.3  | 95.5   | 102.4  | 96.8 NM_005769.1    |
| 91.7   | 88.7   | 85.2   | 78.6 NM_012126.1    |
| 106.3  | 91.6   | 90.5   | 94.5 NM_024533.2    |
| 102.6  | 101.3  | 94.8   | 104.4 NM_021615.3   |

|        |        |        |                       |
|--------|--------|--------|-----------------------|
| 155    | 120.8  | 130.8  | 114.5 NM_019886.2     |
| 94.9   | 95.5   | 87.8   | 93.2 NM_022467.3      |
| 91.7   | 78.4   | 77.9   | 89.8 NM_031422.1      |
| 1441   | 1410.8 | 1544.6 | 1351.7 NM_014918.3    |
| 426.6  | 401.4  | 335.2  | 375.2 NM_022092.1     |
| 479.5  | 334.5  | 273.3  | 232.5 NM_001278.3     |
| 374.4  | 454.7  | 396.7  | 381.4 NM_145165.2     |
| 91.8   | 97.5   | 95.3   | 101 NM_182894.1       |
| 1164.9 | 942.4  | 1069   | 625.1 NM_004804.2     |
| 297    | 205.3  | 167    | 186.7 NM_020313.1     |
| 1206.4 | 925.5  | 870.2  | 605.5 NM_004895.3     |
| 194.5  | 176.2  | 154.2  | 125.8 NM_004895.3     |
| 3943.4 | 3526.7 | 3347.9 | 2171 NM_006384.2      |
| 94     | 85.2   | 90.9   | 86.3 NM_006383.2      |
| 167.4  | 110.7  | 107.4  | 100.5 NM_054113.2     |
| 92.6   | 79.3   | 71     | 78.6 NM_001029881.1   |
| 171.2  | 194.4  | 176.2  | 163.6 NM_015125.2     |
| 108.5  | 93.1   | 92.8   | 102.6 NR_002786.1     |
| 92.2   | 97.7   | 92.9   | 100.2 NM_001080858.1  |
| 92.3   | 89.1   | 91     | 85 NM_198289.1        |
| 89.1   | 88.3   | 81.6   | 85.5 NM_198289.1      |
| 134.8  | 121.5  | 120    | 105.7 NM_014430.1     |
| 100.7  | 86.9   | 91.7   | 92.6 NM_022094.2      |
| 85.8   | 83     | 89.2   | 89.2 NM_000246.2      |
| 84.4   | 80.8   | 81.5   | 85.1 NM_003613.2      |
| 79.4   | 84.7   | 78.3   | 82.1 NM_153221.1      |
| 134.3  | 107.4  | 111.2  | 108.9 NM_032630.2     |
| 3559.9 | 2364.3 | 2126.6 | 1716 NM_033082.1      |
| 153.6  | 158.9  | 161.8  | 141.9 NM_004882.3     |
| 1604.3 | 611.3  | 604.1  | 417.2 NM_001280.1     |
| 1595.7 | 755.1  | 651.9  | 459.3 NM_032830.1     |
| 97.5   | 97.9   | 90.8   | 95.2 NM_145071.1      |
| 83.7   | 86.7   | 80.7   | 84.8 NM_007174.1      |
| 99.8   | 90.2   | 89.3   | 91.6 NM_004143.2      |
| 1281.4 | 796.7  | 794.7  | 705.2 NM_006079.3     |
| 1964.3 | 1107.9 | 1141.6 | 964.5 NM_133467.2     |
| 114.4  | 108.1  | 98.4   | 109.1 NM_012127.2     |
| 754.2  | 521.1  | 459.6  | 385.2 NM_001281.2     |
| 310.9  | 213.2  | 225.7  | 213 NM_018204.2       |
| 1344.8 | 996.8  | 677.3  | 652 NM_006825.2       |
| 2152.1 | 1950.8 | 1581.9 | 1158.8 NM_001008938.1 |
| 167    | 123.8  | 128.4  | 111.3 NM_001008938.1  |
| 166.7  | 105.7  | 108    | 105.8 NM_001823.3     |
| 3574.5 | 2983.8 | 2693.8 | 2000.1 NM_016326.2    |
| 1443   | 1271.7 | 1032.5 | 823.1 NM_001040139.1  |
| 74.5   | 80.9   | 75.7   | 84 NM_001040139.1     |
| 100.9  | 85.1   | 93.9   | 89.2 NM_181521.1      |
| 230    | 196    | 159.1  | 171.8 NM_001824.2     |
| 89.7   | 91.6   | 85.8   | 94.2 NM_001015001.1   |
| 84.5   | 88.2   | 81.1   | 92.8 NM_020990.3      |

|        |        |        |                      |
|--------|--------|--------|----------------------|
| 90.9   | 85.9   | 75.8   | 81.5 NM_001825.1     |
| 1902.5 | 1132.2 | 1008.2 | 750.4 NM_001826.1    |
| 3896.5 | 1536.2 | 1491.8 | 1424.2 NM_001827.1   |
| 328.7  | 442.1  | 393.4  | 359.3 NM_015282.1    |
| 431.8  | 487.3  | 442.2  | 432.8 NM_015097.1    |
| 99.5   | 94.7   | 91.7   | 87.9 NM_001828.4     |
| 95.1   | 78     | 73     | 92 NM_001285.1       |
| 87.9   | 77.6   | 80.5   | 87.7 NM_006536.4     |
| 87.6   | 95     | 94.5   | 87.3 NM_004921.1     |
| 86.5   | 88.5   | 83.8   | 82.5 NM_012128.2     |
| 80.9   | 89.3   | 84.7   | 85.8 NM_015127.2     |
| 150.5  | 113.6  | 101.4  | 98.9 NM_015127.2     |
| 108.7  | 110.9  | 110.6  | 106.3 NM_013246.2    |
| 87     | 83.5   | 87.2   | 76.7 NM_000083.1     |
| 90.9   | 100.9  | 84.5   | 86.2 NM_004366.2     |
| 84.9   | 83.9   | 80.8   | 88.7 NM_173872.2     |
| 312.2  | 293.9  | 252.4  | 220.2 NM_001829.2    |
| 97.7   | 91.2   | 82.6   | 97.1 NM_001830.2     |
| 92     | 90.9   | 85.8   | 97.2 NM_000084.1     |
| 114.4  | 100.3  | 107    | 101.5 NM_001286.1    |
| 178.4  | 237.1  | 315.3  | 175.1 NM_021737.1    |
| 191.7  | 268.7  | 297.6  | 221 NM_021737.1      |
| 3452.7 | 3700.5 | 4110.3 | 1596.6 NM_001287.3   |
| 99.6   | 112.6  | 120.9  | 97.4 NM_004070.2     |
| 109.8  | 110.2  | 118.8  | 107.9 NM_001042704.1 |
| 105.1  | 94.5   | 92.9   | 92.5 NM_000085.1     |
| 90.6   | 95.4   | 93.3   | 91.6 NM_021101.3     |
| 109.3  | 104.2  | 105.2  | 78.1 NM_006984.3     |
| 90.3   | 90.6   | 89.2   | 82.7 NM_182848.2     |
| 112.6  | 90.9   | 96.3   | 94.1 NM_006984.3     |
| 122.1  | 145.9  | 140.1  | 126.1 NM_012129.2    |
| 233.5  | 220.4  | 239.6  | 177.6 NM_012130.2    |
| 90.9   | 80.6   | 76.2   | 89.1 NM_144492.1     |
| 86.7   | 83.8   | 85.7   | 81.4 NM_012130.2     |
| 88.6   | 104.1  | 113.4  | 101.2 NM_138429.1    |
| 449    | 440.7  | 502.7  | 283 NM_014343.1      |
| 115.9  | 111.5  | 112.9  | 114.6 NM_138429.1    |
| 91.3   | 96.1   | 86.6   | 86.8 NM_006580.2     |
| 81.3   | 89     | 83.9   | 85.4 NM_012131.1     |
| 98.8   | 89.2   | 83.6   | 88 NM_016369.3       |
| 106.4  | 115.3  | 111.6  | 103 NM_001002026.2   |
| 99.1   | 93.6   | 102.6  | 90.6 NM_016369.3     |
| 91.7   | 82.4   | 79.6   | 88.1 NM_016369.3     |
| 105.3  | 86     | 93.1   | 97.8 NM_148960.1     |
| 101.6  | 89.3   | 88.7   | 99.1 NM_020384.2     |
| 107.5  | 113.2  | 106.9  | 109.9 NM_001001346.1 |
| 727.6  | 543.4  | 445.9  | 407.9 NM_194284.1    |
| 89.3   | 93.3   | 89     | 86.7 NM_001306.2     |
| 97.1   | 94.2   | 91.4   | 89.2 NM_001305.3     |
| 81.7   | 76.2   | 78.4   | 81.3 NM_003277.2     |

|         |        |        |                      |
|---------|--------|--------|----------------------|
| 91.4    | 86     | 86.5   | 88.6 NM_021195.3     |
| 142     | 145    | 141.7  | 136.5 NM_001307.3    |
| 84.3    | 80.2   | 80.1   | 84.3 NM_199328.1     |
| 103     | 104.3  | 115.4  | 101.1 NM_020982.2    |
| 546.4   | 569.6  | 493.8  | 507.2 NM_001040181.1 |
| 669.2   | 697    | 504.4  | 593.7 NM_019895.1    |
| 253.6   | 187.2  | 204.1  | 172.5 NM_152353.1    |
| 98.9    | 108.9  | 104.4  | 96.3 NM_182906.2     |
| 98.6    | 96     | 93.1   | 96.1 NM_006344.2     |
| 96.4    | 99     | 118    | 112.1 NM_006344.2    |
| 6977.4  | 2726.3 | 2599.4 | 2274 NM_002975.2     |
| 183.5   | 459.6  | 326.8  | 313.7 NM_138337.4    |
| 163.4   | 351    | 311.6  | 216.3 NM_201625.1    |
| 101.3   | 138.7  | 134.9  | 96 NM_138337.4       |
| 93.2    | 93.3   | 91     | 95.8 NM_205852.1     |
| 85.7    | 78.2   | 82.9   | 83.4 NM_175060.1     |
| 87.9    | 89.1   | 87     | 85.3 NM_016511.2     |
| 88.8    | 80.5   | 87.9   | 91.2 NM_016509.2     |
| 89.3    | 85.8   | 83.9   | 78.4 NM_005127.2     |
| 92.9    | 91.5   | 79.6   | 88.1 NM_001004419.1  |
| 171.1   | 162.4  | 150.5  | 179.6 NM_013269.2    |
| 86.7    | 91.5   | 87.6   | 90.1 NM_005752.2     |
| 106.3   | 108    | 117.3  | 106.9 NM_003278.1    |
| 92.7    | 109.9  | 112.1  | 99.1 NM_194448.1     |
| 93.9    | 95     | 87.6   | 87.8 NM_203503.1     |
| 83.1    | 90.7   | 84.1   | 93.6 NM_130441.2     |
| 93.7    | 87.8   | 87.8   | 78.2 NM_080387.4     |
| 89.7    | 83.6   | 86     | 92.9 NM_014358.1     |
| 90.9    | 95.7   | 99.9   | 96.1 NM_173535.2     |
| 97      | 97.2   | 94.9   | 90.9 NM_198492.1     |
| 88.6    | 81.3   | 78.3   | 86.4 NM_214679.1     |
| 101.4   | 113    | 106.3  | 94.5 NM_013252.2     |
| 79.1    | 85.4   | 87.7   | 78.1 NM_001007033.1  |
| 104     | 108.3  | 97.7   | 101.6 NM_197950.2    |
| 93.8    | 89.2   | 88.5   | 86.8 NM_197954.1     |
| 101.3   | 99.7   | 99.3   | 97.1 NM_197953.1     |
| 114.1   | 100.7  | 92.8   | 100 NM_207345.1      |
| 128.5   | 120.2  | 118.3  | 137.5 NM_004362.1    |
| 11992.4 | 9445.4 | 7538.7 | 6364.9 NM_001288.4   |
| 100.6   | 95.2   | 99.5   | 98.5 NM_001289.4     |
| 91.6    | 83.8   | 80.3   | 93.7 NM_004669.2     |
| 890.5   | 646.6  | 570.5  | 670.8 NM_013943.1    |
| 94      | 91.8   | 93.2   | 101.7 NM_016929.1    |
| 241.2   | 237.4  | 228.1  | 186.6 NM_053277.1    |
| 352.2   | 489.3  | 363.4  | 434.8 NM_002956.2    |
| 113.4   | 130    | 107.3  | 108.5 NM_032421.2    |
| 135.4   | 155.2  | 139    | 132.9 NM_032421.2    |
| 104.3   | 125.1  | 156.1  | 114.7 NM_015526.1    |
| 192.6   | 135.7  | 155.5  | 208.2 NM_001024646.1 |
| 129.3   | 117.8  | 111.2  | 119.2 NM_004071.2    |

|         |        |         |         |                |
|---------|--------|---------|---------|----------------|
| 253     | 275.3  | 269.7   | 171.9   | NM_001291.2    |
| 529.8   | 558.3  | 510.4   | 473.6   | XM_941392.1    |
| 83.2    | 82.5   | 89.9    | 88.7    | NR_002711.1    |
| 217.9   | 205.2  | 205.2   | 182     | NM_003992.1    |
| 704.5   | 873.9  | 930.1   | 437.1   | NM_003992.1    |
| 117.5   | 108    | 107.5   | 104.8   | NM_001292.1    |
| 200.3   | 198.6  | 167.8   | 232.3   | NM_020666.2    |
| 79      | 85.4   | 83.6    | 85.6    | NM_001025233.1 |
| 88.2    | 86.4   | 80.9    | 90.4    | NM_001025232.1 |
| 97.6    | 82.3   | 85.1    | 90.8    | NM_024734.2    |
| 237.4   | 341.8  | 300.8   | 264.5   | NM_000086.1    |
| 206.9   | 257.3  | 256.4   | 238.3   | NM_000086.1    |
| 347.4   | 343.2  | 309.6   | 249.1   | NM_006493.1    |
| 218.5   | 173.1  | 182.4   | 160.5   | NM_017882.1    |
| 120.4   | 126.7  | 102.6   | 114     | NM_018941.2    |
| 3520.6  | 2613.8 | 2251.7  | 2099.2  | NM_001293.1    |
| 102.9   | 111.9  | 90.2    | 97.3    | NM_004898.2    |
| 90.6    | 97.9   | 97.3    | 93.5    | NM_030813.3    |
| 602.3   | 334    | 350     | 241.7   | NM_006012.2    |
| 80.3    | 75.4   | 79      | 82.4    | NM_001832.2    |
| 784.3   | 554.5  | 432.6   | 433.3   | NM_001294.1    |
| 660.5   | 540    | 397.6   | 428.3   | NM_006660.3    |
| 85.7    | 85.3   | 95      | 82      | NM_152311.1    |
| 89.2    | 96.4   | 83.9    | 87      | NM_022111.2    |
| 1371.4  | 1361.9 | 1181    | 987.7   | NM_001009566.1 |
| 106.6   | 104.7  | 107.5   | 104.8   | XM_937951.1    |
| 304.7   | 125.6  | 124.6   | 128.1   | NM_022131.1    |
| 86.3    | 88.2   | 89.2    | 91.6    | NM_014718.2    |
| 2418.7  | 1634.8 | 1432.4  | 1109.9  | NM_001076677.1 |
| 96.8    | 89.3   | 81.1    | 100.3   | NM_007096.1    |
| 1605.3  | 1166.2 | 1088    | 787.6   | NM_007096.1    |
| 2047.4  | 1687.4 | 1370.2  | 968.4   | NM_001834.2    |
| 89.4    | 80.5   | 83.5    | 85.5    | NM_007097.2    |
| 170.5   | 157.4  | 148.4   | 187.2   | NM_004859.2    |
| 223.1   | 220.4  | 248.1   | 214.2   | NM_007098.1    |
| 112.1   | 115.5  | 98.5    | 114.1   | NM_007098.1    |
| 75.4    | 72.1   | 77.6    | 76.6    | NM_001831.2    |
| 88.5    | 87     | 75.9    | 82.8    | NM_203339.1    |
| 85.9    | 85.4   | 87.8    | 87.8    | NM_001831.2    |
| 174.4   | 140.1  | 128.7   | 125.8   | NM_015041.1    |
| 21274.3 | 27388  | 29163.3 | 24252.9 | NM_024793.1    |
| 304.2   | 249.6  | 221.4   | 170.5   | NM_015041.1    |
| 89.3    | 89.2   | 95.3    | 88.2    | NM_199167.1    |
| 105.2   | 103.3  | 97.2    | 96.1    | NM_014410.4    |
| 82.1    | 84.1   | 74.3    | 79.7    | NM_199167.1    |
| 476.5   | 348.6  | 381.1   | 316.4   | NM_206808.1    |
| 280.2   | 257.7  | 232.9   | 201.8   | NM_206808.1    |
| 96      | 84.9   | 99.6    | 89.3    | NM_001836.2    |
| 95.8    | 98.6   | 83.1    | 86.9    | NR_002174.1    |
| 1317.2  | 1099.6 | 963.7   | 781.9   | NM_018686.3    |



|        |        |        |                      |
|--------|--------|--------|----------------------|
| 1298.4 | 1010.2 | 895.8  | 653.1 NM_030629.1    |
| 86.1   | 94.6   | 86.9   | 96.3 NM_198390.1     |
| 84     | 85.8   | 84.2   | 81.3 NM_030629.1     |
| 89.4   | 90     | 90     | 89.7 NM_004072.1     |
| 106.2  | 116.6  | 113.1  | 103.2 NM_020311.1    |
| 98.3   | 100.4  | 93.1   | 89.9 NM_016347.1     |
| 800.8  | 844.3  | 615.6  | 812.8 NM_016308.1    |
| 106.1  | 97     | 100.1  | 105.3 NM_181270.1    |
| 84.9   | 89.8   | 91.6   | 87.8 NM_181289.1     |
| 104.3  | 99.9   | 102.4  | 89.8 NM_181301.1     |
| 86.3   | 78.1   | 75.6   | 77.7 NM_144673.2     |
| 82     | 82.6   | 84.6   | 89.4 NM_144601.2     |
| 1794.3 | 1346.2 | 1340.4 | 783.2 NM_181555.1    |
| 106.9  | 114.8  | 110.4  | 95.6 NM_181553.1     |
| 482.4  | 377.3  | 348    | 323.1 NM_001048251.1 |
| 393.3  | 315.6  | 395.6  | 184.2 NM_178818.2    |
| 101.7  | 87     | 92.2   | 85.2 NM_178818.2     |
| 87.8   | 79     | 79.4   | 75 NM_138460.2       |
| 4004.5 | 2678.2 | 2661.7 | 1456.5 NM_138410.2   |
| 267    | 199.9  | 207.5  | 187.8 NM_138410.2    |
| 317.7  | 273.9  | 267.1  | 172.5 NM_181472.1    |
| 178.2  | 276.7  | 283.9  | 279.9 NM_178868.3    |
| 79.5   | 78.4   | 79.1   | 77.2 NM_194293.2     |
| 91.3   | 76.5   | 81.6   | 85.4 NM_152381.3     |
| 79.5   | 88.6   | 84.8   | 93.7 NM_001079810.1  |
| 211.9  | 170.2  | 168.8  | 147.6 NM_153610.3    |
| 817.6  | 559.2  | 509.1  | 365.8 NM_014865.2    |
| 86     | 90.7   | 79     | 78.5 NM_173538.1     |
| 1660.3 | 1337   | 1047.4 | 1322.8 NM_003418.1   |
| 100    | 94.3   | 96.7   | 100.9 NM_032649.5    |
| 1751.5 | 1705.6 | 1557.7 | 1053 NM_018235.1     |
| 428    | 206.5  | 209.4  | 151.2 NM_032488.2    |
| 88.2   | 82.8   | 86.6   | 84.5 NM_000087.2     |
| 97.6   | 87.9   | 102.2  | 95.3 NM_005140.1     |
| 103.5  | 89.5   | 96.9   | 96.8 NM_001298.1     |
| 85.1   | 79.5   | 84.3   | 76.4 NM_001298.1     |
| 100.5  | 107.2  | 107.9  | 101.3 NM_001298.1    |
| 101    | 89.8   | 85.9   | 100.5 NM_001037329.1 |
| 102.7  | 104    | 117.9  | 104.9 NM_001297.1    |
| 86.1   | 88.2   | 77.7   | 90.9 NM_019098.2     |
| 1908.6 | 1017.2 | 1117.2 | 739.9 NM_001009551.1 |
| 1471.5 | 851    | 709.9  | 603 NM_005776.2      |
| 93.6   | 83.5   | 85.8   | 89 NM_182553.1       |
| 101.9  | 95.9   | 97.2   | 102 NM_182553.1      |
| 90.7   | 85.8   | 87.3   | 90.9 NM_152495.1     |
| 2758.4 | 1279.1 | 1935   | 1478.7 NM_014184.1   |
| 92.5   | 99.6   | 95.2   | 93.4 NM_006314.1     |
| 94.3   | 93.9   | 87.8   | 91.5 NM_014927.2     |
| 229.4  | 232.2  | 200.5  | 209.2 NM_173515.2    |
| 77.4   | 78.2   | 75.4   | 83.7 NM_001299.4     |

|        |        |        |                      |
|--------|--------|--------|----------------------|
| 118.2  | 104    | 140    | 126.1 NM_004368.2    |
| 1319.3 | 1149.8 | 1162   | 540 NM_201277.1      |
| 475.4  | 334.2  | 320.8  | 261.1 NM_001839.2    |
| 110.4  | 121.2  | 110.4  | 101.3 NM_020348.1    |
| 87.5   | 82.9   | 76.7   | 90.7 NM_017649.3     |
| 104.9  | 117.4  | 102    | 116.4 NM_199077.1    |
| 82.4   | 87.6   | 79.1   | 82.8 NM_199077.1     |
| 232.2  | 223.2  | 235.1  | 154 NM_017623.3      |
| 128.5  | 116.6  | 110.4  | 113.1 NM_020184.2    |
| 389.4  | 299.6  | 302.1  | 207.8 NM_018366.2    |
| 106.5  | 101.9  | 98.3   | 98.2 NM_206999.1     |
| 3195.5 | 3509.7 | 3144.4 | 1845.1 NM_016284.3   |
| 458.7  | 460.9  | 410.8  | 338.2 NM_015442.1    |
| 676.7  | 822.9  | 713.6  | 590.7 NM_014515.3    |
| 215.2  | 220.3  | 189.4  | 190.3 NM_014516.2    |
| 652.1  | 615.2  | 515.7  | 472.8 NM_013316.2    |
| 95.1   | 111.3  | 104.8  | 100 NM_013316.2      |
| 104.6  | 98     | 103.4  | 102.9 NM_001008225.1 |
| 687.9  | 771.7  | 582.1  | 578.7 NM_015455.3    |
| 158    | 149.3  | 139.9  | 123.6 NM_144571.2    |
| 836.3  | 435.8  | 451    | 424.3 NM_054026.1    |
| 1451.2 | 1139.4 | 724.1  | 1023.5 NM_013354.4   |
| 81.5   | 84.3   | 76     | 79.1 NM_054026.1     |
| 506.1  | 450.1  | 407.2  | 358.7 NM_004779.4    |
| 91     | 83.1   | 82     | 93.8 NM_033133.3     |
| 103.7  | 96.5   | 105.7  | 105.9 NM_016083.3    |
| 105.7  | 95.7   | 87.4   | 99.7 NM_001841.1     |
| 101    | 94.1   | 99.9   | 106.1 NM_173478.1    |
| 81.9   | 80.8   | 88.1   | 78 NM_000614.2       |
| 93     | 85.1   | 90.4   | 88.2 NM_147164.1     |
| 94.7   | 87.4   | 88.1   | 92.1 NM_147164.1     |
| 92.3   | 78.4   | 79.8   | 85.7 NM_001842.3     |
| 90     | 93.5   | 83     | 89.8 NM_001843.2     |
| 90.1   | 78     | 83.1   | 84.4 NM_001843.2     |
| 103.9  | 98.1   | 92.4   | 103.1 NM_005076.2    |
| 89.7   | 86.2   | 83.5   | 88.6 NM_020872.1     |
| 100.5  | 83.5   | 85.3   | 83.9 NM_175612.1     |
| 88.8   | 81.7   | 80.5   | 85.6 NM_175607.1     |
| 164.1  | 115.9  | 124.5  | 108.9 NM_175613.1    |
| 87.8   | 75.7   | 83.3   | 87.3 NM_014361.2     |
| 88.9   | 80     | 77.2   | 89.3 NM_014361.2     |
| 96.6   | 91.6   | 94.9   | 99 NM_014461.2       |
| 93.2   | 86     | 87     | 77.1 NM_003632.1     |
| 91.3   | 80.6   | 76     | 92.1 NM_014141.3     |
| 104    | 91.5   | 86.5   | 95.9 NM_033655.2     |
| 102.5  | 101.5  | 97.8   | 96.7 NM_138994.1     |
| 105.3  | 82.4   | 87.7   | 83.6 NM_033401.2     |
| 96.6   | 97.9   | 88.1   | 92 NM_130773.2       |
| 102    | 97.1   | 100.6  | 100 NM_138996.1      |
| 114.2  | 123.8  | 125.2  | 112.7 NM_053051.1    |

|        |        |        |                    |
|--------|--------|--------|--------------------|
| 799.6  | 925.6  | 987.9  | 582.4 NM_025233.4  |
| 241.2  | 224.6  | 192    | 183.2 NM_025233.4  |
| 103.5  | 97.5   | 84.3   | 95.8 NM_015198.2   |
| 97.3   | 96.6   | 89.3   | 85.9 NM_014900.3   |
| 171.5  | 155.6  | 135.6  | 133.9 NM_015456.2  |
| 1031.5 | 984.8  | 776.3  | 881.2 NM_015456.2  |
| 1685.1 | 1296.6 | 1147.3 | 1132.9 NM_015456.2 |
| 110.2  | 95     | 85.8   | 97.6 NM_004086.1   |
| 172.4  | 161.7  | 174.6  | 137.8 NM_018714.1  |
| 730.5  | 621.8  | 606.9  | 366.5 NM_007357.1  |
| 152.9  | 167.7  | 176.6  | 160 NM_031431.2    |
| 146.8  | 155.2  | 127.2  | 125.9 NM_015386.1  |
| 147.2  | 147.9  | 121.8  | 119.9 NM_006348.2  |
| 171.2  | 142.7  | 123.2  | 139.6 NM_006348.2  |
| 173.8  | 237    | 221.6  | 193.5 NM_020751.1  |
| 165.6  | 158.6  | 130.3  | 131 NM_153603.1    |
| 149.2  | 117.1  | 104.9  | 118.4 NM_032382.2  |
| 753.6  | 803.6  | 655.6  | 630.4 NM_004645.2  |
| 88     | 84.9   | 93.6   | 83.6 NM_000493.2   |
| 105.4  | 106    | 91.2   | 99.5 NM_001854.2   |
| 92     | 83.9   | 81.9   | 92.5 NM_080629.1   |
| 90.6   | 93.1   | 90.1   | 87.2 NM_080629.2   |
| 91.3   | 93.5   | 85.5   | 83.3 NM_080629.2   |
| 99     | 97.9   | 95.1   | 94.8 NM_080681.2   |
| 96.7   | 89.7   | 91.6   | 90.3 NM_080680.1   |
| 112.1  | 109.9  | 93.9   | 109.4 NM_080645.1  |
| 85.4   | 83.5   | 89.5   | 85.9 NM_004370.4   |
| 97.9   | 97.7   | 97.2   | 90.8 NM_080805.2   |
| 91.3   | 92.7   | 81.2   | 84.9 NM_080815.2   |
| 114    | 119.9  | 107    | 109.5 NM_001855.2  |
| 82.8   | 96.6   | 84.3   | 95.1 NM_001856.2   |
| 86.1   | 82.3   | 73.2   | 73.6 NM_130778.1   |
| 90.8   | 87.2   | 84.5   | 75.7 NM_000494.2   |
| 109.9  | 160    | 144.5  | 108.8 NM_030582.2  |
| 95.4   | 88.1   | 89.6   | 79.7 NM_130445.1   |
| 84.5   | 86.9   | 86.2   | 80.2 NM_001858.4   |
| 90.5   | 116.7  | 111    | 110.4 NM_000088.2  |
| 86.7   | 91.4   | 77.7   | 90.6 NM_000089.3   |
| 86.6   | 97.6   | 92     | 99 NM_020882.1     |
| 90.8   | 83.3   | 89.4   | 88.9 NM_030820.2   |
| 101.8  | 83.9   | 90.6   | 92.5 NM_152888.1   |
| 211.4  | 302.5  | 256.6  | 244.4 NM_173465.2  |
| 187.3  | 268.1  | 235.1  | 257 NM_152890.4    |
| 93.1   | 91.7   | 79.2   | 89.6 NM_198721.1   |
| 86.8   | 78.3   | 76.6   | 81.7 NM_032518.2   |
| 89.4   | 83.2   | 87.1   | 82.2 NM_198721.1   |
| 108.9  | 104.5  | 92.8   | 104.9 NM_032888.2  |
| 92.5   | 84.1   | 85.2   | 90 NM_001844.3     |
| 91.5   | 91.9   | 82.3   | 92.7 NM_001844.3   |
| 92     | 83.6   | 91     | 84.9 NM_000090.2   |

|        |        |        |                    |
|--------|--------|--------|--------------------|
| 189    | 394    | 334.9  | 281.1 NM_001845.3  |
| 92.7   | 127.6  | 107.3  | 100.4 NM_001846.1  |
| 78.8   | 73.3   | 73.6   | 81.6 NM_000091.3   |
| 94.5   | 84.4   | 93     | 87.6 NM_000091.2   |
| 126.2  | 122    | 98     | 107.7 NM_005713.1  |
| 354.1  | 503.2  | 446.4  | 347.9 NM_005713.1  |
| 87.9   | 87.2   | 87.1   | 89.5 NM_000092.3   |
| 139    | 108.2  | 104    | 105.6 NM_033381.1  |
| 88.5   | 80.4   | 77.5   | 90.7 NM_033380.1   |
| 91.8   | 79.4   | 84.6   | 88.7 NM_033641.1   |
| 90.5   | 81     | 74.4   | 85.2 NM_001847.1   |
| 89.9   | 90.6   | 82.8   | 79.8 NM_001847.1   |
| 96.9   | 89.7   | 76.6   | 80.1 NM_000093.2   |
| 103.5  | 90.4   | 95.9   | 91.2 NM_000393.2   |
| 80.6   | 86.2   | 85     | 66.3 NM_015719.2   |
| 141    | 213.4  | 204.7  | 195.9 NM_001848.1  |
| 93.8   | 96.7   | 102.1  | 105.8 NM_058174.1  |
| 115    | 112.2  | 105.2  | 104.6 NM_001849.2  |
| 104    | 104.6  | 101    | 93.9 NM_058175.1   |
| 83.8   | 80.9   | 80     | 81 NM_004369.2     |
| 105.1  | 102    | 93.1   | 97.3 NM_057164.2   |
| 191.5  | 209.3  | 201.5  | 167.8 NM_000094.2  |
| 93.7   | 101.3  | 104.2  | 106.1 NM_020351.2  |
| 90.4   | 86     | 77     | 81.8 NM_020351.2   |
| 86.7   | 90.7   | 80.3   | 87.3 NM_001850.3   |
| 169.9  | 160.7  | 116.2  | 118.4 NM_005202.1  |
| 100    | 94.4   | 95.4   | 98.6 NM_001851.3   |
| 80.4   | 92.6   | 85.3   | 79.8 NM_078485.2   |
| 83.7   | 83.5   | 80.2   | 89.1 NM_001851.3   |
| 92     | 84.1   | 72.2   | 74.1 NM_001851.3   |
| 2779.7 | 4116.9 | 3248.7 | 3505.3 NM_001852.3 |
| 90     | 102.3  | 91.4   | 96.1 NM_001853.2   |
| 93.5   | 77.2   | 91.2   | 78.8 NM_006438.2   |
| 81.2   | 83.1   | 82.3   | 87.1 NM_199235.1   |
| 90.8   | 86.2   | 80.2   | 91.3 NM_199235.1   |
| 83.9   | 95.4   | 94.6   | 91.2 NM_024027.3   |
| 90.4   | 91.7   | 96.2   | 93.7 NM_130386.1   |
| 87.3   | 86.5   | 86.3   | 89.9 NM_030781.2   |
| 92.2   | 94.8   | 91.2   | 97.2 NM_080540.2   |
| 93.8   | 83.4   | 82.8   | 93.6 NM_080542.1   |
| 102.8  | 93     | 103.1  | 91.9 NM_080539.2   |
| 98.9   | 102.1  | 106.4  | 95.5 NM_080538.1   |
| 1017.1 | 696.1  | 755    | 526.4 NM_152516.2  |
| 882.7  | 543.5  | 489    | 468 NM_016144.2    |
| 712.7  | 480    | 407.8  | 362.3 NM_016094.2  |
| 7705.3 | 4529.9 | 4271.3 | 2942.9 NM_012071.2 |
| 1605.2 | 1256.1 | 1132.6 | 941.9 NM_017828.3  |
| 989.2  | 512.6  | 511.7  | 355.5 NM_014066.3  |
| 173.1  | 131.4  | 120.3  | 101.1 NM_014066.3  |
| 4183.9 | 4905.5 | 4288.8 | 3774.2 NM_203495.1 |

|        |        |        |        |             |
|--------|--------|--------|--------|-------------|
| 87.3   | 86.2   | 88.6   | 92.2   | NM_203497.1 |
| 3203.5 | 2217.2 | 1970.5 | 1239.6 | NM_053041.1 |
| 108.1  | 89.2   | 106.1  | 116.8  | NM_017845.2 |
| 430.2  | 368.8  | 329.2  | 325.2  | NM_014186.1 |
| 79.3   | 85.4   | 81.9   | 79.9   | NM_000095.2 |
| 328.5  | 259.5  | 225.3  | 168.8  | NM_000754.2 |
| 9946.3 | 7057.9 | 7068.4 | 4057.1 | NM_000754.2 |
| 170.6  | 146    | 114.1  | 136    | NM_144589.2 |
| 107.1  | 113.1  | 94.6   | 97.9   | NM_052889.2 |
| 97.5   | 94.9   | 89.5   | 104.5  | NM_052889.2 |
| 2983.9 | 2502.7 | 2418.6 | 1575.5 | NM_004371.2 |
| 1439.4 | 1225.3 | 957.7  | 1353.7 | NM_016451.3 |
| 1735.4 | 2073.3 | 1675.9 | 997.9  | NM_004766.1 |
| 1518.2 | 995.9  | 971.7  | 708.5  | NM_199444.1 |
| 1562.9 | 960.9  | 1065   | 648.2  | NM_199444.1 |
| 576.8  | 419.4  | 399    | 336.1  | NM_016128.3 |
| 131.5  | 261    | 188.3  | 209.4  | NM_012133.2 |
| 105.9  | 89.8   | 93.6   | 96.9   | NM_004236.1 |
| 1950.4 | 1703.5 | 1434.3 | 1119.1 | NM_003653.2 |
| 727    | 477.6  | 362.6  | 385.5  | NM_016129.2 |
| 5014   | 2954.6 | 2597.8 | 2208.3 | NM_006837.2 |
| 638.4  | 489.8  | 486    | 320.6  | NM_006833.4 |
| 874.1  | 1031.6 | 901.9  | 567.6  | NM_016319.1 |
| 873    | 640.7  | 581.2  | 361    | NM_022730.1 |
| 85.7   | 75.8   | 83     | 80.3   | NM_198189.2 |
| 225.3  | 181.2  | 144.4  | 172.5  | NM_006710.4 |
| 1203.4 | 869.2  | 614.4  | 533.9  | NM_016057.1 |
| 146.5  | 168.4  | 161.7  | 136.8  | NM_016429.1 |
| 196.9  | 207.2  | 183.5  | 151.7  | NM_144576.2 |
| 1109   | 1023   | 948.5  | 602.1  | NM_025147.2 |
| 2320.8 | 1331.4 | 1095.1 | 776.2  | NM_015697.5 |
| 416.2  | 335.4  | 365    | 261.6  | NM_017421.2 |
| 1628.1 | 1471.1 | 1305.7 | 898.5  | NM_032314.2 |
| 139.9  | 148.3  | 148.8  | 162.2  | NM_182476.1 |
| 456.1  | 447.1  | 386.2  | 346.7  | NM_182480.1 |
| 165.4  | 132.2  | 131.8  | 117.8  | NM_016138.3 |
| 775.8  | 550.5  | 514    | 463.9  | NM_020312.1 |
| 89.2   | 88.1   | 87.9   | 79.2   | NM_006587.2 |
| 1937.2 | 1031.7 | 987.9  | 857.2  | NM_007074.2 |
| 161.9  | 150.3  | 155.5  | 129.6  | NM_020441.2 |
| 1063.4 | 964.8  | 797.6  | 530.4  | NM_020441.2 |
| 295.6  | 395.7  | 320    | 297.2  | NM_014325.2 |
| 504.9  | 692.3  | 514.1  | 517    | NM_052820.2 |
| 128.2  | 149    | 129.3  | 124.7  | NM_052820.2 |
| 78.5   | 78.6   | 75.4   | 77.8   | NM_003389.2 |
| 99.8   | 97.3   | 88.6   | 92.4   | NM_006091.2 |
| 106.1  | 118.9  | 101.9  | 110.5  | NM_032854.1 |
| 349.3  | 303.9  | 279.7  | 272.2  | NM_024535.1 |
| 101    | 107.7  | 99     | 99.1   | NM_001302.3 |
| 106.6  | 115.4  | 114.4  | 117.1  | NM_021149.2 |

|         |         |         |         |                |
|---------|---------|---------|---------|----------------|
| 296.2   | 344.8   | 307     | 195.4   | NM_006375.2    |
| 94.3    | 80.6    | 79.1    | 86.3    | NM_182314.1    |
| 133.4   | 147.2   | 131.8   | 132.1   | NM_006375.2    |
| 532.4   | 446.6   | 431.8   | 305     | NM_001303.2    |
| 126.6   | 105.4   | 98.2    | 103.2   | NM_004375.2    |
| 89      | 91.8    | 86.2    | 80.8    | NR_000031.1    |
| 90.7    | 88.3    | 77.3    | 84.3    | NM_078470.2    |
| 237.1   | 180.8   | 175.6   | 129.6   | NM_004376.3    |
| 6386.5  | 4645.8  | 4532.8  | 3273.3  | NM_005694.1    |
| 19651.4 | 15162.5 | 15258.6 | 10163.9 | NM_001861.2    |
| 92.4    | 93.3    | 88.6    | 94.8    | NM_032609.2    |
| 348.7   | 248.9   | 190.5   | 176.9   | NM_006067.3    |
| 12681.3 | 8707.2  | 7871.4  | 7169.5  | NM_004255.2    |
| 6377.4  | 5135.6  | 5162.7  | 3487.7  | NM_001862.2    |
| 1275.2  | 1107.7  | 1197.9  | 805.4   | NM_004373.2    |
| 90      | 91.7    | 80.9    | 92.7    | NM_005205.2    |
| 12465.2 | 7974.8  | 6705.2  | 6551.8  | NM_001863.3    |
| 97.7    | 100.7   | 93.6    | 90      | NM_144613.4    |
| 9843.1  | 7904.5  | 7129.7  | 6158.5  | NM_004374.2    |
| 92.7    | 87.3    | 78.1    | 87.6    | NM_001864.2    |
| 18969.8 | 17289.6 | 13566.3 | 13199.9 | NM_001865.2    |
| 2374.9  | 1968    | 1461.2  | 2060.3  | NM_001866.2    |
| 87.8    | 84      | 82      | 81.2    | NM_130902.1    |
| 22357.5 | 16232   | 13905.8 | 12299.5 | NM_001867.2    |
| 10591.8 | 5641.6  | 5525.7  | 3808.8  | NM_004074.2    |
| 104.4   | 95.5    | 88      | 84.3    | NM_182971.1    |
| 88.2    | 94      | 85      | 90.9    | NM_000096.1    |
| 686.2   | 543.6   | 461.9   | 438.2   | NM_014711.3    |
| 89.2    | 77.2    | 87.2    | 86.6    | NM_001868.1    |
| 83.3    | 78.5    | 84.2    | 95.8    | NM_001869.1    |
| 95.5    | 83.4    | 89.1    | 86.8    | NM_001870.1    |
| 91.5    | 80.3    | 90.4    | 87.6    | NM_016352.2    |
| 89.4    | 92.4    | 89.1    | 77.5    | NM_080385.2    |
| 76.1    | 75.6    | 67.5    | 78.5    | NM_020361.2    |
| 86.8    | 88.9    | 88.5    | 80.3    | NM_015692.1    |
| 88.4    | 79.8    | 81.9    | 87.6    | NM_001871.2    |
| 83.4    | 91.3    | 83.4    | 81.6    | NM_001872.2    |
| 82.2    | 82.4    | 76.3    | 84.2    | NM_016413.3    |
| 94.6    | 96.8    | 92.4    | 96.5    | NM_001872.2    |
| 566.4   | 1272.7  | 1006.9  | 935     | NM_001304.3    |
| 156.5   | 106.2   | 96.5    | 104.9   | NM_001873.1    |
| 83.7    | 84.8    | 84.4    | 84.5    | NM_030594.2    |
| 89      | 96.8    | 90      | 89.6    | NM_001079534.1 |
| 95.3    | 103     | 88.9    | 95.5    | NM_030594.2    |
| 91      | 71.3    | 82      | 82      | XM_944543.1    |
| 475.4   | 446.2   | 376.7   | 437     | NM_182646.1    |
| 97.1    | 90.3    | 84.5    | 92.6    | NM_014912.3    |
| 94.4    | 106.2   | 97.4    | 98.2    | NM_030627.1    |
| 84.7    | 83.6    | 86.3    | 81.3    | NM_006651.3    |
| 88.7    | 94.5    | 96      | 88.3    | NM_001008220.1 |

|        |        |        |                      |
|--------|--------|--------|----------------------|
| 86.6   | 88.7   | 92.6   | 89.4 NM_006650.3     |
| 95.7   | 87.2   | 95     | 95.8 NM_001030005.2  |
| 92.6   | 103.4  | 95.4   | 95 NM_001005502.1    |
| 170.6  | 154.7  | 137.6  | 119.9 NM_001874.3    |
| 91.9   | 83.8   | 82.2   | 85 NM_001308.1       |
| 96.9   | 87.9   | 84.2   | 95.9 XM_942072.1     |
| 101.4  | 99.4   | 88.6   | 89.7 NM_001080513.1  |
| 104.2  | 101.4  | 95.8   | 90.1 NM_003915.2     |
| 872.8  | 639.7  | 627.8  | 481.2 NM_152931.1    |
| 864.9  | 659.6  | 668.1  | 468.2 NM_152931.1    |
| 140.9  | 117.9  | 96.4   | 113.2 NM_152727.4    |
| 1276.2 | 947.5  | 831    | 812.8 NM_003909.2    |
| 92.4   | 87.5   | 88.7   | 97.3 NM_130808.1     |
| 91     | 90.3   | 95.3   | 84.7 NM_020939.1     |
| 91.4   | 87.6   | 89     | 100.3 NM_006032.2    |
| 82.4   | 84.6   | 72.3   | 73.9 NM_153636.1     |
| 436.5  | 370.9  | 418.8  | 376.8 NM_153634.2    |
| 88.8   | 95.6   | 77     | 80.8 NM_001033755.1  |
| 79.8   | 91.8   | 82     | 79.1 NM_173077.1     |
| 169.9  | 98.7   | 82.9   | 92.4 NM_001875.2     |
| 921.5  | 769.9  | 786.1  | 304.9 NM_013291.2    |
| 403.5  | 330.3  | 307.6  | 196.7 NM_017437.1    |
| 1463.9 | 1267.1 | 1314.8 | 913.3 NM_016207.2    |
| 175.7  | 188.7  | 188.4  | 156.2 NM_032179.1    |
| 125.8  | 142.9  | 117.4  | 127.5 NM_017871.3    |
| 2671.9 | 1955.8 | 2178   | 1347.1 NM_006693.1   |
| 121.1  | 108.8  | 116.7  | 104.6 NM_001081559.1 |
| 141.5  | 125.2  | 105.2  | 121 NM_007007.1      |
| 102.9  | 92.2   | 99     | 84.2 NM_001876.2     |
| 92.1   | 86.1   | 90.5   | 91.8 NM_001031847.1  |
| 221.8  | 208.7  | 186.2  | 174.7 NM_001876.2    |
| 182.5  | 207.8  | 209.6  | 195.6 NM_152246.1    |
| 109.5  | 124.3  | 138    | 119.5 NM_152247.1    |
| 97.3   | 93     | 84.9   | 94.7 NM_152359.1     |
| 967.1  | 1041.9 | 882.6  | 543.6 NM_000098.1    |
| 1738.6 | 1896.5 | 1553.7 | 1425.7 NM_031311.3   |
| 502.9  | 648.7  | 535    | 515.6 NM_031311.2    |
| 97.7   | 87.8   | 85.7   | 83.6 NM_033048.3     |
| 94.3   | 81     | 89.6   | 95.2 NM_019609.3     |
| 99.5   | 98.4   | 102.7  | 102.1 NM_198148.1    |
| 89.5   | 90.1   | 80.3   | 92.4 NM_001014447.1  |
| 98.5   | 85.4   | 83     | 88.7 NM_001014448.1  |
| 97.1   | 88     | 84.3   | 88.3 NM_001014447.1  |
| 100.8  | 90.8   | 88.6   | 91.9 NM_000573.3     |
| 78.1   | 79.9   | 77.6   | 77.3 XM_936516.1     |
| 78.7   | 71.6   | 72.4   | 79.4 NM_000651.3     |
| 78.4   | 86     | 76.1   | 84.1 NM_001006658.1  |
| 91.9   | 91.5   | 93.9   | 96.4 NM_001877.3     |
| 704.3  | 395.1  | 381.6  | 357.7 NM_004378.1    |
| 114    | 99.1   | 94.3   | 99.2 NM_001878.2     |

|        |        |        |                      |
|--------|--------|--------|----------------------|
| 278.6  | 275.8  | 280.5  | 163.4 NM_003805.3    |
| 260.3  | 245.5  | 259.4  | 257.6 NM_020825.2    |
| 129.7  | 124.4  | 136.2  | 115.9 NM_000755.2    |
| 99.3   | 93.4   | 105.9  | 91.4 NM_004003.2     |
| 102.1  | 93.4   | 92.7   | 96.5 NM_201253.1     |
| 88.4   | 96.4   | 85.9   | 86 NM_173689.4       |
| 84.9   | 87.3   | 78.2   | 82.1 NM_139161.2     |
| 96.7   | 91     | 97     | 101.8 NM_174881.2    |
| 95.1   | 102.3  | 96.1   | 92.4 NM_139161.2     |
| 324.5  | 299.8  | 251.5  | 276.5 NM_016302.2    |
| 1527.3 | 1798.2 | 2204.9 | 2171.4 NM_004379.2   |
| 102.1  | 86.3   | 91     | 93 NM_006368.4       |
| 92.4   | 90.6   | 80.7   | 94.4 NM_052854.1     |
| 730.1  | 995.1  | 841.6  | 679.9 NM_194071.2    |
| 86.1   | 83.7   | 87.1   | 86.9 NM_032607.1     |
| 91.7   | 97.1   | 91.6   | 88.8 NM_130898.2     |
| 77.1   | 80.1   | 65.9   | 75.3 NM_182898.2     |
| 82.6   | 85.1   | 81.1   | 83.8 NM_182899.3     |
| 82.3   | 92.3   | 90.5   | 91.5 NM_001011666.1  |
| 91.2   | 81.7   | 87.3   | 80.4 NM_182898.2     |
| 102.9  | 90.1   | 86.5   | 96.8 NM_004904.2     |
| 110.4  | 126.5  | 107.3  | 122.3 NM_004380.2    |
| 794.9  | 746.4  | 655.7  | 649.3 NM_004380.1    |
| 108.7  | 111.4  | 94.8   | 92.4 NM_004381.3     |
| 83.5   | 87.3   | 76.5   | 80.7 NM_001310.2     |
| 1658.4 | 2021.4 | 1467.9 | 1426.6 NM_003851.2   |
| 88.1   | 94.1   | 88.8   | 92.9 NM_153836.1     |
| 94.9   | 97.1   | 98     | 95.7 NM_015513.2     |
| 85.5   | 95.4   | 96.9   | 86.9 NM_001031717.1  |
| 396.2  | 503.8  | 476.8  | 321.1 NM_001031717.1 |
| 85.7   | 88.1   | 84.5   | 94.6 NM_001077415.1  |
| 2142.9 | 2476.7 | 2271.2 | 1406.3 NM_024324.2   |
| 94.6   | 86.9   | 77.6   | 85.7 NM_001881.2     |
| 103.1  | 100.5  | 102.4  | 93.2 NM_000756.1     |
| 93.7   | 85.5   | 90.4   | 87.6 NM_001882.3     |
| 140.1  | 137.1  | 149.4  | 114.1 NM_004382.2    |
| 88.7   | 85.2   | 79     | 83.2 NM_004382.2     |
| 84.8   | 84.3   | 77.9   | 82.9 NM_001883.2     |
| 151.8  | 183.4  | 154.8  | 161.4 NM_014335.2    |
| 171.5  | 179.1  | 146.2  | 177.7 NM_153232.3    |
| 103.3  | 104.3  | 101.7  | 97.4 NM_016441.1     |
| 2040.2 | 899.2  | 826.2  | 628.5 NM_001311.3    |
| 93.2   | 88.4   | 76.8   | 79.1 NM_001312.2     |
| 94.8   | 98.6   | 89.9   | 81 NM_206922.1       |
| 147.4  | 191.9  | 210.7  | 210.3 NM_175918.2    |
| 580.1  | 369.8  | 378.5  | 265.2 NM_014171.3    |
| 96.8   | 94.7   | 81.1   | 83.8 NM_001131.2     |
| 85.1   | 87     | 74.9   | 85.9 NM_001131.2     |
| 103.9  | 95.7   | 89     | 104.9 NM_003296.1    |
| 100.2  | 94.5   | 94.5   | 104.9 NM_006061.1    |



|        |        |        |                     |
|--------|--------|--------|---------------------|
| 100.8  | 88.8   | 98.4   | 104.4 NM_031461.3   |
| 92.2   | 118.4  | 103.9  | 102.3 NM_031476.1   |
| 420.1  | 389.9  | 348.9  | 263.1 NM_016823.2   |
| 169.1  | 157.2  | 150.9  | 130.2 NM_016823.2   |
| 2767   | 2363.1 | 2207.3 | 1447.8 NM_005207.2  |
| 230    | 309.4  | 244.8  | 249.5 NM_016507.1   |
| 113    | 99.1   | 101.9  | 98.5 NM_004750.2    |
| 83.1   | 87     | 88.7   | 90.8 NM_001012288.1 |
| 285.1  | 347.8  | 296.5  | 317.5 NM_015986.2   |
| 107.6  | 93.4   | 98.6   | 94 NM_001014809.1   |
| 93.8   | 93.4   | 90.3   | 97.8 NM_001313.3    |
| 93.5   | 93.1   | 91     | 83.5 NM_001014809.1 |
| 110.9  | 115    | 93.5   | 107.5 NM_016652.3   |
| 150.7  | 173.1  | 176    | 135.5 NM_016190.1   |
| 127.9  | 110.4  | 107.8  | 99.1 NM_014675.2    |
| 208    | 191.9  | 198.6  | 241.3 NM_016424.3   |
| 844.5  | 648.9  | 584.5  | 618 NM_006107.2     |
| 127.2  | 153.3  | 128.8  | 129.1 NM_021151.2   |
| 87.2   | 78.1   | 82.9   | 89.7 NM_000567.2    |
| 2078.1 | 1841.7 | 1585.4 | 1361.9 NM_030782.2  |
| 97.9   | 95.5   | 92.8   | 85.4 NM_004229.2    |
| 308.1  | 285.5  | 261.1  | 279.5 NM_004830.2   |
| 122.9  | 108    | 96.1   | 101.6 NM_015979.2   |
| 112.5  | 122.2  | 96.1   | 100.7 NM_004268.3   |
| 163.8  | 147.1  | 127.8  | 125.7 NM_004831.3   |
| 99.8   | 90.9   | 90.8   | 94.6 NM_004270.3    |
| 77.2   | 81.8   | 88.7   | 80 NM_018058.4      |
| 94.3   | 80.8   | 82     | 85.1 NM_019604.2    |
| 1101.2 | 1038.1 | 982.8  | 803.9 NM_006371.3   |
| 178.2  | 282.6  | 264    | 181.7 NM_006371.3   |
| 110.7  | 110.8  | 106.3  | 105.7 NM_015321.1   |
| 118.1  | 101.4  | 90.6   | 106 NM_181715.1     |
| 93.5   | 100.1  | 87.9   | 94.8 NM_000554.2    |
| 158.9  | 165.6  | 151.9  | 151 NM_004075.2     |
| 146.7  | 133.9  | 136.2  | 111.3 NM_021117.1   |
| 85     | 82.6   | 82.3   | 84.4 NM_000394.2    |
| 90.5   | 91.1   | 88.6   | 84.4 NM_001885.1    |
| 89     | 93.8   | 94.9   | 83.6 NM_005208.3    |
| 90.5   | 86.3   | 87.2   | 91.8 NM_057093.1    |
| 94.1   | 103.1  | 93.8   | 94.9 NM_057093.1    |
| 97.8   | 85.8   | 86.7   | 80.7 NM_001886.1    |
| 101.7  | 101    | 90.9   | 86.1 NM_001887.3    |
| 385.8  | 283.9  | 258.8  | 255.8 NM_000496.1   |
| 88.1   | 88.3   | 73.4   | 82.1 NM_004076.3    |
| 129    | 119.2  | 114.4  | 96.9 NM_014617.2    |
| 79.1   | 87     | 81.4   | 78.5 NM_005210.2    |
| 94.8   | 80.6   | 84.5   | 85 NM_020989.2      |
| 85.9   | 90.6   | 83.1   | 80.5 NM_006891.2    |
| 79.2   | 77.8   | 73.8   | 75 NM_144727.1      |
| 144.5  | 163.1  | 159.8  | 128 NM_017541.2     |

|        |        |        |        |                |
|--------|--------|--------|--------|----------------|
| 175.7  | 244.6  | 248.7  | 221.6  | NM_015974.1    |
| 85     | 98.5   | 92.1   | 85     | NM_001888.2    |
| 102.4  | 112.1  | 99.3   | 103.6  | NM_001014444.1 |
| 82.2   | 80.9   | 80.9   | 78.2   | NM_001888.2    |
| 314.3  | 214.7  | 225.3  | 215.3  | NM_001889.2    |
| 699.4  | 568.8  | 525    | 464.9  | NM_005111.5    |
| 98.2   | 98.9   | 90.3   | 106.6  | NM_198324.1    |
| 3856.4 | 3407.2 | 2585.3 | 1895.7 | NM_004077.2    |
| 438.7  | 537.3  | 367.3  | 332.8  | NM_004077.2    |
| 181.6  | 239.7  | 237.7  | 281.4  | NM_015989.3    |
| 101.5  | 94.4   | 93.9   | 90.7   | NM_153479.1    |
| 83.1   | 92.4   | 80.4   | 94.5   | NM_153478.1    |
| 89.6   | 81.3   | 95.6   | 78.8   | NM_004909.1    |
| 96.3   | 95.4   | 95.2   | 91.6   | NM_001080848.1 |
| 85.6   | 77.7   | 75.8   | 83.1   | NM_001080848.1 |
| 102.6  | 95.9   | 89.8   | 100.3  | NM_203311.1    |
| 2769.4 | 1738   | 1877.7 | 1192.7 | NM_003651.3    |
| 95.8   | 101.3  | 94.7   | 101.4  | NM_014460.2    |
| 216.4  | 200.8  | 198    | 148.5  | NM_007158.4    |
| 162.3  | 163.3  | 166.3  | 169    | NM_001007553.1 |
| 2604.2 | 1598.9 | 1129   | 1211   | NM_001316.2    |
| 3462.7 | 2544   | 1716   | 1785.9 | NM_177436.1    |
| 110.1  | 87     | 86.8   | 94.3   | NM_013434.3    |
| 89.7   | 90.2   | 82.7   | 89.8   | NM_172210.1    |
| 93.3   | 77.8   | 79.4   | 84     | NM_172212.1    |
| 86     | 86.3   | 81.7   | 90.2   | NM_000757.3    |
| 1106.5 | 2366.2 | 1932.9 | 1142.3 | NM_005211.2    |
| 90     | 94.3   | 89.1   | 89.7   | NM_000758.2    |
| 354.5  | 354.3  | 394.1  | 341.4  | XM_942501.1    |
| 1307.1 | 1359.2 | 2098.4 | 1175.4 | NM_172249.1    |
| 567.5  | 587.2  | 589    | 474.3  | NM_172249.1    |
| 88.6   | 101.8  | 98.4   | 90.4   | NM_000395.1    |
| 95.9   | 91.6   | 86.3   | 101.8  | NM_000759.2    |
| 81.1   | 74.1   | 76.1   | 84.5   | NM_000759.2    |
| 91.5   | 101    | 93.3   | 89.2   | NM_172220.1    |
| 119.1  | 161.8  | 141.2  | 158.2  | NM_000760.2    |
| 1006.5 | 1960.4 | 1975.3 | 1050   | NM_172313.1    |
| 282    | 230.9  | 202.3  | 182.9  | NM_019015.1    |
| 86.6   | 91.6   | 82.2   | 87     | NM_022640.2    |
| 92.9   | 88.7   | 80.3   | 86.3   | NM_001317.3    |
| 85     | 89.2   | 89     | 85.2   | NM_022644.2    |
| 92.1   | 86.4   | 81.2   | 92.1   | NM_022644.2    |
| 86.2   | 94.4   | 87.5   | 96     | NM_022579.1    |
| 94.9   | 95.4   | 86.7   | 90.3   | NM_022581.1    |
| 1583.6 | 1203.7 | 1127.1 | 683    | NM_004383.1    |
| 85.4   | 80.6   | 79.3   | 79.3   | NM_033225.3    |
| 83.5   | 93.8   | 71.4   | 93.3   | NM_052896.2    |
| 87.3   | 83.5   | 83.1   | 87.6   | NM_198124.1    |
| 79.6   | 89.9   | 78.8   | 80.5   | NM_198123.1    |
| 88.5   | 81.7   | 78.9   | 86.6   | NM_052900.2    |

|         |         |         |                      |
|---------|---------|---------|----------------------|
| 87.6    | 104.9   | 91.1    | 90.5 NM_001025104.1  |
| 85.8    | 74.1    | 76.4    | 85 NM_001890.1       |
| 91.7    | 87.6    | 88.1    | 94.7 NM_001891.1     |
| 94.3    | 85.2    | 80.6    | 88.8 NM_005212.1     |
| 230.4   | 168     | 155.5   | 150.8 NM_001892.4    |
| 110.2   | 113.8   | 117.9   | 107.3 NM_001025105.1 |
| 580.3   | 601.6   | 431     | 426.6 NM_001892.4    |
| 90.2    | 91.9    | 86.8    | 87 NM_145203.2       |
| 1227.6  | 1228.1  | 1356    | 679.5 NM_139062.1    |
| 545.8   | 633.4   | 530.6   | 554.6 NM_139062.1    |
| 1108.1  | 1028.7  | 1113.9  | 623.8 NM_152221.2    |
| 102.3   | 92.8    | 107.5   | 93.5 NM_001894.4     |
| 317.2   | 248.4   | 197.9   | 212.3 NM_152221.2    |
| 230.5   | 289.6   | 256.4   | 201.9 NM_022048.2    |
| 96.4    | 113.9   | 95      | 105.2 NM_001011664.2 |
| 477.1   | 452.5   | 349     | 314.4 NM_001319.5    |
| 96.3    | 89.5    | 88.4    | 79.2 NM_004384.2     |
| 346.4   | 392.5   | 283.7   | 316.1 NM_001031812.1 |
| 171.4   | 178.1   | 126.7   | 165.5 NM_001044722.1 |
| 323.7   | 273.8   | 239.3   | 219.6 NM_001895.3    |
| 365     | 314.7   | 273.7   | 222.5 NM_001895.3    |
| 97      | 104.9   | 99.8    | 93.7 NM_177559.2     |
| 189.8   | 146.7   | 154.1   | 128.5 NR_002207.1    |
| 526.6   | 356.3   | 317.8   | 240.8 NM_001896.2    |
| 7203.4  | 4380.8  | 3382.6  | 2647.9 NM_001320.5   |
| 128.2   | 365.1   | 215.4   | 193 NM_004385.2      |
| 113.5   | 110.9   | 108.9   | 99.9 NM_004386.1     |
| 98.1    | 95.3    | 77.9    | 80.4 NM_001897.3     |
| 93      | 86.6    | 87.3    | 84.5 NR_002194.1     |
| 125.9   | 190.5   | 167.3   | 186.2 NM_006574.2    |
| 424.6   | 360     | 381.7   | 334.7 NM_024790.3    |
| 131     | 126.2   | 126.3   | 126.6 NM_024790.3    |
| 1029.9  | 621.7   | 598.7   | 499.9 NM_004078.1    |
| 91.2    | 86.6    | 82.2    | 83.3 NM_001321.1     |
| 107.3   | 120.4   | 103     | 101.6 NM_020536.2    |
| 462.3   | 303.7   | 281.9   | 233.3 NM_020536.2    |
| 105     | 92.8    | 86.9    | 88 NM_177926.1       |
| 80.2    | 77.4    | 74.9    | 87.4 NM_003476.2     |
| 149.6   | 190.9   | 159.8   | 141.2 NM_175856.4    |
| 98.5    | 85.7    | 84      | 83.9 NM_001898.2     |
| 93.5    | 82.6    | 81.1    | 89 NM_130794.1       |
| 82      | 76.4    | 76.5    | 82.2 NM_130794.1     |
| 84.5    | 81.5    | 73.1    | 80.4 NM_001322.2     |
| 11500.8 | 11566.3 | 10214.8 | 9928.7 NM_000099.2   |
| 96      | 84.2    | 89.1    | 92 NM_001899.2       |
| 87.7    | 85.6    | 76.5    | 84.9 NM_001900.4     |
| 93.5    | 81.9    | 85.2    | 86.1 NM_001323.2     |
| 97      | 86.6    | 73.1    | 76.8 NM_001323.2     |
| 374.4   | 195.9   | 186.2   | 173.3 NM_003650.2    |
| 83      | 85.2    | 84.4    | 85.3 NM_005492.2     |

|        |        |        |                      |
|--------|--------|--------|----------------------|
| 131.5  | 113.2  | 110.6  | 110 NM_001008693.1   |
| 94.4   | 81.2   | 74     | 87.9 NM_080610.1     |
| 170.5  | 173.2  | 143.1  | 130.6 NM_005213.3    |
| 3512.4 | 3695   | 3200.4 | 2942.7 NM_000100.2   |
| 127.5  | 110.6  | 103.7  | 92.8 NM_001033521.1  |
| 91.7   | 91.2   | 96.6   | 90.4 NM_001033522.1  |
| 94.3   | 97.7   | 82     | 98.8 NM_001033522.1  |
| 92.2   | 99.7   | 85.6   | 83.6 NM_001324.2     |
| 857.5  | 562.8  | 513.1  | 448.9 NM_001325.2    |
| 131    | 104.2  | 102.7  | 102.6 NM_015235.2    |
| 541    | 388.8  | 331.9  | 333.3 NM_001033505.1 |
| 134    | 161    | 161.3  | 136.2 NM_001033506.1 |
| 2654.9 | 1657.5 | 1673.5 | 1187 NM_001326.2     |
| 252.4  | 184    | 177.9  | 178 NM_001033505.1   |
| 84     | 76     | 87.5   | 91.9 NM_138283.1     |
| 82.9   | 85.6   | 76.5   | 88.7 NM_001017417.1  |
| 94.4   | 87.5   | 80.3   | 92.4 NM_001017436.1  |
| 84.2   | 77.2   | 80.7   | 80.8 NM_001007551.2  |
| 77.7   | 77.3   | 85.5   | 84.9 NM_001007551.2  |
| 94.6   | 98.9   | 96.3   | 95.9 NM_001007551.2  |
| 114.8  | 110.4  | 100.6  | 112.8 NM_001080146.1 |
| 85.1   | 77.4   | 75.7   | 79.9 NM_001080141.1  |
| 112    | 100.2  | 93.3   | 96.4 NM_001080140.1  |
| 87.1   | 81.7   | 83.3   | 88.3 NM_139250.1     |
| 89.8   | 94.1   | 86.4   | 94.1 NM_001327.1     |
| 91.7   | 95     | 86.5   | 102.3 NM_020994.2    |
| 78.7   | 83.7   | 81.4   | 91.7 NM_020994.2     |
| 84.1   | 85.8   | 88.1   | 84 NM_022663.1       |
| 89.5   | 81.8   | 85.8   | 74.2 NM_203355.1     |
| 81.8   | 85.6   | 80.6   | 85.3 NM_203354.1     |
| 93.9   | 83.1   | 84.8   | 84.1 NM_203356.1     |
| 96.7   | 99     | 117.3  | 116 NM_203356.1      |
| 234.8  | 268.7  | 223.6  | 249.6 NM_001012614.1 |
| 161.3  | 150.8  | 124.2  | 136.5 NM_001328.2    |
| 546.7  | 417    | 369.3  | 258.4 NM_001012614.1 |
| 118.7  | 109.8  | 104.2  | 106.1 NM_001329.1    |
| 98.2   | 94.8   | 94.6   | 95.1 NM_022802.1     |
| 327.2  | 413.2  | 400.8  | 323.6 NM_004388.1    |
| 534.6  | 528    | 394.2  | 394 NM_006565.2      |
| 99.6   | 89     | 88.6   | 89.5 NM_080618.2     |
| 120.6  | 136.9  | 125.9  | 125.1 NM_004715.3    |
| 108.8  | 92.6   | 91.1   | 91.6 NM_004715.3     |
| 133.4  | 143.7  | 145.6  | 129.8 NM_004715.3    |
| 416.4  | 338.5  | 310.2  | 254.4 NM_021198.1    |
| 138.3  | 147.1  | 139    | 168.9 NM_182642.1    |
| 1000.6 | 1089.8 | 1158.8 | 485.6 NM_005730.2    |
| 521.1  | 377.4  | 354.7  | 253.6 NM_005808.2    |
| 212.5  | 229    | 165.9  | 160.2 NM_016396.2    |
| 108.9  | 91.4   | 92.3   | 102.8 NM_001330.2    |
| 115.6  | 100.6  | 101    | 94.2 NM_001040144.1  |

|         |         |         |                      |
|---------|---------|---------|----------------------|
| 104.9   | 99.4    | 92.7    | 96.4 NM_001901.2     |
| 97.7    | 97      | 92.9    | 100 NM_133446.1      |
| 774.9   | 743.8   | 896.8   | 578.4 NM_001077665.1 |
| 99.7    | 97.1    | 85.4    | 91.8 NM_001077685.1  |
| 145.7   | 143.4   | 112.3   | 133.4 NM_153742.3    |
| 105.7   | 106.4   | 98.1    | 98.7 NM_001902.4     |
| 82      | 83      | 81.8    | 87.2 NM_138455.2     |
| 85.5    | 88.4    | 77.9    | 88.2 NM_005214.3     |
| 92.2    | 90.2    | 80.5    | 89.5 NM_005214.3     |
| 94.7    | 81.6    | 82.3    | 79.3 NM_005214.2     |
| 1299.8  | 1516.6  | 1313.3  | 923.3 NM_001903.2    |
| 98.4    | 97.1    | 94.4    | 82.7 NM_004389.2     |
| 86.5    | 75.5    | 77.2    | 88.4 NM_013266.1     |
| 375.7   | 343.1   | 233.7   | 318.4 NM_003798.1    |
| 503.8   | 545.7   | 438.1   | 464.1 NM_001904.2    |
| 90.7    | 84.1    | 81.2    | 87.2 NM_001904.2     |
| 147.6   | 179.2   | 160.6   | 117.1 NM_001012329.1 |
| 102.1   | 88.4    | 95.9    | 95.5 NM_020248.2     |
| 481.4   | 544.5   | 462.9   | 341.3 NM_030877.3    |
| 91.3    | 96.1    | 92.2    | 94.2 XM_943098.1     |
| 93.7    | 95.3    | 99.9    | 88.4 NM_001331.1     |
| 87.8    | 91.8    | 90      | 83.7 NM_001332.2     |
| 70.5    | 82.1    | 72.8    | 86.7 NM_001031681.1  |
| 176.8   | 199.7   | 186.1   | 125 NM_004937.1      |
| 104.8   | 90.5    | 101.2   | 90.3 NM_004937.1     |
| 2643.8  | 2519.2  | 1761.1  | 1622.5 NM_001905.1   |
| 91.9    | 91.3    | 86      | 80.1 NM_019857.3     |
| 603.6   | 763.1   | 771.8   | 514.9 NM_175859.1    |
| 133.4   | 97.2    | 106.3   | 106.6 NM_175859.1    |
| 149     | 183.6   | 156.6   | 140.4 NM_175859.1    |
| 83      | 92.8    | 84.6    | 100.6 NM_014633.2    |
| 84      | 86.5    | 73.7    | 75.3 NM_001906.4     |
| 89      | 90      | 80      | 83.4 NM_001906.4     |
| 102.8   | 93      | 90.1    | 98 NM_001025200.2    |
| 121.2   | 105.7   | 112     | 109 NM_007272.2      |
| 132.7   | 109.1   | 127     | 98 NM_001907.1       |
| 992.1   | 1767.2  | 2016.3  | 961.5 NM_001908.3    |
| 94.1    | 83.2    | 84.4    | 106 NM_148170.2      |
| 526.7   | 487.4   | 427.8   | 378.5 NM_001814.2    |
| 1166    | 1004.6  | 884.8   | 916 NM_001814.2      |
| 380.9   | 624.5   | 525.2   | 458.6 NM_001909.3    |
| 105.5   | 109     | 108.3   | 102.5 NM_148964.1    |
| 89.7    | 85.3    | 94.9    | 84.5 NM_001910.2     |
| 92.7    | 86.6    | 83.7    | 95.2 NM_001910.2     |
| 128.4   | 129     | 116.6   | 110.6 NM_003793.2    |
| 33957.8 | 32283.1 | 32317.4 | 23987.2 NM_001911.2  |
| 2006.2  | 2201.7  | 2332.9  | 1685.8 NM_004390.2   |
| 132     | 151.2   | 141.2   | 127.9 NM_004390.2    |
| 119.1   | 121.5   | 121.8   | 109.4 NM_000396.2    |
| 182.3   | 231.4   | 188.3   | 140.3 NM_001912.2    |

|        |        |        |                       |
|--------|--------|--------|-----------------------|
| 1699.5 | 2501.8 | 1964.3 | 907.5 NM_145918.2     |
| 1396.1 | 2110.1 | 1497.3 | 799.1 NM_145918.2     |
| 167    | 179.9  | 163.8  | 152.3 NM_001333.2     |
| 251    | 232.8  | 238.9  | 233.5 NM_001334.2     |
| 177.7  | 179.3  | 129.2  | 143.5 NM_004079.3     |
| 90.2   | 113.7  | 103.8  | 107.1 NM_001335.2     |
| 666.9  | 1347.7 | 1053.7 | 1155 NM_001336.2      |
| 150.4  | 91.9   | 84.4   | 97 NM_138565.1        |
| 125.7  | 105.7  | 100.2  | 100.5 NM_138565.1     |
| 86.8   | 86.8   | 80.4   | 83 NM_005231.2        |
| 89.9   | 81.9   | 91.1   | 93.7 NM_033427.1      |
| 109.4  | 94.3   | 84.1   | 99.7 NM_018704.1      |
| 254.4  | 121.6  | 96.5   | 102 NM_206833.1       |
| 88.5   | 75     | 90.1   | 85.9 NM_001048252.1   |
| 81.8   | 83.1   | 86.6   | 90.3 NM_001081.2      |
| 276.4  | 323.6  | 275.4  | 143.4 NM_017949.1     |
| 703.5  | 425.6  | 368    | 315.6 NM_024040.1     |
| 140.8  | 176.2  | 159.9  | 165.6 NM_198700.1     |
| 127.5  | 131.8  | 112.9  | 114.5 NM_198700.1     |
| 90.1   | 97.9   | 92.9   | 92.9 NM_001025076.1   |
| 260.4  | 348.4  | 334.6  | 239.1 NM_006561.2     |
| 205.6  | 168.5  | 156.4  | 152.9 NM_001025077.1  |
| 313.2  | 271    | 243    | 185.8 NM_003592.2     |
| 643.6  | 501.7  | 489.2  | 355.2 NM_003591.2     |
| 89.3   | 91.7   | 97.9   | 92.6 NM_003590.2      |
| 89.2   | 96     | 87.6   | 89.2 NM_001008895.1   |
| 732.5  | 675.1  | 653.8  | 662.6 NM_003589.2     |
| 137.6  | 158.7  | 142.1  | 144.1 NM_001079872.1  |
| 160.3  | 128.8  | 110.1  | 133.2 NM_003588.2     |
| 925.3  | 693.6  | 619.6  | 617.1 NM_003478.3     |
| 98.1   | 102.6  | 100.7  | 93.1 NM_014780.3      |
| 5866.7 | 4453.2 | 4328.1 | 2657.5 NM_001014433.2 |
| 1991.7 | 1535.9 | 1549.3 | 1299.7 NM_001014840.1 |
| 104.8  | 97.5   | 97.8   | 107.8 NM_015921.2     |
| 509.3  | 305.2  | 239.2  | 309 NM_015960.1       |
| 93.2   | 88.6   | 84.6   | 100 NM_181500.1       |
| 272.4  | 549.1  | 455.6  | 337.7 NM_181552.1     |
| 88.7   | 102.2  | 100.3  | 99.6 NM_001913.2      |
| 104.3  | 117.1  | 114.8  | 96.1 NM_015267.1      |
| 114.7  | 115.8  | 104.7  | 109 NM_022034.3       |
| 1806.6 | 995.4  | 890.3  | 597.7 NM_018294.3     |
| 270.1  | 331.7  | 247.4  | 233.1 NM_152434.1     |
| 75.2   | 80.6   | 85.3   | 77.5 NM_020660.1      |
| 79.2   | 86     | 86.7   | 77.1 NM_002996.3      |
| 956.5  | 580.8  | 640.5  | 555 NM_001337.3       |
| 86.7   | 84     | 83.8   | 87.7 NM_153368.1      |
| 85.8   | 90.2   | 77.8   | 81.5 NM_032602.1      |
| 83.4   | 84.1   | 78.7   | 87.5 NM_001338.3      |
| 93.4   | 87.8   | 89.2   | 89.6 NM_001511.1      |
| 86.8   | 89.4   | 93.1   | 88.2 NM_001565.1      |

|        |        |        |                      |
|--------|--------|--------|----------------------|
| 84.1   | 81.5   | 84.8   | 85.9 NM_005409.3     |
| 110.3  | 101.5  | 106.2  | 107.3 NM_199168.2    |
| 94.8   | 95.5   | 86.6   | 91.1 NM_001033886.1  |
| 86.6   | 88.8   | 84.3   | 82.3 NM_006419.1     |
| 87.2   | 86.3   | 88.7   | 83.9 NM_004887.3     |
| 112.2  | 116.5  | 108.3  | 98.7 NM_022059.1     |
| 87     | 90     | 89     | 91.5 NM_002089.1     |
| 89.3   | 84.3   | 89.7   | 92.3 NM_002090.2     |
| 90.3   | 88.8   | 79.6   | 86.3 NM_002994.3     |
| 93.9   | 92.5   | 91.2   | 83.4 NM_002993.2     |
| 85.8   | 83.5   | 93.4   | 67.7 NM_002416.1     |
| 94.3   | 91.8   | 88     | 78.9 NM_001504.1     |
| 304.6  | 395.5  | 302    | 239.9 NM_001008540.1 |
| 91.8   | 84.2   | 78.4   | 78.2 NM_001008540.1  |
| 1382.1 | 1597.4 | 1333.1 | 1168.4 NM_003467.2   |
| 92.9   | 93.9   | 86.5   | 97.3 NM_006564.1     |
| 91.6   | 91.7   | 95.9   | 97.7 NM_001047841.1  |
| 94.7   | 95.6   | 93.7   | 89.6 NM_004709.2     |
| 175.7  | 188.4  | 202.4  | 140.6 NM_003492.1    |
| 109.8  | 120    | 108.8  | 108.7 NM_018360.1    |
| 94.4   | 96.2   | 98.7   | 81.2 NM_001586.1     |
| 92.8   | 96.2   | 81.1   | 92.4 NM_153346.2     |
| 114.3  | 100.7  | 93     | 107.6 NM_025159.1    |
| 82.5   | 86     | 84.6   | 88.9 NM_152632.1     |
| 127.6  | 115.5  | 108.3  | 114.3 NM_198279.1    |
| 669.5  | 488.6  | 408.3  | 471 NM_016500.3      |
| 175    | 149.6  | 126.4  | 125.8 NM_198450.1    |
| 79.9   | 83.8   | 94.1   | 82.1 NM_024917.4     |
| 89.5   | 68.8   | 67.1   | 80.8 NM_024689.1     |
| 358.8  | 383.2  | 335.5  | 317.5 NM_144970.1    |
| 178.1  | 143.4  | 144.4  | 164.9 NM_207318.1    |
| 475    | 513.7  | 414.7  | 360.2 NM_178124.3    |
| 369.8  | 280.1  | 244.9  | 236.1 NM_001013845.1 |
| 87.3   | 85.4   | 84.5   | 87 NM_173494.1       |
| 95.3   | 98.4   | 98.9   | 88.2 NM_144657.2     |
| 133.6  | 135.8  | 151.6  | 126.6 NM_138362.1    |
| 153.5  | 218.7  | 223.9  | 217.5 NM_024810.1    |
| 95.9   | 91.8   | 97.8   | 102.6 NM_001031705.1 |
| 88.3   | 78.3   | 82.8   | 75 NM_017863.2       |
| 398.2  | 502.7  | 398.2  | 432.9 NM_024332.2    |
| 90.5   | 86.1   | 89.7   | 95.2 NM_152425.1     |
| 149.2  | 122.7  | 137.9  | 132.7 NM_022101.2    |
| 84.2   | 83.3   | 91.8   | 87.8 NM_005491.1     |
| 181.9  | 370.7  | 262.1  | 298.1 NM_018990.2    |
| 730.3  | 462    | 469.7  | 334.2 NM_003928.1    |
| 1412.6 | 1467.7 | 1417.7 | 672.2 NM_014593.2    |
| 95.7   | 79.6   | 90.2   | 93.1 NM_025212.1     |
| 2139.6 | 2079.9 | 1687.5 | 1643.8 NM_016463.5   |
| 106.7  | 96.3   | 89.3   | 97 NM_030625.1       |
| 2300.8 | 3412   | 3712.2 | 2181.6 NM_005088.2   |

|         |        |        |                      |
|---------|--------|--------|----------------------|
| 127.8   | 128.7  | 116.1  | 106.9 NM_001017916.1 |
| 148.2   | 118.5  | 117.5  | 104.5 NM_001017917.1 |
| 103.4   | 101.9  | 90.7   | 99.2 NM_001915.3     |
| 465.3   | 433.3  | 362.4  | 268.5 NM_007022.3    |
| 933.8   | 979.2  | 977.8  | 822.1 NM_148923.2    |
| 278     | 370.5  | 396.2  | 304.7 NM_001914.2    |
| 194     | 175.8  | 155.1  | 162.3 NM_144607.2    |
| 175.7   | 220.6  | 230.2  | 195.3 NM_144611.2    |
| 4668.7  | 2355.1 | 2289.3 | 1943.8 NM_030579.1   |
| 275.8   | 289.8  | 275.2  | 227.4 NM_016243.2    |
| 196.2   | 153.7  | 169.4  | 132.8 NM_016229.2    |
| 271.5   | 266.4  | 236.4  | 219.5 NM_007326.2    |
| 6482.5  | 3917.5 | 3721.2 | 2270.5 NM_007326.2   |
| 426.4   | 399.1  | 269.6  | 362.6 NM_016230.2    |
| 13998.5 | 9679.6 | 9754.3 | 6597.8 NM_000101.2   |
| 502.6   | 452.6  | 366    | 387.2 NM_153611.3    |
| 99.6    | 521.8  | 448.4  | 430 NM_000397.2      |
| 385     | 426.9  | 397    | 453.1 NM_024843.2    |
| 7219.9  | 4378.2 | 3745.5 | 2415 NM_001916.2     |
| 221.9   | 266.7  | 211.1  | 225.4 NM_018947.4    |
| 116.7   | 118.9  | 140    | 118.6 NR_001561.1    |
| 96      | 94.8   | 107.6  | 95.9 NM_014608.2     |
| 620.8   | 829.6  | 727.3  | 578.9 NM_001033028.1 |
| 100.2   | 94     | 89.9   | 81.1 NM_001033028.1  |
| 82.4    | 91.1   | 81.6   | 87 NM_001037333.1    |
| 102.5   | 113.4  | 109.6  | 105.6 NM_001037333.1 |
| 168.9   | 158.6  | 153.1  | 110.9 NM_014376.1    |
| 81      | 78.4   | 84.6   | 88.6 NM_134268.3     |
| 97.8    | 109.5  | 103.7  | 99.8 NM_032687.2     |
| 90.5    | 84.7   | 79.8   | 82.6 NM_021118.1     |
| 94.4    | 92.3   | 99     | 93.1 NM_001340.1     |
| 82.1    | 88.2   | 83.5   | 92.5 NM_015247.1     |
| 132.9   | 197.3  | 163.9  | 177.5 NM_015247.1    |
| 91.1    | 89.3   | 84.4   | 83.5 NM_003388.3     |
| 131.3   | 147.7  | 157.7  | 158.5 NR_001544.1    |
| 350.6   | 386.4  | 323.6  | 327.1 NM_001005852.1 |
| 127.9   | 142    | 136.4  | 133.2 NM_032576.2    |
| 111.9   | 116.4  | 112.3  | 102.1 NM_000781.1    |
| 94.8    | 77     | 71.6   | 78.8 NM_001026213.1  |
| 89.5    | 92.6   | 91.8   | 80.2 NM_000498.2     |
| 84.5    | 83.7   | 83.3   | 84.2 NM_000102.2     |
| 100     | 101.2  | 93.1   | 98.5 NM_000103.2     |
| 88.3    | 99.6   | 89.1   | 92.1 NM_031226.1     |
| 93.4    | 84.7   | 74.8   | 80 NM_031226.1       |
| 97.5    | 86.7   | 91.4   | 86.5 NM_000499.2     |
| 92.7    | 87.7   | 95.4   | 86 NM_000761.3       |
| 341.5   | 587.7  | 340.1  | 541.8 NM_000104.2    |
| 424.1   | 361    | 301.8  | 271.8 NM_177538.1    |
| 92.3    | 85.3   | 77.6   | 85.6 NM_177538.1     |
| 96.3    | 96.3   | 94.3   | 85.4 NM_000500.5     |



|       |       |       |                     |
|-------|-------|-------|---------------------|
| 97.9  | 80.8  | 77.7  | 82.8 NM_000782.3    |
| 89.6  | 83.6  | 81    | 87.1 NM_057157.1    |
| 88.8  | 91.2  | 89.3  | 90.3 NM_000783.2    |
| 93.5  | 90.2  | 80.4  | 85.9 NM_057157.1    |
| 86.8  | 92.4  | 90.2  | 80.6 NM_019885.2    |
| 79.3  | 80.1  | 88.6  | 79 NM_183374.2      |
| 140.3 | 241   | 242.9 | 239.8 NM_000784.2   |
| 139.8 | 124.6 | 128.3 | 103.1 NM_000785.3   |
| 90.3  | 81.2  | 93.7  | 87.4 NM_000766.3    |
| 86    | 91.2  | 89.7  | 82.3 NM_000762.4    |
| 111.1 | 103   | 103.3 | 100 NM_030589.2     |
| 89    | 91.3  | 79.3  | 89.1 NM_000767.4    |
| 83.8  | 85    | 85    | 81.5 NR_001278.1    |
| 99.3  | 103.3 | 93.1  | 101.2 NM_000772.1   |
| 99    | 83.3  | 90.1  | 89.2 NM_000769.1    |
| 86.6  | 89.9  | 84.4  | 85.1 NM_000770.2    |
| 94.3  | 94.9  | 93.2  | 83.1 NM_000771.2    |
| 104   | 95.9  | 96.5  | 87.1 NM_000106.4    |
| 120.4 | 122.5 | 121.7 | 111.9 NR_002570.2   |
| 95.8  | 96.6  | 91    | 92.3 NM_000773.3    |
| 94.7  | 84.9  | 75.9  | 82.3 NM_000774.3    |
| 115.3 | 140.6 | 126   | 119.2 NM_000775.2   |
| 206.9 | 169.6 | 159.1 | 170.9 NM_024514.4   |
| 111   | 106.8 | 99.8  | 100.8 NM_030622.5   |
| 382.9 | 300.2 | 268.5 | 203.6 NM_030622.6   |
| 92.4  | 88.3  | 82.5  | 100.8 NM_183075.2   |
| 92.4  | 95.8  | 74.7  | 77.3 NM_017781.2    |
| 91.6  | 84.7  | 79.3  | 89.3 NM_016593.3    |
| 74.9  | 87.8  | 78.7  | 86.3 NM_017460.3    |
| 100.1 | 86.4  | 85.3  | 92.6 NM_057096.2    |
| 94.2  | 89.3  | 87.2  | 81.2 NM_057095.1    |
| 90.4  | 88.2  | 89.1  | 84 NM_000777.2      |
| 91.5  | 85    | 92.3  | 91.4 NM_000765.2    |
| 96.9  | 97.5  | 95.3  | 95.6 NM_006668.1    |
| 96.1  | 86.4  | 82.5  | 89.4 NM_000778.2    |
| 105   | 88.4  | 92.5  | 86.6 NM_001010969.2 |
| 86.5  | 81.7  | 87.2  | 87 NM_000779.2      |
| 93.6  | 93.3  | 86    | 91.1 NM_021187.2    |
| 85.8  | 93.2  | 88.1  | 88.6 NM_023944.1    |
| 97.4  | 89    | 97.4  | 88.5 NM_001082.3    |
| 84.8  | 81.4  | 82.5  | 79.8 NM_000896.2    |
| 84.2  | 83.4  | 84.5  | 86.8 NM_007253.2    |
| 351.7 | 502.3 | 483.1 | 422.9 NM_207352.2   |
| 80    | 79.7  | 77.6  | 76.8 NM_178033.1    |
| 95.7  | 84.6  | 88.5  | 86.5 NM_178134.2    |
| 78.8  | 92.1  | 84    | 77.9 NM_178134.2    |
| 82.4  | 81.2  | 77.5  | 80.7 NM_178134.2    |
| 88.4  | 84.2  | 87.7  | 95.9 NR_002788.1    |
| 190.8 | 194.8 | 172.8 | 221.1 NM_000786.2   |
| 99.4  | 91.2  | 93.4  | 96.6 NM_000780.2    |

|        |        |        |                     |
|--------|--------|--------|---------------------|
| 93.9   | 88.8   | 87.9   | 87.9 NM_004820.2    |
| 90     | 92.2   | 95.6   | 92.8 NM_004391.1    |
| 94.1   | 85.9   | 83.1   | 98.5 NM_001554.3    |
| 98.2   | 86.9   | 86.7   | 87.2 XM_927934.1    |
| 90.1   | 93.9   | 88.5   | 81.8 NM_001037160.1 |
| 467.1  | 377.2  | 328.7  | 363.5 NM_006639.2   |
| 95.6   | 89     | 76.8   | 81.1 NM_020377.2    |
| 86.8   | 68.1   | 71.7   | 75.1 NM_018659.2    |
| 88.4   | 87.3   | 92.9   | 93.1 NM_052954.2    |
| 603.5  | 528.6  | 440.1  | 373.3 NM_015704.1   |
| 81     | 88.5   | 76.1   | 77.7 NM_003683.4    |
| 514.7  | 1086.3 | 1431.8 | 805.8 NM_152783.3   |
| 97.7   | 89.7   | 93.5   | 91.5 NM_014392.2    |
| 303.1  | 245.9  | 220.1  | 188.8 NM_130468.2   |
| 92.2   | 102.3  | 94.8   | 103.8 NM_014992.1   |
| 93.9   | 90.8   | 86.7   | 86.5 NM_015345.2    |
| 76.1   | 74.3   | 77.5   | 72.7 NM_021080.3    |
| 179.4  | 386.9  | 424.9  | 259.9 NM_001343.1   |
| 88     | 100.7  | 93.1   | 97.5 NM_032552.1    |
| 87.2   | 78.5   | 87.4   | 89.6 NM_138709.1    |
| 83.7   | 98.3   | 85.2   | 96.7 NM_138709.1    |
| 87.7   | 94.2   | 99.4   | 93.6 NM_080760.3    |
| 97.3   | 98.7   | 95     | 92.4 NM_080759.3    |
| 169.6  | 226.5  | 240.9  | 222 NM_080759.3     |
| 92     | 98.2   | 86.4   | 95.2 NM_016651.5    |
| 99.5   | 106    | 98.2   | 96.7 NM_016651.4    |
| 97.5   | 96.3   | 90.8   | 84.7 NM_016651.5    |
| 96.1   | 91.7   | 91.5   | 86.6 NM_214462.1    |
| 4575.4 | 2816.4 | 2482.5 | 1993.7 NM_001344.1  |
| 272.8  | 253.9  | 246    | 230 NM_004393.1     |
| 121.5  | 117.4  | 124.5  | 119.2 NM_015533.2   |
| 174.1  | 114    | 116.9  | 112.4 NM_018114.4   |
| 79.6   | 74.4   | 86.1   | 88 NM_018114.4      |
| 106.4  | 97.2   | 102.2  | 100.2 NM_152654.2   |
| 84.8   | 84.9   | 88.1   | 93.7 NM_001917.3    |
| 86.4   | 84.2   | 86.9   | 93.7 NM_172370.2    |
| 487.6  | 395.7  | 311.6  | 281.4 NM_004394.1   |
| 2291.2 | 1631.5 | 1299.1 | 1305.9 NM_033657.1  |
| 116.8  | 189.6  | 166.8  | 178.5 NM_004938.1   |
| 123    | 100.6  | 89     | 94.8 NM_014326.3    |
| 149.7  | 147.4  | 122    | 123.6 NM_001348.1   |
| 1428.3 | 1976.7 | 2578.8 | 1544.4 NM_014395.1  |
| 85     | 86.1   | 72.6   | 90.4 NM_002036.2    |
| 6930.2 | 6806.1 | 5531.7 | 4667.9 NM_001349.2  |
| 478.2  | 362.8  | 327.1  | 260 NM_018122.3     |
| 320    | 214.5  | 222.8  | 199 NM_001350.3     |
| 84.6   | 88.3   | 81.8   | 78.4 NM_004081.4    |
| 90.2   | 79     | 90.4   | 84.3 NM_020363.2    |
| 104.4  | 101    | 87.9   | 94.1 NM_001005785.1 |
| 87.4   | 79.8   | 87.2   | 90.9 NM_020420.2    |

|         |        |        |                       |
|---------|--------|--------|-----------------------|
| 98.2    | 91     | 87.2   | 87 NM_170711.1        |
| 784     | 412.1  | 476.3  | 248.9 NM_018959.2     |
| 10335.9 | 8904.4 | 8199.4 | 5839.3 NM_014764.2    |
| 95.1    | 89.8   | 90.9   | 84.6 NM_001351.2      |
| 75.8    | 79.6   | 81.5   | 79.4 NM_014618.1      |
| 99.6    | 97.8   | 93.9   | 98.8 NM_006716.3      |
| 111.8   | 101.1  | 100.8  | 102.1 NM_025104.2     |
| 87.6    | 88.3   | 85.3   | 87.6 NM_145663.1      |
| 76.1    | 75     | 74.5   | 96 NM_000787.2        |
| 8371.7  | 6277.3 | 5388.1 | 5864.7 NM_001079863.1 |
| 735.6   | 680.8  | 577.6  | 594.3 NM_020548.4     |
| 615     | 403.9  | 310    | 215.2 NM_080881.1     |
| 91.8    | 87.8   | 79.2   | 106.2 NM_004395.2     |
| 123.9   | 104.3  | 106.4  | 95.7 NM_001042610.1   |
| 82      | 83.3   | 77.1   | 80.6 NM_001048221.1   |
| 3163.9  | 2706.5 | 2345.4 | 1338.6 NM_014063.5    |
| 404.4   | 345.8  | 363.8  | 280.8 NM_014063.5     |
| 115.7   | 121.9  | 129.3  | 136.6 NM_001352.2     |
| 196.7   | 159.2  | 163    | 151.2 NM_016216.2     |
| 1261.9  | 874    | 939.3  | 571.1 NM_001918.1     |
| 91.2    | 89.3   | 77.7   | 74.3 NM_001029865.1   |
| 92.2    | 86.1   | 89.7   | 86.5 NM_001004329.2   |
| 349.6   | 225.8  | 260.8  | 293.9 NM_021227.2     |
| 871.1   | 1063.7 | 971    | 719.6 NM_024819.3     |
| 95.1    | 90     | 74.5   | 88 NM_172004.2        |
| 96.3    | 97.6   | 97.9   | 96.9 NM_004734.2      |
| 103.5   | 103.1  | 102.4  | 89.9 NM_001040260.1   |
| 91.9    | 89.4   | 79.2   | 84.2 NM_152619.1      |
| 208.4   | 196.9  | 164.8  | 168 NM_173674.1       |
| 398     | 380.9  | 357.7  | 346.6 NM_080927.3     |
| 100.7   | 87.5   | 89.6   | 87.7 NM_005215.1      |
| 171.7   | 142.1  | 127.8  | 116.1 NM_024094.1     |
| 90.2    | 85.6   | 74     | 89.3 NM_053283.1      |
| 82.3    | 88.9   | 86.7   | 83 NM_181807.1        |
| 86.3    | 89     | 100.3  | 87.6 NM_016356.1      |
| 256     | 196.5  | 189.8  | 165.6 NM_198462.2     |
| 108.9   | 92.8   | 105.3  | 82.2 NM_003737.2      |
| 83.1    | 87.5   | 82.6   | 86 NM_017639.2        |
| 213.3   | 175.3  | 194.4  | 139.4 NM_001919.2     |
| 132.4   | 131.1  | 126.5  | 140.6 NM_000788.1     |
| 234.9   | 203.4  | 216.5  | 177.7 NM_014881.2     |
| 111.6   | 104.7  | 97.3   | 104.8 NM_022836.2     |
| 272.1   | 269.9  | 243.3  | 213 NM_001033858.1    |
| 118.7   | 102.1  | 100.6  | 93.8 NM_001033858.1   |
| 261.5   | 326.6  | 481.8  | 303.5 NM_022487.2     |
| 87.9    | 81.5   | 76.1   | 91.6 NM_001920.3      |
| 87.4    | 82.9   | 86     | 82.2 NM_133503.2      |
| 92.5    | 89.2   | 83.6   | 92.6 NM_133505.2      |
| 235.3   | 274.8  | 261.5  | 251.1 NM_018403.2     |
| 101.3   | 102.1  | 97     | 97.8 NM_152640.3      |

|        |        |        |        |                |
|--------|--------|--------|--------|----------------|
| 1024   | 1536.8 | 1337.2 | 1253.8 | NM_152624.4    |
| 596.4  | 312.7  | 259.4  | 212.1  | NM_014026.3    |
| 91     | 98.5   | 81.9   | 85.5   | NM_152494.1    |
| 80.2   | 77     | 70.8   | 78.5   | NM_144622.1    |
| 100.8  | 94.2   | 88     | 86     | NM_001922.2    |
| 178.6  | 153.2  | 114.7  | 129    | NM_001921.2    |
| 1681.7 | 983.2  | 914.8  | 660.4  | NM_001921.2    |
| 566.7  | 507.3  | 472.9  | 366.4  | NM_023019.1    |
| 82.5   | 88.8   | 80     | 90.5   | NM_004082.2    |
| 142.2  | 133.9  | 126.4  | 128    | NM_023019.1    |
| 1805.3 | 1433.5 | 1474.9 | 846.8  | NM_006400.3    |
| 101    | 89.5   | 81.4   | 92.4   | NM_024348.2    |
| 3418.1 | 1758.3 | 1749.3 | 1264.6 | NM_024348.2    |
| 332    | 348.4  | 308.7  | 271.8  | NM_016221.2    |
| 1582   | 1024.1 | 816.4  | 679.4  | NM_032486.2    |
| 104.6  | 93.9   | 90.2   | 107.4  | NM_006571.2    |
| 242.7  | 236.6  | 197.1  | 168.2  | NM_152277.1    |
| 88     | 89     | 91.5   | 83     | NM_020640.2    |
| 120.2  | 124.5  | 128.2  | 109.9  | NM_001014283.1 |
| 148.5  | 166.6  | 173.2  | 123.8  | NM_173475.1    |
| 157.1  | 162.7  | 146.6  | 129.8  | NM_015115.1    |
| 495.9  | 355.3  | 357.7  | 396.3  | NM_015115.1    |
| 1195.2 | 708    | 523.9  | 738.5  | NM_032299.2    |
| 113.8  | 103    | 105.4  | 100.4  | NM_178151.1    |
| 95.2   | 87.9   | 81.2   | 86.1   | NM_000555.2    |
| 1477.7 | 804.9  | 727.2  | 498.5  | NM_016286.2    |
| 1436.3 | 783.3  | 773.4  | 447.7  | NM_024050.4    |
| 134.4  | 155.5  | 118    | 142    | NM_012137.2    |
| 108.7  | 108.1  | 121.2  | 105.5  | NM_013974.1    |
| 4714.4 | 3925.6 | 4073.5 | 2093.2 | NM_001923.2    |
| 105.3  | 129.2  | 122.4  | 117.9  | NM_001923.2    |
| 92.8   | 100.7  | 107.4  | 85     | NM_000107.1    |
| 110.9  | 95     | 100.2  | 89.9   | NM_000790.2    |
| 208.9  | 233.5  | 195.1  | 225.1  | NM_018482.2    |
| 152.7  | 118.7  | 103.8  | 103.1  | NM_003887.1    |
| 88.9   | 107.6  | 90.7   | 88.2   | NM_017707.2    |
| 84.1   | 85.7   | 87.5   | 88.1   | NM_030637.1    |
| 129.8  | 117.1  | 114.2  | 111.4  | NM_015214.1    |
| 104.9  | 100.4  | 100.9  | 82.8   | NM_001001711.1 |
| 94.2   | 85.1   | 82.5   | 100.7  | NM_032341.3    |
| 425.3  | 453.1  | 431.9  | 403.1  | NM_004083.4    |
| 495.7  | 1017.7 | 890.9  | 688.2  | NM_019058.2    |
| 140.6  | 125.2  | 127.5  | 120.9  | NM_145244.2    |
| 92.3   | 83.2   | 88.2   | 93.6   | NM_015086.1    |
| 94.1   | 92.1   | 86.7   | 95.6   | NM_003649.2    |
| 99.6   | 96     | 101.1  | 101.3  | NM_004032.2    |
| 2237.5 | 2096   | 2093.4 | 1483.1 | NM_005216.3    |
| 104.3  | 100    | 93.7   | 94.6   | NM_001954.3    |
| 94.5   | 89.2   | 83.9   | 84.2   | NM_013994.2    |
| 92.9   | 97.7   | 102.8  | 104.5  | NM_001954.3    |

|        |        |        |                      |
|--------|--------|--------|----------------------|
| 91.5   | 92.5   | 91.6   | 94 NM_001014796.1    |
| 104    | 89.1   | 90.5   | 93.5 NM_006182.2     |
| 3320.3 | 2939.2 | 3356.8 | 2254.2 NM_001355.2   |
| 3865.5 | 2999.7 | 2235.5 | 2647.1 NM_004939.1   |
| 687.5  | 518.7  | 388.3  | 319.3 NM_004398.2    |
| 111.5  | 98     | 92.4   | 97.7 NM_030653.3     |
| 131    | 120    | 131.2  | 136.9 NM_030653.3    |
| 96.3   | 100.2  | 86.6   | 92.8 NM_004399.1     |
| 647.3  | 510.3  | 598.9  | 1145.7 NM_030881.2   |
| 143.7  | 234    | 283    | 254.7 NM_030881.2    |
| 426.4  | 585.2  | 633.6  | 599.1 NM_006386.3    |
| 2278.5 | 1944.9 | 1559.6 | 1029.9 NM_006773.3   |
| 512.3  | 516.1  | 482.5  | 319.9 NM_018332.3    |
| 953.9  | 1008.9 | 953.6  | 477.8 NM_001014451.1 |
| 136.3  | 93.7   | 94.1   | 91.8 NM_007204.3     |
| 2091.3 | 1291.9 | 732    | 1118.4 NM_004728.2   |
| 613.2  | 351    | 337.6  | 279.4 NM_004818.2    |
| 959.1  | 693.4  | 595.2  | 634.5 NM_020414.3    |
| 91.9   | 83.9   | 89.5   | 92.5 NM_013264.2     |
| 1064   | 883.2  | 840.3  | 682.4 NM_012141.1    |
| 101.3  | 88.5   | 94.7   | 96.2 NM_182540.3     |
| 275.8  | 292    | 262.4  | 194.4 NM_017895.6    |
| 157.1  | 152.4  | 125.3  | 126 NM_018380.2      |
| 264.7  | 230.2  | 181.2  | 150.3 NM_022779.7    |
| 92.8   | 88.5   | 93     | 92.9 NM_138620.1     |
| 135.9  | 98.6   | 96.6   | 109 NM_138620.1      |
| 4369.1 | 2569.8 | 2024.7 | 2096.9 NM_005804.2   |
| 86.3   | 88.2   | 84.7   | 92 NM_024005.1       |
| 1382.9 | 1381.7 | 1001.1 | 1250.8 NM_001356.2   |
| 94.7   | 82     | 90.6   | 96.5 NM_004660.2     |
| 94.6   | 87.4   | 87.8   | 88.7 NM_019039.1     |
| 464.5  | 497.5  | 438.1  | 274.1 NM_016222.2    |
| 95.8   | 113.5  | 114.9  | 113.1 NM_007372.2    |
| 1076.6 | 1218.3 | 1147.8 | 719.6 NM_007372.2    |
| 96.4   | 91.2   | 87.1   | 92.7 NM_018665.1     |
| 749.2  | 775.6  | 788.1  | 591.5 NM_014829.2    |
| 421.7  | 288.8  | 199.3  | 216.8 NM_016355.3    |
| 785.9  | 586.7  | 484.9  | 422.3 NM_201224.1    |
| 3634.3 | 2699.2 | 2428.4 | 1925 NM_014740.2     |
| 103.9  | 100.9  | 106.7  | 91.5 NM_019070.3     |
| 6888.8 | 5797.8 | 4747.3 | 4319.7 NM_004396.2   |
| 304.7  | 191    | 217.8  | 178.3 NM_024045.1    |
| 2137.9 | 3399.8 | 3782   | 2796.9 NM_175066.2   |
| 107.4  | 108.4  | 110.4  | 112.6 NM_007010.2    |
| 88     | 74.8   | 88.1   | 90.5 NM_182699.2     |
| 236.1  | 203.7  | 212.7  | 177.9 NM_024072.3    |
| 889.8  | 851.1  | 727.4  | 438.3 NM_020936.1    |
| 1324.1 | 915.8  | 865.4  | 603.7 NM_019082.2    |
| 117.4  | 128.3  | 113.4  | 99.5 NM_014314.2     |
| 602.1  | 541.3  | 493.8  | 458 NM_001031725.1   |

|        |       |       |                      |
|--------|-------|-------|----------------------|
| 82.8   | 81.3  | 79.1  | 82.9 NM_031306.1     |
| 114.7  | 125   | 98.9  | 125.2 NM_001031725.1 |
| 106.3  | 108.6 | 91.1  | 93.4 NM_004397.3     |
| 114.5  | 104.1 | 104.5 | 101.7 NM_182503.1    |
| 131.3  | 116.7 | 123.9 | 118 NM_021008.2      |
| 94.8   | 99.5  | 90.6  | 97.4 NM_021008.2     |
| 96     | 86.3  | 81.5  | 83.1 NM_017418.1     |
| 1223.6 | 644.4 | 435.8 | 455.5 NM_001359.1    |
| 647.9  | 440.5 | 422.5 | 199.2 NM_020664.3    |
| 556.5  | 482.3 | 391.8 | 430.1 NM_001039712.1 |
| 81.2   | 81.4  | 88.6  | 82.4 NM_032998.1     |
| 218.4  | 207.3 | 152.3 | 146.9 NM_004216.2    |
| 484.7  | 343.1 | 301.7 | 252.4 NM_133328.2    |
| 357.9  | 407.7 | 412.1 | 232 NM_022047.2      |
| 95.2   | 83.5  | 80.6  | 82.3 NM_004084.2     |
| 85.5   | 75.3  | 76.5  | 91.2 NM_005217.2     |
| 100.2  | 111.7 | 107.2 | 109 NM_001925.1      |
| 100.5  | 91.7  | 106.6 | 93.4 NM_021010.1     |
| 91.4   | 84.3  | 75.6  | 87.1 NM_001926.2     |
| 398.5  | 512.1 | 396.7 | 403.7 NM_005218.3    |
| 105.6  | 103.7 | 98.7  | 107.3 NM_018661.3    |
| 84.3   | 82.6  | 83.4  | 76.8 NM_001040702.1  |
| 88     | 87.4  | 82.8  | 91.5 NM_152250.1     |
| 86.5   | 81.7  | 82.3  | 83.8 NM_152251.2     |
| 91.3   | 111.7 | 94.9  | 86.2 NM_001040704.1  |
| 110.7  | 114.6 | 107.6 | 96.4 NM_001037668.1  |
| 95.6   | 92.6  | 81.7  | 88 NM_001002035.1    |
| 87.8   | 89.5  | 80.6  | 82.9 NM_001037380.1  |
| 83.3   | 77.7  | 84.6  | 87.8 NM_001037728.1  |
| 86.7   | 82.3  | 80.1  | 81.9 NM_001037497.1  |
| 85.2   | 87.2  | 84    | 89 NM_001037498.1    |
| 83.2   | 81.4  | 74.2  | 93.7 NM_001037499.1  |
| 87.7   | 89.3  | 88.2  | 97.4 NM_054112.1     |
| 128.1  | 108.9 | 110.9 | 106.2 NM_153323.3    |
| 88.7   | 81    | 81    | 83.5 NM_153323.3     |
| 79.5   | 74.6  | 82.7  | 79.2 NM_001011878.1  |
| 94.1   | 92.9  | 93.5  | 96 NR_002577.1       |
| 95     | 90.6  | 87    | 94.4 NM_153324.2     |
| 82.4   | 94.4  | 90.5  | 88.4 NM_001037500.1  |
| 92.3   | 102.3 | 85.7  | 102.5 NM_153325.2    |
| 91.8   | 90.5  | 83.4  | 83.6 NM_030931.2     |
| 96.1   | 87.4  | 84.4  | 86 NM_139074.2       |
| 87.6   | 85.5  | 87.7  | 84.8 NM_001037732.1  |
| 97.3   | 84.2  | 74.6  | 84.6 NM_080831.2     |
| 111.1  | 87.5  | 86    | 94.5 NM_001040448.1  |
| 85.8   | 82.7  | 86.2  | 93.7 NM_001033019.1  |
| 86.2   | 85.9  | 80.5  | 87.4 NM_001033017.1  |
| 89.1   | 85.2  | 84.4  | 81.4 NM_001033018.1  |
| 88.6   | 80.9  | 86.1  | 87.6 NM_207469.1     |
| 94     | 87.1  | 72.7  | 89.7 NM_004942.2     |

|        |        |        |        |                |
|--------|--------|--------|--------|----------------|
| 4099.1 | 3261.5 | 2972.7 | 2075.3 | NM_003676.2    |
| 1901.5 | 1329.7 | 1078.6 | 1306   | NM_003676.2    |
| 103.6  | 105.6  | 92.9   | 101.2  | NM_206918.1    |
| 1757.6 | 1172.3 | 1178.9 | 1379.7 | NM_003472.2    |
| 526.7  | 804    | 851.5  | 497.8  | NM_024820.2    |
| 121.5  | 107.3  | 115.1  | 93.9   | NM_020946.1    |
| 176.8  | 266.4  | 233    | 203    | NM_024820.2    |
| 96     | 91     | 85.2   | 86.2   | NM_144977.1    |
| 121.9  | 107.2  | 108.2  | 99.3   | NM_024898.1    |
| 81.9   | 77.4   | 77     | 73.9   | NM_015689.2    |
| 86.1   | 90.1   | 83.1   | 84.5   | NM_198459.3    |
| 240    | 231    | 196.2  | 190    | NM_024901.3    |
| 205.8  | 253.7  | 212    | 203.5  | NM_014957.2    |
| 171.8  | 155.8  | 129    | 144.9  | NM_005848.2    |
| 198.5  | 241.1  | 265.7  | 197    | NM_017925.3    |
| 226.7  | 302.2  | 381.3  | 313.2  | NM_003677.3    |
| 91.1   | 78.9   | 85.3   | 92     | NM_017779.3    |
| 250.5  | 178.8  | 181.4  | 153.3  | NM_018369.1    |
| 88.7   | 87.3   | 89.3   | 80.3   | NM_025170.4    |
| 85.2   | 96.3   | 87.8   | 92     | NM_024870.2    |
| 96.2   | 93.8   | 103.8  | 95.6   | NM_152317.2    |
| 191.9  | 185.3  | 173.5  | 155.3  | NM_014662.2    |
| 95.1   | 88.6   | 94.6   | 99.9   | NM_001007188.1 |
| 74.9   | 73     | 69     | 79.8   | NM_001007188.1 |
| 150.9  | 154.7  | 153    | 138.6  | NM_022783.1    |
| 106.9  | 95.5   | 101    | 100    | NM_001077242.1 |
| 101.6  | 106.2  | 107.5  | 91.7   | NM_001077242.1 |
| 1497.4 | 1327.4 | 1269.2 | 905.1  | NM_015954.1    |
| 1105.3 | 791.7  | 625.6  | 622.5  | NM_024295.3    |
| 192.8  | 213    | 195.5  | 156.2  | NM_016041.2    |
| 94.4   | 91.7   | 85.1   | 95.2   | NM_198440.2    |
| 90.8   | 92.7   | 84.1   | 94.4   | NM_001002862.1 |
| 90     | 89     | 89.4   | 90.8   | NM_001002847.1 |
| 130.4  | 132.7  | 130.4  | 129.7  | NM_017804.3    |
| 92.5   | 84.8   | 81.5   | 85.2   | NM_001927.3    |
| 226.5  | 236.2  | 200.7  | 201.2  | NM_017996.2    |
| 971.2  | 646.7  | 703.3  | 448.9  | NM_014015.3    |
| 346.9  | 418.1  | 378.8  | 230.3  | NM_004401.2    |
| 132.3  | 131    | 134    | 117.5  | NM_213566.1    |
| 93.3   | 84.3   | 87     | 84.4   | NM_001004285.1 |
| 229.6  | 243.1  | 217.3  | 166.4  | NM_001004286.1 |
| 281.4  | 405    | 343.1  | 315.9  | NM_004403.1    |
| 97.4   | 93     | 88.7   | 96.1   | NM_015404.1    |
| 94.1   | 93.6   | 83.2   | 105.2  | NM_001042702.1 |
| 389.8  | 390.5  | 362.1  | 266.1  | NM_012079.2    |
| 94.1   | 109    | 101.9  | 89.8   | NM_032564.2    |
| 110.6  | 90.3   | 106.8  | 101.4  | NM_001013579.1 |
| 97     | 94.2   | 99     | 97.9   | NM_001002254.1 |
| 88.8   | 88.7   | 85     | 90.2   | NM_198512.1    |
| 134.6  | 112.5  | 117.5  | 105.1  | NM_001024733.1 |

|        |        |        |                    |
|--------|--------|--------|--------------------|
| 176.6  | 149.5  | 160.6  | 127.8 NM_022719.1  |
| 288.7  | 251.2  | 235.1  | 230.2 NM_005137.1  |
| 96.9   | 97.5   | 88.1   | 95.1 NR_002733.1   |
| 134.7  | 170.9  | 172.7  | 146.9 NM_005675.3  |
| 520.4  | 425.9  | 361.6  | 324 NM_022720.5    |
| 81.3   | 84     | 77.9   | 86.5 NM_001345.4   |
| 80.6   | 85.9   | 83.9   | 86.3 NM_201445.1   |
| 105.7  | 101.3  | 109    | 97.6 NM_201554.1   |
| 87.6   | 82.9   | 74.9   | 84.8 NM_201444.2   |
| 110.7  | 98.1   | 96.2   | 104.3 NM_201554.1  |
| 89     | 96.4   | 90.7   | 85.4 NM_145695.1   |
| 90.4   | 75.5   | 79.1   | 87.7 NM_145695.1   |
| 90.5   | 81.4   | 85.5   | 88.7 NM_004080.1   |
| 90.9   | 95.1   | 85.6   | 77.7 NM_152879.2   |
| 110.6  | 121.8  | 115.7  | 111.9 NM_152879.2  |
| 86.9   | 79.8   | 83.8   | 88.9 NM_003648.2   |
| 100.5  | 106    | 93.4   | 91.5 NM_003647.1   |
| 115.8  | 121.2  | 107.2  | 99.7 NM_001346.1   |
| 101.6  | 90.6   | 76.7   | 81 NM_152910.3     |
| 88.4   | 93     | 82.6   | 93.5 NM_178009.2   |
| 86.6   | 80.5   | 83.7   | 94.5 NM_004717.2   |
| 94.7   | 85.9   | 90.1   | 92 NM_001013742.1  |
| 748.8  | 803.6  | 597.8  | 486.9 NM_001347.2  |
| 93.9   | 84.9   | 78.7   | 80.7 NM_201532.1   |
| 82     | 86.8   | 83.2   | 98.2 NM_003646.2   |
| 147.4  | 168.1  | 159    | 141.1 NM_201533.1  |
| 2874.8 | 2028.9 | 1989.5 | 1192 NM_080916.1   |
| 3312.9 | 2013.7 | 1952.2 | 1636.4 NM_080916.1 |
| 340    | 304.7  | 262.3  | 215.6 NM_080916.1  |
| 360.2  | 319.8  | 284.7  | 206.6 NM_014762.2  |
| 263.8  | 234.3  | 252.7  | 202 NM_001360.2    |
| 216.1  | 259.2  | 231.4  | 228.1 NM_024887.2  |
| 139.3  | 152.5  | 124.9  | 136.2 NM_024887.2  |
| 103.6  | 114.4  | 117.2  | 98.2 NM_014475.2   |
| 202.6  | 176.5  | 175.5  | 190.1 NM_000791.3  |
| 115.9  | 101.1  | 107.2  | 108.6 NM_176815.2  |
| 95.6   | 90.6   | 94.3   | 91.3 NM_021044.2   |
| 112.3  | 100.5  | 106.3  | 93 NM_001025193.1  |
| 150.3  | 99.4   | 105.6  | 92.1 NM_001361.3   |
| 895.7  | 488.3  | 458.9  | 389.5 NM_001930.2  |
| 674.9  | 469.9  | 477.1  | 325.8 NM_001930.2  |
| 1140.6 | 760    | 723.6  | 726.5 NM_013406.1  |
| 295.6  | 246.8  | 312.9  | 176.1 NM_138452.1  |
| 96.7   | 100    | 100.4  | 94.2 NM_016246.2   |
| 101.8  | 91     | 100.1  | 95.5 NM_182908.3   |
| 94.4   | 91.2   | 76.6   | 86.2 NM_182908.3   |
| 115.9  | 104.3  | 102.3  | 108.5 NM_004753.4  |
| 2834.6 | 2585   | 2196.3 | 1840.8 NM_021004.2 |
| 230.3  | 282.1  | 271.4  | 208.7 NM_198083.1  |
| 799.5  | 463.2  | 455.5  | 328.1 NM_016029.1  |



|        |        |        |        |                |
|--------|--------|--------|--------|----------------|
| 183.9  | 162.5  | 175.6  | 140.7  | NM_015510.3    |
| 604.1  | 353.2  | 289.1  | 326.3  | NM_016245.2    |
| 5133.8 | 2502.5 | 2555.4 | 1514.6 | NM_005771.3    |
| 372.2  | 369.8  | 284.4  | 268.3  | NM_005771.3    |
| 93.2   | 88.6   | 88.8   | 91.5   | NM_199204.1    |
| 1424.8 | 627.1  | 557.1  | 580.8  | NM_005771.3    |
| 130.7  | 126.1  | 115.8  | 113.8  | NM_145177.1    |
| 118.3  | 121.5  | 111.1  | 114.1  | NM_018706.4    |
| 5248.7 | 3389.9 | 2978.6 | 2429.7 | NM_001358.2    |
| 568.9  | 587.7  | 529.4  | 381.7  | NM_003587.3    |
| 935.9  | 1020.4 | 797.2  | 967.1  | NM_019030.2    |
| 779.5  | 623.8  | 518.3  | 505.9  | NM_014966.2    |
| 93.4   | 90.5   | 88.3   | 92.7   | NM_138614.1    |
| 275.1  | 231.8  | 203.6  | 192.7  | NM_014966.2    |
| 398.8  | 239    | 238.3  | 179.8  | NM_018180.2    |
| 392.4  | 363.8  | 293.5  | 297.5  | NM_020162.2    |
| 178.7  | 171.6  | 182.8  | 133.7  | NM_194428.1    |
| 231.4  | 250.7  | 225.5  | 167.7  | NM_021931.2    |
| 223    | 241.4  | 172.1  | 197.8  | NM_020865.1    |
| 587    | 513.6  | 452.1  | 273.4  | NM_032656.2    |
| 205.8  | 245.8  | 177.7  | 151    | NM_014003.3    |
| 509.8  | 423.1  | 363.4  | 278.7  | NM_024612.3    |
| 178.5  | 182.8  | 140.1  | 177.9  | NM_024612.3    |
| 101.6  | 103.3  | 101.7  | 108.8  | NM_144995.2    |
| 98.5   | 93.7   | 98.8   | 87     | NM_198963.1    |
| 174.6  | 177.5  | 131.2  | 134    | NM_004941.1    |
| 520.4  | 542.9  | 409    | 399.2  | NM_001357.2    |
| 2013.8 | 1760.5 | 1697.3 | 1216   | NM_138930.2    |
| 359.2  | 259.9  | 265.6  | 267.7  | NM_019887.3    |
| 219.4  | 161.4  | 164.7  | 129.5  | NM_138930.2    |
| 321.5  | 232.7  | 245    | 199    | NM_005219.2    |
| 1582.5 | 1089.8 | 871.9  | 686.6  | NM_005219.3    |
| 303.7  | 383.3  | 344.8  | 300.5  | NM_007309.1    |
| 193.6  | 152.1  | 132.8  | 117.3  | NM_001042517.1 |
| 215.4  | 134.1  | 127.2  | 133.1  | NM_030932.2    |
| 206.9  | 155.9  | 140.5  | 134.2  | NM_001042517.1 |
| 93.7   | 81.5   | 82.4   | 84.6   | NM_030621.2    |
| 90.9   | 85.4   | 87.9   | 84.8   | NM_177438.1    |
| 102.4  | 100.9  | 103    | 109    | NM_030621.2    |
| 142.6  | 127.5  | 128    | 111    | NM_080796.2    |
| 160.6  | 147    | 161.3  | 122.9  | NM_080797.2    |
| 105.9  | 112.5  | 105.7  | 104.1  | NM_080796.2    |
| 99.2   | 86.9   | 76.7   | 87.4   | NM_000792.4    |
| 101.1  | 96.8   | 84.9   | 91.8   | NM_213593.3    |
| 81     | 71.8   | 71.1   | 81.3   | NM_000792.4    |
| 105.5  | 92.1   | 87.9   | 93.7   | NM_001007023.1 |
| 97.6   | 86.9   | 82.5   | 85.6   | NM_013989.2    |
| 105.9  | 96.5   | 92.3   | 90.3   | NM_001362.2    |
| 934.5  | 1070.8 | 1056.3 | 599.6  | NM_015124.2    |
| 239.1  | 232.1  | 233.2  | 210.8  | NM_018171.2    |

|        |        |        |                      |
|--------|--------|--------|----------------------|
| 87     | 78     | 75.3   | 90.2 NM_206891.1     |
| 87.4   | 95.2   | 88.3   | 91.5 NM_206889.1     |
| 166.6  | 146.8  | 148.5  | 108.7 NM_206890.1    |
| 114.4  | 108.9  | 98.6   | 109.2 NM_206889.1    |
| 141.5  | 185.7  | 192.4  | 209.1 NM_015151.2    |
| 431.2  | 637.9  | 630    | 514.8 NM_173602.2    |
| 80.9   | 81.4   | 82.2   | 82.6 NM_014974.1     |
| 101.1  | 85.9   | 84.9   | 82.6 NM_006848.2     |
| 85     | 102.4  | 83.8   | 91 NM_145173.1       |
| 83.8   | 87.4   | 72.2   | 78.9 NM_017594.3     |
| 95.4   | 101.2  | 96.5   | 95.1 NM_004675.2     |
| 84.8   | 83.6   | 78.4   | 83.1 NM_052952.1     |
| 245.9  | 208    | 189.3  | 174.1 NM_032839.1    |
| 105.3  | 183.7  | 230.6  | 182.2 NM_001012959.1 |
| 95     | 90     | 89     | 84.3 NM_001012958.1  |
| 91     | 85.2   | 96.9   | 76.8 NM_001012959.1  |
| 96     | 98.4   | 91.5   | 88.6 NM_018662.2     |
| 172.6  | 142.3  | 135.1  | 143.8 NM_032890.2    |
| 103    | 107.5  | 97.9   | 100.7 NM_033510.1    |
| 132.5  | 121.5  | 109.6  | 109.2 NM_001037954.2 |
| 85.7   | 83.1   | 84.6   | 83.3 NM_001037954.2  |
| 105.1  | 109.8  | 85.9   | 97.7 NM_033425.1     |
| 1320.4 | 1687.8 | 1266.3 | 1179.4 NM_020466.3   |
| 166.7  | 134.7  | 119.9  | 131.1 NR_002184.1    |
| 3512   | 2722.6 | 1911.3 | 1842.5 NM_001363.2   |
| 89.7   | 82.4   | 90.3   | 90.1 NM_001002840.1  |
| 119.1  | 155.5  | 186.8  | 161.4 NM_018991.2    |
| 147.9  | 195.2  | 153.5  | 173.9 NM_015395.1    |
| 92.5   | 72.7   | 74.6   | 86.8 NM_178275.3     |
| 94.4   | 106.9  | 98.2   | 93.1 NM_194295.1     |
| 361.1  | 301.8  | 265.2  | 165.2 NM_152892.1    |
| 89     | 71.4   | 81     | 75.8 NM_015594.2     |
| 105.1  | 109.6  | 97     | 87.6 NM_194302.1     |
| 151.8  | 142.9  | 132.9  | 148.4 NM_207343.1    |
| 214.6  | 219.4  | 192.6  | 189.6 NM_207343.1    |
| 96.8   | 100.4  | 93.4   | 98.6 NM_020161.2     |
| 263.1  | 226.1  | 222.8  | 187 XR_001087.1      |
| 972.7  | 587.6  | 574.4  | 413.6 NM_015459.3    |
| 94.9   | 82.5   | 83.6   | 85 NM_015398.1       |
| 89.8   | 90.9   | 81.8   | 82.8 NM_015398.1     |
| 1006.5 | 1329.6 | 1826.8 | 1635.5 NM_032121.3   |
| 91.2   | 81.3   | 81.9   | 87.3 NM_182595.2     |
| 242    | 163.3  | 163    | 167.9 NM_032120.1    |
| 99.7   | 97.9   | 104.2  | 95.7 NM_015393.2     |
| 78.2   | 90.8   | 71.5   | 80.9 NM_030923.2     |
| 803.1  | 785.7  | 699.1  | 523.3 NM_206914.1    |
| 96.2   | 107.1  | 100.2  | 114 NM_206914.1      |
| 90.5   | 87.4   | 79.9   | 87.4 NM_015430.2     |
| 78     | 70.2   | 80.6   | 75.7 NM_001001991.1  |
| 133.9  | 178.3  | 199    | 197 NR_002186.1      |

|       |       |       |                      |
|-------|-------|-------|----------------------|
| 93.1  | 102.1 | 96.9  | 96 NM_015531.2       |
| 84    | 79.8  | 74.5  | 82.8 NM_001008226.1  |
| 85.6  | 89.6  | 92.8  | 99.1 NM_153605.2     |
| 79.2  | 78.3  | 87.4  | 87.5 NM_014988.1     |
| 87.7  | 86.9  | 86.3  | 84.4 NM_033107.1     |
| 77.1  | 80.3  | 74.6  | 81.5 NM_001017992.1  |
| 127.4 | 124.4 | 107.1 | 101.2 NM_001048249.1 |
| 99.2  | 95.4  | 90.1  | 102.5 NM_207495.2    |
| 120.7 | 106.9 | 115   | 106.1 NM_001024596.1 |
| 129.3 | 149.4 | 139.8 | 141.2 NM_001012987.1 |
| 323.9 | 247.8 | 247.6 | 224.7 NM_194282.1    |
| 104.9 | 112.2 | 118   | 99.6 NM_173463.2     |
| 116.3 | 127.3 | 123.1 | 95.6 NM_138368.2     |
| 105.3 | 83.6  | 81.4  | 95.3 NM_031297.2     |
| 198.4 | 240   | 275.5 | 224.8 NM_031449.3    |
| 460.8 | 382.4 | 332.4 | 326.8 NM_018410.2    |
| 258.3 | 399.5 | 580.1 | 389.3 NM_152411.1    |
| 103.6 | 97.8  | 94.9  | 89.1 NM_001010903.2  |
| 86.5  | 79.2  | 85.4  | 93.3 NM_001037232.2  |
| 91.3  | 85.7  | 84.1  | 92.1 XM_945945.1     |
| 118.6 | 117.1 | 112.6 | 110.1 NM_152622.2    |
| 85.4  | 87.1  | 80.5  | 89.8 NM_012242.2     |
| 108.9 | 98.3  | 86.9  | 89.2 NM_014421.2     |
| 93.1  | 84.6  | 89    | 77.4 NM_015881.5     |
| 87.8  | 96.3  | 81.1  | 84.1 NM_013253.4     |
| 87.4  | 83.3  | 86.7  | 85.2 NM_013253.4     |
| 90.9  | 87.4  | 75.5  | 85.9 NM_013253.4     |
| 96.6  | 89.3  | 85.6  | 95 NM_014420.2       |
| 107.4 | 118.3 | 106.9 | 84 NM_014419.3       |
| 619.6 | 459.7 | 380.2 | 461.5 NM_001931.2    |
| 94.1  | 92.8  | 75.4  | 81.1 NM_024767.2     |
| 95.7  | 85.9  | 89.7  | 83.8 NM_006094.3     |
| 596.6 | 502.7 | 461.6 | 548.9 NM_000108.2    |
| 85.9  | 88.3  | 92.3  | 91.4 NM_005106.2     |
| 91.2  | 95.2  | 100   | 83.5 NM_007337.2     |
| 88.3  | 85.1  | 91.3  | 90.3 XR_001515.1     |
| 249.7 | 258   | 228   | 261.9 NR_002605.1    |
| 101.8 | 93.1  | 94.4  | 103.1 NR_002771.1    |
| 91.5  | 108.6 | 96.1  | 108.7 NM_198989.1    |
| 79.3  | 82.2  | 92.1  | 74.8 NM_004087.1     |
| 105.9 | 100.2 | 96.5  | 104.6 NM_001364.1    |
| 86    | 84.6  | 88.6  | 96.3 NM_021120.1     |
| 83.2  | 75.9  | 79    | 82.5 NM_021120.1     |
| 89.1  | 89.5  | 74.7  | 86.5 NM_021120.1     |
| 165.4 | 123.4 | 117.4 | 143.5 NM_001365.1    |
| 89.4  | 92.6  | 78.9  | 82.9 NM_004747.2     |
| 672.1 | 317.1 | 250.8 | 257.8 NM_014750.3    |
| 93.8  | 85.9  | 86.3  | 88.8 NM_004746.2     |
| 81.9  | 78.8  | 82.4  | 83.2 NM_001003809.1  |
| 113.8 | 125.1 | 114.8 | 107.3 NM_004745.3    |

|        |        |       |                      |
|--------|--------|-------|----------------------|
| 83.1   | 88.6   | 75.3  | 68 XM_940825.1       |
| 87.1   | 88.1   | 86.9  | 88.7 NM_183006.1     |
| 80.9   | 76.6   | 76.7  | 89.8 NM_014902.2     |
| 168.8  | 190.1  | 157.9 | 155.6 NM_014902.2    |
| 84.8   | 85.3   | 79.4  | 96.6 NM_003836.4     |
| 98.4   | 85.2   | 92.1  | 90.6 NM_003836.4     |
| 186.7  | 331    | 349.1 | 204.4 NM_005618.2    |
| 89.7   | 75.2   | 84.9  | 86.1 NM_016941.2     |
| 206.2  | 89.4   | 93.5  | 92 NM_016941.2       |
| 88.3   | 92.2   | 86.5  | 90.6 NM_019074.2     |
| 376.7  | 313.4  | 350.9 | 286.1 NM_198489.1    |
| 413.4  | 395.9  | 305.4 | 292.5 NM_001933.3    |
| 126.5  | 104.5  | 108.1 | 111.9 NM_001038493.1 |
| 450    | 354.4  | 307.7 | 260.1 NM_178120.3    |
| 84.8   | 76.2   | 77.3  | 85.5 NM_004405.2     |
| 139.3  | 107.3  | 88.8  | 96 NM_005220.2       |
| 110.5  | 104.3  | 89.6  | 110.5 NM_001934.2    |
| 83     | 92.9   | 89.9  | 99.9 NM_138281.1     |
| 87.8   | 104.1  | 93.8  | 92.7 NM_001934.2     |
| 91.5   | 82.6   | 85.2  | 84.9 NM_005221.4     |
| 89.1   | 88.8   | 80    | 88.3 NM_005222.2     |
| 454.8  | 515.6  | 534   | 313.7 NM_019100.3    |
| 229.3  | 236.6  | 243.6 | 163.8 NM_001034024.1 |
| 97.1   | 83.5   | 82.1  | 81.4 NM_017579.1     |
| 95.6   | 88.2   | 87.5  | 83.8 NM_172225.1     |
| 1275.9 | 1973.2 | 2970  | 1699.9 NM_007068.2   |
| 88.8   | 103.7  | 102   | 88.6 NM_004006.1     |
| 83.8   | 88.7   | 75.5  | 78 NM_004012.1       |
| 148    | 153.3  | 173.4 | 127.7 NM_004010.1    |
| 94.4   | 87.2   | 81.5  | 89.3 NM_004014.1     |
| 92.5   | 84.7   | 77.8  | 93.4 NM_004019.1     |
| 80.3   | 87.2   | 81.3  | 92.2 NM_004009.1     |
| 116.5  | 116.6  | 102.8 | 115.2 NM_004019.1    |
| 81     | 77.3   | 81.3  | 75.6 NM_000109.2     |
| 91.7   | 93.4   | 92.9  | 93.5 NM_013391.2     |
| 133.6  | 150.5  | 122.1 | 120.9 NM_015286.4    |
| 83.7   | 89.3   | 82.9  | 90 NM_145728.1       |
| 82.3   | 83     | 70.9  | 86.4 NM_004407.2     |
| 103.5  | 91.3   | 95.5  | 97.1 NM_001081563.1  |
| 87.2   | 85     | 87.3  | 91.7 NM_004409.2     |
| 109.4  | 92.9   | 91    | 87 NM_021951.2       |
| 152.3  | 154.4  | 175.4 | 141.4 NM_181872.1    |
| 91.1   | 94.1   | 92.1  | 85.2 NM_006557.3     |
| 106.6  | 135.7  | 139.4 | 133.9 NM_021240.2    |
| 92     | 76.2   | 80.3  | 84.7 NM_022160.1     |
| 93.8   | 91.8   | 88.4  | 81 NM_033067.1       |
| 83     | 80.6   | 85.2  | 80.8 NM_001040283.1  |
| 311.3  | 425.1  | 469.5 | 348.8 NM_021145.2    |
| 108.9  | 98.2   | 93.9  | 78 NM_004943.1       |
| 93.6   | 94.5   | 93.3  | 96.6 NM_005509.3     |

|        |        |        |                      |
|--------|--------|--------|----------------------|
| 130.6  | 227.3  | 229    | 218 NM_015263.1      |
| 211.7  | 165.7  | 153.8  | 139.2 XM_938629.1    |
| 200.9  | 181.2  | 155.7  | 149.5 NM_001080449.1 |
| 127.3  | 163.1  | 179.9  | 113.6 NM_015512.3    |
| 99.9   | 95.9   | 91.2   | 99.3 NM_207437.1     |
| 87.2   | 83.1   | 82.7   | 84.4 NM_003777.2     |
| 87.1   | 96.4   | 90.6   | 92.5 NM_003727.1     |
| 86.2   | 85.8   | 92.5   | 83.4 NM_017539.1     |
| 92.5   | 96.1   | 89.9   | 87.8 NM_001369.1     |
| 101.6  | 99     | 105.1  | 98 NM_018897.1       |
| 95.6   | 90.2   | 82.9   | 90.1 NM_001371.1     |
| 93.7   | 89.8   | 93     | 91 NM_004662.1       |
| 96.6   | 81.3   | 82     | 73.4 NM_001372.2     |
| 95.8   | 89.5   | 83.6   | 85 NM_001372.2       |
| 78     | 81.3   | 71.4   | 81.8 NM_173628.1     |
| 81     | 92.7   | 92.8   | 88.9 NM_012144.2     |
| 144.8  | 121.3  | 137    | 117.6 NM_023036.1    |
| 8909.8 | 6935.5 | 5308.5 | 4298.8 NM_001539.2   |
| 2031.2 | 1370.9 | 1084.7 | 1119.1 NM_005880.2   |
| 2654.1 | 1246   | 1164.4 | 689.8 NM_005147.3    |
| 1264.3 | 741.4  | 643.2  | 460 NM_018602.2      |
| 99.3   | 103.3  | 102.2  | 97.8 NM_194283.3     |
| 92.4   | 88.2   | 92.4   | 85.2 NM_001012339.2  |
| 991.1  | 497.8  | 392.6  | 442.9 NM_006145.1    |
| 5989.7 | 5722.5 | 4469.9 | 3632.8 NM_016306.4   |
| 97.6   | 106.4  | 115.6  | 100.6 NM_017626.3    |
| 181.4  | 132.5  | 136    | 109.4 NM_001002762.1 |
| 157.6  | 141.4  | 134.2  | 110.7 XM_944538.1    |
| 104.1  | 91.3   | 86.8   | 90.1 NM_153614.2     |
| 100.3  | 92.1   | 98.3   | 94.2 NM_001031723.1  |
| 311.4  | 291    | 329.1  | 265.5 NM_001031723.1 |
| 89.5   | 87     | 83.8   | 96.5 NM_024920.3     |
| 99     | 102.4  | 99.9   | 100.7 NM_006736.5    |
| 316    | 394.2  | 330.6  | 247.1 NM_006736.5    |
| 91.9   | 95.8   | 103.4  | 100.6 NM_007034.3    |
| 94.5   | 96.3   | 97.8   | 95.6 NM_012266.3     |
| 95.1   | 96.1   | 85.6   | 93.4 NM_012266.3     |
| 1035.8 | 799.1  | 733.5  | 498 NM_005494.2      |
| 1465.4 | 2022.1 | 1375   | 1487.1 NM_058246.3   |
| 102.7  | 97.9   | 93     | 96 NM_145174.1       |
| 98.7   | 98.5   | 98.4   | 97.9 NM_153330.2     |
| 372.2  | 328.4  | 316.2  | 285.3 NM_012328.1    |
| 130.5  | 125.9  | 114.2  | 139.6 NM_022365.2    |
| 523.3  | 450.5  | 399.9  | 403.8 NM_018981.1    |
| 149.9  | 114.4  | 104    | 112.4 NM_018198.1    |
| 91.4   | 94.5   | 76.9   | 94.1 NM_021800.2     |
| 85.6   | 77.5   | 76.5   | 78.3 NM_201262.1     |
| 84.5   | 75.2   | 79.6   | 72.3 NM_201262.1     |
| 219.9  | 284.2  | 229    | 169.8 NM_015268.2    |
| 282.3  | 318.5  | 257.1  | 271.1 NM_032364.4    |

|        |        |        |        |                |
|--------|--------|--------|--------|----------------|
| 452.7  | 375.7  | 385.6  | 317.7  | NM_013238.2    |
| 99     | 98     | 89.2   | 103.7  | NM_015291.1    |
| 236.2  | 223.6  | 220.2  | 160.8  | NM_018163.1    |
| 125.1  | 117    | 118.1  | 102.4  | NM_152686.2    |
| 190.5  | 148.3  | 160.3  | 151.6  | NM_145261.2    |
| 178.8  | 155.9  | 140    | 125.8  | NM_006260.2    |
| 98     | 116.8  | 106.1  | 115.5  | NM_005528.1    |
| 273.6  | 216.1  | 210.6  | 168.2  | NM_025219.1    |
| 106.3  | 95.2   | 99.6   | 104.5  | NM_033105.3    |
| 97     | 93.6   | 86.9   | 81.7   | NM_173650.1    |
| 88.9   | 89.6   | 83     | 80.8   | NM_014787.2    |
| 618.9  | 618.3  | 474.4  | 489.3  | NM_003315.1    |
| 6426.8 | 7070.4 | 6405   | 4309.2 | NM_014280.1    |
| 1972.5 | 1098.5 | 990.7  | 707.5  | NM_015190.3    |
| 92.8   | 88.9   | 83.9   | 92.5   | NM_031427.1    |
| 471.2  | 509.7  | 440.2  | 334.9  | NM_005740.2    |
| 97.8   | 94.4   | 98.5   | 100.7  | NM_003462.3    |
| 584.4  | 582.6  | 409.3  | 424.1  | NM_015535.1    |
| 105.6  | 96.7   | 95     | 95.5   | NM_005223.3    |
| 331.8  | 353.6  | 305.8  | 367.4  | NM_001009934.1 |
| 89.7   | 94.3   | 87.4   | 88.6   | NM_006730.2    |
| 156.5  | 146.8  | 134.7  | 123.6  | NM_006730.2    |
| 95.2   | 90.6   | 96.1   | 99.6   | NM_001009932.1 |
| 131.1  | 118.5  | 106.5  | 113.5  | NM_001374.2    |
| 98.7   | 94.6   | 80.8   | 96.2   | NM_004944.2    |
| 1241.5 | 1566.7 | 1103.6 | 706.4  | NM_001375.2    |
| 88.5   | 93.1   | 80.7   | 91.3   | NM_058248.1    |
| 91.7   | 93.6   | 87.2   | 81.6   | NM_021233.2    |
| 101.5  | 107.4  | 95.7   | 108.5  | NM_021233.2    |
| 761.8  | 333.8  | 368.2  | 291    | NM_177953.1    |
| 395.3  | 275    | 269.8  | 253.8  | NM_177953.1    |
| 99.2   | 107    | 92.8   | 103.7  | NM_194249.1    |
| 88.6   | 79.4   | 81.6   | 89.6   | NM_139072.2    |
| 102    | 114.7  | 115.5  | 121.6  | NM_144666.1    |
| 89.2   | 90.8   | 84.8   | 89.4   | NM_178504.3    |
| 86.6   | 78.1   | 79.7   | 90.1   | NM_020877.2    |
| 130.6  | 113.6  | 105.8  | 113.4  | NM_004408.2    |
| 768.5  | 845.1  | 711.1  | 759.3  | NM_012062.2    |
| 215    | 201.6  | 154.3  | 182.1  | NM_005690.2    |
| 149.2  | 158.7  | 158.3  | 139.5  | NM_004945.2    |
| 239.1  | 269.6  | 237.1  | 230.6  | NM_004945.2    |
| 98.1   | 92.7   | 92.6   | 92.4   | NM_015569.2    |
| 107.8  | 97     | 96     | 93     | NM_015221.1    |
| 4714.1 | 4510.8 | 4391.6 | 2926.2 | NM_001379.1    |
| 106    | 88.6   | 88.1   | 96.3   | NM_176085.1    |
| 94.1   | 84.5   | 84.5   | 87.2   | NM_175630.1    |
| 104.4  | 85.8   | 90.4   | 86.7   | NM_022552.3    |
| 93.9   | 83.1   | 83.5   | 92.7   | NM_153759.2    |
| 107.3  | 113.1  | 101.7  | 91.5   | NM_175850.1    |
| 131.4  | 118.7  | 120.3  | 123.4  | NM_006892.3    |

|        |        |        |                     |
|--------|--------|--------|---------------------|
| 97.8   | 94.5   | 94.9   | 98 NM_006892.3      |
| 85.9   | 72     | 86.8   | 87.7 NM_175867.1    |
| 94.7   | 105.2  | 109.5  | 96.3 NM_013369.2    |
| 122.4  | 122.1  | 107.6  | 105.2 NM_012100.1   |
| 91.4   | 86     | 81     | 86.5 NM_001017520.1 |
| 95.6   | 96     | 80.3   | 89.2 NM_001017520.1 |
| 768.1  | 626.2  | 785.5  | 532.6 NM_052951.2   |
| 90.7   | 80.2   | 80.8   | 90.1 NM_014597.3    |
| 211.2  | 366.9  | 239.1  | 215.7 NM_014890.1   |
| 203    | 386.1  | 259.4  | 223.6 NM_182909.1   |
| 87.5   | 89.5   | 87.8   | 90.3 NM_182909.1    |
| 95.7   | 79.6   | 78.3   | 89.1 NM_003586.2    |
| 96.2   | 95.4   | 91.9   | 93.7 NM_003585.1    |
| 90.1   | 93.2   | 84     | 92.5 NM_001380.2    |
| 1022.6 | 1262.5 | 916.7  | 843.3 NM_014689.1   |
| 466.4  | 585    | 570    | 486.7 NM_144658.2   |
| 2963.5 | 5035.4 | 5428   | 2480.2 NM_004946.1  |
| 91.3   | 84.4   | 78.5   | 81.6 NM_004947.3    |
| 87.8   | 83.9   | 77.8   | 78.4 NM_014705.2    |
| 144.7  | 136.1  | 103.5  | 109.7 NM_024940.4   |
| 159.4  | 156    | 137    | 139.4 NM_020812.1   |
| 84     | 76.5   | 81.5   | 81.8 NM_033407.2    |
| 1284.9 | 1235.1 | 1034.4 | 1520.9 NM_203447.1  |
| 85.6   | 95.9   | 93.6   | 93.3 NM_015296.1    |
| 95.1   | 89.5   | 88.9   | 85.3 NM_001381.2    |
| 107.7  | 97.4   | 99     | 87.7 NM_003974.2    |
| 165    | 118.5  | 109.5  | 111.6 NM_201349.1   |
| 99.1   | 120.3  | 130.6  | 114.5 NM_024872.1   |
| 117.7  | 94.6   | 97.5   | 104 NM_018110.2     |
| 83.5   | 80.4   | 78.3   | 82.9 NM_018431.3    |
| 107.5  | 104    | 93.2   | 106 NM_152721.2     |
| 285    | 195.7  | 205.3  | 137 NM_020438.3     |
| 371.4  | 389.1  | 373.9  | 309.1 NM_005510.3   |
| 574.5  | 578.4  | 430.7  | 499.2 NM_145794.1   |
| 180.2  | 150.4  | 131.8  | 139.2 NM_017613.2   |
| 144    | 146.6  | 162.7  | 155.1 NM_015018.2   |
| 376.9  | 578.4  | 698.1  | 379.8 NM_005128.2   |
| 98.9   | 99.7   | 98.7   | 90.9 NM_032482.1    |
| 86.3   | 91.4   | 86.3   | 83.5 NM_001004441.1 |
| 238.8  | 141.9  | 140.2  | 132.1 NM_001382.2   |
| 796.4  | 465.7  | 454.4  | 300.4 NM_001382.2   |
| 89.6   | 97.2   | 86.9   | 100 NM_080870.2     |
| 91.3   | 93     | 96.8   | 89.9 NM_004413.1    |
| 104.3  | 109.5  | 120    | 109.3 NM_022355.1   |
| 87.7   | 93.7   | 90.6   | 84.7 NM_022357.1    |
| 111.2  | 123.3  | 96.3   | 97.5 NM_004647.1    |
| 757.2  | 471.8  | 519.6  | 303.5 NM_006268.3   |
| 98     | 112.7  | 97.8   | 106.7 NM_012074.1   |
| 115.9  | 96.1   | 89.9   | 95.2 NM_001383.2    |
| 151.8  | 124.8  | 121.6  | 110.5 NM_001384.3   |

|        |        |        |                      |
|--------|--------|--------|----------------------|
| 112.1  | 114.6  | 103.3  | 95.2 NM_001384.4     |
| 852.8  | 658.2  | 523.2  | 334.9 NM_001384.4    |
| 426.7  | 283.1  | 265.6  | 248.8 NM_001047434.1 |
| 147.5  | 141.8  | 121.3  | 128 NM_001047434.1   |
| 839.2  | 443.9  | 375.2  | 309.1 NM_015958.1    |
| 614.9  | 270.4  | 227.7  | 188.5 NM_001077395.1 |
| 1960   | 1461.6 | 1128.1 | 1251.6 NM_003859.1   |
| 325.6  | 192.3  | 166.2  | 173.7 NM_003863.2    |
| 1040.6 | 781.5  | 745.7  | 544.9 NM_018973.3    |
| 1838.7 | 1181.8 | 1414.1 | 959.8 NM_153741.1    |
| 96.7   | 100    | 93.6   | 94 NM_001004360.1    |
| 93.2   | 90.3   | 81.8   | 87 NM_020868.2       |
| 189    | 157.2  | 133.4  | 135.9 NM_130443.1    |
| 145.2  | 164.5  | 156.7  | 129.6 NM_005700.2    |
| 335.8  | 339.9  | 277.9  | 239.6 NM_005700.3    |
| 101.8  | 96.7   | 95.2   | 94 NM_001935.3       |
| 79.9   | 82.3   | 72.2   | 79.4 NM_130797.1     |
| 85.3   | 87     | 81.4   | 85 NM_001936.2       |
| 647.8  | 592.1  | 531.4  | 447.1 NM_013379.2    |
| 879.5  | 751.4  | 859.1  | 285.5 NM_013379.2    |
| 154.7  | 171.7  | 153.2  | 167.2 NM_130434.3    |
| 313    | 328.7  | 305.4  | 339.1 NM_130434.2    |
| 90.2   | 85     | 84     | 81.8 NM_197960.2     |
| 412.7  | 392    | 330.7  | 319.3 NM_139159.3    |
| 95.2   | 81.8   | 87.6   | 90.9 NM_138815.2     |
| 94.4   | 90.6   | 80.4   | 92.7 NM_199286.2     |
| 88.4   | 84     | 79.4   | 95 NM_018189.2       |
| 92.2   | 87.7   | 84.5   | 94.5 NM_001025290.1  |
| 88.7   | 79     | 81     | 91.2 NM_001012728.1  |
| 93.6   | 83.2   | 86.4   | 90.7 NR_002221.1     |
| 88.9   | 77.6   | 85.4   | 78.1 NM_001937.3     |
| 91.9   | 91.1   | 90.4   | 88.1 NM_173812.3     |
| 122.8  | 117    | 104.9  | 98.4 NM_207325.1     |
| 236.2  | 188.1  | 190.2  | 168 NM_181787.1      |
| 161.4  | 203.9  | 157.9  | 197.2 NM_000110.2    |
| 86.9   | 83.7   | 80.2   | 82 NM_001385.1       |
| 4375.3 | 2946.2 | 2714.1 | 2242.1 NM_001386.4   |
| 103.3  | 96.9   | 88.1   | 93.5 NM_001387.2     |
| 105.8  | 89     | 78.5   | 91.8 NM_006426.1     |
| 81.3   | 82.7   | 90.2   | 78.7 NM_020134.2     |
| 98.9   | 95.6   | 85.5   | 94.3 NM_133637.1     |
| 445.2  | 428.2  | 358.4  | 290.9 NM_001938.2    |
| 1768.4 | 1716   | 1291   | 1516.4 NM_006442.2   |
| 290.8  | 200.4  | 191.3  | 189.7 NM_152945.1    |
| 92.3   | 77.3   | 83     | 80.2 NM_000794.2     |
| 94.3   | 85.1   | 83.9   | 89.2 NM_015722.2     |
| 84.5   | 91     | 79.4   | 86.6 NM_016574.2     |
| 83.7   | 88     | 75.2   | 84.3 NM_000795.2     |
| 86.2   | 85.8   | 77.4   | 94 NM_000795.2       |
| 100.5  | 92.8   | 91.3   | 92.4 NM_033663.2     |



|        |        |        |                     |
|--------|--------|--------|---------------------|
| 101.8  | 95.8   | 94.6   | 101.9 NM_000796.3   |
| 84.7   | 71.3   | 73     | 84.2 NM_000796.3    |
| 108.3  | 135    | 141.5  | 129.2 NM_000797.2   |
| 99.7   | 91.2   | 88.3   | 103.2 NM_000798.3   |
| 157.4  | 196    | 154.3  | 181.2 NM_016025.2   |
| 2014.9 | 1507.8 | 1082.4 | 990.4 NM_004147.3   |
| 184.5  | 180.5  | 135.1  | 137.9 NM_001388.3   |
| 79.4   | 71.7   | 80.1   | 73.1 NM_001939.1    |
| 100    | 95.6   | 96.6   | 86.1 NM_004948.2    |
| 152.1  | 237.8  | 228    | 217.3 NM_004949.2   |
| 105.4  | 107.4  | 112.3  | 105.5 NM_024422.2   |
| 84.2   | 82.7   | 72.7   | 84.6 NM_001941.2    |
| 130.4  | 151    | 128.5  | 118.3 NM_001389.3   |
| 103    | 100.5  | 94.2   | 88.1 NM_206887.1    |
| 86     | 81     | 88.6   | 90.2 NM_206887.1    |
| 88.1   | 87     | 79.1   | 81.6 NM_020693.2    |
| 82.7   | 80.2   | 87.3   | 87.6 NM_203418.1    |
| 87.4   | 73.8   | 77     | 79.1 NM_004414.5    |
| 403.8  | 339.2  | 245.9  | 280.9 NM_203417.1   |
| 109.6  | 111.4  | 102.8  | 102.9 NM_148676.1   |
| 102.5  | 106.1  | 95.7   | 92.8 NM_005822.2    |
| 126.2  | 102.8  | 97.8   | 91.2 NM_013441.2    |
| 1157.9 | 893.7  | 742    | 863.6 NM_203433.1   |
| 885.7  | 644    | 556.7  | 599.6 NM_003720.2   |
| 441.9  | 547.3  | 521.5  | 417.6 NM_006052.1   |
| 90.7   | 81.7   | 81.3   | 74.3 NM_005867.2    |
| 470.3  | 342.9  | 311.1  | 277.3 NM_153682.1   |
| 1531.6 | 1161.3 | 1010.4 | 941.7 NM_153681.1   |
| 100.3  | 95.9   | 91.1   | 93.1 NM_153681.1    |
| 118.8  | 106.7  | 98.5   | 92.7 NM_018962.1    |
| 101.2  | 95.6   | 97.3   | 105.4 NM_032589.2   |
| 93.1   | 109.5  | 101.5  | 91.8 NM_032589.2    |
| 88.8   | 84.6   | 91     | 90.3 NM_203429.1    |
| 86.2   | 84.7   | 88.6   | 87.4 NM_148675.2    |
| 104.3  | 106.9  | 97.9   | 98.6 NM_032160.2    |
| 103.7  | 89.2   | 92.2   | 88.2 NM_001942.1    |
| 94.5   | 152.7  | 155.9  | 139.5 NM_001943.1   |
| 92.7   | 85.6   | 86.5   | 83.7 NM_001944.1    |
| 98.1   | 92.8   | 83.5   | 95.9 NM_177986.2    |
| 89.8   | 91.7   | 85.9   | 84.7 NM_004415.2    |
| 87.1   | 78.4   | 82.7   | 82.2 NM_004950.3    |
| 97.5   | 96.3   | 88.1   | 98.1 NM_014208.1    |
| 100.6  | 104.7  | 99.6   | 83.4 NM_183380.1    |
| 84.6   | 74.2   | 80.6   | 87.7 NM_020388.2    |
| 95.1   | 102.8  | 95.5   | 92.5 NM_001723.3    |
| 105.6  | 94.2   | 91.8   | 108.7 NM_001723.3   |
| 93.5   | 98.2   | 110.1  | 101.7 NM_183380.1   |
| 401    | 303.5  | 273.9  | 326.7 NM_006870.3   |
| 107.3  | 101.1  | 104.5  | 87.8 NM_001011546.1 |
| 444.1  | 394.1  | 360.9  | 395.1 NM_006870.3   |

|        |        |        |                     |
|--------|--------|--------|---------------------|
| 92.1   | 94.8   | 99.7   | 86.1 NM_018000.1    |
| 363.6  | 278.6  | 263.5  | 267 NM_016448.1     |
| 186.6  | 137.4  | 129.8  | 118.2 NM_001392.3   |
| 704.5  | 306.2  | 232.1  | 199.5 NM_001392.3   |
| 191.2  | 135.3  | 118.3  | 113.1 NM_032981.2   |
| 109.7  | 107.4  | 90     | 110.2 NM_033148.2   |
| 106.4  | 112.5  | 103.6  | 107.6 NM_183040.1   |
| 152.6  | 150.6  | 139    | 140.6 NM_183041.1   |
| 106.9  | 94.5   | 101.6  | 98.1 NM_183041.1    |
| 95.3   | 83.7   | 85     | 83.5 NM_020234.3    |
| 410.6  | 628.2  | 752.2  | 657.6 NM_173666.1   |
| 96.2   | 88.2   | 87.3   | 84.5 NM_004416.2    |
| 572.3  | 595.5  | 690.4  | 278.9 NM_020892.1   |
| 86.5   | 85.3   | 80.6   | 86.8 NM_178502.2    |
| 108.3  | 119.8  | 99.1   | 107.1 NM_138287.2   |
| 91.2   | 79.9   | 91.1   | 86.8 NM_012145.2    |
| 93.4   | 92.4   | 87     | 95.3 NM_201402.1    |
| 172.2  | 178.9  | 158.8  | 155.8 NM_015343.3   |
| 85.4   | 82.4   | 84     | 89.8 NM_017434.3    |
| 108.4  | 98.2   | 98.1   | 93.9 NM_017434.3    |
| 83.5   | 101.9  | 83.6   | 83.9 NM_017434.3    |
| 92.2   | 83.8   | 70.4   | 79.1 NM_014080.3    |
| 99.5   | 90.2   | 79.3   | 98.1 NM_001003892.1 |
| 194.2  | 266.4  | 192.4  | 199.2 NM_022156.3   |
| 233.4  | 152.6  | 177.3  | 117.3 NM_017803.3   |
| 870.1  | 481.8  | 495.1  | 337.9 NM_020175.1   |
| 277.4  | 331.6  | 301.3  | 228.9 NM_181581.1   |
| 165.4  | 184.5  | 159.6  | 121.1 NM_004417.2   |
| 153.4  | 200.2  | 141.4  | 147.6 NM_007207.3   |
| 86.2   | 86.8   | 71.8   | 83.1 NM_144728.1    |
| 285.8  | 423    | 290.1  | 400.7 NM_144729.1   |
| 117.4  | 101.7  | 93.1   | 113.1 NM_003584.1   |
| 1678.4 | 1040.7 | 931    | 820.1 NM_007240.1   |
| 92.5   | 91.2   | 82.8   | 86.9 NM_001007275.1 |
| 89.6   | 85.8   | 86.3   | 90.2 NM_001007271.1 |
| 104.2  | 97.8   | 92.7   | 94.2 NM_001007271.1 |
| 105.4  | 89.4   | 95.8   | 97.3 NM_016364.3    |
| 342.3  | 240.4  | 185.1  | 180.3 NM_007026.1   |
| 97.4   | 96     | 86.5   | 90.4 NM_080611.3    |
| 85.4   | 88.6   | 88.3   | 81.4 NM_001012644.1 |
| 91.7   | 74.8   | 80     | 91.5 NM_080611.3    |
| 117.4  | 102.3  | 89.1   | 99.1 NM_030640.1    |
| 210.5  | 275.1  | 243.8  | 200.3 NM_152511.3   |
| 2549.9 | 2946   | 3463.1 | 3824.3 NM_080876.2  |
| 121.7  | 112.6  | 97.6   | 99.7 NM_004418.2    |
| 95.8   | 87.9   | 81.2   | 92.5 NM_022076.2    |
| 103.8  | 110.9  | 109.4  | 107.6 NM_020185.3   |
| 187.5  | 222.2  | 254.7  | 197.9 NM_020185.3   |
| 2804.9 | 1703.5 | 1664.7 | 1028.6 NM_017823.3  |
| 125.5  | 133    | 113.1  | 109.2 NM_024025.1   |

|        |        |        |                      |
|--------|--------|--------|----------------------|
| 82.7   | 83.2   | 76.2   | 88.3 XM_935434.1     |
| 98     | 97.3   | 103    | 98.1 NM_001080426.1  |
| 1580.5 | 1746.7 | 1792.1 | 1278.5 NM_004090.2   |
| 88.3   | 93     | 81.6   | 88.6 NM_057158.2     |
| 103.2  | 110.4  | 105.4  | 107.5 NM_001394.5    |
| 203.7  | 151.9  | 127.5  | 116.6 NM_004419.3    |
| 159.3  | 125.7  | 142.1  | 125 NR_002834.1      |
| 122.2  | 102.7  | 107.7  | 146 NM_022652.2      |
| 105.2  | 107    | 98.2   | 95.8 NM_001946.2     |
| 101.6  | 115.9  | 105.6  | 98 NM_001947.1       |
| 102.5  | 103.1  | 109.5  | 109.4 NM_004420.1    |
| 106.2  | 93.7   | 82.7   | 93.7 NM_001395.1     |
| 138.3  | 172.8  | 184.6  | 125.8 NM_001025248.1 |
| 387.2  | 289.5  | 291.2  | 242.2 NM_001025248.1 |
| 657.6  | 520.2  | 504.9  | 356.9 NM_001025249.1 |
| 99.8   | 100.6  | 93.4   | 94.5 NM_012146.1     |
| 94.4   | 91.9   | 98.4   | 91 NM_012147.2       |
| 105.6  | 97     | 95.2   | 101.5 NM_012148.2    |
| 77.8   | 80.7   | 90.2   | 84.9 NM_033178.2     |
| 94.2   | 80.2   | 82.4   | 83.7 NM_001023569.1  |
| 80.8   | 81.3   | 75.7   | 75.7 NM_012149.2     |
| 84.5   | 79.1   | 82.3   | 89.7 NM_001012729.1  |
| 645    | 1001.5 | 1630.2 | 1201.6 NR_002220.1   |
| 118.7  | 134.4  | 122.2  | 149.4 NM_181870.1    |
| 192    | 201.6  | 205.7  | 174.3 NM_004422.2    |
| 388.2  | 360    | 274.1  | 328.9 NM_004423.3    |
| 1819.5 | 1064.8 | 922.6  | 665.1 NM_006014.2    |
| 100.1  | 85.8   | 91.2   | 99 NM_138812.1       |
| 903.2  | 830.8  | 662.1  | 606.1 NM_017653.2    |
| 403.1  | 637.8  | 480.8  | 489 NM_001376.2      |
| 91.9   | 80.2   | 81.5   | 85.4 NM_004411.1     |
| 1009.2 | 1218.7 | 761.5  | 842.1 NM_001378.1    |
| 121.7  | 117.4  | 115.2  | 114.1 NM_016141.1    |
| 1586.3 | 1506.1 | 1683   | 1173.7 NM_006141.2   |
| 125.2  | 105.5  | 106.4  | 114.5 NM_001080463.1 |
| 87.4   | 89.2   | 75.8   | 80.2 NM_016008.2     |
| 373.5  | 276.7  | 231.6  | 214.6 NM_015522.2    |
| 125.5  | 111.3  | 104.6  | 107.5 NM_001012665.1 |
| 5874.4 | 3046.2 | 2668.5 | 2198 NM_001037494.1  |
| 325.3  | 384.5  | 344.4  | 211.7 NM_080677.1    |
| 1658.2 | 913.2  | 816.6  | 626.1 NM_014183.2    |
| 98.2   | 87.9   | 88.8   | 85.3 NM_130897.1     |
| 1010.1 | 902.9  | 690.2  | 728.5 NM_006519.1    |
| 96.8   | 96.5   | 93.5   | 92.7 NM_006520.1     |
| 360    | 460.2  | 403.2  | 381.2 NM_130437.2    |
| 85.4   | 87.5   | 85.1   | 94.9 NM_101395.1     |
| 477.8  | 573.5  | 395.6  | 521.2 NM_130438.1    |
| 82.9   | 82.1   | 85.9   | 84.3 NM_130436.1     |
| 96.9   | 93     | 80.8   | 90.5 NM_006484.1     |
| 98.6   | 103.3  | 103.8  | 103.1 NM_004714.1    |

|        |        |        |                      |
|--------|--------|--------|----------------------|
| 451.1  | 471.4  | 532.8  | 374 NM_003583.2      |
| 105    | 105.8  | 99.9   | 105.1 NM_006482.1    |
| 99.7   | 100.8  | 84.6   | 101.1 NM_003582.2    |
| 91.9   | 91.8   | 82.8   | 83.5 NM_003582.2     |
| 87.2   | 89.9   | 84.4   | 93.6 NM_001004023.1  |
| 172.2  | 160.6  | 160.7  | 129.8 NM_003845.1    |
| 93.3   | 93.3   | 90.7   | 100.8 NM_003494.2    |
| 1773.7 | 377.8  | 395.5  | 340.1 NM_001007533.3 |
| 94.4   | 99.2   | 87.3   | 95 NM_130810.2       |
| 93.8   | 81.3   | 92.7   | 91.2 NM_001033560.1  |
| 103.2  | 103.5  | 99.6   | 89.1 NM_198968.1     |
| 90.9   | 93.8   | 90     | 93.2 NM_014934.3     |
| 102.4  | 101.2  | 98.1   | 95.8 NM_173543.1     |
| 91.3   | 88.9   | 98.3   | 99.4 NM_014648.2     |
| 85.9   | 89.8   | 82.9   | 92.3 NM_005225.1     |
| 860    | 977.7  | 1064.7 | 513.9 NM_004091.2    |
| 908.5  | 903.8  | 763.4  | 623.6 NM_001949.2    |
| 1138.2 | 759.5  | 647.6  | 394.8 NM_001950.3    |
| 274.9  | 182    | 152.8  | 168.3 NM_001951.2    |
| 95     | 102.6  | 104    | 80.7 NR_003095.1     |
| 618    | 440.7  | 420.6  | 302.8 NM_001952.3    |
| 294.9  | 268.8  | 245.6  | 207.2 NM_203394.1    |
| 107.6  | 107.5  | 96.7   | 108.7 NM_024680.2    |
| 1260.6 | 1024.4 | 1097.4 | 424.8 NM_004424.3    |
| 140.7  | 120    | 119.9  | 115.2 NM_033083.5    |
| 660.3  | 759    | 625.2  | 582.9 NM_018456.4    |
| 2288.2 | 1453.9 | 1332.3 | 1283.7 NM_004215.3   |
| 130.6  | 114.3  | 121.8  | 111.9 NM_198120.1    |
| 140.2  | 118.3  | 110.6  | 83.3 NM_004215.3     |
| 97.7   | 103.5  | 93.5   | 104.1 NM_024007.2    |
| 79.8   | 87.4   | 79.2   | 84 NM_022659.2       |
| 292.5  | 269.8  | 317.4  | 194.6 NM_001005463.1 |
| 238.6  | 295.7  | 244.7  | 221.5 NM_004951.3    |
| 109.6  | 110.9  | 105.3  | 121.9 NM_005755.2    |
| 3111.7 | 2945.6 | 2414.9 | 1675.2 NM_006824.1   |
| 883.5  | 551.6  | 652.1  | 427 NM_006579.1      |
| 82     | 91.3   | 73.5   | 83.7 NM_001017361.1  |
| 93.1   | 80.4   | 80.5   | 81.3 NM_019079.2     |
| 214.4  | 202.5  | 150    | 160.8 NM_007265.1    |
| 100.2  | 91.6   | 95.7   | 88.2 NM_001397.1     |
| 287.3  | 162.7  | 129.2  | 126.1 NM_014693.2    |
| 94.2   | 82     | 82.7   | 87.3 NM_014693.2     |
| 93.7   | 87.8   | 86.2   | 86.4 NM_014693.2     |
| 100    | 111.5  | 105.7  | 113.1 NM_004826.1    |
| 1867.7 | 2532.3 | 1833.3 | 1332.4 NM_001953.2   |
| 4859.6 | 3737.4 | 3579.2 | 2682.6 NM_001398.2   |
| 337.9  | 360.7  | 305.3  | 264.2 NM_018479.2    |
| 1561.2 | 1629   | 1938.2 | 1084.5 NM_018281.1   |
| 266.1  | 165.5  | 183    | 146.6 NM_024693.2    |
| 1093.8 | 670.6  | 691.2  | 409.7 NM_004092.2    |

|         |         |         |         |                |
|---------|---------|---------|---------|----------------|
| 255.6   | 215.3   | 214.3   | 198.7   | NM_004425.2    |
| 152.8   | 118.9   | 104.7   | 99      | NM_022664.1    |
| 80.5    | 83.7    | 82      | 81      | NM_001393.2    |
| 256.7   | 231.5   | 214.7   | 240.4   | NM_030796.3    |
| 80.8    | 80.7    | 79.8    | 84.3    | NM_032411.1    |
| 144.3   | 113.8   | 121.6   | 121.7   | NM_016581.2    |
| 88.3    | 94.8    | 92.4    | 87.9    | NM_001005610.1 |
| 100.9   | 93.6    | 88.1    | 91.6    | NM_001005614.1 |
| 102     | 104.6   | 91.1    | 100.9   | NM_001005615.1 |
| 97.1    | 92.3    | 95      | 94.2    | NM_001005611.1 |
| 93.3    | 80.4    | 80.5    | 82.6    | NM_001005613.1 |
| 94.7    | 88.6    | 86.6    | 89.5    | NM_021783.2    |
| 101.2   | 76.6    | 82      | 94.6    | NM_022336.1    |
| 89      | 89      | 86.6    | 86.4    | NM_145861.1    |
| 109.4   | 117.8   | 120.7   | 104.9   | NM_145861.1    |
| 75.3    | 70.7    | 79.4    | 73      | NM_080738.2    |
| 363.7   | 374.8   | 375.9   | 317.1   | NM_015902.4    |
| 276.5   | 393.1   | 394.3   | 372.8   | NM_014674.1    |
| 361     | 331.6   | 304.4   | 291.6   | NM_025191.2    |
| 664.3   | 567.1   | 538.4   | 371.2   | NM_003792.2    |
| 9009.7  | 6110.7  | 5715.5  | 5585.3  | NM_003792.2    |
| 84.5    | 88.3    | 73.2    | 83.6    | NM_001400.2    |
| 453.3   | 286.8   | 253.2   | 231.3   | NM_001401.3    |
| 90.2    | 87.6    | 85.9    | 86.9    | NM_057159.2    |
| 231.6   | 114     | 113.6   | 123.2   | NM_005226.2    |
| 478.1   | 602.3   | 616.9   | 427.1   | NM_004720.4    |
| 105.7   | 93.5    | 89      | 91.2    | NM_004230.2    |
| 91.6    | 88.2    | 87.2    | 82.5    | NM_003775.1    |
| 98.1    | 90.8    | 84.3    | 94.8    | NM_012152.1    |
| 155.4   | 151.9   | 161.5   | 154.3   | NM_030760.3    |
| 75.1    | 78.5    | 79.8    | 88.2    | NM_005711.3    |
| 85.1    | 92.5    | 86.7    | 90.5    | NM_001955.2    |
| 98.7    | 93.4    | 80.4    | 93.2    | NM_001956.2    |
| 92.4    | 89.9    | 85.4    | 83.3    | NM_207033.1    |
| 77.8    | 88.5    | 82.8    | 85.8    | NM_207034.1    |
| 81.6    | 92.1    | 90.8    | 97.5    | NM_001957.1    |
| 118.2   | 186.7   | 206.7   | 178.4   | NM_003991.1    |
| 93      | 89.5    | 82.6    | 88.2    | NM_003991.1    |
| 88.5    | 82.4    | 79.5    | 93.1    | NM_000115.1    |
| 121.2   | 128.4   | 106.2   | 111.4   | NM_003566.2    |
| 99.2    | 90.5    | 99.7    | 99.2    | NM_152991.1    |
| 228.9   | 160.5   | 131.9   | 159.2   | NM_003797.2    |
| 135     | 102.2   | 91.2    | 99.1    | NM_152991.1    |
| 60250.9 | 58390.1 | 51447   | 55483.4 | NM_001402.4    |
| 55362.7 | 47315.7 | 39201.1 | 39841.5 | NM_001402.4    |
| 2381.1  | 368.9   | 351.6   | 236.2   | NM_001958.2    |
| 789.1   | 496.4   | 448.7   | 361     | NM_021121.2    |
| 14271.1 | 14409.7 | 11319   | 11404.3 | NM_001037663.1 |
| 777.2   | 658.5   | 634.8   | 432.3   | NM_001959.2    |
| 14907.2 | 15867.8 | 14793.3 | 10887   | NM_001959.2    |

|         |         |         |        |                |
|---------|---------|---------|--------|----------------|
| 2741.7  | 1726.2  | 2111.9  | 1450.9 | NM_032378.2    |
| 85.4    | 81.2    | 80.4    | 76.7   | NM_032378.2    |
| 91.6    | 76.4    | 77      | 77.7   | NM_004280.2    |
| 14414.2 | 13568.8 | 12560.7 | 9882   | NM_001404.4    |
| 9902.1  | 8544.6  | 8140.3  | 4845.6 | NM_001961.2    |
| 564.6   | 560.8   | 584.6   | 318.8  | NM_013302.2    |
| 102.3   | 102.6   | 92.3    | 84.6   | NM_021937.3    |
| 94.6    | 90.1    | 86.3    | 86.6   | NM_024593.2    |
| 87.3    | 78.9    | 80.3    | 82.8   | NM_032328.1    |
| 95.9    | 87.6    | 94.6    | 95.3   | NM_173503.1    |
| 90.9    | 88.5    | 84.2    | 83.2   | NM_022351.2    |
| 142.8   | 108.1   | 120.1   | 99.9   | NM_019065.2    |
| 86.9    | 101.6   | 78.4    | 92.2   | NM_004105.2    |
| 92.6    | 93.7    | 84.1    | 91.5   | NM_004105.2    |
| 83.8    | 87      | 90.7    | 81.9   | NM_001039348.1 |
| 430.7   | 303.5   | 319.2   | 172.9  | NM_016938.1    |
| 902.6   | 657.2   | 619.3   | 708.3  | NM_152726.1    |
| 92.4    | 91.2    | 76.1    | 90.2   | NM_181723.1    |
| 96.4    | 93.5    | 90.4    | 91.9   | NM_144715.2    |
| 91.5    | 110.3   | 128.6   | 117.3  | NM_018100.1    |
| 92.3    | 89.1    | 90.1    | 91.4   | NM_025184.2    |
| 163.2   | 157.4   | 133.3   | 116.4  | NM_025202.2    |
| 2560.7  | 2089.1  | 1741.1  | 1026.4 | NM_024329.4    |
| 88.6    | 94.8    | 87.9    | 85.4   | NM_004428.2    |
| 95.3    | 93.1    | 85.5    | 92.7   | NM_004428.2    |
| 79.2    | 83.8    | 84.7    | 83.5   | NM_001405.2    |
| 80.4    | 85.1    | 82.5    | 89     | NM_004952.3    |
| 112.5   | 104.9   | 103.7   | 95.3   | NM_182690.1    |
| 275.6   | 259.3   | 264.1   | 191.2  | NM_005227.2    |
| 92.9    | 88.9    | 91.2    | 84.4   | NM_001962.1    |
| 114.5   | 106.5   | 95.7    | 108.2  | NM_004429.3    |
| 115.4   | 113     | 110.3   | 111    | NM_004093.2    |
| 94.5    | 82.7    | 80.2    | 83.7   | NM_001406.3    |
| 92.4    | 91.6    | 93.4    | 92.5   | NM_005864.2    |
| 85.2    | 95.3    | 87.8    | 90.1   | NM_005864.2    |
| 169.7   | 199.9   | 166.3   | 155.9  | NM_024580.3    |
| 198.1   | 246.5   | 199.6   | 198.1  | NM_024580.3    |
| 89      | 89.9    | 80.4    | 93.5   | NM_024580.3    |
| 1442.3  | 1484.6  | 1106.8  | 1040   | NM_004247.2    |
| 87.6    | 93      | 88.4    | 85.8   | NM_001963.2    |
| 89.2    | 93.7    | 89.3    | 100.2  | XM_929502.1    |
| 97.9    | 84.8    | 86.5    | 90.7   | NM_015507.2    |
| 142.1   | 115.1   | 107     | 111.5  | NM_016215.3    |
| 94.9    | 100.9   | 90.4    | 97.1   | NM_016215.3    |
| 77.7    | 76      | 73.5    | 71.1   | NM_030652.1    |
| 79.3    | 82.2    | 77.4    | 84.2   | NM_023932.2    |
| 98.3    | 91.1    | 87.8    | 88.8   | NM_023932.2    |
| 99.5    | 107.9   | 85.7    | 98.3   | NM_206539.1    |
| 135.9   | 185.4   | 177.4   | 157    | NM_182799.1    |
| 95      | 94      | 86.5    | 93.6   | NM_005228.3    |

|        |        |        |                      |
|--------|--------|--------|----------------------|
| 87.1   | 90.2   | 93.4   | 92 NM_201284.1       |
| 89.1   | 85.9   | 74.9   | 85.3 NM_201282.1     |
| 94.4   | 97.3   | 92.7   | 98.1 NM_201283.1     |
| 209.5  | 197.2  | 166.8  | 165.4 NM_022051.1    |
| 86     | 94.8   | 85.9   | 85.7 NM_017555.1     |
| 1972.7 | 2199.4 | 2173.8 | 937 NM_080732.1      |
| 94.4   | 96.9   | 85.7   | 90.3 NM_022073.2     |
| 202.3  | 169.2  | 138.2  | 147.2 NM_001964.2    |
| 114.3  | 110.5  | 104    | 110.4 NM_000399.2    |
| 96.1   | 91.1   | 85.7   | 94.1 NM_004430.2     |
| 112    | 107.9  | 110.9  | 104.3 NM_004430.2    |
| 94.8   | 87.1   | 73.8   | 77.6 NM_001965.1     |
| 773.7  | 698.9  | 727.4  | 585.3 NM_015252.2    |
| 999    | 874    | 849.5  | 490.4 NM_006795.2    |
| 101.2  | 100.1  | 93.3   | 94.8 NM_014601.2     |
| 90.2   | 89.6   | 72.6   | 74.1 NM_014600.1     |
| 361.9  | 427.3  | 345.6  | 281.4 NM_139265.2    |
| 92.9   | 84.5   | 77.7   | 87.6 NM_012153.3     |
| 266.8  | 312.5  | 268.5  | 262.8 NM_001966.2    |
| 121.9  | 123.9  | 104.8  | 108.4 NM_024757.3    |
| 153.5  | 151.5  | 151.3  | 124.4 NM_006709.2    |
| 81.4   | 81.8   | 76.6   | 84.9 NM_006709.2     |
| 2495.5 | 1169.3 | 1359.7 | 770.8 NM_004879.3    |
| 609.1  | 339.8  | 317.3  | 375.3 NM_004879.3    |
| 1473.9 | 2244.5 | 2444.7 | 2108.4 NM_152361.1   |
| 76.8   | 81.6   | 88.7   | 85.7 NM_001008394.1  |
| 2733.3 | 2329.6 | 2005   | 1888.2 NM_005801.3   |
| 102.1  | 98.3   | 96.5   | 99.9 XM_942595.1     |
| 792.3  | 435.3  | 622    | 667.2 NM_001412.3    |
| 131.8  | 131.5  | 131.4  | 112.1 NM_001412.3    |
| 220.6  | 227    | 197.1  | 180.6 NM_004681.2    |
| 553    | 428.6  | 510.2  | 385.1 NM_005875.2    |
| 2429.5 | 2330.1 | 1609.9 | 1635.4 NM_032025.2   |
| 3143.3 | 2484.8 | 2511.2 | 1671.9 NM_014413.2   |
| 656.7  | 701.1  | 750.6  | 595 NM_002759.1      |
| 216.4  | 352.7  | 405    | 266.9 NM_001013703.2 |
| 708.4  | 688.4  | 529.5  | 430.4 NM_001414.2    |
| 761.8  | 703.8  | 579    | 458.5 NM_014239.2    |
| 2059.5 | 1702.7 | 1651.5 | 1192.9 NM_015636.2   |
| 1549.8 | 1368.8 | 1260.2 | 805.3 NM_015636.3    |
| 98.6   | 94     | 88.2   | 94.9 NM_172195.1     |
| 525.9  | 564.9  | 454    | 322 NM_003907.1      |
| 200.8  | 232.2  | 217.4  | 170 NM_012199.2      |
| 846.5  | 1047.2 | 1229.5 | 664.5 NM_012154.2    |
| 110.4  | 124.8  | 109.8  | 113.8 NM_177422.1    |
| 109    | 114.1  | 121.1  | 102.1 NM_024852.2    |
| 133.1  | 121    | 114.7  | 126.4 NM_017629.2    |
| 199.3  | 161.7  | 174.6  | 128.4 NM_004094.4    |
| 316.9  | 390    | 296.7  | 251.3 NM_003908.3    |
| 5085.1 | 4436.1 | 4008.2 | 3009 NM_001415.2     |

|         |         |         |         |                |
|---------|---------|---------|---------|----------------|
| 658.3   | 507.5   | 379     | 441.5   | NM_003758.1    |
| 554.3   | 547.3   | 629.1   | 388.5   | NM_003750.1    |
| 3609.2  | 2499.2  | 2365.7  | 1463.3  | NM_013234.1    |
| 1825.5  | 1935.1  | 1776.7  | 1395.2  | NM_003757.1    |
| 4677.8  | 4236.9  | 3889    | 2864.2  | NM_003756.1    |
| 2410.4  | 1423.5  | 1357.8  | 961.7   | NM_003755.2    |
| 4918.8  | 3500.1  | 3121.6  | 2598.5  | NM_003754.1    |
| 21381.8 | 14155.1 | 13570.4 | 13039.4 | NM_001568.1    |
| 5454.5  | 4773.7  | 3803.3  | 3156    | NM_016091.2    |
| 4174.2  | 4093.1  | 3176.7  | 2995.4  | NM_003753.2    |
| 107.3   | 103.7   | 87.8    | 93.2    | NM_001037808.1 |
| 6519.8  | 7250.9  | 7102.3  | 3397.7  | NM_001037283.1 |
| 411.2   | 466.6   | 329.8   | 326.7   | NM_001037283.1 |
| 1814.8  | 1816.7  | 1484    | 1163    | NM_003751.2    |
| 17422.1 | 13270.9 | 13036.2 | 10110   | NM_001416.1    |
| 3554.1  | 4052.8  | 3483.6  | 3150.5  | NM_001967.2    |
| 3936.6  | 3775    | 2848.7  | 2770.6  | NM_001417.2    |
| 118.6   | 110.5   | 108.9   | 107.4   | NM_001968.2    |
| 549.2   | 616.4   | 419.9   | 401     | NM_004846.2    |
| 155.6   | 166.3   | 152.2   | 133.7   | NM_173359.3    |
| 215.7   | 148.3   | 144.5   | 123.7   | NM_004095.2    |
| 668.6   | 530.4   | 403.8   | 395.1   | NM_004096.3    |
| 88.6    | 93.3    | 83.8    | 86.4    | NM_003732.2    |
| 473.3   | 444.5   | 453.7   | 325.3   | NM_019843.2    |
| 842     | 862.6   | 783     | 657     | NM_198244.1    |
| 77      | 85.8    | 79.2    | 88.2    | NM_182917.2    |
| 2204.5  | 2681.9  | 2229.8  | 1720    | NM_004953.2    |
| 91.8    | 91.4    | 85.5    | 86.3    | NM_004953.2    |
| 4902.5  | 2448.2  | 1924.8  | 1892.7  | NM_001418.1    |
| 630.2   | 454.1   | 305.7   | 290.1   | NM_001418.1    |
| 7156.1  | 4400    | 2675.4  | 3501.8  | NM_001418.1    |
| 759.6   | 1136.2  | 845.8   | 759.6   | NM_003760.2    |
| 2239.1  | 2271.3  | 1906.9  | 1461.1  | NM_022170.1    |
| 102.1   | 118.1   | 95.9    | 94.7    | NM_001969.3    |
| 1906.2  | 1357.2  | 1154.6  | 858     | NM_001969.3    |
| 97.8    | 87.1    | 109.1   | 91      | NM_183004.3    |
| 1034.5  | 796.9   | 640.2   | 531.5   | NM_001970.3    |
| 105.1   | 90      | 93.4    | 82.3    | NM_020390.5    |
| 437.6   | 537.8   | 427.2   | 311.3   | NM_015904.2    |
| 90.7    | 119.4   | 119.4   | 119.6   | NM_001971.4    |
| 24999.9 | 24327.8 | 24073   | 12290   | NM_001972.2    |
| 91.4    | 79.5    | 80.4    | 91.7    | NM_033440.1    |
| 106.3   | 99.6    | 99.1    | 86.1    | NM_015849.2    |
| 89.8    | 76.9    | 86.6    | 82.1    | NM_005747.3    |
| 104.5   | 90.8    | 93.6    | 85.5    | NM_007352.2    |
| 180.6   | 181     | 164.7   | 146.8   | NM_018696.2    |
| 255.7   | 235.4   | 208.7   | 202.2   | NM_018127.4    |
| 164.5   | 158.4   | 159.2   | 125.7   | NM_001419.2    |
| 103.1   | 105.9   | 95.6    | 102.3   | NM_004432.1    |
| 89.9    | 90.8    | 86.7    | 85.5    | NM_001420.3    |



|        |        |        |                     |
|--------|--------|--------|---------------------|
| 102.3  | 95.2   | 90.9   | 94.3 NM_001420.3    |
| 90.5   | 85.9   | 92.5   | 100 NM_021952.2     |
| 2369.1 | 2284.3 | 1804   | 1608.3 NM_172373.2  |
| 128.8  | 146.3  | 150.5  | 150.4 NM_201999.1   |
| 945    | 826.3  | 746.8  | 600.3 NM_006874.2   |
| 157    | 148.9  | 137.1  | 129.6 NM_006874.2   |
| 109.7  | 97.7   | 87.5   | 96 NM_004433.3      |
| 801.5  | 681.5  | 600.8  | 363.5 NM_001421.1   |
| 77.5   | 79.4   | 80.6   | 83 NM_198381.1      |
| 92.2   | 84     | 79.9   | 87.2 NM_001422.2    |
| 138.3  | 164.8  | 161.9  | 124.1 NM_005229.2   |
| 99.2   | 98.3   | 92.1   | 92.4 NM_005230.2    |
| 127.4  | 116.8  | 96.1   | 107.1 NM_001973.2   |
| 83.4   | 84.2   | 86.4   | 80.2 NM_021795.2    |
| 110.2  | 112    | 95.9   | 102.4 NM_001973.2   |
| 310.1  | 237.4  | 228.4  | 163.8 NM_006532.2   |
| 101    | 101.2  | 99.4   | 97.2 NM_025165.2    |
| 235.6  | 472.2  | 394.4  | 293.8 NM_152793.1   |
| 89     | 89.8   | 94.4   | 91.7 NM_130442.1    |
| 397.7  | 617.2  | 497.9  | 391 NM_014800.8     |
| 85.3   | 82.7   | 85.1   | 84.3 NM_001039459.1 |
| 114.8  | 132.2  | 133.5  | 131.8 NM_014800.8   |
| 99     | 125    | 102.7  | 105.2 NM_022086.6   |
| 393.5  | 534.8  | 485.9  | 345.1 NM_133171.2   |
| 95.5   | 97.1   | 89.9   | 93.7 NM_133171.2    |
| 119.2  | 119.5  | 118    | 108.1 NM_024712.2   |
| 107.5  | 92.7   | 85.4   | 94.6 NM_018712.2    |
| 179.3  | 144.5  | 125.4  | 128.4 NM_153702.1   |
| 80.5   | 87.3   | 80.6   | 76.6 NM_000501.1    |
| 105.2  | 91.5   | 86.3   | 91.3 NM_001081754.1 |
| 128.3  | 135.1  | 120.9  | 110.5 NM_032377.2   |
| 261.7  | 241.4  | 223.1  | 227.9 NM_022821.2   |
| 87.4   | 92.6   | 84.6   | 93 NM_017770.2      |
| 110.5  | 92.9   | 95.6   | 92 NM_152310.1      |
| 116.8  | 109.6  | 105.2  | 111.9 NM_022726.2   |
| 1398.1 | 1047.9 | 933.7  | 1264.5 NM_021814.3  |
| 98.1   | 92.3   | 87.1   | 94.2 NM_024090.1    |
| 90.9   | 87.6   | 81.1   | 85.8 NM_024930.1    |
| 934.3  | 747.7  | 751.2  | 488.1 NM_018091.3   |
| 286.2  | 206.6  | 198.4  | 183.9 NM_019040.2   |
| 93.9   | 80.6   | 78.4   | 93.7 XM_946145.1    |
| 89.9   | 81.4   | 79.2   | 84.2 NM_016242.2    |
| 97     | 92.9   | 79.4   | 86.9 NM_000117.1    |
| 158.5  | 146.2  | 157.9  | 151.9 NM_152463.1   |
| 91.3   | 93.2   | 89.7   | 98 NM_001010865.1   |
| 1013.5 | 690.4  | 525.6  | 429.8 NM_006331.4   |
| 92.6   | 97.9   | 90.9   | 96.3 NM_133455.2    |
| 91.1   | 90.7   | 88.4   | 86 NM_007046.1      |
| 1715.6 | 1608   | 1587.8 | 797 NM_032048.2     |
| 89     | 84.4   | 94.7   | 87.8 NM_052846.1    |

|        |         |         |                      |
|--------|---------|---------|----------------------|
| 179.3  | 134.7   | 116.2   | 115.6 NM_004434.2    |
| 83.1   | 84.1    | 82.8    | 86.8 NM_001008707.1  |
| 139.8  | 115.4   | 97.7    | 106.4 NM_004434.2    |
| 1005.7 | 768.5   | 793.7   | 401.4 NM_153265.1    |
| 280.8  | 225.7   | 225.6   | 200.2 NM_019063.2    |
| 82.5   | 81.7    | 86      | 86.3 NM_183387.1     |
| 136.9  | 94.6    | 82.5    | 85.4 NM_001423.1     |
| 95.7   | 86.8    | 81.9    | 83.9 NM_001424.3     |
| 3898.7 | 2336    | 2283.7  | 1546.5 NM_001425.1   |
| 99.7   | 100.8   | 93.6    | 104.9 NM_001974.3    |
| 138    | 394.7   | 377.4   | 267.8 NM_152916.1    |
| 76.2   | 78.7    | 69.5    | 75.5 NM_032571.2     |
| 79.6   | 88.5    | 92.9    | 82.9 NM_032571.2     |
| 92.9   | 101.9   | 86.8    | 100.9 NM_001080498.1 |
| 95.5   | 114.9   | 98.5    | 99.5 NM_001080498.1  |
| 89.4   | 90      | 88.6    | 92.3 NM_004097.1     |
| 79     | 82.8    | 79.8    | 82.7 NM_001040404.1  |
| 96.1   | 88.4    | 92.8    | 89.8 NM_004098.2     |
| 94.8   | 84.4    | 86      | 82.4 NM_001426.2     |
| 90.8   | 83.7    | 76.7    | 90.6 NM_001427.2     |
| 81.7   | 80.8    | 77.1    | 78.3 NM_018212.4     |
| 92.1   | 78.4    | 79.9    | 79 NM_018212.4       |
| 82     | 79.2    | 74.4    | 83.9 NM_001008493.1  |
| 94.8   | 94      | 88.3    | 86.5 NM_031889.1     |
| 149.2  | 159.2   | 142.7   | 144 NM_003633.1      |
| 459.6  | 259.4   | 237.3   | 188 NM_004435.2      |
| 115.7  | 87.4    | 93.4    | 99.3 NM_005107.1     |
| 330.7  | 282.1   | 206.6   | 182.7 NM_000118.1    |
| 16648  | 11470.3 | 10757.7 | 6353.1 NM_001428.2   |
| 89.1   | 95      | 82.2    | 92.8 NM_001975.2     |
| 139.3  | 190     | 182.4   | 136.9 NM_001976.2    |
| 93.1   | 97.6    | 106.6   | 106 NM_001976.2      |
| 428.6  | 382.3   | 336.3   | 320.3 NM_017512.2    |
| 75.7   | 80.9    | 82.9    | 83.4 NM_001977.2     |
| 105    | 114     | 101.1   | 94.4 NM_006208.1     |
| 98.9   | 92.6    | 90.8    | 91.8 NM_006209.2     |
| 86.7   | 82.8    | 76.8    | 75.6 NM_001040092.1  |
| 100.6  | 83.6    | 83.3    | 89.6 NM_005021.2     |
| 230.1  | 250.1   | 222     | 243.3 NM_014936.3    |
| 101.3  | 90.9    | 91.8    | 93.9 NM_021572.4     |
| 90.1   | 79.7    | 79.7    | 99.7 NM_153343.2     |
| 95.5   | 91.6    | 87.9    | 93 NM_178543.3       |
| 95.1   | 89.4    | 79      | 83.6 NM_207168.1     |
| 646.7  | 770     | 666.1   | 488.1 NM_207168.1    |
| 2231.5 | 2985.6  | 2100.6  | 2448.4 NM_014666.2   |
| 131.8  | 120.2   | 120.2   | 118.3 NM_001776.3    |
| 97     | 79.1    | 79.4    | 81.4 NM_001246.2     |
| 81.3   | 87.6    | 78.4    | 86.2 NM_203468.1     |
| 76.6   | 70.4    | 83.7    | 88 NM_001248.1       |
| 182.5  | 168.5   | 143.9   | 145.8 NM_004901.1    |

|        |        |        |                     |
|--------|--------|--------|---------------------|
| 92.7   | 93.6   | 85.8   | 96.5 NM_001249.1    |
| 461.7  | 394.4  | 358    | 294 NM_001247.1     |
| 119.8  | 114.6  | 100.7  | 85.5 NM_020354.2    |
| 85.3   | 89.2   | 80.2   | 89.8 NM_001033113.1 |
| 95.2   | 79.4   | 73.2   | 87.4 NM_198585.1    |
| 91.1   | 103.8  | 87.1   | 84.4 NM_001033113.1 |
| 5369   | 2868.9 | 2708.8 | 2519.5 NM_020189.4  |
| 103.7  | 81.9   | 85.7   | 82.6 NM_005442.2    |
| 288.3  | 674.2  | 569.1  | 575.6 NM_001429.2   |
| 409    | 678.4  | 524.8  | 579.8 NM_015409.3   |
| 95.9   | 91.3   | 85.8   | 95.7 NR_003290.1    |
| 87.9   | 101    | 84.4   | 87.8 XM_926826.1    |
| 547.1  | 930.5  | 963.8  | 814.4 NM_001430.3   |
| 88.3   | 97.3   | 84     | 90.6 NM_203343.1    |
| 88.7   | 84.9   | 85.9   | 91 NM_203342.1      |
| 106.5  | 97.4   | 95.9   | 93.9 NM_203343.1    |
| 95.5   | 100.1  | 91.4   | 97 NM_012156.2      |
| 93.3   | 85.1   | 87.9   | 84.5 NM_177996.1    |
| 113.5  | 91.8   | 80.9   | 95.1 NM_001431.1    |
| 551.8  | 1112.1 | 665.6  | 909.8 NM_012307.2   |
| 96.4   | 102.2  | 92.5   | 85.8 NM_018424.1    |
| 84.2   | 79.5   | 88.4   | 83.6 NM_019114.2    |
| 80.3   | 83.1   | 84.4   | 83.8 NM_020909.2    |
| 86     | 83.9   | 75.5   | 82 NM_000119.1      |
| 111.4  | 103.2  | 101.5  | 105.6 NM_001978.1   |
| 129.4  | 150.8  | 143.8  | 148.1 NM_025209.2   |
| 110.5  | 112.5  | 108.1  | 102.5 NM_015630.2   |
| 3300.2 | 2472.6 | 2190.8 | 1808.9 NM_017549.2  |
| 152.4  | 142.2  | 137.5  | 127 NM_001013442.1  |
| 131.4  | 116.6  | 107.5  | 107.1 NM_005232.3   |
| 109.1  | 110.9  | 109.4  | 102.6 NM_173641.1   |
| 93.3   | 93.6   | 89.1   | 84.6 NM_001004338.1 |
| 89.3   | 93     | 79.1   | 94.1 NM_004431.2    |
| 90.8   | 89     | 86.8   | 86.1 NM_182644.1    |
| 101.3  | 98.7   | 99.1   | 98.5 NM_182644.1    |
| 84.9   | 84.7   | 85.3   | 81.1 NM_005233.3    |
| 86.7   | 80.3   | 89.2   | 88.6 NM_004438.3    |
| 77.7   | 82.8   | 88.3   | 86.7 NM_182472.1    |
| 77.7   | 80     | 71.7   | 78.4 NM_004439.4    |
| 89.7   | 77.1   | 84.2   | 83.5 NM_004439.4    |
| 83.8   | 83.7   | 81.8   | 83.9 NM_001080448.1 |
| 123.5  | 116.1  | 108.9  | 100.8 XM_937418.1   |
| 93.7   | 92.3   | 102    | 87.9 NM_004440.2    |
| 101    | 103    | 95.9   | 104.9 NM_020526.3   |
| 85     | 91.2   | 84.2   | 90.9 NM_001006943.1 |
| 220.2  | 306.2  | 275.6  | 406.7 NM_004441.3   |
| 81.1   | 91.9   | 90.5   | 87.5 NM_004442.6    |
| 86     | 80.9   | 74.2   | 82 NM_017449.2      |
| 127.5  | 118.1  | 123.7  | 108.4 NM_004443.3   |
| 168.4  | 169    | 143.2  | 153.1 NM_004444.4   |

|        |        |        |                      |
|--------|--------|--------|----------------------|
| 131.2  | 109.3  | 102.4  | 103.8 NM_004445.2    |
| 183.7  | 170.6  | 150.9  | 155.5 NM_000120.2    |
| 96.1   | 105.5  | 115.5  | 92.2 NM_001979.4     |
| 102.2  | 87.6   | 79.2   | 89.5 NM_194356.1     |
| 114.4  | 112.4  | 100.7  | 96.5 NM_005670.3     |
| 88.5   | 96.8   | 77.1   | 93.4 NM_001018041.1  |
| 416.9  | 383.7  | 322.6  | 350.5 NM_014805.2    |
| 4820.1 | 2961.8 | 2522.7 | 1560.5 NM_013333.2   |
| 96.1   | 89.7   | 84.9   | 83.3 NM_148921.2     |
| 98.4   | 94.2   | 91.7   | 89.8 NM_014964.3     |
| 103.2  | 106.5  | 108.1  | 99.6 NM_014964.3     |
| 83.8   | 84.3   | 77.9   | 85.9 NM_017957.1     |
| 94.7   | 82.6   | 82.6   | 79.5 NM_000799.2     |
| 128.7  | 108.9  | 90.5   | 93.7 NM_000121.2     |
| 94.7   | 87.5   | 90.5   | 83.9 NM_015681.2     |
| 112.4  | 106.8  | 103.7  | 92.7 NR_002219.1     |
| 5400.1 | 4960   | 4062   | 3066.1 NM_004446.2   |
| 201.3  | 173.1  | 192.3  | 176.4 NM_001981.2    |
| 152.8  | 163.4  | 126.7  | 129.8 NM_021235.1    |
| 101.9  | 91.5   | 92     | 97 NM_139204.1       |
| 111.2  | 101.3  | 97.1   | 102.8 NM_133180.1    |
| 92.5   | 88     | 88.4   | 90.5 NM_133180.1     |
| 78.5   | 95.6   | 83.1   | 83.2 NM_017729.2     |
| 89.5   | 85.9   | 89.8   | 83.4 NM_022772.2     |
| 86.8   | 87.8   | 97.8   | 85.7 NM_133181.2     |
| 98     | 86.2   | 85     | 90.2 NM_024526.2     |
| 172.3  | 174.8  | 140.7  | 152.1 NM_033255.2    |
| 81.8   | 87.8   | 84.3   | 88.2 NM_000502.2     |
| 95.7   | 103.3  | 98.3   | 88.4 NM_016633.2     |
| 1136.7 | 752.8  | 598.9  | 434.1 NM_005702.2    |
| 88.6   | 93.4   | 92.1   | 87.3 NM_181532.2     |
| 72.6   | 77     | 79.6   | 80.2 NM_004448.2     |
| 101.1  | 105.8  | 90.8   | 86.3 NM_001005862.1  |
| 115.7  | 110.8  | 121.5  | 111.6 NM_004448.2    |
| 123.3  | 123.6  | 118.8  | 112.5 NM_018695.2    |
| 106    | 107.2  | 104.6  | 115.4 NM_001006600.1 |
| 93     | 105.6  | 91.3   | 94.7 NM_001005915.1  |
| 94.3   | 97.4   | 91.6   | 89.3 NM_001005915.1  |
| 98.5   | 86     | 88.1   | 89.6 NM_001982.2     |
| 123.2  | 120.2  | 127.1  | 102 NM_005235.1      |
| 92.7   | 96.6   | 90     | 87.5 NM_178037.1     |
| 1160.6 | 894.4  | 775.6  | 701.7 NM_001983.2    |
| 1296.2 | 739.8  | 776.9  | 462.6 NM_001983.2    |
| 96.8   | 105    | 105.9  | 98.8 NM_202001.1     |
| 311.4  | 233.4  | 240.2  | 144.2 NM_000400.2    |
| 422.9  | 529.8  | 470.2  | 371.5 NM_000122.1    |
| 121.6  | 125.6  | 108.9  | 99.4 NM_005236.1     |
| 827.6  | 833.4  | 757.7  | 811.4 NM_000123.2    |
| 92.3   | 90.2   | 83.6   | 90.5 NM_000124.1     |
| 92.6   | 85.7   | 91.5   | 83.7 NM_001007234.1  |

|        |        |        |        |                |
|--------|--------|--------|--------|----------------|
| 206.7  | 161.2  | 137.5  | 149.2  | NM_001007234.1 |
| 89.1   | 84.7   | 78.8   | 78     | NM_001007233.1 |
| 166.6  | 131.4  | 118.8  | 116.3  | NM_000082.2    |
| 92.3   | 100    | 96.1   | 90.7   | NM_001432.1    |
| 200.6  | 125.7  | 127.9  | 123.8  | NM_006494.1    |
| 86.1   | 78.9   | 83.1   | 82.9   | NM_182918.2    |
| 92     | 89.7   | 96.2   | 85.7   | NM_004449.3    |
| 109.2  | 107.2  | 95.1   | 94.5   | NM_182918.2    |
| 158.7  | 203.9  | 175.5  | 149.3  | NM_001031711.1 |
| 97.3   | 124.4  | 92.9   | 100.7  | NM_001031711.1 |
| 91.1   | 109.5  | 112.9  | 127.6  | NM_020462.1    |
| 249.3  | 208.2  | 193.1  | 243.7  | NM_016570.2    |
| 756.3  | 669.4  | 602.4  | 513.3  | NM_198398.1    |
| 3295.6 | 2896.1 | 2625.2 | 1938.6 | NM_198398.1    |
| 2202.1 | 1461.2 | 1236   | 1007.2 | NM_004450.1    |
| 1072.4 | 753.6  | 714.6  | 555    | NM_207332.1    |
| 138.2  | 135.7  | 138.4  | 123.6  | NM_001003791.1 |
| 112.6  | 137.7  | 155    | 142.7  | NM_001017922.1 |
| 408.9  | 459.2  | 473.8  | 397.7  | NM_001017922.1 |
| 147    | 134.6  | 155.2  | 131    | NM_152461.2    |
| 83.7   | 82.5   | 77.6   | 88.6   | NM_152461.2    |
| 88     | 95.5   | 87.9   | 94     | NM_033266.2    |
| 292.8  | 215.3  | 201.6  | 181.3  | NM_014584.1    |
| 133.4  | 137.2  | 134.1  | 149    | NM_019891.2    |
| 1763   | 1568.6 | 1503.5 | 1152.3 | NM_006817.3    |
| 8275.9 | 8076.2 | 8802.1 | 5816.2 | NM_001034025.1 |
| 168.3  | 207    | 200.8  | 162.3  | NM_018948.2    |
| 99.4   | 140.7  | 123.6  | 126.3  | NM_001007253.1 |
| 94.7   | 86.1   | 84.1   | 96.7   | NM_014590.3    |
| 91.1   | 96.1   | 98.5   | 91.3   | NM_138961.1    |
| 111.1  | 114    | 95.4   | 110.8  | NM_052911.1    |
| 120    | 90.2   | 97.6   | 101    | NM_001017420.2 |
| 195.2  | 164.7  | 152.7  | 179.3  | NM_001984.1    |
| 86.5   | 87.2   | 76.6   | 91.8   | NM_007036.3    |
| 212.7  | 192.6  | 203.6  | 161.7  | NM_012291.3    |
| 113.2  | 109.7  | 87.7   | 87.9   | NM_031475.1    |
| 79.1   | 86.5   | 78.3   | 78.7   | NM_194312.1    |
| 86.5   | 84.7   | 84.1   | 89.2   | NM_000125.2    |
| 96.9   | 99.3   | 88.1   | 91.5   | NM_001040275.1 |
| 96     | 91.4   | 93.7   | 93.8   | NM_001437.1    |
| 236.6  | 201.8  | 175.8  | 176.9  | NM_004451.3    |
| 101.3  | 91.4   | 95.4   | 89.8   | NM_004452.2    |
| 102    | 109.7  | 94.9   | 82.8   | NM_001438.2    |
| 93.6   | 88.6   | 87     | 89.6   | NM_206595.1    |
| 72.2   | 73.1   | 73.4   | 75.5   | NM_206594.1    |
| 90.4   | 76.7   | 82.4   | 78.7   | NM_183375.1    |
| 176.5  | 182.4  | 200.7  | 128.4  | NR_000033.2    |
| 88.2   | 86.9   | 86.8   | 96.6   | NM_153448.2    |
| 322.9  | 378.5  | 467    | 342.6  | NM_024311.2    |
| 96.5   | 87.6   | 88.8   | 95.2   | NM_019002.2    |

|        |        |        |        |                |
|--------|--------|--------|--------|----------------|
| 2342.3 | 1675.9 | 1349.8 | 1281.3 | NM_004730.1    |
| 4625.7 | 4403.9 | 3918.3 | 2844.2 | NM_000126.1    |
| 77.8   | 77.8   | 78.8   | 77.8   | NM_001014763.1 |
| 2158.7 | 2112.9 | 2022.3 | 1448.8 | NM_001985.2    |
| 1585.4 | 1628   | 1751.8 | 1083.2 | NM_001014763.1 |
| 586.8  | 579.1  | 430.4  | 474.1  | NM_004453.1    |
| 99.7   | 88.8   | 84.5   | 86.4   | NM_014297.3    |
| 107.6  | 100    | 86.4   | 93.5   | NM_001039481.1 |
| 161.5  | 128.7  | 120.4  | 131.3  | NM_001039481.1 |
| 221.8  | 153.5  | 165.8  | 162.5  | NM_018638.3    |
| 93.2   | 95.6   | 98.8   | 91.9   | NM_018208.1    |
| 209.5  | 205.2  | 211.4  | 210    | NM_005238.2    |
| 433.9  | 512.3  | 469.2  | 456.6  | NM_005239.4    |
| 78.9   | 78.3   | 79.6   | 77.9   | NM_004956.3    |
| 88     | 91.8   | 88.8   | 87.8   | NM_014209.1    |
| 139.4  | 132.9  | 129.1  | 140.6  | NM_005240.1    |
| 143.2  | 119    | 110.3  | 106.6  | NM_001986.1    |
| 114.6  | 96.4   | 81.7   | 93     | NM_001986.1    |
| 534    | 537.2  | 496.1  | 326.5  | NM_004454.1    |
| 99.6   | 106.2  | 94.7   | 91.8   | NM_004454.1    |
| 245.9  | 228    | 223.8  | 180.6  | NM_001987.3    |
| 92.1   | 90.3   | 79.9   | 90.4   | NM_144765.1    |
| 95.9   | 98.6   | 85.1   | 84.4   | NM_005797.2    |
| 99.4   | 82     | 75.9   | 77.7   | NM_144765.1    |
| 92.5   | 102.3  | 96.9   | 88.4   | NM_153717.1    |
| 100.6  | 96     | 90.9   | 96.5   | NM_153717.1    |
| 99.9   | 89.6   | 81.3   | 86.2   | NM_147127.2    |
| 82.1   | 84.5   | 82.2   | 88.8   | NM_005241.1    |
| 146.2  | 133.6  | 114.2  | 108.1  | NM_014210.2    |
| 95.6   | 96.6   | 87.7   | 97     | NM_001003927.1 |
| 90.9   | 89.4   | 84.6   | 85.1   | NM_006495.2    |
| 403.2  | 374    | 343.8  | 176.1  | NM_145245.2    |
| 2015.8 | 1745.8 | 1868.6 | 984    | NM_016337.2    |
| 99.9   | 96.8   | 88.9   | 100.3  | NM_001988.1    |
| 99.4   | 82.1   | 93.1   | 87.1   | NM_001989.2    |
| 78.2   | 87.4   | 85.9   | 87.4   | NM_001080458.1 |
| 1661.6 | 1800.2 | 1612.2 | 1062.6 | NM_013986.2    |
| 95.9   | 111.3  | 103.5  | 105.8  | NM_013986.2    |
| 2340   | 2158.9 | 1861.6 | 1980.5 | NM_005243.1    |
| 80.9   | 76.1   | 72.2   | 76.3   | NM_152596.2    |
| 282.2  | 296.4  | 243.7  | 252.5  | NM_018199.1    |
| 898.2  | 693.7  | 681.3  | 558.8  | NM_003686.3    |
| 211.6  | 154.1  | 130.1  | 153    | NM_006027.3    |
| 90.8   | 87.2   | 75.4   | 87.9   | NM_130398.2    |
| 127.7  | 147.1  | 141.2  | 130.1  | NM_001024924.1 |
| 161.3  | 129.7  | 143.1  | 156.6  | NM_018261.3    |
| 475.1  | 448.1  | 359.7  | 491.7  | NM_018261.3    |
| 114.9  | 169.2  | 133.7  | 128    | NM_018303.4    |
| 91.1   | 97.3   | 87.8   | 89.4   | NM_178516.3    |
| 137    | 158.5  | 181.2  | 180.6  | NM_001037126.1 |

|        |        |        |                      |
|--------|--------|--------|----------------------|
| 95.5   | 101.2  | 97.3   | 100.2 NM_001013848.1 |
| 337.9  | 210.7  | 182    | 165.5 NM_001013848.1 |
| 91.9   | 92.1   | 94.4   | 80.9 NM_019053.3     |
| 918.9  | 793    | 776.6  | 509.2 NM_015219.2    |
| 129.9  | 133.3  | 123.8  | 119.6 NM_001013839.1 |
| 96.3   | 101.6  | 96     | 88.9 NM_175876.3     |
| 1796.3 | 1223.3 | 1212.5 | 778.4 NM_016046.3    |
| 475.2  | 393.1  | 344.1  | 329.8 NM_002685.2    |
| 810.4  | 746.5  | 829.2  | 544.7 NM_002685.2    |
| 629.1  | 509.2  | 552    | 455.6 NM_001001998.1 |
| 827.6  | 494.3  | 457.5  | 328.2 NM_014285.4    |
| 1776.2 | 932.4  | 803.8  | 779.7 NM_016042.2    |
| 2427   | 1294.6 | 1157.4 | 822.9 NM_001002269.1 |
| 495.7  | 324.1  | 292.6  | 268.1 NM_019037.2    |
| 607.9  | 376    | 276.5  | 237.1 NM_020158.3    |
| 1017.9 | 534.4  | 464.7  | 422.7 NM_058219.2    |
| 996.9  | 755    | 712.6  | 447.2 NM_015004.2    |
| 1116   | 789.6  | 640.8  | 609.7 NM_181503.1    |
| 241    | 186.1  | 143    | 149 NM_001034194.1   |
| 508.8  | 348    | 228.3  | 288.5 NM_005033.1    |
| 105.7  | 105.2  | 90.2   | 97.1 NM_015065.1     |
| 116.2  | 113.8  | 108.3  | 111.2 NM_000127.2    |
| 86.4   | 78.4   | 82.4   | 80.7 NM_000401.2     |
| 337.9  | 258.4  | 220.4  | 206.9 NM_000401.2    |
| 203.4  | 170.3  | 146.1  | 135.3 NM_207122.1    |
| 102.9  | 101.8  | 91.9   | 96.5 NM_004455.1     |
| 154    | 129.5  | 114.8  | 126.4 NM_001033025.1 |
| 419.3  | 283.1  | 233.7  | 295.9 NM_001439.2    |
| 243.7  | 238.7  | 189.6  | 167.1 NM_001440.2    |
| 88.2   | 90.7   | 91.7   | 87.1 NM_000503.3     |
| 82.5   | 79.4   | 76.6   | 76.1 NM_172059.1     |
| 89     | 92.3   | 82.1   | 89.8 NM_172059.1     |
| 90.4   | 95.5   | 86.9   | 102.1 NM_005244.3    |
| 87.6   | 85.3   | 94.2   | 90.6 NM_172111.1     |
| 87.6   | 102    | 92.1   | 93.8 NM_172112.1     |
| 96.9   | 103.8  | 95.9   | 99.6 NM_172112.1     |
| 86.2   | 86     | 82.6   | 87.6 NM_172113.1     |
| 112.4  | 105.3  | 95.2   | 101.8 NM_172098.1    |
| 97     | 89.8   | 77.6   | 94.6 NM_001990.2     |
| 88.9   | 80.4   | 79.3   | 92.1 NM_172104.1     |
| 98     | 90.4   | 83     | 88.2 NM_004100.3     |
| 102.2  | 90.7   | 96.5   | 93.8 NM_172105.1     |
| 110    | 104.2  | 101.9  | 95.7 NM_001991.2     |
| 376.3  | 313.2  | 274.5  | 271 NM_004456.3      |
| 300.4  | 235.5  | 199    | 202.9 NM_152998.1    |
| 507.9  | 405.2  | 406.5  | 366.2 NM_152998.1    |
| 95.7   | 88.2   | 88.2   | 91.1 NM_000504.2     |
| 96     | 97.5   | 98.9   | 83.6 NM_000128.2     |
| 83.9   | 84.6   | 83.7   | 86.8 NM_000128.2     |
| 114.7  | 110.4  | 104.6  | 109 NM_016946.3      |

|         |         |         |                      |
|---------|---------|---------|----------------------|
| 91.5    | 90.6    | 85.5    | 93.2 NM_144503.1     |
| 122.9   | 157.2   | 160.5   | 173.3 NM_144504.1    |
| 112.3   | 106.1   | 108.8   | 89.5 NM_000505.2     |
| 109.4   | 187.5   | 159.8   | 177.4 NM_000129.2    |
| 83.2    | 78.5    | 79.3    | 86.8 NM_001994.1     |
| 120.8   | 96.4    | 106.5   | 94.5 NM_019104.1     |
| 20789.2 | 28917.8 | 29168.2 | 26710.7 NM_001992.2  |
| 86.6    | 81.7    | 80.2    | 80.7 NM_005242.3     |
| 78.2    | 78.6    | 68.2    | 84.1 NM_004101.2     |
| 114.9   | 120.8   | 100.1   | 113.4 NM_003950.2    |
| 166.4   | 136     | 144.8   | 171.7 NM_001993.2    |
| 99.3    | 97.4    | 89.4    | 92.9 NM_000130.2     |
| 86.7    | 80.2    | 81.9    | 88.8 NM_000131.2     |
| 103.9   | 102     | 88.7    | 85.3 NM_000131.3     |
| 95.1    | 104.1   | 79.8    | 81.1 NM_000131.3     |
| 96.2    | 98.7    | 93.8    | 99.8 NM_019863.2     |
| 86.4    | 93.4    | 90.7    | 100.8 NM_000132.2    |
| 83      | 80.4    | 86.1    | 81.9 NM_019863.2     |
| 406.8   | 293.4   | 224.2   | 209 NM_012151.3      |
| 93.5    | 88.3    | 81.2    | 88.6 NM_001007524.1  |
| 102.4   | 101.4   | 99.4    | 101.6 NM_000133.2    |
| 81      | 75.6    | 83.6    | 79.9 NM_024306.2     |
| 109.1   | 114     | 93.9    | 101.4 NM_001441.1    |
| 90.7    | 85.1    | 85.9    | 83.2 NM_001443.1     |
| 113.4   | 104.3   | 93.7    | 93.2 NM_000134.2     |
| 88.7    | 82.6    | 86      | 91.6 NM_004102.3     |
| 89.2    | 74.3    | 86.9    | 78.1 NM_001442.1     |
| 99.1    | 86.2    | 88.1    | 89.6 NM_001444.1     |
| 102.7   | 100.9   | 92.6    | 95.4 NR_002935.1     |
| 87.4    | 91      | 79.6    | 89.2 NM_001445.1     |
| 87.3    | 85.1    | 83.1    | 87 NM_001445.1       |
| 109.3   | 98.1    | 85.4    | 101.9 NM_001446.3    |
| 627.2   | 529     | 524.2   | 379.3 NM_003824.2    |
| 1069.3  | 907.4   | 840.6   | 925.2 NM_013402.3    |
| 129.3   | 134.9   | 137.9   | 131.7 NM_004265.2    |
| 98      | 85.1    | 86.5    | 86.7 NM_021727.3     |
| 86.2    | 86.4    | 74.4    | 84.2 NM_178128.2     |
| 788     | 692.5   | 663.5   | 530.7 NM_131917.1    |
| 616.3   | 475.1   | 445.3   | 392.4 NM_007051.2    |
| 571.3   | 648.7   | 619.2   | 436.1 NM_000137.1    |
| 216.3   | 156.5   | 174     | 161.8 NM_031208.1    |
| 158.9   | 125.3   | 128.7   | 126.8 NM_001018104.1 |
| 88.6    | 87.5    | 80.8    | 97.8 NM_001018104.1  |
| 112.3   | 109.4   | 108.4   | 90.3 NM_016044.1     |
| 229.5   | 223.2   | 240.4   | 186.7 NM_199336.1    |
| 94.5    | 84.3    | 75      | 87.8 NM_001033032.1  |
| 93.6    | 71.1    | 77.8    | 99.5 NM_001033031.1  |
| 82.3    | 87.7    | 83.1    | 92.7 NM_018147.2     |
| 96.8    | 91.2    | 90.2    | 96.4 NM_001033030.1  |
| 255.5   | 171.1   | 146.6   | 156.8 NM_001033030.1 |



|        |        |        |                      |
|--------|--------|--------|----------------------|
| 91.1   | 99.4   | 88.3   | 87.9 NM_012306.2     |
| 91.1   | 98.3   | 88.6   | 85.5 NM_005449.3     |
| 99.2   | 112.2  | 95.3   | 93 NM_182641.2       |
| 118.5  | 113.3  | 113.1  | 117.1 NM_004459.5    |
| 101.3  | 117.3  | 103.1  | 113.9 NM_004459.5    |
| 212.1  | 184.6  | 155.9  | 176.4 NM_145253.1    |
| 191.6  | 177.1  | 157.5  | 149.9 NM_182565.2    |
| 81.1   | 82.7   | 83.8   | 80.2 NM_181709.2     |
| 322.1  | 357.7  | 361.1  | 322.6 NM_182705.1    |
| 129.4  | 117.1  | 116.1  | 84.4 NM_001035254.1  |
| 91     | 91.4   | 89.3   | 91.2 NM_001035254.1  |
| 316.5  | 239.6  | 250.4  | 191.9 NM_001010883.1 |
| 307.5  | 233.1  | 221.2  | 251.2 NM_031452.2    |
| 1021   | 922.7  | 891    | 738.8 NM_032837.1    |
| 149.7  | 174.7  | 121.9  | 138.4 NM_019018.1    |
| 511.2  | 366.6  | 368.8  | 277 NM_138348.3      |
| 82.3   | 81.7   | 84.1   | 76.8 NM_007177.1     |
| 967.5  | 816.8  | 646.9  | 606 NM_031453.2      |
| 75.4   | 80.4   | 75.9   | 82.1 NM_031213.2     |
| 376.2  | 341    | 297.7  | 175 NM_001080422.1   |
| 130.1  | 108.6  | 111.6  | 122.8 NM_001080422.1 |
| 120.2  | 114.6  | 123.9  | 103 NM_144671.2      |
| 113.7  | 101.2  | 100.7  | 96.7 NM_001002034.1  |
| 94.8   | 75.9   | 86.3   | 82.7 NR_002183.1     |
| 92.8   | 93     | 90.6   | 87.3 NR_002199.1     |
| 159.1  | 151.8  | 132.9  | 146.3 NR_002198.2    |
| 89.8   | 85.5   | 80.5   | 84.7 NM_001077710.1  |
| 745.8  | 1119.9 | 910.4  | 648.7 NM_022074.2    |
| 584.8  | 620.7  | 491.8  | 515.3 NM_022074.2    |
| 106    | 105.8  | 104.6  | 104.2 NM_198947.1    |
| 96.4   | 88     | 83.3   | 87.7 NM_001008901.1  |
| 86.7   | 89.3   | 84.1   | 86.8 NM_176791.3     |
| 1206.6 | 1198.4 | 940.1  | 812.9 NM_144594.1    |
| 129.7  | 127.6  | 124.7  | 121.1 NM_022760.3    |
| 145.6  | 144.1  | 149    | 109.6 NM_138371.1    |
| 1761.2 | 1715.8 | 2385.4 | 2095.1 NM_145280.3   |
| 2154.2 | 1751.9 | 1375.4 | 1104 NM_014612.3     |
| 96.8   | 91.1   | 79     | 79.3 NM_017848.3     |
| 106.5  | 95.6   | 77.9   | 96.9 NM_138333.3     |
| 621.9  | 564.2  | 500.6  | 597.7 NM_145284.3    |
| 97.6   | 91.3   | 87.1   | 91.9 NM_138819.1     |
| 97     | 94.5   | 93.8   | 89.8 NM_199138.1     |
| 664.9  | 361.8  | 400    | 243.8 NM_138401.2    |
| 105.1  | 98.7   | 88.3   | 98 NM_001011703.1    |
| 83.6   | 88.8   | 91     | 77.9 NM_001011703.1  |
| 85.5   | 86.6   | 87     | 84.2 NM_032581.2     |
| 94.8   | 105.5  | 85.9   | 91.6 NM_173822.1     |
| 89.1   | 84.8   | 79.6   | 96.8 NM_001078172.1  |
| 94.4   | 93.4   | 83.2   | 86.8 NM_001078173.1  |
| 92.3   | 86.3   | 86.1   | 85.2 NM_001035534.1  |

|        |       |        |                      |
|--------|-------|--------|----------------------|
| 147.8  | 119.7 | 99.4   | 94.5 NM_001035534.1  |
| 118    | 128.2 | 122.4  | 108.4 NM_006683.3    |
| 99.8   | 98.8  | 97.5   | 88.7 NM_022360.3     |
| 179.2  | 169.2 | 156.4  | 163.5 NM_030809.1    |
| 95.2   | 87.4  | 81.3   | 86.3 NM_024969.2     |
| 84.7   | 78.2  | 80.1   | 87.9 NM_001015045.1  |
| 86.1   | 84.8  | 83.7   | 90.4 NM_014883.2     |
| 91.7   | 84.7  | 82.7   | 91.8 NM_014883.2     |
| 91.7   | 82.8  | 79.8   | 81.8 NM_198215.2     |
| 94.6   | 78    | 77.4   | 84.7 NM_198215.2     |
| 89.9   | 81.6  | 71.1   | 88.6 NM_198215.2     |
| 228.5  | 218.1 | 199.6  | 192.7 NM_032036.2    |
| 97.5   | 114.5 | 104.2  | 96.7 NM_145249.1     |
| 186.5  | 195.4 | 164.3  | 155.9 NM_016078.3    |
| 355.2  | 398.4 | 296.6  | 428.1 NM_016078.3    |
| 100.6  | 101.5 | 96.7   | 97.4 NM_145301.1     |
| 91.9   | 81.4  | 90.5   | 89.3 NM_213609.2     |
| 90.5   | 90.4  | 85.6   | 94.7 NM_178539.3     |
| 88.5   | 78.8  | 82.9   | 86 NM_001004440.1    |
| 96.7   | 89.2  | 71     | 84.4 NM_182759.2     |
| 73.9   | 76.1  | 69.3   | 80.1 NM_182759.2     |
| 92.8   | 105.7 | 109.6  | 86 NM_182522.3       |
| 100.8  | 84.8  | 82.4   | 95.2 NM_182522.3     |
| 93.1   | 95.7  | 102.1  | 101.7 NM_001005527.1 |
| 91.5   | 84.7  | 86.3   | 88.9 NM_015381.3     |
| 90.2   | 86.3  | 90     | 84.6 NM_017565.2     |
| 715.3  | 678.8 | 550.2  | 411.5 NM_014864.2    |
| 95.2   | 91.9  | 97     | 89.3 XM_928334.1     |
| 274.9  | 136.3 | 137.7  | 123.4 NM_020223.1    |
| 113.2  | 112   | 102    | 107.7 NM_020223.1    |
| 107.4  | 115   | 97.9   | 108.3 NM_015262.1    |
| 86     | 86.8  | 75.5   | 81.4 NM_001045477.1  |
| 91.6   | 85.2  | 83.7   | 93.6 NM_001029888.1  |
| 211.1  | 180.4 | 148.5  | 143.2 NM_152644.2    |
| 128.4  | 125.2 | 110.4  | 107.3 NM_015916.3    |
| 131.7  | 108.1 | 106.4  | 119.6 NM_001001412.1 |
| 89     | 87.7  | 75.1   | 95 NM_203392.1       |
| 87.9   | 88.4  | 82.4   | 87.9 XM_935767.1     |
| 110.3  | 105.8 | 99.6   | 116.4 NM_017645.3    |
| 474.1  | 289.6 | 244.7  | 251.5 NM_182620.1    |
| 156.7  | 131.1 | 143    | 165.3 NM_019054.1    |
| 181.9  | 111   | 138.7  | 130.6 NM_198076.4    |
| 1303.7 | 1335  | 1455.5 | 939.2 NM_014745.1    |
| 121.3  | 121.1 | 136    | 106.7 NM_022068.1    |
| 782.1  | 720.5 | 604    | 443.8 NM_021806.1    |
| 88.4   | 77.6  | 84.3   | 87 NM_058186.3       |
| 92.2   | 82    | 75.5   | 91.3 NM_206964.1     |
| 253.8  | 258.4 | 207.8  | 197.3 NM_014888.1    |
| 241.3  | 219.1 | 170.1  | 197 NM_001040020.1   |
| 84     | 81.7  | 88.7   | 88.1 NM_138805.2     |

|        |        |         |        |                |
|--------|--------|---------|--------|----------------|
| 224.1  | 149.3  | 171.4   | 122.9  | NM_033088.2    |
| 168.4  | 268.2  | 320.9   | 241.5  | NM_020704.1    |
| 1590.7 | 1183.4 | 1214.2  | 817.2  | NM_153690.4    |
| 86.1   | 89.6   | 93.4    | 98.2   | NM_207334.1    |
| 79.1   | 94.8   | 91.8    | 91.7   | NM_148894.1    |
| 543.5  | 552    | 493.1   | 432.2  | NM_138369.1    |
| 714.6  | 687.5  | 575.6   | 505.5  | NM_207009.2    |
| 93.5   | 96     | 101.4   | 89.8   | NM_018472.1    |
| 8344.7 | 9729.2 | 10155.4 | 6931.7 | NM_017633.1    |
| 107.7  | 92.8   | 88.2    | 95.2   | NM_052943.2    |
| 115.5  | 168.8  | 167.9   | 133.6  | NM_017709.2    |
| 90.5   | 77.7   | 75.6    | 88.2   | NM_152630.2    |
| 81.7   | 83.6   | 89.7    | 97.9   | NM_203408.1    |
| 83.7   | 84.9   | 70.1    | 77     | NM_152631.1    |
| 92.2   | 81.3   | 90.6    | 92.1   | NM_001013736.1 |
| 315.8  | 350.6  | 285.3   | 283.8  | NM_001014286.1 |
| 98.4   | 83.1   | 74.4    | 82.6   | NM_017569.2    |
| 98.1   | 101.9  | 85.8    | 94.6   | NM_030797.1    |
| 397.3  | 259.9  | 280.2   | 261.9  | NM_016623.3    |
| 2248.4 | 2583.1 | 2348.3  | 1290.3 | NM_004699.1    |
| 105.6  | 93.6   | 87.3    | 99.8   | NM_012135.1    |
| 110.4  | 113.8  | 109.8   | 103.9  | NM_017856.1    |
| 80.7   | 96.5   | 97.7    | 83.3   | NM_001013622.1 |
| 99     | 94.4   | 89.6    | 90.5   | NM_014661.3    |
| 1028.4 | 806.5  | 913.1   | 388.2  | NM_016605.1    |
| 124    | 106.8  | 88.4    | 102    | NM_138419.2    |
| 81.4   | 87.3   | 80.4    | 93.5   | NM_152315.1    |
| 91.1   | 80     | 88.7    | 92     | NM_182495.3    |
| 182.2  | 193.7  | 161.6   | 176.6  | NM_145037.1    |
| 82.7   | 90.1   | 89.2    | 98.1   | NM_017678.1    |
| 91.1   | 85.5   | 86.1    | 89.8   | NM_001077639.1 |
| 80.4   | 76     | 76.2    | 75.6   | NM_001077639.1 |
| 253.7  | 169.5  | 144.4   | 131.1  | NM_024792.1    |
| 673.6  | 575    | 536.1   | 294.8  | NM_152274.2    |
| 105.1  | 108.8  | 98.1    | 109.6  | NM_022751.1    |
| 96.3   | 87.4   | 87      | 87.5   | NM_021165.1    |
| 91     | 87     | 77.5    | 87.5   | NM_199051.1    |
| 935.4  | 903.1  | 793.9   | 599    | NM_015292.1    |
| 3834.2 | 4036.2 | 3997.2  | 3579.6 | NM_020728.1    |
| 129    | 102.7  | 102.1   | 106.4  | NM_031913.1    |
| 404.6  | 429.6  | 495.9   | 557.3  | NM_018379.2    |
| 105.8  | 100.2  | 97      | 116    | NM_019092.1    |
| 283    | 132    | 111.6   | 105.1  | NM_019013.1    |
| 616.5  | 545.3  | 540.5   | 275    | NM_024519.2    |
| 138.9  | 137.9  | 132.5   | 110    | NM_001006605.1 |
| 393.4  | 308.5  | 320.2   | 209.2  | XM_942503.1    |
| 76.3   | 83.8   | 84.6    | 80     | NM_152421.2    |
| 80.1   | 78.7   | 83.5    | 91.6   | NM_017938.2    |
| 103.1  | 99.1   | 102.1   | 91.4   | NM_182614.2    |
| 89.7   | 86.9   | 92.8    | 98.8   | NM_153606.1    |

|        |        |       |                      |
|--------|--------|-------|----------------------|
| 107.9  | 99     | 94.1  | 104.9 NM_153364.1    |
| 277.1  | 188.4  | 132.9 | 193.4 NM_207418.2    |
| 95     | 85.7   | 85.9  | 83 NM_198549.1       |
| 138.7  | 150.7  | 138.1 | 144 NM_032809.2      |
| 104.4  | 98.1   | 96.2  | 105.4 NM_152660.1    |
| 265.4  | 199.2  | 184.6 | 198.1 NM_144664.3    |
| 93     | 82.5   | 79.6  | 84.8 NM_024522.1     |
| 108    | 111.4  | 104.6 | 105.9 NM_173688.1    |
| 141.6  | 128.3  | 111.8 | 113.3 NM_033387.2    |
| 92.3   | 92.6   | 89.3  | 100.2 NM_001017961.1 |
| 558.9  | 726.2  | 713.8 | 420.6 NM_182752.3    |
| 108.2  | 101.8  | 98.9  | 106.5 NM_198485.1    |
| 230.8  | 254.9  | 315.7 | 250.5 NM_001039841.1 |
| 99.7   | 112    | 112   | 104.2 NM_173642.1    |
| 102.5  | 96.5   | 95.9  | 109.2 NM_020734.1    |
| 125.2  | 106    | 88    | 84.6 NM_152450.1     |
| 95.8   | 95.8   | 101.1 | 94.7 NM_152548.1     |
| 86.6   | 90.7   | 89.5  | 99 NM_144713.1       |
| 476    | 523.1  | 374.4 | 400.7 NM_018145.1    |
| 90.6   | 95.7   | 91.7  | 98.1 NM_207006.1     |
| 81.6   | 78.5   | 81.1  | 77.9 NM_032899.4     |
| 93.4   | 89.3   | 82.5  | 81.6 NM_207006.1     |
| 82.4   | 89.8   | 80.5  | 84.8 NM_017708.1     |
| 90.6   | 95.7   | 96.3  | 100.1 NM_138435.1    |
| 88.6   | 88.5   | 86.7  | 92 NM_001039999.2    |
| 94.2   | 88.1   | 86.4  | 90.5 NM_145175.1     |
| 336.7  | 270.1  | 251   | 250.9 NM_174911.3    |
| 298.8  | 175.9  | 165.2 | 161.9 NM_201400.1    |
| 174.5  | 144.4  | 127.9 | 116.5 NM_201598.1    |
| 265.8  | 301.8  | 258.9 | 242 NM_198552.1      |
| 1110.9 | 1138   | 970.8 | 985.6 NM_198552.1    |
| 314.6  | 242.8  | 236.3 | 184.7 NM_152832.1    |
| 113    | 124.1  | 103.8 | 119.8 NM_016255.1    |
| 106.4  | 105.4  | 99.5  | 103.9 NM_018088.2    |
| 267.2  | 179.9  | 164   | 163.5 NM_144963.1    |
| 81.2   | 78.7   | 75.6  | 71 NM_198491.1       |
| 5237.7 | 4230.4 | 4077  | 3195.2 NM_032231.4   |
| 344    | 332.8  | 341.7 | 270.4 NM_001014812.1 |
| 985.7  | 683.6  | 623.3 | 405.7 NM_016062.1    |
| 447.5  | 357.6  | 317.6 | 269.1 NM_015475.3    |
| 87.2   | 84.6   | 78.5  | 92.1 NM_001042429.1  |
| 101    | 155    | 135.3 | 129.3 NM_173611.2    |
| 159.2  | 147.2  | 158.8 | 141.1 NM_174905.2    |
| 87.5   | 97.2   | 82    | 90.3 NM_174951.2     |
| 90.6   | 85.7   | 78.6  | 81.5 NM_205849.1     |
| 98.7   | 94.2   | 91.2  | 93 NM_174901.4       |
| 97.3   | 102.9  | 102.4 | 95.3 NM_000135.2     |
| 91.4   | 85.6   | 89.1  | 77.1 NM_001018112.1  |
| 102.3  | 99.5   | 87.7  | 95.8 NM_001018112.1  |
| 152.8  | 127.8  | 116.8 | 124 NM_001018113.1   |

|         |         |        |                      |
|---------|---------|--------|----------------------|
| 145.2   | 132.7   | 127.2  | 120 NM_001018113.1   |
| 96.5    | 99.9    | 92.3   | 100.5 NM_000136.2    |
| 873.8   | 998.7   | 830.2  | 875.5 NM_001018115.1 |
| 112.3   | 125.7   | 131.9  | 116.5 NM_033084.3    |
| 126.5   | 126.1   | 107.8  | 114.8 NM_001018115.1 |
| 464.3   | 551.7   | 559.7  | 292 NM_021922.2      |
| 94.5    | 85.5    | 79.3   | 90.8 NM_022725.2     |
| 641.1   | 325.4   | 333.5  | 206.1 NM_004629.1    |
| 103.1   | 89.9    | 95.3   | 97 NM_018062.2       |
| 107.9   | 94.8    | 79.4   | 92.5 NM_020937.1     |
| 91.9    | 93.9    | 98.3   | 89.3 NM_145235.2     |
| 104.8   | 101.2   | 89.1   | 101.5 NM_004460.2    |
| 100.6   | 94.6    | 85.8   | 89.1 NM_001001715.1  |
| 78.6    | 88.9    | 89.2   | 90.1 NM_001001715.1  |
| 130     | 102.7   | 96.7   | 89.5 NM_005766.2     |
| 120.1   | 117.7   | 116.5  | 110.1 NM_014808.1    |
| 258.9   | 242.5   | 229.1  | 197.7 NM_006567.2    |
| 124.2   | 124.1   | 125.3  | 120.4 NM_005687.3    |
| 411.4   | 262.9   | 239.4  | 190.4 NM_004461.1    |
| 92.7    | 82.3    | 83.4   | 95 NM_152871.1       |
| 99.3    | 79.8    | 81.9   | 84.6 NM_152877.1     |
| 97      | 88.1    | 92.7   | 89.7 NM_000639.1     |
| 6646.6  | 4978.8  | 3847.3 | 2284 NM_004104.4     |
| 396.7   | 363.6   | 404.5  | 230 NM_033015.2      |
| 219.3   | 208.4   | 180    | 181.8 NM_006712.3    |
| 236.2   | 203.6   | 215    | 198.4 NM_006712.3    |
| 154.3   | 122.5   | 123.1  | 129.4 NM_014929.2    |
| 257.1   | 228.2   | 190.2  | 185.4 NM_024091.2    |
| 362.1   | 441.4   | 383.5  | 399 NM_005245.3      |
| 88.7    | 85.2    | 75.5   | 82.4 NM_001447.1     |
| 80.5    | 77.9    | 87.3   | 89.3 NM_024582.2     |
| 90      | 88.6    | 89.6   | 82.4 NM_033085.2     |
| 14735.2 | 11275.7 | 11552  | 8271.4 NM_001997.3   |
| 102.7   | 100.6   | 97.1   | 98.1 NM_001080542.1  |
| 2289    | 1648.4  | 1600   | 875.5 NM_001436.2    |
| 89.3    | 95.1    | 88.3   | 79.5 NM_017556.2     |
| 113.9   | 99.5    | 90.7   | 97.3 NM_001024215.1  |
| 92.1    | 82.4    | 83.8   | 86.2 NM_006487.2     |
| 120.4   | 91.8    | 91.9   | 97.2 NM_001996.2     |
| 289.7   | 128.2   | 128    | 110.2 NM_006486.2    |
| 89.7    | 82.9    | 85.6   | 90.2 NM_006485.2     |
| 101.5   | 95      | 82.4   | 91.9 NM_001996.2     |
| 84.7    | 82.3    | 89.7   | 81.6 NM_001004019.1  |
| 90.3    | 92.4    | 95.6   | 82.9 NM_001998.2     |
| 84      | 91.4    | 82.7   | 76.3 NM_001004019.1  |
| 114.2   | 102.7   | 96.8   | 100.4 NM_006329.2    |
| 96.1    | 87.7    | 92.1   | 95.8 NM_000138.2     |
| 511.4   | 904.2   | 862.4  | 679.5 NM_001999.3    |
| 97.9    | 97.8    | 91.9   | 95.2 NM_032447.3     |
| 380.5   | 246.6   | 218    | 189.4 NM_000507.2    |

|        |        |        |                     |
|--------|--------|--------|---------------------|
| 96.2   | 89.2   | 89.7   | 104.8 NM_003837.2   |
| 131.5  | 123.1  | 115.2  | 115.2 NM_022452.1   |
| 95.9   | 78.1   | 76.3   | 82.7 NM_032590.3    |
| 2813.4 | 2253.9 | 2208.1 | 1626 NM_032590.3    |
| 90.5   | 94.5   | 90     | 79.9 NM_001005366.1 |
| 139.1  | 123.3  | 133.7  | 97.6 NM_017703.1    |
| 92.4   | 97.2   | 80.9   | 95.4 NM_145032.2    |
| 92.1   | 103.5  | 91.1   | 95.5 NM_152441.1    |
| 233.8  | 204.4  | 183.8  | 156.7 NM_024326.2   |
| 99.3   | 90.9   | 87.2   | 90.8 NM_153350.2    |
| 98.1   | 112    | 108    | 107.4 NM_022824.1   |
| 88.6   | 89.5   | 92.3   | 95.5 NM_024963.2    |
| 93.7   | 91.7   | 89.7   | 103.6 NM_012157.2   |
| 258.2  | 246.9  | 218.7  | 163.3 NM_032875.1   |
| 90.3   | 95.2   | 83.5   | 89.3 NM_012159.1    |
| 81.8   | 86.8   | 81.9   | 91.8 NM_203373.1    |
| 81.4   | 84.6   | 84.9   | 85.4 NM_012158.1    |
| 90.9   | 90.7   | 89.3   | 88.8 NM_012160.3    |
| 90     | 89     | 85.7   | 80.3 NM_033535.2    |
| 124.5  | 93.6   | 107.3  | 99.1 NM_012161.2    |
| 712.6  | 620.5  | 521.4  | 461.4 NM_012161.2   |
| 464.3  | 308.6  | 277.5  | 317.6 NM_024555.3   |
| 84.6   | 81.8   | 84.6   | 81.6 NM_012304.3    |
| 98.5   | 98.5   | 78.7   | 90.4 NM_018378.2    |
| 93.9   | 94.1   | 82.6   | 92.4 XM_933940.1    |
| 173    | 144.3  | 144.4  | 142.2 NM_012166.2   |
| 147.9  | 144.3  | 127.7  | 122.8 NM_018693.2   |
| 937.7  | 877.8  | 989.4  | 795 NM_025133.3     |
| 95.9   | 103.1  | 96.1   | 90.2 NM_012167.1    |
| 187.8  | 184.5  | 141.6  | 161.1 NM_012167.1   |
| 334.1  | 183.6  | 178.4  | 146.6 NM_152676.1   |
| 113.9  | 93.3   | 85.7   | 95.5 NM_172366.2    |
| 80.7   | 72.6   | 72.5   | 84 NM_024907.5      |
| 93.3   | 82.9   | 89.1   | 89.4 NM_148169.1    |
| 81.7   | 86.6   | 79.1   | 86.5 NM_024907.5    |
| 87.1   | 97.4   | 86.6   | 87.1 NM_032807.3    |
| 396.7  | 384.1  | 397.2  | 257.4 NM_032807.3   |
| 89.7   | 92.5   | 90.3   | 95.9 NM_012168.4    |
| 138    | 133.9  | 116    | 103.6 NM_033624.2   |
| 411.5  | 298.5  | 299.5  | 231.5 NM_015002.2   |
| 161.7  | 130.8  | 116.9  | 120.5 NM_147188.1   |
| 82.5   | 80.2   | 62.4   | 75.6 NM_012170.2    |
| 340.3  | 262.5  | 262.1  | 209.5 NM_012170.2   |
| 102.9  | 95.4   | 90.1   | 88 NR_003136.1      |
| 84.1   | 83.7   | 85.3   | 87.5 NM_033506.1    |
| 86.9   | 87.2   | 86.4   | 96.6 NM_033506.1    |
| 96.1   | 83.8   | 84.1   | 81.8 NM_012172.3    |
| 88.4   | 82.3   | 78.1   | 76.3 NM_183420.1    |
| 94.8   | 89.1   | 78.7   | 86.1 NM_178820.3    |
| 991.7  | 657.4  | 616.9  | 513.7 NM_015176.1   |

|        |       |       |                      |
|--------|-------|-------|----------------------|
| 105    | 90.4  | 87    | 96.4 NM_012175.3     |
| 250.5  | 203.6 | 153.1 | 156.8 NM_033406.2    |
| 109.1  | 119.3 | 115.1 | 99.1 NM_033406.2     |
| 278.7  | 187.4 | 229.6 | 234.5 NM_032145.4    |
| 308.6  | 208.4 | 217.4 | 160.8 NM_024735.2    |
| 122.7  | 106.6 | 117.1 | 107.1 NM_058229.2    |
| 102.3  | 91.9  | 102.2 | 94.8 NM_148177.1     |
| 177.8  | 174   | 169.9 | 133.2 NM_148177.1    |
| 910.8  | 727.5 | 705.1 | 557.4 NM_203301.1    |
| 414.7  | 391.8 | 358.2 | 311.4 NM_017943.2    |
| 83     | 100.8 | 75.7  | 71.8 NM_174899.3     |
| 103.9  | 100.4 | 91.8  | 113.4 NM_205836.1    |
| 128.4  | 110.9 | 112.2 | 115.7 NM_030793.3    |
| 93.3   | 92.7  | 86.6  | 94.8 NM_153230.1     |
| 736.4  | 619   | 546.7 | 418.7 NM_012176.2    |
| 142.5  | 119.8 | 107.9 | 120.4 NM_012176.2    |
| 84.1   | 84.6  | 83.4  | 91.5 NM_016298.1     |
| 78.9   | 74.9  | 74.5  | 82 NM_018994.1       |
| 119.9  | 107.2 | 126.1 | 99.2 NM_001029860.1  |
| 122.2  | 120.5 | 104   | 118.4 NM_001029860.1 |
| 96.8   | 100.8 | 96.8  | 94.1 NM_183412.2     |
| 91.7   | 93.2  | 88.1  | 71.1 NM_033182.5     |
| 96.5   | 87.2  | 95.1  | 90.1 NM_001014765.1  |
| 153.7  | 164.5 | 158.7 | 159.3 NM_001080469.1 |
| 92.7   | 94.2  | 84.8  | 93 NM_001008777.1    |
| 141.8  | 135.6 | 114.9 | 116.9 NM_012177.2    |
| 228.6  | 228.7 | 203.1 | 182.9 NM_018438.4    |
| 299.9  | 208   | 187.3 | 169.1 NM_012179.3    |
| 119.6  | 91.7  | 106.9 | 97.8 NM_001033024.1  |
| 612.3  | 521.4 | 473.1 | 396 NM_012179.3      |
| 224.1  | 209.4 | 200.9 | 161.6 NM_012180.2    |
| 96.9   | 87.7  | 89    | 90 NM_012347.3       |
| 179.8  | 123.9 | 107.4 | 116.3 NM_033480.1    |
| 84.5   | 86    | 81.7  | 91.5 NM_033481.2     |
| 89.7   | 87.2  | 85.8  | 81 NM_033481.2       |
| 78.6   | 90.1  | 83.2  | 91.9 NM_031456.2     |
| 92.2   | 90.3  | 89.3  | 88.2 NM_033644.2     |
| 92     | 97.4  | 90.1  | 96.2 NM_012300.2     |
| 1184.6 | 865.9 | 794.2 | 544.5 NM_033645.2    |
| 80.6   | 92.7  | 76.9  | 85.7 NM_207102.1     |
| 235.3  | 207.5 | 180.2 | 154.8 NM_012164.2    |
| 230    | 173.1 | 193.9 | 131 NM_022039.3      |
| 382.3  | 382.8 | 349.4 | 325.4 NM_178225.1    |
| 107.3  | 135.4 | 136.6 | 128.6 NM_033632.2    |
| 94.6   | 98.2  | 90.4  | 93.7 NM_018315.3     |
| 367.6  | 287.4 | 256   | 310.6 NM_033632.2    |
| 81.4   | 81.8  | 83.8  | 86.4 NM_001013415.1  |
| 90.4   | 97.6  | 100.8 | 95.7 NM_153348.2     |
| 91.2   | 96.3  | 93    | 92.4 NM_153348.2     |
| 232.2  | 190.9 | 187.1 | 171.2 NM_012174.1    |

|        |        |        |                      |
|--------|--------|--------|----------------------|
| 205    | 164.7  | 178.4  | 115.1 NM_032301.1    |
| 91.2   | 89.9   | 86.2   | 91.2 NM_032029.2     |
| 628.5  | 726.3  | 864.1  | 933.5 NM_133279.1    |
| 91     | 90     | 91.1   | 84.5 NM_133271.1     |
| 99.1   | 97.8   | 88.4   | 105.2 NM_133280.1    |
| 8822.3 | 6003.2 | 4638.1 | 4751.3 NM_004106.1   |
| 115.1  | 89.2   | 91.6   | 93.7 NM_002002.3     |
| 152    | 133.4  | 130.2  | 139.4 NM_015962.4    |
| 77.5   | 89.6   | 80.5   | 74.6 XM_940656.1     |
| 89.5   | 102.8  | 97     | 93.8 NM_003890.1     |
| 444.3  | 244    | 239.9  | 218.3 NM_000566.2    |
| 1383.4 | 660.4  | 535.1  | 392.8 NM_001017986.1 |
| 1452.8 | 697.5  | 659.3  | 443.9 NM_001004340.1 |
| 226.2  | 253.1  | 235.3  | 171.3 NM_021642.2    |
| 301.7  | 252.5  | 240.9  | 193.1 NM_021642.2    |
| 80     | 125.4  | 123.2  | 118.2 NM_004001.3    |
| 86.9   | 82.7   | 79.9   | 86.6 NM_001005411.2  |
| 74.6   | 79.4   | 71.7   | 85.4 NM_000569.6     |
| 119.5  | 124.4  | 105.3  | 97.2 NM_000570.2     |
| 1556   | 1743.1 | 1601.9 | 1375.4 NM_004107.3   |
| 139.8  | 118.4  | 111.4  | 102.2 NM_015122.1    |
| 108.7  | 119.2  | 114    | 123.4 NM_138782.1    |
| 84.3   | 104.5  | 96.8   | 92.6 NM_033449.1     |
| 262    | 258.3  | 233.2  | 164.8 NM_014824.1    |
| 3687.2 | 4631.2 | 6622.8 | 4162.2 NM_006731.1   |
| 113    | 96.6   | 103.3  | 105.1 NM_006731.1    |
| 96.6   | 86.2   | 81.5   | 88.1 NM_002003.2     |
| 88.9   | 76.3   | 84.8   | 84.2 NM_004108.2     |
| 90     | 80.5   | 82     | 95.6 NM_004108.2     |
| 73.6   | 78     | 79.9   | 85.7 NM_173452.1     |
| 93.7   | 81.3   | 76     | 81.7 NM_173452.1     |
| 85.1   | 88.2   | 89.8   | 98.8 NM_052938.3     |
| 83.4   | 82.9   | 79     | 79.7 NM_138738.2     |
| 101.7  | 96.2   | 101.6  | 104.6 NM_138738.2    |
| 89.7   | 90     | 74.8   | 83.4 NM_030764.2     |
| 90     | 85.3   | 80.7   | 89.3 NM_001024667.1  |
| 95.3   | 96.9   | 89     | 89.6 NM_052939.3     |
| 80.9   | 77.5   | 74.2   | 82.6 NM_031282.1     |
| 106.6  | 94     | 95.2   | 96.1 NM_031281.1     |
| 95.1   | 85.3   | 81.4   | 90.5 NM_001004310.1  |
| 83.1   | 83.8   | 79.2   | 82.2 NM_032738.3     |
| 215.1  | 141    | 126.6  | 117.7 NM_001002901.2 |
| 6511.4 | 4340.3 | 4709.6 | 3524.5 NM_004462.3   |
| 99.5   | 98.2   | 95.2   | 88.8 NM_004109.3     |
| 96.6   | 92.6   | 86.7   | 85.7 NM_024417.1     |
| 87.1   | 89.2   | 79.7   | 80.3 NM_004110.3     |
| 108    | 95.3   | 91.1   | 99.4 NM_001012515.1  |
| 276.2  | 324.4  | 304.3  | 218.6 NM_000140.2    |
| 1227   | 891.1  | 847.5  | 470.5 NM_018708.1    |
| 204    | 194.6  | 162.3  | 174.3 NM_015322.3    |



|        |        |        |                    |
|--------|--------|--------|--------------------|
| 324.8  | 398.2  | 270.4  | 333.2 NM_020177.2  |
| 3943.7 | 2753.5 | 2318.2 | 1654.2 NM_004111.4 |
| 113.2  | 130.9  | 115.3  | 115.4 NM_005246.1  |
| 259.2  | 158.3  | 158.7  | 139.8 NM_013451.2  |
| 144.7  | 106.1  | 98.4   | 92.2 NM_013451.2   |
| 94.4   | 92.1   | 91.2   | 85.8 NR_001442.2   |
| 99     | 93.4   | 95.2   | 98.5 NM_152898.2   |
| 2533.3 | 1696.7 | 1738.6 | 867.9 NM_002005.2  |
| 91.8   | 88.9   | 99.6   | 84.7 NM_014375.2   |
| 95.7   | 81.5   | 84.3   | 93.3 NM_017521.2   |
| 128.6  | 95     | 109.7  | 110 NM_022549.2    |
| 180.3  | 195.4  | 176.9  | 144.1 NM_022549.2  |
| 428.4  | 275.9  | 282.9  | 291.5 NM_005103.3  |
| 1296.8 | 1498.2 | 1003.9 | 1426.5 NM_005102.1 |
| 2613.1 | 2518.9 | 1840.4 | 2193.1 NM_005102.1 |
| 95.7   | 98.5   | 96.1   | 88.3 NM_005303.1   |
| 97.4   | 100.2  | 104.1  | 90.7 NM_005306.1   |
| 95.6   | 100.8  | 96.9   | 95.2 NM_005304.2   |
| 83.2   | 81.3   | 83.8   | 89.4 NM_000508.3   |
| 148.9  | 137.6  | 144.1  | 139.5 NM_021871.2  |
| 82.5   | 78.9   | 81.2   | 81 NM_021871.2     |
| 91.2   | 86.7   | 81.8   | 89.8 NM_005141.2   |
| 117.2  | 89     | 98.8   | 97.5 NM_004463.2   |
| 95.9   | 82.2   | 81.8   | 87.7 NM_173558.2   |
| 752.3  | 680    | 875    | 337.6 NM_033086.1  |
| 87.2   | 88.1   | 81.4   | 93.6 NM_139241.1   |
| 100.3  | 98.3   | 95.9   | 95.3 NM_152536.2   |
| 96.1   | 82.9   | 86     | 95.9 NM_018351.2   |
| 97.9   | 97.2   | 94.4   | 94.1 NM_033136.1   |
| 81.6   | 89.9   | 81.1   | 82.2 NM_000800.2   |
| 81.4   | 90.7   | 82.1   | 89.4 NM_004465.1   |
| 106.6  | 97.9   | 94.4   | 99.2 NM_004112.2   |
| 89.6   | 88.3   | 81.9   | 83.7 NM_004113.3   |
| 95.9   | 94     | 86.1   | 85.3 NM_004113.3   |
| 88.4   | 90.6   | 76.1   | 89.4 NM_021032.2   |
| 88.4   | 85.4   | 89.5   | 89.4 NM_033642.1   |
| 79.2   | 81.4   | 73.8   | 71.5 NM_004114.2   |
| 87     | 83.8   | 75.9   | 73.7 NM_033642.1   |
| 93     | 87.9   | 93.2   | 87.6 NM_175929.1   |
| 83.2   | 83.9   | 84.1   | 82.4 NM_004115.2   |
| 79.7   | 72.3   | 83.8   | 83.5 NM_003868.1   |
| 96     | 92.2   | 98.2   | 103.8 NM_003867.2  |
| 127    | 117.4  | 133.5  | 91.8 NM_003862.1   |
| 84.3   | 87.6   | 88.3   | 91.9 NM_033649.1   |
| 76.8   | 97.4   | 88.9   | 81.5 NM_005117.2   |
| 102.4  | 95.1   | 106.6  | 89.8 NM_002006.3   |
| 104.5  | 107.8  | 103.5  | 90.3 NM_019851.1   |
| 100.9  | 101.7  | 84.1   | 96.9 NM_019113.2   |
| 98.4   | 92.1   | 84.2   | 80.7 NM_020637.1   |
| 84.8   | 88.3   | 90.2   | 88.2 NM_020638.2   |

|        |        |        |                      |
|--------|--------|--------|----------------------|
| 94.8   | 98.5   | 91.1   | 97.7 NM_005247.2     |
| 78.9   | 77.7   | 76.9   | 83.5 NM_002007.1     |
| 101.7  | 91.1   | 91.6   | 92.6 NM_033143.2     |
| 86.3   | 94.2   | 82     | 84.5 NM_004464.3     |
| 83.8   | 79.1   | 70.2   | 73.3 NM_020996.1     |
| 81.7   | 77.6   | 82.1   | 87.7 NM_002009.2     |
| 91.4   | 93.1   | 86     | 87.7 NM_033164.1     |
| 83.6   | 82.7   | 89     | 82.4 NM_006119.2     |
| 86.9   | 80.8   | 76     | 78.8 NM_002010.1     |
| 88.7   | 87.3   | 93.7   | 84.7 NM_005130.3     |
| 101.1  | 82.6   | 99.5   | 100.3 NM_023107.2    |
| 86.6   | 78.3   | 77.7   | 82.2 NM_023110.1     |
| 372.8  | 330    | 320.8  | 265.9 NM_007045.2    |
| 117.9  | 122.4  | 113.4  | 108 NM_015633.1      |
| 91.4   | 81.7   | 83.4   | 88.5 NM_022971.1     |
| 87.2   | 87.1   | 82.8   | 94.4 NM_000142.2     |
| 258.9  | 301.8  | 258.7  | 167.9 NM_000142.2    |
| 103.8  | 114.6  | 100.5  | 101.9 NM_213647.1    |
| 79.4   | 89.1   | 85     | 87.8 NM_022963.2     |
| 98.9   | 94.5   | 92.8   | 88.6 NM_022963.2     |
| 524.8  | 423.9  | 334.2  | 359 NM_001004358.1   |
| 140.1  | 136.6  | 121.2  | 120 NM_001004358.1   |
| 91.8   | 91.1   | 84     | 89.5 NM_000509.4     |
| 82.4   | 80     | 82.6   | 81.2 NM_000509.4     |
| 85.8   | 90.6   | 79.4   | 91 NM_021870.2       |
| 85.7   | 81.4   | 87.1   | 74.5 XM_937886.1     |
| 98.6   | 93.9   | 87     | 96 NM_201553.1       |
| 95.3   | 328.1  | 224.2  | 205.2 NM_006682.1    |
| 172.5  | 169    | 145.8  | 129.6 NM_005248.1    |
| 87     | 90.7   | 87     | 89.8 NM_001042729.1  |
| 358.3  | 332.2  | 276.4  | 176.6 NM_001042729.1 |
| 2334.8 | 1790.8 | 1465.2 | 1319.7 NM_000143.2   |
| 93.3   | 88.6   | 86.9   | 90.2 NM_002012.1     |
| 115.9  | 122.3  | 100.2  | 120.1 NM_001449.3    |
| 302.1  | 217.8  | 198.3  | 171 NM_201555.1      |
| 232.3  | 193.1  | 172.5  | 148.2 NM_001450.3    |
| 94.5   | 91.2   | 87.7   | 93.8 NM_201555.1     |
| 88.1   | 81.2   | 85.9   | 86.9 NM_201557.1     |
| 245.5  | 223.4  | 210.5  | 172.3 NM_004468.3    |
| 97.2   | 89.7   | 89.6   | 92.3 NM_020482.3     |
| 618.3  | 418.2  | 351    | 352.9 NM_013241.1    |
| 97.6   | 95.1   | 93.5   | 97.2 NM_025135.2     |
| 175.9  | 126.6  | 124.7  | 106.2 NM_032843.3    |
| 1132.4 | 775.7  | 794.2  | 463.2 NM_004214.4    |
| 230.4  | 139.9  | 121.9  | 108.3 NM_198897.1    |
| 92.1   | 95     | 75.1   | 84.9 NM_004469.2     |
| 85.5   | 79.1   | 78.9   | 83 NM_001004311.1    |
| 85.8   | 84.9   | 96.2   | 90.3 NM_018086.2     |
| 252.5  | 231.8  | 174.6  | 200.1 NM_001042762.1 |
| 308.9  | 240.3  | 211.2  | 220 NM_022116.2      |

|        |        |        |                      |
|--------|--------|--------|----------------------|
| 95.2   | 115.7  | 104.9  | 99 NM_015687.2       |
| 149.6  | 230.6  | 171.4  | 162.6 NM_001042459.1 |
| 93.9   | 92.1   | 83.8   | 92.4 NM_030917.2     |
| 621.2  | 445.8  | 505.9  | 378.4 NM_016068.1    |
| 93.3   | 94.3   | 86.7   | 91.2 NM_014344.2     |
| 92.9   | 88.1   | 84.7   | 84.5 NM_021939.2     |
| 152.1  | 274.7  | 335.3  | 221.3 NM_016594.1    |
| 999.1  | 1471.2 | 1743.5 | 1979.6 NM_017946.2   |
| 382.1  | 240.5  | 227.6  | 187.1 NM_054014.1    |
| 421.7  | 710.8  | 576.2  | 609.8 NM_054014.1    |
| 1289.6 | 1298.7 | 923.2  | 1043.7 NM_000801.2   |
| 94     | 87.2   | 80.4   | 80.3 NM_054033.1     |
| 248.2  | 290.3  | 280.7  | 221.5 NM_004470.2    |
| 107.7  | 96.7   | 82.4   | 84.9 NM_057092.1     |
| 141.9  | 152.8  | 135.7  | 124.6 NM_004470.2    |
| 321    | 217.2  | 262.3  | 220.7 NM_002013.2    |
| 331.5  | 147.3  | 122.4  | 99.6 NM_002014.2     |
| 491.8  | 559.4  | 520.6  | 389.6 NM_004117.2    |
| 93.4   | 92.4   | 79.8   | 85.5 NM_003602.2     |
| 94.9   | 85.7   | 91.9   | 84.1 NM_016105.2     |
| 118    | 115.1  | 104.9  | 105.7 NM_012181.3    |
| 102.7  | 97.4   | 89.7   | 102.9 NM_007270.2    |
| 467.1  | 537.7  | 520.4  | 464 NM_182827.1      |
| 134    | 128.5  | 120.4  | 111.6 NM_022110.3    |
| 79.2   | 86.3   | 80.4   | 89 NM_004118.3       |
| 130.8  | 139.6  | 157.4  | 122.6 NM_024301.3    |
| 103.9  | 103.8  | 101.7  | 94.1 NM_024301.2     |
| 513.1  | 435.8  | 384    | 552.2 NM_022145.2    |
| 89.9   | 83.5   | 86.9   | 96.2 NM_021631.1     |
| 138.6  | 130.9  | 104.3  | 99.7 NM_032683.1     |
| 95.3   | 80.9   | 86     | 91.8 NM_001017421.1  |
| 90.9   | 88.4   | 80.2   | 86.6 NM_031904.2     |
| 108.3  | 107.4  | 107.8  | 105 NM_025207.3      |
| 647.8  | 484.6  | 432.3  | 245.4 NM_201398.1    |
| 112.5  | 111.5  | 97.4   | 106.7 NM_144997.4    |
| 96.7   | 93.6   | 90.5   | 96.5 NM_144606.4     |
| 99.1   | 90.3   | 96.1   | 93.2 NM_144606.4     |
| 86.3   | 77.8   | 77     | 83.1 NM_002016.1     |
| 89.5   | 88.7   | 87.6   | 88.6 NM_001014342.1  |
| 108.8  | 91.8   | 83.7   | 101.5 NM_002017.2    |
| 288.5  | 308.7  | 281.9  | 252 NM_002018.2      |
| 86.4   | 94.3   | 80     | 97.5 NM_033206.1     |
| 538.8  | 670.9  | 484.3  | 405 NM_017969.1      |
| 494.9  | 404.2  | 340.8  | 383.4 NM_017991.3    |
| 651.5  | 524    | 388.8  | 423 NM_017994.3      |
| 142.8  | 164.6  | 188.3  | 173 NR_002940.1      |
| 104.6  | 103.1  | 103.9  | 100.4 NR_002940.1    |
| 2106   | 1673.9 | 1909.5 | 1653.2 NM_018011.2   |
| 119.1  | 123.7  | 124.3  | 97.3 NM_018013.2     |
| 241.6  | 98.9   | 103.6  | 95.6 NM_018015.3     |

|        |        |       |                    |
|--------|--------|-------|--------------------|
| 171.2  | 200.3  | 247.8 | 196.2 NM_018029.3  |
| 1766.8 | 848.9  | 803   | 627.4 NM_018035.1  |
| 112.4  | 100.4  | 104.1 | 102.8 NM_018042.2  |
| 116    | 103.4  | 98.7  | 96.8 NM_018048.2   |
| 104.9  | 97.6   | 100.9 | 96.1 NM_018059.3   |
| 93.1   | 103.3  | 98.8  | 107 NM_018071.3    |
| 120.2  | 104.7  | 106.4 | 100.1 NM_018074.3  |
| 390.2  | 410.2  | 351   | 317.9 NM_018079.3  |
| 98     | 100.2  | 97.7  | 104.7 NM_018111.1  |
| 159.8  | 117.8  | 100   | 109.4 NM_152563.1  |
| 248    | 247.3  | 182.7 | 242.9 NM_018195.2  |
| 608.7  | 585.8  | 541.3 | 469.3 NM_018210.1  |
| 87.4   | 86.7   | 73.2  | 90.8 NM_018215.2   |
| 84.4   | 73.9   | 84.8  | 80 NM_018219.1     |
| 105.1  | 92.1   | 88.7  | 94.1 NM_018231.1   |
| 132.2  | 213.7  | 189.5 | 171 NM_018242.2    |
| 149.9  | 179.5  | 204.5 | 130.6 NM_018271.2  |
| 140.9  | 143.5  | 119.8 | 108.9 NM_018273.2  |
| 154.2  | 149.5  | 148.8 | 145.2 NM_018275.3  |
| 96.2   | 89.1   | 86.7  | 94.7 NM_018280.1   |
| 360.4  | 501.4  | 410   | 310.1 NM_018291.2  |
| 102.6  | 101.9  | 95.9  | 90.1 NM_019044.2   |
| 117.1  | 122.7  | 111.5 | 109.7 NM_018295.1  |
| 106.5  | 103    | 102.4 | 92 NM_018302.1     |
| 117.8  | 112.2  | 108.5 | 102.5 NM_018340.1  |
| 170.2  | 183.2  | 170.8 | 160.4 NM_018342.2  |
| 265.3  | 190.4  | 169.8 | 192.9 NM_018348.4  |
| 108    | 107.2  | 85.8  | 98.8 NM_018352.1   |
| 150.6  | 134.2  | 112   | 127.1 NM_018356.1  |
| 193.7  | 162.2  | 146.8 | 168.2 NM_018359.1  |
| 187.1  | 141.7  | 123.4 | 149.6 NM_018370.1  |
| 153.9  | 138.6  | 144.7 | 106.2 NM_018381.1  |
| 3089.4 | 2099.4 | 1989  | 1337.3 NM_018386.1 |
| 92.1   | 86.1   | 80    | 87.2 NM_018392.3   |
| 331.8  | 289.4  | 298.6 | 377.7 NM_024570.1  |
| 78.3   | 90.3   | 86.4  | 89.2 NM_024891.1   |
| 131.9  | 130.9  | 126   | 112.4 NM_024669.1  |
| 85.9   | 79.3   | 81.5  | 82.2 NM_207661.2   |
| 129.9  | 134.5  | 116.7 | 115 NM_024824.3    |
| 99.5   | 87.7   | 87.1  | 79.6 NM_207662.2   |
| 136.4  | 127.2  | 108   | 149 NM_024824.3    |
| 85.1   | 90.7   | 79.3  | 89.3 NM_024933.2   |
| 141.4  | 134.6  | 135.1 | 127.7 NM_024537.1  |
| 85.3   | 77.6   | 84.8  | 84.2 NM_024986.1   |
| 90.9   | 91.6   | 87.5  | 86.8 NM_024749.2   |
| 90.9   | 95.3   | 89.8  | 92.1 NM_024811.2   |
| 162.4  | 119    | 113.5 | 108.5 NM_024926.1  |
| 84.6   | 88.8   | 88.5  | 94.2 NM_022773.1   |
| 152.2  | 87.8   | 98.1  | 100 NM_024534.4    |
| 264.7  | 258.9  | 223.5 | 212.7 NM_021942.4  |

|        |       |       |                      |
|--------|-------|-------|----------------------|
| 283.3  | 234.6 | 212.5 | 224.8 NM_199053.1    |
| 499.3  | 520.2 | 521.4 | 361.4 NM_022492.2    |
| 211    | 187.2 | 170   | 164 NM_019108.1      |
| 157.4  | 135.5 | 119.3 | 130 NM_178159.1      |
| 396.9  | 258.1 | 248.5 | 231.3 NM_023008.2    |
| 156.8  | 146.3 | 130.3 | 142.2 NM_022764.1    |
| 119.6  | 113   | 107.9 | 106.7 NM_025000.1    |
| 430.1  | 369   | 358.3 | 208.4 NM_021826.4    |
| 91.2   | 85.7  | 82.9  | 84.2 NM_023073.2     |
| 103.7  | 87.3  | 96.5  | 98.7 NM_024902.2     |
| 97.5   | 91.9  | 104.4 | 96.7 NM_024877.1     |
| 108.4  | 129.2 | 119.9 | 116.3 NM_001031720.1 |
| 286.6  | 240.4 | 247.6 | 245.4 NM_001031720.1 |
| 112.4  | 113.4 | 106.7 | 104.6 NM_032180.1    |
| 78.1   | 77.2  | 86.2  | 82.1 NM_032181.1     |
| 201.4  | 179.4 | 176   | 173 NM_022484.3      |
| 86.7   | 87.1  | 84.4  | 86.5 NM_024941.1     |
| 89.5   | 92.8  | 89.2  | 80.1 NM_139076.1     |
| 136.6  | 140.4 | 123.2 | 104.8 NM_001031719.1 |
| 113.5  | 103.7 | 103   | 101.1 NM_024705.1    |
| 131.7  | 156   | 132.9 | 139.9 NM_001031719.1 |
| 86.9   | 92    | 89.8  | 90.2 NM_024702.1     |
| 366.5  | 297.6 | 284.3 | 156.7 NM_025108.1    |
| 109.1  | 112   | 107.3 | 84.4 NM_022780.2     |
| 729.2  | 436.4 | 397.4 | 292.2 NM_022770.2    |
| 95.5   | 87.1  | 76.3  | 86.7 NM_152275.2     |
| 104.4  | 95    | 90.9  | 92.4 NM_024770.1     |
| 91.3   | 88.8  | 83.4  | 86.6 NM_024563.2     |
| 118.6  | 104.6 | 97.4  | 105.1 NM_025026.1    |
| 129.4  | 126.7 | 112.7 | 89.9 NM_024845.1     |
| 87.6   | 91.2  | 82.3  | 103.6 NM_024565.4    |
| 94.3   | 86.5  | 88.9  | 92.3 NM_024841.2     |
| 92.6   | 101.2 | 83.1  | 84.3 NM_025029.2     |
| 90.1   | 96.3  | 93.8  | 96.1 NM_032779.2     |
| 221    | 188   | 147.4 | 139.6 NM_032790.2    |
| 114.9  | 120   | 117.5 | 114.5 NM_032816.3    |
| 992.5  | 739.2 | 815.9 | 458.1 NM_032822.1    |
| 163.9  | 143.7 | 143.1 | 136.1 NM_032836.1    |
| 1008.2 | 761.6 | 635.7 | 681.9 NM_032842.2    |
| 87     | 86.8  | 89.8  | 90 NM_032845.1       |
| 85     | 84.6  | 71.9  | 89.1 NM_032849.2     |
| 90.9   | 87.3  | 90.4  | 81.9 NM_001001665.2  |
| 90.4   | 86.5  | 84.5  | 86.7 NM_001004345.1  |
| 92.3   | 89.4  | 89    | 89.6 NM_001004318.1  |
| 159.3  | 125.2 | 110.5 | 110.8 NM_001008401.1 |
| 94.4   | 92.9  | 89.5  | 87.5 NM_001004320.1  |
| 108.3  | 100.2 | 105.3 | 112.9 NM_001004326.1 |
| 83.4   | 76.4  | 82.3  | 86.6 NM_001004341.1  |
| 112.7  | 97.7  | 85.5  | 99.6 NM_001004301.1  |
| 90.8   | 87.3  | 84.9  | 89.3 NM_001001662.1  |

|        |        |        |                      |
|--------|--------|--------|----------------------|
| 101.4  | 89.7   | 95.8   | 93.1 NM_001004316.1  |
| 98.5   | 105.5  | 94.1   | 92.7 NM_001039756.1  |
| 111.7  | 96     | 103.2  | 88.5 NM_001039780.1  |
| 84.1   | 91.6   | 77.7   | 86.8 NM_017628.2     |
| 172.1  | 173.6  | 145.7  | 151.1 NM_017631.3    |
| 475.8  | 722.5  | 723    | 566.5 NM_019049.1    |
| 113.4  | 119.6  | 109.1  | 135.5 NM_017667.2    |
| 106.1  | 115.6  | 101.1  | 108.6 NM_024553.2    |
| 92.3   | 76.9   | 77.8   | 83.4 NM_024553.2     |
| 108.7  | 105.8  | 96.7   | 99.5 NM_017669.2     |
| 154.5  | 124.8  | 107.8  | 132 NM_017669.2      |
| 192.2  | 161.2  | 143.5  | 149.6 NM_017676.1    |
| 133.9  | 84.2   | 85.3   | 93.5 NM_017681.1     |
| 95.5   | 92.1   | 84.7   | 95.1 NM_019000.2     |
| 135    | 108.2  | 97     | 101.9 NM_001034850.1 |
| 205.6  | 159.2  | 141.9  | 148.2 NM_001034850.1 |
| 176    | 171.3  | 162    | 177.1 NM_017694.2    |
| 72.5   | 91.3   | 73.3   | 80.7 NM_017700.1     |
| 296.2  | 219.8  | 184.8  | 184.4 NM_017702.2    |
| 195.7  | 152.7  | 146.8  | 134.3 NM_017702.2    |
| 758.5  | 659.9  | 712.8  | 440.6 NM_207514.1    |
| 910.8  | 610.2  | 594.5  | 359.5 NM_019008.4    |
| 486.6  | 346.2  | 274.3  | 322.3 NM_017723.1    |
| 171.5  | 131.2  | 123.4  | 138.8 NM_017727.3    |
| 367.5  | 355.5  | 320.4  | 221.7 NM_017735.3    |
| 153.2  | 244.8  | 196.2  | 214.2 NM_019027.1    |
| 239.5  | 201.1  | 181.9  | 181.1 NM_017741.2    |
| 100.9  | 87.2   | 98.5   | 86.9 NM_017749.2     |
| 109.5  | 118.8  | 112.7  | 101 NM_017751.1      |
| 77.2   | 84.5   | 80.4   | 77.8 NM_198881.1     |
| 94.2   | 88.2   | 93.9   | 87.9 NM_198881.1     |
| 108.3  | 113    | 104.3  | 103 NM_017759.2      |
| 317    | 448.5  | 331.4  | 321.4 NM_019005.2    |
| 778.8  | 593.6  | 519.9  | 425.4 NM_017785.2    |
| 77.9   | 85.6   | 89.9   | 77.3 NM_017786.2     |
| 90.5   | 87.4   | 85.9   | 85.3 NM_017802.2     |
| 152.3  | 110.8  | 107.9  | 117.8 NM_017814.1    |
| 86.9   | 91.4   | 90.7   | 82 NM_017820.2       |
| 429.2  | 386.3  | 288.8  | 308.9 NM_017842.1    |
| 1646.2 | 1121.5 | 1150.6 | 816.6 NM_017854.1    |
| 339.8  | 233.8  | 209.6  | 189.5 NM_017858.1    |
| 413.4  | 302.9  | 271.6  | 306.7 NM_017867.1    |
| 201.7  | 184.3  | 165.6  | 152.6 NM_017875.1    |
| 189.5  | 173.3  | 180.1  | 161.4 NM_017880.1    |
| 115.1  | 114.1  | 124.1  | 103.8 NM_017888.2    |
| 288.8  | 354    | 253.9  | 216.7 NM_014106.2    |
| 1707.4 | 1420.7 | 1216.1 | 849.4 NM_017907.1    |
| 155.6  | 148.1  | 165.8  | 159.9 NM_017910.2    |
| 614.9  | 398.5  | 367.5  | 284 NM_017916.1      |
| 424.5  | 264    | 301.5  | 247.8 NM_017918.3    |

|        |       |       |                      |
|--------|-------|-------|----------------------|
| 90.4   | 85.3  | 79.2  | 90.2 NM_019086.2     |
| 267.6  | 255.7 | 215.2 | 228.4 NM_019086.2    |
| 220.5  | 191.7 | 185.7 | 162.5 NM_017931.2    |
| 95.4   | 102.8 | 89.3  | 95.3 NM_017933.3     |
| 456.6  | 318.1 | 272.7 | 249.3 NM_182922.1    |
| 105    | 109.4 | 108.5 | 109.9 NM_182922.1    |
| 87.7   | 95.4  | 88.6  | 101.7 NM_017952.4    |
| 89.3   | 99    | 97.6  | 79.9 NM_017967.2     |
| 107.5  | 91.4  | 101.3 | 99.7 NM_025149.3     |
| 92.6   | 113.1 | 92.2  | 97.1 NM_024788.2     |
| 87.8   | 83.7  | 88.8  | 89.7 NM_025031.1     |
| 148.5  | 100.1 | 110.7 | 109.5 NM_024556.1    |
| 232.8  | 257.2 | 304.9 | 253.5 NM_025097.1    |
| 218.3  | 255.6 | 258.7 | 229.5 NM_024627.4    |
| 282.9  | 274.6 | 288.5 | 184.8 NM_024549.3    |
| 95.4   | 82.9  | 82.3  | 90.9 NM_024826.1     |
| 114.3  | 108.1 | 94.7  | 107.5 NM_025087.1    |
| 95.1   | 102.8 | 88.7  | 90.9 NM_024859.1     |
| 119.2  | 118.9 | 106.9 | 94.5 NM_032207.1     |
| 172.6  | 182   | 154.8 | 162.4 NM_025124.1    |
| 272.7  | 218.8 | 177.2 | 180.4 NM_024675.2    |
| 362.9  | 320.4 | 281.9 | 258.4 NM_021925.1    |
| 180.5  | 104.1 | 101.5 | 97.2 NM_020153.2     |
| 260.1  | 253.4 | 243.9 | 212.1 NM_001035507.2 |
| 140    | 170   | 144.4 | 163.1 NM_021831.5    |
| 276.9  | 348.7 | 318.1 | 271.6 NM_022759.1    |
| 253.1  | 256.9 | 264.9 | 257.4 NM_024622.2    |
| 89.8   | 95.4  | 79.3  | 87.9 NM_024604.1     |
| 339.9  | 238.1 | 231.6 | 164.3 NM_025203.1    |
| 80.8   | 85.8  | 89.5  | 89.3 NM_024560.2     |
| 89     | 96.5  | 93.3  | 105.2 NM_024913.3    |
| 237.5  | 194.9 | 218.2 | 226.5 NM_022918.2    |
| 117.2  | 97.7  | 87.8  | 95.5 NM_001077419.1  |
| 80.6   | 91    | 85.3  | 89.5 XM_940456.1     |
| 98.3   | 101.7 | 111.8 | 100.4 NM_001080403.1 |
| 118.3  | 130.6 | 128.6 | 117.6 NM_175902.3    |
| 469.3  | 504.7 | 476.1 | 387 NM_024648.1      |
| 122.8  | 112.9 | 113.1 | 113.5 XM_941411.1    |
| 155.5  | 152.2 | 158.2 | 127.7 NM_022762.3    |
| 120.2  | 103.7 | 110.5 | 112.6 NM_024821.2    |
| 103.3  | 94.6  | 98.5  | 94.5 NM_032222.1     |
| 195.8  | 188.9 | 177.9 | 146.8 NM_024589.1    |
| 492.4  | 514.1 | 525.8 | 267.3 NM_025140.1    |
| 131    | 125.6 | 126.3 | 106.9 NM_024650.2    |
| 1100.7 | 647.5 | 618.2 | 625.9 NM_024520.1    |
| 659.9  | 455.8 | 344   | 420.1 NM_024808.2    |
| 110.8  | 96.3  | 90.9  | 106.3 NM_024796.1    |
| 110.8  | 272.3 | 231.5 | 244.7 NM_024829.4    |
| 90.7   | 84.4  | 90.4  | 85.8 NM_024861.1     |
| 98.3   | 95.8  | 89.5  | 103.5 NM_025129.3    |

|       |       |       |                     |
|-------|-------|-------|---------------------|
| 364.2 | 306.5 | 309.3 | 221.7 NM_024578.1   |
| 222.8 | 173.8 | 162.4 | 149.4 NM_024785.2   |
| 103.5 | 110.2 | 111.3 | 98.8 NM_025084.1    |
| 106.4 | 120.7 | 106   | 94.5 NM_024687.1    |
| 83.4  | 83.4  | 73.8  | 84.4 NM_024574.2    |
| 85.5  | 81    | 83.8  | 90.2 NM_032237.2    |
| 104   | 106.6 | 87.6  | 102.5 NM_024671.2   |
| 92.2  | 97.5  | 87.7  | 85.8 NM_024825.2    |
| 98.1  | 95.4  | 90.4  | 91.7 NM_021827.2    |
| 87.1  | 87    | 86.1  | 87 NM_024725.2      |
| 95.6  | 90.3  | 93.8  | 94.9 NM_144722.2    |
| 97.1  | 92.9  | 83.7  | 96.3 NM_024867.2    |
| 92.9  | 82.4  | 82.1  | 80.4 NM_144722.2    |
| 266.1 | 351.2 | 288.4 | 259.7 NM_024588.3   |
| 79.4  | 86.3  | 79.7  | 79 NM_198856.1      |
| 90.1  | 84.3  | 84.6  | 87.2 NM_022785.2    |
| 97    | 94.3  | 89.8  | 92 NM_022785.2      |
| 80.5  | 84.7  | 81    | 81.9 NM_178497.2    |
| 97.5  | 87.2  | 84.4  | 87.7 NM_152750.2    |
| 89.3  | 80.9  | 93.7  | 92.6 NM_152519.2    |
| 99.4  | 86.1  | 84    | 84.2 NM_144990.2    |
| 156.7 | 192.2 | 199.4 | 206.6 NM_144610.1   |
| 193   | 153.1 | 158.8 | 129 NM_152504.2     |
| 101.3 | 96.8  | 103   | 92.4 NM_152792.1    |
| 105.5 | 109.5 | 114.7 | 107.5 NM_182626.1   |
| 100.2 | 100.1 | 94.8  | 88.8 NM_182500.1    |
| 467.9 | 490.7 | 652.5 | 452.8 NM_199163.2   |
| 86.1  | 81.2  | 79.9  | 85.2 NM_152483.1    |
| 80.2  | 88.4  | 84.6  | 84.1 NM_152670.1    |
| 94.3  | 90.2  | 91.3  | 90.2 NM_152543.1    |
| 98.9  | 86.5  | 92.5  | 99.9 NM_144605.1    |
| 476.8 | 324.8 | 244.2 | 209.7 NM_145018.2   |
| 86    | 77.6  | 76.6  | 86.9 NM_152512.3    |
| 93.7  | 93.9  | 97.8  | 97.1 NM_144725.3    |
| 92.2  | 90.4  | 87.7  | 94 NM_152761.1      |
| 417   | 327.1 | 335.3 | 206.6 NM_152493.2   |
| 105   | 95.5  | 97.4  | 104.7 NM_152704.2   |
| 84.6  | 86.7  | 88    | 82 NM_152481.1      |
| 96.4  | 93.2  | 88.2  | 87.5 NM_153216.1    |
| 92.9  | 81.4  | 73.9  | 79.3 NM_178555.2    |
| 84.2  | 89.9  | 72    | 84.9 NM_182560.1    |
| 107.5 | 108.5 | 108.3 | 100.2 NM_173559.1   |
| 91.4  | 86.9  | 87.9  | 86.3 NM_173553.1    |
| 79.1  | 79.4  | 77.6  | 78.8 NM_174943.2    |
| 85.3  | 89.7  | 83    | 85.8 NM_001001699.1 |
| 128.8 | 96.1  | 99    | 88.3 NM_001001668.2 |
| 91.7  | 85    | 80.2  | 90.9 NM_207440.1    |
| 93.1  | 88.7  | 84.8  | 88.2 NM_001001687.1 |
| 124.1 | 117.5 | 120.8 | 109.3 XM_928328.1   |
| 84.5  | 99    | 85.1  | 88.9 XM_932785.1    |



|       |       |        |                     |
|-------|-------|--------|---------------------|
| 80.6  | 74.3  | 75.3   | 86.4 NM_207408.1    |
| 88.1  | 91.7  | 94.1   | 84.2 NM_001080462.1 |
| 462.1 | 256.5 | 223.1  | 224.8 NM_144595.2   |
| 185.3 | 130.7 | 117.4  | 128.6 NM_144595.2   |
| 94.9  | 97.7  | 99.9   | 103.3 NM_144967.2   |
| 89.6  | 87.4  | 90.2   | 75.9 NM_153008.3    |
| 98.3  | 90.3  | 88.9   | 95.1 NM_144632.2    |
| 105.1 | 98.1  | 99.6   | 95.1 NM_152757.1    |
| 151.9 | 118.9 | 115.9  | 113.8 NM_153013.2   |
| 145   | 127.8 | 114.2  | 153 NM_144643.1     |
| 73.3  | 72.9  | 83.2   | 83 NM_145019.2      |
| 93.9  | 88.8  | 89.8   | 99.3 NM_152399.1    |
| 91.5  | 90.4  | 90.1   | 91.4 NM_198553.1    |
| 99.6  | 90.9  | 85.4   | 97.4 NM_152760.2    |
| 97.2  | 92.8  | 84.3   | 92.2 NM_152517.1    |
| 82.8  | 80.4  | 85.5   | 92.3 NM_152908.2    |
| 103.7 | 93.3  | 89.7   | 86.8 NM_174912.2    |
| 90.5  | 83    | 82.6   | 82.5 XR_001005.1    |
| 966.5 | 752.2 | 870.5  | 465.2 NM_152557.3   |
| 104.2 | 97    | 98.5   | 103.2 NM_152385.1   |
| 89.2  | 83.1  | 89.9   | 88.2 NM_152509.1    |
| 113.5 | 103.7 | 107.8  | 99.5 NM_153027.1    |
| 106.6 | 110.7 | 107.8  | 94.7 NM_144974.1    |
| 96.3  | 92.4  | 102    | 102.2 NM_182516.1   |
| 89.7  | 84.4  | 87.4   | 87.5 NM_153031.1    |
| 91.7  | 91.5  | 89.7   | 86.1 NM_181646.2    |
| 88.7  | 99.3  | 95     | 104 NM_152458.4     |
| 94.3  | 91.6  | 77.8   | 91 NM_152497.1      |
| 119.9 | 103.3 | 95     | 98.9 NM_144709.1    |
| 135.8 | 139.6 | 142.1  | 142.1 NM_153038.1   |
| 102.4 | 93.6  | 97.6   | 84.2 NM_152440.3    |
| 80.9  | 83.8  | 82.5   | 82 NM_152491.3      |
| 96    | 88.3  | 93.4   | 94.8 NM_152491.3    |
| 94.6  | 87    | 89.7   | 99.6 NM_144688.2    |
| 92.8  | 86.1  | 80.9   | 89.8 NM_001012452.1 |
| 248.7 | 203.5 | 177.8  | 172.1 NM_144978.1   |
| 93.9  | 92.5  | 92.5   | 96.4 NM_145017.1    |
| 97.5  | 95.7  | 88.8   | 89.3 NM_001039500.1 |
| 89.6  | 96.9  | 99.5   | 88.1 NM_144648.1    |
| 106   | 92.2  | 101.9  | 106.4 XR_001429.1   |
| 87.3  | 83    | 81.3   | 83.8 NM_144674.1    |
| 100.3 | 104.2 | 100.3  | 92.3 NM_144667.1    |
| 86.7  | 82.6  | 77.3   | 92.9 NM_144577.1    |
| 85.8  | 80.6  | 78.8   | 82.5 NM_001001702.1 |
| 101.6 | 89.6  | 92.8   | 94 NM_173821.1      |
| 705   | 1887  | 1745.3 | 1503.5 NM_152687.1  |
| 110.4 | 97.5  | 88.7   | 91.4 NM_173660.2    |
| 270.3 | 224.2 | 215.5  | 141.6 NM_173583.1   |
| 135.9 | 390.1 | 342.1  | 404.7 NM_173644.1   |
| 90    | 82.7  | 80     | 82.2 NM_199340.2    |

|        |       |       |                     |
|--------|-------|-------|---------------------|
| 95.9   | 98.4  | 87.6  | 81.1 NM_173673.1    |
| 90.4   | 91    | 92.3  | 80.9 NM_001029883.1 |
| 505.8  | 360.3 | 319.2 | 367.1 NM_152678.1   |
| 143    | 148   | 125.9 | 133.8 NM_175871.2   |
| 98.6   | 117.4 | 124.1 | 113.6 NM_173627.2   |
| 90.4   | 90.6  | 81    | 85.7 NM_001001688.1 |
| 81.3   | 83.2  | 78    | 84.2 NM_207444.1    |
| 108.3  | 94.7  | 97.2  | 92.7 NM_152544.1    |
| 89.1   | 91.5  | 85    | 94.5 NM_001031742.1 |
| 185.5  | 132.5 | 115   | 106.8 NM_207459.1   |
| 82.7   | 87.5  | 84.6  | 85.6 NM_152599.2    |
| 82.2   | 84.1  | 82.6  | 83.7 NM_001039796.1 |
| 91.5   | 92.5  | 91    | 106 NM_198534.1     |
| 100.8  | 95.4  | 89    | 83.9 NM_207489.1    |
| 99.2   | 93.6  | 89.4  | 95.8 NM_178827.3    |
| 85.8   | 82.5  | 76.6  | 87.3 NM_001033659.1 |
| 101    | 93.5  | 79.2  | 100.4 NM_153264.2   |
| 77.9   | 77.4  | 78.2  | 92.8 NM_173616.1    |
| 83.8   | 77    | 78.4  | 78.7 NM_152590.1    |
| 91     | 81    | 85    | 84.1 NM_175884.3    |
| 114.2  | 101.1 | 93.3  | 96.9 NM_152612.2    |
| 108.8  | 102.2 | 90.6  | 102.7 NM_182574.1   |
| 131.6  | 141.9 | 119.4 | 138.9 NM_153223.1   |
| 96     | 91.3  | 93.3  | 94.9 NM_182634.2    |
| 98.6   | 98.9  | 89.8  | 96.1 NM_178556.3    |
| 106.2  | 107.3 | 105.8 | 100.7 NM_176677.1   |
| 86.2   | 82.3  | 84.8  | 80.9 NM_207511.1    |
| 92.9   | 90.7  | 86.8  | 93.6 NM_153233.1    |
| 81.5   | 86.2  | 79.4  | 89.1 XM_945320.1    |
| 86.6   | 81.9  | 84.4  | 86.1 NM_182568.2    |
| 94.6   | 109.9 | 105.7 | 100.3 NM_152406.1   |
| 93     | 88    | 87.2  | 96.2 NM_152571.2    |
| 1361.5 | 967.1 | 913.3 | 700.7 NM_152716.1   |
| 102.8  | 98.4  | 96    | 97.4 NM_178830.2    |
| 97.1   | 94.4  | 87.3  | 97.6 NM_182598.1    |
| 89     | 88.4  | 81.1  | 96.3 NM_153043.3    |
| 86.6   | 81.8  | 80.1  | 87.8 NM_175892.3    |
| 94.2   | 96.5  | 87    | 91.8 NM_173645.1    |
| 97.2   | 99.4  | 91.8  | 83.2 NM_153214.1    |
| 99.4   | 109.5 | 103   | 103.3 NM_173815.3   |
| 94.7   | 94.9  | 90.9  | 89.5 NM_173564.2    |
| 152.5  | 190.4 | 150.5 | 187.2 NM_152409.2   |
| 110.1  | 103.7 | 108.2 | 108.4 NM_152623.1   |
| 85.7   | 91.6  | 76.7  | 103.6 NM_152382.1   |
| 148.4  | 218.3 | 203.5 | 211.8 NM_032251.3   |
| 97.4   | 90.5  | 87.4  | 85.3 NM_001039775.1 |
| 147.8  | 126   | 130.7 | 136.5 NM_152723.1   |
| 125.1  | 115.6 | 97.6  | 94 NM_173632.2      |
| 84.4   | 106.5 | 87.2  | 84.9 NM_152698.1    |
| 210.9  | 160   | 161.9 | 136.5 NM_175872.3   |

|       |       |       |                      |
|-------|-------|-------|----------------------|
| 981.6 | 734.6 | 613.9 | 661.9 NM_152681.1    |
| 89    | 76.6  | 75.3  | 82.3 NM_001039905.1  |
| 195.7 | 177   | 183.6 | 148.3 NM_152269.1    |
| 94    | 99.1  | 93.4  | 100.5 NM_173805.2    |
| 92.6  | 92.2  | 85.2  | 84.5 NM_153218.1     |
| 91    | 90.9  | 92.4  | 86.6 NM_173527.1     |
| 90.9  | 79.6  | 87.5  | 94 NM_153689.3       |
| 221.8 | 193.8 | 183.5 | 135.1 NM_152374.1    |
| 103.2 | 103.1 | 96.4  | 99.5 NM_173827.2     |
| 97.6  | 100.1 | 105.1 | 105.4 NM_001033760.1 |
| 88.9  | 83.4  | 84.1  | 89.7 NM_001080445.1  |
| 92.2  | 83    | 81.1  | 84 NM_182801.1       |
| 98.2  | 92    | 86.6  | 87.2 NM_152403.2     |
| 86    | 92.6  | 79.3  | 84.9 NM_152403.2     |
| 102.6 | 84.3  | 91.6  | 85.8 NM_198571.1     |
| 100.3 | 102.7 | 92.7  | 101.3 NM_178314.2    |
| 84.3  | 89.4  | 85.5  | 90.4 NM_173483.1     |
| 97    | 98.6  | 91.4  | 90.4 NM_173648.2     |
| 73.1  | 77.9  | 79.8  | 79.7 NM_207445.1     |
| 127.9 | 158.3 | 162.8 | 173.6 NM_182597.1    |
| 102.5 | 102.7 | 103.7 | 118.6 NM_173803.2    |
| 104.1 | 110.2 | 97.4  | 97.5 NM_001080539.1  |
| 86.5  | 85.6  | 82    | 87 NM_182562.1       |
| 85.6  | 91.2  | 91.2  | 85.7 NM_207442.1     |
| 96.4  | 78.8  | 92.6  | 88 NM_173512.1       |
| 380.7 | 370.7 | 331.7 | 227.8 NM_152424.1    |
| 84.5  | 79.4  | 78.6  | 86.5 NR_003246.1     |
| 100.2 | 106.4 | 114.1 | 94.3 NM_178494.2     |
| 200.1 | 220.3 | 249.9 | 182.9 NM_207435.1    |
| 82.6  | 87.5  | 77.2  | 81.3 NM_173649.1     |
| 99.8  | 89.4  | 88.9  | 94.3 NM_173635.1     |
| 72.6  | 72.7  | 72.4  | 75.7 NM_173489.2     |
| 71    | 83.1  | 75.2  | 83.8 NM_001039397.1  |
| 90.7  | 83    | 77.1  | 81.2 NM_173682.1     |
| 101.7 | 97    | 94.6  | 97.5 NM_198441.1     |
| 76.9  | 70.9  | 80    | 78.9 NM_173486.1     |
| 93.7  | 89.9  | 87.9  | 89.8 NM_173482.1     |
| 103.2 | 105.6 | 99.1  | 98.4 NM_001080504.1  |
| 98.6  | 100.5 | 93.3  | 92.7 NM_182605.1     |
| 94.2  | 84.3  | 78.7  | 79.7 NM_001007542.1  |
| 98.4  | 85.7  | 99.7  | 90 NM_173624.1       |
| 857.8 | 553.7 | 480.4 | 379.2 NM_152515.2    |
| 87.3  | 79.8  | 87.8  | 86.4 NM_173678.1     |
| 112.7 | 106.6 | 110.2 | 95.8 NM_173677.1     |
| 81.5  | 81.9  | 79.1  | 83.3 NM_182625.2     |
| 85.7  | 74.3  | 77.5  | 76.1 NM_182508.1     |
| 86.1  | 94.8  | 96.7  | 92.3 NM_207479.1     |
| 264.9 | 240.7 | 247.1 | 145.7 NM_198476.1    |
| 84.5  | 94.5  | 86.1  | 86.1 NM_001004332.1  |
| 269.9 | 294   | 354.1 | 263.9 NM_001001679.1 |

|        |        |        |                       |
|--------|--------|--------|-----------------------|
| 90.3   | 96.6   | 93.5   | 86.9 NM_001001669.1   |
| 98.4   | 77.9   | 76.3   | 91.2 NM_001001705.1   |
| 88.9   | 95.5   | 91.8   | 88.8 NM_207473.1      |
| 76.5   | 73.6   | 83.4   | 78.7 NM_001001697.1   |
| 94.4   | 88.1   | 94.5   | 89.8 NM_207499.1      |
| 90.8   | 84     | 79.9   | 89.2 NM_001001694.1   |
| 79.4   | 73.1   | 73.9   | 82.7 NM_001001680.1   |
| 100.7  | 105.8  | 95.6   | 101 NM_198463.1       |
| 103.7  | 99.4   | 94.4   | 95.8 NM_001001690.1   |
| 93.6   | 93.3   | 94.4   | 82.2 NM_001001706.1   |
| 101.6  | 92     | 87.4   | 99 NM_001004327.1     |
| 97.1   | 82.6   | 93.1   | 85.6 NM_207503.1      |
| 84.7   | 83.3   | 81.2   | 87.4 NM_207383.2      |
| 78.5   | 76.7   | 69.2   | 82.3 NM_198501.1      |
| 93.9   | 88.4   | 85.2   | 95.1 NM_207379.1      |
| 89.2   | 93.9   | 80.4   | 90.7 NM_207474.1      |
| 78.7   | 95.4   | 88.6   | 85 NM_207436.1        |
| 230.6  | 156.2  | 197.2  | 151 NM_207403.1       |
| 1086.6 | 1223   | 1504.4 | 867.3 NM_207498.1     |
| 91     | 86     | 85.7   | 90.7 NM_207382.1      |
| 153.4  | 212.9  | 246.7  | 171.2 NM_207380.1     |
| 105.6  | 124.4  | 134.8  | 109.7 NM_198582.1     |
| 87.4   | 80.5   | 83.7   | 86.1 NM_207468.1      |
| 293.2  | 273.9  | 269.6  | 224.1 NM_001003702.1  |
| 118.6  | 108.5  | 99.5   | 103.1 NM_207497.1     |
| 88.2   | 89.6   | 87     | 89.8 NM_001039892.1   |
| 87.1   | 95.3   | 80.9   | 81.2 NM_201628.1      |
| 91.7   | 91     | 91.3   | 87.6 NM_198857.1      |
| 129.8  | 155.6  | 140.1  | 162.3 NM_198857.1     |
| 95.9   | 88.1   | 84.4   | 83.2 NM_207414.1      |
| 94.8   | 88.9   | 84.7   | 95 NM_207414.1        |
| 91.7   | 83.6   | 88.8   | 80.5 NM_001004299.1   |
| 81.8   | 90     | 91.7   | 90.9 XM_942014.1      |
| 114.6  | 97.2   | 105.7  | 97.5 NM_001080474.1   |
| 88.8   | 87.5   | 88     | 91 NM_207482.1        |
| 85.2   | 85.5   | 77.5   | 86 NM_207366.1        |
| 104    | 89.3   | 90.5   | 91.4 NM_207486.1      |
| 79.8   | 81.7   | 80.9   | 83.8 NM_198520.1      |
| 726.7  | 1436.9 | 1678.3 | 1224.1 NM_001039755.1 |
| 927.1  | 560.9  | 611.7  | 452.9 NM_198567.1     |
| 91.5   | 83.5   | 84.8   | 90.8 XM_496787.2      |
| 90.1   | 86.9   | 81     | 87.5 NM_198564.2      |
| 91.4   | 88.6   | 87.4   | 90.4 NM_001080537.1   |
| 87.4   | 84.1   | 77.7   | 96.3 NM_207422.1      |
| 94.2   | 90.2   | 86.2   | 86.3 NM_207422.1      |
| 85.4   | 89.9   | 85.2   | 94.3 NM_001001678.1   |
| 94.5   | 82.1   | 81.2   | 80.6 NM_198506.1      |
| 99.7   | 102.8  | 90.2   | 93.2 NM_207454.1      |
| 86.2   | 84.5   | 92.1   | 83.7 NM_001039884.1   |
| 87     | 87.2   | 76     | 77.4 NM_207500.1      |

|       |       |        |                       |
|-------|-------|--------|-----------------------|
| 110   | 109   | 99.4   | 107.8 NM_198537.1     |
| 147   | 126   | 102.5  | 112.6 NM_001039770.1  |
| 80.6  | 90.2  | 83.4   | 89.5 NM_001001685.1   |
| 93.5  | 86.6  | 82     | 86.4 NM_207451.1      |
| 84.1  | 83.9  | 76.6   | 91.3 NM_001001692.1   |
| 90.5  | 93.3  | 108.2  | 97.6 NM_207510.2      |
| 118.8 | 117   | 109.5  | 111.7 NM_207448.1     |
| 107.2 | 120.3 | 147.8  | 123 NM_207465.1       |
| 84.7  | 89.3  | 85.1   | 79.3 NM_001004349.1   |
| 104.5 | 94.9  | 94.1   | 94.3 NM_001004321.2   |
| 96    | 97.3  | 88.6   | 95.7 NM_207386.1      |
| 96.4  | 81.4  | 86.3   | 77.8 NM_001001682.1   |
| 107.2 | 102.8 | 88.1   | 101 NM_001001709.1    |
| 125.3 | 125   | 116.6  | 111.4 NM_001039762.1  |
| 101.3 | 94.6  | 76.6   | 91.4 NM_198557.1      |
| 99    | 86.9  | 90.8   | 92 NM_207401.1        |
| 83.7  | 87    | 86.4   | 87.9 NM_207490.1      |
| 88.9  | 81.1  | 87.1   | 92.2 NM_207429.2      |
| 98.9  | 94.9  | 87.9   | 91.3 NM_001001684.1   |
| 101.6 | 84.6  | 84.5   | 87 NM_207395.1        |
| 189.1 | 189.7 | 207.8  | 165.5 NM_198445.1     |
| 97.9  | 87.4  | 90.4   | 93.1 NM_207390.1      |
| 99.7  | 85.3  | 89.8   | 94.9 NM_207483.1      |
| 98.2  | 96.5  | 96.7   | 83.9 NM_001001700.1   |
| 99.4  | 88.7  | 92.7   | 95.5 NM_001001707.1   |
| 84.4  | 85.3  | 93.5   | 95.2 NM_207423.1      |
| 88.1  | 75.7  | 78.5   | 93.4 NM_001001703.1   |
| 266.4 | 249.5 | 242.2  | 224.4 NM_198488.1     |
| 90.3  | 87    | 81.6   | 85.7 NM_207417.1      |
| 102.5 | 91    | 97.1   | 92.1 NR_003082.1      |
| 127.3 | 154   | 223.6  | 161.4 NR_003082.1     |
| 88.6  | 78.6  | 81.2   | 76.3 NM_001004315.1   |
| 94.1  | 80.2  | 83.4   | 88 NM_001033562.1     |
| 87.4  | 86.9  | 86.7   | 83.7 NM_001033562.1   |
| 102.8 | 96    | 95.9   | 97.3 NM_198529.1      |
| 98.7  | 89.2  | 83.6   | 89.4 NM_001001693.1   |
| 94.6  | 81.9  | 88.9   | 93.9 NM_207430.1      |
| 922.2 | 1583  | 2338.2 | 1746.8 NM_001039797.1 |
| 85.4  | 80.6  | 78.7   | 95.2 NM_001001670.1   |
| 91.6  | 78.4  | 89.6   | 86.9 NM_001005303.1   |
| 92.7  | 82.8  | 74.8   | 86.6 NM_001001675.1   |
| 119.7 | 109.5 | 97.4   | 92.1 NM_207405.1      |
| 99.2  | 87.3  | 96.7   | 91.9 NM_198483.1      |
| 107.9 | 101.7 | 102.8  | 93.2 NM_001004330.1   |
| 99.1  | 82.7  | 85.5   | 84.1 NM_207426.1      |
| 95.6  | 92.6  | 72.4   | 85.1 NM_207509.1      |
| 90.9  | 82.9  | 76.7   | 82.1 NM_001007546.1   |
| 139.8 | 120.6 | 120.1  | 116.5 NM_153365.1     |
| 89.5  | 85.2  | 87     | 87.6 NM_153360.1      |
| 233.3 | 194.6 | 213.2  | 233.4 NM_153358.1     |

|        |        |        |                     |
|--------|--------|--------|---------------------|
| 98.6   | 106.3  | 100.1  | 98 NM_153376.1      |
| 75.3   | 80.5   | 72.6   | 83.3 NM_153345.1    |
| 88.6   | 84.9   | 83.4   | 76.5 NM_173800.3    |
| 406.8  | 292.2  | 278.4  | 306.4 NM_173618.1   |
| 258.9  | 296.5  | 273.9  | 210.5 NM_173514.1   |
| 176.7  | 220.7  | 208.5  | 164 NM_001004336.1  |
| 249.2  | 244.1  | 265.9  | 181.2 NM_173633.1   |
| 93.1   | 90.8   | 88.8   | 94.2 NM_173578.1    |
| 103.2  | 89.2   | 95.6   | 94.1 NM_001456.1    |
| 450.4  | 1080.1 | 939.5  | 727.6 NM_001457.1   |
| 93     | 87.4   | 79.4   | 83.3 NM_001458.2    |
| 153.7  | 138.9  | 120.3  | 117 NM_005803.2     |
| 4592.4 | 5175.7 | 4837.7 | 2403.4 NM_004475.1  |
| 147    | 140.9  | 127    | 108.6 NM_013280.4   |
| 98.5   | 101.5  | 89.6   | 101.6 NM_013231.4   |
| 90.4   | 93.4   | 80.7   | 79.4 NM_013281.2    |
| 89.8   | 86     | 82.3   | 86.5 NM_198391.1    |
| 86.8   | 88.2   | 81.4   | 80.3 NM_002019.2    |
| 315.5  | 182.1  | 173.6  | 164.5 NM_004119.1   |
| 112    | 95.4   | 97.3   | 91.9 NM_001459.2    |
| 91.9   | 86.2   | 82.4   | 87.2 NM_002020.1    |
| 80.7   | 85.4   | 83.4   | 85.7 NM_182925.3    |
| 187.7  | 132.8  | 152.3  | 127.1 NM_014053.1   |
| 117.6  | 97.3   | 93.7   | 105.7 NM_020912.1   |
| 111.3  | 106.5  | 109.7  | 98.8 NM_032296.2    |
| 95.7   | 95.3   | 82.7   | 92.7 NM_020066.3    |
| 106    | 110.2  | 112.5  | 94.5 NM_005892.3    |
| 86.4   | 93.7   | 89.9   | 95.3 NM_001004422.1 |
| 86     | 97.6   | 93.1   | 93.2 NM_198900.2    |
| 91.5   | 86.5   | 86.7   | 87.1 NM_175736.3    |
| 87.5   | 81     | 77.4   | 83.7 NM_198900.2    |
| 95.6   | 91.5   | 90.9   | 92.9 NM_002021.1    |
| 97.4   | 101.3  | 89     | 102.3 NM_001460.2   |
| 83.7   | 76.2   | 77.4   | 81.7 NM_001002294.1 |
| 80.7   | 87.2   | 89.3   | 89 NM_006894.4      |
| 155.4  | 143.2  | 143.4  | 144.8 NM_002022.1   |
| 109.9  | 134    | 126.9  | 123.6 NM_001461.1   |
| 146.4  | 160.9  | 156.5  | 109.2 XR_001521.1   |
| 95     | 97.6   | 81.6   | 79.3 NR_002601.1    |
| 92.8   | 92.4   | 97.3   | 86 NM_002023.3      |
| 94.7   | 86.3   | 74.6   | 84.3 NM_002024.3    |
| 103.6  | 107.5  | 90.2   | 92 NM_152578.1      |
| 84.5   | 91.6   | 83.5   | 89.3 NM_054034.2    |
| 85.8   | 82.2   | 81.7   | 81.9 NM_054034.2    |
| 81.1   | 84.2   | 90.9   | 86.3 NM_212474.1    |
| 98.6   | 95.7   | 100.1  | 85.8 NM_022158.2    |
| 630.4  | 642    | 750.7  | 397.2 NM_024619.2   |
| 431.3  | 332.1  | 337.4  | 231.4 NM_020179.1   |
| 1216.7 | 1939.8 | 1995.9 | 1215 NM_015033.2    |
| 88.9   | 81.5   | 82.2   | 89.7 NM_001024948.1 |

|        |        |        |                      |
|--------|--------|--------|----------------------|
| 91.5   | 129.3  | 104.1  | 109.2 NM_017737.3    |
| 1681.6 | 1866.8 | 1756.2 | 1665.9 NM_015308.1   |
| 84.3   | 87     | 75.3   | 84 NM_032532.1       |
| 158.7  | 176    | 171.9  | 170.8 NM_001079673.1 |
| 94.2   | 97.6   | 99.5   | 89.1 NM_001079673.1  |
| 172    | 203.8  | 181.8  | 195.7 NM_014923.2    |
| 92.7   | 86     | 89.8   | 90.8 NM_022823.1     |
| 90.9   | 99.5   | 92     | 94 NM_153756.1       |
| 123.4  | 114.4  | 106.9  | 104.4 NM_144717.2    |
| 99.3   | 86.9   | 91.8   | 94.9 NM_173532.1     |
| 90.2   | 94.4   | 91.1   | 81.5 NM_017559.2     |
| 719.4  | 559.6  | 518    | 385.7 NM_002027.2    |
| 84.8   | 93.6   | 79     | 75.6 NM_001018677.1  |
| 2879.1 | 1965.8 | 1531.9 | 1375.7 NM_002027.2   |
| 295.1  | 238.2  | 269.8  | 179.7 NM_002028.3    |
| 99.4   | 92.1   | 93.5   | 101.4 NM_004476.1    |
| 134    | 131.1  | 124.3  | 108.4 NM_001014986.1 |
| 85     | 88.2   | 79.8   | 88.9 NM_016724.1     |
| 96.2   | 99.3   | 98.4   | 89.4 NM_016730.1     |
| 92     | 89.5   | 85.3   | 94.5 NM_016724.1     |
| 113.6  | 99     | 103.1  | 105.5 NM_016725.1    |
| 109.2  | 93.7   | 97     | 87.2 NM_000803.2     |
| 92.7   | 90.2   | 90.7   | 95.1 NM_000804.2     |
| 402.8  | 291.8  | 227    | 240.7 NM_005252.2    |
| 137.9  | 120.5  | 111.8  | 107.3 NM_006732.1    |
| 142    | 123.1  | 107.5  | 104.4 NM_005438.2    |
| 95.7   | 91.5   | 92.5   | 93.8 NM_005253.3     |
| 88     | 90     | 84.5   | 92.4 NM_004496.2     |
| 91     | 101.9  | 91.7   | 100 NM_021784.3      |
| 82.9   | 72.2   | 78.1   | 76.1 NM_153675.1     |
| 79.6   | 78     | 70.5   | 89.8 NM_021784.3     |
| 105    | 100.6  | 99.8   | 103.7 NM_004497.2    |
| 102.3  | 91.8   | 92.3   | 85.5 NM_012182.2     |
| 310.1  | 142.6  | 158.1  | 106.1 NM_001453.1    |
| 100.9  | 100.7  | 106.1  | 97.8 NM_005251.1     |
| 1178.8 | 1104.2 | 1341   | 613.7 NM_004472.1    |
| 304.8  | 238.2  | 211.4  | 205.7 NM_004474.2    |
| 94.6   | 94     | 79.9   | 90.9 NM_012183.1     |
| 640    | 454    | 477.5  | 382.6 NM_207305.2    |
| 185.1  | 145.7  | 188.8  | 123 NM_012184.3      |
| 91.2   | 82.1   | 79.3   | 88.1 NM_199135.1     |
| 92.5   | 94.3   | 82.6   | 91.9 NM_199358.1     |
| 102.3  | 101.1  | 94.1   | 95.7 NM_004473.3     |
| 96.6   | 92.2   | 83.7   | 88.9 NM_012186.1     |
| 86.1   | 96.3   | 84.5   | 88.2 NM_012186.1     |
| 85.4   | 91.5   | 87.1   | 87.2 NM_001451.1     |
| 140.7  | 89.2   | 85.5   | 97.8 NM_001452.1     |
| 82.9   | 83.6   | 83     | 74.8 NM_005249.3     |
| 87     | 98.2   | 89.4   | 89 NM_003923.1       |
| 86.4   | 91.2   | 77.3   | 85.3 NM_012188.3     |

|        |        |        |                      |
|--------|--------|--------|----------------------|
| 99     | 105.3  | 108.3  | 95.9 NM_012188.3     |
| 85.9   | 87.5   | 75.9   | 82.6 NM_001454.2     |
| 616.2  | 578.9  | 641.1  | 304.8 NM_018416.2    |
| 2419.5 | 2223.5 | 2264.4 | 1838.8 NM_014947.3   |
| 954.2  | 1004.3 | 964    | 823.2 NM_001037165.1 |
| 86.1   | 79.6   | 85.7   | 82.7 NM_004514.3     |
| 108.9  | 115.5  | 106.2  | 101.6 NM_004514.3    |
| 96.8   | 83.1   | 89.6   | 84 NM_005250.1       |
| 103.1  | 110.1  | 87     | 97.1 NM_023067.2     |
| 170.1  | 111.7  | 103.7  | 110.1 NM_023067.2    |
| 277.8  | 199.6  | 197.5  | 175 NM_021953.2      |
| 176.5  | 163.3  | 144.9  | 147.8 NM_202002.1    |
| 92.5   | 98.6   | 91.4   | 90.6 NM_003593.2     |
| 90.9   | 89.7   | 94     | 89.5 NM_213596.1     |
| 116.6  | 133.9  | 149.2  | 120.7 NM_002015.2    |
| 85.9   | 83.8   | 83.2   | 77.7 NM_001455.2     |
| 1023.7 | 1840.4 | 1905.9 | 1015.9 NM_001455.2   |
| 88.3   | 102.1  | 97.6   | 87.8 NM_032682.4     |
| 92     | 88.2   | 94.6   | 81.5 NM_001012505.1  |
| 93     | 89.8   | 75.7   | 84.1 NM_001012505.1  |
| 116.7  | 139.9  | 117.3  | 136.1 NM_148898.1    |
| 125.7  | 161.4  | 142.1  | 134.2 NM_014491.1    |
| 92.2   | 83.6   | 80.3   | 80.8 NM_014009.2     |
| 130.7  | 149.3  | 133.8  | 143.7 NM_001012427.1 |
| 97.5   | 90     | 83.9   | 90.3 NM_001012426.1  |
| 99.9   | 92.9   | 94.4   | 100 NM_033260.2      |
| 93.9   | 95.2   | 88.9   | 98.4 NM_181721.2     |
| 92.5   | 92.7   | 91.3   | 88.1 NM_181721.2     |
| 90.9   | 83.4   | 87.5   | 86.6 NM_198451.1     |
| 581.7  | 458.6  | 477    | 266.5 NM_017547.2    |
| 358.1  | 396.5  | 431.5  | 254.6 NM_024955.4    |
| 103.3  | 103.3  | 95.8   | 96.2 NM_004957.4     |
| 93.5   | 92.8   | 80     | 87.3 NM_001018078.1  |
| 91.2   | 92.3   | 87.5   | 92.8 NM_004957.4     |
| 86.8   | 87     | 82.6   | 98.3 NM_003838.2     |
| 94.9   | 208.4  | 132.8  | 124 NM_002029.3      |
| 88.1   | 127.8  | 96.7   | 102.5 NM_001462.3    |
| 80.2   | 137.8  | 95.1   | 112.2 NM_001462.3    |
| 96.5   | 90.2   | 93.6   | 85.6 NM_002030.3     |
| 242.6  | 231.1  | 256.5  | 158.4 NM_014489.1    |
| 526    | 741.5  | 585.2  | 517.5 NM_004958.2    |
| 89     | 91.6   | 82.7   | 82.8 NM_025074.3     |
| 132.8  | 116.4  | 101.5  | 109.3 NM_181355.1    |
| 111.8  | 108.5  | 101.4  | 105.1 NM_005479.2    |
| 1262.9 | 834.7  | 817.5  | 531 NM_012083.2      |
| 76     | 86.6   | 73.3   | 83.6 NM_144966.3     |
| 99.8   | 105.7  | 85.9   | 97.2 NM_207361.4     |
| 271.9  | 174.5  | 165.1  | 125.9 NM_014286.2    |
| 526.5  | 358.8  | 271.1  | 345.6 NM_004477.2    |
| 75.7   | 68.1   | 66.7   | 74 NM_001005217.1    |



|        |        |        |                      |
|--------|--------|--------|----------------------|
| 75.8   | 77.9   | 82.2   | 83 NM_002031.2       |
| 87.7   | 85.7   | 79.8   | 81.4 NM_024919.2     |
| 93.2   | 121.7  | 118.6  | 95.2 NM_018027.2     |
| 104.8  | 88.7   | 91.8   | 103.4 NM_001031729.1 |
| 94.6   | 101.6  | 92.9   | 87.8 NM_152330.2     |
| 97.3   | 84.3   | 97.4   | 106.6 NM_152330.2    |
| 89     | 91.2   | 83.8   | 91.6 NM_152330.2     |
| 99.9   | 93.5   | 85.9   | 95.8 NM_014907.1     |
| 102.7  | 91.6   | 90.3   | 93.4 NM_152428.3     |
| 90.6   | 96.4   | 84.8   | 92.9 NM_001018071.2  |
| 94.5   | 91.5   | 84.9   | 90.1 NM_001018071.2  |
| 98.5   | 91.7   | 90.1   | 83.6 NM_001017929.1  |
| 80.3   | 85.2   | 81.4   | 86.5 NM_001018071.2  |
| 90.3   | 85.8   | 86.8   | 90.7 XM_937471.1     |
| 113.9  | 92.8   | 95.9   | 98.7 NM_014728.1     |
| 105.1  | 87.3   | 97.1   | 105.8 NM_001013660.1 |
| 98.7   | 91.1   | 87.4   | 100.3 NM_006654.2    |
| 92.9   | 96.2   | 85.8   | 93.4 NM_006654.2     |
| 84.8   | 84.4   | 78.5   | 80.1 NM_006654.2     |
| 219.2  | 250.5  | 259.3  | 135.3 NM_006653.3    |
| 112.2  | 128.8  | 117.1  | 133.9 NM_023037.1    |
| 102.8  | 101.4  | 93.5   | 98.2 NM_015030.1     |
| 107.6  | 87.6   | 87.7   | 93.8 NM_001463.2     |
| 4213.8 | 2855.6 | 2642.5 | 1592 NM_003088.2     |
| 89     | 87.6   | 74.8   | 79 NM_001077182.1    |
| 97.9   | 84.1   | 86.2   | 91.1 NM_012418.1     |
| 99.1   | 81.5   | 96.1   | 89.2 NM_020369.1     |
| 107.2  | 89.2   | 94.5   | 94.2 NM_024333.1     |
| 82.5   | 89.1   | 85     | 85.4 NM_024333.1     |
| 114.9  | 106.1  | 113.3  | 105.4 NM_024333.1    |
| 83.6   | 90.8   | 90.8   | 93.8 NM_207647.1     |
| 107.7  | 115.5  | 106.9  | 97.2 NM_031919.1     |
| 100.7  | 93.5   | 76.9   | 91.4 NM_001007122.1  |
| 97.8   | 88.2   | 87.4   | 84.1 NM_000510.2     |
| 87.2   | 96.9   | 91.6   | 80 NM_000510.2       |
| 88.1   | 88.3   | 82.5   | 83.4 NM_000145.2     |
| 108.1  | 97.3   | 102.8  | 107.9 NM_000145.2    |
| 99.2   | 91     | 94.4   | 97.3 NM_152597.3     |
| 96.9   | 91.5   | 88.4   | 90.5 NM_173651.1     |
| 81.2   | 89.7   | 80.9   | 82.4 NM_006350.2     |
| 191.2  | 183.7  | 152.9  | 149.7 NM_013409.1    |
| 109.7  | 109.4  | 94.6   | 105.6 NM_007085.3    |
| 104.4  | 119.6  | 108.4  | 109.5 NM_005860.1    |
| 85.8   | 76.8   | 78.2   | 89.3 NM_015082.1     |
| 77.3   | 79.7   | 78.5   | 76.8 NM_020116.2     |
| 86.8   | 84.1   | 81.9   | 78.6 NM_206965.1     |
| 84.2   | 88.3   | 81.4   | 80.8 NM_006657.2     |
| 163.3  | 276.6  | 202.5  | 193.5 NR_002204.1    |
| 1145.2 | 1099.5 | 968.5  | 1130.6 NR_002205.1   |
| 84.4   | 74.1   | 75.7   | 81.2 NM_031894.1     |

|         |         |         |                      |
|---------|---------|---------|----------------------|
| 98.5    | 86.9    | 92.1    | 93.5 NR_002200.1     |
| 341.9   | 353     | 236.8   | 373.5 NR_002201.1    |
| 12727.8 | 12921.4 | 11729.4 | 9900 NR_002202.2     |
| 92.2    | 90.2    | 89.9    | 86.2 NR_002203.1     |
| 57084.3 | 55268.8 | 50855.9 | 46688.7 NM_000146.3  |
| 85.8    | 81      | 80.5    | 89.5 NM_177478.1     |
| 160.9   | 132.5   | 134.9   | 124.6 NM_001080432.1 |
| 104.9   | 90.7    | 83.6    | 88.5 NM_022476.2     |
| 425.5   | 381.8   | 348.4   | 286.4 NM_012280.2    |
| 96.5    | 86.9    | 92.2    | 93.2 NM_177439.1     |
| 166.6   | 151.4   | 137     | 125.5 NM_013393.1    |
| 125.6   | 127.4   | 101.3   | 93.9 NM_017647.2     |
| 268.5   | 213.9   | 179.3   | 163 NM_003902.3      |
| 2027.9  | 1772.2  | 1366.6  | 1226.4 NM_003934.1   |
| 273.3   | 340.8   | 298.3   | 294.7 NM_000147.2    |
| 121.4   | 116.1   | 115.5   | 101.4 NM_032020.3    |
| 184.8   | 209.8   | 208.2   | 148.3 NM_145059.2    |
| 79.1    | 80.3    | 84.4    | 87.4 NM_173794.2     |
| 95.9    | 93.2    | 85.6    | 93 NM_023934.3       |
| 137.1   | 136.2   | 124.5   | 129.4 NM_002569.2    |
| 247.1   | 155.3   | 136.2   | 123.9 NM_004960.2    |
| 83.7    | 82.3    | 82.9    | 84 NM_054016.1       |
| 413.5   | 266.1   | 269.4   | 215.8 NM_054016.1    |
| 84.3    | 93.7    | 77.6    | 83.4 NM_000148.2     |
| 118.8   | 98.6    | 84.3    | 101.9 NM_032664.3    |
| 91.6    | 92.7    | 76.8    | 91.1 NM_173540.1     |
| 75.7    | 69.6    | 75.7    | 68.9 NM_000511.3     |
| 89.7    | 79.4    | 86.7    | 90.9 NM_000149.1     |
| 2485.8  | 1662.2  | 1793.8  | 1166.9 NM_002033.2   |
| 95.4    | 88.5    | 88.6    | 94.8 NM_002034.2     |
| 126.9   | 119.1   | 133.6   | 140.6 NM_000150.2    |
| 103.7   | 98.1    | 100.5   | 93 NM_000150.1       |
| 131     | 134.2   | 123.7   | 116.9 NM_004479.2    |
| 175.3   | 124.4   | 100.7   | 125 NM_178154.1      |
| 106.1   | 91.6    | 97.2    | 85.9 NM_004480.3     |
| 79.1    | 82      | 79.2    | 80.1 NM_006581.2     |
| 336.6   | 278.7   | 296.7   | 343.9 NM_002035.1    |
| 245.3   | 193     | 190.7   | 170.4 NM_012192.2    |
| 139.6   | 125     | 112.1   | 108.1 NM_181425.1    |
| 93.3    | 93.5    | 87      | 93.6 NM_000144.3     |
| 1056.5  | 812.4   | 712.5   | 698.3 NM_001013438.1 |
| 90.4    | 91.6    | 81.6    | 84.4 NM_001013439.1  |
| 888.3   | 936.2   | 739.8   | 665 NM_005087.2      |
| 138     | 190.2   | 153.2   | 155 NM_004860.2      |
| 104.1   | 96.7    | 90      | 96.6 NM_005031.3     |
| 88.4    | 95.3    | 80.9    | 91.7 NM_005031.3     |
| 96.8    | 91.7    | 87.3    | 83.9 NM_021902.2     |
| 108     | 106.6   | 102.4   | 101 NM_001680.3      |
| 82.1    | 77.6    | 77      | 80.4 NM_021603.2     |
| 89.2    | 99.5    | 84.8    | 86 NM_001680.3       |

|        |        |        |                      |
|--------|--------|--------|----------------------|
| 92.5   | 86.7   | 88.5   | 85.4 NM_001680.3     |
| 84.7   | 79.3   | 84.9   | 89.2 NM_005971.2     |
| 93.8   | 86.4   | 85     | 90.3 NM_021910.1     |
| 100.1  | 91.8   | 86.7   | 91.8 NM_005971.2     |
| 81     | 85.2   | 87.4   | 82.7 NM_173160.2     |
| 1051.2 | 541.6  | 544.7  | 326.3 NM_014164.4    |
| 122.4  | 117    | 107.8  | 109.9 NM_144779.1    |
| 2646.7 | 1585.1 | 1608.2 | 833.4 NM_014164.4    |
| 92.3   | 91.9   | 84.2   | 82 NM_022003.1       |
| 85     | 86.3   | 93.8   | 87.4 NM_022006.1     |
| 87.5   | 99.5   | 95.6   | 93.3 NM_001465.3     |
| 226.2  | 739.7  | 593.4  | 612.5 NM_199335.2    |
| 197.1  | 227    | 230    | 175.3 NM_024513.1    |
| 185.1  | 198.5  | 166.8  | 189 NM_002037.3      |
| 130.9  | 139.3  | 132.3  | 122.8 NM_153048.1    |
| 153.1  | 159.2  | 135.4  | 129.8 NM_153047.1    |
| 120.4  | 172.1  | 144.7  | 150.7 NM_002037.3    |
| 122.9  | 119.7  | 121.2  | 118.6 NM_001011537.1 |
| 228    | 204    | 151.5  | 186.5 NM_032288.5    |
| 113.5  | 109    | 99.5   | 96 NM_032288.5       |
| 120.9  | 135.8  | 117.3  | 115 NM_003505.1      |
| 103.7  | 91.8   | 89.4   | 103.6 NM_007197.2    |
| 291.3  | 349.2  | 325.2  | 230.1 NM_001466.2    |
| 138.9  | 119.3  | 108.3  | 105.8 NM_017412.2    |
| 112.8  | 115.5  | 104.2  | 104 NM_012193.2      |
| 106.8  | 94.3   | 78.8   | 84.2 NM_003468.2     |
| 138.1  | 106.6  | 107.9  | 114.3 NM_003506.2    |
| 206.9  | 201.7  | 220    | 167.7 NM_003507.1    |
| 92.1   | 85.2   | 87.7   | 83.1 NM_031866.1     |
| 471.3  | 276.4  | 261.5  | 157.1 NM_003508.2    |
| 110.6  | 102.7  | 108.5  | 95 NM_016263.2       |
| 83.8   | 98.6   | 89.4   | 95.7 NM_015714.2     |
| 2546   | 1447.8 | 1308.4 | 1336.1 NM_003910.2   |
| 1486.3 | 1023.1 | 839.4  | 665.3 NM_002038.2    |
| 376.6  | 283.2  | 227.1  | 300.9 NM_005754.2    |
| 239.3  | 203.7  | 178.5  | 166.8 NM_198395.1    |
| 92.4   | 93.6   | 88.7   | 83.8 NM_012297.3     |
| 1667.5 | 1226.6 | 859    | 962.5 NM_203504.1    |
| 90     | 86.5   | 86.5   | 84.5 NM_000151.2     |
| 95.8   | 91.7   | 90.6   | 96.4 NM_021176.1     |
| 87.9   | 85.7   | 85.9   | 97.9 NM_021176.1     |
| 81.5   | 83.9   | 77.6   | 81.3 NM_021176.1     |
| 384.1  | 272.7  | 272    | 215 NM_138387.2      |
| 384.9  | 450.6  | 379.2  | 332.8 NM_000402.2    |
| 1389.1 | 1423.3 | 1028.1 | 693.6 NM_000402.3    |
| 86.4   | 86.7   | 84.6   | 84.8 NM_000402.3     |
| 316.9  | 323.8  | 269.5  | 338.2 NM_001079804.1 |
| 180.5  | 196.6  | 173.9  | 175.8 NM_000152.2    |
| 85.1   | 81.1   | 73.3   | 81.6 NM_207123.1     |
| 89.1   | 82.3   | 90.2   | 85.2 NM_002039.2     |

|       |       |       |                   |
|-------|-------|-------|-------------------|
| 82.8  | 92    | 88.1  | 87.1 NM_207123.1  |
| 185.2 | 373.8 | 368.1 | 274.9 NM_080491.1 |
| 96.9  | 118.6 | 107.5 | 129.4 NM_080491.1 |
| 92.5  | 84.6  | 79.3  | 87.7 NM_012296.2  |
| 122.7 | 133.8 | 121.4 | 128.8 NM_080612.1 |
| 120.1 | 109.7 | 115.3 | 89.4 NM_007278.1  |
| 222.8 | 210   | 182.8 | 195.7 NM_031412.2 |
| 123.6 | 95.8  | 103.9 | 113.4 NM_007285.6 |
| 108.4 | 121.9 | 119   | 94.5 NM_021905.1  |
| 85.1  | 94.9  | 80.7  | 85.2 NM_021903.1  |
| 91.6  | 96.2  | 95.2  | 106.2 NM_021905.1 |
| 229.6 | 653.3 | 582.2 | 651.3 NM_005458.5 |
| 74.8  | 81.3  | 80.5  | 84.2 NM_002040.2  |
| 96.8  | 84.8  | 78.8  | 83.6 NM_002041.3  |
| 379.5 | 205.5 | 182.5 | 182.6 NM_181427.2 |
| 85.9  | 88    | 76.9  | 78.4 NM_000806.3  |
| 94.3  | 90.9  | 90.2  | 92.6 NM_000807.1  |
| 94.3  | 91    | 81.2  | 89.3 NM_000808.2  |
| 82.7  | 85    | 85.5  | 88.3 NM_000809.2  |
| 82.5  | 83.8  | 78.6  | 92.3 NM_000810.2  |
| 84.9  | 87.5  | 82.6  | 93.2 NM_000811.1  |
| 81.9  | 87.9  | 83.1  | 90.7 NM_000812.2  |
| 83    | 82.6  | 83.1  | 83.7 NM_021911.1  |
| 85.7  | 93.7  | 92.4  | 89.5 NM_021911.1  |
| 92.2  | 88.7  | 82.9  | 92.4 XM_937254.1  |
| 91.5  | 97    | 85.8  | 89.7 XM_937254.1  |
| 107.2 | 100   | 90.4  | 89.1 NM_000814.3  |
| 87.8  | 87.3  | 88    | 87.1 NM_000814.3  |
| 91.5  | 95.6  | 78.6  | 86.6 NM_000815.2  |
| 105.5 | 99.9  | 99    | 88.7 NM_004961.3  |
| 85.4  | 84.8  | 77.9  | 93.1 NM_021990.2  |
| 103.7 | 102.3 | 106   | 100.3 NM_021990.2 |
| 98    | 82.7  | 83.7  | 96.2 NM_173536.3  |
| 97.8  | 109.1 | 105.3 | 104.3 NM_198904.1 |
| 162.9 | 139.6 | 151.7 | 137.3 NM_000816.2 |
| 91.4  | 84.9  | 92.3  | 84.1 NM_033223.1  |
| 83    | 77.2  | 72.2  | 80.9 NM_018558.1  |
| 86.8  | 78.7  | 87.9  | 81.3 NM_002042.2  |
| 83.5  | 89.2  | 79.7  | 82.7 NM_002043.1  |
| 69.2  | 73.6  | 73.8  | 82.3 NM_013445.3  |
| 90.7  | 89    | 86.2  | 96.2 NM_013445.3  |
| 75.1  | 83.8  | 85    | 83.4 NM_000817.2  |
| 89.6  | 96    | 96.6  | 84.6 NM_000818.1  |
| 410.9 | 401.8 | 385.1 | 312 NM_001924.2   |
| 118.6 | 112.7 | 102.5 | 97.8 NM_015675.1  |
| 83.3  | 105.2 | 103.7 | 90.8 NM_006705.2  |
| 94.9  | 81.5  | 89.2  | 95.6 NM_052850.2  |
| 97.3  | 96.6  | 93    | 93.9 NM_207359.1  |
| 92.2  | 86.6  | 87.9  | 92.4 XM_937755.1  |
| 99.6  | 91.3  | 86.5  | 88.5 NM_001468.3  |

|        |        |        |                      |
|--------|--------|--------|----------------------|
| 104.8  | 105.6  | 106.5  | 99.6 NM_001468.3     |
| 110    | 100    | 99.6   | 105 NM_001472.2      |
| 93.7   | 92.3   | 92.2   | 86 NM_001474.1       |
| 93.2   | 80.9   | 80.2   | 79.4 NM_001475.1     |
| 93.6   | 87.9   | 82.3   | 91.8 NM_001476.1     |
| 88.9   | 95     | 94.3   | 96.7 NM_021123.1     |
| 86.3   | 77.1   | 85.6   | 86.9 NM_001477.1     |
| 79.7   | 79.7   | 81.7   | 88.9 NM_012196.1     |
| 2045.2 | 1891.9 | 2158.5 | 754.8 NM_005255.1    |
| 988.2  | 468.3  | 366.5  | 357.9 NM_015973.2    |
| 90.1   | 91.8   | 83.6   | 90.9 NM_004861.1     |
| 120.6  | 107.2  | 103.4  | 111.2 NM_022134.1    |
| 96.6   | 97.3   | 93.2   | 95.9 NM_033036.1     |
| 84.6   | 80.1   | 82.1   | 87.7 NM_024637.3     |
| 151.8  | 128.2  | 111.7  | 103.8 NM_001037525.1 |
| 645.4  | 643    | 540.9  | 475.8 NM_000153.1    |
| 91.4   | 82.7   | 83     | 84.6 NM_001008216.1  |
| 169.9  | 173.2  | 184.5  | 136.5 NM_000403.3    |
| 106.4  | 92.3   | 95.3   | 103.5 NM_000403.3    |
| 126.1  | 97.4   | 80.9   | 87.8 NM_001478.2     |
| 103.5  | 91.8   | 90.9   | 103.6 NM_194327.1    |
| 3013.4 | 2509.6 | 2317.7 | 1319.6 NM_000154.1   |
| 321.4  | 275.9  | 232.1  | 228.1 NM_002044.2    |
| 174.4  | 239.9  | 277.1  | 249.5 NM_001001556.1 |
| 115.2  | 106.1  | 104    | 106.1 NM_001001556.1 |
| 328    | 390    | 366.2  | 328.9 NM_138801.1    |
| 74.8   | 74.5   | 80.8   | 69.5 NM_015892.2     |
| 92.3   | 78.2   | 78.2   | 95 NM_018590.3       |
| 99     | 104.2  | 87.7   | 102.7 NM_000512.3    |
| 97.7   | 83     | 93.4   | 93.6 NM_020474.2     |
| 95.8   | 99     | 81.8   | 93.4 NM_198321.2     |
| 125.3  | 113.2  | 113.2  | 106.3 NM_198321.2    |
| 106    | 116.5  | 109.8  | 101.3 NM_017540.3    |
| 211.7  | 292.3  | 251.6  | 256.4 NM_022087.1    |
| 285.3  | 357.7  | 301.5  | 265.4 NM_024642.2    |
| 103.5  | 88.8   | 90.1   | 96 NM_052917.1       |
| 105.3  | 92.3   | 90.9   | 86.7 NM_024572.2     |
| 107.8  | 98.1   | 91.9   | 99.1 NM_001034845.1  |
| 96.3   | 106.6  | 92.7   | 98.5 NM_004481.2     |
| 148.3  | 182.2  | 202.6  | 182.5 NM_004482.2    |
| 120    | 129.8  | 113.5  | 96.8 NM_003774.3     |
| 88.1   | 79.7   | 76.6   | 82.9 NM_014568.1     |
| 106.9  | 123.9  | 114.2  | 112.3 NM_007210.2    |
| 91.3   | 85.5   | 82.9   | 85.4 NM_017423.1     |
| 89.5   | 87.2   | 90.4   | 78.2 NM_017417.1     |
| 81.4   | 86.2   | 82.2   | 85.7 NM_021808.2     |
| 74.3   | 75     | 72.1   | 70.1 NM_021808.2     |
| 105.5  | 93.5   | 89     | 91.1 NM_020692.1     |
| 81.6   | 83.4   | 92.8   | 80.3 NM_054110.2     |
| 92     | 83.6   | 78.4   | 91.4 NM_198516.1     |

|        |        |        |                    |
|--------|--------|--------|--------------------|
| 84.5   | 76.9   | 83.4   | 78 NM_145292.2     |
| 84.5   | 92.1   | 76.3   | 86.9 NM_033106.1   |
| 98.3   | 93.5   | 82.9   | 91.4 NM_001480.2   |
| 436.4  | 199.2  | 212.6  | 111.2 NM_003857.2  |
| 99.1   | 89.1   | 87.2   | 86.1 NM_003614.1   |
| 580.3  | 435.5  | 470.5  | 263 NM_000155.2    |
| 230    | 185.9  | 204.1  | 171.5 NM_000155.2  |
| 1471.5 | 1003.6 | 1106.6 | 566 NM_000156.4    |
| 82.4   | 90     | 75.4   | 92.3 NM_138924.1   |
| 891.6  | 563.2  | 537.6  | 483.2 NM_000156.4  |
| 96.6   | 96.7   | 85     | 94.4 NM_022041.2   |
| 370.3  | 361.9  | 319.5  | 202.8 NM_198334.1  |
| 102.2  | 93.8   | 83.7   | 84.7 NM_198141.2   |
| 88.6   | 84.2   | 88.1   | 90.1 NM_002045.2   |
| 3062.4 | 2090.5 | 2099.7 | 1359.3 NM_002046.2 |
| 772.2  | 556    | 432.2  | 404.2 NM_002046.2  |
| 8093.6 | 5118.2 | 4547.2 | 3140.2 NM_002046.2 |
| 89.9   | 90.2   | 85     | 85.8 NM_014364.4   |
| 773.6  | 812.9  | 773.6  | 566.4 NM_015635.2  |
| 199.3  | 176.6  | 193.2  | 168 NM_194301.2    |
| 89.4   | 102.8  | 104    | 92.4 NM_032293.3   |
| 146.7  | 160.1  | 175.2  | 140.7 NM_015085.3  |
| 3627.2 | 2329.8 | 1552.7 | 1711.6 NM_002047.1 |
| 1505   | 1342   | 914.7  | 888.3 NM_000819.3  |
| 401.6  | 274.7  | 224.4  | 201.1 NM_175085.1  |
| 96.4   | 98.4   | 89.2   | 98.2 NM_175085.1   |
| 106.4  | 85.1   | 97.8   | 87.8 NM_002048.1   |
| 87.9   | 89.2   | 78.2   | 87 NM_177553.1     |
| 83.9   | 82.1   | 73.6   | 88.9 NM_177553.1   |
| 99     | 96.7   | 94.6   | 101.1 NM_006478.3  |
| 93.8   | 116.8  | 92.9   | 89.9 NM_152236.1   |
| 94.2   | 92.3   | 93.8   | 81.1 NM_152237.1   |
| 86.7   | 88.9   | 86.8   | 95 NM_139285.2     |
| 176.2  | 192.1  | 179.3  | 146.5 NM_174942.1  |
| 820.1  | 1286.4 | 1081.2 | 1035.9 NM_000820.1 |
| 833.9  | 1355.7 | 1159.4 | 1061.9 XM_942084.1 |
| 138.3  | 151    | 151.7  | 122.2 NM_000820.1  |
| 95.9   | 87.9   | 92.2   | 89.2 NM_201432.1   |
| 152.1  | 193    | 215.9  | 173.7 NM_201432.1  |
| 98.5   | 96.1   | 89.9   | 96.7 NM_201433.1   |
| 113.6  | 105.6  | 100.7  | 105.6 NM_003644.2  |
| 230.4  | 186.5  | 173.2  | 171.1 NM_001481.1  |
| 126.3  | 100.1  | 100.9  | 103.6 NM_000805.3  |
| 94.6   | 88.5   | 91.4   | 98.1 NM_002049.2   |
| 191.4  | 126.8  | 124.5  | 112 NM_032638.3    |
| 102.1  | 86.2   | 88.6   | 86.3 NM_002051.2   |
| 90.7   | 85.5   | 84.1   | 82.4 NM_002052.2   |
| 90.6   | 83.6   | 85.5   | 100.6 NM_080473.3  |
| 86.9   | 84.2   | 88     | 82.2 NM_005257.3   |
| 157.6  | 168.5  | 182.1  | 177.6 NM_021167.2  |

|        |        |        |       |                |
|--------|--------|--------|-------|----------------|
| 1375.2 | 1232.3 | 1100.2 | 714.3 | NM_017660.2    |
| 248    | 251.6  | 208.8  | 261.8 | NM_020699.1    |
| 231.8  | 240.2  | 214.5  | 167.5 | NM_001482.1    |
| 148.4  | 218.9  | 236.6  | 185.4 | NM_178831.4    |
| 836.2  | 745.4  | 728    | 562.9 | NM_001005742.1 |
| 182.9  | 190.1  | 168.2  | 137.5 | NM_020944.2    |
| 98.3   | 94.9   | 91.8   | 98.3  | NM_020973.2    |
| 660.8  | 459.1  | 472.2  | 529.1 | NM_001483.1    |
| 530.9  | 661.5  | 532.4  | 549.6 | NM_000158.1    |
| 160.9  | 213    | 166.6  | 186.3 | NM_004193.1    |
| 148.9  | 107.5  | 104.9  | 90.8  | NM_021996.3    |
| 343.1  | 255.1  | 240.2  | 222.7 | NM_022372.2    |
| 85.9   | 97.3   | 88.4   | 95.2  | NM_002053.1    |
| 174.6  | 227.7  | 222.5  | 191.5 | NM_004120.3    |
| 124.5  | 115.8  | 102.6  | 110.8 | NM_018284.1    |
| 97.5   | 105.3  | 93.1   | 100.6 | NM_052941.2    |
| 102.1  | 118    | 110.6  | 106.7 | NM_052942.2    |
| 90.5   | 84.8   | 73.6   | 79.4  | NM_198460.1    |
| 87.4   | 81.1   | 81.1   | 82.1  | NM_207398.1    |
| 106.5  | 98.8   | 94     | 93.4  | NM_001485.2    |
| 81.9   | 76.5   | 80.5   | 78.3  | NM_000583.2    |
| 440.2  | 440.5  | 442.9  | 399   | NM_012198.2    |
| 182    | 206.7  | 184.9  | 216.1 | NM_014291.2    |
| 281.8  | 280.5  | 287.8  | 257.5 | NM_024523.5    |
| 92.8   | 88.8   | 87.3   | 95.7  | NM_014635.3    |
| 87.8   | 80.4   | 80.8   | 90.8  | NM_181453.2    |
| 97.8   | 96.7   | 82.7   | 103.5 | NM_014635.3    |
| 128.4  | 137.8  | 126.4  | 142.6 | NM_013976.2    |
| 239.5  | 210.5  | 180    | 151.2 | NM_000159.2    |
| 88     | 95     | 80.8   | 80.2  | NM_001008756.1 |
| 92.6   | 78.2   | 82.9   | 82    | NM_001008756.1 |
| 109.2  | 94.4   | 90.7   | 93.2  | NM_002054.2    |
| 98.6   | 105.5  | 89     | 90.8  | NM_000160.1    |
| 96.9   | 85.1   | 93     | 86.2  | NM_001024024.1 |
| 94     | 87.4   | 85.5   | 86.6  | NM_001024070.1 |
| 86.8   | 78.9   | 75.1   | 88.3  | NM_000161.2    |
| 385.6  | 281.1  | 302.8  | 235.3 | NM_005258.2    |
| 79.7   | 82.4   | 78.3   | 87.6  | NM_000162.2    |
| 88.3   | 89.3   | 89.5   | 85.4  | NM_033508.1    |
| 83.3   | 90.4   | 81.6   | 83.4  | NM_033508.1    |
| 95.3   | 100.1  | 84     | 84.2  | NM_001486.2    |
| 103.4  | 92.3   | 83.7   | 92.8  | NM_001498.2    |
| 657.2  | 623.9  | 528.6  | 499.2 | NM_002061.2    |
| 103.4  | 95.3   | 110.5  | 95.5  | NM_003643.2    |
| 99.1   | 89.4   | 88.3   | 81.9  | NM_004752.1    |
| 255.2  | 309.8  | 255.8  | 245.4 | NM_006836.1    |
| 768.5  | 911.6  | 1008.9 | 506.4 | NM_021078.1    |
| 76.8   | 92.7   | 83.1   | 76.1  | NM_001490.3    |
| 90.4   | 87.9   | 95.4   | 92.7  | NM_145649.2    |
| 93.1   | 90.8   | 85.2   | 88.8  | NM_145655.2    |

|        |       |       |                      |
|--------|-------|-------|----------------------|
| 103.5  | 129.9 | 124.5 | 115.6 NM_001491.2    |
| 92.5   | 92.1  | 91.7  | 101.3 NM_001491.2    |
| 88.9   | 83.9  | 82.8  | 89.3 NM_004751.1     |
| 94.2   | 93.5  | 84.6  | 97 NM_001018100.1    |
| 100    | 91.9  | 99.1  | 98.9 NM_001018090.1  |
| 92.7   | 83.9  | 94.4  | 91.8 NM_001018096.1  |
| 101.2  | 109.7 | 87.4  | 103.6 NM_001018097.1 |
| 186    | 193.1 | 153.5 | 155.9 NM_006302.1    |
| 250.2  | 201.9 | 195   | 159.7 NM_004483.3    |
| 82.7   | 88.7  | 72.4  | 80.7 NM_004293.2     |
| 92.8   | 85.8  | 94.7  | 84.4 NM_018972.1     |
| 114.1  | 100.2 | 87.2  | 99.7 NM_018972.1     |
| 88.8   | 80.8  | 86.6  | 86.5 NM_024034.3     |
| 207.8  | 157.8 | 143.1 | 128.6 NM_017686.1    |
| 98.9   | 102.9 | 90.2  | 91.7 NM_182536.2     |
| 88.6   | 85.5  | 90    | 93.6 NM_001492.3     |
| 86.8   | 89    | 82.1  | 84.6 NM_004962.2     |
| 84.8   | 72.1  | 80.3  | 80.7 NM_005811.2     |
| 105.7  | 114.6 | 112   | 101.1 NM_004864.1    |
| 83.6   | 88.2  | 75    | 93 NM_016204.1       |
| 110.9  | 105.2 | 99.2  | 102.5 NM_020634.1    |
| 97.3   | 84.9  | 92.1  | 94.5 NM_000557.2     |
| 78.8   | 78.6  | 74.8  | 81 NM_001001557.1    |
| 101    | 102.7 | 96.6  | 95.1 NM_182828.2     |
| 96.1   | 98.4  | 85    | 102 NM_005259.1      |
| 99.6   | 90.9  | 94.8  | 87.6 NM_005260.2     |
| 249    | 233.1 | 171.6 | 215.1 NM_001493.1    |
| 1165.9 | 801.1 | 620.1 | 626.2 NM_001494.2    |
| 87.2   | 81.2  | 90.1  | 90.5 NM_199231.1     |
| 77.7   | 84.1  | 83.4  | 83.3 NM_199234.1     |
| 89.1   | 79.2  | 88.4  | 87 NM_000514.2       |
| 147.8  | 167   | 204.2 | 168.7 NM_182569.1    |
| 93.4   | 94.4  | 93.1  | 87.3 NM_017711.2     |
| 112.6  | 137.9 | 140.8 | 126.4 NM_001031718.1 |
| 92.6   | 86.6  | 77    | 85.2 NM_024307.1     |
| 94.5   | 91.2  | 93.8  | 98.9 NM_182833.1     |
| 157.5  | 190.9 | 188   | 184 NM_030792.4      |
| 91     | 91    | 88.6  | 92.5 NM_133483.1     |
| 102.1  | 92.4  | 88.3  | 83.4 NM_182947.1     |
| 105.5  | 107.7 | 98.8  | 84.8 NM_182947.1     |
| 91.2   | 80.1  | 81.9  | 73.1 NM_181702.1     |
| 96     | 84.1  | 95.5  | 94.8 NM_005261.2     |
| 818.5  | 570.4 | 558.6 | 290.8 NM_015721.1    |
| 217.2  | 172   | 143.3 | 144.2 NM_015465.1    |
| 890.5  | 594.8 | 451.7 | 356.2 NM_024775.9    |
| 93.5   | 86.2  | 86.3  | 80.3 NM_024707.2     |
| 95.5   | 90.4  | 79.6  | 94.4 NM_001007269.1  |
| 111.6  | 123.4 | 105.9 | 100 NM_001042480.1   |
| 121.6  | 117.1 | 108.6 | 109.7 NM_003943.1    |
| 93     | 89.8  | 82.6  | 92.1 NM_002055.2     |



|         |         |         |                        |
|---------|---------|---------|------------------------|
| 82.3    | 101.3   | 67      | 71.5 NM_005262.2       |
| 1657.9  | 1116.1  | 869     | 772.4 NM_005263.2      |
| 97.1    | 92.7    | 97.2    | 97.9 NM_004188.2       |
| 769.1   | 584.5   | 586.5   | 506.8 NM_024996.5      |
| 89.7    | 95.9    | 90.9    | 100.3 NM_170681.1      |
| 149.9   | 162.8   | 163.9   | 132.9 NM_018988.1      |
| 302.1   | 292.2   | 275.4   | 270.4 NM_002056.1      |
| 101.6   | 92.7    | 103.1   | 109.4 NM_005110.1      |
| 84.9    | 93.8    | 90.3    | 88.3 NM_005264.3       |
| 101.6   | 92.2    | 85.7    | 91.2 NM_005264.3       |
| 95.1    | 95      | 95.8    | 92.9 NM_005264.2       |
| 145.3   | 200.9   | 175.7   | 145.3 NM_001495.4      |
| 107.9   | 106.1   | 106.5   | 115.2 NM_001496.3      |
| 86.8    | 89.4    | 85.6    | 95 NM_022139.2         |
| 116.1   | 126.2   | 99.7    | 108.7 NM_145762.1      |
| 96      | 107.4   | 89.7    | 96.3 NM_013365.3       |
| 17086.1 | 19473.2 | 20705.6 | 19235.4 NM_001001561.1 |
| 105     | 103.5   | 125.3   | 111.6 NM_001001560.1   |
| 102.3   | 116.1   | 115.9   | 120 NM_001001561.1     |
| 446.4   | 581.1   | 631.9   | 402.8 NM_015044.3      |
| 206.6   | 166.6   | 182.5   | 149.9 NM_014001.2      |
| 204.4   | 202     | 193.6   | 166.6 NM_138619.1      |
| 75.6    | 96.7    | 77.2    | 80.4 NM_138619.1       |
| 148.1   | 158.6   | 173.4   | 141.3 NM_000821.3      |
| 395.1   | 158.1   | 215.2   | 174 NM_003878.1        |
| 88.3    | 82.9    | 75.7    | 85.9 NM_152657.3       |
| 116.4   | 137.4   | 127.3   | 114.1 NM_001037278.1   |
| 1216.3  | 944.6   | 782     | 929.8 NM_004837.2      |
| 99.7    | 107.4   | 104.3   | 95.8 NM_013430.2       |
| 183     | 235.1   | 195.7   | 200.5 NM_005265.2      |
| 106.4   | 109.3   | 98.5    | 93.6 NR_003267.1       |
| 101.2   | 96      | 95.6    | 97.1 NM_153338.1       |
| 74.7    | 85.1    | 85.1    | 79.8 NR_003191.1       |
| 84.4    | 109.6   | 99      | 105.9 NM_178025.1      |
| 136.3   | 155.7   | 130     | 130.9 NM_199127.1      |
| 96      | 88.9    | 85.9    | 87.7 NM_004121.1       |
| 100.5   | 95.7    | 101.4   | 101.7 NM_178311.1      |
| 99.3    | 108.2   | 105.3   | 89.8 NM_178312.1       |
| 102     | 95.7    | 95.2    | 87.7 NM_080920.2       |
| 93      | 88.1    | 87.7    | 85.7 NM_022562.2       |
| 85.8    | 84.3    | 80.9    | 79.8 NM_022560.2       |
| 88.6    | 79.9    | 79.7    | 82.7 NM_022557.2       |
| 98.5    | 86      | 80.8    | 86.5 NM_022558.2       |
| 95.1    | 91.4    | 85.9    | 85 NM_022556.2         |
| 6531.4  | 4264.8  | 3898.7  | 2954.8 NM_014394.1     |
| 80.1    | 77.9    | 77.5    | 78.6 NM_000163.2       |
| 83.9    | 89.8    | 78      | 82.5 NM_021081.3       |
| 87.9    | 81.2    | 72.7    | 75.7 NM_001009824.1    |
| 95.4    | 77      | 69.9    | 87.1 NM_001009824.1    |
| 83.5    | 77      | 77.5    | 71.6 NM_000823.2       |

|        |        |        |                      |
|--------|--------|--------|----------------------|
| 128.3  | 147    | 187.2  | 157.1 NM_016362.2    |
| 90.9   | 80.4   | 85.8   | 89.8 NM_004122.1     |
| 89.4   | 89     | 85.2   | 88.2 NM_198407.1     |
| 85.4   | 91.8   | 81.8   | 89.5 NM_005142.2     |
| 91.4   | 81.5   | 85.8   | 84 NM_130759.2       |
| 179.3  | 155.7  | 154.2  | 155.4 NM_015660.2    |
| 85.1   | 100.5  | 106.2  | 95.5 NM_018326.2     |
| 165    | 134.3  | 160.2  | 135.6 NM_018384.3    |
| 83.3   | 78.2   | 72.4   | 85.5 NM_024711.3     |
| 336.7  | 277.1  | 213.4  | 219.1 NM_001007224.1 |
| 86.7   | 83.5   | 80.4   | 92.2 NM_153236.3     |
| 110.4  | 151.1  | 131.3  | 126 NM_175571.2      |
| 81.7   | 86.1   | 84.7   | 78.2 NM_153257.2     |
| 87.8   | 78.9   | 93     | 82.6 NM_004123.2     |
| 101    | 88.3   | 74.9   | 100.5 NM_005716.2    |
| 565.5  | 421.3  | 320.1  | 320.9 NM_202468.1    |
| 89.8   | 90.1   | 78.6   | 86.4 NM_017655.4     |
| 83.1   | 82.1   | 77.1   | 80.2 NM_133261.1     |
| 80.8   | 85.6   | 96.5   | 90.1 NM_000164.2     |
| 129.6  | 145.5  | 126.8  | 145 NM_014030.2      |
| 289.4  | 303.8  | 265.9  | 223.6 NM_139201.1    |
| 157.4  | 152.6  | 157    | 136 NM_014776.2      |
| 183    | 148.9  | 140    | 119.3 NM_001014999.1 |
| 159.5  | 106.8  | 105.2  | 110.3 NM_001014999.1 |
| 81.6   | 73.2   | 72.1   | 74.5 NM_178044.1     |
| 85.6   | 80.9   | 83.9   | 83.2 NM_000165.2     |
| 92.3   | 81.4   | 85     | 94 NM_030772.3       |
| 112.2  | 112.2  | 122.8  | 91.3 NM_020435.2     |
| 92.1   | 93.1   | 87.3   | 91.5 NM_021954.2     |
| 93.2   | 88     | 87.6   | 83.7 NM_002060.2     |
| 100.7  | 98.5   | 93.2   | 91.1 NM_005266.4     |
| 98.3   | 102.6  | 99.2   | 87.5 NM_181703.1     |
| 90.5   | 82.7   | 83     | 89.1 NM_005497.2     |
| 4047.4 | 7292.4 | 9294.3 | 7138.3 NM_005497.2   |
| 98.6   | 100.5  | 97.7   | 99.9 NM_005267.3     |
| 94.8   | 89.8   | 90.3   | 81.9 NM_000166.2     |
| 93.4   | 87.3   | 92.7   | 89.5 NM_004004.3     |
| 90.5   | 94.1   | 86.3   | 86.4 NM_001005752.1  |
| 82     | 86.2   | 83.3   | 87.9 NM_001005752.1  |
| 96.4   | 89.2   | 82.7   | 89.3 NM_024009.2     |
| 85.8   | 75.2   | 74.9   | 82.1 NM_153212.1     |
| 77.6   | 81.2   | 71.3   | 73.4 NM_005268.2     |
| 79.5   | 79     | 77.3   | 80.1 NM_006783.2     |
| 98.9   | 83.2   | 88.6   | 91.6 NM_198568.1     |
| 136.4  | 153.8  | 125.9  | 115.4 NM_152219.2    |
| 88.6   | 92.2   | 90.9   | 80.7 NM_181538.1     |
| 224.5  | 232.6  | 209.5  | 188.9 NM_203391.1    |
| 183.6  | 145.7  | 151    | 133.5 NM_033214.2    |
| 89.6   | 90     | 86.8   | 92.6 NM_025211.2     |
| 93.8   | 92.7   | 93.3   | 89.7 NM_019617.2     |

|         |         |        |         |                |
|---------|---------|--------|---------|----------------|
| 3799.7  | 3414.8  | 2982.4 | 2184.2  | NM_000169.1    |
| 2347.2  | 2751.2  | 2508.2 | 1700.7  | NM_001079811.1 |
| 92.8    | 89.4    | 84.3   | 89.7    | NM_001079811.1 |
| 1949    | 2341.5  | 2240.6 | 1614.1  | NM_000404.1    |
| 101.4   | 94.8    | 100.3  | 92.7    | NM_024506.3    |
| 153     | 174     | 160.8  | 178.2   | NM_138426.1    |
| 178.1   | 203.8   | 171.2  | 170.3   | NM_015554.1    |
| 413.2   | 116.5   | 112.3  | 94.7    | NM_000170.1    |
| 83.4    | 85.1    | 74.3   | 85.7    | NM_181789.1    |
| 1223.9  | 950.3   | 769.9  | 567.1   | NM_001003722.1 |
| 197.3   | 177.3   | 146.5  | 147.3   | NM_001499.2    |
| 970.6   | 952.3   | 906.2  | 553.9   | NM_012201.4    |
| 132.4   | 107.5   | 104.6  | 101.1   | NM_005269.1    |
| 92.2    | 91.4    | 85.6   | 87.9    | NM_005270.2    |
| 103.1   | 100.9   | 95.3   | 91.3    | NM_000168.2    |
| 116.4   | 113.2   | 106.1  | 98.9    | NM_138465.3    |
| 236.3   | 492.3   | 417.6  | 282.8   | NM_006851.1    |
| 94.9    | 84.1    | 92.8   | 90.4    | NM_147193.1    |
| 86.3    | 81.5    | 83.2   | 84.2    | NM_032575.1    |
| 90.4    | 86.2    | 79.8   | 93.8    | NM_152629.2    |
| 85.6    | 82.5    | 83     | 86.2    | NM_152629.2    |
| 89.9    | 88.6    | 78.2   | 83.3    | NM_152629.2    |
| 95.7    | 94.7    | 85.4   | 91.7    | NM_053274.1    |
| 588.6   | 645.6   | 639.8  | 523.1   | NM_053274.1    |
| 17981.4 | 14369.7 | 9612.3 | 10045.4 | NM_006708.1    |
| 171.8   | 105.3   | 113.1  | 99.9    | NM_032756.2    |
| 91.2    | 89.7    | 83     | 89.4    | NM_002062.2    |
| 77.2    | 87.1    | 82.5   | 77.7    | NM_004246.1    |
| 84.4    | 87.9    | 85.8   | 81.4    | NM_000171.1    |
| 77.5    | 79.8    | 72.2   | 84.6    | NM_002063.2    |
| 95.4    | 97.2    | 84     | 96.7    | NM_006529.1    |
| 87.5    | 91.8    | 82.4   | 90      | NM_001042543.1 |
| 169.3   | 188.3   | 170.4  | 162.7   | NM_000824.2    |
| 349.2   | 514     | 334.6  | 396.1   | NM_002064.1    |
| 410.7   | 297     | 322.3  | 232.2   | NM_197962.1    |
| 96.8    | 95.5    | 94.3   | 94.3    | NM_016066.3    |
| 351.5   | 247.9   | 180.4  | 227.8   | NM_016066.3    |
| 4592.9  | 3235.4  | 3110.8 | 1973.5  | NM_016417.2    |
| 198.9   | 175.1   | 190.8  | 151     | NM_014905.2    |
| 88.7    | 73.9    | 79.4   | 74.9    | NM_013267.2    |
| 95.6    | 88.8    | 83.1   | 87.3    | NM_013267.2    |
| 89.4    | 86.3    | 82.3   | 73.1    | NM_144669.1    |
| 3313.7  | 2418.3  | 2235.8 | 1416.9  | NM_024656.2    |
| 108.7   | 120.7   | 109.3  | 111.1   | NM_015101.1    |
| 99.9    | 90.5    | 77.4   | 97.3    | NM_182974.1    |
| 126.1   | 109.2   | 129.5  | 105.6   | NM_152932.1    |
| 93.4    | 99.9    | 94.4   | 88.1    | NM_152932.1    |
| 98.3    | 91.4    | 90.5   | 99.3    | NM_018446.2    |
| 104.1   | 89      | 89.8   | 95.6    | NM_001010983.1 |
| 93.3    | 86.8    | 83.1   | 89.5    | NM_031302.2    |

|        |        |        |                      |
|--------|--------|--------|----------------------|
| 950.5  | 825.8  | 687.1  | 465 NM_016433.3      |
| 204.9  | 192.8  | 183.8  | 140.8 NM_015711.1    |
| 8944.2 | 8185.2 | 7610   | 5466.7 NM_015710.3   |
| 1282.9 | 1014.6 | 847.8  | 679 NM_005271.1      |
| 132.9  | 110.2  | 121.7  | 97.9 NM_012084.3     |
| 138.1  | 125.5  | 121.1  | 94.5 NM_001033056.1  |
| 104.6  | 104.5  | 88.9   | 101 NM_002065.4      |
| 90.9   | 100.6  | 89.2   | 93.3 NM_001033044.1  |
| 88.3   | 85.3   | 90.6   | 93.7 NM_016571.1     |
| 82.8   | 90     | 81.8   | 92.6 NM_005838.2     |
| 97.1   | 87.6   | 83     | 85.2 NM_005838.2     |
| 77.1   | 77     | 79     | 74.4 NM_201648.1     |
| 97     | 95.6   | 103.4  | 92.6 NM_080661.2     |
| 82.4   | 85.5   | 82.8   | 83.2 NM_145016.2     |
| 92.1   | 81.1   | 75.7   | 95.1 NR_003039.1     |
| 122.7  | 112.4  | 101.4  | 99.3 NM_145262.2     |
| 142.6  | 177.3  | 145.7  | 171.3 NM_000405.3    |
| 189    | 236.5  | 233.8  | 128 NM_020713.1      |
| 452.6  | 416.8  | 346.4  | 372.4 NM_178439.3    |
| 87.3   | 96.7   | 90.4   | 99 NM_022471.2       |
| 699    | 627.5  | 685.2  | 358.1 NM_001500.2    |
| 191.9  | 180.1  | 153.4  | 157 NM_006582.2      |
| 221.5  | 199.8  | 183.5  | 164.7 NM_024482.1    |
| 448.5  | 432.9  | 402.1  | 295.3 NM_012384.2    |
| 2068.5 | 1409.5 | 1423   | 1108.2 NM_004124.2   |
| 1720.1 | 1053.9 | 956.3  | 867.8 NM_004877.1    |
| 202.6  | 215.9  | 195.3  | 187.1 NM_016573.1    |
| 91.5   | 78.1   | 82.9   | 84 NM_002066.1       |
| 324.1  | 254.3  | 222.9  | 228.3 NM_015895.3    |
| 517.3  | 531.8  | 435.7  | 337.1 NM_013335.2    |
| 112.5  | 109.9  | 107.6  | 104.8 NM_205847.1    |
| 370.3  | 285.6  | 227.4  | 204.9 NM_021971.1    |
| 135.4  | 122.1  | 136.1  | 105.4 NM_021971.1    |
| 101.1  | 93.7   | 87.7   | 79.9 NM_013334.2     |
| 96.6   | 92.1   | 93.2   | 89.2 NM_006877.2     |
| 322.7  | 236.8  | 247.1  | 220.4 NM_001002002.1 |
| 91.3   | 88.9   | 84.4   | 95.3 NM_016576.3     |
| 803.2  | 482.6  | 512.4  | 431.6 NM_001002000.1 |
| 175.9  | 174.4  | 159.1  | 189.5 NM_002067.1    |
| 406.7  | 415.1  | 408.5  | 290.2 NM_007353.2    |
| 205.5  | 180.5  | 186.4  | 217.4 NM_006572.3    |
| 125.1  | 134    | 113.2  | 121 NM_004297.2      |
| 999.1  | 855.7  | 825    | 489.2 NM_002068.1    |
| 84.7   | 89.7   | 90.9   | 95.2 NM_002069.4     |
| 1724.3 | 1917.5 | 1695.3 | 1546.5 NM_002070.2   |
| 328.9  | 189.5  | 175.5  | 188.5 NM_006496.1    |
| 78.1   | 90.2   | 82.3   | 76.1 NM_182978.1     |
| 96.1   | 86.8   | 92.7   | 99.5 NM_182978.1     |
| 93.6   | 85.7   | 80.7   | 84 NM_020988.1       |
| 102.8  | 95.6   | 85.9   | 94.2 NM_138736.1     |

|         |         |         |                      |
|---------|---------|---------|----------------------|
| 88.6    | 85.1    | 88.5    | 89.2 NM_138736.1     |
| 239.4   | 281.8   | 231.5   | 240.5 NM_002072.2    |
| 115.4   | 123.7   | 108.2   | 97.9 NM_016592.1     |
| 84.1    | 86      | 76.7    | 93.2 NM_080425.1     |
| 9422.6  | 11103.1 | 8876.1  | 6966.1 NM_000516.3   |
| 97      | 91      | 92.4    | 97.7 NM_144499.1     |
| 98.4    | 110.7   | 93.6    | 92.5 NM_000172.2     |
| 101.4   | 100.3   | 80.4    | 95.5 NM_005272.2     |
| 81.9    | 90.8    | 81.8    | 89.6 NM_002073.2     |
| 4377    | 3544.1  | 3078.7  | 2271.6 NM_002074.2   |
| 145.3   | 108.7   | 107.6   | 90.9 NM_053004.1     |
| 161.2   | 156.5   | 128.6   | 132.9 NM_005273.2    |
| 19379.6 | 17292.9 | 18167.7 | 12753.8 NM_006098.3  |
| 86.4    | 88.9    | 79.3    | 85.2 NM_002075.2     |
| 168.5   | 128.7   | 115.5   | 110.6 NM_021629.2    |
| 358.4   | 287.4   | 329.7   | 254.8 NM_006578.3    |
| 158.1   | 126.1   | 130.7   | 106.7 NM_006578.3    |
| 85.5    | 84.4    | 86.1    | 88.9 NM_016194.3     |
| 382.1   | 294.3   | 325     | 277.5 NM_005476.3    |
| 825.4   | 518.4   | 526.4   | 427.1 NM_001017998.1 |
| 115.7   | 85.2    | 88.9    | 91.2 NM_004126.2     |
| 106     | 108.2   | 94      | 105.9 NM_018841.3    |
| 89.2    | 85.6    | 82      | 89.1 NM_016541.1     |
| 98.4    | 95.2    | 87      | 97.7 NM_053064.2     |
| 90.3    | 81.3    | 83.5    | 81.4 NM_012202.1     |
| 345.2   | 130     | 123.9   | 134.4 NM_004485.2    |
| 381.2   | 337.8   | 267     | 318.8 NM_005274.1    |
| 145.9   | 172     | 201.9   | 142.7 NM_052847.1    |
| 92      | 82      | 91.5    | 88.2 NM_033258.1     |
| 94.8    | 82.2    | 82.4    | 88.1 NM_021955.3     |
| 91.3    | 82.1    | 87.8    | 97.1 NM_031498.1     |
| 281.8   | 210.5   | 216.9   | 134.4 NM_005275.2    |
| 1622.8  | 1515.6  | 1166.3  | 875.7 NM_013285.1    |
| 784.5   | 617.9   | 486.3   | 538.9 NM_014366.4    |
| 2358.6  | 1674.6  | 1014.2  | 1082.5 NM_206826.1   |
| 121.2   | 125.4   | 119.8   | 107.1 NM_206825.1    |
| 1179    | 797.3   | 679.7   | 538.2 NM_019067.3    |
| 76.2    | 91.9    | 75.1    | 85.6 NM_012483.1     |
| 90.3    | 102.8   | 94.2    | 96.8 NM_012483.1     |
| 90.5    | 87.6    | 75.4    | 78.2 NM_006433.2     |
| 111.3   | 103.1   | 115.6   | 103.9 NM_018960.4    |
| 1500    | 1348.1  | 1006.8  | 1123.8 NM_014236.1   |
| 1478.7  | 1657.6  | 1541.8  | 852.8 NM_005471.3    |
| 83.4    | 79.3    | 73      | 81.8 NM_138335.1     |
| 93.9    | 93.4    | 75.1    | 81 NM_198066.2       |
| 102.6   | 97.9    | 94.8    | 89.4 NM_024312.3     |
| 669.6   | 896.2   | 931.4   | 522.4 NM_032520.3    |
| 171.5   | 143.5   | 144.7   | 141.7 NM_000825.2    |
| 81.8    | 78.7    | 75.2    | 86.6 NM_178332.1     |
| 93      | 91.2    | 86.8    | 88.1 NM_001501.1     |

|        |        |        |                       |
|--------|--------|--------|-----------------------|
| 89.9   | 84.3   | 91.3   | 91.3 NM_001012763.1   |
| 82.6   | 85.5   | 87.1   | 85.9 NR_002328.3      |
| 1977.5 | 3246   | 3632   | 1968.7 NM_002076.2    |
| 108.3  | 103.9  | 93.4   | 120.1 NM_018652.4     |
| 147.8  | 168.1  | 185.7  | 143.9 NM_002077.2     |
| 189.3  | 257    | 322.8  | 242.2 NM_004486.4     |
| 88.7   | 86.5   | 99.7   | 89.9 NM_017600.1      |
| 103.5  | 95.4   | 87.4   | 93.1 NR_001555.1      |
| 819.1  | 1057.6 | 1039.1 | 949.4 NM_005895.2     |
| 107.8  | 122.7  | 122.9  | 119.1 NM_002078.3     |
| 96.8   | 98.8   | 98     | 93.6 NM_001038640.1   |
| 3063   | 2575.6 | 2083   | 2045.7 NM_001002296.1 |
| 101.4  | 85     | 80.2   | 80.8 NM_016099.2      |
| 96.5   | 94.8   | 105.4  | 88.2 NM_001002296.1   |
| 142.2  | 146    | 155.5  | 154.2 NM_181077.2     |
| 777.7  | 1397   | 1219.4 | 1580.8 NM_001023567.2 |
| 89.8   | 88.1   | 80.8   | 92.4 NM_001012423.1   |
| 90.5   | 91.2   | 93.6   | 99.7 XM_370843.4      |
| 90.8   | 85.6   | 80.8   | 90 NM_001012420.2     |
| 100.6  | 93.2   | 86.6   | 96.9 NM_004487.1      |
| 296.3  | 198.4  | 191.6  | 198.4 NM_016548.2     |
| 88     | 100.1  | 91.1   | 83.8 NM_177937.1      |
| 1129.9 | 1068.3 | 735.1  | 827.4 NM_022130.3     |
| 365.7  | 310.5  | 262.7  | 311.4 NM_018178.3     |
| 400.6  | 406.8  | 260.9  | 300.4 NM_014498.2     |
| 90.6   | 79.5   | 83.6   | 87.8 NM_198447.1      |
| 128    | 122.3  | 99.9   | 123.9 NM_016072.2     |
| 88.9   | 78.2   | 82.5   | 88.2 NM_032292.3      |
| 182.9  | 187.2  | 161    | 194.9 NM_020399.2     |
| 510.4  | 462.8  | 368.7  | 422.6 NM_031899.2     |
| 716.4  | 577.1  | 530.9  | 356.6 NM_015530.3     |
| 184.5  | 144.4  | 126.5  | 132.2 NM_004871.2     |
| 110.1  | 99     | 101.1  | 101.9 NM_001007024.1  |
| 155.1  | 129.9  | 124.5  | 127.3 NM_001012511.1  |
| 218.8  | 230.1  | 209.8  | 190.6 NM_054022.2     |
| 90.2   | 100.7  | 107.6  | 101.3 NM_004287.3     |
| 454.2  | 309.3  | 270.4  | 241.7 NM_002079.1     |
| 87.2   | 96.5   | 89.1   | 91.3 NM_152413.1      |
| 1263.5 | 816.4  | 629.3  | 581.7 NM_002080.2     |
| 142.3  | 138.2  | 145.4  | 133.1 NM_000173.3     |
| 85.3   | 89.9   | 93.6   | 80.3 NM_001007241.1   |
| 107.5  | 110.7  | 110.7  | 92.5 NM_016363.3      |
| 142.7  | 114.8  | 124.4  | 96.6 NM_000174.2      |
| 102    | 172.4  | 146.9  | 130.8 NM_005814.1     |
| 2155.3 | 1025.6 | 938.2  | 833 NM_003801.2       |
| 129.4  | 115.3  | 94.2   | 96.3 NM_020918.2      |
| 298.6  | 260.2  | 232.4  | 195.8 NM_018025.2     |
| 310.2  | 344.2  | 307.6  | 327.8 NM_018040.1     |
| 154.4  | 144    | 131.5  | 135.1 NM_022078.1     |
| 108.2  | 104.3  | 95.5   | 99.6 NM_182679.1      |

|        |       |       |                      |
|--------|-------|-------|----------------------|
| 1034.4 | 928.2 | 656   | 399.4 NM_182679.1    |
| 519    | 386.3 | 290.3 | 281.8 NM_182679.1    |
| 104.3  | 94    | 80.9  | 97.9 NM_170699.1     |
| 96     | 110.6 | 98.2  | 97.2 NM_001077191.1  |
| 185.7  | 122.8 | 120.2 | 157.8 NM_022913.1    |
| 133.2  | 137.2 | 134.6 | 135.4 NM_021639.3    |
| 107.3  | 108.3 | 92.2  | 108.1 NM_002081.1    |
| 108.9  | 90.1  | 100.9 | 92.7 NM_152742.1     |
| 353.8  | 320.1 | 282.5 | 278.4 NM_004484.2    |
| 211.4  | 289.3 | 229   | 208.4 NM_001448.2    |
| 116.1  | 115.5 | 108.2 | 106.2 NM_004466.3    |
| 143    | 137.2 | 127.3 | 115.9 NM_005708.2    |
| 88.1   | 80.9  | 80.3  | 87.7 NM_005276.2     |
| 639.1  | 635.6 | 616.4 | 351.3 NM_015141.2    |
| 89.7   | 83.8  | 79.3  | 87.8 NM_000408.2     |
| 94.9   | 94    | 81.4  | 83.6 NM_130769.2     |
| 117    | 117.3 | 110.7 | 94.2 NM_145171.2     |
| 227.7  | 235.5 | 193.4 | 148.9 NM_020806.4    |
| 106.3  | 98.4  | 99.1  | 92.2 NM_020806.4     |
| 1801.9 | 884.2 | 775.7 | 611 NM_000175.2      |
| 101.9  | 96.2  | 98.2  | 84.5 NM_005898.4     |
| 1173.9 | 589.9 | 496.3 | 473.3 NM_203364.2    |
| 604.1  | 595.4 | 473.9 | 394.7 NM_203364.2    |
| 133.9  | 137.4 | 150.8 | 127.6 NM_015698.3    |
| 88.1   | 78.4  | 80.6  | 83.7 NM_001503.2     |
| 99.5   | 86.3  | 90.6  | 91 NM_177483.1       |
| 96.6   | 99.1  | 97.4  | 96 NM_201591.1       |
| 91.2   | 88.7  | 82.9  | 88.4 NM_005277.3     |
| 119.1  | 104.6 | 107.8 | 91.6 NM_201592.1     |
| 123.3  | 143.9 | 162.9 | 115.5 NM_001001994.1 |
| 99.3   | 93.3  | 86.6  | 91.4 NM_001001994.1  |
| 105.5  | 113   | 117.1 | 106.7 NM_001001995.1 |
| 120.8  | 273.8 | 237.1 | 239.5 NM_002510.2    |
| 105.8  | 570.8 | 445.8 | 493.2 NM_001005340.1 |
| 349.8  | 467.9 | 718.5 | 423.7 NM_005279.2    |
| 101.3  | 91.1  | 93.9  | 86.5 NM_054021.1     |
| 106.7  | 89.8  | 88.6  | 94.8 NM_198179.1     |
| 110.9  | 97.5  | 99.2  | 102.4 NM_020960.2    |
| 227.2  | 226.6 | 211.9 | 170.3 NM_001080452.1 |
| 96.7   | 95.1  | 78.2  | 96.4 NM_177551.3     |
| 90.8   | 92.8  | 93.4  | 88.5 NM_006018.1     |
| 101.6  | 92.6  | 81.5  | 82.6 NM_025048.2     |
| 78.6   | 91.3  | 74.2  | 79.6 NM_153840.2     |
| 91.3   | 90    | 91.8  | 87.8 NM_025048.2     |
| 78.8   | 75.6  | 83.3  | 82.3 NM_153839.1     |
| 84.7   | 89.8  | 79    | 85.2 NM_153834.3     |
| 105.8  | 111.5 | 111.2 | 108.3 NM_153835.1    |
| 399.9  | 182.8 | 189.6 | 143.4 NM_153837.1    |
| 91     | 81.8  | 79.5  | 84.7 NM_153838.1     |
| 80.5   | 91.3  | 78.9  | 90.2 NM_015234.3     |

|        |        |        |                      |
|--------|--------|--------|----------------------|
| 104.1  | 111.4  | 109.3  | 94 NM_178471.1       |
| 78.4   | 78     | 77.6   | 82.7 NM_005288.1     |
| 81.9   | 85.8   | 75.1   | 79.9 NM_181745.2     |
| 80     | 96.9   | 75.5   | 93.8 NM_032422.1     |
| 396.9  | 412.3  | 384.1  | 462.6 NM_032777.6    |
| 94     | 97     | 92.5   | 87.9 NM_145290.2     |
| 77.7   | 87.8   | 75.2   | 82.3 NM_001032394.1  |
| 95.4   | 91.6   | 84.2   | 85.2 NM_032787.1     |
| 166.5  | 157.6  | 154.8  | 135.2 NM_013345.2    |
| 95     | 91.3   | 92.1   | 100.8 NM_198827.2    |
| 95.3   | 89.3   | 84     | 77.7 NM_022571.5     |
| 579.7  | 492.4  | 491.5  | 302.3 NM_020155.2    |
| 212.5  | 150.5  | 165.9  | 148.7 NM_003272.1    |
| 96.1   | 94.9   | 93.3   | 99.3 NM_001002911.1  |
| 94.5   | 90.3   | 92.7   | 96.6 NM_181791.1     |
| 103.8  | 90.8   | 91.4   | 91.4 NM_181790.1     |
| 96.2   | 97     | 89.6   | 95 NM_000273.1       |
| 108.3  | 107.2  | 110.8  | 110.3 NM_138445.2    |
| 86.1   | 84.2   | 87.6   | 87.9 NM_207364.1     |
| 90.3   | 84.8   | 86.2   | 89.4 NM_001038705.1  |
| 91.3   | 92.3   | 84.3   | 87 XM_293580.2       |
| 92.5   | 93.7   | 88.1   | 96.6 NM_005290.1     |
| 78.2   | 94     | 86.8   | 91.7 NM_199243.1     |
| 92.6   | 78.8   | 77     | 82.1 NM_194251.2     |
| 86.6   | 83.2   | 83.8   | 90.1 NM_206997.1     |
| 102    | 94.2   | 95.9   | 99.4 NM_207370.1     |
| 90.4   | 84.4   | 85.1   | 88.7 NM_207173.1     |
| 91.1   | 89.4   | 93.9   | 91 NM_207172.1       |
| 137.6  | 125.1  | 130.9  | 119.9 NM_207172.1    |
| 84.5   | 81.6   | 74.2   | 78.5 NM_001033045.2  |
| 93.2   | 90.9   | 90.7   | 98.7 NM_152529.5     |
| 97.2   | 108.4  | 86.9   | 89.2 NM_153002.1     |
| 81.2   | 83.7   | 74.9   | 86.1 NM_024980.3     |
| 91.1   | 86.3   | 82.6   | 83.5 NM_020752.1     |
| 1038.5 | 1388.5 | 1592.1 | 1673.9 NM_014373.1   |
| 96.8   | 99.3   | 88.3   | 100.9 NM_007369.1    |
| 81.7   | 87.1   | 83.4   | 98.9 NM_007369.1     |
| 269    | 429.5  | 567    | 270.9 NM_014449.1    |
| 93.5   | 81.4   | 83.4   | 97.4 NM_019858.1     |
| 88     | 88.7   | 81     | 83.3 NM_005291.1     |
| 92.9   | 89.7   | 88.4   | 86.4 NM_013308.2     |
| 1485.6 | 949.3  | 829.4  | 537.6 NM_024531.3    |
| 89.6   | 82.6   | 80.6   | 84.4 NM_017986.2     |
| 93     | 94.3   | 90.6   | 92.3 NM_018969.3     |
| 94.2   | 92.6   | 82     | 94.8 XM_938451.1     |
| 79.7   | 86.8   | 85.9   | 91.8 NM_032553.1     |
| 409.7  | 282.1  | 251.5  | 188.9 NM_016372.1    |
| 101.5  | 99.6   | 95.7   | 91.3 NM_007223.1     |
| 110.1  | 97.5   | 107.7  | 104.4 NM_001002292.1 |
| 285.9  | 306.5  | 253.5  | 230.9 NM_024911.4    |



|       |       |       |                     |
|-------|-------|-------|---------------------|
| 123.3 | 128.1 | 111   | 120 NM_001002292.1  |
| 102.2 | 102.6 | 101.5 | 93.3 NM_001004334.1 |
| 312.4 | 225.6 | 186.5 | 170.8 NM_005292.2   |
| 86.3  | 90.9  | 84.3  | 88.4 NM_006143.1    |
| 92.9  | 88.5  | 81    | 84.7 NM_005293.1    |
| 98.8  | 93.2  | 80.9  | 93.2 NM_005294.1    |
| 106.3 | 91.8  | 92.9  | 101.5 NM_005295.1   |
| 224.2 | 198.2 | 196.5 | 170.2 NM_005296.1   |
| 90.2  | 84.2  | 84.5  | 82.6 NM_005297.2    |
| 94.8  | 84.2  | 86.5  | 87.2 NM_005298.2    |
| 80    | 90.1  | 86.3  | 86.4 NM_153442.1    |
| 164.7 | 114.9 | 123.7 | 126.8 NM_018971.1   |
| 99.3  | 99    | 92.3  | 97.2 NM_005281.2    |
| 86    | 102.1 | 93.9  | 86.9 NM_001039966.1 |
| 89.5  | 103.2 | 90.2  | 96.3 NM_001031682.1 |
| 93.4  | 91.9  | 84.7  | 85.8 NM_001505.1    |
| 75.6  | 87.6  | 86.2  | 89.9 NM_005299.1    |
| 92.9  | 87.1  | 85.2  | 99 NM_001506.1      |
| 85.9  | 79.4  | 85.2  | 91.8 NM_005300.2    |
| 80.2  | 87.7  | 85.1  | 74.6 NM_005300.2    |
| 87.6  | 90.9  | 95.9  | 87.5 NM_001033513.1 |
| 97.9  | 113.1 | 92.8  | 97.4 NM_005301.2    |
| 98.4  | 105   | 108.8 | 109.2 NM_005302.2   |
| 88.4  | 87    | 76.5  | 86.9 NM_004767.2    |
| 99.3  | 93.3  | 93.3  | 98.6 NM_001508.1    |
| 88.5  | 69.2  | 86.7  | 90.7 NM_005282.1    |
| 95.8  | 81    | 87.3  | 81.7 NM_005305.1    |
| 85.5  | 78.7  | 79.7  | 81 NM_004778.1      |
| 86.6  | 94.1  | 93    | 84.6 NM_007227.3    |
| 98.5  | 95.7  | 77.8  | 88.6 NM_004224.1    |
| 87.6  | 82.4  | 81    | 87.3 NM_005684.2    |
| 97.9  | 110.6 | 100.8 | 88.7 NM_005683.2    |
| 99.1  | 90.8  | 100.4 | 95.4 NM_005682.4    |
| 116.7 | 104.8 | 99.5  | 103.9 NM_201524.1   |
| 88.3  | 87.9  | 93.4  | 91.7 NM_201525.1    |
| 89.3  | 96.9  | 85.1  | 94.5 NM_005284.2    |
| 89.6  | 80.9  | 81.6  | 80.7 NM_031936.3    |
| 88.6  | 84.6  | 81.7  | 80.8 NM_080865.2    |
| 197.7 | 174.1 | 179.2 | 157.3 NM_030784.1   |
| 96.7  | 111.4 | 97.2  | 86.4 NM_005756.1    |
| 87    | 88    | 85.9  | 80.3 NM_005756.1    |
| 142.3 | 119.2 | 122.5 | 104.6 NM_003608.2   |
| 95.8  | 94.3  | 87.3  | 87.9 NM_003485.3    |
| 101   | 95.6  | 83.7  | 99.4 NM_006794.1    |
| 80.9  | 81.8  | 80.2  | 77 NM_018485.1      |
| 96.9  | 96.5  | 100.2 | 89.6 NM_080819.2    |
| 97.6  | 87.8  | 94.4  | 94.5 NM_032554.3    |
| 92.3  | 89.6  | 79.5  | 85.5 NM_080817.2    |
| 91    | 88.8  | 93.9  | 83 NM_016540.2      |
| 231.3 | 113.3 | 109.1 | 95.5 NM_020370.1    |

|        |        |        |                       |
|--------|--------|--------|-----------------------|
| 97.3   | 102.4  | 99.7   | 113.3 NM_018970.3     |
| 102.6  | 93.8   | 97.8   | 111.1 NM_023915.2     |
| 91.5   | 101.9  | 101.3  | 100 NM_022049.1       |
| 267.1  | 209.6  | 192.5  | 170.3 NM_016334.2     |
| 191.1  | 225.2  | 187.2  | 151.3 NM_020400.4     |
| 81.2   | 78.3   | 84.9   | 81.2 NM_170776.3      |
| 86     | 83.9   | 72.7   | 89.2 NM_170776.3      |
| 97     | 79     | 79.5   | 90.7 NR_003149.1      |
| 96.2   | 95.6   | 92.6   | 93.2 NM_014710.2      |
| 250.3  | 223    | 180.3  | 235.4 NM_138437.3     |
| 97.3   | 93.2   | 80.7   | 81.3 NM_138437.3      |
| 85     | 81.8   | 79.3   | 83.5 NM_003979.3      |
| 91.2   | 86     | 109.1  | 103.6 NM_016235.1     |
| 109.1  | 113.1  | 98.4   | 104 NM_018653.3       |
| 94.7   | 96.3   | 92.2   | 96.4 NM_022036.2      |
| 170.5  | 145    | 165.2  | 126.6 NM_018653.3     |
| 86.8   | 84.1   | 78     | 85.6 NM_018654.1      |
| 99.1   | 90.3   | 92.8   | 86.6 NM_148963.1      |
| 118.8  | 124.4  | 112.4  | 102.4 NM_212492.1     |
| 1298.5 | 1148.8 | 1073.6 | 556.3 NM_004127.4     |
| 182.3  | 188    | 165.6  | 161.4 NM_004127.4     |
| 237.4  | 215.2  | 210.6  | 183.9 NM_004489.4     |
| 88.3   | 98.9   | 87.2   | 88.2 XM_939186.1      |
| 806.1  | 337.5  | 261.4  | 246.6 NM_013296.3     |
| 596.4  | 448.6  | 424.1  | 319.8 NM_022107.1     |
| 7255.1 | 3171.3 | 3339.5 | 2247.5 NM_138501.4    |
| 104.1  | 100    | 100.6  | 97.1 NM_005309.1      |
| 941.7  | 497.7  | 576.7  | 362.4 NM_133443.1     |
| 9583.8 | 5865.8 | 5505.7 | 4991.6 NM_201397.1    |
| 128.7  | 96     | 103.5  | 90.1 NM_201397.1      |
| 98.8   | 99.2   | 94     | 88.2 NM_002083.2      |
| 89.3   | 96.3   | 87.8   | 84.5 NM_002084.2      |
| 2034.2 | 2037.2 | 1600   | 1538.5 NM_002085.2    |
| 8831.6 | 7729.6 | 7252.2 | 6991.5 NM_001039847.1 |
| 82.4   | 80.5   | 78     | 83.3 NM_001509.1      |
| 90.6   | 89.3   | 93.4   | 87.2 NM_001509.1      |
| 109.4  | 107.4  | 94.5   | 91.4 NM_182701.1      |
| 966.6  | 1268.4 | 922.6  | 866.3 NM_015696.2     |
| 259.4  | 226.1  | 216.8  | 110.2 NM_020895.2     |
| 90.5   | 79.6   | 77.9   | 88 NM_017577.2        |
| 96.7   | 86.5   | 77.9   | 79.9 NM_001012642.1   |
| 258.3  | 287.7  | 266.3  | 282.4 NM_023927.1     |
| 88.3   | 88.2   | 88.7   | 88.8 NM_006613.3      |
| 438    | 406.6  | 362.1  | 227.9 NM_006613.3     |
| 78.5   | 77.1   | 72.5   | 77.3 NM_004810.2      |
| 94.8   | 121.1  | 110.4  | 99.3 NM_181711.1      |
| 91.3   | 95.8   | 91.5   | 95.4 NM_001001550.1   |
| 213.5  | 163.8  | 140.5  | 115.6 NM_005311.3     |
| 99.2   | 82.6   | 91.2   | 94 NM_001001555.1     |
| 157.8  | 127.4  | 117.4  | 110 NM_005311.3       |

|       |       |       |                      |
|-------|-------|-------|----------------------|
| 98.8  | 92.5  | 84.8  | 91 NM_004490.2       |
| 85.5  | 87.4  | 81    | 90.5 NM_004490.2     |
| 653.6 | 688.5 | 604.3 | 574.2 NM_002086.3    |
| 928.7 | 952.6 | 919   | 787.2 NM_002086.3    |
| 91.8  | 87.6  | 84.9  | 87.5 NM_005310.2     |
| 78.8  | 75.8  | 84.7  | 82.6 NM_005310.2     |
| 92.3  | 91.7  | 84.5  | 88.4 NM_001030002.1  |
| 86.5  | 85.1  | 76.3  | 94.3 NM_148903.1     |
| 101.5 | 120.6 | 102.6 | 100.9 NM_033090.1    |
| 90.5  | 84    | 87.2  | 86.8 NM_148903.1     |
| 84.3  | 89.2  | 102   | 105.5 NM_014668.2    |
| 95.4  | 93.1  | 93.9  | 88 NM_013372.5       |
| 84.8  | 88.7  | 84.9  | 88.6 NM_022469.3     |
| 100.6 | 100.2 | 91.9  | 86.9 NM_014552.2     |
| 94.5  | 92.6  | 87.7  | 88.1 NM_198182.1     |
| 89.2  | 91.2  | 79.1  | 85.4 NM_198182.1     |
| 93.9  | 89.8  | 88.3  | 90.1 NM_024915.1     |
| 85.6  | 90.4  | 82.4  | 83.9 NM_021180.2     |
| 89.9  | 85.8  | 92.2  | 88.4 NM_198173.1     |
| 103   | 81.8  | 94.5  | 82.8 NM_021180.2     |
| 339.5 | 289.4 | 230.4 | 232.4 NM_012203.1    |
| 94.8  | 80.9  | 80.1  | 79.5 NM_000827.2     |
| 95    | 97.5  | 84.7  | 98 NM_000826.2       |
| 99    | 91.9  | 94.2  | 95.2 NM_181894.1     |
| 101.4 | 89.1  | 86.4  | 100.2 NM_181894.1    |
| 106.2 | 128.5 | 108.7 | 106.9 NM_007325.2    |
| 97.8  | 91.4  | 91.1  | 91.3 NM_001077244.1  |
| 79.6  | 75.6  | 69.6  | 82.1 NM_000829.1     |
| 86.7  | 83.2  | 77.5  | 87.8 NM_017551.1     |
| 80.4  | 79.2  | 93.1  | 84.8 NM_001510.1     |
| 87    | 84.2  | 79.1  | 86 NM_000830.3       |
| 91.3  | 81.9  | 91.2  | 95.2 NM_000830.3     |
| 86    | 81.5  | 89    | 86.2 NM_175611.2     |
| 89.2  | 86.8  | 79.6  | 85.1 NM_021956.2     |
| 92.4  | 95.3  | 91    | 95.8 NM_175768.1     |
| 94.6  | 97.2  | 91.3  | 90 NM_000831.2       |
| 88.9  | 83.4  | 74.6  | 76.1 NM_014619.2     |
| 87.7  | 86.6  | 90.2  | 97.7 NM_002088.3     |
| 89.1  | 86.9  | 85.4  | 87.5 NM_007327.1     |
| 77.6  | 85.1  | 75.1  | 79.8 NM_007327.1     |
| 199.3 | 166.6 | 175.6 | 154.3 NM_000832.5    |
| 87.4  | 92.9  | 84.7  | 83.7 NM_000833.2     |
| 83.3  | 78.5  | 69.6  | 72.2 NM_000834.2     |
| 93    | 81    | 88.3  | 86.4 NM_000835.3     |
| 95    | 86.9  | 93.4  | 93.1 NM_000836.1     |
| 82.2  | 85.5  | 91    | 83.9 NM_133445.1     |
| 170.2 | 208.9 | 222.6 | 139.1 NM_138690.1    |
| 332.7 | 446.8 | 374.9 | 470.4 NM_000837.1    |
| 775.8 | 695.8 | 607.1 | 518.4 NM_001009184.1 |
| 85.1  | 79.5  | 78.2  | 69.2 NM_001018103.1  |

|        |        |        |                      |
|--------|--------|--------|----------------------|
| 164.3  | 130.5  | 113.6  | 122.9 NM_001018102.1 |
| 138.2  | 133.2  | 137.5  | 109.4 NM_001018102.1 |
| 87.5   | 91.2   | 89     | 85.9 NM_021150.1     |
| 89.7   | 86     | 86     | 92.2 NM_001080423.1  |
| 299.3  | 312.1  | 234.9  | 221.7 NM_020137.3    |
| 134.4  | 169    | 137.3  | 130.1 NM_020137.3    |
| 1647.7 | 2263   | 2964.7 | 2900.3 NM_207672.1   |
| 113.8  | 101.8  | 101.9  | 103.6 NM_002929.2    |
| 83.1   | 86.6   | 92.1   | 97.2 XM_938093.1     |
| 102.2  | 99.6   | 108.3  | 102.7 NM_001004057.1 |
| 108.6  | 97.6   | 86.3   | 102.1 NM_001004056.1 |
| 99.9   | 97.1   | 89.8   | 90.1 NM_005308.2     |
| 174    | 167.3  | 158.1  | 147.2 NM_002082.2    |
| 169.4  | 153    | 140.5  | 132.9 NM_002082.2    |
| 78.5   | 79.4   | 78.5   | 83 NM_139209.2       |
| 106.1  | 112    | 87.8   | 95.5 NM_004491.2     |
| 92.5   | 86.9   | 87.1   | 84.4 NM_000838.2     |
| 128.3  | 97.3   | 99.6   | 99.9 NM_000839.2     |
| 96.1   | 84.6   | 91.7   | 93.3 NM_000840.2     |
| 96.2   | 91.8   | 88.6   | 101.5 NM_000841.1    |
| 76.8   | 81.2   | 82.3   | 77.8 NM_000842.1     |
| 76.6   | 74     | 73.1   | 81.1 NM_000843.2     |
| 91.8   | 100    | 89.9   | 99.1 NM_181874.1     |
| 101.3  | 85.6   | 89.6   | 91.3 NM_181875.1     |
| 88.5   | 84.1   | 82     | 91.7 NM_181875.1     |
| 98.1   | 102.3  | 95.3   | 91.7 NM_000845.1     |
| 1330.6 | 1759.1 | 1500.4 | 1229.2 NM_002087.2   |
| 745.6  | 1095.3 | 1145   | 570 NM_001012479.1   |
| 86.3   | 84     | 77     | 80.9 NM_001012513.1  |
| 83.9   | 91.4   | 86.8   | 93.2 NM_002091.3     |
| 836.7  | 589.5  | 442    | 489.9 NM_025196.2    |
| 838    | 626.2  | 542.8  | 630.9 NM_152407.2    |
| 93.6   | 97.9   | 85.6   | 92.4 NM_005314.2     |
| 85.1   | 75.7   | 77.5   | 92.3 NM_024869.2     |
| 1297   | 803.1  | 743.4  | 570.9 NM_002092.2    |
| 112.2  | 97.3   | 101.3  | 98.6 NM_024719.2     |
| 781.4  | 338.6  | 244    | 273 NM_031485.2      |
| 102.8  | 107.5  | 98.2   | 93.8 NM_173849.2     |
| 83.3   | 85.5   | 80.7   | 83.8 NM_005315.1     |
| 112    | 102.3  | 102.9  | 98.1 NM_178171.2     |
| 833.7  | 823.5  | 910.3  | 351.2 NM_024736.4    |
| 116.2  | 139    | 155.6  | 129.8 NM_018530.1    |
| 105.3  | 130.7  | 132    | 115.3 NM_018530.1    |
| 134.1  | 181.1  | 207.4  | 153.3 NM_018530.1    |
| 90.3   | 85.4   | 86.3   | 84.3 NM_001080554.1  |
| 104.5  | 94.7   | 88.1   | 99.3 NM_031289.1     |
| 105.4  | 101.5  | 95.1   | 105.3 NM_153823.1    |
| 177.4  | 140.3  | 143    | 110.4 NM_031965.2    |
| 85.4   | 77.1   | 90.5   | 79.1 NM_145657.1     |
| 81.5   | 79.5   | 75.4   | 79.7 NM_133267.1     |

|        |        |        |                     |
|--------|--------|--------|---------------------|
| 97.6   | 103    | 92.4   | 97.1 NM_019884.2    |
| 485.5  | 478.3  | 384.6  | 280.4 NM_002093.2   |
| 317.1  | 245    | 176.5  | 196.8 NM_198252.1   |
| 76.6   | 85.7   | 88.7   | 97.1 NM_000177.3    |
| 4770.1 | 3352.6 | 2643.5 | 1695 NM_002094.1    |
| 331    | 265.8  | 233.6  | 193.3 NM_018094.2   |
| 123.5  | 94     | 99.5   | 92.5 NM_000637.2    |
| 455.3  | 526.7  | 444.3  | 344.8 NM_000178.2   |
| 82.6   | 89.2   | 78.1   | 84.7 NM_145740.2    |
| 96     | 80.5   | 93.1   | 95.4 NM_000846.3    |
| 104.6  | 97.4   | 89     | 101.5 NM_000847.3   |
| 112.9  | 113.2  | 103.2  | 96.8 NM_001512.2    |
| 87.6   | 83     | 76.5   | 77.6 NM_153699.1    |
| 114.3  | 120.5  | 132.2  | 131.3 NM_024751.1   |
| 2425.6 | 2362.8 | 2254.1 | 1904.4 NM_015917.1  |
| 1590.2 | 650.4  | 504.3  | 530.4 NM_000561.2   |
| 7350.4 | 3268.5 | 3063.7 | 1817.1 NM_000561.2  |
| 95.5   | 85.1   | 79.6   | 96.4 NR_003112.1    |
| 7673.6 | 3121   | 3104.5 | 1685.3 NM_000848.2  |
| 306.9  | 336.2  | 321.2  | 242.5 NM_000849.3   |
| 227.3  | 160.4  | 138.8  | 128.9 NM_000850.3   |
| 217.1  | 171.8  | 168.6  | 132.3 NM_147148.1   |
| 94.2   | 100.5  | 97.3   | 98.5 NM_000851.2    |
| 2401.1 | 1306.8 | 1331.6 | 946.1 NM_004832.1   |
| 94.1   | 96.3   | 91.2   | 84.7 NM_183239.1    |
| 7020.8 | 5325.7 | 5632   | 2892.1 NM_000852.2  |
| 70.1   | 68     | 64.2   | 86.1 NM_000853.1    |
| 99.4   | 89.1   | 84.8   | 89 NM_001080843.1   |
| 97.5   | 104.2  | 92.2   | 88.8 NM_000854.2    |
| 95.4   | 83.4   | 73.7   | 80.4 NM_001513.2    |
| 237.8  | 237.1  | 257.4  | 169.8 NM_145871.1   |
| 98.7   | 92     | 94     | 87.4 NM_001513.2    |
| 97.3   | 104.9  | 93.9   | 95.2 NM_001006636.1 |
| 140.4  | 144.3  | 124.3  | 152 NM_001006636.1  |
| 106.5  | 106.1  | 94.4   | 90.7 NM_024659.2    |
| 92.6   | 82.2   | 88     | 96.1 NM_201595.1    |
| 92.1   | 96     | 102.2  | 97.8 NM_015859.2    |
| 110.2  | 106.8  | 94.7   | 85.3 NM_201595.1    |
| 1345.7 | 967.2  | 1022.6 | 885.6 NM_004492.1   |
| 757.4  | 615.7  | 491.9  | 460.7 NM_001514.3   |
| 534    | 432.3  | 288.3  | 402.9 NM_005513.1   |
| 2409.9 | 1206.3 | 1123.1 | 692.5 NM_002095.3   |
| 834.5  | 865.5  | 701.9  | 696.4 NM_002096.1   |
| 1553   | 1190   | 1092   | 1020.8 NM_004128.1  |
| 106.4  | 106.5  | 109.2  | 114.6 NM_005316.2   |
| 121.7  | 96.7   | 101.9  | 103 NM_001515.2     |
| 360.9  | 297.4  | 261.2  | 206.5 NM_001516.3   |
| 252.8  | 243.3  | 231.1  | 191.9 NM_001517.4   |
| 2108.6 | 2031.5 | 1599.4 | 1428.2 NM_207118.1  |
| 209.7  | 210    | 196.7  | 186 XM_939506.1     |

|        |        |        |                      |
|--------|--------|--------|----------------------|
| 92.9   | 94.9   | 93.1   | 91.5 NM_032999.1     |
| 149.4  | 143.6  | 136.4  | 138.3 NM_005685.2    |
| 96.4   | 110.9  | 93.3   | 88.4 NM_016328.1     |
| 100.5  | 103.4  | 102.1  | 106.2 NM_001003795.2 |
| 105.4  | 89.3   | 89.7   | 97.3 NR_002164.1     |
| 208.6  | 230.6  | 207.3  | 205 NM_001520.1      |
| 1185   | 1038.9 | 977    | 933.6 NM_001521.1    |
| 213.8  | 200.9  | 160.4  | 149.5 NM_001035521.1 |
| 762.4  | 617.9  | 458.2  | 448.1 NM_012086.1    |
| 88.7   | 87.8   | 93.6   | 90.9 NM_012204.1     |
| 472.6  | 308.3  | 257.2  | 245 NM_012087.1      |
| 109.6  | 105.6  | 91.9   | 109.6 NM_004286.3    |
| 102.1  | 122.5  | 105.3  | 97.6 NM_001042717.1  |
| 137.4  | 136.4  | 123.8  | 131.2 NM_019096.3    |
| 131.8  | 127.9  | 112.2  | 103.6 NM_133644.1    |
| 83.5   | 85.4   | 86.2   | 76.9 NM_133644.1     |
| 1151.3 | 804.1  | 789.7  | 552.7 NM_032620.1    |
| 1897.1 | 1268.2 | 959    | 851.1 NM_012341.2    |
| 105.2  | 100.1  | 93.8   | 86.8 NM_015666.2     |
| 1218.8 | 1701.8 | 1850.5 | 767.8 NM_012227.1    |
| 463.8  | 485.8  | 509.3  | 424 NM_014170.2      |
| 227.9  | 226.3  | 202.1  | 207.1 NM_014170.2    |
| 160.9  | 159.9  | 154.7  | 129.4 NM_138485.1    |
| 89     | 77.4   | 90.7   | 83.5 NM_001011708.1  |
| 449.3  | 250.6  | 225.4  | 184.3 NM_016426.4    |
| 111.1  | 98.5   | 101.4  | 90.4 NM_000409.2     |
| 132.4  | 152.9  | 160.1  | 144.7 NM_002098.3    |
| 124.7  | 111.3  | 113.7  | 99.4 NM_005459.2     |
| 93.6   | 99.5   | 92.2   | 91.9 NM_033553.2     |
| 97     | 86.2   | 86.1   | 95.5 NM_007102.1     |
| 97.2   | 100.2  | 97.5   | 91.6 NM_000855.1     |
| 82.6   | 90.9   | 82.3   | 84.5 NM_000856.2     |
| 116.7  | 99.7   | 96.4   | 86 NM_000857.1       |
| 80.1   | 79.7   | 84.3   | 77.4 NM_004963.1     |
| 94.3   | 87.2   | 88.8   | 86.6 NM_000180.1     |
| 94.3   | 86.6   | 86.8   | 92.1 NM_001522.1     |
| 291.6  | 212.8  | 194.7  | 166 NM_021927.1      |
| 1804.6 | 1903.5 | 1568.9 | 1331.1 NM_000858.4   |
| 87.2   | 79.6   | 87.8   | 88.8 NM_016315.2     |
| 94.1   | 89     | 83.6   | 90.4 NM_020707.2     |
| 2028.9 | 2102.2 | 1959.9 | 1390.2 NM_000181.1   |
| 237.2  | 322.4  | 355.9  | 264.2 NM_206910.1    |
| 1217   | 757.7  | 649    | 667.8 NM_004130.2    |
| 313.8  | 368.5  | 373.5  | 265.3 NM_003918.2    |
| 81.9   | 86.9   | 90     | 88.3 NM_003918.2     |
| 103.7  | 95.6   | 113.3  | 95 NM_003918.1       |
| 91.4   | 84.2   | 82.6   | 83.2 NM_152312.2     |
| 80.2   | 70.1   | 78.4   | 81 NM_002099.3       |
| 82.6   | 74.9   | 74.4   | 84.4 NM_002100.3     |
| 870.3  | 978.2  | 933.3  | 721.7 NM_002101.3    |

|         |         |         |                     |
|---------|---------|---------|---------------------|
| 795.7   | 898.9   | 970.3   | 804.9 XM_940361.1   |
| 91.4    | 88      | 80.1    | 92.7 NM_198682.1    |
| 81.3    | 91.5    | 79.8    | 78.2 NM_002102.2    |
| 88.4    | 86.2    | 78.7    | 89.9 NM_002102.2    |
| 177.3   | 175.2   | 157.4   | 144.3 NM_002103.3   |
| 105.1   | 100.3   | 97      | 97 NM_021957.2      |
| 91.2    | 89.4    | 87.5    | 89.8 NM_006144.2    |
| 87.8    | 80.3    | 84.8    | 90.5 NM_004131.3    |
| 86.7    | 95.8    | 103.3   | 90.5 NM_033423.2    |
| 82.4    | 82.1    | 81.6    | 86.6 NM_002104.2    |
| 96.9    | 97.5    | 80.3    | 90.6 NM_005317.2    |
| 90.4    | 83.2    | 83.9    | 84.1 NR_002196.1    |
| 2175    | 849.6   | 835.4   | 730.2 NM_005318.2   |
| 79.4    | 83.7    | 79.3    | 83.8 NM_153833.1    |
| 315.8   | 205.9   | 210.9   | 206.8 NM_006026.2   |
| 102.6   | 97.1    | 105.1   | 97.2 NM_181788.1    |
| 79.8    | 91.6    | 89.2    | 93.6 NM_001017990.1 |
| 86.5    | 91.2    | 86.8    | 90.9 NM_001017991.1 |
| 78.9    | 88.2    | 79.2    | 78.1 NM_080720.1    |
| 94.4    | 88.8    | 99.4    | 82.6 NM_018267.2    |
| 295.5   | 230.1   | 246.9   | 182.9 NM_177925.1   |
| 126     | 123.4   | 120.3   | 113.9 NM_138635.2   |
| 276.7   | 139.3   | 120.1   | 130.6 NM_002105.2   |
| 222.7   | 138.7   | 133.5   | 119.6 NM_004893.2   |
| 1608.8  | 1589.2  | 1528.5  | 1151.4 NM_138609.1  |
| 19100.5 | 19347.7 | 16907.4 | 11894.4 NM_004893.2 |
| 505.1   | 388.7   | 304.1   | 231 NM_018649.1     |
| 19656.2 | 11567.6 | 11475.6 | 9153.8 NM_002106.3  |
| 178.7   | 249.1   | 231.1   | 191.9 NM_017445.1   |
| 87.3    | 77.7    | 79.3    | 89.9 NM_001002916.2 |
| 98.3    | 82.4    | 91.4    | 91.1 NR_003238.1    |
| 36851.3 | 22985.4 | 21828.2 | 21032.9 NM_002107.3 |
| 899.3   | 1045.4  | 730.8   | 815.7 NM_005324.3   |
| 90.1    | 90      | 82.1    | 91.9 NM_004285.3    |
| 109.2   | 95.2    | 100.5   | 102.6 NM_012205.1   |
| 87.6    | 84.8    | 83      | 84 NM_004132.2      |
| 138.4   | 151.2   | 135.6   | 128.5 NM_014282.1   |
| 92.9    | 108.5   | 93.5    | 90.2 NM_020771.2    |
| 452.7   | 396.2   | 326.4   | 271.6 NM_004493.1   |
| 651.4   | 503.8   | 479.5   | 369.4 NM_004493.1   |
| 592.3   | 479     | 542.7   | 247.8 NM_000182.3   |
| 248.9   | 219.3   | 241.4   | 204.6 NM_000183.2   |
| 2312.9  | 1600    | 1530.9  | 944.4 NM_005327.1   |
| 214.8   | 192.2   | 155.9   | 150.9 NM_005326.3   |
| 821.5   | 802.1   | 802.2   | 425.4 NM_005326.3   |
| 196.2   | 230.9   | 227.3   | 220.4 NM_207112.1   |
| 100.4   | 94.3    | 97.3    | 97.3 NM_032304.2    |
| 299.6   | 301.5   | 290.2   | 234.1 NM_032304.2   |
| 94      | 87.7    | 83.9    | 86.7 NM_052947.2    |
| 115.8   | 160.8   | 144.7   | 151.5 NM_002108.2   |

|        |        |        |                      |
|--------|--------|--------|----------------------|
| 97.7   | 93.3   | 90     | 79.8 NM_021175.2     |
| 93.5   | 82.4   | 84.3   | 89.7 NM_004821.1     |
| 99.8   | 97.7   | 100.3  | 81 NM_021973.2       |
| 92.1   | 81.9   | 83.3   | 77 NM_017545.2       |
| 73.1   | 81.6   | 77.8   | 80.3 NM_001005783.1  |
| 99.3   | 94.1   | 79.1   | 91.1 NM_016527.2     |
| 84.1   | 92.1   | 86.3   | 79 NM_177977.2       |
| 104.1  | 95.8   | 89     | 84.6 NM_003949.2     |
| 93.5   | 84.2   | 84.3   | 92.5 NM_003949.2     |
| 77.7   | 80.3   | 80.7   | 80.5 NM_001884.2     |
| 95.1   | 100.7  | 92.5   | 90.8 NM_021817.2     |
| 113.6  | 88.3   | 92.2   | 77.9 NM_178232.2     |
| 91.3   | 102.7  | 94.5   | 94.2 NM_023002.1     |
| 1021.6 | 785.2  | 770.2  | 437.3 NM_002109.3    |
| 293.5  | 265.9  | 251.6  | 215.7 NM_080820.3    |
| 1268.3 | 1012.6 | 929.6  | 911.6 NM_012208.2    |
| 88.7   | 89.9   | 78.3   | 81.8 NM_001523.1     |
| 89.8   | 82.9   | 83.4   | 89.2 NM_005328.1     |
| 90.8   | 78.2   | 75.3   | 84.8 NM_005328.1     |
| 95.2   | 85.3   | 90.1   | 98.2 NM_005329.2     |
| 95.4   | 96     | 91.8   | 91.8 NM_005329.2     |
| 986.7  | 515.6  | 479.1  | 628.4 NM_003642.2    |
| 213.3  | 191.8  | 146.3  | 191.2 NM_003642.2    |
| 81.8   | 84.1   | 77.6   | 84 NM_012206.1       |
| 141.1  | 150.3  | 120.4  | 110.5 NM_032782.3    |
| 585.3  | 444.1  | 357.5  | 386.4 NM_001018837.1 |
| 288.4  | 268.5  | 224.6  | 191.2 NM_006118.3    |
| 275.2  | 182    | 157.4  | 166 NM_006118.3      |
| 88.8   | 86.6   | 82.7   | 84 NM_021182.1       |
| 95.1   | 102.6  | 81.4   | 79 NM_000517.3       |
| 103.3  | 86.7   | 92.1   | 85.6 NM_000518.4     |
| 88.1   | 89.7   | 89.8   | 90 NM_000519.3       |
| 93.3   | 85     | 87.1   | 84.7 NM_005330.3     |
| 225.1  | 174.1  | 165.6  | 134.4 NM_001945.1    |
| 95.1   | 89.6   | 84.3   | 81.5 NM_000559.2     |
| 90.4   | 92.6   | 93.8   | 96.4 NM_000184.2     |
| 93.9   | 89.3   | 86.9   | 89.8 NM_001003938.3  |
| 215.2  | 287.7  | 348    | 207.7 NM_012257.3    |
| 114.7  | 89.9   | 87     | 83 NM_005331.3       |
| 94.5   | 92.6   | 90     | 90.8 NM_006620.2     |
| 81.6   | 97.2   | 88.7   | 89.7 NM_016578.3     |
| 7532.6 | 4111.5 | 3228.1 | 2974.9 NM_006402.2   |
| 84.4   | 87     | 80.6   | 83.8 NM_005332.2     |
| 89.6   | 93.7   | 87.7   | 91.7 NM_018487.2     |
| 586.1  | 502.8  | 439.1  | 325.9 NM_015261.2    |
| 811.5  | 491.4  | 377.5  | 433.8 NM_022346.3    |
| 184.9  | 154.6  | 144.7  | 150.8 NM_152299.1    |
| 103.5  | 92.9   | 82.6   | 88.9 NM_014551.3     |
| 158.7  | 133    | 117.9  | 135.4 NM_014551.3    |
| 163    | 154.4  | 153.4  | 148.1 NM_053005.2    |



|        |        |        |                      |
|--------|--------|--------|----------------------|
| 96.9   | 99.1   | 94.1   | 95.4 NM_005333.2     |
| 2050.4 | 1699.8 | 1839.1 | 871.3 NM_005334.1    |
| 135.9  | 110.6  | 111.9  | 95.5 NM_001002018.1  |
| 854.8  | 550.2  | 472.9  | 419.4 NM_001002017.1 |
| 130.2  | 130.2  | 127.1  | 127.1 NM_013320.1    |
| 114.1  | 102.9  | 104.4  | 106.4 NM_181717.1    |
| 2264.8 | 3582.6 | 4079.6 | 3320.3 NR_001318.1   |
| 91.8   | 93.7   | 75.4   | 78.1 NM_001001394.2  |
| 88.8   | 81.8   | 77.8   | 83.8 NR_002139.1     |
| 85.2   | 89     | 89.7   | 86.1 NM_005844.2     |
| 379.3  | 548.3  | 581.2  | 476.7 NM_002110.2    |
| 5757.6 | 5000.3 | 4449.1 | 2709.2 NM_005335.3   |
| 87.2   | 89.9   | 90.6   | 82.1 NM_021072.1     |
| 77.5   | 83.8   | 77.9   | 89 NM_001194.2       |
| 132.2  | 125.7  | 146.1  | 119.4 NM_020897.1    |
| 98.5   | 107.2  | 99.9   | 114.4 NM_005477.1    |
| 117.3  | 105.7  | 102.9  | 107.5 NM_080669.2    |
| 165.7  | 108.1  | 114.6  | 113.3 NM_006674.2    |
| 117    | 128.1  | 104.4  | 127.3 NM_001524.1    |
| 90.6   | 91.1   | 87.7   | 105.2 NM_001525.1    |
| 109.3  | 98.4   | 97.3   | 94 NM_001526.2       |
| 2535.6 | 919.4  | 962.6  | 735.4 NM_014266.3    |
| 206.6  | 133.9  | 130.6  | 115.6 NM_014266.3    |
| 86.1   | 81.2   | 91.5   | 100.6 NM_001023564.1 |
| 4343.2 | 3579.2 | 3399.1 | 2034.1 NM_004964.2   |
| 123.9  | 133.4  | 124.1  | 124.3 NM_032019.4    |
| 90.3   | 93.1   | 94.5   | 88.9 NM_024827.1     |
| 1994.8 | 1586.3 | 1041.4 | 1829.5 NM_001527.1   |
| 780.2  | 697.3  | 627.9  | 608.7 NM_003883.2    |
| 176    | 186.4  | 215    | 177.3 NM_006037.2    |
| 109.3  | 85.9   | 85.8   | 91.5 NM_005474.4     |
| 103.7  | 110.2  | 96.2   | 104.2 NM_001015053.1 |
| 212.3  | 287.9  | 256.1  | 235 NM_006044.2      |
| 91.7   | 82.5   | 94.3   | 86 NM_015401.1       |
| 86.4   | 96.1   | 77.9   | 85.2 NM_016596.2     |
| 141.5  | 159.2  | 168.5  | 134.2 NM_018486.1    |
| 105.6  | 109.2  | 88.8   | 89.8 NM_058176.2     |
| 91.8   | 98.2   | 92.4   | 103 NM_014707.1      |
| 98.2   | 104.9  | 91.1   | 104.6 NM_178423.1    |
| 96.4   | 90.2   | 84.5   | 81.4 NM_058177.1     |
| 78.6   | 109.1  | 89.5   | 87.5 NM_058177.1     |
| 87.5   | 82     | 75     | 82.6 NM_002112.1     |
| 605.1  | 472.7  | 322.4  | 509.9 NM_016648.1    |
| 4112.1 | 4481.3 | 4183.4 | 3082.4 NM_016063.1   |
| 613.6  | 433.4  | 345    | 289.9 NM_198527.1    |
| 1857.9 | 1003   | 736    | 600.4 NM_004494.1    |
| 300.6  | 275.2  | 227.2  | 186 NM_001001520.1   |
| 342.7  | 341.5  | 342.4  | 336 NM_001001520.1   |
| 93.6   | 93.1   | 95.2   | 94 NM_138574.2       |
| 83.7   | 89     | 84.8   | 84.8 NM_016073.2     |

|        |        |        |        |                |
|--------|--------|--------|--------|----------------|
| 317.3  | 305.4  | 261.2  | 180.9  | NM_012080.3    |
| 169.9  | 209.2  | 179.1  | 162.8  | NM_032124.3    |
| 157.4  | 122.2  | 119.7  | 110.4  | NM_031219.2    |
| 106    | 146.6  | 145.4  | 123.8  | NM_005336.2    |
| 98.3   | 95.2   | 97     | 93.2   | NM_005336.2    |
| 111.3  | 110    | 119.1  | 104.1  | NM_203346.1    |
| 319.1  | 282.4  | 249    | 217.4  | NM_006831.1    |
| 1204.6 | 907.1  | 841.2  | 546.1  | NM_018072.4    |
| 301.6  | 402.9  | 358.6  | 364.1  | NM_019024.1    |
| 456    | 445.2  | 382.8  | 317.1  | NM_015987.3    |
| 1062.2 | 1166.8 | 1314.3 | 1096.2 | NM_014320.2    |
| 166.7  | 190.9  | 188.8  | 192    | NM_016217.2    |
| 1380.4 | 2385.4 | 1727.5 | 1807   | NM_015382.1    |
| 91.7   | 95.1   | 95.3   | 100.3  | NM_182765.1    |
| 92.6   | 96     | 77.1   | 79.9   | NM_173497.1    |
| 92.6   | 106.1  | 106    | 103.8  | NM_173497.1    |
| 213.2  | 191.9  | 207.6  | 140.2  | NM_024602.4    |
| 79.1   | 80.8   | 76.9   | 84.8   | NM_015052.2    |
| 103.4  | 103.5  | 95.7   | 110.3  | NM_020760.1    |
| 330.7  | 272.4  | 214.9  | 290.3  | NM_133636.1    |
| 122.1  | 110.6  | 107.7  | 95.7   | NM_033647.2    |
| 206.8  | 154.2  | 137.2  | 152.4  | NM_018063.3    |
| 99.1   | 89.2   | 82.9   | 81.7   | NM_001029887.1 |
| 226.8  | 480.6  | 415.7  | 378    | NM_014877.2    |
| 346.6  | 495.2  | 383.6  | 230.5  | NM_005337.2    |
| 94.9   | 94.4   | 92.1   | 88.9   | NM_018437.3    |
| 92.2   | 90.6   | 79.9   | 90.8   | NM_018437.3    |
| 77.6   | 77.5   | 74.1   | 77.5   | NM_197978.1    |
| 154.3  | 189.5  | 178.8  | 154    | NM_016173.3    |
| 84.8   | 90.1   | 84.3   | 86.1   | NM_152722.4    |
| 79.6   | 73.1   | 83.1   | 85.8   | NM_138737.1    |
| 86.1   | 80.7   | 82.6   | 80.4   | NM_014799.2    |
| 323.2  | 540    | 573.6  | 507    | NM_003922.2    |
| 304.8  | 539.1  | 553.9  | 385.8  | NM_004667.3    |
| 103.1  | 123.6  | 108.1  | 120.1  | XR_000517.1    |
| 78.5   | 76.9   | 80.8   | 89.6   | NR_002827.1    |
| 169.6  | 198.1  | 144.7  | 157.5  | NM_014606.1    |
| 121.3  | 115.6  | 119.1  | 124.6  | NM_022079.1    |
| 99.3   | 96.9   | 89.8   | 97.8   | NM_015601.2    |
| 528.3  | 405.2  | 321.1  | 399.8  | NM_015601.2    |
| 346.8  | 263.9  | 245.8  | 217.2  | NM_016323.1    |
| 168.9  | 150.7  | 140.2  | 143.5  | NM_001013005.1 |
| 821.8  | 392    | 375.2  | 378.8  | NM_001010990.1 |
| 118    | 99.3   | 100.6  | 116.6  | NM_022373.3    |
| 102.9  | 97.7   | 91.2   | 94.6   | NM_207582.1    |
| 83.3   | 78.5   | 81.3   | 70.6   | NM_005524.2    |
| 84.7   | 84     | 74.2   | 74     | NM_019089.3    |
| 126    | 111    | 108.8  | 101.4  | NM_021170.2    |
| 792    | 909.8  | 993.2  | 494.9  | NM_018645.3    |
| 73.6   | 82.8   | 74.5   | 75.1   | NM_032580.1    |

|        |         |        |                      |
|--------|---------|--------|----------------------|
| 163    | 140.2   | 148.5  | 149.8 NM_003865.1    |
| 93.3   | 113.7   | 113.6  | 87.7 NM_000520.2     |
| 9014   | 14236.6 | 11431  | 9598.8 NM_000521.2   |
| 97     | 99.7    | 103.5  | 94.7 NM_173620.1     |
| 100.1  | 102     | 90.2   | 95.2 NM_006460.2     |
| 109.1  | 123.2   | 119.6  | 98.8 NM_144608.1     |
| 82.9   | 86.8    | 87.7   | 91.4 NM_012258.2     |
| 93.8   | 85.7    | 93.1   | 100 NM_001040708.1   |
| 92.9   | 91.2    | 91.9   | 85.4 NM_012259.1     |
| 498.3  | 373     | 360.1  | 263.6 NM_014571.2    |
| 84.9   | 84      | 87.9   | 81.4 NM_139005.2     |
| 101.1  | 88.2    | 78.9   | 98.7 NM_139007.1     |
| 89.1   | 87.4    | 77.5   | 85.1 NM_000410.3     |
| 85.2   | 81.7    | 82.1   | 82.6 NM_145277.3     |
| 86     | 97.1    | 86     | 88.7 NM_213653.2     |
| 77.8   | 74.6    | 82.9   | 87.2 NM_213652.2     |
| 121.4  | 129.3   | 117.8  | 120.1 NM_000187.2    |
| 75     | 75.8    | 74.4   | 72.5 NM_001010934.1  |
| 116.7  | 114.4   | 99.1   | 112 NM_001010932.1   |
| 84.6   | 83.4    | 76.1   | 81.8 NM_001010931.1  |
| 86.6   | 83.9    | 85     | 92.8 NM_001528.2     |
| 2903   | 2698.7  | 2791.6 | 1304.3 NM_004712.3   |
| 88     | 85.3    | 82.1   | 79.1 NM_018194.1     |
| 166.5  | 142.2   | 149.7  | 121 NM_002729.2      |
| 84.7   | 87.7    | 92.2   | 95.9 NM_022475.1     |
| 95.4   | 95      | 96.8   | 97.3 NM_005712.1     |
| 83     | 86.1    | 78.2   | 92.1 NM_007072.2     |
| 138.1  | 100.6   | 113.1  | 101.1 NM_001031693.1 |
| 98.2   | 89.4    | 92.8   | 85.1 NM_001036645.1  |
| 88.1   | 81.4    | 81.5   | 88.3 NM_001036645.1  |
| 118.2  | 87.6    | 98.8   | 93.9 NM_033055.2     |
| 1202.6 | 859     | 542.7  | 714.8 NM_032558.1    |
| 664.6  | 846.9   | 705.4  | 711.8 NM_152740.2    |
| 505.5  | 437     | 387.3  | 344.7 NM_014362.2    |
| 109.7  | 101.1   | 107.2  | 99.5 NM_006497.2     |
| 648.2  | 466.3   | 500.6  | 273 NM_015094.1      |
| 156.8  | 125.7   | 109.5  | 154.7 NM_181054.1    |
| 159.9  | 137.9   | 131.5  | 148.3 NM_001530.2    |
| 164.6  | 149     | 138.2  | 133 NM_017902.1      |
| 96.9   | 86.7    | 91.6   | 83 NM_152796.1       |
| 80.3   | 82.5    | 79.2   | 96.8 NM_152795.2     |
| 92.8   | 85.7    | 85.8   | 91.5 NM_152794.2     |
| 94.9   | 90.9    | 98.4   | 88.1 NM_022462.2     |
| 80.8   | 93.4    | 78.8   | 88.1 NM_152794.1     |
| 136.6  | 110.7   | 124.7  | 107.3 NM_013332.1    |
| 1065.9 | 618.4   | 464.9  | 640.1 NM_014056.1    |
| 85.5   | 92.8    | 80.1   | 92 NM_016438.2       |
| 1819.9 | 1511.2  | 1418.1 | 876.3 NM_138820.2    |
| 96     | 92.1    | 88.8   | 85.1 XR_000594.1     |
| 88.9   | 80.6    | 77.3   | 90.3 NR_002780.1     |

|         |         |        |                      |
|---------|---------|--------|----------------------|
| 92.9    | 95.1    | 92.5   | 93 NM_194072.1       |
| 11127.8 | 11498.2 | 9687.3 | 9595 NM_005340.3     |
| 1023.3  | 848.8   | 847.4  | 582.2 NM_032593.2    |
| 85      | 91.8    | 77.3   | 87.2 NM_138571.3     |
| 206.6   | 170.7   | 166.1  | 138.7 NM_005338.4    |
| 100.2   | 101.5   | 90.3   | 103.6 NM_003959.1    |
| 80.9    | 86.7    | 85.3   | 90.9 NM_003959.1     |
| 99.8    | 101.7   | 101.3  | 89 NM_003959.1       |
| 84.7    | 72.6    | 84.9   | 84.5 NM_005339.3     |
| 85.6    | 80      | 76.2   | 83.4 NM_198269.1     |
| 85.6    | 86      | 91.8   | 85.2 NM_181358.1     |
| 103.7   | 98.9    | 88.3   | 92.8 NM_152696.3     |
| 92.1    | 86.1    | 84.1   | 87.5 NM_198268.1     |
| 119.8   | 218.8   | 214.9  | 139.5 NM_022740.2    |
| 110.5   | 114     | 91.6   | 104.3 NM_005734.2    |
| 137.7   | 109.2   | 102    | 100.3 NM_001048200.1 |
| 86.6    | 83.5    | 84.6   | 95.8 NM_144685.3     |
| 96.6    | 96      | 102.1  | 90 NM_003325.3       |
| 548.3   | 486.9   | 449.3  | 219.8 NM_003609.2    |
| 93.4    | 96.2    | 92.8   | 93.3 NM_015216.2     |
| 324.8   | 419.5   | 311.6  | 266.1 NM_001024463.2 |
| 86.4    | 82.8    | 83.8   | 90.7 NM_014659.3     |
| 94.9    | 97.5    | 107    | 90.3 NM_001024463.2  |
| 120.4   | 103.1   | 103.9  | 107.4 NM_005325.2    |
| 107.2   | 92.5    | 97.9   | 96.8 NM_005322.2     |
| 128.9   | 105.3   | 133.8  | 108.7 NM_005319.3    |
| 98      | 100.3   | 100.7  | 85.7 NM_005320.2     |
| 85.8    | 81.4    | 76.9   | 86.1 NM_005321.2     |
| 101.8   | 88.5    | 91.6   | 91.2 NM_005323.3     |
| 106.5   | 102.6   | 96.3   | 87 NM_170745.3       |
| 98.1    | 70.5    | 68.8   | 72.7 NM_003513.2     |
| 89.8    | 101.8   | 94     | 102.3 NM_003512.3    |
| 86.9    | 81.6    | 81.1   | 92.2 NM_021065.2     |
| 89.6    | 88.9    | 79     | 84.2 NM_021052.2     |
| 86.7    | 76.8    | 81     | 81.2 NM_021064.3     |
| 103.4   | 92.4    | 88.2   | 97.6 NM_080596.1     |
| 93.8    | 94.9    | 89.4   | 98.5 NM_003509.2     |
| 96.2    | 99.5    | 86.3   | 88.8 NM_021066.2     |
| 80.1    | 74.9    | 82.9   | 74.5 NM_003510.2     |
| 93.7    | 111.9   | 102.7  | 106.8 NM_003514.2    |
| 88.9    | 93.2    | 91.7   | 93.9 NM_170610.2     |
| 82.9    | 82.6    | 84.1   | 80.5 NM_021062.2     |
| 97.2    | 104     | 87     | 82.4 NM_003526.2     |
| 127.4   | 121.3   | 154.8  | 134.7 NM_138720.1    |
| 100.9   | 118.5   | 99.3   | 117.7 NM_138720.1    |
| 85.9    | 92      | 72.9   | 91.4 NM_021063.2     |
| 94.2    | 94.5    | 93     | 97.8 NM_003523.2     |
| 109.8   | 134.7   | 123.5  | 120.1 NM_003522.3    |
| 104.3   | 102.7   | 101.7  | 99.9 NM_003518.3     |
| 227.4   | 179.5   | 221.2  | 161.3 NM_003524.2    |

|        |         |         |                      |
|--------|---------|---------|----------------------|
| 84.2   | 73.2    | 75.7    | 84 NM_003525.2       |
| 416.1  | 357.2   | 293.1   | 267.2 NM_021058.3    |
| 936.8  | 1477    | 1500.4  | 924.3 NM_080593.1    |
| 81.3   | 83.8    | 83.8    | 81.7 NM_003519.3     |
| 101.1  | 93.3    | 79.1    | 87.6 NM_003521.2     |
| 85.1   | 87.1    | 86.8    | 92.5 NM_003527.4     |
| 96.2   | 96.7    | 100.1   | 99.9 NM_003529.2     |
| 84.5   | 92.1    | 87.7    | 85.9 NM_003537.3     |
| 119.7  | 116     | 101.4   | 109.7 NM_003531.2    |
| 101.5  | 97.6    | 101.8   | 95 NM_003530.3       |
| 85.9   | 87.1    | 83.1    | 84 NM_021018.2       |
| 98.8   | 100     | 97.7    | 92.9 NM_003534.2     |
| 98     | 107.1   | 96.3    | 96.1 NM_003536.2     |
| 110.2  | 101     | 104.9   | 98.8 NM_003533.2     |
| 97.7   | 108.4   | 116.8   | 108.7 NM_003535.2    |
| 87.7   | 89.4    | 87.5    | 87.2 NM_003538.3     |
| 103.6  | 111.1   | 104.9   | 111.4 NM_003544.2    |
| 15723  | 10756.4 | 10386.8 | 5947.3 NM_003542.3   |
| 90.3   | 81.8    | 86.2    | 86.6 NM_003539.3     |
| 87.3   | 96.8    | 98.5    | 93.1 NM_003545.3     |
| 97.5   | 92.9    | 96.6    | 83.8 NM_003540.3     |
| 87.2   | 82.5    | 75.2    | 83.9 NM_003547.2     |
| 95.8   | 88.9    | 86.4    | 92.2 NM_003543.3     |
| 97.9   | 89.7    | 78.3    | 83.5 NM_003495.2     |
| 94.2   | 94.4    | 81.8    | 100.8 NM_021968.3    |
| 84.5   | 78.2    | 77      | 87.2 NM_003546.2     |
| 263.7  | 259.7   | 297.9   | 225 NM_003516.2      |
| 98.4   | 97.8    | 100.8   | 102.2 NM_175065.2    |
| 836.4  | 603.1   | 612.1   | 390.4 NM_003517.2    |
| 98.6   | 92.3    | 85.4    | 94.6 NM_003528.2     |
| 130.8  | 132.9   | 125.7   | 111.6 NM_001024599.1 |
| 92.6   | 104.5   | 101.4   | 95.8 NM_021059.2     |
| 122.2  | 111.2   | 126.5   | 104.6 NM_003548.2    |
| 167.9  | 114.3   | 121.7   | 115.6 NM_033445.2    |
| 108.2  | 90.6    | 85.7    | 90.4 NM_175055.2     |
| 86.1   | 92      | 83.5    | 90.3 NM_003493.2     |
| 88.3   | 81.5    | 76.7    | 78.7 NM_175054.2     |
| 112.1  | 110.1   | 107     | 105.1 NM_002114.1    |
| 142    | 143.4   | 123.4   | 114.1 NM_006734.2    |
| 105    | 109.6   | 105.4   | 91.2 NM_024503.1     |
| 1625.6 | 1775.6  | 1519.6  | 943.7 NM_033500.1    |
| 97.6   | 102.7   | 98.4    | 93.4 NM_000188.1     |
| 85.5   | 79.4    | 73      | 76.4 NM_033496.1     |
| 88.6   | 90.4    | 84.3    | 88.3 NM_033500.1     |
| 141.6  | 150.9   | 151.4   | 133.8 NM_000189.4    |
| 189    | 193.7   | 183.9   | 166.5 NM_002115.1    |
| 85.3   | 84.1    | 85.6    | 73.1 NM_025130.2     |
| 111.2  | 112.3   | 107.8   | 94.9 NM_181786.2     |
| 90.1   | 92.8    | 96.1    | 87.1 NM_181846.1     |
| 557    | 611.1   | 652.8   | 392 NM_005341.1      |

|        |        |        |        |                |
|--------|--------|--------|--------|----------------|
| 9652.2 | 6370.2 | 5460   | 5398.5 | NM_002116.5    |
| 77.2   | 78.5   | 77.4   | 82.7   | NM_002117.4    |
| 394.8  | 469.1  | 514.8  | 282.7  | NM_006120.2    |
| 109.6  | 140.8  | 159    | 131.8  | NM_002118.3    |
| 84.4   | 73.9   | 85.6   | 88.5   | NM_002119.3    |
| 100.1  | 99.7   | 95.9   | 97.9   | NM_002120.2    |
| 140.6  | 122.9  | 129.5  | 121    | NM_033554.2    |
| 80     | 83.7   | 81.6   | 96.1   | NM_002121.4    |
| 92.5   | 80.1   | 87.4   | 82.5   | NR_001435.1    |
| 87.8   | 87.1   | 85.7   | 86     | XM_936120.1    |
| 98.7   | 97.2   | 88.6   | 80.9   | NM_020056.2    |
| 86.5   | 87     | 88.2   | 86.4   | NM_002123.2    |
| 93.4   | 94.6   | 96.7   | 96.3   | NM_182549.1    |
| 379.8  | 284.5  | 237.3  | 252.6  | NM_019111.3    |
| 615.7  | 707.8  | 495.9  | 452.8  | NM_002124.1    |
| 212.6  | 207.7  | 218.4  | 187    | NM_022555.3    |
| 94.5   | 94.1   | 87     | 83.1   | NM_021983.4    |
| 664    | 390.5  | 322.1  | 284.3  | NM_002125.3    |
| 252.6  | 203.4  | 247.3  | 198.8  | NR_001298.1    |
| 155    | 134    | 131.7  | 125.1  | NM_005516.4    |
| 340.9  | 298.7  | 268.3  | 242.8  | NM_018950.1    |
| 113.8  | 104.5  | 107.7  | 108    | NM_002127.3    |
| 1396.8 | 1142.4 | 1008.8 | 816.5  | NR_001434.1    |
| 80.3   | 85.2   | 86.1   | 86.1   | NM_000411.4    |
| 99.4   | 96.4   | 91     | 86.3   | NM_002126.3    |
| 109.7  | 97     | 90.5   | 99.4   | NM_031304.2    |
| 342.3  | 270.2  | 240.4  | 219.7  | NM_021958.2    |
| 97.6   | 110    | 87.1   | 101    | NM_005515.2    |
| 88.2   | 84     | 86     | 88.5   | NM_178580.1    |
| 644.2  | 555.2  | 428.7  | 402.7  | NM_030789.2    |
| 116.1  | 127.8  | 126.3  | 120.3  | NM_178582.1    |
| 146.2  | 144    | 145.8  | 133.7  | NM_024567.2    |
| 103.1  | 101.8  | 93.5   | 95.7   | NM_001024382.1 |
| 666.6  | 447.3  | 437.7  | 274.4  | NM_000190.3    |
| 1050.9 | 681.9  | 682.9  | 338.5  | NM_001024382.1 |
| 98.3   | 88.6   | 93.6   | 88.7   | NM_031935.1    |
| 363.7  | 630.5  | 381    | 335.9  | NM_032717.3    |
| 280    | 194.8  | 212.3  | 254.4  | NM_001008735.1 |
| 198    | 217.9  | 195.8  | 152.2  | NM_018200.2    |
| 1185.4 | 1516.1 | 1510.3 | 798    | NM_006339.1    |
| 131.4  | 122.9  | 128.1  | 118.2  | NM_014250.1    |
| 101.8  | 98.6   | 105.1  | 98.6   | NM_005487.3    |
| 93.2   | 86.3   | 100.8  | 93.6   | NR_002165.1    |
| 87.2   | 94.6   | 88.8   | 89.6   | NM_002131.2    |
| 86.9   | 90.5   | 91.8   | 92.2   | NM_145904.1    |
| 91.7   | 88.2   | 84.1   | 94.6   | NM_145905.1    |
| 3140.1 | 2604.4 | 2071.8 | 2686.7 | NM_145899.1    |
| 91.6   | 98.1   | 85.4   | 85.7   | NM_003484.1    |
| 99.1   | 103.9  | 102.4  | 102.5  | NM_003483.4    |
| 199.4  | 158.6  | 144.6  | 206    | NM_002128.4    |

|         |         |         |                      |
|---------|---------|---------|----------------------|
| 2575.7  | 1645    | 1446.7  | 1581 NM_002129.2     |
| 520.2   | 401     | 322.8   | 309.7 NM_005342.2    |
| 100.9   | 91.2    | 97.5    | 101.3 NM_145205.3    |
| 87.2    | 83.6    | 85.7    | 91.7 NM_001008728.1  |
| 184.8   | 182     | 184.1   | 150.9 NM_000191.2    |
| 92.1    | 96      | 82.8    | 74.5 NM_019036.1     |
| 94.2    | 84.2    | 84.9    | 84.3 NM_019036.1     |
| 95.5    | 93.8    | 90.4    | 96.5 NM_019036.1     |
| 1046.3  | 1511.7  | 1393.1  | 1171.3 NM_000859.1   |
| 927.7   | 1333.3  | 1441.1  | 1071.4 NM_002130.4   |
| 89.1    | 94.2    | 92.8    | 79.4 NM_005518.2     |
| 20064.2 | 19436.1 | 18781.1 | 14921 NM_004965.6    |
| 2296.8  | 1195.9  | 987.7   | 1266.7 NM_005517.2   |
| 93.5    | 90.3    | 86.8    | 89.8 NM_004242.2     |
| 497.2   | 464.7   | 524.1   | 346.8 NM_006353.2    |
| 223.4   | 189.5   | 204     | 128.3 NM_012292.2    |
| 684.7   | 400.8   | 343.3   | 424.5 NM_012484.1    |
| 1390    | 884.8   | 687.6   | 587 NM_012485.1      |
| 3028.7  | 1074.7  | 660.8   | 651.9 NM_002133.1    |
| 88.8    | 94.1    | 87      | 92.1 NM_002134.2     |
| 84.5    | 88.2    | 82.7    | 85.3 NM_015980.3     |
| 93.2    | 89.4    | 84.2    | 102.5 NM_018942.1    |
| 186.2   | 116.1   | 105.7   | 110.2 NM_005519.1    |
| 241.3   | 139.2   | 124.3   | 109.3 NM_016185.2    |
| 90.1    | 86.6    | 90.8    | 88.3 NM_001030004.1  |
| 93.3    | 95.6    | 103.3   | 89.4 NM_178850.1     |
| 222.1   | 159.3   | 139.7   | 155.8 NM_004133.3    |
| 816     | 545.1   | 455.7   | 542.4 NM_001024074.1 |
| 398.7   | 246.5   | 236.9   | 250.8 NM_001024074.1 |
| 216.7   | 203.4   | 179.9   | 201.2 NM_006895.2    |
| 90.3    | 93.6    | 95.3    | 107.3 NM_001024075.1 |
| 81.6    | 90.2    | 85.4    | 87.2 NM_014469.3     |
| 1032    | 746.4   | 550.5   | 640.4 NM_006805.3    |
| 317     | 227.2   | 187.2   | 154.4 NM_002136.1    |
| 162.9   | 135.7   | 138.2   | 108.7 NM_031157.1    |
| 645.4   | 444     | 430.9   | 377.1 NR_002944.2    |
| 10362.7 | 8002.6  | 5440.8  | 6818.9 NM_031243.1   |
| 476.8   | 658     | 588.4   | 490.1 NM_194247.1    |
| 104.7   | 115.8   | 96      | 130.1 NR_002726.1    |
| 1063.2  | 778.2   | 719.2   | 441.9 NM_031266.2    |
| 2234.2  | 1566.2  | 1467.7  | 983.6 NM_004499.3    |
| 13183.1 | 7151    | 6440.4  | 5125.6 NM_031266.2   |
| 303.9   | 194.7   | 146.8   | 184.4 NM_031314.1    |
| 788.5   | 498.9   | 419.3   | 341 NM_001077442.1   |
| 93.2    | 91.5    | 90.5    | 90.7 NM_001013631.1  |
| 11055.2 | 6441.4  | 5673.9  | 5654.6 NM_031369.2   |
| 300.1   | 218.3   | 261     | 229.1 NM_031372.1    |
| 726.2   | 643.6   | 765.6   | 573.9 NM_005463.2    |
| 172.8   | 125.9   | 120.9   | 141 NM_004966.2      |
| 97.5    | 75.2    | 86.8    | 99.4 NM_005520.1     |

|        |        |        |        |                |
|--------|--------|--------|--------|----------------|
| 254.4  | 237.2  | 178.9  | 195.9  | NM_019597.3    |
| 285.6  | 192.7  | 192.7  | 227.4  | NM_012207.1    |
| 94.3   | 96.1   | 98     | 94.2   | NM_021644.2    |
| 4846.7 | 3352.9 | 2371.3 | 3163.2 | NM_031263.1    |
| 1609.7 | 1216.6 | 1033.2 | 1096.1 | NM_001005335.1 |
| 141.1  | 148.8  | 127.1  | 123.2  | NM_138394.2    |
| 151.7  | 116.6  | 121.3  | 96.6   | NM_005968.2    |
| 5722.5 | 4019.2 | 4239.1 | 2303.1 | NM_031203.1    |
| 2034   | 2304.3 | 1981.4 | 1567.5 | NM_005826.2    |
| 528.1  | 608    | 780.8  | 763.6  | NM_004501.3    |
| 603.9  | 648.9  | 592.8  | 405.9  | NM_031844.2    |
| 1992.3 | 1030.9 | 820.9  | 1480.1 | NM_144732.1    |
| 4973.8 | 2852.7 | 2466.2 | 1507.5 | NM_144732.1    |
| 337.7  | 338.2  | 270.7  | 202.3  | NM_001079559.1 |
| 94.7   | 88.2   | 92.2   | 97.9   | NM_016522.2    |
| 89.8   | 97.2   | 90.7   | 92.6   | NM_001048209.1 |
| 90.6   | 82.3   | 80.9   | 87.6   | NM_001048209.1 |
| 124.3  | 104.9  | 96.5   | 112    | NM_004272.3    |
| 109.3  | 122.1  | 112.2  | 107.2  | NM_199332.2    |
| 128.1  | 157.1  | 135.3  | 115.2  | NM_004839.2    |
| 408.7  | 279.6  | 258.1  | 198.5  | NM_004838.2    |
| 88.1   | 100.6  | 90     | 95.3   | NM_080731.1    |
| 113.1  | 101.7  | 103.7  | 100.3  | NM_080731.1    |
| 463.5  | 457.8  | 464.1  | 282.4  | NM_080730.2    |
| 93     | 96.3   | 94.7   | 95.3   | NM_015888.3    |
| 191.9  | 172.1  | 190.5  | 165.5  | NM_013312.1    |
| 136.4  | 122.5  | 135.8  | 127.6  | NM_032410.2    |
| 92.4   | 92.2   | 88.8   | 90.7   | NM_032495.4    |
| 95.8   | 87.4   | 85.5   | 89     | NM_139211.2    |
| 89     | 79.1   | 70.2   | 81.4   | NM_139212.2    |
| 97.5   | 96.5   | 86.4   | 90.6   | NM_032132.2    |
| 85.1   | 87.2   | 81.1   | 83.3   | NM_152510.1    |
| 96.2   | 84.2   | 86.7   | 90     | NM_005522.3    |
| 112.4  | 105.7  | 102.8  | 101.5  | NM_005522.3    |
| 528.2  | 360.9  | 302.2  | 288.4  | NM_153715.1    |
| 133.8  | 93.6   | 105    | 91.6   | NM_153715.1    |
| 152.2  | 130.6  | 109.7  | 103.9  | NM_018951.2    |
| 137    | 155    | 125.9  | 119.6  | NM_005523.4    |
| 445.4  | 428    | 316.1  | 328.4  | NM_000522.2    |
| 92     | 80.7   | 83.1   | 79.4   | NM_006735.3    |
| 98     | 89.8   | 90.6   | 91     | NM_030661.3    |
| 88.2   | 97.8   | 93.8   | 86.2   | NM_153631.1    |
| 87.1   | 93.5   | 92.4   | 95     | NM_153632.1    |
| 89.2   | 86     | 80.2   | 84.7   | NM_153631.1    |
| 99.2   | 102.3  | 91.3   | 105.8  | NM_002141.2    |
| 416.7  | 292.8  | 306.4  | 210.1  | NM_019102.2    |
| 94.2   | 96.7   | 81.8   | 92.5   | NM_024014.2    |
| 99.9   | 87.4   | 91.6   | 93.6   | NM_006896.2    |
| 1764.4 | 1216.9 | 1215.4 | 1024.3 | NM_152739.2    |
| 118.7  | 117.1  | 101.4  | 105.5  | NM_152739.2    |



|        |        |        |                    |
|--------|--------|--------|--------------------|
| 137.6  | 152.3  | 155.2  | 136.8 NM_002144.2  |
| 88.7   | 73.1   | 84.6   | 89.5 NM_006361.4   |
| 82.1   | 88.4   | 79.8   | 89.7 NM_002145.2   |
| 96.5   | 95.2   | 94.2   | 94.3 NM_002146.3   |
| 95.8   | 94.7   | 100.7  | 90.5 NM_024015.3   |
| 79.6   | 85.9   | 80.3   | 87.5 NM_002147.2   |
| 140.9  | 149.6  | 145.8  | 119.8 NM_018952.3  |
| 135    | 113    | 117.2  | 115.8 NM_156036.1  |
| 182.6  | 97.5   | 92.7   | 95.4 NM_004502.2   |
| 84.8   | 80.2   | 81     | 82.9 NM_024016.2   |
| 79.4   | 88.6   | 77.7   | 86 NM_024017.3     |
| 87.2   | 89.6   | 85.3   | 93 NM_017409.2     |
| 117.7  | 91.9   | 99.8   | 107.4 NM_014212.2  |
| 92.5   | 78.8   | 79.7   | 83.8 NM_173860.1   |
| 98.7   | 90.1   | 94.7   | 85.1 NM_017410.2   |
| 103.5  | 94.5   | 88.8   | 106.2 NM_014620.2  |
| 87     | 87.8   | 95.8   | 88.5 NM_153633.1   |
| 86.7   | 90     | 87.2   | 92.3 NM_018953.2   |
| 104.3  | 97     | 99.6   | 89.2 NM_153693.3   |
| 90.2   | 89.9   | 83.9   | 82.2 NM_004503.2   |
| 126.1  | 99.1   | 110.1  | 104.3 NM_153693.1  |
| 84.9   | 96.8   | 85.1   | 90.6 NM_022658.3   |
| 75.3   | 80.7   | 83.7   | 79 NM_006897.1     |
| 88.6   | 88.4   | 84.4   | 85 NM_024501.1     |
| 84.2   | 81     | 72.9   | 82.8 NM_002148.2   |
| 87     | 80.9   | 82.1   | 87 NM_021192.2     |
| 136.6  | 112.8  | 121.2  | 106.1 NM_021193.2  |
| 134.8  | 127.5  | 112.5  | 115.9 NM_000523.2  |
| 121.2  | 121    | 123.9  | 95.3 NM_006898.4   |
| 96.2   | 90.1   | 85     | 84.8 NM_014621.2   |
| 104.3  | 113.3  | 95.9   | 95.7 NM_019558.2   |
| 83.5   | 87.7   | 91.5   | 83.6 NM_014213.2   |
| 102.3  | 145    | 140.4  | 118.6 NM_005143.2  |
| 186.1  | 163.9  | 149.5  | 155.9 NM_016287.2  |
| 96.8   | 92.1   | 82.1   | 97.8 NM_002143.2   |
| 110.8  | 102.6  | 108.7  | 110.3 NM_134421.1  |
| 3079.9 | 2604.6 | 2419.2 | 1477.3 NM_002149.2 |
| 100.7  | 98.9   | 79.9   | 94.7 NM_002149.2   |
| 75.9   | 80     | 76.6   | 87.6 NM_016257.2   |
| 92.7   | 88.8   | 77.4   | 84.7 NM_002150.2   |
| 95     | 85.8   | 84.9   | 88.2 NM_000860.3   |
| 95.2   | 84.2   | 93.2   | 89.1 NM_015852.1   |
| 86.3   | 78.1   | 84.2   | 92.2 NM_002151.1   |
| 85.4   | 97.9   | 101    | 90.2 NM_182983.1   |
| 85.1   | 77.8   | 79     | 90.4 NM_002151.1   |
| 97.3   | 90.8   | 98.1   | 99.8 NM_020995.3   |
| 3705.3 | 2523.6 | 2253.3 | 1651.1 NM_000194.1 |
| 194.9  | 162.3  | 152.1  | 143.6 NM_182639.1  |
| 260.8  | 208.3  | 185    | 142.8 NM_182639.1  |
| 136.1  | 116.3  | 107.4  | 126.3 NM_182637.1  |

|        |       |       |                     |
|--------|-------|-------|---------------------|
| 250.3  | 208   | 154.1 | 162.4 NM_032383.3   |
| 86     | 83.6  | 89.8  | 88.1 NM_152841.1    |
| 118.6  | 121.9 | 116.5 | 107.1 NM_152843.1   |
| 154.4  | 184.6 | 189.6 | 137.8 NM_152843.1   |
| 84.3   | 99.8  | 81.7  | 96.2 NM_022081.4    |
| 476.2  | 423   | 380.1 | 290.7 NM_007216.3   |
| 99.5   | 99.5  | 102.5 | 98.3 NM_181507.1    |
| 1391.3 | 838.1 | 826   | 393.4 NM_024747.4   |
| 142.9  | 133.7 | 107.5 | 124 NM_006665.3     |
| 84.9   | 85    | 76    | 86.1 NM_021828.2    |
| 94.7   | 84.7  | 79.6  | 85.7 NM_000613.1    |
| 84.1   | 73.6  | 75    | 85.4 NM_005144.3    |
| 88.4   | 81.5  | 79.4  | 79 NM_018411.3      |
| 367.6  | 242.3 | 232.8 | 168.2 NM_176795.2   |
| 93.6   | 88.3  | 90.9  | 89.3 NM_176795.2    |
| 96     | 96    | 85.6  | 86.1 NM_020386.2    |
| 80.6   | 94.6  | 79.6  | 98.9 NM_017878.1    |
| 86.2   | 93.4  | 88.6  | 79.3 NM_007069.1    |
| 86.8   | 91.9  | 93.5  | 98.5 NM_054108.1    |
| 104.7  | 96.2  | 104.5 | 95.6 NM_004504.3    |
| 176.2  | 174.9 | 142.8 | 150.6 NM_007043.5   |
| 96.8   | 102.4 | 107.4 | 95.7 NM_006076.3    |
| 125    | 113.7 | 108   | 114.5 NM_002152.2   |
| 95.4   | 87.4  | 77.3  | 85.8 NM_000412.2    |
| 99.6   | 97.9  | 87.9  | 87 NM_000861.2      |
| 93.2   | 89.2  | 77.6  | 87.9 NM_022304.1    |
| 85.9   | 78.8  | 76.9  | 91.8 NM_007232.1    |
| 89.8   | 84.3  | 81.6  | 87.8 NM_021624.2    |
| 148.9  | 171.3 | 155.6 | 130.3 NM_138632.1   |
| 110.4  | 119.2 | 120.7 | 128.8 NM_138632.1   |
| 564    | 525.3 | 502.1 | 323.1 NM_007032.3   |
| 79.2   | 82.6  | 72.7  | 77.9 NM_003806.1    |
| 84.8   | 79.7  | 81.8  | 93.2 NM_001009931.1 |
| 149.2  | 144.5 | 114.9 | 123.4 NM_005836.2   |
| 200.2  | 180.8 | 156.6 | 164.8 NM_022460.3   |
| 104.4  | 115.6 | 96.9  | 99.9 NM_012262.2    |
| 93.7   | 101.7 | 83.4  | 96.2 NM_005114.2    |
| 95.7   | 99.9  | 102.4 | 98.9 NM_006043.1    |
| 155.9  | 135.7 | 123.9 | 110.2 NM_006042.1   |
| 100.7  | 100.9 | 90.1  | 95.6 NM_006041.1    |
| 95.6   | 95.1  | 84.3  | 81 NM_006040.1      |
| 82.5   | 84.1  | 79.1  | 78.6 NM_153612.2    |
| 93.9   | 80.3  | 77.9  | 85.6 NM_001009606.1 |
| 111.6  | 107.6 | 111.2 | 91 NM_004807.1      |
| 93.2   | 80.7  | 88.9  | 83.4 NM_001077188.1 |
| 88.9   | 82.1  | 80.6  | 84.3 NM_147175.2    |
| 94.5   | 86.6  | 90.1  | 91.4 NM_001077188.1 |
| 97.3   | 92.4  | 97.7  | 92.7 XM_931159.1    |
| 93.1   | 86.7  | 88.8  | 92 NM_015370.1      |
| 1022.7 | 627.2 | 564   | 428.4 NM_014473.2   |

|         |         |         |        |                |
|---------|---------|---------|--------|----------------|
| 1791.1  | 1505.2  | 1442.4  | 978.4  | NM_001537.2    |
| 686     | 556.1   | 626     | 413.6  | NM_020677.2    |
| 332.1   | 314.5   | 344.4   | 247.4  | NM_172002.3    |
| 866.6   | 338     | 275.3   | 283.2  | NM_005525.2    |
| 953.1   | 418.1   | 340     | 318.4  | NM_181755.1    |
| 408.7   | 203.8   | 180     | 166.2  | NM_181755.1    |
| 108.2   | 119.9   | 106.6   | 101.5  | NM_198707.1    |
| 88.8    | 77      | 80.9    | 81.8   | NM_000196.2    |
| 85.5    | 85.4    | 94.3    | 85.4   | NM_000413.1    |
| 4252.4  | 2676.3  | 2773.1  | 2432.3 | NM_016142.1    |
| 99.5    | 89.8    | 94.6    | 92.3   | NM_178135.2    |
| 91.7    | 95.2    | 79.6    | 91.6   | NM_002153.1    |
| 96.7    | 91.1    | 102.9   | 93     | NM_000197.1    |
| 1237.6  | 1768.4  | 1218.3  | 1343.3 | NM_000414.1    |
| 158.7   | 116.2   | 121.5   | 106.9  | NM_003725.2    |
| 164.1   | 187     | 166.1   | 160.7  | NM_014234.3    |
| 86.3    | 87.5    | 89.3    | 85.1   | NM_000862.1    |
| 87.6    | 92.2    | 93.1    | 86.3   | NM_000198.2    |
| 105     | 98.1    | 90.1    | 92.3   | NM_025193.2    |
| 159.9   | 133.4   | 145.5   | 138.3  | NM_031463.3    |
| 291.5   | 366.2   | 285.2   | 352.3  | NM_032303.2    |
| 139.4   | 124.7   | 128     | 128.7  | NM_005526.1    |
| 469.2   | 451.9   | 331.3   | 380.2  | NM_004506.2    |
| 140     | 155.9   | 141.5   | 136.8  | NM_007031.1    |
| 92      | 109     | 102.8   | 106.7  | NM_001538.1    |
| 96.2    | 98.3    | 68.4    | 89.1   | NM_001538.1    |
| 76.5    | 103.8   | 76.9    | 81.6   | NM_001080439.1 |
| 87.6    | 95.5    | 82.9    | 89     | NM_016153.1    |
| 108.9   | 86.6    | 92.6    | 93.9   | NM_001001871.1 |
| 92.6    | 80.4    | 84.1    | 80.3   | NM_152584.1    |
| 90.2    | 85.6    | 88.3    | 95.4   | NM_153716.1    |
| 75      | 85.1    | 64.5    | 77.3   | NM_153716.1    |
| 182.3   | 215.7   | 190.4   | 207.4  | NM_032855.2    |
| 472.9   | 544.4   | 551.1   | 495.5  | NM_017520.2    |
| 95      | 115.5   | 116.8   | 128.2  | NM_213655.1    |
| 98.1    | 93.7    | 90.4    | 91.4   | NM_001017963.1 |
| 15454.3 | 13016.4 | 10997.9 | 9742.8 | NM_005348.2    |
| 7440.5  | 5894.6  | 4797    | 3917.1 | NM_007355.2    |
| 102.8   | 100.8   | 89.1    | 98.2   | NR_003132.1    |
| 85.2    | 89.4    | 80.8    | 84.6   | NR_002927.1    |
| 8632.1  | 14169.6 | 11508.6 | 7304.5 | NM_003299.1    |
| 97.6    | 97.2    | 84.5    | 96.2   | NR_003130.1    |
| 89.5    | 94      | 82      | 85.9   | NM_025015.2    |
| 104     | 100.5   | 91.8    | 90.4   | NM_052970.3    |
| 1131.4  | 498.5   | 451     | 365.1  | NM_016299.1    |
| 132.1   | 123.9   | 120.3   | 114.8  | NM_005345.4    |
| 4283.1  | 1893    | 1460.9  | 1111.2 | NM_005346.3    |
| 197.4   | 195.5   | 200.5   | 152.8  | NM_005527.2    |
| 103.1   | 91.8    | 88.8    | 101.3  | NM_021979.2    |
| 206.7   | 167.7   | 158.4   | 147.6  | NM_002154.3    |

|         |        |        |                      |
|---------|--------|--------|----------------------|
| 141.3   | 172.9  | 125.9  | 117.5 NM_198431.1    |
| 2128.7  | 1907.1 | 1584.3 | 1236.5 NM_198431.1   |
| 277.6   | 195.3  | 141.5  | 162.9 NM_014278.2    |
| 1113.7  | 1410.8 | 1209.4 | 810.7 NM_005347.2    |
| 13819.9 | 9697.7 | 6751.9 | 6900.2 NM_153201.1   |
| 11129.5 | 6171.8 | 4674.1 | 4921.3 NM_006597.3   |
| 2228.4  | 2558.1 | 1930.4 | 1762.6 NM_004134.4   |
| 4550.4  | 2132.8 | 2011.3 | 1400 NM_001540.2     |
| 94.9    | 102.3  | 93.9   | 94.7 NM_001541.2     |
| 93.7    | 91.5   | 92.1   | 88.6 NM_006308.1     |
| 112     | 102.5  | 95.7   | 100 NM_144617.1      |
| 130.5   | 125    | 119.7  | 114.6 NM_014424.3    |
| 82.7    | 78.4   | 81.6   | 85.7 NM_014365.2     |
| 92.3    | 88.5   | 81.3   | 94.1 NM_033194.1     |
| 200.1   | 156.2  | 169.7  | 140.7 NM_024610.3    |
| 136.1   | 101.3  | 104.5  | 114.1 NM_012267.2    |
| 145.3   | 115.1  | 95.6   | 92.5 XM_938008.1     |
| 1437    | 1110.7 | 1019   | 643.7 NM_014047.1    |
| 433.2   | 352.2  | 353.9  | 309.9 NM_014149.2    |
| 100.5   | 95     | 95.1   | 92.2 NM_014157.2     |
| 82.3    | 78.6   | 81.2   | 85.6 NM_014162.1     |
| 99.1    | 88.8   | 87.7   | 85.8 NM_145168.1     |
| 412.3   | 321.9  | 250.7  | 203.6 NM_016391.2    |
| 911.5   | 838.1  | 717.1  | 575.6 NM_014306.2    |
| 428.7   | 387.1  | 312.3  | 296 NM_014173.2      |
| 1596    | 1262.6 | 1154.6 | 890.5 NM_014173.2    |
| 1306    | 1204.8 | 976.2  | 839.2 NM_016403.1    |
| 1697.8  | 946.5  | 906.7  | 684.4 NM_016404.1    |
| 108.6   | 90.5   | 98.2   | 92.1 NM_014181.1     |
| 585.3   | 479.3  | 457.9  | 344.6 NM_014187.1    |
| 2361.2  | 1541.3 | 1736.3 | 1016.8 NM_016209.1   |
| 427.7   | 329.7  | 346.7  | 229.9 NM_016464.2    |
| 649.9   | 671.8  | 915.2  | 917.4 NM_197964.1    |
| 6702.6  | 6858.6 | 4530.9 | 4906.2 NM_002156.4   |
| 97.4    | 91.6   | 98.3   | 98.5 NM_199440.1     |
| 175     | 151    | 141.8  | 134.9 NM_002156.4    |
| 1197.9  | 799.9  | 761.3  | 838.8 NM_002157.1    |
| 94.3    | 91.4   | 89.9   | 89.2 NM_005529.3     |
| 4114    | 2536.4 | 1969.2 | 1668.5 NM_006644.2   |
| 885.8   | 387    | 453.2  | 219.7 NM_013301.1    |
| 474.5   | 359.8  | 335.2  | 360.5 NM_001080493.1 |
| 255.4   | 210    | 218.7  | 167.3 XM_936858.1    |
| 108.8   | 104.1  | 100.7  | 85.5 NM_182709.1     |
| 92.8    | 88.3   | 86.7   | 89.4 NM_182710.1     |
| 1650    | 1153.7 | 877.2  | 723.3 NM_006410.3    |
| 93      | 77.3   | 75.4   | 83.8 NM_014500.3     |
| 112.9   | 101.7  | 97.5   | 87.3 NM_022727.4     |
| 107.4   | 115.7  | 112.2  | 109.7 NM_022727.4    |
| 111.8   | 110.3  | 96.8   | 113.2 NM_182984.3    |
| 1000.9  | 819    | 706.3  | 778.5 NM_002158.2    |

|       |        |       |                   |
|-------|--------|-------|-------------------|
| 82.6  | 83.9   | 76.8  | 72.2 NM_002159.2  |
| 91.8  | 105.8  | 99    | 96.6 NM_000200.1  |
| 100.6 | 81.4   | 83    | 87.2 NM_000524.2  |
| 89.3  | 78.7   | 82.8  | 84 NM_000863.1    |
| 94.7  | 96.3   | 94.3  | 91.4 NM_000864.3  |
| 110.8 | 103    | 108.3 | 88.2 NM_000865.1  |
| 98.5  | 95     | 84.4  | 82.8 NM_000866.1  |
| 414.7 | 480.2  | 529.3 | 468.2 NM_000621.2 |
| 104.5 | 88.9   | 95    | 91.7 NM_000867.2  |
| 101.8 | 99.2   | 99.4  | 97 NM_000868.1    |
| 90.7  | 92     | 91.3  | 94.7 NM_000869.2  |
| 94.4  | 101.2  | 89.5  | 90.3 NM_213621.1  |
| 93.4  | 89.1   | 86.4  | 91 NM_000869.2    |
| 92.3  | 91.5   | 90.8  | 81.6 NM_006028.3  |
| 88.3  | 82     | 83.9  | 92.4 NM_130770.2  |
| 89    | 95.5   | 82.8  | 89.8 NM_182537.2  |
| 85.9  | 90.4   | 82.3  | 88.3 NM_182589.2  |
| 74.2  | 74.5   | 75.5  | 74 NM_001040174.1 |
| 94    | 88.2   | 92.3  | 87 NM_000870.2    |
| 111.8 | 105.6  | 106.7 | 99.5 NM_199453.1  |
| 92.5  | 87     | 69.7  | 84.7 NM_199453.1  |
| 83.4  | 80.3   | 78.4  | 85.5 NM_024012.1  |
| 102.1 | 111.4  | 82.8  | 89.6 NM_000871.1  |
| 93.3  | 88.1   | 81.1  | 78.7 NM_000872.3  |
| 102.6 | 101    | 92.2  | 89 NM_019859.2    |
| 85    | 83.6   | 88.3  | 79.6 NR_002774.1  |
| 96.1  | 85.3   | 80.4  | 92.7 NM_002775.3  |
| 246.5 | 223    | 196.4 | 192.5 NM_013247.4 |
| 178.7 | 218.9  | 179.6 | 145.5 NM_145074.2 |
| 87.8  | 90.5   | 85.7  | 89.8 NM_053044.2  |
| 99.2  | 104.8  | 95.4  | 99 NM_153692.2    |
| 87.8  | 91.8   | 88.5  | 85 NM_014586.1    |
| 86.9  | 83.4   | 85.4  | 87 NM_004507.2    |
| 111   | 106.8  | 104.8 | 115.9 NM_148959.2 |
| 122.2 | 207.3  | 156.3 | 167.2 NM_031407.3 |
| 89.4  | 89.7   | 100.4 | 96 NM_153281.1    |
| 88.9  | 83     | 84.3  | 88.8 NM_153283.1  |
| 95.9  | 90.8   | 96.4  | 92.6 NM_153281.1  |
| 83.1  | 90.6   | 88.8  | 77.4 NM_007312.3  |
| 95.9  | 87.5   | 87    | 82 NM_033158.2    |
| 153.5 | 163.1  | 143.7 | 146.6 NM_003773.2 |
| 87.7  | 92.4   | 64.7  | 83.1 NM_003773.2  |
| 903   | 1042.3 | 966.9 | 884 NM_003549.2   |
| 87.5  | 93.3   | 89.2  | 81.6 NM_012269.1  |
| 95.6  | 84.8   | 86.7  | 89.7 NM_017558.2  |
| 85.5  | 82     | 81.6  | 83.9 NM_032821.2  |
| 77    | 86.3   | 80.2  | 88.6 NM_032821.2  |
| 96.5  | 91.4   | 90.1  | 95.1 XM_936224.1  |
| 168.3 | 189.3  | 175.9 | 159.6 NM_031207.2 |
| 731.7 | 342.5  | 282   | 278.9 NM_145014.1 |

|        |        |        |        |                |
|--------|--------|--------|--------|----------------|
| 454.5  | 401.5  | 299.3  | 250.6  | NM_006389.2    |
| 714.2  | 981.8  | 1020.4 | 619.4  | NM_012271.1    |
| 173.7  | 189.1  | 197.6  | 139    | NM_007076.2    |
| 2120.3 | 2951.1 | 4201.8 | 3385.6 | NM_016400.2    |
| 1964.8 | 1566.6 | 1229.6 | 1203.8 | NM_001039613.1 |
| 85.9   | 99.8   | 89.2   | 96.7   | NM_000415.1    |
| 1680.1 | 1203.1 | 850.8  | 803.7  | NM_002161.2    |
| 92.2   | 91.2   | 88.7   | 92.8   | NM_013417.1    |
| 1924.1 | 2032.1 | 1394   | 1718.2 | NM_018060.3    |
| 121.9  | 135.1  | 100.3  | 120.3  | NM_152553.2    |
| 100.2  | 132.5  | 112    | 138.3  | NM_182757.2    |
| 131.3  | 148.6  | 122.4  | 136.8  | NM_153341.1    |
| 90.9   | 90.6   | 93.8   | 95.2   | NM_004967.2    |
| 585.9  | 573.9  | 595    | 659.4  | NM_015525.2    |
| 229.2  | 260.8  | 249.6  | 227.9  | NM_004968.2    |
| 325.7  | 476.1  | 539    | 303.7  | NM_022308.1    |
| 87.5   | 90.6   | 81.3   | 88.8   | NM_004968.2    |
| 109.5  | 93.9   | 102.7  | 89.5   | NM_178231.2    |
| 115.6  | 103.9  | 91.6   | 103.3  | NM_178231.2    |
| 83.6   | 94.2   | 85.6   | 86.3   | NM_000201.1    |
| 200.2  | 223.6  | 248    | 185.4  | NM_000873.2    |
| 882    | 1264.9 | 1147.7 | 952.5  | NM_002162.2    |
| 98.5   | 116.1  | 108.1  | 116.7  | NM_001544.2    |
| 99.9   | 104.3  | 103.3  | 96.4   | NM_022377.1    |
| 113.4  | 94.5   | 84.9   | 87.9   | NM_001544.3    |
| 100.7  | 86.7   | 88.5   | 80.5   | NM_003259.2    |
| 87.2   | 84.9   | 80.3   | 85.1   | NM_021571.2    |
| 93.3   | 93.6   | 100    | 88.8   | NM_016513.3    |
| 88.6   | 86.8   | 79.2   | 83.1   | NM_014920.2    |
| 444    | 451    | 348.9  | 298.8  | NM_012405.2    |
| 97.1   | 97.4   | 100.9  | 109.1  | NM_012092.2    |
| 135.7  | 152.4  | 124.5  | 130.2  | NM_015259.4    |
| 481.5  | 390.2  | 393.9  | 304.6  | NM_001545.1    |
| 118.5  | 101.9  | 101.1  | 107.9  | NM_181353.1    |
| 386.7  | 290.9  | 164.6  | 149.7  | NM_181353.1    |
| 755.4  | 706    | 570.4  | 450.3  | NM_002166.4    |
| 444.9  | 347.5  | 218.9  | 182.9  | NM_002167.2    |
| 80.3   | 77.5   | 75.4   | 91.5   | NM_001546.2    |
| 294.5  | 217.4  | 182.1  | 179.7  | NM_004969.1    |
| 2175   | 1406.8 | 1111.4 | 1075.4 | NM_005896.2    |
| 1652.3 | 1214.5 | 1123.1 | 995.5  | NM_002168.2    |
| 466.6  | 538.2  | 393.7  | 350.5  | NM_005530.2    |
| 1373.6 | 1016.8 | 921.5  | 596    | NM_174855.1    |
| 102.3  | 101.2  | 99.2   | 95.3   | NM_174856.1    |
| 949.5  | 692.4  | 657.8  | 450.1  | NM_006899.2    |
| 123.2  | 98.5   | 103.6  | 90.8   | NM_174869.1    |
| 837.9  | 745.8  | 619.3  | 515.1  | NM_004135.2    |
| 236.3  | 165.8  | 190.9  | 200.4  | NM_004508.2    |
| 84.4   | 83.4   | 79.9   | 78.8   | NM_033261.2    |
| 302.5  | 408.7  | 366.3  | 315.3  | NM_000202.2    |

|        |        |        |                     |
|--------|--------|--------|---------------------|
| 121.8  | 113.1  | 104    | 102.3 NM_006123.1   |
| 264.7  | 269.6  | 233.1  | 242.2 NM_006123.1   |
| 160.9  | 227.4  | 197.1  | 206.7 NM_000203.2   |
| 94.4   | 104.7  | 94.6   | 104.1 NM_004907.2   |
| 82.9   | 80.4   | 86.1   | 82.7 NM_052815.1    |
| 306.3  | 251.7  | 272    | 281.9 NM_016097.2   |
| 320.8  | 241.1  | 223.2  | 216 NM_016545.3     |
| 134.2  | 122.8  | 122.3  | 128.5 NM_203434.1   |
| 174.3  | 173.3  | 158.4  | 164.7 NM_005531.1   |
| 118.5  | 79.8   | 79.6   | 88.1 NM_005532.3    |
| 97.1   | 211.8  | 204.2  | 144.1 NM_006332.3   |
| 633.3  | 587.8  | 564.5  | 446.4 NM_005533.2   |
| 154.9  | 136.8  | 129.1  | 111.8 NM_006417.2   |
| 92     | 93     | 84.2   | 86.7 NM_006820.1    |
| 187.7  | 151.6  | 136.4  | 110.6 NM_022872.2   |
| 165.8  | 140.2  | 137.2  | 162.1 NM_022168.2   |
| 127.5  | 94.2   | 92.9   | 93.3 NM_001548.2    |
| 82.7   | 78.3   | 78.1   | 90.7 NM_001010987.1 |
| 197.9  | 122.6  | 115.1  | 108.5 NM_001547.3   |
| 128.5  | 100.5  | 91.2   | 93.7 NM_001549.2    |
| 136.1  | 91.1   | 91.8   | 93.6 NM_001549.2    |
| 99     | 79.2   | 83.1   | 90.2 NM_001031683.1 |
| 95.7   | 92     | 86.2   | 93 NM_012420.1      |
| 595.9  | 201.3  | 194.7  | 138.6 NM_003641.2   |
| 3353.6 | 1573.7 | 1423.7 | 996.3 NM_006435.1   |
| 1511.9 | 696.8  | 581.5  | 499.5 NM_021034.1   |
| 96.6   | 77.5   | 86.8   | 93.1 NR_001590.1    |
| 92.3   | 91.1   | 92.1   | 83.5 NM_001025295.1 |
| 87.7   | 80.9   | 77.4   | 76.3 NM_024013.1    |
| 114    | 115.2  | 107.3  | 107.4 NM_002171.1   |
| 84     | 89.6   | 81.6   | 88.2 NM_006900.2    |
| 99.9   | 96     | 86.1   | 101.4 NM_002172.1   |
| 94.3   | 93.1   | 102.5  | 94.7 NM_002173.1    |
| 82.4   | 78.5   | 74.9   | 78.4 NM_021268.1    |
| 85.1   | 91.1   | 78.3   | 84.5 NM_000605.2    |
| 103.4  | 107.2  | 102    | 94.3 NM_002175.1    |
| 88.1   | 79.8   | 84.3   | 76.1 NM_021068.1    |
| 94.8   | 83.9   | 76.8   | 86.4 NM_002169.1    |
| 83.2   | 76.4   | 74.9   | 72.9 NM_021002.1    |
| 81.9   | 87.1   | 83.8   | 92.3 NM_021057.2    |
| 168.6  | 152.2  | 155.1  | 143.3 NM_002170.3   |
| 317.5  | 394.5  | 343.5  | 247.2 NM_000629.2   |
| 301.6  | 384.3  | 395.6  | 379.5 NM_207585.1   |
| 794.9  | 813    | 680.8  | 633.5 NM_207584.1   |
| 85     | 82.6   | 94.6   | 86.7 NM_207584.1    |
| 107    | 77.5   | 76.9   | 81.2 NM_002176.2    |
| 98.5   | 99.9   | 94.2   | 98.9 NM_176891.3    |
| 106.1  | 94.1   | 93.9   | 101.2 NM_000619.2   |
| 1596   | 2025.8 | 1647.5 | 1338.1 NM_000416.1  |
| 2794.7 | 2481.8 | 2354.8 | 1623.5 NM_005534.2  |

|        |        |        |                      |
|--------|--------|--------|----------------------|
| 85.8   | 94.4   | 77.9   | 79.5 NM_020124.1     |
| 87.5   | 81.6   | 87.2   | 79.6 NM_002177.1     |
| 276.1  | 262.9  | 241.7  | 227.8 NM_001550.2    |
| 116.3  | 107.8  | 106.5  | 103.7 NM_001007245.1 |
| 414.9  | 280.1  | 265    | 208.7 NM_006764.3    |
| 98.4   | 90.7   | 87.8   | 98.2 NM_022347.1     |
| 85.1   | 84     | 81.3   | 76.9 NM_052985.1     |
| 249.4  | 168.2  | 185.6  | 172.1 NM_052989.1    |
| 322.4  | 322    | 327.2  | 179.9 NM_018262.2    |
| 101.3  | 99.4   | 92.8   | 97.1 NM_014714.2     |
| 115.9  | 126.1  | 131.8  | 115 NM_015662.1      |
| 167.9  | 156.7  | 142.2  | 191.6 NM_016004.2    |
| 144.3  | 119.5  | 104.2  | 108.9 NM_018010.2    |
| 209.3  | 176.3  | 171.4  | 146.1 NM_025103.1    |
| 81.3   | 89.8   | 85.6   | 81.4 NM_020800.1     |
| 111.7  | 106.5  | 113.4  | 115.4 NM_031473.2    |
| 89.2   | 102.8  | 87.8   | 88.9 NM_014055.2     |
| 116.8  | 113.7  | 98.2   | 102.8 NM_031473.2    |
| 130    | 124.2  | 114.4  | 121.7 NM_006531.3    |
| 407.1  | 393.9  | 359.8  | 397.8 NM_001551.2    |
| 80.8   | 90.8   | 84.8   | 86.4 NM_000618.2     |
| 86.5   | 85.5   | 89.1   | 87.1 NM_000875.2     |
| 89.4   | 86.7   | 77.9   | 82.7 NM_001007139.3  |
| 97.5   | 88.2   | 83.8   | 92.8 NM_001007139.3  |
| 84.6   | 79.1   | 78.7   | 81.1 NM_016412.1     |
| 85.4   | 91     | 83.8   | 93.7 NM_006546.3     |
| 1735   | 1722.6 | 1342.8 | 2190 NM_006548.4     |
| 95.4   | 129.9  | 133.9  | 137.7 NM_006547.2    |
| 1957   | 5091.4 | 5032.3 | 2273.4 NM_000876.1   |
| 97.6   | 91.8   | 97     | 98.6 NM_004970.1     |
| 87.8   | 87.3   | 87.7   | 82.8 NM_001013029.1  |
| 331.5  | 546.7  | 481.9  | 433.5 NM_000597.2    |
| 90     | 89.2   | 84.3   | 85.6 NM_001013398.1  |
| 96.1   | 90.1   | 86.8   | 89.1 NM_001013398.1  |
| 309.8  | 179.4  | 129.5  | 171.2 NM_001552.2    |
| 85.2   | 80.8   | 71.4   | 84.9 NM_000599.2     |
| 87.4   | 92.7   | 105.9  | 91.2 NM_002178.2     |
| 2136.8 | 1734   | 1435.1 | 1162 NM_001553.1     |
| 90.1   | 88.3   | 88.4   | 87.9 NM_001007563.1  |
| 99.2   | 96.1   | 85.5   | 94.9 NM_198541.1     |
| 88.5   | 83.8   | 84.2   | 84.9 NM_001002915.1  |
| 83.5   | 78.3   | 84.3   | 93 NM_207393.1       |
| 96.6   | 80.6   | 84.6   | 84.5 NM_001002923.1  |
| 133.2  | 140.4  | 118.8  | 105 NM_002180.1      |
| 93.3   | 80.6   | 85.8   | 78.3 NM_144646.2     |
| 83     | 90.5   | 87.4   | 87.8 NM_020070.2     |
| 101.6  | 94.2   | 94.2   | 89.6 NM_020070.2     |
| 117    | 97.4   | 102.3  | 95.1 NM_001555.2     |
| 102.7  | 93.6   | 85.5   | 84.6 NM_205833.1     |
| 109.7  | 106    | 97.1   | 92.9 NM_205833.1     |



|        |        |        |                      |
|--------|--------|--------|----------------------|
| 86.1   | 76.7   | 72.4   | 78.2 NM_178822.3     |
| 91.1   | 81.9   | 84     | 88.5 NM_001015887.1  |
| 92.5   | 100.2  | 98.1   | 91.4 NM_001015887.1  |
| 99.8   | 103.3  | 108.4  | 100.2 NM_152538.2    |
| 97.1   | 102.9  | 94.4   | 101.3 NM_004258.1    |
| 79.5   | 83.5   | 78.7   | 85.8 NM_032880.2     |
| 88.9   | 79.1   | 77     | 84.2 NM_173588.1     |
| 247.9  | 189.7  | 184.8  | 174.5 NM_001542.2    |
| 102.4  | 98.9   | 93.7   | 94.9 NM_001542.2     |
| 102.5  | 102.6  | 90.8   | 92.6 NM_014333.2     |
| 85.3   | 87     | 87.4   | 91.2 NM_021189.2     |
| 87.4   | 81.6   | 71.9   | 80.4 NM_145296.1     |
| 91     | 87.3   | 85.9   | 87.4 NM_153184.2     |
| 121.3  | 142.9  | 130.4  | 118.4 NM_005849.1    |
| 103.9  | 101.5  | 91     | 111.1 NM_052868.1    |
| 79.6   | 89.3   | 78.2   | 87.5 NM_020789.2     |
| 87.7   | 81.2   | 84.1   | 90.2 NM_002181.1     |
| 88.6   | 94     | 76.5   | 87.9 NM_153273.3     |
| 576.7  | 493.4  | 513.7  | 269.1 NM_001006115.2 |
| 939.8  | 642.8  | 572    | 412.1 NM_153273.3    |
| 230.5  | 193.9  | 179.8  | 161.5 NM_001005911.1 |
| 158.1  | 142.8  | 128.4  | 104.9 NM_016291.2    |
| 90     | 93.8   | 92.2   | 96.8 NM_054111.2     |
| 227.6  | 201.3  | 173.8  | 174.4 NM_001025374.1 |
| 106.2  | 99.1   | 117.3  | 112.4 NM_001025374.1 |
| 841.3  | 1015.1 | 739.1  | 716.2 NM_006083.2    |
| 111.6  | 104.8  | 100.2  | 97 NM_003640.2       |
| 104.6  | 100    | 96.4   | 120 NM_001556.1      |
| 212    | 159.2  | 161.1  | 160.7 NM_014002.2    |
| 1293.5 | 1057.1 | 1141.1 | 604.8 NM_003639.2    |
| 133.8  | 182.1  | 157.1  | 130.6 NM_201612.1    |
| 110.4  | 120.1  | 123.2  | 94.4 NM_153687.2     |
| 128    | 129.9  | 121.1  | 108.5 NM_201612.1    |
| 91.8   | 83.8   | 80.4   | 88.9 NM_012481.3     |
| 542.3  | 1130   | 1682.4 | 709 NM_000572.2      |
| 147.3  | 191.9  | 130.9  | 157.4 NM_001558.2    |
| 4278.5 | 3740.6 | 3720.6 | 2510.3 NM_000628.3   |
| 84.2   | 77     | 74.9   | 80.2 NM_000641.2     |
| 143    | 131.1  | 135.6  | 143.2 NM_147162.1    |
| 576    | 650.2  | 747.8  | 475 NM_004512.3      |
| 84.9   | 86.4   | 82     | 83.5 NM_147162.1     |
| 103.5  | 88.3   | 89     | 89.4 NM_000882.2     |
| 105.5  | 98.9   | 84.6   | 89 NM_002187.2       |
| 96.9   | 94.5   | 91.2   | 86.7 NM_005535.1     |
| 154.5  | 117.9  | 110.4  | 108.2 NM_005535.1    |
| 160.2  | 114.4  | 112.1  | 104.9 NM_153701.1    |
| 147.8  | 133.5  | 118.6  | 118.1 NM_001559.2    |
| 81.7   | 80.8   | 74.1   | 75.4 NM_002188.2     |
| 1118.3 | 1450.5 | 1292.3 | 922.1 NM_001560.2    |
| 92     | 87.1   | 78.3   | 88.4 NM_000640.2     |

|        |        |        |                      |
|--------|--------|--------|----------------------|
| 96.3   | 90.7   | 81.5   | 88.1 NM_172174.1     |
| 93.9   | 83.5   | 78.7   | 82.9 NM_172174.1     |
| 115.6  | 100    | 110.9  | 97.7 NM_172174.1     |
| 79.6   | 82.9   | 78.5   | 76.5 NM_172200.1     |
| 88.1   | 78.5   | 93.7   | 89.6 NM_002189.2     |
| 86.2   | 86.6   | 85.2   | 85 NM_172200.1       |
| 95.9   | 97.4   | 106.2  | 111.9 NM_172217.1    |
| 112.7  | 113.4  | 121.5  | 104.1 NM_172217.1    |
| 83.4   | 76.8   | 73.3   | 89.1 NM_002190.2     |
| 90.6   | 84.3   | 83.5   | 80.1 NM_014443.2     |
| 101.2  | 93.1   | 96.8   | 87.9 NM_013278.3     |
| 166.7  | 161.7  | 158.7  | 112.7 NM_138284.1    |
| 90.3   | 95.8   | 91.6   | 86.8 NM_022789.2     |
| 90.5   | 83.7   | 78.2   | 79.6 NM_052872.3     |
| 253.9  | 286.3  | 254.1  | 276.7 NM_014339.3    |
| 85.7   | 84.6   | 76.3   | 78.5 NM_172234.1     |
| 78.8   | 74.3   | 77.7   | 89 NM_032732.3       |
| 94.5   | 90.6   | 90.4   | 93.4 NM_032732.2     |
| 95.4   | 97     | 85.2   | 92.6 NM_153461.1     |
| 86.7   | 90.6   | 87.8   | 97.1 NM_017563.1     |
| 490.3  | 664.4  | 1245.1 | 691.6 NM_001080973.1 |
| 83.6   | 81.4   | 83.6   | 84.3 NM_001080973.1  |
| 92.1   | 93.8   | 86.6   | 89.6 NM_144640.2     |
| 96.7   | 87.1   | 87.7   | 97.8 NM_153480.1     |
| 79.7   | 83.2   | 81     | 91.1 NM_153483.1     |
| 3817.2 | 5990.2 | 7499   | 4980.1 NM_001562.2   |
| 93.4   | 87.8   | 94.6   | 81.3 NM_173042.2     |
| 397.1  | 654.4  | 658.1  | 371.7 NM_173042.2    |
| 90.7   | 96.9   | 82.1   | 90.1 NM_003855.2     |
| 95.3   | 93.7   | 89.7   | 89.2 NM_003853.2     |
| 86.8   | 76.5   | 80.1   | 75.3 NM_153758.1     |
| 117.1  | 95.7   | 101.3  | 105.4 NM_013371.2    |
| 97.5   | 79.7   | 89.3   | 92.5 NM_000575.3     |
| 168    | 226.5  | 148    | 153.1 NM_000576.2    |
| 92     | 75.4   | 72.5   | 89 NM_032556.4       |
| 83.9   | 95.1   | 80.1   | 86.8 NM_173161.1     |
| 93.6   | 85.9   | 90.4   | 89.6 NM_012275.2     |
| 99.3   | 92.6   | 91.6   | 90.5 NM_173170.1     |
| 94.8   | 93.8   | 79.4   | 83.7 NM_014440.1     |
| 95.8   | 101.8  | 98     | 105.9 NM_173205.1    |
| 147.2  | 135.9  | 135.7  | 111.1 NM_014439.3    |
| 87.4   | 92.8   | 70.2   | 75.3 NM_173204.1     |
| 92.1   | 79.7   | 84.3   | 83.3 NM_173178.1     |
| 91.7   | 92.1   | 79.3   | 91.1 NM_014438.3     |
| 101.1  | 92.9   | 85.8   | 92.8 NM_173178.1     |
| 88.7   | 89.8   | 72     | 84.5 NM_019618.2     |
| 89.1   | 85.8   | 87.5   | 92.4 NM_000877.2     |
| 85.3   | 83.4   | 78.9   | 79.2 NM_004633.3     |
| 94.2   | 92     | 74.3   | 88.9 NM_173343.1     |
| 91.6   | 93.1   | 89.2   | 89 NM_173343.1       |

|       |       |       |                     |
|-------|-------|-------|---------------------|
| 119.1 | 111.3 | 106.3 | 111.1 NM_134470.2   |
| 84.9  | 84.7  | 84    | 89.3 NM_134470.2    |
| 144   | 124.6 | 127.9 | 117.9 NM_002182.2   |
| 93.9  | 81.9  | 90.5  | 96.5 NM_014271.2    |
| 94.6  | 90.9  | 81.4  | 92.3 NM_017416.1    |
| 102.9 | 90    | 89.6  | 87.1 NM_016232.4    |
| 98.7  | 93.4  | 98    | 91.1 NM_003856.2    |
| 98.8  | 87.2  | 91.8  | 93.8 NM_003856.2    |
| 104.8 | 98.2  | 91.7  | 101.6 NM_003854.2   |
| 92.5  | 91.8  | 83.3  | 79.7 NM_173843.1    |
| 419.2 | 157.8 | 138.9 | 140.3 NM_173842.1   |
| 836.6 | 274.2 | 252   | 215.4 NM_173842.1   |
| 91    | 83.8  | 88    | 93.1 NM_000586.2    |
| 90.9  | 86.1  | 83.2  | 90.5 NM_014432.2    |
| 90.4  | 89.3  | 92.4  | 90.7 NM_021803.1    |
| 121.6 | 96.6  | 96.9  | 89.7 NM_181078.1    |
| 119.8 | 112.3 | 100.8 | 110.8 NM_181078.1   |
| 86.5  | 87.4  | 80.8  | 100.3 NM_181079.1   |
| 69.8  | 80.2  | 70.6  | 77.5 NM_021798.2    |
| 93.7  | 81.4  | 81.9  | 96.8 NM_020525.4    |
| 97.7  | 89    | 84.8  | 88.6 NM_021258.2    |
| 104.8 | 98.2  | 83.7  | 85.1 NM_181309.1    |
| 86.9  | 76.9  | 79.1  | 82.5 NM_052962.2    |
| 117.2 | 115.8 | 109.7 | 105 NM_016584.2     |
| 91.3  | 87.2  | 85.4  | 94.2 NM_144701.2    |
| 80.4  | 75.2  | 66.7  | 72.8 NM_181339.1    |
| 90    | 100   | 79.2  | 100.5 NM_181339.1   |
| 85.4  | 92.1  | 80.3  | 86.5 NM_006850.2    |
| 90.6  | 91.2  | 76.8  | 94.8 NM_172314.1    |
| 89.6  | 86.4  | 81.3  | 78.9 NM_172314.1    |
| 89.1  | 95.3  | 86.9  | 90.9 NM_018402.1    |
| 74.4  | 81.6  | 83.5  | 81.6 NM_145659.3    |
| 789.8 | 601.9 | 342.4 | 474.6 NM_004843.2   |
| 87.1  | 96.7  | 85.5  | 92.9 NM_172138.1    |
| 84.5  | 84.5  | 86.2  | 83.7 NM_172139.2    |
| 88.5  | 84.5  | 85.5  | 86.2 NM_170743.2    |
| 85.1  | 81.4  | 86.9  | 83.9 NM_172140.1    |
| 102.2 | 87.8  | 90.6  | 77.1 NM_000417.1    |
| 151.3 | 141.9 | 119.9 | 102.4 NM_000878.2   |
| 88.5  | 82.4  | 81.7  | 86 NM_000206.1      |
| 88.1  | 83.6  | 76.2  | 87.2 NM_000588.3    |
| 85.3  | 80.3  | 78.8  | 74.5 NM_001014336.1 |
| 97.2  | 99.1  | 89.3  | 87.5 NM_139017.3    |
| 92.1  | 76.3  | 85.7  | 87 NM_001012633.1   |
| 95.4  | 98.1  | 93.4  | 96.1 NM_001012632.1 |
| 75.2  | 86.4  | 91.7  | 86 NM_033439.2      |
| 125.8 | 106.1 | 111.6 | 113.7 NM_002183.2   |
| 82.3  | 88.9  | 78.7  | 89.6 NM_172348.1    |
| 103.4 | 93    | 93.4  | 91.4 NM_000589.2    |
| 105.1 | 119.7 | 121.2 | 129.6 NM_152899.1   |

|         |         |         |                      |
|---------|---------|---------|----------------------|
| 100.6   | 82.2    | 83.4    | 94.1 NM_172374.1     |
| 97.9    | 100     | 90.4    | 99.6 NM_001008699.1  |
| 201.6   | 153.8   | 132.2   | 121 NM_000418.2      |
| 91.5    | 92.6    | 93.7    | 85.9 NM_000879.2     |
| 100.5   | 107.7   | 111     | 95.7 NM_175728.1     |
| 101.6   | 80.5    | 92.7    | 86.2 NM_175728.1     |
| 92.6    | 89.4    | 88.9    | 91.1 NM_000600.1     |
| 211     | 233.3   | 235.2   | 191.7 NM_000565.2    |
| 368.4   | 377.9   | 334.9   | 320.4 NM_181359.1    |
| 97.3    | 93.5    | 77      | 89.2 NM_175767.1     |
| 95.5    | 95      | 87.7    | 94.3 NM_002184.2     |
| 97.1    | 93.8    | 86.3    | 85 NM_000880.2       |
| 116     | 95.1    | 85.5    | 94 NM_002185.2       |
| 1010.8  | 1554.1  | 923.3   | 1183.7 NM_000584.2   |
| 96      | 83.8    | 77.7    | 80.4 NM_000634.2     |
| 237.4   | 249.6   | 259     | 191.5 NM_001557.2    |
| 93.9    | 93      | 92.8    | 89 NM_000590.1       |
| 90.8    | 85      | 73.9    | 80.8 NM_176786.1     |
| 88.6    | 90.6    | 89.8    | 96.7 NM_175924.2     |
| 5199    | 3501.3  | 2482.1  | 2484.3 NM_004515.2   |
| 753.4   | 620.3   | 566.2   | 530.6 NM_012218.2    |
| 108.3   | 116     | 110.1   | 83.1 NM_153464.1     |
| 911.5   | 731.6   | 675.7   | 508.1 NM_004516.2    |
| 81.5    | 74.2    | 83.9    | 86.7 NM_001014795.1  |
| 1628.1  | 1248.7  | 1286.7  | 780.3 NM_004517.2    |
| 145.2   | 118.8   | 106.4   | 117.4 NM_001014794.1 |
| 384.9   | 399.2   | 373.7   | 231.4 NM_030768.2    |
| 93.2    | 98      | 97.5    | 94.9 NM_176799.1     |
| 509.1   | 338.8   | 297.1   | 255.2 NM_006844.3    |
| 801.7   | 706.9   | 697     | 376.9 NM_006844.3    |
| 87.9    | 106.2   | 96.5    | 92 XR_000959.1       |
| 29032.4 | 36468.5 | 38096.5 | 33545.1 NR_002594.1  |
| 291.6   | 342.5   | 298.3   | 273.9 NM_032549.1    |
| 714.2   | 538.8   | 472     | 647.1 NM_006839.1    |
| 3852.1  | 2269.1  | 2048.3  | 1379.2 NM_018285.2   |
| 2427.3  | 1474.4  | 1382.6  | 853 NM_033416.1      |
| 96.3    | 93.5    | 91.9    | 87.8 NM_175882.1     |
| 545     | 415.5   | 286     | 329.1 NM_005536.2    |
| 1494.7  | 1659.5  | 1656.1  | 1375.2 NM_014214.1   |
| 119.6   | 105.3   | 93      | 108.5 NM_018439.1    |
| 343.5   | 234.8   | 195.8   | 184 NM_017813.2      |
| 1654.8  | 1431.5  | 1265.5  | 635.9 NM_000883.2    |
| 83.2    | 90.7    | 93.1    | 85.4 NM_183243.1     |
| 81.8    | 76.9    | 77.7    | 83.2 NM_000883.2     |
| 3128    | 1935.8  | 1868.4  | 1504.8 NM_000884.2   |
| 83.7    | 84.8    | 85.3    | 86.1 NM_001563.2     |
| 115.1   | 103.4   | 113.9   | 95.7 NM_016247.2     |
| 98.6    | 96.1    | 91.7    | 108 NM_032727.2      |
| 92      | 83.5    | 81.3    | 85 NM_176877.1       |
| 97.3    | 81.2    | 88.9    | 97.4 NM_170605.2     |

|        |        |        |                      |
|--------|--------|--------|----------------------|
| 89.2   | 86     | 82.9   | 85.5 NM_001007232.1  |
| 85.4   | 81.9   | 75.9   | 80.3 NM_213726.1     |
| 268.3  | 267    | 234.2  | 177.2 NM_001040694.1 |
| 101.1  | 91.3   | 95     | 106.1 NM_002164.3    |
| 93     | 83.4   | 80.5   | 84.6 NM_005537.3     |
| 297.4  | 257.8  | 214.6  | 206.6 NM_198219.1    |
| 92     | 86.4   | 88.9   | 96.2 NM_198219.1     |
| 86.6   | 77.5   | 80.4   | 80.5 NM_198217.1     |
| 368    | 276.1  | 237    | 242.6 NM_001564.2    |
| 230.5  | 185.4  | 182.7  | 165.3 NM_198267.1    |
| 82.7   | 96.7   | 88.7   | 90.6 NM_198267.1     |
| 794.1  | 948.9  | 770.4  | 710.1 NM_019071.2    |
| 104    | 126.2  | 111.8  | 103.4 NM_198287.1    |
| 111.6  | 89.9   | 101.2  | 92.9 NM_032329.4     |
| 89.2   | 88.4   | 87.7   | 78.9 NM_032329.4     |
| 93.9   | 91.2   | 96     | 85.3 NR_002226.1     |
| 86     | 88.2   | 82.1   | 82.1 NM_002191.2     |
| 86.3   | 77.2   | 77.4   | 84.6 NM_002192.2     |
| 95.9   | 94.8   | 95.4   | 98.4 NM_002193.1     |
| 84.6   | 77.2   | 82     | 88.4 NM_005538.2     |
| 101.7  | 100    | 102.4  | 95 NM_031479.3       |
| 95.3   | 86.2   | 78.6   | 88.2 NM_006774.4     |
| 93.6   | 92.6   | 84.5   | 76.5 NM_017553.1     |
| 230.2  | 253.9  | 206.9  | 172.6 NM_032196.3    |
| 684.2  | 556.5  | 587.3  | 317.5 NM_002194.2    |
| 80.5   | 72.6   | 69     | 79.1 NM_004027.1     |
| 112.4  | 119.5  | 122    | 108.6 NM_001566.1    |
| 86.8   | 81.4   | 82.4   | 78 NM_001566.1       |
| 299.3  | 274.3  | 229.8  | 245.2 NM_003866.1    |
| 241.7  | 186.6  | 187.9  | 218 XM_936595.1      |
| 245.7  | 208.2  | 213.9  | 194 NM_005540.1      |
| 445    | 354.9  | 389.9  | 231.9 NM_001017915.1 |
| 361.8  | 326.5  | 294.4  | 302.9 NM_019892.3    |
| 74.9   | 78.9   | 74.8   | 70.7 NM_014937.2     |
| 99.5   | 90     | 100.1  | 93.1 NM_198331.1     |
| 166.8  | 167.7  | 133.8  | 121.3 NM_198330.1    |
| 1866.9 | 1827.3 | 2037.4 | 838.1 NM_001567.2    |
| 91.2   | 88     | 85.4   | 90.2 NM_000207.1     |
| 97.4   | 77.4   | 85     | 91.5 NM_001042536.1  |
| 250.3  | 246.7  | 215.2  | 223.3 NM_198336.1    |
| 338.9  | 350.9  | 319    | 298.7 NM_016133.2    |
| 87.9   | 81.2   | 85.9   | 96.5 NM_001042377.1  |
| 75     | 78.9   | 73     | 77.4 NM_001042377.1  |
| 80.6   | 87.7   | 75.5   | 88.1 NM_005543.2     |
| 84.3   | 93.5   | 88.7   | 83.5 NM_002195.1     |
| 93.4   | 91.8   | 83.6   | 82.3 NM_005478.3     |
| 82.5   | 84.7   | 85.9   | 85.8 NM_007179.2     |
| 94.4   | 101.2  | 94     | 91.5 NM_002196.2     |
| 87.3   | 83.9   | 84.3   | 85.6 NM_032594.2     |
| 96.7   | 103.3  | 87.1   | 80.8 NM_000208.1     |

|        |        |        |                      |
|--------|--------|--------|----------------------|
| 84.1   | 85.2   | 88.1   | 87.7 NM_014215.1     |
| 196.4  | 205    | 191.4  | 158.9 XM_931339.1    |
| 316.1  | 322.5  | 280    | 255.3 NM_033547.3    |
| 404    | 400.9  | 485.6  | 186.1 NM_001080453.1 |
| 102.3  | 103.8  | 89.5   | 92.1 NM_001039938.1  |
| 112.7  | 92.6   | 94.1   | 88.3 NM_015693.2     |
| 108.5  | 100.6  | 102.2  | 94.8 NM_183245.1     |
| 414.5  | 340.5  | 287.3  | 241.5 NM_183245.1    |
| 108.8  | 114.9  | 96.8   | 92.4 NM_014425.2     |
| 92.6   | 89.3   | 86.5   | 92.8 NM_000209.1     |
| 84.3   | 87.5   | 78     | 89.9 NM_152230.2     |
| 740.2  | 689.9  | 557    | 400 NM_016338.3      |
| 146.3  | 183.6  | 158.5  | 168.5 NM_014652.2    |
| 205.3  | 191.6  | 161.9  | 144.6 NM_024658.3    |
| 258.2  | 299.5  | 206.2  | 238.3 NM_006391.1    |
| 119.9  | 159.1  | 133.8  | 116.3 NM_006390.2    |
| 336.7  | 352.8  | 311.3  | 340.5 NM_018085.3    |
| 110    | 104.7  | 107.5  | 112.4 NM_005897.1    |
| 109.8  | 100.3  | 96.7   | 97.1 NM_022755.4     |
| 84.6   | 85.3   | 81.5   | 88.6 NM_024726.3     |
| 94.6   | 87.3   | 91.1   | 87.7 NM_001023570.1  |
| 481.5  | 391.3  | 370.6  | 328.4 NM_001023571.1 |
| 102.3  | 120.1  | 106.5  | 101.1 NM_018134.1    |
| 108.7  | 117.4  | 117.7  | 93.1 NM_138451.1     |
| 109.9  | 105.5  | 98.8   | 102.1 NM_152558.2    |
| 93.1   | 77.8   | 79.4   | 86.6 NM_152397.1     |
| 87.7   | 99.1   | 88.8   | 90.6 NM_203424.1     |
| 96.1   | 90     | 99.9   | 97.8 NM_032263.2     |
| 77.7   | 81.1   | 80.9   | 79.4 NM_022784.1     |
| 102.3  | 91.6   | 94.8   | 93.2 NM_001031715.1  |
| 190.2  | 140.3  | 132.3  | 121.9 NM_153208.1    |
| 418.8  | 535.4  | 279.5  | 518.1 NM_003870.3    |
| 94.8   | 111.1  | 121.1  | 118.7 NM_006633.1    |
| 119.5  | 127    | 115.6  | 112.2 NM_178229.3    |
| 146.5  | 266.8  | 225.8  | 173.9 NM_014869.3    |
| 109.4  | 107.3  | 107    | 111.6 NM_015075.1    |
| 94.4   | 89.6   | 82.9   | 79.8 NM_015232.1     |
| 977.9  | 863.3  | 748.9  | 668.9 NM_018442.2    |
| 103.7  | 121.3  | 113.1  | 122.3 NM_018442.2    |
| 108.3  | 105.4  | 86.4   | 104.7 NM_001017977.1 |
| 1250.9 | 1012.4 | 1019.5 | 959 NM_001025243.1   |
| 166.2  | 139.2  | 123.6  | 130.1 NM_001010844.1 |
| 156.5  | 140    | 143.5  | 122.9 NM_001570.3    |
| 963    | 929.2  | 959.7  | 651.8 NM_007199.1    |
| 214.1  | 187.2  | 173    | 144.7 NM_016123.1    |
| 583.3  | 629.4  | 558.1  | 470.1 NM_004136.1    |
| 417.5  | 322    | 392.9  | 183.5 NM_002198.1    |
| 88.3   | 91.1   | 80.8   | 88.5 NM_002199.2     |
| 142.6  | 123.2  | 121.3  | 111.8 NM_015649.1    |
| 1018.5 | 1187.7 | 1039.1 | 791.6 NM_182972.1    |

|        |        |        |                     |
|--------|--------|--------|---------------------|
| 869.5  | 955.3  | 931.4  | 686.4 NM_182972.1   |
| 315.8  | 261.9  | 275.3  | 262.4 NM_001571.2   |
| 85.8   | 87.9   | 73.3   | 82.5 NM_002460.1    |
| 602.6  | 561.4  | 599.6  | 290 NM_002200.3     |
| 87.4   | 86.7   | 72.6   | 82.9 NM_006147.2    |
| 112.4  | 99.5   | 86.4   | 112.3 NM_004029.2   |
| 94.4   | 91.6   | 92.1   | 98.3 NM_004031.1    |
| 234.4  | 204.9  | 201.5  | 162 NM_004030.1     |
| 9491   | 5833.3 | 5491.2 | 3320 NM_002163.2    |
| 91.8   | 81.2   | 78.8   | 87.2 NM_019612.2    |
| 81.3   | 89.3   | 80.1   | 85.2 NM_001007561.1 |
| 96.7   | 100.8  | 89.1   | 101.8 NM_005544.1   |
| 436.6  | 476.8  | 388.9  | 429.1 NM_003749.2   |
| 103.1  | 100.7  | 103.4  | 91.6 NM_003604.1    |
| 112.2  | 115.9  | 104.8  | 98.1 NM_024337.3    |
| 86.3   | 88.6   | 77.5   | 82 NM_033267.2      |
| 8274.3 | 5482.7 | 5531.3 | 2869.4 NM_024336.1  |
| 97.6   | 115.2  | 92.6   | 93 NM_016358.1      |
| 213.1  | 131.1  | 115.8  | 123.9 NM_005853.4   |
| 98.9   | 97.2   | 86.8   | 89.4 NM_024335.2    |
| 80.4   | 74     | 77.7   | 81.4 NM_173576.1    |
| 169.2  | 166.5  | 124.2  | 158.9 NM_030940.3   |
| 280.7  | 191.4  | 211.5  | 180.7 NM_194279.1   |
| 1161.9 | 1042.9 | 1072.9 | 749.5 NM_213595.1   |
| 220.8  | 153.3  | 195.6  | 138.3 NM_005101.1   |
| 165.5  | 132.4  | 143.6  | 117.9 NM_002201.4   |
| 500.4  | 344.7  | 276.1  | 168.5 NM_022767.2   |
| 1019.8 | 629.5  | 566.3  | 451.3 NM_030980.1   |
| 598.4  | 351.9  | 319.3  | 322.4 NM_006084.3   |
| 113.2  | 105.9  | 108.2  | 93.7 NM_145805.1    |
| 87.5   | 84.4   | 77.3   | 72.3 NM_005545.3    |
| 93     | 87.1   | 88     | 86.7 NM_005545.3    |
| 93     | 91.8   | 98.3   | 88.5 NM_201526.1    |
| 85.1   | 84.2   | 76.1   | 87.8 NM_020851.1    |
| 314.2  | 285.9  | 212.8  | 188.9 NM_016048.1   |
| 363.9  | 247.7  | 208.5  | 243.7 NM_024710.1   |
| 115.6  | 109.9  | 115.8  | 107.9 NM_016368.3   |
| 267.4  | 291    | 258.2  | 283.5 NM_031483.3   |
| 100.1  | 83     | 80.8   | 88.1 NM_030790.2    |
| 84.2   | 77.3   | 82.6   | 83.2 NM_181501.1    |
| 97.1   | 114.5  | 113.2  | 98.7 NM_003637.3    |
| 101.4  | 97.8   | 100.6  | 96.7 NM_012211.3    |
| 102.2  | 102.6  | 86.8   | 88.4 NM_012211.3    |
| 111.9  | 90.1   | 93.3   | 88.5 NM_002203.2    |
| 84.9   | 88.2   | 74.1   | 95.9 NM_000419.2    |
| 96.1   | 94.3   | 95.4   | 98.1 NM_002204.1    |
| 203.7  | 193.2  | 195.9  | 166 NM_002204.1     |
| 242    | 237.2  | 209    | 271.7 NM_000885.4   |
| 473.6  | 386.6  | 385.3  | 183.3 NM_002205.2   |
| 90.9   | 94.7   | 88.8   | 94.4 NM_000210.2    |

|         |         |         |                        |
|---------|---------|---------|------------------------|
| 92.2    | 82.3    | 87.7    | 83.8 NM_000210.2       |
| 101.9   | 101.2   | 96.6    | 83.5 NM_002206.1       |
| 82.1    | 93      | 77.2    | 74.7 NM_003638.1       |
| 92.5    | 85.4    | 81.1    | 84 NM_005353.2         |
| 439     | 294     | 346.2   | 308.4 NM_002208.3      |
| 643.5   | 307.5   | 290.4   | 237.1 NM_002209.1      |
| 209.7   | 402.8   | 356.3   | 344.6 NM_000632.2      |
| 224.7   | 227.3   | 194.1   | 257.8 NM_002210.2      |
| 262.9   | 421.6   | 385.1   | 337.2 NM_000887.3      |
| 98.8    | 89.1    | 93.1    | 111.9 NM_000887.3      |
| 477.6   | 427.5   | 319.2   | 282.8 NM_133376.1      |
| 1614.8  | 1382.5  | 1197.7  | 1168.1 NM_002211.2     |
| 1066.9  | 977.7   | 642.1   | 667.9 NM_033669.1      |
| 85.3    | 92.6    | 89.4    | 86 NM_033666.1         |
| 90.7    | 92.2    | 86.1    | 89.4 NM_133376.1       |
| 95.5    | 97.3    | 86.1    | 79.9 NM_033668.1       |
| 99.7    | 104.1   | 97      | 86.8 NM_022334.2       |
| 820.4   | 573.1   | 568.7   | 504.3 NM_004763.2      |
| 100.2   | 108.9   | 95.3    | 94.6 NM_012278.1       |
| 98.2    | 96.5    | 80.9    | 91.8 NM_014446.1       |
| 92.6    | 88.2    | 93.2    | 93.2 NM_170678.1       |
| 16594.4 | 20813.1 | 21062.7 | 12590.6 NM_000211.2    |
| 98.4    | 92.5    | 87.5    | 101.4 NM_000212.2      |
| 293.2   | 199.8   | 182.4   | 254.4 NM_014288.3      |
| 100     | 91.8    | 88.2    | 96.6 NM_001005731.1    |
| 85.6    | 81.2    | 74.3    | 76.5 NM_001005619.1    |
| 90.2    | 84.5    | 89.2    | 82.5 NM_001005619.1    |
| 90      | 86.5    | 84.1    | 81.8 NM_000213.3       |
| 1560.2  | 1030.3  | 1018.8  | 676.8 NM_181466.1      |
| 89      | 82      | 76.9    | 81.3 NM_181466.1       |
| 2882.4  | 1757.6  | 1600    | 1035.3 NM_181469.1     |
| 211.8   | 128.5   | 128     | 110.5 NM_002213.3      |
| 529.8   | 282.5   | 263.8   | 193.9 XM_944693.1      |
| 85.9    | 78.7    | 82.8    | 85.1 NM_000888.3       |
| 453.5   | 648.6   | 482.2   | 434.7 NM_000889.1      |
| 96.4    | 99.3    | 88.7    | 93.8 NM_002214.1       |
| 83.8    | 97.4    | 94.6    | 88.2 NM_004791.1       |
| 89.7    | 92.6    | 93.4    | 92.6 NM_002215.1       |
| 85.5    | 85.6    | 76.6    | 78.5 NM_002216.2       |
| 89      | 83.6    | 82.7    | 78.8 NM_002217.2       |
| 90.3    | 105.1   | 88.9    | 103.3 NM_002218.3      |
| 92.6    | 90.2    | 80      | 88.9 NM_001001851.1    |
| 13716.5 | 17890.7 | 22264.2 | 17755.7 NM_001001851.1 |
| 76.3    | 85.1    | 74.5    | 83.3 NM_030569.3       |
| 102.5   | 96.3    | 89.4    | 94.4 NM_032817.2       |
| 91.6    | 81.1    | 95.4    | 87 NM_198510.1         |
| 94.3    | 104.7   | 101.8   | 103.8 NM_005546.3      |
| 112.1   | 114.1   | 110.4   | 108.8 NM_017625.2      |
| 89      | 89.8    | 85.2    | 88.9 NM_080878.2       |
| 92.1    | 81.5    | 79.4    | 94.2 NM_004867.3       |



|        |        |        |                       |
|--------|--------|--------|-----------------------|
| 85.1   | 88.3   | 89.3   | 86.8 NM_021999.2      |
| 1406.7 | 2093.9 | 1692.6 | 1552.6 NM_030926.4    |
| 1957.1 | 3172.8 | 2908.9 | 2467.9 NM_001012516.1 |
| 228.7  | 240.2  | 220.1  | 150.9 NM_033453.2     |
| 363.3  | 304.2  | 312.8  | 168.7 NM_181493.1     |
| 160.5  | 187.4  | 158.1  | 161.6 NM_014216.3     |
| 302.1  | 406.8  | 414    | 240.1 NM_002220.1     |
| 242.6  | 189.9  | 185.9  | 172.8 NM_002221.2     |
| 108.2  | 98.9   | 98.5   | 96.3 NM_025194.2      |
| 781    | 997.3  | 754.1  | 752.9 NM_002222.1     |
| 118.8  | 136.7  | 144.8  | 131.5 NM_002223.1     |
| 815.7  | 822.6  | 1000.3 | 425.3 NM_002224.1     |
| 335.8  | 201.8  | 192.7  | 134.9 NM_180989.3     |
| 96.7   | 97.4   | 87.5   | 94.2 NM_003024.2      |
| 78.4   | 79.1   | 84.2   | 92.7 NM_001001132.1   |
| 245.9  | 252.5  | 257.4  | 172.3 NM_001001132.1  |
| 95.1   | 91.9   | 83.9   | 86.6 NM_147152.1      |
| 93.8   | 95.8   | 86.2   | 81.7 NM_006277.1      |
| 268.2  | 226.8  | 227.4  | 198.4 NM_002225.2     |
| 90.2   | 86.2   | 76.7   | 90.2 NM_005547.2      |
| 292.6  | 373    | 273.3  | 331.7 NM_006469.4     |
| 239.6  | 293.1  | 261.8  | 281.2 NM_006469.4     |
| 111.3  | 99.7   | 98.6   | 102.9 NM_016389.2     |
| 404.9  | 310.4  | 321.3  | 174.3 NM_017592.1     |
| 104.2  | 92.2   | 83.7   | 91.2 NM_182575.1      |
| 102.8  | 100.2  | 115.1  | 104.5 NM_000214.1     |
| 327.5  | 255.5  | 246.9  | 171.4 NM_002226.3     |
| 93.3   | 81.2   | 87.7   | 81.8 NM_002226.3      |
| 166.7  | 161.5  | 133    | 130 NM_145159.1       |
| 276.8  | 270.5  | 196.9  | 202.9 NM_002227.1     |
| 221.1  | 207.8  | 174.9  | 225.7 NM_004972.2     |
| 85.6   | 83.9   | 91.3   | 87.1 NM_000215.2      |
| 86.1   | 85     | 85.5   | 78.8 NM_144720.2      |
| 88.4   | 92.3   | 84     | 95.1 NM_014790.3      |
| 85.9   | 92.2   | 97.1   | 89 NM_021219.2        |
| 112.2  | 105.6  | 96.9   | 104.3 NM_032801.3     |
| 81.3   | 74.2   | 74.2   | 74.4 NM_005056.2      |
| 498.8  | 634.3  | 516.7  | 477.7 NM_006618.3     |
| 499.9  | 557.2  | 476.6  | 388.9 NM_004973.2     |
| 121.9  | 103.4  | 96.1   | 98.3 NM_175061.2      |
| 102    | 104.6  | 92.4   | 92.8 NM_130469.2      |
| 146.2  | 138.8  | 131.5  | 113.3 NM_033626.2     |
| 121.6  | 138.6  | 138.1  | 150.2 NM_018433.3     |
| 294.2  | 439.8  | 359.3  | 274.3 NM_016604.3     |
| 1056   | 1034.3 | 881.3  | 1087.3 NM_004241.2    |
| 677.6  | 770.5  | 568.4  | 737 NM_032776.1       |
| 205.1  | 213.6  | 193.5  | 174 NM_014663.1       |
| 84     | 88.3   | 79.7   | 85 NM_015015.1        |
| 105.6  | 116.5  | 122.5  | 105.3 NM_015061.1     |
| 86.7   | 80.9   | 81.1   | 80.5 NM_018039.2      |

|         |         |         |                     |
|---------|---------|---------|---------------------|
| 82.5    | 82.4    | 85.1    | 97.1 NM_001080424.1 |
| 217.6   | 163.4   | 139.1   | 132 NM_023007.1     |
| 103.8   | 95.6    | 85      | 89.1 NM_024773.1    |
| 95.2    | 99.4    | 97.5    | 99.4 NM_152405.1    |
| 173.6   | 216.1   | 169.5   | 149.3 NM_014876.3   |
| 171.1   | 142.4   | 121.9   | 147.6 NM_138334.1   |
| 111.8   | 96.5    | 94.6    | 110.1 NM_024116.2   |
| 141.4   | 123.7   | 126.7   | 131.8 NM_024116.2   |
| 153     | 113.2   | 108.5   | 111 NM_020647.2     |
| 104.5   | 91.6    | 105     | 87.6 NM_175913.3    |
| 93.9    | 106.7   | 88.9    | 85.3 NM_175913.3    |
| 101.3   | 95.7    | 85.9    | 90 NM_020433.4      |
| 85.6    | 99.9    | 93.5    | 107.6 NM_020655.2   |
| 96.9    | 95.4    | 82.9    | 89.9 NM_032452.1    |
| 137.6   | 124.4   | 107.9   | 116.4 NM_003724.1   |
| 119.9   | 120.3   | 114.8   | 129.3 NM_003772.2   |
| 99.2    | 100.9   | 87.2    | 93.9 NM_144616.2    |
| 14432.3 | 9199    | 8905.7  | 6594.5 NM_006694.2  |
| 2128.4  | 1449.8  | 1299.3  | 814.4 NM_006303.2   |
| 101.4   | 95.2    | 88      | 83.4 NM_032876.4    |
| 86.3    | 87.4    | 76.3    | 83.4 NM_198086.1    |
| 95.5    | 89.2    | 85      | 87.7 NM_032876.4    |
| 265.2   | 484.1   | 403.6   | 290.5 NM_002228.3   |
| 154.9   | 135.4   | 122.7   | 128.2 NM_002229.2   |
| 6240.4  | 3681.3  | 2974.3  | 2708.5 NM_005354.2  |
| 84.3    | 97.9    | 82.2    | 79.5 NM_021991.1    |
| 90.5    | 100.6   | 92.9    | 97 NM_002230.1      |
| 117.5   | 165.4   | 181.9   | 177.2 NM_021991.1   |
| 88.6    | 92.2    | 90.7    | 85.4 NM_173352.1    |
| 91.3    | 89.1    | 91.7    | 98.1 NM_004693.1    |
| 93.6    | 104.9   | 91.5    | 89.6 NM_080747.1    |
| 96.4    | 89.4    | 75.8    | 85.4 NM_175068.2    |
| 83.4    | 82.5    | 81.2    | 76.1 NM_175053.2    |
| 90      | 80.3    | 71.4    | 85.3 NM_152349.1    |
| 89      | 89.4    | 88      | 86.2 NM_181337.2    |
| 126.6   | 179.5   | 154.4   | 150.7 NM_000216.1   |
| 22036.3 | 14386.3 | 14584.4 | 9338.8 NM_006082.2  |
| 87.1    | 94.4    | 77.9    | 85.4 NM_001024660.1 |
| 94.8    | 96.1    | 91.6    | 86.2 NM_003947.3    |
| 83.6    | 81.8    | 80.1    | 92.9 NM_007064.2    |
| 91.1    | 82.9    | 82      | 88.3 NM_152366.3    |
| 79.3    | 80.7    | 75.6    | 81 NM_001007255.1   |
| 595.3   | 614.7   | 482.3   | 448.8 NM_005548.1   |
| 1787.9  | 1383.8  | 1127.2  | 1069.6 NM_007044.2  |
| 97.3    | 89.7    | 92      | 89.8 NM_001014380.1 |
| 152.2   | 148.7   | 131.6   | 124.2 NM_032116.3   |
| 100.9   | 91.6    | 103.5   | 89.7 NM_032116.3    |
| 136.3   | 135.9   | 119     | 109.9 XM_938693.1   |
| 89.8    | 82.2    | 83      | 90.9 NM_031303.1    |
| 415.7   | 307.6   | 278.9   | 178.1 NM_005886.1   |

|        |       |        |                     |
|--------|-------|--------|---------------------|
| 89.6   | 91.2  | 87.3   | 92.4 NM_030929.3    |
| 87.6   | 83.5  | 87.6   | 86.4 NM_001003760.2 |
| 85.8   | 89.7  | 82.5   | 86.8 NM_006063.2    |
| 2275.6 | 1463  | 1554.8 | 853.9 NM_014867.1   |
| 575.6  | 708.4 | 625.5  | 436.3 NM_015483.1   |
| 87.7   | 89.9  | 89.9   | 86.8 NM_152433.2    |
| 166.5  | 163.4 | 158.1  | 138.5 NM_198439.1   |
| 90     | 83.2  | 86.1   | 82.3 NM_016506.3    |
| 125.7  | 102.9 | 100.3  | 104.4 NM_018095.3   |
| 90.6   | 85.3  | 83.3   | 81.5 NM_152393.2    |
| 81.2   | 88.6  | 78.9   | 84 NM_152903.4      |
| 143.7  | 182.3 | 174    | 159.6 NM_032138.3   |
| 181    | 131.9 | 141    | 121 NM_032505.1     |
| 95.4   | 88.5  | 96     | 98.8 NM_020122.3    |
| 97.2   | 101.3 | 90.6   | 94.2 NM_020122.3    |
| 173.6  | 167.4 | 136.9  | 131.9 XM_942130.1   |
| 87.3   | 91.6  | 85.9   | 87.2 NM_000217.1    |
| 90.1   | 77.6  | 76.1   | 91 NM_005549.2      |
| 87.6   | 76.6  | 76.7   | 80.3 NM_004974.2    |
| 90.9   | 79.8  | 84.9   | 82.8 NM_002232.2    |
| 85     | 74.2  | 84.5   | 82.4 NM_002233.2    |
| 76.2   | 76.4  | 74.8   | 81.7 NM_002234.2    |
| 87.4   | 83.1  | 84.4   | 81.7 NM_002235.2    |
| 87.9   | 85.2  | 78.9   | 80.4 NM_031886.2    |
| 86.4   | 91.7  | 92.3   | 99.6 NM_172159.2    |
| 88.4   | 85.9  | 82.1   | 82.4 NM_003471.2    |
| 91.5   | 101.4 | 94.7   | 85.6 NM_172159.2    |
| 87.9   | 96.4  | 94.5   | 92.6 NM_172160.1    |
| 124.4  | 135.1 | 130.5  | 120.6 NM_003636.2   |
| 107.4  | 117.3 | 103.2  | 115.9 NM_003636.2   |
| 97     | 104.7 | 91.6   | 88.6 NM_004732.2    |
| 89.4   | 95    | 77     | 93.3 NM_004975.2    |
| 85     | 86.8  | 82.9   | 91.7 NM_004770.2    |
| 84.4   | 72.4  | 80.6   | 81.3 NM_004976.2    |
| 85.3   | 81.8  | 79.1   | 86.4 NM_139137.2    |
| 85.2   | 82.9  | 87.1   | 79.1 NM_139137.2    |
| 82.2   | 81.5  | 90     | 90.1 NM_004977.2    |
| 97.1   | 91.9  | 92.1   | 87.4 NM_153763.1    |
| 95.6   | 85.5  | 81.1   | 92.4 NM_004978.3    |
| 95     | 83.7  | 84.7   | 91.5 NM_004978.3    |
| 94.5   | 91.4  | 86.1   | 85 NM_004978.2      |
| 93.4   | 125.4 | 122.4  | 103.6 NM_004979.4   |
| 95.3   | 86.5  | 89.9   | 87.1 NM_012281.2    |
| 82.1   | 85.2  | 84.5   | 96.9 NM_004980.3    |
| 108.8  | 104.3 | 112.7  | 100.1 NM_172198.1   |
| 97.3   | 90.3  | 92     | 86.8 NM_172198.1    |
| 87.9   | 81.2  | 73.8   | 77.2 NM_000219.2    |
| 97.8   | 97.7  | 100.7  | 91.7 NM_012282.2    |
| 79.5   | 82.1  | 80.1   | 84.8 NM_172201.1    |
| 87     | 95.9  | 99.1   | 93.4 NM_005472.3    |

|        |        |       |                      |
|--------|--------|-------|----------------------|
| 82.9   | 79.6   | 80.1  | 82 NM_080671.1       |
| 97.4   | 94     | 98.8  | 86.5 NM_002236.4     |
| 293.5  | 189.8  | 192   | 139.5 NM_002237.2    |
| 93.2   | 95.7   | 84.8  | 86.6 NM_172318.1     |
| 101.3  | 94.6   | 99.8  | 95.9 NM_172318.1     |
| 105.1  | 109    | 103.2 | 114 NM_012283.1      |
| 90.5   | 75     | 75    | 84.6 NM_133329.4     |
| 97.4   | 101.3  | 94.9  | 102.6 NM_172344.1    |
| 76.6   | 70.6   | 73.7  | 76.5 NM_133490.2     |
| 71.9   | 77.1   | 72.6  | 78.7 NM_172347.1     |
| 89.3   | 89.2   | 78.4  | 83.9 NM_172362.1     |
| 90.3   | 92.8   | 80.5  | 93.6 NM_002238.2     |
| 91.5   | 102.5  | 97.4  | 91.2 NM_172056.1     |
| 87.4   | 79.4   | 94    | 86.3 NM_172057.1     |
| 110.5  | 120.7  | 113.5 | 108.7 NM_172056.1    |
| 89.1   | 92.8   | 89.8  | 90.1 NM_000238.2     |
| 98.4   | 98.8   | 87.1  | 104.7 NM_012284.1    |
| 131.5  | 110.3  | 110.3 | 116 NM_012285.1      |
| 94.3   | 86.2   | 85.8  | 87.3 NM_172376.1     |
| 87.2   | 87.5   | 75.9  | 92.4 NM_172375.1     |
| 88     | 87.4   | 81.4  | 91.3 NM_173092.1     |
| 2648.3 | 4516.1 | 5171  | 3333 NM_030779.2     |
| 80.3   | 81.6   | 85.3  | 76.6 NM_173162.1     |
| 91.7   | 83.9   | 85.1  | 88.7 NM_173162.1     |
| 81.3   | 83     | 71.1  | 82 NM_033272.2       |
| 111.6  | 99.8   | 106.8 | 104.2 NM_144633.2    |
| 88.6   | 92.3   | 82.6  | 94.5 NM_001034838.1  |
| 94.8   | 85     | 81.9  | 93.6 NM_014592.2     |
| 86.5   | 81.4   | 81.6  | 83.9 NM_014592.2     |
| 91.3   | 86.8   | 83    | 81.2 NM_014591.4     |
| 89.3   | 91.6   | 81.4  | 75.6 NM_173197.2     |
| 90.7   | 90.4   | 89.4  | 95.9 NM_001034914.1  |
| 191.1  | 146.6  | 143   | 123.3 NM_001034914.1 |
| 93     | 89     | 89.2  | 90.9 NM_147183.2     |
| 101.7  | 89.5   | 87.3  | 96.2 NM_147182.2     |
| 85.2   | 79.1   | 80    | 84.9 NM_001035003.1  |
| 78.9   | 80.5   | 85.3  | 82.3 NM_025221.4     |
| 83.8   | 85.7   | 85.1  | 88.3 NM_025221.4     |
| 84.5   | 88.6   | 81.7  | 82.6 NM_001035004.1  |
| 86.7   | 89.3   | 83.8  | 89.1 NM_000220.2     |
| 97.7   | 90.7   | 92.9  | 99.9 NM_000220.2     |
| 103.9  | 91.7   | 92.3  | 99.1 NM_153766.1     |
| 85.8   | 84.7   | 80.3  | 78.5 NM_002241.2     |
| 93.4   | 83.3   | 76.3  | 83 NM_000525.3       |
| 73.4   | 72.7   | 74.6  | 69.7 NM_021012.3     |
| 99.1   | 85.4   | 89.6  | 97.4 NM_002242.2     |
| 107.8  | 95.6   | 107   | 89.7 NM_170720.1     |
| 91.8   | 92.3   | 92.1  | 91 NM_170720.1       |
| 101.3  | 94.1   | 109.7 | 100.8 NM_013348.2    |
| 93.7   | 91.8   | 94.7  | 85.5 NM_002243.3     |

|        |       |        |                     |
|--------|-------|--------|---------------------|
| 94     | 95.7  | 89.9   | 88.2 NM_170737.1    |
| 92.2   | 101.9 | 93.5   | 94.1 NM_170736.1    |
| 102.1  | 101.9 | 95.4   | 89.7 NM_018658.1    |
| 105.6  | 146.2 | 117.4  | 144.8 NM_000891.2   |
| 95.3   | 86.4  | 88.2   | 94.4 NM_002239.2    |
| 83.9   | 89.5  | 83.4   | 73 NM_152868.1      |
| 91.7   | 74.2  | 79.9   | 84.7 NM_152868.1    |
| 97.4   | 97.5  | 86.5   | 95 NM_004981.1      |
| 106    | 95.5  | 89.4   | 90.9 NM_000890.3    |
| 92.5   | 80.5  | 83.7   | 93.1 NM_002240.2    |
| 102.6  | 91.5  | 89.4   | 92.1 NM_004982.2    |
| 93.4   | 83.5  | 89.5   | 87.7 NM_004983.2    |
| 100.6  | 85.5  | 95     | 96 NM_002245.2      |
| 84.6   | 96.4  | 92.7   | 83.7 NM_021161.3    |
| 117.8  | 104.9 | 92.7   | 93.9 NM_138317.1    |
| 91.3   | 85.6  | 84.8   | 88.2 NM_021161.3    |
| 95.2   | 84.3  | 82.7   | 92.4 NM_138318.1    |
| 212    | 151.8 | 157    | 110.3 NM_022055.1   |
| 133.6  | 101.3 | 87.3   | 91.9 NM_022054.2    |
| 85.7   | 78.7  | 80.6   | 86.7 NM_022358.2    |
| 104    | 97.9  | 93     | 89.7 NM_032115.2    |
| 91.8   | 92.8  | 92     | 97.9 NM_031460.2    |
| 102.4  | 98.6  | 99.9   | 95.8 NM_181840.1    |
| 100.7  | 86.8  | 87     | 85.4 NM_001017425.2 |
| 93.6   | 96.1  | 86.7   | 97.7 NM_001017425.2 |
| 75.4   | 86.6  | 76.4   | 83.8 NM_001017424.1 |
| 87.5   | 87.1  | 78.9   | 92.3 NM_001017424.1 |
| 99.5   | 95.4  | 95.9   | 95.5 NM_002246.1    |
| 97.8   | 95    | 95.3   | 94.6 NM_033310.1    |
| 90.8   | 92.1  | 88.6   | 88.8 NM_033310.1    |
| 113.4  | 98.7  | 90.9   | 97.4 NM_003740.2    |
| 110.4  | 122.2 | 122.2  | 124.4 NM_004823.1   |
| 105.5  | 113.1 | 110.8  | 116.1 NM_033455.1   |
| 89.7   | 82.1  | 82.4   | 87.3 NM_033347.1    |
| 83.2   | 98.7  | 85.6   | 91.7 NM_016601.2    |
| 84.9   | 84.5  | 80.3   | 84 NM_001014797.1   |
| 88.2   | 96.7  | 84     | 94.2 NM_002247.2    |
| 84.2   | 84    | 80.5   | 89 NM_001014797.1   |
| 493.1  | 468.9 | 502.5  | 312.2 NM_004137.2   |
| 93.9   | 91.6  | 90.8   | 86.3 NM_005832.3    |
| 82.4   | 87.6  | 86.8   | 85.4 NM_181361.1    |
| 89.7   | 90.4  | 85.5   | 81 NM_005832.3      |
| 84.7   | 87.7  | 80.9   | 86 NM_171830.1      |
| 90.4   | 77.8  | 87     | 91.5 NM_171829.1    |
| 230.8  | 297.5 | 301.5  | 265.7 NM_171828.1   |
| 94.3   | 86.5  | 87     | 76.4 NM_014505.4    |
| 94.7   | 103.6 | 93.2   | 90.8 NM_002248.3    |
| 210.7  | 181   | 196.4  | 162 NM_021614.2     |
| 1029.9 | 921.3 | 1097.5 | 719.8 NM_170775.1   |
| 94.6   | 94.1  | 78.2   | 81.2 NM_170782.1    |

|        |        |        |                     |
|--------|--------|--------|---------------------|
| 106    | 102.4  | 89.7   | 103.4 NM_002249.3   |
| 183    | 173.3  | 172.5  | 159.7 NM_002250.2   |
| 89.9   | 87.1   | 89.2   | 75 NM_000218.2      |
| 163.7  | 130.5  | 135.1  | 122.5 NM_000218.2   |
| 93.4   | 91.9   | 91.1   | 83.7 NM_181798.1    |
| 82.4   | 80.8   | 75.5   | 85.3 NM_018722.1    |
| 89.6   | 89.8   | 82.7   | 91.2 NM_172109.1    |
| 111.6  | 98.7   | 89.6   | 86.3 NM_172107.1    |
| 108.5  | 98.2   | 94.4   | 93.7 NM_172108.2    |
| 116    | 117.1  | 117.2  | 101.5 NM_004519.2   |
| 100.6  | 90.1   | 81.7   | 93.9 NM_004700.2    |
| 90.2   | 78.3   | 78.2   | 76.2 NM_004700.2    |
| 83.5   | 85.5   | 79.2   | 84.8 NM_172163.1    |
| 96.6   | 89.2   | 73.3   | 85.7 NM_019842.2    |
| 102.3  | 96.8   | 97.4   | 107.1 NM_173605.1   |
| 97.6   | 104.8  | 104.2  | 111 NM_199464.1     |
| 111.8  | 94.9   | 103.3  | 92.2 NM_002251.3    |
| 83     | 92.9   | 88.7   | 86.8 NM_020697.2    |
| 89.5   | 87.3   | 83.2   | 85.1 NM_002252.3    |
| 87.2   | 87.9   | 82.3   | 87.9 NM_020822.1    |
| 88.6   | 72.9   | 76.4   | 82.9 NM_198503.2    |
| 89.4   | 91.1   | 83.8   | 88.6 NM_014379.2    |
| 114.3  | 104.1  | 94.8   | 90.9 NM_001013620.1 |
| 91.8   | 94     | 76.1   | 91.5 NM_198991.1    |
| 154.3  | 185.1  | 158.1  | 132.6 NM_031954.3   |
| 110.3  | 120.2  | 116.3  | 93.3 NM_001002914.1 |
| 128.5  | 106.6  | 121.7  | 114.8 NM_138444.2   |
| 270.9  | 231.8  | 206.9  | 208.5 NM_178863.2   |
| 91.2   | 89.8   | 80.7   | 87.7 NM_023930.2    |
| 187.6  | 151    | 142.1  | 129.9 NM_024076.1   |
| 84.8   | 96.9   | 73.4   | 80.4 NM_020768.1    |
| 88.1   | 91     | 79.1   | 83.6 NM_024681.1    |
| 140.3  | 141    | 121.2  | 130.4 NM_152387.2   |
| 113.3  | 110.5  | 103.8  | 107.2 NM_015353.1   |
| 136.4  | 156.8  | 141.1  | 123.9 NM_015353.1   |
| 764.8  | 614.8  | 575    | 460.1 NM_016121.3   |
| 85.5   | 89     | 79.3   | 88.8 NM_198404.1    |
| 1259.6 | 1214.9 | 1173.4 | 653.4 NM_018992.1   |
| 342.3  | 279.3  | 241.2  | 251.1 NM_153331.2   |
| 92.7   | 93.4   | 88.9   | 99.6 NM_153033.1    |
| 98.7   | 107    | 101.2  | 96 NM_198353.1      |
| 498.7  | 254.8  | 237.6  | 298 NM_017634.2     |
| 99.7   | 94.3   | 90.7   | 88.8 NM_024089.1    |
| 387.1  | 369.7  | 235.8  | 421 NM_153705.2     |
| 1290.7 | 828.9  | 818.7  | 470.5 NM_006801.2   |
| 1519.6 | 1195.9 | 871.9  | 714.9 NM_006854.2   |
| 249.1  | 226.2  | 201.9  | 159.7 NM_016657.1   |
| 168.7  | 154    | 154.4  | 129.5 NM_006855.2   |
| 109.6  | 106.9  | 94.5   | 94.4 NM_016657.1    |
| 90.5   | 94.4   | 80     | 91.8 NM_002253.1    |

|         |         |         |                        |
|---------|---------|---------|------------------------|
| 733.7   | 569.1   | 519.2   | 423.1 NM_012289.3      |
| 102.5   | 85.9    | 90.4    | 86.7 NM_203500.1       |
| 972.5   | 684     | 596     | 549.5 NM_012289.3      |
| 94.1    | 91.6    | 95.8    | 85.1 NM_000420.2       |
| 143.1   | 152.4   | 132.2   | 137.6 NM_176816.2      |
| 82      | 88.8    | 77.3    | 83.3 NM_007035.3       |
| 75.4    | 76.3    | 82.3    | 84.6 NM_174950.2       |
| 4701.5  | 3540.4  | 3205.9  | 2323.2 NM_006559.1     |
| 87      | 89.4    | 84.4    | 85.3 NM_152688.1       |
| 96      | 86.7    | 75.9    | 81.7 NM_006558.1       |
| 122.3   | 103.6   | 95.6    | 91.5 NM_000221.1       |
| 94.7    | 100.5   | 89.3    | 104.9 NM_006488.1      |
| 98.3    | 97.2    | 100.1   | 99.7 NM_000221.1       |
| 815.7   | 775.2   | 608.4   | 301 NM_003685.1        |
| 2226.8  | 1684    | 1169.1  | 1034.9 NM_014878.3     |
| 98.5    | 104.9   | 92      | 104.8 NM_015050.1      |
| 394.6   | 392.6   | 361.1   | 297.1 NM_015047.1      |
| 102     | 99.5    | 97.5    | 96.3 NM_014680.2       |
| 6546.9  | 4547.1  | 3778.7  | 2717.2 NM_014736.4     |
| 666.1   | 553.9   | 485.4   | 562 NM_014736.4        |
| 11839.2 | 15391.8 | 16654.1 | 14388.6 NM_001029989.1 |
| 140.8   | 110.4   | 108.3   | 118.8 NM_014673.2      |
| 230.7   | 137.7   | 121.2   | 106.8 NM_014777.1      |
| 308.2   | 432.3   | 406.6   | 363 NM_014773.2        |
| 1255.8  | 976     | 806.3   | 643.4 NM_015137.1      |
| 1678.7  | 1976.3  | 1428.7  | 1156.4 NM_014730.2     |
| 911.1   | 519     | 486.1   | 340.6 NM_032182.2      |
| 1852.3  | 1273.4  | 1278.3  | 831.1 NM_014761.2      |
| 293.8   | 264.3   | 230.5   | 222.2 NM_015056.1      |
| 634.2   | 785.9   | 850.6   | 407.9 NM_014615.1      |
| 225     | 275     | 224.6   | 243.3 NM_014738.2      |
| 1473.7  | 1247.1  | 1044.6  | 998 NM_014846.2        |
| 182.2   | 185.4   | 184.4   | 172.7 NM_014743.1      |
| 459.6   | 583.9   | 572.7   | 419.2 NM_015349.1      |
| 134     | 137.1   | 110.8   | 114.9 NM_015060.1      |
| 237.6   | 276.7   | 238.1   | 210.5 NM_014734.2      |
| 163.9   | 162.7   | 130.3   | 136.9 NM_015027.1      |
| 158.4   | 239.9   | 257.1   | 205.7 NM_014701.2      |
| 109.3   | 91.8    | 97.6    | 93.6 NM_001080496.1    |
| 267.7   | 223.1   | 194     | 211.5 NM_015045.1      |
| 105.3   | 104.4   | 98.9    | 103 NM_014997.2        |
| 373.5   | 537.6   | 497.1   | 342.2 NM_014845.4      |
| 90.8    | 88.1    | 84.1    | 88.8 NM_015159.1       |
| 98.5    | 99.6    | 94      | 91.8 NM_015005.1       |
| 503     | 475.5   | 357.6   | 375.3 NM_015257.1      |
| 1710.4  | 1601.2  | 1497.2  | 1168.5 NM_014866.1     |
| 84.7    | 93.5    | 77.4    | 72.1 NM_014809.2       |
| 136.5   | 162.6   | 151.6   | 146.9 NM_024874.3      |
| 183.2   | 209.3   | 177.7   | 216.3 NM_024874.3      |
| 93.1    | 95.5    | 91.7    | 115 NM_182686.1        |

|        |        |        |        |                |
|--------|--------|--------|--------|----------------|
| 242.6  | 218.9  | 223.9  | 201.6  | NM_015299.1    |
| 91.4   | 84.6   | 79.8   | 95.8   | NM_014844.2    |
| 565.7  | 610.8  | 654.4  | 327.1  | NM_015226.1    |
| 241.9  | 276.6  | 309.8  | 217.8  | NM_014686.2    |
| 84.6   | 90.3   | 86.6   | 92.5   | NM_015225.1    |
| 140.1  | 134.2  | 129.6  | 117.2  | NM_001080398.1 |
| 291    | 527.7  | 450.4  | 491.2  | NM_014639.2    |
| 1291.6 | 1744.7 | 1579.9 | 986.9  | NM_015330.1    |
| 539.5  | 331.5  | 274.8  | 240.3  | NM_014672.2    |
| 203.3  | 205.9  | 228.2  | 167.6  | NM_015104.1    |
| 158.7  | 154    | 163.1  | 144.9  | NM_014657.1    |
| 139.1  | 121.7  | 132.6  | 125.5  | NM_014702.3    |
| 237.3  | 186.1  | 163.1  | 131.6  | NM_015324.2    |
| 143.6  | 137.6  | 134.6  | 127.2  | NM_014855.1    |
| 141.6  | 119.1  | 137.5  | 117.9  | NM_015091.1    |
| 170.3  | 204.2  | 179.6  | 177    | NM_014772.1    |
| 472.3  | 310.8  | 306.1  | 231.9  | NM_014655.1    |
| 114.5  | 146.7  | 126.2  | 150.4  | NM_015203.2    |
| 86     | 99.6   | 84.6   | 89.9   | NM_015284.2    |
| 638.9  | 799.5  | 610.9  | 557.5  | NM_014774.1    |
| 95     | 126.5  | 112.3  | 103.8  | NM_207306.1    |
| 116.9  | 111.6  | 112.7  | 113.5  | NM_014732.2    |
| 80.2   | 77.6   | 84.9   | 84.7   | NM_014696.2    |
| 78.9   | 81     | 76.9   | 79.2   | NM_015253.1    |
| 416.4  | 367.8  | 313.3  | 263.6  | NM_014802.1    |
| 95     | 105    | 97.1   | 94.2   | NM_001002909.1 |
| 153.1  | 172.6  | 147.1  | 129.8  | NM_015202.1    |
| 158.2  | 146.3  | 141.2  | 163.8  | NM_014704.2    |
| 164.9  | 145    | 124.5  | 133    | NM_001009814.1 |
| 115.5  | 110.5  | 118.2  | 124.6  | NM_015058.1    |
| 203.4  | 214.8  | 191.6  | 127.6  | NM_014749.2    |
| 94     | 87.5   | 85.7   | 87.2   | NM_014817.2    |
| 112.6  | 136.7  | 102.3  | 105.3  | NM_014811.3    |
| 112.3  | 99.5   | 96     | 94.2   | NM_014741.2    |
| 228.1  | 231.7  | 193.9  | 196.3  | NM_015229.2    |
| 139.9  | 134.3  | 135.3  | 128.3  | NM_014859.3    |
| 310.8  | 293.8  | 276.6  | 150    | NM_016111.1    |
| 306.4  | 210.6  | 183.1  | 172.4  | NM_015179.2    |
| 115.2  | 113.6  | 121.6  | 100.9  | NM_001006947.1 |
| 83     | 86.4   | 72.4   | 82.6   | NM_014861.1    |
| 2088.7 | 3450.9 | 3567.6 | 2585.2 | NM_014719.1    |
| 542.4  | 423.7  | 345.2  | 292.1  | NM_015187.1    |
| 98     | 105.9  | 95.4   | 105.7  | NM_014804.1    |
| 157.1  | 121.3  | 108.4  | 109.3  | NM_001031690.1 |
| 108.2  | 103.4  | 103.6  | 108    | NM_014690.2    |
| 99.7   | 100    | 93.9   | 94.4   | NM_014690.2    |
| 96.4   | 91.5   | 90     | 90.1   | NM_015233.3    |
| 82.5   | 76.1   | 78.4   | 82.7   | NM_015233.3    |
| 85.6   | 84.6   | 83.1   | 89.1   | NM_001033602.1 |
| 154.3  | 167.7  | 138.1  | 168.9  | NM_015323.2    |



|        |        |        |                      |
|--------|--------|--------|----------------------|
| 96.3   | 95.1   | 90     | 83.3 NM_014653.2     |
| 90.9   | 98.6   | 88.8   | 92.7 NM_015210.1     |
| 141    | 178.5  | 164    | 152.9 NM_015328.1    |
| 198.5  | 180.1  | 179.2  | 180.2 NM_014924.3    |
| 87.4   | 88.1   | 81.2   | 82.3 NM_015070.2     |
| 437.9  | 338.4  | 294.9  | 235.3 NM_015935.4    |
| 1590.8 | 1313.3 | 1128.2 | 785 NM_015935.4      |
| 403    | 294.8  | 296.9  | 193.2 NM_015329.2    |
| 98.2   | 86.6   | 82.9   | 84.5 NM_015314.1     |
| 837.8  | 601.9  | 763.3  | 743.4 NM_014949.2    |
| 253.1  | 326.7  | 301.9  | 272 NM_015037.1      |
| 325    | 293.2  | 279.8  | 206.9 NM_015196.2    |
| 113.7  | 97.9   | 90.6   | 94.8 NM_014898.1     |
| 154.2  | 134.1  | 116    | 134.1 NM_014963.1    |
| 103.9  | 101.1  | 100.1  | 105.1 NM_025176.4    |
| 213.9  | 277.1  | 262.4  | 194.8 NM_025164.3    |
| 99     | 85.7   | 88.3   | 89.5 NM_015272.1     |
| 119.2  | 145.7  | 123.5  | 124.9 NM_014953.2    |
| 1024.9 | 1283.6 | 1252.1 | 1045.2 NM_014939.2   |
| 123.6  | 122.2  | 120.6  | 118.7 NM_015206.1    |
| 102.4  | 112.3  | 116.1  | 94.5 NM_001017999.1  |
| 101.5  | 97.8   | 86.1   | 99.3 NM_015209.1     |
| 97.1   | 87.5   | 88.1   | 84.9 NM_001018001.1  |
| 124.1  | 113.1  | 96     | 98.4 NM_001018000.2  |
| 88.7   | 82.5   | 89.8   | 87.3 NM_015209.1     |
| 82.7   | 94     | 95.8   | 93.3 NM_015275.1     |
| 176.6  | 193.8  | 155.5  | 172.9 NM_018999.2    |
| 91     | 95     | 80.1   | 90.6 NM_020696.1     |
| 285.4  | 566.3  | 467    | 438.2 NM_001080392.1 |
| 447.1  | 315.5  | 329.6  | 271.6 NM_020701.1    |
| 84.2   | 98.6   | 85.7   | 81.4 NM_020702.1     |
| 105.2  | 93.7   | 106.5  | 100.6 NM_018684.1    |
| 78.8   | 79.6   | 79.2   | 85.8 XM_945420.1     |
| 99.2   | 93.6   | 92.9   | 92.1 NM_020711.1     |
| 84     | 87.3   | 85.3   | 88 NM_001009959.1    |
| 90.5   | 92.3   | 87     | 92.5 NM_020711.1     |
| 819.8  | 693.7  | 687.9  | 511.1 NM_020444.2    |
| 545.7  | 505.5  | 481.7  | 406.2 NM_020444.2    |
| 95.5   | 76.6   | 78.1   | 82.3 NM_017550.1     |
| 88.2   | 93.9   | 96.3   | 94.8 NM_018689.1     |
| 148.5  | 148.6  | 141.9  | 167.1 NM_018084.3    |
| 86.6   | 84.8   | 80.8   | 79.5 NM_019590.2     |
| 260.4  | 246.8  | 214.1  | 184.7 NM_020336.1    |
| 98.2   | 90.5   | 97.4   | 86.9 NM_020340.2     |
| 574.4  | 524.8  | 564.7  | 574.5 NM_015443.2    |
| 88.9   | 95.8   | 79.3   | 77.3 NM_014431.1     |
| 99     | 107.3  | 102.5  | 91.8 NM_015634.2     |
| 105.4  | 90.7   | 112.5  | 83 NM_015694.1       |
| 217.9  | 262.8  | 261    | 201.8 NM_020748.1    |
| 92     | 92.7   | 85     | 86.2 NM_020775.2     |

|       |       |       |                      |
|-------|-------|-------|----------------------|
| 197.7 | 204.4 | 184.1 | 199.2 NM_152748.2    |
| 116.2 | 126.8 | 117.6 | 110.4 NM_020776.1    |
| 135.2 | 108.1 | 91.6  | 105.8 NM_017769.2    |
| 122.6 | 116.5 | 106.2 | 106.8 NM_020784.1    |
| 92.4  | 87.2  | 88.4  | 99.2 NM_001080522.1  |
| 126.2 | 148.7 | 160.3 | 162.7 NM_019600.1    |
| 96    | 100.1 | 78.8  | 84 NM_020802.1       |
| 111.9 | 104.6 | 109.2 | 114.5 NM_020817.1    |
| 102.4 | 89.8  | 88.9  | 96.6 NM_020818.2     |
| 206.3 | 203.1 | 199.3 | 162.7 NM_020819.2    |
| 199.1 | 213.7 | 172.9 | 172.9 NM_183009.1    |
| 100.8 | 94.6  | 92.6  | 93.9 NM_020829.1     |
| 208.9 | 286.1 | 255.7 | 253.6 NM_019593.2    |
| 87.4  | 91.6  | 89.3  | 95.7 NM_020834.1     |
| 163   | 122.1 | 130.9 | 115.7 NM_020836.2    |
| 91.5  | 88.5  | 86.2  | 95.3 NM_020844.1     |
| 155.5 | 131.2 | 117.1 | 117.7 NM_020853.1    |
| 193.3 | 177.9 | 186.5 | 165.7 NM_020854.2    |
| 108.6 | 110.6 | 110   | 109.6 NM_020879.1    |
| 135.9 | 128.3 | 148.4 | 141 NM_020888.1      |
| 78.6  | 91.8  | 81.5  | 86.3 NM_020890.1     |
| 81.4  | 72.1  | 77    | 90.9 NM_020893.1     |
| 187.5 | 202.9 | 249.1 | 223.1 NM_020894.1    |
| 109.3 | 106.7 | 95    | 97.9 NM_020894.1     |
| 156.9 | 217.1 | 179   | 196.3 NM_025182.2    |
| 85.1  | 90.3  | 100.7 | 86.7 NM_020901.1     |
| 95    | 90.5  | 107.1 | 93 XM_048362.9       |
| 108.3 | 98.1  | 87.4  | 96.5 NM_001080429.1  |
| 97.1  | 92.8  | 95.1  | 93.3 XM_166320.6     |
| 145.8 | 177.3 | 143.7 | 127.4 NM_001080450.1 |
| 92.6  | 95.4  | 112.9 | 109.8 NM_020917.1    |
| 156.5 | 111.6 | 116.9 | 111.1 NM_020927.1    |
| 127.9 | 105.7 | 107.1 | 122.4 NM_020931.1    |
| 414.5 | 461.2 | 364.6 | 439.8 NM_018330.3    |
| 298.7 | 206.9 | 167.6 | 178.1 NM_020940.2    |
| 111.2 | 100.8 | 96.2  | 109.9 NM_020943.1    |
| 119.6 | 112.1 | 94.3  | 104.7 NM_020947.2    |
| 215.4 | 164.1 | 179.6 | 146.7 NM_020954.2    |
| 86.9  | 79.2  | 75.3  | 96.4 NM_020958.2     |
| 96.8  | 82.8  | 88.9  | 93.1 NM_020958.2     |
| 71.6  | 78.5  | 78.4  | 83.4 NM_058237.1     |
| 135.5 | 134.5 | 117.7 | 119.1 NM_020961.2    |
| 86.7  | 119.2 | 118   | 101.2 NM_020964.1    |
| 112.3 | 119.3 | 99.1  | 102.5 NM_025190.2    |
| 100.8 | 86    | 99.1  | 90.6 NM_025249.1     |
| 96.3  | 96.2  | 88.2  | 86.6 NM_025251.1     |
| 299.7 | 203.6 | 185.9 | 170.2 NM_030628.1    |
| 92.5  | 84.4  | 82.2  | 82 NM_018559.2       |
| 159   | 196.1 | 191.3 | 150.3 NM_030636.2    |
| 754.9 | 611.2 | 621   | 414.6 NM_001040157.1 |

|        |        |       |                      |
|--------|--------|-------|----------------------|
| 348.6  | 535.2  | 482.8 | 438.8 NM_030650.1    |
| 97.6   | 103.9  | 90.4  | 90.9 NM_033393.1     |
| 508.6  | 196.6  | 184   | 182.9 NM_053042.2    |
| 336.3  | 244.9  | 246.7 | 253.3 NM_033426.2    |
| 444.9  | 537.8  | 715.8 | 927.6 NM_001080484.1 |
| 268.9  | 172    | 141.6 | 129.5 NM_033397.2    |
| 88.6   | 85.7   | 84.6  | 89.9 NM_001008949.1  |
| 86.3   | 84.4   | 87.3  | 85 NM_001008949.1    |
| 91.4   | 88     | 79.8  | 86.1 NM_178495.4     |
| 86.6   | 92.7   | 91.1  | 91.9 NM_001029864.1  |
| 101.9  | 95.2   | 89.9  | 92.1 NM_024935.2     |
| 183.7  | 200.4  | 183.3 | 183.2 NM_032442.2    |
| 218.4  | 199.1  | 177.9 | 203.2 NM_018193.1    |
| 192.3  | 183.2  | 148.5 | 152.1 NM_017794.2    |
| 99     | 91.7   | 84.9  | 89.4 NM_032437.1     |
| 121.7  | 117.3  | 106.2 | 136.6 NM_032435.1    |
| 133.9  | 170    | 159.7 | 145.3 NM_024896.2    |
| 94.9   | 93.2   | 82.1  | 90.3 NM_032425.3     |
| 97.6   | 85.8   | 88.5  | 100.4 NM_024746.2    |
| 661.2  | 463.5  | 403.7 | 317.8 NM_032424.1    |
| 1219.7 | 1602.3 | 1781  | 940.6 NM_032448.1    |
| 482.7  | 787    | 706   | 790.9 NM_025137.2    |
| 79.2   | 71     | 69    | 75 NM_032506.1       |
| 86.6   | 85.1   | 79.2  | 85.5 NM_194286.2     |
| 130.2  | 127.4  | 125.2 | 113.2 NM_032534.1    |
| 99.1   | 115.8  | 127.6 | 102.4 NM_032529.1    |
| 95.6   | 104    | 100.1 | 102.5 NM_052899.1    |
| 93.5   | 91     | 77.8  | 84 NM_052904.1       |
| 93.9   | 94.4   | 81.3  | 85.6 NM_052906.1     |
| 79.1   | 78     | 73.4  | 88.6 NM_052909.2     |
| 82.6   | 84.1   | 83.6  | 79.9 XM_941554.1     |
| 104.4  | 109.8  | 90.3  | 106 NM_052913.2      |
| 98.4   | 95.9   | 104.3 | 98.2 NM_001001936.1  |
| 95.1   | 101.9  | 84.7  | 97.9 NM_153369.1     |
| 100.7  | 108.2  | 95.4  | 95.6 NM_052919.1     |
| 75.4   | 76.3   | 73.3  | 83.8 NM_153239.2     |
| 86.1   | 81.5   | 82.8  | 85 NM_133448.1       |
| 96.6   | 101.6  | 87.4  | 96.2 NM_177454.2     |
| 116.5  | 109.3  | 134   | 112.9 NM_133465.1    |
| 85     | 78.8   | 69.9  | 77.7 NM_133372.1     |
| 458.7  | 593.2  | 500.2 | 523.5 NM_133372.1    |
| 321.6  | 287    | 241.1 | 221.9 NM_021174.4    |
| 103.4  | 131.3  | 112.6 | 117.3 NM_199205.1    |
| 96.6   | 92.8   | 82.1  | 110.8 NM_021174.4    |
| 396.5  | 264.6  | 219.2 | 225.4 NM_133451.1    |
| 96.5   | 95.3   | 102.2 | 98.1 NM_032874.2     |
| 91.5   | 88.7   | 95.6  | 88.9 NM_032560.3     |
| 799.8  | 568.2  | 458.9 | 453.4 NM_032560.3    |
| 439.1  | 381.3  | 376.7 | 281.6 NM_138346.1    |
| 82.5   | 91     | 83.6  | 89.6 NM_001009899.1  |

|        |        |       |        |                |
|--------|--------|-------|--------|----------------|
| 83.6   | 96.2   | 91.1  | 102.9  | NM_001008537.1 |
| 355.8  | 535.5  | 408   | 453.9  | NM_001017969.1 |
| 762.5  | 1208.1 | 873.8 | 1305.3 | NM_020738.1    |
| 474.6  | 276.9  | 214.5 | 259.9  | NM_004523.2    |
| 102.2  | 96.5   | 93.1  | 97.3   | NM_138424.1    |
| 91     | 87.8   | 95.6  | 101.4  | NM_022113.3    |
| 220.8  | 239    | 209.7 | 221.3  | NM_015254.2    |
| 535.9  | 406.7  | 324.8 | 330.6  | NM_014875.1    |
| 697.6  | 531.7  | 476.4 | 537.3  | NM_020242.1    |
| 259    | 163.4  | 148.7 | 136.1  | NM_020816.1    |
| 168.7  | 116.2  | 108.6 | 102    | NM_031217.2    |
| 102.5  | 92.1   | 90    | 87.1   | NM_153209.1    |
| 94.2   | 94.1   | 78.8  | 87.3   | NM_004321.4    |
| 97.2   | 97.2   | 96.7  | 92.9   | NM_183416.2    |
| 92.9   | 126    | 114.5 | 97.1   | NM_183416.2    |
| 174.3  | 262.7  | 251.6 | 227.5  | NM_015074.2    |
| 96.3   | 102.7  | 92.7  | 97.2   | NM_006612.3    |
| 648.7  | 605.2  | 422.6 | 471.1  | NM_004520.1    |
| 863.7  | 549    | 471.2 | 369.3  | NM_005733.1    |
| 95.7   | 127.4  | 104   | 101.4  | NM_017641.2    |
| 86.9   | 97.1   | 92.4  | 90.3   | XM_935437.1    |
| 151.8  | 102.4  | 94.7  | 103.2  | NM_017596.2    |
| 111.2  | 93.5   | 87.4  | 94.4   | NM_138555.1    |
| 271.4  | 227.2  | 169.4 | 171.6  | NM_004856.4    |
| 88.8   | 79.1   | 79.8  | 74.7   | NM_030615.1    |
| 109.2  | 110.5  | 108.2 | 99     | NM_005355.2    |
| 83.4   | 79.6   | 81.6  | 88.9   | NM_018012.2    |
| 105.2  | 113.1  | 92.4  | 110.5  | NM_017576.1    |
| 88.2   | 81.5   | 69.6  | 83.6   | NM_017576.1    |
| 96.6   | 91.2   | 93.6  | 89.5   | NM_032559.3    |
| 714.5  | 563.4  | 464.3 | 314.6  | NM_006845.2    |
| 82.9   | 84.7   | 74.3  | 87     | NM_007054.4    |
| 275.3  | 295.2  | 276.7 | 251.4  | NM_004798.2    |
| 100.8  | 92.6   | 101.6 | 102.4  | NM_002254.5    |
| 293.2  | 360.5  | 246.8 | 242.8  | NM_012310.2    |
| 93.9   | 89.4   | 92.7  | 88.8   | NM_004984.2    |
| 413.1  | 375.3  | 293.4 | 252.2  | NM_004521.1    |
| 97.3   | 98.4   | 98.3  | 90.3   | NM_004522.1    |
| 114.2  | 114.2  | 91.9  | 109.7  | NM_145027.3    |
| 117    | 183.6  | 127   | 133.4  | NM_198525.1    |
| 88.4   | 87.2   | 80.7  | 94.6   | NM_182903.2    |
| 245.2  | 206.6  | 191.6 | 179.8  | NM_014970.2    |
| 2436.2 | 1703.4 | 1617  | 1199.8 | NM_002263.2    |
| 267.8  | 269.8  | 276.1 | 251.2  | NM_145754.2    |
| 85.2   | 93     | 97.2  | 87.6   | NM_005550.2    |
| 105.1  | 100.3  | 107.9 | 101.2  | NM_012311.2    |
| 97.6   | 93.9   | 90.4  | 98.4   | NM_014218.1    |
| 96.6   | 86.2   | 91.4  | 105.2  | NM_014511.3    |
| 111.4  | 97.1   | 98.4  | 91.9   | NM_015868.2    |
| 105.4  | 94.5   | 100.6 | 93     | NM_001080770.1 |

|       |       |       |                      |
|-------|-------|-------|----------------------|
| 90.6  | 94    | 85.6  | 105.4 NM_020535.3    |
| 103.5 | 107.8 | 88.4  | 104.1 NM_020535.3    |
| 103.4 | 82.2  | 82.3  | 86.8 NM_020535.3     |
| 87.9  | 81.9  | 77.5  | 86.3 NM_001018081.1  |
| 98.2  | 83.8  | 83.7  | 87.8 NM_014512.1     |
| 91.5  | 86.9  | 80    | 88.9 NM_012313.1     |
| 95.9  | 78.4  | 81.9  | 84.8 NM_012314.2     |
| 96.7  | 98    | 89    | 92.5 NM_014513.1     |
| 96.7  | 99.3  | 98.1  | 102.7 NM_013289.1    |
| 88.7  | 90.2  | 94.3  | 87.8 NM_006737.1     |
| 93.8  | 96.4  | 82.2  | 90 NM_153443.2       |
| 102.5 | 90.9  | 86.6  | 87.4 NM_001015070.1  |
| 94.1  | 86.2  | 96.2  | 85.1 NM_018240.3     |
| 111.1 | 96.9  | 90.8  | 100.8 NM_199180.1    |
| 101.4 | 92.5  | 78.8  | 85.4 NM_032123.4     |
| 110.5 | 103.5 | 101.3 | 102.6 NM_199179.1    |
| 77.8  | 96.6  | 82.1  | 79.2 NM_032531.1     |
| 97.4  | 96.3  | 91.4  | 91.9 NM_002256.2     |
| 97.6  | 91.6  | 89.6  | 83.7 NM_032551.3     |
| 118.6 | 113.6 | 111.2 | 101.6 NM_000222.1    |
| 146.7 | 153.9 | 150.1 | 149.7 NM_000899.3    |
| 94.9  | 90    | 85.6  | 89.8 NM_000899.3     |
| 134.7 | 117   | 108.5 | 114.9 NM_153683.2    |
| 101.2 | 100.4 | 98.8  | 94.7 NM_175737.2     |
| 85.2  | 88    | 81    | 92 NM_022822.1       |
| 115.3 | 97.1  | 92.6  | 93.7 NM_022822.1     |
| 86.9  | 81.9  | 80.6  | 84 NM_177417.1       |
| 90.4  | 90.3  | 84    | 81.5 NM_145275.1     |
| 98.7  | 98.9  | 99    | 104.7 NM_138343.2    |
| 82.8  | 80.1  | 79.5  | 85.3 NM_201522.1     |
| 80    | 86.6  | 80.7  | 85.3 NM_201523.1     |
| 101.3 | 92.7  | 100.3 | 89.2 NM_006563.2     |
| 118.3 | 156.7 | 145.7 | 135.6 NM_005655.1    |
| 105.2 | 117.3 | 117   | 120.3 NM_001032282.1 |
| 131.8 | 139.8 | 122.5 | 116.6 NM_005655.1    |
| 148.1 | 132.5 | 124.7 | 139 NM_003597.4      |
| 662.9 | 699.4 | 765.6 | 423 XM_938887.1      |
| 97.3  | 111.2 | 101.7 | 114.4 NM_007249.3    |
| 89.8  | 103.5 | 89    | 99.9 NM_016285.2     |
| 576.3 | 940.2 | 828.8 | 632.8 NM_015995.2    |
| 90.1  | 87.6  | 85.9  | 93 NM_138693.1       |
| 102.9 | 102.6 | 99.4  | 107.6 NM_014079.2    |
| 86.3  | 93.4  | 82.5  | 82.6 NM_031918.1     |
| 87.9  | 87.5  | 84.3  | 86.5 NM_173484.2     |
| 300.2 | 120   | 149.9 | 118.2 NM_016270.2    |
| 95.1  | 104.3 | 86.1  | 85.8 NM_016531.3     |
| 290.2 | 223.2 | 159.9 | 197 NM_004235.3      |
| 84.2  | 78.8  | 93.3  | 93.6 NM_001730.3     |
| 183.2 | 185.4 | 149.5 | 134.7 NM_001008490.1 |
| 505.7 | 405.8 | 413.6 | 265.2 NM_001300.4    |

|        |        |       |        |                |
|--------|--------|-------|--------|----------------|
| 86.9   | 88     | 85.2  | 79.2   | NM_003709.1    |
| 125.1  | 117.5  | 112.9 | 106.9  | NM_007250.2    |
| 696.6  | 641.1  | 599.9 | 404    | NM_001206.2    |
| 85.3   | 84.7   | 87.6  | 81.2   | NM_172193.1    |
| 231.8  | 227.1  | 269.4 | 201.4  | NM_014315.2    |
| 2221.5 | 1613.2 | 1864  | 1153.1 | NM_057161.2    |
| 314.9  | 190    | 179.5 | 125.3  | NM_017566.2    |
| 745.1  | 507.7  | 577.3 | 396.4  | NM_020782.1    |
| 84.1   | 81.6   | 83.2  | 81.4   | NM_207335.1    |
| 107.2  | 101.3  | 94.6  | 96.1   | NM_152375.1    |
| 86.9   | 83.1   | 82.6  | 91.4   | NM_138433.2    |
| 72.1   | 79.1   | 72.8  | 74.2   | NM_018203.1    |
| 155.2  | 345.5  | 362.7 | 233.5  | NM_173546.1    |
| 88     | 85.8   | 87.3  | 89.9   | NM_020866.1    |
| 80.5   | 87.5   | 78    | 86.2   | NM_152467.1    |
| 114.4  | 105.3  | 104.7 | 92.9   | NM_018143.1    |
| 1330.4 | 1003.5 | 900.7 | 683.3  | NM_021633.2    |
| 96.6   | 92.8   | 89    | 100.1  | NM_033495.2    |
| 84.3   | 84.4   | 81.9  | 93.6   | NM_020805.1    |
| 91.9   | 84.1   | 99.9  | 97.9   | NM_030624.1    |
| 98.9   | 107.6  | 95.8  | 95.6   | NM_198317.1    |
| 137    | 159.5  | 163.2 | 133.9  | XM_936706.1    |
| 141.9  | 128.7  | 117.9 | 102.5  | NM_025010.2    |
| 177.1  | 155.1  | 159.9 | 150.2  | NM_007246.2    |
| 272.3  | 261.1  | 263.5 | 247.5  | NM_014458.3    |
| 177.1  | 144.9  | 119.5 | 135.1  | NM_014851.2    |
| 424    | 479.6  | 549.4 | 258.5  | NM_032775.2    |
| 114.7  | 107.4  | 102.9 | 99.3   | NM_144711.3    |
| 96.3   | 98.4   | 91.9  | 96.8   | NM_022480.2    |
| 107.1  | 118.1  | 104.4 | 103.6  | NM_018316.1    |
| 172.4  | 195.8  | 227.6 | 144.1  | NM_017415.1    |
| 76.8   | 82.7   | 83.2  | 83.5   | NM_057162.1    |
| 95.7   | 89     | 83.8  | 92.4   | NM_019117.3    |
| 109.3  | 99.2   | 90    | 90.4   | NM_001007075.1 |
| 642.9  | 651.9  | 506.8 | 591.2  | NM_001007075.1 |
| 193.6  | 210.5  | 207.1 | 193.1  | NM_001007075.1 |
| 161    | 173.7  | 187.1 | 155.9  | NM_001031710.1 |
| 109.8  | 109.5  | 103.3 | 105.2  | NM_018846.2    |
| 628    | 664.7  | 628.5 | 453.4  | NM_020803.3    |
| 91.9   | 81.5   | 88.7  | 82.9   | NM_018847.1    |
| 151.1  | 108.4  | 111.6 | 98.7   | NM_002257.2    |
| 84.4   | 76.3   | 87.2  | 87.4   | NM_002776.3    |
| 113.6  | 108    | 107.1 | 98.5   | NM_145888.1    |
| 93.7   | 96.8   | 86.2  | 90.1   | NM_144947.1    |
| 93.7   | 97.2   | 79.8  | 91.4   | NM_006853.2    |
| 80.9   | 82.2   | 80.5  | 80.7   | NM_019598.2    |
| 83.9   | 82.6   | 89.8  | 80.6   | NM_019598.2    |
| 102.9  | 78.2   | 78.8  | 82.6   | NM_015596.1    |
| 96.9   | 88.6   | 84.6  | 88.2   | NM_022046.3    |
| 87.7   | 93.5   | 91    | 87.1   | NM_023006.1    |

|        |        |        |                     |
|--------|--------|--------|---------------------|
| 93.1   | 87.2   | 84.4   | 87.1 NM_017509.2    |
| 90.1   | 90     | 80.7   | 89.5 NM_017509.2    |
| 90.5   | 88.1   | 84     | 94 NM_001002232.1   |
| 87.6   | 91.5   | 77.4   | 85.3 NM_005551.3    |
| 80.9   | 86     | 72     | 80.3 NM_001030050.1 |
| 82.5   | 82.3   | 80.7   | 89.1 NM_001030047.1 |
| 87.5   | 87     | 78.6   | 76.2 NM_001030050.1 |
| 84.5   | 89.7   | 80.7   | 91.2 NM_004917.2    |
| 79.4   | 76.4   | 72.6   | 86.3 NM_012427.3    |
| 80.2   | 84.4   | 67.7   | 75.9 NM_012427.3    |
| 104    | 85.6   | 83.6   | 82.3 NM_012427.3    |
| 86.4   | 87.7   | 87.3   | 91.8 NM_002774.3    |
| 90.7   | 89.3   | 78     | 83.1 NM_002774.3    |
| 100.8  | 94.6   | 93.3   | 103.9 NM_005046.2   |
| 113.2  | 114.2  | 107    | 101 NM_139277.1     |
| 84     | 91.8   | 88.8   | 91.6 NM_144505.1    |
| 81     | 96.5   | 85.4   | 87.9 NM_144507.1    |
| 81.3   | 78.9   | 73.2   | 93.9 NM_012315.1    |
| 83.2   | 93.8   | 103.8  | 85.1 NM_000892.2    |
| 86.6   | 82.9   | 78.9   | 84.1 NM_001080492.1 |
| 78.1   | 88.6   | 82.8   | 97.2 NR_002948.1    |
| 135.3  | 112.6  | 115.3  | 108.2 NM_020378.2   |
| 110    | 98     | 87     | 103.8 NM_006611.1   |
| 87     | 77.6   | 81.7   | 90.2 NM_002258.2    |
| 93.2   | 90.9   | 91     | 87.9 NM_213657.1    |
| 93.2   | 93.1   | 80.4   | 94.5 NM_002260.3    |
| 87     | 78     | 78.1   | 88.9 NM_002261.2    |
| 104.2  | 96.3   | 89.1   | 104.7 NM_002261.2   |
| 96.4   | 83     | 80     | 82 NM_007333.2      |
| 103.4  | 99.1   | 90     | 98.5 NM_013431.1    |
| 87.3   | 81.9   | 77.4   | 85.7 NM_002262.2    |
| 86.3   | 98.2   | 84.8   | 95.6 NM_007334.1    |
| 100.8  | 101.9  | 107    | 99.1 NM_016523.1    |
| 91.8   | 86.5   | 79.5   | 91.4 NM_005810.3    |
| 123.3  | 109.7  | 102.7  | 97.3 NM_198508.2    |
| 102.4  | 101    | 102.4  | 95.1 NM_007360.1    |
| 99.1   | 96.7   | 97.5   | 93.7 NM_003679.2    |
| 80.2   | 79.1   | 78.2   | 94.2 NM_033404.2    |
| 96.7   | 83.9   | 88.4   | 92.6 NM_152643.5    |
| 92.2   | 91.4   | 81.2   | 93 NM_000893.2      |
| 175.5  | 151.7  | 142.3  | 122.6 NM_005552.3   |
| 298.2  | 274.6  | 248.4  | 229.1 NM_182923.2   |
| 723.2  | 1016.4 | 1075.7 | 781.8 NM_014708.3   |
| 455.4  | 272.5  | 238.6  | 257.8 NM_006101.1   |
| 170.6  | 119.6  | 121.7  | 139.8 NM_002266.2   |
| 366    | 327.8  | 250.1  | 426.9 NM_002267.2   |
| 1226.6 | 1190.2 | 933    | 727.6 NM_002268.3   |
| 115.6  | 124    | 120.2  | 104.7 NM_002269.2   |
| 602.5  | 933    | 681.7  | 835.4 NM_012316.3   |
| 6447.9 | 5289.1 | 5444.5 | 4371.7 NM_002265.4  |

|        |        |        |                      |
|--------|--------|--------|----------------------|
| 83.5   | 88.9   | 89.9   | 87.6 NM_007059.2     |
| 329.5  | 245.2  | 201.9  | 189 NM_004985.3      |
| 91     | 84.9   | 88.7   | 93 NM_033360.2       |
| 246.4  | 228.7  | 215.2  | 288.5 NM_016618.1    |
| 86.3   | 93.1   | 83.5   | 79 NM_153379.1       |
| 131.4  | 127    | 86.7   | 113 NM_153379.1      |
| 82.7   | 83.9   | 84.4   | 81.1 NM_172229.1     |
| 186.3  | 137.1  | 132.3  | 103.8 NM_024507.2    |
| 91     | 99.9   | 96.9   | 105.1 NM_001013406.1 |
| 89.1   | 83.5   | 84.3   | 87.1 NM_006121.2     |
| 1529.3 | 1060.1 | 1203.2 | 816.5 NM_000421.2    |
| 91.9   | 99.3   | 92.3   | 89.3 NM_000223.2     |
| 82.9   | 83.1   | 75.2   | 85 NM_002274.2       |
| 94.7   | 87.6   | 89.6   | 94.7 NM_000526.3     |
| 92.7   | 88.5   | 98.8   | 88.1 NM_002275.2     |
| 89.1   | 93     | 91.1   | 81.9 NM_005557.2     |
| 91.7   | 169.8  | 189.6  | 128.9 NM_000422.1    |
| 83.4   | 87.2   | 77.8   | 76.3 NM_000224.2     |
| 94     | 94.8   | 93.9   | 97.4 NM_199187.1     |
| 95.8   | 80.9   | 79.4   | 80.8 NM_002276.3     |
| 84     | 86.4   | 79.1   | 89.1 NM_175078.1     |
| 85.1   | 84.4   | 76.1   | 83.4 NM_019010.1     |
| 123.5  | 103.9  | 109    | 97 NM_015515.3       |
| 103.6  | 102    | 90.5   | 91.7 NM_019016.1     |
| 74.4   | 80.3   | 78.7   | 81.5 NM_181534.2     |
| 89.5   | 96.8   | 82.2   | 89.8 NM_181537.2     |
| 92.4   | 91.9   | 92.9   | 84.6 NM_181535.2     |
| 88.2   | 88.8   | 83.3   | 91.9 NM_181539.3     |
| 87.1   | 84.6   | 77.6   | 87.7 NM_000423.2     |
| 90.7   | 98.9   | 89.8   | 101.8 NM_015848.1    |
| 94.8   | 103.1  | 89     | 91.1 NM_057088.1     |
| 98.9   | 97     | 90.7   | 88.3 NM_004138.2     |
| 87.3   | 89.8   | 84.9   | 86.8 NM_213656.2     |
| 88.7   | 92.6   | 87.1   | 94.6 NM_002272.1     |
| 73.5   | 76     | 71.2   | 75.8 NM_182497.2     |
| 88.8   | 97.6   | 76.9   | 85.4 NM_000424.2     |
| 106.5  | 100.2  | 86.8   | 102.4 NM_005554.3    |
| 89     | 82.1   | 77.6   | 93.8 NM_005555.2     |
| 92.5   | 100.2  | 92.3   | 92.9 NM_173086.2     |
| 91.4   | 83.8   | 83.1   | 89.5 NM_033448.1     |
| 101.1  | 90.7   | 97.2   | 93.9 NM_175834.2     |
| 100.1  | 95.3   | 91.8   | 86.1 NM_005556.3     |
| 95.2   | 105.8  | 87.8   | 87.7 NM_002273.2     |
| 88.2   | 106.2  | 92.3   | 85.3 NM_002284.3     |
| 103.2  | 116.9  | 110.5  | 105.6 NM_000226.2    |
| 83.6   | 85.8   | 80.8   | 83.5 NM_198691.2     |
| 107.2  | 115.1  | 101.2  | 101.6 NM_181688.1    |
| 103    | 107.6  | 79.3   | 92.1 NM_198692.1     |
| 84.5   | 80.5   | 81.5   | 79.4 NM_198699.1     |
| 102.9  | 108.1  | 93     | 93.7 XM_942388.1     |



|       |       |       |                     |
|-------|-------|-------|---------------------|
| 83.8  | 77.9  | 77.7  | 86.9 NM_198693.2    |
| 89.2  | 90.2  | 87.4  | 97 NM_198696.2      |
| 89.3  | 85.6  | 87.3  | 93.5 NM_198687.1    |
| 99.9  | 88.5  | 73.3  | 85.6 NM_198694.2    |
| 85.2  | 84.8  | 73    | 82.1 NM_198689.1    |
| 90.3  | 82.5  | 85.1  | 80.7 NM_198695.1    |
| 104.8 | 106.5 | 107.3 | 100.6 NM_198690.1   |
| 81.5  | 74.1  | 82.4  | 82.5 NM_030967.2    |
| 91.5  | 88    | 84.3  | 91.4 NM_175858.2    |
| 99.1  | 91.8  | 89.1  | 94.1 NM_181686.1    |
| 93.7  | 95.6  | 88.7  | 99 NM_181684.2      |
| 87.4  | 80.1  | 80.7  | 81.5 NM_198697.1    |
| 93.2  | 94.9  | 96.4  | 89.7 NM_198698.1    |
| 99    | 95.3  | 80.2  | 93.6 NM_030966.1    |
| 88.2  | 93.7  | 87.1  | 95 NM_181599.2      |
| 86.4  | 85.4  | 79.2  | 83.6 NM_181621.2    |
| 97.3  | 90.7  | 82.8  | 86.5 NM_181622.1    |
| 98.5  | 94.5  | 82.7  | 97.6 NM_181600.1    |
| 91.5  | 90.6  | 81.1  | 88.3 NM_181623.1    |
| 85.6  | 80.6  | 87.7  | 83.5 NM_031964.1    |
| 73.9  | 89    | 80    | 86.5 NM_181607.1    |
| 81.7  | 89.2  | 77.7  | 81.9 NM_181608.1    |
| 91.8  | 84.6  | 81.5  | 82.9 NM_181609.2    |
| 90.9  | 82.8  | 82.5  | 94.1 NM_181610.1    |
| 86.7  | 83.9  | 77.1  | 78.7 NM_181611.1    |
| 134.2 | 99.8  | 112.6 | 102.2 NM_181612.1   |
| 98.3  | 91.8  | 92.3  | 86 NM_181614.1      |
| 85.1  | 83.1  | 89.8  | 84.9 NM_181615.1    |
| 99.8  | 85.1  | 89    | 93.7 NM_181616.1    |
| 92.4  | 87.3  | 89.7  | 95.2 NM_181619.1    |
| 104   | 93.4  | 106.3 | 102 NM_181617.1     |
| 85.6  | 83.5  | 79.8  | 91.7 NM_181620.1    |
| 97.3  | 89.5  | 83.3  | 91.9 NM_181624.1    |
| 90.2  | 97.7  | 89.1  | 84.2 NM_203405.1    |
| 95.5  | 95    | 87.9  | 100 NM_001077711.1  |
| 84.3  | 82.4  | 82    | 85 NM_031958.1      |
| 87.5  | 90    | 83.4  | 85.6 NM_031959.2    |
| 83.5  | 86.5  | 79.7  | 84.2 NM_033060.2    |
| 98.5  | 100   | 81.3  | 87.9 NM_031854.2    |
| 88.4  | 90    | 90.5  | 91.1 NM_033059.2    |
| 90.7  | 80    | 76.8  | 84 NM_033062.2      |
| 87.4  | 84.5  | 84.1  | 87.3 NM_032524.1    |
| 80.7  | 80.6  | 80.5  | 84.2 NM_033188.2    |
| 83.5  | 88.9  | 78.6  | 86.6 NM_033061.2    |
| 86.6  | 85    | 83.2  | 89 NM_001005922.1   |
| 89    | 93.4  | 89.9  | 88.3 NM_001012710.1 |
| 88.2  | 87.2  | 89    | 84.1 NM_001005405.1 |
| 86.2  | 80.7  | 78.6  | 90.8 NM_001004325.1 |
| 87.3  | 79.1  | 80.7  | 70.6 NM_001012708.1 |
| 82.8  | 85.1  | 81.3  | 80 NM_001012709.1   |

|        |        |        |                      |
|--------|--------|--------|----------------------|
| 87.5   | 80.3   | 76.3   | 75 NM_001001480.2    |
| 85.8   | 87.7   | 79.4   | 84 NM_001012416.1    |
| 90.8   | 89.7   | 89.8   | 96.5 NM_001012503.1  |
| 87.9   | 86.7   | 78.2   | 83 NM_021046.2       |
| 88     | 85.3   | 88.1   | 84.2 NM_005553.2     |
| 87.1   | 84.9   | 88.9   | 83.9 NM_181602.1     |
| 93.4   | 86.8   | 84.4   | 89.9 NM_181604.1     |
| 93     | 83     | 85.6   | 82.4 NM_181605.1     |
| 76.7   | 79.6   | 76.2   | 88.1 NM_175857.3     |
| 89.7   | 88.6   | 74.1   | 83.3 NM_031962.2     |
| 93.8   | 89.9   | 94.2   | 102.8 NM_033191.2    |
| 5510   | 3459.2 | 3700.7 | 1954.5 NM_173852.3   |
| 107.9  | 95     | 91.4   | 91.4 NM_173853.2     |
| 85.7   | 80.2   | 87.2   | 82.6 NM_002278.2     |
| 92.8   | 86.8   | 80.6   | 85.8 NM_002279.3     |
| 89.5   | 87.6   | 87.3   | 96.5 NM_021013.3     |
| 87.2   | 98.5   | 89.6   | 93.9 NM_002280.3     |
| 99     | 89     | 80.4   | 97.4 NM_003771.3     |
| 86.2   | 93.8   | 82     | 91 NM_003770.4       |
| 93.4   | 98.1   | 86.4   | 91.7 NM_006771.3     |
| 88.5   | 96.3   | 95     | 93.2 NM_002281.2     |
| 88.4   | 78.6   | 78     | 90.5 NM_033033.3     |
| 112.7  | 110.9  | 112.9  | 110.1 NM_002282.2    |
| 88.9   | 90.3   | 83.7   | 87.8 NM_033045.2     |
| 92.8   | 89.4   | 97.5   | 107.4 NM_002283.2    |
| 92.3   | 94     | 81.6   | 93.2 NM_031950.2     |
| 101.1  | 88.9   | 93.3   | 88.4 NM_014238.1     |
| 98.2   | 93.1   | 81.3   | 91.9 NM_173598.2     |
| 302.2  | 238.1  | 225.2  | 228.8 NM_138417.2    |
| 458.1  | 699.4  | 407.6  | 500.1 NM_004986.2    |
| 190.4  | 230.6  | 187.4  | 178.1 NM_182926.1    |
| 397.8  | 421.7  | 405.3  | 254.9 NM_199129.1    |
| 147.4  | 143.4  | 112.8  | 116.4 NM_003349.4    |
| 118.2  | 122.6  | 107    | 109.8 NM_178554.3    |
| 625.7  | 1008.1 | 817.8  | 844.4 NM_003937.2    |
| 358.5  | 500    | 408.6  | 321 NM_003937.2      |
| 100.2  | 108.5  | 100.9  | 100.7 NM_000425.2    |
| 125.7  | 112.7  | 109    | 111 NM_024003.1      |
| 96.2   | 90     | 95.7   | 101.1 NM_032107.2    |
| 87     | 86.7   | 76.2   | 85.4 NM_032107.2     |
| 92     | 84.5   | 105.4  | 102.3 NM_015478.4    |
| 87.6   | 104.4  | 100.5  | 94.2 NM_015478.4     |
| 91.9   | 91.2   | 87.7   | 91.9 NM_001003689.1  |
| 1143.9 | 966.9  | 704.1  | 648.6 NM_031488.4    |
| 201    | 153.4  | 143.2  | 141.8 NM_001007102.1 |
| 95.5   | 82.3   | 82.8   | 86.9 NM_001007102.1  |
| 84.8   | 83.4   | 82     | 84.7 NM_032438.1     |
| 89.7   | 84.5   | 83     | 86.3 NM_173464.1     |
| 121.2  | 124.6  | 125.7  | 123.8 NM_145315.3    |
| 86.7   | 81.4   | 83     | 83.3 NM_033277.1     |

|         |         |         |                     |
|---------|---------|---------|---------------------|
| 137.9   | 126.7   | 122.3   | 177.6 NM_171846.1   |
| 854.1   | 1171.9  | 956.5   | 785.6 NM_032857.2   |
| 121.6   | 148.7   | 132.1   | 140.1 NM_171846.1   |
| 650.4   | 390.8   | 426.9   | 288 NM_016027.1     |
| 89.2    | 86      | 81.4    | 85.6 NM_005558.3    |
| 87.3    | 92.2    | 86.2    | 97.4 NM_005558.3    |
| 92.1    | 95.8    | 102.2   | 94.9 NM_002286.4    |
| 347.2   | 227.1   | 232.3   | 188.3 NM_021708.1   |
| 34217.5 | 36533.1 | 37766.6 | 36453.1 NM_021706.2 |
| 100.2   | 96.1    | 98.3    | 106.1 NM_002288.3   |
| 147.9   | 135.7   | 142.3   | 133.4 NM_021270.2   |
| 90.6    | 94.5    | 91.9    | 89.7 NM_002289.2    |
| 87.4    | 83.1    | 87.5    | 92.3 NM_005559.2    |
| 81.3    | 76.7    | 77.9    | 80.6 NM_005559.2    |
| 111.3   | 106.6   | 106.4   | 89.9 NM_000426.2    |
| 91.2    | 91.2    | 93.8    | 83.9 NM_000426.3    |
| 98.8    | 90.3    | 89.1    | 99.5 NM_198129.1    |
| 80.6    | 92.1    | 89.3    | 80 NM_198129.1      |
| 100.8   | 86.5    | 97.1    | 95.9 NM_000227.2    |
| 93.3    | 99      | 95.7    | 91.1 NM_198129.1    |
| 85.8    | 84.5    | 82.9    | 84.8 NM_002290.2    |
| 618.2   | 498.4   | 621.6   | 330.1 NM_005560.3   |
| 90.5    | 86.6    | 95.2    | 90.3 NM_002291.1    |
| 93.6    | 80.2    | 80.5    | 84.3 NM_002292.2    |
| 128.5   | 135     | 121.7   | 121.8 NM_000228.2   |
| 95.9    | 86.8    | 89      | 90.5 NM_001017402.1 |
| 86.5    | 85.3    | 84.6    | 87.3 NM_000228.2    |
| 92.2    | 96.9    | 92.6    | 80.4 NM_007356.1    |
| 1058.6  | 1552.9  | 1283    | 964.8 NM_002293.2   |
| 88.2    | 86.8    | 84.2    | 90.7 NM_018891.1    |
| 87.1    | 79      | 77.8    | 77.4 NM_018891.1    |
| 89.8    | 93.5    | 84.8    | 93.1 NM_005562.1    |
| 88.7    | 91.2    | 81.6    | 92 NM_006059.2      |
| 3718    | 3355.4  | 3237.4  | 1977.9 NM_005561.2  |
| 4513.8  | 5361.9  | 4923.3  | 4062.5 NM_013995.1  |
| 803.3   | 734.5   | 632     | 711.8 NM_002294.1   |
| 645.9   | 616.9   | 549.6   | 478.6 NM_002294.1   |
| 87.9    | 88.2    | 82.2    | 81.9 NM_014398.2    |
| 762.5   | 534.3   | 523.1   | 326.3 NM_006055.1   |
| 232.9   | 251.9   | 253.8   | 182.9 NM_018697.3   |
| 95.5    | 85.2    | 83.1    | 78.4 NM_198511.1    |
| 681.4   | 455.2   | 482.8   | 430.4 NM_015907.2   |
| 142.4   | 123.9   | 122.4   | 130.7 NM_014713.3   |
| 2718.2  | 1304.3  | 1113.5  | 904 NM_018407.4     |
| 1279    | 1298.6  | 1278.9  | 942.2 NM_006762.1   |
| 97.7    | 95.2    | 85.6    | 93.1 NM_004737.3    |
| 88.3    | 78.7    | 83.7    | 80.7 NM_004737.3    |
| 86.7    | 83.1    | 78.4    | 80 NM_133642.2      |
| 85.2    | 79.4    | 74.3    | 90.1 NM_015315.3    |
| 580.6   | 662.3   | 519.8   | 510.4 NM_033551.2   |

|        |        |        |                      |
|--------|--------|--------|----------------------|
| 98.1   | 98.5   | 95.3   | 96.6 NM_178043.1     |
| 203.6  | 236.4  | 243.1  | 237 NM_018078.2      |
| 98     | 97.1   | 93.5   | 92.9 NM_178043.1     |
| 461    | 264.1  | 262.9  | 211.8 NM_032239.2    |
| 123.3  | 135.7  | 115.1  | 103.3 NM_052879.3    |
| 204.9  | 202.8  | 155.7  | 145.2 NM_052879.3    |
| 862.1  | 881.9  | 816.8  | 660.8 NM_015155.1    |
| 162.1  | 130.4  | 146.8  | 140 NM_018357.2      |
| 140.8  | 128.5  | 125    | 130.1 NM_197958.1    |
| 1512.1 | 1597.3 | 1083.1 | 1401.5 NM_015454.1   |
| 1039.8 | 1109.8 | 755.1  | 561 NM_020117.8      |
| 257.9  | 274.2  | 227.8  | 177.7 NM_015340.3    |
| 352.4  | 300.8  | 314.8  | 215.6 NM_031206.2    |
| 4101.2 | 4401.7 | 4050.2 | 2256.7 NM_006148.1   |
| 87.2   | 89.9   | 85.6   | 97.5 NM_021267.2     |
| 130.8  | 100.5  | 96.4   | 98.7 NM_198207.1     |
| 94.9   | 87.2   | 79.3   | 88.7 NM_021267.2     |
| 438.3  | 383    | 271    | 240.8 NM_022075.3    |
| 647.7  | 576.4  | 517.4  | 406.2 NM_013384.3    |
| 88.8   | 85.6   | 80.1   | 83.3 NM_178842.2     |
| 100.8  | 95.5   | 95.3   | 99.1 NM_024552.1     |
| 196.3  | 206.2  | 205.5  | 162.9 NM_147190.1    |
| 3203.9 | 3977.9 | 3392.5 | 2645.9 NM_203463.1   |
| 148    | 168    | 156.2  | 135 NM_001014987.1   |
| 115.9  | 138.4  | 121.4  | 107.5 NM_001014988.1 |
| 94.7   | 89.8   | 78     | 92.9 NM_001014989.1  |
| 92.5   | 104.3  | 91.3   | 85.6 NM_014387.3     |
| 426.6  | 339.1  | 239.2  | 260.6 XR_000518.1    |
| 92.2   | 99.7   | 91.7   | 97.7 NR_002593.1     |
| 101.9  | 91.2   | 84.9   | 87.1 XR_001385.1     |
| 1415.7 | 1068.5 | 941.7  | 750.3 NM_032464.2    |
| 1235.2 | 730.5  | 631.8  | 636.1 NM_022040.2    |
| 268.7  | 175.2  | 177.4  | 149.6 NM_032464.2    |
| 107.5  | 92.9   | 85.3   | 88.1 NM_004690.2     |
| 103.2  | 131.7  | 143.3  | 110.5 NM_014572.1    |
| 108.9  | 109.4  | 107.8  | 101.9 NM_017773.2    |
| 94     | 95.4   | 94.2   | 89.8 NM_178834.2     |
| 85.4   | 80.2   | 80.9   | 77.5 NM_030915.1     |
| 114.9  | 93.4   | 83.9   | 101 NM_030915.1      |
| 94.4   | 93.8   | 86     | 82.7 NM_004139.2     |
| 309    | 200.2  | 186.7  | 151.3 NM_002296.2    |
| 1134.1 | 980.5  | 731.6  | 665.3 NM_002296.2    |
| 103.6  | 89.3   | 94.3   | 91.7 NM_194442.1     |
| 88.3   | 82.9   | 76.2   | 83 NM_006562.4       |
| 106.7  | 100.4  | 91.7   | 96.8 NM_001009812.1  |
| 93.8   | 91.7   | 80.6   | 96.6 NM_001031807.1  |
| 103.5  | 101.6  | 92.7   | 103.2 NM_001039768.2 |
| 106.6  | 99.5   | 104.4  | 98.5 NM_000229.1     |
| 94.5   | 88.2   | 86     | 89.3 NM_178348.1     |
| 93.8   | 94.4   | 93.4   | 89 NM_178349.1       |

|         |         |         |                      |
|---------|---------|---------|----------------------|
| 98.6    | 88      | 94.2    | 99.8 NM_178352.1     |
| 95.9    | 82      | 93.8    | 82.2 NM_178353.1     |
| 90.1    | 86.5    | 83.1    | 83.1 NM_178353.1     |
| 90.3    | 86.6    | 80.4    | 81.3 NM_178354.1     |
| 83.5    | 85.8    | 78.1    | 93.4 NM_178428.3     |
| 89.2    | 94      | 82.4    | 83.1 NM_014357.3     |
| 90.2    | 90.1    | 80.9    | 91.6 NM_178429.2     |
| 107.1   | 98.5    | 85      | 84.6 NM_178430.2     |
| 83.2    | 82.3    | 85.8    | 80.9 NM_178431.1     |
| 88.4    | 85      | 80.4    | 89.9 NM_178433.1     |
| 97.4    | 86      | 80.8    | 85.1 NM_178434.1     |
| 86.9    | 92.5    | 78.7    | 89 NM_032563.1       |
| 96.9    | 91.9    | 91.5    | 96.5 NM_178435.2     |
| 90.6    | 85.4    | 86.4    | 97.7 NM_178438.3     |
| 109.4   | 101.9   | 94.1    | 95.3 NM_001042771.1  |
| 96.1    | 96.7    | 95.9    | 92.3 NM_005356.3     |
| 95.2    | 94.5    | 90.1    | 102 NM_001042771.1   |
| 519.4   | 403     | 459.2   | 231 NM_016309.2      |
| 359.5   | 266.8   | 263.9   | 206.3 NM_001032391.1 |
| 258.5   | 200.7   | 217.4   | 175.8 NM_016309.2    |
| 697     | 663.4   | 490.1   | 530.4 NM_014793.3    |
| 100.7   | 92.4    | 92.1    | 96 NM_002297.2       |
| 87.2    | 89.1    | 82.3    | 84.2 NM_001001712.1  |
| 83.3    | 88.2    | 76.1    | 81.1 NM_178536.3     |
| 84      | 81.1    | 82      | 81.7 NM_005564.2     |
| 82.4    | 75.9    | 76.9    | 87.2 NM_198946.2     |
| 86.6    | 83.2    | 83.9    | 85.4 NM_178469.3     |
| 100.7   | 88.3    | 78.7    | 90.8 NM_001001676.1  |
| 133.3   | 152.7   | 152.1   | 168.8 NM_032440.1    |
| 78.1    | 78.8    | 71.5    | 79.6 NM_153686.4     |
| 12454.3 | 13280.1 | 12056.6 | 10373.6 NM_002298.2  |
| 115.4   | 132.3   | 131.1   | 129.1 NM_005565.3    |
| 92.2    | 90.9    | 82.8    | 89.5 NM_002299.2     |
| 109     | 101.4   | 96.1    | 101.6 NM_207338.1    |
| 95.8    | 92.6    | 94.1    | 88.2 NM_003893.3     |
| 87.6    | 76      | 87.5    | 81 NM_001290.2       |
| 111.9   | 103.4   | 92.9    | 89.8 NM_001080116.1  |
| 78.3    | 74.7    | 62.9    | 82.1 NM_007078.2     |
| 89.3    | 82.2    | 87.3    | 84.7 NM_001080116.1  |
| 12179.3 | 7623.8  | 5677.8  | 7789.7 NM_005566.1   |
| 90.7    | 101.3   | 91.1    | 84.6 NM_144972.3     |
| 84.1    | 77      | 82.5    | 81.7 NM_033195.1     |
| 2306.1  | 1412.1  | 1005.9  | 1213.1 NM_002300.3   |
| 93.8    | 90.8    | 93.2    | 97.6 NM_017448.1     |
| 93.2    | 83.7    | 78.9    | 82.9 NM_002301.2     |
| 83.7    | 87.2    | 87.1    | 86.4 NM_153486.2     |
| 104.6   | 117.4   | 107.9   | 117.6 NM_194436.1    |
| 1278.3  | 1594.4  | 1738.1  | 953.9 NM_000527.2    |
| 85.2    | 88.4    | 92.4    | 98.7 NM_001010978.2  |
| 95.8    | 92      | 86.3    | 94.1 NM_001013693.1  |

|         |         |         |                      |
|---------|---------|---------|----------------------|
| 100.5   | 104.7   | 90.2    | 93.7 NM_174902.2     |
| 125.2   | 114.1   | 117.3   | 124.9 NM_015627.1    |
| 95.6    | 87      | 92.4    | 97.2 NM_012317.2     |
| 447.6   | 373.2   | 274.4   | 392.2 NM_032287.2    |
| 127     | 163.7   | 151.7   | 147.4 NM_052971.2    |
| 112.6   | 108.4   | 115.3   | 98.9 NM_007015.2     |
| 88.4    | 94.1    | 98.7    | 88.1 NM_002302.2     |
| 147.3   | 82.6    | 86.6    | 96.9 NM_016269.2     |
| 90.8    | 93.9    | 84.9    | 86 NM_020997.2       |
| 87      | 91.4    | 87.8    | 88.4 NM_003240.2     |
| 91.5    | 88.5    | 93.8    | 89.6 NM_001010857.1  |
| 90.6    | 91.7    | 83.6    | 77.7 NM_001001552.3  |
| 405.7   | 414.7   | 462.7   | 301.3 NM_181336.2    |
| 826     | 728.3   | 648.3   | 605.2 NM_014319.3    |
| 84.9    | 79.4    | 76.9    | 85.5 NM_018655.2     |
| 100.1   | 98.5    | 101.5   | 88 NM_024316.1       |
| 254.1   | 307.5   | 282.9   | 253.3 NM_024298.2    |
| 110.5   | 103.2   | 106.7   | 119.5 NM_052925.1    |
| 100.6   | 105.3   | 90.1    | 92.3 NM_198988.1     |
| 117.4   | 106.2   | 108.1   | 100.9 NM_138792.2    |
| 131.9   | 155.6   | 219.8   | 179.3 NM_000230.1    |
| 87.1    | 78.6    | 69      | 89.6 NM_001003680.1  |
| 124.8   | 134     | 138.9   | 132.7 NM_001003679.1 |
| 95.4    | 95.9    | 96.7    | 97.9 NM_002303.3     |
| 831.6   | 1004.9  | 838.9   | 602.9 NM_022356.2    |
| 99.2    | 100.5   | 87.1    | 86.9 NM_018192.2     |
| 83.9    | 83.5    | 89.5    | 81.4 NM_014262.2     |
| 864.1   | 767.3   | 844.8   | 621.8 NM_017526.2    |
| 709.4   | 503.6   | 429     | 306.1 NM_015344.1    |
| 158.4   | 122.7   | 121.1   | 101.6 NM_012318.1    |
| 109.6   | 102.7   | 90.7    | 98.2 NM_144652.1     |
| 128.9   | 149.3   | 147.9   | 133.4 NM_015416.3    |
| 360.2   | 504.5   | 491.6   | 363.7 NM_001024668.1 |
| 83.9    | 103     | 82.2    | 90.5 NM_001040168.1  |
| 86.9    | 109.1   | 96.6    | 103.3 NM_001040168.1 |
| 320.7   | 393.4   | 336.5   | 239.6 NM_002304.1    |
| 17363.3 | 11728.5 | 12635.9 | 7972.7 NM_002305.2   |
| 109.9   | 99.4    | 93.5    | 92.4 NM_033101.2     |
| 82.3    | 81.9    | 88.5    | 88.4 NM_013268.2     |
| 98.2    | 98      | 96.2    | 90.4 NM_020129.2     |
| 81.3    | 88.6    | 76.5    | 92 NM_203471.1       |
| 81.8    | 90.6    | 101.4   | 94 NM_006498.2       |
| 116.1   | 167     | 164.3   | 140.5 NM_002306.1    |
| 89.9    | 101.3   | 89.6    | 94.3 NM_005567.2     |
| 97.6    | 89.8    | 99.9    | 96.4 NM_006149.2     |
| 88.6    | 88      | 78.9    | 86.6 NM_002307.1     |
| 104.2   | 93.4    | 82.6    | 84.4 NM_201545.1     |
| 411.5   | 275.1   | 254     | 263.7 NM_006499.3    |
| 82      | 84.6    | 78.6    | 84.6 NM_201544.1     |
| 729.5   | 598.7   | 566.6   | 471.2 NM_201545.1    |

|        |       |       |                     |
|--------|-------|-------|---------------------|
| 490.6  | 515.8 | 409.7 | 478 NM_009587.2     |
| 229.7  | 200.6 | 182.9 | 176.9 NM_009587.2   |
| 85.2   | 83.1  | 80.6  | 81.3 NM_005097.1    |
| 86.8   | 93.9  | 79.6  | 80.9 NM_018176.2    |
| 80.8   | 79.2  | 84.9  | 86.2 NM_139278.2    |
| 84.6   | 85    | 80.4  | 89.3 NM_139284.1    |
| 83     | 86.2  | 85.3  | 87.1 NM_180990.2    |
| 89.9   | 83.2  | 77.6  | 92.5 NM_001008530.1 |
| 100.2  | 93.1  | 88.3  | 97.5 NM_001008530.1 |
| 105.1  | 93.7  | 96.1  | 94.7 NM_005606.5    |
| 346.1  | 364.7 | 294.2 | 337.5 NM_032484.3   |
| 113.4  | 124.8 | 125.2 | 115.9 NM_024119.1   |
| 129    | 132.7 | 119.1 | 112.5 NM_018490.1   |
| 96.3   | 87.2  | 97.6  | 89.9 NM_003667.2    |
| 84     | 82.4  | 74.3  | 79.2 NM_021636.2    |
| 85.6   | 87.5  | 86.6  | 83.4 NM_001017403.1 |
| 74.1   | 85.2  | 78.7  | 79.2 NM_001017404.1 |
| 79.3   | 87.1  | 84    | 80 NM_001017403.1   |
| 134    | 104.3 | 94.5  | 96.3 NM_021634.1    |
| 78.5   | 85.4  | 82.2  | 95.9 NM_130806.2    |
| 528.1  | 585.5 | 527.9 | 446.9 NM_006893.2   |
| 103.2  | 86.2  | 81.6  | 87.1 NM_000894.2    |
| 91.9   | 92    | 86.4  | 89.7 NM_000233.1    |
| 118.8  | 106.3 | 94.8  | 91.3 NM_005780.1    |
| 85.2   | 88.2  | 84.7  | 89.5 NM_178175.2    |
| 129.9  | 143   | 144.7 | 135.8 NM_005779.1   |
| 101.2  | 105.1 | 96.8  | 97.8 NM_199000.1    |
| 81.1   | 81.8  | 79.5  | 81 NM_182548.2      |
| 97.9   | 93    | 98.5  | 88.2 NM_022126.2    |
| 98.2   | 103.8 | 96.1  | 85.2 NM_005568.2    |
| 1089.8 | 416   | 402.8 | 375.9 NM_004789.3   |
| 90.1   | 92.2  | 90.4  | 90.8 NM_014564.2    |
| 85.7   | 100.4 | 91.9  | 90.1 NM_014564.2    |
| 98.8   | 92.9  | 85.5  | 94.5 NM_178138.2    |
| 83     | 81.1  | 70.6  | 77.7 NM_014564.2    |
| 98.6   | 94.9  | 86.2  | 88.9 NM_178138.2    |
| 102.5  | 101.9 | 93.2  | 101.5 NM_033343.2   |
| 94.8   | 95.9  | 89    | 87.4 NM_022363.2    |
| 113.1  | 114.1 | 110   | 108.4 NM_014368.2   |
| 85.8   | 76.2  | 84.2  | 85 NM_199160.1      |
| 97.4   | 86.4  | 83.5  | 76.1 NM_001001933.1 |
| 77.7   | 76.6  | 73.8  | 83.5 NM_001014434.1 |
| 96.8   | 84.9  | 82.1  | 90 NM_020204.2      |
| 121.9  | 126.3 | 108.8 | 103 NM_194451.1     |
| 335.9  | 231.1 | 212.8 | 222.9 NM_006859.2   |
| 93.7   | 94.6  | 90.5  | 85.7 NM_002309.2    |
| 93.2   | 91.6  | 86.5  | 80.1 NM_002310.3    |
| 482.9  | 488.7 | 463.5 | 378.7 NM_000234.1   |
| 84     | 80.5  | 72.3  | 84 NM_002311.3      |
| 124.4  | 113.2 | 114.7 | 90.4 NM_002311.3    |

|        |         |         |         |                |
|--------|---------|---------|---------|----------------|
| 229.1  | 238.2   | 229.7   | 160.4   | NM_013975.2    |
| 91.3   | 83.5    | 94.1    | 96.8    | NM_002312.3    |
| 95.6   | 91.4    | 80.1    | 88      | NM_002312.3    |
| 85.3   | 83.6    | 88.1    | 81.1    | NM_006863.1    |
| 345.6  | 493.5   | 519.6   | 228.7   | NM_006866.1    |
| 128.9  | 121.3   | 123.5   | 113     | NM_006865.2    |
| 87.2   | 89.6    | 85.1    | 84.3    | NM_006865.2    |
| 91.2   | 77.3    | 73.8    | 77.2    | NM_012276.3    |
| 83.2   | 75.5    | 78.5    | 81.3    | NM_181986.1    |
| 87.9   | 126     | 119.9   | 116.2   | NM_021250.2    |
| 97.8   | 92.1    | 83.9    | 87.5    | NM_021250.2    |
| 90.6   | 86.8    | 84.4    | 91.8    | NM_024318.2    |
| 91.4   | 94.3    | 86      | 88.3    | NM_006669.2    |
| 2152.8 | 2760.3  | 4046.8  | 2192.6  | NM_001081637.1 |
| 161.6  | 210.1   | 192.8   | 182.9   | NM_001080978.1 |
| 80.5   | 112.5   | 110.8   | 91.4    | NM_006864.1    |
| 9313.4 | 14863.1 | 18860.1 | 11266.5 | NM_006864.1    |
| 569.7  | 261.4   | 248.3   | 162.5   | NM_001081438.1 |
| 85.4   | 91.5    | 77.2    | 88.5    | NM_006840.2    |
| 95.1   | 94.9    | 100.9   | 88.9    | NM_006840.2    |
| 87.2   | 89.4    | 78      | 72.4    | NM_030657.2    |
| 193.8  | 259.8   | 188.4   | 262.2   | NM_016357.3    |
| 94.3   | 82.2    | 81.9    | 84.1    | NM_014240.1    |
| 91.5   | 84.7    | 86.3    | 88.7    | NM_030576.2    |
| 337.4  | 359     | 369.2   | 245.5   | NM_017806.1    |
| 86.3   | 92.6    | 105.3   | 92.9    | NM_016735.1    |
| 104.3  | 95.2    | 90.2    | 100.9   | NM_002314.2    |
| 127.6  | 117.9   | 121.6   | 113     | NM_016733.2    |
| 121.4  | 95.6    | 98.3    | 95.6    | NM_001031801.1 |
| 137.1  | 113.9   | 109.1   | 105.6   | NM_001031801.1 |
| 93.6   | 106.8   | 105.8   | 84.6    | NM_005569.3    |
| 260.7  | 295.2   | 248.9   | 222.7   | NM_004987.3    |
| 91.7   | 83.3    | 90.2    | 81.7    | NM_004987.3    |
| 89.6   | 90.5    | 90.9    | 83.8    | NM_017980.2    |
| 93.6   | 95.6    | 81.6    | 86.8    | NM_033514.1    |
| 158.4  | 150.2   | 144.6   | 135.4   | NM_025187.3    |
| 82.2   | 83.1    | 76.4    | 83.1    | NM_024674.3    |
| 86.7   | 82.1    | 80.8    | 81.7    | NM_001004317.2 |
| 213.1  | 269.6   | 198.1   | 202.6   | NM_004664.2    |
| 156.4  | 150.7   | 133.8   | 142.2   | NM_022165.2    |
| 111.4  | 100.4   | 97.8    | 108.2   | NM_018362.2    |
| 499.3  | 342.4   | 234     | 338.8   | NM_173083.2    |
| 98.8   | 83.6    | 94.1    | 92.6    | NM_001080535.1 |
| 113.6  | 105.7   | 103.7   | 108.9   | NM_001004432.1 |
| 108.2  | 108.8   | 107.8   | 101.6   | NM_001040614.1 |
| 92.1   | 98.9    | 94.2    | 96.2    | NM_181739.1    |
| 1556.8 | 1052    | 1004.7  | 918     | NM_000235.2    |
| 79.4   | 73.6    | 83.9    | 85.5    | NM_000236.1    |
| 102.6  | 109.7   | 91.2    | 93.3    | NM_005357.2    |
| 114.3  | 115.8   | 109.6   | 101.1   | NM_004190.1    |



|        |        |        |                      |
|--------|--------|--------|----------------------|
| 88     | 93.3   | 84.9   | 90.5 NM_006033.2     |
| 84.3   | 92.4   | 98.5   | 91.5 NM_139248.2     |
| 91.2   | 78.8   | 76.7   | 75.5 NM_198996.2     |
| 96.3   | 97.1   | 101.7  | 94.3 NM_001080518.1  |
| 90.3   | 97     | 107.3  | 87.1 NM_001010939.1  |
| 290.5  | 319.5  | 271.1  | 279.5 NM_015929.2    |
| 126.5  | 120.8  | 107    | 104.6 NM_145196.1    |
| 3728.5 | 2713.9 | 1837.2 | 2031.7 NM_004862.2   |
| 105.1  | 93.5   | 95     | 92.9 NM_153234.3     |
| 204.4  | 169.4  | 158.1  | 122.3 NM_153713.1    |
| 921.5  | 1375.2 | 1362   | 906.2 NM_014647.1    |
| 191.8  | 203.5  | 227.6  | 160.7 NM_004140.3    |
| 100.6  | 97.5   | 100.5  | 116.3 NM_001015002.1 |
| 119    | 106.2  | 99.6   | 101.6 NM_005570.2    |
| 88.8   | 104.7  | 94.8   | 79.9 NM_021819.2     |
| 154    | 135.8  | 135.6  | 122.7 NM_006816.1    |
| 342.1  | 251.1  | 249.3  | 178.9 NM_030805.1    |
| 621.1  | 570.1  | 438.2  | 389.1 NM_022458.2    |
| 100    | 101.5  | 87.2   | 96.1 NM_018113.1     |
| 1029.3 | 1278.5 | 1266.4 | 926.6 NM_018368.2    |
| 95.6   | 101.9  | 99.5   | 101.1 NM_001007527.1 |
| 104.9  | 86.7   | 78.6   | 85.5 NM_014583.2     |
| 99.1   | 94.3   | 82.8   | 89.6 NM_033029.1     |
| 720.6  | 674.7  | 560.6  | 447.4 NM_005572.2    |
| 1634.1 | 1412.2 | 1187.5 | 695.3 NM_005572.2    |
| 796.7  | 1260.1 | 905.3  | 744.2 NM_005573.2    |
| 2259.5 | 2061.1 | 1842.4 | 1110.8 NM_032737.2   |
| 82.5   | 86.8   | 69.9   | 76.4 NM_002315.1     |
| 687.6  | 458.4  | 561.9  | 456.4 NM_005574.2    |
| 97.1   | 87.4   | 89.9   | 96 NM_018640.3       |
| 102.9  | 95.8   | 97.5   | 103.5 NM_001001395.1 |
| 80.1   | 78.1   | 76.3   | 84.7 NM_018640.3     |
| 1571.8 | 1794.4 | 1621.5 | 2224.6 NM_006769.2   |
| 110.8  | 105.9  | 95.4   | 107.9 NM_006150.3    |
| 101    | 100    | 95.6   | 97.9 NM_005358.3     |
| 80.3   | 94.2   | 85.3   | 87.3 NM_012134.1     |
| 452    | 655.1  | 855.5  | 905.1 NM_198271.2    |
| 87.1   | 88.4   | 84.8   | 88.6 NM_014916.2     |
| 153.5  | 115    | 141.4  | 111.5 XM_936372.1    |
| 84.9   | 82.1   | 82.2   | 76.9 NM_177398.2     |
| 82.1   | 82.3   | 80.5   | 83.6 NM_177398.2     |
| 98.8   | 84.8   | 89.6   | 96.2 NM_001033507.1  |
| 93.3   | 76     | 87.4   | 84.6 NM_177399.2     |
| 98.5   | 96.2   | 82.9   | 93.1 NM_002316.1     |
| 904.9  | 1046.9 | 814.4  | 919.4 NM_005475.1    |
| 110    | 98.9   | 102.5  | 108.5 NM_005575.2    |
| 228.6  | 262.5  | 239.7  | 184.4 NM_005575.2    |
| 85     | 84.7   | 92.4   | 96.4 NM_032622.1     |
| 134.1  | 138.6  | 112.7  | 136.9 NM_153371.2    |
| 118.1  | 108.3  | 116.4  | 109.6 NM_138411.1    |

|        |        |       |                      |
|--------|--------|-------|----------------------|
| 93.3   | 103.7  | 105.4 | 100.7 NM_207312.1    |
| 115.3  | 106.8  | 110   | 104.3 NM_138414.1    |
| 208.2  | 213    | 188.6 | 153.9 XM_941168.1    |
| 178.1  | 143.8  | 123.6 | 130.3 NM_138422.1    |
| 594.6  | 387.8  | 337.7 | 258.9 NM_138781.2    |
| 197.3  | 191.8  | 191.7 | 169.9 NM_138428.2    |
| 227.5  | 219    | 172.7 | 155.5 NM_138439.1    |
| 199.8  | 133.4  | 139   | 134.8 NM_138442.2    |
| 277    | 266.7  | 264.1 | 226 NM_138458.1      |
| 191.1  | 247    | 194.8 | 181.9 NM_198147.1    |
| 639.2  | 656.3  | 575.6 | 450.6 NM_138787.2    |
| 79.2   | 80.4   | 79.2  | 82.7 NM_138789.2     |
| 79.6   | 78     | 79.6  | 92.3 NM_145248.2     |
| 148.9  | 211.7  | 197   | 266.5 NM_001013619.1 |
| 81     | 81.4   | 79.3  | 78.6 NM_001010845.1  |
| 77.1   | 80.3   | 77    | 78 NM_145252.1       |
| 921.1  | 685.6  | 677.1 | 629.7 NM_194280.2    |
| 203.2  | 198.8  | 181   | 159.4 NM_001080510.2 |
| 188.2  | 141.2  | 125.3 | 147 NM_001080510.2   |
| 201    | 182.6  | 175   | 152.5 XM_940962.1    |
| 92.6   | 84.8   | 82.6  | 86 NM_213597.1       |
| 94.1   | 85.1   | 89.7  | 88.4 NM_207313.1     |
| 499.7  | 363.6  | 301.1 | 265.2 NM_001031665.1 |
| 88.8   | 83.4   | 86.3  | 91 NM_001080503.1    |
| 82.1   | 84.2   | 78.6  | 85 NM_145807.1       |
| 1119.8 | 1064.1 | 943   | 499.7 NM_001002836.1 |
| 72.3   | 75.1   | 72.8  | 76.7 NM_173479.2     |
| 134.4  | 89.6   | 113.2 | 104.2 NM_173480.1    |
| 114.2  | 102.8  | 98.3  | 103.2 NM_001034966.1 |
| 86.9   | 85.3   | 82.7  | 93.9 NM_138796.2     |
| 187.9  | 158.3  | 164.1 | 129.7 NM_139016.2    |
| 185.8  | 178.7  | 181.9 | 147.1 NM_173793.3    |
| 380.5  | 326.1  | 266.5 | 252.2 NM_138797.1    |
| 202.4  | 215.5  | 197   | 179.2 NM_152994.2    |
| 122.9  | 114.4  | 106.5 | 120.6 NM_174898.1    |
| 786    | 957.1  | 939.4 | 885.9 NM_138798.1    |
| 123.7  | 113.6  | 99    | 97 NM_207315.1       |
| 210.2  | 254.8  | 234.3 | 197.8 NM_001009993.1 |
| 204.9  | 179.2  | 136.9 | 236.7 NM_001017927.1 |
| 89.5   | 92.4   | 82.7  | 92.6 NM_177964.3     |
| 97.1   | 92.1   | 83.9  | 94.5 NM_138803.2     |
| 108.3  | 95.2   | 91.1  | 86.7 NM_138804.2     |
| 77.2   | 86.4   | 78.9  | 78.6 NM_001080440.1  |
| 91.6   | 77.4   | 85.9  | 84 XM_935351.1       |
| 126    | 105.5  | 93.7  | 100.4 XM_934203.1    |
| 134.2  | 110.6  | 112.9 | 122.6 NM_173487.1    |
| 130.8  | 104.1  | 94.3  | 105 NM_178833.3      |
| 369.2  | 442.9  | 375   | 325 NM_130809.2      |
| 93.2   | 92.5   | 91.1  | 92.6 NM_199133.1     |
| 114.5  | 187.7  | 161.4 | 143.6 NM_138809.2    |

|        |        |        |                      |
|--------|--------|--------|----------------------|
| 7050.5 | 4706.4 | 5557.1 | 3890.5 NR_000030.1   |
| 86.9   | 86.2   | 85.5   | 88.1 NM_001008270.1  |
| 91.6   | 86.9   | 88.2   | 91.4 NM_145268.2     |
| 87.4   | 75.7   | 81.2   | 83.5 NM_174959.1     |
| 68     | 69.6   | 79.4   | 80.6 NM_173848.3     |
| 91.4   | 96.1   | 87.5   | 96.4 NM_001010940.1  |
| 438.6  | 337.2  | 317.2  | 316.2 NM_001012968.1 |
| 75.3   | 75     | 72.5   | 77.3 NM_001025447.1  |
| 205.9  | 140.2  | 139.9  | 127 NR_002197.1      |
| 108.2  | 92.6   | 105.5  | 110.5 NM_001080441.1 |
| 94.9   | 85.5   | 85.7   | 92.3 NM_138471.1     |
| 449.2  | 365    | 321.7  | 216.4 NM_181708.1    |
| 491.6  | 406.6  | 376.3  | 392.6 NM_001001660.1 |
| 81.7   | 83.5   | 93.5   | 84.9 NM_001080825.1  |
| 103.3  | 109.3  | 108.7  | 109.8 XM_084852.11   |
| 83.4   | 76.2   | 79.7   | 79.5 NM_182507.1     |
| 89.2   | 82.1   | 77.9   | 87.9 NM_182507.1     |
| 95.5   | 96     | 94.5   | 87.5 NM_001011724.1  |
| 76.7   | 74.8   | 80     | 77.4 NM_001011724.1  |
| 90.6   | 93.9   | 92     | 92.9 NM_001080442.1  |
| 81.2   | 80.5   | 71     | 77.3 NM_145270.1     |
| 91.6   | 86     | 90     | 93.7 NM_139170.2     |
| 87.1   | 90     | 79.7   | 82.8 NM_001025448.1  |
| 94.5   | 99.1   | 98.3   | 97.8 NM_001080443.1  |
| 101.2  | 110.5  | 98.6   | 106.3 NM_001080443.1 |
| 133    | 113.7  | 140    | 99.6 NM_203374.1     |
| 116.9  | 106.3  | 98.2   | 90.6 NM_138479.2     |
| 86.6   | 85.3   | 98.5   | 99.3 NM_001024601.2  |
| 94.3   | 89.4   | 85     | 85.3 NM_001010976.1  |
| 106.7  | 98.1   | 92.4   | 105.4 NM_001080444.1 |
| 219.7  | 167.4  | 166.8  | 143.4 NM_001017964.1 |
| 87.3   | 86.3   | 86.7   | 84.6 NM_001010859.1  |
| 89.7   | 94.8   | 84.2   | 74.7 NM_001008917.1  |
| 170.2  | 165    | 160.4  | 150.3 NM_207327.4    |
| 97.8   | 90.5   | 94.2   | 85 NM_001008917.1    |
| 105.2  | 97.7   | 100.6  | 93.1 NM_207328.2     |
| 82.1   | 88.9   | 79.7   | 82.2 NM_001077637.1  |
| 82.8   | 81.7   | 87.5   | 82.4 NM_001033657.1  |
| 104.8  | 134    | 120.3  | 107.3 NM_194289.1    |
| 109.1  | 103.8  | 81.6   | 88.8 NM_178835.2     |
| 112.6  | 118.5  | 103    | 111.2 NM_001080505.1 |
| 90.2   | 91.7   | 76.4   | 77.4 NR_002228.1     |
| 208.4  | 263.2  | 273.7  | 312.6 NM_153607.1    |
| 113.8  | 119.6  | 104.8  | 98.2 NM_145282.2     |
| 145.1  | 124.6  | 111.3  | 132.3 NM_203406.1    |
| 81.1   | 79.7   | 79.3   | 77.8 NM_001024607.1  |
| 94.6   | 81.1   | 82.8   | 80.1 NM_001029866.1  |
| 215.7  | 197.2  | 182.6  | 166.9 NM_001031744.1 |
| 88.3   | 90.2   | 85.1   | 94.4 NM_182829.1     |
| 136.6  | 132.7  | 116.6  | 110.3 NM_182829.1    |

|        |        |        |                      |
|--------|--------|--------|----------------------|
| 103.8  | 95.6   | 100.8  | 93.9 NM_001029857.2  |
| 90.4   | 95.4   | 86.7   | 93.7 NM_001025265.1  |
| 107.4  | 98.8   | 89.6   | 85.5 NM_203402.1     |
| 92.1   | 89     | 80.1   | 85.8 NM_139174.2     |
| 75.9   | 91     | 81.4   | 88.3 NM_001034841.1  |
| 100.8  | 99.6   | 77.8   | 76.4 NM_178126.2     |
| 97     | 90.8   | 89.4   | 92.2 NM_001005851.1  |
| 86.4   | 88.1   | 75.3   | 89.7 NR_001279.1     |
| 96.5   | 85.1   | 83.2   | 93.4 NM_001080447.1  |
| 90.5   | 99.2   | 84     | 81.8 NM_199280.1     |
| 101.9  | 103.4  | 107.5  | 105.4 XR_000552.1    |
| 572.3  | 459.1  | 448.8  | 394.1 NM_176814.3    |
| 97.6   | 85.6   | 77.9   | 90.8 NM_198275.1     |
| 113.2  | 105.6  | 92.2   | 94.6 NM_207337.1     |
| 135.8  | 155    | 138.5  | 198 NM_173542.2      |
| 74.5   | 82.3   | 82.1   | 73.6 NM_001010977.1  |
| 90.6   | 100.1  | 82.2   | 87.8 NM_001014830.1  |
| 240.6  | 191.1  | 229.5  | 150.2 NM_174917.1    |
| 331.5  | 229.1  | 266.1  | 161.2 NM_145294.3    |
| 107.7  | 84.9   | 82.5   | 83.8 NM_001007125.1  |
| 111.1  | 99.3   | 109.3  | 112.8 NM_001017981.1 |
| 93.5   | 95.6   | 89.8   | 96.5 NM_145300.1     |
| 103.2  | 99.7   | 86.9   | 84.9 NM_001015050.1  |
| 126.7  | 126.5  | 116.6  | 127.2 NM_178836.2    |
| 141.9  | 110    | 100.6  | 86.1 NM_174919.2     |
| 87.4   | 88.3   | 89.5   | 89.7 NM_001013624.1  |
| 95.3   | 89.1   | 80     | 95.1 XM_942296.1     |
| 103.8  | 103.8  | 100.4  | 100.8 NM_001076680.1 |
| 213.3  | 145.7  | 117.8  | 142.9 NM_001008393.1 |
| 141.6  | 130    | 155.7  | 130.3 NM_001079529.2 |
| 94.2   | 101    | 89.2   | 98.2 NM_145303.1     |
| 98.2   | 85.8   | 88.5   | 91.8 XM_114621.5     |
| 88.7   | 91.2   | 83.1   | 86.3 NM_001017978.1  |
| 1754.5 | 1391.6 | 1432.2 | 877.2 NM_001017980.1 |
| 144.2  | 120.7  | 127.5  | 121.8 NM_174925.1    |
| 956.9  | 612.1  | 593.6  | 479.8 NM_001080546.1 |
| 92     | 77.3   | 84.8   | 86.1 XR_000920.1     |
| 89.4   | 84.3   | 81     | 90.1 NR_002793.1     |
| 93.8   | 89.8   | 90.9   | 86.2 NR_003268.1     |
| 89.1   | 83.8   | 79.2   | 84 NM_203422.1       |
| 99.6   | 88.6   | 91.7   | 96.2 NM_203422.1     |
| 430.2  | 374.5  | 292.9  | 313.3 NM_174928.1    |
| 104.2  | 105    | 102.4  | 90.3 NM_194299.1     |
| 523.4  | 549.3  | 533.4  | 282.1 NM_139179.1    |
| 82.5   | 74.2   | 84.9   | 89.2 NM_173565.1     |
| 99.1   | 96.3   | 94.7   | 93.8 NM_173565.1     |
| 81     | 91.4   | 88.9   | 80.5 NM_198151.1     |
| 101.5  | 105.8  | 99.9   | 114.1 NM_198151.1    |
| 87     | 89     | 82     | 98.6 NM_198151.1     |
| 95.8   | 82.2   | 87.9   | 88.1 NM_203397.1     |

|       |       |       |                      |
|-------|-------|-------|----------------------|
| 98.3  | 87.6  | 85.7  | 87.2 NM_001025454.1  |
| 94.5  | 94.4  | 94.2  | 94.6 NR_001286.1     |
| 92.3  | 84.8  | 90.9  | 92.9 NR_001288.1     |
| 85.1  | 87.6  | 87.5  | 83.5 XM_929824.1     |
| 86    | 82.2  | 82.7  | 81.7 NM_001037225.1  |
| 82.8  | 87.6  | 87.7  | 92.1 NM_182556.1     |
| 89.1  | 80.4  | 81.1  | 85.2 NM_001033658.1  |
| 96.2  | 94.6  | 89.4  | 85.5 NM_001033658.1  |
| 102.6 | 101   | 97    | 93.5 NM_001001873.2  |
| 429.1 | 313.6 | 292.7 | 267.8 NM_001029859.1 |
| 448.6 | 360.6 | 326.7 | 350.8 NR_002803.1    |
| 100.6 | 94.9  | 104.2 | 96.8 NM_207344.1     |
| 94.5  | 94.3  | 99.6  | 89.7 NM_001025457.1  |
| 97    | 92.9  | 87    | 87.3 NM_198849.2     |
| 305.4 | 439.6 | 343.4 | 375.5 NM_181785.1    |
| 80.9  | 90.2  | 78.5  | 85.5 NM_001012706.1  |
| 82.2  | 77.6  | 81.9  | 84.9 NM_001042367.1  |
| 82.3  | 77.6  | 79.2  | 81.9 NM_001024682.1  |
| 198   | 157.1 | 154.2 | 153.4 NM_001042371.2 |
| 116.8 | 109.9 | 106.8 | 112 NM_001012731.1   |
| 884.1 | 615.3 | 590.1 | 509.3 NM_001010878.1 |
| 88    | 91.7  | 84.4  | 91.4 NM_001025459.1  |
| 114.6 | 112.4 | 111.3 | 111.6 NM_001042685.1 |
| 89    | 80.1  | 72.9  | 78.2 NM_001037331.1  |
| 89.3  | 93.7  | 84.3  | 91.5 NM_001010880.1  |
| 87.8  | 75.5  | 77.4  | 82.1 NM_175063.3     |
| 112.1 | 104   | 90.8  | 101.3 NM_175063.3    |
| 114.5 | 103.9 | 98.8  | 113.4 NR_002938.1    |
| 100.1 | 79.2  | 86.9  | 88.8 NM_001025591.1  |
| 86.2  | 91.4  | 77.7  | 87.1 NM_001007525.1  |
| 85.1  | 90.3  | 82.9  | 81.8 NR_003128.1     |
| 87.2  | 87.7  | 80.8  | 81.9 NM_207349.1     |
| 90.7  | 79.2  | 78.4  | 82.1 NM_001025463.1  |
| 84.2  | 175.3 | 220.8 | 169.3 NM_001004305.1 |
| 85.6  | 83.2  | 86.7  | 90.8 NM_203375.1     |
| 82.5  | 90.3  | 84.4  | 85.9 NM_198482.1     |
| 115.6 | 97.9  | 92.4  | 101.9 NM_001002919.1 |
| 93.1  | 101   | 87.4  | 99.3 NM_001037228.1  |
| 520.8 | 446.6 | 443.9 | 393.3 NM_001012626.1 |
| 363.8 | 392.8 | 409.4 | 261 NM_001033575.1   |
| 92.3  | 93.7  | 86.1  | 93.6 NR_002941.1     |
| 117.9 | 108.3 | 98.6  | 87.6 NM_001025266.1  |
| 116.6 | 116.5 | 99    | 99.8 NM_001029955.1  |
| 120.3 | 106.2 | 109.1 | 95.5 NR_002805.2     |
| 132.4 | 115.8 | 123.1 | 114.8 NM_194439.1    |
| 83.7  | 86.7  | 89.5  | 86.8 NM_198281.1     |
| 89.2  | 93.8  | 99.9  | 104.3 XM_945291.1    |
| 511.1 | 541.1 | 438.3 | 425.5 NM_175921.4    |
| 87.4  | 82.1  | 78.1  | 91.3 NM_001037231.1  |
| 140.3 | 150.9 | 212.8 | 125.8 NM_181722.2    |

|        |        |        |                      |
|--------|--------|--------|----------------------|
| 357.4  | 448.7  | 541.8  | 497.3 NM_213603.2    |
| 95.2   | 91.7   | 96.6   | 95.2 NM_001013258.1  |
| 272.9  | 306.5  | 348.4  | 325.5 NM_001013258.1 |
| 83     | 79     | 80.2   | 76.5 NM_001024610.1  |
| 75.3   | 85.5   | 78.1   | 80.6 NM_001013626.1  |
| 101.3  | 82.6   | 95.4   | 97.1 NM_001031834.1  |
| 90.4   | 83.8   | 74.9   | 78.6 NM_178172.2     |
| 94.5   | 87     | 92     | 98.2 NM_178172.2     |
| 108.5  | 138.7  | 126.5  | 136.9 NR_002809.1    |
| 2811.1 | 1960.8 | 2041.5 | 862.6 NM_001005920.2 |
| 1341.7 | 1210.2 | 1268.8 | 679.7 NM_001039842.1 |
| 180.5  | 169    | 154.6  | 136.4 XM_941327.1    |
| 86.1   | 89.3   | 82.4   | 82.1 NR_001443.1     |
| 1148.7 | 784    | 795.2  | 560.6 NM_001012643.2 |
| 95.6   | 91.4   | 94.4   | 99.4 NM_001003808.1  |
| 115.7  | 107.9  | 96.7   | 116.9 NM_001001664.1 |
| 78.3   | 79.8   | 82.6   | 79.3 NM_001024611.1  |
| 96.4   | 95.4   | 90.8   | 89.6 NM_182761.1     |
| 91.8   | 102    | 87.5   | 102.8 NM_001012418.1 |
| 90.4   | 84.8   | 81.9   | 83.8 XM_294209.6     |
| 90.6   | 102.5  | 84.4   | 83.9 XM_936425.1     |
| 111.8  | 104.9  | 87     | 99.5 NM_001013627.1  |
| 92     | 87.3   | 73     | 91 NM_001013627.1    |
| 84.4   | 89.8   | 89.7   | 81.6 NM_001012977.1  |
| 110.9  | 104.3  | 114    | 119.1 NM_001013628.1 |
| 90.8   | 82.7   | 85.4   | 97.8 NM_203407.1     |
| 90.9   | 89     | 84.3   | 83.6 NM_001013629.1  |
| 98.9   | 96.1   | 81.1   | 92.7 NM_001001414.1  |
| 93.2   | 84     | 90.7   | 96.3 NM_001013630.1  |
| 101.3  | 91.7   | 81.5   | 90.6 NM_001013632.2  |
| 102.5  | 102.9  | 94.1   | 100.4 XM_941536.1    |
| 91.5   | 94     | 89.3   | 97.2 NM_001080459.1  |
| 87.4   | 83     | 92     | 95.9 NM_001080460.1  |
| 100.2  | 98.5   | 82     | 81.9 NM_001012982.2  |
| 89.3   | 86.5   | 93.1   | 99.2 NM_001012982.2  |
| 72.7   | 88.4   | 77.9   | 82.2 NM_001076781.1  |
| 95.3   | 89.1   | 83     | 92.1 NM_001012454.1  |
| 98.5   | 87.5   | 85.2   | 99.1 NM_182489.1     |
| 101    | 102.8  | 94.9   | 98.4 NM_001018116.1  |
| 84.4   | 75.7   | 78.3   | 84.3 NM_001013403.1  |
| 83.3   | 77.5   | 82.2   | 84.7 NM_182619.1     |
| 99.5   | 89.3   | 91.9   | 90 NM_001012759.1    |
| 126.8  | 115.8  | 113.3  | 109 XM_939188.1      |
| 88.6   | 95.5   | 73.2   | 74.8 NM_001012762.1  |
| 262    | 162.1  | 171.9  | 180.1 NM_207368.1    |
| 104.5  | 150.3  | 176    | 140.3 NM_198851.1    |
| 119    | 101.8  | 90     | 94.7 NM_182631.1     |
| 175    | 200.6  | 168.3  | 181.5 NM_198284.1    |
| 91.6   | 97.2   | 88.6   | 77.5 NM_198285.1     |
| 90.1   | 96.6   | 100.7  | 103.7 NM_182635.1    |

|         |         |         |         |                |
|---------|---------|---------|---------|----------------|
| 209.7   | 204.7   | 188.3   | 206.9   | NM_182905.1    |
| 98      | 88.5    | 88.6    | 86.3    | NM_001031802.1 |
| 3680.1  | 2516.1  | 2341.8  | 1296.3  | NM_199337.1    |
| 97      | 79.6    | 95      | 81.9    | XR_000221.3    |
| 110.9   | 114.1   | 106.8   | 102.5   | NR_002815.1    |
| 117     | 107.2   | 109.4   | 103     | NM_199341.1    |
| 108.2   | 107     | 103.8   | 105.6   | NM_198560.1    |
| 97.5    | 95.4    | 85.9    | 92.5    | NM_198828.1    |
| 86.4    | 93.6    | 97.1    | 99.2    | NM_001010895.1 |
| 89.7    | 84.6    | 93.2    | 79.3    | NM_199352.2    |
| 93.4    | 85.3    | 91.7    | 88.4    | NM_001006604.1 |
| 118.3   | 109.4   | 114.7   | 122.9   | NM_001005751.1 |
| 90.6    | 88.6    | 92.2    | 99.2    | NM_001031853.2 |
| 98      | 84.5    | 87.1    | 83.7    | NM_203371.1    |
| 82.5    | 87.3    | 76.3    | 84.2    | XM_929102.1    |
| 84.6    | 78.5    | 77.7    | 73      | XM_370629.2    |
| 100.3   | 99      | 97      | 101.2   | NM_001008778.1 |
| 84.4    | 83.3    | 80.4    | 80.9    | XM_937099.1    |
| 87.8    | 80.8    | 77.2    | 84.1    | NM_001013635.2 |
| 96.8    | 98.1    | 95.3    | 97.9    | NM_001013635.2 |
| 80.7    | 88.3    | 94.2    | 87.9    | NM_001007537.1 |
| 102.8   | 96.2    | 96.7    | 101.1   | NM_001012754.2 |
| 288.4   | 345.9   | 329.3   | 377.7   | NM_001017370.1 |
| 98.9    | 100     | 87.2    | 86.7    | NM_001039614.1 |
| 85.2    | 79.1    | 77.2    | 80.6    | NM_001013638.1 |
| 120.7   | 99.8    | 87.4    | 96.6    | NM_001012984.1 |
| 83.4    | 75.5    | 77.2    | 92.3    | NM_001014985.1 |
| 104.3   | 102.7   | 96.9    | 98.7    | NM_001004313.1 |
| 135.6   | 147.8   | 111.7   | 118.8   | NM_213607.1    |
| 93.2    | 102.2   | 94.4    | 88.3    | NM_203425.1    |
| 82.8    | 77.6    | 81.8    | 85.4    | NM_001080466.1 |
| 97      | 105     | 96.3    | 96.9    | NM_001013640.1 |
| 30496.1 | 18518.4 | 17761.5 | 12570.5 | NM_001005472.1 |
| 97.7    | 88.2    | 87.5    | 86.9    | NM_001013641.1 |
| 121.9   | 113.1   | 102     | 99.8    | NM_001013642.1 |
| 149.1   | 173.6   | 165.1   | 173.5   | NM_001013644.1 |
| 87.7    | 88.9    | 89.1    | 88.8    | NM_001006606.1 |
| 109.6   | 125.7   | 126.9   | 125.3   | NM_207644.1    |
| 86.1    | 77.6    | 76.3    | 86.1    | NM_001012986.1 |
| 79.5    | 78.4    | 76.6    | 80.4    | NM_001010902.1 |
| 94.2    | 90.9    | 88.6    | 96.9    | NM_001080473.1 |
| 108.4   | 99.6    | 98.3    | 103.1   | NR_003131.1    |
| 89.9    | 97.6    | 90.6    | 94.3    | NM_001013648.3 |
| 108.1   | 109     | 96.6    | 94.2    | XM_940482.1    |
| 86.5    | 92.6    | 86.1    | 82      | NM_001080475.1 |
| 91.8    | 90.6    | 89.3    | 84.5    | NM_001007540.1 |
| 78.3    | 84.6    | 77.1    | 87.3    | NM_001013650.1 |
| 89.1    | 95.2    | 96.6    | 97.7    | XM_939104.1    |
| 94.1    | 83      | 81.6    | 87.9    | NM_001080478.1 |
| 212.9   | 239.6   | 250.3   | 136.6   | NM_001018022.1 |

|        |         |       |                        |
|--------|---------|-------|------------------------|
| 86.3   | 83.8    | 68.5  | 85.5 NM_001080540.1    |
| 76.3   | 87.9    | 77.4  | 79.6 NM_001010905.1    |
| 86.3   | 90.9    | 89.6  | 98.5 NM_001030060.1    |
| 90.7   | 85.6    | 82.9  | 82.6 NM_203393.1       |
| 85.8   | 76.5    | 72.3  | 81.4 NM_001032389.1    |
| 634.7  | 617.2   | 700.3 | 459.6 NM_001008395.1   |
| 91.7   | 102.1   | 89.6  | 85.4 NM_001024613.1    |
| 84.8   | 86.3    | 81.6  | 87.8 NM_001013651.1    |
| 91.8   | 92      | 87.1  | 102.5 NM_001080482.1   |
| 624.4  | 562.4   | 596.1 | 407.5 NM_001013653.1   |
| 614.5  | 495     | 555.6 | 330.6 XM_939320.1      |
| 93.5   | 90.9    | 83.8  | 87.5 NM_001080483.1    |
| 109.4  | 99.4    | 95.4  | 91.7 XM_372180.3       |
| 85.4   | 91.2    | 88    | 89.6 NM_001013654.1    |
| 79.2   | 95.3    | 81.6  | 85 NM_001013655.1      |
| 87.1   | 76.6    | 75.8  | 74.2 NM_001013656.1    |
| 90.6   | 83.7    | 89.2  | 93.8 NM_001031854.1    |
| 83.8   | 77.7    | 69.6  | 79.3 NM_001080486.1    |
| 97.2   | 89.3    | 90.7  | 89.3 XM_372428.3       |
| 109.2  | 100.1   | 101.9 | 96.3 NM_001013657.1    |
| 91.2   | 90.1    | 88    | 87.4 NM_001013658.1    |
| 89.1   | 89.8    | 83.5  | 90.6 NM_001080829.1    |
| 92.8   | 89.8    | 81.7  | 85.6 XM_372648.3       |
| 93.7   | 102.2   | 85    | 91.5 NM_001080487.1    |
| 97.2   | 90.3    | 98.3  | 97.6 NM_001013659.1    |
| 83.1   | 96      | 79    | 86.7 XM_372760.2       |
| 336.9  | 288.1   | 273.7 | 208.2 NM_001013663.1   |
| 88.6   | 88      | 83.9  | 85.8 NR_003275.1       |
| 85     | 77.6    | 78.1  | 81.6 NM_001013664.1    |
| 90.9   | 95.5    | 78.9  | 78.7 NM_001080489.1    |
| 87.5   | 80.3    | 74.9  | 78.9 NM_001010910.1    |
| 107.5  | 119     | 116.1 | 108.6 NM_001013665.1   |
| 98.7   | 105.8   | 97.3  | 107.6 NM_212554.2      |
| 97     | 94.2    | 82.9  | 95 NM_001013666.1      |
| 7753.2 | 10609.3 | 12891 | 12023.8 NM_001013667.1 |
| 97.8   | 98      | 94.4  | 95.4 NM_207645.1       |
| 119.2  | 116.2   | 124.2 | 98.7 NM_203451.1       |
| 97.1   | 88.5    | 91.7  | 91.3 NM_001008404.1    |
| 241    | 208.6   | 220.9 | 141.7 NM_207446.1      |
| 143.8  | 219.7   | 251.8 | 220.9 NM_001013670.1   |
| 123.7  | 219.2   | 306.8 | 243.3 NM_001013670.1   |
| 103.2  | 98.1    | 94.2  | 97.7 NM_001013671.1    |
| 163.2  | 145.7   | 113.3 | 127.9 NM_001012991.1   |
| 222.8  | 194.6   | 186.5 | 156.5 NM_001013672.2   |
| 413.1  | 325.8   | 313.2 | 191.6 NM_001013672.2   |
| 487.4  | 461.3   | 322.1 | 365.7 NM_001008234.1   |
| 83.6   | 84      | 78.2  | 85.8 NM_001013673.1    |
| 96.2   | 84.5    | 77.7  | 100.5 NM_001013675.1   |
| 86.7   | 106.3   | 95.9  | 94.3 NM_001013676.1    |
| 85.4   | 94.3    | 89.8  | 84.9 NM_001013677.1    |



|         |        |        |                       |
|---------|--------|--------|-----------------------|
| 93.3    | 86.9   | 75     | 87.6 NM_001010914.1   |
| 142.8   | 138.2  | 165.3  | 200.4 NM_001010914.1  |
| 100.8   | 98.1   | 108.2  | 99.2 NR_002826.1      |
| 12863.5 | 8874.6 | 7398.5 | 8991.4 NM_001080831.1 |
| 179.8   | 198.9  | 218.5  | 184.9 NM_001008737.1  |
| 101.1   | 102.7  | 96.5   | 107.2 NM_001013679.1  |
| 86.3    | 95.9   | 81.9   | 93.6 NM_214711.1      |
| 290.4   | 260.6  | 235.8  | 224.4 NM_001001701.1  |
| 157.5   | 308.2  | 248.3  | 260.6 NM_001013680.1  |
| 85.8    | 77.1   | 78.7   | 84.4 NM_001013681.1   |
| 98.4    | 96.4   | 91.9   | 103 NM_001023565.1    |
| 107.8   | 113.9  | 115.1  | 107.9 NM_001024677.1  |
| 307.4   | 363.1  | 405.4  | 239.7 NM_001013685.1  |
| 89.2    | 92.1   | 83.1   | 91.3 NM_001045475.1   |
| 85.4    | 80.3   | 78.8   | 87.6 NM_001023566.1   |
| 86.5    | 81.2   | 73.6   | 86.3 NM_001008742.1   |
| 109.1   | 96.9   | 97     | 95.3 NM_001008745.1   |
| 87.3    | 80.1   | 90.2   | 90.6 NM_212558.1      |
| 115.2   | 110.4  | 98.2   | 99.2 NM_001045476.1   |
| 106.6   | 99.6   | 87.2   | 100 NM_001001710.1    |
| 95.5    | 84.9   | 86.4   | 102.8 NM_001013687.1  |
| 105.2   | 101.3  | 92.8   | 89.4 NM_001013691.1   |
| 154.4   | 152.3  | 120.1  | 148.8 NM_001013694.1  |
| 126.6   | 102.8  | 110.6  | 131.9 NM_001080499.1  |
| 85.8    | 95.5   | 84.5   | 87.3 NM_001013695.1   |
| 85.8    | 84.9   | 88     | 84 NM_001080500.1     |
| 85.1    | 105    | 116.3  | 125.5 NM_001011538.1  |
| 95      | 94.9   | 98.1   | 102.9 NM_001004323.1  |
| 89.6    | 88.9   | 83.5   | 92.4 NM_001015072.1   |
| 92.2    | 93.3   | 84.7   | 88.3 NM_207581.1      |
| 623.6   | 521.1  | 393    | 488.7 NR_002144.1     |
| 13263.6 | 10286  | 9157.8 | 7967.5 NR_002162.1    |
| 94.4    | 96     | 82.3   | 86.2 NM_001013696.1   |
| 81.6    | 79.4   | 79.1   | 81.7 NM_001039615.1   |
| 88      | 82.5   | 83.8   | 77.8 NM_001013698.1   |
| 94.2    | 94.4   | 86.3   | 92.3 NM_001013699.1   |
| 249.9   | 158.3  | 171.4  | 171.1 XM_933946.1     |
| 236.5   | 181.5  | 144.5  | 205.7 NM_001071775.1  |
| 152.1   | 169    | 200.5  | 158.4 NM_001013701.1  |
| 98.6    | 98.9   | 104.5  | 111.2 NM_199045.1     |
| 87.4    | 86.5   | 84.9   | 81.2 NM_198181.1      |
| 87.9    | 88     | 94.6   | 93 NM_001013704.1     |
| 242.5   | 268.5  | 297.5  | 256.4 NM_001018059.2  |
| 112     | 118.9  | 113.9  | 120.1 NM_001018122.1  |
| 119.7   | 124.7  | 120.2  | 120 NR_002473.2       |
| 102.7   | 102    | 87.8   | 95 NR_002943.1        |
| 95.2    | 97.8   | 83.1   | 86.9 XM_941901.1      |
| 89.3    | 78.7   | 84.3   | 75.7 NR_002931.1      |
| 86.6    | 81.5   | 86.8   | 92.5 NM_001013707.1   |
| 89.1    | 81.9   | 91.2   | 82.9 NM_001013708.1   |

|        |        |        |                       |
|--------|--------|--------|-----------------------|
| 153.4  | 144.7  | 136.2  | 132.4 NM_001025303.1  |
| 82.2   | 78     | 83.3   | 81.9 NM_001013710.1   |
| 86.8   | 92     | 81.7   | 83.8 NR_002829.1      |
| 97.3   | 90.4   | 100.9  | 86.8 NM_001014440.2   |
| 97.9   | 98.5   | 92.5   | 89.3 NM_001013712.1   |
| 398.1  | 271.3  | 242.2  | 243.3 NR_002315.1     |
| 87.2   | 88     | 84.6   | 92.5 NM_001013713.1   |
| 86.9   | 105.2  | 91.2   | 83 NM_001011539.1     |
| 75.5   | 82.6   | 80.3   | 81.5 NM_001013715.1   |
| 94     | 93.8   | 101.8  | 94.4 NM_001013717.1   |
| 81.5   | 89     | 81.9   | 87.4 NM_001013718.1   |
| 162.1  | 136    | 147.3  | 135.4 NM_001008739.1  |
| 92.8   | 81.4   | 79.8   | 85 NM_001080507.1     |
| 109.4  | 107.1  | 110.6  | 100.1 NM_001010919.1  |
| 82.3   | 83.4   | 83.8   | 90 NM_001013720.1     |
| 91.4   | 81.5   | 89.3   | 90.6 NM_001025489.1   |
| 91.6   | 97.1   | 81.4   | 87.4 NM_001013723.1   |
| 81.3   | 97     | 89.5   | 89.8 NM_001013724.1   |
| 214.6  | 230.3  | 225.6  | 204.9 NM_001013464.1  |
| 113.6  | 106.4  | 85.6   | 92.5 XM_943658.1      |
| 79.7   | 86     | 81.2   | 87.2 NM_001034844.1   |
| 84.4   | 88.3   | 78     | 90.2 NM_001023562.1   |
| 109.5  | 124.6  | 149.4  | 144.7 NM_001013725.1  |
| 102    | 96.5   | 95.1   | 98 NM_001080538.1     |
| 121.3  | 125    | 115.2  | 116.2 NM_001008747.1  |
| 93     | 80.4   | 86.2   | 81.2 NM_001025357.1   |
| 81.3   | 82.1   | 82.4   | 79.8 NM_001013727.1   |
| 100.3  | 93.3   | 89.6   | 89.8 NM_001004353.1   |
| 89.2   | 91.2   | 82     | 86.6 XM_927564.1      |
| 85.8   | 85.8   | 79.8   | 83.6 NM_001080998.1   |
| 93.3   | 83.8   | 81.7   | 92.1 NR_003034.1      |
| 89.6   | 94.1   | 84.5   | 93.8 XM_928094.1      |
| 157.8  | 140.2  | 131.9  | 131.9 NM_001045548.1  |
| 102.1  | 93.8   | 92.2   | 81.8 NM_001025075.1   |
| 81.2   | 91.6   | 84.1   | 86.4 NM_001013729.1   |
| 102.7  | 93.2   | 93.7   | 93.5 NM_001013729.1   |
| 104.3  | 110    | 104.2  | 98.2 NM_001013732.1   |
| 102.2  | 96.5   | 108    | 98.6 NR_002932.1      |
| 81.3   | 78     | 81.2   | 69.5 XM_498330.2      |
| 82.9   | 79.2   | 83.5   | 80.3 NM_001013735.1   |
| 1103.7 | 1546.9 | 2115.8 | 1443.3 NM_001013739.1 |
| 87.6   | 103.4  | 89.4   | 82.7 NM_001025202.1   |
| 101.1  | 86.9   | 94.4   | 89.8 XM_499461.2      |
| 84.7   | 90.6   | 83.1   | 84.6 NR_002830.1      |
| 152.3  | 256.5  | 249.2  | 228.8 NM_001007189.1  |
| 89.2   | 82     | 80.4   | 89.3 NM_001008274.1   |
| 266.6  | 206.9  | 178.2  | 174.2 NM_001008388.1  |
| 93.7   | 83.4   | 82     | 85.6 NM_001008391.1   |
| 108.3  | 90.8   | 91.7   | 88.5 NM_001008397.1   |
| 99.6   | 98.4   | 98.5   | 97.4 NM_001011880.1   |

|        |        |        |                      |
|--------|--------|--------|----------------------|
| 108.1  | 86.3   | 102.3  | 104.7 NM_001035005.2 |
| 1842.3 | 1410.2 | 1484.3 | 782.1 NM_015853.3    |
| 76.8   | 96.3   | 82     | 92.1 NM_015910.3     |
| 83.9   | 80.8   | 80.7   | 83.4 NM_001042692.1  |
| 397.9  | 426    | 388.4  | 311.8 NM_016125.2    |
| 113.7  | 103    | 106.6  | 95.9 NM_001017987.2  |
| 90.4   | 90.5   | 80.9   | 85.9 NM_001018062.1  |
| 79     | 77.7   | 80     | 80.5 NM_016449.2     |
| 90.4   | 83.8   | 84.3   | 93.3 NM_016490.3     |
| 1584.4 | 1466.6 | 1349.5 | 1174.5 NM_016494.3   |
| 93.8   | 100.8  | 101.9  | 88.8 NM_016643.1     |
| 139.6  | 132.2  | 115.8  | 127.5 NM_016644.1    |
| 116.8  | 95.9   | 104.5  | 105.6 NM_017439.1    |
| 97.7   | 101.2  | 83.8   | 89.5 NM_001013617.1  |
| 90.7   | 102.7  | 91.1   | 88.6 NM_001013748.1  |
| 100.6  | 100.7  | 91     | 91.2 NM_001017437.1  |
| 92.2   | 88.5   | 90.9   | 92 NM_004125.2       |
| 81.1   | 76.9   | 77.7   | 90.9 NM_001024655.1  |
| 101.4  | 84.3   | 89.9   | 98.6 NM_001024656.1  |
| 93.4   | 79.9   | 93.1   | 92.8 NM_001024680.1  |
| 192.9  | 172.8  | 188.7  | 127.8 NM_017530.1    |
| 119.9  | 109    | 102.8  | 86.7 NM_018687.3     |
| 126.6  | 98.4   | 91.7   | 96.1 NM_020142.3     |
| 326.2  | 243.1  | 172.3  | 190.2 NM_020143.2    |
| 94.5   | 74.6   | 86.2   | 91.3 NM_020212.1     |
| 636.4  | 662.7  | 542.7  | 474.1 NM_020424.2    |
| 94     | 93     | 92.1   | 100.5 NM_001031628.1 |
| 105.3  | 121.7  | 102    | 100.3 NM_001031628.1 |
| 86.4   | 81.4   | 84.9   | 87 NM_001033873.1    |
| 99.3   | 105.3  | 96     | 101.8 NM_001031628.1 |
| 79.1   | 72.9   | 76.8   | 85.7 NM_001042524.1  |
| 83.7   | 82.3   | 75.4   | 79.8 NM_001042525.1  |
| 89.4   | 77.7   | 82     | 71.9 NM_001042524.1  |
| 112.7  | 103.6  | 115.1  | 98.3 NR_002453.4     |
| 111.4  | 97.7   | 112.4  | 93.3 NM_001031672.1  |
| 894.7  | 589.6  | 557.8  | 429.4 NR_002454.2    |
| 460.3  | 880.1  | 1109.1 | 839.2 NR_002555.2    |
| 96.7   | 97.6   | 87.7   | 93.8 XM_938437.1     |
| 85.6   | 86.4   | 84.9   | 87.1 NR_002934.1     |
| 85.7   | 93.6   | 77.8   | 82 NM_001033564.1    |
| 181.2  | 154.7  | 169.9  | 159.7 NM_022090.3    |
| 89.5   | 90.4   | 78.5   | 82.6 NM_022097.1     |
| 103.4  | 94.5   | 99.9   | 96.2 NM_001039083.1  |
| 94.2   | 87     | 78.8   | 88 XM_935587.1       |
| 108.9  | 100.4  | 99.4   | 108.5 XM_935713.1    |
| 502.6  | 500.9  | 469.9  | 471.2 XM_942734.1    |
| 83.9   | 89.8   | 85.1   | 77.6 XM_936338.1     |
| 85.8   | 74     | 70.3   | 77.8 XM_936358.1     |
| 79.3   | 79     | 80     | 82.6 NM_001040065.1  |
| 89.9   | 90.5   | 79.8   | 79.7 XM_925836.1     |

|         |         |         |                       |
|---------|---------|---------|-----------------------|
| 90.3    | 89.5    | 91.9    | 91.4 XM_925858.1      |
| 195.2   | 205.4   | 163.9   | 182 XM_925863.1       |
| 86.4    | 85.3    | 83.6    | 83.4 XM_931704.1      |
| 94.9    | 87.7    | 93.3    | 84.9 XM_931182.1      |
| 4117.5  | 8104.5  | 10501.6 | 7440.2 NM_001039895.1 |
| 93.1    | 86.1    | 81.3    | 89.3 XM_926352.1      |
| 84.1    | 115.6   | 81.8    | 85.1 NM_001039761.2   |
| 97.9    | 92      | 86.8    | 97.3 XM_926361.1      |
| 36049.6 | 31542.5 | 28650.2 | 31444.7 XM_926427.1   |
| 93.7    | 86.1    | 81.1    | 88.3 XM_931373.1      |
| 97.3    | 96.3    | 84.5    | 89.5 XM_931397.1      |
| 109.5   | 99.4    | 98.1    | 95.7 XM_926586.1      |
| 77.5    | 77.7    | 73.2    | 84.3 NM_001080516.1   |
| 98.1    | 98.6    | 83.3    | 95.2 XM_931536.1      |
| 92.3    | 102.8   | 96.2    | 105.1 XM_926644.1     |
| 95      | 92.2    | 86.9    | 94.6 XM_927886.1      |
| 92.4    | 91.1    | 82.4    | 86.7 XM_926728.1      |
| 86.9    | 85.1    | 80      | 85.1 XM_926746.1      |
| 90.2    | 80.4    | 84.3    | 94.4 XM_926759.1      |
| 2728.4  | 1993.1  | 1943.1  | 944.4 XM_926831.1     |
| 81.7    | 79.1    | 79.4    | 81.8 XM_931621.1      |
| 155.9   | 164.8   | 208.9   | 163.4 XM_931666.1     |
| 4128.2  | 4023.2  | 3020.3  | 2634 XM_928629.1      |
| 98.9    | 87      | 81.1    | 88.8 XM_927025.1      |
| 100.4   | 104.7   | 100.2   | 88.6 XM_927093.1      |
| 101.5   | 96.3    | 89.1    | 97.9 XM_931851.1      |
| 91.9    | 104.4   | 99      | 100.5 XM_929395.1     |
| 130.4   | 138.7   | 106.1   | 109.3 XM_929395.1     |
| 79.6    | 81.6    | 81.9    | 88.8 XM_927137.1      |
| 92.3    | 84.7    | 92.7    | 83.2 XM_927170.1      |
| 103.4   | 96.2    | 89.6    | 99.3 NM_001039772.1   |
| 82.1    | 80.1    | 78.2    | 81.8 XM_927183.1      |
| 1361.2  | 916.4   | 716.9   | 745.5 XM_927199.1     |
| 735.8   | 280.6   | 228.1   | 220.2 XM_930156.1     |
| 92.4    | 82.2    | 87.5    | 80.9 XM_934127.1      |
| 457.1   | 294.4   | 259.6   | 228.9 NM_001042631.1  |
| 106.3   | 100.4   | 100.5   | 98.6 NM_001080520.1   |
| 97.2    | 88.8    | 85.9    | 93.7 XM_927528.1      |
| 92.5    | 89.2    | 96.9    | 100.2 XM_927544.1     |
| 98      | 91.6    | 86.3    | 85.5 XM_927552.1      |
| 89.9    | 97      | 96.8    | 96.8 XM_934067.1      |
| 85.2    | 88      | 81.4    | 80.3 XM_927728.1      |
| 293.9   | 204.3   | 276.8   | 274.4 XM_927730.1     |
| 97      | 94      | 87.4    | 93.4 XM_930214.1      |
| 87.1    | 76      | 81.2    | 87 XM_927880.1        |
| 86.9    | 89.1    | 89.2    | 90.1 XM_932381.1      |
| 114.6   | 94.8    | 96.2    | 98.3 XM_927975.1      |
| 82      | 95.5    | 88.6    | 84 NM_001080521.1     |
| 91.7    | 96.8    | 85.7    | 91.2 XM_928065.1      |
| 107.1   | 103.4   | 93.7    | 85.1 NM_001045478.1   |

|        |         |        |                      |
|--------|---------|--------|----------------------|
| 105.3  | 96.9    | 90.6   | 96.4 XM_928095.1     |
| 81.9   | 78      | 82.1   | 90.9 XM_932899.1     |
| 97.3   | 92.9    | 87.5   | 91.6 XM_932970.1     |
| 95     | 75.1    | 84.1   | 84.7 XM_928831.1     |
| 84.7   | 85.4    | 75.8   | 86.1 XM_928893.1     |
| 97.5   | 94.1    | 93.4   | 86 NM_001042506.1    |
| 86.5   | 78.7    | 70.9   | 86.4 XM_928939.1     |
| 89.4   | 88.9    | 99.5   | 96.5 NR_003254.1     |
| 11178  | 10704.9 | 9788.2 | 9395.7 XM_930460.1   |
| 89     | 88.6    | 88     | 91.8 XM_929401.1     |
| 88.2   | 96.1    | 88.6   | 96.9 XM_930522.1     |
| 78.4   | 79.5    | 83.6   | 84.9 NM_001039792.1  |
| 87     | 90.7    | 90.3   | 81.8 XM_934232.1     |
| 96.7   | 93      | 81.3   | 83.9 XM_496146.2     |
| 91.3   | 91.7    | 84.8   | 91.3 XM_936717.1     |
| 95.5   | 98.3    | 84.1   | 95.5 XM_942931.1     |
| 112.5  | 106.1   | 93.3   | 104.3 XM_943475.1    |
| 82.4   | 78.4    | 75     | 81.6 XM_944018.1     |
| 99.2   | 98.7    | 92.5   | 92.1 XM_937203.1     |
| 770.2  | 988.2   | 811.9  | 812.4 XM_944019.1    |
| 85     | 92.5    | 76.3   | 81.8 XM_943915.1     |
| 87.8   | 83.9    | 85.6   | 90 XM_938896.1       |
| 111.2  | 94.4    | 95.2   | 95.1 XM_937910.1     |
| 104.7  | 104.5   | 94.8   | 98.6 XM_943542.1     |
| 91.2   | 87.1    | 82.4   | 87.9 NM_001040069.1  |
| 87.1   | 91.3    | 82.2   | 94.3 XM_938230.1     |
| 89.9   | 91.5    | 87.1   | 85.1 XM_938298.1     |
| 77.7   | 80.9    | 81.1   | 81 XM_938449.1       |
| 91.1   | 96.5    | 87.3   | 83.9 XM_945043.1     |
| 86.7   | 79.2    | 74.3   | 83.9 XM_945040.1     |
| 100.2  | 88      | 84.6   | 94.1 XM_943707.1     |
| 78.9   | 81.1    | 81.5   | 82.6 XM_942115.1     |
| 109.5  | 92.6    | 95.7   | 103 XM_943751.1      |
| 89.2   | 91      | 80.1   | 96.8 XM_941960.1     |
| 82     | 81.6    | 77.4   | 82.6 XM_943783.1     |
| 153.6  | 124     | 108.2  | 98.1 XM_938776.1     |
| 1543.8 | 918.9   | 834.7  | 794.2 NM_001080840.1 |
| 1354.6 | 704.6   | 735.6  | 776.7 NR_003040.1    |
| 85.5   | 81.4    | 81.7   | 92.4 XM_942166.1     |
| 97.6   | 95.6    | 88.1   | 91.1 XM_941914.1     |
| 89.3   | 98.3    | 88.4   | 89.6 NM_001080841.1  |
| 84.8   | 87.9    | 82.5   | 94.1 XM_939222.1     |
| 100.5  | 95.5    | 80.8   | 93.6 XM_943161.1     |
| 88.7   | 81.9    | 79.4   | 76.6 XM_945692.1     |
| 97.8   | 87.9    | 88.5   | 94.2 NM_001040071.1  |
| 105.4  | 100.5   | 77.8   | 95.4 XM_939670.1     |
| 89.6   | 80.4    | 86.3   | 86.1 XM_944300.1     |
| 89.5   | 84      | 86.7   | 95.1 XM_939781.1     |
| 85     | 84.9    | 86.2   | 75.7 XM_942582.1     |
| 189    | 99.1    | 128.7  | 114.8 XM_940198.1    |

|        |        |        |                       |
|--------|--------|--------|-----------------------|
| 87.5   | 85.3   | 83.8   | 85.8 XM_945836.1      |
| 102.6  | 103.5  | 106.1  | 97.1 XM_940459.1      |
| 162.5  | 174.3  | 183.8  | 105.8 XM_940575.1     |
| 94.9   | 100.5  | 95.1   | 98.4 NM_001080842.1   |
| 91.2   | 98.3   | 85.7   | 91.5 XM_945117.1      |
| 102.8  | 82.1   | 82.8   | 87.8 XM_941630.1      |
| 90.1   | 97.7   | 92.1   | 92.7 XM_941913.1      |
| 85.4   | 85.8   | 80.4   | 86.3 XM_945551.1      |
| 83     | 76.5   | 81.3   | 83.3 XM_942322.1      |
| 88.5   | 85.6   | 82.1   | 90.6 XM_942375.1      |
| 101.1  | 96     | 96.2   | 85.1 XM_942584.1      |
| 93.5   | 90.9   | 85.2   | 86 XM_942613.1        |
| 204.4  | 206.6  | 218.3  | 233.8 XM_931824.1     |
| 121.6  | 118    | 113    | 104.7 NM_001037666.1  |
| 94.1   | 92.3   | 99.5   | 88.6 XM_930589.1      |
| 96.1   | 87.5   | 84.2   | 85.6 XM_930698.1      |
| 88.6   | 85.5   | 78.9   | 88.9 XM_930645.1      |
| 102    | 94.1   | 86.9   | 98 XM_925895.1        |
| 99.1   | 105.9  | 111.1  | 104 XM_925981.1       |
| 92.3   | 86     | 88.4   | 89.6 XM_925995.1      |
| 82.4   | 86.3   | 85.3   | 98.1 XM_926391.1      |
| 79.4   | 82.3   | 84.4   | 81.6 XM_926981.1      |
| 139    | 209.2  | 194.1  | 196.2 XM_926881.1     |
| 85.6   | 85.5   | 87.4   | 79.5 XM_926186.1      |
| 85.6   | 86.1   | 80.5   | 93 XM_931089.1        |
| 85.8   | 89.8   | 81.6   | 90.6 XM_926230.1      |
| 90.8   | 96     | 87.3   | 86 XM_926321.1        |
| 109.8  | 94.4   | 109.6  | 97.3 XM_926358.1      |
| 100    | 94     | 87     | 92 XM_927227.1        |
| 114.5  | 117.5  | 120.2  | 105.8 NM_001079538.1  |
| 100.7  | 98.7   | 94.9   | 93.5 XM_931950.1      |
| 97.3   | 83.8   | 94.8   | 98.3 XM_926684.1      |
| 111.3  | 120    | 101.8  | 102.1 XM_926686.1     |
| 102.8  | 98.2   | 94.7   | 101.3 XM_926689.1     |
| 3048.7 | 2842.7 | 2910.3 | 2156.5 NM_001080544.1 |
| 91.3   | 79.5   | 81.9   | 80.7 NM_001079527.1   |
| 112    | 95.1   | 96.4   | 103.5 NM_001040715.1  |
| 3699.7 | 3278.7 | 2739.3 | 3043.7 XM_926913.1    |
| 214.8  | 171.9  | 153.2  | 155.3 XM_933544.1     |
| 86.9   | 85.6   | 87.5   | 78.7 XM_927205.1      |
| 82.6   | 96.6   | 93.5   | 93.5 XM_927326.1      |
| 95.7   | 77.2   | 85.2   | 83.7 XM_930216.1      |
| 94.1   | 85     | 90.8   | 82.2 XM_933416.1      |
| 90.2   | 84.4   | 82.7   | 88.5 XM_377002.2      |
| 101.2  | 96.3   | 89.7   | 78.8 XM_927632.1      |
| 104.8  | 99.1   | 105.6  | 105 XM_932255.1       |
| 87.8   | 98.5   | 93.1   | 90.1 NM_001042507.1   |
| 84.1   | 85.7   | 84.6   | 82.1 XM_927759.1      |
| 85.6   | 92.5   | 80.2   | 86.6 XM_932358.1      |
| 258    | 218.1  | 212.7  | 205.1 XM_927999.1     |

|       |       |       |                      |
|-------|-------|-------|----------------------|
| 87    | 87.9  | 82.6  | 88.8 XM_928014.1     |
| 97.9  | 104.6 | 97.8  | 95.7 XM_928059.1     |
| 762.7 | 469.2 | 475.3 | 399.5 NM_001080536.1 |
| 90    | 81    | 79.1  | 85.1 XM_928134.1     |
| 99.7  | 97.8  | 84.8  | 86.8 NM_001042500.1  |
| 96.2  | 91.9  | 82.4  | 83.6 XM_928353.1     |
| 82.3  | 83.6  | 72    | 80.2 XM_935128.1     |
| 94.2  | 89.5  | 82.4  | 89.1 XM_932857.1     |
| 98.2  | 75.1  | 87.8  | 86.3 XM_371416.3     |
| 92.7  | 93.9  | 89.6  | 85 XM_932876.1       |
| 236.7 | 361   | 249.5 | 301.9 XM_928461.1    |
| 84.2  | 88.9  | 78.5  | 77.1 XM_928685.1     |
| 78.9  | 88.1  | 72.7  | 87.1 XM_928912.1     |
| 85.2  | 84.6  | 79.3  | 85.7 XM_933280.1     |
| 95.6  | 93.4  | 91.9  | 97 XM_929011.1       |
| 89.7  | 82.5  | 84.8  | 86.7 XM_929041.1     |
| 99.6  | 94.9  | 87.4  | 103.1 XM_929053.1    |
| 163.6 | 129.1 | 108.7 | 103.7 XM_929072.1    |
| 157.2 | 112.1 | 97.9  | 109.7 XM_929105.1    |
| 82    | 77.7  | 75.5  | 75.8 XM_929192.1     |
| 94.3  | 89.5  | 93.8  | 89.2 XM_929209.1     |
| 114.1 | 109.5 | 106.2 | 107.5 XM_929354.1    |
| 118.6 | 105.6 | 93    | 97 XM_929370.1       |
| 100.6 | 103.3 | 103.2 | 86.4 XM_929376.1     |
| 92    | 78.3  | 100.8 | 77.8 XM_933630.1     |
| 87.5  | 81.5  | 77.5  | 85.1 XM_929409.1     |
| 89.9  | 100.7 | 90.6  | 91.7 XM_930555.1     |
| 82.6  | 79.7  | 91.6  | 84 XM_933689.1       |
| 94.5  | 94    | 93.4  | 95.3 XM_929519.1     |
| 93.9  | 82.5  | 91.5  | 99.8 XM_933779.1     |
| 87.7  | 79.2  | 81.3  | 87.3 XM_929596.1     |
| 85.2  | 84.5  | 92.6  | 88.2 XM_929910.1     |
| 87.6  | 88.9  | 78.5  | 82.1 XM_929939.1     |
| 87.5  | 87.5  | 80.1  | 84.3 XM_929976.1     |
| 125.5 | 125.7 | 121.7 | 113.2 XM_376278.3    |
| 84.9  | 82.8  | 77.9  | 94.3 XM_930091.1     |
| 85.9  | 78.8  | 78.3  | 81.9 XM_930108.1     |
| 79    | 78.8  | 71.9  | 86.5 XM_930313.1     |
| 97.6  | 97.3  | 92.7  | 88.9 NM_001042490.2  |
| 91.9  | 82.7  | 85.2  | 80.4 XM_936577.1     |
| 92.1  | 218.9 | 181.2 | 155.2 XM_937110.1    |
| 81    | 80.9  | 81.2  | 82.3 XM_944064.1     |
| 93.1  | 96.6  | 89.3  | 89.7 XM_944068.1     |
| 225.4 | 226.2 | 204.7 | 207.9 XM_937953.1    |
| 101.6 | 97.5  | 95.2  | 116.1 XM_496163.2    |
| 96.8  | 104.8 | 94.7  | 97.6 XM_938984.1     |
| 92.2  | 77.5  | 87.6  | 91.7 XM_939686.1     |
| 143.4 | 137.5 | 129.5 | 141.2 XM_945987.1    |
| 110.7 | 94.7  | 97.7  | 103.7 XM_945978.1    |
| 108.9 | 96.7  | 94.5  | 89.9 XM_939732.1     |

|         |         |         |                        |
|---------|---------|---------|------------------------|
| 97.2    | 92.7    | 86.2    | 83.5 XM_939968.1       |
| 97.2    | 90.2    | 87.3    | 109.1 XM_940045.1      |
| 72.4    | 84.6    | 80.6    | 78 XM_940489.1         |
| 102.6   | 94.5    | 97.7    | 85.9 XM_945260.1       |
| 82.1    | 68.4    | 64.1    | 68.6 NM_001040078.2    |
| 267.9   | 212.7   | 184.2   | 196.8 NR_003144.1      |
| 89.1    | 89.9    | 77.7    | 78.2 NM_001080393.1    |
| 80.5    | 87.1    | 80.1    | 80.6 NM_001077697.1    |
| 82.3    | 85.5    | 83      | 82.1 NM_001080396.1    |
| 90.3    | 85.5    | 84.5    | 85.4 NM_001080790.1    |
| 782.5   | 715.2   | 724.5   | 334 NM_001080849.1     |
| 89.9    | 79.2    | 82      | 84 NM_001080850.1      |
| 113.2   | 93.7    | 88      | 97.1 NM_001082488.1    |
| 647.8   | 521.9   | 606.4   | 466 NR_003277.1        |
| 148.7   | 200.6   | 234.6   | 199.8 NM_001080853.1   |
| 109.1   | 98.7    | 90.4    | 98.3 NM_001080856.1    |
| 85.4    | 93.3    | 89.4    | 89.3 NM_001080402.1    |
| 3978.4  | 7061.5  | 8946.8  | 6442.3 NR_003288.1     |
| 88.3    | 86.7    | 85.8    | 108.8 NM_030802.2      |
| 638     | 480     | 472.4   | 322.2 NM_030941.1      |
| 2645.2  | 2131.1  | 1941.6  | 1956.1 NM_032574.2     |
| 93.8    | 94.5    | 88.5    | 96.4 NM_138342.2       |
| 87.1    | 82.8    | 78.5    | 91.4 NM_194277.1       |
| 85      | 80.5    | 82.8    | 88.4 NM_001010851.2    |
| 206.5   | 186.6   | 164.3   | 154.1 NM_033211.2      |
| 104.7   | 95.6    | 101.5   | 90.2 XM_944706.1       |
| 264.1   | 240.8   | 254.8   | 219.5 NM_138353.2      |
| 602.1   | 367.1   | 317.3   | 307.2 NM_138358.2      |
| 1177.8  | 1910.1  | 2703.1  | 2025.9 NR_002773.1     |
| 337.3   | 403.2   | 470     | 290.3 NM_001031617.1   |
| 98.4    | 104.3   | 97.2    | 91 NM_138771.2         |
| 188.8   | 175.1   | 179.1   | 131 NM_138364.2        |
| 1135.2  | 576.5   | 672.1   | 395.6 NM_001014979.1   |
| 91.5    | 85.8    | 82.7    | 99.9 NM_175870.3       |
| 706.7   | 468.4   | 432     | 417.4 NM_138773.1      |
| 92.5    | 94.9    | 87.9    | 88.4 NM_001013618.1    |
| 101.4   | 118     | 115.4   | 117.8 NM_138698.2      |
| 134.3   | 106.7   | 100.4   | 114.2 NM_138370.1      |
| 54874.3 | 48748.2 | 46501.7 | 36714.2 NM_001080822.1 |
| 123.9   | 101.1   | 110.4   | 104.6 NM_139160.1      |
| 228.9   | 210.8   | 218.6   | 150.7 NM_033318.3      |
| 98.6    | 111.8   | 140.2   | 127.8 NM_001009607.1   |
| 81.2    | 92.9    | 88.7    | 88.1 NM_001017920.1    |
| 125     | 151.1   | 151     | 131.5 NM_001017971.1   |
| 193     | 158.4   | 146.2   | 128.5 NM_138386.1      |
| 101.8   | 96.2    | 96.8    | 104.3 NM_138389.1      |
| 123.3   | 105.1   | 93.3    | 96.2 NM_138390.2       |
| 1193.4  | 1223.8  | 1009    | 996.5 NM_138779.2      |
| 105     | 85.3    | 87.9    | 83 NM_138402.3         |
| 411.5   | 270.2   | 279.7   | 208.6 NM_138699.2      |



|        |        |        |                    |
|--------|--------|--------|--------------------|
| 108.3  | 121.8  | 104.5  | 119.9 NM_198315.2  |
| 105.8  | 96.4   | 93.3   | 88.4 NM_014622.4   |
| 101.4  | 111.9  | 103.5  | 96.2 NM_058169.2   |
| 92     | 79.4   | 79.1   | 82.2 NM_013343.1   |
| 107.4  | 123.2  | 115.8  | 106.1 NM_031490.2  |
| 251.7  | 189.4  | 169.8  | 191 NM_152271.2    |
| 93.3   | 83.3   | 73.7   | 87 NM_198461.1     |
| 155.1  | 137.5  | 135.8  | 145.3 NM_024778.4  |
| 80.1   | 94     | 83.9   | 95 NM_001031855.1  |
| 81.1   | 81.9   | 77.1   | 82.5 NM_000427.1   |
| 79.4   | 79     | 81.8   | 82.8 NM_002317.3   |
| 92.9   | 81     | 74     | 87.2 NM_144612.4   |
| 75.3   | 72.3   | 74.4   | 77.1 NM_005576.2   |
| 96.3   | 89.1   | 80     | 91 NM_005576.2     |
| 84.8   | 81.3   | 80.2   | 81.1 NM_002318.2   |
| 133.2  | 150.6  | 137.3  | 131.2 NM_032603.2  |
| 102    | 95.6   | 101.7  | 97 NM_032211.6     |
| 93.1   | 93.8   | 81.5   | 94.9 NM_005577.2   |
| 102.5  | 90.2   | 94.7   | 101.5 NM_005577.2  |
| 86.2   | 84.4   | 80.1   | 91.5 NM_024492.2   |
| 93.5   | 90.7   | 84.7   | 90.3 NM_145727.1   |
| 85.5   | 84.7   | 88.9   | 96.8 NM_145727.1   |
| 103.8  | 101.4  | 96.8   | 109 NM_014873.1    |
| 383.2  | 261.5  | 239    | 207.7 NM_014921.3  |
| 81.1   | 91.3   | 96.7   | 86.9 NM_014921.3   |
| 365.7  | 582.3  | 426.4  | 467.2 NM_012302.2  |
| 175.7  | 279.1  | 225    | 283.7 NM_015236.3  |
| 740.5  | 957.1  | 1113.9 | 749.3 NM_145693.1  |
| 127.5  | 112.8  | 111.1  | 98.4 NM_014646.2   |
| 100.5  | 97.4   | 113.1  | 90.7 NM_022896.1   |
| 177.8  | 230    | 187    | 178.7 NM_000237.1  |
| 89.4   | 94     | 86.8   | 98.3 NM_006151.1   |
| 433.6  | 1138.2 | 1372.9 | 808.2 NM_005578.2  |
| 156    | 211.1  | 169.8  | 160.5 NM_022737.1  |
| 81.1   | 82.4   | 83.2   | 89.5 NM_014839.3   |
| 1744.6 | 1163.9 | 1281.9 | 775.6 NM_004811.1  |
| 4569.8 | 5390.6 | 7161.7 | 6349.7 NM_022350.1 |
| 88.6   | 87.4   | 82.6   | 92.5 NM_004744.3   |
| 314.2  | 298.4  | 298.5  | 245.9 NM_006726.1  |
| 75.7   | 80.6   | 77.5   | 94.8 NM_015116.1   |
| 99.7   | 85.7   | 84.5   | 88.3 NM_020871.2   |
| 174    | 194    | 218.1  | 197.8 NM_032773.2  |
| 579.4  | 633.4  | 743.1  | 312.2 NM_002319.3  |
| 311.6  | 321.8  | 290.2  | 312.9 NM_018494.3  |
| 208.2  | 214.9  | 236.4  | 180.3 NM_145887.2  |
| 77.6   | 82.7   | 72.6   | 76.9 NM_018494.3   |
| 85.5   | 90.6   | 84.4   | 78.9 NM_020737.1   |
| 464.3  | 296.7  | 316.8  | 168.9 NM_024509.1  |
| 167.3  | 163.4  | 130.8  | 152.4 NM_024036.3  |
| 90     | 86.7   | 87.2   | 78.7 NM_152447.2   |

|        |        |        |                      |
|--------|--------|--------|----------------------|
| 399.4  | 373.5  | 385.9  | 206.9 NM_052972.2    |
| 401    | 523.6  | 454.3  | 457.7 NM_015541.2    |
| 162.7  | 138    | 149    | 110 NM_014813.1      |
| 93.7   | 88.6   | 80.5   | 84.6 NM_153377.3     |
| 331.8  | 338.1  | 322    | 288 NM_006152.2      |
| 89.9   | 89.6   | 81.9   | 83.6 NM_002332.1     |
| 258.4  | 143.7  | 145.4  | 119.4 NM_014045.3    |
| 237.3  | 380.2  | 262.4  | 375.6 NM_032832.3    |
| 114.1  | 108.8  | 100    | 98.9 NM_013437.2     |
| 97.2   | 85.3   | 81.3   | 84.8 NM_014067.2     |
| 95.7   | 88.6   | 97.5   | 82.9 NM_018557.1     |
| 89     | 100.8  | 84.5   | 88 NM_004525.1       |
| 97.1   | 94.3   | 90.5   | 88.9 NM_018409.2     |
| 1641.1 | 1343.5 | 1113.5 | 638.1 NM_002333.1    |
| 99.2   | 97.1   | 90.9   | 80.5 NM_002334.1     |
| 122.1  | 124.8  | 118.2  | 118.2 NM_002335.2    |
| 184.6  | 308.4  | 333.1  | 208 NM_182492.1      |
| 111.5  | 122.2  | 102.3  | 103.5 NM_002336.1    |
| 118    | 125.3  | 106    | 115.6 NM_001018054.1 |
| 1243.9 | 1156.1 | 925.9  | 999.5 NM_033300.2    |
| 320.7  | 319.2  | 307.7  | 236.2 NM_002337.1    |
| 692.5  | 591    | 504.8  | 412.2 NM_133259.2    |
| 93.1   | 97.2   | 90.3   | 94.1 NM_025168.1     |
| 292.7  | 255.7  | 241.7  | 263.1 NM_018214.3    |
| 93.2   | 93.3   | 82.6   | 91.4 NM_201550.2     |
| 340.1  | 248.5  | 217.4  | 161 NM_014665.1      |
| 118.8  | 119.4  | 105.6  | 103.5 NM_130830.2    |
| 95.2   | 97.8   | 89.4   | 100.1 NM_017640.3    |
| 137.2  | 147.3  | 150.4  | 155.3 NM_001031692.1 |
| 95.9   | 92.1   | 94.9   | 101.7 NM_005824.1    |
| 99.6   | 92.1   | 94.8   | 84 NM_001031692.1    |
| 95.1   | 88.9   | 82.3   | 80.9 NM_001006939.2  |
| 99     | 95.5   | 90.9   | 94.3 NM_022901.1     |
| 86.3   | 83.3   | 81.3   | 83.5 NM_024512.2     |
| 80.1   | 80.5   | 77.5   | 81.8 NM_207119.1     |
| 367.7  | 270.4  | 257.4  | 178.9 NM_207119.1    |
| 159    | 145.7  | 131.6  | 129.7 NM_018239.2    |
| 96.2   | 87.6   | 84.4   | 80.8 NM_015613.1     |
| 95.8   | 87.3   | 83.9   | 93.9 NM_001017924.2  |
| 100.7  | 112.6  | 90.2   | 98.8 NM_201650.1     |
| 97.2   | 98.2   | 93     | 96.3 NM_201650.1     |
| 87.6   | 85.4   | 85.2   | 84.7 NM_001024678.1  |
| 87.6   | 87.3   | 93.9   | 95.4 NM_145256.2     |
| 93.6   | 90.2   | 80.8   | 84 NM_030626.1       |
| 216.4  | 215.2  | 237.7  | 187.6 NM_144598.2    |
| 97.3   | 105.2  | 91.2   | 96.3 NM_012163.2     |
| 130.7  | 113.2  | 110.1  | 108 NM_012163.2      |
| 133.7  | 112.7  | 136.7  | 97.5 NM_030891.3     |
| 109.9  | 107.7  | 103.8  | 103 NM_024727.1      |
| 86.2   | 82.2   | 84.4   | 84.7 NM_005512.1     |

|        |        |        |                     |
|--------|--------|--------|---------------------|
| 815.8  | 614.1  | 524.9  | 475.2 NM_198565.1   |
| 118.7  | 96.5   | 80.1   | 88.2 NM_153353.2    |
| 90.7   | 93     | 79.5   | 75.6 NM_152715.2    |
| 91.4   | 94     | 83.3   | 83.9 NM_018296.4    |
| 88.9   | 90.1   | 92.5   | 95.7 NM_001006607.2 |
| 400.8  | 505.4  | 487.9  | 556.3 NM_052888.2   |
| 92.5   | 82.5   | 83.6   | 93.4 NM_144620.1    |
| 128.3  | 111.3  | 102.1  | 100.2 NM_052953.2   |
| 82.2   | 86.3   | 77.9   | 70.7 NM_022143.3    |
| 125.5  | 115.6  | 111.2  | 118.5 NM_017768.3   |
| 243.4  | 249.6  | 234.7  | 124.5 NM_006369.4   |
| 840.6  | 757    | 788.6  | 592.9 NM_052940.3   |
| 111.5  | 106.9  | 102.9  | 113.1 NM_152759.3   |
| 236.5  | 283.2  | 254.9  | 271.1 NM_144999.2   |
| 112.4  | 126.1  | 133.9  | 116.8 NM_144999.2   |
| 90.8   | 89.8   | 84.3   | 80.3 NM_033413.2    |
| 310.1  | 285.1  | 276.6  | 163.2 NM_020710.1   |
| 102.1  | 102.1  | 86.7   | 99 NM_031294.2      |
| 105.3  | 88.5   | 91.9   | 106.5 NM_031294.2   |
| 104.8  | 93.6   | 92.3   | 94.5 NM_017691.2    |
| 93.7   | 94.4   | 89     | 88.1 NM_001080457.1 |
| 92.7   | 87.9   | 91.3   | 94.7 NM_020929.1    |
| 80.8   | 84.2   | 85.3   | 75.2 NM_178452.3    |
| 98.1   | 92.3   | 93.2   | 96.5 NM_145309.1    |
| 83.9   | 89.8   | 88.1   | 77.9 NM_001005214.1 |
| 229.4  | 153    | 146.3  | 120.7 NM_015516.3   |
| 84.9   | 90.3   | 78.4   | 93.7 NM_001005210.1 |
| 111.7  | 96.2   | 102.4  | 88.9 NM_198075.1    |
| 230.2  | 175.7  | 189.5  | 141.6 NM_153260.1   |
| 103.6  | 100.7  | 95.9   | 91.4 NM_018509.2    |
| 100.5  | 94.5   | 88.4   | 82.4 NM_012472.3    |
| 89.1   | 88.2   | 82.6   | 84.4 NM_023942.1    |
| 85.3   | 85.7   | 88     | 86.2 NM_020794.1    |
| 242.5  | 193.4  | 193.5  | 144.2 NM_019594.2   |
| 101.7  | 89.5   | 83.1   | 86.4 NM_015350.1    |
| 267.2  | 189.1  | 180.2  | 218.6 NM_032270.2   |
| 294.6  | 279.8  | 276.2  | 235.4 NM_018103.3   |
| 91.4   | 83.8   | 81.7   | 86.9 NM_025061.3    |
| 100    | 89.3   | 82     | 92.6 NM_033402.2    |
| 730.6  | 637.5  | 510    | 457.3 NM_033402.2   |
| 100.9  | 100.9  | 97.7   | 101.8 NM_033402.2   |
| 2153.8 | 2379.2 | 2492.1 | 3282.5 NM_004735.2  |
| 88.2   | 88.8   | 84.4   | 82.5 NM_006309.1    |
| 674.2  | 715    | 626.6  | 594.2 NM_017724.1   |
| 302.8  | 380    | 353.8  | 252.3 NM_006309.1   |
| 74.3   | 76     | 80     | 84.8 NM_032165.2    |
| 90.3   | 92.6   | 88.2   | 85.6 NM_024548.2    |
| 108.7  | 97.6   | 109.2  | 98.6 NM_024652.2    |
| 95.2   | 107.7  | 99.2   | 91 NM_198578.2      |
| 91     | 100.6  | 89.3   | 101.5 XM_930820.1   |

|        |        |        |                      |
|--------|--------|--------|----------------------|
| 97.3   | 88.4   | 96.6   | 80 NM_020873.3       |
| 99.2   | 92.7   | 87.8   | 87.9 NM_018334.3     |
| 100.6  | 83     | 86.2   | 86.8 NM_006338.2     |
| 95.3   | 90     | 88.6   | 88.4 NM_006338.2     |
| 86.9   | 90.2   | 84.3   | 87.3 NM_201630.1     |
| 97.2   | 90.2   | 83.1   | 87.1 NM_032808.5     |
| 94.1   | 91.1   | 85.7   | 85.8 NM_152570.1     |
| 88.4   | 96.8   | 90.4   | 90.1 NM_178839.4     |
| 93.7   | 88.1   | 91.3   | 86.2 NM_015564.1     |
| 88.2   | 82.4   | 83.5   | 88.5 NM_178011.3     |
| 112.8  | 93.3   | 101.5  | 85.7 NM_024993.3     |
| 89.8   | 91.9   | 81.9   | 81.4 NM_138361.3     |
| 314.3  | 267.7  | 271.9  | 162.1 NM_001005374.1 |
| 87.4   | 92.5   | 87.6   | 86.2 NM_001005373.1  |
| 95.5   | 92.9   | 87.6   | 88.3 NM_020678.2     |
| 98.3   | 112.9  | 96.2   | 87.6 NM_001039029.1  |
| 114.7  | 104.3  | 106.8  | 95.6 NM_002338.2     |
| 93.4   | 142.7  | 154.3  | 128.8 NM_001013706.2 |
| 229.7  | 211.5  | 166.3  | 158.4 NM_018385.1    |
| 7990.1 | 4771.1 | 4824.5 | 3122.7 NM_014462.1   |
| 343.4  | 303.5  | 260.6  | 226.6 NM_032881.1    |
| 97.8   | 97.9   | 95.1   | 97.4 NM_173491.1     |
| 487.3  | 481.3  | 301.6  | 309.4 NM_152344.1    |
| 2012   | 1869.7 | 1845.9 | 1009.9 NM_015578.1   |
| 118.3  | 124.2  | 124.9  | 109.8 NM_144703.1    |
| 226.9  | 195.1  | 179.9  | 149.8 NM_025083.2    |
| 3258.2 | 2469.5 | 2807.4 | 1385.2 NM_021177.3   |
| 3930.6 | 2326.3 | 1959.7 | 2481.2 NM_014463.1   |
| 2296   | 1212.8 | 1107.9 | 843.8 NM_012321.2    |
| 329.2  | 197.2  | 213.1  | 213.2 NM_012322.1    |
| 142.4  | 114.9  | 133    | 139.3 NM_007080.1    |
| 4036.2 | 2550   | 2948.5 | 1705.8 NM_016199.1   |
| 415.9  | 360.3  | 331.6  | 272.6 NM_016200.2    |
| 345.4  | 288.3  | 263.7  | 197.5 NM_032356.3    |
| 108.5  | 217.1  | 173.8  | 189.4 NM_001013255.1 |
| 87.6   | 95.4   | 84.8   | 87.1 NM_001013253.1  |
| 110.3  | 229.8  | 210.9  | 214.5 NM_001013253.1 |
| 95.8   | 85.6   | 89     | 97.1 NM_001013254.1  |
| 105.5  | 96.3   | 85.9   | 92.2 NM_205835.2     |
| 103.7  | 88.4   | 93.9   | 92.8 NM_205834.2     |
| 85.5   | 82.7   | 74.4   | 86.3 NM_015925.5     |
| 95.3   | 104.6  | 97.2   | 119.5 NM_001001438.1 |
| 125.1  | 111.8  | 114.4  | 117.3 NM_001001438.1 |
| 388.6  | 452.3  | 622    | 568.5 NM_002340.3    |
| 3441.5 | 1540.3 | 1626.4 | 1115.8 NM_007161.2   |
| 202.3  | 145.9  | 140.7  | 149.2 NM_205837.1    |
| 1654.3 | 1015   | 958.6  | 658.3 NM_205837.1    |
| 1653.4 | 984.7  | 1053.6 | 660 NM_205840.1      |
| 87.4   | 90.2   | 81.2   | 89 NM_001009562.4    |
| 135.9  | 112.5  | 114.5  | 103.4 NM_000595.2    |

|        |        |        |        |                |
|--------|--------|--------|--------|----------------|
| 939.7  | 1370.1 | 1256.4 | 1113.4 | NM_000895.1    |
| 477.2  | 256.7  | 277.8  | 182.8  | NM_002341.1    |
| 170.7  | 128.2  | 121.8  | 107.5  | NM_002341.1    |
| 671.2  | 461.6  | 449.1  | 338.3  | NM_012212.2    |
| 140.1  | 149.4  | 161.9  | 161.4  | NM_181657.1    |
| 84.1   | 94.8   | 80.4   | 92.6   | NM_019839.1    |
| 77.9   | 76.6   | 75.1   | 75.9   | NM_000627.2    |
| 88.4   | 92     | 86.7   | 88.9   | NM_206943.1    |
| 92.1   | 89.8   | 82.4   | 89.1   | NM_021070.2    |
| 86.3   | 80.1   | 76.5   | 84.4   | XM_938706.1    |
| 169.9  | 117.2  | 135    | 123.3  | NM_021070.2    |
| 90.9   | 87.4   | 89.1   | 84.8   | NM_003573.2    |
| 188.7  | 185.6  | 161.1  | 161.1  | NM_003573.1    |
| 526.1  | 573    | 434.1  | 482.3  | NM_002342.1    |
| 434.2  | 419.1  | 474.4  | 320.8  | NM_145867.1    |
| 90.9   | 92.9   | 87     | 92.5   | NM_002343.2    |
| 95     | 103    | 85.8   | 99.3   | NM_002344.3    |
| 99.3   | 84.7   | 82.5   | 80.5   | NM_206961.1    |
| 909    | 769.5  | 584.7  | 554.3  | NM_032860.3    |
| 91.7   | 98.9   | 105.1  | 89     | NM_018032.3    |
| 286.1  | 285.3  | 326.2  | 230.3  | NM_018032.3    |
| 156.4  | 159    | 159.5  | 154.8  | NM_016019.1    |
| 96.2   | 96.4   | 84.6   | 93.4   | NM_002345.3    |
| 580.8  | 755.7  | 699.9  | 362.6  | NM_033631.2    |
| 104.7  | 97.8   | 99.5   | 113.4  | NM_001009909.2 |
| 79.1   | 77.2   | 72.8   | 85.3   | NM_016383.2    |
| 92.7   | 98.8   | 84.3   | 95     | NM_020169.2    |
| 86.2   | 90.1   | 72.8   | 86.4   | NM_003695.2    |
| 811.9  | 241.9  | 185.8  | 193.1  | NM_002346.1    |
| 117.9  | 112.2  | 128.7  | 101.9  | NM_021221.2    |
| 155.7  | 125.4  | 122.3  | 97.6   | NM_025262.2    |
| 89.7   | 85.4   | 84.7   | 84.6   | NM_001002848.1 |
| 91.8   | 88.7   | 87     | 84.6   | NM_001002849.1 |
| 88.9   | 81.7   | 76.1   | 82.4   | NM_025261.1    |
| 87     | 85.4   | 90.5   | 86.1   | NM_021246.2    |
| 162.3  | 142.8  | 141.8  | 144.6  | NM_002347.2    |
| 90     | 85.7   | 82.5   | 84.7   | XM_937329.1    |
| 87.8   | 86.5   | 82.1   | 92.7   | NM_017527.2    |
| 89.2   | 81.8   | 83     | 88.2   | NM_002349.1    |
| 1184.3 | 1167.2 | 1268.2 | 800.2  | NM_004271.3    |
| 100.5  | 82.3   | 80.9   | 80.7   | NM_001033667.1 |
| 111.4  | 112    | 114    | 105.5  | NM_002348.2    |
| 92.2   | 81.7   | 89     | 77.7   | NM_001033667.1 |
| 205.8  | 384.3  | 334.9  | 311    | NM_015364.2    |
| 929    | 502.8  | 488.1  | 419.7  | NM_017816.1    |
| 89.7   | 91.5   | 89     | 85.4   | NM_182551.3    |
| 701.4  | 456.4  | 364.1  | 405.9  | NM_001002257.1 |
| 91     | 87.9   | 86.4   | 82.7   | NM_175735.3    |
| 78.7   | 82.5   | 93.3   | 90.8   | NM_153335.4    |
| 743.4  | 664    | 698.8  | 400.5  | NM_001003786.1 |

|        |        |        |                      |
|--------|--------|--------|----------------------|
| 148.8  | 152.2  | 132.8  | 125.4 NM_001003787.1 |
| 941.3  | 1182.1 | 1378.2 | 629.2 NM_005583.3    |
| 3784.6 | 2834.9 | 2228.2 | 2191.2 NM_002350.1   |
| 88.5   | 95.5   | 87.1   | 77.6 NM_177476.1     |
| 83     | 79.7   | 76.3   | 79.6 NM_177458.1     |
| 82.2   | 73.9   | 76.2   | 86.2 NM_177477.1     |
| 91.6   | 93.5   | 84.6   | 80.1 NM_144586.3     |
| 115.9  | 115.4  | 97.4   | 123.6 NM_001077427.2 |
| 92.2   | 96.1   | 96.8   | 96.2 NM_205545.1     |
| 90.7   | 93     | 88.1   | 88.1 NM_014400.1     |
| 87.4   | 83.7   | 86.4   | 87.1 NM_173506.3     |
| 74.1   | 76.4   | 73.3   | 73.5 NM_182573.1     |
| 120    | 95.8   | 115    | 99.1 NM_001031749.1  |
| 90.2   | 90.5   | 88.1   | 100.4 NM_001031749.1 |
| 85.3   | 84.2   | 82.5   | 90.5 NM_006330.2     |
| 165.6  | 160.8  | 153.2  | 145.5 NM_007260.2    |
| 98     | 100    | 98.8   | 96.2 NR_001444.3     |
| 184.5  | 161    | 138.1  | 143.3 NM_012320.3    |
| 1590   | 984.3  | 970.6  | 734.3 NM_138794.1    |
| 101.6  | 99.4   | 94.5   | 95.9 NM_212551.2     |
| 788.8  | 720.6  | 754.6  | 555.3 NM_153374.1    |
| 101.8  | 104.1  | 84.9   | 87.6 XM_938559.1     |
| 85     | 93.2   | 83.3   | 91.1 NM_198273.1     |
| 302.9  | 352.1  | 358.5  | 281.2 NM_152449.2    |
| 799.5  | 875.5  | 844.9  | 1093.6 NM_000081.2   |
| 102.5  | 94.6   | 94.8   | 89.4 NM_001005736.1  |
| 89.7   | 85.3   | 79.1   | 78.3 NM_001005736.1  |
| 227.6  | 333.9  | 275.1  | 213.8 NM_000239.1    |
| 84.2   | 87.5   | 75.7   | 85.1 NM_032517.4     |
| 97.7   | 107.1  | 104.7  | 100 NM_183058.2      |
| 92.1   | 95.3   | 87.9   | 95.7 NM_144634.2     |
| 94.3   | 105    | 101.4  | 81.3 NM_020426.1     |
| 165.7  | 162.5  | 130.8  | 131.8 NM_032368.3    |
| 192.6  | 160.8  | 156.7  | 172.8 NM_020347.2    |
| 870.8  | 774.9  | 788    | 437.3 NM_006767.2    |
| 88.8   | 82.6   | 80.3   | 79.7 NM_033127.1     |
| 146.7  | 111.4  | 93.2   | 98.4 NM_021020.1     |
| 142.2  | 122    | 120.5  | 127.5 NM_032429.1    |
| 886.3  | 880.3  | 657.9  | 556.5 NM_174941.3    |
| 1100.1 | 890    | 757.7  | 498.6 NM_002355.2    |
| 3852   | 2098.1 | 2121.6 | 1324.8 NM_005817.3   |
| 88.9   | 87     | 83.4   | 87.1 NM_005584.2     |
| 86.4   | 86.6   | 82.8   | 101.1 NM_006439.3    |
| 90     | 90.8   | 84.6   | 91.4 NM_006439.3     |
| 106.7  | 104.8  | 107.3  | 116.4 NM_012090.3    |
| 93.1   | 87.9   | 84.5   | 97.3 NM_033044.2     |
| 250.3  | 474    | 431.6  | 419.4 NM_012090.3    |
| 435.8  | 316    | 298.2  | 278.8 NM_001013836.1 |
| 144.3  | 96.3   | 103.7  | 100.2 NM_002358.2    |
| 108.1  | 102    | 115.6  | 107.1 NM_001003690.1 |

|        |        |        |                      |
|--------|--------|--------|----------------------|
| 338.1  | 292.9  | 262.4  | 203.8 NM_014628.2    |
| 937.7  | 651.7  | 546.7  | 435.9 NM_014628.2    |
| 2582.8 | 1756.1 | 1528.7 | 1315.3 NM_006341.2   |
| 98.6   | 90.6   | 94.7   | 93.6 NM_130760.1     |
| 91.5   | 85.7   | 93.9   | 90.3 NM_130760.1     |
| 92.1   | 93.1   | 95.3   | 94.9 NM_130470.1     |
| 176.4  | 207.1  | 194.4  | 211.8 NM_130473.1    |
| 164.5  | 209.3  | 187    | 121.9 NM_130471.1    |
| 825.3  | 348.2  | 315.2  | 246.6 NM_005882.3    |
| 315.4  | 215.7  | 168.3  | 149.9 NM_001017405.1 |
| 90.2   | 80.5   | 83.5   | 84 NM_032858.1       |
| 91.5   | 87.2   | 82     | 96.4 NM_001031804.1  |
| 93.4   | 96.3   | 103.1  | 98.4 NM_005360.3     |
| 239.7  | 192.6  | 199.8  | 174.3 NM_032272.3    |
| 122.3  | 119.4  | 111.8  | 112.4 NM_201589.2    |
| 220    | 396.7  | 301.7  | 277.1 NM_005461.3    |
| 94     | 101.6  | 94.4   | 94.1 NM_152878.1     |
| 202.2  | 155.9  | 167.8  | 124.6 NM_012323.2    |
| 89     | 89.2   | 88.7   | 88 NM_012323.2       |
| 403.6  | 487.7  | 555.2  | 483.6 NM_002359.2    |
| 198.2  | 159.2  | 173.3  | 179.3 NM_032711.2    |
| 90.6   | 90.5   | 86.6   | 92.3 NM_002360.2     |
| 95.5   | 91.9   | 93.4   | 94.8 NM_002361.2     |
| 90.2   | 91.1   | 88.9   | 82.5 NM_080600.1     |
| 93.6   | 84.1   | 79.8   | 75.9 NM_004988.3     |
| 85.4   | 87.1   | 80.9   | 88 NM_001011543.1    |
| 89.1   | 88.7   | 88.6   | 76.9 NM_001011543.1  |
| 78.7   | 74.5   | 76.3   | 87.4 NM_005366.4     |
| 76.8   | 86     | 79.3   | 84.3 NM_005366.4     |
| 105    | 105.4  | 99     | 91.5 NM_001011544.1  |
| 77.5   | 78.7   | 75.5   | 76.7 NM_005366.4     |
| 92.1   | 83.5   | 81.8   | 94.9 NM_005367.4     |
| 78.5   | 85.9   | 82.7   | 90.6 NM_005361.2     |
| 86.2   | 89.1   | 87.4   | 85.6 NM_175743.1     |
| 84.2   | 80.2   | 76.1   | 85.8 NM_153488.3     |
| 86.8   | 92.8   | 83.9   | 79.7 NM_005362.3     |
| 92.7   | 97.4   | 89.9   | 99.5 NM_002362.4     |
| 108.7  | 95.3   | 98.8   | 87.8 NM_021049.3     |
| 95.4   | 91.3   | 92     | 88.4 NM_175868.1     |
| 86.1   | 85.6   | 84.4   | 85.2 NM_005364.3     |
| 78.9   | 79.9   | 69.1   | 80.2 NM_002363.3     |
| 84.7   | 69.5   | 73.1   | 82 NM_002363.3       |
| 89.5   | 76.4   | 69.2   | 90.2 NM_182506.2     |
| 73.3   | 78.7   | 73.3   | 80.8 NM_173699.1     |
| 91.5   | 72.3   | 76.3   | 79.1 NM_002364.3     |
| 86.3   | 93.4   | 93.6   | 82.3 NM_002365.3     |
| 89.5   | 82.6   | 81.3   | 80 NM_002367.2       |
| 90.5   | 89.7   | 87     | 83.9 NM_173523.2     |
| 87.7   | 85.9   | 77.2   | 92.1 NM_005462.3     |
| 84.3   | 75.7   | 82.2   | 82.8 NM_005462.3     |

|        |       |       |                      |
|--------|-------|-------|----------------------|
| 77.3   | 78.2  | 85.6  | 81.4 NM_016249.2     |
| 84.5   | 85    | 86.2  | 91.5 NM_177456.2     |
| 80.5   | 79.8  | 81.8  | 80.6 NM_177456.2     |
| 77.7   | 82    | 70.3  | 78.5 NM_138702.1     |
| 243.9  | 826.6 | 776.8 | 458.1 NM_001005333.1 |
| 118.7  | 273.6 | 214.3 | 187.4 NM_006986.3    |
| 89.5   | 104.5 | 90.5  | 110.3 NM_001005332.1 |
| 92.5   | 80.2  | 92.6  | 84.8 NM_001005333.1  |
| 121.8  | 119.9 | 122.2 | 108.3 NM_014599.4    |
| 98.1   | 87.1  | 107.6 | 89.9 NM_177433.1     |
| 125.5  | 109.1 | 114   | 115.1 NM_201222.1    |
| 105.8  | 92.5  | 93.2  | 87.4 NM_201222.1     |
| 106    | 123.3 | 117.3 | 97 NM_030801.2       |
| 136.9  | 134.7 | 139.4 | 129.2 NM_020932.1    |
| 95     | 87.8  | 85.3  | 89.1 NM_138703.3     |
| 100.1  | 130.2 | 124.4 | 107 NM_022149.4      |
| 120.8  | 122.3 | 129.4 | 97.2 NM_014061.3     |
| 81.5   | 87.9  | 84.2  | 83.7 NM_001033057.1  |
| 76.8   | 73.4  | 76.7  | 79.4 NM_015520.1     |
| 83.3   | 85.2  | 79.4  | 83.9 NM_004742.2     |
| 82.9   | 81.6  | 80.4  | 86.6 NM_012301.3     |
| 86     | 95.3  | 86.5  | 83.2 NM_020965.2     |
| 94.2   | 93.1  | 91.3  | 98.7 NM_020965.2     |
| 1333.5 | 699.1 | 681.9 | 453.7 NM_016069.8    |
| 552.2  | 630.3 | 594.3 | 347 NM_002370.2      |
| 91.2   | 88.9  | 85.7  | 93 NM_005906.3       |
| 110    | 92.1  | 98.5  | 95.7 NM_024635.2     |
| 94.6   | 87.6  | 89.6  | 91 NM_022440.1       |
| 92.8   | 94.1  | 83.5  | 100.2 NM_002371.2    |
| 77.5   | 83.3  | 78    | 75.7 NM_052886.1     |
| 81.6   | 92.3  | 78.7  | 81.1 NR_002819.1     |
| 106    | 90.2  | 85.2  | 91.3 NM_005434.3     |
| 182.6  | 191   | 186.7 | 159.8 NM_173844.1    |
| 87     | 85    | 80.7  | 79 NM_006785.2       |
| 93.4   | 94.8  | 92.2  | 88.2 NM_182830.2     |
| 86.6   | 81.1  | 81.5  | 82.7 NM_153267.3     |
| 105.6  | 117.9 | 111.3 | 106.3 NM_206920.1    |
| 80.5   | 94.2  | 82.5  | 90.7 XM_937023.1     |
| 158.7  | 185.7 | 176   | 163.1 NM_014757.3    |
| 87.8   | 90.1  | 83.8  | 89.3 NM_032427.1     |
| 79.3   | 79.2  | 74.5  | 81.3 NM_018717.3     |
| 157.7  | 132   | 138.7 | 134.1 NM_005907.2    |
| 112.5  | 102   | 96.3  | 100.1 NM_006699.3    |
| 747.4  | 862   | 909.5 | 560.3 NM_016219.2    |
| 184.9  | 144.2 | 149.2 | 131.6 NM_020379.1    |
| 87.2   | 83.7  | 83    | 84 NM_002372.2       |
| 152.7  | 207.3 | 227.4 | 221.3 NM_006122.2    |
| 369.9  | 349.1 | 315.3 | 252.7 NM_000528.2    |
| 282.3  | 281.1 | 311.2 | 184 NM_015274.1      |
| 368.6  | 485   | 487.7 | 445.8 NM_006715.2    |



|        |        |        |        |                |
|--------|--------|--------|--------|----------------|
| 222.8  | 376.2  | 330.9  | 297.3  | NM_005908.2    |
| 663.2  | 582.3  | 532.2  | 484.8  | NM_022077.3    |
| 96.6   | 98     | 97     | 91.7   | NM_022077.3    |
| 140.7  | 127.9  | 140.2  | 109    | NM_001003897.1 |
| 76.6   | 81.5   | 72.2   | 83.9   | NM_024641.2    |
| 256    | 231.7  | 232.1  | 232.2  | NM_024641.2    |
| 94.4   | 88.9   | 91.3   | 95     | NM_152496.1    |
| 79.1   | 82.9   | 86.7   | 83.5   | NM_001031740.1 |
| 84.1   | 89     | 86.7   | 89.8   | NM_001031740.1 |
| 113    | 104.1  | 98.6   | 91.7   | NM_018050.2    |
| 99.2   | 86.4   | 82.2   | 90.6   | NM_000240.2    |
| 91.2   | 89.1   | 91.1   | 80.3   | NM_000898.3    |
| 135.4  | 129.7  | 124    | 131.3  | NM_002373.4    |
| 89     | 92.4   | 76.2   | 85.4   | NM_032010.1    |
| 185.8  | 220    | 186.5  | 217.8  | NM_032010.1    |
| 102.5  | 92.2   | 98.5   | 86.6   | NM_005909.2    |
| 100.5  | 75.6   | 96.4   | 91.9   | NM_199227.1    |
| 79.8   | 95     | 87.6   | 82.5   | NM_181509.1    |
| 96     | 91.2   | 89     | 83.7   | NM_032514.2    |
| 1151.1 | 1011.1 | 964.8  | 796.4  | NM_181509.1    |
| 477.2  | 360.1  | 297.2  | 250.4  | NM_022818.3    |
| 114.6  | 112.6  | 98.3   | 92.5   | NM_001004343.1 |
| 94     | 83.5   | 88.5   | 90.5   | NM_002374.3    |
| 76.1   | 83     | 85.2   | 79.4   | NM_001039538.1 |
| 99     | 95.5   | 88.8   | 88.8   | NM_031845.1    |
| 96.5   | 101.2  | 94.1   | 97     | NM_002374.3    |
| 567.5  | 606.7  | 525.2  | 476.5  | NM_002755.2    |
| 989.2  | 770.1  | 657    | 786.6  | NM_021970.2    |
| 88.9   | 82     | 76.5   | 87.8   | NM_145109.1    |
| 100.6  | 102.6  | 94.4   | 98.7   | NM_145110.1    |
| 92.5   | 86.5   | 89.3   | 87.9   | NM_002756.2    |
| 94.3   | 99.4   | 94.9   | 92     | XM_944206.1    |
| 235    | 215.9  | 150.1  | 194.2  | NM_003010.2    |
| 234.7  | 212    | 214.3  | 179.5  | NM_002757.2    |
| 117.7  | 118.1  | 124.5  | 106.1  | NM_145160.1    |
| 87     | 99     | 92.6   | 94.2   | NM_002758.2    |
| 131.7  | 120.3  | 125    | 110.8  | NM_145185.2    |
| 83.7   | 83.6   | 74.7   | 83.1   | NM_002446.2    |
| 332.2  | 305.6  | 252.1  | 287.7  | NM_002419.3    |
| 97.1   | 81.7   | 82.7   | 80.4   | NM_006301.2    |
| 89.2   | 96.1   | 82.3   | 91.1   | NM_004721.3    |
| 101.9  | 108.1  | 107.1  | 104.1  | NM_003954.1    |
| 93.4   | 97.1   | 100.5  | 89.9   | NM_001001671.1 |
| 130.4  | 154    | 159.7  | 139    | NM_006609.2    |
| 91.9   | 91.1   | 78.3   | 86.5   | NM_203351.1    |
| 86.8   | 102.6  | 81.7   | 90.2   | NM_005922.2    |
| 1025.3 | 970.6  | 979.2  | 667.4  | NM_006724.2    |
| 223.5  | 286.9  | 270.5  | 191.5  | NM_004672.3    |
| 288.1  | 243.4  | 196.6  | 184.2  | NM_145333.1    |
| 1307   | 1704.6 | 1128.1 | 1344.8 | NM_145331.1    |

|        |        |        |                      |
|--------|--------|--------|----------------------|
| 97.9   | 99.9   | 94.4   | 96.2 NM_153497.2     |
| 283.6  | 219.1  | 179    | 188.3 NM_006116.2    |
| 95.9   | 96.8   | 86.1   | 92.8 NM_153497.2     |
| 109.1  | 117.4  | 97.3   | 106.2 NM_145342.1    |
| 150.4  | 179.8  | 152.9  | 136.4 NM_005204.2    |
| 83.5   | 89     | 76.8   | 88.3 NM_033141.2     |
| 94.4   | 148.8  | 131.3  | 128.9 NM_002375.3    |
| 89.2   | 85.9   | 90.2   | 88.7 NM_030885.2     |
| 86.2   | 80.6   | 82.2   | 84.8 NM_030884.2     |
| 1227   | 599    | 608.3  | 349.8 NM_007181.3    |
| 637.7  | 351    | 289.5  | 301.8 NM_001042600.1 |
| 1601.7 | 1439.2 | 1478.3 | 715.6 NM_004579.2    |
| 136.6  | 135.3  | 120.9  | 123.5 NM_003618.2    |
| 93.7   | 89.1   | 88.5   | 95.3 NM_145686.2     |
| 227    | 251.6  | 213.1  | 230.4 NM_145687.2    |
| 118.3  | 100.4  | 91.3   | 99.7 NM_006575.3     |
| 210.2  | 167.4  | 146.9  | 148.4 NM_006575.3    |
| 78     | 77.9   | 73.8   | 83.5 NM_033063.1     |
| 85.1   | 89.5   | 76.8   | 86.3 NM_207577.1     |
| 84.4   | 85.6   | 76.4   | 83.7 NM_033063.1     |
| 330.8  | 294.2  | 309.1  | 197.2 NM_024871.1    |
| 114.7  | 133.7  | 118.5  | 118.5 NM_003980.3    |
| 99.5   | 77.6   | 82.1   | 91.4 NM_152780.2     |
| 1937.8 | 1525.7 | 1536.2 | 1021.7 NM_014017.1   |
| 112.8  | 119.7  | 107.9  | 109.4 NM_002745.4    |
| 752.7  | 686.6  | 654.1  | 474.2 NM_138957.2    |
| 418    | 328.8  | 288.8  | 269.3 NM_138957.2    |
| 85.6   | 79.4   | 83.3   | 78.4 NM_138981.1     |
| 98.1   | 103.3  | 94.6   | 97 NM_138980.1       |
| 103.1  | 105.5  | 93.9   | 94.8 NM_138980.1     |
| 93.8   | 86.7   | 84.3   | 92.2 NM_002753.2     |
| 80.8   | 92.5   | 75     | 85 NM_138980.1       |
| 135.8  | 127.2  | 131.8  | 133.4 NM_002751.5    |
| 100.8  | 96.8   | 93.1   | 83.2 NM_138993.2     |
| 201.5  | 161.4  | 145.9  | 136.2 NM_002969.3    |
| 122.6  | 149.7  | 148.2  | 115 NM_002754.3      |
| 101.4  | 85.8   | 94.5   | 89.6 NM_139013.1     |
| 157.5  | 166    | 144.9  | 186 NM_139013.1      |
| 147.5  | 177.3  | 140.9  | 137.4 NM_001315.1    |
| 94.2   | 88.2   | 93.9   | 94 NM_139021.1       |
| 615.8  | 418.6  | 437.2  | 270.3 NM_002746.1    |
| 368.7  | 240.8  | 233    | 211.6 NM_001040056.1 |
| 91.7   | 89.5   | 82.8   | 89.1 NM_002747.3     |
| 1920.6 | 1391.2 | 1278.8 | 1128.4 NM_002748.2   |
| 84.7   | 86     | 96.5   | 96.5 NM_139032.1     |
| 168.3  | 235.2  | 195.1  | 209.3 NM_139034.1    |
| 98.5   | 96.6   | 91.6   | 102.5 NM_002749.2    |
| 101.2  | 94.8   | 96     | 96 NM_002750.2       |
| 91.9   | 90.6   | 89.2   | 84.2 NM_139049.1     |
| 77.5   | 87.2   | 79.9   | 90.8 NM_005456.2     |

|        |        |        |                      |
|--------|--------|--------|----------------------|
| 84.8   | 75.9   | 85     | 77.7 NM_012324.3     |
| 85.3   | 81.2   | 75.2   | 94.4 NM_012324.3     |
| 86.3   | 86.4   | 81.8   | 90.9 NM_016431.2     |
| 88.9   | 93.2   | 90.5   | 102.1 NM_012324.2    |
| 82     | 82     | 81.7   | 89.1 NM_001040439.1  |
| 293.9  | 336.3  | 305.3  | 324.9 NM_033392.3    |
| 1193   | 1080.4 | 814.5  | 859.5 NM_002752.3    |
| 191.5  | 226.4  | 206.9  | 161.5 NM_001006618.1 |
| 436.4  | 403.7  | 322.7  | 280.4 NM_001006618.1 |
| 101.8  | 87.8   | 85.6   | 92.5 NM_004759.3     |
| 135.9  | 145.7  | 119.2  | 122.9 NM_032960.2    |
| 2559.2 | 2317.1 | 2149   | 1138.4 NM_004635.3   |
| 317.8  | 294.8  | 249.3  | 195.8 NM_139078.1    |
| 107.5  | 125.7  | 121    | 126.8 NM_014994.1    |
| 3171.9 | 2459.6 | 2095.2 | 1533.7 NM_012325.1   |
| 785.4  | 660.3  | 587    | 502.7 NM_014268.1    |
| 123.9  | 112.8  | 113    | 109.5 NM_012326.2    |
| 87.4   | 81.5   | 77.5   | 89.4 NM_016835.2     |
| 86.2   | 83.2   | 88.4   | 87.1 NM_016841.2     |
| 100.3  | 97.2   | 83.8   | 96.2 NM_016834.1     |
| 91.7   | 92.5   | 83.1   | 88.6 NM_017923.2     |
| 163.3  | 182    | 165    | 150.6 NM_001005415.1 |
| 120.8  | 129.9  | 121.4  | 118.4 NM_001005415.1 |
| 96.8   | 100    | 93.9   | 91.7 XM_940510.1     |
| 91.4   | 92.4   | 87.1   | 88.4 NM_016496.4     |
| 118.1  | 135.6  | 162.1  | 134.5 NM_178450.2    |
| 295.2  | 377    | 387.6  | 271.8 NM_178450.2    |
| 290.5  | 389.7  | 373    | 266.3 XM_938009.1    |
| 78.7   | 70     | 71.4   | 82.1 NM_020814.1     |
| 139.8  | 107.6  | 107.9  | 127.5 NM_017824.4    |
| 336.2  | 585.6  | 653.9  | 413.6 NM_005885.2    |
| 2669.5 | 2366.8 | 2309.2 | 1787.8 NM_022826.2   |
| 88.1   | 90.5   | 75.5   | 86.3 NM_001002265.1  |
| 89.8   | 80.6   | 81.1   | 84.4 NM_145021.4     |
| 79.7   | 84.9   | 72     | 77.1 NM_001002266.1  |
| 95.5   | 91     | 95.8   | 88.1 NM_138396.4     |
| 629.8  | 2496.7 | 2312.9 | 1727.1 NM_002356.4   |
| 512.4  | 501.3  | 374.2  | 324.8 NM_023009.4    |
| 96.7   | 107.7  | 104    | 92.8 NM_006770.3     |
| 103.6  | 99     | 89.3   | 93 NM_018650.2       |
| 98.9   | 95.5   | 92.7   | 87.3 NM_004954.2     |
| 93.5   | 89.5   | 80.9   | 96.4 NM_017490.1     |
| 118.7  | 119.7  | 108    | 124.4 NM_004954.3    |
| 267.2  | 216.9  | 217.8  | 221 NM_002376.4      |
| 93     | 88.7   | 87.7   | 77.7 NM_031417.2     |
| 259.3  | 249.3  | 235.6  | 214.5 NM_004990.2    |
| 115.5  | 106    | 93.6   | 95 NM_138395.2       |
| 92.6   | 78.7   | 79.8   | 84.1 NM_144724.1     |
| 97.6   | 89     | 86.4   | 78.3 NM_001038603.1  |
| 82.9   | 86.1   | 78.4   | 87.8 NM_001038603.1  |

|        |        |        |                      |
|--------|--------|--------|----------------------|
| 93     | 94.8   | 87.3   | 95.9 NM_001017967.2  |
| 84.1   | 83.9   | 84.6   | 86 NM_052858.3       |
| 102.8  | 98     | 89.9   | 94.9 NM_052858.3     |
| 90.8   | 91.3   | 89.1   | 89.5 NM_002377.2     |
| 86.4   | 103.8  | 99.6   | 90.3 NM_052967.1     |
| 1653.1 | 1075.7 | 966.2  | 855.4 NM_021204.1    |
| 617.9  | 505    | 525    | 455.4 NM_016542.2    |
| 113    | 136.2  | 131.8  | 123.3 NM_020690.4    |
| 79.8   | 85     | 85.8   | 90.2 NM_001031849.1  |
| 90.8   | 93.9   | 85.7   | 89.2 NM_139125.2     |
| 78.7   | 83.2   | 75.3   | 76.9 NM_001879.4     |
| 100.1  | 98.9   | 98.8   | 105.7 NM_001031849.1 |
| 95.1   | 94.3   | 83.4   | 95.2 NM_139208.1     |
| 85.5   | 84.4   | 71.7   | 83.2 NM_006610.2     |
| 94.4   | 90.9   | 87.5   | 89.5 NM_139208.1     |
| 83.4   | 87.1   | 80.9   | 89.4 NM_032119.1     |
| 92.8   | 91.5   | 96.3   | 95.7 NM_014975.1     |
| 89.3   | 87.5   | 87.5   | 95.4 NM_015112.1     |
| 151.5  | 133.7  | 147.8  | 130.6 NM_032844.1    |
| 85.1   | 75     | 77.9   | 86.8 NM_000429.2     |
| 5275.2 | 3624.7 | 3807.3 | 2530.8 NM_005911.4   |
| 2077.6 | 1574.4 | 1459.7 | 1638.9 NM_013283.3   |
| 147.7  | 133.3  | 115.6  | 114.6 NM_013283.3    |
| 178.1  | 156.1  | 124.7  | 128 NM_182796.1      |
| 85.8   | 93.3   | 96.3   | 89.6 NM_002378.2     |
| 711.9  | 418.4  | 398.4  | 176.7 NM_139354.2    |
| 131.8  | 101.2  | 86.7   | 101.7 NM_139355.1    |
| 98.2   | 84.8   | 88.9   | 79 NM_002379.2       |
| 85.5   | 97.1   | 85.5   | 83.4 NM_002380.3     |
| 260.5  | 216.7  | 193.4  | 216.7 NM_030583.2    |
| 89.1   | 96     | 87.4   | 87.2 NM_002381.3     |
| 85.6   | 76.9   | 75.4   | 83.4 NM_030590.1     |
| 87.4   | 84.4   | 87.5   | 84.3 NM_003833.2     |
| 70.2   | 82     | 73.2   | 77.9 NM_030592.1     |
| 187.9  | 174.6  | 199.7  | 182.9 NM_199189.1    |
| 115    | 108.3  | 106    | 99.5 NM_018834.4     |
| 2216.8 | 1745   | 1326.2 | 1420 NM_018834.4     |
| 586.9  | 414.5  | 293.4  | 363.1 NM_199189.1    |
| 80.1   | 87.9   | 82.5   | 75.9 NM_022129.3     |
| 91.8   | 93.9   | 84.5   | 93 NM_001033083.1    |
| 108.5  | 95.4   | 95.4   | 102.6 NM_001033083.1 |
| 167.9  | 153.8  | 136.9  | 123.4 NM_145114.1    |
| 112.5  | 112.9  | 95.6   | 111.1 NM_002382.3    |
| 161.1  | 122.1  | 121.3  | 115.6 NM_197957.2    |
| 79.2   | 93.2   | 85.2   | 93.8 NM_145113.1     |
| 81.5   | 78.2   | 78.9   | 87 NM_145116.1       |
| 101    | 103.2  | 99.3   | 90.8 NM_002383.1     |
| 116.1  | 93.1   | 103.6  | 103.8 NM_001042539.1 |
| 246.6  | 234.1  | 181    | 229.5 NM_001042539.1 |
| 108.5  | 92.1   | 87.3   | 91.1 NM_005368.2     |

|        |        |        |                       |
|--------|--------|--------|-----------------------|
| 83.6   | 82.8   | 80.6   | 92.9 NM_203377.1      |
| 87.5   | 93.4   | 96.7   | 88.6 NM_005368.2      |
| 87.3   | 87.2   | 89.5   | 94.7 NM_203378.1      |
| 208.9  | 252.8  | 215.4  | 184.9 NM_015844.1     |
| 297.2  | 305.1  | 251.2  | 230.9 NM_015845.2     |
| 85.5   | 85.3   | 86.5   | 87 NM_003927.3        |
| 81.8   | 88.1   | 72.1   | 80.2 NM_015832.3      |
| 87.3   | 95.6   | 94.5   | 93.1 NM_015832.3      |
| 209.1  | 204    | 173.8  | 159.5 NM_003926.5     |
| 74.8   | 77.4   | 79.9   | 74.8 NM_145208.1      |
| 83.9   | 79.4   | 78.9   | 84.7 NM_144614.2      |
| 1553.8 | 1852.7 | 2377.1 | 2021.9 NM_003925.1    |
| 85.5   | 94.2   | 88.3   | 87.5 NM_018328.3      |
| 564.1  | 689.1  | 823.8  | 399.2 NM_052897.3     |
| 275.2  | 220.6  | 196.3  | 186.7 NM_016586.1     |
| 92.8   | 90.4   | 77     | 88.6 NM_000242.1      |
| 779.4  | 487    | 392.4  | 675.7 NM_207295.1     |
| 1542.3 | 1189.6 | 1324.5 | 989.5 NM_207293.1     |
| 95.2   | 93.2   | 90.7   | 91.1 NM_207293.1      |
| 90.4   | 84.7   | 88.4   | 88.5 NM_144778.2      |
| 88     | 86.4   | 74.9   | 86 NM_207304.1        |
| 85.5   | 95.9   | 84.7   | 87.3 NM_144778.2      |
| 88.7   | 82.6   | 84.3   | 95.8 NM_133486.1      |
| 85.8   | 80.2   | 81.1   | 81.1 NM_018388.2      |
| 81.5   | 82.4   | 74.8   | 73.7 NM_001080480.1   |
| 129.9  | 143.1  | 129.2  | 127.3 NM_138799.2     |
| 396.5  | 515.1  | 494.1  | 366.9 NM_001025090.1  |
| 2260.7 | 3230.2 | 3278.5 | 1709.2 NM_001025100.1 |
| 364.8  | 481.9  | 442.1  | 328 NM_001025101.1    |
| 124.3  | 151.6  | 137.8  | 141 NM_017643.1       |
| 793.7  | 877.5  | 687.6  | 746.8 NM_201268.1     |
| 115.4  | 136.6  | 137    | 131.5 NM_003791.2     |
| 151.4  | 153.8  | 137    | 128.8 NM_015884.1     |
| 183    | 163.2  | 156.7  | 125.2 NM_002386.2     |
| 87.9   | 77.6   | 77.1   | 85.5 NM_000529.2      |
| 84     | 86.1   | 85.4   | 86 NM_019888.2        |
| 90.9   | 91.2   | 94.4   | 92.4 NM_005912.1      |
| 83.3   | 84.4   | 77.2   | 78.2 NM_005913.1      |
| 83.3   | 75     | 72.7   | 79.7 NM_006500.2      |
| 133    | 106.3  | 92.5   | 121.9 NM_033412.2     |
| 91.5   | 87.1   | 69.7   | 91.4 NM_001034172.1   |
| 91.6   | 89     | 94.9   | 101.2 NM_001012755.1  |
| 86.2   | 96.2   | 87.6   | 86.5 NM_002387.1      |
| 750.9  | 891.2  | 711    | 786.6 NM_020166.2     |
| 221.8  | 148.9  | 106.8  | 127.1 NM_022132.3     |
| 101.1  | 107.2  | 107.1  | 106.2 NM_001011700.1  |
| 569.5  | 651.4  | 733.1  | 508.1 NM_032601.2     |
| 3998.7 | 2399.1 | 1908.3 | 1165.5 NM_174918.1    |
| 92.7   | 84.6   | 84.7   | 80.1 NM_005369.2      |
| 88.6   | 92.4   | 87.9   | 87.4 NM_024979.2      |

|         |         |         |                      |
|---------|---------|---------|----------------------|
| 93.2    | 89.5    | 92.3    | 89.7 NM_015078.2     |
| 125.1   | 123.2   | 114.8   | 124.7 NM_139279.3    |
| 97.1    | 104.6   | 89.3    | 88.4 NM_032503.1     |
| 112.1   | 105.6   | 109     | 108.3 NM_032503.1    |
| 319.7   | 285.6   | 195.9   | 237.7 NM_021960.3    |
| 278.2   | 199.8   | 151.6   | 171.7 NM_021960.3    |
| 288     | 191     | 170.7   | 188.2 NM_018518.3    |
| 1354.3  | 649.7   | 583.2   | 517.2 NM_018518.3    |
| 1907.2  | 1046.9  | 966     | 854.5 NM_004526.2    |
| 10826   | 11996.6 | 8668.7  | 8544.4 NM_002388.3   |
| 451.2   | 620.9   | 626.7   | 378.7 NM_003906.3    |
| 142.8   | 174.8   | 199.1   | 151.7 NR_002776.1    |
| 1032.8  | 543.6   | 530     | 564.7 NM_182746.1    |
| 4399.1  | 2589.2  | 2501.6  | 1793.9 NM_005914.2   |
| 2207.1  | 915.1   | 893.8   | 816.2 NM_006739.2    |
| 9120.1  | 5757.3  | 5763.3  | 3756.8 NM_005915.4   |
| 551.6   | 418     | 385.2   | 353.6 NM_005916.3    |
| 4776    | 3686    | 4004.6  | 2143.3 NM_182776.1   |
| 144.6   | 139.3   | 145.5   | 138 NM_182776.1      |
| 127.2   | 136.3   | 105.6   | 124.3 NM_032485.4    |
| 89.9    | 83.2    | 85.9    | 93.4 NM_182802.1     |
| 882.7   | 1682.4  | 2395.3  | 1384.6 NM_032485.4   |
| 124.6   | 130.6   | 106.1   | 111.4 NM_153255.2    |
| 239.9   | 240.2   | 218.5   | 202.8 NM_020533.1    |
| 2107.4  | 1671.7  | 1602.4  | 1187.7 NM_153259.2   |
| 151.1   | 223.4   | 224.8   | 194.2 NM_018298.9    |
| 174.5   | 151     | 147.7   | 124.3 NM_024596.1    |
| 1270.5  | 845.1   | 774.2   | 477.9 NM_006337.3    |
| 223.4   | 155.8   | 150.3   | 125.2 NM_006337.3    |
| 81.2    | 78.4    | 84.2    | 80 NM_024717.3       |
| 224.3   | 262.4   | 226.3   | 202.2 NM_001002796.1 |
| 80.9    | 91.2    | 87.2    | 82.3 NM_001002796.1  |
| 81.9    | 75.6    | 87.1    | 92.3 NM_018349.2     |
| 255.5   | 238     | 182.5   | 200.4 NM_014060.1    |
| 92.4    | 86.5    | 78.7    | 80.4 NM_139172.1     |
| 309.4   | 332     | 289.2   | 237.3 NM_014641.1    |
| 79.3    | 84.9    | 75.6    | 86.7 NM_005586.2     |
| 235.3   | 209.4   | 156.8   | 162.6 NM_199072.2    |
| 93.8    | 101.4   | 98      | 93.3 NM_153487.2     |
| 9087.1  | 8542.6  | 8080.1  | 6232.6 NM_005917.2   |
| 87.4    | 75.5    | 77.6    | 81.1 NM_206892.1     |
| 16458.9 | 10904.9 | 10835.9 | 7612.9 NM_005918.2   |
| 100     | 88.7    | 90.9    | 91.6 NM_001012334.1  |
| 95.2    | 91.6    | 83.5    | 80.1 NM_001012334.1  |
| 254.9   | 253.7   | 222.5   | 201.3 NM_001012334.1 |
| 94.6    | 88.3    | 78.8    | 86.9 NM_002391.3     |
| 83.9    | 79.6    | 75.1    | 85.1 NM_001012333.1  |
| 93.6    | 89      | 81.8    | 88.3 NM_020128.1     |
| 101     | 94.3    | 88.8    | 80.9 NM_020128.1     |
| 135.1   | 113.2   | 111.8   | 119.9 NM_017440.2    |

|        |        |        |                      |
|--------|--------|--------|----------------------|
| 124.8  | 143.2  | 124.8  | 127.4 NM_002392.2    |
| 103.7  | 92.7   | 90.8   | 93.6 NM_006879.2     |
| 154.6  | 155.9  | 160.6  | 154.1 NM_002393.1    |
| 125.8  | 140.7  | 118.6  | 115.5 NM_014611.1    |
| 157.4  | 141    | 133.7  | 124.6 NM_138476.2    |
| 236.3  | 211    | 213.1  | 189.1 NM_018463.2    |
| 134.2  | 140.5  | 144.7  | 120.1 NM_018467.2    |
| 86.6   | 89     | 82.2   | 78 NM_004991.1       |
| 642.7  | 655.7  | 563.1  | 782.8 NM_002395.2    |
| 579.7  | 587.1  | 490.8  | 476.8 NM_002396.3    |
| 105    | 100.6  | 96.5   | 92.3 NM_001014811.1  |
| 164    | 199.4  | 194.9  | 175.9 NM_006680.2    |
| 88.9   | 79.7   | 84.2   | 92.8 NM_006680.2     |
| 430.8  | 393.6  | 341.3  | 289.4 NM_014623.2    |
| 110.5  | 103.5  | 101.2  | 119 NM_004992.2      |
| 95.6   | 97.1   | 87.1   | 105 NM_001024732.1   |
| 175.8  | 134.7  | 136.3  | 129.4 NM_016011.2    |
| 153.5  | 280.2  | 226.5  | 201.9 NM_005120.1    |
| 85.8   | 86.7   | 79.7   | 85.4 NM_053002.2     |
| 88     | 93.2   | 88.4   | 91.2 NM_017638.1     |
| 437.4  | 423.2  | 423.6  | 246.1 NM_153450.1    |
| 349.2  | 205.2  | 189.1  | 168.5 NM_030973.2    |
| 1270.6 | 673.3  | 642.9  | 444.4 NM_025205.3    |
| 71.6   | 84.7   | 71.6   | 79.9 NM_016060.1     |
| 820    | 669.3  | 581.7  | 447.3 NM_014166.2    |
| 2030.2 | 1399.8 | 1469.5 | 910.4 NM_005466.2    |
| 456.6  | 453.5  | 395.7  | 333.5 NM_001001651.1 |
| 488.9  | 425.9  | 379.3  | 288.9 NM_001001653.1 |
| 446.6  | 364.1  | 286.7  | 264.1 NM_201542.2    |
| 119.8  | 97.2   | 97.2   | 103.8 NM_018019.2    |
| 122.9  | 116.6  | 125.6  | 110.6 NM_005587.1    |
| 105.6  | 105.8  | 106.4  | 96.2 NM_005919.1     |
| 463.4  | 444.4  | 453.9  | 343.6 NM_002397.2    |
| 1728.9 | 1455.5 | 1697.5 | 689.2 NM_005920.2    |
| 104.2  | 116.9  | 125    | 108 NM_000243.1      |
| 86.9   | 83.6   | 93.1   | 85.4 NR_002766.1     |
| 87.5   | 81.1   | 87.6   | 85.9 XR_000943.1     |
| 82.4   | 89.6   | 81.5   | 83.5 NM_032446.1     |
| 82.6   | 80.7   | 70.2   | 83.8 NM_032445.1     |
| 151.9  | 141.3  | 113.5  | 116.8 NM_001410.1    |
| 84.9   | 90.7   | 82.3   | 92 NM_001080497.1    |
| 131.6  | 120.4  | 129.5  | 109.1 NM_152513.3    |
| 71.9   | 69.8   | 63.9   | 67.9 NM_001080836.1  |
| 343.3  | 262    | 224.5  | 218.7 NM_020149.2    |
| 88.1   | 80.7   | 80.5   | 82.4 NM_170677.2     |
| 79.5   | 78.7   | 78.1   | 83.7 NM_172316.1     |
| 88.9   | 88     | 90.3   | 76.1 NM_002399.2     |
| 84.4   | 87.3   | 80.2   | 90 NM_001009813.1    |
| 325.7  | 241.7  | 229.8  | 211.8 NR_002211.1    |
| 1371.8 | 718.6  | 671.5  | 740.7 NM_014791.2    |

|        |        |        |                      |
|--------|--------|--------|----------------------|
| 114.5  | 114.8  | 101.6  | 104.4 NM_130803.1    |
| 90.3   | 96.6   | 95     | 91 NM_130803.1       |
| 92.1   | 86.1   | 79.4   | 90.7 NM_130802.1     |
| 200.4  | 183.3  | 166.2  | 159.3 NM_130799.1    |
| 95.5   | 85.5   | 89.2   | 86.2 NM_004527.2     |
| 82.8   | 78.6   | 74.1   | 83.9 NM_004527.2     |
| 87.2   | 91.1   | 84.3   | 87.9 NM_001040002.1  |
| 82.8   | 83     | 78.5   | 81.2 NM_005924.3     |
| 91.3   | 103.1  | 94.8   | 90.4 NM_005588.1     |
| 93.1   | 83.5   | 85.5   | 87.6 NM_005925.1     |
| 94.1   | 94.2   | 88.9   | 99.3 NM_020203.1     |
| 118.2  | 274.2  | 268.3  | 231.5 NM_006343.2    |
| 122.8  | 123.9  | 104.9  | 117.1 NM_022566.1    |
| 98.6   | 82.2   | 80.8   | 85.8 NM_015154.1     |
| 140.5  | 118.9  | 123.1  | 101 NM_018670.1      |
| 84.1   | 77.4   | 81.9   | 81.3 NM_002402.2     |
| 161    | 114.8  | 111.4  | 120 NM_177524.1      |
| 95.5   | 87.9   | 82.7   | 90.9 NM_177525.1     |
| 79.8   | 80.1   | 78.5   | 77 NM_000245.2       |
| 2270.6 | 1329.9 | 1029   | 829.3 NM_015143.1    |
| 2235   | 1731.8 | 1447.1 | 1393.5 NM_006838.2   |
| 149.9  | 131.4  | 92.7   | 101.5 NM_024042.2    |
| 181.9  | 158.5  | 135.8  | 135.1 XM_941466.1    |
| 101.8  | 92.1   | 87.8   | 85.6 NM_001004431.1  |
| 108.9  | 121    | 106.5  | 101.1 NM_001004431.1 |
| 145.6  | 150.9  | 167.2  | 131.9 NM_024086.2    |
| 106.4  | 97.3   | 98.6   | 95.5 NM_001029991.1  |
| 151.7  | 119.9  | 125.5  | 113.3 NM_001029991.1 |
| 99.7   | 102.3  | 100.7  | 95.9 NM_152636.1     |
| 229    | 151.4  | 139.7  | 129.9 NM_005371.3    |
| 81.2   | 87     | 81.2   | 77.4 NM_005371.3     |
| 160.3  | 160.3  | 153.3  | 166.1 NM_181725.2    |
| 102.1  | 110    | 101.5  | 103.3 NM_001005372.1 |
| 108.2  | 99.3   | 105.6  | 103.2 NM_018396.1    |
| 658.3  | 622.4  | 478.5  | 522.3 NM_019852.2    |
| 212.5  | 166.7  | 147.2  | 155.7 NM_022840.2    |
| 2226.8 | 1409.9 | 1252.2 | 1493.5 NM_014168.1   |
| 118.4  | 106.6  | 105.8  | 111.1 NM_152396.1    |
| 113.8  | 99.2   | 120.5  | 92.9 NM_014033.2     |
| 600    | 467.1  | 420.2  | 379.9 NM_152637.1    |
| 111.7  | 105.5  | 99.1   | 110.3 NM_001077180.1 |
| 322.7  | 343.6  | 249.4  | 280.9 NM_005926.2    |
| 90.7   | 83.8   | 88.9   | 85.9 NM_017459.1     |
| 84.3   | 84.5   | 81.3   | 79.5 NM_002403.2     |
| 94.1   | 94.1   | 80.8   | 89.7 NM_017459.1     |
| 212    | 151.6  | 134.3  | 131.2 NM_005927.3    |
| 90.8   | 92.8   | 89.7   | 87.2 NM_021647.5     |
| 91.8   | 87.1   | 87.8   | 94.6 NM_021647.5     |
| 84.7   | 83.8   | 82.4   | 84.8 NM_001009554.1  |
| 98.3   | 187.2  | 208.9  | 125.9 NM_002404.1    |



|        |        |        |                      |
|--------|--------|--------|----------------------|
| 109.6  | 93.1   | 96.1   | 98.9 NM_003480.2     |
| 347.7  | 440.6  | 528.3  | 230.9 NM_005928.1    |
| 123.9  | 170.1  | 139.4  | 140.1 NM_004225.1    |
| 107.6  | 110.6  | 102.8  | 90.6 NM_033316.2     |
| 125.6  | 121.1  | 129    | 104.9 NM_033316.2    |
| 101.8  | 84.2   | 86.3   | 88 NM_005929.3       |
| 88.7   | 89.9   | 89.8   | 85.8 NM_033540.2     |
| 107.6  | 101.7  | 104.6  | 97.7 NM_017927.2     |
| 247.7  | 314    | 291.6  | 236.2 NM_014874.2    |
| 689.3  | 279.8  | 274.4  | 181.7 NM_002405.2    |
| 93.2   | 84.5   | 82.6   | 89.8 NM_031433.1     |
| 3283.6 | 3203   | 3134.9 | 3389 NM_022736.1     |
| 269    | 217.5  | 195.3  | 179.2 NM_032793.2    |
| 972    | 505.6  | 510.6  | 233.8 NM_138431.1    |
| 84     | 86.8   | 84.4   | 82.9 NM_181644.2     |
| 474.8  | 373.7  | 321.3  | 243.1 NM_032889.2    |
| 106.1  | 89.5   | 86.5   | 94.5 NM_032219.2     |
| 294.4  | 240.6  | 236.4  | 249.5 NM_152778.1    |
| 164.8  | 166    | 160.4  | 190.9 NM_001080541.1 |
| 81.4   | 98.7   | 88.1   | 88.3 NM_004668.1     |
| 78     | 73.3   | 72     | 83.4 NM_004668.1     |
| 942.5  | 1104.5 | 995.6  | 815 NM_002406.2      |
| 1317.2 | 725    | 646.5  | 669.6 NM_002408.3    |
| 101.5  | 105.7  | 90.5   | 87.1 NM_002408.3     |
| 70.3   | 79.2   | 77.9   | 81.4 NM_002409.3     |
| 285    | 290.3  | 283.4  | 291.8 NM_012214.1    |
| 136.5  | 143.5  | 140.8  | 143.9 NM_014275.2    |
| 84.7   | 77.5   | 78.1   | 88.8 NM_054013.1     |
| 311.5  | 234.5  | 210.5  | 222.4 NM_054013.1    |
| 89     | 91.7   | 88.4   | 93.1 NM_013244.2     |
| 98.6   | 102.5  | 88.9   | 97.6 NM_002410.2     |
| 94.1   | 84.6   | 97.2   | 103.4 NM_144677.2    |
| 92.4   | 81.1   | 88     | 82.3 NM_198955.1     |
| 151    | 131.2  | 126    | 114 NM_001029885.1   |
| 873.4  | 632.1  | 532.6  | 626.4 NM_024321.3    |
| 2158.6 | 1585   | 1813.7 | 1001.7 NM_030818.2   |
| 225.5  | 218.3  | 223    | 153.6 NM_032302.2    |
| 237.3  | 145.8  | 143.7  | 109.9 NM_033212.2    |
| 611.5  | 312    | 297.4  | 222.8 NM_030577.1    |
| 1408.3 | 1436.5 | 1416.7 | 1022.2 NR_001565.1   |
| 92     | 86.9   | 89.8   | 94.2 NM_032325.2     |
| 2827.1 | 2258.3 | 2439   | 1391.4 NM_032350.3   |
| 89.9   | 85.1   | 89.6   | 86 NM_024323.3       |
| 103.1  | 90.3   | 88.7   | 90.6 NM_032718.2     |
| 171.8  | 160.5  | 140.6  | 96.6 NM_030819.2     |
| 79.4   | 94.9   | 86.4   | 87.3 NM_001031618.1  |
| 89.1   | 83.7   | 95.1   | 99.6 NM_198519.1     |
| 86.8   | 79.1   | 92     | 86.9 NM_001037163.1  |
| 910.4  | 736.2  | 560.9  | 683.8 XM_935791.1    |
| 550.4  | 399.2  | 319.7  | 327.5 NM_032357.2    |

|        |         |         |         |                |
|--------|---------|---------|---------|----------------|
| 6353.3 | 7913.9  | 9355.6  | 9601.1  | NM_080656.1    |
| 110.8  | 100.8   | 106.4   | 121.9   | NM_152288.1    |
| 104.3  | 87.9    | 83      | 83.5    | NM_153217.1    |
| 84.9   | 78.6    | 81.5    | 89.9    | NM_001042519.1 |
| 107.3  | 100.2   | 93.6    | 98.5    | NM_032321.1    |
| 259.1  | 175     | 149.5   | 133     | NM_032346.1    |
| 759.9  | 439.6   | 410.9   | 304.6   | NM_032366.2    |
| 147.2  | 111.6   | 99.5    | 110.2   | NM_001040161.1 |
| 200.7  | 182.2   | 165.3   | 142.9   | NM_032725.2    |
| 103.9  | 87.3    | 90.4    | 99.9    | NM_033410.2    |
| 113.3  | 98.2    | 99.8    | 105.5   | NM_199249.1    |
| 1503.4 | 886.5   | 767.9   | 553     | NM_199249.1    |
| 607.3  | 436.9   | 410.5   | 290.3   | NM_016499.2    |
| 355.4  | 297.1   | 288.7   | 193.3   | NM_032928.2    |
| 1619.7 | 1486.7  | 1107.5  | 1016.2  | NM_053045.1    |
| 115.9  | 141.1   | 122.1   | 130.4   | NM_001001870.1 |
| 324.7  | 229.2   | 200.1   | 175     | NM_138418.2    |
| 138.7  | 142     | 148.3   | 123.9   | NM_145056.1    |
| 179.8  | 227.8   | 185.5   | 195.5   | NM_001037984.1 |
| 88     | 91.3    | 78.2    | 87.8    | NM_001037984.1 |
| 502.5  | 426.4   | 357.1   | 280.6   | NM_138570.1    |
| 131.5  | 141.5   | 147.9   | 114.4   | NM_032369.1    |
| 171.4  | 161.9   | 188.7   | 143.4   | NM_032369.1    |
| 178.1  | 191.7   | 163.2   | 156.5   | NM_138381.1    |
| 184.8  | 298.3   | 263.1   | 257.2   | NM_032921.1    |
| 98.7   | 94.8    | 99.6    | 100.7   | NM_153373.1    |
| 151.7  | 276.6   | 251.5   | 250.9   | NM_032886.1    |
| 189.8  | 191.9   | 189.5   | 171.3   | NM_052873.1    |
| 193.9  | 232.1   | 202.9   | 185.7   | NM_033115.2    |
| 98.5   | 101     | 104.4   | 95.3    | NM_032372.3    |
| 82.5   | 77.5    | 85.9    | 89.2    | NM_032770.3    |
| 77.8   | 84      | 85.7    | 83.8    | NM_145038.1    |
| 9753.2 | 13521.8 | 15368.6 | 13165.8 | NM_145042.2    |
| 116.7  | 108.2   | 105.4   | 110     | NM_020314.3    |
| 104.3  | 87.2    | 85.8    | 90.5    | NM_080663.1    |
| 138.9  | 111.2   | 119.3   | 105.7   | NM_052880.3    |
| 95.8   | 105.9   | 105.1   | 107     | NM_206967.1    |
| 191.5  | 106.3   | 96.3    | 107.2   | NM_174926.1    |
| 128.8  | 147.2   | 126.5   | 130.2   | NM_144675.1    |
| 85.5   | 89.2    | 85.5    | 87.3    | XM_927732.1    |
| 242.5  | 173.7   | 184.8   | 124.7   | NM_001031734.1 |
| 89.3   | 101.2   | 95.4    | 81.3    | NM_144975.2    |
| 347.5  | 263.9   | 227.9   | 223.4   | NM_052848.1    |
| 86.4   | 82.8    | 92.9    | 86.6    | NM_145053.3    |
| 120.2  | 118.5   | 112.4   | 106.7   | NM_145045.3    |
| 94.9   | 89.3    | 88.6    | 91      | NM_138492.4    |
| 93.1   | 104.2   | 90.1    | 87.6    | NM_052861.2    |
| 150.4  | 176.9   | 164.9   | 170.2   | NM_182563.2    |
| 95.3   | 98.3    | 87.8    | 95.8    | NM_153238.1    |
| 645.6  | 534.2   | 531.7   | 398.3   | NM_145030.1    |

|        |        |        |                      |
|--------|--------|--------|----------------------|
| 104.9  | 100.4  | 89     | 92 NM_144683.2       |
| 288.2  | 210.6  | 148.9  | 236.9 NM_174909.1    |
| 90.6   | 79.5   | 88.6   | 82.3 NM_206966.1     |
| 109    | 122.3  | 131.5  | 116.9 NM_144973.2    |
| 272.5  | 177.9  | 150.1  | 137.8 NM_032331.2    |
| 135.1  | 126    | 110.4  | 114.3 NM_001001410.2 |
| 83.5   | 84.3   | 88.4   | 89.2 NM_024070.3     |
| 484.9  | 364.9  | 364.8  | 298.2 NM_152308.1    |
| 99.2   | 90.3   | 87.9   | 86 NM_023931.2       |
| 105.6  | 102.8  | 100.9  | 104.4 NM_153359.1    |
| 422.7  | 342.7  | 350.5  | 268 NM_024109.1      |
| 85.4   | 82     | 84.2   | 95 NM_152706.2       |
| 99.5   | 91.6   | 101.6  | 95 NM_001029999.1    |
| 98.2   | 95.8   | 109.1  | 91.7 NM_144992.4     |
| 75.4   | 74.3   | 73.2   | 82 NM_152613.1       |
| 105.6  | 94     | 98.5   | 97.7 NM_152779.1     |
| 200.5  | 131.3  | 141.1  | 116.8 NM_152339.2    |
| 95.6   | 95.3   | 92.6   | 86 NM_152621.3       |
| 75.5   | 72.2   | 75.7   | 74.9 NM_144979.2     |
| 95.6   | 96.3   | 94.2   | 107 NM_001001343.1   |
| 401.8  | 308    | 279.9  | 227.1 NM_024104.2    |
| 482.2  | 240.1  | 215.7  | 226.8 NM_024069.2    |
| 115.7  | 111.1  | 110.5  | 119.5 NM_023939.3    |
| 446.9  | 298.3  | 263.6  | 238.6 NM_024038.2    |
| 95.8   | 100.1  | 86.4   | 93.8 NM_016459.3     |
| 180.2  | 178.1  | 164.3  | 151.1 NM_182538.3    |
| 4546.2 | 6817.9 | 7345.6 | 4304.6 NM_144618.1   |
| 97.6   | 94.3   | 85.3   | 96.4 NM_024043.2     |
| 888    | 658.9  | 720.3  | 342.1 NM_024031.2    |
| 112.5  | 99.6   | 103.7  | 107.1 NM_177441.1    |
| 235.3  | 237.6  | 190.5  | 187.2 NM_001080501.1 |
| 162    | 137.2  | 135    | 122.4 XM_495878.2    |
| 133.9  | 109.4  | 100.1  | 112.2 NM_174923.1    |
| 851.5  | 639.1  | 618.1  | 579.1 NM_032285.2    |
| 80     | 88.1   | 78.4   | 89.8 NM_032285.2     |
| 199.5  | 176.3  | 145.7  | 151.7 NM_001031727.1 |
| 1276.2 | 768.7  | 810.8  | 712.9 NM_032285.1    |
| 101.2  | 98.3   | 86.8   | 102.6 NM_024028.2    |
| 305.6  | 204.6  | 202.1  | 163.7 NM_152773.2    |
| 1276.3 | 819    | 851.3  | 687.4 NM_152773.2    |
| 100.4  | 94.5   | 79.8   | 100.4 NM_153354.2    |
| 81.8   | 88     | 87.5   | 92.8 NM_178525.2     |
| 85.4   | 84.7   | 84.4   | 93.5 XM_938846.1     |
| 96.3   | 98.9   | 94.3   | 95.8 NM_182546.1     |
| 1179.2 | 409.2  | 382.5  | 356 NM_001004307.1   |
| 149.7  | 148.1  | 139.7  | 142.1 NM_173680.2    |
| 87.4   | 89.8   | 82.1   | 93.9 NM_182539.1     |
| 266    | 231.5  | 237.7  | 250.1 NM_153706.2    |
| 108.2  | 99.3   | 95.5   | 97.7 NM_001029996.1  |
| 440.5  | 476.2  | 484    | 299.6 NM_001001794.1 |

|        |        |       |                     |
|--------|--------|-------|---------------------|
| 119.7  | 110.7  | 100.9 | 90.8 NM_175885.3    |
| 109.6  | 100.9  | 92.4  | 103.1 NM_145036.1   |
| 75.3   | 82.8   | 76.2  | 81.5 NM_152914.1    |
| 89.4   | 85.3   | 82    | 86.8 NM_173519.1    |
| 94.4   | 92.7   | 90.1  | 92.1 NM_152456.1    |
| 88.8   | 90.5   | 81.6  | 85.7 NM_173637.1    |
| 80.2   | 78.8   | 72.4  | 75.4 NM_173556.2    |
| 99.5   | 91.6   | 97.4  | 81.5 NM_173619.2    |
| 81     | 87.1   | 83.2  | 90.1 NM_203308.1    |
| 84.9   | 92.7   | 83.4  | 88.2 NM_173586.1    |
| 91.5   | 82     | 85.9  | 92.6 NM_173652.1    |
| 105.3  | 99     | 90.6  | 97.5 NM_152314.1    |
| 94.1   | 79     | 91.9  | 78.7 NM_152770.1    |
| 93.2   | 96     | 88.7  | 92 NM_152614.1      |
| 100.8  | 93.6   | 83.7  | 85 NM_178552.2      |
| 2140.5 | 1129.7 | 925.3 | 679.8 NM_152764.1   |
| 87.2   | 82.6   | 77.1  | 93.5 NM_152717.1    |
| 106.6  | 93.6   | 104.3 | 99.3 NM_175922.3    |
| 113.2  | 123.7  | 137.2 | 118.2 NM_147194.1   |
| 96.4   | 100.7  | 93.6  | 101 NM_203307.2     |
| 94.7   | 89.6   | 83    | 87.5 NM_153220.1    |
| 92.7   | 76.7   | 80.5  | 83.7 NM_152436.1    |
| 87.2   | 87.1   | 86.2  | 90.6 NM_152784.2    |
| 84.3   | 91.6   | 74.8  | 88.7 NM_203306.1    |
| 175.6  | 242.3  | 184.1 | 225.5 NM_152549.1   |
| 86.9   | 85.5   | 77.1  | 84.3 NM_152394.2    |
| 94.1   | 91.9   | 98.5  | 100.5 NM_174939.2   |
| 98.6   | 101.1  | 102.3 | 95.9 NM_152628.2    |
| 401.1  | 261.4  | 231.4 | 209.5 XM_936687.1   |
| 102.5  | 101.3  | 92.8  | 89.2 NM_194324.1    |
| 437    | 270.3  | 244   | 209.4 NM_194324.1   |
| 100.7  | 90.3   | 84    | 93.1 NM_182615.1    |
| 84.2   | 83.6   | 84.1  | 90.1 NM_152738.1    |
| 326.4  | 287.3  | 336   | 262.5 NM_152789.1   |
| 362.2  | 352.3  | 338.6 | 242.5 NM_152789.1   |
| 100.8  | 104.9  | 98    | 106.3 NM_152755.1   |
| 132.3  | 117.6  | 124.9 | 111.9 NM_152755.1   |
| 159.5  | 217    | 235.5 | 179.3 NM_152776.1   |
| 178.7  | 157.1  | 144.2 | 123.2 NM_030578.2   |
| 195.4  | 193.1  | 178.2 | 137 NM_024308.2     |
| 95.8   | 95.5   | 99    | 93.9 NM_203299.1    |
| 93.3   | 82.1   | 73.5  | 78.9 NM_203299.1    |
| 91.9   | 90.4   | 85.1  | 98.3 NM_152774.2    |
| 100    | 97.3   | 89.9  | 80.3 NM_153361.2    |
| 183.9  | 184.9  | 178.5 | 149.1 NM_152383.2   |
| 159.2  | 251.6  | 207.4 | 197.4 NM_207362.1   |
| 94.8   | 93.2   | 77.1  | 86.8 NM_032680.2    |
| 189.3  | 152.5  | 146.8 | 146.6 NM_031445.2   |
| 105.4  | 90.7   | 87.5  | 90.5 NM_032315.1    |
| 84.2   | 89.1   | 89.7  | 90.1 NM_001004344.1 |

|        |       |        |                      |
|--------|-------|--------|----------------------|
| 93.5   | 95.8  | 86.5   | 89 NM_178553.2       |
| 95.8   | 86    | 85.9   | 90.2 NM_152459.2     |
| 91.5   | 85.6  | 83.2   | 88.3 NM_153246.2     |
| 949.8  | 684.7 | 696.9  | 517.7 NM_133375.2    |
| 96.7   | 103.7 | 97.9   | 95.6 NM_178838.3     |
| 209.8  | 398.5 | 408.2  | 309.4 NM_173584.2    |
| 500.7  | 454.8 | 494.5  | 254.1 NM_032326.2    |
| 98.4   | 94.7  | 97.3   | 101.3 NM_174952.1    |
| 86.8   | 80.1  | 82.1   | 90.3 NM_033309.1     |
| 82.8   | 84.5  | 78.5   | 77.4 XM_939115.1     |
| 2909   | 2576  | 2549.9 | 1636 NM_052871.3     |
| 291    | 252.7 | 239.8  | 207.1 NM_198542.1    |
| 188.6  | 168   | 167.2  | 140.4 NM_024122.2    |
| 89.6   | 78.3  | 83.1   | 87.1 NM_203309.1     |
| 100.2  | 78.8  | 75.5   | 83.5 NM_207491.1     |
| 82     | 82.7  | 90.9   | 87.7 NM_178540.3     |
| 83.8   | 78.7  | 76.8   | 79 NM_214461.1       |
| 87     | 95.2  | 77     | 90.4 NM_173566.1     |
| 86.6   | 91.6  | 80.6   | 87.1 NM_173802.2     |
| 87.9   | 71.8  | 82.9   | 90 NM_173806.2       |
| 94.5   | 92.4  | 87.1   | 86.6 NM_203348.1     |
| 87.8   | 82.5  | 85.3   | 91.8 NM_198559.1     |
| 79.9   | 77.9  | 82.3   | 81.4 NM_178571.2     |
| 112.5  | 101.6 | 90.5   | 94.2 XM_934229.1     |
| 113.6  | 93.5  | 94.3   | 100.3 NM_194317.2    |
| 418.8  | 456.7 | 367.8  | 320.9 NM_001008215.1 |
| 308    | 271.2 | 231.6  | 207.3 NM_024033.1    |
| 100.8  | 101.1 | 95.8   | 111.7 NM_001042693.1 |
| 214.4  | 236   | 234.3  | 177.8 NM_024093.1    |
| 100.3  | 103   | 99.9   | 93.8 NM_001004351.2  |
| 85.3   | 82.3  | 76.4   | 83.6 NM_001004351.2  |
| 86.8   | 105.4 | 91.9   | 93.8 NM_199001.1     |
| 490.4  | 456.5 | 433.1  | 377.9 NM_182523.1    |
| 88.9   | 86.8  | 86.1   | 86.6 NM_001004354.1  |
| 104.9  | 96.6  | 90.3   | 107 NM_206894.1      |
| 1107.5 | 821.4 | 727.7  | 672.5 NM_145058.1    |
| 307.4  | 270   | 231.7  | 232 NM_001001795.1   |
| 90.7   | 81.6  | 80.5   | 93.9 NM_203477.1     |
| 123    | 115.7 | 125.4  | 115.3 NM_203302.2    |
| 86.4   | 103.9 | 91.7   | 95.9 NM_203481.1     |
| 99     | 93.4  | 92.4   | 95.6 NM_199285.2     |
| 1202.3 | 639.9 | 615.8  | 480.3 NM_001004333.1 |
| 107.3  | 107.1 | 97.9   | 93.8 NM_199136.1     |
| 115    | 108.7 | 128.9  | 103.7 NR_002822.1    |
| 88.6   | 88    | 85     | 85.7 NM_001004309.1  |
| 103.2  | 100.3 | 99.8   | 95.3 NM_001004306.1  |
| 92.2   | 86.7  | 82.4   | 94.6 NM_001004331.1  |
| 93.4   | 93    | 89.3   | 87.4 NM_001001683.1  |
| 88.2   | 81    | 81.7   | 80.6 NM_152689.2     |
| 755.9  | 579.3 | 537.5  | 422.5 NM_152705.1    |

|        |        |        |                     |
|--------|--------|--------|---------------------|
| 91.7   | 109.6  | 95.4   | 115 NM_001005209.1  |
| 862.9  | 1110.4 | 1130.6 | 827.5 NM_012215.1   |
| 88.7   | 133.1  | 124.8  | 123.7 NM_007283.5   |
| 91.1   | 96.1   | 97.5   | 91.5 NM_001003794.1 |
| 108.2  | 153.3  | 126.7  | 135.4 NM_007283.5   |
| 539.2  | 316.9  | 426.2  | 247.5 NM_002412.2   |
| 104.7  | 93.7   | 84.6   | 96 NM_000900.2      |
| 329.4  | 218.4  | 178.6  | 206.5 NM_015246.1   |
| 78.7   | 73.5   | 75.9   | 81.8 NM_145764.1    |
| 461.8  | 582.6  | 442.3  | 507.6 NM_020300.3   |
| 221    | 287.6  | 285    | 231.6 NM_145791.1   |
| 1713.3 | 2036.3 | 1484.2 | 1355.4 NM_145792.1  |
| 4094.2 | 2606.9 | 2000.3 | 1804.3 NM_002413.3  |
| 3979.4 | 2555.2 | 2739.4 | 1825.3 NM_004528.2  |
| 90.1   | 80.9   | 82.6   | 74.5 NM_006533.1    |
| 86.5   | 72.2   | 73.9   | 90.9 NM_054024.3    |
| 148    | 143.1  | 135    | 117.5 NM_198551.2   |
| 145.6  | 158    | 124.6  | 154.6 NM_020774.2   |
| 249.4  | 249.3  | 248.1  | 240.2 NM_080875.1   |
| 161.6  | 194    | 158.1  | 175.6 NM_080875.1   |
| 106.9  | 100.1  | 99.9   | 93.7 NM_000247.1    |
| 1103.5 | 948.5  | 933.4  | 864.6 NM_022765.2   |
| 87.5   | 85.1   | 80.1   | 94.9 NM_014632.2    |
| 109    | 127.4  | 116.8  | 137.3 NM_032867.1   |
| 144.9  | 130.5  | 125.3  | 126.9 NM_033386.2   |
| 112.4  | 109    | 102.2  | 113.7 NM_182924.1   |
| 110.3  | 104    | 115.7  | 107.9 NM_182924.1   |
| 300.5  | 285.6  | 241.5  | 160.3 NM_005931.2   |
| 143.5  | 153.5  | 172.5  | 136 NM_000381.1     |
| 89.4   | 85     | 76.6   | 91 NM_033290.1      |
| 93.8   | 98.9   | 87.2   | 88.1 NM_000381.1    |
| 347.4  | 329.4  | 395.9  | 274.2 NM_021242.3   |
| 106.3  | 100.2  | 99.2   | 84.8 NM_052817.1    |
| 106    | 107.6  | 109.5  | 93.2 NM_012216.2    |
| 102.2  | 126.7  | 118.1  | 113.3 NM_052817.1   |
| 392.9  | 358.8  | 321.2  | 241.2 NM_177401.4   |
| 93.2   | 85     | 93.8   | 92.6 NM_001077702.1 |
| 490    | 382.9  | 343.5  | 259.9 NM_020948.1   |
| 4865.3 | 3496.9 | 3963.4 | 2693.3 NM_002415.1  |
| 228.7  | 164.6  | 226.8  | 142.1 NM_020679.2   |
| 1253.9 | 1481.3 | 1176.9 | 939.8 NM_174889.2   |
| 127.2  | 106.5  | 123.6  | 111 NM_153182.1     |
| 97.6   | 95.8   | 86.5   | 80.2 NM_001042533.1 |
| 92.1   | 96.4   | 89.8   | 84.3 NM_153827.3    |
| 84.6   | 85.6   | 88.2   | 87.1 NM_015716.2    |
| 141    | 124.6  | 114.7  | 127.4 NM_004897.2   |
| 95.1   | 91.5   | 83.7   | 83.9 NM_017584.5    |
| 74.2   | 79.1   | 71.5   | 72.3 NM_012064.2    |
| 152.1  | 136.2  | 127.1  | 115.2 NM_005932.1   |
| 87.5   | 83.2   | 88.3   | 93 NM_138731.2      |

|        |        |        |        |                |
|--------|--------|--------|--------|----------------|
| 436.6  | 335.5  | 277.3  | 292.9  | NM_016641.3    |
| 367.2  | 260.4  | 260.4  | 216.5  | NM_024039.1    |
| 97.5   | 90.1   | 90.2   | 96.8   | NM_052964.1    |
| 100.5  | 112.9  | 114    | 121.6  | NM_198158.1    |
| 82.1   | 80.7   | 77.2   | 92.1   | NM_006722.1    |
| 146.5  | 107.1  | 124.4  | 110.8  | NM_198159.1    |
| 76.1   | 86.6   | 82.5   | 81.8   | NM_031944.1    |
| 103.7  | 107.6  | 100.1  | 83.7   | NM_015517.3    |
| 356.9  | 268.5  | 240.4  | 222.3  | NM_198971.1    |
| 314.3  | 202.2  | 231    | 171.1  | NM_015517.3    |
| 131.4  | 116.9  | 114.2  | 105.2  | NM_002417.2    |
| 1395.5 | 859.8  | 748.4  | 540.3  | NM_032390.3    |
| 188.7  | 179.6  | 200    | 157.4  | NM_170784.1    |
| 468.3  | 532    | 528.3  | 358.9  | NM_018848.2    |
| 74.1   | 73.9   | 81.2   | 83.4   | NM_018848.2    |
| 322.7  | 284.3  | 254.3  | 254.9  | NM_020831.3    |
| 111.7  | 105.6  | 101    | 117.6  | NM_014048.3    |
| 730.5  | 993    | 1034.8 | 687.6  | NM_013255.3    |
| 100.9  | 103.8  | 88.9   | 96     | NM_198973.1    |
| 667.7  | 654.5  | 581.8  | 614.8  | NM_003684.3    |
| 892.5  | 676.2  | 648.1  | 404.6  | NM_017572.2    |
| 171    | 172.1  | 160.1  | 150    | NM_199054.1    |
| 2480.3 | 2147.7 | 1975.6 | 1423.2 | NM_013446.2    |
| 975.4  | 955    | 764.2  | 785    | NM_014160.3    |
| 122.5  | 107.4  | 111.8  | 100.2  | NM_005664.2    |
| 103.7  | 124.2  | 107.7  | 98.2   | NM_017777.1    |
| 74.8   | 74.6   | 79.2   | 87.6   | NM_005511.1    |
| 148    | 148.5  | 131.4  | 130    | NM_015166.2    |
| 204.2  | 153.3  | 159    | 138.4  | NM_015166.2    |
| 231.5  | 213.6  | 180.6  | 173.5  | NM_139202.1    |
| 1145.6 | 934    | 1034.2 | 551.1  | NM_002475.2    |
| 81.6   | 79.7   | 74.7   | 83     | NM_182493.1    |
| 102.9  | 96.1   | 90.9   | 89.8   | NM_022443.2    |
| 106.2  | 114.7  | 110.2  | 120.6  | NM_024629.2    |
| 392.5  | 352    | 270.8  | 258    | NM_005439.1    |
| 472.5  | 422.1  | 374.6  | 280.5  | NM_000249.2    |
| 131    | 107.3  | 113.2  | 104.1  | NM_001040108.1 |
| 121    | 104.3  | 100.7  | 99.7   | NM_014381.1    |
| 366.3  | 279.2  | 241.3  | 205.1  | NM_152649.1    |
| 197.6  | 155.5  | 117.1  | 124.6  | NM_152649.1    |
| 108.7  | 128.6  | 109.6  | 104.7  | NM_005933.2    |
| 101.5  | 84.1   | 81.4   | 83.6   | NM_003482.1    |
| 98.9   | 123.2  | 113    | 116.5  | NM_021230.1    |
| 99.8   | 132.8  | 120.8  | 120.9  | NM_170606.2    |
| 107.6  | 102.6  | 87.6   | 102.5  | NM_170606.2    |
| 225.5  | 247    | 239.6  | 227.7  | NM_170606.2    |
| 235.7  | 231.1  | 194.8  | 189.6  | NM_014727.1    |
| 111.2  | 152.8  | 137.9  | 142.8  | NM_018682.2    |
| 106.5  | 110.8  | 118.1  | 114.2  | NM_182931.2    |
| 215.1  | 291.8  | 375.9  | 257.6  | NM_182931.2    |

|       |       |       |                     |
|-------|-------|-------|---------------------|
| 104.7 | 87.4  | 92.2  | 84.6 NM_005934.2    |
| 85.9  | 70.5  | 80.8  | 71.3 NM_004641.2    |
| 371.2 | 427.9 | 416.7 | 351.2 NM_004641.2   |
| 119.9 | 120.3 | 122.1 | 122.9 NM_006818.3   |
| 86.6  | 86.1  | 77.7  | 81.1 NM_004529.1    |
| 474.6 | 445.1 | 474.1 | 247.7 NM_005937.2   |
| 131.1 | 157.8 | 167.7 | 133.6 NM_005938.1   |
| 86.5  | 82    | 69.8  | 84.9 NM_002418.2    |
| 96.1  | 92.3  | 86.7  | 83.6 NM_002418.1    |
| 104.7 | 98.3  | 94.8  | 94 NM_001507.1      |
| 95.7  | 103.3 | 90.3  | 98 NM_024101.4      |
| 270.7 | 237.8 | 216.7 | 192.8 NM_018099.3   |
| 553.7 | 681.5 | 529.9 | 544.2 NM_032228.4   |
| 104.6 | 89.3  | 91    | 107.7 NM_198205.1   |
| 225.2 | 228.8 | 207.4 | 179.9 NM_198204.1   |
| 96.8  | 97.4  | 94.3  | 97.4 NM_014938.2    |
| 103.7 | 99.6  | 105.8 | 96.5 NM_032953.2    |
| 128.9 | 131.7 | 125.5 | 100.2 NM_012213.1   |
| 94.7  | 94    | 86.9  | 87.7 NM_031415.1    |
| 97.2  | 83.8  | 75.9  | 85.1 NM_172250.1    |
| 151.6 | 183.1 | 202.7 | 195.3 NM_052845.2   |
| 328.1 | 254.1 | 229.8 | 185.4 NM_015506.1   |
| 795.3 | 630.4 | 504.3 | 427.6 NM_012329.2   |
| 83.7  | 78.1  | 80    | 88.4 NM_198403.2    |
| 99.1  | 83.8  | 89.1  | 94.1 NM_000902.2    |
| 91.7  | 78    | 77.1  | 79 NM_007289.1      |
| 76.8  | 78.3  | 81.4  | 79.9 NM_007288.1    |
| 82.1  | 78    | 81.1  | 80.1 NM_007287.1    |
| 82.4  | 84.6  | 85.3  | 77.7 NM_033467.2    |
| 96.1  | 87.8  | 87.4  | 81 NM_002421.2      |
| 82.4  | 83.2  | 83.3  | 94.8 NM_002425.1    |
| 112.6 | 103.4 | 95.9  | 110.4 NM_005940.3   |
| 79.7  | 89.3  | 79.1  | 82 NM_002426.2      |
| 88.1  | 90.3  | 82.2  | 85.5 NM_002427.2    |
| 100.5 | 90.8  | 93.9  | 100.9 NM_004995.2   |
| 112   | 127   | 125.2 | 107.2 NM_002428.2   |
| 83.7  | 91.3  | 67.4  | 80 NM_022564.1      |
| 79.1  | 75.7  | 86.6  | 84.4 NM_022564.1    |
| 94.2  | 93.3  | 77.8  | 85.8 NM_005941.2    |
| 97.9  | 92.8  | 90.5  | 86.3 NM_016155.3    |
| 96.2  | 97.6  | 87.2  | 95.2 XM_938761.1    |
| 91.8  | 90.7  | 87.8  | 83.4 NM_001032360.1 |
| 110.9 | 117.6 | 98.8  | 105 NM_004530.2     |
| 95.4  | 91.1  | 84.6  | 83.4 NM_004771.3    |
| 82.5  | 83.2  | 78.2  | 86.7 NM_147191.1    |
| 82    | 78.6  | 77.2  | 83.8 NR_002946.1    |
| 117.3 | 122.1 | 131.7 | 100.4 NM_006983.1   |
| 94.5  | 87.1  | 84.5  | 88.4 NM_006690.3    |
| 91.8  | 85.1  | 91.2  | 96 NM_022468.4      |
| 148.4 | 121   | 137.6 | 103.8 NM_022718.2   |



|       |       |       |                      |
|-------|-------|-------|----------------------|
| 87.3  | 85.7  | 81.7  | 88.4 NM_021801.3     |
| 98.2  | 89.4  | 88.1  | 90.1 NM_022122.2     |
| 98.5  | 82.6  | 84    | 86.1 NM_024302.3     |
| 91.4  | 89.3  | 81.5  | 82.8 NM_001032278.1  |
| 107   | 90.7  | 95.3  | 86.5 NM_002422.3     |
| 83.7  | 88    | 72.2  | 79.2 NM_002423.3     |
| 81    | 72.6  | 72.5  | 83.4 NM_002424.1     |
| 126.4 | 378.7 | 330.4 | 264.8 NM_004994.2    |
| 96.3  | 82.5  | 87.7  | 90.4 NM_007351.2     |
| 88.8  | 86.6  | 85.1  | 75.5 NM_024756.1     |
| 764   | 624.7 | 652.9 | 428.1 NM_022362.2    |
| 92.2  | 84.8  | 89.1  | 90.8 NM_002430.2     |
| 152.7 | 129.8 | 117.9 | 126.8 NM_018835.1    |
| 126   | 119.1 | 138.9 | 134.8 NM_002431.2    |
| 505.4 | 274.7 | 304   | 238.1 NM_032117.2    |
| 744.3 | 804   | 578.4 | 570.2 NM_002432.1    |
| 203   | 210.7 | 180.9 | 191.5 NM_018365.1    |
| 213.3 | 247.4 | 243.4 | 192.4 NM_020310.2    |
| 254.5 | 310.8 | 242.6 | 324.4 NM_022151.4    |
| 96.9  | 99.4  | 94.7  | 87.5 NM_018221.1     |
| 90.8  | 91.7  | 85.9  | 94.3 NM_173468.2     |
| 335.9 | 305.2 | 281.3 | 177.8 NM_130807.2    |
| 83.5  | 74.1  | 67.5  | 79.9 NM_024761.3     |
| 97.1  | 95.6  | 87.2  | 88.5 NM_201403.1     |
| 247.9 | 301.6 | 376.8 | 205.5 NM_201403.1    |
| 94.9  | 76.3  | 86.7  | 87.8 NM_145279.3     |
| 85.4  | 80.3  | 80.1  | 80.8 NM_006501.1     |
| 82.7  | 78.8  | 80    | 82.4 NM_182935.2     |
| 88.9  | 82.2  | 79    | 95.5 NM_182935.2     |
| 91.8  | 92.6  | 85.2  | 91.6 NM_182935.2     |
| 175.6 | 171.1 | 155.4 | 138.5 NM_017947.1    |
| 159.5 | 172.9 | 140.9 | 123.2 NM_001075098.1 |
| 109.3 | 85.9  | 87.3  | 85 NM_138928.1       |
| 221.5 | 110.1 | 107.8 | 99.2 NM_001075098.1  |
| 90.4  | 87    | 82.1  | 86.9 NM_004531.3     |
| 97.6  | 104.9 | 83.9  | 95.2 NM_176806.2     |
| 285.2 | 337   | 257.5 | 256.8 NM_176806.2    |
| 122.9 | 110.4 | 110.2 | 98.2 NM_014484.3     |
| 83.1  | 91    | 79    | 79.9 NM_002433.3     |
| 100.5 | 102.6 | 100.2 | 98.2 NM_058165.1     |
| 93.3  | 96.1  | 88.1  | 92.9 NM_025098.2     |
| 94.1  | 94.1  | 81.2  | 95.5 NM_178176.2     |
| 122.2 | 84.7  | 104.1 | 106 NM_032355.2      |
| 252.9 | 213.1 | 209   | 190.3 NM_014940.2    |
| 317.2 | 417   | 409.9 | 375.8 NM_015026.1    |
| 98.1  | 92.3  | 87.2  | 100.5 NM_014429.2    |
| 406.9 | 395.9 | 347   | 366.9 NM_014941.1    |
| 201.2 | 186.4 | 156.4 | 201.5 NM_015358.1    |
| 109.1 | 104.1 | 95    | 99 NM_024657.2       |
| 87.9  | 91.1  | 82.4  | 92.4 NM_006792.2     |

|        |        |       |                      |
|--------|--------|-------|----------------------|
| 1486.6 | 1350.5 | 945.8 | 1204 NM_006791.2     |
| 94.1   | 88.3   | 88.4  | 84.2 NM_206839.1     |
| 158.3  | 142.7  | 170.8 | 124.6 NM_032332.2    |
| 87.7   | 80.3   | 82.6  | 86.8 NM_024848.1     |
| 89.7   | 91     | 87    | 87.9 NM_173855.3     |
| 86.4   | 85     | 71.9  | 81.3 NM_005372.1     |
| 467.6  | 1208.8 | 852.6 | 772 NM_022746.2      |
| 112.2  | 160    | 151.8 | 143.2 NM_017898.3    |
| 104.1  | 103.7  | 117.6 | 98.8 NM_152581.1     |
| 309    | 287.4  | 218   | 215 NM_023948.3      |
| 219.9  | 198.2  | 220.2 | 170.8 NM_023948.3    |
| 250.9  | 197.7  | 188.9 | 181.1 NM_020963.1    |
| 97.8   | 98.6   | 91    | 89.8 NM_018995.1     |
| 150.2  | 174.2  | 199   | 169.5 NM_015529.1    |
| 129.3  | 129.2  | 122.5 | 114.8 NM_001031699.1 |
| 174.9  | 156.3  | 133   | 119.5 NM_004870.2    |
| 98.2   | 95.4   | 79.5  | 88.3 NM_003829.1     |
| 94.9   | 104.5  | 103.6 | 86.3 NM_001025190.1  |
| 99.3   | 92.4   | 94.8  | 93.2 NM_001015054.1  |
| 99.8   | 94.7   | 92.8  | 94.7 NM_001015052.1  |
| 98.8   | 100.1  | 97.3  | 108.6 NM_002434.2    |
| 1069.7 | 662    | 584.3 | 471.6 NM_016195.2    |
| 93.6   | 84.7   | 77.5  | 98.1 NM_005791.1     |
| 161    | 130.4  | 125.7 | 127.7 NM_005792.1    |
| 111.8  | 123.4  | 120.8 | 119.3 NM_002435.1    |
| 90.8   | 86.7   | 83.6  | 96.6 NM_005373.1     |
| 95.2   | 97.7   | 81.4  | 92.1 NM_183062.2     |
| 124    | 124.2  | 123.4 | 111.8 NM_032868.2    |
| 152.1  | 192.7  | 197.1 | 161.4 NM_000250.1    |
| 351.6  | 379.1  | 339.5 | 332.1 NM_002436.2    |
| 113.7  | 104.7  | 102.4 | 98.6 NM_005374.3     |
| 129.1  | 144.6  | 140   | 133.3 NM_001932.2    |
| 85.3   | 72.6   | 72.5  | 80.7 NM_033066.1     |
| 187.8  | 231.1  | 199.7 | 194.7 NM_022474.2    |
| 303.4  | 188.7  | 154.2 | 144.3 NM_016447.2    |
| 80.5   | 89.5   | 82.3  | 86.8 NM_173496.2     |
| 1139.8 | 986.9  | 988   | 717.1 NM_023075.3    |
| 91.5   | 87.6   | 83.3  | 91.9 NM_001585.2     |
| 83.1   | 85.9   | 70.3  | 84.6 NM_001584.1     |
| 99.9   | 104    | 109   | 99.8 NM_001013440.1  |
| 298.9  | 292.3  | 269.5 | 248.8 NM_001013436.1 |
| 104.6  | 101.3  | 113.1 | 104.2 NM_001013436.1 |
| 613.7  | 490.1  | 415.5 | 348.2 NM_002437.3    |
| 93.6   | 89.7   | 94.4  | 85.4 NM_000530.3     |
| 85.1   | 87.6   | 77.2  | 84.7 NM_003953.4     |
| 148    | 167.1  | 151.9 | 142.9 NM_024569.3    |
| 465.7  | 367.7  | 332.9 | 246.8 NM_001531.1    |
| 78.8   | 78.8   | 76.9  | 81.7 NM_206898.1     |
| 97.8   | 94.1   | 91.4  | 99 NM_178817.3       |
| 164.7  | 131    | 100.4 | 121.3 NM_012219.2    |

|         |         |        |                     |
|---------|---------|--------|---------------------|
| 86.5    | 75.7    | 74.7   | 84.5 NM_002438.1    |
| 91.3    | 77.1    | 80.4   | 81.9 NM_001009567.1 |
| 139.7   | 163.9   | 145.9  | 114.3 NM_006039.2   |
| 16452.9 | 10801.6 | 9182.6 | 12416.2 NM_006471.2 |
| 117.8   | 107.6   | 98.5   | 106.6 NM_005590.3   |
| 167.4   | 169     | 140.6  | 132.6 NM_005590.3   |
| 255.7   | 221.3   | 209.7  | 225.2 NM_005591.3   |
| 2818.5  | 2412.7  | 1946.5 | 1823.6 NM_033296.1  |
| 1646.7  | 1595.1  | 1517.2 | 1015.8 NM_152301.3  |
| 161.7   | 138.9   | 152.6  | 129.9 NM_203462.1   |
| 107.5   | 93.6    | 103.9  | 103.2 NM_152301.3   |
| 87.1    | 87.6    | 85.8   | 97.5 NM_198923.2    |
| 107.1   | 98.6    | 100.8  | 90.7 NM_001039165.1 |
| 102.2   | 98.5    | 104.6  | 97.5 NM_145015.2    |
| 83.9    | 83.3    | 72.9   | 84.1 NM_147199.2    |
| 79.8    | 90      | 93.7   | 83.2 NM_054030.2    |
| 103.7   | 97.5    | 88.5   | 93.4 NM_054031.2    |
| 95.1    | 86.2    | 85.7   | 93.6 NM_054032.2    |
| 97      | 105.5   | 106.9  | 90.7 NM_201274.2    |
| 280.9   | 381.7   | 307.8  | 264.4 NM_201274.2   |
| 5760.1  | 4755.7  | 3818.6 | 3074.7 NM_033546.2  |
| 100.3   | 83.2    | 80.3   | 93.3 NM_024864.3    |
| 72.3    | 81.3    | 85.4   | 87.4 NM_031939.2    |
| 211.6   | 230.7   | 245.1  | 182.7 NM_024026.4   |
| 236.7   | 220.1   | 174.9  | 178.8 NM_020236.2   |
| 153.4   | 124.7   | 129.8  | 120.2 NM_145255.2   |
| 96.8    | 99.8    | 90.2   | 91.1 NM_145255.2    |
| 644.5   | 519.5   | 509.4  | 295.4 NM_016050.2   |
| 92.9    | 96.1    | 92.6   | 91.9 NM_170739.1    |
| 2079.2  | 1356    | 1259.4 | 1060.1 NM_016050.2  |
| 1204.2  | 981.9   | 823.5  | 859.7 NM_002949.2   |
| 877.7   | 664.3   | 474.5  | 471.1 NM_014078.4   |
| 2200.1  | 1641.8  | 1540.1 | 1138.5 NM_032111.2  |
| 1061.3  | 673.5   | 444.8  | 529.6 NM_014175.2   |
| 149.6   | 162.6   | 160.1  | 169.9 NM_017840.2   |
| 919.8   | 649.5   | 538.9  | 345.2 NM_022061.2   |
| 2455.4  | 2106.3  | 2676.8 | 2722.6 NM_014161.2  |
| 120.9   | 104.5   | 111    | 98.8 NM_014763.2    |
| 427.8   | 397.8   | 289.6  | 280.8 NM_015950.3   |
| 626.6   | 589.6   | 586.4  | 327.2 NM_017971.2   |
| 1048.1  | 819.5   | 796.4  | 579.2 NM_181514.1   |
| 1465.4  | 1104.7  | 920.9  | 1059.7 NM_181513.1  |
| 1114    | 816.7   | 737.9  | 563.3 NM_014180.2   |
| 2038.7  | 1600.4  | 1544.8 | 1096 NM_001014990.1 |
| 3200.8  | 2188    | 2142.6 | 1620.2 NM_021134.2  |
| 424.1   | 266.8   | 277    | 229.8 NM_024540.2   |
| 2247.7  | 1826.1  | 1537.1 | 1106.7 NM_024540.2  |
| 662.7   | 653.2   | 639.8  | 474 NM_016504.2     |
| 81      | 91      | 85.5   | 88.3 NM_148570.1    |
| 125.4   | 128.8   | 111.1  | 117 NM_148571.1     |

|        |        |        |        |             |
|--------|--------|--------|--------|-------------|
| 223.8  | 183.2  | 159.3  | 134.9  | NM_006428.3 |
| 116.4  | 102.9  | 99.6   | 104.3  | NM_007208.2 |
| 107.9  | 112.7  | 99.9   | 102.1  | NM_145212.1 |
| 288.9  | 244.3  | 204.5  | 223.7  | NM_145213.1 |
| 557.7  | 416.2  | 324.9  | 335.9  | NM_031903.1 |
| 1622.6 | 1230.2 | 945.2  | 1097   | NM_004891.2 |
| 5665.1 | 4989.6 | 3860.7 | 3688.8 | NM_004891.2 |
| 573    | 474.2  | 411    | 324.1  | NM_023937.2 |
| 2273.8 | 1641.8 | 1178.7 | 889.6  | NM_145644.1 |
| 276.1  | 257.8  | 243    | 185.3  | NM_145644.1 |
| 263.7  | 203.4  | 160.5  | 190.5  | NM_016622.2 |
| 1658   | 1332.7 | 1093   | 785.1  | NM_032479.2 |
| 4858.5 | 3879.7 | 4055.7 | 2065.3 | NM_016491.2 |
| 218    | 190.2  | 188.1  | 188.3  | NM_032478.2 |
| 104.5  | 101.8  | 102.3  | 107.3  | NM_080794.2 |
| 1116.9 | 834.3  | 727.6  | 665.5  | NM_017446.2 |
| 92.2   | 86.7   | 91.4   | 85.9   | NM_146388.1 |
| 192.5  | 133.5  | 123.5  | 113.7  | NM_146387.1 |
| 203.8  | 151.4  | 123.4  | 129.6  | NM_015956.2 |
| 744.6  | 689.3  | 566.1  | 575.3  | NM_003776.2 |
| 1460.8 | 1112.3 | 999.5  | 751.6  | NM_032477.1 |
| 191.7  | 186.9  | 135.7  | 154.1  | NM_172177.1 |
| 94     | 93.6   | 98     | 101.4  | NR_002208.1 |
| 703.7  | 526.5  | 410.4  | 416.5  | NM_032112.2 |
| 110    | 99.3   | 103.8  | 94.7   | NM_176792.1 |
| 261.2  | 156    | 148.8  | 144.2  | NM_032112.2 |
| 94.3   | 97.7   | 87.1   | 88     | NM_022915.2 |
| 691    | 482.2  | 455.9  | 390.7  | NM_032351.3 |
| 525.4  | 379.6  | 379.3  | 350    | NM_032351.3 |
| 828.3  | 735.8  | 677    | 550.5  | NM_022163.2 |
| 194.6  | 115.8  | 118.1  | 146.5  | NM_020409.2 |
| 298.6  | 207.3  | 178.1  | 175.5  | NM_177988.1 |
| 321.8  | 256.7  | 207.8  | 227.6  | NM_016055.4 |
| 354    | 212    | 200.6  | 160.5  | NM_004927.2 |
| 878.5  | 508.1  | 388.8  | 424.1  | NM_019051.1 |
| 1614.9 | 1201.6 | 1116.9 | 744.5  | NM_016497.2 |
| 704    | 400.7  | 372.8  | 252.6  | NM_180981.1 |
| 406.8  | 230.9  | 240.8  | 182.5  | NM_181306.1 |
| 481.1  | 352.5  | 332.5  | 240.1  | NM_053050.2 |
| 905.5  | 547.3  | 535.1  | 443.6  | NM_172251.1 |
| 899.1  | 505.6  | 572.8  | 448.9  | NM_181462.1 |
| 723    | 562.7  | 551.5  | 404.9  | NM_181464.1 |
| 1066.9 | 715.7  | 664.4  | 612.8  | NM_181463.1 |
| 474.3  | 385.6  | 384.2  | 323.7  | NM_031420.2 |
| 3095   | 2184.1 | 2379.4 | 1449.2 | NM_018141.2 |
| 1166.4 | 1146.6 | 1115.6 | 748.3  | NM_176805.1 |
| 538.7  | 543.9  | 581    | 373.1  | NM_176805.1 |
| 1403.9 | 909.1  | 848.8  | 470.8  | NM_033363.1 |
| 87.2   | 80     | 82.5   | 85.1   | NM_033362.2 |
| 631.5  | 374    | 282.5  | 279.2  | NM_033363.1 |

|        |        |        |                      |
|--------|--------|--------|----------------------|
| 190    | 116.5  | 109.9  | 106.5 NM_021107.1    |
| 147.1  | 133.7  | 115.6  | 115 NM_022100.1      |
| 1350.9 | 1057.8 | 1049.8 | 916.3 NM_031280.2    |
| 438.2  | 367.4  | 382.1  | 250.2 NM_016065.3    |
| 854.3  | 622.8  | 577.8  | 428.5 NM_015969.2    |
| 317.9  | 303.5  | 341.1  | 163.6 NM_018135.2    |
| 477.9  | 363.7  | 315.2  | 275.3 NM_014046.2    |
| 86.4   | 85.2   | 83.9   | 88.6 NM_016067.1     |
| 575.5  | 362.9  | 294.5  | 254.6 NM_016034.2    |
| 1896.5 | 1336.4 | 1408.4 | 1220 NM_031901.3     |
| 793.4  | 563.9  | 576.6  | 410.8 NM_018997.1    |
| 2335   | 1993.5 | 1700.2 | 1376.9 NM_020191.2   |
| 337.9  | 281.5  | 242.8  | 229.7 NM_016070.2    |
| 2610.3 | 1972.4 | 1729.4 | 1523.1 NM_032014.1   |
| 346    | 212.8  | 232.4  | 167.5 NM_030811.3    |
| 1056.2 | 720.8  | 565    | 604.9 NM_015084.1    |
| 642    | 359.9  | 362.1  | 321.7 NM_014018.2    |
| 1892.2 | 1285.3 | 1131   | 982 NM_016640.3      |
| 761.1  | 764.2  | 755.8  | 584 NM_005830.2      |
| 1719.8 | 1424.2 | 1094.9 | 1198.6 NM_016071.2   |
| 143.7  | 142.2  | 144    | 134 NM_016071.2      |
| 284.2  | 212.9  | 195.5  | 167.7 NM_023936.1    |
| 488.3  | 327    | 259.9  | 267 NM_021821.2      |
| 176.2  | 147    | 146.1  | 145.9 NM_033281.5    |
| 603.6  | 614.4  | 520.1  | 526.7 NM_031902.3    |
| 3488.8 | 4067.7 | 3682.9 | 2721.6 NM_032476.2   |
| 538.4  | 613.3  | 537.2  | 362 NM_015971.2      |
| 1213.9 | 868.7  | 794.8  | 626.5 NM_182640.1    |
| 496.6  | 377.8  | 315.9  | 261.3 NM_138777.2    |
| 922.5  | 500.1  | 472.7  | 334.8 NM_138777.2    |
| 120.3  | 102    | 94.3   | 104.2 NM_138777.2    |
| 164.4  | 162.3  | 138.3  | 147 NM_020662.1      |
| 70.5   | 75.4   | 86     | 88.4 NM_130385.1     |
| 107.5  | 116.9  | 112.7  | 106.6 NM_130385.1    |
| 104.8  | 95.5   | 92.1   | 89.2 NM_021950.3     |
| 86.4   | 77.4   | 81.7   | 82.6 NM_152866.2     |
| 69.1   | 71.8   | 75.2   | 81.2 NM_152866.2     |
| 87.4   | 82.2   | 76.9   | 85.6 NM_206893.1     |
| 86.9   | 83.3   | 87.2   | 91.1 NM_017716.1     |
| 92.5   | 89.3   | 75.5   | 89.2 NM_001012417.1  |
| 88     | 94.5   | 93.3   | 93.1 NM_000139.2     |
| 604    | 2244.3 | 1717   | 1396.5 NM_006138.4   |
| 94.3   | 120.7  | 120.2  | 106.8 NM_001031666.1 |
| 1721.3 | 4749   | 4395.3 | 3986.2 NM_006138.4   |
| 86.2   | 75.2   | 88.9   | 92.8 NM_148975.1     |
| 80     | 92.2   | 90.8   | 83.9 NM_024021.2     |
| 118.8  | 120    | 113.7  | 121.2 NM_148975.1    |
| 93.7   | 85.7   | 82.5   | 76.4 NM_023945.2     |
| 1766.6 | 5309.4 | 3812   | 3895.4 NM_152851.1   |
| 731.8  | 1897.7 | 1592.3 | 1538.1 NM_152851.1   |

|         |         |         |         |                |
|---------|---------|---------|---------|----------------|
| 486.5   | 1301.1  | 1152.1  | 731.6   | NM_022349.2    |
| 83.5    | 86.7    | 76.7    | 85.1    | NM_139249.2    |
| 1516.4  | 2613.2  | 2202.4  | 2020.7  | NM_206938.1    |
| 90.1    | 84.8    | 73.4    | 86.8    | NM_031457.1    |
| 929.7   | 333     | 329.2   | 371.9   | NM_005098.2    |
| 96.6    | 90      | 93.1    | 98.2    | NM_000251.1    |
| 10612.7 | 12064.4 | 16889.4 | 12978.5 | NM_002439.2    |
| 98.4    | 97.2    | 95.5    | 85      | NM_002440.2    |
| 124.7   | 133.1   | 166.3   | 119.9   | NM_002441.2    |
| 248.9   | 258.9   | 267.5   | 221.4   | NM_172166.2    |
| 285     | 272.1   | 282.5   | 232.2   | NM_002441.2    |
| 118.6   | 105.6   | 107.4   | 103.7   | NM_025259.3    |
| 218.3   | 213.6   | 245     | 221.2   | XM_936150.1    |
| 1748.2  | 1813.6  | 1563.2  | 1394.4  | NM_000179.1    |
| 101.1   | 101.7   | 90.1    | 109.5   | NM_002442.2    |
| 93.6    | 78.1    | 85.3    | 87.7    | NM_138962.2    |
| 132     | 105.3   | 106.2   | 105.5   | NM_138962.2    |
| 163.1   | 167.6   | 147.2   | 118.5   | NM_170721.1    |
| 101.7   | 86.4    | 86.1    | 89      | NM_018133.2    |
| 289.9   | 364.5   | 322.3   | 350.8   | NM_078630.1    |
| 81.4    | 83.2    | 88.9    | 78.2    | NM_006800.2    |
| 147.9   | 180.2   | 142     | 130.9   | NM_078630.1    |
| 186.5   | 192.6   | 188.4   | 144.8   | NM_078628.1    |
| 107.6   | 93      | 84.6    | 97.1    | NM_013404.3    |
| 92.9    | 89.7    | 85.7    | 91.2    | NM_002443.2    |
| 84      | 80.1    | 81.7    | 88.9    | NM_138634.1    |
| 100     | 88.4    | 92.3    | 90.5    | NM_002443.2    |
| 3696.2  | 6353.6  | 4925.4  | 4930.8  | NM_002444.2    |
| 84.9    | 75.9    | 72.3    | 84.9    | NM_138716.2    |
| 82.4    | 81.6    | 84.9    | 88.8    | NM_002445.2    |
| 86.5    | 82.2    | 89.1    | 87.3    | NM_138715.1    |
| 1188.1  | 588.1   | 547.1   | 342.7   | NM_012331.2    |
| 2202    | 1428.7  | 1636    | 666.1   | NM_012228.2    |
| 93.1    | 138.3   | 117.7   | 117.3   | NM_198080.2    |
| 104     | 173.5   | 152.9   | 155.7   | NM_198080.2    |
| 91.5    | 88.8    | 83.8    | 91.8    | NM_001031679.1 |
| 163.6   | 127.5   | 135.6   | 134.4   | NM_032947.3    |
| 80.7    | 81.3    | 82.5    | 78.3    | NM_002447.1    |
| 549.3   | 408.8   | 361.2   | 340.8   | NM_001042453.1 |
| 92.7    | 96.1    | 92.4    | 88.9    | NR_002729.1    |
| 567     | 283.5   | 279.5   | 235.6   | NM_002448.1    |
| 96.6    | 95.4    | 84.3    | 86.9    | NM_002449.3    |
| 104.3   | 91.2    | 82.9    | 98      | NR_002307.1    |
| 353.6   | 246     | 203.9   | 183.9   | NM_173467.3    |
| 90.1    | 87.5    | 94.1    | 81.5    | NM_173467.3    |
| 2170.4  | 745.4   | 823.4   | 571.1   | NM_005946.2    |
| 106.6   | 96.1    | 91.5    | 94.1    | NM_005947.1    |
| 1940.1  | 642     | 690.4   | 413.7   | NM_175617.3    |
| 4313.1  | 1522.4  | 1567    | 949.2   | NM_005949.1    |
| 811.8   | 182.7   | 162.8   | 139.7   | NM_005950.1    |

|        |        |        |                       |
|--------|--------|--------|-----------------------|
| 227.9  | 111.8  | 108.9  | 104.4 NM_005951.2     |
| 87.2   | 75.3   | 86     | 83.5 NM_176870.1      |
| 81.3   | 85.7   | 76     | 77.3 NM_001039954.2   |
| 2230.9 | 625.6  | 613.1  | 412.5 NM_005952.2     |
| 669.5  | 355.4  | 359.1  | 295.2 NM_005953.2     |
| 101.9  | 94.5   | 95.5   | 100.1 NM_005954.2     |
| 82.2   | 75.4   | 77.2   | 84.6 NM_032935.1      |
| 512.3  | 460.4  | 407.9  | 404.6 NM_004689.2     |
| 671    | 483    | 377.9  | 360.3 NM_004739.2     |
| 212.6  | 164.4  | 156.3  | 136.8 NM_020744.2     |
| 79.8   | 79.5   | 73.6   | 75.6 NM_152332.2      |
| 105.3  | 99     | 99.5   | 93.2 NM_002451.3      |
| 227.8  | 156    | 166.8  | 151.9 NM_022045.2     |
| 7108.6 | 6071.4 | 5514.5 | 4633.1 NM_014341.1    |
| 103.7  | 104.8  | 98.4   | 93.9 NM_014342.2      |
| 517.8  | 581.6  | 479.6  | 535 NM_001018025.2    |
| 840.6  | 630.5  | 403.2  | 531.5 NM_178812.2     |
| 304.3  | 134    | 144.7  | 132.2 NM_175621.2     |
| 88     | 84.4   | 90.8   | 84.1 NM_006980.3      |
| 1084.1 | 543.9  | 492.4  | 393.2 NM_015942.3     |
| 98.1   | 108.1  | 102.6  | 97.3 NM_182501.2      |
| 94     | 91.6   | 89     | 98.4 NM_025198.3      |
| 107.5  | 98.6   | 91.4   | 91.4 NM_025198.3      |
| 316.4  | 436.7  | 354.9  | 456.4 NM_005955.1     |
| 213    | 242.3  | 191    | 245 NM_007358.1       |
| 93.8   | 84.2   | 89.7   | 88.3 NM_139242.2      |
| 722.4  | 478    | 376.7  | 538.3 NM_014637.2     |
| 137.3  | 124.8  | 118.6  | 104.7 NM_138384.1     |
| 237.4  | 207.3  | 187.6  | 148.2 NM_005956.2     |
| 933.9  | 625.3  | 592.8  | 419.7 NM_015440.3     |
| 803.4  | 514.1  | 608.5  | 290.9 NM_006636.2     |
| 78.9   | 83.3   | 78.8   | 81 NM_001040409.1     |
| 2923.6 | 2373   | 1800.3 | 1740.8 NM_001040409.1 |
| 271.8  | 216.2  | 231.3  | 195.6 NM_001004346.2  |
| 131.5  | 182.5  | 182.5  | 178 NM_005957.2       |
| 417.1  | 467.5  | 412.7  | 403 NM_006441.1       |
| 998.1  | 1080   | 884.6  | 840.1 NM_002453.2     |
| 92.4   | 90     | 84.3   | 82.2 NM_001005369.1   |
| 330.9  | 395.9  | 295.4  | 313.3 NM_152912.3     |
| 271.9  | 228.2  | 270.9  | 164 NM_001039656.1    |
| 107    | 101    | 114.3  | 103 NM_004923.2       |
| 384    | 345.3  | 272.7  | 292.4 NM_000252.1     |
| 87.5   | 83.3   | 82     | 93.4 NM_003828.1      |
| 496.5  | 237.5  | 205.6  | 179.2 NM_181873.1     |
| 175.5  | 174.1  | 136.6  | 136.7 NM_019061.2     |
| 224.4  | 206.9  | 226.3  | 191 NM_001077525.1    |
| 268.5  | 282.2  | 274.2  | 252.4 NM_014967.3     |
| 87.2   | 98     | 84.1   | 90 NM_016156.3        |
| 170.8  | 180.7  | 164.4  | 116.9 NM_201281.1     |
| 454.3  | 625.4  | 541.1  | 631.3 NM_153050.1     |

|        |        |        |                      |
|--------|--------|--------|----------------------|
| 79.5   | 92.4   | 83.9   | 93.5 NM_021090.2     |
| 114.7  | 121.2  | 117    | 124.5 NM_153050.1    |
| 376.7  | 317    | 290    | 289.7 NM_004687.3    |
| 337.3  | 252.4  | 230.9  | 210.9 NM_004685.2    |
| 93.6   | 89.9   | 74.9   | 84 NM_004686.2       |
| 96.3   | 93.9   | 88.1   | 97.8 NM_017677.2     |
| 578.7  | 493    | 458.6  | 305.2 NM_015458.3    |
| 99.2   | 76.5   | 87.5   | 87.1 NM_005958.3     |
| 84.5   | 84.3   | 83.7   | 85.3 NM_005959.3     |
| 97.3   | 100.6  | 92.4   | 94.7 NM_133645.1     |
| 1792.8 | 1429.8 | 1115.5 | 1045.4 NM_012123.2   |
| 191.7  | 157.1  | 135.7  | 134.6 NM_001003704.1 |
| 129.1  | 130.8  | 115.7  | 111.6 NM_016498.3    |
| 746.9  | 456.4  | 409    | 252.5 NM_016498.3    |
| 3954.7 | 3010.3 | 2946.9 | 2421.5 NM_145808.1   |
| 168.2  | 151.4  | 190    | 171.7 NM_000254.1    |
| 139.2  | 110.6  | 124.2  | 132.5 NM_004294.2    |
| 518.2  | 512.2  | 432.1  | 345.5 NM_019041.3    |
| 89.6   | 83.9   | 75.1   | 88.1 NM_024010.1     |
| 144.4  | 120.3  | 113    | 110.7 NM_002454.1    |
| 1120.4 | 850.2  | 745.1  | 609.1 NM_002454.1    |
| 124.5  | 109.5  | 110.5  | 113.2 NM_014751.2    |
| 87.7   | 86.3   | 81.8   | 87.4 NM_000253.1     |
| 88.9   | 78.5   | 78.9   | 80.6 NM_001001931.1  |
| 79.2   | 94.3   | 79.2   | 81.6 NM_020749.3     |
| 92.4   | 77.1   | 82.3   | 88.6 NM_001001924.1  |
| 87.1   | 80.9   | 80.5   | 82.9 NM_001001927.1  |
| 80.1   | 84.4   | 83.8   | 84.9 NM_020749.3     |
| 373.4  | 262.3  | 261    | 191.9 NM_002455.2    |
| 666.1  | 498.2  | 490    | 314.7 NM_002455.2    |
| 728.5  | 824.4  | 768.7  | 674.4 NM_006554.3    |
| 92.9   | 90.7   | 87.1   | 94.4 NM_001006635.1  |
| 343.8  | 408.4  | 316.3  | 358.6 NM_001010891.1 |
| 88.7   | 102.6  | 90.6   | 92.4 NM_002456.4     |
| 140.9  | 127.5  | 163.8  | 136.9 NM_001044390.1 |
| 183.7  | 177.3  | 243.4  | 151.4 NM_001018021.1 |
| 79.8   | 70.4   | 73.2   | 87.5 NM_033049.2     |
| 93.1   | 89.8   | 82.8   | 76.5 NM_145650.2     |
| 96.4   | 88.5   | 86.9   | 81 NM_024690.2       |
| 82.1   | 83.5   | 89.4   | 88.9 NM_001004430.1  |
| 101.5  | 100.8  | 91.6   | 86.1 NM_002457.2     |
| 86.2   | 83.2   | 86.8   | 94.4 NM_152673.1     |
| 87.2   | 86.7   | 76.1   | 82.5 NM_018406.3     |
| 104.4  | 110.9  | 110.2  | 94.9 XM_936261.1     |
| 81.5   | 76.8   | 76.1   | 81.7 NM_018406.3     |
| 98.3   | 79.9   | 85.7   | 91.6 NM_004532.2     |
| 84.4   | 83     | 81.6   | 84.7 NM_152291.1     |
| 88.7   | 87.4   | 86.9   | 91.5 NM_017717.3     |
| 84.4   | 92.7   | 78.5   | 98.2 NM_017717.3     |
| 442.4  | 397.5  | 363.3  | 272.5 NM_018238.2    |



|        |        |        |                       |
|--------|--------|--------|-----------------------|
| 1120.5 | 915.6  | 927.5  | 513.5 NM_032853.2     |
| 91     | 79.1   | 87.9   | 89.9 NM_152423.2      |
| 294.8  | 298.2  | 278.8  | 293.4 NM_025128.3     |
| 150.8  | 149.5  | 121.1  | 122 NM_005592.1       |
| 96.4   | 106.3  | 88.2   | 93.9 NM_205853.1      |
| 93.9   | 83.5   | 81.9   | 93.8 NM_000255.1      |
| 308.2  | 253.4  | 236.3  | 225.4 NM_201280.1     |
| 113.6  | 108.8  | 101.2  | 98.6 NM_012222.2      |
| 614.8  | 421.8  | 441.5  | 259.6 NM_012222.1     |
| 96.6   | 101.9  | 89.9   | 87.4 NM_001048174.1   |
| 183.1  | 169.4  | 166.9  | 182.6 NM_002461.1     |
| 122.6  | 121.2  | 123.8  | 113.6 NM_000431.1     |
| 133.2  | 147.8  | 139.7  | 134 NM_017458.2       |
| 307.6  | 305.4  | 282.3  | 191.6 NM_005115.3     |
| 302.6  | 236.7  | 259    | 186.2 NM_002462.2     |
| 279.9  | 406.8  | 287.4  | 277.3 NM_002463.1     |
| 204.9  | 393.5  | 365.7  | 293.4 NM_002357.2     |
| 204.4  | 180.7  | 168.8  | 139.2 NM_031300.2     |
| 1021.8 | 1127.4 | 1307.7 | 560.7 NM_006454.2     |
| 89.1   | 80.1   | 84.6   | 86.2 NM_005962.4      |
| 85.9   | 81     | 85.6   | 86 NM_001008541.1     |
| 107.3  | 110.8  | 103.3  | 91.1 NM_001008541.1   |
| 116    | 120.9  | 101.2  | 101 NM_130439.3       |
| 119.8  | 92.1   | 104.2  | 90.8 NM_015419.1      |
| 84.9   | 105.9  | 96.3   | 74.7 NM_198530.2      |
| 134.3  | 130.4  | 117.6  | 113.1 NM_001008528.1  |
| 99.4   | 92     | 92.6   | 98 NM_001008529.1     |
| 87.1   | 72     | 83.7   | 81 NM_032348.2        |
| 99.3   | 83.2   | 86.9   | 87.3 NM_001020821.1   |
| 106.7  | 120.5  | 104.6  | 115.7 NM_138373.3     |
| 1813.1 | 1437.4 | 1792.4 | 1033.1 NM_001020820.1 |
| 80.4   | 78.9   | 89.5   | 77.8 NM_207329.1      |
| 6856.1 | 3935.5 | 3669.4 | 2607.7 NM_005375.2    |
| 112.2  | 114.6  | 100.2  | 89.5 NM_014520.1      |
| 97.6   | 93.1   | 95.4   | 81.6 NM_002466.2      |
| 76.5   | 72.3   | 72.8   | 78.1 NM_002465.2      |
| 88.4   | 79.4   | 82.4   | 81.8 NM_206820.1      |
| 80.5   | 98.8   | 91.8   | 82.8 NM_002465.2      |
| 96.1   | 98.7   | 86.4   | 93.6 NM_206821.1      |
| 82.7   | 83.3   | 79.3   | 84.7 NM_004533.2      |
| 113.3  | 130.4  | 131.4  | 116.9 NM_000256.2     |
| 308.6  | 241.4  | 299.3  | 152.8 NM_004997.2     |
| 77.1   | 108.4  | 105.9  | 94.1 NM_001010985.1   |
| 649.3  | 432.4  | 349.2  | 301 NM_002467.3       |
| 135.2  | 108.7  | 108.3  | 110.6 NM_012333.3     |
| 643.6  | 898    | 732.9  | 840.6 NM_015057.2     |
| 99.3   | 106.2  | 99     | 106 NM_032133.2       |
| 93.3   | 95.2   | 81.8   | 87.6 NM_005376.3      |
| 94.2   | 104.5  | 100.9  | 94.4 NM_001033082.1   |
| 91.1   | 84.7   | 86.7   | 80.8 NM_001033081.1   |

|         |         |         |                     |
|---------|---------|---------|---------------------|
| 80.4    | 77.1    | 82.7    | 88.8 NM_005378.4    |
| 97      | 91.6    | 86.6    | 89.3 NM_025107.1    |
| 335.6   | 318.7   | 280.2   | 248.8 NM_002468.2   |
| 97.6    | 82.7    | 79.2    | 80.9 NM_016132.2    |
| 94      | 86.2    | 82.1    | 92.2 NM_138768.2    |
| 89.6    | 92.7    | 94.2    | 90.7 NM_138336.1    |
| 93.5    | 94.6    | 85.1    | 81.8 NM_005593.1    |
| 95      | 86.3    | 81.9    | 88.9 NM_002469.1    |
| 97.7    | 88.9    | 86.2    | 98.2 NM_005963.3    |
| 197     | 370.7   | 338.5   | 277.7 NM_005964.1   |
| 85.4    | 77.6    | 76.3    | 81.8 NM_001040114.1 |
| 87.1    | 81.4    | 82.6    | 95.1 NM_002474.1    |
| 78.3    | 84.2    | 86.2    | 80.8 NM_003802.1    |
| 97.1    | 87.5    | 91.9    | 93.6 NM_024729.2    |
| 99.1    | 89.8    | 94      | 83.7 NM_001077186.1 |
| 89.1    | 97      | 81.9    | 89.1 NR_002147.2    |
| 92.2    | 80.4    | 80.1    | 80.7 NM_017534.3    |
| 87.7    | 89      | 101.4   | 85.5 NM_002470.1    |
| 151.9   | 116.1   | 124.3   | 120.2 NM_017533.1   |
| 97.2    | 109.4   | 104.9   | 92.7 NM_002471.1    |
| 99.2    | 92      | 93.2    | 92.4 NM_000257.1    |
| 84.2    | 78.3    | 82.3    | 78.1 NM_020884.1    |
| 89.6    | 91.2    | 82.7    | 94.1 NM_002472.1    |
| 5420.4  | 6875.1  | 5718.8  | 5417.3 NM_002473.3  |
| 95      | 93.8    | 86.7    | 92.6 NM_079420.1    |
| 91.1    | 86.8    | 83.9    | 89.6 NM_079420.1    |
| 96.6    | 86.9    | 89.2    | 82.6 NM_000432.2    |
| 83.6    | 78.6    | 88.8    | 85.9 NM_002476.2    |
| 93.7    | 84.2    | 86.7    | 84 NM_001002841.1   |
| 326.8   | 285.4   | 257.4   | 231.9 NM_002477.1   |
| 18485.6 | 21339.2 | 18226.2 | 14278.3 NM_021019.3 |
| 18208.7 | 19754   | 17247.4 | 16521.1 NM_021019.2 |
| 88.3    | 89.8    | 93.3    | 88.6 NM_021223.2    |
| 89.7    | 89.9    | 87.8    | 89.3 NM_006097.3    |
| 115     | 127.7   | 120.6   | 130.6 NM_006097.3   |
| 84.6    | 89.5    | 86.5    | 83.7 NM_138403.3    |
| 319.4   | 516.9   | 536.8   | 336 NM_013262.3     |
| 111     | 114.4   | 106.5   | 114.3 NM_053026.3   |
| 87.6    | 83.3    | 79.6    | 89.1 NM_005965.3    |
| 99.2    | 102.4   | 96      | 89.3 NM_033118.2    |
| 92.3    | 82.9    | 82.8    | 90.5 NM_013292.2    |
| 88.7    | 96.5    | 85.8    | 86.9 NM_018657.3    |
| 110.7   | 125.3   | 121.3   | 117.8 NM_012334.1   |
| 84.2    | 72.2    | 80.3    | 86.4 NM_016239.2    |
| 157.3   | 143     | 183.2   | 144.8 NM_203318.1   |
| 81.9    | 89.3    | 89.2    | 94.7 NM_078471.3    |
| 81.6    | 84.6    | 79.5    | 83.1 NM_032608.5    |
| 111.2   | 111.1   | 111.9   | 101.9 NM_005379.2   |
| 84.5    | 98.8    | 87.2    | 95.1 NM_012223.2    |
| 122.6   | 115.1   | 110.4   | 109 NM_001080779.1  |

|        |       |        |                      |
|--------|-------|--------|----------------------|
| 85.6   | 75.4  | 80.3   | 76.7 NM_001080779.1  |
| 124.6  | 154.5 | 116.7  | 114 NM_033375.3      |
| 83.1   | 72.7  | 82.3   | 81.3 NM_015194.1     |
| 95.8   | 89    | 80.7   | 90.3 NM_004998.2     |
| 400.2  | 392.2 | 302.5  | 359.7 NM_012335.2    |
| 737.6  | 780.2 | 834    | 689.1 NM_033054.1    |
| 83.4   | 82.1  | 89     | 86.6 NM_017433.3     |
| 167.3  | 169.8 | 223.2  | 214.4 NM_138995.1    |
| 178.6  | 208.1 | 177.5  | 165.9 NM_000259.1    |
| 93.8   | 91.8  | 95.4   | 94.1 NM_001080467.1  |
| 88.8   | 176.1 | 144.3  | 137.8 NM_018728.1    |
| 168.1  | 215   | 234.3  | 180.4 NM_004999.2    |
| 102.5  | 123.4 | 114    | 112.5 NM_000260.1    |
| 92.4   | 83.3  | 85.3   | 92.6 NM_001080527.1  |
| 220.5  | 429.7 | 427.4  | 313.1 NM_006901.1    |
| 310.9  | 289.9 | 272.9  | 229 NM_004145.2      |
| 85.5   | 80.6  | 81.4   | 81.4 NM_000261.1     |
| 94.4   | 86.7  | 84.5   | 89.8 NM_153604.1     |
| 99.4   | 100.7 | 87.9   | 95.7 NM_002478.3     |
| 84.9   | 92.3  | 74.2   | 82.7 NM_002479.3     |
| 97.1   | 96.7  | 81.7   | 93 NM_001033580.1    |
| 95.1   | 90.8  | 94.1   | 95 NM_001033579.1    |
| 174.6  | 148.7 | 145.5  | 156.9 NM_001033580.1 |
| 92.4   | 100   | 104.4  | 108.5 NM_003803.2    |
| 100.9  | 92.9  | 87.2   | 88.5 NM_003970.1     |
| 94     | 101.8 | 96.4   | 94.1 NM_152372.2     |
| 101.5  | 96.4  | 92.8   | 100.9 NM_006790.1    |
| 134.3  | 128.8 | 111.2  | 101.3 NM_021245.2    |
| 89.4   | 85.2  | 84.9   | 81.6 NM_016599.2     |
| 114.1  | 97.2  | 95.2   | 100 NM_133371.2      |
| 93.9   | 85    | 83     | 91.9 NM_032578.1     |
| 83.3   | 86.2  | 87.6   | 83.1 NM_015011.1     |
| 91.3   | 83.1  | 85.3   | 90.5 NM_015460.2     |
| 436.6  | 305.4 | 301.2  | 208.5 NM_032188.1    |
| 105.4  | 108.6 | 101.9  | 98.4 NM_007067.3     |
| 811.7  | 864.7 | 633.2  | 892.2 NM_006766.2    |
| 91.7   | 106.2 | 102.2  | 103.9 NM_012330.1    |
| 86.2   | 76.9  | 78     | 94.4 NM_004535.2     |
| 85.5   | 91.4  | 87.9   | 83.3 NM_015025.2     |
| 138.1  | 174.2 | 158.6  | 138 NM_153029.3      |
| 370.4  | 717.5 | 892.2  | 651.2 NM_018177.2    |
| 79.2   | 82.6  | 80.4   | 90.1 NM_015111.1     |
| 135.5  | 143   | 135.4  | 129.8 NM_182749.2    |
| 86.3   | 84    | 82.7   | 82.7 NM_005467.2     |
| 80.7   | 82.7  | 88.2   | 91.5 NM_005468.2     |
| 90.7   | 91    | 84.7   | 85.7 NM_207015.1     |
| 323.5  | 289.7 | 256.7  | 263.5 NM_005966.3    |
| 110.7  | 114.5 | 103.2  | 102.5 NM_005967.2    |
| 6822.6 | 5476  | 4102.8 | 5919.9 NM_005594.2   |
| 77.3   | 83    | 81.7   | 76.5 NM_199290.2     |

|         |         |         |                      |
|---------|---------|---------|----------------------|
| 200.5   | 154     | 186.7   | 220.1 NR_002182.1    |
| 240.1   | 273.9   | 228.2   | 215.3 NM_018161.4    |
| 137.6   | 138.4   | 136.5   | 121.5 NM_015909.2    |
| 12869.8 | 13434.2 | 14311.2 | 13152.6 NR_002568.1  |
| 150.9   | 187.7   | 204.9   | 123.7 NM_022742.2    |
| 144.8   | 331.2   | 475.5   | 361.7 NM_014411.2    |
| 227.5   | 267.1   | 191.5   | 219.5 NM_000262.1    |
| 304.7   | 368.7   | 377.8   | 239.8 NM_017567.2    |
| 139.7   | 126.2   | 129.5   | 120.6 NM_000263.3    |
| 308.7   | 259.2   | 223.6   | 204.7 NM_016256.2    |
| 91      | 92.8    | 81.4    | 94.5 NM_153006.2     |
| 82.7    | 94.5    | 86.3    | 93.7 NM_004536.2     |
| 108.1   | 198.5   | 213.6   | 168 NM_004536.2      |
| 100.1   | 96      | 92.5    | 87.8 NM_001033053.1  |
| 109.9   | 110     | 99.6    | 103.3 NM_176821.2    |
| 81.6    | 85.1    | 74.4    | 81 NM_145007.1       |
| 80.9    | 92.9    | 94.5    | 97.4 NM_033297.1     |
| 313.7   | 261.1   | 203.9   | 188.3 NM_033297.1    |
| 103.6   | 87.8    | 90.3    | 89.6 NM_144687.1     |
| 94.3    | 90.3    | 88.8    | 87.6 NM_176810.1     |
| 96      | 78.3    | 82.3    | 85.9 NM_176822.2     |
| 91.7    | 173.3   | 176     | 154.2 NM_017852.1    |
| 84.3    | 86.7    | 86.6    | 85.1 NM_134444.3     |
| 97.2    | 92.7    | 89      | 94.6 NM_153447.2     |
| 84.5    | 75.1    | 77.6    | 81.3 NM_138329.1     |
| 93.2    | 98.1    | 91.4    | 92.3 NM_206828.2     |
| 80.1    | 98.2    | 82.8    | 79.3 NM_206828.2     |
| 92.1    | 83.4    | 81.4    | 84.7 NM_139176.2     |
| 81.6    | 77.7    | 73.7    | 90.1 NM_176820.2     |
| 101     | 83.9    | 93.2    | 92.4 NM_024865.1     |
| 96.8    | 105.7   | 100.1   | 101.1 NM_001009553.1 |
| 87      | 90.5    | 89.7    | 83.3 NM_199461.2     |
| 97.1    | 95.1    | 76.5    | 73.5 NM_199461.2     |
| 89.8    | 81.6    | 75      | 84.6 NM_001029861.1  |
| 114.7   | 102.4   | 97.6    | 100.4 NM_152667.1    |
| 233.7   | 221.5   | 170.2   | 163.9 NM_018946.2    |
| 280.7   | 356.7   | 245.1   | 334.1 NM_139207.1    |
| 85.5    | 90.8    | 85.3    | 89.2 NM_139207.1     |
| 94.8    | 103     | 97.1    | 94.5 NM_021963.2     |
| 102.9   | 104.8   | 95.8    | 102.4 NM_004538.3    |
| 2160.2  | 1848    | 1702.7  | 1278.4 NM_005969.3   |
| 318.8   | 227.4   | 202.6   | 202.5 NM_153757.1    |
| 91.8    | 92.8    | 83.7    | 88.5 NM_207363.2     |
| 76.4    | 72.6    | 76.4    | 79.3 NM_207363.2     |
| 81.4    | 70.5    | 59.5    | 70.8 XM_929894.1     |
| 109.8   | 122.4   | 120.9   | 100.7 NM_003827.2    |
| 250.6   | 289     | 332.1   | 233.4 NM_022080.1    |
| 117.5   | 100.6   | 94.8    | 98.8 NM_198990.3     |
| 118.1   | 121.9   | 102.4   | 118.9 NM_003826.1    |
| 1974.6  | 1693.5  | 1657.2  | 938.4 NM_145201.3    |

|        |        |        |        |                |
|--------|--------|--------|--------|----------------|
| 147.3  | 138.2  | 134.7  | 114.9  | NM_004851.1    |
| 967.4  | 654.5  | 679.3  | 573.9  | NR_002798.1    |
| 516.4  | 498.2  | 563.2  | 350.5  | NM_001038618.1 |
| 164.7  | 163.9  | 158    | 144.4  | NM_022493.1    |
| 265.7  | 205.2  | 169.6  | 166.3  | NM_057175.3    |
| 208    | 204.6  | 193.2  | 197.3  | NM_024561.3    |
| 122.5  | 143.8  | 135.6  | 120.1  | NM_018527.2    |
| 98.4   | 89.1   | 83.2   | 94.1   | NM_018527.2    |
| 102.9  | 107.1  | 90.2   | 94.9   | NM_001018089.1 |
| 135.2  | 131.5  | 126.4  | 131.5  | NM_024611.4    |
| 126.1  | 127.9  | 105.7  | 99.1   | NM_001018089.1 |
| 2307.2 | 2176.7 | 1871.3 | 1599.4 | NM_004539.2    |
| 212.6  | 191.6  | 171.5  | 209.2  | NM_024678.3    |
| 89.3   | 88.9   | 83     | 93.8   | NM_172164.1    |
| 428.5  | 507.7  | 481.9  | 347.2  | NM_002482.2    |
| 103.6  | 93.5   | 89.4   | 91.4   | NM_000662.4    |
| 401    | 280.6  | 241.3  | 208.7  | XM_938769.1    |
| 1339.9 | 1040.9 | 921.2  | 462    | NM_024662.1    |
| 122.6  | 115.9  | 125.1  | 116.6  | NM_024771.1    |
| 125.4  | 120.4  | 120.1  | 108.9  | NM_001011713.1 |
| 163.5  | 149    | 124.4  | 129.8  | NM_025146.1    |
| 88.6   | 86.1   | 85.6   | 89.6   | NM_000015.1    |
| 3498.8 | 2864.3 | 2815.8 | 1761.1 | NM_181528.1    |
| 85.4   | 95.8   | 82.5   | 85     | NM_181527.1    |
| 1842.4 | 1675   | 1508.2 | 1063.5 | NM_181528.2    |
| 225.8  | 242.8  | 218.7  | 246.1  | NM_012191.2    |
| 92.9   | 90.1   | 86.1   | 96.3   | NM_003960.2    |
| 394.7  | 379.1  | 421.2  | 244.3  | NM_015654.3    |
| 101.9  | 100.2  | 97.9   | 106.4  | NM_020443.2    |
| 100.3  | 91.6   | 90.4   | 98.3   | NM_182964.4    |
| 101.9  | 98.5   | 87.7   | 91     | NM_145117.3    |
| 105.7  | 277    | 191.6  | 233.3  | NM_014903.3    |
| 91     | 85.2   | 89.1   | 87.2   | NM_015678.3    |
| 84.9   | 88.1   | 82.9   | 97.9   | NM_198945.1    |
| 552.8  | 309.5  | 245.7  | 207.2  | NM_182744.1    |
| 164.4  | 144.9  | 132.7  | 134    | NM_005380.4    |
| 106.1  | 124.8  | 114.7  | 137.9  | NM_173622.2    |
| 85.3   | 85.1   | 91     | 87.4   | NM_001024688.1 |
| 124.1  | 98.3   | 107    | 108.8  | NM_001024688.1 |
| 150.9  | 160    | 152.9  | 134.6  | NM_017940.2    |
| 102.8  | 103.3  | 102.7  | 95.9   | NM_017940.2    |
| 1046.1 | 2097.2 | 1980.9 | 1705.7 | NM_001039703.1 |
| 571.3  | 775.2  | 656.5  | 617    | NM_183372.3    |
| 146.7  | 181.3  | 156.2  | 152.1  | NM_015383.1    |
| 87.2   | 83.6   | 86.5   | 85.7   | NM_173638.2    |
| 1658.8 | 3034.1 | 3431.4 | 1955.8 | NM_001037675.1 |
| 242.7  | 253.8  | 245.5  | 242.8  | NM_032264.2    |
| 106.4  | 85.5   | 87.4   | 89.5   | NM_032264.2    |
| 96.4   | 92.9   | 87.7   | 88.5   | NM_001047980.1 |
| 102.2  | 119.8  | 116.8  | 110.1  | XM_934022.1    |

|        |        |        |                      |
|--------|--------|--------|----------------------|
| 95.8   | 125.8  | 125.9  | 109.1 NM_005899.2    |
| 94.2   | 98.5   | 92.8   | 105.6 NM_031858.1    |
| 100.4  | 108.2  | 107.4  | 83.1 NM_005821.3     |
| 363.8  | 484.2  | 551.6  | 293.9 NM_032041.1    |
| 256.2  | 351.9  | 400.5  | 275.4 NM_001040626.1 |
| 86.8   | 83.1   | 86     | 92.7 NM_032041.1     |
| 81     | 83.1   | 79.9   | 83.5 NM_001076682.2  |
| 103    | 94     | 98.1   | 90.7 NM_000615.1     |
| 198.5  | 102.3  | 103.2  | 104.1 NM_181351.1    |
| 411.6  | 1240.3 | 907.5  | 870.9 NM_004540.2    |
| 1149.3 | 976.4  | 755.9  | 717.3 NM_017760.5    |
| 510.3  | 458.7  | 280.9  | 333.1 NM_002486.3    |
| 788.1  | 745.2  | 555.8  | 583 NM_007362.2      |
| 128    | 107.4  | 101.1  | 116.9 NM_007362.2    |
| 323    | 323.7  | 298.8  | 246.5 NM_007362.2    |
| 102    | 93.3   | 85     | 85.2 NM_001014839.1  |
| 121.2  | 123.6  | 114.5  | 108.9 NM_014284.2    |
| 131.7  | 126.9  | 110.1  | 117.2 NM_001014839.1 |
| 499.1  | 327.3  | 335.8  | 306.1 NM_000265.1    |
| 92.4   | 90.4   | 84.2   | 97.1 NR_003186.1     |
| 206.2  | 150.9  | 178.3  | 179.7 NR_003187.1    |
| 107.2  | 110.8  | 110.5  | 104.5 NM_000433.2    |
| 231.9  | 342.4  | 253.5  | 162.4 NM_013416.2    |
| 223.4  | 290.6  | 302.4  | 329.6 NM_013416.2    |
| 1338.5 | 1246.5 | 1138.2 | 947.9 NM_000631.3    |
| 817.1  | 842.2  | 625.7  | 601.5 NM_006153.3    |
| 93.3   | 92.4   | 86.4   | 87.6 NM_003581.2     |
| 92.9   | 96.3   | 87.4   | 83 NM_205842.1       |
| 90.8   | 91.5   | 83.5   | 94.7 NM_013436.3     |
| 96.9   | 92.9   | 90.7   | 86 NM_016453.2       |
| 227.3  | 233.6  | 263.1  | 156.1 NM_184231.1    |
| 3598.6 | 3618.8 | 2930.5 | 2767.9 NM_005381.2   |
| 340.9  | 472.2  | 444.8  | 311.9 NM_147223.2    |
| 98.1   | 104    | 98.6   | 109.5 NM_147223.2    |
| 101    | 86.8   | 84.8   | 98.9 NM_147233.2     |
| 115.5  | 115.9  | 99.1   | 102.9 NM_006540.2    |
| 97.6   | 91     | 94.7   | 88.5 NM_181659.1     |
| 383.5  | 431    | 452.2  | 469.6 NM_006534.2    |
| 5216.3 | 4282.5 | 4593.8 | 3244.3 NM_005437.1   |
| 710.5  | 633.6  | 486.5  | 618 NM_020967.2      |
| 580.7  | 725.9  | 737.7  | 521.2 NM_014071.2    |
| 292.5  | 168.2  | 159.7  | 118 NM_024831.5      |
| 605.6  | 641.1  | 659.6  | 615.1 NM_181782.2    |
| 171.6  | 194.1  | 162.6  | 179.2 NM_006311.2    |
| 352.6  | 404.8  | 396.3  | 351.7 NM_006312.2    |
| 1025.9 | 1267.9 | 1050   | 1130.6 NM_006312.3   |
| 96.9   | 100.4  | 98.2   | 101.3 NM_006312.3    |
| 82.3   | 80     | 73.6   | 79.5 NM_004829.3     |
| 92.8   | 87     | 92.1   | 89.3 NM_004828.2     |
| 138.8  | 113.3  | 107    | 97.4 NM_147130.1     |

|         |         |         |        |             |
|---------|---------|---------|--------|-------------|
| 4024.6  | 3797.4  | 3971.7  | 2001.2 | NM_015331.2 |
| 226     | 197.2   | 218.3   | 141.7  | NM_017668.1 |
| 766.3   | 725     | 722.6   | 537.5  | NM_030808.3 |
| 118.8   | 113.9   | 117.4   | 128.1  | NM_030808.3 |
| 174.8   | 179.6   | 169.2   | 164.5  | NM_030571.2 |
| 1700    | 1584    | 1441.9  | 1370.4 | NM_019080.1 |
| 83.4    | 90.2    | 80      | 83.2   | NM_002487.2 |
| 99.8    | 103.8   | 99.3    | 107.4  | NM_138704.2 |
| 86.8    | 83.6    | 79      | 76.2   | NM_014434.1 |
| 92.2    | 85.3    | 96.3    | 90.6   | NM_000266.1 |
| 133     | 159.3   | 162.6   | 124.7  | NM_006096.2 |
| 102.9   | 81      | 83.4    | 83.2   | NM_201535.1 |
| 362.3   | 231.9   | 226.7   | 188.9  | NM_201539.1 |
| 182     | 211.5   | 194.4   | 162.2  | NM_022477.2 |
| 152.6   | 145.1   | 121.6   | 124.7  | NM_022477.2 |
| 86.8    | 94.9    | 81      | 86     | NM_020465.2 |
| 107.7   | 102.8   | 104.9   | 108.4  | NM_020465.2 |
| 91      | 97      | 100.1   | 102.8  | NM_022910.1 |
| 130.5   | 148.7   | 125.8   | 118.7  | NM_001543.3 |
| 326.4   | 245.6   | 240.3   | 147.1  | NM_003635.2 |
| 89.4    | 85.1    | 93.7    | 89.5   | NM_004784.1 |
| 95      | 95.8    | 91.2    | 97.9   | NM_022569.1 |
| 15437.3 | 13238.2 | 11578.4 | 10089  | NM_004541.2 |
| 270.8   | 200.4   | 175.5   | 174.1  | NM_004544.2 |
| 3812.2  | 2126.6  | 2319    | 1393.4 | NM_175614.2 |
| 3041    | 2580.5  | 2477.7  | 1676.8 | NM_018838.3 |
| 2831    | 1830.3  | 1735.6  | 1338.9 | NM_015965.3 |
| 6340.9  | 3102.7  | 3011.7  | 2260.1 | NM_004542.1 |
| 8809.9  | 6911.8  | 6307.2  | 6821.2 | NM_002489.2 |
| 90.3    | 83.2    | 88.9    | 99.3   | NM_005000.2 |
| 994.7   | 496.7   | 517.6   | 341.5  | NM_005001.1 |
| 3074.8  | 2489.6  | 2276.3  | 1377.4 | NM_014222.2 |
| 535.6   | 362.2   | 312.8   | 288.6  | NM_005002.3 |
| 3346.1  | 2141.1  | 2265.6  | 2117.1 | NM_005003.2 |
| 378.2   | 353.9   | 269.9   | 268.8  | NM_016013.2 |
| 135.4   | 129.7   | 113.9   | 121.1  | NM_004545.3 |
| 1259.5  | 726.8   | 853.4   | 631.6  | NM_004548.1 |
| 3880.2  | 2957.2  | 2820.9  | 1885.8 | NM_019056.2 |
| 3642.3  | 4095.4  | 4016.4  | 2761.1 | NM_004546.2 |
| 4842.7  | 3627    | 3093.6  | 3651   | NM_002491.1 |
| 78.1    | 79.1    | 76.2    | 82.5   | NM_004547.4 |
| 6772.8  | 7008.7  | 7350.2  | 4760.9 | NM_002492.2 |
| 1120.7  | 812.3   | 903.5   | 551.4  | NM_002493.3 |
| 2315.8  | 1846.1  | 1762.2  | 1216.7 | NM_004146.4 |
| 12213.6 | 6815.8  | 6331.3  | 4725.1 | NM_005004.2 |
| 1233.2  | 782.1   | 727.7   | 776.6  | NM_002494.2 |
| 103.5   | 95.5    | 102.1   | 85.9   | NM_004549.3 |
| 162.9   | 180.5   | 172.5   | 173.7  | NM_005006.5 |
| 144.8   | 101     | 118.5   | 113.8  | NM_004550.3 |
| 2416.4  | 1809    | 2439.1  | 1324.9 | NM_004551.1 |

|         |        |        |        |                |
|---------|--------|--------|--------|----------------|
| 2725    | 2223.2 | 2027.7 | 1426.3 | NM_002495.1    |
| 6258.2  | 3794.2 | 3082.5 | 2842.5 | NM_004552.1    |
| 86.1    | 81.8   | 82.5   | 89.7   | NM_004553.2    |
| 2652.4  | 1491.1 | 1589.3 | 826.4  | NM_024407.3    |
| 3495.5  | 1864.6 | 1911.4 | 1089.6 | NM_002496.1    |
| 1779.6  | 1643.5 | 1718.4 | 1192.2 | NM_007103.2    |
| 3365.9  | 2227.1 | 1964.4 | 2348.2 | NM_021074.1    |
| 92      | 91.9   | 94.9   | 98     | NM_001001503.1 |
| 208.6   | 185.5  | 177.6  | 159.7  | NM_021075.3    |
| 85.5    | 93.3   | 79.4   | 97.3   | NM_004543.2    |
| 91.9    | 91.2   | 91.1   | 92.7   | NM_006393.1    |
| 81.2    | 77     | 78.8   | 77.2   | NM_213569.1    |
| 96.2    | 81.6   | 80.8   | 84.1   | NM_213569.1    |
| 280.9   | 256.3  | 252.3  | 203.3  | NM_015509.2    |
| 760.7   | 730.5  | 725.8  | 577.2  | NM_018090.3    |
| 101.4   | 88.3   | 82.2   | 91.8   | NM_152905.2    |
| 110.8   | 119.1  | 109.8  | 120.9  | NM_006154.1    |
| 103.4   | 90.2   | 82.1   | 90.2   | NM_198400.1    |
| 181.3   | 225.2  | 194.9  | 133.2  | NM_198400.1    |
| 135.5   | 166.3  | 132.1  | 133.8  | NM_015277.2    |
| 13848.1 | 8403.9 | 7709.1 | 5281.7 | NM_006156.1    |
| 83.9    | 94.5   | 86     | 81.3   | NM_182966.1    |
| 99.7    | 101    | 103.2  | 110.7  | NM_006403.2    |
| 87.1    | 87.4   | 76     | 88.5   | NM_182966.1    |
| 429.8   | 193.9  | 201.5  | 163.4  | NM_021076.2    |
| 94.7    | 94.2   | 88.3   | 88.6   | NM_006158.1    |
| 96      | 93.4   | 95.9   | 83.9   | NM_005382.1    |
| 90.2    | 95.6   | 94     | 95.2   | NM_173808.2    |
| 94.4    | 99.1   | 95.3   | 98.7   | NM_024608.1    |
| 154.2   | 112.6  | 101.3  | 91.2   | NM_145043.1    |
| 92.5    | 87.6   | 78.7   | 87.6   | NM_018248.1    |
| 191.7   | 250.4  | 209.2  | 205.7  | NM_012224.1    |
| 103.1   | 107.9  | 103.4  | 97.4   | NM_001031741.1 |
| 75.8    | 84.2   | 67.4   | 88.6   | NM_152534.2    |
| 91.8    | 94.3   | 90.3   | 91.3   | NM_024800.2    |
| 103.5   | 91.4   | 92.2   | 91.9   | NM_145910.1    |
| 479.8   | 249.5  | 261    | 191.4  | NM_002497.2    |
| 88.8    | 90.4   | 75.7   | 80.8   | NM_152720.1    |
| 169.1   | 155.4  | 154.3  | 161    | NM_002498.2    |
| 99.4    | 86.6   | 88.5   | 89.1   | NM_002498.2    |
| 111.8   | 116.3  | 107.3  | 117.1  | NM_003157.1    |
| 85.3    | 90.1   | 77.9   | 87.8   | NM_199289.1    |
| 501.1   | 319.8  | 320.6  | 241.7  | NM_014397.3    |
| 115.6   | 91.6   | 90.9   | 97.5   | NM_133494.1    |
| 143.7   | 231    | 229.4  | 196.6  | NM_178170.2    |
| 111.9   | 106.5  | 93.9   | 97.4   | NM_033116.3    |
| 502.3   | 502.7  | 472.1  | 217.9  | NM_015537.3    |
| 123.6   | 117.9  | 98.4   | 97.1   | NM_006157.2    |
| 117.9   | 108.5  | 95.1   | 108.5  | NM_006159.1    |
| 2541.8  | 2534.5 | 2857.6 | 1371.9 | NM_013349.3    |



|        |       |       |                     |
|--------|-------|-------|---------------------|
| 123.3  | 150.8 | 125.7 | 119.3 NM_002499.1   |
| 96.8   | 93.5  | 83.9  | 88 NM_006617.1      |
| 1025.3 | 625.1 | 483.2 | 513.7 NM_005863.2   |
| 99.4   | 90.4  | 92.4  | 84.2 NM_005863.2    |
| 222.3  | 176.2 | 170   | 151.3 NM_005863.2   |
| 93     | 93.3  | 89.2  | 89.7 NM_138966.2    |
| 93     | 96.7  | 99.3  | 100.1 NM_153181.2   |
| 92.3   | 94.9  | 85.1  | 75 NM_138999.1      |
| 75.8   | 84.7  | 73.5  | 91.3 NM_138999.1    |
| 490.3  | 356.1 | 304.4 | 268.7 NM_018092.3   |
| 611.4  | 877.4 | 719.6 | 662.1 NM_000434.2   |
| 93.6   | 90.7  | 96.7  | 100.9 NM_005383.1   |
| 98.6   | 93.8  | 89.9  | 80.6 NM_006656.4    |
| 82.8   | 87.1  | 81.2  | 79.4 NM_080741.1    |
| 91.4   | 93.4  | 92.1  | 94.1 NM_004210.3    |
| 117.1  | 107.2 | 106.2 | 102.3 NM_080749.2   |
| 101.4  | 99.6  | 78.2  | 91.6 NM_002500.1    |
| 95.1   | 91    | 84.3  | 94.3 NM_006160.2    |
| 85.3   | 79.1  | 81    | 88.6 NM_021191.1    |
| 94.6   | 92.5  | 94.5  | 95.9 NM_022728.2    |
| 90.4   | 103.2 | 85.6  | 98.1 NM_006161.2    |
| 97.5   | 95.7  | 92.6  | 93.9 NM_024019.2    |
| 109.3  | 86.3  | 91    | 81.2 NM_020999.2    |
| 131.6  | 97.6  | 108.4 | 88.6 NM_144573.1    |
| 96.1   | 139.3 | 112.7 | 130 NM_000267.1     |
| 99.3   | 129.4 | 113.9 | 113.3 NM_181831.1   |
| 81.8   | 99.9  | 89.4  | 100.6 NM_181828.1   |
| 100.2  | 108.8 | 112.9 | 97.9 NM_181825.1    |
| 100.3  | 86.4  | 93.4  | 90.3 NM_145912.4    |
| 95.5   | 89.2  | 86.1  | 99.9 NM_001005389.1 |
| 101.9  | 110.1 | 101.8 | 102.9 NM_138713.2   |
| 106    | 137.1 | 129.3 | 126.1 NM_173215.1   |
| 92.1   | 88.2  | 92.8  | 85.2 NM_173215.1    |
| 136.6  | 122.8 | 109.2 | 100.2 NM_172390.1   |
| 82.9   | 88.9  | 78.3  | 77.3 NM_172388.1    |
| 92.8   | 83.9  | 84.1  | 89.6 NM_172387.1    |
| 94.5   | 85.5  | 90.7  | 87.6 NM_172390.1    |
| 71.8   | 79.4  | 68.7  | 72.3 NM_012340.3    |
| 86.7   | 92.5  | 91.6  | 90.3 NM_173091.2    |
| 154.4  | 141.7 | 141.1 | 122.6 NM_032815.3   |
| 106.6  | 90    | 89.2  | 92.8 NM_032815.3    |
| 189.2  | 196.9 | 195.1 | 156.2 NM_173165.1   |
| 100.9  | 101.9 | 94.3  | 88.1 NM_173164.1    |
| 168.4  | 180.9 | 177.2 | 169.9 NM_004555.2   |
| 132    | 144.4 | 137.2 | 129.3 NM_173163.1   |
| 94.3   | 86.7  | 89.3  | 99.5 NM_004555.2    |
| 86.5   | 85.4  | 74.9  | 91.2 NM_004554.3    |
| 230.3  | 434.3 | 513.1 | 304.7 NM_006163.1   |
| 380.1  | 477.8 | 386.9 | 362.5 NM_003204.1   |
| 1219   | 881.1 | 808.3 | 987.8 NM_006164.2   |

|        |        |        |                      |
|--------|--------|--------|----------------------|
| 153.8  | 151.3  | 141    | 199.1 NM_004289.5    |
| 88.5   | 96.6   | 80.4   | 83.1 NM_005595.1     |
| 92.5   | 86.8   | 80.8   | 90.6 NM_005596.1     |
| 105.5  | 88.8   | 86.2   | 93.9 NM_005597.2     |
| 95.1   | 95.8   | 92.7   | 102.4 NM_205843.1    |
| 124.2  | 104.4  | 102.5  | 92.6 NM_005597.2     |
| 134.1  | 138    | 150.5  | 112.5 NM_005384.2    |
| 346.7  | 152.1  | 143.7  | 152.6 NM_002501.2    |
| 2270.9 | 1398   | 1351.4 | 939.7 NM_003998.2    |
| 117.6  | 108.6  | 104.9  | 115.7 NM_002502.2    |
| 105.4  | 91.5   | 92.8   | 105.6 NM_002502.2    |
| 90     | 80.9   | 81.5   | 76.5 NM_001077494.1  |
| 133.1  | 98.5   | 99.8   | 98.3 NM_002503.3     |
| 97.5   | 92.7   | 92.7   | 93.6 NM_001001716.1  |
| 181.7  | 146.4  | 137.6  | 124.2 NM_002503.3    |
| 276.4  | 219.4  | 213.7  | 172.5 NM_004556.2    |
| 95.9   | 96.4   | 100.8  | 97.7 NM_005007.2     |
| 132.3  | 125.3  | 115.6  | 114.9 NM_013432.3    |
| 110.8  | 102.5  | 102.9  | 110 NM_031419.2      |
| 350.4  | 353.1  | 400.2  | 400.6 NM_001005474.1 |
| 162.9  | 138.7  | 132.6  | 123.6 NM_006165.2    |
| 103.3  | 100.1  | 77.4   | 95.4 NM_021100.3     |
| 467.9  | 382.1  | 407.1  | 210.8 NM_181679.1    |
| 1210.8 | 936    | 874.7  | 1025 NM_001002755.1  |
| 169.3  | 157    | 149    | 125.7 NM_002504.3    |
| 300.3  | 272.6  | 240.8  | 202 NM_147133.1      |
| 144.9  | 129.1  | 150.8  | 163.2 NM_147133.1    |
| 939.6  | 557    | 537.1  | 445.4 NM_147134.1    |
| 248.2  | 283.8  | 262.8  | 259.8 NM_152995.3    |
| 241.6  | 264.7  | 188.5  | 202.5 NM_021705.2    |
| 97.4   | 107.6  | 98.9   | 88.5 NM_002505.3     |
| 107.9  | 129.3  | 114.1  | 116.1 NM_006166.3    |
| 2063.4 | 1905   | 1511.5 | 1139.6 NM_014223.2   |
| 104.4  | 94     | 92.1   | 107.7 NM_021257.3    |
| 108.8  | 141.2  | 124.1  | 116.9 NM_015514.1    |
| 975.2  | 654    | 532.5  | 517 NM_001042635.1   |
| 98.9   | 85.5   | 82.6   | 89.7 NM_019850.1     |
| 116.9  | 117.6  | 109.5  | 91.3 NM_002506.2     |
| 84.5   | 89.9   | 77.2   | 93.3 NM_002507.1     |
| 158.2  | 128.3  | 146    | 128.5 NM_014380.1    |
| 470    | 312.1  | 294.1  | 257.5 NM_014380.1    |
| 3064.4 | 1442.6 | 1340.6 | 1418.1 NM_206917.1   |
| 233.1  | 89.8   | 87.1   | 99.7 NM_001012978.1  |
| 316.5  | 453    | 322.8  | 335.8 NM_018297.2    |
| 3034.7 | 2358.3 | 1985.8 | 1398.8 NM_016645.2   |
| 398.4  | 314.3  | 253.1  | 212.9 NM_016645.2    |
| 90.9   | 89.9   | 88.1   | 89.6 NM_005598.2     |
| 84.8   | 81.8   | 83.4   | 86.9 NM_005599.2     |
| 83     | 83.5   | 81.6   | 89.8 NM_198586.2     |
| 166.7  | 140    | 153.3  | 143.1 NM_198514.2    |

|        |        |        |                      |
|--------|--------|--------|----------------------|
| 182.5  | 162.6  | 140.6  | 134.4 NM_144604.2    |
| 1761.4 | 1327   | 1190.2 | 578.5 NM_005008.2    |
| 992.5  | 725.4  | 651    | 459 NM_005008.2      |
| 603    | 346.4  | 347.8  | 214 NM_001003796.1   |
| 89.7   | 81.2   | 80.3   | 88.1 NM_198270.2     |
| 157.4  | 131.7  | 121.7  | 130.9 NM_031466.3    |
| 431.8  | 431.3  | 468.2  | 324.1 NM_032316.2    |
| 137.2  | 131.2  | 126.5  | 139.2 NM_002508.1    |
| 96     | 91.6   | 80     | 91.6 NM_007361.2     |
| 1679.1 | 1169.4 | 1123.5 | 818.5 NM_021824.2    |
| 5657.5 | 4963.8 | 3770   | 3746.8 NM_025075.1   |
| 2656   | 1343.9 | 1168   | 1129.4 NM_032635.2   |
| 213.1  | 181.6  | 183.6  | 162.4 NM_014301.2    |
| 204.2  | 224.1  | 200.9  | 189.5 NM_182945.1    |
| 240.1  | 269    | 257.3  | 231.5 NM_016350.3    |
| 91.7   | 96     | 87.8   | 87.9 NM_182944.1     |
| 493.3  | 759.2  | 676    | 606.2 NM_020921.2    |
| 1433.9 | 1277.2 | 1262.1 | 663.8 NM_004148.2    |
| 1045.2 | 1040.1 | 1062.7 | 642.1 NM_016533.4    |
| 91.5   | 88.5   | 78.2   | 83.6 NM_144565.2     |
| 339    | 317.2  | 269.2  | 242.8 NM_024946.1    |
| 1678.5 | 729.5  | 641.8  | 435.7 NM_016101.3    |
| 122.3  | 143.1  | 145.1  | 149.2 NM_144599.3    |
| 102    | 96.7   | 109.8  | 86.4 NM_030922.5     |
| 3086.1 | 1999.1 | 1711.2 | 1163.6 NM_030922.5   |
| 77.2   | 79.7   | 78.3   | 88 NM_015384.3       |
| 138.5  | 182.3  | 161    | 147.4 NM_015384.3    |
| 430.8  | 731.3  | 604.3  | 502.3 NM_133433.2    |
| 426.9  | 281    | 307.9  | 205.8 NM_003634.1    |
| 97.5   | 81.6   | 79.3   | 84.8 NM_015469.1     |
| 98.4   | 92.1   | 84.2   | 91.1 NM_018376.2     |
| 587.3  | 583.2  | 690.1  | 371.4 NM_007184.2    |
| 127    | 107.2  | 97.1   | 105.9 NM_005600.1    |
| 639.3  | 505.8  | 486.8  | 334.2 NM_020202.2    |
| 103.1  | 114.5  | 103.8  | 113.1 NM_024528.1    |
| 95.4   | 105.6  | 90.2   | 107 NM_033119.3      |
| 1056.3 | 738.7  | 967.2  | 651.4 NM_033120.2    |
| 1043.3 | 580.4  | 525.6  | 418.4 NM_005601.3    |
| 200.8  | 181.6  | 180.4  | 143.6 NM_020345.3    |
| 95.7   | 103.8  | 89.7   | 102.3 NM_017595.4    |
| 89.8   | 89.8   | 77.2   | 88.7 NM_001001349.1  |
| 155.9  | 199.5  | 169.6  | 166.4 NM_017595.4    |
| 87     | 91.7   | 81.8   | 83.9 NM_198478.2     |
| 366.9  | 341    | 274.1  | 249.4 NM_017544.2    |
| 185    | 216.4  | 239.1  | 219.8 NM_001012651.1 |
| 713.5  | 1552.4 | 1835   | 1283.4 NM_005385.3   |
| 105.1  | 161    | 193.4  | 146.3 NM_002509.2    |
| 83.8   | 89.6   | 89.5   | 87.5 NM_145285.1     |
| 87.8   | 84     | 85     | 88.6 NM_004387.2     |
| 89.3   | 91.9   | 93.3   | 83.3 NM_014360.2     |

|         |        |        |                      |
|---------|--------|--------|----------------------|
| 116.9   | 102.1  | 89.9   | 97.5 NM_006167.2     |
| 91.7    | 75.6   | 74.6   | 77.5 NM_006168.1     |
| 85.1    | 84.5   | 83.4   | 82.5 NM_177400.1     |
| 102.2   | 94.9   | 102.1  | 101.6 NM_152568.2    |
| 109.3   | 92.9   | 99.6   | 97 NM_018096.3       |
| 116.5   | 100.8  | 106.9  | 103.3 NM_001014445.1 |
| 82.7    | 82.5   | 73.3   | 83 NM_207322.1       |
| 83.7    | 76.8   | 75.7   | 83.5 NM_001007595.1  |
| 96.8    | 88.9   | 84.5   | 88.1 XM_940314.1     |
| 92.7    | 96.1   | 90.9   | 91.4 NM_014932.2     |
| 113.6   | 105.9  | 112.2  | 104.4 NM_020795.2    |
| 86.2    | 85.5   | 74.7   | 80.5 NM_018977.2     |
| 85.9    | 77.2   | 92.7   | 89.2 NM_181332.1     |
| 91.4    | 94.1   | 88.4   | 88.9 NM_020742.2     |
| 146.5   | 126.2  | 120.6  | 145.4 NM_014893.2    |
| 123.6   | 129.1  | 114.1  | 140.9 NM_016231.2    |
| 293.7   | 200.1  | 150.7  | 170.9 NM_020726.2    |
| 80.6    | 78.6   | 72.2   | 82.8 NM_033007.3     |
| 871.2   | 705.4  | 711.4  | 436 NM_004895.3      |
| 1188.1  | 2049.6 | 2955.9 | 2394.2 NM_176811.2   |
| 469.3   | 224.5  | 212.5  | 201 NM_021077.3      |
| 91.8    | 84.8   | 85.1   | 80.1 NM_002511.1     |
| 435.5   | 391.2  | 284.5  | 264.3 NM_015938.2    |
| 10060.9 | 6629.4 | 6119.8 | 4739.8 NM_198175.1   |
| 236.6   | 151.8  | 133.8  | 131.7 NM_198175.1    |
| 387     | 287.6  | 298.3  | 193.3 NM_000269.2    |
| 228.2   | 144.7  | 140.5  | 130.3 NM_001018136.1 |
| 97.2    | 89.1   | 84.3   | 81.9 NM_001018137.1  |
| 297.3   | 168.2  | 175    | 169 NM_001018138.1   |
| 93.5    | 89.9   | 93.6   | 105.6 NM_001018139.1 |
| 205.9   | 186.5  | 164.9  | 133.6 NM_002512.2    |
| 102.3   | 99.8   | 94.2   | 91.7 NR_001577.1     |
| 898.6   | 804.1  | 851    | 564.6 NM_002513.2    |
| 2703.2  | 1901.5 | 1636.8 | 1515.3 NM_005009.2   |
| 78.4    | 76.6   | 77.1   | 75.7 NM_003551.2     |
| 315.8   | 252.3  | 260.8  | 217.2 NM_005793.3    |
| 109.1   | 111.3  | 89.2   | 98 NM_197972.1       |
| 294.1   | 178    | 153    | 155.3 NM_013330.3    |
| 913.8   | 643.6  | 486.6  | 839.5 NM_004688.1    |
| 174.5   | 168.5  | 162.5  | 129.4 NM_022787.2    |
| 94.4    | 94.3   | 89.1   | 86.3 NM_015039.2     |
| 94.4    | 89.2   | 80.3   | 91.5 NM_170706.2     |
| 88.7    | 88.6   | 87.4   | 97.6 NM_015039.2     |
| 234.4   | 177.3  | 192.7  | 149.1 NM_178177.2    |
| 87.4    | 87.1   | 87.5   | 89.4 NM_001011717.1  |
| 206     | 256.8  | 262.9  | 146.5 NM_021079.3    |
| 135.5   | 123.7  | 108.2  | 114.8 NM_004808.2    |
| 91.6    | 87.3   | 80.2   | 88.2 NM_006681.1     |
| 101.1   | 106.6  | 103    | 105.4 NM_006056.2    |
| 89.7    | 78.6   | 88.1   | 86.3 NM_020167.3     |

|        |        |        |                      |
|--------|--------|--------|----------------------|
| 97.3   | 84.1   | 79.8   | 91.3 NM_005386.2     |
| 96.6   | 101.5  | 103.1  | 91.6 NM_005386.2     |
| 155.1  | 139    | 130.9  | 129.9 NM_006169.2    |
| 86.3   | 94.5   | 83.6   | 94 NM_012343.3       |
| 584.6  | 501.6  | 414.3  | 597.2 NM_182977.1    |
| 387.2  | 258.5  | 303.7  | 317 NM_012343.3      |
| 227.7  | 180.8  | 163.8  | 151 NM_014062.1      |
| 84.9   | 86.6   | 84.5   | 84.8 XR_000623.1     |
| 101.6  | 91.7   | 89.3   | 87.6 NM_001080413.1  |
| 122.6  | 139.1  | 105    | 113.6 NM_015658.1    |
| 811    | 499.1  | 453.5  | 398.6 NM_022451.9    |
| 188    | 111.3  | 108.7  | 99.3 NM_024078.1     |
| 212.6  | 149.9  | 142.2  | 139.6 NM_024078.1    |
| 207.7  | 199.2  | 192.6  | 159.7 NM_006092.1    |
| 149.4  | 127.7  | 120.1  | 115.7 NM_032206.2    |
| 102.4  | 100.6  | 104.2  | 96.7 NM_178844.1     |
| 813.1  | 443.4  | 493.7  | 233 NM_024618.2      |
| 185.4  | 127.9  | 128.6  | 119.1 NM_024618.2    |
| 96.2   | 89     | 85.9   | 89 NM_018055.3       |
| 94.3   | 91     | 87.2   | 91.4 NM_005450.2     |
| 1071.5 | 719.1  | 655.3  | 380.9 NM_006170.2    |
| 82.3   | 84.4   | 80.5   | 74.1 NM_001033714.1  |
| 119.3  | 104.5  | 113.9  | 100.8 NM_006170.2    |
| 118.3  | 142.8  | 133.6  | 119.9 NM_024894.1    |
| 1045.8 | 797.2  | 607.2  | 551.9 NM_015462.2    |
| 389.8  | 330.8  | 396.1  | 229.9 NM_024313.2    |
| 102.3  | 107.1  | 105.3  | 112.8 NM_003946.3    |
| 103.8  | 100.1  | 91.3   | 93.7 NM_003787.1     |
| 927.2  | 569.5  | 508.3  | 444 NM_006392.2      |
| 1535.7 | 903.9  | 741.2  | 472.1 NM_139235.3    |
| 134.4  | 127.4  | 120.9  | 127.9 NM_022917.4    |
| 2798.2 | 2166   | 2066.4 | 1266.3 NM_016167.3   |
| 387.7  | 225.3  | 203.6  | 254 NM_017948.4      |
| 129.1  | 121.7  | 119.5  | 114.1 NM_024654.3    |
| 248.4  | 221.4  | 224.8  | 164.5 NM_018983.2    |
| 3482.7 | 2067.8 | 1846.5 | 1202.6 NM_032993.2   |
| 490    | 328.4  | 297.8  | 244.3 NM_032993.1    |
| 1070.5 | 660.9  | 637    | 546.4 NM_017838.3    |
| 627.7  | 531.3  | 564.3  | 349.5 NM_001034833.1 |
| 8582.7 | 6737.7 | 5665.2 | 4095.2 NM_018648.2   |
| 503.1  | 268.7  | 205.3  | 182.5 NM_004741.1    |
| 94.8   | 92.3   | 82.4   | 95.2 NM_138400.1     |
| 284    | 271.9  | 253.1  | 216 NM_014287.3      |
| 80.2   | 92.4   | 82.4   | 84.9 NM_001004060.1  |
| 184.8  | 185.8  | 172.2  | 150.9 NM_001004067.1 |
| 5673.7 | 5602.5 | 4733.4 | 3625.8 NM_007363.3   |
| 364.4  | 297.7  | 223.9  | 249.5 NM_015934.3    |
| 92.7   | 97     | 101.7  | 99.6 NM_020962.1     |
| 88.1   | 88.9   | 84.4   | 83.4 NM_000620.1     |
| 87.8   | 82.3   | 92     | 95 NM_014697.1       |

|        |        |        |                    |
|--------|--------|--------|--------------------|
| 95.6   | 89     | 84.4   | 92.9 NM_153292.1   |
| 84.5   | 80.4   | 75.9   | 78 NM_000625.3     |
| 158.9  | 152.8  | 147.1  | 108.6 NM_000603.3  |
| 946.2  | 655.2  | 686.1  | 521.2 NM_015953.3  |
| 94.1   | 95.2   | 89.8   | 89.6 NM_052946.2   |
| 820.6  | 1044.9 | 1273.7 | 441.6 NM_017617.2  |
| 161.3  | 174.3  | 168.6  | 148.1 NM_024408.2  |
| 84.5   | 88.7   | 79.8   | 84.2 NM_203458.2   |
| 102.2  | 85     | 95.9   | 95.2 NM_000435.1   |
| 96.5   | 99.3   | 93.5   | 93.8 NM_004557.3   |
| 94.4   | 95.1   | 92     | 88.9 NM_178493.3   |
| 107.4  | 102.1  | 93     | 92 NM_002514.2     |
| 93     | 87     | 84.7   | 88.3 NM_006491.2   |
| 77.4   | 77     | 72.7   | 74.4 NM_006491.2   |
| 89.9   | 98     | 85.6   | 91.1 NM_002516.1   |
| 85.5   | 86.9   | 88.8   | 87.5 NM_007052.3   |
| 92.8   | 88.9   | 86.6   | 89.8 NM_013955.1   |
| 99.2   | 89.8   | 94     | 100.1 NM_013954.1  |
| 94.4   | 94.6   | 87.1   | 101.6 NM_015718.1  |
| 95.8   | 98.2   | 98.2   | 96.3 NM_016931.2   |
| 86.2   | 77.2   | 80.1   | 83.7 NM_024505.2   |
| 236.8  | 268.5  | 289.8  | 252.6 NM_006647.1  |
| 85.5   | 81.5   | 89.8   | 89.5 NM_144603.2   |
| 87.7   | 91.3   | 80.1   | 82.9 NM_172167.1   |
| 103.5  | 103.3  | 99.4   | 93.1 NM_144603.2   |
| 1893.5 | 934    | 737.1  | 545 NM_000270.1    |
| 534.7  | 440.6  | 379    | 436 NM_032569.2    |
| 85.3   | 78.3   | 72.4   | 84.4 NM_207330.1   |
| 101.6  | 90.6   | 96.1   | 100.7 NM_024759.1  |
| 249.1  | 318.7  | 314.6  | 248.5 NM_020448.2  |
| 104.8  | 115.7  | 104.2  | 95.4 NM_002517.2   |
| 103    | 108.5  | 89.5   | 98.7 NM_002518.3   |
| 90.5   | 75.6   | 78.3   | 89.8 NM_022123.1   |
| 90.2   | 80.4   | 82.3   | 88.8 NM_173159.1   |
| 76.2   | 75.6   | 73     | 79.6 NM_173159.1   |
| 98.5   | 110.4  | 110.4  | 98.6 NM_178864.2   |
| 136    | 144.5  | 121.3  | 123.1 NM_002519.1  |
| 86.8   | 85.6   | 78.1   | 83.8 NM_148896.2   |
| 79     | 86.3   | 71.5   | 82.5 NM_005285.3   |
| 109.4  | 103.5  | 99.8   | 108.9 NM_005286.2  |
| 540.7  | 556.3  | 552.8  | 536.2 NM_000271.1  |
| 87.5   | 85     | 81.5   | 90.2 NM_013389.1   |
| 7740.7 | 7090.9 | 6988.6 | 4477.7 NM_006432.3 |
| 167.1  | 143.8  | 149.9  | 158.3 NM_015392.2  |
| 295.2  | 388    | 482.1  | 272 NM_024663.3    |
| 420.8  | 532.3  | 396.2  | 626.5 NM_006310.2  |
| 90.7   | 88.5   | 84.6   | 85.8 NM_003717.1   |
| 93.6   | 86.3   | 84     | 88.1 NM_022146.1   |
| 90.7   | 91.6   | 85.3   | 80.8 NM_053036.1   |
| 100.7  | 106.3  | 90     | 98.6 NM_004885.1   |

|        |        |        |                      |
|--------|--------|--------|----------------------|
| 91.5   | 89.4   | 86.8   | 88.9 NM_207181.1     |
| 95.8   | 90     | 84.8   | 87.4 NM_000272.2     |
| 86.4   | 85.9   | 78.1   | 88 NM_000272.2       |
| 206.8  | 287.5  | 255.2  | 273.3 NM_153240.3    |
| 193    | 182.3  | 172.8  | 136.9 NM_015102.2    |
| 87.7   | 86.7   | 86.5   | 100.8 NM_004646.1    |
| 81     | 84.7   | 89.6   | 81.2 NM_014625.1     |
| 245    | 243.4  | 258.4  | 280.3 NM_006985.1    |
| 200    | 194.3  | 176.2  | 193.2 NM_030769.1    |
| 282.9  | 322.5  | 265.7  | 239.8 NM_017921.1    |
| 91.6   | 100.9  | 97.2   | 100.2 NM_199185.2    |
| 105.3  | 101.2  | 115.6  | 112.7 NM_182795.1    |
| 1299.5 | 536.8  | 514.5  | 333.7 NM_006993.1    |
| 76.6   | 89.6   | 85     | 74 NM_001033047.1    |
| 89.9   | 99.2   | 83.7   | 90.3 NM_006172.1     |
| 88.1   | 86     | 86.7   | 86.3 NM_002521.1     |
| 92.6   | 95.4   | 89.5   | 87.5 NM_024409.1     |
| 89.6   | 88.5   | 86.1   | 89.8 NM_000906.2     |
| 118.7  | 107.7  | 104.2  | 106.7 NM_000907.2    |
| 89.2   | 84.7   | 93.3   | 82.4 NM_000908.2     |
| 3146.3 | 2441.1 | 2094.7 | 2227.6 NM_017455.2   |
| 85.1   | 86     | 86.6   | 91.4 NM_002522.2     |
| 191.5  | 459.2  | 184.8  | 169.7 NM_002522.2    |
| 473.7  | 214.6  | 150.7  | 156 NM_002523.1      |
| 98.2   | 96.3   | 90.2   | 95.7 NM_058178.1     |
| 154.3  | 96.8   | 103.9  | 92.7 NM_000905.2     |
| 84.9   | 90.1   | 83.9   | 91.9 NM_000910.2     |
| 90.5   | 89.6   | 79.1   | 83 NM_006174.2       |
| 104.4  | 90.2   | 92.9   | 92.1 NR_002713.1     |
| 115.7  | 98.2   | 85.7   | 89.5 NM_000903.2     |
| 3373.7 | 2124.7 | 1768.4 | 1256.6 NM_000903.2   |
| 187.7  | 170.4  | 152.7  | 156.4 NM_000904.1    |
| 90.4   | 100    | 89.5   | 80.1 NM_000475.3     |
| 82.7   | 81.9   | 81.3   | 88 NM_021969.1       |
| 92.5   | 82.5   | 89.4   | 79.9 NM_021724.1     |
| 123.1  | 108.7  | 111    | 116.9 NM_005126.2    |
| 192.3  | 185.6  | 163.4  | 152.5 NM_007121.2    |
| 228.2  | 252.5  | 280.8  | 189.7 NM_005693.1    |
| 100.8  | 93.6   | 84.8   | 93.3 NM_005123.1     |
| 94.2   | 92.2   | 89     | 89.6 NM_022002.1     |
| 89.6   | 88.5   | 87     | 84.2 NM_033013.1     |
| 92.4   | 95.9   | 93.3   | 93.9 NM_005122.2     |
| 87.2   | 81.3   | 82.7   | 93.4 NM_001077475.1  |
| 118.6  | 137.8  | 133.1  | 138.4 NM_003297.1    |
| 113.3  | 108.5  | 110.3  | 107.4 NM_001032287.1 |
| 165.3  | 219.9  | 230.2  | 201.4 NM_001032287.1 |
| 178.8  | 157.2  | 154.7  | 135.5 NM_003298.2    |
| 98.4   | 92.8   | 84.3   | 87.4 NM_003269.2     |
| 89.2   | 79     | 83.2   | 86.5 NM_014249.2     |
| 85.6   | 81.2   | 79.6   | 94.9 NM_016346.2     |

|        |        |        |                      |
|--------|--------|--------|----------------------|
| 94     | 92.1   | 86.6   | 87.8 NM_016346.2     |
| 96.9   | 104.6  | 106.8  | 98 NM_005654.4       |
| 91     | 93.7   | 88.2   | 85.9 NM_021005.2     |
| 302.8  | 264.6  | 263.7  | 168 NM_005234.3      |
| 146.4  | 131.7  | 128.3  | 121.1 NM_001020825.1 |
| 90.3   | 94.6   | 86.5   | 83 NM_001018077.1    |
| 94.5   | 104.7  | 100.1  | 91.2 NM_001018076.1  |
| 84.9   | 83.1   | 88.7   | 81.1 NM_000901.1     |
| 86.4   | 94.4   | 88.1   | 85.3 NM_002135.3     |
| 103.4  | 92     | 80.5   | 85.7 NM_173157.1     |
| 90.5   | 79.5   | 81.5   | 83 NM_173158.1       |
| 95.2   | 87.1   | 80.6   | 86.7 NM_006186.2     |
| 95.9   | 93     | 90.7   | 94.6 NM_006981.2     |
| 80.4   | 83.3   | 81.8   | 83.9 NM_173199.1     |
| 95.2   | 77.4   | 87.4   | 81.6 NM_173198.1     |
| 102.5  | 81.8   | 85.1   | 80.4 NM_173199.1     |
| 94.8   | 81.9   | 82.4   | 88.3 NM_173200.1     |
| 83.4   | 82.8   | 85.9   | 93.7 NM_004959.3     |
| 94.4   | 95.9   | 91.1   | 83.7 NM_205860.1     |
| 87.5   | 86.9   | 88.1   | 93.5 NM_205860.1     |
| 80.3   | 89.8   | 83.6   | 87.1 NM_003822.3     |
| 110.4  | 104.7  | 92     | 97.5 NM_001489.3     |
| 84.5   | 89.9   | 85.4   | 90.7 NM_033334.2     |
| 101.3  | 96     | 89.8   | 90.5 NM_006175.3     |
| 91.5   | 78.9   | 86.4   | 93.6 NM_198060.2     |
| 814.3  | 340.3  | 308.4  | 276.6 NM_002524.2    |
| 130.5  | 118.7  | 113.1  | 122.3 NM_013392.2    |
| 344.6  | 520.3  | 550.7  | 357.6 NM_178564.2    |
| 91.3   | 107.5  | 90.6   | 90 NM_005010.3       |
| 90.3   | 101.9  | 76.1   | 82.8 NM_005010.2     |
| 2818.6 | 3110.6 | 2340.9 | 2628.6 NM_002525.1   |
| 92.9   | 96.9   | 89.2   | 93.3 NM_005011.2     |
| 96.5   | 89     | 97.4   | 87.9 NM_005011.2     |
| 93.8   | 86.1   | 99.9   | 81.9 NM_005011.2     |
| 89.7   | 87.6   | 86.3   | 86.9 NM_013959.1     |
| 85.7   | 91.5   | 78.3   | 97.7 NM_013961.1     |
| 97.4   | 94.6   | 93     | 88.2 NM_013960.1     |
| 73.3   | 90     | 81.3   | 77 NM_013962.2       |
| 98.2   | 82.1   | 90.1   | 96.9 NM_013983.1     |
| 102.6  | 95.9   | 81.1   | 98.3 NM_013985.1     |
| 90.5   | 87.6   | 93.5   | 91.2 NM_001010848.2  |
| 129.2  | 104.2  | 94.8   | 98 NM_138573.1       |
| 226.6  | 150.1  | 132    | 157.1 NM_006176.1    |
| 365.3  | 409.2  | 316.6  | 370.5 NM_003489.2    |
| 94.6   | 98.2   | 96.1   | 91.4 NM_031474.1     |
| 589.8  | 355.3  | 292.5  | 235.8 NM_020645.1    |
| 117.7  | 113.7  | 113.8  | 110.2 NM_198465.1    |
| 92.5   | 95.4   | 79.4   | 90.6 NM_006177.2     |
| 193.1  | 139    | 130.1  | 136.1 NM_007243.1    |
| 84.1   | 91.3   | 95.6   | 79.5 NM_016588.2     |



|        |        |        |                      |
|--------|--------|--------|----------------------|
| 100.2  | 84.1   | 86.9   | 89.8 NM_001024629.1  |
| 164.6  | 163.2  | 126.4  | 136 NM_003873.3      |
| 88.2   | 93     | 89.6   | 101.3 NM_201264.1    |
| 94.8   | 85.7   | 84.3   | 79.2 NM_201264.1     |
| 87.3   | 89.1   | 87.2   | 97.1 NM_018534.3     |
| 105    | 97     | 86.2   | 92.3 NM_004558.2     |
| 71     | 84.3   | 73.6   | 88 NM_004801.2       |
| 82.6   | 83     | 82.7   | 86.6 NM_138735.1     |
| 83.7   | 83     | 86.9   | 80.8 NM_138735.1     |
| 98.3   | 92.1   | 80.1   | 94.8 NM_138734.1     |
| 106    | 99.4   | 93.1   | 95.6 NM_015080.2     |
| 90.4   | 90.6   | 89.1   | 88.6 NM_004796.3     |
| 92.8   | 91.9   | 93.9   | 87.3 NM_004796.3     |
| 93.8   | 92.9   | 84.2   | 80.7 NM_138970.2     |
| 280.3  | 222.2  | 210.7  | 201.7 NM_024632.3    |
| 88     | 79.9   | 73.5   | 79.9 NM_030763.1     |
| 102.5  | 96.4   | 101.1  | 91.1 NM_022455.3     |
| 110.5  | 139.4  | 133.4  | 154.6 NM_022455.3    |
| 500.5  | 455.2  | 493.4  | 269.8 NM_015922.1    |
| 126.9  | 150.3  | 158.8  | 143.9 NM_006178.1    |
| 493.3  | 531.4  | 418.4  | 428.2 NM_006178.1    |
| 3878.4 | 4038.5 | 3822.7 | 2884.2 NM_006178.1   |
| 318.9  | 294.1  | 296.4  | 218 NM_016143.3      |
| 358.7  | 324.7  | 335.4  | 234.6 NM_182483.1    |
| 112    | 98.6   | 104.7  | 97.5 NM_001042549.1  |
| 93.8   | 97.5   | 91.6   | 81.1 NM_001042549.1  |
| 4038.6 | 2520.3 | 2212.4 | 1712.8 NM_003580.2   |
| 609.6  | 430.1  | 503.4  | 241.4 NM_145080.2    |
| 1545.5 | 1270.4 | 955.6  | 892.7 NM_017755.4    |
| 147.5  | 137.5  | 121    | 129.5 NM_022072.2    |
| 599.2  | 624    | 581.1  | 388.1 NM_199044.2    |
| 264.2  | 244.7  | 245.3  | 199.3 NM_148956.1    |
| 141.4  | 143.5  | 141.9  | 139.2 NM_018044.2    |
| 259.1  | 177.5  | 160.2  | 146 NM_018044.2      |
| 360.9  | 295.5  | 314.9  | 237.9 NM_145645.2    |
| 85     | 84.1   | 81.7   | 78.6 NM_148980.1     |
| 115.6  | 112.1  | 107.9  | 99.9 NM_148936.1     |
| 92.4   | 93.8   | 74.6   | 90 NM_182543.1       |
| 89.2   | 96.5   | 89.3   | 84.2 NM_024677.3     |
| 1073.8 | 844.7  | 984.5  | 502 NM_014595.1      |
| 94.2   | 87.7   | 84.9   | 91.8 NM_032526.1     |
| 100.8  | 91.8   | 89.3   | 95.9 NM_033253.2     |
| 85.3   | 82.8   | 79.1   | 78.5 NM_001002006.1  |
| 545.6  | 430.8  | 407.7  | 377.3 NM_012229.2    |
| 1277.4 | 862.4  | 769.3  | 871.6 NM_001002010.1 |
| 377    | 308    | 292.5  | 192.8 NM_052935.2    |
| 106.4  | 88.1   | 89.4   | 92.1 NM_152729.2     |
| 353.9  | 212.5  | 202.7  | 191.6 NM_022908.1    |
| 105    | 102    | 107.9  | 96.9 NM_001031701.1  |
| 485.4  | 449.8  | 485.4  | 297.8 NM_016575.1    |

|        |        |        |        |                |
|--------|--------|--------|--------|----------------|
| 126.4  | 111.6  | 106.1  | 105.2  | NM_002526.1    |
| 96.5   | 93.2   | 90.4   | 92.2   | NM_020201.3    |
| 642.2  | 341.8  | 412    | 431.1  | NM_173474.2    |
| 556.4  | 405.4  | 355.9  | 299.3  | NM_006702.2    |
| 89.8   | 89.8   | 100.1  | 92     | NM_002527.3    |
| 96.6   | 93.7   | 81.7   | 92.6   | NM_006179.3    |
| 380.8  | 255.3  | 211.7  | 183.9  | NM_002528.4    |
| 91.3   | 83.3   | 87.7   | 91.3   | NM_004822.1    |
| 74     | 74.6   | 76.4   | 68.3   | NM_006181.1    |
| 83.8   | 85.7   | 81.8   | 84.4   | NM_021229.3    |
| 83.6   | 76     | 78.2   | 75.3   | NM_014917.2    |
| 95.7   | 85.3   | 84.3   | 92.1   | NM_032536.1    |
| 86.3   | 84.3   | 78.4   | 80.4   | NM_001007792.1 |
| 96     | 102.4  | 102.2  | 89.4   | NM_002529.3    |
| 91.7   | 89.8   | 89.6   | 77.9   | NM_001012331.1 |
| 93     | 83.9   | 85.9   | 78.8   | NM_001018065.1 |
| 91.1   | 95.1   | 89.6   | 92.1   | NM_006180.3    |
| 87.1   | 82.2   | 85.8   | 84.2   | NM_001007097.1 |
| 86.4   | 101.1  | 101.8  | 95.1   | NM_002530.2    |
| 91     | 90.7   | 83.5   | 77.8   | NM_001007156.1 |
| 80.8   | 86.6   | 79.9   | 81.6   | NM_006183.3    |
| 161.2  | 117.5  | 121.8  | 106.3  | NM_002531.1    |
| 91.3   | 91.8   | 74.6   | 71.6   | NM_012344.2    |
| 96.2   | 98.6   | 89.8   | 90.3   | NM_012344.2    |
| 116.1  | 104.7  | 97.9   | 105.7  | NM_014840.2    |
| 85.9   | 87.8   | 83.1   | 81.1   | NM_030952.1    |
| 92     | 92.9   | 92.4   | 85.1   | NM_016118.3    |
| 307    | 271.2  | 266.4  | 209.5  | NM_002484.1    |
| 228    | 165.1  | 154.3  | 128.7  | NM_012225.1    |
| 530.7  | 792.8  | 1004.4 | 680.9  | NM_025152.1    |
| 6822.8 | 6539.4 | 5889.8 | 4438.2 | NM_006184.3    |
| 2307.6 | 1685.8 | 1562.7 | 1715.3 | NM_005013.1    |
| 148.5  | 204.8  | 180.3  | 161.5  | NM_022731.2    |
| 3083.5 | 2818.4 | 2974.6 | 1274.6 | NM_006600.2    |
| 130.7  | 110.6  | 115    | 112.6  | NM_032869.2    |
| 158    | 145.5  | 165.8  | 126.7  | NM_145266.4    |
| 286    | 294.8  | 256.7  | 214    | NM_015332.2    |
| 156.2  | 131.1  | 147.2  | 118.9  | NM_198954.1    |
| 2177   | 1601.3 | 1773.1 | 1094.1 | NM_198948.1    |
| 71.6   | 79.7   | 68.3   | 74.1   | NM_153183.1    |
| 143.6  | 104.5  | 101.6  | 102.4  | NM_018159.2    |
| 88.8   | 90.7   | 79.3   | 83.8   | NM_031438.2    |
| 112.2  | 103    | 102.7  | 105.5  | NM_015901.4    |
| 1636.6 | 1301.8 | 1246.9 | 857.9  | NM_177533.2    |
| 148.2  | 128.2  | 120.8  | 124.3  | NM_018283.1    |
| 168.2  | 172.8  | 141.4  | 151.5  | NM_152395.1    |
| 646.1  | 304.5  | 336    | 272.9  | NM_032349.2    |
| 100    | 92.2   | 90.8   | 87     | NM_001012758.1 |
| 655.3  | 397.2  | 351    | 247.1  | NM_024815.2    |
| 377.6  | 448.4  | 361.4  | 295.6  | NM_147173.1    |

|        |        |        |        |             |
|--------|--------|--------|--------|-------------|
| 873.3  | 828.5  | 846.7  | 630.6  | NM_147173.1 |
| 94.7   | 91.7   | 90.5   | 95.3   | NM_007006.2 |
| 233.8  | 193.4  | 187.4  | 167.1  | NM_032344.1 |
| 1740   | 1387   | 1184   | 810.7  | NM_006703.2 |
| 80.7   | 73.2   | 80.1   | 81.4   | NM_019094.4 |
| 88.6   | 88.3   | 79.7   | 81.7   | NR_002212.1 |
| 1156.7 | 419.5  | 414.8  | 260    | NM_014142.2 |
| 102.1  | 94.6   | 97.8   | 87.6   | NM_007083.3 |
| 182.1  | 141.3  | 142.5  | 126.5  | NM_007083.3 |
| 121.8  | 103.4  | 100.6  | 108.4  | NM_198041.1 |
| 96.8   | 96.6   | 89.3   | 81.3   | NM_181843.1 |
| 91.5   | 97.6   | 99     | 89.7   | NM_198038.1 |
| 674.2  | 462    | 479.3  | 328.3  | NM_198038.1 |
| 100.4  | 90.5   | 94     | 83.1   | NM_024047.3 |
| 91.7   | 84.8   | 84.4   | 84.8   | NR_002779.1 |
| 128.5  | 97.5   | 99.4   | 114    | NM_031423.3 |
| 104.9  | 104.2  | 101.9  | 98.3   | NM_031423.3 |
| 94.9   | 83.2   | 93.3   | 97.6   | NM_012345.1 |
| 530.9  | 411.4  | 375.9  | 398    | NM_020772.1 |
| 1050.2 | 1061.8 | 1208.5 | 624.9  | NM_014972.1 |
| 250.6  | 246.7  | 215.2  | 242.2  | NM_006185.2 |
| 1119.7 | 800.9  | 772.8  | 515.4  | NM_003744.5 |
| 79.8   | 89.5   | 77.9   | 85.7   | NM_004756.2 |
| 534.7  | 576.9  | 501.5  | 419.4  | NM_020401.2 |
| 1236.3 | 779.2  | 627    | 596.8  | NM_018230.2 |
| 361.4  | 399.8  | 324.6  | 372.2  | NM_005124.2 |
| 98.4   | 132.3  | 112.1  | 112.2  | NM_153485.1 |
| 1394.2 | 1135.8 | 898    | 683.6  | NM_004298.2 |
| 1668.2 | 1570.2 | 1202.3 | 1263.1 | NM_015231.1 |
| 369.6  | 359.7  | 286.9  | 252.6  | NM_015354.1 |
| 1671.2 | 1571.6 | 1232.8 | 1050.6 | NM_015135.1 |
| 412.1  | 337.7  | 404.1  | 286.8  | NM_024923.2 |
| 98.2   | 96.9   | 89.5   | 96.9   | NM_207308.1 |
| 1131.3 | 1052.8 | 981.8  | 895.4  | NM_005085.2 |
| 408.4  | 202.7  | 176.4  | 181.8  | NM_138285.3 |
| 145.2  | 113.8  | 116.6  | 119.2  | NM_138285.3 |
| 2727.3 | 1864   | 1655.3 | 1122.2 | NM_024057.2 |
| 137    | 138.4  | 123.1  | 124.8  | NM_198887.1 |
| 744.5  | 598.2  | 582.6  | 524.1  | NM_153645.1 |
| 93.2   | 97.5   | 87.5   | 87.1   | NM_007172.2 |
| 135.5  | 120.1  | 128.9  | 118    | NM_153645.1 |
| 1283.8 | 814    | 705.3  | 696    | NM_017426.2 |
| 217.3  | 185.5  | 162.6  | 158.9  | NM_153719.2 |
| 5061.2 | 3360.2 | 3408.4 | 1892.2 | NM_153719.2 |
| 1852.9 | 1467   | 1205.9 | 1018   | NM_024844.2 |
| 1346.6 | 887.8  | 721.8  | 739.4  | NM_002532.3 |
| 1256.4 | 960.7  | 757.6  | 533    | NM_014669.2 |
| 116.2  | 114.1  | 98.4   | 111.2  | NM_005387.4 |
| 183.8  | 144.9  | 128.6  | 121.8  | NM_139131.2 |
| 98.4   | 105.7  | 91.3   | 95.1   | NM_016320.3 |

|        |        |        |                      |
|--------|--------|--------|----------------------|
| 90.5   | 95.7   | 81.8   | 83.1 NM_001008565.1  |
| 118.5  | 99.5   | 105.1  | 108.1 NM_001008565.1 |
| 150.3  | 164.9  | 143.8  | 128 NM_014089.3      |
| 593.8  | 774.3  | 686.4  | 610.2 NM_007342.1    |
| 136.1  | 247.2  | 254.1  | 175.5 NM_001042483.1 |
| 116.3  | 125.5  | 96.1   | 102.8 NM_138459.3    |
| 5028.6 | 2409.6 | 2234.1 | 1458.7 NM_016359.2   |
| 840.4  | 446.3  | 303.9  | 317.9 NM_018454.5    |
| 116.8  | 89.5   | 97.1   | 104.8 NM_175741.1    |
| 155.9  | 111.3  | 108.4  | 125.1 NM_005796.1    |
| 97     | 81.1   | 89.1   | 88.4 NM_002533.2     |
| 334.8  | 404.4  | 399.8  | 240.8 NM_002533.2    |
| 1097.7 | 806.8  | 792.3  | 652.2 NM_006362.3    |
| 987.7  | 784.6  | 852.1  | 639.2 NM_006362.3    |
| 88.5   | 87.6   | 90.3   | 91.2 NM_022053.1     |
| 88.5   | 86     | 85.1   | 79 NM_022053.1       |
| 229.4  | 226.9  | 254.6  | 173.6 NM_022052.1    |
| 100.6  | 93.9   | 85.6   | 88.4 NR_002216.1     |
| 85.6   | 91.9   | 91.1   | 90.6 NM_033155.1     |
| 193.6  | 299.3  | 280.6  | 219.3 NM_022463.3    |
| 94.9   | 95.6   | 100.4  | 88.9 NM_152745.1     |
| 86.7   | 76     | 79.9   | 93 NM_007226.1       |
| 100.8  | 94.5   | 89.4   | 95.4 NM_007225.1     |
| 95.6   | 88.2   | 84.1   | 84.4 NM_007224.1     |
| 92.7   | 93.7   | 85.3   | 91.4 NM_007224.1     |
| 1581.5 | 1072   | 1003   | 656.4 NM_013248.2    |
| 320.3  | 196.1  | 227.9  | 221.4 NM_018698.3    |
| 101.8  | 99     | 94     | 89.8 NM_031956.1     |
| 78.4   | 80.4   | 80.5   | 80.5 NM_032599.1     |
| 217.1  | 252.8  | 212.1  | 212.1 NM_032597.2    |
| 162.5  | 138.1  | 142.3  | 160.2 NM_001079692.1 |
| 88.2   | 101.7  | 87.5   | 85.6 NM_033122.2     |
| 98.2   | 89.7   | 88.5   | 93 NM_173663.3       |
| 123.6  | 111.7  | 121.1  | 113.1 NM_033417.1    |
| 249.2  | 191.3  | 173.2  | 161.5 NM_001011699.1 |
| 83.9   | 80.7   | 86.7   | 79.4 NM_022567.1     |
| 100.7  | 92.8   | 93.8   | 89.7 XM_938724.1     |
| 219.4  | 207.6  | 191.6  | 148.3 NM_005768.5    |
| 1443   | 524    | 396.3  | 358.4 NM_178507.2    |
| 89.1   | 80     | 76.5   | 81.4 NM_016816.2     |
| 114.6  | 92.1   | 106.9  | 91.4 NM_001032409.1  |
| 137.8  | 114.3  | 115.7  | 107.8 NM_002534.2    |
| 101.9  | 94.8   | 87.9   | 83.4 NM_001032409.1  |
| 115.7  | 93.2   | 95     | 93.6 NM_002535.2     |
| 91.8   | 87.6   | 96.1   | 93.5 NM_001032731.1  |
| 93.6   | 86.9   | 84.6   | 75 NM_016817.2       |
| 278.8  | 215    | 198.8  | 150.3 NM_016817.2    |
| 88.6   | 90.1   | 83.6   | 88.7 NM_006187.2     |
| 97.8   | 92.4   | 84.2   | 75.9 NM_003733.2     |
| 94.4   | 87.3   | 82.1   | 87.1 NM_003733.2     |

|        |         |         |         |                |
|--------|---------|---------|---------|----------------|
| 1182.6 | 906.9   | 778.8   | 667.9   | NM_000274.1    |
| 107.3  | 100.7   | 96.6    | 93.2    | NM_002536.1    |
| 97.5   | 99.5    | 91.3    | 95      | NM_001006113.1 |
| 47331  | 31835.3 | 33409.7 | 24329.9 | NM_004152.2    |
| 104.5  | 102.2   | 96.4    | 90.2    | NM_016178.1    |
| 247.1  | 278.1   | 255     | 215.3   | NM_024928.3    |
| 210.6  | 358.8   | 300     | 283.1   | NM_022837.1    |
| 383.4  | 368.4   | 316.9   | 312.8   | NM_024068.2    |
| 97.6   | 88.6    | 94      | 90.4    | NM_014582.1    |
| 92.8   | 95.4    | 85.1    | 91.7    | NM_052843.2    |
| 89.3   | 87      | 84.2    | 90.8    | NM_001080399.1 |
| 79.6   | 86.4    | 85.4    | 86.2    | NM_000275.1    |
| 1669.8 | 2249.7  | 3443.2  | 2616.6  | NM_001079842.1 |
| 2873   | 1948.5  | 1595.7  | 1934.5  | NM_017830.1    |
| 427.8  | 245.6   | 253.5   | 187.5   | NM_152398.2    |
| 1993.2 | 1380    | 1303.8  | 854.6   | NM_001014446.1 |
| 97.1   | 89.2    | 85.4    | 86.1    | NM_022375.2    |
| 94.7   | 85.6    | 82      | 93.2    | NM_002538.2    |
| 104.7  | 97      | 86.9    | 89.2    | NM_002538.2    |
| 84.7   | 80.3    | 80.4    | 93.5    | NM_006188.2    |
| 286    | 456.5   | 382.1   | 316.6   | NM_000276.3    |
| 204.9  | 230.1   | 204.6   | 195.1   | NM_001587.3    |
| 3069.1 | 1849.5  | 1158.6  | 1130.9  | NM_002539.1    |
| 87.8   | 94.6    | 81.8    | 89.5    | NM_024410.2    |
| 328.6  | 214.2   | 180     | 180     | NM_153437.1    |
| 121.6  | 107.9   | 112.6   | 104.2   | NM_153437.1    |
| 849.7  | 628.8   | 448     | 515.8   | NM_002540.3    |
| 98.1   | 96.7    | 92      | 99.3    | NM_001007022.1 |
| 90     | 81.7    | 80.9    | 88.6    | NM_020729.1    |
| 98.4   | 98.7    | 93.2    | 93      | NM_175881.2    |
| 94.2   | 88.7    | 77.5    | 96.4    | NM_153007.3    |
| 84.2   | 90      | 76      | 87.4    | NM_014253.1    |
| 101.8  | 102.2   | 94.4    | 92.8    | NM_001080428.1 |
| 121.8  | 101.7   | 115.2   | 103.3   | NM_001080477.1 |
| 82.4   | 84.3    | 73.5    | 85.3    | NM_153003.1    |
| 169.6  | 166     | 181     | 190.2   | NM_003611.1    |
| 120.2  | 111.9   | 117.1   | 100.1   | NM_001003941.1 |
| 89.2   | 90.3    | 96.8    | 88.3    | NM_001003941.1 |
| 196.7  | 270.7   | 247.2   | 214.2   | NM_002541.2    |
| 110.2  | 101     | 84.2    | 92.8    | NM_018245.1    |
| 94.7   | 84.1    | 80.1    | 86.5    | NM_001031707.1 |
| 536.8  | 309.6   | 218.4   | 251.2   | NM_001031707.1 |
| 977.1  | 563.6   | 503     | 348.8   | NM_018233.2    |
| 92.5   | 113.8   | 103.7   | 96.6    | NM_024623.1    |
| 485.7  | 431.3   | 362     | 301.7   | NM_007346.2    |
| 388.2  | 256.1   | 194.2   | 278.5   | NM_024576.3    |
| 117.7  | 122.2   | 117.2   | 116.4   | NM_002542.4    |
| 205.9  | 208.9   | 226.1   | 181     | NM_016821.1    |
| 81.3   | 88.8    | 86.5    | 85.8    | NM_014057.3    |
| 88.4   | 88.5    | 81.6    | 79.3    | NM_033014.1    |

|        |        |       |                      |
|--------|--------|-------|----------------------|
| 84.5   | 84.2   | 87.9  | 87.7 NM_024416.2     |
| 1069.8 | 1232.9 | 1381  | 1127 NM_003605.3     |
| 401.5  | 447.1  | 382.1 | 417.2 NM_181672.1    |
| 1840.1 | 975.4  | 954.5 | 874.7 NM_007280.1    |
| 87.3   | 82.8   | 82.5  | 89 NM_152635.1       |
| 86.4   | 96.5   | 81.4  | 89.4 NM_058199.2     |
| 86.8   | 83.2   | 76.8  | 84.5 NM_014279.2     |
| 80     | 91.6   | 93.4  | 89.6 NM_006334.2     |
| 86.5   | 86.8   | 81.9  | 80.2 NM_058164.1     |
| 91.1   | 74.3   | 81.3  | 85.9 NM_058170.1     |
| 97.9   | 83.6   | 95.2  | 90.8 NM_006418.3     |
| 89.1   | 81.7   | 75    | 88 NM_198474.2       |
| 95.3   | 82.7   | 85.6  | 89.3 NM_182487.1     |
| 93.7   | 89.6   | 99.8  | 88.7 NM_015441.1     |
| 164.3  | 225.2  | 190   | 173.1 NM_020190.2    |
| 348.2  | 299.6  | 322.7 | 238.9 NM_005806.2    |
| 86.3   | 92.5   | 90.5  | 97.8 NM_175747.2     |
| 87.4   | 88.4   | 81.3  | 90.6 NM_002543.2     |
| 88.6   | 93.1   | 99.1  | 101.2 NM_145243.3    |
| 98.5   | 107.8  | 94.2  | 95.4 NM_005014.1     |
| 86.3   | 90.8   | 88.8  | 83.1 NM_002544.3     |
| 89.8   | 85     | 80.8  | 91.3 NM_006189.1     |
| 82.3   | 89.6   | 85.3  | 95.3 NM_004498.1     |
| 106.6  | 110.1  | 122.7 | 85.5 NM_004852.1     |
| 87.5   | 95.9   | 82.8  | 88.9 NM_001080488.1  |
| 500.4  | 533.7  | 430.6 | 404.6 NM_130835.1    |
| 90.7   | 89.6   | 81    | 82.3 NM_015560.1     |
| 85.9   | 99.2   | 88    | 93.1 NM_025136.1     |
| 269    | 293.5  | 398.7 | 197.9 NM_025136.1    |
| 86.1   | 80.6   | 83.8  | 84.5 NM_001012393.1  |
| 101.5  | 96.7   | 98.6  | 106.4 NM_002545.3    |
| 87.5   | 84.7   | 84.5  | 88.7 NM_002547.1     |
| 101.8  | 112.3  | 110.5 | 96.5 NM_017570.1     |
| 521.9  | 518.4  | 561.2 | 257.2 NM_017570.1    |
| 81.1   | 83.3   | 80.9  | 92.5 NM_020061.2     |
| 92.6   | 82.5   | 80.7  | 89.9 NM_000513.1     |
| 106.2  | 98.4   | 98.6  | 100.3 NM_001708.1    |
| 378.8  | 233.1  | 232.9 | 227.1 NM_001030012.1 |
| 120.9  | 132.2  | 109   | 103.2 NM_014322.2    |
| 142.7  | 125.8  | 107.5 | 110.4 NM_001030011.1 |
| 86.4   | 91.4   | 82.9  | 81.7 NM_033282.3     |
| 88.3   | 82.7   | 85.9  | 94.7 NM_033282.3     |
| 94.7   | 93.7   | 81.6  | 82.6 NM_001030051.1  |
| 86.7   | 102    | 95.7  | 96.8 NM_181744.2     |
| 98.2   | 102.5  | 91    | 95.6 NM_000911.3     |
| 91.7   | 85     | 91.8  | 98.1 NM_000912.3     |
| 208.8  | 295.5  | 271.8 | 188.1 NM_000913.3    |
| 97.3   | 84.3   | 90.4  | 97.1 NM_000913.3     |
| 86.5   | 85.8   | 81.3  | 81 NM_182647.1       |
| 105.7  | 119.8  | 102.9 | 96.2 NM_001008505.1  |

|       |       |       |                      |
|-------|-------|-------|----------------------|
| 83    | 79.8  | 76    | 87.2 NM_001008503.1  |
| 109.7 | 105.6 | 98.1  | 104.7 NM_000914.2    |
| 78.2  | 81    | 81.5  | 78.3 NM_000914.2     |
| 91.7  | 76.3  | 77.3  | 81.3 NM_001008504.1  |
| 80.7  | 95.4  | 84.1  | 83.9 NM_000914.2     |
| 217.2 | 160.1 | 144.2 | 160.4 NM_147160.2    |
| 630.6 | 383.5 | 339.1 | 281.3 NM_005866.2    |
| 96    | 101.9 | 87.9  | 92.9 NM_014359.3     |
| 148.3 | 166.6 | 167.4 | 209.7 NM_001008213.1 |
| 85.2  | 93.8  | 82.9  | 93.1 NM_001004460.1  |
| 83.5  | 80.3  | 75.6  | 82.5 NM_001003745.1  |
| 77.8  | 96.3  | 82.1  | 80.4 NM_207186.1     |
| 73.3  | 74.8  | 73    | 77.1 NM_178168.1     |
| 92.8  | 82.2  | 82.9  | 95 NM_001004461.1    |
| 90.5  | 99.6  | 84.5  | 86.7 NM_001005280.1  |
| 88.8  | 91.6  | 87.2  | 88.2 NM_001004134.1  |
| 89.9  | 82.3  | 84.7  | 85.9 NM_001005491.1  |
| 89.5  | 94.6  | 89.1  | 86.2 NM_013941.2     |
| 84.1  | 82    | 83.8  | 87 NM_001005466.1    |
| 98.2  | 94.7  | 91.3  | 99 NM_001005465.1    |
| 93.6  | 96    | 82.2  | 92.3 NM_001004462.1  |
| 91.7  | 89.2  | 92.5  | 92.5 NM_001004463.1  |
| 82.6  | 84.2  | 77.4  | 87 NM_001004464.1    |
| 96.1  | 89    | 81    | 83 NM_001001953.1    |
| 82.1  | 76.5  | 77.4  | 72 NM_013940.1       |
| 83.2  | 77.4  | 83    | 76.4 NM_013939.1     |
| 101.1 | 90.4  | 80.1  | 87.8 NM_013938.1     |
| 95.4  | 81.8  | 88.1  | 86.8 NM_001004465.1  |
| 80.4  | 79.3  | 76    | 80.9 NM_001004466.1  |
| 115.2 | 101   | 95.6  | 92.4 NM_012351.1     |
| 89.5  | 78.8  | 82.5  | 89.4 NM_001004467.1  |
| 83.9  | 94.6  | 84    | 85.7 NM_001004469.1  |
| 92.2  | 83.2  | 86.8  | 92.7 NM_001004473.1  |
| 89.1  | 85.9  | 82.3  | 81.6 NM_001004476.1  |
| 84.3  | 91.2  | 88.9  | 85.9 NM_206899.1     |
| 83    | 83.9  | 92.9  | 85.7 NM_001004471.1  |
| 105.4 | 87    | 105   | 102.7 NM_001004472.1 |
| 100.6 | 98.4  | 90    | 100.5 NM_001004474.1 |
| 81.4  | 92.1  | 85.3  | 84.8 NM_001004475.1  |
| 89.1  | 81.8  | 82.9  | 83 NM_001005324.1    |
| 85.5  | 103.3 | 93.9  | 94.5 NM_207374.1     |
| 82.3  | 82    | 77.1  | 82.9 NM_001004477.1  |
| 96.8  | 79    | 82.8  | 84.5 NM_001004478.1  |
| 82.9  | 78.3  | 85.4  | 90.9 NM_013937.2     |
| 83.9  | 85.2  | 86.6  | 80.1 NM_001005503.1  |
| 80.8  | 72.3  | 87.1  | 89.9 NM_001005239.1  |
| 102.8 | 94.4  | 87    | 88.5 XM_939167.1     |
| 96.1  | 97.2  | 94.8  | 88.8 NM_001013354.1  |
| 98.3  | 95.2  | 93.3  | 99 NM_001004479.1    |
| 83    | 81.5  | 80.8  | 89.8 NM_001004480.1  |

|       |       |       |                      |
|-------|-------|-------|----------------------|
| 123.4 | 111.2 | 113.7 | 106 NM_001001959.1   |
| 96.2  | 93.9  | 93.8  | 73.7 NM_013936.2     |
| 80.9  | 78    | 79.1  | 83.3 NM_030959.2     |
| 98.9  | 109.7 | 87.6  | 97 NM_001004297.1    |
| 91.3  | 88.2  | 80.6  | 85.2 NM_001004481.1  |
| 93.3  | 86.7  | 80.8  | 88.1 NM_001001961.1  |
| 90.8  | 85.7  | 80.3  | 78.3 NM_001001919.1  |
| 83.6  | 86.8  | 80.8  | 93.8 NM_001004482.1  |
| 98.5  | 88.8  | 87.3  | 85.3 NM_001004483.1  |
| 99    | 97    | 94.6  | 85.1 NM_001001956.1  |
| 87.8  | 86.8  | 90.3  | 92.4 NM_001004484.1  |
| 81.4  | 80.3  | 76.2  | 73.8 NM_001004485.1  |
| 97.8  | 93    | 95.1  | 90.3 NM_001005487.1  |
| 84.1  | 74.6  | 77.1  | 88.2 NM_001004486.1  |
| 97.2  | 99.7  | 100   | 95.5 NM_001004487.1  |
| 96.9  | 90.5  | 99.1  | 96.7 NM_014565.1     |
| 89.7  | 88.4  | 85.9  | 99.4 NM_012352.1     |
| 92.2  | 87.7  | 86.6  | 88.2 NM_001004450.1  |
| 91.3  | 93.8  | 84.6  | 86.5 NM_012353.1     |
| 92.5  | 99.3  | 90.9  | 83.6 NM_002548.1     |
| 94.4  | 107.8 | 92    | 93.8 NM_003552.2     |
| 79.3  | 75.1  | 84.6  | 81.3 NM_003553.1     |
| 81.9  | 77.5  | 71.9  | 73.4 NM_003554.1     |
| 82.7  | 85.6  | 83.9  | 85.7 NM_012360.1     |
| 83.7  | 85.4  | 87.8  | 92.6 NR_002169.1     |
| 88.9  | 82.9  | 83.6  | 92.7 NM_003555.1     |
| 81.3  | 86.3  | 91.5  | 81.6 NM_001004713.1  |
| 101.4 | 106.2 | 89.2  | 101.1 NM_001004451.1 |
| 95.3  | 91.9  | 90.3  | 93.3 NM_054107.1     |
| 95.5  | 94.1  | 86.8  | 94.5 NM_001004452.1  |
| 81.8  | 84.8  | 90.2  | 82.9 NM_080859.1     |
| 98.3  | 98.5  | 88.4  | 93.4 NM_001005236.1  |
| 83.6  | 86.4  | 86.6  | 83 NM_001005234.1    |
| 93.1  | 92.8  | 87.2  | 82.8 NM_001005235.1  |
| 92.1  | 84.2  | 80.3  | 74.6 NM_001004453.1  |
| 96.5  | 92.2  | 93.5  | 87.8 NM_001004454.1  |
| 75.4  | 85.1  | 80.4  | 86.6 NM_001004456.1  |
| 89.6  | 87.9  | 94.9  | 80.6 NM_012363.1     |
| 94.7  | 89    | 88.8  | 91.3 NM_001004457.1  |
| 79.9  | 77.9  | 72.1  | 75 NM_012364.1       |
| 85.8  | 81.7  | 80.4  | 85.2 NM_001004458.1  |
| 87.6  | 87.7  | 84.5  | 96.2 NM_001004459.1  |
| 112.7 | 120.5 | 118.3 | 93 NM_001005287.1    |
| 92.7  | 91.8  | 79    | 82.4 NM_001004135.1  |
| 92.3  | 88    | 92    | 90.7 NM_001001659.1  |
| 85.3  | 95.2  | 91.1  | 89.3 NM_001005480.1  |
| 93.2  | 89.6  | 82.5  | 84.7 NR_002158.1     |
| 89.2  | 80.9  | 80    | 91.3 NM_001004488.1  |
| 98.3  | 80.3  | 78.8  | 80.8 NM_001001802.1  |
| 93.4  | 97.9  | 94.4  | 84.5 NM_012365.1     |



|       |       |       |                      |
|-------|-------|-------|----------------------|
| 85.6  | 82.5  | 83.1  | 90.8 NM_001005328.1  |
| 238   | 203   | 193.6 | 180.7 NR_002157.1    |
| 88.8  | 85.5  | 81.4  | 91.3 NM_001005276.1  |
| 99.5  | 107.4 | 106.2 | 102.9 NM_001004489.1 |
| 86.3  | 96.8  | 92.1  | 98.6 NM_001004490.1  |
| 84.5  | 89.2  | 74.3  | 83 NM_001004491.1    |
| 86.1  | 83    | 79.6  | 73.5 NM_001005285.1  |
| 90.5  | 89.6  | 90.8  | 99.8 NM_001004492.1  |
| 97.9  | 95.4  | 86.2  | 89.5 NM_033057.1     |
| 87.7  | 78.3  | 78.7  | 94.5 NM_001005226.1  |
| 98.1  | 94.8  | 85.8  | 97.9 NM_012367.1     |
| 99.2  | 90.4  | 83.9  | 85.9 NM_012368.1     |
| 93    | 89.1  | 86.9  | 88.7 NM_198074.3     |
| 83.2  | 81.4  | 76.7  | 89 NM_003700.1       |
| 100.9 | 95.5  | 80.9  | 91.4 NM_001004684.1  |
| 85.6  | 80.9  | 80.3  | 78.7 NM_012369.1     |
| 91.5  | 78.7  | 89    | 81.5 NM_001004685.1  |
| 86.3  | 87.2  | 84.6  | 88.9 NM_001001915.1  |
| 102.6 | 107.8 | 90    | 89.4 NM_001001914.1  |
| 86.3  | 76.5  | 80.4  | 73 NM_001013355.1    |
| 90.7  | 90.2  | 83.4  | 82.7 NM_030883.3     |
| 106.7 | 95.4  | 95.2  | 92.7 NM_007160.2     |
| 92    | 83    | 85.9  | 88 NM_030905.1       |
| 89.8  | 79.8  | 80.2  | 92.9 NM_001005216.1  |
| 81.2  | 74.1  | 76.9  | 78 NM_205859.1       |
| 90.4  | 88.1  | 81.7  | 78.3 NM_175911.2     |
| 84.8  | 104.2 | 84.4  | 84.3 NR_002145.1     |
| 81.5  | 81.7  | 84.3  | 80.4 NM_001004686.1  |
| 90.6  | 90.5  | 95.8  | 88.4 NM_001004687.1  |
| 78.6  | 76.3  | 78.3  | 82.8 NM_001001963.1  |
| 76.9  | 78.6  | 80.4  | 74.7 NR_002141.1     |
| 89.3  | 88.7  | 86    | 85.6 NM_001004688.1  |
| 86.9  | 84.8  | 87.3  | 85.3 NM_001004689.1  |
| 96.8  | 91    | 89.3  | 82.9 NM_017504.1     |
| 94.7  | 87    | 87.5  | 97.1 NM_001004690.1  |
| 83.1  | 87.4  | 74.3  | 91.1 NM_001004691.1  |
| 84.1  | 85.3  | 86.2  | 82.5 NM_019897.1     |
| 89.4  | 82.8  | 74.4  | 80.6 NM_030904.1     |
| 96.9  | 84.8  | 76.5  | 83.8 NM_001004693.1  |
| 91.8  | 93.1  | 78    | 90.3 NM_001001964.1  |
| 78    | 86.5  | 91.6  | 73 NM_001004692.1    |
| 79.9  | 72.8  | 78.1  | 84.8 NM_001001824.1  |
| 76    | 78.9  | 76.3  | 85.8 NM_001005495.1  |
| 99.8  | 98.6  | 89.9  | 94.6 NM_001004695.1  |
| 80.6  | 78.6  | 79.8  | 80.5 NM_001001827.1  |
| 82.6  | 80    | 74.9  | 76.9 NM_001004696.1  |
| 80.2  | 86.1  | 80.1  | 82.8 NM_001004697.1  |
| 91.6  | 104.6 | 86.4  | 88 NM_001005471.1    |
| 90.8  | 85.1  | 76.3  | 80 NM_001005522.1    |
| 91.5  | 92.6  | 86.5  | 94.7 NM_206880.1     |

|       |       |      |                      |
|-------|-------|------|----------------------|
| 80.9  | 68.5  | 70.4 | 76.1 NM_030903.2     |
| 99.5  | 93.6  | 89.4 | 95.2 NM_001001957.2  |
| 105.8 | 104.9 | 98.4 | 104.7 NM_001004698.1 |
| 92.6  | 87.1  | 86   | 87.5 NM_001001657.1  |
| 93.9  | 92.7  | 90.5 | 85.5 NM_001004699.1  |
| 92.8  | 88.8  | 81.9 | 80.5 NM_002550.1     |
| 93.1  | 94.7  | 91.7 | 96.1 NM_002551.2     |
| 98.4  | 90.2  | 79.4 | 81.3 NM_012373.1     |
| 149.1 | 158.9 | 158  | 124.8 NM_001005334.1 |
| 93.6  | 91.7  | 80.6 | 87.3 NM_001005275.1  |
| 91.9  | 87.5  | 80.7 | 84.3 NM_001005274.1  |
| 87    | 87.1  | 76.6 | 85 NM_001005512.1    |
| 93.5  | 82.8  | 86.6 | 93.8 NM_001005272.1  |
| 97.1  | 96.8  | 94   | 84.4 NM_001005470.1  |
| 101.3 | 97.3  | 87.1 | 86.5 NM_001004700.1  |
| 90.1  | 85.2  | 79.8 | 85.6 NM_001005270.1  |
| 80.9  | 84.5  | 80.3 | 83.7 NM_001001955.1  |
| 98    | 89.9  | 85.8 | 91.3 NM_001001920.1  |
| 89.2  | 76.8  | 78.7 | 84.3 NM_001004701.1  |
| 96.1  | 82.5  | 83.9 | 87.3 NM_001004702.1  |
| 102.2 | 90.8  | 98.6 | 84 NM_001005513.1    |
| 91.6  | 84.8  | 88.1 | 85.1 NM_001004703.1  |
| 91.4  | 82.5  | 83.5 | 86.7 NM_001004704.1  |
| 108.1 | 87.1  | 93.4 | 87.7 NM_012374.1     |
| 98.9  | 93.4  | 95.1 | 84.8 NM_001004705.1  |
| 103.9 | 100.6 | 90   | 103.6 NM_001004706.1 |
| 82.6  | 92.8  | 73.6 | 89.8 NM_001004707.3  |
| 86.6  | 84.7  | 79.4 | 94.9 NM_001001965.1  |
| 94.3  | 96.6  | 92.5 | 100.4 NM_001004708.1 |
| 85.5  | 92.3  | 77.3 | 89.8 NM_001004711.1  |
| 91.7  | 88.3  | 85.6 | 85.4 NM_001001912.1  |
| 82.6  | 94.1  | 89.2 | 87.7 NM_001001674.1  |
| 94.4  | 87.6  | 99.8 | 94.5 NM_001005504.1  |
| 86.7  | 88.6  | 85.6 | 89.7 NM_001005224.1  |
| 106.4 | 96.2  | 93.5 | 100.1 NM_001004195.2 |
| 105.4 | 109.2 | 97.1 | 97.3 NM_001005484.1  |
| 96.1  | 87.5  | 87.3 | 91.2 NM_001005326.1  |
| 86.4  | 92.5  | 82.6 | 83.4 NM_001004063.1  |
| 88.2  | 85.1  | 86.3 | 94.2 NM_001004714.1  |
| 99.2  | 89.4  | 94.5 | 91.5 NM_001004712.1  |
| 88.9  | 86.5  | 73.7 | 90.6 NM_001005486.1  |
| 90    | 85.4  | 78.4 | 82.1 NM_001004715.1  |
| 96.6  | 98.9  | 90.4 | 98.5 NM_001005501.1  |
| 85.8  | 78.9  | 74   | 87.4 NM_001005483.1  |
| 88.1  | 86.4  | 84.1 | 84.8 NM_001004717.1  |
| 82.2  | 82.3  | 73.7 | 84.9 NM_001005500.1  |
| 84.7  | 85    | 79.7 | 81.7 NM_001004719.1  |
| 89.7  | 79.6  | 93.2 | 82.8 NM_001004723.1  |
| 88.3  | 86.4  | 85.2 | 91.6 NM_001005241.1  |
| 92.6  | 85.7  | 89.7 | 90 NM_001004724.1    |

|       |       |       |                      |
|-------|-------|-------|----------------------|
| 95.7  | 86.1  | 84.3  | 85.9 NM_001004124.1  |
| 84.2  | 84.2  | 82.2  | 87.5 NM_172194.1     |
| 93.6  | 86.1  | 84.9  | 86.5 NM_001004725.1  |
| 103.8 | 84.9  | 79.4  | 82.8 NM_001004059.1  |
| 86.5  | 79.5  | 86.8  | 78.7 NM_001004726.1  |
| 84    | 82.2  | 82.5  | 80.4 NM_001004727.1  |
| 81.4  | 88.5  | 85.8  | 89 NM_001004748.1    |
| 74.2  | 88.4  | 81.7  | 87.3 NM_001005329.1  |
| 95.6  | 96.5  | 92.3  | 98.2 NM_001004749.1  |
| 85.4  | 81.3  | 83.5  | 87.4 NM_033180.1     |
| 88.5  | 81.4  | 84.6  | 85.2 NM_033179.1     |
| 92.4  | 88.8  | 87.5  | 77 NM_001005567.1    |
| 94.2  | 75.5  | 77.6  | 81.3 NM_001004750.1  |
| 100.1 | 102.4 | 96.6  | 92.7 NM_001004751.1  |
| 83.9  | 85.6  | 94.4  | 88 NM_152430.2       |
| 101.6 | 98.4  | 101.2 | 102.7 NM_030774.2    |
| 90.7  | 88    | 83.3  | 93.1 NM_001004752.1  |
| 88.7  | 81.2  | 85.6  | 86.3 NM_001004753.1  |
| 84.8  | 79.8  | 76.4  | 85.6 NM_001005237.1  |
| 84.7  | 79.7  | 84.6  | 87.7 NM_001005238.1  |
| 93.2  | 96.4  | 92.3  | 102.3 NM_001005288.1 |
| 93.7  | 86.3  | 85.5  | 87.4 NM_001004754.1  |
| 83.9  | 82.9  | 80.8  | 85.8 NM_001004755.1  |
| 98.1  | 100.2 | 89.1  | 94.8 NM_001004756.1  |
| 94.2  | 104.7 | 91.2  | 94.8 NM_001004757.1  |
| 89.6  | 78.8  | 85    | 80.2 NM_001004758.1  |
| 118   | 107.4 | 114.8 | 107.5 NM_001004759.1 |
| 84.5  | 80.7  | 85.6  | 76.7 NM_001004760.1  |
| 80.9  | 73    | 69.1  | 80.6 NM_012375.1     |
| 90.8  | 81.3  | 81.1  | 99.6 NM_001005222.1  |
| 106.9 | 102.3 | 98.5  | 110.1 NM_001005160.1 |
| 80.6  | 84.2  | 83.4  | 93.7 NM_001004052.1  |
| 79.3  | 78.7  | 76.3  | 76 NM_001005161.1    |
| 101.1 | 95    | 99.2  | 106.6 NM_001005162.1 |
| 97.3  | 102   | 89.9  | 91.1 NM_001005163.1  |
| 85.2  | 85.4  | 81.1  | 81.9 NM_001005164.1  |
| 100.4 | 103.2 | 103   | 105.2 NM_001005165.1 |
| 108.4 | 97.9  | 92.5  | 96.7 NM_001005167.1  |
| 77.2  | 83.7  | 72.9  | 83.3 NM_001005168.1  |
| 93.7  | 104.2 | 96.2  | 108.4 NM_001005289.1 |
| 94.9  | 93.4  | 94.5  | 96.9 NM_001005169.1  |
| 80.2  | 83.1  | 82.7  | 78.9 NM_001005170.1  |
| 95.8  | 84.7  | 85    | 90.7 NM_001001916.1  |
| 113.9 | 109.3 | 106.6 | 100.2 NM_001005171.1 |
| 88    | 89.5  | 81.6  | 83 NM_001005172.1    |
| 95.9  | 90.6  | 96.7  | 98 NM_001005173.1    |
| 91.9  | 86.9  | 86.4  | 90.6 NM_001004137.1  |
| 96.6  | 97.8  | 92.1  | 91.7 NM_001001913.1  |
| 108   | 97.2  | 98.4  | 98.6 NM_001005174.1  |
| 91.9  | 94.6  | 85.1  | 98.4 NM_001005175.1  |

|       |       |       |                      |
|-------|-------|-------|----------------------|
| 96.7  | 90    | 99.6  | 89.2 NM_001001922.1  |
| 91.8  | 92.1  | 91.9  | 87.1 NM_001005177.1  |
| 91.3  | 88.2  | 82.4  | 83.3 NM_001005178.1  |
| 105.9 | 104.2 | 99.9  | 109.3 NM_001001917.1 |
| 91.5  | 81.8  | 82.7  | 83.3 NM_001003443.1  |
| 94    | 96.4  | 86    | 89.9 NM_001005179.1  |
| 105.5 | 75.6  | 88.3  | 81.7 NM_001005180.1  |
| 103.8 | 101.2 | 99.8  | 97.5 NM_001005181.1  |
| 85.4  | 79.4  | 75    | 83.3 NM_001004728.1  |
| 80.4  | 74.8  | 70    | 85.1 NM_001001954.1  |
| 102.5 | 85.8  | 88.5  | 87.2 NM_054106.1     |
| 79.6  | 77.7  | 76.9  | 87.7 NM_001005323.1  |
| 87    | 95    | 91.4  | 92.7 NM_001004729.1  |
| 80.4  | 86.1  | 87.2  | 87.5 NM_001002925.1  |
| 90.2  | 92.3  | 78.1  | 81.3 NM_001004730.1  |
| 85.7  | 94.3  | 83.8  | 87.5 NM_001001921.1  |
| 85.9  | 85.5  | 86.5  | 81.1 NM_001001966.1  |
| 89    | 89.4  | 88.5  | 95.4 NM_001004731.1  |
| 90    | 89.6  | 94.6  | 83.1 NM_001004732.1  |
| 95.4  | 96.3  | 83.1  | 87.2 NM_001004733.1  |
| 87.2  | 92    | 76.8  | 83.6 NM_001005489.1  |
| 84.8  | 83.8  | 90.2  | 87.8 NM_001005566.1  |
| 92.3  | 87.2  | 81.1  | 99.2 NM_001005218.1  |
| 87.2  | 76.4  | 76    | 91.9 NM_001005469.1  |
| 94.9  | 80.3  | 91.2  | 92.3 NM_001001918.1  |
| 82.2  | 84.6  | 78.4  | 87.1 NM_001004734.1  |
| 93.1  | 95.5  | 85.1  | 78.9 NM_001001923.1  |
| 81.6  | 95.2  | 89.3  | 88.3 NM_001001967.1  |
| 85.3  | 102.9 | 88.8  | 89.6 NM_001004735.1  |
| 97.6  | 84.9  | 87.2  | 101.1 NM_001005496.1 |
| 78.4  | 78.4  | 78.4  | 77.1 NM_001001952.1  |
| 93.8  | 88.6  | 84.1  | 101 NM_003697.1      |
| 87.6  | 85.8  | 102.8 | 85.4 NM_001005338.1  |
| 79.1  | 73.8  | 74    | 81.1 NM_001005514.1  |
| 88.8  | 78.3  | 75    | 85 NM_001005515.1    |
| 86.8  | 82.6  | 71.2  | 90.7 NM_001005482.1  |
| 94.5  | 92.1  | 88.3  | 86.1 NM_001005479.1  |
| 88    | 90.7  | 90.7  | 86.5 NM_006637.1     |
| 88.8  | 86.2  | 82.9  | 73.1 NM_001005492.1  |
| 86.6  | 90.5  | 85.6  | 91 NM_001004736.1    |
| 91.7  | 99.9  | 95.3  | 91.1 NM_001004737.1  |
| 82.7  | 86.7  | 77.7  | 90.1 NM_001005516.1  |
| 85.4  | 87.5  | 76.9  | 82.3 NM_001005517.1  |
| 87.6  | 88.1  | 85.7  | 82.4 NM_001004738.1  |
| 92.4  | 87.7  | 82    | 92.4 NM_001004739.1  |
| 85.4  | 84.3  | 86.1  | 81.6 NM_001004741.1  |
| 83.9  | 87.1  | 74.7  | 84.3 NM_001005245.1  |
| 88.6  | 85    | 82.7  | 86.2 NM_001004742.1  |
| 90.8  | 87.7  | 85.6  | 84 NM_001005282.1    |
| 91.1  | 88.4  | 85    | 96.5 NM_001004743.1  |

|       |       |       |                     |
|-------|-------|-------|---------------------|
| 86    | 79.2  | 82.3  | 81.2 NM_153444.1    |
| 101.9 | 93.5  | 94.2  | 89.4 NM_153445.1    |
| 87.4  | 85.2  | 90.1  | 80.2 NM_001004744.1 |
| 75.1  | 84.1  | 80.1  | 75.7 NM_001004745.1 |
| 94.1  | 87.5  | 84.3  | 93.9 NM_001004746.1 |
| 100.8 | 95.7  | 82.3  | 89 NM_001004747.1   |
| 91.4  | 93.5  | 86.6  | 82.3 NM_030946.1    |
| 98.3  | 93.5  | 91.5  | 89.9 NM_030876.4    |
| 88    | 81.7  | 73.5  | 88.6 NM_001001960.1 |
| 86.5  | 84.2  | 98.2  | 92.2 NM_003696.2    |
| 85.3  | 85.9  | 88    | 79.1 NM_001005281.1 |
| 95    | 90.1  | 90.2  | 86.6 NM_001005853.1 |
| 89.2  | 91.3  | 80.3  | 90.7 NM_173351.1    |
| 86    | 78.2  | 73.7  | 78.4 NM_001005182.1 |
| 76.7  | 85.4  | 79.1  | 71 NM_054105.1      |
| 95.2  | 87.5  | 82.5  | 93.3 NM_054104.1    |
| 93.3  | 83.3  | 85.9  | 92 NM_001005494.1   |
| 80.5  | 80.8  | 76.3  | 82.6 NM_001005493.1 |
| 94.7  | 89.7  | 85.1  | 92.6 NM_001005518.1 |
| 78    | 84.7  | 75.1  | 85.1 NM_001005519.1 |
| 97.5  | 83.6  | 82.7  | 83.9 NM_001005499.1 |
| 90.9  | 86.4  | 87.7  | 82.6 NM_001005490.1 |
| 84.6  | 84.6  | 90.4  | 85 NM_001005497.1   |
| 85    | 82.3  | 76.9  | 78.6 NM_001005183.1 |
| 91.8  | 92.5  | 93.4  | 89.8 NM_001005286.1 |
| 86.4  | 84.6  | 85.3  | 87.1 NM_001005279.1 |
| 98.2  | 82.7  | 79.6  | 92.9 NM_001005327.1 |
| 90.5  | 84    | 82.7  | 90.6 NM_001005184.1 |
| 77.9  | 77.1  | 80.8  | 79.1 NM_001005325.1 |
| 86.2  | 92.3  | 88.6  | 85.8 NM_001005185.1 |
| 90.4  | 81.2  | 86.3  | 95.8 NM_001005278.1 |
| 78.7  | 80.8  | 83.9  | 85.1 NM_001005186.1 |
| 85    | 86.4  | 82.3  | 82.3 NM_001001968.1 |
| 83.1  | 81.1  | 88.4  | 85.7 NM_001005187.1 |
| 102.3 | 95.8  | 100.6 | 85.6 NM_001001667.1 |
| 88.2  | 91.4  | 92    | 96.2 NR_002140.1    |
| 89.1  | 88.4  | 89.9  | 83.5 NM_001005188.1 |
| 98.4  | 91.9  | 91.7  | 91.5 NM_001005189.1 |
| 87.9  | 90.9  | 85.7  | 87.4 NM_001005190.1 |
| 87.3  | 100.4 | 86.7  | 89.5 NM_030901.1    |
| 81.7  | 81.2  | 72    | 86.1 NM_017506.1    |
| 91.8  | 82    | 90.1  | 89.2 NM_198944.1    |
| 93.5  | 92.7  | 89.2  | 87.9 NM_012377.1    |
| 80.7  | 81.9  | 75.3  | 85 NM_175883.1      |
| 84.6  | 82    | 82.3  | 87 NM_001005191.1   |
| 118.2 | 121.6 | 131.7 | 130.1 NR_002171.1   |
| 101.1 | 86.2  | 88.9  | 97.6 NM_001079935.1 |
| 90.5  | 81.5  | 83.5  | 88.7 NR_002163.2    |
| 90.8  | 88.6  | 79.8  | 85.5 NR_002185.1    |
| 83    | 88.9  | 81.7  | 83.3 NM_001005192.1 |

|         |         |         |                     |
|---------|---------|---------|---------------------|
| 75      | 79.5    | 80.5    | 76.4 NM_001005193.1 |
| 91.5    | 81.8    | 85.7    | 90.4 NM_001001958.1 |
| 90.1    | 83.1    | 89.1    | 90.1 NM_001005194.1 |
| 100.7   | 100.5   | 96.9    | 95 NM_001005195.1   |
| 88.7    | 94.4    | 91.1    | 97.1 NM_001005468.1 |
| 79.7    | 88.2    | 84.4    | 78.9 NM_001005467.1 |
| 86.7    | 87.5    | 82.1    | 84.6 NM_001005196.1 |
| 80.2    | 74.7    | 73.1    | 81.5 NM_012378.1    |
| 98.1    | 86.5    | 92      | 92.3 NM_001002917.1 |
| 103.4   | 94.8    | 91.8    | 105 NM_001002918.1  |
| 90.2    | 83.9    | 76.2    | 79.4 NM_001005197.1 |
| 85.8    | 90.9    | 82.9    | 98 NM_001002905.1   |
| 104.4   | 88.5    | 87.1    | 86.4 NM_001007249.1 |
| 95.3    | 80.9    | 88.4    | 86.2 NM_001005198.1 |
| 95.4    | 92.5    | 88.4    | 82.1 NM_001005199.1 |
| 89.7    | 87.8    | 81.6    | 83.9 NM_001005200.1 |
| 101.4   | 103.9   | 99.2    | 98.1 NM_001005201.1 |
| 80.8    | 76.4    | 85.9    | 84.8 NM_001003750.1 |
| 78.5    | 86.3    | 87.5    | 86.3 NM_001005205.1 |
| 93.7    | 91.9    | 84      | 83 NM_001004064.1   |
| 95.4    | 93.1    | 84.4    | 86.7 NM_001002907.1 |
| 79.4    | 83.5    | 82.1    | 78.2 NM_001005202.1 |
| 89.4    | 95.9    | 96.8    | 90.2 NM_001004058.1 |
| 77.9    | 81      | 71.1    | 82 NM_001005203.1   |
| 85.3    | 89.5    | 83.5    | 82.4 NM_001005204.1 |
| 83.2    | 79.3    | 79.1    | 85.9 NM_001013356.1 |
| 80.3    | 82.3    | 79.5    | 87.6 NM_001013357.1 |
| 104     | 92.5    | 95.5    | 98.1 NM_001001658.1 |
| 82.3    | 75.6    | 78.1    | 71.1 NM_001001656.1 |
| 90.3    | 82.1    | 76.7    | 90.4 NM_001005213.1 |
| 86.4    | 90      | 76      | 89 NM_001005284.1   |
| 96      | 97.5    | 90.4    | 92.2 NM_001013358.1 |
| 112.3   | 107     | 107.2   | 109 NM_001005211.1  |
| 86.1    | 83.1    | 84.3    | 91.2 NM_001005243.1 |
| 78.9    | 81.7    | 79.3    | 83.3 NM_001005212.1 |
| 90.8    | 92.7    | 85      | 87.2 NM_001005283.1 |
| 305.5   | 271.2   | 303.3   | 176.9 NM_153451.2   |
| 451.8   | 257.6   | 269.1   | 208.5 NM_004153.2   |
| 440.8   | 415.9   | 357.2   | 416.8 NM_006190.3   |
| 548.3   | 647.8   | 437.1   | 573.9 NM_181837.1   |
| 118.8   | 100.1   | 102.3   | 100.6 NM_181742.1   |
| 986.7   | 867.5   | 656.2   | 461.3 NM_002553.2   |
| 109.3   | 100.6   | 84.1    | 98 NM_002553.2      |
| 99.2    | 89.2    | 81.2    | 95.2 NM_181747.1    |
| 11457.5 | 18421.4 | 18150.2 | 14276.9 NM_014321.2 |
| 194.9   | 162.7   | 150.3   | 143.5 NM_032412.2   |
| 431.4   | 421.3   | 366.9   | 327.6 NM_000607.1   |
| 96.7    | 105.4   | 103     | 99.1 NM_000608.2    |
| 137.5   | 131.3   | 109.5   | 131.1 NM_016467.3   |
| 104.4   | 92.1    | 93.2    | 87.6 NM_014182.3    |

|        |        |        |                    |
|--------|--------|--------|--------------------|
| 108.9  | 110.1  | 97.9   | 109 NM_139280.1    |
| 149.6  | 172.2  | 148    | 136.1 NM_006812.2  |
| 102.6  | 101.7  | 86.7   | 110.4 NM_032623.3  |
| 1252.9 | 1309.5 | 1281.1 | 771.3 NM_002556.2  |
| 87.6   | 97     | 90.5   | 86.2 NM_030758.3   |
| 88.1   | 82.3   | 96     | 86.6 NM_017784.3   |
| 106.8  | 119.8  | 126    | 124.7 NM_022776.3  |
| 142.6  | 157.7  | 163.4  | 158.4 NM_018030.3  |
| 107.4  | 96.5   | 98.9   | 96 NM_018030.3     |
| 403    | 661.3  | 665    | 505.3 NM_080597.2  |
| 95.6   | 93.7   | 89.9   | 101.2 NM_144498.1  |
| 163.9  | 166.1  | 158.9  | 154.5 NM_144498.1  |
| 97.9   | 100.5  | 95.3   | 95.9 NM_145320.1   |
| 128.7  | 155    | 118.3  | 134.1 NM_145322.1  |
| 563.6  | 514.2  | 582.8  | 381 NM_020896.2    |
| 440.2  | 476.6  | 566.3  | 287.8 NM_145638.1  |
| 136.9  | 127.7  | 139    | 114.2 NM_032523.2  |
| 106.8  | 97.8   | 77.1   | 83.5 NM_145739.1   |
| 292.2  | 293.3  | 298.3  | 235.4 NM_145798.2  |
| 106.9  | 98.9   | 99.5   | 105.8 NM_145798.2  |
| 194.6  | 220    | 153.9  | 180.1 NM_020841.4  |
| 195.2  | 269.5  | 219.3  | 206.5 NM_020841.4  |
| 86.5   | 87.9   | 81.3   | 83.7 NM_148909.1   |
| 1333.5 | 1615.4 | 1425.5 | 1185.6 NM_148906.1 |
| 115.4  | 145.3  | 127.2  | 93.1 NM_130771.2   |
| 153.2  | 185.9  | 160.8  | 161.3 NM_133169.2  |
| 350    | 303.1  | 302.2  | 197.6 NM_017807.2  |
| 284.2  | 224.8  | 172.9  | 217.6 NM_022353.2  |
| 145.3  | 144.3  | 113.6  | 131 NM_182980.2    |
| 88.3   | 81.6   | 79.4   | 92.5 NM_013370.3   |
| 103.5  | 102.4  | 90.3   | 89 NM_020530.3     |
| 92.3   | 81.8   | 86.2   | 91.2 NM_003999.1   |
| 81     | 81.8   | 70.1   | 80.7 NM_145260.2   |
| 92.1   | 94.8   | 80.4   | 101.4 NM_053001.1  |
| 135.6  | 122.5  | 112    | 108.9 NM_053001.1  |
| 133    | 109.8  | 107.6  | 126.9 NM_012382.1  |
| 111.2  | 136.1  | 161.3  | 121.2 NM_152672.3  |
| 88.4   | 90.6   | 80.6   | 86 NM_178859.2     |
| 2871.1 | 2545.1 | 1998.3 | 1795.6 NM_012383.3 |
| 242.6  | 378.7  | 273.2  | 314.8 NM_014028.3  |
| 97     | 88.2   | 87.6   | 89.1 NM_198184.1   |
| 84     | 85.1   | 89.2   | 90.8 NM_000531.3   |
| 84.6   | 91.8   | 88.1   | 87.8 NM_139282.1   |
| 85.2   | 82.3   | 82.9   | 90.2 NM_170664.1   |
| 102    | 103.2  | 100.3  | 103.4 NM_144672.3  |
| 104.6  | 91.8   | 98.3   | 98.9 NM_144672.3   |
| 84.6   | 75.2   | 79.9   | 84.5 NM_194248.1   |
| 94.1   | 94.6   | 110.5  | 87.8 NM_194248.1   |
| 83.6   | 81.6   | 75.5   | 80.8 NM_194322.1   |
| 98.2   | 88.3   | 89.5   | 80.6 NM_177998.1   |

|        |        |        |                      |
|--------|--------|--------|----------------------|
| 92.2   | 89.2   | 85.6   | 83.9 NM_178160.1     |
| 87.8   | 85.7   | 84.1   | 79.2 NM_178233.1     |
| 85     | 86.1   | 81.6   | 84.3 NM_020157.2     |
| 86.3   | 85.3   | 75.9   | 83.9 NM_148961.3     |
| 109.8  | 99.8   | 100.6  | 102.1 NM_032109.2    |
| 96.6   | 87.9   | 94.7   | 89.1 NR_003089.1     |
| 146.8  | 119.7  | 116.2  | 112.3 NM_017670.1    |
| 199.5  | 168.5  | 148.4  | 124.8 NR_003089.1    |
| 131.9  | 120.8  | 111.5  | 110.2 NM_023112.2    |
| 336.6  | 292.7  | 256.1  | 258.2 NM_199324.1    |
| 104.5  | 99.9   | 89.9   | 93.8 NM_017493.4     |
| 105.5  | 97.6   | 92.8   | 99.2 NM_017493.4     |
| 100.2  | 94.6   | 103.4  | 90.3 NM_017602.2     |
| 96.6   | 88.9   | 94.5   | 95.3 NM_207320.1     |
| 230.2  | 175.4  | 177.3  | 163.2 NM_016023.2    |
| 89.2   | 93.6   | 79.8   | 91.3 XM_938058.1     |
| 79     | 82.7   | 81.6   | 95.4 NM_130901.1     |
| 483.8  | 446.9  | 440.2  | 277.8 NM_014562.2    |
| 89.5   | 81.3   | 89     | 90.4 NM_021728.2     |
| 97.7   | 90.4   | 90.7   | 98.7 NM_172337.1     |
| 92.3   | 94.3   | 87     | 90.6 NM_172337.1     |
| 99.5   | 83.3   | 93.9   | 99.6 NM_080822.1     |
| 81     | 75.6   | 82.3   | 87.6 NM_183378.1     |
| 79.5   | 82.6   | 79.3   | 86.1 NM_198185.1     |
| 195.4  | 205.1  | 174.5  | 171.9 NM_002557.3    |
| 84.3   | 93.7   | 83.6   | 79.2 NM_004561.2     |
| 386.2  | 237.1  | 258.9  | 177.2 NM_021220.2    |
| 84     | 76     | 73.7   | 86.9 NM_001080502.1  |
| 126.2  | 111.9  | 104.9  | 102.2 NM_001080502.1 |
| 1016.4 | 726.3  | 687.2  | 563.1 NM_005015.1    |
| 157.6  | 155.7  | 133.8  | 109 NM_000436.2      |
| 286.3  | 231.7  | 286.7  | 175.9 NM_022120.1    |
| 106.3  | 89.3   | 96.6   | 109.6 NM_148962.3    |
| 82.6   | 81.6   | 80.4   | 82.3 NM_080818.3     |
| 1798.8 | 1357.6 | 1250.7 | 1088.3 NM_181354.3   |
| 126.1  | 162.3  | 141.1  | 136.7 NM_017897.1    |
| 967.3  | 1179.7 | 925.3  | 816.6 NM_005109.2    |
| 74.9   | 80     | 81.7   | 88.5 NM_000915.2     |
| 86.1   | 88.4   | 88     | 92.7 NM_000916.3     |
| 105.4  | 110.5  | 106.7  | 100.4 NM_006025.2    |
| 1916.9 | 1816.3 | 1597.6 | 1469.7 NM_018170.2   |
| 159.4  | 153.7  | 130.9  | 142.5 NM_173829.2    |
| 164.5  | 228.2  | 277.1  | 208.5 NM_002558.2    |
| 95.2   | 81.7   | 92.4   | 99.7 NM_170682.2     |
| 90.5   | 84.7   | 87.2   | 89.7 NM_174873.1     |
| 95.7   | 95.2   | 90.7   | 103.1 XM_936449.1    |
| 120    | 99     | 89.5   | 90.3 NM_170683.2     |
| 95.2   | 89.2   | 84.4   | 88.4 NM_002559.2     |
| 92.6   | 78.5   | 81.8   | 85.8 NM_002559.2     |
| 342.9  | 365.2  | 315.7  | 311.5 NM_175568.1    |



|        |        |        |                      |
|--------|--------|--------|----------------------|
| 97.3   | 89.7   | 78.2   | 95.2 NM_175081.1     |
| 95.4   | 85.2   | 83.1   | 86 NM_175081.1       |
| 191.3  | 402.6  | 344.5  | 415.6 NM_002562.4    |
| 90.2   | 86.2   | 82.3   | 89.4 NM_005446.2     |
| 96.5   | 98.2   | 88.3   | 95.7 NM_002563.2     |
| 81.4   | 82.2   | 72.1   | 86.6 NM_198333.1     |
| 93.6   | 90.5   | 85.4   | 88.3 NM_014499.2     |
| 411.7  | 290    | 308    | 157 NM_002566.4      |
| 93.9   | 93.6   | 88.9   | 104.4 NM_176894.1    |
| 100.8  | 98.8   | 95.7   | 88.3 NM_176894.1     |
| 82     | 78.2   | 77.2   | 82.9 NM_023914.2     |
| 83.9   | 90.4   | 81.4   | 85.6 NM_014879.3     |
| 86     | 75.9   | 84.4   | 91 NM_014879.2       |
| 77.9   | 73.3   | 77.5   | 78.5 NM_014879.3     |
| 89.5   | 89.4   | 88.1   | 89.5 NM_176072.1     |
| 205.1  | 291.7  | 254.7  | 198.9 NM_176071.1    |
| 414.2  | 577.8  | 635    | 344 NM_002564.2      |
| 111.4  | 123.9  | 110.1  | 116.9 NM_176071.1    |
| 95.2   | 93.4   | 95     | 87.3 NM_002565.3     |
| 123.6  | 453.3  | 259.2  | 320.9 NM_005767.3    |
| 96.3   | 89.8   | 93.2   | 93.8 NM_176798.1     |
| 195.4  | 151.8  | 141    | 158.2 NM_176797.1    |
| 98.9   | 93.4   | 105.6  | 92.5 NM_004154.3     |
| 1962.2 | 1863.3 | 1621.5 | 1308.1 NM_178129.3   |
| 118.9  | 102.1  | 91     | 91.8 NM_001017962.1  |
| 208.5  | 171.3  | 153.9  | 195.1 NM_000917.2    |
| 196.4  | 176.4  | 168.8  | 130.1 NM_001017974.1 |
| 100.8  | 97.4   | 92.9   | 95.6 NM_001017974.1  |
| 91.9   | 83.6   | 90     | 89.3 NM_182904.3     |
| 88     | 92.2   | 80.3   | 85.9 NM_198180.1     |
| 78.5   | 76.4   | 81.4   | 77.7 NM_022112.1     |
| 125.6  | 173.2  | 155.6  | 117.2 NM_012385.1    |
| 1009.7 | 994.4  | 716.8  | 660.9 NM_006191.1    |
| 91.7   | 78.4   | 90.1   | 91.4 NR_003284.1     |
| 2166.6 | 907.9  | 689.8  | 1926.9 NM_002568.3   |
| 81.6   | 86.8   | 72.6   | 83.6 NM_030979.2     |
| 7530.1 | 8674.1 | 7152.1 | 5616.7 NM_003819.2   |
| 75.9   | 80.5   | 78.4   | 74 NM_080832.1       |
| 83.3   | 84     | 79.4   | 83.1 NM_080832.1     |
| 91.7   | 96.3   | 96.4   | 87.9 NM_080832.1     |
| 1310.1 | 1442.7 | 1133.9 | 975.8 NM_004643.1    |
| 85.9   | 86.3   | 71.1   | 79.7 NM_152410.1     |
| 85.5   | 90.7   | 78.2   | 77.3 NM_001080379.1  |
| 82.5   | 68     | 78.2   | 79.2 NM_001080379.1  |
| 104.6  | 97.5   | 102.8  | 109.2 NM_152410.1    |
| 119.8  | 128.3  | 128.3  | 134.8 NM_018026.2    |
| 162.2  | 138.8  | 129.1  | 127.5 NM_015197.1    |
| 119.4  | 116.7  | 122.6  | 115 NM_020804.2      |
| 2767.5 | 2653.1 | 2400.7 | 1378.9 NM_007229.1   |
| 108.6  | 122.4  | 105.9  | 107.3 NM_016223.3    |

|        |        |        |                      |
|--------|--------|--------|----------------------|
| 102.4  | 95.7   | 96.4   | 95.3 NM_013358.1     |
| 86.8   | 87     | 79.7   | 86.9 NM_007365.1     |
| 103.1  | 84.7   | 83.6   | 79.8 NM_016233.1     |
| 93.2   | 96.4   | 85.5   | 92.6 NM_012387.1     |
| 100.5  | 96.3   | 93.3   | 98.4 NM_207421.1     |
| 92.1   | 91.6   | 83.7   | 91.4 NM_001018049.1  |
| 86.1   | 85.7   | 81.8   | 82.5 NM_002571.2     |
| 351.5  | 268.9  | 319.2  | 233.6 NM_019088.2    |
| 280.9  | 355.1  | 339    | 236.8 NM_000430.2    |
| 125.9  | 116.2  | 95.8   | 97.6 NM_002572.1     |
| 1968.7 | 629.8  | 693    | 423.9 NM_002573.2    |
| 214.2  | 200.2  | 166.9  | 161.1 NM_000437.2    |
| 319.2  | 260.5  | 265.7  | 242.1 NM_018440.3    |
| 94.1   | 95.5   | 96.8   | 98.2 NM_003785.3     |
| 90.8   | 85.1   | 82.7   | 91.3 NM_207339.1     |
| 85.2   | 90.2   | 79     | 84.3 NM_001015038.1  |
| 85.3   | 93.3   | 81     | 86.8 NM_001017931.1  |
| 90.6   | 81.9   | 81.9   | 84 NM_007003.2       |
| 93.8   | 97.2   | 84.4   | 85.1 NM_130467.3     |
| 77.1   | 82.4   | 76.3   | 84.8 NM_130467.3     |
| 85.7   | 96.3   | 73.6   | 83.2 NM_000277.1     |
| 3569.7 | 2045.2 | 1729.7 | 1400.6 NM_006452.2   |
| 109.8  | 107.2  | 98.5   | 107.4 NM_006452.2    |
| 4690.7 | 2828.6 | 2079.5 | 1832.2 NM_006452.2   |
| 116.1  | 131.6  | 116.6  | 106.2 NM_182789.2    |
| 103.1  | 92.9   | 88.7   | 88.1 NM_006451.3     |
| 3768   | 3124.1 | 2711.9 | 3209 NM_001033112.1  |
| 89.3   | 89.3   | 85.8   | 88.9 NM_001033112.1  |
| 105.4  | 93.6   | 99.2   | 96.4 NM_016480.3     |
| 353    | 345.7  | 305.9  | 290.7 NM_002576.3    |
| 123.3  | 98.7   | 97.9   | 112.1 NM_017906.2    |
| 532.2  | 736.3  | 669.3  | 500.6 NM_002577.3    |
| 220.1  | 262.3  | 223    | 224.2 NM_002577.3    |
| 105.6  | 102.4  | 96.9   | 100.4 NM_002578.2    |
| 78.5   | 87     | 82.8   | 80.8 NM_005884.3     |
| 86.4   | 85.1   | 79.6   | 91.3 NM_001014831.1  |
| 201.9  | 160.1  | 149.8  | 129.5 NM_001014832.1 |
| 88.2   | 87.9   | 88.7   | 89.2 NM_020168.3     |
| 88.1   | 88.4   | 84.1   | 97.2 NM_020341.2     |
| 114.4  | 106.6  | 93.5   | 95.9 NM_020341.2     |
| 87     | 84.4   | 87.7   | 82.2 NM_016081.2     |
| 76.1   | 92.4   | 90.8   | 84.6 NM_002579.2     |
| 122.1  | 114    | 105.8  | 125.4 NM_002579.2    |
| 327.9  | 242.5  | 270    | 163.3 NM_002579.1    |
| 80.7   | 82.4   | 76.4   | 71.9 NM_001037293.1  |
| 72.1   | 84     | 83     | 89.9 NM_053016.3     |
| 96.1   | 87.5   | 87.1   | 90 NM_007203.3       |
| 89.9   | 89.7   | 80.6   | 86 NM_007203.3       |
| 83.8   | 97.3   | 94.4   | 90.3 NM_017734.2     |
| 750.2  | 650.5  | 609.7  | 470.4 NM_138821.1    |

|        |        |        |                     |
|--------|--------|--------|---------------------|
| 96.3   | 100.2  | 86.2   | 98.9 NM_005447.2    |
| 1070.1 | 952.9  | 851.6  | 1032.3 NM_175854.5  |
| 98.8   | 95.2   | 94.1   | 87.1 NM_148977.1    |
| 256.3  | 162.7  | 163.3  | 162.2 NM_138316.2   |
| 592.1  | 531.6  | 503.9  | 479.3 NM_153640.1   |
| 359.1  | 305    | 261.6  | 270.6 NM_153640.2   |
| 91.1   | 82.8   | 88     | 88.1 NM_024960.3    |
| 125.6  | 133.3  | 118.5  | 105.7 NM_024594.2   |
| 151.3  | 143.6  | 154.1  | 147.4 NM_018216.1   |
| 144.3  | 122.8  | 109    | 112.7 NM_015368.3   |
| 270.1  | 336.2  | 385.7  | 252 NM_052839.2     |
| 107.6  | 112.6  | 105.6  | 97.1 NM_052959.2    |
| 120.9  | 109.6  | 97.9   | 98.8 NM_152911.2    |
| 154.5  | 141.5  | 150.4  | 122.9 NM_207128.1   |
| 91     | 83.9   | 90.9   | 84.4 NM_152911.2    |
| 105.9  | 94     | 96.2   | 88.7 NM_001010861.1 |
| 96.6   | 94.3   | 84.1   | 88 NM_001037317.1   |
| 638.8  | 384.9  | 335.5  | 288.2 NM_018109.2   |
| 1260.7 | 1139.8 | 997.9  | 1337.2 NM_173797.2  |
| 170.5  | 189.5  | 189    | 126.9 NM_022447.1   |
| 102.7  | 130.8  | 166.5  | 119 NM_173462.2     |
| 1847.1 | 1310.6 | 1175.6 | 1137.3 NM_032632.3  |
| 95.6   | 90.3   | 87.8   | 87.6 NM_020144.3    |
| 122.8  | 119.5  | 118.6  | 103.7 NM_022894.2   |
| 82.3   | 91.8   | 83.1   | 80.9 NM_002581.3    |
| 92.4   | 87.5   | 88     | 91.6 NM_020318.1    |
| 88.5   | 77.7   | 83.1   | 89.1 NM_021936.1    |
| 107.6  | 129.6  | 115.4  | 120.6 NM_005443.4   |
| 155.9  | 192    | 170    | 151.3 NM_004670.3   |
| 346.9  | 233.2  | 169    | 192.9 NM_177453.2   |
| 1249.8 | 711.1  | 633.9  | 374.7 NM_152341.2   |
| 83.9   | 91.9   | 90     | 84.8 NM_017705.2    |
| 91.8   | 85.9   | 84.6   | 83.5 NM_024897.2    |
| 98.1   | 107.9  | 94.8   | 102.2 NM_198406.1   |
| 101.2  | 109.3  | 107.7  | 106.7 NM_024897.2   |
| 116.4  | 98.8   | 107.8  | 99.3 NM_178422.4    |
| 697.2  | 1027   | 718.3  | 607.1 NM_133367.2   |
| 109.7  | 86.8   | 87     | 103.1 NM_198504.1   |
| 107.3  | 117.6  | 125.1  | 135 NM_015089.2     |
| 93.1   | 84.9   | 79.1   | 94.9 NM_019619.2    |
| 97.1   | 89.4   | 90.3   | 87.9 NM_205863.2    |
| 119.9  | 83.9   | 96.3   | 82.1 NM_016948.1    |
| 94.7   | 93.6   | 100    | 97.8 NM_016948.2    |
| 87.4   | 90.5   | 94.4   | 88.7 NM_032521.1    |
| 109.8  | 101.5  | 91     | 97 NM_032510.2      |
| 104.9  | 98     | 102.6  | 95.4 NM_032510.2    |
| 114.2  | 85.9   | 88.7   | 102.1 NM_003631.2   |
| 93.4   | 84.6   | 90.8   | 85.1 NM_013987.1    |
| 93.3   | 83.3   | 86.3   | 89.6 NM_013987.1    |
| 3505   | 3533   | 3323.5 | 2302.8 NM_007262.3  |

|        |        |        |        |                |
|--------|--------|--------|--------|----------------|
| 3233.5 | 3464.5 | 3222   | 2555.2 | NM_018622.5    |
| 915.8  | 838.8  | 717.4  | 721.3  | NM_018622.5    |
| 259.3  | 224.9  | 187.4  | 187.3  | NM_002582.1    |
| 6423.7 | 4490.7 | 3818.9 | 3133.5 | NM_001618.2    |
| 117.5  | 111.7  | 103.4  | 115.6  | NM_032789.1    |
| 142.3  | 178.3  | 183.8  | 122.2  | NM_032789.1    |
| 107.2  | 128.2  | 123.3  | 116.4  | NM_020367.3    |
| 153.9  | 163.8  | 141    | 126.3  | NM_022750.2    |
| 188.9  | 144.5  | 156.2  | 113.9  | NM_017554.1    |
| 90.8   | 86.4   | 82.6   | 88.5   | NM_152615.1    |
| 137.3  | 137    | 129.1  | 126.2  | NM_017851.4    |
| 477.3  | 307.4  | 311.8  | 314.3  | NM_005484.2    |
| 239.8  | 184.7  | 176.2  | 145.6  | NM_001042618.1 |
| 95.4   | 94.6   | 95.1   | 92.4   | NM_001003935.1 |
| 366.2  | 317.8  | 292.9  | 241.1  | NM_005485.3    |
| 140.2  | 146.1  | 156.7  | 134.6  | NM_001003931.1 |
| 1487.1 | 1695.7 | 1919.9 | 881.6  | NM_006437.2    |
| 127.8  | 146.3  | 135    | 141.2  | NM_020214.1    |
| 147.6  | 155.7  | 140.3  | 136.3  | NM_020213.1    |
| 97.5   | 103.8  | 98.4   | 102.3  | NM_020213.1    |
| 672.9  | 524.1  | 484.1  | 477    | NM_024615.2    |
| 94.4   | 100.5  | 90.6   | 87.5   | NM_031458.1    |
| 104.3  | 107.6  | 88.9   | 91.6   | NM_152268.2    |
| 89.3   | 79.9   | 84     | 94.3   | NM_016590.2    |
| 125.4  | 115.6  | 104.2  | 105.8  | NM_018222.2    |
| 861.4  | 742.4  | 549.2  | 694.6  | NM_013327.3    |
| 98.8   | 116.2  | 119.7  | 112.6  | NM_001003828.1 |
| 94.2   | 107.4  | 93.4   | 109.1  | NM_013327.3    |
| 3253.6 | 3107.4 | 2738.3 | 2105.9 | NM_022141.4    |
| 91.6   | 86.2   | 91.4   | 87     | NM_173493.1    |
| 147.5  | 146.4  | 133.7  | 129.2  | NM_015148.2    |
| 102.4  | 106.3  | 101.4  | 94.5   | NM_138294.2    |
| 97.9   | 79.8   | 86.9   | 94.7   | NM_032050.1    |
| 88.1   | 94.2   | 91.6   | 95.1   | NM_006192.1    |
| 101    | 93.2   | 103.3  | 95.5   | NM_003988.2    |
| 92.1   | 76     | 86.5   | 82.9   | NM_003988.2    |
| 102.1  | 101.5  | 92.9   | 89.8   | NM_000278.2    |
| 97.6   | 85.9   | 90.5   | 95.5   | NM_013942.2    |
| 78.2   | 84.1   | 76     | 93.5   | NM_000438.3    |
| 86.9   | 81     | 79.3   | 81.3   | NM_181458.1    |
| 95.8   | 93.8   | 101    | 91     | NM_181457.1    |
| 104.2  | 101    | 89.9   | 96.4   | NM_006193.1    |
| 77.4   | 80.2   | 75.9   | 87     | NM_016734.1    |
| 85.4   | 77.9   | 81.8   | 86.3   | NM_001604.3    |
| 84.5   | 70.7   | 85.2   | 92.7   | NM_000280.2    |
| 237.2  | 242.3  | 229.7  | 223.7  | NM_002584.1    |
| 122.5  | 102.2  | 90.2   | 87.9   | NM_013992.2    |
| 101.9  | 97.7   | 92.3   | 95.3   | NM_013953.3    |
| 95.4   | 84.7   | 94.4   | 86.2   | NM_003466.2    |
| 87.7   | 91.2   | 78.8   | 90.8   | NM_006194.1    |

|        |        |        |        |                |
|--------|--------|--------|--------|----------------|
| 742.4  | 646.8  | 730.1  | 396.9  | NM_007349.2    |
| 103.7  | 114.6  | 106.5  | 97.1   | NM_018313.2    |
| 145.2  | 196.1  | 193.1  | 133.9  | NM_181042.2    |
| 169.7  | 148.2  | 160.7  | 144.5  | NM_181042.2    |
| 155.3  | 152.1  | 132.3  | 122.6  | NM_005746.1    |
| 175.5  | 176.8  | 147.6  | 136.4  | NM_182790.1    |
| 896.1  | 384.6  | 371.2  | 255.2  | NM_018492.2    |
| 88.9   | 88.1   | 88.9   | 83.1   | NM_021635.2    |
| 89.8   | 90.6   | 78.3   | 80     | NM_002585.1    |
| 223.3  | 450.9  | 474.4  | 260.2  | NM_002586.3    |
| 7932.5 | 4903.3 | 4717.1 | 3681.9 | NM_006195.4    |
| 133.9  | 111.3  | 127.4  | 113.9  | NM_025245.1    |
| 103.9  | 108.2  | 107.6  | 96.1   | NM_020524.2    |
| 90.7   | 86.7   | 87.3   | 92.6   | NM_000920.2    |
| 89.6   | 108.5  | 77.1   | 91.1   | NM_022172.2    |
| 107.3  | 112.4  | 102.3  | 109.3  | NM_000920.2    |
| 95     | 89.6   | 87.1   | 85.7   | NM_001044264.1 |
| 103.5  | 91.4   | 91.3   | 90.6   | NM_003884.3    |
| 299.5  | 265.2  | 226.6  | 186.5  | NM_000281.2    |
| 408.3  | 333.6  | 320.5  | 255.7  | NM_001001939.1 |
| 165.7  | 153.7  | 182    | 146.7  | NM_032151.3    |
| 4411.2 | 4802.3 | 4033.2 | 2588.9 | NM_006196.2    |
| 5187.1 | 4932.3 | 4549.3 | 4737.4 | NM_005016.3    |
| 2234.9 | 2809.3 | 2484.5 | 1475.9 | NM_031989.2    |
| 97.9   | 102.5  | 88.5   | 93.1   | NM_020528.1    |
| 237.5  | 200    | 228.8  | 160.6  | NM_033009.1    |
| 108.5  | 103.7  | 102.5  | 95.9   | NM_033008.1    |
| 91.8   | 86.6   | 91.1   | 78.5   | NM_020418.2    |
| 208.9  | 232.4  | 210    | 174.8  | NM_033008.1    |
| 577.9  | 567.2  | 518.1  | 492.4  | NM_000282.2    |
| 3027.9 | 2254   | 2114.8 | 1297.6 | NM_000532.2    |
| 81.7   | 87.8   | 78.9   | 82.9   | NM_032420.2    |
| 100.5  | 99.2   | 83.2   | 92.2   | NM_002587.3    |
| 90.8   | 84.9   | 75.3   | 84.5   | NM_020815.1    |
| 84.9   | 85.2   | 85.1   | 81.4   | NM_020815.1    |
| 94.6   | 87     | 91.1   | 90.3   | NM_032961.1    |
| 107.3  | 98.2   | 98.8   | 99.1   | NM_032967.1    |
| 89.2   | 83.7   | 86     | 92.6   | NM_032968.2    |
| 93.8   | 87.9   | 97.8   | 102.3  | NM_014522.1    |
| 83.6   | 86.5   | 79.6   | 81.9   | NM_032973.1    |
| 79.3   | 82     | 84.8   | 84.8   | NM_032971.1    |
| 83.9   | 78.2   | 80.3   | 84     | NM_032973.1    |
| 94     | 95.2   | 85     | 91.4   | NM_016580.2    |
| 94.8   | 90.7   | 89     | 89.9   | NM_033056.2    |
| 93.7   | 88.2   | 86.9   | 88.3   | NM_014459.2    |
| 99.4   | 106.5  | 97.5   | 83.8   | NM_019035.2    |
| 93.5   | 88.7   | 98.6   | 93.4   | NM_020766.1    |
| 185.4  | 173.2  | 132.8  | 153.9  | NM_022843.2    |
| 85.2   | 89     | 88.6   | 92     | NM_033100.1    |
| 96.6   | 103.5  | 94.5   | 98     | NM_002589.2    |

|       |       |       |                   |
|-------|-------|-------|-------------------|
| 86.9  | 84.7  | 90.7  | 89.5 NM_032457.1  |
| 104.6 | 95.8  | 93.8  | 92.4 NM_032456.1  |
| 92.4  | 87.5  | 85.4  | 83.3 NM_002589.2  |
| 105.8 | 96.7  | 90.7  | 101.9 NM_002590.2 |
| 86.9  | 78.2  | 72.2  | 90.6 NM_002590.2  |
| 82.8  | 89.3  | 86.9  | 81.5 NM_203487.1  |
| 82.8  | 88.3  | 85.6  | 86.8 NM_020403.3  |
| 86.1  | 93.9  | 87.8  | 97 NM_020403.3    |
| 88.4  | 83.2  | 75.9  | 93 NM_031411.1    |
| 88.1  | 81.3  | 85.7  | 85.9 NM_031410.1  |
| 99.3  | 102.8 | 88.7  | 101.8 NM_031410.1 |
| 97.1  | 81.4  | 94.4  | 88.1 NM_031859.1  |
| 86.1  | 79.2  | 77.1  | 84.3 NM_031859.1  |
| 94.3  | 87.6  | 95.6  | 97.6 NM_031861.1  |
| 88.7  | 90.5  | 80.5  | 87.5 NM_031864.1  |
| 90.5  | 89.3  | 90.6  | 89.4 NM_018903.2  |
| 82.7  | 87.5  | 82.7  | 89.6 NM_031865.1  |
| 80.3  | 80.3  | 77.9  | 79.9 NM_031495.1  |
| 90.7  | 87.8  | 85.9  | 92 NM_018906.2    |
| 81.7  | 88.7  | 74.5  | 86.4 NM_031497.1  |
| 92.8  | 90.2  | 88    | 92.9 NM_018906.2  |
| 95.5  | 102.4 | 95.2  | 100.8 NM_031500.1 |
| 104.5 | 101.9 | 106.9 | 98.3 NM_031501.1  |
| 82.3  | 88    | 89.1  | 88.8 NM_031848.1  |
| 98.6  | 83    | 90    | 87.9 NM_031849.1  |
| 85.7  | 85.3  | 88.6  | 92 NM_018910.2    |
| 117.9 | 112.1 | 97.5  | 101.1 NM_018910.2 |
| 81.5  | 81.3  | 80.7  | 79.1 NM_031852.1  |
| 102.9 | 89.2  | 94.6  | 79.5 NM_031856.1  |
| 94.2  | 93.8  | 89.2  | 95.2 NM_014005.3  |
| 87    | 76    | 77.1  | 86 NM_014005.3    |
| 94    | 75.8  | 84.1  | 97.3 NM_031882.2  |
| 88.8  | 81.4  | 85.1  | 86.9 NM_031882.2  |
| 101.6 | 98.3  | 92.6  | 92.6 NM_031883.2  |
| 100.4 | 93.1  | 83.5  | 87.8 NM_018899.4  |
| 100.4 | 126.6 | 122.6 | 106.6 NM_031883.2 |
| 77.9  | 79.6  | 77.7  | 84.4 NM_013340.2  |
| 99.9  | 100   | 94.7  | 103.6 NM_018930.3 |
| 86.1  | 87.3  | 79.9  | 87.1 NM_018931.2  |
| 108.1 | 92.9  | 85.8  | 95.8 NM_018932.3  |
| 99.5  | 92.2  | 84.9  | 89.5 NM_018933.2  |
| 104.1 | 104.5 | 103.9 | 85.9 NM_018934.2  |
| 87.8  | 84.8  | 83    | 86.2 NM_018935.2  |
| 87.6  | 78.9  | 95.2  | 88.4 NM_020957.1  |
| 172.3 | 134.7 | 137.8 | 123.5 NR_001280.1 |
| 86.9  | 80.9  | 84.3  | 87.6 NR_001281.1  |
| 866   | 475.4 | 480   | 341.2 NM_018936.2 |
| 86.1  | 80.3  | 79.3  | 81.2 NM_018937.2  |
| 98.1  | 102.4 | 98.2  | 101.6 NM_018938.2 |
| 217.7 | 174   | 151.2 | 151.4 NM_015669.2 |

|        |        |        |                      |
|--------|--------|--------|----------------------|
| 92.3   | 84     | 80.3   | 80.9 NM_018939.2     |
| 82.9   | 73.8   | 76.9   | 86.1 NM_018940.2     |
| 85.3   | 91.7   | 86.9   | 95.7 NM_019120.2     |
| 173.4  | 188.4  | 297.4  | 182.5 NM_019119.3    |
| 93.1   | 102.6  | 90.9   | 85.2 NM_031993.1     |
| 99.6   | 85.9   | 95.5   | 90.2 NM_018912.2     |
| 95     | 91     | 81     | 86.8 NM_031993.1     |
| 92.8   | 93.6   | 86.6   | 101 NM_032090.1      |
| 87.5   | 81.5   | 85.1   | 88.1 NM_032091.1     |
| 88.3   | 89.3   | 80.1   | 89 NM_032091.1       |
| 90.3   | 87.1   | 100.8  | 79.9 NM_032094.1     |
| 91.6   | 97.3   | 72.2   | 82.4 NM_032009.1     |
| 96.2   | 91.5   | 80.3   | 99.4 NM_032011.1     |
| 96.5   | 87.2   | 87     | 93.1 NM_032011.1     |
| 81.5   | 79     | 70.3   | 74.7 NM_032053.1     |
| 86.8   | 80.9   | 69.1   | 87.6 NM_032053.1     |
| 92.2   | 95.1   | 93.4   | 99.8 NM_032054.1     |
| 83.9   | 87.2   | 78.9   | 83.6 NM_018918.2     |
| 101.7  | 88.8   | 101.8  | 99.4 NM_032086.1     |
| 95.2   | 83     | 85.6   | 84.3 NM_032087.1     |
| 78.5   | 79.1   | 68.8   | 76.3 NM_032087.1     |
| 79.8   | 83.6   | 77.6   | 90.5 NM_014004.2     |
| 80.1   | 80.1   | 74.5   | 85.1 NM_032089.1     |
| 100.6  | 88.3   | 82.1   | 83.4 NM_018921.2     |
| 103.6  | 92.3   | 85.1   | 100.3 NM_032095.1    |
| 91     | 85.2   | 89.8   | 99.5 NM_032096.1     |
| 103.7  | 98.3   | 90.1   | 93.1 NM_032097.1     |
| 114.3  | 106.2  | 86.8   | 87.7 NM_032098.1     |
| 97.2   | 91     | 89.6   | 97.9 NM_032099.1     |
| 90.5   | 92.8   | 93.2   | 88.7 NM_018926.2     |
| 120.4  | 115.4  | 122    | 110.1 NM_032100.1    |
| 92.5   | 88.3   | 79.9   | 83.3 NM_032101.1     |
| 92.8   | 91.3   | 83     | 94 NM_032101.1       |
| 91.5   | 93.3   | 83.2   | 94.5 NM_002588.2     |
| 94.6   | 94     | 88.3   | 90.3 NM_002588.2     |
| 117    | 111.7  | 118.2  | 99.5 NM_032402.1     |
| 91.9   | 97.1   | 96.3   | 91.4 NM_032406.1     |
| 81.8   | 81.5   | 83     | 78.1 NM_032406.1     |
| 94.2   | 91.2   | 90.1   | 85.2 NM_018929.2     |
| 101.4  | 93.2   | 98.9   | 88 NM_032407.1       |
| 271.9  | 342.1  | 303.9  | 287 NM_015885.2      |
| 303.3  | 287.8  | 241.1  | 230 NM_032673.1      |
| 169.6  | 93     | 89.4   | 91.2 NM_007144.2     |
| 94     | 91     | 98.4   | 87.5 NM_006315.4     |
| 2773.7 | 1409.5 | 1260.3 | 1023.9 NM_005180.5   |
| 109.6  | 96.9   | 84     | 93.8 NM_032373.2     |
| 228.7  | 137.8  | 126.2  | 135.6 NM_032154.3    |
| 249.3  | 167.1  | 143.1  | 136.8 NM_001011663.1 |
| 758.4  | 507.4  | 389.9  | 530.4 NM_006360.3    |
| 88.6   | 82.4   | 78     | 79.3 NM_002591.2     |

|        |        |        |                      |
|--------|--------|--------|----------------------|
| 156.5  | 112.3  | 116.2  | 113.9 NM_001018073.1 |
| 935.4  | 480.9  | 492.8  | 414 NM_004563.2      |
| 113.5  | 90.1   | 91.1   | 95.5 NM_001018073.1  |
| 132.5  | 113.9  | 113.3  | 112 NM_017675.3      |
| 1181.3 | 1314.1 | 1108.9 | 1187.1 NM_006197.2   |
| 4357.9 | 3727.1 | 3278.2 | 2478.1 NM_005389.1   |
| 196.3  | 209.7  | 196    | 265.5 NM_052937.1    |
| 476.3  | 643.8  | 507.3  | 552.6 NM_018257.1    |
| 119.3  | 86.2   | 89     | 84.7 NM_002592.2     |
| 131.8  | 112.5  | 116.6  | 110.4 NM_182649.1    |
| 1032.2 | 636.8  | 675.6  | 856.6 NM_182649.1    |
| 3682.7 | 3198   | 2670.5 | 2720.1 NM_020357.1   |
| 509    | 867.2  | 903.3  | 508 NM_006031.3      |
| 353.1  | 459.2  | 416.3  | 256.1 NM_014982.1    |
| 108    | 105.9  | 98.9   | 101.4 NM_024938.2    |
| 99.5   | 107.1  | 102.4  | 101 NM_024938.2      |
| 107.5  | 124.6  | 110    | 107 NM_014801.2      |
| 114    | 106.4  | 100.4  | 96.1 NM_002593.2     |
| 137.2  | 233.7  | 170    | 157.7 NM_013363.2    |
| 400.4  | 287.4  | 262.9  | 286.2 NM_002768.1    |
| 99.1   | 88     | 95.2   | 99.6 NM_174895.1     |
| 92.6   | 91     | 79.8   | 85.8 NM_006198.2     |
| 121    | 142.5  | 120.4  | 133.3 NM_015889.3    |
| 126.9  | 141.6  | 131.2  | 127.8 NM_001003891.1 |
| 88.6   | 83.3   | 82.7   | 75.8 NM_000439.3     |
| 79.1   | 91     | 75.6   | 82.7 NM_013271.2     |
| 89.1   | 84.1   | 83.5   | 73.9 NM_002594.2     |
| 95.3   | 97.9   | 103.6  | 91.6 NM_017573.3     |
| 85.6   | 86.5   | 77.9   | 84.7 XM_940023.1     |
| 84.7   | 78.4   | 79     | 83.9 NM_138325.2     |
| 104.9  | 107.2  | 103.2  | 102.1 NM_138325.2    |
| 98.5   | 98.9   | 94.2   | 85.4 NM_138322.2     |
| 101.7  | 95     | 90.5   | 88.9 NM_138323.1     |
| 277.4  | 243.8  | 236.4  | 171.4 NM_004716.2    |
| 95.4   | 88.2   | 86.9   | 89.3 NM_174936.2     |
| 99.2   | 100.8  | 97.4   | 102.4 NM_006201.3    |
| 85.3   | 79.6   | 87.6   | 78.2 NM_033018.2     |
| 89     | 96.3   | 79.2   | 79 NM_002595.2       |
| 112.8  | 111.3  | 101.4  | 114.9 NM_212503.1    |
| 81.3   | 87.5   | 86     | 89.1 NM_002596.2     |
| 83.7   | 89.7   | 83.1   | 79.9 NM_002596.2     |
| 82.2   | 88.4   | 79.8   | 74.9 NM_212503.1     |
| 151.1  | 142    | 126.2  | 147.5 NM_021213.1    |
| 246    | 509.7  | 584    | 404.9 NM_016297.2    |
| 87.8   | 90.5   | 83.3   | 93.6 NM_005017.2     |
| 90.7   | 91     | 80     | 90.2 NM_004845.3     |
| 91     | 104.6  | 87.2   | 89.4 NM_002861.1     |
| 79.7   | 80.3   | 83.7   | 71 NM_014891.5       |
| 91     | 94     | 94.5   | 95.5 NM_002597.3     |
| 81.6   | 72.9   | 76.1   | 81.8 NM_002597.3     |



|        |        |        |        |                |
|--------|--------|--------|--------|----------------|
| 97.1   | 91.6   | 95.5   | 78.7   | NM_005018.1    |
| 152.3  | 121.6  | 118.6  | 129.9  | NM_145859.1    |
| 93.3   | 103.7  | 107.6  | 98.3   | NM_007217.3    |
| 895.7  | 725.4  | 625.3  | 548.4  | NM_145860.1    |
| 133.3  | 115.7  | 105.9  | 130.5  | NM_145860.1    |
| 82     | 80.2   | 74.3   | 73.4   | NM_025239.2    |
| 928.4  | 825.7  | 684    | 741.6  | NM_144781.1    |
| 1607.3 | 2066   | 1468.3 | 1073.9 | NM_002598.2    |
| 981.1  | 1371.5 | 1572.4 | 1003.8 | NM_145341.2    |
| 976    | 754.2  | 689.7  | 708.9  | NM_004708.2    |
| 3152   | 2908.3 | 2646.2 | 1973.6 | NM_013232.2    |
| 88.3   | 86.7   | 81.7   | 79.8   | NM_013374.3    |
| 5001.2 | 6309.1 | 6899.8 | 6575   | NM_005707.1    |
| 221.1  | 149    | 153.5  | 127.7  | NM_004208.2    |
| 294.1  | 270.1  | 275.9  | 195.6  | NM_004208.2    |
| 95.9   | 85.6   | 81.7   | 89.7   | NM_145812.1    |
| 170.1  | 112.9  | 118.7  | 109.5  | NM_005388.2    |
| 84.9   | 83.2   | 84.8   | 79.8   | NM_152401.2    |
| 447.4  | 520.6  | 438.9  | 284.5  | NM_024065.3    |
| 116.1  | 103.6  | 119.7  | 108.6  | NM_182612.1    |
| 251    | 215.6  | 199.8  | 176.9  | NM_182612.1    |
| 87.9   | 78.7   | 81.1   | 87.4   | NM_006661.1    |
| 79.3   | 87.7   | 85     | 83.6   | NM_001077358.1 |
| 98.3   | 101.9  | 97.9   | 106.2  | NM_016953.2    |
| 98.1   | 98.7   | 95.3   | 98     | NM_016953.3    |
| 98.4   | 87.1   | 87.3   | 91.9   | NM_001003683.1 |
| 104.1  | 99.1   | 90.2   | 100.7  | NM_005019.3    |
| 95.3   | 94.8   | 96.1   | 94.6   | NM_001003683.1 |
| 135.6  | 175.6  | 169.8  | 161.2  | NM_000924.2    |
| 86.5   | 94.5   | 84     | 90.8   | NM_005020.1    |
| 88.4   | 84.6   | 84.5   | 79.7   | NM_002599.1    |
| 89.4   | 86.5   | 81.4   | 91.1   | NM_000921.3    |
| 580.2  | 663    | 539.4  | 531    | NM_000922.2    |
| 91.7   | 84.2   | 94.6   | 87.6   | NM_006202.1    |
| 105.4  | 229.3  | 161.9  | 203.3  | NM_002600.3    |
| 84.9   | 108.5  | 95     | 96.7   | NM_002600.2    |
| 87     | 83.2   | 99.5   | 88.9   | NM_001037340.1 |
| 82.6   | 89.3   | 79.9   | 84.1   | NM_001037341.1 |
| 89.5   | 86.7   | 82.3   | 82.8   | NM_000923.2    |
| 160.9  | 178.6  | 139.3  | 136.7  | NM_006203.3    |
| 100.3  | 91.6   | 90.8   | 95.8   | NM_001002811.1 |
| 97.2   | 91.2   | 89.3   | 86.3   | NM_022359.3    |
| 86.9   | 77.4   | 79.7   | 73     | NM_014644.3    |
| 98.3   | 93     | 94.3   | 91.7   | NM_033437.2    |
| 109    | 91.1   | 100.4  | 95.2   | NM_033437.2    |
| 95.8   | 90.8   | 85.8   | 79.9   | NM_001083.3    |
| 81.4   | 83.8   | 78.9   | 78     | NM_033430.2    |
| 80.7   | 85.8   | 85.2   | 88.7   | NM_001083.3    |
| 93.8   | 87.7   | 91.3   | 96.4   | NM_000440.1    |
| 89.8   | 79.9   | 79.7   | 75.5   | NM_000283.1    |

|        |        |        |        |                |
|--------|--------|--------|--------|----------------|
| 95.2   | 92.2   | 80.4   | 75.3   | NM_006204.2    |
| 217.5  | 197.7  | 189.4  | 135.6  | NM_002601.2    |
| 119    | 109.1  | 99.8   | 106.4  | NM_002602.1    |
| 105.6  | 91.5   | 89.1   | 89.6   | NM_006205.1    |
| 363.7  | 269.5  | 266.6  | 234.6  | NM_002603.1    |
| 342.6  | 567.1  | 858.7  | 437.3  | NM_002604.1    |
| 107.6  | 97     | 95.2   | 97.2   | NM_002603.1    |
| 206.5  | 146    | 146.7  | 118.8  | NM_018945.3    |
| 174.7  | 139.2  | 147.5  | 117    | NM_173455.1    |
| 106.3  | 108    | 93.6   | 89.2   | NM_002605.2    |
| 90.9   | 90.7   | 84.5   | 92.3   | NM_002605.2    |
| 101.2  | 101.6  | 101.3  | 89.9   | NM_001029851.1 |
| 99.2   | 102.2  | 88.4   | 86.9   | NM_001029851.1 |
| 105.8  | 93.7   | 94.5   | 89.2   | NM_001001584.1 |
| 105.7  | 127.4  | 146.9  | 114.3  | NM_001001567.1 |
| 91.6   | 89.7   | 86.2   | 79.6   | NM_001001573.1 |
| 87     | 93.2   | 87.6   | 92     | NM_001001570.1 |
| 94.8   | 90.6   | 94     | 83.8   | NM_022341.1    |
| 89.1   | 93     | 81.6   | 86.4   | NM_033023.3    |
| 99.4   | 87.5   | 93.6   | 92.6   | XM_942520.1    |
| 94     | 89.7   | 87.5   | 89.2   | NM_002608.1    |
| 94.7   | 90.4   | 92.6   | 95.4   | NM_033016.1    |
| 113.2  | 114.5  | 109.9  | 106.2  | NM_033016.1    |
| 111.4  | 111.9  | 108.9  | 114.1  | NM_016205.1    |
| 98.8   | 123    | 111.9  | 108.4  | NM_025208.4    |
| 114.7  | 122.3  | 128.8  | 123.5  | NM_025208.3    |
| 174.7  | 153.6  | 161.4  | 129.8  | NM_006206.3    |
| 99.9   | 102.7  | 104.7  | 104.6  | NM_002609.3    |
| 122.8  | 108.6  | 105.4  | 110.4  | NM_006207.1    |
| 405.1  | 421.5  | 522.7  | 289.3  | NM_000284.1    |
| 84.7   | 80.8   | 77     | 76.5   | NM_005390.3    |
| 3310.3 | 2944.3 | 3011.3 | 2346.4 | NM_000925.1    |
| 506.1  | 497.4  | 390.4  | 365.9  | NM_003477.1    |
| 87.2   | 84.5   | 87.1   | 93.6   | NM_006849.1    |
| 86.1   | 75.9   | 90     | 87.5   | NM_005313.4    |
| 192.5  | 199    | 145.6  | 232.7  | NR_002305.1    |
| 137.4  | 128.9  | 123.1  | 127.2  | NM_004911.3    |
| 401    | 589.4  | 502.2  | 418    | NM_006810.1    |
| 1119.2 | 970.6  | 881.9  | 803    | NM_005742.2    |
| 212.9  | 186.5  | 189.8  | 163.5  | NM_152835.1    |
| 84.2   | 98.9   | 78     | 92.6   | NM_174924.1    |
| 94.1   | 109.1  | 110.2  | 86.6   | NM_002610.3    |
| 102.3  | 107.6  | 101.2  | 99.9   | NM_002611.3    |
| 166.7  | 123.5  | 130.2  | 135.4  | NM_005391.1    |
| 110.3  | 131.3  | 120.1  | 150.6  | NM_002612.2    |
| 555.2  | 208.8  | 199    | 159.7  | NM_020992.2    |
| 96.9   | 91.4   | 81     | 79     | NM_176871.2    |
| 82.9   | 75.1   | 66.6   | 75.7   | NM_198042.2    |
| 112.7  | 84     | 86.6   | 89.6   | NM_014476.1    |
| 93     | 91.6   | 87     | 92.3   | NM_003687.2    |

|        |        |        |                      |
|--------|--------|--------|----------------------|
| 146.7  | 121.2  | 115.3  | 118.5 NM_001011515.1 |
| 101.8  | 102.5  | 100.2  | 101.8 NM_006457.2    |
| 100.2  | 97.5   | 93.3   | 101.2 NM_001011516.1 |
| 163.8  | 136    | 108.1  | 131.6 NM_213636.1    |
| 250.5  | 223.8  | 198.6  | 179.8 NM_005451.3    |
| 268.6  | 188    | 136.2  | 136.7 NM_213636.1    |
| 136.6  | 120.1  | 96.2   | 117.7 NM_020786.1    |
| 96.8   | 93.8   | 96.2   | 106.1 XM_939834.1    |
| 442.7  | 374.7  | 300.5  | 258.5 NM_002613.3    |
| 921.1  | 834.7  | 747    | 909.3 NM_031268.4    |
| 113.3  | 94.7   | 91.9   | 93.7 NM_001006625.1  |
| 95.7   | 87     | 83.7   | 90.5 NM_198389.2     |
| 173.6  | 192.1  | 183.5  | 178.7 XM_942678.1    |
| 329.6  | 385.7  | 352.4  | 246.5 NM_017990.3    |
| 90.3   | 85.9   | 80.3   | 83.9 NM_017990.3     |
| 444.7  | 396.2  | 331.8  | 247.1 NM_030815.2    |
| 487.1  | 310.1  | 327.8  | 263.1 NM_014317.3    |
| 680    | 813.1  | 935.5  | 679.4 NM_020381.2    |
| 1285.9 | 1897.5 | 1898.6 | 834.6 NM_003681.3    |
| 1189.5 | 1053.2 | 1055.6 | 430.8 NM_020315.3    |
| 91.2   | 93.7   | 84.5   | 90.5 NM_024411.2     |
| 94.9   | 82.5   | 89.3   | 91.1 NM_016484.4     |
| 93.1   | 88.3   | 74.2   | 81.1 NM_024791.2     |
| 98.9   | 95.9   | 87.1   | 99.8 NM_032512.2     |
| 124.5  | 102    | 102    | 105.2 NM_024895.3    |
| 164.6  | 134.4  | 112.1  | 129 NM_173791.2      |
| 97.6   | 91.6   | 92.6   | 81.9 NM_002614.3     |
| 80.7   | 77.4   | 82.7   | 78.9 NM_005764.3     |
| 96.2   | 84.6   | 84.9   | 87.9 NM_178140.1     |
| 80     | 91.4   | 83.1   | 83.4 NM_178140.1     |
| 85.1   | 91.7   | 89.8   | 91.6 NM_001042516.1  |
| 95.9   | 86.1   | 79     | 91.5 NM_001042515.1  |
| 82.9   | 88.1   | 91.5   | 71.3 NM_001042516.1  |
| 82.4   | 90.9   | 85     | 76.8 NM_015009.1     |
| 82.9   | 93.1   | 83.1   | 91.6 NM_015009.1     |
| 87.6   | 86.5   | 77.3   | 84.8 XM_946222.1     |
| 94.2   | 89.2   | 86.2   | 93.2 NM_013377.2     |
| 2166.5 | 1444.3 | 1187.8 | 815.6 NM_003768.2    |
| 89     | 97.3   | 94.5   | 97.1 NM_001080471.1  |
| 582.9  | 626.1  | 445    | 518.7 NM_002567.2    |
| 81.4   | 87     | 76.1   | 77.2 NM_144962.1     |
| 592.1  | 711.9  | 571.1  | 613.9 NM_000442.2    |
| 192.7  | 196.2  | 214.4  | 151.7 NM_006117.2    |
| 209.8  | 227.2  | 184.7  | 201.3 NM_006117.2    |
| 280.4  | 240.5  | 235.1  | 197.2 NM_018441.2    |
| 253.7  | 270.9  | 253.6  | 200.8 NM_012392.1    |
| 79.5   | 73.6   | 73.3   | 79.6 NM_001040152.1  |
| 88.7   | 88.8   | 80.6   | 81.4 NM_006210.1     |
| 177.5  | 214    | 166.1  | 194.5 NM_020651.2    |
| 475.2  | 573.3  | 423.6  | 455.8 NM_021255.1    |

|        |        |        |                     |
|--------|--------|--------|---------------------|
| 101.7  | 106.4  | 98.3   | 110.8 NM_145065.1   |
| 1187   | 1079.6 | 878.8  | 575.5 NM_015946.4   |
| 207.7  | 166.9  | 145.6  | 146.3 NM_014389.1   |
| 305.4  | 244.2  | 251.4  | 170.8 NM_148173.1   |
| 95.5   | 89.6   | 88.8   | 86.7 NM_148173.1    |
| 85.8   | 86.5   | 81     | 88.1 NM_007169.2    |
| 107.1  | 98.2   | 93.4   | 85.5 NM_148172.1    |
| 677    | 396.6  | 372.2  | 257.4 NM_006211.2   |
| 212.6  | 143.1  | 153.9  | 126.5 NM_021830.3   |
| 628.1  | 612.3  | 513.2  | 448.5 NM_000285.1   |
| 80.7   | 83.8   | 80.6   | 83.4 NM_002616.1    |
| 78.1   | 82.1   | 75.7   | 79.8 NM_003894.3    |
| 1088.5 | 726.7  | 751.5  | 586 NM_022817.1     |
| 98.6   | 88.9   | 96     | 97.2 NM_001080526.1 |
| 319.5  | 442.6  | 413.2  | 228 NM_033419.3     |
| 107.4  | 118.9  | 85.5   | 110.6 NM_022121.2   |
| 120.9  | 124.3  | 120.9  | 114.6 NM_022574.2   |
| 146.6  | 122    | 114.7  | 98.7 NM_014303.2    |
| 207.3  | 205    | 219.3  | 146.7 NM_004564.1   |
| 143.1  | 165.1  | 152.4  | 149.9 NM_000466.1   |
| 93.5   | 86.1   | 87     | 83.6 NM_002617.3    |
| 95.5   | 83.4   | 91.5   | 101.5 NM_153818.1   |
| 97.1   | 98.3   | 89.5   | 95.2 NM_003847.1    |
| 952.5  | 642.4  | 562    | 469.7 NM_003846.1   |
| 95.5   | 98.2   | 88.6   | 93 NM_080662.2      |
| 84.1   | 98.8   | 84.8   | 88.5 NM_000286.1    |
| 78.2   | 80.7   | 74.3   | 82.1 NM_002618.2    |
| 190    | 149.4  | 128.1  | 135.4 NM_004565.1   |
| 500.5  | 387.7  | 403.5  | 252 NM_004813.1     |
| 125    | 112.1  | 102.2  | 106.7 NM_057174.1   |
| 781.9  | 506.2  | 549.6  | 361.2 NM_004813.1   |
| 492.3  | 630.3  | 540.3  | 432 NM_002857.2     |
| 104.1  | 93.9   | 95.9   | 94.1 NM_017929.3    |
| 97.9   | 100.2  | 95.2   | 102.2 NM_003630.1   |
| 477.3  | 559.3  | 507.1  | 320.5 NM_000319.3   |
| 96.4   | 105.4  | 89.4   | 88.9 NM_016559.1    |
| 154.8  | 156.7  | 144    | 132.7 NM_000287.2   |
| 335.6  | 333.2  | 306.5  | 253.2 NM_000288.1   |
| 86.2   | 93.4   | 93.9   | 93 NM_002619.1      |
| 96.4   | 99.7   | 87.2   | 90.5 NM_002620.1    |
| 229.1  | 255.2  | 289.4  | 220.6 NM_014887.1   |
| 360.7  | 294.4  | 267.6  | 216.3 NM_012393.1   |
| 138.3  | 218.4  | 205.4  | 198.3 NM_002621.1   |
| 1424.4 | 1334.9 | 1099.4 | 885.9 NM_002622.3   |
| 94.7   | 94.9   | 83     | 97.7 NM_012394.2    |
| 102.3  | 109.8  | 88.9   | 106.3 NM_002623.3   |
| 2675.5 | 4021.8 | 3766.5 | 2833.5 NM_002624.2  |
| 2268.1 | 2383.4 | 1789.4 | 2405.9 NM_145897.2  |
| 400.7  | 465.7  | 423.6  | 350.5 NM_014260.2   |
| 89.3   | 94     | 71.2   | 101 NM_002625.1     |

|        |         |         |                      |
|--------|---------|---------|----------------------|
| 96     | 85.5    | 83.6    | 91.4 NM_006212.2     |
| 100.6  | 93.3    | 89.4    | 97.1 NM_001018053.1  |
| 98.6   | 100.4   | 95.4    | 93.9 NM_001018053.1  |
| 753.3  | 619.3   | 639.1   | 393.4 NM_004566.2    |
| 393.8  | 543.4   | 577.2   | 310.4 NM_004567.2    |
| 90.1   | 86.9    | 85      | 88.2 NM_001002021.1  |
| 527.2  | 650.3   | 537.3   | 483.8 NM_002626.4    |
| 104.9  | 118.3   | 125.6   | 111.8 NM_000289.3    |
| 1264.4 | 607.1   | 511     | 410.6 NM_002627.3    |
| 20166  | 16115.5 | 15184.7 | 8483.2 NM_005022.2   |
| 91.5   | 91.3    | 86.9    | 94.5 NM_053024.2     |
| 109.8  | 99.6    | 83.4    | 95.2 NM_053024.2     |
| 85.2   | 81.9    | 85.6    | 82.4 NM_001029886.1  |
| 110.3  | 107     | 99      | 104.7 NM_199346.1    |
| 1474.7 | 759.5   | 679.5   | 509.6 NM_016095.1    |
| 133.9  | 148.1   | 107.3   | 129.6 NM_012395.2    |
| 99.7   | 100.4   | 92.2    | 87.9 NM_001079807.1  |
| 87.8   | 91.1    | 85.8    | 93.2 NM_001079808.1  |
| 97.8   | 105.5   | 98.8    | 82 NM_014224.1       |
| 2405.2 | 1221.4  | 1000.4  | 806.1 NM_002629.2    |
| 102.5  | 94.1    | 92.4    | 85.9 NM_000290.2     |
| 88.9   | 84.2    | 84.7    | 82.4 NM_001029891.2  |
| 92.5   | 89.7    | 87      | 92.6 NM_138575.1     |
| 92.3   | 93.9    | 93.9    | 89.9 NM_024989.3     |
| 141    | 127.1   | 122.9   | 120.9 NM_032507.2    |
| 211.1  | 168.5   | 165.2   | 166.3 NM_170725.2    |
| 94.1   | 107.1   | 90.7    | 100.8 NM_170725.2    |
| 106.2  | 91.7    | 85.3    | 90.7 NM_170753.1     |
| 98.1   | 102.1   | 90.6    | 99.6 NM_152595.4     |
| 218.9  | 233.9   | 209     | 183.5 NM_024554.2    |
| 92.9   | 79.1    | 88.4    | 91.8 NM_002630.1     |
| 694.1  | 492.1   | 458.1   | 372.4 NM_016134.2    |
| 4162.3 | 3498.5  | 3041.3  | 2347.8 NM_002631.2   |
| 89.8   | 86.7    | 84.9    | 91.6 NM_014485.2     |
| 264.5  | 250.5   | 291.2   | 215.4 NM_001002880.1 |
| 104.6  | 97.1    | 95.1    | 98.9 NM_001002880.1  |
| 78.2   | 83.1    | 71.1    | 69.3 NM_002632.4     |
| 252.5  | 239.6   | 218.5   | 194.6 NM_005023.2    |
| 1233.8 | 864.3   | 748.5   | 646.9 NM_000291.2    |
| 71.9   | 76.5    | 72.5    | 79.2 NM_138733.2     |
| 1508.5 | 1259.3  | 1184.8  | 1020.2 NM_012088.2   |
| 100.5  | 94.9    | 91.4    | 96.7 NM_005091.1     |
| 89.8   | 88.1    | 84.8    | 96.2 NM_052890.2     |
| 90.6   | 83.9    | 88      | 96 NM_052891.1       |
| 122.8  | 111     | 104.5   | 100.9 NM_020393.2    |
| 928.8  | 1057.7  | 931.9   | 705.4 NM_002633.2    |
| 581    | 393     | 341.5   | 285.7 NM_018290.2    |
| 114.8  | 108.4   | 100     | 115 NM_173582.3      |
| 170.3  | 169     | 165     | 159.3 NM_015599.1    |
| 101    | 96.1    | 95.3    | 98.5 NM_021965.3     |

|        |        |        |                      |
|--------|--------|--------|----------------------|
| 90.5   | 90.4   | 88.2   | 84.8 NM_021965.3     |
| 109.8  | 99.5   | 93.5   | 95.3 XM_936702.1     |
| 90.1   | 83.6   | 79.5   | 89.3 NR_002836.1     |
| 85.6   | 77.3   | 70.4   | 77.4 XR_001072.1     |
| 99.3   | 99.1   | 93.6   | 87.5 NM_017712.1     |
| 91.6   | 92.1   | 95.5   | 96.2 NM_000926.2     |
| 2064.2 | 1605.7 | 1473.6 | 970.9 NM_006667.2    |
| 1844.1 | 1220.3 | 1190.8 | 841 NM_006320.1      |
| 451.2  | 477.1  | 409.4  | 338.9 NM_024419.3    |
| 101.2  | 97.8   | 105.5  | 97.9 NM_017732.3     |
| 142.6  | 132.4  | 115.4  | 120.2 NM_177939.2    |
| 334    | 312.7  | 339.1  | 191.9 NM_177938.2    |
| 200.2  | 248.4  | 269.7  | 217.6 NM_032592.1    |
| 144.7  | 250.7  | 251.6  | 199.4 NM_030948.1    |
| 650.2  | 853.4  | 784.3  | 645.7 NM_014721.1    |
| 82.5   | 77.9   | 82.2   | 85.5 NM_080672.3     |
| 2178.3 | 1365   | 1311.2 | 970.1 NM_080672.3    |
| 311.7  | 237.6  | 197.4  | 186.6 NM_183246.1    |
| 967.7  | 1008.8 | 1118.8 | 686.3 NM_023923.2    |
| 88.6   | 87     | 81.4   | 94.5 NM_023923.3     |
| 80.4   | 75.7   | 79.4   | 74.9 NM_023923.3     |
| 476.1  | 538.7  | 419.5  | 314.7 NM_002634.2    |
| 429.3  | 310.2  | 326.8  | 259.5 NM_007273.3    |
| 112.2  | 114.6  | 101.7  | 117.3 NM_004426.2    |
| 87.1   | 90.7   | 87.9   | 84.4 NM_004427.2     |
| 138.8  | 177.3  | 143.8  | 141 NM_198040.1      |
| 91.2   | 87.9   | 90.3   | 88.4 NM_198040.1     |
| 141.6  | 138.3  | 137.9  | 144.9 NM_024947.2    |
| 308.5  | 360.9  | 341.3  | 222.1 NM_018367.3    |
| 89     | 93.6   | 75.6   | 88.6 NM_000444.2     |
| 103.2  | 103    | 104.9  | 120.5 NM_024165.1    |
| 124.9  | 159.5  | 144.3  | 148.9 NM_002636.3    |
| 206.2  | 219.1  | 188.1  | 244 NM_002636.3      |
| 1170.4 | 737.6  | 598.9  | 659.3 NM_133325.1    |
| 960.3  | 615.7  | 538.4  | 448.5 NM_001040443.1 |
| 1569.3 | 934.2  | 932.8  | 618.1 NM_016119.1    |
| 103.1  | 93.3   | 83.1   | 89.6 NM_001040443.1  |
| 94.3   | 98.7   | 102.1  | 103.7 NM_020889.2    |
| 168.6  | 178.8  | 155.9  | 171.3 NM_001033561.1 |
| 79.7   | 89.8   | 75.3   | 75.7 NM_020889.2     |
| 450.9  | 384.3  | 359.5  | 268.1 NM_153812.1    |
| 85.3   | 85.6   | 87.9   | 93 NM_001007157.1    |
| 127    | 125.2  | 107    | 110.4 NM_014660.2    |
| 249.2  | 242.6  | 194.2  | 207.3 NM_001007157.1 |
| 381.9  | 319.9  | 339.4  | 231.3 NM_015288.4    |
| 279.3  | 305.2  | 278.7  | 246.7 NM_014735.2    |
| 86.7   | 92.5   | 87.9   | 78 NM_014735.3       |
| 108.3  | 115.4  | 102.2  | 107.4 NM_199320.1    |
| 461.8  | 289.2  | 270.1  | 197.4 NM_024900.2    |
| 122.7  | 117.2  | 109.7  | 114.5 NM_199320.1    |

|         |        |        |                      |
|---------|--------|--------|----------------------|
| 282.3   | 210.7  | 193.2  | 162.1 NM_015651.1    |
| 241.9   | 189.5  | 168.7  | 126.2 NM_001009936.1 |
| 202     | 146.2  | 147.3  | 131.7 NM_001009936.1 |
| 92.5    | 94.2   | 79.6   | 86.8 NM_005392.2     |
| 378.7   | 313.3  | 289.6  | 262.4 NM_024517.1    |
| 167.8   | 224.1  | 212.5  | 175.2 NM_016436.3    |
| 131.2   | 136.1  | 118.9  | 137.3 NM_198513.1    |
| 859     | 1077.7 | 658.5  | 929.7 NM_016018.3    |
| 99.8    | 98     | 95.7   | 107.3 NM_198513.1    |
| 98      | 97.4   | 104.7  | 105.2 NM_032205.2    |
| 201.3   | 219.7  | 168.2  | 218 NM_198513.1      |
| 965     | 1026.4 | 1006.1 | 712.8 NM_016621.2    |
| 103.1   | 85.9   | 91.9   | 81.3 NM_138415.1     |
| 989.9   | 774.1  | 604.4  | 544.8 NM_020395.2    |
| 127.3   | 125.8  | 129    | 107.8 NM_024297.1    |
| 114.9   | 126.2  | 106.5  | 146.8 NM_015153.1    |
| 2293.2  | 1201.2 | 1150.8 | 693.2 NM_032758.3    |
| 102.7   | 97.6   | 95.6   | 99 NM_032335.2       |
| 81      | 85.6   | 86.1   | 89.5 NM_032458.2     |
| 135.4   | 169.7  | 149.6  | 135.7 NM_173341.1    |
| 95.7    | 93.3   | 96.3   | 99 NM_016483.4       |
| 103.5   | 109.2  | 103    | 99.5 NM_173341.1     |
| 86.7    | 84     | 83.2   | 81.7 NM_015107.1     |
| 11406.9 | 3308.4 | 3550   | 1959.9 NM_006623.2   |
| 496.8   | 517.4  | 564.8  | 270.1 NM_177967.2    |
| 855.5   | 1133.5 | 977.3  | 1016 NM_017934.4     |
| 117.1   | 147.2  | 119.9  | 123.6 NM_002637.1    |
| 336.3   | 526.2  | 614.6  | 425.1 NM_000292.1    |
| 242.6   | 278.1  | 232.6  | 230.8 NM_000293.1    |
| 109.9   | 110.4  | 92.2   | 108.5 NM_001031835.1 |
| 616.2   | 696.8  | 689.4  | 523.9 NM_001031835.1 |
| 103.5   | 97     | 100.8  | 95.1 NM_006213.3     |
| 142.9   | 125.6  | 143.1  | 118.4 NM_000294.1    |
| 139.1   | 118.9  | 95.8   | 101.2 NM_007350.2    |
| 97.1    | 93.3   | 86.2   | 86.1 NM_003311.3     |
| 99.3    | 88.6   | 92.9   | 93.3 NM_012396.2     |
| 312     | 193.9  | 238.2  | 134.9 NM_015157.1    |
| 87.9    | 89.9   | 76.4   | 84.9 NM_145753.1     |
| 84.9    | 89.3   | 89.9   | 78.7 NM_198850.2     |
| 160.2   | 195.4  | 192    | 163.1 NM_194449.1    |
| 121.3   | 126.3  | 104.9  | 119.8 NM_015020.2    |
| 85.9    | 91.9   | 81.5   | 82.5 NM_178500.2     |
| 87.6    | 78.8   | 78.3   | 82.8 NM_001008489.2  |
| 92.5    | 90.5   | 95.3   | 91.1 NM_005169.2     |
| 82      | 83.1   | 82.2   | 81.9 NM_003924.2     |
| 1490.5  | 1047   | 1602.6 | 1140.2 NM_014172.2   |
| 650.7   | 427.1  | 327.8  | 367.6 NM_006608.1    |
| 103.7   | 92.6   | 100.2  | 99.4 NM_020432.2     |
| 159.9   | 140.5  | 126.6  | 120.1 NM_006214.3    |
| 381     | 286.5  | 309.5  | 218.5 NM_006214.3    |

|       |        |        |                    |
|-------|--------|--------|--------------------|
| 582.2 | 562.5  | 442.9  | 400.4 NM_006214.2  |
| 1056  | 980.9  | 878.7  | 547.4 NM_012260.1  |
| 79.6  | 79.7   | 78.5   | 77.1 NM_174933.2   |
| 105.7 | 108.2  | 100.3  | 102.9 NM_014759.2  |
| 87.6  | 83.5   | 83.5   | 85.1 NM_032439.1   |
| 153   | 113.4  | 123.3  | 106.8 NM_015886.3  |
| 107.9 | 101.7  | 90.1   | 88.2 NM_153370.2   |
| 88.4  | 84.2   | 90.5   | 86.1 NM_002638.2   |
| 102   | 95.3   | 94.5   | 108.8 NM_018323.2  |
| 129.6 | 114.7  | 102.7  | 106.7 NM_018425.2  |
| 498.6 | 684.4  | 539.1  | 596.1 NM_016166.1  |
| 84.1  | 85.3   | 77.8   | 73.1 NM_173206.2   |
| 401.7 | 312.3  | 237.9  | 226.1 NM_173206.2  |
| 131.5 | 115    | 117.6  | 105.3 XM_938229.1  |
| 132   | 119.2  | 117.3  | 122.3 NM_006099.2  |
| 671.8 | 753.3  | 761.8  | 420.2 NM_015897.2  |
| 145.8 | 102.1  | 105.1  | 95.8 NM_014422.2   |
| 89.1  | 88.6   | 75.2   | 84.1 NM_014422.2   |
| 94.7  | 103.6  | 89.4   | 91 NM_007166.2     |
| 402.2 | 437.9  | 340.4  | 413.9 NM_007166.2  |
| 158.9 | 167.3  | 158.5  | 148.8 NM_012407.3  |
| 140   | 105    | 103    | 123.7 NM_025049.2  |
| 94    | 77     | 82.1   | 79.8 NM_017993.1   |
| 730   | 611.5  | 559.4  | 573.5 NM_020472.1  |
| 80.2  | 92.4   | 75     | 77.3 NM_002641.1   |
| 126.9 | 110.8  | 108.4  | 120.9 NM_020473.2  |
| 648.1 | 810.1  | 569.4  | 533.7 NM_004855.3  |
| 897.4 | 625.8  | 490.6  | 467.4 NM_153747.1  |
| 246.1 | 202.9  | 183.3  | 168.4 NM_153747.1  |
| 633.4 | 564.2  | 402.6  | 465 NM_173074.1    |
| 94.1  | 116.5  | 96.9   | 108.3 NM_173074.1  |
| 191.9 | 155.3  | 152.8  | 137.5 NM_017733.2  |
| 227.9 | 141.8  | 133.6  | 149 NM_004569.2    |
| 368.3 | 321.1  | 275.4  | 246.2 NM_005482.1  |
| 100.4 | 96.9   | 99.1   | 91.9 NM_004278.2   |
| 166.1 | 190    | 164.9  | 163.5 NM_145167.1  |
| 92.9  | 98     | 88.2   | 86.5 NM_176787.3   |
| 341.8 | 409.2  | 379.6  | 247.2 NM_176787.3  |
| 472.6 | 648.3  | 506.3  | 476.3 NM_012327.3  |
| 149.7 | 122.9  | 105    | 103.3 NM_032634.2  |
| 241.2 | 165.9  | 142.8  | 163.3 NM_152850.2  |
| 114.2 | 100.2  | 99.6   | 107 NM_032634.2    |
| 266.3 | 257.2  | 222.2  | 141.2 NM_004204.2  |
| 92.4  | 93.1   | 89.5   | 97.1 NM_002644.2   |
| 571.5 | 558.2  | 538.5  | 443.1 NM_033198.2  |
| 851.1 | 678.5  | 643.5  | 461.8 NM_015937.2  |
| 179.5 | 213.2  | 211.1  | 233.8 NM_017837.2  |
| 86.9  | 89.2   | 85     | 83.5 NM_178517.3   |
| 121.6 | 129.5  | 143.4  | 108.1 NM_017861.1  |
| 2647  | 1882.6 | 1459.3 | 1413.8 NM_032906.2 |



|        |        |        |                      |
|--------|--------|--------|----------------------|
| 113    | 183.7  | 172.6  | 151.1 NM_025163.2    |
| 161    | 161.8  | 162.9  | 133 NM_152309.2      |
| 127.8  | 127.2  | 112.8  | 124.8 NM_002645.1    |
| 102.2  | 113.4  | 99.4   | 95.6 NM_002646.2     |
| 91.9   | 86     | 81.5   | 78.6 NM_004570.2     |
| 97.9   | 102    | 102.9  | 117.2 NM_002647.2    |
| 112.2  | 96.7   | 97.2   | 112.2 NM_006218.2    |
| 217    | 241.9  | 176.3  | 215.1 NM_006219.1    |
| 362.4  | 382.5  | 369.4  | 261.1 NM_005026.2    |
| 299.6  | 300.7  | 242.8  | 231.4 NM_002649.2    |
| 335.5  | 487.2  | 486.9  | 438.6 NM_181504.2    |
| 97.5   | 80.5   | 76.4   | 79.7 NM_181504.2     |
| 89.5   | 91     | 94     | 88.9 NM_181524.1     |
| 104    | 89.7   | 89.3   | 89.1 NM_181523.1     |
| 95.7   | 108.3  | 98.6   | 102.6 NM_181504.2    |
| 973.9  | 1223.9 | 1265.8 | 530.2 NM_005027.2    |
| 88.6   | 98.4   | 98.6   | 106.5 NM_003629.2    |
| 166.6  | 189.3  | 159.7  | 141.8 NM_014602.1    |
| 87.3   | 100.8  | 99.7   | 88.6 NM_014308.1     |
| 1035.7 | 1330.4 | 1498.7 | 965.5 NM_058004.1    |
| 598.3  | 456.8  | 419.4  | 275.4 NM_002651.1    |
| 127.1  | 198.1  | 171.3  | 165.9 NM_178272.1    |
| 85.7   | 95.5   | 90.1   | 100.5 NM_178272.1    |
| 117.5  | 145.6  | 117.7  | 131.2 NM_013439.2    |
| 115.5  | 120.8  | 124.7  | 109.2 NM_013440.3    |
| 468.5  | 584.3  | 570.1  | 346.8 NM_175047.2    |
| 88.3   | 76.4   | 82.5   | 89.1 NM_178238.1     |
| 109.4  | 124.6  | 107.4  | 133.6 NM_175047.2    |
| 316.5  | 373.6  | 308.1  | 299.5 NM_002648.2    |
| 463    | 351.5  | 264.7  | 280.4 NM_006875.2    |
| 210.7  | 204.3  | 194.8  | 176.3 NM_001001852.2 |
| 94.8   | 79.2   | 74.2   | 86.4 NM_001001852.2  |
| 2326.4 | 1637.6 | 1534.6 | 789.2 NM_006221.2    |
| 150.2  | 135.3  | 121.3  | 108.3 NM_032409.1    |
| 192.4  | 165.7  | 165.5  | 123.8 NM_017884.3    |
| 90.7   | 93.2   | 90.6   | 77.5 NM_002652.2     |
| 246.7  | 222.5  | 246.9  | 208.9 NM_015553.1    |
| 103.1  | 102.1  | 99     | 86.8 NM_003557.1     |
| 96.1   | 90.9   | 83.6   | 91.4 NM_001031687.1  |
| 417.2  | 325.9  | 348.5  | 305.5 NM_012398.1    |
| 151.9  | 127.1  | 129.5  | 124.4 NM_005028.3    |
| 148.7  | 250.8  | 247.8  | 210.4 NM_138687.1    |
| 96.2   | 99.8   | 103.3  | 108.1 NM_003559.3    |
| 120.8  | 119    | 100.4  | 96.6 NM_024779.3     |
| 100.9  | 110.9  | 100.4  | 100.5 NM_152671.2    |
| 98.4   | 95.7   | 83.2   | 95.7 NM_152671.2     |
| 94.4   | 116    | 102.2  | 108.7 NM_015040.2    |
| 124.3  | 126.2  | 138.8  | 139.7 NM_173492.1    |
| 115.8  | 109    | 105.1  | 115.6 NM_016518.2    |
| 400.8  | 461.2  | 421.8  | 431.6 NM_001018109.1 |

|        |        |        |                      |
|--------|--------|--------|----------------------|
| 426.2  | 554.6  | 381.2  | 381.2 NM_001018109.1 |
| 335.9  | 377.7  | 335.3  | 311.3 NM_014338.3    |
| 152    | 137.7  | 120.7  | 122.3 NM_006224.2    |
| 395.2  | 330.7  | 295.5  | 255.5 NM_012399.3    |
| 224.1  | 227.7  | 178.7  | 164.6 NM_181671.1    |
| 88.3   | 90.7   | 89     | 98.6 NM_181671.1     |
| 415.1  | 513.4  | 402.7  | 442.8 NM_004910.1    |
| 114.9  | 136.5  | 114.7  | 100.7 NM_020845.1    |
| 73.6   | 77.9   | 84     | 79.7 NM_031220.1     |
| 229.6  | 266    | 220.6  | 198.1 NM_014889.2    |
| 1063.3 | 560.8  | 443.2  | 287.6 NM_002653.3    |
| 111.9  | 98.8   | 98.6   | 95.6 NM_000325.4     |
| 107.4  | 92.7   | 90.7   | 99.6 NM_153427.1     |
| 82.2   | 81.5   | 79.6   | 84.8 NM_153426.1     |
| 84.6   | 84.5   | 82.4   | 80.1 NM_005029.3     |
| 98.3   | 99.5   | 97.3   | 86.6 NM_004764.3     |
| 92.9   | 86.7   | 93.4   | 87.6 XM_938848.1     |
| 98.3   | 90.5   | 98.5   | 98.1 NM_018068.2     |
| 88.9   | 91.7   | 85.6   | 79.7 NM_001008496.1  |
| 223.6  | 194.4  | 154    | 172.4 NM_152431.1    |
| 101.4  | 102.5  | 91.7   | 94.4 NM_145119.2     |
| 232    | 209.7  | 206.3  | 194.5 NM_001032396.1 |
| 91     | 80.5   | 82.2   | 87.3 NM_145119.2     |
| 1745.3 | 2006.7 | 1604.6 | 1638.2 NM_014819.2   |
| 88     | 91.4   | 96.2   | 99.7 NM_001040066.1  |
| 173.6  | 195.9  | 187.8  | 203.9 NM_001009944.1 |
| 122.4  | 125.7  | 135.6  | 119.3 NM_001009944.1 |
| 91.8   | 102.1  | 89.9   | 97.3 NM_138295.2     |
| 88.4   | 90.4   | 84.4   | 88.9 NM_001076780.1  |
| 80.7   | 84.2   | 76     | 75.1 NM_052892.2     |
| 88.9   | 93.6   | 86.5   | 82 NM_001076780.1    |
| 90.5   | 87.4   | 89.1   | 89.9 NM_182740.1     |
| 84.7   | 81.3   | 86.1   | 81.7 NM_181536.1     |
| 237.7  | 203.3  | 165    | 230.7 NM_000297.2    |
| 100    | 88.3   | 88.4   | 102.9 NM_016112.2    |
| 92.7   | 89.4   | 87.5   | 90.3 NM_014386.1     |
| 88.6   | 87.2   | 76     | 85.5 NM_006071.1     |
| 81.7   | 80.8   | 85.3   | 82.8 NM_170724.1     |
| 90.7   | 86.7   | 74.3   | 87 NM_170724.1       |
| 99.4   | 104.1  | 99.1   | 107.5 NM_138694.2    |
| 93.5   | 96     | 89.2   | 81.2 NM_177531.3     |
| 133.1  | 89.7   | 95.4   | 95.1 NM_181839.1     |
| 89.6   | 84.9   | 92.4   | 89.2 NM_006823.2     |
| 107.7  | 99.8   | 78.5   | 96 NM_006823.2       |
| 89.9   | 93.7   | 94.3   | 114.3 NM_181794.1    |
| 913.8  | 883    | 826.9  | 543.2 NM_032471.4    |
| 101.8  | 86.7   | 88.7   | 86.7 NM_181805.1     |
| 94.6   | 92.8   | 91.9   | 85.4 NM_007066.3     |
| 81.1   | 91.8   | 91.8   | 88.8 NM_181804.1     |
| 91.6   | 91.3   | 85.1   | 78.5 NM_181871.1     |

|        |        |        |                      |
|--------|--------|--------|----------------------|
| 80.5   | 80.7   | 76.4   | 85.1 NM_000298.4     |
| 99     | 92.1   | 85.6   | 94.5 NM_181871.1     |
| 91.4   | 90.7   | 85.2   | 89.4 NM_000298.4     |
| 1560.6 | 1481.1 | 1208.5 | 1371.7 NM_182471.1   |
| 383.2  | 442.2  | 341.9  | 378.7 NM_182470.1    |
| 373.3  | 614    | 492.1  | 489.3 NM_002654.3    |
| 177.4  | 111.9  | 133.4  | 125.5 NM_182687.1    |
| 84.7   | 80.1   | 79.6   | 86.2 NM_213560.1     |
| 129.4  | 97.8   | 110.1  | 108 NM_213560.1      |
| 141.9  | 118.4  | 112.4  | 120.7 NM_213560.1    |
| 90     | 99.2   | 102.7  | 79.2 NM_002741.3     |
| 106.7  | 122.7  | 104.1  | 115.6 NM_006256.1    |
| 244    | 146.3  | 150.7  | 132.8 NM_013355.3    |
| 134    | 117.5  | 132.7  | 103.2 NM_197976.1    |
| 117.5  | 95.6   | 98.3   | 104.2 NM_004571.3    |
| 93.4   | 90     | 96.6   | 89.4 NM_022062.1     |
| 101.6  | 101.2  | 102.4  | 99.9 NM_000299.2     |
| 85.3   | 94     | 87.7   | 86 NM_001005337.1    |
| 101.5  | 104.7  | 109.6  | 116.4 NM_001005242.1 |
| 92     | 94.3   | 80.1   | 84.4 NM_007183.2     |
| 117.4  | 143.8  | 126.6  | 117.2 NM_003628.3    |
| 910.8  | 819    | 692.3  | 442.5 NM_003628.3    |
| 104.2  | 92.7   | 84.4   | 92.3 NM_015900.1     |
| 101.4  | 99.2   | 98.4   | 106.1 NM_003561.1    |
| 98.2   | 88.7   | 78.9   | 83.9 NM_030821.3     |
| 91.9   | 101.1  | 105.1  | 98.6 NM_032562.2     |
| 83     | 86.7   | 80.2   | 79.5 NM_000928.2     |
| 93.6   | 82.9   | 81.6   | 83.3 NM_000300.2     |
| 145.2  | 207.3  | 281.1  | 205.7 NM_012400.2    |
| 88.3   | 88.1   | 83.3   | 88.8 NM_014589.1     |
| 95.7   | 81.5   | 84.7   | 83.6 NM_022819.2     |
| 94.1   | 84.5   | 82.9   | 98.9 NM_015715.2     |
| 138.9  | 132.7  | 113.3  | 127.5 NM_024420.1    |
| 451.9  | 543.3  | 581.3  | 343.3 NM_005090.1    |
| 173.5  | 121.2  | 137    | 124.4 NM_003706.1    |
| 92.5   | 91.1   | 84.8   | 92.8 NM_178034.3     |
| 87.5   | 90.9   | 87.2   | 80.2 NM_001080490.1  |
| 90.3   | 92.3   | 79.9   | 81.5 NM_213600.2     |
| 86.7   | 82.8   | 89.3   | 88.4 NM_000929.1     |
| 112.9  | 103.1  | 101.3  | 94.2 NM_003560.2     |
| 102.1  | 89.6   | 76.2   | 85 NM_003560.2       |
| 107.8  | 662.8  | 428.8  | 558.8 NM_005084.2    |
| 94.8   | 88.2   | 81.8   | 87.2 NM_001007267.1  |
| 93.3   | 94.3   | 85.3   | 87 NM_007366.3       |
| 107.1  | 106.9  | 111.2  | 100.3 NM_004253.2    |
| 96.7   | 109.2  | 97.8   | 98.5 NM_001031689.1  |
| 109.8  | 95.8   | 100.3  | 89.5 NM_001031689.1  |
| 85.4   | 92.5   | 88.3   | 86.5 NM_021796.3     |
| 114.9  | 90.7   | 94.6   | 97.5 NM_153375.1     |
| 94.6   | 91.6   | 92.4   | 90.2 NM_182832.1     |

|        |        |        |        |                |
|--------|--------|--------|--------|----------------|
| 5694.2 | 5244.9 | 5008.3 | 4227.8 | NM_016619.1    |
| 124.4  | 116.2  | 124.1  | 103.1  | NM_001029869.1 |
| 96.8   | 93.7   | 85.6   | 90.3   | NM_001012973.1 |
| 100.6  | 90.5   | 87.4   | 89.9   | NM_002655.1    |
| 102.2  | 84.5   | 90.4   | 94.1   | NM_002655.1    |
| 189.7  | 303.3  | 280.3  | 296.7  | NM_006718.2    |
| 124    | 125.5  | 122.4  | 133.3  | NM_001080952.1 |
| 558.3  | 481.4  | 430    | 313.8  | NM_002657.2    |
| 86.7   | 76.7   | 75.3   | 82.6   | NM_000930.2    |
| 489    | 385.8  | 326.4  | 235.8  | NM_002658.2    |
| 239.8  | 253.6  | 197.5  | 148.9  | NM_001005376.1 |
| 199.8  | 178.1  | 157.9  | 148.3  | NM_002659.2    |
| 626.2  | 524.3  | 378.1  | 306.2  | NM_001005376.1 |
| 122.6  | 122.4  | 118.7  | 114.9  | NM_153021.3    |
| 109.3  | 106.9  | 96.5   | 102    | NM_182734.1    |
| 92.6   | 91.3   | 78.3   | 101.4  | NM_182734.1    |
| 327.4  | 380.4  | 366.5  | 298.3  | NM_004573.1    |
| 105.2  | 95.4   | 87.4   | 91.6   | NM_000932.1    |
| 96.6   | 108.4  | 108.4  | 91.6   | NM_000933.2    |
| 77.3   | 72.1   | 90     | 82.5   | NM_000933.2    |
| 99.1   | 102.1  | 95     | 91.8   | NM_006225.1    |
| 87.5   | 83     | 83.9   | 82.9   | NM_133373.2    |
| 102.4  | 79.4   | 76.6   | 91.3   | NM_032726.2    |
| 81.6   | 91     | 79.3   | 80.8   | NM_016341.2    |
| 124    | 114.1  | 96.7   | 106.3  | NM_182811.1    |
| 173.8  | 131.2  | 156.1  | 165    | NM_002660.2    |
| 2107.5 | 2006.6 | 2132.2 | 1419.3 | NM_002661.1    |
| 90.3   | 92.7   | 76.3   | 92.7   | NM_014996.1    |
| 109.2  | 102.9  | 95.3   | 99.9   | NM_014638.2    |
| 97.5   | 90.8   | 89.7   | 81.7   | NM_006226.1    |
| 266.2  | 263.5  | 225.3  | 193.1  | NM_015184.2    |
| 712.9  | 898.3  | 847.3  | 750.6  | NM_018390.1    |
| 91.3   | 77.9   | 74.5   | 88.7   | NM_153268.1    |
| 95     | 81.4   | 83.7   | 85.4   | NM_001005473.1 |
| 87.8   | 85.9   | 88.1   | 87.3   | NM_033123.2    |
| 109.7  | 141.7  | 142.7  | 132.9  | NM_002662.2    |
| 100    | 105.1  | 101.2  | 106.4  | NM_002663.2    |
| 94.2   | 97.8   | 81.8   | 89.5   | NM_001031696.1 |
| 810.2  | 2665.6 | 2611.8 | 1249   | NM_001031696.1 |
| 103.4  | 97.3   | 106.1  | 93.7   | NM_012268.1    |
| 114.2  | 127.6  | 131.6  | 115.7  | NM_138790.1    |
| 79.6   | 78.9   | 71.8   | 89.9   | NM_152666.1    |
| 860.4  | 833.1  | 969.8  | 925.8  | NM_012388.2    |
| 186.6  | 219.6  | 186.1  | 171.1  | NM_201384.1    |
| 87.2   | 88.6   | 82.5   | 89.4   | NM_201378.1    |
| 102.2  | 91.8   | 93.6   | 86     | NM_201380.2    |
| 91.7   | 88     | 82     | 89.6   | NM_201381.1    |
| 98.2   | 98.1   | 88.3   | 101.5  | NM_201379.1    |
| 97.2   | 87.8   | 84.8   | 89.3   | NM_201382.1    |
| 86.4   | 85.5   | 89     | 89.5   | NM_201383.1    |

|        |        |        |                      |
|--------|--------|--------|----------------------|
| 95.9   | 92.8   | 86     | 100.9 NM_000445.2    |
| 2107.6 | 2634.1 | 2735.5 | 1066.1 NM_002664.1   |
| 101.6  | 91.2   | 78.1   | 83.9 NM_016445.1     |
| 96.5   | 87.1   | 92.7   | 84 NM_021622.3       |
| 97.3   | 87.9   | 96.7   | 97.2 NM_001001974.1  |
| 202.7  | 206.3  | 191.2  | 181 NM_019091.3      |
| 120.5  | 100.3  | 100.8  | 103.8 NM_020904.1    |
| 102.9  | 99.2   | 109.6  | 88 NM_019012.2       |
| 91.1   | 94     | 87.7   | 87.2 NM_014935.2     |
| 88.8   | 103.4  | 111.1  | 96.9 NM_175058.3     |
| 88.1   | 78     | 85.5   | 81.9 NM_032639.2     |
| 301.1  | 360    | 297.1  | 238.1 NM_015899.1    |
| 112.1  | 102.1  | 112    | 96.9 NM_021200.1     |
| 340.5  | 290.6  | 327.4  | 262.2 NM_017958.1    |
| 1093.4 | 717.5  | 717.8  | 479.6 NM_001031706.1 |
| 90.6   | 86.8   | 85.3   | 90.7 NM_001031706.1  |
| 105.5  | 96.9   | 85.2   | 95.3 NM_006832.1     |
| 266.5  | 148.4  | 159.5  | 110.6 NM_024310.2    |
| 180.7  | 131.2  | 137.4  | 108 NM_024613.2      |
| 88.1   | 85     | 87.7   | 85.4 NM_001029884.1  |
| 145.7  | 113.2  | 98.8   | 109 NM_022835.1      |
| 220.3  | 218.8  | 232.6  | 166 NM_015549.1      |
| 169.9  | 137    | 138.9  | 109.6 NM_015432.2    |
| 95.2   | 89.8   | 93     | 94.7 NM_001042664.1  |
| 78.8   | 85.1   | 81.7   | 80.4 NM_001042663.1  |
| 86.8   | 88.1   | 74.6   | 76.2 NM_020631.2     |
| 96.2   | 77.3   | 89.3   | 85.4 NM_198681.1     |
| 105.4  | 87.3   | 89.8   | 93.9 NM_020631.2     |
| 91     | 90.7   | 81.7   | 86.9 NM_018173.1     |
| 92.6   | 104.7  | 101.5  | 118.4 NM_020715.1    |
| 93.7   | 86.9   | 80.3   | 94.8 NM_172069.1     |
| 132.7  | 119.8  | 119    | 109.9 NM_024927.3    |
| 166    | 151.4  | 143.3  | 137.5 NM_018049.1    |
| 197.5  | 209.3  | 201.4  | 138 NM_014798.1      |
| 120.4  | 102.4  | 112.5  | 112.5 NM_032129.1    |
| 158.2  | 217.2  | 203.3  | 144.8 NM_016274.3    |
| 156.6  | 136.9  | 129.6  | 121.5 NM_025201.3    |
| 88.8   | 90.5   | 84.7   | 84.9 NM_000301.1     |
| 126.9  | 135.1  | 127.8  | 137.8 NM_001032392.2 |
| 88.7   | 83     | 77.8   | 96 NM_002666.3       |
| 475    | 210.4  | 180.9  | 173.8 NM_005030.3    |
| 87.4   | 84.1   | 81     | 89.2 NM_006622.1     |
| 80.9   | 82     | 75.2   | 78.4 NM_004073.2     |
| 1295.5 | 882.3  | 701.6  | 714.2 NM_014264.2    |
| 92.6   | 103    | 96.6   | 91.8 NM_002667.2     |
| 658.3  | 1007.6 | 1039.6 | 546.8 NM_000302.2    |
| 99.6   | 89     | 90.1   | 77.5 NM_182943.2     |
| 101.3  | 95.9   | 91.8   | 102 NM_000935.2      |
| 337    | 191.9  | 179.9  | 186.2 NM_182943.2    |
| 2888.1 | 1870.3 | 1664.4 | 1242.7 NM_001084.4   |

|        |        |        |                      |
|--------|--------|--------|----------------------|
| 87.6   | 88.3   | 85.2   | 88.4 NM_000533.3     |
| 90.4   | 83.4   | 77.7   | 92.1 NM_199478.1     |
| 96.3   | 84.3   | 81.5   | 91 NM_000533.3       |
| 146.4  | 123.3  | 123.7  | 113.8 NM_002668.1    |
| 975.7  | 740.2  | 522.5  | 508.9 NM_002669.2    |
| 110    | 105.3  | 97     | 109 NM_002670.1      |
| 491    | 313.8  | 271.8  | 342 NM_005032.3      |
| 149.2  | 137.3  | 142.1  | 119.2 NM_021105.1    |
| 96.4   | 92.4   | 94.4   | 95 NM_020359.1       |
| 609.4  | 612.1  | 617.2  | 294.1 NM_020360.2    |
| 99.2   | 124.2  | 111.2  | 112.5 NM_020353.1    |
| 160.9  | 176.1  | 137.7  | 140.5 NM_006227.2    |
| 424.2  | 547.7  | 450    | 391.8 NM_006227.2    |
| 79.2   | 80.5   | 70.6   | 84 NM_016583.2       |
| 87.8   | 79.1   | 92.6   | 94.9 NM_031310.1     |
| 106.4  | 100.6  | 102.1  | 96.4 NM_020405.3     |
| 118.4  | 116.2  | 103.3  | 105.7 NM_032812.7    |
| 185.7  | 151.8  | 135.1  | 121.6 NM_032242.2    |
| 100    | 88.2   | 97.6   | 89 NM_025179.2       |
| 159.8  | 174.8  | 170.5  | 126.6 NM_017514.2    |
| 77     | 84.9   | 77.9   | 77.8 NM_181775.2     |
| 129.8  | 126.6  | 127.7  | 109.2 NM_002673.3    |
| 88.7   | 92.5   | 85.4   | 90.8 NM_005393.1     |
| 102.5  | 105.5  | 104.1  | 106.4 NM_005761.1    |
| 78.7   | 83.2   | 82.6   | 84.2 NM_015103.1     |
| 256.4  | 236.2  | 224.7  | 214.6 NM_021127.1    |
| 103.8  | 90.6   | 91.6   | 95.4 NM_002674.2     |
| 108    | 96.3   | 86.3   | 96.8 NM_031887.2     |
| 96.8   | 95.6   | 82.6   | 97.3 NM_031293.1     |
| 91.6   | 88.7   | 92.7   | 87.6 NM_033246.2     |
| 99.9   | 96.6   | 93.3   | 101.9 NM_033238.2    |
| 104.8  | 94     | 96.4   | 102.6 NM_033246.2    |
| 97.9   | 108.4  | 83.6   | 102.4 XM_945882.1    |
| 100.4  | 96     | 95.9   | 89.7 NM_033240.2     |
| 930.4  | 774.4  | 888.1  | 497.4 NM_002676.1    |
| 398.9  | 241.5  | 208.5  | 150.3 NM_000303.1    |
| 96.6   | 87.2   | 77.4   | 89.1 NM_002677.3     |
| 91.6   | 88.4   | 85.8   | 89.6 NM_153321.1     |
| 100.6  | 90.8   | 90.4   | 97.1 NM_000304.2     |
| 130.3  | 127.2  | 150.2  | 118.9 NM_153322.1    |
| 102.7  | 92.7   | 86.7   | 90.1 NM_001013743.1  |
| 1009.4 | 780.7  | 805.2  | 499.9 NM_015160.1    |
| 1258.1 | 1062.7 | 1020.7 | 732.2 NM_004279.1    |
| 136    | 120.4  | 117.7  | 120 NM_000534.3      |
| 212.6  | 193.7  | 175.4  | 181.1 NM_001018040.1 |
| 120.1  | 118.9  | 108.4  | 126.3 NM_000535.4    |
| 117.4  | 142.4  | 133.1  | 100.8 NR_002217.1    |
| 93.1   | 85.9   | 77.8   | 79.4 NR_002217.1     |
| 86.8   | 94.5   | 99.3   | 95.2 NM_002679.1     |
| 191.4  | 231.9  | 196.4  | 192.7 NM_001003686.1 |

|        |        |        |                      |
|--------|--------|--------|----------------------|
| 225.5  | 192.5  | 169.3  | 144.6 NM_174930.2    |
| 202.2  | 174.2  | 187.5  | 122 NM_006556.2      |
| 108.3  | 216    | 217    | 173.6 NM_198452.1    |
| 268.4  | 350.4  | 292.6  | 335.2 NM_022572.2    |
| 106.8  | 103.8  | 103.5  | 90.9 NM_022572.2     |
| 156.9  | 171    | 157.5  | 137.8 NM_015488.3    |
| 628.7  | 452.1  | 429.9  | 341.3 NM_007254.2    |
| 78.2   | 85.7   | 83.5   | 85.8 NM_173516.1     |
| 97.5   | 102.6  | 86.8   | 88 NM_000936.2       |
| 86.4   | 85.2   | 92.1   | 86.4 NM_006229.1     |
| 74.4   | 76     | 78.7   | 86.5 NM_005396.3     |
| 85.1   | 84.1   | 77.5   | 88.2 NM_001011709.1  |
| 151.1  | 127.4  | 123.2  | 118.7 NM_006029.4    |
| 130.7  | 326.4  | 408    | 316.3 NM_007257.4    |
| 190.7  | 119.1  | 121    | 90.3 NM_013364.2     |
| 82     | 89.5   | 84.4   | 81.2 NM_052926.1     |
| 96.1   | 94.9   | 104    | 92.5 NM_032882.2     |
| 99.4   | 81.4   | 89.1   | 97.5 NM_002686.2     |
| 1311.5 | 940.4  | 891.9  | 1096.3 NM_002687.2   |
| 122.7  | 78.2   | 89.8   | 89.2 NM_006228.2     |
| 144.3  | 116.9  | 111.2  | 120 NM_001039725.1   |
| 122.1  | 105.5  | 96     | 109.9 NM_173676.1    |
| 175.7  | 160.6  | 151.2  | 170 NM_020376.2      |
| 86.5   | 95.1   | 94     | 94.6 NM_004650.1     |
| 83.9   | 80.7   | 75.5   | 74.7 NM_138814.2     |
| 104.2  | 105    | 114.8  | 124.3 NM_015723.2    |
| 1021.2 | 753    | 797    | 435.3 NM_018129.1    |
| 3232.6 | 5539.2 | 8355   | 4886 NM_033109.2     |
| 96.6   | 92.6   | 93.2   | 101.1 NM_006813.1    |
| 1645.1 | 1535.2 | 1405.6 | 1057.8 NM_017761.2   |
| 88.1   | 98.3   | 88     | 94.2 NM_153703.3     |
| 136.6  | 137.7  | 122.9  | 105.2 NM_001018111.1 |
| 89.8   | 88.9   | 83.7   | 90.9 NM_001018111.1  |
| 103.8  | 102    | 100.2  | 91 NM_005397.2       |
| 243.5  | 312.8  | 262.9  | 252.1 NM_015720.1    |
| 81.9   | 83.9   | 71.1   | 82 NM_024921.2       |
| 1552   | 1883.5 | 2560.5 | 1519.9 NM_015352.1   |
| 102    | 101.6  | 103.2  | 95.9 NM_172236.1     |
| 78.7   | 82.1   | 92.5   | 86.8 NM_172236.1     |
| 276.4  | 361    | 330.5  | 242.8 NM_133635.4    |
| 127.1  | 140.1  | 126.9  | 123.7 NM_015227.3    |
| 297.9  | 312.3  | 282.6  | 266.1 NM_133635.4    |
| 2100.8 | 1501.6 | 1126.7 | 802 NM_017542.3      |
| 189.2  | 200.2  | 229.5  | 225.1 NM_145796.2    |
| 108.8  | 108    | 98.9   | 104.2 NM_145796.2    |
| 109    | 109.9  | 126.2  | 104.9 NM_207171.1    |
| 125.3  | 116.4  | 115.6  | 99.6 NM_001039503.2  |
| 250    | 291.5  | 257.2  | 193.8 NM_016937.2    |
| 933.5  | 803.9  | 761.4  | 434.8 NM_002689.2    |
| 668.5  | 469.4  | 509    | 328.3 NM_002690.1    |

|        |        |        |        |                |
|--------|--------|--------|--------|----------------|
| 401.3  | 316.6  | 267.1  | 284.9  | NM_002691.1    |
| 98.4   | 97.2   | 88.7   | 100.9  | NM_006591.1    |
| 149.4  | 190.9  | 158.3  | 149.4  | NM_021173.2    |
| 295.2  | 278.3  | 253.3  | 185.3  | NM_015584.2    |
| 981.9  | 569.1  | 514.6  | 395    | NM_032311.3    |
| 145.2  | 214.5  | 197.1  | 173.8  | NM_032311.3    |
| 323.6  | 300.5  | 255.7  | 252.9  | NM_006231.2    |
| 963.1  | 407.5  | 374.3  | 305.2  | NM_002692.2    |
| 5984.6 | 2995.8 | 2915.3 | 1935.7 | NM_017443.3    |
| 4469.4 | 3819.9 | 3374   | 2266.3 | NM_019896.2    |
| 322    | 403    | 349.7  | 311.3  | NM_002693.1    |
| 125.5  | 116.4  | 113.3  | 114.2  | NM_007215.2    |
| 98.1   | 92.7   | 83.3   | 88.1   | NM_006502.1    |
| 83.3   | 80.1   | 77.2   | 85.6   | NM_007195.1    |
| 84.7   | 84.2   | 76.6   | 79.6   | NM_016218.1    |
| 99.8   | 93.9   | 89.5   | 98.3   | NM_013274.2    |
| 278.6  | 218.5  | 218.3  | 210.3  | NM_013284.1    |
| 95     | 88.4   | 86.4   | 93.3   | NM_181808.1    |
| 903.8  | 979.6  | 907.8  | 723.2  | NM_199420.2    |
| 88     | 86.4   | 94.1   | 92.3   | NM_015425.1    |
| 102.6  | 98.6   | 90.1   | 94.9   | NM_019014.3    |
| 1147.1 | 768.4  | 581.4  | 454.7  | NM_203290.1    |
| 819.1  | 545.7  | 385.4  | 419.1  | NM_004875.2    |
| 3996.7 | 3370   | 2992.7 | 2235.4 | NM_015972.1    |
| 1189.6 | 746.6  | 700.8  | 405.9  | NM_022490.1    |
| 938.2  | 1163   | 970.5  | 762.4  | NM_000937.2    |
| 691.9  | 389.9  | 340.8  | 355.2  | NM_000938.1    |
| 152.7  | 136    | 137.8  | 112.7  | NM_002694.2    |
| 1196.4 | 920    | 815.2  | 524.5  | NM_032940.1    |
| 1011.8 | 664.2  | 513.4  | 496.8  | NM_004805.2    |
| 4036.9 | 3383.2 | 2972.9 | 1758.4 | NM_021974.2    |
| 1483.7 | 910.2  | 824    | 793.4  | NM_002696.1    |
| 1125.5 | 786.3  | 843.9  | 487.6  | NM_006232.2    |
| 1054   | 518.5  | 427.6  | 409.9  | NM_006233.4    |
| 222.9  | 156.2  | 162.4  | 156.7  | NM_006234.4    |
| 99     | 90.3   | 96.5   | 95.9   | NM_145325.2    |
| 103.1  | 97.2   | 93.8   | 92.4   | NM_032958.3    |
| 459.8  | 399.5  | 408.4  | 347.3  | NM_001015884.1 |
| 134    | 125.2  | 105.7  | 101.1  | NM_005034.3    |
| 188    | 137.2  | 138.1  | 128.7  | NM_021128.3    |
| 337.9  | 294    | 254.5  | 209.4  | NM_007055.2    |
| 305.8  | 298.1  | 228.8  | 252.5  | NM_018082.3    |
| 1605.1 | 1086.7 | 948.8  | 752.9  | NM_006468.5    |
| 145.8  | 126.3  | 112    | 100    | NM_001722.2    |
| 108.5  | 96.2   | 96.7   | 93.6   | NM_006466.2    |
| 110.9  | 96.5   | 90.9   | 91.4   | NM_006467.2    |
| 1300.4 | 1147.1 | 1145.1 | 803.9  | NM_032305.1    |
| 589.7  | 317.3  | 323.5  | 182.4  | NM_138338.2    |
| 95.5   | 83.6   | 78.4   | 83.8   | NM_001018050.1 |
| 96.6   | 90.9   | 84.1   | 83.1   | NM_001018051.1 |



|        |        |        |                      |
|--------|--------|--------|----------------------|
| 630    | 385.5  | 321.7  | 304.2 NM_016310.2    |
| 477.1  | 385.7  | 268.8  | 266.3 NM_005035.2    |
| 310.1  | 299.3  | 314.7  | 253.6 NM_006999.3    |
| 89.9   | 130.9  | 114.9  | 132.8 NM_172020.1    |
| 106.5  | 120.4  | 107.9  | 106.6 NM_001035256.1 |
| 97.6   | 87.5   | 89.5   | 79.3 NM_000939.1     |
| 277.9  | 276.9  | 322.2  | 197 NM_017739.1      |
| 86     | 80.8   | 80.5   | 90.4 NM_015932.2     |
| 104.9  | 98     | 106    | 89.4 NM_007171.3     |
| 257    | 202.3  | 231.8  | 204.1 NM_007171.3    |
| 134.1  | 143.5  | 124.6  | 135 NM_013382.3      |
| 102.1  | 99.5   | 87.8   | 106.9 NM_012230.2    |
| 86.7   | 75.9   | 78.3   | 77.2 NM_000446.3     |
| 710.2  | 546    | 529.1  | 576.5 NM_000305.2    |
| 100.9  | 97.1   | 97.3   | 102.5 NM_000940.1    |
| 424.2  | 214.6  | 205.8  | 172.9 NM_015029.1    |
| 164.3  | 128.1  | 116.1  | 128.5 NM_006627.1    |
| 408.4  | 423.1  | 437.2  | 309.3 NM_015918.3    |
| 518.9  | 377.1  | 304.7  | 274.4 NM_005837.1    |
| 91.8   | 86.5   | 83.3   | 93.1 NM_022135.2     |
| 97.3   | 101.7  | 102.7  | 94.7 NM_022361.3     |
| 238.2  | 243.5  | 211.2  | 196.3 NM_000941.1    |
| 96.7   | 98.9   | 93.4   | 95 NM_022825.2       |
| 94.3   | 96.7   | 81.8   | 78.8 NM_203474.1     |
| 84.8   | 92.3   | 89.7   | 91.7 NM_006475.1     |
| 89.7   | 82.9   | 90.9   | 93 NM_015450.1       |
| 183.4  | 176.3  | 137.4  | 148.4 NR_003104.1    |
| 91.4   | 91.2   | 89.2   | 94.4 NR_003102.1     |
| 95.9   | 91.1   | 98     | 83.7 NM_207355.2     |
| 86.1   | 80.4   | 86.3   | 83.4 NM_001005364.1  |
| 90.6   | 87.2   | 93.2   | 98.7 NM_001005365.2  |
| 84.9   | 82.6   | 83.7   | 85.8 NM_000306.1     |
| 96     | 101.6  | 79.2   | 80.1 NM_006235.1     |
| 107.8  | 156.1  | 144.6  | 123.2 NM_002697.2    |
| 89.3   | 80.6   | 72.6   | 89.4 NM_002698.1     |
| 104.2  | 94.8   | 93.5   | 92 NM_014352.1       |
| 88.1   | 86     | 84     | 90.5 NM_002699.3     |
| 89.1   | 90.7   | 88.5   | 89.6 NM_005604.2     |
| 81.3   | 89.9   | 86.9   | 83 NM_006236.1       |
| 90.4   | 92.9   | 82.6   | 88.8 NM_000307.1     |
| 121.5  | 106.8  | 98.2   | 103.2 NM_006237.2    |
| 102.2  | 227.2  | 175.5  | 179.3 NM_004575.1    |
| 99.5   | 97.5   | 90.3   | 86 NM_002700.1       |
| 97.3   | 87.6   | 82.7   | 87.4 NM_002701.3     |
| 84.7   | 85.7   | 90.9   | 86.9 NR_002304.1     |
| 89.4   | 98.1   | 94.9   | 90.6 NM_002702.2     |
| 81.1   | 81.7   | 80.9   | 78.9 NM_007252.2     |
| 3259.5 | 3597.3 | 4222.7 | 1784.4 NM_025204.2   |
| 77.9   | 83.2   | 83.4   | 78.5 NM_001080113.1  |
| 6823.9 | 5193.4 | 4968.7 | 3619.4 NM_021129.2   |

|        |        |        |        |                |
|--------|--------|--------|--------|----------------|
| 1815.2 | 1061.8 | 1064.1 | 787.8  | NM_006903.3    |
| 1585.7 | 2845.5 | 3965.1 | 2311.2 | NM_006903.4    |
| 95.9   | 82.9   | 74     | 86.8   | NM_176869.1    |
| 343    | 254.9  | 221.5  | 181.5  | NM_020230.4    |
| 97.5   | 96.6   | 92.9   | 87.9   | NM_001040664.1 |
| 81.6   | 78.4   | 82.7   | 97.4   | NM_003711.2    |
| 106.1  | 100.6  | 96.6   | 107.3  | NM_176895.1    |
| 104.8  | 112.8  | 107.1  | 94.3   | NM_176895.1    |
| 89     | 90.6   | 78.6   | 86.6   | NM_003713.3    |
| 84.5   | 88.7   | 87.5   | 102.4  | NM_177414.1    |
| 89     | 81.2   | 82     | 81.7   | NM_177543.1    |
| 91.3   | 90     | 94.1   | 99.6   | NM_177543.1    |
| 99.1   | 95     | 91.8   | 91.5   | NM_177526.1    |
| 80.1   | 82     | 78     | 74.9   | NM_001030059.1 |
| 202.4  | 154.1  | 137.9  | 117.7  | NM_032483.2    |
| 277.5  | 239.8  | 191.4  | 270    | NM_203453.2    |
| 189    | 129.6  | 120.7  | 131    | NM_032728.2    |
| 110.3  | 110.3  | 114.4  | 103.9  | NM_001001930.2 |
| 86.5   | 95.8   | 89.1   | 93.4   | NM_001001928.2 |
| 204.7  | 188    | 165.8  | 173.1  | NM_004774.2    |
| 93.8   | 91.2   | 97.9   | 106.3  | NM_177435.1    |
| 133.9  | 168.2  | 170.1  | 165    | NM_006238.2    |
| 82.3   | 95.2   | 87.9   | 95.3   | NM_015869.3    |
| 503.6  | 897.3  | 819.1  | 542.6  | NM_138712.3    |
| 99.6   | 121.7  | 110.5  | 111.7  | NM_138712.3    |
| 83.2   | 80.8   | 75.3   | 84.4   | NM_138711.2    |
| 98.8   | 87.4   | 83.7   | 95.4   | NM_013261.2    |
| 157.7  | 149.7  | 142    | 133.6  | NM_133263.2    |
| 452    | 254.9  | 192.2  | 182    | NM_002703.3    |
| 89.3   | 92.6   | 84.1   | 83.8   | NM_002704.2    |
| 107.5  | 91.4   | 92.9   | 94.9   | NM_021823.3    |
| 1306.8 | 1557.2 | 1603.7 | 1724.1 | NM_001077447.1 |
| 2643.2 | 3451.3 | 2954.4 | 3018.9 | NM_024664.1    |
| 87.1   | 90.3   | 85.5   | 89.9   | NM_006240.2    |
| 104.6  | 104.3  | 92.8   | 81.8   | NM_006240.2    |
| 86.5   | 83.7   | 83.7   | 87.7   | NM_152933.1    |
| 724.4  | 631    | 671.8  | 504.3  | NM_003626.2    |
| 160.4  | 142.5  | 158.3  | 142.1  | NM_177423.1    |
| 188.8  | 166.7  | 160.3  | 156.7  | NM_177423.1    |
| 82.3   | 80     | 84.1   | 85.8   | NM_003625.2    |
| 85     | 93.6   | 87     | 84.4   | NM_003660.2    |
| 140.5  | 138    | 113.7  | 128.3  | NM_015053.1    |
| 93.4   | 102.1  | 86.6   | 91.5   | NM_177444.1    |
| 91.9   | 106.2  | 107.5  | 108.6  | NM_177444.1    |
| 85.3   | 87     | 87.6   | 88.7   | NM_003622.2    |
| 269.5  | 335.2  | 378.1  | 258.8  | NM_003621.1    |
| 424.8  | 420.7  | 448.2  | 404.1  | NM_000308.1    |
| 890.6  | 567.5  | 427.1  | 538.6  | NM_201440.1    |
| 101.1  | 108.4  | 114.7  | 111.5  | NM_201438.1    |
| 103    | 107.1  | 104.1  | 112.7  | NM_016488.5    |

|        |        |        |        |                |
|--------|--------|--------|--------|----------------|
| 1250.3 | 844.9  | 686    | 517.6  | NM_201440.1    |
| 133.9  | 130.1  | 97.6   | 108.4  | NM_203430.1    |
| 118.4  | 128.8  | 134.7  | 126.6  | NM_000942.4    |
| 1279.4 | 1859.2 | 1744.2 | 1358.8 | NM_000943.4    |
| 97.9   | 74.3   | 91.5   | 82.2   | NM_005038.2    |
| 1478.6 | 1357.5 | 1337.8 | 797.5  | NM_006112.2    |
| 101.3  | 104    | 104.8  | 99.3   | NM_203456.1    |
| 170.1  | 160.1  | 137.1  | 113    | NM_005729.3    |
| 97.1   | 81.1   | 86     | 103.2  | NM_004792.2    |
| 4470.4 | 2449.9 | 2077.8 | 1333.3 | NM_006347.3    |
| 979.9  | 651.1  | 446.3  | 516.1  | NM_016059.3    |
| 87.4   | 93.2   | 84.4   | 94     | NM_014337.2    |
| 86.9   | 108.5  | 102.1  | 104.1  | NM_148175.1    |
| 97.8   | 92.5   | 81.8   | 97.3   | NM_014337.2    |
| 104.5  | 104.5  | 106.5  | 92.2   | NM_131916.1    |
| 88     | 73.3   | 72.3   | 87.3   | NM_032472.3    |
| 2202   | 1702.4 | 1541.4 | 1337.6 | NM_032472.3    |
| 130.4  | 106.1  | 101.7  | 103.9  | NM_130906.1    |
| 83.3   | 80.2   | 85.2   | 85.7   | NM_139126.2    |
| 1829.5 | 827.7  | 731.2  | 621.9  | NM_152329.3    |
| 89.7   | 84.7   | 82.4   | 83.5   | NM_203467.1    |
| 105    | 97.6   | 92.1   | 99.1   | NM_152329.3    |
| 83.6   | 93.6   | 83.5   | 83.5   | NM_173672.1    |
| 88.6   | 86.1   | 77     | 87.8   | NM_002705.3    |
| 79.4   | 88.5   | 83.7   | 83.8   | NM_177952.1    |
| 202.5  | 200.3  | 187.5  | 174.5  | NM_177952.1    |
| 116.1  | 102.6  | 91.9   | 94.9   | NM_177951.1    |
| 119    | 123.4  | 132.4  | 117.8  | NM_177952.1    |
| 105.1  | 86.3   | 86.3   | 88.1   | NM_177969.2    |
| 777.1  | 983    | 879.3  | 868.6  | NM_177968.2    |
| 94.7   | 179.7  | 237.3  | 175.2  | NM_001033556.1 |
| 112.4  | 110.6  | 106.8  | 116.4  | NM_001033556.1 |
| 87     | 89.2   | 91.2   | 86.1   | NM_001033557.1 |
| 233.2  | 188.8  | 187.2  | 170.9  | NM_003620.2    |
| 162    | 141.7  | 136.2  | 124.6  | NM_014906.3    |
| 961.1  | 911.2  | 1012.3 | 378.7  | NM_014634.2    |
| 153.9  | 115.8  | 105.2  | 100.2  | NM_177983.1    |
| 4529.9 | 3919   | 3724.7 | 1989.9 | NM_002707.3    |
| 88.9   | 90.4   | 89.6   | 83     | NM_005167.5    |
| 171    | 202.4  | 256.8  | 208.5  | NM_152542.2    |
| 96.6   | 95     | 81     | 99.7   | NM_139245.2    |
| 256.4  | 227.5  | 196.8  | 150.7  | NM_144641.1    |
| 92.3   | 101.4  | 83.3   | 97.4   | NM_018444.2    |
| 274.3  | 237    | 186.2  | 179.7  | NM_016147.1    |
| 260.5  | 194.2  | 187.2  | 140.9  | NM_000309.2    |
| 329.3  | 235.1  | 218.7  | 173.9  | NM_002708.3    |
| 500.7  | 555.7  | 465.2  | 386.2  | NM_206876.1    |
| 3342.9 | 3139.8 | 2769.2 | 1954.5 | NM_002710.1    |
| 221.4  | 188.1  | 179    | 213.9  | NM_002714.2    |
| 932.1  | 750.8  | 691.9  | 429.7  | NM_021959.1    |

|        |        |        |                      |
|--------|--------|--------|----------------------|
| 115.8  | 124.4  | 112.9  | 161.8 NM_002480.1    |
| 179    | 163    | 139.5  | 147 NM_032103.1      |
| 119.4  | 103.2  | 103.8  | 122 NM_017607.1      |
| 182.6  | 163.5  | 162.5  | 113.8 NM_015316.1    |
| 102.2  | 92.8   | 93.1   | 99 NM_006663.2       |
| 127.2  | 113.1  | 121.6  | 104.9 NM_033256.1    |
| 3008.2 | 2260.7 | 1829.4 | 1407.3 NM_138689.2   |
| 174.8  | 168.6  | 169.5  | 154.4 NM_030949.1    |
| 99.8   | 103.8  | 91.5   | 104.7 NM_017726.6    |
| 869.7  | 751.1  | 736.7  | 465.8 NM_014330.2    |
| 100.2  | 87.9   | 80.2   | 93.3 NM_032833.2     |
| 177.9  | 137.5  | 155.4  | 108.7 NM_032902.5    |
| 117.8  | 114.3  | 115    | 116.7 NM_015568.2    |
| 94.5   | 93     | 93.7   | 94 NM_006741.2       |
| 93     | 91.9   | 75     | 86.5 NM_032192.2     |
| 93     | 98.9   | 90.7   | 88.3 NM_181505.1     |
| 105.4  | 105.9  | 103.9  | 93.2 NM_181505.1     |
| 89.7   | 77.9   | 83.4   | 85.6 XM_945023.1     |
| 250.9  | 248    | 224    | 172.8 NM_006241.3    |
| 95.4   | 92     | 92     | 96.4 NR_002168.1     |
| 91.7   | 84.8   | 86.9   | 90.2 NR_002191.2     |
| 93.6   | 90     | 91.4   | 93.6 NM_002711.2     |
| 98     | 81.8   | 84.4   | 84 NM_024607.1       |
| 112.4  | 107.8  | 117.1  | 98.3 NM_005398.3     |
| 215    | 207.5  | 165.5  | 145.7 NM_006242.3    |
| 98.7   | 115.2  | 113.9  | 97.6 NM_033215.3     |
| 538.6  | 475.3  | 478.3  | 451 NM_002712.1      |
| 359.5  | 250.6  | 201    | 188.8 NM_014110.3    |
| 142.7  | 104.3  | 97.1   | 90.3 NM_014110.3     |
| 83.5   | 82.2   | 88.2   | 87.7 NM_002713.2     |
| 105.5  | 100.9  | 104.7  | 101.8 XM_934519.1    |
| 101.2  | 121    | 106.2  | 127.4 NM_032595.1    |
| 1872.7 | 1421.4 | 1203.5 | 901.6 NM_002715.2    |
| 154.4  | 138.1  | 153.8  | 134.1 NM_001009552.1 |
| 181.7  | 136.1  | 123.1  | 137.6 NM_004156.2    |
| 2271.4 | 1629.7 | 1199.4 | 1110.8 NM_014225.3   |
| 98.5   | 105.3  | 97     | 93.7 NM_002716.3     |
| 103.2  | 94.9   | 87.5   | 94.1 NM_181699.1     |
| 251.2  | 147.1  | 133.7  | 142.8 NM_181699.1    |
| 1644.9 | 1202.7 | 904.7  | 915.1 NM_002717.2    |
| 206.2  | 219.7  | 235.2  | 195.2 NM_181677.1    |
| 80.9   | 83.3   | 77.5   | 87.7 NM_181676.1     |
| 103.4  | 94.5   | 84.3   | 92.9 NM_181678.1     |
| 95.9   | 86.2   | 96     | 88 NM_181674.1       |
| 131.1  | 120.2  | 106.6  | 116 NM_181676.1      |
| 75     | 77.3   | 72.5   | 86.1 NM_004576.2     |
| 88.8   | 80.6   | 82.7   | 86.8 NM_181876.2     |
| 100.7  | 97.5   | 104.9  | 93.6 NM_181876.2     |
| 76.8   | 78.9   | 78.5   | 84.2 NM_181876.2     |
| 97.9   | 81.9   | 90     | 92.6 NM_020416.2     |

|         |         |         |                      |
|---------|---------|---------|----------------------|
| 129.6   | 118.8   | 116.7   | 105.8 NM_018461.2    |
| 103.6   | 100.7   | 102.5   | 98.2 NM_001003656.1  |
| 398.3   | 319.4   | 295.9   | 233.4 NM_018461.2    |
| 96.5    | 91.7    | 100.4   | 97.4 NM_181897.1     |
| 87.5    | 91.1    | 91.4    | 95.1 NM_002718.3     |
| 125.7   | 113.1   | 99      | 107.4 NM_002718.3    |
| 101.6   | 115.6   | 101.4   | 108 NM_013239.3      |
| 108.7   | 133.8   | 115.3   | 126.2 NM_199326.1    |
| 97.1    | 122.5   | 110.5   | 145.6 NM_199326.1    |
| 847.6   | 483     | 510.2   | 410.8 NM_017917.2    |
| 94.3    | 98.6    | 97.2    | 94.5 NM_178001.1     |
| 88.3    | 86.4    | 78.5    | 86.8 NM_178003.1     |
| 109.1   | 98.7    | 89.1    | 101.6 NM_021131.3    |
| 754.8   | 442.5   | 398.2   | 273.2 NM_178000.1    |
| 607.4   | 542     | 450.7   | 393.5 NM_006243.2    |
| 100.8   | 133.8   | 112.7   | 109.8 NM_006244.2    |
| 1691.8  | 973.1   | 756.3   | 704.7 NM_178588.1    |
| 119.7   | 110.9   | 103     | 97.1 NM_002719.2     |
| 98.9    | 95      | 93.7    | 94.9 NM_178587.1     |
| 117.3   | 125.6   | 135     | 125.1 NM_006245.2    |
| 189.4   | 175.3   | 165.1   | 147.1 NM_180977.1    |
| 386.6   | 277.2   | 242.1   | 262 NM_180976.1      |
| 1326.5  | 1147    | 910.3   | 779.7 NM_006246.2    |
| 141.5   | 136.2   | 117.3   | 171.4 NM_000944.2    |
| 952.4   | 656     | 529.5   | 467.9 NM_021132.1    |
| 304     | 227.6   | 211.1   | 169.7 NM_005605.3    |
| 1304.5  | 925.2   | 722     | 655.9 NM_000945.3    |
| 95.3    | 92.4    | 86.7    | 91.1 NM_147180.2     |
| 469     | 404.5   | 400.8   | 348 NM_005134.1      |
| 348.9   | 296     | 321.7   | 290.2 NM_005134.1    |
| 81.7    | 85.1    | 82.7    | 85.9 NM_018498.2     |
| 107.8   | 79.6    | 93      | 95.7 NM_174907.1     |
| 75.8    | 92.6    | 86.3    | 90.2 NM_006247.2     |
| 2792.2  | 1964.8  | 1647.7  | 1117.7 NM_002721.3   |
| 486.3   | 326.8   | 275.7   | 211.7 NM_015062.3    |
| 14052.9 | 12067.7 | 12559.5 | 13805.5 NM_000310.2  |
| 92.9    | 76.9    | 83.7    | 87.4 NM_138717.1     |
| 96.5    | 96.7    | 89.4    | 89.9 NM_138717.1     |
| 497.3   | 530.1   | 422     | 423.2 NM_015342.1    |
| 83.3    | 75.8    | 83.4    | 90.4 NM_002722.2     |
| 91.9    | 84.1    | 81.4    | 75.6 NR_002181.1     |
| 80.4    | 82.5    | 81.8    | 89.9 NM_005972.3     |
| 139.6   | 143.6   | 150.2   | 115.6 NM_001032385.1 |
| 590.9   | 630.5   | 662.4   | 457.8 NM_001032382.1 |
| 108.1   | 97.9    | 119.3   | 105.6 NM_005710.2    |
| 2381.3  | 2329    | 2093.5  | 1173.6 NM_025078.3   |
| 108.8   | 113.8   | 95.9    | 95.8 NM_001040125.1  |
| 88.4    | 87.2    | 88.1    | 92.9 NM_001040125.1  |
| 837.6   | 913.6   | 805.9   | 864.7 NM_152391.2    |
| 88.5    | 89.7    | 86.9    | 87 NM_032391.2       |

|        |        |        |                      |
|--------|--------|--------|----------------------|
| 100    | 99.8   | 87     | 86.4 NM_007213.1     |
| 167.5  | 244.5  | 223.1  | 154.3 NM_032152.3    |
| 106.6  | 99     | 83.9   | 112.9 NM_206953.1    |
| 396.4  | 342.8  | 351.9  | 256.7 NM_206955.1    |
| 552.3  | 510.5  | 408.5  | 406 NM_206956.1      |
| 96.4   | 85.5   | 80.7   | 93.1 NM_023013.1     |
| 108.5  | 111    | 101.3  | 95.4 NM_001039361.1  |
| 79.9   | 80.8   | 76.4   | 82.6 NM_001039361.1  |
| 87.8   | 82.3   | 84.7   | 84.9 XM_496342.2     |
| 95.9   | 95.5   | 95.4   | 94.5 NM_001045480.1  |
| 89.8   | 82.6   | 84.1   | 80.2 NM_001009611.1  |
| 146.3  | 134.3  | 115.4  | 128.5 NM_001013407.1 |
| 101.3  | 96.4   | 96.4   | 95.1 NM_001010889.2  |
| 102.3  | 91.6   | 92.9   | 96.9 NM_001012277.1  |
| 100.7  | 96.2   | 93.2   | 85.3 NM_001012276.1  |
| 89.6   | 83.5   | 66.9   | 85.1 NM_001010890.1  |
| 86.6   | 91.3   | 92.3   | 95.2 NM_145202.3     |
| 103.5  | 89     | 90.7   | 90 NM_199354.1       |
| 111.2  | 112.2  | 109.2  | 111.4 NM_199353.1    |
| 102.7  | 89.9   | 90.6   | 99.8 NM_006248.2     |
| 104.4  | 101.4  | 103.7  | 92.1 NM_006249.4     |
| 96.1   | 86.4   | 89.9   | 87.7 NM_002723.3     |
| 3088.4 | 2304.8 | 1915.3 | 1857.3 NM_003981.2   |
| 142.7  | 130.3  | 129    | 131.5 NM_005973.4    |
| 359.6  | 303.1  | 274.3  | 193.7 NM_199416.1    |
| 1686.7 | 1768.9 | 1699.7 | 1259.9 NM_199418.1   |
| 411.9  | 422.4  | 402.2  | 289.7 NM_005040.2    |
| 100.8  | 98.2   | 92.4   | 109.6 NM_182907.1    |
| 85.9   | 100.6  | 84.1   | 106.6 NM_001198.2    |
| 96.5   | 120.5  | 115.5  | 114 NM_001198.2      |
| 212.9  | 802.6  | 628    | 609.2 NM_001198.2    |
| 310.8  | 398.4  | 361.9  | 332.5 NM_020228.2    |
| 83.8   | 83.8   | 87.6   | 85.4 NM_020229.2     |
| 71.5   | 79.7   | 75.5   | 82.5 NM_021619.2     |
| 101.7  | 93.7   | 96.1   | 96 NM_021620.2       |
| 90.4   | 82.6   | 75.1   | 94.5 NM_024504.2     |
| 94.1   | 89.1   | 82.3   | 88.5 NM_022115.2     |
| 91     | 84.4   | 83.7   | 73.1 NM_022114.2     |
| 83.1   | 92.1   | 75.7   | 82.2 NM_022114.2     |
| 91.5   | 90.2   | 92.8   | 91.4 XM_936938.1     |
| 124.5  | 113.7  | 112.7  | 105 NM_012231.3      |
| 85.7   | 84.5   | 78.2   | 83.4 NM_012231.3     |
| 206.5  | 258.9  | 231.8  | 146.8 NM_012406.3    |
| 101.8  | 87.1   | 90.7   | 93.1 NM_018699.2     |
| 81.1   | 94.5   | 101.1  | 96.5 NM_052996.2     |
| 188.6  | 158.7  | 163.8  | 128.2 NM_020226.2    |
| 121.5  | 112.7  | 110.7  | 102.7 NM_020227.1    |
| 9915.8 | 7498.1 | 6398.2 | 4761 NM_181696.1     |
| 3960.7 | 2750.2 | 2847.5 | 1824.2 NM_181696.1   |
| 98.9   | 99.4   | 86.6   | 92.7 NM_181738.1     |

|        |        |        |        |                |
|--------|--------|--------|--------|----------------|
| 1133.2 | 796.4  | 687.1  | 595.6  | NM_181738.1    |
| 4316.2 | 2674.7 | 2335.6 | 1897.3 | NM_006793.2    |
| 3153.4 | 1813.2 | 1938.2 | 1456.1 | NM_006406.1    |
| 1942.3 | 2245.9 | 2132.5 | 1458   | NM_012094.3    |
| 5488.4 | 5712.7 | 5193.5 | 4614.4 | NM_181652.1    |
| 5401.1 | 5252   | 4901   | 4504.7 | NM_181652.1    |
| 4975.2 | 3927.9 | 3180.1 | 2298.9 | NM_004905.2    |
| 414.7  | 348.6  | 300.6  | 298.2  | NM_013388.4    |
| 100.7  | 86.8   | 91.4   | 90.2   | NM_001080845.1 |
| 606.1  | 448.5  | 451.8  | 318.1  | NM_199482.1    |
| 229.1  | 177.6  | 190.8  | 159.3  | NM_015387.2    |
| 82.8   | 79.5   | 74.3   | 85.8   | NM_199482.1    |
| 1641   | 1621.6 | 1296.9 | 1149   | NM_013237.2    |
| 108    | 91.7   | 90.3   | 101.2  | NM_205846.1    |
| 92.7   | 87.5   | 91.6   | 95.2   | NM_201348.1    |
| 428.3  | 414.7  | 409.2  | 332.7  | NM_002726.3    |
| 270.7  | 315.6  | 251.6  | 271.9  | NM_006036.3    |
| 136.7  | 213.6  | 230.3  | 168.2  | NM_020820.2    |
| 103.8  | 94.6   | 96.4   | 92.2   | NM_005041.3    |
| 659.5  | 605.1  | 474.6  | 451.6  | NM_024888.1    |
| 201.8  | 134.8  | 119.1  | 115.8  | NM_002728.4    |
| 87.8   | 88.2   | 97     | 93.2   | NM_006093.2    |
| 113    | 113.5  | 117.3  | 121.2  | NM_017753.2    |
| 79.8   | 80.9   | 83.7   | 86.2   | NM_207299.1    |
| 91.6   | 84.2   | 80.7   | 84.4   | NM_017753.2    |
| 96.5   | 85     | 89.5   | 86.1   | NM_006250.1    |
| 95.3   | 80.1   | 86.1   | 92.1   | NM_005042.2    |
| 529.5  | 450.4  | 468.9  | 263.5  | NM_033405.2    |
| 551.2  | 411.7  | 423.7  | 265.2  | NM_153026.1    |
| 97     | 86.6   | 100.1  | 90.3   | NM_198859.1    |
| 1242.4 | 956.2  | 699.4  | 607    | NM_000946.2    |
| 111.2  | 92.1   | 91     | 87.1   | NM_000947.2    |
| 99.7   | 86.2   | 81.5   | 87.4   | NM_178004.1    |
| 164.1  | 198    | 197.2  | 165    | NM_206907.2    |
| 297.4  | 298.3  | 269    | 258.5  | NM_206907.3    |
| 89.4   | 84.7   | 82.4   | 82.4   | NM_006252.2    |
| 223.2  | 199.4  | 188.3  | 165.8  | NM_006253.4    |
| 167.2  | 156.3  | 141.4  | 144.1  | NM_005399.3    |
| 93.4   | 94.9   | 96.6   | 102    | NM_002730.3    |
| 94     | 87.7   | 88.3   | 90.7   | NM_207518.1    |
| 94     | 100.1  | 87.1   | 91.7   | NM_182948.2    |
| 137.6  | 120.5  | 120.4  | 124.1  | NM_002731.2    |
| 90.8   | 80.9   | 75.2   | 92.7   | NM_207578.1    |
| 101    | 92.5   | 96.5   | 101.1  | NM_207578.1    |
| 94.3   | 95.6   | 99.7   | 97.2   | NM_002732.2    |
| 193.5  | 178.3  | 159.2  | 154.9  | NM_212461.1    |
| 308.7  | 344.5  | 262    | 246.9  | NM_002733.3    |
| 350.7  | 387.6  | 377.9  | 329.4  | NM_016203.2    |
| 137.9  | 142.1  | 149.4  | 131.3  | NM_001040633.1 |
| 96.7   | 113.1  | 117.9  | 104.8  | NM_016203.2    |

|        |        |        |                      |
|--------|--------|--------|----------------------|
| 100.6  | 90     | 87.1   | 96.8 NM_017431.2     |
| 106    | 91.9   | 82.3   | 94.5 NM_212471.1     |
| 427.9  | 408    | 495.2  | 414.6 NM_002734.3    |
| 175.1  | 221.1  | 223.3  | 186.6 NM_002735.1    |
| 171.3  | 273.3  | 252.1  | 217 NM_004157.2      |
| 89     | 105.4  | 83.9   | 93.6 NM_002736.2     |
| 286    | 608.3  | 509.1  | 472.2 NM_002737.2    |
| 114.4  | 106.7  | 107.1  | 99.8 NM_012407.2     |
| 120.4  | 129.9  | 111.7  | 142.6 NM_212535.1    |
| 189.1  | 287.3  | 209.2  | 226.5 NM_212535.1    |
| 2178.9 | 2244.8 | 2014.4 | 1592.9 NM_002738.5   |
| 180.4  | 190.8  | 187.2  | 172.4 NM_012408.3    |
| 81     | 91     | 87.6   | 86.3 NM_183047.1     |
| 2576.1 | 2932.1 | 2933.4 | 1989.7 NM_212539.1   |
| 93.6   | 99.9   | 95.8   | 95.6 NM_006254.3     |
| 147.8  | 213.8  | 199.9  | 144.5 NM_145040.2    |
| 99.8   | 93.1   | 93.6   | 96 NM_005400.2       |
| 95.6   | 88.2   | 80.8   | 90.6 NM_002739.3     |
| 213.9  | 137.4  | 140.3  | 124.4 NM_006255.3    |
| 107.9  | 121.4  | 105.1  | 117.4 NM_002740.4    |
| 507.5  | 324    | 272.3  | 346 NM_006257.2      |
| 900.5  | 673.3  | 644.8  | 383.8 NM_001001329.1 |
| 152.4  | 121.4  | 132    | 114 NM_001001329.1   |
| 111.4  | 103.9  | 95.5   | 85.9 NM_001033582.1  |
| 104.4  | 97.6   | 85.6   | 92.1 NM_002744.4     |
| 175.4  | 211.3  | 234.4  | 160.4 NM_002744.4    |
| 89.2   | 84.3   | 82.5   | 89.1 NM_001033581.1  |
| 77.2   | 79.4   | 77.1   | 76.5 NM_002742.1     |
| 124.8  | 119    | 104.3  | 108 NM_016457.3      |
| 105.5  | 96     | 89     | 97.2 NM_001079881.1  |
| 95.8   | 96.4   | 88.9   | 86.9 NM_005813.3     |
| 780.1  | 1171.2 | 1192.5 | 400.2 NM_006904.6    |
| 124.9  | 133    | 116.4  | 142.5 NM_006904.6    |
| 118.3  | 156.9  | 119.9  | 141.4 NM_006904.6    |
| 89.4   | 87.9   | 80.1   | 79.4 NM_006258.1     |
| 88.6   | 82.2   | 78     | 88.4 NM_006259.1     |
| 313.9  | 384    | 428.7  | 257.4 NM_024653.1    |
| 2084   | 1505.3 | 1272   | 1331.9 NM_004705.2   |
| 147.5  | 149.1  | 149.4  | 131.3 NM_005044.1    |
| 93.1   | 89.9   | 91.6   | 92.5 NM_002760.2     |
| 84.2   | 86.8   | 81.6   | 83.6 NM_000948.2     |
| 88.4   | 89.3   | 88.1   | 88.7 NM_015893.1     |
| 99.1   | 83.3   | 84.3   | 88.7 NM_004248.1     |
| 104.7  | 76     | 77.3   | 83.5 NM_000949.2     |
| 89.3   | 89.4   | 82.4   | 97.4 NM_002761.1     |
| 83.5   | 78.7   | 71     | 84 NM_002762.2       |
| 95.9   | 90.8   | 81.8   | 79.8 XM_929446.1     |
| 98.1   | 109.2  | 93     | 93.7 NM_021247.1     |
| 101.5  | 93.5   | 99.2   | 94.6 NM_198319.1     |
| 1543.9 | 1020.7 | 925.1  | 690.9 NM_198318.1    |



|        |        |        |        |                |
|--------|--------|--------|--------|----------------|
| 3333.4 | 2540.9 | 2049   | 1748.1 | NM_198319.1    |
| 254    | 292.2  | 289.4  | 276.2  | NM_001535.2    |
| 107.7  | 109.2  | 105.2  | 124.2  | NM_206962.1    |
| 238.7  | 373.9  | 376.2  | 315.9  | NM_206962.1    |
| 538    | 376.7  | 299.8  | 274    | NM_001039619.1 |
| 556.5  | 404.8  | 339.4  | 242.2  | NM_006109.2    |
| 1483.4 | 603.9  | 518.3  | 460.9  | NM_018137.1    |
| 192.6  | 140.3  | 131.9  | 112    | NM_019023.1    |
| 99.5   | 89.1   | 80.6   | 89.5   | NM_019854.3    |
| 90.1   | 87.9   | 84.3   | 98.2   | NM_012409.2    |
| 382.8  | 504.2  | 380.4  | 319.6  | NM_183079.2    |
| 1539.7 | 1622.2 | 1390.8 | 1264.9 | NM_183079.2    |
| 85.1   | 90.3   | 86.7   | 80.4   | NM_024066.1    |
| 85.9   | 78.1   | 86.1   | 84     | NM_177549.2    |
| 460.7  | 376.3  | 320.5  | 263.5  | NM_014117.2    |
| 78     | 77.7   | 82     | 92.3   | NR_002762.1    |
| 132.6  | 172.9  | 182.2  | 160.7  | NR_002764.1    |
| 115.3  | 123.5  | 149.8  | 136    | NM_144736.3    |
| 136.9  | 128.8  | 121.5  | 123    | NM_144736.3    |
| 98.7   | 112.7  | 115.7  | 99.8   | NM_000312.1    |
| 93.9   | 93.7   | 86     | 92.9   | NM_152465.1    |
| 171.9  | 130.8  | 126.4  | 113.3  | NM_006404.3    |
| 88     | 86     | 78.1   | 76.3   | NM_016335.2    |
| 83.6   | 85.2   | 89.4   | 82     | NM_021232.1    |
| 80.9   | 92.3   | 77.6   | 94     | NM_032414.2    |
| 128.1  | 113.9  | 111.3  | 98.8   | NM_021935.2    |
| 92.2   | 67.6   | 79.1   | 76.6   | NM_138964.2    |
| 97.1   | 93.9   | 91.7   | 95.1   | NM_144773.2    |
| 93.3   | 92.4   | 86.5   | 87.8   | NM_021225.1    |
| 100.2  | 70     | 71.8   | 86.1   | NM_006017.1    |
| 87     | 81.5   | 88.3   | 79.3   | NM_144707.1    |
| 84.1   | 91     | 81.9   | 86.1   | NM_006261.2    |
| 1393.7 | 1386.2 | 1154.7 | 1020.2 | NM_000313.1    |
| 92.9   | 87.1   | 89.3   | 92     | NM_014731.2    |
| 2861.6 | 2001.7 | 1573.5 | 1618.8 | NM_007198.2    |
| 83     | 86.5   | 81.4   | 80.8   | NM_002763.3    |
| 81.9   | 83.2   | 79.8   | 86.3   | NM_003891.1    |
| 89.5   | 93.2   | 89.6   | 95.6   | NM_173490.4    |
| 222.7  | 153.6  | 163.3  | 153.3  | NM_003675.2    |
| 452.9  | 338.6  | 265.3  | 240.8  | NM_014502.3    |
| 1478.1 | 1256.8 | 1033.9 | 1050.6 | NM_004698.1    |
| 881.8  | 627.4  | 499.9  | 446.9  | NM_015629.2    |
| 469.9  | 502.2  | 403.5  | 331.5  | NM_032864.2    |
| 136    | 149.1  | 122.7  | 128.6  | NM_032284.2    |
| 345.4  | 222.7  | 217.4  | 227.2  | NM_018061.1    |
| 101.5  | 102.2  | 97.7   | 107.3  | NM_017922.2    |
| 2796.8 | 1489.2 | 1225   | 937.7  | NM_004697.3    |
| 110.9  | 100.8  | 89.2   | 94.1   | NM_001031698.1 |
| 97.1   | 84.1   | 80.2   | 82.8   | NM_012272.1    |
| 92     | 97.4   | 84.8   | 105.9  | NM_176800.1    |

|         |        |        |                      |
|---------|--------|--------|----------------------|
| 78.6    | 81.5   | 72.5   | 83.7 NM_176800.1     |
| 196.4   | 236.1  | 210.6  | 286.2 NM_003913.3    |
| 1453.5  | 1222.9 | 992.9  | 597.2 NM_006445.2    |
| 112.1   | 122.2  | 110.7  | 112.5 NM_006262.3    |
| 1177    | 572.7  | 567.5  | 371.4 NM_002764.2    |
| 86.9    | 83.8   | 89.3   | 84.5 NM_175886.2     |
| 276.6   | 269.3  | 232    | 221.7 NM_002765.2    |
| 563.6   | 586.9  | 549.3  | 345.8 NM_001039091.1 |
| 1132.1  | 1334.6 | 1314.2 | 938.1 NM_002766.1    |
| 316.7   | 342    | 335.9  | 220 NM_002767.2      |
| 350.6   | 312.5  | 277.2  | 221.9 NM_018304.1    |
| 13978.6 | 9777.1 | 9636.6 | 6535.7 NM_018457.2   |
| 97.5    | 79.9   | 84.3   | 86.8 NM_175887.2     |
| 98.6    | 91.1   | 85.7   | 95.3 NM_001077497.1  |
| 106     | 95.2   | 97.8   | 84.2 NM_025263.1     |
| 133.5   | 101.6  | 104.1  | 105 NM_007244.1      |
| 97.7    | 89.4   | 86.4   | 95.2 NM_181333.2     |
| 288.2   | 259.7  | 229.3  | 194.8 NM_001017530.1 |
| 163     | 146.1  | 138.7  | 135.6 NM_001017530.1 |
| 932.9   | 696.5  | 759.5  | 372 NM_181716.2      |
| 103.1   | 99.6   | 91.7   | 95.7 NM_030567.2     |
| 102     | 95.2   | 97.7   | 99.1 NM_053043.1     |
| 298.7   | 234.9  | 209.4  | 189.7 NM_000950.1    |
| 86.8    | 77.9   | 88.8   | 79.7 NM_000951.1     |
| 91      | 88.2   | 84.3   | 85.4 NM_024082.2     |
| 152.8   | 148.2  | 158.6  | 144.7 NM_024081.4    |
| 94.7    | 91.2   | 92     | 92.2 NM_030651.2     |
| 92.4    | 90.4   | 88.2   | 85.1 NM_145239.1     |
| 126.6   | 117    | 99.5   | 99.4 NM_207351.2     |
| 89.3    | 94.3   | 89.3   | 87 NM_022716.2       |
| 86.9    | 92.2   | 85.6   | 82.1 NM_006902.3     |
| 95.5    | 86.1   | 74.2   | 78.1 NM_016307.3     |
| 93.8    | 84.6   | 78.8   | 81 NM_002769.2       |
| 182.1   | 197.5  | 185.9  | 171.4 NM_003619.2    |
| 1514.2  | 1420.5 | 1223.3 | 1008.3 NM_004793.2   |
| 94.9    | 102.3  | 85.1   | 92.9 NM_005865.2     |
| 90.6    | 79     | 73.9   | 87.8 NM_002770.2     |
| 83.1    | 87.1   | 86.2   | 85.2 NM_006799.2     |
| 78.5    | 77.4   | 86     | 93.6 NM_006799.2     |
| 96.1    | 79.3   | 93     | 84.3 NM_022119.3     |
| 84.4    | 84.7   | 85.5   | 81.3 NM_007173.3     |
| 114.7   | 104.9  | 104.1  | 108 NM_031948.3      |
| 99.4    | 96.3   | 99.6   | 97.5 NM_002771.2     |
| 86.8    | 83.7   | 76.3   | 85.7 NM_152891.1     |
| 90      | 85.3   | 79.4   | 96.5 NM_153362.1     |
| 136     | 118.2  | 107.9  | 110.1 NM_002772.1    |
| 82.1    | 90.2   | 74.7   | 79.2 NM_002773.2     |
| 117     | 101.7  | 97.9   | 92.7 NM_214710.1     |
| 79.5    | 84.4   | 85.8   | 83.5 NM_020200.5     |
| 84.5    | 84.6   | 88.1   | 76.8 XM_945227.1     |

|        |        |        |                      |
|--------|--------|--------|----------------------|
| 87.9   | 95.4   | 84.2   | 86.2 NM_173814.3     |
| 8313.4 | 5573.5 | 5476.3 | 4935.7 NM_002777.3   |
| 274.1  | 243    | 197.2  | 212.7 NM_021222.1    |
| 94.7   | 88.6   | 87.3   | 90.2 NM_138818.2     |
| 87.4   | 89.5   | 84     | 94.1 NM_181882.2     |
| 94.6   | 97.8   | 100.5  | 93 NM_020956.1       |
| 107.1  | 106.8  | 97.6   | 90.8 NM_020956.1     |
| 82.4   | 78.1   | 76.6   | 75.3 NM_004676.2     |
| 1879.6 | 3338.4 | 3243.7 | 1618.1 NM_002778.1   |
| 1550.2 | 3251.5 | 2970.2 | 1642.9 NM_002778.1   |
| 3521.3 | 3558.3 | 3479.9 | 2609.4 NM_018622.4   |
| 3338.2 | 1073.7 | 915.8  | 859.9 NM_021154.3    |
| 84.3   | 84.6   | 88.1   | 82.8 NM_058179.2     |
| 91.9   | 100.6  | 85.6   | 90.1 NM_005672.2     |
| 125.8  | 128.2  | 121.8  | 117.1 NM_017456.2    |
| 936.2  | 1027.5 | 1001.4 | 673.5 NM_017456.2    |
| 123    | 111    | 120.1  | 122.5 NM_004228.4    |
| 108.2  | 98.9   | 93.1   | 87.6 NM_017457.3     |
| 139    | 146.9  | 120.5  | 126.5 NM_004227.3    |
| 824.9  | 720.8  | 738.5  | 355.3 NM_013385.2    |
| 79.8   | 80.4   | 79.4   | 74.3 NM_004288.3     |
| 86.7   | 93.7   | 89.1   | 86.9 NM_002779.3     |
| 94.3   | 80.9   | 84.3   | 82.9 NM_032289.1     |
| 102.5  | 98.2   | 88.1   | 103.6 NM_015310.2    |
| 102.1  | 95.6   | 88.7   | 85.8 NM_206909.1     |
| 136.5  | 160.4  | 136    | 141.6 NM_206909.1    |
| 428.5  | 395.7  | 379.7  | 262.1 NM_012455.2    |
| 133.6  | 131.2  | 135.2  | 142.1 NM_000021.2    |
| 122.6  | 96.6   | 92.2   | 102.5 NM_007319.1    |
| 250    | 234.8  | 215.3  | 187.1 NM_000447.1    |
| 328    | 291    | 246.8  | 175.9 NM_012486.1    |
| 153.9  | 124    | 117.3  | 107.9 NM_172341.1    |
| 82.3   | 91.9   | 72.6   | 78.2 NM_021067.2     |
| 83.1   | 79.9   | 81.7   | 83 NM_006905.2       |
| 74.5   | 79.2   | 92     | 87 NM_203287.1       |
| 104.1  | 99.8   | 94     | 90.3 NM_031246.1     |
| 82.8   | 81.5   | 78     | 81.9 NM_021016.2     |
| 88.8   | 88.1   | 90     | 86.2 NM_002780.3     |
| 80.9   | 81.3   | 77.1   | 78.7 NM_002780.3     |
| 88.7   | 83.8   | 88.1   | 96.4 NM_002780.3     |
| 94     | 86.3   | 82.5   | 86.2 NM_002781.2     |
| 96.4   | 93.9   | 84.1   | 90.1 NM_002782.3     |
| 104.1  | 102.3  | 94.6   | 101.1 NM_001031850.1 |
| 96.4   | 84.8   | 87.5   | 90.8 NM_002782.3     |
| 92.1   | 74     | 82.6   | 86.2 NM_002783.1     |
| 97.7   | 98.9   | 88.1   | 97.4 NM_182707.1     |
| 87.2   | 83.1   | 87.5   | 86.5 NM_002784.2     |
| 87.4   | 85.8   | 83     | 82.2 NM_021144.2     |
| 599.1  | 411.8  | 435.3  | 476.5 NM_033222.2    |
| 84.3   | 87.1   | 78.2   | 74.6 NR_001591.1     |

|         |        |        |        |                |
|---------|--------|--------|--------|----------------|
| 86.7    | 100.5  | 87.6   | 78.9   | NM_006742.1    |
| 78.3    | 81.6   | 72     | 75.6   | NM_033126.1    |
| 88      | 92.9   | 98.2   | 100.1  | NM_148976.1    |
| 596.6   | 419.4  | 367.6  | 314.6  | NM_002786.2    |
| 5102.1  | 3620.2 | 3346.2 | 2116.8 | NM_148976.1    |
| 491.4   | 321.5  | 235.1  | 285.1  | NM_002787.3    |
| 1248.6  | 962.7  | 748.2  | 820    | NM_152132.1    |
| 529.9   | 407.3  | 259.1  | 374.3  | NM_002788.2    |
| 1992.9  | 1592.1 | 1474.5 | 1120.4 | NM_002789.3    |
| 8844.1  | 3672.5 | 2966.7 | 2681.1 | NM_002790.2    |
| 12347.1 | 9041.3 | 6877   | 7239.5 | NM_002791.1    |
| 91.6    | 92.5   | 86.7   | 87.8   | NM_001025096.1 |
| 92.8    | 87.4   | 86.5   | 86.6   | NM_153696.2    |
| 9367.3  | 8495.9 | 7798.7 | 5904.1 | NM_002793.2    |
| 5119.5  | 4160.1 | 4246.7 | 2544.3 | NM_002801.2    |
| 2439    | 1768.5 | 1558.2 | 1111.3 | NM_002794.3    |
| 8269.2  | 5159.9 | 5163.8 | 3613.9 | NM_002795.2    |
| 4308.5  | 2797   | 2285   | 1960.9 | NM_002796.2    |
| 1552.1  | 1021.4 | 839    | 680.3  | NM_002797.2    |
| 3477.1  | 2771.3 | 2834.1 | 1515.3 | NM_002798.1    |
| 4720.4  | 4102.9 | 3504.9 | 2300.9 | NM_002799.2    |
| 774.8   | 796.1  | 685.2  | 531.9  | NM_148919.3    |
| 246     | 204.3  | 200.2  | 156.7  | NM_004159.4    |
| 94.7    | 96.9   | 87     | 95.9   | NM_004159.4    |
| 2458    | 2357   | 2300.7 | 1487.1 | NM_004159.4    |
| 528.8   | 403.7  | 358.2  | 259.9  | NM_002800.4    |
| 109.1   | 90.8   | 81     | 92     | NM_002800.4    |
| 8251.9  | 7843.5 | 6193   | 5026.1 | NM_002802.2    |
| 3394.6  | 2896.9 | 2650.4 | 2374.3 | NM_002803.2    |
| 1429.9  | 1519   | 1430.8 | 704.6  | NM_002804.3    |
| 145.4   | 109.3  | 106.7  | 114.8  | NM_016556.1    |
| 244.4   | 198.1  | 206.4  | 183.1  | NM_016556.1    |
| 748.7   | 435.4  | 395.4  | 350    | NM_006503.2    |
| 456.7   | 323.9  | 353.3  | 221.8  | NM_006503.2    |
| 930.6   | 952.9  | 861.4  | 605.6  | NM_002805.4    |
| 105.6   | 94.7   | 89.4   | 101.4  | NM_002806.2    |
| 1733.3  | 1664.2 | 1198.6 | 1397.6 | NM_002807.2    |
| 1328.9  | 1247.5 | 942.8  | 932.4  | NM_170750.1    |
| 112     | 113.2  | 93     | 101    | NM_002814.2    |
| 365.5   | 380.6  | 299.8  | 301.4  | NM_002814.2    |
| 164     | 139.5  | 148.7  | 117.8  | NM_002815.2    |
| 1670.9  | 1149.6 | 822.5  | 960.4  | NM_002816.3    |
| 96.1    | 102    | 99.2   | 88.6   | NM_175932.1    |
| 162.1   | 155.2  | 138.5  | 145.9  | NM_002817.2    |
| 1308.7  | 890.2  | 750.4  | 961.1  | NM_005805.2    |
| 997.1   | 1017.2 | 862.5  | 545.3  | NM_002808.3    |
| 222.3   | 195.9  | 161.3  | 182.8  | NM_002809.2    |
| 167.2   | 111.3  | 152.5  | 115.7  | NM_153822.1    |
| 1842.4  | 1439.4 | 1314.7 | 921.7  | NM_002810.2    |
| 3227.8  | 2594.5 | 2348.5 | 1553.6 | NM_002810.1    |

|         |         |        |        |                |
|---------|---------|--------|--------|----------------|
| 220     | 136.6   | 118.4  | 109.8  | NM_005047.2    |
| 2899.7  | 2061.3  | 1654.3 | 1454.9 | NM_014814.1    |
| 2993.5  | 2034.8  | 1462.1 | 1244.2 | NM_002811.3    |
| 692.1   | 466.7   | 515.9  | 265    | NM_002812.3    |
| 157.3   | 155.1   | 139.2  | 132.4  | NM_002813.4    |
| 4608.9  | 2550.4  | 2309.6 | 2362.1 | NM_006263.2    |
| 101.5   | 100     | 98.6   | 106    | NM_176783.1    |
| 2010.4  | 1196    | 1109.5 | 774.1  | NM_002818.2    |
| 633.8   | 617.2   | 481.2  | 361.6  | NM_005789.2    |
| 716.5   | 652.3   | 527.5  | 412.9  | NM_005789.2    |
| 946.2   | 1065.2  | 861.1  | 594    | NM_014614.1    |
| 84.5    | 78.6    | 87.2   | 83.8   | NM_178578.1    |
| 1033.4  | 841.4   | 836    | 510.2  | NM_178579.1    |
| 133.8   | 128.8   | 133.4  | 107.5  | NM_014068.1    |
| 107.1   | 86.7    | 88.9   | 100    | NM_014069.1    |
| 247.6   | 156.6   | 169.9  | 160    | NM_018282.1    |
| 144.9   | 118.6   | 116.5  | 100.6  | NM_004577.3    |
| 80.8    | 87      | 80.9   | 80     | NM_004158.2    |
| 847     | 269.8   | 237.1  | 176.9  | NM_001005290.2 |
| 106.4   | 94.3    | 78.1   | 100.8  | NM_001032291.1 |
| 105.1   | 103     | 94.3   | 91.1   | NM_001032290.1 |
| 112.1   | 137.3   | 115.3  | 151.9  | NM_144982.3    |
| 188.1   | 227.4   | 235.3  | 156.7  | NM_003978.2    |
| 137.5   | 138.7   | 148.2  | 132.3  | NM_024430.2    |
| 92.1    | 85.3    | 83.1   | 75.9   | NM_000952.3    |
| 8802.9  | 5137.2  | 5125   | 3385.4 | NM_175847.1    |
| 15575.1 | 10018.8 | 9831.8 | 6112.5 | NM_175847.1    |
| 219.7   | 210     | 223.9  | 211.4  | NM_021190.1    |
| 688.3   | 437.2   | 453.5  | 247.1  | NM_015545.2    |
| 339.4   | 272.7   | 260.8  | 216.9  | NM_024754.3    |
| 109.1   | 99.4    | 103.5  | 107.4  | NM_000264.2    |
| 94.7    | 83.3    | 91.1   | 90.6   | NM_003738.3    |
| 86.9    | 82.4    | 79.9   | 88.2   | NM_173495.1    |
| 102     | 88.4    | 98     | 87.8   | NM_001034842.2 |
| 107.1   | 101.9   | 89.1   | 93.4   | NM_138296.2    |
| 96.3    | 90.9    | 84.7   | 91.2   | NM_013341.3    |
| 93.6    | 106.8   | 93     | 94.3   | NM_013341.3    |
| 1639    | 1028.6  | 1128.2 | 672.1  | NM_016145.1    |
| 372.2   | 305.6   | 274.8  | 245.3  | NM_024684.2    |
| 93.1    | 82.6    | 87.5   | 84.2   | NM_015167.1    |
| 163.4   | 155.5   | 138    | 125.1  | NM_015167.1    |
| 4053.1  | 2166.6  | 1576.4 | 1416.1 | NM_014754.1    |
| 113     | 131.4   | 123.6  | 99     | NM_030783.1    |
| 97.9    | 165.3   | 144.9  | 132.9  | NM_000314.3    |
| 86.3    | 83.8    | 72.1   | 81.2   | NM_030664.3    |
| 96.7    | 87.5    | 82.9   | 86.4   | NM_001001484.1 |
| 104.3   | 95.6    | 94.6   | 97.8   | NM_030664.3    |
| 91.9    | 76.1    | 83.9   | 85.7   | NM_178161.1    |
| 92.5    | 86.3    | 89     | 87.9   | NM_000953.2    |
| 103.9   | 166.2   | 152    | 146    | NM_000954.5    |

|        |        |        |                    |
|--------|--------|--------|--------------------|
| 111.2  | 99.2   | 99.5   | 92.1 NM_000955.2   |
| 107.7  | 108.7  | 92.9   | 101.3 NM_000956.2  |
| 88.9   | 87.9   | 83.4   | 90.6 NM_198715.1   |
| 88.2   | 83.9   | 82.7   | 80.2 NM_198716.1   |
| 104.8  | 97.2   | 87.1   | 95 NM_198719.1     |
| 86.2   | 84.1   | 75.9   | 83.2 NM_000957.2   |
| 82.5   | 88.5   | 78.4   | 80.9 NM_198718.1   |
| 86.1   | 80.5   | 86.2   | 87.9 NM_198712.2   |
| 439.9  | 407.2  | 523.1  | 529.9 NM_000958.2  |
| 89     | 87.7   | 85.5   | 90.2 NM_004878.3   |
| 570.3  | 302.5  | 269.8  | 226.5 NM_198938.1  |
| 732.4  | 479.5  | 365.1  | 221 NM_198938.1    |
| 1941.9 | 910.1  | 867.4  | 1124.9 NM_006601.4 |
| 81.6   | 88.6   | 82.1   | 81.9 NM_000959.3   |
| 92     | 94.8   | 97.4   | 87.9 NM_000959.2   |
| 92.4   | 90.2   | 83     | 96.5 NM_020440.2   |
| 110.1  | 105.9  | 100.6  | 103.3 NM_000960.3  |
| 79.6   | 85.6   | 80.4   | 87.2 NM_000961.3   |
| 204.7  | 186.6  | 179.3  | 171.2 NM_080591.1  |
| 118.9  | 101.5  | 104.9  | 96.9 NM_000962.2   |
| 162.4  | 195.6  | 168.5  | 152.8 NM_000963.1  |
| 74.8   | 80.2   | 71.2   | 79.2 NM_000315.2   |
| 83.7   | 86.4   | 78.9   | 82.1 NM_198966.1   |
| 99.5   | 85.9   | 81     | 88.7 NM_198965.1   |
| 115.8  | 109.8  | 111.1  | 103 NM_000316.2    |
| 85.9   | 77.9   | 82     | 81.5 NM_005048.2   |
| 838.8  | 210.9  | 168.7  | 154.3 NM_153831.2  |
| 82.3   | 71.3   | 83.3   | 86.4 NM_153831.2   |
| 97.4   | 106.8  | 102.7  | 95.2 NM_004103.3   |
| 140    | 152    | 144    | 147.9 NM_173176.1  |
| 95.2   | 98.8   | 107.6  | 103 NM_173174.1    |
| 141.1  | 141.4  | 123.1  | 119.9 NM_005975.2  |
| 105.9  | 91     | 108.4  | 102.9 NM_152882.2  |
| 104.3  | 91.8   | 88.3   | 90.8 NM_152880.2   |
| 93.8   | 86.7   | 84.5   | 89.9 NM_198974.1   |
| 114.7  | 106.9  | 97.4   | 111.3 XM_936937.1  |
| 867.6  | 705.5  | 571.7  | 481.6 NM_007284.3  |
| 1132.1 | 611.5  | 722.1  | 883.3 NM_002823.2  |
| 155.7  | 160.5  | 133.8  | 132.5 NM_002824.4  |
| 214.1  | 197.7  | 197.5  | 165.4 NM_002825.5  |
| 1716.2 | 1134.3 | 1028   | 877 NM_017432.2    |
| 86     | 89.7   | 90.8   | 82.3 NM_003463.3   |
| 2879.2 | 3879.1 | 3349.6 | 2533 NM_080392.2   |
| 144.3  | 135.4  | 132.7  | 129.6 NM_007079.2  |
| 146.1  | 151.3  | 150.3  | 130.5 NM_007079.2  |
| 84.8   | 82.3   | 82.1   | 85.8 NM_152422.3   |
| 146.1  | 166.3  | 167    | 171 NM_152422.3    |
| 80.1   | 91.1   | 81.7   | 83.9 NM_177995.1   |
| 612.9  | 330.6  | 300.9  | 349.1 NM_014241.2  |
| 1386.8 | 952.5  | 765.7  | 644.1 NM_016395.1  |

|        |        |        |        |                |
|--------|--------|--------|--------|----------------|
| 258.2  | 347.5  | 480.3  | 319.4  | NM_001010915.1 |
| 781.4  | 755.4  | 592.1  | 605.7  | NM_198402.2    |
| 652.1  | 967    | 858.6  | 658.7  | NM_002827.2    |
| 1370.5 | 1464.4 | 1033.7 | 1077.1 | NM_002834.3    |
| 836    | 1294.9 | 1141.2 | 935.7  | NM_002835.2    |
| 86.7   | 80.8   | 77.5   | 89.3   | NM_080684.1    |
| 95.9   | 92.5   | 93.2   | 90.8   | NM_005401.3    |
| 94.6   | 99.9   | 91     | 99     | NM_014369.2    |
| 91.2   | 83     | 81.4   | 89.1   | NM_002828.2    |
| 340.5  | 421.9  | 397.6  | 312.6  | NM_080422.1    |
| 85.5   | 76.9   | 76.4   | 84.7   | NM_001042389.1 |
| 82.5   | 89.5   | 85.8   | 91.8   | NM_001042358.3 |
| 82.4   | 88.8   | 70.3   | 82.9   | NM_007039.2    |
| 105.7  | 107.4  | 102.8  | 99.3   | NM_012411.2    |
| 89.1   | 81.9   | 78.5   | 81.8   | NM_012411.2    |
| 156.5  | 124.9  | 127.1  | 117.6  | NM_015967.3    |
| 125.2  | 138    | 134.5  | 140.9  | NM_015466.1    |
| 114.2  | 113.4  | 95.3   | 98.3   | NM_002829.2    |
| 176    | 165.3  | 146.1  | 156.1  | NM_002830.2    |
| 87.5   | 96.5   | 86.1   | 77     | NM_032781.2    |
| 87.4   | 84.8   | 78.3   | 88.2   | NM_001039970.1 |
| 84.2   | 87.1   | 94.1   | 85.9   | NM_080548.2    |
| 1221.5 | 822    | 622.4  | 658.6  | NM_080549.2    |
| 102.1  | 122.2  | 120.1  | 110.1  | NM_080588.1    |
| 1161.2 | 657.1  | 546.8  | 528.4  | NM_080588.1    |
| 148.4  | 146.4  | 146.1  | 131.2  | NM_002833.2    |
| 97.5   | 111.5  | 91.7   | 96.9   | NM_002833.2    |
| 723    | 758.4  | 652.2  | 441.7  | NM_080792.1    |
| 167.8  | 216.7  | 175    | 178.7  | NM_080792.1    |
| 88.7   | 96.9   | 93     | 91.9   | NM_080841.2    |
| 203.9  | 232.8  | 237.2  | 199.8  | NM_080841.2    |
| 162.4  | 163    | 156.2  | 131.7  | NM_080841.2    |
| 117.2  | 123.3  | 114.1  | 116.4  | NM_080840.1    |
| 93.5   | 84.6   | 93.4   | 89.8   | NM_002837.2    |
| 80.1   | 74.8   | 68.2   | 77.2   | NM_080923.1    |
| 116.6  | 120.8  | 114.7  | 92     | NM_080921.2    |
| 110.5  | 140.2  | 128.1  | 124.1  | NM_080922.1    |
| 98.4   | 95.6   | 92.4   | 94.9   | NM_002838.2    |
| 108.5  | 97.7   | 96.2   | 97.7   | NM_005608.2    |
| 93.8   | 87.4   | 84.3   | 86.3   | NM_130391.2    |
| 98.3   | 86.5   | 82.4   | 92.7   | NM_130391.2    |
| 748.5  | 964.7  | 821.5  | 749.6  | NM_130435.2    |
| 118.8  | 106.1  | 105.1  | 105.4  | NM_006504.3    |
| 87.6   | 94     | 89.1   | 93.2   | NM_130435.2    |
| 567    | 854.4  | 974.8  | 438.5  | NM_002840.3    |
| 475.7  | 760.8  | 676.7  | 664.3  | NM_130440.1    |
| 96.3   | 114.7  | 86.2   | 93.7   | NM_002841.2    |
| 92.7   | 91.5   | 92.8   | 90.9   | NM_002842.2    |
| 250.9  | 259.5  | 202.1  | 236.8  | NM_002844.2    |
| 82.7   | 80.3   | 78.9   | 81.4   | NM_002845.2    |

|        |        |        |                       |
|--------|--------|--------|-----------------------|
| 100.4  | 97.7   | 78.5   | 80.7 NM_002846.2      |
| 199    | 164.6  | 152.2  | 154.8 NM_002847.2     |
| 153.8  | 126.3  | 121.3  | 114.5 NM_030670.1     |
| 230.7  | 172    | 150.8  | 163.9 NM_030671.1     |
| 91.7   | 85     | 75.8   | 82.5 NM_002849.2      |
| 118.2  | 119.5  | 113.2  | 104.5 NM_130846.1     |
| 96.2   | 96.8   | 85.8   | 89.5 NM_130855.2      |
| 98.2   | 84     | 91.9   | 76 NM_130855.2        |
| 79.2   | 87.2   | 84.2   | 77.5 NM_133170.2      |
| 97.9   | 87     | 78     | 92.1 NM_133170.2      |
| 90.7   | 81.2   | 74.7   | 77.1 NM_007050.4      |
| 82.1   | 94.2   | 92.3   | 80.2 NM_005704.3      |
| 99.1   | 86.1   | 76.1   | 81.6 NM_133178.1      |
| 96.2   | 96.3   | 95.8   | 88.2 NM_002851.1      |
| 84.2   | 76.4   | 80.3   | 87.8 NM_012232.2      |
| 228.5  | 165.8  | 180.2  | 110.7 NM_001002913.1  |
| 1383.3 | 1047.2 | 876    | 750.1 NM_016077.3     |
| 168.1  | 146    | 136.6  | 142.2 NM_001015509.1  |
| 642.6  | 465.4  | 475.7  | 398.6 NM_000317.1     |
| 4620.6 | 1530.5 | 1352.7 | 823.9 NM_004219.2     |
| 1983.2 | 2357.2 | 2348   | 1740.9 NM_004339.2    |
| 187.6  | 140.7  | 144.5  | 120.6 NM_006607.1     |
| 1698.3 | 493.2  | 434.5  | 365.4 NR_002734.1     |
| 85.4   | 84     | 82.5   | 86.3 NM_002852.2      |
| 1349.3 | 1717.2 | 1695.5 | 1030.5 NM_001020658.1 |
| 1479.6 | 1293.2 | 1319.2 | 924.9 NM_014676.2     |
| 1064.4 | 1096   | 893    | 961.7 NM_015317.1     |
| 93     | 82.7   | 72.9   | 81.5 NM_004884.2      |
| 386.1  | 382.3  | 344.5  | 512 NM_005859.3       |
| 1305.3 | 1843.4 | 1613.2 | 1570.9 NM_033224.3    |
| 161.6  | 155    | 159.1  | 131.5 NM_001015508.1  |
| 84.1   | 83     | 78.7   | 81.6 NM_013357.2      |
| 2220.8 | 1333.3 | 1510.2 | 751.4 NM_025215.4     |
| 100.9  | 95.1   | 102.7  | 86.7 NM_025215.4      |
| 391.4  | 235.7  | 248.1  | 189.9 NM_001002019.1  |
| 177.3  | 134.2  | 132.7  | 131.3 NM_031307.2     |
| 696.5  | 504.6  | 410.5  | 351.6 NM_019042.3     |
| 256.9  | 249.3  | 174.2  | 194.6 NM_031292.2     |
| 225.9  | 216.4  | 174.2  | 167.5 NM_153339.1     |
| 82.6   | 85.1   | 76.2   | 82.6 NM_002854.2      |
| 149.7  | 132.9  | 121.4  | 116.7 NM_006505.2     |
| 91.5   | 87.5   | 83.3   | 99.2 NM_203285.1      |
| 107.2  | 87     | 84.7   | 82.8 NM_203286.1      |
| 95.8   | 100.4  | 87     | 88.4 NM_203285.1      |
| 77.7   | 81.1   | 81.7   | 87.1 NM_002855.3      |
| 201.3  | 123.1  | 128.1  | 136.8 NM_001042724.1  |
| 328    | 175.5  | 194.4  | 169.7 NM_002856.1     |
| 103.7  | 104.6  | 91.2   | 88.7 NM_001042724.1   |
| 110.7  | 97.8   | 89.2   | 97.1 NM_015480.1      |
| 89.9   | 89.7   | 89.8   | 86.9 NM_030916.1      |



|         |        |        |        |                |
|---------|--------|--------|--------|----------------|
| 1252.3  | 1145.7 | 818.1  | 716.2  | NM_007062.1    |
| 109     | 106.5  | 96.2   | 82.8   | NM_005049.2    |
| 248.7   | 235.4  | 207.6  | 214.3  | NM_138499.2    |
| 98.9    | 97.3   | 97.7   | 100.3  | NM_138499.2    |
| 90.3    | 71.9   | 76.2   | 85.4   | NM_012293.1    |
| 88.9    | 80.7   | 91.2   | 97.1   | NM_144651.4    |
| 354.8   | 413.1  | 383.2  | 360.5  | NM_017771.2    |
| 1381.4  | 1033.2 | 948.6  | 841.7  | NM_018663.1    |
| 506.5   | 376.4  | 367.9  | 312.6  | NM_018663.1    |
| 1016.1  | 623.6  | 494    | 482.3  | NM_000318.1    |
| 123.3   | 139.8  | 121.7  | 101.3  | NM_007238.3    |
| 138.8   | 150.4  | 143.6  | 144.5  | NM_007238.3    |
| 92.6    | 107.5  | 101.3  | 104.3  | NM_002859.1    |
| 84.6    | 79.1   | 82.3   | 85.8   | NM_152990.2    |
| 319.5   | 312.8  | 266.3  | 243.3  | NM_145182.1    |
| 6443.4  | 4518.5 | 5097.4 | 3852.4 | NM_145183.1    |
| 88      | 80.7   | 77.1   | 87.5   | NM_153824.1    |
| 1119.8  | 1103.1 | 909.5  | 898.5  | NM_013328.2    |
| 95      | 81.8   | 93.7   | 87.9   | NM_023078.1    |
| 86.8    | 88.2   | 82.1   | 96.2   | NM_152901.1    |
| 332.4   | 246.6  | 221.3  | 166.7  | NM_002862.3    |
| 621.8   | 575.1  | 337.2  | 489.2  | NM_002863.3    |
| 88.4    | 94.3   | 85.1   | 97.2   | NM_005609.1    |
| 98      | 97     | 99.5   | 102.4  | NM_015617.1    |
| 124.4   | 127.7  | 102    | 118.2  | NM_138300.3    |
| 81.3    | 96.6   | 92.9   | 101.2  | NM_152501.3    |
| 95      | 107.4  | 111.3  | 103.3  | NM_198929.2    |
| 126.4   | 146    | 145    | 121.8  | NM_152501.3    |
| 85.7    | 77.8   | 81.7   | 80.6   | NM_004160.3    |
| 75.6    | 71.8   | 73.2   | 72.4   | NR_003064.2    |
| 89.6    | 94     | 83.4   | 85.6   | NM_002864.1    |
| 4119.7  | 4484.4 | 3788.5 | 2516.2 | NM_005051.1    |
| 1278.2  | 714.5  | 644.5  | 480.8  | NM_000320.1    |
| 1821.6  | 1351   | 1082.2 | 900.6  | NM_205767.1    |
| 84.2    | 105.5  | 91.2   | 101.5  | NM_206853.1    |
| 137.4   | 172.3  | 164.8  | 130.9  | NM_206854.1    |
| 139.5   | 174.7  | 137.5  | 137.8  | XM_942223.1    |
| 10221.1 | 9061.9 | 8307.7 | 6556.8 | NM_014402.2    |
| 181.3   | 174.2  | 131.2  | 152.8  | NM_012413.3    |
| 135.8   | 136.4  | 128.4  | 97.5   | NM_017659.1    |
| 2395.7  | 2754.4 | 2667.3 | 1648.9 | NM_014298.3    |
| 99.2    | 97.3   | 88.9   | 89.3   | NM_017730.2    |
| 81.6    | 87.4   | 81.3   | 89     | NM_017730.2    |
| 1779.5  | 1869.3 | 1929.8 | 1192.8 | NM_017730.2    |
| 83.2    | 85.3   | 85.9   | 86.2   | NM_032134.1    |
| 126.6   | 132.9  | 117.5  | 104    | NM_018292.2    |
| 528.7   | 463.4  | 292.3  | 256.3  | NM_001004128.2 |
| 216.8   | 217.3  | 197.4  | 200.2  | NM_002826.4    |
| 264.6   | 253.6  | 285.3  | 162.3  | NM_181701.2    |
| 113.7   | 111.6  | 99.2   | 91.9   | NM_001076786.1 |

|        |        |        |                       |
|--------|--------|--------|-----------------------|
| 157.9  | 140    | 113.7  | 109 NM_031209.1       |
| 194.4  | 126.6  | 153.1  | 131.8 NM_024638.2     |
| 132    | 127.4  | 107.1  | 120.6 NM_015361.2     |
| 118.8  | 131.7  | 124.6  | 119.9 NM_014925.2     |
| 82.7   | 85.3   | 73.7   | 81.9 NM_178491.2      |
| 3009   | 2955.3 | 2614.7 | 2127 NM_016131.2      |
| 2971.3 | 2475.4 | 2385   | 1456.5 NM_004663.3    |
| 89.2   | 100.1  | 96     | 95.5 NM_004218.1      |
| 85.6   | 94.9   | 81.4   | 77.5 NM_001002233.1   |
| 115    | 117.5  | 103.1  | 101.5 NM_025151.3     |
| 1941.4 | 2362.5 | 2036.2 | 1383.6 NM_001002814.1 |
| 321.1  | 290.2  | 232.8  | 244.3 NM_014904.1     |
| 321.1  | 357.9  | 404.6  | 221.3 NM_014700.2     |
| 80.4   | 95.6   | 81.7   | 95.8 NM_032932.3      |
| 345.5  | 273.3  | 264    | 176.4 NM_015470.1     |
| 100.9  | 93.6   | 86.8   | 92.9 NM_001025300.2   |
| 128.8  | 132.9  | 118.9  | 101.3 NM_002870.2     |
| 100.9  | 92     | 94     | 94.4 NM_016322.2      |
| 90.5   | 94.3   | 90.2   | 96 NM_198686.1        |
| 221    | 212.8  | 197.2  | 117.5 NM_022449.1     |
| 144.5  | 120.9  | 103.4  | 111.5 NM_021252.3     |
| 88.9   | 79     | 77.7   | 84.6 NM_001008749.1   |
| 328.1  | 326.1  | 296.9  | 267.1 NM_004161.3     |
| 199.7  | 183.9  | 153    | 155.5 NM_030981.1     |
| 530.6  | 320.3  | 308.8  | 289.2 NM_002865.1     |
| 121.9  | 134    | 117.7  | 124.7 NM_017817.1     |
| 368    | 321    | 285.8  | 300 NM_014999.1       |
| 426.9  | 731.8  | 715.2  | 582.6 NM_020673.2     |
| 92.6   | 88.2   | 91.7   | 85.6 NM_183227.1      |
| 83.3   | 88.2   | 79.1   | 91.6 NM_016277.3      |
| 951.3  | 764    | 636.9  | 536 NM_016277.3       |
| 154.7  | 195.8  | 198.9  | 141.4 NM_001031677.2  |
| 567.5  | 960.2  | 889.2  | 756.6 NM_001031677.2  |
| 224.7  | 369.5  | 411.3  | 277.8 NM_130781.1     |
| 118.7  | 113.3  | 109.8  | 106.8 NM_001031677.2  |
| 91.6   | 89.7   | 92     | 88.8 NM_020387.1      |
| 111.6  | 106.2  | 97.5   | 93.9 NM_014353.4      |
| 210    | 258.9  | 242.4  | 227.4 NM_004580.3     |
| 97.3   | 125.5  | 112.5  | 89.2 NM_183235.1      |
| 102.8  | 92     | 99.6   | 81.6 NM_183234.1      |
| 97.5   | 83.1   | 77.4   | 83.9 NM_004163.3      |
| 237.2  | 180.1  | 169.6  | 161.3 NM_004249.1     |
| 278.3  | 212.8  | 201.7  | 211 NM_001017979.1    |
| 1181.7 | 677.3  | 814    | 551.8 NM_032846.2     |
| 87.1   | 80.8   | 78.1   | 82.6 NM_014488.3      |
| 3454.9 | 6108.5 | 4309   | 3393.8 NM_006868.2    |
| 2174.7 | 2213.7 | 1614.9 | 1310.1 NM_006834.2    |
| 230.7  | 201.7  | 212    | 139.1 NM_004794.2     |
| 104.2  | 104.5  | 106.6  | 128.2 NM_031296.1     |
| 96.6   | 89.4   | 75.9   | 85.4 NM_031934.3      |

|        |        |        |                      |
|--------|--------|--------|----------------------|
| 393.1  | 407.9  | 480.3  | 249.5 NM_006861.4    |
| 75.5   | 78.7   | 68.5   | 74.6 NM_004914.2     |
| 129.8  | 204    | 221.6  | 221.2 NM_175738.3    |
| 98.5   | 156.8  | 154.9  | 131.1 NM_001006638.1 |
| 83.3   | 85.9   | 90.2   | 80.1 NM_175738.3     |
| 143    | 119.7  | 110    | 114 NM_022337.1      |
| 94     | 80.5   | 88.3   | 85.8 NM_017516.1     |
| 78.5   | 79.2   | 79.8   | 86.1 NM_171998.2     |
| 90.1   | 81.8   | 81.3   | 76.9 NM_002866.3     |
| 96     | 85     | 94.4   | 84.8 NM_002867.2     |
| 98.6   | 199    | 223    | 181.4 NM_138453.2    |
| 98.4   | 104.9  | 88.1   | 94.8 NM_004283.2     |
| 994.5  | 1420.9 | 1447.1 | 1103.5 NM_012233.1   |
| 593.6  | 443.7  | 419    | 268 NM_013401.2      |
| 169.3  | 234.4  | 285.9  | 259.7 NM_001024647.2 |
| 243    | 303.5  | 267.4  | 237.7 NM_175624.1    |
| 96.3   | 96     | 84     | 96.5 NM_080879.2     |
| 349.5  | 374.5  | 410.1  | 372.3 NM_006822.1    |
| 1961.7 | 1519.8 | 1714.6 | 823.5 NM_021168.2    |
| 85.5   | 80.8   | 82.9   | 87.4 NM_001032726.1  |
| 102.5  | 107    | 102    | 91.7 NM_152304.1     |
| 152.7  | 182.9  | 185.2  | 168.3 NM_198490.1    |
| 641    | 396.4  | 324.3  | 313.9 NM_004578.2    |
| 183.7  | 184.8  | 161.1  | 158.1 NM_016154.3    |
| 390.5  | 431.8  | 339.6  | 316.5 NM_004162.3    |
| 1090.7 | 1336.9 | 1203.3 | 957.4 NM_002868.2    |
| 412.7  | 548.6  | 490.4  | 408.5 NM_201434.1    |
| 434.3  | 406.7  | 352.1  | 283.2 NM_004583.2    |
| 104.1  | 97.9   | 81.7   | 94.9 NM_198896.1     |
| 122.4  | 121    | 109    | 116.5 NM_016577.2    |
| 91     | 86     | 73.5   | 82.7 NM_032144.2     |
| 920    | 801.8  | 779.5  | 645.5 NM_015213.2    |
| 80.9   | 83.3   | 80.2   | 83.6 NM_178040.1     |
| 3403   | 3701   | 3374.1 | 2264.5 NM_004637.5   |
| 600.3  | 789    | 636.9  | 483.9 NM_177403.3    |
| 614.8  | 452.9  | 412.5  | 388.9 NM_003929.1    |
| 1995.9 | 1261.1 | 1218.5 | 731.4 NM_005370.4    |
| 648    | 723.4  | 740.3  | 594.2 NM_016530.2    |
| 607.9  | 845.1  | 701.1  | 565.8 NM_004251.3    |
| 135.4  | 161.2  | 170.2  | 143.2 NM_016370.1    |
| 331    | 266.1  | 256.1  | 215.7 NM_006423.1    |
| 396    | 497.1  | 384.4  | 392.9 NM_004703.3    |
| 89     | 77.8   | 81.4   | 90.9 NM_024816.1     |
| 93.6   | 97.6   | 92.5   | 93.8 NM_024816.1     |
| 633.6  | 396.2  | 414.5  | 283 NM_005833.2      |
| 393.2  | 534.8  | 551.3  | 438.8 NM_012197.2    |
| 108.7  | 88.6   | 96.4   | 98 NM_014504.1       |
| 99.2   | 88.9   | 100.7  | 90.2 NM_004581.3     |
| 135.1  | 123.2  | 120.5  | 105.3 NM_182836.1    |
| 286.6  | 177.4  | 197.5  | 199.2 NM_004582.2    |

|        |        |        |                     |
|--------|--------|--------|---------------------|
| 97.1   | 103.5  | 99.8   | 90.2 NM_002871.3    |
| 99.6   | 103.1  | 109.6  | 94.5 NM_007082.2    |
| 126    | 107.2  | 118.6  | 103.1 NM_013412.1   |
| 244.2  | 269.5  | 257.8  | 203.8 NM_007081.2   |
| 436.7  | 374.1  | 307.7  | 283.6 NM_173825.2   |
| 261.3  | 238.9  | 205.2  | 196.9 NM_006860.2   |
| 94.1   | 95.6   | 90.5   | 84.3 NM_022777.1    |
| 6211.1 | 3941.2 | 3442   | 2779.8 NM_006908.3  |
| 90.4   | 88.9   | 77.5   | 83.7 NM_018890.2    |
| 87.4   | 77.2   | 87     | 87.4 NM_198829.1    |
| 5302.1 | 3912.9 | 3748.2 | 2519.5 NM_002872.3  |
| 224.3  | 229.2  | 200.3  | 219.9 NM_005052.2   |
| 674.8  | 467.3  | 430.6  | 340 NM_013277.2     |
| 148.8  | 121.4  | 130.3  | 124.7 NM_133377.2   |
| 84.8   | 74.9   | 78.1   | 80.7 NM_133377.2    |
| 90.3   | 87.8   | 86     | 93.9 NM_002873.1    |
| 174.7  | 180.4  | 168.7  | 169.7 NM_133340.1   |
| 101.2  | 92.7   | 91.1   | 89.1 NM_133343.1    |
| 105.4  | 102.3  | 101.3  | 104.8 NM_020165.2   |
| 1360.5 | 567    | 674.5  | 657.1 NM_006265.1   |
| 990.7  | 741.9  | 591.2  | 591.2 NM_005053.2   |
| 882.1  | 545.6  | 519.4  | 488.6 NM_002874.3   |
| 202.7  | 372    | 311.6  | 280.9 NM_005732.2   |
| 97.1   | 93.8   | 88.9   | 88.8 NM_005732.2    |
| 271.1  | 236.1  | 250.8  | 193.5 NM_133487.1   |
| 159.2  | 145.1  | 141    | 125.9 NM_133487.1   |
| 199.9  | 167.3  | 155.6  | 134.7 NM_002875.2   |
| 834.8  | 612    | 598.4  | 520 NM_006479.2     |
| 1151.7 | 804.1  | 660.4  | 556.5 NM_058216.1   |
| 81.6   | 85.6   | 89     | 86.9 NM_002876.2    |
| 1272.7 | 814.6  | 681.6  | 632 NM_002876.2     |
| 96.1   | 91.6   | 92.4   | 89.7 NM_133509.2    |
| 84.3   | 93.6   | 81.9   | 90.9 NM_002877.4    |
| 92.9   | 90.1   | 75     | 93 NM_133510.2      |
| 156    | 129.7  | 124    | 119.6 NM_002878.2   |
| 98.9   | 91.4   | 89.2   | 94.9 NM_002878.2    |
| 149.4  | 116.7  | 110.9  | 112.5 NM_002878.2   |
| 99.7   | 91.7   | 83.3   | 90.7 NM_134422.1    |
| 94.8   | 80.8   | 84.7   | 78.2 NM_145654.2    |
| 87.7   | 87     | 77     | 82.5 NM_012415.2    |
| 332.2  | 262.7  | 199.5  | 206.2 NM_012415.2   |
| 169.8  | 169.6  | 181.4  | 173.6 NM_003579.2   |
| 386.2  | 269.3  | 251    | 220.8 NM_004584.2   |
| 96.5   | 90.7   | 86.9   | 92.5 NM_152442.2    |
| 188.8  | 119.2  | 123.7  | 104.1 NM_003610.3   |
| 78     | 79.2   | 75     | 87.2 NM_001015885.1 |
| 1474   | 972.4  | 910    | 600.3 NM_003610.3   |
| 96.9   | 88.1   | 91.9   | 88.3 NM_139165.1    |
| 97.2   | 83.9   | 82.8   | 88 NM_001001788.1   |
| 94.5   | 93.9   | 91.5   | 94.2 NM_130900.2    |

|        |        |        |                      |
|--------|--------|--------|----------------------|
| 584.2  | 606.1  | 576.1  | 407.1 NM_002880.2    |
| 315.5  | 258.8  | 271    | 220.5 NM_015150.1    |
| 85.6   | 87.4   | 82     | 84.8 NM_000448.1     |
| 129.6  | 104.4  | 111.6  | 89.3 NM_018845.1     |
| 89.7   | 75     | 76.6   | 78.9 NM_000536.1     |
| 135    | 111.4  | 124    | 112.4 NM_014226.1    |
| 239.1  | 252.4  | 283.1  | 148.2 NM_030665.3    |
| 381.1  | 275    | 234.3  | 189 NM_015577.1      |
| 111.8  | 102.6  | 98.2   | 96.9 NM_022749.4     |
| 570.1  | 530.6  | 562    | 398.2 NM_020338.2    |
| 1411.3 | 1687.1 | 1517.9 | 1127.1 NM_005402.2   |
| 2301.2 | 1510.4 | 1277.7 | 951 NM_002881.2      |
| 262.7  | 284    | 301.9  | 267.1 NM_006788.3    |
| 85.2   | 79.3   | 83.8   | 88.7 NM_006266.2     |
| 1188.2 | 1026   | 1089.8 | 517.4 NM_006266.2    |
| 88.2   | 114.7  | 141.5  | 126.4 NM_014636.1    |
| 91.8   | 94.7   | 95.8   | 93 NM_018037.1       |
| 93.2   | 88.9   | 91.7   | 100.3 NM_018037.1    |
| 87.9   | 87.4   | 88.4   | 86.9 NM_152663.2     |
| 758.2  | 895.9  | 764.7  | 672 NM_007367.2      |
| 1381.2 | 1599.6 | 1325.8 | 1284.4 NM_016732.1   |
| 86.5   | 86.4   | 88.7   | 86.5 NM_005855.2     |
| 115.5  | 120    | 113.6  | 100.5 NM_005854.2    |
| 100.5  | 91.8   | 81.5   | 98.7 NM_005856.2     |
| 735    | 560.9  | 372    | 363.3 NM_006325.2    |
| 2213.6 | 1540.7 | 1563.8 | 1279.7 NM_002882.2   |
| 232.1  | 230.7  | 207.9  | 211 NM_020850.1      |
| 92.3   | 95.6   | 80.9   | 91.4 NM_022897.2     |
| 84.4   | 103.2  | 101.6  | 110.5 NM_006267.3    |
| 547.4  | 366.9  | 362.4  | 276.4 NM_007320.1    |
| 223.3  | 147.4  | 147.5  | 119.7 NM_003624.1    |
| 88.8   | 83.3   | 85.9   | 92.6 NM_145000.2     |
| 228.8  | 179.3  | 157.5  | 140.3 NM_002271.4    |
| 96     | 90.5   | 92.6   | 94.1 NM_012416.2     |
| 95.8   | 100.8  | 96.1   | 89.3 NM_005493.2     |
| 2065.8 | 1138.4 | 1184.1 | 463.6 NM_002883.2    |
| 90.7   | 90.6   | 77.6   | 96.2 NM_016492.3     |
| 178.8  | 132.2  | 118.1  | 122.1 NM_002884.2    |
| 181.7  | 142.4  | 156.5  | 150 NM_001010935.1   |
| 90.9   | 93.3   | 77.5   | 79.9 NM_015646.4     |
| 211.5  | 186.6  | 175.5  | 201.7 NM_001010942.1 |
| 174.7  | 209.2  | 210.4  | 137.5 NM_002885.1    |
| 337.1  | 186.8  | 159.6  | 196.6 NM_021159.3    |
| 287    | 93.4   | 96.1   | 90.6 NM_021033.4     |
| 90.2   | 96.2   | 83.9   | 88.3 NM_002886.2     |
| 230.2  | 156.4  | 127.2  | 168.1 NM_021183.3    |
| 1214.1 | 1523   | 1448.7 | 872.8 NM_016290.3    |
| 95.6   | 111.6  | 104.9  | 94.4 NM_005312.2     |
| 916.3  | 1245.3 | 1182.5 | 542.2 NM_005312.2    |
| 76.2   | 106.1  | 132    | 118.2 NM_198679.1    |

|       |        |        |                      |
|-------|--------|--------|----------------------|
| 82.3  | 85.9   | 88.2   | 90.4 NM_006105.3     |
| 97.5  | 100.2  | 86.7   | 85.9 NM_007023.1     |
| 341.4 | 444.9  | 390.1  | 378.6 NM_016340.3    |
| 125.3 | 133.6  | 132.6  | 112.7 NM_016339.1    |
| 88.5  | 83.7   | 78     | 86.6 NM_203365.2     |
| 94.6  | 93.3   | 95.7   | 93.3 NM_025252.3     |
| 97.6  | 92.4   | 91.5   | 85.7 NM_025252.3     |
| 99.4  | 91.3   | 85.2   | 97 NM_213589.1       |
| 117.6 | 116.3  | 114.4  | 107 NM_032645.3      |
| 93.6  | 84.7   | 87.1   | 84.2 NM_005055.3     |
| 98.4  | 98.1   | 99.2   | 100.9 NM_020761.1    |
| 100.9 | 111    | 98.7   | 99.3 NM_000964.2     |
| 903.1 | 1156.2 | 994.6  | 810.3 NM_001024809.2 |
| 92.1  | 84     | 77.8   | 91.9 NM_001024809.2  |
| 109   | 126.5  | 106.4  | 93.4 NM_000965.2     |
| 85.3  | 87.4   | 83     | 96.4 NM_000965.2     |
| 98.8  | 87.6   | 78.7   | 100 NM_016152.2      |
| 93.1  | 103.3  | 99.5   | 87.2 NM_000966.3     |
| 85.5  | 87.7   | 85.5   | 80.8 NM_002888.2     |
| 108.6 | 95.9   | 95     | 99.8 NM_206963.1     |
| 107   | 100.2  | 98.4   | 97.1 NM_002888.2     |
| 89.3  | 83.8   | 88.2   | 94.9 NM_002889.2     |
| 135.2 | 123.8  | 119.4  | 126.2 NM_004585.2    |
| 2121  | 1704.6 | 1402.9 | 1304.4 NM_002887.3   |
| 961.1 | 1027.4 | 878.3  | 764.3 NM_020320.2    |
| 88.3  | 76.3   | 76.4   | 81 NM_002890.1       |
| 504.2 | 619.8  | 669.5  | 559.4 NM_002890.1    |
| 87.4  | 86.1   | 90.4   | 85.2 NM_022650.1     |
| 135.9 | 123.9  | 114.9  | 114.4 NM_006506.2    |
| 177.9 | 151.5  | 145.3  | 134.8 NM_007368.2    |
| 88.7  | 98.6   | 96.1   | 104.8 NM_006989.3    |
| 96.4  | 102.4  | 93.9   | 90.9 NM_004658.1     |
| 139.3 | 142.7  | 135.7  | 123.4 NM_170692.1    |
| 95.2  | 94.2   | 85.3   | 79.8 NM_170692.1     |
| 80.1  | 85.2   | 73.5   | 83.1 NM_004841.2     |
| 91.5  | 96.2   | 81.2   | 88.6 NM_016084.3     |
| 133.5 | 129.4  | 108.1  | 102.6 NM_014310.3    |
| 95.2  | 84.5   | 78.7   | 90.6 NM_152573.2     |
| 84.1  | 88.1   | 83.9   | 89.4 NM_145313.1     |
| 88.3  | 79.5   | 83.1   | 75.2 NM_152545.1     |
| 89.3  | 98.8   | 84.4   | 94.9 NM_175062.3     |
| 79.4  | 91.8   | 73.5   | 83.8 NM_001031799.1  |
| 95.3  | 92.2   | 89.2   | 91.7 NM_001031799.1  |
| 98.7  | 92.6   | 96.2   | 94 NM_002891.3       |
| 105.5 | 86.5   | 94.1   | 82.3 NM_153815.1     |
| 86.6  | 77.8   | 81.2   | 87.8 NM_006909.1     |
| 100.1 | 85.1   | 85.5   | 95.8 NM_005739.2     |
| 706   | 526.9  | 592.6  | 414.3 NM_005825.2    |
| 427.3 | 344.9  | 362.2  | 213.8 NM_005825.2    |
| 168.8 | 105.6  | 110.3  | 108.6 NM_005825.2    |

|        |        |        |                     |
|--------|--------|--------|---------------------|
| 95.5   | 95.1   | 89.3   | 87.7 NM_170672.1    |
| 100.9  | 104.7  | 95.4   | 103.9 NM_170603.1   |
| 102.4  | 100.7  | 101.6  | 104.8 NM_170604.1   |
| 77.8   | 78.3   | 68     | 76.9 NM_170604.1    |
| 95.3   | 97.9   | 97.6   | 95.4 NM_017805.2    |
| 92.5   | 84.6   | 85.2   | 86.2 NM_033315.2    |
| 111.4  | 100.8  | 97     | 94.7 NM_206827.1    |
| 165.3  | 82.3   | 93.8   | 88.5 NM_023940.2    |
| 89.8   | 91.7   | 75.3   | 89.9 NM_016563.2    |
| 494.2  | 346.8  | 324.6  | 266.3 NM_007182.4   |
| 594.5  | 426.8  | 387.5  | 327.2 NM_007182.4   |
| 83     | 75.4   | 79     | 82.6 NM_170712.1    |
| 213.1  | 170.7  | 169.7  | 159.4 NM_170713.1   |
| 504.7  | 717.7  | 523.3  | 803.1 NM_170774.1   |
| 102.2  | 95.2   | 94     | 88.5 NM_014737.1    |
| 1285.3 | 1633   | 1364.1 | 1329.1 NM_170773.1  |
| 85.6   | 88.6   | 82.1   | 85.4 NM_178169.2    |
| 191.1  | 166.4  | 164.1  | 131.8 NM_178145.1   |
| 105.7  | 101.2  | 106.5  | 94.1 NM_032023.3    |
| 112.4  | 97.9   | 78.3   | 91.2 NM_182664.2    |
| 105.8  | 89     | 87.4   | 90.2 NM_182665.1    |
| 1088.8 | 839.7  | 558.2  | 581.3 NM_182664.2   |
| 142.5  | 146.3  | 137.2  | 127.4 NM_177532.3   |
| 85.8   | 81     | 81.6   | 82.5 NM_201431.1    |
| 80.5   | 81.4   | 85.2   | 84.1 NM_177532.3    |
| 938.1  | 1006.8 | 1015.9 | 495.2 NM_003475.2   |
| 90.1   | 100.7  | 90.6   | 91.3 NM_007211.2    |
| 501    | 396.7  | 330.4  | 332.2 NM_133452.1   |
| 141.7  | 155.2  | 124.1  | 123.8 NM_018211.2   |
| 87.7   | 96.8   | 91     | 89.4 NM_013435.1    |
| 213    | 394.5  | 527    | 310.4 NM_032753.2   |
| 85     | 83.3   | 77     | 84.4 NM_001008494.1 |
| 320.7  | 322.4  | 239.5  | 246.9 NM_000321.1   |
| 594.6  | 682.7  | 570.6  | 547.9 NM_014781.3   |
| 889.1  | 944.2  | 894.4  | 696.3 NM_020765.1   |
| 102.3  | 114.8  | 104.7  | 111.3 NM_021163.2   |
| 135.3  | 119.8  | 121.8  | 122.8 NM_005610.1   |
| 461.2  | 382.7  | 303    | 297.6 NM_005057.2   |
| 81.2   | 83.4   | 80.7   | 84.1 NM_006910.4    |
| 93.1   | 76.1   | 81.7   | 82.4 NM_032626.5    |
| 89.7   | 83.6   | 84     | 90.6 NM_032626.5    |
| 476.3  | 277.8  | 305    | 297.5 NM_002893.2   |
| 96.3   | 95.7   | 89.5   | 87.4 NM_002894.2    |
| 94.4   | 89.8   | 77.8   | 85.1 NM_203292.1    |
| 1112.8 | 1189.5 | 862    | 846.8 NM_203291.1   |
| 98.9   | 86.9   | 85.8   | 81.7 NM_006606.2    |
| 157.2  | 147.8  | 153    | 140.2 NM_006606.2   |
| 417.2  | 328.1  | 318.7  | 262.7 NM_006462.3   |
| 325.4  | 262.8  | 219.6  | 228.4 NM_006462.3   |
| 132.4  | 123.7  | 121.1  | 121 NM_032213.3     |

|        |        |        |        |                |
|--------|--------|--------|--------|----------------|
| 176.6  | 157.5  | 161.2  | 142.8  | NM_016544.1    |
| 244.3  | 185.7  | 187.6  | 169.3  | NM_022128.1    |
| 103.7  | 101.1  | 89.3   | 93.7   | NM_183404.1    |
| 257.4  | 238.3  | 204.1  | 144.8  | NM_002895.2    |
| 623.4  | 964.6  | 823.1  | 799.4  | NM_005611.2    |
| 205.3  | 209.3  | 227    | 155.6  | NM_005676.3    |
| 2397.4 | 2138.4 | 2099.6 | 1237.8 | NM_152856.1    |
| 91.9   | 93.5   | 93.5   | 102.4  | NM_005676.3    |
| 94.6   | 91.4   | 89.2   | 91.7   | NM_144770.2    |
| 171.2  | 184.3  | 151    | 160.9  | NM_006047.4    |
| 633.5  | 482.7  | 412.9  | 371.2  | NM_006047.4    |
| 230.6  | 217    | 244.8  | 185    | NM_203390.1    |
| 777.9  | 388.8  | 350.8  | 272.4  | NM_032509.2    |
| 2075.3 | 1850   | 1572.8 | 762.8  | NM_006328.2    |
| 897.9  | 809.8  | 674.8  | 635    | NM_022768.4    |
| 107.7  | 116.9  | 101.5  | 86.2   | NM_013286.3    |
| 663.4  | 538.1  | 477.1  | 469.9  | NM_032905.3    |
| 307    | 233.2  | 193.1  | 219    | NM_033117.2    |
| 87.3   | 96.2   | 99.6   | 94.4   | NM_016196.1    |
| 199.2  | 167.5  | 156.4  | 126.7  | NM_022830.1    |
| 4523.2 | 3362.9 | 3196.1 | 2109.1 | NM_018047.1    |
| 914.8  | 603.5  | 513.9  | 364.3  | NM_018107.3    |
| 1583   | 1114.2 | 859.2  | 841.9  | NM_001077352.1 |
| 82.4   | 80     | 72.8   | 88.8   | NM_153020.1    |
| 612.5  | 550.6  | 656.2  | 501.8  | NM_021239.1    |
| 310.7  | 372.4  | 296.3  | 256.3  | NM_018077.1    |
| 105.5  | 98.6   | 114.1  | 90.5   | NM_001017430.1 |
| 101.3  | 124.8  | 133.7  | 125.3  | NM_001017430.1 |
| 464    | 705.9  | 995    | 440.3  | NM_001008408.1 |
| 530.3  | 346.2  | 325.8  | 397.8  | NM_015014.1    |
| 93.7   | 82.6   | 91.4   | 88.5   | NM_024939.2    |
| 252.2  | 262.7  | 222.1  | 257.8  | NM_183425.1    |
| 999.7  | 964.9  | 1036.3 | 733.4  | NM_184234.1    |
| 397.5  | 337.1  | 299.2  | 288.5  | XM_945490.1    |
| 941.8  | 750.1  | 764.4  | 538.6  | NM_002896.1    |
| 311.7  | 209.9  | 194    | 156.2  | NM_002896.1    |
| 95.8   | 88.3   | 78.5   | 87.8   | NM_018301.2    |
| 601.7  | 491.7  | 505.3  | 316.3  | NM_031492.2    |
| 1615.3 | 1599.8 | 1811.9 | 1174   | NM_005778.1    |
| 338.2  | 433.4  | 448.9  | 390.8  | NM_005777.1    |
| 188.2  | 144.8  | 143.3  | 152.9  | NM_016090.2    |
| 109.4  | 112.8  | 90.1   | 92.1   | NM_005105.2    |
| 249.3  | 245.8  | 220.3  | 194.3  | NM_001031695.1 |
| 95.8   | 93.4   | 94.6   | 91.5   | NM_014309.1    |
| 594.6  | 665.9  | 531.6  | 484.8  | NM_002897.3    |
| 86.6   | 92.3   | 81.5   | 88.1   | NM_016839.2    |
| 107.6  | 102.2  | 102.7  | 93.3   | NM_002898.2    |
| 91.5   | 79.8   | 82.6   | 82.7   | NM_001003793.1 |
| 95     | 91.6   | 89.2   | 88.7   | NM_014483.2    |
| 85.7   | 84.6   | 82.8   | 80.8   | NM_014483.2    |



|        |        |        |                      |
|--------|--------|--------|----------------------|
| 1723.4 | 1088.3 | 923.2  | 768.5 NM_002139.2    |
| 231    | 179.3  | 172.8  | 193.9 NM_016024.2    |
| 90.6   | 79.4   | 86.6   | 84.1 NM_019610.3     |
| 78     | 72.1   | 77.4   | 79.6 NM_005058.2     |
| 95.5   | 88.8   | 85.6   | 91.4 NM_001007526.1  |
| 85.8   | 85.5   | 90.2   | 91.4 NR_001547.1     |
| 93.1   | 81.9   | 81.8   | 96.8 NM_001006121.1  |
| 91.4   | 87.6   | 90.3   | 92.6 NM_001006118.2  |
| 98.8   | 90.7   | 87.1   | 89.2 NM_152585.1     |
| 83.9   | 81.9   | 85.1   | 94.7 NM_001006117.2  |
| 98.4   | 85.1   | 84.4   | 88.3 NR_001574.1     |
| 92.6   | 82.6   | 90.6   | 103.9 NR_002193.1    |
| 83.1   | 94.8   | 93     | 85.9 NM_002899.2     |
| 94.8   | 97.4   | 98.3   | 94 NM_004164.2       |
| 81.1   | 84.9   | 80.9   | 92.1 NM_002900.2     |
| 84     | 89.2   | 90.7   | 84.6 NM_006744.3     |
| 104.6  | 91.1   | 96.2   | 98.8 NM_031491.1     |
| 104.6  | 113.6  | 99.7   | 106.5 NM_052960.1    |
| 106.8  | 95     | 85.3   | 104.1 NM_203283.1    |
| 104.3  | 92.9   | 99     | 97.4 NM_001008712.1  |
| 95.7   | 86.4   | 90.7   | 88.8 NM_001008711.1  |
| 77.3   | 85.7   | 79.1   | 87 NM_006867.2       |
| 151.8  | 171.4  | 149.5  | 118.3 NM_194272.1    |
| 92.9   | 89.8   | 87.2   | 100.2 NM_005349.2    |
| 924.2  | 588.9  | 574.2  | 534.2 NM_203284.1    |
| 107    | 105.6  | 108.9  | 120.4 NM_014276.2    |
| 1869   | 1427.5 | 1288.9 | 1110.1 NM_014248.2   |
| 72.1   | 87.6   | 77.8   | 73 NM_172071.1       |
| 926.5  | 599.2  | 608.2  | 302.1 NM_018250.1    |
| 131.7  | 134.9  | 119.7  | 133 NM_018191.3      |
| 376.4  | 446.9  | 355    | 354.9 NM_001268.2    |
| 175.7  | 200.6  | 157.5  | 170 NM_001269.3      |
| 3951.5 | 3432.1 | 3462.9 | 1703.8 NM_018715.1   |
| 107.9  | 104.5  | 95.9   | 88.2 NM_033544.2     |
| 105    | 93.6   | 87.6   | 102.7 NM_033544.2    |
| 231.2  | 214.7  | 246.3  | 198.5 NM_001017919.1 |
| 1380.7 | 1000.8 | 969.8  | 504.5 NM_014329.3    |
| 466.7  | 344.4  | 286.5  | 248.1 NM_001032279.1 |
| 162.1  | 143.5  | 147.1  | 147.8 NM_001032279.1 |
| 170.4  | 145.1  | 127.2  | 115.5 NM_015436.2    |
| 83.7   | 87.1   | 78.7   | 79 NM_001009922.1    |
| 387.1  | 247.6  | 232.7  | 174.9 NM_005772.2    |
| 112.3  | 99.9   | 101.9  | 105.1 NM_002901.1    |
| 83.1   | 84.1   | 77.3   | 86.9 NM_002902.1     |
| 109.9  | 163.8  | 179    | 136.7 NM_020650.2    |
| 101.9  | 98.7   | 87.2   | 96.5 NM_015156.1     |
| 161    | 114.7  | 116.3  | 95.5 NM_173587.2     |
| 601.9  | 647.8  | 610.4  | 553.8 NM_018254.2    |
| 607    | 951.5  | 1200.4 | 657.2 NM_014478.3    |
| 99     | 100.2  | 92.1   | 93.5 NM_014478.3     |

|        |        |        |        |                |
|--------|--------|--------|--------|----------------|
| 86.2   | 71.6   | 76.3   | 75.9   | NM_014478.3    |
| 365.5  | 263.7  | 276.9  | 233.6  | NM_052862.2    |
| 96.6   | 112    | 91     | 101.8  | NM_002903.2    |
| 335.5  | 269.7  | 263.4  | 202.3  | NM_002904.5    |
| 463.9  | 397.9  | 295    | 321.3  | NM_172037.2    |
| 292.2  | 197.2  | 212.8  | 149.9  | NM_016026.2    |
| 92.8   | 85.7   | 81.9   | 93.1   | NM_152443.1    |
| 276.6  | 218.6  | 222.3  | 179.5  | NM_138412.2    |
| 1742.9 | 1347.6 | 1206.2 | 1060.9 | NM_020905.1    |
| 85.1   | 78.8   | 80.4   | 80.9   | NM_003708.2    |
| 165.8  | 155.8  | 190.8  | 135    | NM_002905.2    |
| 91.6   | 95.6   | 80.5   | 90.7   | NM_015725.1    |
| 92.1   | 80.1   | 83.3   | 86.3   | NM_138969.2    |
| 103    | 110    | 103.1  | 96.7   | NM_001034836.1 |
| 106.4  | 99.8   | 96.8   | 100.5  | NM_000322.2    |
| 260.5  | 222.4  | 252.3  | 176    | NM_005132.1    |
| 128.7  | 128.4  | 110.8  | 118.3  | NM_005132.1    |
| 178.7  | 137.3  | 147.7  | 150    | NM_021111.1    |
| 228.3  | 238.6  | 196.5  | 197.2  | NM_002907.2    |
| 347.4  | 290.5  | 244.9  | 285.3  | NM_032941.1    |
| 372.3  | 288.8  | 282    | 299.1  | NM_004260.1    |
| 104.9  | 99.4   | 96.2   | 93.2   | NM_001003715.1 |
| 128.2  | 138.3  | 137    | 134.9  | NM_004259.4    |
| 104.3  | 103.1  | 91.8   | 95.5   | NM_001003716.1 |
| 111    | 93.3   | 94     | 92.8   | NM_022912.1    |
| 76.9   | 75.3   | 70.9   | 82.9   | NM_016606.2    |
| 121.6  | 99.6   | 89.6   | 107.6  | NM_001001330.1 |
| 288.7  | 176.5  | 160.6  | 149.1  | NM_025232.2    |
| 712.3  | 644.9  | 632    | 523.5  | NM_005669.3    |
| 345.8  | 284.7  | 337.7  | 198.1  | NM_138393.1    |
| 90.4   | 85.2   | 83.7   | 87.3   | NM_002909.3    |
| 87.7   | 88.4   | 85.7   | 81.6   | NM_006507.2    |
| 77.9   | 85.8   | 75.8   | 83.1   | NM_138938.1    |
| 97.1   | 91.5   | 94.9   | 90.9   | NM_138937.1    |
| 97.7   | 91     | 87.9   | 80.4   | NM_001008387.1 |
| 94     | 97.5   | 90.3   | 94.3   | NM_001008387.1 |
| 100.3  | 83.7   | 90.5   | 91.5   | NM_032044.2    |
| 111.9  | 115.3  | 105.7  | 101.3  | NM_002908.2    |
| 156.4  | 160.6  | 137.5  | 133.2  | NM_021975.2    |
| 162.6  | 143.7  | 149.3  | 185.9  | NM_006509.2    |
| 88.7   | 78.2   | 74.9   | 79.9   | NM_005045.2    |
| 98.9   | 104.6  | 92.9   | 99.7   | NM_005045.2    |
| 90.2   | 91.9   | 86.2   | 86.6   | NM_014012.4    |
| 90.1   | 98.6   | 102.8  | 84.2   | NM_000537.2    |
| 369.1  | 634.5  | 579.9  | 398.7  | NM_002910.4    |
| 273.1  | 205.8  | 213.7  | 175.4  | NM_002911.2    |
| 88     | 94.6   | 86.2   | 91.8   | NM_001029874.1 |
| 96.5   | 94     | 85.8   | 101.6  | NM_013400.1    |
| 105.8  | 122.3  | 124.6  | 98.7   | NM_014374.1    |
| 969.8  | 1473.6 | 1575.3 | 703.8  | NM_014374.1    |

|        |        |        |                      |
|--------|--------|--------|----------------------|
| 167    | 161.9  | 144.6  | 147.6 NM_031922.2    |
| 99.3   | 107.7  | 104.2  | 101.3 NM_004726.1    |
| 96.6   | 108.1  | 104.4  | 94.7 NM_001080975.1  |
| 99.4   | 88.2   | 91     | 90.9 XM_942570.1     |
| 87.3   | 140.4  | 148.8  | 135.1 XM_942570.1    |
| 89.8   | 83.6   | 91.6   | 89.2 NM_004726.1     |
| 118.6  | 115.4  | 121    | 116.7 NM_007033.2    |
| 168    | 326.7  | 289.5  | 258 NM_012102.2      |
| 84.5   | 77.8   | 77.7   | 79.8 NM_012102.3     |
| 113.9  | 141.2  | 130.2  | 117 NM_012102.3      |
| 79.2   | 69.5   | 80.3   | 79.8 NM_032918.1     |
| 92.1   | 87.6   | 75.7   | 93 NM_001007089.1    |
| 113.7  | 98.9   | 102    | 108.4 NM_005612.3    |
| 1333.6 | 646.3  | 737.4  | 313.6 NM_020630.3    |
| 175.2  | 187.2  | 155.9  | 168 NM_020975.3      |
| 684.1  | 398.2  | 325.3  | 284.7 NM_020630.3    |
| 86.8   | 87.6   | 83.2   | 86 NM_020415.2       |
| 104.3  | 89     | 89.5   | 90 NM_032579.1       |
| 176.2  | 120.1  | 127.7  | 124.3 NM_017750.2    |
| 317.8  | 339.4  | 295.5  | 284.5 NM_001037872.1 |
| 445.6  | 449.6  | 401.2  | 336.4 NM_016316.1    |
| 150.3  | 174.8  | 169.6  | 162.9 NM_002912.1    |
| 206.6  | 181    | 175.2  | 121.3 NM_020695.2    |
| 83.5   | 82.5   | 70.2   | 75.6 NM_172239.1     |
| 1148.7 | 888.7  | 796.3  | 717.9 NM_015523.1    |
| 348.5  | 301    | 325.4  | 180.4 NM_020385.2    |
| 509.5  | 585.5  | 567.1  | 418.8 NM_002913.3    |
| 157.6  | 135.2  | 152.6  | 122.6 NM_002914.3    |
| 276.3  | 228.5  | 231.5  | 217.7 NM_181471.1    |
| 555    | 363.1  | 265.9  | 272.7 NM_181558.1    |
| 403.3  | 270.2  | 236.8  | 177.4 NM_002915.2    |
| 207.2  | 183.3  | 168.6  | 145.3 NM_181558.1    |
| 1061.4 | 917.7  | 880.9  | 898.5 NM_002916.3    |
| 1908.7 | 1797.4 | 1436.5 | 1340.9 NM_002916.3   |
| 1097.6 | 899.8  | 674.9  | 503.7 NM_007370.3    |
| 97.4   | 101.4  | 95.2   | 88 NM_181578.1       |
| 183.4  | 173.9  | 128.7  | 132.4 NM_173362.2    |
| 87.9   | 83.7   | 84.8   | 84.8 NM_057178.3     |
| 84.5   | 79.3   | 77.2   | 82.5 NM_001017368.1  |
| 90.3   | 94.8   | 74.1   | 93.2 NM_018339.3     |
| 117.1  | 115.7  | 97.7   | 102.5 XM_941367.1    |
| 560.7  | 524.4  | 442.8  | 409.6 NM_002917.1    |
| 90.2   | 100.3  | 89.4   | 88.6 NM_002917.1     |
| 169.8  | 161.5  | 140.7  | 141.9 NM_006510.3    |
| 102.7  | 102.5  | 106    | 105.4 NM_213590.1    |
| 119.9  | 99.8   | 97.6   | 100.5 NR_002727.1    |
| 92.8   | 88.1   | 92.3   | 91.2 NR_001450.2     |
| 89.8   | 87.5   | 87.2   | 92 NR_002596.1       |
| 81.9   | 87.4   | 87.2   | 83.1 NM_001013734.1  |
| 95.4   | 95.5   | 84.2   | 94.8 NM_052859.2     |

|        |        |        |        |                |
|--------|--------|--------|--------|----------------|
| 2203.2 | 1767.2 | 1449   | 1260.6 | NM_022457.5    |
| 102.9  | 85.8   | 100.6  | 80.6   | NM_022457.5    |
| 1520.5 | 1210.7 | 1053.3 | 908.8  | NM_022457.5    |
| 1005.1 | 751.4  | 688.4  | 331.8  | NM_018124.3    |
| 218.4  | 164.8  | 166.1  | 138.9  | NM_002918.3    |
| 113    | 107.2  | 110.9  | 99.6   | NM_134433.1    |
| 115.1  | 113.4  | 109.7  | 106.6  | NM_000635.2    |
| 85.4   | 99.5   | 85.9   | 86.2   | NM_134428.1    |
| 114.5  | 98.1   | 99.7   | 111.8  | NM_134428.1    |
| 101.9  | 87.7   | 89.8   | 84.7   | NM_002919.2    |
| 80.8   | 80.2   | 84.6   | 89.8   | NM_002920.3    |
| 75.7   | 86.4   | 79     | 71.6   | NM_213594.1    |
| 88.3   | 88.4   | 88.5   | 92     | NM_032491.3    |
| 83.1   | 84     | 81.4   | 87.7   | NM_002920.3    |
| 88.2   | 85     | 75.2   | 80     | NM_000449.3    |
| 1573.8 | 1542.3 | 1264.3 | 1232.4 | NM_000449.3    |
| 454    | 319    | 301.3  | 233.1  | NM_134440.1    |
| 143    | 136    | 122.2  | 109.2  | NM_003721.2    |
| 1636   | 1201.2 | 1042.8 | 805.3  | NM_003721.2    |
| 82.3   | 88.3   | 75.9   | 97.2   | NM_000538.2    |
| 97.4   | 107.3  | 99.3   | 93.7   | NM_173560.1    |
| 97.1   | 118.3  | 91.9   | 110.5  | NM_022841.2    |
| 267.3  | 184.7  | 172.9  | 225.7  | NM_017819.1    |
| 119    | 126.4  | 117.2  | 104.4  | NM_152292.2    |
| 189.8  | 161.4  | 171.7  | 153.3  | NM_144964.1    |
| 91.2   | 82.1   | 87.7   | 91.5   | NM_020769.1    |
| 96.5   | 99.8   | 92.7   | 97     | NM_001024455.1 |
| 120.7  | 102.2  | 102.5  | 94.8   | XM_936417.1    |
| 417.7  | 308.9  | 284.3  | 205.6  | NM_014059.1    |
| 125.6  | 317.1  | 257.6  | 246.2  | NM_015149.2    |
| 224.2  | 245.2  | 237.6  | 202.2  | NM_004761.2    |
| 82.1   | 84.9   | 79.7   | 82.4   | NM_001035223.1 |
| 137.2  | 178.7  | 169.9  | 141.4  | NM_020211.1    |
| 101    | 87.7   | 95.9   | 88.9   | NM_173670.2    |
| 96.9   | 87.1   | 82.5   | 86.3   | NM_001012761.1 |
| 97.3   | 101    | 95.1   | 90     | NM_173670.2    |
| 93.6   | 101.6  | 91.5   | 93     | NM_152869.2    |
| 86.7   | 85.9   | 84.8   | 84.3   | XM_937211.1    |
| 89.3   | 92.5   | 85.9   | 78.5   | XM_943466.1    |
| 84     | 92.3   | 81.8   | 83.1   | NM_001080479.1 |
| 170.6  | 235.7  | 284    | 193.9  | NM_001024457.1 |
| 106.8  | 125.3  | 107.9  | 140.7  | NM_001078170.1 |
| 92.6   | 86.7   | 88.3   | 92     | NM_005054.2    |
| 95.1   | 85.5   | 98.4   | 93.8   | NM_005054.2    |
| 86.6   | 86.6   | 79.5   | 84.6   | NM_032260.2    |
| 82.2   | 104.8  | 98.5   | 92.3   | NM_001037866.1 |
| 86.1   | 81.7   | 76.6   | 84.5   | NM_001012722.1 |
| 105.7  | 111.9  | 110.2  | 110.8  | NM_001012720.1 |
| 111.2  | 116.4  | 101.4  | 108.7  | NM_153615.1    |
| 86.7   | 91     | 83.7   | 87.1   | NM_002922.3    |

|        |        |        |                      |
|--------|--------|--------|----------------------|
| 441    | 278.8  | 242.9  | 231.8 NM_001005339.1 |
| 990.5  | 686    | 622.7  | 403 NM_002925.3      |
| 79.2   | 75.7   | 74.8   | 77.2 NM_002925.3     |
| 91.8   | 79.3   | 90.3   | 95.3 NM_183337.1     |
| 91.2   | 76.5   | 93     | 85.2 NM_183337.1     |
| 96.7   | 87.8   | 95.3   | 93.2 NM_198227.1     |
| 338.6  | 367.3  | 383.4  | 246.8 NM_002926.2    |
| 87.7   | 88.6   | 83.6   | 86.6 NM_198229.2     |
| 92.5   | 82.9   | 82.9   | 87.2 NM_144766.1     |
| 131.9  | 145.5  | 141.8  | 124.7 NM_006480.4    |
| 124.1  | 122.5  | 109.1  | 111.9 NM_002928.2    |
| 114.4  | 114    | 123.6  | 119.3 NM_012419.4    |
| 602.9  | 565.9  | 410.7  | 390.5 NM_130782.2    |
| 1094.5 | 1353.7 | 1068.8 | 1002.7 NM_005873.1   |
| 213.4  | 192.6  | 145.7  | 168.9 NM_002923.1    |
| 91     | 90.1   | 87.3   | 90.1 NM_170587.1     |
| 107.8  | 150.3  | 143.3  | 128.6 NM_170587.1    |
| 89.4   | 86.6   | 82.4   | 89.1 NM_015668.2     |
| 87.2   | 88.7   | 90.4   | 86 NM_134427.1       |
| 94.3   | 83.6   | 73.6   | 90 NM_144488.3       |
| 87     | 85.9   | 75.2   | 76.5 NM_130795.2     |
| 83.7   | 79     | 74.2   | 79.3 NM_021106.3     |
| 80.7   | 74     | 86.4   | 84.4 NM_017790.3     |
| 101.2  | 95.6   | 96.8   | 98.2 NM_144489.2     |
| 95.9   | 97.6   | 88.7   | 93 NM_005613.3       |
| 98.4   | 92     | 103.2  | 99.9 NM_003617.2     |
| 111.1  | 106.9  | 90.7   | 96 NM_004296.3       |
| 87.1   | 74.5   | 82.7   | 84.8 NM_002924.2     |
| 86.2   | 81.8   | 76.5   | 83.6 NM_033345.1     |
| 88.6   | 88.3   | 82.7   | 77.6 NM_003835.1     |
| 89.4   | 84     | 76.9   | 78 NM_003835.1       |
| 97.1   | 102    | 87.3   | 97.2 NM_207391.1     |
| 96.5   | 86.9   | 87.8   | 95.1 NM_000324.1     |
| 249.4  | 253.6  | 255    | 191.2 NM_032276.2    |
| 984.3  | 549.4  | 422    | 335.5 NM_001040456.1 |
| 1136   | 562    | 492.4  | 399.5 NM_020684.2    |
| 180    | 198.4  | 154.4  | 175.1 NM_012265.1    |
| 584    | 628.3  | 672.5  | 374.9 NM_022450.2    |
| 279.7  | 303.1  | 330.6  | 189.3 NM_024599.3    |
| 89.4   | 86.5   | 86.1   | 84.8 NM_001005498.1  |
| 252.2  | 269.5  | 259.1  | 157.6 NM_024599.2    |
| 86.3   | 83.2   | 89.9   | 89 NM_024599.3       |
| 170.5  | 167.6  | 168.8  | 158.2 NM_003961.1    |
| 105.9  | 97.7   | 94.9   | 96.7 NM_017821.3     |
| 106.9  | 96.8   | 97.8   | 99.5 NM_138328.2     |
| 95.2   | 83.9   | 78.2   | 87.2 NM_020407.1     |
| 96.1   | 92.9   | 83.7   | 96.6 NM_138617.2     |
| 87.7   | 81.3   | 83.4   | 87.2 NM_020485.3     |
| 80.6   | 73.3   | 84.4   | 81.9 NM_016321.1     |
| 84.2   | 91.1   | 83.1   | 90.2 NM_016124.3     |

|        |        |        |        |                |
|--------|--------|--------|--------|----------------|
| 2365.9 | 2145.4 | 1766.3 | 1341.2 | NM_005614.2    |
| 89.7   | 91.2   | 92.9   | 91.9   | NM_144593.1    |
| 91.4   | 88.8   | 80.4   | 87.1   | NM_000539.2    |
| 5936.2 | 3720.4 | 3621.9 | 3330.7 | NM_001664.2    |
| 101.2  | 103.9  | 85     | 96.2   | NM_004040.2    |
| 104.4  | 79.6   | 83.6   | 79.9   | NM_198225.1    |
| 93.4   | 92.3   | 90.9   | 89     | NM_001032380.1 |
| 80.9   | 78.3   | 75.8   | 84.3   | NM_014836.3    |
| 92     | 93.3   | 94.9   | 86     | NM_198225.1    |
| 121.6  | 126    | 132.7  | 112.6  | NM_015178.1    |
| 201    | 324.9  | 330.4  | 278    | NM_014899.2    |
| 1153.5 | 505.6  | 519.3  | 377.5  | NM_175744.3    |
| 404.5  | 226.1  | 220.4  | 125.8  | NM_175744.3    |
| 86     | 76     | 76     | 90.5   | NM_014578.2    |
| 87.2   | 92     | 85.1   | 97.2   | NM_019034.2    |
| 2318.1 | 1535.2 | 1107.7 | 847.7  | NM_001665.2    |
| 85.2   | 83.9   | 70.1   | 75.9   | NM_004310.2    |
| 96.2   | 91.4   | 84.4   | 86.5   | NM_020663.2    |
| 1125.5 | 1377.2 | 1177.8 | 938.6  | NM_012249.2    |
| 402    | 648.5  | 467.9  | 564.5  | NM_001033566.1 |
| 697.7  | 1164.4 | 862    | 895.6  | NM_018307.3    |
| 113.6  | 125.8  | 103    | 112.6  | NM_001033568.1 |
| 549    | 508.1  | 442.2  | 410.7  | NM_138769.1    |
| 88     | 83.7   | 78.3   | 77.3   | NM_133639.2    |
| 111.5  | 101.7  | 92.4   | 97.3   | NM_052924.1    |
| 117.5  | 113.1  | 93.6   | 93.7   | NM_033103.3    |
| 85.8   | 100    | 88.4   | 84.8   | NM_001031745.1 |
| 87.5   | 76     | 88.4   | 85.1   | NM_144968.1    |
| 91.6   | 94.3   | 76.1   | 87     | NM_015653.2    |
| 78.1   | 91.3   | 67.9   | 78.4   | NM_024557.2    |
| 869    | 679.3  | 580.4  | 506.2  | NM_021932.4    |
| 94.2   | 89.9   | 78     | 97.8   | NM_018157.1    |
| 237.2  | 271.7  | 261.7  | 263.3  | NM_014715.2    |
| 97.3   | 88.5   | 90.4   | 94.5   | NM_152756.3    |
| 271.7  | 235.8  | 224    | 221.2  | NM_018151.3    |
| 160.9  | 142.2  | 139.3  | 128.3  | NM_031430.1    |
| 100.5  | 96.8   | 101.5  | 98.8   | NM_015347.3    |
| 89.9   | 87.8   | 85.3   | 92.5   | NM_014989.2    |
| 89.5   | 93.4   | 81.6   | 84.5   | NM_014677.2    |
| 1692.4 | 2096.9 | 2490   | 1375.7 | NM_014747.2    |
| 96.3   | 92.5   | 83.9   | 85.7   | NM_182970.2    |
| 115.8  | 102.8  | 109    | 96.4   | NM_004292.2    |
| 87.8   | 86.3   | 88.1   | 99.7   | NM_018993.2    |
| 108.6  | 106.5  | 101.3  | 93.6   | NM_024832.3    |
| 3250.8 | 2879.8 | 2912.2 | 1648.1 | NM_002931.3    |
| 196.6  | 234.9  | 212.2  | 168.1  | NM_021930.3    |
| 339.1  | 270    | 247.3  | 191.7  | NM_031480.2    |
| 75.6   | 78.6   | 80.5   | 84.8   | NM_153005.1    |
| 151.1  | 102.2  | 106.2  | 124.2  | NM_031480.2    |
| 920.1  | 635.9  | 480.5  | 560.8  | NM_018343.1    |

|         |         |         |         |                |
|---------|---------|---------|---------|----------------|
| 585.1   | 509.9   | 462.9   | 381.1   | NM_003831.2    |
| 1397.2  | 1360    | 1338.3  | 931.8   | NM_003831.2    |
| 91      | 91.2    | 88.1    | 93.3    | NM_145906.1    |
| 709.2   | 866.1   | 724.3   | 630.3   | NM_001033002.1 |
| 197.9   | 252.3   | 234.4   | 198.3   | NM_003804.3    |
| 687     | 444.9   | 384.8   | 315.1   | NM_003821.4    |
| 213.6   | 140.6   | 158.3   | 138.1   | NM_006871.2    |
| 107.5   | 110.5   | 105.1   | 97.4    | NM_020639.2    |
| 132.6   | 135.6   | 131.4   | 120.8   | NM_015375.1    |
| 407.2   | 344.5   | 341     | 243.6   | NM_199462.1    |
| 1143.8  | 1220.3  | 885.1   | 665.7   | NM_015444.1    |
| 478.8   | 378     | 322.6   | 336.8   | NM_006912.3    |
| 79.1    | 81.5    | 70.5    | 87      | NM_002930.1    |
| 87.8    | 89.8    | 81.7    | 85.7    | NM_203304.1    |
| 311.3   | 347.5   | 271.1   | 332     | NM_016626.2    |
| 103.3   | 94.1    | 89.9    | 102.2   | NM_032246.3    |
| 95.1    | 84.8    | 93.2    | 89.9    | NM_000326.3    |
| 251.6   | 471.2   | 390.9   | 379.7   | NM_012421.1    |
| 83.9    | 89      | 86.5    | 88.5    | NM_006911.2    |
| 86      | 86.1    | 84.4    | 83.3    | NM_005059.2    |
| 89      | 89      | 88.9    | 84.1    | NM_005059.2    |
| 83.7    | 83.1    | 81.6    | 91.1    | NM_080864.2    |
| 94      | 90.6    | 91.8    | 94.1    | NM_016568.1    |
| 92.8    | 85.4    | 85.2    | 85.2    | NM_181885.1    |
| 87.4    | 87.4    | 85.2    | 87.4    | NM_001013838.1 |
| 897.5   | 697.2   | 602.7   | 586.3   | NM_024945.1    |
| 433     | 992.5   | 1172.8  | 893.9   | NR_001445.1    |
| 14994   | 19220.4 | 20793.8 | 17435.5 | NR_002715.1    |
| 97.2    | 103.6   | 101.8   | 101.1   | NM_198232.1    |
| 91      | 102.1   | 94.8    | 101.8   | NM_198235.1    |
| 101.7   | 104.5   | 112.8   | 92.3    | NM_001012975.1 |
| 92.1    | 88.8    | 82.5    | 98.1    | NM_145250.3    |
| 85.3    | 82.3    | 84.9    | 86.2    | NM_001024822.1 |
| 95      | 85.9    | 83.8    | 81.4    | NM_001012264.2 |
| 14357.8 | 9990.1  | 8072.4  | 8169.6  | NM_002934.2    |
| 1023    | 856.7   | 688.8   | 669.8   | NM_002935.2    |
| 88.8    | 100.3   | 86      | 94.8    | NM_194431.1    |
| 96.4    | 103.3   | 89.3    | 89.8    | NM_194430.1    |
| 115.4   | 118.6   | 122.9   | 119.2   | NM_002937.3    |
| 93.6    | 101.7   | 95.5    | 98.9    | NM_194430.1    |
| 200.3   | 213.3   | 178     | 148.6   | NM_005615.2    |
| 83.9    | 79      | 75      | 79.6    | NM_032572.2    |
| 87.8    | 84.3    | 82.4    | 88.3    | NM_138331.1    |
| 81.4    | 73.2    | 81.6    | 78      | NM_001001673.1 |
| 1252.9  | 1071.6  | 1007.8  | 627.5   | NM_002936.3    |
| 517.4   | 333.8   | 331.8   | 241.8   | NM_006397.2    |
| 443.3   | 348.6   | 422.4   | 356.7   | NM_021133.2    |
| 85      | 86.9    | 90.5    | 79.4    | NM_013235.2    |
| 12634.7 | 14088.9 | 13816.8 | 8753.9  | NM_003730.3    |
| 95.9    | 87.8    | 88.2    | 93.6    | NM_014470.2    |

|       |       |       |                   |
|-------|-------|-------|-------------------|
| 106   | 106.6 | 116.1 | 105 NM_005440.3   |
| 99.5  | 105.9 | 95.3  | 94.5 NM_005168.3  |
| 207.5 | 174.8 | 158.1 | 148.1 NM_014868.3 |
| 100.9 | 93.5  | 101.1 | 81.4 NM_014372.3  |
| 90.8  | 100.2 | 89.7  | 80.2 NM_017610.6  |
| 341.9 | 340.9 | 360.8 | 221.1 NM_006978.1 |
| 89.6  | 96    | 97    | 95.1 NM_178861.3  |
| 93    | 92.7  | 87    | 78.2 NM_183353.1  |
| 80    | 84.4  | 80.7  | 79.1 NM_183353.1  |
| 100   | 96.5  | 90.2  | 104.2 NM_183353.1 |
| 150.6 | 152.3 | 122.3 | 118.9 NM_018320.3 |
| 389.6 | 311.6 | 343.9 | 220.2 NM_018320.3 |
| 99.5  | 90.5  | 89.2  | 93.9 NM_024787.2  |
| 201.4 | 215.8 | 205.5 | 147.6 NM_022064.2 |
| 129.6 | 112.8 | 124.3 | 114.2 NM_017831.2 |
| 400.8 | 386.9 | 389.2 | 189.8 NM_194460.1 |
| 225.5 | 213.8 | 212.4 | 213.7 NM_194460.1 |
| 121.7 | 105.4 | 102.5 | 107.2 XR_000279.2 |
| 90.3  | 97    | 86.2  | 95.7 NR_002818.1  |
| 91.8  | 88    | 94.7  | 85.4 NM_194463.1  |
| 104.2 | 123   | 103.2 | 92.7 NM_024539.3  |
| 108.8 | 114.2 | 107.6 | 94.9 NM_024539.3  |
| 373.1 | 495.8 | 390.4 | 572.1 NM_183381.1 |
| 93.6  | 110.3 | 105   | 93 NM_007282.3    |
| 448.9 | 835.9 | 843.6 | 677.7 NM_018434.4 |
| 116.5 | 97.5  | 91.3  | 96.9 NM_139175.1  |
| 387.4 | 349.1 | 269   | 295.1 NM_032322.3 |
| 197.7 | 186.3 | 177.6 | 166.8 NM_032322.3 |
| 125.4 | 100.2 | 96.7  | 87.9 NM_197939.1  |
| 234   | 221.5 | 190.7 | 202.3 NM_016271.3 |
| 96.3  | 81.7  | 89.4  | 78.6 NM_007218.3  |
| 96.5  | 96.4  | 94.5  | 89.9 NM_183401.1  |
| 688.2 | 583.4 | 495.3 | 443.6 NM_004290.3 |
| 389.6 | 357.4 | 283.8 | 264.9 NM_183400.1 |
| 126.3 | 121.8 | 103.6 | 103.6 NM_016422.3 |
| 282.1 | 257.1 | 275.8 | 197.2 NM_014746.2 |
| 536.8 | 485.9 | 366.3 | 379.1 NM_030963.2 |
| 110.8 | 103.6 | 104   | 91 NM_198085.1    |
| 109.1 | 139.8 | 147.8 | 139.8 NM_173647.2 |
| 95.4  | 108.8 | 113.1 | 97.3 NM_020724.1  |
| 94.1  | 94.7  | 84.5  | 87.3 XM_939671.1  |
| 86.3  | 81.3  | 77.4  | 84.7 NM_174903.4  |
| 91.1  | 94    | 100.4 | 100.9 NM_173557.2 |
| 92.5  | 99.5  | 99.7  | 91.3 NM_052916.1  |
| 170.1 | 117.9 | 132.3 | 105.2 NM_152470.2 |
| 136.6 | 112.3 | 108.8 | 118.2 NM_178841.2 |
| 201.7 | 197.8 | 204.2 | 141.3 NM_015528.1 |
| 91.1  | 93.8  | 87.8  | 90.7 NM_152617.2  |
| 89.2  | 86    | 81.2  | 93.2 NM_031994.1  |
| 92.5  | 87.9  | 82.7  | 85.9 NM_031277.1  |



|        |        |        |                   |
|--------|--------|--------|-------------------|
| 215.3  | 183.1  | 204.3  | 195.2 NM_030954.2 |
| 236.1  | 157.9  | 218.1  | 175.9 NM_173662.1 |
| 90.5   | 85.8   | 89.7   | 91.1 NM_178532.2  |
| 108.9  | 98.9   | 95.3   | 87.3 NM_145051.2  |
| 131    | 134.5  | 123.4  | 110 NM_152267.2   |
| 93.7   | 77.9   | 81.1   | 77.8 NM_019062.1  |
| 122.6  | 127.4  | 136.2  | 117.8 NM_183419.1 |
| 83.7   | 90     | 84.3   | 98 NM_015435.3    |
| 573.6  | 398.8  | 345    | 355.3 NM_015435.3 |
| 90.4   | 77.5   | 79.8   | 80.6 NM_152598.1  |
| 82.5   | 104.5  | 90.6   | 86.3 NM_007212.3  |
| 565.1  | 483.8  | 421.7  | 430.9 NM_019592.5 |
| 401.7  | 724    | 627.1  | 629.8 NM_007219.2 |
| 128.7  | 109.8  | 120.7  | 114.6 NM_022453.2 |
| 369.3  | 205.4  | 215.5  | 175.9 NM_032015.3 |
| 252.4  | 190.3  | 190.5  | 174.5 NM_017999.3 |
| 105.8  | 94.3   | 96.2   | 103.7 NM_030936.2 |
| 1752   | 1421.1 | 1332.5 | 1149 NM_025126.2  |
| 105.8  | 112.8  | 100.8  | 106.8 NM_025126.2 |
| 82.2   | 89.7   | 82.3   | 80.1 NM_194271.1  |
| 95.8   | 81.6   | 77.8   | 81 NM_080745.2    |
| 93.7   | 94.1   | 82.9   | 97.9 NM_182985.2  |
| 94     | 79.3   | 71.1   | 84.8 NM_194330.2  |
| 172.9  | 160.4  | 129.2  | 152.1 NM_194328.2 |
| 680.5  | 711.3  | 674.5  | 525 NM_194331.1   |
| 95     | 90.2   | 77.8   | 98.8 NM_025236.2  |
| 90     | 99.6   | 91.3   | 91.2 NM_170770.1  |
| 276.5  | 225    | 187.5  | 164.1 NM_002938.2 |
| 369.3  | 372.2  | 282.8  | 306.8 NM_014771.2 |
| 170.3  | 162.8  | 170.3  | 157.6 NM_194359.1 |
| 95     | 96.1   | 89.3   | 111.5 NM_194358.1 |
| 97.3   | 99.4   | 101    | 88.5 NM_017763.3  |
| 188.7  | 264.7  | 285.1  | 177.1 NM_014901.4 |
| 379.3  | 352.5  | 356.8  | 282.2 NM_006913.2 |
| 1450.1 | 1335.8 | 1267   | 901.7 XR_000528.1 |
| 333.6  | 307.8  | 295.8  | 211 NR_003129.1   |
| 103.8  | 102.4  | 97.9   | 104 NM_183044.1   |
| 92.2   | 85.4   | 91     | 90.6 NM_183043.1  |
| 133.5  | 117.4  | 111.3  | 105.9 NM_183045.1 |
| 107.5  | 94     | 88     | 92.8 NM_014245.2  |
| 106.6  | 101    | 88.4   | 96.5 NM_003958.2  |
| 383.4  | 254    | 262.5  | 212.4 NM_003958.2 |
| 848.9  | 915.9  | 666.9  | 681.5 NM_003800.1 |
| 2128.6 | 1479.9 | 1331.3 | 963.1 NM_203385.1 |
| 430.4  | 306.2  | 248.8  | 318.9 NM_203384.1 |
| 601.8  | 626.3  | 588.7  | 414.5 NM_003799.1 |
| 381.5  | 298.9  | 309.7  | 189.2 NM_018146.2 |
| 171.8  | 185.6  | 146.7  | 146.8 NM_017495.4 |
| 92     | 90.9   | 89.2   | 90.4 NM_004902.2  |
| 155.9  | 143.9  | 139.2  | 144.6 NM_017619.3 |

|         |        |         |         |                |
|---------|--------|---------|---------|----------------|
| 588.1   | 504.4  | 487.9   | 228.7   | NM_020216.3    |
| 107.2   | 105.1  | 101.8   | 96.8    | NM_018226.3    |
| 1772.1  | 974.8  | 791.6   | 570.4   | NM_006711.2    |
| 187.1   | 118.6  | 125.6   | 117.7   | NM_080594.1    |
| 103     | 101.2  | 99      | 113.5   | NR_002716.1    |
| 148.6   | 108.4  | 100.7   | 98.4    | NM_004704.3    |
| 1017.8  | 853.2  | 739.8   | 714.1   | NM_005701.2    |
| 218.1   | 231    | 295.2   | 230.3   | NM_032177.2    |
| 94      | 85.3   | 85.1    | 91.2    | NM_133631.1    |
| 98.7    | 107.1  | 103.8   | 111.8   | NM_133631.1    |
| 85.6    | 80.5   | 88.6    | 71.3    | NM_002941.2    |
| 91      | 82.7   | 79.8    | 89.7    | NM_002942.2    |
| 240.2   | 137.5  | 160.3   | 140.6   | NM_022370.2    |
| 88.6    | 77.9   | 74.4    | 90.2    | NM_019055.4    |
| 157     | 221.8  | 210.2   | 213.1   | NM_005406.1    |
| 10152.6 | 15785  | 18177.6 | 12258.6 | NM_004850.3    |
| 1334.3  | 1182.1 | 1135.4  | 1328.2  | NM_005156.4    |
| 117.9   | 114.4  | 116.3   | 103.6   | NM_000327.2    |
| 97.5    | 91.9   | 83.4    | 85.5    | NM_017578.2    |
| 95.9    | 92     | 89.4    | 96.2    | NM_001012337.1 |
| 93.6    | 96.4   | 95.2    | 89.8    | NM_001012337.1 |
| 129.6   | 107.3  | 102.6   | 95.3    | NM_031916.2    |
| 91      | 81.5   | 80.8    | 88.6    | NM_005012.1    |
| 114.7   | 88.7   | 86.5    | 96.6    | NM_004560.2    |
| 98.1    | 91.2   | 82.5    | 94.8    | NM_002943.2    |
| 78.3    | 81.5   | 76.3    | 76.2    | NM_002943.2    |
| 97.8    | 83.8   | 74.8    | 84.5    | NM_134262.1    |
| 105.6   | 107.9  | 106.6   | 103.1   | NM_134261.1    |
| 86      | 78.5   | 78.9    | 92.2    | NM_134260.1    |
| 88.2    | 83.5   | 84.9    | 84.8    | NM_002943.2    |
| 78      | 78.5   | 76      | 86.6    | NM_006914.3    |
| 86.4    | 81.7   | 82.1    | 86.9    | NM_001001523.1 |
| 94.3    | 84.1   | 77      | 87.3    | NM_001001523.1 |
| 92.2    | 101    | 92.2    | 87      | NM_001001523.1 |
| 92.8    | 78.1   | 79.6    | 80.8    | NM_005060.3    |
| 92.9    | 82.1   | 81.7    | 92      | NM_002944.2    |
| 94.3    | 85.6   | 84.4    | 87.5    | NM_006269.1    |
| 397.8   | 342.5  | 298.9   | 215.6   | NM_058163.1    |
| 181.8   | 186.1  | 180.1   | 171.4   | NM_001012267.1 |
| 88.4    | 98.8   | 85.3    | 97.3    | NM_153270.1    |
| 177     | 137.2  | 141.9   | 124.6   | NM_015448.1    |
| 100.5   | 85     | 97.7    | 89.4    | NM_001079516.1 |
| 74.5    | 85.2   | 88.2    | 82.9    | NM_173695.1    |
| 95.6    | 89.6   | 97.2    | 95      | NM_001010866.1 |
| 137.4   | 111.4  | 97.7    | 112.6   | NM_001010866.1 |
| 93.5    | 83.3   | 82.2    | 81.7    | NM_173698.1    |
| 89.5    | 92.3   | 84.4    | 92.5    | NM_178857.4    |
| 499.1   | 443.7  | 384.7   | 305.8   | NM_006915.1    |
| 480.5   | 540.8  | 528.4   | 344.8   | NM_203288.1    |
| 826.4   | 606.1  | 589     | 432.9   | NM_002945.2    |

|         |         |         |         |                |
|---------|---------|---------|---------|----------------|
| 2107.1  | 1570.3  | 1494.5  | 880.5   | NM_002946.3    |
| 4209.9  | 2344.8  | 1911.2  | 2394.5  | NM_002947.3    |
| 94.9    | 124.5   | 134.9   | 128.8   | NM_013347.1    |
| 1358.9  | 1201.6  | 1215.7  | 939.4   | NM_032308.1    |
| 162.7   | 179.6   | 127.1   | 162.4   | NM_015540.2    |
| 88      | 82.3    | 82.5    | 82.1    | NM_006916.1    |
| 935.2   | 679.4   | 494.1   | 532.5   | NM_006916.1    |
| 99.7    | 91.3    | 101.8   | 87      | NM_199229.1    |
| 87.3    | 82.2    | 80.4    | 90.2    | NM_000329.2    |
| 105.3   | 96.3    | 95.4    | 98.1    | NM_153225.2    |
| 91      | 80.9    | 82.3    | 82.2    | NM_001034853.1 |
| 121.8   | 124.3   | 121.3   | 145.2   | NM_001023582.1 |
| 104.2   | 92.1    | 96.8    | 90.9    | NM_000328.2    |
| 85.1    | 80.8    | 77.7    | 73.8    | NM_020366.2    |
| 100.6   | 97.2    | 89.5    | 92.8    | NM_014954.2    |
| 87.8    | 90.9    | 97.6    | 91      | NM_006987.2    |
| 579.3   | 396.4   | 424.1   | 302.2   | NM_144563.1    |
| 82.6    | 84.2    | 84.9    | 79      | NM_138290.1    |
| 78.5    | 101.1   | 86.5    | 75.9    | NM_006695.3    |
| 85.1    | 85.3    | 76.4    | 78.8    | NM_006013.2    |
| 25656.1 | 20506.5 | 20188.4 | 16853.5 | NM_007104.4    |
| 102.3   | 94.3    | 87.9    | 89.9    | NM_080746.2    |
| 14578.8 | 14834.8 | 12156.8 | 13414.2 | NM_000975.2    |
| 35590.6 | 25636   | 26896.3 | 19783.4 | NM_000976.2    |
| 185.7   | 135.3   | 111.1   | 108.4   | NM_033251.1    |
| 364.3   | 326.1   | 261.9   | 225.5   | NM_033251.1    |
| 1604.2  | 1040.3  | 917.8   | 788.7   | NM_012423.2    |
| 368.6   | 278.7   | 275.2   | 208.1   | NM_003973.2    |
| 1510.5  | 1246.3  | 1297.4  | 796.1   | NM_001034996.1 |
| 16631   | 17384.3 | 18083.7 | 12864.6 | NM_001035006.1 |
| 2468.8  | 2353.8  | 2576.7  | 1757.2  | NM_000985.2    |
| 25340.2 | 14584.7 | 16154.3 | 10638.2 | NM_000979.2    |
| 28095.4 | 19021.1 | 20559.5 | 12682.1 | NM_000980.2    |
| 24641.1 | 20091   | 19807.6 | 19592.3 | NM_000981.3    |
| 4111.4  | 3060.4  | 2377.2  | 2420.4  | NM_000982.3    |
| 4624.2  | 4379.1  | 3748.5  | 3013.9  | NM_000983.3    |
| 1555.5  | 1218.5  | 1300.6  | 1319.3  | NM_000978.2    |
| 578.3   | 378.7   | 461.8   | 386.2   | NM_000984.4    |
| 111.3   | 120.6   | 127.8   | 112.1   | NR_002229.1    |
| 242.2   | 219.8   | 233.9   | 205     | NR_000029.1    |
| 19756.3 | 17108.6 | 15323.3 | 13402   | NM_000986.3    |
| 3895.9  | 3579    | 3215.6  | 2550.8  | NM_000987.2    |
| 1796.3  | 1650.1  | 1222    | 1316.4  | NM_016093.2    |
| 28222.3 | 27607.3 | 25009.9 | 18577.6 | NM_000988.2    |
| 15451.8 | 13862.1 | 12488.2 | 11158.2 | NM_000990.2    |
| 537.8   | 286.7   | 269.2   | 223.7   | NM_000991.3    |
| 1567.3  | 700.3   | 567.3   | 516     | NM_000992.2    |
| 113.1   | 114.4   | 107.4   | 111.7   | NR_002778.1    |
| 8769.5  | 9812.2  | 8919.5  | 6419.9  | NM_001033853.1 |
| 11350.1 | 10285.2 | 9925.6  | 10727   | NM_001033853.1 |

|         |         |         |         |                |
|---------|---------|---------|---------|----------------|
| 23712.1 | 17083.6 | 13570.6 | 14556.9 | NM_000989.2    |
| 3822.8  | 4687.5  | 3807.6  | 3211.3  | NM_000993.2    |
| 400.4   | 287.9   | 269     | 228.9   | NM_001007073.1 |
| 122.4   | 109.2   | 106.2   | 99.1    | NR_003111.1    |
| 731.5   | 779.6   | 618.9   | 636.9   | NM_000995.2    |
| 1177.6  | 923.5   | 636.1   | 564.2   | NM_033625.1    |
| 9182.4  | 8757.6  | 8751.8  | 7191.1  | NM_007209.3    |
| 25373.6 | 22632.7 | 17924.7 | 18803.6 | NM_000996.2    |
| 7213.1  | 6160.8  | 5536.2  | 4613    | NM_033643.1    |
| 229.7   | 155.5   | 134.4   | 119.8   | NM_015414.2    |
| 393     | 241.4   | 187.3   | 184     | NM_021029.4    |
| 5319    | 2273.5  | 2377.3  | 2322.8  | NM_001001.3    |
| 121.7   | 130.9   | 110.2   | 136.2   | NM_000997.4    |
| 6019.2  | 4571.7  | 4645.2  | 5457.9  | NM_000998.4    |
| 41645.8 | 39515.4 | 37408.2 | 37112.2 | NM_000999.2    |
| 27927.3 | 28170.5 | 26254.1 | 21471.7 | NM_001035258.1 |
| 23992.3 | 21798.6 | 16818.4 | 20365.4 | NM_001000.2    |
| 2210.3  | 1428.1  | 1164.5  | 1399.3  | NM_052969.1    |
| 94      | 87.9    | 88.9    | 97.7    | NM_005061.2    |
| 8318    | 10667.1 | 11030.6 | 7029.3  | NM_000968.2    |
| 124.3   | 104.1   | 92.8    | 104.3   | NM_021104.1    |
| 34511.2 | 31728.3 | 27777.6 | 26007.5 | NM_001035267.1 |
| 7562.9  | 6975.8  | 7266.5  | 5376.4  | NM_000969.3    |
| 662.8   | 641.7   | 503.1   | 384.3   | NM_001024662.1 |
| 917.1   | 711.6   | 804.9   | 852.9   | NM_000971.3    |
| 259.5   | 244.6   | 242.8   | 255     | NM_000972.2    |
| 6021.9  | 7232.5  | 8379.7  | 5283.3  | NM_198486.2    |
| 714.3   | 368.9   | 338.7   | 262.2   | NM_033301.1    |
| 34531.3 | 24866.2 | 24424   | 21101.3 | NM_033301.1    |
| 539.2   | 460.6   | 414.2   | 308     | NM_001024921.2 |
| 3383.3  | 1828.4  | 1648.1  | 2264    | NM_001024921.2 |
| 86      | 75.5    | 77.9    | 76.9    | NM_001002.3    |
| 2330.1  | 1795.8  | 1674.5  | 1274.3  | NM_053275.3    |
| 91.9    | 100.2   | 83.3    | 94.4    | NR_002775.1    |
| 15960.3 | 10613.7 | 11473.4 | 9984.5  | NM_001003.2    |
| 7521.9  | 3734.7  | 4798.6  | 4422.3  | NM_213725.1    |
| 25173.6 | 16369.7 | 16904.2 | 16288.4 | NM_001004.2    |
| 5856.7  | 5580.5  | 4887.6  | 3208.5  | NM_002950.3    |
| 367.9   | 382.5   | 392.6   | 358.7   | NM_002951.2    |
| 77.9    | 78      | 78.3    | 84.1    | NM_007042.1    |
| 614.5   | 632.7   | 641.1   | 369.9   | NM_024839.1    |
| 224.4   | 171     | 152.1   | 163     | NM_017793.1    |
| 85.2    | 81.9    | 87.2    | 83.5    | NM_006413.2    |
| 176.7   | 120.8   | 110.3   | 116.8   | NM_183005.1    |
| 96      | 92.3    | 91      | 93.2    | NM_183005.1    |
| 970.4   | 631.3   | 579.1   | 496.6   | NM_006638.2    |
| 1471.5  | 1479    | 1425.1  | 676.6   | NM_018067.2    |
| 87.8    | 90.6    | 83.1    | 88.1    | NM_019845.2    |
| 96.6    | 91.1    | 92.6    | 91.4    | NM_203400.1    |
| 38547   | 34763.8 | 32807   | 32416.4 | NM_001014.3    |

|         |         |         |         |                |
|---------|---------|---------|---------|----------------|
| 22374.5 | 22000   | 21558.8 | 16182.7 | NM_001015.3    |
| 36170.1 | 34475.4 | 32904.8 | 30982.2 | NM_001016.3    |
| 10044.3 | 10546.9 | 9188.1  | 6840.3  | NM_001017.2    |
| 18514.1 | 15944.6 | 17736.9 | 13073.6 | NM_001025071.1 |
| 9838.4  | 8052.2  | 9127.5  | 5426.7  | NM_001025071.1 |
| 12162.9 | 8793.2  | 9511.2  | 6107.8  | NM_001018.3    |
| 4266.8  | 4295    | 3255.7  | 3718.1  | NM_001019.4    |
| 26557.3 | 26122.8 | 23121.6 | 15185.3 | NM_001030009.1 |
| 7072.6  | 5019.2  | 4625.9  | 3493.7  | NM_001019.4    |
| 28529.2 | 20418   | 21819.5 | 15526   | NM_001020.4    |
| 26088.5 | 21334.1 | 21727.1 | 20325.4 | NM_001021.3    |
| 8864.5  | 8434.5  | 5621.3  | 6833.1  | NM_001022.3    |
| 489.6   | 481.3   | 425     | 414.1   | NM_194326.2    |
| 15584.3 | 10328.5 | 11055.3 | 7892.4  | NM_002952.3    |
| 12263.4 | 9522.5  | 9428.1  | 7927.9  | NM_001023.2    |
| 5028.4  | 2821.3  | 2739.2  | 1849.3  | NM_001024.3    |
| 1850.9  | 1626.9  | 1595.1  | 964.5   | NM_001025.4    |
| 2557.1  | 1616.3  | 1164.1  | 1005.5  | NM_001026.3    |
| 4486.6  | 3088.5  | 3008.5  | 4162.8  | NM_033022.2    |
| 55898.9 | 41711.8 | 36678.9 | 34939   | NM_001028.2    |
| 3735.2  | 2125.9  | 2170.9  | 2169.3  | NM_001029.3    |
| 1202    | 1009.6  | 803.4   | 758.4   | NR_002225.2    |
| 81.5    | 89.7    | 79.2    | 96.2    | NR_002309.1    |
| 47859.7 | 45284.9 | 41046.5 | 38211   | NM_001030.3    |
| 39703.7 | 35450.4 | 32048.6 | 32731.6 | NM_002954.3    |
| 83.2    | 95.3    | 80      | 84.4    | NM_015920.3    |
| 3636.8  | 1725.5  | 2625    | 2270.7  | NM_001031.4    |
| 11464   | 8443.4  | 7361.4  | 7430.2  | NM_001030001.1 |
| 543.9   | 339.6   | 326     | 275.2   | NM_001030001.1 |
| 41691.5 | 37435.4 | 33232.1 | 29680.4 | NM_001030001.1 |
| 35445.8 | 27610.3 | 23997.8 | 26066.9 | NM_001032.3    |
| 34199.9 | 21535.4 | 24062.8 | 14680.7 | NM_001005.3    |
| 8494.3  | 5931    | 5869.3  | 5707.7  | NM_001006.3    |
| 6188.4  | 5645.8  | 4892.9  | 2802.5  | NM_001007.3    |
| 6360.9  | 5869.1  | 4913.5  | 4388    | NM_001008.3    |
| 358.7   | 300.2   | 227.3   | 289.5   | NM_001039567.2 |
| 16704.7 | 11807.9 | 10882.9 | 9139.6  | NM_001009.3    |
| 8908.2  | 9737.5  | 9034.8  | 8506.1  | NM_001010.2    |
| 89.7    | 91.1    | 89.1    | 85.1    | NM_002953.3    |
| 554.2   | 565.7   | 562.9   | 341.3   | NM_001006665.1 |
| 95.9    | 107.5   | 93.7    | 105.7   | NM_021135.4    |
| 269.7   | 289.2   | 319.7   | 221.3   | NM_021135.4    |
| 101.6   | 93      | 93.8    | 90.3    | NM_001006932.1 |
| 147.8   | 213.8   | 191.1   | 183.5   | NM_004586.2    |
| 103     | 106.9   | 92.9    | 104.8   | XM_944112.1    |
| 142.9   | 139.1   | 123     | 124.2   | NM_004586.2    |
| 261.9   | 226.9   | 199.2   | 194.4   | NM_003942.2    |
| 152.7   | 217.7   | 251     | 200.6   | NM_004755.2    |
| 94.3    | 99.9    | 84.4    | 93.9    | NM_182398.1    |
| 117.7   | 95.9    | 108     | 95.7    | NM_014496.1    |

|         |         |         |                      |
|---------|---------|---------|----------------------|
| 591.1   | 518.2   | 506.9   | 452 NM_003161.2      |
| 1385.3  | 1165.3  | 1467.2  | 455 NM_003952.2      |
| 126.6   | 112.4   | 101.1   | 111.4 NM_012424.2    |
| 111.8   | 118.2   | 114.8   | 112.7 NM_031464.2    |
| 1394.4  | 864.2   | 718.4   | 527.7 NM_001011.3    |
| 6767.1  | 5330.1  | 5974.3  | 3608.4 NM_001013.2   |
| 10711.4 | 8191.7  | 7874.3  | 5048.4 NM_001013.3   |
| 38961.4 | 19857.5 | 21435.9 | 14748.8 NM_002295.4  |
| 133.8   | 99.8    | 98.7    | 102.2 NM_001012321.1 |
| 729.8   | 301.8   | 251.1   | 205.5 NM_058192.2    |
| 1197.9  | 824.3   | 781.7   | 494.4 NM_152260.1    |
| 1138    | 761.5   | 633.3   | 423.5 NM_173659.2    |
| 2221.2  | 961.4   | 934     | 642.6 NM_032795.1    |
| 1113.5  | 722.7   | 675.9   | 504.8 NM_005444.1    |
| 82.8    | 77.4    | 82.5    | 80.8 NM_004165.1     |
| 2057.7  | 1631.8  | 1268    | 1097.5 NM_006570.4   |
| 118.7   | 105.7   | 101.7   | 102.3 NM_006064.3    |
| 77.6    | 84.5    | 82.8    | 86.9 NM_016656.2     |
| 257.6   | 246.9   | 261.4   | 211.6 NM_006064.3    |
| 303.8   | 369.2   | 401.8   | 278 NM_022157.2      |
| 438.2   | 852.1   | 875.7   | 651 NM_021244.2      |
| 333.6   | 223.1   | 251.4   | 174.4 NM_006270.2    |
| 233.4   | 173.6   | 166     | 147.2 NM_012250.3    |
| 109.8   | 126.5   | 110     | 128.8 NM_004587.1    |
| 506.3   | 739     | 673.5   | 435.9 NM_001042576.1 |
| 110.6   | 193.1   | 167.6   | 140.3 NM_001042576.1 |
| 108.5   | 101.4   | 88.9    | 98.1 NM_002955.4     |
| 147.6   | 149.5   | 134.5   | 127.6 NM_001003699.1 |
| 106.3   | 103     | 89.7    | 92.8 NM_001003699.1  |
| 115.1   | 102.2   | 106     | 114.7 NM_001003699.1 |
| 80.7    | 76.6    | 76.7    | 85.4 NM_006583.2     |
| 6955.5  | 4450.7  | 3910.3  | 3958.3 NM_001033.2   |
| 493.5   | 440.2   | 391.1   | 299.3 NM_001034.1    |
| 142.2   | 117.5   | 114.4   | 119.1 NM_015713.3    |
| 123.3   | 113.4   | 101.7   | 99.9 NM_018427.2     |
| 140.4   | 124.8   | 111.8   | 103.6 NM_001007279.1 |
| 84.9    | 94.2    | 92.5    | 90.5 NM_001007279.1  |
| 944.5   | 495.6   | 395.3   | 288.8 NM_015169.3    |
| 92.6    | 92      | 80.9    | 84.2 NM_000330.2     |
| 114.5   | 111.2   | 108.8   | 100.8 NM_018346.1    |
| 106.3   | 98.9    | 103.5   | 104.3 NM_080657.3    |
| 272.6   | 329     | 294.6   | 233.4 NM_018264.2    |
| 1087.4  | 594     | 566.9   | 461.9 NM_018364.3    |
| 261.4   | 298.8   | 266.7   | 234.5 NM_198467.1    |
| 138.5   | 126.6   | 100.9   | 113.7 NM_006511.1    |
| 85.9    | 93      | 93.3    | 87.3 NM_030785.2     |
| 235.1   | 349.7   | 325.8   | 316.9 NM_031924.3    |
| 115.3   | 124.5   | 98.6    | 110.8 NM_001010892.1 |
| 2414.2  | 2443.9  | 1926.5  | 1520.2 NM_015659.1   |
| 110.8   | 90.5    | 88.8    | 95.6 NM_002956.2     |

|        |        |        |                      |
|--------|--------|--------|----------------------|
| 155.6  | 204.4  | 158    | 159.6 NM_024692.3    |
| 84.4   | 80.9   | 77.3   | 76.4 NM_173640.1     |
| 143.8  | 144.2  | 153.7  | 124.5 NM_178565.3    |
| 124.9  | 118.7  | 104    | 109.6 NM_032784.3    |
| 89.6   | 92.6   | 88.9   | 85.5 NM_001029871.1  |
| 91.8   | 87.1   | 84.3   | 91.9 NM_001040007.1  |
| 1237.6 | 1332.6 | 1158.4 | 807.6 NM_133368.1    |
| 1107.7 | 1087.4 | 807.5  | 866.6 NM_016625.2    |
| 406.2  | 364.1  | 327.7  | 304.7 NM_023012.4    |
| 503    | 611.7  | 592.4  | 489.2 NM_152724.2    |
| 106.8  | 112.3  | 105.7  | 100.9 NM_152724.2    |
| 80.3   | 78.3   | 77.7   | 79.2 NM_031429.1     |
| 85.3   | 80.3   | 90.8   | 87.6 NM_031429.1     |
| 96.9   | 98.5   | 87     | 90.3 NM_031429.1     |
| 774.1  | 451.2  | 475    | 345.5 NM_003729.1    |
| 75.2   | 73.9   | 79     | 75.2 NM_014433.2     |
| 108.3  | 98.3   | 97.3   | 91.8 NM_032957.2     |
| 82.6   | 78     | 82.3   | 78.1 NM_016434.2     |
| 156    | 158.2  | 132.6  | 134.6 NM_015138.3    |
| 119.1  | 108.5  | 113.8  | 100.5 NM_001015056.1 |
| 236.2  | 233.9  | 217    | 142.6 NM_001015055.1 |
| 98     | 85.8   | 83.8   | 81.8 NM_033046.2     |
| 87.6   | 90.9   | 74.7   | 80.9 NM_001015055.1  |
| 88.2   | 90.9   | 81.8   | 83.3 NM_206852.1     |
| 97.5   | 95.5   | 86.6   | 89.9 NM_021136.2     |
| 159.7  | 96.1   | 88.3   | 102.6 NM_206857.1    |
| 168.2  | 175.6  | 182.5  | 193.3 NM_206902.1    |
| 358.6  | 346.6  | 294.6  | 260.3 NM_005619.3    |
| 87.4   | 93.9   | 94.3   | 90.2 NM_206902.1     |
| 372    | 257.7  | 251.5  | 310.1 NM_006054.2    |
| 104    | 108.2  | 105.7  | 135.2 NM_201428.1    |
| 86.6   | 89.6   | 84.9   | 88.6 NM_201429.1     |
| 1375.9 | 1351.3 | 1154.9 | 1015.3 NM_201430.1   |
| 531.3  | 503.7  | 371.8  | 595.6 NM_020532.4    |
| 83.8   | 80     | 80.9   | 86.1 NM_207521.1     |
| 4878.9 | 4293.3 | 3244.7 | 4767.1 NM_007008.2   |
| 98.2   | 97.7   | 85.7   | 100.2 NM_007008.2    |
| 312.5  | 277.2  | 211.9  | 192.9 NM_032730.3    |
| 92.6   | 108.1  | 109.6  | 95 NM_023004.5       |
| 86.2   | 84.8   | 91.2   | 86.4 NM_178568.2     |
| 94.7   | 92     | 93     | 85.7 NM_178570.1     |
| 91.6   | 112.3  | 105.6  | 93.3 NM_153708.1     |
| 95.7   | 88.8   | 90.8   | 85.9 NM_001004312.1  |
| 87.4   | 86.7   | 80.2   | 81.5 NM_031440.1     |
| 166.6  | 172.5  | 166.8  | 141.5 NM_022147.2    |
| 92.2   | 83.8   | 85.7   | 94.5 NM_025158.3     |
| 288    | 355.6  | 307.5  | 258.8 NM_001040451.1 |
| 100.3  | 92.8   | 96.4   | 90.8 NM_001042417.1  |
| 115.9  | 116.2  | 102.7  | 98.6 NM_017987.3     |
| 99.6   | 94.5   | 90.3   | 100.6 NM_001042417.1 |

|        |        |        |                      |
|--------|--------|--------|----------------------|
| 90.8   | 98.5   | 96.5   | 88.2 NM_001037442.1  |
| 119.5  | 109.6  | 95.5   | 110.8 NM_014961.2    |
| 105.2  | 103.5  | 96.5   | 95.4 NM_001037442.1  |
| 482.1  | 565.1  | 473.3  | 484.9 NM_173079.1    |
| 100.5  | 96.2   | 92.6   | 105 NM_032167.1      |
| 89.6   | 102.4  | 86.4   | 77.1 NM_001754.3     |
| 97     | 119.3  | 111.7  | 119.4 NM_001001890.1 |
| 449.8  | 604.7  | 693.4  | 439.4 NM_001754.3    |
| 81     | 83     | 75.4   | 94.1 NM_175634.1     |
| 91.7   | 85     | 78.9   | 88 NM_175635.1       |
| 80.2   | 95.7   | 79.8   | 79 NM_175636.1       |
| 94.3   | 108.6  | 99.9   | 95.4 NM_175636.1     |
| 83.6   | 83.2   | 77.9   | 80.5 NM_004349.2     |
| 97.5   | 97.5   | 84.7   | 94.5 NM_001015051.2  |
| 266    | 310.8  | 273    | 316.2 NM_001024630.1 |
| 99.1   | 83.4   | 81.7   | 87.6 NM_004348.3     |
| 1209.2 | 1212.9 | 1077   | 639.3 NM_004350.1    |
| 103.9  | 92.8   | 92.7   | 100.4 NM_001031680.1 |
| 2066.7 | 1169.9 | 1217.7 | 799.5 NM_014328.2    |
| 113.6  | 92.2   | 92.3   | 96.1 NM_014806.1     |
| 851.3  | 1327.5 | 1455.2 | 590.9 NM_014853.1    |
| 99.3   | 93.9   | 89.1   | 86.2 NM_001039948.1  |
| 140.8  | 155.7  | 134.6  | 137.1 NM_015705.4    |
| 421.3  | 234    | 219.1  | 159.4 NM_003707.1    |
| 1146.7 | 569.1  | 520.5  | 416.3 NM_006666.1    |
| 165.5  | 149.9  | 138.7  | 134.1 NM_016104.2    |
| 5083.1 | 5531.1 | 4201.7 | 3606 NM_001007464.1  |
| 272.2  | 285.2  | 284.7  | 250.5 NM_033411.2    |
| 505.6  | 407.5  | 368.8  | 286.2 NM_152682.1    |
| 4072.2 | 3568.2 | 2589.9 | 2214.6 NM_002957.3   |
| 291.1  | 349.7  | 419.2  | 184.8 NM_021976.3    |
| 83.9   | 78.8   | 79.3   | 75.9 NM_001009598.1  |
| 102.8  | 100    | 96.9   | 98.6 NM_001009598.1  |
| 87.5   | 88.6   | 83     | 92.4 NM_006917.3     |
| 946    | 757    | 669.1  | 536.5 NM_006857.1    |
| 616.7  | 571.8  | 738.4  | 502.2 NM_012234.3    |
| 206.2  | 219.9  | 191.4  | 182.7 NM_002958.3    |
| 308.9  | 366.2  | 281.2  | 298.2 XM_940269.1    |
| 799.8  | 852    | 823.8  | 621.1 NM_001005861.1 |
| 111.8  | 108.4  | 107.8  | 95.8 NM_000540.1     |
| 197.9  | 222.4  | 178.4  | 185.8 NM_001042723.1 |
| 104.1  | 93.7   | 93.8   | 103.7 NM_001035.1    |
| 105.6  | 98.6   | 104    | 103.6 NM_001036.2    |
| 104.6  | 102.3  | 89.9   | 91.7 NM_006271.1     |
| 4508.2 | 2427.2 | 1941.3 | 1431.6 NM_002966.2   |
| 622.8  | 452.9  | 441.3  | 322.5 NM_005620.1    |
| 94.6   | 139.6  | 111.3  | 134.4 NM_005621.1    |
| 108    | 103.5  | 95.1   | 103 NM_001024213.1   |
| 81.5   | 98.8   | 95.6   | 91.2 NM_001024212.1  |
| 129    | 145.4  | 130.3  | 128.2 NM_001024211.1 |



|         |         |         |                      |
|---------|---------|---------|----------------------|
| 134.6   | 121.9   | 127.6   | 117.8 NM_001024211.1 |
| 115     | 109.6   | 115.4   | 100.3 NM_005979.2    |
| 151.7   | 155.2   | 137.5   | 143.7 NM_001024210.1 |
| 84.3    | 81.4    | 74.7    | 81 NM_020672.1       |
| 85      | 93.5    | 94.8    | 80.9 NM_080388.1     |
| 121.1   | 110.8   | 107.6   | 94.3 NM_005978.3     |
| 92.6    | 87      | 79.3    | 89.3 NM_002960.1     |
| 13505.2 | 10657.3 | 10763.5 | 9268.5 NM_002961.2   |
| 19201.4 | 16572   | 17499.4 | 12539.6 NM_002961.2  |
| 105.1   | 84      | 87.6    | 92.9 NM_002962.1     |
| 1706.2  | 2328.6  | 2753.2  | 910.6 NM_014624.3    |
| 85      | 81.5    | 76.2    | 83.6 NM_002963.2     |
| 91.2    | 88      | 91.3    | 91.1 NM_176823.2     |
| 95.2    | 90.4    | 82.8    | 87.1 NM_001045479.1  |
| 640.6   | 2159    | 1796.8  | 1822.6 NM_002964.3   |
| 1468.4  | 2615.6  | 2027.9  | 2369.6 NM_002965.2   |
| 78.6    | 82.8    | 75.3    | 85.5 NM_006272.1     |
| 95      | 87      | 89.4    | 90.6 NM_004057.1     |
| 306.9   | 256     | 213     | 200 NM_005980.2      |
| 107.1   | 118.1   | 106.3   | 108.2 NM_001017406.1 |
| 124.4   | 139.4   | 120.5   | 137.2 NM_022753.2    |
| 75.9    | 84.5    | 70.8    | 87.4 NM_130772.1     |
| 91.2    | 85.4    | 91.3    | 85.8 NM_199161.1     |
| 95      | 90.6    | 73.8    | 81.5 NM_199161.1     |
| 91.3    | 100.7   | 96.3    | 96 NM_000331.2       |
| 97.3    | 100.2   | 88.1    | 93.7 NM_030754.2     |
| 73.2    | 70.9    | 82.1    | 81.2 NM_006512.1     |
| 1090.8  | 630.3   | 559.8   | 480.4 NM_138421.1    |
| 83.4    | 76.3    | 83.6    | 87.1 NM_018417.2     |
| 507.3   | 397.5   | 347     | 432.7 NM_014016.2    |
| 130.9   | 166.5   | 141.8   | 140.5 NM_014363.3    |
| 7138    | 4938.9  | 4578    | 2962.8 NM_005500.1   |
| 1114.2  | 1016.2  | 1196.2  | 442.6 NM_002967.2    |
| 703.4   | 626.4   | 610.6   | 454.2 NM_014649.2    |
| 89      | 85.5    | 89.8    | 86.6 NM_000541.2     |
| 87.4    | 83.1    | 71.7    | 81.6 NM_018666.1     |
| 92.7    | 86.3    | 78.1    | 82.8 NM_172311.1     |
| 86.6    | 96.1    | 87.5    | 86.9 NM_002968.1     |
| 95.1    | 92.8    | 83.3    | 97.5 NM_005407.1     |
| 133.7   | 122.6   | 110.1   | 129.3 NM_171999.1    |
| 112.8   | 115.5   | 119.6   | 121.4 NM_020436.2    |
| 138.6   | 123.8   | 117.8   | 122.9 NM_138352.1    |
| 93.1    | 105.4   | 97.9    | 85.5 NM_080621.3     |
| 116.3   | 109.4   | 107     | 98.1 NM_152486.2     |
| 90.6    | 90.6    | 87.3    | 92.6 NM_207506.1     |
| 108.3   | 113.1   | 100.4   | 113.1 NM_001010971.1 |
| 92.9    | 109.7   | 109.3   | 98.7 NM_174920.2     |
| 83.5    | 87      | 90.4    | 90.1 NM_001017373.2  |
| 95.2    | 92.1    | 103.4   | 100.1 NM_152552.1    |
| 86.9    | 89.3    | 85.9    | 84.2 NM_001017373.2  |

|        |        |        |                      |
|--------|--------|--------|----------------------|
| 89.2   | 81.7   | 81.1   | 85 NM_015589.3       |
| 143.4  | 162.9  | 155    | 169.1 NM_018028.2    |
| 104.5  | 94.1   | 99     | 90.7 NM_182610.1     |
| 105.2  | 91.7   | 93.8   | 88.1 NM_144660.1     |
| 401.7  | 325.6  | 296    | 284.5 NM_017654.2    |
| 122.8  | 183.4  | 173.1  | 170.2 NM_152703.2    |
| 126    | 167.5  | 120.1  | 138.3 NM_015474.2    |
| 2370.3 | 1817.5 | 1822.4 | 975.5 NM_015380.3    |
| 91     | 93.6   | 90.5   | 93.5 NM_022136.3     |
| 476.9  | 469.4  | 425    | 315.8 NM_024545.2    |
| 288.6  | 307.5  | 262.4  | 241.3 NM_005870.3    |
| 878.4  | 404    | 383.3  | 449.6 NM_003864.1    |
| 151.6  | 151    | 129.9  | 134.9 NM_013260.5    |
| 363.3  | 285    | 238.2  | 219.6 NM_014931.2    |
| 92.6   | 80.9   | 92.7   | 94.4 NM_014678.3     |
| 459.1  | 527.8  | 522.9  | 378.4 NM_018312.3    |
| 213.9  | 174.8  | 146.8  | 147.2 NM_020150.3    |
| 92.5   | 100.9  | 101.9  | 85.5 NM_001033503.1  |
| 1203.3 | 701.1  | 535.9  | 664.4 NM_016103.2    |
| 333.5  | 245.2  | 194.6  | 205.5 NM_001033503.1 |
| 93.9   | 95     | 82.1   | 88.7 NM_007101.2     |
| 82.4   | 82     | 84.9   | 83 NM_015077.1       |
| 308.4  | 169.5  | 163.8  | 156.5 NM_006513.2    |
| 314.3  | 206.2  | 216.2  | 142 NM_017827.2      |
| 92.9   | 91.9   | 103.4  | 98.1 NM_005146.3     |
| 80.4   | 82.5   | 80     | 81.4 NM_013352.1     |
| 84.3   | 85.3   | 90.6   | 83.8 NM_013352.1     |
| 203.3  | 225.6  | 208.3  | 227.3 NM_013352.1    |
| 132.3  | 122.2  | 116.3  | 112.1 NM_014706.2    |
| 85.6   | 83     | 79.3   | 89.3 NM_020368.1     |
| 484.1  | 740.8  | 627.9  | 600.9 NM_015278.3    |
| 320.3  | 207    | 186.4  | 179.5 NM_194292.1    |
| 90.4   | 92.3   | 76.9   | 85.2 NR_002438.1     |
| 565.9  | 960.8  | 941.4  | 802.3 NM_002970.1    |
| 148.2  | 159.5  | 163.9  | 145.8 NM_133491.2    |
| 170.1  | 135    | 126.5  | 144.8 NM_002971.2    |
| 1379.5 | 1536.2 | 1135.2 | 1127.1 NM_015265.1   |
| 91.4   | 93.1   | 100.1  | 86.6 NM_001012980.1  |
| 204.8  | 167.5  | 141.1  | 164.1 NM_021818.2    |
| 375.7  | 297    | 246.9  | 262.3 NM_016038.2    |
| 221.7  | 193.1  | 186.1  | 150.9 NR_001588.1    |
| 88.7   | 93.2   | 87.7   | 79.3 NM_058173.1     |
| 476.2  | 567.5  | 582.2  | 267 NM_002972.1      |
| 101.7  | 108    | 99.2   | 99.4 NM_030962.2     |
| 76.1   | 76     | 73.4   | 75.5 NM_001024401.2  |
| 112.2  | 98.8   | 109.5  | 96.7 NM_001024401.2  |
| 115.7  | 97.4   | 93.4   | 104 NM_018183.2      |
| 110.9  | 110    | 98.6   | 91.3 NM_178121.2     |
| 92.9   | 92.4   | 83.4   | 103 NM_198538.1      |
| 199.2  | 193.5  | 170.1  | 185.3 NM_006745.3    |

|        |        |        |                      |
|--------|--------|--------|----------------------|
| 370.7  | 372    | 519.9  | 330.4 NM_006745.3    |
| 83.8   | 94.4   | 85     | 89.5 NM_001017369.1  |
| 578.5  | 391.1  | 435.3  | 396.4 NM_006918.3    |
| 238    | 173.5  | 178    | 186.6 NM_006455.2    |
| 1247.7 | 1161.5 | 1156.3 | 915.2 NM_052822.2    |
| 129.6  | 125.3  | 109.5  | 136.9 NM_004866.3    |
| 247.5  | 241.4  | 224.3  | 178.8 NM_005697.3    |
| 144.3  | 117.2  | 118.8  | 106.2 NM_005698.2    |
| 2067.6 | 1024.4 | 1049.9 | 589.5 NM_052837.1    |
| 123.7  | 124.7  | 128.7  | 113 NM_079834.2      |
| 243.6  | 267.2  | 282.7  | 259.1 NM_138967.2    |
| 561.2  | 468.7  | 412.7  | 333 NM_033630.1      |
| 236.4  | 171.2  | 142.5  | 122.6 NM_016558.2    |
| 989    | 795    | 758.8  | 491.8 NM_033630.1    |
| 579.7  | 586.8  | 618.9  | 268.1 NM_012235.2    |
| 83.8   | 87.5   | 74.9   | 86.2 NM_003726.2     |
| 87.9   | 87.4   | 93.1   | 96.7 NM_182826.1     |
| 94.7   | 92.4   | 85.4   | 84.6 NM_182826.1     |
| 78.9   | 86     | 81.2   | 79.3 NM_016240.2     |
| 94.6   | 88.7   | 83     | 93.3 NM_173833.3     |
| 693.8  | 757    | 691.8  | 654.3 NM_005505.3    |
| 1590.4 | 2212.9 | 1935.1 | 1310.6 NM_005506.2   |
| 91.1   | 86.9   | 88.8   | 86.4 NM_145351.1     |
| 98.4   | 86.3   | 78.6   | 86.1 NM_145350.1     |
| 96.2   | 90.8   | 84.3   | 91.4 NM_153334.3     |
| 79.9   | 77.1   | 72.7   | 82.8 NM_153334.3     |
| 79.3   | 81.4   | 83.6   | 83.9 NR_003011.1     |
| 356    | 428.6  | 323.3  | 373.2 NM_015200.1    |
| 165.3  | 152.3  | 149.9  | 141.5 NM_016002.2    |
| 4636.7 | 3977.1 | 4554.7 | 3798 NM_005063.4     |
| 123.2  | 111.8  | 92.4   | 105.8 NM_024906.1    |
| 86.5   | 77.2   | 88.2   | 93.9 NM_001037582.1  |
| 209.9  | 130.9  | 128.6  | 124.7 NM_001037582.1 |
| 126.8  | 99.2   | 106.9  | 106.3 NM_198533.1    |
| 104.4  | 88.7   | 97.6   | 94.9 NM_003843.2     |
| 1027.3 | 926.6  | 844.8  | 601.1 NM_182835.1    |
| 94.8   | 85.6   | 84.4   | 91.1 NM_016106.2     |
| 94     | 99.4   | 101.1  | 86.8 NM_152540.3     |
| 89.1   | 88.1   | 86.3   | 89.5 NM_003469.3     |
| 148.1  | 150.4  | 122.7  | 127.6 NM_013243.2    |
| 116.8  | 100.9  | 110.3  | 111.9 NM_003020.1    |
| 88.4   | 94.3   | 85.5   | 92.8 NM_003357.3     |
| 99.9   | 90.2   | 94.1   | 94.2 NM_145651.1     |
| 114.3  | 104.9  | 102    | 91.9 NM_006552.1     |
| 86.7   | 83     | 85.2   | 84.7 NM_006551.3     |
| 86.4   | 90.3   | 88.9   | 85.2 NM_206998.1     |
| 95.1   | 86.9   | 82.7   | 96.4 NM_002407.1     |
| 89.2   | 94.5   | 94     | 99.2 NM_002411.1     |
| 97.9   | 94.5   | 92     | 89.3 NM_052863.2     |
| 83.7   | 82.6   | 78.6   | 71.2 NM_054023.2     |

|        |        |        |                      |
|--------|--------|--------|----------------------|
| 87.7   | 90.3   | 93.9   | 96.3 NM_006998.3     |
| 115.1  | 104.8  | 114.9  | 107.3 NM_014575.1    |
| 133.4  | 139.7  | 134.9  | 128.3 NM_033128.1    |
| 196.7  | 167.5  | 149.9  | 145.2 NM_016510.3    |
| 126.5  | 197.5  | 164.9  | 148.8 NM_001031694.1 |
| 727.6  | 612.1  | 910.8  | 448.2 NM_001031694.1 |
| 146.1  | 223    | 243.1  | 269.8 NM_012236.1    |
| 275.8  | 301.9  | 251.7  | 273.1 NM_001031694.1 |
| 85.8   | 87.2   | 84     | 90.7 NM_006746.3     |
| 99.6   | 95     | 105.1  | 96.9 NM_001037540.1  |
| 82.4   | 82.2   | 76.7   | 76.8 NM_001037540.1  |
| 204.1  | 155.4  | 136.6  | 155.5 NM_006089.1    |
| 93.1   | 88.7   | 93.8   | 89.2 NM_198081.1     |
| 84.6   | 85.3   | 87.8   | 94.2 NM_006514.1     |
| 93.5   | 81     | 81.6   | 88 NM_014139.1       |
| 86.5   | 79.3   | 84.5   | 82.1 NM_006920.2     |
| 102.1  | 93     | 101.1  | 96.7 NM_199037.2     |
| 91.6   | 96.8   | 87.2   | 89.8 NM_199037.2     |
| 91.2   | 95.4   | 89.2   | 87.8 NM_021007.1     |
| 99.9   | 84     | 87.9   | 93.3 NM_021007.1     |
| 88.7   | 88.2   | 86.4   | 92.6 NM_021007.1     |
| 91.7   | 81.7   | 88.2   | 87.9 NM_004588.3     |
| 87.6   | 78.3   | 79.4   | 80.7 NM_006922.2     |
| 311.4  | 271.9  | 269.8  | 206.5 NM_006922.2    |
| 101.7  | 98.4   | 89.1   | 96.7 NM_006922.2     |
| 83.1   | 83.4   | 85.7   | 92.3 NM_018400.2     |
| 91.5   | 92.8   | 85     | 81.4 NM_018400.2     |
| 95.8   | 95.2   | 80.3   | 91 NM_000334.3       |
| 83.9   | 90.8   | 90.1   | 97.7 NM_174934.1     |
| 88.8   | 85.2   | 88.4   | 85.4 XM_940695.1     |
| 87     | 80.7   | 73.4   | 88.2 NM_000335.3     |
| 100.5  | 97.9   | 101.6  | 85.8 NM_002976.1     |
| 97.4   | 91.4   | 91.7   | 84.6 NM_014191.1     |
| 94.2   | 90.9   | 87.8   | 98.3 NM_002977.1     |
| 728.6  | 522.4  | 522.7  | 411.5 NM_024041.2    |
| 1323.1 | 894.9  | 863.6  | 565.4 NM_024041.2    |
| 108    | 95.7   | 97.6   | 93 NM_001038.4       |
| 90.8   | 94.6   | 96.1   | 90 NM_000336.1       |
| 148.2  | 162.3  | 172    | 118.6 NM_002978.2    |
| 91.6   | 89     | 86.8   | 85.1 NM_001039.2     |
| 581.3  | 404.2  | 394.1  | 273.9 NM_004589.1    |
| 1089   | 774.7  | 705.8  | 473 NM_005138.1      |
| 570.9  | 408.2  | 309.6  | 481.7 NM_032547.1    |
| 1168   | 674.3  | 584.4  | 535.8 NM_016479.3    |
| 100    | 86.8   | 88.7   | 86.4 NM_001007098.1  |
| 219.7  | 255.2  | 229.2  | 228.6 NM_002979.3    |
| 1275.1 | 2088.9 | 2209.1 | 1783.8 NM_021626.1   |
| 100.8  | 87.2   | 87.9   | 93.8 NM_007281.1     |
| 113.2  | 104.3  | 93.5   | 111 NM_015356.3      |
| 782.7  | 588.1  | 555.7  | 337.1 NM_015356.3    |

|        |        |        |                       |
|--------|--------|--------|-----------------------|
| 110.5  | 108.2  | 113.3  | 111.9 NM_182706.2     |
| 92.9   | 83.4   | 81.9   | 85.3 NM_152358.2      |
| 119.5  | 126.1  | 141.7  | 126.6 NM_014766.2     |
| 111.6  | 119.1  | 111.9  | 110.8 NM_138355.2     |
| 116.5  | 107.4  | 94.6   | 107.9 NM_024583.2     |
| 98.7   | 87     | 90.8   | 90.2 NM_031309.3      |
| 98.5   | 87.2   | 89.2   | 92.9 NM_033129.1      |
| 85.4   | 86.4   | 79.8   | 89.3 NM_021920.2      |
| 84.3   | 83     | 94.2   | 89.7 NM_002980.1      |
| 114.8  | 109    | 106.6  | 116.8 NM_173050.1     |
| 92     | 98.6   | 95.4   | 100.3 NM_020974.1     |
| 93.6   | 93.7   | 87.9   | 93.2 NM_152753.2      |
| 92.6   | 95.8   | 87.3   | 96.6 NM_004757.2      |
| 288.6  | 262.1  | 217.5  | 151.3 NM_020680.2     |
| 684.9  | 570.7  | 503.6  | 345.9 NM_020680.2     |
| 138.8  | 125    | 129    | 143.9 NM_152281.1     |
| 575.1  | 453.4  | 415.8  | 436.8 NM_017988.4     |
| 136.2  | 125.5  | 115.1  | 123.3 NM_020423.4     |
| 131.9  | 127.8  | 109    | 118.1 NM_181093.1     |
| 94.6   | 89.1   | 74.4   | 82.8 NM_181093.1      |
| 2274.1 | 1314.6 | 807.4  | 1072.5 NM_018115.1    |
| 88.1   | 91.1   | 82.5   | 89.5 NM_002997.4      |
| 104.2  | 102.2  | 111.5  | 104.3 NM_002997.4     |
| 91.9   | 88.4   | 92.5   | 104 NM_001006946.1    |
| 135.4  | 127.3  | 100    | 104.6 NM_002998.3     |
| 97.2   | 81.9   | 97     | 92.1 NM_014654.2      |
| 106.2  | 98.2   | 95.2   | 112.8 XM_944729.1     |
| 129.9  | 105.8  | 95.9   | 97.3 NM_002999.2      |
| 1496.7 | 1488.5 | 923.7  | 1552.5 NM_001007067.1 |
| 93.3   | 90.8   | 94.6   | 89 NM_080489.2        |
| 91.4   | 78.4   | 82.8   | 83.8 NM_015685.3      |
| 83.4   | 82.4   | 77.8   | 79.8 NM_015685.3      |
| 86.4   | 82.3   | 84.5   | 84.7 NM_080489.2      |
| 402.2  | 471.5  | 366.1  | 445.7 NM_004713.2     |
| 981.3  | 980.5  | 880.3  | 547.2 NM_005869.2     |
| 689.4  | 411.1  | 423.2  | 290 NM_001039708.1    |
| 103    | 96.5   | 102.9  | 87.8 NM_001039707.1   |
| 1922.5 | 1052   | 1119.9 | 652 NM_006643.2       |
| 276.3  | 308.1  | 217.9  | 236.8 NM_005786.3     |
| 187.2  | 234.6  | 244.7  | 213.7 NM_006642.1     |
| 997.9  | 819.7  | 787.9  | 728.8 NM_006923.2     |
| 5640.1 | 4401.9 | 4290.6 | 2323.9 NM_022044.2    |
| 1022.8 | 972.3  | 825.5  | 745.8 NM_016547.1     |
| 86.6   | 85.1   | 88.7   | 86.4 NM_016547.1      |
| 621.2  | 600.7  | 545    | 517.7 NM_016176.2     |
| 441.8  | 308.3  | 302.6  | 301.6 NM_012428.1     |
| 90.7   | 89.6   | 93     | 92.5 NM_012428.1      |
| 973.8  | 946.3  | 803.1  | 573.3 NM_004168.1     |
| 122.7  | 145.7  | 162.5  | 130.2 NR_003263.1     |
| 2950.9 | 2782.1 | 2393.4 | 1981.7 NM_003000.1    |

|        |        |        |                       |
|--------|--------|--------|-----------------------|
| 339.6  | 332.5  | 279.9  | 229.8 NM_001035513.1  |
| 750.1  | 789.1  | 554    | 631.3 NM_003002.1     |
| 88.6   | 88.5   | 83     | 96.5 NM_152744.2      |
| 93.2   | 107.9  | 99.6   | 102.5 NM_152744.2     |
| 82.5   | 82.6   | 82.5   | 76 NM_019064.3        |
| 110.1  | 99.5   | 103.1  | 96.8 NM_004657.4      |
| 84.7   | 91.1   | 84.1   | 82 NM_148897.1        |
| 97     | 113    | 125.1  | 101 NM_006843.2       |
| 387.2  | 623.7  | 583.9  | 346.3 NM_138432.2     |
| 88.5   | 87.5   | 90.7   | 88.6 NM_001080837.1   |
| 122.7  | 122.7  | 114.6  | 110 NM_006544.2       |
| 4779.4 | 5336.8 | 5246.7 | 3852.8 NM_014300.2    |
| 313.8  | 239.7  | 261    | 288.5 NM_033280.1     |
| 114.7  | 119.4  | 120.5  | 109.2 NM_003003.2     |
| 147.2  | 138.7  | 143.1  | 116.1 NM_003003.2     |
| 99.8   | 95.3   | 81.4   | 94.4 NM_012429.1      |
| 92.8   | 86.5   | 77.9   | 77 NM_174975.3        |
| 83.8   | 78.6   | 68.7   | 83 NM_174977.2        |
| 738.9  | 774.7  | 740.8  | 558.1 NM_004206.2     |
| 299.2  | 258.5  | 224.6  | 194.6 NM_004206.2     |
| 796.6  | 540.9  | 479.3  | 483.3 NM_004892.3     |
| 515.2  | 401.1  | 392.6  | 391.7 NM_012430.2     |
| 169.7  | 139.6  | 152.9  | 126.7 NM_032970.2     |
| 87.2   | 86.2   | 77.9   | 82.3 NM_006364.2      |
| 508.1  | 506.9  | 434.6  | 334.3 NM_032985.3     |
| 669.9  | 664    | 528.4  | 463.6 NM_032985.4     |
| 444    | 369.8  | 249.5  | 274.3 NM_007190.2     |
| 128.1  | 122.3  | 131.5  | 129.9 NM_021982.1     |
| 209.5  | 189.5  | 158.2  | 188.7 NM_001042734.1  |
| 89.1   | 78.6   | 79     | 83.7 NM_006323.1      |
| 146.1  | 127.5  | 123.8  | 135.3 NM_006323.1     |
| 116    | 106.9  | 111.7  | 108.3 XM_945425.1     |
| 1747.3 | 1135.8 | 1108.6 | 707 NM_198597.1       |
| 126.7  | 122.7  | 119.1  | 96.8 NM_004922.2      |
| 246.4  | 205.1  | 189.6  | 193.2 NM_014822.1     |
| 109.8  | 109.5  | 112.8  | 102.9 NM_014933.2     |
| 620.5  | 669.6  | 566.6  | 533.3 NM_014933.2     |
| 88.7   | 86.9   | 88.1   | 91 NM_015490.3        |
| 80.4   | 89.4   | 83     | 84.1 NM_198138.1      |
| 2933.7 | 3246.8 | 3273.2 | 1741.6 NM_013336.3    |
| 124.7  | 101.1  | 98.3   | 97.4 NM_018144.2      |
| 4073.1 | 2324.4 | 2680.1 | 2143.4 NM_006808.2    |
| 7573.8 | 5866.8 | 3933.4 | 4045.1 NM_001012456.1 |
| 6523.3 | 4879   | 3566.8 | 3847.1 NM_014302.3    |
| 128.6  | 146    | 123.2  | 148 NM_007214.3       |
| 531    | 448.5  | 452.4  | 404.3 NM_007277.3     |
| 104.9  | 96.5   | 102.9  | 95.3 NM_021807.2      |
| 307.4  | 402.5  | 417.5  | 301.7 NM_024077.2     |
| 83.3   | 86.4   | 80.2   | 80.9 NM_003004.1      |
| 307.9  | 208.8  | 260.1  | 230.3 NR_002166.1     |

|        |        |        |                      |
|--------|--------|--------|----------------------|
| 403.4  | 363.3  | 261.5  | 275.3 NM_031216.3    |
| 272.4  | 217.9  | 139.3  | 186.1 NM_031216.3    |
| 523.6  | 468.8  | 367    | 327.1 NM_001013437.1 |
| 112.8  | 134.6  | 137.8  | 121.9 NM_005065.3    |
| 93.8   | 94     | 88.1   | 90.5 NM_000450.1     |
| 86.5   | 98.3   | 90.6   | 84.9 NM_003944.2     |
| 235.2  | 252.8  | 248.9  | 185 NM_033505.1      |
| 681.1  | 554.1  | 495.9  | 497.6 NM_021237.3    |
| 93.3   | 95.2   | 87     | 88 NM_000655.2       |
| 89.1   | 89.3   | 82.4   | 91.9 NM_080430.2     |
| 228.9  | 267.5  | 281.5  | 207.6 NM_031454.1    |
| 92.6   | 92.9   | 87.9   | 100.9 NM_003005.2    |
| 93.1   | 107.9  | 105.9  | 101.7 NM_003006.3    |
| 98.9   | 91.6   | 99     | 94.7 NM_203472.1     |
| 2522.7 | 2478.5 | 2254.9 | 1657.7 NM_018445.4   |
| 765.4  | 803    | 780.5  | 680.7 NM_203472.1    |
| 93.4   | 90.4   | 88.6   | 80.3 NM_016275.3     |
| 91.7   | 84.1   | 85.4   | 82.3 NM_182704.1     |
| 95.1   | 91.2   | 92.2   | 87 NM_006080.1       |
| 103.6  | 88.3   | 89.5   | 88 NM_001005914.1    |
| 82.1   | 87.7   | 83.3   | 90.3 NM_001005914.1  |
| 91.7   | 90.4   | 92.3   | 85.3 NM_006379.2     |
| 81.2   | 75.3   | 73.9   | 77.8 NM_152754.2     |
| 1033.6 | 1191.7 | 1470.5 | 1654.2 NM_012431.1   |
| 110.8  | 101.9  | 111.6  | 103.2 NM_004186.2    |
| 99.5   | 94.6   | 81.5   | 89.2 NM_020163.1     |
| 549.7  | 477.4  | 353.1  | 312.8 NM_022367.2    |
| 168.8  | 156.6  | 149.5  | 142.8 NM_020210.2    |
| 83.1   | 88.1   | 84.4   | 84.2 NM_020210.2     |
| 108.7  | 122.1  | 100.9  | 105.2 NM_017789.3    |
| 436.7  | 587.7  | 556.1  | 410.3 NM_006378.2    |
| 156    | 146.2  | 122.5  | 114.9 NM_004263.2    |
| 81.5   | 85     | 84.9   | 92.5 NM_017893.2     |
| 99.5   | 89.6   | 82.4   | 93.3 NM_003966.1     |
| 90     | 89.8   | 84.8   | 88.9 NM_001031702.1  |
| 112.2  | 93.8   | 90.9   | 95.4 NM_020241.2     |
| 84.8   | 84.7   | 90.6   | 88.1 NM_032108.2     |
| 101.4  | 90.8   | 91.1   | 89.1 NM_133327.1     |
| 91.1   | 93.1   | 84.9   | 91.9 NM_030913.3     |
| 90.3   | 89.3   | 77.8   | 91.6 NM_153618.1     |
| 87.9   | 90.1   | 81.2   | 81.7 NM_024966.2     |
| 92.5   | 86.1   | 89.5   | 91.4 NM_024966.2     |
| 96.5   | 86.3   | 92     | 95.8 NM_003612.1     |
| 160.8  | 220.8  | 198.6  | 171.4 NM_198139.1    |
| 138.6  | 172.3  | 137.2  | 148.6 NM_003007.2    |
| 93.6   | 82.3   | 83.5   | 88.3 NM_003008.2     |
| 210.1  | 242.4  | 209.9  | 219.2 NM_021627.2    |
| 85.9   | 88.9   | 81.2   | 88.6 NM_015670.3     |
| 122.8  | 111.7  | 118.4  | 113 NM_152699.2      |
| 97.8   | 96.7   | 92.5   | 98.8 NM_015571.1     |

|        |        |        |                       |
|--------|--------|--------|-----------------------|
| 89     | 92.9   | 87.1   | 80.8 NM_020654.2      |
| 130.3  | 164.2  | 163.5  | 154.2 NM_001077203.1  |
| 92.3   | 82.8   | 80.9   | 84.9 NM_145204.2      |
| 2775.9 | 1753.5 | 1881   | 1860.7 NM_004261.3    |
| 739.1  | 439    | 398.8  | 343.3 NM_012247.3     |
| 400.1  | 291.5  | 275.3  | 228.8 NM_012248.2     |
| 102.5  | 94.6   | 93.5   | 89.1 NM_020451.2      |
| 161.9  | 151.6  | 159    | 120 NM_020451.2       |
| 640.9  | 747.8  | 666.7  | 562.4 NM_206926.1     |
| 89.9   | 88.7   | 82.6   | 87 NM_005410.2        |
| 88.9   | 102.7  | 83.8   | 81.9 NM_052838.2      |
| 89.5   | 84.9   | 87     | 83.1 NM_144710.2      |
| 85     | 86.4   | 78.9   | 77.5 NM_144710.2      |
| 602.6  | 362    | 337.9  | 391 NM_018243.2       |
| 5622.8 | 5744.9 | 5676   | 3791.6 NM_004404.3    |
| 6135   | 5163.9 | 4261.5 | 4145 NM_001008491.1   |
| 114.5  | 110.6  | 108.2  | 99.5 NM_001008492.1   |
| 113.1  | 110.3  | 107.1  | 108.4 NM_001008491.1  |
| 414.8  | 493.1  | 455.3  | 277.1 NM_019106.4     |
| 198.5  | 236.1  | 191.4  | 179.8 NM_019106.4     |
| 120.6  | 114.5  | 119.1  | 101.8 NM_080415.1     |
| 124.1  | 122.8  | 118.4  | 101 NM_080417.1       |
| 89.8   | 91.1   | 88.4   | 86.1 NM_080416.1      |
| 89.6   | 87.6   | 79.6   | 82.7 NM_004574.2      |
| 105.1  | 97.5   | 101.9  | 97.4 NM_002688.3      |
| 95.8   | 91.5   | 86.8   | 93.1 NM_145802.2      |
| 140    | 179.6  | 153    | 177.8 NM_145799.2     |
| 214.9  | 281.4  | 290.5  | 230.5 NM_145800.2     |
| 135.7  | 115.4  | 126.3  | 138.4 NM_001011553.1  |
| 2520   | 3290.8 | 3144.4 | 1806.6 NM_006640.2    |
| 456.8  | 277.4  | 241.4  | 188.9 NM_003009.2     |
| 4004.9 | 3233.5 | 2899   | 2104.9 NM_016332.2    |
| 91.5   | 95.1   | 88.4   | 93.9 NM_032861.2      |
| 100.8  | 87.4   | 85.2   | 85.5 NM_021967.1      |
| 90.6   | 80.4   | 95.4   | 90.1 NM_021967.1      |
| 84.6   | 75     | 77.6   | 78.1 NM_022978.1      |
| 6729   | 7269   | 7202.2 | 5136.3 NM_001018108.1 |
| 322.6  | 276.5  | 261.1  | 218.9 NM_012139.2     |
| 103.1  | 89.8   | 92.2   | 94.8 NM_170694.1      |
| 91.7   | 97.5   | 94.4   | 92.9 NM_014509.3      |
| 416.7  | 414.4  | 430.7  | 418.1 NM_020755.2     |
| 96.9   | 121.5  | 101.5  | 107.6 NM_178865.3     |
| 115.7  | 102.8  | 121.6  | 117.4 NM_198941.1     |
| 115.7  | 92.2   | 97.4   | 101.2 NM_006811.2     |
| 1064.6 | 1231.9 | 1193.7 | 960.6 NM_198941.1     |
| 86.3   | 88.8   | 85.2   | 83.5 NM_001033517.1   |
| 91.1   | 90.8   | 91.2   | 88.8 NM_178276.2      |
| 279.1  | 235.9  | 211.3  | 212.4 NM_014445.2     |
| 122.8  | 126.6  | 127.2  | 116.7 NM_001002236.1  |
| 78.6   | 81     | 90.2   | 82.4 NM_001002236.1   |



|        |        |        |                      |
|--------|--------|--------|----------------------|
| 99.7   | 101.1  | 98.7   | 106 NM_001002235.1   |
| 93.7   | 90.6   | 88.3   | 92.3 NM_000295.3     |
| 78     | 85.7   | 80.4   | 83.1 NM_016186.1     |
| 97.8   | 96     | 90.4   | 94.7 NM_001080451.1  |
| 89.2   | 83.9   | 80.7   | 80.2 XM_940101.1     |
| 95.9   | 87.5   | 87.1   | 89.8 NM_173850.2     |
| 86.2   | 77.8   | 82.1   | 85.3 NM_207378.1     |
| 94.8   | 81.5   | 91.5   | 82.7 NM_001085.4     |
| 98.4   | 90.2   | 90.3   | 89.7 NM_006215.2     |
| 78.5   | 77.3   | 70.4   | 83 NM_000624.3       |
| 83.3   | 82.7   | 82.3   | 81.9 NM_001756.3     |
| 89     | 92.3   | 90.7   | 93.7 NM_000354.3     |
| 97.9   | 99.2   | 100.3  | 91.8 NM_175739.2     |
| 82.3   | 78.8   | 84.8   | 89.9 NM_001042518.1  |
| 403    | 485.9  | 501.8  | 392.5 NM_030666.2    |
| 185.8  | 244.1  | 208.8  | 188 NM_005024.1      |
| 99     | 90.9   | 91.6   | 98.2 NM_080475.1     |
| 78.8   | 76.4   | 77.3   | 77.3 NM_080474.1     |
| 79.3   | 77.4   | 73.7   | 75.6 NM_012397.2     |
| 254.2  | 282.6  | 222.9  | 257.6 NM_002575.1    |
| 82.7   | 86.4   | 80.5   | 84.4 NM_006919.1     |
| 81.6   | 80.6   | 86.6   | 81.9 NM_002974.1     |
| 94.2   | 86.8   | 95     | 83.3 NM_002639.2     |
| 1177.1 | 807.4  | 819.7  | 461.1 NM_004568.4    |
| 81.4   | 86     | 82.1   | 82.5 NM_003784.1     |
| 92.1   | 87.1   | 89.9   | 96.5 NM_003784.1     |
| 675.9  | 456.3  | 410.7  | 297.9 NM_002640.3    |
| 585.7  | 425.7  | 382.8  | 284.6 NM_001031848.1 |
| 88.4   | 85.1   | 93.9   | 85.8 NM_004155.3     |
| 103.3  | 86     | 89.6   | 94.3 NM_000488.2     |
| 89.8   | 89.2   | 90.1   | 95.2 NM_000185.3     |
| 93.1   | 89.4   | 96.2   | 91.7 NM_000602.1     |
| 638.9  | 518.7  | 434.1  | 326.2 NM_006216.2    |
| 271.5  | 473.3  | 428.4  | 290.9 NM_002615.4    |
| 89.1   | 78.5   | 89.5   | 86 NM_000934.1       |
| 96.9   | 90.7   | 91     | 98.7 NM_000062.2     |
| 108    | 94.8   | 93.4   | 92.8 NM_000062.2     |
| 449.3  | 291.8  | 290.1  | 208.1 NM_001235.2    |
| 89.3   | 86.8   | 84.5   | 95.6 NM_005025.2     |
| 131.9  | 125.6  | 138.9  | 146.7 NM_006217.3    |
| 347.2  | 249.1  | 229.5  | 171.8 NM_013376.1    |
| 1507.7 | 1294.5 | 1211.4 | 753.6 NM_014755.1    |
| 341.1  | 326.5  | 285.9  | 243 NM_203344.1      |
| 89     | 93.1   | 84.1   | 81.2 NM_013368.2     |
| 153.8  | 138.9  | 114.6  | 125.2 NM_203344.1    |
| 100.2  | 103.9  | 90.8   | 93 NM_019605.2       |
| 381.7  | 349.9  | 322.8  | 366.1 NM_014454.1    |
| 96.6   | 104.6  | 99.4   | 102.3 NM_031459.3    |
| 137.4  | 151.6  | 113.7  | 125.9 NM_144665.2    |
| 319.8  | 357.6  | 252.2  | 290.6 NM_178123.3    |

|        |        |        |                      |
|--------|--------|--------|----------------------|
| 1705.1 | 1189.9 | 826    | 826.8 NM_003011.1    |
| 90.5   | 92.9   | 92.5   | 92.9 NM_030648.1     |
| 109.3  | 102.5  | 98.5   | 96.2 NM_015559.1     |
| 478.6  | 424.8  | 405.7  | 352 NM_014712.1      |
| 191.9  | 138.8  | 134.4  | 120.5 NM_199123.1    |
| 104.9  | 101.5  | 90.2   | 100.6 NM_199123.1    |
| 2825.5 | 3114.4 | 2702.8 | 1669 NM_032233.2     |
| 234.1  | 160.2  | 149.7  | 130 NM_001007260.1   |
| 80.8   | 80.6   | 82.2   | 76.5 NM_024860.1     |
| 366    | 329.9  | 303.6  | 251.3 NM_020382.3    |
| 515.6  | 530.5  | 477.3  | 462.7 NM_012432.2    |
| 240.3  | 500    | 483.8  | 425.3 NM_031915.1    |
| 672.6  | 522.9  | 416.9  | 320 NM_006515.1      |
| 137    | 164.5  | 148.4  | 139.1 NM_015046.4    |
| 88.9   | 87.2   | 87.4   | 92.6 NM_178860.3     |
| 78.9   | 77.7   | 71.3   | 75.4 NM_021115.3     |
| 101.4  | 99.4   | 96.1   | 88.4 NM_201575.1     |
| 85.2   | 82.6   | 83     | 87.4 XM_939114.1     |
| 1311.5 | 1709.8 | 1568.5 | 859.3 NM_201575.1    |
| 104.7  | 112.2  | 110.7  | 129.7 NM_201997.1    |
| 113.6  | 140    | 165.7  | 134.4 NM_201997.1    |
| 139.4  | 132.9  | 128.8  | 123.7 NM_004630.2    |
| 101.9  | 111.7  | 105.5  | 103.2 NM_005877.4    |
| 455.2  | 515.1  | 388.3  | 367.8 NM_001005409.1 |
| 2009.6 | 1179.6 | 987.7  | 977.2 NM_007165.4    |
| 1536.3 | 1736   | 1691.2 | 807.7 NM_006802.2    |
| 104.8  | 97.3   | 102.3  | 96.8 NM_001005526.1  |
| 2082.6 | 2455   | 1836.5 | 1702 NM_012433.2     |
| 300.5  | 310.3  | 292.5  | 256.3 NM_001005526.1 |
| 684.7  | 477.6  | 468.4  | 378.4 NM_016047.3    |
| 1154.5 | 1039.3 | 994.6  | 797.8 NM_006842.2    |
| 729.5  | 561.4  | 574.9  | 363 NM_012426.3      |
| 2933.3 | 1495.7 | 1489.2 | 1066.4 NM_005850.3   |
| 2917.4 | 2334.7 | 2210.8 | 1911.4 NM_031287.2   |
| 438.9  | 386.2  | 390.7  | 254.5 NM_021164.2    |
| 92.9   | 90.9   | 95.4   | 83 NM_001007467.1    |
| 106.5  | 105.8  | 90     | 100.1 NM_014775.2    |
| 99     | 87.8   | 97.5   | 94 NM_014775.2       |
| 195.1  | 168.6  | 138    | 153.6 NM_001005158.1 |
| 260.2  | 211.5  | 164.8  | 185.7 NM_001005158.1 |
| 85.4   | 78.3   | 83.2   | 86.7 NM_001005159.1  |
| 178.4  | 242.8  | 261.7  | 155.4 NM_001029880.1 |
| 92.3   | 88     | 86.2   | 87.6 NM_006142.3     |
| 128    | 106.1  | 107    | 118.9 NM_005066.1    |
| 268.9  | 586.6  | 480.2  | 559.6 NM_003012.3    |
| 87.4   | 82.2   | 74.5   | 83.1 NM_003013.2     |
| 82.4   | 87.3   | 79.6   | 72.1 NM_003014.2     |
| 86.5   | 86.2   | 82.1   | 86.9 NM_003015.2     |
| 1679.1 | 1036.7 | 1065   | 1329.9 NM_006924.3   |
| 2306.9 | 1264.4 | 1226.4 | 965.2 NM_004593.1    |

|         |        |        |                      |
|---------|--------|--------|----------------------|
| 166.6   | 189.7  | 147.9  | 175.9 NM_004768.2    |
| 165.1   | 138.4  | 157.3  | 157.6 NM_139168.1    |
| 306.3   | 341.8  | 269.9  | 314.4 NM_001077199.1 |
| 105.9   | 108    | 126.8  | 111.9 NM_001077199.1 |
| 1118.3  | 1160.2 | 1480   | 779.2 NM_014884.1    |
| 538.2   | 470    | 457.2  | 475.5 NM_014884.1    |
| 241.5   | 183.9  | 178.8  | 195.2 NM_001017392.1 |
| 328.7   | 381.9  | 344    | 297.3 NM_020706.1    |
| 131.2   | 155    | 140.9  | 147 NM_007056.1      |
| 11307.5 | 6798.9 | 5734.7 | 5337.6 NM_003016.2   |
| 480.2   | 735.6  | 595.1  | 526.9 NM_004719.2    |
| 90.4    | 84.6   | 76.9   | 84.9 NM_003017.3     |
| 1999.2  | 1991.3 | 1914.3 | 1557.6 NM_005626.3   |
| 2609.2  | 2737   | 2836.4 | 1839.1 NM_006925.2   |
| 2885.8  | 2587.2 | 2540.4 | 1962.9 NM_006925.3   |
| 5013.5  | 3793.7 | 3480.1 | 2693.5 NM_006275.4   |
| 1132.4  | 719.2  | 690.8  | 460.6 NM_001031684.1 |
| 135.1   | 162.3  | 145.2  | 150.1 NM_004592.2    |
| 6430.2  | 5163.4 | 4573.2 | 3740 NM_003769.2     |
| 10039.8 | 9480.3 | 9374.9 | 7723.4 NM_145169.1   |
| 93.9    | 96     | 93.3   | 96.3 NM_199344.1     |
| 124.1   | 123.5  | 112.4  | 101.5 NM_032740.3    |
| 89.8    | 80.5   | 85.2   | 83.5 NM_005411.3     |
| 101     | 89.3   | 86.6   | 83.7 NM_006926.1     |
| 95.5    | 84.3   | 87.5   | 87.4 NM_000542.2     |
| 100.7   | 98.4   | 94     | 95.3 NM_198843.1     |
| 97.9    | 94.6   | 90.9   | 88.4 NM_003018.2     |
| 235.5   | 278.7  | 266.4  | 182 NM_003019.4      |
| 98.8    | 93.6   | 85.9   | 100.7 NM_205854.1    |
| 505.4   | 309.9  | 247.5  | 262 NM_022754.4      |
| 117.3   | 103.3  | 125.7  | 97.7 NM_178858.3     |
| 123.7   | 114.8  | 101.4  | 96.4 NM_030971.3     |
| 783.6   | 478.4  | 471.9  | 375.1 NM_213650.1    |
| 1045.8  | 763    | 716.3  | 395.3 NM_178867.3    |
| 131.3   | 121.8  | 106.9  | 103.8 NM_178867.3    |
| 199.7   | 214.7  | 193.7  | 192.8 NM_144579.1    |
| 110.4   | 103.3  | 104.9  | 91.3 NM_000023.1     |
| 96.6    | 89.2   | 101    | 90.7 NM_000232.3     |
| 93      | 83.9   | 79.7   | 83 NM_000337.4       |
| 91.4    | 87.4   | 83.7   | 84.8 NM_172244.2     |
| 86.6    | 87.2   | 90     | 94.5 NM_172244.2     |
| 92.3    | 88.6   | 88.9   | 92 NM_003919.1       |
| 89.1    | 96.1   | 94.5   | 87 NM_000231.1       |
| 101     | 105.4  | 100.1  | 91.4 NM_139167.1     |
| 77.4    | 88.9   | 85.7   | 82.1 NM_015595.2     |
| 391.5   | 189.4  | 170.1  | 169.8 NM_032291.1    |
| 201.1   | 398.5  | 305    | 267.4 NM_005627.2    |
| 83.2    | 75.9   | 88.7   | 92.2 NM_170693.1     |
| 88.6    | 75.2   | 86.5   | 94 NM_016276.3       |
| 81.7    | 81.2   | 80.9   | 84.3 NM_016276.3     |

|        |        |        |                       |
|--------|--------|--------|-----------------------|
| 86.4   | 80.4   | 69.1   | 77.4 NM_001033578.1   |
| 724.2  | 532.5  | 553.8  | 440.1 NM_170709.1     |
| 472.7  | 400.8  | 369.7  | 308.1 NM_170709.1     |
| 300    | 264.3  | 222.6  | 179.6 NM_001012413.1  |
| 94.7   | 88.4   | 87     | 85.5 NM_152524.3      |
| 124.3  | 127.9  | 114.9  | 110.5 NM_003901.2     |
| 95.9   | 93.9   | 97     | 95 NM_030791.2        |
| 98.7   | 91.5   | 86.3   | 105.2 NM_152386.2     |
| 95.1   | 85.2   | 88.9   | 85.1 NM_152386.2      |
| 160.1  | 200.5  | 171.6  | 159.2 NM_000199.2     |
| 155.3  | 121.1  | 109    | 132.1 NM_003021.3     |
| 122.4  | 119.5  | 100.9  | 113.7 NM_019072.2     |
| 280.1  | 222.9  | 187.2  | 178.3 NM_015503.1     |
| 121.2  | 114.5  | 101.4  | 103 NM_002351.1       |
| 91.8   | 85.9   | 80.9   | 90 NM_053282.4        |
| 96.4   | 90.2   | 91     | 93.3 NM_003975.2      |
| 99.6   | 88.7   | 83.8   | 101.8 NM_005490.1     |
| 166.1  | 148.6  | 176.7  | 140.6 NM_170600.1     |
| 104.6  | 107.3  | 95     | 102.9 NM_005489.1     |
| 88.6   | 89.8   | 86.6   | 91.9 NM_005489.1      |
| 138.8  | 164.7  | 136    | 135.7 NM_022071.2     |
| 86.5   | 78.9   | 82.2   | 72.3 NM_207372.1      |
| 90.9   | 98.2   | 87.2   | 84.5 NM_007341.2      |
| 114.7  | 129.6  | 133    | 133 NM_001001713.1    |
| 75.6   | 76.9   | 75.8   | 78.3 NM_003022.1      |
| 144    | 121.2  | 110.1  | 99.1 NM_031469.1      |
| 1655.6 | 1591.9 | 1399.2 | 1156.8 NM_031286.2    |
| 234.4  | 253.7  | 223.7  | 253.1 NM_018957.2     |
| 105.9  | 108.3  | 97.9   | 111.6 NM_003023.2     |
| 101.8  | 84.2   | 81.3   | 87.2 NM_014521.1      |
| 98.6   | 91.7   | 92     | 95.7 NM_004844.2      |
| 92.1   | 83.2   | 91.6   | 92.7 NM_001018009.1   |
| 347.5  | 347.5  | 365    | 337.8 NM_030645.1     |
| 108.2  | 90.6   | 83.9   | 96 NM_001009555.2     |
| 171.4  | 143.3  | 144.3  | 104.4 NM_003025.2     |
| 112.7  | 103.5  | 114.2  | 103.9 NM_003026.1     |
| 100    | 89.6   | 87.2   | 89.2 NM_003027.2      |
| 1007.7 | 937.5  | 756.9  | 722 NM_016009.2       |
| 1347.7 | 1041.8 | 955.8  | 607.1 NM_020145.2     |
| 5453.1 | 4540.3 | 4007.7 | 2722 NM_031892.1      |
| 97     | 96     | 85.4   | 89.2 NM_001024666.1   |
| 3178.4 | 4288.1 | 3382.5 | 2611.6 NM_001024666.1 |
| 126    | 107.8  | 106.4  | 115.8 NM_020870.2     |
| 123.4  | 144.4  | 110.5  | 132.5 NM_153271.1     |
| 307.6  | 312.6  | 304.9  | 228.6 NM_014631.2     |
| 95.3   | 106    | 88.7   | 100.1 NM_001017995.1  |
| 87.9   | 91.4   | 80.1   | 90.5 NM_152550.2      |
| 112.3  | 134.4  | 126.7  | 131.1 NM_018986.2     |
| 91.6   | 101.7  | 98.2   | 87.6 NM_024577.2      |
| 120    | 138.5  | 145.9  | 125.9 NM_015677.1     |

|         |        |        |                      |
|---------|--------|--------|----------------------|
| 102.1   | 92     | 86.7   | 97.4 NM_016148.1     |
| 98.1    | 94.7   | 86     | 89.6 NM_133266.1     |
| 93.4    | 93.2   | 81.5   | 85.1 NM_012309.1     |
| 129     | 168.9  | 144.3  | 148.1 NM_001080420.1 |
| 171.2   | 161.5  | 137.5  | 119.5 NM_030974.2    |
| 135.1   | 122.9  | 111    | 115.3 NM_003028.1    |
| 97.5    | 82.6   | 88.9   | 88.2 NM_001040.2     |
| 133.8   | 110.1  | 117.6  | 110.5 NM_183001.3    |
| 79.6    | 93.5   | 91.7   | 97 NM_183001.3       |
| 1338    | 1139.9 | 964.9  | 861.9 NM_003029.3    |
| 89.9    | 82.4   | 90.5   | 77.2 NM_016848.2     |
| 115.6   | 101.4  | 104.1  | 91.8 NM_203349.2     |
| 5315.5  | 5980.1 | 7795.8 | 4715.6 NM_024745.2   |
| 81.1    | 80.2   | 93.6   | 91.9 NM_020209.2     |
| 103.5   | 104.1  | 98.1   | 96.7 NM_001010846.1  |
| 107.7   | 99.9   | 92     | 90.4 NM_138356.2     |
| 10731.6 | 9505.9 | 7731.3 | 7121.8 NM_006304.1   |
| 92.6    | 87.3   | 94.4   | 99.7 NM_000193.2     |
| 219.7   | 183.9  | 170    | 168.3 NM_138392.1    |
| 267.4   | 328.6  | 344.6  | 194 NM_148918.1      |
| 113.1   | 103    | 115.9  | 103.7 NM_148918.1    |
| 125.9   | 122.9  | 112.5  | 110.3 NM_004169.3    |
| 4474    | 2630.3 | 2540.9 | 1790.3 NM_005412.4   |
| 167.6   | 118.6  | 116.7  | 133.4 NM_007373.2    |
| 88.2    | 92     | 91.5   | 87.4 NM_006883.1     |
| 90.6    | 96.2   | 85.3   | 83.9 NM_006883.1     |
| 153.8   | 254.6  | 256.5  | 249.8 NM_006884.1    |
| 90.3    | 99.5   | 87.7   | 96.6 NM_006884.1     |
| 130.6   | 148.3  | 144.5  | 156.2 NM_173082.1    |
| 149.2   | 159    | 172.3  | 156.2 NM_173082.1    |
| 255.4   | 212    | 174.6  | 180.6 NM_018130.2    |
| 97.9    | 100    | 91.7   | 99.1 NM_020859.1     |
| 985.9   | 1301.9 | 1614.4 | 1710.5 NM_020717.2   |
| 88.9    | 89.9   | 82.8   | 90.1 NM_001041.1     |
| 89.6    | 94.4   | 74     | 88.2 NM_170601.3     |
| 92.7    | 92.8   | 83.8   | 81.7 NM_001006610.1  |
| 94.8    | 93.7   | 83.6   | 91.1 NM_003031.3     |
| 420.1   | 427.2  | 404.6  | 282.8 NM_001006610.1 |
| 206.8   | 219.4  | 169.6  | 150.6 NM_005067.5    |
| 5542.1  | 2865.9 | 2756.4 | 1211.9 NM_014281.3   |
| 86.1    | 88.5   | 86.4   | 90.5 NM_017699.1     |
| 422.7   | 391.2  | 379.1  | 213.4 NM_015996.1    |
| 119.6   | 100.9  | 98.5   | 96.7 NM_021805.1     |
| 120.5   | 147.3  | 148.6  | 121.4 NM_021805.1    |
| 126     | 117.6  | 104.2  | 112.6 NM_033130.2    |
| 89.5    | 85.5   | 89.8   | 78.8 NM_052884.1     |
| 118.9   | 101.4  | 106.4  | 92 NM_053003.2       |
| 110.7   | 81.8   | 90.9   | 105.6 NM_053003.2    |
| 85.2    | 94     | 76.5   | 81.5 NM_033329.1     |
| 95.2    | 85.9   | 87.7   | 85.3 NM_003830.1     |

|        |        |        |                      |
|--------|--------|--------|----------------------|
| 135.9  | 101.3  | 99.7   | 98.7 NM_198845.2     |
| 95.3   | 114.1  | 109.8  | 89.4 NM_014385.1     |
| 91.7   | 91.1   | 86.6   | 91.6 NM_014385.1     |
| 88.6   | 88.3   | 88.3   | 77 NM_016543.2       |
| 92.1   | 89.6   | 88.2   | 97.7 NM_014442.1     |
| 89.2   | 86.6   | 92.5   | 82.6 NM_014441.1     |
| 150.9  | 146.6  | 137.5  | 110.1 NR_002825.1    |
| 93.7   | 99     | 88.7   | 87.2 NR_002804.1     |
| 102.2  | 119.8  | 114    | 107.9 XR_001419.1    |
| 141.7  | 120.1  | 108.2  | 114.9 NM_025073.1    |
| 230.5  | 349.4  | 326.6  | 178.9 NM_001037633.1 |
| 108.9  | 111.8  | 95.2   | 94.6 NM_001037633.1  |
| 563.1  | 925.4  | 872.3  | 489.4 NM_022464.3    |
| 93.5   | 103.1  | 83     | 89.2 NM_006928.3     |
| 84.2   | 92.6   | 83.5   | 79.7 NM_005068.2     |
| 88     | 94.7   | 92.2   | 94 NM_009586.1       |
| 93.4   | 93.4   | 86.5   | 92.2 NM_005069.2     |
| 990.5  | 1283.3 | 1118.6 | 713.1 NM_015477.1    |
| 146.4  | 129    | 126.7  | 134 NM_015260.1      |
| 734    | 471.2  | 393.5  | 345.4 NM_001009182.1 |
| 136.5  | 154.3  | 163.4  | 149.2 NM_153253.28   |
| 778.9  | 887.8  | 918.4  | 283.5 NM_153253.28   |
| 107.1  | 102.3  | 95.6   | 92.3 NM_015556.1     |
| 125.1  | 191.8  | 158    | 137.8 NM_020808.1    |
| 124.2  | 121    | 108.5  | 102.7 NM_015073.1    |
| 151.3  | 156    | 136.2  | 138.5 NM_006065.1    |
| 70.3   | 81.4   | 75.1   | 90.8 NM_018556.2     |
| 108.9  | 116.9  | 100.7  | 120.6 NM_178460.1    |
| 406.3  | 311.8  | 324    | 279.6 NM_080816.2    |
| 84.8   | 94.3   | 86.5   | 95 NM_080816.2       |
| 308    | 227.6  | 209.8  | 248.3 NM_012238.3    |
| 100.2  | 89.5   | 94.5   | 96.4 NM_030593.1     |
| 111.9  | 99.4   | 90.2   | 104.5 NM_030593.1    |
| 82.6   | 84.9   | 82.9   | 84.6 NM_012239.4     |
| 75.9   | 83.1   | 74.1   | 83.2 NM_012239.4     |
| 122.4  | 104.5  | 118    | 115.2 NM_012240.1    |
| 94.4   | 109.7  | 93     | 109.9 NM_031244.1    |
| 115.6  | 108.7  | 102    | 111.6 NM_012241.2    |
| 186.2  | 201.5  | 194.5  | 168.7 NM_012241.2    |
| 99.9   | 92.8   | 98.5   | 94.5 NM_016539.1     |
| 101.3  | 99.3   | 88     | 107.8 NM_014450.2    |
| 2077.2 | 1464.6 | 1620.8 | 761.2 NM_021709.1    |
| 1484.6 | 974.3  | 895.4  | 794.1 NM_006427.2    |
| 89.4   | 88.5   | 82.2   | 95.7 NM_005982.1     |
| 104.5  | 90.3   | 100.4  | 102 NM_016932.3      |
| 110.1  | 90.6   | 101    | 103 NM_005413.1      |
| 109.6  | 112.7  | 111.2  | 99.2 NM_017420.2     |
| 324    | 281.2  | 283.3  | 167.5 NM_175875.3    |
| 83.9   | 93.9   | 79.2   | 91 NM_007374.1       |
| 83.9   | 82     | 79.6   | 92.9 NM_001075099.1  |

|        |        |        |        |                |
|--------|--------|--------|--------|----------------|
| 184.6  | 191.6  | 163.7  | 189.4  | NM_003930.3    |
| 151.3  | 184.4  | 171.5  | 126.2  | NM_003036.1    |
| 81.6   | 78.5   | 82.5   | 88.3   | NM_005414.2    |
| 101.3  | 98.7   | 101.4  | 89.7   | NM_130766.1    |
| 82.5   | 77     | 87.4   | 89.6   | NM_030623.1    |
| 976    | 1118.1 | 1151.5 | 652.8  | NM_006929.4    |
| 608.5  | 533.3  | 374.3  | 481.3  | NM_015360.2    |
| 1358   | 956.8  | 732.4  | 710.4  | NM_170679.1    |
| 98.4   | 79.9   | 79.8   | 89.7   | NM_006930.2    |
| 2169.7 | 1921.4 | 1561   | 1416.2 | NM_032637.2    |
| 512.6  | 339.8  | 286.1  | 265.3  | NM_032637.2    |
| 97.6   | 105.6  | 113.6  | 104.6  | NM_005983.2    |
| 121.8  | 118.9  | 109.8  | 104.8  | NM_001045556.1 |
| 153.8  | 122.4  | 113.6  | 97.9   | NM_001045557.1 |
| 177.8  | 142.3  | 142.1  | 127.7  | NM_153825.1    |
| 107.7  | 91.2   | 92     | 96.7   | NM_016955.1    |
| 88.6   | 81.3   | 79.7   | 95     | NM_032214.2    |
| 91     | 97.4   | 80     | 84.8   | NM_175077.1    |
| 97.9   | 85.3   | 86.4   | 87.8   | NM_003037.1    |
| 134.3  | 127.9  | 142.8  | 111.2  | NM_052931.3    |
| 89.5   | 78.6   | 83     | 83.4   | NM_021181.3    |
| 103.9  | 78.4   | 83.3   | 90.5   | NM_020125.1    |
| 99.9   | 106.9  | 86     | 84.4   | NM_033438.1    |
| 481.9  | 360.9  | 317.5  | 271.7  | NM_006527.2    |
| 87.9   | 79.7   | 82.9   | 93     | NM_003049.1    |
| 98.9   | 86     | 84.2   | 99.3   | NM_000452.1    |
| 430.8  | 361.4  | 353.7  | 288.1  | NM_019848.2    |
| 389.8  | 217.2  | 198.9  | 229.8  | NM_152679.2    |
| 88.5   | 82.5   | 80.7   | 87.6   | NM_001010893.1 |
| 73.6   | 80.3   | 73.6   | 83     | NM_197965.1    |
| 93     | 85.1   | 89.5   | 83.8   | NM_032128.2    |
| 205.6  | 174    | 160.7  | 136.6  | NM_001032220.1 |
| 89.7   | 90.7   | 83.9   | 92     | NM_000578.2    |
| 238.5  | 383.2  | 336.5  | 299.1  | NM_000617.1    |
| 94.7   | 97.5   | 88.4   | 94.2   | NM_000338.1    |
| 115.5  | 119.4  | 96.6   | 114.1  | NM_001046.2    |
| 85.3   | 84.1   | 79.2   | 82.7   | NM_000339.1    |
| 115.8  | 97.8   | 97.6   | 90     | NM_005072.3    |
| 86.2   | 92.5   | 83.3   | 94.8   | NM_020708.3    |
| 99.5   | 90.7   | 91.4   | 97.2   | NM_005135.1    |
| 69.2   | 81.2   | 75.2   | 80.8   | NM_005135.1    |
| 89.6   | 86.9   | 91.4   | 89.6   | NM_006598.1    |
| 103.9  | 109.3  | 100.3  | 103.9  | NM_024628.4    |
| 1518.7 | 1343.4 | 1318.1 | 592    | NM_020246.2    |
| 96.8   | 96.9   | 95.7   | 92.3   | NM_022444.3    |
| 92.5   | 93.9   | 88.7   | 88.1   | NM_003984.1    |
| 141.5  | 145.5  | 153.1  | 134.2  | NM_022829.4    |
| 84.1   | 83.6   | 82.8   | 76.9   | NM_001011554.1 |
| 94.5   | 92.5   | 90.1   | 96.5   | NM_022829.4    |
| 93.3   | 91     | 87.6   | 99.3   | NM_012450.2    |

|        |        |        |                     |
|--------|--------|--------|---------------------|
| 81.7   | 84.4   | 79.8   | 91.4 NM_177550.2    |
| 95.1   | 86.3   | 85.4   | 86.4 NM_015865.1    |
| 98.9   | 97.3   | 94.8   | 115.3 NM_007163.2   |
| 90.5   | 77.3   | 76.3   | 83.4 NM_005073.1    |
| 131    | 155.9  | 167.9  | 153.4 NM_021082.2   |
| 511.2  | 1130   | 888.4  | 424.5 NM_016582.1   |
| 404.2  | 463.8  | 455.6  | 385.3 NM_145648.1   |
| 91     | 85.8   | 78.3   | 83.8 NM_003051.2    |
| 294.8  | 171.3  | 175.9  | 143.3 NM_018593.3   |
| 99.7   | 86     | 86.7   | 95.8 NM_153357.1    |
| 3702.4 | 5704.5 | 7219.4 | 5006.2 NM_213606.1  |
| 100.9  | 78.9   | 90.8   | 92.3 NM_201566.1    |
| 77.6   | 83.7   | 87     | 90.8 NM_152527.3    |
| 126.2  | 120.3  | 112.5  | 120.7 NM_006517.2   |
| 2629.2 | 2671.2 | 2125.1 | 1627.9 NM_004207.2  |
| 87.5   | 75.7   | 71.5   | 74.4 NM_004696.1    |
| 301.2  | 310.9  | 347.4  | 225.5 NM_004695.2   |
| 105.4  | 96.2   | 94.5   | 100.1 NM_004694.2   |
| 91.9   | 89.7   | 95.2   | 98.7 NM_004731.3    |
| 89     | 81.6   | 88.5   | 90.7 NM_013356.1    |
| 224.2  | 147.6  | 135.4  | 126.1 NM_194298.1   |
| 84.1   | 72.8   | 81     | 85.6 NM_005074.1    |
| 93.4   | 91.3   | 79.5   | 90.9 NM_005835.1    |
| 107.5  | 109.7  | 109.3  | 95.6 NM_006632.1    |
| 84.1   | 77.4   | 81.2   | 78.7 NM_005495.1    |
| 96.1   | 98.2   | 84.4   | 92.7 NM_012434.3    |
| 88.3   | 80.5   | 82.3   | 92.7 NM_020346.1    |
| 98.1   | 91.4   | 93.6   | 92.3 NM_020309.2    |
| 81.1   | 90.3   | 76.8   | 80.9 NM_139319.1    |
| 98.9   | 97.9   | 98.8   | 102.8 NM_003053.1   |
| 95     | 83.9   | 82.1   | 87.2 NM_003054.2    |
| 92.4   | 85.5   | 80.4   | 81.8 NM_003055.2    |
| 210.1  | 223.7  | 201.9  | 183.8 NM_003056.2   |
| 119.3  | 105.5  | 101.4  | 108.1 NM_006996.1   |
| 95.1   | 96.2   | 82     | 89.7 NM_025243.2    |
| 111.8  | 115.1  | 101.5  | 111.8 NM_004170.4   |
| 83     | 89.9   | 75.6   | 89.7 NM_004171.2    |
| 168    | 252.3  | 216.1  | 195.5 NM_004172.3   |
| 260.8  | 187.8  | 168.7  | 158.9 NM_003038.2   |
| 566.1  | 435.5  | 332.3  | 280.4 NM_005628.1   |
| 85.2   | 84.1   | 78.5   | 82.6 NM_005071.1    |
| 97.2   | 94.3   | 98.1   | 89 NM_006671.3      |
| 2028.3 | 1587.7 | 1101.7 | 1094.8 NM_005415.3  |
| 468.2  | 268.8  | 283.9  | 143.6 NM_006749.3   |
| 104.2  | 92     | 84.1   | 89 NM_153187.1      |
| 97.7   | 89.6   | 81.1   | 86.1 NM_003057.2    |
| 80.9   | 86.7   | 93.6   | 88.1 NM_001039752.2 |
| 91.4   | 97.1   | 85.8   | 93 NM_018484.2      |
| 98.5   | 91.6   | 86.5   | 85.4 NM_153378.1    |
| 93.9   | 88.7   | 98.1   | 95.4 NM_144585.2    |



|        |        |        |                   |
|--------|--------|--------|-------------------|
| 97.8   | 91.7   | 73.6   | 89.9 NM_144585.2  |
| 98.2   | 92.9   | 96.6   | 102.4 NM_004256.1 |
| 98.1   | 92.2   | 95.7   | 98 NM_004803.2    |
| 1078.6 | 616.4  | 544.8  | 532.9 NM_018420.1 |
| 1368.6 | 1340.6 | 1431.3 | 810 NM_033125.2   |
| 87.6   | 90.8   | 83.3   | 88.1 NM_020372.2  |
| 143.6  | 122.8  | 111.3  | 123.8 NM_016609.3 |
| 122.2  | 116.9  | 108.4  | 107.9 NM_183233.1 |
| 417.8  | 443.6  | 387.1  | 361 NM_002555.3   |
| 155.4  | 170.7  | 144.3  | 134.9 NM_007105.1 |
| 91.1   | 89.1   | 86.8   | 88.9 NM_153191.1  |
| 84.7   | 70.4   | 79.5   | 81.7 NM_003058.2  |
| 97     | 90.8   | 83.7   | 89.3 NM_021977.2  |
| 188.5  | 275.5  | 232    | 202.4 NM_003059.2 |
| 231.5  | 318.1  | 247.8  | 238.5 NM_003060.2 |
| 97.8   | 91.9   | 98     | 94.8 NM_153276.1  |
| 91.5   | 90.1   | 81.5   | 88.1 NM_004790.3  |
| 85.5   | 86.7   | 86     | 90.4 NM_006672.2  |
| 109.4  | 93.5   | 91.8   | 111.8 NM_153320.2 |
| 90.6   | 85.9   | 80.8   | 83.6 NM_004254.2  |
| 88.5   | 84.9   | 81.5   | 88.7 NM_080866.2  |
| 99.1   | 94.3   | 103.3  | 86.7 NM_152685.2  |
| 97.1   | 93.2   | 97     | 91.7 NM_005847.3  |
| 82.6   | 89.6   | 83.1   | 90.4 NM_203327.1  |
| 162.1  | 289.1  | 266.8  | 205 NM_005116.5   |
| 86.5   | 88.1   | 100    | 93.1 NM_005116.5  |
| 91     | 94.3   | 98.2   | 98.1 NM_144712.2  |
| 105.1  | 122.8  | 101.5  | 114 NM_004727.1   |
| 98.1   | 82.4   | 88.2   | 92.7 NM_020344.1  |
| 81     | 86.9   | 72.3   | 71.5 NM_020689.3  |
| 108.1  | 104.2  | 90.2   | 102.3 NM_153648.2 |
| 106.3  | 106.2  | 114.2  | 97.6 NM_153646.2  |
| 106.5  | 116.1  | 105.9  | 93.3 NM_153647.2  |
| 90.2   | 85.4   | 82     | 85.3 NM_205850.1  |
| 335.6  | 344    | 432.3  | 237.1 NM_024959.2 |
| 1756.2 | 1130.5 | 1041.7 | 881.1 NM_005984.1 |
| 317.4  | 321.5  | 298.2  | 137.3 NM_012140.3 |
| 117.8  | 120.7  | 104.5  | 106.9 NM_003562.3 |
| 194.7  | 140.9  | 158    | 146.8 NM_003705.2 |
| 291.4  | 259.9  | 240.5  | 210.1 NM_014251.1 |
| 172    | 162.3  | 153.1  | 118.8 NM_022810.1 |
| 150.7  | 148.6  | 137.6  | 112.1 NM_022810.1 |
| 185.6  | 193.1  | 160.6  | 148.3 NM_014252.2 |
| 89.8   | 83.2   | 83.2   | 89.8 NM_152707.2  |
| 200.3  | 182.1  | 175.7  | 147.4 NM_006358.2 |
| 98.6   | 107.1  | 93.5   | 95.4 NM_031481.1  |
| 720.9  | 597.7  | 728.9  | 268.2 NM_021734.3 |
| 84.1   | 83.6   | 88.9   | 80.6 NM_031947.2  |
| 139.5  | 121.6  | 108.5  | 114.1 NM_000387.3 |
| 93.4   | 80.9   | 82.5   | 78.8 NM_030631.1  |

|        |         |        |                      |
|--------|---------|--------|----------------------|
| 373.5  | 266     | 244.8  | 131.9 NM_024698.4    |
| 1892.9 | 1230.3  | 1119.9 | 671.2 NM_024103.2    |
| 89.8   | 83.4    | 85.3   | 74.4 NM_213651.1     |
| 126.5  | 99.7    | 87.9   | 86.5 NM_013386.2     |
| 410    | 226.6   | 192.8  | 191.3 NM_013386.2    |
| 278.6  | 264.3   | 234.3  | 170.9 NM_052901.2    |
| 81.3   | 91.1    | 89.2   | 80.3 NM_001006641.1  |
| 90.8   | 89.2    | 74.4   | 88.9 NM_001006642.1  |
| 114.3  | 100.5   | 100.2  | 106.8 NM_052901.2    |
| 241.4  | 192.1   | 174.8  | 164.5 NM_001009937.1 |
| 123.8  | 121.3   | 117.4  | 101 NM_173471.1      |
| 205.7  | 151.5   | 133.2  | 125.6 NM_001009937.1 |
| 102.5  | 104.4   | 101.1  | 94.8 NM_004277.2     |
| 864.8  | 628.9   | 717.3  | 323.1 NM_031212.2    |
| 116.5  | 110.5   | 116.6  | 107.4 NM_001039355.1 |
| 121.9  | 140.4   | 143.4  | 136.9 NM_152333.1    |
| 6429.5 | 3768.9  | 3402   | 3498.8 NM_002635.2   |
| 105.2  | 102     | 100.2  | 94.6 NM_213611.1     |
| 104.5  | 95.7    | 102.6  | 97.2 NM_001010875.1  |
| 86.9   | 92.8    | 78.5   | 87.5 NM_031291.1     |
| 85.9   | 90.5    | 91.7   | 90.2 NM_030780.2     |
| 98.4   | 105.8   | 114    | 96.2 NM_207348.1     |
| 96.5   | 112.8   | 122.2  | 116.6 NM_201520.1    |
| 325.5  | 418     | 337.9  | 342.1 NM_018155.1    |
| 690.6  | 558.7   | 575    | 542 NM_016612.1      |
| 626.9  | 479     | 401.2  | 370.1 NM_001151.2    |
| 472.2  | 393.7   | 326.3  | 340.6 NM_018843.2    |
| 482.3  | 394.5   | 483.7  | 254.6 NM_178526.1    |
| 929.9  | 801.6   | 796.6  | 627.5 NM_145305.1    |
| 85.8   | 92.2    | 87.6   | 86.5 NM_001077241.1  |
| 15301  | 11067.9 | 9938.6 | 7992.2 NM_001152.1   |
| 86     | 96.1    | 95     | 85.6 NM_134425.1     |
| 92.7   | 93.9    | 80.2   | 87.2 NM_213613.2     |
| 82.7   | 94.8    | 88.2   | 91.6 NM_134425.1     |
| 87.4   | 80.6    | 77.3   | 87 NM_001018084.1    |
| 87.6   | 89.1    | 81.1   | 88.3 NM_173626.1     |
| 89.4   | 96      | 101.1  | 87.3 NM_173626.1     |
| 117.6  | 108.8   | 95.3   | 107.1 NM_000112.2    |
| 96.3   | 84.2    | 77.5   | 90.2 NM_000111.1     |
| 92.9   | 90.4    | 92.3   | 91.7 NM_000441.1     |
| 87.8   | 86.7    | 87.2   | 89.4 NM_206885.1     |
| 101    | 87      | 89.7   | 90 NM_206884.1       |
| 105.3  | 105.8   | 89.8   | 104.2 NM_198999.1    |
| 510.1  | 535.4   | 524.8  | 279.9 NM_134426.2    |
| 82     | 82.4    | 83     | 81.1 NM_001040454.1  |
| 107.7  | 98.9    | 94.5   | 105.9 NM_134426.2    |
| 85.9   | 83.4    | 84.1   | 93.6 NM_134266.1     |
| 86.2   | 93.5    | 96.3   | 90.2 NM_052832.2     |
| 93     | 89      | 85     | 91 NM_052961.2       |
| 81     | 80.1    | 79.6   | 89.4 NM_138718.1     |

|        |        |        |                      |
|--------|--------|--------|----------------------|
| 72.7   | 74.4   | 72.1   | 87.6 NM_052934.2     |
| 92.3   | 94.7   | 87.2   | 91.7 NM_134325.1     |
| 95.7   | 89.1   | 88.9   | 83.5 NM_134325.1     |
| 190    | 227.2  | 215.2  | 168.5 NM_198580.1    |
| 371.7  | 271.6  | 258.5  | 226.3 NM_003645.2    |
| 196.5  | 202    | 250.5  | 134.2 NM_024330.1    |
| 76.9   | 87.2   | 64.8   | 74.2 NM_005094.2     |
| 172.2  | 106.3  | 107.4  | 99.9 NM_012254.1     |
| 100.1  | 97.5   | 91.1   | 98.3 NM_014031.3     |
| 83     | 92.1   | 87.8   | 87.3 NM_001017372.1  |
| 83.6   | 72.9   | 74.1   | 85.4 NM_201651.1     |
| 82.7   | 84.7   | 74.3   | 81.5 NM_201651.1     |
| 96.3   | 93.7   | 95.6   | 99.7 NM_004213.3     |
| 101.7  | 90.6   | 85.7   | 93.8 NM_022127.1     |
| 98.5   | 92.1   | 98.4   | 90.6 NM_001078177.1  |
| 628.3  | 637.9  | 499    | 544.3 NM_004955.1    |
| 362.7  | 341.7  | 305.3  | 314.7 NM_001078174.1 |
| 116.2  | 99.2   | 118.8  | 108.8 NM_001532.2    |
| 164.4  | 128.3  | 127.4  | 125.5 NM_018344.3    |
| 99.8   | 108.5  | 101.1  | 102.2 NM_001040661.1 |
| 893.1  | 855.3  | 818.4  | 468.2 NM_006516.1    |
| 212.5  | 269.1  | 257.1  | 252.7 NM_030777.3    |
| 88.1   | 94.6   | 95.7   | 97.3 NM_030807.2     |
| 94.3   | 107.6  | 105.5  | 121.6 NM_001024938.1 |
| 122.8  | 119    | 119.1  | 117.3 NM_001024939.1 |
| 96.7   | 79.4   | 75.5   | 82.3 NM_145176.1     |
| 92.4   | 100.5  | 91.4   | 99.9 NM_052885.1     |
| 99.8   | 93.3   | 95.2   | 98.9 NM_153449.2     |
| 96.2   | 85.3   | 78.7   | 97.2 NM_000340.1     |
| 399.6  | 435.4  | 375.4  | 256.5 NM_006931.1    |
| 84.8   | 89     | 92.5   | 84.8 NM_001042.1     |
| 437.1  | 329.3  | 414.1  | 212.2 NM_020062.3    |
| 1642.6 | 1561.7 | 1634.7 | 1197 NM_003039.1     |
| 513    | 585.5  | 612.8  | 489.8 NM_017585.2    |
| 94.2   | 90.4   | 87.6   | 94.6 NM_207420.1     |
| 463.8  | 486.5  | 522.7  | 246.6 NM_014580.3    |
| 112.7  | 82.1   | 78.4   | 85 NM_001001290.1    |
| 101.5  | 104.9  | 98.2   | 97.3 NM_020041.2     |
| 507.5  | 552.4  | 508    | 402.2 NM_001001290.1 |
| 159.9  | 134.9  | 110.3  | 117.2 NM_021194.2    |
| 86.1   | 98.6   | 89.6   | 86.6 NM_018713.2     |
| 88.7   | 84.8   | 81.2   | 79.1 NM_001004434.1  |
| 97     | 89.3   | 93.6   | 95.6 NM_032513.3     |
| 309.7  | 119.4  | 126    | 106.6 NM_003459.4    |
| 94.6   | 91.1   | 91.1   | 101.9 NM_013309.4    |
| 955    | 621.1  | 639.2  | 433.1 NM_024055.2    |
| 118.9  | 123.6  | 84.4   | 114.9 NM_022902.2    |
| 105.4  | 77     | 96.9   | 95.5 NM_024055.2     |
| 101.1  | 88.4   | 84.4   | 86.4 NM_017964.2     |
| 861.6  | 624.7  | 646.2  | 591.3 NM_133496.3    |

|        |        |        |        |                |
|--------|--------|--------|--------|----------------|
| 101    | 90.6   | 89.2   | 91.8   | NM_173851.2    |
| 846.6  | 610.4  | 510.1  | 575.9  | NM_006345.3    |
| 274.4  | 403.7  | 364.5  | 265.8  | NM_001860.1    |
| 83.6   | 79.4   | 80.8   | 82.1   | NM_080552.2    |
| 139.2  | 160    | 135.9  | 149.4  | NM_004733.2    |
| 92     | 83.9   | 83.7   | 82.5   | NM_003052.2    |
| 88.8   | 98.9   | 94.1   | 92.7   | NM_006424.2    |
| 92.3   | 93.2   | 90.9   | 85.2   | NM_080877.1    |
| 1732.9 | 1836   | 1665.6 | 1600.4 | NM_006416.2    |
| 753.2  | 577.3  | 489.1  | 343.7  | NM_001032289.1 |
| 121.3  | 112.1  | 113.7  | 99.8   | NM_001032289.1 |
| 170.8  | 162    | 132.7  | 147.4  | NM_005660.1    |
| 157.9  | 132.9  | 133.4  | 140.7  | NM_005660.1    |
| 692.3  | 415.1  | 419.8  | 337.4  | NM_012243.1    |
| 475    | 478.5  | 326.8  | 294.3  | NM_080670.2    |
| 523    | 529.8  | 479    | 412.6  | NM_017945.2    |
| 3080.7 | 2438.9 | 2076   | 1615.5 | NM_005827.1    |
| 753.2  | 783.1  | 679    | 645.6  | NM_178148.1    |
| 508.3  | 503.6  | 394.2  | 438.2  | NM_015948.2    |
| 175.6  | 162.6  | 135.2  | 176.2  | NM_032826.3    |
| 162.3  | 119.9  | 104.5  | 118.8  | NM_018389.3    |
| 153.8  | 152.9  | 131.7  | 139.7  | NM_173073.2    |
| 213.1  | 221.1  | 221.2  | 168.1  | NM_173073.2    |
| 91.1   | 77.2   | 83.9   | 92.8   | NM_173179.2    |
| 115    | 100.9  | 89.2   | 100.6  | NM_015139.1    |
| 154.2  | 195    | 162.2  | 158.4  | NM_007001.1    |
| 88.3   | 82.4   | 79.9   | 87.5   | NM_001008783.1 |
| 569    | 654.3  | 1025.5 | 674.2  | NM_024881.3    |
| 102    | 99.2   | 103.8  | 109.6  | NM_182838.1    |
| 318    | 343.4  | 335.6  | 292.4  | NM_018656.2    |
| 100.5  | 92.8   | 85.5   | 96.3   | NM_001001479.1 |
| 95.8   | 112.4  | 101    | 88.3   | NM_001029858.1 |
| 960.6  | 429.3  | 465.3  | 325.4  | NM_017515.3    |
| 94     | 92.2   | 78.3   | 85.3   | NM_173508.1    |
| 84.3   | 93.1   | 74.2   | 81.8   | XM_939358.1    |
| 91.9   | 95.2   | 91.4   | 95     | XM_936857.1    |
| 162.6  | 147.9  | 131.3  | 139.5  | NM_025181.2    |
| 222.6  | 210.7  | 171.3  | 184    | NM_078483.2    |
| 79.7   | 76.8   | 83.9   | 79.9   | NM_181776.1    |
| 88.2   | 76.3   | 92.6   | 77.7   | NM_181774.2    |
| 601.7  | 335.9  | 317.8  | 433.6  | NM_152313.2    |
| 139.3  | 126.7  | 112.5  | 111.8  | NM_018964.3    |
| 83.7   | 79.1   | 75.4   | 88.1   | NM_198277.1    |
| 143.8  | 134.4  | 108    | 105.5  | NM_032295.2    |
| 97.1   | 88.5   | 98.4   | 89.8   | NM_207113.1    |
| 544.6  | 363    | 372.5  | 204    | NM_001467.3    |
| 142    | 107.6  | 95.3   | 101.1  | NM_030674.2    |
| 992.4  | 707.6  | 598    | 626.4  | NM_030674.2    |
| 461    | 413.4  | 397.2  | 444.4  | NM_018976.3    |
| 93.4   | 91.4   | 91.3   | 97.6   | NM_006841.3    |

|        |        |        |        |                |
|--------|--------|--------|--------|----------------|
| 118.2  | 112.1  | 109.5  | 107.3  | NM_033518.1    |
| 187.4  | 196.5  | 176.1  | 171.6  | NM_153811.1    |
| 1392.1 | 1309.9 | 1063.3 | 769.8  | NM_014437.3    |
| 187.9  | 211.2  | 167.6  | 178.2  | NM_020342.1    |
| 442.5  | 511.8  | 453.1  | 442.5  | NM_139177.2    |
| 89.2   | 94.9   | 90.4   | 100    | NM_152725.1    |
| 111.7  | 101.5  | 103.5  | 96.1   | NM_152264.2    |
| 478.9  | 228.1  | 166.5  | 185.3  | NM_015359.1    |
| 90.4   | 88.2   | 91.2   | 87     | NM_014579.1    |
| 352.1  | 239.2  | 229.8  | 197.1  | NM_144564.4    |
| 2449.3 | 1915.2 | 1649.3 | 1006.2 | NM_144564.4    |
| 206.6  | 158.5  | 135.5  | 142.4  | NM_213568.1    |
| 82.7   | 85.5   | 82     | 93     | NM_130849.1    |
| 95     | 95.1   | 84     | 84.5   | NM_017767.1    |
| 85.4   | 87.3   | 82.7   | 89.8   | NM_173596.1    |
| 163.8  | 162.8  | 149.5  | 178    | NM_012319.2    |
| 109.1  | 115.1  | 95.7   | 99.9   | NM_001077516.1 |
| 125.6  | 130.8  | 111.7  | 115.9  | NM_006979.1    |
| 470.1  | 273.5  | 203    | 221.6  | NM_022154.5    |
| 183.2  | 115.7  | 96.4   | 115    | NM_018375.2    |
| 88     | 80.8   | 78.3   | 85.4   | NM_000341.2    |
| 634.3  | 409    | 381.5  | 278.8  | NM_001013251.1 |
| 128.7  | 111.7  | 113.6  | 108.3  | NM_001012661.1 |
| 936    | 622.5  | 517.6  | 420    | NM_001012661.1 |
| 153.2  | 261.5  | 214.7  | 244.2  | NM_014585.3    |
| 155    | 123.4  | 129.2  | 135    | NM_173854.4    |
| 92.3   | 88.3   | 85.1   | 83.5   | NM_032148.2    |
| 696.9  | 462.3  | 492.2  | 302.9  | NM_001008485.1 |
| 76.8   | 82.7   | 77     | 79.7   | NM_001008487.1 |
| 383.6  | 273.9  | 287.5  | 185.9  | NM_017836.3    |
| 100.6  | 100.2  | 94.6   | 91.8   | NM_003627.4    |
| 170.8  | 278.7  | 265.2  | 138.6  | NM_152346.1    |
| 685.5  | 781.2  | 573    | 544.6  | NM_017611.2    |
| 76.4   | 83.8   | 78     | 79.8   | NM_014096.2    |
| 179.5  | 273.4  | 172.4  | 192.9  | NM_199329.1    |
| 131.4  | 124.7  | 120.3  | 112.3  | NM_199329.1    |
| 2989.1 | 3224.5 | 3221.1 | 1839.6 | NM_080546.2    |
| 948.7  | 1579.3 | 1148.3 | 1196.5 | NM_022109.2    |
| 85.8   | 104.4  | 111.2  | 95.9   | NM_020428.2    |
| 106.5  | 112.7  | 113.1  | 101.1  | NM_152369.2    |
| 96.6   | 91.7   | 94.5   | 96.2   | NM_025257.1    |
| 2902.9 | 4210.1 | 6000.7 | 3972.5 | NM_032794.1    |
| 92     | 91.4   | 87.8   | 92.2   | NM_032794.1    |
| 99.6   | 84.1   | 71.8   | 83.1   | NM_152697.2    |
| 96.9   | 102.3  | 90.8   | 86.1   | NM_001080397.1 |
| 79.8   | 91.6   | 80.8   | 73.1   | NM_016180.3    |
| 89.9   | 91.5   | 90     | 94     | NM_016180.3    |
| 101.2  | 90.4   | 93     | 83.3   | NM_001012509.1 |
| 224.4  | 201.3  | 170    | 182.5  | NM_033102.1    |
| 211.3  | 212.8  | 215.1  | 178.6  | NM_001080431.1 |

|       |       |       |                     |
|-------|-------|-------|---------------------|
| 78.2  | 88    | 76.6  | 83.4 NM_000342.1    |
| 87.8  | 76.7  | 81.7  | 96.6 NM_022058.2    |
| 218.1 | 163.3 | 173.3 | 148.4 NM_032034.1   |
| 129.7 | 159.6 | 111   | 127.6 NM_018158.1   |
| 202.1 | 250.6 | 209.2 | 209.8 NM_003040.2   |
| 86.9  | 105.2 | 107.4 | 116.2 NM_005070.1   |
| 86.2  | 81.7  | 82.5  | 89.1 NM_201574.1    |
| 96.3  | 94.3  | 92.4  | 90 NM_003759.1      |
| 241.3 | 473.8 | 770.7 | 439.1 NM_133478.2   |
| 84.6  | 81    | 88.8  | 80.9 NM_133478.2    |
| 92.8  | 89.5  | 92.5  | 99 NM_133479.1      |
| 357.4 | 343.7 | 337.2 | 313.7 NM_003615.2   |
| 97.7  | 113   | 122.7 | 110.6 NM_004858.1   |
| 89.7  | 95.5  | 92.3  | 99.4 NM_001039960.1 |
| 86.5  | 100.5 | 81.9  | 83.2 NM_031467.1    |
| 102.9 | 94.9  | 91.6  | 102.8 NM_000343.1   |
| 94.6  | 89.7  | 91.3  | 95 NM_152351.2      |
| 99.6  | 89    | 89    | 92.5 XM_941678.1    |
| 83.3  | 84.5  | 85.5  | 76 NM_152351.2      |
| 92.1  | 81.7  | 96.6  | 86.4 NM_001042450.1 |
| 96.7  | 84.8  | 88.6  | 95 NM_052944.2      |
| 88    | 78.9  | 84    | 90.1 NM_001042366.1 |
| 87.4  | 78.7  | 76.9  | 80.9 NM_178498.2    |
| 76.5  | 80.7  | 75.3  | 77.9 NM_001042366.1 |
| 92.4  | 94.2  | 86.8  | 85 NM_003041.1      |
| 93.8  | 92.6  | 95.3  | 95.5 NM_006933.2    |
| 84.7  | 83.6  | 85    | 87.7 NM_014227.1    |
| 96.4  | 85.3  | 88.4  | 85.4 NM_000453.1    |
| 683.6 | 463.7 | 359.1 | 326.5 NM_021095.1   |
| 87.9  | 83.8  | 83.1  | 86 NM_021815.2      |
| 119.1 | 132.3 | 173.3 | 137.7 NM_145913.2   |
| 90    | 94.2  | 83.1  | 94.9 NM_001011547.1 |
| 79.4  | 84    | 77    | 85.9 NM_003042.2    |
| 89.9  | 90.1  | 87.2  | 92.4 NM_014229.1    |
| 109   | 104.8 | 101.9 | 92 NM_003044.2      |
| 127.8 | 107.2 | 107.3 | 104.3 NM_016615.2   |
| 96.8  | 96.3  | 92.3  | 89 NM_007231.1      |
| 100.5 | 95.6  | 94.3  | 90 NM_182767.3      |
| 92    | 94.8  | 97    | 96.1 NM_182767.3    |
| 90.3  | 97.4  | 89.2  | 99.3 NM_018057.4    |
| 87.1  | 92.7  | 89.4  | 89.3 NM_014037.2    |
| 86.5  | 87.2  | 85.5  | 88.3 NM_001010898.1 |
| 112.5 | 95.5  | 91.6  | 99.9 NM_182632.1    |
| 87.7  | 72.2  | 73.5  | 81.5 NM_001003841.1 |
| 100   | 97.6  | 89.8  | 98.1 NM_001043.2    |
| 97.8  | 87    | 91.5  | 94.6 NM_020208.2    |
| 82.7  | 85.9  | 79.2  | 82 NM_022405.2      |
| 96.9  | 93.5  | 88.1  | 96.8 NM_020208.2    |
| 91.6  | 87.5  | 81.4  | 91.8 NM_001044.2    |
| 92.4  | 84.4  | 82.6  | 83.3 NM_001045.2    |

|        |        |        |                      |
|--------|--------|--------|----------------------|
| 86.3   | 79.5   | 79.8   | 85.4 NM_004211.1     |
| 106.3  | 102    | 99.6   | 101.3 NM_003043.2    |
| 96.5   | 90.7   | 84     | 95.9 NM_014228.2     |
| 107.2  | 138.1  | 123.4  | 122.7 NM_005629.1    |
| 101.8  | 94.3   | 103.1  | 83 NM_201649.2       |
| 97.8   | 98.9   | 95.1   | 94 NM_006934.2       |
| 89.8   | 86.3   | 84.1   | 93 NM_001024845.1    |
| 1185.5 | 1034.3 | 876.6  | 639.3 NM_003045.3    |
| 113.2  | 131.3  | 128.1  | 106.4 NM_019849.1    |
| 222.5  | 182.6  | 156.1  | 151.6 NM_014331.2    |
| 80.6   | 71.8   | 85.8   | 76.9 NM_138817.2     |
| 89.7   | 87.4   | 89     | 93.5 NM_020949.1     |
| 93.3   | 88.8   | 81.7   | 86.3 NM_001008539.1  |
| 79.1   | 82     | 76.9   | 78.5 NM_003046.2     |
| 226.4  | 118.2  | 110.8  | 116.7 NM_003046.2    |
| 95.7   | 91.9   | 90.9   | 85.3 NM_001048164.1  |
| 93.7   | 85.5   | 78     | 93.6 NM_032803.3     |
| 81.8   | 87.1   | 89.7   | 89.4 NM_004173.1     |
| 3581.7 | 1226.7 | 1015.9 | 450.2 NM_003486.5    |
| 221    | 158    | 153.9  | 154.9 NM_003983.3    |
| 193.5  | 146.5  | 127.3  | 119 NM_001076785.1   |
| 154.4  | 142.7  | 137.3  | 119.8 NM_032178.1    |
| 638.3  | 581.4  | 494.8  | 459.2 NM_003982.2    |
| 87.3   | 87.6   | 74.1   | 89.3 NM_012244.2     |
| 103    | 95.3   | 95.9   | 88.6 NM_182728.1     |
| 102.9  | 104.5  | 95.9   | 88.1 NM_012244.2     |
| 118.7  | 113    | 101.2  | 107.9 NM_014270.3    |
| 85     | 91.8   | 84.1   | 90.7 NM_021097.1     |
| 100.8  | 92.2   | 89.6   | 83.9 NM_015063.1     |
| 83.4   | 81.7   | 75.9   | 89.9 NM_182936.1     |
| 101.1  | 81.9   | 95.4   | 98.5 NM_033262.3     |
| 81.6   | 81.2   | 72.4   | 86.3 NM_183002.1     |
| 530.2  | 462.7  | 458.9  | 241.2 NM_003047.2    |
| 101.6  | 91.8   | 90.6   | 95.3 NM_183061.1     |
| 90.3   | 86.1   | 78.9   | 85.6 NM_178527.2     |
| 83.3   | 82     | 68.2   | 87.1 NM_003048.3     |
| 97.4   | 92.4   | 88.4   | 85 NM_004174.1       |
| 478.3  | 415.9  | 398.5  | 235.1 NM_004252.1    |
| 88.2   | 79     | 80.4   | 84.7 NM_004785.3     |
| 623.6  | 184.1  | 123.7  | 144.2 NM_001011552.1 |
| 101.1  | 88.1   | 90.8   | 93.4 NM_004594.1     |
| 89.2   | 88.6   | 75     | 81.4 NM_001042537.1  |
| 90.5   | 88.5   | 84.3   | 92.5 NM_001042537.1  |
| 460    | 369.6  | 314.3  | 348.5 NM_006359.1    |
| 100.7  | 89.5   | 88.1   | 91.1 NM_032591.1     |
| 146    | 143    | 115.5  | 132.4 NM_015266.1    |
| 105.1  | 92     | 87.6   | 96.3 NM_173653.1     |
| 83.1   | 68.5   | 69.7   | 85.9 NM_005075.2     |
| 87.9   | 84.1   | 86.4   | 80.9 NM_005075.2     |
| 81.1   | 77.8   | 78.3   | 85.6 NM_021094.2     |

|        |        |        |                      |
|--------|--------|--------|----------------------|
| 93     | 90     | 86.6   | 91.1 NM_021094.2     |
| 86.8   | 77.9   | 80.2   | 88.4 NM_134431.1     |
| 83.8   | 78.1   | 85.8   | 79.8 NM_006446.2     |
| 90.3   | 80.4   | 71.2   | 78.8 NM_019844.1     |
| 81.6   | 79     | 76     | 81.9 NM_017435.2     |
| 93.7   | 83.3   | 87.2   | 92.6 NM_005630.1     |
| 104.9  | 105.8  | 95.1   | 94.3 NM_007256.2     |
| 92.9   | 96     | 88.9   | 89 NM_013272.2       |
| 129    | 140.9  | 141.2  | 134.5 NM_013272.2    |
| 243.4  | 169.6  | 146.9  | 143 NM_016354.3      |
| 94.9   | 102.6  | 104.7  | 93.6 NM_180991.4     |
| 88.7   | 86.4   | 84.1   | 89.9 NM_030958.1     |
| 86.8   | 90.6   | 71.5   | 83.9 NM_173488.2     |
| 397    | 267.4  | 251.1  | 244.4 NM_032336.1    |
| 364.8  | 257.7  | 231.4  | 228.7 NM_152270.2    |
| 101.6  | 97.3   | 107.8  | 91.7 NM_144682.3     |
| 107.8  | 86.1   | 89.9   | 84.4 NM_182854.1     |
| 114.5  | 108.7  | 103.6  | 105.3 NM_182854.1    |
| 112.2  | 102.7  | 92.7   | 87.7 NM_003061.1     |
| 94.8   | 94.3   | 80.8   | 94.6 NM_004787.1     |
| 89.6   | 87.7   | 89.9   | 80.3 NM_003062.1     |
| 114    | 98.9   | 105.2  | 89.5 NM_138440.1     |
| 85.9   | 78.4   | 82.7   | 89.9 NM_052910.1     |
| 86.7   | 78     | 85.9   | 85.9 NM_032539.2     |
| 100.2  | 94.6   | 84.8   | 97.4 NM_014926.2     |
| 357.1  | 319    | 294.6  | 264.6 NM_173078.2    |
| 100.7  | 101.2  | 96.3   | 100.9 NM_015567.1    |
| 92.8   | 93.9   | 88.2   | 96.6 NM_032229.2     |
| 191.7  | 183.2  | 180.6  | 183.6 NM_014720.2    |
| 779.2  | 735.5  | 668.6  | 622.3 NM_007159.2    |
| 301.5  | 170.6  | 190    | 153.2 NM_006553.2    |
| 93.7   | 78.2   | 81.8   | 84.8 NM_003063.1     |
| 370.3  | 416.8  | 298.4  | 313.7 NM_003064.2    |
| 965.1  | 1055.4 | 1070.9 | 803.2 NM_017968.2    |
| 441.5  | 574.9  | 511.3  | 372 NM_001013843.1   |
| 170.6  | 166.8  | 154.9  | 176.6 NM_024755.2    |
| 643.7  | 600.4  | 470.2  | 553 NM_006425.3      |
| 91     | 87.5   | 87.9   | 83.6 NM_020427.2     |
| 153.3  | 200.4  | 240.6  | 220.6 NM_021652.2    |
| 86.6   | 89.9   | 86     | 88.2 NM_021036.1     |
| 92.9   | 95.8   | 91.7   | 93.5 NM_005900.2     |
| 97     | 85.4   | 88     | 82.4 NM_001003688.1  |
| 162.6  | 183.8  | 149.5  | 150.5 NM_001003652.1 |
| 80.5   | 80.8   | 81     | 90.2 NM_005901.3     |
| 231.4  | 253.9  | 255.6  | 225.4 NM_005902.3    |
| 1001.1 | 824    | 855.6  | 657.5 NM_005359.3    |
| 90.5   | 90     | 92.6   | 99.9 NM_001001419.1  |
| 88.1   | 85.9   | 88.3   | 92.4 NM_005903.5     |
| 646.9  | 723.4  | 717.2  | 418.8 NM_005903.5    |
| 336.4  | 294.4  | 304    | 158.6 NM_005585.2    |



|         |         |         |                       |
|---------|---------|---------|-----------------------|
| 112     | 99.9    | 89.8    | 100.4 NM_005904.2     |
| 91.3    | 83.9    | 88.4    | 93.7 NM_005905.2      |
| 95.8    | 87.1    | 85.3    | 89.3 NM_001018082.1   |
| 127.1   | 107.9   | 110.2   | 129.5 NM_014267.3     |
| 552.1   | 671     | 501     | 494.6 NM_021940.2     |
| 126.3   | 131.6   | 118     | 119.2 NM_021940.2     |
| 10868.2 | 11249.3 | 11513.5 | 5966.6 NM_022733.1    |
| 81.1    | 90.3    | 81.2    | 87.8 NM_003069.2      |
| 88      | 94      | 92.7    | 95.9 NM_003070.3      |
| 1125.5  | 1270.7  | 1184.1  | 1279.6 NM_139045.2    |
| 130     | 117.9   | 118.8   | 121 NM_003071.2       |
| 466.5   | 563.9   | 472     | 550.2 NM_003071.2     |
| 1406.1  | 957.5   | 960.8   | 534.5 NM_003072.2     |
| 205.9   | 230.6   | 166.9   | 190.4 NM_003601.2     |
| 220.8   | 185.6   | 170.8   | 158.8 NM_020159.1     |
| 380.9   | 390.2   | 363.2   | 287.8 NM_014140.2     |
| 352.4   | 259     | 241.2   | 234.8 NM_001007468.1  |
| 438.1   | 403.4   | 301.8   | 299.9 NM_001007468.1  |
| 1053.4  | 1484.6  | 927     | 1279 NM_003074.2      |
| 99.3    | 88.9    | 81.2    | 87.4 NM_139067.1      |
| 495.9   | 646.8   | 601.7   | 487.9 NM_003075.2     |
| 147.1   | 194.5   | 205.1   | 219.5 NM_003075.2     |
| 90.8    | 103.1   | 90.3    | 82 NM_003076.3        |
| 625.3   | 531.7   | 526.3   | 349.7 NM_003076.3     |
| 459.1   | 280.1   | 253.4   | 272 NM_003077.2       |
| 95.2    | 115.2   | 120.3   | 106.5 NM_001003802.1  |
| 83      | 84.1    | 82.4    | 77.3 NM_001003801.1   |
| 192     | 253.6   | 270.1   | 214.6 NM_003078.3     |
| 417.6   | 371.8   | 278.3   | 337.7 NM_003079.4     |
| 249.3   | 192.3   | 163.2   | 180.7 NM_020123.2     |
| 105.4   | 114.4   | 116.4   | 125.1 NM_006306.2     |
| 103.1   | 102     | 105.4   | 103.9 NM_148674.3     |
| 123.2   | 141     | 123.7   | 128.5 NM_001042550.1  |
| 457     | 408.8   | 373.8   | 337.6 NM_001042550.1  |
| 420.8   | 338.7   | 226     | 287.1 NM_006444.1     |
| 110.5   | 98.9    | 101.5   | 111.3 NM_005445.3     |
| 2778.7  | 2026.9  | 1371.4  | 1815.3 NM_001002800.1 |
| 157     | 121     | 138.8   | 130.7 NM_001002800.1  |
| 134.6   | 111.4   | 108.5   | 116.4 NM_005496.3     |
| 87.4    | 74.5    | 75      | 84.9 NM_015110.1      |
| 94.3    | 89.4    | 82.5    | 91.4 NM_024624.3      |
| 79.2    | 95      | 81.4    | 76.6 NM_030663.2      |
| 88.2    | 77.7    | 85.4    | 85.7 NM_139162.2      |
| 92.5    | 85.9    | 88.9    | 84.1 NM_139162.2      |
| 81.5    | 79.5    | 81.5    | 83.4 NM_144775.1      |
| 111     | 115.2   | 115.6   | 114.2 NM_004187.1     |
| 256.8   | 336.8   | 324.4   | 236.5 NM_004653.3     |
| 730.5   | 756.1   | 637     | 619.9 NM_020463.1     |
| 86.2    | 91.5    | 80.1    | 91.4 NR_002784.1      |
| 470.7   | 761.9   | 565.4   | 672.1 NM_015092.3     |

|        |        |        |                     |
|--------|--------|--------|---------------------|
| 543.8  | 542.5  | 511.6  | 269.8 NM_015327.1   |
| 88.6   | 90.8   | 95.4   | 96.6 NM_017575.3    |
| 174    | 191.5  | 178.9  | 182.2 NM_201569.1   |
| 93.1   | 103.8  | 96     | 94.7 NM_173156.1    |
| 488.7  | 751.7  | 562.7  | 684.1 NM_014837.3   |
| 81.1   | 84.7   | 95.9   | 82.2 NM_022874.1    |
| 124.2  | 123.7  | 118.6  | 115.1 NM_022875.1   |
| 718.2  | 349.6  | 315    | 355.3 NM_005871.2   |
| 113.5  | 125.8  | 101.2  | 119.8 NM_005631.3   |
| 79.5   | 78.4   | 70.9   | 76.7 NM_001034852.1 |
| 90.5   | 76.8   | 78.1   | 91.4 NM_022137.3    |
| 93.3   | 98.2   | 85.1   | 93.2 NM_022138.1    |
| 155.9  | 130    | 119.6  | 101.1 NM_019025.2   |
| 114.9  | 106.9  | 93.3   | 111.3 NM_175840.1   |
| 92.1   | 88     | 85.9   | 91 NM_175842.1      |
| 131.4  | 143.5  | 121    | 113.3 NM_000543.3   |
| 122    | 85.2   | 75.2   | 89.2 NM_001007593.1 |
| 175.1  | 162.5  | 145.1  | 149.3 NM_003080.1   |
| 96.6   | 101.6  | 103.6  | 94.4 NM_018667.2    |
| 108.5  | 102.1  | 87.3   | 103.2 NM_006714.2   |
| 96.3   | 101.6  | 93.4   | 96.9 NM_001009568.1 |
| 89.1   | 98.8   | 95.2   | 98.1 NM_014474.2    |
| 89.4   | 86.6   | 91.4   | 92.6 NM_014474.2    |
| 99.6   | 91.3   | 79.7   | 89.9 NM_014332.1    |
| 87     | 84     | 87.1   | 85.9 NM_012390.3    |
| 97.3   | 88.8   | 97.2   | 85.6 NM_006685.2    |
| 952.8  | 908.4  | 697.6  | 719.1 NM_004595.2   |
| 102    | 95.7   | 92.3   | 82.8 NM_134269.1    |
| 89.9   | 91.7   | 92.3   | 98.8 NM_134269.1    |
| 261.4  | 215.8  | 178.4  | 188.1 NM_006932.3   |
| 192.8  | 140.3  | 127    | 134.3 NM_018225.1   |
| 406.4  | 404    | 373.3  | 309 NM_014311.1     |
| 98.7   | 103.9  | 113.7  | 98.4 NM_181349.1    |
| 94     | 89.3   | 88.5   | 83 NM_020429.1      |
| 107.8  | 102.6  | 101    | 82.4 NM_022739.3    |
| 77.9   | 71.5   | 70.6   | 75.9 NM_198274.2    |
| 219.4  | 252    | 221.1  | 223.4 NM_020197.1   |
| 2971.6 | 2058.4 | 1384.6 | 1496 NM_022743.1    |
| 216.4  | 187.1  | 188.2  | 189.1 NM_052928.1   |
| 106.2  | 95.6   | 98.4   | 102.4 NM_006062.1   |
| 89.2   | 82.7   | 83.8   | 94.8 NM_023068.2    |
| 92.8   | 98     | 81.9   | 84 NM_052870.1      |
| 86     | 77.5   | 85.5   | 91.3 NM_005985.2    |
| 128    | 96.2   | 91.8   | 93.4 NM_003068.3    |
| 112.1  | 100.2  | 95.6   | 109.9 NM_178310.1   |
| 335.7  | 225.5  | 211.1  | 212.3 NM_003825.2   |
| 183.5  | 171.9  | 165.1  | 173.6 NM_130798.1   |
| 105.6  | 99.2   | 110.7  | 98.2 NM_130811.1    |
| 143.3  | 111.4  | 111.1  | 111.5 NM_003081.2   |
| 302.9  | 362.5  | 262.9  | 254.1 NM_004782.2   |

|         |        |         |                     |
|---------|--------|---------|---------------------|
| 100     | 143.3  | 158.3   | 159.2 NM_014841.1   |
| 121.3   | 123.7  | 106.2   | 95.4 NM_012437.3    |
| 148.1   | 190    | 249.7   | 167.5 NM_003082.2   |
| 345.2   | 309.4  | 243.7   | 188.3 NM_003083.1   |
| 75.4    | 80.4   | 77.7    | 77.8 NM_001039697.1 |
| 1173.6  | 863    | 964     | 551.9 NM_003086.1   |
| 150.9   | 156.7  | 134.3   | 141.3 NM_006049.1   |
| 110.2   | 96.5   | 83.8    | 86.2 NM_007308.1    |
| 78.3    | 85.4   | 77.5    | 95.7 NM_000345.2    |
| 83.9    | 74.2   | 79.6    | 89.2 NM_005460.2    |
| 84.2    | 91.3   | 82.5    | 81.5 XM_936492.1    |
| 93.3    | 91.6   | 90.3    | 84.5 NM_003085.3    |
| 82.1    | 91.5   | 85.4    | 87.4 NM_003087.1    |
| 1084.4  | 1158.1 | 1113.1  | 807.7 NM_014390.2   |
| 105.9   | 116    | 109.7   | 96.7 NM_173354.2    |
| 105.2   | 105    | 99.1    | 89.6 NM_015191.1    |
| 248.7   | 315.9  | 332.2   | 199.8 NM_007241.2   |
| 265.8   | 174.4  | 176.2   | 146.2 NM_018664.1   |
| 88.4    | 80.2   | 91.5    | 80.1 NR_001459.2    |
| 92.7    | 90.8   | 84.3    | 89 NR_002909.1      |
| 83.3    | 89.3   | 90.1    | 84.4 NM_001048198.1 |
| 6284.2  | 5951.7 | 4797.9  | 5266.5 NR_003038.1  |
| 103.2   | 85.4   | 82.2    | 84 NR_003192.1      |
| 85.7    | 76.4   | 82      | 87.2 NM_025248.1    |
| 221.6   | 220.2  | 189.5   | 160.6 NM_024700.2   |
| 111.7   | 116.3  | 103.8   | 103.9 NM_003498.3   |
| 133.1   | 128.2  | 105.5   | 121.3 NR_003032.1   |
| 94.3    | 84.8   | 90.5    | 89 NR_001293.1      |
| 98.8    | 91.6   | 89.2    | 89.1 NR_003317.1    |
| 88.7    | 87.4   | 78.5    | 95.2 NR_003319.1    |
| 144.2   | 101.3  | 101.4   | 117.6 NR_002448.1   |
| 155.5   | 115.4  | 101.9   | 111.7 NR_000016.1   |
| 254     | 220.7  | 238.3   | 175 NR_002745.1     |
| 209.8   | 180.4  | 168.4   | 180.3 NR_002739.1   |
| 85.4    | 95     | 88.7    | 90.2 NM_014723.2    |
| 837     | 937.4  | 954.5   | 688.5 NM_017719.3   |
| 315.8   | 296    | 244.7   | 250.7 NM_003089.4   |
| 3421.5  | 2488   | 2315.9  | 1702.7 NM_003089.4  |
| 101.3   | 101.1  | 93.2    | 95.6 NM_001009820.1 |
| 664.4   | 529.9  | 480.3   | 414.8 NM_004596.3   |
| 4538.5  | 2716.6 | 2416.3  | 1993.1 NM_003090.2  |
| 3365.7  | 1252.8 | 1251.4  | 654.6 NM_003091.3   |
| 3990.6  | 2090.3 | 2029.1  | 1421.7 NM_003091.3  |
| 2870.8  | 2330.1 | 1978    | 1476.8 NM_003092.3  |
| 824.8   | 811.7  | 679.2   | 573.8 NM_003092.3   |
| 1732.4  | 1623.3 | 1154.5  | 1175.4 NM_003093.1  |
| 257.5   | 168    | 144.6   | 149.6 NM_006938.2   |
| 99      | 96.4   | 87.6    | 92 NM_177542.1      |
| 22265.9 | 16546  | 16523.9 | 11091.8 NM_004597.4 |
| 366     | 247.2  | 249.1   | 178.8 NM_004175.3   |

|         |         |        |                      |
|---------|---------|--------|----------------------|
| 98      | 94.8    | 85.4   | 86.4 NM_003094.2     |
| 8342.3  | 7294.3  | 6431.7 | 4633.8 NM_003095.2   |
| 19486.5 | 12376.1 | 9526.3 | 9877.1 NM_003096.2   |
| 2007.5  | 1362.8  | 1409.4 | 681.9 NM_022805.2    |
| 81.2    | 85.6    | 83.8   | 88.9 NM_022807.2     |
| 168.6   | 165.5   | 141.2  | 135.8 NM_003098.2    |
| 650.7   | 376.3   | 392.1  | 318.3 NM_021021.2    |
| 90.5    | 90.5    | 74.6   | 89.5 NM_006750.2     |
| 192.5   | 144.7   | 143.5  | 117.2 NM_006750.2    |
| 75      | 78.7    | 82.2   | 88 NM_018967.2       |
| 93.3    | 98.1    | 90.5   | 93.2 NM_018968.2     |
| 763.9   | 628     | 528.6  | 480.9 NM_001042581.1 |
| 1849.8  | 1372.1  | 1243.3 | 923.3 NM_005678.3    |
| 109.7   | 89.4    | 103.1  | 101.7 NM_022804.2    |
| 152.6   | 138.7   | 118.2  | 140.8 NM_012245.2    |
| 158.3   | 196.7   | 209.9  | 207.3 NM_003099.3    |
| 185.3   | 233     | 265.2  | 241.8 NM_013322.2    |
| 588     | 474.7   | 439.6  | 265.4 NM_152244.1    |
| 95.9    | 99.5    | 95.4   | 91.5 NM_152244.1     |
| 112.5   | 116.4   | 108.5  | 115.6 NM_013346.2    |
| 184.4   | 183.9   | 172    | 178.5 NM_015132.2    |
| 95.6    | 69.3    | 87.4   | 73.1 NM_153816.2     |
| 570     | 447.5   | 439.2  | 483.1 NM_020468.2    |
| 100.5   | 97.5    | 99.2   | 97.4 NM_013306.3     |
| 108.9   | 102.1   | 100.6  | 105.4 NM_013306.3    |
| 240.3   | 200.9   | 192.6  | 175 NM_022133.2      |
| 85.1    | 73.9    | 80.9   | 82.7 NM_152837.1     |
| 1369.2  | 1132.3  | 1066   | 712 NM_014748.2      |
| 301.2   | 241     | 230    | 236.4 NM_014758.1    |
| 1646.3  | 1608.6  | 1417.3 | 1184.8 NM_003100.2   |
| 79.4    | 85.7    | 87.7   | 79.4 NM_001042633.1  |
| 92.2    | 90.7    | 87.7   | 84.3 NM_024798.2     |
| 95.1    | 100.2   | 104.1  | 106.6 NM_014035.1    |
| 127     | 122.8   | 101.7  | 108.4 NM_031953.2    |
| 513.7   | 636.7   | 788.7  | 374.7 NM_052948.2    |
| 1388.1  | 1501.7  | 1510.6 | 700.8 NM_030918.5    |
| 9321.5  | 8087.6  | 8767   | 6478.9 NM_152828.2   |
| 852.9   | 679.3   | 716.9  | 547.6 NM_003794.2    |
| 408.5   | 288.2   | 268.5  | 219.5 NM_152227.1    |
| 258.7   | 244.5   | 223.5  | 184.7 NM_014426.2    |
| 309.8   | 228.2   | 249.8  | 168.3 NM_152233.1    |
| 103.2   | 92.8    | 94.7   | 93.3 NM_021249.2     |
| 82.1    | 75.3    | 82.8   | 85.4 NM_152238.1     |
| 116.3   | 108.6   | 89.2   | 106.7 NM_152238.1    |
| 116     | 110.5   | 99.8   | 115.1 NM_015976.2    |
| 324.3   | 268.3   | 254.1  | 224.7 NM_013321.1    |
| 79.7    | 73.6    | 86     | 83.2 NM_016224.3     |
| 138.9   | 122.6   | 100.7  | 125.4 NM_003101.4    |
| 86.2    | 85.6    | 80     | 78.3 NM_003578.3     |
| 92.6    | 97.1    | 93.3   | 93 NM_003745.1       |

|        |        |        |                      |
|--------|--------|--------|----------------------|
| 102.1  | 104.5  | 104.5  | 106.7 NM_003877.3    |
| 87.6   | 84.7   | 87.4   | 84.4 NM_003955.3     |
| 120.3  | 109.6  | 90.1   | 98.9 NM_199421.1     |
| 446.1  | 348.2  | 324.9  | 349 NM_080867.2      |
| 81.4   | 73.3   | 79.2   | 85.9 NM_144949.2     |
| 97.3   | 82.7   | 70.3   | 86.8 NM_014011.4     |
| 118.6  | 103.5  | 105.8  | 106.8 NM_014011.4    |
| 87.1   | 95.2   | 87.7   | 82 NM_004232.2       |
| 106    | 88.5   | 96.8   | 101 XM_936572.1      |
| 90.7   | 97.8   | 80.7   | 81.4 NM_014598.1     |
| 6568.4 | 4331.8 | 4220.2 | 3870.8 NM_000454.4   |
| 258    | 212.2  | 199.8  | 179.5 NM_001024466.1 |
| 1347.5 | 1163.2 | 910.4  | 962.9 NM_001024465.1 |
| 94     | 86.7   | 88.7   | 88.8 NM_000636.2     |
| 81.2   | 84.5   | 71.5   | 77.5 NM_003102.1     |
| 86.1   | 79.3   | 78     | 80.3 NM_017826.1     |
| 161.8  | 158.9  | 132.7  | 136.6 NM_005632.2    |
| 228    | 327.8  | 263.8  | 283 NM_032195.1      |
| 176.2  | 159.1  | 158.8  | 167.2 NM_138927.1    |
| 295.5  | 339.5  | 272.1  | 251.1 NM_032195.1    |
| 2495.5 | 3044.6 | 3050.5 | 2669.5 NM_138927.1   |
| 113.8  | 89.1   | 92.4   | 94 NM_015385.1       |
| 88     | 98.3   | 86.3   | 86 NM_015385.2       |
| 93.7   | 93.6   | 90.5   | 99.1 NM_006434.1     |
| 84.3   | 92.1   | 82.4   | 84.3 NM_001034955.1  |
| 104    | 100.9  | 93.3   | 94.9 NM_001034954.1  |
| 104.2  | 91.6   | 85.6   | 100.8 NM_003603.4    |
| 77.7   | 79.1   | 80.5   | 86.1 NM_003603.4     |
| 101.7  | 86.8   | 87.1   | 87 NM_021069.3       |
| 90.8   | 86.3   | 86.2   | 83 NM_001018003.1    |
| 109.7  | 98.9   | 85.6   | 104 NM_005775.3      |
| 464.4  | 212    | 199.6  | 147.3 NM_005775.3    |
| 81.3   | 76.9   | 74     | 81.5 NM_001013031.1  |
| 93.7   | 98.3   | 88.9   | 92.4 NM_001013031.1  |
| 86.1   | 87     | 88.1   | 93.6 NM_052918.3     |
| 83     | 90.7   | 69.9   | 92.3 NM_020777.1     |
| 77     | 78.1   | 80.6   | 74.2 NM_014978.1     |
| 161.5  | 135    | 115.5  | 113.6 NM_003104.3    |
| 172.5  | 148.4  | 120.3  | 134.9 NM_003104.3    |
| 121.2  | 146.8  | 138.1  | 125.6 NM_003105.3    |
| 142.3  | 137.5  | 133.6  | 109.6 NM_002959.4    |
| 127.4  | 137.8  | 126.6  | 134.4 NM_005633.2    |
| 110.4  | 99.3   | 102.8  | 82.5 NM_006939.1     |
| 87.7   | 81.8   | 80     | 90.4 NM_025237.2     |
| 117.2  | 99.4   | 96.9   | 109.4 NM_015464.1    |
| 84.1   | 82.2   | 82     | 83.6 NM_005986.2     |
| 82.1   | 84.8   | 84.2   | 83.7 NM_006941.3     |
| 88.3   | 80.5   | 78.4   | 83.7 NM_003108.3     |
| 107.8  | 115.6  | 119.8  | 108.7 NM_006943.2    |
| 131.5  | 176.1  | 189.2  | 115.3 NM_005686.2    |

|       |       |       |                      |
|-------|-------|-------|----------------------|
| 97    | 86.6  | 84.8  | 88 NM_004189.2       |
| 106.7 | 95.4  | 98.4  | 94 NM_006942.1       |
| 84.2  | 83.1  | 86.2  | 83.8 NM_022454.2     |
| 202   | 122.6 | 137.1 | 108.6 NM_018419.2    |
| 87.4  | 72.9  | 76.8  | 84.5 NM_003106.2     |
| 104.6 | 108.3 | 96.2  | 95.5 NM_007084.2     |
| 138.6 | 103.9 | 98.6  | 94.5 NM_005634.2     |
| 79.8  | 82.3  | 82.7  | 88.4 NM_007017.2     |
| 96.2  | 94.8  | 90    | 97.3 NM_178424.1     |
| 112.3 | 109   | 107.9 | 107 NM_003107.2      |
| 89.1  | 84.6  | 85.8  | 87.2 NM_152989.2     |
| 84    | 81.2  | 84.8  | 82.3 NM_006940.4     |
| 100.9 | 96.9  | 83.9  | 92.7 NM_152989.2     |
| 91.2  | 83.4  | 80.3  | 81.9 NM_017508.1     |
| 93    | 90.8  | 91.1  | 97.1 NM_017508.1     |
| 83.3  | 78.8  | 84.6  | 82.2 NM_017508.1     |
| 79.5  | 80.3  | 70.6  | 79.5 NM_033326.2     |
| 99.9  | 92.5  | 93    | 91.7 NM_031439.2     |
| 96.6  | 101.8 | 91.8  | 92 NM_014587.2       |
| 94.2  | 100.9 | 96.9  | 105.2 NM_000346.2    |
| 340.1 | 362.6 | 354.4 | 229.1 NM_138473.2    |
| 197.4 | 199.1 | 171   | 156.6 NM_001080391.1 |
| 141.8 | 142.2 | 136.4 | 136.1 NM_003113.2    |
| 178.2 | 170.4 | 157.2 | 161.6 NM_001080391.1 |
| 685.7 | 418.6 | 425.1 | 340.9 NM_004510.2    |
| 446.5 | 382.2 | 309.8 | 257.9 NM_004510.2    |
| 91    | 102.2 | 95.3  | 91.2 NM_080424.1     |
| 88.9  | 85    | 79.8  | 78.2 NM_001005176.1  |
| 100   | 103.1 | 90    | 94.5 NM_007237.3     |
| 87.4  | 98.5  | 84    | 86.4 NM_001005176.1  |
| 263.5 | 285.4 | 226.5 | 237.1 NM_003110.4    |
| 160.6 | 155.2 | 155.6 | 179.2 NM_001017371.3 |
| 97.3  | 90.3  | 92.3  | 84.5 NM_001017371.3  |
| 102.9 | 93.6  | 102.3 | 100.9 NM_003111.3    |
| 111.6 | 102.7 | 93.7  | 120.7 NM_003112.3    |
| 98.1  | 99.3  | 87.6  | 94.1 NM_001003845.1  |
| 93.4  | 94.5  | 90.7  | 92.7 NM_199262.2     |
| 85.5  | 91.9  | 78.3  | 84.5 NM_152860.1     |
| 79    | 89    | 75.8  | 82.4 NM_182700.2     |
| 98.1  | 86.5  | 86.7  | 104.2 NM_198956.1    |
| 536.9 | 217.1 | 200.2 | 203.9 NM_017425.2    |
| 104.6 | 107.4 | 92.2  | 89.9 NM_030960.2     |
| 94.8  | 102.2 | 105.9 | 86.6 NM_173847.2     |
| 94.4  | 84.4  | 81.2  | 90 NM_133498.2       |
| 96.5  | 86.8  | 80.7  | 82.5 NM_205856.2     |
| 96.5  | 83.1  | 88.3  | 91.7 NM_001079900.1  |
| 168   | 117.5 | 100.9 | 112.6 NM_003114.3    |
| 111.2 | 106.8 | 111.3 | 106.7 NM_003114.3    |
| 78.7  | 83.6  | 91    | 87.7 NM_172218.1     |
| 84.4  | 84.4  | 75.3  | 84.9 NM_058203.1     |

|       |        |       |                      |
|-------|--------|-------|----------------------|
| 105.1 | 95.3   | 91.2  | 90.9 NM_001081552.2  |
| 82.8  | 92     | 76.3  | 73.5 NM_024532.3     |
| 101.3 | 78.9   | 81.4  | 86.9 NM_001025436.1  |
| 99.8  | 97     | 98.9  | 105.6 NM_001025436.1 |
| 87.3  | 91.9   | 82.9  | 87.5 NM_206996.1     |
| 106.1 | 116    | 102.7 | 101.5 NM_003116.1    |
| 101.5 | 103.3  | 96.9  | 103.8 NM_080675.3    |
| 178.8 | 158.2  | 131.2 | 149.2 NM_006461.3    |
| 101.8 | 92.7   | 87.4  | 90.2 NM_012443.2     |
| 134.3 | 99.5   | 94.5  | 113.7 NM_172242.1    |
| 244.6 | 254.7  | 210.2 | 184.2 NM_004890.1    |
| 86.8  | 100.2  | 86.4  | 93.7 NM_172312.1     |
| 85.6  | 83.6   | 82    | 97.5 NM_001039592.1  |
| 274.1 | 386.9  | 276.5 | 250.6 NM_172345.1    |
| 127.3 | 155.4  | 130.3 | 138.5 NM_172345.1    |
| 776.8 | 1117.3 | 942   | 792.2 NM_003971.3    |
| 103.1 | 100.6  | 110.3 | 90.9 NM_003117.3     |
| 99.2  | 89.6   | 86.4  | 87.3 NM_153189.1     |
| 86.4  | 81.7   | 78.5  | 85.8 NM_013453.2     |
| 85.1  | 91.6   | 81.1  | 80.8 NM_032461.2     |
| 79.4  | 81.1   | 81.3  | 75.5 NM_022661.2     |
| 96.7  | 93.5   | 89.6  | 98.1 NM_145665.1     |
| 89.3  | 81.3   | 83.3  | 83.3 NM_001009614.1  |
| 92.9  | 85.1   | 87.5  | 86 NM_001009615.1    |
| 87.3  | 77.6   | 73.3  | 85.5 NM_001009609.1  |
| 84.7  | 79.5   | 85.4  | 77.9 NM_001009613.1  |
| 81.3  | 76.9   | 87.5  | 76.1 NM_001009616.1  |
| 80.9  | 81.9   | 73.7  | 84.3 NM_003118.2     |
| 76.9  | 86.7   | 74.5  | 83.4 NM_004684.2     |
| 118.5 | 126.6  | 113.9 | 118.5 NM_199436.1    |
| 106.7 | 86.1   | 98.7  | 92.7 NM_014946.3     |
| 88.1  | 84.2   | 80.1  | 88.6 NM_022354.1     |
| 90.3  | 93.2   | 98.2  | 92.2 NM_181727.1     |
| 100.1 | 102.9  | 100   | 92.7 NM_153023.1     |
| 94.9  | 84.7   | 78.5  | 84.6 NM_031955.2     |
| 89.9  | 99.7   | 91.5  | 93.7 NM_145263.1     |
| 76.5  | 86.9   | 90.6  | 89.7 NM_174927.1     |
| 181.1 | 192.3  | 167.5 | 151.4 NM_006038.2    |
| 496.1 | 562.3  | 547.9 | 311.9 NM_022827.2    |
| 80.7  | 91.4   | 85.7  | 81.7 NM_198546.1     |
| 87.9  | 82.9   | 82.8  | 95.3 NM_032598.2     |
| 85.1  | 85.9   | 76.3  | 82.8 NM_139073.2     |
| 102.1 | 98.7   | 90.9  | 90.2 NM_144644.2     |
| 93    | 87.7   | 77.9  | 80.4 NM_145207.1     |
| 643.1 | 498.9  | 376.3 | 468.6 NM_024063.1    |
| 90.1  | 87.7   | 85.3  | 77.2 NM_019073.1     |
| 248.4 | 230.9  | 251.1 | 194.7 NM_018418.1    |
| 87.6  | 87.8   | 82.6  | 94.8 NM_018418.1     |
| 105.3 | 102.3  | 94    | 97.6 NM_018418.1     |
| 105   | 112.1  | 101.6 | 108.2 NM_173499.2    |

|        |        |        |                      |
|--------|--------|--------|----------------------|
| 82.7   | 82.6   | 90.2   | 98.3 NM_173360.2     |
| 92.2   | 83.8   | 82.3   | 84 XM_937647.1       |
| 98.7   | 96.1   | 95.4   | 95.8 NM_198572.1     |
| 71.4   | 79.5   | 78.5   | 76 NM_145026.2       |
| 122.2  | 124.3  | 106.7  | 108.1 NM_023071.1    |
| 732.4  | 390.6  | 376.2  | 341.7 NM_182513.1    |
| 243.9  | 99.8   | 79.2   | 83.3 NM_020675.3     |
| 9225.7 | 5885.5 | 5343.5 | 5901.1 NM_014041.2   |
| 103.7  | 85     | 74.6   | 83.8 NM_014752.1     |
| 354.8  | 181.5  | 177.7  | 172.1 NM_021928.1    |
| 83.8   | 84.9   | 89.5   | 85.3 NM_012391.1     |
| 97.1   | 101.4  | 99.6   | 98.9 NM_001008779.1  |
| 93.1   | 91.1   | 88.4   | 100.1 NM_182756.2    |
| 83.1   | 84.9   | 82     | 88.1 NM_001008779.1  |
| 95.7   | 94.4   | 94.3   | 76.7 NM_001033554.1  |
| 114.4  | 97     | 92.1   | 105.5 NM_001033554.1 |
| 734.6  | 1023.5 | 1065.8 | 655.1 NM_015001.2    |
| 90.9   | 96.7   | 100.6  | 83.1 NM_152719.1     |
| 101.9  | 92.3   | 92.9   | 88.5 NM_145658.1     |
| 115.7  | 126.3  | 127.6  | 116.5 NM_006459.2    |
| 117.4  | 101.3  | 90.2   | 97.2 NM_001003790.1  |
| 580.8  | 552.5  | 524    | 425.6 NM_007175.5    |
| 140.8  | 150.2  | 139.3  | 145.5 NM_015087.3    |
| 206.3  | 148.3  | 127.4  | 115.1 NM_016630.3    |
| 886.9  | 731.5  | 639    | 463.3 XM_945608.1    |
| 136.5  | 125.8  | 126.9  | 111.8 NM_181598.2    |
| 194.1  | 170.6  | 173    | 144.3 NM_199367.1    |
| 106.4  | 106    | 114.2  | 114.9 NM_199367.1    |
| 950.5  | 1102.3 | 1498.9 | 710.2 NM_003119.2    |
| 125.6  | 119.7  | 107.2  | 106.9 NM_006542.2    |
| 124.1  | 157.6  | 135.9  | 125.8 NM_021972.2    |
| 93.2   | 84.9   | 91.6   | 90.9 NM_182965.1     |
| 1244.6 | 807.9  | 758.2  | 331.5 NM_020126.3    |
| 401.1  | 279.8  | 201.5  | 271.4 NM_003120.2    |
| 855.4  | 649.9  | 430.7  | 446.5 NM_003120.1    |
| 146.2  | 92.1   | 99.2   | 119.4 NM_003121.2    |
| 92.5   | 101.3  | 84.2   | 95.2 NM_152323.1     |
| 202.8  | 175.4  | 173.5  | 173.3 NM_006717.1    |
| 509.9  | 498.1  | 523.4  | 323.6 NM_032038.1    |
| 93.8   | 96.7   | 88.5   | 92.4 NM_019003.2     |
| 89.9   | 77.3   | 81.9   | 82.8 NM_001006681.1  |
| 101    | 85.6   | 91.2   | 88.5 NM_001006682.1  |
| 92     | 89.9   | 87.1   | 94.3 NM_003122.2     |
| 89.8   | 87.8   | 76.3   | 85.6 NM_021114.1     |
| 82.3   | 85.4   | 83     | 80.8 NM_014471.1     |
| 102.4  | 87.5   | 89.6   | 88.7 NM_006846.2     |
| 96.5   | 92.8   | 86.2   | 94.5 NM_001001325.1  |
| 83.9   | 88.8   | 91.4   | 81.7 NM_205841.2     |
| 98.3   | 94.8   | 89     | 95.5 NM_032566.2     |
| 99.1   | 98.4   | 107.1  | 102.7 NM_001040433.1 |



|        |        |        |                       |
|--------|--------|--------|-----------------------|
| 89.2   | 90.1   | 76.6   | 81 NM_020398.2        |
| 137.1  | 138.7  | 145.1  | 128.6 NM_181502.1     |
| 83.8   | 84.9   | 84     | 81.8 NM_020398.2      |
| 79.8   | 86.7   | 94.6   | 75.7 NM_181642.2      |
| 110    | 97.8   | 98     | 105.6 NM_003710.3     |
| 154.3  | 128.6  | 127.8  | 115.2 NM_021102.2     |
| 92.2   | 89.4   | 78.1   | 80.2 XM_938199.1      |
| 530.7  | 522.3  | 392.8  | 343 NM_020148.1       |
| 113.3  | 111.1  | 111.8  | 102.3 NM_032451.1     |
| 1886.2 | 987.8  | 1014.5 | 869.1 NM_001030288.1  |
| 101.4  | 91.6   | 87.5   | 84.1 NM_001030288.1   |
| 108.3  | 99.9   | 102.4  | 111.1 NM_003123.3     |
| 85.6   | 85.7   | 81.4   | 84.5 NM_012444.2      |
| 92     | 108.2  | 106    | 88.7 NM_198265.1      |
| 91.3   | 91.1   | 86.7   | 96.9 NM_144569.3      |
| 190.2  | 542.6  | 478.7  | 397.1 NM_004598.2     |
| 109.5  | 110    | 109.4  | 102.6 NM_014767.1     |
| 76.3   | 82.8   | 82.2   | 77.5 NM_016950.2      |
| 87.6   | 92.7   | 80.9   | 87.9 NM_006108.1      |
| 88.7   | 80.1   | 85     | 81.3 NM_012445.1      |
| 1533.4 | 2176.3 | 2106.4 | 1371.6 NM_001007230.1 |
| 101    | 94.5   | 96.4   | 87.1 NM_001007228.1   |
| 101.5  | 119    | 113    | 122.6 NM_000582.2     |
| 99.2   | 99.9   | 97.1   | 107.5 NM_001040058.1  |
| 78     | 85.1   | 78.6   | 89.4 NM_006944.2      |
| 1346.6 | 1049.2 | 933.8  | 718.6 NM_032802.2     |
| 96.1   | 102.2  | 94.9   | 94.8 NM_020172.1      |
| 85.6   | 107    | 92.3   | 94.2 NM_001077238.1   |
| 117.5  | 122.6  | 98.7   | 118.9 NM_152988.1     |
| 90     | 96.7   | 93.2   | 96.3 NM_139015.3      |
| 257.4  | 189.3  | 153.1  | 158 NM_003124.3       |
| 307.5  | 97.7   | 102.9  | 96.5 NM_152594.1      |
| 237.8  | 233.9  | 217.1  | 176.7 NM_181784.1     |
| 93.7   | 92.3   | 91.6   | 91.2 XM_946006.1      |
| 95.7   | 90.8   | 78.8   | 87.2 NM_001042522.1   |
| 99.1   | 96.2   | 80.9   | 90.5 NM_001039616.1   |
| 121.2  | 95.6   | 91.3   | 95.4 NM_001012508.2   |
| 86.8   | 80.6   | 70     | 83.5 NM_005987.2      |
| 106.1  | 102.7  | 105.3  | 102.3 NM_003125.1     |
| 88.2   | 85.3   | 76.6   | 88.9 NM_005988.2      |
| 100.7  | 85.4   | 91.9   | 90.1 NM_001017418.1   |
| 81.1   | 87.8   | 90.6   | 84.3 NR_003062.1      |
| 77     | 77.9   | 72.5   | 81.4 NM_006945.3      |
| 96.4   | 82.2   | 81.5   | 80.3 NM_001024209.2   |
| 82.3   | 80.2   | 79.4   | 87.5 NM_001014450.1   |
| 96.9   | 87.2   | 91.7   | 106.2 NM_001014291.1  |
| 99.1   | 95     | 97.6   | 101.5 NM_005416.1     |
| 86.2   | 97.9   | 81.1   | 101 NM_173080.1       |
| 87.1   | 84.4   | 90.4   | 86.1 NM_005841.1      |
| 94.2   | 96.8   | 89.8   | 78.9 NM_005841.1      |

|        |        |        |                      |
|--------|--------|--------|----------------------|
| 293.2  | 191.3  | 206.6  | 177 NM_005842.2      |
| 93.8   | 92.5   | 92     | 97.7 NM_005840.1     |
| 159.6  | 232.8  | 158.7  | 162.4 NM_030964.2    |
| 209.8  | 225.3  | 201.5  | 115.2 NM_032840.1    |
| 125.9  | 119.1  | 115.7  | 104.8 NM_025106.2    |
| 163.4  | 220.3  | 173.8  | 205.6 NM_032641.1    |
| 614.1  | 664.5  | 890.4  | 350.1 NM_080861.3    |
| 92.7   | 89     | 87.4   | 90.1 NM_080862.1     |
| 104.2  | 108.7  | 98.6   | 108.9 NM_003126.1    |
| 274.2  | 301.2  | 276.1  | 246.6 NM_003127.1    |
| 90.4   | 92     | 94.1   | 74.4 NM_001024858.1  |
| 102    | 99.3   | 93.4   | 91.2 NM_000347.4     |
| 96.9   | 97     | 95.1   | 94.9 NM_178313.1     |
| 102.3  | 97.3   | 87.2   | 95.6 NM_178313.1     |
| 160.3  | 157.7  | 153    | 155.1 NM_003128.1    |
| 108.9  | 96.7   | 101.9  | 89.3 NM_006946.1     |
| 81.7   | 91     | 94.5   | 85.4 NM_025213.2     |
| 91.6   | 88.3   | 85.3   | 87.9 NM_025213.2     |
| 90.2   | 81.6   | 92.1   | 86 NM_016642.1       |
| 1846.2 | 2054.8 | 2323.6 | 1759.1 NM_178324.1   |
| 223.1  | 178.2  | 158.4  | 152.4 NM_006415.2    |
| 300.4  | 216    | 196.8  | 166.5 NM_178324.1    |
| 127    | 153.7  | 133.8  | 135.9 NM_004863.2    |
| 81.3   | 85.3   | 79.2   | 85.1 NM_018327.2     |
| 186.9  | 167.7  | 152.6  | 139.9 NM_194285.2    |
| 101.6  | 96.7   | 89.2   | 89.3 NM_032567.2     |
| 2147.9 | 1722.4 | 1406.8 | 1863.9 NM_003129.3   |
| 531.9  | 487.2  | 386.1  | 315.5 NM_021199.2    |
| 1612.5 | 928.4  | 1346.5 | 709.3 NM_003900.3    |
| 1055.7 | 1228.9 | 792    | 846.6 NM_001080415.1 |
| 182.5  | 203.4  | 182.9  | 168 NM_001035235.2   |
| 106.2  | 113.8  | 98.9   | 107.5 NM_021228.1    |
| 84.7   | 86.9   | 82     | 89 NM_198291.1       |
| 94.6   | 97.7   | 100.2  | 87.1 NM_005417.3     |
| 220.4  | 154.4  | 143.7  | 147.1 NM_005417.3    |
| 89.5   | 96     | 89.3   | 87.5 NM_006662.1     |
| 95.6   | 89.8   | 79.8   | 81.9 NM_080744.1     |
| 104.5  | 91     | 94.6   | 94.9 NM_001047.1     |
| 92.3   | 91.3   | 81.4   | 82.6 NM_000348.2     |
| 145.9  | 132.5  | 124.9  | 131.6 NM_024592.1    |
| 90.2   | 78     | 80.4   | 75.5 NM_001010874.2  |
| 267.9  | 248.1  | 254.2  | 215.4 NM_004176.3    |
| 88.7   | 81.8   | 80.4   | 86.5 NM_001005291.1  |
| 139.2  | 134.9  | 132.9  | 149.7 NM_004176.3    |
| 117.6  | 103    | 103.3  | 89.3 NM_004599.2     |
| 1957   | 1744.6 | 1662.5 | 836.4 NM_003131.2    |
| 335.5  | 415.6  | 323.5  | 277.7 NM_152546.1    |
| 90.2   | 91.6   | 87.1   | 89.6 NM_020762.1     |
| 237.6  | 251.9  | 244.6  | 195.9 XM_936300.1    |
| 85.6   | 77.1   | 78.5   | 86.2 NM_015326.2     |

|         |         |         |                      |
|---------|---------|---------|----------------------|
| 95.5    | 109.2   | 111     | 109.5 NM_015326.2    |
| 83      | 87.2    | 78.1    | 81.8 NM_015326.2     |
| 111.4   | 128.6   | 128.5   | 113.6 NM_001033117.1 |
| 99.2    | 102.5   | 98.6    | 104.6 NM_014850.2    |
| 13558.8 | 10862.3 | 12205.9 | 7411.2 NM_002727.2   |
| 82.1    | 82.5    | 84.3    | 91.3 NM_198901.1     |
| 219.2   | 197     | 178.7   | 154.4 NM_003130.2    |
| 301.9   | 320.7   | 261.6   | 227.6 NM_003130.2    |
| 1034.6  | 618.5   | 466.4   | 408.8 NM_003132.2    |
| 95.4    | 92.1    | 91.6    | 89.8 NM_080823.2     |
| 6975    | 6516    | 6918.7  | 5639.2 NM_003134.2   |
| 1419.8  | 1377.7  | 1594.9  | 1261.8 NR_003273.1   |
| 976.1   | 797.2   | 637.4   | 717.3 NM_003135.1    |
| 859.8   | 602.4   | 485.7   | 436.6 NM_032102.1    |
| 1891.9  | 1420.2  | 1134.5  | 1188.1 NM_003136.2   |
| 1158.6  | 1168.6  | 931.2   | 842 NM_014230.2      |
| 336.3   | 286.4   | 230.6   | 229.7 NM_006947.2    |
| 8663.5  | 6588.8  | 5670.9  | 6312.9 NM_003133.2   |
| 1409.8  | 1301.9  | 1044    | 1201.9 NM_003137.3   |
| 117.3   | 147     | 143.2   | 143.7 NM_182691.1    |
| 128.8   | 100     | 102.3   | 109.9 NM_182692.1    |
| 108.2   | 110.1   | 100.1   | 115.2 NM_182691.1    |
| 683.5   | 323.7   | 250.8   | 222.3 NM_003139.2    |
| 2626.1  | 1437    | 1195.8  | 828.3 NM_021203.2    |
| 111.4   | 105     | 83.3    | 89.2 NM_006307.2     |
| 81.5    | 95.2    | 83      | 79.6 NM_014467.1     |
| 123.2   | 123.4   | 114.5   | 105.6 NM_021947.1    |
| 2423    | 1798.9  | 1817    | 1527.4 NM_005839.2   |
| 2403.2  | 2837.9  | 2953    | 2248.3 NM_016333.2   |
| 98.9    | 109     | 93.3    | 99.4 NM_080743.2     |
| 1016.8  | 667.4   | 485.9   | 556.2 NM_080725.1    |
| 89.5    | 89.6    | 83.8    | 82.5 NM_003140.1     |
| 105.4   | 102.9   | 84      | 83.1 NM_005637.2     |
| 103.4   | 107.7   | 105.1   | 101.5 NM_001007559.1 |
| 157.5   | 248.7   | 227.6   | 182 NM_015558.3      |
| 83.5    | 81.9    | 75.3    | 78.3 NM_198935.1     |
| 6935.1  | 4729.8  | 4561    | 3580 NM_016305.1     |
| 88.2    | 88.2    | 77      | 87.6 NM_003142.2     |
| 2676.3  | 1790.5  | 1519.8  | 1641.8 NM_003143.1   |
| 351.7   | 345.1   | 348.6   | 300.9 NM_012446.2    |
| 135.1   | 194.4   | 170.4   | 188.6 NM_018070.3    |
| 112.3   | 142.9   | 122.9   | 138 NM_145716.2      |
| 328.9   | 240.8   | 206.9   | 226.6 NM_032627.2    |
| 155.4   | 157.4   | 135     | 149.6 NM_006751.3    |
| 116.3   | 163.4   | 136.9   | 147.8 NM_018984.2    |
| 317.6   | 451.7   | 442.4   | 317.3 NM_033389.2    |
| 491.3   | 489.6   | 523.8   | 270.9 NM_017857.2    |
| 87      | 87.3    | 81.6    | 84.4 NM_017857.2     |
| 827.9   | 756.3   | 606.3   | 528.3 NM_003731.1    |
| 95      | 85.3    | 77.5    | 91.4 NM_005086.3     |

|        |        |        |        |                |
|--------|--------|--------|--------|----------------|
| 1613.6 | 1441.7 | 1314.8 | 1234.7 | NM_003144.2    |
| 1573.2 | 1374.6 | 985.8  | 852.9  | NM_003145.2    |
| 149.2  | 120.3  | 123.6  | 118.3  | NM_007107.2    |
| 5491.5 | 4687.4 | 4267.2 | 3021.9 | NM_006280.1    |
| 247.6  | 224    | 191    | 160.3  | NM_003146.2    |
| 158.4  | 110.9  | 117.6  | 102.5  | NM_006396.1    |
| 80.7   | 81.4   | 86.4   | 80.7   | NM_001048.3    |
| 74.5   | 77.2   | 74     | 78     | NM_001049.2    |
| 211.9  | 265.1  | 309.9  | 274.3  | NM_001050.2    |
| 100.3  | 85.4   | 100    | 89.8   | NM_001051.2    |
| 94.7   | 84.5   | 79.9   | 92.3   | NM_001052.1    |
| 78     | 89.9   | 86.4   | 89     | NM_001053.1    |
| 3221.9 | 2414.2 | 2205.4 | 1391.7 | NM_014188.2    |
| 87.7   | 81.1   | 87.5   | 96.8   | NM_005635.2    |
| 97.7   | 94.4   | 89.7   | 90.5   | NM_003147.4    |
| 83.7   | 76.1   | 75.1   | 85.3   | NM_003147.4    |
| 103.2  | 113.9  | 103.3  | 101.2  | NM_014021.2    |
| 84.4   | 85.9   | 87.1   | 85.2   | NM_175711.1    |
| 94.4   | 94.7   | 96.1   | 93.5   | NM_021014.2    |
| 85     | 87.3   | 85.6   | 87.9   | NM_175711.1    |
| 79.3   | 84.8   | 74     | 96.6   | NM_175729.1    |
| 92.4   | 92.2   | 82.3   | 87.5   | NM_005636.3    |
| 87.6   | 89     | 91.6   | 87.7   | NM_001034832.2 |
| 93.2   | 96.7   | 94     | 87.6   | NM_001034832.2 |
| 94.2   | 86.5   | 86.1   | 78.8   | NM_021015.3    |
| 96.4   | 94.8   | 86.3   | 92.6   | NM_021015.3    |
| 93     | 82.2   | 79.5   | 82.1   | NM_173357.2    |
| 85.6   | 88.7   | 78.5   | 80.1   | NM_173358.2    |
| 98.3   | 96.5   | 96.8   | 95.2   | NM_174962.2    |
| 71.7   | 71.6   | 80.3   | 77.2   | XM_937492.1    |
| 682    | 739.7  | 595.1  | 591.8  | NM_003932.3    |
| 353.5  | 303.2  | 231.6  | 223.1  | NM_021978.2    |
| 88.9   | 78     | 80.3   | 88.4   | NM_014682.1    |
| 332.7  | 418.3  | 333.8  | 333.1  | NM_173344.1    |
| 116.5  | 109.2  | 116.4  | 98.4   | NM_003033.2    |
| 101.7  | 126    | 123.9  | 101.7  | NM_006927.2    |
| 291.7  | 220.1  | 234.3  | 195.5  | NM_174970.1    |
| 575.3  | 511.4  | 539.5  | 282    | NM_006279.2    |
| 304    | 188.6  | 194.6  | 175.2  | NM_006278.1    |
| 117.8  | 111.7  | 123    | 97.6   | NM_001042437.1 |
| 198.1  | 225.8  | 217.8  | 214.7  | NM_003896.2    |
| 341.1  | 441    | 380.3  | 279.7  | NM_006100.2    |
| 88.7   | 93     | 86     | 81.7   | NM_139157.2    |
| 114.3  | 95.3   | 97.9   | 89.5   | NM_005418.3    |
| 84.4   | 90.4   | 79.8   | 79.3   | NM_005418.3    |
| 96.9   | 106.7  | 92.4   | 102.2  | NM_213618.1    |
| 81.1   | 98.5   | 89.8   | 91.8   | NM_173216.1    |
| 351.1  | 347.2  | 307.6  | 240.9  | NM_173217.1    |
| 96.5   | 93.6   | 82.3   | 93.7   | NM_003032.2    |
| 92.6   | 98.1   | 91     | 84.7   | NM_032528.1    |

|       |       |       |                      |
|-------|-------|-------|----------------------|
| 80.6  | 77.9  | 76.8  | 89.1 NM_018414.2     |
| 87.7  | 89.9  | 92.2  | 88.8 NM_006456.1     |
| 100.9 | 89.6  | 93.8  | 92.7 NM_152996.1     |
| 252.6 | 210.7 | 175.6 | 166 NM_175040.1      |
| 106.8 | 104.3 | 99.6  | 100.1 NM_175039.3    |
| 181.5 | 173.4 | 147.6 | 114.6 NM_175039.3    |
| 91.8  | 96.3  | 79.1  | 88 NM_030965.1       |
| 206.7 | 172.6 | 159.9 | 178.1 NM_013443.3    |
| 186.1 | 154.8 | 154.8 | 129.9 NM_018412.3    |
| 170.9 | 128   | 122.2 | 112 NM_021908.2      |
| 301.7 | 248.9 | 223.4 | 202.5 NM_018412.3    |
| 133.1 | 114.8 | 104.5 | 107.9 NM_138729.2    |
| 199.1 | 129.4 | 124.3 | 108.6 NM_138729.2    |
| 101.5 | 102.5 | 96.6  | 106.9 NM_198327.1    |
| 87.1  | 85.5  | 79.3  | 82.3 NM_003034.2     |
| 88.9  | 90.6  | 85.3  | 91.6 NM_006011.3     |
| 101.4 | 101.6 | 97    | 100.6 NM_015879.1    |
| 118.6 | 107.1 | 107.5 | 119.5 NM_175052.1    |
| 89.5  | 76.5  | 81.4  | 80.2 NM_175052.1     |
| 120.6 | 104.3 | 103.8 | 102.2 NM_005668.3    |
| 149.9 | 111.1 | 109.8 | 99.3 NM_013305.3     |
| 97.1  | 86.9  | 87.7  | 97.1 NM_001004470.1  |
| 85.4  | 78.5  | 82.6  | 81.4 NM_015136.2     |
| 95    | 80.1  | 89.4  | 89.2 NM_017564.9     |
| 95.7  | 78.3  | 78.6  | 91.2 NM_003149.1     |
| 96.6  | 96.8  | 96.8  | 107.2 NM_198993.2    |
| 109.4 | 96.2  | 113.9 | 101.3 NM_145064.1    |
| 391.9 | 301.5 | 269.2 | 240.4 NM_005862.2    |
| 122.5 | 106   | 98.4  | 97.1 NM_001042749.1  |
| 430.1 | 576   | 450.3 | 689.2 NM_006603.3    |
| 88.8  | 90.3  | 80.7  | 88.9 NM_006603.3     |
| 103.2 | 106.3 | 98.2  | 96.1 NM_012447.2     |
| 313.2 | 202.9 | 203.1 | 166.4 NM_003473.2    |
| 152.2 | 144.5 | 129.8 | 140.3 NM_005843.3    |
| 774.2 | 823.8 | 775.3 | 637 NM_201647.1      |
| 91.5  | 86.1  | 83.8  | 84.8 NM_213622.1     |
| 485.3 | 449.5 | 382.9 | 358.6 NM_006463.3    |
| 151.5 | 119   | 112.7 | 131.5 NM_020799.2    |
| 99.5  | 80.7  | 85.4  | 85.2 NM_017720.2     |
| 99.6  | 92.9  | 78.5  | 88.4 XM_939590.1     |
| 118.6 | 120.4 | 113.5 | 94.7 NM_017720.2     |
| 98.1  | 93.1  | 92.9  | 98.7 NM_017720.2     |
| 122.3 | 106.6 | 112.5 | 124.4 NM_001007243.1 |
| 169.5 | 118.3 | 98.7  | 105.2 NM_000349.2    |
| 137.2 | 123.3 | 144.4 | 117.4 NM_001007243.1 |
| 130.9 | 145.4 | 152.1 | 141.3 NM_006645.1    |
| 91.9  | 78.9  | 79.6  | 83 NM_052851.1       |
| 95.1  | 98.7  | 119.4 | 104.6 NM_178006.1    |
| 116.2 | 149.4 | 155.1 | 137.4 NM_178006.1    |
| 124.3 | 123.5 | 115.1 | 102.8 NM_178007.1    |

|        |        |        |                     |
|--------|--------|--------|---------------------|
| 144    | 124.3  | 118    | 123.3 NM_006804.2   |
| 527.1  | 517.6  | 411.9  | 405.6 NM_032016.2   |
| 87.8   | 87.7   | 86.8   | 85 NM_139164.1      |
| 83.8   | 83.9   | 88.7   | 86 NM_181900.2      |
| 147.7  | 152.6  | 143.7  | 113 NM_181900.2     |
| 81.9   | 78.8   | 81.1   | 80.9 NM_139171.1    |
| 5146.6 | 5217.1 | 4162.1 | 3706.1 NM_020151.2  |
| 1175   | 1054.8 | 951.2  | 940.8 NM_139267.1   |
| 151.2  | 116.3  | 103.4  | 103.6 NM_020151.2   |
| 115    | 115    | 117.6  | 100.3 NM_014725.2   |
| 276.9  | 195.6  | 187.1  | 206.9 NM_139266.1   |
| 884    | 519    | 574.4  | 438.5 NM_139266.1   |
| 1561.5 | 1580.6 | 1347.3 | 1121.3 NM_007315.2  |
| 547.7  | 1752.8 | 1932.8 | 1467.1 NM_005419.2  |
| 574.7  | 742.6  | 674.4  | 575.9 NM_213662.1   |
| 105.2  | 103.8  | 85.9   | 91.3 NM_003151.2    |
| 278.2  | 329.3  | 294.6  | 268.3 NM_003152.2   |
| 210.6  | 274    | 223.9  | 248.5 NM_012448.3   |
| 362.7  | 532.3  | 505.1  | 341.1 NM_003153.3   |
| 89.6   | 96.5   | 98.2   | 91.5 NM_001009181.1 |
| 665    | 658.2  | 612.1  | 500.1 NM_018255.1   |
| 98.1   | 102.6  | 96.2   | 101.9 NM_017453.1   |
| 578.5  | 573.3  | 430.5  | 551.3 NM_017454.1   |
| 3843.2 | 3417.9 | 3213.5 | 2367.9 NM_017454.2  |
| 343.1  | 199.8  | 165.2  | 196.5 NM_014393.1   |
| 97.7   | 92     | 91     | 96.6 NM_003155.2    |
| 120.7  | 84.7   | 85.3   | 89.8 NM_003714.2    |
| 140.9  | 135.4  | 149.3  | 150.1 NM_006948.4   |
| 84.5   | 81.2   | 77.6   | 82 NM_012449.2      |
| 98.2   | 94.4   | 95.2   | 98.9 NM_152999.2    |
| 87.6   | 96.6   | 85.1   | 88 NM_152999.2      |
| 77.7   | 79     | 83.5   | 87.9 NM_152999.2    |
| 85.8   | 83.8   | 72.3   | 80.2 NM_182915.2    |
| 416.1  | 481.4  | 440.7  | 269 NM_018234.2     |
| 77.4   | 80     | 85.7   | 73.1 NM_018234.2    |
| 88.4   | 77.9   | 81.7   | 86.4 NM_024636.1    |
| 89.1   | 96     | 79.4   | 79.3 NM_001006608.1 |
| 88.2   | 99.5   | 89.6   | 99.5 NM_001007532.1 |
| 1480.3 | 1282.7 | 1274.3 | 941.2 NM_003035.2   |
| 187.3  | 225.9  | 153.2  | 195.2 NM_003156.2   |
| 113.9  | 103.9  | 106.1  | 104.8 NM_020860.1   |
| 1689.9 | 1069.6 | 891.9  | 638.3 NM_006819.1   |
| 253.8  | 243.8  | 217.4  | 187.6 NM_005990.2   |
| 99.6   | 105.1  | 107.7  | 114.1 NM_000455.4   |
| 257.7  | 254.7  | 242.9  | 231.6 NM_052902.1   |
| 114.9  | 104.5  | 101.7  | 93.7 NM_003691.2    |
| 112.8  | 100.7  | 98.2   | 92.4 NM_001008910.1 |
| 90.1   | 84.6   | 94     | 78.6 NM_003691.2    |
| 86.7   | 86.7   | 81.6   | 81.9 NM_004760.1    |
| 92.2   | 100.6  | 86.5   | 92 NM_004226.2      |

|        |        |        |                      |
|--------|--------|--------|----------------------|
| 554    | 588    | 693.4  | 349.1 NM_004197.1    |
| 446.4  | 428.1  | 494.8  | 290.4 NM_032454.1    |
| 112.8  | 106.7  | 98     | 104.3 NM_014370.2    |
| 84.4   | 77.3   | 76.8   | 80.6 NM_003576.2     |
| 93.6   | 88.6   | 92.4   | 103.1 NM_001032296.1 |
| 4397.6 | 2421.2 | 2177.3 | 1518 NM_001032296.1  |
| 379.8  | 529.3  | 483.9  | 274.2 NM_006374.3    |
| 702.6  | 489.5  | 383.2  | 470.1 NM_006281.1    |
| 95.8   | 90.5   | 80.9   | 85.3 NM_031414.2     |
| 110.2  | 100.8  | 94.1   | 101.7 NM_031414.2    |
| 84     | 79     | 75.1   | 79.1 NM_032944.1     |
| 85.4   | 79.5   | 79.2   | 81.1 NM_145001.1     |
| 105    | 97.6   | 86.8   | 83.4 NM_018401.1     |
| 102.4  | 94.6   | 95.7   | 94.2 NM_173575.2     |
| 100.3  | 86.3   | 85.1   | 88.2 NM_030906.2     |
| 121.5  | 96.2   | 90     | 89.3 NM_080836.2     |
| 412.5  | 523    | 564.3  | 325.6 NM_015690.2    |
| 557    | 861.1  | 717.1  | 725.6 NM_007271.2    |
| 101    | 105.4  | 93.1   | 107.9 NM_015000.1    |
| 691.1  | 781.5  | 638.3  | 598.7 NM_013233.1    |
| 2378.6 | 1855.9 | 1631.3 | 1073.2 NM_006282.2   |
| 1050.5 | 1366.5 | 1221.6 | 811 NM_032017.1      |
| 101    | 105.3  | 91.1   | 94.3 NR_001587.1     |
| 105.5  | 94.7   | 100.2  | 94.5 NM_203399.1     |
| 3256.7 | 2350.3 | 1757.3 | 1522.6 NM_005563.3   |
| 322.7  | 252.5  | 216.5  | 210.4 NM_005563.3    |
| 78.2   | 84.4   | 72     | 75.3 NM_203401.1     |
| 88.8   | 83.5   | 81.6   | 84.5 NM_007029.2     |
| 88.8   | 92.5   | 79.9   | 84.3 NM_030795.2     |
| 588.7  | 381.2  | 288.5  | 233.4 NM_004099.4    |
| 506.4  | 201.3  | 203.1  | 146.1 NM_004099.4    |
| 108    | 106.2  | 94.8   | 92.8 NM_004809.3     |
| 3934.4 | 1954.9 | 1554.5 | 1332.5 NM_013442.1   |
| 83.9   | 88.5   | 85.4   | 84.3 NM_145286.1     |
| 85.7   | 95.4   | 80.7   | 85.6 NM_006873.2     |
| 91     | 83     | 83.4   | 87.6 NM_033104.2     |
| 89.4   | 82.4   | 87.2   | 86.1 NM_152709.3     |
| 217.2  | 251.9  | 265.3  | 229.4 NM_020225.1    |
| 2254.5 | 2284.3 | 2223.3 | 1242.8 NM_144998.2   |
| 93     | 82.7   | 80     | 88.6 NM_022369.2     |
| 481.1  | 384.6  | 296.7  | 288.4 NM_007178.2    |
| 391.4  | 492.4  | 408.2  | 495.3 NM_018387.2    |
| 104.6  | 108.5  | 116.4  | 103.6 NM_153700.2    |
| 117.1  | 109.4  | 101.5  | 104.7 NM_003162.2    |
| 682.8  | 608.9  | 491.9  | 493.5 NM_014574.2    |
| 181.4  | 150.3  | 135.1  | 128.5 NM_013403.1    |
| 102.9  | 106.5  | 102.7  | 94.1 NM_013403.2     |
| 84.5   | 99.6   | 80.8   | 84.7 NM_000351.3     |
| 257.8  | 285.5  | 271.9  | 181.6 NM_032873.3    |
| 1778.5 | 1287.2 | 936.7  | 821.8 NM_152713.2    |

|        |        |        |                      |
|--------|--------|--------|----------------------|
| 383.5  | 356.7  | 253.2  | 286.1 NM_178862.1    |
| 1039.3 | 834.1  | 732.8  | 668.5 NM_005861.2    |
| 686.4  | 725.3  | 724    | 569.4 NM_003765.1    |
| 312.2  | 433.3  | 293.5  | 347.1 NM_003764.2    |
| 233.9  | 217.5  | 194.4  | 176.7 NM_177424.1    |
| 90.5   | 90.1   | 96     | 89.8 NM_001001433.1  |
| 1823.1 | 2870.6 | 3301   | 1727.7 NM_003763.3   |
| 114.5  | 100.4  | 90.9   | 98.5 NM_017919.1     |
| 114.8  | 108.7  | 100.2  | 101.7 NM_016930.2    |
| 116.7  | 113.6  | 104.5  | 105.8 NM_001001850.1 |
| 140.1  | 125.1  | 119.6  | 125 NM_004603.1      |
| 91.4   | 85.4   | 81.7   | 85.3 NM_052874.1     |
| 305.6  | 377.1  | 344.5  | 248.5 NM_001980.2    |
| 252.1  | 249.5  | 278.8  | 296.2 NM_001980.2    |
| 357.5  | 372.9  | 319.2  | 283 NM_004177.3      |
| 795.4  | 653.5  | 672.6  | 431.5 NM_004604.3    |
| 1332   | 1058.8 | 1161.7 | 573.6 NM_003164.2    |
| 104.9  | 108.6  | 90.9   | 93.6 XM_938340.1     |
| 432.1  | 428.8  | 367.4  | 359 NM_003164.2      |
| 559.8  | 544.5  | 483.6  | 513.4 NM_005819.4    |
| 92     | 84     | 91.4   | 94.8 NM_003569.1     |
| 244    | 224.1  | 197.6  | 179.2 NM_004853.1    |
| 92.8   | 92.5   | 89.8   | 93.9 NM_003165.1     |
| 134.9  | 124.5  | 135.5  | 127.8 NM_001032221.1 |
| 104.2  | 88.7   | 97.1   | 90.7 NM_003165.1     |
| 1547.9 | 1030.2 | 789.3  | 771.3 NM_006949.1    |
| 956.1  | 507.3  | 433.6  | 514.5 NM_007269.1    |
| 545.1  | 932.1  | 776    | 738.2 NM_139244.2    |
| 121.9  | 99.6   | 93.4   | 110.5 NM_014178.6    |
| 85.8   | 94.5   | 90.9   | 87 NM_018423.1       |
| 93.3   | 83.9   | 78.1   | 88.7 NM_145251.2     |
| 888.8  | 926.2  | 713.5  | 667.5 NM_016086.2    |
| 608.8  | 376.2  | 385    | 366.2 NM_006713.2    |
| 727    | 636.9  | 483.8  | 556 NM_003850.1      |
| 1190   | 1093.5 | 944    | 698.1 NM_003849.1    |
| 436    | 434.5  | 315    | 289.6 NM_003848.1    |
| 101.1  | 86.9   | 92     | 77.6 NM_022491.2     |
| 84.3   | 89     | 80.5   | 84 NM_016169.2       |
| 477.8  | 304.2  | 264.1  | 253.8 NM_006704.2    |
| 104.7  | 96     | 96.1   | 98.7 NM_080740.3     |
| 128.8  | 103.1  | 91.8   | 102.8 NM_080764.2    |
| 304.1  | 293.8  | 281.2  | 244.2 NM_017666.2    |
| 171.1  | 131.9  | 126.8  | 136.8 NM_001002844.1 |
| 146.1  | 128    | 123.7  | 126.8 NM_001002844.1 |
| 113.2  | 106.7  | 105.1  | 101.8 NM_001002843.1 |
| 87.5   | 86.7   | 83.1   | 84.7 NM_015170.1     |
| 193.2  | 235.5  | 270.7  | 193.6 NM_018837.2    |
| 87.2   | 101.9  | 108.1  | 103.7 NM_018837.2    |
| 109.1  | 109.2  | 96.1   | 105.3 NM_177534.1    |
| 88.3   | 105.5  | 106.4  | 106.5 NM_177536.1    |



|        |        |        |        |                |
|--------|--------|--------|--------|----------------|
| 1587.9 | 2736.8 | 3661.8 | 2272.1 | NM_177530.1    |
| 84.1   | 89.1   | 83.3   | 94.8   | NM_177534.1    |
| 89.1   | 96.2   | 84     | 97.2   | NM_177528.1    |
| 150.3  | 240.7  | 218.1  | 206.7  | NM_001054.2    |
| 106.5  | 114.6  | 98.7   | 100.8  | NM_003166.3    |
| 388.9  | 375    | 365.3  | 327.6  | NM_001017391.1 |
| 95.9   | 90.2   | 82.7   | 86.6   | NM_001056.3    |
| 82.1   | 80.4   | 86.3   | 83.8   | NM_001056.3    |
| 89.4   | 79.3   | 81.1   | 92.1   | NM_006588.2    |
| 86.2   | 87     | 81     | 86.2   | NM_001008743.1 |
| 75.3   | 85.8   | 77.9   | 81.6   | NM_005420.2    |
| 104.7  | 88.7   | 97.5   | 94.9   | NM_003167.2    |
| 114.8  | 98.3   | 89.4   | 90.4   | NM_004605.2    |
| 202.2  | 160.7  | 171    | 139.9  | NM_177973.1    |
| 94.8   | 89.5   | 90.3   | 93.6   | NM_004605.2    |
| 89.2   | 87     | 79.9   | 78.8   | NM_176874.1    |
| 106.2  | 113.4  | 103.5  | 96.2   | NM_001032377.1 |
| 224.9  | 215.9  | 225.1  | 162.2  | NM_182760.2    |
| 286.6  | 146.7  | 167.7  | 157    | NM_015411.1    |
| 3690   | 2952   | 2790.5 | 1868   | NM_001042470.1 |
| 89     | 88.3   | 89.3   | 99.7   | NM_003352.4    |
| 91.9   | 93     | 81.4   | 91.7   | NM_003352.4    |
| 89.8   | 87.6   | 73.6   | 74.4   | NR_002189.2    |
| 87.5   | 71.1   | 78.7   | 81.2   | NR_002190.1    |
| 538    | 436.9  | 372.2  | 297.8  | NM_001005849.1 |
| 3879.1 | 3200.4 | 3245.8 | 2165.7 | NM_001005849.1 |
| 9014.7 | 6330.3 | 6052.7 | 3805.4 | NM_006936.2    |
| 102.6  | 100.8  | 86.7   | 90.3   | NM_001002255.1 |
| 112.6  | 111.4  | 112.8  | 101.8  | NM_001030019.1 |
| 86.5   | 83.7   | 85.4   | 82.8   | NM_152782.3    |
| 402.5  | 419.1  | 424.3  | 271.1  | NM_001032386.1 |
| 84.6   | 81.2   | 82.5   | 89.2   | NM_000456.2    |
| 152.1  | 164.2  | 148.7  | 140.7  | NM_001032386.1 |
| 2450.1 | 2247.9 | 1470.4 | 1353.7 | NM_007192.2    |
| 137.9  | 113.9  | 114.7  | 120.2  | NM_181356.1    |
| 130.2  | 103.1  | 135.5  | 114.8  | NM_003599.1    |
| 745.5  | 769.9  | 595.2  | 499.7  | NM_003168.1    |
| 578.1  | 531.4  | 477.5  | 480    | NM_003169.2    |
| 149.2  | 152.8  | 144.5  | 161    | NM_003170.3    |
| 120.6  | 101.7  | 102.3  | 104.7  | NM_014860.1    |
| 299.4  | 220.1  | 210.3  | 168.9  | NM_003171.2    |
| 97.5   | 102.9  | 101.7  | 106.9  | NM_004264.2    |
| 399.9  | 419.2  | 391.4  | 323.9  | NM_003172.2    |
| 109.7  | 119.3  | 105.6  | 107.7  | NM_017503.2    |
| 1292.3 | 889    | 729.4  | 593.5  | NM_033161.2    |
| 134.2  | 104.3  | 112.8  | 104.1  | NM_181491.1    |
| 511.5  | 374    | 426.3  | 216    | NM_006752.4    |
| 1085.8 | 773.8  | 700.8  | 484.8  | NM_006753.3    |
| 581.4  | 621.9  | 518.9  | 564.7  | NM_022486.3    |
| 96.5   | 83.8   | 89     | 86.4   | NM_019601.3    |

|        |        |        |                     |
|--------|--------|--------|---------------------|
| 410.3  | 306.4  | 322.1  | 204.1 NM_145006.2   |
| 83.1   | 80.4   | 87.4   | 84.9 NM_001037175.1 |
| 88.9   | 76.6   | 76.2   | 84.8 NM_001037175.1 |
| 1714.8 | 1038   | 1043.1 | 517.5 NM_003173.1   |
| 119.1  | 149.4  | 134.1  | 115.2 NM_024670.3   |
| 101.4  | 94.3   | 107.1  | 108.7 NM_017635.3   |
| 202.7  | 190.4  | 147.7  | 134.1 NM_017635.3   |
| 184.5  | 130.1  | 115.2  | 116.1 NM_016028.4   |
| 92.7   | 99     | 89.3   | 78.6 NM_032701.2    |
| 5468.6 | 5875.1 | 5429.8 | 4528.9 NM_015355.1  |
| 113.8  | 103.9  | 96.7   | 95.2 NM_014849.2    |
| 92.5   | 91.9   | 86.1   | 87.9 NM_014848.2    |
| 92.7   | 82.4   | 82.3   | 90.2 NM_014979.1    |
| 134.2  | 103.5  | 99.2   | 103.1 NM_153366.2   |
| 99.9   | 96     | 96.1   | 88.6 NM_021738.1    |
| 103.6  | 107.7  | 95.5   | 94.9 NM_003174.2    |
| 290.4  | 249    | 224.9  | 229.4 NM_003174.2   |
| 98.8   | 82.1   | 83.3   | 91.2 NM_018711.2    |
| 874    | 933.3  | 754.4  | 701.6 NM_015055.1   |
| 135.4  | 175.2  | 190.2  | 143 NM_032796.2     |
| 1716.1 | 1943   | 1706.8 | 1619.5 NM_005638.3  |
| 102.7  | 98.1   | 110.2  | 103 NM_201564.1     |
| 82.6   | 82.5   | 76.5   | 89.4 NM_130784.1    |
| 81.5   | 84.5   | 88.2   | 77.3 XM_942505.1    |
| 94.1   | 93.1   | 84     | 88.8 NM_003176.2    |
| 94.8   | 96.7   | 101.3  | 90.4 NM_014258.2    |
| 95.7   | 94.9   | 90.1   | 99.3 NM_153694.3    |
| 89.8   | 89.6   | 85.3   | 89.9 NM_033025.4    |
| 472.1  | 547.1  | 624.6  | 406.9 NM_207170.1   |
| 77.5   | 82.8   | 79.9   | 87.6 NM_015484.4    |
| 1431.5 | 1819.9 | 1996.7 | 1342.3 NM_015484.4  |
| 2207.7 | 2120.4 | 1796.3 | 1432 NM_003177.3    |
| 187.8  | 149.4  | 144.9  | 130.5 NM_004819.1   |
| 85.7   | 86.2   | 81.4   | 90.1 NM_006950.2    |
| 100.4  | 95.4   | 83.2   | 94.5 NM_006950.2    |
| 86.9   | 78.1   | 77.1   | 83.2 NM_133499.1    |
| 99.5   | 98     | 85.6   | 90.3 NM_003178.3    |
| 114.1  | 98.1   | 71.9   | 86.2 NM_133625.2    |
| 97.3   | 85.8   | 86.8   | 90.9 NM_003490.2    |
| 85.6   | 85.2   | 87.6   | 82.6 NM_133633.1    |
| 127.8  | 98.1   | 97.2   | 100.9 NM_030786.1   |
| 2995.4 | 1813.2 | 1745.6 | 1188.6 NM_006372.3  |
| 75.4   | 78.1   | 82.7   | 95.4 NM_133650.1    |
| 82     | 96.6   | 79.5   | 84.7 NM_015293.1    |
| 102.2  | 99.7   | 95     | 96.1 NM_182961.1    |
| 90.3   | 86.6   | 86.9   | 79 NM_033071.1      |
| 80.8   | 86.3   | 84.4   | 86.4 NM_015180.3    |
| 92.2   | 92.3   | 75.2   | 91.9 NM_015180.4    |
| 98.8   | 99.1   | 101.3  | 98 NM_182910.1      |
| 84.4   | 97.5   | 81.5   | 99.3 NM_182913.1    |

|        |        |        |                      |
|--------|--------|--------|----------------------|
| 87.8   | 85.3   | 81.4   | 86 NM_006772.1       |
| 178.7  | 152    | 146.8  | 132.1 NM_145738.1    |
| 91.6   | 85.2   | 81.2   | 90.4 NM_145738.1     |
| 93.9   | 101.4  | 102.2  | 98.5 NM_004711.3     |
| 194.8  | 180.9  | 156.7  | 154.3 NM_145731.2    |
| 91.1   | 92     | 87.2   | 91.1 NM_004710.3     |
| 103.7  | 98.6   | 91.1   | 96.2 NM_004209.4     |
| 117.2  | 98.7   | 104.7  | 99.8 NM_012451.2     |
| 168.7  | 155.7  | 144.4  | 171.5 NM_203446.1    |
| 100.9  | 99.5   | 93.4   | 90.2 NM_003895.2     |
| 81.9   | 94.4   | 83.2   | 80 NM_203446.1       |
| 223.3  | 252.4  | 226.6  | 233.4 NM_003898.2    |
| 234.9  | 259.8  | 270.4  | 197.9 NM_018373.1    |
| 89.4   | 85.7   | 83.4   | 87.9 NM_007286.3     |
| 99.8   | 104.2  | 91     | 95.6 NM_133477.1     |
| 92.6   | 87.8   | 93     | 88.6 NM_133477.1     |
| 89     | 86.2   | 89.1   | 89.5 NM_024875.2     |
| 83.2   | 85     | 81.8   | 80 NM_144642.3       |
| 86.8   | 86.1   | 81.9   | 81.5 NM_003179.2     |
| 2971.8 | 2378.2 | 2181.6 | 1910.4 NM_182715.1   |
| 291.4  | 201.9  | 189.7  | 189.8 NM_182715.1    |
| 95.9   | 87.5   | 85.5   | 89.9 NM_006754.2     |
| 74     | 83.3   | 78.6   | 85.2 NM_001006603.1  |
| 96.8   | 91.9   | 96.7   | 96.2 NM_005639.1     |
| 74.6   | 79.5   | 69.2   | 78.5 NM_198992.1     |
| 146    | 120.4  | 129.9  | 107.9 NM_152280.2    |
| 97.7   | 97.6   | 92.4   | 89.7 NM_177963.2     |
| 98     | 91.6   | 83.3   | 83.4 NM_020826.1     |
| 90.1   | 84.1   | 90     | 95.7 NM_153262.1     |
| 192.6  | 120.6  | 122.4  | 110.8 NM_181519.2    |
| 99.9   | 93.2   | 100    | 92.6 NM_031912.3     |
| 96     | 95.5   | 81.6   | 89.3 NM_031914.1     |
| 99.7   | 91.5   | 99.7   | 91.8 NM_016524.2     |
| 80.5   | 73.4   | 74.8   | 78.6 NM_177402.3     |
| 115.3  | 102.1  | 116.5  | 95.3 NM_032298.1     |
| 86.9   | 90     | 82.3   | 83.4 NM_020783.2     |
| 95.2   | 92.5   | 84.2   | 91.3 NM_003180.1     |
| 100.4  | 96.5   | 91.3   | 91.8 NM_205848.1     |
| 86.2   | 84.4   | 81.5   | 81.6 NM_004200.2     |
| 98.2   | 94.4   | 96.2   | 87.7 NM_004200.2     |
| 93.5   | 92.4   | 93.5   | 91.8 NM_138567.2     |
| 100.4  | 89.7   | 87.3   | 87.2 NM_175733.2     |
| 118.7  | 120.6  | 106.2  | 131.1 NM_032872.1    |
| 82.7   | 89.1   | 76.8   | 81.5 NM_032943.2     |
| 85.7   | 91.8   | 78.8   | 93 NM_206930.1       |
| 96.4   | 95.2   | 85.4   | 91.8 NM_032379.3     |
| 121.2  | 117.1  | 116.9  | 112.1 NM_206929.1    |
| 120.4  | 110.7  | 96.7   | 107.6 NM_001009991.1 |
| 165.6  | 181.6  | 176.7  | 147.5 NM_080737.1    |
| 88.8   | 92.5   | 86.2   | 88.2 NM_138780.1     |

|        |        |        |                     |
|--------|--------|--------|---------------------|
| 460.9  | 367.6  | 414.9  | 228.8 NM_032431.2   |
| 99.1   | 100.1  | 94     | 89.7 NM_172230.2    |
| 94.2   | 80.2   | 79.7   | 82 NM_003181.2      |
| 89.5   | 77.5   | 86.1   | 82.7 NM_181429.1    |
| 96.6   | 92.1   | 92.4   | 95.8 NM_138327.1    |
| 111.9  | 94     | 88.8   | 97.8 NM_014626.3    |
| 95.5   | 94.3   | 81.8   | 91.9 NM_003967.1    |
| 101.3  | 99     | 91.9   | 83.7 NM_053278.1    |
| 97.4   | 89.8   | 90.6   | 86.4 NM_175057.2    |
| 95.1   | 95.5   | 94.9   | 96.8 NM_198312.1    |
| 100.5  | 101.6  | 103.2  | 103.6 NM_152787.2   |
| 76.5   | 77.1   | 85.1   | 79.2 NM_013996.1    |
| 84.9   | 87.8   | 83.8   | 72.9 NM_013251.2    |
| 110.4  | 98.5   | 97.4   | 96.6 NM_001006667.1 |
| 92.1   | 81.4   | 77     | 75.2 NM_001006667.1 |
| 86.4   | 92.4   | 88.5   | 96.5 NM_170685.1    |
| 88.9   | 97.2   | 83.8   | 93.6 NM_001077504.1 |
| 4237.1 | 2729.8 | 2478.1 | 1688.6 NM_006283.1  |
| 201.7  | 139.7  | 116.5  | 121.8 NM_006997.2   |
| 91.7   | 80.5   | 77.7   | 93.2 NM_206862.1    |
| 109.8  | 98.7   | 94.6   | 84.7 NM_206861.1    |
| 380.1  | 243.4  | 196.6  | 196.1 NM_006342.1   |
| 76.8   | 82.8   | 76.2   | 77.4 NM_001058.2    |
| 85.8   | 84.7   | 78.6   | 87.9 NM_015727.1    |
| 98.1   | 103.3  | 97.4   | 89.4 NM_015727.1    |
| 81.5   | 87.1   | 88.9   | 86.7 NM_001057.1    |
| 113.2  | 105.8  | 100.1  | 96.4 NM_001059.1    |
| 86.2   | 102.7  | 81.9   | 91.5 NM_002354.1    |
| 94.6   | 86.7   | 91.7   | 102.8 NM_002353.1   |
| 289.6  | 230.6  | 208    | 227.8 NM_053053.2   |
| 94.2   | 93.6   | 87.8   | 87 NM_133439.2      |
| 132.5  | 115.7  | 113.2  | 112 NM_001488.3     |
| 94.2   | 96.7   | 96.3   | 95.7 NM_133439.2    |
| 246.5  | 241.8  | 207.3  | 153.8 NM_006354.2   |
| 283.5  | 279.9  | 289    | 273.1 NM_006354.2   |
| 90.8   | 83     | 84.4   | 84.6 NM_133480.1    |
| 121.9  | 151.3  | 128.4  | 136.7 NM_138923.1   |
| 105.6  | 98.5   | 107.3  | 106.7 NM_004606.2   |
| 1206.8 | 983.9  | 870.9  | 640.8 NM_006284.2   |
| 94.8   | 90.9   | 78.9   | 90.7 NM_005643.2    |
| 128.5  | 121.6  | 99.3   | 110.9 NM_005645.3   |
| 3481.7 | 4632.4 | 4487.9 | 2598.1 NM_003487.2  |
| 224.4  | 279.3  | 296.7  | 241.6 NM_003487.2   |
| 116.9  | 111    | 96.6   | 93.2 NM_005681.2    |
| 96     | 74.6   | 74.3   | 79.9 NM_005681.2    |
| 239.7  | 216.3  | 184.4  | 167.7 NM_005680.1   |
| 83.6   | 97.1   | 82.2   | 91.4 NM_005679.2    |
| 172.1  | 179.5  | 156.1  | 117.2 NM_139353.1   |
| 1707.1 | 1347.4 | 1338.4 | 858.1 NM_139353.1   |
| 174.6  | 266.1  | 233.3  | 202.7 NM_153809.1   |

|         |         |        |                      |
|---------|---------|--------|----------------------|
| 741.8   | 721     | 521.3  | 515 NM_003184.2      |
| 886.8   | 844     | 815.6  | 574.1 NM_003185.2    |
| 427.2   | 270.3   | 201.2  | 253.3 NM_006951.3    |
| 132.6   | 111.4   | 96.5   | 111.2 NM_001025247.1 |
| 214     | 401.6   | 279.6  | 312.6 NM_014409.3    |
| 163     | 137     | 112.3  | 120.6 NM_005641.2    |
| 97      | 81.5    | 88.7   | 89 NM_139122.1       |
| 404.2   | 350.6   | 351.2  | 229.2 NM_006473.2    |
| 334.5   | 319.8   | 230.2  | 332.6 NM_005642.2    |
| 84.9    | 87.8    | 83.7   | 87.4 NM_024885.2     |
| 170.8   | 162.5   | 125    | 135 NM_016283.4      |
| 161.4   | 122.5   | 148.5  | 138.9 NM_016283.4    |
| 87.2    | 84.5    | 75.8   | 84.4 NM_015975.4     |
| 121.9   | 123.3   | 118.5  | 118.5 NM_138810.2    |
| 122.6   | 125.8   | 122.3  | 108.3 NM_054114.3    |
| 114.5   | 118.6   | 104.4  | 118.6 NM_138810.2    |
| 156     | 176.8   | 190.6  | 146.6 NM_003186.3    |
| 87.7    | 90.4    | 89.1   | 84.7 NM_003186.3     |
| 84.2    | 86.5    | 83.2   | 86 NM_001001522.1    |
| 5339.4  | 2882.6  | 2296.9 | 2611.4 NM_003564.1   |
| 94.8    | 99.6    | 86.5   | 92.1 NM_001008273.1  |
| 96.9    | 88.6    | 85.6   | 89.2 NM_001008273.1  |
| 95.4    | 85.2    | 95.7   | 87.5 NM_003189.1     |
| 88.4    | 91.7    | 84.7   | 78.8 NM_005421.1     |
| 11372.8 | 10710.5 | 8358.8 | 6741.4 NM_006755.1   |
| 144.6   | 180.4   | 161.9  | 192.1 NM_033394.1    |
| 127.2   | 107.9   | 97.4   | 106 NM_139239.1      |
| 99.5    | 99.8    | 88     | 99.6 NM_004180.2     |
| 92.6    | 81.8    | 84.4   | 80.8 NM_133484.1     |
| 180.4   | 322.6   | 245    | 284.9 NM_020791.1    |
| 175.1   | 183.8   | 167.8  | 157.8 NM_016151.2    |
| 94.6    | 85.7    | 88.4   | 100.2 NM_004783.2    |
| 87.7    | 81.4    | 71.7   | 80.9 NM_004783.2     |
| 86.1    | 83.9    | 81     | 82.8 NM_016281.2     |
| 1153.9  | 1324.7  | 1335.8 | 906.4 NM_000593.5    |
| 227.6   | 228.4   | 211.5  | 191 NM_018833.2      |
| 460.3   | 391.2   | 315.1  | 366.3 NM_000544.3    |
| 1461.3  | 2445.5  | 2333.3 | 2147.2 NM_003190.3   |
| 133.4   | 117.6   | 119.3  | 152.9 NM_172208.1    |
| 221.9   | 196.9   | 186.3  | 172.5 NM_172209.1    |
| 128.9   | 137.2   | 128.5  | 119.7 NM_018009.3    |
| 255.8   | 197.9   | 179.1  | 176.8 NM_139283.1    |
| 357.5   | 650.9   | 610.8  | 469.1 NM_005646.2    |
| 227.3   | 200.1   | 188.2  | 153.1 NM_134324.2    |
| 222.4   | 210.9   | 217.7  | 145.3 NM_134323.1    |
| 131.1   | 121.5   | 122.4  | 121.1 NM_007375.3    |
| 214     | 229.3   | 151.3  | 154.1 NM_001003799.1 |
| 910.4   | 1050    | 895.1  | 952.5 NM_152295.3    |
| 134.7   | 127.5   | 115.1  | 105.1 NM_025150.3    |
| 76.6    | 88.3    | 79.1   | 87.8 NM_177539.1     |

|        |        |        |                       |
|--------|--------|--------|-----------------------|
| 92.1   | 88.8   | 88.1   | 80.3 NM_138697.2      |
| 102.4  | 87.2   | 88.9   | 104.2 NM_152232.1     |
| 88     | 82.8   | 81.7   | 80.5 NM_152228.1      |
| 95.3   | 93.5   | 87.7   | 91 NM_019599.2        |
| 94.1   | 95.4   | 98.7   | 108.6 NM_023921.1     |
| 83.1   | 75.7   | 78.9   | 84 NM_023920.2        |
| 94.1   | 88.1   | 83     | 94.5 NM_023922.1      |
| 88.4   | 98.7   | 86.2   | 96.6 NM_016945.2      |
| 94.3   | 97.8   | 84.8   | 91.6 NM_016943.2      |
| 86.6   | 93     | 94     | 85.8 NM_176817.1      |
| 93.1   | 89     | 79.6   | 85.7 NM_176881.1      |
| 88.1   | 85.1   | 90.7   | 88.9 NM_016944.1      |
| 78     | 79.1   | 71.6   | 80.1 NM_176882.1      |
| 97.8   | 99.9   | 103.4  | 100.1 NM_176884.1     |
| 92.5   | 96.6   | 87.7   | 89.1 NM_176885.1      |
| 93     | 86.2   | 93.7   | 106.6 NM_176886.1     |
| 102.5  | 87.1   | 79.8   | 100.3 NM_176887.1     |
| 94.2   | 89.3   | 90.4   | 88.8 NM_176888.1      |
| 90.9   | 96.4   | 94.1   | 95.2 NM_176889.1      |
| 92.1   | 88     | 90.1   | 85.4 NM_018980.2      |
| 79.4   | 78.7   | 67.3   | 83.9 NM_176890.1      |
| 98.1   | 96.4   | 85.7   | 86.7 NM_177437.1      |
| 89.8   | 81.9   | 83.9   | 90.1 NM_023919.2      |
| 89.5   | 92.9   | 82.3   | 80.1 NM_023918.1      |
| 92.6   | 93.8   | 91.4   | 93.4 NM_023917.2      |
| 146.5  | 129.5  | 135.3  | 119.5 NM_017714.1     |
| 82.1   | 84.3   | 86.4   | 89 NM_000353.1        |
| 325.4  | 226.7  | 197.8  | 238.1 NM_032026.1     |
| 263.2  | 251.7  | 212.8  | 190.4 NM_014760.2     |
| 411.7  | 299.3  | 339.3  | 239.2 NM_001042552.1  |
| 467.1  | 370.7  | 306.4  | 320.4 XM_931843.1     |
| 1692.4 | 3440.2 | 2695.2 | 2420.3 NM_001079864.1 |
| 2414.3 | 4222.7 | 3888.7 | 2880.5 NM_006024.4    |
| 460.6  | 381    | 343.5  | 203.8 NM_014604.2     |
| 206.1  | 202.4  | 233.5  | 194.6 NM_181312.1     |
| 101.9  | 105.3  | 95.9   | 108 NM_181314.1       |
| 182.9  | 202.9  | 194.9  | 189.5 NM_181313.1     |
| 84.9   | 82.1   | 87.3   | 79.2 NM_015173.2      |
| 106.5  | 107.3  | 86.5   | 85.5 NM_031937.1      |
| 141.7  | 113.9  | 110.3  | 116.8 NM_015527.2     |
| 118.2  | 165.4  | 164.9  | 163.5 NM_198517.2     |
| 510.6  | 383.9  | 375.7  | 244.1 NM_018201.2     |
| 975.4  | 1041.1 | 987.1  | 807.6 NM_020773.1     |
| 514.2  | 647.8  | 425.4  | 529.9 NM_022771.3     |
| 230.8  | 287.3  | 251.8  | 191.8 NM_019020.2     |
| 109.7  | 110    | 121.4  | 103.1 NM_024682.1     |
| 119.1  | 104.7  | 104.2  | 93.2 NM_018317.1      |
| 129.5  | 139.4  | 147.6  | 109.2 NM_018421.2     |
| 322.9  | 387.7  | 325.9  | 303.3 NM_144628.2     |
| 82.6   | 90.2   | 83.5   | 81.9 NM_153356.1      |

|         |         |         |                      |
|---------|---------|---------|----------------------|
| 98.7    | 90.5    | 88.8    | 87 NM_014346.1       |
| 253.8   | 250.4   | 231.9   | 224.8 NM_017772.2    |
| 165.2   | 198.7   | 172.4   | 178.7 NM_018309.1    |
| 150.6   | 134.4   | 139     | 114.1 NM_020705.1    |
| 369.5   | 437.2   | 431.8   | 358.4 NM_015079.2    |
| 88.3    | 82.3    | 84.7    | 78.5 NM_032258.1     |
| 128.7   | 128.2   | 145.9   | 115.2 NM_001001417.4 |
| 79.5    | 83.4    | 82.9    | 79.1 NM_001001418.3  |
| 105     | 121.7   | 134.2   | 100.1 NM_001040282.1 |
| 95.9    | 90.9    | 86.8    | 99.6 NM_014832.1     |
| 122.5   | 127.2   | 148.7   | 126.7 NM_014744.1    |
| 247.8   | 195.9   | 195.5   | 165.6 NM_016495.2    |
| 93.3    | 93.1    | 91.4    | 91.4 NM_017752.2     |
| 147.5   | 133.6   | 118.7   | 119.8 NM_015130.1    |
| 256.3   | 342.4   | 277.1   | 251.8 NM_015043.3    |
| 178.6   | 301.3   | 192.9   | 196.8 NM_015043.3    |
| 12155.5 | 12356.2 | 10075.5 | 8272.9 NM_004607.1   |
| 455.4   | 286.3   | 266.9   | 254.3 NM_003192.1    |
| 102.3   | 106.9   | 101.9   | 96.2 NM_018138.1     |
| 97.5    | 98.7    | 88.3    | 85.4 NM_005993.3     |
| 427.9   | 418.4   | 388.7   | 363.1 NM_005993.3    |
| 1995.9  | 1588.9  | 1724.6  | 1194.6 NM_003193.2   |
| 291.7   | 276     | 273.8   | 292.9 NM_003193.2    |
| 741.1   | 721.5   | 642.6   | 539.3 NM_013254.2    |
| 92.7    | 96.4    | 87.2    | 92.6 NM_014726.1     |
| 416.1   | 598.8   | 530.1   | 297.6 NM_005647.2    |
| 126.1   | 124.6   | 111.2   | 107.9 NM_024665.3    |
| 96.3    | 93.2    | 91.9    | 89.8 NM_134259.1     |
| 91.8    | 98.3    | 88.8    | 83.3 NM_033284.1     |
| 268.9   | 234.8   | 179.1   | 187.9 NM_032988.1    |
| 160.5   | 120.5   | 107.5   | 111.1 NM_006453.2    |
| 89.2    | 86.7    | 78.3    | 75.4 NM_138572.2     |
| 970.7   | 800.3   | 768     | 606.9 NM_003194.3    |
| 98.4    | 90.7    | 84.1    | 83.9 NM_013290.3     |
| 765.7   | 532.6   | 480.6   | 436.2 NM_004865.2    |
| 97.3    | 90.3    | 83.7    | 96.6 NM_199047.1     |
| 81.9    | 89.6    | 80.9    | 82.8 NM_006593.2     |
| 101.5   | 93.5    | 96.9    | 90.5 NM_032811.1     |
| 415.4   | 324.2   | 340.6   | 245.3 NM_030900.2    |
| 788.6   | 567.4   | 529.5   | 443.9 NM_199122.1    |
| 133.1   | 120.7   | 110.1   | 99.9 NM_004749.2     |
| 99.6    | 81.9    | 76.9    | 92.6 NM_080647.1     |
| 86.1    | 91.4    | 85.2    | 90.8 NM_005992.1     |
| 109.3   | 110.6   | 105.2   | 98.2 NM_005992.1     |
| 105.4   | 104.4   | 98.7    | 102.6 NM_080646.1    |
| 103.6   | 103.5   | 89.1    | 95.4 NM_005995.2     |
| 111.8   | 146.7   | 114.9   | 115.6 NM_152380.2    |
| 178.7   | 153.4   | 142.7   | 119.5 XM_943618.1    |
| 179.7   | 193     | 164.6   | 203.7 NM_001080508.1 |
| 151.2   | 139.5   | 134.3   | 129.2 NM_005149.1    |

|        |        |        |                       |
|--------|--------|--------|-----------------------|
| 121.1  | 117    | 91.3   | 105 NM_005994.3       |
| 84     | 82.6   | 77.8   | 88.3 NM_001077653.1   |
| 88.3   | 93.9   | 93.1   | 100.4 NM_020417.1     |
| 79.9   | 85.5   | 77.8   | 74.2 NM_013351.1      |
| 98.9   | 96.6   | 82.3   | 91.8 NM_016954.2      |
| 97.9   | 94     | 85.6   | 91.1 NM_016569.3      |
| 117.3  | 111.8  | 107    | 109.3 NM_016569.3     |
| 96.4   | 94.3   | 85.7   | 87.9 NM_018488.2      |
| 93.6   | 81.4   | 77     | 80.3 NM_181486.1      |
| 89.1   | 85.9   | 85.4   | 86.3 NM_080718.1      |
| 84.2   | 78.1   | 72.4   | 90.7 NM_000192.3      |
| 90.6   | 104.2  | 91.7   | 99.2 NM_080758.1      |
| 90.9   | 88.2   | 83.9   | 94.9 NM_004608.2      |
| 97.5   | 90.1   | 93.4   | 94.2 NM_080758.1      |
| 84.7   | 86.7   | 87.7   | 96.7 NM_201636.1      |
| 78.1   | 83.1   | 76.5   | 81.7 NM_001060.3      |
| 82.9   | 76.8   | 75.2   | 87.1 NM_001060.3      |
| 172.7  | 385.8  | 310.3  | 271.5 NM_001061.2     |
| 86.7   | 86.3   | 83.1   | 88.5 NM_003673.2      |
| 88.4   | 87.9   | 76     | 103.6 NM_153355.2     |
| 1857.2 | 1090.5 | 850.5  | 849 NM_201437.1       |
| 155    | 124.9  | 114.3  | 133.1 NM_006756.2     |
| 181.6  | 150    | 151.2  | 171.2 XM_943119.1     |
| 352.4  | 306.2  | 328.6  | 230.8 NM_003195.4     |
| 143    | 106.8  | 116.4  | 108.5 NM_003195.4     |
| 85.3   | 87.8   | 74.2   | 87.8 NM_198723.1      |
| 82.9   | 123.4  | 109.9  | 115.5 NM_003196.1     |
| 180.9  | 179.1  | 193.8  | 188.6 NM_001006639.1  |
| 125.9  | 130.4  | 110.9  | 106 NM_001006640.1    |
| 170.2  | 121    | 110.8  | 100.8 NM_080390.3     |
| 1499.6 | 1019   | 1066.4 | 587.2 NM_001006933.1  |
| 3150.2 | 2503.3 | 2310.3 | 1348 NM_001006933.1   |
| 103.5  | 91.8   | 92.2   | 88.7 NM_024863.4      |
| 265.7  | 250.9  | 212.8  | 186.1 NM_001006936.1  |
| 2907.9 | 2617.4 | 2610.4 | 1817.9 NM_001006937.1 |
| 83.3   | 94.6   | 88.5   | 82.6 NM_001012979.1   |
| 87.9   | 94.8   | 85.9   | 78.7 NM_001006938.1   |
| 90     | 94.2   | 80.4   | 91 NM_152278.1        |
| 624.5  | 548.2  | 431.1  | 421.7 NM_001006684.1  |
| 411.7  | 300.7  | 252.1  | 235 NM_153333.2       |
| 616.7  | 395.4  | 429.7  | 371.1 NM_153333.2     |
| 4686.1 | 2424   | 2253.1 | 2086.5 NM_005648.2    |
| 250    | 192.8  | 190.1  | 154.2 NM_007108.2     |
| 6509.2 | 4167.8 | 4178.2 | 2917.2 NM_007108.2    |
| 350.4  | 346.9  | 287    | 201.9 NM_003198.1     |
| 87.1   | 79.8   | 85.1   | 80.8 NM_016427.2      |
| 88.6   | 85.4   | 75.9   | 86.5 NM_145653.2      |
| 459.6  | 455.9  | 404.5  | 326.6 NM_006706.2     |
| 86.6   | 103.4  | 94.1   | 93.7 NM_006706.2      |
| 305.5  | 257.1  | 294.6  | 224.4 NM_006706.2     |



|       |       |       |                     |
|-------|-------|-------|---------------------|
| 79    | 76.4  | 81    | 77.5 NM_174937.1    |
| 97.6  | 87.3  | 83.7  | 83.2 NM_000545.3    |
| 711   | 866.8 | 777.1 | 794.5 NM_207037.1   |
| 105.6 | 120   | 102.5 | 93.4 NM_207040.1    |
| 115.3 | 106.1 | 110.7 | 95.5 NM_004609.3    |
| 88.8  | 88    | 81.5  | 84.2 NM_001077511.1 |
| 101.3 | 97    | 98.9  | 83.2 NM_007109.2    |
| 84.4  | 85.1  | 78.1  | 86.7 NM_000458.1    |
| 101.7 | 93.3  | 92.8  | 98.3 NM_000458.1    |
| 86    | 82.9  | 75.7  | 87.2 NM_006481.1    |
| 153.6 | 144.1 | 162.7 | 131.1 XM_935478.1   |
| 95.3  | 88.7  | 88.6  | 92.9 NM_005650.1    |
| 385.3 | 647   | 589   | 458.6 NM_181492.1   |
| 89.9  | 86.6  | 90    | 81 NM_198392.1      |
| 90    | 90.2  | 82.6  | 82 NM_003206.2      |
| 94.4  | 86.1  | 82.4  | 88.6 NM_003206.2    |
| 96.3  | 95.4  | 91.5  | 92.1 NM_175769.1    |
| 354.3 | 271   | 237.7 | 275.8 NM_003200.1   |
| 103.8 | 108.4 | 114.4 | 108.8 NM_003199.1   |
| 90    | 98.8  | 98.8  | 94.3 NM_201632.1    |
| 87.6  | 92.5  | 89.7  | 90.4 NM_201633.1    |
| 84.3  | 91.8  | 87    | 82.3 NM_213648.1    |
| 79.6  | 84.4  | 76.8  | 86.5 NM_201633.1    |
| 86.5  | 91.9  | 80.8  | 93.6 NM_003202.2    |
| 78.1  | 77.8  | 74.5  | 84.8 NM_201634.1    |
| 97.3  | 87.4  | 94.4  | 94.7 NM_031283.1    |
| 85.9  | 82.5  | 86.3  | 89.9 NM_030756.1    |
| 95.7  | 91.7  | 95.7  | 92.6 NM_030751.2    |
| 723.3 | 791.2 | 643.8 | 836.3 NM_006602.2   |
| 89.1  | 76.6  | 83.1  | 81.8 NM_001008536.1 |
| 173.8 | 130.9 | 145.9 | 139.3 NM_032300.2   |
| 705.8 | 777   | 695.9 | 602.1 NM_006053.2   |
| 103.4 | 100   | 108.9 | 101.9 NM_006053.2   |
| 131.5 | 168.2 | 136   | 147.7 NM_006019.2   |
| 83.8  | 79.4  | 79.6  | 89.5 NM_021966.1    |
| 77.5  | 93    | 84.6  | 86.6 NM_004918.2    |
| 85.8  | 87.7  | 83.9  | 91.3 NM_199206.1    |
| 81.8  | 87.1  | 85.3  | 86.2 NM_020554.3    |
| 101.1 | 86.2  | 85.3  | 84.5 NM_012468.3    |
| 91.8  | 89    | 95.9  | 104.3 NM_020553.2   |
| 132.1 | 177.5 | 144.3 | 135.1 NM_001062.2   |
| 96.1  | 95    | 88.8  | 100.7 NM_000355.2   |
| 90.8  | 93    | 92    | 93.1 NM_001008657.1 |
| 94.1  | 95.3  | 98.3  | 96.2 NM_000356.2    |
| 87.1  | 80.9  | 89.1  | 83.7 NM_001008657.1 |
| 92.8  | 82.3  | 98.3  | 93.9 NM_001008656.1 |
| 682.4 | 435.3 | 381   | 361.3 NM_030752.2   |
| 129.9 | 141.6 | 126   | 118 NM_030752.2     |
| 82.3  | 81.7  | 84.6  | 83.9 NM_004610.3    |
| 107.3 | 97.8  | 100.5 | 95.2 NM_144659.3    |

|        |        |        |                     |
|--------|--------|--------|---------------------|
| 101.1  | 91.6   | 94     | 98.8 NM_018679.2    |
| 87     | 84.3   | 78     | 81.3 NM_018393.2    |
| 71.2   | 78.3   | 73.5   | 77.2 NM_152772.1    |
| 215.4  | 189.3  | 171.5  | 181.4 NM_022171.1   |
| 1041.8 | 598.6  | 563.1  | 609.4 NM_152665.1   |
| 98.2   | 81.2   | 92.5   | 96.1 NM_003212.1    |
| 77.6   | 76.1   | 78.2   | 83.9 NR_002718.2    |
| 86     | 82.1   | 71.1   | 87.2 NR_001578.1    |
| 89.1   | 84.7   | 78.6   | 85.8 NM_005651.1    |
| 533.5  | 552.1  | 655.6  | 654.8 NM_018319.3   |
| 141.3  | 124.5  | 123.2  | 119.6 NM_018319.3   |
| 233.5  | 181.7  | 179.8  | 139.3 NM_018319.3   |
| 339.3  | 450.2  | 482.7  | 508.9 NM_198795.1   |
| 88.9   | 95.5   | 85.7   | 94 NM_182499.2      |
| 128.7  | 131    | 109    | 133.5 NM_030794.1   |
| 91.2   | 84.1   | 90.2   | 83.8 NM_019038.2    |
| 84.3   | 76.5   | 89.3   | 86.8 NM_173533.2    |
| 99.4   | 95.1   | 101    | 88.4 NM_001010870.1 |
| 1411.5 | 1636.5 | 1560.1 | 1446 NM_014290.1    |
| 92.7   | 101.1  | 89.4   | 81.2 NM_153046.1    |
| 97.7   | 98.2   | 101.5  | 95.2 NM_006862.2    |
| 81.8   | 83.5   | 86.5   | 77.3 NM_021961.3    |
| 229.8  | 149.5  | 143.9  | 129.2 NM_003598.1   |
| 83.7   | 88.2   | 86.7   | 85.9 NM_003214.2    |
| 77.5   | 79.2   | 83.4   | 97.5 NM_201443.1    |
| 108.8  | 108.2  | 100.4  | 98.4 NM_003213.2    |
| 232.4  | 156.6  | 155.3  | 116.3 NM_201441.1   |
| 105.8  | 94.1   | 98.9   | 88.4 NM_003215.1    |
| 93.4   | 109.5  | 98.2   | 86.1 NM_005422.1    |
| 94.7   | 88     | 85.4   | 91.7 NM_058222.1    |
| 97.8   | 97.8   | 93.9   | 95.9 NM_172000.1    |
| 189.6  | 174.4  | 144.5  | 177.7 NM_003216.2   |
| 3161.5 | 2689.3 | 1936.7 | 1902 NM_003217.1    |
| 105.1  | 91.7   | 92.6   | 102.6 NM_000459.2   |
| 97.6   | 90.3   | 93.5   | 92.9 NM_053285.1    |
| 109.8  | 119.8  | 112.8  | 108.6 NM_014466.2   |
| 84     | 84.5   | 82.2   | 94.7 NM_031898.1    |
| 76.7   | 70.5   | 68.5   | 83.7 NM_144705.2    |
| 91.2   | 82.9   | 82.5   | 87.3 NM_015319.2    |
| 86     | 86.8   | 89.1   | 85.1 NM_198316.1    |
| 99.1   | 95.5   | 96.4   | 91.5 NM_198316.1    |
| 89.6   | 82.3   | 81.4   | 85.2 NM_170754.2    |
| 79     | 87     | 75.5   | 89.4 NM_139243.1    |
| 100.3  | 89.9   | 88.1   | 99.6 NM_007110.3    |
| 90.8   | 95.9   | 84.4   | 88.1 NM_199046.1    |
| 85.1   | 86.5   | 88.5   | 91.8 NM_199046.1    |
| 85.9   | 87     | 81.4   | 86.9 NM_199046.1    |
| 336.1  | 238.8  | 215.5  | 207.4 NM_017489.1   |
| 86.1   | 78     | 83.5   | 78.2 NM_003218.2    |
| 108.9  | 86.9   | 78.5   | 99.2 NM_003218.2    |

|        |        |        |                     |
|--------|--------|--------|---------------------|
| 382.4  | 319.6  | 248    | 249.8 NM_005652.2   |
| 542.7  | 407.4  | 342.2  | 286.3 NM_018975.2   |
| 97.2   | 90.5   | 92.7   | 95.6 NM_198253.2    |
| 92.7   | 82.1   | 84.6   | 93.5 NM_003219.1    |
| 107.2  | 118.5  | 95.2   | 108.2 NM_152829.1   |
| 121.4  | 120.8  | 118.9  | 110.2 NM_015641.2   |
| 410.7  | 200.2  | 186.8  | 169.9 NM_017899.1   |
| 335.9  | 258.5  | 218.2  | 182.8 NM_006285.2   |
| 109.6  | 137.9  | 132.6  | 135.5 NM_007170.1   |
| 87.3   | 87.9   | 78.5   | 87.6 NM_182702.1    |
| 100.1  | 82.9   | 91.4   | 89.1 NM_199183.1    |
| 9610   | 5972.8 | 6141.1 | 3588.3 NM_001120.2  |
| 531.6  | 325.4  | 299.3  | 241.2 NM_017746.1   |
| 84.6   | 83.2   | 85.1   | 76.7 NM_031451.3    |
| 100    | 96.6   | 84.5   | 88 NM_001003811.1   |
| 93.2   | 94.7   | 82     | 94.4 NM_031276.2    |
| 87.8   | 89.4   | 85.6   | 85.5 NM_001003811.1 |
| 95.2   | 87.9   | 88     | 87.6 NM_031275.3    |
| 90.5   | 96.5   | 89.7   | 98.3 NM_031274.2    |
| 98.4   | 88.1   | 78.2   | 88.1 NM_031273.1    |
| 96.1   | 88.3   | 79.4   | 90.4 NM_198393.2    |
| 78.7   | 79.2   | 79.5   | 82.9 NM_031272.3    |
| 125.2  | 103.6  | 84.4   | 101.5 NM_031271.2   |
| 599.1  | 607.9  | 572.3  | 427.4 NM_018469.3   |
| 206.8  | 179.9  | 153.8  | 135.6 NM_144582.2   |
| 408.9  | 262.5  | 249    | 179.3 NM_015926.3   |
| 83.5   | 84.1   | 88.1   | 92.8 NM_198524.1    |
| 94.5   | 91.6   | 86.1   | 87.6 NM_001063.2    |
| 1126.4 | 763.9  | 653.7  | 492.1 NM_003201.1   |
| 115    | 121.4  | 172.1  | 162.4 NM_003220.2   |
| 129.4  | 126.6  | 125.3  | 114 NM_001032280.1  |
| 89.7   | 90.8   | 82.6   | 86.8 NM_001032280.2 |
| 101.6  | 112.3  | 98.7   | 88.5 NM_001032280.2 |
| 85.1   | 76.1   | 82.1   | 86.3 NM_003221.2    |
| 121.1  | 337.6  | 330.2  | 296.7 NM_003222.3   |
| 84.9   | 84.1   | 92.1   | 90.3 NM_172238.1    |
| 107.8  | 95.7   | 99.5   | 91.9 NM_178548.2    |
| 104.4  | 96.1   | 101.6  | 96.7 NM_003223.1    |
| 612.5  | 657.1  | 586.5  | 410.3 NM_016020.1   |
| 1424.4 | 705.8  | 614.9  | 471.6 NM_022366.1   |
| 634.6  | 577.9  | 524    | 406.2 NM_005653.3   |
| 97.5   | 90.6   | 91.4   | 88.4 NM_014553.1    |
| 4527.3 | 3033.4 | 2717   | 2516.1 NM_007111.3  |
| 153.6  | 127.8  | 125.8  | 122.1 NM_006286.1   |
| 91.7   | 95.9   | 100.6  | 96.8 NM_016521.2    |
| 181.4  | 173.8  | 156.9  | 137.3 NM_006521.3   |
| 103.5  | 105.2  | 108.1  | 101.9 NM_007162.1   |
| 94.3   | 83.7   | 89.9   | 99.1 NM_012252.2    |
| 94.7   | 83.7   | 80.8   | 90.1 NM_012252.2    |
| 95.5   | 82.9   | 90.5   | 95.8 NM_003225.2    |

|        |        |        |                      |
|--------|--------|--------|----------------------|
| 93     | 85.8   | 87     | 89.6 NM_005423.3     |
| 85.2   | 87.9   | 89.1   | 84.4 NM_003226.2     |
| 196.2  | 116.2  | 101.7  | 100.8 NM_006070.4    |
| 3230.8 | 2005.2 | 1747.8 | 2071.1 NM_006070.4   |
| 291.2  | 288.9  | 235.9  | 220.2 NM_012143.2    |
| 294.8  | 286.3  | 236.7  | 212.8 NM_012143.2    |
| 178.7  | 184.3  | 210    | 166.9 NM_001008697.1 |
| 90.7   | 88.8   | 81.3   | 83.6 NM_001032281.1  |
| 94.2   | 83.8   | 86.7   | 79.3 NM_001032281.1  |
| 100.9  | 85.4   | 83.2   | 79.4 NM_006287.3     |
| 94     | 91.4   | 88.8   | 91.5 NM_006528.2     |
| 498.4  | 441    | 427.2  | 298.8 NM_013342.1    |
| 91.8   | 91.7   | 94.8   | 90.3 NM_003227.2     |
| 4833.8 | 3805.2 | 3191.4 | 2752.9 NM_003234.1   |
| 103.2  | 94.3   | 91.4   | 104.1 NM_003235.4    |
| 554.7  | 440.1  | 348.2  | 288 NM_014305.1      |
| 95     | 99.9   | 94.1   | 97.1 NM_003236.1     |
| 104.3  | 93.8   | 104.9  | 103.1 NM_000660.3    |
| 88     | 86.9   | 85.4   | 83.9 NM_015927.3     |
| 113.5  | 99.3   | 87     | 88 NM_015927.3       |
| 88.2   | 68.1   | 78     | 94.2 NM_003238.1     |
| 101.8  | 96.9   | 98.1   | 100.7 NM_003239.1    |
| 2442.7 | 7804.2 | 5983.6 | 4172.2 NM_000358.1   |
| 94.6   | 90     | 100    | 97.9 NM_004612.2     |
| 108.2  | 115.6  | 95.3   | 103.6 NM_001024847.1 |
| 377.3  | 602.5  | 557.5  | 388.8 NM_001024847.1 |
| 195.6  | 236.4  | 267.5  | 244.6 NM_003243.2    |
| 192.4  | 169.4  | 170.8  | 126.8 NM_004257.3    |
| 94.3   | 91.1   | 91.5   | 94.2 NM_173207.1     |
| 89.5   | 78.1   | 77.4   | 85 NM_003244.2       |
| 108.4  | 100.1  | 94     | 108.3 NM_173209.1    |
| 79.6   | 87.8   | 80.6   | 84.2 NM_174886.1     |
| 340.9  | 396.9  | 323.8  | 342.3 NM_170695.2    |
| 106.6  | 102.2  | 92.8   | 94.7 NM_170695.2     |
| 261.4  | 203.3  | 225.2  | 157.5 NM_021809.4    |
| 91.8   | 95.4   | 92.3   | 90.4 NM_000359.1     |
| 89.5   | 88.5   | 87.5   | 95.2 NM_004613.2     |
| 96.8   | 96     | 91.6   | 89.1 NM_198951.1     |
| 91.5   | 91     | 99.8   | 85.7 NM_198951.1     |
| 93.5   | 81.8   | 89.2   | 84.7 NM_003245.2     |
| 100.2  | 95     | 89     | 101 NM_003241.1      |
| 391.9  | 481.9  | 421.9  | 332.2 NM_201631.1    |
| 179.8  | 276.2  | 208.9  | 189.4 NM_201631.2    |
| 85.3   | 92.3   | 86.1   | 77.1 NM_201631.2     |
| 81.6   | 82.1   | 81     | 85.9 NM_198994.1     |
| 92.5   | 91.4   | 87.4   | 93.4 NM_052955.1     |
| 1229.8 | 1222.3 | 1244.6 | 527.8 NM_006464.2    |
| 86.5   | 88.6   | 77.6   | 89.4 NM_000360.2     |
| 85.8   | 72.4   | 83.4   | 81.4 NM_000360.3     |
| 987    | 707.9  | 716.8  | 448.8 NM_198976.1    |

|        |       |       |                      |
|--------|-------|-------|----------------------|
| 226.4  | 264.3 | 270.9 | 185.3 NM_198554.1    |
| 84.1   | 92.1  | 89.5  | 83.6 NM_022065.3     |
| 277.1  | 230.8 | 165.5 | 164.2 NM_018105.2    |
| 120.3  | 100.4 | 111.2 | 99 NM_199003.1       |
| 308.9  | 272.9 | 251.4 | 211.3 NM_020147.2    |
| 1574.8 | 907.5 | 863.8 | 581 NM_020457.2      |
| 99.5   | 91.6  | 93.5  | 101.3 NM_031435.1    |
| 101.3  | 90.9  | 85.7  | 93.6 NM_138350.2     |
| 124    | 126.5 | 102.2 | 130.6 NM_015963.4    |
| 90.3   | 76.6  | 73.2  | 88 NM_182529.1       |
| 193.6  | 219.5 | 193.4 | 169.6 NM_144721.3    |
| 121.5  | 110.1 | 116   | 105.6 NM_001008696.1 |
| 271.3  | 245   | 224.1 | 188.8 NM_030573.2    |
| 103.9  | 97.2  | 87    | 87.4 NM_030573.2     |
| 80.5   | 65.7  | 77.7  | 86 NM_152658.1       |
| 95.6   | 94.6  | 86    | 94.2 NM_024672.2     |
| 165.2  | 144.2 | 118.6 | 115 NM_000361.2      |
| 92.2   | 110.2 | 85.5  | 99.3 NM_003246.2     |
| 94.1   | 84.1  | 85.2  | 83.9 NM_003247.2     |
| 92.7   | 88.2  | 90.1  | 101.2 NM_007112.3    |
| 438.5  | 338   | 360.7 | 230.6 NM_003248.3    |
| 83.7   | 90.8  | 81.5  | 84.3 NM_018324.1     |
| 104.1  | 104   | 102.6 | 92.3 NM_199202.1     |
| 95.5   | 96.5  | 93.6  | 94.5 NM_016585.3     |
| 461.9  | 516.2 | 411.6 | 485.8 NM_018473.2    |
| 95.2   | 94.5  | 84.7  | 85.8 NM_053055.3     |
| 88.2   | 95.7  | 85.3  | 86.2 NM_182578.1     |
| 84.1   | 76.2  | 79.7  | 83.4 NM_153332.2     |
| 161.6  | 149.4 | 139.8 | 122.8 NM_017872.3    |
| 126.1  | 115.8 | 99.1  | 97.8 NM_024838.3     |
| 429    | 376.1 | 346.2 | 329.7 NM_005131.1    |
| 291.1  | 400.8 | 401.8 | 283 NM_020449.2      |
| 138.5  | 145.5 | 138   | 133.7 NM_020449.1    |
| 639.9  | 478.7 | 404.4 | 309.8 NM_032361.1    |
| 880    | 812.2 | 701.6 | 487.6 NM_032361.1    |
| 783.4  | 382.6 | 340.6 | 238.7 NM_005782.2    |
| 602    | 358.3 | 422.3 | 255.8 NM_001002878.1 |
| 640.7  | 408.5 | 405.6 | 280.4 NM_001002878.1 |
| 851.5  | 541.1 | 474.4 | 402.9 NM_003249.3    |
| 84.7   | 83.7  | 82.5  | 79.8 NM_199356.1     |
| 101.9  | 109.4 | 88.8  | 100 NM_199334.2      |
| 97.5   | 93.2  | 89.6  | 90.7 NM_199334.2     |
| 98.2   | 91.3  | 102.1 | 87.7 NM_003250.4     |
| 84.4   | 87.4  | 85.2  | 101.6 NM_005121.1    |
| 102.4  | 132.3 | 135.6 | 148.7 NM_015335.2    |
| 99.5   | 93    | 98.2  | 86.9 NM_005119.2     |
| 284.5  | 233.5 | 225.5 | 187.4 NM_014815.3    |
| 414    | 377.1 | 347.5 | 288.7 NM_014815.2    |
| 366.2  | 293.9 | 312.7 | 153 XM_939640.1      |
| 613.5  | 431.6 | 435.5 | 235.7 NM_005481.2    |

|        |        |        |                     |
|--------|--------|--------|---------------------|
| 193.3  | 195    | 155.6  | 148.5 NM_005481.2   |
| 2738.7 | 1508.8 | 1603.8 | 954.6 NM_080651.1   |
| 88.6   | 80.9   | 78.3   | 75.3 NM_000461.2    |
| 86.9   | 84.8   | 76     | 70.3 NM_003251.2    |
| 93.3   | 86     | 74.9   | 88.9 NM_018676.2    |
| 87.6   | 82.3   | 83.4   | 85.1 NM_018676.2    |
| 93.4   | 88.1   | 83.4   | 94 NM_199263.1      |
| 100.4  | 97.2   | 84.1   | 94.7 NR_002816.1    |
| 84.6   | 88.3   | 89     | 87.8 XR_000915.1    |
| 77.4   | 73.1   | 70.2   | 79.8 NM_199296.1    |
| 86.4   | 91.7   | 85.1   | 89.6 NM_199296.1    |
| 97.6   | 109.1  | 94.1   | 93.6 NM_199265.1    |
| 109.6  | 103.8  | 98.6   | 108.4 NM_024817.1   |
| 85.8   | 86.9   | 82.9   | 93.2 NM_001080427.1 |
| 99.3   | 93.9   | 81.2   | 92.3 NM_024328.2    |
| 372.2  | 297.9  | 325    | 295 NM_017736.3     |
| 317.2  | 303.5  | 237    | 221.5 NM_025264.2   |
| 171.6  | 156.9  | 158.1  | 152.9 NM_015453.1   |
| 89.6   | 78.7   | 84.4   | 77.4 NM_006288.2    |
| 847.9  | 519.3  | 401.1  | 520.4 NM_199298.1   |
| 130.6  | 109    | 91.8   | 102.9 NM_014174.2   |
| 599.9  | 384.2  | 270.9  | 297.4 NM_199297.1   |
| 1143.7 | 944.9  | 866    | 754.7 NM_022173.1   |
| 848.4  | 845.9  | 1070.1 | 660.6 NM_004740.3   |
| 296.1  | 271.7  | 203    | 310.1 XM_945552.1   |
| 1009.7 | 598.4  | 533.6  | 684.2 NM_003252.2   |
| 210.6  | 139.2  | 132.3  | 165.6 NM_003252.3   |
| 91     | 92.6   | 92.5   | 94 NM_003253.1      |
| 86.6   | 82.9   | 83.4   | 91.3 NM_012454.3    |
| 94.4   | 106    | 103    | 90.3 NM_001010927.2 |
| 102.5  | 104.4  | 97.1   | 113.2 NM_014261.1   |
| 517    | 405.9  | 410    | 231.3 NM_182919.1   |
| 477.6  | 429.4  | 326.8  | 297.9 NM_021649.3   |
| 95.1   | 90.8   | 81.1   | 87.4 NM_005424.2    |
| 120.3  | 98.5   | 94     | 92.6 NM_052864.2    |
| 97.9   | 93.9   | 94.5   | 97.5 NM_145702.1    |
| 379.6  | 279.7  | 216.3  | 226.4 NM_145715.1   |
| 98.1   | 80.3   | 86.1   | 99.4 NM_145719.1    |
| 76.8   | 79.2   | 73.3   | 77.6 NM_145720.2    |
| 892.4  | 547.9  | 513.7  | 263 NM_032862.2     |
| 118.7  | 116.7  | 112.8  | 106.7 NM_030953.2   |
| 156.2  | 164.5  | 189.6  | 157.3 NM_033208.2   |
| 84.7   | 77.2   | 82.4   | 92.9 NM_138379.1    |
| 888.3  | 778.4  | 763    | 489.2 NM_003920.2   |
| 2150.2 | 1152.9 | 1000.9 | 607 NM_012456.1     |
| 94.9   | 85     | 72.1   | 81.6 NM_012458.2    |
| 122.4  | 99.7   | 106.6  | 102.8 NM_006335.1   |
| 332.2  | 301.7  | 241    | 158.2 NM_005834.1   |
| 600.8  | 470.4  | 486.3  | 277.2 NM_013337.2   |
| 626.4  | 476.4  | 355.1  | 338.5 NM_006327.2   |

|        |        |        |        |                |
|--------|--------|--------|--------|----------------|
| 2334.6 | 1403.1 | 910.3  | 1032.5 | NM_006327.2    |
| 1149.7 | 711.1  | 534.4  | 528.5  | XM_943316.1    |
| 299.5  | 261.2  | 243.3  | 194.8  | NM_006351.2    |
| 82.7   | 86.3   | 79.6   | 82.9   | NM_001001563.1 |
| 147.3  | 124    | 115.8  | 102.5  | NM_004085.2    |
| 133.7  | 126.7  | 125.9  | 112.5  | NM_012459.1    |
| 330.8  | 175.6  | 162.1  | 211.5  | NM_012460.2    |
| 4343   | 4702.1 | 4588.7 | 2815.9 | NM_003254.2    |
| 952.3  | 1764.8 | 1545.8 | 1231.6 | NM_003255.4    |
| 199.7  | 242.3  | 219.6  | 217.2  | NM_003255.4    |
| 181.8  | 132.4  | 119    | 128.2  | NM_000362.4    |
| 100.5  | 81.3   | 86.6   | 88.1   | NM_003256.2    |
| 90.8   | 87.5   | 88.4   | 94.3   | NM_014464.2    |
| 82.5   | 87.1   | 78.2   | 88.9   | NM_022164.1    |
| 559.2  | 432.7  | 415.5  | 285.9  | NM_012461.1    |
| 8076.6 | 8121   | 7307   | 6072.8 | NM_014886.2    |
| 111.4  | 97.3   | 99.9   | 100.8  | NM_178449.2    |
| 653.5  | 751.9  | 684.2  | 552.5  | NM_015508.2    |
| 837.1  | 586.1  | 507.6  | 420.9  | NM_001031800.1 |
| 290.1  | 260.3  | 242.5  | 286.8  | NM_152902.3    |
| 89.8   | 80.6   | 79.6   | 90.6   | NM_148910.1    |
| 112.8  | 100.4  | 93.5   | 95.2   | NM_001039661.1 |
| 115.8  | 104.5  | 90.9   | 95.9   | NM_001039661.1 |
| 85.8   | 77     | 75.7   | 84     | NM_003317.3    |
| 89.2   | 93.4   | 87.6   | 93.7   | NM_003317.3    |
| 2027.3 | 1613.9 | 1797.4 | 689.4  | NM_080604.1    |
| 76.9   | 86.6   | 87.2   | 84.2   | NM_175610.2    |
| 95.1   | 80.4   | 85.6   | 90.8   | NM_003257.2    |
| 113.7  | 100.5  | 98.7   | 94.9   | NM_201629.1    |
| 103.1  | 104.2  | 91     | 96.4   | NM_004817.2    |
| 96.1   | 112.6  | 124.1  | 106.2  | NM_014428.1    |
| 2746.5 | 1359   | 1495.2 | 1052.7 | NM_003258.1    |
| 153.9  | 135.2  | 134.8  | 119.9  | NM_004614.2    |
| 6707.9 | 6735.7 | 6271.2 | 4807.2 | NM_001064.1    |
| 89.4   | 90.7   | 98.5   | 85.6   | NM_012253.2    |
| 93.2   | 81     | 84.3   | 92.8   | NM_032136.3    |
| 114    | 112.4  | 96.5   | 93.1   | NM_138463.2    |
| 137.7  | 117.5  | 129.4  | 100.9  | NM_005077.3    |
| 99.8   | 90.2   | 95.2   | 92.5   | NM_003260.3    |
| 146.6  | 154    | 140.3  | 134.4  | NM_005078.1    |
| 948.7  | 681.7  | 532.3  | 585.9  | NM_007005.3    |
| 100.8  | 89.5   | 88.1   | 94.6   | NM_024760.1    |
| 263.3  | 197.8  | 181.5  | 255.1  | NM_012290.3    |
| 458.9  | 533.9  | 439.4  | 358.3  | NM_006852.2    |
| 86.4   | 76.2   | 78.7   | 78     | NM_012464.3    |
| 90.8   | 81.4   | 69.8   | 82.1   | NM_012465.2    |
| 483.2  | 500.1  | 431.7  | 359.8  | NM_006289.2    |
| 105.9  | 137.8  | 137.9  | 117    | NM_015059.1    |
| 241.2  | 427.1  | 361.6  | 307.2  | NM_003262.3    |
| 95.4   | 95.9   | 90.6   | 80.8   | NM_003263.3    |

|        |        |        |                      |
|--------|--------|--------|----------------------|
| 104.3  | 96.7   | 80.7   | 90 NM_030956.2       |
| 88.9   | 90.8   | 91.3   | 94.8 NM_030956.2     |
| 99.2   | 108.7  | 105    | 102.2 NM_003264.3    |
| 95.2   | 88.3   | 70.8   | 79.2 NM_003265.2     |
| 138.2  | 228.3  | 156.3  | 175.2 NM_138557.1    |
| 99.7   | 100.5  | 92.2   | 86.7 NM_003268.3     |
| 100.8  | 93.4   | 79.9   | 83.3 NM_006068.2     |
| 95.7   | 93.2   | 98.7   | 93.7 NM_016562.3     |
| 89.8   | 80.5   | 80.3   | 82.6 NM_016610.2     |
| 94.5   | 88.9   | 89.9   | 93.4 NM_016610.2     |
| 89     | 88.1   | 87.5   | 88 NM_138636.2       |
| 97.8   | 99.3   | 103.5  | 83.7 NM_017442.2     |
| 91.6   | 97     | 79.3   | 85.7 NM_005521.2     |
| 89.9   | 93.7   | 88.9   | 85.1 NM_001534.2     |
| 85     | 88.2   | 85.9   | 85 NM_016170.3       |
| 82.8   | 89.4   | 80.3   | 81.5 NM_016170.3     |
| 86     | 90.1   | 90.2   | 83.7 NM_021025.2     |
| 1051.1 | 832.8  | 908.8  | 765.4 NM_032027.2    |
| 300.9  | 197.9  | 193.1  | 190 NM_078473.2      |
| 141.7  | 134.4  | 125.8  | 107.5 NM_078474.1    |
| 799.2  | 562.5  | 499.6  | 498.2 NM_025141.2    |
| 90     | 83.3   | 89.6   | 91.7 NM_014220.2     |
| 99.9   | 80     | 88.8   | 97.3 NM_015993.1     |
| 99.7   | 85.6   | 87.6   | 99.3 NM_138786.1     |
| 94.6   | 94.6   | 89.8   | 90 NM_138461.2       |
| 101.4  | 98.6   | 88.8   | 95.3 NM_138461.2     |
| 89.6   | 82.5   | 85.7   | 81.3 NM_024795.1     |
| 86.1   | 82.7   | 82.7   | 83.6 NM_004617.2     |
| 80.3   | 83.8   | 68.4   | 88.2 NM_003963.2     |
| 123.6  | 170.2  | 148.5  | 133 NM_023003.1      |
| 83     | 77.6   | 80.7   | 80.2 NM_001001524.1  |
| 103    | 95     | 95.7   | 96.8 NM_203510.1     |
| 85.2   | 84.3   | 78.5   | 83.3 NM_203510.1     |
| 427    | 267.5  | 266.1  | 227.1 NM_003273.1    |
| 261.9  | 223.6  | 189.2  | 220.7 NM_016551.1    |
| 99.2   | 95.3   | 87.5   | 90.6 NM_030788.2     |
| 329.1  | 232.4  | 205.6  | 188.6 NM_006405.5    |
| 129    | 114.5  | 104    | 105.6 NM_001014842.1 |
| 149.3  | 129.6  | 128.9  | 124.1 NM_001014842.1 |
| 2330.8 | 1757.6 | 1571.2 | 1732 NM_004800.1     |
| 552.8  | 581.9  | 501.7  | 358.5 NM_014742.2    |
| 162.3  | 147.9  | 140.2  | 120.7 NM_022152.4    |
| 5586.1 | 5252.6 | 5841.4 | 4249.3 NM_016056.1   |
| 92.3   | 85.8   | 86.3   | 81.8 NM_080751.1     |
| 93.5   | 95.1   | 86.4   | 87.9 NM_144686.1     |
| 92.9   | 89.2   | 90.5   | 77.3 NM_024780.3     |
| 467.4  | 420.7  | 339    | 277 NM_007267.5      |
| 95.2   | 104    | 91.9   | 101.3 NM_024847.2    |
| 92.9   | 100.2  | 100.6  | 99.5 NM_152468.3     |
| 77.8   | 87.5   | 83.4   | 84.6 NM_001017395.1  |



|        |        |        |                      |
|--------|--------|--------|----------------------|
| 97.2   | 93.6   | 102.1  | 101.9 NM_015008.2    |
| 78.2   | 89.1   | 83.2   | 89 NM_014858.2       |
| 82.5   | 87.2   | 87     | 74.8 NM_020698.1     |
| 4330.6 | 3440   | 3111.1 | 2052 NM_019026.2     |
| 86.3   | 85     | 89.6   | 90.4 NM_001008740.2  |
| 475    | 427.9  | 387.5  | 355 NM_017905.3      |
| 124.6  | 123.5  | 122.4  | 117.5 NM_181719.2    |
| 92.7   | 91.8   | 80.4   | 77.1 NM_152453.2     |
| 133.3  | 117    | 110.9  | 101.6 NM_018502.3    |
| 94     | 82.9   | 89.3   | 90 NR_001448.1       |
| 277.1  | 249.7  | 220.6  | 151.9 NM_006858.2    |
| 1892.1 | 1583.6 | 1498.2 | 1355 NM_006827.4     |
| 3669.1 | 1953.3 | 1944.5 | 1272.5 NR_002807.1   |
| 797.3  | 726.6  | 651.1  | 540.8 NM_006815.2    |
| 5228.1 | 4735.8 | 4526.1 | 2617.7 NM_007364.2   |
| 1106.9 | 1211.1 | 1083.4 | 933.3 NM_182547.2    |
| 979.4  | 836.4  | 813.1  | 783.8 NM_016040.3    |
| 90.2   | 80.2   | 93.2   | 94.4 NM_144676.1     |
| 691.3  | 490.1  | 489.2  | 677.6 NM_181836.3    |
| 101.8  | 107.9  | 101.1  | 95.4 NM_213601.1     |
| 2415.9 | 2432.9 | 1902.7 | 1543.6 NM_017510.3   |
| 101.8  | 94     | 84.2   | 94.8 NM_003692.2     |
| 80.1   | 80.8   | 80.8   | 77.5 NM_016192.2     |
| 148.4  | 162.1  | 140.4  | 134.4 NM_003274.3    |
| 88.8   | 92.5   | 77.2   | 82.8 NM_001001723.1  |
| 102.9  | 104.2  | 100    | 97.8 NM_001001723.1  |
| 88.9   | 84.9   | 96.9   | 94.9 NM_033207.2     |
| 102.3  | 90.9   | 87.8   | 85.7 NM_001040102.1  |
| 101.3  | 109.7  | 94.2   | 82.3 NM_018286.1     |
| 956.7  | 789.6  | 785.4  | 541.5 NM_032376.2    |
| 91.6   | 105    | 93.3   | 88.7 NM_178518.2     |
| 421.9  | 774.2  | 714.2  | 479.2 NM_001031703.1 |
| 146.1  | 188.1  | 193.3  | 144.3 NM_001031703.1 |
| 146.9  | 131.6  | 125.7  | 119.3 NM_017728.2    |
| 141.1  | 125.6  | 124.1  | 95.6 NM_178520.2     |
| 89.1   | 110.1  | 95.4   | 105.6 NM_018374.2    |
| 499.6  | 412.5  | 337.5  | 352 NM_024056.2      |
| 92.2   | 87     | 82.4   | 89.3 NM_032354.2     |
| 119.5  | 120.3  | 115.4  | 96.5 NM_023943.1     |
| 771.9  | 599.3  | 506    | 467.7 NM_024092.1    |
| 166.6  | 136.5  | 120.5  | 137.2 NM_003876.1    |
| 119.6  | 110.5  | 99.9   | 107.1 NM_198563.1    |
| 1029.9 | 782.4  | 716.5  | 646.4 NM_025222.2    |
| 444    | 386.2  | 336.1  | 231.2 NM_007024.4    |
| 513    | 569.5  | 585.9  | 403.1 NM_138341.1    |
| 147.2  | 104.9  | 107.2  | 114.7 NM_032256.1    |
| 120.6  | 97.2   | 105.5  | 98.7 NM_032814.1     |
| 86.7   | 92     | 90     | 99.7 NM_181724.1     |
| 85.7   | 88.2   | 78     | 81.2 NM_025268.2     |
| 90.1   | 83     | 90.3   | 86.6 NM_173801.3     |

|        |        |        |        |                |
|--------|--------|--------|--------|----------------|
| 3405.1 | 2978.2 | 1920.7 | 2228.9 | NM_052932.1    |
| 96.3   | 95.9   | 86.7   | 85.4   | NM_144626.1    |
| 3433.3 | 2064.7 | 1859.9 | 2089.9 | NM_032273.2    |
| 1878   | 1631.6 | 1606.3 | 913.4  | NM_018480.2    |
| 128.7  | 157.7  | 142.3  | 111.6  | NM_017849.1    |
| 142.5  | 126.7  | 120.9  | 115.9  | NM_032927.2    |
| 92.5   | 89.4   | 90.8   | 99.5   | NM_138385.2    |
| 89.9   | 93.1   | 90.1   | 87.6   | NM_152913.1    |
| 93.1   | 88.8   | 81.7   | 80.1   | NM_178031.2    |
| 160.4  | 160.5  | 135.9  | 140.3  | NM_001078651.1 |
| 968.8  | 837.3  | 766.2  | 670    | NM_014051.2    |
| 1333.4 | 871.8  | 1270.3 | 921.8  | NM_030969.2    |
| 2221.6 | 2107.6 | 2168.2 | 1540.2 | NM_016462.2    |
| 399    | 263.1  | 219.3  | 238.4  | NM_014908.3    |
| 176.8  | 243.1  | 223.1  | 156.9  | NM_001031738.1 |
| 112.6  | 90.7   | 90.7   | 85.4   | NM_153266.2    |
| 86.4   | 91.5   | 83.1   | 91.9   | NM_153266.2    |
| 371.1  | 332.4  | 339.6  | 281.9  | NM_152680.1    |
| 100.6  | 123.1  | 126    | 97     | NM_024943.1    |
| 93.8   | 98.2   | 96.2   | 87.9   | NM_198507.1    |
| 105    | 108    | 108.1  | 98.7   | NM_020422.3    |
| 95.5   | 121.1  | 111.6  | 97.7   | NM_032227.2    |
| 85.4   | 81.9   | 90.7   | 84.2   | NM_018043.4    |
| 89.8   | 96     | 85.9   | 87.6   | NM_020373.1    |
| 93.7   | 89.2   | 90.5   | 89.2   | NM_031418.1    |
| 104.2  | 105.6  | 94     | 107.3  | NM_178826.2    |
| 90.5   | 85.3   | 82.6   | 81.7   | NM_213599.1    |
| 520.2  | 656.1  | 497    | 463.7  | NM_001025356.1 |
| 78.9   | 85.2   | 71.4   | 79.7   | NM_001001666.1 |
| 103.3  | 93.6   | 94.3   | 96.7   | NM_001001891.1 |
| 77.9   | 73.8   | 81.3   | 75.7   | NM_001001666.1 |
| 122    | 125.3  | 128.4  | 113.6  | NM_020959.1    |
| 101.8  | 113.7  | 101.6  | 101.4  | NM_001012302.1 |
| 86.2   | 84.1   | 74.3   | 88.2   | NM_001012302.1 |
| 174.1  | 145    | 144.6  | 136.8  | NM_018075.2    |
| 4036.3 | 5758.5 | 7230.1 | 7634.2 | NM_198276.1    |
| 254.1  | 185.1  | 178.4  | 156.7  | NM_145254.1    |
| 3283.1 | 2106.4 | 2484.8 | 1867.8 | NM_198282.1    |
| 94.5   | 99.1   | 99.2   | 98.2   | NM_014020.2    |
| 86.9   | 95.7   | 81     | 94.1   | NM_152390.1    |
| 214.9  | 185.6  | 156    | 162.6  | NM_152834.2    |
| 3670.8 | 2369.5 | 2188.8 | 1784.1 | NM_001079809.1 |
| 297.5  | 262.7  | 255.2  | 214.9  | NM_032508.1    |
| 327.8  | 299.1  | 245.9  | 190.7  | NR_000034.1    |
| 120.3  | 121.8  | 112.8  | 97.8   | NM_015421.1    |
| 86.7   | 91.3   | 78.7   | 89.7   | NM_018279.2    |
| 144.6  | 173.1  | 154.9  | 127.3  | NM_013390.1    |
| 145.3  | 111.2  | 102.6  | 100.3  | NM_153226.1    |
| 126.2  | 115.3  | 120.2  | 123.2  | NM_025246.1    |
| 85.5   | 100.8  | 90.2   | 95.3   | NM_147156.3    |

|        |        |        |                     |
|--------|--------|--------|---------------------|
| 127.7  | 92.9   | 108    | 110.7 NM_014807.3   |
| 95.5   | 85.3   | 92.8   | 88.5 NM_032780.2    |
| 91     | 91.3   | 77.3   | 87 NM_178505.4      |
| 88.5   | 101    | 96.2   | 90.5 NM_020665.2    |
| 95.3   | 94.6   | 83.7   | 90.3 NM_015686.2    |
| 368.7  | 416.1  | 351.5  | 335 NM_014138.3     |
| 456.4  | 934.8  | 810    | 637.9 NM_018247.2   |
| 76.9   | 81.1   | 75.3   | 85.8 NM_001017970.1 |
| 153.9  | 133.6  | 136.4  | 113.8 NM_182541.2   |
| 2046.1 | 1571.9 | 1480   | 1130 NM_173470.1    |
| 102.6  | 101.1  | 103.6  | 96.1 NM_018241.1    |
| 113.7  | 102.9  | 109.8  | 111 NM_021637.1     |
| 126.6  | 115.2  | 116.5  | 121.9 NM_183240.1   |
| 95.4   | 88.6   | 75.8   | 76.9 NM_024074.1    |
| 93.1   | 88.3   | 88.1   | 85.4 NM_018112.1    |
| 225.5  | 217.6  | 187.8  | 190.1 NM_018266.1   |
| 517.1  | 492.3  | 522.3  | 454.3 NM_018056.1   |
| 568.4  | 644.8  | 620.4  | 510 NM_014255.3     |
| 109.2  | 94.8   | 96.2   | 94.7 NM_018306.2    |
| 252.5  | 189.9  | 174.3  | 139.8 NM_080652.2   |
| 638.1  | 605.1  | 613.9  | 561.9 NM_015012.1   |
| 386.7  | 384.9  | 375.4  | 246.5 NM_144638.1   |
| 1196.5 | 1710.8 | 1426.4 | 853.7 NM_024334.1   |
| 133.4  | 116.6  | 118.4  | 94.9 NM_138399.3    |
| 97.4   | 101.8  | 89.2   | 93.3 NM_138399.3    |
| 145.5  | 240.3  | 180.4  | 244.8 NM_018004.1   |
| 96.3   | 92.8   | 89.6   | 88.6 NM_138788.2    |
| 90.4   | 82.6   | 78.4   | 92.1 NM_001007538.1 |
| 106.3  | 107.4  | 109    | 106 NM_031442.2     |
| 670.5  | 455.2  | 397.2  | 400.9 NM_018087.3   |
| 1318.7 | 1466.6 | 1307.8 | 964.5 NM_030938.2   |
| 1515.4 | 903.1  | 893.7  | 584.8 NM_014254.1   |
| 138.1  | 153.8  | 123    | 128.9 NM_014313.2   |
| 1069.3 | 855.6  | 764    | 602.5 NM_006134.5   |
| 506.7  | 590.8  | 550.9  | 452.8 NM_018022.1   |
| 99.7   | 97.9   | 87.5   | 100.4 NM_178545.2   |
| 107.2  | 106.4  | 110.3  | 96.8 NM_024587.2    |
| 233    | 238.4  | 192.6  | 199.3 NM_033504.2   |
| 389.6  | 335.1  | 338.6  | 399.2 NM_018710.1   |
| 402    | 361.9  | 343.8  | 273 NM_144568.1     |
| 91.4   | 87.2   | 82.5   | 93.2 NM_152487.1    |
| 163    | 176.1  | 174.4  | 153.9 NM_018202.2   |
| 97.4   | 89.1   | 98.3   | 95.8 NM_198149.1    |
| 4870.9 | 4353.6 | 4138.3 | 3262 NM_004872.3    |
| 1690.1 | 1706.5 | 1804.2 | 1281.3 NM_032936.2  |
| 90     | 92     | 90.4   | 90.6 NM_182532.1    |
| 263.3  | 319.9  | 284.3  | 266.4 NM_024956.3   |
| 130.1  | 164.6  | 163.7  | 159.7 NM_014698.1   |
| 87.2   | 97.5   | 87.4   | 101 NM_018426.1     |
| 85.2   | 99.4   | 96.1   | 85.7 NM_020431.1    |

|        |        |        |        |                |
|--------|--------|--------|--------|----------------|
| 170.1  | 156.1  | 117.2  | 128.6  | NM_001008495.2 |
| 106.5  | 109.6  | 103.4  | 115.3  | NM_194291.1    |
| 5662.6 | 3313.3 | 2952.1 | 3378.6 | NM_016127.4    |
| 105.7  | 88.9   | 90.3   | 92     | NM_153704.3    |
| 115.6  | 103.8  | 99     | 103.9  | NM_152417.1    |
| 967.3  | 917.1  | 999.2  | 560.9  | NM_016486.2    |
| 136.5  | 91.7   | 107.4  | 92.5   | NM_017866.4    |
| 389.1  | 225.2  | 185.7  | 166.7  | NM_017866.3    |
| 115.6  | 117.6  | 111    | 111.1  | NM_144649.1    |
| 105.5  | 99.7   | 96.2   | 102.7  | NM_153015.1    |
| 90.4   | 81.7   | 81     | 91.8   | NM_001037234.1 |
| 826.3  | 405.2  | 278.6  | 337.3  | NM_178454.2    |
| 473.2  | 300.4  | 317.8  | 202.7  | NM_032323.1    |
| 286.6  | 276.7  | 247.2  | 289.8  | NM_021259.1    |
| 186.7  | 181.1  | 197.3  | 216.4  | XM_938671.1    |
| 149.2  | 180.1  | 166.9  | 170.1  | NM_174940.1    |
| 79.4   | 92.2   | 75.5   | 73.6   | NM_174940.1    |
| 84.2   | 74.3   | 76     | 84.6   | NM_203376.1    |
| 91.3   | 82     | 73.1   | 79.5   | NM_152454.1    |
| 3245.6 | 2941.5 | 2500   | 1802.6 | NM_016454.2    |
| 76     | 99.1   | 86.1   | 89.8   | NM_153347.1    |
| 340.5  | 261.8  | 272    | 275    | NM_173804.3    |
| 3498.2 | 3002.8 | 3242.4 | 1949.6 | NM_015497.2    |
| 105.6  | 126.4  | 100.8  | 102.8  | NM_032824.1    |
| 92.4   | 94.2   | 82     | 85     | NM_203411.1    |
| 104.9  | 106.3  | 96.1   | 91.4   | NM_001008269.1 |
| 376.5  | 324.7  | 280.5  | 230.3  | NM_016456.2    |
| 179.9  | 236.6  | 291.1  | 159.1  | NM_001042595.1 |
| 104.5  | 104    | 92.8   | 99.2   | NM_153229.1    |
| 386    | 320.3  | 347.5  | 222.4  | NM_031298.2    |
| 108.9  | 107    | 89.2   | 104.6  | NM_001014764.1 |
| 657.8  | 516.9  | 616.9  | 411.9  | NM_001014764.1 |
| 78     | 76.1   | 79.4   | 83.2   | NM_198154.1    |
| 1827.8 | 1266.9 | 1288.4 | 934.9  | NM_014573.1    |
| 92.4   | 81     | 91.3   | 84.7   | NM_015544.2    |
| 86.3   | 87.1   | 85.1   | 86.3   | NM_015544.2    |
| 832.9  | 596.1  | 488.5  | 455.8  | NM_145274.1    |
| 1102.2 | 778.4  | 768.1  | 548.2  | NM_020644.1    |
| 76.7   | 88.9   | 76.4   | 88.2   | NM_199169.1    |
| 85.4   | 87.4   | 78.8   | 85.5   | NM_020182.3    |
| 93     | 112.3  | 106.8  | 97.5   | NM_199169.1    |
| 90.6   | 98.9   | 90.6   | 92.2   | NM_199171.1    |
| 276.8  | 360.4  | 284.1  | 298.3  | NM_007114.1    |
| 98.4   | 99.9   | 102.4  | 98.2   | NM_147196.1    |
| 108.9  | 100.4  | 109.4  | 94.8   | NM_206832.1    |
| 88.1   | 84     | 82.1   | 83.2   | NM_144615.1    |
| 124.2  | 152.5  | 133.2  | 135.3  | NM_018196.1    |
| 110.7  | 108.3  | 94.7   | 101.9  | NM_018196.1    |
| 220.1  | 226.4  | 228.1  | 157.1  | NM_003275.1    |
| 85.4   | 75.7   | 87     | 80.4   | NM_014548.2    |

|        |        |       |                      |
|--------|--------|-------|----------------------|
| 163.9  | 154.3  | 137.8 | 127.1 NM_014547.3    |
| 111.8  | 109.3  | 103   | 111.2 NM_013353.1    |
| 148.5  | 151.3  | 161.2 | 137.3 NM_031925.1    |
| 112    | 107.1  | 94.1  | 90.6 NM_003276.1     |
| 332.3  | 192.5  | 157.6 | 162.7 NM_003276.1    |
| 95.2   | 85.1   | 93.1  | 76.6 NM_001032283.1  |
| 90.9   | 89     | 78.6  | 90.3 NM_182606.2     |
| 97.6   | 86.9   | 88.4  | 89.1 NM_182502.1     |
| 92.2   | 91.9   | 87.1  | 86.4 NM_004262.2     |
| 101.2  | 89.4   | 80.3  | 91.1 NM_182559.1     |
| 93.7   | 92.9   | 98.2  | 108.3 NM_032046.1    |
| 95.6   | 94.9   | 85.4  | 93.2 NM_005656.2     |
| 96.6   | 84.1   | 82.8  | 96.1 NM_032405.1     |
| 78.2   | 82.3   | 81.1  | 71.3 NM_032401.1     |
| 103.3  | 100.6  | 98.8  | 94.2 NM_024022.1     |
| 97.5   | 90.2   | 86.3  | 88.6 NM_032404.1     |
| 71.8   | 73.6   | 81.6  | 87.3 NM_032405.1     |
| 100.5  | 97.1   | 96    | 94.6 NM_019894.2     |
| 82.9   | 85.1   | 78.7  | 90 NM_183247.1       |
| 96.7   | 95.4   | 90.9  | 89.8 NM_030770.1     |
| 86.4   | 82.8   | 75.4  | 82.3 NM_153609.2     |
| 99.7   | 123.5  | 106.6 | 89.1 NM_001042575.1  |
| 92.2   | 79     | 92.7  | 85.2 XM_938469.1     |
| 90.7   | 90.6   | 84.9  | 91.5 NM_182973.1     |
| 8115.2 | 7515.9 | 7016  | 5595.9 NM_021103.3   |
| 98.6   | 84.3   | 90.5  | 98.4 NM_021109.2     |
| 109.1  | 110.1  | 108.5 | 90 NM_004202.2       |
| 1095.9 | 388    | 423   | 304.1 NM_021992.2    |
| 91.1   | 101.2  | 100.1 | 97.9 NM_152588.1     |
| 143.7  | 144.8  | 123   | 140.3 NM_181783.1    |
| 250.8  | 219.6  | 176.2 | 169.6 NM_032813.1    |
| 127.7  | 123.7  | 128.6 | 116.2 NM_032813.1    |
| 339.6  | 256.8  | 262.3 | 218.2 NM_032813.1    |
| 239.3  | 263    | 305   | 264.5 NM_024107.2    |
| 242.7  | 318.3  | 415   | 153.2 NM_024107.2    |
| 153.6  | 139.3  | 104.8 | 104.3 NM_002160.1    |
| 761.7  | 531.1  | 460.3 | 307.1 NM_000594.2    |
| 172.5  | 165.7  | 150.8 | 168.1 NM_021137.3    |
| 283.5  | 273.4  | 292.1 | 276.8 NM_006291.2    |
| 161.7  | 202.8  | 184.5 | 190 NM_006290.2      |
| 100.5  | 101.9  | 100.6 | 93.8 NM_007115.2     |
| 380.4  | 377.9  | 320.9 | 289.5 NM_001077654.1 |
| 100.7  | 95.4   | 82    | 80.8 NM_014350.1     |
| 182    | 140.4  | 136.1 | 118.2 NM_152362.1    |
| 216.4  | 244.3  | 229.2 | 203.9 NM_024575.1    |
| 106.1  | 105    | 89.2  | 88.9 NM_207381.2     |
| 281.2  | 210.2  | 178.2 | 168.1 NM_003844.2    |
| 90.5   | 95.3   | 90.7  | 95.4 NM_147187.1     |
| 94.8   | 96.3   | 82.4  | 107.5 NM_003842.3    |
| 467.6  | 317.7  | 285.7 | 234.5 NM_003842.3    |

|        |        |        |                     |
|--------|--------|--------|---------------------|
| 119    | 117.8  | 120.3  | 93.8 NM_003841.2    |
| 87.1   | 93.1   | 85.6   | 75 NM_003840.3      |
| 77.4   | 81.7   | 74.5   | 89.5 NM_003839.2    |
| 96.2   | 82.5   | 85.2   | 86.9 NM_002546.2    |
| 99.6   | 105.2  | 91.8   | 100.2 NM_016639.1   |
| 96.5   | 84.1   | 78.6   | 90.6 NM_012452.2    |
| 93.5   | 111.9  | 127.2  | 111.8 NM_052945.2   |
| 221.7  | 795.3  | 927.1  | 446.5 NM_003820.2   |
| 89     | 85.7   | 76.7   | 82.2 NM_001192.2    |
| 95.4   | 90.3   | 83.1   | 88.5 NM_148902.1    |
| 87.2   | 90.3   | 73.7   | 81.1 NM_148901.1    |
| 98.6   | 91.4   | 88.8   | 92.2 NM_018647.2    |
| 105.7  | 105.3  | 97.3   | 97.3 NM_148957.2    |
| 77.1   | 74.7   | 74.6   | 78.4 NM_018647.2    |
| 76.8   | 84.9   | 76.3   | 77.9 NM_152222.1    |
| 80.3   | 80.3   | 80.5   | 78.9 NM_032871.3    |
| 83.9   | 77.2   | 80.5   | 82.4 NM_032871.3    |
| 783.3  | 780.8  | 641.7  | 577.2 NM_001065.2   |
| 120.6  | 176.3  | 191.5  | 110 NM_001066.2     |
| 900.1  | 2006.6 | 1141.1 | 1018.4 NM_014452.3  |
| 84.2   | 87.3   | 83.9   | 81.8 NM_001039664.1 |
| 94.9   | 120.9  | 123.3  | 109.1 NM_148973.1   |
| 89.9   | 93.3   | 96.8   | 92.6 NM_003327.2    |
| 93.9   | 89.3   | 90     | 93 NM_003823.2      |
| 132.5  | 149.9  | 144.2  | 141.8 NM_032945.2   |
| 91.3   | 81.2   | 89.3   | 85 NM_001242.3      |
| 88.9   | 95.5   | 83.8   | 90.7 NM_001243.3    |
| 91.8   | 82.8   | 72.3   | 86.3 NM_001243.3    |
| 93.6   | 98.3   | 97.8   | 106.7 NM_001561.4   |
| 312.3  | 246.7  | 199.5  | 219.2 NM_003810.2   |
| 88.9   | 89     | 88.4   | 80 NM_003701.2      |
| 90.2   | 94     | 86     | 88.2 NM_003701.2    |
| 87.1   | 82.5   | 79.6   | 78.2 NM_033012.2    |
| 88.5   | 82.4   | 86.9   | 84.4 NM_003809.2    |
| 104    | 103.2  | 100.8  | 96.1 NM_172087.1    |
| 90.5   | 97.7   | 104.3  | 100.5 NM_172088.1   |
| 305.8  | 375.4  | 348.7  | 327.6 NM_006573.3   |
| 325.2  | 503.4  | 498.9  | 367.4 NM_003807.2   |
| 151.5  | 230.7  | 185.8  | 185.5 NM_003807.2   |
| 307.2  | 486.8  | 592.7  | 308.8 NM_172014.1   |
| 229.8  | 277.5  | 360.2  | 349.7 NM_005118.2   |
| 87.4   | 84     | 83.6   | 83.1 NM_005092.2    |
| 98.4   | 108.1  | 95.7   | 104.4 NM_003326.2   |
| 4483   | 2962   | 2368.5 | 2710.5 NM_020232.3  |
| 1330.1 | 1377.8 | 1091.3 | 933.6 NM_001252.2   |
| 89.6   | 97     | 82.9   | 90.6 NM_001244.2    |
| 184.2  | 147.2  | 125    | 137.2 NM_003811.2   |
| 91.7   | 93.2   | 88.7   | 103.2 NM_015028.1   |
| 274.5  | 280.5  | 268.3  | 172.4 NM_006058.2   |
| 144.5  | 113.2  | 102.9  | 100.9 NM_024309.2   |

|        |        |        |                      |
|--------|--------|--------|----------------------|
| 96.7   | 94.8   | 93.3   | 103.5 NM_024873.2    |
| 85.4   | 79.3   | 74.7   | 76.9 NM_003985.1     |
| 447.9  | 680    | 784.3  | 380.2 NM_005781.4    |
| 87.2   | 89.2   | 90.7   | 80.5 NM_001010938.1  |
| 98.4   | 103.5  | 94.7   | 92.2 NM_005781.4     |
| 100.4  | 101.2  | 104.1  | 102 NM_003747.1      |
| 137.6  | 130.9  | 132.9  | 126.8 NM_033396.1    |
| 82.8   | 88.9   | 86.8   | 88.1 NM_025235.2     |
| 107.7  | 96.1   | 98.1   | 96.9 NM_022144.1     |
| 98     | 98.3   | 105.1  | 100.8 NM_022093.1    |
| 82.1   | 80.3   | 78     | 83.4 NM_003280.1     |
| 87.4   | 94.1   | 85.6   | 88.6 NM_003279.2     |
| 86.1   | 88.2   | 80     | 85.3 NM_003281.3     |
| 90.4   | 109.8  | 94.1   | 93 NM_003282.2       |
| 102.5  | 90.4   | 87.3   | 93.6 NM_000363.3     |
| 95.6   | 102.2  | 101.7  | 100.9 NM_015978.1    |
| 140.5  | 136.3  | 137.1  | 130.2 NM_003283.3    |
| 101.9  | 116.5  | 99.7   | 97.9 NM_001001431.1  |
| 100.7  | 96.8   | 88.1   | 94.5 NM_001001432.1  |
| 87.7   | 81.4   | 76.2   | 80.1 NM_001042780.1  |
| 88.6   | 81     | 74.2   | 85.1 NM_006757.1     |
| 103.1  | 108.4  | 104.1  | 92.7 NM_003284.2     |
| 90.4   | 80.5   | 71.8   | 89.6 NM_005425.4     |
| 289.5  | 222.4  | 179.2  | 189.4 NM_153188.1    |
| 119.1  | 113.3  | 115.4  | 120.3 NM_002270.2    |
| 1276.7 | 1448.6 | 1296   | 852 NM_002270.2      |
| 1471.2 | 865.3  | 772.3  | 568.8 NM_013433.3    |
| 743.2  | 1063.7 | 898.2  | 760.1 NM_012470.2    |
| 97     | 90.8   | 88.2   | 93.3 NM_003285.1     |
| 357.5  | 442.9  | 427.2  | 379.6 NM_015575.2    |
| 99.4   | 90.5   | 80.9   | 81.9 NM_007185.3     |
| 1126   | 1058.3 | 836.2  | 899.3 NM_006586.2    |
| 617.4  | 535.1  | 520.5  | 381.2 NM_006586.2    |
| 100    | 101.9  | 100.8  | 106.3 NM_020847.1    |
| 212.6  | 288.9  | 273.9  | 335.3 NM_014494.1    |
| 92.5   | 92.4   | 95.7   | 90.8 NM_020847.1     |
| 411.2  | 802.9  | 657.7  | 679.6 NM_001024843.1 |
| 96.5   | 85.5   | 77.8   | 80.4 NM_001024843.1  |
| 95.2   | 91.4   | 91.8   | 98.9 NM_015088.1     |
| 92.6   | 85     | 81.3   | 85 NM_018996.2       |
| 89.8   | 79     | 78.8   | 87.4 NM_001080430.1  |
| 134.4  | 111.1  | 111    | 102.2 NM_022648.3    |
| 1208.1 | 1881.5 | 1801.1 | 1009.6 NM_022748.9   |
| 91.1   | 88.9   | 81.3   | 94 NM_032865.3       |
| 94.6   | 85.3   | 83.5   | 91.6 NM_182831.1     |
| 84.3   | 80.4   | 79.7   | 79.7 NR_001284.1     |
| 102.9  | 93.1   | 96.6   | 99.3 NM_032470.2     |
| 88     | 80.9   | 83.7   | 87.6 NM_019105.5     |
| 392.4  | 478.2  | 413.5  | 320.7 NM_005749.2    |
| 134.5  | 116.7  | 126.6  | 113 NM_016272.3      |

|         |        |        |                      |
|---------|--------|--------|----------------------|
| 141.6   | 125.3  | 133.3  | 111.6 NM_025077.2    |
| 243.4   | 240.5  | 228.1  | 204.7 NM_019009.2    |
| 306.9   | 433    | 366.3  | 194 NM_005488.1      |
| 122.2   | 113.2  | 94.8   | 107.3 NM_005486.1    |
| 89.5    | 97.2   | 103.4  | 99.6 NM_144678.3     |
| 91.2    | 90.9   | 92.9   | 100.4 NM_001033551.1 |
| 93      | 86.3   | 94.9   | 85.2 NM_144678.3     |
| 4775    | 3727.5 | 3154.5 | 2916.2 NM_014765.1   |
| 991.9   | 750.7  | 743.4  | 567.5 NM_020243.4    |
| 923.3   | 650.6  | 685.9  | 346.2 NM_006809.4    |
| 4011.5  | 2439.9 | 2023.7 | 943.3 NM_006114.1    |
| 282.7   | 235.8  | 193.7  | 200.8 NM_032174.4    |
| 10205.9 | 10271  | 9760.8 | 8192.4 NM_019059.2   |
| 1559    | 1089.7 | 1026   | 938.3 NM_014820.3    |
| 138.2   | 115.5  | 137.6  | 117.6 NM_003286.2    |
| 1442    | 1569.8 | 1291.4 | 1112 NM_052963.1     |
| 562.9   | 456    | 472.9  | 379.3 NM_052963.1    |
| 336.4   | 248.2  | 246.7  | 241.9 XM_944877.1    |
| 94.5    | 87     | 87.8   | 85.6 NR_002719.1     |
| 253     | 213.5  | 189.5  | 177.9 NR_001283.1    |
| 4221.4  | 3147   | 2093.5 | 2264.3 NM_001067.2   |
| 2735.3  | 3626   | 2721.3 | 3014.2 NM_001068.2   |
| 227.8   | 267.1  | 275.6  | 161 NM_004618.3      |
| 509.1   | 477.9  | 467.3  | 282.4 NM_003935.3    |
| 349.1   | 430.3  | 404.5  | 388.7 NM_007027.2    |
| 85.2    | 87.3   | 71.9   | 90.9 NM_005802.2     |
| 275.8   | 241.3  | 186.4  | 168.3 NM_000113.2    |
| 1474.3  | 979.9  | 755.4  | 921.3 NM_015602.2    |
| 159.9   | 157.9  | 125.2  | 144.4 NM_145034.1    |
| 329.2   | 245.7  | 249.7  | 181.9 NM_014506.1    |
| 167.5   | 128.6  | 134.8  | 120.6 NM_130459.1    |
| 1056.6  | 833.2  | 590.1  | 499.5 NM_022371.2    |
| 83      | 81.4   | 87.8   | 75 NM_014729.2       |
| 87.4    | 82.6   | 81.2   | 95.2 NM_000546.2     |
| 301.3   | 314.3  | 309.1  | 245.2 NM_005657.1    |
| 789.5   | 798.7  | 793.9  | 485.4 NM_001031685.1 |
| 100.4   | 90.2   | 84.7   | 95.2 NM_005426.2     |
| 120.1   | 118.8  | 114.1  | 124.5 NM_006034.2    |
| 93.4    | 90.2   | 78.1   | 92.2 NM_006034.2     |
| 400.2   | 411.9  | 526.6  | 230.4 NM_138349.2    |
| 134.4   | 100.7  | 111.1  | 108.1 NM_147184.1    |
| 107.3   | 112.3  | 110.5  | 118.2 NM_004881.2    |
| 93.3    | 102.5  | 95.7   | 108.7 NM_033285.2    |
| 222.7   | 230.6  | 201.7  | 216.8 NM_021202.1    |
| 316.8   | 306    | 250.8  | 238.3 NM_033550.3    |
| 108     | 95.6   | 92.6   | 94.4 NM_016212.1     |
| 89.8    | 93.4   | 88.2   | 86 NM_016212.2       |
| 94.4    | 89.3   | 85.2   | 97.9 NM_005427.1     |
| 81.9    | 86.4   | 89.4   | 82.6 NM_003722.3     |
| 205.3   | 148    | 176.9  | 122.3 NM_018475.2    |



|         |         |         |         |                |
|---------|---------|---------|---------|----------------|
| 150.2   | 198.8   | 214.1   | 187.6   | NM_017901.3    |
| 258.9   | 236     | 283.4   | 148.9   | NM_139075.1    |
| 83.5    | 76.5    | 75.9    | 73.1    | NM_001025253.1 |
| 106.1   | 93.1    | 100.5   | 103.5   | NM_001003396.1 |
| 91.8    | 83.1    | 92.4    | 85.7    | NM_001003395.1 |
| 90.8    | 85.6    | 100.6   | 99.3    | NM_001003397.1 |
| 308.7   | 275.5   | 296.8   | 247.8   | NM_199361.1    |
| 1536.5  | 2064.1  | 2195.5  | 756     | NM_199362.1    |
| 96.9    | 84.3    | 87.9    | 84      | NM_001001874.1 |
| 91.9    | 90.6    | 84.5    | 89.6    | NM_001001875.2 |
| 109.1   | 104.6   | 100.7   | 103.2   | NM_033516.4    |
| 97.1    | 97.7    | 94      | 90.3    | NM_004179.1    |
| 93.8    | 95.9    | 90.8    | 93.1    | NM_173353.2    |
| 5036.5  | 3698    | 3325.2  | 2854.7  | NM_000365.4    |
| 843.4   | 496.1   | 444.2   | 410     | NM_022445.2    |
| 111.1   | 91.2    | 87.5    | 95.9    | NM_001042482.1 |
| 144.1   | 285.4   | 247.5   | 224.6   | NM_000366.5    |
| 104.6   | 127.1   | 129.7   | 133.2   | NM_001018008.1 |
| 224.8   | 458.2   | 409.8   | 399.5   | NM_001018004.1 |
| 873.8   | 1335.6  | 1732.2  | 797.2   | NM_213674.1    |
| 91.6    | 95      | 88.1    | 89.8    | NM_003289.3    |
| 454.6   | 633.9   | 712.2   | 676.9   | NM_003289.3    |
| 1643.6  | 1068.6  | 899.6   | 623.6   | NM_153649.2    |
| 83.5    | 85.5    | 84.8    | 94.2    | NM_001043353.1 |
| 86.5    | 82.7    | 85.9    | 85.9    | NM_152263.1    |
| 153.2   | 150.5   | 114.8   | 125.2   | NM_003290.1    |
| 304.7   | 435     | 407.7   | 286.8   | NM_000367.2    |
| 79.1    | 74.4    | 66      | 77.9    | NM_175719.1    |
| 93.5    | 85.9    | 89.8    | 91      | NM_175720.1    |
| 1623.6  | 1843.8  | 1716.5  | 1272.8  | NM_000391.2    |
| 127.3   | 133.6   | 108.9   | 129.9   | NM_003291.1    |
| 92.9    | 81.7    | 100     | 91.1    | NM_007030.1    |
| 1029    | 1687.3  | 1285.6  | 1173.3  | NM_003292.1    |
| 96.9    | 90.2    | 93.1    | 94.7    | NM_016058.1    |
| 81.4    | 77.9    | 77.7    | 84.1    | NM_198479.2    |
| 82.8    | 77.5    | 84.5    | 88.4    | NR_002223.1    |
| 79.4    | 90.4    | 75.3    | 86.3    | NM_003294.3    |
| 78.6    | 77.3    | 81.7    | 79      | NM_012217.2    |
| 103.1   | 91.2    | 88.3    | 89.6    | NM_012467.2    |
| 158.5   | 230.5   | 176.3   | 186.4   | NM_003596.2    |
| 1766.1  | 1172.9  | 1306.3  | 669.4   | NM_001008566.1 |
| 57861.9 | 56646.6 | 52855.9 | 53967.1 | NM_003295.1    |
| 77.1    | 85.4    | 85.2    | 78.5    | NM_199260.2    |
| 91.2    | 86.1    | 84.1    | 90.5    | NM_199254.1    |
| 113.1   | 158.6   | 179     | 133.3   | NM_130785.2    |
| 83.7    | 99.6    | 102.3   | 97.9    | NM_130785.2    |
| 616     | 561.9   | 449.3   | 386.6   | NM_012112.4    |
| 83.9    | 88.4    | 82.8    | 93      | NM_001039783.1 |
| 269     | 143.2   | 162.8   | 120.3   | NM_176880.4    |
| 219.5   | 289.5   | 226.1   | 255.7   | XR_000203.3    |

|        |        |        |                      |
|--------|--------|--------|----------------------|
| 526.8  | 503.8  | 574.9  | 412.1 NM_013293.2    |
| 156.2  | 157.5  | 135.8  | 142.8 NM_003789.2    |
| 186.2  | 193.5  | 161    | 164.3 NM_003789.2    |
| 93.6   | 87.7   | 92.4   | 84.9 NM_005658.3     |
| 191.2  | 167.2  | 163    | 172.2 NM_021138.3    |
| 182.9  | 164.4  | 159.6  | 152.6 NM_003300.2    |
| 177.7  | 157.1  | 149.1  | 134.3 NM_015650.2    |
| 82.2   | 78.6   | 74.9   | 86.8 NM_147686.1     |
| 109.2  | 109.8  | 104.1  | 105.8 NM_147200.1    |
| 550.4  | 563.5  | 468.6  | 314.3 NM_147200.1    |
| 308.4  | 283    | 281.6  | 248.8 NM_025228.1    |
| 108.3  | 106.7  | 88.5   | 96.4 NM_004295.2     |
| 85.3   | 81.8   | 82.5   | 76.6 NM_004295.2     |
| 83.2   | 93.7   | 92.2   | 87.1 NM_004619.3     |
| 82.1   | 84.7   | 81.9   | 88.5 NM_004619.3     |
| 92     | 85.7   | 78.7   | 90.9 NM_145759.2     |
| 92     | 90.4   | 86.4   | 81.5 NM_001033910.1  |
| 97.1   | 86.7   | 88.1   | 88.2 NM_004619.3     |
| 101.2  | 98.7   | 95.5   | 104.8 NM_145803.1    |
| 162.6  | 133.3  | 135.3  | 130.1 NM_004620.2    |
| 185.5  | 149    | 126.8  | 145.8 NM_004620.2    |
| 203.9  | 197.7  | 160    | 169.5 NM_032271.2    |
| 78.6   | 79.3   | 79.9   | 83.9 NM_206835.1     |
| 216.9  | 238.9  | 223.3  | 182.8 NM_006700.1    |
| 115.3  | 116.3  | 122.7  | 110.4 NM_005879.2    |
| 334.6  | 343.4  | 327.1  | 240.6 NM_014965.2    |
| 388.3  | 482.3  | 439.5  | 449.5 NM_001042646.1 |
| 153.6  | 212.9  | 209.6  | 242.9 NM_001042646.1 |
| 314.3  | 320.8  | 259.5  | 252.1 NM_015049.1    |
| 6089.5 | 4393.2 | 4008.6 | 4077.7 NM_014294.3   |
| 87.3   | 91.3   | 84.3   | 84.9 NM_152402.1     |
| 411    | 417.9  | 402.2  | 336.7 NM_012288.3    |
| 546.4  | 449    | 394.2  | 293.6 NM_016292.1    |
| 680    | 444.1  | 465.2  | 298.1 NM_021210.2    |
| 114.3  | 113.1  | 111.3  | 113.3 NM_001011658.1 |
| 559.7  | 540.3  | 458    | 391.9 NM_014563.3    |
| 95.4   | 97.5   | 87.7   | 89.9 NM_014563.3     |
| 904.9  | 964.1  | 1009.2 | 569.7 NM_014408.3    |
| 1542.3 | 753    | 708.9  | 530.4 NM_016146.1    |
| 894.4  | 667.6  | 673.7  | 487.5 NM_001042462.1 |
| 223.8  | 197    | 249.1  | 167.3 NM_024108.1    |
| 120.4  | 109.5  | 92.1   | 113.8 NM_177452.2    |
| 102.3  | 99     | 84.3   | 95.8 NM_001079537.1  |
| 141.3  | 120    | 115.7  | 119.7 NM_001079537.1 |
| 98.5   | 89.6   | 93.3   | 100.3 NM_016388.2    |
| 114.9  | 109.9  | 111.8  | 100.4 NM_176083.2    |
| 100    | 91.5   | 88.3   | 83.6 NM_006073.1     |
| 86.3   | 85.6   | 86.1   | 92.6 NM_007180.1     |
| 82.2   | 92.4   | 86.9   | 80.6 NM_018643.2     |
| 122.1  | 125.5  | 114.9  | 107.9 NM_018965.1    |

|        |        |        |                      |
|--------|--------|--------|----------------------|
| 94.1   | 98.6   | 83.9   | 88.3 NM_178174.2     |
| 99.5   | 99.7   | 92.4   | 93.6 NM_024807.1     |
| 75.9   | 80     | 77.6   | 80 NR_002794.1       |
| 114.4  | 106.8  | 100.8  | 109 NM_198153.1      |
| 193.5  | 187.3  | 189.8  | 153.2 NM_033501.1    |
| 88.1   | 77.2   | 83.1   | 80.1 NM_033502.1     |
| 90.6   | 95.1   | 83.3   | 84.6 NM_033627.3     |
| 441.1  | 352.2  | 325.8  | 256.8 NM_032166.2    |
| 351.5  | 287.5  | 277.8  | 206.3 NM_032166.2    |
| 101.9  | 98.3   | 79     | 90.1 NM_016381.2     |
| 87.2   | 84.5   | 81.7   | 79.3 NM_080701.3     |
| 2218.9 | 1821.5 | 1495.1 | 969.4 NM_004275.3    |
| 766.3  | 737.2  | 692.6  | 456.1 NM_032286.2    |
| 88.5   | 78     | 79.5   | 74.3 NM_007117.1     |
| 104.1  | 107.5  | 104.1  | 107.1 NM_013381.1    |
| 80.9   | 89.5   | 84.5   | 81.1 NM_003301.1     |
| 98.9   | 89.7   | 98.7   | 103.6 NM_207111.2    |
| 708.7  | 626.6  | 682.7  | 395.1 NM_019011.4    |
| 355.4  | 312.8  | 265.2  | 239.2 NM_016399.2    |
| 253.1  | 173.7  | 174.6  | 154.6 NM_025195.2    |
| 133.4  | 164.9  | 135.3  | 128.1 NM_021643.1    |
| 794.1  | 613.2  | 660.8  | 356.6 NM_021158.3    |
| 77.3   | 84.9   | 86.3   | 81.2 NM_006778.2     |
| 86.7   | 90.7   | 76.8   | 80.8 NM_006778.2     |
| 96     | 83.6   | 93.8   | 88.4 NM_052828.1     |
| 200.8  | 158.3  | 164.3  | 120.6 NM_145214.2    |
| 466.7  | 517.4  | 619.5  | 608 NM_001007278.1   |
| 221.4  | 235.6  | 188.1  | 214.6 NM_001007278.1 |
| 351.3  | 534    | 721.7  | 544.9 NM_001007278.1 |
| 90.8   | 96.1   | 85.1   | 88.7 NM_033221.1     |
| 86.3   | 93     | 88.2   | 84.4 NM_033220.1     |
| 113.8  | 97.6   | 92     | 103.8 NM_014788.2    |
| 97.4   | 97.7   | 87.6   | 99.9 NM_033220.1     |
| 91.1   | 83.2   | 86.9   | 86.2 NM_052812.1     |
| 75.3   | 69.3   | 73     | 83.9 NM_033229.1     |
| 88.8   | 86.2   | 91.4   | 76.9 NM_052812.1     |
| 100.3  | 98.3   | 86.4   | 80.7 NM_006470.3     |
| 79.5   | 88.7   | 78     | 88.4 NM_001037330.1  |
| 88.9   | 92.8   | 93     | 88 NM_016102.2       |
| 84.9   | 82     | 79.6   | 81.1 NM_016102.2     |
| 93.6   | 111.7  | 100.7  | 107.9 NM_015271.2    |
| 366    | 313.9  | 263.6  | 292.4 NM_003141.3    |
| 122.3  | 138.2  | 117.1  | 125.8 NM_006074.2    |
| 232.9  | 203.4  | 234.9  | 193.9 NM_001656.3    |
| 91.7   | 92.8   | 90.3   | 83.6 NM_033227.2     |
| 135.6  | 200    | 164.2  | 180.5 NM_003852.3    |
| 90.1   | 92.6   | 88.6   | 100.8 NM_015905.2    |
| 614    | 811.2  | 631.8  | 828.2 NM_015905.2    |
| 692.3  | 651.7  | 572.6  | 524.9 NM_005082.4    |
| 143.2  | 139.7  | 109    | 118.1 NM_003449.3    |

|        |       |        |                      |
|--------|-------|--------|----------------------|
| 686.8  | 426.2 | 327.2  | 317.5 NM_005762.2    |
| 78.7   | 78.1  | 82.8   | 80.4 NM_058193.1     |
| 112.7  | 117.2 | 112.7  | 108.6 NM_012101.2    |
| 102.1  | 91.9  | 94.7   | 93.2 NM_006458.2     |
| 87     | 83.7  | 74.7   | 87.7 NM_006458.2     |
| 84.3   | 88.9  | 83.2   | 87.4 NM_052816.2     |
| 78.8   | 86    | 84.2   | 85.2 NM_007028.3     |
| 311.6  | 254.6 | 200.5  | 180.2 NM_012210.2    |
| 501.2  | 376.5 | 343.1  | 251.9 NM_033020.2    |
| 1116.5 | 933.7 | 786.9  | 683.2 NM_033020.2    |
| 87.7   | 86.4  | 79.9   | 78.4 NM_015906.3     |
| 90.8   | 86.8  | 95.9   | 92.9 NM_001003827.1  |
| 90.6   | 91.1  | 82.2   | 90.5 NM_130389.2     |
| 97.6   | 87.6  | 83.9   | 92.7 NM_001003827.1  |
| 83.4   | 91.2  | 78.4   | 87 NM_130390.1       |
| 160.3  | 124.2 | 105.5  | 113.8 NM_171982.2    |
| 87.2   | 97.8  | 91.3   | 87.6 NM_001017398.1  |
| 109.3  | 115.5 | 111    | 109 NM_018700.3      |
| 90.7   | 113.1 | 92.7   | 99 NM_001017397.1    |
| 98.4   | 93.8  | 99.3   | 90.4 NM_001017397.1  |
| 108.8  | 108.1 | 104    | 111.2 NM_001005207.1 |
| 197.5  | 159.8 | 157.3  | 146.5 NM_015294.2    |
| 140.2  | 175.7 | 156.9  | 166.1 NM_006355.2    |
| 90.2   | 87.1  | 86.6   | 87.4 NM_021253.2     |
| 188.9  | 211.3 | 192.7  | 161.5 NM_172016.1    |
| 116    | 120.5 | 105.5  | 116.5 NM_172016.1    |
| 1058.1 | 780.5 | 750.3  | 660.7 NM_033091.1    |
| 131    | 106.9 | 90.6   | 93.5 NM_033017.2     |
| 88     | 82.9  | 85.8   | 95 NM_138700.2       |
| 313.2  | 358.6 | 291.7  | 255.4 NM_201627.1    |
| 107.5  | 115   | 109.4  | 118.8 NM_033549.3    |
| 90     | 95    | 82.4   | 81.1 NM_152616.3     |
| 79.4   | 77.3  | 75.7   | 90.4 NM_138800.1     |
| 1113.8 | 1777  | 1308.8 | 1134.6 NM_017583.3   |
| 264.1  | 176.3 | 177.4  | 173.5 NM_025188.2    |
| 133.5  | 105.1 | 104.5  | 119.7 NM_025058.3    |
| 110.8  | 83.1  | 86.7   | 89.9 NM_033452.2     |
| 90.4   | 83    | 85.4   | 94.4 NM_024114.2     |
| 138.2  | 131.7 | 124.8  | 114.8 NM_020358.2    |
| 236.1  | 259.7 | 235.1  | 192.7 NM_033034.1    |
| 88.7   | 83.3  | 89.7   | 90 NM_033092.1       |
| 128.5  | 122.9 | 145.6  | 108.4 NM_033093.1    |
| 96.6   | 91.6  | 88.6   | 87.2 NM_178125.2     |
| 101.8  | 98.9  | 101.3  | 92.3 NM_032681.1     |
| 155.9  | 183.6 | 170.3  | 186.7 NM_032765.2    |
| 100.4  | 95.9  | 91.2   | 90.5 NM_187841.1     |
| 90.9   | 82.2  | 81.9   | 78 NM_187841.1       |
| 90.8   | 90.5  | 91.1   | 91.9 NM_032546.2     |
| 89.1   | 91.3  | 69.9   | 82.8 NM_184086.1     |
| 83.4   | 86.2  | 81.3   | 92.4 NM_033058.2     |

|        |        |        |                       |
|--------|--------|--------|-----------------------|
| 81.4   | 87.3   | 75.2   | 83.9 NM_184086.1      |
| 228.1  | 282.1  | 220.3  | 294.8 NM_030961.1     |
| 140.5  | 158.7  | 132.8  | 126.2 NM_015431.2     |
| 98.5   | 91.1   | 83.4   | 92.1 NM_173084.1      |
| 86.3   | 79.8   | 79.1   | 82.5 NM_058166.3      |
| 108.4  | 110.5  | 113.8  | 107.3 NM_001003818.1  |
| 79.4   | 79     | 85.4   | 90.3 NM_152620.2      |
| 86.9   | 91.5   | 82.2   | 80.5 NM_018207.1      |
| 93.3   | 87.3   | 78.6   | 88.1 NM_032588.2      |
| 93.9   | 94.8   | 80.7   | 90.2 NM_001004342.2   |
| 338.2  | 270.3  | 261.3  | 216.5 NM_018073.5     |
| 94.3   | 90.4   | 78.4   | 87.6 NM_080745.3      |
| 91.3   | 92.7   | 81.5   | 87 NM_001003819.1     |
| 87.1   | 86.9   | 90.3   | 90.1 NM_203296.1      |
| 91.6   | 93.1   | 97.1   | 83.4 NM_203297.1      |
| 102.2  | 86.5   | 86.4   | 95 NM_033342.2        |
| 90.4   | 90.9   | 86.4   | 83.8 NM_001039111.1   |
| 91.7   | 86.5   | 86.2   | 100.1 NM_198853.1     |
| 570.2  | 446.9  | 420.2  | 271.8 NM_030912.1     |
| 92.2   | 97.6   | 95.8   | 82.8 NM_052978.3      |
| 169.2  | 119.2  | 115    | 118.5 NM_015163.4     |
| 103.6  | 97.8   | 91.1   | 100.9 NM_052978.3     |
| 94.2   | 94.8   | 92     | 96.8 NM_007118.2      |
| 94.5   | 88.2   | 85.9   | 91.7 NM_007032.5      |
| 176.7  | 161.5  | 150.4  | 155 NM_004240.2       |
| 250.9  | 365    | 346.3  | 258.3 NM_004239.1     |
| 543.2  | 564.9  | 435.9  | 542.5 NM_004238.1     |
| 1163.6 | 906.9  | 691.5  | 486.1 NM_004237.2     |
| 385.9  | 488.7  | 402.1  | 315.8 NM_016213.3     |
| 1621.8 | 810.2  | 766.7  | 518.1 NM_003302.1     |
| 768.5  | 615.9  | 522.8  | 492 NM_017646.3       |
| 379.1  | 329.7  | 348    | 199 NM_017722.2       |
| 227.8  | 167.4  | 145.1  | 131.6 NM_017956.1     |
| 5894.5 | 3588.7 | 3004.8 | 2788.7 NM_020810.1    |
| 126.8  | 123.1  | 126.5  | 117.9 NM_001008571.1  |
| 77.7   | 83.2   | 81     | 95.7 NM_016000.2      |
| 380.4  | 214.2  | 174.8  | 204.9 NM_182916.1     |
| 102    | 90     | 88.3   | 95.9 NM_016000.2      |
| 162.3  | 215    | 244.3  | 157.2 NM_001039705.1  |
| 104.9  | 118.6  | 124.6  | 104.1 NM_177557.1     |
| 149.2  | 185    | 179.8  | 142.2 NM_001039705.1  |
| 600.9  | 288.8  | 285.9  | 223.9 NM_005480.2     |
| 892.4  | 660    | 662.8  | 628.5 NM_001042369.1  |
| 113.2  | 92.4   | 95.3   | 103 NM_004600.3       |
| 424.2  | 310.8  | 336.7  | 231.9 NM_001042370.1  |
| 1883.6 | 1549.6 | 1381   | 1335.5 NM_001042369.1 |
| 85.2   | 84.3   | 88.3   | 93 NM_007332.1        |
| 94.8   | 85.3   | 90.7   | 91.6 NM_003304.3      |
| 151.9  | 103.7  | 134.5  | 109.2 NR_002720.1     |
| 90     | 92     | 92.8   | 88.4 NM_003305.1      |

|        |        |        |                      |
|--------|--------|--------|----------------------|
| 100.8  | 92.3   | 86.8   | 81.2 NM_016179.1     |
| 346.9  | 340.8  | 331    | 229.3 NM_015638.2    |
| 907.5  | 821.3  | 786.3  | 672.7 NM_015638.2    |
| 84.7   | 75.1   | 81.8   | 82 NM_012471.1       |
| 91.8   | 92.9   | 91.9   | 88.2 NM_004621.3     |
| 95.9   | 94     | 93.6   | 91.9 NM_020389.1     |
| 80.2   | 71.2   | 79.2   | 87.7 NM_002420.3     |
| 112.3  | 136.3  | 146.8  | 111.4 NM_001001188.3 |
| 103.1  | 103.9  | 113.5  | 102.2 NM_001001188.3 |
| 82.4   | 81.3   | 86.6   | 82.3 NM_001007471.1  |
| 83.9   | 87.3   | 78.6   | 82.3 NM_001007470.1  |
| 538.1  | 286.7  | 305.6  | 168.7 NM_017636.2    |
| 75.7   | 81.5   | 80.5   | 84.3 NM_014555.2     |
| 92.4   | 94     | 84.3   | 90.8 NM_017662.3     |
| 90.6   | 109.2  | 96.3   | 99.5 NM_024080.4     |
| 102.3  | 95.1   | 85.2   | 92.5 NM_014112.1     |
| 76     | 76.1   | 76.1   | 81.4 NM_031472.2     |
| 1288.5 | 867.9  | 950.6  | 437.2 NM_031472.2    |
| 103.2  | 115.2  | 97.9   | 96.6 NM_080705.2     |
| 82.1   | 82.9   | 87.6   | 77.3 NM_080706.2     |
| 94.7   | 82.1   | 81.3   | 90.5 NM_080704.2     |
| 82     | 92.8   | 87.4   | 88.9 NM_018727.4     |
| 86.2   | 92.2   | 80.6   | 86.3 NM_080705.2     |
| 361.5  | 392.1  | 344.7  | 280.1 NM_016113.3    |
| 100.7  | 106.1  | 97.5   | 95.1 NM_145068.2     |
| 90.3   | 93.3   | 76.8   | 82.3 NM_021625.3     |
| 92.9   | 103.1  | 91.9   | 106.4 NM_147204.1    |
| 90     | 96.3   | 90.8   | 91.9 NM_019841.4     |
| 100.7  | 94.9   | 97.2   | 90.3 NM_018646.2     |
| 89.6   | 94.1   | 86.4   | 80.1 NM_018646.2     |
| 90.6   | 77.1   | 77.5   | 89.6 NM_018646.2     |
| 1018.6 | 1865.8 | 1963.9 | 1001.2 NM_003496.1   |
| 124.8  | 127.6  | 115.1  | 111.2 NM_017846.3    |
| 95     | 94     | 84.4   | 93.8 NR_003109.1     |
| 112.8  | 108.5  | 96.1   | 100.5 NM_139169.3    |
| 125.8  | 99.7   | 104.8  | 115.4 NM_015679.1    |
| 91     | 87.6   | 88.3   | 96.3 NM_001001317.1  |
| 82.5   | 87     | 72.3   | 87.8 NR_001296.2     |
| 91.2   | 86.1   | 83.7   | 94.7 NM_001008567.1  |
| 206.2  | 274.3  | 215.4  | 175.6 NM_000368.3    |
| 90.6   | 103.9  | 97.1   | 92.8 NM_001008567.1  |
| 128.5  | 121    | 123.9  | 120.1 NM_021055.1    |
| 93.9   | 90.3   | 91.9   | 93.3 NM_000548.2     |
| 125    | 116.3  | 143.6  | 121.8 NM_183422.1    |
| 128    | 169.6  | 160.5  | 155.7 NM_006022.2    |
| 94.7   | 105.1  | 98.8   | 96.7 NM_183422.1     |
| 233.1  | 209.8  | 208.7  | 243.6 NM_014779.2    |
| 99.8   | 101.2  | 85.7   | 83.3 NM_004089.3     |
| 212.2  | 218.1  | 237.5  | 192.8 NM_004089.3    |
| 199.3  | 185.9  | 203.8  | 190.1 NM_004089.3    |

|        |        |        |                      |
|--------|--------|--------|----------------------|
| 81.3   | 89.6   | 81.2   | 81 NM_001015881.1    |
| 84.9   | 85.2   | 85.7   | 86.8 NM_198057.2     |
| 171.7  | 183.1  | 181.9  | 200.4 NM_030935.3    |
| 104.5  | 84.2   | 86.3   | 87.9 NM_033051.2     |
| 565.8  | 480.8  | 478.5  | 378.2 NM_025265.2    |
| 743.1  | 714.5  | 784.4  | 536.2 NM_001077446.1 |
| 492.8  | 438.8  | 378.3  | 365.4 NM_024075.1    |
| 251.2  | 228.3  | 211.7  | 213.4 NM_207346.1    |
| 189.4  | 211.7  | 188    | 146.4 NM_005726.2    |
| 1663.1 | 1070.2 | 867    | 989.5 NM_006292.2    |
| 118.5  | 125.9  | 115.8  | 135.1 NM_025244.1    |
| 101.5  | 100.9  | 109    | 96.3 NM_182911.1     |
| 94.5   | 92     | 85.4   | 101.7 NM_025244.1    |
| 93     | 82.3   | 89.3   | 84.2 NM_152762.1     |
| 92     | 98     | 87.1   | 92.6 NM_052933.2     |
| 321.1  | 168    | 153.5  | 158.2 NM_018718.1    |
| 98.9   | 89.9   | 84.4   | 84.1 NM_080860.2     |
| 87.7   | 83.4   | 91.7   | 88.4 NM_000549.2     |
| 95.2   | 89.8   | 87.4   | 88.8 NM_000369.2     |
| 81.1   | 87.8   | 83.2   | 80.7 NM_001018036.1  |
| 83.5   | 84.6   | 84.7   | 83.4 NM_001018036.1  |
| 87.9   | 89.9   | 86.1   | 94.9 NM_021733.1     |
| 101.7  | 96.4   | 92.6   | 99.9 NM_138551.2     |
| 87.4   | 86.7   | 84.7   | 94.8 NM_033035.3     |
| 97.6   | 105.8  | 89.2   | 101.4 NM_004622.2    |
| 100.3  | 84.8   | 83.4   | 88.1 NM_145003.1     |
| 133.2  | 108.7  | 123.2  | 152.3 NM_005999.2    |
| 77.9   | 87.5   | 82.5   | 82.8 NM_018430.1     |
| 98.6   | 82     | 83.8   | 83.5 NM_013270.2     |
| 100.9  | 115.5  | 119.5  | 106.6 NM_005727.2    |
| 92.1   | 122.2  | 117.9  | 105.6 NM_031945.2    |
| 96.1   | 88     | 81.1   | 88 XM_497334.2       |
| 75.5   | 85.7   | 78.6   | 78.7 NM_001080509.1  |
| 79.2   | 85     | 82.8   | 87.5 NM_012338.3     |
| 92.8   | 84.5   | 82.9   | 87.2 NM_014399.3     |
| 105.9  | 106.4  | 97.8   | 93.8 NM_030927.1     |
| 99.4   | 97.4   | 93.8   | 105.4 NM_012339.3    |
| 94.8   | 90.3   | 93.4   | 93.3 NM_012466.2     |
| 150.3  | 141    | 130    | 108.4 NM_130465.3    |
| 1074.2 | 977    | 1062.6 | 498 NM_012171.1      |
| 105.4  | 97     | 102.9  | 99.9 NM_001031730.1  |
| 103.2  | 91.8   | 102.4  | 89.6 NM_130783.2     |
| 90.2   | 84.5   | 88.4   | 76 NM_130783.2       |
| 91.1   | 80.4   | 78.1   | 85.3 NM_005725.3     |
| 781.1  | 541.3  | 463.8  | 390.5 NM_198902.1    |
| 1408   | 775.4  | 709.4  | 648 NM_005724.4      |
| 420.3  | 442.6  | 418.6  | 287.2 NM_005981.3    |
| 566.2  | 1277.8 | 1606.3 | 729.2 NM_139022.2    |
| 172.8  | 326.5  | 315.6  | 266.6 NM_005705.4    |
| 204.5  | 299.7  | 359.1  | 309.5 NM_139022.2    |

|         |         |         |                      |
|---------|---------|---------|----------------------|
| 141.4   | 151.6   | 148.9   | 111.5 NM_178562.2    |
| 150.1   | 131.9   | 147.2   | 104.8 NM_001025235.1 |
| 89.9    | 83      | 79.3    | 81.8 NM_001025237.1  |
| 126.5   | 115.5   | 125.9   | 116.9 NM_001025238.1 |
| 78.5    | 83.7    | 81.3    | 65 NM_001025234.1    |
| 205     | 168.2   | 159.6   | 130.7 NM_005723.2    |
| 102.7   | 107     | 114.4   | 94.1 NM_003270.2     |
| 86.2    | 78.4    | 75      | 72.5 NM_004615.2     |
| 78.4    | 98.8    | 84.3    | 83.3 NM_004616.2     |
| 131.2   | 99.5    | 103.3   | 105.2 NM_006675.3    |
| 3509.9  | 1714.1  | 1717.1  | 1428.9 NM_000714.4   |
| 697.3   | 395.8   | 423.4   | 383.4 NM_007311.3    |
| 20449.1 | 12233.3 | 12737.6 | 7081.1 NM_000714.4   |
| 77.2    | 77.6    | 67.6    | 74.9 NM_003308.2     |
| 85.6    | 89.1    | 88.8    | 87.5 NM_022573.2     |
| 741.8   | 790.6   | 631     | 810.8 NM_003309.1    |
| 90      | 89.8    | 91.8    | 91.5 NM_022117.1     |
| 106.9   | 104.3   | 96.7    | 99.6 NM_022117.1     |
| 95.7    | 93.6    | 77.2    | 90.1 NM_022117.1     |
| 132.6   | 125.3   | 134     | 118.1 NM_022117.1    |
| 83.3    | 85.8    | 86.7    | 93.4 NR_002781.1     |
| 110.8   | 103.3   | 106.2   | 111.2 NM_021648.4    |
| 453.6   | 258.3   | 229.8   | 208.5 NM_033512.2    |
| 91      | 91.1    | 89.4    | 84.6 NM_001003937.1  |
| 79.5    | 82.8    | 79.7    | 82.5 NM_018128.4     |
| 136.8   | 180.6   | 195     | 126.7 NM_025008.2    |
| 93.6    | 105.1   | 102.2   | 96.1 NM_019032.3     |
| 125.7   | 154     | 142.3   | 124.9 NM_025008.2    |
| 766.6   | 727.9   | 646.8   | 450.6 NM_003310.1    |
| 425.7   | 429.1   | 428.5   | 226.1 NM_005706.2    |
| 94.4    | 96.3    | 92.8    | 83.7 NM_032028.2     |
| 91.7    | 90.1    | 84.1    | 89.7 NM_053006.3     |
| 102.5   | 102.4   | 100.1   | 98.2 NM_052841.3     |
| 93.6    | 85.7    | 96.9    | 97.8 NM_174944.2     |
| 2418.5  | 1957.1  | 2036.8  | 995.2 NM_003312.4    |
| 219.5   | 174     | 154.8   | 145.5 NM_003313.2    |
| 85.5    | 86.9    | 79.9    | 86.2 NM_032538.1     |
| 96      | 92.1    | 98.8    | 97 NM_173500.2       |
| 690.4   | 714.9   | 562.9   | 479.5 NM_003314.1    |
| 105.2   | 98.4    | 95.4    | 106.8 NM_175605.2    |
| 175.5   | 186     | 160.6   | 173.5 NM_175605.2    |
| 137.8   | 125.5   | 108.2   | 112.6 NM_017868.3    |
| 1136.8  | 1109.6  | 875     | 722.2 XM_939087.1    |
| 111.9   | 108.6   | 109     | 106.4 NM_024525.2    |
| 375.6   | 369.3   | 297.7   | 258.6 NM_024525.2    |
| 313     | 325.4   | 274.6   | 349.3 NM_133462.1    |
| 263.9   | 304.3   | 242.7   | 274.8 NM_133462.1    |
| 694.5   | 645.8   | 595.1   | 493.3 NM_016030.5    |
| 120.1   | 120.7   | 121.5   | 101.1 NM_144965.1    |
| 342.9   | 475.3   | 444     | 385.2 NM_018259.3    |



|        |        |        |                      |
|--------|--------|--------|----------------------|
| 96.5   | 104.8  | 83.6   | 107.1 NM_145170.2    |
| 573.1  | 691.4  | 544.2  | 678.8 NM_017775.2    |
| 91.4   | 88.7   | 80.3   | 102 NM_145755.1      |
| 80.6   | 92.7   | 76.4   | 84.8 NM_024753.3     |
| 80.5   | 79.7   | 87.9   | 88.1 NM_017904.1     |
| 106.3  | 101.9  | 107.6  | 96.1 NM_001040658.1  |
| 346.8  | 288.5  | 269.1  | 222.3 NM_022905.3    |
| 98.8   | 91.5   | 93.5   | 97.6 NM_031421.1     |
| 1028.2 | 1438.4 | 1100.7 | 1120.8 NM_003316.3   |
| 85.2   | 83.2   | 77.5   | 84.7 NM_003316.3     |
| 170.6  | 187.1  | 181.2  | 179.9 NM_001008237.1 |
| 1429.8 | 969.5  | 933.2  | 741.4 NM_004623.2    |
| 279.8  | 199.3  | 205.5  | 167 NM_138376.1      |
| 86.6   | 83.7   | 69.2   | 89.3 NM_001007795.1  |
| 213.6  | 255.7  | 235    | 232 NM_020458.1      |
| 103.2  | 102.7  | 99.6   | 98.1 NM_001010854.1  |
| 92.6   | 110.1  | 108    | 108.5 NM_198309.2    |
| 192    | 166.9  | 169.8  | 162.3 NM_144596.2    |
| 92.6   | 92.4   | 86.4   | 91.2 NM_152479.3     |
| 228.7  | 194.5  | 183.9  | 156.1 NM_173810.3    |
| 92.4   | 82.3   | 85.8   | 84.3 NM_007344.2     |
| 1483   | 1109.7 | 1058.4 | 670.4 NM_003594.3    |
| 1359.5 | 770.9  | 699.9  | 613.6 NM_003318.3    |
| 237.8  | 218    | 240.1  | 162 NM_153712.3      |
| 86.9   | 88.1   | 79.3   | 83.6 NM_001008572.1  |
| 107.9  | 109.1  | 106.8  | 105.5 NM_001008572.1 |
| 117.9  | 122.8  | 122    | 104.3 NM_012263.3    |
| 83.1   | 87.4   | 83.4   | 86.2 NM_153254.1     |
| 598.5  | 549    | 464.9  | 306.4 NM_015140.2    |
| 85.4   | 77.6   | 84.1   | 85.4 NM_001029964.2  |
| 82.4   | 78.1   | 66.3   | 84.8 NM_031949.4     |
| 243.6  | 332.8  | 334.9  | 321.1 NM_015644.2    |
| 101.5  | 102.5  | 96.8   | 100.6 NM_001025930.1 |
| 141.1  | 158.7  | 150.6  | 139 NM_014640.2      |
| 219.8  | 205.4  | 212.2  | 134.4 NM_015072.3    |
| 99.2   | 97.1   | 88.6   | 96 NM_173623.1       |
| 128.2  | 111.3  | 112.3  | 115.5 NM_024686.3    |
| 87.2   | 83.5   | 83.3   | 82.4 NM_001008409.1  |
| 104.2  | 102.1  | 90.9   | 95.8 NM_001080209.1  |
| 86.3   | 79.4   | 70.3   | 79.7 NM_001003682.1  |
| 88.9   | 79.7   | 91.4   | 85.3 NM_133432.1     |
| 96.4   | 88.7   | 82.9   | 85.3 NM_133379.1     |
| 99.2   | 96.6   | 87.2   | 97.6 NM_133378.2     |
| 88.6   | 90.4   | 81.4   | 89.5 NM_003319.3     |
| 97.8   | 87.6   | 91.9   | 92.4 NM_000370.2     |
| 111.6  | 97.1   | 106.1  | 102.2 NM_000371.1    |
| 88.7   | 90.7   | 80.3   | 93.6 NM_016614.2     |
| 85.1   | 77.1   | 83.9   | 80 NR_001538.1       |
| 95.5   | 91.9   | 97.1   | 82.2 NR_001542.1     |
| 105.8  | 111    | 110.6  | 99.3 NR_001548.1     |

|         |        |        |                     |
|---------|--------|--------|---------------------|
| 85.9    | 84.7   | 77.7   | 76.3 NR_001551.1    |
| 82.2    | 84.9   | 82.6   | 92.3 NR_001537.1    |
| 92.1    | 88.6   | 93.4   | 83.4 NR_001543.1    |
| 87.1    | 81.3   | 79.2   | 77.1 NR_001526.1    |
| 103.1   | 114.4  | 96.5   | 104.1 NR_001549.1   |
| 85.2    | 81.5   | 77.6   | 75 NR_001536.1      |
| 91.6    | 87     | 95.2   | 91.5 NR_001535.1    |
| 87.7    | 94.3   | 95.7   | 89 NR_001541.1      |
| 92.7    | 85.6   | 98.8   | 86.9 NR_001527.1    |
| 95.3    | 73     | 82.9   | 84.5 NR_002175.2    |
| 80.7    | 82.8   | 83.7   | 92.2 NR_001534.1    |
| 87.5    | 91.5   | 82.1   | 86.2 NR_001533.1    |
| 94.7    | 87.5   | 88.5   | 93.2 NR_002159.1    |
| 80.9    | 83.1   | 79.2   | 82.8 NM_020659.2    |
| 74.6    | 83.9   | 74     | 83.8 NM_001005367.1 |
| 94.1    | 152.4  | 156.1  | 113.6 NM_052869.1   |
| 110.1   | 106    | 118.4  | 108.9 NM_052869.1   |
| 93      | 96.7   | 89.4   | 94.4 NM_032646.5    |
| 386.3   | 451.4  | 392.1  | 392.8 NM_025250.2   |
| 97.2    | 87.2   | 85.3   | 93.2 NM_177972.1    |
| 88.7    | 87.8   | 81.9   | 86.8 NM_003320.3    |
| 96      | 81.5   | 75.6   | 77.1 NM_177972.1    |
| 507     | 282.7  | 295.3  | 186.1 NM_006000.1   |
| 7851.1  | 4790.7 | 4429.6 | 2995.4 NM_006009.2  |
| 94.7    | 90.8   | 83.4   | 92.1 NM_079836.1    |
| 82      | 87.3   | 83.7   | 90 NM_080386.1      |
| 84.1    | 82.8   | 81.2   | 86.3 NM_025019.1    |
| 15525.9 | 7284.9 | 6794.9 | 5499.5 NM_032704.2  |
| 79.1    | 87.7   | 84.8   | 88 NM_018943.1      |
| 86.6    | 104.8  | 86     | 79.9 NM_024803.1    |
| 88.3    | 86.2   | 85.4   | 90.9 NM_001069.1    |
| 6557.1  | 4711.7 | 3888.5 | 2690.4 NM_178014.2  |
| 85.9    | 78.5   | 88     | 84.1 NM_001069.2    |
| 92.2    | 88     | 79.1   | 102.4 NM_178012.3   |
| 2837.9  | 1284.1 | 1167.7 | 768.3 NM_006088.5   |
| 166.5   | 120.7  | 113.9  | 98.2 NM_006086.2    |
| 112.5   | 102.6  | 99.7   | 100.5 NM_006087.2   |
| 152.5   | 130.5  | 105    | 123.2 NM_020040.3   |
| 576.8   | 377.6  | 324.4  | 233.5 NM_032525.1   |
| 1107.6  | 770.7  | 601.6  | 584.6 XM_940079.1   |
| 93.8    | 90.6   | 86.2   | 96.1 NM_177987.1    |
| 110.2   | 100.4  | 91.2   | 104.3 NM_016261.2   |
| 99.6    | 107.5  | 84.6   | 106 NM_016262.3     |
| 103.1   | 87.2   | 81.3   | 85.2 XM_944510.1    |
| 2088.3  | 1644   | 1481.5 | 766.2 NM_001070.3   |
| 1130.1  | 801.6  | 678.4  | 642.2 NM_001070.3   |
| 240.1   | 232.7  | 277.8  | 182.6 NM_016437.1   |
| 483.4   | 402.5  | 433.1  | 261.5 NM_006659.1   |
| 120.7   | 112.8  | 110.9  | 105.1 NM_006322.3   |
| 188.5   | 187.8  | 165.8  | 133.6 NM_052903.2   |

|         |         |         |                      |
|---------|---------|---------|----------------------|
| 124.5   | 111.1   | 110.7   | 118.7 NM_020461.3    |
| 144.5   | 192     | 186.7   | 169.9 NM_020461.3    |
| 88.5    | 88.8    | 77.6    | 100 NM_001008658.1   |
| 1386.7  | 1039.7  | 856.2   | 789.7 NM_003321.3    |
| 116.1   | 133.9   | 117.7   | 113.9 NM_020127.1    |
| 94      | 90.3    | 80.3    | 83.3 NM_003322.2     |
| 88.8    | 88.4    | 84.1    | 91.6 NM_003323.1     |
| 117.8   | 119.8   | 112.6   | 111.5 NM_003324.3    |
| 150.8   | 180.6   | 163.6   | 169.3 NM_020245.3    |
| 241.8   | 350.4   | 292.5   | 257.2 NM_020245.3    |
| 92.3    | 89.8    | 85      | 88.8 NM_020245.3     |
| 279.7   | 251.1   | 215.6   | 240.7 NM_001004125.1 |
| 180.2   | 150.3   | 132.9   | 131.8 NM_007275.1    |
| 81.9    | 87.8    | 85.1    | 89.1 NM_006765.2     |
| 87.1    | 84.8    | 77.1    | 83.9 NM_006765.2     |
| 662.7   | 579.3   | 692     | 363.5 NM_006545.4    |
| 85.8    | 92.3    | 83.6    | 84.2 NM_172367.1     |
| 426.1   | 422.2   | 379.9   | 301.9 NM_000474.3    |
| 197.7   | 142.3   | 124.2   | 128.2 NM_001002926.1 |
| 751.5   | 561.2   | 594.5   | 480.1 NM_020648.3    |
| 89.8    | 92.1    | 94.9    | 92.1 NM_003328.1     |
| 1158.3  | 1051.8  | 1082.2  | 593.7 NM_175852.3    |
| 93.9    | 94.9    | 89.8    | 90.4 NM_153235.2     |
| 6752.1  | 4743.4  | 3684.2  | 3989.4 NM_003329.2   |
| 20372.6 | 13912.2 | 11351.9 | 10254.4 NM_003329.1  |
| 101     | 89.1    | 82.1    | 95.2 NM_012473.3     |
| 2229.1  | 1420    | 1415    | 1038 NM_030755.3     |
| 354.3   | 377.1   | 313.9   | 536 NM_019022.3      |
| 204.2   | 202.8   | 200.3   | 177.6 NM_015914.5    |
| 4880.9  | 4360.8  | 3966.1  | 2897.5 NM_015913.2   |
| 271.1   | 252.7   | 210.3   | 243.4 NM_021156.2    |
| 1760.6  | 1322.2  | 1052.7  | 794.5 NM_015959.1    |
| 83.9    | 78.2    | 79.2    | 89.1 NM_016616.2     |
| 95.2    | 83.7    | 91.7    | 81.7 NM_015051.1     |
| 76.7    | 74.8    | 69.7    | 81.5 NM_022085.3     |
| 219.5   | 167.8   | 147     | 129.5 NM_022085.3    |
| 120.4   | 107.9   | 103.1   | 109.4 NM_030810.2    |
| 87      | 80.4    | 77.2    | 79.6 NM_178130.2     |
| 104.3   | 89.2    | 87.5    | 104.5 NM_001003936.1 |
| 327.3   | 239.9   | 248.1   | 251.4 NM_005783.3    |
| 445     | 508.5   | 726.5   | 366.3 NM_006472.1    |
| 202.4   | 175.7   | 162.3   | 170.3 NM_004786.1    |
| 1104.6  | 607.9   | 483.7   | 492.9 NM_006541.2    |
| 138.1   | 140.3   | 140     | 124.3 NM_006701.2    |
| 116.8   | 115.1   | 128.5   | 117.6 NM_017853.1    |
| 2854.3  | 1938.5  | 1898.2  | 1587.4 NM_032731.2   |
| 98.5    | 96.7    | 96.9    | 100.5 NM_138454.1    |
| 1900.8  | 1650.2  | 1330.6  | 1184.5 NM_003330.2   |
| 1034.1  | 582.7   | 476.6   | 454.1 NM_182743.1    |
| 330.9   | 286.4   | 300.6   | 167.8 NM_145748.1    |

|         |         |         |         |                |
|---------|---------|---------|---------|----------------|
| 1923.8  | 1800.4  | 1871.2  | 848.6   | NM_003331.3    |
| 6084.7  | 4365.9  | 4044    | 2869.2  | NM_001071.1    |
| 99.7    | 94.8    | 82.1    | 92      | NM_000372.3    |
| 201.6   | 216.1   | 169     | 179.8   | NM_006293.2    |
| 95      | 76.9    | 83.3    | 84.1    | NR_002721.1    |
| 4887.4  | 7149.5  | 6183    | 5461.3  | NM_003332.2    |
| 81.3    | 89.5    | 77.2    | 85.7    | NM_000550.1    |
| 513.2   | 285.6   | 277     | 161.3   | NM_173555.1    |
| 115.9   | 103.1   | 101.4   | 89.6    | NM_173555.1    |
| 97.6    | 104.1   | 95.4    | 101.4   | NM_173555.1    |
| 292     | 276.2   | 264.7   | 203.5   | NM_180703.1    |
| 116.5   | 110.1   | 122.1   | 99.9    | NM_180699.1    |
| 797.9   | 638.6   | 613.7   | 500.1   | NM_001025204.1 |
| 186.6   | 197.7   | 177.9   | 163.1   | NM_001025203.1 |
| 340.6   | 418.8   | 468.3   | 263.6   | NM_005089.1    |
| 180.8   | 132.7   | 140.4   | 119.7   | NM_144987.1    |
| 115     | 111.5   | 110.8   | 102.2   | NM_144987.1    |
| 443.5   | 428.8   | 421.1   | 295.7   | NM_024660.1    |
| 2574.4  | 1974.6  | 1790.1  | 1159.2  | NM_007279.2    |
| 150.4   | 155     | 127.7   | 123.6   | NM_007279.2    |
| 91.7    | 86.7    | 85.3    | 96.8    | NM_018003.2    |
| 84.7    | 93.5    | 98.4    | 82.5    | NM_018003.2    |
| 98.6    | 88.2    | 87.1    | 79.7    | NM_001008224.1 |
| 231.8   | 173.1   | 154.5   | 147.3   | NM_003115.3    |
| 563.2   | 667.8   | 632.5   | 618.4   | NM_207309.1    |
| 97      | 89      | 83.2    | 99.6    | NM_005499.2    |
| 49767.3 | 32202.9 | 33736.3 | 23295.9 | NM_003333.2    |
| 295.4   | 278.4   | 261.5   | 172     | NM_003333.3    |
| 3211.7  | 2616.4  | 2272    | 1805.9  | NM_016172.2    |
| 633.7   | 533.5   | 422.8   | 363.2   | NM_016525.3    |
| 202.5   | 175.2   | 152.4   | 157.7   | NM_018449.2    |
| 313.1   | 473.2   | 381.5   | 372.6   | NM_014847.2    |
| 78.8    | 89.5    | 78      | 87.7    | NM_001001895.1 |
| 97.9    | 89.5    | 94.6    | 89.6    | NM_018961.2    |
| 21735.9 | 15468.9 | 16695.6 | 9759.2  | NM_018955.2    |
| 23082   | 17637.3 | 16153.5 | 12776.2 | NM_021009.3    |
| 24688.9 | 17963.8 | 14749   | 12831   | NM_021009.1    |
| 108.7   | 95.3    | 107.2   | 96      | NM_021009.3    |
| 89      | 80.7    | 79.9    | 83.2    | NM_006398.2    |
| 1161.5  | 1051.6  | 914.1   | 834.6   | NM_153280.1    |
| 153.9   | 144.9   | 105.4   | 129.4   | NM_153280.1    |
| 481.6   | 395     | 317     | 378.9   | NM_198195.1    |
| 120.7   | 105     | 91.9    | 120.5   | NM_198197.1    |
| 356.2   | 251.8   | 205.9   | 217.1   | NM_024818.2    |
| 95.8    | 83.2    | 84.8    | 84.6    | NM_198329.1    |
| 130.6   | 130.4   | 105.2   | 128     | NM_024818.2    |
| 526     | 518.4   | 568.8   | 298.1   | NM_003335.2    |
| 269.5   | 211.8   | 233.1   | 221.4   | NM_018227.3    |
| 88.6    | 95.1    | 85.7    | 87.8    | NM_181777.1    |
| 2147    | 1491.3  | 1101    | 1231.8  | NM_181762.1    |

|        |        |        |                     |
|--------|--------|--------|---------------------|
| 100.1  | 111.7  | 114.6  | 110.9 NM_003337.2   |
| 1704.7 | 618.7  | 628.9  | 466.7 NM_181800.1   |
| 1519.9 | 491.8  | 529.6  | 408.1 NM_181803.1   |
| 165.6  | 129.8  | 144.8  | 114.7 NM_181799.1   |
| 83     | 78.5   | 80.8   | 83.4 NM_181802.1    |
| 107.6  | 105.2  | 79.5   | 94.6 NM_003338.3    |
| 173.9  | 171    | 163.6  | 136.1 NM_003339.2   |
| 140.1  | 156.9  | 115.9  | 122.7 NM_003339.2   |
| 110    | 104.4  | 105.3  | 101.5 NM_181838.1   |
| 86.9   | 84.6   | 81.3   | 86.7 NM_181889.1    |
| 2180.4 | 1584.1 | 1205.9 | 1023.4 NM_181890.1  |
| 6434.7 | 4092.9 | 3674.1 | 2933.7 NM_181890.1  |
| 104.5  | 96.5   | 88.3   | 89.4 NM_181892.1    |
| 333.4  | 310.8  | 263    | 248.5 NM_015983.2   |
| 3302.2 | 2503.7 | 2206.5 | 2246.9 NM_003341.3  |
| 249.6  | 224.2  | 171.4  | 141.5 NM_003341.3   |
| 899.7  | 637.5  | 650.9  | 450.7 NM_152653.1   |
| 314.8  | 247.6  | 214.5  | 202.9 XM_944996.1   |
| 1651.6 | 1147.8 | 1011.1 | 1095.6 NM_006357.2  |
| 1512.2 | 1610.3 | 1664.2 | 883.3 NM_080678.1   |
| 347    | 258.6  | 227.4  | 195.7 NM_182682.2   |
| 369.8  | 272.1  | 236.5  | 212.5 NM_003342.4   |
| 1057.3 | 1119.2 | 1086.5 | 738 NM_182688.1     |
| 106.1  | 96.5   | 88.9   | 94.3 NM_182688.1    |
| 153.6  | 132.6  | 122.3  | 135.1 NM_003344.2   |
| 144.6  | 157.5  | 146.4  | 116.2 NM_182697.1   |
| 4817.9 | 2679   | 2771.1 | 1623.9 NM_003345.3  |
| 90.4   | 96.5   | 92.7   | 85.7 NM_194261.1    |
| 97     | 101.4  | 101.3  | 89.3 NM_194260.1    |
| 119.5  | 106.1  | 103.1  | 104 NM_194259.1     |
| 710.2  | 538.7  | 509.7  | 395 NM_016021.2     |
| 142    | 150.9  | 127.4  | 132.2 NM_194457.1   |
| 166.1  | 173.9  | 154.7  | 97.5 NM_194315.1    |
| 86.8   | 83.5   | 80.2   | 80.5 NM_194458.1    |
| 444.2  | 402.2  | 412.8  | 237.9 NM_003347.2   |
| 177.1  | 165    | 139.1  | 132.5 NM_198157.1   |
| 94.1   | 92.4   | 89.9   | 94 NM_198183.1      |
| 556    | 394    | 483.5  | 266.2 NM_004223.3   |
| 198    | 168    | 146.8  | 144.4 NM_004223.3   |
| 2812   | 2128.1 | 2219.5 | 1063.8 NM_003969.2  |
| 93.4   | 99.6   | 80.9   | 84.4 NR_002837.1    |
| 995    | 794.2  | 750.6  | 533.9 NM_003348.3   |
| 85.8   | 81.9   | 87.1   | 82.7 NM_001012989.1 |
| 250    | 258.2  | 250    | 182.6 NM_022066.2   |
| 607.1  | 560.6  | 496.9  | 339.1 NM_017582.5   |
| 529.8  | 340.6  | 393.7  | 354.6 NM_173469.1   |
| 95.9   | 91     | 78.8   | 90.4 NM_017811.3    |
| 96.1   | 83.8   | 78.1   | 83.9 NM_014501.2    |
| 822.5  | 522.8  | 379.5  | 489.7 NM_014176.1   |
| 112.1  | 101.5  | 100.2  | 90.3 NM_152489.1    |

|        |        |        |                      |
|--------|--------|--------|----------------------|
| 117.4  | 131.4  | 116.1  | 110.4 NM_001032288.1 |
| 92.3   | 94.5   | 86     | 92.4 NM_021988.3     |
| 76.4   | 87.7   | 92.7   | 83 NM_022442.3       |
| 83.9   | 87.9   | 84.6   | 93.5 NM_003350.2     |
| 97     | 81.7   | 89.8   | 89.7 NM_018299.2     |
| 156.6  | 160.4  | 137.5  | 131.1 XM_945544.1    |
| 365.2  | 394.6  | 314.7  | 362.8 NM_023079.2    |
| 123.4  | 111.7  | 104.5  | 115 NM_023079.2      |
| 799.5  | 788.2  | 684.2  | 574 NM_130839.1      |
| 575.5  | 469.2  | 398.6  | 385.3 NM_000462.2    |
| 94.2   | 109.6  | 95.2   | 93.3 NM_130839.1     |
| 108.4  | 112.3  | 91.4   | 112.1 NM_183414.1    |
| 1279.3 | 1377.2 | 1283.4 | 945.7 NM_014671.1    |
| 371.8  | 257.1  | 224.7  | 220.9 NM_004788.2    |
| 194.2  | 247.6  | 205.4  | 203.4 NM_006048.2    |
| 179.2  | 138.7  | 113.2  | 100.1 NM_013319.1    |
| 395.8  | 397.6  | 399    | 329 NM_007106.2      |
| 512.4  | 339.1  | 317.7  | 216.7 NM_014235.2    |
| 79     | 82     | 76.5   | 86.2 NM_203412.1     |
| 156.1  | 139.2  | 138.8  | 122.1 NM_024292.2    |
| 993.6  | 870    | 754.9  | 556.3 NM_001048241.1 |
| 211.9  | 222    | 211.9  | 169.4 NM_032907.3    |
| 352.2  | 312.3  | 306    | 254.6 NM_201265.1    |
| 463.2  | 395.7  | 399    | 448.7 NM_145049.1    |
| 90.2   | 89.8   | 76.8   | 97.9 NM_001079514.1  |
| 1408.4 | 1522.3 | 1504.1 | 858.3 NM_001079514.1 |
| 117.8  | 104.1  | 112.4  | 98.2 NM_014948.2     |
| 103.9  | 97.5   | 86.7   | 90.8 NM_014948.2     |
| 1814   | 1771.9 | 1347.7 | 1633.8 NM_014517.2   |
| 155.6  | 143.2  | 131    | 123 NM_019116.1      |
| 541.3  | 357.9  | 287.7  | 274.8 NM_053067.1    |
| 1983.3 | 1508.2 | 1185.1 | 1018.8 NM_013438.3   |
| 762.5  | 497    | 580.4  | 460.7 NM_013444.2    |
| 128.4  | 127.6  | 115.1  | 114.7 NM_017481.2    |
| 1063.8 | 682.7  | 620    | 385.4 NM_020131.3    |
| 165.4  | 174.3  | 131.4  | 144.5 NM_174916.1    |
| 518.6  | 581.1  | 586.1  | 434.4 NM_015255.1    |
| 242.5  | 227.4  | 187.6  | 214 NM_024954.3      |
| 157.4  | 140.7  | 111.9  | 116.1 NM_014233.1    |
| 81.7   | 98.1   | 80.9   | 90.6 NM_014233.1     |
| 177.3  | 180.9  | 158.7  | 136.8 NM_014233.1    |
| 85.2   | 94.4   | 86.3   | 77.4 NM_001076683.1  |
| 310.6  | 366.5  | 355.9  | 319.6 NM_025241.1    |
| 1599.8 | 1765.9 | 1492.9 | 1479.6 NM_014607.2   |
| 125.6  | 145.6  | 134.5  | 114.6 NM_152376.2    |
| 502.6  | 430.8  | 406.5  | 328.5 NM_181713.3    |
| 97.6   | 95.3   | 105.1  | 88.4 NM_183008.2     |
| 80.7   | 90.8   | 75.2   | 87 NM_145345.2       |
| 94.2   | 89.8   | 90.2   | 90.9 NM_183008.2     |
| 242.5  | 242.3  | 205.6  | 167.8 NM_183008.2    |

|        |        |        |                      |
|--------|--------|--------|----------------------|
| 88.1   | 90.9   | 72.6   | 86.4 NM_183008.2     |
| 138.9  | 110.9  | 104.9  | 119.1 NM_005671.1    |
| 2304.8 | 2383   | 2163.1 | 1498.6 NM_014613.1   |
| 88.8   | 90.3   | 87     | 82.2 NM_004181.3     |
| 1302.3 | 748.5  | 639    | 617 NM_006002.3      |
| 1510.5 | 1231.5 | 860.5  | 904 NM_015984.1      |
| 987.9  | 969.5  | 920.8  | 546.9 NM_017518.5    |
| 127    | 118.6  | 113.4  | 110.9 NM_031432.1    |
| 935    | 654.8  | 595.7  | 472.1 NM_012474.3    |
| 769.4  | 972.3  | 861.4  | 870.8 NM_017859.2    |
| 122.9  | 141.4  | 174.4  | 107.4 NM_003353.2    |
| 83.8   | 81.2   | 87.8   | 81.4 NM_033199.3     |
| 91.7   | 86.1   | 92.2   | 87.5 NM_053049.2     |
| 679.9  | 615.2  | 488.1  | 505.8 NM_003355.2    |
| 83.9   | 85.9   | 84.8   | 89.8 NM_022803.1     |
| 106.8  | 111.9  | 91.2   | 99 NM_003356.2       |
| 93.1   | 100.1  | 88.8   | 91 NM_022803.1       |
| 618.5  | 389.8  | 398.3  | 290.6 NM_001003684.1 |
| 354.3  | 360.5  | 315.8  | 313.9 NM_013387.3    |
| 330    | 409.5  | 441.4  | 264.3 NM_013387.3    |
| 121.2  | 108.1  | 106    | 106 NM_018314.2      |
| 102.7  | 95.4   | 93.6   | 93.1 NM_001040697.1  |
| 4657.6 | 2899.1 | 2471   | 2012.4 NM_016406.1   |
| 170.2  | 144.5  | 133.8  | 115.4 NM_005659.4    |
| 119.2  | 106.7  | 107.6  | 112.4 NM_001035247.1 |
| 112    | 105.3  | 104.6  | 125.2 NM_016617.1    |
| 244.5  | 189.6  | 210.1  | 164.9 NM_003358.1    |
| 73.4   | 80     | 73.7   | 80.9 NM_001025777.1  |
| 140.9  | 192.3  | 191.6  | 151.9 NM_020120.2    |
| 281.2  | 397.2  | 348.9  | 356.1 NM_020120.2    |
| 187.9  | 193.5  | 206.7  | 165.5 NM_020121.2    |
| 371.2  | 315.4  | 299.9  | 262.5 NM_003359.2    |
| 560.5  | 529.5  | 431.4  | 564.6 NM_006759.3    |
| 100    | 92.8   | 95.8   | 90.3 NM_006759.3     |
| 1958.6 | 1892.4 | 1667.4 | 1707.3 NM_006759.3   |
| 98.6   | 89.8   | 83.4   | 100.7 NM_000463.2    |
| 73.1   | 72.6   | 73.8   | 73.8 NM_019075.2     |
| 90.2   | 88.2   | 83.4   | 73.6 NM_019093.2     |
| 86.2   | 78.3   | 76.4   | 87.4 NM_007120.2     |
| 92.8   | 87.7   | 91.3   | 84.9 NM_019078.1     |
| 91.9   | 93.7   | 88.1   | 89.2 NM_205862.1     |
| 86.8   | 95.1   | 91.6   | 102.6 NM_001072.2    |
| 91.2   | 81.7   | 81.5   | 81.8 NM_001072.2     |
| 88.2   | 88.2   | 80.2   | 89.5 NM_019077.2     |
| 86.1   | 83.6   | 78.5   | 89.6 NM_019076.4     |
| 89.6   | 95     | 89.1   | 88.3 NM_021027.2     |
| 79.1   | 82.2   | 77.6   | 82.5 NM_006798.1     |
| 99.6   | 91.4   | 90.4   | 85.6 NM_024743.2     |
| 82.6   | 84.5   | 81.8   | 79.2 NM_001075.2     |
| 107    | 95.6   | 93.5   | 95.7 NM_001073.1     |

|        |        |        |                      |
|--------|--------|--------|----------------------|
| 96     | 91.7   | 81.8   | 89.2 NM_001076.2     |
| 81.8   | 84.3   | 84.8   | 85 NM_001077.2       |
| 84.2   | 97.6   | 82.8   | 89.1 NM_001077.2     |
| 89.2   | 96.1   | 82.3   | 88.8 NM_053039.1     |
| 90.5   | 88.1   | 88.3   | 78.3 NM_021139.1     |
| 81.6   | 85.7   | 82.4   | 84.8 XM_943434.1     |
| 94.5   | 98.4   | 83.6   | 96.8 NM_001074.1     |
| 114.4  | 95.2   | 102.2  | 101.7 NM_152404.2    |
| 201.5  | 151.8  | 175.9  | 134.2 NM_174914.2    |
| 85.9   | 85.3   | 79.1   | 76.5 NM_003360.2     |
| 274.6  | 247.4  | 240.9  | 186.1 NM_175866.2    |
| 195.2  | 136.3  | 160.8  | 130.3 NM_013282.3    |
| 167.8  | 178.3  | 169.9  | 171.8 NM_152306.2    |
| 114.2  | 123.8  | 108.1  | 109 NM_207107.2      |
| 150.1  | 118.7  | 102.5  | 111.4 NM_025218.2    |
| 105.2  | 94.6   | 98.3   | 88 NM_024518.1       |
| 1054.9 | 904    | 1203.9 | 561.1 XM_942125.1    |
| 914.5  | 861.6  | 991.8  | 477.7 NM_003565.1    |
| 84.3   | 77.3   | 84.2   | 85.3 NM_003565.1     |
| 91.8   | 89.2   | 82.8   | 85.1 NM_014683.2     |
| 113.5  | 128.4  | 118.2  | 114.9 NM_015518.1    |
| 87.4   | 86.6   | 78.1   | 81 NM_001008389.1    |
| 107.2  | 99.5   | 98.4   | 94.3 NM_003361.2     |
| 88.2   | 76.5   | 81.3   | 83.6 NM_173568.2     |
| 81.6   | 85.1   | 87.7   | 89.8 NM_173568.2     |
| 115.9  | 106.1  | 102.3  | 110.2 NM_000373.1    |
| 113.5  | 103.9  | 97.5   | 91.7 NM_054035.1     |
| 151.5  | 190.8  | 170.7  | 104.9 NM_005148.2    |
| 95.8   | 86.4   | 90     | 83.9 NM_001080421.1  |
| 102.4  | 103.7  | 93.7   | 93.5 XM_038604.9     |
| 97.1   | 85.4   | 86.4   | 80.7 NM_001080421.1  |
| 105.6  | 105.7  | 114.9  | 102.1 NM_006377.2    |
| 87.5   | 86.6   | 85.5   | 77 NM_001080534.1    |
| 135.4  | 142    | 128.7  | 119.5 NM_199242.1    |
| 558.4  | 467.2  | 473.1  | 303.7 NM_001039675.1 |
| 125.9  | 118    | 112    | 110.2 NM_017979.1    |
| 631.7  | 620.1  | 583.7  | 453.5 NM_018671.2    |
| 97.6   | 99.5   | 98.2   | 94.7 NM_001039675.1  |
| 88.3   | 88.9   | 82.7   | 89.8 NM_173167.2     |
| 3402.5 | 2653.1 | 2362.9 | 1674.8 NM_014044.4   |
| 98.6   | 92.3   | 86     | 86.4 NM_133369.2     |
| 90.3   | 101.9  | 97.3   | 106 NM_170744.2      |
| 116.6  | 115.9  | 106.1  | 94.1 NM_003728.2     |
| 86.8   | 75.4   | 83.6   | 85.6 NM_173561.1     |
| 82.1   | 86     | 69.1   | 78.8 NM_080872.1     |
| 403.7  | 392.4  | 350.9  | 314.5 NM_025154.2    |
| 2705.2 | 2380.8 | 2706.5 | 1156.5 NM_015374.1   |
| 93.3   | 90.2   | 85.4   | 89.3 NM_018974.2     |
| 788.1  | 746.7  | 741.4  | 583.9 NM_030930.2    |
| 99.3   | 92.5   | 90.2   | 93.6 NM_001080461.1  |



|        |        |        |                      |
|--------|--------|--------|----------------------|
| 94.6   | 92.8   | 92.6   | 93.6 NM_080911.1     |
| 880    | 741.3  | 646.9  | 511.5 NM_080911.1    |
| 85.3   | 80.5   | 84.5   | 81 NM_003362.2       |
| 136.3  | 100.6  | 103.9  | 108.6 NM_021147.2    |
| 85.8   | 84.6   | 82.6   | 87.2 NM_001080419.1  |
| 89.7   | 93.6   | 93.2   | 102.7 NM_001037125.1 |
| 88.7   | 87.5   | 80.6   | 86.2 NM_205855.1     |
| 101.5  | 87.7   | 90.5   | 88.4 NM_198443.1     |
| 79     | 82     | 82.1   | 85.8 NM_203347.1     |
| 100.4  | 90.1   | 90.6   | 90.3 NM_198481.1     |
| 116.3  | 94.1   | 110.1  | 101.7 NM_207409.1    |
| 95.5   | 95.5   | 95.2   | 97.9 NM_207392.1     |
| 93.9   | 125.8  | 117.7  | 122.9 NM_198573.2    |
| 90.8   | 89.2   | 92     | 91.9 NM_198477.1     |
| 2393.5 | 1963.3 | 2236.2 | 1016.4 NM_198536.1   |
| 95.4   | 108.4  | 104.6  | 97.2 NM_207103.1     |
| 90     | 93.9   | 89.2   | 85.3 NM_207384.1     |
| 99     | 105.3  | 101.6  | 99.3 NM_213608.1     |
| 88.1   | 80.6   | 85.3   | 90 NM_212557.1       |
| 102.6  | 99.7   | 81.5   | 86.2 NM_198570.1     |
| 116    | 129    | 127.9  | 104.3 NM_206895.1    |
| 122.2  | 103.3  | 104.2  | 102.8 NM_207316.1    |
| 112.8  | 101.5  | 104.4  | 86.8 NM_205548.1     |
| 100.9  | 81.4   | 84.8   | 86.2 NM_207410.1     |
| 94.7   | 103    | 83.7   | 85.4 NM_198464.1     |
| 94.6   | 107.1  | 81.2   | 95.6 NM_207413.1     |
| 98.3   | 88     | 85.3   | 79.8 NM_207377.1     |
| 104.9  | 104.2  | 91.2   | 93.9 NM_016327.2     |
| 1338.7 | 1366.4 | 1108.5 | 999.4 NM_080599.1    |
| 103.8  | 100.3  | 95.3   | 93.9 NM_080599.1     |
| 620.3  | 736.3  | 605.4  | 559.8 NM_015542.2    |
| 326.9  | 359.8  | 338.3  | 435.3 NM_023011.2    |
| 486.9  | 533.9  | 492.8  | 452.3 NM_080687.1    |
| 689.4  | 594.6  | 492.8  | 538.9 NM_080632.1    |
| 698.5  | 694.6  | 648.1  | 596.8 NM_080632.1    |
| 91.1   | 94.5   | 87.6   | 87.5 NM_007000.2     |
| 88.1   | 84.5   | 90.3   | 80.9 NM_006952.3     |
| 94.3   | 95.2   | 90.2   | 92.4 NM_006760.1     |
| 90.8   | 88.7   | 87.4   | 85.7 NM_006953.2     |
| 93.7   | 81.4   | 90.3   | 84 NM_182684.1       |
| 97.2   | 102.6  | 81.1   | 95.5 NM_182684.1     |
| 93.5   | 96.1   | 82     | 97.5 NM_030570.2     |
| 86.6   | 89.1   | 90.6   | 87.5 NM_003364.2     |
| 85.9   | 82.5   | 74.7   | 89.4 NM_181597.1     |
| 167.6  | 194    | 182.6  | 126.3 NM_181597.1    |
| 92     | 82.2   | 74.8   | 89.8 NM_173355.2     |
| 456.5  | 417.7  | 378.5  | 315.1 NM_145052.1    |
| 145.9  | 122.6  | 111    | 116.5 NM_006830.2    |
| 139.5  | 119.7  | 110.9  | 104.1 NM_006294.2    |
| 1201   | 1098.4 | 893.5  | 862.3 NM_003365.2    |

|         |         |         |         |                |
|---------|---------|---------|---------|----------------|
| 410.1   | 345.2   | 289.7   | 290.3   | NM_003366.2    |
| 6439.2  | 4447.9  | 4029.9  | 2835.8  | NM_006003.1    |
| 15898.3 | 15591.9 | 12413.8 | 12704.2 | NM_006004.2    |
| 113.3   | 95.6    | 108.5   | 97.1    | NM_199511.1    |
| 81.9    | 90.9    | 82.5    | 92.4    | NM_199512.1    |
| 315.5   | 302     | 280.1   | 180.8   | NM_017920.2    |
| 322.8   | 310.6   | 278.7   | 268     | NM_001077664.1 |
| 100.9   | 80.5    | 84.8    | 76.3    | NM_144639.1    |
| 880.6   | 816     | 896.1   | 586.4   | NM_000374.3    |
| 2064    | 1355.5  | 1463.2  | 599.2   | NM_000375.1    |
| 1524.6  | 1595.1  | 1428.1  | 1082.6  | NM_031471.4    |
| 278.8   | 294.1   | 276.9   | 287.7   | NM_031471.4    |
| 241.3   | 187.7   | 210.4   | 159.2   | NM_007122.3    |
| 281.3   | 382.3   | 286.4   | 247.7   | NM_007122.3    |
| 94.3    | 96.8    | 95.9    | 96.4    | NM_003367.2    |
| 303.7   | 294.9   | 271.3   | 285.8   | NM_207291.1    |
| 145.9   | 144.9   | 120.4   | 156.3   | NM_207291.1    |
| 88.6    | 94.4    | 83.7    | 84.9    | NM_005709.2    |
| 80.9    | 76.6    | 86.9    | 78.8    | NM_005709.2    |
| 115.1   | 102     | 100     | 107.5   | NM_173477.2    |
| 96.5    | 99.1    | 94.7    | 95.6    | NM_007123.4    |
| 90.9    | 86.8    | 81.6    | 95.4    | NM_206933.1    |
| 86      | 86      | 85.7    | 85.5    | NM_007123.4    |
| 112.2   | 110.4   | 107     | 90.9    | NM_052995.2    |
| 92.5    | 91.2    | 89.2    | 101.8   | NM_174878.2    |
| 88.7    | 91.6    | 82.9    | 80.5    | NM_031941.3    |
| 136.3   | 126.8   | 122.1   | 105.3   | NM_032747.1    |
| 84.2    | 89.8    | 83      | 82.9    | NM_001017415.1 |
| 490.3   | 440     | 394.3   | 491.9   | NM_003368.4    |
| 252.5   | 290.3   | 294     | 218.7   | NM_003368.4    |
| 295.2   | 247.6   | 211.4   | 196.6   | NM_005153.1    |
| 194.6   | 157.5   | 170.6   | 139.6   | NM_004651.3    |
| 78.9    | 85.9    | 102.9   | 92.5    | NM_182488.1    |
| 329.5   | 368.4   | 328.2   | 320.7   | NM_003940.1    |
| 499.1   | 419.2   | 323.5   | 455.5   | NM_005151.2    |
| 241     | 271.6   | 214.1   | 238.5   | NM_001037334.1 |
| 107.9   | 124.6   | 111.2   | 123.7   | NM_006313.1    |
| 846.5   | 1123.6  | 749.9   | 976.3   | NM_006447.2    |
| 106.1   | 94.7    | 84.6    | 91      | NM_001032410.1 |
| 103.1   | 102.4   | 94.9    | 102.6   | NM_006677.1    |
| 88.9    | 86.3    | 93.5    | 81.5    | NM_171997.1    |
| 123.6   | 111.5   | 100.5   | 97.8    | NM_004205.3    |
| 96.1    | 94.8    | 91.3    | 95.2    | NM_171997.1    |
| 82.4    | 79.5    | 80.5    | 84      | NM_006676.4    |
| 92      | 94.7    | 89.2    | 83.4    | NM_001008563.1 |
| 379.9   | 222.5   | 216.5   | 182.1   | NM_012475.4    |
| 113.5   | 95.5    | 83.9    | 90.1    | NM_001014443.2 |
| 289.1   | 180.4   | 173.1   | 143.6   | NM_012475.4    |
| 104.4   | 102.1   | 90.2    | 106.5   | NM_013396.3    |
| 120     | 126.7   | 99.7    | 99.8    | NM_031907.1    |

|        |        |        |                      |
|--------|--------|--------|----------------------|
| 84     | 86.2   | 83.3   | 91.8 NM_020886.2     |
| 84.3   | 88.9   | 77.6   | 87.3 NM_020903.2     |
| 1439.5 | 1041.1 | 934.8  | 794.6 NM_006537.2    |
| 94.9   | 100.7  | 96.8   | 95.8 NM_032663.2     |
| 85.1   | 78.9   | 82.9   | 74.9 NM_020718.2     |
| 99.9   | 93.3   | 95.3   | 87.4 XM_939750.1     |
| 92.9   | 146    | 168.9  | 157.3 NM_032582.3    |
| 128    | 134.8  | 120.5  | 117.6 NM_201624.1    |
| 164.6  | 237.3  | 219.6  | 195.4 NM_201626.1    |
| 229    | 360    | 283.4  | 267.9 NM_014709.2    |
| 231.5  | 187.9  | 184.8  | 151.3 NM_020935.1    |
| 561.8  | 392.4  | 391.4  | 271.6 NM_032557.4    |
| 1282   | 1218.4 | 911.8  | 692 NM_006590.2      |
| 141.1  | 167.3  | 146    | 149.5 NM_003363.2    |
| 702.1  | 606.7  | 544.7  | 329.1 NM_003363.2    |
| 101.3  | 107    | 94.7   | 97.2 NM_018218.1     |
| 110.7  | 118.2  | 114.1  | 122.6 XM_932190.1    |
| 568.8  | 484.2  | 493.5  | 370 NM_032172.1      |
| 100    | 98.3   | 78.5   | 85.4 NM_153210.2     |
| 87.3   | 85.2   | 83     | 89.4 NM_032147.1     |
| 96     | 92.9   | 89.2   | 86.5 NM_001042403.1  |
| 119.8  | 128.4  | 97.3   | 94.6 NM_001080481.1  |
| 111.3  | 110.9  | 89.8   | 93 NM_022832.2       |
| 116.1  | 125.7  | 108.2  | 127 NM_017944.3      |
| 183.6  | 238.7  | 280.8  | 249.4 NM_032236.5    |
| 170.3  | 154.6  | 143.3  | 155.3 NM_001032730.1 |
| 351.2  | 317.1  | 288    | 260.9 NM_001032730.1 |
| 822.4  | 1179   | 1504.4 | 1039.5 NM_018561.3   |
| 838.9  | 776.1  | 620.1  | 574.3 NM_003481.1    |
| 84.4   | 87.5   | 84.4   | 84.3 NM_203494.1     |
| 89.2   | 93.7   | 81.1   | 89.1 NM_201286.2     |
| 195.5  | 279.9  | 271.4  | 203.3 NM_014871.2    |
| 100.5  | 101.5  | 92     | 103.9 NM_019050.1    |
| 92.9   | 89.6   | 88.1   | 81 NM_152586.2       |
| 95.6   | 87.4   | 81.1   | 88.8 NM_004505.1     |
| 166    | 129    | 119.6  | 111 NM_001080491.1   |
| 88.8   | 86.7   | 78.5   | 84.8 XM_943796.1     |
| 264.6  | 196.3  | 205.6  | 173.9 NM_003470.1    |
| 194.3  | 167    | 177.3  | 216.1 NM_005154.2    |
| 99.1   | 89.6   | 86.3   | 92.3 NM_001039590.1  |
| 388    | 520.4  | 458.3  | 331.7 NM_004652.3    |
| 112.3  | 112.3  | 103.2  | 114.8 NM_004654.3    |
| 238.7  | 240.3  | 250.6  | 194.8 NM_005800.3    |
| 126    | 112.4  | 105.9  | 119.4 NM_005715.1    |
| 95.9   | 90.1   | 88.6   | 88.6 NM_003577.2     |
| 1220.8 | 833    | 743.8  | 595.8 NM_016037.2    |
| 1066.7 | 797.9  | 629.6  | 628.7 NM_006649.2    |
| 519.4  | 593    | 559.8  | 423.3 NM_021645.4    |
| 203    | 146.8  | 133.6  | 122.9 NM_032175.2    |
| 88.5   | 91     | 82.6   | 86.4 NM_014503.2     |

|         |         |        |                      |
|---------|---------|--------|----------------------|
| 113.4   | 118.8   | 130    | 122 NM_007124.1      |
| 123.6   | 114.4   | 116.3  | 127 NM_006786.2      |
| 229.7   | 190     | 222.1  | 190.5 NM_021995.1    |
| 175.1   | 186.7   | 155.6  | 185.9 NM_021995.1    |
| 92.2    | 96      | 83.4   | 95.4 NM_198152.2     |
| 87.8    | 91      | 86.3   | 90.9 NM_018949.1     |
| 81.2    | 81.7    | 81.4   | 91.4 NM_021140.1     |
| 90.1    | 88.9    | 94.4   | 87.9 NM_182659.1     |
| 102.3   | 112.6   | 103.6  | 120.4 NM_007125.3    |
| 86      | 93.2    | 79.3   | 90.1 NM_182660.1     |
| 202.8   | 181     | 168.6  | 183.7 NM_003369.2    |
| 95.3    | 83.7    | 90.3   | 83.1 NM_025076.2     |
| 3229.6  | 2394.8  | 1947.9 | 1762.3 NM_004182.2   |
| 92.6    | 86.6    | 85.3   | 86.8 NM_153477.1     |
| 99.4    | 109     | 109.3  | 99 NM_018052.3       |
| 140.7   | 141.9   | 129.1  | 103.7 NM_018052.3    |
| 93      | 92.5    | 85.4   | 90.9 NM_014231.3     |
| 81.4    | 82      | 80.5   | 79.7 NM_199245.1     |
| 189.6   | 192.8   | 218.6  | 170.2 NM_016830.2    |
| 124.7   | 128.1   | 128.3  | 117.6 NM_014232.1    |
| 484.9   | 445.6   | 442.5  | 361.1 NM_004781.3    |
| 128     | 105.7   | 102.4  | 103.6 NM_003762.2    |
| 154.9   | 136.9   | 126.9  | 142.6 NM_003762.2    |
| 188     | 213     | 230.9  | 196.8 NM_006634.2    |
| 11374.3 | 12138.5 | 11145  | 8075.4 NM_003761.2   |
| 109.5   | 104.6   | 89.4   | 92.4 NM_138959.1     |
| 99.2    | 94.2    | 95.7   | 94.8 NM_020335.1     |
| 104.3   | 108.7   | 112.1  | 126.5 NM_194434.2    |
| 98.3    | 92.4    | 91.5   | 102.4 NM_194434.2    |
| 310.4   | 246.7   | 206.8  | 197.9 NM_003574.4    |
| 83.5    | 82.5    | 75.9   | 76.1 NM_004738.3     |
| 136.1   | 146.1   | 147    | 144 NM_006295.1      |
| 1737    | 990     | 839.3  | 469 NM_006295.1      |
| 255.1   | 192.6   | 182.6  | 136.5 NM_020442.3    |
| 231.8   | 240     | 204.5  | 150.8 NM_014909.2    |
| 122.9   | 142.7   | 109.8  | 109.4 NM_001008736.1 |
| 101.4   | 105.8   | 100    | 100.2 NM_003370.3    |
| 197.1   | 214     | 174.7  | 188.4 NM_006373.2    |
| 265.6   | 318.4   | 275.9  | 205.9 NM_005428.2    |
| 107     | 109.9   | 95.3   | 93.8 NM_003371.2     |
| 129.1   | 127.2   | 125.1  | 117.8 NM_006113.4    |
| 439.9   | 314.2   | 308.6  | 240.9 NM_006113.3    |
| 1406.5  | 1167.2  | 1031.8 | 968.5 NM_006113.4    |
| 74      | 83.1    | 77.6   | 82.9 NM_199131.1     |
| 102.8   | 102.9   | 99.8   | 99.1 NM_012476.1     |
| 3396.8  | 2134.6  | 1784.1 | 2004.3 NM_003372.4   |
| 100.8   | 95.8    | 86.3   | 94.9 NM_001078.2     |
| 1107.5  | 893.4   | 754.9  | 575.8 NM_003373.3    |
| 132.8   | 130.6   | 117.9  | 111.8 NM_003373.3    |
| 89.9    | 80.1    | 75.3   | 77.8 NM_014000.2     |

|         |        |        |                      |
|---------|--------|--------|----------------------|
| 893.2   | 759.4  | 770.3  | 407.4 NM_007126.2    |
| 428.8   | 323.7  | 303.1  | 344.8 NM_025054.3    |
| 88.1    | 107.7  | 99.6   | 90.4 NM_013452.2     |
| 85      | 92.1   | 87.3   | 80.9 NM_016378.2     |
| 85.6    | 81.6   | 87.9   | 83.4 NM_016378.2     |
| 90.5    | 84.4   | 88.4   | 82 NM_016379.2       |
| 87.1    | 109.6  | 107    | 85.8 NM_016379.2     |
| 95.4    | 111.8  | 109.2  | 103.2 NM_001001888.1 |
| 84.3    | 87     | 88.9   | 84.1 NM_004679.2     |
| 74.6    | 86.1   | 78.6   | 79.5 NM_181880.1     |
| 8814.3  | 4822.9 | 3585   | 4845.8 NM_003374.1   |
| 78.6    | 77.3   | 80     | 84.8 NM_003375.2     |
| 10957.7 | 7067.8 | 6314.4 | 4750.6 NM_005662.3   |
| 806.7   | 878.8  | 794.1  | 660.2 NM_003715.1    |
| 80.1    | 76     | 89.3   | 83.5 NM_001017535.1  |
| 124.8   | 115.6  | 103.8  | 105.2 NM_000376.2    |
| 102.5   | 115.2  | 112.9  | 107.1 NM_001025366.1 |
| 92.9    | 82.5   | 78     | 86.3 NM_001025366.1  |
| 176.3   | 243.8  | 221.4  | 128.1 NM_003376.4    |
| 1293.4  | 1485.7 | 1709.1 | 619.7 XM_938483.1    |
| 82.4    | 80.1   | 90.3   | 98.2 NM_003377.3     |
| 122.2   | 124    | 115    | 135.5 NM_003377.3    |
| 81.8    | 74.2   | 79.2   | 81.7 NM_005429.2     |
| 89.1    | 87.1   | 89.9   | 83.6 NM_014468.2     |
| 95.1    | 87.7   | 85.5   | 91.9 NR_002311.1     |
| 91      | 102.5  | 80.1   | 84 NM_024621.1       |
| 84.2    | 90.2   | 87.1   | 91.3 NM_017599.2     |
| 94      | 92     | 87.8   | 86.6 NM_052867.1     |
| 144.1   | 111.9  | 108.3  | 116.3 NM_003378.2    |
| 118.6   | 93.2   | 92.2   | 100 NM_016267.2      |
| 88.9    | 90.5   | 85.5   | 85.1 NM_153453.1     |
| 97.6    | 103.4  | 84.2   | 94.9 NM_182645.2     |
| 85.9    | 76.8   | 76.1   | 84.4 NM_016206.2     |
| 740.9   | 642.7  | 722.1  | 448.6 NM_014667.1    |
| 305.7   | 265.6  | 318.6  | 241.5 NM_198156.1    |
| 1877.7  | 1726.1 | 1731.9 | 1241.3 NM_000551.2   |
| 271.3   | 211.2  | 230.1  | 202.9 NM_000551.2    |
| 88.9    | 83.4   | 83.2   | 87.6 NM_001004319.1  |
| 85.3    | 81.5   | 68     | 82.8 NM_007127.1     |
| 4378.2  | 4269.6 | 4032.6 | 2158.7 NM_003379.3   |
| 112.6   | 113    | 111.3  | 113 NM_015873.2      |
| 1686.5  | 707.6  | 626.3  | 552.7 NM_003380.2    |
| 78.6    | 89.2   | 86.8   | 86.1 NM_194435.1     |
| 92.1    | 91     | 86.5   | 93.4 NM_003381.2     |
| 176.8   | 217.4  | 208.9  | 159.9 NM_004624.2    |
| 86.7    | 81.6   | 80.2   | 91.7 NM_003382.3     |
| 93.3    | 94.9   | 97.6   | 91.6 NM_020746.2     |
| 89.9    | 89.5   | 86.1   | 94.7 NM_053276.2     |
| 4360.4  | 3138.2 | 3293.9 | 1916.5 NM_024006.4   |
| 426.4   | 303.9  | 256.2  | 240.6 NM_024006.4    |

|        |        |        |       |                |
|--------|--------|--------|-------|----------------|
| 837.5  | 452.7  | 393.2  | 348.8 | NM_173517.3    |
| 482.4  | 494    | 371.3  | 453.7 | NM_001018056.1 |
| 101.2  | 90.7   | 89     | 92.7  | NM_003383.3    |
| 101.1  | 106.1  | 101.2  | 93.9  | NM_001017921.1 |
| 214.2  | 167.6  | 160    | 129.4 | NM_004183.1    |
| 87.1   | 81     | 76.2   | 78.7  | NM_017682.1    |
| 88.8   | 85     | 87.3   | 93.7  | NM_153274.1    |
| 100.9  | 87.6   | 92.7   | 94.6  | NM_152439.1    |
| 92.8   | 86.2   | 90.8   | 82.2  | NM_152439.1    |
| 92.7   | 90.8   | 86.8   | 94.3  | NM_182566.1    |
| 87.5   | 90.3   | 86.8   | 88.7  | NM_080723.2    |
| 87     | 89.7   | 86.9   | 88.9  | NM_020633.2    |
| 92.5   | 96.7   | 85.4   | 88.3  | NM_173856.1    |
| 89.7   | 83.8   | 86.6   | 85.7  | NM_173857.2    |
| 99.1   | 80.2   | 88.4   | 85.9  | NM_173858.1    |
| 96.8   | 93.9   | 96.8   | 96.1  | NM_004666.1    |
| 104    | 98.3   | 97.7   | 94.8  | NM_004665.2    |
| 91.6   | 90.4   | 90.7   | 92.2  | NM_078488.1    |
| 91.4   | 78.8   | 81.5   | 88.5  | NM_004665.2    |
| 90.5   | 84.5   | 85.5   | 89.7  | NM_078625.2    |
| 94.3   | 88.4   | 87.5   | 82.2  | NM_001024460.1 |
| 99.7   | 87.6   | 83.3   | 83.3  | NM_001024460.1 |
| 148.1  | 155.2  | 111.2  | 117.9 | NM_014703.1    |
| 96.3   | 93.1   | 92.9   | 92.8  | NM_007128.2    |
| 105.6  | 97.9   | 94.4   | 97.3  | NM_013378.1    |
| 136.7  | 144.4  | 135.1  | 122.2 | NM_021729.4    |
| 85.2   | 82.1   | 79     | 80.4  | NM_015186.2    |
| 120.1  | 146.5  | 135.1  | 155.6 | NM_033305.2    |
| 86.9   | 90.2   | 85.1   | 89.3  | NM_001018038.1 |
| 122.8  | 127.3  | 109.1  | 133.8 | NM_015186.2    |
| 92.8   | 88     | 86.8   | 89.6  | NM_015243.2    |
| 128.7  | 128.8  | 150.5  | 121.6 | NM_184042.1    |
| 91.2   | 96.4   | 91.7   | 89.4  | NM_181661.1    |
| 94.2   | 99.1   | 93.6   | 95.4  | NM_017890.3    |
| 99.6   | 81.5   | 89.1   | 94.1  | NM_152564.3    |
| 110    | 109.2  | 129    | 124.5 | NM_152564.3    |
| 108    | 148    | 135.5  | 121.2 | NM_018080.2    |
| 123.7  | 194    | 180.4  | 153.3 | NM_018080.2    |
| 94.3   | 89.3   | 87.4   | 92.2  | NM_015378.2    |
| 87.7   | 90     | 73.2   | 72.8  | NM_015378.2    |
| 95     | 114.2  | 95.2   | 99.5  | NM_015378.2    |
| 119.1  | 111.5  | 100.8  | 100.5 | NM_022575.2    |
| 361.4  | 426.2  | 450.6  | 219.4 | NM_080413.1    |
| 96.6   | 96.3   | 88.9   | 91.2  | NM_080414.1    |
| 218.8  | 227    | 188.8  | 197.3 | NM_020857.2    |
| 959.1  | 593.9  | 533.3  | 307.7 | NM_001005753.1 |
| 86.1   | 86.6   | 86.4   | 78.3  | NM_016079.2    |
| 515.1  | 436.8  | 391.6  | 321.1 | NM_032353.2    |
| 159.8  | 143.6  | 128.3  | 142   | NM_004896.2    |
| 1600.2 | 1222.4 | 1035.9 | 849   | NM_001035260.1 |

|        |        |        |        |                |
|--------|--------|--------|--------|----------------|
| 448.8  | 333.3  | 291.5  | 270.4  | NM_052875.2    |
| 1067.5 | 752.2  | 730.3  | 621.5  | NM_016208.2    |
| 681.5  | 450.2  | 458.1  | 366.9  | NM_016208.2    |
| 2911.1 | 2766.7 | 2376   | 2183.8 | NM_016226.2    |
| 185.7  | 200.4  | 169.3  | 141.8  | NM_022916.3    |
| 353.3  | 312.7  | 309.7  | 269.7  | NM_018668.2    |
| 1647.5 | 1113   | 1190.2 | 869    | NM_018206.3    |
| 410.1  | 523.8  | 484.5  | 508.8  | NM_016075.2    |
| 293.1  | 251.8  | 228.2  | 267.1  | NM_152415.1    |
| 301.6  | 240.1  | 192.7  | 194.7  | NM_024667.1    |
| 2555.9 | 2052   | 1952.6 | 1186.4 | NM_017966.4    |
| 178.6  | 134.9  | 148.3  | 121.2  | XM_376631.3    |
| 199.2  | 215.7  | 212.7  | 174.6  | NM_015289.2    |
| 132    | 162.1  | 134.8  | 167.2  | NM_014396.3    |
| 229.9  | 259.5  | 350.5  | 203.5  | NM_014396.3    |
| 1393.7 | 1279.8 | 1188.9 | 1066.1 | NM_014396.3    |
| 103.4  | 109.8  | 92.5   | 91.3   | NM_014396.3    |
| 483.5  | 459.1  | 374.9  | 376.6  | NM_007259.2    |
| 230.4  | 187.2  | 159.1  | 153.2  | NM_013245.2    |
| 1271.6 | 1432.4 | 1364.6 | 1149.8 | NM_004869.2    |
| 530.3  | 577.7  | 541.4  | 447.3  | NM_022553.4    |
| 82.9   | 99.4   | 93.3   | 103.9  | NM_018289.2    |
| 140.1  | 129    | 110.8  | 144.9  | NM_001005739.1 |
| 231.7  | 190.4  | 177.7  | 162.7  | NM_016516.2    |
| 466.4  | 274.1  | 267.2  | 197.9  | NM_005997.1    |
| 263    | 258.5  | 256.4  | 277.4  | NM_015303.3    |
| 82.4   | 92.8   | 82.7   | 89.7   | NM_015303.3    |
| 594.7  | 280.4  | 237.8  | 370.9  | NM_003384.2    |
| 179.6  | 166.1  | 122.9  | 175    | NM_006296.3    |
| 217.3  | 192.3  | 202.6  | 169.9  | NM_001025778.1 |
| 172.9  | 187.6  | 172.5  | 137.2  | NM_016440.3    |
| 523.5  | 427.1  | 408.2  | 284.5  | NM_001025778.1 |
| 87.6   | 82     | 79.2   | 76.4   | NM_182607.3    |
| 91.3   | 87.9   | 86.1   | 83.3   | NM_014312.3    |
| 105    | 97.7   | 103.1  | 89.6   | NM_007268.1    |
| 97.7   | 102    | 84.2   | 100.3  | NM_001013661.1 |
| 90.8   | 86.3   | 83.6   | 97.1   | NM_173799.2    |
| 85.4   | 85.3   | 76.3   | 79.2   | NM_003385.4    |
| 79.8   | 82.5   | 87.5   | 89.1   | NM_199425.1    |
| 106.5  | 92.8   | 94     | 97.4   | NM_199425.1    |
| 84.8   | 85.7   | 74.6   | 81     | NM_014588.4    |
| 85.7   | 78     | 80.1   | 82     | NM_024626.1    |
| 164.6  | 144.9  | 141.8  | 117.7  | NM_006370.1    |
| 82.4   | 72.8   | 79.5   | 77.7   | NM_000638.2    |
| 87.7   | 87.9   | 93.3   | 82.5   | NM_022834.3    |
| 109    | 103.8  | 100    | 94.5   | NM_022834.3    |
| 88.7   | 88     | 83.9   | 92.4   | NM_198496.1    |
| 97.6   | 87.9   | 85.5   | 80.5   | NM_152718.1    |
| 88.7   | 99.6   | 90.7   | 88     | NM_000552.2    |
| 839.9  | 696.1  | 540.8  | 638.8  | NM_100486.1    |

|        |        |        |                      |
|--------|--------|--------|----------------------|
| 101.9  | 87.5   | 89.2   | 102.6 NM_100264.1    |
| 1504.6 | 1204.6 | 1056.4 | 1455.4 NM_016628.2   |
| 999    | 618.6  | 490.4  | 374.1 NM_213646.1    |
| 1613.2 | 890.2  | 740.3  | 463.4 NM_004184.3    |
| 101.7  | 100.2  | 95.5   | 108.9 NM_201263.2    |
| 3890.7 | 3039.7 | 2867.5 | 1971.9 NM_000377.1   |
| 86.7   | 92.2   | 84.4   | 94.9 NM_003931.2     |
| 105.9  | 102.6  | 103.1  | 109 NM_003931.2      |
| 227.8  | 366.3  | 221.4  | 235.7 NM_006990.2    |
| 89     | 99.6   | 92.5   | 98.8 NM_006646.4     |
| 337.4  | 406.8  | 367.6  | 351.3 NM_003941.2    |
| 414.4  | 486.5  | 461.4  | 469.6 NM_003387.3    |
| 139.1  | 119.4  | 149.4  | 112.2 NM_012477.2    |
| 1377.7 | 1199.4 | 906.4  | 915.7 NM_016312.2    |
| 4455.6 | 3353.4 | 3533.7 | 3547.3 NM_012478.2   |
| 355.4  | 352.6  | 303.7  | 345.9 NM_007187.3    |
| 93.3   | 96.2   | 89.6   | 88.1 NM_001006614.1  |
| 107.2  | 99.6   | 106.5  | 98.6 NM_032994.1     |
| 173.5  | 123.2  | 135.6  | 112 NM_030798.2      |
| 94.1   | 86.2   | 91.7   | 95.2 NM_022479.1     |
| 208.5  | 283.1  | 269.3  | 287.5 NM_032317.2    |
| 87.7   | 81.7   | 84.8   | 85.3 NM_175064.2     |
| 85.5   | 94.3   | 86.7   | 90.6 NM_175064.2     |
| 1509.1 | 1173.6 | 1090.7 | 820.9 NM_017528.2    |
| 90.7   | 85.9   | 78.3   | 77.2 NM_025042.2     |
| 108.1  | 98     | 99.4   | 97.9 NM_152559.2     |
| 95.7   | 85     | 95.6   | 91.9 NM_182504.2     |
| 2139.8 | 1682.4 | 1521.1 | 1306 NM_020830.3     |
| 427.1  | 530.5  | 554.9  | 395.6 NM_052950.2    |
| 110.5  | 100.6  | 82.6   | 118.8 NM_014991.3    |
| 104    | 98.1   | 95.7   | 99.2 NM_178583.1     |
| 87.1   | 85.2   | 77.6   | 86.2 NM_178585.1     |
| 99.1   | 94.4   | 93.6   | 93.6 NM_001008396.1  |
| 180.5  | 149.1  | 139.8  | 139.5 NM_001008396.1 |
| 132.5  | 136.2  | 132.3  | 120.7 NM_007086.2    |
| 404.6  | 358.2  | 287.5  | 262.8 NM_017491.3    |
| 5857.8 | 4632.7 | 3730   | 3120.6 NM_017491.3   |
| 868.7  | 721.8  | 593.3  | 550.9 NM_018256.2    |
| 302.6  | 274    | 277.8  | 199.2 NM_017883.3    |
| 87.8   | 87.7   | 81.4   | 79.6 NM_145054.4     |
| 83.5   | 92.5   | 89     | 74.7 NM_145054.4     |
| 86.3   | 86.6   | 79.7   | 89.8 NM_181265.2     |
| 99.5   | 88.7   | 88.4   | 88.3 NM_170710.3     |
| 1740.3 | 915.6  | 851.9  | 394.5 NM_024100.3    |
| 214.1  | 236.7  | 216.8  | 185.2 NM_025132.3    |
| 312.9  | 262.2  | 269.9  | 204.1 NM_181291.1    |
| 188.7  | 169.1  | 117.5  | 143.2 NM_181308.1    |
| 153.1  | 119.7  | 100.4  | 104.5 NM_144574.2    |
| 294.1  | 217.5  | 199    | 202 NM_015604.2      |
| 104.2  | 92.8   | 96.7   | 90.9 NM_152418.2     |



|        |        |        |        |                |
|--------|--------|--------|--------|----------------|
| 240.6  | 241.3  | 208.7  | 177.3  | NM_003861.1    |
| 130.9  | 102.9  | 95.6   | 96.3   | NM_025230.3    |
| 217.3  | 256.3  | 297.1  | 184.2  | NM_025230.3    |
| 124.7  | 119.1  | 122.5  | 105.9  | NM_032259.1    |
| 110.1  | 101.5  | 105.2  | 97.8   | NM_024515.3    |
| 244.5  | 237.9  | 230.2  | 285.2  | NM_025160.4    |
| 193    | 265.9  | 265.4  | 234.9  | NM_182552.2    |
| 113.7  | 105.2  | 96.4   | 92.7   | NM_006784.1    |
| 100.4  | 92.5   | 89.9   | 94.3   | NM_145241.2    |
| 113.4  | 156.9  | 178    | 156.8  | NM_001006623.1 |
| 887.1  | 712.8  | 612.7  | 485.8  | NM_001006622.1 |
| 118.7  | 121.4  | 109.8  | 119.6  | NM_001006622.1 |
| 130.6  | 142.3  | 118.7  | 135.7  | NM_018383.3    |
| 312.4  | 190.4  | 148.2  | 176.1  | NM_052844.3    |
| 88.6   | 110.7  | 103.8  | 81.7   | NM_020779.3    |
| 539    | 498    | 414    | 331.3  | NM_139281.2    |
| 634.4  | 473.8  | 492    | 412.5  | NM_014023.3    |
| 1531   | 1029.6 | 922.2  | 598.3  | NM_033661.3    |
| 125.6  | 103.5  | 109.2  | 106.8  | NM_033661.3    |
| 131.4  | 115.5  | 102.6  | 106.3  | NM_018669.4    |
| 1187.4 | 1072.7 | 890.4  | 667.5  | NM_015397.1    |
| 222.9  | 187.7  | 165.5  | 152.9  | NM_178470.3    |
| 537.8  | 427.5  | 450.3  | 237.3  | NM_018268.2    |
| 93.8   | 78.7   | 75.6   | 84.7   | NM_001017930.1 |
| 107.6  | 89.7   | 90.3   | 90.1   | NM_019045.3    |
| 176.4  | 212.5  | 200.4  | 203.7  | NM_001029896.1 |
| 109.1  | 83.4   | 86.7   | 98.2   | NM_007075.3    |
| 96.1   | 103    | 89.6   | 99.9   | NM_001029896.1 |
| 364.3  | 345.8  | 317.8  | 272.1  | NM_019613.2    |
| 968.1  | 944.6  | 809.2  | 615    | NM_005452.4    |
| 87.2   | 83.9   | 80     | 74     | NM_014969.3    |
| 326.3  | 307.6  | 249.4  | 232.4  | NM_020839.2    |
| 194.7  | 178.2  | 171.8  | 161.3  | NM_178824.3    |
| 138    | 113.4  | 96     | 110.2  | NM_017588.2    |
| 955.8  | 531.2  | 498    | 478.6  | NM_052821.3    |
| 361.2  | 294.4  | 222.9  | 247.8  | NM_016001.1    |
| 1409.6 | 958.3  | 979.6  | 476.3  | NM_015426.2    |
| 131    | 119.8  | 115.7  | 118.1  | NM_172240.1    |
| 123.2  | 117.5  | 113.4  | 105.4  | NM_018338.2    |
| 226.2  | 233.6  | 201    | 175.5  | NM_182627.1    |
| 1498.7 | 665.4  | 765.6  | 483.1  | NM_032118.2    |
| 253.2  | 248.5  | 272.3  | 213.5  | NM_017706.3    |
| 1724.3 | 1528   | 1071.9 | 961.2  | NM_004814.1    |
| 515.4  | 356.7  | 326.8  | 290.7  | NM_024339.2    |
| 645.9  | 580.6  | 596.3  | 455.8  | NM_030581.3    |
| 136.9  | 136    | 140.8  | 139.9  | NM_019069.3    |
| 1471.6 | 1550.5 | 1621   | 950.2  | NM_018031.2    |
| 201.7  | 283.8  | 276.6  | 234    | NM_018051.2    |
| 2687.7 | 2679.5 | 2639.5 | 1764.7 | NM_025234.1    |
| 151.9  | 138.4  | 123.8  | 134    | NM_173636.3    |

|        |        |        |                    |
|--------|--------|--------|--------------------|
| 94.2   | 83.9   | 85.5   | 92 NM_145172.1     |
| 98.4   | 99.7   | 83.7   | 95.9 NM_144625.2   |
| 89.2   | 84.1   | 78.7   | 85.5 NM_152498.1   |
| 92.1   | 85.8   | 85.2   | 92.1 NM_144668.3   |
| 545.8  | 341.4  | 327.6  | 251.7 NM_145647.1  |
| 1737.1 | 1778.8 | 1349.8 | 1496.9 NM_005828.2 |
| 91.3   | 81.4   | 75     | 85.7 NM_178821.1   |
| 91.7   | 91     | 92.1   | 95.9 NM_015285.2   |
| 202.7  | 221.7  | 186    | 173.6 NM_015285.2  |
| 774.5  | 873.9  | 786.1  | 708.8 NM_018034.2  |
| 883.5  | 440    | 335.8  | 332.4 NM_025155.1  |
| 89.2   | 81.6   | 88.7   | 85.5 NM_182758.1   |
| 335.2  | 261    | 253.9  | 197.8 NM_032856.1  |
| 614.5  | 355.5  | 353    | 217.4 XM_936269.1  |
| 179.2  | 281.2  | 433.9  | 287.8 NM_018093.1  |
| 182.5  | 137.7  | 132.1  | 115.3 NM_018093.1  |
| 1593.7 | 1166.4 | 1006.1 | 910.6 NM_032168.1  |
| 483.4  | 285.9  | 226.8  | 223.9 NM_024102.2  |
| 87.1   | 90.9   | 85.1   | 89.1 NM_207014.1   |
| 73.9   | 75.3   | 82.6   | 78.3 NM_024763.3   |
| 85.8   | 88.9   | 81.2   | 77.9 NM_207014.1   |
| 162.3  | 142.8  | 167.4  | 111.8 NM_018081.1  |
| 763.8  | 610.8  | 534.1  | 466.6 NM_017818.2  |
| 115.4  | 95.9   | 98.3   | 119.2 NM_152348.1  |
| 92     | 98.7   | 89.9   | 89 NM_145054.2     |
| 110.9  | 98.9   | 88     | 98.8 NM_015420.4   |
| 432.3  | 486.7  | 429    | 399.9 NM_152528.1  |
| 91.7   | 87.4   | 87.3   | 86.4 NM_015023.2   |
| 439.2  | 269.6  | 242.3  | 221.7 NM_003390.2  |
| 90.6   | 90.2   | 86.6   | 100.7 NM_021197.2  |
| 114.4  | 100.2  | 95.8   | 109 NM_080753.2    |
| 84.6   | 80.2   | 78.7   | 79.9 NM_172006.2   |
| 96.8   | 96.3   | 94.5   | 82.6 NM_172131.2   |
| 90.7   | 88.7   | 88     | 85.2 NM_147197.2   |
| 88.6   | 83.2   | 81.6   | 90.3 NM_080869.1   |
| 72.6   | 78.6   | 76.6   | 77.5 NM_172005.1   |
| 93.1   | 82.2   | 82.2   | 73.9 NM_080736.1   |
| 98.8   | 85.4   | 89.1   | 100.3 NM_080735.1  |
| 88.1   | 95.6   | 85     | 96.7 NM_181530.1   |
| 122.3  | 117.1  | 119.4  | 115.6 NM_181522.1  |
| 88.1   | 84.6   | 75.4   | 82 NM_080614.1     |
| 78.2   | 85.4   | 86.2   | 81.4 NM_145652.2   |
| 86.3   | 91.8   | 91.5   | 97.5 NM_080827.1   |
| 98.4   | 84.1   | 91.6   | 95.2 NM_181510.1   |
| 86.3   | 90.6   | 95     | 87.5 NM_130896.1   |
| 84.3   | 90.3   | 82.5   | 86.5 NM_147198.2   |
| 80.3   | 87.3   | 90.6   | 81.6 NM_053284.2   |
| 77.7   | 79.3   | 78.5   | 78.3 NM_175575.4   |
| 123.2  | 106.4  | 106.7  | 92 NM_006005.2     |
| 122.5  | 138    | 136.2  | 149.4 XM_058720.7  |

|       |       |       |                      |
|-------|-------|-------|----------------------|
| 105.7 | 96    | 104.9 | 105 NM_001080435.1   |
| 90    | 88.4  | 93.5  | 96 NM_001042424.1    |
| 97.1  | 85.1  | 103.9 | 94.6 NM_133330.1     |
| 107.9 | 89.6  | 86.8  | 96.4 NM_007331.1     |
| 96.3  | 94.5  | 88    | 84.4 NM_133336.1     |
| 100.5 | 92.3  | 78.9  | 85 NM_133334.1       |
| 92    | 88.4  | 82.6  | 94.1 NM_023034.1     |
| 115.7 | 111.9 | 104.6 | 95.8 NM_023034.1     |
| 193.8 | 170.8 | 155.1 | 135.3 NM_017778.2    |
| 112.7 | 123.3 | 99.6  | 104.6 NM_005663.2    |
| 310.2 | 410.2 | 436.3 | 397.6 NM_032345.1    |
| 90.9  | 83.2  | 89.2  | 87.9 NM_007191.2     |
| 95    | 96.7  | 90.8  | 88.2 NM_001077269.1  |
| 149.1 | 133   | 133.9 | 158.2 NM_001077269.1 |
| 88.6  | 89.8  | 92.8  | 90.1 NM_001080529.1  |
| 117.3 | 151.1 | 146.9 | 145.4 NM_017983.3    |
| 271.8 | 269.8 | 294.2 | 194.5 NM_016003.3    |
| 98.9  | 91    | 91.2  | 95.9 NM_001033520.1  |
| 116.7 | 119.4 | 118   | 101 NM_133264.4      |
| 92.7  | 84.8  | 77.2  | 79.9 NM_080838.1     |
| 83.4  | 90.2  | 93.9  | 88.4 NM_003882.2     |
| 83.4  | 83.6  | 85.9  | 97.5 NM_003881.2     |
| 94    | 86.4  | 88.6  | 86.5 NM_198239.1     |
| 87    | 86.6  | 83.3  | 91.5 NM_003880.2     |
| 85.2  | 91.9  | 98.2  | 83.4 NM_130396.1     |
| 136.5 | 83.9  | 82.6  | 83.1 NM_015855.2     |
| 153.3 | 255.8 | 212.5 | 210.2 NM_018979.1    |
| 95.6  | 91.4  | 86.5  | 88.1 NM_006648.3     |
| 99    | 93.7  | 96.1  | 89.3 NM_020922.2     |
| 87.7  | 93.2  | 87.9  | 81.4 NM_001002838.1  |
| 105.7 | 98.5  | 88.2  | 92.8 NM_032387.3     |
| 93.4  | 80.7  | 86.9  | 88.5 NM_005430.2     |
| 96.6  | 89.9  | 85.7  | 87 NM_025216.2       |
| 92.7  | 90.2  | 83.3  | 79.6 NM_003394.2     |
| 94.3  | 88.2  | 82.7  | 89.7 NM_004626.2     |
| 105.5 | 112.9 | 103.1 | 102.2 NM_016087.2    |
| 97.4  | 90.2  | 85    | 100.2 NM_057168.1    |
| 93.7  | 96.2  | 85.2  | 97.5 NM_003391.1     |
| 103.4 | 90.6  | 95.4  | 88.1 NM_024494.1     |
| 97.8  | 82.9  | 89.2  | 94.4 NM_004185.2     |
| 170.1 | 206.5 | 224.4 | 142.5 NM_030753.3    |
| 95.1  | 80.1  | 83    | 89.5 NM_033131.2     |
| 90.6  | 80.2  | 77.5  | 89.5 NM_030761.3     |
| 82.8  | 86.6  | 87    | 86.8 NM_003392.3     |
| 106.1 | 100.8 | 92.9  | 94 NM_032642.2       |
| 80    | 84.1  | 86.4  | 83.6 NM_030775.2     |
| 101.1 | 99.7  | 94.1  | 94.1 NM_006522.3     |
| 89.8  | 86.1  | 87.8  | 83.9 NM_004625.3     |
| 103   | 115.2 | 114.2 | 105.4 NM_058238.1    |
| 93.7  | 90.5  | 89.4  | 93.4 NM_058244.1     |

|        |        |        |                       |
|--------|--------|--------|-----------------------|
| 100.6  | 88.6   | 86.5   | 88.1 NM_031933.1      |
| 85.5   | 86.4   | 78.9   | 82.2 NM_003393.2      |
| 96.4   | 97.4   | 80.1   | 100.1 NM_003395.1     |
| 86.9   | 77.3   | 78.6   | 87.8 NM_003396.1      |
| 274.6  | 208.6  | 215.1  | 198 NM_004627.2       |
| 640.8  | 474.4  | 499.9  | 322.3 NM_000553.2     |
| 154.3  | 140.9  | 118.5  | 127.1 NM_020135.2     |
| 1040.4 | 1051.6 | 875.5  | 1318.5 NM_130395.1    |
| 451.7  | 422.4  | 412.9  | 417.2 NM_134265.2     |
| 430.4  | 486.6  | 481.6  | 502.5 NM_134264.2     |
| 142.4  | 121.5  | 108.3  | 116.8 NM_018639.3     |
| 181.3  | 123.1  | 90.8   | 106.6 NM_000378.3     |
| 205.2  | 127.8  | 103    | 116.7 NM_024425.2     |
| 1310.4 | 1011.3 | 765.5  | 814.2 NM_004906.3     |
| 122.3  | 102    | 104.5  | 106.2 NM_152857.1     |
| 111.7  | 122    | 109.6  | 103.5 NM_152858.1     |
| 90.4   | 94.5   | 85.7   | 79.3 NM_001080436.1   |
| 119.5  | 104    | 96.5   | 97.2 XM_059037.7      |
| 187.3  | 181.4  | 171.6  | 133.2 NM_015238.1     |
| 102.1  | 98.7   | 98.3   | 87.8 NM_024949.4      |
| 143.9  | 162.7  | 148.8  | 156.4 NM_015691.2     |
| 96.1   | 85.6   | 88.9   | 84.9 NM_130791.1      |
| 128.4  | 101.9  | 105.8  | 103.7 NM_018560.4     |
| 82.5   | 73.7   | 71     | 75 NM_130844.1        |
| 129.3  | 102    | 104.9  | 92.5 NM_130844.1      |
| 102.1  | 94.9   | 90.7   | 94.8 NM_007013.3      |
| 79.8   | 80     | 78.9   | 89.6 NM_007014.3      |
| 124.8  | 109.8  | 99.5   | 101.4 NM_199424.1     |
| 277.2  | 230.3  | 224.4  | 150.4 NM_199423.1     |
| 77.1   | 90.5   | 86     | 90.6 NM_015472.3      |
| 1566.8 | 1113.6 | 901.8  | 855.6 NM_007266.1     |
| 712.5  | 501.2  | 355.2  | 416.4 NM_020196.2     |
| 330.7  | 300.5  | 319.6  | 271.8 NM_199139.1     |
| 113.8  | 118.9  | 109    | 119.3 NM_199139.1     |
| 87.6   | 93.8   | 85.1   | 92.6 NM_133431.1      |
| 303.9  | 234.5  | 230.9  | 207.9 NM_133431.1     |
| 85.5   | 80.9   | 86.6   | 90.9 NM_130777.1      |
| 86.8   | 91.6   | 86.7   | 84.2 NM_133179.1      |
| 82.1   | 88.9   | 79.1   | 91.6 NM_130776.1      |
| 88.3   | 81.9   | 78.6   | 80.1 NM_130775.1      |
| 3488.8 | 1872.3 | 1457   | 1483.7 NM_001079539.1 |
| 6122.5 | 3301.5 | 2911.6 | 2195.2 NM_005080.2    |
| 79.9   | 87.3   | 86.6   | 96.7 NM_002995.1      |
| 86.7   | 89     | 90.7   | 93.6 NM_005283.2      |
| 85.8   | 86.2   | 82.6   | 91.7 NM_001024644.1   |
| 115.8  | 112.3  | 102.4  | 108 NM_001024644.1    |
| 79.8   | 80     | 79.2   | 74.3 NM_000379.2      |
| 85.9   | 86.8   | 75.4   | 82.2 NM_175569.1      |
| 125.9  | 169.1  | 150.9  | 185.5 NM_021083.2     |
| 89.8   | 82.8   | 81.5   | 84.9 NM_175878.2      |

|        |        |        |                      |
|--------|--------|--------|----------------------|
| 85.9   | 81.5   | 75.2   | 80.7 NM_052898.1     |
| 81.4   | 84.5   | 81.2   | 93.3 NM_207411.2     |
| 96.8   | 81.7   | 79.8   | 90.8 NM_001012239.1  |
| 92.9   | 83.2   | 81.1   | 93.1 NM_173683.2     |
| 156.1  | 117.8  | 113.1  | 108.1 NM_001012239.1 |
| 89.2   | 86.9   | 87.9   | 83.9 NM_001011718.1  |
| 192.4  | 186.8  | 155.2  | 165 NM_018053.2      |
| 93.4   | 81.3   | 89.3   | 95.7 NM_001011720.1  |
| 81.5   | 85.2   | 80.4   | 85.2 NM_212559.1     |
| 83.3   | 83.4   | 73.2   | 88.5 NM_004677.2     |
| 102.1  | 93.9   | 92.4   | 86.6 NM_024782.1     |
| 81.8   | 84.8   | 81.2   | 90.1 NM_006691.2     |
| 97     | 92.9   | 81.5   | 88.1 NM_000380.2     |
| 612.9  | 795.2  | 711.1  | 666 NM_004628.3      |
| 1591.5 | 960.3  | 856.9  | 680.7 NM_020383.2    |
| 102.4  | 101.2  | 95.9   | 93.9 NM_003399.4     |
| 5966.6 | 5943.9 | 7951   | 8223.7 NM_022098.2   |
| 2643.3 | 2759.6 | 2031.5 | 2282.9 NM_003400.3   |
| 218.3  | 212.9  | 207    | 195.3 NM_022459.3    |
| 464.7  | 379.7  | 343.8  | 249.4 NM_020750.1    |
| 459.8  | 422.5  | 373.4  | 246.7 NM_015171.1    |
| 605.3  | 458.5  | 436.2  | 273.4 NM_015024.2    |
| 360.2  | 276.7  | 206.9  | 202.4 NM_007235.3    |
| 1007.8 | 1002.5 | 897    | 640.3 NM_004736.2    |
| 284.8  | 216.6  | 226.3  | 159.6 NM_006297.1    |
| 862.2  | 1108.8 | 1355.8 | 1666.2 NM_005431.1   |
| 263.8  | 177.8  | 160.5  | 157.9 NM_005432.2    |
| 88.5   | 81.1   | 84.3   | 86.6 NM_022406.1     |
| 443.8  | 369.4  | 329.8  | 280.4 NM_021141.2    |
| 3872.8 | 3008.9 | 2711.7 | 1938.3 NM_001469.3   |
| 94     | 97.4   | 97.6   | 102.8 NM_001042604.1 |
| 349.3  | 448.3  | 435.8  | 420.6 NM_019001.2    |
| 94.2   | 81     | 79.4   | 88 NM_012255.3       |
| 2063.3 | 900.5  | 748.3  | 530.6 NM_024096.1    |
| 82.2   | 78.3   | 82.7   | 79 NM_138568.2       |
| 113.5  | 115.2  | 109.8  | 121.9 NM_022166.2    |
| 426.6  | 445.9  | 431    | 336.6 NM_022167.1    |
| 117.6  | 108.9  | 100.9  | 96.3 NM_001012424.1  |
| 90.4   | 80.8   | 87.6   | 95.7 NM_005748.3     |
| 129.2  | 125.1  | 120.5  | 107.2 NM_001012424.1 |
| 107.3  | 103.6  | 85.4   | 90.8 NM_006106.2     |
| 2244.7 | 1488.2 | 1489.1 | 914 NM_003680.2      |
| 440.5  | 396.4  | 301.6  | 327.1 NM_015936.1    |
| 5238.1 | 5338.1 | 6628.6 | 4154.4 NM_004559.3   |
| 92.7   | 84.1   | 99.6   | 96.3 NM_015982.1     |
| 318.3  | 556.8  | 458.8  | 400 NM_018023.3      |
| 573.6  | 486.2  | 389.2  | 553.4 NM_006530.2    |
| 234.7  | 161.3  | 184.8  | 194.7 NM_005433.3    |
| 476.8  | 337.7  | 365.7  | 173.4 NM_020470.1    |
| 136.5  | 102.6  | 118    | 112.3 NM_001031731.1 |

|         |        |        |        |                |
|---------|--------|--------|--------|----------------|
| 452.9   | 332.1  | 307.9  | 281.3  | NM_033557.1    |
| 592.2   | 379.9  | 331.3  | 321.8  | NM_001039673.1 |
| 501.1   | 467.2  | 403.9  | 423.5  | NM_018982.3    |
| 114.1   | 104.7  | 91     | 98.6   | NM_024029.3    |
| 797.1   | 547.6  | 561.1  | 352.4  | NM_015388.2    |
| 90.8    | 84.1   | 88.2   | 87.4   | NM_032312.2    |
| 150.4   | 129.8  | 107.7  | 127.8  | NM_030799.6    |
| 89.5    | 97.8   | 94.4   | 94.1   | NM_001024947.1 |
| 676.4   | 785.9  | 814    | 540.1  | NM_173834.2    |
| 80.4    | 80.3   | 84.7   | 80.8   | NM_006555.3    |
| 1052.1  | 680.6  | 500    | 544.7  | NM_139313.1    |
| 89.6    | 90.1   | 90.8   | 84.6   | NM_018566.3    |
| 109.4   | 137    | 140.8  | 119.3  | NM_013313.3    |
| 165.1   | 173.7  | 171    | 163.6  | NM_001005404.3 |
| 125.7   | 118.5  | 121.9  | 116.2  | NM_031477.3    |
| 88.5    | 88     | 88.2   | 92.8   | NM_145008.1    |
| 356.7   | 476.9  | 498.6  | 533.1  | NM_016061.1    |
| 339.8   | 333.5  | 302.6  | 232.5  | NM_024640.3    |
| 89.6    | 76.4   | 84.2   | 89     | NM_025052.3    |
| 83.2    | 79.4   | 76.7   | 99.3   | NM_001018046.1 |
| 91.8    | 100.9  | 90.7   | 91.4   | NM_001018046.1 |
| 96.9    | 88     | 88.1   | 89.5   | NM_001031732.1 |
| 127     | 110.7  | 101.5  | 100.5  | NM_133370.1    |
| 2650.4  | 2385.1 | 1985.4 | 2061.7 | NM_001031732.1 |
| 138.8   | 161.3  | 135.8  | 157    | NM_022828.2    |
| 922.9   | 643.7  | 634.6  | 475.5  | NM_017798.2    |
| 861.4   | 650.9  | 564.6  | 649.8  | NM_016258.1    |
| 228.2   | 186.9  | 161    | 163.4  | NM_152758.3    |
| 11115.5 | 7975.5 | 7584.2 | 6921.6 | NM_139323.2    |
| 384.7   | 288.1  | 292    | 232.7  | NM_003404.3    |
| 289.6   | 187.4  | 186.4  | 179.2  | NM_006761.3    |
| 1040.8  | 1022.1 | 556.6  | 767    | NM_012479.2    |
| 9094.3  | 7299.7 | 5951.7 | 5223.1 | NM_003405.3    |
| 8464    | 6217.6 | 5249.3 | 4175.7 | NM_006826.2    |
| 8339    | 6330.5 | 4263.6 | 4350.6 | NM_003406.2    |
| 226.9   | 177.7  | 124.3  | 162.9  | NM_003406.2    |
| 457.2   | 312.2  | 283.2  | 311.6  | NM_003403.3    |
| 1121.2  | 977.1  | 953.2  | 595.5  | NM_139119.1    |
| 96.4    | 94.9   | 89     | 99     | NM_206923.1    |
| 3256.5  | 2398   | 2021   | 1728.1 | NM_006007.1    |
| 170.6   | 184.2  | 243.5  | 217.7  | NM_152444.1    |
| 287.2   | 379.1  | 393.9  | 278.4  | NM_175907.3    |
| 179.9   | 128    | 117.8  | 115.5  | NM_016653.1    |
| 1238.5  | 664.3  | 576.2  | 430.9  | NM_133646.1    |
| 87.7    | 92.5   | 83.5   | 95.3   | NM_003386.1    |
| 109.1   | 88.3   | 85.5   | 92.4   | NM_173055.1    |
| 93.2    | 87.6   | 75.9   | 96.4   | NM_003386.1    |
| 89.6    | 89.7   | 96.8   | 88     | NM_207519.1    |
| 98.1    | 88.3   | 85.9   | 91.9   | NM_207519.1    |
| 87.2    | 80.3   | 81.1   | 83.4   | NM_001079.3    |

|        |        |        |                      |
|--------|--------|--------|----------------------|
| 95.6   | 85.4   | 83.5   | 92.9 NM_175619.1     |
| 1210   | 1795   | 1695.7 | 1184 NM_004729.3     |
| 87.2   | 84.3   | 76.2   | 82.9 NM_024508.3     |
| 75.7   | 78.9   | 82.2   | 85.2 NM_032367.1     |
| 430.8  | 482.8  | 428.1  | 376.5 NM_014838.1    |
| 267    | 282.1  | 205.1  | 189.8 NM_021211.2    |
| 183    | 136.9  | 139.9  | 120.5 NM_030776.1    |
| 100.2  | 87.4   | 94.4   | 102.3 NM_014950.1    |
| 94.7   | 97     | 95.1   | 98 NM_023929.2       |
| 100.7  | 99.8   | 92.5   | 107.6 NM_014415.1    |
| 91.4   | 99.7   | 100.3  | 100.4 NM_181842.1    |
| 80.8   | 84.8   | 87.1   | 85.1 NM_001018011.1  |
| 100.1  | 97     | 97.5   | 96.8 NM_006006.4     |
| 86.9   | 84.2   | 82.9   | 82.3 NM_006006.4     |
| 272.6  | 278.9  | 242.2  | 207.4 NM_003443.1    |
| 107    | 109.2  | 99.8   | 107.2 NM_020861.1    |
| 104.7  | 160.7  | 175.6  | 143.8 NM_015642.2    |
| 338.2  | 332.5  | 315.4  | 220.5 NM_014797.1    |
| 151.8  | 120.8  | 126.2  | 140.1 NM_006977.2    |
| 93.6   | 85.6   | 96.1   | 79.8 NM_020924.2     |
| 129.2  | 113.2  | 97.2   | 101 NM_024784.2      |
| 107.1  | 109.3  | 101    | 106.3 NM_014383.1    |
| 1771.4 | 1856.4 | 1695.7 | 1321.4 NM_006777.3   |
| 80.3   | 88.1   | 88.1   | 83.8 NM_032522.2     |
| 91.7   | 93.8   | 78.9   | 80.8 NM_001080412.1  |
| 142.4  | 110.9  | 116.1  | 99.9 NM_014830.1     |
| 383    | 462.3  | 357.2  | 434.3 NM_020899.2    |
| 229.6  | 334.9  | 357.4  | 208.9 NM_014870.2    |
| 106.9  | 98.1   | 97.1   | 98.8 NM_194314.2     |
| 126.4  | 101.8  | 119.8  | 114.5 NM_014155.3    |
| 229.5  | 189.1  | 159.5  | 174.1 NM_014872.1    |
| 77.2   | 83.8   | 75.7   | 80.2 NM_015898.2     |
| 113.3  | 101.7  | 91.9   | 102.5 NM_015872.1    |
| 89.2   | 93.8   | 87.4   | 94.3 NM_144621.2     |
| 111.8  | 95.7   | 97.6   | 100.4 NM_001040441.1 |
| 120    | 126    | 103    | 110.7 NM_178547.2    |
| 346.8  | 289    | 208.1  | 218.2 NM_152735.3    |
| 155.1  | 163.1  | 139.6  | 141.8 NM_032786.1    |
| 85.8   | 83.2   | 85.2   | 85.1 NM_014827.3     |
| 159    | 142.9  | 137.8  | 149.3 NM_025079.1    |
| 117.3  | 95.4   | 100.9  | 100.3 NM_001010888.1 |
| 336    | 382.3  | 284.6  | 287.9 NM_207660.2    |
| 615.3  | 447.9  | 224.5  | 371.5 NM_018471.2    |
| 951.9  | 646    | 623.6  | 399.5 NM_015117.1    |
| 132.9  | 126.5  | 108    | 122.1 NM_198581.1    |
| 103.9  | 99.3   | 95.2   | 88.5 NM_014153.2     |
| 91.4   | 89     | 85.2   | 82.2 NM_017590.4     |
| 137.9  | 123.7  | 102.8  | 107.3 NM_032494.1    |
| 167.7  | 111    | 99.9   | 108.7 NM_024625.3    |
| 166.3  | 143.6  | 113.3  | 124.9 NM_024625.3    |

|        |        |        |                      |
|--------|--------|--------|----------------------|
| 1378.3 | 889.5  | 945    | 516.1 NM_020119.3    |
| 86.4   | 85.7   | 91.6   | 88.5 NM_080660.2     |
| 1834.5 | 1103.2 | 1140.7 | 828.9 NM_016478.3    |
| 103    | 95.7   | 96.8   | 95.5 NM_017665.1     |
| 240.9  | 335.4  | 265.1  | 238.4 NM_001009881.1 |
| 144.8  | 183.6  | 146.5  | 147.3 NM_015269.1    |
| 86.2   | 82.8   | 89.3   | 88.8 NM_173798.2     |
| 73.1   | 83.6   | 78.8   | 80.1 NM_203303.1     |
| 353.6  | 401.7  | 360.4  | 308.4 NM_015144.1    |
| 95.1   | 78.7   | 84     | 87.5 NM_001004308.1  |
| 882.9  | 902.5  | 699.3  | 683.4 NM_016505.2    |
| 92.4   | 93.2   | 86.3   | 93.4 NM_017742.3     |
| 340.5  | 321.9  | 253.6  | 259.3 NM_033089.6    |
| 119.3  | 109.4  | 93.6   | 100.6 NM_152694.1    |
| 100.8  | 109.9  | 99     | 98.9 NM_024617.2     |
| 1020.4 | 780.8  | 757.8  | 693.1 NM_032226.1    |
| 379.3  | 476.4  | 407    | 382.9 NM_017612.2    |
| 1456.9 | 1798.4 | 1315.9 | 1293.6 NM_032280.1   |
| 2167.7 | 1171.4 | 1097.6 | 1001.4 NM_018464.2   |
| 178.4  | 159.4  | 166.4  | 143.5 NM_033114.3    |
| 330.2  | 237.7  | 209    | 219.2 NM_206831.1    |
| 406.5  | 242.1  | 211.2  | 296.8 NM_181706.3    |
| 171.2  | 233    | 275    | 147 NM_017984.2      |
| 109    | 160.9  | 139.4  | 136.4 NM_001040432.1 |
| 78.8   | 76.1   | 80.2   | 81.3 NM_033317.2     |
| 90.6   | 75.7   | 78.1   | 89.9 NM_033317.2     |
| 96.3   | 96.3   | 87.8   | 85.8 NM_033317.2     |
| 157    | 107.2  | 106    | 91.5 NM_013304.1     |
| 111.5  | 164.1  | 164.9  | 134.5 NM_024786.1    |
| 92.7   | 97.4   | 94.2   | 103.4 XM_940764.1    |
| 388.8  | 310.1  | 256.5  | 304 NM_032799.4      |
| 416.2  | 342.4  | 273.5  | 274.6 NM_001001483.1 |
| 177.2  | 166.3  | 138    | 138.7 NM_001001483.1 |
| 131.6  | 109.7  | 103.2  | 98.2 NM_019028.2     |
| 183.4  | 221.3  | 217.6  | 174.6 NM_024630.2    |
| 76.1   | 82.6   | 79.4   | 83.4 NM_144969.1     |
| 387    | 287.7  | 232.9  | 213.9 NM_032327.2    |
| 97.1   | 97     | 97.1   | 81.1 NM_198046.1     |
| 1338.3 | 932.2  | 939.1  | 594.5 NM_198044.1    |
| 242.4  | 243.2  | 254.2  | 268.1 NM_015336.1    |
| 146.7  | 141.7  | 106.8  | 122.7 NM_032283.1    |
| 98     | 99.2   | 106.8  | 99.5 NM_144637.2     |
| 103.9  | 104.6  | 101.4  | 110.8 NM_016353.2    |
| 104.1  | 112.3  | 106.2  | 94.9 NM_153251.2     |
| 84.8   | 81.2   | 90.5   | 90.5 NM_178566.2     |
| 77.3   | 87.2   | 86.8   | 91.2 NM_174976.1     |
| 109.2  | 116.8  | 109.7  | 92.4 NM_173570.2     |
| 121.2  | 110.6  | 99.4   | 102.1 NM_207340.1    |
| 282.5  | 300    | 215.6  | 248.9 NM_016598.1    |
| 85.9   | 86     | 85.6   | 89.1 NM_018106.2     |



|        |        |        |                      |
|--------|--------|--------|----------------------|
| 420.1  | 467    | 443.1  | 316.7 NM_015457.2    |
| 1456.3 | 721.8  | 530.8  | 692.6 NM_022494.1    |
| 743.2  | 697.7  | 730    | 521.1 NM_017740.1    |
| 1672.2 | 2012   | 2464.9 | 987.1 NM_013373.2    |
| 655.5  | 350.8  | 359.8  | 202.5 NM_016032.2    |
| 92.5   | 99.5   | 97.7   | 94.5 NM_001008222.1  |
| 103.2  | 94.2   | 85.2   | 98.1 NM_016032.2     |
| 284.5  | 285.1  | 246.1  | 198.7 NM_021212.1    |
| 269.2  | 225.7  | 197.7  | 179.5 NM_024699.1    |
| 600.8  | 540.6  | 537.2  | 321.2 NM_182491.1    |
| 597.6  | 548.9  | 550.6  | 328.3 NM_138802.1    |
| 200.8  | 281.3  | 243.7  | 215.3 NM_021943.1    |
| 168    | 184.1  | 154    | 170.6 NM_019006.2    |
| 687.9  | 703.5  | 579.3  | 894.4 NM_014795.2    |
| 95.3   | 83     | 79.5   | 81.2 NM_024721.2     |
| 98.2   | 96.4   | 96.9   | 98.4 NM_153688.2     |
| 622.4  | 1188.2 | 844.8  | 806.1 NM_022473.1    |
| 323.8  | 362.6  | 311.6  | 251.3 NM_003409.2    |
| 146.9  | 150.8  | 149.9  | 141 NM_030613.2      |
| 318.9  | 323.4  | 291.6  | 224.9 NM_001012756.1 |
| 107.8  | 103.5  | 100.9  | 92.7 NM_020828.1     |
| 183.9  | 166.5  | 173.4  | 160.7 NM_153018.1    |
| 968.4  | 756.8  | 816    | 281.5 NM_003407.1    |
| 93.6   | 93.7   | 89.2   | 92.3 NM_004926.2     |
| 678.5  | 665    | 530.5  | 453.6 NM_006887.3    |
| 87.6   | 80.3   | 90.2   | 87 NM_003408.1       |
| 96.7   | 95     | 95.4   | 89.8 NM_173832.3     |
| 87.8   | 88.5   | 90.9   | 87.6 XM_944871.1     |
| 92.4   | 87.4   | 91.2   | 91.2 NM_174900.2     |
| 129    | 111.8  | 108.8  | 106.3 NM_199427.1    |
| 113.2  | 115.1  | 110.9  | 118.3 NM_199426.1    |
| 656.1  | 511.1  | 527.9  | 336.7 NM_133458.1    |
| 2598.2 | 2948.4 | 2331.7 | 2355.5 NM_053023.2   |
| 132.7  | 161.6  | 152.3  | 146.8 NM_170768.1    |
| 99.6   | 93.9   | 92.1   | 95.2 NM_145102.1     |
| 85.2   | 84.7   | 85.1   | 79.4 NM_014569.2     |
| 130.1  | 136.3  | 130.8  | 118.2 NM_014569.2    |
| 140.8  | 135.9  | 115.7  | 126.2 NM_006782.3    |
| 271.6  | 205.7  | 189.9  | 214.6 NM_153813.1    |
| 78.3   | 74.8   | 78.7   | 82.3 NM_012082.2     |
| 1138.1 | 636.2  | 635    | 441.9 NM_016107.3    |
| 133.1  | 130.8  | 122    | 143.9 NM_003410.2    |
| 175.7  | 152.1  | 145    | 161.3 NM_003411.2    |
| 101.6  | 103.1  | 98.6   | 93.2 NM_021260.1     |
| 106.6  | 100.7  | 97.8   | 94.9 NM_021260.1     |
| 158    | 152.8  | 167.2  | 134.1 NM_014733.2    |
| 352.5  | 467.9  | 415.4  | 406.1 NM_032850.3    |
| 668.5  | 698.3  | 715.4  | 499.9 NM_022340.2    |
| 852.3  | 612.3  | 583.4  | 493.6 NM_024071.2    |
| 319.7  | 487.6  | 478.3  | 301.9 NM_015346.2    |

|         |        |        |                      |
|---------|--------|--------|----------------------|
| 96      | 86.6   | 77.1   | 87.9 NM_001002262.1  |
| 129.5   | 106    | 115.1  | 114 NM_144588.4      |
| 82.3    | 81.7   | 76.6   | 87.1 NM_020972.1     |
| 101.4   | 103.1  | 94.3   | 92.1 NM_007323.1     |
| 97.3    | 82.5   | 82.7   | 86.9 NM_007323.1     |
| 87.7    | 95.6   | 87.8   | 98.1 NM_007324.2     |
| 90      | 96.3   | 95.9   | 93.2 NM_004799.2     |
| 103.4   | 108.5  | 105.6  | 98.7 NM_181485.1     |
| 88.7    | 86     | 87.9   | 92.1 NM_032527.2     |
| 545.6   | 465.8  | 474.8  | 253.5 NM_032527.2    |
| 114.8   | 101.5  | 105.9  | 102.1 NM_181484.1    |
| 172.3   | 139.9  | 129.8  | 147.6 NM_007222.3    |
| 92      | 87.3   | 95.2   | 101.3 NM_001017926.1 |
| 145.7   | 127    | 111.4  | 106.7 NM_007222.3    |
| 143.7   | 159.4  | 161.8  | 117.2 NM_014943.3    |
| 126.5   | 155.5  | 168.7  | 119.3 NM_015035.3    |
| 85.2    | 90.8   | 83.4   | 84 NM_003412.3       |
| 1579.1  | 1099.3 | 897.4  | 762.4 NM_007129.2    |
| 89.4    | 76.4   | 76.8   | 77.8 NM_003413.2     |
| 89.9    | 84     | 80.4   | 84.2 NM_032153.3     |
| 102.3   | 93.3   | 93.7   | 97.5 NM_033132.2     |
| 85.8    | 74.9   | 77.9   | 88 NM_001010879.1    |
| 83.4    | 78.5   | 71.2   | 84.7 NM_015363.3     |
| 81.3    | 83.6   | 83.9   | 81 NM_052882.1       |
| 113.2   | 117.6  | 102.1  | 121.9 NM_003439.1    |
| 103     | 100.1  | 95.9   | 103.8 NM_001011656.1 |
| 87.7    | 92.9   | 92.6   | 91.1 NM_032441.1     |
| 96.8    | 85.7   | 81.3   | 84.4 NM_032441.1     |
| 1058.9  | 1012.5 | 797.9  | 514.9 NM_144723.1    |
| 2334.5  | 2454   | 2887.7 | 2769.5 NM_152240.1   |
| 89.7    | 85.9   | 93.5   | 91 NM_019103.2       |
| 249.2   | 188    | 175.4  | 144.9 NM_019103.2    |
| 117.8   | 119.3  | 111.8  | 123.2 NM_174929.2    |
| 11254.4 | 8743.1 | 7481.4 | 6386.8 NM_005857.2   |
| 320     | 301.1  | 324.2  | 244.7 NM_024772.2    |
| 95.9    | 79.5   | 77.2   | 92 NM_005096.2       |
| 149.7   | 184.6  | 164    | 164.3 NM_005096.2    |
| 103.1   | 103.8  | 99.4   | 93.3 NM_201599.1     |
| 408     | 704    | 689    | 663 NM_005095.2      |
| 141     | 144.7  | 133.4  | 132.1 NM_014242.1    |
| 131     | 142.1  | 142.5  | 132.9 NM_001039649.1 |
| 103.9   | 95     | 101.4  | 95.5 NM_007167.3     |
| 99.1    | 97.9   | 95.6   | 95.8 NM_015896.2     |
| 116.5   | 97.7   | 94.4   | 100.9 NM_212479.1    |
| 94.5    | 89     | 95     | 99 NM_212479.1       |
| 103.3   | 137.2  | 127.7  | 97.6 NM_032257.3     |
| 82.9    | 85.6   | 78.5   | 88.4 NM_032265.1     |
| 93.3    | 97.8   | 109.6  | 105 NM_001024593.1   |
| 1323.5  | 1070.5 | 968.1  | 555.6 NM_138462.2    |
| 135.8   | 169.3  | 148.6  | 154.2 NM_183048.1    |

|        |        |        |                      |
|--------|--------|--------|----------------------|
| 148.3  | 134    | 127.8  | 128.2 NM_015394.4    |
| 92.2   | 81.8   | 89.4   | 89.9 NM_173531.1     |
| 164.1  | 132.2  | 133.5  | 125.4 NM_033204.2    |
| 115.4  | 102.5  | 100.6  | 94.7 NM_153608.1     |
| 86.5   | 83.3   | 84.3   | 91.8 NM_024498.1     |
| 176.3  | 215.3  | 186.6  | 207.1 NM_006955.1    |
| 118.9  | 137.6  | 120    | 167.2 NM_016265.2    |
| 86.7   | 93.1   | 84.8   | 88.2 NM_001008727.1  |
| 117.9  | 106.8  | 103.1  | 102.6 NM_003431.2    |
| 85.5   | 84     | 83.3   | 89.6 NM_003432.1     |
| 99.9   | 90.6   | 80.4   | 87.4 NM_003433.2     |
| 147.3  | 182.7  | 179.6  | 162.4 NM_003434.3    |
| 178    | 142.1  | 142.3  | 109.5 NM_003435.2    |
| 80.7   | 83     | 84.1   | 96 NM_003436.2       |
| 130    | 103.9  | 99.5   | 110.8 XM_936978.1    |
| 157.8  | 139    | 114.7  | 119 NM_003437.2      |
| 98.6   | 114.6  | 124.1  | 107.6 NM_003438.1    |
| 92.1   | 83.6   | 82.6   | 86.7 NM_021030.2     |
| 102.8  | 109.4  | 102.8  | 100.6 NM_003440.2    |
| 94.2   | 88.4   | 79.8   | 97.8 NM_003441.1     |
| 212    | 176.1  | 194.4  | 140.9 NM_005081.2    |
| 377    | 343.9  | 260.1  | 325.8 NM_003442.3    |
| 784.8  | 593    | 471.8  | 548.6 NM_007145.1    |
| 1349.4 | 1437.3 | 1249.6 | 1032.6 NM_021964.1   |
| 105    | 87.9   | 91.7   | 86.7 NM_198089.1     |
| 96.4   | 93.2   | 85.7   | 91 NM_003445.2       |
| 98     | 91.3   | 82.5   | 94.6 NM_198089.1     |
| 78.3   | 80.8   | 84.9   | 79.5 NM_003446.2     |
| 205.2  | 173.9  | 152.3  | 125.4 NM_006958.2    |
| 92.1   | 87.1   | 86     | 88 NM_001029976.1    |
| 154.8  | 125    | 107.9  | 114.7 NM_001029976.1 |
| 169.3  | 215.6  | 194.7  | 186.1 NM_033288.2    |
| 101.2  | 106.2  | 105.2  | 108.5 NM_198893.1    |
| 215.2  | 347.6  | 432.1  | 282 NM_033288.2      |
| 848.4  | 1022.4 | 983.8  | 599.6 NM_007146.2    |
| 125.5  | 104.4  | 104.2  | 106 NM_003447.2      |
| 98.6   | 96     | 102.9  | 91.6 NM_018651.2     |
| 87.2   | 85.1   | 79.7   | 88.6 NM_025169.1     |
| 93.4   | 86.5   | 85.5   | 87.1 NM_025169.1     |
| 128.9  | 119.7  | 124.1  | 111.6 NM_194320.1    |
| 307.7  | 249.8  | 212.3  | 190.1 NM_006959.1    |
| 111.4  | 107.4  | 103.4  | 97.5 NM_001032292.1  |
| 143    | 131.1  | 124.8  | 118.8 NM_003450.1    |
| 103.5  | 102    | 96     | 98.4 NM_001032292.1  |
| 255.7  | 186    | 188.9  | 169.6 NM_007147.2    |
| 257.3  | 268.4  | 243.8  | 246.1 NM_003451.1    |
| 111.8  | 103.8  | 98.2   | 103 NM_007148.2      |
| 176.1  | 190.5  | 158.5  | 166.4 NM_144680.2    |
| 95.7   | 107.6  | 106.2  | 102.4 NM_001029997.1 |
| 294.4  | 347.8  | 277.7  | 310.8 NM_001007088.1 |

|        |        |        |                      |
|--------|--------|--------|----------------------|
| 102.6  | 97.1   | 92.6   | 109.9 NM_007149.1    |
| 91.2   | 94.4   | 81.3   | 86.6 NM_007151.1     |
| 111.1  | 119.2  | 121    | 112.8 NM_001023560.1 |
| 539.2  | 380.1  | 353.5  | 341 NM_003452.2      |
| 82.1   | 93.7   | 94.7   | 98.7 NM_197977.1     |
| 84     | 84.2   | 85     | 82.2 NM_006961.2     |
| 100.7  | 88.8   | 90.8   | 86.4 NM_006298.2     |
| 189    | 186    | 160.8  | 163.5 NM_006299.2    |
| 500.9  | 356.5  | 266.1  | 346.7 NM_007152.1    |
| 178.6  | 156.3  | 145.7  | 129.7 NM_006991.3    |
| 97.8   | 94.4   | 88.6   | 93.6 NM_001024855.1  |
| 153.6  | 152.2  | 145.7  | 135.1 NM_001024855.1 |
| 169.1  | 156.8  | 170.6  | 138.1 NM_021088.2    |
| 83.7   | 100.1  | 83.2   | 93.9 NM_021088.2     |
| 241.4  | 204    | 204.1  | 156 NM_021143.1      |
| 99.2   | 95.3   | 78.4   | 79.2 NM_003454.2     |
| 184.8  | 153.4  | 145.2  | 133.2 NM_198088.1    |
| 503.6  | 446.2  | 373.9  | 330.5 NM_198088.1    |
| 186.9  | 115.3  | 105.8  | 104.7 NM_003455.2    |
| 83.4   | 88.6   | 90.2   | 84.8 NR_002722.1     |
| 91.6   | 89.3   | 91.4   | 83.2 NM_001042428.1  |
| 115.8  | 108.7  | 92.8   | 98.7 NM_001031686.1  |
| 92.6   | 85.3   | 89.3   | 86 NM_032805.1       |
| 3378.5 | 1628.6 | 1520.5 | 1317.1 NM_003457.2   |
| 3004.5 | 1918.7 | 1947.3 | 1497.6 NM_003457.2   |
| 83.9   | 81.5   | 76.7   | 86.4 NM_007153.1     |
| 85.9   | 102.1  | 85.4   | 92.2 NM_006962.1     |
| 230.5  | 210.6  | 217.3  | 178.4 NM_006385.2    |
| 237.1  | 242.2  | 260    | 202.8 NM_012256.2    |
| 322.6  | 210.3  | 200.1  | 135.1 NM_004220.1    |
| 91.2   | 85.1   | 78.1   | 84.7 NM_013249.1     |
| 130.1  | 111.7  | 108.3  | 106.5 NM_013250.1    |
| 828.7  | 833.5  | 668.8  | 685.3 NM_006526.2    |
| 97.3   | 90.5   | 83.4   | 96.5 NM_173485.2     |
| 164.9  | 142.5  | 123.1  | 129.1 NM_016423.1    |
| 876    | 682.6  | 658.6  | 599 NM_006963.3      |
| 85.7   | 77.8   | 70     | 82.7 NM_013359.1     |
| 107.3  | 92.4   | 88.7   | 102.2 NM_013360.1    |
| 251.1  | 348.2  | 450.3  | 275.4 NM_013361.2    |
| 152.8  | 144    | 155.6  | 135.8 NM_013398.1    |
| 176.6  | 152.5  | 138.1  | 151.7 NM_013362.1    |
| 97.4   | 105.6  | 98.5   | 100.6 NM_001032374.1 |
| 110.7  | 107.2  | 106.9  | 112.2 NM_015919.3    |
| 123.7  | 125.6  | 105.4  | 122.6 NM_182490.1    |
| 95.7   | 90.9   | 88.8   | 87.9 NM_013380.2     |
| 94.2   | 82.2   | 78.7   | 78.3 NM_014518.1     |
| 107    | 87.3   | 96.1   | 84.3 NM_145911.1     |
| 186.6  | 175.4  | 153.1  | 173.9 NM_006300.2    |
| 132.3  | 88.8   | 91.7   | 79.5 NM_014519.2     |
| 90.6   | 83.7   | 82.1   | 93.1 NM_181756.1     |

|       |       |       |                      |
|-------|-------|-------|----------------------|
| 198.5 | 197.6 | 195.8 | 154.7 NM_006630.1    |
| 178.2 | 157.3 | 152.8 | 158.5 NM_004234.3    |
| 136.8 | 131.5 | 142.4 | 114.8 NM_007345.1    |
| 95.1  | 98.5  | 92.8  | 108.5 NM_205768.1    |
| 88.5  | 79.2  | 82.4  | 79.4 NM_205768.1     |
| 103.7 | 109.5 | 97.8  | 92.5 NM_006352.3     |
| 234.2 | 159.6 | 139.9 | 133.3 NM_005674.1    |
| 161.7 | 153.6 | 125.8 | 140.9 NM_006965.1    |
| 103.4 | 96.5  | 95    | 90.9 NM_021045.1     |
| 359.3 | 349.9 | 300.5 | 243.5 NM_145011.2    |
| 234.3 | 207.9 | 195.4 | 161.2 NM_021061.1    |
| 100.5 | 79.1  | 76.7  | 85.3 NM_021047.1     |
| 143.1 | 141.3 | 118.2 | 132 NM_004876.2      |
| 142.1 | 121.5 | 109.7 | 109.2 NM_005773.2    |
| 81.5  | 87.8  | 81.1  | 90.1 NM_033468.1     |
| 226.4 | 193.1 | 136.8 | 175.5 NM_003904.3    |
| 336.4 | 317.3 | 307.5 | 232.9 NM_019591.2    |
| 526.9 | 368.6 | 422.6 | 315.5 NM_005741.3    |
| 178.9 | 157.4 | 200.2 | 138.6 NM_003417.2    |
| 222.1 | 287.9 | 251.3 | 213 NM_005455.3      |
| 637.6 | 690.7 | 546.9 | 563.8 NM_005455.3    |
| 192.9 | 195.5 | 173.1 | 163.8 NM_198058.1    |
| 130.3 | 130.3 | 108.2 | 149.1 NM_006631.2    |
| 100.6 | 111.9 | 92.4  | 111.1 NM_006631.2    |
| 72.6  | 75.7  | 74.9  | 77.2 NM_003414.3     |
| 92.7  | 90.4  | 79.9  | 91.1 NM_003415.1     |
| 94.6  | 87.1  | 89.5  | 87.6 NM_152943.1     |
| 215   | 298.3 | 245.6 | 236.9 NM_006629.3    |
| 136.6 | 122   | 118.6 | 137.1 NM_021148.1    |
| 98.3  | 98.2  | 94.4  | 91.1 NM_021148.1     |
| 934.7 | 708.9 | 620.5 | 522 NM_016324.2      |
| 110.8 | 97.2  | 97.8  | 99.1 NM_133502.1     |
| 272.8 | 186.3 | 156.9 | 143.5 NM_016324.2    |
| 427.9 | 520.5 | 478   | 349.9 NM_001080485.1 |
| 93.4  | 92.6  | 89.5  | 90.2 NM_001080485.1  |
| 105.3 | 89.3  | 95.9  | 95.2 NM_152287.2     |
| 787.2 | 814.5 | 789.7 | 609.9 NM_021994.1    |
| 118.7 | 100.6 | 99.2  | 108.6 NM_032051.1    |
| 79.9  | 79.9  | 72.3  | 86.2 NM_014323.2     |
| 87.6  | 89.7  | 80.8  | 95.9 NM_006969.2     |
| 81.4  | 83.3  | 78.3  | 83.8 NM_001037813.1  |
| 158.8 | 128.7 | 110.6 | 109.3 NM_152354.2    |
| 146.9 | 124.5 | 121.3 | 127 NM_020652.1      |
| 85.1  | 82    | 73.3  | 83.2 NM_020653.1     |
| 303.6 | 263.8 | 278.2 | 171.3 NM_032389.3    |
| 138.2 | 181.3 | 153.4 | 150.8 NM_020843.1    |
| 105.3 | 94.3  | 101.2 | 104 NM_015565.1      |
| 227.7 | 257.5 | 220.3 | 255.1 NM_020727.3    |
| 234.7 | 307.1 | 294.8 | 226.7 NM_014007.2    |
| 135.8 | 147.3 | 122.6 | 129.3 NM_017715.2    |

|        |        |        |                      |
|--------|--------|--------|----------------------|
| 139.5  | 128.1  | 129.6  | 134.3 NM_017715.2    |
| 130.1  | 107.9  | 104.3  | 96.3 NM_032924.2     |
| 101.2  | 105.7  | 94.9   | 98.3 NM_017715.2     |
| 142.2  | 178.1  | 153    | 156.1 NM_194325.1    |
| 83.6   | 88.3   | 70.7   | 80.7 NM_052860.1     |
| 89.7   | 86.1   | 82.9   | 89.6 NM_001012320.1  |
| 111.9  | 94.3   | 104.2  | 100.6 NM_020657.1    |
| 148.1  | 115.8  | 107.6  | 120 NM_024493.1      |
| 174.9  | 206.4  | 190.3  | 140.9 NM_019110.3    |
| 92.4   | 95.6   | 81.1   | 87.9 NM_145238.2     |
| 101.8  | 115.1  | 112    | 110.3 NM_001010877.2 |
| 75.3   | 83.1   | 74.9   | 85.1 NM_018008.2     |
| 1039.9 | 1012.4 | 1096.7 | 759.8 NM_018683.3    |
| 293.9  | 216.1  | 206.3  | 153.2 NM_020933.2    |
| 163    | 219.6  | 186.2  | 229.7 NM_014345.2    |
| 393.5  | 302.6  | 282.9  | 207.9 NM_020807.1    |
| 94.6   | 83.7   | 88.6   | 89.6 NM_001005368.1  |
| 215.7  | 168.5  | 169.8  | 152.7 NM_006973.2    |
| 185.7  | 146.2  | 132.4  | 135.4 NM_006973.2    |
| 97.8   | 105.7  | 90.6   | 86.6 NM_207333.2     |
| 92.5   | 96.9   | 81     | 82.9 NM_024639.2     |
| 91.8   | 92.4   | 75.7   | 77.7 NM_199005.1     |
| 112.4  | 114    | 104.6  | 131.3 NM_145909.1    |
| 92.3   | 88.8   | 92     | 92.3 NM_030899.2     |
| 246.5  | 238    | 199.7  | 227.9 NM_014347.1    |
| 107.8  | 113.5  | 89.1   | 85.4 NM_182976.1     |
| 97.6   | 92.7   | 88.5   | 89.9 NM_181781.2     |
| 142.2  | 137.3  | 135    | 117.4 NM_182975.1    |
| 265.5  | 163    | 161    | 152.6 NM_024620.3    |
| 251.5  | 182.9  | 178.8  | 172.2 NM_014487.2    |
| 113.6  | 101    | 106.5  | 104.8 NM_018555.4    |
| 89.1   | 95.7   | 93.6   | 86.9 NM_018555.4     |
| 115.5  | 89.8   | 86.2   | 100.3 NM_018555.4    |
| 127.6  | 131.3  | 117.6  | 156.9 NM_032433.2    |
| 93.8   | 78.6   | 83     | 80.9 NM_199441.1     |
| 105.9  | 101.5  | 81.1   | 95.9 NM_018102.3     |
| 100.2  | 102.6  | 93.1   | 106.6 NM_022095.3    |
| 109.4  | 133.7  | 113.2  | 123.6 NM_022482.3    |
| 394.4  | 335.6  | 334    | 230 NM_015655.2      |
| 135.9  | 137    | 129.3  | 123.5 NM_006974.1    |
| 94.6   | 91.4   | 94.4   | 94.3 NM_006974.1     |
| 176.1  | 143.7  | 148.9  | 135.5 NM_030580.2    |
| 186.2  | 173    | 148.8  | 151.8 NM_032819.3    |
| 564.3  | 294.4  | 296.1  | 163.5 NM_145288.1    |
| 90.1   | 88.3   | 82.9   | 83.4 NM_024325.4     |
| 83.9   | 91.2   | 95.9   | 85.2 NM_003419.2     |
| 133.6  | 154    | 176.7  | 157 NM_012279.2      |
| 103.6  | 88.5   | 88.8   | 89.8 NM_032584.1     |
| 259.4  | 253.6  | 204.5  | 183.2 NM_003420.2    |
| 185.8  | 160.1  | 142.6  | 154.1 NM_021632.3    |

|        |        |        |                      |
|--------|--------|--------|----------------------|
| 127.8  | 124.3  | 101.3  | 116.4 NM_005649.2    |
| 96.9   | 87.6   | 84.8   | 92.4 NM_058230.1     |
| 81.7   | 83.6   | 76.9   | 85.8 NM_014594.1     |
| 226.9  | 181.1  | 171.7  | 116.3 NM_018083.3    |
| 1142.9 | 937.3  | 837.1  | 518.8 NM_014455.1    |
| 80.8   | 87.5   | 89.1   | 94.2 NM_199452.1     |
| 91.6   | 80.9   | 88     | 92.4 NM_199451.1     |
| 90.6   | 93.7   | 81.5   | 89.6 NM_199450.1     |
| 88.2   | 82.7   | 79.6   | 85.7 NM_014951.1     |
| 164.3  | 227    | 169.1  | 153.7 NM_152625.1    |
| 108.4  | 105.6  | 103.6  | 102.1 NM_153695.2    |
| 91.3   | 91     | 95.7   | 99 NM_003421.1       |
| 80.5   | 73     | 79.6   | 92.8 NM_001007094.1  |
| 102.5  | 95.4   | 72.8   | 97.3 NM_003421.1     |
| 76.1   | 82.1   | 94.3   | 82.1 NM_032825.3     |
| 143.8  | 103.3  | 107.6  | 104.5 NM_152604.1    |
| 97.1   | 93.2   | 92.4   | 95.6 NM_001039919.1  |
| 138.4  | 173.2  | 144.1  | 166 NM_133476.2      |
| 151.9  | 198.8  | 168.4  | 169.6 NM_015481.1    |
| 1247   | 1605.5 | 2212.2 | 1945.7 NM_032164.2   |
| 252.7  | 387.6  | 320.7  | 272.6 NM_018660.2    |
| 111.6  | 110.5  | 106    | 109.1 NM_145756.1    |
| 111.2  | 125.9  | 120.5  | 112.8 NM_032347.1    |
| 101    | 100.2  | 93     | 87.3 NM_020781.2     |
| 208.2  | 184.6  | 166    | 173.7 NM_170686.1    |
| 1084.9 | 1195.9 | 1091.4 | 1049.3 NM_024835.2   |
| 98.5   | 79.1   | 75.5   | 88.4 NM_001033719.1  |
| 96.7   | 105.8  | 90.4   | 103.5 NM_020863.2    |
| 96.4   | 84.5   | 82.4   | 80.4 NM_001029939.1  |
| 84.4   | 89.6   | 88.4   | 94.6 NM_017757.1     |
| 156.3  | 110.9  | 105.7  | 112 NM_024741.1      |
| 87.7   | 92.3   | 90.6   | 83.9 NM_153380.1     |
| 78.4   | 78.8   | 83.3   | 70 NM_007130.1       |
| 113.2  | 108.7  | 100.9  | 96.4 NM_007130.1     |
| 657.4  | 375    | 300.2  | 338.5 NM_021188.1    |
| 137.6  | 124.5  | 131.7  | 109.3 NM_032370.1    |
| 109.1  | 105.4  | 102.9  | 98.9 NM_018355.2     |
| 158.9  | 142.9  | 118.6  | 130.8 NM_017879.1    |
| 135.7  | 129.4  | 128.1  | 132.3 NM_152475.1    |
| 79.9   | 84.1   | 79.1   | 79.4 NM_133460.1     |
| 220.9  | 175.7  | 162    | 147.3 NM_024691.2    |
| 383.5  | 426.2  | 578.7  | 253.3 NM_198055.1    |
| 97.1   | 105.5  | 91.7   | 83.7 NM_198055.1     |
| 92.4   | 90     | 89.2   | 89.1 NM_144689.3     |
| 94.8   | 83.6   | 88.7   | 90.1 NM_015069.2     |
| 126.4  | 120.9  | 118.7  | 136.3 NM_001001661.1 |
| 143.8  | 161.2  | 124.3  | 129.1 NM_024106.1    |
| 108.3  | 96.1   | 92.5   | 102.2 NM_001001415.1 |
| 83.5   | 88.5   | 78.9   | 84.6 NM_003423.2     |
| 2104.4 | 2813.2 | 3693.4 | 2351.8 NM_025189.2   |

|       |       |       |                      |
|-------|-------|-------|----------------------|
| 176.5 | 138.2 | 117   | 128.9 NM_133473.1    |
| 113.7 | 111.1 | 115.7 | 115.4 NM_014650.2    |
| 146.1 | 154.3 | 140   | 148.1 NM_152602.1    |
| 412.4 | 338.9 | 319.1 | 293.7 NM_017810.2    |
| 131.4 | 114.3 | 94.9  | 112.8 NM_025231.1    |
| 98.5  | 94.6  | 82.1  | 92 NM_030634.1       |
| 90.3  | 81.7  | 84.6  | 80.8 NM_030634.1     |
| 88.6  | 94.6  | 85.2  | 89.5 NM_030634.1     |
| 442.7 | 334.6 | 274.7 | 217 NM_182755.1      |
| 129.5 | 146.6 | 155.1 | 166.4 NM_152262.1    |
| 93.7  | 76.7  | 76    | 90.1 NM_016264.2     |
| 121   | 133.5 | 147.6 | 131.3 NM_001012753.1 |
| 110.2 | 108.7 | 93.7  | 106.9 NM_152355.1    |
| 137   | 130.2 | 136.9 | 124.2 NM_030824.1    |
| 308.3 | 262.5 | 212.6 | 205.2 NM_005815.2    |
| 169.5 | 121.2 | 125.5 | 170.6 NM_018337.2    |
| 90.2  | 87.1  | 89.2  | 89.4 NM_181489.4     |
| 167.9 | 149.4 | 143.6 | 119.2 NM_017908.1    |
| 92.9  | 90.9  | 87.2  | 85.7 NM_023926.3     |
| 101.1 | 85.8  | 98.9  | 100.8 NM_152695.3    |
| 307.8 | 249   | 211   | 207.3 NM_003425.2    |
| 89.3  | 87.6  | 85.5  | 89.6 NM_015555.2     |
| 368.2 | 485.2 | 422.2 | 470.6 NM_001031623.1 |
| 119.3 | 126.7 | 137.4 | 167.4 NM_001031623.1 |
| 83.2  | 84.4  | 76.7  | 75.2 NM_052923.1     |
| 91.2  | 86    | 91.2  | 97.3 NM_182594.1     |
| 105.9 | 87.2  | 92.5  | 85.9 NM_006635.2     |
| 156.5 | 90.7  | 85.4  | 92.2 NM_021224.3     |
| 143.7 | 298.5 | 357   | 182.3 NM_207336.1    |
| 91.6  | 91.6  | 80    | 87.1 NM_199132.1     |
| 92.3  | 89.8  | 87.3  | 82.5 NM_020813.1     |
| 399.9 | 282.9 | 224.2 | 206.2 NM_015428.1    |
| 101.7 | 109   | 103.1 | 76.6 NM_015428.1     |
| 85.5  | 96.6  | 92.6  | 84.1 NM_207317.1     |
| 301.4 | 213.5 | 191.2 | 181.8 NM_144684.1    |
| 103.8 | 98.8  | 92.8  | 96.9 NM_006626.3     |
| 81.1  | 72.3  | 76.6  | 75.7 NM_001007169.1  |
| 283   | 419.6 | 496.3 | 438.3 NM_001007169.1 |
| 98.7  | 101.3 | 96.2  | 91.6 NM_133464.1     |
| 133.9 | 128   | 118.6 | 120.4 NM_031486.1    |
| 82.7  | 90.4  | 89.9  | 77.4 NM_145312.2     |
| 91.1  | 97.5  | 88.3  | 90.3 NM_020714.1     |
| 81.5  | 87.3  | 73.3  | 78.1 NM_152356.3     |
| 79.6  | 101.2 | 88.5  | 94.8 NM_001076678.1  |
| 95.5  | 88.4  | 88.7  | 99.7 NM_001076678.1  |
| 97    | 83.6  | 83    | 87.4 NM_032752.1     |
| 100.1 | 85.4  | 85    | 92 NM_198458.1       |
| 94.6  | 91.9  | 81.9  | 84.9 NM_145115.2     |
| 179.9 | 132.3 | 107.1 | 104.5 NM_032792.2    |
| 235.4 | 217.9 | 210   | 263.2 NM_021646.1    |



|        |        |        |                      |
|--------|--------|--------|----------------------|
| 83.8   | 87     | 84.6   | 82.8 NM_145044.1     |
| 84.5   | 86.4   | 85.3   | 92.2 NM_033210.3     |
| 204.7  | 191.4  | 168.6  | 152.6 NM_032772.3    |
| 119.6  | 109.5  | 109.2  | 93.8 NM_014910.2     |
| 1107.5 | 834.4  | 760    | 502.1 NM_014913.2    |
| 146.2  | 140.8  | 141.3  | 127.2 NM_145291.2    |
| 104.4  | 117.7  | 102.6  | 109.4 NM_014930.1    |
| 764.8  | 453.1  | 516.9  | 302.8 NM_145806.2    |
| 860.8  | 937.2  | 769.6  | 826.8 NM_032434.2    |
| 113.1  | 123    | 111.5  | 115 NM_144631.4      |
| 217.3  | 180.5  | 177.2  | 145.7 NM_032788.1    |
| 97     | 90.1   | 86.7   | 98.6 NM_213605.2     |
| 220    | 219.1  | 215.8  | 188.5 NM_014803.2    |
| 94.1   | 89.1   | 88.2   | 93.9 XM_940357.1     |
| 240.5  | 253.1  | 264.5  | 235.2 NM_145287.1    |
| 460.6  | 399    | 379    | 372.3 NM_015461.1    |
| 294.6  | 270.9  | 249.7  | 226.2 NM_153219.2    |
| 132.5  | 136    | 165    | 128.6 NM_133444.1    |
| 89.1   | 85.4   | 87.4   | 89 NM_032423.2       |
| 354.3  | 293.5  | 339.2  | 271.8 NM_020951.1    |
| 111.9  | 112.5  | 94.6   | 102 NM_020880.2      |
| 115.5  | 160.4  | 139    | 138.4 NM_018181.4    |
| 84.1   | 84.3   | 92.7   | 90.5 NM_152520.3     |
| 112.1  | 100.2  | 82.2   | 81 NM_014717.1       |
| 375.1  | 386.1  | 385.5  | 298.3 NM_020856.1    |
| 100.3  | 96.6   | 108.4  | 111.1 NM_203282.1    |
| 91.9   | 86.8   | 80.3   | 87.8 NM_152606.2     |
| 90.9   | 82.6   | 83.5   | 87.3 NM_194319.1     |
| 148.8  | 130.8  | 124.1  | 133 NM_213598.1      |
| 87.8   | 89.9   | 81.6   | 75.6 NM_014480.1     |
| 192.3  | 129.1  | 129.8  | 114.3 NM_133466.1    |
| 75.4   | 79.1   | 80.5   | 85.4 NM_178544.2     |
| 85.7   | 84     | 84.6   | 90.3 NM_173631.2     |
| 259.8  | 301.4  | 278.3  | 255 NM_152909.2      |
| 5387.8 | 6540.1 | 8327.8 | 8883.5 NM_153263.1   |
| 111    | 94.2   | 103.9  | 105.4 NM_001039654.1 |
| 125.4  | 112.2  | 108.4  | 114.4 NM_138347.2    |
| 94.1   | 95.4   | 88.1   | 80.8 NM_024762.2     |
| 97     | 84.3   | 80.1   | 76.2 NM_152652.1     |
| 89.2   | 89.8   | 89.6   | 95.1 NM_152303.1     |
| 103.8  | 90.8   | 92.9   | 105.3 NM_152791.3    |
| 110.4  | 95.4   | 91.6   | 94.7 NM_024967.1     |
| 82.7   | 83.1   | 74.4   | 82.9 NM_024341.1     |
| 201.5  | 173.3  | 224.3  | 182.8 NM_001044387.1 |
| 134.8  | 132.5  | 127.3  | 141 NM_144693.1      |
| 207.5  | 196.5  | 189.4  | 164 NM_032497.1      |
| 87.4   | 91.6   | 85.1   | 85.4 NM_152476.1     |
| 103.3  | 83.5   | 82.4   | 93.4 NM_152289.1     |
| 348.8  | 345.9  | 356.1  | 287.1 NM_017656.1    |
| 98.9   | 108.6  | 109.1  | 84 NM_145276.1       |

|       |       |       |                      |
|-------|-------|-------|----------------------|
| 408.7 | 351   | 296.7 | 276.9 NM_144976.2    |
| 132.3 | 122.8 | 114.4 | 123.5 NM_152477.3    |
| 144.6 | 127.4 | 113.8 | 114.8 NM_032838.2    |
| 87.6  | 74.8  | 76.3  | 88.8 NM_152603.2     |
| 92.7  | 103.5 | 90.6  | 94.6 NM_198539.2     |
| 88.6  | 78.8  | 82.2  | 94.6 NM_152484.2     |
| 94.3  | 97.6  | 88.5  | 92.4 NM_144694.1     |
| 89.7  | 89.8  | 78    | 85.9 NM_016536.3     |
| 92    | 89.9  | 83.3  | 84.9 NM_152412.1     |
| 291.7 | 369.9 | 366.7 | 297.8 NM_152360.2    |
| 109.7 | 104.8 | 102.4 | 98.8 NM_022752.3     |
| 81.4  | 85.1  | 75.4  | 77 NM_174945.1       |
| 260.6 | 203.2 | 179.1 | 121.3 NM_024327.1    |
| 330.8 | 413.7 | 496.6 | 487.2 NM_032679.1    |
| 89.2  | 97.6  | 89.6  | 85.5 NM_152600.1     |
| 88.3  | 86.6  | 89.6  | 86.7 NM_207115.1     |
| 164.6 | 135.6 | 139.1 | 131.8 NM_207115.1    |
| 102.1 | 85.3  | 79.3  | 97.3 NM_016202.2     |
| 593.1 | 367.1 | 343.7 | 292.7 NM_016535.3    |
| 84.9  | 76    | 82.4  | 80.1 NM_144690.1     |
| 111.4 | 97.4  | 99.4  | 95.8 NM_173548.1     |
| 200   | 216.6 | 186.8 | 169.6 NM_152655.2    |
| 119.9 | 127.9 | 134.3 | 106.8 NM_199126.1    |
| 85.5  | 86.9  | 78.8  | 86.1 NM_152279.2     |
| 281.8 | 227.2 | 214.2 | 203 NM_017652.1      |
| 487.8 | 358   | 357.2 | 278.1 NM_017652.1    |
| 106.6 | 90.6  | 101.8 | 90.2 NM_017652.1     |
| 100   | 105.3 | 95.4  | 98.8 NM_032828.2     |
| 79.5  | 77.3  | 82.3  | 82.9 NM_001013746.1  |
| 255.2 | 310   | 248.8 | 238.9 NM_016089.1    |
| 102.3 | 99.4  | 92    | 90.9 NM_014630.1     |
| 521.4 | 361.8 | 335.4 | 173.2 NM_015871.2    |
| 68.4  | 79.6  | 72    | 73.9 NM_182524.1     |
| 78.8  | 84.3  | 75    | 98.2 NM_173539.1     |
| 106.3 | 94.7  | 93    | 101.2 NM_001042416.1 |
| 149.9 | 123.1 | 112.3 | 120 NM_152457.1      |
| 1307  | 978.9 | 999.2 | 511.2 NM_178167.2    |
| 87    | 93.1  | 86.4  | 88.6 NM_001007248.1  |
| 91.2  | 89.7  | 79.2  | 88.3 NM_001007247.1  |
| 89    | 90    | 85.2  | 85.6 NM_021998.3     |
| 95.5  | 104.2 | 111   | 99.5 NM_198457.1     |
| 109.6 | 97.7  | 95.9  | 100.5 NM_025027.3    |
| 84.8  | 81.4  | 78.7  | 81 NM_032689.3       |
| 108.9 | 100.3 | 97.8  | 103.8 NM_020747.1    |
| 135.8 | 144.2 | 135.9 | 128 NM_015042.1      |
| 83.6  | 81.2  | 78.1  | 75 NM_173530.1       |
| 112.1 | 91.8  | 106.9 | 99 NM_030972.2       |
| 294.5 | 244.3 | 220.1 | 222.6 NM_001031721.1 |
| 90.7  | 88.7  | 85.4  | 91.3 NM_024840.2     |
| 297.7 | 276.5 | 206   | 237.7 NM_025040.2    |

|       |        |       |                      |
|-------|--------|-------|----------------------|
| 326.2 | 199.9  | 191.1 | 152.1 NM_198480.2    |
| 183.7 | 152.2  | 130.5 | 124.6 NM_178523.3    |
| 189.8 | 169.2  | 168.8 | 138 NM_133374.1      |
| 88.3  | 81     | 80.5  | 95.6 NM_173656.1     |
| 90.8  | 83.2   | 79.9  | 83.4 NM_175888.1     |
| 401.1 | 397.5  | 381.4 | 309 NM_198484.2      |
| 737   | 658.4  | 552   | 484.4 NM_033414.2    |
| 99.6  | 86.2   | 79.3  | 89.1 NM_014789.3     |
| 98.2  | 94.8   | 100.9 | 97.4 NM_020787.1     |
| 103.2 | 99.3   | 88.5  | 98.5 NM_145233.2     |
| 89    | 97.3   | 89.8  | 95.2 NM_145297.1     |
| 78.9  | 96.9   | 77.4  | 73.9 NM_001076675.1  |
| 108.1 | 111.8  | 98.8  | 92.1 NM_001076675.1  |
| 623.4 | 526.7  | 433   | 383.5 NM_145295.2    |
| 92.4  | 85.3   | 84.1  | 81.8 NM_033113.1     |
| 165.9 | 143.9  | 129.3 | 133.4 NM_001080417.1 |
| 126.4 | 135.8  | 91.7  | 132.6 XM_034819.6    |
| 93.1  | 97     | 98.5  | 96.9 NM_001037735.1  |
| 113.1 | 154.8  | 126.3 | 133.2 XM_929476.1    |
| 91.9  | 89.3   | 85    | 93.3 NM_016331.1     |
| 124.2 | 203.9  | 168.5 | 167.6 NM_152320.1    |
| 228.6 | 211.3  | 245.5 | 298.1 NM_198494.1    |
| 134.7 | 142.5  | 139.1 | 141 NM_023070.1      |
| 99.8  | 90.8   | 79.2  | 91 NM_016620.2       |
| 336.7 | 387.6  | 325.1 | 368.8 NM_016620.2    |
| 164.4 | 170    | 173.2 | 163.6 NM_201269.1    |
| 91.5  | 79.7   | 79.5  | 87.9 NM_152577.1     |
| 121.9 | 121.6  | 99    | 111.1 NM_014699.2    |
| 97.8  | 84.9   | 81.8  | 84.5 NM_001009992.1  |
| 102.6 | 92.6   | 94.9  | 88.8 NM_023074.2     |
| 392.9 | 383.4  | 351.7 | 280.9 NM_172070.2    |
| 154.9 | 164.9  | 164.1 | 112.3 NM_145166.2    |
| 804.7 | 1307.1 | 2122  | 1257.4 NM_014897.1   |
| 244.8 | 204.2  | 208.3 | 128.3 NM_138783.1    |
| 131.1 | 123.7  | 122.1 | 126.6 NM_018293.2    |
| 173   | 178    | 151.6 | 209.9 NM_018293.2    |
| 136.6 | 147.7  | 124   | 155 NM_018293.2      |
| 105   | 100.4  | 92.1  | 121.3 NM_018293.2    |
| 94.9  | 91.3   | 88.5  | 86.4 NM_001009958.1  |
| 99.2  | 103.5  | 85.5  | 96.8 NM_024061.3     |
| 99.8  | 92.5   | 100.4 | 99.5 NM_001009957.1  |
| 172.2 | 219.8  | 210.4 | 186.6 NM_001009956.1 |
| 115.2 | 105.7  | 102.1 | 110.1 NM_033160.4    |
| 79.8  | 83.5   | 79.1  | 86.5 NM_001032297.1  |
| 104.9 | 95.3   | 108.3 | 87.8 NM_024697.1     |
| 126.7 | 130.8  | 122.2 | 124 NM_173658.1      |
| 92.7  | 80.4   | 83.9  | 89.1 NM_207404.2     |
| 161   | 142.8  | 132.3 | 126.1 NM_152437.1    |
| 83.9  | 76.7   | 75.9  | 77.7 NM_024733.2     |
| 87.4  | 84.3   | 88.1  | 79.9 NM_022103.2     |

|       |        |        |                      |
|-------|--------|--------|----------------------|
| 455.4 | 355.8  | 365.1  | 186.2 NM_024706.3    |
| 237.1 | 271.7  | 307.5  | 240 NM_024804.1      |
| 293.7 | 179.4  | 158.8  | 143.1 NM_033213.2    |
| 284.1 | 217.7  | 225.4  | 151.3 NM_024833.1    |
| 871.8 | 861.2  | 940.8  | 430.4 NM_024836.1    |
| 115.3 | 108.8  | 104.3  | 79.5 NM_017776.1     |
| 95.8  | 90.7   | 84.7   | 92 NM_138330.1       |
| 86.7  | 92.4   | 80.8   | 80 NM_182609.1       |
| 79.9  | 71.6   | 67.2   | 72.1 NM_178549.2     |
| 129.3 | 120    | 132.4  | 139.5 NM_178558.2    |
| 148   | 107.8  | 106.3  | 135 NM_138286.1      |
| 93    | 86.5   | 81.5   | 98 NM_033196.1       |
| 144.5 | 175.7  | 165.6  | 143.4 NM_033196.1    |
| 790.5 | 1033.3 | 1354.4 | 1201.6 NM_033196.1   |
| 89.3  | 82.7   | 85.7   | 88.6 NM_173574.1     |
| 803.8 | 842.8  | 729.3  | 823.1 NM_152373.2    |
| 93.7  | 91.7   | 94.8   | 93.5 NM_020832.1     |
| 107.8 | 105.9  | 118.8  | 96.5 NM_145271.3     |
| 96    | 94.1   | 95.6   | 86.8 NM_145271.3     |
| 555.4 | 574.8  | 546.6  | 305.2 NM_138447.1    |
| 807.7 | 1274.6 | 1728.9 | 1748.1 NM_021915.1   |
| 113.5 | 127.1  | 108.6  | 98.5 NM_152455.2     |
| 177   | 188.5  | 172.3  | 176.5 NM_015911.2    |
| 387.5 | 522.6  | 500    | 441.2 NM_017865.2    |
| 142.6 | 162.7  | 137    | 141.1 NM_001012981.2 |
| 229   | 180.2  | 178.9  | 160.4 NM_020394.2    |
| 355.3 | 265.1  | 261.7  | 182 NM_030895.1      |
| 102.1 | 97.4   | 91.7   | 84.7 NM_198535.1     |
| 584.2 | 492.2  | 369.1  | 429.7 NM_003416.1    |
| 93.5  | 83.8   | 77.2   | 84.4 NM_021916.2     |
| 977.6 | 1020.4 | 1003.5 | 844.1 NM_144566.1    |
| 102.5 | 95.7   | 94.6   | 86.6 NM_018260.1     |
| 87.4  | 90.3   | 80.1   | 80.8 NM_024924.3     |
| 80.6  | 90.2   | 80.7   | 79.4 NM_025069.1     |
| 93.4  | 83.1   | 87.2   | 96 NM_025069.1       |
| 109   | 97.6   | 103    | 96.2 NM_001033723.1  |
| 167.3 | 138.4  | 126.6  | 128.8 NM_001042511.1 |
| 113.1 | 99     | 91.7   | 116.1 NM_001042510.1 |
| 185.7 | 160.7  | 152.3  | 132.5 NM_016096.2    |
| 185   | 164.7  | 138.9  | 130 NM_173831.2      |
| 84.7  | 85.4   | 89.6   | 84.6 NM_021269.1     |
| 85.9  | 91.6   | 83.4   | 83.8 NM_152601.2     |
| 97.7  | 101.3  | 83.7   | 94.8 NM_021216.3     |
| 82.8  | 73.5   | 77.2   | 81.2 NM_198526.1     |
| 100.9 | 101    | 96.1   | 100 NM_182633.1      |
| 98.6  | 89.7   | 84.2   | 91.9 NM_182515.1     |
| 103.5 | 99.7   | 97.5   | 97.6 NM_001039127.2  |
| 519   | 323.7  | 325.8  | 369.5 NM_133474.1    |
| 89.8  | 88.7   | 87.2   | 83.5 NM_003426.1     |
| 110.9 | 100    | 98.6   | 94.9 NM_003426.1     |

|        |        |        |                      |
|--------|--------|--------|----------------------|
| 147.2  | 140.6  | 131.4  | 122.8 NM_003426.1    |
| 100.4  | 100.5  | 108.6  | 114.8 NM_001004304.2 |
| 74     | 72.3   | 74.4   | 79 NM_001023561.1    |
| 172.6  | 214.3  | 199.7  | 186.6 NM_007131.2    |
| 138.1  | 147.9  | 109.6  | 129.9 NM_153028.1    |
| 199.4  | 226.9  | 209.6  | 201.5 NM_003427.3    |
| 75.8   | 72.5   | 71.9   | 78.8 NM_001040185.1  |
| 189.7  | 188.4  | 201.7  | 150.8 NM_024910.1    |
| 216.3  | 197.9  | 161    | 164.5 NM_021217.1    |
| 89.8   | 97.9   | 86.2   | 94.7 NM_152605.2     |
| 107.6  | 100.1  | 89.7   | 101.2 NM_007135.1    |
| 98.7   | 92.5   | 95.6   | 87.4 NM_021089.1     |
| 117.1  | 98.7   | 99.6   | 101.9 NM_007136.1    |
| 112.8  | 126.9  | 116.6  | 145.4 NM_001023563.1 |
| 95.8   | 86.6   | 86.9   | 95.1 NM_001039886.1  |
| 90.4   | 84.1   | 90     | 84 NM_007137.1       |
| 182.4  | 141.1  | 157.8  | 170.5 NM_018300.2    |
| 102.7  | 90.2   | 89.5   | 99.7 NM_003429.1     |
| 282.7  | 223.2  | 163    | 211.2 NM_003430.1    |
| 88.8   | 93.3   | 88.4   | 90.8 NM_152626.2     |
| 111.3  | 88.4   | 94.7   | 99.3 NM_007139.2     |
| 144.8  | 156.4  | 131    | 127.4 NM_001004126.1 |
| 147.3  | 145.8  | 130.3  | 137.8 NM_031218.2    |
| 94.5   | 98.3   | 89.6   | 91.4 NM_014724.2     |
| 95     | 92.3   | 89.5   | 95 NM_001080409.1    |
| 364.6  | 342.9  | 310.6  | 241.4 NM_006060.2    |
| 101.5  | 107.6  | 98.5   | 104.3 NM_016260.1    |
| 95.7   | 102.7  | 84.5   | 93.1 NM_016260.1     |
| 98.4   | 89.6   | 84.5   | 94.8 NM_183231.1     |
| 145.5  | 123.7  | 127.1  | 116.2 NM_022465.2    |
| 227.6  | 151.4  | 141    | 129.5 NM_022466.2    |
| 329.4  | 241.2  | 236.1  | 193.5 NM_021035.1    |
| 1077.7 | 1053.5 | 1144.2 | 812.9 NM_006349.2    |
| 121.9  | 101.1  | 101.5  | 106.9 NM_014205.2    |
| 2944.7 | 3003   | 2986.8 | 2016.8 NM_004773.2   |
| 88     | 85.1   | 95.6   | 83.7 NM_001033577.1  |
| 259.3  | 285.2  | 353.4  | 242.5 NM_001033577.1 |
| 128.1  | 123.6  | 119.2  | 106.9 NM_031288.1    |
| 215.4  | 134.1  | 157.5  | 147.6 NM_170783.1    |
| 305.6  | 236.1  | 225.3  | 167 NM_170783.1      |
| 258.8  | 172.7  | 157.8  | 149.4 NM_014596.4    |
| 82.5   | 90.1   | 90.6   | 81.4 NM_032268.3     |
| 84.7   | 84.2   | 75.7   | 84.9 NM_147128.3     |
| 85.6   | 85.9   | 92.4   | 91.4 NM_181710.2     |
| 89.3   | 91.7   | 94.1   | 88.1 NM_207341.2     |
| 96.9   | 80.3   | 88.3   | 90.3 NM_003460.1     |
| 101.8  | 95.2   | 92.9   | 91.7 NM_007155.4     |
| 87.3   | 82.4   | 78.9   | 78.5 NM_021186.2     |
| 97.3   | 86     | 85.9   | 91.2 NM_007009.1     |
| 92.5   | 98.3   | 93.2   | 92 NM_198844.2       |

|        |        |        |                      |
|--------|--------|--------|----------------------|
| 78.3   | 92.9   | 86.7   | 86.3 NM_199321.1     |
| 80.5   | 75.8   | 86     | 84.4 NM_198844.1     |
| 79.8   | 83.4   | 73.1   | 84.4 NM_175056.1     |
| 146.2  | 124.2  | 120.5  | 119.9 NM_017580.1    |
| 104.1  | 91.7   | 90.3   | 96.2 NM_032143.2     |
| 96.5   | 87     | 81.3   | 95.4 NM_014377.1     |
| 88.5   | 78.8   | 79.3   | 86.3 NM_182572.2     |
| 116.7  | 116.2  | 114.3  | 113.5 NM_017894.4    |
| 184.4  | 244.6  | 275.9  | 183.3 NM_181877.3    |
| 106.9  | 104.2  | 121.3  | 102.4 NM_001007072.1 |
| 85.3   | 85.3   | 85.6   | 88.7 NM_001007072.1  |
| 92.7   | 83.6   | 90.2   | 89.6 NM_152677.1     |
| 180.5  | 127.5  | 137.1  | 121.9 NM_024303.1    |
| 405.3  | 379    | 415    | 269.4 NM_080603.3    |
| 87.5   | 81.7   | 85.4   | 84.8 NM_182521.2     |
| 92.2   | 91.8   | 100.8  | 98.5 NM_080752.2     |
| 204.8  | 204.8  | 165.2  | 157.3 NM_080752.2    |
| 104.5  | 98.6   | 88.1   | 94.3 NM_080752.2     |
| 92.5   | 107.3  | 91.5   | 84 NM_080752.2       |
| 197.7  | 208.3  | 193    | 137.5 NM_023072.1    |
| 768.2  | 698.2  | 627.8  | 416.9 NM_004724.2    |
| 136.4  | 103    | 92     | 108.8 NM_017975.2    |
| 117.4  | 106.9  | 89.6   | 96.7 NM_017975.2     |
| 1370.6 | 1005.7 | 791.3  | 721.5 NR_003105.1    |
| 118.2  | 104.6  | 100.8  | 94 NM_032997.2       |
| 290.9  | 162    | 150.8  | 180.5 NM_001005413.1 |
| 102.3  | 88.7   | 83     | 90.6 NM_001005414.1  |
| 101.7  | 109.3  | 105.1  | 104.1 NM_007156.3    |
| 91.3   | 100.5  | 91.4   | 84.7 NM_007156.3     |
| 121.3  | 121.6  | 117.5  | 123.1 NM_007157.3    |
| 105.3  | 105.2  | 99.9   | 93.3 NM_001040653.1  |
| 196.5  | 242.3  | 288.7  | 161.2 NM_025112.3    |
| 94.2   | 89.5   | 90.5   | 92.4 NM_001004339.1  |
| 905.9  | 1264.4 | 1222.9 | 1055.8 NM_024646.1   |
| 120.2  | 120.6  | 116.8  | 104.7 NM_006336.2    |
| 535.6  | 567.3  | 502.6  | 395.7 NM_003461.4    |
| 2246.9 | 2026.7 | 2057.2 | 1150 NM_003461.4     |
| 173.7  | 277.1  | 283.3  | 190.5 NM_015113.3    |
| 533.8  | 366.1  | 360.2  | 401.7 NM_015534.3    |
