# Supplementary material for: Inflammatory Transcriptome Profiling of Human Monocytes Exposed Acutely to Cigarette Smoke
Source: PubMed Central journal article supplement (PMC3281820; doi:10.1371/journal.pone.0030120), 2012-02-17
Supplement: pone.0030120.s002.pdf [file pone.0030120.s002.pdf]

| TargetID | AVG_Signa | AVG_Signa | AVG_Signa | AVG_Signa | AVG_Signa | AVG_Signa | AVG_Signa | AVG_Signa |
|----------|-----------|-----------|-----------|-----------|-----------|-----------|-----------|-----------|
| 15E1.2   | 128.9     | 128.2     | 128.8     | 118.8     | 112.4     | 100.6     | 128.8     | 131.9     |
| 2'-PDE   | 207.8     | 238.4     | 180       | 203.8     | 212.8     | 157.4     | 249.3     | 260.1     |
| 7A5      | 110       | 113.3     | 116.3     | 115.5     | 108.7     | 95.4      | 113.1     | 108.3     |
| A1BG     | 123.1     | 124.1     | 126.8     | 122.8     | 115       | 100.3     | 137       | 113.1     |
| A2BP1    | 103.9     | 115.6     | 121.3     | 106.3     | 101.4     | 99.1      | 105.3     | 107.2     |
| A2BP1    | 114.4     | 110.6     | 117.3     | 118.7     | 109.2     | 100.9     | 122.2     | 119.5     |
| A2BP1    | 120.6     | 119.7     | 118.4     | 126       | 107.6     | 98.4      | 106.7     | 118.6     |
| A2BP1    | 112.6     | 126.6     | 124.2     | 125.2     | 105.3     | 95.7      | 115.3     | 116.6     |
| A2M      | 118.4     | 111.3     | 133.1     | 122.5     | 104.4     | 105.8     | 120.2     | 114.3     |
| A2ML1    | 113.4     | 124.9     | 116.5     | 115.8     | 107.6     | 94.6      | 118       | 115.8     |
| A3GALT2  | 104.7     | 112.3     | 120.7     | 112.7     | 103.6     | 99.4      | 120.5     | 110.8     |
| A3GALT2  | 108.2     | 112.9     | 111.5     | 120.7     | 103.2     | 101       | 120.4     | 119.3     |
| A4GALT   | 111.2     | 112.6     | 122.1     | 115.5     | 106.8     | 109.2     | 117.4     | 112.6     |
| A4GNT    | 128       | 119.4     | 118.6     | 128.7     | 116.1     | 99.1      | 125.1     | 121       |
| AAA1     | 118.2     | 110.9     | 119.1     | 128.3     | 109.4     | 100.7     | 115.4     | 105.4     |
| AAA1     | 108.8     | 122       | 120.9     | 118.1     | 100.1     | 106.3     | 115       | 116.6     |
| AAA1     | 118.2     | 110.4     | 116.5     | 107.8     | 106.8     | 101.5     | 120.1     | 108.7     |
| AAA1     | 113.3     | 114.7     | 108.7     | 108.6     | 106.8     | 98.6      | 117       | 111.7     |
| AAA1     | 116       | 116.2     | 116.6     | 115.8     | 111.7     | 98.1      | 110.4     | 110.7     |
| AAAS     | 137.3     | 125.5     | 133.8     | 130.1     | 119.6     | 100.6     | 127.9     | 127.8     |
| AACS     | 177.3     | 171.6     | 144.5     | 184.9     | 144.7     | 124.1     | 170.8     | 172.7     |
| AADAC    | 109.2     | 110.5     | 116.9     | 117.5     | 100       | 98        | 119       | 109.4     |
| AADA1    | 155.4     | 170.2     | 189.9     | 140.7     | 126.4     | 119.7     | 153.1     | 126.7     |
| AADA2    | 115.9     | 115.7     | 112.4     | 118.4     | 103.1     | 95.9      | 116.5     | 111.4     |
| AADAT    | 105.3     | 120.7     | 120.3     | 114.1     | 113.2     | 89.6      | 116.6     | 115.1     |
| AADAT    | 111.9     | 118.2     | 118.3     | 112.5     | 108       | 97.2      | 118.4     | 126.2     |
| AADAT    | 106.6     | 114.4     | 116.9     | 114.5     | 103.5     | 100.1     | 120.3     | 121.7     |
| AAK1     | 111.1     | 115.3     | 118.1     | 119.7     | 107.2     | 99.8      | 118       | 116       |
| AAMP     | 176.8     | 171.1     | 169.5     | 192.2     | 133       | 146.8     | 182.1     | 194.5     |
| AANAT    | 116.5     | 107.3     | 111.1     | 117.9     | 101.9     | 98.6      | 119.2     | 119.1     |
| AARS     | 1143.2    | 1281.2    | 1073.8    | 1321.8    | 1051.6    | 996.2     | 950.3     | 1052.5    |
| AARSD1   | 190.7     | 208       | 241.5     | 229       | 162.8     | 171.5     | 168.4     | 172.6     |
| AARSL    | 136.8     | 132.6     | 159.6     | 175.7     | 131.9     | 129.9     | 153       | 148.9     |
| AASDH    | 203.2     | 197.4     | 208.3     | 206.7     | 173.3     | 155.9     | 173.6     | 182.1     |
| AASDHPT  | 304.5     | 372.2     | 354       | 295       | 238.2     | 297.5     | 335.2     | 304.2     |
| AASS     | 115.5     | 120.9     | 119.4     | 116       | 111       | 100       | 123.8     | 114.6     |
| AATF     | 393.8     | 359.1     | 410.3     | 409.4     | 319.9     | 403.6     | 391.9     | 420.8     |
| AATK     | 119.8     | 117       | 123.9     | 119.5     | 117.3     | 120.8     | 126       | 126.8     |
| AATK     | 121.5     | 114.9     | 121.6     | 117.7     | 121.6     | 96.8      | 118.2     | 112.6     |
| ABAT     | 118.8     | 127.1     | 122.4     | 115.9     | 117.9     | 110.3     | 112.9     | 110.7     |
| ABAT     | 125.7     | 120.4     | 133.9     | 138.7     | 119.2     | 111.6     | 123.6     | 134.1     |
| ABAT     | 114       | 116.6     | 116.1     | 124.7     | 112.2     | 104.2     | 132.1     | 116.8     |
| ABC1     | 148.8     | 143       | 154.8     | 155.2     | 132.7     | 116.9     | 138.3     | 135.3     |
| ABCA1    | 280.2     | 223.7     | 270.4     | 562.3     | 329       | 470.5     | 649.8     | 251.9     |
| ABCA10   | 121       | 112.5     | 126.2     | 125       | 121       | 104.4     | 120.9     | 124.4     |
| ABCA11   | 117.5     | 123.6     | 129.6     | 122       | 117.1     | 100       | 123.1     | 125.5     |
| ABCA12   | 115.9     | 122.9     | 115.5     | 117.2     | 120.9     | 98.7      | 114       | 114.8     |
| ABCA12   | 115.3     | 112.8     | 117       | 115       | 112.2     | 101.2     | 116.2     | 115.3     |
| ABCA13   | 115.1     | 110.4     | 122.3     | 118.2     | 104.5     | 97.1      | 110.2     | 111       |
| ABCA2    | 110       | 115       | 113.5     | 121.4     | 112.9     | 99.7      | 109.5     | 115.8     |

|        |       |       |       |       |       |       |       |       |
|--------|-------|-------|-------|-------|-------|-------|-------|-------|
| ABCA2  | 144.7 | 140.4 | 139.5 | 144.8 | 110   | 110.5 | 126.5 | 131   |
| ABCA3  | 121.2 | 126.2 | 127.1 | 131   | 124.1 | 101.4 | 126.7 | 122.7 |
| ABCA4  | 130.5 | 140.8 | 134.5 | 151.5 | 145.2 | 118.6 | 144   | 137   |
| ABCA5  | 133.8 | 136.6 | 144.9 | 139.6 | 133.6 | 109.2 | 125.9 | 135.3 |
| ABCA5  | 116.2 | 123.3 | 122.8 | 127.2 | 118.5 | 106.5 | 113.7 | 108.9 |
| ABCA5  | 114.8 | 123.8 | 127.1 | 129.8 | 118.7 | 110   | 119.6 | 116.6 |
| ABCA6  | 105.6 | 107.4 | 122.3 | 119.8 | 101.7 | 105.8 | 108.2 | 108.8 |
| ABCA6  | 126.8 | 135.6 | 114.7 | 123.9 | 116.4 | 100.3 | 129   | 119.8 |
| ABCA7  | 114.2 | 107.5 | 106   | 110.4 | 108.9 | 96.4  | 122.5 | 111.5 |
| ABCA7  | 401.9 | 334.9 | 309.7 | 320   | 220   | 219.7 | 257.2 | 225.4 |
| ABCA7  | 109.1 | 118.3 | 105.6 | 113.1 | 113   | 97.7  | 104.8 | 108.7 |
| ABCA8  | 109.9 | 114.2 | 119   | 124.9 | 105.3 | 96.1  | 116.5 | 109.1 |
| ABCA9  | 117.1 | 117.6 | 128.3 | 125.6 | 127.9 | 106.3 | 120.5 | 122.9 |
| ABCA9  | 115.4 | 121.1 | 130.4 | 121.5 | 112.6 | 92.2  | 127.2 | 116.9 |
| ABCB1  | 203.3 | 245.8 | 400.1 | 266.3 | 271.1 | 277.7 | 318.6 | 362   |
| ABCB10 | 173   | 206.7 | 220.4 | 226.4 | 186.4 | 192.4 | 191.6 | 185.1 |
| ABCB11 | 114.1 | 118.8 | 117.3 | 116.9 | 106.7 | 102.9 | 115.3 | 112.1 |
| ABCB4  | 107.3 | 115.2 | 137.6 | 124.1 | 106.8 | 101.2 | 115.5 | 119.2 |
| ABCB5  | 106.9 | 109.7 | 109.7 | 120.7 | 109.4 | 97.2  | 115.6 | 111.2 |
| ABCB6  | 131.4 | 154.9 | 141.3 | 195.6 | 174.3 | 136.6 | 228.6 | 220.9 |
| ABCB7  | 204.3 | 224.3 | 258.3 | 267.3 | 234.1 | 153.7 | 203.7 | 186.9 |
| ABCB8  | 112.2 | 135.8 | 111.6 | 113.6 | 108.6 | 106.8 | 112   | 117.1 |
| ABCB9  | 113   | 120.2 | 112.5 | 116.7 | 104.9 | 110.9 | 125.9 | 105.2 |
| ABCB9  | 121.8 | 128.8 | 121.7 | 129.8 | 111.5 | 105.4 | 144.6 | 122.1 |
| ABCB9  | 124.1 | 136.4 | 123.8 | 136.5 | 124.2 | 100   | 130.9 | 125.2 |
| ABCC1  | 120.1 | 108   | 117.6 | 120.3 | 110.9 | 97.9  | 119.8 | 122.5 |
| ABCC1  | 138.9 | 128.4 | 128.3 | 158.2 | 121.7 | 115.2 | 152.6 | 120.8 |
| ABCC10 | 148.8 | 141.4 | 153.1 | 155.4 | 131.1 | 129.6 | 139.4 | 148.8 |
| ABCC11 | 112.7 | 113.9 | 117.3 | 110.2 | 105.7 | 95    | 109.7 | 112.7 |
| ABCC11 | 118.2 | 119   | 123.3 | 119.2 | 110   | 104.3 | 131.7 | 117.8 |
| ABCC11 | 113.5 | 116.6 | 119.4 | 122.3 | 114.4 | 98.9  | 117.5 | 129.7 |
| ABCC12 | 122.9 | 116.8 | 135.5 | 128.7 | 118   | 106   | 122.7 | 126   |
| ABCC13 | 123.6 | 132.6 | 127.3 | 130.3 | 107.8 | 105.2 | 126.9 | 118.5 |
| ABCC13 | 123.2 | 139.2 | 116.7 | 127   | 117   | 105.7 | 122.4 | 112.9 |
| ABCC2  | 129.7 | 116   | 120   | 132.1 | 114   | 98    | 140.3 | 132.6 |
| ABCC3  | 236.7 | 237.6 | 381.5 | 203.4 | 168.4 | 234.7 | 167.2 | 141.6 |
| ABCC4  | 132.2 | 118.7 | 170.9 | 132   | 119.4 | 114.9 | 130.8 | 107   |
| ABCC5  | 110.4 | 109.4 | 112.5 | 104.7 | 99.4  | 98.2  | 109.9 | 114.5 |
| ABCC5  | 274.5 | 243.7 | 295.7 | 263.2 | 227.6 | 175.6 | 243.6 | 204.1 |
| ABCC5  | 198.6 | 182.9 | 191.7 | 186.2 | 146.2 | 145.3 | 162   | 137.6 |
| ABCC6  | 111.6 | 111.4 | 119.3 | 115.9 | 109.2 | 96    | 121.3 | 117.4 |
| ABCC6  | 122.5 | 118.3 | 154.6 | 131.9 | 122.6 | 106.9 | 143.9 | 129.1 |
| ABCC6  | 109.6 | 110.9 | 112.9 | 108.5 | 98.1  | 92.7  | 107.6 | 117.3 |
| ABCC6  | 108.3 | 116.6 | 119.1 | 122.1 | 113.3 | 98.3  | 114.3 | 119.4 |
| ABCC6  | 127.2 | 129.1 | 123.7 | 131.3 | 120   | 98.9  | 125.8 | 110.9 |
| ABCC8  | 110.9 | 113   | 117.4 | 111.6 | 106   | 96    | 114   | 117.6 |
| ABCC9  | 114.4 | 114.8 | 105.6 | 113.6 | 101.8 | 94.3  | 116.4 | 107.2 |
| ABCC9  | 131.2 | 121.5 | 146   | 117.4 | 115.1 | 119.6 | 134.2 | 118.9 |
| ABCD1  | 120.9 | 120   | 125.5 | 154.5 | 107   | 114.9 | 160.6 | 124.9 |
| ABCD2  | 119.8 | 111.6 | 113.2 | 123.5 | 99.9  | 96.9  | 119.1 | 102.5 |
| ABCD4  | 125.3 | 123.2 | 111.3 | 118.3 | 117.7 | 99.8  | 124   | 115.6 |

|         |       |        |       |        |       |       |        |        |
|---------|-------|--------|-------|--------|-------|-------|--------|--------|
| ABCD4   | 129.9 | 121.6  | 129   | 123.6  | 115.6 | 99.8  | 123.3  | 121.2  |
| ABCE1   | 336.8 | 318.7  | 342.8 | 356.7  | 352   | 265.1 | 333.4  | 341    |
| ABCE1   | 324.8 | 276.6  | 285.4 | 322.8  | 362.4 | 204.1 | 302    | 339    |
| ABCF1   | 397.1 | 570.6  | 274.7 | 533.5  | 363.6 | 276.8 | 459.3  | 471.3  |
| ABCF1   | 992.4 | 1270.5 | 721.7 | 1044.2 | 817.2 | 582.2 | 1187.4 | 1209.3 |
| ABCF2   | 130.6 | 154.7  | 144.5 | 134.1  | 119.6 | 120.3 | 147.2  | 133.2  |
| ABCF2   | 164.3 | 185.5  | 150.5 | 184.2  | 148.9 | 127.6 | 180.9  | 149.7  |
| ABCF2   | 147.4 | 162.8  | 130.1 | 159.5  | 135.7 | 120.8 | 155.2  | 148.1  |
| ABCF3   | 145.7 | 145.7  | 146.5 | 151.6  | 126.8 | 116.9 | 148.6  | 138.1  |
| ABCG1   | 135.9 | 143.5  | 129.7 | 146    | 137.5 | 107.5 | 146.5  | 124.5  |
| ABCG1   | 117.1 | 111.4  | 109.4 | 125.5  | 116.1 | 102.9 | 131.2  | 109    |
| ABCG1   | 118.1 | 117.2  | 122.5 | 113.9  | 106.4 | 100.6 | 116.1  | 117.1  |
| ABCG1   | 124.8 | 134.6  | 136.3 | 144.7  | 137.5 | 114.2 | 144    | 132.3  |
| ABCG1   | 122.4 | 127.3  | 133.5 | 142.5  | 114.6 | 111.8 | 125.2  | 134.2  |
| ABCG1   | 116.2 | 122.8  | 125.9 | 122.7  | 112.9 | 116.8 | 118.5  | 124.2  |
| ABCG2   | 111.2 | 121.8  | 115.5 | 108.8  | 107.2 | 94.9  | 109    | 112.9  |
| ABCG4   | 111.4 | 117.1  | 119.7 | 115.8  | 108.6 | 101.9 | 119.3  | 113.8  |
| ABCG5   | 130.6 | 122.4  | 134.1 | 132.2  | 111.2 | 103.9 | 124.1  | 118.4  |
| ABCG8   | 111.2 | 110.6  | 119.4 | 128.8  | 107.2 | 102.4 | 115.7  | 124.3  |
| ABHD1   | 124   | 117.7  | 118.5 | 124.2  | 116.6 | 102.6 | 127.6  | 111.6  |
| ABHD10  | 133.6 | 134.2  | 143.3 | 116.6  | 129.3 | 119.9 | 132.5  | 133.2  |
| ABHD11  | 121.9 | 114    | 137.2 | 131.8  | 115.9 | 104.4 | 129.9  | 129.4  |
| ABHD11  | 119.4 | 110.3  | 120.3 | 116.1  | 121.5 | 100.9 | 123.1  | 119.7  |
| ABHD11  | 130.7 | 128.3  | 140   | 136    | 126.8 | 121   | 124.9  | 127.6  |
| ABHD12  | 129.9 | 123.9  | 147   | 147.5  | 133.1 | 134.6 | 139.9  | 132.5  |
| ABHD12  | 174.7 | 156.4  | 297.8 | 186.2  | 133.5 | 151.6 | 172.9  | 148.2  |
| ABHD13  | 111.7 | 116    | 122.2 | 131.8  | 113.4 | 104.5 | 125.1  | 119.8  |
| ABHD14A | 191.4 | 205.1  | 213.6 | 177.4  | 142.8 | 159.5 | 134.3  | 129.5  |
| ABHD14B | 189.9 | 218.5  | 217.7 | 196.8  | 143.1 | 160.6 | 171.6  | 182.5  |
| ABHD2   | 142.3 | 125.3  | 145.2 | 141.3  | 130.7 | 127.5 | 137.3  | 124.5  |
| ABHD2   | 112.1 | 122.3  | 113.7 | 126.4  | 103.4 | 94.4  | 109.5  | 115    |
| ABHD2   | 127   | 123.2  | 130.2 | 145.8  | 118.4 | 122.9 | 123.9  | 145.6  |
| ABHD3   | 293.1 | 214.3  | 333.6 | 329.6  | 243.3 | 292.1 | 277    | 388.6  |
| ABHD4   | 138.2 | 143.7  | 148.1 | 179.4  | 131.5 | 139.1 | 184.5  | 194.5  |
| ABHD5   | 130.2 | 133.9  | 139.9 | 149.4  | 123   | 117.4 | 147.2  | 137.8  |
| ABHD6   | 176.8 | 161.1  | 140.6 | 161.8  | 145.3 | 151.5 | 161.5  | 146.7  |
| ABHD7   | 122.2 | 145.8  | 143   | 135.5  | 145.4 | 120.6 | 124.8  | 132.6  |
| ABHD8   | 288.4 | 304.1  | 261.6 | 259.7  | 199.3 | 229.3 | 247.3  | 232.3  |
| ABHD9   | 113.7 | 120.4  | 130.2 | 116.5  | 113.6 | 96.8  | 121.2  | 117.9  |
| ABI1    | 108.8 | 118    | 114.6 | 119.7  | 112.1 | 111   | 120.6  | 108.5  |
| ABI1    | 197.5 | 243.2  | 178.7 | 224.6  | 193.4 | 255.9 | 211.4  | 274.9  |
| ABI2    | 121.6 | 121.6  | 122.7 | 127.1  | 111.5 | 108.1 | 126.4  | 118.1  |
| ABI2    | 174.9 | 146.6  | 148.4 | 157.9  | 135.9 | 133.4 | 144.4  | 157.1  |
| ABI2    | 114   | 116    | 118.5 | 122.9  | 114.2 | 99.6  | 115.8  | 123    |
| ABI3    | 165.4 | 176.3  | 305.9 | 183.8  | 154.4 | 206.2 | 140.7  | 137.5  |
| ABI3BP  | 124   | 130.1  | 125   | 130.4  | 118.9 | 105.7 | 125.4  | 118.8  |
| ABL1    | 226.2 | 264.5  | 240.4 | 247.8  | 190.3 | 192.9 | 235.4  | 240.8  |
| ABL1    | 114   | 113.3  | 115.5 | 121.1  | 119.3 | 111.8 | 127.1  | 128.4  |
| ABL1    | 110.9 | 104.8  | 110.3 | 113    | 102.8 | 105.3 | 112.9  | 108.6  |
| ABL2    | 129.3 | 116.7  | 118   | 137.6  | 111.9 | 105.9 | 133.5  | 124    |
| ABL2    | 120.2 | 126.5  | 126   | 119    | 108.8 | 105.7 | 118.6  | 122.8  |

|        |        |        |        |        |       |        |        |        |
|--------|--------|--------|--------|--------|-------|--------|--------|--------|
| ABL2   | 107.7  | 111.7  | 110.8  | 114.1  | 109.3 | 97.3   | 113.7  | 118.5  |
| ABLIM1 | 2354.2 | 3093.8 | 2731.3 | 3134.7 | 2851  | 2624.2 | 3408.1 | 4150.2 |
| ABLIM1 | 195.8  | 212    | 237.9  | 208.1  | 250.1 | 146.7  | 185.2  | 233.4  |
| ABLIM1 | 113.9  | 113.3  | 123.7  | 126.1  | 110.5 | 101.3  | 126.9  | 113.5  |
| ABLIM1 | 433.8  | 602.1  | 605.2  | 635    | 715.3 | 556.3  | 605.4  | 605.7  |
| ABLIM2 | 130.7  | 137.3  | 129.4  | 137    | 136.2 | 117    | 133    | 125.2  |
| ABLIM3 | 119.9  | 126.8  | 128.4  | 122.4  | 106.6 | 100.8  | 125.4  | 123.9  |
| ABO    | 115.2  | 117.4  | 131.1  | 119.4  | 108   | 100.7  | 117.6  | 113.8  |
| ABP1   | 132.5  | 111.3  | 119.3  | 132.2  | 109.2 | 107.3  | 117.2  | 118    |
| ABR    | 667.6  | 580.5  | 619.6  | 772.7  | 393.8 | 482.6  | 819.2  | 605.3  |
| ABR    | 125.1  | 118.4  | 138    | 124.7  | 123.9 | 107.1  | 132.3  | 124.3  |
| ABR    | 123.4  | 123.3  | 114.9  | 118.4  | 102.3 | 98.8   | 122.4  | 116    |
| ABRA   | 121.4  | 112.5  | 112.5  | 123.6  | 102.2 | 97.9   | 114.4  | 117.7  |
| ABT1   | 139.2  | 121    | 133.5  | 139.3  | 104.1 | 110.5  | 141    | 142.2  |
| ABTB1  | 422.2  | 424.5  | 450.4  | 576    | 394.1 | 405.3  | 462.4  | 482.1  |
| ABTB1  | 205.3  | 267.2  | 226.2  | 268    | 202.6 | 196    | 266.9  | 213    |
| ABTB2  | 105.5  | 106.9  | 113.8  | 112.8  | 102.9 | 90.8   | 108.3  | 121.1  |
| ACAA1  | 317.5  | 400.3  | 358.5  | 365    | 272.8 | 224.7  | 301.4  | 267.2  |
| ACAA2  | 140.3  | 143.5  | 145    | 154.6  | 130.1 | 149.9  | 146.1  | 143.3  |
| ACACA  | 177.9  | 179.3  | 164.2  | 212.1  | 156.6 | 141.3  | 209.4  | 258.9  |
| ACACA  | 132    | 144.1  | 137    | 140.7  | 143.3 | 108.6  | 155.7  | 183.7  |
| ACACA  | 109.1  | 115.3  | 112.3  | 122    | 108.4 | 101.2  | 122.9  | 124.7  |
| ACACB  | 191.8  | 208.8  | 191.3  | 172.8  | 195   | 159.1  | 159.6  | 159.5  |
| ACAD10 | 131.3  | 123.6  | 127.9  | 129.1  | 124.1 | 126.6  | 141.5  | 132    |
| ACAD11 | 274.1  | 244.7  | 395.5  | 285.1  | 238.6 | 285.2  | 257.6  | 219    |
| ACAD8  | 328.5  | 346.2  | 348.1  | 310.2  | 253.7 | 236.6  | 235.4  | 276.1  |
| ACAD9  | 242.7  | 388.5  | 285.8  | 243.5  | 302.3 | 185.9  | 207.7  | 326.8  |
| ACADL  | 115.8  | 119.4  | 111.2  | 118.4  | 106.8 | 105    | 115.2  | 117.8  |
| ACADM  | 717.1  | 800.8  | 707    | 936.1  | 758.3 | 512.6  | 861.6  | 1006   |
| ACADS  | 130.9  | 128.4  | 145.4  | 131.5  | 112.6 | 120    | 121.7  | 123.8  |
| ACADSB | 122.8  | 121.7  | 115.5  | 122.4  | 113.3 | 108.1  | 118.3  | 135    |
| ACADVL | 119.6  | 124.2  | 141.2  | 114.1  | 115.7 | 109.8  | 117.4  | 115.2  |
| ACADVL | 1384.2 | 1172.8 | 1725.3 | 1116.7 | 900.2 | 1202   | 1110   | 894.8  |
| ACADVL | 378.6  | 411.7  | 511.3  | 401.9  | 295   | 338.8  | 306.6  | 254.9  |
| ACAT1  | 284.5  | 275.9  | 438.7  | 364.6  | 269.6 | 264.1  | 285.5  | 295.5  |
| ACAT2  | 122.1  | 122    | 124.9  | 121.8  | 111.8 | 98.3   | 119.5  | 126.4  |
| ACBD3  | 342.1  | 402.1  | 306.8  | 394.8  | 274.8 | 259.6  | 365.4  | 412.3  |
| ACBD4  | 123    | 134.1  | 137.7  | 138.1  | 112.8 | 104.7  | 127.2  | 126    |
| ACBD5  | 115.8  | 129    | 137.4  | 133.7  | 121.3 | 119    | 130.7  | 117.6  |
| ACBD5  | 111    | 111.8  | 113.9  | 113.4  | 112   | 100.8  | 121.4  | 108.5  |
| ACBD5  | 112.4  | 110.1  | 116    | 117.9  | 104.2 | 103.2  | 109.7  | 117.9  |
| ACBD6  | 142.4  | 159.7  | 158    | 151    | 128.4 | 121.4  | 144    | 141    |
| ACBD7  | 111.1  | 109.7  | 110.4  | 116.7  | 109.2 | 90.3   | 124.2  | 116.7  |
| ACBD7  | 113.1  | 127    | 113.7  | 124    | 112.5 | 98.4   | 121    | 114.2  |
| ACCN1  | 106    | 119.2  | 105.6  | 109.7  | 111.5 | 98.9   | 113.1  | 110.3  |
| ACCN2  | 116.7  | 122.9  | 113.5  | 117.2  | 103.5 | 96.7   | 116.3  | 116.5  |
| ACCN2  | 113    | 110    | 121.2  | 123.2  | 101.6 | 96.1   | 117.9  | 114.8  |
| ACCN3  | 131.3  | 129.6  | 125.6  | 127.4  | 118.3 | 108.5  | 135    | 127.1  |
| ACCN3  | 105.2  | 112.7  | 116.7  | 132.4  | 108.8 | 109.9  | 122.1  | 111.4  |
| ACCN4  | 119    | 120.1  | 138.1  | 118.4  | 117.9 | 107.1  | 133.3  | 126.5  |
| ACCN4  | 108.4  | 105.2  | 108    | 115.5  | 103.5 | 95.9   | 110    | 119.1  |

|        |       |       |        |       |       |       |       |       |
|--------|-------|-------|--------|-------|-------|-------|-------|-------|
| ACCN4  | 116.5 | 115   | 114.6  | 123.3 | 108   | 100.6 | 112.9 | 112.1 |
| ACCN5  | 115.5 | 115.2 | 123.9  | 114.7 | 112.8 | 95.6  | 118.7 | 115.5 |
| ACD    | 226.6 | 250.6 | 216.5  | 233.6 | 216.3 | 220.2 | 255.6 | 242.7 |
| ACE    | 117.7 | 119.2 | 112.3  | 121.3 | 106.5 | 97.4  | 120.3 | 115   |
| ACE    | 113.6 | 109.1 | 127.2  | 106.9 | 105.7 | 96.2  | 115.9 | 111.3 |
| ACE    | 123.6 | 114.2 | 112.1  | 121.8 | 113.7 | 103.3 | 112.2 | 112.8 |
| ACE2   | 120.4 | 117.1 | 120    | 129.8 | 106.9 | 100.9 | 120.4 | 113   |
| ACF    | 103.9 | 116.2 | 117    | 116.1 | 111.6 | 105   | 119.9 | 125.6 |
| ACF    | 119.2 | 117.7 | 117.9  | 121.7 | 114.9 | 106.2 | 118   | 117.5 |
| ACF    | 108.7 | 129.2 | 116.8  | 127.1 | 117.8 | 98.2  | 120.2 | 120.1 |
| ACHE   | 122.5 | 110.9 | 120.1  | 115.3 | 102   | 100.1 | 111.8 | 109.3 |
| ACHE   | 113.9 | 108.2 | 111.5  | 115.7 | 100   | 96.8  | 116.3 | 114.1 |
| ACIN1  | 460.5 | 421.6 | 418.1  | 441.7 | 343.7 | 366.9 | 586.3 | 598.9 |
| ACLY   | 633.7 | 570.6 | 503    | 659.3 | 553.2 | 547.8 | 587.4 | 627.4 |
| ACMSD  | 132   | 141.5 | 137.9  | 149.3 | 136.5 | 119   | 141.5 | 143.5 |
| ACN9   | 392.4 | 389   | 444.8  | 421   | 340.8 | 261.8 | 254.6 | 248.1 |
| ACO1   | 315.6 | 316   | 290    | 317.5 | 230.2 | 209.3 | 205.9 | 167.8 |
| ACO2   | 148.1 | 181.2 | 165.3  | 142.6 | 152.6 | 150.2 | 146.7 | 153.3 |
| ACOT1  | 118.7 | 123.2 | 119.6  | 118.7 | 110.9 | 101   | 120.8 | 116.7 |
| ACOT1  | 119.2 | 133.4 | 132.4  | 120.8 | 111.8 | 97.7  | 114.2 | 126.5 |
| ACOT11 | 121.3 | 113.1 | 142.1  | 124.3 | 102.6 | 96.3  | 124.5 | 108.6 |
| ACOT11 | 112.3 | 121.4 | 117.2  | 119.7 | 119.9 | 99.7  | 118.9 | 114.6 |
| ACOT12 | 112.7 | 118   | 131.2  | 118.8 | 112.7 | 113   | 124.2 | 119.9 |
| ACOT2  | 117.3 | 117.5 | 119.1  | 121.3 | 115   | 98.5  | 121.6 | 110.1 |
| ACOT4  | 127.9 | 122.7 | 134.7  | 120.3 | 113.1 | 97    | 124.9 | 122   |
| ACOT6  | 115.2 | 112.4 | 113    | 117.2 | 101.3 | 93.1  | 109.8 | 111.9 |
| ACOT7  | 114.4 | 109.1 | 123.7  | 122   | 110.3 | 98.4  | 120.2 | 119.3 |
| ACOT7  | 112.5 | 104.1 | 113.3  | 111.2 | 108.5 | 100.8 | 118.1 | 113.5 |
| ACOT7  | 147.2 | 186   | 165.9  | 164   | 157.4 | 138.9 | 212.7 | 334.4 |
| ACOT7  | 123.6 | 113.9 | 132.7  | 125.8 | 120.1 | 108.4 | 129.8 | 112.1 |
| ACOT7  | 121.4 | 119.4 | 125.1  | 137.3 | 118.8 | 118.7 | 150.4 | 198.4 |
| ACOT7  | 119.8 | 120.7 | 113.9  | 113.2 | 106.8 | 99    | 119.7 | 126.5 |
| ACOT8  | 127.7 | 136.6 | 127.9  | 125.3 | 117.6 | 106.7 | 130.5 | 123.7 |
| ACOT9  | 141.6 | 128.4 | 140.5  | 153.2 | 120.6 | 141.5 | 165.8 | 128.7 |
| ACOT9  | 215.3 | 164.8 | 229    | 244.6 | 181.7 | 238.7 | 221.6 | 166.9 |
| ACOX1  | 143.3 | 150.5 | 142.4  | 147.6 | 121.9 | 112.2 | 147.7 | 133   |
| ACOX1  | 114.2 | 105.5 | 113.3  | 118.7 | 105.6 | 90.7  | 109.2 | 106.8 |
| ACOX1  | 115   | 110.2 | 116.1  | 110.3 | 107.9 | 101.5 | 115.6 | 106   |
| ACOX2  | 110.1 | 103.9 | 109.5  | 114.5 | 103.8 | 102.2 | 111.4 | 103.8 |
| ACOX3  | 148   | 154.4 | 181    | 167   | 136.2 | 141.3 | 179   | 154.2 |
| ACOXL  | 116.5 | 115.8 | 107.8  | 107.3 | 99.4  | 96.8  | 111.3 | 108.9 |
| ACP1   | 418.8 | 382   | 472.4  | 416   | 398   | 478.8 | 405.6 | 503.9 |
| ACP1   | 663.9 | 794.7 | 1119.5 | 894.9 | 842.1 | 779.1 | 696.6 | 689.4 |
| ACP2   | 163   | 153.4 | 151.4  | 154.1 | 138.3 | 125.1 | 134.8 | 146.3 |
| ACP5   | 543.7 | 306.2 | 510.2  | 473.5 | 229.6 | 254.9 | 285.6 | 175.5 |
| ACP6   | 130.4 | 139   | 133.1  | 139.8 | 128.7 | 116.2 | 122.1 | 112.5 |
| ACPL2  | 156.9 | 210.6 | 166.4  | 156.6 | 176.1 | 129.6 | 145.8 | 139.2 |
| ACPP   | 108.4 | 118.4 | 130.8  | 115.6 | 110.1 | 100.3 | 124   | 121.5 |
| ACPT   | 155   | 163.3 | 168.3  | 158.8 | 146.2 | 132.2 | 161   | 155   |
| ACPT   | 123.6 | 112.7 | 106.5  | 123.2 | 110.7 | 103.4 | 122   | 107.8 |
| ACR    | 116.5 | 122.5 | 125.2  | 121.8 | 106   | 98.4  | 117.5 | 111.1 |

|        |        |        |         |        |        |        |        |        |
|--------|--------|--------|---------|--------|--------|--------|--------|--------|
| ACRBP  | 116.3  | 127.1  | 129.7   | 120.4  | 115.2  | 108.8  | 129.2  | 123.9  |
| ACRC   | 145.4  | 149    | 164.1   | 145.5  | 131.7  | 121.2  | 148.7  | 154.1  |
| ACRV1  | 118.1  | 131    | 120.3   | 115.8  | 114.9  | 97.4   | 118.8  | 126.1  |
| ACRV1  | 116    | 115.3  | 117.8   | 117.1  | 115.4  | 102.8  | 123    | 115.4  |
| ACSBG1 | 115.2  | 107.6  | 134.2   | 119    | 112.7  | 95.4   | 116.4  | 110.3  |
| ACSBG2 | 115.5  | 117.4  | 117.2   | 125.7  | 117    | 89.9   | 116    | 117.6  |
| ACSL1  | 184.7  | 152.8  | 127     | 178.7  | 142.1  | 128.6  | 166    | 132.2  |
| ACSL3  | 317.6  | 340.3  | 295.6   | 315.7  | 329.1  | 243.4  | 446.2  | 360.1  |
| ACSL3  | 109.8  | 122.2  | 124.9   | 124.2  | 123.4  | 100.2  | 122.4  | 129.3  |
| ACSL3  | 132.2  | 140.2  | 143.4   | 158.9  | 136.7  | 123.8  | 146.6  | 143.6  |
| ACSL4  | 119.3  | 122.9  | 119.6   | 126.5  | 118.7  | 100.4  | 113.2  | 115.7  |
| ACSL4  | 158.8  | 156.5  | 146.9   | 146.3  | 141.9  | 120.3  | 157.9  | 146.7  |
| ACSL4  | 392.7  | 353.4  | 359.8   | 426.7  | 326.7  | 323    | 422.2  | 340.7  |
| ACSL5  | 160.9  | 159.4  | 197.5   | 192.2  | 165    | 142.1  | 156.6  | 147.1  |
| ACSL5  | 112.1  | 113.5  | 115.6   | 117.3  | 112.3  | 106.5  | 120.9  | 109.1  |
| ACSL5  | 116    | 120.2  | 115.1   | 115.7  | 110.7  | 96.1   | 121.3  | 112.8  |
| ACSL5  | 116    | 112.7  | 112.2   | 125.3  | 119.8  | 95     | 124.5  | 110.7  |
| ACSL5  | 632.3  | 609.6  | 571.6   | 591.7  | 449.7  | 427.1  | 648.2  | 484.7  |
| ACSL6  | 105.6  | 110.5  | 124.5   | 117    | 118.1  | 99.3   | 113.8  | 128.5  |
| ACSL6  | 109.8  | 124.8  | 118.4   | 126.3  | 114.1  | 99.6   | 126.1  | 107.4  |
| ACSL6  | 118.7  | 115    | 120.1   | 117.4  | 115.1  | 96.4   | 118.1  | 115.9  |
| ACSM1  | 106.6  | 106.9  | 113     | 112.1  | 102.5  | 90.2   | 103.7  | 103.4  |
| ACSM2  | 109    | 109.6  | 110     | 119.6  | 106.3  | 95.3   | 115.5  | 107.1  |
| ACSM2  | 118    | 111.7  | 113.2   | 115.7  | 113.6  | 97.5   | 115.9  | 115    |
| ACSM3  | 119.2  | 126.1  | 131.3   | 127.1  | 117.4  | 105.1  | 118.1  | 118.1  |
| ACSM3  | 121.2  | 128.4  | 111.8   | 119.5  | 110.5  | 96.2   | 118.1  | 111.2  |
| ACSM3  | 155.8  | 136.7  | 155.2   | 165.4  | 145.8  | 132.2  | 147.4  | 151.2  |
| ACSS1  | 329.8  | 428.9  | 215.7   | 307.7  | 239.1  | 170.5  | 306.9  | 273.1  |
| ACSS2  | 130.3  | 116.2  | 126.7   | 113.5  | 120.3  | 119.2  | 127.2  | 112.5  |
| ACSS2  | 117.3  | 113.3  | 109.2   | 136.2  | 121.2  | 102.2  | 132.3  | 111.1  |
| ACSS2  | 280.3  | 328.1  | 508.6   | 351.5  | 252.4  | 400.6  | 266.9  | 277.6  |
| ACSS2  | 453.3  | 423.1  | 675.8   | 481.6  | 329.3  | 496.3  | 334.7  | 347    |
| ACTA1  | 115.6  | 116.8  | 111.4   | 123.8  | 111.8  | 101.8  | 113.9  | 123.7  |
| ACTA2  | 277.7  | 183.9  | 326.9   | 286    | 146.4  | 215.8  | 273.4  | 175.6  |
| ACTB   | 3948.5 | 3579.6 | 6996.9  | 3873.8 | 2768.6 | 4938.8 | 2941.9 | 2139.7 |
| ACTB   | 3314.5 | 2950.7 | 5638.2  | 2900.8 | 1917.6 | 4457.6 | 2450.3 | 1812.6 |
| ACTBL1 | 105.3  | 113.7  | 120.4   | 116.5  | 109.4  | 105.6  | 117.9  | 99.7   |
| ACTC   | 115.1  | 112.6  | 120.3   | 116.2  | 101.4  | 105.3  | 115.9  | 113.5  |
| ACTG1  | 9457.2 | 7900.6 | 10806.5 | 8007.7 | 5664.1 | 9237.1 | 6334.4 | 5294.3 |
| ACTG2  | 115.9  | 117.6  | 122.9   | 119.3  | 116.5  | 97.9   | 118.6  | 121.8  |
| ACTL6A | 564.4  | 559.6  | 576.4   | 602.4  | 519.4  | 510.4  | 490.7  | 444.2  |
| ACTL6A | 268.2  | 232.7  | 260.2   | 235.5  | 190.4  | 194    | 230.6  | 204.3  |
| ACTL6B | 110.9  | 114.4  | 117.1   | 117.5  | 105.6  | 101.3  | 119.8  | 117.1  |
| ACTL7A | 111.5  | 113.6  | 112.5   | 114.3  | 102.8  | 92.4   | 112.8  | 114.2  |
| ACTL7B | 127.4  | 125    | 124.5   | 121.5  | 109.3  | 98.9   | 123.3  | 111.9  |
| ACTL8  | 113.9  | 123.3  | 139.7   | 125.2  | 112.3  | 107.2  | 121.3  | 121.6  |
| ACTN1  | 1075.7 | 1347.3 | 1010.8  | 1079.5 | 1075.1 | 648    | 975.6  | 1083.7 |
| ACTN2  | 119    | 118.1  | 128.3   | 124.3  | 120.2  | 102.1  | 139.2  | 119.6  |
| ACTN3  | 111.2  | 109    | 119.6   | 122.2  | 106.7  | 89     | 118.4  | 123    |
| ACTN4  | 347.8  | 286.2  | 298.2   | 370.1  | 243.4  | 324.6  | 437    | 322.8  |
| ACTR10 | 300.1  | 326.3  | 388.7   | 343.9  | 327.8  | 435.9  | 473.8  | 406.5  |

|        |        |       |        |        |        |        |        |        |
|--------|--------|-------|--------|--------|--------|--------|--------|--------|
| ACTR1A | 481    | 649.1 | 501    | 614.3  | 391.3  | 436.9  | 776.5  | 610.9  |
| ACTR1B | 330.3  | 329.7 | 327.3  | 330.1  | 246.6  | 259.9  | 229.1  | 226.2  |
| ACTR2  | 2340.9 | 2553  | 3130.5 | 2908.6 | 2075.5 | 2270.3 | 2667.1 | 2413.6 |
| ACTR3  | 506.5  | 495.2 | 615.3  | 669.7  | 480    | 632.7  | 778    | 668.6  |
| ACTR3B | 118.9  | 123.3 | 117.8  | 118.7  | 115    | 105    | 120.9  | 126.9  |
| ACTR3B | 113.7  | 113.1 | 113.3  | 118.9  | 104.8  | 96.6   | 124    | 125.2  |
| ACTR3B | 122.2  | 125.9 | 123.2  | 135    | 119.1  | 105.6  | 129.7  | 128.4  |
| ACTR5  | 224.3  | 197.4 | 187.4  | 205.9  | 180.9  | 156    | 218.6  | 202.2  |
| ACTR6  | 475.9  | 536.9 | 543.6  | 568.4  | 423.3  | 401.9  | 400.3  | 382.9  |
| ACTR8  | 155.9  | 182.7 | 165    | 180.4  | 149.9  | 128.2  | 160    | 149.6  |
| ACTRT1 | 136    | 135   | 124.9  | 130.8  | 124.8  | 108.1  | 127.8  | 123.5  |
| ACVR1  | 477.2  | 442.1 | 298.1  | 678.3  | 535.6  | 537.1  | 571.1  | 443.1  |
| ACVR1B | 108.5  | 124.8 | 129.2  | 118    | 112.8  | 105.2  | 127.6  | 119.3  |
| ACVR1B | 123.5  | 129.4 | 115.8  | 129.1  | 123    | 106.3  | 137.9  | 140.2  |
| ACVR1B | 190.6  | 239.7 | 207.2  | 222    | 203.3  | 190    | 189.9  | 213.3  |
| ACVR1B | 111.6  | 115.1 | 112    | 123.3  | 102.8  | 104.3  | 112.6  | 125    |
| ACVR1C | 114.2  | 108.5 | 122.1  | 119.7  | 106    | 100.9  | 110    | 117.8  |
| ACVR2A | 186.3  | 180.7 | 214    | 227.3  | 169.8  | 123.4  | 200.8  | 170.7  |
| ACVR2B | 134.1  | 111   | 117    | 118.6  | 106.9  | 105.4  | 115.5  | 114.1  |
| ACVRL1 | 108.1  | 109.9 | 118.9  | 117.8  | 103.7  | 98     | 114    | 108.3  |
| ACY1   | 147.8  | 146   | 140.9  | 143.9  | 133.2  | 124.2  | 136.8  | 129.3  |
| ACY1L2 | 134.6  | 140.8 | 137.2  | 141.1  | 135    | 115.9  | 141.6  | 131.4  |
| ACY3   | 114.3  | 108   | 115.6  | 117.7  | 106.4  | 94.7   | 109.9  | 112.9  |
| ACYP1  | 121.6  | 142   | 139.5  | 141.8  | 121.9  | 111.9  | 125.6  | 116    |
| ACYP1  | 256    | 222.6 | 286.5  | 212.1  | 197.5  | 186.4  | 206.4  | 176.4  |
| ACYP1  | 129    | 129.7 | 125.9  | 127.2  | 115.3  | 103.1  | 140.8  | 125    |
| ACYP2  | 189.7  | 207.2 | 171.5  | 197.4  | 186.4  | 192.1  | 208.5  | 203.8  |
| AD031  | 122.6  | 118.9 | 132.4  | 120.7  | 107.6  | 106.7  | 112.8  | 111.4  |
| ADA    | 445.9  | 420.4 | 852.5  | 358.9  | 280.7  | 598.4  | 244.1  | 227.9  |
| ADAL   | 127.8  | 132.9 | 132.6  | 133.2  | 124.8  | 105.9  | 134.5  | 135.2  |
| ADAM10 | 114.7  | 126.3 | 129.6  | 124.8  | 123.7  | 115.1  | 119.3  | 130.4  |
| ADAM11 | 115.5  | 120.9 | 116.1  | 118    | 114.9  | 108.7  | 124.8  | 123.8  |
| ADAM12 | 119.7  | 108.6 | 123    | 125.2  | 111    | 99.1   | 122.1  | 117.9  |
| ADAM12 | 121.8  | 133.6 | 116    | 119.3  | 111.4  | 111.7  | 137.8  | 116.1  |
| ADAM12 | 113.3  | 120.5 | 115    | 122    | 114.1  | 99     | 116.8  | 114.8  |
| ADAM15 | 117.7  | 114.5 | 135.1  | 133.7  | 112.9  | 112.4  | 123    | 118.9  |
| ADAM15 | 283.7  | 256.8 | 496.5  | 291.9  | 204.1  | 227.1  | 275.8  | 287.8  |
| ADAM15 | 118.1  | 117.9 | 116.5  | 121    | 113.6  | 97.3   | 117.4  | 114.4  |
| ADAM17 | 187.6  | 157.3 | 151    | 179.4  | 143.2  | 152.5  | 237.3  | 192.3  |
| ADAM18 | 108.3  | 111.9 | 106.7  | 106.3  | 107    | 92.5   | 114.4  | 111.5  |
| ADAM19 | 121.7  | 124   | 132.1  | 127.1  | 135.3  | 106.2  | 124.6  | 121.6  |
| ADAM19 | 110.2  | 120.3 | 117.1  | 126    | 105.9  | 96.6   | 128.1  | 115.1  |
| ADAM19 | 288.8  | 272.5 | 310.1  | 279.5  | 212    | 287.5  | 204.5  | 180.3  |
| ADAM2  | 115.5  | 135.7 | 133.1  | 120.5  | 111.8  | 102.3  | 127.3  | 125.3  |
| ADAM20 | 112.3  | 115.6 | 111.6  | 117.8  | 109    | 105.5  | 125.9  | 109    |
| ADAM21 | 109    | 120.9 | 127.5  | 131.6  | 116.8  | 106.8  | 127.7  | 119.4  |
| ADAM22 | 120.4  | 109.6 | 114.3  | 121.9  | 106.6  | 100.4  | 111    | 111.5  |
| ADAM22 | 112.3  | 120.1 | 118.1  | 123.3  | 107.6  | 96     | 126.1  | 119.3  |
| ADAM22 | 107    | 108.6 | 126.3  | 120.7  | 108.9  | 120.3  | 119.4  | 121    |
| ADAM23 | 114.2  | 125.7 | 121.9  | 124.8  | 108.9  | 101.5  | 121.7  | 118.8  |
| ADAM28 | 121.5  | 132.3 | 123.4  | 126.2  | 123.3  | 99.3   | 123.9  | 112.9  |

|          |       |       |       |       |       |       |       |       |
|----------|-------|-------|-------|-------|-------|-------|-------|-------|
| ADAM28   | 146.5 | 123.4 | 133.3 | 121.7 | 123.5 | 102.1 | 120.1 | 120.8 |
| ADAM28   | 115.2 | 116.4 | 135.4 | 117.1 | 110.7 | 104.9 | 118.8 | 117.7 |
| ADAM29   | 102.6 | 119.5 | 126.4 | 121.4 | 121.8 | 109.8 | 125.2 | 121.2 |
| ADAM30   | 116   | 110.5 | 109.8 | 105.4 | 101.9 | 101.8 | 123.8 | 113.4 |
| ADAM32   | 115.6 | 114.6 | 117.2 | 121   | 111.2 | 98.4  | 114.9 | 116.6 |
| ADAM32   | 121.1 | 108.4 | 121.1 | 120.8 | 110.7 | 96.1  | 116.9 | 124.2 |
| ADAM33   | 118.2 | 118.2 | 123.9 | 121.2 | 122.2 | 104.7 | 122.1 | 126   |
| ADAM33   | 118.3 | 119.7 | 130.2 | 132.6 | 115.9 | 112.1 | 120   | 114.8 |
| ADAM3A   | 102.8 | 105.8 | 107   | 114.5 | 106   | 105   | 119.1 | 111.3 |
| ADAM6    | 115.3 | 115.7 | 120.8 | 133.9 | 108.2 | 102.3 | 124.9 | 123.6 |
| ADAM7    | 162.3 | 174.1 | 159.8 | 153.8 | 149.5 | 129.1 | 164.2 | 149   |
| ADAM8    | 333.7 | 283.4 | 289.6 | 287.1 | 167.1 | 178.7 | 218.6 | 183.7 |
| ADAM9    | 122   | 118.6 | 145.8 | 133.9 | 116   | 148.6 | 131.3 | 132.4 |
| ADAMDEC  | 246.7 | 150.6 | 219.9 | 263.5 | 148.9 | 140.7 | 189.9 | 149.8 |
| ADAMTS1  | 115.2 | 112.5 | 124   | 135.1 | 125.9 | 101.1 | 124.8 | 121.2 |
| ADAMTS1C | 108.9 | 133.6 | 127.9 | 123.6 | 108   | 105.1 | 115.1 | 129.5 |
| ADAMTS12 | 109.3 | 119.6 | 113.9 | 116.2 | 106.6 | 104.3 | 122.8 | 119.4 |
| ADAMTS13 | 118.2 | 110.8 | 136.3 | 135.9 | 115   | 101.3 | 114.3 | 120.6 |
| ADAMTS13 | 111   | 111.8 | 110.8 | 105.9 | 104.6 | 95    | 114.5 | 115.9 |
| ADAMTS13 | 118.6 | 120.3 | 131.5 | 127   | 119.8 | 106.3 | 127.3 | 122.2 |
| ADAMTS14 | 115.1 | 115.7 | 113   | 117.5 | 111.8 | 102   | 121.2 | 120.1 |
| ADAMTS14 | 110   | 115.2 | 113.8 | 123.7 | 112.1 | 96.4  | 124.3 | 112   |
| ADAMTS15 | 119.5 | 123.1 | 115.8 | 115.2 | 114   | 98.2  | 123.4 | 119.2 |
| ADAMTS16 | 119.6 | 123.9 | 120.2 | 116.2 | 99.7  | 98.7  | 116.5 | 117.1 |
| ADAMTS17 | 118.5 | 112.1 | 113   | 118.1 | 106.8 | 102.4 | 109.1 | 121   |
| ADAMTS18 | 119.9 | 114.7 | 131.1 | 121   | 118   | 102.2 | 124.3 | 117.6 |
| ADAMTS18 | 116.9 | 114.6 | 117.9 | 110.5 | 106.1 | 95.8  | 125.9 | 114.9 |
| ADAMTS19 | 136.3 | 132.5 | 136.3 | 140   | 139.5 | 115.3 | 132.7 | 140.5 |
| ADAMTS2  | 112.6 | 112.4 | 120.7 | 116.3 | 99.5  | 97.9  | 114.3 | 104.2 |
| ADAMTS2  | 112.8 | 112.6 | 111.2 | 118.9 | 108.3 | 98    | 114.1 | 112.4 |
| ADAMTS2C | 121.9 | 115.6 | 127.2 | 123.7 | 116.6 | 104.2 | 133.8 | 128.7 |
| ADAMTS2C | 115.3 | 112.8 | 123.8 | 116.1 | 111.5 | 98    | 117.8 | 112.8 |
| ADAMTS3  | 111.8 | 110.2 | 123.4 | 130.3 | 118.6 | 96.5  | 114.2 | 104.5 |
| ADAMTS4  | 119.4 | 117.1 | 119.4 | 124.7 | 115.3 | 96.7  | 110.6 | 121.4 |
| ADAMTS5  | 110.6 | 111.4 | 104.7 | 119.3 | 103.7 | 92.2  | 109.2 | 109.7 |
| ADAMTS6  | 118.8 | 125   | 128.4 | 122.4 | 109.8 | 112.2 | 125   | 125.3 |
| ADAMTS7  | 117.4 | 121.4 | 117.9 | 119.6 | 113.2 | 108.7 | 120.9 | 114.7 |
| ADAMTS8  | 116.5 | 111.8 | 112.1 | 110.9 | 104.9 | 93.1  | 115.9 | 110.6 |
| ADAMTS9  | 117.4 | 116.2 | 113.9 | 118.6 | 108   | 102   | 114.2 | 113   |
| ADAMTSL1 | 121.5 | 111.6 | 119.4 | 129.5 | 112.7 | 99.1  | 119.1 | 113.8 |
| ADAMTSL1 | 109.4 | 114.2 | 116.6 | 115.6 | 107.8 | 103.1 | 108.7 | 119.6 |
| ADAMTSL1 | 106.5 | 118.1 | 107.8 | 116.1 | 110.8 | 100.3 | 115.1 | 120.5 |
| ADAMTSL1 | 117.2 | 111.1 | 114.9 | 114.6 | 99.5  | 97.5  | 123.2 | 105.7 |
| ADAMTSL2 | 113.9 | 126.1 | 128.5 | 113.1 | 110.8 | 103.5 | 113.3 | 121.3 |
| ADAMTSL3 | 124.5 | 112.7 | 128.1 | 136.2 | 122.8 | 110.7 | 124.9 | 120.6 |
| ADAMTSL5 | 119.9 | 128.9 | 129.9 | 129   | 114.6 | 103.4 | 131   | 131.2 |
| ADAR     | 920.9 | 877.9 | 875.8 | 809.9 | 507.7 | 653.5 | 672   | 590.1 |
| ADAR     | 115.7 | 108.2 | 112.6 | 147.3 | 110.6 | 92.1  | 127.3 | 118.2 |
| ADAR     | 451   | 598   | 515.9 | 572.6 | 406.8 | 394.6 | 458.4 | 439.3 |
| ADARB1   | 124.3 | 117.9 | 120.5 | 115.5 | 111.5 | 106.5 | 122.9 | 117.4 |
| ADARB1   | 179.1 | 170.5 | 179.9 | 171.9 | 160.1 | 156.4 | 166.4 | 140.2 |



|          |        |        |        |        |        |        |        |        |
|----------|--------|--------|--------|--------|--------|--------|--------|--------|
| ADARB1   | 118    | 113.2  | 113    | 118.7  | 105.4  | 91.2   | 121.7  | 117.1  |
| ADARB1   | 402.6  | 441.5  | 495    | 443.4  | 371.6  | 354.9  | 346.7  | 297.7  |
| ADARB2   | 114.5  | 130.4  | 131.5  | 123.9  | 127.3  | 112.1  | 117.9  | 135.1  |
| ADAT1    | 258.1  | 343.4  | 272.3  | 271.7  | 221.7  | 187.7  | 285.9  | 244    |
| ADC      | 113.2  | 144.9  | 128.9  | 130.2  | 120.3  | 108.3  | 129.5  | 128.8  |
| ADCK1    | 169.1  | 166.7  | 154.4  | 157.8  | 136.7  | 119.8  | 149.6  | 137.8  |
| ADCK2    | 317.1  | 361.5  | 364.5  | 324.5  | 279.6  | 255.4  | 352.4  | 376.3  |
| ADCK4    | 127.9  | 136.7  | 129.5  | 130.9  | 109.9  | 107.2  | 133    | 122.5  |
| ADCK5    | 152.7  | 150.4  | 169.6  | 150.3  | 132.5  | 128.9  | 154    | 138.1  |
| ADCY1    | 116.3  | 109.3  | 120.8  | 134.2  | 111.6  | 100.3  | 123.9  | 116.1  |
| ADCY2    | 119.5  | 110.9  | 124.9  | 124.7  | 103.3  | 101    | 134.5  | 124.3  |
| ADCY3    | 429.9  | 464    | 402.6  | 411.4  | 295.3  | 245.9  | 364    | 280.6  |
| ADCY4    | 139.3  | 123.1  | 128.9  | 116.3  | 120    | 111    | 124    | 124.7  |
| ADCY5    | 110.5  | 104.2  | 108    | 114.9  | 103.5  | 101.4  | 120.1  | 117.5  |
| ADCY6    | 112.7  | 115.2  | 115.9  | 120.4  | 115.4  | 95.4   | 115.6  | 115.2  |
| ADCY6    | 121.1  | 117    | 116.5  | 120.4  | 106.1  | 100    | 124.9  | 114.6  |
| ADCY7    | 197.4  | 205.9  | 239.4  | 198.3  | 183.6  | 164.6  | 181.3  | 167.3  |
| ADCY8    | 113.9  | 110.4  | 116.6  | 110.2  | 103.6  | 105.4  | 110.4  | 109.9  |
| ADCY9    | 134    | 144.4  | 144.2  | 151.2  | 118.1  | 123.6  | 144.4  | 132.8  |
| ADCYAP1  | 118.3  | 109.6  | 114.8  | 115.7  | 107.8  | 99.1   | 107.7  | 126.1  |
| ADCYAP1R | 116.2  | 120.4  | 123.7  | 125    | 111.1  | 99.4   | 114.7  | 118.4  |
| ADD1     | 127    | 123.8  | 137.4  | 127    | 118.7  | 113.1  | 129.2  | 119.4  |
| ADD1     | 1819.3 | 1971.5 | 1837.2 | 1901.1 | 1596.4 | 1463.2 | 1977.4 | 2106.3 |
| ADD2     | 113    | 110    | 109.2  | 122.3  | 107.7  | 101.5  | 108.7  | 119.6  |
| ADD2     | 120.1  | 121.2  | 125.5  | 110.2  | 112.1  | 106.9  | 128.1  | 124.1  |
| ADD2     | 117.2  | 123.2  | 128.6  | 117.4  | 112.2  | 105.9  | 125.2  | 120.1  |
| ADD3     | 110.9  | 108.9  | 111.3  | 112.3  | 106.6  | 97.3   | 110.4  | 111.7  |
| ADD3     | 725    | 645.2  | 640.6  | 517.2  | 702.7  | 356.4  | 657.1  | 705.6  |
| ADD3     | 1052   | 1033.9 | 816.2  | 888.4  | 895.3  | 587.8  | 1067.3 | 1395.6 |
| ADD3     | 498.1  | 593.4  | 579.6  | 552.6  | 612.3  | 440.5  | 516.8  | 517.9  |
| ADFP     | 682.3  | 759.9  | 672.1  | 799.2  | 599    | 861    | 885.7  | 986.2  |
| ADH1A    | 107.4  | 114.6  | 111.6  | 113.6  | 108.7  | 95.9   | 115.5  | 117.5  |
| ADH1B    | 114.3  | 119.2  | 121.7  | 114.9  | 101.4  | 115.7  | 117.8  | 109.4  |
| ADH1C    | 113.9  | 112.2  | 117    | 126.9  | 104.7  | 98.3   | 118    | 109.8  |
| ADH4     | 110.6  | 111.7  | 114.1  | 107.2  | 103.9  | 100.8  | 112    | 109.7  |
| ADH5     | 127.6  | 133.4  | 125.1  | 122.9  | 128.4  | 126.1  | 123.8  | 127.5  |
| ADH6     | 114.8  | 116.7  | 132.1  | 122.5  | 114.4  | 105.9  | 115.3  | 120.9  |
| ADH7     | 120.7  | 120.2  | 116.4  | 121.4  | 112.6  | 95.2   | 121.3  | 108.9  |
| ADHFE1   | 185.6  | 165.8  | 241.7  | 152.8  | 146.9  | 164.7  | 148.1  | 142    |
| ADHFE1   | 115.8  | 112.8  | 131.7  | 112.3  | 121.2  | 108.6  | 119.1  | 109.4  |
| ADI1     | 123.3  | 117.6  | 127.6  | 124.8  | 120.7  | 103.5  | 131.1  | 124.4  |
| ADIPOQ   | 110.8  | 111    | 108    | 108    | 110.8  | 97.5   | 121    | 106.8  |
| ADIPOR1  | 371.7  | 314.4  | 272.6  | 412.1  | 238.3  | 317.7  | 437.9  | 409.3  |
| ADIPOR2  | 414.3  | 453.4  | 387.2  | 433.8  | 464.3  | 320.7  | 547    | 527    |
| ADK      | 122.5  | 116.5  | 134.6  | 124.3  | 123.1  | 106.3  | 122.7  | 127.3  |
| ADK      | 122.2  | 111.8  | 118.8  | 113.2  | 106.5  | 99.3   | 123.2  | 121.4  |
| ADK      | 142.1  | 140    | 153.9  | 156.5  | 137.5  | 116    | 124.8  | 139.2  |
| ADM      | 275.6  | 181.9  | 225.4  | 489.5  | 265.7  | 597.6  | 1264.8 | 1304.6 |
| ADM2     | 138.7  | 136.8  | 138.1  | 146.7  | 143.6  | 130    | 158.6  | 144.6  |
| ADMR     | 117.5  | 113.1  | 129.4  | 121.8  | 94.3   | 104.8  | 119.4  | 116.2  |
| ADNP     | 173.3  | 195.1  | 172    | 179.7  | 209.3  | 133.2  | 191.8  | 177    |

|         |        |        |        |        |        |        |        |        |
|---------|--------|--------|--------|--------|--------|--------|--------|--------|
| ADNP    | 147.2  | 146.3  | 144.4  | 153.9  | 150.3  | 109.4  | 140.4  | 139.9  |
| ADORA1  | 121.7  | 118.5  | 120.9  | 118.9  | 110.5  | 101.3  | 124.5  | 115.9  |
| ADORA1  | 123.9  | 116.9  | 125.5  | 126.2  | 117.6  | 105.7  | 114.7  | 128.8  |
| ADORA2A | 329.4  | 356.6  | 216.4  | 298.2  | 241.3  | 158.9  | 226.9  | 194.4  |
| ADORA2B | 121.8  | 130.4  | 144.3  | 125.6  | 116    | 108.8  | 126    | 115.7  |
| ADORA3  | 105.7  | 109.7  | 230.6  | 109.2  | 100.9  | 114.2  | 110.4  | 111    |
| ADORA3  | 132.2  | 145.3  | 211.6  | 157.3  | 103.5  | 120.4  | 138.2  | 121.6  |
| ADPGK   | 299.8  | 326.5  | 416.6  | 402.6  | 245.5  | 316    | 294.8  | 278.1  |
| ADPN    | 109.1  | 109.7  | 111.3  | 117.3  | 106.3  | 95.7   | 109.5  | 111    |
| ADPRH   | 148.1  | 131.4  | 143.1  | 147.5  | 128    | 137.4  | 135.2  | 129.4  |
| ADPRHL1 | 117    | 121    | 114.7  | 115.7  | 109.8  | 102.6  | 117.5  | 109.3  |
| ADPRHL1 | 116.8  | 117.2  | 116.9  | 126.2  | 115.5  | 97.6   | 114.8  | 129.5  |
| ADPRHL1 | 111.6  | 122.2  | 127.9  | 124.7  | 111.2  | 97.7   | 120.6  | 115.9  |
| ADPRHL2 | 243.4  | 236.7  | 225.9  | 226.4  | 187.9  | 178.8  | 251.2  | 251.6  |
| ADRA1A  | 98.3   | 108.8  | 113.8  | 125.6  | 107.1  | 97.5   | 112.5  | 103.6  |
| ADRA1A  | 103.7  | 113.8  | 109    | 112.8  | 104.1  | 95.9   | 107.9  | 111.9  |
| ADRA1A  | 112.7  | 118.2  | 127.9  | 123.2  | 108.5  | 102.5  | 120.5  | 120.4  |
| ADRA1A  | 119.9  | 124    | 131.6  | 126.3  | 122.6  | 107.2  | 127.7  | 124.7  |
| ADRA1A  | 118.4  | 119.3  | 118.9  | 119.9  | 109.7  | 104.7  | 123.4  | 118.6  |
| ADRA1B  | 116.1  | 126    | 117.7  | 128.4  | 123.2  | 102.6  | 118.5  | 119.3  |
| ADRA1D  | 127.1  | 124    | 124.3  | 119.4  | 120.7  | 104.7  | 124.7  | 113.7  |
| ADRA2A  | 122    | 115.4  | 103.9  | 121.2  | 110.8  | 106    | 127.9  | 125.3  |
| ADRA2B  | 119.8  | 118.1  | 131.3  | 120.6  | 120.9  | 110.6  | 132.6  | 126.2  |
| ADRA2C  | 128.6  | 123.3  | 128.9  | 126.1  | 111.8  | 101.3  | 121.4  | 127.5  |
| ADRB1   | 111.4  | 113.9  | 126.6  | 124.2  | 108.1  | 101.5  | 117.7  | 114.4  |
| ADRB2   | 369.8  | 372    | 311.2  | 395    | 341.1  | 219.1  | 353.3  | 282.8  |
| ADRB3   | 116.7  | 117    | 117.9  | 129.8  | 114.4  | 101.9  | 127    | 115.2  |
| ADRBK1  | 107.2  | 102.2  | 118.2  | 110.1  | 111.2  | 95     | 115.5  | 108.5  |
| ADRBK2  | 122.6  | 110    | 118.8  | 115.7  | 114.7  | 99     | 134.3  | 117    |
| ADRM1   | 231.2  | 223.9  | 196.6  | 224.4  | 167.3  | 186.1  | 321.6  | 295.1  |
| ADRM1   | 268.4  | 308.7  | 263.2  | 363.3  | 275.5  | 285.6  | 493.1  | 449.7  |
| ADSL    | 905.3  | 1233.3 | 926.5  | 904.3  | 708.5  | 534.5  | 724.8  | 638.4  |
| ADSS    | 893.6  | 1007.4 | 963.6  | 1168.2 | 757.3  | 990.7  | 1150.7 | 992.5  |
| ADSSL1  | 113.2  | 125.9  | 115.9  | 122.3  | 112.4  | 99.4   | 122.6  | 119.5  |
| ADSSL1  | 117.9  | 117.4  | 136.7  | 133    | 118.2  | 107.8  | 120    | 129.7  |
| ADSSL1  | 117.9  | 116.9  | 121.7  | 130    | 115.4  | 104.7  | 132.9  | 118.3  |
| AEBP1   | 170.4  | 153.6  | 144.7  | 169.2  | 117.9  | 120.6  | 161.1  | 153.5  |
| AEBP2   | 140.5  | 152.6  | 150.6  | 143.1  | 137    | 124.4  | 158.2  | 164.2  |
| AES     | 2289.4 | 2323.8 | 1425.1 | 2282.3 | 1507.4 | 1546.4 | 2865.1 | 2351.3 |
| AES     | 654.9  | 710    | 479.6  | 699    | 459.3  | 562.3  | 671.2  | 476.5  |
| AES     | 116.7  | 111.9  | 120.3  | 138.2  | 116.7  | 105    | 120.4  | 115.2  |
| AFAP    | 110.7  | 113.4  | 117.6  | 117.8  | 107    | 86.9   | 117.2  | 108.2  |
| AFAP    | 125.3  | 120.9  | 132    | 137.1  | 114.9  | 118.9  | 141.7  | 126.4  |
| AFAP    | 123.3  | 124.7  | 125.1  | 116.5  | 122.3  | 105.5  | 120.1  | 108.1  |
| AFAP1L2 | 126.9  | 128.4  | 127.3  | 134.6  | 117.9  | 107.9  | 130.1  | 121    |
| AFAR3   | 124.8  | 124.2  | 123.4  | 122.9  | 123.4  | 106.4  | 126.8  | 125.5  |
| AFARP1  | 124    | 122.2  | 124.8  | 118.5  | 110.4  | 108.1  | 118.6  | 120    |
| AFARP1  | 118.1  | 117.9  | 115.2  | 117.3  | 108.3  | 96.3   | 117.5  | 112.1  |
| AFF1    | 139    | 135.9  | 118.9  | 135.9  | 133.3  | 111.9  | 134.3  | 129.8  |
| AFF2    | 119.3  | 115.2  | 110.9  | 121.1  | 100.2  | 99.6   | 114.2  | 121.7  |
| AFF3    | 163.9  | 166.6  | 157.9  | 175.6  | 133.9  | 124.7  | 156.2  | 128.6  |

|            |       |       |       |       |       |       |       |       |
|------------|-------|-------|-------|-------|-------|-------|-------|-------|
| AFF3       | 112.9 | 114   | 116.4 | 128.7 | 109.5 | 102.1 | 109.7 | 108   |
| AFF4       | 166.4 | 170.1 | 212.3 | 190.5 | 174.8 | 165.4 | 224   | 199.7 |
| AFG3L1     | 306.3 | 324.2 | 268.7 | 284.5 | 265.3 | 266.5 | 326.2 | 320.9 |
| AFG3L1     | 125.2 | 122   | 136.2 | 135.6 | 123.7 | 106.5 | 132.1 | 134.6 |
| AFG3L1     | 116.1 | 106.6 | 120.6 | 120.5 | 109.6 | 96.9  | 118   | 132.7 |
| AFG3L1     | 116.3 | 119.5 | 121.2 | 127.8 | 101.5 | 103.2 | 116   | 109.6 |
| AFG3L2     | 284   | 347.1 | 251.1 | 401   | 289.1 | 244.4 | 345.7 | 326.1 |
| AFM        | 109.5 | 107.7 | 108.3 | 105.9 | 101.8 | 103.8 | 113.3 | 110.3 |
| AFMID      | 124.5 | 131.5 | 141.8 | 129.4 | 115.2 | 108.8 | 128   | 128.4 |
| AFP        | 119.4 | 117.9 | 117.9 | 117   | 116.6 | 101.2 | 122.4 | 118.4 |
| AFTIPHILIN | 161   | 158.3 | 140.7 | 169.6 | 147   | 132.6 | 164.9 | 165.4 |
| AFTIPHILIN | 144.2 | 145.1 | 135.5 | 142.4 | 127   | 109.7 | 150.3 | 142.1 |
| AFTPH      | 206.7 | 214.4 | 199.8 | 252.5 | 184.3 | 202.7 | 258.5 | 288.4 |
| AGA        | 196.7 | 193   | 248.5 | 222.1 | 146.9 | 164.8 | 169.9 | 149   |
| AGBL1      | 106.1 | 110.4 | 105.4 | 113.8 | 103.1 | 93.9  | 111   | 118.8 |
| AGBL2      | 113.8 | 116.6 | 112.8 | 117.1 | 108.9 | 96.6  | 112.3 | 116.8 |
| AGBL4      | 115.5 | 111.7 | 106.7 | 113.5 | 111.9 | 93.8  | 119.4 | 107.4 |
| AGC1       | 113.5 | 112.6 | 117.9 | 116.2 | 116.8 | 101.2 | 118.3 | 118.2 |
| AGC1       | 120.6 | 118.3 | 110.9 | 116.7 | 108.7 | 102.2 | 113.3 | 114.4 |
| AGER       | 116.3 | 122.2 | 133.4 | 127   | 117   | 107.6 | 130.9 | 136.8 |
| AGER       | 121.9 | 130.2 | 128.6 | 122.5 | 116.2 | 108.9 | 143.7 | 124   |
| AGGF1      | 327.2 | 345.7 | 409.3 | 301.9 | 253.3 | 294.9 | 261.3 | 322.1 |
| AGL        | 112.8 | 120.4 | 120.5 | 130   | 105.2 | 102.2 | 116.7 | 119.6 |
| AGL        | 109.4 | 120.1 | 117.7 | 115.4 | 103.1 | 104.6 | 117.1 | 110.6 |
| AGL        | 354.9 | 413   | 386.8 | 378.9 | 314.5 | 243.6 | 324.5 | 302.3 |
| AGL        | 117.5 | 111.9 | 119.4 | 127.8 | 112.8 | 101.4 | 109.4 | 116.2 |
| AGL        | 121.7 | 119.9 | 121.1 | 124.3 | 108.3 | 95.1  | 120.1 | 113.4 |
| AGL        | 154.2 | 162.6 | 145.3 | 144.4 | 134.5 | 114   | 131.2 | 132.3 |
| AGMAT      | 158.8 | 162.4 | 208.9 | 157.8 | 149.5 | 137.6 | 139.4 | 130.1 |
| AGPAT1     | 116.1 | 116   | 108.4 | 116.1 | 108.4 | 96.5  | 114.9 | 115.7 |
| AGPAT1     | 113.6 | 114   | 112.2 | 114.9 | 101.6 | 102.6 | 116.2 | 119.5 |
| AGPAT1     | 147.5 | 153.9 | 150   | 151.1 | 126.5 | 136.5 | 166.2 | 149.6 |
| AGPAT2     | 129.1 | 129.3 | 146.7 | 136.1 | 119.7 | 112.9 | 143.7 | 119   |
| AGPAT2     | 123.9 | 118.3 | 142   | 142.3 | 119.5 | 110.6 | 132.9 | 119.6 |
| AGPAT2     | 154.9 | 139.3 | 142.3 | 135.3 | 117.1 | 110   | 123.7 | 141.8 |
| AGPAT3     | 119   | 109.3 | 131.3 | 114.6 | 110.2 | 100.2 | 128.3 | 117   |
| AGPAT3     | 142   | 129.1 | 137.7 | 131.6 | 116   | 116.6 | 137.2 | 119.8 |
| AGPAT4     | 206   | 211.2 | 218.2 | 211   | 178.2 | 150.3 | 174.4 | 166.3 |
| AGPAT5     | 170.8 | 213.1 | 163   | 223.4 | 163.3 | 139   | 192.8 | 181.2 |
| AGPAT6     | 126.1 | 116.8 | 119.7 | 113   | 116.6 | 104.1 | 129.2 | 124.8 |
| AGPAT7     | 144.4 | 152.5 | 129.3 | 147.6 | 123.7 | 118.3 | 135.2 | 130.5 |
| AGPS       | 212.6 | 212.2 | 230.2 | 210.4 | 192.9 | 179   | 205.4 | 195.9 |
| AGR2       | 116.2 | 116.3 | 117.7 | 127   | 119.2 | 111.1 | 120.5 | 120   |
| AGR3       | 115.9 | 116   | 122.8 | 117.7 | 103.5 | 100.8 | 124   | 119.2 |
| AGRN       | 113.1 | 116.3 | 112.6 | 126.3 | 117.5 | 102.3 | 119.5 | 121.7 |
| AGRP       | 110.7 | 113.5 | 123.7 | 126.4 | 108.5 | 104.8 | 138.1 | 114   |
| AGRP       | 118.2 | 114.2 | 115   | 117.1 | 100.5 | 105.6 | 112   | 114.8 |
| AGT        | 112.8 | 113.3 | 111.8 | 110.7 | 106.3 | 95.5  | 106.7 | 117   |
| AGTPBP1    | 129.5 | 128.5 | 147.7 | 128.9 | 134   | 109   | 143.3 | 133.3 |
| AGTR1      | 110.4 | 116.3 | 107.3 | 130.1 | 103   | 103.8 | 108.2 | 106   |
| AGTR1      | 108.3 | 120.8 | 106   | 114.2 | 101.2 | 91.9  | 102.9 | 105.7 |

|         |        |        |        |        |        |        |        |        |
|---------|--------|--------|--------|--------|--------|--------|--------|--------|
| AGTR2   | 127.3  | 124.2  | 126.6  | 133.5  | 116.8  | 114.8  | 127.2  | 134.7  |
| AGTRAP  | 129.3  | 122.7  | 151.5  | 129    | 124.9  | 116.1  | 129.3  | 134.6  |
| AGTRAP  | 134.4  | 119    | 133.7  | 123.3  | 113.4  | 99.3   | 121.1  | 114.4  |
| AGTRL1  | 114    | 114.7  | 122.6  | 118.6  | 110.5  | 103.2  | 123.7  | 117.9  |
| AGXT    | 119.3  | 128.8  | 118.1  | 125.8  | 111.9  | 103.7  | 115.2  | 119.4  |
| AGXT2   | 106    | 117.7  | 111.1  | 117.4  | 103.6  | 93.6   | 117.9  | 110.4  |
| AGXT2L1 | 118.7  | 112.1  | 114.5  | 115.4  | 117    | 96.6   | 113.9  | 122.5  |
| AHCTF1  | 223.8  | 245.9  | 267.5  | 261    | 240.3  | 198.6  | 247.6  | 275.2  |
| AHCTF1  | 300.2  | 314.3  | 256    | 274.3  | 238.7  | 196.8  | 288.9  | 352    |
| AHCY    | 681.6  | 659.1  | 477.5  | 707    | 445.3  | 326.2  | 798    | 539.2  |
| AHCYL1  | 445.7  | 602.7  | 501.1  | 641.8  | 505.1  | 415.1  | 490.3  | 403.5  |
| AHDC1   | 131    | 145.3  | 127.1  | 127.7  | 124.1  | 102.1  | 154.1  | 143.6  |
| AHI1    | 142.8  | 132.9  | 132.5  | 162.8  | 139.6  | 119.8  | 176.5  | 139    |
| AHNAK   | 828    | 516    | 531.2  | 672    | 667.1  | 565.3  | 591.2  | 438    |
| AHNAK   | 134.7  | 114.7  | 131.6  | 133.1  | 115.9  | 109.7  | 135.8  | 119.9  |
| AHNAK   | 115.6  | 115.3  | 127.1  | 121.6  | 116.5  | 101.5  | 117.6  | 127.9  |
| AHR     | 124.6  | 119.9  | 139.1  | 136.2  | 118.2  | 111.3  | 124.9  | 122.5  |
| AHRR    | 117.1  | 127.4  | 127.1  | 130.8  | 114.1  | 109.7  | 125.9  | 122.6  |
| AHSA1   | 281.1  | 298.2  | 258    | 347.1  | 251.1  | 302.7  | 491.4  | 816.7  |
| AHSA2   | 169.9  | 152.3  | 192.3  | 149.5  | 154.2  | 150.8  | 167    | 154.4  |
| AHSG    | 116    | 116.9  | 124.3  | 110.8  | 110.1  | 92.5   | 123.9  | 110.6  |
| AICDA   | 109.4  | 114.6  | 109.1  | 114.3  | 108.5  | 97.2   | 113    | 110.1  |
| AIF1    | 265    | 125.3  | 1332   | 234.7  | 115.6  | 654.9  | 161.8  | 105.5  |
| AIF1    | 664.9  | 402.7  | 3403.1 | 532.8  | 361.2  | 1903.5 | 389.9  | 322.3  |
| AIF1    | 109.4  | 115.2  | 113.3  | 115.4  | 106.9  | 98.2   | 116.9  | 125.7  |
| AIFL    | 120.2  | 124.6  | 124    | 128.7  | 124.6  | 111.4  | 134    | 128    |
| AIFM1   | 257.8  | 319.7  | 286.5  | 311.7  | 253.7  | 227.2  | 268.7  | 275.8  |
| AIG1    | 124.1  | 117.9  | 123.5  | 128.1  | 122    | 102.4  | 126.9  | 117.5  |
| AIM1    | 140.8  | 139.2  | 150.9  | 148.9  | 130    | 124.3  | 140.2  | 145.1  |
| AIM1L   | 112.2  | 117.2  | 116.5  | 113.8  | 110.2  | 103.9  | 122.3  | 113.4  |
| AIM2    | 117.4  | 121.2  | 128.1  | 113.5  | 106.2  | 100.5  | 118.2  | 120.9  |
| AIP     | 1018.1 | 1127.4 | 826.6  | 1001.2 | 745.9  | 688.8  | 863.7  | 915.6  |
| AIPL1   | 118.7  | 117.7  | 115.4  | 117.8  | 124.9  | 95.1   | 121.1  | 121.5  |
| AIPL1   | 114.3  | 105.1  | 117.8  | 111.1  | 108.2  | 102.7  | 116    | 110.3  |
| AIRE    | 115    | 109.3  | 122.8  | 117.8  | 94.8   | 97.1   | 121    | 119.8  |
| AIRE    | 3911.9 | 3661.8 | 3742   | 3608.1 | 4094.6 | 2060.9 | 3994.5 | 3544.3 |
| AJAP1   | 121.5  | 113.5  | 117.4  | 117.9  | 106.7  | 94.5   | 121.6  | 114.3  |
| AJAP1   | 114.4  | 112    | 122.9  | 128.4  | 106.3  | 103.4  | 117.6  | 114.9  |
| AJAP1   | 125.6  | 131.3  | 120.8  | 131.7  | 114.1  | 109.9  | 121.1  | 114.3  |
| AK1     | 278.9  | 266.5  | 382.7  | 243.6  | 247.8  | 215    | 203.5  | 229.3  |
| AK2     | 149.4  | 140.5  | 144.8  | 150.2  | 121.7  | 121.4  | 140.1  | 126    |
| AK2     | 134.3  | 163.7  | 165.6  | 167    | 140.2  | 124.3  | 147.5  | 139.8  |
| AK2     | 334.5  | 310.6  | 308.8  | 304.6  | 248.8  | 222.4  | 258.6  | 209    |
| AK3     | 401.4  | 589.9  | 387.6  | 435.2  | 485.6  | 318.7  | 337.8  | 361.6  |
| AK3L1   | 127.8  | 146.9  | 121    | 141.1  | 127.9  | 100.2  | 118.4  | 121.9  |
| AK3L1   | 106.2  | 115    | 114.4  | 107.5  | 110.8  | 101.8  | 115.7  | 113.1  |
| AK5     | 116.6  | 120.9  | 120.1  | 121.3  | 114.8  | 99.1   | 113.8  | 114.3  |
| AK5     | 121.6  | 115.6  | 115.5  | 120    | 101.5  | 94.3   | 118.7  | 123.1  |
| AK5     | 133    | 160.9  | 122.3  | 150.6  | 128.2  | 105.5  | 130.8  | 135.4  |
| AK7     | 114.1  | 107.7  | 114.5  | 116.7  | 113.4  | 105.8  | 117.5  | 108.7  |
| AKAP1   | 144.6  | 132.6  | 129.3  | 143.2  | 137.3  | 113.8  | 138    | 145.4  |

|         |        |        |        |        |        |        |        |        |
|---------|--------|--------|--------|--------|--------|--------|--------|--------|
| AKAP10  | 127.5  | 129.1  | 142.1  | 149    | 131.5  | 116.3  | 140.5  | 139.6  |
| AKAP11  | 105.6  | 116.9  | 111.4  | 109.6  | 102.4  | 96.6   | 111.9  | 108.8  |
| AKAP11  | 330.6  | 334.9  | 313.5  | 393.7  | 303    | 284.9  | 282.2  | 315.3  |
| AKAP11  | 131.9  | 130.7  | 164.5  | 144    | 135    | 110.2  | 125.5  | 113.8  |
| AKAP12  | 119    | 113.9  | 115.8  | 121.4  | 106.7  | 99.2   | 111.2  | 116.1  |
| AKAP12  | 127.7  | 119.9  | 113.9  | 133.2  | 110.3  | 114.7  | 115.9  | 123    |
| AKAP12  | 115    | 124.4  | 119.9  | 118.9  | 112.1  | 104.1  | 127.3  | 115.8  |
| AKAP13  | 214.6  | 208.8  | 240.4  | 258.2  | 201.4  | 170.8  | 249.6  | 218    |
| AKAP13  | 1098   | 1191.8 | 1019.8 | 1156.4 | 910.5  | 727    | 1286.2 | 1171   |
| AKAP14  | 101.7  | 109.9  | 104.5  | 114.8  | 102.9  | 94.8   | 120.3  | 113.2  |
| AKAP14  | 105.7  | 109.7  | 114.3  | 118.3  | 111.8  | 90.7   | 114.3  | 116.8  |
| AKAP14  | 127.3  | 109.6  | 116.8  | 110.8  | 101    | 105.1  | 116    | 116    |
| AKAP2   | 112.7  | 112.7  | 113.8  | 123.6  | 118    | 94.7   | 121.4  | 121.2  |
| AKAP3   | 120.5  | 122.9  | 123.1  | 132.5  | 116.7  | 102.3  | 122.9  | 128.4  |
| AKAP4   | 109.3  | 105.3  | 117.3  | 111.4  | 108.3  | 101.4  | 116.5  | 106    |
| AKAP4   | 111    | 113    | 116.1  | 112.2  | 109    | 96.5   | 120.9  | 115.6  |
| AKAP4   | 107.4  | 121.6  | 139.2  | 133.7  | 121    | 102    | 116    | 122.6  |
| AKAP5   | 102.2  | 118.3  | 120.7  | 116.1  | 106.8  | 98.9   | 115.6  | 102.6  |
| AKAP6   | 105.2  | 110.1  | 109.4  | 123.7  | 103.9  | 88.7   | 114.5  | 101.3  |
| AKAP7   | 109.5  | 97.2   | 109.7  | 104.7  | 97.2   | 96.3   | 113.3  | 104.1  |
| AKAP7   | 150.5  | 130.5  | 131.5  | 141.9  | 134    | 108.1  | 137    | 145.7  |
| AKAP7   | 323.4  | 392.1  | 490.3  | 320.5  | 279.2  | 313.3  | 214.4  | 197.1  |
| AKAP7   | 106.8  | 119.2  | 113.2  | 124.3  | 115    | 100    | 124.6  | 116.2  |
| AKAP8   | 409.8  | 422.8  | 361.8  | 381    | 346.9  | 309.3  | 452.9  | 472.5  |
| AKAP8L  | 191.1  | 202    | 179.8  | 219.9  | 209.2  | 165.7  | 265    | 245.4  |
| AKAP9   | 111.4  | 107.9  | 117    | 122.8  | 107.7  | 98.2   | 119    | 127.5  |
| AKAP9   | 118.8  | 118.1  | 122.7  | 121    | 113    | 100.1  | 125    | 120.3  |
| AKNA    | 903.1  | 1203.6 | 669.2  | 966.5  | 749.2  | 738.3  | 908.4  | 803.3  |
| AKR1A1  | 535    | 520    | 1024.8 | 581.3  | 360.4  | 580.9  | 405    | 327.7  |
| AKR1A1  | 109.9  | 114.1  | 117    | 112.9  | 107    | 93.9   | 113    | 102.9  |
| AKR1A1  | 450.5  | 380.2  | 793.7  | 454.7  | 314.3  | 441.1  | 425.6  | 256.1  |
| AKR1B1  | 1188.6 | 1889.2 | 664.1  | 1225.5 | 1145.8 | 466.5  | 1222.9 | 1008.9 |
| AKR1B10 | 113.5  | 112.8  | 105.6  | 112    | 106    | 97.5   | 113    | 117.7  |
| AKR1C1  | 107.6  | 102.2  | 108.6  | 114.8  | 99.1   | 96.9   | 117.1  | 112.7  |
| AKR1C2  | 115.7  | 112.9  | 113.6  | 122.5  | 109.5  | 133.8  | 132.4  | 115.6  |
| AKR1C3  | 234.7  | 277.2  | 225.9  | 374.3  | 266.9  | 507    | 372.5  | 494.6  |
| AKR1C4  | 117.3  | 121.6  | 118.3  | 114.5  | 106.6  | 105.2  | 121    | 122.1  |
| AKR1CL1 | 112.2  | 123.5  | 116.9  | 134.4  | 112.1  | 109.4  | 122    | 125.9  |
| AKR1CL2 | 106.5  | 119.4  | 118.7  | 115.2  | 100.6  | 98     | 117.3  | 113.9  |
| AKR1D1  | 4138.9 | 4113.6 | 4711.6 | 5696.9 | 3811   | 1753.1 | 3490.9 | 3944.4 |
| AKR7A2  | 459.5  | 579.4  | 609.7  | 453.9  | 365.6  | 461.3  | 280.4  | 254.5  |
| AKR7A3  | 158.7  | 181.5  | 181.2  | 195.4  | 137.2  | 149    | 148.5  | 137.3  |
| AKT1    | 729.7  | 694.5  | 737.7  | 825    | 582.1  | 721.8  | 865.1  | 663.3  |
| AKT1    | 571.2  | 553.3  | 501.8  | 572.2  | 402.9  | 545    | 657.4  | 437.4  |
| AKT1    | 119.4  | 131.6  | 137.3  | 127.6  | 125    | 112.8  | 119.7  | 119.8  |
| AKT1S1  | 108.8  | 114.8  | 112.3  | 114.9  | 100.3  | 102.8  | 126.1  | 118.1  |
| AKT2    | 113.4  | 117.9  | 119.7  | 117.3  | 118.1  | 104.2  | 116.1  | 126.2  |
| AKT3    | 108    | 116.9  | 126    | 120.2  | 109.3  | 103.5  | 118.8  | 124.7  |
| AKT3    | 123    | 126.1  | 128.5  | 143.6  | 121.6  | 109.7  | 125    | 125.4  |
| AKT3    | 112.8  | 132.3  | 127.3  | 129    | 115.4  | 114    | 132.3  | 124.3  |
| AKTIP   | 620.9  | 897.7  | 700    | 762.6  | 846.9  | 501.3  | 632    | 756.5  |

|          |        |        |        |        |        |        |        |        |
|----------|--------|--------|--------|--------|--------|--------|--------|--------|
| ALAD     | 120.7  | 135.4  | 123.2  | 145.5  | 121.1  | 111.9  | 121.3  | 130.8  |
| ALAD     | 219    | 224.3  | 240.8  | 224    | 185.3  | 173    | 160.6  | 158.3  |
| ALAD     | 115.9  | 110    | 122.3  | 120.3  | 104.5  | 94.9   | 122.1  | 121.9  |
| ALAS1    | 127.2  | 116.1  | 117.9  | 124.9  | 107.7  | 99.6   | 124.6  | 114.5  |
| ALAS1    | 125.7  | 135.4  | 133.7  | 130.6  | 117.5  | 105.3  | 133    | 122.3  |
| ALAS1    | 126    | 116.5  | 131.4  | 122.6  | 115.7  | 113.6  | 131.4  | 124.7  |
| ALAS2    | 113.8  | 112    | 131.1  | 120.9  | 111.9  | 102.6  | 120.8  | 119.1  |
| ALAS2    | 113.4  | 115.8  | 138    | 118.3  | 105.1  | 116.7  | 124.7  | 107.8  |
| ALAS2    | 116.1  | 124.4  | 127    | 119.3  | 107.3  | 99     | 126.8  | 122.1  |
| ALB      | 109.2  | 108.6  | 112.1  | 103.3  | 99.9   | 87.4   | 111.5  | 111.6  |
| ALCAM    | 158.4  | 143.9  | 209.1  | 165    | 136.8  | 204.5  | 163.7  | 142.2  |
| ALDH16A1 | 194.6  | 191.4  | 202.3  | 184.8  | 140.3  | 148    | 175.5  | 151.1  |
| ALDH18A1 | 147.4  | 166    | 141    | 165.2  | 126.4  | 114.3  | 158.7  | 165.2  |
| ALDH1A1  | 234.8  | 200.9  | 132.1  | 236.8  | 137.1  | 124.7  | 161.8  | 133.4  |
| ALDH1A2  | 137.6  | 138.3  | 124.3  | 146.2  | 136.9  | 117.3  | 150.7  | 122.4  |
| ALDH1A2  | 113.1  | 123.2  | 120.5  | 122.6  | 112.3  | 113.7  | 129.6  | 115.5  |
| ALDH1A3  | 112.5  | 118.1  | 123.5  | 113.6  | 112.8  | 99     | 119.7  | 114.5  |
| ALDH1B1  | 119.5  | 126.4  | 118.5  | 132.3  | 109.7  | 105.1  | 117.7  | 112.9  |
| ALDH1L1  | 123.7  | 111.3  | 124.8  | 123.7  | 109.6  | 107.4  | 119.3  | 111.9  |
| ALDH1L2  | 123.8  | 118.1  | 132.6  | 124.4  | 114.6  | 110.4  | 123.2  | 125    |
| ALDH2    | 141.3  | 125.5  | 301.5  | 132.8  | 107    | 130.8  | 130.3  | 119.7  |
| ALDH3A1  | 107.2  | 116    | 114.3  | 111.8  | 112.6  | 86.2   | 125.7  | 120.7  |
| ALDH3A2  | 124.6  | 120.4  | 119.3  | 117.1  | 105.8  | 105.3  | 122.3  | 113    |
| ALDH3A2  | 237.7  | 169.6  | 217    | 239.2  | 161.5  | 189.9  | 193.4  | 138.1  |
| ALDH3B1  | 115.6  | 119.3  | 118.7  | 112.5  | 117.7  | 106.5  | 119.4  | 116.4  |
| ALDH3B1  | 118.8  | 123.3  | 150.4  | 121.3  | 109.7  | 108.4  | 116.8  | 117.1  |
| ALDH3B2  | 124.5  | 117.8  | 122.6  | 126.6  | 118.2  | 99     | 122.1  | 108.9  |
| ALDH3B2  | 109.2  | 118.7  | 120.5  | 116.4  | 109.3  | 98.8   | 120    | 123.4  |
| ALDH3B2  | 113.6  | 116.2  | 109.1  | 117.6  | 111.6  | 98.9   | 107.8  | 112.6  |
| ALDH4A1  | 121.2  | 110.8  | 119.6  | 116.5  | 109.1  | 99     | 116.9  | 110.3  |
| ALDH4A1  | 116.2  | 130.7  | 134.3  | 127.1  | 116.8  | 95.5   | 127.7  | 127.9  |
| ALDH4A1  | 112.3  | 127    | 113.9  | 122.6  | 113.7  | 100.2  | 118.9  | 125.9  |
| ALDH5A1  | 184.2  | 182.9  | 235.3  | 178.4  | 160.3  | 149.9  | 138.3  | 143    |
| ALDH6A1  | 135.1  | 132.4  | 124    | 124.9  | 111.4  | 100.2  | 120.3  | 127.1  |
| ALDH7A1  | 127.6  | 138.3  | 128.9  | 129.2  | 118    | 99.1   | 129.7  | 126.9  |
| ALDH8A1  | 113.4  | 116.3  | 109.7  | 109.8  | 112.7  | 101.3  | 119.7  | 133.6  |
| ALDH8A1  | 109.1  | 119.7  | 123.6  | 116.3  | 110.6  | 109.4  | 117.1  | 117    |
| ALDH9A1  | 2135.2 | 2438.6 | 2544.1 | 2276.3 | 1787.9 | 1707.5 | 1865.4 | 1448.6 |
| ALDOA    | 116.8  | 119.9  | 126.6  | 133.4  | 120.3  | 103.2  | 127.1  | 120.9  |
| ALDOA    | 1121.2 | 994.7  | 1300.9 | 1642.4 | 1054.4 | 1311.1 | 1040   | 1057.5 |
| ALDOA    | 124.1  | 126.5  | 125.4  | 128.4  | 117.7  | 111.9  | 125.3  | 127.4  |
| ALDOA    | 1077.6 | 1050.7 | 996.2  | 1100.3 | 777.2  | 1096.2 | 1193.8 | 961.3  |
| ALDOB    | 125.3  | 123    | 122.6  | 131.1  | 128.4  | 103.4  | 137.6  | 120.7  |
| ALDOC    | 395.5  | 475.9  | 503    | 424.3  | 339.5  | 302.2  | 375.6  | 370.7  |
| ALF      | 114.8  | 123    | 115.8  | 111.1  | 102.6  | 100.2  | 116.1  | 121.6  |
| ALF      | 111.3  | 113.9  | 107.6  | 113.5  | 105    | 91.8   | 111.4  | 114.4  |
| ALG1     | 140.3  | 141.9  | 143.6  | 131.4  | 129.9  | 112.2  | 123    | 127.8  |
| ALG10    | 114.6  | 117.4  | 120.2  | 126.5  | 110.4  | 102    | 123.7  | 123.3  |
| ALG11    | 125    | 109.7  | 122.1  | 130.8  | 113.7  | 92.6   | 115.8  | 119.9  |
| ALG12    | 123.3  | 115.9  | 122.5  | 139.6  | 116.5  | 118.8  | 118.6  | 125.2  |
| ALG13    | 145.1  | 150.1  | 159.3  | 161.8  | 122.7  | 120.3  | 138.1  | 133.7  |

|          |        |        |        |        |        |        |        |        |
|----------|--------|--------|--------|--------|--------|--------|--------|--------|
| ALG14    | 118.2  | 118.8  | 123.2  | 122.8  | 114.5  | 103.7  | 111.1  | 129    |
| ALG2     | 113.9  | 122.7  | 113.5  | 119.7  | 106.1  | 100.9  | 116.5  | 109.4  |
| ALG3     | 260.7  | 247    | 220.2  | 280.3  | 213.2  | 159.7  | 230.8  | 203.4  |
| ALG5     | 280.6  | 317.9  | 333.3  | 312.2  | 246.1  | 250    | 333    | 268    |
| ALG6     | 331.2  | 324.6  | 300    | 289.7  | 266.7  | 227.8  | 259.9  | 239.9  |
| ALG8     | 241.1  | 229.8  | 235    | 225.2  | 188.2  | 196.1  | 181.2  | 207.6  |
| ALG8     | 115.8  | 116.7  | 117.8  | 117.5  | 101    | 93.2   | 119.5  | 117.4  |
| ALG8     | 312.6  | 305.8  | 414.7  | 361    | 289.6  | 251.2  | 306.8  | 283.2  |
| ALG9     | 192.2  | 174.1  | 221.6  | 202.9  | 160.4  | 182.5  | 172.5  | 170.6  |
| ALK      | 121.4  | 116    | 123.8  | 124.9  | 119.6  | 97.6   | 116.9  | 116.8  |
| ALKBH    | 189.9  | 193.6  | 186.7  | 197.8  | 192.9  | 184.5  | 181.4  | 174.1  |
| ALKBH1   | 119.1  | 110.1  | 125.2  | 123.4  | 112.2  | 99.9   | 121.9  | 116.4  |
| ALKBH1   | 219.7  | 220.8  | 211.2  | 216.6  | 202.5  | 184.1  | 189.1  | 210.1  |
| ALKBH2   | 154.6  | 186.7  | 166.6  | 175.3  | 165    | 124.7  | 152.2  | 142.5  |
| ALKBH3   | 214.1  | 245.3  | 262.2  | 213.2  | 204.3  | 206.3  | 179.6  | 188    |
| ALKBH4   | 132.6  | 144.6  | 131.2  | 142.4  | 132.1  | 108.1  | 130.9  | 137.4  |
| ALKBH5   | 2346   | 2782.1 | 1950.2 | 2948.9 | 2282.7 | 1773.3 | 2611.7 | 2465.9 |
| ALKBH6   | 213.8  | 214.9  | 261.2  | 237.2  | 208.7  | 205.5  | 213.7  | 231.3  |
| ALKBH7   | 166.6  | 203.3  | 203.7  | 193.9  | 199.1  | 164.1  | 221.2  | 229.2  |
| ALKBH8   | 190.3  | 183.7  | 177.3  | 182.9  | 187.8  | 131.2  | 170    | 178    |
| ALLC     | 112.4  | 107.7  | 121.5  | 116.1  | 109    | 98.8   | 113.5  | 122.9  |
| ALLC     | 112.5  | 121.3  | 125.8  | 112.1  | 106.4  | 94.6   | 111.4  | 118.3  |
| ALLC     | 112.2  | 125.6  | 126.6  | 115.8  | 106.6  | 95.3   | 117.8  | 119.9  |
| ALMS1    | 156.8  | 162.6  | 136.5  | 174.4  | 151.9  | 133.7  | 157.3  | 141.9  |
| ALOX12   | 118.3  | 115.6  | 116.5  | 121.8  | 106.8  | 101.8  | 117.1  | 122.6  |
| ALOX12B  | 117.7  | 116.9  | 115.3  | 127    | 111.1  | 95.4   | 127.1  | 108    |
| ALOX12P2 | 110.8  | 120.2  | 123.5  | 123.6  | 110.1  | 95.9   | 114.3  | 116.6  |
| ALOX15   | 125.1  | 121.4  | 124.9  | 107.6  | 125.2  | 102.3  | 129.1  | 127.9  |
| ALOX15   | 106.6  | 113.8  | 136.7  | 128    | 110.2  | 111.1  | 128.1  | 113.2  |
| ALOX15B  | 113.8  | 118.7  | 120.6  | 119.3  | 114.6  | 102.6  | 114.9  | 119.5  |
| ALOX15B  | 133.9  | 120.1  | 121    | 122.6  | 109.3  | 104.4  | 117.8  | 112.9  |
| ALOX15B  | 119.2  | 120.1  | 134    | 131.8  | 114.5  | 107.1  | 117.3  | 120.2  |
| ALOX5    | 506.1  | 369.5  | 1656.3 | 424    | 223.1  | 459.2  | 199.3  | 169.4  |
| ALOX5    | 123.1  | 116.5  | 112.2  | 118.3  | 122.2  | 104.4  | 118.8  | 130.8  |
| ALOX5AP  | 1394.9 | 1956.2 | 1582.4 | 1305.6 | 1290.7 | 915.3  | 636.2  | 840.5  |
| ALOXE3   | 111.4  | 118.1  | 123.3  | 123.9  | 114    | 102.9  | 120.4  | 121.9  |
| ALPI     | 121.7  | 126.1  | 122.6  | 120.3  | 106.2  | 99.6   | 125.2  | 119.6  |
| ALPK1    | 142.2  | 142    | 172.7  | 163.7  | 129.3  | 133.7  | 149.4  | 132.3  |
| ALPK3    | 113    | 104.8  | 107.2  | 116.3  | 107.5  | 100.4  | 118.8  | 111.7  |
| ALPL     | 115.5  | 112.1  | 117.8  | 127.5  | 107    | 104.8  | 126.7  | 115.1  |
| ALPP     | 1633.4 | 1136.7 | 1581.2 | 1194.7 | 2186.9 | 906.6  | 1855   | 1642.2 |
| ALPPL2   | 121.7  | 121.6  | 118.2  | 124    | 110.4  | 109.7  | 124.1  | 118.5  |
| ALS2     | 188    | 219.9  | 185.1  | 198    | 191.4  | 163.4  | 181.4  | 231.8  |
| ALS2CL   | 112.2  | 113.5  | 112.6  | 114    | 115.7  | 102.7  | 115    | 110.2  |
| ALS2CL   | 119.2  | 123.3  | 133.7  | 124    | 104.5  | 107.9  | 120.7  | 103.3  |
| ALS2CL   | 111.7  | 106    | 122.1  | 121.6  | 101.3  | 97.9   | 122.4  | 117.4  |
| ALS2CR11 | 108.5  | 116.5  | 107.8  | 110.1  | 105.6  | 101.9  | 119.4  | 112.8  |
| ALS2CR12 | 114.1  | 114.7  | 129.8  | 117.5  | 114.3  | 102.3  | 127    | 112.5  |
| ALS2CR13 | 1110.9 | 1395.8 | 743.8  | 1287.2 | 1020.6 | 496.3  | 1306.6 | 1473.9 |
| ALS2CR15 | 117.6  | 118.8  | 121.2  | 128    | 108.1  | 101.9  | 131.5  | 114    |
| ALS2CR16 | 118.3  | 122.7  | 131.2  | 125    | 115    | 98.4   | 127.8  | 123.9  |

|          |       |       |       |       |       |       |       |        |
|----------|-------|-------|-------|-------|-------|-------|-------|--------|
| ALS2CR19 | 107.5 | 111.4 | 119.7 | 127.2 | 106.2 | 98.4  | 115.9 | 106.7  |
| ALS2CR2  | 174.7 | 175.8 | 196   | 176.2 | 161.4 | 164.4 | 173.2 | 168.9  |
| ALS2CR4  | 134   | 161.8 | 134   | 153.7 | 136.8 | 110.9 | 128.5 | 131.9  |
| ALS2CR7  | 110.1 | 115.9 | 127.7 | 115.9 | 104.7 | 99    | 123.6 | 117.7  |
| ALS2CR8  | 110   | 117.9 | 120.3 | 125.6 | 120.6 | 105.6 | 118.9 | 115    |
| ALX3     | 110   | 113.2 | 119.3 | 118.1 | 110.6 | 96.3  | 112   | 115.8  |
| ALX4     | 113.1 | 118.4 | 120.6 | 127.2 | 122.3 | 102.2 | 116.1 | 115.4  |
| AMAC1    | 121.8 | 115.2 | 133.3 | 125.9 | 110.2 | 101.5 | 135.2 | 124.1  |
| AMAC1L2  | 115.7 | 110.8 | 118.8 | 125.7 | 115.1 | 94.4  | 120.8 | 114    |
| AMACR    | 111.6 | 127.3 | 124.1 | 130   | 119.7 | 108.7 | 129.2 | 131.5  |
| AMACR    | 122.6 | 142.6 | 131.4 | 142.9 | 130.9 | 98.3  | 119.2 | 130.2  |
| AMBN     | 114.8 | 120.1 | 113.8 | 119.4 | 112.3 | 106   | 118.7 | 108.2  |
| AMBN     | 108.6 | 119.7 | 115.2 | 118.6 | 109.8 | 93    | 114.7 | 108.9  |
| AMBP     | 121.6 | 127.9 | 122.2 | 122.5 | 112.3 | 102.2 | 131.5 | 119.3  |
| AMD1     | 804.6 | 820.3 | 835.7 | 923   | 749.6 | 544.4 | 872.1 | 1129.8 |
| AMD1     | 291.9 | 286.8 | 361.9 | 337.7 | 269.5 | 202.6 | 333.5 | 337    |
| AMDHD1   | 116.1 | 115.2 | 130.1 | 119.9 | 117.5 | 112.5 | 114.1 | 111.8  |
| AMDHD2   | 161.4 | 169.3 | 146.2 | 172.1 | 135.1 | 122.4 | 126.6 | 142.5  |
| AMELX    | 108.9 | 111.3 | 106.8 | 114.3 | 105.1 | 100.3 | 114.1 | 111.2  |
| AMELY    | 124.8 | 119.3 | 127.7 | 122.5 | 109.2 | 99.4  | 116.5 | 127.5  |
| AMFR     | 311.9 | 410.1 | 238.5 | 370.3 | 381.9 | 294.8 | 496.1 | 510.3  |
| AMFR     | 122   | 126.7 | 124.6 | 143.3 | 120.2 | 108   | 135   | 135.8  |
| AMH      | 106.7 | 116   | 121.4 | 117.7 | 105.5 | 100.3 | 113.7 | 114.7  |
| AMHR2    | 120.7 | 112.9 | 123.7 | 119.8 | 112.8 | 105.3 | 112.9 | 110.7  |
| AMICA1   | 603.3 | 918.5 | 874.1 | 654   | 578.7 | 499.7 | 519.6 | 437.1  |
| AMID     | 113.5 | 124.4 | 113.9 | 133.2 | 132.7 | 112.4 | 130.2 | 138.9  |
| AMIGO1   | 123.8 | 116.9 | 127.2 | 127.7 | 111.8 | 103.6 | 120.6 | 120.4  |
| AMIGO2   | 118.9 | 128.9 | 130.8 | 123.8 | 118.4 | 108.7 | 126.1 | 130.3  |
| AMIGO3   | 113.7 | 123.6 | 119.2 | 118.6 | 105   | 95.7  | 122.7 | 119.9  |
| AMMECR1  | 111.9 | 113.1 | 121.5 | 120.8 | 115.3 | 95.6  | 120   | 119.4  |
| AMMECR1  | 141.6 | 152.7 | 152.4 | 155.4 | 154.8 | 134.2 | 153   | 144.6  |
| AMMECR1  | 138.1 | 129.7 | 145.2 | 137.4 | 136.4 | 119.5 | 130.5 | 127.2  |
| AMN      | 112.8 | 112.4 | 115.2 | 115.8 | 112.2 | 95.9  | 112.8 | 117.9  |
| AMOT     | 123.5 | 133.6 | 130.2 | 144.8 | 116.4 | 122.3 | 150.6 | 141.5  |
| AMOTL2   | 135.5 | 117.3 | 123.7 | 130.3 | 108.7 | 117.3 | 128   | 124.7  |
| AMPD1    | 111.9 | 113.1 | 111   | 119.8 | 104.1 | 104.1 | 112.3 | 119.2  |
| AMPD2    | 113.5 | 117.7 | 118.4 | 119.8 | 113.7 | 112.3 | 116.7 | 118.9  |
| AMPD2    | 117   | 123   | 131.2 | 129   | 108.4 | 108.9 | 122.5 | 119.7  |
| AMPD2    | 121.8 | 118.3 | 120.2 | 128.3 | 113.8 | 104.8 | 125   | 114.3  |
| AMPD3    | 126.7 | 136.7 | 136.4 | 132.9 | 120.9 | 104.5 | 123.9 | 128.2  |
| AMPD3    | 116.6 | 116.7 | 123   | 117.4 | 108.4 | 100.2 | 125   | 122.2  |
| AMPD3    | 117.2 | 116   | 121.3 | 127.7 | 106.2 | 101.2 | 119.5 | 119    |
| AMPD3    | 119.6 | 116.9 | 114.8 | 118.8 | 105.4 | 96.6  | 121.5 | 116.2  |
| AMPH     | 124.4 | 128.1 | 125.8 | 128.7 | 116.9 | 108   | 124.3 | 116.5  |
| AMPH     | 127.3 | 102.5 | 125.5 | 116.4 | 109.5 | 104.4 | 122.2 | 127.4  |
| AMT      | 194.5 | 166   | 202.7 | 191.2 | 138.7 | 144.9 | 158.4 | 163.5  |
| AMY1A    | 109.1 | 120.9 | 110.2 | 115   | 113.9 | 94.1  | 123.8 | 110.7  |
| AMY1A    | 186.9 | 163.9 | 230.7 | 194.3 | 160   | 142   | 150.6 | 170.2  |
| AMY1A    | 111.4 | 117.9 | 104.9 | 118.4 | 102.9 | 95.7  | 111.2 | 108.5  |
| AMY1B    | 118   | 120.6 | 147.4 | 116.5 | 116.2 | 119.3 | 118   | 122.1  |
| AMY2A    | 113.1 | 117   | 132.5 | 115.1 | 101.6 | 98.5  | 122.1 | 118.2  |



|         |       |       |       |       |       |       |       |        |
|---------|-------|-------|-------|-------|-------|-------|-------|--------|
| AMY2B   | 154.7 | 123   | 194.8 | 141   | 140.2 | 160.7 | 157.7 | 141.1  |
| AMZ1    | 120.4 | 114.3 | 124.6 | 122.9 | 110   | 98.6  | 124.9 | 110    |
| AMZ2    | 120.9 | 121.3 | 120.7 | 122.5 | 108.2 | 102.3 | 115.2 | 124.4  |
| AMZ2    | 804.9 | 909.3 | 942.6 | 990.5 | 853.6 | 769.4 | 808.3 | 1157.6 |
| ANAPC1  | 406.9 | 445   | 327.5 | 469.1 | 403.6 | 276   | 419.5 | 420.2  |
| ANAPC10 | 218.9 | 238.2 | 273.6 | 237.3 | 210.8 | 218.4 | 175.4 | 227.3  |
| ANAPC11 | 229.4 | 236.6 | 291.3 | 243.8 | 196.2 | 217.7 | 240.9 | 208.7  |
| ANAPC11 | 118.5 | 110.4 | 113.1 | 119.9 | 107.5 | 100.4 | 116.6 | 122.9  |
| ANAPC11 | 205.2 | 204.9 | 268.5 | 224   | 203.1 | 181.3 | 189.8 | 212    |
| ANAPC13 | 833.1 | 718.2 | 909.9 | 825.6 | 492.3 | 576   | 667.3 | 578.2  |
| ANAPC2  | 114.7 | 111.1 | 111.1 | 112.5 | 104.8 | 98.5  | 109.9 | 105.4  |
| ANAPC2  | 127.1 | 129.4 | 117.4 | 138.4 | 111.7 | 116.8 | 124.1 | 109.2  |
| ANAPC4  | 276.7 | 360.7 | 379.1 | 354.4 | 321.3 | 255.7 | 278.7 | 276.1  |
| ANAPC5  | 761   | 745.4 | 749.2 | 745.1 | 613   | 561.7 | 514.6 | 587.5  |
| ANAPC7  | 131.8 | 133.4 | 145.9 | 125.7 | 126.2 | 122.2 | 129   | 140.4  |
| ANG     | 123.2 | 128.6 | 203.5 | 134.4 | 116.8 | 162.8 | 134.2 | 121.8  |
| ANGEL1  | 178.5 | 168.5 | 142.5 | 181.4 | 169.9 | 145.5 | 183.9 | 159.1  |
| ANGEL2  | 696.6 | 666.6 | 660   | 659.5 | 618.2 | 595.7 | 800.7 | 946.8  |
| ANGPT1  | 123.8 | 119.1 | 135.4 | 124.9 | 116.7 | 108.1 | 120   | 119.1  |
| ANGPT2  | 116.4 | 119.3 | 114.5 | 124.6 | 110.5 | 101.3 | 118.2 | 114.5  |
| ANGPT4  | 109   | 123.4 | 116.7 | 109.3 | 107.7 | 100.4 | 114.4 | 106.8  |
| ANGPTL1 | 121.1 | 116.5 | 116   | 119.4 | 111   | 98.8  | 114.7 | 112.4  |
| ANGPTL2 | 118.6 | 116.1 | 122.9 | 121.2 | 118.5 | 107.4 | 119.9 | 121.6  |
| ANGPTL3 | 112   | 115.7 | 112.5 | 113.7 | 111.1 | 90    | 107.1 | 111.3  |
| ANGPTL4 | 127.8 | 114.6 | 134.2 | 129.4 | 109.1 | 98.6  | 121.3 | 118    |
| ANGPTL4 | 135.7 | 115.6 | 141.4 | 123.7 | 118.7 | 105.7 | 124.6 | 115.9  |
| ANGPTL4 | 120.1 | 126.1 | 129.4 | 118.8 | 121.6 | 109.8 | 118.9 | 129    |
| ANGPTL5 | 110.8 | 110.3 | 109   | 106.8 | 95.1  | 91.2  | 117.6 | 101.6  |
| ANGPTL6 | 126.5 | 123.9 | 130.1 | 125.2 | 114   | 107.8 | 114.9 | 114    |
| ANGPTL7 | 112.8 | 116.3 | 111.6 | 116.2 | 106.5 | 97.6  | 116.4 | 118.8  |
| ANK1    | 118.9 | 124.6 | 114.2 | 126.4 | 110.1 | 108.3 | 129.8 | 113.1  |
| ANK1    | 130.9 | 117.7 | 141.1 | 131.7 | 127.1 | 107.8 | 129.7 | 122    |
| ANK2    | 109.7 | 112.9 | 116.2 | 115.2 | 105.3 | 101.2 | 110.4 | 106.6  |
| ANK2    | 117.9 | 112.9 | 120.8 | 112.2 | 109.3 | 103.1 | 118.2 | 111.2  |
| ANK3    | 121.6 | 141.3 | 129.3 | 133.2 | 114.2 | 108.8 | 143.4 | 135.1  |
| ANK3    | 141.8 | 137.1 | 157.3 | 155.1 | 138.8 | 104.5 | 138   | 142.1  |
| ANK3    | 124.5 | 108.8 | 128   | 123.5 | 115.3 | 102.2 | 130   | 127    |
| ANKAR   | 124.8 | 122.3 | 119.7 | 122.6 | 121.7 | 111.7 | 121.3 | 123.8  |
| ANKDD1A | 184.7 | 157.1 | 174.7 | 215.8 | 195.1 | 133.9 | 238.1 | 199.1  |
| ANKFN1  | 120.7 | 117.2 | 115.7 | 114.6 | 103.5 | 100.8 | 113.5 | 124.9  |
| ANKFY1  | 228   | 225   | 226.1 | 227.2 | 173.3 | 177.3 | 230.1 | 193.4  |
| ANKFY1  | 162.8 | 157.4 | 146.2 | 202   | 156.3 | 114.6 | 161.4 | 155.3  |
| ANKFY1  | 121.1 | 118.5 | 119.1 | 125.1 | 122.2 | 96.8  | 134.8 | 119.5  |
| ANKH    | 115.6 | 124.7 | 145   | 129   | 113.6 | 119.3 | 133.7 | 126.2  |
| ANKHD1  | 126.8 | 116.1 | 119.6 | 128.4 | 117   | 104.8 | 120.1 | 118    |
| ANKHD1  | 117.8 | 113.5 | 115.3 | 117.5 | 107   | 94.4  | 118.3 | 115.8  |
| ANKK1   | 111.5 | 111.4 | 126.2 | 116.7 | 101.4 | 106.4 | 119.5 | 120    |
| ANKMY1  | 249.3 | 330.3 | 270.7 | 237.8 | 227.8 | 189.8 | 187.5 | 207.9  |
| ANKMY1  | 121.7 | 115.6 | 119.2 | 125.8 | 111.9 | 105.5 | 125.1 | 119.5  |
| ANKMY1  | 109.8 | 110.8 | 112.3 | 113.4 | 105.5 | 102.1 | 111.7 | 122.5  |
| ANKMY2  | 163.2 | 158.2 | 172.5 | 176.3 | 156.5 | 141.3 | 153.3 | 170.1  |

|          |       |       |       |       |       |       |       |       |
|----------|-------|-------|-------|-------|-------|-------|-------|-------|
| ANKRA2   | 495.1 | 507.6 | 655.8 | 538   | 478.3 | 418.1 | 381.9 | 508.2 |
| ANKRD1   | 125.4 | 123.3 | 118.9 | 119.3 | 113.2 | 96.4  | 117.9 | 111.1 |
| ANKRD10  | 232.8 | 266.9 | 238.6 | 245.3 | 260.5 | 163.3 | 225.4 | 248.9 |
| ANKRD11  | 709.1 | 673.5 | 433.4 | 660.8 | 566.6 | 378.7 | 655.7 | 807.5 |
| ANKRD12  | 617.9 | 423   | 503.9 | 582.3 | 516.5 | 472.6 | 491.7 | 630.5 |
| ANKRD13  | 670.5 | 587   | 666.9 | 567.4 | 492.1 | 428.8 | 486.5 | 482.9 |
| ANKRD13B | 117.5 | 127.9 | 124.3 | 120.2 | 105.6 | 101.6 | 123.8 | 118.5 |
| ANKRD13C | 176.2 | 193.4 | 169.8 | 191.9 | 203.4 | 135.2 | 189.9 | 172.1 |
| ANKRD13D | 100.9 | 119   | 116.6 | 116.5 | 110.4 | 93.9  | 116.5 | 113.6 |
| ANKRD15  | 114.4 | 117.8 | 116   | 119   | 112.6 | 97.3  | 115.9 | 117.9 |
| ANKRD15  | 114.6 | 123.5 | 114.7 | 111.2 | 111.8 | 96.4  | 119.1 | 125.9 |
| ANKRD15  | 250.1 | 212.5 | 197.4 | 269   | 173.4 | 208.8 | 208.2 | 166.3 |
| ANKRD16  | 121.3 | 138.4 | 129.6 | 139.3 | 120.7 | 113.7 | 136.8 | 123.1 |
| ANKRD16  | 120.9 | 135.8 | 128.4 | 136.8 | 116.6 | 103.2 | 124.5 | 125.4 |
| ANKRD16  | 132.3 | 128.9 | 128.3 | 133.3 | 120.2 | 105.2 | 119.5 | 124   |
| ANKRD17  | 133.1 | 133.4 | 127.3 | 137   | 124.6 | 105   | 128.7 | 133.4 |
| ANKRD17  | 197.1 | 175.9 | 160.2 | 223.3 | 229.7 | 168.6 | 200.8 | 207.6 |
| ANKRD17  | 250.6 | 250.8 | 257.9 | 327.6 | 246.8 | 225   | 257.8 | 316.7 |
| ANKRD19  | 117.4 | 139.9 | 136.9 | 128.2 | 125.9 | 105.4 | 125.9 | 117.1 |
| ANKRD2   | 118.6 | 111.3 | 116.6 | 119.6 | 110.7 | 105   | 117.2 | 108.3 |
| ANKRD20A | 136.3 | 181   | 141.5 | 160   | 182   | 107.9 | 141.6 | 146.5 |
| ANKRD20A | 109.8 | 117.2 | 108.7 | 108.7 | 103   | 103.3 | 118.7 | 109.9 |
| ANKRD20A | 112.6 | 137   | 120.5 | 117.6 | 114.3 | 106   | 115.5 | 126.8 |
| ANKRD20B | 111   | 112.4 | 121.2 | 111.2 | 107   | 94.1  | 113.3 | 110   |
| ANKRD20B | 118.6 | 118.6 | 118   | 113.3 | 101.9 | 97.1  | 111.9 | 120.5 |
| ANKRD21  | 124.1 | 112.4 | 118.7 | 117.7 | 106   | 104   | 110.4 | 108.8 |
| ANKRD22  | 149.5 | 117.3 | 183.9 | 126.4 | 108   | 102.3 | 115.1 | 112.8 |
| ANKRD23  | 121.2 | 127.8 | 123.7 | 130.8 | 120.4 | 118.4 | 128.6 | 132.5 |
| ANKRD24  | 105.8 | 121.3 | 118.8 | 114.5 | 98.9  | 91.9  | 120.8 | 113.9 |
| ANKRD25  | 112.8 | 111.7 | 106.5 | 116.5 | 105.4 | 101.7 | 110.6 | 110.3 |
| ANKRD26  | 141.1 | 154.8 | 137   | 140.6 | 152.5 | 108.7 | 144   | 148.5 |
| ANKRD27  | 128.3 | 141.6 | 122.4 | 132.4 | 123.4 | 122.5 | 142.1 | 134.4 |
| ANKRD28  | 172.1 | 172.1 | 151.2 | 167.3 | 166.8 | 142.4 | 198.5 | 178.9 |
| ANKRD29  | 113.1 | 104.8 | 101.7 | 114.6 | 102.1 | 94.8  | 113.7 | 107.5 |
| ANKRD30A | 112.3 | 115.5 | 128.4 | 110   | 102.4 | 101.8 | 111.9 | 104.3 |
| ANKRD30A | 109.2 | 113.8 | 121.7 | 120.8 | 111.7 | 97.6  | 117.1 | 113.1 |
| ANKRD30B | 112.9 | 108.8 | 118.2 | 120.5 | 111.4 | 95.3  | 124.1 | 117.3 |
| ANKRD32  | 132.1 | 130.6 | 142.3 | 130.7 | 111.1 | 127.6 | 127.1 | 127.1 |
| ANKRD33  | 248.2 | 230.7 | 248.7 | 274.9 | 163.3 | 211.7 | 236.6 | 192   |
| ANKRD34  | 131.7 | 127.6 | 133.2 | 141.2 | 126.3 | 109.4 | 129.1 | 132.6 |
| ANKRD35  | 125.5 | 123.6 | 138.9 | 129.6 | 110.6 | 117.8 | 130.4 | 123.5 |
| ANKRD36  | 130.4 | 131.1 | 125.2 | 126.8 | 133.3 | 101.3 | 117.6 | 118.9 |
| ANKRD36  | 121.7 | 112.9 | 121.1 | 123.1 | 103.5 | 99    | 119.2 | 108.2 |
| ANKRD36  | 162   | 162.4 | 150.4 | 158.2 | 175.1 | 111.8 | 131.7 | 150   |
| ANKRD37  | 149.5 | 173.7 | 150.8 | 185.8 | 161.6 | 123   | 199.3 | 247.6 |
| ANKRD38  | 115.2 | 115.5 | 134   | 116.5 | 118.1 | 103.7 | 121.5 | 125   |
| ANKRD39  | 173.8 | 203.8 | 169.7 | 204   | 184.4 | 148.2 | 181.3 | 161.4 |
| ANKRD40  | 115.1 | 116.9 | 119.1 | 120.8 | 108.8 | 104.4 | 121.2 | 118   |
| ANKRD41  | 118.7 | 129.8 | 127.5 | 131.2 | 121.5 | 98.8  | 132.6 | 118.4 |
| ANKRD42  | 113.4 | 102.9 | 113   | 118.7 | 119.6 | 101.7 | 113   | 117   |
| ANKRD43  | 113.6 | 112.4 | 117   | 117.6 | 108.9 | 93.2  | 118.3 | 121.8 |

|         |        |        |        |        |        |        |        |        |
|---------|--------|--------|--------|--------|--------|--------|--------|--------|
| ANKRD44 | 181.7  | 155.8  | 163.3  | 151    | 141.3  | 135.4  | 148    | 144.2  |
| ANKRD45 | 111.8  | 121    | 118.7  | 112.5  | 107.5  | 99.2   | 121.6  | 124.8  |
| ANKRD46 | 280    | 275.4  | 307.8  | 275.5  | 249.4  | 209.2  | 217.8  | 220.7  |
| ANKRD47 | 123.3  | 130.5  | 118.8  | 125.6  | 108.1  | 104.7  | 118.7  | 122.3  |
| ANKRD49 | 386.7  | 467.3  | 591    | 400.5  | 402.8  | 356.5  | 322    | 344.8  |
| ANKRD5  | 114.4  | 113.2  | 117.9  | 106.6  | 107.1  | 96.4   | 116.2  | 105.3  |
| ANKRD5  | 117.4  | 106.1  | 109.5  | 108    | 111.6  | 100.5  | 108.2  | 105.8  |
| ANKRD5  | 120.6  | 120.4  | 119.2  | 119.2  | 113.1  | 104.9  | 115.2  | 112.7  |
| ANKRD50 | 118.5  | 120.9  | 144.2  | 137.5  | 118    | 103.4  | 124.6  | 130.5  |
| ANKRD55 | 136.5  | 141.6  | 141.8  | 151.1  | 136.1  | 116.7  | 137.7  | 126.2  |
| ANKRD56 | 112.3  | 119.8  | 115.5  | 121    | 107.7  | 97.5   | 116.8  | 119.5  |
| ANKRD6  | 156.6  | 157.5  | 149    | 150.5  | 134.3  | 116.8  | 162.6  | 169.7  |
| ANKRD7  | 127.2  | 133.9  | 126.3  | 122.7  | 116.6  | 103.1  | 128.9  | 116.6  |
| ANKRD7  | 116    | 114.1  | 125.7  | 125.7  | 109.2  | 101.2  | 115.3  | 121.9  |
| ANKRD9  | 163.5  | 153.8  | 143.6  | 179    | 136.3  | 130.5  | 159.3  | 154.9  |
| ANKS1A  | 231.2  | 208.4  | 201.9  | 240.7  | 189.2  | 171    | 200.5  | 221.6  |
| ANKS1B  | 118.8  | 124    | 126.7  | 125.3  | 107    | 99.8   | 108.8  | 115.7  |
| ANKS1B  | 106.7  | 112.3  | 105.2  | 112.2  | 100.1  | 96.8   | 113    | 111    |
| ANKS1B  | 114.9  | 119    | 115.3  | 115.9  | 108.9  | 95.5   | 110.4  | 103    |
| ANKS3   | 138.2  | 157.8  | 134.6  | 159.9  | 122.8  | 103.7  | 149.5  | 145.3  |
| ANKS4B  | 109.1  | 111.3  | 116.9  | 108.3  | 106.5  | 92.2   | 115.3  | 104.6  |
| ANKS6   | 118.8  | 105.2  | 123.7  | 110.6  | 107.7  | 100.2  | 124.1  | 114.3  |
| ANKZF1  | 289.9  | 345    | 324.3  | 319.8  | 197.6  | 222    | 235.2  | 197.5  |
| ANKZF1  | 124.2  | 112    | 125.3  | 122.8  | 112.2  | 98.8   | 109.9  | 113.1  |
| ANKZF1  | 123    | 122.4  | 125.8  | 112.5  | 110.7  | 107.8  | 115.9  | 119.1  |
| ANLN    | 114.4  | 120.4  | 117.2  | 113    | 119.2  | 105    | 118    | 112.3  |
| ANP32A  | 110    | 125.1  | 121.8  | 127.4  | 118.8  | 105.9  | 123.6  | 108.6  |
| ANP32B  | 4012.9 | 4436.9 | 4654.6 | 4025.5 | 3513.9 | 4455.1 | 3578.6 | 3896.2 |
| ANP32C  | 129.8  | 117.9  | 117.7  | 123.8  | 110.4  | 102.2  | 130.7  | 116.3  |
| ANP32D  | 115.8  | 116.5  | 116.5  | 114.3  | 100    | 105.2  | 113.6  | 109.1  |
| ANP32E  | 110.3  | 115.8  | 125    | 130.7  | 112.5  | 101.4  | 112.6  | 121.5  |
| ANPEP   | 248.3  | 194.9  | 639.4  | 246.4  | 165.7  | 487.8  | 183.5  | 131.4  |
| ANTXR1  | 124    | 130.8  | 123.5  | 127.2  | 116.9  | 98.7   | 131.4  | 121.5  |
| ANTXR1  | 120.7  | 143.2  | 142.6  | 149.6  | 126.6  | 126.5  | 143.3  | 129.7  |
| ANTXR1  | 118.2  | 117.2  | 126.5  | 118.7  | 107.9  | 97.7   | 117.2  | 121.7  |
| ANTXR2  | 322.3  | 296.8  | 375.8  | 310.8  | 206.4  | 261    | 201    | 169.1  |
| ANUBL1  | 127.7  | 130.4  | 126.8  | 121.6  | 106.6  | 99.7   | 114    | 109    |
| ANXA1   | 3202.5 | 3028.4 | 2971.1 | 4205.8 | 2899.5 | 2655.1 | 6207.8 | 4603.9 |
| ANXA10  | 107.3  | 106.1  | 123.9  | 105.5  | 109.2  | 95.3   | 110.1  | 112.9  |
| ANXA11  | 174.7  | 212.3  | 228.3  | 220.1  | 191.9  | 164.7  | 169    | 184.8  |
| ANXA11  | 464.2  | 534.5  | 595.8  | 560.8  | 422.6  | 307.4  | 404.4  | 444.6  |
| ANXA11  | 132    | 126.7  | 126.1  | 141.7  | 127.3  | 104.6  | 124.7  | 121.4  |
| ANXA13  | 105.2  | 106.4  | 107.5  | 108.7  | 105.2  | 97.2   | 111.3  | 108.5  |
| ANXA13  | 113.2  | 103.6  | 108.5  | 119.3  | 105    | 96.7   | 115.4  | 115.6  |
| ANXA13  | 108    | 117.4  | 116.5  | 115.2  | 114.5  | 93.8   | 118.8  | 115.9  |
| ANXA2   | 317.3  | 233.9  | 598.3  | 378.9  | 236.7  | 387.8  | 287.5  | 240.9  |
| ANXA2   | 191.8  | 166.4  | 204.2  | 214.6  | 154.6  | 166.6  | 211.9  | 164.5  |
| ANXA2   | 2674.8 | 1773.9 | 4207.6 | 3248.5 | 1401.1 | 2988.5 | 3232.8 | 2132.8 |
| ANXA2P1 | 1003.2 | 520.1  | 1127   | 871.5  | 461.5  | 916.4  | 874.6  | 572.4  |
| ANXA3   | 111.6  | 118    | 125.2  | 125.6  | 112.3  | 106.2  | 122.2  | 111.9  |
| ANXA4   | 116.7  | 119.5  | 132    | 130.7  | 116.3  | 106.3  | 118.7  | 115.4  |

|         |       |        |        |        |        |        |        |        |
|---------|-------|--------|--------|--------|--------|--------|--------|--------|
| ANXA5   | 1917  | 1852.1 | 1669.3 | 3148.8 | 1651.6 | 1653.1 | 3520   | 1852.9 |
| ANXA6   | 126.5 | 141.8  | 137.3  | 137    | 141.6  | 112.3  | 138.9  | 134.2  |
| ANXA6   | 175.1 | 203.5  | 140.6  | 148.5  | 151.7  | 118.7  | 147    | 170.7  |
| ANXA7   | 120   | 110    | 117.2  | 123.9  | 112    | 92.1   | 111.3  | 112.3  |
| ANXA7   | 765.9 | 1003.2 | 917    | 1157.6 | 886.6  | 923.7  | 1053.2 | 1143.1 |
| ANXA8   | 124.2 | 119.3  | 115.3  | 127.3  | 115.1  | 106.8  | 134.1  | 114.7  |
| ANXA8L1 | 109.3 | 112.3  | 128.3  | 124.1  | 113    | 96.3   | 122.2  | 115.6  |
| ANXA9   | 123.4 | 118.1  | 120.4  | 124.9  | 102.6  | 101.8  | 124.8  | 115.6  |
| AOAH    | 214.7 | 212.9  | 201.1  | 235.6  | 181.2  | 140.7  | 187.6  | 148.7  |
| AOC2    | 123.9 | 126.9  | 131.6  | 137.6  | 109    | 100.2  | 127.4  | 133.8  |
| AOC2    | 117.6 | 118.2  | 118.3  | 116.3  | 108.4  | 102.1  | 118.7  | 113.5  |
| AOC2    | 115.1 | 114.7  | 113.8  | 123    | 108.7  | 93.9   | 121.1  | 109.6  |
| AOC3    | 128.4 | 138.6  | 142    | 133.4  | 128.3  | 99.9   | 126.6  | 129.1  |
| AOF1    | 110.2 | 109.5  | 124.5  | 112.2  | 107.8  | 94     | 118.9  | 116.9  |
| AOF2    | 281.4 | 331.4  | 259    | 290.2  | 269.6  | 248.1  | 286.4  | 247.4  |
| AOX1    | 121.9 | 127.7  | 113.4  | 115.6  | 108    | 102.3  | 119.9  | 113.1  |
| AP1B1   | 121   | 121.7  | 141.1  | 117.8  | 113.3  | 109    | 134.6  | 129.5  |
| AP1B1   | 276.8 | 268.1  | 354.6  | 264.2  | 213    | 195.3  | 246.9  | 296.3  |
| AP1G1   | 271.9 | 311    | 246.3  | 309.5  | 253.3  | 247.6  | 307.3  | 366.8  |
| AP1G2   | 101.4 | 116.5  | 109.8  | 109.3  | 106.2  | 92.5   | 100.2  | 111.2  |
| AP1G2   | 628.3 | 568.9  | 468.5  | 577.7  | 484.7  | 344.7  | 551.7  | 539.2  |
| AP1GBP1 | 139.3 | 135.2  | 126.4  | 132.5  | 130.1  | 105.9  | 128.4  | 133.5  |
| AP1GBP1 | 137.1 | 138.3  | 142    | 131.1  | 135.7  | 111.8  | 139.5  | 143    |
| AP1M1   | 753.2 | 700.8  | 804.6  | 825.4  | 529.3  | 513.5  | 536.3  | 468.6  |
| AP1M2   | 108.7 | 134.3  | 125.8  | 128.9  | 120.6  | 99.2   | 119.6  | 122.6  |
| AP1S1   | 151.7 | 174    | 172.6  | 152.4  | 162    | 140.9  | 138.5  | 161.6  |
| AP1S1   | 171.9 | 156.9  | 206.3  | 179.6  | 138.5  | 142    | 144.3  | 151    |
| AP1S2   | 859.3 | 679.4  | 1407.9 | 753.6  | 556.7  | 729.5  | 687.2  | 728.8  |
| AP1S3   | 114.5 | 110.8  | 110.1  | 108.7  | 109.7  | 99.9   | 109.6  | 113    |
| AP2A1   | 121.6 | 114.8  | 140.6  | 125.5  | 114.6  | 111.6  | 137.8  | 122.6  |
| AP2A1   | 115   | 109    | 114    | 118.7  | 107.6  | 104.4  | 123.7  | 113.2  |
| AP2A1   | 114.2 | 108.6  | 117.9  | 116.7  | 113.2  | 98.7   | 120.1  | 119    |
| AP2A2   | 159.2 | 188.2  | 184.3  | 167    | 136.3  | 147.1  | 184    | 163.1  |
| AP2B1   | 168.6 | 190.2  | 156.3  | 167.3  | 141.9  | 127.7  | 185.5  | 167.9  |
| AP2B1   | 158.3 | 161.9  | 158.1  | 150.4  | 148.3  | 140.7  | 171    | 164.4  |
| AP2M1   | 370.2 | 313.9  | 432.4  | 388    | 255.7  | 302.5  | 397.3  | 348.5  |
| AP2M1   | 419.7 | 327.4  | 370.5  | 397.8  | 256    | 324    | 334.1  | 319.7  |
| AP2S1   | 606.1 | 474.2  | 1063.6 | 448.4  | 424.2  | 598.3  | 444.9  | 314.4  |
| AP2S1   | 3326  | 3252.5 | 5578.9 | 3547   | 2066.1 | 3413   | 3012.3 | 2060   |
| AP3B1   | 645.6 | 644.3  | 979.4  | 747.1  | 417.8  | 649.4  | 616.5  | 547.6  |
| AP3B2   | 112.6 | 110.5  | 115.1  | 117.2  | 108.7  | 101.5  | 116.9  | 115.5  |
| AP3D1   | 117.8 | 110.3  | 115.8  | 114.6  | 107.5  | 98.8   | 116.6  | 114.3  |
| AP3D1   | 370.5 | 348.8  | 313.8  | 376.9  | 244.8  | 303.9  | 388.7  | 343.1  |
| AP3D1   | 326.4 | 296.2  | 276.4  | 390.2  | 265.6  | 283.7  | 355.8  | 313.7  |
| AP3M1   | 253.2 | 275.5  | 342.6  | 290    | 264.1  | 331.6  | 281.1  | 274.1  |
| AP3M1   | 120.5 | 109    | 115.9  | 128.5  | 103.4  | 97.3   | 111.6  | 114.3  |
| AP3M1   | 306.7 | 315.5  | 391.8  | 361.3  | 295.7  | 407    | 329.7  | 297.1  |
| AP3M2   | 339.6 | 385.3  | 383.3  | 369.6  | 263.1  | 298.8  | 292.1  | 291.4  |
| AP3S1   | 199.9 | 224.3  | 269.8  | 226.8  | 187.5  | 210.7  | 209.2  | 232.7  |
| AP3S2   | 139.9 | 119.6  | 152.5  | 134    | 120.4  | 122.6  | 134.9  | 129.5  |
| AP4B1   | 415.2 | 405.7  | 508.8  | 475.3  | 442.3  | 315.7  | 474.1  | 597.9  |

|          |        |        |        |        |        |       |        |       |
|----------|--------|--------|--------|--------|--------|-------|--------|-------|
| AP4E1    | 204    | 232.8  | 229.9  | 245    | 231.2  | 186.6 | 229.8  | 221.6 |
| AP4M1    | 120.2  | 119.1  | 135    | 121.4  | 106.8  | 105.8 | 128.1  | 115.6 |
| AP4S1    | 132.7  | 129.1  | 133.4  | 140.8  | 120.6  | 107.2 | 122.3  | 125.4 |
| APAF1    | 298.5  | 244.8  | 372.5  | 310.4  | 266.3  | 247.2 | 301.3  | 329.1 |
| APAF1    | 129.7  | 127.9  | 140.7  | 124.5  | 131.7  | 110.5 | 130.1  | 125.9 |
| APBA1    | 113.5  | 124.3  | 128.3  | 122.8  | 105.9  | 110.6 | 116.6  | 117.6 |
| APBA2    | 140.9  | 161.5  | 120.9  | 116.3  | 136.9  | 107.8 | 125.7  | 126   |
| APBA2BP  | 110.7  | 127.1  | 117    | 120.5  | 105.9  | 102   | 118    | 108.5 |
| APBA2BP  | 109    | 114.7  | 111.1  | 119.5  | 112.5  | 100.5 | 113.3  | 113.3 |
| APBA2BP  | 137.4  | 128.7  | 146.1  | 125.8  | 125.4  | 124.5 | 126.1  | 133.2 |
| APBA3    | 336.8  | 501.3  | 366.9  | 370.7  | 301.5  | 242.8 | 282.3  | 299.3 |
| APBB1    | 128.7  | 119.2  | 114.8  | 124.5  | 118.3  | 113.3 | 126.3  | 121.2 |
| APBB1    | 108.1  | 121    | 118.5  | 127    | 113.6  | 100.3 | 120.5  | 117.3 |
| APBB1    | 111.3  | 116.3  | 111.3  | 113.4  | 112.2  | 104.6 | 124.3  | 126.7 |
| APBB1IP  | 633.4  | 791.1  | 639.5  | 655.5  | 483.5  | 493.6 | 568.8  | 448.4 |
| APBB2    | 103.3  | 107.6  | 112.8  | 112.6  | 109    | 99    | 115    | 115.3 |
| APBB3    | 557.2  | 441.5  | 764.2  | 588.6  | 346.8  | 590.3 | 361.1  | 229.4 |
| APBB3    | 312.9  | 233.2  | 382.1  | 292.5  | 218.8  | 240.6 | 211    | 160.7 |
| APC      | 112.8  | 113.7  | 129.6  | 120.5  | 112.1  | 109.3 | 111.7  | 118.3 |
| APC2     | 108.2  | 117    | 115.1  | 118.8  | 104.5  | 101.4 | 113.7  | 107.1 |
| APCDD1   | 122    | 120.8  | 118.4  | 117.8  | 108.9  | 107.6 | 119.3  | 114.4 |
| APCS     | 140.8  | 136.6  | 142.6  | 143.3  | 123.1  | 109.2 | 140.5  | 136   |
| APEH     | 274.6  | 367.3  | 289.8  | 342.1  | 181    | 284.3 | 228.9  | 206   |
| APEX1    | 738.1  | 929.7  | 625.2  | 746.3  | 669.4  | 469.2 | 519.2  | 500.8 |
| APEX1    | 1297.3 | 1662.7 | 1410.5 | 1502.1 | 1201.7 | 919.7 | 1010.5 | 895.2 |
| APEX2    | 231.1  | 190.5  | 258.5  | 231.6  | 175.2  | 225.5 | 195.3  | 197   |
| APH1A    | 660.7  | 609.4  | 652.5  | 660.9  | 428.6  | 497   | 619.7  | 519.6 |
| APH1A    | 147.1  | 165.2  | 168.5  | 163    | 145.2  | 134.4 | 166.1  | 169.8 |
| APH1B    | 245.5  | 194.4  | 340    | 238.7  | 161    | 235.1 | 180.9  | 158.2 |
| API5     | 369.6  | 466    | 473.2  | 492.8  | 360    | 363.2 | 471.5  | 360.1 |
| APIN     | 112.1  | 111.4  | 115.7  | 113.6  | 115.5  | 97.6  | 112.2  | 111.9 |
| APIP     | 147.4  | 159    | 141.4  | 170    | 150.3  | 131.2 | 170.8  | 156.6 |
| APITD1   | 114.3  | 117.1  | 121.9  | 124.5  | 104.4  | 103   | 123.1  | 115.3 |
| APITD1   | 175.9  | 181.6  | 179.7  | 177.8  | 150.7  | 139.1 | 167.9  | 150.6 |
| APLN     | 124.4  | 117.3  | 125.5  | 121.6  | 112.4  | 103.9 | 112.2  | 121   |
| APLP1    | 112.9  | 134.8  | 121.9  | 123.3  | 109.7  | 97.6  | 127.2  | 111.2 |
| APLP1    | 108.7  | 108.2  | 110    | 114.7  | 108.6  | 95.1  | 120.8  | 107.6 |
| APLP2    | 117.4  | 111.5  | 123.5  | 116    | 115.4  | 102.9 | 106.6  | 122.5 |
| APOA1    | 110.1  | 128    | 123.7  | 118.5  | 113.8  | 100.2 | 123.3  | 112.7 |
| APOA1BP  | 548.7  | 555.5  | 526.9  | 602    | 447.4  | 353.9 | 386.6  | 349.2 |
| APOA2    | 120.1  | 113.9  | 117.8  | 121.5  | 102.9  | 92.6  | 114.2  | 119   |
| APOA4    | 104.9  | 105.1  | 105.3  | 114.5  | 113.7  | 99.5  | 115    | 113.7 |
| APOA5    | 105.8  | 110.2  | 120.8  | 103.9  | 109.1  | 102   | 117.7  | 109.8 |
| APOB     | 116.1  | 116.2  | 123.4  | 117.5  | 106    | 100.5 | 112.9  | 120.6 |
| APOB48R  | 183.1  | 168.6  | 218    | 190.8  | 127.6  | 172.7 | 170.6  | 163.3 |
| APOBEC1  | 114.1  | 107.5  | 116.3  | 120.1  | 107.9  | 92.7  | 112.9  | 120.2 |
| APOBEC2  | 118.6  | 117.3  | 116.7  | 117.3  | 102.8  | 94.4  | 118.2  | 118.5 |
| APOBEC3A | 140.7  | 116.9  | 125.7  | 139.8  | 112.6  | 104.2 | 129.8  | 115.4 |
| APOBEC3B | 114.3  | 113.5  | 117.2  | 116    | 103.7  | 98.8  | 114.5  | 116.8 |
| APOBEC3C | 158.5  | 148.9  | 185.3  | 161.3  | 127.3  | 130.6 | 132.9  | 134.5 |
| APOBEC3D | 118.5  | 123.9  | 123.4  | 134.8  | 108.3  | 105.9 | 116.5  | 119   |

|          |        |        |       |        |       |       |        |        |
|----------|--------|--------|-------|--------|-------|-------|--------|--------|
| APOBEC3F | 186.1  | 173.7  | 251.2 | 162.8  | 149.1 | 177.7 | 146.5  | 141    |
| APOBEC3F | 207.8  | 165    | 236   | 201.9  | 160.8 | 170.9 | 171.4  | 166.6  |
| APOBEC3F | 141.6  | 147.1  | 175.9 | 148.6  | 124.1 | 133.1 | 145.6  | 148.4  |
| APOBEC3G | 348.6  | 367.6  | 606.1 | 328.7  | 334.8 | 471.6 | 251.9  | 248.6  |
| APOBEC4  | 110.5  | 128.9  | 117.6 | 124.5  | 104.9 | 103.4 | 121.6  | 111.1  |
| APOC1    | 121.2  | 116    | 130.9 | 119    | 104.6 | 98.3  | 120.9  | 124.7  |
| APOC2    | 121.4  | 95.8   | 130.1 | 143.2  | 102.9 | 104.4 | 115.5  | 110.3  |
| APOC3    | 116.6  | 113.9  | 121   | 116.9  | 104.5 | 95.3  | 110.2  | 116.5  |
| APOC4    | 107.9  | 112.7  | 114.4 | 114.2  | 104.7 | 102.1 | 112.2  | 115.4  |
| APOD     | 109.7  | 113.8  | 120.8 | 119.9  | 113.6 | 102.7 | 116.4  | 109.1  |
| APOE     | 140.8  | 224    | 118.8 | 125.9  | 168.8 | 106.6 | 129    | 197.4  |
| APOF     | 116.6  | 122.9  | 113.9 | 123.4  | 118.1 | 98.9  | 123.1  | 117.8  |
| APOH     | 105.4  | 115.8  | 115.7 | 113.3  | 108.6 | 100   | 114.5  | 118.7  |
| APOL1    | 131.8  | 120.9  | 124.2 | 121.7  | 120.4 | 100.5 | 120.7  | 121.7  |
| APOL1    | 107.9  | 108    | 108.4 | 124.5  | 104.7 | 96.1  | 109.1  | 111.2  |
| APOL2    | 129.2  | 114    | 139.4 | 127.8  | 111.5 | 103.9 | 129.5  | 128.8  |
| APOL2    | 114.1  | 119.3  | 119.2 | 115.9  | 103.2 | 103.5 | 129.1  | 121.4  |
| APOL2    | 158.6  | 131.6  | 160.5 | 154    | 133.8 | 119.3 | 146.7  | 135.2  |
| APOL3    | 110.1  | 112.7  | 106.3 | 105.4  | 104.4 | 102.2 | 105.4  | 114.9  |
| APOL3    | 1183.9 | 1196.8 | 940.4 | 1102.4 | 962.8 | 834.8 | 1161.1 | 1106.5 |
| APOL3    | 129.4  | 119.7  | 125.7 | 122.4  | 113.1 | 101.7 | 120    | 111.2  |
| APOL4    | 119.8  | 125    | 138   | 130.5  | 118.4 | 103.9 | 118.4  | 116.7  |
| APOL4    | 110.8  | 108.2  | 120.6 | 117.2  | 109.5 | 94.6  | 119.8  | 115.3  |
| APOL5    | 125.7  | 116    | 121.7 | 117.6  | 111.4 | 99.9  | 121.4  | 120.3  |
| APOL6    | 126.8  | 132.2  | 133.1 | 133.8  | 120.4 | 103.8 | 120.9  | 119.1  |
| APOLD1   | 125.8  | 116.5  | 120.3 | 131.3  | 119.4 | 104   | 129.4  | 119.6  |
| APOM     | 120.5  | 131.3  | 143.7 | 115.1  | 113.4 | 117   | 124    | 124.9  |
| APP      | 191.6  | 191.2  | 258.3 | 202.4  | 174.2 | 224.7 | 192.6  | 176.1  |
| APP      | 116.7  | 121    | 122.1 | 113.3  | 119.7 | 107.2 | 121.4  | 127.3  |
| APP      | 155.5  | 147.9  | 191.4 | 167.1  | 140.9 | 160.6 | 166.2  | 157.8  |
| APPBP1   | 116.8  | 117.8  | 127.6 | 121.6  | 108.6 | 102.9 | 120    | 107    |
| APPBP1   | 422.3  | 643.8  | 538.4 | 438.8  | 427.7 | 384.1 | 477.6  | 423.5  |
| APPBP1   | 358.5  | 423.3  | 458.9 | 394.4  | 333.7 | 352.8 | 340.8  | 343.2  |
| APPBP2   | 508.5  | 513.3  | 453.5 | 471.2  | 391.3 | 341.5 | 596.5  | 556.1  |
| APPL     | 175    | 183    | 159.8 | 171.5  | 147.5 | 139.8 | 159.4  | 165.1  |
| APRIN    | 159.8  | 174.1  | 176   | 171.8  | 151.1 | 140.9 | 180.7  | 202    |
| APRIN    | 189.7  | 238.7  | 174.6 | 215.1  | 207.5 | 156.6 | 256.9  | 243.6  |
| APRT     | 722.5  | 888.3  | 914.3 | 755.5  | 643.8 | 730.4 | 660.4  | 559.1  |
| APRT     | 299.8  | 381    | 363.4 | 307.8  | 296.9 | 260.2 | 262.4  | 278.8  |
| APS      | 131.1  | 124.2  | 112.2 | 129.6  | 112.3 | 102.6 | 125.7  | 112.3  |
| APTX     | 207.5  | 221.5  | 220.6 | 230.6  | 190.8 | 181.3 | 249.8  | 222.4  |
| APTX     | 109.5  | 113.8  | 107.9 | 103.6  | 107   | 97.6  | 107.9  | 108.5  |
| APTX     | 141.4  | 157.6  | 173.5 | 161.3  | 141.8 | 131.7 | 149.1  | 163.8  |
| APXL     | 114.8  | 120.7  | 117.1 | 122.4  | 112   | 100.6 | 122.1  | 120.6  |
| APXL2    | 113.7  | 123.2  | 116.8 | 120.8  | 114.5 | 100   | 119.3  | 110    |
| AQP1     | 129.8  | 111.2  | 134.1 | 121.9  | 115.1 | 112.6 | 124    | 127.8  |
| AQP1     | 117.7  | 116.3  | 119.7 | 115.9  | 113.9 | 98.6  | 117.2  | 118.1  |
| AQP10    | 108.8  | 114.4  | 114.3 | 110.5  | 102.1 | 95.6  | 114.7  | 105.6  |
| AQP11    | 122.6  | 122    | 116.8 | 135.3  | 121.8 | 102   | 117.5  | 108.8  |
| AQP12A   | 112.5  | 118    | 119.3 | 122.6  | 107.6 | 100.7 | 119.1  | 113.9  |
| AQP2     | 112    | 105.6  | 121.1 | 108.7  | 108.4 | 98.1  | 110.5  | 108.4  |

|          |        |        |        |        |        |        |        |        |
|----------|--------|--------|--------|--------|--------|--------|--------|--------|
| AQP3     | 127.6  | 133.7  | 142.1  | 125.8  | 126.5  | 113.3  | 117.5  | 126.6  |
| AQP4     | 116.8  | 120    | 111.4  | 127.6  | 111.6  | 112.3  | 118.2  | 119.4  |
| AQP4     | 104    | 96.7   | 113.3  | 114.6  | 99.6   | 94.6   | 113.1  | 113.7  |
| AQP5     | 118.6  | 117.3  | 112.5  | 122.6  | 108.8  | 95.8   | 134    | 115.4  |
| AQP6     | 120.7  | 116.6  | 118.9  | 116.7  | 115    | 103.4  | 128.9  | 131.9  |
| AQP7     | 110.8  | 114.7  | 110.6  | 115.9  | 110.3  | 96.1   | 115.7  | 105    |
| AQP7P2   | 120    | 119.5  | 134.9  | 136.6  | 119.5  | 112.2  | 122.3  | 117.5  |
| AQP8     | 111.2  | 117.1  | 115.5  | 116    | 102.9  | 96.8   | 114.3  | 125.9  |
| AQP9     | 292.1  | 326.4  | 121.4  | 304    | 236.5  | 120.1  | 329.3  | 235.9  |
| AQR      | 120.3  | 115.7  | 137.1  | 143.1  | 114.3  | 110.5  | 129.7  | 133.4  |
| AR       | 123.4  | 130.4  | 128.3  | 128.5  | 111.5  | 111.2  | 116.7  | 123.2  |
| AR       | 110.2  | 108.3  | 110.3  | 118.8  | 105.1  | 94.5   | 115.4  | 107.8  |
| AR       | 111.6  | 117    | 121.9  | 120    | 109.7  | 98.8   | 124.5  | 112.5  |
| ARAF     | 588.2  | 735.9  | 511.1  | 604.1  | 444.7  | 289.3  | 467.5  | 466.9  |
| ARC      | 120    | 128.8  | 125.7  | 123.6  | 107.9  | 102.9  | 132.8  | 119.8  |
| ARCN1    | 510.9  | 621.5  | 540    | 690.6  | 496.5  | 571.7  | 759.8  | 761.3  |
| ARD1A    | 220.9  | 239.8  | 212    | 199.3  | 198    | 188.5  | 190.8  | 185.5  |
| AREG     | 107.8  | 111.6  | 109.8  | 114.5  | 116.5  | 97     | 109.3  | 111.9  |
| ARF1     | 141.7  | 146.4  | 135.9  | 167.2  | 138.6  | 146.8  | 167.3  | 171.5  |
| ARF1     | 1159.4 | 1285.8 | 1018.4 | 1319.1 | 807.4  | 1062.7 | 1246.7 | 1585   |
| ARF1     | 128.8  | 132.5  | 135.4  | 133.1  | 119.3  | 117.2  | 123.8  | 133.3  |
| ARF3     | 213.6  | 314.9  | 300.5  | 224.7  | 194.3  | 242.3  | 201.1  | 174.6  |
| ARF4     | 151.6  | 172.9  | 166.2  | 163.8  | 142.7  | 165    | 161.6  | 194.8  |
| ARF4     | 540.9  | 540.7  | 486.8  | 573.7  | 513.1  | 625.6  | 990.5  | 1076.5 |
| ARF5     | 447.1  | 477.5  | 744.3  | 567.5  | 391.4  | 578.7  | 526    | 497.9  |
| ARF6     | 123.4  | 119.4  | 130.7  | 114.6  | 116.9  | 106.8  | 124.8  | 122.8  |
| ARFGAP1  | 119.6  | 117.9  | 129.8  | 122.8  | 111.6  | 98     | 124.4  | 119    |
| ARFGAP1  | 340.2  | 357    | 246.1  | 292.8  | 201.9  | 182.3  | 321.5  | 297.1  |
| ARFGAP3  | 118.5  | 119    | 128.2  | 119.3  | 121.5  | 114.9  | 113.3  | 123.8  |
| ARFGEF1  | 161.3  | 176.9  | 184.9  | 171.8  | 151.3  | 154.9  | 178.9  | 177.8  |
| ARFGEF2  | 123    | 124.8  | 121.9  | 140.2  | 130    | 111.7  | 139.8  | 143.1  |
| ARFIP1   | 195    | 205.4  | 222.8  | 220    | 164.1  | 161.3  | 194.7  | 167.3  |
| ARFIP1   | 118.2  | 121.2  | 120    | 124.6  | 108.6  | 98.2   | 120.1  | 122.9  |
| ARFIP2   | 118    | 136.6  | 130.9  | 131.5  | 117.4  | 128.6  | 106.7  | 115.5  |
| ARFRP1   | 136.4  | 147.9  | 143.5  | 145.9  | 132.7  | 123.9  | 137.2  | 136.2  |
| ARG1     | 113.4  | 109    | 124.1  | 117.9  | 106.6  | 84.3   | 122.7  | 112.7  |
| ARG2     | 157.8  | 139.7  | 120.3  | 188.5  | 132.2  | 116.5  | 245    | 195.9  |
| ARG99    | 114.4  | 113.7  | 119.7  | 118.9  | 109.8  | 98.6   | 116.6  | 111.2  |
| ARGFX    | 106.6  | 115.9  | 111.4  | 118.4  | 109.4  | 97.4   | 111    | 113.7  |
| ARGFXP2  | 112.4  | 120.1  | 117.8  | 121.6  | 116.8  | 97.6   | 116    | 123    |
| ARHGAP1  | 362.3  | 353.6  | 381.8  | 420.7  | 410.7  | 380.3  | 380    | 350.2  |
| ARHGAP10 | 132.3  | 137.2  | 149.9  | 163.4  | 120.6  | 147.8  | 144.1  | 132.8  |
| ARHGAP11 | 144.9  | 141    | 134.1  | 126.5  | 120.2  | 119.2  | 140.9  | 138.6  |
| ARHGAP11 | 110.1  | 117.1  | 110.9  | 115.8  | 110.2  | 104.9  | 115.9  | 111.4  |
| ARHGAP11 | 125.6  | 124.9  | 126.7  | 124.2  | 113.3  | 114.2  | 126.6  | 125.7  |
| ARHGAP12 | 117.1  | 132.2  | 136.6  | 143.5  | 131.1  | 113.6  | 127.1  | 134.6  |
| ARHGAP15 | 1005.9 | 1629.1 | 1112.2 | 1145.5 | 1669.8 | 993    | 1242.3 | 1275.9 |
| ARHGAP17 | 874.1  | 738.1  | 593.3  | 974.7  | 629.7  | 444.3  | 1054.1 | 979.4  |
| ARHGAP17 | 167.5  | 148.1  | 154.6  | 167.4  | 144.4  | 135.6  | 184.4  | 167    |
| ARHGAP17 | 122.6  | 116.8  | 114.5  | 124.9  | 105.5  | 100.3  | 119.9  | 121    |
| ARHGAP18 | 124.2  | 122.1  | 139    | 126.6  | 100.5  | 115.6  | 119.2  | 119.8  |

|          |        |         |        |        |        |        |        |        |
|----------|--------|---------|--------|--------|--------|--------|--------|--------|
| ARHGAP19 | 218.5  | 232.8   | 277.8  | 262    | 184.3  | 228.8  | 198.8  | 191.9  |
| ARHGAP20 | 110.7  | 125.7   | 119.4  | 129.1  | 112.1  | 106.9  | 117.6  | 113.1  |
| ARHGAP21 | 246.9  | 236.2   | 278    | 251.6  | 228.8  | 236.6  | 338.9  | 430.4  |
| ARHGAP22 | 131    | 114.9   | 144.7  | 126.2  | 114    | 105    | 123.1  | 108.7  |
| ARHGAP24 | 129.1  | 120.1   | 126.2  | 137.2  | 117.5  | 102    | 114.6  | 118.7  |
| ARHGAP24 | 126.5  | 122.5   | 134.4  | 131.1  | 122.9  | 104    | 120.9  | 122.2  |
| ARHGAP24 | 120.9  | 122.2   | 125.2  | 141.5  | 117.2  | 111.3  | 124.2  | 124.5  |
| ARHGAP24 | 147.4  | 185.4   | 171.7  | 180.1  | 160.1  | 145.4  | 165.9  | 136.7  |
| ARHGAP25 | 115.5  | 115.5   | 120.2  | 123.5  | 111.6  | 102.4  | 125.1  | 117.5  |
| ARHGAP25 | 907    | 792.2   | 422.9  | 743.1  | 713.9  | 453.2  | 538.9  | 601.7  |
| ARHGAP25 | 110.9  | 119.5   | 119.5  | 113.5  | 110.3  | 102.1  | 125    | 119.6  |
| ARHGAP26 | 119.9  | 136.6   | 133    | 120.8  | 110.7  | 114.2  | 134    | 126.1  |
| ARHGAP27 | 117.5  | 116.3   | 116.9  | 118.8  | 106.4  | 106.2  | 124.2  | 112.6  |
| ARHGAP28 | 112.3  | 113.5   | 116.2  | 120.3  | 109.6  | 95.9   | 119.4  | 109.3  |
| ARHGAP28 | 115.5  | 119.9   | 119.8  | 120.7  | 112.7  | 93.3   | 115    | 103.3  |
| ARHGAP28 | 109.4  | 122.2   | 116.7  | 118    | 108.6  | 94.9   | 123.6  | 110.6  |
| ARHGAP29 | 119.2  | 123.1   | 116.1  | 116.5  | 105.5  | 97.3   | 116    | 126.6  |
| ARHGAP30 | 462.6  | 644.1   | 547    | 569.9  | 499.9  | 526.1  | 495    | 505.7  |
| ARHGAP30 | 683.5  | 1050.3  | 898.7  | 923.3  | 841.6  | 821.6  | 932.3  | 756.7  |
| ARHGAP30 | 249.5  | 233     | 335.2  | 253.9  | 206.4  | 229.8  | 195.2  | 208.2  |
| ARHGAP4  | 781.5  | 813.3   | 999.9  | 679.2  | 491.4  | 466.8  | 430.3  | 438.2  |
| ARHGAP5  | 108.8  | 117.5   | 119.9  | 132.5  | 112.9  | 97.7   | 134.6  | 109.7  |
| ARHGAP6  | 112.8  | 114.3   | 124.6  | 120.2  | 116.7  | 101.5  | 116.2  | 128.6  |
| ARHGAP6  | 108    | 117.4   | 117.8  | 119.5  | 106.5  | 104.5  | 119.1  | 121.5  |
| ARHGAP6  | 118.4  | 112     | 109.6  | 118.4  | 110.2  | 94.5   | 111.5  | 109.8  |
| ARHGAP6  | 117.9  | 114.3   | 124.3  | 109.8  | 112.3  | 100.3  | 115.9  | 111.4  |
| ARHGAP8  | 108.3  | 110.8   | 109.1  | 113.9  | 102.4  | 97.2   | 109    | 101.3  |
| ARHGAP8  | 119.8  | 114.7   | 116.8  | 120.6  | 103.3  | 98.2   | 114.1  | 123.3  |
| ARHGAP8  | 116    | 113.8   | 122.1  | 115.7  | 104    | 107.7  | 124    | 118.7  |
| ARHGAP9  | 1984.5 | 1790.2  | 1781   | 1981.8 | 1099.4 | 1012   | 1349.2 | 1038.7 |
| ARHGAP9  | 496.7  | 402.5   | 334    | 418.2  | 375.1  | 279    | 386.5  | 318.3  |
| ARHGDIA  | 463.4  | 479.8   | 382.8  | 357.5  | 322.4  | 469.6  | 635.7  | 640.1  |
| ARHGDIB  | 8988   | 10827.8 | 13771  | 9306.5 | 8599.1 | 9500.2 | 8960.6 | 8589.8 |
| ARHGDIG  | 103.4  | 113     | 106.8  | 113.6  | 104.1  | 98.5   | 111.9  | 108.2  |
| ARHGEF1  | 183.5  | 187.8   | 206.7  | 195.9  | 200.7  | 159.8  | 204.6  | 176.3  |
| ARHGEF1  | 126.1  | 123.1   | 137.1  | 131.7  | 109.1  | 107.2  | 107.8  | 125.2  |
| ARHGEF1  | 166.9  | 133.6   | 138.5  | 146.4  | 138.2  | 126.6  | 129.9  | 140.6  |
| ARHGEF10 | 146.7  | 222.8   | 137.7  | 159.3  | 163.7  | 119.5  | 150.1  | 199.6  |
| ARHGEF10 | 126.4  | 132.7   | 145.2  | 139.7  | 128.3  | 120.8  | 132.7  | 127.9  |
| ARHGEF10 | 117.7  | 124.5   | 137.6  | 131.9  | 113.8  | 103.7  | 124    | 116.6  |
| ARHGEF10 | 116.5  | 115.5   | 132.6  | 116.4  | 105.1  | 104.9  | 111.5  | 116.2  |
| ARHGEF11 | 109.4  | 112.5   | 115.1  | 111.1  | 109.1  | 104    | 107.9  | 110.9  |
| ARHGEF11 | 133.4  | 124.6   | 138.7  | 119.6  | 123.8  | 106.2  | 150.1  | 123.4  |
| ARHGEF11 | 133.5  | 128.8   | 124.3  | 130.9  | 110.9  | 109    | 126.6  | 124.9  |
| ARHGEF12 | 112.4  | 119.5   | 111.1  | 120.5  | 106.6  | 107.4  | 125.3  | 116.9  |
| ARHGEF15 | 115.1  | 122     | 125.6  | 121.8  | 110.5  | 100.5  | 109.5  | 118.9  |
| ARHGEF16 | 116.8  | 131.8   | 129    | 129.7  | 115.3  | 118.8  | 122.7  | 115.9  |
| ARHGEF17 | 103.1  | 116.3   | 117.9  | 120    | 108.1  | 99.7   | 116.6  | 108.7  |
| ARHGEF18 | 2814.9 | 3203    | 2444.6 | 2943   | 2128.7 | 1777.6 | 2346.8 | 1855.1 |
| ARHGEF19 | 191.1  | 176.9   | 196.8  | 173.1  | 155.1  | 143.4  | 205.8  | 176.6  |
| ARHGEF2  | 1335.6 | 1282.4  | 1230   | 1472.9 | 995.4  | 1074.8 | 1607.3 | 1289.6 |



|         |        |        |        |        |        |        |        |        |
|---------|--------|--------|--------|--------|--------|--------|--------|--------|
| ARHGEF3 | 1996.7 | 2065   | 1659.9 | 1956.4 | 1531.5 | 1558.3 | 2071.3 | 1771.7 |
| ARHGEF4 | 108.6  | 113    | 120    | 124.5  | 115.4  | 93.5   | 115.6  | 111.9  |
| ARHGEF4 | 107.5  | 118.4  | 131.8  | 130.7  | 110.9  | 109.2  | 122.4  | 113.4  |
| ARHGEF5 | 118.6  | 148.3  | 114.2  | 147    | 112.3  | 103.7  | 155.5  | 145.5  |
| ARHGEF6 | 1574.2 | 1905.7 | 2146.4 | 1362.1 | 1350.9 | 1469   | 873    | 1039.9 |
| ARHGEF7 | 606.6  | 635.1  | 621.2  | 658    | 626.2  | 542.8  | 896.5  | 769.8  |
| ARHGEF7 | 109.9  | 107.4  | 106    | 121.6  | 108.3  | 97.1   | 116.3  | 118.1  |
| ARHGEF7 | 120.8  | 120.6  | 121.4  | 118.5  | 106.8  | 108.5  | 124.5  | 127    |
| ARHGEF9 | 110.2  | 131.1  | 127.4  | 134.2  | 112.2  | 103.4  | 120.4  | 111    |
| ARID1A  | 111.9  | 125.4  | 123.1  | 120.3  | 108.6  | 97.8   | 121.6  | 109.2  |
| ARID1A  | 710.1  | 837.3  | 665.7  | 849.7  | 834.4  | 521.2  | 684.9  | 812.7  |
| ARID1B  | 103    | 112.5  | 106.6  | 113.1  | 108    | 98.1   | 109.7  | 112.3  |
| ARID1B  | 122.5  | 117.8  | 118.5  | 119.9  | 111.6  | 101.7  | 118.3  | 123.7  |
| ARID2   | 161.1  | 148.3  | 161.1  | 151.6  | 155.9  | 145.3  | 180.5  | 156.7  |
| ARID3A  | 266.6  | 226.1  | 272.2  | 363.9  | 235.8  | 280.4  | 407.3  | 269.1  |
| ARID3C  | 126.1  | 121.6  | 115.4  | 135    | 112.6  | 99.3   | 120    | 125.6  |
| ARID4A  | 155    | 176.3  | 144.2  | 181    | 141.5  | 130.8  | 162.4  | 188.5  |
| ARID4A  | 152.5  | 144.2  | 147.8  | 177.9  | 142    | 122.1  | 155.9  | 165.2  |
| ARID4A  | 185.5  | 209.9  | 212.2  | 187.6  | 195.8  | 170.4  | 217.3  | 218.9  |
| ARID4B  | 134.8  | 143.8  | 134.3  | 126.7  | 136.9  | 115    | 137.2  | 126.9  |
| ARID4B  | 557.8  | 642.7  | 485.4  | 747.7  | 498.8  | 313.8  | 712.5  | 845.6  |
| ARID4B  | 202.1  | 217.4  | 198.4  | 271.8  | 197.7  | 137.9  | 267.7  | 289.7  |
| ARID5A  | 127    | 127    | 122.4  | 119.5  | 115    | 111.7  | 133.3  | 133.4  |
| ARID5A  | 129.2  | 115    | 111.6  | 110.2  | 105.1  | 98.5   | 117.9  | 117.9  |
| ARID5A  | 134.9  | 155.7  | 160.8  | 166.5  | 129    | 139.2  | 186.1  | 157.1  |
| ARID5B  | 682.8  | 733.6  | 387.1  | 804.4  | 642.1  | 472.6  | 849.7  | 769.8  |
| ARIH1   | 205    | 214.1  | 171.9  | 227.2  | 189.1  | 170.2  | 258.3  | 226    |
| ARIH2   | 872.2  | 824.8  | 778.2  | 1008.5 | 910.6  | 567.9  | 1023.7 | 1335.8 |
| ARL1    | 286.9  | 301.7  | 304.5  | 331.1  | 234.9  | 231.1  | 249.4  | 273.4  |
| ARL10   | 106.9  | 124.1  | 110.8  | 121.3  | 107.8  | 96.3   | 118.5  | 114.4  |
| ARL11   | 106.4  | 116.3  | 119.5  | 116.4  | 98.2   | 93.5   | 112    | 106.9  |
| ARL13A  | 109.6  | 116.1  | 117.2  | 124.8  | 105.9  | 97.4   | 114.6  | 121.2  |
| ARL13B  | 119    | 122.4  | 113.4  | 137    | 127.5  | 103.5  | 132.3  | 116.4  |
| ARL13B  | 119.7  | 111.1  | 120.9  | 122    | 110.9  | 104.2  | 114.6  | 119.5  |
| ARL14   | 110.3  | 114.3  | 118.2  | 113.9  | 105.2  | 101.8  | 112.5  | 111.9  |
| ARL15   | 128.7  | 127.7  | 122.8  | 142.1  | 110.7  | 105.6  | 135.1  | 115.8  |
| ARL16   | 717.6  | 726.6  | 692.6  | 591.5  | 629.8  | 379.6  | 664.6  | 673.1  |
| ARL2    | 589.3  | 794.9  | 633.1  | 634.1  | 523.1  | 311    | 434.5  | 520.5  |
| ARL2BP  | 648.5  | 587.4  | 727.6  | 524.9  | 467.4  | 486.6  | 455.7  | 502.1  |
| ARL3    | 120.8  | 119.4  | 124    | 129.6  | 112.5  | 106.3  | 137.3  | 127.3  |
| ARL4    | 127    | 128.7  | 137.1  | 138.8  | 124.2  | 115.3  | 138.2  | 128.6  |
| ARL4    | 127    | 156.6  | 120    | 124.4  | 118    | 102.9  | 131.6  | 134.6  |
| ARL4    | 128.9  | 127.1  | 123.9  | 139.2  | 112.9  | 108.5  | 129.3  | 129.7  |
| ARL4A   | 119.1  | 115.5  | 120.1  | 121.6  | 109.9  | 105.1  | 119.2  | 125.9  |
| ARL4C   | 150.8  | 148.2  | 152.6  | 159.1  | 136.9  | 133.9  | 175.4  | 138.2  |
| ARL4D   | 109.9  | 125.7  | 118.2  | 118.9  | 112.8  | 105    | 115.2  | 121.1  |
| ARL5    | 129.3  | 141.9  | 138.3  | 138.6  | 127.5  | 117.9  | 135.1  | 133.1  |
| ARL5    | 1085.7 | 1424.7 | 1279.1 | 1459   | 931.5  | 766.8  | 1052.7 | 1066   |
| ARL5A   | 427.7  | 312.9  | 399.9  | 389.7  | 265.7  | 341.5  | 367.6  | 368.9  |
| ARL5B   | 128.3  | 142.2  | 122.6  | 131    | 121.1  | 114    | 136.8  | 151.8  |
| ARL6    | 121    | 114.8  | 117.5  | 124    | 110.5  | 93.2   | 113.2  | 111.3  |

|         |        |        |        |        |        |        |        |        |
|---------|--------|--------|--------|--------|--------|--------|--------|--------|
| ARL6    | 119.8  | 116.6  | 118.5  | 114.2  | 108    | 98.1   | 126    | 122.1  |
| ARL6    | 107.7  | 103.8  | 109.3  | 125.1  | 108.5  | 98.5   | 115.9  | 113.5  |
| ARL6IP1 | 127.3  | 137.8  | 126.4  | 138    | 113.7  | 131.2  | 138.7  | 128.8  |
| ARL6IP2 | 149.4  | 193.5  | 179.9  | 172.3  | 168    | 149.8  | 153.7  | 160.9  |
| ARL6IP4 | 134.8  | 126.6  | 132.9  | 156.7  | 111.7  | 119.9  | 130.9  | 129.6  |
| ARL6IP4 | 136.5  | 145.3  | 131.5  | 142.1  | 121.1  | 116.5  | 134.5  | 132.7  |
| ARL6IP4 | 179.8  | 171.7  | 217.7  | 201.8  | 154.4  | 167    | 191.2  | 149.6  |
| ARL6IP5 | 1277.6 | 1282   | 1633.3 | 1032.7 | 751.7  | 1111.5 | 1246.8 | 1270.8 |
| ARL6IP6 | 111.3  | 108.8  | 125.3  | 110.9  | 105.1  | 102.3  | 115.9  | 109.3  |
| ARL8A   | 122    | 117.9  | 131.6  | 138.2  | 109.6  | 103.9  | 140.5  | 124.9  |
| ARL8B   | 381.4  | 353    | 358    | 415.6  | 410.8  | 334.7  | 441.5  | 431.1  |
| ARL9    | 114.2  | 103.6  | 122.3  | 118.1  | 114.6  | 102.1  | 123.3  | 127    |
| ARMC1   | 250.4  | 230.7  | 234    | 257.1  | 222.4  | 159.3  | 210.7  | 209    |
| ARMC10  | 339.3  | 425.9  | 468.2  | 465.2  | 370.9  | 316.1  | 375    | 354    |
| ARMC2   | 105.6  | 112.1  | 127.9  | 111.5  | 106.1  | 109.1  | 116    | 118.7  |
| ARMC4   | 109.9  | 115.4  | 115.2  | 119.7  | 98.4   | 99.7   | 116.5  | 109.2  |
| ARMC5   | 131.3  | 118.8  | 141.2  | 135    | 116.2  | 99.8   | 144.9  | 138    |
| ARMC6   | 134.9  | 144.5  | 135.3  | 145.5  | 121    | 109.3  | 128.5  | 138.8  |
| ARMC7   | 308.9  | 309.1  | 257.8  | 274    | 240.7  | 209    | 246.7  | 222.4  |
| ARMC8   | 118.2  | 132.5  | 120.1  | 121.1  | 115.6  | 109.4  | 123.8  | 118.2  |
| ARMC8   | 148.6  | 190.7  | 173.9  | 178.3  | 181.7  | 165.2  | 159.9  | 174.4  |
| ARMC8   | 122.4  | 118.4  | 129.7  | 128.1  | 110.9  | 102.5  | 128.4  | 110.7  |
| ARMC8   | 108.2  | 124.7  | 117.3  | 132.4  | 118.7  | 101.9  | 118.3  | 115.6  |
| ARMC9   | 125.4  | 117.9  | 121.4  | 126.1  | 114.7  | 109.8  | 119.6  | 118.3  |
| ARMCX1  | 123.6  | 111.1  | 126.7  | 114.3  | 111.7  | 106.1  | 115.4  | 113.7  |
| ARMCX2  | 245.6  | 248.8  | 190.6  | 219.3  | 189.4  | 142.4  | 208.5  | 229.2  |
| ARMCX3  | 175.2  | 204.5  | 181.1  | 200.7  | 183.9  | 174.2  | 177.6  | 222.8  |
| ARMCX3  | 108.6  | 116.2  | 123    | 121.9  | 113.6  | 103.9  | 113.3  | 110.3  |
| ARMCX5  | 138.8  | 133.1  | 149.6  | 138.3  | 131.4  | 127.5  | 138    | 146.9  |
| ARMCX6  | 197.8  | 208    | 190.9  | 194.6  | 169.8  | 179.4  | 198.5  | 181.3  |
| ARMCX6  | 175.9  | 199.3  | 159.5  | 161.9  | 179.8  | 147.3  | 165.9  | 184.2  |
| ARMET   | 709    | 848.1  | 1329.1 | 1020.1 | 943.8  | 977.8  | 1058.6 | 1205.2 |
| ARMETL1 | 109.4  | 120.2  | 116.7  | 119.7  | 110.6  | 100.3  | 119    | 120.3  |
| ARNT    | 138.1  | 130.9  | 131    | 131.3  | 121    | 114.8  | 151    | 136.9  |
| ARNT    | 107.4  | 114.9  | 117.4  | 125.7  | 105.1  | 105.8  | 112.9  | 121.3  |
| ARNT2   | 114    | 110.2  | 110.2  | 125.3  | 113.9  | 101.6  | 114.9  | 121.8  |
| ARNTL   | 114.5  | 132.6  | 132.8  | 135.1  | 116.4  | 107.9  | 128.5  | 145.5  |
| ARNTL   | 476.8  | 519.7  | 585.8  | 565.1  | 513.1  | 423.1  | 558.3  | 547    |
| ARNTL2  | 114.7  | 115.5  | 115.9  | 123.6  | 110.7  | 99.3   | 114.5  | 126.5  |
| ARP10   | 136.4  | 134.4  | 174.3  | 136.8  | 130    | 137    | 124.1  | 131.2  |
| ARPC1A  | 336.4  | 337.4  | 359    | 421.6  | 305    | 329.5  | 317.4  | 287    |
| ARPC1B  | 310.6  | 366.1  | 516.1  | 360.9  | 279.7  | 346.4  | 240.3  | 220.4  |
| ARPC2   | 109.3  | 113.9  | 106.6  | 110.6  | 110.1  | 88.3   | 99.8   | 121.7  |
| ARPC2   | 3385   | 2943.4 | 3857.5 | 3383.6 | 2174   | 3836.6 | 4125.3 | 3309.1 |
| ARPC2   | 129.3  | 121.3  | 118.5  | 126.8  | 119.5  | 106.4  | 142.6  | 136.1  |
| ARPC3   | 2836.9 | 2641.7 | 3674.3 | 2783.4 | 2671.4 | 3208.3 | 3122.2 | 2424.3 |
| ARPC4   | 115.2  | 114.5  | 122.6  | 110.6  | 107.3  | 104.3  | 116.9  | 115    |
| ARPC4   | 503.3  | 443.1  | 900.1  | 592.1  | 532.6  | 763.6  | 602.6  | 496.3  |
| ARPC4   | 351.7  | 337.7  | 486.6  | 388.2  | 278.4  | 403.5  | 442.9  | 456.4  |
| ARPC5   | 1463   | 882.8  | 1371.9 | 1297.5 | 1054.2 | 1363.2 | 1399.4 | 1199.8 |
| ARPC5L  | 376.7  | 422    | 374.5  | 347.8  | 312.9  | 345    | 466    | 435.1  |

|          |        |        |        |        |        |       |        |        |
|----------|--------|--------|--------|--------|--------|-------|--------|--------|
| ARPM1    | 121.3  | 112.9  | 121.7  | 129.8  | 111.8  | 107.2 | 125.8  | 118.2  |
| ARPM2    | 119.2  | 115.5  | 108.6  | 123.4  | 111.1  | 103.1 | 119.2  | 112.7  |
| ARPP-19  | 198.3  | 177.8  | 194.9  | 246.3  | 181.2  | 183.2 | 213.9  | 231.6  |
| ARPP-21  | 114.1  | 115    | 115    | 114.4  | 112.1  | 95.7  | 125.8  | 115    |
| ARPP-21  | 104.2  | 103.6  | 102.5  | 119.2  | 104.5  | 93.1  | 116.2  | 115.8  |
| ARPP-21  | 111.2  | 111.7  | 113.3  | 120    | 109.1  | 102.5 | 130.3  | 114.8  |
| ARPP-21  | 110.3  | 118.3  | 113.1  | 115.3  | 106.3  | 99.9  | 108.7  | 114.2  |
| ARR3     | 117.7  | 116.8  | 114.7  | 121.2  | 111.1  | 98.6  | 114    | 111.3  |
| ARRB1    | 163.5  | 162.5  | 201.3  | 176    | 130.6  | 138.4 | 175.4  | 143    |
| ARRB1    | 151.1  | 146.6  | 181.4  | 153.7  | 121.3  | 129.4 | 133.8  | 118    |
| ARRB2    | 133.7  | 120.3  | 125.4  | 134.6  | 119.8  | 104.6 | 129.9  | 128    |
| ARRB2    | 157.1  | 152.7  | 136.1  | 157.8  | 149    | 161.6 | 153.3  | 148.4  |
| ARRDC1   | 133.2  | 133.5  | 123.1  | 138.6  | 119.1  | 102.5 | 132.8  | 118.3  |
| ARRDC2   | 124    | 124.8  | 128.7  | 123    | 100.2  | 108.3 | 123.7  | 127.3  |
| ARRDC2   | 132    | 130.7  | 147.7  | 138.8  | 148.6  | 117   | 144.8  | 141.1  |
| ARRDC2   | 291.6  | 343.2  | 322.8  | 370.9  | 321.6  | 252   | 383.6  | 500.4  |
| ARRDC3   | 139.7  | 144.2  | 156.1  | 161.9  | 141.3  | 131.6 | 148    | 180.6  |
| ARRDC4   | 136.2  | 120    | 134    | 149.7  | 125.7  | 130.5 | 154.2  | 145.7  |
| ARRDC5   | 171.5  | 167.8  | 154    | 178.3  | 162.8  | 112.8 | 138.1  | 146.8  |
| ARS2     | 1518.2 | 1743.9 | 1373.3 | 1627.5 | 1499.6 | 871.5 | 1735.3 | 1768.4 |
| ARS2     | 114.6  | 119.9  | 117.5  | 115.9  | 112.8  | 95.4  | 115.2  | 112.5  |
| ARSA     | 149.1  | 142.9  | 146.4  | 150.8  | 162    | 129.1 | 136    | 143.7  |
| ARSB     | 119.4  | 118.7  | 116.5  | 122.4  | 103.9  | 107.1 | 113    | 128    |
| ARSB     | 160.4  | 135.1  | 177    | 156.5  | 130.3  | 144   | 172.4  | 131.7  |
| ARSB     | 122.9  | 124.9  | 127.5  | 128.7  | 120.4  | 105   | 125.4  | 112.2  |
| ARSD     | 126.2  | 113.5  | 122.7  | 120.1  | 113    | 103.6 | 116.3  | 119.7  |
| ARSD     | 119.5  | 115.4  | 125    | 116.9  | 119.9  | 107.3 | 139.4  | 126.1  |
| ARSD     | 163.6  | 172.3  | 212.3  | 158.1  | 133.9  | 162.8 | 158.1  | 156.3  |
| ARSE     | 118.8  | 114.5  | 114.2  | 108.8  | 105.7  | 98.7  | 123    | 111.1  |
| ARSF     | 115.8  | 106.6  | 111.6  | 113.5  | 109.7  | 96    | 120    | 109.9  |
| ARSG     | 118    | 128.1  | 141.5  | 130.3  | 122.7  | 113.6 | 123.9  | 102.7  |
| ARSH     | 114.5  | 111.8  | 119.7  | 119.7  | 115.1  | 98.4  | 113.7  | 122.8  |
| ARSI     | 123.2  | 112.6  | 120.1  | 110.1  | 107.6  | 100.7 | 124.7  | 120.3  |
| ARSJ     | 120.8  | 117.1  | 126.8  | 128.4  | 104.8  | 102.6 | 129.1  | 107.3  |
| ARSK     | 143.3  | 135.2  | 140.7  | 153.1  | 141.8  | 114.8 | 133.7  | 139.9  |
| ART1     | 116.8  | 115.1  | 121.3  | 126.3  | 116.8  | 101.7 | 129.7  | 118.7  |
| ART3     | 124.7  | 116    | 119.7  | 117.3  | 111.2  | 100.8 | 121.9  | 116.7  |
| ART4     | 117.3  | 131.4  | 119.7  | 114.7  | 111.7  | 99.5  | 125.3  | 117.6  |
| ART5     | 112.1  | 115.3  | 113.2  | 116.3  | 101.9  | 96.7  | 113.7  | 120.5  |
| ART5     | 112.3  | 108.9  | 119.3  | 113.8  | 102    | 93.5  | 117.7  | 110.8  |
| ARTN     | 112.5  | 117.3  | 107    | 108.4  | 109.8  | 94.4  | 115.9  | 113.4  |
| ARTN     | 112.8  | 113.5  | 113.3  | 120.1  | 106.5  | 96.6  | 118.6  | 115.3  |
| ARTN     | 114.2  | 105.5  | 116.4  | 108.4  | 106.8  | 101.8 | 123.7  | 110.9  |
| ARTN     | 111.8  | 116.1  | 114.6  | 122.8  | 109.3  | 96.7  | 120.6  | 120    |
| ARTS-1   | 122.8  | 130.3  | 125.6  | 134.9  | 132.7  | 105.8 | 123.1  | 130.5  |
| ARTS-1   | 114.8  | 130.5  | 138.1  | 126.2  | 107.8  | 107.7 | 121.4  | 118.2  |
| ARV1     | 157.5  | 171.1  | 201.8  | 182    | 187.4  | 152.1 | 175.4  | 166    |
| ARVCF    | 119.9  | 120.3  | 125.5  | 118.8  | 113.4  | 99.8  | 123.6  | 110.8  |
| ARVP6125 | 108.6  | 118    | 114.6  | 128.7  | 113.8  | 104.6 | 116.9  | 114.7  |
| ARX      | 117.9  | 119.5  | 115.4  | 114.3  | 110.3  | 95.5  | 119.5  | 115.8  |
| AS3MT    | 113.5  | 119.7  | 123    | 117.6  | 109.4  | 100.8 | 114.6  | 118.4  |

|         |       |       |       |       |       |       |       |       |
|---------|-------|-------|-------|-------|-------|-------|-------|-------|
| ASAH1   | 145.2 | 125.7 | 169.8 | 143.7 | 136.8 | 127.1 | 144.6 | 137.2 |
| ASAH1   | 117.4 | 116.8 | 120.7 | 127.1 | 110.4 | 110.2 | 133.6 | 131.8 |
| ASAH2   | 108   | 113.4 | 115.5 | 114.5 | 105   | 98.3  | 118.5 | 106   |
| ASAH3   | 110.8 | 114.6 | 112.4 | 113.5 | 101.8 | 92.2  | 107.8 | 113   |
| ASAH3L  | 114.2 | 110.1 | 111.6 | 114.7 | 108.9 | 99.3  | 117.3 | 110.1 |
| AS AHL  | 174.2 | 221.1 | 239.6 | 179.1 | 169.1 | 168.3 | 152   | 163.1 |
| AS AHL  | 183   | 218.5 | 284.2 | 189   | 190   | 192   | 160.2 | 170.4 |
| AS AHL  | 137   | 164.2 | 220.2 | 154.6 | 154.3 | 159.5 | 146.4 | 141.3 |
| ASAM    | 112.1 | 126.5 | 99.8  | 117.7 | 106.9 | 105.3 | 115.5 | 113.1 |
| ASB1    | 188.6 | 203.5 | 180.2 | 214.4 | 195.5 | 169.1 | 248.3 | 243.8 |
| ASB10   | 117.9 | 113.7 | 124.9 | 110.9 | 109.8 | 100.6 | 122.1 | 112.7 |
| ASB11   | 120.2 | 132.5 | 122.4 | 127.3 | 101.9 | 101.8 | 124.7 | 114.7 |
| ASB11   | 124   | 123.8 | 133.6 | 118.7 | 107.2 | 107.7 | 123.4 | 118   |
| ASB11   | 114.3 | 126.3 | 122.1 | 139.1 | 122.1 | 102.3 | 116.9 | 116.3 |
| ASB12   | 112.6 | 115.9 | 110.3 | 122.7 | 109   | 101.8 | 114.2 | 111.9 |
| ASB13   | 195.3 | 169   | 192.5 | 187.3 | 134.8 | 129.3 | 135   | 115.6 |
| ASB14   | 105.7 | 110.1 | 113.4 | 118.6 | 104.1 | 100.5 | 115   | 101.7 |
| ASB15   | 119.6 | 105.6 | 107.9 | 114.6 | 108.5 | 94.2  | 116.1 | 105.5 |
| ASB16   | 113.8 | 116.7 | 120.2 | 119.2 | 110.3 | 101.3 | 106.8 | 118.4 |
| ASB17   | 104.7 | 107.4 | 107   | 117   | 101.2 | 93.5  | 111.9 | 111.3 |
| ASB2    | 118   | 119.9 | 132.3 | 129.2 | 117   | 110.9 | 120.4 | 122.3 |
| ASB3    | 154.4 | 154.8 | 174.5 | 207.2 | 148.4 | 136.5 | 159.8 | 160.3 |
| ASB3    | 145.2 | 135.2 | 173.8 | 149.1 | 127.6 | 129.1 | 142.1 | 131   |
| ASB4    | 114.8 | 117.7 | 119.3 | 115.7 | 102.5 | 101.1 | 110.2 | 116.9 |
| ASB4    | 116.6 | 107.2 | 110.6 | 117.9 | 115.3 | 111   | 116.5 | 115.5 |
| ASB4    | 127.1 | 123.4 | 129.4 | 118.9 | 108.9 | 95.2  | 120.8 | 119.1 |
| ASB5    | 115.5 | 118.8 | 119.2 | 126.1 | 112.5 | 105.5 | 113.3 | 113.7 |
| ASB6    | 107.4 | 112.8 | 106.2 | 114.5 | 101.5 | 101.5 | 113.2 | 109.5 |
| ASB6    | 239.1 | 196.8 | 174.4 | 194.7 | 162.4 | 141.4 | 202.5 | 255.4 |
| ASB6    | 186.8 | 186.4 | 168.7 | 205.9 | 161   | 155.2 | 219.6 | 212.3 |
| ASB7    | 118.5 | 114.4 | 116.3 | 112.8 | 104.9 | 102.1 | 126.3 | 124.5 |
| ASB7    | 126.7 | 123   | 130.7 | 127.4 | 108.7 | 108.5 | 120.2 | 116.9 |
| ASB7    | 131   | 124.7 | 129.4 | 135.8 | 112.4 | 99.4  | 123.2 | 116   |
| ASB8    | 223.5 | 253.8 | 213.9 | 234.2 | 163.8 | 171.2 | 249.4 | 235.1 |
| ASB9    | 112   | 118.7 | 116.1 | 122.6 | 113.2 | 91.3  | 113.8 | 116.5 |
| ASB9    | 109.9 | 114.1 | 113.7 | 108.6 | 111.3 | 97.7  | 115.4 | 113.9 |
| ASCC1   | 370   | 394.9 | 356.9 | 385.9 | 309.8 | 285   | 364.3 | 321.5 |
| ASCC2   | 587.9 | 601.3 | 718.9 | 585.2 | 422.2 | 407.6 | 512.3 | 466.2 |
| ASCC3   | 116.2 | 123.2 | 135.4 | 132.6 | 118   | 112.6 | 136.7 | 126.4 |
| ASCC3   | 151.2 | 135.3 | 155.5 | 136.3 | 127.9 | 111   | 152.6 | 149.5 |
| ASCC3   | 122.1 | 110.1 | 123.4 | 105.6 | 108.7 | 102.7 | 112.5 | 121.3 |
| ASCC3L1 | 148.1 | 140   | 139.3 | 133.7 | 126.5 | 128.8 | 138.6 | 134   |
| ASCIZ   | 169.4 | 151   | 170.6 | 188.6 | 157.6 | 159.8 | 178.9 | 177.9 |
| ASCL1   | 118   | 113.1 | 116   | 122.1 | 113.3 | 100.9 | 119.4 | 112.5 |
| ASCL2   | 322.8 | 222.5 | 300.9 | 288.4 | 157.3 | 151.4 | 215.3 | 152.9 |
| ASCL3   | 111.2 | 116   | 116.1 | 113.5 | 103.3 | 95.8  | 117.8 | 111.8 |
| ASCL4   | 110.7 | 106.9 | 133.9 | 120.4 | 105.6 | 98.4  | 122.5 | 126.5 |
| ASF1A   | 403.1 | 411.7 | 603.3 | 454   | 451.6 | 543.3 | 616.3 | 729.4 |
| ASF1B   | 119.7 | 126.1 | 122.6 | 124.1 | 104.3 | 102.3 | 121.7 | 111.6 |
| ASGR1   | 135.3 | 127.5 | 195.2 | 149   | 120.5 | 110.3 | 136.1 | 129.6 |
| ASGR2   | 114.2 | 110.2 | 114.9 | 112.3 | 104.6 | 94.4  | 111.5 | 113.3 |

|        |        |        |        |       |        |       |        |        |
|--------|--------|--------|--------|-------|--------|-------|--------|--------|
| ASGR2  | 124.9  | 120.5  | 180.5  | 118.6 | 108.2  | 100.8 | 116.2  | 123.1  |
| ASGR2  | 113.5  | 112.3  | 146.4  | 116.4 | 103.2  | 109.1 | 121.8  | 116.9  |
| ASH1L  | 118.5  | 131.2  | 129.1  | 127.3 | 110.5  | 101.3 | 131.5  | 130.8  |
| ASH2L  | 321.5  | 369.2  | 322.1  | 335.5 | 341    | 289.8 | 306.7  | 241.1  |
| ASIP   | 107.1  | 108.9  | 103.8  | 114.3 | 108.4  | 93.3  | 125.6  | 116.2  |
| ASL    | 120.8  | 112.2  | 115.4  | 112.7 | 108    | 102.5 | 117.4  | 114.1  |
| ASL    | 123.7  | 123.7  | 120.5  | 123.4 | 107.4  | 98.7  | 122.7  | 116    |
| ASL    | 148.1  | 137.4  | 147.6  | 141.6 | 129.6  | 116.7 | 143.1  | 127    |
| ASMT   | 126.2  | 112    | 121.7  | 120.8 | 108    | 102.5 | 118.8  | 113.6  |
| ASMTL  | 141.8  | 162.1  | 151.7  | 167.3 | 143.8  | 160   | 179.9  | 153.4  |
| ASNA1  | 111.1  | 116.9  | 113.3  | 124.2 | 113.3  | 106.8 | 124.4  | 117.1  |
| ASNS   | 469.7  | 540.2  | 475.1  | 509.9 | 437.8  | 489.7 | 390    | 446.2  |
| ASNS   | 143.2  | 118.8  | 129.8  | 147.1 | 133.6  | 118.4 | 139.2  | 126.7  |
| ASNSD1 | 1055.8 | 1226.5 | 1028.8 | 1024  | 1201.2 | 942.7 | 1038.7 | 1276.7 |
| ASPA   | 105    | 108.4  | 121.5  | 116.1 | 109.2  | 103.5 | 121.5  | 115.1  |
| ASPH   | 119.4  | 121.3  | 132.7  | 137.9 | 124.7  | 135.6 | 144.7  | 128.7  |
| ASPH   | 123.2  | 129.6  | 122.7  | 156   | 137.7  | 125.2 | 187.9  | 131.6  |
| ASPH   | 113.6  | 116.5  | 118.9  | 118.2 | 108.7  | 105   | 123.2  | 111.8  |
| ASPHD1 | 119    | 123.8  | 114.8  | 115.7 | 112.7  | 102.9 | 122.2  | 111.2  |
| ASPHD1 | 120.9  | 114.5  | 119.3  | 122.4 | 107.4  | 102.5 | 124.5  | 120.2  |
| ASPHD2 | 132.3  | 138.4  | 135.9  | 141.5 | 121.3  | 102.7 | 129    | 137    |
| ASPM   | 118.9  | 121.1  | 130.9  | 123.6 | 107.9  | 99.8  | 119.9  | 109.2  |
| ASPN   | 115.8  | 115.1  | 108.9  | 117.5 | 101.9  | 97.2  | 106.6  | 120.8  |
| ASPSR1 | 115    | 121.6  | 110.3  | 125   | 109.7  | 98.8  | 125.8  | 115.5  |
| ASPSR1 | 544.3  | 498.2  | 452.1  | 487.4 | 402.7  | 338.4 | 495.4  | 495.9  |
| ASRGL1 | 133.4  | 107.8  | 124.8  | 141.3 | 105.3  | 103.3 | 112    | 114.4  |
| ASS    | 118.1  | 119.6  | 125.1  | 116   | 102.9  | 102.4 | 116.7  | 112.4  |
| ASS1   | 121.1  | 114.7  | 117.5  | 127   | 112    | 103.5 | 129.8  | 123.1  |
| ASTE1  | 162.5  | 191.3  | 202.8  | 185.9 | 194.6  | 141.4 | 160    | 161.1  |
| ASTL   | 124.7  | 127.5  | 123.5  | 129.7 | 116.2  | 97.8  | 118.2  | 126.5  |
| ASTN   | 114.3  | 112.7  | 114.6  | 118.9 | 106    | 102   | 113.2  | 116.4  |
| ASTN   | 109.2  | 119.4  | 125.7  | 117.3 | 116.8  | 99.5  | 120.2  | 114.3  |
| ASTN2  | 124.7  | 125.6  | 132.6  | 124.7 | 113.5  | 109.3 | 126.2  | 124.4  |
| ASTN2  | 123    | 113.4  | 123    | 126.6 | 120.6  | 97.8  | 119.1  | 117.3  |
| ASTN2  | 108.9  | 109.2  | 127.4  | 121.5 | 118.2  | 102.6 | 131.9  | 108.5  |
| ASXL1  | 238.1  | 307.1  | 219.5  | 264.5 | 238.1  | 179.9 | 343.2  | 273.5  |
| ASXL2  | 449.3  | 513    | 408.4  | 611.9 | 601.4  | 285.1 | 678.8  | 944.4  |
| ASZ1   | 113.4  | 113.4  | 117.8  | 111.9 | 112.5  | 95.7  | 107.5  | 110.9  |
| ATAD1  | 152.2  | 151.1  | 162.3  | 160.2 | 128.3  | 130.9 | 145.2  | 151.9  |
| ATAD2  | 143.6  | 141.7  | 167.6  | 151.3 | 140.1  | 145.4 | 137.5  | 141.5  |
| ATAD3A | 165.4  | 143.4  | 139.8  | 140.2 | 128.8  | 107.3 | 164.5  | 158.3  |
| ATAD3B | 117.6  | 115.2  | 117.3  | 123.9 | 114.5  | 99.4  | 127.2  | 120.5  |
| ATAD3C | 110.4  | 120.3  | 109.3  | 111.5 | 103.3  | 96.5  | 107.9  | 123.9  |
| ATAD4  | 132.5  | 134.8  | 134.1  | 136   | 125.1  | 113.6 | 137.8  | 133.1  |
| ATBF1  | 146.1  | 123.6  | 140.2  | 130.4 | 119.4  | 125.3 | 126.1  | 125    |
| ATCAY  | 120.2  | 118.5  | 142    | 135.8 | 116.1  | 107.7 | 122.1  | 116.3  |
| ATE1   | 108.9  | 120.7  | 126.2  | 114.5 | 117.2  | 101.7 | 124.8  | 114.4  |
| ATE1   | 107.6  | 115.3  | 113.4  | 122.8 | 94.1   | 102.1 | 114.4  | 114    |
| ATE1   | 136.7  | 118.8  | 132    | 132.5 | 124.7  | 109.1 | 138.4  | 120.6  |
| ATF1   | 136.2  | 139.5  | 146.2  | 161.2 | 142.8  | 151.4 | 141.4  | 158.4  |
| ATF2   | 143.1  | 136.9  | 143.6  | 154.3 | 136.5  | 117.4 | 146.2  | 145.4  |

|         |        |        |        |        |        |        |        |        |
|---------|--------|--------|--------|--------|--------|--------|--------|--------|
| ATF3    | 236.7  | 223    | 152.4  | 337.9  | 294.9  | 168.8  | 524    | 393.2  |
| ATF3    | 111.6  | 116.9  | 102.5  | 111    | 115    | 97.1   | 122.6  | 113.5  |
| ATF3    | 110.4  | 109.1  | 124.3  | 121.9  | 108.4  | 100.9  | 114.9  | 103.5  |
| ATF4    | 3736.6 | 4214.5 | 2983.9 | 3948.9 | 3005.6 | 3416.2 | 5889   | 6409.8 |
| ATF4    | 121.6  | 123.6  | 140.1  | 120.4  | 118    | 115.7  | 139.6  | 133.9  |
| ATF4    | 186    | 188.4  | 174.4  | 201    | 172    | 164.1  | 239.5  | 292.8  |
| ATF5    | 318.3  | 184.6  | 323.1  | 349.6  | 171.4  | 285.6  | 307.3  | 240.6  |
| ATF6    | 267.7  | 351.8  | 288.7  | 295    | 313.8  | 225.2  | 237.7  | 278.9  |
| ATF7    | 120.4  | 118.6  | 110.2  | 123.6  | 115.3  | 104.6  | 121.4  | 118.9  |
| ATF7IP  | 113.6  | 119.3  | 127.4  | 128.2  | 112.9  | 92     | 116.5  | 130.5  |
| ATF7IP2 | 160.7  | 251.3  | 179.9  | 174.3  | 230.5  | 157.4  | 176.9  | 208.1  |
| ATG10   | 129.7  | 117.9  | 139.2  | 134.8  | 123.8  | 116.1  | 130.3  | 118.3  |
| ATG12   | 632.3  | 820.1  | 863.9  | 851.2  | 748.4  | 586.7  | 968.3  | 840.7  |
| ATG16L1 | 386.1  | 381.6  | 347.7  | 466.7  | 327.6  | 339.2  | 398.4  | 423.8  |
| ATG16L1 | 495.4  | 505.5  | 381.5  | 513.3  | 424.8  | 351    | 525.6  | 511    |
| ATG16L2 | 175.4  | 154.1  | 189.1  | 167.4  | 144.6  | 153.3  | 156.8  | 147.2  |
| ATG3    | 126.3  | 127.2  | 135.7  | 128.3  | 114.9  | 109.6  | 124.9  | 148.2  |
| ATG4A   | 179.8  | 180.9  | 166.5  | 183.2  | 161.4  | 130    | 169.8  | 191.6  |
| ATG4A   | 114.8  | 119.5  | 120.8  | 116.9  | 111.5  | 100.9  | 113.2  | 108.7  |
| ATG4B   | 113.7  | 113.9  | 111.8  | 116.5  | 109    | 95.8   | 117.4  | 117.2  |
| ATG4B   | 304.4  | 274.1  | 280.2  | 289.4  | 224.6  | 234.7  | 289.8  | 240.3  |
| ATG4C   | 109.5  | 113.4  | 110.6  | 127.7  | 103.5  | 101.7  | 108.1  | 113.4  |
| ATG4D   | 118.9  | 128.6  | 123.8  | 125.5  | 120.3  | 106.4  | 117.1  | 116.8  |
| ATG5    | 137.3  | 160.6  | 129.2  | 143    | 159.7  | 139.8  | 150.2  | 146.3  |
| ATG7    | 231    | 180.8  | 297.3  | 255.8  | 157.9  | 175    | 204.4  | 160.1  |
| ATG9A   | 106    | 109.6  | 110.6  | 114    | 103.5  | 98.3   | 105.7  | 110.5  |
| ATG9A   | 278.4  | 271    | 267.6  | 286.4  | 215.7  | 223    | 303.2  | 257.5  |
| ATG9A   | 247.5  | 256.3  | 246.4  | 286.3  | 173.6  | 213.7  | 259.6  | 239.6  |
| ATG9B   | 114.3  | 122.7  | 119.8  | 128    | 106.8  | 97.4   | 121.7  | 122.7  |
| ATHL1   | 727.5  | 1048.3 | 494.6  | 676.8  | 563.2  | 386.9  | 878.3  | 940.6  |
| ATIC    | 650.8  | 778.1  | 663.7  | 684    | 542    | 490.1  | 758.3  | 547.9  |
| ATM     | 117.1  | 114.7  | 119.4  | 119.1  | 109    | 96.6   | 122.9  | 120.9  |
| ATM     | 1425.1 | 1289.4 | 1126.3 | 1652.9 | 1515.1 | 814.5  | 1406.1 | 2120   |
| ATM     | 104.5  | 117    | 113    | 109.5  | 102.6  | 90.1   | 110.2  | 109    |
| ATN1    | 128.2  | 112.1  | 114.9  | 114.8  | 111.8  | 102.6  | 118.4  | 121.7  |
| ATN1    | 252.7  | 266.5  | 180.1  | 276.7  | 168.7  | 175.1  | 314    | 290    |
| ATN1    | 118.5  | 107.4  | 113.9  | 115.6  | 112.3  | 92.9   | 112.4  | 110.9  |
| ATOH1   | 105.2  | 112.1  | 118.7  | 116.3  | 114.4  | 100.7  | 115.1  | 112.5  |
| ATOH7   | 120.1  | 122.1  | 113.5  | 118.2  | 119    | 91.8   | 113    | 117.5  |
| ATOH8   | 110.8  | 116.5  | 127.4  | 115.2  | 112    | 105.9  | 125.2  | 122    |
| ATOX1   | 394    | 291.5  | 481.8  | 384.2  | 209    | 319.1  | 309.2  | 244.8  |
| ATP10A  | 130.3  | 128.6  | 127.1  | 125.1  | 117.4  | 109.3  | 130.1  | 129.4  |
| ATP10D  | 128.1  | 119.5  | 121.1  | 128.8  | 120.8  | 108.4  | 129.5  | 117.5  |
| ATP11A  | 108.4  | 112.1  | 118.2  | 110.6  | 103.2  | 92.7   | 117.5  | 117.4  |
| ATP11A  | 118.4  | 112.1  | 111.9  | 124.5  | 102.8  | 95.9   | 117.8  | 109    |
| ATP11B  | 343.4  | 311    | 273.2  | 390    | 311.8  | 214.6  | 424    | 503.3  |
| ATP11C  | 120.1  | 117.6  | 118.1  | 126.1  | 115.7  | 105.1  | 123.8  | 117.2  |
| ATP11C  | 208.3  | 232.1  | 229.3  | 250.3  | 205.3  | 207.7  | 234.8  | 254.1  |
| ATP12A  | 119.6  | 131.3  | 137    | 126.9  | 118    | 110.2  | 118.8  | 125.7  |
| ATP13A1 | 272.9  | 271.6  | 225.1  | 310.4  | 241.2  | 187.7  | 264.4  | 266.1  |
| ATP13A2 | 147.7  | 167.6  | 156.1  | 160.7  | 134.8  | 126.4  | 150.8  | 163.9  |

|         |        |        |        |        |        |        |        |        |
|---------|--------|--------|--------|--------|--------|--------|--------|--------|
| ATP13A4 | 108.6  | 115.5  | 124.1  | 121.3  | 104.1  | 91.2   | 116.8  | 119.4  |
| ATP13A5 | 110.6  | 114.8  | 115.2  | 108.1  | 113.3  | 100.3  | 120.4  | 113.7  |
| ATP1A1  | 859.7  | 1302.8 | 674.8  | 989.7  | 857.6  | 649.4  | 1076.8 | 1243.7 |
| ATP1A1  | 1371.7 | 1168.9 | 1108.1 | 1336.9 | 933.4  | 1234.5 | 1484.5 | 1834.5 |
| ATP1A1  | 315.7  | 344.4  | 262.5  | 297.8  | 273    | 249    | 305.9  | 312.8  |
| ATP1A2  | 114.4  | 106.2  | 107.9  | 106.7  | 102    | 92.9   | 118.9  | 114.4  |
| ATP1A3  | 115.1  | 130.7  | 124    | 124.2  | 120    | 113.9  | 126.9  | 119.5  |
| ATP1A4  | 112.7  | 111.2  | 115.8  | 118.8  | 110.1  | 96.3   | 115.5  | 118.7  |
| ATP1A4  | 111.6  | 111.1  | 115.9  | 119.1  | 109.6  | 106.1  | 118.9  | 114.2  |
| ATP1B1  | 125.6  | 132.9  | 168.3  | 137.1  | 120.9  | 122.5  | 118.1  | 124.3  |
| ATP1B1  | 178.7  | 181.5  | 258    | 181.2  | 149.9  | 161.1  | 168.2  | 171.7  |
| ATP1B1  | 157    | 134.1  | 169.1  | 138.5  | 133.9  | 124.8  | 131.3  | 147    |
| ATP1B2  | 157.1  | 183.4  | 157.4  | 173.6  | 150.2  | 138.4  | 162.3  | 182.4  |
| ATP1B3  | 881.3  | 726.3  | 620.7  | 1075.2 | 657.1  | 656    | 1409.2 | 1035.4 |
| ATP1B3  | 203.7  | 177.3  | 166.5  | 244.2  | 191    | 169.9  | 288.4  | 227.7  |
| ATP1B3  | 574.1  | 460.4  | 342.7  | 402.9  | 417.1  | 333.8  | 630.4  | 567.4  |
| ATP1B4  | 108.4  | 110.3  | 118.8  | 122.8  | 116    | 102    | 118.7  | 123.4  |
| ATP2A1  | 112.3  | 113.1  | 111.8  | 115.5  | 106    | 92.9   | 113.9  | 116.8  |
| ATP2A2  | 202.1  | 175.1  | 215    | 216.7  | 185.4  | 227.1  | 238.9  | 208.8  |
| ATP2A2  | 300.2  | 326.5  | 406.5  | 307    | 282.7  | 295.9  | 342.1  | 412.9  |
| ATP2A2  | 280.3  | 244    | 292.7  | 307.1  | 219.8  | 274.1  | 431.3  | 325.5  |
| ATP2A3  | 147.6  | 137.1  | 147.1  | 155.2  | 125.1  | 115.2  | 135    | 131.2  |
| ATP2A3  | 148.6  | 150.3  | 145.6  | 157.6  | 126.8  | 124.5  | 156.6  | 139.2  |
| ATP2B1  | 149    | 143.4  | 143    | 134.2  | 128.7  | 115.5  | 143.5  | 134    |
| ATP2B1  | 122.6  | 126.5  | 125.7  | 122.8  | 108.8  | 109.4  | 121.3  | 116.4  |
| ATP2B2  | 117.2  | 116    | 113.9  | 119    | 112.5  | 105    | 136.7  | 119.3  |
| ATP2B2  | 119.2  | 114.4  | 116.8  | 116.8  | 109.6  | 101.1  | 118.3  | 116.5  |
| ATP2B2  | 114.1  | 118.3  | 113.7  | 123.1  | 108.2  | 101.1  | 118.3  | 120.8  |
| ATP2B3  | 113.8  | 111.3  | 120    | 119.3  | 107.7  | 96.7   | 121.9  | 122    |
| ATP2B3  | 124    | 130    | 124.9  | 124.8  | 117.6  | 105    | 124.5  | 117.1  |
| ATP2B3  | 104.7  | 113.8  | 112.2  | 124.6  | 111.2  | 102.5  | 109.5  | 118.3  |
| ATP2B4  | 113.2  | 135.9  | 129.9  | 131.8  | 124.3  | 102    | 127.9  | 135.5  |
| ATP2B4  | 377.1  | 426.8  | 395.8  | 415.7  | 346.7  | 259.8  | 262    | 305.1  |
| ATP2C1  | 162.4  | 155.6  | 197.5  | 188.8  | 172.5  | 151.9  | 173.1  | 202.4  |
| ATP2C1  | 128.3  | 135.5  | 121.3  | 137.4  | 142.3  | 103.6  | 133.1  | 140.4  |
| ATP2C1  | 173.6  | 177.8  | 240.4  | 199.7  | 201.3  | 176.3  | 184.1  | 203.8  |
| ATP4A   | 113.9  | 107    | 116.2  | 113.1  | 103.6  | 97.4   | 109.7  | 107    |
| ATP4B   | 113    | 117.3  | 102.9  | 123.6  | 97.4   | 100.2  | 115.5  | 109.3  |
| ATP4B   | 116.2  | 122.6  | 119.7  | 115.4  | 109.5  | 95     | 116.5  | 112.8  |
| ATP5A1  | 4047.2 | 4192.3 | 4482.2 | 4770.7 | 3182.9 | 3526   | 3274.8 | 3921.9 |
| ATP5A1  | 3956.7 | 4280.2 | 4244.8 | 4312   | 3286.2 | 2697.2 | 3232.3 | 3313.5 |
| ATP5B   | 4212   | 5727.6 | 5011.4 | 5117.3 | 3580.2 | 4160.8 | 4577.5 | 5763.5 |
| ATP5C1  | 477.5  | 641.7  | 540    | 512.2  | 538.7  | 519.8  | 430.7  | 426.4  |
| ATP5D   | 211    | 233.5  | 164.4  | 235.7  | 178.8  | 162.7  | 249.4  | 183.1  |
| ATP5D   | 1124   | 1356.7 | 1161   | 978.1  | 696.3  | 933.9  | 797.6  | 722.6  |
| ATP5F1  | 345.8  | 287.6  | 322.6  | 270.4  | 174.7  | 244    | 221.7  | 219.1  |
| ATP5F1  | 1430.5 | 1366.9 | 1611.4 | 1506.7 | 1149.2 | 1692.4 | 1139.4 | 1084.7 |
| ATP5G1  | 127.1  | 123.4  | 124.5  | 119.4  | 119.2  | 103.2  | 120.8  | 125.6  |
| ATP5G1  | 639.7  | 712.8  | 877.8  | 671.6  | 482.3  | 485.6  | 405.5  | 445.1  |
| ATP5G2  | 113    | 110.7  | 115    | 125.2  | 115.5  | 104.3  | 119.8  | 115.8  |
| ATP5G2  | 124.4  | 116.9  | 128    | 126.8  | 106.6  | 104.8  | 125    | 126.4  |

|           |        |        |        |        |        |        |        |        |
|-----------|--------|--------|--------|--------|--------|--------|--------|--------|
| ATP5G2    | 931.7  | 1050.9 | 2015.3 | 1341.5 | 967    | 1625.7 | 906.6  | 1007.3 |
| ATP5G3    | 130.2  | 128.4  | 139.5  | 129.9  | 113.8  | 110.9  | 125.9  | 124.9  |
| ATP5H     | 1317.9 | 1420.3 | 1994.4 | 1662   | 1199.4 | 1561.6 | 1264.9 | 1313.8 |
| ATP5H     | 1666.4 | 2172.8 | 2729.8 | 2030.5 | 1734.6 | 2274.8 | 1406.6 | 1438.6 |
| ATP5I     | 2206.7 | 2747.9 | 3409   | 2529.4 | 2157.2 | 1992.3 | 2155.3 | 2140.3 |
| ATP5I     | 280    | 271.3  | 358.3  | 325.3  | 290.3  | 263.9  | 310.8  | 316.9  |
| ATP5J     | 215.9  | 223.6  | 285.2  | 251.9  | 212.5  | 201.9  | 206.6  | 206    |
| ATP5J     | 1461   | 1817.8 | 2525.1 | 1874.4 | 1438.3 | 1520.5 | 1544.4 | 1563.6 |
| ATP5J     | 1786.6 | 1914.2 | 2442.2 | 2019.8 | 1775.9 | 1838.2 | 1612.9 | 1772.9 |
| ATP5J2    | 566.7  | 539.6  | 747.6  | 609.6  | 458.3  | 518.3  | 584.5  | 500.6  |
| ATP5J2    | 774.4  | 678.8  | 1192.2 | 969.5  | 603.3  | 774.1  | 685.4  | 641.4  |
| ATP5L     | 198.1  | 207.5  | 286.8  | 203.1  | 190.7  | 179.2  | 199.9  | 197.8  |
| ATP5O     | 1696.9 | 1699.3 | 2165.9 | 1939.6 | 1855.7 | 1744.9 | 1533.1 | 2018.1 |
| ATP5S     | 167.5  | 154    | 165    | 151.6  | 142.7  | 132.4  | 170.1  | 143    |
| ATP5S     | 120.7  | 126.2  | 136.5  | 134.1  | 120    | 106.1  | 137.1  | 132.5  |
| ATP6AP1   | 2996.3 | 2452.7 | 2479.5 | 2631   | 1548.4 | 1723.6 | 2089   | 1895.6 |
| ATP6AP2   | 1400.2 | 909.8  | 1830.7 | 1033.8 | 591.7  | 1109.2 | 1122.5 | 975.6  |
| ATP6V0A1  | 402.3  | 233.1  | 685.2  | 458.3  | 224.5  | 440.8  | 574.3  | 397.9  |
| ATP6V0A2  | 212.8  | 236.9  | 198.2  | 226.9  | 189    | 174.3  | 235.4  | 224.6  |
| ATP6V0A4  | 110.5  | 110    | 127    | 127    | 118.4  | 92.1   | 122.6  | 110    |
| ATP6V0A4  | 113.1  | 114.3  | 126.6  | 120.5  | 109.1  | 99.1   | 132.8  | 123    |
| ATP6V0A4  | 111.1  | 112.5  | 104.7  | 117.7  | 108.1  | 104.2  | 129.8  | 117.3  |
| ATP6V0A4  | 113.6  | 113.1  | 113.8  | 110.2  | 110.7  | 99.7   | 125.4  | 117.7  |
| ATP6V0B   | 1988.7 | 1753.6 | 2270.4 | 2755.8 | 1374.7 | 2033.8 | 2415.6 | 1758.5 |
| ATP6V0B   | 158.1  | 139.3  | 158.4  | 171.7  | 145.6  | 158.5  | 144.6  | 159.2  |
| ATP6V0C   | 277.7  | 260.7  | 299.7  | 345.3  | 199.9  | 273.4  | 383.5  | 334.9  |
| ATP6V0D1  | 505    | 453.4  | 657.5  | 599.5  | 402.9  | 463.2  | 630.9  | 600.1  |
| ATP6V0D2  | 116.7  | 111.7  | 110.8  | 116.5  | 108.9  | 102.4  | 116.6  | 114.2  |
| ATP6V0E1  | 2318.8 | 2212.7 | 2600.4 | 2975.2 | 2192   | 1938.2 | 2766   | 2562.9 |
| ATP6V0E2L | 1295.9 | 1664.7 | 1228.3 | 1172   | 848.3  | 701.5  | 510.3  | 485.2  |
| ATP6V1A   | 1521.5 | 1149.1 | 1007.3 | 1832.2 | 893.5  | 1101.8 | 2095.4 | 1406.6 |
| ATP6V1B1  | 124.6  | 118.1  | 116.2  | 122.4  | 114.2  | 102.4  | 114.5  | 122.3  |
| ATP6V1B2  | 2295.5 | 1704.9 | 2432.2 | 2826.4 | 1342.9 | 2472.1 | 3996.8 | 2469.1 |
| ATP6V1C1  | 194.7  | 173.3  | 200.8  | 193.8  | 147.2  | 176.6  | 274.4  | 208.7  |
| ATP6V1C1  | 117    | 115.7  | 125.2  | 127.4  | 111    | 96.2   | 120.5  | 117.2  |
| ATP6V1C2  | 110.9  | 113    | 111    | 124.4  | 115    | 102.6  | 123.6  | 113.2  |
| ATP6V1C2  | 110.9  | 113.4  | 111    | 114.2  | 111.2  | 94.2   | 116.5  | 107.7  |
| ATP6V1D   | 642.6  | 571.2  | 629.1  | 765.2  | 486.2  | 564.7  | 705.4  | 542    |
| ATP6V1E1  | 1502.1 | 1597.2 | 1501   | 1755.3 | 1114   | 1342.7 | 1655.7 | 1308.9 |
| ATP6V1E1  | 1001.4 | 1114.4 | 1063.6 | 1304.4 | 840.6  | 1004.9 | 1231.1 | 958.4  |
| ATP6V1E2  | 145.4  | 171.9  | 197.1  | 150.9  | 153.3  | 152.4  | 188    | 198.3  |
| ATP6V1F   | 1207.7 | 1135.9 | 1303   | 1331.8 | 982.9  | 1028.7 | 1395   | 1035.1 |
| ATP6V1G1  | 1257.8 | 1574.6 | 1657.7 | 1580.3 | 1392   | 1456.5 | 1824.1 | 1886.6 |
| ATP6V1G2  | 124.3  | 128.3  | 150.1  | 138.4  | 117.3  | 109.2  | 125    | 125.2  |
| ATP6V1G2  | 117.4  | 118.8  | 123    | 119.9  | 114.2  | 102.1  | 112.7  | 118    |
| ATP6V1G3  | 113.1  | 119.3  | 120.2  | 110    | 111.8  | 103.3  | 119.7  | 115.6  |
| ATP6V1H   | 121.9  | 118.3  | 123.5  | 118    | 113.2  | 101.1  | 121.2  | 119.5  |
| ATP6V1H   | 220.5  | 214.5  | 195.7  | 217.7  | 175.8  | 167    | 222.4  | 224.3  |
| ATP7A     | 143.7  | 129.5  | 137.2  | 150.9  | 141.9  | 118.6  | 141.6  | 149.7  |
| ATP7B     | 114.3  | 126.9  | 117.3  | 120.6  | 110.7  | 110.2  | 124.9  | 124.7  |
| ATP7B     | 124.9  | 126.7  | 118.6  | 116.9  | 119.4  | 103.4  | 127.5  | 122    |



|          |        |        |        |        |        |        |       |       |
|----------|--------|--------|--------|--------|--------|--------|-------|-------|
| ATP8A1   | 124    | 122.7  | 121.9  | 124.8  | 125.6  | 106.2  | 125.2 | 125.5 |
| ATP8A2   | 132.8  | 123.9  | 128.5  | 137.4  | 117.5  | 107    | 122.9 | 111.8 |
| ATP8B1   | 108.1  | 109.8  | 121.6  | 124.1  | 112.5  | 104.6  | 124.3 | 118.9 |
| ATP8B2   | 127.5  | 135.6  | 124.8  | 130.2  | 135.8  | 105.7  | 124.3 | 124.4 |
| ATP8B2   | 235.4  | 341.3  | 228.3  | 212.6  | 211.6  | 199.4  | 174.3 | 261.4 |
| ATP8B3   | 117.5  | 113.9  | 114.9  | 122.4  | 110.6  | 101.5  | 128.3 | 114.4 |
| ATP8B4   | 186    | 219.3  | 226.3  | 182.1  | 196.6  | 131.2  | 180.2 | 177.5 |
| ATP9A    | 261.2  | 215    | 238.2  | 268.2  | 153.7  | 162.3  | 243.5 | 188   |
| ATP9B    | 131.2  | 136.8  | 136.3  | 152.8  | 120.7  | 108    | 144.7 | 129.4 |
| ATPAF1   | 181.1  | 194.6  | 256.6  | 195    | 178.7  | 204.8  | 193.9 | 166.5 |
| ATPAF1   | 179.5  | 157.4  | 209.4  | 198.3  | 169.1  | 153.8  | 176.7 | 162.2 |
| ATPAF2   | 137    | 126.2  | 138.9  | 132.9  | 118.9  | 113.3  | 131.2 | 127.1 |
| ATPBD1B  | 330.4  | 325.9  | 317.5  | 330.5  | 253.3  | 213.4  | 296.4 | 317.8 |
| ATPBD1C  | 109.7  | 109.8  | 111    | 122.9  | 105.5  | 103.4  | 118.7 | 113.9 |
| ATPBD3   | 144.5  | 146.9  | 165.2  | 155    | 136.1  | 115.7  | 155.1 | 151.1 |
| ATPBD4   | 124.1  | 127.5  | 140.8  | 119.3  | 115.2  | 112.6  | 118   | 111.8 |
| ATPIF1   | 235.2  | 271.2  | 249.3  | 220.5  | 193.3  | 170.1  | 187   | 186   |
| ATPIF1   | 192.2  | 154.1  | 178.5  | 181    | 122.4  | 158.2  | 145.9 | 137.6 |
| ATR      | 118.7  | 121.8  | 114.5  | 117.1  | 106.4  | 100.9  | 120.2 | 107.4 |
| ATR      | 115.7  | 115.5  | 121    | 116.2  | 103.8  | 96.1   | 108.4 | 109.5 |
| ATR      | 135.7  | 171.6  | 151.2  | 145.7  | 136.9  | 117.1  | 131.8 | 156.9 |
| ATRN     | 125    | 122.6  | 117.4  | 137.7  | 119.9  | 109.5  | 126.4 | 123   |
| ATRN     | 112.5  | 115.9  | 117.5  | 118.1  | 110.2  | 106.1  | 119.7 | 117.8 |
| ATRN11   | 116.9  | 119.6  | 130    | 116.1  | 111.2  | 94.6   | 118.2 | 111.8 |
| ATRX     | 123.9  | 120.4  | 122    | 140.4  | 122.3  | 101.4  | 134.7 | 129.7 |
| ATRX     | 111.1  | 118.7  | 112.7  | 119.7  | 103.6  | 92.8   | 114.7 | 113.7 |
| ATRX     | 120.9  | 115    | 124.4  | 125.4  | 116.8  | 99.6   | 125.5 | 121.4 |
| ATXN1    | 274.4  | 320.3  | 287.5  | 362.3  | 289    | 219.8  | 338.4 | 312.6 |
| ATXN10   | 119.4  | 134.4  | 115.4  | 124.6  | 114.8  | 100.1  | 114.5 | 121.8 |
| ATXN2    | 720.2  | 706.2  | 614.6  | 707.8  | 692    | 565.3  | 861   | 864.6 |
| ATXN2L   | 148.3  | 140.7  | 126.7  | 136.7  | 132    | 121.6  | 165.9 | 152.7 |
| ATXN2L   | 130.2  | 124.4  | 117.3  | 143.3  | 129.8  | 101.8  | 140.8 | 132.6 |
| ATXN3    | 258.3  | 340.4  | 230.7  | 327.2  | 321.8  | 160.2  | 341   | 371   |
| ATXN3    | 122.1  | 124    | 123.9  | 142.7  | 124.4  | 108.6  | 131.7 | 129.7 |
| ATXN7    | 119.3  | 111.6  | 114    | 119.9  | 109.3  | 95     | 115.8 | 105.3 |
| ATXN7L2  | 173.6  | 203.4  | 146.3  | 171    | 145.4  | 120.4  | 180.5 | 151.9 |
| ATXN7L4  | 122.1  | 128    | 115.6  | 123.1  | 115.4  | 93     | 120   | 115.8 |
| ATXN8OS  | 110.9  | 111    | 113.2  | 114.1  | 108.4  | 96.6   | 108.2 | 109.8 |
| AUH      | 170    | 184.9  | 176.2  | 177    | 168.6  | 149.9  | 153.7 | 159.7 |
| AUP1     | 173.6  | 156.7  | 162.3  | 172.7  | 146.2  | 168.1  | 152.5 | 162.9 |
| AURKA    | 158.5  | 163.3  | 161.9  | 144.1  | 140.5  | 134.2  | 160.2 | 147.3 |
| AURKA    | 139.5  | 140.2  | 136.7  | 148.1  | 137    | 118.3  | 136.1 | 149.1 |
| AURKAIP1 | 1771.2 | 2014.5 | 1571.5 | 1854.6 | 1406.5 | 1125.3 | 1635  | 1707  |
| AURKB    | 117.9  | 125    | 110.2  | 126.4  | 119.3  | 103.5  | 133.6 | 124.8 |
| AURKC    | 101.1  | 115.2  | 108.9  | 123.5  | 103.5  | 89.1   | 115.9 | 110.2 |
| AURKC    | 114.1  | 116.1  | 122.8  | 119.3  | 100.8  | 93.9   | 121.1 | 116.1 |
| AURKC    | 117.8  | 122.7  | 121.2  | 126.3  | 108.7  | 104    | 119.5 | 113.3 |
| AUTS2    | 398.1  | 477.4  | 613.3  | 496.5  | 431.2  | 536.1  | 438.5 | 438.9 |
| AVEN     | 129.8  | 146.5  | 130.9  | 139.7  | 138.4  | 110.1  | 143.2 | 131   |
| AVIL     | 129.4  | 128.8  | 128.4  | 137.7  | 111.7  | 107.8  | 134   | 154.8 |
| AVP      | 121.5  | 123.8  | 117.1  | 135.6  | 121.4  | 105.7  | 124.8 | 117.6 |

|          |        |        |        |        |        |        |       |        |
|----------|--------|--------|--------|--------|--------|--------|-------|--------|
| AVPI1    | 282.5  | 324.7  | 223    | 398.6  | 324.1  | 287.5  | 438.5 | 386    |
| AVPR1A   | 109.2  | 113    | 119.8  | 111.5  | 108    | 96     | 122.8 | 119.1  |
| AVPR1B   | 124.4  | 135.3  | 141.6  | 125.7  | 119    | 107.5  | 121.4 | 129.3  |
| AVPR2    | 109.2  | 122    | 113.8  | 117.2  | 108.7  | 104.4  | 116.3 | 115.1  |
| AXIIR    | 1200.8 | 1092.8 | 1317.1 | 928.1  | 613.9  | 1039.6 | 463.5 | 370.9  |
| AXIN1    | 541.3  | 579.4  | 430.6  | 594.7  | 520.7  | 428.6  | 812.2 | 842    |
| AXIN1    | 122    | 135.4  | 122.2  | 132.2  | 123.4  | 105.9  | 139.8 | 140.2  |
| AXIN2    | 408.6  | 477.4  | 277    | 343.6  | 358.7  | 231.5  | 333.3 | 314.5  |
| AXL      | 116.6  | 118.4  | 123.8  | 116.2  | 107.8  | 102.7  | 119.6 | 115.5  |
| AXL      | 116.8  | 120.8  | 121.5  | 130.4  | 113.4  | 99.8   | 113.2 | 112.9  |
| AXUD1    | 480.8  | 596.3  | 352.3  | 639.6  | 462.9  | 419.7  | 753.4 | 844.4  |
| AYP1     | 134.7  | 126.5  | 127.1  | 125.3  | 112.1  | 106.7  | 129.8 | 124.6  |
| AYTL1    | 115.1  | 131    | 118    | 125.4  | 116.1  | 102.6  | 119.9 | 119.2  |
| AYTL2    | 321.8  | 336.1  | 270.9  | 349.1  | 235.6  | 193.4  | 279.9 | 288    |
| AZGP1    | 127.9  | 127.9  | 127.6  | 135.4  | 115.8  | 105.5  | 128.6 | 123.7  |
| AZI1     | 216.9  | 256    | 233.8  | 189.6  | 158.7  | 167.8  | 195.8 | 169.6  |
| AZI1     | 113    | 122.1  | 121.3  | 116    | 116.3  | 106.6  | 114   | 122.2  |
| AZI2     | 153.6  | 154    | 162.3  | 157.8  | 157.5  | 157.2  | 158.3 | 216.5  |
| AZIN1    | 732.1  | 907.5  | 822.3  | 767.6  | 720.4  | 664.4  | 887.8 | 1252.6 |
| AZIN1    | 131.7  | 127.6  | 130.9  | 139.5  | 128    | 105.2  | 128.4 | 126    |
| AZIN1    | 157.8  | 164.1  | 196.4  | 151.3  | 127.1  | 142.6  | 180.5 | 163.6  |
| AZU1     | 116.7  | 114.5  | 117.3  | 117.5  | 123.8  | 93.8   | 121.2 | 127.5  |
| B2M      | 4277.4 | 3789.2 | 4235.2 | 5882.2 | 3217.4 | 2669.3 | 5529  | 3373.1 |
| B3GALNT1 | 109.8  | 130.6  | 120.9  | 123.1  | 113.3  | 104.6  | 120.6 | 116.9  |
| B3GALNT2 | 114.6  | 115.4  | 118.4  | 126    | 115.9  | 105.8  | 124.3 | 114.1  |
| B3GALT1  | 125.9  | 123.2  | 120.9  | 131.7  | 117.2  | 108.4  | 125.1 | 128.9  |
| B3GALT2  | 135    | 118.2  | 141.2  | 136.4  | 118.2  | 106.8  | 138   | 127.6  |
| B3GALT3  | 126.5  | 112.5  | 123.9  | 127.3  | 119.9  | 97     | 115.7 | 130.5  |
| B3GALT3  | 104.2  | 111.3  | 119.2  | 117.1  | 101.6  | 92.1   | 111.9 | 119.4  |
| B3GALT3  | 103.4  | 132.4  | 136.7  | 137.3  | 117.5  | 107.7  | 126.7 | 126.1  |
| B3GALT4  | 237.9  | 200.9  | 214.2  | 230    | 175.1  | 177.2  | 216.8 | 186.2  |
| B3GALT5  | 118.6  | 120    | 117.2  | 117.3  | 108.2  | 106.2  | 119.8 | 114.6  |
| B3GALT5  | 113.5  | 116.9  | 115    | 119.5  | 120.7  | 114.5  | 122.9 | 121.7  |
| B3GALT5  | 115.4  | 110.7  | 104.2  | 116.6  | 108.4  | 97.6   | 112.8 | 120.9  |
| B3GALT6  | 247.7  | 294.1  | 216.3  | 279.1  | 225.5  | 183.5  | 285.4 | 208    |
| B3GALT7  | 115    | 111.4  | 110.3  | 120.2  | 119.6  | 111.7  | 130.9 | 121.2  |
| B3GAT1   | 126.7  | 123.2  | 125.8  | 126.5  | 115.9  | 104.3  | 126.3 | 142    |
| B3GAT1   | 124.9  | 121    | 122.6  | 127.8  | 120.1  | 117.9  | 139.6 | 130.3  |
| B3GAT1   | 113    | 129.3  | 115.1  | 126.5  | 113.1  | 98.6   | 127.3 | 117.2  |
| B3GAT2   | 114.5  | 117.8  | 111.3  | 114.5  | 101.5  | 101.1  | 108.1 | 112.2  |
| B3GAT3   | 174.2  | 190.4  | 212.9  | 166.8  | 155.8  | 152.7  | 158.8 | 140.3  |
| B3GNT1   | 142.4  | 154.4  | 178.9  | 144.5  | 143.2  | 112.3  | 141.2 | 142.3  |
| B3GNT3   | 125    | 120.9  | 127.7  | 135.5  | 112.9  | 109.1  | 150.1 | 125.7  |
| B3GNT4   | 117.9  | 116    | 128.3  | 131.2  | 112.1  | 97.1   | 116.2 | 115.7  |
| B3GNT5   | 121.7  | 129.8  | 135.2  | 118.2  | 106.3  | 107.2  | 137.6 | 141.6  |
| B3GNT6   | 154.6  | 157.6  | 152    | 145.7  | 131.5  | 125.6  | 132.7 | 115.7  |
| B3GN-T6  | 111.7  | 122.1  | 115.9  | 119    | 107.3  | 98     | 110.4 | 120    |
| B3GNT7   | 116.6  | 121.5  | 116.6  | 122.8  | 116.4  | 97.2   | 108.7 | 112.6  |
| B3GNTL1  | 119.9  | 116.5  | 117.4  | 129.9  | 101.5  | 110.3  | 111.2 | 112    |
| B3GTL    | 194.9  | 184.9  | 180.8  | 194.5  | 197.2  | 144.4  | 186   | 195.8  |
| B4GALNT2 | 111.9  | 113.9  | 118.2  | 118.7  | 104.8  | 96.8   | 120.2 | 112.7  |

|            |       |       |       |       |       |       |       |        |
|------------|-------|-------|-------|-------|-------|-------|-------|--------|
| B4GALNT3   | 119.6 | 111.9 | 124.8 | 109.7 | 104.1 | 97.4  | 119.7 | 114.8  |
| B4GALNT4   | 111.3 | 100.3 | 109.8 | 109.5 | 107.8 | 95.1  | 112   | 103.5  |
| B4GALT1    | 140.2 | 205.9 | 145.1 | 153.5 | 160.1 | 133.9 | 168.2 | 158.6  |
| B4GALT2    | 108.4 | 135.4 | 106.3 | 126   | 111.2 | 109   | 116.4 | 116.7  |
| B4GALT2    | 112.1 | 116.7 | 137   | 135   | 122.6 | 106.6 | 124.8 | 129.6  |
| B4GALT2    | 115.3 | 138.9 | 133.5 | 142.9 | 129.7 | 114.6 | 136.3 | 134    |
| B4GALT3    | 547.9 | 672.5 | 425.3 | 549.4 | 453.8 | 401.1 | 637.6 | 618.6  |
| B4GALT4    | 210.2 | 190.2 | 183.5 | 192.7 | 161.2 | 172.8 | 227.1 | 213.5  |
| B4GALT4    | 129.4 | 153.6 | 163.5 | 146.4 | 137   | 128.4 | 158.7 | 150.6  |
| B4GALT5    | 336.3 | 362.8 | 273.9 | 353.8 | 247.1 | 182   | 426.8 | 292.4  |
| B4GALT6    | 116.5 | 113.7 | 116.8 | 112.9 | 121.4 | 104.2 | 132.4 | 121.1  |
| B4GALT7    | 283.5 | 268.5 | 319.5 | 286.1 | 213.4 | 208.6 | 228.4 | 213    |
| BA16L21.2. | 154.8 | 141.4 | 162.8 | 174.7 | 146.8 | 118.5 | 148.6 | 173.9  |
| BA9F11.1   | 111.4 | 114   | 110.7 | 109.5 | 99.4  | 94.3  | 114.5 | 118.6  |
| BAALC      | 114.9 | 112.7 | 113.4 | 121.9 | 104.4 | 105   | 123.1 | 120.8  |
| BAALC      | 117.6 | 113.3 | 131.7 | 116.2 | 118.4 | 104.1 | 123.2 | 116.2  |
| BAAT       | 114.2 | 109.9 | 108.9 | 116.4 | 109.2 | 102.2 | 117.7 | 108.7  |
| BACE1      | 114   | 117.7 | 123.8 | 115.4 | 105.3 | 93.2  | 116.4 | 116    |
| BACE1      | 120.6 | 122.8 | 128   | 137.4 | 128.1 | 108.3 | 124.3 | 124.4  |
| BACE2      | 111.1 | 121.8 | 114.1 | 127   | 116.1 | 105.8 | 128.3 | 110.1  |
| BACE2      | 115.1 | 114.3 | 112   | 116   | 117.9 | 105.4 | 123.9 | 118.4  |
| BACH1      | 121.6 | 122.2 | 116.7 | 126.1 | 113.7 | 99.7  | 131.5 | 129.6  |
| BACH1      | 122.3 | 118.9 | 116.4 | 119.9 | 113.2 | 98.2  | 108.9 | 116    |
| BACH1      | 108.9 | 126.3 | 116.5 | 129.2 | 123.3 | 102.4 | 122.7 | 113.7  |
| BACH2      | 394   | 389.6 | 275.6 | 340.8 | 322.9 | 251.3 | 394.9 | 493.5  |
| BAD        | 124.2 | 122.5 | 132.3 | 129.7 | 110.1 | 111.8 | 120   | 116    |
| BAD        | 185.9 | 194.9 | 178.2 | 182.1 | 154.2 | 156.2 | 172.8 | 145.3  |
| BAD        | 113.7 | 120.4 | 119.5 | 123.9 | 109.6 | 100.7 | 111.7 | 122.2  |
| BAG1       | 128.8 | 133   | 126.9 | 118.8 | 115.7 | 101.9 | 138.9 | 131.8  |
| BAG3       | 367.7 | 437   | 360.7 | 425.4 | 375.9 | 299.9 | 870.7 | 1815.6 |
| BAG4       | 117.6 | 126.8 | 135.4 | 135.7 | 111.7 | 109   | 127.1 | 138.5  |
| BAG5       | 812.4 | 690.9 | 796.9 | 861.4 | 630.7 | 652.9 | 897.3 | 828.2  |
| BAG5       | 110.1 | 113.9 | 108   | 109.7 | 112.6 | 95.4  | 116   | 101.6  |
| BAG5       | 115.1 | 115.1 | 110.4 | 123.9 | 107.1 | 95.6  | 120.7 | 113.2  |
| BAG5       | 162.7 | 177.3 | 166.7 | 207.3 | 152   | 139.9 | 197   | 192.7  |
| BAGE       | 117.8 | 112.9 | 115.6 | 116.2 | 104   | 102.8 | 127.1 | 129.8  |
| BAGE2      | 116.4 | 120.6 | 122.4 | 125.2 | 116.9 | 103.6 | 131.4 | 126.1  |
| BAGE3      | 115.8 | 121.6 | 130.8 | 125   | 119.5 | 105.6 | 130.2 | 139    |
| BAGE4      | 113   | 118.7 | 115.1 | 113.5 | 111.3 | 101.5 | 116.3 | 115.9  |
| BAGE5      | 137.8 | 141.5 | 122.3 | 151   | 160.1 | 106.5 | 163.1 | 173.1  |
| BAHD1      | 123.5 | 113   | 133.7 | 126.2 | 118.9 | 107.1 | 117.3 | 117.6  |
| BAI1       | 115.7 | 111.8 | 120.9 | 115.9 | 106.3 | 100.4 | 110.6 | 105.8  |
| BAI1       | 110.9 | 114.7 | 115.5 | 110.1 | 98.7  | 108.5 | 119.5 | 125.7  |
| BAI1       | 113.1 | 109.2 | 116.2 | 115.9 | 99.9  | 97.4  | 117.3 | 114.2  |
| BAI2       | 127.5 | 119   | 116.8 | 119.1 | 117.4 | 94.4  | 112.2 | 110.3  |
| BAI3       | 104   | 102.1 | 110.2 | 110.4 | 108.9 | 100.5 | 117.5 | 114.9  |
| BAIAP2     | 122.4 | 133.2 | 127.2 | 134.9 | 121.4 | 113.4 | 148.7 | 130.8  |
| BAIAP2     | 108.7 | 116.5 | 119.9 | 123.7 | 104.8 | 99    | 123.6 | 119.3  |
| BAIAP2     | 104.4 | 105.8 | 106.6 | 128.6 | 102.1 | 102   | 116.7 | 118.6  |
| BAIAP2     | 108.3 | 111.7 | 117.8 | 117.8 | 102.6 | 97.6  | 123.2 | 120.5  |
| BAIAP2L1   | 107.7 | 117.5 | 108.2 | 106.1 | 103.4 | 97.7  | 109.7 | 122.8  |

|           |        |        |        |        |       |        |        |        |
|-----------|--------|--------|--------|--------|-------|--------|--------|--------|
| BAIAP2L2  | 151.8  | 159.8  | 178.2  | 203.6  | 167.2 | 145.8  | 170    | 189.8  |
| BAIAP3    | 110.3  | 110    | 113.9  | 111.8  | 105.6 | 96.3   | 119.3  | 120.8  |
| BAK1      | 133.2  | 162.2  | 147.4  | 145.9  | 131.6 | 117.9  | 131.2  | 143.6  |
| BAMBI     | 113.1  | 107.1  | 99.6   | 121    | 104.6 | 97.4   | 126.8  | 122.7  |
| BANF1     | 603.3  | 604    | 697.9  | 658.7  | 560.9 | 527.4  | 628.2  | 741.2  |
| BANK1     | 418.6  | 340.7  | 301.6  | 532.7  | 325.5 | 227.2  | 358.9  | 274.5  |
| BANP      | 154.1  | 150.4  | 135.7  | 155.3  | 124.9 | 121.8  | 184.3  | 179.1  |
| BAP1      | 169.7  | 193    | 160.2  | 194.9  | 170   | 141.9  | 195.3  | 205.7  |
| BAPX1     | 111.7  | 120.6  | 119.9  | 117.9  | 103.7 | 99.7   | 125.4  | 113.4  |
| BARD1     | 203.9  | 172.4  | 204.4  | 197.6  | 184.2 | 141    | 219.5  | 212.6  |
| BARHL1    | 118.8  | 120.8  | 115.7  | 118.5  | 102.2 | 103.1  | 123.4  | 114.4  |
| BARHL2    | 122.3  | 127.6  | 132    | 124.7  | 121.3 | 108.5  | 117.8  | 119.4  |
| BARX1     | 117.3  | 112    | 119.4  | 116.1  | 110.9 | 99.5   | 127.1  | 110    |
| BARX2     | 110.6  | 109.6  | 123.6  | 119.3  | 106.9 | 107.5  | 121.1  | 115.7  |
| BASP1     | 404.4  | 364.3  | 454.7  | 496.5  | 312.1 | 615.6  | 482.2  | 278.1  |
| BAT1      | 1184.5 | 1101.6 | 1105.7 | 1071.4 | 826.5 | 1038.2 | 1379.7 | 1059.3 |
| BAT1      | 111.5  | 122.2  | 120.1  | 117.2  | 115.3 | 104.8  | 113.8  | 122.2  |
| BAT1      | 133.9  | 126.1  | 130    | 142.3  | 114.7 | 110.6  | 124.6  | 115.4  |
| BAT2      | 169.3  | 195.4  | 143.4  | 172.7  | 175.2 | 146.5  | 213.3  | 185.7  |
| BAT2      | 361.5  | 386.1  | 294.2  | 389.4  | 228   | 284.3  | 555.6  | 399.7  |
| BAT2D1    | 716.5  | 823.8  | 635.9  | 855.8  | 807.7 | 522.9  | 844.6  | 992.4  |
| BAT3      | 175.1  | 188.7  | 156.9  | 177.4  | 136.9 | 122    | 177.3  | 164.2  |
| BAT3      | 156.6  | 162.4  | 187    | 170.4  | 138.7 | 158.7  | 175.1  | 154.5  |
| BAT4      | 115.7  | 123.5  | 121.9  | 127.4  | 108.2 | 122.5  | 122.1  | 117    |
| BAT5      | 324.2  | 292.4  | 335.1  | 318.2  | 269   | 285    | 302.1  | 271.4  |
| BATF      | 189.1  | 200.7  | 163.1  | 175.4  | 152.7 | 122.7  | 155.3  | 154.9  |
| BATF2     | 126.4  | 113.5  | 127.6  | 112.8  | 110.6 | 99.7   | 113.1  | 118.3  |
| BAX       | 757.3  | 899.3  | 480.1  | 704.7  | 820.9 | 479.9  | 692.8  | 883    |
| BAX       | 117.9  | 119.8  | 114.5  | 122.1  | 110   | 96.3   | 128.3  | 126.7  |
| BAX       | 129.2  | 139.8  | 130.3  | 143.1  | 138.9 | 112.3  | 195.1  | 185.8  |
| BAZ1A     | 782    | 737.8  | 695.5  | 881.5  | 674.3 | 520.2  | 1086.3 | 882.1  |
| BAZ1A     | 242.5  | 203.3  | 187.4  | 230.4  | 182.3 | 143    | 247    | 302.2  |
| BAZ1B     | 400.5  | 392.1  | 285.7  | 359.1  | 406.3 | 267.4  | 423    | 372.3  |
| BAZ2A     | 133.4  | 118.6  | 127.3  | 126.4  | 116   | 107.9  | 133.3  | 121.4  |
| BAZ2B     | 267.6  | 263.3  | 255    | 246.8  | 209   | 210.6  | 213.6  | 219.7  |
| BBC3      | 108.2  | 116.1  | 124.6  | 127.4  | 113.7 | 109.9  | 119.2  | 130.2  |
| BBOX1     | 107.5  | 128    | 121.6  | 124.6  | 110.4 | 105.7  | 119.9  | 118    |
| BBS1      | 160.5  | 165.7  | 189.7  | 158.4  | 136.4 | 126.6  | 153.6  | 136.9  |
| BBS12     | 117.1  | 116.4  | 125.6  | 125.8  | 116.5 | 113.9  | 125.6  | 117.1  |
| BBS2      | 276.2  | 278.2  | 379.8  | 264.5  | 264   | 229.6  | 216.2  | 173    |
| BBS4      | 160.6  | 162.8  | 231    | 182.1  | 138.3 | 158.2  | 156    | 142.2  |
| BBS5      | 112.1  | 117.7  | 112.3  | 119.6  | 107.4 | 97.6   | 126.7  | 119.7  |
| BBS5      | 117.3  | 114.6  | 117.4  | 113.6  | 104.4 | 98.3   | 106.1  | 113.8  |
| BBS5      | 118.4  | 114.4  | 110.4  | 114.5  | 103.3 | 95.4   | 115.6  | 108.9  |
| BBS7      | 120.5  | 121    | 117.6  | 127.4  | 110.4 | 108.9  | 113.8  | 109.2  |
| BBS7      | 175.1  | 190.8  | 173.1  | 169.3  | 176.2 | 152.8  | 222.1  | 227.2  |
| BBS7      | 107.8  | 117.4  | 111.9  | 118.4  | 102.9 | 101.5  | 110.2  | 114.9  |
| BBS9      | 102.9  | 121.1  | 116.5  | 121.7  | 106.8 | 100.9  | 122.6  | 120.8  |
| BBX       | 549.9  | 625.7  | 440.7  | 544.3  | 488.2 | 355.3  | 538.6  | 705    |
| BC002942  | 399.7  | 381.1  | 497.9  | 443.2  | 282.9 | 346.6  | 519.2  | 413.9  |
| BC37295_3 | 120    | 117.9  | 117.5  | 128.6  | 102.5 | 95.2   | 126.8  | 112.9  |

|         |        |        |        |        |        |        |        |        |
|---------|--------|--------|--------|--------|--------|--------|--------|--------|
| BCAM    | 111.9  | 121.3  | 120    | 120.5  | 108.7  | 103.9  | 118.4  | 124.7  |
| BCAM    | 108.3  | 109.7  | 111.2  | 115.1  | 101.6  | 100.3  | 114.6  | 110.3  |
| BCAM    | 113.2  | 121.4  | 113.2  | 123.6  | 118.1  | 99.5   | 123.4  | 113.5  |
| BCAN    | 131.1  | 131.7  | 134.4  | 152.2  | 140.1  | 121.6  | 139.4  | 137.2  |
| BCAN    | 106.8  | 121.7  | 107.2  | 117.3  | 107.3  | 89.6   | 107.9  | 114.5  |
| BCAN    | 120.6  | 115.9  | 116.6  | 120.8  | 109.6  | 100.8  | 127.5  | 115.9  |
| BCAP29  | 185    | 188.8  | 223.1  | 201    | 164.5  | 193.2  | 178    | 181.7  |
| BCAP29  | 115.4  | 115.9  | 117.3  | 118.1  | 101.6  | 99.9   | 118.5  | 123    |
| BCAP29  | 156.2  | 145.8  | 186.2  | 200.7  | 154.8  | 177.9  | 181.6  | 178.3  |
| BCAP29  | 121.5  | 113.8  | 116.4  | 119.4  | 110.9  | 95.4   | 115.7  | 112    |
| BCAP29  | 134.4  | 144.4  | 180.5  | 148.1  | 136.4  | 131.7  | 149.5  | 149.2  |
| BCAP31  | 1248.4 | 1367.8 | 1207.1 | 1591.5 | 1120.5 | 1162   | 2305.9 | 1540   |
| BCAR1   | 115.6  | 117.5  | 114.8  | 116.6  | 106.4  | 94.9   | 112.5  | 113.1  |
| BCAR3   | 137    | 135.1  | 128.7  | 153.9  | 125.3  | 106.5  | 131.3  | 126.2  |
| BCAS1   | 116    | 109.8  | 110.4  | 127.4  | 105.5  | 97.6   | 127.1  | 117.1  |
| BCAS2   | 119.6  | 122.7  | 133.8  | 129.8  | 115.2  | 100.3  | 117.8  | 125.1  |
| BCAS3   | 115.8  | 114.3  | 108.3  | 116.2  | 102.3  | 94.4   | 123    | 115.5  |
| BCAS4   | 378.3  | 406.3  | 422.5  | 441.2  | 329.5  | 274.5  | 305.9  | 236.4  |
| BCAS4   | 480.1  | 574.4  | 453.6  | 481.8  | 343.2  | 306.2  | 298.7  | 275.9  |
| BCAS4   | 121.2  | 131.4  | 136.5  | 129.3  | 120.4  | 102.7  | 135.3  | 141.5  |
| BCAT1   | 133.7  | 132.4  | 137.6  | 125.4  | 122.2  | 111.4  | 135.8  | 135.8  |
| BCAT2   | 157.7  | 171.4  | 184.2  | 162.7  | 140.9  | 136.5  | 162.2  | 151.1  |
| BCCIP   | 450.4  | 556.4  | 549    | 431.6  | 417.7  | 342.9  | 455.1  | 420.2  |
| BCCIP   | 184    | 164.7  | 235.5  | 197.2  | 158    | 173.5  | 153.8  | 176.9  |
| BCCIP   | 168.9  | 148.4  | 201.8  | 181.8  | 160.6  | 137.6  | 169.9  | 193    |
| BCCIP   | 120.5  | 119.8  | 134.3  | 120.3  | 121.3  | 102.2  | 130.5  | 120    |
| BCDIN3  | 919.8  | 1015.3 | 631.4  | 960    | 833.8  | 598.2  | 1297.9 | 1347.5 |
| BCDO2   | 104.4  | 109.6  | 112.1  | 111    | 104    | 96.9   | 112.9  | 111    |
| BCHE    | 110    | 118.1  | 121.8  | 116    | 109.1  | 97.5   | 110.8  | 118.5  |
| BCKDHA  | 351.8  | 394.5  | 430.6  | 371.8  | 304.4  | 344.2  | 268.4  | 274.8  |
| BCKDHB  | 128.8  | 123.5  | 128.2  | 136.6  | 117.2  | 109    | 120    | 116.7  |
| BCKDHB  | 113.3  | 122.1  | 116.5  | 128.9  | 110.4  | 107.1  | 128.3  | 125    |
| BCKDK   | 793.9  | 630.6  | 1051.8 | 865.4  | 397.5  | 608.3  | 601.4  | 416.2  |
| BCL10   | 123    | 132.9  | 134.9  | 127.6  | 124.1  | 123    | 142.5  | 130.2  |
| BCL11A  | 147.9  | 136.8  | 142.1  | 157    | 127.1  | 107.1  | 144.9  | 117.1  |
| BCL11A  | 127.9  | 135.3  | 117.2  | 133.9  | 116.6  | 101.6  | 132.5  | 114.6  |
| BCL11A  | 155.8  | 143.4  | 153.6  | 160.8  | 126.1  | 114.7  | 123.5  | 128.9  |
| BCL11B  | 1596.1 | 1841.9 | 1361.8 | 1525.8 | 1494.7 | 1205.5 | 1050.4 | 1157.1 |
| BCL11B  | 109.8  | 110.6  | 109    | 117.4  | 107.5  | 98.1   | 108.3  | 112.4  |
| BCL2    | 108.2  | 115.2  | 113.4  | 114.3  | 101.3  | 92.9   | 111.6  | 108.1  |
| BCL2    | 117.6  | 128.4  | 123.1  | 121.6  | 113.9  | 100.9  | 116.3  | 121.9  |
| BCL2    | 461.6  | 457.9  | 393.3  | 452.1  | 340.7  | 349.8  | 383.3  | 329.1  |
| BCL2A1  | 112.6  | 138.2  | 125.3  | 128.3  | 119.2  | 119.1  | 133.5  | 123.2  |
| BCL2L1  | 392.4  | 390.4  | 392.1  | 367.2  | 312.7  | 335.8  | 383.2  | 315    |
| BCL2L1  | 117.6  | 116.2  | 119.4  | 116.9  | 113    | 93.5   | 130.6  | 121.4  |
| BCL2L10 | 105.2  | 115.4  | 113.6  | 122.2  | 109.9  | 102.1  | 129.4  | 114.4  |
| BCL2L11 | 113.5  | 111.2  | 115.5  | 118.6  | 106.6  | 96.1   | 121.5  | 117.2  |
| BCL2L11 | 108.2  | 116.8  | 112.4  | 114.8  | 108.4  | 101.1  | 112.7  | 115.8  |
| BCL2L11 | 119.3  | 117.8  | 114.8  | 124.8  | 113    | 104.8  | 130.4  | 111.1  |
| BCL2L12 | 121.7  | 124.2  | 134.9  | 135.3  | 118.6  | 118    | 132.7  | 126    |
| BCL2L12 | 226.7  | 258.4  | 242.3  | 259.6  | 205.5  | 207.5  | 252.9  | 249.7  |

|         |       |        |       |        |       |       |       |       |
|---------|-------|--------|-------|--------|-------|-------|-------|-------|
| BCL2L12 | 213.4 | 216.7  | 220.6 | 192.7  | 190.1 | 185.6 | 210.7 | 233.3 |
| BCL2L13 | 598.6 | 608.6  | 636.3 | 607.1  | 681.4 | 556.8 | 703   | 881.4 |
| BCL2L14 | 122.8 | 127.1  | 123.3 | 120    | 112.1 | 109.1 | 123.4 | 123.6 |
| BCL2L14 | 111.7 | 119.4  | 124.4 | 121.1  | 103.6 | 102.8 | 124.7 | 114.8 |
| BCL2L14 | 119.8 | 121.3  | 130.1 | 116.7  | 116.3 | 106.6 | 122.3 | 124.8 |
| BCL2L14 | 110.3 | 110.4  | 111.8 | 113.1  | 108.3 | 95.7  | 114.7 | 107.8 |
| BCL2L2  | 146.8 | 130.4  | 176.9 | 159.7  | 136.3 | 138.1 | 147.2 | 135.2 |
| BCL3    | 235.9 | 220.8  | 192.6 | 303.9  | 200.2 | 239.2 | 315.5 | 214.8 |
| BCL6    | 113   | 111.9  | 116.9 | 121.4  | 107.2 | 96.5  | 118.5 | 117.1 |
| BCL6    | 495.5 | 379.8  | 375.5 | 581.4  | 425.9 | 320.2 | 757   | 620.6 |
| BCL6B   | 103.9 | 119.7  | 109   | 118.1  | 108.3 | 95.8  | 120   | 113.2 |
| BCL7A   | 110.4 | 113.7  | 120.1 | 119.7  | 117   | 105.7 | 116.6 | 123.3 |
| BCL7A   | 121   | 125.3  | 112.8 | 118.6  | 104.3 | 101.9 | 128.7 | 121.7 |
| BCL7A   | 123.6 | 120.2  | 119.3 | 128.3  | 119.8 | 100.9 | 118.3 | 121.3 |
| BCL7B   | 190.3 | 193.4  | 159.8 | 193.1  | 147.1 | 147   | 197.1 | 173.6 |
| BCL7B   | 232.4 | 241    | 237.1 | 270.2  | 217.6 | 202.8 | 302.4 | 267   |
| BCL7C   | 239.9 | 290.3  | 397.3 | 254.9  | 217.1 | 278.6 | 246.6 | 213.7 |
| BCL9    | 150.2 | 150.5  | 151.4 | 157.4  | 153.2 | 144.7 | 155   | 162.9 |
| BCL9L   | 170.3 | 160.7  | 159.1 | 163.2  | 134.8 | 138   | 159.6 | 143.9 |
| BCLAF1  | 932.8 | 1027.6 | 894.6 | 1107.9 | 753   | 699.2 | 914.6 | 842.7 |
| BCLAF1  | 343   | 284.5  | 270.5 | 264.6  | 277.7 | 220.3 | 210.4 | 220.8 |
| BCMO1   | 112   | 117.3  | 123   | 111.9  | 112.4 | 103.6 | 127.5 | 111.5 |
| BCNP1   | 133.7 | 123.7  | 146.4 | 133.9  | 111.1 | 110.7 | 130.5 | 117.8 |
| BCOR    | 318.9 | 305.4  | 348.6 | 294.6  | 247.4 | 301.3 | 258.3 | 208.1 |
| BCOR    | 122   | 126    | 131.7 | 124.6  | 107.2 | 106.4 | 125.8 | 120.9 |
| BCOR    | 140.1 | 152.5  | 170.5 | 158    | 126.9 | 120.5 | 137.8 | 120.8 |
| BCORL1  | 122.3 | 126.6  | 125.5 | 135.7  | 114.7 | 115.3 | 141.3 | 145.6 |
| BCORL2  | 129   | 136.9  | 134.7 | 131    | 124.6 | 109.1 | 129.3 | 125.7 |
| BCR     | 120.9 | 183.2  | 125.6 | 135.2  | 164.6 | 102.9 | 129.3 | 155.1 |
| BCR     | 118.4 | 118.2  | 119.1 | 114.4  | 116.6 | 101.2 | 131.3 | 107.4 |
| BCR     | 126   | 122.4  | 120.3 | 129.7  | 109.4 | 104.9 | 129.2 | 119   |
| BCS1L   | 177.4 | 174.9  | 185.8 | 162    | 145.4 | 140.9 | 171.4 | 159.5 |
| BDH     | 119.5 | 123    | 127.5 | 122.6  | 111   | 109.1 | 126   | 118.9 |
| BDH     | 110.4 | 116.6  | 114.3 | 127.8  | 114.4 | 103.9 | 113   | 107.3 |
| BDH     | 136.1 | 145.9  | 127.6 | 135.6  | 115.3 | 113.3 | 130   | 132.2 |
| BDH2    | 118.1 | 117.6  | 131.1 | 119.7  | 109.2 | 102.3 | 123.2 | 109.2 |
| BDKRB1  | 113.4 | 121.2  | 118.1 | 114    | 115.8 | 102   | 132.9 | 119.4 |
| BDKRB2  | 119.4 | 110    | 133.4 | 114.9  | 96.6  | 97.7  | 108.3 | 110.1 |
| BDNF    | 107.4 | 115.6  | 120   | 117.5  | 120.1 | 98.2  | 121.7 | 110.4 |
| BDNF    | 112.7 | 117.3  | 120.4 | 118.2  | 108.9 | 104.8 | 116.3 | 117   |
| BDNF    | 136.5 | 133.1  | 173.6 | 130.1  | 129.8 | 111.7 | 128   | 128.8 |
| BDNF    | 121.5 | 123.2  | 126   | 142.5  | 115.4 | 107.2 | 115.5 | 132.3 |
| BDNF    | 117.7 | 106.7  | 116.6 | 111.7  | 107.5 | 108.8 | 110.7 | 110.4 |
| BDNF    | 125.3 | 132    | 143.5 | 134    | 117.4 | 122.4 | 124.3 | 119.8 |
| BDNF    | 100.4 | 110.7  | 112.8 | 118.6  | 109.1 | 99.5  | 118.7 | 112.3 |
| BDP1    | 140.5 | 124.4  | 131   | 137.9  | 126.1 | 106.9 | 137.6 | 131.7 |
| BECN1   | 185.4 | 200.2  | 193.2 | 176.7  | 189.2 | 177.3 | 204.8 | 181.1 |
| BET1    | 151.1 | 177.3  | 162.5 | 164.7  | 147.6 | 126.2 | 147.2 | 168.4 |
| BET1L   | 155.8 | 152.3  | 148.1 | 144.8  | 143.9 | 120   | 142.9 | 136.9 |
| BEX1    | 121.2 | 131.1  | 121.6 | 120    | 109.6 | 103.8 | 113.9 | 124   |
| BEX2    | 457.3 | 556.7  | 540.7 | 472.4  | 426   | 374.6 | 369   | 388.3 |

|         |        |        |        |        |        |        |        |        |
|---------|--------|--------|--------|--------|--------|--------|--------|--------|
| BEXL1   | 242.4  | 265.8  | 285.2  | 251.7  | 212.6  | 272.9  | 175.9  | 187.9  |
| BEXL1   | 545.7  | 668.4  | 688    | 575.5  | 368.9  | 484.8  | 430    | 478.8  |
| BFAR    | 290    | 260.2  | 270.4  | 306.9  | 248.1  | 227    | 296.2  | 406.3  |
| BFSP1   | 117.3  | 109.1  | 123.2  | 119.8  | 105.5  | 95.3   | 117.7  | 111    |
| BFSP2   | 115.7  | 119    | 116.6  | 118.9  | 121.4  | 105.2  | 119.6  | 111.9  |
| BGLAP   | 121.6  | 132.2  | 125.6  | 133.4  | 120.2  | 103.1  | 131.7  | 119.4  |
| BGN     | 119.3  | 112.8  | 126.7  | 112.1  | 110.8  | 103.8  | 119.1  | 118.2  |
| BHLHB2  | 602.8  | 638.6  | 485.1  | 641.1  | 434.2  | 344.9  | 659.8  | 544.9  |
| BHLHB3  | 158.2  | 151.4  | 129.3  | 178.3  | 134.3  | 113.7  | 120.5  | 115.5  |
| BHLHB4  | 110.7  | 122.8  | 120.7  | 123.8  | 112.5  | 102.7  | 117.5  | 105.3  |
| BHLHB5  | 101.3  | 116.2  | 114.6  | 114.2  | 96.8   | 101.9  | 113.7  | 113.3  |
| BHLHB8  | 118.6  | 118.3  | 111.5  | 120    | 117.4  | 105.4  | 118.8  | 121.3  |
| BHLHB9  | 123.4  | 131.4  | 128.1  | 137    | 123.5  | 108.3  | 131.2  | 130.3  |
| BHMT    | 110.2  | 113    | 113.5  | 113.6  | 103.4  | 95.2   | 120.4  | 103.5  |
| BHMT2   | 112.6  | 111    | 115.1  | 111    | 102.6  | 98     | 117.1  | 109.6  |
| BICC1   | 114    | 113    | 121    | 111.8  | 102.2  | 99     | 110.5  | 115.3  |
| BICD1   | 117.2  | 119.1  | 117.9  | 121.4  | 119.3  | 104.4  | 123    | 116.5  |
| BICD1   | 123.4  | 118    | 117.7  | 111.8  | 114.8  | 102.2  | 122.3  | 118.9  |
| BICD2   | 110.9  | 112.8  | 112.7  | 122.2  | 113.4  | 104.9  | 116    | 125.2  |
| BICD2   | 841.7  | 892.7  | 857.2  | 876.1  | 571.9  | 531.7  | 772.5  | 844.9  |
| BID     | 205.6  | 248.1  | 226.1  | 260.2  | 221.2  | 238.9  | 220.3  | 178    |
| BID     | 192.9  | 182.6  | 180.6  | 197.2  | 162    | 136.5  | 184.6  | 172    |
| BID     | 109.6  | 100.5  | 103.6  | 109.9  | 96.5   | 89.1   | 102.6  | 108.8  |
| BIK     | 112.1  | 120.5  | 109.4  | 118.8  | 112.3  | 110.9  | 120.5  | 115.6  |
| BIN1    | 562.4  | 799.6  | 731.7  | 767.3  | 598.5  | 674.4  | 606.5  | 585.4  |
| BIN1    | 1193.4 | 1344.3 | 1340.7 | 1325.8 | 1083.6 | 1245.5 | 1252.3 | 989.6  |
| BIN2    | 138    | 128.7  | 141.7  | 135    | 130.2  | 110.6  | 135.6  | 134.3  |
| BIN3    | 129.4  | 129.4  | 145.5  | 128.8  | 127.5  | 118.2  | 131.9  | 136.7  |
| BIRC1   | 112.4  | 115.3  | 115.6  | 119.5  | 109    | 100.2  | 120.1  | 111.8  |
| BIRC1   | 110.7  | 116.3  | 121.3  | 118.7  | 109.8  | 93.5   | 118.4  | 114.5  |
| BIRC2   | 1207   | 1064.2 | 1385.4 | 1012.8 | 1043.1 | 956.5  | 1129.8 | 1192   |
| BIRC3   | 1655   | 2057.3 | 1268.3 | 2047.3 | 1685.9 | 1029.1 | 1954.5 | 1705.4 |
| BIRC3   | 1155.4 | 1481.4 | 901.3  | 1253.1 | 1262.3 | 652    | 1510.1 | 1292.3 |
| BIRC3   | 325.5  | 388.4  | 217.9  | 327.9  | 364.3  | 123.8  | 378.1  | 369.8  |
| BIRC4   | 126    | 120.9  | 124.9  | 127.9  | 127.4  | 115.5  | 120.2  | 128.1  |
| BIRC5   | 109.6  | 116.1  | 119.4  | 115.1  | 108.1  | 93     | 116    | 119.1  |
| BIRC5   | 107.5  | 120    | 113.8  | 111.2  | 109.5  | 98.4   | 111.3  | 114.4  |
| BIRC6   | 168.4  | 177.6  | 168.1  | 176.1  | 172.2  | 131.2  | 194.5  | 172    |
| BIRC7   | 116.2  | 121.8  | 114.1  | 118.9  | 102.9  | 97.3   | 116.9  | 116.8  |
| BIRC7   | 113.1  | 120.5  | 121.4  | 121.1  | 120.5  | 95.7   | 113.2  | 122.4  |
| BIRC8   | 114.6  | 113.4  | 114.1  | 120.6  | 107.8  | 100.3  | 124.2  | 120    |
| BIVM    | 152    | 161.7  | 166.3  | 149.5  | 163.6  | 147    | 134.4  | 139.4  |
| BLCAP   | 248    | 250.7  | 286.9  | 230.9  | 195.1  | 214.6  | 213.3  | 211.6  |
| BLES03  | 139.9  | 156.9  | 151.6  | 144.7  | 131.5  | 131.8  | 133.5  | 138.7  |
| BLK     | 177.3  | 182.9  | 201.3  | 189    | 121.7  | 168.4  | 160.9  | 125    |
| BLM     | 113.8  | 118.5  | 133.1  | 120.1  | 102    | 113.1  | 117.9  | 122    |
| BLMH    | 168    | 216.2  | 175.2  | 188.3  | 165    | 142    | 179    | 182.3  |
| BLNK    | 122.4  | 117.5  | 115.2  | 124.3  | 109.5  | 102.3  | 116.3  | 112.6  |
| BLOC1S1 | 211.1  | 237    | 250.8  | 227.6  | 203.4  | 202.9  | 191.1  | 197    |
| BLOC1S2 | 119.4  | 108.2  | 119.6  | 124.6  | 111.2  | 103.5  | 120.4  | 110.3  |
| BLOC1S2 | 124.5  | 124.3  | 132.9  | 133.3  | 126.5  | 109.2  | 140    | 144.6  |

|         |       |       |       |       |       |       |       |        |
|---------|-------|-------|-------|-------|-------|-------|-------|--------|
| BLOC1S3 | 105.9 | 108.9 | 114.8 | 113   | 103.9 | 101.3 | 122.6 | 116.3  |
| BLR1    | 456.6 | 303.5 | 354.3 | 407.1 | 206.9 | 277.7 | 291.9 | 251.1  |
| BLR1    | 180   | 166.3 | 167   | 180.8 | 140.9 | 139.2 | 174.9 | 148.3  |
| BLR1    | 119.1 | 122.1 | 120.5 | 116.4 | 105.8 | 100.9 | 125.7 | 112.8  |
| BLVRA   | 161.6 | 130.3 | 228.6 | 163.9 | 154.7 | 153.5 | 148.2 | 137.7  |
| BLVRB   | 142.3 | 117.1 | 185.3 | 142.8 | 117.7 | 163.1 | 154.5 | 131.9  |
| BLZF1   | 226.6 | 187.7 | 183.1 | 229   | 202.2 | 169   | 247.2 | 235.3  |
| BM88    | 121.6 | 108.4 | 120.6 | 127.8 | 114.3 | 99.1  | 119.1 | 117.4  |
| BMF     | 148.2 | 142.9 | 186.2 | 165.4 | 121.8 | 148.6 | 152.3 | 131.4  |
| BMF     | 102.8 | 109.6 | 117.6 | 115.9 | 100.2 | 99.1  | 120.3 | 105.4  |
| BMF     | 116.2 | 117.2 | 137.3 | 125.1 | 106.5 | 94.8  | 133.5 | 119.7  |
| BMF     | 135.2 | 136.3 | 150.5 | 146.7 | 120.2 | 123.1 | 138.4 | 128.5  |
| BMP1    | 105.2 | 111.5 | 113   | 98.7  | 110.6 | 98.1  | 115.9 | 112.6  |
| BMP1    | 117.3 | 123.4 | 122.5 | 121.6 | 106.9 | 101.1 | 128.1 | 117.7  |
| BMP1    | 126.9 | 126.9 | 126.7 | 134.3 | 123.3 | 111.1 | 143.9 | 144.9  |
| BMP10   | 108.6 | 106.2 | 117.2 | 126.1 | 113.2 | 102.5 | 116.8 | 110.8  |
| BMP15   | 111.9 | 115   | 124   | 113.2 | 108.1 | 93.3  | 114.9 | 112.8  |
| BMP2    | 114.1 | 119.8 | 114   | 119.4 | 109.4 | 106.9 | 118.7 | 112.8  |
| BMP2K   | 133   | 145.4 | 130.9 | 133.5 | 124.8 | 106.6 | 123   | 124.6  |
| BMP2K   | 132.7 | 131.4 | 126.7 | 139.3 | 105.9 | 107.9 | 122.2 | 121.7  |
| BMP2K   | 123.3 | 129.1 | 138.1 | 120.4 | 122.4 | 103.4 | 118.6 | 137.7  |
| BMP3    | 115.9 | 114.8 | 112.2 | 131.9 | 109.6 | 97.9  | 124.3 | 125.8  |
| BMP4    | 121   | 121.6 | 117   | 122.9 | 118.5 | 105.8 | 115   | 115.2  |
| BMP4    | 113.7 | 111.8 | 116.7 | 119   | 106.2 | 99.9  | 121.1 | 113.2  |
| BMP4    | 121.2 | 119.8 | 128.5 | 116.1 | 106.7 | 100   | 120.5 | 118.8  |
| BMP5    | 111.4 | 106.3 | 115.2 | 123.9 | 111.4 | 101.8 | 117.4 | 124.9  |
| BMP6    | 131.2 | 151.4 | 126   | 128.2 | 127.1 | 123.4 | 135.5 | 133.8  |
| BMP7    | 117.9 | 118.3 | 124.1 | 116.4 | 117.4 | 103.6 | 115.8 | 116.8  |
| BMP8A   | 109.2 | 112.4 | 118.4 | 119   | 100.1 | 90.3  | 115.2 | 108.1  |
| BMP8B   | 125.6 | 105.9 | 129.4 | 138.7 | 122.4 | 104.6 | 127.5 | 127.1  |
| BMPER   | 110.1 | 128.6 | 119   | 125.2 | 110.7 | 100.2 | 118.8 | 118.5  |
| BMPR1A  | 113.1 | 116.1 | 122.3 | 119.6 | 105.6 | 99.9  | 119.7 | 117.9  |
| BMPR1B  | 108.1 | 119.2 | 109.7 | 113.3 | 103.1 | 104   | 106.9 | 109.2  |
| BMPR2   | 171.8 | 168.8 | 173.1 | 195.8 | 162.6 | 130.1 | 231.2 | 174.6  |
| BMS1L   | 405.6 | 459   | 334   | 453.1 | 366.6 | 259.9 | 363.4 | 337.2  |
| BMX     | 119.9 | 112.8 | 120.5 | 116.5 | 103.1 | 100.3 | 112.9 | 112.3  |
| BMX     | 118.1 | 119.6 | 121.3 | 119.1 | 110   | 104.5 | 117.8 | 120.9  |
| BNC1    | 135.6 | 115.2 | 116.2 | 123.7 | 111.8 | 104.7 | 116.2 | 118.3  |
| BNC1    | 114.8 | 116.2 | 114.7 | 116.8 | 107.9 | 96.7  | 114.1 | 104    |
| BNC2    | 120.6 | 121.2 | 150.5 | 135.3 | 107.5 | 112.6 | 124.1 | 132.9  |
| BNIP1   | 138.6 | 131.8 | 128.3 | 128   | 113.4 | 101.5 | 119.1 | 132.4  |
| BNIP1   | 139.6 | 149.2 | 143.3 | 158.5 | 127.7 | 115.4 | 126.2 | 128.7  |
| BNIP2   | 610.4 | 758.1 | 597   | 782.5 | 667.4 | 646.7 | 910.3 | 1009.9 |
| BNIP3   | 766.1 | 723.2 | 547.4 | 720.7 | 537.1 | 431   | 678.8 | 671.6  |
| BNIP3L  | 147.7 | 153.5 | 158.1 | 179.3 | 132.5 | 127.8 | 160.5 | 193.6  |
| BNIPL   | 121.4 | 122.1 | 124.5 | 139.1 | 119.5 | 102.3 | 134.2 | 126    |
| BNIPL   | 132.8 | 154.3 | 153   | 162.4 | 139.3 | 115.4 | 165.7 | 180.1  |
| BNIPL   | 126.1 | 122   | 120.9 | 118.5 | 122.8 | 95.2  | 120   | 120.5  |
| BOC     | 105.5 | 106.4 | 103.1 | 113.8 | 101.5 | 91.8  | 111.8 | 111.3  |
| BOK     | 128.6 | 124.5 | 132.7 | 137.2 | 121.2 | 114.9 | 142.3 | 135.4  |
| BOLA1   | 111.6 | 119.5 | 133.8 | 139.1 | 111.5 | 105   | 127   | 115.1  |



|         |       |        |        |        |        |        |        |       |
|---------|-------|--------|--------|--------|--------|--------|--------|-------|
| BOLA2   | 791   | 1027.7 | 924.4  | 869.6  | 820.1  | 611.7  | 625    | 651.7 |
| BOLA2   | 281.6 | 295.4  | 274.7  | 193.1  | 213.9  | 184.5  | 197.2  | 220.1 |
| BOLA3   | 308.4 | 380.2  | 559.1  | 329.7  | 357.7  | 379.6  | 301.5  | 338.9 |
| BOLA3   | 314.4 | 379.6  | 597.9  | 353.8  | 368.5  | 462    | 335.4  | 356.1 |
| BOLA3   | 128.1 | 119.1  | 129.6  | 126.5  | 117.5  | 102.8  | 123.8  | 115.1 |
| BOLL    | 103.2 | 105.9  | 110.6  | 112.8  | 108.2  | 86.3   | 111.3  | 106.5 |
| BOLL    | 121.8 | 116.6  | 124.8  | 121.3  | 112    | 103.5  | 118    | 115   |
| BOLL    | 119.5 | 121.7  | 116.8  | 115.4  | 106.8  | 102.9  | 116.2  | 111.7 |
| BOP1    | 446.4 | 467.1  | 344.8  | 417.2  | 338.6  | 186.1  | 371.9  | 331.5 |
| BP75    | 156.5 | 147.7  | 147.7  | 153.8  | 161.9  | 125.4  | 144.1  | 132.8 |
| BPGM    | 176.4 | 160    | 206.1  | 164.3  | 151.3  | 172.8  | 170    | 158.3 |
| BPGM    | 113.7 | 122.3  | 121.5  | 121.3  | 116.9  | 107.4  | 117    | 122   |
| BPHL    | 184.9 | 242.9  | 229    | 235.2  | 189.1  | 181.6  | 195.2  | 187   |
| BPI     | 105.1 | 128.1  | 115.6  | 113.1  | 115.3  | 99.6   | 113.4  | 130.1 |
| BPIL1   | 110.7 | 103.6  | 110.1  | 120.1  | 106.9  | 99.2   | 115.1  | 113.5 |
| BPIL2   | 118.9 | 114.3  | 123    | 119.5  | 107.3  | 97     | 127.9  | 116.8 |
| BPIL3   | 110.4 | 122.8  | 123.1  | 121.2  | 102.9  | 106.2  | 115.4  | 114.1 |
| BPNT1   | 142.1 | 137    | 143.5  | 151.8  | 134.4  | 113.2  | 130.8  | 141.1 |
| BPY2    | 116   | 112.3  | 107.9  | 116.3  | 104.9  | 94.4   | 111.9  | 116.7 |
| BPY2B   | 110.8 | 109.3  | 113.4  | 107    | 103.1  | 99     | 125.1  | 117.2 |
| BPY2IP1 | 250.3 | 263.1  | 255.8  | 283.6  | 184.1  | 231.7  | 361.2  | 357.7 |
| BRAF    | 126.2 | 124.5  | 116.8  | 137.4  | 123.1  | 113.4  | 130.6  | 128.6 |
| BRAP    | 119.3 | 115.5  | 124.2  | 130.2  | 113.1  | 114.8  | 121    | 122.1 |
| BRCA1   | 111.7 | 116.1  | 126.7  | 128.5  | 109.6  | 98.3   | 117.4  | 118.7 |
| BRCA1   | 122.4 | 116.1  | 118.2  | 105.7  | 111.4  | 108.9  | 127.4  | 115.7 |
| BRCA1   | 123   | 120    | 118.6  | 121    | 117.6  | 96.8   | 113.9  | 116.8 |
| BRCA2   | 107.9 | 102.9  | 110.1  | 113.3  | 107.6  | 113.4  | 120.8  | 124.1 |
| BRCC2   | 111.6 | 105.8  | 133.5  | 122    | 111.2  | 95.4   | 125.7  | 115.8 |
| BRD1    | 206.5 | 186.5  | 160.4  | 195.9  | 169.9  | 157    | 192    | 216.9 |
| BRD2    | 2144  | 2693.8 | 1438.4 | 2699.5 | 2408.8 | 1413.2 | 3377.5 | 3829  |
| BRD3    | 481.2 | 532.6  | 464.6  | 608.3  | 476.7  | 400.9  | 643.1  | 583.8 |
| BRD4    | 119.8 | 124.7  | 123.2  | 129.4  | 113.6  | 92.1   | 143    | 134.3 |
| BRD4    | 125.2 | 118.2  | 109.3  | 131.6  | 123.6  | 98.3   | 147.3  | 141.7 |
| BRD7    | 447.6 | 443.4  | 338.5  | 387.8  | 287.3  | 273.6  | 380.8  | 318.4 |
| BRD8    | 260.9 | 317.8  | 263.8  | 338.1  | 229.7  | 212.8  | 321.5  | 287.6 |
| BRD8    | 106.8 | 110.1  | 112.7  | 110.6  | 108.3  | 99.1   | 122.5  | 121.8 |
| BRD9    | 550.3 | 616.6  | 597.7  | 612.3  | 439.6  | 473.7  | 657.8  | 652.4 |
| BRD9    | 115.1 | 113.2  | 118.6  | 120.2  | 105.7  | 108    | 123.8  | 112.9 |
| BRDG1   | 136.6 | 132.3  | 148.4  | 130.5  | 111    | 117.5  | 131.7  | 123.4 |
| BRDT    | 113.5 | 109.1  | 114.8  | 121    | 105.5  | 95.7   | 116.6  | 110.6 |
| BRDT    | 118.7 | 117.3  | 109.9  | 114.1  | 107.9  | 98.3   | 114.4  | 121.1 |
| BRDT    | 112.2 | 108.9  | 105.8  | 108.9  | 104.1  | 90.8   | 108.5  | 112.6 |
| BRE     | 211.6 | 244.9  | 278.2  | 247.6  | 201.7  | 227.8  | 218    | 204.2 |
| BRE     | 209.8 | 195.7  | 226.4  | 196.7  | 172.2  | 186.7  | 220.3  | 210.7 |
| BRE     | 116.3 | 126.8  | 125.1  | 115.8  | 121.9  | 101.2  | 129.4  | 118.6 |
| BRF1    | 112.4 | 114.9  | 112.9  | 119.3  | 114.2  | 101    | 114.1  | 125.6 |
| BRF1    | 142.3 | 126.4  | 141.6  | 143.1  | 121.7  | 117.1  | 135.6  | 143   |
| BRF1    | 126.1 | 119.1  | 125.8  | 117.7  | 106.5  | 115.5  | 124.4  | 119.8 |
| BRF2    | 265.8 | 321.2  | 328.8  | 318.7  | 273.8  | 270.8  | 345.5  | 397.3 |
| BRI3    | 861.8 | 676.1  | 1023.2 | 889.5  | 480.6  | 940.1  | 1047.2 | 824.8 |
| BRI3BP  | 111.8 | 123.9  | 122.4  | 120.8  | 109.8  | 107.1  | 121.8  | 121.4 |

|         |        |        |        |        |        |        |        |        |
|---------|--------|--------|--------|--------|--------|--------|--------|--------|
| BRI3BP  | 138    | 131.4  | 154.4  | 129.1  | 117.2  | 112.4  | 127.4  | 121.7  |
| BRI3BP  | 131.6  | 117.8  | 138.6  | 114.4  | 127.8  | 106.6  | 129.7  | 131.4  |
| BRIP1   | 114.1  | 117.2  | 134.8  | 122.7  | 109.3  | 105.9  | 127.8  | 117.4  |
| BRMS1   | 1579   | 1629.8 | 1746.2 | 1549.2 | 1321.6 | 1102.2 | 1234.7 | 962.2  |
| BRMS1   | 197.5  | 207.3  | 219.6  | 234.8  | 198.5  | 216.8  | 199.3  | 174.6  |
| BRMS1L  | 112    | 114.7  | 117.3  | 109.7  | 107.1  | 106.9  | 120.6  | 122.4  |
| BRP44   | 363.2  | 358.8  | 408.9  | 402.5  | 307.4  | 323.3  | 356.5  | 419.4  |
| BRP44L  | 603.9  | 577.2  | 739.2  | 619.1  | 546.4  | 572.5  | 607.9  | 560.1  |
| BRPF1   | 201.6  | 183.2  | 176.7  | 249.6  | 143.7  | 170.4  | 234.1  | 253.9  |
| BRPF1   | 1864.4 | 2378.1 | 1588.2 | 2119.3 | 1680.6 | 1367   | 2345.4 | 2369.3 |
| BRPF3   | 326.5  | 351.6  | 256.3  | 392.6  | 265.9  | 240.3  | 471.4  | 458.2  |
| BRRN1   | 113.6  | 127.2  | 141.6  | 129.3  | 118.3  | 115.7  | 136.8  | 115.8  |
| BRS3    | 114.6  | 112.5  | 124    | 111.9  | 122.7  | 105.2  | 121.7  | 119.6  |
| BRSK1   | 332.1  | 202    | 581.2  | 510.8  | 223.8  | 1011.6 | 430.8  | 205    |
| BRSK2   | 118.9  | 127.1  | 136.7  | 116.3  | 113.4  | 108.5  | 119.4  | 126.4  |
| BRUNOL4 | 128.7  | 118.1  | 122.5  | 123.2  | 110.1  | 97.6   | 111    | 118.4  |
| BRUNOL4 | 117.8  | 118.1  | 118.9  | 118.8  | 118.5  | 104.2  | 123.6  | 114.7  |
| BRUNOL5 | 121.7  | 117.3  | 112.2  | 125.3  | 120.8  | 99.6   | 116.1  | 117.3  |
| BRUNOL6 | 128.2  | 124    | 136.9  | 132.8  | 126.1  | 114.6  | 132.2  | 127.6  |
| BRWD1   | 114.4  | 108    | 110.3  | 115.3  | 112    | 92.9   | 118.9  | 107.5  |
| BRWD1   | 117.5  | 121.5  | 141.6  | 137.9  | 113.8  | 114.7  | 129.9  | 121.6  |
| BRWD1   | 168.5  | 184.2  | 211.8  | 197.2  | 175.9  | 187.3  | 176.2  | 167.8  |
| BRWD1   | 157.1  | 136.8  | 144.5  | 160.3  | 142.8  | 116.4  | 171.8  | 161.2  |
| BRWD2   | 155.8  | 126.5  | 162.4  | 167.5  | 125.2  | 138.7  | 142.4  | 130.7  |
| BRWD3   | 119.8  | 121.6  | 133.4  | 132.8  | 111.7  | 109.3  | 125.3  | 124.2  |
| BSCCL2  | 261.9  | 306.3  | 272.5  | 316.4  | 257.1  | 212.5  | 320.3  | 361.8  |
| BSDC1   | 457.5  | 363.8  | 371.7  | 447.9  | 332.6  | 316.9  | 481.8  | 462.3  |
| BSG     | 424.4  | 725.1  | 515.5  | 614.2  | 458.9  | 421.8  | 712.2  | 656.2  |
| BSG     | 109.5  | 111.9  | 119.6  | 116.2  | 108.7  | 100.8  | 121.8  | 111.8  |
| BSN     | 115    | 115.8  | 125.4  | 122    | 108.3  | 101.8  | 118.9  | 108.7  |
| BSND    | 115    | 133.3  | 124.2  | 123.7  | 109.5  | 104.8  | 133.7  | 111.8  |
| BST1    | 112.6  | 119.2  | 120.7  | 113.8  | 103.7  | 103.4  | 119.9  | 112.8  |
| BST2    | 372.3  | 313.7  | 455.4  | 387    | 241.6  | 335.6  | 454.9  | 359.3  |
| BTAF1   | 625.1  | 475.2  | 755.4  | 564    | 519.8  | 434.9  | 636    | 527.4  |
| BTBD1   | 156.4  | 158.3  | 175.8  | 199.7  | 171    | 145.5  | 159.6  | 182.5  |
| BTBD1   | 125.8  | 129.2  | 137.8  | 155.4  | 134.3  | 132.3  | 121.6  | 115.4  |
| BTBD10  | 143.5  | 196.6  | 197.6  | 178.6  | 172.8  | 125.4  | 169.4  | 168.3  |
| BTBD11  | 109.2  | 116.5  | 116.8  | 108.6  | 112    | 96.3   | 108    | 112.3  |
| BTBD11  | 122.7  | 111.7  | 118    | 122.4  | 108.5  | 101.3  | 117.8  | 114.5  |
| BTBD11  | 110    | 118    | 118.3  | 109.3  | 108.3  | 95.5   | 123.1  | 100.3  |
| BTBD11  | 422.3  | 533    | 231.2  | 379.8  | 323.1  | 171.8  | 296.9  | 274.2  |
| BTBD12  | 167.5  | 172.4  | 171.5  | 192.4  | 149.5  | 131    | 196.7  | 180    |
| BTBD14A | 143.6  | 143.7  | 140.1  | 151.1  | 128.2  | 105.3  | 143.8  | 143.1  |
| BTBD14B | 125.8  | 117.3  | 135.3  | 114.1  | 114.3  | 101.3  | 134.2  | 130    |
| BTBD3   | 111.1  | 115.6  | 119.5  | 111.4  | 110.4  | 104.3  | 114.2  | 124    |
| BTBD3   | 128.8  | 139.3  | 130.2  | 133.9  | 119.3  | 118.7  | 132.2  | 129.6  |
| BTBD4   | 128.1  | 122    | 124.8  | 144.8  | 110.3  | 114.1  | 136.6  | 118.6  |
| BTBD5   | 408.1  | 389.9  | 262.3  | 387.1  | 428.6  | 215.8  | 431.5  | 467.6  |
| BTBD6   | 441.4  | 468.7  | 369.3  | 392.7  | 428.9  | 288.7  | 439.9  | 447.5  |
| BTBD7   | 174.9  | 206.4  | 220.3  | 240.2  | 205.6  | 148.8  | 229.4  | 274.1  |
| BTBD7   | 113.5  | 115    | 115.6  | 115.3  | 108.5  | 107.5  | 122    | 112.1  |

|                       |        |        |        |        |        |        |        |        |
|-----------------------|--------|--------|--------|--------|--------|--------|--------|--------|
| BTBD7                 | 152.8  | 160.5  | 159    | 172.5  | 138    | 128.7  | 180.5  | 190.7  |
| BTBD8                 | 123    | 115.7  | 118.4  | 118.4  | 112.4  | 105.2  | 126.4  | 117    |
| BTBD9                 | 126.6  | 135.7  | 123.4  | 134.8  | 105.2  | 107.9  | 126.4  | 127.9  |
| BTC                   | 116.3  | 106.3  | 119.4  | 126.6  | 107.8  | 89.1   | 107.9  | 110.1  |
| BTD                   | 137.5  | 152.7  | 146.6  | 139.1  | 134.6  | 117.4  | 147.7  | 138.9  |
| BTF3                  | 4394.7 | 4167   | 5879.5 | 5679.7 | 3133.8 | 4706.1 | 4463.4 | 4778.5 |
| BTF3                  | 5558.2 | 4915.2 | 5907.8 | 6415.4 | 4673.5 | 5712.8 | 7379.7 | 4999.6 |
| BTF3                  | 155.4  | 158.1  | 182.3  | 176.4  | 136.4  | 151.9  | 154.1  | 160.8  |
| BTF3L4                | 149.1  | 166.4  | 194.7  | 164.2  | 150.5  | 151.2  | 133.6  | 154.6  |
| BTG1                  | 3531.3 | 3402.1 | 3683.5 | 3761.8 | 2981.2 | 3512.5 | 3316.3 | 3732   |
| BTG2                  | 694.9  | 734.1  | 740.7  | 769.1  | 443.3  | 816    | 505.2  | 543.7  |
| BTG3                  | 230.7  | 176.8  | 166.4  | 226    | 148.4  | 175.1  | 232    | 225.7  |
| BTG4                  | 112.1  | 106.5  | 109.5  | 114.5  | 117    | 104.4  | 118.3  | 112.8  |
| BTK                   | 199.8  | 143.7  | 282.9  | 216.7  | 136.3  | 201.8  | 166.5  | 138.6  |
| BTLA                  | 201    | 198.7  | 188.7  | 180.6  | 147.3  | 132.9  | 154.8  | 140.2  |
| BTN1A1                | 103.1  | 104.9  | 107.8  | 112.1  | 103.4  | 96     | 106.8  | 110.5  |
| BTN2A1                | 121.2  | 126.5  | 127.2  | 131.3  | 109.9  | 106.3  | 136.9  | 129.5  |
| BTN2A1                | 477.7  | 487.5  | 403.2  | 458.7  | 362.1  | 381.1  | 455.5  | 464.7  |
| BTN2A2                | 126.7  | 140.8  | 141.7  | 133    | 113.2  | 111.4  | 131.1  | 136.3  |
| BTN2A2                | 108.3  | 111.5  | 113.8  | 123.3  | 113.2  | 93.7   | 109.4  | 113.4  |
| BTN2A3                | 112.3  | 111.1  | 116.9  | 118.4  | 104.3  | 97.9   | 119.9  | 112    |
| BTN3A1                | 117    | 126.3  | 116.3  | 112    | 105.7  | 97.9   | 106.3  | 112.6  |
| BTN3A1                | 319.8  | 247    | 370.4  | 272.7  | 178.2  | 235.3  | 189.2  | 171.6  |
| BTN3A2                | 559    | 673.7  | 657.9  | 585.7  | 320.6  | 463    | 275.7  | 354.2  |
| BTN3A3                | 276.3  | 246.5  | 244.8  | 258.9  | 188    | 197.9  | 178.9  | 155    |
| BTNL2                 | 128.2  | 135.9  | 117.5  | 126.9  | 117.1  | 100.8  | 122.6  | 125    |
| BTNL3                 | 113.6  | 113.7  | 120.8  | 114    | 105.8  | 103.4  | 113.7  | 118.2  |
| BTNL3                 | 113.4  | 105.8  | 113.2  | 125.7  | 100.8  | 99.5   | 118.4  | 117.9  |
| BTNL3                 | 113.9  | 118.3  | 119.1  | 121.1  | 112.6  | 101.2  | 120.2  | 114.1  |
| BTNL8                 | 107.6  | 108.9  | 117    | 105.8  | 108.4  | 105.8  | 115.3  | 109.8  |
| BTNL9                 | 114.6  | 118.6  | 125.7  | 112.5  | 113.3  | 101.4  | 129.5  | 120    |
| BTRC                  | 121.5  | 137.7  | 128.8  | 129    | 117.5  | 103.2  | 125.3  | 136.7  |
| BTRC                  | 117.9  | 116.4  | 115.9  | 119    | 114.8  | 98.6   | 117    | 115.9  |
| BUB1                  | 111.8  | 113.6  | 127.4  | 113.9  | 100.6  | 96.8   | 115.3  | 108.1  |
| BUB1B                 | 130    | 116.3  | 125.6  | 125.5  | 121.4  | 106.7  | 120.1  | 123.9  |
| BUB3                  | 2630.3 | 2796.8 | 2334.9 | 2748.8 | 1943.6 | 1724.8 | 2542.3 | 2770.9 |
| BUB3                  | 126.6  | 133.8  | 123.2  | 126.9  | 122.4  | 102.4  | 115    | 121.5  |
| BUB3                  | 197.9  | 201.3  | 162.9  | 284.1  | 180.2  | 144.1  | 254.1  | 178.3  |
| BVES                  | 114.3  | 114.3  | 114.1  | 119.9  | 108.5  | 108.1  | 118.7  | 116.4  |
| BVES                  | 116.8  | 113.6  | 110.5  | 115.3  | 105.4  | 99.1   | 121.3  | 106.8  |
| BVES                  | 115.6  | 110    | 121.1  | 113.9  | 120.7  | 95.5   | 118.2  | 119.8  |
| BXDC1                 | 403.2  | 453.5  | 453.1  | 437.1  | 496.9  | 312.4  | 494    | 477.4  |
| BXDC2                 | 192.4  | 208.8  | 191.6  | 234.1  | 179.3  | 149    | 198.7  | 223.6  |
| BXDC5                 | 269.6  | 254.5  | 242.3  | 236.3  | 219.3  | 192.7  | 249.4  | 283.5  |
| BYSL                  | 148.5  | 157.9  | 162.1  | 145.5  | 128.8  | 113.3  | 145.6  | 152.3  |
| BZRAP1                | 180.8  | 159.7  | 189.4  | 166.8  | 136.5  | 145.4  | 165.3  | 155.8  |
| BZRPL1                | 109.1  | 112.4  | 109.5  | 112.9  | 103.2  | 95.2   | 112.6  | 109.6  |
| BZW1                  | 128.3  | 116.5  | 133.7  | 125.7  | 113.7  | 109.5  | 129.4  | 126.5  |
| BZW2                  | 277.5  | 295.3  | 303.7  | 268.3  | 283.1  | 248.6  | 371.1  | 321.9  |
| C10ORF10              | 106    | 111.1  | 120.3  | 124.2  | 120.4  | 94.9   | 123.8  | 117.3  |
| C10ORF10 <sup>4</sup> | 392.1  | 358.1  | 534.7  | 448.9  | 381.7  | 271    | 370.5  | 437.1  |

|          |       |       |        |       |        |       |        |       |
|----------|-------|-------|--------|-------|--------|-------|--------|-------|
| C10ORF10 | 117.9 | 118.6 | 129.7  | 122.2 | 107    | 100.2 | 119.8  | 123.7 |
| C10ORF11 | 113   | 113.8 | 135.4  | 117.3 | 106.6  | 103.5 | 110.6  | 108.6 |
| C10ORF11 | 114.6 | 122.2 | 121.2  | 124   | 104.8  | 99    | 129.4  | 126.9 |
| C10ORF11 | 109.3 | 117.8 | 126.9  | 121   | 113.4  | 101.9 | 125.3  | 120.8 |
| C10ORF11 | 106.2 | 120.2 | 121.1  | 111.5 | 108.6  | 101.1 | 119.4  | 114.9 |
| C10ORF11 | 121.1 | 120.4 | 131.5  | 132.4 | 112.5  | 100.1 | 129.4  | 125.4 |
| C10ORF11 | 123.3 | 125.8 | 132.9  | 138   | 113.8  | 107.4 | 130.9  | 137   |
| C10ORF11 | 164.9 | 148.5 | 156    | 153.6 | 135.7  | 118.7 | 167.1  | 156.7 |
| C10ORF12 | 115.5 | 122.9 | 114.2  | 125.6 | 112.7  | 102.1 | 136.7  | 119.9 |
| C10ORF12 | 107.8 | 110.9 | 114.4  | 114.7 | 112.4  | 92.2  | 117.7  | 108.2 |
| C10ORF12 | 138.1 | 140.4 | 195.1  | 142.5 | 114.3  | 125.2 | 129.9  | 124.2 |
| C10ORF12 | 113   | 107.9 | 114    | 127.3 | 104.5  | 104.2 | 115.3  | 126.4 |
| C10ORF13 | 122.9 | 115.6 | 125.2  | 127.5 | 112.5  | 105.5 | 123.6  | 114.2 |
| C10ORF13 | 116   | 112.5 | 117.8  | 115.1 | 103.5  | 92.4  | 123.9  | 105.5 |
| C10ORF13 | 127   | 119.6 | 131.5  | 131.3 | 110.2  | 99    | 114.4  | 116.2 |
| C10ORF13 | 184.3 | 220   | 213.6  | 251.3 | 161.5  | 182.6 | 178.3  | 183.3 |
| C10ORF22 | 349   | 351.8 | 259.6  | 369.7 | 250.5  | 251.8 | 299.7  | 238   |
| C10ORF25 | 115.9 | 113.2 | 115.9  | 125.1 | 109.2  | 103.7 | 120.3  | 118.5 |
| C10ORF26 | 229.4 | 227   | 252    | 245.4 | 222.7  | 218   | 237.5  | 241.6 |
| C10ORF27 | 120.4 | 122.1 | 120.1  | 118.8 | 112.2  | 99.1  | 111.1  | 119.2 |
| C10ORF28 | 138   | 151.8 | 137.9  | 152.6 | 144.4  | 135   | 170.5  | 184   |
| C10ORF30 | 112.2 | 118.7 | 113.9  | 114.7 | 102.6  | 103   | 114.1  | 114.8 |
| C10ORF32 | 284.3 | 343.8 | 280.6  | 294.8 | 315.6  | 246.8 | 305.7  | 296.1 |
| C10ORF33 | 137.6 | 145.5 | 126.2  | 132   | 125.8  | 112.3 | 121.5  | 136.2 |
| C10ORF35 | 192.2 | 193.7 | 174.4  | 198.2 | 162.1  | 129.9 | 175.1  | 187.1 |
| C10ORF37 | 117.7 | 121.7 | 114.4  | 119   | 108.6  | 103   | 116.3  | 116.2 |
| C10ORF38 | 169.7 | 167.2 | 173.8  | 179.9 | 158    | 175.6 | 144.6  | 147.7 |
| C10ORF4  | 127.8 | 128.7 | 142    | 129   | 112.7  | 101.9 | 123.1  | 139.6 |
| C10ORF4  | 114.2 | 117.4 | 114    | 121.5 | 115.2  | 103   | 124.4  | 120.7 |
| C10ORF4  | 114.1 | 125   | 124    | 123.2 | 111.1  | 112.8 | 137.4  | 126.3 |
| C10ORF4  | 115.4 | 116.4 | 116.5  | 118.8 | 106.3  | 99.9  | 118.5  | 114.5 |
| C10ORF4  | 121.6 | 117.4 | 109.4  | 118.3 | 105.3  | 93.9  | 117.2  | 112.2 |
| C10ORF42 | 164.9 | 140.7 | 162.2  | 178.8 | 140.2  | 129.4 | 167    | 164.5 |
| C10ORF46 | 119.4 | 118.8 | 125.2  | 116.2 | 112.2  | 104.8 | 115    | 113.6 |
| C10ORF47 | 116.9 | 117.7 | 127.3  | 119.4 | 107.1  | 110.2 | 119.1  | 110.3 |
| C10ORF49 | 110   | 128.8 | 127.2  | 106.6 | 115.5  | 102.8 | 114.8  | 123.5 |
| C10ORF53 | 109.5 | 117.6 | 123.1  | 120.1 | 112.5  | 106.3 | 109.5  | 112   |
| C10ORF53 | 119.9 | 115   | 113.4  | 117.8 | 110.3  | 105   | 107    | 113.2 |
| C10ORF53 | 117.1 | 114.3 | 124.2  | 115.9 | 110.9  | 100.6 | 129.8  | 123.3 |
| C10ORF54 | 410.6 | 441.3 | 628.9  | 348.8 | 301.6  | 285   | 209.2  | 238.5 |
| C10ORF55 | 122.2 | 110.5 | 121.2  | 122   | 110.2  | 102.9 | 123.2  | 112.8 |
| C10ORF56 | 136.7 | 143.8 | 158.5  | 148.5 | 121.4  | 125.3 | 142.7  | 141.1 |
| C10ORF57 | 144   | 144.3 | 184    | 152   | 130.4  | 117.1 | 131.1  | 126.7 |
| C10ORF58 | 728   | 965.4 | 1151.6 | 872.9 | 1070.2 | 611.1 | 1659.2 | 919.2 |
| C10ORF59 | 98.4  | 112.2 | 105.8  | 119.3 | 99.1   | 98.1  | 113.7  | 114.4 |
| C10ORF59 | 143.5 | 145.9 | 143.2  | 145.2 | 122.1  | 116   | 132.3  | 139.5 |
| C10ORF59 | 129.4 | 137.8 | 140.1  | 141.5 | 116.6  | 114.1 | 126.2  | 129.3 |
| C10ORF6  | 327.9 | 316.2 | 323.4  | 318.4 | 319.1  | 200.6 | 318.8  | 324.8 |
| C10ORF61 | 152.1 | 129.8 | 189.7  | 157.8 | 134.7  | 140.8 | 133.3  | 127.4 |
| C10ORF61 | 112.2 | 110.3 | 115.1  | 114.2 | 107.5  | 99.6  | 119.1  | 114.5 |
| C10ORF61 | 132.5 | 139.4 | 137    | 120.2 | 116.8  | 115.3 | 132.5  | 118.6 |

|          |        |        |        |        |        |        |        |        |
|----------|--------|--------|--------|--------|--------|--------|--------|--------|
| C10ORF62 | 108.3  | 106.7  | 110.7  | 125.1  | 103.9  | 98.3   | 119.5  | 106.3  |
| C10ORF63 | 109.8  | 118.4  | 116.2  | 115.2  | 110.2  | 99.2   | 117    | 109.2  |
| C10ORF65 | 121.6  | 129    | 122.5  | 121.1  | 109.2  | 108.2  | 111.2  | 112.6  |
| C10ORF67 | 117.3  | 114    | 117.4  | 120.3  | 106.9  | 95.2   | 114.1  | 111.4  |
| C10ORF68 | 116.6  | 112.2  | 113.8  | 118    | 112.5  | 96.6   | 111.4  | 113.2  |
| C10ORF7  | 402.7  | 456.5  | 408.1  | 356.5  | 316.2  | 358.5  | 343.2  | 315.7  |
| C10ORF71 | 104.3  | 104.1  | 105.4  | 112.5  | 104.1  | 98.3   | 107.2  | 109.7  |
| C10ORF72 | 112.1  | 118.8  | 106.2  | 117    | 96.3   | 91.9   | 120.3  | 109.4  |
| C10ORF72 | 117.8  | 121.5  | 128.1  | 124.1  | 110.1  | 105.1  | 135.2  | 123.6  |
| C10ORF72 | 118.3  | 114.8  | 121.9  | 123.8  | 114.8  | 103    | 119.6  | 122.2  |
| C10ORF76 | 240.4  | 229.7  | 228.6  | 254    | 227.6  | 276.9  | 261.9  | 210.1  |
| C10ORF77 | 125.9  | 142.8  | 141.9  | 143.8  | 117    | 101.9  | 120.2  | 128.1  |
| C10ORF78 | 121.5  | 123.8  | 134.3  | 134.3  | 110.5  | 97.6   | 127.5  | 119.5  |
| C10ORF79 | 119    | 119.8  | 122.4  | 113.7  | 105.6  | 105.4  | 113.7  | 117.8  |
| C10ORF80 | 118.8  | 119.9  | 115.5  | 122.4  | 116.2  | 107.1  | 125.5  | 111.4  |
| C10ORF81 | 115.5  | 115.5  | 113.4  | 119.1  | 110.1  | 102.2  | 118.9  | 110.6  |
| C10ORF82 | 121.8  | 110.8  | 117.2  | 123.4  | 106.6  | 110.2  | 125.7  | 128    |
| C10ORF83 | 117.9  | 130.6  | 120    | 121.1  | 124.4  | 104.1  | 115.2  | 115.6  |
| C10ORF84 | 126.5  | 140.6  | 131.8  | 125.4  | 112.9  | 111.2  | 127    | 138.7  |
| C10ORF85 | 126.4  | 114.4  | 122.9  | 124.4  | 110.6  | 97     | 122.8  | 114.2  |
| C10ORF86 | 615.6  | 647.2  | 812.7  | 500.8  | 465.7  | 463.2  | 436.1  | 435.1  |
| C10ORF87 | 112.6  | 121.2  | 126.8  | 122.3  | 106.2  | 99.3   | 113.7  | 111.4  |
| C10ORF88 | 141.5  | 139.9  | 140.1  | 138.8  | 119.8  | 130.6  | 130.4  | 147    |
| C10ORF89 | 133.2  | 128.1  | 133.4  | 135.8  | 118.8  | 105.9  | 137.8  | 127.4  |
| C10ORF9  | 164.2  | 168.2  | 155.1  | 161.8  | 153.8  | 174    | 157.9  | 178.4  |
| C10ORF9  | 110.4  | 119.7  | 107.3  | 109.8  | 109    | 96.6   | 118.4  | 107.2  |
| C10ORF90 | 127.3  | 115.6  | 107.9  | 112.5  | 109.8  | 102    | 114.8  | 106.6  |
| C10ORF91 | 117.6  | 124.3  | 107.9  | 115.5  | 105.7  | 94.5   | 122.4  | 106.9  |
| C10ORF92 | 125    | 130    | 115.9  | 128.5  | 119.9  | 102    | 122.6  | 122.1  |
| C10ORF93 | 118    | 109.6  | 106.3  | 110.1  | 109.5  | 102.7  | 124.3  | 107.8  |
| C10ORF93 | 110.2  | 106.1  | 106.8  | 111.4  | 110.9  | 98.3   | 109.3  | 108.4  |
| C10ORF95 | 116.1  | 112.1  | 111.1  | 116.2  | 103.6  | 104.9  | 119.5  | 117.7  |
| C10ORF96 | 111.3  | 113.7  | 117.1  | 114.3  | 109.1  | 99.4   | 115.5  | 113.9  |
| C10ORF97 | 200.9  | 195.9  | 203.1  | 215.7  | 199.1  | 159.3  | 193.9  | 196.6  |
| C10ORF99 | 125.2  | 119.3  | 113.4  | 113.9  | 111.5  | 98.1   | 118.3  | 119.1  |
| C11ORF1  | 221.5  | 298.7  | 380.2  | 280.3  | 252.1  | 377.7  | 251.7  | 313    |
| C11ORF10 | 1643.8 | 1996.4 | 2414.9 | 1606.9 | 1749.3 | 1821.8 | 1910.8 | 1805.2 |
| C11ORF11 | 154.1  | 160    | 131.1  | 167    | 122.3  | 118.2  | 146.1  | 125.1  |
| C11ORF16 | 120.5  | 121.6  | 125.3  | 110.9  | 116.1  | 103.7  | 120.8  | 114.2  |
| C11ORF17 | 122.1  | 113.6  | 127.3  | 121.8  | 116.8  | 108.8  | 119    | 113.2  |
| C11ORF17 | 185.8  | 194.7  | 232.9  | 175.4  | 157.7  | 174.6  | 156.3  | 163.9  |
| C11ORF17 | 150.3  | 151.2  | 180.5  | 167.2  | 124.5  | 123.1  | 133.7  | 142.7  |
| C11ORF17 | 116.9  | 120.1  | 116.6  | 125    | 110.9  | 103.9  | 121.5  | 115.3  |
| C11ORF17 | 241.9  | 252.6  | 364.4  | 233.1  | 238.2  | 283.4  | 201.3  | 210.5  |
| C11ORF2  | 2398.5 | 2731.9 | 1558   | 2430.8 | 1724.1 | 1149.7 | 2490.4 | 2534.7 |
| C11ORF24 | 142.7  | 138.4  | 158.4  | 145.9  | 151.7  | 129.6  | 138.2  | 135.2  |
| C11ORF30 | 122.5  | 144.6  | 125.7  | 134.2  | 121.8  | 98.8   | 118.8  | 124.6  |
| C11ORF31 | 143.6  | 149.5  | 152.1  | 150    | 140.1  | 117    | 150.3  | 145.8  |
| C11ORF35 | 123.6  | 133.5  | 122.7  | 134.3  | 111.3  | 111.1  | 129.4  | 122.5  |
| C11ORF36 | 109.5  | 107.3  | 108    | 110.3  | 102.4  | 96.7   | 115.7  | 110.6  |
| C11ORF38 | 141.9  | 137    | 140.7  | 151    | 139.7  | 114    | 158.2  | 154.6  |

|          |       |       |       |       |       |       |       |       |
|----------|-------|-------|-------|-------|-------|-------|-------|-------|
| C11ORF40 | 120.6 | 118.5 | 119.6 | 122.1 | 109.4 | 102   | 116.4 | 119   |
| C11ORF42 | 113.8 | 119.7 | 121.2 | 121.7 | 109.4 | 96.3  | 111.3 | 119.2 |
| C11ORF44 | 113.7 | 109.4 | 122   | 121.6 | 111.8 | 104.7 | 129.7 | 114   |
| C11ORF45 | 123.5 | 124.1 | 118.9 | 124.8 | 119.6 | 108   | 142.1 | 124.4 |
| C11ORF46 | 548.8 | 607.3 | 524.9 | 467.7 | 485.9 | 311.4 | 482.5 | 650.1 |
| C11ORF47 | 128.5 | 127.1 | 139   | 147.9 | 127.2 | 106.7 | 129.8 | 140.1 |
| C11ORF48 | 279   | 328.2 | 289.7 | 301.2 | 266.9 | 301.5 | 298.2 | 302.8 |
| C11ORF49 | 119.3 | 120.5 | 106.9 | 117.7 | 110.5 | 98.6  | 116   | 118.7 |
| C11ORF49 | 119.3 | 123.7 | 124.2 | 115   | 110.5 | 99.7  | 128.6 | 115.5 |
| C11ORF49 | 127.3 | 125.8 | 139.1 | 127   | 106.2 | 104.2 | 129   | 125.5 |
| C11ORF49 | 119.4 | 114.4 | 117.4 | 115.4 | 109.6 | 102.2 | 126.5 | 114.3 |
| C11ORF51 | 134   | 145.7 | 136.3 | 139.9 | 114.1 | 129.5 | 133.7 | 125.2 |
| C11ORF52 | 115.9 | 122.9 | 112   | 114   | 105.3 | 95.4  | 116.6 | 114   |
| C11ORF53 | 121.7 | 111.4 | 112.4 | 118.3 | 105.6 | 100.3 | 120.9 | 111.9 |
| C11ORF54 | 285.7 | 299   | 332.7 | 391.4 | 318.1 | 295.1 | 363.9 | 343.2 |
| C11ORF55 | 126.2 | 116   | 125.3 | 127   | 114.5 | 105.6 | 125.9 | 125.8 |
| C11ORF56 | 213   | 236.5 | 230.1 | 253.4 | 185.7 | 212.7 | 216   | 212.9 |
| C11ORF61 | 117.2 | 145.3 | 139   | 146.1 | 122.9 | 105.9 | 143   | 131.6 |
| C11ORF63 | 120.7 | 123.8 | 118.9 | 115.4 | 106   | 101.5 | 128.5 | 117.8 |
| C11ORF63 | 114.9 | 129.4 | 121   | 113.4 | 108   | 105.1 | 120.1 | 119.6 |
| C11ORF63 | 187.1 | 171.6 | 233.9 | 184.3 | 193.6 | 138.2 | 218   | 240.6 |
| C11ORF65 | 103.9 | 116.8 | 103.8 | 116   | 103.5 | 92.4  | 110.6 | 109.8 |
| C11ORF70 | 116.3 | 111.1 | 110.7 | 120.3 | 110.1 | 96.7  | 112.3 | 120.3 |
| C11ORF71 | 124.8 | 120   | 148   | 129.6 | 124.5 | 117.3 | 144.8 | 115.5 |
| C11ORF76 | 104.3 | 119.8 | 108.5 | 124.4 | 103.9 | 96.2  | 114.3 | 109.5 |
| C11ORF77 | 132.1 | 121.1 | 129.8 | 129   | 124.6 | 104.3 | 139.4 | 145   |
| C11ORF9  | 117.9 | 118.5 | 115.3 | 114.7 | 112.5 | 102   | 114.2 | 104.6 |
| C12ORF10 | 402.6 | 454.7 | 473.7 | 404.3 | 323.9 | 315.9 | 271.1 | 306.5 |
| C12ORF11 | 117.8 | 113.8 | 127.9 | 115.9 | 112.9 | 107.3 | 120.3 | 115.7 |
| C12ORF12 | 123.5 | 119.9 | 125.5 | 125.2 | 114.3 | 102.1 | 120.8 | 113   |
| C12ORF23 | 162.1 | 154.3 | 137.2 | 169.7 | 135.8 | 113.5 | 146.1 | 169   |
| C12ORF24 | 242   | 240.2 | 191.8 | 218   | 198.5 | 114.3 | 182   | 162.5 |
| C12ORF25 | 108.8 | 122.1 | 108.6 | 124.8 | 104.7 | 100   | 122.4 | 127   |
| C12ORF26 | 306   | 397.5 | 316.9 | 313.8 | 305.3 | 217.4 | 297.6 | 322.4 |
| C12ORF28 | 111.3 | 121.4 | 119.5 | 115.4 | 112.6 | 93.3  | 118.1 | 123.2 |
| C12ORF29 | 216.3 | 285.5 | 246   | 270.5 | 254   | 187.5 | 267.8 | 255.2 |
| C12ORF30 | 129   | 139   | 140.5 | 142.8 | 121   | 116.4 | 124.5 | 128.1 |
| C12ORF31 | 200.2 | 203.5 | 187.1 | 198.3 | 187.3 | 147.1 | 181.5 | 200.8 |
| C12ORF32 | 188.6 | 178.7 | 229.3 | 195.2 | 170.2 | 176.3 | 197   | 176.3 |
| C12ORF34 | 112.1 | 123.9 | 117.4 | 129.2 | 114.8 | 106.4 | 122.6 | 123.7 |
| C12ORF35 | 228.5 | 214.3 | 216.8 | 340.5 | 188.9 | 203.1 | 239   | 188.6 |
| C12ORF36 | 119.3 | 114.5 | 112.8 | 115   | 108.1 | 98    | 124.2 | 106.3 |
| C12ORF38 | 102.6 | 119.7 | 112.4 | 114   | 107   | 96.5  | 115.8 | 109.6 |
| C12ORF39 | 107.6 | 118.9 | 115.7 | 122.1 | 111.8 | 96.7  | 125.3 | 110.5 |
| C12ORF4  | 136.3 | 154.4 | 158.9 | 142.1 | 142.6 | 121.6 | 157.7 | 145.9 |
| C12ORF40 | 110.7 | 111.6 | 118.7 | 123.1 | 106.8 | 97.8  | 105.3 | 111.1 |
| C12ORF40 | 117.6 | 114   | 110.7 | 117.6 | 106.7 | 104.3 | 112   | 108.7 |
| C12ORF41 | 689.2 | 911.3 | 645.6 | 737   | 574.7 | 620.5 | 755.3 | 944.9 |
| C12ORF42 | 106.8 | 116   | 106.4 | 116.3 | 106.6 | 94.4  | 121.3 | 112.3 |
| C12ORF43 | 200.1 | 191.8 | 258.5 | 221.2 | 162.3 | 168.9 | 203.5 | 195.7 |
| C12ORF44 | 487.5 | 526   | 409.2 | 521.8 | 359.9 | 297.5 | 601.1 | 525.9 |

|          |        |        |        |        |        |        |        |        |
|----------|--------|--------|--------|--------|--------|--------|--------|--------|
| C12ORF45 | 145.2  | 158.2  | 176.9  | 143.5  | 137.4  | 131.4  | 148.5  | 147.6  |
| C12ORF46 | 256.1  | 223.8  | 319.3  | 251.4  | 271    | 212.3  | 247.8  | 267.7  |
| C12ORF47 | 459.9  | 476.1  | 588.4  | 374.6  | 347.4  | 371.5  | 469.6  | 495.3  |
| C12ORF48 | 132.1  | 138    | 139.9  | 134.4  | 113.3  | 109.4  | 122.9  | 112.6  |
| C12ORF49 | 155.5  | 171.5  | 145.4  | 175    | 172.5  | 130.7  | 161.8  | 194.4  |
| C12ORF5  | 157.6  | 139.7  | 160.6  | 165    | 138.9  | 121.2  | 155.8  | 155.2  |
| C12ORF50 | 115.6  | 116    | 110.7  | 125.3  | 112.7  | 99.7   | 119.6  | 119.1  |
| C12ORF52 | 184.7  | 190    | 178.4  | 180.6  | 158.4  | 132.4  | 161.8  | 159.5  |
| C12ORF53 | 116.6  | 120.7  | 107.4  | 116.2  | 110.4  | 97.1   | 130.9  | 109.9  |
| C12ORF54 | 119    | 125.9  | 122.8  | 126.9  | 109.4  | 99.5   | 123.1  | 112.6  |
| C12ORF57 | 1365.1 | 1719.1 | 1880.9 | 1606.6 | 1235.2 | 1439.5 | 1297.2 | 1626.8 |
| C12ORF58 | 127.9  | 129.4  | 147.1  | 134.8  | 123.4  | 107.4  | 124    | 127.2  |
| C12ORF59 | 108.1  | 111.3  | 114.8  | 114.1  | 101.5  | 97.6   | 114.4  | 116.5  |
| C12ORF60 | 113.7  | 114.5  | 119.2  | 127.9  | 114.8  | 90.2   | 132.5  | 116.7  |
| C12ORF61 | 106    | 111.2  | 116.5  | 121    | 119.7  | 101.5  | 122    | 125.7  |
| C12ORF62 | 160.5  | 184    | 176.3  | 158.2  | 167    | 127.5  | 138.7  | 164.4  |
| C12ORF64 | 129    | 111.6  | 116.5  | 113.1  | 114.3  | 92.6   | 113    | 113.8  |
| C13ORF1  | 126.1  | 121.2  | 137.4  | 134.3  | 119.5  | 104.4  | 124.2  | 129.8  |
| C13ORF10 | 228.5  | 287    | 224    | 259    | 246.9  | 220.7  | 277.4  | 286.3  |
| C13ORF16 | 120.9  | 113.5  | 122.4  | 121.2  | 107.7  | 92.7   | 123    | 133.9  |
| C13ORF18 | 144.5  | 137    | 133.7  | 183.1  | 132.2  | 130.6  | 180.1  | 146.1  |
| C13ORF21 | 123    | 112.8  | 119.8  | 129    | 118.1  | 99.4   | 115.5  | 119.7  |
| C13ORF23 | 281.4  | 367.1  | 291.8  | 321.4  | 278.2  | 242.7  | 269.8  | 298.7  |
| C13ORF23 | 255.7  | 307.3  | 262.7  | 285.3  | 283.2  | 208.7  | 218.4  | 220.1  |
| C13ORF23 | 111.9  | 112.9  | 107.9  | 119.9  | 101.9  | 103    | 114.4  | 108.4  |
| C13ORF24 | 136.9  | 154.5  | 152.3  | 160.6  | 130.7  | 133.1  | 148    | 145.6  |
| C13ORF26 | 113.7  | 109.8  | 100.8  | 119.8  | 111.7  | 95.8   | 106.6  | 110.3  |
| C13ORF3  | 113.7  | 129.5  | 120    | 116.2  | 118.9  | 102    | 117.4  | 103.4  |
| C13ORF7  | 166.6  | 177.8  | 197.1  | 151.8  | 179    | 133.7  | 153.6  | 175.4  |
| C13ORF8  | 437.9  | 512.6  | 380.8  | 453.8  | 387.2  | 334.8  | 439    | 300.3  |
| C14ORF1  | 126.4  | 129.4  | 139.8  | 136.5  | 126.5  | 112.4  | 134.9  | 116.7  |
| C14ORF10 | 275    | 241.6  | 283.3  | 273    | 211    | 306.7  | 182.3  | 182.5  |
| C14ORF10 | 115.1  | 112.1  | 125.5  | 117.4  | 115.7  | 103.4  | 115.8  | 118.3  |
| C14ORF10 | 365.1  | 452.1  | 410    | 450.5  | 521.7  | 341.8  | 436.1  | 432.4  |
| C14ORF10 | 214.9  | 198.6  | 175.2  | 197.1  | 158.5  | 141.8  | 195.5  | 190.3  |
| C14ORF10 | 146.3  | 149.7  | 156.5  | 157.1  | 142.5  | 129.5  | 163.5  | 174.2  |
| C14ORF10 | 156.5  | 149    | 135.6  | 146    | 154.1  | 118.3  | 140    | 149    |
| C14ORF10 | 119.5  | 130.3  | 116.6  | 128.6  | 109.4  | 102.7  | 124.1  | 117.7  |
| C14ORF10 | 454.8  | 361.7  | 493.2  | 422.8  | 306.3  | 270.4  | 340.1  | 345.5  |
| C14ORF10 | 220.8  | 225    | 276.9  | 332.8  | 287.2  | 200.4  | 302.7  | 223.3  |
| C14ORF11 | 112.7  | 115.3  | 119.1  | 117.7  | 116.8  | 97.1   | 118.9  | 112.9  |
| C14ORF11 | 267.6  | 359.1  | 457.6  | 385.7  | 328.4  | 352.7  | 273.3  | 354.6  |
| C14ORF11 | 112.6  | 105.5  | 109    | 114.8  | 107.3  | 97.5   | 112.1  | 116.2  |
| C14ORF11 | 139.8  | 126    | 123.3  | 128.2  | 118.9  | 104.3  | 130.8  | 125.6  |
| C14ORF11 | 133.1  | 128.3  | 125    | 128.2  | 126.7  | 109.7  | 132.5  | 138.3  |
| C14ORF11 | 136    | 138.8  | 157.6  | 140.4  | 123.6  | 106.2  | 138.1  | 143.7  |
| C14ORF12 | 240.6  | 238.3  | 223.6  | 239.3  | 266.2  | 197.4  | 226.6  | 248    |
| C14ORF12 | 126.5  | 125.6  | 135.9  | 131.2  | 122.3  | 108    | 120    | 133.6  |
| C14ORF12 | 138.4  | 155.1  | 157.4  | 146.3  | 135.1  | 128.1  | 145.2  | 131.3  |
| C14ORF12 | 168.7  | 138.8  | 148.2  | 161.2  | 136    | 111.5  | 142.7  | 135.7  |
| C14ORF12 | 114.4  | 114.9  | 123.1  | 120.8  | 115.7  | 99.3   | 114.4  | 108.6  |

|          |        |        |        |        |        |        |        |        |
|----------|--------|--------|--------|--------|--------|--------|--------|--------|
| C14ORF12 | 162.3  | 171.9  | 200.3  | 191.6  | 157.9  | 159.3  | 201.9  | 203.7  |
| C14ORF13 | 150.1  | 157.7  | 148.3  | 147.5  | 149.6  | 133.5  | 140.7  | 158.5  |
| C14ORF13 | 219.3  | 193.1  | 197.8  | 250.5  | 177    | 188.5  | 312.1  | 278.8  |
| C14ORF13 | 110.7  | 117.7  | 122.4  | 124.9  | 111.9  | 109.4  | 120.7  | 112.3  |
| C14ORF13 | 266.6  | 313    | 335.1  | 287.1  | 244.5  | 223.4  | 234.2  | 218.8  |
| C14ORF13 | 142.6  | 160.8  | 169.1  | 156.8  | 134.5  | 140    | 149.7  | 139.1  |
| C14ORF13 | 460.4  | 463.6  | 455    | 433.7  | 442.4  | 303.3  | 405.1  | 342.3  |
| C14ORF13 | 112.9  | 106.3  | 114.8  | 109.4  | 105.9  | 95.5   | 110.9  | 107.9  |
| C14ORF13 | 240.6  | 216.6  | 233.4  | 237.6  | 256.3  | 205    | 259.6  | 277.3  |
| C14ORF13 | 392.7  | 429.7  | 352.9  | 467.5  | 370.7  | 285.8  | 446.1  | 467.1  |
| C14ORF13 | 135.9  | 144.9  | 140.3  | 149.2  | 124.1  | 110.9  | 138.7  | 123.2  |
| C14ORF14 | 105.8  | 117.2  | 116.8  | 107.9  | 104.7  | 94.9   | 113.4  | 116.9  |
| C14ORF14 | 124.8  | 123.1  | 110    | 114.1  | 108.1  | 96.8   | 120.3  | 123.4  |
| C14ORF14 | 157.7  | 180.6  | 178.6  | 178.1  | 136.4  | 121.5  | 175.2  | 221.1  |
| C14ORF14 | 116.1  | 114.8  | 114.2  | 115.5  | 110.9  | 109.6  | 117    | 110.1  |
| C14ORF14 | 139.9  | 141    | 108.7  | 125.2  | 111.8  | 102.8  | 147.8  | 131.2  |
| C14ORF14 | 186.7  | 172.6  | 166.3  | 192.6  | 166.8  | 145.7  | 170.2  | 151.1  |
| C14ORF14 | 120.6  | 130.4  | 114.2  | 110.8  | 101.8  | 98.1   | 116.1  | 108.3  |
| C14ORF14 | 130.4  | 123.8  | 132.8  | 130.9  | 107.3  | 108.1  | 127.9  | 123.2  |
| C14ORF15 | 105    | 117.8  | 113    | 116.7  | 108.3  | 95.5   | 113.3  | 109    |
| C14ORF15 | 127.1  | 130.8  | 132.9  | 137.1  | 119.3  | 115.2  | 131.4  | 127.9  |
| C14ORF15 | 130.1  | 131.5  | 134    | 130.7  | 117.6  | 114.8  | 130.4  | 124.2  |
| C14ORF15 | 134.8  | 150    | 141.3  | 152    | 131.7  | 133    | 179.9  | 167.5  |
| C14ORF15 | 112.6  | 108.7  | 114    | 116.1  | 110.2  | 103.9  | 120.8  | 114.9  |
| C14ORF15 | 1912.6 | 1438.7 | 2008.9 | 1594.6 | 1976.7 | 909.1  | 2123.7 | 2355.9 |
| C14ORF15 | 115.6  | 110    | 110.6  | 118.2  | 106.2  | 98.9   | 114.4  | 113.8  |
| C14ORF15 | 1339.2 | 1446   | 1873.4 | 1413.9 | 1062.1 | 1201.2 | 977.3  | 1029.6 |
| C14ORF15 | 331    | 347.3  | 316.2  | 363.2  | 341.9  | 251.5  | 314.4  | 242.2  |
| C14ORF16 | 131.5  | 127.5  | 139.6  | 133.6  | 127    | 113.8  | 134.8  | 129.9  |
| C14ORF16 | 115.6  | 113.1  | 121.7  | 126.7  | 111.1  | 108.5  | 125.5  | 117.4  |
| C14ORF16 | 240.5  | 290.4  | 338.8  | 265.6  | 286.8  | 259.5  | 278.9  | 237.8  |
| C14ORF16 | 112.9  | 114.8  | 113.1  | 121.5  | 103.8  | 106.1  | 122.7  | 113.6  |
| C14ORF16 | 179.3  | 218.5  | 196.5  | 261.1  | 199.2  | 145.8  | 208.4  | 197.8  |
| C14ORF17 | 134.6  | 162.9  | 138.5  | 153.7  | 129.9  | 120.5  | 138.9  | 141.9  |
| C14ORF17 | 1169.6 | 1127.4 | 1033.8 | 966.8  | 828.2  | 731.5  | 863.7  | 841.5  |
| C14ORF17 | 196.2  | 206.8  | 178    | 193.2  | 153.3  | 153    | 172.6  | 167.5  |
| C14ORF19 | 141.1  | 146.1  | 143.7  | 159.9  | 125.4  | 130.1  | 140.9  | 150.7  |
| C14ORF2  | 305.4  | 332.8  | 410.2  | 325.5  | 257.2  | 274.3  | 302    | 291.8  |
| C14ORF21 | 130.3  | 122.9  | 130    | 129.4  | 117    | 109.1  | 129.6  | 120.6  |
| C14ORF24 | 2865.4 | 2670.6 | 2945.7 | 3588.1 | 2262   | 1173.1 | 2977.1 | 3035.9 |
| C14ORF24 | 132.3  | 118.9  | 131.7  | 125.9  | 115.9  | 119.4  | 132.5  | 126.8  |
| C14ORF24 | 134    | 124.9  | 126.5  | 151.2  | 116.9  | 115.3  | 134.1  | 127.5  |
| C14ORF28 | 197.5  | 181.7  | 225.4  | 200.7  | 205.2  | 176.1  | 219.1  | 228.5  |
| C14ORF29 | 110    | 116    | 117.2  | 115.3  | 110.7  | 96.4   | 115.4  | 130    |
| C14ORF29 | 109.3  | 120.7  | 112    | 116.2  | 100.5  | 98.9   | 113.5  | 106.1  |
| C14ORF32 | 391.3  | 464.6  | 371.2  | 488.1  | 511.6  | 335.2  | 506.4  | 563.1  |
| C14ORF37 | 115.9  | 117.2  | 115.2  | 121.5  | 107.5  | 97.1   | 119.1  | 121.1  |
| C14ORF39 | 119.1  | 116.1  | 111.6  | 119.5  | 111.6  | 93     | 115.7  | 107.7  |
| C14ORF4  | 306.2  | 224.7  | 325.5  | 335.3  | 204.3  | 273.5  | 330.1  | 239.4  |
| C14ORF43 | 111.2  | 104.1  | 122.1  | 113.2  | 105.2  | 96.1   | 105.1  | 103.8  |
| C14ORF43 | 180.2  | 198.9  | 186.9  | 196.5  | 173.2  | 129.6  | 152.5  | 131.5  |



|          |        |        |        |        |        |       |        |        |
|----------|--------|--------|--------|--------|--------|-------|--------|--------|
| C14ORF43 | 256.3  | 387.2  | 272.2  | 348.5  | 244.9  | 220   | 202.9  | 176.4  |
| C14ORF44 | 116.7  | 117.6  | 115.9  | 126.9  | 110.4  | 105.6 | 108.4  | 112.9  |
| C14ORF45 | 115.8  | 116.7  | 123.2  | 113    | 102.5  | 102.7 | 119.2  | 123.3  |
| C14ORF46 | 137.2  | 127.1  | 146.6  | 136.6  | 130.9  | 116.8 | 141.9  | 134.7  |
| C14ORF48 | 122.2  | 124    | 129.7  | 129.1  | 113.1  | 103.8 | 121.6  | 116.6  |
| C14ORF49 | 118.3  | 121.9  | 136.6  | 123    | 117    | 101.3 | 114.8  | 122.7  |
| C14ORF50 | 109.1  | 114.5  | 108.9  | 118    | 105.8  | 102.4 | 110.9  | 110.5  |
| C14ORF54 | 114.5  | 119.6  | 113.9  | 121.2  | 109.1  | 100.9 | 117.4  | 117.2  |
| C14ORF58 | 162.7  | 133.3  | 276.9  | 190.4  | 113    | 198.7 | 142.9  | 120    |
| C14ORF68 | 120.9  | 119.9  | 119.7  | 114.8  | 110.6  | 94.9  | 120.9  | 118.7  |
| C14ORF73 | 113.9  | 116.3  | 114.9  | 113.7  | 104.6  | 102.7 | 112.3  | 113.4  |
| C14ORF73 | 112.9  | 113.7  | 117.2  | 114.7  | 112.2  | 103.6 | 121.8  | 124.4  |
| C14ORF79 | 128.3  | 123.4  | 128.8  | 127.6  | 123.8  | 107.2 | 121.1  | 124    |
| C14ORF8  | 113.7  | 110.2  | 110.6  | 116.9  | 103.1  | 100.8 | 114.4  | 111.4  |
| C14ORF80 | 144.7  | 166    | 162.8  | 146.3  | 148.7  | 132   | 142.1  | 156.6  |
| C14ORF85 | 1701.2 | 1576.2 | 1514   | 1449.2 | 1186.9 | 936.4 | 1693.7 | 1306.5 |
| C14ORF92 | 143.5  | 130.4  | 150.1  | 143.1  | 131.1  | 125.8 | 155.7  | 162.4  |
| C14ORF93 | 297.5  | 304.7  | 278.4  | 219.6  | 225    | 190.4 | 253.2  | 221.8  |
| C14ORF94 | 150.3  | 158.8  | 208.2  | 185.8  | 128.3  | 149.8 | 158.6  | 140.6  |
| C15ORF15 | 695.5  | 1348.8 | 1002.3 | 927.5  | 899.3  | 678.3 | 930.1  | 1710.9 |
| C15ORF17 | 248.4  | 273.5  | 266.3  | 230.2  | 262.2  | 198.5 | 209.6  | 192.8  |
| C15ORF2  | 119.1  | 128.1  | 126.5  | 119.1  | 120.3  | 105.3 | 121.3  | 124.8  |
| C15ORF21 | 117.3  | 114.5  | 121.7  | 126.4  | 107.1  | 100.8 | 123.1  | 115    |
| C15ORF21 | 115.3  | 121.4  | 123.9  | 129.3  | 109.3  | 99.7  | 122.2  | 123.2  |
| C15ORF21 | 112.7  | 117.1  | 112.2  | 108.9  | 111.3  | 105.3 | 119.1  | 110.6  |
| C15ORF23 | 116.2  | 141.8  | 123.5  | 125.5  | 118.2  | 104.5 | 113.9  | 119.6  |
| C15ORF24 | 788.5  | 928.4  | 904.2  | 886    | 749.2  | 821.7 | 803.6  | 746.4  |
| C15ORF26 | 106.2  | 123.9  | 135.2  | 112.9  | 114.7  | 101.1 | 124.9  | 111.9  |
| C15ORF27 | 111.7  | 110.5  | 117.4  | 122.7  | 105.8  | 100.9 | 107.9  | 112    |
| C15ORF29 | 115.7  | 113    | 138.1  | 128.7  | 111.9  | 109.9 | 132.5  | 114.8  |
| C15ORF32 | 113.8  | 111.5  | 126.6  | 111.4  | 111.1  | 99.4  | 117.4  | 120.8  |
| C15ORF33 | 114.3  | 107.9  | 125.9  | 114.3  | 103.9  | 98.9  | 114.5  | 114.8  |
| C15ORF37 | 118.2  | 116.9  | 111.7  | 116    | 110.3  | 104.7 | 122.9  | 112    |
| C15ORF38 | 129.2  | 107.7  | 147.5  | 120.9  | 113    | 105.2 | 117.7  | 115.1  |
| C15ORF39 | 163.2  | 169.1  | 147.7  | 154.6  | 134.9  | 141.3 | 151.1  | 164.8  |
| C15ORF40 | 154.8  | 166.4  | 163.8  | 164.5  | 158.7  | 148.4 | 176.4  | 162.8  |
| C15ORF41 | 140.3  | 111.3  | 123.5  | 137.1  | 138.9  | 111   | 130.6  | 119.8  |
| C15ORF42 | 114.1  | 114.7  | 121.9  | 119.6  | 109.1  | 105.6 | 120.1  | 114.4  |
| C15ORF43 | 116.1  | 112.6  | 111.4  | 117.7  | 106.3  | 93.6  | 116.7  | 109.9  |
| C15ORF44 | 105.1  | 130.3  | 122.1  | 122.8  | 123.6  | 97.6  | 112.7  | 129.8  |
| C15ORF44 | 134.4  | 155.2  | 160.3  | 150.4  | 150    | 132.5 | 165.9  | 151.4  |
| C15ORF48 | 386    | 324.8  | 395.7  | 487.4  | 252.2  | 888.6 | 400.9  | 212    |
| C15ORF48 | 170.8  | 142    | 129.7  | 183.7  | 122.9  | 180.9 | 186    | 130.6  |
| C15ORF48 | 115.9  | 121.6  | 135.5  | 131.2  | 107.1  | 112.4 | 125.9  | 124.8  |
| C15ORF5  | 127.5  | 117.1  | 130.3  | 128.9  | 119.6  | 103.9 | 129.7  | 137.1  |
| C16ORF24 | 254.8  | 286.1  | 215.9  | 215.6  | 170.8  | 153.9 | 169.2  | 145.7  |
| C16ORF25 | 116.5  | 117.4  | 112.6  | 114.2  | 108.1  | 102.9 | 126.2  | 108.5  |
| C16ORF25 | 110.3  | 108.4  | 118    | 117.7  | 98     | 101.8 | 118.8  | 113.8  |
| C16ORF28 | 147.6  | 144.7  | 171.1  | 166.7  | 147.7  | 151.3 | 193.5  | 173.2  |
| C16ORF3  | 112.1  | 116.5  | 117.6  | 117.3  | 113.2  | 100.6 | 118    | 118.6  |
| C16ORF30 | 518.8  | 511    | 381.1  | 523.8  | 346.6  | 323.1 | 369.5  | 338.2  |

|          |        |        |        |        |        |        |        |        |
|----------|--------|--------|--------|--------|--------|--------|--------|--------|
| C16ORF33 | 304    | 385.7  | 377.8  | 346.4  | 294.9  | 260.5  | 286.8  | 318.4  |
| C16ORF34 | 136.2  | 134.2  | 157.8  | 130.2  | 126.4  | 119.7  | 148.9  | 157.4  |
| C16ORF35 | 110.1  | 117.3  | 122    | 119.2  | 111.9  | 96.9   | 108.4  | 120.5  |
| C16ORF35 | 330.7  | 378.5  | 257.3  | 386.2  | 286.1  | 190.6  | 382.7  | 274.1  |
| C16ORF44 | 266    | 322.4  | 236.7  | 286.6  | 222.7  | 205.6  | 291.3  | 314.2  |
| C16ORF45 | 116.6  | 118.5  | 117.1  | 116.8  | 120.9  | 108.3  | 125.4  | 109.4  |
| C16ORF46 | 118.7  | 114.5  | 122.3  | 125.8  | 111    | 100.7  | 129.5  | 127.6  |
| C16ORF48 | 138    | 171.2  | 161.1  | 149.2  | 129    | 130.8  | 147    | 137    |
| C16ORF5  | 131.5  | 135.3  | 126.6  | 133.3  | 114.1  | 111.8  | 138.8  | 150.8  |
| C16ORF50 | 119.9  | 129.9  | 121    | 125.7  | 117.3  | 111.2  | 125.3  | 117.8  |
| C16ORF53 | 180.3  | 176.2  | 152    | 178.3  | 223.8  | 163    | 209.3  | 151.9  |
| C16ORF54 | 116.4  | 124.2  | 120.4  | 135    | 116.5  | 118.6  | 124.2  | 127.1  |
| C16ORF55 | 120.6  | 115.9  | 120    | 126.1  | 119.8  | 106.1  | 122.2  | 119.4  |
| C16ORF56 | 391    | 357.2  | 419.8  | 407.7  | 279.6  | 361.2  | 329.5  | 335.5  |
| C16ORF57 | 138.3  | 143.7  | 152.6  | 183.1  | 136.4  | 125.2  | 166.2  | 170.2  |
| C16ORF58 | 479.5  | 546.4  | 590.9  | 492    | 425.4  | 402.9  | 411.8  | 382    |
| C16ORF60 | 156.2  | 136    | 160.8  | 166.6  | 127    | 139.4  | 166.3  | 153.5  |
| C16ORF61 | 979    | 1104.2 | 1166.2 | 1049.5 | 882.7  | 900.6  | 1082.6 | 1313.3 |
| C16ORF63 | 616.9  | 641.7  | 568.3  | 753.2  | 459.6  | 576.9  | 576.7  | 473.8  |
| C16ORF69 | 114.3  | 121.4  | 124.3  | 121.9  | 117.5  | 105.8  | 122.2  | 120    |
| C16ORF7  | 302.6  | 255.7  | 296.8  | 260.2  | 167.9  | 188.9  | 242.1  | 272.2  |
| C16ORF78 | 112.4  | 105.7  | 113.1  | 116.7  | 99.4   | 95.6   | 106.6  | 104.6  |
| C16ORF80 | 252.3  | 353.7  | 261.1  | 347.3  | 255.3  | 218.2  | 270.3  | 314.7  |
| C16ORF9  | 264    | 264.2  | 268.9  | 239    | 189.7  | 240.4  | 235.1  | 191.8  |
| C17ORF25 | 225    | 284.9  | 330.8  | 294.7  | 249.8  | 233.6  | 262.6  | 227.1  |
| C17ORF27 | 129.4  | 123    | 117.4  | 125.2  | 124.7  | 111.7  | 133    | 136.3  |
| C17ORF28 | 110.7  | 118.2  | 111.5  | 113.1  | 104.4  | 101.9  | 125.4  | 125.1  |
| C17ORF32 | 169.1  | 164.7  | 165.5  | 180.3  | 152.5  | 143.4  | 184.9  | 172.7  |
| C17ORF37 | 134.4  | 135.4  | 142.5  | 127.3  | 120.4  | 121.7  | 134.1  | 128.8  |
| C17ORF38 | 108.6  | 115.2  | 113.1  | 115.2  | 101.3  | 97.7   | 110.9  | 104.3  |
| C17ORF39 | 174.1  | 138.2  | 141.7  | 144.4  | 127.3  | 122.8  | 133.1  | 133.1  |
| C17ORF40 | 326    | 281.4  | 349.1  | 330.7  | 254.1  | 215    | 326.9  | 351.5  |
| C17ORF42 | 108.5  | 119.7  | 125.3  | 122.9  | 106.4  | 98.9   | 116.6  | 117.8  |
| C17ORF45 | 2634.2 | 3004.6 | 3186.6 | 3086.1 | 2211.2 | 2661.9 | 2990.9 | 4202.3 |
| C17ORF46 | 113.2  | 126.2  | 121.9  | 125.6  | 114.2  | 103.6  | 128.4  | 120.2  |
| C17ORF47 | 119.7  | 117.3  | 129.6  | 137.7  | 114    | 117.4  | 127.1  | 121.7  |
| C17ORF47 | 124.1  | 125    | 146.6  | 132    | 116.6  | 114.8  | 131.8  | 124.5  |
| C17ORF48 | 292.5  | 434.6  | 363.5  | 418.3  | 314.6  | 242.6  | 382.1  | 342.1  |
| C17ORF49 | 551    | 552.8  | 549.6  | 491.8  | 345.6  | 366    | 497.2  | 399.3  |
| C17ORF50 | 111.5  | 123.9  | 115.4  | 122.9  | 117.1  | 100.3  | 138    | 119    |
| C17ORF53 | 123.9  | 139.2  | 128.4  | 126.8  | 119.1  | 110.3  | 120.1  | 118.6  |
| C17ORF54 | 121.1  | 121    | 120.1  | 117.5  | 112.6  | 98.8   | 123.8  | 126.9  |
| C17ORF55 | 110.9  | 109.4  | 123.7  | 114.5  | 113.2  | 86.8   | 120    | 109.6  |
| C17ORF56 | 135.2  | 165    | 158.7  | 141.8  | 124.4  | 135    | 147.5  | 117.8  |
| C17ORF57 | 114.9  | 117    | 120.4  | 122.3  | 108.4  | 101    | 112    | 117.5  |
| C17ORF58 | 155.4  | 163.6  | 228.9  | 153    | 144.1  | 154.8  | 156.2  | 160.2  |
| C17ORF58 | 154    | 142.4  | 185.5  | 149.4  | 124.2  | 123.7  | 127.6  | 128    |
| C17ORF58 | 119    | 118.6  | 115.8  | 115.2  | 112.4  | 108.3  | 129.9  | 115    |
| C17ORF59 | 154.7  | 205.1  | 155.2  | 170.3  | 142    | 138.4  | 152.1  | 139.6  |
| C17ORF61 | 464.2  | 524.7  | 922.3  | 472.9  | 426    | 461.2  | 371.4  | 373.5  |
| C17ORF62 | 367.7  | 356.2  | 482    | 344.2  | 262.5  | 337    | 253.2  | 224.8  |

|          |       |       |       |       |       |       |       |       |
|----------|-------|-------|-------|-------|-------|-------|-------|-------|
| C17ORF63 | 221.5 | 205.4 | 193.5 | 228   | 200.9 | 162.6 | 216   | 230   |
| C17ORF64 | 124.8 | 129.1 | 120.2 | 122.6 | 115.4 | 112.3 | 131.3 | 117.5 |
| C17ORF65 | 129.5 | 132.4 | 156.2 | 124.1 | 136.2 | 121.6 | 124   | 121   |
| C17ORF66 | 117.8 | 117.9 | 122   | 123.4 | 109.7 | 106.2 | 116.1 | 119.1 |
| C17ORF68 | 329.8 | 409.8 | 357.8 | 359.8 | 273.4 | 229.8 | 304.8 | 264.6 |
| C17ORF68 | 217   | 220.4 | 184.6 | 201.2 | 162.4 | 141.4 | 189.2 | 164.8 |
| C17ORF69 | 138.1 | 142.9 | 128.5 | 142.9 | 138.8 | 106.9 | 136.2 | 131.9 |
| C17ORF70 | 568.4 | 670.5 | 603.2 | 602.1 | 388.7 | 329.3 | 450.7 | 407.9 |
| C17ORF71 | 120.8 | 128.1 | 119.1 | 136.3 | 122.3 | 111.4 | 125.4 | 132.6 |
| C17ORF73 | 122.9 | 123.4 | 126.9 | 148   | 118.2 | 106.6 | 138.2 | 135   |
| C17ORF74 | 124.1 | 116.1 | 136.7 | 139.6 | 116.5 | 98.8  | 117.4 | 130.2 |
| C17ORF75 | 142.4 | 137.9 | 143   | 157   | 152.9 | 110.2 | 129   | 150.3 |
| C17ORF76 | 120.8 | 123.4 | 116.1 | 118.9 | 108.4 | 104.5 | 128   | 125.5 |
| C17ORF77 | 107   | 98.8  | 108   | 112.7 | 94.3  | 99.9  | 113.4 | 110.1 |
| C17ORF78 | 110.7 | 130.4 | 110.6 | 111.3 | 97.3  | 92.7  | 110   | 111.7 |
| C17ORF79 | 144.8 | 135.9 | 129.1 | 138   | 125.5 | 116.6 | 144.9 | 126.2 |
| C17ORF80 | 139.4 | 151.3 | 151   | 150.7 | 128.4 | 120.5 | 140.5 | 142.9 |
| C17ORF81 | 126   | 134.7 | 129.3 | 135.2 | 127.5 | 110.5 | 143.6 | 154.9 |
| C17ORF81 | 182.9 | 189.2 | 175   | 211.6 | 162.3 | 139.3 | 154.1 | 144.7 |
| C17ORF81 | 178.7 | 184.9 | 172.6 | 183.7 | 158.2 | 129.5 | 185.3 | 163.4 |
| C17ORF81 | 115   | 132.6 | 130.3 | 117.8 | 110.3 | 107.1 | 128.4 | 117   |
| C17ORF83 | 103.5 | 109.6 | 115.8 | 113.1 | 105.4 | 97.7  | 114.6 | 111.5 |
| C17ORF85 | 188.4 | 175.9 | 213   | 218.8 | 170.2 | 187.6 | 223.2 | 286.5 |
| C18ORF1  | 122.5 | 108.5 | 134.7 | 129.9 | 110.4 | 135.5 | 120.5 | 112   |
| C18ORF10 | 144.4 | 129.8 | 161.9 | 145.5 | 117.7 | 124.9 | 139.7 | 126.4 |
| C18ORF14 | 104.1 | 121.6 | 116.3 | 115.3 | 108   | 99.6  | 113.2 | 115.7 |
| C18ORF17 | 456.3 | 499.1 | 340.3 | 393.8 | 371.1 | 278.2 | 361.6 | 306.8 |
| C18ORF19 | 144.9 | 143.1 | 141.1 | 141.9 | 135.7 | 115.8 | 131.3 | 147.2 |
| C18ORF21 | 183.7 | 228.1 | 199.2 | 203.2 | 187.7 | 179.2 | 177.8 | 184.8 |
| C18ORF22 | 132.4 | 144.9 | 141.8 | 144   | 132.3 | 108.7 | 143.6 | 131.2 |
| C18ORF24 | 117.1 | 118.6 | 123.9 | 118   | 123.2 | 102.1 | 125.7 | 124.1 |
| C18ORF25 | 695.6 | 619.1 | 605.5 | 754.7 | 700.4 | 533.5 | 783.1 | 756.1 |
| C18ORF25 | 111.8 | 112   | 115.3 | 113.2 | 108.1 | 104.7 | 123   | 118.7 |
| C18ORF26 | 117.6 | 115   | 124.9 | 128.7 | 113.8 | 104.9 | 119.2 | 113.6 |
| C18ORF34 | 110.8 | 118.5 | 124.2 | 118.9 | 111.9 | 97.4  | 122.3 | 110.4 |
| C18ORF37 | 213.3 | 203.6 | 186.4 | 227.4 | 212.2 | 149.1 | 209.3 | 187   |
| C18ORF45 | 121.5 | 123.4 | 119.5 | 125.1 | 124   | 98.2  | 131.1 | 120.6 |
| C18ORF51 | 112.3 | 113.3 | 119.9 | 112.1 | 107.3 | 104   | 122.5 | 116.5 |
| C18ORF51 | 125.9 | 133.2 | 142.9 | 127.6 | 116   | 93.4  | 123.8 | 130.6 |
| C18ORF54 | 123.6 | 131.4 | 138.1 | 135.7 | 126   | 112.9 | 129.5 | 131.2 |
| C18ORF55 | 403.5 | 402.1 | 575.6 | 522.6 | 429.2 | 369.4 | 384.1 | 359.3 |
| C18ORF56 | 115.9 | 117.2 | 119.7 | 109.4 | 115   | 97.2  | 108.7 | 131   |
| C18ORF8  | 432.4 | 433   | 362.1 | 575.3 | 387.9 | 364.6 | 568.2 | 581.1 |
| C19ORF10 | 272.4 | 272.5 | 405.9 | 280.1 | 253   | 301.9 | 325.9 | 340.9 |
| C19ORF12 | 112.6 | 113.4 | 115   | 116.8 | 111.6 | 100.4 | 121.9 | 107.1 |
| C19ORF12 | 320.3 | 418.1 | 243.4 | 312.5 | 342.1 | 169.3 | 291.6 | 373.8 |
| C19ORF12 | 396.2 | 494.2 | 309.1 | 449.3 | 304.2 | 228.3 | 423.6 | 362.7 |
| C19ORF12 | 118.3 | 107.2 | 131.2 | 138   | 117.8 | 100.7 | 123.3 | 118.9 |
| C19ORF15 | 114.5 | 118   | 126.3 | 119.6 | 108.7 | 99.7  | 116.7 | 113.1 |
| C19ORF18 | 118.1 | 108.1 | 133.1 | 119.5 | 114   | 99.8  | 122   | 120.7 |
| C19ORF19 | 112.8 | 113.3 | 127.5 | 118.5 | 120   | 102.4 | 121.6 | 109   |

|           |         |         |         |         |         |        |         |         |
|-----------|---------|---------|---------|---------|---------|--------|---------|---------|
| C19ORF2   | 252     | 239.8   | 248.9   | 226     | 232.4   | 149.5  | 265.2   | 228.8   |
| C19ORF2   | 1045.6  | 1535.5  | 1235.2  | 1381.8  | 1308.7  | 998.6  | 1627.4  | 1684.1  |
| C19ORF20  | 125.2   | 122.1   | 127.9   | 120.3   | 126.8   | 106.8  | 117.4   | 119.9   |
| C19ORF21  | 119.3   | 125     | 125.9   | 134.5   | 115.6   | 105.6  | 120.9   | 126.5   |
| C19ORF22  | 911.7   | 1008.8  | 921.8   | 988     | 717     | 970.7  | 1054.4  | 1075.4  |
| C19ORF23  | 120.5   | 131.9   | 120.3   | 128.5   | 122.5   | 104.3  | 151.3   | 127.4   |
| C19ORF24  | 225.9   | 225.9   | 184.6   | 226.2   | 169.7   | 142.4  | 190     | 191.2   |
| C19ORF25  | 261.6   | 228.7   | 230.9   | 227.2   | 203.1   | 210.2  | 237.6   | 230.6   |
| C19ORF26  | 117.5   | 135.9   | 137.9   | 134.8   | 133.3   | 117.3  | 154.9   | 142.7   |
| C19ORF28  | 130.1   | 120.6   | 134.2   | 126.6   | 120.5   | 108.1  | 122.3   | 122.4   |
| C19ORF28  | 158.8   | 176.7   | 146.9   | 153.7   | 128     | 119.2  | 153.8   | 133.8   |
| C19ORF29  | 157.2   | 145.9   | 155.1   | 152.5   | 132.6   | 128.4  | 165.7   | 157.6   |
| C19ORF29  | 125.1   | 117.8   | 125.5   | 131.9   | 126.3   | 112.1  | 136.3   | 133.6   |
| C19ORF30  | 117.3   | 120.1   | 124.8   | 128.2   | 111.6   | 97.5   | 129.7   | 126.2   |
| C19ORF31  | 12977.1 | 12563.5 | 13928.4 | 14179.7 | 11491.1 | 7590.2 | 11646.7 | 14013.1 |
| C19ORF33  | 112.8   | 111.2   | 109.2   | 119.7   | 112.1   | 95     | 119.4   | 118.6   |
| C19ORF34  | 110     | 118.2   | 117.6   | 117.7   | 112.5   | 87.6   | 121.8   | 110.9   |
| C19ORF35  | 113.7   | 109.2   | 129.7   | 130.6   | 106.7   | 110    | 118.8   | 112.7   |
| C19ORF36  | 119     | 123.4   | 129.3   | 128.2   | 123.5   | 106.5  | 120.6   | 112.7   |
| C19ORF36  | 106.3   | 117.3   | 103     | 115.9   | 109.3   | 95.9   | 116.9   | 113.3   |
| C19ORF37  | 755.7   | 835.6   | 850.5   | 660.8   | 737.5   | 627.2  | 491.7   | 476.8   |
| C19ORF4   | 114.9   | 111.3   | 129.2   | 117.1   | 117.5   | 102.6  | 117.9   | 115.8   |
| C19ORF40  | 125.7   | 122.4   | 123.7   | 120.2   | 114     | 110.7  | 136.7   | 121.9   |
| C19ORF48  | 133.1   | 138.4   | 125.7   | 150.1   | 125.1   | 104    | 143.6   | 130.7   |
| C19ORF55  | 115.4   | 113.5   | 120.7   | 122     | 105.5   | 97.2   | 119.4   | 113.2   |
| C19ORF6   | 160.2   | 182.3   | 151.5   | 163.8   | 151.4   | 134.7  | 144.2   | 140     |
| C19ORF6   | 380.6   | 387.4   | 345.4   | 400.2   | 264     | 290.4  | 335.1   | 367.7   |
| C19ORF7   | 460.6   | 591.1   | 436     | 628.9   | 511.6   | 476.9  | 740.3   | 760.1   |
| C1D       | 109     | 118.3   | 131.2   | 133.1   | 108.2   | 108.1  | 131     | 132.8   |
| C1D       | 114.8   | 108.9   | 112.6   | 114.8   | 106.3   | 95.8   | 117.7   | 104.6   |
| C1GALT1   | 197.6   | 225     | 196.6   | 229     | 229.7   | 128.6  | 264.4   | 298.9   |
| C1GALT1C1 | 116.9   | 107.9   | 122.2   | 120.5   | 106.6   | 95.1   | 121.8   | 113.1   |
| C1GALT1C1 | 154.7   | 143.2   | 159.3   | 151.6   | 146.7   | 120.8  | 162.3   | 143.3   |
| C1ORF100  | 117.9   | 113.6   | 114     | 120.5   | 106.8   | 104.5  | 119.1   | 112.9   |
| C1ORF101  | 127.9   | 130.3   | 126     | 130.6   | 125.6   | 111.3  | 136.1   | 145.5   |
| C1ORF102  | 113.1   | 114.4   | 121.7   | 123.7   | 111     | 101.5  | 128     | 127.9   |
| C1ORF102  | 118.2   | 120.6   | 134.4   | 123.9   | 110.8   | 100.6  | 125.3   | 120.5   |
| C1ORF102  | 108     | 112.1   | 116.4   | 127.8   | 106.2   | 99.5   | 130.4   | 118.2   |
| C1ORF103  | 111.5   | 116.8   | 118.5   | 108     | 102.5   | 102.4  | 121.4   | 111.7   |
| C1ORF103  | 138.4   | 122.6   | 128.9   | 141.9   | 159     | 108    | 151.2   | 165.8   |
| C1ORF104  | 123.3   | 131.2   | 115     | 133.3   | 116.9   | 100.9  | 126.1   | 127.7   |
| C1ORF105  | 106     | 117.1   | 115.6   | 121.2   | 108.7   | 94.4   | 119.3   | 108.2   |
| C1ORF106  | 110.2   | 119.5   | 127     | 112.1   | 115.1   | 104.3  | 113.2   | 114.2   |
| C1ORF107  | 187.4   | 192.7   | 164.5   | 189.2   | 183.5   | 108.7  | 183.9   | 194.6   |
| C1ORF108  | 593.9   | 600.9   | 465.1   | 640.1   | 452.1   | 312.4  | 685.3   | 660.9   |
| C1ORF108  | 122.2   | 119.3   | 133.5   | 137.3   | 120.3   | 108.1  | 125     | 120     |
| C1ORF108  | 271.5   | 309.5   | 322.8   | 304.6   | 307.6   | 214.7  | 302.3   | 356.2   |
| C1ORF109  | 238.5   | 224     | 228.5   | 233.5   | 218.2   | 186.2  | 220.1   | 213.6   |
| C1ORF110  | 122.3   | 114.9   | 114.4   | 120.9   | 107.5   | 100.7  | 122.1   | 119.9   |
| C1ORF111  | 113.6   | 114.6   | 121.3   | 118.6   | 101.6   | 94.1   | 123.3   | 112.5   |
| C1ORF112  | 143.4   | 139.4   | 145.8   | 147.5   | 128     | 122.8  | 133.5   | 126     |

|          |        |        |        |        |        |        |        |        |
|----------|--------|--------|--------|--------|--------|--------|--------|--------|
| C1ORF113 | 119.4  | 123.1  | 138.6  | 142    | 107.4  | 105.8  | 127    | 117.2  |
| C1ORF114 | 108.7  | 116.9  | 127.4  | 123.9  | 104.6  | 99     | 119.5  | 121    |
| C1ORF115 | 123.1  | 140.9  | 124.7  | 131.6  | 138.5  | 108.4  | 120.3  | 119.4  |
| C1ORF116 | 114    | 122.1  | 120.2  | 118.3  | 105    | 108.9  | 112.8  | 114    |
| C1ORF117 | 111.7  | 114.3  | 104.4  | 116.1  | 112.5  | 95     | 117.1  | 102    |
| C1ORF118 | 116.2  | 119.7  | 119.3  | 115.5  | 119.1  | 99.7   | 114.3  | 123.4  |
| C1ORF119 | 353.3  | 376.3  | 418.9  | 370.3  | 336    | 308.3  | 394.5  | 416.2  |
| C1ORF121 | 185.8  | 216.1  | 214.8  | 235.5  | 209    | 161.3  | 201.8  | 230.1  |
| C1ORF122 | 265.1  | 239.7  | 218.8  | 230.3  | 160.4  | 193.6  | 215.1  | 183.4  |
| C1ORF123 | 483.1  | 418.5  | 497.9  | 393.5  | 318.3  | 317.1  | 293.1  | 273.4  |
| C1ORF124 | 160.5  | 181.6  | 151.8  | 176.6  | 164.1  | 132    | 153.5  | 151    |
| C1ORF124 | 119    | 123.4  | 125.2  | 136.1  | 119.7  | 108.1  | 124.7  | 119    |
| C1ORF124 | 114.6  | 127    | 115.8  | 119    | 109.2  | 105.1  | 114.9  | 110.8  |
| C1ORF125 | 126.5  | 115.8  | 113.6  | 122.3  | 118.4  | 101.8  | 110.2  | 125.4  |
| C1ORF125 | 116.4  | 118.1  | 115.7  | 117.2  | 105    | 96.4   | 110.8  | 111.8  |
| C1ORF127 | 131.5  | 119.8  | 144.9  | 130    | 110.1  | 105.4  | 129.2  | 133.2  |
| C1ORF128 | 1189.3 | 1164.5 | 1212.8 | 1323.6 | 1190.5 | 1022.3 | 1605.8 | 1583.2 |
| C1ORF129 | 110.6  | 113.4  | 123.3  | 122.2  | 106.3  | 94.2   | 109.5  | 113.4  |
| C1ORF131 | 411.5  | 393.4  | 607.3  | 437    | 371.4  | 463.9  | 400.7  | 297.2  |
| C1ORF135 | 108.5  | 111    | 113.3  | 115.9  | 105.1  | 98.3   | 119.1  | 121.3  |
| C1ORF14  | 119.6  | 107.1  | 115.5  | 111.8  | 101.4  | 99.6   | 114.6  | 109.7  |
| C1ORF140 | 112.1  | 121.2  | 118.5  | 124.4  | 106.6  | 102.2  | 112    | 117.2  |
| C1ORF141 | 108.4  | 114.7  | 110.6  | 115.5  | 103.3  | 101.7  | 123.3  | 107.4  |
| C1ORF142 | 149.7  | 140.6  | 134.5  | 160.4  | 121.3  | 116.8  | 125.9  | 159.4  |
| C1ORF144 | 355.5  | 414.7  | 476.4  | 413.9  | 356.5  | 328.1  | 442.9  | 365.7  |
| C1ORF146 | 112.4  | 115.1  | 116    | 116.1  | 106.3  | 93.4   | 108.1  | 110.1  |
| C1ORF149 | 175.4  | 222.5  | 178.4  | 183.1  | 175.1  | 144.8  | 173.5  | 168    |
| C1ORF150 | 118.4  | 120.4  | 123.2  | 128.1  | 126.1  | 102.6  | 125.1  | 122.8  |
| C1ORF151 | 110.4  | 115    | 113.8  | 121.2  | 112.2  | 98.2   | 123    | 116.8  |
| C1ORF152 | 123    | 122.3  | 116    | 123.2  | 99.3   | 103    | 125.4  | 106.4  |
| C1ORF155 | 179.8  | 190.3  | 161.4  | 201.4  | 174.7  | 138.2  | 199.2  | 215.8  |
| C1ORF156 | 116.2  | 127.9  | 123.7  | 140.7  | 114.2  | 105.8  | 122.9  | 119.5  |
| C1ORF157 | 120.5  | 114.2  | 127.4  | 126.4  | 108    | 99.2   | 115.2  | 118.3  |
| C1ORF158 | 116.9  | 110.6  | 128.3  | 122.1  | 110    | 113    | 125.6  | 112    |
| C1ORF159 | 146.2  | 148.3  | 151.1  | 146.8  | 122.1  | 128.5  | 158.4  | 144.6  |
| C1ORF160 | 157.5  | 174.2  | 210.5  | 201.2  | 176.1  | 164.8  | 164.3  | 201.1  |
| C1ORF162 | 1004.9 | 1117.1 | 2980.3 | 927.6  | 810.9  | 956.8  | 519.7  | 639.3  |
| C1ORF163 | 135.2  | 144.7  | 121.8  | 125.4  | 109.9  | 109.1  | 133.3  | 134.6  |
| C1ORF164 | 422.8  | 471.8  | 435    | 457.8  | 377    | 327.7  | 415.9  | 406.6  |
| C1ORF165 | 127.4  | 128.4  | 128    | 129.6  | 122.5  | 102.5  | 136.7  | 132.3  |
| C1ORF166 | 162.4  | 155.6  | 149.3  | 162.7  | 146.1  | 134.4  | 155.8  | 172.2  |
| C1ORF168 | 116    | 120.3  | 113.1  | 109.9  | 109.4  | 95     | 122.8  | 117.5  |
| C1ORF171 | 179.8  | 152.6  | 166.7  | 164.7  | 161.2  | 127.2  | 144.6  | 168    |
| C1ORF172 | 117.9  | 127.7  | 119.7  | 121.2  | 115    | 100.6  | 113.8  | 107.1  |
| C1ORF173 | 114.9  | 114.3  | 112.7  | 113.2  | 111.9  | 97.8   | 121.7  | 115.4  |
| C1ORF175 | 125.5  | 109.7  | 136.7  | 122    | 103.7  | 98.6   | 120.1  | 121.4  |
| C1ORF176 | 650.8  | 577.3  | 617.4  | 451.7  | 581.2  | 357    | 660.2  | 561.8  |
| C1ORF177 | 121.4  | 114.2  | 114.4  | 118.1  | 113.4  | 100.5  | 118.2  | 123.3  |
| C1ORF178 | 116    | 111.2  | 117.4  | 118.7  | 109.3  | 99.6   | 124.7  | 107.9  |
| C1ORF178 | 120.4  | 110.8  | 120    | 118.8  | 109.3  | 94.1   | 111.5  | 121.3  |
| C1ORF179 | 115.4  | 123.4  | 117.7  | 116.2  | 108    | 99.4   | 113.7  | 116.5  |

|          |       |       |        |       |       |       |       |       |
|----------|-------|-------|--------|-------|-------|-------|-------|-------|
| C1ORF181 | 293.4 | 389.5 | 347    | 380.2 | 297.3 | 212.9 | 284.1 | 322.7 |
| C1ORF182 | 109.8 | 114   | 112.3  | 110.6 | 109.4 | 104   | 123.1 | 115.1 |
| C1ORF183 | 117.2 | 116.1 | 121.4  | 113.6 | 110.9 | 98.2  | 125.3 | 116.7 |
| C1ORF183 | 112.8 | 114.8 | 125.9  | 121.5 | 111.8 | 103.5 | 116   | 116.7 |
| C1ORF183 | 113.5 | 108.4 | 122.4  | 125.1 | 111   | 101.3 | 135.2 | 121.3 |
| C1ORF186 | 115.4 | 118.9 | 119    | 117.1 | 102.2 | 98.1  | 126.4 | 111   |
| C1ORF187 | 120.8 | 119.1 | 125.1  | 119.4 | 109.4 | 107.5 | 112.4 | 113.4 |
| C1ORF188 | 117.4 | 111.2 | 117.6  | 114.5 | 109.4 | 97    | 114.2 | 110.5 |
| C1ORF189 | 123.6 | 114.2 | 113.3  | 116   | 108.2 | 98.8  | 118   | 116.3 |
| C1ORF19  | 382.1 | 424.7 | 481.5  | 400.9 | 397.7 | 317.2 | 335.8 | 380.3 |
| C1ORF190 | 117.3 | 122.9 | 116.7  | 115.9 | 103.2 | 104.2 | 120.3 | 117.1 |
| C1ORF192 | 119.1 | 115.8 | 119.7  | 125.2 | 119.4 | 112   | 129.3 | 126.8 |
| C1ORF198 | 128.5 | 140.3 | 131    | 150.8 | 134.7 | 113.4 | 151.5 | 161.1 |
| C1ORF2   | 262.8 | 352.2 | 207.1  | 276.6 | 232.3 | 171.5 | 223.5 | 207.4 |
| C1ORF2   | 111.5 | 113.9 | 111    | 119.6 | 103.4 | 101.7 | 123.7 | 110.8 |
| C1ORF2   | 112.9 | 135.6 | 118.4  | 123   | 108   | 92.8  | 117.9 | 119.1 |
| C1ORF201 | 116.4 | 121.8 | 120.6  | 114   | 108.6 | 109.5 | 128.3 | 126.9 |
| C1ORF21  | 157.2 | 150.1 | 171.3  | 177.5 | 152.1 | 154.7 | 202.1 | 177.2 |
| C1ORF210 | 115.4 | 106.8 | 122.3  | 118   | 108.7 | 93.5  | 118   | 113.1 |
| C1ORF24  | 388.1 | 433.5 | 342.3  | 370.3 | 330.1 | 201.3 | 315.7 | 322.9 |
| C1ORF25  | 120.9 | 126.4 | 123.7  | 123.5 | 115.7 | 118.5 | 125.1 | 123.7 |
| C1ORF26  | 142.2 | 125.7 | 129.5  | 135.4 | 128.8 | 121.6 | 132.4 | 128.1 |
| C1ORF27  | 127   | 118.5 | 120.1  | 120.8 | 114.8 | 98.3  | 129.7 | 116.3 |
| C1ORF31  | 189.6 | 148   | 157.7  | 186.7 | 134.2 | 145.5 | 156.2 | 149.4 |
| C1ORF32  | 100.1 | 112   | 112    | 117.1 | 115.4 | 101.3 | 122.4 | 115.3 |
| C1ORF33  | 157.5 | 168.9 | 152.2  | 153.9 | 162.4 | 126.3 | 155.2 | 144.3 |
| C1ORF34  | 122.7 | 115.4 | 116.1  | 112.7 | 109.4 | 99.5  | 115.5 | 116.7 |
| C1ORF35  | 229   | 262.8 | 213.4  | 246.1 | 225.8 | 187.4 | 249.3 | 244.8 |
| C1ORF36  | 121.7 | 122.9 | 130.9  | 127.1 | 113.2 | 104.1 | 125.2 | 132.8 |
| C1ORF37  | 813.8 | 967.8 | 1043   | 976.4 | 720.7 | 692.5 | 893.6 | 856.3 |
| C1ORF38  | 128.1 | 139   | 125.7  | 134.7 | 116.9 | 104.6 | 134.7 | 132.7 |
| C1ORF41  | 306.1 | 358.3 | 414.1  | 352.2 | 297.9 | 340.2 | 286.4 | 399.1 |
| C1ORF42  | 117.6 | 113.7 | 112    | 118.7 | 111.5 | 98.2  | 118.6 | 108.1 |
| C1ORF43  | 253.6 | 304.7 | 355.4  | 333.7 | 293   | 297.8 | 446   | 368.3 |
| C1ORF43  | 135.6 | 150   | 169.2  | 169.9 | 134.4 | 141.3 | 146   | 164.2 |
| C1ORF45  | 114.8 | 112.4 | 109.2  | 113.8 | 97.3  | 89.8  | 122.6 | 110.9 |
| C1ORF48  | 862.9 | 925   | 1179.4 | 853.4 | 844.2 | 731   | 704.9 | 681.6 |
| C1ORF49  | 117   | 118.8 | 124.4  | 117.6 | 118.3 | 97.8  | 130.5 | 114   |
| C1ORF50  | 389.2 | 429   | 397.7  | 397.9 | 277.1 | 282.6 | 346.9 | 340.3 |
| C1ORF51  | 111.5 | 106.5 | 117.1  | 114.5 | 108.6 | 98.5  | 119.6 | 122.5 |
| C1ORF52  | 660.6 | 705.1 | 608.9  | 689.8 | 646.8 | 417.3 | 693.1 | 693.6 |
| C1ORF53  | 124.3 | 119.7 | 132    | 119.5 | 116.4 | 105.1 | 118.9 | 121.1 |
| C1ORF54  | 216.6 | 225.8 | 352.1  | 228.5 | 205.8 | 197.3 | 218.6 | 278.8 |
| C1ORF55  | 268.2 | 292   | 277    | 310.2 | 297.9 | 226.7 | 345.6 | 438.1 |
| C1ORF56  | 159.3 | 152.4 | 147    | 152   | 179.8 | 118.7 | 160.3 | 176   |
| C1ORF57  | 162.2 | 197.3 | 242.1  | 168.6 | 186.5 | 156.4 | 162.1 | 151.1 |
| C1ORF58  | 99.5  | 111.6 | 121.9  | 112.4 | 113.5 | 101.5 | 113.1 | 115.1 |
| C1ORF59  | 692.2 | 795.9 | 776.5  | 707.8 | 597.7 | 581.1 | 617.9 | 656.2 |
| C1ORF60  | 235.2 | 247.4 | 202.2  | 268.2 | 250.1 | 216.1 | 265.3 | 219.6 |
| C1ORF61  | 108.5 | 115.9 | 117.7  | 122.3 | 107.4 | 97.9  | 108.7 | 110.7 |
| C1ORF62  | 112   | 115.7 | 125.9  | 117   | 106.7 | 103.8 | 117.5 | 111.8 |

|         |        |       |       |        |        |       |        |       |
|---------|--------|-------|-------|--------|--------|-------|--------|-------|
| C1ORF63 | 214    | 192.1 | 210.9 | 186.7  | 170.3  | 242   | 193.8  | 194.5 |
| C1ORF64 | 103    | 115.8 | 112.8 | 116.2  | 100.1  | 97.8  | 119    | 114.6 |
| C1ORF65 | 117.2  | 115.5 | 121.2 | 110.2  | 103.9  | 93.6  | 119.5  | 111.2 |
| C1ORF66 | 265.5  | 266.8 | 248.6 | 247.4  | 219.5  | 218.6 | 271.6  | 247.9 |
| C1ORF69 | 141.4  | 154.3 | 134.9 | 162.3  | 138.3  | 136.9 | 155.8  | 148   |
| C1ORF71 | 1251.7 | 1511  | 941.4 | 1438.7 | 1233.1 | 600.4 | 2204.4 | 2142  |
| C1ORF73 | 131.7  | 130.5 | 137   | 138.6  | 127.1  | 104.3 | 131.6  | 129.9 |
| C1ORF74 | 133.7  | 131.4 | 136.8 | 137.1  | 127.6  | 124.6 | 135.8  | 132.8 |
| C1ORF75 | 116.1  | 122.4 | 118.1 | 124.5  | 114.7  | 105.2 | 117.3  | 109.5 |
| C1ORF76 | 133.6  | 132.1 | 134.5 | 133.9  | 116.9  | 110.6 | 126.9  | 131.2 |
| C1ORF77 | 284.2  | 383.1 | 315.1 | 417.3  | 312.5  | 278.2 | 412.8  | 489   |
| C1ORF78 | 147.3  | 143.1 | 143.7 | 176.4  | 135.1  | 132.3 | 187.7  | 148.6 |
| C1ORF82 | 251.8  | 255.2 | 269.2 | 289.3  | 276.7  | 168.6 | 305.7  | 316.1 |
| C1ORF83 | 141.8  | 143.2 | 175.6 | 149.1  | 128.2  | 135.1 | 148.2  | 148.4 |
| C1ORF84 | 122.2  | 113.8 | 113.4 | 123.7  | 114.3  | 111.9 | 124.8  | 117.4 |
| C1ORF84 | 116.2  | 119.6 | 122.3 | 122.8  | 107.3  | 102.4 | 114.8  | 127.8 |
| C1ORF84 | 130.2  | 133.3 | 121.8 | 125.6  | 116.7  | 107.6 | 125.8  | 120.8 |
| C1ORF85 | 372.2  | 246.9 | 372.6 | 325.8  | 202.4  | 192.2 | 241.6  | 219.1 |
| C1ORF86 | 229.1  | 256.3 | 276.5 | 197.9  | 163    | 215.1 | 202.7  | 196.4 |
| C1ORF87 | 110    | 113.6 | 121.4 | 120.1  | 118.3  | 105.5 | 121.9  | 117.1 |
| C1ORF88 | 131.3  | 125.3 | 134   | 144.2  | 115.1  | 116.1 | 133.3  | 125.7 |
| C1ORF89 | 121.1  | 126   | 136.8 | 132.8  | 114.7  | 107   | 123.4  | 118.5 |
| C1ORF9  | 112.2  | 109.4 | 110.3 | 109.2  | 105.3  | 93.3  | 111.1  | 109.2 |
| C1ORF9  | 106.5  | 114.4 | 116.1 | 119.9  | 102.6  | 98.5  | 121.5  | 108.7 |
| C1ORF9  | 126.7  | 122.1 | 130.9 | 132.1  | 116    | 111.3 | 128.4  | 143.6 |
| C1ORF90 | 127.3  | 121.6 | 124.5 | 132.8  | 115.9  | 116.3 | 120.6  | 120.5 |
| C1ORF91 | 107.5  | 104   | 110.7 | 122.4  | 100.5  | 102.5 | 121.7  | 112.6 |
| C1ORF92 | 107.1  | 118.3 | 114.7 | 125.6  | 105.2  | 98.5  | 138.5  | 113   |
| C1ORF94 | 113.1  | 119.7 | 115.9 | 125    | 112.2  | 109.1 | 111.5  | 112.6 |
| C1ORF95 | 114    | 123.2 | 109.5 | 119    | 111.4  | 108   | 113.6  | 109.4 |
| C1ORF96 | 124.5  | 123.7 | 112.9 | 106.9  | 107    | 102.9 | 122.9  | 113   |
| C1ORF97 | 136.1  | 117   | 162.7 | 127.9  | 121.8  | 118   | 138.8  | 136.6 |
| C1ORF99 | 121.7  | 115.4 | 116.8 | 113.9  | 105.9  | 106   | 114    | 114.1 |
| C1QA    | 118.2  | 112.3 | 116   | 125.4  | 108.4  | 101.5 | 108    | 115.7 |
| C1QB    | 122.5  | 123.1 | 144.2 | 131.3  | 107    | 103.9 | 143.7  | 123.7 |
| C1QBP   | 723.1  | 971.9 | 731.2 | 923.2  | 702.1  | 497.2 | 788    | 740.7 |
| C1QC    | 113.8  | 110.1 | 154.2 | 115.7  | 109.8  | 111.5 | 119.6  | 112.7 |
| C1QDC1  | 189.7  | 177.5 | 186.7 | 203.2  | 173.4  | 168.2 | 189    | 163.7 |
| C1QDC1  | 179.2  | 169.5 | 224.6 | 210.8  | 195.3  | 168.7 | 179.1  | 176   |
| C1QDC2  | 114.3  | 123.8 | 121.5 | 119.7  | 111.6  | 103.1 | 126.7  | 120.5 |
| C1QL1   | 115    | 116.3 | 117.3 | 116.7  | 114.3  | 102.3 | 119.8  | 108.8 |
| C1QL2   | 121.6  | 115.7 | 116.9 | 117.1  | 108.5  | 93.3  | 114.2  | 116.1 |
| C1QL3   | 116.7  | 120.6 | 119.1 | 132.1  | 112    | 101.5 | 117.6  | 119.5 |
| C1QL4   | 115.7  | 106.4 | 112.3 | 118.7  | 111.8  | 96.4  | 111.8  | 114.5 |
| C1QR1   | 127.9  | 128.7 | 184.7 | 125.5  | 116.8  | 104.1 | 126.4  | 118.3 |
| C1QTNF1 | 129    | 125   | 132.2 | 131.7  | 114.9  | 110.4 | 129.2  | 121.1 |
| C1QTNF1 | 110.5  | 113.6 | 116.9 | 112    | 106.1  | 99.2  | 109.8  | 113.5 |
| C1QTNF1 | 120.6  | 116.4 | 115.8 | 113.5  | 108.3  | 92.4  | 125.5  | 118.8 |
| C1QTNF2 | 116.9  | 118.4 | 123.3 | 110.9  | 109.1  | 107   | 125    | 119.6 |
| C1QTNF3 | 112.6  | 116.5 | 117.9 | 118.5  | 108.7  | 97.9  | 117.1  | 108.8 |
| C1QTNF3 | 109.5  | 119.7 | 113.2 | 119.9  | 108.7  | 102.7 | 113.4  | 113   |

|          |       |       |       |        |       |       |        |        |
|----------|-------|-------|-------|--------|-------|-------|--------|--------|
| C1QTNF4  | 117.4 | 117.1 | 116.2 | 120.3  | 109.6 | 97.8  | 115.8  | 114.7  |
| C1QTNF5  | 113.2 | 119.3 | 132.4 | 126.7  | 121.4 | 105.3 | 117.1  | 117.8  |
| C1QTNF6  | 115.9 | 122.3 | 119.4 | 121.2  | 109.2 | 95.6  | 116.6  | 117.6  |
| C1QTNF6  | 132.3 | 140.9 | 194.5 | 155.7  | 135.2 | 142.3 | 133.4  | 136.6  |
| C1QTNF6  | 108.4 | 105   | 119   | 114.7  | 108.3 | 91    | 124.5  | 113.1  |
| C1QTNF7  | 120.4 | 119.1 | 114.5 | 117.1  | 106.9 | 100   | 112    | 113.2  |
| C1QTNF8  | 121.1 | 110.9 | 122.2 | 124.6  | 111.9 | 107.4 | 116.5  | 125.1  |
| C1R      | 117.8 | 120.2 | 118.8 | 125.2  | 103.9 | 107.2 | 116.5  | 120.8  |
| C1RL     | 126.2 | 140.3 | 138.2 | 132.2  | 135.3 | 122.6 | 117.9  | 117.8  |
| C1S      | 111.5 | 116.9 | 114.6 | 113.7  | 105.2 | 105.8 | 109.3  | 117.9  |
| C1S      | 119.4 | 110.2 | 120.1 | 119.7  | 105.4 | 100.7 | 124    | 118.2  |
| C2       | 121.3 | 116.5 | 126.9 | 122.3  | 120.7 | 103.1 | 123.3  | 117.4  |
| C20ORF10 | 115.5 | 112.6 | 115   | 113.8  | 106.6 | 97.7  | 111.1  | 113    |
| C20ORF10 | 152   | 180.1 | 181.5 | 181.8  | 155.6 | 169.2 | 213.9  | 227.2  |
| C20ORF10 | 111.8 | 113.7 | 114.8 | 114.3  | 105.8 | 95.9  | 121.4  | 104.2  |
| C20ORF10 | 113.7 | 113.1 | 108   | 114.5  | 105.1 | 107   | 113.1  | 117.2  |
| C20ORF10 | 114.9 | 124.5 | 120.8 | 129.4  | 120.3 | 105.5 | 124.3  | 141.9  |
| C20ORF10 | 136.3 | 141.4 | 143.8 | 137.1  | 124.1 | 106.4 | 156.9  | 157.5  |
| C20ORF10 | 164.6 | 195.9 | 203.6 | 184.3  | 148.3 | 179.6 | 152.6  | 139.1  |
| C20ORF11 | 802.3 | 967.2 | 727   | 1000.1 | 810.5 | 671.7 | 1011.3 | 1085.6 |
| C20ORF11 | 493.2 | 590.6 | 566.5 | 627.9  | 499.8 | 679.6 | 981.9  | 1444   |
| C20ORF11 | 107.1 | 112.7 | 129.2 | 128.7  | 115.9 | 104.9 | 123.2  | 113.9  |
| C20ORF11 | 112.3 | 108.9 | 126   | 119.8  | 111.4 | 107.6 | 120    | 117.7  |
| C20ORF11 | 375.7 | 399.2 | 389.7 | 363.4  | 277.3 | 285.7 | 446    | 370.4  |
| C20ORF11 | 128.1 | 131.4 | 136.7 | 151.3  | 118   | 122.2 | 180.6  | 177.2  |
| C20ORF11 | 106.5 | 113   | 118.9 | 122.2  | 106.7 | 105.6 | 113.8  | 114.5  |
| C20ORF11 | 112.8 | 113.1 | 138   | 118.7  | 107.9 | 101.2 | 120.4  | 126.1  |
| C20ORF12 | 125.5 | 121.8 | 125.9 | 122.3  | 114.6 | 95    | 115.8  | 118.7  |
| C20ORF12 | 324.7 | 389.8 | 263.8 | 333.3  | 313.5 | 243   | 337.8  | 265.1  |
| C20ORF12 | 167.1 | 185.4 | 169.1 | 205.2  | 184.1 | 132.9 | 189.6  | 178.9  |
| C20ORF12 | 114.9 | 111.5 | 129.8 | 120.7  | 109.7 | 103.4 | 112.3  | 124    |
| C20ORF12 | 115.9 | 112.5 | 127.1 | 129    | 115.9 | 98.8  | 122.4  | 135.7  |
| C20ORF13 | 118.6 | 118.3 | 115   | 117.7  | 114.9 | 98.7  | 114.8  | 113.4  |
| C20ORF13 | 114.1 | 119.8 | 119.7 | 123.9  | 107.7 | 102.4 | 126.9  | 120.2  |
| C20ORF13 | 108.7 | 110.2 | 117.9 | 109.7  | 102   | 98.2  | 117.8  | 115.1  |
| C20ORF13 | 121.8 | 127.1 | 126.6 | 111.7  | 111.1 | 105.2 | 114    | 114.6  |
| C20ORF13 | 110   | 117.1 | 122.8 | 114.2  | 108.9 | 99.9  | 119.4  | 120.7  |
| C20ORF13 | 120.8 | 129.8 | 125.4 | 142.1  | 116.6 | 107.3 | 129.6  | 120.1  |
| C20ORF13 | 116.1 | 121.3 | 111.7 | 115.5  | 107.3 | 101.1 | 122.1  | 124.4  |
| C20ORF14 | 124.7 | 116.8 | 145.8 | 130.6  | 114.6 | 114.1 | 127.9  | 115.7  |
| C20ORF14 | 109.6 | 110.1 | 111.2 | 119.1  | 102.8 | 99.3  | 115.5  | 111.8  |
| C20ORF14 | 110.9 | 120.1 | 118.1 | 128.7  | 110.3 | 104.1 | 119.7  | 110.7  |
| C20ORF14 | 106.5 | 107.2 | 122.4 | 117    | 106.9 | 89.4  | 119.1  | 114.7  |
| C20ORF14 | 144   | 137   | 137.1 | 149.5  | 134.8 | 120.9 | 140    | 139.8  |
| C20ORF15 | 116.9 | 124.7 | 136.3 | 124.3  | 105.7 | 109.1 | 117.9  | 119.5  |
| C20ORF15 | 116.8 | 115.2 | 120.9 | 127.8  | 102.1 | 107.6 | 118.7  | 109.8  |
| C20ORF15 | 376.3 | 422.1 | 453.9 | 381.8  | 361.5 | 274.1 | 370.6  | 363.2  |
| C20ORF16 | 116.7 | 121.6 | 118   | 124.9  | 110   | 101.6 | 120    | 118    |
| C20ORF16 | 118   | 104.5 | 118   | 118.4  | 112.4 | 109.7 | 122.7  | 113.6  |
| C20ORF16 | 117.3 | 128.7 | 129.3 | 120.3  | 121.7 | 102.1 | 115.9  | 123.7  |
| C20ORF16 | 101.9 | 109.3 | 120.9 | 117.2  | 106.8 | 99.8  | 107.6  | 111.5  |



|          |        |        |        |        |        |        |        |        |
|----------|--------|--------|--------|--------|--------|--------|--------|--------|
| C20ORF16 | 112    | 124.4  | 111.6  | 109.8  | 106.9  | 104.5  | 116.7  | 115.4  |
| C20ORF17 | 135.4  | 141.6  | 160.3  | 141.7  | 134.7  | 119.5  | 146.6  | 142.1  |
| C20ORF17 | 156.3  | 145.2  | 111.9  | 136.3  | 130.9  | 107.1  | 151.2  | 135.5  |
| C20ORF17 | 334.1  | 353.8  | 240.7  | 425.1  | 280.8  | 194.2  | 279.5  | 302.7  |
| C20ORF17 | 623.6  | 704.9  | 851.4  | 649.5  | 647.5  | 501.5  | 390.9  | 348.4  |
| C20ORF17 | 116.6  | 115.2  | 113.3  | 112.4  | 104.9  | 96     | 112.8  | 119    |
| C20ORF17 | 108.2  | 114.1  | 111.3  | 124.2  | 113.7  | 95.9   | 114.8  | 106.5  |
| C20ORF18 | 128.2  | 116.7  | 123    | 123.9  | 112.2  | 103.2  | 119.5  | 121.6  |
| C20ORF18 | 109.2  | 106.5  | 109.4  | 120.1  | 109.7  | 96.3   | 107.5  | 114.4  |
| C20ORF19 | 122.5  | 120.9  | 131.8  | 141.2  | 118.1  | 102    | 129.6  | 139.1  |
| C20ORF19 | 172.9  | 203.2  | 174.9  | 221.7  | 204.8  | 148.2  | 206    | 220.6  |
| C20ORF19 | 113.2  | 125.7  | 122.7  | 126    | 115.5  | 104.7  | 132.9  | 120.1  |
| C20ORF20 | 948.1  | 1090.8 | 690.4  | 996.2  | 786    | 535.5  | 956.1  | 845.4  |
| C20ORF22 | 126.8  | 123.3  | 164.6  | 135.5  | 120.2  | 129.6  | 146.6  | 140.5  |
| C20ORF23 | 132.1  | 139.1  | 136    | 123.2  | 139.8  | 123.9  | 133.2  | 141.1  |
| C20ORF24 | 2728.4 | 2880.2 | 2817.1 | 3600.2 | 2451.8 | 2515.7 | 4706   | 3380.9 |
| C20ORF24 | 3584.6 | 3025.1 | 3473.7 | 4759.9 | 2974.5 | 3689.5 | 5177.2 | 4183.1 |
| C20ORF24 | 930.2  | 717.2  | 908.8  | 1229.6 | 691.9  | 928.2  | 1299   | 1160.8 |
| C20ORF26 | 116.7  | 120    | 110.5  | 120.9  | 114.7  | 103.5  | 126.8  | 115.8  |
| C20ORF27 | 194.2  | 200.5  | 244.7  | 204.6  | 164.8  | 146.9  | 161.8  | 150.4  |
| C20ORF28 | 121.6  | 120.5  | 134.1  | 138.8  | 117.4  | 106.2  | 119.1  | 122.3  |
| C20ORF29 | 161.9  | 173.4  | 146.1  | 164.5  | 142    | 136.8  | 132.5  | 139.9  |
| C20ORF3  | 394.2  | 409    | 506.5  | 379.5  | 304.9  | 368.5  | 377.8  | 346.5  |
| C20ORF30 | 853.5  | 689.6  | 997    | 733.2  | 702    | 715.8  | 739.8  | 693.8  |
| C20ORF30 | 1103.9 | 1375.8 | 1282.2 | 1175.5 | 1026.4 | 1424.5 | 1170.3 | 1065.5 |
| C20ORF31 | 166    | 169.7  | 192.2  | 170.2  | 160    | 151.9  | 177.5  | 166.7  |
| C20ORF32 | 122.2  | 119.4  | 116.5  | 112.5  | 105.1  | 97.3   | 116.5  | 107.7  |
| C20ORF35 | 250.1  | 287.1  | 319.5  | 295.1  | 216.5  | 266.9  | 262.8  | 248.4  |
| C20ORF39 | 110.5  | 121.3  | 115.5  | 115.4  | 104.8  | 102.2  | 125.6  | 111.9  |
| C20ORF4  | 353.9  | 402.6  | 355.5  | 387.3  | 297.2  | 332.6  | 397.6  | 329.3  |
| C20ORF42 | 108.4  | 113.6  | 110.9  | 113.2  | 104.7  | 90.9   | 110.2  | 119.4  |
| C20ORF43 | 1330.9 | 1417.1 | 1379.4 | 1529.2 | 1078   | 1294.6 | 1309.5 | 886    |
| C20ORF44 | 144.4  | 159.7  | 152.6  | 164.6  | 134.4  | 134    | 155.3  | 158.1  |
| C20ORF44 | 131.2  | 123    | 132.7  | 135.6  | 126.2  | 104.7  | 126.3  | 127.1  |
| C20ORF44 | 308.8  | 354.4  | 312.1  | 279.4  | 280.8  | 204.2  | 277    | 336.6  |
| C20ORF45 | 255.9  | 275.7  | 239.4  | 293.7  | 298.8  | 199.3  | 306.1  | 291    |
| C20ORF46 | 120.5  | 110.5  | 130    | 116.5  | 119.1  | 106.8  | 121.1  | 116.8  |
| C20ORF52 | 824.8  | 856.3  | 1202.7 | 877.9  | 878.6  | 921.5  | 715.4  | 859.1  |
| C20ORF54 | 111.9  | 114.2  | 118.9  | 113.5  | 105.7  | 103.8  | 122.3  | 106.5  |
| C20ORF55 | 214.4  | 231    | 166    | 195.7  | 146    | 186.3  | 227.4  | 159.5  |
| C20ORF55 | 126.6  | 111.2  | 121.4  | 118.5  | 110.9  | 105.4  | 116.1  | 118    |
| C20ORF55 | 366.5  | 369.7  | 274.3  | 386.3  | 280.5  | 281.4  | 406.5  | 242.2  |
| C20ORF58 | 105.9  | 111.3  | 114    | 117.1  | 110.6  | 101.4  | 118.2  | 116.3  |
| C20ORF59 | 117.2  | 119.6  | 125.6  | 129.1  | 110.5  | 107.5  | 121.3  | 119.2  |
| C20ORF6  | 109.6  | 119.3  | 114    | 116.1  | 103.4  | 96.8   | 116.1  | 109.6  |
| C20ORF67 | 145.7  | 169.4  | 138.2  | 170.8  | 137.5  | 121.9  | 156.9  | 168.7  |
| C20ORF7  | 121.6  | 120.2  | 124.4  | 126    | 122.5  | 88.5   | 120.8  | 124    |
| C20ORF7  | 208.3  | 202.3  | 266.7  | 236.1  | 186.7  | 189.9  | 225    | 241.7  |
| C20ORF7  | 143.5  | 135.7  | 156.9  | 150.8  | 147.6  | 132.3  | 157.1  | 142.5  |
| C20ORF70 | 116.2  | 119.2  | 117.9  | 117    | 119.9  | 97.8   | 114.8  | 117.3  |
| C20ORF71 | 120.6  | 115.6  | 114.5  | 122.3  | 104.8  | 95.6   | 117.2  | 127.4  |

|           |        |        |        |       |       |        |        |       |
|-----------|--------|--------|--------|-------|-------|--------|--------|-------|
| C20ORF71  | 109.6  | 122.5  | 122.6  | 120.1 | 110.8 | 98.6   | 127.4  | 115.7 |
| C20ORF71  | 111.1  | 110.4  | 112.3  | 115.4 | 99.9  | 103.7  | 119.3  | 114.5 |
| C20ORF72  | 372.2  | 298    | 423.4  | 303.3 | 294   | 224.3  | 269.7  | 261.5 |
| C20ORF74  | 112.2  | 119.2  | 116.4  | 114.7 | 104.5 | 102.3  | 121.9  | 112.5 |
| C20ORF74  | 114.2  | 108.3  | 126.8  | 117   | 118.6 | 118    | 126.9  | 123.5 |
| C20ORF75  | 111.1  | 119.9  | 115.5  | 117   | 115.1 | 97.3   | 124.4  | 115.6 |
| C20ORF77  | 118.7  | 112.4  | 112.5  | 111.3 | 111.3 | 100.7  | 120    | 109.2 |
| C20ORF79  | 112.6  | 113.2  | 112.9  | 116   | 106.6 | 94.3   | 121.4  | 110.8 |
| C20ORF85  | 119.5  | 120.9  | 119.1  | 122.7 | 104.9 | 100.6  | 115.6  | 118.6 |
| C20ORF86  | 120.1  | 126.4  | 127.6  | 131.7 | 107.9 | 112.2  | 135.4  | 122.8 |
| C20ORF94  | 150.1  | 136.5  | 131.4  | 152.3 | 151.8 | 105.7  | 142.5  | 154.9 |
| C20ORF96  | 111.7  | 118.5  | 112.7  | 117.3 | 110.4 | 97     | 124.6  | 113.3 |
| C20ORF98  | 141.4  | 114.2  | 124.1  | 127.9 | 116.5 | 102.8  | 128    | 121.7 |
| C21ORF100 | 109.3  | 115.9  | 114.3  | 127.4 | 114.3 | 106.2  | 119.9  | 121.3 |
| C21ORF110 | 127.1  | 121.1  | 133.8  | 126.7 | 119.1 | 112.1  | 126.2  | 129.1 |
| C21ORF120 | 108.9  | 119.5  | 115.7  | 110.3 | 108   | 96.4   | 114.5  | 116.2 |
| C21ORF120 | 144.4  | 148.2  | 139.7  | 134.6 | 137.7 | 111.3  | 137.5  | 134.4 |
| C21ORF120 | 118.4  | 113    | 111.2  | 110   | 102.2 | 95.8   | 119.4  | 118.6 |
| C21ORF130 | 109.8  | 115.3  | 122.9  | 113.7 | 106.3 | 102.9  | 115.2  | 116.9 |
| C21ORF20  | 553.5  | 576.4  | 514.7  | 529.7 | 367.9 | 306.3  | 536.4  | 464   |
| C21ORF24  | 4234.5 | 4080.8 | 3545.5 | 3338  | 3853  | 2895.6 | 4730.8 | 4758  |
| C21ORF25  | 116.2  | 131.1  | 135    | 123   | 115.9 | 117.2  | 119.5  | 125.2 |
| C21ORF25  | 166.8  | 167    | 203.1  | 158.5 | 135.4 | 156.7  | 143.4  | 146.5 |
| C21ORF29  | 107    | 113.6  | 114.6  | 123   | 110   | 93.7   | 115.3  | 126.1 |
| C21ORF33  | 188.7  | 191.4  | 258    | 164.3 | 209.5 | 169.6  | 149.6  | 151.1 |
| C21ORF33  | 617.1  | 581    | 713.3  | 571.4 | 433.1 | 544.1  | 439.4  | 372.2 |
| C21ORF33  | 157.8  | 187.9  | 160.9  | 151.9 | 140.9 | 134.4  | 146.3  | 141.1 |
| C21ORF34  | 125.6  | 117    | 120.4  | 130   | 114.6 | 114.8  | 124.9  | 116.9 |
| C21ORF34  | 110.2  | 116.2  | 125    | 123.9 | 108.9 | 98.8   | 132.8  | 123.5 |
| C21ORF34  | 116.5  | 100.3  | 108.2  | 120.1 | 111.9 | 99.2   | 112.2  | 113.4 |
| C21ORF41  | 117.3  | 115    | 112.5  | 130.6 | 110.3 | 107    | 121.3  | 113.6 |
| C21ORF45  | 125.7  | 119.5  | 121.7  | 123.6 | 111.6 | 102.3  | 123.4  | 113.4 |
| C21ORF49  | 120.7  | 111.9  | 130.1  | 116.5 | 107.3 | 101.2  | 124.2  | 109.7 |
| C21ORF51  | 221.2  | 264.6  | 323.1  | 255.8 | 266.3 | 220.2  | 216.8  | 234   |
| C21ORF51  | 155.5  | 154.3  | 166.4  | 157.8 | 151.4 | 124.1  | 138.1  | 153.5 |
| C21ORF55  | 123    | 112.6  | 125.7  | 125.8 | 110.3 | 103.4  | 125.7  | 114.4 |
| C21ORF55  | 123.2  | 119.9  | 123    | 118.3 | 117.5 | 105    | 124    | 124.4 |
| C21ORF55  | 116.9  | 123.2  | 127.1  | 117.1 | 112.8 | 95.7   | 109    | 123.8 |
| C21ORF56  | 125.9  | 130.5  | 135.1  | 128.8 | 112.1 | 119.6  | 127.9  | 123.6 |
| C21ORF57  | 245.1  | 258.9  | 249.3  | 254.9 | 216.7 | 210.2  | 277.6  | 295.4 |
| C21ORF57  | 165.8  | 150.5  | 169.8  | 187.4 | 152.8 | 140.2  | 155    | 168.7 |
| C21ORF57  | 124.8  | 126    | 124.8  | 122.6 | 111   | 98.7   | 122.6  | 123   |
| C21ORF58  | 116.7  | 111.3  | 114.4  | 117.2 | 105.7 | 90.9   | 112.9  | 113.7 |
| C21ORF58  | 107.7  | 116.8  | 108.9  | 121.6 | 115.1 | 103.8  | 121.2  | 116.6 |
| C21ORF58  | 116.3  | 114    | 112.6  | 116.8 | 116   | 103.9  | 118.5  | 109.6 |
| C21ORF59  | 103.7  | 117    | 111.7  | 117.3 | 103   | 93.1   | 109.8  | 108.9 |
| C21ORF59  | 279.8  | 342.9  | 282.8  | 243.6 | 275.7 | 213.9  | 223.3  | 224.9 |
| C21ORF60  | 122.9  | 129.6  | 137.3  | 142.8 | 127.8 | 109.9  | 120.9  | 128.6 |
| C21ORF62  | 120.1  | 124    | 113.6  | 122.1 | 112.4 | 101.1  | 117.6  | 122.6 |
| C21ORF63  | 129.4  | 137.6  | 136.3  | 148.2 | 111   | 105.1  | 128.9  | 128.8 |
| C21ORF66  | 131.7  | 119.8  | 132.2  | 137   | 118.4 | 106.1  | 122.2  | 125.1 |

|          |       |        |        |       |       |       |       |        |
|----------|-------|--------|--------|-------|-------|-------|-------|--------|
| C21ORF66 | 130.9 | 128.2  | 164.2  | 143.4 | 126.9 | 124.8 | 133.7 | 132.2  |
| C21ORF66 | 132   | 120.8  | 149    | 142.5 | 122.2 | 99.2  | 146.8 | 125.7  |
| C21ORF66 | 429.3 | 432.2  | 387.6  | 458.4 | 425.6 | 255.9 | 429.5 | 460.7  |
| C21ORF67 | 121.4 | 133.6  | 129.5  | 144.2 | 122.6 | 111.3 | 123.2 | 125.5  |
| C21ORF69 | 108.5 | 116.4  | 117.8  | 116   | 116.2 | 101.6 | 126.1 | 103.7  |
| C21ORF7  | 211.3 | 210.2  | 207.8  | 348.8 | 240.1 | 234.3 | 294.5 | 213.3  |
| C21ORF70 | 146.1 | 151.7  | 143.3  | 143   | 126.2 | 121.6 | 137.8 | 132.2  |
| C21ORF87 | 113.1 | 121.7  | 119.8  | 125.3 | 124.1 | 112.9 | 122.7 | 120.3  |
| C21ORF87 | 119.8 | 122.6  | 125.3  | 119.7 | 109.4 | 105.2 | 120.2 | 123.2  |
| C21ORF88 | 116.7 | 125.4  | 120    | 122   | 109.4 | 103.3 | 129.3 | 119.6  |
| C21ORF90 | 118.1 | 112.8  | 124.7  | 127.8 | 115   | 96.3  | 125.1 | 116.9  |
| C21ORF91 | 190.7 | 196.7  | 173    | 168.1 | 169.8 | 132.2 | 172.5 | 200.3  |
| C21ORF94 | 109.5 | 114.4  | 118.5  | 117.4 | 109.1 | 100.6 | 112.4 | 122.3  |
| C21ORF99 | 112.1 | 120.2  | 121.5  | 127.7 | 102.7 | 100.6 | 121.1 | 109    |
| C22ORF13 | 564.9 | 551.1  | 438.7  | 605.7 | 431.1 | 400   | 800.1 | 728.4  |
| C22ORF15 | 126.1 | 129.5  | 125.6  | 120.9 | 112.6 | 108.7 | 128.1 | 111.1  |
| C22ORF16 | 365.3 | 395.1  | 523.1  | 370   | 290.4 | 373.6 | 346.9 | 299    |
| C22ORF18 | 109.9 | 116.8  | 118.3  | 123.4 | 109.4 | 102.2 | 118.6 | 127.7  |
| C22ORF23 | 117.9 | 121.3  | 116.8  | 132.3 | 117.7 | 103.9 | 130.5 | 122    |
| C22ORF25 | 195.6 | 183.7  | 230.3  | 177.4 | 162   | 168.9 | 184.7 | 160.3  |
| C22ORF5  | 217.5 | 229.1  | 182.9  | 221.4 | 184.2 | 157.5 | 242.1 | 221.7  |
| C22ORF8  | 251.7 | 141.4  | 302.3  | 222.6 | 122.1 | 188.4 | 215.9 | 127.8  |
| C22ORF9  | 116.7 | 115.2  | 121.7  | 122.4 | 112.2 | 96.8  | 113.4 | 116.1  |
| C22ORF9  | 126.1 | 139.3  | 161    | 146.6 | 128.4 | 128.3 | 150.7 | 123    |
| C22ORF9  | 112.5 | 108.5  | 110.6  | 112.5 | 110.3 | 96.8  | 111.4 | 110.9  |
| C2ORF10  | 117.6 | 121    | 117.2  | 119.6 | 112.8 | 103.8 | 122.8 | 117.3  |
| C2ORF11  | 108.2 | 115.4  | 119.3  | 113.1 | 110.8 | 96    | 115.9 | 116    |
| C2ORF12  | 119.3 | 115.2  | 121.9  | 121   | 108.1 | 105   | 127.8 | 117.5  |
| C2ORF13  | 105.9 | 107.4  | 117.5  | 122.1 | 107.3 | 102   | 109.1 | 112.6  |
| C2ORF16  | 117.7 | 110.1  | 114.2  | 112.9 | 102.6 | 97.3  | 125.2 | 110.7  |
| C2ORF17  | 296.8 | 335    | 229.6  | 403.8 | 255.8 | 233.5 | 359.8 | 331    |
| C2ORF18  | 145   | 132.6  | 171    | 164.2 | 125.3 | 162.1 | 154.9 | 137.1  |
| C2ORF21  | 121.2 | 116.6  | 128.2  | 129.3 | 110.1 | 107   | 122   | 118.9  |
| C2ORF24  | 197.1 | 217.9  | 206.4  | 237.5 | 193.3 | 214.5 | 308.9 | 254.9  |
| C2ORF25  | 936.3 | 838.2  | 851.8  | 817.5 | 762   | 843.7 | 855.8 | 1053.2 |
| C2ORF26  | 228.7 | 166.6  | 354.5  | 247.5 | 133   | 319.3 | 289.1 | 147.9  |
| C2ORF27  | 114.5 | 111.7  | 107.2  | 108.7 | 107   | 97.9  | 113.7 | 113.9  |
| C2ORF28  | 978.1 | 1045.5 | 1595.4 | 1044  | 942.6 | 994.5 | 938   | 816.2  |
| C2ORF28  | 482.1 | 496.1  | 498.1  | 453.5 | 391.3 | 366   | 493.5 | 401.9  |
| C2ORF29  | 654.8 | 825.7  | 821.5  | 759.7 | 697.5 | 526.6 | 625.7 | 602.4  |
| C2ORF3   | 133.9 | 126.5  | 127.5  | 133.7 | 109.5 | 106.2 | 118.5 | 118.6  |
| C2ORF30  | 337.4 | 417.8  | 412.7  | 435.4 | 361.1 | 413.2 | 363.8 | 380.1  |
| C2ORF32  | 117.6 | 114.1  | 121.5  | 117   | 105.4 | 99.9  | 120.3 | 108.9  |
| C2ORF33  | 132.7 | 129.4  | 155.7  | 174   | 127.3 | 122.9 | 155   | 143.4  |
| C2ORF34  | 133.4 | 149.5  | 145.3  | 155.9 | 132   | 121.9 | 135.8 | 121.2  |
| C2ORF4   | 187   | 209    | 239.6  | 213.7 | 169.2 | 152.7 | 203.3 | 214.7  |
| C2ORF52  | 115.5 | 120.6  | 110.4  | 117.8 | 114.4 | 103.4 | 117.5 | 117.2  |
| C2ORF7   | 138.9 | 113.6  | 118.2  | 121.3 | 108.5 | 114.3 | 123.2 | 119    |
| C3       | 119.7 | 117.4  | 128.2  | 117.9 | 113.1 | 100.7 | 114.5 | 115.5  |
| C3AR1    | 201.3 | 127.4  | 202.2  | 193.5 | 117.8 | 166.4 | 152.9 | 129.5  |
| C3ORF1   | 134.1 | 131.2  | 138.3  | 131.8 | 132.1 | 115.1 | 118.5 | 125.6  |

|         |        |        |        |        |        |       |        |        |
|---------|--------|--------|--------|--------|--------|-------|--------|--------|
| C3ORF10 | 405.6  | 356.3  | 454    | 446.2  | 332.3  | 366.2 | 427.7  | 452    |
| C3ORF14 | 154.5  | 132.1  | 213    | 163.9  | 124.9  | 158.1 | 143    | 124.2  |
| C3ORF15 | 124.4  | 108.6  | 124.4  | 135.8  | 112.1  | 110.3 | 117.9  | 118.9  |
| C3ORF17 | 210.3  | 205.7  | 208.1  | 185.6  | 153.3  | 202.5 | 181.5  | 166    |
| C3ORF17 | 111.4  | 114.5  | 117.6  | 123.5  | 98.3   | 108.8 | 113.6  | 119.8  |
| C3ORF17 | 147.1  | 173.7  | 164.7  | 153.6  | 152    | 125.6 | 143.2  | 163.7  |
| C3ORF18 | 123    | 128.2  | 125    | 133.6  | 112    | 107.8 | 124.7  | 120.5  |
| C3ORF19 | 602.6  | 601.6  | 629.6  | 745.7  | 565.4  | 492.5 | 575.6  | 639.5  |
| C3ORF20 | 116.3  | 117.9  | 114.3  | 126.2  | 116.3  | 102.8 | 119.9  | 113.1  |
| C3ORF21 | 143.2  | 149.5  | 182.2  | 146.2  | 139.2  | 129.6 | 136.4  | 135.2  |
| C3ORF22 | 119.4  | 116.1  | 117.9  | 117.9  | 117.8  | 104.1 | 125.2  | 119.8  |
| C3ORF23 | 129.9  | 129    | 143.4  | 126.1  | 124    | 106.6 | 126.9  | 122.3  |
| C3ORF23 | 114.9  | 109    | 111.8  | 116.3  | 106    | 94.7  | 108.7  | 112.9  |
| C3ORF23 | 111.4  | 108.4  | 114.5  | 109.9  | 105.5  | 108.3 | 118.7  | 109.8  |
| C3ORF23 | 122.4  | 126.1  | 133.4  | 139.4  | 120.5  | 110.7 | 135.1  | 132    |
| C3ORF24 | 111.4  | 109.4  | 114.1  | 109.2  | 109.4  | 94.5  | 122.2  | 111.7  |
| C3ORF25 | 114.6  | 120.8  | 120.1  | 122.2  | 109.1  | 100.9 | 125.2  | 113.9  |
| C3ORF26 | 254.7  | 302.8  | 245.7  | 273.8  | 234.4  | 167.4 | 226.7  | 249.8  |
| C3ORF27 | 124.7  | 115.9  | 130.4  | 117.5  | 111.7  | 109.5 | 122.1  | 123.2  |
| C3ORF28 | 264.4  | 279.1  | 376.6  | 271.3  | 216.1  | 257   | 202.9  | 211.7  |
| C3ORF29 | 579.6  | 597.3  | 564.8  | 700.3  | 444.6  | 489.9 | 739.1  | 781    |
| C3ORF29 | 144.5  | 196.9  | 169    | 187    | 194.5  | 155.5 | 216.3  | 190.7  |
| C3ORF30 | 110.6  | 116.1  | 123.2  | 118.9  | 107.6  | 100.7 | 114    | 119.3  |
| C3ORF31 | 272.9  | 283.1  | 367.8  | 251.8  | 268.9  | 243.3 | 216.2  | 198.2  |
| C3ORF32 | 114.1  | 117    | 116.8  | 131.1  | 114.2  | 104.7 | 128.6  | 113.5  |
| C3ORF33 | 115.3  | 117.5  | 127.1  | 115.8  | 105.5  | 98.4  | 127.5  | 115.6  |
| C3ORF34 | 148.2  | 184.6  | 162.9  | 186.6  | 157.9  | 134.1 | 178.9  | 159.2  |
| C3ORF34 | 2959.5 | 2310.5 | 3429.8 | 2616.9 | 2795.5 | 1860  | 2959.6 | 3204.2 |
| C3ORF35 | 114.9  | 127.1  | 127.6  | 118    | 116.2  | 104.4 | 119.4  | 126.3  |
| C3ORF35 | 118.1  | 117.2  | 131.4  | 121    | 108.8  | 101.7 | 125.6  | 127.4  |
| C3ORF36 | 112.2  | 113.6  | 114.8  | 115    | 110.4  | 101.5 | 122.6  | 116.3  |
| C3ORF37 | 399.3  | 458.8  | 346.4  | 361.5  | 326.9  | 269.4 | 416.6  | 399.8  |
| C3ORF37 | 109.2  | 111.6  | 122.7  | 122.5  | 115.3  | 97.5  | 118.9  | 121.4  |
| C3ORF38 | 295.4  | 256.5  | 318.8  | 280.8  | 202.3  | 253.7 | 239.3  | 232.8  |
| C3ORF39 | 156.2  | 161.6  | 147.5  | 147.2  | 140.2  | 117.9 | 159.9  | 156.7  |
| C3ORF40 | 171.5  | 179.7  | 166.3  | 206.8  | 180.8  | 152.5 | 214.1  | 191.2  |
| C3ORF42 | 118.5  | 132.6  | 115.8  | 137.5  | 119.9  | 111.2 | 134.7  | 129.9  |
| C3ORF42 | 125.6  | 113.6  | 125.4  | 125.4  | 114.6  | 112.4 | 122.4  | 126.2  |
| C3ORF45 | 111.2  | 121.4  | 109.2  | 120.6  | 108.9  | 97.6  | 118.1  | 117.6  |
| C3ORF48 | 117.8  | 115.5  | 115.5  | 115.2  | 112.1  | 97.8  | 117.1  | 114.7  |
| C3ORF52 | 107.1  | 121.4  | 116.3  | 121.8  | 109.7  | 93.9  | 126.9  | 115.7  |
| C3ORF54 | 168.1  | 179.3  | 163.5  | 167.4  | 142    | 127   | 138.7  | 140    |
| C3ORF56 | 114.7  | 114.3  | 116.4  | 117.2  | 102.1  | 106.2 | 115.9  | 123.1  |
| C3ORF57 | 117.6  | 109    | 115.6  | 119    | 106.2  | 97.5  | 117.6  | 122.5  |
| C3ORF58 | 175    | 195.8  | 191.4  | 162.2  | 174.5  | 136.7 | 163.9  | 168.1  |
| C3ORF59 | 149.2  | 147.5  | 166.4  | 145.6  | 137.3  | 154.1 | 133.5  | 136.3  |
| C3ORF60 | 117.2  | 105.7  | 121.2  | 118.6  | 110.4  | 103   | 116.4  | 116.6  |
| C3ORF60 | 121.5  | 127.2  | 131    | 138    | 115    | 106   | 120.4  | 127    |
| C3ORF60 | 103.4  | 116    | 122.3  | 132    | 110.6  | 103.3 | 116.3  | 116.6  |
| C3ORF60 | 111.9  | 121.2  | 127.2  | 112.1  | 115.9  | 106.9 | 119.5  | 109.7  |
| C3ORF60 | 1168.1 | 1352   | 1152.4 | 1230   | 776    | 839.3 | 736.6  | 540.9  |

|          |        |        |        |        |        |        |        |        |
|----------|--------|--------|--------|--------|--------|--------|--------|--------|
| C3ORF62  | 157.7  | 159.6  | 176.5  | 189.2  | 165.6  | 137.7  | 195.7  | 207.4  |
| C3ORF63  | 184.4  | 169.3  | 208.8  | 173.9  | 184.2  | 157.5  | 191.7  | 151.8  |
| C3ORF64  | 163.6  | 152.4  | 165.3  | 174.9  | 172.4  | 126.1  | 152.3  | 159    |
| C3ORF65  | 116.4  | 115    | 117.5  | 114.7  | 109.4  | 101.4  | 115.7  | 121.1  |
| C3ORF9   | 264.5  | 265    | 224.3  | 218.4  | 211.2  | 159.8  | 195.7  | 187.8  |
| C3ORF9   | 1109.3 | 1300.2 | 962.3  | 1064.7 | 1094.8 | 498.5  | 874.5  | 685    |
| C4A      | 115.3  | 129.9  | 142.2  | 133.1  | 121.2  | 110.8  | 136.2  | 126.9  |
| C4BPA    | 109.2  | 118.9  | 115.8  | 130.1  | 106.1  | 101.7  | 119.4  | 114.9  |
| C4BPB    | 118.4  | 120.6  | 126    | 126.7  | 117    | 107.4  | 117.3  | 115.5  |
| C4BPB    | 115.2  | 120.6  | 114.4  | 123.3  | 112    | 102.4  | 122.6  | 110.8  |
| C4ORF13  | 113.2  | 116.4  | 117.8  | 115.5  | 110    | 97.3   | 119.3  | 120.4  |
| C4ORF13  | 136.6  | 138.4  | 171.9  | 147    | 134.2  | 134.7  | 128.8  | 119.3  |
| C4ORF14  | 456.6  | 565.1  | 442.7  | 517.6  | 330.1  | 389.6  | 371.4  | 443.6  |
| C4ORF15  | 126.9  | 115.2  | 119.1  | 114.2  | 126.2  | 104.6  | 132.7  | 121.5  |
| C4ORF16  | 133.7  | 128.7  | 129.1  | 131    | 121.8  | 107.2  | 128.4  | 142.8  |
| C4ORF17  | 103.4  | 113.1  | 108.2  | 110.1  | 110.3  | 93     | 120.5  | 106.4  |
| C4ORF18  | 116.9  | 112.6  | 159.9  | 126.7  | 111.4  | 146.2  | 120.3  | 115.4  |
| C4ORF18  | 153.8  | 117.8  | 208.3  | 184.4  | 124.1  | 194.9  | 146.3  | 116.8  |
| C4ORF18  | 111.6  | 108.6  | 115.5  | 123.2  | 102.1  | 94.5   | 117.4  | 107.2  |
| C4ORF28  | 106.4  | 109.4  | 105.9  | 104.4  | 108.8  | 97.5   | 105.8  | 110.9  |
| C4ORF32  | 114    | 139.5  | 128.2  | 121.7  | 118.8  | 107.7  | 126.6  | 122.1  |
| C4ORF34  | 281.6  | 318.9  | 390.3  | 304.7  | 260.2  | 177.4  | 308.7  | 287.5  |
| C4ORF36  | 117.4  | 114.3  | 106.8  | 117.5  | 116.5  | 97.9   | 114.1  | 112.1  |
| C4ORF6   | 109.9  | 120.6  | 115.7  | 114.8  | 109.1  | 99.9   | 106.4  | 111.3  |
| C4ORF7   | 112    | 119.3  | 119.3  | 126.8  | 99.1   | 101.9  | 118.3  | 111.6  |
| C4ORF8   | 191.3  | 203.4  | 161.8  | 186.7  | 218.4  | 169.8  | 222.6  | 224    |
| C4ORF9   | 235.9  | 230.5  | 232.4  | 222.8  | 223.5  | 169.9  | 228.4  | 187.1  |
| C5       | 115.8  | 127.9  | 153.2  | 145.9  | 133.5  | 106.7  | 131.5  | 129.8  |
| C5AR1    | 334.7  | 282.7  | 460    | 745.2  | 334    | 1265.8 | 1004   | 325.9  |
| C5ORF13  | 126.3  | 148.7  | 159.2  | 144.5  | 126.9  | 107.3  | 121.4  | 127.8  |
| C5ORF14  | 129.3  | 129.9  | 123    | 126.2  | 129    | 109.1  | 128.3  | 127    |
| C5ORF15  | 588.8  | 580.1  | 653.4  | 637    | 432.3  | 462.3  | 510.3  | 492.7  |
| C5ORF16  | 163.1  | 170.6  | 130.3  | 172    | 149.7  | 123.5  | 185.7  | 183.5  |
| C5ORF20  | 122.1  | 118.9  | 143.8  | 118.5  | 111.1  | 102.7  | 120.5  | 120.9  |
| C5ORF21  | 306.4  | 326.3  | 496.8  | 319.7  | 291.2  | 363.9  | 356.4  | 334.9  |
| C5ORF28  | 1435.6 | 1424   | 1249.2 | 1340.3 | 1326.8 | 615.8  | 1416.2 | 1689.3 |
| C5ORF3   | 122.9  | 136.9  | 136.6  | 135.3  | 124.3  | 116.6  | 142.9  | 154.2  |
| C5ORF34  | 124.1  | 128.1  | 125.2  | 135.4  | 113.8  | 102.9  | 124.2  | 120.7  |
| C5ORF36  | 119.6  | 108.8  | 113.6  | 115.7  | 106.7  | 94.1   | 121.3  | 115.3  |
| C5ORF37  | 188.9  | 194.5  | 208.8  | 195.7  | 180    | 165.3  | 198.2  | 176.5  |
| C5ORF4   | 107.5  | 110.3  | 120.6  | 123.6  | 110.8  | 101.3  | 120.2  | 122.2  |
| C5ORF4   | 116.3  | 104.3  | 104.6  | 119.8  | 111.7  | 95.8   | 121.2  | 119.9  |
| C5ORF4   | 120.6  | 124.9  | 120.7  | 123.9  | 113.8  | 100.5  | 113    | 120.3  |
| C5ORF5   | 459.8  | 609    | 514.5  | 567.3  | 537.3  | 376.2  | 578.2  | 645.8  |
| C6       | 109    | 113.5  | 116.5  | 126.9  | 106.1  | 94.7   | 123.6  | 108    |
| C6ORF1   | 119.7  | 119.7  | 129.6  | 122.4  | 108.7  | 102.2  | 117    | 119.2  |
| C6ORF1   | 132.8  | 120.7  | 142.4  | 132.5  | 111.5  | 113.5  | 116.2  | 127.5  |
| C6ORF1   | 127.8  | 118.3  | 118.3  | 120.2  | 110.9  | 96.5   | 126.6  | 116.1  |
| C6ORF10  | 117.3  | 108.5  | 113.9  | 113.3  | 109.9  | 97.2   | 125.9  | 109.8  |
| C6ORF105 | 163.6  | 131.8  | 171.3  | 158.3  | 118.4  | 130    | 131.3  | 113.4  |
| C6ORF106 | 128.4  | 149.6  | 136.6  | 192.6  | 157.8  | 105.1  | 182.8  | 196.8  |

|          |       |       |        |       |       |       |       |       |
|----------|-------|-------|--------|-------|-------|-------|-------|-------|
| C6ORF106 | 188   | 239.2 | 179.2  | 242.5 | 164.9 | 183.9 | 315.8 | 285.8 |
| C6ORF107 | 111.9 | 113.1 | 124.3  | 122.5 | 111.7 | 100.2 | 115.6 | 128.2 |
| C6ORF108 | 120.1 | 116.3 | 120.8  | 124.5 | 118.5 | 103.2 | 115.4 | 113.6 |
| C6ORF108 | 438.5 | 459.8 | 898.1  | 406.2 | 238.1 | 648.8 | 231   | 141.4 |
| C6ORF111 | 769.9 | 572.6 | 1044.8 | 681.1 | 644.5 | 509.3 | 467.1 | 525.3 |
| C6ORF113 | 171.9 | 180.1 | 205    | 203   | 175.2 | 156   | 189.7 | 203.6 |
| C6ORF114 | 113.1 | 119.7 | 124.1  | 122.7 | 111.7 | 103.7 | 116.2 | 117.7 |
| C6ORF117 | 123.1 | 113.2 | 125    | 120.2 | 110.5 | 99.1  | 117.8 | 120.2 |
| C6ORF118 | 115.5 | 119.8 | 116.3  | 125.7 | 106.8 | 101.2 | 122.8 | 124.5 |
| C6ORF120 | 158.4 | 169.4 | 181.9  | 156.3 | 169   | 123.1 | 155.3 | 150.8 |
| C6ORF122 | 109   | 119.9 | 106.1  | 112.8 | 109.3 | 96.1  | 112.2 | 105.9 |
| C6ORF125 | 295.2 | 381.2 | 310.1  | 353   | 261.9 | 218.8 | 255.5 | 212.1 |
| C6ORF128 | 136.4 | 125.5 | 119.6  | 127.2 | 111   | 107.4 | 126.1 | 124.7 |
| C6ORF129 | 220.7 | 278.2 | 329.4  | 230   | 196.4 | 303   | 209.3 | 210.5 |
| C6ORF130 | 352   | 409.3 | 457    | 448.8 | 445.1 | 418.8 | 523.3 | 594.9 |
| C6ORF134 | 117.1 | 120.4 | 116.8  | 127.5 | 111   | 99.3  | 124.8 | 122.4 |
| C6ORF134 | 119.2 | 120   | 131.6  | 124.2 | 111.1 | 101.2 | 128.1 | 123   |
| C6ORF134 | 109   | 105.5 | 110.1  | 123.6 | 109.5 | 98.7  | 115.2 | 114.8 |
| C6ORF136 | 189.8 | 181.4 | 205.9  | 197.6 | 218.7 | 139.9 | 195.9 | 178.9 |
| C6ORF139 | 137.4 | 129.3 | 145.2  | 135.2 | 115.6 | 113.2 | 139.1 | 133.3 |
| C6ORF142 | 125.8 | 119   | 117.8  | 118.7 | 114.9 | 94.7  | 122.8 | 117.5 |
| C6ORF143 | 109.8 | 119.5 | 114.5  | 116.8 | 106.7 | 101.8 | 112.4 | 118.3 |
| C6ORF145 | 117   | 108   | 118.5  | 122   | 114.5 | 109.9 | 115.9 | 113.7 |
| C6ORF146 | 111.6 | 121.5 | 113.5  | 106.7 | 105.2 | 99.6  | 112.3 | 110.2 |
| C6ORF148 | 114.2 | 122.4 | 127.9  | 123   | 120.1 | 106.1 | 123.3 | 122.1 |
| C6ORF149 | 153.3 | 165.1 | 139.8  | 146.1 | 133.6 | 121.7 | 154.8 | 148.5 |
| C6ORF15  | 109.6 | 119   | 114.2  | 114.9 | 102.6 | 92    | 124.6 | 112.7 |
| C6ORF150 | 123.9 | 121.9 | 129.4  | 128.3 | 112   | 111   | 121.9 | 132.3 |
| C6ORF151 | 138.2 | 151.9 | 133.4  | 137.8 | 125.5 | 114.4 | 140   | 142.9 |
| C6ORF152 | 113.5 | 118.8 | 118.8  | 119.6 | 105.2 | 101.9 | 112.7 | 109.6 |
| C6ORF153 | 339.9 | 323.5 | 333.5  | 328.4 | 276.8 | 214.5 | 247.6 | 335.1 |
| C6ORF154 | 111.1 | 115.6 | 120.2  | 113.4 | 110.3 | 101.4 | 108   | 122   |
| C6ORF157 | 119.9 | 118.2 | 122.9  | 121.8 | 106.2 | 102.7 | 126.1 | 127.5 |
| C6ORF159 | 115.2 | 117.8 | 123.5  | 128.2 | 107.3 | 103.3 | 128.8 | 130.3 |
| C6ORF162 | 128.5 | 120   | 136.4  | 132.1 | 123   | 114.4 | 127.8 | 136.6 |
| C6ORF162 | 134.6 | 130.5 | 142.1  | 128   | 126.7 | 115.6 | 141.8 | 125.2 |
| C6ORF165 | 109.6 | 116   | 113.1  | 121.9 | 109.4 | 96.7  | 115.3 | 125   |
| C6ORF165 | 119.6 | 127.5 | 116.7  | 116.7 | 106   | 102.1 | 124.7 | 124.8 |
| C6ORF165 | 114.8 | 128.9 | 117.5  | 120.9 | 109.2 | 94.3  | 111   | 126.1 |
| C6ORF166 | 479.3 | 492.5 | 477.2  | 517.9 | 540.9 | 651.9 | 710.1 | 825   |
| C6ORF167 | 110.5 | 111.7 | 132.1  | 126.6 | 115.3 | 107.3 | 114.4 | 125.9 |
| C6ORF168 | 121   | 118.5 | 114.5  | 116.9 | 109.7 | 97.6  | 116.7 | 107.5 |
| C6ORF170 | 261.7 | 280.2 | 281.9  | 262.6 | 301.8 | 168.8 | 260.2 | 289.4 |
| C6ORF173 | 138   | 115.9 | 141.6  | 133.2 | 127.9 | 111.2 | 126.6 | 133.9 |
| C6ORF174 | 107.8 | 112   | 117    | 116.3 | 107.5 | 96.8  | 121.4 | 109.1 |
| C6ORF182 | 106.6 | 119.8 | 120.7  | 122.2 | 109   | 92.9  | 117.9 | 118.6 |
| C6ORF188 | 110   | 114   | 115    | 116.6 | 110.7 | 97.5  | 120.6 | 114   |
| C6ORF190 | 173.6 | 214.5 | 176.8  | 196.6 | 199.2 | 149.2 | 270.2 | 442   |
| C6ORF191 | 122   | 113.4 | 123.1  | 118.4 | 110.4 | 97.2  | 123.9 | 112.2 |
| C6ORF192 | 261.2 | 263.5 | 246.9  | 270.2 | 236.5 | 202.6 | 171.9 | 166.6 |
| C6ORF194 | 123.4 | 115.6 | 126.6  | 120.6 | 108.1 | 108   | 123.1 | 125.6 |

|          |        |        |        |        |        |        |        |        |
|----------|--------|--------|--------|--------|--------|--------|--------|--------|
| C6ORF195 | 111.6  | 126.1  | 104    | 114.1  | 105.6  | 98.2   | 113.8  | 118    |
| C6ORF199 | 115.5  | 127.9  | 113.6  | 116    | 112.1  | 107.2  | 117.2  | 119.2  |
| C6ORF201 | 116.6  | 110.7  | 121.7  | 122.2  | 112.7  | 106.9  | 119.5  | 114.4  |
| C6ORF203 | 134.9  | 121.2  | 141.4  | 130.4  | 111.8  | 119.2  | 115    | 121.6  |
| C6ORF204 | 188.6  | 159.9  | 141    | 175.1  | 159.5  | 111.9  | 148.6  | 167.2  |
| C6ORF204 | 156.1  | 145.5  | 143.8  | 165    | 151.3  | 138.2  | 144.3  | 141.2  |
| C6ORF205 | 122.9  | 133.9  | 125.5  | 129.2  | 118.4  | 105    | 119.5  | 126.7  |
| C6ORF205 | 114.2  | 121.2  | 125.7  | 117.1  | 116.8  | 94.9   | 116.7  | 113.5  |
| C6ORF206 | 112.5  | 108.2  | 113.3  | 119.7  | 100    | 92.7   | 98.4   | 106.1  |
| C6ORF208 | 117.9  | 123.8  | 112.7  | 116.7  | 113.8  | 95.1   | 124.1  | 118.6  |
| C6ORF21  | 115.1  | 109.7  | 118.4  | 115.9  | 115    | 97.1   | 121.4  | 112.7  |
| C6ORF211 | 151    | 137.5  | 191.9  | 154    | 129.6  | 127.8  | 173.6  | 153.3  |
| C6ORF213 | 113    | 118.2  | 115.8  | 118.1  | 106.1  | 103    | 114.1  | 114.4  |
| C6ORF25  | 130.1  | 119.2  | 125.3  | 139.2  | 121.9  | 106    | 114.3  | 122.8  |
| C6ORF25  | 112.4  | 121.6  | 125.6  | 128.7  | 114.7  | 100.2  | 118.2  | 115.4  |
| C6ORF25  | 116.2  | 122    | 137.2  | 118.6  | 124.6  | 103.9  | 127.4  | 118.6  |
| C6ORF25  | 113.8  | 115    | 113.5  | 115.3  | 106.4  | 92.6   | 112.9  | 116    |
| C6ORF26  | 112.9  | 119.8  | 122.1  | 119.2  | 103    | 96.8   | 117.4  | 119.3  |
| C6ORF27  | 124    | 121.3  | 129.5  | 120.3  | 114.2  | 105.6  | 126.9  | 110.9  |
| C6ORF32  | 1147.9 | 1286.3 | 984.3  | 1201.2 | 1109.9 | 755.7  | 858.4  | 655.9  |
| C6ORF35  | 117.6  | 125.7  | 129.1  | 106.7  | 110.2  | 101.7  | 125.1  | 119    |
| C6ORF47  | 270.1  | 228.5  | 217.7  | 257.9  | 204.8  | 165.2  | 226.5  | 220.2  |
| C6ORF48  | 114.6  | 110.4  | 112.9  | 110.6  | 111.1  | 97.6   | 122.7  | 112    |
| C6ORF48  | 3086.5 | 3149.2 | 4104.9 | 3139.4 | 2460.6 | 3334.4 | 3071.9 | 3400.1 |
| C6ORF49  | 606.6  | 624.4  | 855.6  | 640    | 567.9  | 534.2  | 439.7  | 615.1  |
| C6ORF51  | 122.7  | 121.7  | 118    | 126    | 106.1  | 97.1   | 114    | 114    |
| C6ORF55  | 181.2  | 186.5  | 189.4  | 187.8  | 149.6  | 161.3  | 187.5  | 191    |
| C6ORF57  | 126.1  | 125.6  | 141.8  | 129.2  | 122.5  | 126.5  | 114.6  | 120.1  |
| C6ORF59  | 117.6  | 120.6  | 124    | 122    | 119.3  | 107.8  | 117.3  | 126.3  |
| C6ORF60  | 152    | 155.6  | 142.8  | 144.6  | 147.4  | 124.3  | 209.8  | 225.8  |
| C6ORF62  | 116.3  | 114.3  | 123.1  | 120.4  | 112    | 106.3  | 124.1  | 120.7  |
| C6ORF64  | 184.5  | 186.8  | 210    | 195.5  | 164.2  | 140.7  | 206.8  | 214.8  |
| C6ORF65  | 111.2  | 114.7  | 117.3  | 115.5  | 103.3  | 95.3   | 119.1  | 113    |
| C6ORF66  | 136.8  | 144.3  | 138.5  | 146.5  | 136.1  | 111.2  | 131.9  | 156.4  |
| C6ORF69  | 395.1  | 445.1  | 584.4  | 495.3  | 366.3  | 313    | 450.1  | 564.7  |
| C6ORF70  | 171.4  | 201.3  | 181.4  | 206.5  | 193.6  | 158.1  | 190.7  | 185.6  |
| C6ORF71  | 116.4  | 107.4  | 111.2  | 109.5  | 98.7   | 88.6   | 112.9  | 107.9  |
| C6ORF72  | 124.6  | 112.4  | 132.9  | 135.7  | 136.1  | 104.7  | 129.7  | 132.4  |
| C6ORF75  | 116.9  | 115.4  | 127.1  | 118.4  | 106.6  | 106    | 119.2  | 114.6  |
| C6ORF75  | 120.5  | 116.1  | 123.1  | 115    | 111    | 95.8   | 121.1  | 112.1  |
| C6ORF75  | 244.7  | 240.3  | 260.2  | 226.4  | 246.2  | 192.3  | 191.4  | 177.9  |
| C6ORF78  | 114.9  | 112.2  | 127.2  | 114.7  | 116    | 92.8   | 108.9  | 111.4  |
| C6ORF79  | 198.7  | 184.4  | 179.2  | 220.2  | 175.1  | 152    | 204    | 217.8  |
| C6ORF81  | 118.7  | 124.3  | 116.8  | 122.7  | 112.9  | 102.3  | 128.7  | 123.5  |
| C6ORF84  | 133.4  | 124.8  | 133.1  | 129.3  | 124.4  | 120.9  | 131.7  | 121.3  |
| C6ORF85  | 168.9  | 178.1  | 134.7  | 182.7  | 174.5  | 121    | 186.2  | 210.2  |
| C6ORF89  | 123.7  | 128.8  | 139.4  | 145.5  | 128.8  | 124    | 145.6  | 133.7  |
| C6ORF96  | 127.9  | 132.3  | 151.7  | 144.4  | 124.2  | 109.9  | 140.9  | 117.3  |
| C7       | 108.5  | 111.8  | 115.1  | 121.1  | 106.1  | 101.7  | 113.7  | 112.7  |
| C7ORF10  | 115.2  | 122.8  | 121.4  | 121.6  | 128.5  | 105.2  | 128.7  | 124.9  |
| C7ORF11  | 153.1  | 155.3  | 161.1  | 165.9  | 128.2  | 127.3  | 170.4  | 131.8  |

|          |        |        |        |        |        |        |        |        |
|----------|--------|--------|--------|--------|--------|--------|--------|--------|
| C7ORF16  | 114.2  | 113.6  | 116.8  | 117.9  | 109.9  | 109.9  | 120.5  | 113    |
| C7ORF20  | 181.3  | 177.3  | 217.6  | 197.8  | 175.9  | 182.5  | 217.4  | 213.3  |
| C7ORF20  | 137.5  | 133.1  | 134.5  | 133.8  | 123.8  | 115.6  | 134.9  | 143.2  |
| C7ORF21  | 584.3  | 556.4  | 473.5  | 518.7  | 377.6  | 449.6  | 645.1  | 674.4  |
| C7ORF24  | 191.7  | 185.4  | 205    | 170.9  | 159    | 146.3  | 194.7  | 154.7  |
| C7ORF25  | 156.2  | 171.3  | 158.9  | 165.7  | 144.2  | 126.9  | 177.3  | 162.3  |
| C7ORF26  | 461.9  | 528.8  | 412    | 487.5  | 331    | 398.9  | 475.3  | 417.8  |
| C7ORF27  | 289.2  | 290.5  | 291.7  | 362.9  | 271.7  | 245.8  | 206    | 258.5  |
| C7ORF28A | 116    | 118    | 103.3  | 117.1  | 110.1  | 101.2  | 115    | 118.8  |
| C7ORF28B | 352.2  | 451    | 324.2  | 351.1  | 373.3  | 262.3  | 299.6  | 536.6  |
| C7ORF29  | 134.9  | 129.8  | 134.1  | 144    | 131.2  | 112.4  | 123.9  | 135.8  |
| C7ORF30  | 795.3  | 889.1  | 905.1  | 762    | 727.5  | 767.5  | 588.3  | 618.6  |
| C7ORF31  | 114.6  | 120    | 116.1  | 119.1  | 110.5  | 101    | 124.7  | 121.9  |
| C7ORF33  | 114.5  | 109.7  | 123.8  | 108    | 104.4  | 92.4   | 115.2  | 112.9  |
| C7ORF34  | 121    | 117.5  | 123    | 122    | 103.1  | 98.3   | 122.6  | 116.2  |
| C7ORF36  | 158.7  | 167.2  | 155.8  | 160.3  | 144.3  | 127    | 127.8  | 135.5  |
| C7ORF44  | 355.6  | 432.4  | 502.8  | 342.8  | 321.8  | 338.5  | 270.7  | 262    |
| C7ORF9   | 116.9  | 113.2  | 120.2  | 116.5  | 101.5  | 101    | 116.7  | 107.6  |
| C8A      | 117.6  | 106.7  | 114.7  | 107.5  | 110.1  | 97.3   | 100.4  | 113.9  |
| C8B      | 121.9  | 122.2  | 114    | 121.3  | 112.7  | 93.9   | 117    | 98.3   |
| C8G      | 122.5  | 114.3  | 118.3  | 121.5  | 110    | 105.9  | 127.7  | 127.3  |
| C8ORF1   | 154    | 162.4  | 144.1  | 155    | 149.7  | 125.5  | 171.7  | 149.8  |
| C8ORF13  | 113.6  | 119.2  | 123.5  | 120.6  | 116.3  | 107.6  | 120.4  | 128.9  |
| C8ORF15  | 127.5  | 120.5  | 125.4  | 125.6  | 109.7  | 97     | 123.3  | 127.5  |
| C8ORF22  | 106.4  | 112.3  | 112.5  | 117.1  | 119.3  | 109.7  | 116.6  | 119.5  |
| C8ORF30A | 100.1  | 115.9  | 106.2  | 109.7  | 111.5  | 102.7  | 110.7  | 109.6  |
| C8ORF31  | 120.1  | 116.6  | 111.4  | 118.7  | 112.7  | 94     | 119.6  | 108.3  |
| C8ORF32  | 147.4  | 130.8  | 125.7  | 138.8  | 124.8  | 110.1  | 138.5  | 137.6  |
| C8ORF33  | 208.7  | 217.1  | 236.4  | 258.7  | 188.6  | 172.1  | 205    | 239.6  |
| C8ORF34  | 131.8  | 134.9  | 140.2  | 133.5  | 128.6  | 110.9  | 133.8  | 124.6  |
| C8ORF35  | 391.8  | 458.7  | 366.6  | 413.8  | 500.4  | 307.1  | 386.5  | 472.4  |
| C8ORF36  | 184.5  | 200.7  | 209.7  | 204    | 177.5  | 162    | 176.7  | 211.7  |
| C8ORF37  | 1552.9 | 1703.7 | 1997.1 | 1940.9 | 2161.8 | 1104.9 | 2205.8 | 2123.9 |
| C8ORF38  | 145.7  | 154    | 140.6  | 147.1  | 134.1  | 124.4  | 142.7  | 140.9  |
| C8ORF4   | 109.3  | 110.1  | 114.5  | 112.5  | 109.5  | 93.1   | 118    | 113.4  |
| C8ORF40  | 252.3  | 257.2  | 429.5  | 270.1  | 278    | 308.5  | 230.5  | 260.4  |
| C8ORF41  | 204.2  | 154.4  | 160.3  | 198.8  | 154.2  | 154.7  | 160.8  | 176.1  |
| C8ORF42  | 108.3  | 115.2  | 101.8  | 110.1  | 99.6   | 90.2   | 110.3  | 108.5  |
| C8ORF44  | 118.7  | 120.3  | 137    | 140.7  | 129.1  | 101.8  | 124.4  | 115.9  |
| C8ORF45  | 939.9  | 613.2  | 794.1  | 726.3  | 621.4  | 414.1  | 621.2  | 801.9  |
| C8ORF46  | 116.2  | 124.2  | 108.7  | 119.4  | 109.4  | 94.7   | 107.5  | 118.8  |
| C8ORF47  | 114.9  | 110.7  | 128    | 119.8  | 114.8  | 99.8   | 113.4  | 117.8  |
| C8ORF48  | 120.6  | 119.3  | 125.9  | 127    | 114.1  | 106    | 124.2  | 118.2  |
| C8ORF49  | 108.8  | 115.4  | 122.4  | 118    | 114    | 96.9   | 114.2  | 113.5  |
| C8ORF52  | 158.2  | 178    | 173.7  | 156.6  | 136.2  | 138.2  | 160.3  | 184.9  |
| C8ORF53  | 127.5  | 141.5  | 130.3  | 133.9  | 128.2  | 108.4  | 135.1  | 174.3  |
| C8ORF55  | 361.8  | 437.6  | 363.3  | 387.7  | 296.6  | 194.2  | 210.3  | 214    |
| C8ORF58  | 141.2  | 128.6  | 131.4  | 142.5  | 121.3  | 129.3  | 160.8  | 134.7  |
| C8ORF61  | 148.5  | 138.3  | 135.5  | 149.7  | 135.5  | 130.2  | 150.6  | 157.7  |
| C8ORF70  | 132.1  | 134.2  | 140.7  | 143.4  | 125.9  | 109.9  | 132.6  | 121.5  |
| C8ORF72  | 120.4  | 116.9  | 120.2  | 120.4  | 105.2  | 99.9   | 121.5  | 115.6  |



|          |       |        |        |       |       |        |       |       |
|----------|-------|--------|--------|-------|-------|--------|-------|-------|
| C8ORF74  | 110.1 | 112.3  | 117.3  | 121.7 | 107.4 | 95.3   | 113.5 | 113.1 |
| C8ORF76  | 621.9 | 653.2  | 679.2  | 678.1 | 610.7 | 475.8  | 748.2 | 699.8 |
| C8ORFK32 | 116.9 | 120.7  | 114.2  | 126.1 | 110.7 | 104.4  | 120.7 | 118.9 |
| C8ORFK36 | 111.2 | 106.7  | 120.8  | 119.1 | 109.6 | 93.4   | 110.5 | 103.5 |
| C8ORFK36 | 114.1 | 106.3  | 109    | 112.1 | 106.9 | 95.4   | 115.5 | 110.9 |
| C9       | 108.5 | 116.1  | 110.3  | 114.1 | 110   | 97.9   | 118.7 | 124.6 |
| C9ORF100 | 108.6 | 116.2  | 115.6  | 112.1 | 101.7 | 99.1   | 112.7 | 105.4 |
| C9ORF100 | 112.4 | 114.9  | 122.5  | 118.3 | 117.7 | 103.5  | 116.9 | 122.5 |
| C9ORF102 | 181.7 | 187    | 162.1  | 186   | 178.1 | 132.2  | 214.9 | 199.9 |
| C9ORF103 | 165.9 | 183.9  | 283.4  | 188.8 | 182.4 | 238.8  | 184.8 | 227.5 |
| C9ORF106 | 113.4 | 121.4  | 122.2  | 124   | 109.3 | 102.4  | 117   | 120.8 |
| C9ORF100 | 144.5 | 160.7  | 159.1  | 176.9 | 161.4 | 161.8  | 164   | 138.9 |
| C9ORF11  | 117.1 | 104.6  | 111.5  | 112.2 | 104.3 | 104.2  | 112.4 | 110.4 |
| C9ORF111 | 276.4 | 262.7  | 432.3  | 258.6 | 228.8 | 270.3  | 234.8 | 218.2 |
| C9ORF112 | 118.3 | 120.5  | 132.8  | 127.7 | 119   | 117.9  | 124.5 | 124.7 |
| C9ORF114 | 679.2 | 757.1  | 454.8  | 733.3 | 541.2 | 328.2  | 568.7 | 516.4 |
| C9ORF116 | 116.1 | 117.6  | 119.3  | 119.9 | 103.4 | 110.7  | 112.7 | 118.3 |
| C9ORF116 | 116.8 | 118.1  | 118.1  | 119   | 107.6 | 95     | 121   | 111.2 |
| C9ORF117 | 111.2 | 110.1  | 119    | 113.1 | 104.1 | 106.3  | 111.1 | 114.5 |
| C9ORF121 | 113.3 | 106.1  | 120.4  | 118.5 | 107   | 92.6   | 113.5 | 110.6 |
| C9ORF123 | 203.9 | 197.4  | 247.4  | 225.4 | 187.7 | 183.4  | 200.8 | 175.5 |
| C9ORF125 | 119.2 | 119    | 115.7  | 119.1 | 107.1 | 97.2   | 117.5 | 111.1 |
| C9ORF126 | 113.6 | 111.9  | 111    | 115.7 | 105.8 | 93.6   | 111.9 | 106.8 |
| C9ORF127 | 133.1 | 149.6  | 147.5  | 140.1 | 128   | 138.9  | 139.4 | 179.5 |
| C9ORF127 | 119   | 110.9  | 174.4  | 119   | 111.1 | 119.4  | 130.9 | 124.5 |
| C9ORF128 | 108.4 | 113.7  | 104.7  | 115   | 109.1 | 93.6   | 117   | 112.8 |
| C9ORF132 | 201.3 | 212.7  | 218    | 229.1 | 179.6 | 282.9  | 226.6 | 217.1 |
| C9ORF138 | 123.8 | 108.7  | 113    | 115.2 | 98.7  | 95.1   | 120.5 | 110.4 |
| C9ORF140 | 107.7 | 120.7  | 121.8  | 114.6 | 104.9 | 105.4  | 121.5 | 122.6 |
| C9ORF142 | 948   | 1249.7 | 1819.4 | 1056  | 768.1 | 1236.3 | 695.6 | 681.8 |
| C9ORF150 | 117.4 | 114.6  | 115    | 111.1 | 104.9 | 97.1   | 114.8 | 105.1 |
| C9ORF152 | 110.4 | 109    | 101.9  | 117.6 | 106.6 | 100    | 122.4 | 118.4 |
| C9ORF153 | 115.1 | 114.2  | 123.1  | 118.1 | 103.9 | 99.1   | 123.3 | 116.5 |
| C9ORF156 | 452.4 | 477.3  | 492.7  | 495.2 | 400.1 | 400.9  | 409.1 | 434   |
| C9ORF157 | 117.2 | 114.7  | 126.6  | 113.2 | 111.2 | 99.9   | 114.8 | 116.3 |
| C9ORF16  | 129.7 | 151.9  | 155.8  | 160.7 | 115.1 | 116.9  | 135.2 | 135.8 |
| C9ORF166 | 117.6 | 119.5  | 120.1  | 113.8 | 116.6 | 104.5  | 125.1 | 122.1 |
| C9ORF18  | 108.3 | 110.5  | 103.7  | 114.2 | 103.7 | 98.5   | 113.4 | 108.5 |
| C9ORF19  | 941.7 | 952.7  | 1751.7 | 893.8 | 667.1 | 917.5  | 557.9 | 448.8 |
| C9ORF21  | 138.1 | 144    | 148.1  | 153.1 | 120.3 | 115.4  | 161   | 136.1 |
| C9ORF23  | 135.9 | 165.4  | 167.1  | 140.4 | 137.3 | 119.3  | 129.4 | 150.8 |
| C9ORF23  | 131.7 | 124.3  | 128.6  | 142.1 | 125.4 | 111    | 133   | 126   |
| C9ORF23  | 229   | 236.1  | 255.7  | 254.6 | 184.1 | 234    | 250.2 | 220   |
| C9ORF24  | 121.6 | 129.1  | 120.5  | 125.1 | 117.4 | 97.3   | 120.2 | 137.1 |
| C9ORF24  | 119.1 | 118.8  | 124.2  | 126.6 | 111.8 | 93.3   | 114.4 | 119.2 |
| C9ORF24  | 113.5 | 113.8  | 128.8  | 136.1 | 109.9 | 97.8   | 112.4 | 111.1 |
| C9ORF25  | 137.6 | 141.2  | 152    | 128.7 | 119.3 | 102.1  | 129.4 | 139   |
| C9ORF28  | 167.2 | 187.1  | 180.8  | 180.7 | 148.4 | 166.5  | 170   | 145.1 |
| C9ORF3   | 109.5 | 111.5  | 116.1  | 115.1 | 106.6 | 97.7   | 116.6 | 114.2 |
| C9ORF30  | 142.6 | 151    | 144    | 152.9 | 148.5 | 118.3  | 167.2 | 137.1 |
| C9ORF32  | 162.3 | 150.5  | 190.2  | 201.8 | 170.6 | 153.7  | 146.7 | 164.9 |

|         |        |        |        |        |        |        |        |        |
|---------|--------|--------|--------|--------|--------|--------|--------|--------|
| C9ORF36 | 113.4  | 121.9  | 110.5  | 125.4  | 118.6  | 96.8   | 113.6  | 111.5  |
| C9ORF37 | 130.3  | 155.1  | 160.9  | 147.1  | 120.1  | 121.9  | 137.7  | 123.7  |
| C9ORF39 | 123.8  | 111    | 116.5  | 118.2  | 105.1  | 106.5  | 117.6  | 125.7  |
| C9ORF4  | 107.5  | 112.9  | 122.9  | 119.8  | 108.9  | 103.4  | 121.4  | 109.6  |
| C9ORF40 | 156.1  | 153.9  | 149.9  | 166.8  | 149.7  | 128.5  | 187.5  | 180.1  |
| C9ORF41 | 117.6  | 125.8  | 119.2  | 126.9  | 112.9  | 94.3   | 125.6  | 118.5  |
| C9ORF43 | 108.1  | 115.8  | 124.6  | 107.9  | 116.6  | 103.2  | 129.4  | 121.9  |
| C9ORF45 | 266.9  | 230.7  | 277.5  | 254.4  | 210.3  | 189.6  | 232.1  | 239.1  |
| C9ORF46 | 381.3  | 358.1  | 656    | 387.2  | 288    | 426.9  | 263.7  | 201.7  |
| C9ORF47 | 115.1  | 106.8  | 105.9  | 128.9  | 114.5  | 107.6  | 117.2  | 118.7  |
| C9ORF48 | 119.4  | 132.4  | 118.2  | 119.5  | 119.8  | 99     | 116.3  | 110.3  |
| C9ORF5  | 308.8  | 408.8  | 272.6  | 281.5  | 408.4  | 260    | 477.9  | 421.2  |
| C9ORF50 | 110.4  | 115.7  | 122.6  | 118.4  | 117.6  | 97.7   | 111.3  | 126.7  |
| C9ORF52 | 107.6  | 121.8  | 124.9  | 120.9  | 112.8  | 98.2   | 116.4  | 115.4  |
| C9ORF58 | 126.4  | 118.3  | 116.3  | 127.8  | 114.9  | 101.4  | 113.7  | 112.6  |
| C9ORF58 | 114.1  | 123.2  | 128.5  | 129.3  | 115.2  | 101.5  | 115.7  | 117.2  |
| C9ORF6  | 156.1  | 177.6  | 209    | 179.2  | 174.3  | 169.1  | 159.6  | 149.8  |
| C9ORF61 | 108.3  | 116.4  | 108.6  | 111.1  | 108.7  | 98.4   | 117.7  | 109.9  |
| C9ORF64 | 119.9  | 126.8  | 126.4  | 126.1  | 124.5  | 118.5  | 135.1  | 128.7  |
| C9ORF66 | 123.2  | 133.8  | 137.9  | 127.8  | 131    | 107.7  | 124.4  | 112.2  |
| C9ORF68 | 109.6  | 119.4  | 109.7  | 118.5  | 98.8   | 99.9   | 113.4  | 106.8  |
| C9ORF7  | 129.5  | 132.9  | 129.4  | 134.2  | 120    | 110.9  | 150.7  | 146.8  |
| C9ORF71 | 111    | 115.8  | 112.2  | 113.6  | 102.1  | 102.1  | 118.7  | 117.6  |
| C9ORF72 | 138.5  | 133.5  | 150    | 158.1  | 119.6  | 122.5  | 149.6  | 128.8  |
| C9ORF72 | 113.1  | 111.6  | 122.5  | 115    | 108.1  | 103.5  | 120    | 114.2  |
| C9ORF72 | 115.7  | 115    | 125.2  | 125.9  | 116.6  | 112.9  | 118.5  | 119    |
| C9ORF74 | 482.5  | 562.8  | 620.3  | 511.6  | 420.7  | 532.1  | 433.5  | 375.2  |
| C9ORF75 | 140.6  | 143.3  | 137.1  | 139.9  | 114.9  | 126.1  | 144.9  | 142.5  |
| C9ORF77 | 125.8  | 137.9  | 154.9  | 142.9  | 132.6  | 118.5  | 141.2  | 130.9  |
| C9ORF77 | 123.7  | 118.4  | 130.1  | 134.4  | 103.5  | 103.1  | 122.9  | 113    |
| C9ORF77 | 192.6  | 233.9  | 188.8  | 186    | 147.9  | 153    | 191.8  | 253.4  |
| C9ORF78 | 1871.7 | 2097.2 | 1921.1 | 1834.3 | 1745   | 1686.4 | 2003.4 | 2058.4 |
| C9ORF79 | 117.7  | 124.8  | 114.7  | 115.6  | 109.4  | 97.1   | 131.3  | 118.2  |
| C9ORF80 | 2830   | 3059.5 | 2637.8 | 3263.3 | 3010.4 | 1454.6 | 3091   | 4264.1 |
| C9ORF82 | 147.9  | 171.8  | 171.9  | 186.9  | 148.3  | 135.4  | 148    | 152.8  |
| C9ORF84 | 120.5  | 122.8  | 117.9  | 123.1  | 115.2  | 97.2   | 119.3  | 124    |
| C9ORF84 | 115.4  | 114.8  | 118.6  | 119.3  | 102    | 100.7  | 127.6  | 113.5  |
| C9ORF85 | 124.6  | 129.6  | 122.7  | 131.4  | 128.9  | 109    | 121.5  | 123.3  |
| C9ORF85 | 122.2  | 127.3  | 126.9  | 125.3  | 113.2  | 115.4  | 126.1  | 106.8  |
| C9ORF86 | 201.3  | 228    | 213.6  | 233.8  | 186.4  | 151.4  | 235.9  | 201.3  |
| C9ORF88 | 757.7  | 1017.4 | 651.1  | 1293   | 736.1  | 747.1  | 892.9  | 439.8  |
| C9ORF89 | 354.9  | 346    | 378.7  | 369.9  | 268.4  | 385    | 509.8  | 501.4  |
| C9ORF9  | 118.1  | 116.5  | 117.3  | 125.4  | 109    | 101.3  | 113.5  | 113.8  |
| C9ORF90 | 248.6  | 253.7  | 210.8  | 274.4  | 265    | 205.5  | 351.4  | 352.9  |
| C9ORF91 | 171.8  | 177.5  | 156.6  | 161.2  | 150.9  | 119.8  | 141.2  | 153.8  |
| C9ORF93 | 112.3  | 119.5  | 121.5  | 117.6  | 117.4  | 95.8   | 120.7  | 124.9  |
| C9ORF95 | 173.8  | 193.8  | 212.4  | 198    | 196.2  | 180.8  | 200.9  | 164.1  |
| C9ORF96 | 106.8  | 109.9  | 111.5  | 121.4  | 104.8  | 96     | 115.4  | 116.4  |
| C9ORF97 | 128.7  | 151.4  | 135.2  | 136.1  | 135.6  | 105.3  | 137.9  | 128.5  |
| C9ORF98 | 135.3  | 125.5  | 127.9  | 126.7  | 115.5  | 94.9   | 148.4  | 110.9  |
| CA1     | 123.2  | 118.1  | 123.5  | 119.2  | 107.8  | 104.5  | 120.6  | 113.3  |

|         |        |        |        |        |        |        |        |        |
|---------|--------|--------|--------|--------|--------|--------|--------|--------|
| CA10    | 117.5  | 123.3  | 114.8  | 119.8  | 106.3  | 105.9  | 112.7  | 121.5  |
| CA11    | 163.8  | 174.3  | 135.2  | 157.8  | 142.6  | 129.7  | 182.1  | 163.4  |
| CA12    | 110.8  | 115.3  | 116.7  | 117.2  | 110.5  | 94.8   | 116.6  | 124.9  |
| CA12    | 107.1  | 110.4  | 112.6  | 112.3  | 102.6  | 91.7   | 110.8  | 104.7  |
| CA13    | 116    | 130.3  | 121.5  | 116.4  | 111.4  | 107    | 127    | 120.8  |
| CA14    | 108.5  | 111.4  | 120.5  | 119    | 103.6  | 93.7   | 114.6  | 114.2  |
| CA2     | 188.5  | 265    | 381.9  | 213.6  | 181.4  | 220.1  | 182.7  | 224.5  |
| CA3     | 109    | 119.7  | 112.7  | 108.8  | 108.4  | 95.2   | 120.2  | 103.4  |
| CA4     | 112.6  | 128.7  | 124.8  | 118.8  | 110    | 97.7   | 136.6  | 127.2  |
| CA5A    | 112.8  | 105.5  | 107.6  | 106.9  | 100.4  | 97.1   | 115.1  | 113.3  |
| CA5B    | 227.7  | 289    | 268    | 279.1  | 228.7  | 206.1  | 210.8  | 206.6  |
| CA6     | 122.8  | 138    | 139.1  | 139.6  | 110.5  | 108.4  | 125    | 129.6  |
| CA7     | 120.5  | 109.3  | 108.7  | 117.1  | 111    | 100.3  | 116.7  | 119.2  |
| CA7     | 106.5  | 116.1  | 111.6  | 124.2  | 102.1  | 99.5   | 117.5  | 112.4  |
| CA8     | 108.9  | 111.8  | 115.5  | 122.7  | 110.1  | 101.4  | 106.6  | 109.5  |
| CA9     | 125    | 114.7  | 138.3  | 125.5  | 113    | 102.3  | 127.2  | 117.2  |
| CAB39   | 1631.9 | 1816.7 | 1555.3 | 1739.2 | 1625.3 | 1552.7 | 1837.4 | 1922.3 |
| CAB39L  | 123.3  | 127.2  | 136.6  | 132.1  | 127    | 115.5  | 167.5  | 148.6  |
| CAB39L  | 107.7  | 118.7  | 107.9  | 129.9  | 117.1  | 96.5   | 123.1  | 110.9  |
| CAB39L  | 121.6  | 122.2  | 122.6  | 130.4  | 113.2  | 97.5   | 117.4  | 116.2  |
| CABC1   | 440.6  | 491.9  | 356.5  | 534.4  | 451.1  | 431.1  | 552    | 497.5  |
| CABIN1  | 193.6  | 241.4  | 205.1  | 195.5  | 155.2  | 212    | 157.9  | 140.5  |
| CABLES1 | 139.7  | 136.2  | 136.5  | 147.1  | 119.6  | 106.7  | 141.5  | 132    |
| CABLES2 | 133.2  | 135.2  | 140.9  | 134.4  | 117.4  | 120.7  | 143    | 144.3  |
| CABP1   | 130.4  | 110.6  | 121.8  | 123.1  | 109.8  | 93.5   | 120.5  | 122.2  |
| CABP1   | 105.7  | 113.8  | 115.4  | 115.8  | 105    | 102.1  | 113.2  | 115.3  |
| CABP1   | 118.7  | 117    | 112.7  | 124.5  | 107    | 99.1   | 118.2  | 107.7  |
| CABP2   | 114.4  | 116.7  | 118.8  | 121.8  | 111.9  | 101    | 118    | 117.7  |
| CABP2   | 115.8  | 131.2  | 113.7  | 120.6  | 104.6  | 98.5   | 121.7  | 119.7  |
| CABP2   | 120.9  | 107.4  | 133.5  | 119.5  | 109.8  | 104.7  | 124.4  | 116.1  |
| CABP4   | 118.5  | 119.5  | 123.9  | 127.1  | 117.1  | 94.1   | 130.6  | 124    |
| CABP5   | 116.6  | 111.2  | 111.6  | 111.6  | 101.1  | 101.6  | 123.1  | 115.2  |
| CABP7   | 124.5  | 126.7  | 132.6  | 123.7  | 123.5  | 114.9  | 132.3  | 123.3  |
| CABYR   | 106.7  | 100.6  | 123.6  | 112.8  | 117.4  | 99.3   | 110.2  | 107.9  |
| CABYR   | 120.8  | 123.7  | 125.4  | 136    | 135    | 107.1  | 189.2  | 245    |
| CACHD1  | 125.5  | 135.6  | 117.6  | 124.2  | 114.1  | 99.7   | 123.9  | 128.1  |
| CACNA1A | 110.6  | 109.5  | 116.1  | 116    | 109.6  | 104.3  | 111.1  | 110.8  |
| CACNA1A | 119.5  | 113.8  | 128.8  | 129.4  | 111.6  | 107.2  | 132.1  | 115.1  |
| CACNA1B | 131.8  | 127.9  | 129.5  | 128.7  | 123.9  | 112.1  | 127.6  | 135.7  |
| CACNA1C | 123.5  | 122.4  | 126.9  | 116.4  | 117.5  | 113.9  | 133.5  | 108.1  |
| CACNA1D | 119    | 120.6  | 121.6  | 136.9  | 117.3  | 103.4  | 132.2  | 118.9  |
| CACNA1E | 118.3  | 115.7  | 118.5  | 124.2  | 107.8  | 94.9   | 126.5  | 110.8  |
| CACNA1F | 111.8  | 125    | 125.9  | 114    | 104.7  | 97.4   | 121.2  | 107.7  |
| CACNA1G | 106.8  | 112.7  | 110.6  | 104.5  | 105.2  | 97.5   | 106    | 112.3  |
| CACNA1G | 123.2  | 116.5  | 112.7  | 122.1  | 108.6  | 98     | 127.6  | 108.1  |
| CACNA1G | 113.8  | 112.6  | 109.2  | 116.5  | 105.3  | 92.8   | 114.2  | 112.7  |
| CACNA1G | 111.4  | 105.7  | 112.1  | 108.9  | 111.2  | 95.6   | 112.9  | 113.9  |
| CACNA1H | 148    | 137.1  | 145.2  | 166.8  | 125.9  | 123.4  | 146.4  | 142.2  |
| CACNA1H | 120.3  | 118.4  | 122.9  | 118.1  | 106.8  | 99     | 111.6  | 111.8  |
| CACNA1I | 114.1  | 113.8  | 118.2  | 121.7  | 101.8  | 101.6  | 106.7  | 113.7  |
| CACNA1I | 452.1  | 367.7  | 395.8  | 463.5  | 311.4  | 294.5  | 331.4  | 307.3  |

|          |       |       |       |       |       |       |       |        |
|----------|-------|-------|-------|-------|-------|-------|-------|--------|
| CACNA1S  | 113.4 | 114.6 | 110.1 | 120.2 | 100.8 | 96.3  | 119.3 | 110.9  |
| CACNA2D1 | 114.7 | 122.2 | 123.5 | 125.8 | 109.8 | 97.3  | 114.4 | 113.6  |
| CACNA2D2 | 126.9 | 150.8 | 137.2 | 131   | 138.9 | 104.8 | 135.6 | 130.5  |
| CACNA2D2 | 111.6 | 112.7 | 117.2 | 117   | 109.3 | 103.7 | 115.3 | 115.6  |
| CACNA2D3 | 117.9 | 109.2 | 128.2 | 121.8 | 119.5 | 101.4 | 117.8 | 121.6  |
| CACNA2D4 | 136.3 | 117.4 | 125.6 | 121.2 | 105.9 | 106.9 | 117   | 120.1  |
| CACNA2D4 | 130.1 | 147.4 | 125.3 | 153.4 | 117.9 | 121.1 | 120.1 | 128.8  |
| CACNB1   | 120.5 | 122.4 | 103.1 | 127.3 | 112.1 | 98.7  | 118   | 112.7  |
| CACNB1   | 114.8 | 113.5 | 120.2 | 119.4 | 107   | 100.5 | 121   | 118.2  |
| CACNB1   | 112.2 | 120   | 113.3 | 109.5 | 106.3 | 94.7  | 110.1 | 113.8  |
| CACNB1   | 117.2 | 120.7 | 111.8 | 123.8 | 109.1 | 98    | 118.7 | 114.3  |
| CACNB2   | 109.4 | 115.1 | 116.3 | 130   | 111.8 | 92.3  | 107.9 | 113.8  |
| CACNB2   | 118.9 | 122   | 114.6 | 118.2 | 107.3 | 98.3  | 123.3 | 123.9  |
| CACNB2   | 119.7 | 115.9 | 126   | 117   | 103.2 | 93.5  | 113.4 | 118.3  |
| CACNB2   | 120.9 | 115.4 | 120.5 | 123.9 | 102.2 | 95.8  | 113   | 113.9  |
| CACNB2   | 116.3 | 109.3 | 116.9 | 121.9 | 97.5  | 96.6  | 106.3 | 112.9  |
| CACNB3   | 188.2 | 179   | 150.2 | 180.8 | 187   | 131.6 | 266.9 | 255.8  |
| CACNB4   | 121.9 | 127.2 | 128.1 | 121.1 | 118.2 | 98.9  | 114.6 | 117    |
| CACNB4   | 101.9 | 106.7 | 114.2 | 113.7 | 106.2 | 94.1  | 113.5 | 122.1  |
| CACNB4   | 105.8 | 108.7 | 111.8 | 122   | 100.3 | 95.1  | 115.2 | 112.8  |
| CACNG1   | 112.3 | 109.9 | 109.9 | 124.2 | 100.3 | 102.4 | 118.2 | 112.2  |
| CACNG2   | 114.7 | 116.9 | 115.9 | 108   | 101.5 | 99.1  | 117.8 | 115.5  |
| CACNG3   | 110.4 | 110.4 | 111.1 | 114.9 | 102.5 | 96.8  | 117.9 | 106.2  |
| CACNG4   | 111.6 | 108.9 | 112.6 | 111.8 | 103.3 | 90.7  | 109.3 | 105.4  |
| CACNG5   | 117.4 | 120.7 | 119.7 | 122.2 | 114.5 | 94.6  | 125.9 | 111.2  |
| CACNG5   | 121.7 | 123.4 | 122.9 | 109.1 | 115.2 | 97.3  | 112   | 112.9  |
| CACNG5   | 120   | 105.7 | 119.4 | 122.7 | 113.4 | 97.1  | 121.4 | 114.6  |
| CACNG6   | 109.2 | 116.5 | 124.3 | 122.1 | 116.1 | 101.1 | 117.4 | 110.2  |
| CACNG6   | 121.4 | 115.1 | 127.1 | 117.2 | 110.7 | 93.8  | 111.2 | 120.7  |
| CACNG6   | 110.2 | 114.5 | 132.9 | 125.5 | 113.4 | 106.7 | 121   | 118.2  |
| CACNG7   | 115.8 | 112.5 | 115.6 | 115.3 | 112.4 | 95.4  | 109.2 | 109.5  |
| CACNG8   | 130.1 | 121.4 | 128   | 132.4 | 127.8 | 101   | 114.3 | 134.2  |
| CACYBP   | 322.6 | 297.9 | 415   | 420.1 | 380.1 | 350.3 | 657   | 1016.2 |
| CACYBP   | 168.5 | 183.1 | 178.7 | 192.4 | 166   | 139.6 | 201.5 | 211.4  |
| CACYBP   | 118.1 | 106.6 | 109.7 | 123.9 | 109.5 | 107.9 | 114.8 | 120.7  |
| CAD      | 150.6 | 175.7 | 148.2 | 162.3 | 150.5 | 124.7 | 163.4 | 175.2  |
| CADPS    | 120.8 | 109.2 | 120.3 | 124   | 108   | 97.9  | 115.3 | 115    |
| CADPS    | 119.7 | 123.8 | 123.4 | 128.4 | 124.8 | 104.5 | 127.1 | 123.7  |
| CADPS    | 105.2 | 116.4 | 117.9 | 118.5 | 105.7 | 94.3  | 114.7 | 118.1  |
| CADPS2   | 104.7 | 107.8 | 107.5 | 109.6 | 104.8 | 100.8 | 106.8 | 105.9  |
| CADPS2   | 111.3 | 121.7 | 133.4 | 119.4 | 122.8 | 94.1  | 117.6 | 113.6  |
| CAGE1    | 125.9 | 150   | 129.2 | 131.3 | 121.6 | 108.6 | 139   | 141.6  |
| CALB1    | 115.2 | 112.9 | 110.8 | 114.3 | 115   | 97.3  | 113   | 117.8  |
| CALB2    | 132.1 | 136.8 | 138.2 | 138.2 | 126.8 | 115.1 | 115   | 139.1  |
| CALB2    | 114.5 | 115   | 114.4 | 108.4 | 112.3 | 98.9  | 122.2 | 113.2  |
| CALCA    | 112.8 | 112   | 111.6 | 120.8 | 111.3 | 107.1 | 122   | 117.6  |
| CALCA    | 118.7 | 112.5 | 127.8 | 129.1 | 114.3 | 105.4 | 120.5 | 130.9  |
| CALCA    | 108.8 | 123.5 | 118.7 | 122.1 | 102.7 | 97.5  | 117.4 | 111.7  |
| CALCB    | 118.8 | 116.4 | 119.9 | 116.1 | 110   | 98.5  | 117.4 | 118.2  |
| CALCOCO1 | 205.3 | 200.9 | 177.6 | 197.2 | 148.5 | 145.9 | 185.1 | 149.8  |
| CALCOCO2 | 157.7 | 146.2 | 163.6 | 170   | 149.1 | 158.2 | 149.4 | 156.5  |

|          |        |        |        |        |        |        |        |        |
|----------|--------|--------|--------|--------|--------|--------|--------|--------|
| CALCR    | 111.7  | 117    | 120.4  | 119.9  | 111.2  | 106.5  | 128.3  | 110.3  |
| CALCRL   | 105.9  | 104.9  | 108.8  | 109.4  | 105.8  | 98.1   | 119.9  | 114.1  |
| CALD1    | 106.9  | 106.3  | 120.3  | 125.1  | 110    | 100.8  | 121.8  | 114.9  |
| CALM1    | 2345   | 2920.2 | 2444.1 | 2426.9 | 2053.9 | 2341.3 | 2237   | 2609.8 |
| CALM2    | 2572.5 | 2168.8 | 4323.1 | 2497.2 | 1922.4 | 2455.4 | 1905.7 | 2167.2 |
| CALM3    | 1661.2 | 2245.9 | 1636.9 | 1687.8 | 1602.4 | 1357.4 | 1244.8 | 1523.8 |
| CALML3   | 110.3  | 116.6  | 110.2  | 115.1  | 115.8  | 101.5  | 120.2  | 111.5  |
| CALML4   | 112.9  | 121.4  | 107.1  | 119    | 111.6  | 97.6   | 110.6  | 123.9  |
| CALML4   | 128.8  | 131.6  | 125.7  | 126.8  | 115.5  | 103.8  | 128.4  | 117.7  |
| CALML4   | 405.2  | 656.4  | 659.7  | 616.7  | 418    | 333    | 462.7  | 506.7  |
| CALML4   | 136.2  | 138.6  | 192.3  | 151.6  | 134.6  | 140.2  | 138.4  | 136.4  |
| CALML5   | 118.8  | 114.5  | 115.6  | 129.5  | 119    | 111.9  | 119.7  | 116    |
| CALML6   | 112    | 115.2  | 109.3  | 122.3  | 113.2  | 101.1  | 120    | 113.5  |
| CALN1    | 127.9  | 122.4  | 118.9  | 132.3  | 113.4  | 105.3  | 128.3  | 122    |
| CALN1    | 139.5  | 146.4  | 150.5  | 156.8  | 124.8  | 118.3  | 142.9  | 152.9  |
| CALN1    | 125.9  | 115.2  | 116.3  | 114.7  | 108.5  | 100.7  | 119.3  | 112.5  |
| CALR     | 268.1  | 209.2  | 299    | 260.2  | 221.7  | 389.6  | 255.7  | 336.5  |
| CALR3    | 110.3  | 115.1  | 110.5  | 117.2  | 108.3  | 96.6   | 114.9  | 116.7  |
| CALU     | 194    | 159.7  | 154    | 188.1  | 143.7  | 136    | 228.7  | 167    |
| CAMK1    | 227.1  | 167.1  | 550.9  | 236.1  | 142.3  | 455.9  | 180.9  | 119.1  |
| CAMK1D   | 152.8  | 157.4  | 192.7  | 175.8  | 146    | 119    | 161.9  | 133.9  |
| CAMK1D   | 107.2  | 108.4  | 114.2  | 111.4  | 100.5  | 93.3   | 111.2  | 115.3  |
| CAMK1D   | 123.1  | 112.3  | 112.1  | 108.1  | 116.7  | 107.4  | 126.8  | 108.7  |
| CAMK1G   | 109.3  | 117.3  | 119.3  | 117.4  | 103.5  | 106.7  | 122    | 117.8  |
| CAMK2A   | 119.5  | 114.6  | 115.9  | 114.6  | 104    | 104.8  | 116.9  | 115.4  |
| CAMK2B   | 114    | 110.4  | 115.8  | 109.3  | 103.4  | 90.8   | 115    | 112.9  |
| CAMK2B   | 105    | 105.5  | 108.7  | 117.7  | 106.8  | 98.8   | 116.8  | 109.6  |
| CAMK2B   | 117.3  | 112.3  | 123.1  | 116.1  | 112.5  | 100.5  | 130.7  | 116.1  |
| CAMK2B   | 124.5  | 120.2  | 132    | 131.8  | 116.6  | 103.1  | 120.8  | 127.3  |
| CAMK2D   | 133.3  | 128.1  | 120.5  | 139.5  | 113.4  | 108.2  | 130.1  | 123.6  |
| CAMK2D   | 119.9  | 122    | 117.7  | 109.4  | 113.9  | 94.4   | 129.1  | 117.8  |
| CAMK2D   | 112.4  | 113.4  | 113.5  | 123.1  | 111.1  | 99.6   | 120.3  | 115.9  |
| CAMK2D   | 113.4  | 114.2  | 117    | 119.1  | 109.7  | 100.4  | 116.2  | 110.3  |
| CAMK2G   | 235.1  | 241.3  | 232.9  | 232.5  | 203.5  | 151.3  | 181.2  | 171.9  |
| CAMK2G   | 156    | 160.3  | 143.9  | 168.1  | 128.2  | 112.5  | 136.1  | 131.7  |
| CAMK2N1  | 205.3  | 194.1  | 201.4  | 204.6  | 197.1  | 184.9  | 205.7  | 191.8  |
| CAMK2N2  | 120.4  | 122.3  | 117    | 111.4  | 103.5  | 100.9  | 124    | 114.6  |
| CAMK4    | 105.7  | 112.4  | 112.4  | 115.8  | 103.7  | 97.3   | 124.4  | 113.2  |
| CAMKK1   | 130.5  | 119    | 131.8  | 122    | 114.1  | 100    | 126.9  | 120    |
| CAMKK1   | 117.3  | 107.7  | 117.2  | 119.3  | 106.7  | 99.7   | 124.3  | 114.3  |
| CAMKK2   | 122    | 115    | 131.9  | 125    | 117.4  | 108.5  | 123.2  | 120.5  |
| CAMKK2   | 122.9  | 116.7  | 132.9  | 133.4  | 112.5  | 103.3  | 120.9  | 129.9  |
| CAMKV    | 116.3  | 111.9  | 119.1  | 115.7  | 105.7  | 118.2  | 116.9  | 107.6  |
| CAMP     | 147.7  | 201.3  | 168.9  | 150.2  | 180.1  | 140.9  | 138.5  | 180.8  |
| CAMSAP1  | 221    | 252.3  | 219    | 284    | 208.8  | 192.7  | 275.8  | 265.4  |
| CAMSAP1L | 188.2  | 213.5  | 198.5  | 239.3  | 197.9  | 170.2  | 230    | 240.9  |
| CAMTA1   | 124.2  | 130.1  | 120.4  | 134.6  | 125.1  | 103.6  | 138.9  | 136.2  |
| CAMTA2   | 120.5  | 118.8  | 123.1  | 128.2  | 103.8  | 98.2   | 121.8  | 117.4  |
| CAND1    | 146.2  | 164.4  | 123.5  | 177.1  | 153.1  | 131.3  | 148.4  | 169.7  |
| CAND2    | 106.3  | 123.7  | 119.8  | 109    | 107.5  | 94.3   | 119.3  | 107.7  |
| CAND2    | 151.7  | 139.8  | 145.2  | 144.2  | 135.3  | 118.3  | 145.9  | 121.1  |

|         |        |        |        |        |        |        |        |        |
|---------|--------|--------|--------|--------|--------|--------|--------|--------|
| CANT1   | 303.3  | 306.4  | 250    | 361.8  | 250.7  | 307.2  | 425.5  | 396.1  |
| CANX    | 702    | 797.5  | 1089.7 | 931.4  | 705.7  | 1001.8 | 1050.3 | 1095.3 |
| CAP1    | 3445.8 | 3444.7 | 4499.3 | 3420.7 | 2254.6 | 3271.7 | 4129.9 | 3508.3 |
| CAP2    | 110.7  | 117.4  | 108.6  | 113.8  | 107    | 91.3   | 124.2  | 110.2  |
| CAPG    | 125.3  | 119    | 155.6  | 132.2  | 120.4  | 114.2  | 138    | 132.5  |
| CAPN1   | 511.2  | 521.7  | 684.1  | 493.4  | 343.4  | 432.1  | 559.3  | 370.6  |
| CAPN10  | 137    | 155.4  | 152    | 131.5  | 125.1  | 124.8  | 142.8  | 140.8  |
| CAPN10  | 119.6  | 121.2  | 120.6  | 126.1  | 125.7  | 92     | 121.7  | 116.3  |
| CAPN10  | 120.1  | 128.2  | 122    | 121    | 113.5  | 106.6  | 121.2  | 121.6  |
| CAPN10  | 111.2  | 120.1  | 112.2  | 119.3  | 113.5  | 105.4  | 121.8  | 117.8  |
| CAPN11  | 125.4  | 112.2  | 131.9  | 124.9  | 111.3  | 103.7  | 119.7  | 112.7  |
| CAPN12  | 209.4  | 222.5  | 184.4  | 197.8  | 175.1  | 133    | 161.7  | 142.6  |
| CAPN13  | 114.3  | 123.9  | 120    | 123.8  | 121.7  | 111.3  | 113.4  | 112.2  |
| CAPN2   | 137    | 138.5  | 138    | 132.3  | 128.2  | 112.3  | 127.8  | 129.9  |
| CAPN3   | 110.9  | 114.6  | 122.7  | 114    | 106.8  | 107    | 114.1  | 118.8  |
| CAPN3   | 110.8  | 111.8  | 111.7  | 121.6  | 112.3  | 97.1   | 107.4  | 123.3  |
| CAPN3   | 154.7  | 144.3  | 170.6  | 168.5  | 144.4  | 138.6  | 161.2  | 163.3  |
| CAPN3   | 126.1  | 130.6  | 157.7  | 131.3  | 118    | 117    | 134.3  | 145.3  |
| CAPN5   | 141.1  | 155.4  | 129.2  | 134.6  | 135.2  | 97.6   | 142.3  | 130.8  |
| CAPN7   | 135.3  | 132    | 130.7  | 138.9  | 123.7  | 115.1  | 133.1  | 127.1  |
| CAPN9   | 121.5  | 106.4  | 120.3  | 120.6  | 116.1  | 94.9   | 116.5  | 121    |
| CAPN9   | 117.1  | 116.5  | 114.9  | 117.3  | 109.5  | 99.3   | 111.9  | 118.4  |
| CAPNS1  | 693.3  | 767.7  | 882.2  | 727    | 550.4  | 800.5  | 834    | 719.2  |
| CAPNS1  | 227.7  | 225.4  | 224.4  | 236.1  | 230.8  | 232.2  | 253.2  | 240.7  |
| CAPNS2  | 116.2  | 117.7  | 126.5  | 121.4  | 104.1  | 101.7  | 122.2  | 113.8  |
| CAPS    | 126.9  | 115.5  | 125.7  | 123.4  | 99.6   | 101.2  | 129.1  | 117.7  |
| CAPS    | 170.2  | 207    | 206.6  | 190.9  | 196.2  | 160.3  | 164.3  | 186.3  |
| CAPS2   | 108.3  | 112.9  | 113    | 123    | 113.7  | 103    | 117.7  | 126.1  |
| CAPSL   | 124.2  | 110.4  | 122.5  | 131.9  | 112.1  | 102.1  | 128    | 116.3  |
| CAPSL   | 114.8  | 115.6  | 126.6  | 113.2  | 103.5  | 101    | 127    | 117.2  |
| CAPSL   | 115.7  | 133.4  | 119    | 121.7  | 114.5  | 100.1  | 122.6  | 116.8  |
| CAPZA2  | 1046.7 | 885.9  | 1298.5 | 1164.9 | 914.1  | 1131.5 | 1326.6 | 1090.2 |
| CAPZA3  | 103.8  | 117.3  | 109.4  | 113.4  | 99.3   | 95.2   | 109.2  | 109.6  |
| CAPZB   | 164.7  | 202.2  | 202.3  | 181.1  | 169.6  | 188.9  | 169    | 176.2  |
| CARD10  | 126.3  | 121.8  | 118    | 133.3  | 119.4  | 103.2  | 120.3  | 122.8  |
| CARD11  | 420.7  | 470.9  | 302.5  | 446.3  | 356.8  | 259.5  | 322.7  | 302.8  |
| CARD12  | 112.3  | 120.7  | 145    | 119.1  | 109.5  | 147.3  | 120.7  | 109    |
| CARD14  | 117.2  | 113.6  | 126.1  | 123.1  | 100.2  | 97.4   | 120.5  | 119.1  |
| CARD14  | 120.2  | 110.3  | 111.9  | 113.9  | 108.1  | 91.9   | 104.3  | 114    |
| CARD14  | 122    | 121.8  | 114.5  | 119.6  | 113.9  | 97.5   | 115.5  | 123.3  |
| CARD15  | 183.9  | 138.3  | 162.4  | 157.6  | 110.5  | 137.6  | 126.8  | 118.3  |
| CARD6   | 122.6  | 123.6  | 118.2  | 119.2  | 122    | 104.3  | 120.8  | 119.5  |
| CARD8   | 677.7  | 685.8  | 561.3  | 635.8  | 740.4  | 440.9  | 578.2  | 560.6  |
| CARD9   | 171.2  | 156.5  | 553.7  | 164.8  | 125.8  | 171.7  | 154.3  | 152.4  |
| CARF    | 385.1  | 339.7  | 359.6  | 372.7  | 328    | 206.5  | 350    | 415.9  |
| CARHSP1 | 411    | 471.7  | 420.6  | 502.4  | 394    | 347.8  | 489.1  | 521.4  |
| CARKL   | 200.5  | 225.3  | 269.3  | 216.3  | 177.3  | 180.8  | 186.3  | 169.6  |
| CARM1   | 543.3  | 702    | 607.8  | 561.5  | 438.7  | 403.8  | 558.9  | 718.6  |
| CARS    | 126.5  | 137.8  | 125.8  | 128.7  | 124.6  | 107.5  | 118.7  | 144.5  |
| CARS    | 285.2  | 483.4  | 259.4  | 419.6  | 458.4  | 267.8  | 369    | 498.4  |
| CART    | 112.2  | 123.5  | 118    | 124.2  | 115.4  | 102.7  | 127.3  | 118.5  |

|          |       |        |        |        |        |        |        |        |
|----------|-------|--------|--------|--------|--------|--------|--------|--------|
| CART1    | 105.7 | 107.6  | 110.3  | 111.9  | 103.4  | 95.4   | 109.9  | 111.1  |
| CASC1    | 116.4 | 123    | 124.1  | 114.3  | 113.6  | 107.1  | 121.1  | 121.8  |
| CASC2    | 127.6 | 118    | 137.1  | 133.1  | 116.4  | 102    | 136.8  | 117.4  |
| CASC2    | 124.7 | 127.1  | 133    | 122.7  | 117.1  | 101.4  | 123.5  | 118    |
| CASC3    | 295.5 | 321    | 246    | 365.4  | 229.2  | 251.1  | 373.2  | 316.2  |
| CASC4    | 108   | 115    | 117.2  | 121    | 112    | 101.2  | 110.4  | 111.1  |
| CASC4    | 215.8 | 201.8  | 275.8  | 230.6  | 182.5  | 246.1  | 206.2  | 158.8  |
| CASC5    | 106.9 | 115.3  | 112.4  | 119.4  | 109.2  | 91.8   | 116.7  | 110.6  |
| CASC5    | 114.5 | 123.6  | 114.9  | 118.7  | 103.7  | 103.2  | 118.4  | 123.1  |
| CASD1    | 138.9 | 131.5  | 148.8  | 134.4  | 144.2  | 108.9  | 128.9  | 122.4  |
| CASK     | 175.3 | 206.7  | 191.2  | 187.4  | 195.6  | 168.1  | 219.9  | 192    |
| CASKIN1  | 112.4 | 111.1  | 120    | 119.9  | 114.4  | 89.1   | 116    | 110.1  |
| CASKIN2  | 122.8 | 114.2  | 135.8  | 124    | 123.6  | 106.7  | 120.6  | 112    |
| CASP1    | 332.8 | 315.6  | 931.7  | 259.2  | 251.5  | 429.9  | 174.1  | 229.2  |
| CASP1    | 115.6 | 107    | 118.3  | 112.3  | 108.1  | 92.2   | 111.3  | 107.1  |
| CASP1    | 232.2 | 229.8  | 535.6  | 205.2  | 160.6  | 254.4  | 162.5  | 151.6  |
| CASP10   | 123.1 | 121.6  | 118.2  | 133.8  | 114.9  | 97.4   | 133.2  | 127.8  |
| CASP10   | 116.7 | 119.2  | 122.2  | 125.1  | 110.5  | 102    | 123.4  | 118.8  |
| CASP12   | 115.5 | 111.7  | 118.4  | 125.3  | 109.7  | 97.5   | 111.7  | 121.2  |
| CASP14   | 109   | 115.5  | 128.6  | 116.5  | 113    | 96.7   | 116    | 118.9  |
| CASP2    | 123.3 | 123.4  | 119.7  | 138.9  | 112.6  | 99.8   | 123.3  | 119.1  |
| CASP2    | 1982  | 2260.7 | 1601.5 | 2272.4 | 2001.8 | 1331.4 | 2042.2 | 1597.4 |
| CASP2    | 270.1 | 296.4  | 218.4  | 289.6  | 224.7  | 203.6  | 280.6  | 264.1  |
| CASP3    | 266.8 | 350    | 256.9  | 353.6  | 281.9  | 233.4  | 343.5  | 376    |
| CASP3    | 129.1 | 130.2  | 120.4  | 145    | 113.2  | 110.9  | 123.6  | 129.1  |
| CASP4    | 113   | 114.1  | 121.1  | 110.9  | 107.2  | 97.1   | 118.9  | 117.2  |
| CASP4    | 241.7 | 305.8  | 345.4  | 295    | 235.2  | 331.1  | 259.5  | 304.7  |
| CASP4    | 116.3 | 114.3  | 119.2  | 115.4  | 116.6  | 96.8   | 117.2  | 111.1  |
| CASP4    | 128.3 | 126.9  | 139.6  | 134.3  | 123    | 109.4  | 133.3  | 138.6  |
| CASP5    | 118.7 | 124.2  | 120.3  | 114.2  | 107.5  | 104.7  | 125    | 118.1  |
| CASP6    | 197.3 | 187    | 219.5  | 208.4  | 206.1  | 154.5  | 170.8  | 225    |
| CASP6    | 139.4 | 136    | 127.3  | 133    | 122.3  | 106.3  | 129.6  | 124    |
| CASP6    | 143.7 | 140.1  | 147.3  | 149.4  | 132.1  | 114.8  | 154.2  | 139.7  |
| CASP7    | 151.9 | 144.3  | 142    | 133.8  | 129.9  | 128.5  | 144.4  | 125.8  |
| CASP7    | 112.3 | 110.2  | 119.6  | 127.7  | 117.2  | 96.1   | 122.8  | 121    |
| CASP7    | 112.2 | 106.7  | 115.9  | 118.3  | 104.5  | 99.4   | 109.1  | 106.5  |
| CASP8    | 133.2 | 125.2  | 124.6  | 146    | 131.4  | 102.6  | 126.6  | 154.1  |
| CASP8    | 123.1 | 116.2  | 135.5  | 134.2  | 131.4  | 110.7  | 129.3  | 124.3  |
| CASP8    | 132.2 | 134.6  | 151    | 154.8  | 137.8  | 114.4  | 125.4  | 143.2  |
| CASP8    | 124.5 | 133    | 147.4  | 138.6  | 134.3  | 108.8  | 133.2  | 132.2  |
| CASP8AP2 | 112.2 | 117.4  | 114.4  | 115.5  | 106.2  | 101.5  | 105.2  | 112    |
| CASP9    | 130.4 | 114.6  | 135.3  | 132.5  | 105    | 115.7  | 132.2  | 114.4  |
| CASP9    | 167.9 | 178.4  | 156.6  | 203.7  | 167    | 158.1  | 216    | 195.6  |
| CASQ1    | 126.5 | 121.9  | 123.8  | 124.5  | 112.1  | 107.1  | 117    | 112.4  |
| CASQ2    | 114.7 | 117    | 110.9  | 120.2  | 111.1  | 93.1   | 115.3  | 110.3  |
| CASR     | 118.6 | 122.2  | 112.5  | 126.8  | 105.5  | 100.9  | 121.8  | 128.5  |
| CAST     | 199.6 | 173.2  | 172    | 196.6  | 191.2  | 164.2  | 187.7  | 162.5  |
| CAST     | 111.9 | 114.6  | 118.9  | 120.5  | 106.9  | 96     | 117.5  | 109.8  |
| CAST     | 107.6 | 112.5  | 113.5  | 108.8  | 104.7  | 91.7   | 112.7  | 104.3  |
| CAST     | 229.4 | 275.6  | 215.5  | 214.1  | 223.8  | 201.4  | 243.4  | 196.7  |
| CAST1    | 118.1 | 108.3  | 112.7  | 115.1  | 106.2  | 97.8   | 113    | 115.8  |

|          |       |       |       |        |        |       |        |        |
|----------|-------|-------|-------|--------|--------|-------|--------|--------|
| CASZ1    | 240.1 | 252.6 | 194.4 | 261.1  | 224.6  | 154.4 | 319.9  | 287.8  |
| CASZ1    | 115.1 | 112.7 | 125.3 | 114    | 107.3  | 103.8 | 114.3  | 117.7  |
| CASZ1    | 117.9 | 118.3 | 120.6 | 114    | 113.6  | 103.3 | 129.5  | 138.4  |
| CAT      | 200.5 | 176.4 | 225.1 | 206.9  | 154.2  | 185   | 150.8  | 155.3  |
| CATSPER1 | 113.1 | 124.1 | 141.4 | 120.4  | 106.6  | 100.6 | 121.7  | 114    |
| CATSPER2 | 120.6 | 117.5 | 121   | 120.6  | 112.6  | 100.5 | 122.4  | 110.7  |
| CATSPER3 | 129.2 | 123   | 118.1 | 121.7  | 115.5  | 104.2 | 108.6  | 111.5  |
| CATSPER4 | 109.4 | 103.2 | 114.4 | 111.8  | 104.3  | 96.5  | 114.7  | 103.7  |
| CAV1     | 113.1 | 111.2 | 115.4 | 109.8  | 103    | 94.9  | 119.7  | 116.5  |
| CAV2     | 125.4 | 112.1 | 118   | 118.8  | 111.8  | 96.7  | 128.3  | 122.3  |
| CAV2     | 116.6 | 121.3 | 133.1 | 139.4  | 116.9  | 109   | 132.6  | 123.4  |
| CAV3     | 106.6 | 116.2 | 121   | 109.9  | 110.4  | 104.8 | 120.5  | 113.8  |
| CAV3     | 114   | 130.4 | 129.9 | 122.2  | 110.1  | 111.8 | 133.5  | 129.9  |
| CBARA1   | 176   | 167.9 | 186.7 | 185.3  | 151.4  | 158.3 | 183.9  | 203.6  |
| CBFA2T2  | 171.6 | 167.4 | 151.9 | 153    | 147.9  | 114.8 | 159.4  | 175    |
| CBFA2T2  | 112.6 | 126.1 | 122.3 | 116.5  | 121.5  | 110.6 | 114.8  | 124.4  |
| CBFA2T2  | 129.4 | 115.9 | 145.4 | 126.9  | 113.6  | 112.2 | 140.6  | 131.6  |
| CBFA2T3  | 123.4 | 119.9 | 116.5 | 125.4  | 106.1  | 104.8 | 127.8  | 115.9  |
| CBFA2T3  | 128.5 | 128.3 | 146.7 | 149.5  | 131.6  | 117.9 | 145.5  | 130.6  |
| CBFA2T3  | 113.4 | 135.8 | 121.4 | 111.3  | 116.8  | 102.6 | 132.3  | 124.2  |
| CBFB     | 287.9 | 299.5 | 297.8 | 373.8  | 359.3  | 345.8 | 335.6  | 376.9  |
| CBFB     | 109.6 | 112.7 | 103.6 | 110.9  | 111.4  | 97.3  | 114.4  | 113.3  |
| CBL      | 158.7 | 151.5 | 141.8 | 173.2  | 179.2  | 155.1 | 198.9  | 204.3  |
| CBLB     | 861.3 | 792.4 | 610.3 | 1166.5 | 1043.8 | 546.4 | 1482.3 | 1844.7 |
| CBLC     | 114   | 116.4 | 109.8 | 115.1  | 103.4  | 89.3  | 117.8  | 110.9  |
| CBLL1    | 501.1 | 557.7 | 455.9 | 481    | 528.9  | 310.7 | 542.8  | 611.7  |
| CBLN1    | 113.7 | 104.2 | 121.2 | 121.5  | 116.4  | 108.3 | 115.4  | 111.4  |
| CBLN2    | 123.8 | 115.7 | 130.1 | 119.4  | 108.6  | 104.8 | 121.9  | 120.8  |
| CBLN3    | 151.7 | 150.3 | 194.7 | 193.1  | 128.6  | 155.6 | 145.5  | 136    |
| CBLN4    | 120.4 | 122.1 | 117.8 | 121.7  | 108.2  | 96.6  | 116    | 119.6  |
| CBR1     | 164.1 | 136.9 | 147.4 | 161.3  | 132    | 134.2 | 149.8  | 141.4  |
| CBR3     | 179.8 | 239.2 | 169.5 | 189.8  | 187.2  | 148.9 | 166.5  | 202.5  |
| CBR4     | 194.9 | 201.1 | 328.7 | 234    | 203.9  | 201.5 | 180.8  | 186.8  |
| CBS      | 125.1 | 118.9 | 128.7 | 129.1  | 113.7  | 106.1 | 135    | 123.4  |
| CBWD1    | 108.3 | 119.6 | 116   | 119.8  | 110.2  | 96.7  | 115.4  | 113.7  |
| CBWD2    | 121.7 | 112.3 | 123.3 | 113.3  | 108.7  | 96    | 117.8  | 110.1  |
| CBWD5    | 175.3 | 186.7 | 205   | 177.3  | 168.4  | 132.6 | 152.1  | 162.2  |
| CBX1     | 131.9 | 143.5 | 138.8 | 146.5  | 136    | 129.5 | 168.4  | 132.2  |
| CBX2     | 128.6 | 115.9 | 123.2 | 124.9  | 117.3  | 98.2  | 121.8  | 135.8  |
| CBX2     | 105.9 | 118.3 | 111.6 | 116    | 106.1  | 93.6  | 116.3  | 111.1  |
| CBX2     | 116.3 | 128.9 | 120.3 | 129.2  | 104.6  | 105.1 | 114    | 115.5  |
| CBX3     | 147.9 | 152.7 | 147.1 | 170.5  | 144.5  | 114.7 | 177.1  | 188.4  |
| CBX3     | 500.3 | 546.6 | 585.5 | 585    | 502.9  | 419.1 | 426.2  | 440.8  |
| CBX3     | 106   | 106.4 | 115.4 | 115.5  | 110.6  | 101.2 | 116.5  | 118.3  |
| CBX4     | 193.3 | 201.8 | 193   | 194.7  | 152.6  | 192.9 | 162.6  | 175.3  |
| CBX5     | 190.8 | 206   | 171.6 | 209.8  | 213.5  | 126.6 | 225    | 235.7  |
| CBX6     | 453.5 | 540.1 | 385.6 | 570.9  | 361.6  | 256.1 | 577.9  | 508.1  |
| CBX7     | 646.3 | 686.1 | 673.1 | 540.1  | 428.7  | 650   | 391.8  | 368.6  |
| CBX8     | 124.1 | 112.9 | 125.5 | 126.4  | 118.8  | 113.5 | 129.7  | 120    |
| CBY1     | 116.9 | 107.4 | 125.5 | 120.3  | 108.1  | 100.8 | 124.8  | 118.3  |
| CC2D1A   | 137.5 | 150.8 | 129.7 | 147.8  | 114.3  | 105.8 | 145.2  | 142    |



|         |       |       |       |       |       |       |       |       |
|---------|-------|-------|-------|-------|-------|-------|-------|-------|
| CC2D1B  | 214.2 | 235.4 | 228.1 | 262.5 | 219.8 | 191.5 | 226.4 | 219.1 |
| CCBE1   | 264.7 | 245.8 | 302.4 | 303.9 | 323.5 | 165.7 | 336.1 | 310   |
| CCBL1   | 178.2 | 175.7 | 166.7 | 161.7 | 144.7 | 128.8 | 141.1 | 138.1 |
| CCBL2   | 251.3 | 325.7 | 248.3 | 302.3 | 261.5 | 188   | 247.6 | 180.8 |
| CCBL2   | 121.1 | 115.3 | 130.1 | 139.3 | 112.7 | 113.3 | 126.5 | 133.8 |
| CCBP2   | 116   | 112.8 | 122.2 | 123.6 | 112.2 | 98    | 119.9 | 111.1 |
| CCDC104 | 111.7 | 121.7 | 111.1 | 121.7 | 107.7 | 108.7 | 117.3 | 127.1 |
| CCDC108 | 113   | 110.9 | 115.7 | 121.4 | 108.2 | 99.4  | 114.8 | 117   |
| CCDC108 | 113.8 | 118.4 | 117.4 | 116   | 106   | 97.4  | 116.4 | 113.4 |
| CCDC11  | 111.8 | 121.9 | 115.7 | 112   | 106.2 | 102.8 | 119.6 | 115.3 |
| CCDC110 | 127.9 | 119.6 | 117.4 | 117   | 118.1 | 99.7  | 112   | 121   |
| CCDC117 | 121.5 | 128.2 | 120.2 | 126.4 | 122.5 | 105   | 134.7 | 134   |
| CCDC12  | 711.1 | 698.5 | 680.9 | 676.8 | 575.2 | 462.7 | 658   | 739.3 |
| CCDC121 | 113.2 | 125.2 | 121.9 | 115.4 | 116.4 | 109.7 | 111   | 109.4 |
| CCDC127 | 171   | 171.8 | 162.7 | 180.7 | 173.5 | 143.1 | 176.5 | 235.5 |
| CCDC129 | 116.8 | 106.1 | 119.5 | 125.9 | 106.5 | 99.1  | 111.7 | 106   |
| CCDC13  | 108.4 | 111.2 | 118.4 | 125.1 | 101.2 | 91.5  | 111.5 | 115.1 |
| CCDC14  | 195.4 | 233.5 | 304.4 | 236.1 | 205.4 | 199.9 | 180.8 | 193.7 |
| CCDC16  | 554.9 | 330.5 | 428.3 | 521.5 | 461.7 | 415.5 | 460.1 | 476.4 |
| CCDC17  | 140.1 | 128.4 | 137.9 | 133.6 | 124.1 | 103.2 | 140.2 | 122.3 |
| CCDC18  | 127.6 | 123.2 | 133.3 | 118.6 | 104.5 | 102.2 | 122   | 125.8 |
| CCDC21  | 171   | 166.5 | 139.7 | 164.5 | 136.2 | 126.5 | 152.7 | 145.9 |
| CCDC22  | 134.1 | 131.4 | 150   | 135.5 | 113.8 | 121.3 | 127.3 | 138.7 |
| CCDC23  | 496.7 | 447.6 | 704.2 | 450.6 | 386.7 | 451   | 520.7 | 445.1 |
| CCDC24  | 125.7 | 135   | 106.8 | 124.2 | 129.9 | 103.6 | 140.1 | 130.2 |
| CCDC25  | 133.7 | 167.6 | 167.7 | 168.2 | 157.8 | 120.2 | 139.7 | 150.1 |
| CCDC25  | 509.5 | 545.4 | 484.3 | 484   | 418.9 | 381.1 | 403.3 | 348.7 |
| CCDC27  | 120.7 | 129.3 | 123.6 | 128.5 | 117.9 | 103.7 | 128.6 | 122   |
| CCDC28A | 405.3 | 534.3 | 520.8 | 482.9 | 447.7 | 502   | 393   | 432.2 |
| CCDC28B | 146.8 | 142.4 | 127.9 | 140.9 | 126.7 | 99.2  | 130.5 | 130.6 |
| CCDC3   | 107.7 | 116.7 | 109.5 | 118.5 | 106.7 | 89.3  | 114.3 | 106.1 |
| CCDC32  | 129.4 | 159.3 | 152.7 | 142.3 | 133.2 | 139.8 | 144.1 | 157.4 |
| CCDC32  | 745.4 | 588.3 | 653.2 | 734.2 | 445.8 | 582.5 | 670.6 | 624.5 |
| CCDC33  | 109.5 | 117.2 | 122.9 | 122.8 | 110   | 102.1 | 127.5 | 112.7 |
| CCDC34  | 112.5 | 102.4 | 116.1 | 112.9 | 105.8 | 97.8  | 114   | 104.6 |
| CCDC34  | 146.1 | 144.3 | 147.8 | 121   | 123.3 | 108.5 | 126.4 | 124.5 |
| CCDC34  | 196   | 299.3 | 276   | 243.8 | 203.9 | 202.2 | 192.3 | 163.7 |
| CCDC36  | 125.4 | 127   | 126.9 | 137.2 | 123.9 | 102.8 | 125.7 | 123.1 |
| CCDC37  | 115.7 | 127   | 115.2 | 125.4 | 108.3 | 99.6  | 118.4 | 113.1 |
| CCDC38  | 118.7 | 123.9 | 119.2 | 127.7 | 114.1 | 100.8 | 119.4 | 110.1 |
| CCDC4   | 112.3 | 119.9 | 114.8 | 120.6 | 104.2 | 91.1  | 117.4 | 114.5 |
| CCDC4   | 119.5 | 147.4 | 115.1 | 132.8 | 126.9 | 105.9 | 139.8 | 150.1 |
| CCDC41  | 115.1 | 121.2 | 115.5 | 126.5 | 111   | 98.9  | 124.5 | 114   |
| CCDC41  | 136.7 | 143.3 | 157.4 | 141   | 148.6 | 121.9 | 143.4 | 149.5 |
| CCDC42  | 103.5 | 108.4 | 108.1 | 118.1 | 97.5  | 90.6  | 106.2 | 110.3 |
| CCDC43  | 128.4 | 124.9 | 150.5 | 138.4 | 129.3 | 117.3 | 127.1 | 130.4 |
| CCDC44  | 273.8 | 328.7 | 325.5 | 292.1 | 237   | 240.9 | 247.8 | 239.3 |
| CCDC45  | 269   | 272.1 | 382.6 | 266.5 | 286.7 | 224.1 | 318   | 369   |
| CCDC46  | 123.9 | 130   | 121.6 | 116.7 | 110   | 105.4 | 126.8 | 120.2 |
| CCDC46  | 106.8 | 116   | 118.7 | 134.2 | 112.1 | 99.7  | 120.9 | 109.5 |
| CCDC47  | 202.4 | 184.3 | 201   | 216.2 | 172   | 160.3 | 207.9 | 214.3 |

|         |       |        |        |        |        |        |        |        |
|---------|-------|--------|--------|--------|--------|--------|--------|--------|
| CCDC48  | 102.2 | 116.4  | 112.1  | 115.7  | 104.5  | 97.6   | 107.7  | 115.4  |
| CCDC49  | 298   | 309.2  | 302.1  | 336.9  | 267.6  | 196.5  | 350.8  | 385.9  |
| CCDC5   | 159.3 | 154.3  | 169.8  | 161.1  | 146.5  | 133.8  | 150.6  | 143    |
| CCDC50  | 394.8 | 331.2  | 365.6  | 425    | 263.4  | 288.4  | 387.7  | 295.1  |
| CCDC50  | 108.6 | 112.8  | 118.5  | 118    | 108.7  | 96     | 119.5  | 110.7  |
| CCDC51  | 128.9 | 132.5  | 125.5  | 138.8  | 125    | 111.3  | 130.7  | 127.6  |
| CCDC52  | 122.2 | 111.9  | 116.3  | 118.9  | 105.9  | 96.2   | 116.4  | 113    |
| CCDC53  | 507.7 | 710.8  | 693.8  | 546.5  | 488.2  | 552.1  | 512.5  | 549.8  |
| CCDC54  | 103.4 | 118.1  | 108.4  | 112.1  | 104.1  | 101.4  | 115    | 107.8  |
| CCDC55  | 124.1 | 134.2  | 135.4  | 153    | 128.5  | 140.1  | 151.1  | 130.4  |
| CCDC56  | 667.5 | 714.5  | 726.7  | 720.6  | 453.4  | 445.2  | 522.2  | 463.6  |
| CCDC57  | 125.6 | 122.5  | 135.4  | 127.7  | 111.3  | 115.1  | 124.3  | 128.6  |
| CCDC58  | 162.9 | 181    | 161.9  | 167.1  | 227.8  | 119.8  | 153.6  | 184.1  |
| CCDC59  | 1144  | 1359.4 | 1225.3 | 1238.3 | 974.5  | 1167.2 | 1172.4 | 1298.6 |
| CCDC6   | 466.6 | 484.7  | 451.6  | 536.2  | 475.6  | 417.9  | 415.4  | 357.4  |
| CCDC60  | 127.2 | 117.9  | 115.8  | 114.3  | 108.4  | 99.6   | 118    | 114.5  |
| CCDC62  | 127   | 118.4  | 137.5  | 137    | 123.7  | 115.8  | 132.1  | 125.5  |
| CCDC62  | 111   | 117.6  | 117.9  | 129.3  | 108.1  | 102.8  | 132.8  | 122.1  |
| CCDC63  | 122.9 | 122.6  | 112.8  | 121    | 110.8  | 89.6   | 113.2  | 125    |
| CCDC64  | 116.2 | 106.2  | 110.7  | 115.9  | 107.7  | 95.8   | 114.7  | 110.9  |
| CCDC65  | 123.4 | 131.8  | 133.1  | 124.6  | 116.8  | 98.2   | 127.9  | 130.7  |
| CCDC66  | 160.1 | 231.1  | 199.7  | 193.8  | 176.8  | 139.3  | 185.4  | 228.2  |
| CCDC67  | 108.9 | 112.2  | 105.7  | 118.6  | 108.6  | 103.8  | 107.7  | 125.3  |
| CCDC68  | 112.7 | 108.6  | 110.8  | 115    | 105.2  | 99.8   | 113    | 113.5  |
| CCDC69  | 140.1 | 163.8  | 146.8  | 158.6  | 150    | 140.2  | 142.4  | 147.3  |
| CCDC7   | 118.1 | 125.9  | 124.1  | 123.8  | 109.8  | 101.6  | 120.8  | 122.1  |
| CCDC7   | 115.2 | 110.9  | 116.4  | 115.6  | 105.7  | 90.9   | 115.9  | 115.9  |
| CCDC7   | 116.4 | 126.6  | 124.1  | 121.2  | 113.9  | 98.5   | 120.2  | 121.3  |
| CCDC70  | 117.3 | 112.9  | 130    | 137.9  | 110.7  | 114.9  | 118.9  | 117.1  |
| CCDC71  | 195.8 | 222.6  | 170.4  | 209.5  | 146    | 164    | 164.2  | 179.3  |
| CCDC72  | 891.9 | 1350.7 | 1563.4 | 1079.6 | 1185.3 | 1295.8 | 1068.4 | 1029.5 |
| CCDC74A | 110.3 | 121.6  | 117.9  | 124.2  | 101.8  | 100.8  | 113.9  | 115.7  |
| CCDC74B | 118   | 113.3  | 121.8  | 127    | 111.8  | 106.2  | 126.6  | 125.4  |
| CCDC75  | 122.1 | 122.5  | 130.6  | 126.2  | 111.3  | 104.1  | 124.4  | 116.6  |
| CCDC76  | 220.2 | 205.1  | 276.8  | 229.2  | 252.5  | 236.9  | 211.6  | 222.4  |
| CCDC77  | 247.5 | 254.7  | 240.8  | 285.7  | 255    | 219.1  | 276.2  | 245.5  |
| CCDC8   | 114.8 | 119.6  | 126.1  | 120    | 113.4  | 109.6  | 115.1  | 118.6  |
| CCDC85A | 111.3 | 115.3  | 108.7  | 128.4  | 102.4  | 99.8   | 111    | 111.6  |
| CCDC9   | 111.5 | 121.2  | 121.3  | 137    | 110.1  | 98.7   | 131.8  | 119.1  |
| CCDC90B | 733.4 | 792.3  | 1039.8 | 868.5  | 706.8  | 834.5  | 816.7  | 700    |
| CCDC91  | 149.7 | 138.1  | 146.6  | 137.2  | 129    | 107.7  | 134.2  | 152.5  |
| CCHCR1  | 117.6 | 118.7  | 129.9  | 110.9  | 105.6  | 103.4  | 122.4  | 113.6  |
| CCIN    | 114.3 | 110    | 116.9  | 118.7  | 106.1  | 98.2   | 114.7  | 114.5  |
| CCK     | 109.3 | 115.5  | 117    | 114.5  | 102.8  | 104    | 134.2  | 117.6  |
| CCKAR   | 110.2 | 107.4  | 117.4  | 118.2  | 102    | 96.2   | 119.4  | 112.3  |
| CCKBR   | 114.6 | 125.7  | 125.7  | 121.3  | 106    | 99.9   | 127.1  | 105.9  |
| CCL1    | 118   | 126    | 110.8  | 115.7  | 107.7  | 92.2   | 116.8  | 105.4  |
| CCL11   | 110.5 | 108.3  | 108.2  | 106.9  | 108.5  | 97.9   | 113.9  | 121.4  |
| CCL13   | 131.2 | 118    | 132    | 134.4  | 111.5  | 110.4  | 121    | 122.4  |
| CCL15   | 105.6 | 113.9  | 113.7  | 103.8  | 102.4  | 108.9  | 102.1  | 110.2  |
| CCL15   | 124   | 117.5  | 117    | 110.5  | 119.3  | 95.6   | 118.4  | 113.5  |

|          |        |        |         |        |        |        |        |        |
|----------|--------|--------|---------|--------|--------|--------|--------|--------|
| CCL16    | 120.7  | 104.1  | 112.4   | 108.7  | 106.1  | 100.9  | 119.8  | 112.5  |
| CCL17    | 113.6  | 117.5  | 114.5   | 121.2  | 107.3  | 94.6   | 120.8  | 117.3  |
| CCL18    | 118.5  | 117.1  | 122.2   | 128.7  | 116.1  | 109.7  | 111.9  | 121.8  |
| CCL19    | 120.9  | 124    | 125.1   | 128.5  | 120.3  | 114.3  | 130.2  | 132.5  |
| CCL2     | 1469.9 | 461.8  | 525.3   | 2256.1 | 870.9  | 782    | 1927.9 | 760.4  |
| CCL20    | 134.9  | 157.8  | 160.5   | 137    | 121.6  | 114    | 129.7  | 146.2  |
| CCL21    | 115.6  | 113.9  | 115.4   | 118.1  | 113.5  | 99.7   | 115.2  | 124.1  |
| CCL22    | 178.7  | 156.3  | 176.5   | 192.7  | 121    | 147.7  | 163.7  | 131.3  |
| CCL23    | 106.9  | 107.1  | 112.9   | 117.2  | 109.2  | 99.5   | 109.9  | 107.1  |
| CCL23    | 120.7  | 123.2  | 137     | 131.2  | 115.2  | 105.7  | 125.7  | 122.7  |
| CCL24    | 1699   | 1715.9 | 161.2   | 2434.2 | 1291.4 | 217.4  | 1529.2 | 331.7  |
| CCL25    | 117.5  | 113.6  | 119.9   | 111.4  | 107.4  | 99     | 118.6  | 108.4  |
| CCL25    | 115.8  | 108.5  | 116.3   | 120.7  | 106.9  | 99.7   | 108.9  | 111.5  |
| CCL26    | 109.5  | 107.4  | 112.6   | 121.7  | 107.8  | 95.8   | 118.7  | 108.4  |
| CCL27    | 110.2  | 114.8  | 115.1   | 112.6  | 112.4  | 93     | 108.4  | 106.2  |
| CCL28    | 123    | 114.4  | 128.4   | 110.6  | 115.2  | 99.7   | 114.9  | 119.3  |
| CCL3     | 434.2  | 354.6  | 240     | 358    | 312.2  | 143.1  | 315.9  | 224.7  |
| CCL3L1   | 184    | 163.4  | 132.4   | 188.1  | 135.5  | 119.3  | 181.1  | 134.2  |
| CCL3L3   | 592.9  | 386.3  | 358     | 466.4  | 360.9  | 179.4  | 515.8  | 300.6  |
| CCL4L1   | 360.6  | 179.7  | 324.9   | 330    | 135    | 237.9  | 260.3  | 147.6  |
| CCL5     | 6190.4 | 8102.2 | 11607.2 | 7444.3 | 6098.8 | 8078.9 | 7226.3 | 6645.8 |
| CCL7     | 122.4  | 124.7  | 116     | 128.5  | 124.8  | 105.1  | 131.9  | 127.5  |
| CCL8     | 808.9  | 134    | 240.7   | 565    | 125.9  | 131.9  | 147.7  | 119.7  |
| CCM2     | 142    | 128.8  | 133.8   | 123.1  | 108.4  | 107.4  | 129.2  | 129    |
| CCM2     | 340.3  | 442.4  | 435.5   | 429.6  | 401.1  | 351.3  | 277.4  | 348.8  |
| CCM2     | 1823.3 | 2065.2 | 1866.7  | 2124.1 | 1539.6 | 1328.5 | 1931.1 | 1824.2 |
| CCNA1    | 122.5  | 126.4  | 118.5   | 125.8  | 114.2  | 109.2  | 124.7  | 127.4  |
| CCNA2    | 113.9  | 118.8  | 128     | 120.8  | 112.6  | 105.3  | 144.3  | 133.9  |
| CCNB1    | 120    | 112.8  | 127.2   | 115.8  | 100.5  | 107.5  | 109.1  | 121.8  |
| CCNB1IP1 | 290.2  | 265.3  | 333.4   | 282.4  | 265.4  | 210.4  | 364.8  | 347.6  |
| CCNB1IP1 | 115.9  | 127.1  | 125.4   | 134.9  | 105.2  | 105.4  | 126.8  | 125.4  |
| CCNB1IP1 | 117.8  | 128.1  | 118.2   | 124.6  | 109.9  | 95.9   | 119.8  | 122    |
| CCNB1IP1 | 206.3  | 220.1  | 197.5   | 192.7  | 154.6  | 155.1  | 175.7  | 183.4  |
| CCNB2    | 113.4  | 117.3  | 108.7   | 118.4  | 108    | 97.1   | 114    | 124.8  |
| CCNB3    | 108.5  | 114.6  | 112.1   | 126.9  | 118    | 102.7  | 120.9  | 124.6  |
| CCNB3    | 111.6  | 115.1  | 123.3   | 117.4  | 106.5  | 101.8  | 124.5  | 113.5  |
| CCNB3    | 111.7  | 126    | 115.9   | 123.3  | 103.6  | 98.1   | 119.4  | 109.5  |
| CCNC     | 149.2  | 138.8  | 209     | 152.4  | 140.6  | 151.4  | 136.8  | 150.6  |
| CCNC     | 177.6  | 199.9  | 271.4   | 214.4  | 189.4  | 232.6  | 190.9  | 229.6  |
| CCNC     | 159.7  | 139.7  | 141.2   | 136.9  | 140.6  | 134.7  | 159    | 166.5  |
| CCND1    | 122.6  | 122.2  | 125.3   | 117    | 112.2  | 105.6  | 124.8  | 119.7  |
| CCND2    | 1675.3 | 1809.7 | 1240.1  | 1340.7 | 1239.7 | 837.2  | 1005.8 | 955.2  |
| CCND3    | 3863.1 | 4076.9 | 2980.3  | 3921.7 | 2877.7 | 2320.4 | 3568.9 | 3403.6 |
| CCNDBP1  | 127.6  | 128.9  | 134.8   | 140.8  | 121.6  | 120.2  | 119.5  | 134.1  |
| CCNDBP1  | 125.5  | 116.4  | 124.4   | 119.8  | 123.5  | 114.9  | 121.5  | 114.6  |
| CCNDBP1  | 2236.9 | 2290.4 | 2418.6  | 2328.2 | 2030.5 | 2179.5 | 1828.6 | 1993.3 |
| CCNE1    | 155.4  | 171.8  | 136.6   | 174.7  | 172.4  | 117.1  | 205.8  | 244    |
| CCNE1    | 116.3  | 114.6  | 111.2   | 121.2  | 104.2  | 104.1  | 117    | 116.9  |
| CCNE2    | 105    | 110.3  | 123.6   | 122.1  | 105.3  | 102.1  | 122.6  | 115.4  |
| CCNE2    | 125.2  | 120.4  | 116.4   | 134.6  | 117.9  | 108.9  | 139.8  | 134.2  |
| CCNF     | 133.2  | 157.7  | 129.5   | 154.1  | 130.8  | 125    | 153.4  | 136.5  |

|         |        |        |        |        |        |        |        |        |
|---------|--------|--------|--------|--------|--------|--------|--------|--------|
| CCNG1   | 421.8  | 569.5  | 315.8  | 347.2  | 378.7  | 251.1  | 465.8  | 429.7  |
| CCNG1   | 125.2  | 119.1  | 126.3  | 118.6  | 108.2  | 97.2   | 123    | 124.8  |
| CCNG2   | 207.7  | 214.6  | 150.2  | 207.1  | 217.9  | 146.5  | 181.3  | 203.5  |
| CCNH    | 180.2  | 199.6  | 221    | 219.7  | 185.1  | 174.8  | 220.2  | 192.2  |
| CCNI    | 7967.2 | 8175   | 7218.9 | 8877.5 | 5794.7 | 5310.2 | 8220.7 | 8752.8 |
| CCNJ    | 118.4  | 114.2  | 106    | 117.9  | 119.8  | 90     | 111.1  | 117.5  |
| CCNK    | 343.3  | 464.8  | 463.3  | 438.8  | 432.9  | 474.9  | 649.2  | 680.6  |
| CCNL1   | 561.5  | 503.9  | 664.9  | 506.5  | 489.9  | 414.1  | 477    | 700.6  |
| CCNL2   | 115.3  | 130.7  | 126.6  | 135.6  | 113    | 109.5  | 126.7  | 129    |
| CCNT1   | 143.4  | 145.8  | 141.1  | 150.9  | 149.5  | 117.1  | 161.9  | 164.5  |
| CCNT2   | 123.6  | 127.2  | 118.6  | 132.5  | 120.2  | 104    | 136    | 133.5  |
| CCNT2   | 243.3  | 228.3  | 263.1  | 252    | 248.9  | 235.4  | 209.4  | 298.2  |
| CCNT2   | 109.3  | 120.2  | 127.8  | 131    | 102    | 104.4  | 125    | 120.1  |
| CCNY    | 731.2  | 844.3  | 800.2  | 969.7  | 810.3  | 752.6  | 960.9  | 963.5  |
| CCNYL1  | 141.2  | 133.4  | 152.5  | 152.5  | 143.3  | 127.7  | 144.5  | 162.8  |
| CCPG1   | 120.9  | 123.6  | 123.1  | 123.6  | 110.8  | 110.4  | 120.6  | 111.1  |
| CCPG1   | 225.1  | 244.4  | 287.7  | 287.8  | 203.9  | 274.4  | 204.3  | 160.1  |
| CCR1    | 352    | 259    | 315.2  | 537.9  | 348    | 503.7  | 562.9  | 250.9  |
| CCR10   | 116.1  | 122.2  | 120.8  | 125.1  | 105    | 98.4   | 128.2  | 115.5  |
| CCR2    | 121    | 113.4  | 114.1  | 114.4  | 98.8   | 95.4   | 119.1  | 118.5  |
| CCR2    | 109.7  | 112.2  | 133.1  | 124.6  | 105    | 97.3   | 121    | 118.9  |
| CCR3    | 114.7  | 125.9  | 127.6  | 119.9  | 112.7  | 103.8  | 121.8  | 119.5  |
| CCR3    | 113.3  | 109.9  | 123.7  | 116.2  | 114.8  | 101.2  | 111.4  | 115.3  |
| CCR4    | 116.2  | 132.7  | 110.9  | 125.6  | 118.2  | 96.9   | 118.7  | 127.3  |
| CCR5    | 119.2  | 124.3  | 125.6  | 127.8  | 105.5  | 113.3  | 116.7  | 107.4  |
| CCR6    | 6999   | 7110.2 | 8072.7 | 6791.5 | 8664.2 | 3596.9 | 7051.7 | 8948.7 |
| CCR6    | 118.9  | 114.2  | 117.9  | 118.7  | 112.7  | 97.1   | 117.5  | 114.5  |
| CCR7    | 4151.7 | 5058.5 | 3788.4 | 4220.7 | 3498.5 | 2989.1 | 3449.2 | 3402.7 |
| CCR8    | 123.3  | 108.9  | 115.2  | 115.7  | 105.5  | 97.8   | 120.7  | 114.1  |
| CCR9    | 128.4  | 137.3  | 130.3  | 130.8  | 119    | 112.7  | 126.4  | 121.1  |
| CCR9    | 118.7  | 109.8  | 114.1  | 119.7  | 109.5  | 104    | 115.7  | 107.9  |
| CCRK    | 178.9  | 171.2  | 175.7  | 174.4  | 152    | 125.8  | 158.1  | 143.1  |
| CCRK    | 127.5  | 125    | 135.1  | 139.4  | 120.8  | 111.1  | 133.5  | 125.7  |
| CCRL1   | 118.3  | 108.1  | 119.9  | 109.9  | 104    | 106    | 121.3  | 114.2  |
| CCRL1   | 114.4  | 120.1  | 119.6  | 123.5  | 110.9  | 104.5  | 128.1  | 116    |
| CCRL1   | 110    | 112.4  | 115.5  | 121.5  | 105.7  | 94.1   | 112.6  | 107.5  |
| CCRL2   | 117.3  | 121.3  | 114.3  | 125.4  | 111.8  | 93.2   | 113.7  | 114.8  |
| CCRN4L  | 125.6  | 123.9  | 119.9  | 126.6  | 112.3  | 98.4   | 131.4  | 132.4  |
| CCS     | 296.4  | 260.8  | 357.3  | 245.8  | 248.4  | 254.7  | 192.9  | 175.4  |
| CCS     | 198.5  | 219.9  | 231.8  | 196.6  | 153.4  | 157.7  | 172.2  | 147.8  |
| CCT2    | 814.7  | 969    | 623.8  | 932.7  | 751.7  | 559.5  | 934.4  | 1361.6 |
| CCT3    | 136.1  | 143.4  | 145.5  | 147.1  | 136.2  | 124.7  | 133.8  | 163.5  |
| CCT3    | 510.5  | 507.9  | 480    | 581.1  | 479.2  | 386    | 630.4  | 791.7  |
| CCT4    | 184.4  | 178.7  | 180.3  | 208.1  | 144.1  | 133.8  | 223.5  | 242.9  |
| CCT5    | 128.6  | 125.6  | 126.5  | 130.8  | 122.6  | 105.6  | 152.5  | 160.2  |
| CCT6A   | 234.3  | 249.3  | 271.4  | 262.6  | 210.2  | 168.6  | 264.2  | 319.3  |
| CCT6A   | 245.2  | 256.8  | 228.1  | 272.5  | 242.7  | 205.9  | 385.8  | 484.9  |
| CCT6AP1 | 406.8  | 436.4  | 402.9  | 447    | 363.9  | 270.2  | 482.6  | 450    |
| CCT6B   | 120.3  | 120.2  | 135.8  | 137    | 126.3  | 110.7  | 141.5  | 134.5  |
| CCT7    | 1315.6 | 1318   | 1210.8 | 1532.2 | 1101   | 1021   | 1676.1 | 1864.8 |
| CCT7    | 240.7  | 244    | 244.4  | 247.5  | 201.2  | 207.6  | 292.8  | 311.1  |

|         |        |        |        |        |        |        |        |        |
|---------|--------|--------|--------|--------|--------|--------|--------|--------|
| CCT7    | 376.9  | 425.3  | 412.2  | 434.7  | 370.2  | 312.4  | 390.3  | 415.6  |
| CCT8    | 1317.6 | 1213.2 | 1371.8 | 1377.3 | 1227.5 | 1123.4 | 1235.3 | 1445.1 |
| CD109   | 121.5  | 116.4  | 120.9  | 127    | 108.5  | 100.9  | 120.1  | 120.5  |
| CD14    | 6172.2 | 1645.4 | 9051.8 | 5702.7 | 1114.4 | 9046.3 | 3525.2 | 540.9  |
| CD14    | 953.1  | 291.9  | 1727.1 | 1010.6 | 231.7  | 1710   | 540.3  | 161.5  |
| CD151   | 142.1  | 130.1  | 183.8  | 160.6  | 115.3  | 132.3  | 135    | 117.9  |
| CD151   | 1197.3 | 753.4  | 1447.6 | 1230.8 | 530    | 834.5  | 981.3  | 572.9  |
| CD151   | 129.5  | 118.8  | 120.7  | 130.3  | 112.8  | 118    | 128.4  | 127.7  |
| CD160   | 131.4  | 108.7  | 132.5  | 127    | 110.5  | 99.3   | 127.5  | 124.5  |
| CD163   | 213.2  | 125.8  | 920.8  | 166.7  | 109.7  | 397.8  | 150    | 118.4  |
| CD163   | 142.3  | 117.6  | 275.2  | 132.9  | 103    | 181    | 128.4  | 120.6  |
| CD164   | 153.8  | 147.6  | 157.5  | 180.6  | 145    | 135.5  | 187.7  | 166.7  |
| CD164L2 | 111.4  | 106.3  | 114.4  | 112.7  | 101.3  | 95.3   | 111.8  | 114.6  |
| CD177   | 112.5  | 117.1  | 122.7  | 131.8  | 110.1  | 98     | 119.9  | 123.1  |
| CD180   | 116.6  | 120.9  | 114.7  | 126.6  | 113.5  | 105.8  | 118.7  | 121.6  |
| CD19    | 435.5  | 322.9  | 553.5  | 406.7  | 193.1  | 337.4  | 227.4  | 168.3  |
| CD1A    | 104.7  | 109.3  | 111.1  | 112.1  | 99.8   | 96.5   | 118.6  | 106.4  |
| CD1B    | 108.8  | 110.2  | 126.2  | 114.4  | 106.5  | 94.1   | 116.6  | 114.8  |
| CD1C    | 115.7  | 109.5  | 143.6  | 113.6  | 128.8  | 93.9   | 120    | 109    |
| CD1D    | 118.4  | 118.3  | 135.7  | 126.7  | 114.6  | 108.6  | 108.2  | 113.6  |
| CD1E    | 121.8  | 118.7  | 123.2  | 122.2  | 111.9  | 96.4   | 112.4  | 111.2  |
| CD1E    | 117.7  | 121.7  | 133.1  | 121.1  | 111.2  | 112.2  | 124.9  | 116.1  |
| CD2     | 2085.1 | 2414.2 | 2772.5 | 2033.5 | 1740.8 | 2386.3 | 1482.9 | 1322.6 |
| CD200   | 142.3  | 138.7  | 147.2  | 142.1  | 119.7  | 107.8  | 116    | 128.2  |
| CD200   | 115.7  | 115.4  | 110.1  | 127.6  | 104.9  | 100.3  | 117.8  | 111.7  |
| CD200R1 | 121.2  | 121.6  | 119.6  | 117.3  | 107.8  | 102.9  | 113.7  | 118.1  |
| CD200R2 | 107.7  | 116.8  | 109.1  | 111.7  | 103.7  | 98.3   | 109.8  | 114.1  |
| CD207   | 123.7  | 115.7  | 116.7  | 125.8  | 111.9  | 107.8  | 106.6  | 111.6  |
| CD209   | 142.1  | 120.4  | 129.7  | 144.3  | 112.9  | 103.6  | 129.6  | 116.5  |
| CD22    | 132.3  | 124.6  | 130.7  | 126.2  | 114.8  | 112.2  | 125.3  | 116.5  |
| CD226   | 186.2  | 201.7  | 155.8  | 167.1  | 191.7  | 147.8  | 164.4  | 173    |
| CD24    | 295    | 286.2  | 402    | 250.4  | 217.6  | 265.9  | 179.6  | 159.5  |
| CD244   | 145.3  | 170.4  | 148.2  | 186    | 142.2  | 121.6  | 180.5  | 163.6  |
| CD247   | 6262.7 | 6139.8 | 5727.6 | 6285.6 | 4963.1 | 4986.5 | 5402.1 | 5373.2 |
| CD247   | 5601.5 | 5146.5 | 4437.3 | 5020.5 | 4261.8 | 3525.7 | 4233.3 | 4289.7 |
| CD248   | 159.6  | 248.5  | 149.2  | 161    | 188.2  | 121.2  | 148.3  | 158.6  |
| CD274   | 114.1  | 110.6  | 107.2  | 124.5  | 113.6  | 98.8   | 122.9  | 110.9  |
| CD276   | 138.5  | 121.3  | 146.7  | 142.6  | 116.8  | 108.9  | 134.9  | 127    |
| CD276   | 112.9  | 108.7  | 104.7  | 108.6  | 116.7  | 98     | 116.8  | 113.4  |
| CD2AP   | 129.8  | 129.8  | 141.8  | 141.2  | 121.2  | 108.8  | 131.5  | 155    |
| CD2BP2  | 782.7  | 798.7  | 729.2  | 790.6  | 588.9  | 626    | 658.5  | 588.6  |
| CD300A  | 285    | 271.6  | 272.7  | 235.4  | 220.5  | 157.2  | 268.6  | 221.5  |
| CD300C  | 128.9  | 116.1  | 176.4  | 125.7  | 109.6  | 117.7  | 128.7  | 123.3  |
| CD300E  | 116.1  | 118    | 125.6  | 109.9  | 113    | 94.4   | 118.3  | 123.9  |
| CD300LB | 116.9  | 118.7  | 124.3  | 121.4  | 113.4  | 94.1   | 133.6  | 115.2  |
| CD300LF | 121.4  | 113.4  | 144    | 117.9  | 98     | 103.9  | 114.5  | 114.3  |
| CD300LG | 122.4  | 124.7  | 139.7  | 134.8  | 105.2  | 104.8  | 123.7  | 127.6  |
| CD302   | 107    | 105.3  | 125.9  | 112.7  | 113    | 98.5   | 110.3  | 113.7  |
| CD320   | 253.5  | 283.3  | 184.3  | 256.5  | 217.6  | 143    | 194.4  | 163.7  |
| CD33    | 130.2  | 116.5  | 208.2  | 130.4  | 104.5  | 97.4   | 121.5  | 115.2  |
| CD33L3  | 107    | 115.5  | 115.1  | 122.2  | 118    | 98.7   | 107.7  | 110.5  |

|        |        |        |        |        |        |        |        |        |
|--------|--------|--------|--------|--------|--------|--------|--------|--------|
| CD34   | 142.1  | 132.7  | 137.8  | 128.3  | 119.2  | 112.9  | 123.8  | 129.7  |
| CD34   | 114.8  | 108.4  | 119.8  | 111.7  | 102.9  | 99.7   | 114.8  | 116.5  |
| CD34   | 119.2  | 116.3  | 116.6  | 119.5  | 114.8  | 107.8  | 124.8  | 122.9  |
| CD34   | 106.9  | 114    | 116.7  | 117.4  | 106.8  | 103.2  | 112.9  | 117.9  |
| CD36   | 314.7  | 116.3  | 1258.2 | 239.3  | 113.4  | 456.5  | 177.2  | 114.3  |
| CD36   | 289.6  | 126    | 1594.5 | 288.9  | 121.3  | 672.5  | 168.8  | 115.7  |
| CD36   | 113.2  | 115.7  | 112.3  | 113.8  | 103.5  | 103.5  | 115.9  | 110    |
| CD37   | 433.6  | 431.3  | 399.9  | 411.7  | 346    | 336.3  | 347.4  | 330.3  |
| CD37   | 562.3  | 543.2  | 532.3  | 505.2  | 456.1  | 373.9  | 604.3  | 488.2  |
| CD38   | 113.4  | 115.4  | 109.3  | 108.2  | 95     | 87.2   | 116.9  | 109.8  |
| CD3D   | 2763.7 | 3893.8 | 3730.1 | 3044.5 | 2881.3 | 2548.6 | 1952.8 | 2300.2 |
| CD3D   | 1989.1 | 2725.5 | 2563.1 | 2010.7 | 1833.1 | 1539.5 | 1615.3 | 1423.2 |
| CD3E   | 575.7  | 633.9  | 418.1  | 487.7  | 379.6  | 336.3  | 526.1  | 545.5  |
| CD3EAP | 128    | 108.6  | 120    | 124.5  | 119.2  | 99.3   | 121.4  | 112.4  |
| CD3G   | 264.4  | 485.4  | 322.9  | 359.8  | 465.5  | 196.5  | 245.6  | 326.2  |
| CD4    | 196.6  | 186.3  | 238.7  | 180.6  | 128.8  | 156    | 144.3  | 132.8  |
| CD40   | 121.9  | 113.4  | 130.2  | 124.3  | 110.6  | 103.6  | 122.6  | 112.1  |
| CD40   | 157.8  | 125.1  | 148    | 147.7  | 122.3  | 113.4  | 138.5  | 118.9  |
| CD40LG | 129.4  | 140.2  | 153.9  | 149.2  | 137.7  | 137.1  | 144    | 138.2  |
| CD44   | 162.4  | 162.1  | 162.6  | 149.4  | 185.7  | 132.4  | 157    | 139.2  |
| CD44   | 694.8  | 590.2  | 696.8  | 673    | 594.9  | 528.1  | 764.5  | 461    |
| CD44   | 8339.5 | 7570   | 6287.4 | 7460   | 6440.7 | 6047.4 | 8794.8 | 6865.5 |
| CD46   | 636.8  | 650.7  | 764.3  | 544.5  | 465    | 507.8  | 388.6  | 361.3  |
| CD47   | 1193.9 | 1049.1 | 1134.6 | 1216.6 | 1107   | 882.3  | 762    | 724.3  |
| CD47   | 161.7  | 183.4  | 185.7  | 170.9  | 139.3  | 151.1  | 152.8  | 152    |
| CD48   | 815.9  | 852.7  | 778.2  | 1031.4 | 688.2  | 744.9  | 883.8  | 800.6  |
| CD5    | 410.9  | 495.4  | 358.2  | 448    | 332.3  | 350.5  | 490.2  | 438.9  |
| CD52   | 2363.6 | 3605.9 | 2968.2 | 2547   | 3175.7 | 2125.9 | 2000.2 | 1685.8 |
| CD53   | 338.8  | 361.4  | 348.7  | 355.9  | 234.2  | 286.3  | 332.2  | 379.7  |
| CD53   | 364.8  | 407.5  | 391.1  | 476.4  | 292.5  | 360.9  | 449.5  | 463.5  |
| CD55   | 350.9  | 487.3  | 255.4  | 365.4  | 346.4  | 262.7  | 553.2  | 837.2  |
| CD58   | 260.9  | 275.3  | 390.1  | 239.1  | 258.5  | 276.4  | 262.9  | 197.2  |
| CD59   | 150.1  | 144.4  | 135    | 167.4  | 166.5  | 117.3  | 246    | 279.3  |
| CD59   | 111.2  | 115.4  | 126.4  | 127.3  | 109.3  | 100.6  | 124.2  | 135.4  |
| CD5L   | 123.8  | 110.9  | 120.1  | 129.3  | 119.8  | 101.5  | 115.8  | 121    |
| CD6    | 1945.5 | 1922.5 | 2571   | 2088.5 | 1492.2 | 2135.2 | 1423.7 | 1473.6 |
| CD63   | 264.2  | 258.2  | 217.6  | 302.9  | 244.2  | 212.5  | 307    | 227.7  |
| CD68   | 909.7  | 523    | 1132.9 | 824.7  | 340    | 712.7  | 988.9  | 532.6  |
| CD68   | 269.8  | 190.7  | 279.3  | 270.3  | 159.1  | 219.8  | 275.4  | 161.5  |
| CD69   | 416.2  | 394.2  | 436.2  | 384.4  | 356.2  | 432.4  | 649.1  | 1385.7 |
| CD7    | 736.8  | 1023.5 | 674.8  | 721.4  | 536    | 496.5  | 539.7  | 510.5  |
| CD72   | 136.5  | 131.3  | 135.2  | 134.6  | 115.7  | 108.9  | 120.8  | 128.9  |
| CD74   | 1407   | 1243.3 | 3368.8 | 1432.3 | 417.6  | 1535.4 | 1155   | 906.9  |
| CD74   | 143.6  | 133.9  | 212    | 148.7  | 109.1  | 148    | 123.6  | 114.5  |
| CD74   | 571.2  | 477.8  | 1520   | 486.6  | 315.3  | 945.8  | 471.4  | 334.1  |
| CD79A  | 250.7  | 182.3  | 230.8  | 270.3  | 174.9  | 219.4  | 228.6  | 185.1  |
| CD79A  | 1554.5 | 1183.9 | 1343.7 | 1769.3 | 767.7  | 1578.5 | 1299.5 | 858.7  |
| CD79A  | 112.4  | 124.4  | 130.4  | 141.8  | 123.5  | 107.5  | 134.7  | 132.2  |
| CD79B  | 1447.9 | 1229.9 | 1350   | 1589.6 | 837.5  | 837    | 823.1  | 459.8  |
| CD79B  | 485.9  | 441.4  | 506.5  | 668    | 386    | 403    | 389.9  | 260.3  |
| CD79B  | 325.3  | 343.2  | 296.8  | 348.4  | 242.3  | 214.8  | 179.6  | 165.4  |

|        |        |        |        |        |        |        |        |        |
|--------|--------|--------|--------|--------|--------|--------|--------|--------|
| CD80   | 131.6  | 120.8  | 123    | 123.3  | 110.8  | 105.6  | 123.1  | 122.1  |
| CD81   | 4930.9 | 5360.4 | 7127.4 | 4949.1 | 3450.2 | 3681   | 3923.3 | 3688.5 |
| CD82   | 282.3  | 292.3  | 284.4  | 249.5  | 259.7  | 251    | 260.9  | 190.4  |
| CD82   | 138    | 143.2  | 155.3  | 156.5  | 130.3  | 120.4  | 134.9  | 127.6  |
| CD83   | 613.3  | 443.7  | 504    | 544.8  | 350    | 417.4  | 727.2  | 441.9  |
| CD83   | 371.8  | 333    | 326    | 443.8  | 316.1  | 295.4  | 443    | 353.8  |
| CD84   | 142.2  | 136.8  | 150.5  | 160.3  | 143.4  | 121.5  | 124.6  | 152.4  |
| CD86   | 121.8  | 117.6  | 236.7  | 125.1  | 110    | 148.3  | 122.9  | 125.5  |
| CD86   | 201.7  | 176.4  | 407.9  | 171.3  | 134.7  | 371.8  | 134.5  | 137.8  |
| CD86   | 115.5  | 123.6  | 118.4  | 113.2  | 112.4  | 102.5  | 110.4  | 118.4  |
| CD8A   | 730.8  | 1308.1 | 865.1  | 1088.5 | 755.7  | 1007.5 | 636.5  | 548.7  |
| CD8A   | 256.3  | 298    | 399.3  | 257.5  | 261.6  | 271.3  | 174.4  | 154.3  |
| CD8A   | 1352.7 | 2142.7 | 1512.7 | 1210.6 | 1020.8 | 1155.4 | 739.5  | 618.6  |
| CD8B   | 184.4  | 301.8  | 196.9  | 181.9  | 233.8  | 181.6  | 146.6  | 161.8  |
| CD8B1  | 151.3  | 192.5  | 161.4  | 156.8  | 170.4  | 140.2  | 158.5  | 133.8  |
| CD8B1  | 106.8  | 117.2  | 116.6  | 120.8  | 108.9  | 94     | 113.4  | 114.9  |
| CD8B1  | 113.6  | 110.7  | 111.4  | 114.4  | 115.2  | 95.8   | 112.5  | 114.1  |
| CD9    | 149.5  | 130.7  | 155    | 150    | 144.9  | 138    | 127.2  | 125    |
| CD96   | 575.6  | 996.2  | 1027.1 | 645.4  | 912.8  | 812.6  | 669    | 844.6  |
| CD96   | 604.5  | 1115.6 | 1032.7 | 719    | 1065.7 | 689.1  | 876.9  | 1173.1 |
| CD97   | 180.7  | 199.4  | 169.8  | 170.4  | 148.2  | 136.8  | 146.2  | 159.1  |
| CD97   | 1703.8 | 1283.6 | 1460.5 | 1093.2 | 740.8  | 922    | 698.1  | 773.3  |
| CD99   | 206.2  | 216.6  | 212.2  | 211.7  | 160.9  | 196.9  | 215.4  | 166.3  |
| CD99L2 | 132.3  | 148.7  | 165.7  | 146.4  | 135.7  | 144.8  | 151.7  | 143.8  |
| CD99L2 | 595.8  | 678.3  | 830.4  | 608.6  | 420.7  | 601.7  | 603.9  | 338.9  |
| CDA    | 158.9  | 193.6  | 133.3  | 191.5  | 156.8  | 105.5  | 163.6  | 127.8  |
| CDADC1 | 118.1  | 121.4  | 120.8  | 133.4  | 110.9  | 98     | 123.1  | 116.8  |
| CDAN1  | 200.6  | 175.5  | 171.4  | 223    | 189.1  | 162.3  | 237.4  | 173.3  |
| CDAN1  | 3412.1 | 3075.9 | 3817.2 | 2914.4 | 2503.9 | 1383.2 | 2887.5 | 3570.4 |
| CDC14A | 131.1  | 136    | 135.5  | 127    | 117.6  | 109.5  | 136.6  | 131.9  |
| CDC14A | 120.4  | 112.8  | 111.4  | 127.8  | 117.8  | 103.7  | 123.8  | 109.8  |
| CDC14A | 111.1  | 113.6  | 106.9  | 115.4  | 106.4  | 94.5   | 114.9  | 116.5  |
| CDC14A | 172.5  | 150    | 147.2  | 162.2  | 159.4  | 110.4  | 147.1  | 153.6  |
| CDC14B | 137.6  | 126.5  | 139.6  | 125.8  | 119.3  | 107.7  | 121.9  | 124.5  |
| CDC14B | 156    | 160.9  | 148.4  | 162.9  | 144.7  | 132.1  | 147.9  | 134.9  |
| CDC14B | 289.4  | 228.2  | 147.7  | 364.9  | 217.5  | 125.1  | 303.1  | 258.4  |
| CDC16  | 801.2  | 572.7  | 779    | 665.8  | 607    | 545.1  | 680    | 572.1  |
| CDC16  | 571.8  | 582.5  | 612.1  | 568.7  | 369.4  | 377.4  | 579.3  | 464.7  |
| CDC16  | 1133.1 | 988.6  | 1291.5 | 1167.5 | 807.7  | 894.1  | 1139.4 | 808.9  |
| CDC2   | 107.4  | 116.8  | 118.2  | 114.5  | 114.7  | 97     | 124.5  | 119.2  |
| CDC2   | 113.9  | 118.5  | 122.9  | 123.4  | 106.9  | 98.7   | 117.8  | 121    |
| CDC20  | 117.1  | 116.7  | 110.8  | 117    | 112.6  | 101.4  | 130.9  | 116    |
| CDC23  | 295.9  | 323.2  | 332.5  | 359.7  | 293.3  | 272.7  | 271.6  | 287.6  |
| CDC25A | 110    | 109.4  | 106.8  | 119.7  | 106.8  | 92.3   | 118.6  | 117.5  |
| CDC25A | 111.4  | 113.5  | 121.8  | 119.5  | 115.1  | 95     | 116.3  | 108.7  |
| CDC25B | 3164.9 | 3607.9 | 2086.2 | 3132.2 | 2647.8 | 1759.3 | 2413.1 | 1761.6 |
| CDC25C | 119.7  | 125.9  | 123.7  | 126.8  | 113.4  | 106    | 127.1  | 133    |
| CDC25C | 118.6  | 116.2  | 120    | 124.7  | 108.9  | 100.1  | 120.7  | 119.7  |
| CDC25C | 109.9  | 118.9  | 118.3  | 106.5  | 106.5  | 99.8   | 118.7  | 117.1  |
| CDC26  | 1026.5 | 1254.7 | 720.7  | 1222.2 | 873.5  | 470.9  | 952    | 1174.9 |
| CDC27  | 125.1  | 117.3  | 132.2  | 125.8  | 110.2  | 103.6  | 116.8  | 125.8  |

|          |        |        |        |        |        |        |        |        |
|----------|--------|--------|--------|--------|--------|--------|--------|--------|
| CDC2L1   | 107.5  | 104.6  | 112.6  | 111.5  | 103    | 100.2  | 110.4  | 112.1  |
| CDC2L2   | 135.9  | 128.1  | 130.3  | 149.3  | 123.9  | 118.7  | 158.6  | 141.1  |
| CDC2L5   | 275.9  | 310.4  | 253    | 276.4  | 228.7  | 231.6  | 285.2  | 279    |
| CDC2L5   | 283    | 324    | 259.6  | 343.5  | 246    | 223.5  | 339.2  | 291.7  |
| CDC2L6   | 381.2  | 407.2  | 340.4  | 436    | 329.5  | 313.4  | 420.2  | 463.1  |
| CDC34    | 164.8  | 187.7  | 169.5  | 203.7  | 176.5  | 137.9  | 179.3  | 235.6  |
| CDC37    | 5265.9 | 5367.9 | 5532.8 | 5850.7 | 4073.4 | 3690.2 | 4886.9 | 4237.1 |
| CDC37L1  | 123.8  | 112.2  | 127.4  | 127.3  | 109.1  | 108.4  | 136.5  | 127.6  |
| CDC40    | 505.8  | 598.9  | 543.7  | 555.3  | 385.3  | 426.1  | 410.8  | 435.4  |
| CDC42    | 128.4  | 120.9  | 132.8  | 126.8  | 117.7  | 112.5  | 128    | 119    |
| CDC42    | 104.7  | 110.5  | 105.7  | 118.2  | 104.7  | 91.6   | 118.4  | 116    |
| CDC42    | 139.7  | 144.2  | 146.4  | 165.4  | 153.5  | 134.5  | 190.8  | 176.7  |
| CDC42    | 333.3  | 237.3  | 324.3  | 325.3  | 283.6  | 307.7  | 525.1  | 315.7  |
| CDC42BPA | 109.3  | 124.4  | 125.9  | 129    | 115.4  | 106.7  | 122.9  | 110    |
| CDC42BPA | 105.2  | 102.9  | 112.3  | 112.8  | 104.5  | 97.4   | 117.6  | 110.8  |
| CDC42BPB | 125.8  | 125.1  | 134.1  | 133.7  | 116.2  | 123.2  | 125.5  | 126.2  |
| CDC42BPG | 117.2  | 119.4  | 106.9  | 106.8  | 101.9  | 91.4   | 103.8  | 109.8  |
| CDC42EP1 | 120.5  | 121.9  | 127.7  | 130.8  | 112    | 106.3  | 121    | 125    |
| CDC42EP1 | 123.8  | 120.1  | 115.4  | 128    | 115.8  | 101.2  | 115.2  | 123.8  |
| CDC42EP2 | 128.7  | 126.6  | 116.5  | 127.3  | 113    | 120.4  | 132.7  | 116.8  |
| CDC42EP3 | 132.6  | 138.9  | 127.3  | 140.6  | 154.3  | 124.5  | 133.1  | 130.3  |
| CDC42EP4 | 207.1  | 178.7  | 219.3  | 225.7  | 188.5  | 193.4  | 213.8  | 210.3  |
| CDC42EP5 | 110.5  | 119.8  | 112.7  | 114.6  | 110.4  | 96.7   | 121.9  | 119.7  |
| CDC42SE1 | 364.5  | 389.2  | 347.6  | 386    | 325.6  | 312.8  | 395.5  | 326.8  |
| CDC42SE1 | 162.7  | 181.5  | 179.1  | 175.9  | 156.7  | 150.5  | 156.3  | 165.2  |
| CDC42SE2 | 189.6  | 195.6  | 150.4  | 186    | 191.5  | 121.5  | 173.1  | 203.6  |
| CDC42SE2 | 1225   | 2138.6 | 990.6  | 1364.4 | 1641.8 | 1076.2 | 1703.1 | 1886.4 |
| CDC45L   | 108    | 114.4  | 108.2  | 122.2  | 111.4  | 96.1   | 119.5  | 116.7  |
| CDC5L    | 232.9  | 229.4  | 187.5  | 233.2  | 174.2  | 208.5  | 270.2  | 200.3  |
| CDC6     | 111.4  | 125.2  | 113    | 121.3  | 102.4  | 107.7  | 125.5  | 120.9  |
| CDC7     | 129.5  | 145.3  | 138.7  | 146.5  | 133.9  | 99.4   | 138.1  | 141.4  |
| CDC73    | 116.2  | 124.6  | 122.8  | 118.5  | 107.1  | 104    | 115.1  | 125.9  |
| CDC91L1  | 148.9  | 164.7  | 157.4  | 159.6  | 140.9  | 121.9  | 145.6  | 139.4  |
| CDCA1    | 108.2  | 118.2  | 111.9  | 110.4  | 106.6  | 98.7   | 118.4  | 112    |
| CDCA2    | 114.4  | 119.7  | 125.2  | 117.9  | 113.9  | 100.3  | 121.6  | 125.8  |
| CDCA3    | 115.3  | 116.5  | 112.3  | 123.4  | 112    | 105.8  | 119.2  | 121.2  |
| CDCA4    | 115.7  | 113    | 114.8  | 116.9  | 100.7  | 107.1  | 125.3  | 116.2  |
| CDCA4    | 172.5  | 214.2  | 207.1  | 191.6  | 180.9  | 156.9  | 185.2  | 172.1  |
| CDCA4    | 149.9  | 155.5  | 141.1  | 167.1  | 150.1  | 124    | 144.7  | 149    |
| CDCA5    | 122.6  | 131.1  | 130.5  | 134.1  | 113.6  | 107.4  | 159.4  | 138.1  |
| CDCA7    | 164    | 157.8  | 154.9  | 155.4  | 122.7  | 118.4  | 124.2  | 123.9  |
| CDCA7    | 107.7  | 112.4  | 107.8  | 113.2  | 107.9  | 99.1   | 117.8  | 111.8  |
| CDCA7L   | 140.4  | 152.1  | 150.7  | 133.6  | 117.1  | 117.4  | 122.3  | 129.8  |
| CDCA8    | 116.5  | 122.7  | 128    | 112.7  | 119.8  | 105.6  | 133.5  | 127.2  |
| CDCP1    | 121.9  | 114.1  | 123    | 119.7  | 118.9  | 99.4   | 121.1  | 119.7  |
| CDCP1    | 119.1  | 125.1  | 124.4  | 105.3  | 108.8  | 98.9   | 123.5  | 120.5  |
| CDCP1    | 122.5  | 113.5  | 135.8  | 133.9  | 108.9  | 105.5  | 121.3  | 119.7  |
| CDCP2    | 113    | 116.8  | 111.5  | 121.6  | 104.8  | 101.7  | 106.4  | 116.9  |
| CDGAP    | 115.6  | 118.1  | 124    | 126.3  | 113.7  | 105.9  | 123.8  | 109    |
| CDH1     | 114.9  | 116.9  | 116.5  | 115.6  | 102.9  | 94.9   | 120.1  | 111.8  |
| CDH10    | 118.2  | 110.8  | 115.4  | 125    | 101.3  | 102.6  | 118.8  | 112    |



|          |        |        |        |       |       |       |       |        |
|----------|--------|--------|--------|-------|-------|-------|-------|--------|
| CDH11    | 115.4  | 126.5  | 116.1  | 130.3 | 110.7 | 100   | 133.1 | 117.9  |
| CDH12    | 109.5  | 113.5  | 108.8  | 108.4 | 106.5 | 98.4  | 115.1 | 108.4  |
| CDH12P   | 118.5  | 118.5  | 122.5  | 116.3 | 106.9 | 100.8 | 121.6 | 117.4  |
| CDH13    | 114.7  | 111.8  | 116.9  | 123.9 | 108.7 | 100.1 | 112.4 | 110.6  |
| CDH15    | 119.3  | 109.2  | 115.3  | 115.2 | 103.7 | 98.3  | 121.7 | 114.8  |
| CDH16    | 111.5  | 121.3  | 120    | 124.6 | 108.3 | 104   | 124.1 | 117.1  |
| CDH17    | 114.8  | 118.5  | 122.4  | 122.8 | 107.3 | 98.6  | 120.2 | 113.9  |
| CDH18    | 108.7  | 111.8  | 116.3  | 117.1 | 100.5 | 94.5  | 114.2 | 111.8  |
| CDH19    | 122.2  | 113.8  | 118.3  | 122   | 111.7 | 98.3  | 110.7 | 118.4  |
| CDH2     | 131.8  | 141.2  | 130.7  | 139.7 | 127.9 | 102.9 | 125.1 | 124.6  |
| CDH20    | 114.9  | 119.1  | 117.8  | 127.3 | 117.5 | 106.5 | 126.1 | 120.5  |
| CDH22    | 121.6  | 122.7  | 113.6  | 115.3 | 106.2 | 94.4  | 126.2 | 116.6  |
| CDH23    | 119.6  | 106.1  | 123.4  | 128.3 | 111.4 | 96.3  | 139.6 | 122.9  |
| CDH23    | 108.8  | 115.8  | 117.1  | 112.7 | 108.8 | 99    | 113.5 | 116.3  |
| CDH23    | 276.8  | 293.6  | 233.2  | 226   | 188   | 147.4 | 156.3 | 194.4  |
| CDH24    | 117.5  | 109.5  | 112.7  | 123.1 | 110.6 | 99.7  | 129.9 | 106.8  |
| CDH24    | 115.9  | 116.4  | 113.7  | 130.6 | 117.2 | 109.6 | 126.3 | 123.6  |
| CDH24    | 106.5  | 107.4  | 120.5  | 113.9 | 116.1 | 98.9  | 113.6 | 109.1  |
| CDH26    | 111.2  | 122.1  | 121.8  | 117.7 | 106.8 | 102   | 118.5 | 119.6  |
| CDH26    | 119.9  | 108.5  | 126    | 122.7 | 124   | 103.6 | 118   | 121.1  |
| CDH3     | 118.3  | 117    | 122.3  | 124.7 | 105.7 | 97.6  | 117.5 | 122.6  |
| CDH4     | 121.2  | 111.1  | 116.6  | 101.5 | 107.7 | 93.6  | 114.2 | 118.6  |
| CDH5     | 113.4  | 115.8  | 118.5  | 114.6 | 109.9 | 100.1 | 118.6 | 120    |
| CDH6     | 112.8  | 114.5  | 115.6  | 115.7 | 108.6 | 96.4  | 117.7 | 119.5  |
| CDH7     | 122.5  | 122    | 121.5  | 125.9 | 108.1 | 104.8 | 115.5 | 116.3  |
| CDH7     | 122    | 112.3  | 116.2  | 121.9 | 107.1 | 103.5 | 116   | 116.8  |
| CDH7     | 124.7  | 124.7  | 122.5  | 120.2 | 113.8 | 104.4 | 122.9 | 118    |
| CDH8     | 120.9  | 108.1  | 117.4  | 106.8 | 101.7 | 98.3  | 107.9 | 114.9  |
| CDH9     | 127.1  | 130    | 134.9  | 127.3 | 123.4 | 101.8 | 118.7 | 114.7  |
| CDIPT    | 141.1  | 160.8  | 134.1  | 153   | 122.4 | 124.6 | 152.8 | 148.1  |
| CDK10    | 754    | 869.3  | 695.7  | 741.4 | 611.3 | 346.2 | 531   | 462.3  |
| CDK10    | 122.8  | 121.1  | 125.4  | 120.6 | 109.4 | 106.5 | 117.5 | 125.8  |
| CDK2     | 122.1  | 144.1  | 136.3  | 158   | 127.3 | 111.3 | 144.7 | 145.5  |
| CDK2     | 232    | 223.8  | 233    | 272.9 | 242.3 | 198.8 | 287.6 | 324.2  |
| CDK2AP2  | 166.7  | 163.2  | 182.9  | 172.6 | 145.5 | 163   | 149.3 | 161.1  |
| CDK3     | 114.8  | 129.9  | 120.5  | 123.6 | 113.9 | 101.3 | 129   | 131.9  |
| CDK4     | 229.2  | 297.4  | 205.6  | 277.5 | 246.8 | 188.7 | 261.8 | 301.8  |
| CDK5     | 137.4  | 125    | 137.7  | 121.6 | 110.3 | 103.2 | 127.8 | 110.5  |
| CDK5R1   | 118    | 123.2  | 131.9  | 118.9 | 117.7 | 120   | 123.4 | 119.8  |
| CDK5R2   | 112.5  | 114.2  | 119    | 123.1 | 112.6 | 105.2 | 120.8 | 119.9  |
| CDK5RAP1 | 332.5  | 315.7  | 318.2  | 297   | 229.6 | 234.1 | 207.2 | 223.2  |
| CDK5RAP1 | 115.9  | 106.1  | 122.9  | 123.7 | 115.4 | 103.3 | 124.8 | 117.8  |
| CDK5RAP2 | 198.1  | 200.3  | 150.7  | 313.8 | 264.6 | 142.1 | 391.2 | 303.7  |
| CDK5RAP2 | 367.4  | 643.7  | 197.3  | 707.9 | 678.7 | 259.6 | 1203  | 1012.3 |
| CDK5RAP2 | 119.6  | 121.1  | 120.1  | 130.1 | 111.5 | 96.9  | 118.1 | 122.2  |
| CDK5RAP3 | 1052.8 | 1107.6 | 1213.2 | 935.3 | 899.9 | 841.2 | 780.3 | 735.6  |
| CDK5RAP3 | 227.2  | 266.8  | 234.3  | 201.8 | 225.1 | 179.4 | 217.7 | 213.3  |
| CDK5RAP3 | 1197.9 | 1286.2 | 1362.8 | 936.2 | 726.6 | 774.5 | 704.7 | 811.1  |
| CDK6     | 160.7  | 167.2  | 158    | 174.9 | 160.2 | 134.7 | 187.6 | 203.4  |
| CDK7     | 173.1  | 177.6  | 194    | 181.1 | 156   | 144.2 | 171.1 | 209.4  |
| CDK8     | 115    | 130.3  | 133.5  | 129   | 127.2 | 107.9 | 126.4 | 121.2  |

|         |       |        |       |        |       |        |        |        |
|---------|-------|--------|-------|--------|-------|--------|--------|--------|
| CDK9    | 282.9 | 267.9  | 258.3 | 291.9  | 261.8 | 230.3  | 274.4  | 204    |
| CDKAL1  | 126.7 | 135.9  | 129.6 | 124.1  | 121.4 | 104.5  | 124.8  | 132.1  |
| CDKL1   | 122.3 | 124.2  | 124.7 | 118.2  | 117.2 | 98.6   | 111.8  | 119.1  |
| CDKL2   | 105.1 | 111.3  | 112   | 114.8  | 106   | 88.5   | 117.2  | 110.6  |
| CDKL3   | 120.8 | 136.8  | 128.4 | 128.9  | 122.3 | 119.7  | 160.2  | 178.1  |
| CDKL4   | 115.4 | 109.3  | 119.8 | 116.1  | 114.1 | 101.6  | 125.5  | 119.1  |
| CDKL5   | 114.4 | 116.2  | 114.1 | 117.4  | 117.4 | 100.3  | 112.5  | 112.8  |
| CDKL5   | 113.2 | 115.3  | 112.6 | 107.4  | 105.6 | 102.7  | 109.3  | 106    |
| CDKL5   | 115.1 | 128    | 108.3 | 121.3  | 108.7 | 97.7   | 117.9  | 113.6  |
| CDKN1A  | 591.4 | 588    | 402.4 | 1234.6 | 844.7 | 738.2  | 1425.4 | 1294.4 |
| CDKN1A  | 121.2 | 121.4  | 119.7 | 133.7  | 116.9 | 109.6  | 167.6  | 139.6  |
| CDKN1B  | 1307  | 1146.1 | 1061  | 1190.7 | 830.1 | 1071.8 | 1059.8 | 1011   |
| CDKN1C  | 120.6 | 115.7  | 117.6 | 124.3  | 110.8 | 103.9  | 119.3  | 124.2  |
| CDKN2A  | 122.1 | 120.5  | 117.9 | 129.9  | 120.9 | 102.2  | 125.6  | 111.6  |
| CDKN2A  | 114.5 | 107.6  | 113.5 | 121.6  | 112.5 | 103.6  | 123.3  | 113.5  |
| CDKN2A  | 106.8 | 110.7  | 122.5 | 124    | 107.3 | 110.4  | 121.3  | 118.2  |
| CDKN2B  | 186.6 | 152.1  | 139.3 | 286.1  | 145.3 | 167.1  | 271.8  | 145.9  |
| CDKN2B  | 116.2 | 112.2  | 115.4 | 124.1  | 112.5 | 95.7   | 113.9  | 122.6  |
| CDKN2C  | 142   | 147.9  | 178.4 | 161.2  | 145.5 | 150.7  | 143.1  | 146.6  |
| CDKN2C  | 125   | 108.1  | 116.4 | 110.2  | 112.4 | 101.4  | 117.2  | 106.2  |
| CDKN2C  | 119.7 | 116    | 130.1 | 137.4  | 120.2 | 96     | 116.3  | 127.4  |
| CDKN2D  | 121.9 | 125.5  | 128.1 | 121.7  | 119.5 | 94.8   | 123.5  | 121.1  |
| CDKN2D  | 373.1 | 383    | 265.7 | 362.7  | 274.6 | 213.8  | 347.9  | 358.5  |
| CDKN3   | 124.5 | 110.8  | 129.7 | 140.4  | 120.3 | 107.3  | 120.5  | 123.5  |
| CDO1    | 114.9 | 117.2  | 119.4 | 117.4  | 99.1  | 101.6  | 125.6  | 112.2  |
| CDON    | 115.4 | 110    | 119.7 | 112.1  | 118.1 | 93     | 110.6  | 116.2  |
| CDON    | 105   | 121.9  | 118.8 | 116.8  | 120.5 | 108.2  | 119.7  | 116.5  |
| CDR1    | 114.1 | 109.7  | 105.6 | 116.5  | 108.2 | 96.7   | 113.7  | 106.7  |
| CDR2    | 535.7 | 481.4  | 340   | 522.8  | 513.5 | 254.6  | 387.9  | 487.6  |
| CDR2L   | 112.9 | 117.7  | 118.4 | 119.6  | 103.9 | 100.4  | 120.1  | 120.3  |
| CDRT1   | 105.3 | 110.9  | 111.3 | 107.6  | 99.4  | 95.4   | 118    | 113.2  |
| CDRT15P | 128.9 | 115.4  | 114.5 | 116.8  | 109   | 99.4   | 118.1  | 119.4  |
| CDS1    | 116   | 137.4  | 115.5 | 133.3  | 119.7 | 92.1   | 130.2  | 127.1  |
| CDS2    | 281.7 | 262.8  | 221.8 | 283.8  | 247.8 | 234.6  | 376.6  | 350.6  |
| CDSN    | 124.6 | 109.4  | 122.2 | 123.5  | 119.1 | 114.4  | 121.2  | 125.3  |
| CDT1    | 112.3 | 121.4  | 113.9 | 128.3  | 117.3 | 92.6   | 119.3  | 107.9  |
| CDV3    | 535.9 | 705.9  | 639.5 | 650.2  | 544.2 | 465.5  | 805.7  | 880.5  |
| CDV3    | 847.2 | 697.2  | 559.5 | 681.8  | 507   | 520.2  | 847.7  | 974.4  |
| CDX1    | 111.1 | 112.1  | 115.8 | 121.4  | 109.8 | 94.3   | 117.7  | 120.3  |
| CDX2    | 114.6 | 118.2  | 114.7 | 106.5  | 102.3 | 93.8   | 115.3  | 111.9  |
| CDX4    | 116.3 | 119.5  | 118.3 | 118.8  | 109.3 | 98.4   | 121    | 110.7  |
| CDY1    | 106.7 | 111.5  | 112   | 127    | 107   | 98.3   | 112.6  | 117.2  |
| CDY1    | 107.3 | 108.3  | 119.4 | 118.2  | 103.3 | 93.7   | 115.5  | 115.5  |
| CDY1B   | 122.1 | 116.2  | 126.5 | 130.7  | 106.7 | 101.3  | 114.2  | 121.5  |
| CDY2A   | 115.4 | 108.5  | 104.6 | 113.6  | 108.6 | 96.4   | 108.6  | 111.3  |
| CDY2B   | 109.2 | 116.5  | 117.3 | 117.2  | 100.5 | 96.1   | 114.3  | 110.6  |
| CDYL    | 132.6 | 146.5  | 133.1 | 139.5  | 138.5 | 118.6  | 145.1  | 130.4  |
| CDYL    | 119.4 | 107.1  | 111.8 | 120.9  | 105.2 | 100.5  | 111.5  | 120.1  |
| CDYL2   | 113   | 115.8  | 120.3 | 123.9  | 110.9 | 101.5  | 125.5  | 120.1  |
| CEACAM1 | 118.8 | 124.1  | 126.3 | 139.8  | 125.2 | 112.4  | 143.7  | 134    |
| CEACAM1 | 123.1 | 110.4  | 115   | 128.3  | 117.2 | 98.3   | 109.6  | 123.5  |

|          |        |        |        |        |        |        |        |        |
|----------|--------|--------|--------|--------|--------|--------|--------|--------|
| CEACAM1  | 129.2  | 121    | 126    | 123.3  | 129.2  | 104.2  | 124.8  | 117    |
| CEACAM19 | 117    | 121.2  | 121.7  | 124.5  | 116.9  | 101.6  | 122.9  | 122.2  |
| CEACAM20 | 117.6  | 117.8  | 131.5  | 108.1  | 106.6  | 97.1   | 113.2  | 118.7  |
| CEACAM21 | 126.7  | 133    | 118.9  | 132.6  | 121.3  | 113    | 123.8  | 133.8  |
| CEACAM3  | 111.3  | 116.4  | 112.3  | 107.2  | 109.5  | 101.4  | 124.1  | 116.1  |
| CEACAM4  | 118.1  | 121.6  | 128    | 123.8  | 109.2  | 103.8  | 126.5  | 125.9  |
| CEACAM5  | 117.5  | 121.8  | 116.8  | 118.8  | 109.6  | 101.9  | 117.2  | 113.9  |
| CEACAM6  | 115.8  | 130.7  | 120.6  | 119    | 134.3  | 102.9  | 123.5  | 148.1  |
| CEACAM7  | 109.9  | 116.3  | 115.9  | 122.5  | 105.1  | 99.3   | 117.5  | 113.1  |
| CEACAM8  | 113.2  | 161.7  | 130.3  | 127.1  | 141.4  | 109.5  | 119.9  | 141.8  |
| CEBPA    | 274.3  | 199.4  | 661.6  | 302.8  | 132.4  | 356.6  | 236.8  | 146    |
| CEBPB    | 3618.8 | 2651.1 | 1527.3 | 4097.2 | 2451.4 | 2176.1 | 3508.8 | 1366.3 |
| CEBPD    | 537.2  | 600.5  | 630.3  | 656.2  | 513.4  | 537.9  | 548.6  | 677.4  |
| CEBPE    | 117.7  | 124.3  | 113.5  | 125.1  | 109.2  | 109.7  | 121.6  | 119.9  |
| CEBPG    | 224.3  | 319.7  | 242.9  | 303.6  | 295.9  | 251.7  | 306.2  | 436    |
| CEBPZ    | 902.6  | 1338.2 | 993    | 1302.8 | 1000.8 | 753.1  | 1047.1 | 1303.1 |
| CECR1    | 123.9  | 123.9  | 131.3  | 118    | 117.8  | 101.2  | 118.3  | 103.8  |
| CECR1    | 1100.8 | 1166.4 | 1676.7 | 1009   | 808.2  | 1134.6 | 750.2  | 687.7  |
| CECR1    | 125.1  | 133.7  | 128.1  | 122.7  | 121    | 100.5  | 130.9  | 125.6  |
| CECR5    | 139.5  | 130.2  | 129.2  | 154.9  | 125.1  | 122.5  | 140.2  | 124.7  |
| CECR5    | 478.1  | 563.9  | 427.4  | 487.3  | 371.3  | 210.4  | 388.5  | 514.8  |
| CECR6    | 133.2  | 144.3  | 125.1  | 155.6  | 126.9  | 100    | 156.9  | 121.5  |
| CEECAM1  | 113.3  | 104.9  | 114.7  | 110.7  | 102.4  | 100.7  | 119.8  | 121.8  |
| CEI      | 115.7  | 116.1  | 118.8  | 126.1  | 116.9  | 100.4  | 118.6  | 116.9  |
| CEL      | 141.4  | 128.1  | 133    | 134.3  | 119.5  | 105.6  | 141.7  | 143.3  |
| CELSR1   | 123.7  | 120.4  | 132.1  | 130.2  | 118.7  | 107.4  | 125.7  | 122.5  |
| CELSR2   | 114.6  | 118.9  | 122    | 115.5  | 108    | 98.1   | 116.6  | 111.8  |
| CELSR3   | 153.6  | 181.1  | 143.2  | 168.9  | 157.6  | 110.5  | 168.6  | 180.1  |
| CEMP1    | 120.3  | 133.1  | 137.4  | 138.8  | 122.2  | 111.8  | 119.6  | 117.9  |
| CENPA    | 121.3  | 121    | 125    | 119.3  | 118.8  | 104.5  | 129.6  | 120.7  |
| CENPA    | 115.5  | 130.8  | 118.5  | 118.9  | 107.2  | 103.6  | 132.8  | 128    |
| CENPB    | 936.9  | 1464.9 | 1049.6 | 1065.6 | 955.4  | 836.9  | 856.6  | 825.3  |
| CENPC1   | 127.8  | 110.5  | 120.6  | 125.5  | 111.1  | 109.5  | 114.5  | 126.6  |
| CENPE    | 121.9  | 117.2  | 117.4  | 117    | 106.6  | 101    | 111.9  | 114.9  |
| CENPF    | 114.8  | 113.6  | 116    | 122.2  | 108.1  | 107.9  | 117.5  | 115    |
| CENPH    | 122.4  | 121.7  | 121.2  | 126.8  | 106.2  | 107.3  | 122.6  | 117.4  |
| CENPI    | 109.9  | 113.4  | 113.1  | 112    | 105.6  | 101.3  | 121.3  | 108.6  |
| CENPJ    | 131.7  | 128.9  | 144    | 135.2  | 116.5  | 113.5  | 130.9  | 127.8  |
| CENPM    | 123.9  | 130.1  | 127.8  | 128.4  | 114.9  | 106    | 118.1  | 123.2  |
| CENPM    | 107.1  | 112.3  | 112.4  | 118    | 105.5  | 101    | 103.1  | 120.5  |
| CENPO    | 111.1  | 120    | 118.8  | 123.4  | 111    | 97.7   | 120.4  | 125.1  |
| CENTA1   | 810.4  | 698.5  | 1462.4 | 823.8  | 397.1  | 693    | 741.9  | 378    |
| CENTA2   | 328.8  | 158.3  | 833.7  | 307.3  | 146.6  | 695.6  | 191.2  | 130.7  |
| CENTB1   | 909.2  | 892.1  | 670.7  | 697.6  | 468.1  | 466.2  | 622    | 446.7  |
| CENTB2   | 176.2  | 181.2  | 169.2  | 184.5  | 164.7  | 145.7  | 199.6  | 213.6  |
| CENTB5   | 121.5  | 120.3  | 128.7  | 119.7  | 112.2  | 98     | 129.9  | 108.1  |
| CENTD1   | 183    | 181    | 135.9  | 182.3  | 171.8  | 123.2  | 188.7  | 228    |
| CENTD1   | 109.8  | 107.6  | 120.1  | 114.8  | 107.5  | 102.1  | 121.9  | 114.7  |
| CENTD2   | 131.4  | 126.4  | 125.9  | 121.1  | 115.5  | 116.8  | 120.7  | 113.4  |
| CENTD2   | 207.3  | 201.6  | 191    | 224.9  | 161.1  | 170.2  | 221.3  | 177.3  |
| CENTD3   | 329.4  | 365.7  | 272.3  | 518.9  | 317.6  | 245.9  | 494    | 291.1  |

|        |       |        |        |       |       |       |       |       |
|--------|-------|--------|--------|-------|-------|-------|-------|-------|
| CENTG1 | 116.9 | 118.1  | 114.6  | 128.8 | 104.8 | 95.2  | 116.8 | 116   |
| CENTG2 | 110.1 | 120.6  | 125.5  | 115.4 | 121.3 | 105.2 | 116.2 | 109.5 |
| CENTG2 | 125.2 | 139.7  | 140.8  | 134.5 | 134.5 | 103.8 | 129.3 | 132.2 |
| CENTG2 | 107.5 | 108.4  | 116    | 116.6 | 112.4 | 100.3 | 114.3 | 102.3 |
| CENTG3 | 113.7 | 110.4  | 116.4  | 111.1 | 109.3 | 102.5 | 117.8 | 116.1 |
| CENTG3 | 158.8 | 141.4  | 138.8  | 150.7 | 122.8 | 112.9 | 149.4 | 127.8 |
| CENTG3 | 213.4 | 186.4  | 193.7  | 216   | 143.7 | 185.8 | 203.3 | 173.9 |
| CEP1   | 228.9 | 195.8  | 263.1  | 249.1 | 211.5 | 221.4 | 223.7 | 204.7 |
| CEP135 | 431.6 | 446.4  | 387.5  | 420.1 | 382   | 267.7 | 331.7 | 349.6 |
| CEP152 | 126   | 118.4  | 138.6  | 133.1 | 124.1 | 121.4 | 130.7 | 116.7 |
| CEP164 | 164   | 154.3  | 156.2  | 165.8 | 150.4 | 146.1 | 161.5 | 143.5 |
| CEP170 | 128.6 | 132.7  | 124.4  | 135.7 | 119.2 | 96.9  | 123.7 | 125.7 |
| CEP170 | 104.7 | 119.5  | 104.3  | 113.7 | 105.3 | 96.8  | 110.6 | 120.6 |
| CEP192 | 245.2 | 254.5  | 217    | 258.2 | 289.9 | 195.5 | 217.9 | 207.4 |
| CEP250 | 122.8 | 128    | 116.2  | 122.6 | 111.7 | 103.5 | 120.5 | 120.1 |
| CEP250 | 121.1 | 120    | 132.7  | 121.2 | 113.7 | 108.4 | 132.9 | 132.9 |
| CEP27  | 363.8 | 354    | 345.3  | 292.7 | 347.2 | 172.3 | 345.8 | 351.1 |
| CEP290 | 162.2 | 158.3  | 157.4  | 176.6 | 173.7 | 133.5 | 178.5 | 177.7 |
| CEP55  | 126.4 | 130.2  | 126.1  | 125.6 | 116.1 | 119.3 | 115.9 | 124.5 |
| CEP57  | 173.3 | 178.9  | 161.4  | 173.1 | 141.4 | 137.5 | 169.7 | 167.4 |
| CEP63  | 316.7 | 353.9  | 371.4  | 382.4 | 436.5 | 321.3 | 382.8 | 309.3 |
| CEP63  | 120.2 | 122.1  | 126.5  | 118.8 | 107.3 | 102.1 | 126.3 | 115.7 |
| CEP63  | 113.4 | 112.7  | 115.6  | 111.7 | 110.3 | 101.8 | 131.2 | 113.3 |
| CEP63  | 117.4 | 128.9  | 140.7  | 125.2 | 113.8 | 119.6 | 125.7 | 128.7 |
| CEP68  | 157.8 | 153.9  | 150.3  | 164.9 | 143.3 | 142.6 | 148.2 | 144.6 |
| CEP70  | 119.3 | 122.8  | 117.2  | 122.8 | 120.5 | 101.9 | 123   | 129.6 |
| CEP72  | 120.7 | 128.9  | 112.3  | 128.9 | 110.5 | 105.3 | 127.1 | 123.4 |
| CEP76  | 144.1 | 116.5  | 131.9  | 114.8 | 121.1 | 109.6 | 132   | 122.4 |
| CEPT1  | 126.1 | 111.5  | 118.5  | 118.2 | 110.2 | 103.7 | 124   | 118.7 |
| CEPT1  | 146.3 | 142.9  | 145.6  | 159.5 | 147.2 | 122.9 | 157.5 | 147.5 |
| CEPT1  | 230.5 | 238.5  | 286.4  | 265.2 | 230.9 | 162.3 | 258.8 | 241.9 |
| CER1   | 105   | 108    | 113.5  | 110.4 | 115.4 | 92.8  | 111.9 | 110.7 |
| CERK   | 860   | 1149.8 | 1140.8 | 991.2 | 990.8 | 978.3 | 907.7 | 976.8 |
| CERK   | 801.2 | 736    | 771.4  | 770.3 | 542.5 | 523.8 | 729.9 | 796.1 |
| CERK   | 122.3 | 118.4  | 133.2  | 141.6 | 125.9 | 105.9 | 139   | 119.9 |
| CERKL  | 123.1 | 146.5  | 130.8  | 168.9 | 114   | 101.4 | 115.9 | 131.1 |
| CERKL  | 106.8 | 112.2  | 121.4  | 121.9 | 103.3 | 95.8  | 106.2 | 122.2 |
| CERKL  | 117.4 | 109.7  | 117.8  | 116.3 | 114.2 | 102.1 | 114.9 | 112.7 |
| CERKL  | 111.4 | 114.6  | 109.9  | 122   | 103.6 | 92.3  | 110.4 | 118   |
| CES1   | 272.1 | 158.5  | 145.5  | 417.2 | 150.6 | 139.6 | 443.2 | 140.9 |
| CES2   | 292.2 | 314.1  | 423.4  | 333.4 | 246.8 | 300.2 | 300.1 | 245.9 |
| CES2   | 130.2 | 121.4  | 136.8  | 149.5 | 136.4 | 121.3 | 131.7 | 142   |
| CES3   | 116.4 | 117    | 120.8  | 114.4 | 101.4 | 99.3  | 112.6 | 112.8 |
| CES4   | 140.5 | 111    | 115.2  | 157.1 | 118.6 | 104.2 | 137.5 | 117.4 |
| CES7   | 109.2 | 117.2  | 108.9  | 127.1 | 102.2 | 94.1  | 119.8 | 119.9 |
| CESK1  | 112.7 | 111.5  | 106.5  | 105.7 | 98    | 94.6  | 110.1 | 105   |
| CETN1  | 117.1 | 109.2  | 122.5  | 116.6 | 107.5 | 98    | 109.1 | 115.7 |
| CETN2  | 339.1 | 513.6  | 673.4  | 348.5 | 298.8 | 454.6 | 264.2 | 224.6 |
| CETN3  | 111.3 | 130.4  | 117.3  | 108.3 | 104.1 | 110.2 | 122.9 | 109.1 |
| CETP   | 121.8 | 116.9  | 132.3  | 130.5 | 119.1 | 110   | 122.6 | 123.7 |
| CFB    | 124.6 | 112.8  | 118.8  | 118.4 | 106.7 | 92.3  | 120   | 115.9 |

|         |        |        |        |        |        |        |        |        |
|---------|--------|--------|--------|--------|--------|--------|--------|--------|
| CFC1    | 111    | 115.7  | 114.6  | 118.3  | 106.9  | 100.4  | 112.9  | 115.8  |
| CFD     | 143.4  | 114.8  | 453.9  | 140.1  | 107.6  | 258.4  | 132.4  | 117.4  |
| CFDP1   | 139.2  | 134.1  | 142.6  | 132.6  | 145.5  | 106.9  | 145.4  | 135.3  |
| CFH     | 110.8  | 108.9  | 113.9  | 116.9  | 105.1  | 96.3   | 114.1  | 113.8  |
| CFH     | 130    | 125.1  | 132.7  | 133.6  | 115.5  | 110    | 128.9  | 128.7  |
| CFH     | 114.3  | 110.3  | 114.6  | 123.8  | 109.1  | 103    | 126.1  | 124.5  |
| CFHR1   | 118    | 118.7  | 138.6  | 114.1  | 109.5  | 115.7  | 120.2  | 114.9  |
| CFHR2   | 121.9  | 141.6  | 116.2  | 126.5  | 107.7  | 103.1  | 125.5  | 122.4  |
| CFHR3   | 107.1  | 115.8  | 124    | 110.9  | 106.4  | 98.6   | 123.5  | 119.2  |
| CFHR4   | 110.7  | 111    | 112.5  | 119.8  | 107.4  | 97.1   | 128.8  | 107.9  |
| CFHR5   | 112.6  | 113.9  | 118.3  | 125.9  | 106.3  | 109    | 128.7  | 116.5  |
| CFI     | 116.6  | 125.5  | 123.9  | 130.6  | 120.1  | 107.2  | 128.4  | 115    |
| CFL1    | 1682.4 | 1541.8 | 1939.6 | 1959.2 | 1099   | 1690.2 | 1658.1 | 1797.7 |
| CFL2    | 119.6  | 109.4  | 112.2  | 125.5  | 107.7  | 101    | 124.3  | 113.6  |
| CFL2    | 112.7  | 107    | 106.5  | 121.7  | 107    | 99.8   | 111.7  | 115.7  |
| CFLAR   | 425.6  | 430.4  | 409.9  | 517.6  | 411.7  | 304.3  | 455.3  | 417.5  |
| CFTR    | 119.1  | 131.4  | 131.7  | 140.9  | 124.4  | 115.8  | 129.1  | 121.6  |
| CG018   | 145.9  | 148.6  | 158.5  | 144.1  | 138.7  | 143.6  | 137.2  | 146    |
| CG018   | 115.2  | 110.5  | 118.3  | 130.4  | 107.9  | 108.4  | 121.6  | 116    |
| CG018   | 158    | 162.8  | 170    | 151.9  | 130.8  | 118.4  | 154    | 155.5  |
| CGA     | 124.7  | 120.3  | 128.1  | 138.1  | 107.9  | 111.1  | 119.6  | 116.2  |
| CGB     | 115    | 117.2  | 123.3  | 116    | 110.4  | 96.5   | 121.2  | 118.1  |
| CGB1    | 119.4  | 124    | 132.5  | 121.3  | 106.2  | 112.8  | 118.3  | 114.5  |
| CGB2    | 111.8  | 104.2  | 110.4  | 117.4  | 99.1   | 93.2   | 117.8  | 112.5  |
| CGB5    | 114.8  | 115.2  | 115.7  | 119    | 108.3  | 99.4   | 111.8  | 113.4  |
| CGB7    | 112.3  | 110.6  | 115.1  | 121.7  | 109.9  | 100.9  | 117.1  | 109.1  |
| CGGBP1  | 734.6  | 712    | 598.8  | 844.9  | 581.8  | 481.5  | 881.3  | 794.2  |
| CGGBP1  | 111.2  | 110.7  | 121.2  | 123.7  | 111.9  | 104.9  | 137.1  | 128.8  |
| CGGBP1  | 1360.6 | 1551.1 | 1444.7 | 1549   | 1400.2 | 1123.7 | 1669.6 | 1900.2 |
| CGI-09  | 120.1  | 124.8  | 123.1  | 119.9  | 112.4  | 112.7  | 114.3  | 126.3  |
| CGI-115 | 228.6  | 276.4  | 240.8  | 229.2  | 224    | 156.2  | 203.4  | 229.7  |
| CGI-38  | 116.5  | 114.7  | 113.3  | 125.2  | 110.9  | 92.4   | 114.8  | 131.4  |
| CGI-38  | 118.4  | 114.7  | 112.5  | 115.3  | 114    | 95.2   | 114.2  | 112.4  |
| CGI-69  | 1136   | 971.1  | 1019.8 | 1054.2 | 685.1  | 580.3  | 863.7  | 694    |
| CGI-96  | 298.6  | 192.7  | 343.4  | 314.2  | 153.8  | 231.6  | 270.4  | 219    |
| CGI-96  | 117.6  | 125.3  | 136.9  | 131.4  | 109.6  | 117.6  | 129.6  | 115.4  |
| CGN     | 144.9  | 138.3  | 119    | 138.6  | 121.2  | 99.5   | 130.5  | 133.1  |
| CGNL1   | 122    | 112.7  | 113.4  | 112.1  | 111.3  | 99.2   | 114.8  | 113.5  |
| CGREF1  | 122.5  | 120    | 138.7  | 112    | 116.6  | 96.3   | 129.2  | 110.5  |
| CGRRF1  | 232.2  | 242.5  | 252.7  | 225.5  | 204.7  | 183    | 203.6  | 203.9  |
| CH25H   | 121.6  | 107.8  | 116    | 130    | 111.1  | 95.5   | 114.9  | 127.3  |
| CHAC1   | 114.6  | 109.2  | 116.1  | 114.9  | 111.6  | 106.9  | 111.8  | 122.8  |
| CHAC2   | 121.5  | 117.4  | 110    | 115    | 104    | 98.7   | 113.9  | 117.4  |
| CHAD    | 109.9  | 112.3  | 120.6  | 117.1  | 105.6  | 95.9   | 115.6  | 104.5  |
| CHAF1A  | 115.1  | 126.3  | 119.3  | 113.5  | 107.6  | 104.7  | 118.4  | 117.9  |
| CHAF1B  | 132.3  | 134.3  | 125.3  | 132.5  | 114.1  | 108.5  | 155.1  | 139.9  |
| CHAT    | 121.3  | 111.1  | 122.3  | 129.4  | 114.1  | 100.2  | 128.1  | 117.2  |
| CHAT    | 121.7  | 114.8  | 115.1  | 116    | 106.4  | 97.2   | 130.5  | 118.8  |
| CHAT    | 109.1  | 115.7  | 106.1  | 118.9  | 109.2  | 95.2   | 121.4  | 117.9  |
| CHAT    | 106    | 121.4  | 110.1  | 121.9  | 98.5   | 95.8   | 115.6  | 113.6  |
| CHCHD1  | 148.9  | 142.2  | 151.4  | 161.2  | 121    | 116.7  | 128.9  | 134.2  |

|        |        |        |        |        |       |        |        |        |
|--------|--------|--------|--------|--------|-------|--------|--------|--------|
| CHCHD2 | 1369.9 | 2595.5 | 1977.4 | 1517   | 1988  | 1271   | 1356.2 | 2713.2 |
| CHCHD3 | 142.3  | 188.3  | 194.5  | 182.2  | 153   | 146.3  | 153.7  | 164.3  |
| CHCHD4 | 328.1  | 315    | 270.6  | 329.5  | 257.1 | 200.2  | 230.1  | 227.6  |
| CHCHD5 | 216.6  | 202.5  | 267.4  | 231.2  | 197.3 | 211.8  | 214.8  | 185.3  |
| CHCHD6 | 127.8  | 145.4  | 124.7  | 147.8  | 118.3 | 111.3  | 134.6  | 131.6  |
| CHCHD7 | 137.5  | 128.2  | 171.9  | 141.1  | 123.1 | 119.9  | 138.1  | 127.7  |
| CHCHD7 | 257.2  | 321.1  | 339.9  | 261.5  | 242.5 | 256.7  | 249    | 231.2  |
| CHCHD8 | 149    | 150.5  | 156.8  | 141.4  | 141   | 117.4  | 145.2  | 152.4  |
| CHD1   | 555.5  | 385.2  | 416    | 472.9  | 299.7 | 288.7  | 528.6  | 704.3  |
| CHD1L  | 156.2  | 142.6  | 147    | 139.7  | 142.9 | 121.2  | 160.6  | 147.6  |
| CHD2   | 145.4  | 150.9  | 177.6  | 145.2  | 143.1 | 116.5  | 151.4  | 149.8  |
| CHD3   | 130.7  | 130.9  | 125.7  | 143.6  | 127.3 | 107    | 120.6  | 136.9  |
| CHD3   | 136.5  | 136.3  | 129.9  | 138.6  | 128.3 | 110.6  | 137.3  | 123.1  |
| CHD4   | 1045.2 | 1132.5 | 644.9  | 1010.2 | 803.6 | 621    | 853.9  | 708.3  |
| CHD5   | 117.2  | 105.4  | 112.1  | 118.5  | 103.1 | 102.6  | 121.2  | 121    |
| CHD6   | 155.8  | 165.4  | 163.5  | 148.1  | 140.8 | 129.4  | 155.1  | 153    |
| CHD7   | 301    | 368.4  | 440.8  | 387.6  | 378   | 334.5  | 536.5  | 599.8  |
| CHD8   | 650.6  | 614.1  | 457.5  | 749.4  | 575   | 394.3  | 883.8  | 908.5  |
| CHD9   | 562    | 588.6  | 535.8  | 646.7  | 489.2 | 383.4  | 710.8  | 705.3  |
| CHDH   | 114.5  | 107    | 104.9  | 108.1  | 99.6  | 95.4   | 117.8  | 107.9  |
| CHEK1  | 114.7  | 121    | 119.2  | 115.9  | 115.3 | 101.1  | 136    | 129.2  |
| CHEK2  | 127    | 128.1  | 126.6  | 123.6  | 117.3 | 103.1  | 115.5  | 128.9  |
| CHEK2  | 115.8  | 117.2  | 117.6  | 114.1  | 107.5 | 99.3   | 110.7  | 114.2  |
| CHERP  | 149.6  | 149.5  | 130.5  | 158.3  | 132.6 | 117.6  | 154.1  | 162.8  |
| CHES1  | 407.6  | 474.5  | 425.6  | 418.7  | 310.4 | 479.9  | 412.1  | 355    |
| CHFR   | 704.3  | 652.3  | 736.6  | 706.5  | 581.4 | 525.6  | 740.8  | 551.2  |
| CHGA   | 112.6  | 115.5  | 123.5  | 108.9  | 101.4 | 98     | 126.6  | 116.2  |
| CHGB   | 116.5  | 113.6  | 119.2  | 120.6  | 108.4 | 95.6   | 128.2  | 111.1  |
| CHGN   | 135.6  | 141.7  | 153.3  | 167.4  | 117.2 | 125.5  | 151.8  | 136.2  |
| CHI3L1 | 112.9  | 112.6  | 115.1  | 120.7  | 111.1 | 93.6   | 126.2  | 113.3  |
| CHI3L2 | 136.7  | 141.6  | 163.8  | 139.5  | 120.1 | 129    | 140.6  | 120.4  |
| CHI3L2 | 116.5  | 117.5  | 123.4  | 125.2  | 107   | 104.4  | 111.9  | 110.9  |
| CHIA   | 116.1  | 116.4  | 115.2  | 112    | 106.9 | 100.4  | 117.8  | 117.1  |
| CHIA   | 114    | 118.7  | 116.3  | 123.5  | 114.4 | 100.8  | 124.1  | 115.7  |
| CHIC1  | 115.5  | 120    | 112.5  | 130.9  | 109   | 100.5  | 124.9  | 129.8  |
| CHIC1  | 115.3  | 115.7  | 124.9  | 122.9  | 110.1 | 107.5  | 119    | 116.7  |
| CHIC2  | 822.7  | 933.6  | 1058.4 | 1301.3 | 953.6 | 1007.1 | 1383.6 | 1208.6 |
| CHID1  | 121.1  | 122.2  | 115.2  | 110.4  | 108.5 | 101.3  | 126    | 108.4  |
| CHKA   | 171.6  | 175    | 157.8  | 181.7  | 166.7 | 118.6  | 202.2  | 213.7  |
| CHKA   | 113.1  | 122.9  | 113.2  | 134.6  | 115.6 | 105.1  | 121.7  | 128.2  |
| CHKB   | 735.2  | 756.9  | 768.6  | 665.2  | 513   | 472.7  | 525.5  | 511.3  |
| CHKB   | 123.9  | 115.5  | 117.3  | 120    | 112.4 | 100.1  | 115.6  | 104.9  |
| CHL1   | 115.2  | 122    | 115.9  | 125    | 104.3 | 95.4   | 114.6  | 120.3  |
| CHM    | 120.5  | 122.2  | 121.8  | 127.3  | 113   | 96     | 107    | 118.9  |
| CHML   | 137.5  | 137.7  | 137    | 141.4  | 130.6 | 119.1  | 146.9  | 138    |
| CHMP1B | 560.6  | 588.4  | 583.5  | 723.7  | 548.8 | 635.5  | 783.5  | 893.6  |
| CHMP2A | 116.3  | 124.8  | 120.3  | 119    | 121.5 | 101.7  | 124.9  | 126.6  |
| CHMP2A | 148.7  | 137.1  | 180.3  | 178.8  | 142.5 | 170.1  | 147.9  | 159.1  |
| CHMP2A | 519.9  | 505.7  | 887.4  | 500.6  | 386.7 | 628.7  | 491    | 582.9  |
| CHMP2B | 271.6  | 244.1  | 226.4  | 268.3  | 217.5 | 207.9  | 262    | 318.2  |
| CHMP4A | 292    | 328.4  | 392.3  | 358.3  | 262.2 | 296.5  | 279.2  | 271.5  |

|           |        |       |        |        |        |        |        |        |
|-----------|--------|-------|--------|--------|--------|--------|--------|--------|
| CHMP4B    | 366.3  | 426.1 | 454.9  | 467.5  | 394.6  | 377    | 381.3  | 428    |
| CHMP4C    | 109.1  | 139.5 | 143.5  | 123.1  | 99.2   | 100    | 128.9  | 115.8  |
| CHMP5     | 219.2  | 181.5 | 258.5  | 236.6  | 204.7  | 216.7  | 196.1  | 192.3  |
| CHMP6     | 171.1  | 204.4 | 189.7  | 166.3  | 135.9  | 148.7  | 148.9  | 133.2  |
| CHMP6     | 113.6  | 118.9 | 123.7  | 123.8  | 109    | 113.5  | 103.7  | 105    |
| CHMP7     | 150.4  | 161.7 | 186.8  | 189.9  | 153.4  | 146.4  | 202.6  | 184.3  |
| CHN1      | 150.5  | 165   | 144.6  | 142.6  | 142.6  | 115.3  | 139.5  | 148.5  |
| CHN1      | 116.1  | 111.9 | 106.5  | 115.7  | 108.7  | 104.9  | 112.5  | 115.9  |
| CHN2      | 121.5  | 127.7 | 143.7  | 125.9  | 117    | 101.1  | 114.1  | 109.4  |
| CHN2      | 136.4  | 128.1 | 148.9  | 129.9  | 123.1  | 106.4  | 121.6  | 122.1  |
| CHN2      | 120.3  | 116.4 | 109.1  | 112.7  | 100.6  | 104.1  | 111    | 106.3  |
| CHODL     | 128.9  | 127.1 | 127.1  | 134.9  | 101.1  | 106.2  | 137.6  | 123.6  |
| CHORDC1   | 112.3  | 123.6 | 123.8  | 144.1  | 103.1  | 103.6  | 113.4  | 112.4  |
| CHP       | 147.8  | 154.5 | 147.6  | 165    | 128.2  | 145.2  | 174.2  | 163.4  |
| CHPF      | 133.8  | 132.2 | 117.1  | 128.5  | 110.1  | 111    | 142.4  | 138.2  |
| CHPT1     | 157.4  | 138.3 | 188.3  | 183.8  | 163.1  | 124.2  | 177.4  | 178.6  |
| CHR415SY1 | 111.2  | 108.9 | 119.7  | 119.6  | 108.6  | 100.2  | 120.1  | 114.5  |
| CHRAC1    | 151.2  | 166.5 | 151.8  | 184.6  | 149.9  | 129.2  | 164.7  | 168    |
| CHRD      | 107.1  | 117.9 | 111.8  | 130.8  | 113.5  | 103.5  | 119.9  | 114.1  |
| CHRD1     | 103.9  | 105.9 | 103.9  | 112.9  | 105.8  | 95.6   | 113.7  | 107.7  |
| CHRD2     | 116.7  | 112   | 118.4  | 117    | 112.7  | 100    | 116.4  | 112.4  |
| CHRFAM7A  | 106.2  | 120.2 | 110.1  | 115.3  | 104.5  | 93     | 111.5  | 111.3  |
| CHRFAM7A  | 110.8  | 120.7 | 119.4  | 115.3  | 108.7  | 97     | 123.2  | 109.7  |
| CHRFAM7A  | 110.4  | 113.9 | 111.3  | 112.8  | 109.8  | 103.4  | 109    | 113.9  |
| CHRM1     | 122.6  | 115.4 | 116.7  | 119    | 111.2  | 102.6  | 123.5  | 120.7  |
| CHRM2     | 110.5  | 114.1 | 109.7  | 111.4  | 112.4  | 95.2   | 114.6  | 115.3  |
| CHRM2     | 115.8  | 112.4 | 123.8  | 113.4  | 102.4  | 99.1   | 112.8  | 121.9  |
| CHRM4     | 108.7  | 116.4 | 122.3  | 116.8  | 108.5  | 103.3  | 117.7  | 103.8  |
| CHRM5     | 111.7  | 118.1 | 118.6  | 120.8  | 107.7  | 107.9  | 119.8  | 117.5  |
| CHRNA1    | 107.3  | 111.8 | 118.5  | 116.8  | 110.8  | 103.8  | 118.9  | 115.4  |
| CHRNA1    | 115.6  | 114.6 | 113.6  | 127.2  | 104.9  | 98.8   | 115.6  | 106.8  |
| CHRNA1    | 109.2  | 113.1 | 111.1  | 112.8  | 102.9  | 97.8   | 112.7  | 111.8  |
| CHRNA10   | 116.5  | 114.4 | 124.7  | 133.3  | 109.2  | 96.7   | 130.8  | 122.6  |
| CHRNA2    | 118    | 116.2 | 122.3  | 125.6  | 117.9  | 101.2  | 132.3  | 125.5  |
| CHRNA3    | 121.6  | 119.5 | 120.7  | 125.4  | 106    | 104.1  | 116.6  | 118.6  |
| CHRNA4    | 122.3  | 119.3 | 120.3  | 117.4  | 111.8  | 113.3  | 118.5  | 122.1  |
| CHRNA5    | 1423.9 | 989.2 | 1578.8 | 1141.4 | 1221.9 | 1015.6 | 1521.8 | 1461.3 |
| CHRNA6    | 128.4  | 126.6 | 122.5  | 134.6  | 115.7  | 107.1  | 131.7  | 119.9  |
| CHRNA7    | 117    | 116.4 | 130.3  | 135.1  | 111.2  | 92.5   | 119.7  | 111.7  |
| CHRNA9    | 119.9  | 113.8 | 117.7  | 124.5  | 111.2  | 95.6   | 108.6  | 120.2  |
| CHRN1     | 172.6  | 181.8 | 191.7  | 186.6  | 159.7  | 168.4  | 175.3  | 156.2  |
| CHRN2     | 107.8  | 107.6 | 120.3  | 116.4  | 101    | 92.5   | 108.8  | 109.2  |
| CHRN3     | 137    | 123.2 | 133.1  | 112    | 115.5  | 108.6  | 124.9  | 116.9  |
| CHRN4     | 110.9  | 115.1 | 116.1  | 123.8  | 113.8  | 102.4  | 119.6  | 117.6  |
| CHRN5     | 116    | 116.5 | 116.4  | 126    | 110.4  | 102.7  | 123.9  | 111.6  |
| CHRN6     | 115.7  | 123.8 | 120.2  | 115.4  | 108.9  | 104.8  | 120.7  | 121.7  |
| CHST1     | 110.4  | 123.6 | 116.6  | 123.9  | 108.6  | 100.2  | 108.7  | 116.5  |
| CHST10    | 130    | 116.7 | 118.8  | 138.4  | 119.1  | 101    | 133.9  | 124.1  |
| CHST11    | 114.8  | 114.9 | 124.8  | 128.2  | 118.3  | 106.6  | 129.8  | 117.2  |
| CHST12    | 451.9  | 384.6 | 403.6  | 431.9  | 333.8  | 232.8  | 406.9  | 279.2  |
| CHST13    | 147.6  | 115.3 | 194.4  | 131    | 111.3  | 117.3  | 118.3  | 117.4  |

|           |        |        |        |        |        |        |        |        |
|-----------|--------|--------|--------|--------|--------|--------|--------|--------|
| CHST2     | 136.2  | 112.7  | 135.6  | 131.5  | 131    | 135.3  | 135.5  | 133    |
| CHST3     | 126.8  | 127.8  | 119.5  | 126.1  | 114.8  | 97.1   | 117.9  | 127.3  |
| CHST4     | 111.9  | 109    | 112.8  | 109.4  | 104.4  | 99.2   | 115.3  | 116    |
| CHST5     | 118.9  | 114.7  | 111    | 112.6  | 108.4  | 98.5   | 128.3  | 111.9  |
| CHST5     | 112.1  | 108.4  | 117.8  | 114.2  | 112.4  | 94.6   | 103.9  | 112.6  |
| CHST6     | 111    | 109    | 119.9  | 113.1  | 113.2  | 95     | 112    | 112.9  |
| CHST7     | 256    | 242.4  | 208    | 236.7  | 183.2  | 164.7  | 230    | 193.6  |
| CHST8     | 119.9  | 117.7  | 131    | 115.8  | 105.6  | 102.8  | 116.8  | 125.1  |
| CHST9     | 113.3  | 114.4  | 114.6  | 112.9  | 99.9   | 100.3  | 121.5  | 113.2  |
| CHSY1     | 436.8  | 390.6  | 414.8  | 483.8  | 445.2  | 419    | 472.3  | 450.3  |
| CHTF18    | 174.9  | 149.5  | 147.6  | 157.6  | 132    | 119.1  | 158.1  | 147.8  |
| CHUK      | 231.1  | 240.7  | 258.7  | 316.6  | 254.5  | 284.2  | 352.6  | 263.8  |
| CHURC1    | 1005.4 | 504.4  | 1180.9 | 1049.4 | 519.2  | 957.2  | 884.7  | 625.9  |
| CHX10     | 120    | 119.8  | 130.6  | 122.5  | 118.4  | 97.9   | 120.7  | 118    |
| CIAO1     | 638.6  | 738.8  | 699.9  | 626.5  | 566.1  | 510.2  | 551.9  | 597    |
| CIAPIN1   | 164.8  | 141.4  | 140.4  | 169.3  | 142    | 141.1  | 177.8  | 171.6  |
| CIAS1     | 139    | 125.9  | 184.6  | 130.2  | 111.3  | 119.2  | 122.8  | 121.2  |
| CIAS1     | 118.6  | 122.8  | 128.8  | 116.7  | 118    | 107.9  | 124    | 121.6  |
| CIB1      | 3207.1 | 3492.2 | 4724.3 | 3278.8 | 1948.8 | 3027.3 | 2087.3 | 1750.1 |
| CIB2      | 116.9  | 116.2  | 129.4  | 122.5  | 118.2  | 101    | 123.8  | 119.1  |
| CIB3      | 116.5  | 119.9  | 117.5  | 122.3  | 120.4  | 106.6  | 111.7  | 121.2  |
| CIB4      | 107.7  | 108.8  | 109.6  | 112.6  | 105.8  | 97.1   | 114.2  | 100.9  |
| CIC       | 197.3  | 232.7  | 198.8  | 238.4  | 163.4  | 171.9  | 228.8  | 268.1  |
| CICE      | 120.2  | 117.4  | 126.1  | 119    | 111.7  | 102.5  | 127.8  | 125.3  |
| CICK0721Q | 107.1  | 117.2  | 124.1  | 116    | 108.8  | 99.4   | 117.2  | 117.9  |
| CIDEA     | 125.3  | 119.3  | 121.1  | 125.4  | 106.7  | 107.4  | 132.4  | 120    |
| CIDEA     | 114.5  | 126.3  | 126.8  | 125.8  | 105.4  | 101    | 124.2  | 119.6  |
| CIDEB     | 151.9  | 153.5  | 172.5  | 127.4  | 138.6  | 113.6  | 121.9  | 122    |
| CIDEC     | 105.1  | 109.7  | 113.6  | 116.8  | 103.6  | 96.9   | 118.6  | 117.1  |
| CIITA     | 142.2  | 118.3  | 146.9  | 136.8  | 118.4  | 108.2  | 113    | 121.1  |
| CILP      | 117.2  | 112.7  | 107.8  | 121.3  | 112    | 94.6   | 125.8  | 118.4  |
| CILP2     | 112.5  | 111.3  | 130.3  | 134.8  | 110.9  | 110.8  | 122    | 117.3  |
| CINP      | 114.9  | 119.6  | 128.4  | 123.3  | 112.1  | 106.5  | 119.7  | 117.2  |
| CIP29     | 694.2  | 719.5  | 922.2  | 830.1  | 741.8  | 838    | 786.4  | 744.2  |
| CIR       | 157    | 158.4  | 138    | 173.8  | 151.6  | 132.3  | 140.4  | 152.2  |
| CIRBP     | 771.4  | 783.6  | 1255.1 | 825.2  | 770.4  | 1007.3 | 763.8  | 735.5  |
| CIRH1A    | 375    | 494    | 376.7  | 442.6  | 379.2  | 230.5  | 455.7  | 467.2  |
| CISH      | 121.9  | 114.4  | 137.2  | 124.3  | 114.5  | 113.1  | 121.4  | 119.7  |
| CIT       | 112.7  | 112.8  | 108.2  | 113.9  | 112.7  | 96.6   | 117.5  | 118.6  |
| CITED1    | 112.3  | 122.1  | 108.4  | 124    | 116.2  | 92.8   | 115    | 109    |
| CITED2    | 328.4  | 283.5  | 285.5  | 238.2  | 267.6  | 253.4  | 301    | 309    |
| CITED4    | 145    | 155.4  | 160.4  | 156.5  | 127.7  | 134    | 138.7  | 122.9  |
| CIZ1      | 124    | 128.5  | 120.1  | 127.7  | 124.3  | 100.1  | 131.6  | 131.8  |
| CKAP1     | 362.1  | 318    | 359.3  | 300.7  | 263    | 227.8  | 284.2  | 267.6  |
| CKAP2     | 171.6  | 177.1  | 208.5  | 185.1  | 147.9  | 153.4  | 161.7  | 174.1  |
| CKAP4     | 211.7  | 295.9  | 249.3  | 261.9  | 204.2  | 286.8  | 280    | 225.3  |
| CKAP5     | 368.1  | 445    | 332.3  | 398.8  | 363.7  | 313    | 348.1  | 308.8  |
| CKAP5     | 122.4  | 117.4  | 136.1  | 127.8  | 122.4  | 101.8  | 125.8  | 112.3  |
| CKB       | 119.7  | 112.1  | 128.8  | 128.5  | 105.4  | 99.4   | 126.9  | 117.7  |
| CKLF      | 1070.1 | 1227.7 | 1622.6 | 1274.2 | 1117   | 997.2  | 845.7  | 765.6  |
| CKLF      | 477.7  | 557.9  | 575.3  | 510.7  | 427    | 357.7  | 363.3  | 381.5  |



|         |        |       |        |        |        |        |        |        |
|---------|--------|-------|--------|--------|--------|--------|--------|--------|
| CKLF    | 116.7  | 120.4 | 122.6  | 113.7  | 118.8  | 98.2   | 118    | 115.3  |
| CKLFSF4 | 126.1  | 111.7 | 114.3  | 108.4  | 107.7  | 100.1  | 114.9  | 114.7  |
| CKM     | 111.6  | 113.6 | 117.3  | 117.3  | 106.8  | 94.2   | 115    | 111.4  |
| CKMT1A  | 112.9  | 118.5 | 122.3  | 118.6  | 110.7  | 102.3  | 115.7  | 120.4  |
| CKMT1B  | 116.6  | 110.9 | 110.9  | 110.2  | 107.7  | 90.7   | 112.5  | 114.8  |
| CKMT2   | 124.1  | 121.7 | 120.7  | 113.2  | 106.3  | 109.6  | 130.4  | 126    |
| CKS1B   | 223.8  | 183.4 | 178.3  | 189.9  | 154.6  | 132.9  | 201    | 169.8  |
| CKS2    | 279.7  | 303.2 | 314.2  | 389.9  | 298    | 212.9  | 588.5  | 569.1  |
| CLASP1  | 331.5  | 368.5 | 323.5  | 330.9  | 265.3  | 259    | 388.4  | 399.5  |
| CLASP2  | 149.3  | 162.1 | 197.4  | 194.5  | 173.9  | 188.8  | 185.3  | 162.3  |
| CLC     | 132.7  | 141.8 | 618.4  | 145    | 147.2  | 411.1  | 126.5  | 144.3  |
| CLCA1   | 112.2  | 123   | 113.4  | 109.2  | 104.5  | 92.6   | 117.4  | 120    |
| CLCA2   | 105.9  | 107.9 | 105.8  | 110.8  | 107    | 88.7   | 109.9  | 111.7  |
| CLCA3   | 115.3  | 119.3 | 110.3  | 116.1  | 112.7  | 97.2   | 122.6  | 118    |
| CLCA4   | 121.8  | 118.3 | 125.3  | 122.9  | 109.8  | 106.9  | 120.5  | 108.6  |
| CLCC1   | 118.8  | 112.3 | 112.4  | 120.7  | 106.4  | 106.6  | 124.8  | 122.8  |
| CLCC1   | 120    | 106.3 | 127.4  | 123.3  | 109.2  | 105.5  | 117.2  | 122.2  |
| CLCF1   | 196.4  | 219.7 | 203.8  | 211    | 175.6  | 201.5  | 226.6  | 188.7  |
| CLCN1   | 110.7  | 112.6 | 114.4  | 120.1  | 110.3  | 100.9  | 120.8  | 115.2  |
| CLCN2   | 131.6  | 122   | 118.6  | 113.7  | 110.7  | 91.2   | 126.6  | 115.4  |
| CLCN3   | 111.9  | 125.4 | 121    | 114.8  | 107    | 98.6   | 111.6  | 112    |
| CLCN3   | 184.4  | 220.9 | 210.9  | 222.1  | 217.5  | 177.5  | 232.7  | 260.4  |
| CLCN4   | 108.5  | 113.1 | 117.6  | 117.9  | 110.8  | 94.2   | 111.7  | 109.2  |
| CLCN5   | 106.6  | 114   | 116.1  | 115.6  | 110.2  | 103.8  | 119.5  | 114.3  |
| CLCN6   | 120.1  | 120.1 | 123.8  | 118.5  | 114.3  | 108.1  | 127.7  | 140.8  |
| CLCN6   | 180.2  | 179.4 | 152.4  | 176.2  | 160.7  | 128.8  | 169.6  | 164    |
| CLCN6   | 206.7  | 200.9 | 202.1  | 215.3  | 174.6  | 161.2  | 202.9  | 186.1  |
| CLCN7   | 2572.8 | 3034  | 1962.5 | 3638.7 | 1802.2 | 1468.4 | 3523.4 | 2417.6 |
| CLCNKA  | 124.4  | 112   | 114.8  | 118.3  | 110.8  | 95.7   | 119.9  | 115.2  |
| CLCNKA  | 111.3  | 119.4 | 121.9  | 127.1  | 110.9  | 103.1  | 125.5  | 116.8  |
| CLCNKB  | 117.8  | 125.9 | 114.5  | 115.1  | 107.2  | 103.2  | 121.3  | 122.7  |
| CLDN1   | 117.6  | 116.4 | 112.5  | 126.4  | 117.7  | 96     | 115.4  | 118.1  |
| CLDN10  | 114.9  | 112.6 | 114.7  | 116.3  | 110.6  | 100.9  | 113.1  | 113.8  |
| CLDN10  | 110    | 106.8 | 113    | 105    | 105.8  | 93.2   | 108.4  | 112.1  |
| CLDN10  | 112    | 115.1 | 108.8  | 120.9  | 113.5  | 95.9   | 116.2  | 108.5  |
| CLDN12  | 127.8  | 125.5 | 118.2  | 131.4  | 118.3  | 100.2  | 122.3  | 125.1  |
| CLDN14  | 216    | 206.3 | 181.1  | 203.5  | 166.6  | 147.7  | 202.9  | 193.1  |
| CLDN14  | 109.4  | 103.7 | 102    | 104.1  | 108.2  | 88     | 111.2  | 106.3  |
| CLDN14  | 112.4  | 110   | 112.9  | 115.7  | 109.6  | 89.5   | 118.6  | 105.5  |
| CLDN15  | 118.2  | 133.8 | 109.2  | 128.8  | 122.9  | 100.4  | 131.4  | 139.7  |
| CLDN15  | 422.6  | 555.6 | 479.6  | 595.3  | 494.9  | 328.3  | 554.4  | 768.9  |
| CLDN15  | 137    | 143.9 | 134.9  | 145    | 129.7  | 96.2   | 142.3  | 163.7  |
| CLDN16  | 105.4  | 113.3 | 113.5  | 118.1  | 107.8  | 96     | 113.2  | 113.6  |
| CLDN17  | 114.8  | 115.4 | 117.8  | 126    | 103.3  | 96.8   | 121    | 118.6  |
| CLDN18  | 121.5  | 110.6 | 123    | 121    | 107.6  | 97.1   | 118.3  | 121.9  |
| CLDN18  | 130.4  | 130.2 | 117.9  | 131.1  | 118    | 108.5  | 126.4  | 137.6  |
| CLDN18  | 112.4  | 122.9 | 118.9  | 107.7  | 112.7  | 105.4  | 118.1  | 118.5  |
| CLDN18  | 125.5  | 118.1 | 120.6  | 115.7  | 113.4  | 100.6  | 117.2  | 117.8  |
| CLDN19  | 109.5  | 116   | 121.1  | 115.1  | 109.6  | 106.1  | 118.1  | 109.1  |
| CLDN2   | 111.4  | 111   | 101.1  | 114.2  | 103.2  | 95.3   | 111.1  | 114.8  |
| CLDN20  | 125.5  | 125.9 | 129.9  | 123.9  | 109.1  | 105.5  | 131    | 116.6  |

|         |       |       |        |       |       |        |       |       |
|---------|-------|-------|--------|-------|-------|--------|-------|-------|
| CLDN23  | 159.1 | 148.9 | 154.8  | 177.7 | 124.9 | 118    | 145.5 | 131.7 |
| CLDN3   | 111.3 | 132.7 | 123.6  | 122.5 | 118   | 102.5  | 119.1 | 122.4 |
| CLDN4   | 101.8 | 114.7 | 113.9  | 127.5 | 106.8 | 99     | 120.9 | 108   |
| CLDN5   | 113.1 | 121.1 | 112.2  | 118.8 | 118.8 | 99.9   | 119.4 | 110.8 |
| CLDN6   | 117.3 | 112.8 | 113.7  | 118.1 | 116.2 | 99.9   | 125.3 | 115.5 |
| CLDN7   | 113.4 | 127.1 | 116.9  | 124.3 | 112.5 | 98.4   | 115.5 | 115.4 |
| CLDN8   | 107.3 | 105.3 | 115.5  | 109.6 | 102   | 95.3   | 119.8 | 103.5 |
| CLDN9   | 120.3 | 132.5 | 125    | 121.9 | 115.5 | 109.5  | 131.9 | 133.7 |
| CLDND1  | 629.7 | 591.3 | 662.5  | 769.5 | 473.6 | 552.5  | 736.3 | 671.9 |
| CLDND1  | 747   | 662.2 | 805.9  | 832.6 | 793.3 | 743.1  | 760   | 888.8 |
| CLDND2  | 235.3 | 222   | 241.1  | 282.1 | 226.7 | 188.9  | 303.2 | 335.6 |
| CLEC10A | 115.6 | 109.4 | 170.4  | 113.2 | 105.6 | 99.5   | 124.1 | 105.9 |
| CLEC10A | 105.3 | 112.1 | 167.5  | 108.9 | 100.9 | 104.4  | 121   | 112.5 |
| CLEC10A | 133.4 | 105.1 | 276    | 120.9 | 106.2 | 99.3   | 120.3 | 110.6 |
| CLEC11A | 124.1 | 137.1 | 139.9  | 134.6 | 122.4 | 113.8  | 126.6 | 122.2 |
| CLEC12A | 199.3 | 151.2 | 188.2  | 167.7 | 125.2 | 112.6  | 156.5 | 125.8 |
| CLEC12A | 207.6 | 161.7 | 187.4  | 165.7 | 129.5 | 114    | 187.3 | 149   |
| CLEC12A | 132.8 | 142.5 | 128.5  | 135.5 | 117.5 | 110.2  | 119.7 | 117.9 |
| CLEC12B | 113.3 | 116.8 | 122.2  | 121.8 | 108.1 | 104.9  | 114.8 | 114.9 |
| CLEC14A | 118.6 | 108.1 | 112.8  | 113.7 | 99.6  | 93.3   | 112.8 | 124.3 |
| CLEC1A  | 110.1 | 110   | 126    | 116.6 | 102.6 | 103.9  | 111.7 | 118   |
| CLEC1B  | 107.2 | 111   | 119.8  | 115.3 | 114.4 | 99.8   | 127.2 | 119.2 |
| CLEC2B  | 277.9 | 166   | 331.8  | 324.4 | 160   | 336.3  | 365.5 | 224   |
| CLEC2D  | 134.1 | 132.6 | 215.8  | 155.4 | 119.6 | 128.5  | 155.4 | 141.3 |
| CLEC2D  | 497.2 | 519.7 | 560.7  | 634.1 | 669.5 | 382    | 570.3 | 518.8 |
| CLEC3A  | 118.7 | 108.5 | 114.5  | 120.4 | 100.1 | 110.7  | 119.1 | 107.1 |
| CLEC3B  | 111.4 | 121.9 | 130.4  | 119.1 | 106.8 | 96.3   | 122.3 | 114   |
| CLEC4A  | 275   | 142.8 | 472    | 242.7 | 129.1 | 249    | 170.4 | 135.9 |
| CLEC4C  | 121.8 | 121.2 | 121.5  | 126.8 | 107.4 | 100.5  | 122.9 | 118   |
| CLEC4C  | 109.5 | 123.3 | 110.5  | 120.3 | 108.6 | 100.1  | 123.2 | 114.9 |
| CLEC4D  | 119   | 119.2 | 111.6  | 131.3 | 110   | 102.6  | 140.4 | 122.3 |
| CLEC4E  | 127   | 110.8 | 113.3  | 120.4 | 103.1 | 101.8  | 118.1 | 118   |
| CLEC4F  | 109.6 | 117.6 | 117.2  | 123   | 106.4 | 95.3   | 114.6 | 116   |
| CLEC4G  | 114   | 115.4 | 114    | 125.7 | 107.2 | 98.7   | 115.4 | 113.1 |
| CLEC4M  | 109.1 | 112.8 | 114.4  | 106.1 | 111.3 | 98.2   | 114   | 114   |
| CLEC5A  | 352.1 | 321.5 | 555.2  | 710.8 | 352.1 | 1144.5 | 543.9 | 200.2 |
| CLEC6A  | 114.2 | 111.2 | 111.1  | 112   | 108.5 | 96.1   | 111.4 | 121.5 |
| CLEC7A  | 137.6 | 137.7 | 167.6  | 152.9 | 115.1 | 157    | 139.8 | 116   |
| CLEC7A  | 114.8 | 107.6 | 121.7  | 130   | 109.4 | 114.2  | 115.6 | 112.8 |
| CLEC7A  | 145.2 | 134.8 | 184.4  | 179.2 | 127.9 | 164.9  | 157.3 | 126.5 |
| CLEC9A  | 115.1 | 114.9 | 119.4  | 121.8 | 108.3 | 105    | 117.1 | 107.3 |
| CLGN    | 112   | 117.6 | 117.5  | 117.6 | 109.9 | 95.3   | 109   | 111.5 |
| CLIC1   | 777   | 526.2 | 1261.1 | 703.4 | 524.6 | 1053   | 878.3 | 458.2 |
| CLIC2   | 125.3 | 117.5 | 130.9  | 126.4 | 118.3 | 103.1  | 120.6 | 137.9 |
| CLIC3   | 244.4 | 256.1 | 439.6  | 266.4 | 211.8 | 362.7  | 209.2 | 196.6 |
| CLIC4   | 235.3 | 195.7 | 225.4  | 235   | 171.9 | 220.9  | 192.2 | 165.7 |
| CLIC5   | 136.5 | 138.3 | 164    | 136.2 | 114.3 | 116.3  | 133   | 126.3 |
| CLIC6   | 124.8 | 125.5 | 125.4  | 121.1 | 123.2 | 107    | 132.3 | 134.5 |
| CLIP1   | 375.9 | 322.4 | 358.4  | 509.8 | 302.2 | 445.5  | 457.7 | 437.7 |
| CLIP2   | 149   | 142.7 | 114.1  | 148.3 | 126.1 | 125.6  | 182.7 | 158.3 |
| CLIP2   | 151.8 | 135.3 | 151.9  | 190   | 129.9 | 144    | 208.6 | 140.5 |

|          |         |         |         |         |         |        |         |       |
|----------|---------|---------|---------|---------|---------|--------|---------|-------|
| CLIPR-59 | 142.1   | 221.9   | 127.2   | 149.1   | 207.3   | 106.1  | 143.1   | 236.5 |
| CLK1     | 243.7   | 375.5   | 325.3   | 313.4   | 304.7   | 293.8  | 445.8   | 497.1 |
| CLK1     | 137.4   | 138.7   | 153.9   | 145.2   | 147.2   | 126    | 149.6   | 179.1 |
| CLK2     | 178.8   | 172.3   | 162.1   | 169.5   | 144.1   | 166.2  | 166.7   | 135.2 |
| CLK2     | 372.4   | 377.3   | 374.5   | 319.4   | 245.1   | 300.6  | 299.2   | 269.8 |
| CLK2P    | 109.2   | 113.6   | 124.1   | 122.4   | 111.4   | 93.2   | 118.9   | 109.2 |
| CLK3     | 182.9   | 196.8   | 182.7   | 217.3   | 189.7   | 145.7  | 178.7   | 199   |
| CLK3     | 542.1   | 615.6   | 467.4   | 608.6   | 572.9   | 377.3  | 541.2   | 659.8 |
| CLK3     | 129.1   | 118.5   | 138.3   | 128.3   | 126.9   | 110.2  | 132.9   | 121.1 |
| CLK4     | 296.9   | 292.3   | 323.4   | 345.8   | 305.8   | 229.1  | 268.4   | 299.5 |
| CLLU1    | 108     | 113.9   | 112.1   | 107.4   | 102.2   | 87.7   | 113.7   | 123   |
| CLLU1OS  | 142     | 117.6   | 118.8   | 149.4   | 106     | 101    | 126.2   | 108.5 |
| CLMN     | 117.1   | 118.6   | 115.8   | 117.7   | 104.9   | 104.6  | 119.2   | 112.6 |
| CLN3     | 293.5   | 342.6   | 244.9   | 267.4   | 193.8   | 211.7  | 276.9   | 208.1 |
| CLN3     | 256.6   | 244.5   | 215.8   | 231.5   | 192.3   | 176.1  | 237.7   | 185.5 |
| CLN5     | 197.8   | 192.5   | 240.1   | 203     | 179.8   | 177.2  | 209.6   | 236.8 |
| CLN6     | 131.1   | 126.1   | 157.6   | 119     | 114.7   | 117.3  | 139.6   | 126.3 |
| CLN8     | 117     | 139.9   | 143.9   | 128.7   | 156.3   | 101.7  | 157.3   | 156.7 |
| CLNS1A   | 716     | 759.8   | 919.9   | 663     | 683.3   | 496.6  | 511.2   | 557.6 |
| CLOCK    | 130.3   | 129.6   | 140.5   | 130.2   | 116.6   | 106    | 129.8   | 120.8 |
| CLPB     | 114.1   | 118.2   | 117.6   | 116.6   | 107.1   | 96.4   | 119.4   | 117.5 |
| CLPP     | 242.8   | 265.7   | 222.3   | 249.8   | 181     | 176    | 240.6   | 187.5 |
| CLPS     | 110.2   | 111.5   | 113.8   | 110     | 98.3    | 89.2   | 112.7   | 108.3 |
| CLPTM1   | 484.4   | 426.8   | 462.9   | 481.9   | 339.7   | 455.4  | 645.5   | 487.4 |
| CLPX     | 228.3   | 263     | 201.8   | 210.1   | 232.1   | 200.5  | 227.8   | 231.7 |
| CLRN3    | 111.6   | 109.8   | 114.5   | 115.9   | 99.3    | 98.3   | 122.5   | 108.9 |
| CLSPN    | 114.1   | 117     | 141.7   | 120     | 107.6   | 108.3  | 134.3   | 119.8 |
| CLSTN1   | 883.3   | 891.7   | 753.3   | 912.8   | 564.1   | 680.8  | 914.1   | 600.4 |
| CLSTN1   | 122.8   | 118.1   | 117     | 130.1   | 114.1   | 101.5  | 117.9   | 109.5 |
| CLSTN2   | 118.8   | 134.7   | 117.3   | 125.2   | 111.7   | 104.3  | 129.2   | 119.3 |
| CLSTN3   | 125.4   | 118.7   | 118.5   | 121.9   | 112     | 97.6   | 134.1   | 117.6 |
| CLTA     | 570.8   | 575.8   | 657.7   | 610     | 454.9   | 527.1  | 554.9   | 604.1 |
| CLTA     | 115.8   | 123.9   | 116.4   | 113.1   | 105.3   | 99.4   | 120.1   | 112.1 |
| CLTA     | 396.3   | 392     | 429.7   | 412.3   | 324.1   | 363.4  | 432.8   | 431.9 |
| CLTB     | 377.6   | 321.7   | 473.4   | 348.5   | 307.4   | 409.1  | 335.5   | 364.2 |
| CLTB     | 112.7   | 113.4   | 124.8   | 113.1   | 106.8   | 102.9  | 114.2   | 103.5 |
| CLTC     | 123.2   | 131.6   | 135.2   | 139.1   | 130.2   | 116    | 182.3   | 157.3 |
| CLTCL1   | 109.1   | 95.9    | 113.1   | 112.9   | 111.2   | 105.1  | 117.8   | 116.4 |
| CLTCL1   | 114.2   | 119.1   | 135.5   | 130     | 107.6   | 105.4  | 130.3   | 124.8 |
| CLU      | 110.2   | 105.8   | 105.7   | 112.2   | 102.6   | 101.5  | 106.6   | 108   |
| CLU      | 109.3   | 105.4   | 102.8   | 111.7   | 96.6    | 99.7   | 114.2   | 110.9 |
| CLU      | 122.3   | 106.9   | 113.5   | 115     | 105.8   | 97.1   | 113.2   | 115   |
| CLUAP1   | 135.2   | 155.6   | 162.3   | 148.4   | 135.4   | 111.1  | 122.1   | 130   |
| CLUAP1   | 15529.8 | 11579.9 | 12817.1 | 11469.8 | 13201.3 | 7646.4 | 12266.4 | 13790 |
| CLUAP1   | 158.7   | 195.3   | 168.4   | 158.1   | 160     | 146.8  | 131.9   | 125.6 |
| CLUL1    | 107.7   | 111.6   | 112.9   | 115.2   | 103.5   | 95.9   | 113.3   | 120.7 |
| CLUL1    | 125.3   | 138.2   | 135.3   | 139.6   | 121.3   | 102.7  | 125.1   | 124.5 |
| CLUL1    | 115.1   | 121.7   | 138.2   | 120.2   | 113.8   | 99.5   | 126.7   | 118.2 |
| CLYBL    | 161.5   | 191.9   | 205.3   | 169.5   | 176.5   | 169.4  | 146.4   | 173.1 |
| CLYBL    | 122.9   | 138.5   | 148.9   | 134.5   | 131.2   | 139    | 132.7   | 131.5 |
| CMA1     | 118.8   | 115.3   | 130.8   | 112.7   | 103     | 96.8   | 118.3   | 110.8 |

|        |        |        |        |        |        |        |        |        |
|--------|--------|--------|--------|--------|--------|--------|--------|--------|
| CMAH   | 132.2  | 137.3  | 153.6  | 165    | 134.7  | 118.9  | 132.1  | 132.3  |
| CMAS   | 439.7  | 425.6  | 425.2  | 477.5  | 387.5  | 350.2  | 494.4  | 422    |
| CMIP   | 556.2  | 428.5  | 776.3  | 536.5  | 457.7  | 809.7  | 514    | 520.7  |
| CMIP   | 115.8  | 109.1  | 113.7  | 121.2  | 101.3  | 98.5   | 128.9  | 119.6  |
| CMIP   | 116.9  | 116.5  | 129.4  | 119.5  | 113.9  | 105.9  | 118.7  | 115.1  |
| CMKLR1 | 128.7  | 120    | 142.7  | 127    | 108.1  | 124.1  | 126.4  | 113.2  |
| CMKOR1 | 187.4  | 181.2  | 240.2  | 176.5  | 156.2  | 153.1  | 144.8  | 137.4  |
| CML2   | 111.3  | 119.2  | 119.5  | 112.2  | 109.2  | 103.5  | 131.7  | 117.6  |
| CMPK   | 701.9  | 724.3  | 638.1  | 686    | 551.3  | 632.2  | 530.9  | 659.7  |
| CMTM1  | 117.3  | 111.2  | 113    | 124.2  | 114.9  | 93.2   | 117.1  | 124    |
| CMTM1  | 114.7  | 110    | 118.1  | 116.9  | 110.4  | 103.4  | 122.5  | 121    |
| CMTM1  | 112.3  | 128.9  | 128.7  | 125.6  | 127    | 105.2  | 122.6  | 110.5  |
| CMTM2  | 109.3  | 110.6  | 119    | 110.3  | 107.1  | 99.6   | 113.6  | 110.6  |
| CMTM3  | 98.8   | 107.2  | 123.6  | 128.4  | 112    | 104.5  | 122.2  | 119    |
| CMTM3  | 744.3  | 911.5  | 754.2  | 766.6  | 564.6  | 664.9  | 809.8  | 799.1  |
| CMTM3  | 122.7  | 129.1  | 128.6  | 128.5  | 118.9  | 112    | 130.3  | 121.2  |
| CMTM3  | 254.2  | 296    | 279.4  | 258.8  | 226.3  | 240.6  | 285.3  | 260.8  |
| CMTM4  | 127.3  | 112.3  | 146.6  | 125.8  | 125.5  | 116.7  | 131    | 134.1  |
| CMTM4  | 117.3  | 118.7  | 129.6  | 120.7  | 115.1  | 107.3  | 115    | 121.4  |
| CMTM5  | 118.4  | 115.6  | 121.7  | 122.5  | 120.3  | 103.7  | 123.2  | 116.8  |
| CMTM7  | 1551.4 | 1681.8 | 2518   | 1571.2 | 1175.3 | 1351.6 | 1077.1 | 1036.6 |
| CMTM7  | 192.1  | 164.5  | 220.1  | 181.4  | 176.5  | 153.8  | 152.8  | 162.5  |
| CMTM7  | 197.2  | 173.1  | 201.1  | 203.3  | 162.7  | 167    | 188.1  | 164.8  |
| CMTM8  | 992.9  | 357    | 822.6  | 1057.2 | 317    | 635.6  | 757.1  | 283.1  |
| CMYA1  | 108.4  | 107.9  | 118.6  | 119.8  | 109.7  | 96.1   | 115.3  | 106.8  |
| CMYA3  | 112    | 107.1  | 122.1  | 119.7  | 99.1   | 92.2   | 109.9  | 106.8  |
| CMYA3  | 115.2  | 104.6  | 116.5  | 106.4  | 107.3  | 98.6   | 120.5  | 111.8  |
| CMYA5  | 125    | 129.4  | 127.9  | 127.5  | 111.8  | 107.2  | 132.6  | 118.1  |
| CNAP1  | 242.6  | 273.4  | 241.1  | 246.3  | 196.1  | 172    | 231.9  | 213.6  |
| CNBD1  | 107.3  | 112.2  | 108.4  | 114.5  | 107.9  | 95.5   | 119.9  | 109.7  |
| CNBP   | 1060.6 | 1079.4 | 1279.3 | 1285.1 | 957.9  | 1200.9 | 1290.1 | 1012.6 |
| CNDP1  | 112.4  | 115.6  | 120    | 119    | 113.2  | 98.5   | 125.9  | 112.7  |
| CNDP2  | 1322   | 1269.8 | 1948.6 | 1406.4 | 1016.4 | 1109.2 | 1239.4 | 1229.9 |
| CNFN   | 139.1  | 133    | 125    | 140.9  | 115.2  | 112.8  | 132.6  | 117.9  |
| CNGA1  | 105.2  | 110    | 118    | 114.6  | 106.4  | 96.7   | 118.3  | 113.5  |
| CNGA2  | 110.5  | 114.3  | 118.8  | 115.2  | 106.8  | 102.5  | 109.6  | 112.1  |
| CNGA3  | 120.8  | 118.9  | 119.4  | 115    | 109.5  | 95.8   | 122.9  | 110.6  |
| CNGA3  | 114.3  | 115.1  | 100.3  | 116    | 107.3  | 95.9   | 114.4  | 110    |
| CNGA3  | 124    | 125.2  | 122.7  | 119.7  | 110.5  | 102.7  | 122    | 118.2  |
| CNGA4  | 113.4  | 110.4  | 124.3  | 120.7  | 103.6  | 105.1  | 117.3  | 118    |
| CNGB1  | 129.9  | 133.1  | 135.5  | 131.3  | 127.8  | 112.6  | 140.1  | 129.8  |
| CNGB3  | 111.3  | 119.7  | 127.8  | 113.1  | 102.8  | 103.3  | 117.5  | 113.8  |
| CNIH   | 401.7  | 463.5  | 450.2  | 374.8  | 303.9  | 354.3  | 348.8  | 377.6  |
| CNIH   | 257    | 291.7  | 352.3  | 302.9  | 205.3  | 267.7  | 256.8  | 249.8  |
| CNIH2  | 110    | 113    | 108    | 113.4  | 108.1  | 94.4   | 104    | 109.6  |
| CNIH2  | 115.3  | 113.2  | 114.6  | 118.4  | 107.9  | 104.4  | 118.7  | 109    |
| CNIH3  | 120.9  | 116.7  | 117.5  | 123    | 104.2  | 105.1  | 115.8  | 122.3  |
| CNIH4  | 248.4  | 398.5  | 416    | 357.3  | 283.9  | 376.2  | 322.1  | 341.4  |
| CNKSR1 | 117.2  | 124    | 126.2  | 124.3  | 120.9  | 95.5   | 126.2  | 114.8  |
| CNKSR2 | 120.8  | 118.1  | 119.3  | 124.3  | 105.2  | 101    | 126.1  | 114.4  |
| CNKSR3 | 117    | 114.2  | 121.7  | 129.3  | 105.9  | 100.1  | 120.3  | 119.6  |

|         |        |        |        |        |       |        |        |        |
|---------|--------|--------|--------|--------|-------|--------|--------|--------|
| CNN1    | 114.3  | 108.5  | 119.6  | 112    | 107.6 | 98     | 111.3  | 104.1  |
| CNN2    | 137.7  | 122.8  | 137.4  | 128.3  | 118.3 | 109.5  | 119.4  | 124.3  |
| CNN2    | 1087.1 | 1047   | 986.1  | 880.5  | 661.6 | 650.3  | 542.5  | 464.9  |
| CNN3    | 215.9  | 278.7  | 200.8  | 247.2  | 217.7 | 138.9  | 244.1  | 230.6  |
| CNNM1   | 130.8  | 128.2  | 129    | 138.3  | 138.7 | 106.9  | 131.8  | 129.8  |
| CNNM2   | 114.2  | 110.4  | 124.1  | 106.8  | 107.9 | 94     | 124.5  | 115.8  |
| CNNM2   | 119.8  | 132.7  | 129.4  | 132.7  | 114.8 | 105.5  | 140.9  | 147    |
| CNNM2   | 130.5  | 126.2  | 137.8  | 132.3  | 114.7 | 106.2  | 125.9  | 122    |
| CNNM3   | 265.7  | 233.7  | 255.3  | 266.3  | 206.6 | 183.9  | 257.7  | 218.5  |
| CNNM4   | 143.8  | 129.5  | 128.3  | 132.5  | 122.5 | 112.3  | 134.2  | 129.5  |
| CNO     | 319.9  | 297.8  | 359.3  | 344.6  | 240.9 | 227.6  | 280.7  | 270.1  |
| CNOT1   | 115.2  | 116.7  | 117.1  | 122.9  | 114.6 | 99.2   | 120.4  | 113.4  |
| CNOT1   | 1532.5 | 1586.1 | 1404.4 | 1573.8 | 1433  | 1342.9 | 1912.1 | 2115.1 |
| CNOT10  | 191    | 192.9  | 228    | 216.4  | 161.6 | 173.4  | 191.4  | 185.8  |
| CNOT2   | 558.1  | 579.4  | 529    | 549.5  | 366.2 | 466.1  | 536.7  | 496.5  |
| CNOT3   | 146.4  | 168.7  | 142.5  | 151    | 143.8 | 122    | 208.8  | 169.7  |
| CNOT4   | 281.1  | 287.4  | 294.6  | 323.3  | 304.6 | 253.2  | 423.5  | 466.3  |
| CNOT4   | 115.8  | 120.5  | 120.8  | 130.7  | 108   | 104.6  | 136.5  | 129.3  |
| CNOT4   | 125.3  | 127.1  | 118    | 122    | 114.7 | 107    | 151.9  | 134.7  |
| CNOT6   | 454.7  | 373.3  | 434.8  | 519.6  | 343   | 396.1  | 546.9  | 463    |
| CNOT6L  | 218.3  | 228.5  | 207.4  | 233.2  | 236.7 | 178.6  | 258.3  | 270.2  |
| CNOT7   | 239.8  | 264.9  | 279    | 327.5  | 203.5 | 243.7  | 256    | 262.7  |
| CNOT7   | 636.6  | 676.6  | 514.5  | 583.4  | 492.1 | 381.6  | 461.2  | 483.6  |
| CNOT7   | 111.7  | 113.2  | 129    | 122.6  | 100   | 111.2  | 111.4  | 110.2  |
| CNOT8   | 337.6  | 384.7  | 337.7  | 307.5  | 321.5 | 229.3  | 370    | 336.8  |
| CNP     | 110.5  | 128.1  | 114    | 128.4  | 107.2 | 102.3  | 135.5  | 118.1  |
| CNR1    | 120.6  | 123.7  | 124.3  | 123.9  | 117.7 | 112    | 128.7  | 123.4  |
| CNR2    | 108.2  | 118.4  | 112.4  | 120.5  | 112.6 | 93.4   | 112.1  | 114.9  |
| CNTD    | 118.1  | 114.8  | 113    | 119.2  | 114.1 | 91.5   | 115    | 125.3  |
| CNTF    | 113    | 117.1  | 116    | 117.6  | 118.5 | 103.8  | 116.8  | 117.2  |
| CNTFR   | 118.1  | 115.9  | 125.9  | 118.4  | 110.7 | 103.6  | 120.7  | 119.9  |
| CNTFR   | 119.8  | 124.5  | 120.2  | 121.7  | 110   | 97.4   | 126.2  | 116.5  |
| CNTFR   | 114.6  | 109.7  | 105    | 119.8  | 100.6 | 94.2   | 115.8  | 116.7  |
| CNTN1   | 111    | 112.7  | 119.4  | 109.8  | 109.2 | 94     | 117    | 110.2  |
| CNTN1   | 106.1  | 118.6  | 121.5  | 119.2  | 103.9 | 97.5   | 109.7  | 119.3  |
| CNTN2   | 114.7  | 116.5  | 110.1  | 115.4  | 104.9 | 100.4  | 110.9  | 108.3  |
| CNTN3   | 114    | 117.9  | 117.1  | 116.8  | 107.5 | 96.5   | 115.5  | 115.6  |
| CNTN4   | 116.9  | 130.3  | 141.5  | 130.9  | 117.9 | 110    | 132.5  | 117.1  |
| CNTN4   | 108.3  | 111.9  | 105.9  | 121.5  | 107.3 | 92.8   | 115.1  | 109.3  |
| CNTN4   | 119.5  | 109.8  | 114.9  | 134.1  | 115.1 | 103    | 125.4  | 117.1  |
| CNTN5   | 105.5  | 109.1  | 112.9  | 116.4  | 107.2 | 92.5   | 120.2  | 110.4  |
| CNTN5   | 119.1  | 118.9  | 121.5  | 123.8  | 107.1 | 107.5  | 117.9  | 113.5  |
| CNTN6   | 112.6  | 117.3  | 110.3  | 109.6  | 113.1 | 103.8  | 124.6  | 117.6  |
| CNTNAP1 | 115.5  | 113.7  | 125.7  | 125.4  | 117.6 | 107.3  | 119.6  | 113    |
| CNTNAP2 | 400.7  | 332.9  | 189.8  | 299.2  | 177.5 | 131.7  | 174.1  | 141.1  |
| CNTNAP3 | 121.5  | 117    | 122.8  | 125.6  | 110.4 | 99.9   | 121    | 115.5  |
| CNTNAP4 | 116    | 121.4  | 117.2  | 119.6  | 114.5 | 96.7   | 115.9  | 110.4  |
| CNTNAP4 | 111.7  | 112.6  | 108.9  | 115.8  | 104.3 | 106.1  | 122.3  | 110.2  |
| CNTNAP5 | 110.4  | 116.4  | 119.7  | 118.5  | 110.9 | 103    | 111.8  | 122.9  |
| CNTNAP5 | 113.5  | 110.2  | 111.2  | 114.7  | 105.8 | 93.6   | 115.6  | 112.8  |
| CNTROB  | 138.8  | 122.7  | 131.2  | 137.8  | 110.1 | 111.2  | 134.1  | 117.5  |

|         |       |       |       |       |       |       |       |       |
|---------|-------|-------|-------|-------|-------|-------|-------|-------|
| COASY   | 325.6 | 371.8 | 457.9 | 362.7 | 307.1 | 243.3 | 284   | 279.4 |
| COASY   | 133.8 | 143.5 | 148   | 150.4 | 131.3 | 141.6 | 153.4 | 126.3 |
| COBL    | 118   | 106   | 113.1 | 118.5 | 117.7 | 98.5  | 113.4 | 118.2 |
| COBLL1  | 415.5 | 346.9 | 234.3 | 487.9 | 256.6 | 208.5 | 364   | 252.1 |
| COBRA1  | 137.7 | 142.8 | 143.9 | 137.3 | 124.9 | 110.3 | 128.6 | 125.1 |
| COBRA1  | 311.1 | 328.1 | 308   | 349.2 | 251.1 | 264.2 | 374.9 | 309.3 |
| COBRA1  | 537.4 | 483.9 | 453.8 | 532.6 | 349.6 | 423.2 | 580.2 | 462.1 |
| COCH    | 114.5 | 114.4 | 112.5 | 120.2 | 114.4 | 97.2  | 122.5 | 112.3 |
| COG1    | 169.9 | 172   | 199.3 | 171.2 | 155   | 138.4 | 163.9 | 168.2 |
| COG2    | 306.1 | 313.9 | 257.8 | 313.1 | 223.1 | 197.2 | 313.1 | 225   |
| COG3    | 173.8 | 190.8 | 211.8 | 215.3 | 197   | 168.5 | 164.7 | 229.1 |
| COG4    | 134.2 | 153.9 | 128.2 | 147.1 | 122.4 | 116.5 | 146   | 139   |
| COG5    | 122.9 | 115.1 | 139.9 | 124.6 | 113.4 | 108.9 | 126.4 | 127   |
| COG5    | 140.3 | 137.3 | 148.3 | 184.1 | 146.2 | 118.2 | 167.1 | 137.3 |
| COG6    | 217.6 | 256.7 | 199.6 | 223.3 | 215   | 161.7 | 225   | 192   |
| COG7    | 122.7 | 128.7 | 136.2 | 144.5 | 118.2 | 111.1 | 123.6 | 126   |
| COG8    | 128.1 | 129.3 | 133.9 | 135.6 | 121.2 | 116.4 | 124.3 | 122.4 |
| COIL    | 271   | 348.4 | 278.7 | 355.4 | 251.2 | 270.5 | 284.1 | 327.3 |
| COL10A1 | 116.6 | 118.1 | 118.8 | 117.7 | 108.2 | 100.9 | 123.1 | 114.8 |
| COL11A1 | 112.2 | 111.3 | 105.6 | 126.3 | 97.3  | 90.4  | 116.3 | 113.9 |
| COL11A1 | 114   | 119.5 | 120.5 | 113.3 | 109.7 | 96.1  | 117.3 | 113.2 |
| COL11A1 | 118.5 | 117.6 | 112.1 | 118.1 | 106.5 | 104.8 | 118.8 | 113.9 |
| COL11A1 | 114.2 | 118.2 | 120.4 | 109.8 | 105.5 | 95.9  | 115.2 | 123   |
| COL11A2 | 123.6 | 117   | 121.8 | 118.3 | 109.9 | 105.2 | 118.8 | 119.2 |
| COL11A2 | 120.9 | 118   | 126.1 | 121.9 | 118.7 | 106.4 | 117.9 | 121.4 |
| COL12A1 | 124.9 | 121.2 | 121.1 | 119.6 | 118.6 | 100.4 | 125.6 | 125.4 |
| COL12A1 | 125.7 | 120.7 | 125.9 | 128.8 | 121.9 | 109.6 | 120   | 120.4 |
| COL13A1 | 125.4 | 118.2 | 109.1 | 120   | 106.3 | 96.4  | 117.9 | 118.1 |
| COL13A1 | 112.2 | 114.2 | 129.6 | 117.8 | 104.2 | 99.5  | 117.8 | 118.5 |
| COL15A1 | 107.6 | 113.8 | 111   | 112.8 | 102.8 | 93.1  | 111   | 103.7 |
| COL16A1 | 117   | 122   | 122   | 118.2 | 111.8 | 97.9  | 123.3 | 121.2 |
| COL17A1 | 103   | 123.1 | 116.7 | 119.1 | 104.9 | 99.4  | 115.7 | 119.9 |
| COL17A1 | 117.5 | 125.1 | 124.8 | 109.3 | 118.4 | 101.6 | 123.8 | 115.8 |
| COL18A1 | 121   | 151.5 | 132.5 | 131.2 | 128.1 | 105.4 | 117.4 | 132.5 |
| COL18A1 | 115   | 125.6 | 127.8 | 119.8 | 118   | 104.6 | 126.9 | 122.5 |
| COL19A1 | 114.4 | 117.7 | 114   | 111.8 | 112.1 | 97.9  | 121.8 | 118.3 |
| COL1A1  | 110.9 | 115.5 | 113.1 | 120.1 | 116.2 | 96    | 111.2 | 117.3 |
| COL1A2  | 114.8 | 114.7 | 119.5 | 119.1 | 116.3 | 99.4  | 121.9 | 114.1 |
| COL20A1 | 125.2 | 114.9 | 126.5 | 118.3 | 112.1 | 97.6  | 125.5 | 122.7 |
| COL21A1 | 108.7 | 111.7 | 118.9 | 111.7 | 101.3 | 93    | 111.9 | 109.5 |
| COL22A1 | 117.5 | 115   | 119.8 | 128.8 | 112.7 | 103.6 | 122.3 | 120.3 |
| COL23A1 | 118.1 | 126.1 | 159.1 | 132.2 | 125.3 | 136.4 | 131.9 | 125.2 |
| COL24A1 | 122.6 | 111.2 | 109.9 | 123.3 | 111.1 | 105.4 | 119.5 | 112.3 |
| COL25A1 | 121.1 | 116.7 | 129.8 | 121.4 | 116.2 | 101.4 | 131.3 | 115.2 |
| COL25A1 | 125.9 | 119   | 116   | 113.4 | 108.9 | 94.4  | 117.2 | 110.6 |
| COL25A1 | 108.8 | 108.4 | 109   | 106.5 | 109.9 | 97.3  | 121.1 | 104.6 |
| COL27A1 | 120.5 | 122   | 123.9 | 113.6 | 100.4 | 95.1  | 120.8 | 116.4 |
| COL2A1  | 122.1 | 124.5 | 132.1 | 118.1 | 117.9 | 112   | 124   | 128.8 |
| COL2A1  | 112.8 | 103.8 | 120   | 115.5 | 106.4 | 111.1 | 116.4 | 114.8 |
| COL3A1  | 137.2 | 129.2 | 123.9 | 123.8 | 111.2 | 97.8  | 131.6 | 112.8 |
| COL4A1  | 122.9 | 126.5 | 133.2 | 131.9 | 121   | 105.1 | 127.5 | 116   |

|          |        |        |        |        |        |        |        |       |
|----------|--------|--------|--------|--------|--------|--------|--------|-------|
| COL4A2   | 126.5  | 130    | 123.9  | 142.3  | 120.6  | 109    | 128.7  | 116.4 |
| COL4A3   | 110.3  | 112.2  | 113.5  | 113    | 111.5  | 98.6   | 124    | 107.2 |
| COL4A3   | 122.2  | 128.2  | 125.8  | 122.3  | 122.2  | 101.9  | 125.1  | 125.9 |
| COL4A3BP | 118.3  | 130.3  | 120.7  | 135.2  | 115.2  | 99     | 134.8  | 157.5 |
| COL4A3BP | 384.6  | 394.2  | 327.1  | 374.9  | 368.7  | 235.2  | 528.1  | 503.4 |
| COL4A4   | 117.2  | 128.7  | 116.1  | 116.8  | 112    | 103.6  | 119.8  | 113.3 |
| COL4A5   | 105.1  | 112.2  | 108.8  | 118.3  | 109.6  | 99.8   | 114    | 108.1 |
| COL4A5   | 102    | 110.9  | 111.8  | 118.9  | 99.8   | 98     | 111.8  | 102.3 |
| COL4A6   | 110.3  | 108.2  | 111    | 110.4  | 103.1  | 95.1   | 107.5  | 109.8 |
| COL4A6   | 107    | 117.3  | 118.6  | 111.5  | 120.5  | 100.6  | 118.7  | 111   |
| COL4A6   | 112.3  | 113.2  | 114.2  | 123    | 108.4  | 101.4  | 116.2  | 121.1 |
| COL5A1   | 128    | 119.9  | 136.7  | 125.8  | 114.9  | 94.6   | 116.6  | 130.1 |
| COL5A2   | 119.7  | 110.9  | 117.3  | 124.4  | 117.3  | 104.2  | 136.2  | 115.9 |
| COL5A3   | 111    | 115.8  | 122.8  | 121.9  | 111    | 102    | 116.6  | 123   |
| COL6A1   | 116.1  | 122.7  | 125    | 114.7  | 113    | 96.8   | 131.5  | 121.8 |
| COL6A2   | 111.5  | 126.1  | 119.8  | 113.6  | 109    | 116.9  | 126.9  | 109.5 |
| COL6A2   | 116    | 126.5  | 118    | 123.4  | 107.4  | 103.8  | 118.2  | 118.4 |
| COL6A2   | 126.7  | 121.4  | 121    | 124.8  | 112    | 106.9  | 128.4  | 112.2 |
| COL6A3   | 120.9  | 129.1  | 111.4  | 117.9  | 110.8  | 94.7   | 105.6  | 110.6 |
| COL6A3   | 128.9  | 147.4  | 122.6  | 126.1  | 131.8  | 101.1  | 125.8  | 132.5 |
| COL7A1   | 140.4  | 125.4  | 128.4  | 143.3  | 124.8  | 111.6  | 153.1  | 145.4 |
| COL8A1   | 125    | 108.3  | 117.5  | 124.4  | 105    | 96.2   | 113.4  | 122.7 |
| COL8A1   | 107.9  | 109    | 113.9  | 112.5  | 105.6  | 93.8   | 112.5  | 116.3 |
| COL8A1   | 110.8  | 110.1  | 105.7  | 121.5  | 102.5  | 97.4   | 124.7  | 116.5 |
| COL8A2   | 128.8  | 126.4  | 126.4  | 129    | 107.1  | 99.2   | 124.6  | 122.7 |
| COL9A1   | 109.8  | 121.3  | 117    | 118    | 118.3  | 97.5   | 118.6  | 122.3 |
| COL9A1   | 111.5  | 133.5  | 114.2  | 119.1  | 109.3  | 99     | 128    | 126.1 |
| COL9A1   | 125.5  | 122.9  | 142.2  | 131.8  | 133    | 104.8  | 119.1  | 125.1 |
| COL9A1   | 115.6  | 110.1  | 108.3  | 107.5  | 110.7  | 99     | 121.2  | 113.2 |
| COL9A2   | 120.9  | 124.6  | 129.3  | 130.1  | 104    | 103.2  | 125.7  | 114   |
| COL9A3   | 115.9  | 118.2  | 119.1  | 119.7  | 109    | 111.1  | 123.9  | 114.7 |
| COLEC10  | 120.9  | 107.4  | 118.8  | 116.1  | 104.3  | 111.3  | 124.7  | 107   |
| COLEC11  | 111.6  | 114    | 114    | 120.5  | 106.2  | 100.2  | 116.6  | 109.5 |
| COLEC11  | 108.3  | 110.6  | 110.9  | 111.4  | 107.6  | 95.3   | 108.8  | 112.8 |
| COLEC11  | 135.7  | 133.1  | 124.5  | 127.7  | 125.4  | 129.9  | 134.1  | 131   |
| COLEC12  | 118    | 129.7  | 124.7  | 109.6  | 103.9  | 111.2  | 119.8  | 117.2 |
| COLEC12  | 107.3  | 111.5  | 116.8  | 121.9  | 104.6  | 92.1   | 121.8  | 114.8 |
| COLQ     | 135.9  | 137    | 153.5  | 144.6  | 120.9  | 113.6  | 135.9  | 147.4 |
| COLQ     | 113.6  | 111.1  | 112.1  | 121.4  | 104.6  | 102.5  | 122.6  | 111   |
| COLQ     | 133    | 130.7  | 118.5  | 135    | 133.2  | 105.8  | 132.8  | 124.2 |
| COLQ     | 119.6  | 116.3  | 120.2  | 129.1  | 121.4  | 107.3  | 122.2  | 119.8 |
| COMMD1   | 302    | 334.9  | 498.6  | 325.5  | 256.2  | 293    | 250.5  | 235.5 |
| COMMD10  | 208.1  | 194.3  | 350.2  | 227.6  | 177.1  | 205    | 152.5  | 140.2 |
| COMMD2   | 253.8  | 268.9  | 315.2  | 274.7  | 192.5  | 226.5  | 201.9  | 208.9 |
| COMMD3   | 1134.1 | 1134.1 | 1569.5 | 864.5  | 896.8  | 928.4  | 650.3  | 646.8 |
| COMMD4   | 331.9  | 314.1  | 333.4  | 266.4  | 227.7  | 251.8  | 230.1  | 193.3 |
| COMMD5   | 298.3  | 298.8  | 306.7  | 317.7  | 300.7  | 265.9  | 264.5  | 316.6 |
| COMMD5   | 127.5  | 135.9  | 133.9  | 137.6  | 129.3  | 111.7  | 128.9  | 134.9 |
| COMMD6   | 1953.2 | 2240.5 | 3789.5 | 2318.5 | 2499.1 | 2507.3 | 1978.6 | 2411  |
| COMMD6   | 109.7  | 116.4  | 110.9  | 116.7  | 105.3  | 99.7   | 113.8  | 111   |
| COMMD7   | 649.2  | 585.3  | 1183.6 | 630.8  | 464.3  | 784.6  | 437.5  | 490.2 |

|        |        |        |        |        |        |        |        |        |
|--------|--------|--------|--------|--------|--------|--------|--------|--------|
| COMMD8 | 132.6  | 124.5  | 148.1  | 138.9  | 115.1  | 125.1  | 122.6  | 125.4  |
| COMMD9 | 215.5  | 248.3  | 255.6  | 235.6  | 189.9  | 199.8  | 194.6  | 231.3  |
| COMP   | 115.7  | 109.7  | 114.1  | 116.9  | 112    | 106    | 117.2  | 109.7  |
| COMT   | 130.4  | 128.1  | 137.6  | 127.1  | 121    | 121.3  | 124.8  | 123    |
| COMT   | 811.4  | 676.2  | 1011.5 | 857.3  | 545.6  | 677.4  | 712.6  | 707.6  |
| COMTD1 | 149.7  | 169.1  | 161.1  | 158.6  | 139.2  | 145.3  | 146.5  | 147.3  |
| COP1   | 126.4  | 124.3  | 157.5  | 128.2  | 132.5  | 127    | 124.3  | 143    |
| COP1   | 123.3  | 122.7  | 132.2  | 121.4  | 111.6  | 103.3  | 117.8  | 115.6  |
| COPA   | 949.3  | 972    | 1073   | 1003.1 | 1243.6 | 819.6  | 1112   | 1095.5 |
| COPB   | 575.3  | 702.9  | 560.3  | 817.7  | 540.8  | 576.8  | 815.8  | 1077   |
| COPB2  | 444.3  | 531.8  | 443.9  | 527.9  | 393.4  | 421.1  | 488.4  | 432    |
| COPE   | 325.9  | 368.3  | 415.2  | 428.9  | 307.2  | 412.3  | 343.3  | 332.4  |
| COPE   | 382.9  | 424.3  | 549.7  | 463.2  | 333.2  | 371.1  | 413.7  | 360.4  |
| COPG   | 175.3  | 181    | 193.6  | 185.9  | 164.3  | 178    | 177.4  | 160    |
| COPG2  | 140.3  | 137.4  | 141.2  | 130.9  | 114.7  | 109.1  | 136.6  | 129.7  |
| COPS2  | 108.5  | 107.9  | 110.5  | 117.7  | 115.2  | 95     | 110.4  | 111.1  |
| COPS3  | 633.8  | 774.2  | 667.2  | 726.7  | 695    | 633.3  | 776.4  | 741.8  |
| COPS4  | 218.9  | 289.2  | 258.8  | 238.9  | 210.3  | 217.8  | 228    | 257.8  |
| COPS5  | 912    | 1041   | 1096.7 | 1005.6 | 879.3  | 1025.7 | 951    | 1114.1 |
| COPS6  | 315.4  | 320.9  | 320.1  | 300.2  | 227.3  | 239.3  | 252    | 212.3  |
| COPS7A | 562.1  | 493.8  | 704.8  | 525.9  | 384.2  | 535.3  | 433.5  | 368.7  |
| COPS7B | 388.3  | 386.3  | 355.1  | 395.3  | 282.6  | 247.2  | 325.2  | 279.9  |
| COPS8  | 112.3  | 100.8  | 110.4  | 114.8  | 105.6  | 101.5  | 115.7  | 121.4  |
| COPS8  | 147.3  | 126.8  | 139.3  | 151.9  | 130.8  | 129.9  | 128.6  | 142.3  |
| COPZ1  | 387.9  | 428.2  | 527    | 504.1  | 358    | 452.5  | 439.9  | 497.2  |
| COPZ2  | 126.2  | 114.8  | 119.4  | 129    | 116.1  | 99     | 120.8  | 118.9  |
| COQ10A | 294.5  | 332.7  | 220.4  | 319.7  | 218.5  | 174.6  | 234.2  | 187.5  |
| COQ10B | 831    | 1101.7 | 702.8  | 867.9  | 874.7  | 568.8  | 1098.1 | 1236.5 |
| COQ2   | 210.2  | 216.5  | 262.7  | 250.8  | 168.9  | 216.7  | 200.9  | 150    |
| COQ3   | 144.3  | 126    | 136.1  | 138    | 137.1  | 126.7  | 166.4  | 159.8  |
| COQ5   | 359.6  | 479.9  | 540    | 498.4  | 419.9  | 387.6  | 412.3  | 430.3  |
| COQ6   | 137.6  | 137.7  | 134.5  | 138.7  | 120    | 109.7  | 126.4  | 120.1  |
| COQ6   | 292.8  | 299    | 292.6  | 268.6  | 188.5  | 235    | 223.1  | 259.8  |
| COQ7   | 126    | 135.2  | 145.5  | 134.3  | 125.8  | 116.6  | 131.9  | 131    |
| COQ9   | 304.8  | 296.5  | 369.7  | 315.7  | 273.3  | 281.4  | 255.5  | 212    |
| CORIN  | 108.1  | 108.9  | 119.6  | 116.4  | 103.8  | 94.5   | 110.6  | 114.6  |
| CORO1A | 1605.3 | 1409.9 | 1458.6 | 1321.6 | 899.2  | 1116.5 | 997.4  | 1155.6 |
| CORO1B | 138    | 134.5  | 160.2  | 128.9  | 117.3  | 127.3  | 123.7  | 112.4  |
| CORO1B | 393.1  | 266.9  | 633.2  | 383    | 205.4  | 450.1  | 234.1  | 174.5  |
| CORO1C | 186.5  | 156    | 171.4  | 194.5  | 149.3  | 163.7  | 205.5  | 164.4  |
| CORO2A | 247    | 264.5  | 274.7  | 234.2  | 246.1  | 191.4  | 213.9  | 213.1  |
| CORO2A | 131.6  | 128.5  | 120.3  | 131.3  | 120.2  | 104.5  | 123.6  | 131    |
| CORO2A | 113.7  | 121.8  | 138    | 137.4  | 120.8  | 110.3  | 124.8  | 116.6  |
| CORO2B | 106.3  | 118.5  | 125    | 120.9  | 114.9  | 102.8  | 114.3  | 121.1  |
| CORO6  | 112.4  | 115.8  | 108.2  | 115.1  | 111.9  | 98.1   | 120.9  | 118.9  |
| CORO7  | 254.5  | 244.1  | 252.4  | 249.8  | 215.7  | 217.1  | 316.7  | 274    |
| CORT   | 121    | 113.2  | 107.4  | 109.2  | 102.7  | 95.9   | 116.3  | 116.9  |
| COTL1  | 118.3  | 129.8  | 131.6  | 156.5  | 121.5  | 112.6  | 146    | 131.6  |
| COVA1  | 199.1  | 194.6  | 178.6  | 172.9  | 163.5  | 156.8  | 176    | 166.2  |
| COVA1  | 117.2  | 113.6  | 110.2  | 120    | 108.3  | 101.2  | 113.6  | 114.6  |
| COVA1  | 129.3  | 126.1  | 131.9  | 126.1  | 117.6  | 102.8  | 124.2  | 127.7  |



|        |        |        |        |        |        |        |        |        |
|--------|--------|--------|--------|--------|--------|--------|--------|--------|
| COX10  | 246.7  | 290    | 271.6  | 272.5  | 240.1  | 207.7  | 219.2  | 240.6  |
| COX11  | 130.1  | 148.3  | 159.7  | 146.7  | 134    | 120.1  | 140.1  | 139.3  |
| COX11P | 114.9  | 122.1  | 105.2  | 126    | 104.1  | 95     | 123.2  | 105.9  |
| COX15  | 104.2  | 111.2  | 111.7  | 105.6  | 96.3   | 97.5   | 115.5  | 107.1  |
| COX15  | 142    | 160    | 195.1  | 149.9  | 141.3  | 140.8  | 171.3  | 147.3  |
| COX17  | 1554.3 | 1515.4 | 1690.7 | 1832.4 | 1571.8 | 1532.8 | 1932.7 | 1600.4 |
| COX4I1 | 6084.6 | 8038.6 | 7865.8 | 7477.7 | 6243.4 | 5482.4 | 6955.1 | 8150.6 |
| COX4I2 | 116    | 122.2  | 114.3  | 117.9  | 105.1  | 98.6   | 119.8  | 114.9  |
| COX4NB | 139.8  | 138.6  | 163.3  | 154.9  | 159.8  | 131.3  | 147.7  | 154    |
| COX5A  | 975.7  | 1173.2 | 1543.3 | 1293.5 | 966.4  | 1280.9 | 1165.4 | 1263.9 |
| COX5B  | 1195.4 | 1418.5 | 1624.4 | 1363   | 1139.2 | 1188.9 | 964.6  | 862.7  |
| COX6A1 | 473.1  | 558.6  | 508.6  | 522.3  | 449.8  | 413.4  | 581.3  | 635.7  |
| COX6A2 | 113.3  | 105.2  | 112.6  | 114.7  | 107.1  | 89.3   | 109.1  | 107.5  |
| COX6B1 | 2422.7 | 2433.5 | 3784.1 | 2624   | 2468.9 | 2669.3 | 2412.8 | 2394.5 |
| COX6B2 | 116.9  | 112.9  | 119.9  | 121.3  | 115.5  | 100.9  | 121.9  | 113.3  |
| COX6C  | 1872.6 | 2055.8 | 2413.5 | 1607.5 | 1680.6 | 1932.6 | 1742.9 | 1994.4 |
| COX7A1 | 120.3  | 117.3  | 115.6  | 123.7  | 114.4  | 110.1  | 118.4  | 121.6  |
| COX7A2 | 2644.8 | 2846.1 | 4355.7 | 3188.5 | 2503.4 | 2644.9 | 2692.6 | 2909.4 |
| COX7B  | 399.1  | 565    | 580.2  | 496.1  | 538.3  | 480.3  | 413.3  | 513.4  |
| COX7B2 | 118.8  | 107.9  | 122.3  | 113    | 110.1  | 96.7   | 118.3  | 121.1  |
| COX7C  | 5955   | 7020.7 | 8042.5 | 7221   | 7185.1 | 7271.4 | 6391.9 | 6082.4 |
| COX8A  | 1898.7 | 1837.6 | 2510   | 2053.8 | 1371.5 | 1843.9 | 1726.3 | 1628.2 |
| COX8C  | 114.2  | 113.1  | 113.1  | 124.4  | 112.9  | 101.4  | 119.6  | 109    |
| CP     | 108.1  | 117.7  | 115.3  | 118.2  | 108.1  | 96.1   | 117.2  | 115.1  |
| CP110  | 312.2  | 275.4  | 252.9  | 327.9  | 249.7  | 190.9  | 252.2  | 251.7  |
| CPA1   | 117.7  | 104.3  | 120.7  | 114.4  | 101.9  | 98.7   | 117.8  | 125.8  |
| CPA2   | 118    | 108.1  | 123.8  | 122.4  | 102.1  | 95.5   | 105.1  | 123.8  |
| CPA3   | 118.3  | 120.3  | 144    | 118.7  | 113.8  | 125.1  | 120    | 113.2  |
| CPA4   | 113.5  | 125.7  | 117.5  | 116.8  | 105.7  | 106.5  | 117.5  | 117.4  |
| CPA5   | 122    | 132.7  | 116.9  | 118.8  | 111.7  | 103    | 120.4  | 122.3  |
| CPA6   | 104.4  | 107.1  | 111.7  | 111.7  | 107.9  | 98.5   | 121.4  | 106.4  |
| CPAMD8 | 105.2  | 121.6  | 117.5  | 125.2  | 116.4  | 101.2  | 114.6  | 117.9  |
| CPB1   | 116.5  | 113.9  | 137.7  | 111.3  | 116.5  | 99.4   | 130.2  | 110    |
| CPB2   | 130.7  | 116    | 124.2  | 120.3  | 109.7  | 103.4  | 117.1  | 119.7  |
| CPB2   | 120.5  | 108.6  | 107    | 113.5  | 105.7  | 93.2   | 114.1  | 110.6  |
| CPB2   | 109.8  | 109.2  | 113.4  | 113.8  | 107.7  | 95.7   | 116.4  | 114.7  |
| CPD    | 258.6  | 304.6  | 213.3  | 337.5  | 248.8  | 202    | 333.5  | 366.3  |
| CPE    | 106.7  | 120.9  | 110.9  | 122.6  | 113.5  | 105.9  | 126.1  | 110.3  |
| CPEB1  | 124.4  | 114.5  | 123.1  | 130.9  | 120.7  | 101.8  | 126.8  | 118.2  |
| CPEB1  | 112.1  | 121    | 109.1  | 118.7  | 110.6  | 105.9  | 120.9  | 117.3  |
| CPEB1  | 112.1  | 120.8  | 115.7  | 121.5  | 113.3  | 92.7   | 116.1  | 120.3  |
| CPEB2  | 112.8  | 111.6  | 131.1  | 128.9  | 125.9  | 117.2  | 124.7  | 132.8  |
| CPEB2  | 170.4  | 157.7  | 170.5  | 171.3  | 163.3  | 171.9  | 160.3  | 149.1  |
| CPEB3  | 127.2  | 121.4  | 120    | 132.1  | 110.1  | 101.7  | 121    | 122.1  |
| CPEB4  | 142.9  | 161.6  | 131.2  | 180.6  | 174.7  | 106.4  | 176.9  | 227    |
| CPLX1  | 113    | 122.1  | 114.1  | 114.2  | 113.5  | 103    | 118.4  | 116.6  |
| CPLX2  | 123.4  | 115.3  | 132.2  | 120.7  | 116.6  | 100.3  | 110    | 127.3  |
| CPLX2  | 108.1  | 107    | 112.2  | 111.1  | 106.5  | 96.7   | 111    | 118.2  |
| CPLX3  | 121.3  | 118.1  | 116.2  | 120.7  | 109.6  | 100.3  | 121.3  | 125.1  |
| CPM    | 112.8  | 107.3  | 125.3  | 124.4  | 107    | 100.9  | 124.4  | 130.6  |
| CPM    | 112.1  | 113.5  | 111.5  | 124.3  | 111.6  | 95.3   | 118.8  | 106.6  |

|         |       |       |       |        |       |       |        |       |
|---------|-------|-------|-------|--------|-------|-------|--------|-------|
| CPN1    | 109.9 | 119.6 | 106.9 | 116.2  | 106.8 | 88.6  | 111.4  | 116.3 |
| CPN2    | 121.4 | 113.9 | 121   | 123.7  | 106.9 | 97.5  | 118.3  | 121.8 |
| CPN2    | 117   | 117.1 | 115.5 | 126.1  | 119   | 104.4 | 117.6  | 121.8 |
| CPNE1   | 114.3 | 122.4 | 120.5 | 127.7  | 118   | 105.1 | 118.1  | 120.7 |
| CPNE1   | 415.9 | 474.1 | 330.5 | 482.9  | 352.2 | 326.5 | 497    | 417.3 |
| CPNE1   | 450.6 | 415.6 | 357.9 | 505.8  | 471   | 347.7 | 483.9  | 408.3 |
| CPNE2   | 123   | 119.6 | 119.9 | 117.2  | 114.9 | 111.5 | 128.9  | 120.4 |
| CPNE3   | 870.7 | 758   | 777.1 | 782    | 687.7 | 632.4 | 792.4  | 963.5 |
| CPNE4   | 122.5 | 119.9 | 115.1 | 120.1  | 111.4 | 109.8 | 118.7  | 120.4 |
| CPNE5   | 122.7 | 127.7 | 114.9 | 130.2  | 114.5 | 104.4 | 120.9  | 121.4 |
| CPNE6   | 108.3 | 122.2 | 121.6 | 115    | 104.4 | 96.8  | 124.3  | 115.6 |
| CPNE7   | 113.6 | 102.6 | 116.9 | 111.9  | 104.6 | 103.3 | 110    | 110.5 |
| CPNE8   | 163.5 | 139.4 | 151.8 | 149.7  | 124.8 | 124.1 | 151.6  | 133.6 |
| CPNE9   | 138.4 | 118.5 | 127.8 | 122.9  | 106   | 110.2 | 131.5  | 133.7 |
| CPO     | 121.2 | 120.1 | 115.6 | 119.7  | 102.2 | 99.2  | 122.4  | 112.6 |
| CPS1    | 113.6 | 115.6 | 116.8 | 118.9  | 102.3 | 96.3  | 114.4  | 111.1 |
| CPSF1   | 336.9 | 300.1 | 266.7 | 430.5  | 230.3 | 206.5 | 259.2  | 233.9 |
| CPSF2   | 193.1 | 225.2 | 210   | 225.5  | 183   | 176.3 | 271.4  | 234.5 |
| CPSF3   | 251.4 | 251.3 | 296   | 232.4  | 268.7 | 220.3 | 246.8  | 242.3 |
| CPSF3L  | 179.9 | 168   | 197.2 | 186.9  | 146.4 | 132.8 | 175.5  | 184.9 |
| CPSF3L  | 138.7 | 158.1 | 154.4 | 158.8  | 133.4 | 128.3 | 154.5  | 138.6 |
| CPSF4   | 816.2 | 893.6 | 797.9 | 1063.4 | 765.8 | 695.2 | 1179.2 | 946.3 |
| CPSF4   | 119.7 | 119.4 | 132.1 | 122.8  | 110.3 | 101.4 | 114.3  | 126.3 |
| CPSF6   | 149.9 | 125.1 | 131.6 | 114.6  | 120.9 | 99.7  | 142.1  | 131.5 |
| CPT1A   | 112.7 | 116.6 | 113.2 | 131.1  | 112.7 | 105.7 | 113.6  | 119   |
| CPT1A   | 113.7 | 110.5 | 111   | 107.4  | 108   | 99.2  | 114.2  | 122.1 |
| CPT1A   | 124.4 | 128.8 | 134.7 | 132.4  | 119.5 | 116.3 | 130.9  | 121.9 |
| CPT1B   | 150.1 | 146.5 | 197.4 | 151.5  | 138.9 | 144.1 | 177.8  | 172.3 |
| CPT1B   | 118.6 | 136.1 | 125.7 | 122    | 116   | 105.9 | 130    | 123.4 |
| CPT1C   | 132.5 | 123.4 | 126.9 | 129.3  | 116.1 | 99.7  | 127.5  | 122.6 |
| CPT2    | 227.2 | 210.9 | 334.8 | 218.6  | 226.6 | 296.5 | 187.8  | 186.6 |
| CPVL    | 171   | 124   | 471.3 | 150.8  | 112.7 | 196.5 | 132.9  | 120.9 |
| CPVL    | 145.4 | 111.9 | 273.8 | 126.8  | 110.6 | 120.4 | 134.1  | 119.1 |
| CPXCR1  | 122.6 | 114.8 | 128.6 | 128.2  | 120.9 | 103   | 123.9  | 118.8 |
| CPXM    | 114   | 113.7 | 120.6 | 109.2  | 107.4 | 102.2 | 123.8  | 114.7 |
| CPXM2   | 114.4 | 117.5 | 132.1 | 117.5  | 121.1 | 101.3 | 128.1  | 118.3 |
| CPZ     | 117.8 | 113.6 | 114.4 | 121.8  | 106.5 | 101.6 | 121.1  | 112.2 |
| CPZ     | 109.2 | 123   | 117.5 | 119.5  | 103.6 | 96.7  | 121.7  | 113.6 |
| CPZ     | 113.6 | 106.4 | 112.6 | 109.7  | 108.7 | 91.6  | 119.6  | 112.9 |
| CR1     | 119.9 | 121.9 | 122.5 | 113.7  | 112.9 | 95.9  | 115    | 120.1 |
| CR1     | 113.6 | 115.6 | 116.7 | 116.7  | 106.2 | 104.3 | 117.3  | 118   |
| CR1     | 110.2 | 112.3 | 116.7 | 118.7  | 115.7 | 105.9 | 126.3  | 113.1 |
| CR2     | 111.4 | 117.2 | 124.2 | 113.3  | 105   | 96.4  | 116.9  | 112.6 |
| CR2     | 130.3 | 131.6 | 126.9 | 135.3  | 123.3 | 116   | 124.6  | 128.9 |
| CRABP1  | 112.8 | 125.4 | 127.1 | 117.6  | 110   | 93.3  | 126.4  | 120.3 |
| CRABP2  | 127.2 | 123.3 | 120.1 | 116.4  | 111   | 101.7 | 128.6  | 120.9 |
| CRADD   | 191   | 203.1 | 203.2 | 225    | 207.1 | 179.7 | 250.5  | 200.8 |
| CRAMP1L | 228.4 | 235.5 | 167.1 | 184.1  | 181.9 | 177.9 | 196.5  | 204.8 |
| CRAT    | 127.4 | 115.2 | 121.4 | 127    | 111.3 | 105.3 | 131.5  | 132.8 |
| CRAT    | 104.7 | 117.3 | 112.5 | 108.4  | 103.1 | 96    | 113.8  | 112.3 |
| CRB1    | 115.2 | 107.2 | 117.2 | 109.8  | 113.2 | 104.5 | 124.2  | 117.5 |

|          |        |        |        |        |        |       |        |        |
|----------|--------|--------|--------|--------|--------|-------|--------|--------|
| CRB2     | 118.8  | 113.6  | 116.1  | 124.1  | 111.6  | 99.8  | 117.1  | 114.4  |
| CRB3     | 119.3  | 109.8  | 110.2  | 133.2  | 106    | 88.1  | 117.3  | 110.7  |
| CRB3     | 127.7  | 137.7  | 126.1  | 121.2  | 118.5  | 108.4 | 128.7  | 121.6  |
| CRB3     | 119.6  | 122.1  | 131.7  | 143.3  | 132.6  | 114.5 | 135.8  | 142.7  |
| CRBN     | 545.2  | 800.2  | 708.3  | 667.8  | 686    | 503.3 | 700    | 556.8  |
| CREB1    | 1066.1 | 850.4  | 1156.9 | 970.2  | 1113.9 | 859.9 | 1136.3 | 1137.2 |
| CREB3    | 133.7  | 141.8  | 138.6  | 132.6  | 128.9  | 122.2 | 133.4  | 125.7  |
| CREB3L1  | 119.9  | 114.5  | 118.3  | 130.3  | 106.9  | 101.7 | 120.2  | 112.2  |
| CREB3L2  | 303.8  | 289.2  | 293.1  | 291.9  | 295.2  | 202.2 | 292.4  | 246.4  |
| CREB3L3  | 129.5  | 114.6  | 120.3  | 112.8  | 106    | 96.9  | 120.4  | 117.6  |
| CREB3L4  | 118    | 114.6  | 125.7  | 113.2  | 107.1  | 98.7  | 124.4  | 119.4  |
| CREB5    | 112.3  | 108.7  | 118.5  | 122.5  | 111.1  | 97    | 119    | 118.5  |
| CREB5    | 111.3  | 117.2  | 112.7  | 126.4  | 103.5  | 102.3 | 122.4  | 115.1  |
| CREB5    | 113.7  | 111.1  | 118.6  | 111.7  | 102    | 102.4 | 120.2  | 103    |
| CREB5    | 116.5  | 113.7  | 149    | 127.7  | 110.7  | 101.1 | 126.2  | 116.6  |
| CREB5    | 117.3  | 112.1  | 119.7  | 126.9  | 106.1  | 99.7  | 108.9  | 109.9  |
| CREBBP   | 137.5  | 129.1  | 112.2  | 145.7  | 122.8  | 103   | 139.4  | 139.8  |
| CREBBP   | 684.4  | 852.4  | 687.7  | 915.2  | 854.8  | 602.9 | 1009.2 | 1091.8 |
| CREBL1   | 123.8  | 134.7  | 129.7  | 130.6  | 126.1  | 108.8 | 129    | 137.1  |
| CREBL2   | 124.5  | 118    | 131.8  | 117.9  | 117.5  | 111.8 | 124    | 128.2  |
| CREG1    | 549.1  | 370.9  | 634.4  | 1013.9 | 416.8  | 726.4 | 995    | 455    |
| CREG2    | 103.6  | 117.3  | 123.2  | 127.8  | 114.7  | 99.8  | 126.5  | 121.9  |
| CRELD1   | 118.7  | 118.7  | 116.4  | 121.2  | 111.4  | 111.9 | 131.1  | 115.6  |
| CRELD1   | 117.9  | 112.2  | 128.6  | 113.5  | 119.6  | 106.5 | 111.9  | 112.5  |
| CRELD1   | 353.2  | 368.5  | 448.8  | 305.5  | 227.4  | 315.8 | 229.5  | 231.4  |
| CRELD1   | 107.5  | 118.6  | 118.9  | 114.5  | 107.1  | 97.5  | 114.1  | 112.9  |
| CRELD2   | 358.6  | 372.4  | 681.5  | 388.9  | 356.4  | 331.2 | 362.2  | 411.4  |
| CREM     | 128.1  | 123.6  | 118.9  | 120.3  | 128.3  | 98.6  | 133.7  | 124.5  |
| CRH      | 113.8  | 124.9  | 139.3  | 122.8  | 107.6  | 104   | 119.3  | 111.6  |
| CRHBP    | 119.7  | 115.4  | 117.9  | 123    | 112.5  | 94.5  | 119.6  | 115.7  |
| CRHR1    | 158.8  | 152.8  | 141    | 149.4  | 132.8  | 108.3 | 138.5  | 146.2  |
| CRHR1    | 122    | 118.6  | 114.1  | 115.1  | 110    | 100.8 | 128.3  | 130.6  |
| CRHR2    | 104.7  | 104.6  | 104.5  | 114.9  | 104.2  | 96.2  | 106    | 108.9  |
| CR11     | 135    | 131.1  | 133.7  | 124.6  | 111.7  | 121.3 | 126.5  | 112.4  |
| CR12     | 180.2  | 214.8  | 181.7  | 222.7  | 187.5  | 149.4 | 169.6  | 169.6  |
| CRIM1    | 119.4  | 113.2  | 109.8  | 131    | 118.5  | 98    | 119.1  | 110.9  |
| CRIP1    | 456.6  | 509.6  | 539.5  | 347.7  | 333.9  | 397.7 | 260    | 244.9  |
| CRIP2    | 124.9  | 121    | 131    | 125.8  | 103.9  | 114.6 | 117.2  | 104.5  |
| CRIP3    | 110.4  | 119.5  | 127.6  | 116.6  | 115    | 104.1 | 128.6  | 128.3  |
| CRIPAK   | 199.3  | 180.6  | 193.9  | 211.2  | 166.8  | 161.6 | 187.8  | 199.7  |
| CRIPT    | 293.8  | 225.7  | 299.9  | 275.8  | 219.2  | 248.7 | 269.6  | 203.9  |
| CRISP1   | 118    | 109.3  | 122.3  | 109.3  | 113.5  | 102.9 | 111.5  | 117.7  |
| CRISP1   | 122.4  | 117.4  | 123.2  | 114.8  | 105.8  | 93.8  | 118.7  | 118.5  |
| CRISP2   | 126.6  | 120.4  | 117.4  | 119.3  | 117.9  | 103.6 | 113.7  | 112.5  |
| CRISP3   | 112.3  | 117.5  | 117    | 116.6  | 103.4  | 92    | 110.5  | 111    |
| CRISPLD1 | 115.2  | 119    | 116.7  | 114.9  | 111.2  | 96.6  | 121.5  | 114.2  |
| CRISPLD2 | 114.8  | 113.9  | 101.8  | 119.4  | 111.9  | 98.5  | 114.8  | 115.5  |
| CRK      | 224.1  | 261.8  | 279.7  | 315.1  | 243.2  | 206.4 | 297.8  | 343.5  |
| CRK      | 131.5  | 139.6  | 140.5  | 144.1  | 126.6  | 136.8 | 171.8  | 140.9  |
| CRKL     | 1337.9 | 1623.8 | 1136.4 | 1653.3 | 1396.8 | 938.4 | 1651.7 | 1768.8 |
| CRKRS    | 216.4  | 240.6  | 174.5  | 262.1  | 200.3  | 150.6 | 227.4  | 243    |

|        |       |       |       |       |       |       |       |       |
|--------|-------|-------|-------|-------|-------|-------|-------|-------|
| CRLF1  | 115.1 | 112   | 118.2 | 112.3 | 114   | 96.2  | 125.8 | 114.2 |
| CRLF2  | 124.8 | 119.9 | 118.2 | 126.2 | 108.6 | 94.7  | 118.2 | 117.6 |
| CRLF3  | 870.5 | 973.4 | 887.8 | 861.3 | 947.7 | 771.1 | 809.7 | 996.1 |
| CRMP1  | 136.6 | 120.8 | 122   | 116.7 | 116.9 | 101.5 | 116.6 | 121.7 |
| CRMP1  | 121.9 | 131.9 | 129.1 | 128.6 | 114.4 | 109.4 | 131.5 | 127   |
| CRMP1  | 115   | 115.3 | 110.5 | 116.7 | 104.2 | 98.3  | 114.5 | 116.7 |
| CRNKL1 | 166.2 | 162.3 | 142.9 | 169.5 | 132.7 | 140.6 | 189.2 | 191.2 |
| CRNN   | 127.6 | 142   | 123.3 | 129.2 | 120.9 | 95.9  | 130.8 | 145.5 |
| CROCC  | 138.8 | 124.2 | 144   | 134.3 | 128.1 | 111.7 | 144.9 | 122.5 |
| CROP   | 197.9 | 203.1 | 253.5 | 204.3 | 171   | 193.5 | 179.8 | 176.4 |
| CROP   | 627.5 | 947.2 | 988.6 | 797.6 | 661.2 | 539.9 | 999.3 | 728.3 |
| CROT   | 157.5 | 182.3 | 148   | 167.5 | 157.4 | 126.3 | 152.3 | 147   |
| CRP    | 111.5 | 116.8 | 110.9 | 116.5 | 110.8 | 95.8  | 112.7 | 114.1 |
| CRR9   | 512.4 | 543.7 | 406   | 550   | 412.3 | 382.2 | 526.8 | 420.8 |
| CRSP2  | 117.4 | 121.8 | 119.5 | 116.7 | 107.6 | 103.4 | 122.2 | 109.9 |
| CRSP3  | 262.6 | 329   | 276.4 | 335.7 | 250.5 | 228.7 | 301.3 | 345.2 |
| CRSP3  | 119.8 | 119.3 | 132.5 | 113.9 | 122.5 | 103.1 | 121   | 116.2 |
| CRSP6  | 117.4 | 128.3 | 128.7 | 120.5 | 118.6 | 115.7 | 131.8 | 132.5 |
| CRSP7  | 143.7 | 154.4 | 145.6 | 152.1 | 139.2 | 125.1 | 154.4 | 163.9 |
| CRSP9  | 122.8 | 128.2 | 135.1 | 122.7 | 111.7 | 111.4 | 138.1 | 116.5 |
| CRTAC1 | 111.7 | 118   | 117.7 | 118.9 | 110   | 100.7 | 107.6 | 108.7 |
| CRTAM  | 115.1 | 113.2 | 122.9 | 112.6 | 107.1 | 108.4 | 122.3 | 107.3 |
| CRTAP  | 185.8 | 189.3 | 230.9 | 186   | 173.1 | 174.7 | 181   | 159.3 |
| CRTAP  | 139.3 | 132.8 | 168.3 | 151.7 | 129.7 | 126.4 | 158.8 | 125   |
| CRTC1  | 130.5 | 122.9 | 112   | 129   | 114.7 | 101.6 | 137.5 | 123.9 |
| CRTC2  | 146.3 | 166.1 | 164.4 | 157.7 | 141.6 | 163.8 | 146.5 | 161   |
| CRX    | 124.1 | 116.3 | 124.3 | 119   | 107.3 | 101.4 | 119.7 | 114.6 |
| CRY1   | 307.7 | 340.1 | 227.2 | 351.7 | 332.3 | 257   | 503   | 446.4 |
| CRY2   | 171.2 | 173.3 | 168.9 | 171   | 140   | 149.3 | 155.5 | 153.9 |
| CRYAA  | 112   | 109.5 | 112.1 | 124.1 | 104.8 | 97.1  | 117   | 118.1 |
| CRYAB  | 122.6 | 117.5 | 125   | 122.6 | 107.3 | 103.5 | 115   | 112.1 |
| CRYBA1 | 111   | 119   | 117.4 | 122   | 107.1 | 95.1  | 127.2 | 112.5 |
| CRYBA2 | 114.2 | 113   | 111.3 | 109.3 | 102.3 | 96.4  | 119.8 | 104.1 |
| CRYBA2 | 114   | 119.1 | 109.9 | 124.4 | 113.4 | 99.1  | 114.3 | 112.2 |
| CRYBA4 | 121.6 | 120   | 116.9 | 120.7 | 112.8 | 99.4  | 118.2 | 117.6 |
| CRYBB1 | 116.4 | 127.6 | 116.2 | 107.7 | 106.3 | 104.7 | 129.3 | 114.7 |
| CRYBB2 | 139.2 | 143   | 140.6 | 140   | 121.4 | 113.7 | 150   | 159.7 |
| CRYBB3 | 111.8 | 113.7 | 120   | 118.3 | 106.7 | 97.6  | 122.5 | 110.7 |
| CRYGA  | 125.2 | 125.2 | 130   | 138.4 | 122.4 | 113.4 | 133.2 | 133.4 |
| CRYGB  | 116.3 | 119.5 | 116.6 | 125.1 | 119   | 109.9 | 117.9 | 124.2 |
| CRYGC  | 112.9 | 112.4 | 102   | 106.7 | 110.3 | 92.3  | 110.5 | 107.8 |
| CRYGD  | 109.6 | 113.2 | 110.2 | 109.8 | 106.3 | 93.9  | 111.3 | 110.3 |
| CRYGN  | 116.2 | 122   | 126.2 | 138.4 | 119.3 | 102.4 | 122.4 | 131.5 |
| CRYGS  | 181   | 185.9 | 193.5 | 202   | 160.9 | 158.7 | 188.4 | 202.8 |
| CRYL1  | 139.9 | 143.7 | 201.6 | 147.7 | 126.5 | 129.9 | 125.9 | 122.7 |
| CRYM   | 114.9 | 127.2 | 133.4 | 129.3 | 132.5 | 117.2 | 121   | 124.8 |
| CRYM   | 117.8 | 122.5 | 114   | 122   | 108.7 | 95.1  | 124.9 | 123.7 |
| CRYM   | 108.4 | 118.3 | 114.6 | 123.7 | 114.1 | 101.4 | 117.4 | 117.5 |
| CRYZ   | 305.6 | 461   | 256.4 | 274.4 | 368.6 | 181.7 | 215   | 378.7 |
| CRYZL1 | 230.1 | 239.6 | 322.7 | 252.7 | 266.2 | 239.9 | 190.4 | 210.1 |
| CS     | 113.1 | 113.3 | 115   | 118.6 | 108.1 | 101.2 | 119.4 | 116.2 |

|          |        |        |        |        |       |        |        |       |
|----------|--------|--------|--------|--------|-------|--------|--------|-------|
| CS       | 901    | 1095.7 | 1037.8 | 1015.7 | 762.4 | 1054.1 | 1204.3 | 974.9 |
| CS       | 206.2  | 181.8  | 191.7  | 214.7  | 161.1 | 152.6  | 170.5  | 189   |
| CSAD     | 176.4  | 181.5  | 302.4  | 218.3  | 198.4 | 165    | 172.5  | 169.4 |
| CSAG1    | 118.8  | 124.3  | 119.5  | 110    | 112.1 | 100.2  | 125.4  | 119.1 |
| CSAG1    | 116    | 117.1  | 108.3  | 121.7  | 111.3 | 107.8  | 118.2  | 121.3 |
| CSAG2    | 113.9  | 116.7  | 106.9  | 122.7  | 111   | 106.2  | 115.8  | 117.7 |
| CSAG2    | 122    | 116.2  | 125.2  | 120.8  | 113.4 | 104.8  | 110.4  | 119.6 |
| CSAG2    | 110    | 112.7  | 107.4  | 108.2  | 108.3 | 96.2   | 121.3  | 113.1 |
| CSAG3A   | 113.1  | 109.3  | 104.4  | 112.5  | 105.8 | 100.3  | 122.7  | 124.2 |
| CSDA     | 344.6  | 297.9  | 462.5  | 328.5  | 256.5 | 335.9  | 263    | 271.4 |
| CSDC2    | 124.2  | 121.3  | 108.2  | 111.6  | 105.5 | 93.5   | 120.3  | 106.6 |
| CSDE1    | 152.1  | 141.5  | 168.3  | 163.4  | 150.6 | 154    | 140.5  | 154.9 |
| CSDE1    | 133.9  | 139    | 150.4  | 152.1  | 143.5 | 118    | 150    | 134.9 |
| CSE1L    | 357.3  | 406.4  | 377.8  | 425.8  | 298.6 | 324.7  | 437.9  | 504.1 |
| CSE1L    | 472.8  | 481.8  | 497.5  | 559.5  | 438.2 | 411.8  | 619.7  | 676   |
| CSEN     | 133.6  | 122.3  | 135.4  | 112.2  | 121.2 | 105    | 130.9  | 124.1 |
| CSF1     | 112.3  | 122.5  | 119.4  | 120.4  | 111.2 | 101    | 119.2  | 112.9 |
| CSF1     | 108.6  | 111.9  | 111.2  | 122.9  | 105.3 | 92.9   | 112.8  | 119.1 |
| CSF1     | 109.1  | 105.8  | 108.1  | 119.4  | 102.6 | 96.2   | 117.7  | 108.8 |
| CSF1R    | 1139   | 762.2  | 2989.8 | 1439.6 | 577.1 | 2551.7 | 812.6  | 292.2 |
| CSF2     | 120.9  | 113.4  | 119.8  | 117.9  | 105.7 | 99.1   | 121.1  | 113.2 |
| CSF2RA   | 263.5  | 184.8  | 374.9  | 546.1  | 205.6 | 538.7  | 404.1  | 216.3 |
| CSF2RA   | 1014.9 | 850.8  | 1015.8 | 1592.8 | 869.9 | 1864.5 | 1638.1 | 1000  |
| CSF2RA   | 316.9  | 244.3  | 474.9  | 637.5  | 323.8 | 898.8  | 611.4  | 315.3 |
| CSF2RB   | 117.2  | 110.9  | 122.1  | 114.4  | 108.7 | 102.2  | 133.9  | 113.8 |
| CSF3     | 116.8  | 113    | 112.8  | 120.1  | 111.8 | 99.1   | 128.2  | 116.9 |
| CSF3     | 115.4  | 118    | 121.9  | 117.1  | 111.5 | 100    | 126.4  | 120.6 |
| CSF3     | 115.5  | 119.5  | 139    | 118.8  | 131.7 | 106.5  | 127.4  | 131   |
| CSF3R    | 121.5  | 114.2  | 129.6  | 114.3  | 101.8 | 93.8   | 123.9  | 116.8 |
| CSF3R    | 122.8  | 116.2  | 260.7  | 120.1  | 105   | 123.2  | 117.9  | 114.1 |
| CSSLCA-T | 192.2  | 193.9  | 177.2  | 195    | 153.7 | 180.3  | 187.3  | 184.6 |
| CSH1     | 117.5  | 118.2  | 124.6  | 118    | 100.2 | 95.3   | 119.3  | 121.5 |
| CSH1     | 109.2  | 106.7  | 129.1  | 114.4  | 115.8 | 100    | 116.6  | 115.6 |
| CSH2     | 117.1  | 116.2  | 122.2  | 131.4  | 116.9 | 100.8  | 133.6  | 121.7 |
| CSH2     | 112.6  | 112.2  | 112.9  | 116.1  | 107.7 | 102.4  | 121.8  | 118.3 |
| CSHL1    | 116    | 116.9  | 132.8  | 119.2  | 123.2 | 100.4  | 120.3  | 132.8 |
| CSHL1    | 122.4  | 124.1  | 116.9  | 129.5  | 113   | 102.2  | 118.7  | 125.1 |
| CSK      | 1180.6 | 1443.3 | 1263.4 | 1226.5 | 859.2 | 1099.5 | 1000   | 949.4 |
| CSMD1    | 114.3  | 109.6  | 109.1  | 105.9  | 104.7 | 94.4   | 114.8  | 105.4 |
| CSMD2    | 117.6  | 119.4  | 139    | 122.4  | 115   | 110.5  | 119.5  | 116.5 |
| CSMD3    | 108.6  | 101.8  | 112.4  | 115.3  | 104.6 | 101.9  | 112.7  | 112   |
| CSMD3    | 104.9  | 107    | 121    | 117.6  | 107.4 | 93     | 114.6  | 121.4 |
| CSMD3    | 108.7  | 109.2  | 114.6  | 115.5  | 104.3 | 102.5  | 116    | 105.9 |
| CSN1S1   | 121.5  | 119.3  | 131.7  | 116.6  | 102.6 | 100    | 117.7  | 112.5 |
| CSN1S1   | 124.9  | 130.3  | 121.8  | 128.6  | 110.8 | 105.9  | 118.4  | 119.3 |
| CSN2     | 112.2  | 116    | 112.9  | 111    | 108.5 | 96.8   | 110.1  | 112.8 |
| CSN3     | 116.3  | 115.5  | 106.4  | 111.8  | 105.3 | 101.2  | 115.9  | 109.5 |
| CSNK1A1  | 131.2  | 127.8  | 133    | 147.1  | 126.4 | 108.8  | 138.5  | 151.5 |
| CSNK1A1  | 119.2  | 119.7  | 122.5  | 132.8  | 113.4 | 108.8  | 137.5  | 126   |
| CSNK1A1  | 238.5  | 231.8  | 249.1  | 294    | 256.9 | 219    | 286.5  | 283.4 |
| CSNK1A1L | 109.2  | 121.2  | 119.1  | 119.5  | 111   | 98.1   | 120.1  | 116.4 |

|           |        |        |        |        |        |        |        |        |
|-----------|--------|--------|--------|--------|--------|--------|--------|--------|
| CSNK1D    | 443.9  | 394.8  | 412.5  | 521.4  | 354.7  | 360.6  | 594.8  | 547.7  |
| CSNK1D    | 219.7  | 206.7  | 272    | 270.8  | 200.8  | 253.7  | 291.2  | 230.6  |
| CSNK1E    | 523.8  | 525.4  | 431.8  | 466.8  | 436.6  | 351.8  | 492.9  | 638.6  |
| CSNK1E    | 115.7  | 120.1  | 121.2  | 126.8  | 113.9  | 105.1  | 126.8  | 122.6  |
| CSNK1E    | 145.7  | 147    | 159.5  | 174.6  | 147.9  | 133.5  | 177.1  | 166.4  |
| CSNK1G1   | 152.7  | 190.7  | 193.4  | 204.4  | 176.4  | 151.2  | 186.6  | 195.1  |
| CSNK1G1   | 118.3  | 116.9  | 123.7  | 108.3  | 109.6  | 101    | 121.6  | 113.8  |
| CSNK1G2   | 256.7  | 260.2  | 228.5  | 274.3  | 234.7  | 210.2  | 356.5  | 243.4  |
| CSNK1G3   | 107.5  | 103.3  | 119.5  | 115.7  | 102.6  | 97.7   | 119.2  | 117.4  |
| CSNK1G3   | 193.4  | 219.4  | 226.2  | 206.9  | 217.1  | 163.7  | 176.9  | 187.9  |
| CSNK1G3   | 136.4  | 153.3  | 150.1  | 161.2  | 149.1  | 113.5  | 131.1  | 133    |
| CSNK2A1   | 172.2  | 173    | 162.8  | 180.3  | 170    | 141.3  | 169.1  | 189.1  |
| CSNK2A1   | 203    | 165.6  | 163.1  | 217    | 182.8  | 174    | 204.6  | 190.7  |
| CSNK2A1   | 123.3  | 128.7  | 120.9  | 136    | 113.6  | 95.2   | 147.4  | 132.6  |
| CSNK2A1P  | 144.2  | 152.6  | 117    | 141    | 126.8  | 112.5  | 153.2  | 143.2  |
| CSNK2A2   | 382.7  | 457.8  | 349.4  | 457.1  | 329.5  | 359.5  | 531.8  | 515.2  |
| CSNK2B    | 1108   | 1058.8 | 1093   | 1081.2 | 762.3  | 1104.2 | 1030.1 | 950.9  |
| CSPG2     | 129.7  | 120.4  | 146.4  | 133    | 112.1  | 167.2  | 122.5  | 119.9  |
| CSPG3     | 126.4  | 128    | 137.7  | 136.1  | 119.2  | 112.7  | 124.6  | 132.7  |
| CSPG4     | 125    | 116.3  | 126.1  | 131.7  | 117.2  | 102.6  | 134.9  | 127.9  |
| CSPG4LYP2 | 118.2  | 120.2  | 121.5  | 115.4  | 102.3  | 96.6   | 116.8  | 116.7  |
| CSPG5     | 113.8  | 105.8  | 113    | 113.8  | 111.3  | 96.3   | 122.7  | 116.9  |
| CSPP1     | 215.8  | 193.3  | 185.3  | 196.6  | 197.8  | 148.4  | 228.5  | 257.4  |
| CSPP1     | 115.2  | 122.8  | 132    | 138.7  | 124.3  | 111.3  | 126.3  | 117.3  |
| CSRP1     | 228.2  | 225.2  | 339    | 204.9  | 168.9  | 195.8  | 176.4  | 178.5  |
| CSRP2     | 107.4  | 110.8  | 127    | 131.2  | 115.2  | 98.9   | 124.7  | 124.4  |
| CSRP2BP   | 129.4  | 131.1  | 132.4  | 132.1  | 121.1  | 103.3  | 135    | 127.6  |
| CSRP2BP   | 224.2  | 259.5  | 251.7  | 217.6  | 204.5  | 173.3  | 190.1  | 161.2  |
| CSRP2BP   | 119.2  | 117.6  | 117.7  | 119.1  | 111.4  | 104.5  | 119.9  | 121.6  |
| CSRP3     | 101.9  | 105.4  | 110.8  | 113.5  | 106    | 96.8   | 109.2  | 108.3  |
| CSS3      | 116.3  | 124.6  | 118.6  | 115.2  | 115.6  | 96.6   | 126.2  | 117.6  |
| CST1      | 105    | 112.5  | 117    | 124.4  | 108    | 100.1  | 124.1  | 121.2  |
| CST11     | 105.3  | 117.2  | 109.4  | 109.7  | 98.5   | 89.3   | 124    | 110.5  |
| CST11     | 112.5  | 111.6  | 121.4  | 112.1  | 97.6   | 97.3   | 119.5  | 108.8  |
| CST2      | 108.5  | 117.2  | 121.4  | 121.9  | 131.7  | 100.7  | 112.7  | 122.2  |
| CST3      | 533.2  | 211.9  | 3323.6 | 460.6  | 160.5  | 1824.1 | 351.9  | 225.3  |
| CST4      | 117.6  | 118.2  | 109.1  | 113.9  | 110.1  | 105.6  | 118.9  | 126.5  |
| CST5      | 113.6  | 118.5  | 125    | 123.9  | 111.7  | 107.7  | 107    | 113.5  |
| CST6      | 118.6  | 108.2  | 280.6  | 121.5  | 110.4  | 120.5  | 109.9  | 114.1  |
| CST6      | 127.8  | 119.8  | 224.5  | 121.4  | 109.9  | 126    | 132.3  | 116.9  |
| CST7      | 620.4  | 929.4  | 477.4  | 758.4  | 621.9  | 399.9  | 787.3  | 870.5  |
| CST8      | 111.7  | 117.1  | 116.4  | 116.6  | 111.6  | 91.9   | 123.9  | 112.7  |
| CST9      | 120.1  | 130    | 120.8  | 127.1  | 114.9  | 102.8  | 130.7  | 122.9  |
| CST9L     | 115    | 117.6  | 117.5  | 113.1  | 100.1  | 99.2   | 116    | 113.8  |
| CSTA      | 130.4  | 124.3  | 122.5  | 116.4  | 105.1  | 102.2  | 124    | 116.1  |
| CSTB      | 3028.2 | 1844.2 | 2248.4 | 3205.9 | 1765.4 | 2152.5 | 2967   | 1746.4 |
| CSTF1     | 123.1  | 126.5  | 139.9  | 130.1  | 124.9  | 109.3  | 128    | 132.7  |
| CSTF1     | 123.6  | 125.8  | 128    | 129    | 106.4  | 102.4  | 115.3  | 124.5  |
| CSTF1     | 118.1  | 128.9  | 115.6  | 119.2  | 117.4  | 114.2  | 115.5  | 112.5  |
| CSTF1     | 116    | 123.4  | 129.1  | 124.5  | 112.3  | 99.6   | 113    | 122.8  |
| CSTF2     | 219.7  | 260    | 224.5  | 225.9  | 214.2  | 196.3  | 223.8  | 191.1  |

|         |        |        |        |        |        |        |        |        |
|---------|--------|--------|--------|--------|--------|--------|--------|--------|
| CSTF2T  | 146.8  | 159.7  | 160.9  | 155.5  | 126.4  | 128.7  | 153.3  | 144.5  |
| CSTF3   | 243.2  | 222.6  | 363.7  | 252.1  | 255.8  | 243.9  | 199.9  | 190.8  |
| CSTF3   | 184.2  | 191.1  | 180    | 164.9  | 184.3  | 136.2  | 141.8  | 145.2  |
| CSTF3   | 249.5  | 255.9  | 290    | 298.5  | 268.4  | 241.2  | 399.1  | 492.4  |
| CSTF3   | 168.5  | 156.3  | 183.4  | 168.3  | 162.1  | 150.1  | 145.8  | 142    |
| CSTL1   | 107.1  | 119.2  | 117.7  | 118.8  | 109.6  | 97.7   | 117.6  | 110.9  |
| CT45-1  | 108.5  | 116.5  | 112.7  | 111.6  | 109.7  | 109.5  | 113.5  | 110.5  |
| CT45-4  | 114    | 122.8  | 127.4  | 113.9  | 110.2  | 103.2  | 116.4  | 109.7  |
| CT45-5  | 112    | 109.1  | 119.4  | 114.9  | 105.5  | 96.8   | 118.4  | 108.2  |
| CT45-5  | 114.5  | 122.4  | 117.2  | 124.7  | 109.6  | 97.5   | 114.3  | 123.5  |
| CT45-5  | 121    | 111.7  | 112.8  | 125.1  | 116.9  | 95.8   | 121.8  | 110.3  |
| CT47.1  | 110.3  | 111.5  | 120.2  | 116    | 99.7   | 92.2   | 114.2  | 114.4  |
| CT47.6  | 115.8  | 112.2  | 103.8  | 127    | 110.8  | 107.1  | 125.5  | 132.4  |
| CT47.7  | 114.3  | 115    | 124.3  | 119.6  | 109.2  | 98.3   | 114.1  | 114.1  |
| CTAG1A  | 121.8  | 113.4  | 133.3  | 121.2  | 107.4  | 114.6  | 130.4  | 131.6  |
| CTAG1B  | 112.5  | 115.8  | 122.3  | 108.6  | 102.3  | 99.5   | 113.8  | 111.6  |
| CTAG2   | 124.3  | 114.4  | 120.1  | 109.4  | 106.7  | 98.7   | 116    | 125.6  |
| CTAG2   | 117.9  | 110.3  | 122.5  | 120.6  | 107.8  | 98.3   | 119    | 115    |
| CTAGE1  | 120.5  | 110.9  | 117.3  | 119.2  | 105.5  | 97.7   | 123.2  | 113.3  |
| CTAGE5  | 119.9  | 117    | 120.2  | 119.8  | 114    | 107.9  | 116.2  | 113.9  |
| CTAGE5  | 111.9  | 115.4  | 114.4  | 119.2  | 103.4  | 98.3   | 119.1  | 114.4  |
| CTAGE5  | 111.8  | 113.3  | 115.1  | 113.9  | 101.9  | 93.5   | 117.4  | 110.7  |
| CTAGE5  | 130.9  | 129.6  | 145.6  | 143.1  | 137.1  | 107.1  | 133.1  | 124.7  |
| CTBP1   | 130.9  | 118    | 122.8  | 122.3  | 111.8  | 106.4  | 127    | 115.9  |
| CTBP1   | 121.5  | 141.1  | 119.6  | 132.6  | 119.7  | 112.8  | 130.1  | 119.8  |
| CTBP1   | 265.3  | 321.3  | 214.9  | 240.1  | 277.3  | 203.4  | 231.2  | 220.6  |
| CTBP2   | 110.7  | 123.2  | 120.2  | 118.2  | 111.3  | 106    | 116.5  | 123    |
| CTBP2   | 112.9  | 117.3  | 112.6  | 113.9  | 109.8  | 101.9  | 113.4  | 109.2  |
| CTBS    | 230.5  | 209.4  | 258.3  | 292.2  | 251.3  | 191.8  | 237.7  | 260.4  |
| CTCF    | 316.1  | 374.7  | 272.9  | 320.5  | 308.2  | 230.4  | 320.7  | 275.8  |
| CTCFL   | 109.7  | 111.8  | 112.1  | 125.4  | 97.6   | 108.8  | 112.7  | 114.6  |
| CTDP1   | 141.5  | 158.6  | 153.3  | 154.6  | 135.1  | 112.1  | 149.4  | 142.7  |
| CTDP1   | 124    | 124.5  | 114    | 122.9  | 114.9  | 100    | 123.8  | 121.1  |
| CTDP1   | 151.1  | 153.3  | 135.6  | 141.5  | 123.7  | 109.4  | 141.2  | 139    |
| CTDSP1  | 254.9  | 396.3  | 330.7  | 287.5  | 268.6  | 301.2  | 233.5  | 206.7  |
| CTDSP1  | 147.7  | 146.9  | 140.9  | 147.1  | 138.3  | 116.3  | 135.3  | 122    |
| CTDSP2  | 1423.1 | 1592.2 | 1175.4 | 1519.4 | 1106.2 | 1002.7 | 1483.1 | 1441.6 |
| CTDSPL  | 133.4  | 119.6  | 130.2  | 133.2  | 110.4  | 105.3  | 141.3  | 122.5  |
| CTDSPL2 | 128.8  | 135.7  | 128    | 156.5  | 117.9  | 110.1  | 144.3  | 142    |
| CTF1    | 122.6  | 113    | 121.2  | 121.5  | 111.8  | 95.5   | 120.8  | 113.7  |
| CTF8    | 112.5  | 122.4  | 126.1  | 128.4  | 127.4  | 118.1  | 138.4  | 130.2  |
| CTGF    | 124.4  | 121.9  | 121.1  | 127    | 120.2  | 112.1  | 119.2  | 132.6  |
| CTGLF1  | 123.3  | 123.4  | 118.9  | 125.9  | 113.9  | 99.1   | 124.7  | 125.4  |
| CTGLF3  | 697.3  | 624.9  | 765.7  | 656.7  | 559.7  | 476.1  | 735    | 606.2  |
| CTGLF4  | 131.9  | 143.6  | 149.3  | 152.3  | 153.6  | 134.5  | 155    | 160.2  |
| CTH     | 126.1  | 122.4  | 133.6  | 128.7  | 119.6  | 110.2  | 125.7  | 133.6  |
| CTH     | 114.7  | 124.7  | 119.3  | 120.2  | 116    | 104    | 124.8  | 116    |
| CTHRC1  | 108.6  | 113.2  | 119.5  | 111.7  | 101.1  | 98.7   | 114.1  | 111.4  |
| CTLA4   | 130.7  | 130    | 129.7  | 141.6  | 134.4  | 112.3  | 131.7  | 141.1  |
| CTLA4   | 128.6  | 113.7  | 132.1  | 120.2  | 120.6  | 110.2  | 117.8  | 123.1  |
| CTLA4   | 157.9  | 149.4  | 146.8  | 190.1  | 134.5  | 133    | 172.3  | 191.6  |

|          |        |        |        |        |        |        |        |        |
|----------|--------|--------|--------|--------|--------|--------|--------|--------|
| CTNNA1   | 329.1  | 254.4  | 559.8  | 499.3  | 282.4  | 467    | 447.3  | 296.6  |
| CTNNA2   | 111.1  | 119.1  | 110.2  | 119.8  | 107.3  | 95.4   | 116.3  | 117.3  |
| CTNNA3   | 110.7  | 115.9  | 121.3  | 121.6  | 115.3  | 94.9   | 134.4  | 117    |
| CTNNAL1  | 140    | 134.1  | 132.7  | 179.4  | 126.7  | 133.3  | 216.7  | 237.7  |
| CTNNB1   | 168.5  | 161.2  | 192    | 176.1  | 169.9  | 162.9  | 164.9  | 151.5  |
| CTNNB1   | 110.9  | 125.3  | 120.2  | 115.8  | 115.9  | 103.2  | 111.2  | 122    |
| CTNNBIP1 | 109.2  | 114.5  | 111.8  | 109.1  | 104.8  | 101.2  | 117.1  | 117    |
| CTNNBIP1 | 111.4  | 118.2  | 114.6  | 115.9  | 101    | 103.1  | 122.9  | 116.3  |
| CTNNBL1  | 294.8  | 300.5  | 336.2  | 379.1  | 269.9  | 199.5  | 299.6  | 316.7  |
| CTNND1   | 113.7  | 115.7  | 119.5  | 121.9  | 108.5  | 95.4   | 106.7  | 113.9  |
| CTNND1   | 100.8  | 107.8  | 116.9  | 120.3  | 94.6   | 92.4   | 115.7  | 107.9  |
| CTNND2   | 121.7  | 120.1  | 124.1  | 128.7  | 113.1  | 99.8   | 122.9  | 120    |
| CTNS     | 109.9  | 102.9  | 118.3  | 120    | 100    | 96.7   | 115.9  | 115.5  |
| CTNS     | 280.1  | 296    | 317.4  | 317.2  | 197.8  | 173.9  | 308    | 286.3  |
| CTNS     | 130.5  | 134.3  | 135.9  | 127    | 123.3  | 106.7  | 129.7  | 120.3  |
| CTPS     | 225.4  | 220.9  | 155.4  | 258.2  | 193.7  | 149.5  | 302.7  | 310.9  |
| CTPS2    | 104.6  | 112.6  | 117.4  | 108.8  | 102.9  | 96.6   | 113.5  | 107.4  |
| CTPS2    | 203.6  | 195    | 203.9  | 209.1  | 190.3  | 171.3  | 155.3  | 163.1  |
| CTPS2    | 120.6  | 118.9  | 139    | 137.3  | 121.7  | 109.2  | 130.1  | 120.9  |
| CTPS2    | 114.8  | 114.2  | 116.1  | 123.4  | 113.4  | 107.6  | 119    | 118.8  |
| CTR9     | 132.5  | 139.2  | 133.9  | 131.7  | 121.3  | 119.2  | 136.7  | 136.2  |
| CTRB1    | 110.1  | 105.8  | 113.9  | 115.6  | 104.5  | 94.8   | 112.7  | 107.1  |
| CTRB1    | 119.7  | 118.5  | 131.5  | 113.3  | 120.2  | 101.3  | 114.4  | 114.8  |
| CTRB2    | 124.9  | 127.4  | 130.8  | 129.7  | 115.2  | 106.9  | 123.8  | 122.7  |
| CTRC     | 139.6  | 145    | 131.3  | 158.6  | 140.6  | 117.6  | 159.6  | 141.9  |
| CTRL     | 177.2  | 158.5  | 160.4  | 190.9  | 159.1  | 122.5  | 242.2  | 220.2  |
| CTSB     | 1435.1 | 1068.8 | 3152.3 | 2597.4 | 1109.2 | 3077.1 | 2329.9 | 870.9  |
| CTSC     | 120.6  | 118.4  | 119.8  | 115.1  | 106.4  | 103.1  | 117.7  | 111.2  |
| CTSC     | 180    | 173.3  | 241.7  | 171.5  | 157.2  | 159.9  | 191.4  | 159    |
| CTSC     | 357.5  | 296.6  | 494.4  | 348.6  | 233.7  | 295.1  | 281.7  | 242.1  |
| CTSD     | 311.2  | 243.1  | 322.8  | 362.9  | 205.8  | 353.9  | 406.8  | 218.8  |
| CTSE     | 123.7  | 117    | 137.1  | 121.5  | 110.9  | 103.3  | 129.5  | 118.5  |
| CTSE     | 117.8  | 121.9  | 115.6  | 127.8  | 112.3  | 102.5  | 122.4  | 111.5  |
| CTSE     | 121.6  | 122.3  | 130.7  | 126.8  | 118.5  | 113.4  | 126.5  | 117.8  |
| CTSF     | 199.8  | 195.5  | 177.4  | 162.5  | 128    | 129.4  | 138.3  | 143    |
| CTSG     | 113    | 146.4  | 122.3  | 116.3  | 124.1  | 100.2  | 115.5  | 149.7  |
| CTSH     | 832.7  | 445.7  | 1208.6 | 476.7  | 253.5  | 399.2  | 431.1  | 268.1  |
| CTSH     | 114.2  | 123.2  | 141.5  | 136.1  | 113.7  | 124.2  | 136.7  | 129.5  |
| CTSK     | 134.7  | 121.1  | 148.3  | 140    | 117    | 125    | 151.7  | 144.5  |
| CTSL     | 135.9  | 134.5  | 189.5  | 193.5  | 171.2  | 162.7  | 264.8  | 213.5  |
| CTSL1    | 575.3  | 541.3  | 1743.5 | 1654.5 | 1544.6 | 1442.9 | 4064.5 | 2397.5 |
| CTSL1    | 496.8  | 494.1  | 996.9  | 1392.7 | 892.5  | 1389.5 | 3653.1 | 1964   |
| CTSL2    | 125.6  | 122.4  | 123.8  | 118.4  | 110.9  | 104.6  | 128.4  | 117.9  |
| CTSO     | 215.5  | 275.7  | 385.7  | 256.5  | 192.4  | 253    | 178.4  | 145.8  |
| CTSS     | 280.7  | 170.3  | 285.8  | 229.7  | 156.1  | 187    | 184.8  | 157.3  |
| CTSW     | 244.1  | 380.3  | 197    | 218.9  | 236.5  | 165.7  | 211.1  | 215.9  |
| CTSZ     | 498.7  | 277.7  | 599.6  | 488.7  | 236.7  | 598.7  | 466.9  | 287.7  |
| CTTN     | 116    | 112.1  | 113.1  | 120.3  | 112.6  | 105.9  | 129.2  | 115.3  |
| CTTN     | 123.6  | 130    | 125.6  | 123.5  | 108.9  | 103.3  | 118.7  | 130.5  |
| CTTN     | 107.3  | 114.1  | 108.6  | 110.1  | 101.6  | 100    | 117.2  | 111.3  |
| CTTNBP2  | 120.4  | 111.4  | 119.4  | 117.2  | 104.4  | 106.3  | 120.1  | 122    |



|          |        |        |        |        |        |        |        |       |
|----------|--------|--------|--------|--------|--------|--------|--------|-------|
| CTTNBP2N | 125.1  | 117.6  | 123.6  | 115.8  | 108.5  | 98.2   | 122.6  | 112.5 |
| CTXN1    | 108.2  | 110    | 121.1  | 116.1  | 121.4  | 92.5   | 130.1  | 103.7 |
| CTXN3    | 118.1  | 115.5  | 110.1  | 117.7  | 100.9  | 99.4   | 114.3  | 106.7 |
| CUBN     | 129.1  | 114.2  | 130.3  | 131.4  | 113    | 110.6  | 129.5  | 125.9 |
| CUEDC1   | 154.2  | 138.4  | 327.5  | 232.1  | 152    | 202.6  | 246.6  | 168.7 |
| CUEDC2   | 239.8  | 300.4  | 324.7  | 254.8  | 213.5  | 213.8  | 217    | 236.1 |
| CUGBP1   | 134    | 117.9  | 121.5  | 124.1  | 137.6  | 108.7  | 130.3  | 138.6 |
| CUGBP1   | 132.8  | 139.5  | 134.9  | 136.3  | 128.3  | 115.6  | 129    | 117.8 |
| CUGBP2   | 112    | 117.3  | 126.9  | 125.3  | 114    | 112.8  | 116.9  | 123.1 |
| CUGBP2   | 257.9  | 261.7  | 276.7  | 259.5  | 287.9  | 270.6  | 247.9  | 300.7 |
| CUGBP2   | 211.5  | 182.4  | 201    | 200.4  | 163    | 150.5  | 195.2  | 198.6 |
| CUL1     | 215.8  | 190.8  | 199.5  | 197.6  | 173.1  | 173.2  | 214.5  | 251.3 |
| CUL2     | 355.2  | 347    | 376.6  | 367.9  | 314.9  | 277.7  | 316.8  | 336.2 |
| CUL3     | 107.1  | 120.5  | 125.1  | 118.3  | 116.8  | 103.6  | 117.3  | 145.1 |
| CUL4A    | 114    | 119.9  | 130    | 121.6  | 118.2  | 106.2  | 124.1  | 124.2 |
| CUL4A    | 427.5  | 378.5  | 437.6  | 450.7  | 356.2  | 280.6  | 532.1  | 595.9 |
| CUL4B    | 133.7  | 155.5  | 146.7  | 149.3  | 153.7  | 122.4  | 146.3  | 170.8 |
| CUL4B    | 139.4  | 141.2  | 143.6  | 149.7  | 141.2  | 133.9  | 131.1  | 134.6 |
| CUL5     | 432.7  | 412.6  | 439.7  | 349.6  | 345.7  | 291.5  | 304    | 337.4 |
| CUL7     | 114.9  | 123.4  | 130.4  | 115    | 110    | 108    | 134.8  | 123.8 |
| CUTA     | 1123.8 | 1728.9 | 1095.9 | 1225.1 | 1270.3 | 869.8  | 1011.9 | 1340  |
| CUTA     | 434.9  | 481.4  | 536    | 549.9  | 407.6  | 340.2  | 379.3  | 457.4 |
| CUTA     | 116.5  | 121    | 118.7  | 129.6  | 111.6  | 109.4  | 126.2  | 117.5 |
| CUTC     | 280.4  | 372.6  | 366.9  | 367.3  | 326.7  | 273.7  | 308.6  | 300.6 |
| CUTL1    | 109.5  | 126.5  | 120.8  | 122.6  | 109.5  | 97.4   | 122.1  | 123.6 |
| CUTL1    | 286.5  | 345.2  | 245.9  | 346.9  | 319.5  | 221.4  | 361.2  | 385.8 |
| CUTL1    | 118.4  | 115.7  | 110.5  | 120.8  | 100.3  | 100.4  | 111.3  | 112.6 |
| CUTL2    | 115    | 105    | 116.8  | 112.3  | 97.4   | 96.1   | 114.1  | 111.2 |
| CUZD1    | 143    | 132.1  | 145.4  | 144.6  | 128.9  | 113.6  | 146.2  | 119.2 |
| CWF19L1  | 835.3  | 696.3  | 848.9  | 1060.1 | 547.2  | 1195.2 | 784.8  | 529.4 |
| CWF19L2  | 281.9  | 330.7  | 248.9  | 313.2  | 261.1  | 216.6  | 227.9  | 286.8 |
| CX36     | 121.5  | 116.5  | 110.9  | 118.5  | 115.4  | 99     | 115.3  | 111.7 |
| CX3CL1   | 107.1  | 115    | 115.3  | 114.4  | 111.5  | 97.5   | 113.9  | 109.6 |
| CX3CR1   | 1081.9 | 1056.9 | 504.5  | 1019.6 | 722.6  | 383.9  | 911.2  | 801.1 |
| CX40.1   | 105.4  | 114.7  | 115.9  | 116.1  | 99.1   | 94.8   | 123.9  | 119.4 |
| CX62     | 115.8  | 118.3  | 111.3  | 114.6  | 108.6  | 111.7  | 107.6  | 112.7 |
| CXADR    | 116.3  | 117.6  | 108.2  | 98.8   | 105.1  | 101.2  | 111.7  | 110.3 |
| CXCL1    | 117.5  | 124.3  | 123.2  | 127.3  | 105.2  | 124.1  | 118    | 121.9 |
| CXCL10   | 2676   | 194    | 1021.5 | 665.2  | 118.6  | 126.5  | 119.1  | 116   |
| CXCL11   | 118.9  | 115    | 118.7  | 116.1  | 104    | 93.2   | 109.5  | 103.9 |
| CXCL12   | 114.1  | 115.2  | 127    | 119.6  | 113.6  | 97.2   | 117.5  | 116.4 |
| CXCL12   | 115.2  | 115.4  | 126.3  | 115.8  | 110.7  | 96.1   | 123    | 112.1 |
| CXCL13   | 114.3  | 114.4  | 122.2  | 127.8  | 108.7  | 94.3   | 127.3  | 111   |
| CXCL14   | 118.2  | 114.9  | 119.8  | 129.1  | 121.6  | 111.8  | 129.4  | 125.1 |
| CXCL16   | 975.4  | 492.7  | 807    | 1880.5 | 420.7  | 2699.7 | 1331.2 | 394.8 |
| CXCL2    | 133    | 141.3  | 123.7  | 157.1  | 142.4  | 284.2  | 205.1  | 146.4 |
| CXCL3    | 122.4  | 134.2  | 124.3  | 142.8  | 121.3  | 110.2  | 134.1  | 120.5 |
| CXCL5    | 180.5  | 269.2  | 126.4  | 294.8  | 207    | 182.2  | 198.9  | 135.6 |
| CXCL6    | 111.7  | 117.5  | 113.3  | 121.7  | 105.9  | 150.1  | 119.5  | 110.6 |
| CXCL9    | 309    | 127.2  | 187.3  | 120.1  | 116.3  | 111.8  | 116.6  | 113.9 |
| CXCR3    | 201.5  | 252.4  | 278.2  | 179.2  | 170.6  | 178.7  | 147.5  | 151.5 |

|          |        |        |        |        |        |        |        |        |
|----------|--------|--------|--------|--------|--------|--------|--------|--------|
| CXCR4    | 329.6  | 381.3  | 452.9  | 377.7  | 408.7  | 355.3  | 333.6  | 332.9  |
| CXCR4    | 111    | 110.8  | 126.5  | 137    | 98.4   | 98.9   | 109.4  | 112    |
| CXCR4    | 1278.5 | 1607.9 | 1796.3 | 1553.9 | 1732.1 | 1454.9 | 1009.8 | 1273   |
| CXCR6    | 203.8  | 280.4  | 234.2  | 259.5  | 251.3  | 237.2  | 289    | 331.9  |
| CXCR7    | 121.5  | 133    | 134.6  | 128.2  | 110.4  | 104.8  | 124.9  | 111.7  |
| CXORF1   | 111    | 114.3  | 106.9  | 111.3  | 102.2  | 93     | 114.7  | 105.9  |
| CXORF12  | 193.6  | 241.6  | 213.3  | 208.3  | 189.4  | 167.4  | 184.4  | 229.7  |
| CXORF15  | 114.5  | 113.7  | 120.6  | 122.3  | 114.2  | 99.9   | 120.4  | 114.8  |
| CXORF2   | 120.2  | 130    | 118.4  | 116.4  | 114.7  | 105.8  | 126.4  | 122    |
| CXORF20  | 111.3  | 121.4  | 115.5  | 112.7  | 116.5  | 101.4  | 121.9  | 125.6  |
| CXORF21  | 120.8  | 109.5  | 125.3  | 121.6  | 109.3  | 106    | 118.9  | 112.8  |
| CXORF22  | 112.7  | 113.4  | 115.5  | 120.4  | 108.1  | 104.1  | 120.7  | 111.2  |
| CXORF23  | 119.9  | 115.5  | 132.3  | 123.2  | 112.8  | 107.7  | 114.4  | 112.6  |
| CXORF26  | 321.2  | 377.8  | 339.9  | 334.5  | 432.6  | 262.6  | 349    | 381.9  |
| CXORF33  | 129.7  | 127.9  | 132.4  | 136    | 119.1  | 101.3  | 121.2  | 120    |
| CXORF34  | 109.1  | 113.4  | 108.6  | 117.5  | 104.8  | 101.7  | 103.6  | 116.7  |
| CXORF36  | 133.7  | 121.3  | 135.3  | 134.7  | 130.3  | 121.7  | 130.7  | 141    |
| CXORF38  | 261.5  | 238.9  | 323.7  | 266.9  | 220.3  | 201.2  | 220.7  | 198.6  |
| CXORF39  | 167.4  | 180.5  | 156.6  | 204.4  | 154.2  | 143.5  | 177.8  | 177.9  |
| CXORF40A | 286.3  | 276.3  | 295.9  | 292.6  | 225    | 224    | 294.7  | 278.2  |
| CXORF40B | 212    | 249.9  | 251.3  | 252.2  | 214.5  | 181.8  | 224.3  | 194.1  |
| CXORF41  | 121.3  | 105.1  | 110.3  | 117.6  | 106.9  | 98.9   | 115.9  | 110.8  |
| CXORF43  | 130.5  | 115.1  | 118.9  | 114.3  | 116.5  | 104.3  | 131.6  | 123.2  |
| CXORF44  | 152.1  | 152.1  | 175.9  | 142.6  | 131.8  | 127.9  | 155.2  | 143    |
| CXORF45  | 166.5  | 146.3  | 198    | 184.3  | 160    | 159.4  | 164.2  | 171.9  |
| CXORF48  | 114.4  | 110.4  | 114.4  | 115.3  | 102.5  | 100.2  | 116.7  | 105.1  |
| CXORF48  | 107.7  | 113.2  | 112.4  | 110.2  | 103.7  | 99.4   | 114.5  | 108.6  |
| CXORF53  | 187.6  | 205.5  | 189.2  | 203.3  | 217    | 167.2  | 182.4  | 206.8  |
| CXORF55  | 114.6  | 127.5  | 112.6  | 113.8  | 110.4  | 98     | 122.6  | 113.4  |
| CXORF56  | 127.7  | 127.3  | 126.2  | 136.7  | 116.7  | 113.1  | 125.4  | 121.2  |
| CXORF6   | 133.9  | 138.4  | 120    | 136.6  | 113.5  | 101.7  | 119.2  | 126.9  |
| CXORF9   | 541.5  | 512.8  | 611.8  | 455    | 378.1  | 442    | 447.3  | 422.7  |
| CXX1     | 333    | 290.6  | 371    | 361.7  | 192.2  | 289.1  | 245.8  | 185    |
| CXXC1    | 1065.1 | 1265.8 | 973.5  | 1162.8 | 768.7  | 736.1  | 1277.4 | 930.2  |
| CXXC4    | 127.2  | 126.8  | 141.4  | 141.5  | 107.9  | 111.6  | 129    | 125.1  |
| CXXC5    | 452.6  | 466.2  | 400.6  | 479.4  | 303.7  | 355.3  | 407.3  | 254.6  |
| CXXC6    | 119.1  | 111.2  | 129.1  | 122.6  | 104.9  | 98.8   | 121.7  | 120.8  |
| CXYORF3  | 1890.1 | 1927.4 | 2015.2 | 2439.1 | 1601.5 | 1228.5 | 2351.2 | 2750   |
| CYB561   | 169.2  | 164.2  | 152.9  | 179.2  | 146.5  | 124.2  | 143.8  | 133.5  |
| CYB561   | 190.4  | 231.7  | 178.1  | 190.9  | 163.8  | 134.6  | 144.4  | 150    |
| CYB561   | 116.3  | 125.5  | 117    | 124.7  | 103.8  | 104.4  | 122.3  | 118.1  |
| CYB561D2 | 271.5  | 302.1  | 346.1  | 292.7  | 206.9  | 247.5  | 229.2  | 180.2  |
| CYB5A    | 252    | 262.9  | 296.9  | 262.4  | 256    | 181    | 219.1  | 237.6  |
| CYB5A    | 152.2  | 191.9  | 148.9  | 167    | 155.9  | 107.8  | 138    | 136.7  |
| CYB5D1   | 155.8  | 158.1  | 179.1  | 158.2  | 157.7  | 143.3  | 150.9  | 143.9  |
| CYB5D2   | 213.8  | 198.9  | 167    | 199.8  | 193.2  | 171.3  | 220.8  | 212.6  |
| CYB5-M   | 942.2  | 868.5  | 953.2  | 1004.2 | 850.5  | 817.9  | 1024.3 | 837.1  |
| CYB5R1   | 331.3  | 265.5  | 310.7  | 350.9  | 230.7  | 299    | 306.6  | 296.1  |
| CYB5R2   | 126.3  | 112.7  | 124.2  | 114.1  | 114.7  | 110.4  | 133.1  | 121    |
| CYB5R3   | 143.3  | 135.3  | 148.9  | 159.5  | 126.8  | 144.6  | 165.6  | 159.3  |
| CYB5R3   | 1290.5 | 1341.8 | 1699.3 | 1730.3 | 1058.9 | 1613.7 | 1413   | 1497.9 |

|          |        |        |        |        |        |        |        |        |
|----------|--------|--------|--------|--------|--------|--------|--------|--------|
| CYB5R4   | 226.4  | 254.9  | 301.4  | 344.7  | 305.5  | 308.2  | 352    | 215.1  |
| CYBA     | 2993.2 | 2748.5 | 4405.5 | 3112.1 | 1716.1 | 2929.9 | 2243.8 | 1541.4 |
| CYBASC3  | 642.6  | 568.6  | 464.6  | 622.1  | 340.2  | 446.1  | 498    | 286.8  |
| CYBB     | 417    | 225.4  | 474.5  | 493.7  | 202.3  | 304.4  | 296.8  | 216.1  |
| CYBRD1   | 134.6  | 142.3  | 186.6  | 150    | 129.5  | 134.1  | 144.3  | 135.2  |
| CYC1     | 728.5  | 748.1  | 901.9  | 831.7  | 528.2  | 527.9  | 656.9  | 519.3  |
| CYCS     | 195.4  | 223.9  | 197.8  | 233.3  | 186.9  | 154.3  | 219.2  | 225    |
| CYCSL1   | 156.5  | 157.6  | 164.9  | 154.9  | 136    | 109.4  | 147.6  | 164    |
| CYFIP1   | 122.5  | 126.3  | 124    | 122.7  | 114.7  | 107.8  | 130    | 117.9  |
| CYFIP1   | 248.5  | 186.5  | 380.4  | 202.3  | 183.3  | 257.8  | 216.8  | 166.1  |
| CYFIP1   | 120.1  | 115.2  | 121.4  | 125.1  | 125.9  | 105.4  | 112.4  | 124.2  |
| CYFIP2   | 126.1  | 124.5  | 125.7  | 124.4  | 113.8  | 100.2  | 117.5  | 122.9  |
| CYFIP2   | 436    | 518.9  | 417.7  | 501.7  | 399.8  | 443.5  | 562.2  | 673.7  |
| CYFIP2   | 1456.8 | 1721.3 | 1041.4 | 1226.5 | 1081.4 | 605.2  | 1358.3 | 1722.6 |
| CYGB     | 122.2  | 131.3  | 126.1  | 127.3  | 109.4  | 101.7  | 117    | 126.2  |
| CYHR1    | 117.5  | 124.7  | 132.4  | 138.9  | 106.7  | 112.3  | 127    | 118.2  |
| CYLC1    | 113.5  | 112.6  | 117.8  | 114.1  | 110.7  | 101.7  | 113.5  | 108.6  |
| CYLC2    | 121.7  | 112.5  | 115.8  | 132.5  | 114.8  | 94.4   | 122    | 123.4  |
| CYLD     | 123.5  | 124.7  | 129.6  | 129.7  | 116.7  | 98.6   | 122    | 131.8  |
| CYLD     | 596.4  | 630.5  | 471.8  | 623.2  | 580.8  | 302.2  | 661.8  | 836.3  |
| CYLN2    | 117    | 116.1  | 123.2  | 127    | 117.3  | 100.1  | 128.6  | 120.1  |
| CYORF14  | 121.6  | 121.1  | 121.6  | 130.1  | 113.9  | 104.7  | 118.8  | 114.9  |
| CYORF15A | 276.9  | 344.7  | 335.2  | 274.8  | 295.4  | 271.5  | 249.8  | 276.7  |
| CYORF15B | 155.6  | 156.2  | 148.3  | 146.5  | 138.4  | 114.4  | 136.6  | 155.4  |
| CYP11A1  | 119.8  | 124.9  | 132.5  | 140.3  | 117    | 117.3  | 128.5  | 115.4  |
| CYP11B1  | 107.2  | 107.5  | 119.2  | 114.7  | 104.5  | 99.3   | 112.3  | 119.8  |
| CYP11B2  | 123    | 121.2  | 130    | 117.8  | 120    | 102.6  | 124.8  | 122.6  |
| CYP17A1  | 112.3  | 123    | 120.5  | 114    | 109.5  | 101.8  | 115.8  | 114.9  |
| CYP19A1  | 107    | 111    | 113.4  | 116.3  | 113.6  | 102.7  | 116.4  | 113.4  |
| CYP19A1  | 110.1  | 101.7  | 110.6  | 115.8  | 107.6  | 97.9   | 115.5  | 110.6  |
| CYP19A1  | 127    | 130    | 132.5  | 143.1  | 119.5  | 128.1  | 120.9  | 120.4  |
| CYP1A1   | 123.1  | 117.3  | 129.5  | 123.5  | 110.7  | 99.5   | 120.5  | 114.1  |
| CYP1A2   | 115.5  | 111.7  | 113.8  | 111    | 101.6  | 95.5   | 115.2  | 116.4  |
| CYP1B1   | 1399.8 | 1532.8 | 1318.8 | 2912.8 | 1012.7 | 1798.2 | 3090   | 576.9  |
| CYP20A1  | 272.6  | 292.1  | 293.7  | 308.6  | 269    | 220.8  | 312.9  | 389.8  |
| CYP20A1  | 111.6  | 108.6  | 119.6  | 118.1  | 109.1  | 102.6  | 121.9  | 117    |
| CYP21A2  | 116.9  | 117.3  | 122    | 124.7  | 106.6  | 100.7  | 126.5  | 130.8  |
| CYP24A1  | 107.6  | 112.5  | 118.7  | 120.8  | 109.8  | 97.5   | 116.1  | 106.5  |
| CYP26A1  | 103.1  | 109.3  | 112.3  | 116    | 106.9  | 104.8  | 118    | 107.1  |
| CYP26A1  | 115.3  | 111.3  | 112.6  | 125.2  | 107.6  | 108.4  | 120.9  | 121.6  |
| CYP26A1  | 114.2  | 115.2  | 114.6  | 117.4  | 109.4  | 98     | 115.7  | 110    |
| CYP26B1  | 120.2  | 120.3  | 133.1  | 127.5  | 107.7  | 109.3  | 111.2  | 129.1  |
| CYP26C1  | 119.8  | 124.4  | 126.2  | 117.7  | 112.3  | 96.7   | 119.8  | 116.2  |
| CYP27A1  | 2211.9 | 1469   | 234.9  | 2818.8 | 936.7  | 958.2  | 1957.9 | 532.1  |
| CYP27B1  | 138.6  | 134.6  | 122.7  | 114.4  | 118.6  | 110.8  | 135.1  | 134.6  |
| CYP2A13  | 112.2  | 120.3  | 120.3  | 124.3  | 103.3  | 105.4  | 117.8  | 117.6  |
| CYP2A6   | 104.7  | 109.5  | 112.5  | 109    | 109.9  | 98.3   | 122.3  | 116.8  |
| CYP2A7   | 116.4  | 116.4  | 117.3  | 120.6  | 108.3  | 98.7   | 129.5  | 121.7  |
| CYP2B6   | 116.1  | 114.5  | 126.4  | 119.8  | 109.2  | 99.8   | 120.9  | 107.6  |
| CYP2B7P1 | 106.4  | 111.2  | 114.7  | 121.1  | 106.1  | 97.9   | 118.6  | 114.1  |
| CYP2C18  | 107.1  | 110.9  | 115.2  | 130.7  | 109.5  | 94.1   | 113.5  | 112.3  |

|           |       |       |       |       |       |       |       |       |
|-----------|-------|-------|-------|-------|-------|-------|-------|-------|
| CYP2C19   | 113.1 | 116.6 | 112   | 107.9 | 104   | 95.7  | 121.6 | 108.7 |
| CYP2C8    | 123.6 | 122.5 | 123.6 | 127.7 | 115.2 | 108.3 | 124.4 | 114.3 |
| CYP2C9    | 113.9 | 102.3 | 115.2 | 119.8 | 104.4 | 95.3  | 115   | 116.1 |
| CYP2D6    | 120.2 | 116.1 | 124.8 | 109.4 | 107.8 | 98.9  | 112   | 117.3 |
| CYP2D7P1  | 124.7 | 123.4 | 120.8 | 131.8 | 122.2 | 113.2 | 128.3 | 135   |
| CYP2E1    | 137.9 | 127.8 | 136.8 | 146.6 | 123.6 | 103.2 | 137.3 | 135.3 |
| CYP2F1    | 112.3 | 114   | 133.9 | 127.8 | 116.2 | 107.4 | 115.7 | 113.5 |
| CYP2J2    | 124.9 | 136.5 | 121.8 | 142.1 | 119.9 | 104.3 | 134.2 | 117.3 |
| CYP2R1    | 197.6 | 196.7 | 235   | 215.1 | 193.5 | 174.6 | 240.2 | 233.4 |
| CYP2S1    | 107.4 | 113.9 | 122.1 | 122.4 | 112.7 | 98.7  | 111.6 | 106.4 |
| CYP2S1    | 129.3 | 118.9 | 176.8 | 138.9 | 109.7 | 126   | 130.3 | 118.2 |
| CYP2U1    | 126.4 | 115.6 | 130.4 | 119   | 115.9 | 106.1 | 115.1 | 119.6 |
| CYP2W1    | 126.4 | 119.4 | 115.3 | 112.2 | 112.7 | 109   | 120.9 | 121.5 |
| CYP3A1    | 107.7 | 107.2 | 111.3 | 113.5 | 108   | 94.8  | 113.7 | 107.3 |
| CYP3A4    | 108.1 | 114.3 | 123.3 | 112.5 | 107.1 | 95.2  | 114   | 108   |
| CYP3A43   | 116.2 | 115.9 | 110.4 | 119.4 | 113.8 | 103.7 | 121.7 | 109.2 |
| CYP3A43   | 107.9 | 110.7 | 111.1 | 115.9 | 103.7 | 94.3  | 116.9 | 121   |
| CYP3A5    | 106.4 | 117.8 | 123.4 | 115.1 | 106.2 | 100   | 113.6 | 111.8 |
| CYP3A7    | 109   | 114.7 | 131.6 | 121.2 | 107.6 | 109.4 | 120.8 | 120.2 |
| CYP4A1    | 110.2 | 114.3 | 109.1 | 121.6 | 111.5 | 101.1 | 122.1 | 115.7 |
| CYP4A11   | 104   | 114.2 | 114.8 | 123.3 | 109.6 | 91.2  | 124   | 113.2 |
| CYP4A22   | 107.3 | 110.2 | 107.1 | 119   | 105.8 | 101.4 | 106   | 112.7 |
| CYP4B1    | 117.3 | 107.6 | 117.6 | 123.7 | 109   | 97.2  | 122.1 | 113   |
| CYP4F11   | 119.5 | 114.7 | 117.8 | 127   | 115.8 | 106.2 | 125.8 | 126.5 |
| CYP4F12   | 121.2 | 120.3 | 119.2 | 120.1 | 106.5 | 100.9 | 113.4 | 105.3 |
| CYP4F2    | 106   | 120.6 | 121.1 | 111.5 | 109.5 | 98.5  | 107.9 | 117.3 |
| CYP4F3    | 113.7 | 115.4 | 112.1 | 116.9 | 105.4 | 101.2 | 111.1 | 106.6 |
| CYP4F8    | 117   | 122.9 | 122.5 | 122.7 | 115.2 | 109.6 | 120.8 | 121.2 |
| CYP4V2    | 275.1 | 310.3 | 364.9 | 301   | 264   | 208.7 | 200.6 | 210.9 |
| CYP4X1    | 113.2 | 110.3 | 110.1 | 120.6 | 105.1 | 105.2 | 119   | 117.8 |
| CYP4Z1    | 112.7 | 110.1 | 107.3 | 121.1 | 111.5 | 96    | 127   | 111.7 |
| CYP4Z1    | 104.5 | 112   | 127.8 | 116.3 | 112.1 | 94.2  | 109.6 | 112.6 |
| CYP4Z1    | 113.5 | 115.2 | 106.9 | 118.8 | 101   | 101.1 | 117.7 | 117.9 |
| CYP4Z2P   | 111.8 | 108.8 | 114.7 | 120.2 | 107.1 | 103   | 115.6 | 117.1 |
| CYP51A1   | 151.4 | 154.7 | 146.6 | 152.4 | 124.3 | 128.5 | 165.3 | 151.5 |
| CYP7A1    | 124.4 | 125.4 | 127.5 | 111.7 | 110.4 | 101.5 | 114.1 | 126.2 |
| CYP7B1    | 111.9 | 112.7 | 120.1 | 123.8 | 115.2 | 112.1 | 120.6 | 112.3 |
| CYP8B1    | 116.5 | 109.6 | 130.3 | 126.3 | 118.6 | 103.1 | 120.5 | 107.1 |
| CYR61     | 112.2 | 116.1 | 116.9 | 116.9 | 106.7 | 98.6  | 107.2 | 111.9 |
| CYS1      | 117.1 | 113.3 | 119.4 | 120.6 | 110.8 | 105.5 | 120.2 | 130.5 |
| CYS1      | 109.8 | 111.7 | 117.4 | 120.6 | 107.1 | 94.8  | 102.4 | 108.4 |
| CYSLTR1   | 223.7 | 225.5 | 323.7 | 209.1 | 192.9 | 144   | 174.9 | 196.4 |
| CYSLTR2   | 115.6 | 101.7 | 130.5 | 118.5 | 115.9 | 105.8 | 130.9 | 117.7 |
| CYTL1     | 112.4 | 117   | 122.4 | 114.6 | 115.9 | 105.5 | 119.6 | 114.2 |
| CYYR1     | 109.2 | 113.7 | 114   | 125.5 | 101.5 | 102.1 | 109.5 | 107.1 |
| D15WSU75  | 243.2 | 304   | 228.3 | 297.4 | 229.5 | 244.7 | 279   | 288.5 |
| D21S2056E | 127.6 | 120.5 | 129.5 | 132.4 | 118   | 100.9 | 113.8 | 125.9 |
| D2HGDH    | 580.2 | 504.7 | 839   | 566.5 | 409.6 | 380   | 351   | 298.8 |
| D4S234E   | 378.9 | 370.1 | 352.9 | 414.6 | 364.2 | 291.9 | 349.9 | 325.6 |
| D4ST1     | 182.5 | 183.3 | 146   | 163.8 | 157   | 144.8 | 171.3 | 156.8 |
| DAAM1     | 150.1 | 147.8 | 133.8 | 148.8 | 114.4 | 130.7 | 144.8 | 149.8 |

|        |        |        |        |        |        |        |        |        |
|--------|--------|--------|--------|--------|--------|--------|--------|--------|
| DAAM2  | 123.4  | 120.3  | 119.4  | 123.1  | 116    | 102.7  | 126.2  | 118.4  |
| DAB1   | 114.1  | 108.7  | 117.3  | 111.2  | 99     | 94.5   | 117.5  | 108.5  |
| DAB2   | 218.5  | 177.8  | 318.6  | 230.7  | 133.9  | 204.2  | 208.7  | 161    |
| DAB2IP | 115.8  | 125.7  | 111.6  | 129.8  | 110.1  | 104.4  | 118.1  | 117.4  |
| DAB2IP | 110.8  | 114.7  | 117.6  | 122.4  | 100.4  | 97.9   | 114.4  | 107.9  |
| DAB2IP | 113    | 108.3  | 117.9  | 112.2  | 103.5  | 95.2   | 114.4  | 108.3  |
| DACH1  | 110.5  | 116.1  | 110.4  | 118.2  | 108.7  | 98.8   | 121.4  | 104.3  |
| DACH1  | 116.6  | 119.4  | 119.9  | 116.8  | 100.4  | 93.2   | 114.9  | 120.6  |
| DACH1  | 114.5  | 115.5  | 126.2  | 113.9  | 103.3  | 103.1  | 116.6  | 111.1  |
| DACT1  | 132.4  | 117.7  | 132.4  | 120.9  | 113    | 108.3  | 128.5  | 112.9  |
| DACT1  | 129.1  | 130.9  | 127    | 124.4  | 109.6  | 108.2  | 131.7  | 125.7  |
| DACT1  | 120    | 124.2  | 119.8  | 123.1  | 110.9  | 98.7   | 126.7  | 117.9  |
| DACT2  | 124.8  | 120.8  | 133.1  | 124.8  | 118.2  | 97.7   | 119.3  | 111.1  |
| DAD1   | 1565   | 1859.6 | 1942.1 | 1903.4 | 1376   | 1889.3 | 2111.8 | 2565.4 |
| DAG1   | 144.6  | 144.8  | 151.3  | 146.8  | 135.3  | 128.5  | 149.2  | 136.6  |
| DAK    | 112.8  | 120.7  | 124.4  | 118    | 119.5  | 120.3  | 112    | 118.1  |
| DALRD3 | 117.5  | 124    | 135    | 140.1  | 121.2  | 114.1  | 118.2  | 120.3  |
| DALRD3 | 104.3  | 106.7  | 114.7  | 115.1  | 101.8  | 100    | 125    | 113.1  |
| DAND5  | 112.7  | 118.3  | 115.9  | 120    | 113.9  | 104.6  | 112.9  | 117.1  |
| DAO    | 112.9  | 111.3  | 115.7  | 115.5  | 100.9  | 100.1  | 109.7  | 111.1  |
| DAOA   | 118.8  | 119.7  | 119.6  | 120.1  | 110.9  | 102.4  | 108    | 118.9  |
| DAP    | 161.1  | 179.4  | 172.3  | 154.3  | 134.1  | 150.9  | 206.2  | 151.5  |
| DAP3   | 458.4  | 474.6  | 615    | 489.6  | 382.4  | 483.4  | 564.6  | 598.4  |
| DAPK1  | 144.6  | 137.6  | 164.9  | 133.9  | 105.4  | 134.2  | 147.8  | 124.5  |
| DAPK2  | 129    | 117.9  | 138.4  | 123.7  | 112.7  | 113.6  | 123.4  | 106.7  |
| DAPK3  | 176.7  | 155.5  | 157.5  | 170.8  | 160.3  | 133.6  | 179.1  | 148    |
| DAPP1  | 1278.6 | 1473   | 1917.5 | 1426.8 | 1625.3 | 981.5  | 1606.4 | 1648   |
| DARC   | 112.1  | 125    | 137.3  | 139.9  | 115.3  | 112.5  | 119.8  | 123    |
| DARS   | 1561.1 | 2129.7 | 1975.9 | 1567.2 | 1539.7 | 1277.4 | 1329.5 | 1431.2 |
| DARS2  | 169.8  | 163.2  | 151.4  | 154.5  | 142.3  | 122.4  | 151.2  | 172.7  |
| DAXX   | 205.1  | 220.8  | 190.6  | 228.6  | 184    | 181.9  | 206.8  | 231.4  |
| DAZ1   | 117.8  | 113.3  | 112.2  | 115.1  | 110.2  | 98.2   | 126.1  | 110.6  |
| DAZ2   | 117.2  | 118.3  | 122.9  | 114.4  | 111.3  | 93.2   | 125.8  | 111.3  |
| DAZ2   | 119.2  | 122.6  | 119    | 127    | 113.2  | 100.5  | 119.7  | 121.3  |
| DAZ4   | 117.7  | 121.9  | 115.2  | 110.8  | 103.4  | 99.5   | 115.5  | 114    |
| DAZAP1 | 115    | 123.7  | 126.7  | 124.9  | 116.6  | 110    | 120.8  | 123.3  |
| DAZAP1 | 262    | 250.3  | 315.7  | 263.3  | 253.5  | 261.2  | 340.7  | 276.7  |
| DAZAP2 | 4585.4 | 5137   | 6160.4 | 5154.4 | 4615.2 | 5272.8 | 5491.2 | 4831.4 |
| DAZL   | 117.1  | 122.2  | 117.5  | 132.6  | 114.2  | 100.8  | 116.5  | 112.8  |
| DBC1   | 111.3  | 109.1  | 114.3  | 110.9  | 105.7  | 102.2  | 113.6  | 114.5  |
| DBF4   | 120.2  | 117.9  | 120.5  | 120    | 105.3  | 104.4  | 117.2  | 121    |
| DBF4B  | 121.1  | 115.1  | 127.3  | 122.6  | 119.1  | 96.3   | 122.5  | 119.6  |
| DBF4B  | 112.5  | 116    | 110.5  | 117.8  | 101.5  | 101.6  | 117.7  | 108.7  |
| DBH    | 106.9  | 109.4  | 120.5  | 131.9  | 107.5  | 115.8  | 120.3  | 113.5  |
| DBI    | 1323.5 | 1320.1 | 1474.5 | 1334.1 | 1047.3 | 971.9  | 1091.3 | 948.1  |
| DBI    | 214.8  | 242.6  | 213.8  | 193.4  | 190.9  | 137.7  | 229.9  | 186.9  |
| DBN1   | 151.9  | 205.2  | 140.6  | 167.7  | 149.1  | 113.6  | 156.9  | 155.9  |
| DBN1   | 117    | 118.6  | 114.2  | 119.7  | 104.5  | 106.2  | 121.6  | 125.5  |
| DBNDD1 | 124.1  | 136.3  | 126.5  | 136.8  | 120.2  | 114.7  | 131.1  | 141.2  |
| DBNDD2 | 112.9  | 112    | 114.3  | 117.6  | 111.4  | 90.5   | 117.5  | 115.2  |
| DBNL   | 1040.3 | 1232.6 | 1411.2 | 1104.1 | 711.7  | 730.7  | 622.7  | 512    |

|         |        |       |        |        |       |        |       |        |
|---------|--------|-------|--------|--------|-------|--------|-------|--------|
| DBNL    | 242.1  | 236.6 | 252.2  | 200.1  | 187.5 | 167.6  | 180.3 | 142.8  |
| DBP     | 130    | 145.3 | 151.9  | 145.1  | 123.7 | 125.9  | 128.6 | 125.7  |
| DBR1    | 160.8  | 172.6 | 158.8  | 182.4  | 132.3 | 133.8  | 178.5 | 150.9  |
| DBT     | 301.6  | 370.1 | 452.7  | 358.5  | 309.3 | 273.4  | 327   | 325.1  |
| DBX1    | 116.9  | 124.1 | 127.4  | 125.3  | 115.4 | 111.9  | 118.3 | 111.3  |
| DBX2    | 120    | 124.1 | 114    | 115.7  | 104.3 | 101.6  | 117.8 | 117.6  |
| DC2     | 165.8  | 147.7 | 239.9  | 176.2  | 203.3 | 167.3  | 170.2 | 209.7  |
| DCAKD   | 379.6  | 402.9 | 425.3  | 427.8  | 342.8 | 301.5  | 394.4 | 348.9  |
| DCAL1   | 203    | 199.5 | 245.3  | 221.7  | 149.1 | 148.9  | 158.4 | 147.1  |
| DCAMKL1 | 131.3  | 116.7 | 129.4  | 125    | 112.9 | 125.8  | 124.6 | 114.9  |
| DCAMKL2 | 121.3  | 109.6 | 110.5  | 117.3  | 115.3 | 100.8  | 116.1 | 113.9  |
| DCAMKL2 | 112.8  | 113.5 | 112    | 120.2  | 107.6 | 97.1   | 114.1 | 111.8  |
| DCBLD1  | 111    | 123   | 129    | 122    | 116.1 | 107.5  | 121.7 | 130.9  |
| DCBLD2  | 146.9  | 169   | 137.2  | 175.3  | 132.8 | 111.7  | 144.3 | 158.7  |
| DCC     | 113.8  | 116.1 | 113.7  | 121.5  | 109.4 | 95.9   | 129.6 | 120.5  |
| DCC1    | 117.9  | 117.8 | 126.6  | 127.2  | 117   | 104.3  | 114.8 | 119.2  |
| DCD     | 115.9  | 110.3 | 114.3  | 114.2  | 105.8 | 97.7   | 118.6 | 109.3  |
| DCDC1   | 107.1  | 114.9 | 118.1  | 117.3  | 108   | 101.3  | 114.6 | 117.3  |
| DCDC2   | 102.9  | 112.7 | 123.1  | 113.3  | 106   | 96.1   | 117.9 | 119.7  |
| DCDC5   | 160.2  | 224.4 | 210.1  | 192.3  | 183.5 | 154    | 179.5 | 219.4  |
| DCHS1   | 133.1  | 114.8 | 129.4  | 137.5  | 122.3 | 108.8  | 121.5 | 125.4  |
| DCHS2   | 113    | 122.4 | 113.5  | 109.9  | 105.4 | 101.6  | 115.6 | 118.2  |
| DCI     | 128.6  | 144.6 | 132.6  | 144    | 124.1 | 114.2  | 126.5 | 131.9  |
| DCK     | 148.5  | 141   | 151    | 162.1  | 151.3 | 129.8  | 162.2 | 145.7  |
| DCLRE1A | 132.4  | 142.6 | 137.3  | 140.4  | 125.2 | 124.3  | 142.5 | 137    |
| DCLRE1B | 111.9  | 117.7 | 116.2  | 121.8  | 117   | 99.7   | 122.8 | 120.3  |
| DCLRE1C | 159.4  | 186.6 | 175.3  | 180.9  | 153.1 | 150.3  | 166   | 153.2  |
| DCLRE1C | 124.1  | 130.3 | 127.1  | 119.6  | 101   | 104.3  | 115.5 | 117.1  |
| DCLRE1C | 239    | 226.1 | 236.9  | 240.1  | 275.6 | 145.8  | 214.9 | 226.6  |
| DCN     | 118.4  | 114   | 115.2  | 111.1  | 105.6 | 98.4   | 111.2 | 113.7  |
| DCN     | 116.5  | 124.7 | 120.9  | 118.6  | 106.5 | 91.4   | 122.8 | 126.5  |
| DCN     | 118.3  | 119.7 | 118.9  | 115.6  | 109.1 | 96.1   | 119.9 | 116.4  |
| DCP1A   | 203.1  | 210   | 178.3  | 199.8  | 210.1 | 182.8  | 270.5 | 303.9  |
| DCP1B   | 125.6  | 137.8 | 138.5  | 129.9  | 119.9 | 101.5  | 136.1 | 126.6  |
| DCP2    | 499.5  | 649.5 | 492.2  | 549.3  | 562.8 | 481    | 646.5 | 854.8  |
| DCPS    | 133.1  | 150.9 | 154.1  | 155.7  | 131.3 | 123.8  | 118.8 | 143    |
| DCST1   | 119.2  | 125.7 | 130.1  | 120    | 114.7 | 104.4  | 124.4 | 114.7  |
| DCST2   | 112.4  | 112.4 | 110.2  | 127    | 107.5 | 100.4  | 117.7 | 110.9  |
| DCT     | 117.3  | 116.7 | 118.7  | 119    | 107.9 | 104    | 114.2 | 114.5  |
| DCTD    | 121    | 144.1 | 132    | 133.5  | 110.4 | 118.7  | 142   | 134    |
| DCTD    | 377.7  | 497.2 | 395.5  | 420.5  | 335.7 | 382.3  | 389   | 392.5  |
| DCTN1   | 412.1  | 350.8 | 282.3  | 334.7  | 264   | 330.1  | 347   | 363.3  |
| DCTN1   | 115.1  | 117.2 | 129.2  | 123.5  | 114.9 | 97.3   | 121.7 | 129.3  |
| DCTN1   | 156.2  | 154.2 | 157.5  | 168.5  | 135.5 | 146.6  | 172.4 | 168    |
| DCTN2   | 1252.7 | 1202  | 1106.4 | 1297.7 | 935.9 | 1075.5 | 1414  | 1035.7 |
| DCTN3   | 107.7  | 115.2 | 117.4  | 126.9  | 116.1 | 102.1  | 109.5 | 118.5  |
| DCTN3   | 515.4  | 520.2 | 707.7  | 524.9  | 498   | 510.9  | 348.9 | 386.2  |
| DCTN4   | 187.7  | 187.3 | 192.6  | 183.6  | 176.1 | 184.9  | 199.7 | 179.2  |
| DCTN5   | 398.9  | 462.4 | 411.7  | 495.1  | 347.4 | 351.8  | 523.4 | 462.3  |
| DCTN6   | 121.9  | 118.1 | 118.5  | 121.4  | 112.1 | 104.2  | 129.9 | 126.3  |
| DC-UBP  | 181.1  | 166.7 | 140.1  | 200.4  | 152.3 | 123.2  | 195.3 | 164.3  |

|         |        |        |        |        |        |        |        |        |
|---------|--------|--------|--------|--------|--------|--------|--------|--------|
| DCUN1D1 | 107.4  | 111.1  | 108    | 126.1  | 109.7  | 102.9  | 114.3  | 111.6  |
| DCUN1D2 | 125.7  | 137.7  | 114.7  | 150.5  | 120.7  | 119.7  | 141.7  | 131.6  |
| DCUN1D3 | 225.3  | 246.5  | 159    | 260.1  | 185.4  | 149.1  | 255.3  | 269    |
| DCUN1D4 | 129.9  | 135.8  | 143.5  | 146.6  | 116.7  | 107.6  | 148.7  | 124.4  |
| DCUN1D4 | 380.3  | 382    | 364.2  | 402.1  | 329.9  | 264.2  | 383.2  | 443.3  |
| DCUN1D5 | 286.1  | 321.2  | 329    | 320.4  | 257.7  | 270.4  | 268.1  | 315.2  |
| DCX     | 126.5  | 115.3  | 129.9  | 119.6  | 105.7  | 102.3  | 107.8  | 121.7  |
| DCX     | 115.1  | 113.9  | 113.5  | 115.9  | 111.2  | 100.5  | 118.3  | 112.9  |
| DCXR    | 254.4  | 251.6  | 289.6  | 261    | 187.8  | 190.9  | 243.8  | 227.4  |
| DDA1    | 575.5  | 562.3  | 538.1  | 609.2  | 376.9  | 545.7  | 700.2  | 626    |
| DDAH1   | 111.8  | 118.3  | 121.3  | 116.7  | 105.3  | 98     | 117.6  | 109.4  |
| DDAH2   | 114.5  | 126.1  | 138.3  | 137.3  | 123.4  | 135.8  | 131    | 136.2  |
| DDB1    | 1785.1 | 2033.6 | 1460.9 | 2070.5 | 1458.5 | 1372.5 | 2312.5 | 2152.7 |
| DDB1    | 136    | 137.8  | 129.1  | 128.4  | 140.1  | 101.7  | 131.5  | 132    |
| DDB2    | 114.4  | 117.1  | 134.1  | 122.1  | 118.2  | 101.1  | 126.3  | 127.1  |
| DDC     | 114.6  | 110.7  | 104.9  | 120.1  | 100.9  | 100.1  | 116.2  | 108.6  |
| DDEF1   | 206.4  | 177.1  | 142.5  | 225.7  | 218.7  | 146.7  | 198.8  | 213.4  |
| DDEF2   | 119    | 120.3  | 114    | 127.7  | 111.5  | 107.2  | 121    | 121.5  |
| DDEFL1  | 135.9  | 136.6  | 138.1  | 131.6  | 118.8  | 112.8  | 135.5  | 125.8  |
| DDHD1   | 122.8  | 136.3  | 127.4  | 122.8  | 111.2  | 104.6  | 130.6  | 116.2  |
| DDHD2   | 127.9  | 129.9  | 136.7  | 131.2  | 109.5  | 112.9  | 124.6  | 125.8  |
| DDI1    | 130.2  | 124.9  | 134.3  | 135.5  | 115.3  | 100.8  | 119.3  | 122.6  |
| DDI2    | 112.1  | 123    | 119.8  | 113    | 102.6  | 92.4   | 126.6  | 121    |
| DDIT3   | 195    | 230    | 227.9  | 257.7  | 249.7  | 189.4  | 289.9  | 508.1  |
| DDIT4   | 173.8  | 228.4  | 246.9  | 200.1  | 173.6  | 250    | 196.6  | 257.2  |
| DDIT4L  | 114.5  | 125.5  | 122.9  | 118    | 112.3  | 106.1  | 121.2  | 125.4  |
| DDN     | 115.3  | 120.7  | 109.1  | 115.1  | 100.4  | 98.9   | 116.8  | 114.5  |
| DDO     | 108.9  | 121.3  | 116.3  | 121.9  | 104.8  | 95.6   | 120    | 117.6  |
| DDO     | 120.7  | 113    | 129.5  | 131.1  | 109    | 109.3  | 121.3  | 119.9  |
| DDOST   | 451.5  | 369.4  | 576.7  | 465.9  | 401.1  | 414.7  | 374.3  | 366.4  |
| DDR1    | 139.5  | 155.9  | 131.5  | 149.4  | 124    | 113.8  | 146.6  | 155.7  |
| DDR1    | 124.4  | 126    | 142.6  | 133    | 118.3  | 110.7  | 123.7  | 126.5  |
| DDR1    | 114    | 115.5  | 125.5  | 125.6  | 115.8  | 100    | 126.3  | 116.7  |
| DDR2    | 112.9  | 121    | 115.3  | 116.8  | 110    | 98.6   | 113.6  | 105.2  |
| DDR2    | 103.7  | 112.9  | 113.7  | 102.4  | 106.8  | 99.9   | 120.1  | 124.8  |
| DDT     | 759.9  | 1114   | 1240.6 | 875.8  | 599.8  | 739.4  | 903.9  | 1028.9 |
| DDX1    | 949.5  | 758.2  | 947    | 871.8  | 832.1  | 828.2  | 825.1  | 724.8  |
| DDX10   | 282.5  | 307.4  | 224.2  | 247.9  | 279.5  | 189.5  | 249.1  | 253.4  |
| DDX11   | 121.9  | 114.9  | 121    | 122.6  | 107.6  | 109.7  | 127.4  | 120.4  |
| DDX11   | 152.4  | 157.3  | 163.3  | 150.7  | 121.8  | 134.1  | 153.1  | 131.8  |
| DDX11   | 107.8  | 118.5  | 128.6  | 122.9  | 118.4  | 108.9  | 116.7  | 121.9  |
| DDX17   | 793    | 1004.3 | 815.5  | 570    | 814.3  | 865.3  | 1048.8 | 1009   |
| DDX17   | 162.3  | 162.1  | 149    | 159.4  | 157.7  | 123.8  | 158.2  | 134.2  |
| DDX17   | 349.3  | 335.8  | 244.5  | 345.2  | 352.2  | 172.6  | 321.5  | 287.9  |
| DDX18   | 952.3  | 1176.4 | 736.3  | 938    | 752.2  | 546.5  | 781.5  | 639.9  |
| DDX19A  | 281.8  | 344    | 260.2  | 337.2  | 256.7  | 227.8  | 259    | 219.2  |
| DDX19B  | 334.7  | 406    | 385.4  | 349    | 311    | 290.3  | 255    | 273.9  |
| DDX20   | 128.5  | 134.1  | 115.9  | 127.6  | 123.9  | 112.6  | 125.2  | 120.6  |
| DDX21   | 974.7  | 791.9  | 599.2  | 947.9  | 725.6  | 426.3  | 1003.2 | 1037.9 |
| DDX23   | 363.5  | 381.7  | 405.1  | 386.1  | 309.6  | 362.8  | 394.8  | 348.1  |
| DDX24   | 510.1  | 668.5  | 496.8  | 591.4  | 523.8  | 437.1  | 519.4  | 516    |

|        |        |        |        |        |        |       |        |        |
|--------|--------|--------|--------|--------|--------|-------|--------|--------|
| DDX25  | 114.5  | 112    | 110.3  | 128.1  | 106    | 100.9 | 117.1  | 116.3  |
| DDX26  | 644.2  | 747.4  | 589    | 658    | 492.4  | 422.7 | 710.6  | 785.4  |
| DDX26B | 137.1  | 129.4  | 138.3  | 145.8  | 125.4  | 118.1 | 147.9  | 125.8  |
| DDX27  | 202.3  | 191.6  | 190    | 231.6  | 190.7  | 127.8 | 196.4  | 197    |
| DDX28  | 144.2  | 178.1  | 143.7  | 176.1  | 150.9  | 150   | 183.2  | 150.6  |
| DDX31  | 204.1  | 190.7  | 181.7  | 180.1  | 169.8  | 134.6 | 184.2  | 166.4  |
| DDX31  | 111.3  | 119.7  | 110.6  | 114.8  | 114.5  | 100.7 | 124.7  | 103.9  |
| DDX31  | 126.1  | 122.9  | 126    | 129.1  | 113.5  | 102.3 | 127.8  | 124.6  |
| DDX39  | 1821.9 | 1611.9 | 1113.5 | 1303.2 | 1714   | 916.8 | 1842.4 | 2090.1 |
| DDX3X  | 116.8  | 119    | 119.9  | 127.6  | 100.2  | 100.1 | 124.2  | 113.6  |
| DDX3X  | 1098.6 | 1090.4 | 952.9  | 1392.9 | 976.8  | 734.6 | 1454.7 | 1313.3 |
| DDX3Y  | 139    | 126.2  | 130    | 141.8  | 131.1  | 108.4 | 119.4  | 149.2  |
| DDX4   | 110.4  | 111.6  | 117.2  | 117.3  | 112.5  | 101.6 | 121.6  | 114.3  |
| DDX41  | 180.7  | 182.6  | 174.8  | 191.1  | 164.9  | 152.4 | 208    | 170.2  |
| DDX42  | 120.4  | 117.2  | 116.5  | 132.9  | 109.7  | 94.6  | 121.8  | 123.4  |
| DDX42  | 563.2  | 467.6  | 508.1  | 560.7  | 486.2  | 392.1 | 456.6  | 356.2  |
| DDX43  | 119.2  | 117.2  | 122.4  | 133.8  | 114.9  | 106.9 | 131.6  | 125.3  |
| DDX46  | 313.8  | 388.5  | 383    | 396.1  | 349.4  | 252.8 | 312.2  | 309    |
| DDX47  | 244.3  | 276.6  | 305.6  | 279.1  | 250.3  | 237.3 | 240.9  | 273.5  |
| DDX47  | 615.2  | 694.8  | 608.7  | 579.8  | 495    | 377.2 | 580    | 662.8  |
| DDX48  | 892.6  | 851.2  | 917.2  | 1044.9 | 734.7  | 815.3 | 1065.4 | 1029.7 |
| DDX49  | 125.6  | 126.3  | 133.4  | 130.9  | 112.7  | 107.1 | 130.6  | 119.6  |
| DDX5   | 3789.3 | 4310.5 | 4978   | 4005.4 | 4155.5 | 4486  | 4117.4 | 5353.2 |
| DDX50  | 207.4  | 215.2  | 203.6  | 210.5  | 189.7  | 146   | 210.1  | 215.4  |
| DDX51  | 2013.2 | 1870.5 | 2128.4 | 2074   | 2668.2 | 1188  | 2537.6 | 2214.6 |
| DDX52  | 123.7  | 111.9  | 113.3  | 128.3  | 116.9  | 103.6 | 122.9  | 128.1  |
| DDX53  | 112.2  | 123.8  | 122.7  | 124.9  | 113.4  | 102.7 | 120.1  | 123.5  |
| DDX54  | 180.2  | 206    | 152    | 199.2  | 172.2  | 133.8 | 223.9  | 227.8  |
| DDX55  | 362.4  | 332.6  | 348.4  | 399    | 239.4  | 275.2 | 313.8  | 268.8  |
| DDX56  | 547.5  | 522.9  | 456.8  | 515.4  | 414.8  | 349.7 | 520    | 475.3  |
| DDX58  | 153.4  | 176.7  | 156.5  | 163    | 157.3  | 128.5 | 145.1  | 139.2  |
| DDX59  | 303    | 302.7  | 347.1  | 306.5  | 311    | 373.6 | 387.6  | 285.5  |
| DDX59  | 119    | 114    | 117.2  | 121.4  | 106.2  | 103.1 | 111.2  | 114.8  |
| DDX59  | 149.8  | 122.2  | 152.6  | 144.8  | 124.4  | 141.2 | 143.5  | 149.8  |
| DDX6   | 130    | 129.5  | 132.9  | 140.8  | 125    | 99.5  | 137.9  | 130.5  |
| DEADC1 | 120.1  | 113.3  | 115.8  | 112.9  | 110.8  | 103.1 | 116.4  | 119.7  |
| DEAF1  | 124.4  | 141.9  | 135.6  | 127    | 112.1  | 105.1 | 138.4  | 126.8  |
| DEAF1  | 119.1  | 115.3  | 125.2  | 127    | 122.9  | 104.7 | 116.5  | 117.8  |
| Dec-01 | 119.9  | 109.2  | 118.1  | 120    | 106.1  | 98.4  | 123.5  | 121.5  |
| DECR1  | 270.2  | 270    | 297.1  | 250.2  | 283.2  | 227.7 | 264.1  | 277    |
| DECR2  | 138.2  | 158.7  | 171.6  | 152.9  | 127.3  | 118.8 | 152.2  | 150.2  |
| DEDD   | 385.6  | 419.3  | 349    | 432.7  | 337.1  | 330.8 | 583.6  | 559.7  |
| DEDD   | 120.7  | 133.5  | 131.8  | 127.4  | 124.3  | 109.2 | 129.7  | 133.2  |
| DEDD   | 160.7  | 181.8  | 172.8  | 177.9  | 154.2  | 144.2 | 210.4  | 182.7  |
| DEDD2  | 573.2  | 514.3  | 481.1  | 546.4  | 468.1  | 316.8 | 863.4  | 1188.1 |
| DEF6   | 281.1  | 321.6  | 431.5  | 298.2  | 284.9  | 261.9 | 255.7  | 316.5  |
| DEFA1  | 268.2  | 1438   | 646    | 420.2  | 1256.3 | 436.6 | 271.8  | 1450.5 |
| DEFA3  | 185.4  | 779.7  | 434.3  | 229.6  | 685.5  | 268.9 | 187.8  | 840.3  |
| DEFA4  | 121.8  | 212.4  | 122.6  | 122.8  | 166.3  | 104.2 | 118.9  | 221.2  |
| DEFA5  | 111.3  | 115.9  | 131.4  | 125.9  | 108    | 99.4  | 118.5  | 116.2  |
| DEFA6  | 114.2  | 105.6  | 116.1  | 111.5  | 105.7  | 102.9 | 113.8  | 113.3  |



|          |        |        |        |        |        |       |        |        |
|----------|--------|--------|--------|--------|--------|-------|--------|--------|
| DEFB1    | 107.7  | 106.5  | 115.1  | 111.6  | 110.7  | 97.6  | 116.4  | 119.4  |
| DEFB103A | 117.4  | 109.9  | 108    | 115.5  | 103.9  | 97.6  | 119.3  | 112.2  |
| DEFB104B | 111.8  | 113.2  | 111.5  | 112.1  | 105.7  | 97.5  | 115.1  | 116.8  |
| DEFB105A | 110.7  | 109.1  | 121.4  | 116.3  | 112    | 108.6 | 117.6  | 107.5  |
| DEFB106A | 109.7  | 112    | 104.7  | 113.7  | 102.6  | 99.8  | 113.6  | 107.5  |
| DEFB106B | 119.9  | 115.9  | 117    | 118.9  | 113.7  | 93.8  | 115.7  | 141.3  |
| DEFB107A | 122    | 123.1  | 120.1  | 129.1  | 113.7  | 105   | 123.7  | 120.9  |
| DEFB108B | 121.2  | 111.6  | 121.1  | 122.9  | 103.8  | 107.8 | 125.4  | 119.2  |
| DEFB109  | 103    | 118.3  | 112.6  | 123.6  | 100.9  | 97.5  | 109.5  | 116.4  |
| DEFB110  | 111.2  | 114.2  | 116.6  | 121.1  | 101.8  | 95.9  | 115    | 111.1  |
| DEFB111  | 110.3  | 122.1  | 114.3  | 110.1  | 99.8   | 101.7 | 114.2  | 116.9  |
| DEFB112  | 108.3  | 104    | 120.4  | 116.5  | 104.6  | 96.5  | 109.9  | 112.1  |
| DEFB114  | 116.4  | 117.4  | 123.7  | 124.6  | 101.1  | 110.4 | 120.6  | 112.2  |
| DEFB118  | 114.9  | 118    | 122.1  | 121.9  | 104.5  | 105.1 | 119.2  | 115.3  |
| DEFB119  | 137.8  | 128.9  | 124.5  | 135.2  | 114.1  | 108   | 135.7  | 134.9  |
| DEFB119  | 111.6  | 110.9  | 111.6  | 113.3  | 105.5  | 102.6 | 115.6  | 110.1  |
| DEFB121  | 109.7  | 117.2  | 106.4  | 116.3  | 99.5   | 99.5  | 108.1  | 112.9  |
| DEFB122  | 116.5  | 113.3  | 114.4  | 121.4  | 107.8  | 99.5  | 124.5  | 114.1  |
| DEFB123  | 120    | 116.3  | 121.7  | 127    | 111.2  | 102.7 | 115.9  | 118    |
| DEFB124  | 113    | 109.5  | 126.3  | 122    | 113    | 103.9 | 124.9  | 116.9  |
| DEFB125  | 122.8  | 121.4  | 115.4  | 118.3  | 111.6  | 100.7 | 123.2  | 122.6  |
| DEFB126  | 106.6  | 113.8  | 114.3  | 112    | 112.1  | 97.1  | 117    | 115.2  |
| DEFB127  | 112.3  | 120.8  | 122.4  | 108.2  | 103.1  | 99    | 111.6  | 111.4  |
| DEFB128  | 113.3  | 118.9  | 117.3  | 127.1  | 120.1  | 103   | 124.1  | 115.9  |
| DEFB129  | 98.7   | 113.1  | 115.9  | 113.7  | 99.4   | 99.2  | 116.8  | 103.3  |
| DEFB131  | 134.1  | 136    | 139.6  | 134.2  | 118.7  | 103   | 139.8  | 129.8  |
| DEFB134  | 112.5  | 109.4  | 118    | 113.5  | 105.7  | 91.3  | 115.8  | 110.3  |
| DEFB136  | 106.6  | 104.5  | 112.9  | 106.8  | 102.1  | 95.4  | 120.7  | 105.4  |
| DEFB137  | 116.1  | 114.6  | 111.3  | 124.5  | 117.5  | 100.7 | 129.9  | 113    |
| DEFB32   | 113.3  | 115.7  | 115.2  | 113.7  | 114.2  | 100.3 | 123.2  | 114.4  |
| DEFB4    | 116.7  | 110.6  | 121.8  | 113.9  | 110.8  | 103.4 | 109.9  | 117.1  |
| DEGS1    | 882.8  | 885.3  | 1050.4 | 854.7  | 617.6  | 769   | 987    | 1156.1 |
| DEGS1    | 256.9  | 306    | 329.4  | 285.2  | 294.9  | 374.5 | 281.8  | 367.3  |
| DEGS2    | 109.9  | 111.2  | 108.3  | 114.3  | 105.1  | 99.8  | 111    | 109.4  |
| DEK      | 1291.5 | 1058.4 | 986    | 1219.2 | 1104.9 | 882.4 | 1223.6 | 1402.9 |
| DENND1A  | 122.1  | 117.3  | 146.6  | 122    | 119.3  | 121.7 | 139.7  | 137.8  |
| DENND1A  | 126.3  | 126.9  | 129.8  | 128.6  | 112.6  | 109.8 | 124.9  | 114    |
| DENND1A  | 123.4  | 131.3  | 121.9  | 119.7  | 107.7  | 103.3 | 119.4  | 124.2  |
| DENND1B  | 114.2  | 115.9  | 108.1  | 115    | 106.2  | 103.9 | 105.5  | 108.1  |
| DENND1C  | 146.8  | 134.1  | 141.1  | 153    | 132.4  | 128.1 | 139.8  | 132    |
| DENND2A  | 119.4  | 107.3  | 128.6  | 120.9  | 114    | 94.9  | 118.8  | 120.6  |
| DENND2C  | 117.2  | 118.8  | 128    | 129.5  | 107.9  | 103.6 | 110.4  | 115.8  |
| DENND2D  | 643.9  | 815.9  | 838.3  | 664.1  | 642.2  | 584.4 | 549.2  | 466.1  |
| DENND3   | 137.3  | 126.7  | 145.8  | 135.3  | 114.5  | 131.8 | 144.3  | 128.8  |
| DENND4A  | 146    | 158.7  | 141.6  | 153    | 141.8  | 135.9 | 140.2  | 141.9  |
| DENND4C  | 246.7  | 284.1  | 203.5  | 258.3  | 232.1  | 194.6 | 277.8  | 293.7  |
| DENR     | 310.3  | 258.1  | 255.3  | 263.1  | 261    | 131.7 | 283.7  | 317.6  |
| DEPDC1   | 120    | 120.6  | 115.5  | 117.2  | 108.5  | 96.5  | 125.5  | 120.8  |
| DEPDC1B  | 113.7  | 109    | 121    | 110.9  | 101.4  | 103.2 | 119    | 113.6  |
| DEPDC2   | 104.1  | 121.7  | 119.4  | 118.1  | 113.7  | 107.5 | 115.9  | 114.1  |
| DEPDC2   | 123.2  | 112.9  | 111.2  | 111.4  | 111.1  | 101.5 | 115.2  | 109.1  |

|         |       |       |       |       |       |       |       |       |
|---------|-------|-------|-------|-------|-------|-------|-------|-------|
| DEPDC4  | 111.5 | 117   | 117.3 | 119.2 | 104.1 | 99.3  | 129.2 | 120.7 |
| DEPDC5  | 170.8 | 162.4 | 177.7 | 173.5 | 146.8 | 140.7 | 173.8 | 169.7 |
| DEPDC5  | 117   | 116.8 | 124.9 | 120.2 | 107.3 | 101.9 | 124.3 | 110.7 |
| DEPDC5  | 106.9 | 107.4 | 114.1 | 114.2 | 109.1 | 97.1  | 114.4 | 111   |
| DEPDC6  | 112.3 | 140.1 | 129.2 | 125.6 | 116.4 | 103.4 | 110.8 | 125   |
| DEPDC7  | 120.1 | 116.3 | 122.7 | 120.3 | 113.7 | 102.6 | 116.2 | 109.9 |
| DEPDC7  | 114.4 | 111.7 | 111.3 | 122.1 | 111.1 | 100.2 | 110.9 | 106.8 |
| DERA    | 451.9 | 504.6 | 712.2 | 499.3 | 381.5 | 428.3 | 379.8 | 457.3 |
| DERL1   | 613.5 | 713.1 | 482.7 | 679.1 | 470.3 | 421.1 | 675.5 | 681.2 |
| DERL2   | 202   | 254.6 | 207.6 | 244.3 | 177.9 | 193   | 250.4 | 281.8 |
| DERL3   | 117.1 | 125   | 124.8 | 111.5 | 109.7 | 102.2 | 131.7 | 106.1 |
| DERL3   | 116.2 | 119.9 | 126.4 | 115.8 | 99.3  | 102.6 | 118.2 | 120.1 |
| DERPC   | 114.7 | 120.9 | 130.9 | 127.8 | 112.3 | 104.6 | 111.1 | 122.7 |
| DERPC   | 124.9 | 132.3 | 128.3 | 141.4 | 124.7 | 112.5 | 132.3 | 136.4 |
| DES     | 111   | 134.7 | 116.2 | 117.5 | 109.3 | 104.5 | 121.8 | 115.3 |
| DET1    | 165.8 | 149   | 165.5 | 157.6 | 145.1 | 129.1 | 145.4 | 133.5 |
| DEXI    | 525.2 | 612.7 | 441.9 | 579.1 | 465.9 | 384.8 | 537.7 | 607.3 |
| DFFA    | 317.7 | 278.3 | 315.2 | 358.9 | 296.5 | 167   | 303.3 | 310.2 |
| DFFA    | 122.8 | 130.4 | 126.9 | 134   | 120.8 | 106.3 | 118.9 | 122.4 |
| DFFB    | 108.6 | 116.4 | 120   | 115.7 | 111.4 | 108.2 | 124.1 | 114.6 |
| DFFB    | 216.7 | 218.5 | 212   | 210.5 | 177   | 162.9 | 164.8 | 190.2 |
| DFNA5   | 126   | 132.8 | 118   | 136.7 | 127.1 | 132.7 | 148.4 | 161.6 |
| DFNB31  | 135.7 | 123.6 | 122.9 | 133.8 | 123.1 | 107.4 | 127.6 | 120.1 |
| DFNB59  | 122.1 | 114.6 | 126.9 | 122.1 | 122.8 | 105.8 | 125.8 | 116.2 |
| DGAT1   | 201.2 | 248.1 | 205.3 | 231.9 | 176.9 | 150   | 190.6 | 172.5 |
| DGAT2   | 120.1 | 127.3 | 135   | 131.7 | 130.6 | 117.3 | 125.7 | 125.1 |
| DGAT2L3 | 118.2 | 123.9 | 118.8 | 124.8 | 106.2 | 106.4 | 120.9 | 119.4 |
| DGAT2L4 | 109.9 | 115   | 107   | 113.2 | 100.9 | 97.3  | 115.1 | 110.6 |
| DGAT2L6 | 106   | 114.4 | 111.1 | 110.9 | 99.7  | 100.6 | 111.1 | 110.2 |
| DGCR13  | 141.2 | 141.5 | 124   | 139.4 | 126   | 119.5 | 158.6 | 164.6 |
| DGCR14  | 139.5 | 153.9 | 145   | 146.7 | 139.6 | 118.1 | 134.6 | 131.9 |
| DGCR2   | 181.9 | 231.4 | 173.7 | 213.1 | 187.5 | 174.9 | 244.3 | 209.4 |
| DGCR5   | 110.2 | 115   | 112.8 | 119   | 106.4 | 105.9 | 120.1 | 115.1 |
| DGCR6   | 138.1 | 149.5 | 151.1 | 139.5 | 126.9 | 114.6 | 119.4 | 137.9 |
| DGCR8   | 253   | 242.1 | 197.6 | 248.6 | 200.4 | 227.9 | 281.1 | 204.6 |
| DGKA    | 131.7 | 132.1 | 139.1 | 130.4 | 141.7 | 109.6 | 128.3 | 123   |
| DGKA    | 116.7 | 109   | 119.5 | 122   | 115.4 | 104.7 | 114.5 | 125.9 |
| DGKA    | 355.2 | 340.1 | 289   | 312.3 | 287.6 | 295.9 | 284.2 | 269.8 |
| DGKA    | 125.2 | 126.9 | 121.4 | 125.4 | 109.1 | 113.8 | 122.1 | 117.8 |
| DGKA    | 460.4 | 571.9 | 480.6 | 545.7 | 391.4 | 397.4 | 384.6 | 412.2 |
| DGKB    | 119.7 | 116.7 | 107.1 | 117.7 | 106   | 85.3  | 127.8 | 114.5 |
| DGKB    | 119.3 | 117.7 | 118.8 | 126.2 | 116.3 | 104.8 | 119   | 113.7 |
| DGKB    | 110.9 | 114.1 | 114   | 114.3 | 107.7 | 100.7 | 118.7 | 114   |
| DGKD    | 131.6 | 137   | 159.7 | 134.3 | 128.3 | 107.2 | 140.8 | 129.7 |
| DGKD    | 125.5 | 124.7 | 124.6 | 139.7 | 123.5 | 102.7 | 124.8 | 132.1 |
| DGKD    | 106.7 | 113   | 117.2 | 121.8 | 112.3 | 100.1 | 109.4 | 108.1 |
| DGKE    | 129.4 | 138.7 | 136.2 | 150.3 | 126.1 | 107.2 | 134.2 | 112.8 |
| DGKG    | 117.1 | 121.3 | 118.1 | 120.3 | 107.7 | 98.3  | 113.5 | 104.9 |
| DGKH    | 109   | 106   | 115.8 | 113.6 | 102   | 96.9  | 115.5 | 110.4 |
| DGKH    | 128.4 | 115.4 | 135.6 | 129.5 | 119.3 | 115.5 | 134.8 | 130.2 |
| DGKI    | 112.6 | 119.6 | 127.1 | 116.3 | 105.5 | 103.8 | 120   | 123.3 |

|         |        |        |        |        |        |        |        |        |
|---------|--------|--------|--------|--------|--------|--------|--------|--------|
| DGKK    | 112.8  | 120    | 125.3  | 122.2  | 106.8  | 102.3  | 107.5  | 114    |
| DGKQ    | 464.1  | 581.4  | 454.2  | 522.1  | 368.9  | 397    | 522.7  | 416.3  |
| DGKZ    | 121.1  | 112.2  | 114.3  | 127.7  | 110.3  | 103.6  | 118.1  | 115.2  |
| DGKZ    | 110.1  | 116.6  | 131.7  | 119    | 113    | 106.2  | 113.4  | 120.2  |
| DGKZ    | 105.1  | 115.8  | 129    | 114.5  | 113.3  | 97.4   | 123.2  | 108.4  |
| DGUOK   | 973.6  | 1117.1 | 998.1  | 1028.6 | 855.8  | 744.1  | 826.2  | 1178   |
| DGUOK   | 990    | 1205.6 | 1158.2 | 903.3  | 981.9  | 893.6  | 996.8  | 1196.3 |
| DGUOK   | 173.3  | 204.8  | 202.9  | 197.7  | 189.7  | 182.7  | 210.6  | 244.3  |
| DHCR24  | 127.5  | 125.3  | 120.3  | 119.1  | 110    | 104.3  | 126.3  | 115.9  |
| DHCR7   | 163.3  | 179.9  | 152.1  | 179.4  | 144    | 128.3  | 168.7  | 157    |
| DHDDS   | 202.4  | 205.6  | 182.6  | 192.9  | 160.2  | 166.1  | 205.3  | 194.5  |
| DHDDS   | 130.3  | 130.2  | 131.8  | 140.1  | 127.9  | 126.5  | 138.6  | 134.9  |
| DHDH    | 127.2  | 128.5  | 125.6  | 124    | 129.4  | 110.9  | 134.8  | 167.2  |
| DHFR    | 112.2  | 122.4  | 113.1  | 121.8  | 106    | 100    | 117.5  | 109.2  |
| DHFRL1  | 151.7  | 145.8  | 149.8  | 142.8  | 120.4  | 121.4  | 143.9  | 122    |
| DHH     | 131.1  | 124.6  | 132.9  | 128.1  | 115.7  | 122.1  | 132    | 123.8  |
| DHODH   | 123.8  | 123.6  | 118.4  | 111.2  | 105.4  | 97.8   | 121.5  | 105.6  |
| DHODH   | 116    | 122.2  | 111.5  | 122.5  | 112.1  | 100.8  | 117.9  | 112.9  |
| DHPS    | 353.7  | 394.6  | 400.6  | 334.3  | 272.7  | 339.7  | 281.5  | 252.2  |
| DHPS    | 359.9  | 415.7  | 372.5  | 379.2  | 264.9  | 289.4  | 332.6  | 233.3  |
| DHPS    | 495.6  | 417.8  | 402    | 446.5  | 290.3  | 311.8  | 391.9  | 317    |
| DHRS1   | 475.2  | 550    | 432.5  | 372.5  | 301.8  | 240.7  | 226.4  | 184.6  |
| DHRS10  | 128.1  | 120.2  | 116.7  | 118.4  | 111.9  | 99.9   | 120.3  | 116.2  |
| DHRS2   | 123.8  | 119.1  | 142.5  | 130.8  | 113.1  | 107.2  | 122.5  | 113.4  |
| DHRS2   | 110.9  | 113.9  | 116.8  | 113.8  | 110    | 92.9   | 116.2  | 118.2  |
| DHRS3   | 271.5  | 258.4  | 288.7  | 290.2  | 247.7  | 213.3  | 289.7  | 253.9  |
| DHRS4   | 637.7  | 481.4  | 903.8  | 514.3  | 399.3  | 533.3  | 474    | 355.3  |
| DHRS4L2 | 146.5  | 144.9  | 168.7  | 151.9  | 147.9  | 152    | 149.2  | 129.4  |
| DHRS7   | 462.3  | 524.5  | 630.4  | 521    | 567.7  | 668.3  | 504.3  | 578.5  |
| DHRS7B  | 146.6  | 129.7  | 152.6  | 132.3  | 121.1  | 129.9  | 146.2  | 131.6  |
| DHRS8   | 211.3  | 258.1  | 350.9  | 259.8  | 237.3  | 254.8  | 204.4  | 235.2  |
| DHRS9   | 238.9  | 155.2  | 188.9  | 684.5  | 249.1  | 1227.7 | 827.4  | 342.5  |
| DHRS9   | 111.4  | 116.5  | 121.7  | 147.2  | 111.3  | 148.8  | 157.5  | 135.8  |
| DHRS9   | 109.5  | 105.2  | 110.8  | 119.9  | 109.3  | 100    | 117.6  | 111.9  |
| DHRS9   | 125.3  | 122    | 130.1  | 224.9  | 130.4  | 419.3  | 245.5  | 164.9  |
| DHRX    | 122.8  | 125.7  | 133.7  | 127.3  | 119.1  | 107.2  | 132.5  | 114.4  |
| DHTKD1  | 129.2  | 125.7  | 137.4  | 142.3  | 130.9  | 110.3  | 142.8  | 125.5  |
| DHX15   | 1394.4 | 1667.1 | 1380   | 1651.9 | 1636.5 | 1055.5 | 2042.1 | 2197.1 |
| DHX16   | 635.9  | 662.7  | 522.8  | 617.8  | 453.8  | 460.3  | 535.9  | 482.5  |
| DHX29   | 334.8  | 368.1  | 424.3  | 365    | 274.2  | 365.2  | 407    | 396.3  |
| DHX30   | 409.5  | 514.2  | 369.1  | 416.5  | 369.4  | 371.2  | 550.3  | 456.3  |
| DHX30   | 110.4  | 108.1  | 115.5  | 115.4  | 101.7  | 93.4   | 117.2  | 116.6  |
| DHX30   | 215.2  | 207.1  | 175.8  | 196.7  | 153    | 154.1  | 206.5  | 208.3  |
| DHX32   | 191.6  | 211.8  | 188.7  | 169.8  | 181.5  | 142.6  | 175.7  | 160.9  |
| DHX33   | 197    | 218.3  | 202.7  | 212.4  | 217.6  | 177.2  | 200.6  | 193.2  |
| DHX34   | 183.2  | 175.8  | 200.7  | 206.1  | 139.7  | 141.8  | 223.7  | 203    |
| DHX35   | 170.1  | 174.5  | 179.6  | 152.8  | 140.4  | 146.6  | 151.6  | 146.6  |
| DHX36   | 193.1  | 279    | 193.8  | 230.1  | 226.7  | 154.5  | 217.8  | 206.9  |
| DHX37   | 325.9  | 424.3  | 269.4  | 323.9  | 240.8  | 182.3  | 270.7  | 256.7  |
| DHX38   | 175.9  | 198.3  | 183.7  | 159.3  | 150.5  | 141.2  | 235.1  | 212.1  |
| DHX40   | 304.6  | 297.9  | 231.4  | 277.7  | 253.5  | 239.2  | 300.6  | 412.1  |

|           |       |       |       |        |       |       |       |        |
|-----------|-------|-------|-------|--------|-------|-------|-------|--------|
| DHX40     | 141   | 171.1 | 155.4 | 153.6  | 154.7 | 146.2 | 144.6 | 157.4  |
| DHX57     | 121.8 | 124   | 127.9 | 114.2  | 110.6 | 92.7  | 130.7 | 115.1  |
| DHX57     | 109.1 | 112.6 | 114.1 | 125.8  | 108.4 | 98.6  | 117.7 | 111.5  |
| DHX8      | 147.8 | 155.5 | 147.1 | 153.5  | 138.2 | 132   | 142.4 | 157.6  |
| DHX9      | 234.2 | 226.3 | 244.7 | 252    | 236.4 | 190.3 | 265.3 | 252.7  |
| DIABLO    | 782   | 973.8 | 930.4 | 1050.7 | 773   | 930.2 | 976.9 | 1025.3 |
| DIABLO    | 175.6 | 206.2 | 185.6 | 187.1  | 191.4 | 176   | 214.5 | 207.6  |
| DIABLO    | 137.8 | 141   | 158.8 | 136.5  | 143.3 | 123.6 | 142.1 | 151.3  |
| DIAPH1    | 213.6 | 214.6 | 179.2 | 186.8  | 200.5 | 188.7 | 253.2 | 250.3  |
| DIAPH1    | 718.3 | 814.4 | 657   | 789.5  | 634.4 | 602.9 | 947.4 | 1110.1 |
| DIAPH2    | 148.1 | 154.8 | 139.3 | 179.3  | 142.7 | 135.3 | 152.7 | 164.3  |
| DIAPH3    | 117.6 | 124.9 | 130   | 119    | 118.3 | 100.7 | 119.7 | 125.8  |
| DIAPH3    | 112.5 | 120.5 | 119.5 | 118.9  | 109.8 | 98.7  | 121.4 | 110.9  |
| DIAPH3    | 109.5 | 112.7 | 121.4 | 118.3  | 113.4 | 105.6 | 124.5 | 108.6  |
| DICER1    | 107.6 | 110.1 | 106.8 | 104    | 107.2 | 96.9  | 116.9 | 114.8  |
| DICER1    | 121   | 118.7 | 127.1 | 130.1  | 112.3 | 103.7 | 116   | 126.8  |
| DICER1    | 165.3 | 179.6 | 144.7 | 168.5  | 141.1 | 147.2 | 140.7 | 130.9  |
| DIDO1     | 153.6 | 137.4 | 144.7 | 161.7  | 136.8 | 122.7 | 142.2 | 135.9  |
| DIDO1     | 269.7 | 248.8 | 217.2 | 220.4  | 186.5 | 168.3 | 238.7 | 168.6  |
| DIDO1     | 126.4 | 129.6 | 118.4 | 138.4  | 123   | 115   | 124.9 | 128    |
| DIO1      | 117.3 | 111.4 | 120.4 | 116.4  | 107.8 | 94.6  | 128.4 | 112.7  |
| DIO1      | 113.1 | 120.4 | 109.7 | 110.7  | 109.4 | 99.5  | 116.2 | 116.8  |
| DIO1      | 109.1 | 101.9 | 114.1 | 105.4  | 108.5 | 102.2 | 119.7 | 115.3  |
| DIO2      | 115.2 | 112.3 | 114.9 | 125.8  | 111.9 | 103.7 | 116.7 | 118.3  |
| DIO2      | 137.5 | 114.8 | 116.1 | 120.5  | 105.2 | 90.5  | 115.7 | 111.7  |
| DIO3      | 105.2 | 111.4 | 111.8 | 124    | 103.3 | 94.7  | 111.2 | 110.5  |
| DIP       | 187.1 | 165.3 | 228.3 | 179.8  | 138.2 | 165   | 160   | 135.4  |
| DIP13B    | 353.8 | 404.7 | 483.8 | 374    | 337.1 | 495.1 | 428.4 | 339    |
| DIP2A     | 125.7 | 115   | 123.2 | 114.7  | 108.3 | 108.8 | 120.3 | 117.9  |
| DIP2A     | 115.2 | 115.4 | 112.2 | 118.4  | 116   | 97.1  | 113.3 | 111.3  |
| DIP2A     | 146   | 155.2 | 154.3 | 169.8  | 147.1 | 124.9 | 167.8 | 197.5  |
| DIP2A     | 134.6 | 149.2 | 164.7 | 144.4  | 133.5 | 120.1 | 152.6 | 156.9  |
| DIP2A     | 175.4 | 219.2 | 185.2 | 185.1  | 225.1 | 141.7 | 167   | 194.9  |
| DIP2B     | 647.9 | 694.9 | 564.9 | 631.1  | 618.6 | 494.7 | 676.2 | 819.9  |
| DIP2C     | 132.5 | 135.8 | 138.8 | 134.2  | 120.2 | 115.1 | 133.8 | 125    |
| DIPA      | 118.6 | 119.7 | 113.5 | 123.4  | 113.4 | 114.1 | 124.3 | 122.8  |
| DIRAS1    | 104.1 | 120.2 | 128.6 | 123.8  | 101.4 | 96.6  | 128.5 | 105    |
| DIRAS2    | 112.2 | 114.4 | 115.3 | 117.3  | 109.6 | 102.8 | 114.7 | 115.9  |
| DIRAS3    | 120.8 | 121.8 | 119.5 | 120.1  | 119.2 | 106.1 | 116.3 | 123    |
| DIRC1     | 115.8 | 118.8 | 110.3 | 115.1  | 105.9 | 98.4  | 114.4 | 113.6  |
| DIRC2     | 554.2 | 420.4 | 371.2 | 1003.2 | 450.4 | 730.4 | 789   | 280.2  |
| DISC1     | 121.9 | 110.8 | 115.8 | 128.3  | 112.4 | 97.4  | 119.8 | 117    |
| DISC1     | 112   | 113.2 | 110.6 | 125.6  | 112.8 | 106.6 | 124.8 | 115.8  |
| DISC1     | 113.6 | 118.7 | 120.8 | 125.7  | 113   | 101.2 | 120.6 | 117.7  |
| DISC1     | 126.4 | 124.9 | 108.8 | 120.2  | 106.6 | 94.5  | 123.2 | 106.5  |
| DISP1     | 140.3 | 131   | 150.1 | 154.9  | 122.1 | 117.7 | 128   | 137.1  |
| DISP2     | 119.1 | 112.7 | 109.1 | 124.3  | 107.7 | 102.4 | 120.6 | 122.1  |
| DIXDC1    | 134.2 | 132   | 137.9 | 128.3  | 124.7 | 107   | 116.1 | 115.1  |
| DIXDC1    | 103.6 | 116.4 | 110.8 | 117    | 103.2 | 99.4  | 121.4 | 109    |
| DIXDC1    | 126.3 | 121.2 | 135.7 | 124    | 109.6 | 108   | 124.8 | 116.7  |
| DJ12208.2 | 422.6 | 472.2 | 510.8 | 395.5  | 429.2 | 308.7 | 323.9 | 304.7  |

|            |        |        |       |       |       |       |        |        |
|------------|--------|--------|-------|-------|-------|-------|--------|--------|
| DJ222E13.2 | 151    | 149.8  | 139.1 | 150   | 133.9 | 106.8 | 157.8  | 146.1  |
| DKC1       | 975.4  | 1138.3 | 893.9 | 1094  | 805.2 | 646.3 | 1112.3 | 893.4  |
| DKFZP434A  | 126.6  | 110    | 113.6 | 110.5 | 103.1 | 97    | 117.6  | 109.1  |
| DKFZP434A  | 165.9  | 137.9  | 138.4 | 145.9 | 135   | 121.6 | 139.8  | 133.8  |
| DKFZP434E  | 319.8  | 322.5  | 264   | 313.3 | 242.5 | 232.9 | 332.8  | 355.7  |
| DKFZP434E  | 99.2   | 115    | 111.6 | 112.4 | 102.4 | 101.7 | 111.2  | 110.6  |
| DKFZP434I  | 113.8  | 117    | 123.2 | 124.6 | 108.7 | 97.5  | 122    | 112.9  |
| DKFZP434K  | 225.7  | 249.7  | 177.9 | 238.6 | 192.2 | 146.9 | 246.5  | 244.1  |
| DKFZP434C  | 117.8  | 113.8  | 125.5 | 115.7 | 112.2 | 103.8 | 120.8  | 120    |
| DKFZP434C  | 127.1  | 122.8  | 123.3 | 139.3 | 125   | 124   | 116.9  | 127.8  |
| DKFZP547C  | 129.1  | 154.1  | 142.6 | 134.9 | 127.2 | 129.2 | 124.4  | 127.9  |
| DKFZP547C  | 145.2  | 143.2  | 148.6 | 155.5 | 132.8 | 136.3 | 157.7  | 130.5  |
| DKFZP547F  | 117    | 115.5  | 112.2 | 122.7 | 108.1 | 102.2 | 117    | 113.8  |
| DKFZP564E  | 146.9  | 156.8  | 170.9 | 157.7 | 130.7 | 142.2 | 151.2  | 131.8  |
| DKFZP564J  | 239.1  | 223.2  | 279.1 | 266.9 | 167.2 | 213.3 | 342.2  | 227.8  |
| DKFZP564J  | 128.6  | 117.8  | 127.6 | 120.9 | 115.2 | 103.9 | 130.9  | 116.4  |
| DKFZP564J  | 115.5  | 111.2  | 121.7 | 127.3 | 106.9 | 101.1 | 113.9  | 115.3  |
| DKFZP564K  | 1069.4 | 798.8  | 936.4 | 935.2 | 925   | 527.7 | 998.6  | 1150.3 |
| DKFZP564N  | 118.9  | 121.6  | 112.3 | 118.6 | 115.2 | 101.7 | 121.6  | 108.5  |
| DKFZP564C  | 162.4  | 168.9  | 178   | 179.5 | 177.6 | 139.4 | 156    | 185.5  |
| DKFZP564C  | 119.4  | 121.8  | 140.2 | 124.9 | 119.1 | 110.7 | 126    | 110.3  |
| DKFZP566N  | 120.5  | 119.4  | 124.8 | 119.2 | 127.1 | 108.8 | 121.5  | 119    |
| DKFZP586E  | 186.2  | 207.3  | 173.9 | 185.7 | 158.9 | 133   | 137.5  | 154    |
| DKFZP586E  | 123.1  | 110.3  | 119.2 | 118.5 | 113.4 | 99.4  | 117.2  | 118.7  |
| DKFZP586F  | 100.4  | 117.1  | 120.4 | 120.2 | 108.8 | 99.7  | 115.7  | 108.4  |
| DKFZP586F  | 102.1  | 117.9  | 118.2 | 125.7 | 101.9 | 96.3  | 117.8  | 110.8  |
| DKFZP586I  | 184.8  | 177.5  | 197.8 | 166.9 | 201.7 | 145.1 | 208.5  | 281.2  |
| DKFZP586F  | 120    | 112.9  | 121.4 | 112.5 | 116.6 | 96.4  | 114.7  | 117.7  |
| DKFZP666C  | 104.9  | 106.9  | 110.6 | 120.3 | 105.6 | 102.3 | 117    | 108.1  |
| DKFZP667C  | 114.2  | 116.4  | 116.3 | 119.4 | 110   | 98    | 116.9  | 111    |
| DKFZP686A  | 117    | 119.6  | 122.4 | 134.6 | 113   | 99.5  | 123.2  | 103.2  |
| DKFZP686A  | 114.2  | 147.7  | 126.8 | 137.2 | 113.1 | 109.4 | 123    | 126.5  |
| DKFZP686E  | 110.1  | 112.9  | 118.8 | 117.9 | 105.9 | 98.3  | 112.7  | 111.8  |
| DKFZP686E  | 119.9  | 121.2  | 135.8 | 130.6 | 119.2 | 102.7 | 130.7  | 127.7  |
| DKFZP686I  | 121.7  | 120.3  | 139.1 | 127.6 | 109.8 | 117.5 | 116.6  | 114.6  |
| DKFZP686I  | 133.5  | 126    | 127.8 | 123.5 | 128.1 | 114.6 | 131.9  | 127.3  |
| DKFZP686K  | 388.5  | 382.5  | 340.2 | 421.3 | 359.4 | 182.7 | 413.2  | 378.1  |
| DKFZP686L  | 174.3  | 177.5  | 155.3 | 175.1 | 145.3 | 146.7 | 201.4  | 210    |
| DKFZP761E  | 114    | 117    | 116.4 | 117.1 | 113.2 | 92.6  | 120.1  | 117.3  |
| DKFZP761E  | 137.5  | 129.2  | 122.8 | 148.4 | 118.9 | 108.4 | 149.1  | 138.3  |
| DKFZP761F  | 112.6  | 122.5  | 125.2 | 126.2 | 118.5 | 104.1 | 121.8  | 116    |
| DKFZP761I  | 249.8  | 237    | 196.9 | 255.9 | 187.7 | 159.7 | 227    | 209.5  |
| DKFZP762E  | 120.5  | 119.3  | 121.2 | 131.2 | 113   | 100.2 | 122.8  | 119.9  |
| DKFZP762I  | 444    | 331.8  | 382.9 | 474.4 | 431.4 | 228.3 | 420.5  | 476    |
| DKFZP779E  | 109.5  | 121.1  | 126.7 | 126.9 | 109.1 | 113.6 | 118.7  | 120.5  |
| DKFZP779C  | 112.4  | 118.6  | 113.7 | 120.6 | 111.9 | 93.4  | 126.6  | 113.1  |
| DKFZP779C  | 118.2  | 121.3  | 119.3 | 121.4 | 108.9 | 101.9 | 119.1  | 124.8  |
| DKFZP781I  | 124.3  | 127.4  | 118.6 | 118.1 | 111.9 | 107.7 | 116.9  | 128    |
| DKK1       | 108.9  | 111.9  | 115.1 | 116.2 | 103.7 | 99.3  | 108.1  | 114    |
| DKK2       | 104.6  | 110.2  | 108.3 | 111.9 | 102   | 97.8  | 102.8  | 109.9  |
| DKK3       | 114.6  | 119.8  | 123.4 | 128.2 | 114.1 | 106.6 | 116.8  | 126.4  |

|        |       |       |       |       |       |       |       |       |
|--------|-------|-------|-------|-------|-------|-------|-------|-------|
| DKK3   | 124.6 | 157.6 | 209.9 | 120.3 | 148   | 144.6 | 126   | 142.7 |
| DKK3   | 108.9 | 117.1 | 117.8 | 112.5 | 101.7 | 102.4 | 116.2 | 112.4 |
| DKK3   | 133.2 | 189.6 | 246.2 | 155.2 | 165.3 | 198.9 | 140.7 | 146.6 |
| DKK4   | 115.9 | 118   | 126.6 | 129.2 | 110.7 | 100.9 | 126.2 | 119.6 |
| DKKL1  | 117   | 120.3 | 127   | 131.9 | 111.5 | 102.1 | 124.3 | 114.6 |
| DLAT   | 203.1 | 214.5 | 232.3 | 260.4 | 198.4 | 164.2 | 187.3 | 217.5 |
| DLC1   | 114.9 | 122.7 | 126.2 | 125.3 | 105.9 | 103.9 | 126.5 | 122   |
| DLC1   | 108.9 | 118.6 | 130.8 | 127.8 | 119.7 | 116.1 | 129.3 | 127   |
| DLD    | 181.3 | 225.3 | 193.6 | 217.9 | 165.9 | 162.4 | 191.8 | 213.7 |
| DLEC1  | 129.4 | 118.7 | 129.1 | 125.8 | 109.6 | 105   | 122.1 | 115.2 |
| DLEC1  | 111.1 | 118.9 | 131.4 | 122   | 105.9 | 106.7 | 117.7 | 115.7 |
| DLEU1  | 121.7 | 129.3 | 131.9 | 117.5 | 118   | 100.5 | 140.1 | 125.1 |
| DLEU1  | 215   | 261.4 | 164.5 | 213.8 | 165.9 | 139.3 | 178.4 | 182.2 |
| DLEU2L | 113.2 | 108.2 | 108.6 | 124.5 | 104.6 | 99.7  | 123.8 | 107.8 |
| DLEU7  | 113.2 | 117.7 | 118.3 | 114.2 | 114   | 108.9 | 117.9 | 109.8 |
| DLG1   | 111.7 | 115.9 | 121.3 | 129.7 | 109.3 | 111   | 123.8 | 112.7 |
| DLG2   | 109   | 113.8 | 113.1 | 123.5 | 106.7 | 99.1  | 114.5 | 113.7 |
| DLG3   | 121.7 | 125.1 | 127.7 | 125.2 | 104.4 | 110   | 137.4 | 116.3 |
| DLG3   | 119.3 | 112.1 | 119.5 | 114.2 | 107.9 | 96    | 110.3 | 119.8 |
| DLG3   | 122.3 | 114.8 | 119.4 | 117.9 | 104   | 97.1  | 116.5 | 115.2 |
| DLG4   | 136.2 | 135   | 127.2 | 144.2 | 117.7 | 105.7 | 132.2 | 127.1 |
| DLG5   | 115.8 | 114.3 | 128.2 | 129.5 | 106.1 | 106.9 | 110.9 | 115.1 |
| DLG7   | 112.5 | 122.9 | 125.1 | 138.2 | 112.1 | 108.4 | 123.2 | 118.5 |
| DLGAP1 | 101.7 | 111.1 | 108   | 110   | 101   | 96    | 114.2 | 107.6 |
| DLGAP1 | 126.8 | 130.4 | 122.2 | 121.7 | 104.6 | 99.8  | 128.6 | 119.3 |
| DLGAP2 | 123.1 | 122.6 | 125.7 | 130.4 | 116.3 | 111.8 | 121.6 | 121.1 |
| DLGAP3 | 121.7 | 113.2 | 121.8 | 118   | 116   | 106.5 | 123.7 | 118.2 |
| DLGAP4 | 110.1 | 117   | 115.7 | 123.2 | 102.8 | 94.8  | 111.4 | 113   |
| DLGAP4 | 116.1 | 111.9 | 111.7 | 116.3 | 108.6 | 101.3 | 113.8 | 114   |
| DLGAP4 | 173.6 | 170.9 | 182.1 | 176.9 | 155.7 | 166.7 | 189.5 | 164.2 |
| DLK1   | 108.4 | 114   | 119.9 | 117.2 | 104.8 | 97.8  | 111.8 | 110   |
| DLK1   | 106.8 | 113.2 | 108.1 | 122.6 | 105.5 | 105.2 | 113.4 | 115.4 |
| DLL1   | 124.1 | 126.1 | 134.1 | 138.5 | 128.8 | 104.5 | 118.9 | 127.4 |
| DLL3   | 112.8 | 103.2 | 114.2 | 107.7 | 102   | 99.3  | 113.3 | 115.5 |
| DLL3   | 110.1 | 122.5 | 118.6 | 123   | 111.3 | 102.5 | 119.4 | 117.7 |
| DLL4   | 127   | 115.4 | 117.9 | 125.9 | 107.7 | 106.7 | 116.5 | 120   |
| DLNB14 | 358.4 | 370.5 | 332.6 | 368.7 | 430   | 254.3 | 310.9 | 316.4 |
| DLST   | 266.1 | 349.7 | 296.7 | 318.9 | 242.8 | 202   | 353.7 | 405.8 |
| DLX1   | 120.6 | 125.9 | 127.8 | 118.8 | 107.4 | 103.3 | 125.5 | 131.2 |
| DLX1   | 127.6 | 119.9 | 128.4 | 130.3 | 117.5 | 103.5 | 128.6 | 125.3 |
| DLX2   | 127   | 112.8 | 116.1 | 115.3 | 108.4 | 98.1  | 113.7 | 110.6 |
| DLX3   | 119.3 | 118.7 | 130.7 | 125.3 | 120.8 | 97.2  | 119.5 | 121.7 |
| DLX4   | 118.3 | 115.6 | 118.1 | 105.8 | 102.4 | 100.7 | 122   | 113.8 |
| DLX4   | 124.2 | 112.7 | 121.5 | 114.9 | 114.6 | 101.2 | 117.3 | 112   |
| DLX4   | 104.4 | 116.3 | 117.9 | 121.8 | 101.9 | 103.2 | 107.9 | 115.5 |
| DLX5   | 107.4 | 108.9 | 113.8 | 119.8 | 106.8 | 94.9  | 122.8 | 115.3 |
| DLX6   | 116.3 | 110.1 | 112   | 121.4 | 105.5 | 95.5  | 120.1 | 112.1 |
| DMAP1  | 505.4 | 479.1 | 400.6 | 446.8 | 330.7 | 316.8 | 377.2 | 403   |
| DMAP1  | 304.8 | 341.7 | 351.5 | 322.7 | 241.4 | 224.7 | 260.1 | 283.6 |
| DMBT1  | 114.5 | 112.8 | 124.2 | 116.6 | 112.7 | 101.9 | 118.2 | 112.3 |
| DMBX1  | 118.5 | 131.9 | 116.8 | 124.2 | 110.5 | 98.2  | 121.5 | 119.2 |

|         |        |        |        |        |        |        |        |        |
|---------|--------|--------|--------|--------|--------|--------|--------|--------|
| DMC1    | 1680.1 | 1444   | 1627.2 | 1545.8 | 1302   | 954.6  | 1919   | 2153.3 |
| DMD     | 119.9  | 113.8  | 123.6  | 113.2  | 108.2  | 95.2   | 120.5  | 121.6  |
| DMD     | 107.1  | 122.7  | 107.2  | 110.3  | 111.7  | 99     | 112    | 110.9  |
| DMD     | 141.9  | 157.3  | 158.9  | 177.9  | 149.2  | 134.7  | 154.6  | 141    |
| DMD     | 114    | 116    | 122.3  | 111.5  | 110.7  | 103.1  | 114.7  | 121.5  |
| DMD     | 102.4  | 108.9  | 109    | 115.3  | 105.7  | 96.9   | 112.8  | 116.4  |
| DMD     | 113.5  | 120.4  | 114.2  | 121.4  | 102.9  | 98.5   | 124.5  | 115.3  |
| DMD     | 126.1  | 121.8  | 125    | 132    | 110.4  | 112.9  | 133.9  | 125.4  |
| DMD     | 113.9  | 125.9  | 123.6  | 129    | 116.6  | 98.6   | 115.3  | 113.4  |
| DMGDH   | 116.4  | 120.2  | 115.6  | 122.2  | 108.9  | 111    | 119.8  | 115.7  |
| DMN     | 172.9  | 146.3  | 119.8  | 159.7  | 145.4  | 121.9  | 181    | 152    |
| DMN     | 116.3  | 117.4  | 116.4  | 118.3  | 109.8  | 100.1  | 123.9  | 107.1  |
| DMP1    | 115.9  | 119.8  | 106    | 112.3  | 104.8  | 96.2   | 128.9  | 113.8  |
| DMPK    | 109.6  | 119.3  | 112.3  | 119.3  | 109.8  | 98.2   | 113    | 112.3  |
| DMPK    | 123    | 118    | 119.5  | 118.3  | 115.1  | 99     | 119.1  | 111.1  |
| DMRT1   | 109.9  | 117.2  | 114.9  | 119.8  | 107.3  | 101.9  | 123    | 114.7  |
| DMRT2   | 116.6  | 113.2  | 108.2  | 118.7  | 107.8  | 92.9   | 117.5  | 108.6  |
| DMRT2   | 125.1  | 120.9  | 110.9  | 126    | 112.1  | 96.8   | 120.9  | 114.7  |
| DMRT3   | 104.2  | 108.9  | 104.5  | 112.1  | 103.3  | 91.2   | 117.9  | 112.4  |
| DMRTA1  | 113.2  | 116.1  | 117.9  | 116.9  | 111.5  | 103.4  | 129.4  | 120.6  |
| DMRTB1  | 113.4  | 116.4  | 112.7  | 112.7  | 107.6  | 97.1   | 116.7  | 105.2  |
| DMRTC2  | 118.9  | 114.3  | 120.1  | 110.5  | 107.6  | 97.5   | 120.3  | 127.5  |
| DMTF1   | 458.6  | 451.9  | 422.8  | 452.4  | 440.4  | 322    | 433.2  | 500.5  |
| DMWD    | 131.7  | 138.7  | 133.4  | 137.6  | 141.3  | 123.6  | 141.4  | 125.6  |
| DMXL1   | 148.4  | 131    | 126.5  | 141.9  | 114.6  | 104.5  | 135.2  | 125.1  |
| DMXL2   | 144.9  | 121.4  | 162.7  | 146.1  | 121.8  | 138.8  | 127.9  | 115.8  |
| DNA2L   | 130.8  | 131.2  | 126    | 138.7  | 120.9  | 108.2  | 131.1  | 122.4  |
| DNA2L   | 133.4  | 148.4  | 135.4  | 135.2  | 119.6  | 102.1  | 141    | 129.8  |
| DNAH1   | 235.2  | 196.1  | 254.9  | 252.6  | 179.5  | 172.9  | 202.5  | 224.9  |
| DNAH10  | 117.5  | 114.7  | 115.4  | 119.9  | 103.9  | 101.9  | 116.1  | 116.2  |
| DNAH11  | 116.4  | 115.2  | 109.5  | 115.3  | 110.9  | 95.4   | 117.8  | 112.5  |
| DNAH17  | 110.7  | 113.3  | 114.4  | 110.6  | 102    | 95.5   | 115.8  | 125.7  |
| DNAH3   | 109.6  | 107.7  | 120.4  | 120.6  | 103.4  | 104.5  | 124.4  | 118.9  |
| DNAH5   | 119.5  | 116.7  | 118.9  | 123.8  | 117.7  | 100.1  | 120    | 115.1  |
| DNAH7   | 122.6  | 129.1  | 135.9  | 122.6  | 111.5  | 101.3  | 124.6  | 123.9  |
| DNAH8   | 113.3  | 116.5  | 116.2  | 121.7  | 116.9  | 103.5  | 113.3  | 113.8  |
| DNAH9   | 114.3  | 121.7  | 112.9  | 107    | 102.6  | 103.3  | 113.1  | 110.9  |
| DNAH9   | 110.2  | 107.3  | 122.8  | 122.6  | 110.5  | 102    | 119    | 117.2  |
| DNAH9   | 114.7  | 111.3  | 116.4  | 122    | 109    | 99.2   | 124.3  | 117.5  |
| DNAHL1  | 110.9  | 112.3  | 126.1  | 112.5  | 108.4  | 103.3  | 119.4  | 112.7  |
| DNAI1   | 109.9  | 121.4  | 113.1  | 113.5  | 104.5  | 93.6   | 117.9  | 116.1  |
| DNAI2   | 135    | 155    | 130    | 141.3  | 120.9  | 115.5  | 142.8  | 146.2  |
| DNAJA1  | 2311.9 | 2176.5 | 1887.2 | 3099.4 | 1747.2 | 1673.7 | 4599.6 | 7632.9 |
| DNAJA2  | 636.5  | 828    | 565.7  | 885.6  | 663.7  | 551    | 939.6  | 818.2  |
| DNAJA3  | 922.1  | 927    | 788.2  | 943.7  | 683.1  | 496.5  | 701    | 767.9  |
| DNAJA4  | 267.4  | 269.2  | 263.5  | 289.5  | 304.5  | 243.2  | 711    | 1340.1 |
| DNAJA5  | 133.8  | 132.4  | 135.4  | 141.4  | 125.7  | 109.8  | 131    | 128.5  |
| DNAJA5  | 117.6  | 118.5  | 116    | 120.7  | 109.4  | 101    | 119.8  | 127.7  |
| DNAJB1  | 579.2  | 664    | 486.9  | 639.4  | 583.5  | 510.9  | 1814.8 | 3471.5 |
| DNAJB11 | 768.7  | 716.2  | 1098.6 | 898.7  | 672.4  | 995.3  | 848.2  | 896.9  |
| DNAJB12 | 130.6  | 134.3  | 123.5  | 138.3  | 136.9  | 103.9  | 141    | 159.1  |

|          |        |        |        |        |       |        |        |        |
|----------|--------|--------|--------|--------|-------|--------|--------|--------|
| DNAJB12  | 160.6  | 174    | 171.8  | 172.9  | 146   | 118.1  | 193.4  | 161.4  |
| DNAJB12  | 132    | 133.3  | 151.7  | 131.7  | 121.2 | 116.7  | 140    | 136.2  |
| DNAJB13  | 114.4  | 119    | 124    | 121.9  | 111   | 105.5  | 127    | 126.6  |
| DNAJB14  | 119.6  | 125.3  | 134.9  | 146.9  | 121.2 | 104.2  | 117.7  | 125.2  |
| DNAJB14  | 311.5  | 248.6  | 247.2  | 339.9  | 283.8 | 196.9  | 287.7  | 316.6  |
| DNAJB14  | 116.5  | 121.5  | 114.8  | 117    | 104.4 | 98.5   | 111.9  | 121.5  |
| DNAJB2   | 122.2  | 129.7  | 125.3  | 136.7  | 116.7 | 109.6  | 129    | 124.5  |
| DNAJB2   | 747.7  | 783.5  | 855.6  | 844.1  | 598.5 | 722.7  | 854.7  | 800    |
| DNAJB4   | 129.7  | 122.7  | 128.2  | 136.5  | 121.4 | 113.8  | 169.7  | 175.7  |
| DNAJB5   | 123.6  | 125.7  | 118.2  | 120.1  | 109.8 | 98.8   | 112.8  | 119.1  |
| DNAJB5   | 126.2  | 133    | 126    | 130.8  | 116.8 | 95.6   | 137.3  | 122.7  |
| DNAJB6   | 407.3  | 334.1  | 664.5  | 462.6  | 433.9 | 526.7  | 728.2  | 1106.1 |
| DNAJB6   | 1102   | 983.1  | 974.4  | 1435.7 | 987.9 | 1172.6 | 3217.1 | 4181   |
| DNAJB7   | 115.5  | 119.8  | 117.4  | 118    | 115.1 | 104.5  | 110.5  | 120.3  |
| DNAJB8   | 134.4  | 128.8  | 132.2  | 127.2  | 116.1 | 114.5  | 115.1  | 130.9  |
| DNAJB9   | 364.1  | 351.6  | 375.8  | 396.7  | 345.4 | 377.1  | 534.6  | 744.6  |
| DNAJC1   | 119.8  | 124.7  | 127.4  | 126.4  | 118.3 | 106    | 116.1  | 122.5  |
| DNAJC10  | 296.9  | 238.8  | 335.4  | 285.5  | 219.3 | 209    | 249.2  | 222.7  |
| DNAJC11  | 119.5  | 121.1  | 131.9  | 114    | 119.1 | 110.2  | 126.2  | 124.5  |
| DNAJC12  | 113.8  | 118.4  | 114.1  | 130    | 106.1 | 95.7   | 123.5  | 106.8  |
| DNAJC12  | 110.8  | 114.6  | 110.4  | 114.9  | 99.6  | 92.5   | 117    | 108.3  |
| DNAJC12  | 111.9  | 116.2  | 123.1  | 121.3  | 114.3 | 105.3  | 121.3  | 118.5  |
| DNAJC13  | 190.7  | 217.8  | 168.3  | 225.7  | 163.8 | 146.2  | 216.1  | 184.7  |
| DNAJC14  | 210.9  | 208.4  | 214.2  | 226.5  | 182.1 | 198.7  | 245.2  | 180.3  |
| DNAJC15  | 174.4  | 200.6  | 257.5  | 199.6  | 158.5 | 176.2  | 197.5  | 205.5  |
| DNAJC16  | 113.4  | 112.4  | 125.4  | 126.3  | 114.4 | 107.2  | 113.8  | 112    |
| DNAJC17  | 151.4  | 155.2  | 151    | 158.4  | 131.7 | 129.3  | 142.8  | 140.6  |
| DNAJC18  | 133.8  | 148    | 141    | 128.7  | 118.9 | 115.6  | 152.1  | 123.1  |
| DNAJC19  | 156.7  | 152.3  | 175.3  | 186.4  | 143.8 | 131.9  | 153.7  | 133.2  |
| DNAJC3   | 121.5  | 134.6  | 126    | 139.6  | 113.2 | 118.5  | 136.6  | 120.4  |
| DNAJC4   | 122.4  | 127.3  | 124.1  | 122.7  | 113.3 | 113.9  | 125.2  | 114    |
| DNAJC5   | 212.2  | 172.3  | 199.7  | 251    | 168.9 | 201.7  | 284.6  | 222.7  |
| DNAJC5B  | 100.7  | 114.4  | 107.1  | 104.6  | 107.7 | 98.8   | 118.1  | 103.5  |
| DNAJC5G  | 115.6  | 112.6  | 115.2  | 111    | 100   | 92.6   | 115.8  | 116.2  |
| DNAJC6   | 117.1  | 111.5  | 114.3  | 113.7  | 106.1 | 93.3   | 116.4  | 115.7  |
| DNAJC7   | 233.6  | 244.1  | 200.1  | 279.2  | 202.3 | 206    | 313.7  | 305.3  |
| DNAJC8   | 2746.1 | 3258.2 | 2887.1 | 3336.5 | 2673  | 1976.9 | 3305.3 | 4235.3 |
| DNAJC9   | 548.2  | 688.6  | 462.4  | 652.7  | 496.1 | 355    | 597.3  | 611.8  |
| DNAL1    | 121    | 115.5  | 112.7  | 125.3  | 116.3 | 104    | 115.9  | 111    |
| DNAL4    | 223.6  | 258.6  | 314.7  | 239.4  | 227   | 283    | 249.1  | 256.3  |
| DNALI1   | 121.6  | 111.9  | 120.6  | 125.5  | 114.5 | 105.6  | 116.2  | 125.9  |
| DNAPTP6  | 138.2  | 141.8  | 137.7  | 128.2  | 142.4 | 124.2  | 147.6  | 151.2  |
| DNASE1   | 121.9  | 124.5  | 128.3  | 115.7  | 111.1 | 101.3  | 124.1  | 120.2  |
| DNASE1L1 | 207.4  | 209    | 266.1  | 211.7  | 166.7 | 226.4  | 170.4  | 139.1  |
| DNASE1L1 | 115.1  | 112.6  | 119.8  | 113.4  | 109.4 | 93.5   | 116.9  | 119.6  |
| DNASE1L1 | 123.8  | 124.1  | 140.3  | 134.2  | 105.7 | 116    | 118.6  | 115.3  |
| DNASE1L1 | 118.8  | 121.6  | 113.2  | 123.9  | 108.8 | 100.3  | 125.2  | 118.2  |
| DNASE1L2 | 118.3  | 118.9  | 120.9  | 128.9  | 109.8 | 96.8   | 125.3  | 125.6  |
| DNASE1L3 | 124.7  | 123.6  | 121.8  | 122.6  | 121.3 | 102    | 111.2  | 116.9  |
| DNASE2   | 517.7  | 508.5  | 968.1  | 498.3  | 440.6 | 446.4  | 372    | 316.6  |
| DNASE2B  | 111    | 115.1  | 117    | 126.9  | 110.3 | 100.8  | 120.8  | 120.2  |



|         |        |        |        |        |        |        |        |        |
|---------|--------|--------|--------|--------|--------|--------|--------|--------|
| DNASE2B | 110.1  | 111.5  | 112.3  | 115.8  | 106.9  | 94.3   | 116.6  | 109.6  |
| DNASE2B | 112    | 117    | 114.1  | 114.2  | 105.4  | 95.4   | 112.4  | 117.2  |
| DNCL2A  | 212.6  | 229.9  | 280.5  | 227.6  | 219.1  | 325.3  | 323.7  | 305.5  |
| DNCL2A  | 156.9  | 173.4  | 213.9  | 185.6  | 168    | 173.7  | 160    | 180.8  |
| DND1    | 115.4  | 120.4  | 117.6  | 129.6  | 113    | 97.9   | 118.1  | 113.6  |
| DNER    | 117.9  | 113.1  | 121.8  | 114.9  | 106.5  | 99.5   | 124.2  | 119.2  |
| DNHD1   | 171.2  | 201.2  | 150.5  | 179    | 129.4  | 125.1  | 149.9  | 151.6  |
| DNHD2   | 112.4  | 114.8  | 128.4  | 120.8  | 105.4  | 100    | 118.2  | 111.7  |
| DNHD3   | 110    | 114.9  | 116.3  | 116.9  | 105.5  | 99     | 123.7  | 118.4  |
| DNM1    | 117.1  | 112.1  | 112.2  | 118    | 100.3  | 97.9   | 122.4  | 109.8  |
| DNM1L   | 325.4  | 347.2  | 386.2  | 412.1  | 374.8  | 250.3  | 412.6  | 536.9  |
| DNM1L   | 135.6  | 117.3  | 135    | 145.3  | 132.1  | 121.3  | 143    | 141.4  |
| DNM2    | 167.5  | 189.1  | 218.6  | 175.1  | 141.6  | 162.4  | 207.6  | 175.1  |
| DNM2    | 240.1  | 212.2  | 255.3  | 252.4  | 180.5  | 181.1  | 244.8  | 215.8  |
| DNM3    | 115.4  | 117.6  | 123    | 120.5  | 111.5  | 100.5  | 119.1  | 119.5  |
| DNMBP   | 115.3  | 119.7  | 117.1  | 127.7  | 114.3  | 97.1   | 129.1  | 120.1  |
| DNMT1   | 2539.1 | 2465.2 | 2638.8 | 2136.3 | 1613.6 | 1669.8 | 1981.7 | 1641.8 |
| DNMT2   | 124.5  | 127.9  | 133.3  | 125.4  | 112.8  | 103.3  | 118.7  | 119.9  |
| DNMT3A  | 121.3  | 153.9  | 122.1  | 138.4  | 120.5  | 111.7  | 144.2  | 128.2  |
| DNMT3A  | 120    | 126.8  | 134.9  | 136.6  | 108.5  | 111.3  | 120.6  | 132.8  |
| DNMT3A  | 122.7  | 127    | 130.2  | 117.8  | 118    | 96.7   | 133.4  | 116.2  |
| DNMT3B  | 128.7  | 129    | 129    | 124.9  | 119.6  | 97.1   | 126.3  | 129    |
| DNMT3B  | 106.1  | 105.5  | 111.5  | 110.2  | 101.6  | 96.1   | 109.6  | 117.4  |
| DNMT3B  | 116.2  | 115.6  | 115.3  | 106.3  | 103.1  | 100.1  | 118.9  | 115.3  |
| DNMT3L  | 119.7  | 115.3  | 121.7  | 112.3  | 111    | 97.9   | 122.9  | 112.1  |
| DNMT3L  | 120.1  | 124.3  | 116.7  | 129.1  | 114.1  | 98.7   | 125    | 121.5  |
| DNPEP   | 138.7  | 139.2  | 158.5  | 152.4  | 127.4  | 127.6  | 153.6  | 139.5  |
| DNTT    | 131.1  | 120.4  | 115.9  | 125.6  | 129.8  | 102.3  | 124.8  | 117.5  |
| DNTT    | 119.5  | 115.2  | 116.4  | 116.8  | 108.7  | 106.9  | 130.6  | 115.6  |
| DNTTIP1 | 163.9  | 164    | 196.9  | 162.2  | 163.3  | 157.3  | 174.6  | 160.2  |
| DNTTIP2 | 124.3  | 126.3  | 113.7  | 125.3  | 116.3  | 115.4  | 153    | 159.8  |
| DOC1    | 121.3  | 121.1  | 131.2  | 134.5  | 113.8  | 105.3  | 131.9  | 107.6  |
| DOC1    | 127    | 121.4  | 125.9  | 136.3  | 118.7  | 109.7  | 134.8  | 110.2  |
| DOC1    | 116.9  | 115.2  | 122.3  | 118.8  | 105.5  | 96.4   | 125.9  | 117.6  |
| DOC2A   | 118.7  | 127.2  | 117.6  | 124.1  | 112.9  | 99.2   | 120.5  | 116.8  |
| DOC2B   | 121.1  | 115.7  | 112.3  | 119.7  | 114.9  | 97.1   | 123.3  | 113.6  |
| DOCK1   | 123.7  | 122.9  | 131.9  | 122    | 109.5  | 106.6  | 119.6  | 120    |
| DOCK10  | 1253.9 | 1165.9 | 1307.6 | 1051   | 1096.9 | 874.5  | 1050.7 | 1004.1 |
| DOCK11  | 745.1  | 614.5  | 483.5  | 740.8  | 832.6  | 534.9  | 848.8  | 1043.9 |
| DOCK2   | 1053.8 | 1078   | 1091.4 | 958.2  | 754.3  | 657.7  | 659.6  | 656.4  |
| DOCK3   | 114.5  | 110.3  | 109.6  | 119.3  | 111.9  | 92.7   | 109    | 115    |
| DOCK4   | 123.6  | 116.6  | 122.5  | 125.1  | 124.1  | 106.1  | 121.3  | 114.1  |
| DOCK5   | 114.1  | 117.8  | 138    | 128.3  | 107.5  | 116.5  | 129.2  | 111.7  |
| DOCK6   | 112    | 109.1  | 115.6  | 115.8  | 106.6  | 97.3   | 121.6  | 109.6  |
| DOCK7   | 102.1  | 107.9  | 122.1  | 114.8  | 111    | 96.5   | 107    | 121.3  |
| DOCK8   | 699.4  | 653.1  | 760.5  | 737.9  | 531.1  | 548.8  | 582.1  | 497    |
| DOCK9   | 163    | 169    | 161.4  | 177    | 148.8  | 143.2  | 147.2  | 157.6  |
| DOK1    | 122.4  | 128.5  | 137.3  | 140.1  | 109    | 104.5  | 136    | 114.1  |
| DOK2    | 111.7  | 114.7  | 119.2  | 111.6  | 103.3  | 96.5   | 115.9  | 102.3  |
| DOK2    | 137    | 123    | 158.3  | 140.6  | 116.4  | 126.1  | 138.9  | 138.2  |
| DOK3    | 115.7  | 114.6  | 130.7  | 117.8  | 106.2  | 112.8  | 122.5  | 110.6  |

|        |       |       |       |       |       |       |       |       |
|--------|-------|-------|-------|-------|-------|-------|-------|-------|
| DOK4   | 114.9 | 123.3 | 117.8 | 116   | 120.1 | 100.6 | 121.2 | 121.8 |
| DOK5   | 113.8 | 115   | 112.7 | 113.8 | 108.5 | 105.1 | 113.5 | 117.6 |
| DOK6   | 113.6 | 117.2 | 117.4 | 127.3 | 106.3 | 95.7  | 115.6 | 108.1 |
| DOLPP1 | 170.1 | 193.2 | 172.7 | 165.2 | 145.4 | 138.7 | 158.6 | 168.1 |
| DOM3Z  | 237.7 | 260.5 | 213.4 | 227.1 | 207   | 173.8 | 205.8 | 177.5 |
| DONSON | 164.8 | 142   | 169.7 | 170.3 | 155.4 | 144.3 | 169   | 224.7 |
| DONSON | 116.7 | 118.9 | 116.6 | 123.5 | 114.1 | 104.3 | 121.7 | 125.5 |
| DOPEY1 | 142.7 | 128.9 | 139.7 | 144.8 | 129   | 110.7 | 144.1 | 134.4 |
| DOPEY2 | 330   | 254.4 | 343.5 | 315.7 | 311.4 | 207   | 349.6 | 392.3 |
| DOT1L  | 116.5 | 123.4 | 126.9 | 127.6 | 121.6 | 107.8 | 122.8 | 124.1 |
| DP58   | 117.5 | 111.3 | 123.7 | 119.7 | 113.9 | 95.6  | 119.8 | 113.6 |
| DPAGT1 | 123.5 | 135.6 | 135.8 | 126.9 | 113.8 | 116.2 | 119.9 | 127.2 |
| DPAGT1 | 286.6 | 320.4 | 321.3 | 255.2 | 236.4 | 195.6 | 254   | 211.6 |
| DPCCR1 | 118.7 | 121.1 | 121.3 | 109.8 | 116.8 | 106   | 118.6 | 116.1 |
| DPEP1  | 116.4 | 118.6 | 121.1 | 120.4 | 112.3 | 101.1 | 113.1 | 112.5 |
| DPEP2  | 606.5 | 517.4 | 692.7 | 523.7 | 313.4 | 410.1 | 291   | 312.7 |
| DPEP3  | 163.3 | 146.5 | 138.6 | 161.1 | 142.1 | 122.2 | 155   | 163.6 |
| DPF1   | 114.8 | 125   | 118.7 | 124.8 | 110.4 | 114.9 | 132.9 | 127   |
| DPF2   | 425.3 | 408   | 436   | 490.5 | 305.3 | 333.2 | 480.7 | 389.9 |
| DPF3   | 118.1 | 124.9 | 118.7 | 130   | 110.8 | 108.4 | 120.2 | 126.7 |
| DPH1   | 120.5 | 120   | 122.9 | 128.6 | 117.3 | 103.5 | 127.9 | 122.7 |
| DPH2   | 119.7 | 138.3 | 123.3 | 132.6 | 117.5 | 99.3  | 130.9 | 135.4 |
| DPH2   | 113.7 | 128.3 | 121.4 | 116.3 | 111   | 98.3  | 127.6 | 120.5 |
| DPH2   | 352   | 343.7 | 294.8 | 335.4 | 260.6 | 205.8 | 356.8 | 308.6 |
| DPH3   | 169.2 | 199.4 | 219.4 | 208.5 | 156.6 | 163.5 | 169.4 | 178.5 |
| DPH3   | 143.8 | 140.6 | 133.3 | 146.4 | 110   | 135.6 | 128.1 | 148.9 |
| DPH5   | 295.2 | 379.3 | 453   | 331   | 348.3 | 313.7 | 266.2 | 353.6 |
| DPH5   | 233   | 231.4 | 314.3 | 249.8 | 197.7 | 211.3 | 233   | 233.2 |
| DPM1   | 565.8 | 493.4 | 758.3 | 643.6 | 490.8 | 506.3 | 569.3 | 633.2 |
| DPM2   | 150.8 | 142.4 | 151.9 | 146.6 | 140.3 | 124.3 | 149.6 | 157.1 |
| DPM3   | 190.6 | 189   | 251.2 | 176.5 | 174.2 | 237.2 | 152.4 | 180.2 |
| DPM3   | 307.3 | 323.4 | 438.1 | 305.3 | 290.5 | 358.3 | 221.9 | 201.9 |
| DPP10  | 122.9 | 111.1 | 122.1 | 117.4 | 109.2 | 95.7  | 117.7 | 118.1 |
| DPP10  | 131.6 | 113.4 | 118   | 123.3 | 108   | 98.2  | 111.5 | 121.4 |
| DPP3   | 136.2 | 139.5 | 139   | 135.7 | 124   | 114.3 | 151.3 | 133.9 |
| DPP3   | 135   | 122.4 | 132.7 | 121.8 | 113.8 | 99.4  | 123.7 | 120.7 |
| DPP3   | 163.1 | 168.8 | 181.4 | 171.9 | 154.9 | 142.6 | 156   | 168.1 |
| DPP4   | 131.1 | 146.2 | 157.6 | 148.4 | 141.4 | 141.9 | 144.5 | 133.8 |
| DPP6   | 115.9 | 132   | 127.1 | 137.6 | 122.4 | 114.1 | 118.1 | 114.8 |
| DPP6   | 107.6 | 106.1 | 100.5 | 121.3 | 106.4 | 96.9  | 120.3 | 108.9 |
| DPP7   | 176.7 | 172.5 | 225.6 | 181.7 | 158.3 | 164.6 | 185.5 | 179.2 |
| DPP7   | 294.8 | 328.7 | 331.3 | 310.1 | 242.4 | 189   | 267.8 | 291.8 |
| DPP8   | 178.6 | 193.7 | 156.5 | 187.5 | 140.7 | 134.4 | 170.9 | 165   |
| DPP8   | 254.7 | 191.2 | 253.5 | 264.8 | 239.5 | 200.2 | 255.7 | 257.1 |
| DPP8   | 112.6 | 115.5 | 135.3 | 128.8 | 114.2 | 109.3 | 115.7 | 128.8 |
| DPP9   | 349.8 | 369.1 | 318.9 | 397.5 | 263.4 | 262.5 | 373.8 | 371.1 |
| DPPA2  | 113.7 | 116.5 | 134.4 | 125.2 | 111.8 | 97.6  | 121.7 | 116.5 |
| DPPA3  | 115.8 | 122.1 | 121.7 | 116.2 | 106   | 100.4 | 122.5 | 117.3 |
| DPPA4  | 110   | 114.7 | 117.2 | 120.4 | 112.5 | 101.5 | 120.3 | 113.3 |
| DPPA5  | 110.9 | 110.6 | 121.2 | 109.6 | 112.3 | 96.2  | 119.3 | 108.2 |
| DPRX   | 120.9 | 118.3 | 113.6 | 107.7 | 106.3 | 94.4  | 114.8 | 112.7 |

|         |       |        |        |       |       |        |        |       |
|---------|-------|--------|--------|-------|-------|--------|--------|-------|
| DPRXP4  | 118.1 | 108.6  | 126.5  | 116   | 110.8 | 102.7  | 127.9  | 118.4 |
| DPT     | 120.4 | 124.5  | 135.2  | 123.2 | 110.8 | 114.1  | 133.5  | 123.8 |
| DPY19L2 | 105.8 | 113.7  | 116.9  | 116.6 | 106.6 | 96     | 119.3  | 107.9 |
| DPY19L3 | 113.1 | 107.5  | 129.8  | 123.7 | 105.5 | 102.6  | 120.3  | 111.2 |
| DPY19L4 | 117.1 | 143.4  | 128.6  | 131.9 | 124.5 | 119.9  | 143.5  | 126.7 |
| DPYD    | 198.6 | 175.7  | 225.8  | 196.9 | 187.2 | 171.1  | 191.2  | 145.6 |
| DPYS    | 111.9 | 113.6  | 118.9  | 119.8 | 101.6 | 101.8  | 110.5  | 111.2 |
| DPYSL2  | 758   | 668.6  | 1169.8 | 568.6 | 400.6 | 296    | 357.6  | 268.4 |
| DPYSL3  | 172.1 | 341.7  | 119    | 227.7 | 336.1 | 107.7  | 282.4  | 259   |
| DPYSL4  | 120.5 | 174.5  | 116.6  | 117   | 145.6 | 94.7   | 129.2  | 202.5 |
| DPYSL5  | 113.8 | 121.5  | 120    | 121   | 117.6 | 103.4  | 127.6  | 119.9 |
| DQX1    | 123.1 | 111    | 119.9  | 113.3 | 105.6 | 104.9  | 123.2  | 117.5 |
| DR1     | 211.6 | 209.9  | 229    | 240.4 | 216   | 178.6  | 268    | 227.6 |
| DRAP1   | 855.4 | 1019.2 | 1058.2 | 979.9 | 765.7 | 1121.6 | 1190.2 | 997.6 |
| DRB1    | 173.2 | 203.3  | 202.7  | 196   | 173.2 | 143.6  | 145.2  | 137.6 |
| DRD1    | 120   | 126.9  | 112.5  | 112.2 | 106.9 | 106.7  | 122.2  | 121.7 |
| DRD1IP  | 116.2 | 138.4  | 151    | 144.9 | 121.8 | 110.5  | 127.5  | 123.4 |
| DRD2    | 113.4 | 117.3  | 116.2  | 127.3 | 106.9 | 93.5   | 116.8  | 112.1 |
| DRD2    | 116.3 | 115.9  | 114.8  | 110   | 112.1 | 106.5  | 122.7  | 124.2 |
| DRD2    | 130.2 | 109.6  | 142.8  | 124.5 | 116.9 | 108.7  | 117.5  | 115.3 |
| DRD3    | 112.1 | 116.7  | 116.1  | 122.9 | 115.9 | 103.4  | 121.5  | 117.3 |
| DRD3    | 119.1 | 114.6  | 116.6  | 123   | 110.7 | 104.5  | 107.1  | 119.8 |
| DRD3    | 102.2 | 107.2  | 120    | 112.1 | 112.3 | 99.2   | 105.9  | 118.5 |
| DRD4    | 119   | 109.2  | 129.1  | 131.1 | 118.3 | 112.4  | 130.4  | 157.5 |
| DRD5    | 113.3 | 113.6  | 117.7  | 116.9 | 108   | 99.7   | 117.5  | 114   |
| DREV1   | 142.5 | 162.4  | 159.5  | 175.7 | 166.3 | 149.4  | 162.3  | 174.1 |
| DRG1    | 355.6 | 344.7  | 387.1  | 362   | 346   | 313.7  | 307.7  | 329.2 |
| DRG2    | 196.4 | 184.6  | 195.7  | 204   | 159.6 | 157.8  | 185.6  | 181.7 |
| DRP2    | 103.6 | 105.4  | 115.5  | 116.1 | 110.1 | 92.4   | 113.5  | 111.7 |
| DSC1    | 145.1 | 179.8  | 142.8  | 148.8 | 179.5 | 110.3  | 128.1  | 142.3 |
| DSC2    | 138.2 | 119.2  | 140.5  | 121   | 109.2 | 101.8  | 123.8  | 115.5 |
| DSC2    | 120.4 | 122.5  | 114.1  | 117.2 | 104.4 | 108.2  | 118.9  | 117.1 |
| DSC3    | 105.2 | 112.7  | 112.3  | 114   | 103.3 | 97.1   | 116.1  | 110.4 |
| DSCAM   | 135.2 | 156.4  | 140    | 137.8 | 134.3 | 125.7  | 156    | 139.5 |
| DSCAM   | 123   | 116.6  | 141.6  | 123.1 | 117.1 | 105.2  | 136.1  | 127.9 |
| DSCAM   | 122.4 | 122.9  | 129.8  | 129.3 | 112.2 | 109.4  | 124.4  | 116.7 |
| DSCAML1 | 111.9 | 115    | 113.1  | 109.5 | 110.7 | 104.1  | 105.6  | 116.7 |
| DSCR1   | 120.6 | 123.7  | 113    | 132   | 112.4 | 102    | 128.6  | 112.6 |
| DSCR1   | 108.8 | 116.1  | 116.4  | 118.8 | 113   | 91.6   | 114.1  | 113.4 |
| DSCR1   | 172   | 208    | 187.7  | 179.7 | 170.3 | 152    | 160.7  | 155   |
| DSCR10  | 113.7 | 126.7  | 126.4  | 121.9 | 107.8 | 103.9  | 120.6  | 115.6 |
| DSCR1L1 | 110.7 | 120.6  | 111.4  | 116.9 | 104.8 | 101.1  | 119.9  | 112.3 |
| DSCR1L2 | 158.2 | 137.9  | 139.9  | 148.5 | 136.5 | 120.3  | 140.9  | 143.1 |
| DSCR2   | 196   | 210.7  | 221.9  | 209.5 | 195.9 | 167    | 220.2  | 217.2 |
| DSCR2   | 186.3 | 200.3  | 202.2  | 204.5 | 184   | 167.3  | 194.9  | 212.8 |
| DSCR3   | 432.9 | 329.6  | 348.4  | 417.7 | 412.8 | 349.2  | 500.9  | 428.4 |
| DSCR4   | 117.7 | 124.8  | 124.6  | 128.6 | 119.7 | 120.7  | 132.3  | 124.1 |
| DSCR5   | 161   | 199.4  | 175.3  | 177.7 | 198.8 | 145.5  | 160.4  | 191.8 |
| DSCR5   | 317.9 | 439.9  | 492.8  | 346.1 | 429.9 | 333.4  | 321    | 442.5 |
| DSCR5   | 119.9 | 122.2  | 120.1  | 120.2 | 110   | 105.7  | 126.1  | 113   |
| DSCR6   | 111.1 | 118    | 126.4  | 131.3 | 113.3 | 100    | 124    | 124.1 |

|         |       |       |       |       |       |       |       |       |
|---------|-------|-------|-------|-------|-------|-------|-------|-------|
| DSCR8   | 109.8 | 120.9 | 113.9 | 117.9 | 112.5 | 97.5  | 117.6 | 112.6 |
| DSCR8   | 112.8 | 121.9 | 127.7 | 126.5 | 113.5 | 99.6  | 121.4 | 115.1 |
| DSCR8   | 113.1 | 108.4 | 114   | 111.3 | 107   | 96.6  | 112   | 112.5 |
| DSCR9   | 111.3 | 119.2 | 121.1 | 118.6 | 105.4 | 95.6  | 109   | 108.8 |
| DSEL    | 127.6 | 130.4 | 135.3 | 142.9 | 108.2 | 109.3 | 128.9 | 150.1 |
| DSG1    | 121.4 | 123.2 | 132.8 | 120.1 | 122.3 | 105.2 | 121.9 | 120.8 |
| DSG2    | 110.2 | 120.9 | 116.6 | 123.8 | 103.9 | 95    | 108.4 | 105.5 |
| DSG3    | 112.5 | 114.7 | 120.8 | 111.2 | 117.3 | 96    | 120.5 | 117   |
| DSG4    | 120   | 117.8 | 113.9 | 124.8 | 112.6 | 104.5 | 121.9 | 115.8 |
| DSP     | 117.9 | 118.1 | 114.9 | 114.9 | 107.3 | 102.4 | 122.7 | 113.3 |
| DSPG3   | 106.4 | 119.1 | 112.9 | 109.4 | 109   | 95.3  | 113.8 | 104.5 |
| DSPP    | 112   | 114.4 | 120.3 | 114   | 107.2 | 101.8 | 130.2 | 111.7 |
| DST     | 116.9 | 125.7 | 116   | 135.6 | 113.9 | 101.1 | 122.3 | 130.2 |
| DST     | 112.6 | 113.4 | 112.7 | 121.1 | 111   | 101.3 | 120.2 | 113.9 |
| DST     | 122   | 119.1 | 118.2 | 122.2 | 106   | 98.5  | 116.9 | 109.1 |
| DST     | 116.7 | 110.5 | 116.9 | 112   | 107.4 | 98.6  | 117.6 | 118.3 |
| DST     | 106.5 | 113.4 | 118.5 | 110.2 | 109.2 | 97.6  | 121   | 122.5 |
| DSTN    | 318.6 | 369.4 | 361.6 | 276.8 | 268   | 311.9 | 262.4 | 293.4 |
| DSTN    | 128   | 130.3 | 121.5 | 133.4 | 118.8 | 111.4 | 119.5 | 117.9 |
| DSTN    | 239.8 | 303.7 | 292.5 | 248.8 | 294.1 | 258.7 | 262.5 | 253.2 |
| DSU     | 119.6 | 120.4 | 120.3 | 128.6 | 110.2 | 94    | 120.9 | 117.6 |
| DTL     | 107.6 | 107.9 | 109.4 | 112.7 | 108.9 | 103.7 | 117.1 | 117.9 |
| DTNA    | 120   | 111.9 | 112.4 | 112.2 | 115.4 | 94.9  | 114.8 | 115.6 |
| DTNA    | 112.8 | 123.4 | 121.7 | 122.4 | 112.3 | 108.8 | 130.4 | 116   |
| DTNA    | 110.7 | 119.3 | 113.8 | 127.5 | 105.6 | 92.6  | 111.6 | 116.5 |
| DTNB    | 109.3 | 122   | 117.8 | 125   | 116.2 | 99.4  | 119.1 | 112.4 |
| DTNBP1  | 128.7 | 130.1 | 113.1 | 127.4 | 115   | 96.3  | 132.6 | 134.3 |
| DTNBP1  | 170   | 178.9 | 162.3 | 163.2 | 151.6 | 129.1 | 183.5 | 165.6 |
| DTNBP1  | 127.1 | 135.4 | 125.5 | 131.9 | 120.7 | 100.1 | 122   | 123.6 |
| DTWD1   | 118.6 | 113.3 | 121.3 | 119   | 111.4 | 106.6 | 114.8 | 117.3 |
| DTWD2   | 549   | 386.7 | 493.9 | 609.1 | 658.9 | 293.4 | 637.8 | 736.7 |
| DTX1    | 113.4 | 117.2 | 126.6 | 133.4 | 118.9 | 110.5 | 127.8 | 127.2 |
| DTX2    | 495.6 | 478.1 | 473.2 | 539.8 | 324   | 341.6 | 444.8 | 377.4 |
| DTX3    | 142.9 | 175.2 | 145.2 | 144.4 | 118.3 | 115.5 | 164.2 | 142.2 |
| DTX3L   | 145.3 | 142.9 | 160.4 | 153.1 | 118.5 | 114   | 134.5 | 138.9 |
| DTYMK   | 122.4 | 121.4 | 114.5 | 121.8 | 108.8 | 103.5 | 116.9 | 115   |
| DUB3    | 113.3 | 119.6 | 114.4 | 121.8 | 111.4 | 99.2  | 114   | 118   |
| DULLARD | 204   | 185.8 | 162.1 | 193.9 | 149.7 | 153.4 | 207.6 | 208.4 |
| DUOX1   | 122.5 | 115   | 123.8 | 122   | 107.3 | 97.6  | 114.4 | 122.6 |
| DUOX1   | 136.3 | 130.1 | 114.6 | 124.6 | 117.6 | 109.9 | 127.7 | 127.7 |
| DUOX1   | 113.7 | 110.8 | 110.8 | 112.4 | 103   | 98.5  | 107.2 | 111.6 |
| DUOX2   | 110.4 | 114.7 | 114.1 | 109.1 | 109.1 | 98.8  | 119.7 | 109   |
| DUPD1   | 119   | 120.2 | 116   | 124.3 | 100.5 | 95.7  | 112.1 | 114.1 |
| DUS1L   | 161.6 | 166.8 | 162.2 | 140   | 145.1 | 126.1 | 151.4 | 140.7 |
| DUS2L   | 159.5 | 180   | 214.5 | 167.6 | 173.1 | 129.7 | 165.3 | 146.8 |
| DUS3L   | 260   | 342.6 | 271.7 | 307.8 | 239.5 | 198.2 | 274.2 | 261.9 |
| DUS4L   | 152   | 153.6 | 201.4 | 159.6 | 137.2 | 139.9 | 155.2 | 153.1 |
| DUSP1   | 365.2 | 305.3 | 362.8 | 598.6 | 422.7 | 619.9 | 968.1 | 1131  |
| DUSP10  | 117.5 | 119.3 | 128   | 127.9 | 116.6 | 107.2 | 117.8 | 123.6 |
| DUSP10  | 115.9 | 104.4 | 114.6 | 124.7 | 113.1 | 110.1 | 115.7 | 107.8 |
| DUSP10  | 162.4 | 133.4 | 164.7 | 153.7 | 128.9 | 134.1 | 183.6 | 221.7 |

|          |        |        |        |        |        |       |        |       |
|----------|--------|--------|--------|--------|--------|-------|--------|-------|
| DUSP11   | 128.8  | 144.5  | 151.6  | 143.8  | 130.5  | 114.9 | 140.6  | 146.2 |
| DUSP12   | 497.3  | 636.8  | 672.7  | 576.5  | 417.2  | 431.3 | 440.1  | 525.9 |
| DUSP13   | 111    | 116.9  | 114    | 123    | 113    | 103.9 | 115.4  | 112.7 |
| DUSP13   | 115.5  | 105.2  | 113.2  | 122.3  | 110    | 92.5  | 114.1  | 116.3 |
| DUSP13   | 120.4  | 125.7  | 117.6  | 126.8  | 110.7  | 105.4 | 119.5  | 118.5 |
| DUSP13   | 114.7  | 115.6  | 122.7  | 124.4  | 113.4  | 105.9 | 121.2  | 108.2 |
| DUSP14   | 215.9  | 219.2  | 180.4  | 239.8  | 185.6  | 143.3 | 226.2  | 236.6 |
| DUSP15   | 113.1  | 118    | 115.5  | 119.2  | 113.8  | 102.3 | 113.5  | 116.2 |
| DUSP15   | 114.9  | 106    | 113.4  | 119.5  | 99.2   | 94.7  | 105.9  | 110.4 |
| DUSP15   | 114.4  | 119.3  | 127.7  | 121.5  | 113.3  | 108.1 | 115.3  | 117.9 |
| DUSP16   | 153.1  | 146.4  | 145.5  | 145.1  | 147.4  | 116.8 | 186.4  | 166.1 |
| DUSP18   | 199    | 205.2  | 194.2  | 242    | 179.9  | 192.8 | 193.5  | 172.5 |
| DUSP19   | 2017.9 | 1873.1 | 1919.3 | 1497.5 | 2274.2 | 1529  | 2025.1 | 2385  |
| DUSP2    | 217.2  | 210.5  | 160.8  | 243.3  | 153.9  | 146.5 | 238.3  | 208.5 |
| DUSP21   | 118.5  | 121.8  | 114.4  | 113.4  | 108.3  | 108.5 | 127.3  | 113.2 |
| DUSP22   | 129.9  | 133.3  | 189    | 135.2  | 114.4  | 140.4 | 128.4  | 141.4 |
| DUSP22   | 304.5  | 377.2  | 414.8  | 336    | 306.2  | 306.5 | 312.3  | 367.6 |
| DUSP23   | 426.4  | 530    | 790.6  | 415.7  | 331.4  | 325.4 | 379.9  | 309.4 |
| DUSP26   | 116.5  | 130    | 126.5  | 126.2  | 107.8  | 101.4 | 122.3  | 126.2 |
| DUSP27   | 118.4  | 129.7  | 131.3  | 127.8  | 120.3  | 109.7 | 128.6  | 132.2 |
| DUSP27   | 115.9  | 123.1  | 124.4  | 123.5  | 121.7  | 103.4 | 127.9  | 117   |
| DUSP3    | 375.6  | 286.6  | 573    | 367.9  | 233.5  | 373.8 | 399.9  | 451   |
| DUSP4    | 111.8  | 108.3  | 105.7  | 108.8  | 98.9   | 92.5  | 111.8  | 116.8 |
| DUSP4    | 114.6  | 110.5  | 116.8  | 127.3  | 105.8  | 94.7  | 121.1  | 119.2 |
| DUSP5    | 263.4  | 186.2  | 184.4  | 276.3  | 189.2  | 211.7 | 400.6  | 330   |
| DUSP5P   | 119.4  | 121.3  | 121.2  | 120.7  | 115.4  | 101.4 | 127.3  | 111.9 |
| DUSP6    | 217.1  | 154.9  | 281.4  | 195.7  | 176.6  | 246.3 | 207.9  | 146.7 |
| DUSP6    | 149.1  | 133.1  | 186.7  | 187.2  | 138.6  | 216.8 | 162.5  | 125.5 |
| DUSP7    | 120.5  | 113.6  | 125.5  | 125.6  | 106.6  | 104.7 | 113.8  | 123.5 |
| DUSP8    | 142.6  | 155.6  | 148.2  | 158.7  | 134.4  | 113.3 | 180.9  | 210.5 |
| DUSP9    | 110.1  | 128.8  | 118.8  | 123.7  | 105.7  | 102.8 | 126.2  | 117.6 |
| DUT      | 121.8  | 131    | 154    | 141.8  | 117.8  | 113.7 | 124.1  | 133   |
| DUT      | 137.7  | 140.8  | 124.8  | 142.8  | 124.8  | 125.3 | 124.5  | 137.3 |
| DUT      | 145.5  | 139.6  | 160.6  | 164.2  | 139.1  | 130.8 | 134.9  | 158.4 |
| DUX1     | 113.2  | 108.8  | 122    | 121.9  | 112.5  | 100.6 | 119    | 108.4 |
| DUX2     | 116.7  | 122.2  | 128.8  | 120.8  | 116.1  | 105.9 | 119.4  | 130.7 |
| DUX3     | 114.7  | 123.4  | 120.9  | 118    | 106.5  | 97.1  | 127.9  | 113.2 |
| DUX4     | 112.1  | 110.5  | 117.5  | 119.2  | 111    | 102.9 | 115.4  | 120.5 |
| DUX4C    | 114.2  | 123.6  | 116.1  | 109.3  | 114.3  | 102.3 | 115.6  | 115.7 |
| DUX5     | 115.6  | 109.7  | 110.7  | 128.1  | 109.7  | 116.4 | 120.6  | 118.2 |
| DUXA     | 104.9  | 112.3  | 117.4  | 120.2  | 108.3  | 102.7 | 106.6  | 112   |
| DUXAP3   | 677.1  | 630.8  | 682.8  | 658    | 923.2  | 518.2 | 650.1  | 688.7 |
| DVL1     | 120.4  | 124.1  | 114.3  | 127.7  | 112.1  | 104.8 | 122.9  | 126.4 |
| DVL2     | 219.4  | 239.9  | 208.9  | 225.2  | 187.7  | 175.9 | 208.8  | 233.4 |
| DVL3     | 203.9  | 231.7  | 267.4  | 224.1  | 219.6  | 222.6 | 226.3  | 261.8 |
| DXS9879E | 548.1  | 691.8  | 659.3  | 572.5  | 398.4  | 409.7 | 475.6  | 553.7 |
| DYDC1    | 112.9  | 125.4  | 115.6  | 116.6  | 107    | 100   | 119.9  | 115.3 |
| DYM      | 400.7  | 443.2  | 403    | 411.9  | 359.5  | 349.1 | 385.5  | 344.1 |
| DYNC1H1  | 310.9  | 280.7  | 193.7  | 314.2  | 225.6  | 300.2 | 297    | 295.2 |
| DYNC1I1  | 106.5  | 111.5  | 115.7  | 115.5  | 110.1  | 92    | 107.3  | 112.6 |
| DYNC1I2  | 485.9  | 482.2  | 480    | 432.1  | 372.7  | 434.9 | 341.1  | 338.4 |

|          |        |        |        |        |        |        |        |        |
|----------|--------|--------|--------|--------|--------|--------|--------|--------|
| DYNC1LI1 | 120    | 129.4  | 138.6  | 132.1  | 125    | 109.6  | 143.4  | 150.8  |
| DYNC1LI2 | 936.8  | 1029.8 | 989.2  | 1083.2 | 1034.7 | 771    | 938.2  | 970.9  |
| DYNC2H1  | 116.2  | 135.2  | 132.3  | 121.2  | 121.5  | 109.2  | 132.7  | 146.3  |
| DYNC2LI1 | 115.5  | 108.8  | 110.1  | 114.9  | 106.7  | 100.2  | 114.4  | 109.8  |
| DYNC2LI1 | 132.3  | 142.2  | 161.2  | 136.6  | 125.1  | 112.5  | 118.4  | 113.4  |
| DYNC2LI1 | 115.3  | 103.7  | 114.7  | 114    | 107.9  | 100.9  | 117.7  | 104.7  |
| DYNLL1   | 1306.8 | 1014.3 | 1498.7 | 1331.3 | 873.6  | 1304.7 | 1097.8 | 963.2  |
| DYNLL2   | 192.7  | 237.9  | 218.2  | 209.7  | 213.6  | 157.8  | 184.5  | 213.2  |
| DYNLRB1  | 435.8  | 427.3  | 502    | 389.1  | 364.1  | 430    | 433.3  | 460.8  |
| DYNLRB2  | 135.2  | 139.8  | 138.3  | 145.9  | 125.4  | 118.1  | 139.6  | 135    |
| DYNLT1   | 448.1  | 411    | 473.9  | 471.5  | 405.5  | 534    | 423.8  | 371.1  |
| DYNLT3   | 130.7  | 119    | 123.3  | 117.9  | 107    | 95.5   | 120.5  | 112.5  |
| DYRK1A   | 322.7  | 411.8  | 346    | 394.6  | 283.6  | 314.1  | 345.8  | 458.8  |
| DYRK1A   | 113.7  | 125.7  | 124.2  | 127.1  | 115.3  | 100.5  | 133.5  | 115.2  |
| DYRK1A   | 411.7  | 511.1  | 336.9  | 432.9  | 422.6  | 384    | 501.7  | 539.2  |
| DYRK1A   | 114.4  | 122.5  | 117.5  | 126.4  | 112    | 111.3  | 120.9  | 123.1  |
| DYRK1B   | 136    | 136.9  | 124.9  | 145.3  | 132.5  | 118.9  | 149.5  | 140.5  |
| DYRK1B   | 140.6  | 139.7  | 129.6  | 139.2  | 116.3  | 115.2  | 138.5  | 125.7  |
| DYRK2    | 947    | 890.8  | 876.7  | 1004.9 | 839.5  | 443.6  | 800.8  | 733.5  |
| DYRK2    | 119.2  | 121.3  | 126.5  | 136.1  | 113.9  | 103.3  | 135.2  | 115.5  |
| DYRK3    | 118.6  | 118.1  | 122.5  | 116.7  | 104.7  | 103.2  | 116.7  | 108.5  |
| DYRK3    | 122.5  | 115.6  | 106.3  | 118    | 103.6  | 94.1   | 114.8  | 113.6  |
| DYRK3    | 102    | 108.1  | 110    | 107.9  | 99.9   | 90.1   | 115.2  | 108.7  |
| DYRK4    | 182.9  | 194.4  | 227.4  | 168.7  | 158.4  | 147    | 157.1  | 131.8  |
| DYSF     | 130    | 117.2  | 127.7  | 134    | 111.1  | 104.8  | 130.3  | 117.3  |
| DYSFIP1  | 121.5  | 119.1  | 130    | 125.9  | 106.9  | 103.1  | 124.6  | 120.1  |
| DYX1C1   | 108.1  | 109.6  | 119.1  | 116.1  | 106.3  | 103.8  | 131.9  | 111.9  |
| DYX1C1   | 115.9  | 115    | 120.6  | 118.7  | 110.6  | 102.9  | 119.5  | 112.4  |
| DZIP1    | 115.7  | 115.4  | 117.7  | 121.7  | 112.6  | 98.5   | 112.7  | 114    |
| DZIP1    | 111.1  | 114.2  | 110.1  | 119.2  | 106.5  | 93.8   | 117.8  | 113.3  |
| DZIP1L   | 121.8  | 124.2  | 133.2  | 122.5  | 111.5  | 104.1  | 123.2  | 120.6  |
| DZIP3    | 115.3  | 116.9  | 114.5  | 116.8  | 107.1  | 107.3  | 121.1  | 124.8  |
| E2F1     | 114    | 116.6  | 124.2  | 123.9  | 108.2  | 100.8  | 128.1  | 117.7  |
| E2F2     | 143.6  | 149.2  | 146.1  | 144.8  | 111.6  | 105    | 133.9  | 132.9  |
| E2F3     | 1237.9 | 1297.5 | 1043.6 | 1377.1 | 1085.1 | 906    | 1454.3 | 1198.1 |
| E2F4     | 451.9  | 483.6  | 448.8  | 469.7  | 342    | 345.8  | 427.5  | 383.9  |
| E2F5     | 250.1  | 224.5  | 251.8  | 267.1  | 202.5  | 191.9  | 247.4  | 170    |
| E2F6     | 121.1  | 120.7  | 127.8  | 133.9  | 121.7  | 106.7  | 131.1  | 121    |
| E2F6     | 263.2  | 284    | 207.4  | 330    | 279.5  | 226.2  | 475.8  | 584.1  |
| E2F7     | 124.2  | 114.5  | 120.2  | 118.1  | 103.1  | 98.3   | 119.4  | 112    |
| E2F8     | 116    | 113.4  | 117.1  | 120.3  | 113    | 105.4  | 109    | 109.6  |
| E4F1     | 550.5  | 681.3  | 632.8  | 660.5  | 589.3  | 376.3  | 555.2  | 459.3  |
| EAF1     | 142.7  | 155.2  | 140    | 140.1  | 131.8  | 131.8  | 164.3  | 127.9  |
| EAF2     | 149.5  | 136.9  | 159.9  | 150.1  | 124    | 108.8  | 152.9  | 154.8  |
| EBAG9    | 603.4  | 722    | 752.3  | 816.3  | 743.2  | 558    | 604    | 752.7  |
| EBAG9    | 133.2  | 133.8  | 119    | 134.3  | 128    | 104.2  | 134.7  | 124.1  |
| EBAG9    | 120    | 128.7  | 117.8  | 122.3  | 116.2  | 105.9  | 117.2  | 128.4  |
| EBF      | 129.2  | 141.8  | 144.7  | 150.1  | 124.7  | 114    | 139.7  | 129.8  |
| EBF2     | 110.9  | 111    | 111.9  | 115.4  | 100.6  | 97.7   | 108.7  | 117.7  |
| EBF3     | 113.7  | 119.8  | 109.9  | 125.6  | 105.6  | 100    | 117.4  | 119.2  |
| EBI2     | 359.4  | 527.4  | 532.2  | 637.3  | 368.6  | 505.6  | 603.6  | 587.6  |

|          |        |        |        |        |        |        |        |        |
|----------|--------|--------|--------|--------|--------|--------|--------|--------|
| EBI3     | 124.4  | 125.5  | 119.3  | 139.9  | 118.1  | 104.9  | 120.2  | 121.4  |
| EBNA1BP2 | 435.3  | 441.6  | 559.4  | 467.7  | 430.3  | 393.4  | 400.8  | 355.9  |
| EBP      | 193.4  | 217.1  | 200.1  | 180.8  | 196    | 161.6  | 181.2  | 178.3  |
| ECAT1    | 117.6  | 105.8  | 112    | 111    | 112.9  | 98.3   | 109.4  | 107.7  |
| ECAT11   | 123    | 107.5  | 141.7  | 120.6  | 131.8  | 114.1  | 126.7  | 124    |
| ECD      | 160.4  | 154.5  | 141    | 159.8  | 143.6  | 154.1  | 172.8  | 139.5  |
| ECE1     | 117.6  | 127.1  | 117.5  | 116.2  | 104.6  | 104    | 130    | 124    |
| ECE2     | 130.6  | 130.8  | 135.6  | 124.8  | 125.7  | 115.4  | 122.8  | 119    |
| ECE2     | 115.3  | 116    | 110.9  | 113.5  | 106.8  | 94.6   | 114.5  | 118.2  |
| ECE2     | 123.6  | 111.1  | 114.3  | 116.4  | 114.2  | 102.4  | 121.9  | 123    |
| ECEL1    | 115.6  | 116.3  | 116.2  | 111.4  | 111.8  | 98.7   | 116.8  | 107.6  |
| ECGF1    | 1611   | 405.7  | 4170   | 1416.9 | 342.8  | 2314   | 661.3  | 243.9  |
| ECH1     | 995.9  | 1301.6 | 1095.5 | 1038.6 | 894.3  | 819.2  | 650.1  | 657.9  |
| ECHDC1   | 178.9  | 177    | 168.5  | 214.3  | 174.7  | 133.2  | 157.7  | 146    |
| ECHDC2   | 366.9  | 505.4  | 775.5  | 455.5  | 378.2  | 424.1  | 341.8  | 320.6  |
| ECHDC3   | 134.4  | 109.8  | 137.6  | 132.4  | 106    | 110.3  | 122.2  | 111.7  |
| ECHS1    | 289.6  | 337.7  | 382.4  | 314    | 230.3  | 242.3  | 260.6  | 226.3  |
| ECM1     | 120.8  | 114.1  | 118.6  | 126.8  | 109.4  | 103.9  | 118.9  | 126.8  |
| ECM1     | 120.8  | 132.6  | 143.9  | 137    | 131.3  | 106.8  | 122.8  | 125.4  |
| ECM2     | 108.6  | 110    | 113.9  | 122.9  | 111.9  | 101.9  | 120.6  | 119.4  |
| ECOP     | 191.3  | 192.8  | 229.1  | 207.6  | 176    | 210.3  | 155.8  | 133    |
| ECRG4    | 125.3  | 125.3  | 133.5  | 123.6  | 130.8  | 118    | 128.3  | 125    |
| ECSIT    | 123.5  | 134.9  | 135.4  | 128.1  | 108.5  | 102.4  | 128.3  | 116.1  |
| EDA      | 121.8  | 142.2  | 119.9  | 126.2  | 114.3  | 100.9  | 124.1  | 118.2  |
| EDA      | 115    | 111.4  | 117.5  | 112.7  | 107.6  | 99.4   | 116.2  | 119.3  |
| EDA      | 104.5  | 123.9  | 116    | 115.2  | 105.8  | 96.6   | 118.9  | 120.4  |
| EDA      | 120.9  | 115.9  | 118.5  | 122.1  | 108.6  | 101.8  | 123.4  | 117.7  |
| EDA      | 105.6  | 115.2  | 114.4  | 122.2  | 107.9  | 99.7   | 119.5  | 122.9  |
| EDA2R    | 114.1  | 106.5  | 115.8  | 116.9  | 106.9  | 95.5   | 117.1  | 110    |
| EDAR     | 155.9  | 159    | 152.5  | 163.9  | 140.7  | 137.2  | 156.5  | 143.9  |
| EDARADD  | 116.4  | 113.6  | 119    | 113.4  | 106.6  | 99.7   | 112.4  | 121.3  |
| EDARADD  | 133.9  | 159.3  | 136.6  | 151.2  | 135.4  | 109.3  | 127.3  | 143.2  |
| EDARADD  | 121.9  | 119.8  | 124.7  | 114    | 103.3  | 103.5  | 123.6  | 111.9  |
| EDD1     | 222.1  | 173.2  | 172.8  | 208.1  | 199.1  | 175.6  | 242    | 343.6  |
| EDEM1    | 178.5  | 214.3  | 175.7  | 189.4  | 199.5  | 162.4  | 180.3  | 240.9  |
| EDEM3    | 201.6  | 217.3  | 208.1  | 259.1  | 172.9  | 175.8  | 225.9  | 244    |
| EDF1     | 314.6  | 318.3  | 347.9  | 302.7  | 246.3  | 250.7  | 206.5  | 310.5  |
| EDF1     | 1672.5 | 2169.2 | 2329.8 | 2068.8 | 1810.2 | 2547.5 | 1655.3 | 1775.9 |
| EDG1     | 443.2  | 560.3  | 483    | 660.8  | 554.2  | 713.1  | 521.5  | 571    |
| EDG2     | 153.1  | 140.7  | 156.2  | 161.7  | 123.5  | 219.6  | 142.3  | 110.6  |
| EDG2     | 113.6  | 114.7  | 129.1  | 119.8  | 107.9  | 99.6   | 114.9  | 114.6  |
| EDG3     | 113.4  | 124    | 117.5  | 137.7  | 132.5  | 104    | 244.1  | 134.6  |
| EDG4     | 238.2  | 228.9  | 307.4  | 266    | 191.7  | 269.7  | 239.4  | 301.4  |
| EDG5     | 116.7  | 119.5  | 122.1  | 120    | 109    | 100.6  | 128.2  | 110.6  |
| EDG6     | 953.8  | 1171.4 | 724.4  | 1013.8 | 680.3  | 607.3  | 839.9  | 716    |
| EDG7     | 115.6  | 122.8  | 121.3  | 123.2  | 110.4  | 94.4   | 120.9  | 116.2  |
| EDG8     | 388.9  | 455.3  | 260.9  | 416    | 387.6  | 210.1  | 330.8  | 261.4  |
| EDIL3    | 113.8  | 112.2  | 130.3  | 123.9  | 109.7  | 111.7  | 118.6  | 122    |
| EDN1     | 118.7  | 138.8  | 146.3  | 132.3  | 123.7  | 109.6  | 129.7  | 120.7  |
| EDN2     | 107    | 114    | 108    | 111.5  | 110.4  | 92.9   | 121.8  | 104.8  |
| EDN3     | 117.6  | 121.8  | 117.6  | 121.7  | 110.5  | 100.2  | 118.1  | 125.2  |

|        |         |         |         |         |         |         |         |         |
|--------|---------|---------|---------|---------|---------|---------|---------|---------|
| EDN3   | 112.2   | 112.7   | 120.3   | 116.2   | 112.2   | 97.5    | 111.8   | 120.1   |
| EDNRA  | 108.3   | 110.3   | 107.3   | 116     | 109     | 98.1    | 111.9   | 107     |
| EDNRB  | 124     | 130.3   | 145.3   | 141.3   | 114.2   | 248.3   | 138.7   | 136.4   |
| EDNRB  | 112.9   | 109.5   | 115.7   | 119.2   | 110.2   | 108.6   | 128     | 112.8   |
| EDNRB  | 107.4   | 115.2   | 119.1   | 112.2   | 115     | 94.7    | 113.4   | 114.7   |
| EEA1   | 126.6   | 125.5   | 125.1   | 121.7   | 118.8   | 95.6    | 125.7   | 129.4   |
| EED    | 120.2   | 121.8   | 124.2   | 125.2   | 123.5   | 112.6   | 133.7   | 128.3   |
| EED    | 179.9   | 206.7   | 215.9   | 214.3   | 156.6   | 175.8   | 205.1   | 260.2   |
| EED    | 125.7   | 133.3   | 118.6   | 131.6   | 129.1   | 125.2   | 144.2   | 132.6   |
| EEF1A1 | 33711   | 35629.4 | 34130   | 35477.3 | 31777.4 | 30100.2 | 39463.4 | 35595.2 |
| EEF1A1 | 18359.5 | 25334.6 | 23556.3 | 25917.9 | 21927   | 21987.3 | 23654   | 24050.1 |
| EEF1A2 | 124.6   | 126.3   | 123.4   | 122.9   | 126     | 103.5   | 133     | 132.1   |
| EEF1B2 | 135.8   | 130     | 183.5   | 150.2   | 130.2   | 121.6   | 133.3   | 140.2   |
| EEF1B2 | 3690.6  | 4049    | 4483.3  | 4488.2  | 6322.5  | 3544.7  | 4761.8  | 5118.4  |
| EEF1B2 | 323.4   | 322.8   | 376.2   | 341     | 310.1   | 281.1   | 371.1   | 372.2   |
| EEF1B2 | 7249.7  | 7637.4  | 8457    | 8002.3  | 6359.1  | 6432.9  | 7907.5  | 9257.7  |
| EEF1D  | 1646.2  | 1540.9  | 1615    | 1874.2  | 1660.3  | 1281.1  | 1449.9  | 1644.9  |
| EEF1D  | 120.9   | 112.6   | 118.2   | 117.1   | 98      | 95.5    | 114     | 117.3   |
| EEF1E1 | 115.7   | 111.6   | 118.1   | 122.7   | 101.9   | 91.2    | 118.2   | 113.8   |
| EEF1G  | 4889.4  | 5293    | 4569.2  | 4579.4  | 5166.1  | 4339.6  | 4729.5  | 5546    |
| EEF2   | 5154.7  | 5440.3  | 3464.7  | 4703.2  | 4307.7  | 3748    | 5813.5  | 5607.3  |
| EEF2K  | 209.9   | 250.1   | 227.1   | 191.1   | 186.6   | 129.4   | 182.5   | 177.2   |
| EEFSEC | 114.7   | 123.8   | 125.5   | 129.5   | 113.4   | 105.8   | 118     | 133.8   |
| EFCAB1 | 112.3   | 115.5   | 129.2   | 121.4   | 104.1   | 93.2    | 121     | 122.4   |
| EFCAB2 | 117.3   | 110.3   | 118.3   | 122.6   | 102.1   | 99.2    | 107.7   | 105.2   |
| EFCAB3 | 113.5   | 123.5   | 128.5   | 109.3   | 117.4   | 97.2    | 126.6   | 119.2   |
| EFCBP1 | 124.1   | 123.7   | 118.9   | 114.4   | 119.1   | 101     | 137.4   | 129.7   |
| EFCBP2 | 115.7   | 117.4   | 115.3   | 118.2   | 115.9   | 96.7    | 128.6   | 115.3   |
| EFEMP1 | 116.1   | 109.6   | 127.9   | 127.2   | 108.7   | 110.9   | 120.8   | 115.7   |
| EFEMP1 | 123.4   | 110     | 109.5   | 125     | 105.9   | 97.7    | 120     | 117.5   |
| EFEMP1 | 124.7   | 113     | 114.2   | 122.2   | 112.5   | 98.5    | 115.9   | 114.6   |
| EFEMP2 | 144.6   | 135.1   | 145.1   | 140.5   | 120.8   | 119.9   | 120.9   | 135     |
| EFHA1  | 723.9   | 649.6   | 643.1   | 603.9   | 583.6   | 492.6   | 651.6   | 601.5   |
| EFHA2  | 139.5   | 120     | 125.8   | 120.1   | 111.7   | 108.6   | 126.6   | 121.4   |
| EFHB   | 115.1   | 109.5   | 130.3   | 109     | 107.8   | 99.1    | 121.2   | 137.5   |
| EFHC1  | 124.8   | 119.4   | 133.6   | 121.5   | 112.8   | 109.5   | 126.2   | 116.5   |
| EFHC2  | 133.3   | 116.1   | 131.4   | 125     | 101.2   | 102.7   | 121.2   | 120.7   |
| EFHD1  | 136.6   | 125.3   | 132.5   | 138.5   | 131.3   | 117.3   | 127.4   | 128.4   |
| EFHD2  | 1223.9  | 1330.8  | 1563.5  | 1589.2  | 837.8   | 1184    | 1332.8  | 945.7   |
| EFNA1  | 116.7   | 114.7   | 122.3   | 121.9   | 109     | 107     | 114.4   | 125.8   |
| EFNA1  | 158.8   | 188.3   | 143.2   | 164.1   | 152.7   | 115.6   | 148.4   | 145.6   |
| EFNA2  | 113.9   | 111.4   | 116.7   | 110.8   | 110     | 96.5    | 118.8   | 105.4   |
| EFNA3  | 116.4   | 122.5   | 114.9   | 115.9   | 105.9   | 95.6    | 124.8   | 120.3   |
| EFNA4  | 130     | 134.5   | 139.5   | 136.2   | 119.2   | 119.2   | 127.9   | 127.3   |
| EFNA4  | 219     | 206.4   | 192.4   | 216.3   | 182.3   | 154.7   | 183.3   | 198.1   |
| EFNA5  | 126.6   | 118.2   | 120.1   | 117     | 116.6   | 103.1   | 117.7   | 113.2   |
| EFNB1  | 117.2   | 118.2   | 117.3   | 128.8   | 113     | 102.9   | 121.5   | 128.5   |
| EFNB2  | 139     | 116.3   | 130.9   | 125.5   | 123.2   | 105.1   | 153.7   | 163.1   |
| EFNB3  | 108.1   | 114.8   | 126.8   | 109.7   | 110.9   | 94      | 117.1   | 112     |
| EFS    | 125.3   | 114.8   | 119.6   | 117.9   | 114     | 100.5   | 115.7   | 117     |
| EFS    | 113.6   | 123.6   | 114.4   | 125.8   | 115     | 99.6    | 128.5   | 116.4   |



|         |        |        |        |        |        |        |        |        |
|---------|--------|--------|--------|--------|--------|--------|--------|--------|
| EFTUD1  | 161.6  | 223.7  | 168.6  | 170.7  | 155.7  | 128.9  | 184.1  | 164.7  |
| EFTUD1  | 186.4  | 175.8  | 185.5  | 200.4  | 167.3  | 165.6  | 148.3  | 173.2  |
| EFTUD1  | 111.2  | 117.3  | 112.8  | 123.3  | 113.2  | 102.9  | 126.1  | 108.4  |
| EFTUD2  | 408.9  | 435.6  | 466.5  | 498.4  | 373.9  | 390    | 451.4  | 338.4  |
| EGF     | 121.9  | 115    | 111.6  | 116.7  | 111    | 105.5  | 122.5  | 116.4  |
| EGFL5   | 110.9  | 111.8  | 116    | 115.7  | 111.3  | 95.3   | 117.2  | 108.6  |
| EGFL6   | 121    | 119.8  | 116.8  | 121.5  | 112.4  | 103.8  | 122.3  | 121.5  |
| EGFL7   | 118.5  | 123.8  | 129.1  | 121.6  | 112.1  | 96.6   | 122.5  | 116.2  |
| EGFL7   | 116.3  | 115.3  | 116.1  | 111.6  | 107.1  | 100    | 124.6  | 108.7  |
| EGFL8   | 120.5  | 110.6  | 131    | 132.1  | 123.3  | 105.1  | 120.3  | 105.1  |
| EGFL9   | 111.4  | 108.9  | 127    | 125.5  | 109.4  | 104.9  | 121    | 108.6  |
| EGFL9   | 128.5  | 125    | 115.2  | 120.6  | 112.8  | 101.1  | 127.8  | 127.8  |
| EGFL9   | 112.9  | 116.7  | 120.3  | 129.6  | 106.9  | 97.5   | 114    | 118.3  |
| EGFLAM  | 126.7  | 118    | 135.4  | 113.5  | 119.4  | 105.2  | 123.4  | 118.4  |
| EGFR    | 109    | 110    | 109    | 115    | 105.8  | 94.3   | 108.7  | 116.3  |
| EGFR    | 108.9  | 118.4  | 113.5  | 109.4  | 107.8  | 103.1  | 123.1  | 117.5  |
| EGFR    | 115.8  | 114.4  | 120.2  | 126.2  | 100.7  | 105.9  | 111    | 107.7  |
| EGFR    | 126.3  | 131.3  | 131.1  | 128.9  | 114.6  | 101.7  | 124.5  | 120.8  |
| EGLN1   | 129.1  | 139.1  | 128.4  | 133.3  | 122    | 113    | 125.9  | 122.9  |
| EGLN2   | 111.3  | 114.2  | 122.4  | 112.4  | 123.6  | 101.9  | 121.8  | 119.2  |
| EGLN2   | 1944.9 | 2025.9 | 1656.4 | 2069.7 | 1735.9 | 1171.2 | 1889.7 | 2082.6 |
| EGLN3   | 120.1  | 107.9  | 119.1  | 117.1  | 105.1  | 94.7   | 121.8  | 115.9  |
| EGR1    | 142.6  | 132.4  | 132.9  | 132.2  | 127.4  | 104.5  | 138.2  | 165.6  |
| EGR2    | 1003.6 | 1168.8 | 233.3  | 1475.5 | 857.3  | 561.4  | 1441.2 | 488.8  |
| EGR3    | 128.4  | 116.2  | 111.6  | 131.1  | 111.1  | 100.3  | 127.5  | 117.9  |
| EGR3    | 118.9  | 137.9  | 132.1  | 126.3  | 120.2  | 118.2  | 133.7  | 130.1  |
| EGR4    | 113.8  | 112.9  | 131.7  | 117.6  | 105.2  | 100.2  | 109.3  | 111.6  |
| EHBP1   | 197.1  | 204.8  | 181.2  | 213.2  | 189.1  | 149.3  | 243.5  | 212.9  |
| EHD1    | 1573.3 | 1957.9 | 1668.9 | 1928   | 1361.2 | 1173.4 | 1288.3 | 1188.3 |
| EHD2    | 112.5  | 123    | 127.4  | 119.7  | 110.1  | 98.5   | 129.9  | 127.8  |
| EHD3    | 122.6  | 127.2  | 129.4  | 124.7  | 115.4  | 118    | 137.2  | 128.6  |
| EHD4    | 274.8  | 256.7  | 284.7  | 288.6  | 179.4  | 213.7  | 226.4  | 192.1  |
| EHF     | 117.2  | 117.9  | 116.5  | 119.7  | 117.1  | 100.9  | 122    | 118.1  |
| EHHADH  | 103.1  | 116    | 116.2  | 112.3  | 99.2   | 101.7  | 113.3  | 119    |
| EHMT1   | 118    | 111.7  | 121.7  | 122.2  | 115.9  | 108.6  | 121.7  | 110.8  |
| EHMT2   | 133.5  | 137.4  | 124.3  | 133.8  | 119.9  | 102.5  | 129    | 124.2  |
| EHMT2   | 108.3  | 121.6  | 126.5  | 117    | 118.6  | 112.2  | 123.7  | 109.8  |
| EI24    | 333.5  | 359.1  | 389.8  | 386.1  | 359.7  | 322.2  | 317.6  | 379    |
| EI24    | 173.4  | 149.9  | 166.6  | 156.9  | 135.6  | 155    | 159.2  | 157.1  |
| EID2B   | 1387.2 | 1069.9 | 1587.8 | 1229.6 | 1316.7 | 871.5  | 1194.1 | 1307.3 |
| EID3    | 119.7  | 127.1  | 138.8  | 136.6  | 122.9  | 104.5  | 133.2  | 148.4  |
| EIF1    | 1924.5 | 1552.3 | 1510.6 | 1792   | 1854.5 | 1545   | 3108   | 5063.7 |
| EIF1AX  | 126.8  | 121.5  | 120.7  | 127.1  | 114.9  | 105.1  | 129.8  | 123.4  |
| EIF1AX  | 255.2  | 301.2  | 330.6  | 348.2  | 254.1  | 258.8  | 315.2  | 307.6  |
| EIF1AX  | 202.1  | 190.2  | 184.4  | 163.3  | 136.7  | 139.6  | 191    | 203.8  |
| EIF1AY  | 154.6  | 171.8  | 178.9  | 196.3  | 150    | 154.2  | 194.6  | 196.8  |
| EIF1B   | 390.9  | 486.1  | 371.9  | 437.4  | 390.5  | 411.1  | 435.7  | 612    |
| EIF2A   | 598.1  | 554.8  | 579.8  | 623    | 554.4  | 532.2  | 608.1  | 518.6  |
| EIF2AK1 | 900.2  | 1048.7 | 906.8  | 1075.4 | 811.9  | 798.3  | 778.6  | 741.7  |
| EIF2AK2 | 586.5  | 399.4  | 281.2  | 470    | 372.3  | 220    | 393.9  | 332.7  |
| EIF2AK4 | 241.2  | 236.3  | 224.5  | 312    | 240.4  | 165.4  | 253.3  | 271    |

|           |        |        |        |        |        |        |        |        |
|-----------|--------|--------|--------|--------|--------|--------|--------|--------|
| EIF2B1    | 310.4  | 350.2  | 406.1  | 308.6  | 261    | 326.4  | 269    | 257.6  |
| EIF2B2    | 298.2  | 358.2  | 259    | 331.6  | 308.4  | 287.6  | 255.5  | 284.9  |
| EIF2B4    | 823.4  | 981.9  | 880.5  | 1045.1 | 819.7  | 674.8  | 1024   | 805.5  |
| EIF2B4    | 691.9  | 842.3  | 696.9  | 829.6  | 630.4  | 601.9  | 699.6  | 715.1  |
| EIF2B4    | 116.1  | 119.3  | 121    | 123.2  | 125.8  | 106.1  | 125.7  | 129.7  |
| EIF2B5    | 252.2  | 345.7  | 236.9  | 279.3  | 238.2  | 207.1  | 287.7  | 246.7  |
| EIF2C1    | 227.1  | 195.9  | 183.7  | 211.4  | 180    | 176.5  | 169.6  | 151.7  |
| EIF2C2    | 510.5  | 517.3  | 324.1  | 602.4  | 633.6  | 298.2  | 942.6  | 970.1  |
| EIF2C3    | 146.6  | 131.9  | 123.3  | 142    | 138.3  | 126.2  | 162.1  | 159.3  |
| EIF2C3    | 137.3  | 115.7  | 123.1  | 123.6  | 115.3  | 99.6   | 129.5  | 132.2  |
| EIF2C4    | 143.3  | 138.6  | 137.8  | 134.2  | 130.8  | 129.8  | 135.8  | 131    |
| EIF2S1    | 177.1  | 143.1  | 150.8  | 167.9  | 148.3  | 130.2  | 191.1  | 173.7  |
| EIF2S2    | 146.4  | 131.6  | 127    | 144.3  | 136.2  | 114.4  | 160.3  | 161.5  |
| EIF2S3    | 715.6  | 904.9  | 1049.3 | 830    | 670.2  | 927.3  | 814.4  | 817.7  |
| EIF3S1    | 209.1  | 223.9  | 195.6  | 213.2  | 175.3  | 193.1  | 239.9  | 252.6  |
| EIF3S10   | 383    | 397.3  | 339.5  | 403.1  | 354.9  | 267.9  | 434.3  | 572    |
| EIF3S12   | 739.4  | 800    | 1370.9 | 1259.5 | 753.9  | 1120.3 | 1309.3 | 1063.6 |
| EIF3S2    | 595.9  | 747.7  | 598    | 736    | 514.3  | 368.5  | 720.1  | 726.2  |
| EIF3S3    | 1284.4 | 1289.4 | 1347   | 1500.8 | 1037.3 | 1152.3 | 1259.2 | 1898.5 |
| EIF3S4    | 1416.3 | 1318.4 | 1254.6 | 1160.5 | 1169.1 | 1219   | 1058   | 1192.8 |
| EIF3S5    | 2420.8 | 2573.3 | 2617.1 | 2448.8 | 2196.3 | 2522.3 | 2112   | 2675.3 |
| EIF3S6    | 4970.4 | 5153.1 | 7748.2 | 6335.9 | 5433.1 | 7364.3 | 5823.7 | 6595.1 |
| EIF3S6IP  | 1861.2 | 1796.5 | 1727.5 | 1512.3 | 1317.1 | 1603.8 | 1859.1 | 1854.2 |
| EIF3S7    | 1621   | 1751.8 | 1977.3 | 2013.1 | 1130.4 | 1602.5 | 1792.1 | 1878.3 |
| EIF3S8    | 111.9  | 108.2  | 116.9  | 107.2  | 101.9  | 97.2   | 120.3  | 120.6  |
| EIF3S9    | 2479   | 2591.9 | 2154.4 | 2615.1 | 1708.8 | 1315.3 | 2870   | 2633.2 |
| EIF3S9    | 208.8  | 192.3  | 187.9  | 209.4  | 174.9  | 162.1  | 200.4  | 182.4  |
| EIF3S9    | 589.9  | 574.7  | 520.8  | 618.5  | 390.5  | 449.8  | 781.1  | 717.2  |
| EIF4A1    | 5779.1 | 5247.8 | 5579.4 | 6725.9 | 5163.5 | 5345.7 | 7878.2 | 7955.4 |
| EIF4A2    | 4994.6 | 4362.4 | 4609.4 | 4459.8 | 3059.3 | 3431   | 5279.9 | 4583.7 |
| EIF4B     | 3512.6 | 4256.3 | 3475.9 | 3820.4 | 2959.2 | 2950.4 | 3703.1 | 4441.5 |
| EIF4E     | 127.1  | 135.7  | 132.1  | 131.1  | 130.1  | 107.3  | 140.1  | 126.6  |
| EIF4E2    | 219.9  | 199.8  | 235.1  | 222.2  | 159.1  | 215.9  | 197.6  | 183.4  |
| EIF4E3    | 502.4  | 448.5  | 480    | 578.6  | 375.2  | 352.3  | 356.1  | 330.6  |
| EIF4EBP1  | 135.1  | 110.4  | 139.7  | 111.9  | 112.2  | 108.7  | 119.6  | 121.2  |
| EIF4EBP2  | 294.7  | 365.8  | 352.2  | 402.7  | 326.6  | 323.6  | 304.3  | 345.9  |
| EIF4EBP3  | 114    | 109.4  | 115.6  | 118.5  | 113.7  | 97.6   | 118.1  | 117.1  |
| EIF4ENIF1 | 189.3  | 211.3  | 189.6  | 246.4  | 196    | 176.6  | 221    | 228    |
| EIF4G1    | 262.3  | 294.3  | 245.3  | 279.2  | 260.1  | 197.7  | 285.7  | 328.7  |
| EIF4G1    | 122.4  | 106.8  | 123.4  | 113.9  | 114    | 93.5   | 121.4  | 109.2  |
| EIF4G1    | 762.7  | 775.1  | 502.2  | 827.7  | 694    | 461.3  | 929.5  | 937.7  |
| EIF4G1    | 125.9  | 107.8  | 122.1  | 121    | 107.7  | 98.7   | 116.6  | 115.3  |
| EIF4G2    | 1573.5 | 1656.3 | 1451.5 | 1630.2 | 1215.6 | 2054.5 | 1893.5 | 2991.7 |
| EIF4G2    | 176    | 179    | 197.4  | 188.6  | 180.6  | 199.1  | 198.4  | 193.9  |
| EIF4G2    | 2864.8 | 2914.4 | 2861.3 | 3020.2 | 2632.3 | 2871.9 | 4104.6 | 3880.9 |
| EIF4G3    | 335    | 285.1  | 244.7  | 321.5  | 229.3  | 185.7  | 265.9  | 232    |
| EIF4H     | 723.6  | 856    | 944.2  | 1051.1 | 641.8  | 830.4  | 946.2  | 1155.9 |
| EIF5      | 136.2  | 141.8  | 143.8  | 154.8  | 124.7  | 104.9  | 145.5  | 153.9  |
| EIF5      | 490    | 514.1  | 546.3  | 635.4  | 513.1  | 370.8  | 664.1  | 795.3  |
| EIF5      | 127.4  | 114.2  | 115.2  | 131.9  | 112.1  | 100.2  | 118.1  | 122.6  |
| EIF5A     | 546    | 559    | 518.5  | 581.8  | 414.1  | 520.2  | 542.2  | 530.5  |

|        |       |        |       |        |       |       |        |        |
|--------|-------|--------|-------|--------|-------|-------|--------|--------|
| EIF5A2 | 123.7 | 125.5  | 123.2 | 116.6  | 124.7 | 103.5 | 130.8  | 139    |
| EIF5B  | 221.3 | 259.8  | 248.5 | 248.3  | 206.7 | 166.3 | 234.5  | 261.3  |
| ELA1   | 172.8 | 169.6  | 212.2 | 176.7  | 170.4 | 159.8 | 193.8  | 190.2  |
| ELA2   | 123.6 | 165.1  | 131.6 | 134.8  | 150.5 | 115.2 | 122.4  | 165.6  |
| ELA2A  | 100.6 | 104.2  | 115.7 | 110.8  | 104   | 101.7 | 103.8  | 106.9  |
| ELA2B  | 125.5 | 118.6  | 128.5 | 135.4  | 133.6 | 111.1 | 122.6  | 118.3  |
| ELA3A  | 106.1 | 107.8  | 117   | 112.3  | 103.8 | 94.9  | 112.4  | 119.6  |
| ELA3B  | 109.4 | 112    | 122.9 | 114.9  | 107.8 | 97.7  | 120.8  | 127.5  |
| ELAC1  | 121.1 | 131    | 120.7 | 132.9  | 122.1 | 122.4 | 121.5  | 122.9  |
| ELAC2  | 193   | 183.3  | 175.3 | 179    | 154.1 | 151.4 | 195.1  | 155.8  |
| ELAVL1 | 152   | 149.6  | 131.9 | 148.7  | 129.3 | 114.9 | 151.7  | 141    |
| ELAVL2 | 113.8 | 117.3  | 106.9 | 126.7  | 111.1 | 104.3 | 120.5  | 111.8  |
| ELAVL3 | 114.5 | 129.2  | 124.6 | 128.6  | 120   | 108.5 | 135.6  | 118.3  |
| ELAVL3 | 115.1 | 119.6  | 130.5 | 123.2  | 109.5 | 106.4 | 128.9  | 122    |
| ELAVL4 | 115.2 | 109.5  | 112.4 | 113.8  | 107.7 | 101.1 | 113.3  | 112.5  |
| ELF1   | 753.7 | 1282.8 | 952.7 | 1392.3 | 941.4 | 748.1 | 1039.4 | 2063.5 |
| ELF2   | 137.3 | 121.7  | 127.9 | 127.9  | 125.5 | 102.2 | 127.4  | 117.4  |
| ELF2   | 288.1 | 330.7  | 455.1 | 344.7  | 293.8 | 356.3 | 290.5  | 243.1  |
| ELF2   | 151.3 | 174.6  | 155.2 | 178.7  | 203.7 | 116   | 165.1  | 152    |
| ELF3   | 115.4 | 106.6  | 104.2 | 117.3  | 107.1 | 95.5  | 113.5  | 107.6  |
| ELF4   | 323.5 | 293.6  | 293.7 | 342.6  | 227.4 | 277.1 | 362.8  | 266.6  |
| ELF5   | 105   | 114.2  | 106.7 | 108.5  | 108.1 | 94.4  | 118.4  | 110.8  |
| ELF5   | 110.2 | 105.3  | 110.7 | 128.3  | 101.8 | 98.2  | 117.1  | 114.7  |
| ELK1   | 231   | 216.5  | 200.6 | 237    | 181.2 | 202   | 205.5  | 260    |
| ELK3   | 120.6 | 123.4  | 126.5 | 123.5  | 113.3 | 99.5  | 117.4  | 109.7  |
| ELK4   | 141.2 | 132.3  | 120.6 | 137.7  | 123.9 | 105.7 | 143.8  | 138.5  |
| ELK4   | 111.8 | 117.8  | 108.3 | 117.7  | 109.7 | 95.4  | 125.4  | 112.6  |
| ELK4   | 135.4 | 140    | 126   | 137.4  | 123.7 | 108.4 | 144.4  | 136.1  |
| ELL    | 190.5 | 228.1  | 186.4 | 223.7  | 162.7 | 161.1 | 204    | 223.3  |
| ELL3   | 157.9 | 129.8  | 165.1 | 142.4  | 124.8 | 129.2 | 137.5  | 125.4  |
| ELLS1  | 230   | 214.3  | 253   | 286.5  | 217.6 | 218.6 | 335.2  | 435.5  |
| ELMO1  | 134.1 | 120.6  | 123.9 | 128.9  | 119.8 | 109.6 | 121.9  | 124.6  |
| ELMO1  | 335.5 | 365.6  | 295.4 | 429.7  | 306.7 | 333   | 544.9  | 388.7  |
| ELMO1  | 120.7 | 111.5  | 132.6 | 119.4  | 110.3 | 105.3 | 123.8  | 115.2  |
| ELMO1  | 135   | 130.7  | 120.7 | 124    | 121.8 | 121.7 | 140    | 131.2  |
| ELMO2  | 124.4 | 126.4  | 130.8 | 142.7  | 115.6 | 108.9 | 138.6  | 138.7  |
| ELMO2  | 492.9 | 444.2  | 335.3 | 467.1  | 340.7 | 323.7 | 541    | 474.3  |
| ELMO2  | 122.9 | 109.4  | 115.6 | 122.7  | 108.4 | 100.5 | 123.1  | 114.3  |
| ELMO3  | 135.8 | 145.3  | 159.5 | 154    | 134.9 | 114.9 | 159    | 157.9  |
| ELMOD1 | 118.5 | 119.5  | 123.4 | 119.1  | 112.3 | 97.8  | 120.5  | 109.2  |
| ELMOD2 | 141.2 | 141.7  | 149.5 | 160.7  | 135.9 | 145.3 | 154.9  | 132.1  |
| ELN    | 112.1 | 119.4  | 124.2 | 117.9  | 117.9 | 110.9 | 131.9  | 132.2  |
| ELN    | 113.2 | 120.5  | 118.9 | 107.1  | 108.4 | 104.7 | 121.6  | 113.4  |
| ELOF1  | 169   | 143.7  | 163   | 166.5  | 140.1 | 127.5 | 132.7  | 149.3  |
| ELOVL1 | 155.4 | 172.2  | 193.9 | 172.6  | 143.1 | 154.5 | 179.6  | 157    |
| ELOVL2 | 113.8 | 109.9  | 118.6 | 125.3  | 108.4 | 97.9  | 114.5  | 113.4  |
| ELOVL3 | 111.2 | 115.3  | 122.3 | 117.6  | 106.4 | 98.2  | 107.8  | 111    |
| ELOVL4 | 195.6 | 211.6  | 190.5 | 165.2  | 183.4 | 149.7 | 180.7  | 191.2  |
| ELOVL5 | 659   | 523.8  | 623.1 | 654.1  | 603.8 | 532.3 | 739.8  | 589.4  |
| ELOVL6 | 134   | 139.4  | 131.1 | 149.6  | 124   | 108.5 | 160.5  | 140.4  |
| ELOVL7 | 110.8 | 115.6  | 110.1 | 110.6  | 108   | 102.2 | 116.6  | 112.4  |

|         |        |        |        |        |        |        |        |        |
|---------|--------|--------|--------|--------|--------|--------|--------|--------|
| ELP3    | 359    | 413.4  | 344.9  | 387.8  | 316.3  | 250.9  | 374.7  | 332.2  |
| ELP4    | 147.1  | 136.2  | 163.5  | 141.2  | 115.5  | 125.6  | 140.1  | 131.5  |
| ELSPBP1 | 105.7  | 111.1  | 105.8  | 118.3  | 108.3  | 95.9   | 118.6  | 112.3  |
| EMCN    | 118.7  | 113    | 115.3  | 115.2  | 108.9  | 99.2   | 117.9  | 120    |
| EMD     | 621.1  | 662.6  | 731.9  | 680    | 538.1  | 639.4  | 681.5  | 731.1  |
| EME1    | 120.6  | 117    | 137    | 136.7  | 119.1  | 105.3  | 124.5  | 129.4  |
| EME2    | 119.1  | 123.9  | 111.5  | 118.6  | 105.1  | 102.3  | 111.9  | 110.4  |
| EMG1    | 376.1  | 547.2  | 372.6  | 414.2  | 387.8  | 323.6  | 377.7  | 463.9  |
| EMID1   | 116.8  | 119.3  | 107.9  | 121.7  | 111.9  | 97.5   | 121.9  | 118.5  |
| EMILIN1 | 115.7  | 127.4  | 116.7  | 124.3  | 112.4  | 101.1  | 124.7  | 115.1  |
| EMILIN2 | 390.4  | 284.5  | 682.1  | 406.8  | 207.3  | 498.1  | 350.2  | 235.2  |
| EMILIN3 | 116.9  | 109.6  | 110.9  | 117.7  | 106    | 96.1   | 111.1  | 114.8  |
| EML1    | 116.3  | 118    | 115.2  | 119.3  | 118.6  | 104.3  | 120.3  | 117.8  |
| EML1    | 118.7  | 128.9  | 115.5  | 120.2  | 109.6  | 98.7   | 121.4  | 108.7  |
| EML1    | 121.4  | 119.2  | 119.4  | 113.5  | 111.1  | 99     | 119.2  | 116.3  |
| EML3    | 1094.2 | 1256.1 | 2009.1 | 1171.1 | 939.9  | 1690.1 | 1082.3 | 1109.3 |
| EML4    | 630.2  | 568.5  | 464.5  | 569    | 554.9  | 501.8  | 539.7  | 734.7  |
| EML5    | 103.1  | 110.2  | 115.8  | 118.9  | 118    | 95.7   | 121    | 115.1  |
| EMP1    | 787.3  | 950.9  | 246.8  | 1227.6 | 892.6  | 628.4  | 2113.6 | 794.2  |
| EMP2    | 130.3  | 138.4  | 126.8  | 140.1  | 118.7  | 121.5  | 137.8  | 130.8  |
| EMP3    | 2659.1 | 2859.9 | 2511.9 | 3324.2 | 2403.8 | 2386.7 | 3056   | 2749.3 |
| EMR1    | 141.7  | 116    | 116.8  | 137.9  | 108.1  | 106.8  | 146.5  | 120.7  |
| EMR2    | 252.6  | 201.7  | 338.4  | 313    | 160.4  | 303.6  | 228.2  | 169.9  |
| EMR3    | 104.8  | 114.4  | 119.3  | 123.3  | 109.8  | 107.5  | 119.8  | 111.9  |
| EMR3    | 120.2  | 126.7  | 119    | 121.9  | 117.9  | 103.1  | 124.7  | 110.5  |
| EMR4    | 108.9  | 120.8  | 130.5  | 119.6  | 116.9  | 100.2  | 128    | 120.1  |
| EMR4    | 113.3  | 122.7  | 116.8  | 109.8  | 114.5  | 99.2   | 113.7  | 112.6  |
| EMX1    | 110.5  | 123.3  | 116    | 106.7  | 110.4  | 94.6   | 110.8  | 106    |
| EMX1    | 116.7  | 121.6  | 122.1  | 130.2  | 110.1  | 96.3   | 120.3  | 115.9  |
| EMX2    | 124.5  | 118    | 116.5  | 121    | 103.5  | 102.8  | 121.3  | 123.4  |
| EN1     | 118.3  | 111.3  | 116.4  | 115    | 105.4  | 95.4   | 119.9  | 112.4  |
| EN2     | 116.8  | 105.6  | 136.2  | 134.1  | 114.7  | 106.4  | 122.9  | 119.9  |
| ENAH    | 114.7  | 111.6  | 112.3  | 114    | 105.1  | 97.7   | 116.6  | 108.4  |
| ENAH    | 107.4  | 113.6  | 110.4  | 119.4  | 108.5  | 102.6  | 114.3  | 111.8  |
| ENAH    | 115.6  | 107.1  | 119    | 124.3  | 98     | 101.1  | 114.8  | 126.5  |
| ENAM    | 103.6  | 113.2  | 115.1  | 117.3  | 109.2  | 102.7  | 118    | 112.5  |
| ENC1    | 129    | 132.5  | 137.4  | 134.3  | 127.7  | 106.3  | 137.4  | 129.4  |
| ENDOG   | 195.2  | 153.2  | 167.7  | 155.3  | 127.1  | 131.6  | 150.9  | 146.2  |
| ENDOGL1 | 115.3  | 118.7  | 122.5  | 134.5  | 118.8  | 101.4  | 160.5  | 120.4  |
| ENG     | 293.6  | 187.5  | 404.2  | 325.7  | 160.2  | 368.3  | 331.2  | 148.1  |
| ENO1    | 3598.7 | 3670.8 | 3566.5 | 3713.3 | 2336.6 | 3377.6 | 4233.8 | 3342.7 |
| ENO2    | 285.2  | 266.6  | 347.5  | 301.2  | 219.7  | 289.7  | 281.6  | 222.9  |
| ENO3    | 188.2  | 161.2  | 229.6  | 240.5  | 194.8  | 140    | 197    | 191.8  |
| ENO3    | 123.8  | 120.7  | 135    | 129.3  | 117.9  | 121.9  | 125.8  | 122.8  |
| ENOSF1  | 157.4  | 181.9  | 201.2  | 169    | 146.1  | 133.6  | 138.1  | 174.3  |
| ENPEP   | 117.8  | 109    | 119    | 113.1  | 114.8  | 96.7   | 108.6  | 112.7  |
| ENPP1   | 125.1  | 125.9  | 119.4  | 132.5  | 127.3  | 103.3  | 117.9  | 125.2  |
| ENPP2   | 110.2  | 106.7  | 114.3  | 127.9  | 113.3  | 98.5   | 130.8  | 110.9  |
| ENPP2   | 108.2  | 118.6  | 122.4  | 113    | 105.4  | 109.7  | 130.8  | 123.2  |
| ENPP3   | 117.1  | 121.9  | 114.4  | 109.9  | 105.6  | 93.3   | 106.6  | 115.3  |
| ENPP4   | 221.4  | 240.5  | 219.1  | 233.8  | 212.2  | 181.4  | 195    | 182.2  |

|          |       |       |        |       |       |       |       |       |
|----------|-------|-------|--------|-------|-------|-------|-------|-------|
| ENPP5    | 119.1 | 139.3 | 119.3  | 125.2 | 115.8 | 102.9 | 136.1 | 126.1 |
| ENPP6    | 117.9 | 102.9 | 111.9  | 113.1 | 112   | 93.3  | 119.2 | 115.1 |
| ENPP7    | 123.2 | 127.3 | 124.1  | 119.6 | 118.8 | 112.2 | 128.3 | 125.6 |
| ENSA     | 121.9 | 121.4 | 114.7  | 117.7 | 112.8 | 103.9 | 128.1 | 120.4 |
| ENSA     | 193.5 | 207.1 | 218.7  | 202.8 | 158   | 144.6 | 177.8 | 173.3 |
| ENTH     | 629.5 | 879.2 | 778.5  | 762.8 | 652   | 598.9 | 724.3 | 814.7 |
| ENTPD1   | 128.2 | 145.6 | 170.3  | 131   | 129   | 116.1 | 136.6 | 128.1 |
| ENTPD2   | 115.1 | 115   | 111    | 119.2 | 102.2 | 97.3  | 110.5 | 110.5 |
| ENTPD2   | 117.8 | 114.7 | 122.9  | 113.5 | 105.1 | 97.3  | 115.4 | 117.9 |
| ENTPD3   | 123.5 | 116.8 | 120    | 119.1 | 107.3 | 105.5 | 113.5 | 116.4 |
| ENTPD4   | 307.7 | 360.9 | 342.4  | 316   | 335.4 | 188.8 | 303.6 | 382   |
| ENTPD5   | 112.6 | 122.6 | 118.4  | 128.4 | 111.9 | 104.1 | 123.3 | 112.4 |
| ENTPD6   | 266.6 | 276.7 | 322.4  | 270.1 | 220   | 246.6 | 266.7 | 292.9 |
| ENTPD7   | 120.5 | 125.2 | 121.7  | 126.7 | 114.7 | 115.2 | 122.8 | 120.8 |
| ENTPD8   | 102.8 | 117.7 | 119.8  | 115.1 | 113.3 | 102.2 | 111.6 | 112.4 |
| ENTPD8   | 126.9 | 125.4 | 126.2  | 133.1 | 118.4 | 121.3 | 121.1 | 128.7 |
| ENTPD8   | 109.8 | 117.1 | 111.1  | 117   | 104.7 | 101.8 | 114.5 | 119.7 |
| ENY2     | 672.7 | 601.1 | 767.6  | 643.4 | 536.4 | 888.7 | 628.5 | 548.6 |
| EOMES    | 835.7 | 939.7 | 1226.4 | 788.7 | 544.6 | 828.8 | 578.2 | 507.9 |
| EP300    | 244.5 | 248.8 | 181.2  | 285.2 | 235.1 | 221.3 | 331.4 | 375.9 |
| EP400    | 351.7 | 395.5 | 347.7  | 431.7 | 412.2 | 333.3 | 395.2 | 432.8 |
| EP400NL  | 112.5 | 115.9 | 114.7  | 116.3 | 107.1 | 101.8 | 116.1 | 117.4 |
| EPAG     | 110.9 | 122.7 | 111.8  | 117   | 103.1 | 97.1  | 115.6 | 111.4 |
| EPAS1    | 121   | 127.2 | 123.1  | 140.3 | 120.9 | 123.5 | 150.2 | 151.2 |
| EPB41    | 123.5 | 131.3 | 138.7  | 137.9 | 113.7 | 127   | 141.3 | 142.4 |
| EPB41    | 119.5 | 118.5 | 114    | 111.6 | 114.8 | 106   | 121.3 | 117.7 |
| EPB41    | 141.7 | 161.9 | 158.4  | 156.2 | 156.2 | 137.7 | 147.8 | 192   |
| EPB41L1  | 122.7 | 107.8 | 110.4  | 114.3 | 106.9 | 98.3  | 119.7 | 111.6 |
| EPB41L1  | 122   | 124.9 | 122.9  | 128.5 | 116.9 | 109.4 | 128.4 | 108.1 |
| EPB41L2  | 116.3 | 122.5 | 121    | 121.4 | 104.1 | 99.4  | 120.8 | 121.8 |
| EPB41L3  | 341.8 | 151.3 | 1118.7 | 338.1 | 140.6 | 850.2 | 199.4 | 132.8 |
| EPB41L4B | 119.3 | 116.6 | 126.7  | 128.4 | 119.3 | 104.4 | 114.1 | 124   |
| EPB41L4B | 118.8 | 108.9 | 129.6  | 126.9 | 113.8 | 101.6 | 121.8 | 112.3 |
| EPB41L5  | 120.1 | 117.2 | 120.9  | 121.3 | 117.9 | 101.6 | 126.4 | 116.9 |
| EPB42    | 115   | 117.8 | 117    | 127   | 108.9 | 94.5  | 122.3 | 113.6 |
| EPB49    | 122.9 | 124.3 | 114.7  | 118.9 | 116.6 | 108.4 | 120.6 | 119.9 |
| EPC1     | 263.3 | 287.3 | 211.4  | 338.2 | 303.8 | 143.2 | 367.5 | 381   |
| EPC2     | 135.7 | 152   | 132.7  | 146.8 | 120.5 | 109.7 | 138.9 | 137.9 |
| EPDR1    | 121.5 | 124.2 | 121.3  | 128.9 | 119.1 | 112.4 | 130.3 | 139.6 |
| EPGN     | 124.8 | 118   | 144.9  | 142.9 | 125.1 | 111.4 | 120.2 | 126.3 |
| EPHA1    | 280.2 | 347.5 | 417.8  | 283.1 | 187.3 | 268.1 | 189.1 | 180.7 |
| EPHA10   | 128.2 | 125.8 | 133.6  | 135.6 | 128   | 108   | 134.3 | 131   |
| EPHA10   | 112.2 | 122.9 | 116.8  | 125   | 110.6 | 98.7  | 119.7 | 116.1 |
| EPHA2    | 114.7 | 121.3 | 127.6  | 120   | 115.5 | 95.6  | 123.8 | 111.7 |
| EPHA3    | 114.4 | 109.2 | 115.1  | 125.7 | 106.5 | 94.6  | 120.9 | 118.3 |
| EPHA3    | 117.1 | 116.2 | 112    | 115.5 | 106.4 | 94    | 120.3 | 107.9 |
| EPHA3    | 116.8 | 116.1 | 122.1  | 125.3 | 108.4 | 110.9 | 125.3 | 112.5 |
| EPHA4    | 221.4 | 229.3 | 233.1  | 216.7 | 183.4 | 167.8 | 181.8 | 173.1 |
| EPHA5    | 119.9 | 132.8 | 133.3  | 126.7 | 112.6 | 113.4 | 129.3 | 112   |
| EPHA5    | 107.3 | 108.5 | 108.6  | 117.8 | 105.3 | 95    | 111.4 | 117.2 |
| EPHA5    | 119.3 | 108.6 | 123.8  | 125.8 | 114.7 | 111.2 | 118.6 | 133.5 |

|          |       |       |       |        |       |       |       |       |
|----------|-------|-------|-------|--------|-------|-------|-------|-------|
| EPHA6    | 117.8 | 107   | 134.2 | 128    | 112.4 | 95.8  | 112.9 | 119.9 |
| EPHA6    | 127.3 | 144.9 | 122.4 | 125    | 113.2 | 106.3 | 117.3 | 128.8 |
| EPHA7    | 114.8 | 109.9 | 113.8 | 110.7  | 110.7 | 99.9  | 115.6 | 116.1 |
| EPHA8    | 110.4 | 128.3 | 138.3 | 116.8  | 124.9 | 108.1 | 130.4 | 122.9 |
| EPHA8    | 111.7 | 107.6 | 112.4 | 117.8  | 112.8 | 96    | 115.9 | 121.7 |
| EPHB1    | 118.4 | 114.9 | 118.9 | 119.2  | 109.8 | 101   | 118   | 112.9 |
| EPHB2    | 130.2 | 132.3 | 150   | 130.5  | 117.4 | 123.8 | 121.6 | 135.1 |
| EPHB2    | 109.5 | 115.7 | 124.1 | 120    | 108.5 | 103.7 | 114.6 | 114.1 |
| EPHB3    | 128.8 | 131.7 | 125.1 | 126.7  | 122.3 | 101   | 129.8 | 127.9 |
| EPHB4    | 119.3 | 126   | 121.1 | 126.5  | 108.1 | 106.4 | 120.8 | 128.3 |
| EPHB6    | 206.2 | 215.2 | 214.6 | 253.7  | 153.9 | 165.7 | 200.4 | 152.7 |
| EPHX1    | 130.4 | 121.1 | 131.4 | 140.4  | 123   | 112.5 | 140.6 | 141.4 |
| EPHX2    | 153.9 | 144.8 | 148   | 162.2  | 119.4 | 115.7 | 127.7 | 122   |
| EPIM     | 125   | 119.6 | 132.2 | 127.9  | 127.7 | 107.6 | 117.5 | 131.2 |
| EPM2A    | 124.2 | 128.8 | 128.5 | 117.3  | 119.8 | 114.5 | 113.3 | 137   |
| EPM2A    | 108   | 100.9 | 107.9 | 111.5  | 109.2 | 97.1  | 110.7 | 114.6 |
| EPM2AIP1 | 259.7 | 288.7 | 350.6 | 271.2  | 230.6 | 257.1 | 247.1 | 230   |
| EPN1     | 950.5 | 915.9 | 910.9 | 1096.5 | 642.6 | 778.2 | 897.9 | 826.4 |
| EPN2     | 119.4 | 113.8 | 118   | 117.3  | 115.6 | 108.9 | 136.8 | 110.4 |
| EPN2     | 108.2 | 113.3 | 117.9 | 115.6  | 104.4 | 93.9  | 118.2 | 101.9 |
| EPN2     | 102.6 | 123.3 | 115.9 | 122    | 111.5 | 96.6  | 123.4 | 115.1 |
| EPN3     | 124.2 | 118.1 | 130.8 | 122.8  | 112   | 101.5 | 108.7 | 117   |
| EPO      | 111.3 | 117.8 | 106.7 | 108.6  | 109.2 | 104.6 | 118.4 | 115.1 |
| EPOR     | 113.5 | 109.9 | 118.8 | 117.8  | 107.6 | 108.1 | 121.1 | 110.9 |
| EPPB9    | 109   | 112   | 117.7 | 119.9  | 111.5 | 107.4 | 117.1 | 118.6 |
| EPR1     | 115.3 | 112.7 | 123.1 | 111.4  | 104.1 | 96.5  | 109.5 | 125.2 |
| EPRS     | 795.2 | 925.9 | 821   | 934.5  | 723.2 | 745.9 | 753.8 | 911.4 |
| EPS15    | 197.5 | 208.1 | 236.7 | 213.4  | 168.4 | 181.6 | 183.9 | 211.4 |
| EPS15L1  | 144.6 | 135.7 | 130.8 | 138.6  | 132.2 | 112   | 140.8 | 139.9 |
| EPS8L1   | 117.2 | 108.8 | 116.3 | 112.8  | 107.7 | 95.1  | 115.1 | 117.9 |
| EPS8L1   | 122.6 | 118.1 | 123   | 121.6  | 111.7 | 97.5  | 121   | 109.1 |
| EPS8L1   | 114.7 | 116.1 | 118.9 | 121.2  | 108.8 | 100   | 120.5 | 115   |
| EPS8L1   | 123.3 | 110.9 | 122.2 | 133.1  | 110.8 | 105.7 | 120.9 | 117.1 |
| EPS8L2   | 117   | 124.3 | 130.5 | 124.3  | 113.6 | 106.5 | 114.8 | 118.3 |
| EPS8L3   | 110.8 | 118.1 | 121.5 | 116.7  | 109.7 | 99.9  | 122.2 | 115.2 |
| EPS8L3   | 121.3 | 122.3 | 131.2 | 130.6  | 120.6 | 108.2 | 124.4 | 117   |
| EPSTI1   | 764.4 | 361.7 | 838.9 | 671.3  | 276   | 501.5 | 419.9 | 222.9 |
| EPX      | 125.2 | 119.2 | 128.8 | 132.4  | 124.5 | 101.2 | 118   | 119.6 |
| ERAF     | 119.3 | 109.3 | 132.7 | 125.9  | 114.4 | 115.6 | 131.8 | 122.8 |
| ERAL1    | 255.5 | 255.5 | 366.8 | 299.3  | 212.6 | 262.9 | 244.2 | 266   |
| ERAS     | 105.9 | 108.9 | 113.6 | 118.3  | 107.7 | 102.7 | 120.7 | 121.5 |
| ERBB2    | 118.1 | 119.5 | 116.2 | 108.3  | 108.6 | 99.5  | 125.1 | 109.8 |
| ERBB2    | 117.5 | 118.5 | 125.8 | 127.6  | 115.4 | 105.7 | 117.4 | 107.1 |
| ERBB2    | 118.4 | 133.7 | 132.5 | 130.7  | 117.5 | 104   | 128.1 | 126.2 |
| ERBB2IP  | 119.2 | 121.9 | 128.6 | 133.2  | 122.7 | 116   | 130.5 | 124.8 |
| ERBB2IP  | 124.6 | 119.9 | 125.9 | 127.3  | 111.6 | 102.3 | 127.4 | 115.2 |
| ERBB3    | 116.2 | 124.1 | 134.5 | 130.2  | 123.9 | 107.2 | 130.6 | 129.3 |
| ERBB3    | 110.2 | 112   | 120.6 | 118.5  | 101.8 | 97.3  | 119.4 | 118.9 |
| ERBB3    | 134.6 | 116.9 | 134   | 121.1  | 119.7 | 113.7 | 118   | 110   |
| ERBB4    | 129.9 | 133.4 | 133   | 136.1  | 129.5 | 105.9 | 133.2 | 145   |
| ERC1     | 128   | 123.2 | 140.8 | 124.2  | 119   | 112.6 | 121.1 | 126.9 |

|        |        |        |        |        |        |        |        |        |
|--------|--------|--------|--------|--------|--------|--------|--------|--------|
| ERCC1  | 239.9  | 263.3  | 390.6  | 254.7  | 216.6  | 215.1  | 191.8  | 164.4  |
| ERCC1  | 232.8  | 274.2  | 360.3  | 261.3  | 194.8  | 187.3  | 213.7  | 174.4  |
| ERCC1  | 110.8  | 120.5  | 121.5  | 121.4  | 101.8  | 96.1   | 130.7  | 110.7  |
| ERCC2  | 131.6  | 125.4  | 142.5  | 143.8  | 117.8  | 115.6  | 128.2  | 129.7  |
| ERCC3  | 242.6  | 279.3  | 230.7  | 259.3  | 210.7  | 184.6  | 255.2  | 230    |
| ERCC4  | 116.4  | 115.4  | 122.2  | 129.7  | 120.1  | 102.2  | 124.2  | 118.3  |
| ERCC5  | 599.5  | 767    | 731.5  | 699.8  | 676.1  | 614.6  | 663    | 683.2  |
| ERCC6  | 119.4  | 131.7  | 123.5  | 119.8  | 105.9  | 109.1  | 117.5  | 120.4  |
| ERCC8  | 115.9  | 121.4  | 122.8  | 116.1  | 109.1  | 98.4   | 111.7  | 121.7  |
| ERCC8  | 107.9  | 118.9  | 133    | 120.3  | 112.1  | 103.5  | 123.9  | 116.8  |
| ERCC8  | 116.1  | 119.1  | 118.4  | 109.1  | 101.7  | 96.1   | 116.8  | 114.3  |
| ERCC8  | 119.3  | 113.8  | 120    | 136    | 102.3  | 98.2   | 122.6  | 114.3  |
| EREG   | 126.1  | 144.9  | 123.6  | 191.8  | 148.4  | 120.1  | 178.7  | 124.7  |
| ERF    | 146.2  | 156    | 149.4  | 144.8  | 128    | 140.7  | 155.3  | 202.8  |
| ERG    | 113.6  | 116.7  | 111.5  | 124.2  | 109.1  | 94.8   | 116.6  | 119.6  |
| ERG    | 116.2  | 116.7  | 125.9  | 129.9  | 119.1  | 101.3  | 117    | 112.8  |
| ERG    | 120    | 117.4  | 130    | 126.3  | 108    | 101.9  | 135.8  | 125.1  |
| ERGIC1 | 181.4  | 230.1  | 217.8  | 195.5  | 198.4  | 177    | 159.8  | 153.2  |
| ERGIC1 | 117.9  | 125.4  | 125.5  | 123.7  | 117.4  | 116.3  | 122.5  | 110.2  |
| ERGIC1 | 135.8  | 135.1  | 129.5  | 130.9  | 128.3  | 112    | 134.6  | 131.5  |
| ERGIC2 | 203.5  | 195.2  | 175.8  | 218.3  | 168.9  | 174.5  | 245.5  | 201.4  |
| ERGIC3 | 283.4  | 287    | 234.8  | 298.9  | 209    | 217.1  | 222.7  | 236.5  |
| ERGIC3 | 999.7  | 1303   | 1030.8 | 1189.5 | 1004.4 | 878.3  | 1178.9 | 1271.1 |
| ERH    | 421.3  | 526.5  | 519.9  | 507.1  | 452.5  | 397.7  | 509.7  | 564.8  |
| ERICH1 | 605.1  | 467.5  | 565    | 634.1  | 415.4  | 458.7  | 537.9  | 384.8  |
| ERLIN2 | 114.1  | 126.2  | 126.9  | 124.3  | 125.5  | 105.5  | 123.6  | 127.4  |
| ERMAP  | 118.5  | 104.9  | 106.7  | 112.4  | 108.6  | 102.7  | 134.7  | 119.2  |
| ERMAP  | 137.3  | 168.2  | 150    | 147.7  | 152.9  | 114.6  | 139.7  | 172.8  |
| ERN1   | 236.2  | 233.9  | 254.9  | 244.1  | 212.3  | 175.7  | 229.2  | 246.8  |
| ERN1   | 123.7  | 110.8  | 113.9  | 119    | 101.8  | 102    | 105    | 106.8  |
| ERN2   | 111.5  | 122.9  | 129.2  | 118.5  | 114.1  | 99.9   | 123.8  | 118.6  |
| ERO1L  | 185.7  | 204.6  | 178.5  | 191.3  | 179.4  | 164.4  | 197.7  | 177.8  |
| ERO1LB | 134.6  | 123    | 130.2  | 132.1  | 120.1  | 119.2  | 127.1  | 122.5  |
| ERP29  | 387.7  | 469.9  | 505.6  | 399.3  | 365.6  | 361.8  | 294.1  | 360.3  |
| ERP29  | 3163.8 | 3871.7 | 3448.9 | 3373.1 | 2842.8 | 2628.5 | 2841.4 | 2882.4 |
| ERRFI1 | 156.1  | 173.4  | 165.8  | 165.2  | 145.2  | 128.9  | 199.7  | 259    |
| ERV3   | 114.4  | 118.5  | 128.7  | 119.2  | 117.3  | 114.5  | 112.2  | 123.2  |
| ERVWE1 | 109.7  | 112.5  | 113.9  | 115.9  | 110.5  | 103    | 119    | 116    |
| ESAM   | 124.2  | 121.7  | 123.6  | 120    | 109.9  | 99.5   | 134.4  | 119.7  |
| ESCO1  | 140.1  | 142    | 129    | 149.8  | 122.6  | 112.5  | 139.7  | 157.5  |
| ESCO2  | 110.7  | 107.4  | 115.5  | 112    | 101.9  | 98.5   | 124.9  | 108.6  |
| ESD    | 152.3  | 149.7  | 148.8  | 160.2  | 141.8  | 129.6  | 149.1  | 142.2  |
| ESM1   | 118.5  | 123.7  | 118.3  | 113.4  | 109.6  | 106.1  | 114.4  | 114.4  |
| ESPL1  | 119.3  | 122.4  | 125.9  | 143.5  | 129.2  | 109.4  | 127.4  | 122.2  |
| ESPN   | 119.2  | 112.4  | 117.3  | 120.4  | 104    | 98.7   | 119.4  | 117.5  |
| ESPNL  | 110.3  | 117.7  | 114.3  | 119.6  | 100    | 100.6  | 112.5  | 115.8  |
| ESR1   | 107    | 112.8  | 111.7  | 110.6  | 109    | 100.1  | 119.2  | 111.8  |
| ESR2   | 130    | 121.1  | 128.9  | 124.9  | 121.5  | 109.1  | 133.5  | 123.5  |
| ESR2   | 121.7  | 117.9  | 122.9  | 124.3  | 106.9  | 101.2  | 119    | 124.4  |
| ESRRA  | 168.7  | 191.7  | 189.9  | 186.4  | 138.1  | 137.9  | 204.3  | 198.5  |
| ESRRB  | 119.3  | 134.4  | 122.1  | 120.1  | 115.2  | 105.7  | 118.3  | 112.8  |

|        |        |        |        |        |        |        |        |        |
|--------|--------|--------|--------|--------|--------|--------|--------|--------|
| ESRRG  | 125.2  | 131.3  | 125.4  | 140.2  | 118.6  | 107.4  | 114.1  | 118.3  |
| ESRRG  | 115.6  | 110.6  | 114    | 112.8  | 108.4  | 98.2   | 118.8  | 115.2  |
| ESRRG  | 100.4  | 105.8  | 106.9  | 109.4  | 101.6  | 89.3   | 107.1  | 107.5  |
| ESSPL  | 107.2  | 113.2  | 109.1  | 108.1  | 104.4  | 93.1   | 111.6  | 112.2  |
| ESTRRA | 150.4  | 164.2  | 150.2  | 155.1  | 155.1  | 146    | 145    | 157.5  |
| ESX1   | 109.1  | 114    | 131.1  | 123.4  | 105.8  | 93     | 123.4  | 117.2  |
| ET     | 377.3  | 402.9  | 380.7  | 381.5  | 343.4  | 277.4  | 509    | 533.9  |
| ETAA16 | 125.5  | 124.2  | 128.5  | 140.3  | 115.9  | 112.9  | 134.9  | 115    |
| ETF1   | 424.7  | 482.7  | 390    | 506.2  | 418.3  | 373    | 622.8  | 711    |
| ETFA   | 573.8  | 647.3  | 742.3  | 560.4  | 512.3  | 506.8  | 372.9  | 388.4  |
| ETFB   | 109.9  | 112.1  | 105.4  | 117    | 107.8  | 97.1   | 113.5  | 108.8  |
| ETFB   | 221.2  | 209.5  | 387.3  | 245.7  | 232.6  | 284.5  | 191.8  | 190.4  |
| ETFB   | 317.8  | 345.5  | 561.6  | 368.2  | 298.3  | 419.8  | 314.3  | 334.6  |
| ETFDH  | 230.1  | 230.2  | 250.1  | 246.3  | 223.7  | 206.5  | 244.2  | 291.7  |
| ETHE1  | 119.9  | 117.4  | 115.4  | 118.1  | 113.8  | 111.3  | 115.9  | 123    |
| ETNK1  | 112.3  | 124.9  | 121.8  | 135.9  | 119.3  | 116.4  | 128.6  | 134.3  |
| ETNK1  | 148.2  | 150    | 162.1  | 170.4  | 146.8  | 156.7  | 166.1  | 179.5  |
| ETNK1  | 203.8  | 167.2  | 154.2  | 215.3  | 164.3  | 170.6  | 221.6  | 192.5  |
| ETNK2  | 119.9  | 120    | 114.1  | 131.4  | 99.1   | 95.8   | 116.8  | 116.6  |
| ETS1   | 2742.1 | 2816.2 | 2616.6 | 2296.3 | 1852.3 | 2508.4 | 2002.7 | 2401.4 |
| ETS2   | 302.6  | 249.7  | 230.9  | 482.3  | 256.3  | 370    | 558.6  | 260.4  |
| ETV1   | 108.3  | 110.6  | 109    | 110.4  | 104.8  | 97.7   | 114.1  | 104.6  |
| ETV2   | 121    | 124.3  | 140    | 139.1  | 114.6  | 114.7  | 138.7  | 123.7  |
| ETV3   | 135    | 148.1  | 140.9  | 142.2  | 132.3  | 109.2  | 154.3  | 145    |
| ETV4   | 118.6  | 123.8  | 117.6  | 113.5  | 108.7  | 103.5  | 111.7  | 106.3  |
| ETV4   | 110.3  | 117.7  | 111.4  | 108.3  | 110    | 96.5   | 114    | 109.8  |
| ETV5   | 102.5  | 113.1  | 175.5  | 120.7  | 108.8  | 111.1  | 117.6  | 107.2  |
| ETV5   | 122.2  | 137.6  | 135.9  | 120.8  | 109.5  | 100.1  | 122.5  | 116.3  |
| ETV6   | 218.4  | 160.4  | 252.4  | 194.8  | 153.1  | 177.5  | 152.6  | 150.6  |
| EVA1   | 119.8  | 122.2  | 126.5  | 117.8  | 114.5  | 104.7  | 117    | 118.7  |
| EVA1   | 177.7  | 229.2  | 154.2  | 186.8  | 165.5  | 126    | 161    | 168    |
| EVA1   | 104.9  | 104.3  | 112.1  | 113.8  | 98.2   | 96     | 110.7  | 114.5  |
| EVC    | 123.9  | 113.1  | 124.8  | 121.7  | 114.2  | 96.1   | 117    | 116.9  |
| EVC    | 128.5  | 118.3  | 125.6  | 118.6  | 109.9  | 103.5  | 135.4  | 119.9  |
| EVC2   | 113.2  | 109.6  | 120    | 118.5  | 111    | 103.8  | 124.7  | 118.5  |
| EVI1   | 112.4  | 114.2  | 111.8  | 119.4  | 101.6  | 89.4   | 114.5  | 113.3  |
| EVI2A  | 218.5  | 204    | 194.5  | 239.1  | 178.9  | 168.4  | 231.8  | 196.6  |
| EVI2A  | 143.4  | 131.4  | 133.9  | 152.6  | 125.6  | 110.6  | 144.1  | 178.1  |
| EVI2B  | 105.5  | 118.9  | 119.5  | 122.8  | 109.6  | 103.2  | 124.3  | 108.8  |
| EVI5L  | 179.6  | 201.9  | 193.1  | 201.5  | 189.2  | 174.3  | 203.3  | 187.1  |
| EVL    | 4456   | 4927.4 | 5378.5 | 4555.9 | 3681.6 | 3409.4 | 3052.3 | 2970.4 |
| EVPL   | 110.1  | 119    | 113.8  | 116.2  | 114.2  | 97.8   | 115.5  | 115.7  |
| EVX1   | 121.6  | 130    | 124.5  | 136.2  | 111.4  | 114.4  | 133.4  | 123.7  |
| EVX2   | 121.6  | 116.1  | 111.3  | 118.6  | 110.9  | 104.6  | 116.4  | 122.9  |
| EWSR1  | 467    | 458.3  | 491.2  | 602.1  | 473    | 557.1  | 714.9  | 1050.8 |
| EWSR1  | 133.4  | 134.5  | 146.6  | 134.1  | 119.4  | 121.4  | 132.1  | 122.9  |
| EWSR1  | 684.7  | 691.5  | 822.5  | 845.6  | 824    | 867    | 1074.9 | 1276.4 |
| EXDL1  | 109    | 116.7  | 116.5  | 120    | 109.2  | 97.4   | 122.5  | 119.7  |
| EXDL2  | 164.5  | 178.6  | 182.2  | 165.5  | 162.5  | 133.4  | 150.4  | 136.7  |
| EXO1   | 120.1  | 125    | 120.5  | 127.7  | 111.3  | 94.4   | 119.2  | 116.3  |
| EXO1   | 113.1  | 116.4  | 119.3  | 120.3  | 103.6  | 99.2   | 115.3  | 115.6  |



|         |       |       |       |       |       |       |       |       |
|---------|-------|-------|-------|-------|-------|-------|-------|-------|
| EXO1    | 114.3 | 115.4 | 133.5 | 121.4 | 114.9 | 101.3 | 119.7 | 117.4 |
| EXOC1   | 123.5 | 125   | 136.7 | 137.8 | 126.4 | 106.4 | 144.9 | 121.7 |
| EXOC1   | 140.4 | 121.1 | 144.8 | 142.1 | 133.6 | 131.1 | 134.9 | 133.8 |
| EXOC1   | 285.8 | 272.6 | 303.7 | 274.4 | 268.5 | 230.4 | 274.8 | 255.4 |
| EXOC2   | 211.3 | 208.2 | 186.5 | 208.5 | 182.6 | 162.2 | 177.8 | 206.2 |
| EXOC3L  | 112.8 | 124.8 | 115.7 | 111   | 119.8 | 97.7  | 119.3 | 115.6 |
| EXOC4   | 144.1 | 127.9 | 145.5 | 127.1 | 131.2 | 110.8 | 126.5 | 141   |
| EXOC6   | 115.5 | 125.1 | 119.9 | 133.1 | 116.4 | 101.7 | 121.7 | 119.5 |
| EXOC6   | 163.1 | 190.8 | 161.4 | 206.7 | 158.9 | 137.7 | 156.9 | 160.5 |
| EXOC6   | 122.8 | 124.1 | 141.1 | 122.2 | 104.6 | 100.2 | 122.2 | 120   |
| EXOC7   | 630   | 697.3 | 530.6 | 800.8 | 561   | 484.6 | 899.4 | 875.9 |
| EXOC7   | 148.1 | 130   | 121.8 | 129.1 | 135.9 | 111.7 | 124.8 | 145.9 |
| EXOC8   | 124.3 | 120.8 | 127.2 | 149.5 | 118.8 | 112.6 | 131.5 | 132.8 |
| EXOSC1  | 666.1 | 642.8 | 699.3 | 593.2 | 681.7 | 610.3 | 554.2 | 550.7 |
| EXOSC10 | 336   | 382   | 404.6 | 371.8 | 335.5 | 364.4 | 389.7 | 402   |
| EXOSC10 | 364.9 | 393.2 | 359.6 | 516.4 | 319   | 334.7 | 446.6 | 402.2 |
| EXOSC10 | 321.8 | 326.6 | 340.1 | 361.1 | 335.5 | 286.1 | 292.9 | 288.1 |
| EXOSC2  | 222.6 | 223   | 233.5 | 231.5 | 230.2 | 161.3 | 234.1 | 201.6 |
| EXOSC3  | 295.8 | 333.4 | 308.6 | 320.5 | 235   | 212.8 | 261.6 | 249.5 |
| EXOSC3  | 307.6 | 404.5 | 290   | 302.9 | 251.3 | 255.8 | 274.4 | 269.1 |
| EXOSC4  | 171.6 | 169.3 | 168   | 179.3 | 149   | 147.3 | 178.7 | 143.6 |
| EXOSC5  | 189.6 | 187.1 | 191.9 | 192.1 | 184.6 | 145.9 | 190.3 | 166.8 |
| EXOSC6  | 497.2 | 546.5 | 369.8 | 459.7 | 380.1 | 282.8 | 495   | 579.2 |
| EXOSC7  | 254   | 249.5 | 229.9 | 252.4 | 207.3 | 179.5 | 190   | 173.1 |
| EXOSC8  | 391.4 | 435.8 | 434.7 | 433.3 | 406.2 | 410.9 | 426.7 | 439.6 |
| EXOSC9  | 149.9 | 154.4 | 181.5 | 165.4 | 150.7 | 148.1 | 174.5 | 152   |
| EXOSC9  | 162.6 | 196.9 | 229.2 | 195.3 | 162.4 | 177.9 | 176.4 | 189.9 |
| EXPH5   | 124.7 | 134.1 | 118.5 | 136.3 | 114.9 | 104.4 | 132.6 | 141.5 |
| EXT1    | 137.1 | 149.1 | 130.4 | 144.9 | 136.9 | 112.9 | 130.9 | 127.7 |
| EXT2    | 110.8 | 119.4 | 118   | 118.4 | 106   | 100.2 | 115   | 116.9 |
| EXT2    | 193.9 | 226.2 | 183.5 | 208.3 | 214.5 | 152.2 | 201.4 | 232.3 |
| EXT2    | 168.8 | 156   | 151.8 | 154.5 | 149.1 | 120.8 | 166   | 158.4 |
| EXTL1   | 119.4 | 120.6 | 118.7 | 119.4 | 115.2 | 108.4 | 124.5 | 125.9 |
| EXTL2   | 114.5 | 121.1 | 117.6 | 132.9 | 119.7 | 104.7 | 135.1 | 125.7 |
| EXTL2   | 153.4 | 169.4 | 140.1 | 176.8 | 141.4 | 108.1 | 161.4 | 154.7 |
| EXTL3   | 202.5 | 209.4 | 176.3 | 187.8 | 151   | 166.2 | 217.6 | 181.1 |
| EYA1    | 108.1 | 119.7 | 130.9 | 116.9 | 109.6 | 110.3 | 114.3 | 117.7 |
| EYA1    | 109   | 110.8 | 110   | 112.5 | 109.2 | 92.7  | 118.1 | 110.8 |
| EYA1    | 112.6 | 120.8 | 96.9  | 115.9 | 104.9 | 92.9  | 115.8 | 120.2 |
| EYA2    | 113.2 | 113.4 | 113.8 | 122.5 | 103.4 | 97.9  | 141.3 | 116.8 |
| EYA2    | 108.9 | 112.2 | 114.6 | 111.7 | 116.2 | 98.4  | 122.9 | 112.8 |
| EYA2    | 111.1 | 119.9 | 120.6 | 113.1 | 113.7 | 100.7 | 120.4 | 122.7 |
| EYA2    | 113.7 | 112.1 | 123.2 | 112.4 | 100.8 | 92.5  | 114.9 | 117.4 |
| EYA2    | 108.7 | 117.1 | 123.9 | 120.1 | 110   | 101.1 | 122.5 | 111.5 |
| EYA3    | 115.6 | 117.9 | 129.6 | 117.3 | 107.1 | 113.9 | 120.6 | 129.1 |
| EYA3    | 115.3 | 123.4 | 116.4 | 115.8 | 105.3 | 102.7 | 108.8 | 121.7 |
| EYA4    | 123.8 | 135.2 | 127.5 | 114.7 | 113.8 | 103.8 | 117.5 | 125.9 |
| EYA4    | 114.4 | 118.7 | 118.3 | 126.2 | 113.2 | 107.4 | 120.3 | 125.6 |
| EYA4    | 113.3 | 108.1 | 119.8 | 118.7 | 109.8 | 99.5  | 111.2 | 115.6 |
| EZH1    | 152.6 | 131.5 | 149.1 | 130.4 | 136   | 110.7 | 146.2 | 144.8 |
| EZH2    | 124.7 | 127.3 | 133   | 125.9 | 123.1 | 100   | 131   | 128.9 |

|         |       |         |         |         |         |        |         |         |
|---------|-------|---------|---------|---------|---------|--------|---------|---------|
| EZH2    | 115.5 | 121.8   | 123.4   | 137.6   | 113.5   | 108.8  | 126.9   | 129.4   |
| EZH2    | 132.1 | 136     | 131.3   | 125.1   | 123.9   | 109    | 133.5   | 146.5   |
| F10     | 107.6 | 110.6   | 110.5   | 113.9   | 111.2   | 95.2   | 111.2   | 111.5   |
| F11     | 121.3 | 120.2   | 127.1   | 129.2   | 115.8   | 107.6  | 128.3   | 122.8   |
| F11     | 116.8 | 116.6   | 108.9   | 110.8   | 103.3   | 91.2   | 110.1   | 124.1   |
| F11R    | 111.7 | 119.3   | 118.2   | 114.8   | 117.2   | 99.1   | 114.7   | 106.6   |
| F11R    | 117.7 | 111.7   | 122.5   | 118.6   | 103.7   | 97.7   | 111.8   | 116.9   |
| F11R    | 153.7 | 162.4   | 201.1   | 160.9   | 144.1   | 145.4  | 168.9   | 166.8   |
| F12     | 109.7 | 125.9   | 121.7   | 121.8   | 106.1   | 99.6   | 123.4   | 114.1   |
| F13A1   | 112.3 | 113.9   | 124.2   | 109.3   | 111.1   | 97.3   | 125.3   | 111.7   |
| F13B    | 112   | 107.6   | 118.9   | 122.7   | 107.9   | 101.5  | 110.9   | 109     |
| F25965  | 136.2 | 133.5   | 146.8   | 128.7   | 126.4   | 120.1  | 150.9   | 139.2   |
| F2R     | 15130 | 16512.2 | 13360.9 | 16107.4 | 14327.4 | 8948.1 | 16997.9 | 17229.2 |
| F2RL1   | 147.6 | 146.2   | 153     | 141.8   | 126.3   | 137.4  | 132.7   | 136.2   |
| F2RL2   | 118.9 | 117.5   | 116.7   | 114     | 110.7   | 103.7  | 116.7   | 103.6   |
| F2RL3   | 122.3 | 124.6   | 121.6   | 113.9   | 113.3   | 102.4  | 116.4   | 114.9   |
| F3      | 117.7 | 120.3   | 115.7   | 121.7   | 110.7   | 97.9   | 129.1   | 118.3   |
| F5      | 128.7 | 135.3   | 127.1   | 130.9   | 137.7   | 114.6  | 131.1   | 127.3   |
| F7      | 103.6 | 108.4   | 105.8   | 113.8   | 106     | 90.9   | 111.6   | 107.9   |
| F7      | 119.5 | 122.2   | 120.9   | 122.2   | 121.7   | 106.9  | 125.7   | 128.7   |
| F7      | 120   | 118.3   | 115.6   | 108.9   | 104.6   | 105.3  | 122.6   | 133.6   |
| F8      | 115.1 | 115.3   | 118     | 116.9   | 107     | 102.1  | 121     | 109.5   |
| F8      | 109.3 | 114.2   | 114.3   | 122.4   | 107.9   | 95.6   | 113.9   | 119.3   |
| F8      | 124.6 | 120.6   | 118.9   | 115.5   | 114     | 99.4   | 131.5   | 114.3   |
| F8A1    | 188.2 | 237.1   | 199     | 202.5   | 171.2   | 195.5  | 199.2   | 166.6   |
| F8A3    | 124.3 | 123     | 115.1   | 132.2   | 108.5   | 104.4  | 137.7   | 123.5   |
| F9      | 129.6 | 118.6   | 123.8   | 114.7   | 113.2   | 103.5  | 122.7   | 116     |
| FA2H    | 109.2 | 126.3   | 129.3   | 113.9   | 113.9   | 103.2  | 117.3   | 116.7   |
| FAAH    | 119.8 | 134.7   | 130.5   | 161.4   | 118     | 111.4  | 124     | 118.8   |
| FABP1   | 112.9 | 109.4   | 122.1   | 119.4   | 108.7   | 93     | 117.7   | 112.7   |
| FABP2   | 113.4 | 123.9   | 133.2   | 127.1   | 113.6   | 95.9   | 119     | 113.5   |
| FABP3   | 110.1 | 108.2   | 112.1   | 111.4   | 98.7    | 95.5   | 110.3   | 125.8   |
| FABP4   | 119.7 | 130.4   | 134.3   | 120.2   | 114.9   | 107.7  | 121.7   | 116.7   |
| FABP5   | 114.3 | 120     | 121.6   | 124.1   | 111.8   | 111.7  | 121.6   | 115.6   |
| FABP5L3 | 115.4 | 116.4   | 122.5   | 119.7   | 113.9   | 96.8   | 120.9   | 153.5   |
| FABP6   | 109.7 | 111.9   | 114.1   | 115.6   | 101.1   | 100.6  | 112.6   | 115.6   |
| FABP6   | 113.3 | 110.4   | 118.3   | 105.9   | 112.5   | 100    | 114.7   | 109.5   |
| FABP7   | 121.4 | 119.2   | 113.6   | 119.8   | 109.7   | 106.8  | 122.6   | 123     |
| FADD    | 445.9 | 487.5   | 462     | 434.8   | 325.7   | 295.6  | 353.8   | 343.2   |
| FADS1   | 163   | 129.6   | 151.9   | 140.3   | 119.9   | 119.5  | 121.6   | 121.4   |
| FADS2   | 118.7 | 125.3   | 120.3   | 123.1   | 110     | 102.3  | 121.5   | 111     |
| FADS3   | 100.9 | 129.7   | 113.1   | 113.8   | 111.7   | 100.2  | 123.8   | 108.8   |
| FADS6   | 114.4 | 120.6   | 136.2   | 141.1   | 126.7   | 103    | 123.2   | 128.1   |
| FAF1    | 180   | 217     | 170.7   | 187.3   | 162.6   | 136.2  | 169.6   | 171.6   |
| FAF1    | 142.3 | 145.7   | 162.4   | 153.6   | 144.7   | 113.6  | 134     | 125.5   |
| FAH     | 127.3 | 109.5   | 161.2   | 126.9   | 118.7   | 112.4  | 132.7   | 123.5   |
| FAHD1   | 173.9 | 176.7   | 174.6   | 172     | 138.5   | 147.5  | 139.5   | 148.1   |
| FAHD1   | 126   | 142.1   | 135.6   | 142.2   | 124.9   | 113.7  | 127.7   | 132.7   |
| FAHD1   | 112.8 | 123     | 118.4   | 116.5   | 105.5   | 96.3   | 113.5   | 117     |
| FAHD2A  | 117.2 | 122.7   | 138.2   | 139.2   | 121.3   | 109.1  | 132.9   | 127.4   |
| FAHD2B  | 173.2 | 165.5   | 163.5   | 150.6   | 132.4   | 137.1  | 125.6   | 135.9   |

|          |        |        |        |        |        |        |        |        |
|----------|--------|--------|--------|--------|--------|--------|--------|--------|
| FAIM     | 117    | 117.1  | 130.7  | 121.9  | 117.7  | 107.6  | 117.7  | 124.7  |
| FAIM     | 110.7  | 106.9  | 110.8  | 121.4  | 108.1  | 98.6   | 119.5  | 103.9  |
| FAIM     | 124.1  | 124.1  | 125.8  | 118.9  | 117.5  | 105.9  | 128.5  | 118.7  |
| FAIM     | 125.5  | 118.9  | 114.9  | 112.5  | 105.6  | 102.6  | 110.8  | 120.7  |
| FAIM     | 143.3  | 142.8  | 160.2  | 158.3  | 145.3  | 108.1  | 140.5  | 132.5  |
| FAIM2    | 117.5  | 112.1  | 118.7  | 117    | 108    | 93.3   | 120.5  | 111.6  |
| FAIM3    | 5734.7 | 5089.9 | 3374.9 | 4935   | 4164.3 | 3810.8 | 5848.2 | 6397.5 |
| FALZ     | 115.7  | 111.7  | 113    | 122.2  | 112.6  | 94.8   | 112.6  | 121.9  |
| FALZ     | 145.3  | 135.8  | 131    | 148.7  | 141.4  | 111.7  | 140.4  | 134.3  |
| FALZ     | 119.9  | 120.3  | 115.4  | 130.4  | 126.9  | 109.5  | 128.1  | 125.3  |
| FAM100A  | 211.4  | 189.9  | 177.9  | 193.3  | 135.8  | 145.9  | 260.9  | 219    |
| FAM100B  | 243    | 232.5  | 170.5  | 223    | 185.8  | 183.2  | 334.9  | 379.6  |
| FAM101A  | 117.8  | 113.3  | 113.4  | 124.9  | 112.1  | 98.6   | 109.6  | 121.6  |
| FAM101B  | 192.3  | 167.8  | 164.8  | 180    | 157.7  | 123.2  | 171.3  | 204.4  |
| FAM102A  | 511.6  | 798.6  | 747.2  | 509.1  | 588    | 531.4  | 496.5  | 512.2  |
| FAM102A  | 125.7  | 154.4  | 135.8  | 135.4  | 128.7  | 117.1  | 130.8  | 144.7  |
| FAM102B  | 124.6  | 130.6  | 165.7  | 149.8  | 132.9  | 132.4  | 128.2  | 136.8  |
| FAM103A1 | 257.8  | 245.6  | 314.1  | 294.5  | 230.2  | 240.4  | 300.6  | 284.1  |
| FAM104A  | 687.9  | 742.3  | 748    | 893.9  | 601.2  | 538.2  | 882.4  | 918.8  |
| FAM105A  | 146.1  | 126.7  | 164    | 142.2  | 123.4  | 119.4  | 160.6  | 125.4  |
| FAM105B  | 287.2  | 318.5  | 291    | 340.6  | 271.3  | 242.6  | 352.5  | 423.3  |
| FAM107A  | 128.9  | 125.3  | 132.8  | 121.9  | 123.5  | 112.5  | 125.2  | 119.8  |
| FAM107B  | 1651.5 | 1814   | 1180.1 | 1689.3 | 1257.1 | 1034.6 | 1746.3 | 2096.3 |
| FAM108A1 | 97.4   | 115.5  | 112.4  | 105.9  | 99.4   | 97.2   | 108    | 109    |
| FAM108A2 | 286    | 226.5  | 294.3  | 256    | 177.8  | 220    | 180.9  | 190.1  |
| FAM108A2 | 124.6  | 138.2  | 128.5  | 122.6  | 126.3  | 120.8  | 142.8  | 115.6  |
| FAM109A  | 136.4  | 140.4  | 129.2  | 131.9  | 118    | 108.6  | 141.8  | 129.1  |
| FAM109B  | 113.1  | 116.4  | 113.1  | 120.4  | 111.8  | 102.1  | 127.5  | 115.5  |
| FAM10A4  | 110.4  | 99.2   | 112.2  | 114.2  | 106.4  | 104.1  | 123.5  | 118.9  |
| FAM10A6  | 122.6  | 110.2  | 109.6  | 117    | 113.2  | 94.3   | 115.9  | 117.5  |
| FAM10A7  | 139.1  | 130.8  | 134.8  | 143.7  | 135.9  | 115.7  | 156.5  | 148.9  |
| FAM110C  | 116.3  | 118.8  | 120.4  | 117.5  | 115.7  | 104.3  | 117.5  | 117    |
| FAM111A  | 439.7  | 502.8  | 417.7  | 409.9  | 284.4  | 303    | 328.1  | 367.1  |
| FAM111A  | 302.4  | 296.3  | 346.9  | 297.7  | 230.5  | 202.9  | 210.1  | 228.5  |
| FAM111B  | 125.4  | 116.1  | 126.9  | 126.4  | 109    | 103.5  | 118.7  | 123.2  |
| FAM112A  | 119.1  | 125.8  | 118.9  | 129.2  | 107.6  | 100.6  | 118.1  | 115.2  |
| FAM112A  | 116.9  | 107.5  | 111.5  | 123.2  | 110    | 95.7   | 113.4  | 113.3  |
| FAM112B  | 123.4  | 121.9  | 131.9  | 143.6  | 131.2  | 105.5  | 132.8  | 132.4  |
| FAM113A  | 148.9  | 167.7  | 166.1  | 164.1  | 141.4  | 156.1  | 125.8  | 135.3  |
| FAM113B  | 1070.4 | 1579.1 | 921.4  | 1130.8 | 775.2  | 721.8  | 636.3  | 698.7  |
| FAM119A  | 1538.7 | 1633.9 | 1532.8 | 1384.4 | 1390.2 | 957.9  | 1595.5 | 1970   |
| FAM120A  | 1079.3 | 910.1  | 1111.9 | 1109.8 | 921.3  | 814.3  | 999.6  | 939.1  |
| FAM120C  | 118.6  | 101.6  | 116    | 114.1  | 110.1  | 96.5   | 114.4  | 106    |
| FAM122A  | 119.5  | 135.9  | 127.8  | 151.1  | 113.3  | 109.1  | 120    | 123.1  |
| FAM122B  | 305.6  | 345.8  | 375.8  | 352.6  | 301.6  | 268.5  | 298    | 284.1  |
| FAM122C  | 112.8  | 116    | 118.2  | 112.5  | 112.1  | 96.1   | 110    | 117.8  |
| FAM123A  | 113.3  | 102.1  | 112.7  | 117.1  | 108.6  | 100.9  | 121    | 107.6  |
| FAM125A  | 255.9  | 213.1  | 305.4  | 254.3  | 193.2  | 198.7  | 196.8  | 184.4  |
| FAM125B  | 125.9  | 121.3  | 119.2  | 110.3  | 103.7  | 96.7   | 118    | 119.6  |
| FAM125B  | 113.7  | 107.5  | 104.6  | 111.8  | 106.7  | 94.7   | 113.1  | 112    |
| FAM126A  | 111.9  | 107.2  | 109    | 128.5  | 107.1  | 94.4   | 115.4  | 108.5  |

|          |       |       |       |       |       |       |       |       |
|----------|-------|-------|-------|-------|-------|-------|-------|-------|
| FAM126B  | 108.1 | 109.8 | 108.3 | 110.7 | 107.1 | 94.3  | 123.5 | 115.6 |
| FAM127B  | 113.2 | 111.2 | 119.2 | 121.8 | 118.4 | 104.1 | 114.3 | 108.8 |
| FAM127C  | 115.1 | 105.6 | 117.6 | 117.3 | 108.2 | 95.2  | 107.7 | 113   |
| FAM129B  | 128.2 | 114.4 | 118.2 | 126.5 | 117.6 | 102.9 | 124.7 | 123.2 |
| FAM129B  | 176.9 | 179.8 | 161.6 | 214.5 | 157   | 159.6 | 213.9 | 155.8 |
| FAM12A   | 121.7 | 143.9 | 132.3 | 141.2 | 115.9 | 107.8 | 140.4 | 129.8 |
| FAM12B   | 121.9 | 118.2 | 112   | 115.6 | 105.5 | 102.9 | 129.8 | 106.5 |
| FAM130A1 | 208.8 | 195   | 184.1 | 218.6 | 196   | 164.8 | 272.4 | 211.7 |
| FAM130A2 | 117.4 | 119.4 | 109.2 | 123.4 | 111.1 | 101.1 | 114.9 | 112.1 |
| FAM13A1  | 112.2 | 116.8 | 120.7 | 120.7 | 106.4 | 101.9 | 116.9 | 114.9 |
| FAM13A1  | 113.5 | 109.7 | 117.8 | 123.6 | 111.9 | 99.9  | 119.4 | 122   |
| FAM13A1  | 115.3 | 108.5 | 115.1 | 113.4 | 113.7 | 100.1 | 115.5 | 115.7 |
| FAM13C1  | 111.7 | 116   | 115.9 | 115.7 | 112.4 | 98.7  | 116.2 | 112   |
| FAM13C1  | 105.4 | 105.5 | 107.1 | 116.7 | 104.5 | 94.8  | 110.8 | 111.6 |
| FAM13C1  | 114.1 | 113.9 | 122.1 | 118.6 | 107.3 | 100.6 | 119.1 | 108.7 |
| FAM14A   | 160.9 | 161.2 | 167   | 185.3 | 136.6 | 170.6 | 154.9 | 141.4 |
| FAM14B   | 130.7 | 122.2 | 132.3 | 128.4 | 112.9 | 100.1 | 125.1 | 114.1 |
| FAM18B   | 153.5 | 146.8 | 196.6 | 170.2 | 160.6 | 140.5 | 146.2 | 162.9 |
| FAM18B   | 350.3 | 361.5 | 332.2 | 355.2 | 343   | 314   | 343.2 | 421.8 |
| FAM18B2  | 129.6 | 114.3 | 112.8 | 122.6 | 110.7 | 104.7 | 119   | 107.9 |
| FAM19A1  | 126.8 | 127.3 | 117.7 | 124   | 114.3 | 96.5  | 114.7 | 117.9 |
| FAM19A2  | 126.6 | 125   | 112.3 | 116   | 102.3 | 102.7 | 128.2 | 118.7 |
| FAM19A3  | 110.1 | 115   | 116.2 | 114.7 | 101.9 | 98.6  | 112.2 | 109.3 |
| FAM19A3  | 123.4 | 120.5 | 126.6 | 123.9 | 110.5 | 108.9 | 121.5 | 120.9 |
| FAM19A3  | 113.7 | 113.3 | 114.9 | 117.7 | 95.5  | 93.7  | 108.6 | 100.2 |
| FAM19A4  | 127.6 | 115.4 | 123.8 | 134.4 | 117.3 | 104.2 | 118.9 | 121.1 |
| FAM19A4  | 118.8 | 114.3 | 115.7 | 125.1 | 107.4 | 103.3 | 119.1 | 112.1 |
| FAM19A4  | 114.2 | 114.9 | 121.8 | 112.8 | 107.7 | 101.4 | 120.7 | 121.6 |
| FAM19A5  | 113.9 | 111.3 | 122.7 | 118   | 110.1 | 107.3 | 113.4 | 117.6 |
| FAM20A   | 118.9 | 115.4 | 113.1 | 130.1 | 104.3 | 105.2 | 113.6 | 116.3 |
| FAM20B   | 270.4 | 254.6 | 267.3 | 278.8 | 220.9 | 247.8 | 266.6 | 284.3 |
| FAM20C   | 109.9 | 116.4 | 114.1 | 116.5 | 105.2 | 99.8  | 117.1 | 111.4 |
| FAM20C   | 269   | 183.6 | 252.1 | 287.7 | 138.3 | 241.6 | 253.5 | 151.4 |
| FAM20C   | 125.4 | 129   | 131.1 | 139.5 | 122.1 | 112.2 | 131   | 129.3 |
| FAM21C   | 131.6 | 136.3 | 131.8 | 126.4 | 117.7 | 120.7 | 155.5 | 145.8 |
| FAM22G   | 113   | 123.6 | 127   | 118.7 | 110.4 | 98.1  | 118.5 | 117.1 |
| FAM24A   | 114   | 116.9 | 112.8 | 126.6 | 109.1 | 99.5  | 110.2 | 122.1 |
| FAM24B   | 146.5 | 146.8 | 162.1 | 145.3 | 135.1 | 127.1 | 128.7 | 155.7 |
| FAM26B   | 153   | 174.4 | 158.6 | 149.1 | 148.1 | 129.2 | 144.6 | 143.1 |
| FAM26C   | 160.8 | 165.3 | 164.4 | 163.8 | 127.4 | 127.6 | 168.1 | 141.5 |
| FAM27L   | 123.2 | 124.2 | 111.9 | 112.5 | 115.3 | 98.9  | 110.1 | 108.9 |
| FAM29A   | 120.3 | 113.7 | 125.1 | 112.7 | 108.1 | 97.8  | 116.9 | 114.7 |
| FAM29A   | 133   | 107.2 | 125.9 | 118.5 | 107.8 | 111.1 | 107.8 | 115.8 |
| FAM33A   | 140.7 | 158.8 | 172.9 | 148.9 | 137.8 | 120.8 | 159.5 | 133.6 |
| FAM35A   | 130.7 | 143.6 | 130   | 168.3 | 123.5 | 129.7 | 150.4 | 152.4 |
| FAM36A   | 146.5 | 155.4 | 152.5 | 158.7 | 159.2 | 135.4 | 150.5 | 187.7 |
| FAM38A   | 391.2 | 365.8 | 302   | 407   | 344.8 | 253.9 | 395.4 | 406.1 |
| FAM38B   | 111.4 | 124.2 | 131.4 | 127.9 | 111.9 | 105.1 | 124.6 | 123.7 |
| FAM3A    | 552.3 | 625   | 550.3 | 521.1 | 414.8 | 565   | 526.5 | 493.2 |
| FAM3B    | 114   | 124.4 | 125   | 118.2 | 111   | 96.1  | 110.6 | 111.7 |
| FAM3B    | 112   | 107.1 | 123.8 | 108.4 | 100.6 | 96.2  | 125.2 | 114.8 |

|         |        |        |        |        |        |        |        |        |
|---------|--------|--------|--------|--------|--------|--------|--------|--------|
| FAM3C   | 141.3  | 155.8  | 138    | 157.3  | 141.7  | 136.7  | 133.5  | 139.8  |
| FAM3C   | 151.3  | 149.9  | 151.8  | 156.2  | 138.6  | 143.1  | 136.3  | 134.4  |
| FAM3D   | 118.1  | 121.6  | 118.7  | 119.4  | 115.1  | 101.5  | 110.8  | 125.6  |
| FAM40A  | 185.1  | 199.5  | 168.8  | 192.6  | 184.9  | 144.7  | 206.6  | 164.3  |
| FAM40B  | 303    | 247.3  | 293.8  | 289.2  | 312.2  | 186.9  | 280.8  | 296.5  |
| FAM43A  | 325.3  | 328    | 392.2  | 272.4  | 260.1  | 232    | 202.7  | 221.5  |
| FAM43B  | 110.9  | 113.7  | 111.5  | 111.8  | 107.2  | 99.3   | 114.5  | 112.6  |
| FAM44A  | 114.9  | 109.5  | 110.8  | 110.2  | 112.7  | 97.4   | 109.2  | 116.6  |
| FAM44B  | 267.5  | 328.4  | 339.4  | 323.7  | 292.3  | 242.3  | 263.7  | 252.9  |
| FAM45A  | 204    | 223.7  | 306.5  | 240.6  | 214.7  | 189    | 180.8  | 207    |
| FAM45B  | 110.3  | 127.7  | 110.6  | 126.2  | 110.4  | 97.5   | 118.1  | 115    |
| FAM46A  | 491    | 421.7  | 601.2  | 500    | 326.6  | 327.5  | 440.3  | 467.3  |
| FAM46B  | 111.9  | 113.1  | 115.1  | 117.1  | 104.8  | 100.4  | 113.7  | 116.4  |
| FAM46C  | 524.8  | 416.2  | 494.7  | 576.8  | 427.5  | 494.8  | 564.3  | 554.5  |
| FAM46D  | 115.1  | 108    | 112.8  | 115.1  | 106.9  | 97.6   | 104.9  | 109.5  |
| FAM47A  | 119.7  | 116.3  | 123.9  | 109.1  | 107.5  | 102.1  | 105.9  | 119.8  |
| FAM47B  | 123.1  | 114.1  | 119.3  | 123.2  | 106.7  | 103.6  | 119.3  | 117.1  |
| FAM47C  | 112.9  | 114.9  | 125.4  | 119.5  | 124.7  | 108.3  | 115.9  | 118.3  |
| FAM48A  | 216.6  | 243.7  | 224.6  | 242.8  | 197.9  | 166.1  | 215.9  | 211.8  |
| FAM48A  | 117.8  | 102.3  | 113.4  | 121.2  | 102.2  | 98.8   | 126.7  | 122.1  |
| FAM49A  | 129.5  | 132.6  | 117.1  | 118.2  | 107.8  | 111.4  | 116.7  | 115.6  |
| FAM49B  | 210.8  | 167.9  | 256.9  | 195.7  | 184.8  | 265.5  | 243.3  | 267.6  |
| FAM50A  | 1634.1 | 1502.1 | 1585   | 1773   | 1046.1 | 1192   | 1646.8 | 1466.2 |
| FAM50B  | 162.4  | 232.9  | 186.8  | 186.5  | 227.9  | 177.1  | 186.2  | 168.4  |
| FAM51A1 | 127.2  | 136.5  | 131.4  | 127.9  | 115.9  | 102.5  | 119.2  | 121.1  |
| FAM53A  | 128    | 133.9  | 127.8  | 133.4  | 119.7  | 109.8  | 129.4  | 135.2  |
| FAM53B  | 127.6  | 122.2  | 140.8  | 136.3  | 124.4  | 121.8  | 127.5  | 131.6  |
| FAM53C  | 467    | 527    | 354.4  | 490    | 411.8  | 273.6  | 751.7  | 1055.1 |
| FAM54A  | 116.1  | 119.1  | 112.4  | 115.7  | 111.7  | 104.9  | 123    | 114.4  |
| FAM55A  | 111.2  | 107.1  | 110.5  | 102.6  | 106.9  | 97     | 116    | 112    |
| FAM55B  | 122.3  | 117.6  | 113.2  | 114.2  | 106    | 98.9   | 126.5  | 113.1  |
| FAM55C  | 139.8  | 156.1  | 142.3  | 136.5  | 153.5  | 113.2  | 134.9  | 145.5  |
| FAM55D  | 117.7  | 114.8  | 115.5  | 116.9  | 109.8  | 96.4   | 133.4  | 110.9  |
| FAM55D  | 116.4  | 105.1  | 113.5  | 121.4  | 103.5  | 93     | 116.2  | 112.7  |
| FAM55D  | 118.5  | 113.7  | 124    | 118.3  | 115.4  | 98.6   | 113.5  | 106.3  |
| FAM57A  | 130.5  | 139.6  | 127.9  | 142.3  | 112.9  | 115.5  | 127.3  | 131.4  |
| FAM58A  | 310.4  | 346.8  | 320.7  | 361.2  | 282    | 259.3  | 308    | 265    |
| FAM59A  | 113    | 120.7  | 119.8  | 123    | 109.9  | 101.2  | 115.6  | 119.6  |
| FAM5B   | 118.5  | 110    | 116.5  | 122.9  | 110.9  | 100.1  | 117    | 124.4  |
| FAM5C   | 119.7  | 122.1  | 132.2  | 126.7  | 114.7  | 106.3  | 128    | 117.4  |
| FAM62A  | 426.3  | 906.6  | 602.2  | 678.2  | 487.8  | 422.6  | 518.3  | 522    |
| FAM62B  | 2154.9 | 2973.4 | 1825.6 | 2240.8 | 2325.2 | 1465.1 | 2506.8 | 2795.9 |
| FAM62C  | 112.6  | 122.1  | 116.6  | 122.7  | 112.2  | 106.2  | 119.2  | 117.1  |
| FAM63A  | 404.6  | 302.6  | 394.8  | 324.4  | 343.2  | 327.4  | 391    | 307.2  |
| FAM63B  | 123.2  | 119.1  | 129.7  | 120.9  | 115    | 107.7  | 122.7  | 124.9  |
| FAM64A  | 110.5  | 113.4  | 112.4  | 112.6  | 107    | 98.1   | 120.9  | 122.3  |
| FAM65A  | 458.3  | 471.6  | 474    | 629.8  | 342.6  | 331.2  | 491.2  | 552.6  |
| FAM69A  | 141.4  | 135.3  | 155.9  | 154.6  | 140.1  | 115.5  | 143.6  | 128.3  |
| FAM69B  | 137.9  | 128.5  | 140.9  | 148.1  | 117.9  | 115.3  | 130.8  | 113    |
| FAM69B  | 117.3  | 117    | 120.7  | 111.8  | 109.9  | 102.2  | 110.8  | 121.1  |
| FAM70A  | 113.4  | 116.9  | 117.5  | 119.1  | 104.3  | 101.2  | 131    | 114.6  |

|         |       |        |        |        |        |        |        |        |
|---------|-------|--------|--------|--------|--------|--------|--------|--------|
| FAM70B  | 119.7 | 116.3  | 127    | 123.2  | 103.6  | 99.4   | 119.9  | 118.8  |
| FAM71A  | 126.3 | 116.2  | 117.2  | 99.4   | 101.7  | 99.7   | 108.6  | 116.8  |
| FAM71C  | 109.9 | 110.8  | 125.1  | 124.4  | 104.8  | 97.5   | 115.2  | 119.7  |
| FAM72A  | 117.5 | 122.9  | 119.6  | 119.9  | 120.4  | 99.5   | 128.5  | 119.5  |
| FAM73A  | 116.4 | 115.8  | 120.9  | 115.4  | 114.3  | 99.6   | 126.1  | 110.1  |
| FAM73B  | 176.6 | 170.2  | 155.7  | 167.4  | 144.7  | 151.7  | 177.2  | 178.7  |
| FAM76A  | 160.8 | 155.3  | 136    | 154    | 129    | 119.3  | 147.8  | 135    |
| FAM76B  | 211.9 | 227.4  | 250.8  | 235.8  | 177.2  | 183.7  | 217.9  | 219.3  |
| FAM77C  | 112.8 | 108.5  | 110    | 119    | 103.3  | 94.3   | 116    | 117.4  |
| FAM77D  | 120.2 | 114.6  | 123.6  | 133.9  | 126.3  | 104    | 119.6  | 121.6  |
| FAM78A  | 143.2 | 155.3  | 157.7  | 156    | 134.7  | 129.5  | 143.9  | 137.7  |
| FAM78B  | 126.9 | 126.4  | 116.4  | 126    | 118.2  | 106.2  | 127.5  | 136.4  |
| FAM79A  | 968.3 | 1228   | 807.5  | 1185.5 | 1028.3 | 818.9  | 1518.1 | 1698.8 |
| FAM79B  | 115   | 119.6  | 124.6  | 112.3  | 116.6  | 104.5  | 117.6  | 110.6  |
| FAM7A2  | 120.8 | 105.8  | 119.7  | 114.3  | 107.7  | 103.8  | 122.2  | 116.7  |
| FAM80A  | 121.2 | 125.5  | 116.4  | 116.9  | 96.9   | 98.4   | 125.8  | 120.7  |
| FAM80B  | 131.7 | 134.7  | 131.5  | 133.5  | 136.7  | 118.5  | 131.5  | 152    |
| FAM81A  | 116.3 | 105.8  | 122.8  | 125.9  | 109.2  | 104.7  | 123.6  | 110.6  |
| FAM81B  | 123.3 | 114.2  | 123.6  | 120.8  | 109.1  | 115.1  | 129.3  | 132.8  |
| FAM82A  | 126.9 | 114.4  | 125.1  | 117.8  | 102.7  | 100.1  | 117.3  | 124.2  |
| FAM82C  | 220.1 | 238.4  | 259.6  | 225.7  | 196.3  | 229.4  | 205.8  | 208.8  |
| FAM83A  | 114   | 107.1  | 109.4  | 113.5  | 106.4  | 111.3  | 124    | 116.7  |
| FAM83A  | 110.5 | 114.2  | 114.6  | 109.7  | 96.8   | 96.1   | 105.1  | 99.4   |
| FAM83A  | 109.5 | 104.8  | 111.2  | 123.3  | 106.1  | 101.6  | 111.1  | 107.7  |
| FAM83E  | 119.4 | 114.2  | 124.6  | 118.4  | 104.8  | 102    | 119.4  | 119    |
| FAM83F  | 125.1 | 116.6  | 124.3  | 120.7  | 119.4  | 99.5   | 133.8  | 121.8  |
| FAM83G  | 112   | 115.2  | 119.7  | 114.6  | 100.4  | 101    | 123.3  | 117.4  |
| FAM84A  | 119.4 | 116.1  | 114    | 116.6  | 105    | 102.8  | 114.5  | 116.1  |
| FAM84B  | 377.9 | 392.4  | 274.3  | 382.1  | 405.8  | 240.1  | 431.2  | 457.8  |
| FAM86A  | 131.7 | 134.5  | 132.5  | 126.8  | 124.6  | 118    | 135.8  | 141.1  |
| FAM86A  | 113.6 | 126.3  | 126    | 129.2  | 123.5  | 104.8  | 130.9  | 129.1  |
| FAM89A  | 153.6 | 163.4  | 161.1  | 167.3  | 152.1  | 119.6  | 171.8  | 195.4  |
| FAM89A  | 331.4 | 368.6  | 281.4  | 441.1  | 320.7  | 196.7  | 476.7  | 462.7  |
| FAM89B  | 495.8 | 621.8  | 497.2  | 473.9  | 305.7  | 341.5  | 412.9  | 405.1  |
| FAM8A1  | 186.9 | 174.1  | 144    | 187.9  | 153.7  | 159.5  | 200.7  | 186.2  |
| FAM90A1 | 109.6 | 114.6  | 118.1  | 131.9  | 111.9  | 103.3  | 115.2  | 121.7  |
| FAM91A1 | 142.3 | 147.3  | 144.3  | 178.5  | 136    | 134.8  | 166.2  | 140.4  |
| FAM92B  | 120.1 | 113.1  | 113.1  | 114.6  | 113.1  | 94.4   | 117.1  | 125.5  |
| FAM96A  | 969.4 | 1017.2 | 1866.2 | 967.9  | 762.8  | 1018.3 | 792.1  | 771.4  |
| FAM96A  | 153.7 | 171.5  | 232.8  | 197.8  | 147.9  | 160.9  | 179.2  | 171.1  |
| FAM96B  | 365.6 | 418.5  | 437.2  | 455.9  | 324.5  | 371.1  | 314.2  | 293.5  |
| FAM98A  | 223.4 | 241.1  | 255.7  | 286.5  | 194.4  | 190.8  | 256.4  | 209.8  |
| FAM98B  | 127.2 | 120.9  | 132    | 132    | 119.1  | 118    | 130.6  | 116.1  |
| FAM98B  | 121   | 109.7  | 117.5  | 116    | 112.2  | 103.3  | 116.2  | 117.6  |
| FAM98C  | 137.7 | 143    | 170.9  | 163.1  | 152.2  | 130.4  | 151.6  | 150.5  |
| FAM9A   | 117.7 | 122.7  | 108.8  | 113.2  | 111.1  | 92.9   | 112.4  | 114.1  |
| FAM9B   | 110.1 | 112.3  | 119.1  | 123.3  | 114.4  | 98.3   | 129.7  | 109    |
| FAM9C   | 115.1 | 111.3  | 110.9  | 118.1  | 115.9  | 96.2   | 120.8  | 126.2  |
| FANCA   | 114   | 118    | 111.2  | 131.7  | 118.7  | 103.4  | 121.3  | 118.2  |
| FANCA   | 117.3 | 126.2  | 126    | 125.4  | 116.2  | 113.3  | 123.9  | 128.2  |
| FANCA   | 116.9 | 125.4  | 116.4  | 114.9  | 110.8  | 102.9  | 114.7  | 121.7  |

|         |       |        |         |        |        |        |        |        |
|---------|-------|--------|---------|--------|--------|--------|--------|--------|
| FANCB   | 124.3 | 131.6  | 135.3   | 133.3  | 127.6  | 101.3  | 124.9  | 124.3  |
| FANCB   | 126.6 | 129.8  | 121.8   | 132.6  | 119.1  | 108.6  | 127    | 121    |
| FANCC   | 127.6 | 119.1  | 121.3   | 126.7  | 116.2  | 98.6   | 123.9  | 123.7  |
| FANCD2  | 138.7 | 159.6  | 194.8   | 155.7  | 148.5  | 167.5  | 156.6  | 134.1  |
| FANCD2  | 117.4 | 114    | 110.8   | 115    | 119.6  | 90.8   | 116.3  | 111    |
| FANCD2  | 121   | 113    | 120.2   | 119.6  | 108.7  | 100    | 125    | 115.5  |
| FANCE   | 208.3 | 221.2  | 185     | 203.4  | 221    | 130.1  | 200    | 202    |
| FANCF   | 112.7 | 123.8  | 119.1   | 126.3  | 118.9  | 102.9  | 126.8  | 117.4  |
| FANCG   | 157.6 | 177.7  | 167.5   | 168.2  | 150.1  | 128.6  | 156.1  | 151.9  |
| FANCL   | 117.4 | 116.6  | 112.3   | 116.8  | 103.8  | 103.8  | 107.4  | 123.2  |
| FANCM   | 119.6 | 117.9  | 131.8   | 137.5  | 118.4  | 107.4  | 123.3  | 123.3  |
| FANK1   | 124.3 | 120.1  | 125.4   | 128.3  | 109.9  | 102.3  | 130.8  | 119.8  |
| FAP     | 106   | 115.2  | 116.9   | 110.7  | 113.5  | 96.6   | 108.8  | 115.3  |
| FARP1   | 121.6 | 112.8  | 120.3   | 116.3  | 117.8  | 100.5  | 115.1  | 114.9  |
| FARP1   | 112.3 | 119.8  | 117.3   | 110.7  | 106.1  | 100.5  | 119.4  | 112    |
| FARP1   | 111.2 | 111.4  | 110.9   | 113.5  | 110.2  | 100.8  | 116.3  | 117    |
| FARP2   | 134.5 | 138    | 144.3   | 127.7  | 122.9  | 108.1  | 125.7  | 130    |
| FARS2   | 214.4 | 227.8  | 263.2   | 234.9  | 205.5  | 206.6  | 183.4  | 177.6  |
| FARSB   | 120.8 | 113.9  | 115.9   | 119.7  | 118.2  | 108.9  | 117.9  | 123.1  |
| FARSLA  | 154.1 | 181.5  | 178.7   | 184.3  | 124.4  | 126.2  | 153.3  | 164.1  |
| FAS     | 123.6 | 115.1  | 132.6   | 134.2  | 108.8  | 100.7  | 127    | 113.1  |
| FAS     | 128.7 | 119.3  | 136     | 133.4  | 111.8  | 109.6  | 134    | 129.1  |
| FASLG   | 186.6 | 156.9  | 146.8   | 148.3  | 132.6  | 124.6  | 136.7  | 123.4  |
| FASN    | 242.5 | 288.8  | 258.5   | 328.5  | 216.9  | 208.6  | 288.1  | 320.4  |
| FASTK   | 443.3 | 495.7  | 496.5   | 472.3  | 349.2  | 275    | 331.1  | 406.6  |
| FASTK   | 149.4 | 171.6  | 144.3   | 157.6  | 153.5  | 128.7  | 145.9  | 137    |
| FASTK   | 168.7 | 184.8  | 192.1   | 168.6  | 147.8  | 170.7  | 190.4  | 168.6  |
| FASTKD2 | 126.1 | 133.2  | 134     | 129.7  | 125.7  | 122.6  | 123.7  | 117    |
| FASTKD3 | 152.4 | 176.2  | 176.2   | 188.2  | 151.5  | 139.5  | 154.9  | 162.6  |
| FAT     | 117.3 | 124    | 118.3   | 126    | 115.4  | 95.1   | 113.6  | 114.2  |
| FAT2    | 115.3 | 109.2  | 107.6   | 116    | 102.9  | 94     | 109.2  | 103.5  |
| FAT4    | 114.5 | 132.1  | 122.3   | 123.8  | 118.1  | 107.9  | 115.1  | 120    |
| FATE1   | 118.8 | 114.9  | 120.6   | 116    | 109.8  | 107.7  | 124    | 118.3  |
| FAU     | 7001  | 9333.9 | 10174.2 | 8051.3 | 8026.6 | 7298.1 | 7291.6 | 8715.2 |
| FBF1    | 117   | 122.5  | 121     | 122.7  | 119.6  | 102    | 129    | 117.9  |
| FBL     | 956.5 | 1078.6 | 1014.9  | 997    | 817.2  | 787.2  | 931.5  | 1169.6 |
| FBLIM1  | 111.5 | 111.5  | 105.9   | 113.2  | 108.4  | 101.9  | 125    | 110.2  |
| FBLIM1  | 116.9 | 124.1  | 124.4   | 126.2  | 102.7  | 99.7   | 119.3  | 120.2  |
| FBLN1   | 124.7 | 121.7  | 113.9   | 121.9  | 108    | 101.7  | 128    | 113.1  |
| FBLN1   | 111.5 | 121.3  | 127.9   | 117.8  | 118.8  | 96.5   | 126.3  | 114.5  |
| FBLN1   | 118.6 | 120.9  | 118     | 124.6  | 114.5  | 100.6  | 109.5  | 113.7  |
| FBLN1   | 116.7 | 110.8  | 115     | 121.5  | 119.3  | 97.3   | 120.8  | 119.2  |
| FBLN1   | 119   | 112.5  | 113.5   | 122    | 109.3  | 103    | 122.1  | 120.9  |
| FBLN2   | 110.8 | 112.5  | 104.4   | 110.6  | 105.2  | 94.3   | 111.9  | 110.1  |
| FBLN2   | 125.6 | 123.7  | 123.5   | 121.5  | 99.2   | 108.2  | 126.4  | 115.3  |
| FBLN2   | 128.7 | 140.5  | 139.1   | 133.2  | 129.6  | 108.9  | 130.6  | 128.5  |
| FBLN5   | 145.9 | 161.4  | 209.7   | 164.6  | 145.1  | 166.9  | 163.2  | 163.9  |
| FBN1    | 108.9 | 121    | 125.7   | 129.5  | 115.4  | 104.3  | 133    | 136.5  |
| FBN2    | 132.5 | 123.3  | 154.1   | 144.9  | 112.4  | 113.8  | 119.5  | 127.1  |
| FBN3    | 113   | 131.3  | 118.5   | 116.7  | 108.6  | 97.6   | 117.8  | 113.3  |
| FBP1    | 351.2 | 342.6  | 235.1   | 293.5  | 189.3  | 126.6  | 255    | 179.9  |

|          |        |        |        |        |       |       |        |       |
|----------|--------|--------|--------|--------|-------|-------|--------|-------|
| FBP2     | 110.2  | 108.3  | 107.8  | 121.5  | 107.7 | 100.5 | 113.6  | 114.3 |
| FBS1     | 145.7  | 160.3  | 144    | 154.9  | 146.8 | 125.2 | 198.7  | 170   |
| FBXL10   | 106.3  | 112.3  | 112.7  | 120.2  | 115.2 | 103.1 | 120    | 115.7 |
| FBXL10   | 1206.9 | 1259.2 | 1298.5 | 1074.3 | 942.2 | 915.6 | 1147.9 | 1056  |
| FBXL10   | 120.5  | 119.5  | 129.6  | 142.3  | 112.8 | 100.4 | 135.4  | 128   |
| FBXL12   | 135.4  | 132.3  | 144.5  | 140.3  | 121.1 | 117.6 | 132.9  | 135.8 |
| FBXL13   | 98.6   | 115.4  | 115.6  | 122.8  | 112.8 | 98.8  | 121.7  | 112.3 |
| FBXL14   | 118.5  | 129.3  | 124.7  | 126.3  | 113.6 | 106.4 | 128.1  | 125.1 |
| FBXL15   | 303    | 345.1  | 271.4  | 286.9  | 235.8 | 203.8 | 222    | 216.4 |
| FBXL16   | 178    | 165.6  | 155.4  | 160.5  | 118.6 | 129.6 | 129.4  | 126.6 |
| FBXL17   | 121.8  | 135.3  | 145.6  | 125.5  | 120.8 | 117.4 | 125.1  | 123.3 |
| FBXL18   | 111.3  | 115.7  | 113.6  | 116.3  | 110.5 | 99.5  | 118.3  | 118.1 |
| FBXL2    | 127    | 116.7  | 121.8  | 118.2  | 109.4 | 94.5  | 114.8  | 108.2 |
| FBXL20   | 148.7  | 154.1  | 145.4  | 157    | 134.5 | 135.8 | 175.9  | 155.4 |
| FBXL21   | 120.7  | 123    | 130.5  | 111.6  | 109.5 | 102.4 | 112.9  | 115.8 |
| FBXL22   | 116    | 108.1  | 118.7  | 112.1  | 109   | 95.3  | 115    | 107.1 |
| FBXL3    | 117.1  | 112.2  | 124.9  | 107.2  | 114.1 | 103.8 | 116.1  | 112.2 |
| FBXL4    | 106.8  | 111.6  | 121.3  | 130.2  | 106.1 | 94    | 120.7  | 112.2 |
| FBXL5    | 101.8  | 115    | 119.2  | 109.9  | 110.7 | 97.9  | 116.5  | 115.2 |
| FBXL5    | 126.2  | 126.1  | 136.7  | 120.5  | 129.9 | 108.7 | 135    | 128.3 |
| FBXL5    | 318.8  | 363.5  | 344.8  | 440.7  | 313.4 | 330   | 336.8  | 294.6 |
| FBXL6    | 164.3  | 172.9  | 182.8  | 181.3  | 154.3 | 141.1 | 185.1  | 168.5 |
| FBXL7    | 131.4  | 122.6  | 138.2  | 134.4  | 116.1 | 107.4 | 128.2  | 129.1 |
| FBXL8    | 120.8  | 115    | 128.2  | 123.8  | 118.7 | 100.3 | 123.6  | 115.8 |
| FBXO10   | 125.4  | 120.8  | 119.6  | 119.7  | 116.6 | 98.7  | 119.6  | 110.1 |
| FBXO10   | 134.5  | 118.3  | 133.4  | 124.3  | 109.5 | 105.9 | 142.4  | 129.1 |
| FBXO11   | 134.5  | 122.5  | 128.6  | 127.8  | 113.3 | 103.2 | 127.6  | 128.6 |
| FBXO11   | 622.7  | 675    | 565.5  | 728.3  | 497   | 507.6 | 960.5  | 826.9 |
| FBXO11   | 117.1  | 118.3  | 119.7  | 128.8  | 114   | 98.2  | 124.5  | 118.6 |
| FBXO11   | 137.7  | 133.2  | 140.4  | 145.4  | 141.7 | 113.4 | 126.8  | 142   |
| FBXO15   | 123.7  | 128.2  | 139.5  | 140.2  | 120.5 | 118   | 135.2  | 125.9 |
| FBXO16   | 110    | 107.4  | 118.2  | 114.1  | 100.6 | 100.8 | 124.5  | 114.1 |
| FBXO17   | 114.7  | 107.3  | 112.6  | 118    | 106.3 | 99.9  | 109.3  | 106.7 |
| FBXO17   | 121.5  | 114.9  | 117.2  | 122.7  | 112.9 | 104.6 | 118.4  | 121.8 |
| FBXO17   | 124.5  | 128.1  | 128.7  | 116.2  | 109.6 | 108.2 | 115.9  | 119.4 |
| FBXO18   | 112.7  | 115.1  | 120.8  | 117.2  | 113.8 | 101.2 | 124.6  | 121.1 |
| FBXO18   | 396.3  | 435.5  | 440    | 414.9  | 329.1 | 282.4 | 420.4  | 396.7 |
| FBXO2    | 167.1  | 156.4  | 134    | 146.7  | 128.7 | 108.2 | 155.5  | 138.6 |
| FBXO21   | 166.1  | 145.7  | 152.3  | 170.1  | 143.8 | 139.5 | 155.3  | 161.1 |
| FBXO21   | 427.3  | 502.5  | 485.7  | 500.6  | 478.6 | 363.2 | 480.1  | 506.2 |
| FBXO22   | 131.7  | 154.2  | 162.3  | 142.1  | 129.4 | 115.1 | 123.6  | 125.2 |
| FBXO22   | 113.3  | 113.3  | 121.7  | 111    | 102   | 95.5  | 115.9  | 107.6 |
| FBXO22   | 131.7  | 136.8  | 137.9  | 138    | 119.3 | 107.4 | 130.5  | 131.4 |
| FBXO22OS | 115    | 111.9  | 113.4  | 118.1  | 107.9 | 97    | 119.2  | 118.3 |
| FBXO24   | 103.9  | 110    | 110.2  | 112.9  | 109   | 95.9  | 113.1  | 107.5 |
| FBXO24   | 111.5  | 111    | 112.2  | 118.5  | 106.5 | 91.4  | 111.5  | 110.4 |
| FBXO24   | 110.6  | 112.1  | 111.1  | 112    | 104.8 | 100.9 | 117.7  | 115.9 |
| FBXO25   | 117.1  | 126.7  | 109.1  | 116.5  | 112.4 | 96    | 114.1  | 115.3 |
| FBXO27   | 118    | 115.1  | 117.3  | 117.3  | 107.2 | 93.4  | 123.2  | 107.8 |
| FBXO28   | 271.5  | 279.8  | 261.1  | 294.7  | 236.8 | 226.5 | 330.1  | 290.6 |
| FBXO3    | 134.5  | 121.4  | 133.5  | 148.4  | 126.5 | 103.2 | 120.1  | 127.3 |



|        |       |       |       |       |       |       |       |       |
|--------|-------|-------|-------|-------|-------|-------|-------|-------|
| FBXO3  | 163   | 155.8 | 186.2 | 173.2 | 170.5 | 144.5 | 140.2 | 169.8 |
| FBXO3  | 138.8 | 145.1 | 152   | 154.2 | 136.8 | 110.5 | 137   | 137.6 |
| FBXO30 | 186.3 | 173.7 | 184.4 | 198.5 | 187.3 | 190.5 | 244.9 | 278.5 |
| FBXO31 | 437.8 | 543.2 | 387.2 | 507.4 | 352.6 | 320.8 | 596.9 | 527.4 |
| FBXO32 | 141.2 | 146.9 | 161.5 | 148.3 | 134.1 | 123.3 | 144.5 | 163.1 |
| FBXO32 | 117.8 | 108.9 | 113.1 | 117.6 | 112.1 | 102.2 | 121   | 123.8 |
| FBXO32 | 341.6 | 351.3 | 318.2 | 297.8 | 263.1 | 224.3 | 279.7 | 375.1 |
| FBXO33 | 769.8 | 901.2 | 796.9 | 817.7 | 814.9 | 716.1 | 741.5 | 923.4 |
| FBXO34 | 317.3 | 330.1 | 309.2 | 302   | 266.8 | 240.9 | 327.7 | 330.8 |
| FBXO36 | 110.5 | 116.7 | 123.6 | 115.8 | 108.8 | 94.8  | 118   | 128.6 |
| FBXO38 | 125.9 | 129.5 | 120.5 | 130.7 | 125.8 | 109.1 | 128.2 | 120.7 |
| FBXO38 | 199.9 | 175.7 | 173.3 | 151.9 | 156.9 | 137.9 | 184   | 176.1 |
| FBXO39 | 111.3 | 123   | 119.8 | 119.5 | 103.6 | 94    | 115.4 | 113.2 |
| FBXO4  | 134   | 164.4 | 180.7 | 155.8 | 127.9 | 131.7 | 153.5 | 138.2 |
| FBXO4  | 118.3 | 120.8 | 120.7 | 118.9 | 110.8 | 106.3 | 122.1 | 123.4 |
| FBXO40 | 125.5 | 116.4 | 116.9 | 120.7 | 117.2 | 97.7  | 117.4 | 123   |
| FBXO42 | 134.8 | 139.5 | 147   | 130.4 | 132.2 | 123.1 | 141.3 | 137.7 |
| FBXO43 | 107.6 | 117.8 | 131.5 | 120.7 | 118.9 | 110.4 | 121.3 | 117   |
| FBXO43 | 114.2 | 119.5 | 122.5 | 113.7 | 106.9 | 104.9 | 121.8 | 119.6 |
| FBXO44 | 125   | 131.7 | 151.6 | 132.3 | 119.2 | 119.9 | 128.2 | 115.5 |
| FBXO44 | 114.2 | 119.5 | 132.5 | 121.4 | 118   | 109   | 121.2 | 119.2 |
| FBXO44 | 107.8 | 102.3 | 118.5 | 115   | 110.3 | 98.8  | 111.5 | 108.4 |
| FBXO46 | 152.5 | 150.3 | 131.6 | 154.4 | 126.3 | 129.2 | 149.9 | 137.5 |
| FBXO47 | 119.4 | 112.8 | 109.4 | 117.5 | 98.5  | 90.8  | 112.1 | 114.1 |
| FBXO5  | 134.5 | 124.7 | 146.5 | 141.3 | 125.7 | 102.8 | 143.7 | 129   |
| FBXO6  | 192.7 | 182.8 | 184.3 | 187.6 | 136.5 | 127.9 | 138.3 | 142   |
| FBXO7  | 149.9 | 160.4 | 200.1 | 190.3 | 142.3 | 155.9 | 160.9 | 171.6 |
| FBXO7  | 130.2 | 124   | 130.4 | 132   | 131.7 | 110.6 | 135   | 122   |
| FBXO7  | 351.3 | 389.1 | 333.9 | 336.4 | 314.3 | 272.8 | 437.6 | 454   |
| FBXO8  | 177   | 213.2 | 201.9 | 218   | 191.4 | 193.3 | 192.4 | 228.2 |
| FBXO9  | 112.5 | 106.6 | 115.7 | 105.1 | 110.5 | 90.2  | 114   | 108.5 |
| FBXO9  | 126.9 | 130.3 | 128.7 | 141.1 | 123.9 | 95.9  | 132   | 126   |
| FBXO9  | 111.7 | 126.4 | 110.3 | 115.1 | 109.3 | 93.5  | 117.6 | 114.5 |
| FBXO9  | 115.9 | 115.3 | 122.2 | 135.8 | 112.2 | 106.2 | 123.1 | 116.2 |
| FBXW10 | 119.2 | 115.2 | 118.2 | 128.2 | 103.8 | 104   | 117.4 | 115.1 |
| FBXW11 | 112.7 | 117.8 | 125.6 | 113.9 | 107.1 | 102.3 | 112.1 | 121.9 |
| FBXW11 | 118.3 | 120.8 | 122.9 | 114.4 | 113.8 | 96.8  | 111.2 | 121.1 |
| FBXW11 | 461.9 | 444.9 | 469.2 | 524.2 | 343.7 | 408.8 | 524.6 | 491.6 |
| FBXW12 | 112.3 | 117.4 | 112.9 | 118.8 | 115.6 | 98.6  | 107.3 | 115   |
| FBXW2  | 210.7 | 210.2 | 157.8 | 196.4 | 194.9 | 152.4 | 201   | 185.7 |
| FBXW4  | 183   | 191.6 | 186.3 | 186.9 | 172   | 166.4 | 218.4 | 201   |
| FBXW5  | 266.8 | 338.5 | 291.4 | 289.4 | 235.1 | 229.4 | 321.3 | 245.3 |
| FBXW7  | 216.2 | 223.2 | 198.1 | 249.8 | 218.4 | 113.1 | 241.4 | 288.4 |
| FBXW7  | 109.6 | 130.8 | 122.9 | 127.3 | 115.8 | 115.9 | 126.9 | 118.5 |
| FBXW7  | 295.8 | 251.3 | 264.1 | 300.7 | 249.6 | 247.9 | 277.3 | 291.7 |
| FBXW7  | 110.9 | 122.6 | 117.6 | 121.8 | 103.7 | 104.5 | 116.1 | 103.2 |
| FBXW8  | 111.1 | 113.4 | 112   | 121.8 | 107.1 | 100.5 | 120.8 | 117.5 |
| FBXW8  | 116.5 | 112   | 120.3 | 115.8 | 103.7 | 95.1  | 118.7 | 119.7 |
| FBXW8  | 173.1 | 159.3 | 189   | 182.7 | 151.7 | 150.8 | 174.1 | 173.1 |
| FBXW9  | 139.2 | 141.5 | 144.9 | 131.3 | 133.1 | 119.9 | 123   | 139.5 |
| FCAMR  | 112.2 | 117.8 | 111.8 | 122.8 | 111.6 | 101   | 126.6 | 112.4 |

|        |        |        |        |        |        |        |        |        |
|--------|--------|--------|--------|--------|--------|--------|--------|--------|
| FCAR   | 449.4  | 361.2  | 489    | 399.9  | 395.7  | 328.7  | 651.7  | 471.4  |
| FCAR   | 138.1  | 157.8  | 197.2  | 170.1  | 185.7  | 180.3  | 164.4  | 177.3  |
| FCAR   | 128.8  | 136.1  | 125.8  | 171.5  | 143.7  | 211.9  | 149.4  | 118.1  |
| FCER1G | 1274.1 | 586.8  | 2731.1 | 1166.3 | 486.1  | 1686.9 | 736.8  | 435.3  |
| FCER2  | 201.5  | 136.8  | 146.5  | 200.6  | 124.5  | 119.2  | 181.2  | 132.3  |
| FCF1   | 127.9  | 124.4  | 132.5  | 136.4  | 121.1  | 109.3  | 144.7  | 143.5  |
| FCGBP  | 148.6  | 142.2  | 131.4  | 135.3  | 126    | 110.4  | 141.8  | 157.8  |
| FCGBP  | 854.8  | 1597   | 525.6  | 828.4  | 998    | 273.4  | 759.5  | 1022.1 |
| FCGR1A | 158.5  | 120.3  | 147.8  | 136    | 115.8  | 111.9  | 129.2  | 117.3  |
| FCGR1B | 272.6  | 118    | 312    | 179.6  | 114.1  | 140.4  | 116.8  | 118.7  |
| FCGR1B | 167.8  | 128.5  | 220.5  | 140.8  | 115.7  | 110.7  | 129.8  | 123.1  |
| FCGR2A | 125.8  | 126.7  | 180.6  | 129.4  | 109.3  | 155.6  | 158.7  | 128.2  |
| FCGR2A | 133.8  | 119.6  | 162.8  | 128.8  | 115.6  | 124.1  | 127.8  | 123.7  |
| FCGR2B | 121.6  | 129.8  | 178.8  | 134.1  | 123    | 127.3  | 125.9  | 124.1  |
| FCGR2C | 110.1  | 111.2  | 112.1  | 109.8  | 99.8   | 94.9   | 111    | 108.5  |
| FCGR3A | 111.1  | 112.2  | 119.6  | 114.5  | 100.9  | 101.8  | 108.1  | 106.2  |
| FCGR3B | 133.3  | 129.1  | 135.9  | 136.5  | 114.4  | 115.1  | 127.8  | 125.8  |
| FCGRT  | 352.1  | 274.6  | 1188.4 | 370    | 204.9  | 650.8  | 240.5  | 210.3  |
| FCHO1  | 225.9  | 239.9  | 219.5  | 221.8  | 168.4  | 162    | 214.7  | 193.6  |
| FCHO2  | 118.2  | 123.4  | 118.3  | 125    | 116.1  | 108.4  | 137.7  | 120.8  |
| FCHSD1 | 117.7  | 121.1  | 118.7  | 116.2  | 114.1  | 110.4  | 118    | 111    |
| FCHSD2 | 301.3  | 231.4  | 229.1  | 274.4  | 210.1  | 192    | 209.7  | 202.6  |
| FCMD   | 3652.3 | 2753.9 | 3117   | 4215.2 | 2732.5 | 2008.9 | 3293.4 | 2527.1 |
| FCMD   | 113.2  | 110.9  | 125.1  | 112.5  | 110.1  | 93     | 129.4  | 118.5  |
| FCN1   | 550.3  | 170.7  | 5839.6 | 562.1  | 170.8  | 2336.1 | 358.5  | 192.4  |
| FCN2   | 116    | 113.2  | 114.5  | 122    | 117.3  | 93.9   | 115.7  | 119.9  |
| FCN2   | 125.1  | 121.7  | 147.1  | 132.4  | 116.1  | 110.6  | 134.9  | 114.2  |
| FCN3   | 115.2  | 109.2  | 118.2  | 115.3  | 95.5   | 108.4  | 117.4  | 125.1  |
| FCN3   | 126.2  | 109.7  | 124.8  | 120.5  | 111.1  | 108.4  | 122.7  | 125.5  |
| FCRL1  | 111.7  | 113.6  | 113    | 113.6  | 107.2  | 101.6  | 121.4  | 116    |
| FCRL2  | 106.2  | 113.3  | 106.6  | 112.4  | 102.2  | 88.6   | 107.1  | 108.4  |
| FCRL2  | 187.2  | 157    | 196.1  | 191.6  | 136.1  | 147.4  | 143.7  | 118.3  |
| FCRL2  | 114.8  | 115.1  | 116.8  | 123.4  | 115.5  | 95.8   | 124.3  | 116.3  |
| FCRL3  | 162    | 140.9  | 127.7  | 158.1  | 118.4  | 115    | 124.4  | 122.6  |
| FCRL3  | 224.5  | 174.2  | 165.6  | 213.4  | 145.7  | 136.2  | 163.3  | 135.4  |
| FCRL4  | 115.7  | 105.3  | 111.2  | 115.8  | 104.6  | 102.1  | 124.7  | 106.6  |
| FCRL5  | 111.9  | 119.6  | 119.7  | 128.8  | 120.7  | 103.1  | 126.2  | 125.6  |
| FCRL6  | 111.2  | 118.1  | 128.8  | 117.2  | 102.2  | 98.8   | 113.6  | 110.3  |
| FCRLM1 | 288.5  | 216.2  | 304.2  | 242.2  | 162.6  | 165.8  | 158    | 130    |
| FCRLM2 | 134.6  | 129.7  | 155    | 130.8  | 126.2  | 114.1  | 119.4  | 120.4  |
| FDFT1  | 1246.7 | 1547.3 | 1145.8 | 1212.8 | 887.1  | 796.3  | 1214.2 | 1433.3 |
| FDX1   | 118.5  | 118.3  | 127.5  | 128    | 125.4  | 105.9  | 118.6  | 130.9  |
| FDXR   | 124.1  | 106.1  | 111.8  | 121    | 110.3  | 99.1   | 119.1  | 118.5  |
| FDXR   | 118.8  | 125.1  | 126.7  | 129.5  | 104.6  | 106.4  | 122.8  | 121.4  |
| FECH   | 110.2  | 118.8  | 116    | 122    | 110.3  | 99.2   | 123.5  | 120.5  |
| FECH   | 157.5  | 169.9  | 149.1  | 161.8  | 170.6  | 135.5  | 160.1  | 197.9  |
| FEM1A  | 399.9  | 420.8  | 367    | 456.8  | 403.4  | 316.7  | 442.9  | 378.2  |
| FEM1B  | 135.3  | 134.9  | 138.3  | 130.3  | 130.5  | 112.4  | 145.5  | 123.6  |
| FEM1C  | 244.6  | 276.6  | 249    | 240.5  | 251.6  | 236.5  | 297.8  | 393    |
| FEN1   | 303.4  | 334.7  | 244.3  | 310.5  | 212.4  | 225.4  | 286.7  | 265.4  |
| FER    | 123.3  | 112.6  | 119.5  | 131.8  | 115.6  | 102.4  | 123.5  | 117.9  |

|        |        |        |        |        |        |       |        |        |
|--------|--------|--------|--------|--------|--------|-------|--------|--------|
| FER1L3 | 291.6  | 221.7  | 508.1  | 240.7  | 159.8  | 160.8 | 214.7  | 146    |
| FER1L3 | 123.6  | 134.3  | 179.3  | 131.1  | 111.8  | 110   | 136.5  | 115.9  |
| FER1L4 | 118.4  | 123.2  | 112.9  | 126.3  | 113.1  | 92.3  | 131.2  | 123.2  |
| FERD3L | 118.8  | 110.7  | 131.3  | 127.7  | 104.9  | 105.7 | 113.2  | 118.2  |
| FES    | 148.3  | 132.7  | 256.7  | 126.9  | 114.3  | 121.6 | 125    | 115.7  |
| FETUB  | 117.9  | 110.6  | 117.9  | 115.9  | 102.3  | 94.8  | 121.2  | 110    |
| FEV    | 112.5  | 119.2  | 120.1  | 124    | 108.2  | 97.3  | 122.1  | 121.5  |
| FEZ1   | 123    | 124.2  | 116.4  | 109.4  | 118.6  | 106.4 | 132.2  | 125.6  |
| FEZ1   | 159.1  | 169.6  | 168.9  | 155.1  | 164.6  | 124.8 | 155.6  | 147.8  |
| FEZ1   | 241.4  | 247.3  | 139.9  | 189.2  | 176.3  | 112   | 176.2  | 156.9  |
| FEZ2   | 307    | 295    | 387.6  | 309.8  | 300.2  | 329.9 | 349.4  | 327.6  |
| FEZ2   | 442.9  | 534.8  | 540    | 478.9  | 489    | 523.8 | 542.5  | 536.5  |
| FFAR1  | 125.8  | 119.7  | 118.8  | 126    | 116.5  | 109   | 125.8  | 110.5  |
| FFAR2  | 133    | 116.5  | 131    | 114.8  | 112.4  | 99    | 110.7  | 114.9  |
| FFAR3  | 112.2  | 119    | 120.5  | 116.1  | 117.4  | 97.3  | 123.9  | 112.7  |
| FGA    | 117.1  | 118.7  | 116.4  | 111.4  | 109.3  | 113.9 | 121.8  | 119.1  |
| FGA    | 172.9  | 170.9  | 174.7  | 172.1  | 163.2  | 134.7 | 163.2  | 153.9  |
| FGA    | 105.6  | 106.2  | 110.5  | 125.8  | 110    | 98.1  | 113.2  | 120.2  |
| FGB    | 119.9  | 126.8  | 129.3  | 124    | 116.3  | 101.2 | 125    | 114.6  |
| FGD1   | 112.3  | 115    | 116.7  | 118.2  | 107.6  | 105   | 109.8  | 107.8  |
| FGD2   | 115    | 122.4  | 127    | 127.7  | 110.4  | 105.8 | 115.9  | 116.4  |
| FGD3   | 2285.3 | 2432.9 | 2358.3 | 2240.9 | 1800.8 | 1666  | 2863.2 | 2435.7 |
| FGD4   | 106.7  | 118.7  | 137.8  | 117    | 102.7  | 98.2  | 118.7  | 115.6  |
| FGD5   | 113.7  | 106.8  | 115.6  | 116    | 105.1  | 101.5 | 103.5  | 114.1  |
| FGD6   | 120.9  | 111.5  | 114    | 117.4  | 110.8  | 105   | 124.3  | 111.2  |
| FGF1   | 125.1  | 99.5   | 112.3  | 117.6  | 97.7   | 96.6  | 112.5  | 121.5  |
| FGF1   | 122    | 112.3  | 122.3  | 130.8  | 119.7  | 113.3 | 113.8  | 119.2  |
| FGF10  | 101.8  | 118    | 107.8  | 111.8  | 105.9  | 100.2 | 113.4  | 109.5  |
| FGF11  | 108.4  | 116.6  | 114.8  | 117.4  | 111.6  | 104.9 | 124.8  | 128.7  |
| FGF12  | 121.9  | 120.1  | 111.3  | 133.5  | 101.8  | 97.2  | 112.8  | 116.6  |
| FGF12  | 115    | 117.8  | 122.3  | 116.4  | 109.9  | 97.8  | 117.3  | 123.9  |
| FGF12  | 109.7  | 118.9  | 109.6  | 121.4  | 106    | 104   | 118.5  | 111.4  |
| FGF13  | 115.2  | 110.8  | 114.6  | 121.4  | 114.9  | 100   | 110.7  | 113.8  |
| FGF13  | 105.7  | 109.5  | 116.2  | 113.4  | 105.1  | 95.8  | 126.9  | 104    |
| FGF13  | 108.4  | 112.6  | 113.4  | 113.3  | 108.1  | 92.6  | 115.1  | 112.7  |
| FGF14  | 118.8  | 114.7  | 124.9  | 119.9  | 111.8  | 98.5  | 125.5  | 119.7  |
| FGF14  | 104.6  | 109.5  | 126    | 110.3  | 113.4  | 95.3  | 119.3  | 107.2  |
| FGF16  | 115.3  | 115.2  | 112.1  | 116.6  | 115.2  | 94.8  | 125.8  | 111.3  |
| FGF17  | 121.8  | 115.3  | 119.6  | 111.6  | 106.2  | 100.5 | 117.9  | 119    |
| FGF18  | 150.8  | 153.1  | 153    | 135.4  | 137.6  | 127   | 137.7  | 158.9  |
| FGF18  | 108.7  | 113.4  | 110    | 109    | 107.8  | 94.8  | 132.6  | 111.7  |
| FGF19  | 116.4  | 118.6  | 122.1  | 129.6  | 118.5  | 107.5 | 125.1  | 117.6  |
| FGF2   | 125.5  | 140.5  | 135.5  | 135.2  | 118    | 119.4 | 129.5  | 123.6  |
| FGF20  | 113.8  | 113.3  | 116.6  | 113.6  | 99.8   | 99.2  | 107.2  | 105.8  |
| FGF21  | 118.3  | 115.5  | 114.9  | 126.1  | 109.1  | 103.2 | 116.5  | 116.3  |
| FGF22  | 106.9  | 112.5  | 123.9  | 114.2  | 102.3  | 97.1  | 112.8  | 107.1  |
| FGF23  | 106.2  | 110.9  | 112.8  | 116    | 105.9  | 87.4  | 123.7  | 108.1  |
| FGF3   | 115.7  | 121.5  | 131.9  | 117.3  | 106.6  | 100.9 | 114.6  | 122.7  |
| FGF4   | 117.9  | 115.6  | 130.8  | 124.1  | 112.1  | 115.6 | 121.6  | 117.7  |
| FGF5   | 105.2  | 115.2  | 116.5  | 118.6  | 117.3  | 99.8  | 121.9  | 115.7  |
| FGF5   | 114.4  | 120.2  | 124.6  | 125.5  | 121.1  | 102.9 | 122.9  | 120.7  |

|          |       |       |        |       |       |       |       |       |
|----------|-------|-------|--------|-------|-------|-------|-------|-------|
| FGF6     | 108.5 | 116.9 | 122.2  | 119.5 | 111   | 99.9  | 123.5 | 117.2 |
| FGF7     | 111.9 | 105.9 | 122    | 109.7 | 113.3 | 99.8  | 115   | 106.5 |
| FGF8     | 118.6 | 116   | 117    | 118.6 | 113.7 | 104.5 | 115.8 | 119.5 |
| FGF8     | 107.6 | 117.2 | 109.2  | 115.8 | 97.4  | 95.1  | 117.1 | 114.6 |
| FGF9     | 162   | 208.8 | 174.6  | 172.3 | 174.1 | 145.3 | 185.9 | 170.3 |
| FGFBP1   | 108.1 | 110.4 | 108    | 118.4 | 103.5 | 96.4  | 112.4 | 111.2 |
| FGFR1    | 115.9 | 111.7 | 116.7  | 120.9 | 109.3 | 103.9 | 123.2 | 109.1 |
| FGFR1    | 113.2 | 119.8 | 116.7  | 123.1 | 108.1 | 102.1 | 117   | 111.1 |
| FGFR1OP  | 123.2 | 128.4 | 128.4  | 135.5 | 129.5 | 115.6 | 142.5 | 129.4 |
| FGFR1OP2 | 172.5 | 157.6 | 174.3  | 160.8 | 159.9 | 149.7 | 161.9 | 189.2 |
| FGFR2    | 105.5 | 125.6 | 120    | 114.3 | 105.7 | 103.4 | 116.8 | 110.3 |
| FGFR3    | 112.1 | 125.8 | 128.8  | 130.9 | 110   | 117.7 | 133   | 120.4 |
| FGFR3    | 107.3 | 126.9 | 112.3  | 119.1 | 103.3 | 102   | 124.9 | 122.7 |
| FGFR4    | 117.2 | 121.5 | 119.4  | 125.2 | 111.1 | 101.8 | 125.1 | 125.8 |
| FGFR4    | 105.5 | 113.6 | 123.7  | 115.6 | 105.2 | 99.6  | 116.3 | 108.7 |
| FGFR4    | 114.2 | 119   | 123.2  | 116   | 114.4 | 99.7  | 122.5 | 118.9 |
| FGFRL1   | 169.9 | 172.5 | 192.3  | 183.3 | 150   | 203.8 | 241.5 | 234.5 |
| FGFRL1   | 122.5 | 123   | 130.8  | 119   | 117.3 | 116   | 136.3 | 128.6 |
| FGG      | 109.3 | 107.7 | 115.8  | 112   | 102   | 93.6  | 119   | 111.8 |
| FGG      | 111.2 | 115.6 | 110.8  | 115   | 104.7 | 96.7  | 121   | 107.9 |
| FGG      | 110   | 106.1 | 116.9  | 122.4 | 108.6 | 101.2 | 104.2 | 120.7 |
| FGL1     | 114.4 | 115.3 | 114.3  | 110.4 | 105.2 | 98.5  | 121.2 | 110.4 |
| FGL1     | 117.7 | 117.3 | 114.3  | 117.4 | 100.7 | 97.5  | 114.8 | 110.2 |
| FGL2     | 442.5 | 249.3 | 3363.3 | 319   | 143.1 | 999.6 | 152.8 | 118.5 |
| FGR      | 323.5 | 274.6 | 259.1  | 339.7 | 231.6 | 192.6 | 261.8 | 233.3 |
| FGR      | 120.2 | 115.6 | 131    | 128.9 | 118.9 | 104   | 124.7 | 125.6 |
| FGR      | 675.3 | 588.3 | 700.6  | 702.8 | 500.4 | 325   | 746.4 | 440.1 |
| FH       | 362.4 | 384.2 | 429.6  | 350.5 | 228.3 | 322.8 | 299.5 | 312.2 |
| FHIT     | 168.9 | 152.2 | 187.7  | 175.8 | 129.9 | 142.7 | 162.5 | 134.4 |
| FHL1     | 146.3 | 148.5 | 139.9  | 159.2 | 141.4 | 133.9 | 151.6 | 136   |
| FHL2     | 125.1 | 116.3 | 114.7  | 129.9 | 97.3  | 102.7 | 124.7 | 108.9 |
| FHL2     | 113.5 | 128.3 | 119.8  | 121.2 | 107.1 | 101.1 | 126.7 | 113.7 |
| FHL2     | 117.1 | 120.9 | 122.8  | 120.7 | 105.9 | 105.2 | 120.1 | 116.6 |
| FHL2     | 115.1 | 118.6 | 111.1  | 121.2 | 108.9 | 96.9  | 121   | 111.2 |
| FHL3     | 214.1 | 225.3 | 242.1  | 240.8 | 157.6 | 228.4 | 195.5 | 187.1 |
| FHL5     | 113.5 | 118.3 | 119.7  | 123.8 | 111.1 | 95    | 122.4 | 114.5 |
| FHOD1    | 312.7 | 308   | 427.9  | 346.8 | 233.4 | 308.3 | 319.6 | 248.1 |
| FHOD3    | 112.6 | 110.6 | 113.3  | 118.7 | 109.4 | 104.5 | 116   | 125.1 |
| FIBCD1   | 121.7 | 131.7 | 139.1  | 126.2 | 104.5 | 95.8  | 125.2 | 128.9 |
| FIBP     | 431.1 | 453.2 | 520.6  | 360.2 | 269   | 260.2 | 319.1 | 251.8 |
| FIBP     | 145.3 | 137   | 139.6  | 136.2 | 135.7 | 105.2 | 134   | 132.7 |
| FIGF     | 116.8 | 118.6 | 128.3  | 118.9 | 108.8 | 103   | 129.6 | 120.1 |
| FIGLA    | 117.4 | 118.5 | 119.2  | 118.7 | 107   | 103.9 | 119.4 | 112.3 |
| FIGN     | 110.3 | 120.7 | 114.1  | 118.9 | 118.3 | 98.8  | 112.2 | 122   |
| FIGNL1   | 135.9 | 125.3 | 147.4  | 128.3 | 132.6 | 120.6 | 146.6 | 128.3 |
| FIGNL1   | 132.8 | 136.5 | 152.9  | 151.9 | 132.1 | 122.9 | 133.1 | 135.3 |
| FILIP1   | 116   | 122.8 | 120.7  | 128.6 | 110.1 | 100.3 | 121.2 | 111.4 |
| FILIP1L  | 138.9 | 117.2 | 115.8  | 131.1 | 114.6 | 104.8 | 126.5 | 121   |
| FIP1L1   | 119.4 | 114.1 | 118.1  | 115.8 | 102.6 | 97.7  | 124.6 | 112.4 |
| FIS1     | 223.6 | 254.1 | 288.4  | 246.5 | 210.5 | 235.5 | 204.6 | 180.2 |
| FJX1     | 119.4 | 112.1 | 122.4  | 123.4 | 106.2 | 93    | 124.1 | 124.1 |

|          |        |        |        |        |        |        |        |        |
|----------|--------|--------|--------|--------|--------|--------|--------|--------|
| FKBP10   | 121.8  | 125.9  | 124.2  | 128.5  | 121.2  | 106    | 122.7  | 135.3  |
| FKBP11   | 776.9  | 895.9  | 610.3  | 720.5  | 518.5  | 455.6  | 651    | 646.6  |
| FKBP14   | 1362.3 | 1046.5 | 1258.1 | 1125.1 | 1117.8 | 658.7  | 1386.9 | 1101.1 |
| FKBP1A   | 144.2  | 143.7  | 143.4  | 148.5  | 142.9  | 130    | 152.5  | 136.9  |
| FKBP1A   | 160.1  | 222.2  | 187.5  | 194.5  | 187.6  | 114.8  | 175.9  | 165.6  |
| FKBP1A   | 472.9  | 620.5  | 485.1  | 450.6  | 419.4  | 324.2  | 478.7  | 389.9  |
| FKBP1B   | 116.5  | 129    | 121.6  | 116.4  | 113.5  | 107.1  | 118.8  | 112.7  |
| FKBP2    | 231.4  | 216.6  | 230.4  | 279.2  | 199    | 221    | 255.9  | 239.9  |
| FKBP2    | 128.6  | 124.6  | 130.6  | 132.9  | 129.4  | 134    | 134.4  | 122.3  |
| FKBP2    | 128.2  | 117.2  | 130.6  | 122.2  | 123.6  | 103.7  | 127.8  | 121.4  |
| FKBP3    | 182.5  | 166.7  | 224.1  | 204.7  | 158.4  | 181.3  | 178.8  | 240.8  |
| FKBP4    | 236    | 211.1  | 174.4  | 237.9  | 198.4  | 161.2  | 513.5  | 612.3  |
| FKBP5    | 350.7  | 416.1  | 290.4  | 314.5  | 369.2  | 218.9  | 370    | 510.6  |
| FKBP6    | 114.4  | 115.9  | 119.2  | 112.7  | 100.9  | 98.4   | 116.1  | 109.2  |
| FKBP7    | 113.6  | 114.1  | 109.7  | 117    | 106.4  | 105.5  | 116.3  | 115.9  |
| FKBP8    | 121.8  | 125.2  | 138.2  | 137.8  | 114.2  | 114.3  | 125    | 131.5  |
| FKBP9    | 104.8  | 109.5  | 121.8  | 116.5  | 102    | 90.1   | 114.3  | 110.2  |
| FKBP9L   | 110.8  | 106.1  | 117.1  | 116.6  | 120    | 100    | 118.5  | 109.4  |
| FKBPL    | 123.8  | 129.1  | 126.4  | 133.1  | 122.7  | 102.4  | 120.9  | 126.9  |
| FKHL18   | 116.6  | 116.9  | 105.3  | 113.1  | 102.8  | 91.2   | 110.9  | 108.8  |
| FKRP     | 184.3  | 203.6  | 193.3  | 203.8  | 176.1  | 135    | 238.7  | 226.1  |
| FKRP     | 141.7  | 134.1  | 158.9  | 138.4  | 128.9  | 112    | 137.7  | 129.5  |
| FKSG14   | 196.2  | 333.5  | 170.5  | 154.9  | 236.9  | 122.9  | 145    | 231.9  |
| FKSG2    | 115.9  | 124.5  | 121.4  | 124.3  | 104.7  | 98.8   | 121.6  | 112.9  |
| FKSG24   | 118.6  | 127.4  | 124.8  | 122.7  | 121.4  | 102.3  | 120.3  | 127.1  |
| FKSG30   | 113.5  | 108.3  | 110.5  | 115.5  | 107.1  | 97.1   | 118.8  | 119    |
| FKSG44   | 111.8  | 114.8  | 112.3  | 111.9  | 109.7  | 96.6   | 122.8  | 113.5  |
| FLAD1    | 133.5  | 125.7  | 128.7  | 130.1  | 117.3  | 104.8  | 140.2  | 123.3  |
| FLAD1    | 260.3  | 244.5  | 289.2  | 275.1  | 207.6  | 197.4  | 267    | 276.6  |
| FLCN     | 122.3  | 133.1  | 120.7  | 150.6  | 131.2  | 105.4  | 144    | 154.8  |
| FLCN     | 127.3  | 111.7  | 131.2  | 139.2  | 110.3  | 109.2  | 127    | 130.4  |
| FLCN     | 117    | 123.9  | 117.2  | 129.8  | 117.5  | 102.8  | 132.6  | 122.8  |
| FLG      | 111.1  | 120.2  | 110.1  | 115.7  | 103.9  | 95.8   | 122.9  | 110.1  |
| FLG2     | 117.8  | 111    | 117.5  | 124.7  | 114.4  | 105.6  | 120.5  | 120.4  |
| FLI1     | 114.6  | 126.2  | 124.8  | 136    | 107.3  | 109.4  | 124.9  | 117.4  |
| FLII     | 224.3  | 280.5  | 259.5  | 239.2  | 193.3  | 250.2  | 250.6  | 269.2  |
| FLJ00060 | 116    | 124.5  | 121.9  | 122.7  | 114.8  | 99     | 115.4  | 119.5  |
| FLJ10006 | 318.1  | 336.2  | 362.8  | 419.8  | 303.9  | 256.5  | 374.5  | 358    |
| FLJ10081 | 486.7  | 466.2  | 386.6  | 432.6  | 378.6  | 389.2  | 508.6  | 608.4  |
| FLJ10099 | 226.1  | 270.7  | 206.9  | 265.1  | 244.2  | 282.4  | 270.8  | 256.5  |
| FLJ10120 | 189.4  | 184.3  | 204.2  | 173.7  | 160.3  | 144.7  | 155.1  | 158.9  |
| FLJ10120 | 120    | 127.1  | 130.3  | 121.4  | 113.1  | 107.8  | 128.9  | 128.6  |
| FLJ10154 | 2470.3 | 2235.4 | 3211.1 | 2028.6 | 1776.4 | 1488.1 | 1854.6 | 1642.7 |
| FLJ10159 | 113.1  | 116    | 125.3  | 123.8  | 108.5  | 96     | 120.8  | 110.6  |
| FLJ10178 | 192.5  | 197.5  | 206.4  | 200.1  | 178.7  | 165.6  | 203.3  | 196.3  |
| FLJ10213 | 160.5  | 145.7  | 149.9  | 154.3  | 163.7  | 130    | 161.7  | 192.8  |
| FLJ10241 | 441.2  | 462.5  | 411.7  | 531.7  | 367.2  | 384.5  | 475.9  | 440.1  |
| FLJ10260 | 127.6  | 135.9  | 145    | 146.6  | 122.9  | 103.6  | 122.2  | 115.7  |
| FLJ10292 | 112.7  | 122.7  | 128.8  | 117.8  | 109.3  | 100.8  | 124.1  | 125    |
| FLJ10324 | 115.3  | 108.4  | 114.9  | 116.4  | 105.3  | 94.2   | 119.4  | 114.3  |
| FLJ10357 | 108.3  | 110.7  | 139.6  | 129.1  | 114.8  | 108.1  | 126    | 114.2  |

|          |        |        |        |        |       |       |        |       |
|----------|--------|--------|--------|--------|-------|-------|--------|-------|
| FLJ10374 | 138.5  | 145.1  | 157.2  | 163.7  | 141.7 | 123.4 | 125.2  | 149.5 |
| FLJ10379 | 206.6  | 241.4  | 211.9  | 247.2  | 232.7 | 185.4 | 236.5  | 194.3 |
| FLJ10490 | 120.8  | 122.5  | 112.4  | 136.3  | 108.2 | 109.8 | 110.1  | 125.9 |
| FLJ10661 | 110.4  | 126.7  | 133.2  | 130.1  | 121.2 | 102.1 | 120.1  | 120.5 |
| FLJ10726 | 132.2  | 152.1  | 137.7  | 150.4  | 134.1 | 118   | 150.1  | 180.4 |
| FLJ10769 | 299.8  | 285    | 309.8  | 351.4  | 250   | 259.3 | 333.3  | 241.6 |
| FLJ10781 | 125.4  | 117.7  | 114.4  | 113.7  | 119.3 | 103.3 | 120.7  | 116.5 |
| FLJ10786 | 101.1  | 110.5  | 109.9  | 113.5  | 103.1 | 97.9  | 106.7  | 113.4 |
| FLJ10815 | 121    | 115.6  | 121.2  | 127.1  | 113.9 | 107.6 | 125.2  | 119.9 |
| FLJ10847 | 122    | 118.7  | 109.6  | 123.1  | 111.4 | 100.1 | 121.3  | 112.8 |
| FLJ10916 | 125.4  | 123.6  | 130.1  | 127.3  | 114   | 108   | 130.9  | 130.2 |
| FLJ10922 | 137.5  | 142.6  | 147.7  | 148.5  | 119.6 | 120.4 | 138.2  | 124.2 |
| FLJ10925 | 212.2  | 199.8  | 194    | 190.8  | 157.8 | 145.4 | 182.3  | 167.9 |
| FLJ10945 | 108.9  | 121.2  | 117.8  | 107    | 114.7 | 106   | 114.6  | 119.4 |
| FLJ10986 | 155.4  | 140.2  | 173.8  | 146.5  | 128.7 | 138   | 133.2  | 120.6 |
| FLJ10996 | 116.3  | 110    | 117    | 124.8  | 119.7 | 101.3 | 149.4  | 122.8 |
| FLJ11000 | 280.4  | 271.9  | 271.3  | 340.8  | 281.7 | 274.4 | 342.2  | 310.1 |
| FLJ11017 | 121.5  | 120.4  | 123.5  | 122.5  | 111.9 | 102.3 | 114.9  | 110.2 |
| FLJ11151 | 121.4  | 120.8  | 123.9  | 124.5  | 106.2 | 102.6 | 124.5  | 119.7 |
| FLJ11155 | 109.3  | 110.5  | 124.8  | 115.6  | 102.4 | 101.6 | 116.7  | 108.2 |
| FLJ11171 | 258.3  | 214.1  | 257.4  | 235.1  | 202.2 | 210.7 | 207    | 228.8 |
| FLJ11184 | 121.4  | 119.2  | 123.6  | 125.8  | 108   | 106.1 | 113.3  | 114.9 |
| FLJ11193 | 118.9  | 125.3  | 138    | 122.4  | 116.1 | 107.2 | 128.2  | 125.6 |
| FLJ11200 | 193    | 184.8  | 194.2  | 175.9  | 162   | 145.1 | 164.2  | 217.3 |
| FLJ11259 | 286.3  | 158.5  | 220.9  | 256.8  | 155.6 | 153.7 | 202.2  | 134.1 |
| FLJ11286 | 309.9  | 342.7  | 322.6  | 291.3  | 252.9 | 249.6 | 274    | 290.7 |
| FLJ11305 | 1221.4 | 1065.2 | 1427.2 | 1240.7 | 999.5 | 946.3 | 1186.2 | 964.2 |
| FLJ11331 | 114.5  | 124    | 118.1  | 117.3  | 107   | 92.7  | 121.5  | 118.3 |
| FLJ11712 | 188.1  | 188.3  | 225.2  | 178.4  | 150.6 | 130.9 | 170.1  | 166.3 |
| FLJ11783 | 129.1  | 127.7  | 133    | 149.2  | 130.4 | 101.9 | 130.9  | 122.5 |
| FLJ11795 | 158.5  | 157.1  | 141.1  | 150.3  | 150.5 | 132.6 | 152    | 147.5 |
| FLJ11806 | 119.7  | 111.7  | 120.1  | 118.8  | 116.5 | 101.5 | 123.1  | 117.4 |
| FLJ11806 | 120.7  | 117.4  | 125.2  | 137.9  | 117.5 | 110.8 | 119.7  | 127.9 |
| FLJ11806 | 115.6  | 117.3  | 122.6  | 119.9  | 112.7 | 93.6  | 103.8  | 114.6 |
| FLJ11806 | 136.6  | 131.8  | 122.1  | 127.7  | 122.5 | 113.3 | 125.4  | 137.8 |
| FLJ12056 | 113.9  | 118.6  | 125.6  | 121.5  | 110.9 | 107   | 117.4  | 114.2 |
| FLJ12118 | 126    | 136.3  | 134    | 124.1  | 124.7 | 102.9 | 124.8  | 130.5 |
| FLJ12331 | 113.2  | 128.7  | 120.2  | 122.2  | 113.2 | 93.9  | 111.4  | 111.2 |
| FLJ12505 | 115.1  | 114.8  | 124.4  | 118.7  | 101.8 | 99.1  | 124.8  | 111.7 |
| FLJ12529 | 111.6  | 113.1  | 115.5  | 117.3  | 110   | 104.3 | 131.7  | 124.6 |
| FLJ12571 | 128.9  | 124.3  | 125.6  | 125.3  | 112   | 97.5  | 118.9  | 123.5 |
| FLJ12681 | 125.4  | 118.4  | 135.1  | 137.7  | 122.7 | 110.8 | 122.3  | 124.4 |
| FLJ12684 | 106.4  | 112.1  | 112.1  | 115.6  | 103.8 | 93.3  | 114.5  | 114.5 |
| FLJ12716 | 161.9  | 161.6  | 185.9  | 159.9  | 143.9 | 144.1 | 136.3  | 147.7 |
| FLJ12716 | 195.1  | 199    | 190.6  | 217.2  | 178.4 | 185.2 | 174    | 186.9 |
| FLJ12788 | 384.3  | 393.4  | 409.5  | 356    | 280.4 | 279.8 | 268.6  | 207.9 |
| FLJ12886 | 134.6  | 142    | 146.6  | 160.6  | 135.5 | 131.6 | 180.1  | 153.6 |
| FLJ12949 | 133    | 152.3  | 132.9  | 142.6  | 136   | 128.5 | 127.5  | 136   |
| FLJ12949 | 283    | 269.7  | 272.2  | 287.6  | 257.6 | 203.1 | 218.3  | 203.8 |
| FLJ12998 | 127.2  | 135.4  | 134.8  | 142    | 116   | 123.8 | 143.2  | 133   |
| FLJ13096 | 127    | 130.2  | 135.2  | 136.5  | 121.5 | 106.8 | 134.4  | 136   |

|          |       |       |       |       |       |       |       |       |
|----------|-------|-------|-------|-------|-------|-------|-------|-------|
| FLJ13149 | 353.8 | 502.7 | 357.4 | 443.4 | 325.5 | 268.1 | 445.4 | 467.2 |
| FLJ13231 | 111.7 | 111.4 | 108   | 105   | 105.8 | 100.8 | 118.4 | 115   |
| FLJ13236 | 120   | 120.4 | 120.4 | 114.6 | 105.8 | 96.4  | 122.2 | 124.3 |
| FLJ13265 | 126.4 | 122.1 | 117.1 | 115.3 | 112   | 105.2 | 133.4 | 128.6 |
| FLJ13273 | 126.4 | 125.7 | 132.4 | 135.6 | 125.4 | 105.3 | 126.2 | 122.2 |
| FLJ13273 | 187.5 | 250.4 | 203.8 | 249.6 | 220.8 | 170.4 | 208.1 | 261   |
| FLJ13305 | 129.9 | 124.6 | 128.4 | 125.8 | 116.9 | 101.8 | 119.9 | 125   |
| FLJ13391 | 102.9 | 111.7 | 122.5 | 119.3 | 109.3 | 99.6  | 115.7 | 113   |
| FLJ13576 | 138.2 | 145.8 | 146.2 | 151.4 | 139   | 125.1 | 134.6 | 121.9 |
| FLJ13611 | 119.5 | 116.9 | 120.8 | 118.3 | 107   | 99    | 123.2 | 114.4 |
| FLJ13614 | 116.6 | 103.4 | 112.3 | 118.2 | 98    | 100.8 | 113.7 | 109.1 |
| FLJ13639 | 126.3 | 126.9 | 136.3 | 131.8 | 118.7 | 111.3 | 128.8 | 142.3 |
| FLJ13639 | 132.6 | 139.9 | 151.7 | 133.1 | 119.2 | 117.1 | 139.8 | 125.7 |
| FLJ13639 | 131.4 | 137.4 | 138.9 | 153.9 | 127.5 | 113.2 | 129.8 | 129.9 |
| FLJ13841 | 113.9 | 115.8 | 123.5 | 117.8 | 103.6 | 104.6 | 122.2 | 111.9 |
| FLJ13909 | 115   | 126.3 | 129.6 | 125.7 | 102.5 | 102   | 122.1 | 116   |
| FLJ13910 | 129.8 | 127   | 123   | 135.1 | 127.3 | 128.4 | 145.7 | 138.4 |
| FLJ13912 | 142.1 | 166.5 | 143.8 | 149.4 | 148.5 | 111.5 | 162.8 | 169   |
| FLJ13946 | 113.6 | 109.5 | 130.1 | 121.3 | 116.1 | 101.1 | 118.3 | 119.7 |
| FLJ13984 | 116.1 | 108.7 | 118   | 121.7 | 102.4 | 104.4 | 120.4 | 119.8 |
| FLJ14054 | 119.1 | 113.1 | 118.7 | 117.6 | 110.2 | 95.7  | 117.4 | 114.5 |
| FLJ14107 | 125.1 | 115.5 | 132.3 | 140.7 | 104.4 | 111.7 | 125.7 | 123.6 |
| FLJ14154 | 141.1 | 138.2 | 145.3 | 161.2 | 118.5 | 119.4 | 173.1 | 164.6 |
| FLJ14166 | 106.6 | 113.1 | 114.4 | 116.4 | 113   | 94    | 113.6 | 115.9 |
| FLJ14213 | 300.3 | 248.9 | 355.3 | 295.6 | 208   | 270.6 | 229.2 | 187.6 |
| FLJ14346 | 121.7 | 118.3 | 132.2 | 128.5 | 114.3 | 110.1 | 125.2 | 123.2 |
| FLJ14397 | 113.2 | 116.6 | 118.3 | 114.2 | 113.1 | 102.8 | 114.6 | 115.1 |
| FLJ14466 | 317.4 | 376.9 | 253.7 | 309.8 | 235   | 215.5 | 270.1 | 241   |
| FLJ14640 | 125.9 | 125.4 | 119.2 | 124.3 | 109.7 | 113   | 122.7 | 118.4 |
| FLJ14668 | 303.3 | 389   | 372.6 | 292.1 | 273.1 | 214.1 | 224.6 | 210.1 |
| FLJ14768 | 179.8 | 171.6 | 144.2 | 180   | 146.6 | 116.5 | 192.5 | 187.6 |
| FLJ14803 | 322.1 | 309.4 | 348.9 | 337.6 | 246.1 | 273   | 284.1 | 231.9 |
| FLJ14816 | 112.8 | 113.3 | 107.7 | 111.9 | 100.9 | 99.8  | 113.9 | 108.7 |
| FLJ14834 | 112.9 | 107.8 | 103.8 | 113   | 102.2 | 91.2  | 108.1 | 116.1 |
| FLJ16008 | 119.5 | 139.7 | 121.8 | 125.5 | 116.2 | 103.4 | 123.6 | 123.8 |
| FLJ16124 | 118.1 | 107   | 118.2 | 115   | 108.4 | 91.2  | 114.3 | 113.4 |
| FLJ16165 | 115   | 111.8 | 120.5 | 117   | 122.4 | 98.8  | 112.4 | 108.8 |
| FLJ16231 | 122.8 | 113.4 | 139.7 | 130.5 | 122.5 | 116.4 | 137.2 | 121   |
| FLJ16237 | 119.5 | 108   | 113.6 | 129.8 | 114   | 99.6  | 118.4 | 115   |
| FLJ16331 | 110   | 107.9 | 108.6 | 120.3 | 111.1 | 106.1 | 119.8 | 109.1 |
| FLJ16478 | 112   | 115.2 | 108.3 | 118.9 | 99.1  | 95.2  | 115.3 | 117.6 |
| FLJ16542 | 129.5 | 132.9 | 145.9 | 131.7 | 127.9 | 122.7 | 134.9 | 135.8 |
| FLJ16636 | 113.6 | 112.1 | 138.8 | 122.6 | 105.9 | 105.4 | 126.4 | 117.5 |
| FLJ16641 | 115.6 | 114   | 124.6 | 111.2 | 113.5 | 97.5  | 118.8 | 111.4 |
| FLJ16734 | 131.6 | 136.2 | 141.1 | 128.5 | 115   | 112.9 | 125.5 | 126.3 |
| FLJ16793 | 121.1 | 130.1 | 126.4 | 125.5 | 115.9 | 106.8 | 119.5 | 119.8 |
| FLJ20032 | 110.8 | 121.5 | 119.6 | 116.9 | 104.6 | 99.3  | 118   | 118.4 |
| FLJ20035 | 202.2 | 192.5 | 248.3 | 206.2 | 204.1 | 179.8 | 171.4 | 163.2 |
| FLJ20054 | 302.2 | 271.5 | 393.4 | 372.4 | 282.8 | 349   | 303.1 | 402.5 |
| FLJ20097 | 171.3 | 176.1 | 160.4 | 175.5 | 164.3 | 142   | 191   | 197.6 |
| FLJ20097 | 137.7 | 118   | 127.2 | 119.7 | 115.4 | 105.2 | 127.9 | 116.6 |

|          |        |        |       |        |        |        |        |        |
|----------|--------|--------|-------|--------|--------|--------|--------|--------|
| FLJ20097 | 112.3  | 120.4  | 112.9 | 118    | 114.1  | 98.1   | 113.2  | 103.5  |
| FLJ20105 | 123.1  | 115.5  | 113   | 115.6  | 111.8  | 100.4  | 118.2  | 118.6  |
| FLJ20105 | 111.7  | 114.2  | 119.1 | 121.9  | 107.1  | 97     | 117.7  | 112.2  |
| FLJ20125 | 144.9  | 159.6  | 171.5 | 156.5  | 152.6  | 145.5  | 159.2  | 143.2  |
| FLJ20130 | 126.1  | 133.1  | 136.8 | 138.9  | 118.2  | 107.9  | 112    | 119.8  |
| FLJ20152 | 155.2  | 182.8  | 175.3 | 195.9  | 161.4  | 150.7  | 166.7  | 187.1  |
| FLJ20152 | 188.8  | 216.5  | 231.9 | 198.1  | 190.6  | 219.2  | 180.2  | 185.6  |
| FLJ20152 | 447.2  | 554.7  | 485.2 | 494.5  | 348.5  | 324.1  | 348.3  | 472.8  |
| FLJ20160 | 330.1  | 312.9  | 221.5 | 362.2  | 254.6  | 227.5  | 279.9  | 258.2  |
| FLJ20184 | 108.9  | 101.9  | 119.7 | 109.4  | 107.9  | 101.6  | 116.6  | 112.9  |
| FLJ20186 | 148.4  | 164.5  | 136.3 | 159.2  | 124.1  | 121.5  | 142.5  | 138.8  |
| FLJ20186 | 132.6  | 148.5  | 154.5 | 154.2  | 122.3  | 141.5  | 152.6  | 150.7  |
| FLJ20186 | 308.2  | 309.7  | 415.2 | 338.5  | 233.1  | 290.2  | 274.9  | 261.2  |
| FLJ20232 | 326.8  | 406.9  | 319.2 | 366.3  | 307.5  | 268    | 336.8  | 309.4  |
| FLJ20245 | 135.5  | 139.8  | 151.9 | 125.8  | 123    | 144.1  | 144.5  | 127    |
| FLJ20254 | 143.6  | 150    | 175   | 172.1  | 139.7  | 134.7  | 150.8  | 150.2  |
| FLJ20272 | 196    | 196.4  | 191.3 | 226.3  | 175.8  | 155.2  | 172.1  | 171.1  |
| FLJ20273 | 179.2  | 187.2  | 173.8 | 209.1  | 135.3  | 216.5  | 214.8  | 137.5  |
| FLJ20280 | 232.7  | 267.2  | 295.8 | 235.1  | 225.7  | 202.2  | 205.8  | 184.6  |
| FLJ20294 | 130    | 125.2  | 127.3 | 120.5  | 119.2  | 108.1  | 124.6  | 115.7  |
| FLJ20297 | 121.2  | 140.2  | 154   | 146.3  | 120.5  | 108.5  | 148.4  | 133    |
| FLJ20298 | 122.2  | 109.2  | 132.3 | 126.8  | 113.9  | 100.2  | 118.3  | 118.9  |
| FLJ20298 | 117.7  | 117.9  | 110.3 | 114.8  | 111.5  | 96.1   | 111.7  | 110.7  |
| FLJ20309 | 122.1  | 127.6  | 114.1 | 120    | 109.7  | 96.5   | 128.4  | 136.7  |
| FLJ20323 | 204    | 205.3  | 224.4 | 196    | 174.6  | 183.6  | 201.3  | 184.9  |
| FLJ20364 | 154.3  | 142.3  | 148.9 | 166.9  | 146.5  | 127.8  | 158.3  | 157.8  |
| FLJ20366 | 113.1  | 126.1  | 124.4 | 117.4  | 113.6  | 95.7   | 118.8  | 115.2  |
| FLJ20397 | 107    | 106.5  | 116.8 | 112.9  | 108.5  | 95.6   | 111.8  | 116.9  |
| FLJ20422 | 131.6  | 121.1  | 117.7 | 128.7  | 114.8  | 107.1  | 120.8  | 117.2  |
| FLJ20433 | 120.2  | 122.2  | 136   | 124.2  | 112.3  | 102.7  | 118.9  | 111.5  |
| FLJ20489 | 131    | 122.9  | 144.4 | 127.7  | 110.5  | 197.7  | 135.1  | 140.8  |
| FLJ20512 | 684.3  | 869.9  | 784.5 | 755.9  | 567.4  | 478.7  | 549.2  | 387.9  |
| FLJ20516 | 120.8  | 118.4  | 131.4 | 123.1  | 116    | 99.4   | 122.3  | 119    |
| FLJ20534 | 167.1  | 205.8  | 217   | 201.1  | 168.6  | 158.6  | 164.2  | 131    |
| FLJ20551 | 223    | 235    | 205.6 | 218.2  | 206.4  | 159.7  | 240.7  | 221    |
| FLJ20558 | 237.2  | 225.5  | 220.4 | 240.2  | 226.5  | 203.3  | 277.9  | 249.2  |
| FLJ20581 | 124.5  | 131.8  | 136.6 | 126    | 115.7  | 101    | 122.5  | 117.8  |
| FLJ20582 | 208.4  | 239.9  | 196.6 | 195.7  | 228.9  | 187.3  | 225.6  | 236.5  |
| FLJ20625 | 504.5  | 574.7  | 708   | 563.1  | 483.6  | 559.2  | 533.3  | 453.3  |
| FLJ20628 | 144.5  | 152.6  | 144.4 | 144.7  | 136.6  | 118.9  | 134.7  | 133.8  |
| FLJ20643 | 222.7  | 225.3  | 175.7 | 221.3  | 200.3  | 171.2  | 177.9  | 163.7  |
| FLJ20647 | 1653.1 | 1634.8 | 1940  | 2188.2 | 1620.6 | 1438.5 | 1649.7 | 2012.9 |
| FLJ20674 | 117.6  | 110    | 119   | 117.5  | 111.5  | 107.3  | 126.6  | 116.9  |
| FLJ20674 | 120.8  | 135.2  | 116.2 | 129.1  | 106.1  | 113.7  | 121.3  | 112.7  |
| FLJ20699 | 205.1  | 226.1  | 210.9 | 243.4  | 145.6  | 149.9  | 244    | 197.9  |
| FLJ20701 | 240.7  | 190.3  | 486.6 | 199.9  | 138.9  | 261    | 164.1  | 125.1  |
| FLJ20718 | 146.4  | 136.2  | 160.1 | 129.9  | 135.5  | 121.4  | 144.8  | 130.3  |
| FLJ20718 | 119.5  | 129.6  | 120.9 | 132.1  | 121.4  | 100.7  | 139.5  | 135.4  |
| FLJ20758 | 134.1  | 137.3  | 117   | 134.7  | 110.5  | 112.6  | 134.4  | 119.8  |
| FLJ20850 | 134.7  | 149    | 146.8 | 133    | 116.6  | 104.7  | 134.4  | 119.4  |
| FLJ20920 | 113.2  | 106.3  | 113.2 | 123.7  | 108.4  | 101.9  | 112.8  | 108.7  |



|          |       |       |       |       |       |       |       |       |
|----------|-------|-------|-------|-------|-------|-------|-------|-------|
| FLJ21062 | 123.2 | 116.6 | 118.2 | 124.8 | 114.1 | 105.8 | 112.3 | 111   |
| FLJ21075 | 108.4 | 107.8 | 111.4 | 127.2 | 102.4 | 96.3  | 114   | 119.2 |
| FLJ21103 | 126.4 | 130.7 | 123.6 | 124.5 | 110.7 | 104.5 | 126.9 | 133.9 |
| FLJ21106 | 205.8 | 216.6 | 189.7 | 213.6 | 198.7 | 131.8 | 200.2 | 165.3 |
| FLJ21125 | 223.3 | 264.5 | 274.4 | 214.8 | 195.3 | 224.7 | 157.3 | 153.3 |
| FLJ21127 | 152.7 | 127.6 | 137.1 | 134.8 | 114.9 | 116.8 | 129.1 | 116.1 |
| FLJ21159 | 120.8 | 120.6 | 119.7 | 112.7 | 117.5 | 98.4  | 122.1 | 120.5 |
| FLJ21511 | 112.3 | 112.2 | 115.2 | 108.5 | 106.2 | 91.4  | 120.6 | 125.6 |
| FLJ21687 | 127.5 | 136.6 | 139.3 | 124.1 | 113.7 | 102   | 128.9 | 124.5 |
| FLJ21742 | 129.2 | 132.2 | 133   | 129.6 | 121.1 | 108.5 | 127.1 | 130   |
| FLJ21749 | 317.4 | 283.9 | 416   | 299.6 | 249.6 | 276   | 244.4 | 243.2 |
| FLJ21816 | 142.9 | 158.9 | 143   | 144.1 | 135.2 | 126.8 | 156.2 | 152.1 |
| FLJ21820 | 148.4 | 142.9 | 163.3 | 152.5 | 143   | 137.3 | 143.1 | 127.1 |
| FLJ21827 | 134.8 | 134.8 | 151   | 132.6 | 122.4 | 126.2 | 142.7 | 129.9 |
| FLJ21839 | 159.7 | 163.7 | 139.8 | 154.7 | 116.2 | 118.5 | 128.7 | 127.3 |
| FLJ21839 | 144.1 | 139.2 | 124.1 | 169.7 | 136.1 | 115   | 158.5 | 133.5 |
| FLJ21865 | 313.3 | 271   | 328.2 | 275.4 | 180.4 | 248   | 226   | 216.8 |
| FLJ21901 | 153.7 | 182.3 | 166.9 | 162.9 | 146.5 | 135   | 172.1 | 168   |
| FLJ21908 | 120   | 114.6 | 118.1 | 114.5 | 102.5 | 95.7  | 113   | 107.7 |
| FLJ21945 | 220.2 | 226.3 | 208.6 | 230.6 | 205.3 | 179.2 | 208.4 | 177   |
| FLJ21963 | 120.5 | 117.7 | 122.6 | 127.4 | 115.2 | 105.8 | 121   | 120.9 |
| FLJ21986 | 127.1 | 116   | 318.3 | 125.4 | 111.6 | 102.1 | 119.6 | 120   |
| FLJ22104 | 137   | 157.6 | 140.8 | 140.6 | 142   | 122.1 | 151.1 | 151.9 |
| FLJ22167 | 125.5 | 123   | 113.3 | 124.8 | 114   | 100.1 | 122.2 | 121.1 |
| FLJ22184 | 125.3 | 109.2 | 116.1 | 120.8 | 101.6 | 97.5  | 114.7 | 118.6 |
| FLJ22184 | 110.3 | 119.8 | 127   | 121   | 109.9 | 94.3  | 113.8 | 118.6 |
| FLJ22222 | 127.8 | 127.1 | 134.5 | 134   | 119.2 | 110.5 | 126.7 | 126.6 |
| FLJ22222 | 133.4 | 128.6 | 157.6 | 143.3 | 126   | 140   | 126.3 | 146.1 |
| FLJ22222 | 120.5 | 126.8 | 131.3 | 132.8 | 114   | 102.7 | 130.8 | 134.5 |
| FLJ22318 | 142.9 | 171.7 | 129.3 | 159.9 | 119.8 | 116.5 | 135.9 | 123.7 |
| FLJ22349 | 122   | 129.8 | 125   | 131.7 | 114   | 112.1 | 120.5 | 116   |
| FLJ22374 | 127.8 | 134.9 | 128.3 | 120.6 | 115.1 | 104.6 | 125   | 115.2 |
| FLJ22386 | 134.2 | 120.5 | 133.5 | 128.1 | 110.6 | 104.5 | 125.4 | 130.2 |
| FLJ22471 | 642.3 | 606.3 | 557.9 | 660.8 | 560   | 422.1 | 632.4 | 650.5 |
| FLJ22531 | 137.8 | 186.4 | 141.9 | 144.7 | 141.1 | 115.5 | 145.3 | 139.4 |
| FLJ22555 | 304.1 | 324.1 | 338.1 | 304.4 | 324.1 | 272.3 | 320.1 | 309.5 |
| FLJ22624 | 165.2 | 155.4 | 163.7 | 193   | 153.4 | 135.9 | 174.2 | 182.3 |
| FLJ22639 | 128.7 | 128.6 | 128.2 | 134.7 | 143.2 | 118   | 123.6 | 148.7 |
| FLJ22662 | 333.3 | 199.5 | 760.4 | 272.2 | 170.2 | 512.8 | 246.3 | 155.9 |
| FLJ22671 | 108.8 | 114.4 | 106.6 | 112.6 | 110.6 | 100.6 | 122.9 | 111.6 |
| FLJ22688 | 126.6 | 131.1 | 132.7 | 133   | 128.1 | 109   | 124.1 | 125   |
| FLJ22709 | 307.7 | 320.7 | 371.1 | 283.8 | 226.8 | 205.9 | 243.9 | 172.5 |
| FLJ22746 | 118.1 | 108.6 | 117.8 | 119.6 | 109.3 | 105   | 115.2 | 106.3 |
| FLJ22795 | 148.7 | 154.4 | 139.9 | 143.4 | 124.4 | 105.7 | 136.5 | 133.6 |
| FLJ23049 | 123.4 | 109.3 | 119.1 | 125.3 | 128.7 | 102   | 128   | 114.2 |
| FLJ23191 | 105.6 | 110.1 | 104.4 | 110.6 | 105.9 | 95.6  | 117.1 | 114.6 |
| FLJ23356 | 118   | 133   | 117.5 | 121.9 | 121.8 | 98.6  | 120.2 | 117.4 |
| FLJ23436 | 126.1 | 110.8 | 124.6 | 124.1 | 114.2 | 97    | 111.7 | 118.3 |
| FLJ23447 | 125.1 | 111.8 | 116.2 | 126.3 | 115.2 | 98    | 110.3 | 111.9 |
| FLJ23514 | 110.9 | 111.8 | 119.6 | 118.5 | 113.3 | 102.6 | 121.7 | 114.5 |
| FLJ23518 | 119.4 | 121.4 | 116.9 | 115.9 | 113.8 | 97.7  | 121.1 | 112.4 |

|          |       |       |       |       |       |       |       |       |
|----------|-------|-------|-------|-------|-------|-------|-------|-------|
| FLJ23577 | 110.6 | 107.3 | 117.1 | 114.9 | 110.3 | 91.2  | 113.2 | 110.5 |
| FLJ23577 | 120.2 | 129.5 | 145   | 135.1 | 112.2 | 112.4 | 130.4 | 125.5 |
| FLJ23577 | 109.8 | 114.4 | 116.7 | 111.1 | 111.2 | 105.7 | 112.2 | 109.4 |
| FLJ23584 | 157.3 | 170.7 | 162   | 168.6 | 148.2 | 140.6 | 170.6 | 167.7 |
| FLJ23588 | 113.7 | 112.8 | 108.9 | 110.1 | 102.2 | 95.7  | 113.2 | 105.5 |
| FLJ23588 | 121   | 115.8 | 110.4 | 117.1 | 115.1 | 101.4 | 119.2 | 114.9 |
| FLJ23588 | 120.2 | 108.7 | 117.3 | 126.2 | 116.3 | 109.5 | 117.5 | 124.6 |
| FLJ23657 | 118   | 119.1 | 111.7 | 110.8 | 105.5 | 100.3 | 113.7 | 111.9 |
| FLJ23834 | 138   | 146.8 | 141   | 131.9 | 113.5 | 101.8 | 120.9 | 118.6 |
| FLJ23861 | 124.1 | 110.6 | 129.1 | 120.4 | 111.7 | 106.6 | 129   | 121.7 |
| FLJ23878 | 112.2 | 114.9 | 111.3 | 121.6 | 110.9 | 102.6 | 118.9 | 110.2 |
| FLJ25006 | 122.8 | 120   | 150   | 121.2 | 119.5 | 109   | 102.8 | 126.8 |
| FLJ25067 | 188   | 205.7 | 175.5 | 174.1 | 155.7 | 146.6 | 173.5 | 146.4 |
| FLJ25084 | 132.1 | 128.1 | 124.5 | 131   | 117.5 | 106.2 | 138.7 | 137.4 |
| FLJ25102 | 122.7 | 114.1 | 116   | 120.7 | 115.2 | 102.3 | 123.8 | 120.6 |
| FLJ25143 | 119.5 | 116.8 | 120.7 | 126.4 | 114.3 | 106.1 | 126.9 | 138.1 |
| FLJ25222 | 339.3 | 316.3 | 330.4 | 320.2 | 192.7 | 302.5 | 375.7 | 238.4 |
| FLJ25328 | 112.5 | 109.3 | 114.2 | 130.3 | 110.4 | 99.7  | 109   | 116.6 |
| FLJ25369 | 103.5 | 101.6 | 113.9 | 114.6 | 109   | 90.5  | 109.9 | 112.2 |
| FLJ25371 | 111   | 122.2 | 117.6 | 122.4 | 105.1 | 98.5  | 119.3 | 113.1 |
| FLJ25410 | 134.9 | 131.4 | 153.2 | 141.1 | 123.6 | 115.2 | 128.1 | 135.5 |
| FLJ25416 | 115.4 | 142.1 | 120.8 | 126.2 | 115.2 | 101.3 | 147.8 | 131.8 |
| FLJ25421 | 115.3 | 132.9 | 130.4 | 128.7 | 119   | 104.8 | 128.1 | 118.2 |
| FLJ25439 | 122.3 | 123.2 | 120.1 | 122.1 | 108.9 | 100.4 | 121.1 | 120.9 |
| FLJ25444 | 117.9 | 106.6 | 110.7 | 118.2 | 104.5 | 103.6 | 121.7 | 110.1 |
| FLJ25476 | 202.1 | 239.3 | 305.3 | 218.3 | 181.1 | 206.1 | 192.8 | 174.1 |
| FLJ25477 | 123.6 | 121.8 | 119.8 | 131.7 | 123.4 | 97.4  | 113.2 | 109.1 |
| FLJ25660 | 121.5 | 111.1 | 118.2 | 115.9 | 107   | 99.1  | 127.1 | 112.7 |
| FLJ25680 | 117.5 | 113.8 | 116.4 | 118.3 | 116.2 | 99.7  | 124.3 | 110.4 |
| FLJ25770 | 107   | 109.9 | 107.4 | 133.7 | 105.9 | 99.6  | 110.8 | 116.5 |
| FLJ25773 | 113.8 | 111.9 | 115.9 | 111   | 101.6 | 93.7  | 108.8 | 113.2 |
| FLJ25791 | 108.4 | 136.6 | 133.1 | 130.7 | 128.9 | 109.4 | 141.7 | 139.6 |
| FLJ25801 | 116.1 | 121.5 | 123   | 125.4 | 104.8 | 105.6 | 116.4 | 120.5 |
| FLJ25976 | 106.5 | 107.4 | 108.8 | 114.2 | 102.7 | 89.8  | 107.9 | 114.4 |
| FLJ25996 | 105.7 | 119.6 | 116.2 | 118.4 | 108.6 | 105.8 | 112.4 | 114.4 |
| FLJ26175 | 143.2 | 147.1 | 144.8 | 147.9 | 139.1 | 120.6 | 141.6 | 137.4 |
| FLJ26443 | 117.7 | 119.9 | 112.6 | 119.7 | 107.9 | 103   | 127.1 | 107.7 |
| FLJ26850 | 136.8 | 121   | 140.2 | 125.6 | 128.2 | 109.1 | 124.2 | 118.7 |
| FLJ27465 | 120.7 | 114.2 | 119.3 | 123.9 | 114.2 | 102   | 122.2 | 116.1 |
| FLJ27465 | 115.2 | 107.4 | 116   | 136.8 | 119   | 103.5 | 127.9 | 116.6 |
| FLJ27505 | 104.6 | 107.9 | 110.3 | 111.9 | 102   | 95.3  | 117.1 | 120.5 |
| FLJ27523 | 105.7 | 121.6 | 124.3 | 132.2 | 116   | 107.8 | 129.1 | 130.4 |
| FLJ30046 | 217.4 | 237.5 | 195.4 | 252.6 | 255   | 191.9 | 229.1 | 235.9 |
| FLJ30046 | 126   | 132.6 | 109.9 | 129.9 | 124.8 | 106   | 118.8 | 133.5 |
| FLJ30058 | 123.8 | 117.6 | 118.1 | 124.3 | 116.4 | 114.2 | 126.1 | 125.9 |
| FLJ30277 | 112   | 110.8 | 117.1 | 114.1 | 113.6 | 94.4  | 126.5 | 129.6 |
| FLJ30294 | 107.7 | 111   | 112.8 | 123.5 | 113.8 | 101.3 | 112.3 | 114.4 |
| FLJ30313 | 120.2 | 112.4 | 113.5 | 123.4 | 113   | 99    | 118.1 | 116.4 |
| FLJ30596 | 114.9 | 125.1 | 119   | 127   | 119.9 | 117   | 135.3 | 118.7 |
| FLJ30655 | 115.5 | 120.7 | 131.1 | 124.9 | 116.5 | 106.6 | 115.7 | 119.4 |
| FLJ30707 | 104.9 | 106.3 | 105.3 | 121.7 | 109.8 | 99.9  | 107.5 | 102.3 |

|          |       |       |        |       |       |       |       |       |
|----------|-------|-------|--------|-------|-------|-------|-------|-------|
| FLJ30834 | 118.5 | 116.9 | 123.7  | 134.9 | 113.7 | 106.6 | 116.1 | 118.2 |
| FLJ30851 | 112.7 | 114.6 | 107.9  | 111.8 | 102.7 | 97.1  | 115.5 | 112.5 |
| FLJ30934 | 115.8 | 117.4 | 114.9  | 120.3 | 106.9 | 99.1  | 117.4 | 119.8 |
| FLJ30990 | 111.4 | 105.5 | 112.9  | 113.4 | 106.8 | 97.1  | 117.6 | 103.6 |
| FLJ31196 | 119.9 | 114.2 | 128.5  | 115.9 | 104.6 | 109.1 | 120.6 | 122.1 |
| FLJ31204 | 145   | 133.4 | 137.8  | 160.4 | 119.7 | 108.8 | 132.3 | 130.8 |
| FLJ31401 | 113   | 114.1 | 109.5  | 114   | 111.5 | 98.2  | 116.2 | 109.4 |
| FLJ31413 | 378.7 | 378.8 | 323.4  | 653   | 414.9 | 506.4 | 804.9 | 615.2 |
| FLJ31438 | 122   | 117.1 | 131.3  | 108.3 | 128.3 | 100.8 | 117.7 | 111.8 |
| FLJ31568 | 119.9 | 112.8 | 123.5  | 121.4 | 104.2 | 98.4  | 110.6 | 110.9 |
| FLJ31659 | 116.2 | 121.7 | 120.9  | 112.8 | 104.8 | 96.7  | 120.2 | 118   |
| FLJ31846 | 115.4 | 121.1 | 125    | 125.1 | 108.8 | 96.7  | 126.3 | 111.2 |
| FLJ32011 | 121   | 124.4 | 122.5  | 134.5 | 105.3 | 105.4 | 122.9 | 120.6 |
| FLJ32063 | 109.9 | 106.4 | 117.4  | 117.5 | 103.2 | 95.6  | 113.2 | 111.6 |
| FLJ32110 | 115.7 | 115.9 | 113.3  | 119.2 | 106.2 | 99.3  | 115.1 | 113.2 |
| FLJ32130 | 132.5 | 126.6 | 130    | 143.9 | 136   | 107   | 126.1 | 114.6 |
| FLJ32206 | 114.7 | 112.9 | 119.8  | 122.6 | 105.2 | 97.1  | 124.5 | 130   |
| FLJ32312 | 121.6 | 118.3 | 131.6  | 128.4 | 111.7 | 104.3 | 129.7 | 120.2 |
| FLJ32447 | 138.9 | 138.9 | 147.3  | 134.9 | 124.3 | 110.5 | 152.3 | 134.6 |
| FLJ32549 | 124.5 | 128.4 | 131    | 129.8 | 115.2 | 97    | 127.4 | 125.5 |
| FLJ32569 | 109.3 | 123.1 | 114.4  | 122.9 | 112.5 | 101.8 | 117.5 | 109.9 |
| FLJ32569 | 113.4 | 119.4 | 119.6  | 120.2 | 106   | 96.8  | 115   | 110.7 |
| FLJ32658 | 123.7 | 128.2 | 122.9  | 119.2 | 111.3 | 103.7 | 114.9 | 118   |
| FLJ32679 | 120   | 120.2 | 147.4  | 135.9 | 116.3 | 118   | 109.3 | 116.6 |
| FLJ32745 | 128.4 | 129.9 | 136.7  | 135.4 | 128.3 | 105.7 | 137.1 | 125.3 |
| FLJ32771 | 114   | 126.4 | 117.2  | 116.6 | 113.1 | 103.1 | 125.4 | 119.1 |
| FLJ32784 | 122.7 | 129.1 | 114.3  | 121.4 | 114.8 | 98.3  | 125.3 | 113   |
| FLJ32786 | 110.8 | 110   | 113.6  | 116.7 | 102.4 | 93.2  | 112   | 111.6 |
| FLJ32867 | 110.7 | 102.8 | 111.1  | 113.9 | 112.2 | 94.4  | 111.5 | 114.5 |
| FLJ32871 | 118.1 | 118   | 119.6  | 118.5 | 110.1 | 95.5  | 116.4 | 117.6 |
| FLJ32894 | 123.5 | 124.3 | 116.8  | 117   | 110.8 | 101   | 135.6 | 112.9 |
| FLJ32926 | 118.8 | 124.4 | 114.9  | 122.7 | 105   | 97.6  | 111.5 | 111.5 |
| FLJ33360 | 113.6 | 118.9 | 120.5  | 112.1 | 120   | 103.2 | 115.4 | 114.9 |
| FLJ33590 | 148.6 | 144.2 | 145.1  | 137.8 | 126.2 | 115   | 137.1 | 122.8 |
| FLJ33641 | 316.4 | 157.7 | 2197.8 | 274.1 | 131.8 | 859   | 152.6 | 126   |
| FLJ33718 | 114   | 114.2 | 135.5  | 125.8 | 114.7 | 107.9 | 117.8 | 130.4 |
| FLJ33790 | 123.8 | 130   | 116.1  | 128.2 | 128.2 | 109.3 | 127.9 | 128.1 |
| FLJ33860 | 116.5 | 118.1 | 117.8  | 120   | 108   | 98.1  | 119.7 | 118.5 |
| FLJ34306 | 110.2 | 107.3 | 111.7  | 119.2 | 102.8 | 101.8 | 109.7 | 107.6 |
| FLJ34503 | 117.8 | 117.9 | 129.7  | 124.1 | 116.3 | 102.7 | 120.3 | 119.3 |
| FLJ34931 | 118.6 | 115.8 | 118.2  | 126.9 | 116.1 | 116.2 | 127.7 | 109.6 |
| FLJ34969 | 260.3 | 241   | 270.7  | 303.3 | 242.2 | 258.2 | 278.3 | 246.2 |
| FLJ35119 | 153.3 | 138.9 | 155.7  | 141.4 | 132.9 | 109.6 | 144.4 | 149   |
| FLJ35220 | 117.1 | 120.4 | 116.1  | 117.6 | 108.6 | 95.9  | 111.6 | 122.1 |
| FLJ35409 | 118.5 | 114.3 | 116.3  | 113.9 | 107.5 | 96.8  | 112.5 | 112.9 |
| FLJ35695 | 116.4 | 107.4 | 117.3  | 117.7 | 103.6 | 101.6 | 117.3 | 125.5 |
| FLJ35725 | 129.6 | 128.7 | 124.3  | 127.6 | 111.8 | 110.8 | 131.3 | 129.9 |
| FLJ35725 | 116.7 | 119.6 | 115.5  | 121.8 | 105.9 | 104.4 | 127   | 127.9 |
| FLJ35767 | 118.1 | 113   | 117.6  | 113.7 | 108.6 | 100.6 | 130.2 | 121.7 |
| FLJ35773 | 110   | 113.3 | 119.1  | 114.1 | 107.5 | 94.3  | 116.6 | 112.7 |
| FLJ35776 | 116.5 | 120.2 | 114.8  | 121.6 | 111.6 | 88.2  | 120.6 | 115.6 |

|          |       |       |       |       |       |       |       |       |
|----------|-------|-------|-------|-------|-------|-------|-------|-------|
| FLJ35784 | 115.4 | 118.4 | 118.2 | 125.8 | 113.9 | 103   | 116.6 | 115.9 |
| FLJ35816 | 118.6 | 110   | 115.9 | 123.1 | 113   | 97.9  | 108.6 | 120.4 |
| FLJ35834 | 118   | 124.5 | 117.6 | 123.5 | 105.8 | 99.9  | 120.4 | 112.9 |
| FLJ35848 | 108.6 | 110.1 | 118.5 | 109.9 | 106.8 | 100.5 | 114.2 | 111.2 |
| FLJ35880 | 107.8 | 116.8 | 126.3 | 119.2 | 113.9 | 99.3  | 119.9 | 113.6 |
| FLJ35894 | 111   | 110.9 | 119.1 | 117.8 | 105.6 | 104.5 | 113.1 | 109.9 |
| FLJ36004 | 109.9 | 113   | 120.5 | 108.6 | 106   | 100   | 111.4 | 108.9 |
| FLJ36031 | 109.2 | 110.1 | 112.2 | 111.8 | 109.4 | 100.3 | 118.2 | 110.3 |
| FLJ36046 | 115.3 | 109.2 | 109.4 | 116.8 | 114.7 | 101.8 | 123.6 | 111.3 |
| FLJ36070 | 124.9 | 115.5 | 122   | 136.8 | 113   | 96    | 121.6 | 122.4 |
| FLJ36090 | 128.7 | 126.3 | 133.8 | 136.4 | 129.2 | 131   | 129.3 | 124.8 |
| FLJ36166 | 103.2 | 113.1 | 116.3 | 113.4 | 111.6 | 100.4 | 117   | 115.3 |
| FLJ36180 | 118.5 | 115.1 | 125.7 | 137.6 | 114.7 | 107.3 | 132.7 | 121.9 |
| FLJ36208 | 116.7 | 126.1 | 119.8 | 131.5 | 116   | 99.6  | 120.7 | 119.2 |
| FLJ36268 | 114.4 | 112.1 | 109.6 | 109.6 | 105.6 | 94.6  | 116.4 | 114.9 |
| FLJ36445 | 116   | 120   | 119.5 | 122   | 107.2 | 103.7 | 120.1 | 118.3 |
| FLJ36492 | 118.3 | 115.6 | 118.9 | 123.6 | 111.7 | 91.2  | 122.8 | 116.9 |
| FLJ36492 | 114.7 | 116.3 | 118.6 | 116.6 | 107.3 | 94.6  | 114.7 | 115.6 |
| FLJ36748 | 126.4 | 122.3 | 120.5 | 128   | 115.4 | 99.7  | 134.4 | 120.6 |
| FLJ36779 | 111.9 | 125.8 | 113.8 | 120.6 | 110.6 | 97.2  | 121.8 | 113.4 |
| FLJ36874 | 619   | 668.6 | 649.9 | 730.8 | 599.7 | 532.5 | 752.8 | 842.8 |
| FLJ36888 | 135.4 | 118.6 | 126.9 | 135.4 | 112   | 106.2 | 138   | 127.8 |
| FLJ36980 | 114.1 | 128   | 124   | 132.9 | 113.2 | 99.4  | 119.6 | 114.6 |
| FLJ37078 | 122.2 | 119.5 | 111.8 | 128.4 | 111.3 | 102.3 | 113.4 | 124.5 |
| FLJ37266 | 114.3 | 117.1 | 114.4 | 115.8 | 114.3 | 101.3 | 113.9 | 116.3 |
| FLJ37357 | 124.9 | 123.2 | 121.5 | 127.9 | 109.4 | 96.5  | 124.7 | 123.6 |
| FLJ37440 | 159.1 | 165   | 233.1 | 180.6 | 134.7 | 267   | 145.8 | 136.9 |
| FLJ37464 | 137.8 | 134.8 | 158.3 | 130.9 | 114.3 | 114.3 | 124   | 124.1 |
| FLJ37538 | 116   | 109.9 | 113.5 | 115.3 | 107.2 | 102.8 | 112.8 | 129.5 |
| FLJ37562 | 166.8 | 163.9 | 164.5 | 173.3 | 153.3 | 124.2 | 184.6 | 161.1 |
| FLJ37927 | 110.2 | 113.8 | 116.4 | 122.6 | 113.4 | 105.6 | 123.6 | 119.5 |
| FLJ37953 | 118   | 123.3 | 110   | 123   | 115   | 95.7  | 128.7 | 116.6 |
| FLJ37970 | 156.3 | 164.7 | 151.4 | 147.1 | 155.7 | 112.8 | 154.5 | 155.8 |
| FLJ38020 | 112   | 120.2 | 128.6 | 125.4 | 112.2 | 101.9 | 116.8 | 121.3 |
| FLJ38159 | 124   | 127   | 149.1 | 132.8 | 122.6 | 116.7 | 122.9 | 121.7 |
| FLJ38288 | 130.8 | 136   | 139.7 | 131.7 | 122.2 | 112.4 | 133.1 | 127.7 |
| FLJ38377 | 115.3 | 113.8 | 100.6 | 115.3 | 105.9 | 95.8  | 118.9 | 112.1 |
| FLJ38451 | 323.5 | 373.1 | 301.3 | 312.8 | 250   | 242.6 | 260   | 236.7 |
| FLJ38482 | 254.7 | 245.6 | 319.6 | 316.8 | 239.8 | 227.8 | 270.4 | 311.3 |
| FLJ38596 | 111.4 | 110.4 | 123.8 | 111.8 | 109.9 | 89.7  | 110.5 | 127   |
| FLJ38663 | 173.7 | 203   | 201.4 | 212.4 | 204   | 186.8 | 186.8 | 183.8 |
| FLJ38723 | 117.4 | 116   | 115.1 | 119.3 | 106.2 | 104.5 | 120.8 | 113.1 |
| FLJ38725 | 131.5 | 122.5 | 148.9 | 155.9 | 117.5 | 127.2 | 141.3 | 127.6 |
| FLJ38964 | 127.3 | 131.9 | 135.5 | 123.4 | 121.7 | 109.4 | 141.3 | 201.5 |
| FLJ38973 | 117.2 | 125.7 | 132.2 | 126.1 | 114.2 | 100.4 | 121.9 | 116   |
| FLJ38984 | 138.2 | 152.1 | 135.1 | 152.7 | 143.6 | 123.2 | 176.5 | 172.4 |
| FLJ38991 | 119.3 | 117.2 | 117.5 | 115.5 | 105.8 | 101   | 120.3 | 119.7 |
| FLJ38991 | 136.3 | 124.8 | 136.3 | 125   | 120.4 | 112.7 | 130.9 | 113.8 |
| FLJ39061 | 112.8 | 117   | 114   | 121.7 | 109.9 | 98.9  | 113.2 | 117.9 |
| FLJ39155 | 113.2 | 115.1 | 121.3 | 114.5 | 110.9 | 95.8  | 116.2 | 123.7 |
| FLJ39155 | 111.5 | 114   | 119.9 | 114.1 | 107.7 | 97.5  | 121.1 | 117.1 |

|          |       |       |       |       |       |       |       |       |
|----------|-------|-------|-------|-------|-------|-------|-------|-------|
| FLJ39155 | 107.9 | 115.4 | 107.6 | 109.9 | 110.7 | 101.2 | 112.1 | 115.9 |
| FLJ39237 | 114   | 116.5 | 121.4 | 112.9 | 112.1 | 96.3  | 117.8 | 109.7 |
| FLJ39378 | 136.8 | 133.2 | 155.4 | 153.3 | 141.6 | 124.1 | 154   | 145.9 |
| FLJ39501 | 116.1 | 121.5 | 122.2 | 126.7 | 106.9 | 107.6 | 128.1 | 120.5 |
| FLJ39502 | 112.1 | 120.7 | 113.5 | 119   | 112.4 | 98.9  | 108.8 | 108.2 |
| FLJ39531 | 113.7 | 119.6 | 122.5 | 122.9 | 111.1 | 97.8  | 112   | 126.1 |
| FLJ39575 | 135.7 | 130.2 | 138.5 | 157   | 142.8 | 117.1 | 199.1 | 192.6 |
| FLJ39599 | 124.3 | 117.8 | 127.6 | 123.4 | 121.8 | 118   | 123.1 | 127.3 |
| FLJ39660 | 110.2 | 113.2 | 115.1 | 115.9 | 113.4 | 95.2  | 116.3 | 117   |
| FLJ39743 | 106.9 | 108.6 | 108.8 | 113.7 | 98.8  | 95    | 112.7 | 114.9 |
| FLJ39779 | 119.4 | 124.1 | 134.4 | 124.2 | 114.8 | 105.2 | 121.1 | 121.9 |
| FLJ39822 | 138.2 | 120.3 | 130.1 | 127.2 | 113.4 | 110.4 | 113.8 | 122.6 |
| FLJ39827 | 197.7 | 218.7 | 183.3 | 187.8 | 170.9 | 139.3 | 155.5 | 150.5 |
| FLJ40113 | 115.6 | 112.6 | 111.3 | 116.1 | 102.1 | 107.4 | 113.4 | 114.9 |
| FLJ40125 | 119.3 | 128.4 | 127.4 | 123.6 | 115.7 | 102.8 | 126.1 | 124.3 |
| FLJ40142 | 224   | 233.5 | 250.3 | 201.3 | 187.2 | 183   | 159.7 | 133.2 |
| FLJ40172 | 107.6 | 105.5 | 112.6 | 120.8 | 102.4 | 93.8  | 111.6 | 102.7 |
| FLJ40235 | 125.5 | 117.5 | 121.7 | 120   | 107.9 | 98.2  | 126.5 | 119.3 |
| FLJ40243 | 109.5 | 108.3 | 111.9 | 117.7 | 102.3 | 99.6  | 109.5 | 108.5 |
| FLJ40244 | 104.7 | 115.2 | 108.7 | 113.4 | 102.2 | 95.3  | 106.5 | 118.2 |
| FLJ40288 | 114.8 | 124.4 | 141.6 | 121.6 | 122.3 | 102.8 | 121.9 | 128   |
| FLJ40296 | 118.4 | 120   | 117.1 | 129.8 | 98.7  | 99.7  | 121.2 | 112.8 |
| FLJ40298 | 100.8 | 109.6 | 109.1 | 113.5 | 108.2 | 96.7  | 119.6 | 113.3 |
| FLJ40365 | 117.1 | 112.1 | 115.7 | 112   | 107.9 | 102.9 | 120.3 | 111.6 |
| FLJ40411 | 125.3 | 118.4 | 116.2 | 121.6 | 112.8 | 108.5 | 114.2 | 115.4 |
| FLJ40448 | 118.3 | 127.4 | 127.2 | 138.1 | 127.5 | 116.3 | 139.2 | 135   |
| FLJ40453 | 111.8 | 108.4 | 122.1 | 131.3 | 108.9 | 98.3  | 121.7 | 114   |
| FLJ40504 | 113.8 | 122.4 | 118   | 120.1 | 116.2 | 95.1  | 117.4 | 112.3 |
| FLJ40629 | 117.7 | 110.3 | 117.4 | 116.9 | 114.2 | 98.7  | 116.8 | 111.3 |
| FLJ40722 | 117.1 | 122.8 | 123.3 | 144.7 | 122.1 | 115.3 | 127.8 | 107.4 |
| FLJ40852 | 125.9 | 123.6 | 143.7 | 132.8 | 117.3 | 101.5 | 131.4 | 126.8 |
| FLJ40869 | 105.6 | 116   | 116.8 | 105.5 | 105.8 | 98.5  | 109.2 | 117.3 |
| FLJ40919 | 111.6 | 117   | 116.7 | 114.4 | 109.9 | 103.2 | 112.8 | 121   |
| FLJ41046 | 116.2 | 121.8 | 118.1 | 112.8 | 110   | 102.4 | 115.9 | 115.4 |
| FLJ41131 | 129.6 | 135   | 147.5 | 125.1 | 127.6 | 118.8 | 132.4 | 146.2 |
| FLJ41170 | 124.3 | 122.5 | 119.9 | 125.3 | 109.8 | 98.9  | 128.6 | 110.2 |
| FLJ41423 | 242.1 | 233.9 | 230.1 | 236.4 | 258.7 | 151.4 | 219.9 | 266.4 |
| FLJ41603 | 110.6 | 119.8 | 114.2 | 118.3 | 112.9 | 104.7 | 121   | 124.3 |
| FLJ41649 | 116.2 | 119.7 | 111.3 | 122.8 | 115.6 | 99.6  | 119.3 | 119.9 |
| FLJ41733 | 116   | 113.3 | 133.4 | 124.2 | 114.9 | 107.5 | 130   | 130.9 |
| FLJ41821 | 104   | 109.9 | 117.3 | 108.5 | 102.8 | 95.4  | 115   | 115.6 |
| FLJ41841 | 112.3 | 115.7 | 112.8 | 113.9 | 99.7  | 92.7  | 126.5 | 119.5 |
| FLJ41993 | 118.3 | 117.1 | 113   | 120.2 | 103.8 | 100.6 | 117   | 121.7 |
| FLJ42102 | 110.7 | 106.5 | 116   | 117.7 | 108.4 | 97.1  | 115.6 | 114.9 |
| FLJ42117 | 120.8 | 118.9 | 118.7 | 130.5 | 110.7 | 110.4 | 126.3 | 116.3 |
| FLJ42133 | 110.8 | 112.9 | 105.1 | 112.9 | 109.6 | 101.6 | 118.8 | 108.1 |
| FLJ42177 | 115.8 | 116.6 | 124   | 124.4 | 117.3 | 106.5 | 114.8 | 116.1 |
| FLJ42258 | 119.8 | 121.4 | 113   | 122.4 | 106.7 | 97.3  | 114   | 107.8 |
| FLJ42280 | 117   | 111.5 | 120.1 | 119.2 | 108.1 | 104.9 | 116.4 | 119.4 |
| FLJ42289 | 110.3 | 113.5 | 128.3 | 126.1 | 108.9 | 102.7 | 125.2 | 113.1 |
| FLJ42461 | 109   | 106.3 | 112   | 108.9 | 100.5 | 90.5  | 112   | 109.6 |

|          |        |        |        |        |       |       |        |        |
|----------|--------|--------|--------|--------|-------|-------|--------|--------|
| FLJ42486 | 114.1  | 120    | 116.1  | 123.8  | 107.1 | 97.7  | 115.1  | 115.7  |
| FLJ42953 | 109.2  | 121.5  | 115.3  | 108.2  | 102.2 | 100.5 | 111    | 112.7  |
| FLJ42957 | 119.4  | 108.1  | 119.8  | 126.6  | 112.9 | 102.2 | 124.3  | 113    |
| FLJ42986 | 112.4  | 115.3  | 114.4  | 114.6  | 111.9 | 97.5  | 118    | 107.6  |
| FLJ43093 | 116.7  | 114.7  | 121.2  | 118.6  | 102.4 | 97.6  | 116.9  | 107.9  |
| FLJ43276 | 105.5  | 113.2  | 114.4  | 116.4  | 112.7 | 98.4  | 129.8  | 114.4  |
| FLJ43339 | 127.6  | 125.3  | 145.5  | 121.3  | 118.1 | 115.3 | 125.5  | 119.7  |
| FLJ43374 | 117.3  | 117.3  | 114.6  | 114.1  | 107.1 | 93.4  | 120.7  | 108    |
| FLJ43505 | 112.1  | 120    | 122.1  | 120.5  | 104   | 102.9 | 113.8  | 108.9  |
| FLJ43692 | 161.5  | 178.2  | 136.2  | 181.2  | 168   | 120.3 | 180.7  | 199.6  |
| FLJ43752 | 116.4  | 116.8  | 123    | 125.1  | 121.6 | 106.6 | 124    | 121.7  |
| FLJ43763 | 114.7  | 103.1  | 108    | 109.7  | 119.9 | 95.6  | 117.2  | 111.7  |
| FLJ43806 | 113.6  | 112.8  | 112.7  | 117.2  | 102.8 | 93.4  | 118.1  | 110.7  |
| FLJ43855 | 113.3  | 116.9  | 112.4  | 115.1  | 104.9 | 95.5  | 109.2  | 111.6  |
| FLJ43855 | 122.1  | 123.4  | 130.2  | 121.9  | 115.7 | 115.4 | 130.6  | 133.3  |
| FLJ43860 | 115.6  | 117.9  | 117    | 114.3  | 106.8 | 95.5  | 118.8  | 112.3  |
| FLJ43860 | 111.3  | 121.5  | 106.5  | 113.1  | 104.1 | 100.5 | 114.9  | 113.1  |
| FLJ43980 | 111.3  | 121.2  | 109.7  | 112.3  | 114.2 | 95.2  | 126.9  | 119    |
| FLJ43987 | 123.6  | 113.5  | 121.1  | 115    | 112.4 | 97.7  | 123.2  | 125.3  |
| FLJ43987 | 110    | 122.7  | 127.8  | 122.2  | 118.3 | 104.4 | 123.3  | 116.9  |
| FLJ44048 | 115.9  | 111.1  | 121.2  | 121.3  | 117.9 | 107.4 | 121    | 117.5  |
| FLJ44060 | 115.5  | 113.9  | 107.9  | 118.5  | 103.6 | 100.3 | 121.9  | 114.1  |
| FLJ44076 | 115.6  | 112.3  | 112.6  | 113.8  | 107.3 | 102.3 | 114.8  | 112.2  |
| FLJ44112 | 116.1  | 109.9  | 110.2  | 112.8  | 110.2 | 101.4 | 112.9  | 118.5  |
| FLJ44124 | 1276.6 | 1052.4 | 1021.7 | 1003.2 | 903.3 | 646.4 | 1568.7 | 1321.2 |
| FLJ44216 | 206.3  | 172.9  | 173.7  | 224.5  | 164.7 | 172   | 240.6  | 216.7  |
| FLJ44216 | 115.4  | 123.8  | 114.4  | 123.5  | 108.9 | 97.3  | 118.9  | 117.9  |
| FLJ44290 | 117.9  | 118.7  | 118.5  | 111.9  | 113.7 | 101.8 | 117    | 113.5  |
| FLJ44379 | 112.4  | 114.2  | 119.5  | 126.8  | 116.9 | 97.9  | 114.4  | 124.2  |
| FLJ44635 | 117.9  | 128.9  | 119.6  | 127.2  | 106.2 | 121.4 | 131.6  | 119.1  |
| FLJ44635 | 114.5  | 116.1  | 115.5  | 116.6  | 104.3 | 99.3  | 110.3  | 115.3  |
| FLJ44653 | 122.6  | 127.2  | 131.6  | 119.4  | 114.9 | 104.1 | 125    | 119.2  |
| FLJ44691 | 118.6  | 118.6  | 119.2  | 118.5  | 111.2 | 101.8 | 115    | 118.9  |
| FLJ44815 | 114.7  | 107    | 110.3  | 112.1  | 100.8 | 94.5  | 111.5  | 110.3  |
| FLJ44894 | 109.7  | 111.8  | 129.3  | 115.8  | 108.4 | 98    | 137.7  | 119.1  |
| FLJ44955 | 107.8  | 113.9  | 130.3  | 124.2  | 117   | 104.4 | 115.7  | 110.2  |
| FLJ44968 | 112.4  | 113.3  | 116.9  | 126.4  | 121.3 | 100.2 | 123.4  | 129.9  |
| FLJ45032 | 136.9  | 121.7  | 130    | 139.6  | 114.9 | 115.5 | 134.7  | 126.1  |
| FLJ45079 | 110.5  | 110.4  | 116.3  | 122.6  | 112.1 | 94.4  | 133    | 116.6  |
| FLJ45121 | 112    | 124.7  | 114.6  | 124.4  | 115.7 | 92.8  | 127.9  | 112.4  |
| FLJ45139 | 111.2  | 111.6  | 109.5  | 117.6  | 103.5 | 98.6  | 113.8  | 110.9  |
| FLJ45224 | 118.7  | 116.7  | 121.9  | 125.8  | 118.4 | 104.9 | 125.8  | 115.5  |
| FLJ45256 | 127.7  | 121.5  | 124    | 119.6  | 121.3 | 99.6  | 137.5  | 118.2  |
| FLJ45337 | 131.9  | 136.7  | 136.2  | 148.2  | 130.6 | 118.4 | 139.2  | 145.1  |
| FLJ45422 | 127.1  | 116.8  | 130.3  | 124.6  | 116.6 | 105   | 117.7  | 129.6  |
| FLJ45445 | 119.5  | 119.5  | 134.6  | 122.8  | 115.4 | 95.5  | 129.4  | 126.5  |
| FLJ45455 | 114.2  | 116.2  | 115.1  | 119.9  | 102.9 | 101.8 | 121.9  | 116.8  |
| FLJ45530 | 110.4  | 124.5  | 107.3  | 108.5  | 103.4 | 91.8  | 113.4  | 115    |
| FLJ45537 | 122.7  | 124.7  | 127.3  | 117.8  | 105.5 | 102.5 | 121.5  | 106.7  |
| FLJ45557 | 127.9  | 127.1  | 133.4  | 132.8  | 116.9 | 109.1 | 128.9  | 114.3  |
| FLJ45645 | 116    | 115.3  | 116.5  | 121.5  | 110   | 114.1 | 125.3  | 116.9  |

|          |        |        |        |        |        |        |        |        |
|----------|--------|--------|--------|--------|--------|--------|--------|--------|
| FLJ45717 | 125    | 108.3  | 115.1  | 120.5  | 109.4  | 92.9   | 109.4  | 113.3  |
| FLJ45721 | 108.4  | 113.7  | 124    | 119.7  | 110.8  | 99.6   | 118.7  | 117.6  |
| FLJ45803 | 109.5  | 121    | 129.9  | 118.2  | 108.6  | 103.3  | 118.7  | 108.6  |
| FLJ45831 | 113.9  | 113.9  | 122.8  | 120.6  | 110.1  | 95.5   | 115.9  | 122.4  |
| FLJ45850 | 115.8  | 126.5  | 123.1  | 132.5  | 106.6  | 93.5   | 122.5  | 118.4  |
| FLJ45909 | 193.2  | 184.7  | 207.4  | 179.3  | 176.6  | 154.2  | 185.9  | 190.8  |
| FLJ45910 | 113.4  | 109.8  | 119    | 117.6  | 111.1  | 96.7   | 114    | 109.7  |
| FLJ45964 | 107.2  | 108.6  | 111.3  | 120.8  | 109.6  | 95.8   | 111.7  | 109.1  |
| FLJ45966 | 118.9  | 121    | 111.8  | 110.5  | 107.6  | 104.7  | 110.3  | 112.8  |
| FLJ45974 | 121.5  | 118.6  | 117.1  | 119.4  | 109.3  | 106.7  | 125.7  | 122    |
| FLJ45983 | 121.9  | 120.3  | 118.9  | 135    | 110.7  | 111    | 123.3  | 114.2  |
| FLJ46010 | 107.7  | 108.7  | 118.6  | 110.7  | 113.8  | 98.6   | 115.5  | 121    |
| FLJ46072 | 126.6  | 125.2  | 135.9  | 135.5  | 130.2  | 112.6  | 130.9  | 118.3  |
| FLJ46082 | 111.9  | 107.1  | 111.9  | 115.5  | 110.2  | 93.2   | 117.7  | 110.2  |
| FLJ46109 | 112.6  | 120.1  | 118.4  | 109.2  | 100.7  | 98.8   | 120.5  | 120.8  |
| FLJ46109 | 188.7  | 169.4  | 165.4  | 169.6  | 153.7  | 126.3  | 164.8  | 173.2  |
| FLJ46210 | 119.7  | 115.6  | 118.5  | 123.1  | 106.1  | 99.5   | 120.6  | 115.3  |
| FLJ46247 | 116.6  | 109.6  | 115.1  | 127.4  | 101.6  | 97.4   | 113.7  | 126.8  |
| FLJ46247 | 111.6  | 119.9  | 121.7  | 126.7  | 111    | 95     | 120.9  | 110.8  |
| FLJ46247 | 107.5  | 117.3  | 116    | 117.8  | 103.8  | 103    | 115.4  | 124.3  |
| FLJ46257 | 110.5  | 109.7  | 119.3  | 105.8  | 94.9   | 100.4  | 123.1  | 114.3  |
| FLJ46266 | 114.9  | 110.4  | 107.4  | 110.3  | 106.7  | 93.3   | 116.3  | 111.8  |
| FLJ46309 | 1397.8 | 1106.2 | 1249.2 | 814.2  | 1051   | 898.3  | 1143.2 | 1234.3 |
| FLJ46321 | 120.8  | 119.1  | 119.9  | 116.8  | 105.9  | 99.7   | 114.3  | 116.4  |
| FLJ46347 | 106.2  | 113.5  | 109.3  | 113.2  | 104.2  | 102.1  | 109.3  | 114.7  |
| FLJ46385 | 121.7  | 120.8  | 113.4  | 108.7  | 116.1  | 97.9   | 118.1  | 115.8  |
| FLJ46481 | 123    | 124.7  | 141.2  | 133.1  | 105.2  | 110.2  | 125    | 128.1  |
| FLJ46536 | 110.3  | 112.3  | 110.7  | 116.5  | 109.3  | 101.6  | 116.6  | 109.2  |
| FLJ46688 | 123.1  | 120.5  | 126.6  | 131.4  | 116.4  | 104.1  | 129    | 126.3  |
| FLJ46831 | 118.6  | 124.2  | 114.2  | 120    | 111.9  | 92.9   | 116.5  | 118.6  |
| FLJ46836 | 134    | 139    | 146.3  | 141.6  | 126.4  | 126.6  | 132.4  | 136.2  |
| FLJ46838 | 113.3  | 113.9  | 120.4  | 125.5  | 113.8  | 109.7  | 137.4  | 120.4  |
| FLJ90013 | 131.2  | 156.8  | 166.1  | 158    | 153.2  | 130.7  | 131.6  | 148.4  |
| FLJ90166 | 125.2  | 139.8  | 119.8  | 179.5  | 151.2  | 99.3   | 210.1  | 150.1  |
| FLJ90396 | 195.2  | 194    | 244.9  | 251.5  | 176.4  | 170.8  | 220.6  | 239.5  |
| FLJ90575 | 138.9  | 111.9  | 125.1  | 130.1  | 118.9  | 106.7  | 129.2  | 120.1  |
| FLJ90586 | 108.7  | 113.9  | 106.1  | 113.6  | 106.4  | 89.4   | 105    | 115.1  |
| FLJ90650 | 114.7  | 119.5  | 112.9  | 112.2  | 106.6  | 99.3   | 120.8  | 117.2  |
| FLJ90652 | 212.9  | 247.1  | 225.5  | 245.8  | 177.7  | 216.2  | 247.2  | 193.4  |
| FLJ90709 | 137.5  | 168.8  | 146.9  | 157.5  | 157.1  | 136.8  | 141.6  | 151.4  |
| FLJ90757 | 121.5  | 124.1  | 119.1  | 121.2  | 116    | 110    | 128.2  | 122.5  |
| FLJ90805 | 121.2  | 121.1  | 121.3  | 126.6  | 119.7  | 104.9  | 131    | 127.9  |
| FLJ90834 | 122.9  | 116.2  | 113.8  | 122.7  | 110.1  | 94.3   | 123.1  | 119.4  |
| FLNA     | 124    | 121.1  | 144.6  | 128.3  | 116.6  | 114.3  | 146.7  | 116.1  |
| FLNB     | 350.2  | 390.3  | 209.9  | 331.1  | 340.7  | 222.4  | 271.9  | 332.6  |
| FLNC     | 117.3  | 113.4  | 113.7  | 118.7  | 115.2  | 101.3  | 122    | 108.6  |
| FLOT1    | 323.7  | 256.1  | 276.5  | 281.9  | 190.8  | 225.2  | 247.4  | 210.6  |
| FLOT2    | 2282.6 | 2924.5 | 2354.1 | 2160.6 | 1767.8 | 1478.1 | 1740.6 | 1476.7 |
| FLRT1    | 107.9  | 114.1  | 105.6  | 115.3  | 105.7  | 94.2   | 115.5  | 114.6  |
| FLRT2    | 128.2  | 114.2  | 105.4  | 127.6  | 108    | 107.4  | 119.7  | 111.9  |
| FLRT3    | 122.4  | 118.6  | 117.2  | 123.6  | 112    | 96.2   | 118.3  | 112    |

|         |        |        |        |        |        |        |        |        |
|---------|--------|--------|--------|--------|--------|--------|--------|--------|
| FLRT3   | 115.7  | 112.1  | 119.5  | 122.6  | 104.5  | 98     | 123.2  | 117.4  |
| FLT1    | 116.2  | 111.1  | 118.2  | 121.8  | 108.6  | 96.6   | 119.9  | 119.4  |
| FLT3    | 112.3  | 119    | 120.4  | 135.8  | 102.1  | 99.6   | 118.2  | 120.5  |
| FLT3LG  | 273.5  | 318    | 392.3  | 265.7  | 262.1  | 267.9  | 310.2  | 291.2  |
| FLT4    | 111.8  | 111.3  | 115.4  | 115    | 110.7  | 100.7  | 110.9  | 109.6  |
| FLT4    | 113.8  | 114.4  | 123.6  | 113.1  | 107.2  | 101.9  | 116    | 114.5  |
| FLVCR   | 140    | 135.6  | 158.6  | 158.4  | 134.3  | 121.8  | 135.4  | 134.9  |
| FLYWCH1 | 118.8  | 121.1  | 121.6  | 135.2  | 114.4  | 107.8  | 118.3  | 115    |
| FLYWCH1 | 119.8  | 119.9  | 135.1  | 125    | 119.6  | 115.2  | 134    | 155.3  |
| FMN2    | 114.8  | 101.6  | 112.2  | 116.1  | 105.1  | 96.7   | 121.4  | 111.7  |
| FMNL1   | 156.3  | 141.9  | 142.8  | 141.5  | 125.6  | 129.3  | 144.9  | 134.7  |
| FMNL2   | 115    | 115.3  | 125.9  | 117.9  | 105.9  | 100    | 110.5  | 119.9  |
| FMNL3   | 162.1  | 158.4  | 239.2  | 166.1  | 145.9  | 193.3  | 154.1  | 132.9  |
| FMNL3   | 117.6  | 121.3  | 103.7  | 115.5  | 108.4  | 108.6  | 109.1  | 114.5  |
| FMNL3   | 124.6  | 128    | 137.6  | 131.5  | 112.4  | 122.2  | 123    | 116.8  |
| FMO1    | 117.7  | 110    | 112.7  | 121.3  | 105.5  | 105.9  | 126    | 117.2  |
| FMO2    | 111.3  | 116.5  | 121.3  | 119.9  | 112.5  | 95.4   | 109.5  | 113.7  |
| FMO3    | 108    | 114.3  | 111.4  | 110.9  | 104.6  | 91.3   | 118.7  | 115.7  |
| FMO3    | 106.6  | 120.8  | 115    | 120.2  | 102.9  | 97.7   | 119.3  | 118.2  |
| FMO4    | 151.5  | 117.7  | 148.2  | 142.6  | 125.8  | 114.8  | 130.2  | 127.3  |
| FMO5    | 121.4  | 123.6  | 125.3  | 112.1  | 111.1  | 107.7  | 116    | 121.1  |
| FMO6    | 136    | 155.1  | 159.6  | 130.7  | 131.9  | 125.7  | 139.7  | 149    |
| FMO6P   | 112.1  | 122.8  | 130.9  | 117.1  | 118    | 101    | 118.2  | 118.6  |
| FMOD    | 117    | 118.3  | 116.6  | 128.5  | 110.3  | 100.3  | 119.4  | 122.4  |
| FMR1    | 111.7  | 118.5  | 120.8  | 111.5  | 110.8  | 98     | 122.9  | 112.4  |
| FMR1NB  | 118.4  | 121.4  | 123.6  | 127.4  | 112.2  | 100.9  | 128.3  | 112.9  |
| FN1     | 118.3  | 121.7  | 133.7  | 127    | 99.7   | 109.3  | 126.7  | 115.9  |
| FN1     | 109    | 111.3  | 112.2  | 114.4  | 108.9  | 100.6  | 117.3  | 114.8  |
| FN1     | 119    | 115.5  | 121.6  | 123.3  | 114.1  | 111.5  | 115.8  | 124.1  |
| FN3K    | 114.9  | 115.4  | 124.4  | 129.1  | 107.1  | 98     | 116.3  | 120.5  |
| FN3KRP  | 323.4  | 315.2  | 317.1  | 302.9  | 221    | 260.1  | 241.9  | 254.8  |
| FN5     | 145.8  | 143.7  | 200.7  | 145.2  | 123.7  | 113.8  | 129.6  | 123.8  |
| FNBP1   | 2816.3 | 3639.9 | 2944.1 | 3120.9 | 2553.5 | 2343   | 3083.7 | 3057.4 |
| FNBP1L  | 107.7  | 105.4  | 117.7  | 109.9  | 105.4  | 96.8   | 117.9  | 113.4  |
| FNBP1L  | 117.2  | 116.7  | 136.9  | 118.3  | 117.5  | 94.2   | 118.4  | 117.6  |
| FNBP4   | 2358.7 | 2312.8 | 1767.2 | 2482.9 | 2444.5 | 1459.2 | 2412.4 | 2587.5 |
| FNDC1   | 106.8  | 112.5  | 121.5  | 126.7  | 116.3  | 104.5  | 118    | 113.9  |
| FNDC3A  | 173.4  | 155.3  | 158.2  | 175.7  | 145.1  | 190.3  | 172.9  | 190.7  |
| FNDC3A  | 115.8  | 128    | 112.8  | 126    | 111    | 102.8  | 118.7  | 116.7  |
| FNDC3A  | 183    | 174.4  | 187.6  | 208.9  | 199.3  | 227.4  | 192.3  | 189.2  |
| FNDC4   | 117.5  | 126    | 124    | 126.4  | 110.9  | 95.6   | 123.1  | 113.9  |
| FNDC5   | 113.1  | 111.2  | 114.8  | 119    | 109.3  | 103.5  | 119.4  | 111.7  |
| FNDC6   | 117.9  | 119.9  | 114.8  | 121.5  | 119    | 104.7  | 137.5  | 149.3  |
| FNDC7   | 114.9  | 112.6  | 114.3  | 119.3  | 111.6  | 95.4   | 116.4  | 112.7  |
| FNDC8   | 115.2  | 120.1  | 121.7  | 124.8  | 113.5  | 104.4  | 123.3  | 117.1  |
| FNTA    | 218.9  | 273.6  | 348.3  | 282    | 253.2  | 239.3  | 215.5  | 235.6  |
| FNTA    | 124.1  | 115.2  | 142.1  | 126.4  | 110    | 109.1  | 119.9  | 115.6  |
| FNTA    | 987.2  | 1230.6 | 1281.1 | 1112.7 | 1030.2 | 974.6  | 1241.1 | 1401.7 |
| FNTB    | 151.3  | 160.3  | 156.6  | 152.7  | 133.5  | 115.2  | 147.9  | 146.9  |
| FOLH1   | 112.5  | 113    | 114.4  | 121.8  | 107.4  | 97.3   | 109.4  | 112.5  |
| FOLH1   | 135    | 136.4  | 129.8  | 147.4  | 122.1  | 117.9  | 128.7  | 132    |



|         |       |        |        |        |        |       |        |        |
|---------|-------|--------|--------|--------|--------|-------|--------|--------|
| FOLR1   | 115.2 | 126.5  | 119    | 118.3  | 110.6  | 101.4 | 115.5  | 119.8  |
| FOLR1   | 113.1 | 113.6  | 120    | 118.9  | 106.2  | 101   | 111.7  | 113.3  |
| FOLR1   | 105   | 120.5  | 112.3  | 117.7  | 120.8  | 104.5 | 120.3  | 112.3  |
| FOLR1   | 113.3 | 115.3  | 109.2  | 120.8  | 99.5   | 98.8  | 110.1  | 116.9  |
| FOLR2   | 114   | 111.3  | 116.1  | 116    | 112.1  | 107   | 121.5  | 114.6  |
| FOLR3   | 132.2 | 114.4  | 154.8  | 123.8  | 117.2  | 106   | 120.3  | 123.3  |
| FOS     | 204.9 | 189.7  | 401.2  | 345.1  | 188    | 394.2 | 353.9  | 206    |
| FOSB    | 126.5 | 128.8  | 122.6  | 120.9  | 132.4  | 106.3 | 158.4  | 228.9  |
| FOSL1   | 107.7 | 116.8  | 116.2  | 124.7  | 116.9  | 104.3 | 148.2  | 123.6  |
| FOSL2   | 122.5 | 116.7  | 125.4  | 119.5  | 113.8  | 104.8 | 127.1  | 106    |
| FOXA1   | 104.8 | 113.4  | 112.7  | 102.6  | 105.5  | 95    | 109.9  | 117.9  |
| FOXA2   | 110.7 | 109.4  | 116.8  | 122    | 112.7  | 98.5  | 117.9  | 124.9  |
| FOXA2   | 105.4 | 105.9  | 108.4  | 113.6  | 105.1  | 100.9 | 111.4  | 113    |
| FOXA2   | 118.8 | 114.3  | 115.6  | 120.2  | 109.1  | 102   | 127.4  | 119.8  |
| FOXA3   | 112.1 | 118.5  | 111.7  | 114.8  | 105.1  | 95.2  | 112.6  | 117    |
| FOXB1   | 115.2 | 126.9  | 128.9  | 129.6  | 121.5  | 103.1 | 123.7  | 114.5  |
| FOXC1   | 114   | 118.5  | 124    | 111.9  | 108.7  | 103.3 | 113.8  | 116.1  |
| FOXC2   | 123.9 | 125.3  | 125.8  | 129    | 121.3  | 119.6 | 129.2  | 125.6  |
| FOXD1   | 115.3 | 110.8  | 128.9  | 124.4  | 101.7  | 96.9  | 121.8  | 108.6  |
| FOXD2   | 129   | 145.9  | 138.1  | 137.6  | 126.5  | 104.5 | 138.1  | 147.2  |
| FOXD3   | 113.3 | 114    | 118.3  | 118    | 107.4  | 94.1  | 113.1  | 114.7  |
| FOXD4   | 119.7 | 133.5  | 131.8  | 142.2  | 125    | 112.1 | 169.1  | 198.6  |
| FOXD4L1 | 123.8 | 121.5  | 130.3  | 132.6  | 106.6  | 95.4  | 134.3  | 166.7  |
| FOXD4L2 | 111.6 | 112.2  | 107.9  | 109.8  | 107.8  | 92.9  | 120.5  | 110.3  |
| FOXD4L3 | 122.1 | 133.2  | 149.6  | 137.3  | 118.3  | 110.3 | 132.4  | 120.7  |
| FOX E1  | 122.1 | 115.5  | 111.6  | 116.8  | 105.6  | 92.8  | 122.5  | 119.4  |
| FOX E3  | 120   | 111.7  | 118.3  | 118.6  | 101.3  | 102.4 | 129.4  | 115.8  |
| FOX E3  | 122.1 | 123.2  | 126.2  | 111.1  | 121.5  | 105.7 | 119.5  | 127.4  |
| FOX F1  | 118.7 | 114    | 119.7  | 128.5  | 116.7  | 109.1 | 108.8  | 119.7  |
| FOX F2  | 110.7 | 110.8  | 108.8  | 118    | 112.2  | 97.1  | 108.1  | 117.7  |
| FOX G1B | 118.1 | 124.5  | 132.4  | 140.8  | 113.4  | 109.8 | 122.5  | 110.8  |
| FOX H1  | 119.7 | 118.4  | 124.9  | 128.8  | 116.2  | 98.4  | 125    | 120.3  |
| FOX I1  | 114.3 | 117.1  | 128.8  | 117    | 115.4  | 101.7 | 125.6  | 116.8  |
| FOX I1  | 131.5 | 135    | 119.4  | 126.5  | 115.1  | 94.4  | 124    | 117.7  |
| FOX J1  | 133.1 | 123.1  | 140.8  | 124.3  | 119.2  | 107.4 | 112.5  | 129.5  |
| FOX J2  | 663.6 | 778.5  | 792.6  | 748.4  | 679.2  | 574   | 829.9  | 990.8  |
| FOX J3  | 1205  | 1324.5 | 1006.2 | 1326.2 | 1215.7 | 720   | 1431.3 | 1692.3 |
| FOX K1  | 434.5 | 482.5  | 449.2  | 464.8  | 506.4  | 430.1 | 512.6  | 506.8  |
| FOX K2  | 110.1 | 108.5  | 114.5  | 106.4  | 102.6  | 96    | 115.6  | 108.9  |
| FOX K2  | 131.2 | 128.2  | 136.7  | 125.2  | 142.1  | 100.5 | 139.9  | 149.9  |
| FOX L1  | 115.8 | 119    | 115.9  | 115.6  | 110.4  | 92.1  | 116.1  | 110.6  |
| FOX L2  | 106.3 | 111    | 116.6  | 111.5  | 102.8  | 96.9  | 114.9  | 103.1  |
| FOX L2  | 111.8 | 118    | 132.8  | 116.5  | 112.8  | 101.3 | 125.6  | 126.3  |
| FOX M1  | 114.1 | 114.5  | 129.2  | 120.7  | 107.4  | 89.8  | 106.1  | 117.4  |
| FOX M1  | 113.6 | 119.8  | 125.2  | 120.7  | 114.8  | 97.5  | 120.6  | 115.9  |
| FOX N1  | 114   | 114.6  | 111.9  | 106.3  | 103.8  | 95.7  | 114    | 115.7  |
| FOX N4  | 104.9 | 117    | 114.7  | 118.6  | 105.4  | 95.2  | 117.8  | 110.2  |
| FOX O1A | 706   | 937.4  | 561.3  | 725.7  | 619.2  | 466.8 | 578.6  | 625.5  |
| FOX O3A | 110.7 | 107.2  | 116.2  | 119.7  | 104.4  | 101.8 | 117.7  | 117.3  |
| FOX O3A | 652.1 | 754.6  | 572.6  | 724.9  | 626.5  | 400.7 | 897.1  | 751.9  |
| FOX P1  | 125.6 | 121.8  | 127.3  | 146.8  | 129.3  | 118.8 | 139.3  | 127.6  |

|         |       |       |       |       |       |       |       |       |
|---------|-------|-------|-------|-------|-------|-------|-------|-------|
| FOXP1   | 130.8 | 138.8 | 136.8 | 140.5 | 119   | 117.8 | 128.8 | 147.8 |
| FOXP1   | 135.3 | 134.6 | 125.6 | 142   | 124.6 | 109   | 155.7 | 143.5 |
| FOXP2   | 113.5 | 109   | 109   | 112.2 | 113.9 | 93    | 110.6 | 106   |
| FOXP2   | 117.3 | 111.7 | 112.9 | 108.1 | 112   | 99.2  | 119.6 | 114.2 |
| FOXP3   | 124.8 | 121.5 | 120.1 | 120.2 | 119.6 | 102.8 | 118.8 | 115.8 |
| FOXP4   | 123.4 | 134.2 | 129.9 | 131.4 | 105.1 | 107.8 | 133.9 | 131.5 |
| FOXP4   | 113.7 | 116.3 | 125.2 | 117.4 | 112.3 | 94.9  | 126.1 | 113.9 |
| FOXQ1   | 111.3 | 121.4 | 117.4 | 118.5 | 107.4 | 100.2 | 130.2 | 119.7 |
| FOXR1   | 112.2 | 120.9 | 111   | 122.3 | 110.3 | 99    | 117.9 | 107.4 |
| FOXR1   | 125.4 | 108.1 | 113.3 | 121   | 102.5 | 96.2  | 117.8 | 116   |
| FOXR2   | 113.8 | 107.9 | 116.1 | 110.6 | 110.3 | 97    | 111   | 118.8 |
| FOXRED1 | 176.6 | 192.4 | 204.7 | 176   | 142.5 | 148.2 | 167.6 | 155.2 |
| FOXRED2 | 145   | 138.8 | 173   | 137.8 | 117.9 | 105.2 | 141.5 | 128.2 |
| FPGS    | 122.2 | 113.3 | 120.5 | 132   | 111.4 | 97    | 121.7 | 114.4 |
| FPGS    | 133.2 | 140.7 | 141.7 | 126.8 | 120.8 | 121.8 | 126.4 | 137.2 |
| FPGS    | 111.2 | 116.7 | 121.4 | 125   | 102.5 | 111.8 | 121   | 115.3 |
| FPGT    | 112.5 | 111.3 | 116.5 | 123.8 | 110.1 | 95.4  | 119.7 | 114.5 |
| FPR1    | 128.7 | 113.2 | 250.4 | 120.8 | 105.5 | 124.4 | 121.5 | 107.7 |
| FPRL1   | 109.5 | 116.8 | 118.2 | 119.7 | 106.2 | 101.1 | 125.4 | 116.4 |
| FPRL1   | 116.7 | 111.7 | 115.5 | 114.3 | 106.4 | 98.3  | 112.4 | 113.9 |
| FPRL2   | 230   | 116.3 | 974.7 | 270.8 | 108.6 | 812.9 | 159.5 | 124.7 |
| FRAG1   | 151   | 149.8 | 158.7 | 149.9 | 137.5 | 124.4 | 149.2 | 156.8 |
| FRAP1   | 383.4 | 389.7 | 337   | 377.1 | 352   | 300.9 | 448.7 | 418.9 |
| FRAS1   | 112.4 | 112.9 | 112.6 | 115.8 | 105.7 | 97.5  | 109.3 | 111.2 |
| FRAT1   | 149.3 | 145.4 | 152.4 | 146.8 | 143   | 115.2 | 140.6 | 126.3 |
| FRAT1   | 142.6 | 133.1 | 129.3 | 143   | 126.6 | 108.8 | 135.4 | 130   |
| FRAT2   | 578.2 | 704.2 | 555.5 | 594   | 499.3 | 392.4 | 494.6 | 509   |
| FREM1   | 113.2 | 113   | 124.4 | 118.7 | 113   | 105.9 | 114   | 115.3 |
| FREM2   | 111.7 | 108.9 | 116.4 | 115.1 | 111.2 | 108.2 | 123   | 121.5 |
| FREQ    | 121.8 | 108.4 | 120.9 | 116.1 | 108.2 | 99.2  | 126   | 116.5 |
| FRG1    | 233.7 | 279.2 | 210.8 | 344.3 | 278.5 | 361.7 | 258.5 | 189.5 |
| FRG2    | 116.5 | 108.5 | 117.6 | 108.9 | 105.2 | 100.2 | 111.8 | 110.7 |
| FRK     | 104.2 | 107.8 | 106   | 117.7 | 112.6 | 104.6 | 117.8 | 117.2 |
| FRMD1   | 113   | 119   | 121.6 | 118.6 | 101.5 | 98.5  | 126.7 | 109.4 |
| FRMD4A  | 117.7 | 119.9 | 135.3 | 125.1 | 130.8 | 105.3 | 139.1 | 121.2 |
| FRMD5   | 110.3 | 116.8 | 122.2 | 116.1 | 111.9 | 99.2  | 117.4 | 105.7 |
| FRMD6   | 117.4 | 121.1 | 126.1 | 118.4 | 115   | 105.7 | 149.9 | 142.9 |
| FRMD6   | 133.2 | 148.6 | 130.3 | 171.9 | 147.4 | 129.8 | 216   | 241.3 |
| FRMD6   | 121.4 | 122.3 | 123.7 | 125.2 | 115.8 | 108.1 | 114.3 | 121.2 |
| FRMPD1  | 116.4 | 115.8 | 120.8 | 121.1 | 111.1 | 96.9  | 113.1 | 114.9 |
| FRMPD2  | 115.9 | 121.3 | 117.5 | 114.9 | 107.7 | 105   | 122.2 | 112.8 |
| FRMPD2  | 109.1 | 115.4 | 125.2 | 117   | 109.2 | 99.1  | 117.5 | 118.9 |
| FRMPD2  | 110.4 | 115.5 | 123.8 | 113.6 | 118.2 | 100.7 | 129.8 | 116.7 |
| FRMPD2  | 120.4 | 112.3 | 109.7 | 110.5 | 108.3 | 102.1 | 113   | 108.7 |
| FRMPD2  | 108.3 | 117   | 108.2 | 125.4 | 114.2 | 106.8 | 129.4 | 116.7 |
| FRMPD2  | 105.1 | 120.1 | 120.7 | 119.3 | 114.1 | 102.9 | 112.9 | 121.7 |
| FRMPD4  | 121.4 | 125.7 | 115.3 | 119.5 | 105   | 90.6  | 118.6 | 129.1 |
| FRRS1   | 110.1 | 123.7 | 120.7 | 120.3 | 112   | 108.8 | 116.7 | 116.4 |
| FRS2    | 116.3 | 123.4 | 119.3 | 120.2 | 109.3 | 98    | 124.7 | 110.1 |
| FRS2    | 123   | 122.4 | 124.7 | 125.1 | 108.1 | 101.1 | 117.7 | 123.5 |
| FRS2    | 106.5 | 120.1 | 107.3 | 117.1 | 103.2 | 98.7  | 112.1 | 122.4 |

|        |         |         |         |         |         |         |         |         |
|--------|---------|---------|---------|---------|---------|---------|---------|---------|
| FRS3   | 150.6   | 159.5   | 170.1   | 149.2   | 143     | 128.1   | 130.2   | 132.5   |
| FRY    | 117.3   | 126.5   | 124.3   | 140.2   | 117.3   | 104.9   | 128.7   | 119.1   |
| FRYL   | 125     | 118.3   | 126.9   | 129.4   | 118.8   | 101.6   | 134.1   | 114.7   |
| FRZB   | 118.3   | 114.7   | 116.5   | 130.9   | 119.5   | 106.7   | 117.9   | 123.9   |
| FSCN1  | 190.3   | 181.6   | 178.4   | 196     | 146.5   | 126     | 157.5   | 131.4   |
| FSCN2  | 112.7   | 123.9   | 114.5   | 120.2   | 104.8   | 100.6   | 113.6   | 109.1   |
| FSCN2  | 111.4   | 117     | 116.5   | 110.5   | 108.4   | 99.8    | 114.4   | 115.2   |
| FSCN3  | 128.3   | 116.9   | 120.2   | 123.3   | 111     | 98.2    | 123.4   | 115.6   |
| FSD1   | 116.5   | 117.9   | 118.5   | 119.5   | 108     | 100.7   | 118.2   | 124.8   |
| FSD1   | 119.6   | 109.2   | 121.5   | 121.4   | 110     | 97.9    | 118.2   | 128     |
| FSD1   | 130.7   | 150.5   | 131.3   | 134.3   | 125.4   | 102.7   | 128     | 121.2   |
| FSD1CL | 111.3   | 113.9   | 112.7   | 104.1   | 112.2   | 99.1    | 109.7   | 109.8   |
| FSD1NL | 118.3   | 130.1   | 122.8   | 135.2   | 116     | 101     | 123.9   | 121.4   |
| FSD2   | 121.2   | 114     | 110.7   | 116     | 102.7   | 100     | 115.5   | 119.8   |
| FSHB   | 111.7   | 112.1   | 111     | 112.8   | 106.8   | 93.9    | 126.8   | 117.9   |
| FSHB   | 120.8   | 119.5   | 148.6   | 133.9   | 119.8   | 121     | 122.9   | 120.6   |
| FSHR   | 111.2   | 108.3   | 111.8   | 119.3   | 108.8   | 99.5    | 118.8   | 112.1   |
| FSHR   | 110     | 110.6   | 111.3   | 118.2   | 108.6   | 103     | 114.5   | 117.9   |
| FSIP1  | 125.4   | 113     | 113.8   | 125.3   | 115.7   | 103.3   | 122.4   | 119.2   |
| FSIP2  | 115.6   | 123.7   | 115.8   | 121.2   | 110.1   | 97      | 118.2   | 116.5   |
| FST    | 132.1   | 109.2   | 123.2   | 118.4   | 108     | 109.4   | 120.3   | 111.5   |
| FST    | 188.6   | 176.3   | 180.6   | 212.5   | 144.4   | 182     | 177     | 168.3   |
| FSTL1  | 110.8   | 107.3   | 122.2   | 120.4   | 103.7   | 95.2    | 111.2   | 104.7   |
| FSTL3  | 131.7   | 145.6   | 118.2   | 132.5   | 117.1   | 107.4   | 128     | 119.6   |
| FSTL4  | 104     | 117.8   | 108.4   | 111     | 104.5   | 97.4    | 115.9   | 115.1   |
| FSTL5  | 110.2   | 115.6   | 114.4   | 109.7   | 109.7   | 93.5    | 120.6   | 106.7   |
| FTCD   | 115     | 116.5   | 115.1   | 116     | 111.1   | 97.5    | 119.8   | 120.9   |
| FTCD   | 116.2   | 112.1   | 117.9   | 114.6   | 107.9   | 101.2   | 112.8   | 110.2   |
| FTHL11 | 645.4   | 399.8   | 412.6   | 583.6   | 246.5   | 559.3   | 521.2   | 520     |
| FTHL12 | 1714.4  | 1051.5  | 1492.2  | 2427.6  | 1307.5  | 3102.8  | 2269.7  | 1466.3  |
| FTHL17 | 117.3   | 121.6   | 116.7   | 134.5   | 111.2   | 100.2   | 125.8   | 106.8   |
| FTHL2  | 168     | 126.4   | 153.8   | 199.9   | 142     | 173.6   | 186.9   | 145.9   |
| FTHL3  | 656     | 452.6   | 627.5   | 719.2   | 351.5   | 924.8   | 1064.7  | 599.3   |
| FTHL7  | 7378.1  | 6379.4  | 9770.1  | 13617.5 | 8113.7  | 15280.1 | 11363.6 | 9856.5  |
| FTHL8  | 113.5   | 114.9   | 121.8   | 116.7   | 110.9   | 106.1   | 121.9   | 117.5   |
| FTL    | 16636.9 | 16042.4 | 24481.1 | 24112.6 | 22591.5 | 27883.5 | 33145.9 | 31583.6 |
| FTMT   | 112.9   | 114.3   | 115.6   | 117.6   | 108.6   | 101.6   | 115.9   | 111.3   |
| FTO    | 132.5   | 153.7   | 128.5   | 145     | 132.1   | 117.3   | 126.5   | 136.2   |
| FTS    | 163.2   | 217.6   | 154.6   | 182     | 200.3   | 146.8   | 178.5   | 153.7   |
| FTSJ1  | 242.5   | 282     | 238.2   | 255.6   | 201     | 235.6   | 210.2   | 274.1   |
| FTSJ1  | 118.1   | 116.2   | 126.6   | 119.6   | 104.2   | 94.5    | 119.4   | 108.2   |
| FTSJ2  | 151.2   | 150.1   | 152.4   | 151.6   | 140.5   | 122.1   | 137.7   | 137.5   |
| FTSJ3  | 129.4   | 143.9   | 138.2   | 151.6   | 131.7   | 122.9   | 133.4   | 156.5   |
| FUBP1  | 138.1   | 144.1   | 132.4   | 144.4   | 135.1   | 125.6   | 140.8   | 154.9   |
| FUBP3  | 532.8   | 578.8   | 502.5   | 621.3   | 556.5   | 469.2   | 571.3   | 600.4   |
| FUCA1  | 226.1   | 283     | 403     | 246.4   | 278.1   | 347.6   | 204.3   | 217.9   |
| FUCA2  | 108.8   | 107.2   | 108.8   | 114.3   | 99.7    | 91      | 106.9   | 117.7   |
| FUK    | 258.8   | 264.5   | 220.9   | 230.1   | 188.7   | 168.8   | 193.9   | 206.1   |
| FUNDC1 | 147.6   | 150.9   | 152.4   | 161.4   | 128     | 137     | 138.6   | 142.7   |
| FUNDC2 | 112     | 118.6   | 128.2   | 127.2   | 125.4   | 105.5   | 120.9   | 117.7   |
| FURIN  | 141.4   | 138.8   | 173.6   | 146.1   | 124     | 129.7   | 160.3   | 152.5   |

|        |        |        |        |        |        |        |        |        |
|--------|--------|--------|--------|--------|--------|--------|--------|--------|
| FUS    | 129    | 130.9  | 127.7  | 139.3  | 124.5  | 108.3  | 138.8  | 138.2  |
| FUSIP1 | 111.8  | 110.2  | 114.9  | 110.5  | 107.3  | 101.3  | 116.7  | 111.8  |
| FUSIP1 | 210.1  | 198.6  | 231.7  | 196.2  | 214.3  | 152.4  | 189.2  | 194.3  |
| FUT1   | 114.4  | 120.6  | 122.7  | 126.5  | 114.7  | 103.9  | 125.4  | 121.5  |
| FUT10  | 108.8  | 111.3  | 107.3  | 114.5  | 103.4  | 98     | 106    | 119.2  |
| FUT11  | 128.8  | 125.7  | 126.8  | 135.9  | 121.6  | 102    | 132.7  | 128.6  |
| FUT2   | 117.9  | 107.3  | 104.3  | 115.2  | 102    | 100.7  | 119.1  | 114.7  |
| FUT3   | 116.5  | 109.3  | 117.2  | 120.8  | 106.1  | 93.2   | 129.6  | 111.4  |
| FUT4   | 181.3  | 188.1  | 173.8  | 195.7  | 201.5  | 163.2  | 205.7  | 219.1  |
| FUT5   | 121.6  | 125.9  | 121.8  | 122.8  | 111.7  | 101    | 120    | 116.4  |
| FUT6   | 132.8  | 142    | 150    | 155.1  | 144.7  | 115.2  | 149.6  | 135.3  |
| FUT6   | 111.1  | 124.6  | 123.2  | 120.4  | 112.3  | 103.6  | 116.1  | 112.8  |
| FUT7   | 114.2  | 113.3  | 116.6  | 126.6  | 104.6  | 100.3  | 106.4  | 120.4  |
| FUT8   | 138.7  | 147    | 146.1  | 135.5  | 122.4  | 127.9  | 133.2  | 138.8  |
| FUT8   | 105    | 115.7  | 113.9  | 114    | 102.5  | 95.8   | 115.5  | 108.9  |
| FUT9   | 120    | 112.9  | 106.6  | 120.2  | 110.7  | 99.9   | 112.7  | 108.8  |
| FVT1   | 268.2  | 268.5  | 218.7  | 243.2  | 201.3  | 164.8  | 302.5  | 308.4  |
| FXC1   | 170.6  | 163.7  | 151.6  | 179.6  | 161.9  | 138.2  | 148.9  | 150.7  |
| FXN    | 128.4  | 126.7  | 125.9  | 136.9  | 116    | 107.4  | 127.9  | 121.9  |
| FXN    | 117.8  | 123.9  | 123.5  | 124.5  | 111.8  | 105.7  | 128    | 109.2  |
| FXR1   | 336.6  | 394.3  | 386.5  | 422.9  | 416.9  | 319.8  | 595.8  | 767.2  |
| FXR1   | 119.7  | 117.5  | 117.9  | 124.4  | 116.5  | 104.4  | 129.5  | 136.7  |
| FXR1   | 215.3  | 228.9  | 229.8  | 222.8  | 225.5  | 215.9  | 269.5  | 320    |
| FXR2   | 229    | 235    | 210    | 274.7  | 188.8  | 181.3  | 303.9  | 260.7  |
| FXYD1  | 129.2  | 122.3  | 121.8  | 120.3  | 111.9  | 112.6  | 121.1  | 126.3  |
| FXYD1  | 113.7  | 120    | 121.5  | 121.3  | 112.3  | 104.8  | 127.1  | 113.7  |
| FXYD1  | 137    | 122.8  | 124.6  | 144.8  | 122.4  | 117.9  | 119.4  | 127.8  |
| FXYD2  | 120.8  | 123.7  | 114.5  | 125.1  | 115.3  | 102.1  | 127.2  | 123.5  |
| FXYD2  | 112.7  | 120.4  | 107.5  | 121.3  | 103.6  | 97.5   | 115.9  | 107.6  |
| FXYD2  | 121.5  | 116.5  | 108.2  | 119.9  | 113.9  | 98.1   | 119.4  | 123.3  |
| FXYD2  | 110.7  | 121    | 115.1  | 125    | 104.5  | 101.1  | 127.2  | 114.8  |
| FXYD3  | 117.1  | 113.1  | 121.6  | 126.1  | 107.1  | 99.6   | 109.8  | 112.5  |
| FXYD3  | 114.3  | 130.9  | 127.6  | 123.9  | 107.5  | 102.2  | 115.5  | 115.1  |
| FXYD3  | 117.5  | 115    | 119.8  | 123    | 112.5  | 90.4   | 124    | 116.8  |
| FXYD4  | 118.6  | 122.1  | 130.9  | 120.7  | 105.2  | 111.7  | 116.7  | 113.4  |
| FXYD5  | 855.1  | 984    | 980.9  | 909.3  | 792.8  | 1125.9 | 803.1  | 1026.7 |
| FXYD5  | 135.4  | 151.4  | 137.4  | 155.7  | 126.5  | 126.9  | 143.9  | 152.1  |
| FXYD5  | 3607.4 | 3975.4 | 4221.9 | 4304.8 | 3505.1 | 3483   | 3241.9 | 3682.9 |
| FXYD6  | 110.7  | 116.6  | 108.7  | 119.3  | 109.1  | 89.6   | 120.5  | 118.7  |
| FXYD7  | 123.2  | 129.5  | 130.7  | 128.3  | 112.7  | 112.1  | 122.1  | 119.2  |
| FYB    | 127    | 120.3  | 124.9  | 136.1  | 114.3  | 99.5   | 120.8  | 140.7  |
| FYB    | 2611.1 | 2475.3 | 2556.5 | 2087.5 | 1929.8 | 2019   | 1906.7 | 1674.4 |
| FYCO1  | 251.6  | 278.4  | 291    | 329.1  | 282.7  | 294.7  | 314.9  | 243.6  |
| FYN    | 706.4  | 912.1  | 532.9  | 756.4  | 511.5  | 456.6  | 714.4  | 746.4  |
| FYN    | 399.2  | 448.6  | 338.4  | 448.8  | 421    | 329.7  | 416.4  | 426    |
| FYN    | 342.4  | 345    | 390.5  | 366.2  | 368.6  | 321.6  | 377.1  | 443.5  |
| FYN    | 487.7  | 426.8  | 443.2  | 490.6  | 435.7  | 345.2  | 364.4  | 369.4  |
| FYTTD1 | 141.3  | 155.9  | 168    | 186.4  | 157.6  | 119.8  | 194.1  | 192.6  |
| FYTTD1 | 258.3  | 264.7  | 222.5  | 284.3  | 227.5  | 245.1  | 273.2  | 235.4  |
| FYTTD1 | 125.5  | 133    | 140.3  | 138.9  | 128.2  | 106.6  | 127.4  | 124.5  |
| FZD1   | 118.5  | 119    | 118.2  | 125.5  | 112    | 100    | 120.8  | 124.4  |

|          |       |        |       |        |       |        |        |        |
|----------|-------|--------|-------|--------|-------|--------|--------|--------|
| FZD10    | 116.5 | 106.6  | 120   | 119.5  | 104.7 | 105.3  | 115    | 117    |
| FZD2     | 124.7 | 113.7  | 183.5 | 123.9  | 106.9 | 110.4  | 112.9  | 110.8  |
| FZD3     | 112.4 | 126.2  | 119.2 | 115.5  | 109.2 | 103.7  | 125.3  | 125    |
| FZD4     | 115.5 | 118.3  | 117.5 | 132.8  | 112.6 | 100.2  | 126    | 115.2  |
| FZD5     | 112.1 | 117.6  | 123.5 | 120.9  | 108   | 106.7  | 114.1  | 119.4  |
| FZD6     | 127.4 | 132.6  | 129.9 | 122.5  | 110.7 | 98.5   | 124.3  | 125.4  |
| FZD7     | 148.8 | 161.3  | 167.4 | 174.1  | 163.6 | 123    | 145.6  | 170.1  |
| FZD8     | 119.1 | 120.6  | 123.6 | 116.4  | 109.4 | 109.8  | 125    | 119.7  |
| FZD9     | 127.2 | 131.1  | 123.3 | 128.8  | 118.3 | 106.8  | 147.1  | 148.1  |
| FZR1     | 132.2 | 137.9  | 121.6 | 142.5  | 123.3 | 115.1  | 131.5  | 137.2  |
| G0S2     | 116.1 | 112.5  | 117.5 | 120.4  | 103.9 | 94.3   | 110    | 112.5  |
| G10      | 367.8 | 467.3  | 546   | 516.1  | 571.6 | 700.4  | 739.4  | 671.4  |
| G1P3     | 981.6 | 733.3  | 936.7 | 1132.1 | 547.3 | 513.8  | 830.6  | 505.1  |
| G3BP1    | 297.5 | 268.4  | 251   | 333.9  | 236.2 | 230.8  | 290.6  | 247.5  |
| G3BP1    | 136.8 | 137.5  | 133.3 | 139    | 129.2 | 109.1  | 135.6  | 139.1  |
| G3BP2    | 124   | 123.8  | 123.2 | 124.8  | 113.4 | 95.4   | 119.4  | 123.2  |
| G3BP2    | 715.1 | 785.5  | 714.9 | 713.7  | 708.6 | 619.3  | 861.3  | 1015.7 |
| G6PC     | 114.7 | 121.7  | 111.3 | 113.8  | 116.5 | 94.7   | 125.3  | 116.5  |
| G6PC2    | 118.8 | 122.1  | 117.1 | 127.5  | 110.6 | 91.5   | 121.3  | 124.2  |
| G6PC2    | 126.9 | 118.7  | 111.5 | 122.5  | 107   | 98.2   | 129.3  | 117.6  |
| G6PC2    | 104   | 112.8  | 119.6 | 110.9  | 104.8 | 104.3  | 118.2  | 111.1  |
| G6PC3    | 161.7 | 156.6  | 137.5 | 129.4  | 116.1 | 114.8  | 131.5  | 126.3  |
| G6PD     | 375.2 | 381.3  | 234.7 | 559.6  | 249.1 | 390.1  | 613.5  | 319.3  |
| G6PD     | 945.6 | 1009.6 | 668.8 | 1665.7 | 640   | 1275.7 | 1730.3 | 800.2  |
| G6PD     | 117.6 | 133.6  | 120.4 | 121.7  | 112.2 | 101.6  | 119.2  | 107.9  |
| GAA      | 151.4 | 124.7  | 196   | 140.5  | 114   | 144.5  | 145.5  | 130.4  |
| GAA      | 126.4 | 129.5  | 179.8 | 130    | 117.8 | 114.2  | 133.3  | 114.9  |
| GAB1     | 106.6 | 111.6  | 107.2 | 114.3  | 97.7  | 95.8   | 115.6  | 110.5  |
| GAB1     | 108   | 120.6  | 115.9 | 126.7  | 99.6  | 97.6   | 113.6  | 112.7  |
| GAB1     | 124.3 | 116.2  | 137.1 | 112.2  | 109.2 | 99.2   | 132.7  | 118.7  |
| GAB2     | 147.7 | 156.2  | 166.7 | 179.5  | 138.5 | 184.9  | 189.9  | 132.8  |
| GAB2     | 120   | 105.9  | 105.3 | 114.5  | 98.1  | 102.6  | 124.6  | 110.4  |
| GAB2     | 107.9 | 108.3  | 113.1 | 117.4  | 109.7 | 103.9  | 116.9  | 113.1  |
| GAB3     | 138.9 | 135.7  | 164.7 | 146.9  | 124.7 | 126.8  | 140.5  | 128.7  |
| GABARAP  | 152.1 | 151.7  | 141.8 | 166.4  | 140.5 | 141    | 172.6  | 146.6  |
| GABARAPL | 477.5 | 592.8  | 566.3 | 936.1  | 886   | 1000.8 | 1326.3 | 1925.3 |
| GABARAPL | 153.7 | 169.5  | 158.3 | 180.4  | 151.1 | 160.3  | 159.5  | 165.7  |
| GABBR1   | 123.3 | 115.5  | 130.1 | 138.4  | 112.5 | 104.5  | 127.7  | 120.3  |
| GABBR1   | 117.6 | 115.8  | 112.7 | 112.9  | 104.6 | 100.7  | 128.7  | 105.2  |
| GABBR1   | 145.3 | 133    | 142.4 | 148.1  | 142.5 | 141.1  | 138.4  | 139.9  |
| GABBR2   | 115.4 | 113.2  | 117.3 | 130.7  | 110   | 101.3  | 119.6  | 118.8  |
| GABPA    | 119.3 | 107.5  | 113.7 | 118.1  | 110   | 99.5   | 112    | 110.7  |
| GABPB2   | 107.8 | 113.5  | 113.5 | 110.8  | 110.5 | 100.6  | 120.5  | 116    |
| GABPB2   | 147   | 143.5  | 161.4 | 159.3  | 139.2 | 135.2  | 155    | 171.3  |
| GABRA1   | 114.4 | 113.4  | 111.5 | 115.6  | 107.9 | 94.2   | 112.5  | 112.6  |
| GABRA2   | 119.4 | 120.3  | 117.4 | 130.6  | 110.1 | 92.5   | 122.1  | 110.1  |
| GABRA3   | 114.6 | 120.7  | 118.5 | 127.5  | 105.2 | 103.3  | 110.8  | 121.8  |
| GABRA4   | 108.7 | 113.9  | 123.5 | 118.7  | 112.2 | 98.1   | 119    | 110.8  |
| GABRA5   | 116.6 | 108.1  | 116.6 | 114.6  | 107   | 95.8   | 120.8  | 122    |
| GABRA6   | 120.5 | 117.8  | 130.2 | 127    | 117.4 | 108.4  | 120.8  | 118    |
| GABRB1   | 109.9 | 110.7  | 108.7 | 105.8  | 106.8 | 98     | 116.5  | 110.5  |

|           |        |        |        |        |        |        |        |        |
|-----------|--------|--------|--------|--------|--------|--------|--------|--------|
| GABRB2    | 119.8  | 113.1  | 118.5  | 113.2  | 103.7  | 98.8   | 126.4  | 113.6  |
| GABRB2    | 115.1  | 118.5  | 117.1  | 126    | 110.8  | 97.4   | 124.2  | 118.1  |
| GABRB3    | 112.1  | 112.4  | 115.2  | 116.9  | 105.5  | 99.6   | 113.9  | 116.6  |
| GABRB3    | 116.6  | 122.5  | 114.5  | 133.9  | 119.1  | 112.7  | 123.5  | 109.9  |
| GABRB3    | 114.8  | 115.2  | 120.8  | 123.6  | 110.7  | 96.8   | 124.6  | 114    |
| GABRB3    | 118.5  | 121.6  | 119.5  | 122.6  | 107.5  | 102.1  | 119.9  | 106.3  |
| GABRD     | 117    | 119.6  | 126.1  | 126.4  | 110.3  | 101.7  | 120    | 109.3  |
| GABRE     | 128.2  | 118.3  | 122.8  | 132.1  | 117.5  | 99.3   | 121.8  | 124.3  |
| GABRE     | 114.5  | 114.6  | 112    | 120.9  | 104.8  | 99.1   | 109.7  | 112.9  |
| GABRE     | 129.8  | 131.2  | 126.8  | 132.1  | 117.1  | 108.5  | 136.6  | 129.2  |
| GABRG1    | 114.1  | 111.6  | 122.2  | 110.9  | 110.7  | 98     | 124.4  | 111.7  |
| GABRG2    | 113.5  | 119.2  | 112.7  | 128.2  | 109.2  | 92.8   | 118.5  | 112.3  |
| GABRG2    | 111.9  | 120.6  | 108.6  | 121.6  | 115.6  | 96.3   | 117.7  | 121.7  |
| GABRG3    | 119.8  | 117.2  | 131.9  | 115    | 106.5  | 98.5   | 121.7  | 118.1  |
| GABRQ     | 104.1  | 104    | 109.5  | 120    | 98.6   | 92.9   | 106.6  | 111.7  |
| GABRR1    | 120.5  | 112.1  | 112.7  | 117.3  | 105.1  | 98     | 111.8  | 122.2  |
| GABRR2    | 113    | 125    | 124.3  | 124.3  | 107.4  | 106.5  | 122.5  | 121    |
| GAD1      | 103.1  | 102.5  | 113.3  | 114.8  | 106.2  | 91.6   | 116    | 107.8  |
| GAD1      | 116.1  | 115.4  | 120.6  | 116.1  | 110.3  | 102.6  | 121.3  | 109.1  |
| GAD1      | 113    | 112    | 117.2  | 111.3  | 101.4  | 95.5   | 114.8  | 106.8  |
| GAD2      | 112.4  | 121.7  | 123.8  | 119.4  | 107.8  | 103.9  | 120.9  | 121.5  |
| GADD45A   | 161.8  | 164.5  | 164.4  | 172.2  | 152    | 136.5  | 168    | 214.6  |
| GADD45B   | 141.3  | 137.4  | 160.9  | 152.1  | 144.7  | 128.3  | 135.6  | 143.5  |
| GADD45G   | 123    | 125.3  | 124.5  | 126.3  | 117.4  | 109.1  | 139.7  | 144.8  |
| GADD45GII | 110.5  | 118.3  | 111.7  | 123.8  | 111.7  | 99.9   | 118.6  | 109    |
| GADL1     | 99.9   | 111.3  | 118.1  | 111    | 104.9  | 100.1  | 112.6  | 111.1  |
| GAGE1     | 119    | 109.5  | 117.2  | 117.3  | 110.2  | 97.5   | 121    | 112.1  |
| GAGE1     | 113.8  | 109.9  | 105.4  | 122.4  | 113.7  | 105.6  | 107.4  | 118.6  |
| GAGE1     | 112.7  | 110.5  | 114.1  | 121.4  | 119.1  | 99.7   | 123    | 112.9  |
| GAGE2     | 106.5  | 119.5  | 117.2  | 116.7  | 112.5  | 96.8   | 118.9  | 109.1  |
| GAGE4     | 107.4  | 121.2  | 120.4  | 123.2  | 115.4  | 104    | 122.9  | 118.1  |
| GAGE5     | 115.5  | 121.8  | 112.7  | 113.7  | 108.9  | 95.3   | 118.3  | 111.9  |
| GAGE6     | 126.8  | 126.1  | 136.4  | 122.8  | 106.6  | 107.6  | 126.4  | 123.5  |
| GAGE7     | 112    | 116.9  | 118    | 123.3  | 106.4  | 110    | 127.5  | 119    |
| GAGE7B    | 111.2  | 113.4  | 110.1  | 116.8  | 112.3  | 100.2  | 128.9  | 113.7  |
| GAGE8     | 118.5  | 117.2  | 126.6  | 116    | 99.7   | 101.6  | 109.9  | 118.1  |
| GAK       | 1554.3 | 1688.5 | 1310.3 | 1744.6 | 1325.8 | 1095.6 | 1597.3 | 1477.8 |
| GAL       | 109.9  | 121.2  | 111.4  | 118.7  | 116.7  | 100.7  | 120.3  | 111.9  |
| GAL3ST1   | 119.1  | 125.2  | 131.1  | 123.4  | 120.4  | 109.7  | 119.5  | 119.3  |
| GAL3ST2   | 119.2  | 125.4  | 124    | 129.1  | 112.3  | 112.5  | 121.4  | 127.6  |
| GAL3ST3   | 121.7  | 118.7  | 117.7  | 123    | 111.3  | 96.7   | 119.5  | 115.6  |
| GAL3ST4   | 135.8  | 156.5  | 166.9  | 138.7  | 132.4  | 130.2  | 142    | 130.2  |
| GALC      | 138.5  | 134.2  | 162.7  | 132.4  | 120.6  | 110.1  | 138.8  | 124.6  |
| GALC      | 281.7  | 282.9  | 474.1  | 300.8  | 263.5  | 305.5  | 238.4  | 217.3  |
| GALE      | 105.8  | 116.5  | 117.6  | 117    | 108.1  | 99     | 117.7  | 112.4  |
| GALE      | 133.1  | 124    | 146.2  | 138.6  | 114.9  | 140    | 141.2  | 144.4  |
| GALE      | 117.9  | 116.5  | 119.6  | 121.5  | 108.9  | 100.1  | 117.9  | 106.3  |
| GALGT     | 121.4  | 124.7  | 123.6  | 121.5  | 118.3  | 102.8  | 119.3  | 114.6  |
| GALIG     | 120.5  | 123.5  | 118.1  | 124.5  | 118.9  | 99.1   | 128.9  | 116.5  |
| GALK1     | 461.8  | 380.5  | 707    | 344.9  | 238.9  | 264.7  | 211.3  | 198.8  |
| GALK2     | 127.4  | 113.4  | 160.6  | 133.3  | 126.4  | 118    | 137.5  | 145.5  |

|           |        |        |        |       |        |        |       |        |
|-----------|--------|--------|--------|-------|--------|--------|-------|--------|
| GALK2     | 178.1  | 181.2  | 154.5  | 168.3 | 165    | 114.4  | 142.3 | 163.8  |
| GALK2     | 117.4  | 117.8  | 120.5  | 121.6 | 106.8  | 105.2  | 122.5 | 114.2  |
| GALM      | 228.6  | 311.7  | 297.5  | 270.8 | 255.9  | 226.3  | 187   | 195.6  |
| GALNAC4S  | 222.7  | 193.2  | 263.6  | 274.1 | 176.8  | 235.8  | 282.4 | 166.5  |
| GALNACT-2 | 139.2  | 137.6  | 145    | 149.8 | 150.8  | 122.2  | 139.2 | 129.2  |
| GALNS     | 133.2  | 114.9  | 123.6  | 138.9 | 110.8  | 116.3  | 129.8 | 132    |
| GALNT1    | 114.2  | 121.7  | 121.8  | 119   | 108.8  | 100.5  | 120   | 118.4  |
| GALNT10   | 126    | 109.4  | 124.6  | 125.5 | 111.3  | 101.9  | 125.5 | 119.8  |
| GALNT10   | 140    | 168.8  | 199.5  | 157.7 | 153.5  | 157.4  | 162.3 | 145.2  |
| GALNT10   | 115.4  | 120.3  | 122.4  | 123.1 | 110.1  | 95.3   | 114.3 | 111.2  |
| GALNT11   | 226.6  | 314    | 226    | 246.7 | 222.3  | 188    | 197.2 | 249.1  |
| GALNT12   | 121.4  | 123.4  | 130.1  | 125.1 | 117.2  | 110.7  | 118.7 | 119.4  |
| GALNT13   | 116.3  | 118.5  | 117.4  | 121.4 | 112.3  | 97.6   | 122.5 | 117.8  |
| GALNT14   | 123.3  | 121.2  | 120.6  | 130.5 | 116.1  | 110.5  | 119.9 | 123.3  |
| GALNT17   | 108.8  | 118.8  | 121.8  | 120.4 | 105.3  | 97.4   | 127.5 | 125.7  |
| GALNT2    | 122.4  | 134.1  | 129.8  | 123.4 | 122.3  | 107.9  | 129.2 | 122.5  |
| GALNT3    | 208.2  | 183.2  | 224.2  | 186   | 199.5  | 143.7  | 223   | 165.3  |
| GALNT4    | 149.4  | 141.8  | 168    | 157.1 | 153.7  | 144.4  | 166.2 | 149.7  |
| GALNT5    | 106.6  | 106.5  | 116.4  | 105.8 | 101.8  | 95.7   | 109.3 | 107.1  |
| GALNT6    | 119.8  | 116.6  | 124.1  | 122.8 | 111.1  | 109.4  | 125.4 | 121.3  |
| GALNT7    | 110.5  | 109.5  | 114.5  | 115.4 | 108.5  | 98.4   | 111.1 | 108.4  |
| GALNT8    | 119.1  | 122.2  | 121.9  | 120.5 | 115.4  | 106.8  | 119.9 | 120.9  |
| GALNT9    | 118.4  | 121.3  | 124.3  | 128.1 | 115.6  | 103.1  | 120.2 | 112.4  |
| GALNT9    | 124.3  | 109.6  | 119.3  | 115.1 | 100.8  | 106.7  | 116.6 | 127.6  |
| GALNTL1   | 115.4  | 110.3  | 110.8  | 122   | 104    | 99.5   | 121   | 116.7  |
| GALNTL2   | 120    | 119.1  | 124.2  | 122.4 | 111.8  | 97.5   | 118   | 113.6  |
| GALNTL4   | 119.2  | 112.4  | 122.6  | 122.9 | 110.7  | 100.6  | 109.9 | 115.9  |
| GALNTL5   | 111    | 108.5  | 111.8  | 113.2 | 111.3  | 95.6   | 110.2 | 110.6  |
| GALP      | 118.1  | 116.1  | 129.7  | 106.5 | 102.7  | 106    | 124.5 | 110.4  |
| GALR1     | 114.4  | 107.2  | 121    | 115.1 | 105.6  | 95.5   | 122.8 | 115.6  |
| GALR2     | 112    | 117.1  | 119.2  | 123   | 104.8  | 93.4   | 116.2 | 112.9  |
| GALR3     | 121.2  | 114.7  | 122.1  | 114.3 | 110.4  | 101.1  | 117.3 | 112.4  |
| GALT      | 325.5  | 390.4  | 336.7  | 300.1 | 232.6  | 170.1  | 183.8 | 189.7  |
| GALT      | 210.5  | 198.5  | 217.7  | 194.5 | 172.4  | 128.1  | 158.7 | 145.1  |
| GAMT      | 216.9  | 239.8  | 224.9  | 247.6 | 176.6  | 143.7  | 179.9 | 152    |
| GAMT      | 126.3  | 128.1  | 142.4  | 145.5 | 117.6  | 124.6  | 119.5 | 125.6  |
| GAMT      | 148.5  | 144    | 148.9  | 149   | 138.6  | 123.6  | 130.4 | 139.5  |
| GAN       | 116.9  | 117.2  | 118.8  | 124.9 | 104    | 100.8  | 121.3 | 118.5  |
| GANAB     | 189.9  | 183.9  | 199.2  | 244.4 | 189.1  | 187.1  | 203.7 | 211.4  |
| GANC      | 112.8  | 122.6  | 116.4  | 120.4 | 113.4  | 100.6  | 122.7 | 120.3  |
| GAP43     | 107.7  | 116.5  | 117.3  | 118.2 | 113    | 98.2   | 120.8 | 117.3  |
| GAPDH     | 678.4  | 774.7  | 902.2  | 763.7 | 660    | 646.9  | 910   | 852.5  |
| GAPDH     | 253.5  | 244.5  | 310.1  | 337   | 217    | 223.2  | 293   | 239.9  |
| GAPDH     | 1472.4 | 1718.5 | 1842.7 | 2312  | 1477.2 | 1707.6 | 2492  | 2669.9 |
| GAPDHS    | 114.4  | 112.4  | 129    | 129.4 | 114.8  | 107.6  | 120.9 | 121.4  |
| GAPVD1    | 366.4  | 391    | 405.6  | 432.1 | 426.8  | 349.3  | 382.1 | 439    |
| GARNL1    | 397.2  | 336.1  | 319.7  | 385.7 | 260.4  | 253.2  | 448.6 | 519.5  |
| GARNL3    | 102.4  | 109.4  | 109.4  | 108.9 | 110.1  | 93.8   | 114.7 | 109.1  |
| GARNL4    | 145.8  | 145.4  | 173.9  | 193.2 | 136    | 116.1  | 141.1 | 134.3  |
| GARS      | 593.2  | 714.4  | 565.5  | 674.9 | 638.7  | 543    | 770.6 | 923    |
| GART      | 490.8  | 477.2  | 425.2  | 483.9 | 412.1  | 318.5  | 597.5 | 576.1  |

|         |        |        |        |        |        |        |        |        |
|---------|--------|--------|--------|--------|--------|--------|--------|--------|
| GART    | 134.3  | 149.9  | 154.2  | 145.4  | 151.7  | 122.9  | 150.7  | 142.5  |
| GART    | 120.4  | 117.2  | 119.7  | 111.3  | 112.7  | 97.1   | 122.7  | 110.5  |
| GAS1    | 119    | 120.9  | 114.9  | 121.1  | 106.2  | 95.6   | 114    | 116.7  |
| GAS2    | 119.9  | 110.4  | 128.9  | 120.8  | 110.8  | 102.3  | 115.8  | 109.5  |
| GAS2    | 113.3  | 118.2  | 109.8  | 116.8  | 111.4  | 95.9   | 108.6  | 107.8  |
| GAS2L1  | 120.7  | 116.9  | 129.1  | 129.2  | 111.4  | 101.5  | 127.6  | 121.7  |
| GAS2L1  | 120.6  | 117.1  | 132.3  | 120.8  | 107.1  | 98.6   | 124.6  | 106.6  |
| GAS2L1  | 111.4  | 114.7  | 128.6  | 120.3  | 114.5  | 104.2  | 125    | 112    |
| GAS2L2  | 114.5  | 124    | 136.5  | 121.8  | 117.3  | 112.2  | 119.1  | 123    |
| GAS2L3  | 156.2  | 138.9  | 152.8  | 139.8  | 143.3  | 109.2  | 165.2  | 141.7  |
| GAS6    | 133    | 135.6  | 145.6  | 131.1  | 127.4  | 122.7  | 119.6  | 116.6  |
| GAS6    | 126.2  | 127.7  | 143.1  | 130.9  | 112    | 114.2  | 119.2  | 110    |
| GAS6    | 119.7  | 119.3  | 124.9  | 116    | 117.6  | 94.6   | 114.9  | 121    |
| GAS7    | 112.9  | 115.9  | 114.7  | 121.8  | 114.2  | 98.6   | 118.4  | 112.1  |
| GAS7    | 158.2  | 135.6  | 265    | 158.7  | 122.9  | 192.5  | 149.9  | 131.8  |
| GAS7    | 116.1  | 110.5  | 115    | 115.7  | 110.9  | 96.9   | 113.3  | 111.1  |
| GAS7    | 116.9  | 109.9  | 121.9  | 122.9  | 111.5  | 99.7   | 124    | 118.6  |
| GAS8    | 131.5  | 123    | 128.3  | 129.4  | 112.2  | 102.7  | 118.3  | 127.2  |
| GAST    | 121.5  | 119.7  | 123.5  | 118.4  | 115.8  | 102.3  | 126.3  | 120.9  |
| GATA1   | 118.9  | 120.8  | 112.3  | 117    | 109.2  | 101.8  | 118.9  | 116.6  |
| GATA2   | 123.7  | 111.5  | 123.9  | 125    | 114.2  | 102.8  | 124.1  | 121.8  |
| GATA3   | 167.2  | 164.7  | 178.3  | 143.6  | 152.5  | 138.4  | 144.2  | 143    |
| GATA4   | 118.7  | 113.1  | 119.8  | 121.8  | 114.9  | 98.2   | 119.3  | 109.7  |
| GATA5   | 117.6  | 109.1  | 116.1  | 113.1  | 107.2  | 95.6   | 115.9  | 122.1  |
| GATA6   | 112.7  | 117.9  | 110.7  | 118.1  | 104.5  | 97.2   | 121.3  | 112    |
| GATAD1  | 129.7  | 139.2  | 172.8  | 142.6  | 139    | 139    | 140    | 132.7  |
| GATAD2A | 693.9  | 862.4  | 447.2  | 796    | 646.9  | 529.1  | 1107   | 961.1  |
| GATAD2B | 271.1  | 276.5  | 207.2  | 281    | 215.8  | 186.4  | 304.9  | 336.3  |
| GATM    | 113.3  | 117.2  | 125.3  | 121.1  | 107.9  | 95.3   | 119.9  | 105.6  |
| GATS    | 334.5  | 289.4  | 301.6  | 343.2  | 299.4  | 260.6  | 409.1  | 303.4  |
| GBA     | 349.3  | 337.1  | 386.3  | 335.6  | 228.4  | 208    | 288.4  | 248.8  |
| GBA2    | 171.6  | 192.2  | 160.8  | 186.5  | 166.5  | 156.1  | 177.4  | 189.1  |
| GBA3    | 114.2  | 109.3  | 109.4  | 113.4  | 111.6  | 92     | 118.1  | 110.9  |
| GBAS    | 255.2  | 284    | 311.4  | 269    | 298.8  | 237    | 233.4  | 246.1  |
| GBE1    | 179.5  | 197.9  | 158.7  | 207.4  | 170.1  | 151.6  | 210.3  | 177    |
| GBF1    | 183.7  | 170.2  | 155.7  | 158.2  | 148.6  | 123.8  | 182.7  | 162.5  |
| GBGT1   | 159.8  | 136.1  | 182.8  | 159.4  | 120.7  | 128.3  | 138.4  | 118.1  |
| GBL     | 189    | 185.7  | 187.6  | 181.4  | 151.1  | 156.8  | 172.1  | 154.9  |
| GBP1    | 504.9  | 214.7  | 413    | 355.4  | 195.4  | 251.4  | 221.1  | 168    |
| GBP2    | 1937.7 | 1781.4 | 2045.3 | 1977.1 | 1146.9 | 1359.5 | 1675.1 | 1125.7 |
| GBP3    | 122.3  | 138.6  | 132.5  | 128.6  | 110.4  | 122.2  | 127.5  | 134.2  |
| GBP4    | 621.7  | 557.6  | 414.9  | 485.6  | 363    | 326.9  | 338    | 312.6  |
| GBP5    | 512.2  | 313.2  | 402.3  | 335.6  | 186.2  | 362.5  | 219    | 171.6  |
| GBP6    | 121.8  | 117.9  | 130.7  | 132.8  | 126.8  | 102.2  | 125.7  | 123.2  |
| GBP7    | 104.8  | 99.8   | 106.5  | 116.4  | 108.8  | 93.3   | 125.5  | 106.1  |
| GBX2    | 109.5  | 116.5  | 121.2  | 125.3  | 108.3  | 100.8  | 127.1  | 112.2  |
| GC      | 114    | 119.5  | 121.2  | 122.8  | 107.5  | 97     | 113    | 108.7  |
| GCA     | 347.3  | 298.8  | 467.8  | 334.2  | 217.6  | 344.1  | 256.5  | 308.1  |
| GCAT    | 119.3  | 122.9  | 125.5  | 121.4  | 116.9  | 107    | 121.7  | 117.7  |
| GCC1    | 304.3  | 227.7  | 274.1  | 294    | 184.1  | 203.7  | 347.8  | 355.7  |
| GCC2    | 126.6  | 124.1  | 119.8  | 124.3  | 121    | 101.2  | 119.8  | 109.4  |



|         |       |       |       |       |       |       |       |       |
|---------|-------|-------|-------|-------|-------|-------|-------|-------|
| GCC2    | 119.6 | 117.7 | 114   | 111.4 | 108.9 | 95.4  | 120.8 | 108   |
| GCC2    | 124.9 | 130.1 | 139.8 | 142   | 134.3 | 114   | 125.7 | 133.3 |
| GCDH    | 133   | 143.9 | 124.3 | 138.4 | 117.8 | 116.1 | 138.7 | 125.1 |
| GCDH    | 204   | 198.4 | 177.8 | 197.1 | 166.3 | 131.3 | 154.8 | 152.2 |
| GCET2   | 117.4 | 116.6 | 125.2 | 121.7 | 113.8 | 100.7 | 120   | 117.2 |
| GCET2   | 126.5 | 124   | 135.6 | 132.1 | 125.6 | 108.1 | 133.8 | 124.2 |
| GCG     | 112.6 | 120.9 | 117.4 | 121.2 | 112.5 | 104.4 | 120.2 | 130.3 |
| GCGR    | 112   | 125.4 | 115.2 | 131.9 | 110.7 | 100.3 | 127.2 | 113.5 |
| GCH1    | 186.6 | 164.2 | 158.9 | 183.4 | 155.5 | 131.3 | 153.5 | 164.2 |
| GCH1    | 121.7 | 115.8 | 125.6 | 117.1 | 116   | 99.6  | 121.8 | 119.5 |
| GCH1    | 118   | 123.3 | 134.5 | 131.8 | 136.3 | 105.6 | 122.5 | 111.8 |
| GCHFR   | 285   | 337.2 | 453.3 | 291.1 | 239   | 302   | 197.1 | 193.4 |
| GCK     | 114.5 | 119.8 | 134.5 | 140.5 | 108.9 | 99.3  | 117.2 | 116.7 |
| GCK     | 115   | 122.1 | 118.6 | 120.4 | 108.9 | 96.7  | 119.8 | 108.9 |
| GCK     | 112.4 | 114   | 115.5 | 120.9 | 103.3 | 99.1  | 116.5 | 114.1 |
| GCKR    | 119   | 122.1 | 115.2 | 129.5 | 103.8 | 98.7  | 114.3 | 121.7 |
| GCLC    | 123.7 | 127.1 | 124.4 | 147.3 | 119.5 | 111.1 | 140.8 | 117.5 |
| GCLM    | 132.3 | 136.8 | 138   | 167   | 171.5 | 140.5 | 320.4 | 466.5 |
| GCM1    | 108.1 | 113.6 | 120.4 | 121.2 | 114.9 | 107.1 | 124.8 | 137.6 |
| GCM2    | 119.8 | 116.7 | 116.3 | 124.9 | 110.8 | 99    | 131   | 114   |
| GCN1L1  | 221   | 248.4 | 206.4 | 179.6 | 164.3 | 173   | 252.8 | 183.3 |
| GCN5L2  | 477.8 | 484.6 | 492.1 | 463.8 | 334.8 | 264.4 | 290.4 | 294.8 |
| GCNT1   | 115.9 | 116.8 | 128.4 | 119.6 | 107.8 | 110.2 | 122   | 122.5 |
| GCNT2   | 109.1 | 113.9 | 109.9 | 118   | 104.3 | 94.9  | 114.4 | 111.9 |
| GCNT2   | 108.8 | 117.1 | 117.5 | 117.2 | 113.4 | 100.2 | 113.5 | 120.9 |
| GCNT2   | 137.8 | 114.5 | 144.1 | 134.7 | 119.5 | 110   | 131.2 | 115.6 |
| GCNT2   | 116.1 | 115.5 | 117.2 | 123.6 | 111.3 | 93.8  | 120.4 | 114.4 |
| GCNT3   | 114.8 | 107   | 110.1 | 119.2 | 109.7 | 101.5 | 115.6 | 110   |
| GCOM1   | 117.9 | 118.2 | 114.9 | 116.6 | 117.6 | 97.4  | 117.8 | 119.2 |
| GCOM1   | 115.4 | 115.5 | 126   | 109.1 | 109.5 | 96.3  | 119.3 | 116.5 |
| GCOM1   | 119   | 117.1 | 125.3 | 119   | 107.7 | 98.6  | 114.2 | 117.6 |
| GCOM1   | 117   | 119.5 | 111.2 | 114.7 | 111.3 | 97.4  | 114.1 | 109.7 |
| GCS1    | 158.7 | 162.6 | 177.6 | 162.8 | 141.5 | 120.9 | 169.2 | 141.3 |
| GCSH    | 129.7 | 129.9 | 139.9 | 144.1 | 126.6 | 123.9 | 135.9 | 123.8 |
| GDA     | 119.4 | 121.6 | 113.8 | 112.2 | 102.3 | 100.4 | 114.4 | 111   |
| GDAP1   | 112.2 | 114.9 | 123.4 | 119.8 | 108.4 | 99.3  | 123   | 115   |
| GDAP1   | 117.9 | 116.8 | 116.5 | 125.2 | 108.9 | 103.2 | 118.6 | 111.3 |
| GDAP1L1 | 117.5 | 115.4 | 121.1 | 115   | 116   | 97.9  | 112.3 | 109   |
| GDAP2   | 161.5 | 179.8 | 140.2 | 178.8 | 148.9 | 128.2 | 196.4 | 173.8 |
| GDDR    | 114.9 | 118.2 | 106.7 | 116.6 | 115.1 | 101.4 | 110.7 | 121.7 |
| GDF1    | 123   | 119.6 | 123.4 | 129.5 | 114.5 | 105.2 | 125.6 | 115.8 |
| GDF10   | 119   | 114.7 | 118.8 | 117.3 | 104.3 | 102.5 | 123.2 | 119.1 |
| GDF11   | 120.2 | 129.3 | 124.5 | 137.5 | 115.8 | 123.2 | 126.2 | 126.8 |
| GDF15   | 120.8 | 123.9 | 115   | 135.5 | 118   | 95    | 186.4 | 136.3 |
| GDF2    | 104.7 | 114.7 | 104.1 | 109.1 | 106.2 | 93.7  | 121.1 | 102.3 |
| GDF3    | 117.6 | 122.2 | 115.8 | 112.9 | 103.8 | 100.3 | 111.1 | 110.8 |
| GDF5    | 114.9 | 104.3 | 110.5 | 113.4 | 109.2 | 102.9 | 114.9 | 118.6 |
| GDF6    | 110.7 | 115.1 | 115.2 | 117.5 | 104.8 | 96.4  | 119.1 | 118   |
| GDF7    | 111.9 | 115.7 | 112   | 120.1 | 109.6 | 100.7 | 115.4 | 114.7 |
| GDF8    | 114.1 | 110.9 | 112.5 | 115.1 | 103.5 | 104   | 122.3 | 113.8 |
| GDF9    | 125.6 | 120.5 | 119.4 | 117.4 | 114.8 | 101.4 | 119.5 | 112.1 |

|           |        |         |         |        |         |        |         |         |
|-----------|--------|---------|---------|--------|---------|--------|---------|---------|
| GDI1      | 277.3  | 296.2   | 283.8   | 314.6  | 218.5   | 328.5  | 375.6   | 314.1   |
| GDI2      | 525.5  | 523.6   | 602.1   | 481.3  | 339.3   | 373.1  | 493     | 443.1   |
| GDNF      | 113.4  | 101.1   | 122.5   | 118.2  | 109.1   | 98.6   | 118.8   | 114     |
| GDNF      | 111.3  | 111.4   | 109.6   | 115.2  | 110.3   | 108.8  | 110.2   | 112     |
| GDNF      | 119.9  | 129.3   | 131.6   | 129    | 118.8   | 104.5  | 130.2   | 127     |
| GDPD1     | 196.8  | 199.4   | 210.7   | 163.5  | 170.2   | 141.6  | 214.9   | 166.8   |
| GDPD2     | 113.4  | 120.7   | 130.4   | 121    | 113.3   | 101.9  | 117.5   | 113.8   |
| GDPD3     | 171.4  | 201.5   | 224.4   | 189.9  | 176.7   | 194.4  | 179.3   | 170.6   |
| GDPD3     | 106.7  | 107.9   | 113     | 117.3  | 113.9   | 99.7   | 125.4   | 117.5   |
| GDPD4     | 111.4  | 135     | 133.5   | 125.2  | 120.5   | 115.9  | 135.8   | 126.5   |
| GDPD5     | 162.2  | 192.6   | 145.8   | 163.3  | 152.3   | 139.3  | 158     | 157     |
| GEFT      | 117.5  | 123.6   | 126.1   | 132    | 113.7   | 101.1  | 120.3   | 123.1   |
| GEFT      | 115.8  | 123.9   | 108.5   | 116.9  | 106.8   | 91.7   | 104.6   | 112.1   |
| GEFT      | 123.3  | 123.2   | 128.1   | 124.8  | 107.2   | 101.8  | 123     | 116.7   |
| GEM       | 113    | 118.4   | 123.5   | 127.8  | 109.7   | 97.9   | 127.2   | 118.6   |
| GEM       | 117.5  | 118     | 126.1   | 116.9  | 112.1   | 91.2   | 118.2   | 111.8   |
| GEMIN4    | 585.5  | 722.7   | 465.5   | 634    | 439.5   | 298.2  | 530.7   | 576.9   |
| GEMIN5    | 135.9  | 151.9   | 148.6   | 146.4  | 132.8   | 138.6  | 134.6   | 132.3   |
| GEMIN6    | 226.2  | 239.3   | 232.5   | 234.5  | 217.4   | 185.3  | 223.6   | 208     |
| GEMIN7    | 115.9  | 121.5   | 118.9   | 128.9  | 106.4   | 105.3  | 128.6   | 123.6   |
| GEMIN7    | 105.7  | 128.2   | 116     | 121.2  | 114.8   | 103.3  | 126     | 112.8   |
| GEMIN8    | 120.3  | 130.5   | 138.2   | 140.4  | 124.3   | 116.6  | 125.4   | 132.9   |
| GENX-3414 | 113.8  | 113.3   | 123.4   | 122.7  | 121.2   | 102.1  | 123.9   | 129.3   |
| GFAP      | 114.5  | 117.9   | 128.1   | 120.6  | 111.3   | 104.9  | 115.7   | 122.4   |
| GFER      | 120.3  | 115     | 126.8   | 139.1  | 118.7   | 97.2   | 116.1   | 139.3   |
| GFI1      | 260.9  | 283.8   | 210     | 284.8  | 186.3   | 149.1  | 326.2   | 231.5   |
| GFI1B     | 113    | 116.5   | 118.9   | 115.2  | 113.5   | 96     | 122.6   | 112.1   |
| GFM1      | 300.7  | 362.2   | 295.9   | 251.1  | 269.6   | 241.6  | 269.8   | 330.8   |
| GFM2      | 110.4  | 111.1   | 124.4   | 114.1  | 110.8   | 95.9   | 116     | 108.3   |
| GFOD1     | 205.2  | 184.6   | 173.3   | 214.6  | 168.1   | 145.3  | 186     | 184.6   |
| GFPT1     | 216    | 215.9   | 195.1   | 270.5  | 189     | 187.3  | 300     | 268.5   |
| GFPT2     | 121.1  | 126.9   | 116.1   | 125.1  | 117.4   | 105.6  | 120     | 124.6   |
| GFRA1     | 119    | 124.7   | 119.6   | 130.4  | 110.8   | 108.8  | 130.2   | 117.9   |
| GFRA1     | 121.9  | 114.6   | 118.5   | 114.1  | 97.5    | 96.4   | 118.5   | 114     |
| GFRA1     | 124.4  | 123.6   | 125     | 128.3  | 122.4   | 106.8  | 117.9   | 113.2   |
| GFRA2     | 151    | 154.1   | 150.4   | 147.8  | 137.2   | 116    | 138.9   | 150.5   |
| GFRA3     | 114.2  | 113.8   | 120.1   | 121.9  | 106.7   | 95.2   | 120.9   | 123.4   |
| GFRA4     | 114.6  | 117     | 115.6   | 118.3  | 109.9   | 99.3   | 123.1   | 110     |
| GFRA4     | 146.2  | 130.3   | 140.2   | 137.7  | 126     | 108.8  | 138.1   | 142.8   |
| GGA1      | 117.3  | 124.6   | 137.5   | 128    | 121.2   | 101.2  | 117.6   | 120.6   |
| GGA1      | 9785.2 | 12288.7 | 11422.6 | 9251.6 | 10005.9 | 8814.1 | 10416.6 | 12034.4 |
| GGA1      | 129.2  | 128.9   | 118.4   | 135.7  | 122.3   | 108.9  | 118.4   | 130.1   |
| GGA1      | 140.4  | 117.2   | 121.4   | 138.5  | 129.6   | 105.5  | 133.9   | 120     |
| GGA2      | 351.7  | 334.8   | 485.1   | 358.6  | 289.2   | 348.2  | 316.5   | 274.8   |
| GGA3      | 212    | 229.5   | 253     | 280.3  | 238.4   | 170.5  | 261.4   | 242.6   |
| GGA3      | 151.2  | 173     | 179.7   | 149.5  | 139.8   | 139.5  | 185.1   | 150.7   |
| GGA3      | 117.7  | 125.6   | 131.9   | 122.5  | 122.4   | 122.3  | 129.6   | 120.3   |
| GGCX      | 154.2  | 132.5   | 142     | 147.9  | 121.3   | 115.1  | 138.6   | 130.1   |
| GGH       | 176.3  | 141.1   | 127.9   | 167.2  | 128.2   | 107.6  | 162.4   | 128.9   |
| GGN       | 116.8  | 109.4   | 111.1   | 123.7  | 108.8   | 100.5  | 123.2   | 112.3   |
| GGPS1     | 115.7  | 131.2   | 115.4   | 142.1  | 120.3   | 104.7  | 120.8   | 132     |

|        |        |        |        |        |        |        |        |        |
|--------|--------|--------|--------|--------|--------|--------|--------|--------|
| GGPS1  | 474.2  | 370    | 418.5  | 495.7  | 367.1  | 473.4  | 513.6  | 475.3  |
| GGT1   | 119.7  | 116.3  | 115.7  | 111.2  | 101.1  | 95.6   | 117.5  | 115.1  |
| GGT1   | 115.4  | 116.5  | 124.3  | 124.3  | 109.1  | 104.2  | 123    | 117.3  |
| GGT3   | 113.5  | 118.3  | 128.7  | 134.3  | 109.9  | 101.4  | 124.4  | 115.9  |
| GGT6   | 117    | 117.2  | 120.7  | 124.9  | 106.4  | 104.7  | 121    | 116.9  |
| GGTA1  | 116.2  | 125.1  | 127.1  | 118.3  | 108.8  | 102.7  | 119.2  | 114.6  |
| GGTL3  | 121    | 135.3  | 134.5  | 130    | 129.7  | 100.3  | 132.5  | 137.9  |
| GGTL4  | 106.3  | 116.5  | 106.3  | 119.3  | 106.8  | 98.8   | 110.6  | 107.7  |
| GGTLA1 | 116.5  | 125.9  | 123    | 125.9  | 117.9  | 105.9  | 124.4  | 124    |
| GGTLA4 | 118.8  | 114.3  | 122.9  | 118.7  | 110.6  | 101.1  | 129.8  | 121.4  |
| GGTLA4 | 116.8  | 124.3  | 124.4  | 124.6  | 108.1  | 105    | 132.6  | 117.2  |
| GGTLA4 | 120.7  | 120.5  | 122.2  | 125.3  | 108.8  | 105.5  | 117.9  | 125.7  |
| GH1    | 120.3  | 117.9  | 131.3  | 119.6  | 108.1  | 97.5   | 113.5  | 110.8  |
| GH1    | 110.2  | 115    | 119.6  | 116    | 105.8  | 100    | 119.1  | 114.8  |
| GH2    | 115.2  | 122.8  | 116.8  | 118.6  | 107    | 104.6  | 111.5  | 122.8  |
| GH2    | 115    | 110.6  | 114.1  | 123.8  | 112.4  | 97.9   | 117.5  | 116.1  |
| GH2    | 117.3  | 113.8  | 117.3  | 118.7  | 108.8  | 99.9   | 116.1  | 123.6  |
| GHITM  | 2167.4 | 2577.8 | 2328.9 | 3035.6 | 2146.1 | 2432.6 | 2924.9 | 3221.4 |
| GHR    | 104    | 109.3  | 109.5  | 113    | 105.2  | 86.6   | 116.6  | 111.7  |
| GHRH   | 119.2  | 117.8  | 115.2  | 111.3  | 113.1  | 108    | 114    | 114.9  |
| GHRHR  | 116.6  | 122.2  | 118.3  | 118.4  | 98.7   | 97.9   | 118.1  | 107.2  |
| GHRHR  | 110.7  | 105.3  | 107    | 115.2  | 112.4  | 89.5   | 123.5  | 122.2  |
| GHRHR  | 113.7  | 115.2  | 110.6  | 120    | 110.7  | 104.8  | 121.2  | 105.7  |
| GHRL   | 106.3  | 112.9  | 116.8  | 119.7  | 103.4  | 96.7   | 127.8  | 117.6  |
| GHSR   | 121.9  | 113.8  | 125    | 115.6  | 110.1  | 92.8   | 117.6  | 98.9   |
| GHSR   | 132.2  | 115.6  | 118.1  | 117.2  | 107.2  | 95     | 114.8  | 121.6  |
| GIF    | 114.5  | 107.2  | 119.6  | 128.7  | 106.4  | 98.8   | 115    | 106.7  |
| GIMAP1 | 244.5  | 261.9  | 238.7  | 231.1  | 247.6  | 171.5  | 204.1  | 189.4  |
| GIMAP2 | 833.7  | 703.9  | 525.6  | 844.3  | 679.6  | 445.7  | 581.5  | 626.1  |
| GIMAP4 | 2935.4 | 3830   | 2792.2 | 3398.5 | 2764.3 | 2305.5 | 2598.4 | 2162.8 |
| GIMAP5 | 2794.2 | 3920.1 | 2037.8 | 2898.5 | 2290.2 | 1639   | 2078.6 | 1657.6 |
| GIMAP6 | 119.3  | 113.8  | 130.5  | 140.9  | 112.1  | 108.9  | 128    | 110.6  |
| GIMAP6 | 1121   | 1407.2 | 683    | 981.5  | 874.5  | 472.2  | 664.2  | 762    |
| GIMAP7 | 185.8  | 198.8  | 189.8  | 190.7  | 160.9  | 153.6  | 197.6  | 177    |
| GIMAP8 | 606.8  | 913.3  | 603.4  | 611.6  | 583.8  | 504.3  | 582.3  | 637.5  |
| GIOT-1 | 106.2  | 105.5  | 122.9  | 112.4  | 105.1  | 91.9   | 114.4  | 110.7  |
| GIP    | 116.9  | 113    | 126.9  | 122.9  | 103.8  | 99.9   | 114.7  | 110.6  |
| GIPC1  | 116.4  | 123.8  | 135    | 127.4  | 111    | 105.1  | 117.3  | 116.2  |
| GIPC1  | 344.9  | 417    | 388.7  | 310.5  | 253.2  | 239.2  | 294.8  | 237.5  |
| GIPC2  | 113.4  | 118    | 126.1  | 125.2  | 106.4  | 96.9   | 120.3  | 106    |
| GIPC3  | 116.5  | 112.7  | 114.2  | 120    | 109.6  | 93.7   | 113.7  | 106.6  |
| GIPR   | 109    | 110.8  | 109    | 108.3  | 104    | 92.2   | 116.2  | 106.4  |
| GIT1   | 153    | 129.2  | 137.2  | 144.2  | 123.2  | 116.6  | 163.9  | 153.7  |
| GIT2   | 165    | 196.2  | 256.7  | 184.2  | 202    | 166.1  | 165    | 167.8  |
| GIT2   | 131.2  | 140.4  | 155.5  | 139    | 141.5  | 123    | 134    | 125    |
| GIYD1  | 138.7  | 150.7  | 146.6  | 152.4  | 128.6  | 125.5  | 145.5  | 130.5  |
| GIYD1  | 128.2  | 109.5  | 139.5  | 119.3  | 114.8  | 101.6  | 122.5  | 111.3  |
| GIYD2  | 112.3  | 112.8  | 114.9  | 111.7  | 102.6  | 97.1   | 106.4  | 114    |
| GJA1   | 116.9  | 115.1  | 108.2  | 108.4  | 107.4  | 103.2  | 113.4  | 117.9  |
| GJA10  | 116.6  | 117.5  | 120.4  | 150.3  | 118.6  | 89.5   | 131    | 126.6  |
| GJA12  | 155    | 184.3  | 125.8  | 168.6  | 154.6  | 113    | 186    | 219.2  |

|        |        |        |        |        |        |        |        |        |
|--------|--------|--------|--------|--------|--------|--------|--------|--------|
| GJA3   | 106.5  | 117.2  | 115.2  | 118.4  | 109.8  | 114.1  | 117.7  | 119.4  |
| GJA4   | 112.5  | 113.4  | 110.6  | 121.5  | 107.5  | 95.5   | 120.9  | 112.8  |
| GJA5   | 115.6  | 115.5  | 115.8  | 120.4  | 101.1  | 105.5  | 114.1  | 114.6  |
| GJA5   | 126    | 122.9  | 131.9  | 120    | 117.9  | 100.5  | 116.2  | 119.7  |
| GJA7   | 115.5  | 121.2  | 135.1  | 123.2  | 120.8  | 107.6  | 126.6  | 122.2  |
| GJA7   | 4614.4 | 4948.8 | 4265.9 | 4687.9 | 3523.3 | 2716   | 4824.5 | 4656   |
| GJA8   | 120    | 112.9  | 113.6  | 121.6  | 111.7  | 102.6  | 114.6  | 109.9  |
| GJB1   | 116.1  | 122.1  | 125.7  | 118.1  | 109.4  | 110.3  | 132.5  | 119.1  |
| GJB2   | 127.3  | 131.9  | 112.2  | 123.8  | 113.2  | 105.3  | 128.3  | 122.8  |
| GJB3   | 113.8  | 126.6  | 127.5  | 129.6  | 115.1  | 112.8  | 132.4  | 117.3  |
| GJB3   | 111    | 111.6  | 116.2  | 120    | 109.1  | 101.8  | 119.3  | 111.8  |
| GJB3   | 114.2  | 112.3  | 109.7  | 117    | 103.5  | 95.5   | 113.7  | 111.2  |
| GJB4   | 108.6  | 113.5  | 127.2  | 112.2  | 112.3  | 94.5   | 120.7  | 126.3  |
| GJB5   | 117.1  | 123.7  | 115.2  | 123.5  | 114    | 100.4  | 113.9  | 115.9  |
| GJB6   | 123.6  | 124.1  | 120.4  | 115.1  | 112.9  | 110.6  | 114.7  | 112.8  |
| GJB7   | 113.7  | 117.5  | 113.3  | 110.2  | 106.3  | 107.8  | 112.9  | 121.6  |
| GJC1   | 119.7  | 109.5  | 132.3  | 116.3  | 106.4  | 101.2  | 121.4  | 115.6  |
| GJE1   | 110    | 107.1  | 125.8  | 119.1  | 107    | 104.9  | 110.3  | 113.5  |
| GK     | 358.6  | 276.8  | 203.2  | 481.8  | 293    | 372    | 474.2  | 226.4  |
| GK2    | 164.2  | 162.6  | 169.2  | 169.2  | 139.6  | 137.5  | 181.6  | 167.4  |
| GKAP1  | 120.3  | 132.1  | 131.6  | 123.4  | 117.4  | 103.9  | 133.7  | 129.1  |
| GKN1   | 116.9  | 127.9  | 120    | 122.8  | 107.1  | 98.8   | 121.7  | 118.7  |
| GLA    | 1819.9 | 1918.8 | 800.8  | 3115.3 | 1534.2 | 1111.7 | 3805.9 | 2345.2 |
| GLB1   | 526.5  | 518    | 713    | 583.4  | 437.8  | 641.1  | 448.4  | 374.8  |
| GLB1   | 123.9  | 120.2  | 120.1  | 118.3  | 107.2  | 100.5  | 126.6  | 113.1  |
| GLB1   | 501.5  | 456.8  | 689.9  | 499.9  | 383.3  | 570.4  | 497.7  | 310.8  |
| GLB1L  | 122.2  | 118.2  | 124    | 121.9  | 115.8  | 104.2  | 109.6  | 106.9  |
| GLCCI1 | 155.1  | 168.4  | 188.3  | 159.4  | 147.1  | 152.9  | 154.7  | 140    |
| GLCE   | 137.2  | 138    | 149.5  | 129.5  | 130.5  | 115.1  | 133.4  | 116.2  |
| GLDC   | 113.3  | 119.2  | 116.8  | 112.3  | 101.2  | 93.5   | 108.7  | 113.3  |
| GLDN   | 104.1  | 107.3  | 112.1  | 118.8  | 109.4  | 98.3   | 118.8  | 121.4  |
| GLE1L  | 435.8  | 494.1  | 433.8  | 483.9  | 339.2  | 463.3  | 412.6  | 403.1  |
| GLE1L  | 135.2  | 130.2  | 140.2  | 140.9  | 127.6  | 113    | 125.2  | 142.8  |
| GLG1   | 723.1  | 797.2  | 904.2  | 827.9  | 726.5  | 642.8  | 762.4  | 792.2  |
| GLI1   | 127.2  | 119.5  | 121.8  | 126.3  | 109.6  | 105.6  | 132.2  | 115    |
| GLI2   | 108.2  | 113.3  | 108    | 116.1  | 107.9  | 94.5   | 112.9  | 113    |
| GLI3   | 107.2  | 121.5  | 111    | 112.4  | 104.5  | 96.3   | 117.6  | 113.8  |
| GLI4   | 117.2  | 123.5  | 126    | 129.9  | 118.8  | 103.7  | 119.5  | 117.3  |
| GLIPR1 | 294.2  | 349.4  | 620.7  | 321.7  | 306.4  | 402.1  | 288    | 239.3  |
| GLIS1  | 108.6  | 120.1  | 111.6  | 114.1  | 103.9  | 94.4   | 118    | 110.6  |
| GLIS2  | 122.2  | 122.6  | 115.4  | 118.8  | 103.2  | 96.9   | 115.9  | 111.9  |
| GLIS3  | 113.3  | 115.3  | 110.8  | 113.4  | 104.6  | 96.3   | 115.6  | 108.2  |
| GLIS3  | 125.2  | 109.7  | 115.7  | 107.9  | 113.4  | 102.5  | 113.5  | 108    |
| GLIS3  | 122.6  | 113.4  | 119.6  | 147.3  | 131.3  | 170.7  | 166.2  | 130.3  |
| GLMN   | 119.2  | 113.6  | 123.1  | 123.2  | 112.2  | 102.5  | 118.7  | 117.9  |
| GLMN   | 245.2  | 248.2  | 217.9  | 232.6  | 215.4  | 165.7  | 262.5  | 256.3  |
| GLO1   | 725.3  | 935.6  | 1026.3 | 838.2  | 644    | 944.4  | 684.9  | 747.3  |
| GLOXD1 | 106    | 120.9  | 108.4  | 113.4  | 108    | 98.9   | 119.7  | 128.5  |
| GLP1R  | 113.1  | 112.3  | 118.1  | 116.5  | 105.9  | 93.6   | 115.4  | 113.9  |
| GLP2R  | 117.8  | 112.1  | 114.4  | 116.3  | 102.2  | 93.2   | 118.8  | 114.4  |
| GLRA1  | 114.5  | 104.8  | 117.3  | 113.5  | 94     | 96.2   | 115.5  | 112.6  |

|         |        |         |        |        |        |        |         |         |
|---------|--------|---------|--------|--------|--------|--------|---------|---------|
| GLRA2   | 117.8  | 114.6   | 115.9  | 112.9  | 113.3  | 94.3   | 125.6   | 111.7   |
| GLRA3   | 117.3  | 115.3   | 120.1  | 117.3  | 111.5  | 100.3  | 126.7   | 117.8   |
| GLRA3   | 106.6  | 117.5   | 109.6  | 115.6  | 114.1  | 100.3  | 121.2   | 111.4   |
| GLRB    | 103.3  | 113.6   | 112.4  | 116.1  | 107.5  | 103.6  | 110.4   | 112.9   |
| GLRX    | 362.2  | 376.5   | 470    | 664.1  | 442.7  | 432.8  | 774.7   | 513.1   |
| GLRX2   | 147.9  | 153.8   | 166.7  | 173.4  | 136.6  | 131.6  | 146     | 135.2   |
| GLRX2   | 120.6  | 122.6   | 130.7  | 138.7  | 113.2  | 96.4   | 125.4   | 120.9   |
| GLRX2   | 156.7  | 175.5   | 166.6  | 205.4  | 151.3  | 157    | 150.1   | 164.7   |
| GLRX5   | 1224.6 | 1422.1  | 1290.4 | 1362.1 | 1021   | 798.2  | 876     | 756.6   |
| GLS     | 246.5  | 259.1   | 244    | 327.8  | 220.4  | 192.8  | 286.8   | 323     |
| GLS2    | 116.4  | 114.3   | 117.6  | 113.8  | 105.2  | 100.2  | 113.5   | 111.1   |
| GLS2    | 114.3  | 112     | 105    | 123.5  | 110    | 93     | 122.3   | 115.5   |
| GLT1D1  | 122    | 127.4   | 135.3  | 119.1  | 117    | 106.6  | 117.9   | 115.1   |
| GLT25D1 | 614.7  | 611.2   | 754.9  | 625.3  | 486.5  | 425.2  | 662.5   | 510.1   |
| GLT25D2 | 145    | 129     | 140.7  | 149    | 125.5  | 113    | 141.2   | 122.4   |
| GLT6D1  | 106.3  | 116.7   | 115.1  | 122    | 108.5  | 107.9  | 125.4   | 111.8   |
| GLT8D1  | 137.8  | 140.1   | 156    | 132.4  | 123.9  | 116    | 123.2   | 138.1   |
| GLT8D1  | 113.4  | 108.9   | 115.4  | 112.8  | 98.2   | 98.5   | 120.3   | 112.1   |
| GLT8D1  | 123.8  | 122.7   | 119    | 123.7  | 108.6  | 107.8  | 135.7   | 128.4   |
| GLT8D1  | 113.1  | 115.5   | 123.5  | 110.2  | 111.7  | 107.6  | 132.1   | 115.1   |
| GLT8D2  | 118.2  | 130.7   | 118.9  | 120.6  | 114.3  | 97.8   | 111.7   | 119.7   |
| GLTP    | 1150.6 | 1263.7  | 1300.1 | 1374.1 | 1090.9 | 1045.2 | 1315.4  | 1345.8  |
| GLTSCR1 | 193.9  | 236     | 179.2  | 279.9  | 230.7  | 170.8  | 275.3   | 333.5   |
| GLTSCR2 | 8410   | 11385.9 | 8497.7 | 9147.1 | 8475.3 | 8761.9 | 11116.9 | 12111.4 |
| GLUD1   | 542.8  | 504.2   | 578.9  | 611.1  | 357.1  | 585.4  | 485.3   | 507     |
| GLUD2   | 128.5  | 119.6   | 121.8  | 138.9  | 122.2  | 109.8  | 128.4   | 136     |
| GLUL    | 122.8  | 117.6   | 127    | 128.5  | 125.3  | 102.9  | 118.9   | 123.4   |
| GLUL    | 117.7  | 111.6   | 111.3  | 111    | 106.3  | 94     | 106.1   | 113.9   |
| GLUL    | 116.1  | 115.4   | 141.9  | 120.3  | 112.3  | 123.9  | 124.9   | 113.3   |
| GLULD1  | 113.1  | 108.4   | 110.4  | 112.1  | 117.5  | 97.4   | 114.6   | 113.6   |
| GLYAT   | 106.3  | 112.8   | 112.3  | 114.2  | 100.8  | 94.9   | 116.9   | 113.7   |
| GLYAT   | 110.4  | 123.9   | 117.6  | 114    | 112.3  | 98.7   | 117.2   | 120.5   |
| GLYAT   | 109.4  | 125.9   | 124.8  | 130.7  | 111.6  | 108.6  | 136.5   | 116.4   |
| GLYATL1 | 119.6  | 116.3   | 128.4  | 115.7  | 104.5  | 92.2   | 125.8   | 116.3   |
| GLYATL2 | 120.6  | 111.1   | 108.4  | 112.6  | 102.3  | 96.2   | 121.5   | 114.5   |
| GLYCAM1 | 106.5  | 111.4   | 132.5  | 118.6  | 104.5  | 104.5  | 119.7   | 116.1   |
| GLYCTK  | 163.4  | 172.7   | 199.2  | 163.8  | 132.4  | 124.7  | 138     | 134.6   |
| GM2A    | 122.8  | 119.6   | 121.7  | 123.3  | 118.1  | 100.2  | 133.8   | 127.3   |
| GM632   | 146.5  | 143.2   | 151.3  | 152    | 136.5  | 107.3  | 134.8   | 115.4   |
| GMCL1   | 374.8  | 430.1   | 291.3  | 421.1  | 406.4  | 202.1  | 409.1   | 370.4   |
| GMCL1L  | 108    | 113.5   | 102.7  | 112.7  | 108.6  | 95     | 117.1   | 116.7   |
| GMDS    | 277.4  | 260.6   | 238.7  | 251.6  | 245    | 173.7  | 207.1   | 195.3   |
| GMEB1   | 151.5  | 170.3   | 141.6  | 166.2  | 152.7  | 117.9  | 178.2   | 165.6   |
| GMEB1   | 159.5  | 164.9   | 149.6  | 166    | 126.3  | 132.6  | 170.3   | 155.5   |
| GMEB2   | 416.3  | 427.5   | 383.6  | 471.7  | 377.7  | 363.3  | 491.5   | 459.2   |
| GMFB    | 734.1  | 674.6   | 862.8  | 805.9  | 566.3  | 767.9  | 757.2   | 848.7   |
| GMFG    | 739.6  | 594.9   | 1016.2 | 691.6  | 508.9  | 688.4  | 447     | 521.5   |
| GMIP    | 305.9  | 281.1   | 367.3  | 348.4  | 209.3  | 303.4  | 310.2   | 242.8   |
| GML     | 125.9  | 110.6   | 124.1  | 129.7  | 119.7  | 98.5   | 121.6   | 120     |
| GMNN    | 122.3  | 147.7   | 137.5  | 163.5  | 127.8  | 118.3  | 163     | 136.9   |
| GMPPA   | 261.2  | 248.2   | 347.3  | 271.7  | 191.6  | 276.3  | 248.6   | 250     |

|        |         |         |        |        |         |        |        |         |
|--------|---------|---------|--------|--------|---------|--------|--------|---------|
| GMPPA  | 124.8   | 128.8   | 115.3  | 120    | 120.3   | 108.2  | 118.8  | 122.4   |
| GMPPB  | 185.6   | 186.4   | 241.3  | 218.4  | 146.1   | 177.5  | 160.5  | 164     |
| GMPPB  | 137.6   | 128.2   | 159.2  | 127    | 121.5   | 119.1  | 130.9  | 129.5   |
| GMPPB  | 127.4   | 111.7   | 121.3  | 123.3  | 113     | 100.5  | 114.8  | 124.5   |
| GMPR   | 127.4   | 109.6   | 127.4  | 120.6  | 113.2   | 100    | 115.6  | 130.2   |
| GMPR2  | 198.7   | 189.5   | 205.1  | 182.9  | 165.1   | 151.4  | 159.7  | 178.8   |
| GMPR2  | 128.5   | 120.1   | 140.8  | 139.3  | 103.2   | 107.1  | 126.6  | 108.4   |
| GMPR2  | 426.2   | 453.7   | 508.7  | 438    | 340.5   | 337    | 308.1  | 371.5   |
| GNA11  | 140.6   | 156.1   | 124.6  | 140.4  | 130.9   | 107.7  | 133.9  | 138.1   |
| GNA12  | 249.5   | 201     | 264.5  | 269.3  | 171.3   | 233    | 264.7  | 193.4   |
| GNA13  | 263.6   | 319.8   | 233.3  | 240.6  | 253.7   | 292.2  | 341.3  | 330.4   |
| GNA14  | 111.5   | 115.6   | 111.1  | 118.4  | 107.1   | 97.8   | 120.4  | 109.4   |
| GNA15  | 259     | 184.1   | 506.1  | 279.3  | 183.6   | 377    | 352.8  | 184     |
| GNAI1  | 109.7   | 119.2   | 124    | 130.2  | 108.8   | 103.6  | 124.4  | 124.7   |
| GNAI2  | 835.7   | 824.9   | 1214.8 | 952.2  | 688.3   | 1035.7 | 681.7  | 749     |
| GNAI3  | 242.6   | 193.4   | 177.9  | 250.6  | 178.2   | 170.4  | 264.9  | 214.7   |
| GNAL   | 123.1   | 119.7   | 123    | 127.2  | 117.2   | 100.7  | 118.6  | 124.9   |
| GNAL   | 109.1   | 122     | 111.1  | 119.9  | 109.8   | 104.2  | 120.6  | 117.2   |
| GNAO1  | 125.8   | 114.6   | 126.2  | 122.8  | 114.6   | 103.5  | 128.4  | 119.2   |
| GNAO1  | 117.5   | 131.8   | 120.6  | 120.3  | 114.7   | 108    | 127.4  | 116.1   |
| GNAO1  | 114.7   | 120.2   | 110.8  | 125.7  | 108     | 95.3   | 121.5  | 102     |
| GNAQ   | 134.4   | 146.1   | 151.5  | 142.1  | 140.6   | 126.3  | 149.6  | 131.2   |
| GNAS   | 119.7   | 124.9   | 120.9  | 120.7  | 118.2   | 97.5   | 129.3  | 121.7   |
| GNAS   | 110.7   | 108.4   | 118.7  | 111.9  | 118.9   | 98     | 122.4  | 112.4   |
| GNAS   | 5901.9  | 5211.8  | 6154   | 5408.8 | 3814.3  | 4692   | 6215.6 | 6751.3  |
| GNAT1  | 115.8   | 108     | 116.3  | 127.1  | 114.2   | 100.4  | 132    | 114.9   |
| GNAT1  | 123.2   | 117     | 123    | 129.5  | 114.1   | 103.5  | 118.2  | 111.6   |
| GNAT2  | 113.5   | 113.1   | 134.5  | 124    | 111.8   | 104.1  | 121.9  | 115.9   |
| GNAZ   | 121.5   | 118.9   | 137.2  | 125.1  | 107.8   | 108.7  | 123.7  | 122.7   |
| GNB1   | 2085.4  | 2343.6  | 1992.1 | 2316.5 | 1762.6  | 2230   | 2787.4 | 2640.4  |
| GNB1L  | 145.7   | 131.8   | 156.6  | 173    | 133.7   | 147.5  | 163.1  | 145.3   |
| GNB2   | 146.2   | 148.9   | 155    | 171.2  | 121.9   | 130.4  | 153.1  | 158.1   |
| GNB2L1 | 10784.2 | 11283.6 | 9726.8 | 9883   | 10386.9 | 8673.1 | 8664.3 | 12742.9 |
| GNB3   | 114.8   | 117.5   | 129    | 114.9  | 115.2   | 102.6  | 115.8  | 116     |
| GNB4   | 141.3   | 118.2   | 178    | 143.3  | 116.3   | 119.1  | 126.6  | 128.8   |
| GNB5   | 233.1   | 233.1   | 200.4  | 221.5  | 186.5   | 159.7  | 180.6  | 191.2   |
| GNB5   | 112     | 129.1   | 116.6  | 112.8  | 109.5   | 98.9   | 119.7  | 115.8   |
| GNB5   | 108.7   | 110.6   | 113.7  | 115.5  | 102.8   | 95.9   | 114.5  | 107.6   |
| GNE    | 219.7   | 196     | 196.4  | 258.9  | 182.5   | 190.4  | 216    | 220.5   |
| GNG10  | 155.5   | 168.1   | 203.4  | 207.3  | 170.7   | 192.3  | 146    | 169.8   |
| GNG11  | 129.4   | 139.8   | 169.2  | 153.2  | 118.8   | 119.9  | 135.4  | 140     |
| GNG12  | 115.6   | 123     | 118.7  | 119.5  | 108.3   | 96.3   | 108.9  | 119.4   |
| GNG13  | 107.4   | 109.9   | 116.3  | 109.6  | 99.5    | 100.9  | 113.6  | 104.9   |
| GNG2   | 190.3   | 224.6   | 188.8  | 231.6  | 171.5   | 177.8  | 221.1  | 211.8   |
| GNG3   | 126.4   | 113     | 135.9  | 124.2  | 104.7   | 103.4  | 119.2  | 125.1   |
| GNG4   | 113.8   | 115.2   | 114.8  | 118.4  | 108.4   | 98.1   | 119.1  | 108.7   |
| GNG5   | 191.8   | 215.2   | 188.8  | 222.1  | 199.6   | 221.5  | 221.3  | 185.7   |
| GNG7   | 181.1   | 164.2   | 173.7  | 186.8  | 144.5   | 148.7  | 183.1  | 185.6   |
| GNG8   | 134.9   | 123.8   | 127.4  | 143.2  | 119.9   | 110.2  | 124.6  | 128.4   |
| GNGT1  | 119.3   | 112.7   | 125.6  | 120.5  | 111     | 105.8  | 126.7  | 121.1   |
| GNGT2  | 157.9   | 141.7   | 164.4  | 149.9  | 120.7   | 114.9  | 142.6  | 121.2   |

|          |        |        |        |        |        |        |        |        |
|----------|--------|--------|--------|--------|--------|--------|--------|--------|
| GNL1     | 365    | 390.1  | 311.2  | 422.7  | 312.7  | 230.8  | 407.3  | 404.4  |
| GNL2     | 397.7  | 409    | 479.3  | 447.9  | 350.7  | 304.4  | 442.5  | 455.7  |
| GNL3     | 210    | 240.2  | 269.9  | 285.2  | 203.9  | 216.4  | 213.8  | 315.7  |
| GNL3     | 393.9  | 403.8  | 439.9  | 437.9  | 359.6  | 319.4  | 387.2  | 429.2  |
| GNL3     | 117.8  | 116.7  | 121.2  | 121.3  | 119.4  | 87.1   | 115    | 116.8  |
| GNL3L    | 325.1  | 420    | 413.9  | 363.6  | 381.3  | 213.4  | 372.4  | 459.9  |
| GNLY     | 146    | 151.1  | 143.4  | 158.9  | 130.6  | 114.9  | 129.3  | 124.5  |
| GNLY     | 6558.5 | 3918.9 | 4487.1 | 6395.8 | 2475.7 | 3349.1 | 5889.6 | 2535.3 |
| GNLY     | 2164.3 | 1365.1 | 1405.7 | 2018.5 | 899.1  | 1277.2 | 1766.4 | 1015.7 |
| GNMT     | 125    | 111.9  | 122.9  | 126    | 118    | 98.7   | 119.4  | 122    |
| GNPAT    | 337.9  | 349.8  | 392.2  | 359.2  | 309.6  | 283.7  | 323.5  | 376.2  |
| GNPDA1   | 569    | 764.5  | 678.6  | 735    | 697.9  | 474    | 946    | 1378   |
| GNPDA2   | 117.1  | 124    | 119.4  | 116.3  | 105.7  | 107.7  | 110.7  | 113.8  |
| GNPNAT1  | 124.6  | 121    | 112.3  | 117.6  | 108.3  | 94.6   | 116.3  | 125.6  |
| GNPTAB   | 113.8  | 115.2  | 113.5  | 118.7  | 107.3  | 106.7  | 118.6  | 127.4  |
| GNPTG    | 587.8  | 519.1  | 461    | 467.5  | 420.7  | 296    | 433.6  | 418.9  |
| GNRH1    | 124.6  | 147.3  | 158.7  | 162.2  | 140.8  | 123.5  | 179.7  | 200.5  |
| GNRH2    | 114    | 105.9  | 112.2  | 117.6  | 108.7  | 94.9   | 117.9  | 108.2  |
| GNRH2    | 113.1  | 120.9  | 118    | 111.8  | 100.7  | 101    | 120.1  | 120.1  |
| GNRHR    | 104.5  | 113.5  | 109    | 117.2  | 112.7  | 94.8   | 118.4  | 112    |
| GNRHR2   | 116.1  | 124.3  | 127.4  | 119.1  | 112.9  | 106.9  | 121.6  | 131.9  |
| GNS      | 2479   | 1538.6 | 2662.6 | 2178.9 | 1227.7 | 1644.2 | 2177.8 | 1656.6 |
| GOLGA    | 146.9  | 145    | 167.1  | 136.2  | 121.3  | 125.5  | 151.8  | 126.9  |
| GOLGA1   | 146.8  | 149.7  | 164.5  | 153.2  | 144.8  | 140    | 153.4  | 144.5  |
| GOLGA2   | 167.1  | 147.3  | 149.2  | 166.9  | 158.8  | 129.7  | 159.9  | 175.4  |
| GOLGA2L1 | 121.9  | 123.6  | 116.9  | 125.6  | 105.3  | 117.6  | 124.9  | 125    |
| GOLGA2LY | 125.3  | 118.9  | 121.5  | 117.1  | 107.9  | 98.2   | 116.1  | 111.3  |
| GOLGA3   | 502    | 590    | 411.3  | 562.4  | 586.4  | 393.9  | 537.7  | 601.1  |
| GOLGA4   | 142.8  | 122.6  | 131.7  | 139.4  | 132.3  | 114.6  | 131.8  | 130.9  |
| GOLGA6   | 120.1  | 111.9  | 112.2  | 138.9  | 104.8  | 93.9   | 117.9  | 113.8  |
| GOLGA7   | 1743.1 | 1945.5 | 1898.2 | 1975.8 | 1487.7 | 1408.4 | 1908.3 | 1627.8 |
| GOLGA7   | 115.3  | 121.5  | 139.7  | 128.2  | 110.6  | 99.7   | 122.4  | 136.3  |
| GOLGA7   | 124.6  | 133.1  | 127.6  | 153.5  | 124.9  | 122.1  | 152.4  | 125.7  |
| GOLGA8A  | 161.4  | 181.4  | 286.1  | 204    | 176.3  | 124.7  | 180.2  | 159.4  |
| GOLGA8B  | 1617.2 | 1491.3 | 2293.3 | 1381.2 | 1688.2 | 1315.7 | 1365.5 | 1282.5 |
| GOLGA8E  | 113.8  | 117.4  | 110.7  | 120.4  | 103.4  | 98.5   | 117.7  | 111.1  |
| GOLGA8F  | 118    | 114.5  | 108.5  | 110    | 101    | 100.4  | 119    | 114.7  |
| GOLGA8G  | 108    | 118.9  | 115.7  | 111.3  | 104.9  | 100.9  | 123    | 116.9  |
| GOLGB1   | 173.1  | 146.4  | 146.4  | 127.4  | 148    | 116.2  | 173.4  | 192    |
| GOLPH2   | 115.8  | 109    | 110.2  | 113.8  | 111.4  | 95.7   | 112.6  | 126.2  |
| GOLPH2   | 114.8  | 110.8  | 122.5  | 127.9  | 126.6  | 105.7  | 118.1  | 118.2  |
| GOLPH3   | 431.3  | 644.7  | 470.8  | 477.4  | 450.7  | 423.4  | 634.4  | 585.8  |
| GOLPH3L  | 211    | 217.1  | 178.1  | 201    | 184.3  | 126.7  | 194.4  | 186.5  |
| GOLPH4   | 150.6  | 136.6  | 147.8  | 149.4  | 129.1  | 116.6  | 142.4  | 133.8  |
| GOLT1A   | 128.8  | 109.2  | 123.8  | 113.6  | 104.8  | 99.9   | 106.9  | 113.5  |
| GOLT1B   | 129.4  | 144.4  | 142.1  | 149.8  | 143.6  | 144.3  | 133.4  | 133.7  |
| GON4     | 114.7  | 120.5  | 117.3  | 121.6  | 111.3  | 93.1   | 118.7  | 116.7  |
| GOPC     | 166.8  | 165.6  | 183.3  | 155.2  | 146.8  | 138    | 152.6  | 149.3  |
| GORASP1  | 202.6  | 184.1  | 235.1  | 185.2  | 152.3  | 208    | 151.3  | 122    |
| GORASP2  | 400.8  | 430    | 306    | 426.8  | 368.6  | 261    | 464.4  | 460.8  |
| GOSR1    | 125    | 138.7  | 155.1  | 136.2  | 136    | 123.3  | 147.7  | 135.2  |

|         |       |       |       |       |       |       |       |       |
|---------|-------|-------|-------|-------|-------|-------|-------|-------|
| GOSR1   | 119   | 110.3 | 130.7 | 124.7 | 107.8 | 99    | 122.9 | 127.1 |
| GOSR2   | 124.4 | 123.4 | 131.7 | 137.5 | 120.4 | 106.6 | 147.3 | 133.3 |
| GOSR2   | 156.5 | 143.1 | 159.1 | 155.7 | 145.7 | 136.8 | 135.7 | 146.6 |
| GOSR2   | 124.4 | 124.9 | 121   | 121.8 | 114.9 | 109.8 | 122.3 | 119.4 |
| GOT1    | 293.8 | 318.4 | 279.4 | 328.8 | 241   | 254.4 | 241.6 | 339.3 |
| GOT1L1  | 115.2 | 119.7 | 119.1 | 119.5 | 104.1 | 97.2  | 117.5 | 110.5 |
| GOT2    | 540.9 | 673.7 | 402.7 | 524.8 | 436.2 | 347.6 | 505.9 | 476.7 |
| GP1BA   | 131   | 137.3 | 139   | 133.3 | 122   | 124.6 | 130.7 | 130   |
| GP2     | 124.3 | 117.4 | 131   | 128   | 120.1 | 103.5 | 126.3 | 119.1 |
| GP6     | 121.7 | 129.4 | 117.8 | 113.3 | 111.5 | 103.2 | 128.7 | 117.4 |
| GP9     | 103.6 | 113   | 108   | 116.3 | 115.8 | 97.4  | 108.1 | 116.7 |
| GPA33   | 159.8 | 178.6 | 156.7 | 177.2 | 137.8 | 124.9 | 147.5 | 134.5 |
| GPAA1   | 259.5 | 261   | 308   | 245.8 | 169.3 | 231.7 | 222.3 | 183.1 |
| GPAM    | 122.8 | 129.8 | 133.4 | 133.3 | 128.8 | 120.3 | 131.3 | 119.5 |
| GPATC1  | 170.2 | 171.3 | 170.5 | 175.3 | 147.3 | 144.2 | 151.6 | 144.7 |
| GPATC2  | 119.2 | 120.9 | 147.1 | 135.9 | 120.1 | 130.1 | 119.7 | 120.1 |
| GPATC3  | 185.3 | 163.2 | 190.7 | 185.3 | 145.5 | 151.3 | 200.8 | 193.5 |
| GPATCH4 | 113.2 | 123.6 | 118.7 | 119.6 | 109.2 | 97    | 126.3 | 116.8 |
| GPATCH4 | 234.7 | 295.1 | 219.8 | 230.7 | 230.9 | 164.8 | 204.1 | 234.5 |
| GPATCH4 | 119.7 | 160.8 | 110.4 | 124.8 | 154.6 | 95.6  | 118.2 | 159.4 |
| GPBAR1  | 126.7 | 124.7 | 143   | 125.4 | 116.4 | 97.8  | 125.5 | 125.3 |
| GPBAR1  | 130.3 | 123.1 | 164.3 | 126.8 | 105.5 | 111.8 | 132.4 | 127.2 |
| GPBP1   | 173.3 | 147.9 | 155.5 | 187.9 | 213.9 | 175.1 | 194.5 | 217   |
| GPBP1L1 | 168.7 | 177.8 | 139.7 | 157.8 | 147.1 | 130.7 | 180.8 | 169.4 |
| GPC1    | 111.8 | 110.4 | 113.7 | 118.6 | 112.4 | 95.3  | 117.5 | 119.6 |
| GPC2    | 151.2 | 154.2 | 220   | 160.7 | 140.9 | 146.6 | 128.7 | 132.9 |
| GPC3    | 115.4 | 112.9 | 117.1 | 107.2 | 104.6 | 93.1  | 110.8 | 120.4 |
| GPC4    | 149.6 | 193.3 | 124.1 | 138.6 | 152   | 97.5  | 136   | 121.8 |
| GPC5    | 119.1 | 130   | 127.3 | 127   | 111.7 | 100.6 | 128.1 | 117.9 |
| GPC6    | 123.9 | 133.5 | 131.9 | 131.9 | 131.2 | 123.1 | 139.9 | 137.6 |
| GPD1    | 113.5 | 109.2 | 109.9 | 114.5 | 108.8 | 93.8  | 115.4 | 100.5 |
| GPD1L   | 359.6 | 191.5 | 258.9 | 320.3 | 190   | 199.8 | 225.9 | 200.7 |
| GPD2    | 104   | 109.8 | 122   | 113.1 | 105.9 | 98.1  | 114.1 | 115.6 |
| GPHA2   | 110.1 | 127.6 | 123.1 | 133.6 | 117.5 | 106.9 | 132.7 | 111   |
| GPHB5   | 132.7 | 131.6 | 125   | 118.8 | 116.1 | 101.2 | 118.6 | 120   |
| GPHN    | 137.8 | 136.9 | 135.5 | 142   | 123.8 | 108   | 141.6 | 127.8 |
| GPHN    | 113.4 | 120   | 120   | 122.2 | 116   | 96.6  | 121.8 | 112.4 |
| GPI     | 413.2 | 438.8 | 324   | 444.5 | 328   | 347   | 351.6 | 327.5 |
| GPIAP1  | 127   | 131.8 | 128.6 | 126.8 | 137.2 | 107.1 | 131.3 | 122.5 |
| GPIAP1  | 179.9 | 198.4 | 195.5 | 210.3 | 196   | 162.3 | 190   | 210   |
| GPIAP1  | 159   | 176.7 | 183.4 | 176.9 | 172.9 | 172.5 | 149.2 | 162.7 |
| GPKOW   | 138   | 131.9 | 143.7 | 155   | 144.4 | 144.1 | 131.1 | 168   |
| GPLD1   | 122   | 116.5 | 124.9 | 113.7 | 108.6 | 95.6  | 115.9 | 115.4 |
| GPLD1   | 108.8 | 112.4 | 119.5 | 120.1 | 103.1 | 95    | 109.8 | 115.9 |
| GPM6A   | 113.6 | 122.1 | 114.6 | 134.2 | 114   | 104.9 | 125.4 | 113.8 |
| GPM6A   | 115.6 | 121.2 | 118.3 | 120.8 | 108.6 | 93    | 117.4 | 117.1 |
| GPM6A   | 128.7 | 128.5 | 128.9 | 127   | 128.1 | 109.1 | 141.5 | 133.1 |
| GPM6B   | 120.3 | 120.6 | 119.6 | 120   | 109.6 | 100.6 | 114.9 | 111.6 |
| GPM6B   | 114.8 | 118   | 110   | 107.3 | 109.7 | 94.1  | 119.5 | 111.9 |
| GPM6B   | 121.3 | 119.6 | 117.4 | 136   | 118.8 | 99.3  | 117.8 | 119.6 |
| GPNMB   | 469.8 | 167.7 | 154.4 | 313.6 | 152.2 | 110.5 | 320   | 157.2 |



|         |       |       |       |       |       |       |        |        |
|---------|-------|-------|-------|-------|-------|-------|--------|--------|
| GPNMB   | 878.6 | 269.9 | 262.9 | 586.9 | 214.2 | 163.2 | 461.5  | 188.5  |
| GPR1    | 425.1 | 357.4 | 464.6 | 331.6 | 479.1 | 296.7 | 371.4  | 321.1  |
| GPR101  | 110.6 | 119.8 | 118.8 | 126   | 105.2 | 112.1 | 115.2  | 109.6  |
| GPR103  | 118.3 | 114.3 | 106.2 | 115.4 | 107.9 | 96.2  | 122.5  | 109.2  |
| GPR107  | 113.7 | 114.3 | 125.9 | 132   | 113.8 | 104   | 122.7  | 119.5  |
| GPR108  | 173.3 | 196.6 | 199   | 177.2 | 155.1 | 183.2 | 212.9  | 177.4  |
| GPR109A | 111   | 111.2 | 124.9 | 113.9 | 102.1 | 103.3 | 124.1  | 111.3  |
| GPR109B | 118.9 | 114.3 | 108.3 | 117.7 | 106.5 | 102.8 | 111.2  | 107.2  |
| GPR110  | 112.8 | 110.9 | 108   | 121.5 | 111.5 | 98.8  | 110.7  | 113.4  |
| GPR110  | 110.9 | 116.3 | 122.3 | 119   | 110.3 | 100.8 | 117.5  | 115.8  |
| GPR110  | 112.5 | 114.9 | 117.9 | 112.1 | 107.7 | 103.4 | 115.8  | 112.1  |
| GPR111  | 113.2 | 116.9 | 129.4 | 113.4 | 109   | 99.4  | 116.2  | 111.5  |
| GPR112  | 101.4 | 106.5 | 112.9 | 104.6 | 102   | 93.5  | 116.5  | 113    |
| GPR113  | 120.7 | 129   | 127.9 | 129.4 | 117.6 | 100   | 114.8  | 128.3  |
| GPR114  | 255.3 | 274   | 218.6 | 245.7 | 203.5 | 147.2 | 227.3  | 180.5  |
| GPR115  | 110.8 | 110.8 | 116.3 | 111.4 | 108.2 | 97    | 115.2  | 118.5  |
| GPR116  | 112.7 | 116.4 | 116.1 | 119   | 108.9 | 92.7  | 118.1  | 116.7  |
| GPR119  | 136.4 | 135   | 147.8 | 142.8 | 125.7 | 117.6 | 133    | 128.8  |
| GPR12   | 104.8 | 108.2 | 113.7 | 119.3 | 104.5 | 101.2 | 114.5  | 107.6  |
| GPR120  | 110   | 116   | 126.2 | 119.5 | 111.1 | 105   | 117.1  | 119.7  |
| GPR123  | 125.3 | 111.1 | 107.4 | 123.1 | 109.7 | 102.9 | 120.7  | 115.8  |
| GPR124  | 110   | 125.2 | 119.7 | 120.5 | 108.6 | 102.9 | 117.4  | 124.2  |
| GPR125  | 125.6 | 134.9 | 130.9 | 128.8 | 113   | 101.5 | 123.5  | 125.2  |
| GPR126  | 103.7 | 112.9 | 113.3 | 114.1 | 100.5 | 107.4 | 109.8  | 108.6  |
| GPR128  | 124.6 | 113.6 | 127.6 | 117   | 107.8 | 98.6  | 113.9  | 123.6  |
| GPR132  | 247   | 265.1 | 221.4 | 236   | 171.6 | 160.9 | 206.5  | 180.7  |
| GPR133  | 110.8 | 115.6 | 116.9 | 119.1 | 103.9 | 101.2 | 124.2  | 116.9  |
| GPR135  | 120.2 | 114.5 | 116.8 | 119.7 | 112.4 | 103.3 | 123.5  | 118.4  |
| GPR137  | 786.5 | 933.5 | 493.8 | 856.2 | 662.4 | 500.5 | 1033.2 | 1185.6 |
| GPR137B | 175.6 | 173.2 | 223.1 | 204.6 | 176.7 | 201.3 | 188.3  | 157.4  |
| GPR139  | 118.3 | 117.4 | 115.1 | 128.8 | 104   | 98.5  | 124.2  | 115.3  |
| GPR141  | 115.6 | 111.7 | 117   | 122.6 | 108.3 | 103.4 | 117.6  | 109.7  |
| GPR142  | 112   | 110.7 | 119.6 | 121   | 114.8 | 105.9 | 121.3  | 114.1  |
| GPR143  | 127.9 | 121.1 | 143.5 | 117.7 | 113.9 | 121.1 | 120.7  | 121.9  |
| GPR146  | 132.7 | 128.9 | 135   | 129.3 | 114.4 | 110.5 | 126.6  | 118.6  |
| GPR148  | 113.8 | 117.6 | 122.9 | 123.2 | 113.5 | 105.5 | 124.5  | 107.9  |
| GPR149  | 108   | 115.3 | 117.2 | 114.4 | 100.9 | 94.8  | 115    | 122.2  |
| GPR149  | 124.3 | 121   | 130.3 | 124.8 | 112.1 | 107   | 114.3  | 121.7  |
| GPR15   | 124.8 | 128.5 | 122.1 | 127.5 | 114   | 103   | 120.3  | 121.7  |
| GPR150  | 111.4 | 117.5 | 129.3 | 111.6 | 106.9 | 96.3  | 124.6  | 115.1  |
| GPR151  | 110.2 | 113.3 | 124.5 | 113.2 | 102.4 | 98.9  | 121.9  | 124.5  |
| GPR152  | 115.2 | 113.2 | 115.3 | 124.9 | 101.8 | 104.4 | 120.7  | 117.6  |
| GPR153  | 121.7 | 111.9 | 118.1 | 119.5 | 115.3 | 99.7  | 111.6  | 120.9  |
| GPR154  | 111.1 | 118.2 | 116.1 | 122.6 | 105.6 | 98.2  | 128.6  | 114.7  |
| GPR154  | 110.4 | 114.6 | 112   | 113.3 | 105.9 | 92.4  | 113.9  | 106.5  |
| GPR154  | 161.8 | 189.7 | 221   | 150.2 | 176.6 | 148.7 | 153.7  | 177.9  |
| GPR155  | 127   | 122.5 | 125.3 | 124.3 | 126.8 | 98.4  | 125.6  | 121.6  |
| GPR155  | 140.5 | 131.4 | 122.7 | 138.9 | 125.1 | 100.3 | 124.4  | 134.2  |
| GPR156  | 118   | 129.1 | 141.6 | 126.6 | 132.8 | 116   | 129.2  | 125.7  |
| GPR157  | 107.9 | 109.6 | 112.7 | 124.6 | 106.1 | 96.7  | 118.9  | 112.6  |
| GPR158  | 113.2 | 126.7 | 112.2 | 117.3 | 119.2 | 102.9 | 125.9  | 119    |

|         |        |       |       |        |       |       |       |       |
|---------|--------|-------|-------|--------|-------|-------|-------|-------|
| GPR160  | 136    | 210.5 | 154.2 | 151.3  | 190.5 | 122.6 | 136.1 | 181.8 |
| GPR161  | 126.6  | 136.1 | 125.2 | 133    | 118.2 | 112.2 | 118.8 | 120.9 |
| GPR161  | 112.9  | 114.7 | 120.3 | 119.1  | 99.5  | 97.8  | 110   | 110.6 |
| GPR162  | 246.6  | 167   | 476.5 | 338.3  | 162.5 | 482.7 | 287.5 | 139.2 |
| GPR162  | 118.2  | 105.9 | 127.2 | 120.7  | 104.5 | 102.7 | 124.2 | 115.6 |
| GPR17   | 113.9  | 122   | 127.3 | 122.4  | 107.2 | 101.1 | 124.5 | 113.6 |
| GPR171  | 118.4  | 119.4 | 120.7 | 112    | 107.2 | 104.2 | 120.8 | 121.6 |
| GPR172A | 377.8  | 417.9 | 299.2 | 436.5  | 265.1 | 295.4 | 508.5 | 422.7 |
| GPR172B | 112.7  | 119.1 | 113.4 | 127.3  | 109.3 | 104.5 | 123.5 | 118   |
| GPR173  | 116.5  | 113.3 | 120.9 | 128.6  | 114.3 | 103.9 | 124   | 119.2 |
| GPR173  | 127.4  | 125   | 116.3 | 110.6  | 108.1 | 106.9 | 129.3 | 117.6 |
| GPR174  | 117.6  | 134.9 | 125.1 | 111.1  | 107   | 94.6  | 125.7 | 120.1 |
| GPR175  | 177.2  | 190.8 | 180.7 | 184.7  | 145.7 | 180.2 | 208.9 | 180.8 |
| GPR176  | 111    | 120.8 | 130.4 | 134.7  | 112   | 99.1  | 129.6 | 114.3 |
| GPR177  | 109.2  | 103.1 | 104.3 | 114    | 108.4 | 94.4  | 115.1 | 110.3 |
| GPR177  | 124.5  | 134.1 | 116.3 | 126.1  | 106.7 | 106.6 | 122   | 120   |
| GPR177  | 114.1  | 115.2 | 115.7 | 130.8  | 123.2 | 103.8 | 137.6 | 121.2 |
| GPR179  | 115    | 121.6 | 113.8 | 123    | 106.9 | 104.8 | 119.6 | 116.3 |
| GPR18   | 374    | 513.3 | 358.5 | 420.3  | 361.2 | 300.7 | 338.9 | 383.5 |
| GPR19   | 116.8  | 107.5 | 118.5 | 121.4  | 104.2 | 97.9  | 118.6 | 116.6 |
| GPR20   | 119.6  | 116.8 | 125.8 | 117.9  | 106.1 | 101.7 | 121.2 | 114.4 |
| GPR21   | 113.3  | 112.6 | 132.5 | 124.5  | 110   | 104.6 | 121.4 | 121.1 |
| GPR22   | 119.1  | 117.5 | 112.5 | 133.7  | 106.5 | 105.5 | 121   | 114   |
| GPR23   | 121.3  | 121.6 | 116.9 | 113.8  | 112.5 | 100.9 | 121   | 114.1 |
| GPR24   | 114.6  | 119.5 | 118   | 122.6  | 111.2 | 108   | 119   | 108.2 |
| GPR25   | 119.8  | 117.7 | 119   | 131.3  | 112.1 | 109.2 | 113.4 | 114.9 |
| GPR26   | 128.8  | 125.6 | 128.3 | 130.2  | 106.8 | 104.1 | 118.9 | 117.4 |
| GPR27   | 135    | 142.8 | 142.2 | 136    | 120.9 | 120.6 | 142   | 141.7 |
| GPR3    | 110.2  | 117.7 | 115.9 | 110.1  | 112   | 102.6 | 125.4 | 125.9 |
| GPR30   | 132.1  | 128   | 125.7 | 157.7  | 121.7 | 106.7 | 134.9 | 118.6 |
| GPR30   | 138.2  | 148.7 | 132   | 148.3  | 114.9 | 102.3 | 141.4 | 134.2 |
| GPR30   | 111    | 130.9 | 121.6 | 113.3  | 110.2 | 101.5 | 126.2 | 117.3 |
| GPR31   | 109.8  | 116.1 | 124.4 | 123.6  | 110.6 | 99.9  | 116.2 | 117.4 |
| GPR32   | 118    | 114.2 | 115.5 | 113.5  | 108.5 | 100.7 | 136.1 | 116.4 |
| GPR34   | 115.1  | 122.7 | 115.3 | 120.4  | 116.1 | 97.3  | 128.5 | 113   |
| GPR34   | 114.9  | 130.7 | 208.6 | 122.7  | 115   | 105.8 | 123.2 | 112.8 |
| GPR34   | 115.7  | 114.3 | 118.8 | 131.6  | 103   | 103.8 | 125.5 | 110.8 |
| GPR35   | 122.7  | 136.3 | 133.9 | 133.4  | 122.7 | 117.2 | 132   | 129   |
| GPR37   | 112.7  | 110   | 111.8 | 117.4  | 101.7 | 103   | 116.3 | 113.4 |
| GPR37L1 | 112.6  | 106.2 | 111.6 | 113.9  | 103.2 | 98.6  | 107.3 | 111.2 |
| GPR39   | 122.8  | 115.1 | 118.2 | 115.4  | 108.2 | 102.3 | 127.6 | 112.5 |
| GPR4    | 110.8  | 106.8 | 108.6 | 102.5  | 104.3 | 94.3  | 111.2 | 107.2 |
| GPR42   | 108.8  | 108.3 | 121.8 | 114.1  | 111.8 | 97.5  | 116.2 | 112.9 |
| GPR44   | 112.8  | 116.2 | 114.7 | 117.5  | 103.2 | 102   | 113.9 | 115.9 |
| GPR45   | 117.3  | 118.3 | 109.2 | 112    | 106.9 | 96.7  | 111.6 | 111.4 |
| GPR50   | 119.2  | 113.1 | 119.4 | 110.5  | 106.9 | 104.2 | 119.2 | 113   |
| GPR52   | 110.3  | 108   | 107.4 | 115.9  | 106.7 | 97.6  | 111.6 | 111.3 |
| GPR55   | 123.7  | 124.8 | 139.9 | 125.9  | 132.2 | 112.2 | 122   | 125.7 |
| GPR56   | 117.2  | 128.4 | 112.1 | 115.8  | 108.4 | 104.9 | 119.3 | 121.4 |
| GPR56   | 1037.9 | 614.1 | 828   | 1006.8 | 441.9 | 657.4 | 927.2 | 380.1 |
| GPR56   | 1075.1 | 563.1 | 891.2 | 1196.3 | 380   | 646.3 | 832.9 | 400.8 |

|         |        |        |        |        |        |        |        |        |
|---------|--------|--------|--------|--------|--------|--------|--------|--------|
| GPR6    | 107.8  | 113.5  | 113    | 114.8  | 117.5  | 94.7   | 110    | 103.8  |
| GPR61   | 121.1  | 118.6  | 127.9  | 125.7  | 112.8  | 100.8  | 122.8  | 113.5  |
| GPR62   | 107.6  | 112.4  | 116.4  | 119.8  | 107.8  | 98.7   | 121.2  | 116    |
| GPR63   | 116.5  | 114.5  | 111.5  | 113.2  | 112.2  | 95.3   | 118    | 123.4  |
| GPR64   | 122.5  | 125.6  | 122    | 127.2  | 128.2  | 101.8  | 119.4  | 120.3  |
| GPR64   | 112.6  | 112.5  | 124.9  | 114.6  | 105.4  | 110    | 120.9  | 113.1  |
| GPR65   | 320.9  | 370.6  | 397.1  | 343    | 236.4  | 304.2  | 347.7  | 359.6  |
| GPR68   | 207.3  | 257.4  | 223.9  | 262.8  | 194.4  | 183.2  | 181.2  | 143    |
| GPR75   | 113.7  | 119    | 118.1  | 123.4  | 108.9  | 103.4  | 123.9  | 113.1  |
| GPR77   | 119.6  | 106.5  | 116    | 118.6  | 110.3  | 100.8  | 117.7  | 103.5  |
| GPR78   | 129.7  | 124.6  | 124.8  | 122.1  | 111.7  | 107.2  | 122.4  | 131.6  |
| GPR81   | 125.2  | 110.8  | 114.6  | 108.3  | 109.2  | 101.1  | 125.4  | 110    |
| GPR82   | 106.3  | 107.8  | 151.3  | 111.9  | 108.5  | 93.5   | 107.8  | 111.6  |
| GPR83   | 108.4  | 115    | 117.3  | 121.2  | 111.2  | 104.3  | 122.8  | 132.2  |
| GPR84   | 124.6  | 137.6  | 170.8  | 121.3  | 117.1  | 104.4  | 127    | 116.5  |
| GPR85   | 124.2  | 119.3  | 126.5  | 121.1  | 109.3  | 98.6   | 121.8  | 115.6  |
| GPR87   | 114.8  | 108.6  | 113.8  | 114.6  | 102.6  | 98.2   | 120.9  | 108    |
| GPR88   | 114.4  | 120.6  | 106.9  | 118.5  | 112.8  | 107.1  | 124    | 118.8  |
| GPR89A  | 137.4  | 138.3  | 162.6  | 146.7  | 152.2  | 124    | 140.9  | 147.1  |
| GPR92   | 372.8  | 464.4  | 371.4  | 358.2  | 341.1  | 237.2  | 272.9  | 257.2  |
| GPR97   | 118.1  | 121.7  | 118.6  | 123.3  | 111.8  | 102.7  | 117.3  | 125.1  |
| GPR97   | 119.9  | 117.2  | 121.7  | 123.8  | 111.1  | 105.8  | 113.2  | 116.3  |
| GPR98   | 114.2  | 109.3  | 116.8  | 121.4  | 107.2  | 106.2  | 121.6  | 109.6  |
| GPRASP1 | 116.4  | 107.6  | 123.5  | 126    | 111.2  | 99.8   | 122.3  | 119.2  |
| GPRASP2 | 132.6  | 156.7  | 143.5  | 143.4  | 139.1  | 111.7  | 139.5  | 147.1  |
| GPRASP2 | 131.8  | 114.8  | 143.1  | 131.1  | 121.4  | 118.4  | 144.5  | 120.7  |
| GPRC5A  | 110.3  | 121.3  | 113    | 121.2  | 115.3  | 101.5  | 124.7  | 114.8  |
| GPRC5B  | 123.1  | 124.5  | 122.8  | 127.9  | 131.2  | 112.4  | 125.9  | 122.3  |
| GPRC5C  | 121.1  | 118.5  | 113    | 123.9  | 107.4  | 103.3  | 115.3  | 112.4  |
| GPRC5C  | 118.7  | 113.2  | 109.4  | 121.2  | 112.1  | 101.6  | 123.7  | 122.8  |
| GPRC5C  | 107.4  | 112.7  | 112.6  | 113.1  | 121.3  | 101.4  | 113.2  | 116.2  |
| GPRC5D  | 116.3  | 123.1  | 123.1  | 125.7  | 115    | 103.5  | 127.9  | 117.5  |
| GPRC6A  | 118.2  | 116.5  | 119.1  | 129.7  | 110.1  | 96     | 116.6  | 124.3  |
| GPS1    | 123.5  | 127.4  | 140.8  | 131.8  | 123    | 104.7  | 123.2  | 125.2  |
| GPS1    | 559.3  | 626.9  | 572.7  | 628.4  | 388.4  | 361.5  | 423.5  | 424    |
| GPS1    | 134.8  | 150.1  | 144    | 146.9  | 123.1  | 113.1  | 141.1  | 129.9  |
| GPS2    | 345.3  | 325.9  | 267.3  | 338.5  | 250.5  | 267.2  | 329.2  | 323.7  |
| GPSM1   | 111.3  | 117.2  | 119.7  | 120.4  | 116.9  | 110.8  | 114.7  | 113.5  |
| GPSM2   | 119.4  | 127.1  | 127.7  | 135.8  | 124.9  | 97.5   | 117.3  | 126.5  |
| GPSM3   | 484.5  | 528.9  | 335.6  | 484.2  | 330.4  | 488    | 402.6  | 603.7  |
| GPSN2   | 1050.7 | 1271.6 | 1353.8 | 1269.8 | 798.2  | 943.8  | 973    | 856    |
| GPT     | 121    | 130.8  | 123.2  | 124.3  | 111.3  | 102.1  | 119.8  | 121.9  |
| GPT2    | 166.3  | 172.7  | 141.1  | 177.4  | 133.5  | 110.8  | 151.8  | 146.1  |
| GPX1    | 1099.7 | 845    | 3213.4 | 847.6  | 430    | 1116.9 | 408.4  | 332.1  |
| GPX1    | 115.7  | 111.3  | 141.6  | 114.9  | 102.6  | 104.8  | 124.8  | 116    |
| GPX2    | 117.7  | 117.8  | 114.2  | 114    | 112.5  | 100.4  | 114.9  | 121.5  |
| GPX3    | 126.1  | 129.6  | 142.2  | 131.9  | 113.4  | 117.8  | 123.8  | 120.4  |
| GPX4    | 565.5  | 540.9  | 793.3  | 783.9  | 632.1  | 668.4  | 836.5  | 486.8  |
| GPX4    | 4039.9 | 3506.3 | 3973.2 | 4122.8 | 2950.4 | 4126.1 | 4190.5 | 3203.2 |
| GPX5    | 115.9  | 123.3  | 107.5  | 121.8  | 109.8  | 106.6  | 108.7  | 109.4  |
| GPX5    | 109.2  | 111.4  | 110.3  | 109.1  | 100.2  | 94.3   | 115.6  | 115.4  |

|         |        |        |        |        |        |        |       |        |
|---------|--------|--------|--------|--------|--------|--------|-------|--------|
| GPX6    | 118.3  | 129.2  | 124.7  | 131.7  | 111    | 106.1  | 120.9 | 112.1  |
| GPX7    | 208.7  | 200.9  | 266.5  | 222.7  | 186.7  | 186.3  | 178.8 | 192.4  |
| GRAMD1A | 479.9  | 765.1  | 480.1  | 487.6  | 402.9  | 324.8  | 404.9 | 474.2  |
| GRAMD1C | 113.6  | 118.9  | 121.4  | 125.1  | 109    | 101    | 113.4 | 117    |
| GRAMD2  | 111.4  | 111.7  | 117    | 120.9  | 101.2  | 105.4  | 121.3 | 116.4  |
| GRAMD3  | 124.7  | 144.3  | 145.9  | 136.9  | 130.6  | 117.4  | 123.3 | 139.3  |
| GRAP    | 134.2  | 125.7  | 140    | 127.2  | 124    | 116.5  | 126.1 | 128.5  |
| GRAP    | 1057.4 | 1215.8 | 1498.9 | 1139.8 | 1017.7 | 1231.2 | 813.9 | 1104.5 |
| GRAP2   | 136.5  | 140.4  | 125.2  | 132.8  | 120.3  | 115.2  | 128.8 | 155.4  |
| GRASP   | 130.2  | 130.6  | 125    | 141.5  | 120.4  | 111.6  | 145.2 | 130.6  |
| GRB10   | 123.3  | 110.8  | 111.4  | 125    | 109.7  | 101.2  | 124.1 | 129.9  |
| GRB10   | 128.6  | 125.4  | 134.5  | 126.9  | 117.6  | 112.4  | 131.7 | 142.4  |
| GRB10   | 116.3  | 122.7  | 124.8  | 120.5  | 110    | 102.2  | 126.4 | 112.1  |
| GRB10   | 113.5  | 113.5  | 121    | 121.4  | 107.2  | 108.3  | 128.4 | 121.5  |
| GRB14   | 104.9  | 113.1  | 115.1  | 127.6  | 105.5  | 104.9  | 120.9 | 114.7  |
| GRB14   | 117.7  | 127.4  | 134.6  | 127.5  | 119.9  | 125.7  | 122.9 | 131.2  |
| GRB2    | 286.4  | 267.1  | 344.2  | 240.5  | 175.5  | 303    | 190.5 | 206.6  |
| GRB2    | 403.3  | 391.5  | 648.4  | 516.3  | 315    | 341.6  | 347.5 | 309.8  |
| GRB7    | 118    | 115    | 115.5  | 117.5  | 110.9  | 105.1  | 104.7 | 111.9  |
| GRB7    | 111.1  | 106.8  | 122.3  | 117.6  | 100.6  | 97.8   | 120.5 | 105.4  |
| GRB7    | 121.9  | 126    | 116.3  | 122.9  | 111.4  | 100.1  | 124.6 | 128.3  |
| GREB1   | 109.9  | 105.3  | 116.3  | 116.8  | 102.3  | 98.5   | 115.9 | 118.1  |
| GREB1   | 116.1  | 128.9  | 127.1  | 120.7  | 110.5  | 102.3  | 125.5 | 119    |
| GREB1   | 119.3  | 119.1  | 122.3  | 125.6  | 107.9  | 100.1  | 116.2 | 117.4  |
| GREB1   | 114.2  | 117.6  | 117.5  | 119.8  | 117    | 105.6  | 129.3 | 111.5  |
| GREM1   | 116.4  | 117.3  | 114.4  | 115.5  | 110.2  | 105.6  | 119.8 | 121    |
| GREM2   | 116.4  | 128.1  | 113.6  | 124.1  | 106.8  | 100.3  | 117.6 | 113.3  |
| GRHL1   | 116.3  | 111.8  | 121.6  | 125.6  | 115.1  | 110.4  | 111.7 | 117.8  |
| GRHL1   | 121.4  | 118.8  | 126.6  | 120.5  | 109.5  | 101.1  | 123.5 | 117.3  |
| GRHL1   | 111.7  | 123.3  | 112    | 107    | 105.6  | 98.8   | 109.7 | 107.3  |
| GRHL2   | 112.5  | 114.9  | 115.1  | 125.6  | 101.3  | 95.4   | 117.1 | 121.5  |
| GRHL3   | 106.3  | 112.8  | 119.8  | 107.9  | 111.7  | 101.7  | 126.2 | 115.4  |
| GRHL3   | 113.3  | 112.6  | 110.6  | 111.1  | 110.1  | 88.3   | 113.3 | 119.4  |
| GRHL3   | 111.8  | 122.6  | 127.9  | 128.8  | 113.5  | 110.8  | 121.9 | 115.4  |
| GRHPR   | 128.7  | 178.8  | 152.6  | 158.1  | 152.4  | 149.3  | 140.1 | 154.1  |
| GRIA1   | 105.8  | 113.4  | 111.1  | 100.5  | 95.5   | 98.6   | 108.4 | 105.2  |
| GRIA2   | 118.9  | 111.1  | 108.2  | 123.3  | 117.7  | 99.6   | 118.9 | 118.8  |
| GRIA3   | 120.7  | 115    | 122.9  | 120.7  | 112.8  | 100.9  | 131.2 | 118.9  |
| GRIA3   | 112.6  | 115.5  | 117.8  | 119.7  | 114    | 93.9   | 114.1 | 126.4  |
| GRIA3   | 124.3  | 120.8  | 126.9  | 131.6  | 118.8  | 108.1  | 135.9 | 125.9  |
| GRIA4   | 115.8  | 116    | 127.6  | 118.2  | 112.5  | 97.9   | 108   | 121.7  |
| GRIA4   | 107.7  | 106.8  | 110    | 116.3  | 101.6  | 93.3   | 110.7 | 111.3  |
| GRID1   | 120.7  | 122.2  | 126.3  | 124.5  | 115.8  | 104.4  | 117.8 | 111.5  |
| GRID2   | 106.6  | 111.7  | 119    | 107.2  | 108.8  | 97.9   | 107.9 | 108.7  |
| GRIK1   | 118.5  | 115    | 124.6  | 121    | 119.1  | 110    | 122.3 | 124.3  |
| GRIK1   | 124    | 118.7  | 113    | 120    | 112.1  | 91.3   | 117.6 | 103.3  |
| GRIK1   | 109    | 110.7  | 111.6  | 111.7  | 103.7  | 94.7   | 117.3 | 114.3  |
| GRIK2   | 111.5  | 110.4  | 113.1  | 110.9  | 106.7  | 97.9   | 118.5 | 106.5  |
| GRIK2   | 118.8  | 109.2  | 111.9  | 107.9  | 107.4  | 99.2   | 117.4 | 112    |
| GRIK3   | 110    | 114.4  | 114.6  | 126.2  | 104.1  | 97.6   | 121.7 | 108.9  |
| GRIK4   | 111.7  | 115.9  | 129.3  | 122.1  | 108.5  | 97.9   | 116.4 | 110.8  |

|         |        |        |        |        |        |        |        |        |
|---------|--------|--------|--------|--------|--------|--------|--------|--------|
| GRIK5   | 120.3  | 118    | 121.1  | 123.1  | 114.4  | 108.3  | 123.4  | 119.2  |
| GRIN1   | 108.3  | 114    | 117.1  | 114.8  | 104.9  | 96.6   | 112.7  | 111.4  |
| GRIN1   | 113.4  | 117.2  | 112.9  | 119    | 107.8  | 102.4  | 115.1  | 118.1  |
| GRIN1   | 173.1  | 144.6  | 177.6  | 156.2  | 151.8  | 138.6  | 173.3  | 155.5  |
| GRIN2A  | 120.3  | 130.5  | 137.9  | 124.4  | 113.6  | 103.5  | 121.2  | 117.6  |
| GRIN2B  | 115.3  | 112.8  | 132.5  | 132.2  | 112    | 107.7  | 123.7  | 121.9  |
| GRIN2C  | 110.5  | 106.4  | 109.1  | 104.8  | 103.8  | 99.8   | 117.2  | 113.4  |
| GRIN2D  | 105.9  | 112    | 110.1  | 111.8  | 97.1   | 100.3  | 110    | 115.6  |
| GRIN3A  | 115.8  | 112.5  | 117.9  | 113.3  | 105.1  | 101    | 108.8  | 109.3  |
| GRIN3B  | 116    | 129.8  | 131.6  | 120.9  | 115.1  | 94.5   | 131    | 121.8  |
| GRINA   | 260.1  | 221.5  | 209.2  | 250.7  | 149.2  | 162.6  | 226.5  | 193.4  |
| GRINA   | 489    | 200.3  | 385    | 369    | 164.9  | 355    | 293.8  | 184.4  |
| GRINL1A | 111.5  | 111.7  | 112.8  | 117    | 105.8  | 97.4   | 113.3  | 106.1  |
| GRINL1A | 141.6  | 141.7  | 145    | 138.4  | 121.2  | 135.2  | 157.4  | 167.7  |
| GRINL1A | 113.9  | 117.4  | 126.5  | 119.7  | 119.8  | 108.4  | 118.8  | 125.3  |
| GRIP1   | 112.2  | 103.6  | 109.8  | 114.9  | 102.2  | 93.4   | 113.5  | 112.6  |
| GRIP2   | 118.6  | 120    | 122    | 109.8  | 105.2  | 98.6   | 114.7  | 116.6  |
| GRIPAP1 | 186.2  | 222.1  | 196.8  | 218.9  | 169    | 176    | 190.8  | 158.5  |
| GRIPAP1 | 135.4  | 140    | 144.3  | 133.2  | 142.2  | 116    | 141    | 143.4  |
| GRIPAP1 | 1842.1 | 1177.1 | 1589.8 | 1518.6 | 1541.3 | 1200.1 | 2077.3 | 1872.2 |
| GRK1    | 113.7  | 113.6  | 107.3  | 118.6  | 110.7  | 89.9   | 111.4  | 111.7  |
| GRK4    | 113.3  | 116.9  | 117.4  | 117.1  | 103.1  | 96.7   | 115.1  | 108.9  |
| GRK4    | 113.7  | 120.7  | 118.2  | 111    | 116.5  | 103.8  | 123.2  | 133.4  |
| GRK4    | 117.3  | 108.3  | 117.2  | 115.1  | 117.7  | 98     | 115.4  | 135.2  |
| GRK5    | 180.5  | 210.7  | 166.6  | 181.8  | 164.5  | 149.1  | 199.9  | 175.8  |
| GRK6    | 154.2  | 144.2  | 142.2  | 154.6  | 138.3  | 138.8  | 146.4  | 143.7  |
| GRK6    | 166.8  | 177.7  | 137.8  | 177.6  | 134.5  | 149.3  | 162    | 148.2  |
| GRK7    | 114.7  | 103.1  | 118.2  | 107.4  | 109.7  | 100.8  | 112.2  | 111.9  |
| GRLF1   | 121.5  | 129.6  | 116.3  | 119.8  | 108.9  | 99.7   | 125.6  | 122.6  |
| GRM1    | 115.6  | 125.4  | 115.9  | 119.6  | 109.4  | 101.4  | 117.3  | 109.9  |
| GRM2    | 131.9  | 123.8  | 162.6  | 128.8  | 115.4  | 121.2  | 137.2  | 137    |
| GRM3    | 114.8  | 108.5  | 117.7  | 124.3  | 109.1  | 95.9   | 113.5  | 116.4  |
| GRM4    | 121.8  | 117.5  | 114.9  | 126.8  | 106.9  | 99.8   | 118.5  | 111.1  |
| GRM5    | 111.1  | 114.7  | 119.2  | 128.9  | 106.6  | 105.3  | 126.7  | 130.6  |
| GRM6    | 111.2  | 115.4  | 120.8  | 116    | 109.5  | 95.4   | 114.9  | 114    |
| GRM7    | 102.8  | 111.9  | 106.1  | 116.8  | 112.2  | 101.6  | 118.2  | 111.2  |
| GRM7    | 113.4  | 118.1  | 118.2  | 111.9  | 104.5  | 97.4   | 117.3  | 116.2  |
| GRM7    | 113.2  | 115.2  | 108.1  | 123.4  | 102.6  | 99.5   | 114.5  | 114.6  |
| GRM8    | 118.2  | 117.3  | 115.1  | 123.4  | 112.4  | 101.2  | 123.1  | 119.8  |
| GRN     | 495.2  | 241.4  | 600.9  | 408.9  | 182    | 438.9  | 298.2  | 216    |
| GRN     | 394.6  | 248.6  | 545.3  | 328.5  | 185.3  | 304.6  | 301.5  | 211.1  |
| GRP     | 122.7  | 126.5  | 123.6  | 115.1  | 117.2  | 98.8   | 127.1  | 108.9  |
| GRP     | 117.7  | 118.1  | 111.7  | 116.6  | 113.8  | 96.6   | 113.2  | 123.1  |
| GRPEL1  | 238.4  | 255.7  | 258.6  | 252    | 229.5  | 206.8  | 256    | 294.5  |
| GRPEL2  | 645.4  | 859.2  | 662    | 798.1  | 664.7  | 569    | 747.9  | 843.6  |
| GRPR    | 119.8  | 110    | 122    | 122.8  | 112.8  | 107.7  | 118.6  | 115.6  |
| GRRP1   | 120.3  | 116.3  | 118.5  | 108.5  | 111    | 102.6  | 116.2  | 111    |
| GRSF1   | 428.1  | 488.4  | 452.2  | 511.2  | 385.4  | 316.1  | 477.9  | 560.6  |
| GRTF1   | 117.4  | 116.2  | 110.9  | 110.9  | 106.8  | 96     | 120.9  | 114    |
| GRWD1   | 288.1  | 337    | 275.3  | 316.7  | 251    | 217.2  | 273.4  | 321.6  |
| GSC     | 118.1  | 129.9  | 136.8  | 127.1  | 118.9  | 105.5  | 133.5  | 131.6  |

|         |        |        |        |        |        |        |        |        |
|---------|--------|--------|--------|--------|--------|--------|--------|--------|
| GSCL    | 115.5  | 111.7  | 115.7  | 111.6  | 110.7  | 100.7  | 117.4  | 111.3  |
| GSDM1   | 133.9  | 146.2  | 134.5  | 137    | 122.7  | 106.1  | 124.9  | 128.5  |
| GSDMDC1 | 596.7  | 616.1  | 522.3  | 514.3  | 390.5  | 330.5  | 447.7  | 378    |
| GSDML   | 245.8  | 304    | 267.6  | 229.3  | 281.5  | 200.3  | 246    | 223.2  |
| GSDML   | 161.5  | 183.7  | 156.7  | 170.3  | 191.2  | 127.7  | 186.4  | 165.2  |
| GSDML   | 340.8  | 411.3  | 336.9  | 352.1  | 408.6  | 218.7  | 314.8  | 339.6  |
| GSG1    | 117.7  | 111.5  | 116.3  | 131.7  | 104.7  | 94.9   | 124.2  | 114.1  |
| GSG1    | 111.5  | 110.5  | 115.7  | 109.5  | 110.9  | 97.3   | 114    | 108.6  |
| GSG1    | 118.1  | 120.5  | 117.6  | 127    | 106.2  | 99.8   | 126.3  | 122.4  |
| GSG2    | 113.6  | 123    | 121.1  | 129    | 113.9  | 96.8   | 121.9  | 114.8  |
| GSH1    | 104.6  | 111.1  | 122.9  | 118    | 112.4  | 89.4   | 112    | 111    |
| GSH2    | 113.9  | 112.1  | 110.6  | 119.7  | 110.2  | 98.7   | 118.3  | 114.3  |
| GSK3A   | 116.2  | 132.2  | 128.8  | 133.1  | 131.1  | 123.1  | 128.7  | 135    |
| GSK3B   | 291.7  | 308    | 270.3  | 336.2  | 226.9  | 200.5  | 323.5  | 292.5  |
| GSN     | 143.2  | 129.7  | 184.7  | 150    | 109.5  | 132    | 134.9  | 112.1  |
| GSN     | 114.6  | 124.7  | 105.6  | 115.6  | 113.7  | 94.4   | 115.4  | 111.8  |
| GSPT1   | 1464.1 | 1366   | 1197.9 | 1656   | 1313.7 | 1001.9 | 1836.1 | 1852.7 |
| GSPT2   | 273.7  | 325.9  | 288.1  | 289.7  | 237.3  | 224    | 242    | 214.3  |
| GSR     | 117.5  | 122.9  | 130.3  | 127.3  | 128.7  | 116.5  | 127.8  | 124.4  |
| GSS     | 248.9  | 207.4  | 242.7  | 254.6  | 197.3  | 228.1  | 253.3  | 238.7  |
| GSTA1   | 114.7  | 111.7  | 115.5  | 113.9  | 107.8  | 93.7   | 110.6  | 111.7  |
| GSTA2   | 124    | 113.1  | 117.3  | 129.3  | 120    | 100    | 121.6  | 131.3  |
| GSTA3   | 119.5  | 112    | 123.4  | 115.7  | 106.8  | 96     | 122.3  | 123.8  |
| GSTA4   | 105.3  | 118.8  | 117.6  | 119.6  | 109.3  | 101.1  | 123.3  | 113.5  |
| GSTA5   | 125.9  | 120.1  | 118.5  | 122.5  | 109.3  | 99.7   | 124.6  | 111.6  |
| GSTCD   | 121.8  | 118.8  | 125.2  | 118    | 105.5  | 93.8   | 114.7  | 110.4  |
| GSTK1   | 1897.2 | 2127.8 | 2227.8 | 1873.4 | 1083.6 | 1133.8 | 763.5  | 904.5  |
| GSTM1   | 148    | 139.5  | 166.3  | 161.1  | 124.4  | 158    | 148.8  | 125    |
| GSTM1   | 881.3  | 586.8  | 1341.5 | 789.8  | 323.8  | 815    | 439.2  | 272.2  |
| GSTM1L  | 113.1  | 112.2  | 112.8  | 121.2  | 103.9  | 98.3   | 113.6  | 112    |
| GSTM2   | 861.2  | 462.6  | 1297.2 | 783.8  | 296.2  | 862.2  | 433.1  | 242.8  |
| GSTM3   | 124.9  | 157.4  | 124.3  | 123.7  | 140.8  | 100.7  | 134.7  | 198    |
| GSTM4   | 114.7  | 126    | 129.1  | 125.5  | 112.1  | 104.1  | 119    | 116.1  |
| GSTM4   | 131.2  | 145.6  | 124.9  | 132.5  | 133.7  | 120.8  | 119    | 133.4  |
| GSTM5   | 104.3  | 123.5  | 114.5  | 124    | 110.5  | 103.7  | 119.7  | 131.6  |
| GSTO1   | 787.2  | 848.8  | 1416.2 | 829.2  | 619.6  | 977    | 913.2  | 692.1  |
| GSTO2   | 119.2  | 124.7  | 126.8  | 122.7  | 116.1  | 110.3  | 132.5  | 124    |
| GSTP1   | 1206.9 | 1439.9 | 1892.9 | 1948.9 | 1321.9 | 1715.8 | 1920.7 | 1951.4 |
| GSTT1   | 226.3  | 182.6  | 210    | 208.9  | 140.8  | 154.8  | 145.2  | 124.9  |
| GSTT2   | 107.9  | 127    | 124.8  | 122.4  | 107.2  | 99.4   | 125    | 119.1  |
| GSTT2   | 121    | 118.8  | 120.1  | 116.7  | 107.7  | 98.2   | 107.4  | 105.6  |
| GSTZ1   | 115.4  | 126.3  | 134.5  | 126.3  | 122.6  | 102.7  | 128.2  | 119    |
| GSTZ1   | 139.9  | 121.9  | 178.8  | 144.5  | 119.7  | 115.4  | 136.6  | 132.2  |
| GSTZ1   | 122.2  | 111.7  | 123    | 124.5  | 109.6  | 101.9  | 116.2  | 125.2  |
| GTDC1   | 117.7  | 127.5  | 134.3  | 132.2  | 114.1  | 112.5  | 128.3  | 121.5  |
| GTDC1   | 143.5  | 125.7  | 145.1  | 147.9  | 117.5  | 114.5  | 131.4  | 130.4  |
| GTDC1   | 118.7  | 128.9  | 116.1  | 129.4  | 112.3  | 100.6  | 116    | 121.8  |
| GTF2A1  | 112.2  | 123.4  | 129.1  | 120.8  | 107.8  | 105.1  | 126.2  | 120.1  |
| GTF2A1  | 119.5  | 119.9  | 109.1  | 129.4  | 106.1  | 98.5   | 118.8  | 122.6  |
| GTF2A1  | 120.6  | 107    | 128.1  | 130    | 125.8  | 109.7  | 124    | 123.3  |
| GTF2A2  | 358.2  | 343.3  | 526.6  | 517.2  | 445.5  | 399    | 430    | 452.5  |

|           |       |        |       |        |        |       |        |        |
|-----------|-------|--------|-------|--------|--------|-------|--------|--------|
| GTF2B     | 393.9 | 398.2  | 412.7 | 422.2  | 347.5  | 317.7 | 529.2  | 511.8  |
| GTF2E1    | 229.2 | 275    | 286.1 | 297    | 227.6  | 248.2 | 275    | 251    |
| GTF2E2    | 713.4 | 687.1  | 841.9 | 799.9  | 575.8  | 671.4 | 801.3  | 743.8  |
| GTF2F1    | 362.3 | 381.7  | 410   | 417.4  | 332    | 340.3 | 393.2  | 386.5  |
| GTF2F2    | 624.2 | 500.1  | 502.6 | 669.6  | 314    | 405.1 | 460.6  | 357.5  |
| GTF2H1    | 140.2 | 143.2  | 153.4 | 158.2  | 122.6  | 120   | 171.1  | 160.6  |
| GTF2H2    | 116.4 | 114.4  | 119.9 | 125.5  | 110.5  | 100.9 | 123.4  | 112.9  |
| GTF2H3    | 145.4 | 143.9  | 202.9 | 161.4  | 145    | 135.2 | 149.2  | 161.7  |
| GTF2H4    | 285.5 | 287    | 274.6 | 296.5  | 234.4  | 180   | 230.5  | 211.4  |
| GTF2H5    | 324.6 | 443.2  | 594.8 | 335.1  | 389    | 366.9 | 320.2  | 282.7  |
| GTF2I     | 143.4 | 160    | 148.6 | 147.6  | 143.5  | 117.5 | 144.1  | 144.8  |
| GTF2I     | 124.2 | 125.8  | 127.6 | 120.6  | 123.6  | 106.3 | 127    | 129.5  |
| GTF2IRD1  | 113   | 121.6  | 118.6 | 131.1  | 116.9  | 100   | 128    | 126.9  |
| GTF2IRD1  | 124.9 | 117    | 117.1 | 131.1  | 113.5  | 105.3 | 120.2  | 122.5  |
| GTF2IRD2B | 116.9 | 111.1  | 118.4 | 119.5  | 113.2  | 103.5 | 118.6  | 111.5  |
| GTF2IRD2P | 109.4 | 114.7  | 118.7 | 119.5  | 112.7  | 99.1  | 120.2  | 121.8  |
| GTF3C1    | 159.2 | 151.7  | 129.5 | 169.2  | 141.7  | 126   | 166    | 151.1  |
| GTF3C2    | 466.2 | 546    | 624.1 | 582.8  | 413.6  | 450.6 | 438.7  | 402.3  |
| GTF3C2    | 175.4 | 152.4  | 143.2 | 143    | 128.3  | 127.1 | 149.5  | 132.4  |
| GTF3C3    | 205.8 | 250.2  | 243.5 | 207    | 212.5  | 214.8 | 229    | 298.5  |
| GTF3C4    | 115.4 | 116.8  | 128.3 | 123.3  | 116.8  | 105.7 | 109.2  | 116.1  |
| GTF3C5    | 248.9 | 306.8  | 291.8 | 322.8  | 218.6  | 222.8 | 266.8  | 244.6  |
| GTPBP1    | 123.7 | 124    | 122.8 | 133.1  | 107    | 107.5 | 125    | 125.1  |
| GTPBP10   | 119.8 | 131    | 126.7 | 111.6  | 123.5  | 107.8 | 114.8  | 107.6  |
| GTPBP2    | 121.3 | 133.5  | 122.7 | 128.3  | 120.8  | 109.9 | 128.2  | 126.3  |
| GTPBP3    | 133.9 | 142.3  | 154.1 | 144.8  | 123.7  | 111.7 | 129.2  | 134    |
| GTPBP3    | 106.7 | 114.2  | 121   | 124.5  | 115.2  | 93.6  | 119.5  | 112.4  |
| GTPBP3    | 539.4 | 615.6  | 635.4 | 537.6  | 464.7  | 391.8 | 429.5  | 320.3  |
| GTPBP4    | 583.1 | 539.6  | 466.6 | 780.6  | 423.6  | 341.4 | 610.6  | 628.2  |
| GTPBP5    | 119.3 | 117.3  | 124.5 | 127.4  | 118.3  | 96.4  | 127.9  | 120.4  |
| GTPBP6    | 938.4 | 1380.3 | 983.8 | 1228.4 | 1230.2 | 625   | 1216.3 | 1337.5 |
| GTPBP8    | 336.3 | 329.1  | 377.1 | 359.9  | 336.8  | 225.9 | 267.5  | 337.4  |
| GTPBP8    | 181   | 199.2  | 182.5 | 194    | 189.7  | 143.7 | 168.9  | 221.5  |
| GTPBP8    | 174.4 | 169.9  | 175.1 | 174.9  | 146.4  | 143.1 | 155.6  | 188.9  |
| GTPBP9    | 111   | 113.9  | 112   | 117.7  | 107.6  | 94.8  | 113.3  | 110.8  |
| GTSE1     | 125.8 | 124    | 128.7 | 115.7  | 106    | 116.2 | 128.6  | 124.8  |
| GUCA1A    | 117.3 | 125.1  | 136.2 | 131.4  | 126.8  | 109.4 | 123.7  | 125.5  |
| GUCA1B    | 148.5 | 136.6  | 162.8 | 150.5  | 135.4  | 124.8 | 139.7  | 145.7  |
| GUCA1C    | 140.6 | 135.4  | 133   | 135    | 120.6  | 105.8 | 132.7  | 124.1  |
| GUCA2A    | 128.2 | 123.9  | 119.7 | 125.2  | 118.3  | 94.4  | 122.9  | 121.7  |
| GUCA2B    | 115.9 | 113.6  | 121.4 | 121.8  | 118.9  | 107.7 | 111.1  | 109.4  |
| GUCY1A2   | 116   | 116.9  | 122.7 | 124.7  | 112.6  | 100.5 | 117.9  | 120.4  |
| GUCY1A3   | 108.7 | 109.7  | 116.3 | 115.5  | 103.5  | 96.6  | 107.1  | 106.5  |
| GUCY1B3   | 120.2 | 120.4  | 124.5 | 124.9  | 123.9  | 102.3 | 117.3  | 113.4  |
| GUCY2C    | 106.9 | 103.9  | 117.2 | 104    | 110.1  | 102.8 | 113.5  | 114.5  |
| GUCY2D    | 118.9 | 116.9  | 122.8 | 120.1  | 109.3  | 96.8  | 119.5  | 125.3  |
| GUCY2F    | 114.1 | 116.3  | 113.6 | 128.9  | 112.4  | 106.2 | 118.1  | 111.5  |
| GUF1      | 131.5 | 135.2  | 135.9 | 136.6  | 128    | 119.9 | 130.2  | 130    |
| GUK1      | 516.8 | 661.3  | 559.5 | 594.5  | 359.2  | 545.1 | 403.2  | 410.9  |
| GULP1     | 112.2 | 111.4  | 119.2 | 112    | 111.4  | 98.3  | 123.3  | 124.1  |
| GUP1      | 113.9 | 126    | 115.3 | 117.2  | 113.2  | 103.1 | 121.7  | 118.8  |

|         |        |        |         |        |        |        |        |        |
|---------|--------|--------|---------|--------|--------|--------|--------|--------|
| GUSB    | 399.7  | 383.7  | 402.7   | 404.3  | 316.1  | 292.3  | 316.3  | 281.1  |
| GUSBL2  | 137.7  | 160.7  | 149.3   | 142.8  | 155.1  | 113.4  | 141.4  | 145.2  |
| GYG1    | 350.5  | 438.6  | 536     | 416.9  | 368.8  | 387.8  | 395.7  | 448.3  |
| GYG2    | 109.6  | 117.4  | 104.8   | 112.7  | 103.5  | 97.4   | 113.9  | 112.8  |
| GYG2    | 112.2  | 121.3  | 114.3   | 110.7  | 102.4  | 99.6   | 122.5  | 110.3  |
| GYG2    | 113.5  | 111.9  | 107.4   | 110.5  | 109.1  | 95.7   | 115.7  | 112.8  |
| GYLTL1B | 107.4  | 109.6  | 112.9   | 111.1  | 106.8  | 95.6   | 116.6  | 115.9  |
| GYPA    | 111.4  | 108.4  | 114.1   | 115    | 105.7  | 96.1   | 113.6  | 111.3  |
| GYPB    | 107.9  | 114.7  | 112.8   | 118.1  | 109.8  | 97.8   | 115.8  | 116    |
| GYPE    | 907.1  | 997.4  | 591.4   | 833.4  | 668.6  | 582    | 850.1  | 686.9  |
| GYPE    | 942.3  | 835.4  | 729.5   | 840.9  | 849.1  | 530.4  | 785.1  | 790.5  |
| GYPE    | 111.3  | 111.7  | 124.8   | 119.9  | 112.6  | 98.8   | 122    | 116.6  |
| GYPE    | 112.4  | 124.5  | 112.8   | 124.9  | 113.3  | 105.9  | 118.8  | 125.3  |
| GYPE    | 110.8  | 110    | 122.7   | 116.1  | 98.7   | 97.4   | 110.3  | 99.5   |
| GYS1    | 143.4  | 137.4  | 162.4   | 152.9  | 127.9  | 121.9  | 133.5  | 129.1  |
| GYS2    | 116.6  | 117.4  | 114.7   | 114.4  | 106.6  | 91.9   | 121    | 122    |
| GZMA    | 744.7  | 818    | 751.3   | 921.8  | 693.1  | 516.5  | 649.7  | 658.9  |
| GZMB    | 1113   | 887.3  | 682.6   | 933.9  | 575.2  | 516.6  | 752.5  | 612.9  |
| GZMH    | 505.3  | 422.5  | 645.5   | 470.4  | 297.4  | 442.8  | 375.1  | 264.9  |
| GZMK    | 1177.8 | 1530.4 | 1200.1  | 1129.3 | 1110.7 | 869.1  | 1091.1 | 1182.9 |
| GZMM    | 297.1  | 263.7  | 248.3   | 295    | 176.4  | 182    | 189.9  | 186.4  |
| H19     | 111.5  | 104    | 109.4   | 112.6  | 102.5  | 97.9   | 118.3  | 112.2  |
| H1F0    | 221.2  | 139.9  | 231.6   | 168.1  | 118.3  | 157.9  | 132.3  | 121.3  |
| H1FOO   | 117    | 123.4  | 110.8   | 119.6  | 106    | 94.4   | 113.8  | 116.3  |
| H1FX    | 162.3  | 176.1  | 201.8   | 152.1  | 131.7  | 163.1  | 138.8  | 133.3  |
| H1T2    | 117.2  | 109.5  | 118.3   | 114.2  | 105.2  | 96.4   | 110.1  | 114.9  |
| H2AFB1  | 121.4  | 125.3  | 120.9   | 125.7  | 115    | 100.7  | 124.1  | 115.8  |
| H2AFB2  | 121    | 116.1  | 123.2   | 117.8  | 116.9  | 109    | 116.1  | 126.6  |
| H2AFB3  | 109    | 115.9  | 105.2   | 114.9  | 102.1  | 94.8   | 111.7  | 118.1  |
| H2AFJ   | 112.4  | 112.5  | 119.4   | 113.5  | 120.5  | 103.5  | 125.9  | 121.3  |
| H2AFJ   | 148.7  | 142.3  | 184.7   | 150.8  | 131.1  | 164.7  | 146.4  | 161    |
| H2AFV   | 130.2  | 144.4  | 135.2   | 139.2  | 136.6  | 106.8  | 151.6  | 148.1  |
| H2AFX   | 122.3  | 120.3  | 137.6   | 130.7  | 125.9  | 110.6  | 139.7  | 129.2  |
| H2AFY   | 107.9  | 104.9  | 108.8   | 110.8  | 99     | 92.3   | 122.7  | 119.1  |
| H2AFY   | 228.6  | 187.7  | 569.3   | 199.7  | 166.4  | 214.2  | 144.5  | 132.2  |
| H2AFY   | 2697.8 | 2105.4 | 4482.4  | 3254.2 | 2191   | 2450.4 | 3238.6 | 2594.7 |
| H2AFY2  | 195.8  | 231.7  | 331.6   | 203.4  | 169.6  | 259.6  | 136.3  | 150.6  |
| H2AFZ   | 3777.6 | 3928.7 | 2917.5  | 3606.8 | 2870.6 | 2646.8 | 3852.6 | 4030.7 |
| H2BFS   | 265.7  | 262.2  | 203.1   | 279.4  | 237.3  | 193.6  | 240.9  | 246.1  |
| H2BFWT  | 102.3  | 114    | 112.7   | 111.8  | 107.7  | 108.2  | 118.8  | 105.2  |
| H2BFXP  | 113.5  | 116.4  | 118.5   | 110.5  | 106.8  | 99.5   | 121.1  | 114.4  |
| H3F3A   | 7536   | 8844.9 | 11675.1 | 8748.1 | 8067.9 | 9761.4 | 8755.6 | 8285.7 |
| H3F3B   | 462    | 492.9  | 507.7   | 500.2  | 366.9  | 464.1  | 816.3  | 1221.8 |
| H6PD    | 110.4  | 115.2  | 120.1   | 117.9  | 103.2  | 95.5   | 112.1  | 123.6  |
| HAAO    | 118.9  | 113.2  | 110.9   | 123.1  | 108.4  | 100.4  | 129.2  | 120.7  |
| HABP2   | 105    | 110.3  | 116.8   | 113.9  | 100    | 106    | 115.5  | 115.5  |
| HABP4   | 174.6  | 219.6  | 213.5   | 177.8  | 164.8  | 174.5  | 161.9  | 203.2  |
| HACE1   | 127.8  | 133.4  | 148.4   | 136.6  | 117.5  | 119.4  | 127.6  | 121.3  |
| HADH2   | 155.2  | 157    | 168.5   | 159.6  | 135.7  | 152.9  | 140.3  | 147.5  |
| HADH2   | 176.1  | 174.3  | 199.3   | 181.1  | 154.9  | 150.4  | 174.5  | 200.6  |
| HADHA   | 195    | 231.9  | 222     | 212.2  | 170.2  | 164.4  | 250    | 206.4  |



|        |        |        |        |        |        |        |        |        |
|--------|--------|--------|--------|--------|--------|--------|--------|--------|
| HADHB  | 167.2  | 138    | 152.2  | 158.7  | 139.4  | 135.3  | 141.1  | 152.8  |
| HADHSC | 369.7  | 365.5  | 442.8  | 378.3  | 358.7  | 304.2  | 289.2  | 296.7  |
| HAGH   | 184.6  | 144.9  | 148.5  | 144.9  | 129.8  | 135.2  | 129.6  | 130.4  |
| HAGH   | 763.3  | 603.4  | 750.2  | 807.1  | 414.7  | 482.7  | 445.1  | 321.5  |
| HAGHL  | 149.2  | 188    | 165.7  | 155.7  | 173.9  | 123.2  | 148.6  | 145.2  |
| HAGHL  | 127.8  | 120.4  | 129.8  | 123.1  | 112.4  | 107.6  | 119.9  | 119    |
| HAGHL  | 167.3  | 204.2  | 173.6  | 168.3  | 163.8  | 141.6  | 155.9  | 150.9  |
| HAK    | 129.5  | 114.3  | 130.3  | 126.5  | 110.2  | 108.2  | 121.7  | 114    |
| HAL    | 124.2  | 117.5  | 123.4  | 125    | 111.5  | 99.4   | 127.3  | 113.3  |
| HAMP   | 125.8  | 134.9  | 118.2  | 164.7  | 134.5  | 122.8  | 159    | 132.9  |
| HAND1  | 115.1  | 107.5  | 122.4  | 119.4  | 110    | 102    | 125.5  | 116.7  |
| HAND2  | 117.6  | 113.7  | 114.6  | 123.9  | 112    | 101.1  | 133.6  | 123.3  |
| HAO1   | 107.8  | 114.6  | 122.8  | 124.7  | 106    | 101    | 119.2  | 125.3  |
| HAO2   | 118.7  | 123.4  | 124.7  | 125.4  | 125.6  | 111.8  | 121.7  | 115.7  |
| HAO2   | 110.1  | 111.9  | 120.9  | 111    | 110.6  | 98.7   | 114.1  | 124.6  |
| HAP1   | 113.9  | 108.3  | 113.9  | 126.6  | 104.9  | 99.1   | 118    | 114.4  |
| HAP1   | 116.1  | 107.6  | 111.9  | 117.7  | 114.2  | 108.8  | 112.5  | 106.6  |
| HAP1   | 112.3  | 121.5  | 114.2  | 125.1  | 113.6  | 96.1   | 132.4  | 113    |
| HAPLN1 | 104    | 103.8  | 108.7  | 121.5  | 99.2   | 98.7   | 121.8  | 115.8  |
| HAPLN2 | 126.5  | 126.4  | 131.1  | 123.3  | 113.5  | 104.5  | 121.6  | 123.6  |
| HAPLN3 | 179.8  | 186.4  | 204    | 165.7  | 134.4  | 167.2  | 145.1  | 157.3  |
| HAPLN4 | 123.7  | 115.6  | 118.5  | 114    | 123.9  | 105.4  | 117.5  | 118.4  |
| HARS   | 479.6  | 672.8  | 446.9  | 645    | 487.9  | 362.6  | 685.6  | 614.9  |
| HARS2  | 173    | 172.6  | 199    | 176.2  | 153.2  | 143.6  | 164.5  | 139.1  |
| HARSL  | 644.1  | 901.3  | 782.8  | 844.7  | 709.9  | 757.4  | 646.1  | 721.5  |
| HAS1   | 119.8  | 120.8  | 122.9  | 118.3  | 107.7  | 97.6   | 122.4  | 114.6  |
| HAS2   | 107.8  | 108    | 115.2  | 118.5  | 110.8  | 96.8   | 113.2  | 105.2  |
| HAS2   | 102.6  | 113.8  | 110    | 107.7  | 97.3   | 98.9   | 109.5  | 107.9  |
| HAS3   | 114.2  | 113.1  | 115.2  | 119.8  | 97.9   | 98.4   | 117.5  | 118.7  |
| HAS3   | 114    | 113.5  | 117.4  | 123.1  | 110.9  | 101.3  | 136.1  | 118.4  |
| HAT1   | 207.6  | 190.9  | 235.4  | 238.6  | 150.8  | 210.6  | 252.4  | 186.1  |
| HAT1   | 142.3  | 135.2  | 145.8  | 136    | 122    | 124.6  | 128.7  | 147.4  |
| HAVCR1 | 116.1  | 118.8  | 109.9  | 109.1  | 110.3  | 96     | 114.4  | 112.2  |
| HAVCR2 | 439.4  | 314.1  | 702.5  | 589.5  | 330.2  | 514.1  | 932.9  | 537.3  |
| HAX1   | 306.3  | 299.2  | 286.9  | 351.2  | 283.2  | 260.2  | 237    | 273    |
| HAX1   | 154.5  | 138.4  | 165    | 149    | 123.9  | 135.3  | 122.3  | 137.2  |
| HAX1   | 145.1  | 174.7  | 174.1  | 155.6  | 132.5  | 129    | 147.6  | 148.5  |
| HB-1   | 112.1  | 105.2  | 109.8  | 113.4  | 106.5  | 95.7   | 113.9  | 104.2  |
| HBA2   | 784.1  | 289.4  | 3584.2 | 1278.4 | 234.6  | 2562.6 | 1055.4 | 270.4  |
| HBB    | 1838.7 | 536.9  | 8474.4 | 3134.4 | 539.1  | 6996.4 | 2676   | 650.6  |
| HBD    | 129.4  | 121.3  | 162.9  | 150.3  | 124.8  | 149.2  | 143.7  | 137.5  |
| HBE1   | 114.7  | 116.3  | 116.4  | 106.6  | 106    | 100.1  | 122.4  | 109.3  |
| HBEGF  | 137.4  | 133.1  | 140.2  | 127.5  | 119    | 131.8  | 140.4  | 153.9  |
| HBG1   | 139.2  | 117.1  | 221.3  | 153    | 112.9  | 173.4  | 134.9  | 121.7  |
| HBG2   | 133.4  | 121.6  | 274.3  | 167.7  | 110.1  | 235.4  | 142.8  | 121.2  |
| HBM    | 114.7  | 116.1  | 125.3  | 118.6  | 108    | 100.7  | 116.5  | 108.6  |
| HBP1   | 429    | 431.7  | 377.5  | 491    | 404.3  | 316.8  | 515.6  | 679.5  |
| HBQ1   | 121    | 119.1  | 128.7  | 118.9  | 121.1  | 112    | 126.8  | 130.1  |
| HBS1L  | 116.1  | 109.9  | 117.7  | 122.2  | 104.4  | 96.4   | 114.8  | 119.4  |
| HBXAP  | 129.8  | 118    | 128.2  | 127    | 120    | 106.8  | 136.1  | 125    |
| HBXIP  | 1455.8 | 1677.1 | 1714.8 | 1411.8 | 1393.5 | 1614.6 | 1342.6 | 1504.1 |

|          |        |        |        |        |        |        |        |        |
|----------|--------|--------|--------|--------|--------|--------|--------|--------|
| HBZ      | 112.9  | 101.9  | 111.6  | 116.2  | 103.7  | 94.1   | 103.4  | 108.3  |
| HCA112   | 150.5  | 104.4  | 196.4  | 138.5  | 107.2  | 112.9  | 129.3  | 120.1  |
| HCAP-D3  | 152.1  | 142.6  | 139.1  | 146.4  | 134.1  | 116.3  | 133.4  | 144.8  |
| HCAP-G   | 116.4  | 113.3  | 137.7  | 114.4  | 115.4  | 106.7  | 131.3  | 115.3  |
| HCAP-H2  | 141.1  | 166.5  | 139.4  | 149.9  | 134    | 128.4  | 146.8  | 151.7  |
| HCAP-H2  | 117.7  | 116.4  | 118.8  | 116.9  | 107.8  | 114.3  | 117.5  | 120.1  |
| HCAP-H2  | 122.4  | 123.5  | 137    | 123.3  | 114.4  | 105.3  | 123.8  | 126.4  |
| HCCA2    | 233.1  | 248    | 180.2  | 246.9  | 172.4  | 181.9  | 291    | 312.6  |
| HCCS     | 143.8  | 133.8  | 144.2  | 151.2  | 122.2  | 116.9  | 142.1  | 159    |
| HCFC1    | 685    | 766    | 529.7  | 805.9  | 647.1  | 541.2  | 1145.1 | 1443.2 |
| HCFC1R1  | 141.6  | 150.9  | 136.7  | 164.2  | 132.8  | 105.9  | 143.1  | 135.7  |
| HCFC1R1  | 391.8  | 326.6  | 315.2  | 370.1  | 248.7  | 240.3  | 325.5  | 264.3  |
| HCFC2    | 167.4  | 155.2  | 176.3  | 178.6  | 158.7  | 130.8  | 157.5  | 163.9  |
| HCG27    | 117.7  | 119.7  | 147.6  | 127.6  | 118.7  | 112.8  | 113.1  | 122.9  |
| HCG2P7   | 1606.9 | 1441.3 | 1246.5 | 1175.9 | 1530.6 | 1647   | 1843.4 | 1265.5 |
| HCG3     | 123.6  | 122.9  | 132    | 118.1  | 103    | 105    | 122.3  | 111.8  |
| HCG4     | 119.2  | 103.6  | 109.3  | 108.1  | 100    | 98.8   | 116.2  | 108.9  |
| HCG9     | 118.1  | 118.8  | 113.2  | 120.5  | 104.6  | 103.9  | 124.2  | 123.1  |
| HCK      | 503.4  | 207.7  | 506.7  | 322.9  | 145.6  | 428.6  | 208.4  | 146.5  |
| HCLS1    | 1570.4 | 2674.3 | 2679.4 | 2552.1 | 1779.1 | 2560.9 | 2080.2 | 1950.5 |
| HCN1     | 112.3  | 112.7  | 111.1  | 116.4  | 106.7  | 111    | 113.3  | 111.8  |
| HCN2     | 110    | 115.3  | 113.3  | 111.7  | 105.5  | 97.8   | 113.9  | 114    |
| HCN3     | 140.4  | 139.3  | 137.2  | 135    | 124.3  | 114.1  | 144.2  | 117.7  |
| HCN4     | 109.3  | 124.7  | 116.8  | 127.5  | 116    | 103    | 129.2  | 124.4  |
| HCP1     | 114.2  | 121.5  | 124.4  | 110.6  | 103.9  | 98.8   | 111    | 113.5  |
| HCP5     | 3092.1 | 3820.9 | 3256   | 2688.1 | 2095.6 | 1799.9 | 1741.8 | 1467.3 |
| HCRT     | 124.7  | 125.5  | 122.3  | 130    | 125.6  | 104.9  | 125.9  | 132.3  |
| HCRTR1   | 114.9  | 124.3  | 109.3  | 121.1  | 107.6  | 112.7  | 122.7  | 113.8  |
| HCRTR2   | 121.7  | 125.8  | 129.7  | 133.7  | 111.6  | 98.7   | 134.9  | 129.3  |
| HCST     | 1934.4 | 2575.5 | 3501.2 | 1840.5 | 1429.6 | 2166.2 | 1202.8 | 1152.7 |
| HCST     | 258.1  | 281.2  | 296.6  | 254.5  | 206.7  | 209.8  | 189.2  | 209.8  |
| HCTSL-S  | 106.4  | 104    | 120.8  | 121    | 110.8  | 101.7  | 114.4  | 122.9  |
| HDAC1    | 1469   | 1986.7 | 1621.5 | 2056.4 | 1626.2 | 1292.9 | 1622   | 1970.8 |
| HDAC10   | 129.2  | 119.2  | 133.3  | 126.7  | 112.8  | 102.7  | 119.8  | 123.1  |
| HDAC11   | 118    | 120.5  | 140.5  | 133.6  | 115    | 107.7  | 125.8  | 130    |
| HDAC2    | 410.6  | 407.4  | 317.7  | 449.2  | 478.8  | 383.1  | 462.2  | 456.6  |
| HDAC3    | 263    | 355.3  | 395.4  | 270.1  | 287.5  | 297.8  | 336.6  | 371.1  |
| HDAC4    | 218.9  | 238.2  | 160.7  | 194.9  | 173.6  | 137.6  | 198.6  | 191.5  |
| HDAC5    | 123    | 123.5  | 136.1  | 123.8  | 108.4  | 115.8  | 122.6  | 128.2  |
| HDAC5    | 127.1  | 132.1  | 136.6  | 135.1  | 121.3  | 110.9  | 124.6  | 143.1  |
| HDAC6    | 241.8  | 216.4  | 234.2  | 250.5  | 180.8  | 189.3  | 188    | 235    |
| HDAC7A   | 119.1  | 123.5  | 121.4  | 125.9  | 110.1  | 104    | 119.5  | 119.8  |
| HDAC7A   | 131.5  | 129.1  | 136.4  | 132.2  | 119.3  | 117.6  | 140.2  | 123.6  |
| HDAC8    | 126.7  | 122.6  | 128.3  | 121.4  | 113.2  | 108.4  | 119.1  | 118.6  |
| HDAC9    | 133.1  | 138.9  | 131.7  | 123.5  | 116.2  | 104.4  | 143.5  | 123.6  |
| HDAC9    | 114.8  | 105.4  | 114.7  | 113.1  | 108.4  | 94.7   | 114.2  | 118.1  |
| HDAC9    | 116.5  | 110.5  | 115    | 110.5  | 111    | 102.6  | 119.2  | 119.2  |
| HDAC9    | 105    | 117.2  | 114.8  | 119.3  | 105.3  | 96.9   | 122.3  | 110.9  |
| HDAC9    | 113.9  | 111.7  | 119.4  | 124.4  | 109.5  | 99     | 119.3  | 117.3  |
| HDC      | 122.3  | 133.5  | 173.6  | 136.8  | 122.9  | 136.6  | 115.4  | 113.4  |
| HDCMA18f | 245.6  | 287.4  | 282.6  | 284.9  | 319    | 261.7  | 275.7  | 277.1  |

|         |       |       |       |       |       |       |        |       |
|---------|-------|-------|-------|-------|-------|-------|--------|-------|
| HDDC2   | 674.7 | 705.5 | 662.9 | 735.5 | 572.2 | 657.8 | 634.2  | 716.3 |
| HDDC3   | 213.2 | 212.1 | 238.1 | 219   | 172.5 | 177.1 | 159.4  | 160.6 |
| HDGF    | 355.6 | 396.2 | 338.5 | 390.9 | 270.6 | 304.5 | 361.1  | 357.8 |
| HDGF2   | 177   | 179.1 | 189   | 175.3 | 154.4 | 152.1 | 180.9  | 184.3 |
| HDGF2   | 175.5 | 165.9 | 149.7 | 189.8 | 161.1 | 156.4 | 162.2  | 158.1 |
| HDGFL1  | 105.3 | 112.9 | 112.5 | 128.1 | 110.7 | 93.8  | 119.9  | 117.1 |
| HDGFRP3 | 121.1 | 124.1 | 122.4 | 127.9 | 119   | 112.4 | 129.1  | 118.2 |
| HDHD1A  | 155.8 | 163.2 | 173.1 | 156.7 | 139.7 | 124.6 | 143.9  | 141.6 |
| HDHD2   | 148.6 | 163.7 | 184.4 | 141.8 | 134.3 | 112.3 | 135.2  | 142.3 |
| HDHD3   | 219   | 216.1 | 191.2 | 192.6 | 171.6 | 134.3 | 176.3  | 193.1 |
| HDLBP   | 118.3 | 126.8 | 127.4 | 141.1 | 114.7 | 106.8 | 121.4  | 142.3 |
| HDLBP   | 118.9 | 113.2 | 117.4 | 121.5 | 105.7 | 90.5  | 112    | 118.6 |
| HDLBP   | 114.4 | 131.6 | 131.3 | 127.2 | 121.7 | 107.6 | 124.7  | 129.7 |
| HEAB    | 247.9 | 287.1 | 242.3 | 281.7 | 221.8 | 191.8 | 254.7  | 313.4 |
| HEATR1  | 330.6 | 476.8 | 363.8 | 430.6 | 338.4 | 162.8 | 292.7  | 305.3 |
| HEATR5B | 327   | 363.5 | 300.8 | 392   | 373   | 253.7 | 322.5  | 334   |
| HEBP1   | 187.4 | 202.1 | 308.4 | 346.2 | 227.6 | 354.6 | 436.6  | 241.9 |
| HEBP2   | 284.9 | 393.8 | 323.6 | 349.3 | 291.5 | 228.5 | 281.9  | 263.7 |
| HECA    | 595.2 | 732.9 | 437.4 | 590.2 | 609.9 | 417.1 | 697.8  | 961.1 |
| HECTD1  | 870.4 | 921.4 | 780.3 | 960   | 978.6 | 688.4 | 1027.5 | 892.9 |
| HECTD2  | 114.6 | 120.1 | 122.2 | 124.1 | 123.3 | 107.8 | 120.1  | 119.6 |
| HECTD2  | 110.2 | 114   | 116.6 | 116.8 | 105.7 | 103.5 | 111.1  | 110.6 |
| HECTD2  | 149.5 | 124.6 | 123.3 | 133.1 | 115.1 | 115.2 | 126.8  | 129.9 |
| HECTD3  | 212.2 | 192   | 195.8 | 204.8 | 151.4 | 149   | 148.4  | 155.8 |
| HECW1   | 107.4 | 105.3 | 126.6 | 117.3 | 107   | 94.4  | 120.9  | 112.7 |
| HECW2   | 115.6 | 119.9 | 133.9 | 114.5 | 111.5 | 95.3  | 131    | 111.5 |
| HEL308  | 287.5 | 273.1 | 273.5 | 288.8 | 272.5 | 231.4 | 278.5  | 276.7 |
| HELB    | 128.2 | 142.3 | 124.3 | 128.6 | 127.6 | 110.7 | 136.8  | 150.5 |
| HELLS   | 118.5 | 124.9 | 122.6 | 133.3 | 111.4 | 94.4  | 128.7  | 115.6 |
| HELT    | 111.1 | 116.7 | 115.1 | 117.2 | 110.5 | 101.9 | 121.4  | 120   |
| HELZ    | 217.1 | 227.7 | 176.8 | 242.1 | 210.7 | 133.7 | 249.5  | 326.8 |
| HEM1    | 182.6 | 199   | 190.2 | 187.1 | 147.9 | 162.3 | 167.5  | 133.6 |
| HEMGN   | 115.4 | 118.7 | 118.2 | 126   | 110.4 | 106.5 | 128.2  | 122.5 |
| HEMGN   | 112   | 111.2 | 128.7 | 126   | 111.5 | 94.9  | 127.4  | 110.5 |
| HEMGN   | 122.8 | 131.9 | 116.4 | 121.7 | 129.6 | 103.2 | 125.8  | 120   |
| HEMK1   | 133.4 | 128.5 | 150.8 | 132   | 121.8 | 120.4 | 127.7  | 127.2 |
| HEPACAM | 117.6 | 118   | 128.2 | 110.8 | 108.9 | 104.4 | 118.7  | 109.8 |
| HEPH    | 115.8 | 119.7 | 107.9 | 112.5 | 101.5 | 98.6  | 115.8  | 102   |
| HEPH    | 108.8 | 111.3 | 115.9 | 112.8 | 100.5 | 98.2  | 109.1  | 116   |
| HERC1   | 389   | 362.4 | 381.4 | 436.5 | 372.4 | 312.6 | 445.1  | 489.3 |
| HERC2   | 198.7 | 240.5 | 247   | 220.5 | 188.6 | 162.1 | 233.7  | 224.2 |
| HERC2P2 | 118.8 | 119.9 | 136.9 | 124.3 | 118.5 | 102.1 | 131.7  | 118   |
| HERC2P4 | 112.3 | 108.1 | 113.3 | 125.3 | 109.3 | 96    | 115.6  | 113.1 |
| HERC3   | 169.4 | 157.2 | 172.7 | 155.3 | 165.3 | 129.6 | 143.7  | 145.6 |
| HERC4   | 141.7 | 138   | 150.2 | 150.5 | 122.9 | 123.8 | 153    | 157.3 |
| HERC4   | 131.1 | 134.8 | 125.3 | 130   | 123.3 | 107.2 | 121.4  | 135.2 |
| HERC4   | 363.4 | 331.2 | 361.6 | 394.9 | 441.5 | 316.3 | 463.3  | 500.1 |
| HERC5   | 716.9 | 588.6 | 371.7 | 719.3 | 487.5 | 316.5 | 504.8  | 560.3 |
| HERC6   | 306.1 | 312   | 266.1 | 322.6 | 325.1 | 233.4 | 316    | 248.4 |
| HERPUD1 | 357.7 | 336.2 | 399.4 | 401   | 374.5 | 294.9 | 428.3  | 620.2 |
| HERPUD2 | 170.1 | 148.6 | 155.5 | 171.9 | 147.3 | 185.5 | 174.8  | 161.4 |

|          |        |        |        |        |        |        |        |        |
|----------|--------|--------|--------|--------|--------|--------|--------|--------|
| HERV-FRD | 112.7  | 117.5  | 116.3  | 121.6  | 113.7  | 102    | 115.6  | 118.2  |
| HES1     | 105.4  | 112.5  | 113.4  | 109.1  | 110.6  | 99.3   | 115.9  | 113.3  |
| HES2     | 115.7  | 119.3  | 134.4  | 124.3  | 113.8  | 105.2  | 132.9  | 120.8  |
| HES4     | 119.3  | 116.4  | 118.9  | 113.8  | 105.2  | 95.9   | 122    | 126.5  |
| HES6     | 147.3  | 153.5  | 212.1  | 181.2  | 130.8  | 145.6  | 187.6  | 150.3  |
| HES7     | 108.2  | 113.4  | 106    | 109.2  | 95.5   | 92.1   | 109    | 108.8  |
| HESX1    | 113    | 114.1  | 115.5  | 115.5  | 104.9  | 95.7   | 114.7  | 112    |
| HEXA     | 131.3  | 120.1  | 122.4  | 132.7  | 115.2  | 108.4  | 141.6  | 128.1  |
| HEXB     | 1612.3 | 1194.6 | 2503.2 | 1814.9 | 1057.6 | 1773.8 | 1984.1 | 1190   |
| HEXDC    | 131.4  | 145.4  | 134.9  | 129.3  | 105.6  | 129.3  | 133.6  | 116.8  |
| HEXIM1   | 113.6  | 123.1  | 117.1  | 138.9  | 105.1  | 102.1  | 130.4  | 116.1  |
| HEXIM2   | 124.7  | 125.7  | 120.1  | 118.5  | 116.4  | 93.4   | 126.3  | 126.5  |
| HEY1     | 118.4  | 119.6  | 118.1  | 123.3  | 110.3  | 101.6  | 125.6  | 122.8  |
| HEY1     | 118    | 118.7  | 119.8  | 117    | 112.8  | 106.9  | 122.2  | 117.1  |
| HEY2     | 122.8  | 127    | 128    | 128.5  | 118.3  | 101    | 120.9  | 138.3  |
| HEYL     | 116.9  | 108    | 109.5  | 118.4  | 106.5  | 98.7   | 116.6  | 118.5  |
| HFE      | 113.9  | 117    | 118.2  | 123.2  | 105.4  | 103.4  | 116.1  | 109.7  |
| HFE      | 109.7  | 117.6  | 122.7  | 118.1  | 111.5  | 103.7  | 122    | 112    |
| HFE      | 118.8  | 117.9  | 112.2  | 135.1  | 116.3  | 106.4  | 121.3  | 113.8  |
| HFE2     | 118.3  | 108.4  | 124    | 125    | 111.5  | 103.7  | 126.9  | 127.4  |
| HFE2     | 121.8  | 120.4  | 120.2  | 121.8  | 117.4  | 102.9  | 129.7  | 117.4  |
| HFE2     | 104.4  | 109.1  | 107.2  | 110.6  | 102.8  | 89.7   | 107.7  | 112.3  |
| HGD      | 117.3  | 124    | 123    | 117.4  | 112.1  | 100.3  | 118.1  | 126.3  |
| HGF      | 118.1  | 118.8  | 129.6  | 130.3  | 120    | 108.8  | 126.5  | 115    |
| HGF      | 109.5  | 124.9  | 116    | 116.5  | 113.7  | 99.9   | 126.7  | 111.4  |
| HGF      | 113.6  | 118.8  | 116.9  | 121.5  | 104.9  | 100.5  | 124.6  | 117    |
| HGFAC    | 114    | 110.6  | 108.2  | 116    | 110.8  | 101.9  | 117.9  | 121.7  |
| HGS      | 1375.7 | 1256.4 | 1148   | 1702.1 | 980.1  | 960.6  | 1538.1 | 1416.2 |
| HHAT     | 105.5  | 114.2  | 117.2  | 124.8  | 113.9  | 105.5  | 114.4  | 112.2  |
| HHEX     | 133.5  | 132    | 173.4  | 147.9  | 114.6  | 124.6  | 135.6  | 138.6  |
| HHIP     | 116.9  | 120.8  | 117.3  | 112.4  | 108.4  | 100.2  | 116.6  | 110.2  |
| HHLA1    | 116.8  | 117.6  | 116.2  | 115.6  | 104.3  | 91.5   | 115.1  | 118.7  |
| HHLA2    | 111.1  | 111    | 121.3  | 126.6  | 110.3  | 97.9   | 110.6  | 123    |
| HHLA3    | 123    | 122.5  | 113.3  | 112.5  | 120    | 108.8  | 121.9  | 109.1  |
| HHLA3    | 118    | 114.4  | 116.6  | 119    | 115.3  | 113.1  | 116.5  | 111.2  |
| HHLA3    | 114.8  | 116.6  | 123.2  | 120.4  | 110.2  | 103.5  | 111.8  | 109.4  |
| HIAT1    | 147.7  | 129.5  | 143.1  | 159.2  | 123.1  | 119.5  | 185.2  | 126.7  |
| HIATL1   | 322.8  | 422    | 287.9  | 394.5  | 399.4  | 296.8  | 374.3  | 422.5  |
| HIBADH   | 304.1  | 330    | 299.8  | 346.5  | 283.3  | 274.7  | 269.6  | 236.1  |
| HIBCH    | 203.4  | 219.1  | 252.4  | 232.3  | 170.1  | 161.3  | 169.3  | 164.8  |
| HIC1     | 122.9  | 120.9  | 122.3  | 130.1  | 119.1  | 99     | 123.4  | 115.9  |
| HIC2     | 227    | 266.8  | 250.1  | 269.4  | 250    | 226.1  | 316.2  | 287.3  |
| HIF1A    | 330.6  | 352.7  | 286.9  | 319    | 281    | 257    | 429.8  | 416.1  |
| HIF1A    | 187.6  | 148.9  | 195.2  | 242.8  | 180.5  | 158.5  | 192.8  | 227.5  |
| HIF1AN   | 148.7  | 164.4  | 141.7  | 151.5  | 138.1  | 129.3  | 161.7  | 177.2  |
| HIF3A    | 114.8  | 112    | 123.2  | 119.2  | 106.2  | 96.3   | 117.8  | 115.3  |
| HIF3A    | 115.8  | 121.7  | 131.7  | 140.8  | 116.5  | 103.8  | 125.4  | 123.1  |
| HIF3A    | 119.2  | 119.3  | 109.3  | 118.8  | 103.9  | 102    | 124.6  | 110.9  |
| HIF3A    | 115.3  | 115.2  | 110.5  | 117.2  | 109.4  | 99.9   | 113.1  | 111.8  |
| HIF3A    | 122.6  | 115    | 111.9  | 113.4  | 106.4  | 103.7  | 120.1  | 125.6  |
| HIG2     | 125.8  | 127.3  | 130.4  | 133.5  | 125.6  | 115.9  | 124.9  | 140    |

|           |        |        |        |        |       |        |        |        |
|-----------|--------|--------|--------|--------|-------|--------|--------|--------|
| HIGD1A    | 479    | 498    | 503.6  | 569.9  | 361.7 | 379.4  | 695.8  | 805.2  |
| HIGD1B    | 114.9  | 125.5  | 117.6  | 120.9  | 118.9 | 96.5   | 118.3  | 115.3  |
| HIGD2A    | 865    | 822.8  | 783.9  | 895.9  | 541.9 | 636.9  | 664.6  | 613.3  |
| HIGD2BP   | 112.5  | 109.3  | 115.1  | 115.8  | 112.1 | 101.7  | 111.2  | 109.8  |
| HIGD2BP   | 110.8  | 110.5  | 122.5  | 119.7  | 109.7 | 98.6   | 117.1  | 111.6  |
| HILS1     | 111.1  | 122.6  | 120    | 121.3  | 111.5 | 104.5  | 116.8  | 124.2  |
| HINT1     | 4478.1 | 4734.7 | 5664.4 | 5400.3 | 5459  | 4852.1 | 5432.5 | 6201.9 |
| HINT2     | 185.4  | 239.5  | 276.5  | 211    | 219.1 | 183.5  | 190.4  | 170.8  |
| HINT3     | 123    | 115.8  | 114.4  | 129.6  | 107.6 | 90.3   | 112.4  | 109.5  |
| HIP1      | 134.5  | 121.8  | 143.7  | 119.5  | 119.7 | 149.9  | 127.7  | 115.9  |
| HIP1R     | 151.6  | 154    | 148.2  | 146.4  | 149.6 | 137.2  | 160    | 151.2  |
| HIP1R     | 134.6  | 118.5  | 143.5  | 120.5  | 124.4 | 124.9  | 138.4  | 128.3  |
| HIP1R     | 114.2  | 112    | 125    | 120    | 108.8 | 103.9  | 126    | 119.3  |
| HIP2      | 110.3  | 108.3  | 111.2  | 118.8  | 108   | 100.4  | 117.8  | 119.5  |
| HIPK1     | 116.7  | 114.5  | 111.4  | 107.4  | 112.3 | 98.3   | 112.5  | 99.8   |
| HIPK1     | 119.5  | 111.8  | 121.7  | 121.8  | 106.8 | 98.9   | 113.1  | 115.7  |
| HIPK1     | 112.4  | 116.4  | 115.4  | 118.2  | 105   | 98.4   | 118    | 109.6  |
| HIPK1     | 114.9  | 113.1  | 111.2  | 108.9  | 101.7 | 96.7   | 119.6  | 100.3  |
| HIPK2     | 172.6  | 156.2  | 151.6  | 196.1  | 171.6 | 142    | 199.2  | 206.5  |
| HIPK3     | 122.8  | 114.8  | 122.2  | 130    | 111.6 | 104.7  | 125.9  | 124.3  |
| HIPK3     | 124.8  | 122.2  | 133.5  | 119.3  | 110.2 | 112.9  | 141.9  | 113.2  |
| HIPK4     | 119.9  | 114.5  | 117.4  | 122.1  | 107.3 | 98.4   | 118.4  | 112.1  |
| HIRA      | 128.8  | 123.3  | 139    | 131.2  | 130.2 | 106.3  | 128.3  | 119.1  |
| HIRIP3    | 194.8  | 243.8  | 209.6  | 236.6  | 183.4 | 139.7  | 216.6  | 203.9  |
| HISPPD1   | 107.9  | 108    | 108.9  | 127    | 106.6 | 93.9   | 115.9  | 110.4  |
| HISPPD2A  | 182.4  | 189.7  | 195.3  | 173    | 159   | 147.1  | 156.1  | 153.6  |
| HISPPD2A  | 110.9  | 108.9  | 110    | 111.8  | 106.2 | 89.9   | 106.9  | 107.6  |
| HISPPD2A  | 110.3  | 114    | 120.4  | 122.5  | 116.1 | 98.8   | 112.9  | 116.9  |
| HIST1H1A  | 112.1  | 115.5  | 115    | 118.9  | 114.5 | 102.9  | 114.1  | 117    |
| HIST1H1B  | 116.6  | 116.2  | 112.5  | 117.3  | 112.1 | 96.7   | 113.4  | 120    |
| HIST1H1C  | 127.9  | 129.5  | 152.9  | 146.1  | 118.6 | 107    | 124.8  | 126.3  |
| HIST1H1D  | 116.3  | 121.7  | 120.9  | 121.3  | 111.7 | 100.8  | 121.7  | 111.7  |
| HIST1H1E  | 109    | 117.8  | 119.3  | 116.9  | 113   | 94.3   | 118.5  | 116    |
| HIST1H1T  | 113.4  | 110.2  | 119.9  | 126.8  | 110.1 | 99.1   | 116.1  | 117.3  |
| HIST1H2AA | 114.8  | 114.9  | 111.6  | 122.8  | 112.1 | 96.5   | 121.8  | 119.9  |
| HIST1H2AB | 107.6  | 113.3  | 124.1  | 118.9  | 105.5 | 104.8  | 110.4  | 123.1  |
| HIST1H2AC | 166.1  | 183.2  | 132.5  | 204.2  | 170.4 | 144.7  | 173.7  | 151.2  |
| HIST1H2AC | 100    | 107.1  | 109.1  | 117.4  | 107.9 | 96     | 113.8  | 109.3  |
| HIST1H2AE | 106.1  | 116.2  | 119.6  | 118.2  | 107.5 | 105.8  | 117.1  | 113.4  |
| HIST1H2AC | 105.9  | 106.2  | 105.2  | 115.3  | 113   | 94.7   | 116.3  | 112.8  |
| HIST1H2AF | 101    | 117.1  | 108.4  | 110.9  | 106.7 | 97.4   | 118.4  | 111.8  |
| HIST1H2AI | 118.7  | 120.7  | 112.8  | 121.9  | 104.9 | 103.1  | 118.3  | 124.2  |
| HIST1H2AJ | 117.7  | 119.4  | 120.7  | 118    | 108.2 | 95.1   | 120.8  | 114.5  |
| HIST1H2AK | 119.6  | 107.6  | 110.7  | 117.9  | 105.8 | 105.5  | 122.5  | 106    |
| HIST1H2AM | 110.8  | 109.5  | 120.4  | 118.3  | 116.8 | 99.5   | 129.3  | 123.5  |
| HIST1H2BA | 103.5  | 118.7  | 114    | 110.8  | 111.4 | 90.7   | 117.6  | 101.1  |
| HIST1H2BB | 111.5  | 110.6  | 119.7  | 112.8  | 110.1 | 96.7   | 110.1  | 113.8  |
| HIST1H2BC | 116.7  | 109.5  | 122.4  | 118.5  | 110.2 | 95.5   | 126.4  | 115.7  |
| HIST1H2BC | 209.6  | 271.7  | 148.5  | 250.6  | 253.7 | 143.5  | 274.9  | 298.5  |
| HIST1H2BC | 151.4  | 165.5  | 145    | 166.5  | 155.5 | 128.6  | 153    | 158.3  |
| HIST1H2BC | 105.3  | 116.8  | 107.2  | 108.9  | 100.2 | 98.7   | 112.7  | 104.5  |

|           |        |        |        |        |        |        |        |        |
|-----------|--------|--------|--------|--------|--------|--------|--------|--------|
| HIST1H2BE | 114.8  | 124.8  | 114.2  | 117.4  | 116.6  | 98.2   | 118.3  | 116    |
| HIST1H2BF | 118.9  | 117    | 110.9  | 122.1  | 102.7  | 106.3  | 118.4  | 120    |
| HIST1H2BG | 122.9  | 122.4  | 116.3  | 126.9  | 121.2  | 103.4  | 130.5  | 142.9  |
| HIST1H2BF | 109.6  | 121.4  | 119.7  | 108.4  | 115.9  | 100.3  | 124    | 125.7  |
| HIST1H2BI | 101.8  | 105.6  | 115.7  | 118.1  | 99.1   | 94     | 117    | 118.7  |
| HIST1H2BJ | 240.3  | 243.4  | 304.6  | 262    | 257.6  | 223.3  | 251.9  | 291.6  |
| HIST1H2BK | 2712.8 | 1986   | 1508.3 | 2513   | 1150.3 | 1223.3 | 2480.3 | 2381.4 |
| HIST1H2BL | 108    | 127.5  | 110.4  | 112.5  | 105    | 93.3   | 116.6  | 112.1  |
| HIST1H2BN | 116.4  | 117.5  | 122.8  | 111.9  | 108.9  | 104.3  | 124.7  | 113.2  |
| HIST1H2BC | 117.3  | 126.7  | 116.2  | 125.2  | 101    | 108.6  | 125.6  | 123.7  |
| HIST1H3A  | 125.2  | 115.3  | 118.6  | 133.5  | 107.1  | 103.6  | 129.6  | 121.4  |
| HIST1H3B  | 120.4  | 110.2  | 119.8  | 112.9  | 106.5  | 100.9  | 110.1  | 119.2  |
| HIST1H3C  | 110.2  | 114.1  | 116    | 105.2  | 106.9  | 93.8   | 117.4  | 118.4  |
| HIST1H3D  | 136.5  | 137.3  | 135.5  | 123.8  | 115.2  | 107.1  | 137.4  | 128    |
| HIST1H3F  | 116.3  | 131.8  | 137.7  | 130.5  | 108.1  | 110.7  | 129.6  | 118.6  |
| HIST1H3G  | 117.4  | 123.2  | 122.5  | 129.4  | 114.3  | 104.5  | 119.6  | 121.5  |
| HIST1H3H  | 124    | 117.1  | 130.6  | 131    | 109.5  | 111.9  | 122.2  | 111.6  |
| HIST1H3I  | 114.9  | 119.7  | 119    | 125.4  | 116.7  | 99.6   | 123.4  | 116.6  |
| HIST1H3J  | 114.4  | 120.7  | 112.5  | 123.5  | 111.7  | 99.1   | 120.7  | 126.1  |
| HIST1H4A  | 131.1  | 111    | 129.1  | 114.5  | 112.4  | 110    | 124.2  | 119.6  |
| HIST1H4B  | 118.8  | 120.7  | 120    | 128.6  | 110.1  | 100.7  | 121.4  | 112.2  |
| HIST1H4C  | 2605.4 | 3179.4 | 2898   | 2671.4 | 2171.5 | 1170.3 | 1611.5 | 2150.7 |
| HIST1H4D  | 107.8  | 110.4  | 106.3  | 111.2  | 110.4  | 91.7   | 117.3  | 110.3  |
| HIST1H4E  | 117.9  | 117.4  | 123.4  | 115.2  | 109.6  | 107.6  | 114.9  | 121.7  |
| HIST1H4F  | 118.5  | 114.4  | 109    | 112.3  | 106.2  | 93.8   | 116.2  | 121.2  |
| HIST1H4G  | 113.8  | 119.1  | 120.1  | 132.8  | 109.9  | 110.2  | 117    | 109    |
| HIST1H4H  | 158.2  | 142.6  | 132    | 172.4  | 140.2  | 113.2  | 161.4  | 175    |
| HIST1H4I  | 108.4  | 118.6  | 125.2  | 117.4  | 116.9  | 102.7  | 118.3  | 117.9  |
| HIST1H4J  | 117.8  | 120.1  | 116.7  | 122.9  | 111.4  | 105    | 113.2  | 119.9  |
| HIST1H4L  | 106.8  | 110.8  | 123.9  | 116    | 110.3  | 100.7  | 118.2  | 116.2  |
| HIST2H2AA | 252.5  | 218.1  | 266.3  | 295.6  | 164.6  | 190.2  | 270.9  | 270.8  |
| HIST2H2AB | 113.2  | 115.1  | 123.4  | 121    | 113.5  | 93.1   | 126.2  | 120.5  |
| HIST2H2AC | 202.9  | 188.6  | 220.2  | 190    | 152    | 173.9  | 214.2  | 217    |
| HIST2H2BE | 131.3  | 133.8  | 145.8  | 149.4  | 117.5  | 119.7  | 136.8  | 151.5  |
| HIST2H2BF | 117.2  | 125.4  | 125.6  | 132.9  | 113.3  | 102    | 127    | 128.3  |
| HIST2H3C  | 113.8  | 112.5  | 116    | 108.9  | 108.4  | 96.4   | 111.5  | 108.7  |
| HIST2H4A  | 113.8  | 123.9  | 114.6  | 128.6  | 119.1  | 99.3   | 122.5  | 122    |
| HIST3H2A  | 142.4  | 132.1  | 190.4  | 162.8  | 151.1  | 132.6  | 148.3  | 153.8  |
| HIST3H2BB | 113.9  | 121.5  | 119.6  | 116    | 105.3  | 102.4  | 115.7  | 116.3  |
| HIST3H3   | 119.1  | 120.7  | 116.9  | 122.5  | 108.5  | 103.3  | 120    | 117    |
| HIST4H4   | 109.8  | 105.1  | 115.3  | 122.6  | 106.5  | 93     | 123.5  | 109.2  |
| HIVEP1    | 147.2  | 143    | 143.8  | 148.9  | 136.3  | 120.2  | 169.3  | 174.6  |
| HIVEP2    | 134    | 148.3  | 142.5  | 162.8  | 144.8  | 126.5  | 159.3  | 140.7  |
| HIVEP3    | 113.2  | 119.1  | 112.8  | 107.1  | 112.9  | 97.4   | 127.7  | 117.5  |
| HK1       | 1918.2 | 1921.8 | 2527.6 | 1740.5 | 1368.1 | 1795.5 | 1783.5 | 1798.8 |
| HK1       | 119.5  | 122.5  | 125.9  | 129.4  | 118    | 103.3  | 124.7  | 117.5  |
| HK1       | 109.6  | 129.1  | 116.9  | 125.2  | 109.4  | 92     | 115.4  | 110.9  |
| HK1       | 120.4  | 114.5  | 114.2  | 115.4  | 102.5  | 97.1   | 107.8  | 107    |
| HK2       | 191.9  | 163.9  | 175.7  | 176.4  | 144.3  | 121.5  | 171.9  | 167.5  |
| HK3       | 109.5  | 147.2  | 198.9  | 137.2  | 117.2  | 115.9  | 126.9  | 114.7  |
| HKDC1     | 114.8  | 130.7  | 136.2  | 131    | 118.3  | 113.6  | 118    | 118.3  |

|          |         |         |         |         |         |         |         |         |
|----------|---------|---------|---------|---------|---------|---------|---------|---------|
| HKR1     | 141.5   | 138.5   | 136.6   | 133.3   | 123.1   | 117.4   | 139     | 153.3   |
| HKR2     | 120.5   | 138.2   | 129.2   | 118.1   | 109.4   | 104     | 127.2   | 112.6   |
| HKR3     | 366     | 344.9   | 435.6   | 366.9   | 228     | 327.2   | 380.2   | 308     |
| HLA-A    | 19966.2 | 18095.9 | 24113.6 | 21647.4 | 15175.4 | 21955.8 | 18614.1 | 14532.8 |
| HLA-C    | 103.4   | 110     | 118.1   | 117.6   | 102.7   | 102.7   | 119.9   | 110     |
| HLA-DMA  | 1358.9  | 889.6   | 3591.1  | 1180.5  | 457.8   | 1144    | 615     | 401.2   |
| HLA-DMB  | 1686.1  | 1048.9  | 4855.3  | 1459.1  | 471.9   | 1568.3  | 721.7   | 349.9   |
| HLA-DOA  | 268.1   | 232.8   | 349.5   | 220.4   | 184.9   | 232.6   | 168.1   | 153     |
| HLA-DOB  | 197.3   | 197.8   | 216     | 181.9   | 140.9   | 134.3   | 132.5   | 147.9   |
| HLA-DPA1 | 1596.9  | 1032.4  | 7556.7  | 1464.7  | 503     | 4149.3  | 678.7   | 418     |
| HLA-DPB1 | 155.1   | 131     | 320.8   | 145.1   | 122.9   | 209.8   | 127.5   | 120.9   |
| HLA-DPB2 | 105.7   | 107.5   | 109.3   | 114.4   | 110.8   | 104     | 116     | 122.1   |
| HLA-DQA1 | 647.5   | 290.3   | 2461    | 554.6   | 230.4   | 1470    | 287.6   | 211.4   |
| HLA-DQA2 | 111.3   | 116.9   | 118.4   | 117.6   | 109.4   | 94.8    | 116.1   | 114.6   |
| HLA-DQB1 | 168.3   | 119.3   | 300.6   | 167.9   | 108     | 161.7   | 137     | 116.9   |
| HLA-DQB2 | 114.8   | 113.2   | 119.8   | 114.6   | 109     | 97.1    | 109.3   | 114.3   |
| HLA-DRA  | 1970.7  | 1277.4  | 7885    | 2132.9  | 1051.9  | 7414.9  | 1330.2  | 912.8   |
| HLA-DRB1 | 126     | 192.5   | 125.2   | 122.7   | 169.2   | 104.8   | 121     | 160.5   |
| HLA-DRB3 | 178.5   | 150.2   | 503.6   | 169.2   | 144.4   | 332.4   | 150.1   | 136.9   |
| HLA-DRB4 | 157.2   | 116.9   | 258.7   | 163.2   | 116.5   | 218.7   | 148     | 115.8   |
| HLA-DRB5 | 113.2   | 123.2   | 118.1   | 113.9   | 112.3   | 99.2    | 109.6   | 113.8   |
| HLA-DRB6 | 247.5   | 177.2   | 519.6   | 252.3   | 138.5   | 517.4   | 236.3   | 195.4   |
| HLA-E    | 784.5   | 755.2   | 1164.1  | 774.1   | 636     | 666.2   | 399.2   | 595     |
| HLA-F    | 1536    | 2254.9  | 1971    | 1975.3  | 1504.3  | 1245    | 1385.3  | 1460.9  |
| HLA-G    | 330.7   | 377.9   | 302.1   | 257.1   | 216.9   | 288.1   | 251.2   | 249.9   |
| HLA-H    | 4853.1  | 6723.1  | 5825.4  | 5089.9  | 3524.2  | 4413.7  | 3258.5  | 3720    |
| HLCS     | 108.4   | 119.5   | 106.5   | 112     | 107.8   | 102.9   | 116.5   | 123.4   |
| HLF      | 116.8   | 133.3   | 119     | 137.9   | 121.6   | 109     | 128.1   | 130.1   |
| HLRC1    | 117.5   | 126.7   | 144     | 133.3   | 132.6   | 120.1   | 122.7   | 135.1   |
| HLX1     | 145.1   | 159.9   | 164.8   | 170.6   | 152.2   | 154.2   | 235.2   | 168     |
| HLXB9    | 118.9   | 120.5   | 122.8   | 122.2   | 113     | 100.1   | 115.2   | 119.3   |
| HM13     | 114.8   | 113.8   | 115.1   | 115.1   | 107     | 97.9    | 120.4   | 104     |
| HM13     | 258.5   | 207.9   | 252.3   | 264.7   | 210.7   | 229.4   | 253.6   | 208.5   |
| HM13     | 160.8   | 145.9   | 141.4   | 168     | 160.9   | 110     | 162.4   | 140.4   |
| HMBX1    | 132.5   | 142.7   | 127     | 154.7   | 132.1   | 135.4   | 153.8   | 186     |
| HMBS     | 123.5   | 122.3   | 126.4   | 125.7   | 114.5   | 105.5   | 121.2   | 123.8   |
| HMBS     | 117.2   | 139.7   | 135.5   | 147.7   | 128.6   | 111.5   | 138.4   | 123.8   |
| HMBS     | 139.3   | 187.6   | 178.8   | 165.3   | 143.6   | 126.8   | 137.7   | 146.8   |
| HMCN1    | 119     | 106.3   | 111.6   | 126.4   | 103.6   | 100.5   | 121.1   | 115     |
| HMFN083C | 348.7   | 447.8   | 223.7   | 683.3   | 429.6   | 377.1   | 657.5   | 427.2   |
| HMG1L1   | 167.6   | 158     | 192.1   | 182.4   | 165.6   | 128.9   | 152     | 165.7   |
| HMG20A   | 137     | 143.5   | 128.4   | 130.8   | 129     | 135.7   | 136.3   | 141.4   |
| HMG20B   | 474     | 549.3   | 306.6   | 525.6   | 371     | 318     | 409.6   | 417.1   |
| HMG2L1   | 119.8   | 141     | 143     | 135.5   | 118.4   | 115.8   | 123     | 120.6   |
| HMG2L1   | 104.7   | 127.7   | 122.9   | 134.3   | 109.5   | 111.5   | 122.3   | 112.3   |
| HMG4L    | 109.2   | 114.8   | 108.5   | 120.2   | 102.1   | 95.4    | 114.6   | 104.6   |
| HMGA1    | 120.2   | 136.6   | 117.7   | 127.2   | 122     | 112.4   | 135.1   | 136     |
| HMGA1    | 120.7   | 120.2   | 121.2   | 115.7   | 103.4   | 100     | 114.6   | 110.5   |
| HMGA1    | 119     | 125.8   | 122.5   | 129.3   | 106.4   | 106.3   | 126.7   | 116.8   |
| HMGA1    | 414.5   | 498.4   | 343.6   | 612.6   | 371.2   | 345.1   | 707.7   | 416.3   |
| HMGA2    | 124.3   | 114.8   | 117.5   | 131.4   | 118     | 93.9    | 129.3   | 109.1   |

|           |        |        |        |        |        |        |        |        |
|-----------|--------|--------|--------|--------|--------|--------|--------|--------|
| HMGA2     | 124.4  | 118.4  | 117.1  | 127.4  | 112.7  | 93.9   | 119.4  | 114.1  |
| HMGB1     | 205.5  | 171.4  | 179.1  | 184.3  | 137.2  | 149.3  | 169.4  | 167.6  |
| HMGB2     | 360.8  | 334.7  | 346.6  | 333.6  | 279    | 284.5  | 318.6  | 407.6  |
| HMGB3     | 131.3  | 123    | 131.4  | 123.9  | 117.9  | 107.2  | 121.6  | 127.8  |
| HMGB4     | 113.7  | 118.3  | 119.9  | 124.2  | 111.8  | 96.1   | 124.6  | 115.2  |
| HMGB4     | 111.8  | 114.6  | 129.1  | 113.1  | 105.2  | 100.6  | 115.3  | 115.2  |
| HMGCL     | 137.7  | 138.3  | 159.6  | 151.8  | 134.3  | 137.1  | 149.7  | 139    |
| HMGCLL1   | 112.4  | 113.6  | 117    | 112.9  | 108    | 96.7   | 111.2  | 110.1  |
| HMGCLL1   | 116.3  | 115.9  | 115.6  | 114.1  | 110.1  | 93.9   | 106.4  | 126.7  |
| HMGCLL1   | 101.1  | 105.8  | 106.2  | 106.2  | 107.9  | 99.2   | 109.2  | 108.9  |
| HMGCR     | 336.1  | 385.8  | 297.1  | 409.4  | 283.3  | 284.6  | 381.1  | 297.1  |
| HMGCS1    | 319.4  | 320.5  | 279.7  | 273.4  | 253.5  | 211.3  | 369.7  | 328.7  |
| HMGCS2    | 117.2  | 127.1  | 112.7  | 122.3  | 112.2  | 110.5  | 115.5  | 120.2  |
| HMGN1     | 3189.3 | 2461.6 | 3265.7 | 3406   | 2479.2 | 2955.8 | 3336.1 | 2930.5 |
| HMGN2     | 296.1  | 252.6  | 370.7  | 249.1  | 232.8  | 449.2  | 229.6  | 287.4  |
| HMGN3     | 110.7  | 109    | 115.4  | 129    | 106.6  | 102.7  | 119.9  | 123.2  |
| HMGN4     | 1122.2 | 969    | 1091.4 | 907.8  | 776.3  | 690.7  | 990.8  | 980.5  |
| HMHA1     | 494.7  | 552.9  | 348.6  | 439.3  | 355.2  | 271.2  | 308.1  | 387.1  |
| HMMR      | 122.7  | 112.5  | 119.9  | 117.1  | 109    | 104.9  | 127.4  | 118.3  |
| HMMR      | 121.5  | 118.2  | 112.7  | 124.7  | 109.7  | 102.5  | 114.8  | 118.8  |
| HMOX1     | 193    | 170.7  | 316.1  | 550.6  | 669.8  | 2186.7 | 4348.5 | 5093.7 |
| HMOX2     | 116.9  | 126.6  | 118.7  | 134.4  | 121.5  | 111    | 113    | 109.3  |
| HMP19     | 122.4  | 111.6  | 119.4  | 118.7  | 115.1  | 112    | 123.4  | 118.9  |
| HMX1      | 111.9  | 124.3  | 115.4  | 120    | 108.8  | 95.4   | 123.4  | 125.2  |
| HMX2      | 115.9  | 107.8  | 116.8  | 111.8  | 110    | 98.5   | 120.1  | 114.5  |
| HN1       | 133.7  | 146    | 160.3  | 139.8  | 129.7  | 120    | 129.7  | 151.1  |
| HNF4A     | 119.8  | 116.7  | 113.3  | 121.4  | 105.6  | 99.9   | 125.2  | 120.7  |
| HNF4A     | 119.2  | 120    | 118.5  | 122.8  | 110.2  | 98.5   | 125.3  | 122.4  |
| HNF4G     | 113.7  | 108.2  | 112.3  | 115.9  | 107.9  | 97     | 125.9  | 111.8  |
| HNMT      | 207.4  | 116.6  | 282.3  | 163.5  | 120.2  | 180.6  | 134    | 115.5  |
| HNMT      | 214.1  | 133.5  | 345.8  | 187.9  | 113.3  | 243.6  | 157.7  | 117.1  |
| HNMT      | 136.7  | 114.4  | 186.8  | 124.6  | 112.2  | 124.4  | 121    | 118.6  |
| HNMT      | 113.2  | 117    | 115.3  | 110.2  | 107.6  | 95.5   | 109.9  | 111.6  |
| HNRNPG-T  | 109.2  | 115    | 123.7  | 121.5  | 116.5  | 103.4  | 112.6  | 113.5  |
| HNRPA0    | 701    | 632.4  | 612.5  | 779.8  | 645.8  | 584.4  | 836.2  | 1069.8 |
| HNRPA1    | 124.8  | 140.7  | 125.6  | 136.9  | 121.3  | 119.5  | 135.3  | 140.8  |
| HNRPA1    | 129.9  | 137.3  | 143.1  | 132    | 133.1  | 120.5  | 122.3  | 132.2  |
| HNRPA1L-2 | 224    | 234.4  | 262.3  | 252.8  | 275.2  | 199.6  | 271.9  | 332    |
| HNRPA2B1  | 2134.6 | 1972.3 | 2115.5 | 2232.3 | 2015.3 | 2082.8 | 2606.9 | 2955.9 |
| HNRPA3    | 138.5  | 136.9  | 134.7  | 138.9  | 137.1  | 121.2  | 135.2  | 148.2  |
| HNRPA3P1  | 133.4  | 115.7  | 134.3  | 132.6  | 119    | 116.8  | 131.5  | 121.4  |
| HNRPAB    | 212.2  | 241.7  | 239.3  | 227.9  | 209.9  | 196.9  | 194.6  | 193.6  |
| HNRPAB    | 388.3  | 464.2  | 419.5  | 428.6  | 382.2  | 342.2  | 403.6  | 530.4  |
| HNRPAB    | 2033.6 | 2351.1 | 1945.9 | 2415.5 | 1529.3 | 1769.7 | 2654.4 | 2643   |
| HNRPC     | 153.7  | 157.1  | 150    | 189.9  | 172.6  | 135.5  | 199.1  | 221.7  |
| HNRPC     | 408.3  | 402.9  | 493.6  | 535.7  | 377.7  | 394.8  | 554.6  | 688.7  |
| HNRPCL1   | 109.4  | 115.8  | 115.3  | 117.1  | 110.1  | 100.6  | 125.1  | 110.5  |
| HNRPD     | 2654.5 | 2676   | 2538   | 2370   | 2391.9 | 2469.2 | 3016.3 | 2839.4 |
| HNRPDL    | 296.5  | 293.8  | 285.5  | 339.3  | 281.5  | 224    | 377.6  | 429    |
| HNRPDL    | 758.6  | 822.4  | 850.7  | 714.8  | 673.2  | 458.7  | 489    | 620.4  |
| HNRPF     | 132.3  | 138.4  | 135.9  | 146.1  | 138.9  | 126.2  | 131.6  | 139.4  |



|           |        |        |        |        |        |        |        |        |
|-----------|--------|--------|--------|--------|--------|--------|--------|--------|
| HNRPH1    | 118.6  | 129.4  | 128.4  | 123.8  | 117.4  | 106.5  | 136    | 120.5  |
| HNRPH2    | 163.7  | 156    | 197    | 173.2  | 148    | 141.8  | 176.6  | 200.2  |
| HNRPH3    | 267.8  | 271.4  | 275.1  | 289.3  | 345.4  | 261.9  | 286.4  | 474.2  |
| HNRPH3    | 122.8  | 111.8  | 134.5  | 127.3  | 118.3  | 103.6  | 118    | 125    |
| HNRPK     | 1642.3 | 1805.9 | 2052   | 1940.7 | 1648.9 | 1489.1 | 1697.2 | 2219.8 |
| HNRPL     | 355    | 299.4  | 246.9  | 359    | 333.7  | 275.3  | 409.2  | 474.9  |
| HNRPLL    | 123.8  | 151.7  | 150.6  | 148    | 129.6  | 114.4  | 150.7  | 145.4  |
| HNRPM     | 118.6  | 123.4  | 119.6  | 128    | 113.7  | 101.1  | 134    | 120.3  |
| HNRPM     | 1112.4 | 1356.3 | 1331.8 | 1393.2 | 1170.2 | 1052.3 | 1757.5 | 1916.4 |
| HNRPR     | 869    | 1098.7 | 904.1  | 1128.1 | 922.7  | 788.7  | 1082.2 | 1078.5 |
| HNRPU     | 698.6  | 497.6  | 606.1  | 478.9  | 577.5  | 396.4  | 621.9  | 565.9  |
| HNRPU     | 260.9  | 326.3  | 228.3  | 251    | 279.9  | 189    | 289.3  | 348.7  |
| HNRPUL1   | 688.8  | 657.5  | 771.4  | 739.3  | 481.7  | 517.7  | 633.1  | 708.6  |
| HNRPUL1   | 1545.5 | 1834.3 | 1396   | 1696.2 | 1507   | 1305   | 1552   | 1552.9 |
| HNRPUL2   | 320.5  | 443.5  | 298.9  | 424.6  | 391    | 263.3  | 535.5  | 399.6  |
| HNT       | 115.1  | 115.6  | 109.2  | 109.3  | 104.9  | 94.9   | 111.9  | 119    |
| HNT       | 121.4  | 108.7  | 118.8  | 118.9  | 103.3  | 104.9  | 114.1  | 127.6  |
| HNT       | 120    | 110.6  | 118.6  | 113.1  | 108.6  | 93.7   | 125.3  | 115.7  |
| HOMER1    | 114.8  | 119    | 112.4  | 132.5  | 119.7  | 102.2  | 125.6  | 123.4  |
| HOMER2    | 109.4  | 110.2  | 120.1  | 118.9  | 107.5  | 97.3   | 109.3  | 111    |
| HOMER2    | 122.7  | 110.5  | 130.5  | 128.2  | 111.7  | 120.4  | 110.7  | 112.2  |
| HOMER3    | 167.4  | 152.2  | 169.6  | 224.5  | 136.8  | 153.5  | 186.1  | 124.1  |
| HOM-TES-1 | 114.9  | 121.6  | 125.2  | 124.6  | 121.5  | 99.8   | 110.2  | 117.2  |
| HOM-TES-1 | 134.1  | 128.7  | 137.6  | 141.5  | 128.1  | 111.3  | 119    | 116.2  |
| HOM-TES-1 | 686    | 521.4  | 725.9  | 509.7  | 375.7  | 419.6  | 403.8  | 342.8  |
| HOOK1     | 195.8  | 209.3  | 191    | 200.4  | 208.1  | 136.2  | 229.9  | 177.5  |
| HOOK2     | 172.8  | 149.1  | 148.9  | 190.9  | 145    | 116.2  | 181.7  | 157.2  |
| HOOK3     | 126.1  | 129.7  | 127.8  | 133    | 113.5  | 120.7  | 140.6  | 136.4  |
| HOP       | 110.2  | 111.9  | 129.1  | 116.9  | 106.5  | 100.1  | 122.6  | 116    |
| HOP       | 125.1  | 120.1  | 146.2  | 122    | 114.1  | 108.7  | 132.1  | 122.9  |
| HOP       | 839.3  | 709.1  | 652.1  | 800.4  | 500.4  | 449.9  | 570.1  | 446.3  |
| HORMAD1   | 113.5  | 109.9  | 118.2  | 111.7  | 107.8  | 97.2   | 118.5  | 106.9  |
| HORMAD2   | 110.1  | 119.4  | 115.3  | 113.3  | 106.9  | 100.2  | 132.2  | 119    |
| HOXA1     | 109.9  | 114.2  | 116.1  | 120.1  | 100.3  | 103.4  | 122.6  | 116    |
| HOXA1     | 122    | 124.6  | 128.8  | 133    | 115.7  | 114.3  | 115.9  | 134    |
| HOXA10    | 115.5  | 118.2  | 115    | 114.3  | 109.6  | 103.8  | 120.4  | 115.7  |
| HOXA10    | 113.2  | 111    | 118.5  | 112.5  | 109.6  | 99.8   | 108.8  | 115.1  |
| HOXA10    | 106.2  | 112.1  | 121.5  | 110.6  | 105.1  | 91.9   | 120.6  | 106.2  |
| HOXA11    | 107.6  | 108.7  | 111.2  | 109.6  | 105.5  | 99     | 119.1  | 116.5  |
| HOXA13    | 124    | 111.4  | 121.8  | 115.9  | 109.4  | 92.9   | 120.7  | 110.3  |
| HOXA2     | 116.9  | 107.8  | 119.8  | 112.2  | 111    | 99.6   | 121.2  | 107.4  |
| HOXA3     | 111.6  | 111.4  | 121    | 113.2  | 108.6  | 103.1  | 114.1  | 117    |
| HOXA3     | 115.6  | 111.6  | 120.2  | 110.2  | 109.7  | 102.6  | 116.9  | 117.8  |
| HOXA3     | 112.2  | 111.4  | 112.9  | 125.5  | 104    | 100.3  | 109.9  | 108.6  |
| HOXA3     | 109    | 109.6  | 113    | 115.5  | 107.5  | 97.6   | 114.7  | 107.9  |
| HOXA4     | 114.7  | 114.3  | 119.9  | 116.8  | 121.6  | 98.9   | 119.1  | 115.7  |
| HOXA5     | 124.8  | 135.5  | 124.5  | 126.6  | 109.7  | 109.4  | 131.4  | 116.1  |
| HOXA6     | 124.6  | 112.9  | 120.4  | 127.8  | 125    | 104.9  | 137.9  | 120.6  |
| HOXA7     | 114.6  | 110    | 116    | 120.3  | 107.6  | 91.1   | 128    | 109.3  |
| HOXA9     | 120.3  | 120.7  | 125.2  | 132.1  | 103.8  | 106.4  | 135.5  | 117.2  |
| HOXA9     | 116.8  | 119.1  | 113.3  | 121.4  | 108.7  | 104.7  | 119.9  | 112.3  |

|        |       |        |        |        |        |        |        |        |
|--------|-------|--------|--------|--------|--------|--------|--------|--------|
| HOXB1  | 123.8 | 123.2  | 142    | 136.1  | 113.8  | 115.2  | 139.9  | 137.7  |
| HOXB13 | 120.3 | 109.7  | 107.4  | 113.6  | 107.4  | 91.3   | 108.5  | 107.5  |
| HOXB2  | 314.5 | 202.8  | 309.3  | 259.3  | 156.1  | 189.6  | 207.4  | 150.6  |
| HOXB3  | 123.3 | 126.1  | 122.7  | 113.8  | 113.9  | 111.6  | 120.4  | 112.4  |
| HOXB4  | 117   | 132.1  | 125.1  | 128.1  | 114    | 106.7  | 124.4  | 118.1  |
| HOXB5  | 118.7 | 122.3  | 130.2  | 123    | 111.7  | 108.8  | 124.6  | 122.9  |
| HOXB6  | 170.6 | 148.3  | 147.1  | 150.3  | 132.4  | 129.9  | 135.3  | 141.9  |
| HOXB6  | 132.6 | 124.1  | 127.2  | 140.4  | 117.5  | 98     | 144.1  | 125.5  |
| HOXB7  | 108   | 124    | 124.7  | 119.7  | 114.4  | 99.7   | 117.4  | 117.2  |
| HOXB8  | 102.5 | 113.3  | 117.6  | 116.4  | 100    | 91.5   | 107.3  | 110.6  |
| HOXB9  | 127.1 | 120.2  | 119    | 120.8  | 106.1  | 98.6   | 121.2  | 111.5  |
| HOXC10 | 120.5 | 119.6  | 121.5  | 126.6  | 105.1  | 99.2   | 130.2  | 124.9  |
| HOXC11 | 117   | 136    | 139.7  | 128.4  | 124.5  | 120.9  | 131.6  | 134.6  |
| HOXC12 | 103.3 | 108.4  | 119    | 127.3  | 113.1  | 86.8   | 114.3  | 113    |
| HOXC13 | 118.8 | 127.3  | 118.5  | 131.5  | 111.7  | 113.5  | 120    | 122.9  |
| HOXC4  | 125.5 | 118.7  | 117.7  | 111.5  | 102.3  | 101.7  | 120.3  | 113.6  |
| HOXC4  | 163.7 | 207.4  | 178.5  | 181.1  | 181.3  | 123.3  | 160.4  | 159.6  |
| HOXC5  | 117.2 | 117.3  | 121.8  | 125.8  | 109.4  | 99.2   | 120.4  | 119.4  |
| HOXC6  | 113.2 | 118.1  | 118.6  | 123.9  | 106.7  | 99.1   | 122.6  | 109.9  |
| HOXC6  | 124.6 | 123.4  | 113.5  | 114.1  | 117.9  | 105.2  | 127.1  | 125.4  |
| HOXC6  | 121.8 | 115.6  | 120.6  | 119.8  | 115.1  | 105.2  | 120.5  | 124.9  |
| HOXC8  | 125.3 | 111    | 115.3  | 120.3  | 111.1  | 99.6   | 126.9  | 122.5  |
| HOXC9  | 109.6 | 115.4  | 119.3  | 121.6  | 104.9  | 104.6  | 119.1  | 126.1  |
| HOXD1  | 105.9 | 110.4  | 116.4  | 121.1  | 107    | 96     | 119.5  | 124.4  |
| HOXD10 | 105.3 | 116    | 111.2  | 114.2  | 105.6  | 101.4  | 116.6  | 106.1  |
| HOXD11 | 128   | 123.3  | 139    | 137.4  | 119.5  | 108.8  | 110.4  | 118.5  |
| HOXD12 | 132.1 | 124.8  | 122.4  | 124.3  | 113.1  | 117.5  | 124.6  | 120.1  |
| HOXD13 | 113.8 | 129.1  | 130.1  | 139.8  | 114.7  | 112.9  | 143.9  | 133.9  |
| HOXD3  | 132.3 | 137.4  | 129.6  | 138.1  | 127.4  | 100.7  | 121.8  | 140.5  |
| HOXD4  | 126.1 | 117.2  | 113.7  | 127.3  | 115.1  | 108.4  | 118.7  | 128.1  |
| HOXD8  | 117.3 | 115    | 114.2  | 118.6  | 115.7  | 109    | 125.3  | 115.2  |
| HOXD9  | 117.8 | 116.7  | 123    | 120.3  | 106.5  | 101.3  | 110.8  | 119.6  |
| HP     | 119.1 | 116.4  | 123.6  | 113.2  | 113    | 103.8  | 126.4  | 112.9  |
| HP1BP3 | 148.3 | 128.3  | 152.9  | 127.2  | 127.4  | 124.3  | 164.1  | 139.6  |
| HPCA   | 106.9 | 115.8  | 112    | 114.2  | 102.3  | 102.7  | 116.6  | 117.1  |
| HPCAL1 | 123.2 | 123.3  | 110.8  | 119.4  | 114.8  | 103.4  | 126.5  | 99.2   |
| HPCAL1 | 964.9 | 1535.2 | 1044.5 | 1560.2 | 1018.6 | 1349.1 | 1780.3 | 1165.8 |
| HPCAL1 | 123.1 | 122.4  | 131.3  | 126.9  | 116.5  | 114.6  | 129.1  | 121.3  |
| HPCAL4 | 140.5 | 163.7  | 156    | 176.7  | 143.2  | 123.7  | 143.4  | 154.2  |
| HPD    | 118.7 | 127.9  | 121.9  | 131.6  | 109.5  | 99.1   | 127.7  | 120.7  |
| HPGD   | 117.9 | 137.2  | 131    | 129.7  | 116.8  | 115.3  | 122.9  | 138.6  |
| H-PLK  | 107.7 | 115.6  | 122.5  | 115.1  | 104.9  | 92.6   | 111.8  | 110.6  |
| HPN    | 113.2 | 126    | 111.9  | 118.2  | 116.5  | 97.5   | 122.1  | 108.1  |
| HPN    | 117   | 117.3  | 123.5  | 113.4  | 116.9  | 104.9  | 129.7  | 116.1  |
| HPN    | 114.1 | 114.6  | 118.1  | 120.1  | 114.3  | 93.5   | 120.9  | 112.5  |
| HPR    | 107.5 | 114.5  | 120.6  | 121.1  | 103.4  | 98.1   | 118.3  | 109.5  |
| HPRT1  | 412.8 | 375    | 571    | 509.3  | 347.6  | 459.5  | 412.1  | 595.2  |
| HPS1   | 129.2 | 128.7  | 134.8  | 133.2  | 119.6  | 111.2  | 134.4  | 132.1  |
| HPS1   | 155.7 | 138.2  | 134.2  | 139.8  | 145.2  | 118.8  | 156.6  | 135.2  |
| HPS1   | 121.8 | 130.6  | 115.5  | 133.6  | 120.7  | 103.7  | 122.6  | 143.7  |
| HPS3   | 164.9 | 154.7  | 220.6  | 147.3  | 149.7  | 183.6  | 138.9  | 134.5  |

|           |       |       |       |       |       |       |       |       |
|-----------|-------|-------|-------|-------|-------|-------|-------|-------|
| HPS4      | 127.1 | 105.7 | 115.7 | 112.7 | 105.3 | 92.3  | 118.1 | 120.3 |
| HPS4      | 134.6 | 117.2 | 138.6 | 131   | 116.3 | 108.6 | 124.1 | 128.5 |
| HPS4      | 149.2 | 141.9 | 156.2 | 140.5 | 146.9 | 134.8 | 143.6 | 149.8 |
| HPS4      | 120.1 | 116.1 | 131   | 115.4 | 119.1 | 108   | 126.2 | 125.3 |
| HPS5      | 182.8 | 188.6 | 201.2 | 213.5 | 195.3 | 180.8 | 247.4 | 270.9 |
| HPS5      | 114.6 | 126.2 | 113.1 | 107.8 | 101.8 | 98.1  | 121.6 | 109.1 |
| HPS6      | 724.8 | 778.3 | 778.9 | 722.9 | 500   | 532.3 | 592.1 | 561.3 |
| HPSE      | 132.5 | 137.5 | 143.6 | 130.1 | 116.3 | 124.4 | 122.7 | 128.1 |
| HPSE2     | 112.1 | 121.1 | 118.7 | 108   | 108.7 | 98.9  | 118   | 110.4 |
| HPX       | 117.5 | 105   | 114.2 | 115.6 | 106.8 | 95.9  | 116.4 | 118.2 |
| HR        | 104.6 | 108   | 108.2 | 107.9 | 102.5 | 91.5  | 107.6 | 107.8 |
| HR        | 117.3 | 113.2 | 119.3 | 115.8 | 108.3 | 96    | 118.9 | 111.6 |
| HRAS      | 170.1 | 183.8 | 228.4 | 209.5 | 165.2 | 154.8 | 215.6 | 194.7 |
| HRAS      | 114.1 | 112.8 | 124.2 | 129.2 | 108.5 | 104.4 | 117.4 | 121.8 |
| HRASLS    | 124.6 | 117.6 | 125.3 | 126   | 113.8 | 99.1  | 120.2 | 117.4 |
| HRASLS2   | 121.5 | 123.4 | 132.5 | 135.2 | 111.2 | 105.8 | 116.8 | 120.3 |
| HRASLS3   | 165.2 | 198.3 | 271.5 | 187.3 | 142.8 | 177.9 | 154.2 | 154.5 |
| HRASLS5   | 108.1 | 111.9 | 111.2 | 112.8 | 106   | 92.8  | 115.9 | 115.6 |
| HRB       | 100.7 | 106.3 | 121.3 | 111.4 | 110.9 | 99    | 113.8 | 113.2 |
| HRB2      | 152.1 | 138   | 148.4 | 149.5 | 130.1 | 131.5 | 151   | 151.1 |
| HRBL      | 127.1 | 124.7 | 127.7 | 131.1 | 110.4 | 98.7  | 133.1 | 125   |
| HRC       | 109.5 | 108.9 | 123.1 | 119.9 | 101.1 | 97.9  | 118.2 | 100.8 |
| HRG       | 106.2 | 109.7 | 110.9 | 123.4 | 98.9  | 93    | 110.3 | 114.2 |
| HRH1      | 126   | 115.4 | 123.6 | 124.6 | 111.3 | 99.3  | 118.3 | 114.9 |
| HRH2      | 117.5 | 114.3 | 116.3 | 111.1 | 109.7 | 101.9 | 117.9 | 122.7 |
| HRH3      | 119.2 | 105.2 | 116.3 | 125.5 | 113   | 100.3 | 118.3 | 111.9 |
| HRH4      | 114   | 107.6 | 117.4 | 116.4 | 106.3 | 93.2  | 113.8 | 108.1 |
| HRIHFB212 | 126.4 | 125.5 | 144.7 | 139.3 | 132.5 | 112.3 | 128.4 | 126.5 |
| HRIHFB212 | 115.2 | 116.4 | 119.1 | 118   | 114.1 | 103.7 | 122.1 | 112.7 |
| HRIHFB212 | 187.8 | 201.3 | 277.4 | 173.7 | 164.6 | 218.9 | 178.2 | 156.5 |
| HRK       | 102.3 | 111.5 | 114.3 | 117.6 | 106.4 | 103.6 | 112.1 | 116.5 |
| HRNR      | 109   | 116   | 123.9 | 118.6 | 109.3 | 100.7 | 110.3 | 124.9 |
| HRSP12    | 109.7 | 139.2 | 125.5 | 130.7 | 129.7 | 109.1 | 129.2 | 115.3 |
| HS1BP3    | 184.8 | 157.1 | 172.5 | 186.5 | 137.7 | 150.3 | 169.2 | 159.7 |
| HS2ST1    | 126   | 134.3 | 123.1 | 127.8 | 129.3 | 106.9 | 124.9 | 127.3 |
| HS3ST1    | 122.5 | 104.8 | 255.8 | 126   | 114   | 297.2 | 111.4 | 107.5 |
| HS3ST2    | 120.6 | 113.1 | 120.3 | 121   | 114   | 105.1 | 121.8 | 117.2 |
| HS3ST3A1  | 110.6 | 112.2 | 116   | 111.1 | 104   | 101.5 | 108.9 | 109.4 |
| HS3ST3B1  | 127.8 | 124   | 121   | 124.5 | 111.1 | 103.1 | 126.7 | 119.6 |
| HS3ST4    | 115.3 | 106.3 | 133   | 120.9 | 116.5 | 98    | 115.8 | 117.4 |
| HS3ST5    | 121.7 | 122.3 | 118.9 | 127.8 | 106.5 | 98.3  | 137.6 | 117.4 |
| HS3ST6    | 108.4 | 112.9 | 115.1 | 105.9 | 108.4 | 100.3 | 114   | 106.1 |
| HS6ST1    | 127.4 | 129.8 | 127.9 | 125.8 | 115.1 | 105.5 | 133.9 | 126.3 |
| HS6ST2    | 103.4 | 107.9 | 109.4 | 112   | 107.9 | 93.2  | 115.5 | 110.3 |
| HS6ST2    | 120.4 | 119   | 138.4 | 123.4 | 116.9 | 100.2 | 124.9 | 121.3 |
| HS6ST2    | 100   | 118.4 | 111.2 | 113.3 | 105.6 | 100.1 | 117.8 | 110.3 |
| HS6ST3    | 111.4 | 113.3 | 121.1 | 120.7 | 101.3 | 97.2  | 119.9 | 119.2 |
| HS747E2A  | 116.1 | 115.5 | 118.8 | 120.5 | 105.5 | 95.6  | 128   | 125.9 |
| HSA9761   | 487.9 | 574.4 | 456.9 | 533.1 | 438.3 | 256.9 | 506.8 | 555.1 |
| HSBP1     | 715.6 | 666.6 | 737   | 740.5 | 499.7 | 570.3 | 705.1 | 539.3 |
| HSCARG    | 339.1 | 356.1 | 351.9 | 302.7 | 312.2 | 252.8 | 227.2 | 243.7 |

|           |        |        |        |        |        |        |        |        |
|-----------|--------|--------|--------|--------|--------|--------|--------|--------|
| HSCB      | 291.4  | 236.5  | 264    | 252    | 235.5  | 203.6  | 262.4  | 405    |
| HSD11B1   | 122.7  | 117.6  | 122.6  | 124.1  | 106.5  | 98.9   | 115.3  | 110.1  |
| HSD11B1   | 116    | 117.9  | 112.5  | 117.5  | 109    | 100.3  | 121.4  | 113.1  |
| HSD11B1   | 121.5  | 111    | 112.2  | 116.1  | 108.3  | 97.7   | 114.2  | 122.2  |
| HSD11B1L  | 135.6  | 143.8  | 134.6  | 135.4  | 124.6  | 111.4  | 117.9  | 123.9  |
| HSD11B2   | 110.3  | 113    | 115    | 107.3  | 103.7  | 98     | 121.6  | 110.7  |
| HSD17B1   | 113.2  | 117.9  | 120.7  | 122.7  | 111.2  | 101.4  | 127.5  | 116.1  |
| HSD17B12  | 531.5  | 456.5  | 781    | 556.6  | 393.9  | 533.2  | 716.2  | 584.1  |
| HSD17B13  | 113.7  | 123    | 119.8  | 118.5  | 109.3  | 99.7   | 116.3  | 114.5  |
| HSD17B2   | 103.6  | 115.9  | 112    | 114.7  | 103.5  | 88.8   | 115.7  | 110.5  |
| HSD17B3   | 117.6  | 116.4  | 120.7  | 118.1  | 106.8  | 95     | 113    | 109.1  |
| HSD17B4   | 319.3  | 343.4  | 446.3  | 369.9  | 269.4  | 305    | 232.7  | 239.3  |
| HSD17B6   | 131.5  | 111.3  | 104.1  | 115.1  | 122.1  | 94.3   | 121    | 122.7  |
| HSD17B8   | 149.2  | 162.9  | 243.8  | 149    | 132.4  | 180.5  | 128.5  | 132.5  |
| HSD3B1    | 110.1  | 111.7  | 115.1  | 112.3  | 110.9  | 93.5   | 118.5  | 111.7  |
| HSD3B2    | 112.5  | 107.7  | 112.9  | 128    | 105.5  | 102.1  | 122.7  | 107.6  |
| HSD3B7    | 137.3  | 130.5  | 118.1  | 148.8  | 113.3  | 105    | 131    | 116.9  |
| HSDL1     | 223    | 230.4  | 203    | 215.3  | 221.3  | 151    | 225    | 205.5  |
| HSDL2     | 146.9  | 152.8  | 170.2  | 136.9  | 133.3  | 133.2  | 145.9  | 136.9  |
| HSF1      | 121.2  | 125.2  | 119.4  | 133.3  | 106.4  | 112.3  | 119.9  | 125.6  |
| HSF2      | 167.6  | 263.1  | 207.3  | 219.7  | 225.2  | 194.4  | 268.3  | 276.6  |
| HSF2BP    | 121.7  | 119.1  | 121.8  | 121.4  | 117.4  | 104.6  | 117.3  | 120.2  |
| HSF4      | 107    | 116.6  | 118.2  | 110    | 113.5  | 92.9   | 111.9  | 113.5  |
| HSF4      | 112.3  | 116.9  | 115.5  | 121.7  | 117.4  | 104.2  | 114.7  | 116.2  |
| HSF5      | 147.7  | 126.1  | 151.7  | 143.4  | 125.5  | 106.1  | 149.1  | 133.7  |
| HSFX1     | 111.8  | 121.4  | 117.4  | 111    | 102.7  | 95     | 120.3  | 118.9  |
| HSFY1     | 120.3  | 116.6  | 123.2  | 122.7  | 113.5  | 98.2   | 122.6  | 117.4  |
| HSFY1     | 103.2  | 114.9  | 115.9  | 117.2  | 102    | 96     | 122.5  | 118.5  |
| HSFY2     | 111.2  | 112.6  | 106.2  | 111.5  | 103.2  | 99.6   | 120.2  | 112.3  |
| HSFY2     | 134.6  | 116.7  | 128.8  | 122.6  | 118.9  | 103.3  | 117.1  | 118.9  |
| HSH2D     | 225.2  | 229.5  | 209.3  | 236.6  | 178.4  | 165    | 177    | 178    |
| HSMPP8    | 444.9  | 392.5  | 498.5  | 420.9  | 394.8  | 423.5  | 345.1  | 291.5  |
| HSN2      | 119.7  | 119.2  | 123.5  | 130.3  | 129.6  | 100.7  | 123.3  | 125.9  |
| HSP90AA1  | 121.4  | 119.7  | 121.9  | 127.7  | 121.9  | 110.8  | 154.1  | 148.3  |
| HSP90AA1  | 4161.2 | 3963.2 | 3674.6 | 4697.8 | 3601.6 | 2942   | 8350.2 | 9592.9 |
| HSP90AB1  | 987    | 957.7  | 837.3  | 1183.9 | 965.4  | 846.8  | 3179.1 | 5019.3 |
| HSP90AB2I | 119.6  | 128.7  | 128.2  | 121.7  | 114.1  | 104.6  | 124.9  | 127.2  |
| HSP90AB4I | 112.5  | 118.5  | 113.9  | 120.4  | 107.3  | 97.4   | 116.4  | 116.9  |
| HSP90B1   | 1721.3 | 1829.3 | 2564.3 | 2112.1 | 1888.3 | 2059.3 | 2037.8 | 2050.2 |
| HSP90B3P  | 112.5  | 118.2  | 117    | 119.9  | 117.2  | 99.7   | 125.4  | 111    |
| HSPA12A   | 119.8  | 109    | 113.3  | 124.7  | 108.8  | 102.4  | 133    | 122.6  |
| HSPA12B   | 126.3  | 114.7  | 129.8  | 122.3  | 112.8  | 105.4  | 126.5  | 124.5  |
| HSPA14    | 200    | 225.9  | 253    | 210.1  | 186.7  | 197.5  | 211.8  | 275    |
| HSPA1A    | 1058.8 | 563.6  | 1153.1 | 945.7  | 598.7  | 1012.5 | 3699.3 | 7544.3 |
| HSPA1B    | 505.5  | 385    | 491    | 548.2  | 498.4  | 451.3  | 3322.1 | 6990.1 |
| HSPA1L    | 250.4  | 252.7  | 231.9  | 255.7  | 229.7  | 206    | 276.3  | 451.5  |
| HSPA2     | 118    | 129.9  | 108.8  | 125.5  | 110    | 96.9   | 140.2  | 168.8  |
| HSPA4     | 135.9  | 153.1  | 137.8  | 184.7  | 122.7  | 115.6  | 160.3  | 144    |
| HSPA4     | 128.1  | 124.1  | 141.7  | 142.2  | 128.4  | 105.5  | 135.6  | 138.9  |
| HSPA4     | 393.9  | 501.7  | 466.7  | 586    | 357.8  | 295.5  | 634    | 639.8  |
| HSPA4L    | 130.2  | 106    | 121.7  | 120.3  | 114.7  | 97.9   | 121.9  | 117.5  |

|          |        |        |        |        |        |        |        |        |
|----------|--------|--------|--------|--------|--------|--------|--------|--------|
| HSPA5    | 225.3  | 286.9  | 466.3  | 266.8  | 273.7  | 216.6  | 332.4  | 390.2  |
| HSPA8    | 3250.5 | 3555.7 | 3653.1 | 3909.5 | 2415   | 2486.9 | 5223.3 | 7210.7 |
| HSPA8    | 2976.7 | 2482.6 | 2198.2 | 2418.5 | 2325.8 | 2675   | 4041.5 | 5021.7 |
| HSPA9B   | 398.1  | 408.1  | 368    | 446.5  | 322.7  | 312.5  | 504    | 579.3  |
| HSPB1    | 529    | 503.7  | 411.9  | 570.4  | 308.3  | 286.3  | 676.1  | 1161.5 |
| HSPB2    | 108.5  | 114.5  | 111.2  | 120.6  | 109.6  | 105.8  | 112.6  | 115.3  |
| HSPB3    | 125.5  | 113.4  | 116    | 115    | 114.4  | 100.7  | 121    | 117.1  |
| HSPB6    | 114.4  | 110.8  | 122.7  | 113.6  | 103.6  | 98.7   | 123.5  | 120.1  |
| HSPB7    | 111.6  | 115.2  | 117.2  | 109.2  | 100.9  | 101.3  | 115.8  | 111.9  |
| HSPB8    | 109.3  | 106.5  | 110.9  | 120.6  | 105.7  | 95.9   | 113    | 119.7  |
| HSPB9    | 122.7  | 121.9  | 114.8  | 116.1  | 110.9  | 102.2  | 120.6  | 113    |
| HSPBAP1  | 238.8  | 228.5  | 204.3  | 229.5  | 209    | 166.3  | 222.6  | 208.6  |
| HSPBP1   | 121.6  | 114.5  | 124.8  | 121.5  | 119.7  | 97     | 119.1  | 109.4  |
| HSPBP1   | 129.7  | 108.8  | 114.9  | 125    | 107.8  | 102.7  | 117.6  | 117.6  |
| HSPC023  | 849.8  | 854.7  | 826.9  | 740    | 646.7  | 582.4  | 664.6  | 660.9  |
| HSPC049  | 167.8  | 169.1  | 191.7  | 181.3  | 142.9  | 210.1  | 205    | 158.4  |
| HSPC065  | 118.6  | 113.4  | 118.3  | 124.9  | 104.2  | 95.4   | 114.6  | 116    |
| HSPC072  | 110.6  | 115.6  | 120.2  | 115.2  | 110.4  | 96.7   | 127.4  | 117.6  |
| HSPC105  | 118.1  | 130    | 115.1  | 114.4  | 108.6  | 93.8   | 121.2  | 112.8  |
| HSPC111  | 166.3  | 156.6  | 158.3  | 197.4  | 135.9  | 124.8  | 174.9  | 164.1  |
| HSPC117  | 314.2  | 374.6  | 333.5  | 323.5  | 253.5  | 227.2  | 278    | 220    |
| HSPC142  | 160.9  | 214.3  | 226.6  | 218.6  | 181.3  | 193.6  | 168.3  | 151.2  |
| HSPC142  | 609.8  | 774.3  | 876.9  | 653.9  | 505.8  | 591    | 517.2  | 395    |
| HSPC148  | 492.5  | 416.9  | 501.1  | 474.3  | 345.3  | 346.3  | 414.9  | 470.7  |
| HSPC152  | 900.7  | 826.7  | 960.8  | 928.3  | 965.2  | 710.5  | 737    | 1003.5 |
| HSPC159  | 109.3  | 113.4  | 116.5  | 123.6  | 105.9  | 96.7   | 115.5  | 115    |
| HSPC171  | 267.2  | 247.8  | 311.3  | 311.1  | 229.6  | 255.6  | 245.4  | 221.9  |
| HSPC176  | 576.7  | 478.2  | 894.5  | 555.5  | 433.5  | 432.4  | 489.4  | 354.7  |
| HSPC196  | 254.5  | 234.7  | 228.5  | 267.6  | 173.5  | 218.9  | 225.6  | 186.7  |
| HSPC268  | 585.9  | 452    | 552.8  | 430.9  | 526.9  | 433.9  | 572.4  | 585.3  |
| HSPD1    | 1111.1 | 850.3  | 881.3  | 1014.6 | 898.8  | 608.2  | 1692.3 | 1583   |
| HSPD1    | 117.8  | 118.1  | 126.2  | 126.8  | 111.1  | 99.9   | 120.6  | 119.3  |
| HSPD1    | 121    | 126.5  | 133.2  | 140.5  | 114.3  | 105    | 122.2  | 125.9  |
| HSPE1    | 363.6  | 321.8  | 337.6  | 349.2  | 280.9  | 236.5  | 384    | 628.9  |
| HSPG2    | 118.1  | 117    | 113.5  | 124.5  | 112.3  | 98     | 118.2  | 115.8  |
| HSPH1    | 723.1  | 538.2  | 591.9  | 658.8  | 602.7  | 458.9  | 2086.8 | 4413.7 |
| HSU79303 | 235    | 227    | 209    | 232.6  | 205.7  | 148.6  | 192.8  | 162.9  |
| HSZFP36  | 228.1  | 264.7  | 230.8  | 238.1  | 222.3  | 153.4  | 202    | 212.1  |
| HSZFP36  | 182.4  | 188.9  | 149.5  | 174.6  | 149.2  | 125.5  | 145.2  | 143.2  |
| HTATIP   | 123.1  | 119.6  | 125.9  | 132.8  | 114.1  | 107.4  | 131.4  | 128.4  |
| HTATIP   | 137.6  | 136.7  | 147.7  | 154.7  | 125.8  | 129.4  | 135.9  | 135    |
| HTATIP2  | 371.4  | 419.8  | 563    | 647.7  | 451.6  | 823.3  | 523.9  | 575    |
| HTATSF1  | 126.8  | 123    | 113.6  | 115.4  | 105.3  | 95.1   | 116.1  | 113.7  |
| HTF9C    | 132.4  | 134.5  | 131.4  | 139.7  | 106.6  | 113.5  | 136    | 132.6  |
| HTF9C    | 112.6  | 116.6  | 110.1  | 121.6  | 108.4  | 99.3   | 121.6  | 114    |
| HTF9C    | 131.6  | 131.2  | 121.5  | 136.1  | 113.4  | 106    | 133.9  | 127.6  |
| HTLF     | 603.5  | 644.4  | 570    | 705.2  | 571    | 476.2  | 479.9  | 424.5  |
| HTN1     | 105.2  | 118.3  | 112.9  | 118.1  | 109.5  | 94.3   | 113.2  | 116    |
| HTN3     | 114.9  | 121.2  | 122.1  | 123.7  | 113.7  | 107.3  | 124.2  | 120.1  |
| HTR1A    | 110.9  | 120.7  | 125    | 122.1  | 115.3  | 107    | 122.4  | 114.6  |
| HTR1B    | 113.1  | 106.4  | 108    | 111.5  | 104.9  | 96.7   | 118    | 113.7  |

|       |        |       |        |        |        |        |        |        |
|-------|--------|-------|--------|--------|--------|--------|--------|--------|
| HTR1D | 116.5  | 124.8 | 124.1  | 128.9  | 119.1  | 112    | 127.4  | 114.6  |
| HTR1E | 128.5  | 122.4 | 132.3  | 141.3  | 122.5  | 117.9  | 145.1  | 117.6  |
| HTR1F | 106.4  | 109.9 | 109.7  | 113    | 104.6  | 97.4   | 116.1  | 111.8  |
| HTR2A | 266.7  | 319.4 | 329.1  | 291.1  | 271    | 279.3  | 374.7  | 367.6  |
| HTR2B | 113.9  | 122.2 | 118.8  | 110.4  | 108.9  | 101    | 112.9  | 111.7  |
| HTR2C | 115.3  | 107.8 | 117.1  | 124.3  | 112    | 96.2   | 119.9  | 114.3  |
| HTR3A | 121.1  | 121.3 | 117.3  | 132.7  | 121.6  | 99.3   | 123.4  | 125.1  |
| HTR3A | 119.7  | 112.9 | 122.4  | 117.8  | 113.1  | 99     | 115.2  | 120.3  |
| HTR3A | 123.2  | 120.2 | 112.7  | 120.3  | 116.4  | 101.3  | 118.8  | 116.5  |
| HTR3B | 113    | 117.4 | 110.9  | 111.2  | 114.9  | 95.1   | 118.8  | 115.7  |
| HTR3C | 121.3  | 118.1 | 109.2  | 114.3  | 102.3  | 101.5  | 109    | 121.7  |
| HTR3D | 110.2  | 115.1 | 116.2  | 118.7  | 109.7  | 101.6  | 118.3  | 114.1  |
| HTR3E | 113.3  | 116.7 | 104    | 115.6  | 109    | 93.8   | 116.9  | 109.2  |
| HTR4  | 115    | 114.1 | 121.6  | 119    | 106.4  | 97.3   | 114.3  | 117.4  |
| HTR4  | 113.8  | 116.7 | 116.1  | 126.1  | 108.1  | 90.7   | 129.1  | 112.8  |
| HTR4  | 114.3  | 121.9 | 114.4  | 121.9  | 111.6  | 100.1  | 126.2  | 113.7  |
| HTR4  | 116.2  | 116.8 | 129.3  | 133.9  | 106.9  | 104.6  | 124.2  | 114.2  |
| HTR5A | 117.2  | 117.1 | 117.3  | 127.2  | 105    | 98     | 111.4  | 106.9  |
| HTR6  | 128.4  | 132.7 | 134.5  | 129.8  | 128.5  | 108.6  | 130.5  | 127.7  |
| HTR7  | 125.7  | 117.3 | 118.8  | 118.5  | 111.1  | 107.8  | 125.7  | 122.5  |
| HTR7  | 116.8  | 123.4 | 137.1  | 122.3  | 112.6  | 106.9  | 122.6  | 131.8  |
| HTR7P | 117.2  | 131.6 | 121    | 132.9  | 118.4  | 114.2  | 117.6  | 123.2  |
| HTRA1 | 161.4  | 179.6 | 241.8  | 198.1  | 158.2  | 224.6  | 197.1  | 141.3  |
| HTRA2 | 169.1  | 172.4 | 183.8  | 204.1  | 188    | 163    | 197.7  | 204.6  |
| HTRA2 | 192.6  | 184.5 | 175    | 201.5  | 168.4  | 156.5  | 250.2  | 188.1  |
| HTRA3 | 133.3  | 123.2 | 120    | 122    | 107.8  | 102.9  | 119.2  | 114.8  |
| HTRA4 | 136.1  | 133.2 | 124.1  | 139.4  | 113    | 100.1  | 129.5  | 121.6  |
| HUNK  | 123.4  | 111.4 | 114.9  | 107.2  | 100.5  | 85.3   | 126.1  | 110.6  |
| HUS1  | 113.4  | 123.9 | 107.7  | 121    | 103.7  | 92.8   | 118.7  | 109.5  |
| HUS1B | 129.5  | 138   | 132.8  | 134.7  | 114.9  | 108.6  | 133.5  | 136.4  |
| HUWE1 | 134.8  | 134.9 | 135.1  | 142.5  | 134    | 116.4  | 159.1  | 146.3  |
| HYAL1 | 119.6  | 116.3 | 110.2  | 118.5  | 113.5  | 97.1   | 119.6  | 118.1  |
| HYAL1 | 115.7  | 114.8 | 120.3  | 115.8  | 106.1  | 99.8   | 108.6  | 115    |
| HYAL1 | 118.7  | 110.7 | 118.7  | 118.4  | 101    | 100.7  | 119.3  | 117.7  |
| HYAL1 | 105.2  | 123.4 | 124.6  | 133.1  | 106.1  | 101.1  | 120.1  | 115.1  |
| HYAL2 | 122.7  | 120.2 | 119.7  | 130.5  | 113.6  | 105.1  | 118.3  | 123.5  |
| HYAL2 | 136.8  | 132.4 | 138.1  | 136.5  | 118    | 105.7  | 125.5  | 132.3  |
| HYAL2 | 120.1  | 127.5 | 121    | 115.2  | 112.5  | 98.2   | 117.9  | 113.9  |
| HYAL3 | 111.7  | 129.5 | 117    | 125    | 121.4  | 101    | 129.4  | 127.9  |
| HYAL4 | 119.1  | 117.8 | 121.6  | 118.5  | 106.9  | 100.3  | 118.9  | 111.6  |
| HYDIN | 111.1  | 113.7 | 107.5  | 114.1  | 109    | 95.6   | 113.2  | 110.4  |
| HYDIN | 111    | 115   | 119.2  | 113.5  | 101.3  | 97.1   | 114    | 113.3  |
| HYDIN | 118.1  | 111.8 | 108    | 116    | 106    | 101.7  | 121.7  | 115.7  |
| HYDIN | 112.6  | 116.6 | 122    | 116    | 103.5  | 100    | 114    | 107.4  |
| HYI   | 130.5  | 121.1 | 132.9  | 138.4  | 118.6  | 103.5  | 123.1  | 122.7  |
| HYLS1 | 256.7  | 303.5 | 231.5  | 278.5  | 224.7  | 171    | 260.9  | 257.4  |
| HYOU1 | 185.3  | 164.9 | 181.4  | 160.5  | 151.2  | 158.8  | 183.5  | 176.7  |
| HYPB  | 598.2  | 689.7 | 536.2  | 726.9  | 741.3  | 500.3  | 783.9  | 741.9  |
| HYPE  | 176.9  | 169.7 | 195.1  | 156.3  | 170.8  | 147.3  | 181    | 185.8  |
| HYPK  | 2436.9 | 2000  | 2029.4 | 2029.8 | 2094.4 | 1248.9 | 2210.4 | 2214.9 |
| IAH1  | 369.3  | 428   | 504    | 438.8  | 377.8  | 397.7  | 347.1  | 237.6  |

|         |        |        |        |        |        |        |        |        |
|---------|--------|--------|--------|--------|--------|--------|--------|--------|
| IAPP    | 114.8  | 124.3  | 123.2  | 111.7  | 106.2  | 100.2  | 127.2  | 116.6  |
| IARS    | 266.6  | 337.6  | 267.6  | 330.5  | 340.3  | 278.4  | 318.1  | 320.8  |
| IARS    | 107.6  | 108.4  | 105.9  | 117.4  | 100.1  | 94.9   | 117.8  | 108.5  |
| IARS2   | 425.6  | 614.1  | 486.4  | 453.2  | 449.3  | 433.3  | 520.8  | 619.3  |
| IBRDC1  | 122.2  | 114    | 124.4  | 111.2  | 110.8  | 103.4  | 109.2  | 111.3  |
| IBRDC2  | 148.8  | 123.5  | 157.2  | 133.3  | 112.2  | 109.4  | 117.8  | 111    |
| IBRDC3  | 154.5  | 135.8  | 160.7  | 150    | 130.1  | 169.3  | 144.8  | 141.2  |
| IBSP    | 123.6  | 126.3  | 128.7  | 116.3  | 127    | 111.4  | 131.1  | 129    |
| IBTK    | 252.5  | 265.8  | 308.2  | 327.4  | 229.1  | 286    | 267.3  | 271.4  |
| ICA1    | 114.6  | 125.7  | 130.3  | 114.8  | 111.2  | 98     | 113.2  | 109.3  |
| ICA1    | 125.5  | 124.7  | 141.4  | 124.5  | 114.7  | 114.5  | 121.7  | 119.1  |
| ICA1    | 116.9  | 128.7  | 138.6  | 133.3  | 120.3  | 111    | 131.1  | 138.8  |
| ICA1L   | 117.3  | 116.3  | 115.5  | 119    | 104.9  | 105.8  | 117.6  | 119.8  |
| ICA1L   | 113.3  | 111.7  | 117.4  | 130.1  | 108.1  | 96.8   | 118.3  | 115.8  |
| ICAM1   | 121.3  | 138.3  | 157    | 153.1  | 133.4  | 119.7  | 143.8  | 133.8  |
| ICAM2   | 1499.6 | 1884.7 | 1283.1 | 1491.9 | 1186.7 | 855    | 1251.1 | 1104   |
| ICAM3   | 1632.1 | 1941   | 1946.3 | 1762.7 | 1443.3 | 1541.6 | 1682   | 1868.4 |
| ICAM4   | 111.4  | 114.5  | 115.3  | 115.4  | 99     | 101    | 105.3  | 110.5  |
| ICAM4   | 124.4  | 124.9  | 127.7  | 128.3  | 120.8  | 111.7  | 113.7  | 121.4  |
| ICAM4   | 119.9  | 115.2  | 111.2  | 133.1  | 104.1  | 97.1   | 113.8  | 112.8  |
| ICAM5   | 117.4  | 122.8  | 127.8  | 118.9  | 109.5  | 106.3  | 121.9  | 114.4  |
| ICEBERG | 104.8  | 123.1  | 107.3  | 111.2  | 104.6  | 98.8   | 110.3  | 103.5  |
| ICK     | 112.9  | 137.7  | 122.2  | 120.5  | 113.6  | 105.2  | 124.9  | 129.7  |
| ICK     | 114.6  | 120.4  | 117.8  | 110.1  | 105.1  | 94.3   | 117.2  | 116.7  |
| ICMT    | 215.3  | 209.5  | 193.5  | 207.6  | 155.5  | 159.5  | 180.2  | 152.6  |
| ICOS    | 545.4  | 677.3  | 350.8  | 668.7  | 631.8  | 390.7  | 1280   | 1390.5 |
| ICOSLG  | 118    | 121.7  | 138    | 133.1  | 111.7  | 113.7  | 123.3  | 110.9  |
| ICT1    | 143.9  | 159.4  | 190.3  | 158.4  | 155.7  | 145.7  | 145.5  | 172    |
| ID1     | 119.8  | 115    | 109.9  | 116.9  | 107.6  | 96     | 122.8  | 116.6  |
| ID1     | 116.7  | 114.9  | 125.8  | 123.9  | 105.4  | 109.6  | 114.7  | 123    |
| ID2     | 479.7  | 527.6  | 626.3  | 456.7  | 405.8  | 337.8  | 416.7  | 399.7  |
| ID3     | 410.2  | 344.4  | 567.8  | 352.7  | 296.3  | 340.1  | 270.3  | 253.8  |
| ID4     | 104.4  | 119.1  | 112.5  | 120.8  | 110    | 101.4  | 119.4  | 118.1  |
| IDE     | 167.5  | 139.3  | 167.2  | 155.3  | 148.9  | 147.3  | 160.9  | 136.5  |
| IDH1    | 300.2  | 246.1  | 407.4  | 262.8  | 206.7  | 273.9  | 210.2  | 182.4  |
| IDH2    | 213.3  | 240.1  | 551.4  | 202.7  | 158    | 284    | 164.8  | 166.7  |
| IDH3A   | 186.9  | 180.7  | 169.3  | 201.9  | 167.4  | 138.6  | 202.3  | 171.5  |
| IDH3B   | 889.9  | 955.6  | 972.5  | 949    | 721.2  | 739.2  | 813.3  | 807.9  |
| IDH3B   | 120.5  | 121.4  | 120.3  | 127.6  | 109.4  | 111.4  | 125.4  | 116.8  |
| IDH3B   | 641.1  | 643.8  | 585.8  | 552    | 495.3  | 459.4  | 457.2  | 398.1  |
| IDH3G   | 129.2  | 119.4  | 146.8  | 145.2  | 115.4  | 113.9  | 143.9  | 142.2  |
| IDH3G   | 401.8  | 455.6  | 494.9  | 380    | 262.7  | 343.7  | 266.1  | 234.6  |
| IDI1    | 157.2  | 164.1  | 204.7  | 162.5  | 164.6  | 153.4  | 184    | 184.3  |
| IDI2    | 108.5  | 111.7  | 111.6  | 121.2  | 104    | 91.9   | 115.6  | 110.4  |
| IDS     | 410.7  | 467.5  | 497    | 620    | 498.2  | 644.5  | 626.1  | 668.8  |
| IDS     | 146.7  | 132.3  | 202.6  | 156.6  | 131.2  | 150.1  | 145.7  | 166.6  |
| IDS     | 291.8  | 308.3  | 403.6  | 385.5  | 268.2  | 371.8  | 295.5  | 300.4  |
| IDUA    | 236.9  | 240.7  | 245.8  | 226.5  | 171.1  | 172.7  | 231.7  | 166.4  |
| IER2    | 128.3  | 161.3  | 172    | 135.8  | 139.2  | 138.1  | 151.2  | 142.8  |
| IER3    | 546.6  | 990.4  | 453.1  | 899.3  | 586    | 295.1  | 945.9  | 398.9  |
| IER3IP1 | 157.9  | 177.1  | 204.9  | 179.6  | 150.7  | 134.8  | 162.1  | 166.6  |

|         |        |        |        |       |        |        |       |       |
|---------|--------|--------|--------|-------|--------|--------|-------|-------|
| IER5    | 264.7  | 313.3  | 226.1  | 315.4 | 241.5  | 221.2  | 423.9 | 369.6 |
| IER5L   | 133.1  | 130.9  | 161.7  | 131.9 | 116.3  | 120.3  | 142.1 | 134   |
| IFI16   | 501.8  | 440    | 466.5  | 542.4 | 439.2  | 326.8  | 441.1 | 559.5 |
| IFI27   | 111    | 115.8  | 116.6  | 116.5 | 108.7  | 95.7   | 115.2 | 115   |
| IFI30   | 398.9  | 179.8  | 935.2  | 436.9 | 199.7  | 461    | 487.6 | 222.6 |
| IFI35   | 373.7  | 384.7  | 470.7  | 337.7 | 233.7  | 292.4  | 205.9 | 181.9 |
| IFI44   | 306    | 328.8  | 387.2  | 344   | 305.9  | 244.7  | 284.2 | 404.1 |
| IFI44L  | 230.2  | 163.3  | 162.7  | 238.9 | 141    | 123.1  | 148.3 | 137.3 |
| IFI6    | 198.1  | 155.5  | 193.7  | 205.6 | 166.6  | 131.4  | 147.2 | 153.9 |
| IFIH1   | 369.9  | 240.9  | 292.3  | 370.9 | 261    | 225.2  | 284.1 | 226.5 |
| IFIT1   | 173.7  | 145.6  | 148.3  | 182.1 | 131.2  | 116.9  | 142.2 | 125.4 |
| IFIT1L  | 117.4  | 115    | 106.9  | 115.9 | 105.2  | 103.3  | 121.5 | 111   |
| IFIT2   | 319.4  | 281.8  | 291.2  | 291.4 | 229.9  | 248.4  | 223.9 | 202.4 |
| IFIT3   | 153.1  | 133.5  | 151.2  | 143.2 | 125.7  | 119.5  | 136.5 | 127.4 |
| IFIT3   | 295.2  | 174.7  | 208.9  | 248.3 | 131.4  | 126.1  | 174.4 | 135.8 |
| IFIT3   | 116.5  | 114.9  | 122.4  | 114.7 | 112.6  | 93.7   | 115.7 | 99.9  |
| IFIT5   | 130.8  | 137.4  | 140.5  | 135.2 | 119.6  | 129.1  | 129.6 | 120.5 |
| IFITM1  | 2233.8 | 2661.8 | 1484   | 1852  | 1081.2 | 859.8  | 803.5 | 594.7 |
| IFITM2  | 684.3  | 916    | 619.6  | 639   | 526.6  | 377.7  | 393.1 | 410.2 |
| IFITM3  | 146    | 189.3  | 176.7  | 172.4 | 145.9  | 109.6  | 128.8 | 146.9 |
| IFITM4P | 118.7  | 107.3  | 120.2  | 120.6 | 104.7  | 101.2  | 123.7 | 110.1 |
| IFITM5  | 107.5  | 103.2  | 110.2  | 119.2 | 97.9   | 105.6  | 122.2 | 108.8 |
| IFNA1   | 117    | 111.4  | 115.4  | 116.4 | 104.7  | 108.5  | 113.6 | 114.5 |
| IFNA10  | 128.7  | 121.7  | 146    | 131.1 | 120.1  | 112.7  | 124.1 | 115.6 |
| IFNA13  | 113.8  | 108.5  | 117.3  | 116.5 | 106.4  | 97.5   | 119   | 119.9 |
| IFNA14  | 126    | 121.6  | 143.1  | 124.6 | 117.1  | 104.5  | 126   | 127.3 |
| IFNA16  | 111.4  | 113.7  | 119.3  | 117   | 110.2  | 99.7   | 118.1 | 106.8 |
| IFNA17  | 109.5  | 111.9  | 118    | 112.7 | 108.4  | 102.3  | 113.9 | 114.2 |
| IFNA2   | 109.4  | 115.5  | 118.1  | 113.2 | 107.9  | 88.7   | 120.4 | 114.3 |
| IFNA21  | 124.8  | 124.2  | 129.9  | 128.2 | 117.8  | 105.9  | 124   | 125.8 |
| IFNA4   | 109.2  | 109    | 123.1  | 115.3 | 105    | 97.3   | 112.6 | 107.6 |
| IFNA5   | 117.4  | 121.2  | 121.1  | 111.2 | 118.4  | 99     | 127.8 | 123.8 |
| IFNA6   | 111.5  | 110.6  | 111.2  | 106.1 | 108.1  | 90.3   | 109.2 | 112   |
| IFNA7   | 125.2  | 132.9  | 138.2  | 132.1 | 113.5  | 107.8  | 112.7 | 120.8 |
| IFNA8   | 137.5  | 154.1  | 131    | 129.6 | 129.9  | 113.4  | 134.1 | 146.4 |
| IFNAR1  | 280.7  | 319.8  | 288.3  | 292.4 | 235.3  | 202    | 250.2 | 252.5 |
| IFNAR2  | 259.4  | 222.9  | 215.2  | 239.7 | 188.5  | 171    | 223.5 | 206.8 |
| IFNAR2  | 188.3  | 235.3  | 270.5  | 189.1 | 175.1  | 205.9  | 154.2 | 170.5 |
| IFNAR2  | 111.1  | 105.1  | 118.3  | 119   | 110.6  | 110.9  | 119.8 | 109.8 |
| IFNB1   | 107.1  | 113.8  | 116.6  | 110.7 | 105.5  | 98.1   | 105.7 | 106.7 |
| IFNE1   | 117.3  | 116.3  | 111    | 116.8 | 111.4  | 104.4  | 114.4 | 117.9 |
| IFNG    | 142.9  | 121.2  | 155.5  | 133   | 119.2  | 107.7  | 125.2 | 125.2 |
| IFNGR1  | 871.2  | 705.5  | 2369.1 | 925.3 | 505.4  | 1484.6 | 685.6 | 576.7 |
| IFNGR2  | 950.9  | 638.3  | 1913.9 | 663.6 | 489.6  | 682.7  | 529.5 | 418.6 |
| IFNK    | 113.2  | 105.4  | 126.8  | 130.5 | 109.1  | 92.5   | 119.4 | 109.4 |
| IFNW1   | 111.4  | 114.6  | 109.8  | 114.6 | 103.3  | 94.9   | 117.1 | 116.6 |
| IFRD1   | 143.3  | 169.4  | 144.2  | 145.7 | 138.9  | 127.9  | 163   | 180.3 |
| IFRD1   | 104.8  | 112.9  | 117.3  | 123.9 | 111.7  | 107.2  | 122.4 | 115.7 |
| IFRD2   | 160.1  | 161.3  | 132.9  | 155.6 | 132.6  | 108    | 161   | 145.9 |
| IFRG15  | 117.6  | 120.6  | 121.1  | 125.2 | 108.1  | 96.2   | 121.8 | 117.1 |
| IFT122  | 113    | 105.2  | 110.8  | 111.1 | 103.2  | 98.9   | 120.1 | 107.7 |



|         |       |       |       |        |       |       |        |        |
|---------|-------|-------|-------|--------|-------|-------|--------|--------|
| IFT122  | 121.2 | 121.3 | 123   | 122.1  | 115.9 | 106.8 | 122.4  | 123.9  |
| IFT122  | 150.3 | 169.6 | 162.7 | 150.3  | 131.9 | 124.4 | 171.2  | 141.6  |
| IFT140  | 114.8 | 119.2 | 121.8 | 124.3  | 108.2 | 99.5  | 120.6  | 119.7  |
| IFT172  | 129.6 | 125.1 | 126.7 | 134.4  | 120.4 | 104.3 | 121.4  | 120.2  |
| IFT52   | 120.5 | 148.8 | 141.2 | 128.5  | 122.5 | 103.1 | 123.2  | 128.9  |
| IFT57   | 149.9 | 144.2 | 168.2 | 152.5  | 143.1 | 127.5 | 151.1  | 166.1  |
| IFT74   | 138.2 | 145.1 | 163.8 | 143.8  | 137.9 | 120.4 | 134.9  | 141.5  |
| IFT80   | 113.7 | 121.3 | 116   | 117.7  | 106.2 | 101   | 114.5  | 120.9  |
| IFT81   | 108.5 | 116.9 | 115.3 | 113.6  | 105   | 101.8 | 124.2  | 113    |
| IFT81   | 117.2 | 118.7 | 121.8 | 114.2  | 113.6 | 99.9  | 113.4  | 109.5  |
| IFT81   | 120.6 | 126.9 | 123.4 | 120.3  | 114.1 | 111.2 | 117.6  | 116.9  |
| IFT88   | 124.2 | 118.9 | 124.9 | 130.2  | 113.5 | 99.1  | 123.2  | 124.2  |
| IGBP1   | 365.9 | 375.7 | 302.1 | 274.9  | 312.7 | 246.3 | 325.1  | 321.7  |
| IGF1    | 114.5 | 113.4 | 117.4 | 124.4  | 108   | 95.8  | 119.2  | 116.2  |
| IGF1R   | 115.4 | 126.7 | 124.9 | 125.8  | 117.5 | 102.4 | 127.8  | 122.3  |
| IGF2    | 109.4 | 112.3 | 108.4 | 114    | 104.5 | 103.1 | 114.2  | 110.1  |
| IGF2    | 109.4 | 118.5 | 116.9 | 116.2  | 107.8 | 95.9  | 124.8  | 121.4  |
| IGF2AS  | 114.3 | 114.6 | 122.6 | 121.1  | 110.8 | 96.7  | 116.5  | 127.8  |
| IGF2BP1 | 112.2 | 131.5 | 125.7 | 121.9  | 119.6 | 113.8 | 116.6  | 128.9  |
| IGF2BP2 | 141.3 | 147.2 | 150.4 | 167.6  | 133.9 | 162.6 | 153.1  | 135.1  |
| IGF2BP3 | 109.7 | 121.7 | 120.2 | 126    | 114   | 105.1 | 133.1  | 125    |
| IGF2R   | 850.5 | 754.7 | 572.4 | 1072.4 | 928.6 | 429.8 | 1082.3 | 1169.9 |
| IGFALS  | 124.4 | 122.8 | 104.7 | 117.9  | 102.2 | 101.4 | 123.7  | 107.6  |
| IGFBP1  | 116.7 | 114.3 | 126.5 | 113.1  | 108   | 104.2 | 120.9  | 119.2  |
| IGFBP2  | 111.8 | 111.1 | 128.1 | 124.4  | 112.4 | 96.6  | 114    | 116.5  |
| IGFBP3  | 126.6 | 122.6 | 130.7 | 127.6  | 109.5 | 107.9 | 113.9  | 115.6  |
| IGFBP3  | 125.3 | 124   | 123   | 131.7  | 122.8 | 105.1 | 119.8  | 123.8  |
| IGFBP4  | 130.7 | 123.7 | 138.7 | 145.1  | 118.7 | 108.9 | 145.6  | 129.9  |
| IGFBP5  | 105.3 | 120.2 | 114   | 125.1  | 107   | 106.8 | 113.3  | 121.1  |
| IGFBP6  | 119.1 | 121.3 | 108.9 | 117.3  | 112.6 | 103.3 | 118.8  | 117.6  |
| IGFBP7  | 128.5 | 134.7 | 144.1 | 142.1  | 114.1 | 106.2 | 130.9  | 125    |
| IGFBPL1 | 136.6 | 134.8 | 142.8 | 132.4  | 131.2 | 114.3 | 122.7  | 128    |
| IGFL1   | 120.5 | 113.3 | 119.3 | 118.6  | 113.4 | 101.4 | 117.4  | 107.9  |
| IGFL2   | 110.3 | 109.8 | 106.2 | 110.6  | 103.6 | 96.3  | 112.4  | 106.3  |
| IGFL3   | 114.1 | 123.7 | 120.7 | 113.1  | 120.9 | 96.2  | 124.8  | 120.9  |
| IGFL4   | 115.2 | 112.4 | 120.1 | 116.9  | 110.1 | 103.7 | 115.5  | 106.1  |
| IGHMBP2 | 134.3 | 144.3 | 155.1 | 127.3  | 136.1 | 122.6 | 139.8  | 157    |
| IGJ     | 141.7 | 142.6 | 137.7 | 135.8  | 129.9 | 124.3 | 118.1  | 131.4  |
| IGLL1   | 624.1 | 783.1 | 494.8 | 496.8  | 403.3 | 487.8 | 499.8  | 391.5  |
| IGLL1   | 102.4 | 118.7 | 129.9 | 116.9  | 113.1 | 102   | 107.5  | 119.6  |
| IGSF1   | 115.6 | 118.5 | 116.8 | 123.5  | 111.9 | 98.5  | 119.5  | 113    |
| IGSF1   | 114.9 | 124.7 | 124.1 | 128.1  | 104   | 102.8 | 113.6  | 115.3  |
| IGSF1   | 115.7 | 124   | 130.6 | 129.4  | 118.8 | 96.7  | 126.5  | 115.5  |
| IGSF10  | 106.8 | 108.9 | 105.3 | 116.3  | 105   | 97.1  | 115.7  | 117.6  |
| IGSF11  | 115.3 | 108.2 | 112   | 116.9  | 104.6 | 103.4 | 113.2  | 112.6  |
| IGSF11  | 116.6 | 118.2 | 125.4 | 125.3  | 113.3 | 102.5 | 119.8  | 122.1  |
| IGSF11  | 120.7 | 117.1 | 126.3 | 123.6  | 117.5 | 104.6 | 120.6  | 115.9  |
| IGSF2   | 113   | 127   | 116.5 | 131.7  | 112.8 | 104.1 | 123.5  | 124.5  |
| IGSF21  | 104.9 | 117.3 | 116.8 | 115.9  | 104.9 | 99.8  | 116.7  | 115.7  |
| IGSF22  | 108   | 105.7 | 115.9 | 115.4  | 110.7 | 102.4 | 118.3  | 119.3  |
| IGSF3   | 114.9 | 106.7 | 110.9 | 113.8  | 98.1  | 101.8 | 124    | 108.6  |

|         |        |        |        |       |        |       |       |       |
|---------|--------|--------|--------|-------|--------|-------|-------|-------|
| IGSF3   | 114.8  | 120.5  | 122.8  | 116   | 103.5  | 98.4  | 125.4 | 114.4 |
| IGSF4   | 141.9  | 162    | 118.6  | 141.5 | 138    | 110.7 | 141   | 135.8 |
| IGSF4B  | 117.6  | 114.4  | 114.5  | 114.4 | 112.7  | 103.3 | 118.5 | 118.3 |
| IGSF4C  | 103.5  | 112.2  | 107.2  | 114.8 | 101.9  | 94.5  | 111   | 108.3 |
| IGSF4D  | 109.8  | 110.7  | 109.5  | 112.9 | 105.6  | 92.4  | 112.1 | 105.6 |
| IGSF6   | 224.7  | 169.7  | 230.7  | 142.3 | 121.7  | 105.6 | 154   | 123.7 |
| IGSF8   | 126.7  | 140    | 134.4  | 119.4 | 124.5  | 108.1 | 123.8 | 133.1 |
| IGSF9   | 109.7  | 111    | 122.1  | 117   | 109.8  | 92.9  | 135.4 | 119.4 |
| IHH     | 120.4  | 101.1  | 115    | 118   | 104.7  | 97.2  | 107.2 | 114.5 |
| IHPK1   | 119.8  | 123.3  | 125.7  | 122.9 | 116    | 96.1  | 133.6 | 117.9 |
| IHPK1   | 324.5  | 318.8  | 288.6  | 346.4 | 253.7  | 270.4 | 466.1 | 586.4 |
| IHPK1   | 352.5  | 410.7  | 350.1  | 422.5 | 323.1  | 358.2 | 568   | 701.6 |
| IHPK2   | 144    | 154    | 160    | 152.6 | 138.8  | 141.8 | 159.4 | 173.7 |
| IHPK2   | 131.8  | 121.7  | 143.1  | 147.8 | 124.2  | 132.5 | 139.8 | 148.2 |
| IHPK3   | 133.8  | 118.5  | 138.1  | 128.5 | 130.7  | 106.2 | 121.9 | 133.1 |
| IIP45   | 146.7  | 141.4  | 157    | 160.9 | 124.5  | 119.4 | 151.3 | 138.8 |
| IIP45   | 113.1  | 105    | 124.3  | 113.6 | 113.9  | 106.6 | 120.8 | 112.8 |
| IK      | 423.8  | 395.5  | 488    | 442.4 | 371.3  | 448.4 | 397.7 | 465.6 |
| IKBKAP  | 130.8  | 127.4  | 132.5  | 128.6 | 119.1  | 102.5 | 135.1 | 126.1 |
| IKBKB   | 144    | 147.5  | 147.3  | 149.6 | 132    | 124.1 | 145.6 | 124.9 |
| IKBKE   | 244.7  | 301    | 231.9  | 248.1 | 178.2  | 180   | 174.1 | 157.4 |
| IKBKG   | 505.2  | 573.7  | 644.4  | 749   | 553.6  | 595.9 | 753.2 | 631.7 |
| IKIP    | 122.1  | 126.1  | 138    | 131.5 | 119.1  | 104.7 | 121.2 | 119.4 |
| IKIP    | 110.6  | 127    | 122.5  | 115.2 | 105.7  | 107.5 | 123.1 | 122   |
| IKIP    | 115.4  | 120.1  | 109.1  | 115.9 | 103.6  | 97.1  | 111.5 | 114   |
| IKZF3   | 135.9  | 131.6  | 131.4  | 132.7 | 120.1  | 95.8  | 118.9 | 114.6 |
| IL10    | 833.9  | 665.2  | 910.9  | 800.4 | 1035.8 | 607.9 | 789.8 | 899.6 |
| IL10RA  | 397.3  | 484.3  | 414.8  | 511   | 315.7  | 408.1 | 381.5 | 342.7 |
| IL10RB  | 662.4  | 796.4  | 1317   | 724.9 | 564.1  | 974.4 | 635.5 | 623   |
| IL11    | 107.8  | 110.9  | 116.4  | 113.8 | 107.9  | 93.4  | 112.9 | 114.4 |
| IL11RA  | 177.9  | 173.3  | 187.4  | 174.2 | 127.5  | 129.2 | 136   | 117.7 |
| IL11RA  | 1135.9 | 1082.6 | 1318.3 | 874.8 | 643.5  | 687.7 | 481.5 | 375.9 |
| IL11RA  | 114.9  | 109.3  | 113.8  | 125.4 | 108    | 99.2  | 115.2 | 118.6 |
| IL12A   | 122.7  | 126.9  | 123.9  | 129.8 | 119.4  | 106.6 | 129.1 | 122.9 |
| IL12B   | 106.5  | 106.9  | 111.2  | 107.5 | 101.7  | 94.7  | 115.5 | 115.6 |
| IL12RB1 | 121.8  | 126.4  | 118.4  | 112.3 | 116.8  | 97.7  | 114.6 | 118.3 |
| IL12RB1 | 185.8  | 170.1  | 162.3  | 161   | 154.9  | 126.5 | 137.8 | 137.5 |
| IL12RB1 | 156.5  | 177.2  | 159.5  | 175   | 154.2  | 120.1 | 146.3 | 150.4 |
| IL12RB2 | 127.5  | 131.7  | 128.1  | 122.4 | 113.1  | 110.2 | 137   | 133.2 |
| IL13    | 100.5  | 102.8  | 110.5  | 111.9 | 97.5   | 95.8  | 123.1 | 104.7 |
| IL13RA1 | 410    | 193    | 858.8  | 405.6 | 169    | 645.2 | 268.9 | 147   |
| IL13RA2 | 108.8  | 107.6  | 128.9  | 130.1 | 105.9  | 106.7 | 121   | 108.7 |
| IL15    | 202.6  | 186.5  | 224.8  | 226   | 145.5  | 172   | 167.2 | 147   |
| IL15    | 125.5  | 134.1  | 147.3  | 134.1 | 132.1  | 111.3 | 124.5 | 122.1 |
| IL15    | 124.1  | 123.2  | 135.7  | 120.3 | 107.2  | 102.4 | 115.9 | 114.9 |
| IL15RA  | 124.2  | 111.8  | 110.8  | 128.4 | 106.7  | 98.2  | 134.1 | 121.8 |
| IL15RA  | 116.5  | 119.2  | 114    | 127.9 | 113    | 110.5 | 120.7 | 121   |
| IL15RA  | 120.3  | 104.5  | 111    | 117.2 | 107.3  | 95.6  | 117.3 | 116.4 |
| IL16    | 159.1  | 195.3  | 206.6  | 185.4 | 190.5  | 179.1 | 172.7 | 172.8 |
| IL16    | 192.5  | 196.8  | 247.3  | 214.3 | 188.9  | 247.3 | 189.6 | 158.4 |
| IL17    | 111.2  | 115.8  | 122.5  | 113.5 | 104.8  | 96.2  | 116.2 | 103.3 |

|          |        |        |        |        |        |       |        |        |
|----------|--------|--------|--------|--------|--------|-------|--------|--------|
| IL17B    | 120.2  | 116.7  | 111    | 116.4  | 108.8  | 102.3 | 122.1  | 114.7  |
| IL17C    | 119.5  | 121.5  | 111.7  | 117.9  | 118.8  | 117.8 | 118.1  | 115.1  |
| IL17D    | 126.7  | 121.6  | 134.8  | 139    | 114.3  | 104   | 129.4  | 137.2  |
| IL17E    | 131.9  | 124.9  | 129    | 127.3  | 110.6  | 108.9 | 119.5  | 128.7  |
| IL17F    | 116.5  | 104.5  | 105.7  | 105.9  | 103.6  | 92.3  | 118.3  | 106.6  |
| IL17R    | 210.9  | 206.8  | 187.6  | 219.5  | 160.7  | 159.4 | 221.7  | 194.6  |
| IL17RB   | 101.9  | 120.3  | 119.9  | 114.4  | 110.5  | 97.5  | 111.1  | 110.1  |
| IL17RC   | 110.8  | 110.4  | 114    | 123.4  | 106.3  | 105.5 | 121.3  | 114    |
| IL17RC   | 118.5  | 122    | 128.3  | 123    | 113    | 104.5 | 118    | 119    |
| IL17RC   | 130.3  | 132.8  | 124.7  | 130.3  | 119.7  | 106.5 | 120.2  | 127.1  |
| IL17RD   | 102.4  | 109.4  | 120.9  | 107.5  | 103.3  | 94    | 115.4  | 115.2  |
| IL17RD   | 818.9  | 661.1  | 712.8  | 969.5  | 809.3  | 339.6 | 848.6  | 763.2  |
| IL17RD   | 111.4  | 108.6  | 113.5  | 110.7  | 109.6  | 98.6  | 112.7  | 118.2  |
| IL17RE   | 127.4  | 121    | 131.1  | 133.6  | 105.4  | 96.8  | 119.1  | 130.8  |
| IL17RE   | 119.3  | 119.5  | 124.2  | 122    | 115.4  | 105.8 | 117.2  | 107.5  |
| IL17RE   | 115.3  | 112.6  | 118.3  | 121.2  | 104.5  | 101.1 | 117.8  | 118    |
| IL18     | 4119.5 | 4051.1 | 3940.8 | 4049.9 | 4059.8 | 1733  | 3612.1 | 4989.1 |
| IL18BP   | 108.1  | 104.5  | 113.2  | 114.5  | 102.5  | 95.8  | 112    | 109.6  |
| IL18BP   | 365.8  | 219.7  | 1156.1 | 460.8  | 175.3  | 941.2 | 265.6  | 210.5  |
| IL18R1   | 218    | 216.9  | 161.8  | 206    | 186.3  | 123.2 | 215.2  | 196.4  |
| IL18RAP  | 856.9  | 710    | 643.8  | 843.5  | 542.5  | 422.9 | 733.4  | 588.6  |
| IL19     | 121.9  | 110.5  | 116.3  | 116.1  | 106.6  | 93.8  | 124.5  | 116.9  |
| IL19     | 118.2  | 119.4  | 122.3  | 127.1  | 108.7  | 104   | 121    | 122.2  |
| IL1A     | 117.6  | 123.6  | 123.6  | 127    | 114    | 106.8 | 131.5  | 112.1  |
| IL1B     | 352.8  | 703.4  | 213    | 594    | 514.1  | 197.4 | 473.1  | 199.2  |
| IL1F10   | 116.5  | 103.4  | 105    | 118.8  | 111.7  | 89.2  | 112.2  | 109.6  |
| IL1F10   | 116.1  | 113.9  | 122.4  | 114.7  | 111.1  | 99.1  | 120.7  | 111.1  |
| IL1F5    | 119.2  | 108.3  | 112.3  | 111.8  | 114.7  | 93.8  | 119.2  | 112.3  |
| IL1F5    | 108.3  | 105.3  | 112.9  | 101.4  | 113    | 96    | 118.3  | 113    |
| IL1F6    | 113.7  | 114    | 112.6  | 116    | 105.4  | 93.9  | 109.8  | 113.5  |
| IL1F7    | 117.9  | 112.7  | 106.2  | 108.3  | 111    | 100.9 | 118.2  | 106.3  |
| IL1F7    | 135.7  | 118.2  | 128.9  | 124.5  | 123.2  | 104.4 | 124.2  | 113.9  |
| IL1F7    | 118    | 117.5  | 108    | 113.3  | 111.8  | 102.1 | 115.9  | 120.5  |
| IL1F8    | 115    | 118.6  | 124.4  | 119.4  | 110.6  | 100.6 | 117.4  | 127.7  |
| IL1F8    | 115.7  | 121.7  | 125.8  | 133    | 108.9  | 99.8  | 113.3  | 110.8  |
| IL1F8    | 119.7  | 118.5  | 121.2  | 130.3  | 122.2  | 101.2 | 125.4  | 122.4  |
| IL1F9    | 112.3  | 107.4  | 108.5  | 113.4  | 105.3  | 93.9  | 115.5  | 109.1  |
| IL1R1    | 99.9   | 109.8  | 120.8  | 134.5  | 115.7  | 97.4  | 122.9  | 114    |
| IL1R2    | 132.3  | 120.8  | 123.3  | 148.3  | 115    | 110.6 | 124.8  | 116.5  |
| IL1R2    | 201.5  | 151.2  | 182.8  | 373.6  | 146.3  | 205.2 | 240.7  | 135.5  |
| IL1R2    | 111.9  | 110.7  | 116.6  | 115    | 98.3   | 99.9  | 110.1  | 111.1  |
| IL1RAP   | 111.6  | 114    | 115    | 120.5  | 110.6  | 99.1  | 116.6  | 111.2  |
| IL1RAP   | 121.8  | 118.1  | 121.1  | 115.1  | 111.7  | 100   | 117.2  | 126.8  |
| IL1RAP   | 121    | 116    | 139.1  | 131.8  | 124.9  | 111.1 | 117.3  | 130.2  |
| IL1RAPL1 | 117.6  | 109.2  | 108.3  | 109.6  | 106.4  | 93.9  | 114.1  | 110.4  |
| IL1RAPL2 | 112.9  | 108.4  | 110.5  | 117.9  | 105.7  | 104.4 | 102    | 110.8  |
| IL1RL1   | 111.9  | 113.4  | 107.3  | 116.9  | 106.4  | 102.8 | 112.9  | 110.7  |
| IL1RL1   | 112.5  | 119.5  | 117.7  | 115.6  | 115.9  | 108.5 | 119.7  | 128.3  |
| IL1RL1   | 113.3  | 118.9  | 111    | 123    | 109.7  | 95.9  | 113.5  | 116.6  |
| IL1RL2   | 112    | 109.3  | 117.6  | 119.5  | 111.8  | 102.4 | 122    | 120.4  |
| IL1RN    | 116.6  | 119.6  | 129.4  | 122.2  | 105.7  | 94.6  | 125.9  | 120.8  |

|         |        |        |        |        |       |       |       |       |
|---------|--------|--------|--------|--------|-------|-------|-------|-------|
| IL1RN   | 210.2  | 198    | 132.3  | 293.7  | 225   | 105.9 | 250.9 | 131.6 |
| IL1RN   | 285.9  | 404.2  | 142.4  | 453.9  | 302.2 | 126   | 682.3 | 162.7 |
| IL2     | 112    | 118.7  | 113.2  | 110.6  | 100.2 | 91.3  | 120.9 | 106.8 |
| IL20RA  | 116.8  | 110.6  | 115    | 126.3  | 116   | 105.5 | 111.2 | 124.6 |
| IL21    | 108.9  | 122.5  | 113.9  | 115.1  | 101.3 | 97.1  | 123.2 | 112.6 |
| IL21R   | 161.7  | 176.7  | 164.4  | 160.7  | 144.7 | 121   | 166.4 | 160.5 |
| IL21R   | 122.1  | 115.5  | 118    | 126.7  | 101.3 | 96.2  | 113.5 | 121.3 |
| IL21R   | 116.8  | 107.8  | 124    | 127.9  | 117.5 | 99.4  | 117.1 | 127   |
| IL21R   | 129.2  | 116.2  | 108.5  | 117.2  | 105   | 98.4  | 109.9 | 113.5 |
| IL22    | 107.8  | 116.7  | 106.9  | 115.7  | 106.3 | 91.3  | 115.9 | 116.2 |
| IL22RA1 | 104.2  | 123.7  | 119.7  | 123.5  | 126.8 | 98.6  | 115.9 | 122.8 |
| IL22RA2 | 123.1  | 117.4  | 142.5  | 138.1  | 123.6 | 105.2 | 122.4 | 133.8 |
| IL22RA2 | 112.5  | 110.7  | 125.3  | 111.9  | 109.3 | 100.5 | 121.3 | 116.1 |
| IL23A   | 163.4  | 204.4  | 148.4  | 168.4  | 157.8 | 122.8 | 133.5 | 144.5 |
| IL23R   | 117.8  | 125    | 107.6  | 124    | 115.3 | 101.4 | 122.1 | 136.7 |
| IL24    | 112.1  | 119.5  | 111.4  | 120.2  | 104.6 | 105.6 | 114.5 | 108.9 |
| IL24    | 139.3  | 190.2  | 140.7  | 204.9  | 153.9 | 122.1 | 147.6 | 168.1 |
| IL24    | 112.7  | 120.4  | 122.9  | 128.1  | 112.7 | 107.9 | 117.2 | 114.7 |
| IL25    | 118.1  | 117.8  | 111.5  | 117    | 108.1 | 99.4  | 112.5 | 115.8 |
| IL25    | 114.2  | 129.4  | 135.9  | 132.3  | 111.8 | 105.1 | 126.2 | 119.1 |
| IL26    | 111.4  | 118    | 112.1  | 113.4  | 109.7 | 97.6  | 117.5 | 110.3 |
| IL27    | 114.4  | 104.8  | 112.4  | 110.9  | 106   | 99.7  | 115.8 | 108.3 |
| IL27RA  | 626.4  | 854.6  | 501.1  | 683.5  | 568   | 606.1 | 743.4 | 548.2 |
| IL28A   | 114    | 116.1  | 117.1  | 118.7  | 106.1 | 99.6  | 112.6 | 119.3 |
| IL28B   | 115.4  | 117.7  | 134    | 136    | 111.6 | 112.3 | 137.2 | 117.8 |
| IL28RA  | 170.4  | 142.7  | 145.1  | 153.8  | 132.1 | 121.8 | 132.1 | 136   |
| IL29    | 118.4  | 120    | 121.3  | 112.5  | 110.9 | 101.5 | 116.6 | 111.8 |
| IL2RA   | 114.1  | 120    | 128.8  | 126.8  | 125.7 | 108.1 | 121.7 | 118.5 |
| IL2RB   | 1105.7 | 1162.6 | 1130.4 | 1111.8 | 660.4 | 683.8 | 603.5 | 547.9 |
| IL2RG   | 183.4  | 187.9  | 152.4  | 184.3  | 145.5 | 121.3 | 173.4 | 199.5 |
| IL3     | 106.2  | 122.8  | 113.8  | 110.5  | 119   | 95.1  | 123.9 | 107.4 |
| IL31    | 117    | 110.9  | 111.3  | 112.2  | 97.2  | 97.8  | 104.9 | 113.7 |
| IL31RA  | 114.1  | 116.8  | 118.8  | 117    | 109.6 | 102.4 | 120.6 | 114.2 |
| IL32    | 324.2  | 425.6  | 237.2  | 342.1  | 349.1 | 221.2 | 253.2 | 253.1 |
| IL32    | 415.4  | 570.1  | 339.7  | 452.2  | 367.3 | 256.9 | 319.7 | 298.6 |
| IL33    | 127    | 113.7  | 119.8  | 114.9  | 108.8 | 93.2  | 129   | 110.7 |
| IL3RA   | 143.7  | 116.3  | 134.9  | 127.4  | 121.3 | 123.2 | 134.1 | 124.7 |
| IL4     | 104.1  | 117.6  | 115.6  | 118.8  | 112.6 | 99.6  | 125.6 | 117.4 |
| IL4     | 123.3  | 115.5  | 123    | 113.1  | 110.9 | 110.8 | 119.1 | 109.1 |
| IL4I1   | 159.1  | 123.3  | 142.7  | 148.2  | 115.1 | 103.4 | 128.6 | 116.8 |
| IL4I1   | 121.2  | 116.2  | 109.9  | 116.5  | 108.3 | 96.3  | 123.6 | 117.2 |
| IL4R    | 116.9  | 123.5  | 118.3  | 126.3  | 112.7 | 101   | 118.8 | 118.9 |
| IL4R    | 201.1  | 189.3  | 225.3  | 207.5  | 160   | 154   | 187.2 | 182   |
| IL5     | 108.6  | 106    | 114.6  | 120.4  | 107.4 | 98.6  | 120.7 | 109.4 |
| IL5RA   | 127.5  | 138.9  | 131.9  | 132.9  | 118.6 | 112.8 | 129.7 | 128   |
| IL5RA   | 119.9  | 110.1  | 113.5  | 115.4  | 108.6 | 96.4  | 113.4 | 116.5 |
| IL6     | 118.5  | 119    | 124.3  | 132.5  | 116.1 | 106.4 | 128.5 | 138.5 |
| IL6R    | 129.9  | 129.9  | 150    | 137.4  | 117.5 | 116.7 | 141.4 | 126.6 |
| IL6R    | 209.5  | 184.9  | 227.4  | 232.2  | 214   | 145.2 | 220.2 | 179.3 |
| IL6ST   | 119    | 119.1  | 113.7  | 133    | 112   | 102.2 | 128.7 | 121.4 |
| IL6ST   | 116.1  | 126.6  | 118.7  | 120.4  | 124.3 | 99    | 127   | 151.9 |

|        |         |         |         |         |         |         |         |         |
|--------|---------|---------|---------|---------|---------|---------|---------|---------|
| IL7    | 108.5   | 111.8   | 120.7   | 122.8   | 112.7   | 95.5    | 111.4   | 110.5   |
| IL7R   | 6358.2  | 7962    | 4474.6  | 6637.6  | 6323.9  | 3287.6  | 7339.1  | 8564    |
| IL8    | 7966.8  | 13707.5 | 918.8   | 20570.9 | 20408.5 | 18566.6 | 32605.4 | 16844.7 |
| IL8RA  | 115.8   | 131.2   | 134.1   | 139.4   | 111.1   | 114.9   | 118     | 119.7   |
| IL8RB  | 127.4   | 131.2   | 131.6   | 135.9   | 116     | 111.4   | 125     | 128.5   |
| IL9    | 125     | 119.3   | 124.3   | 119.7   | 104.8   | 99.6    | 118.1   | 112.8   |
| IL9R   | 118.1   | 110.6   | 128.2   | 121.2   | 112.1   | 101.9   | 111.1   | 110.8   |
| ILD1R1 | 109.7   | 118.4   | 108.7   | 114.3   | 107.5   | 97.2    | 109.2   | 116.3   |
| ILF2   | 840.6   | 1156.6  | 887.6   | 912.2   | 743.7   | 771.2   | 1293.5  | 1324.9  |
| ILF3   | 760.6   | 934.8   | 466.5   | 805.8   | 510.7   | 497.3   | 888.9   | 1069.9  |
| ILF3   | 123.8   | 130.6   | 141.9   | 127.5   | 117.4   | 112.9   | 121.9   | 120.1   |
| ILF3   | 219.1   | 223.3   | 221.1   | 217.9   | 237.8   | 210.1   | 216.7   | 213.8   |
| ILK    | 117.3   | 114.6   | 119.3   | 126.3   | 117.7   | 98.8    | 116.9   | 119.1   |
| ILK    | 1351.3  | 1199    | 1447.9  | 1139.5  | 765     | 1047.8  | 1142.4  | 965.1   |
| ILK    | 150.9   | 149.8   | 165.8   | 166.7   | 133.4   | 124.4   | 138.4   | 139.8   |
| ILKAP  | 202.5   | 229     | 202.8   | 196.1   | 178.9   | 164.8   | 264.2   | 220.3   |
| ILKAP  | 110.5   | 111.9   | 124.3   | 118.3   | 104.1   | 97.5    | 116.8   | 125     |
| ILVBL  | 217.7   | 226.7   | 229.5   | 250.7   | 173.7   | 203.1   | 242.4   | 226.6   |
| ILVBL  | 426.4   | 480.2   | 411     | 427     | 343.5   | 272.6   | 408.3   | 423.1   |
| IMAA   | 115.9   | 110     | 116.6   | 134.2   | 112     | 101     | 128.9   | 121.9   |
| IMAA   | 18335.4 | 16543.4 | 15888.8 | 16588.5 | 16329.6 | 12371.5 | 17292.8 | 18157.3 |
| IMMP2L | 125.4   | 130.8   | 153     | 145.2   | 127.7   | 134     | 140.9   | 134.5   |
| IMMT   | 287.4   | 323.9   | 345.1   | 309     | 207.1   | 304.3   | 322.9   | 268.5   |
| IMP3   | 1455.1  | 1629.7  | 1528.8  | 1456.3  | 1073.3  | 1051.8  | 820.4   | 739.2   |
| IMP4   | 876.2   | 913.7   | 946.4   | 864.8   | 621.3   | 499.8   | 668     | 595.8   |
| IMP5   | 118.7   | 124.1   | 130.2   | 123.1   | 118.4   | 106     | 123.6   | 122.7   |
| IMPA1  | 238.2   | 206.7   | 232.5   | 217     | 165.8   | 180.5   | 246.4   | 220.6   |
| IMPA2  | 178.5   | 150.3   | 352.1   | 188.6   | 146.3   | 303.4   | 222.3   | 194.4   |
| IMPACT | 111.5   | 116.1   | 117.4   | 122.3   | 107.1   | 114.9   | 117.6   | 107.7   |
| IMPAD1 | 142.4   | 161.5   | 149.1   | 145.8   | 124.8   | 117.3   | 149.9   | 150.5   |
| IMPDH1 | 249.5   | 239.7   | 346.1   | 214.3   | 167.5   | 205     | 191     | 162.5   |
| IMPDH1 | 131.5   | 120.3   | 127.1   | 123.9   | 110.9   | 118.2   | 123.9   | 125.3   |
| IMPDH1 | 120.5   | 111.5   | 137.2   | 140.3   | 117.1   | 102.6   | 124.1   | 119.9   |
| IMPDH2 | 505.4   | 688.7   | 369.4   | 524.4   | 523.6   | 397.5   | 610.6   | 540.6   |
| IMPG1  | 111.6   | 108.9   | 111.4   | 118.3   | 98.9    | 95.5    | 117.1   | 113.9   |
| IMPG2  | 120.4   | 136.5   | 131.2   | 135.2   | 125.2   | 104.4   | 124     | 134.9   |
| INA    | 115.6   | 115.1   | 112.6   | 113.6   | 114.4   | 95.9    | 119.6   | 116.8   |
| INADL  | 111.5   | 117     | 126.5   | 122.3   | 107.4   | 111.3   | 114.8   | 124.8   |
| INADL  | 115.7   | 123.8   | 113.4   | 123.1   | 105.2   | 95.2    | 112.7   | 126.1   |
| INCA   | 117.7   | 113.3   | 121.9   | 115     | 110.6   | 98.5    | 118.8   | 109.9   |
| INCA1  | 111.6   | 108.1   | 115.7   | 118.8   | 97.1    | 97.4    | 113.5   | 119.2   |
| INCENP | 135.3   | 136.4   | 128.8   | 139.2   | 121.3   | 106.2   | 143.6   | 131.8   |
| INDO   | 136.9   | 120.4   | 131.9   | 147.2   | 119.8   | 108.3   | 117.8   | 113.7   |
| ING1   | 110     | 113.8   | 117.9   | 119.6   | 107.9   | 95.3    | 110.1   | 113.2   |
| ING1   | 236.4   | 226.7   | 237.6   | 219.5   | 200.1   | 176.6   | 217.7   | 220.6   |
| ING1   | 123.3   | 128     | 132.8   | 126.3   | 139.4   | 108.4   | 129.1   | 126.3   |
| ING1   | 113.6   | 120.5   | 120.1   | 112.6   | 107.4   | 97.7    | 127.3   | 126.9   |
| ING2   | 179.5   | 202.9   | 211.1   | 199.6   | 163     | 198.7   | 204.5   | 190.4   |
| ING3   | 174.2   | 165.9   | 191.2   | 163.8   | 155.7   | 128.5   | 166.5   | 197.4   |
| ING3   | 123.8   | 118.6   | 130.3   | 121.5   | 117.5   | 101.8   | 119.7   | 117.9   |
| ING3   | 570     | 659.3   | 548     | 654.1   | 551.7   | 490.8   | 686.5   | 801.7   |

|          |       |       |       |       |       |       |       |       |
|----------|-------|-------|-------|-------|-------|-------|-------|-------|
| ING4     | 176.4 | 172.3 | 171.6 | 191.7 | 157   | 146.8 | 182.3 | 172.3 |
| ING5     | 119.9 | 119.1 | 121   | 125.3 | 119.3 | 96.8  | 113.4 | 122.6 |
| ING5     | 117.4 | 109   | 121   | 119.6 | 117.1 | 105.8 | 123   | 115.9 |
| INGX     | 117.5 | 123.8 | 121   | 116.9 | 112.8 | 95.9  | 113.6 | 119.9 |
| INHA     | 119   | 118.8 | 114.7 | 125.2 | 116.7 | 105.1 | 115.8 | 120.1 |
| INHBA    | 116.7 | 111.8 | 117.7 | 112.7 | 104.9 | 99.3  | 123   | 115.4 |
| INHBB    | 118   | 117.3 | 117   | 119.9 | 111.4 | 103.3 | 113.6 | 122.7 |
| INHBC    | 113.4 | 127   | 140.7 | 118.2 | 102.8 | 105.8 | 118.7 | 111.9 |
| INHBE    | 127.3 | 116.8 | 131   | 131.8 | 117.6 | 112.4 | 132.2 | 123.1 |
| INMT     | 113.5 | 110.9 | 109.6 | 113.7 | 108.7 | 99.6  | 114.4 | 116.9 |
| INOC1    | 108.9 | 130.2 | 115.7 | 130.5 | 107.9 | 102.9 | 128.4 | 115.2 |
| INOC1    | 202   | 192   | 184.5 | 223.6 | 193.5 | 155.1 | 207.3 | 200.3 |
| INPP1    | 216   | 213.2 | 222.7 | 222.5 | 147.5 | 173.7 | 172   | 157.3 |
| INPP4A   | 111.5 | 107.6 | 115.3 | 110.3 | 111.2 | 96.1  | 120.6 | 114.1 |
| INPP4A   | 149.4 | 144.6 | 141.1 | 145.7 | 128.8 | 119.8 | 155.4 | 143.2 |
| INPP4A   | 128.3 | 119.3 | 129.7 | 135.1 | 116   | 107.1 | 128.9 | 116.6 |
| INPP4B   | 185.7 | 183.1 | 135.4 | 187.1 | 166.1 | 133.6 | 186.4 | 173.8 |
| INPP5A   | 164.3 | 166.6 | 176.6 | 156.9 | 147.3 | 178.2 | 155.5 | 168.3 |
| INPP5B   | 160.7 | 166.4 | 187.7 | 177.7 | 149.1 | 144.1 | 164.9 | 162.8 |
| INPP5D   | 318.2 | 281.2 | 351.1 | 370   | 210.1 | 298.9 | 257.4 | 282.6 |
| INPP5E   | 159.7 | 164.2 | 155.4 | 186.9 | 151.5 | 149.3 | 216.6 | 184.8 |
| INPP5F   | 103.1 | 114.1 | 123.9 | 128.8 | 112.5 | 92.3  | 118.7 | 113.8 |
| INPP5F   | 117.5 | 109.4 | 116.2 | 125.8 | 116.4 | 103.6 | 115.8 | 116.7 |
| INPP5F   | 142.9 | 152.1 | 154.3 | 161.9 | 137.6 | 137.9 | 159.1 | 161.1 |
| INPPL1   | 574.8 | 558.3 | 562   | 621.6 | 479   | 378.5 | 651   | 652.1 |
| INS      | 109.3 | 113.1 | 108.2 | 118.3 | 98.8  | 93.3  | 115.2 | 117.2 |
| INSC     | 113.2 | 112.6 | 116.4 | 118.8 | 108.3 | 103.2 | 121   | 120.1 |
| INSIG1   | 133.8 | 143.5 | 186.1 | 166.4 | 136.1 | 209.8 | 140.9 | 129.1 |
| INSIG2   | 334.4 | 396.5 | 322.5 | 393.9 | 299.4 | 270.6 | 311   | 307.1 |
| INS-IGF2 | 114.7 | 114.7 | 115.7 | 118.3 | 114.8 | 101   | 115.5 | 118.5 |
| INS-IGF2 | 114.2 | 116.8 | 118.7 | 120.3 | 109.1 | 99.7  | 116.3 | 116.7 |
| INSL3    | 143.4 | 132.9 | 126.1 | 149   | 119.8 | 109.2 | 147.8 | 143.3 |
| INSL4    | 116.9 | 123.8 | 120.8 | 117.8 | 116   | 105.3 | 118.1 | 127.5 |
| INSL5    | 121.9 | 107   | 113.4 | 119.3 | 109.3 | 101.8 | 115.2 | 118.2 |
| INSL6    | 110.9 | 118.7 | 122.8 | 114.6 | 109.3 | 102.2 | 125.9 | 110.1 |
| INSM1    | 120.2 | 124.2 | 134.4 | 135.8 | 115.8 | 115.4 | 128.9 | 122.5 |
| INSM2    | 108.8 | 111.4 | 111.8 | 112.3 | 105.1 | 103.2 | 129.3 | 112   |
| INSR     | 126.7 | 136.9 | 163   | 137.3 | 122.1 | 112.3 | 126.4 | 147   |
| INSRR    | 111   | 120.4 | 115   | 122.1 | 112   | 102.6 | 119.2 | 125.6 |
| INT1     | 183.2 | 185.2 | 178.7 | 188.3 | 144.2 | 139.8 | 149.6 | 173.2 |
| INT4     | 299.9 | 274.2 | 247.2 | 279.8 | 232.3 | 248.2 | 286.9 | 234.1 |
| INTS1    | 217   | 335.6 | 243.2 | 299.1 | 208.3 | 165.3 | 254.5 | 239.6 |
| INTS6    | 111   | 121.5 | 127.3 | 116.7 | 123.8 | 105.6 | 118.3 | 123.1 |
| INTU     | 107.4 | 110.2 | 120.5 | 119.4 | 111.7 | 109   | 122   | 119   |
| INVS     | 121.6 | 127.3 | 116.3 | 132.5 | 103.9 | 96.8  | 120.1 | 112.6 |
| INVS     | 168.1 | 156.3 | 169.9 | 192.2 | 148.2 | 129.2 | 175.6 | 170.7 |
| INVS     | 113   | 125.7 | 114.5 | 129.7 | 110.5 | 100.9 | 128.4 | 117.1 |
| IPF1     | 111.5 | 117.6 | 107.6 | 117.2 | 107.6 | 94.1  | 128.7 | 108.3 |
| IPMK     | 131.1 | 131.2 | 127.2 | 145.3 | 128.6 | 101.3 | 129.4 | 119   |
| IPO11    | 265.2 | 307.4 | 253.3 | 273.3 | 218.8 | 208.9 | 255.1 | 252.5 |
| IPO13    | 174.3 | 166.1 | 156.1 | 143.3 | 148.2 | 127.9 | 150.5 | 156.9 |

|          |       |        |        |        |       |       |       |       |
|----------|-------|--------|--------|--------|-------|-------|-------|-------|
| IPO4     | 167.5 | 172    | 146.7  | 157.8  | 136.1 | 118.7 | 163.1 | 138.6 |
| IPO7     | 123.7 | 137.3  | 120.6  | 150.6  | 141.4 | 107.4 | 143.7 | 133.1 |
| IPO8     | 223.4 | 217.2  | 198.7  | 224.6  | 198.9 | 194.4 | 217.2 | 223.3 |
| IPO9     | 145.8 | 184.5  | 172.5  | 192.6  | 157.5 | 161.6 | 193.9 | 169   |
| IPP      | 134.9 | 129.6  | 153.1  | 144    | 121   | 120.2 | 138.9 | 140   |
| IPPK     | 122.9 | 120.9  | 132.2  | 129    | 115.9 | 94    | 124.6 | 121.1 |
| IQCA     | 123.6 | 119.5  | 123.3  | 121    | 116.4 | 102.7 | 118.5 | 115.5 |
| IQCB1    | 116.6 | 124.7  | 123.2  | 122.2  | 106.9 | 106.9 | 114.8 | 111.1 |
| IQCB1    | 152.7 | 170.5  | 162.8  | 186.8  | 160.7 | 168.5 | 196.6 | 201.6 |
| IQCC     | 134.2 | 119.9  | 122.3  | 124.9  | 125.3 | 102.3 | 119.8 | 119.1 |
| IQCD     | 116.8 | 111.1  | 113.3  | 109.3  | 99.6  | 96.3  | 120.1 | 112.6 |
| IQCE     | 111   | 118.1  | 114.3  | 119    | 110.1 | 101.4 | 118.4 | 123.6 |
| IQCF1    | 124.1 | 113    | 112.9  | 111.7  | 107.1 | 95.9  | 117.7 | 116.3 |
| IQCF2    | 120.3 | 122.5  | 125.8  | 125    | 117.8 | 97    | 121.1 | 111.2 |
| IQCG     | 131   | 136.3  | 126.3  | 134.5  | 119.8 | 111.4 | 130   | 118.1 |
| IQCH     | 105.6 | 106.8  | 112.6  | 112.8  | 106.3 | 92.8  | 118.6 | 115.9 |
| IQCH     | 117.3 | 113.2  | 112.6  | 114.2  | 99.9  | 96.1  | 110.7 | 117.3 |
| IQCK     | 126.8 | 136.7  | 138.2  | 136.4  | 122.7 | 110.6 | 122.6 | 127.6 |
| IQGAP1   | 264.7 | 306    | 379.6  | 312.6  | 195.1 | 321.1 | 406.5 | 275   |
| IQGAP2   | 247.1 | 222    | 196    | 223.5  | 156.9 | 162   | 175.7 | 164.5 |
| IQGAP3   | 122.1 | 120.5  | 133.7  | 122.4  | 127.7 | 106.5 | 119.9 | 124.1 |
| IQSEC1   | 339.6 | 298.6  | 280.9  | 400.6  | 252.2 | 329.4 | 420.7 | 277.3 |
| IQSEC2   | 116.8 | 122.8  | 123.3  | 122.5  | 108.4 | 100.1 | 122.6 | 108.4 |
| IQSEC3   | 104.8 | 113.5  | 121.4  | 119.2  | 117.9 | 104.6 | 125.1 | 115.4 |
| IQWD1    | 396.6 | 381.5  | 339.4  | 381.2  | 383.4 | 348.9 | 472   | 533.3 |
| IQWD1    | 132.3 | 142.5  | 132.3  | 135.3  | 113.6 | 102.1 | 127.7 | 129.7 |
| IQWD1    | 122.8 | 124.5  | 122.3  | 127.3  | 117   | 110.6 | 132.6 | 143.7 |
| IRAK1    | 339.5 | 327.2  | 269.1  | 328.8  | 269.2 | 252.9 | 267.5 | 247.1 |
| IRAK1BP1 | 111.4 | 116.1  | 119    | 109.7  | 110.9 | 94.7  | 113.6 | 111.7 |
| IRAK2    | 379.9 | 404.5  | 217.5  | 475.5  | 345.4 | 223.7 | 550   | 395.1 |
| IRAK3    | 182.3 | 150.5  | 218.2  | 160.6  | 129.4 | 160.5 | 172   | 146.6 |
| IRAK4    | 157.1 | 151.8  | 218.4  | 174.3  | 146.6 | 190.3 | 171.8 | 161.1 |
| IREB2    | 220.5 | 258.4  | 197.7  | 233.6  | 210.3 | 191.5 | 267.9 | 198   |
| IRF1     | 2062  | 1182.4 | 1216.8 | 1338.8 | 743.7 | 828.9 | 958   | 683   |
| IRF2     | 117.7 | 127.2  | 124.7  | 128.1  | 106.4 | 107.5 | 121.3 | 130.4 |
| IRF2BP1  | 166.6 | 165.8  | 144.4  | 159.9  | 149.4 | 134.1 | 170.2 | 149.2 |
| IRF2BP2  | 306.4 | 307.6  | 388.5  | 244.4  | 254.1 | 227.8 | 252.2 | 281.5 |
| IRF2BP2  | 174.3 | 189.9  | 166.2  | 197.6  | 213.4 | 130.8 | 212.3 | 178.8 |
| IRF3     | 343.2 | 353.6  | 441.4  | 303.4  | 250.8 | 303.9 | 267.1 | 273.2 |
| IRF4     | 117.2 | 115.5  | 122.5  | 122.7  | 111.1 | 108.4 | 136   | 136.4 |
| IRF5     | 115.4 | 126.1  | 129.5  | 126.8  | 115.7 | 102.3 | 119.2 | 118.3 |
| IRF6     | 110.7 | 114.9  | 115.5  | 119.4  | 104.3 | 98.1  | 116.5 | 114.2 |
| IRF7     | 202.6 | 190.7  | 185.5  | 195    | 175.4 | 174.1 | 193   | 158.8 |
| IRF7     | 122.5 | 112    | 115.6  | 116.5  | 109.2 | 99.7  | 119.7 | 117.8 |
| IRF7     | 754.6 | 601.4  | 618.8  | 656.3  | 338.3 | 338.8 | 608.3 | 401.2 |
| IRF8     | 921.8 | 486    | 765.4  | 804.6  | 337.1 | 411.3 | 627.3 | 394.3 |
| IRGC     | 124.2 | 112.4  | 122.5  | 114.1  | 108.9 | 104.2 | 119.9 | 127.3 |
| IRGQ     | 115.2 | 106.2  | 106.8  | 101    | 107.1 | 92.9  | 110.8 | 106.3 |
| IRS1     | 117.7 | 121.5  | 113.9  | 131.5  | 115.3 | 102.6 | 121.7 | 120.6 |
| IRS2     | 217.8 | 184    | 188.2  | 197.2  | 237.4 | 180.1 | 279.5 | 375.5 |
| IRS4     | 120.4 | 122    | 122.9  | 128.6  | 117   | 102   | 121.6 | 124.2 |

|         |        |        |        |        |        |        |        |        |
|---------|--------|--------|--------|--------|--------|--------|--------|--------|
| IRX1    | 127.2  | 129.4  | 144.2  | 134.5  | 121.8  | 112    | 125    | 127.3  |
| IRX2    | 108.5  | 118.9  | 120.4  | 117.5  | 115.9  | 110.1  | 119.1  | 115.5  |
| IRX3    | 108.1  | 118.2  | 109    | 126.1  | 107.6  | 103    | 109.2  | 109.6  |
| IRX4    | 114.6  | 117.1  | 122.9  | 121.3  | 119    | 96.6   | 125.2  | 113.7  |
| IRX5    | 123.1  | 114.1  | 121.7  | 121    | 107.6  | 101.4  | 118    | 110.4  |
| IRX6    | 123.8  | 117.5  | 120.5  | 126.2  | 99.4   | 103.1  | 117    | 114.9  |
| IRXL1   | 111.6  | 119.9  | 119.6  | 109.6  | 106.5  | 95.3   | 122.1  | 108.9  |
| ISCA1   | 192.3  | 169.4  | 176.4  | 203.8  | 183.9  | 160.6  | 210.2  | 199.5  |
| ISCA2   | 168    | 183.3  | 201    | 205.5  | 180.7  | 150.8  | 191.5  | 197.1  |
| ISCU    | 1945.4 | 1805.2 | 2049.9 | 2091.5 | 1459.2 | 1542.3 | 1789.9 | 1645.6 |
| ISG15   | 247    | 222.7  | 214.4  | 292.9  | 187.7  | 182.5  | 204    | 158.4  |
| ISG20   | 1608.1 | 2077.1 | 1499.8 | 1616.3 | 1258.7 | 988.5  | 1125   | 1423.4 |
| ISG20L1 | 278.9  | 231.2  | 208    | 315.8  | 236    | 169.3  | 385.2  | 306.4  |
| ISG20L2 | 339.6  | 380.7  | 402.6  | 460.8  | 352.7  | 384.9  | 505    | 470.5  |
| ISGF3G  | 710.6  | 616.5  | 762    | 792.8  | 556.7  | 548.4  | 724.4  | 583.3  |
| ISL2    | 121.7  | 125.3  | 129.7  | 144.1  | 127    | 105.5  | 131.8  | 130.2  |
| ISLR    | 102.3  | 114    | 115.2  | 110.6  | 103.1  | 105.7  | 111.3  | 105    |
| ISLR    | 111.7  | 121.8  | 119.1  | 119.4  | 108.1  | 102.2  | 116.6  | 122.3  |
| ISLR    | 115.1  | 117.8  | 124.5  | 123.4  | 113.4  | 94.9   | 125.9  | 121.1  |
| ISLR2   | 110    | 117    | 115.7  | 119.2  | 110.5  | 98.3   | 114.9  | 115.5  |
| ISOC1   | 144    | 189.5  | 190.8  | 172.8  | 166.1  | 163.8  | 180.7  | 175.9  |
| ISOC2   | 127.1  | 131.9  | 156.8  | 132.2  | 113.8  | 123.3  | 148.6  | 133    |
| ISYNA1  | 143.5  | 134.9  | 135.3  | 154.3  | 124.8  | 115.7  | 141.5  | 141.5  |
| ITCH    | 261.9  | 311.5  | 283    | 299.3  | 305.9  | 212.4  | 280.4  | 262.4  |
| ITFG1   | 112.9  | 121.6  | 111.3  | 129.1  | 119    | 98.5   | 116.7  | 118.2  |
| ITGA1   | 128.4  | 110.7  | 128.7  | 125.9  | 109.6  | 102.6  | 124.4  | 114.3  |
| ITGA10  | 158.9  | 148.3  | 131.9  | 157.4  | 149.4  | 119.4  | 190.9  | 187    |
| ITGA11  | 116.1  | 113.3  | 112.7  | 112.8  | 108.1  | 102.2  | 116.9  | 110.8  |
| ITGA11  | 122.8  | 125.8  | 127.2  | 111.8  | 108.8  | 110.8  | 129.4  | 110.5  |
| ITGA2   | 112.9  | 113.4  | 108.2  | 122.5  | 118.2  | 96.6   | 123.5  | 110.3  |
| ITGA2B  | 115.6  | 108.9  | 120.4  | 122.8  | 104.8  | 102.9  | 117.4  | 138    |
| ITGA3   | 114.1  | 116.7  | 121.3  | 117.4  | 114.3  | 101.8  | 116.3  | 112.1  |
| ITGA3   | 166.7  | 160.9  | 171.7  | 195.8  | 165.4  | 152.1  | 195.5  | 219.5  |
| ITGA4   | 249.1  | 228.3  | 253.7  | 285.7  | 236.5  | 173.1  | 198    | 186.5  |
| ITGA5   | 342.8  | 327.9  | 430.1  | 367.4  | 234.7  | 283.8  | 421.7  | 400    |
| ITGA6   | 161    | 159.3  | 148.6  | 185    | 136.9  | 114.5  | 176.4  | 162.4  |
| ITGA6   | 113.7  | 128.4  | 111.7  | 122    | 102.9  | 98.3   | 119.7  | 112.5  |
| ITGA7   | 112.9  | 123.1  | 112.9  | 117.4  | 105.6  | 104.6  | 109.4  | 121    |
| ITGA8   | 105.9  | 112.2  | 106.5  | 113.3  | 105    | 90     | 109.6  | 108.9  |
| ITGAD   | 106.2  | 107.9  | 120.8  | 113.4  | 116.1  | 104    | 115    | 118.9  |
| ITGAE   | 220.8  | 266.4  | 301.5  | 280.8  | 259.1  | 257    | 225.6  | 217.4  |
| ITGAL   | 514.4  | 676.8  | 666.4  | 764.5  | 441.5  | 525.9  | 460.6  | 376.6  |
| ITGAM   | 157.5  | 153.8  | 149.8  | 141.7  | 139.3  | 110.1  | 124    | 128.8  |
| ITGAV   | 151.8  | 164.4  | 297.5  | 171    | 158.4  | 213    | 180.6  | 195.7  |
| ITGAX   | 340.5  | 245.6  | 226.8  | 384.2  | 234.6  | 334.1  | 392.6  | 180.9  |
| ITGAX   | 113.7  | 117.6  | 118    | 122.1  | 113.5  | 111.5  | 121.8  | 119.2  |
| ITGB1   | 294    | 309.7  | 465    | 342.6  | 282.4  | 388    | 260.2  | 289.1  |
| ITGB1   | 1259.3 | 1494.1 | 1707.6 | 1780.5 | 1101.1 | 1797.4 | 1562.6 | 1362.7 |
| ITGB1   | 763.4  | 772.2  | 1103.5 | 936.6  | 675.8  | 881.7  | 676.3  | 617.8  |
| ITGB1   | 108.1  | 109    | 118.3  | 128.3  | 109.8  | 102.7  | 112.6  | 108.7  |
| ITGB1   | 111.9  | 113.9  | 122.2  | 122.8  | 118    | 97.6   | 125.1  | 109.6  |



|          |        |         |         |         |         |        |        |         |
|----------|--------|---------|---------|---------|---------|--------|--------|---------|
| ITGB1    | 114.6  | 104.2   | 120.8   | 117.1   | 101.6   | 97.9   | 112.4  | 115.8   |
| ITGB1BP1 | 290.2  | 170     | 223.6   | 277.6   | 172.9   | 195.2  | 334.8  | 251     |
| ITGB1BP1 | 179.8  | 330.9   | 166.3   | 204.4   | 192.9   | 180.3  | 196.1  | 272.4   |
| ITGB1BP2 | 118.1  | 117.6   | 120.5   | 122.3   | 106.4   | 106.3  | 117.2  | 126.6   |
| ITGB1BP3 | 122.8  | 114.1   | 120.9   | 114.9   | 115.1   | 106    | 130.3  | 118.9   |
| ITGB1BP3 | 114.7  | 113.1   | 119.6   | 116.4   | 109     | 96.1   | 118.4  | 113.5   |
| ITGB2    | 7940.1 | 7781.8  | 8946.7  | 6789.6  | 4752.2  | 4685.8 | 4735.6 | 3047.8  |
| ITGB3    | 116.8  | 112.1   | 113.6   | 110.7   | 106.6   | 89.3   | 112.4  | 111.7   |
| ITGB3BP  | 130.8  | 148.6   | 160.9   | 153.3   | 145.6   | 128.1  | 138.2  | 141.2   |
| ITGB4    | 115.4  | 103.6   | 110.1   | 108.7   | 110.7   | 97.5   | 119.9  | 108.6   |
| ITGB4    | 102.5  | 112.5   | 110.6   | 114.1   | 109.2   | 92.7   | 122    | 111     |
| ITGB4    | 113    | 111.9   | 124.6   | 115.3   | 99      | 98.1   | 119.6  | 114.2   |
| ITGB4    | 118.5  | 112.4   | 123.6   | 127.4   | 112.8   | 114.2  | 127.8  | 122.3   |
| ITGB4BP  | 539.2  | 583.1   | 448.5   | 590.8   | 429.7   | 459.7  | 662.1  | 501.1   |
| ITGB4BP  | 114.6  | 117.9   | 111.6   | 137.1   | 122.4   | 108    | 123.7  | 136.2   |
| ITGB4BP  | 827.5  | 821.9   | 788.9   | 1091.7  | 654.2   | 728.8  | 1186   | 874.8   |
| ITGB5    | 112.8  | 119.2   | 166     | 121.3   | 112.7   | 123.1  | 117.4  | 124.6   |
| ITGB5    | 138.6  | 135.6   | 393.3   | 143.3   | 122.3   | 193.4  | 147.4  | 128     |
| ITGB6    | 111.2  | 118.3   | 114.8   | 115.9   | 104.7   | 96.4   | 115.9  | 118.9   |
| ITGB7    | 1136.5 | 1218.4  | 1019.9  | 1029.7  | 781.5   | 1032.9 | 785.1  | 609.3   |
| ITGB8    | 117.6  | 118.2   | 117.4   | 117.4   | 111.9   | 106    | 120.2  | 121.3   |
| ITGBL1   | 121    | 117.8   | 116.1   | 114.6   | 111.4   | 113    | 122.4  | 122.3   |
| ITIH1    | 121.2  | 126     | 127.6   | 116.1   | 105.9   | 101.6  | 120.5  | 116.3   |
| ITIH2    | 110.6  | 123.8   | 121.7   | 118     | 110.1   | 100.1  | 113    | 116.4   |
| ITIH3    | 121.8  | 115.8   | 117.8   | 112     | 122.5   | 107.6  | 123.1  | 132.8   |
| ITIH4    | 130.7  | 132.1   | 113.8   | 129.7   | 117.7   | 108.3  | 123.3  | 115.1   |
| ITIH5    | 115.7  | 115.7   | 112.7   | 116.9   | 98.7    | 95.3   | 117.4  | 112.8   |
| ITIH5    | 10169  | 10355.9 | 10729.6 | 10341.9 | 11561.8 | 4907.5 | 9722.5 | 10021.2 |
| ITIH5    | 114.4  | 120.7   | 119.6   | 112.7   | 105     | 96.7   | 119.5  | 117.5   |
| ITIH5    | 111.3  | 117     | 119.8   | 119.7   | 110.1   | 102.5  | 118.5  | 120.6   |
| ITIH5L   | 107.6  | 119.4   | 117.1   | 120.6   | 110.6   | 93     | 111.1  | 115.4   |
| ITK      | 2040.3 | 2618.1  | 1579.7  | 2540.9  | 2142.8  | 1180.6 | 2171.7 | 2323.7  |
| ITLN1    | 116.4  | 120.5   | 117.8   | 117.3   | 111.2   | 97.5   | 122.4  | 123.5   |
| ITLN2    | 112.3  | 118.2   | 108.1   | 113.3   | 102.6   | 93.7   | 108.9  | 117.7   |
| ITM2A    | 170.1  | 161.9   | 150.2   | 181.9   | 145.7   | 137.6  | 163.5  | 156     |
| ITM2B    | 107.5  | 129.3   | 125.4   | 125.9   | 112.7   | 118.2  | 125.2  | 125.6   |
| ITM2C    | 353.6  | 492.9   | 441.9   | 376.8   | 259.8   | 332.1  | 243    | 279.2   |
| ITM2C    | 489.3  | 617.3   | 604.7   | 449.6   | 418.3   | 413.1  | 347    | 424.3   |
| ITPA     | 162.2  | 158.8   | 185.7   | 200     | 167.8   | 132.6  | 159.4  | 191.4   |
| ITPA     | 254.1  | 274.3   | 257     | 295.1   | 218.7   | 199    | 241.8  | 262.7   |
| ITPK1    | 169.1  | 187.5   | 155.6   | 174.2   | 142.5   | 132.7  | 211.6  | 178     |
| ITPKA    | 125.7  | 146.5   | 125.7   | 118     | 114.1   | 109.1  | 125    | 127.5   |
| ITPKB    | 426.7  | 536.9   | 375.2   | 463.2   | 386.6   | 323    | 429.5  | 384.4   |
| ITPKC    | 130.2  | 139.8   | 131.5   | 122.1   | 119.8   | 112.9  | 137.2  | 130.1   |
| ITPR1    | 278.6  | 284     | 281.2   | 293.7   | 257.9   | 244.7  | 279.8  | 218.7   |
| ITPR2    | 146    | 156.2   | 171.8   | 152.7   | 154.6   | 143.8  | 144.5  | 161.4   |
| ITPR3    | 1226.1 | 1185.6  | 1248.1  | 1430.9  | 1005.1  | 833.1  | 1170.9 | 1240    |
| ITR      | 181.5  | 162.9   | 191.9   | 209.6   | 154.8   | 142.3  | 152.3  | 146.9   |
| ITSN1    | 109.6  | 121.9   | 121.2   | 115.1   | 103.1   | 100.3  | 118.2  | 118.1   |
| ITSN1    | 111.6  | 110.7   | 118     | 116.9   | 102.9   | 100.5  | 111.7  | 112.4   |
| ITSN1    | 147.6  | 143.5   | 136.1   | 161.4   | 125.2   | 110.1  | 147.1  | 155.2   |

|          |       |       |       |       |       |       |       |       |
|----------|-------|-------|-------|-------|-------|-------|-------|-------|
| ITSN2    | 119.1 | 117.2 | 139.4 | 109   | 112   | 108.9 | 132   | 130.6 |
| ITSN2    | 109.4 | 117   | 119.3 | 113.9 | 113   | 101.5 | 117.9 | 116.4 |
| IVD      | 154.1 | 149.1 | 149.3 | 143.5 | 122.9 | 110.3 | 131.1 | 124   |
| IVL      | 118.5 | 116   | 124.4 | 126.5 | 110.4 | 105   | 125.4 | 128.2 |
| IVNS1ABP | 362.7 | 361.8 | 475.8 | 462.3 | 393.8 | 334.5 | 397.5 | 403.3 |
| IVNS1ABP | 296.1 | 402.4 | 307.6 | 369.6 | 328   | 259.3 | 323.5 | 269.4 |
| IVNS1ABP | 130.5 | 122.6 | 145.1 | 130.5 | 121   | 104.6 | 125.8 | 129.6 |
| IXL      | 290.5 | 246.3 | 294.6 | 296.7 | 216.6 | 217   | 266.4 | 215.9 |
| IZUMO1   | 111.5 | 117.3 | 119.7 | 118.5 | 100.4 | 94    | 115.9 | 112.5 |
| JAG1     | 113.7 | 114.3 | 120.5 | 116.3 | 105.9 | 110.7 | 126.5 | 118.5 |
| JAG2     | 129.6 | 127.5 | 130   | 136.4 | 115.6 | 102.6 | 143.8 | 147.1 |
| JAG2     | 126.2 | 118.9 | 115.6 | 119.7 | 121.3 | 101.6 | 114.9 | 123.6 |
| JAG2     | 111.2 | 122.4 | 124.6 | 130.1 | 115.3 | 99.7  | 125   | 122.4 |
| JAK1     | 736.2 | 793.3 | 970.5 | 824.5 | 798.9 | 741.2 | 629.4 | 775.4 |
| JAK2     | 160.9 | 151   | 209.3 | 153.5 | 139.8 | 150.4 | 144.7 | 139.5 |
| JAK3     | 115.2 | 120.6 | 122.4 | 125.2 | 103.3 | 98    | 122.3 | 108.2 |
| JAKMIP1  | 123.3 | 124.2 | 126.9 | 112.7 | 109.7 | 99.8  | 116.2 | 110.5 |
| JAKMIP2  | 165.6 | 149.6 | 131   | 148.8 | 136.4 | 103.4 | 130.9 | 136.8 |
| JAM2     | 115.9 | 117.1 | 116.8 | 118.4 | 109.3 | 98.7  | 114.2 | 110   |
| JAM3     | 254.4 | 318.2 | 229.3 | 234.8 | 270.9 | 162.5 | 204.6 | 243.3 |
| JARID1A  | 95.5  | 113.8 | 110   | 116   | 99.4  | 94.3  | 111.5 | 98.9  |
| JARID1B  | 274.9 | 298.1 | 280.5 | 294.3 | 252.6 | 227.6 | 265.5 | 331.3 |
| JARID2   | 341.6 | 310.9 | 334.6 | 378.8 | 348.8 | 363.4 | 332.5 | 293.5 |
| JAZF1    | 173.4 | 216.1 | 245.2 | 177.7 | 138.8 | 177   | 164.4 | 160.8 |
| JDP2     | 120.5 | 130.7 | 154   | 143.1 | 127.4 | 115.9 | 151.9 | 122.8 |
| JM11     | 165.2 | 171.3 | 155.8 | 173.7 | 147.3 | 122.8 | 191.7 | 189.1 |
| JMJD1A   | 138.2 | 182.3 | 157.3 | 193.6 | 176.7 | 155.8 | 182.4 | 235.4 |
| JMJD1B   | 197.6 | 221   | 167.1 | 216.5 | 184   | 133.3 | 176   | 209.9 |
| JMJD1C   | 459   | 449.2 | 471.7 | 510.5 | 400.6 | 502   | 441.2 | 468.3 |
| JMJD1C   | 334   | 340   | 405.1 | 379.7 | 334.1 | 302.3 | 418.7 | 373.9 |
| JMJD2A   | 122.8 | 114.6 | 125.3 | 124   | 118   | 103.9 | 137.9 | 117.2 |
| JMJD2B   | 114.4 | 116.6 | 128.1 | 119.4 | 110.5 | 114.8 | 119.3 | 112.3 |
| JMJD2C   | 123.2 | 121.5 | 128.2 | 128.2 | 124.9 | 107.5 | 131.4 | 117.5 |
| JMJD2D   | 114.1 | 107.1 | 118.1 | 134.1 | 107.8 | 96.5  | 124   | 118.4 |
| JMJD3    | 119.1 | 144.3 | 127.1 | 128.3 | 123.6 | 111.1 | 147.6 | 130.9 |
| JMJD4    | 151.6 | 150.7 | 143   | 153.9 | 128.1 | 114.5 | 159.1 | 139.1 |
| JMJD5    | 116.1 | 120.5 | 122.8 | 119.4 | 111.2 | 102.1 | 121.7 | 117.1 |
| JMY      | 126.8 | 139.6 | 124.1 | 127.6 | 131.1 | 114.1 | 155   | 155.3 |
| JOSD1    | 183.3 | 182.1 | 148.2 | 165.3 | 183.8 | 128.3 | 247.6 | 234.6 |
| JOSD2    | 133.7 | 128.9 | 137.1 | 136.1 | 121.4 | 113.5 | 131.7 | 123.4 |
| JOSD3    | 138.2 | 128   | 140.4 | 141   | 115.3 | 117.2 | 141.6 | 121.4 |
| JOSD3    | 176.7 | 152.1 | 187.4 | 205.4 | 173.8 | 141.1 | 211.8 | 176.1 |
| JPH1     | 106.9 | 120.5 | 114.8 | 127.2 | 104.9 | 93.5  | 116.3 | 112.9 |
| JPH2     | 118.6 | 134.9 | 129.3 | 133.9 | 116   | 106.9 | 128.6 | 119   |
| JPH2     | 125.1 | 124.9 | 125.2 | 128   | 117.9 | 103.7 | 128.4 | 128.6 |
| JPH2     | 114.7 | 105.1 | 118.1 | 112.3 | 104.4 | 103.3 | 115.4 | 109.5 |
| JPH3     | 109.2 | 128.6 | 140.7 | 123.3 | 112.1 | 101.4 | 120.2 | 120   |
| JPH4     | 118.2 | 113.2 | 122.4 | 128.8 | 115.3 | 112.2 | 125.2 | 123.2 |
| JRK      | 117.9 | 117   | 112.6 | 123.7 | 113.5 | 99.8  | 119.8 | 107.9 |
| JRKL     | 118.3 | 117.6 | 121.1 | 127.8 | 118.1 | 107.2 | 131.7 | 124.8 |
| JSRP1    | 133   | 128.9 | 127.4 | 133.1 | 119.2 | 103.1 | 126.4 | 125.9 |

|           |        |        |        |        |        |        |        |        |
|-----------|--------|--------|--------|--------|--------|--------|--------|--------|
| JTB       | 4781.7 | 4554.1 | 5168.5 | 4858.5 | 4500.8 | 4229.4 | 5609.6 | 3978.9 |
| JTV1      | 301.7  | 334    | 370.9  | 335    | 248.3  | 214.1  | 284.2  | 283.6  |
| JUB       | 119.9  | 119    | 140    | 130.2  | 114.1  | 106.6  | 123.2  | 119.3  |
| JUB       | 109.2  | 109.8  | 111.7  | 115.3  | 102.8  | 92.5   | 112.4  | 119.9  |
| JUB       | 110.9  | 106.4  | 121.2  | 120    | 109.8  | 95.8   | 115.2  | 118.3  |
| JUN       | 337.1  | 334.4  | 626.8  | 425.1  | 303.1  | 535    | 496.6  | 548.4  |
| JUNB      | 169    | 175.9  | 163    | 189.1  | 155.2  | 138    | 200.6  | 172    |
| JUND      | 4207   | 4874.5 | 3596.1 | 4749.2 | 3460.2 | 3993.9 | 6094.1 | 4671.4 |
| JUP       | 112.7  | 112    | 121.1  | 130.2  | 119.4  | 97.3   | 118.9  | 121.9  |
| JUP       | 127.9  | 118.4  | 117    | 133.3  | 109.4  | 102.5  | 116.5  | 116.4  |
| JUP       | 165.4  | 153.1  | 149.6  | 140.8  | 123.6  | 109    | 133.7  | 115.6  |
| K5B       | 114.8  | 115.1  | 116.1  | 123.1  | 109.9  | 109.4  | 116.3  | 116    |
| K6HF      | 114.3  | 109.5  | 117.2  | 121.5  | 114.2  | 105.8  | 114.5  | 115.3  |
| K6IRS2    | 413.2  | 915    | 294.8  | 397.1  | 800.9  | 234.3  | 299    | 546.2  |
| K6IRS3    | 210.6  | 270.4  | 163.3  | 206    | 191.7  | 124.8  | 154.2  | 161.6  |
| K6IRS4    | 113.3  | 120.4  | 113.5  | 110    | 117.8  | 97.3   | 108.3  | 114.7  |
| KA21      | 112    | 109.7  | 120.1  | 114.9  | 106.1  | 98.5   | 114    | 111.1  |
| KAAG1     | 114.1  | 114.8  | 116.7  | 113.5  | 111.8  | 96.9   | 116.2  | 116.9  |
| KAL1      | 112.4  | 116.4  | 114.8  | 120    | 105.1  | 95.4   | 121.9  | 104.2  |
| K-ALPHA-1 | 3126.5 | 3104.7 | 5690.3 | 3051.8 | 2278.6 | 2927.6 | 3122   | 3739.2 |
| KALRN     | 132.5  | 126.1  | 132.9  | 135.8  | 123.8  | 107.3  | 120.3  | 117.4  |
| KALRN     | 116.5  | 113.8  | 110.1  | 106.6  | 107.5  | 99.3   | 118.3  | 109.9  |
| KALRN     | 127    | 113.5  | 107.7  | 111.4  | 100.9  | 100.1  | 112.5  | 111.6  |
| KARCA1    | 118.9  | 120.7  | 122    | 118.5  | 115.4  | 105.7  | 118.3  | 110.9  |
| KARCA1    | 100.3  | 122    | 117    | 116.6  | 111.3  | 98.3   | 115.7  | 118.3  |
| KARS      | 292.3  | 324.6  | 330    | 338.4  | 262    | 318.8  | 256.4  | 273.4  |
| KATNA1    | 279.4  | 373.1  | 356.7  | 425.4  | 358.7  | 312.4  | 422.8  | 446.8  |
| KATNAL1   | 132.5  | 129.4  | 122.3  | 137.2  | 122.5  | 108    | 126    | 118.9  |
| KATNAL1   | 118.9  | 129    | 124.4  | 133.1  | 134.2  | 114.6  | 145.9  | 145.4  |
| KATNAL1   | 113.5  | 116    | 117.1  | 119.1  | 109.3  | 92.8   | 113.8  | 121.7  |
| KATNAL2   | 110.1  | 125.4  | 127.6  | 119.6  | 110.7  | 103.9  | 119.9  | 123.3  |
| KATNAL2   | 122.7  | 116.9  | 127.9  | 123.7  | 106.6  | 107.5  | 118.5  | 112.2  |
| KATNB1    | 240.5  | 253.5  | 239.8  | 255.6  | 197.1  | 193.2  | 249.2  | 223.3  |
| KAZALD1   | 106.1  | 113.8  | 115.6  | 121.9  | 109.6  | 98.9   | 127.2  | 114.7  |
| KBTBD1    | 114.2  | 121.5  | 138.9  | 138.9  | 120.9  | 108    | 125.3  | 129.6  |
| KBTBD10   | 105.7  | 110.1  | 117.3  | 118.4  | 117.1  | 98.4   | 126.1  | 116.2  |
| KBTBD11   | 337.8  | 411    | 323.6  | 350.2  | 298.3  | 263.3  | 323.4  | 310.9  |
| KBTBD2    | 550.4  | 618.8  | 498.1  | 577.9  | 476.6  | 446.1  | 757.9  | 963.9  |
| KBTBD3    | 125    | 122.2  | 120.5  | 122.9  | 115.7  | 107.2  | 117.6  | 121.1  |
| KBTBD3    | 134    | 132.1  | 161.4  | 139    | 128.9  | 114.6  | 151.7  | 151.7  |
| KBTBD4    | 112.2  | 115.2  | 137.8  | 121.9  | 109.1  | 97.2   | 116.8  | 112.6  |
| KBTBD4    | 138.5  | 135.1  | 132.8  | 134    | 120.5  | 110.5  | 129.9  | 137.6  |
| KBTBD5    | 109.8  | 105.6  | 123    | 118.9  | 97.5   | 94.4   | 110.5  | 109.7  |
| KBTBD6    | 117.1  | 130.5  | 135.1  | 128.6  | 114.2  | 105.1  | 133.2  | 120.2  |
| KBTBD7    | 156    | 181.9  | 156.7  | 174.4  | 152.5  | 128.7  | 152.7  | 141.6  |
| KBTBD8    | 194.9  | 185.6  | 175.3  | 189.3  | 178    | 142.8  | 199.5  | 224.8  |
| KCMF1     | 122.5  | 113.3  | 119.5  | 134.4  | 117.7  | 110.6  | 132.8  | 142.2  |
| KCMF1     | 114    | 111.1  | 123    | 125.1  | 115.1  | 107.9  | 128.1  | 136.7  |
| KCMF1     | 129.2  | 142    | 140.4  | 141.2  | 153.6  | 112.1  | 157.3  | 177    |
| KCNA1     | 108.9  | 117.3  | 117.5  | 117.2  | 109.8  | 97.4   | 128.8  | 122.5  |
| KCNA10    | 104.4  | 108.6  | 106    | 110.2  | 103.5  | 96.3   | 109    | 106.6  |

|        |       |       |       |       |       |       |       |       |
|--------|-------|-------|-------|-------|-------|-------|-------|-------|
| KCNA2  | 113.8 | 108   | 115.3 | 111.4 | 108.6 | 96.7  | 113.5 | 115.3 |
| KCNA3  | 126.9 | 141.9 | 123.9 | 132.2 | 124.1 | 97.9  | 136.6 | 141.9 |
| KCNA4  | 113   | 109.3 | 118.7 | 112.3 | 110.7 | 94.5  | 115.1 | 120.1 |
| KCNA5  | 117.7 | 120.6 | 121.5 | 119   | 107   | 95.8  | 113.2 | 115   |
| KCNA6  | 111   | 125.1 | 121.3 | 127.3 | 126.3 | 110   | 123   | 129.7 |
| KCNA7  | 121.8 | 130.1 | 125.1 | 129.3 | 111.8 | 104.4 | 118.4 | 113.2 |
| KCNAB1 | 126.5 | 118.4 | 126.8 | 130.7 | 118.3 | 96.2  | 123.1 | 129.9 |
| KCNAB1 | 119.1 | 117   | 121   | 118.4 | 105.1 | 98.8  | 124.7 | 122   |
| KCNAB1 | 119.7 | 117.6 | 122.5 | 111.6 | 105.1 | 99.7  | 121.5 | 115   |
| KCNAB1 | 112   | 114.8 | 121.8 | 112.9 | 107.3 | 99.3  | 111.4 | 120.4 |
| KCNAB2 | 122.3 | 125.7 | 132.6 | 133.4 | 121   | 108.3 | 143.3 | 113.8 |
| KCNAB2 | 119.3 | 119.3 | 112.2 | 130.1 | 107.8 | 105.1 | 126.8 | 123   |
| KCNAB3 | 122.3 | 126.6 | 117   | 117.4 | 114.1 | 103.5 | 120.6 | 112.6 |
| KCNB1  | 114.2 | 125.1 | 123   | 122.2 | 114.5 | 108.2 | 127.9 | 120.6 |
| KCNB2  | 114.2 | 119   | 109.7 | 117.4 | 109.5 | 104.1 | 111.1 | 117.2 |
| KCNC1  | 114.1 | 115.2 | 115.9 | 116.5 | 110.3 | 105.6 | 120.1 | 110.4 |
| KCNC2  | 104.3 | 104.1 | 104.8 | 106.5 | 102.6 | 92.9  | 111.7 | 102.7 |
| KCNC2  | 114.6 | 106.7 | 117.6 | 112.5 | 109.6 | 91.4  | 112.2 | 121.6 |
| KCNC3  | 117.5 | 111.9 | 115.3 | 116.3 | 105.9 | 97.3  | 112.3 | 118.4 |
| KCNC4  | 114   | 117.3 | 112.1 | 124.7 | 112.6 | 101.3 | 110.9 | 119.3 |
| KCNC4  | 119.2 | 105.8 | 127.5 | 114.1 | 116.9 | 97.6  | 112.5 | 116.4 |
| KCNC4  | 106.2 | 109.2 | 109.3 | 118.1 | 105.1 | 97.3  | 112   | 112.1 |
| KCNC4  | 120.1 | 114   | 118.4 | 125.1 | 111.8 | 96.9  | 112.3 | 115.2 |
| KCND1  | 119.8 | 118.3 | 122.8 | 121.6 | 109   | 104.6 | 123.2 | 124.1 |
| KCND2  | 113.4 | 113.7 | 111.7 | 117.1 | 109.1 | 101.5 | 105.4 | 115   |
| KCND3  | 128.5 | 119.5 | 111.9 | 126.7 | 103.4 | 102.4 | 122.4 | 119.3 |
| KCND3  | 127.5 | 124.7 | 121.6 | 125.4 | 119.9 | 113.3 | 120.8 | 116.9 |
| KCND3  | 114.4 | 117   | 116.5 | 114.6 | 106.3 | 99.2  | 116.1 | 112.7 |
| KCNE1  | 107.5 | 120.5 | 109   | 110.1 | 99.3  | 90.5  | 113.9 | 110.3 |
| KCNE1L | 124.5 | 118.1 | 119.8 | 126.7 | 116.7 | 109.7 | 122.1 | 118.9 |
| KCNE2  | 113.9 | 112.9 | 117.1 | 122.2 | 117.3 | 99.9  | 117.9 | 115.5 |
| KCNE3  | 116.9 | 111.3 | 109.4 | 114.1 | 103.5 | 103.2 | 122.2 | 108.8 |
| KCNE4  | 111.1 | 106.5 | 114.8 | 109   | 110.2 | 94.7  | 117.2 | 114.5 |
| KCNF1  | 102.6 | 114.1 | 112.4 | 119.4 | 106.8 | 98.5  | 117.6 | 111.4 |
| KCNG1  | 185   | 155.7 | 170.5 | 182   | 121.6 | 115.9 | 147.5 | 121.1 |
| KCNG1  | 112.4 | 114.3 | 125   | 125.4 | 108.9 | 102.5 | 111.7 | 117.4 |
| KCNG1  | 113   | 114.4 | 116.1 | 119.2 | 107.8 | 96.5  | 113.4 | 112.2 |
| KCNG2  | 126.3 | 128   | 127.7 | 134.6 | 133.8 | 111.6 | 153   | 149.4 |
| KCNG3  | 109.2 | 110.7 | 118.4 | 109.5 | 101.6 | 94.4  | 109.4 | 106.7 |
| KCNG3  | 109.1 | 109.2 | 108.7 | 109.3 | 112.8 | 94.1  | 121.8 | 111   |
| KCNG4  | 107.7 | 111.5 | 108.6 | 120   | 110.1 | 93.8  | 118   | 111.6 |
| KCNG4  | 111.7 | 117.6 | 109.5 | 114.5 | 104.6 | 96.6  | 107.4 | 109.2 |
| KCNH1  | 121.3 | 104.9 | 116.9 | 121   | 110.8 | 101   | 118   | 107.5 |
| KCNH1  | 111.2 | 111.7 | 114.3 | 111.2 | 103.8 | 97.6  | 115   | 104   |
| KCNH2  | 112.3 | 107.6 | 112.2 | 116.4 | 106.7 | 104.3 | 117.6 | 117.3 |
| KCNH2  | 120.5 | 122.7 | 118.5 | 127.3 | 116.3 | 95.4  | 121.4 | 118.8 |
| KCNH2  | 127.2 | 132.4 | 128.8 | 142.5 | 126.7 | 99.5  | 126.9 | 126.4 |
| KCNH2  | 108.9 | 118.7 | 119.2 | 124   | 109.6 | 100.9 | 106.1 | 115   |
| KCNH3  | 160.5 | 134   | 150.2 | 145.9 | 114.5 | 118.7 | 151.6 | 115.7 |
| KCNH4  | 125.4 | 116.6 | 126.7 | 119.2 | 107.1 | 102.4 | 123.8 | 117.9 |
| KCNH5  | 110.5 | 119.5 | 110.3 | 117.9 | 104.5 | 98.5  | 114.8 | 120.1 |

|        |        |        |        |        |       |        |        |        |
|--------|--------|--------|--------|--------|-------|--------|--------|--------|
| KCNH5  | 120.8  | 116.1  | 115.4  | 113    | 110.5 | 94     | 116    | 115.2  |
| KCNH6  | 122.3  | 109.5  | 110    | 113.2  | 111.1 | 94.5   | 113    | 105.2  |
| KCNH6  | 1914.4 | 2488.8 | 2921.5 | 2926.9 | 2264  | 1122.9 | 3284.8 | 2044.8 |
| KCNH7  | 123.4  | 110    | 115.8  | 124.5  | 109.7 | 99.5   | 115.5  | 115.1  |
| KCNH7  | 111.4  | 116.7  | 123.1  | 123.9  | 118.5 | 106.6  | 115    | 117.7  |
| KCNH7  | 112.7  | 117.1  | 126.1  | 126.6  | 110.2 | 100.1  | 112.1  | 122.9  |
| KCNH8  | 123.6  | 123.5  | 126.9  | 119.8  | 107   | 102.9  | 123.4  | 133.1  |
| KCNIP1 | 121.8  | 113.3  | 116.8  | 118.9  | 109.5 | 108.3  | 120.1  | 118.4  |
| KCNIP1 | 109.5  | 107.7  | 117.2  | 111.4  | 100   | 97.5   | 117.4  | 109    |
| KCNIP1 | 107.6  | 119.1  | 113.9  | 115.4  | 107.3 | 93.4   | 120.8  | 108.6  |
| KCNIP2 | 119.9  | 119.5  | 122.8  | 119.5  | 116.5 | 99.9   | 122.8  | 115    |
| KCNIP2 | 120.1  | 112.3  | 124.9  | 117.4  | 104.8 | 106.5  | 112.8  | 120.7  |
| KCNIP3 | 117.8  | 118.6  | 116.4  | 122.1  | 113.7 | 105.7  | 119    | 113.3  |
| KCNIP3 | 130.6  | 122.1  | 124.1  | 114.7  | 118.2 | 106.8  | 118.6  | 117.4  |
| KCNIP4 | 113.8  | 109.6  | 120.8  | 117.7  | 119   | 97.2   | 116    | 108.5  |
| KCNIP4 | 121    | 119.9  | 125.7  | 113    | 120   | 98.8   | 117.5  | 113.8  |
| KCNIP4 | 118.7  | 109    | 113.9  | 121.7  | 106.4 | 98     | 122    | 118.4  |
| KCNIP4 | 107.6  | 101.7  | 116    | 122.3  | 113.5 | 103.4  | 112.3  | 108.3  |
| KCNIP4 | 110.7  | 116.1  | 117.3  | 118.2  | 103.5 | 93.5   | 135    | 112.6  |
| KCNIP4 | 114    | 116.2  | 120.6  | 105.1  | 113.5 | 97.5   | 114.9  | 116.2  |
| KCNJ1  | 114.6  | 108.8  | 117.4  | 117.1  | 104.5 | 94.9   | 125.3  | 110.8  |
| KCNJ1  | 111.5  | 118.7  | 117.4  | 122.4  | 109.1 | 100.7  | 116.4  | 121.8  |
| KCNJ1  | 103.9  | 109.6  | 117.1  | 115.7  | 111.8 | 96.8   | 125.1  | 110.5  |
| KCNJ10 | 109.5  | 115.7  | 112.9  | 114    | 111.3 | 93.6   | 116.2  | 119    |
| KCNJ11 | 120.1  | 111.5  | 108.2  | 112.5  | 104   | 98.2   | 103.5  | 109.6  |
| KCNJ12 | 113.8  | 111    | 109.4  | 115.7  | 109.4 | 95.3   | 111.4  | 104.3  |
| KCNJ13 | 116.1  | 117.1  | 125.8  | 122.4  | 111.7 | 100.3  | 124.4  | 115.9  |
| KCNJ14 | 112.9  | 115.3  | 116.6  | 127.8  | 111.8 | 96.8   | 115.4  | 108.4  |
| KCNJ14 | 113.5  | 124.1  | 116.4  | 122.1  | 106.8 | 102.3  | 119.9  | 122.8  |
| KCNJ14 | 119.9  | 132.5  | 130.6  | 132.3  | 119.4 | 106    | 129.3  | 128.6  |
| KCNJ15 | 136.3  | 137.4  | 128.8  | 156.4  | 128.9 | 105.8  | 163.4  | 132.6  |
| KCNJ15 | 114.2  | 115.8  | 120.3  | 122.3  | 120.5 | 102.1  | 129.4  | 119.4  |
| KCNJ15 | 107    | 117.3  | 128.5  | 123.3  | 111.6 | 107.1  | 135.3  | 122.3  |
| KCNJ16 | 117.6  | 113.1  | 120.7  | 123.7  | 116.8 | 94.7   | 125.7  | 116.2  |
| KCNJ2  | 117.7  | 124.6  | 132.5  | 132.1  | 108.4 | 110.8  | 116.1  | 109.2  |
| KCNJ3  | 121.5  | 113.7  | 106.6  | 124.8  | 103.6 | 102.1  | 116.6  | 120    |
| KCNJ4  | 113.9  | 127.1  | 116.8  | 115.9  | 108   | 100.4  | 121.2  | 117    |
| KCNJ4  | 108    | 116.6  | 123.8  | 120    | 114.9 | 99.9   | 120.2  | 110.4  |
| KCNJ4  | 114.7  | 117.7  | 113.5  | 112.6  | 108.4 | 99.5   | 121.6  | 113.7  |
| KCNJ5  | 119.9  | 119.7  | 127.1  | 125.6  | 114.5 | 102.1  | 111.9  | 119.3  |
| KCNJ6  | 115.3  | 119    | 121.3  | 111.8  | 108.7 | 103.5  | 112.3  | 114.8  |
| KCNJ8  | 115    | 124.8  | 124.5  | 128.8  | 111.8 | 105.7  | 129.7  | 120.9  |
| KCNJ9  | 108.9  | 113.3  | 107.7  | 121    | 114.1 | 97.2   | 122.4  | 113.7  |
| KCNK1  | 115    | 116.4  | 116.1  | 110.9  | 107.2 | 105.8  | 120.5  | 126.4  |
| KCNK10 | 115.1  | 114.6  | 119.1  | 116.8  | 107.3 | 108.7  | 128.1  | 112.2  |
| KCNK10 | 117.2  | 127.6  | 129.4  | 129.3  | 106.8 | 112    | 126.4  | 119.6  |
| KCNK10 | 110.1  | 114.6  | 116.5  | 115.6  | 102   | 105.6  | 116.4  | 106.4  |
| KCNK10 | 112.5  | 112.8  | 109    | 115.1  | 108.9 | 99.8   | 114.9  | 112.6  |
| KCNK12 | 117.8  | 128.8  | 168.3  | 129.8  | 121.9 | 113.9  | 119    | 121.8  |
| KCNK13 | 105.7  | 115.8  | 143.1  | 128.7  | 99.3  | 112.1  | 131.7  | 116.3  |
| KCNK15 | 125.1  | 125.9  | 121.4  | 126.3  | 117.7 | 115.2  | 120.2  | 131.3  |

|         |       |       |       |       |       |       |       |       |
|---------|-------|-------|-------|-------|-------|-------|-------|-------|
| KCNK16  | 113.1 | 107.9 | 118.7 | 115.8 | 115   | 103.4 | 124.8 | 112.5 |
| KCNK17  | 124.5 | 112.7 | 117   | 117.4 | 106   | 110   | 113.4 | 102.6 |
| KCNK18  | 110.8 | 125.9 | 118.8 | 120.7 | 104   | 104.4 | 120.2 | 117.1 |
| KCNK2   | 118.8 | 121.2 | 118   | 118.1 | 110.5 | 95.4  | 111.3 | 114.1 |
| KCNK2   | 110.4 | 118.5 | 109.3 | 113.8 | 103.4 | 102.5 | 122.7 | 113.3 |
| KCNK2   | 106.3 | 113.4 | 111.8 | 103.9 | 106.4 | 92.1  | 114.7 | 107.8 |
| KCNK2   | 116.6 | 113.4 | 124.9 | 118.5 | 110.2 | 102.9 | 118.5 | 122.2 |
| KCNK3   | 116.9 | 125.9 | 119.3 | 124.7 | 111.9 | 106.3 | 117.7 | 117.5 |
| KCNK4   | 114   | 113.7 | 113.7 | 113.3 | 115.4 | 93.7  | 113.4 | 120.1 |
| KCNK4   | 115.5 | 110.4 | 124.8 | 123.9 | 114.4 | 101.2 | 119.1 | 110   |
| KCNK5   | 127.1 | 120.1 | 122.7 | 125.6 | 113.8 | 108.2 | 119.5 | 119.6 |
| KCNK6   | 128.5 | 128.9 | 137.4 | 133.6 | 122.3 | 110   | 130.8 | 130   |
| KCNK7   | 126.6 | 129.5 | 126.3 | 132.2 | 113.9 | 102.7 | 128.1 | 127   |
| KCNK7   | 109.1 | 125.9 | 113.9 | 119.5 | 108   | 98    | 119.3 | 121.5 |
| KCNK9   | 110.7 | 120.1 | 125.1 | 119.1 | 112   | 99.8  | 127   | 124.8 |
| KCNMA1  | 109.9 | 114   | 111.3 | 115.6 | 112.7 | 105.7 | 108.2 | 115   |
| KCNMA1  | 114.7 | 126.3 | 120.7 | 133.6 | 116.4 | 121.2 | 130.4 | 119.4 |
| KCNMA1  | 110.7 | 114   | 107.3 | 110.1 | 101   | 99.4  | 114.4 | 114.7 |
| KCNMB1  | 140.8 | 112.2 | 226.4 | 122.7 | 110.9 | 102.1 | 120.6 | 116.2 |
| KCNMB2  | 108.6 | 131.5 | 122.8 | 120.9 | 118.6 | 96.9  | 119.7 | 118.9 |
| KCNMB2  | 117.6 | 112.4 | 110.1 | 108.6 | 104.8 | 96.6  | 121.5 | 109.8 |
| KCNMB2  | 110.6 | 125   | 111.3 | 114.1 | 114.1 | 100.6 | 118.3 | 108.8 |
| KCNMB3  | 110.6 | 115.8 | 111.9 | 108.6 | 107   | 98.9  | 114.5 | 106.5 |
| KCNMB3  | 127   | 115.8 | 125   | 123.2 | 110.3 | 104.3 | 132.7 | 113.7 |
| KCNMB3  | 145   | 123.1 | 127.1 | 135.4 | 136.1 | 114.8 | 127.9 | 122.8 |
| KCNMB4  | 127.3 | 127.5 | 143.2 | 132.8 | 126.1 | 114.4 | 124.2 | 129.2 |
| KCNN1   | 114.4 | 123.2 | 123.5 | 125.1 | 112.6 | 99.4  | 118.9 | 124.7 |
| KCNN2   | 112.8 | 122.5 | 124.9 | 111   | 103   | 103.1 | 118   | 125.9 |
| KCNN2   | 114   | 121.1 | 122.3 | 119   | 104.3 | 103.6 | 118.2 | 111.9 |
| KCNN3   | 113   | 109.6 | 121.4 | 121.1 | 105.3 | 92.2  | 119.6 | 109.2 |
| KCNN3   | 116.4 | 107.2 | 127.5 | 117.7 | 106.6 | 106.6 | 119.2 | 116.2 |
| KCNN4   | 142.7 | 136   | 138.8 | 140.1 | 123.4 | 115.5 | 135.5 | 123   |
| KCNQ1   | 119.4 | 113.2 | 111.3 | 129.5 | 108.4 | 98.8  | 117.9 | 120.8 |
| KCNQ1   | 123.7 | 142.6 | 142   | 141.1 | 126.4 | 106   | 150.7 | 145.5 |
| KCNQ1   | 114.5 | 124.9 | 111.3 | 116.6 | 109.6 | 97.8  | 110   | 112.1 |
| KCNQ1DN | 102.9 | 118.5 | 110.9 | 122.4 | 105.9 | 90    | 113.9 | 119.8 |
| KCNQ2   | 104.9 | 111.7 | 116.9 | 125.4 | 104.5 | 94.9  | 123.9 | 112.7 |
| KCNQ2   | 117   | 130.7 | 105.6 | 123.5 | 118.2 | 97    | 129.9 | 118.4 |
| KCNQ2   | 123.2 | 115.3 | 108.1 | 122.2 | 107.9 | 105.5 | 118.9 | 121.9 |
| KCNQ3   | 140.5 | 133.2 | 127.3 | 130.7 | 108.3 | 105.6 | 121.9 | 121.1 |
| KCNQ4   | 115.6 | 119.5 | 114.2 | 118.7 | 105.5 | 96.7  | 114.1 | 115.1 |
| KCNQ4   | 108.2 | 108.1 | 118.4 | 118.7 | 91.1  | 90.1  | 116.8 | 109.4 |
| KCNQ4   | 120.6 | 131.1 | 118   | 122.5 | 112.5 | 107.1 | 116.2 | 122   |
| KCNQ5   | 115.1 | 111.5 | 118.7 | 108.1 | 109.3 | 97.3  | 109.2 | 114.5 |
| KCNRG   | 106   | 97.2  | 118.1 | 131.5 | 109.3 | 97.2  | 110.4 | 96.1  |
| KCNRG   | 141.5 | 116.3 | 127.9 | 132.6 | 118.6 | 106.8 | 137.5 | 127.5 |
| KCNS1   | 117.5 | 119.5 | 122.8 | 132.4 | 114.1 | 102.9 | 121.3 | 116.6 |
| KCNS2   | 116.5 | 117   | 115.8 | 110.6 | 108.8 | 95.8  | 108.2 | 112.8 |
| KCNS3   | 106.2 | 108.4 | 107.1 | 114.9 | 106   | 94.6  | 119.9 | 121.6 |
| KCNT1   | 104.7 | 112.1 | 108.6 | 124.6 | 103.4 | 101.9 | 113.9 | 116.2 |
| KCNT2   | 112.3 | 109   | 115   | 122.1 | 107.3 | 100.6 | 115.9 | 114.3 |

|          |        |        |        |        |        |        |        |        |
|----------|--------|--------|--------|--------|--------|--------|--------|--------|
| KCNV1    | 105.5  | 113.6  | 111.1  | 119.7  | 103.6  | 97.6   | 120.6  | 122.2  |
| KCR1     | 122.3  | 117.3  | 119.2  | 122.8  | 112.8  | 102.7  | 141.4  | 114.2  |
| KCTD1    | 121.4  | 117.3  | 119.3  | 134.1  | 115.1  | 107.1  | 128.5  | 119.9  |
| KCTD10   | 203.1  | 160.5  | 201.8  | 198.9  | 147.4  | 181.3  | 183.6  | 157.6  |
| KCTD11   | 129    | 127.3  | 148.2  | 149.2  | 121.2  | 127    | 133.2  | 126.1  |
| KCTD12   | 117.5  | 112.2  | 118.1  | 119.5  | 105.5  | 106.6  | 116.6  | 113.8  |
| KCTD13   | 261.5  | 264.9  | 229.1  | 300    | 233.1  | 232.3  | 316.5  | 256.4  |
| KCTD14   | 114    | 115.2  | 117.8  | 115.8  | 111.4  | 100.1  | 128.3  | 115.6  |
| KCTD15   | 123.6  | 120.1  | 127    | 124.4  | 100.4  | 100.7  | 119.9  | 113.9  |
| KCTD16   | 111.5  | 116.7  | 121.5  | 123.8  | 109.9  | 93     | 118.8  | 112.4  |
| KCTD17   | 119.7  | 113.2  | 117.1  | 114.8  | 99.5   | 106.2  | 121    | 120.7  |
| KCTD18   | 160.7  | 161.8  | 172.5  | 159.3  | 141.8  | 135.8  | 146.9  | 156.7  |
| KCTD2    | 117.4  | 112.9  | 120.5  | 132.2  | 107.9  | 101.5  | 129.9  | 119    |
| KCTD2    | 189.6  | 193.3  | 181.1  | 209    | 177.1  | 174    | 222.1  | 174.8  |
| KCTD3    | 129.8  | 127.1  | 127.8  | 128.3  | 115.7  | 99.7   | 113.9  | 123.6  |
| KCTD4    | 113.5  | 114.6  | 116.4  | 115.4  | 104    | 95.7   | 128.3  | 113.5  |
| KCTD5    | 482.2  | 476    | 585.2  | 588    | 406.7  | 514.8  | 732.4  | 715.6  |
| KCTD6    | 464.4  | 460.4  | 412.2  | 450.4  | 314.2  | 446.4  | 459.2  | 467.5  |
| KCTD7    | 127.1  | 119.8  | 132.4  | 134.9  | 127.9  | 116.7  | 131.4  | 125.3  |
| KCTD8    | 117.2  | 115.7  | 118.9  | 110.7  | 107.6  | 100.4  | 112.6  | 119.1  |
| KCTD9    | 189.1  | 197.6  | 241.3  | 230.4  | 218.5  | 202.2  | 246.9  | 252.7  |
| KDELC1   | 101    | 118.1  | 126.2  | 117    | 105.6  | 100.7  | 115.5  | 109.4  |
| KDELC2   | 143.2  | 152.5  | 162.2  | 145.3  | 130.4  | 127.9  | 173.5  | 155.7  |
| KDELR1   | 282.3  | 267.8  | 388.9  | 299.1  | 265.7  | 362.5  | 276.6  | 278.5  |
| KDELR2   | 204.2  | 198.3  | 252.6  | 196    | 179.6  | 197.4  | 193.6  | 216.3  |
| KDELR3   | 129.1  | 115.7  | 118.3  | 134.6  | 113.3  | 112.2  | 116.5  | 115    |
| KDELR3   | 112.6  | 111.1  | 122.1  | 117.3  | 114.7  | 96.6   | 115.7  | 122.2  |
| KDELR3   | 106.5  | 110.1  | 113.2  | 115.1  | 101    | 97.8   | 110.2  | 117.5  |
| KDR      | 113.6  | 117    | 119.7  | 117.9  | 105.3  | 103.2  | 114.1  | 121.9  |
| KEAP1    | 218.3  | 222.9  | 162.2  | 254.4  | 172.5  | 222.1  | 292.8  | 304.5  |
| KEAP1    | 116.8  | 107.5  | 117.4  | 123.2  | 106.6  | 98.5   | 112.4  | 109.7  |
| KEAP1    | 170.4  | 206.6  | 199.9  | 265.1  | 270.2  | 221.4  | 348.1  | 327    |
| KEL      | 120.2  | 115.7  | 115.4  | 121.5  | 112    | 102.3  | 143    | 118.3  |
| KENAE    | 125.9  | 121.1  | 117.2  | 122.8  | 111.4  | 103.8  | 119.4  | 124.1  |
| KERA     | 117.3  | 118.8  | 116.2  | 109.5  | 112.3  | 98.1   | 118.2  | 121.6  |
| KGFLP1   | 97.5   | 111.3  | 106.5  | 112.1  | 111.2  | 92.4   | 115    | 112.9  |
| KHDRBS1  | 1253.3 | 1211.2 | 1335.9 | 1317.7 | 1119.2 | 1077.3 | 1770.8 | 1562.2 |
| KHDRBS2  | 119.3  | 113.9  | 113.7  | 132.1  | 106.3  | 107    | 113.8  | 109.4  |
| KHDRBS3  | 109.3  | 107.7  | 110.4  | 119    | 116    | 102.9  | 123.5  | 113    |
| KHK      | 121.6  | 127.6  | 118.4  | 134.1  | 121.9  | 105.6  | 113.4  | 110.1  |
| KHK      | 119.3  | 120.9  | 121.9  | 119    | 126.7  | 104.3  | 114.6  | 120.8  |
| KHK      | 119.5  | 123.3  | 119.2  | 130.5  | 117.3  | 104.4  | 120.1  | 119.1  |
| KHSRP    | 299.7  | 287.4  | 235.7  | 292.4  | 234.4  | 186.5  | 311.2  | 293.9  |
| KIAA0020 | 338.6  | 354.5  | 300.3  | 355.4  | 325.3  | 258.8  | 287    | 348.5  |
| KIAA0082 | 123.2  | 115.5  | 127.4  | 122.9  | 116.9  | 119.2  | 123.3  | 117.5  |
| KIAA0090 | 183.3  | 193.6  | 179.9  | 204.4  | 184.5  | 163.4  | 205.9  | 168.7  |
| KIAA0100 | 116.4  | 125.5  | 120.2  | 121    | 114    | 100.1  | 118.6  | 122.8  |
| KIAA0101 | 111.9  | 118.3  | 115.6  | 120.2  | 106.5  | 99.9   | 119.3  | 111.7  |
| KIAA0101 | 118.2  | 111.5  | 127    | 132.4  | 113.5  | 104.8  | 117.5  | 110    |
| KIAA0101 | 8255   | 6325.4 | 6670.4 | 6497.9 | 7611.1 | 5080.5 | 7815.9 | 8400   |
| KIAA0103 | 135.7  | 131.8  | 131.5  | 137.7  | 113.5  | 115    | 133.9  | 121.8  |

|           |        |        |        |        |        |       |        |        |
|-----------|--------|--------|--------|--------|--------|-------|--------|--------|
| KIAA0133  | 138.3  | 147.7  | 146.5  | 147.7  | 125.1  | 123.6 | 168.7  | 143.8  |
| KIAA0141  | 284.3  | 327.6  | 325.1  | 285.5  | 207.5  | 223.3 | 269.6  | 223.6  |
| KIAA0143  | 911.6  | 819    | 702.6  | 929    | 713.2  | 796   | 829.5  | 645.9  |
| KIAA0152  | 291.3  | 354.3  | 445.6  | 350    | 303.6  | 297.2 | 325.1  | 292.4  |
| KIAA0157  | 311.8  | 347    | 359.1  | 368.2  | 259.1  | 271.8 | 334.9  | 295.7  |
| KIAA0174  | 1360.6 | 1502.5 | 1332.9 | 1614.3 | 1147.5 | 1005  | 1504.6 | 2033.9 |
| KIAA0179  | 158.8  | 179.4  | 162.6  | 185.2  | 158    | 139.2 | 134.6  | 134.4  |
| KIAA0182  | 285    | 248.9  | 249.2  | 232.9  | 224.5  | 187   | 232.8  | 203.7  |
| KIAA0195  | 202.4  | 198    | 167.8  | 189.1  | 182.4  | 131.8 | 183.4  | 169.9  |
| KIAA0196  | 444.9  | 433.6  | 472.6  | 458.5  | 391.8  | 394   | 382.8  | 364.6  |
| KIAA0232  | 138.8  | 140.9  | 130.7  | 150.9  | 148.8  | 116.3 | 144.7  | 163.4  |
| KIAA0240  | 649.2  | 676.3  | 446.2  | 744.3  | 625.9  | 455   | 871.2  | 837.9  |
| KIAA0241  | 126.6  | 137.1  | 126.4  | 150    | 124.4  | 116   | 145.7  | 135.1  |
| KIAA0247  | 293.5  | 254.1  | 270.3  | 301.4  | 213.8  | 297.7 | 248.9  | 216.4  |
| KIAA0251  | 127.5  | 130.9  | 152.7  | 138.4  | 117.7  | 109.7 | 132.5  | 141.5  |
| KIAA0256  | 343.7  | 257.2  | 302.3  | 315.7  | 252.2  | 224.8 | 300.4  | 272.9  |
| KIAA0258  | 117.6  | 118.5  | 124.6  | 118.2  | 108.9  | 102.1 | 114.3  | 114.5  |
| KIAA0261  | 230.6  | 257.5  | 247.4  | 243.2  | 251.6  | 199   | 290.9  | 280.5  |
| KIAA0265  | 125.7  | 125.1  | 118.4  | 123.8  | 115.4  | 104.5 | 126.1  | 116.3  |
| KIAA0274  | 178.5  | 176.1  | 188.3  | 193.1  | 162.8  | 145.6 | 170.1  | 181.4  |
| KIAA0280  | 117.6  | 119.6  | 135.8  | 116.3  | 107.7  | 100.8 | 130    | 119.9  |
| KIAA0284  | 113.5  | 110.6  | 116.3  | 116.9  | 99.1   | 95.9  | 127.2  | 115.1  |
| KIAA0286  | 174    | 182.1  | 169.1  | 243.8  | 168.2  | 182.7 | 220.4  | 241.3  |
| KIAA0310  | 569    | 539.2  | 536.3  | 676.9  | 569.5  | 605.8 | 788.2  | 785.1  |
| KIAA0319  | 117.4  | 122.1  | 118.3  | 125.2  | 109.2  | 109   | 125.5  | 111.1  |
| KIAA0319L | 125.4  | 157.1  | 136.8  | 151    | 133.3  | 115.8 | 144.9  | 145.3  |
| KIAA0319L | 179.5  | 174.9  | 177.9  | 161.7  | 144.7  | 148.3 | 166.2  | 149.3  |
| KIAA0319L | 126.9  | 118.7  | 120.1  | 121.7  | 114.9  | 105.5 | 114.8  | 122.7  |
| KIAA0323  | 309.1  | 332.2  | 269.9  | 373.4  | 239.6  | 332.8 | 384.7  | 481.2  |
| KIAA0329  | 110.6  | 112.3  | 114.3  | 119.6  | 110.8  | 99.9  | 113.7  | 116    |
| KIAA0350  | 423.6  | 384.6  | 307.2  | 378.8  | 356.6  | 226.8 | 407.4  | 367.3  |
| KIAA0355  | 621.7  | 633.6  | 641    | 692    | 748.6  | 480.4 | 729.2  | 796.1  |
| KIAA0367  | 108.8  | 111.8  | 120.4  | 121    | 108.8  | 100.9 | 110.3  | 115.2  |
| KIAA0368  | 142.4  | 128.7  | 145.1  | 127.5  | 124.9  | 116.3 | 155.1  | 162.5  |
| KIAA0372  | 323.4  | 303    | 258.3  | 306.7  | 281.9  | 239.5 | 302.2  | 318.5  |
| KIAA0376  | 862.2  | 1143.9 | 691.8  | 1096.4 | 856.5  | 514.5 | 1017.1 | 856.8  |
| KIAA0391  | 382.8  | 483.2  | 332.8  | 401.6  | 364.1  | 321   | 326.5  | 303.7  |
| KIAA0404  | 247.6  | 284.8  | 213    | 288.5  | 190.3  | 193.3 | 317.8  | 361.7  |
| KIAA0406  | 127.9  | 139.2  | 134.1  | 142.9  | 115    | 114.4 | 123.5  | 128.3  |
| KIAA0408  | 140.4  | 161.9  | 161.1  | 148.6  | 136.1  | 118.6 | 153.4  | 157.4  |
| KIAA0409  | 129.9  | 167.6  | 153.3  | 133    | 142.4  | 125.5 | 144.3  | 137.1  |
| KIAA0415  | 145.9  | 145    | 147.5  | 153.9  | 119.9  | 115.7 | 181    | 161.9  |
| KIAA0423  | 167.5  | 157.6  | 156.8  | 158.4  | 135.5  | 123.2 | 153.6  | 156.8  |
| KIAA0427  | 138.4  | 129.7  | 136    | 138.7  | 121.3  | 128.1 | 161.5  | 135.7  |
| KIAA0446  | 232    | 231.2  | 245.7  | 285.9  | 219.5  | 183.3 | 214.4  | 244.8  |
| KIAA0460  | 152.3  | 139.3  | 127.3  | 138.9  | 134.4  | 126.9 | 160.5  | 136.5  |
| KIAA0467  | 119.4  | 114.1  | 112.8  | 121    | 105    | 102.7 | 116.8  | 112.1  |
| KIAA0494  | 446.8  | 529.7  | 451.1  | 525.4  | 359.9  | 407.9 | 370.3  | 343.9  |
| KIAA0495  | 144.4  | 143.9  | 131.3  | 130.2  | 130    | 139.6 | 131.8  | 135.4  |
| KIAA0513  | 218.3  | 227.7  | 287    | 170    | 155.1  | 194.7 | 180.7  | 169.3  |
| KIAA0514  | 109.5  | 118.3  | 102.5  | 108.2  | 106.4  | 97.2  | 115.5  | 113    |



|          |        |        |        |        |        |        |        |       |
|----------|--------|--------|--------|--------|--------|--------|--------|-------|
| KIAA0523 | 118    | 123.8  | 123    | 112.3  | 111.6  | 110.5  | 124.8  | 121.9 |
| KIAA0528 | 349.3  | 356.9  | 330.9  | 361.7  | 267.1  | 231.9  | 228    | 216.1 |
| KIAA0553 | 124.3  | 125.3  | 132.1  | 130.7  | 130.3  | 101.9  | 140.8  | 130.6 |
| KIAA0556 | 153.9  | 163    | 155.7  | 137.9  | 139.9  | 122.7  | 141.4  | 144.2 |
| KIAA0562 | 162.5  | 157.3  | 143.7  | 158.7  | 160.2  | 127.5  | 197.2  | 177.2 |
| KIAA0564 | 133.6  | 127    | 129.7  | 134.5  | 119    | 114.3  | 117.7  | 119.9 |
| KIAA0564 | 129.2  | 148.8  | 129    | 139.7  | 131.1  | 110.2  | 129.3  | 127.7 |
| KIAA0586 | 141.1  | 130.6  | 155.3  | 160.4  | 136.3  | 119.8  | 132    | 140.2 |
| KIAA0644 | 114.5  | 121.7  | 116.8  | 119.5  | 103.4  | 103.2  | 116.9  | 111   |
| KIAA0649 | 123.4  | 120.1  | 117.3  | 123.6  | 106.8  | 103.6  | 130.6  | 118.7 |
| KIAA0652 | 115.5  | 122.3  | 128.3  | 118    | 117.5  | 97.8   | 128.4  | 117.9 |
| KIAA0664 | 172    | 175.7  | 154.3  | 170.3  | 153.7  | 132.5  | 199.3  | 190.5 |
| KIAA0672 | 121.9  | 116.3  | 113.2  | 106.4  | 99.4   | 101.5  | 110.5  | 108.7 |
| KIAA0683 | 194.9  | 155.9  | 161.2  | 166    | 143.4  | 126.5  | 159.5  | 180.1 |
| KIAA0690 | 143.9  | 169.7  | 161.4  | 150    | 143.5  | 118.4  | 136.4  | 177.1 |
| KIAA0701 | 125    | 122.8  | 119.3  | 118.3  | 109.6  | 111.3  | 133.3  | 127.1 |
| KIAA0703 | 111.2  | 114.8  | 115.1  | 116.9  | 116.8  | 95.6   | 125    | 114.9 |
| KIAA0738 | 1702.9 | 1915.4 | 1822.3 | 1642.6 | 2160.8 | 1240.3 | 1677.3 | 1746  |
| KIAA0746 | 346.5  | 316.2  | 293.9  | 323.6  | 297.3  | 293.3  | 389.7  | 415.7 |
| KIAA0753 | 117.4  | 127.4  | 148.2  | 128.3  | 113.2  | 111.7  | 134.6  | 119.5 |
| KIAA0773 | 122.4  | 129.2  | 127.5  | 127    | 121    | 113.8  | 126.3  | 125   |
| KIAA0773 | 113.5  | 130.7  | 123.5  | 124.2  | 111.4  | 104    | 123.3  | 116.1 |
| KIAA0773 | 108.2  | 104.3  | 113.8  | 110.4  | 100    | 103.5  | 110.8  | 121.1 |
| KIAA0774 | 118.7  | 111.7  | 113.7  | 119.8  | 109.9  | 95.4   | 118.5  | 115.8 |
| KIAA0774 | 117.4  | 114.7  | 108.7  | 116    | 110.1  | 95.6   | 117.7  | 111.9 |
| KIAA0774 | 109    | 102.2  | 114.3  | 119.5  | 106.7  | 97.2   | 117.6  | 108.7 |
| KIAA0776 | 131.7  | 130.8  | 134.8  | 144.2  | 123    | 112.1  | 129.2  | 122.9 |
| KIAA0789 | 106.9  | 125.7  | 125.1  | 123.8  | 113.8  | 99.8   | 133.7  | 118.6 |
| KIAA0802 | 105.8  | 112.2  | 114.2  | 111.8  | 107.1  | 92.5   | 120.1  | 112.8 |
| KIAA0828 | 160.2  | 169.5  | 175.3  | 176.9  | 148.6  | 140.3  | 192    | 163.2 |
| KIAA0831 | 215.7  | 189.3  | 233.6  | 207.4  | 170.3  | 175.9  | 203.8  | 241.9 |
| KIAA0853 | 115    | 104    | 118.4  | 115.7  | 109.2  | 97     | 108.2  | 112.2 |
| KIAA0859 | 199.3  | 233.2  | 228    | 215.5  | 196.2  | 184.6  | 226.4  | 231.8 |
| KIAA0859 | 461.2  | 544.7  | 505.3  | 585.7  | 383.9  | 353    | 469    | 529.5 |
| KIAA0892 | 258.2  | 288.4  | 296.5  | 317.5  | 275.9  | 295.7  | 359.7  | 320.7 |
| KIAA0895 | 125.1  | 114.2  | 126.1  | 128.2  | 103.4  | 97.6   | 119.4  | 113.2 |
| KIAA0907 | 395.1  | 397    | 372.3  | 465    | 309.2  | 191.7  | 437.5  | 475   |
| KIAA0913 | 481.1  | 473.9  | 426.2  | 576.3  | 385.6  | 426.5  | 657.4  | 537.4 |
| KIAA0922 | 248.1  | 223.4  | 243.2  | 212    | 226.7  | 204.5  | 207.3  | 196.5 |
| KIAA0961 | 119    | 126.5  | 127.1  | 121    | 136    | 107.4  | 121.9  | 121.6 |
| KIAA0963 | 155.7  | 158.8  | 149.1  | 153.3  | 120.5  | 122.6  | 132.5  | 121.4 |
| KIAA0980 | 106.7  | 106.4  | 116.4  | 114.1  | 117.8  | 98.5   | 126.9  | 126.5 |
| KIAA0999 | 326.8  | 295.4  | 230.5  | 311.7  | 291.9  | 216.6  | 360.7  | 478.6 |
| KIAA1005 | 120.3  | 119.2  | 118.3  | 120.3  | 110.3  | 97     | 117.4  | 109.8 |
| KIAA1008 | 119.7  | 120.2  | 131    | 136.5  | 131.2  | 106.6  | 141.5  | 122.8 |
| KIAA1012 | 788.1  | 971.3  | 740.6  | 984.6  | 774.7  | 538.9  | 921.1  | 870.9 |
| KIAA1024 | 122.3  | 118.1  | 116.6  | 127.9  | 112.6  | 97.6   | 116.6  | 131.6 |
| KIAA1026 | 120.7  | 119.5  | 133.6  | 128.7  | 114.3  | 95.8   | 120.4  | 115.4 |
| KIAA1026 | 118.2  | 120.6  | 112.6  | 114.6  | 114.5  | 94.4   | 122.1  | 110.2 |
| KIAA1026 | 133.2  | 121.5  | 119.7  | 123.3  | 104.7  | 93.7   | 116.1  | 113.6 |
| KIAA1026 | 123.7  | 128.6  | 121    | 126.7  | 108.5  | 97.3   | 114.6  | 117.6 |

|           |       |       |        |        |        |        |       |        |
|-----------|-------|-------|--------|--------|--------|--------|-------|--------|
| KIAA1026  | 111.3 | 105.9 | 122.8  | 118.1  | 118.1  | 102.6  | 116.6 | 118.7  |
| KIAA1033  | 136.8 | 126.8 | 139.9  | 133.9  | 123.5  | 113.1  | 159.8 | 139.6  |
| KIAA1128  | 471.2 | 753.1 | 540.7  | 488.4  | 608.2  | 460.1  | 578.1 | 708.3  |
| KIAA1143  | 105.8 | 116.2 | 109.7  | 118    | 101    | 99.7   | 119.9 | 109    |
| KIAA1147  | 789.4 | 1103  | 1284.9 | 1094.3 | 1162.3 | 1192.6 | 937   | 891.9  |
| KIAA1160  | 175.9 | 190.1 | 219.4  | 196    | 177.6  | 158.2  | 167.7 | 193.8  |
| KIAA1161  | 124   | 110.3 | 123.4  | 120.1  | 125.3  | 105.4  | 126.2 | 122.6  |
| KIAA1166  | 126.1 | 123.8 | 140.2  | 136.3  | 122.4  | 106.9  | 132.7 | 128.5  |
| KIAA1171  | 108.8 | 112.3 | 113.9  | 120.8  | 110.8  | 95.1   | 112.3 | 115.5  |
| KIAA1189  | 117.7 | 106.5 | 115.3  | 119.9  | 106.8  | 99.3   | 114.8 | 111.3  |
| KIAA1189  | 115.5 | 116.1 | 113.2  | 121.1  | 102.3  | 88.8   | 117   | 109.8  |
| KIAA1189  | 123.1 | 123.1 | 120.4  | 124.4  | 103.3  | 102.4  | 128.6 | 114.8  |
| KIAA1191  | 374.4 | 428.2 | 498.1  | 426.5  | 419.3  | 413.9  | 437.9 | 391.2  |
| KIAA1191  | 361.2 | 359   | 304.6  | 360.4  | 295    | 236.3  | 321.1 | 354.4  |
| KIAA1193  | 126.1 | 123.1 | 131    | 134.4  | 123.6  | 114.9  | 136.9 | 130    |
| KIAA1199  | 106.1 | 115.5 | 115.5  | 118.3  | 112.6  | 103.5  | 117.5 | 116.6  |
| KIAA1212  | 148.5 | 129.5 | 125.8  | 133    | 125.3  | 111    | 134.5 | 140.2  |
| KIAA1217  | 118.3 | 114.5 | 115    | 113.1  | 107.8  | 99.5   | 114.6 | 107.3  |
| KIAA1219  | 212.7 | 224.6 | 208.7  | 229.6  | 188.4  | 160.1  | 246.9 | 252.2  |
| KIAA1244  | 128.4 | 108.3 | 130.4  | 121.9  | 111.2  | 93.4   | 123   | 126.6  |
| KIAA1267  | 837.7 | 675.3 | 741.2  | 782.9  | 729.6  | 538.7  | 837.2 | 1087.9 |
| KIAA1274  | 125   | 116.6 | 133.1  | 131.9  | 107.7  | 115.5  | 123.9 | 130.4  |
| KIAA1279  | 127.6 | 126.5 | 123.2  | 129.1  | 116.3  | 105.7  | 132.4 | 140.2  |
| KIAA1285  | 104.6 | 112.7 | 114    | 131.8  | 106    | 107.9  | 125   | 120.1  |
| KIAA1287  | 188.6 | 151.5 | 171.5  | 164.8  | 166.3  | 150.4  | 176   | 210.9  |
| KIAA1324  | 128.5 | 145.3 | 131.5  | 137.3  | 124    | 108    | 142   | 137    |
| KIAA1324L | 160.4 | 150.9 | 152.6  | 149.9  | 145.8  | 130.6  | 138.3 | 151.8  |
| KIAA1328  | 120.2 | 129.9 | 139.2  | 123.8  | 111.5  | 102.9  | 121.6 | 122.9  |
| KIAA1333  | 123.4 | 123.9 | 135.4  | 132.9  | 133.4  | 113.1  | 132.3 | 142.5  |
| KIAA1344  | 124.2 | 120.1 | 120.7  | 120.5  | 119.6  | 110.2  | 138.4 | 120.5  |
| KIAA1345  | 107.2 | 118.7 | 119.9  | 110.5  | 97.8   | 92.5   | 123.1 | 113.4  |
| KIAA1370  | 243.8 | 251.3 | 491.4  | 331    | 255.2  | 300.8  | 292.9 | 343.3  |
| KIAA1377  | 111   | 117.8 | 112.6  | 123.1  | 105.7  | 97.4   | 108.8 | 111.7  |
| KIAA1407  | 130.6 | 134.1 | 140.3  | 131    | 121.2  | 108.7  | 117.3 | 130.1  |
| KIAA1409  | 107.8 | 118.3 | 114.1  | 114.4  | 103.2  | 106.1  | 125.6 | 114.7  |
| KIAA1411  | 145.2 | 140.7 | 133.6  | 171.9  | 139.1  | 112.5  | 156.5 | 129.2  |
| KIAA1429  | 149.6 | 142.8 | 148.3  | 141.1  | 124.9  | 119.8  | 128.3 | 128.6  |
| KIAA1432  | 121.4 | 118   | 115.8  | 114.5  | 107.1  | 98.9   | 125.5 | 113.1  |
| KIAA1434  | 172   | 197.9 | 235    | 191.9  | 198.7  | 173.4  | 213.5 | 223.1  |
| KIAA1443  | 120.7 | 119.1 | 123.5  | 120.3  | 105.7  | 100    | 125.5 | 124.1  |
| KIAA1446  | 123.8 | 131   | 127    | 127    | 119.2  | 109.3  | 123.7 | 125.9  |
| KIAA1456  | 110.5 | 116.6 | 116.6  | 119.4  | 109.6  | 107.4  | 119.3 | 112.4  |
| KIAA1467  | 129.2 | 128.8 | 123.4  | 134.4  | 121    | 110    | 120   | 114.8  |
| KIAA1468  | 140.8 | 156.1 | 179.8  | 166    | 149.1  | 133.6  | 138.8 | 162.4  |
| KIAA1505  | 134.6 | 139.9 | 157.6  | 155.4  | 158.2  | 127.3  | 135.2 | 149.8  |
| KIAA1522  | 118.8 | 119.4 | 115.8  | 123.8  | 113.3  | 101.5  | 125.9 | 118.2  |
| KIAA1524  | 114.7 | 115.8 | 118.2  | 123.6  | 115.7  | 105.4  | 113.9 | 110.6  |
| KIAA1529  | 110.3 | 112.9 | 113.6  | 121.6  | 115.9  | 98     | 127.4 | 113.3  |
| KIAA1530  | 277.8 | 216.2 | 290.6  | 281.5  | 252.6  | 216.1  | 283.5 | 258.5  |
| KIAA1530  | 118.8 | 115.3 | 127.9  | 126.9  | 120.4  | 100.4  | 129   | 122.1  |
| KIAA1539  | 196.7 | 178.4 | 219.6  | 208.5  | 147.7  | 223.7  | 253.7 | 188.7  |

|           |       |       |       |       |       |       |       |       |
|-----------|-------|-------|-------|-------|-------|-------|-------|-------|
| KIAA1542  | 121.3 | 115.8 | 123.6 | 114.9 | 107.9 | 100.8 | 133.8 | 127.5 |
| KIAA1543  | 115.8 | 120.2 | 123.5 | 114.2 | 113.2 | 101.2 | 124   | 126.3 |
| KIAA1543  | 106.8 | 118.5 | 108.1 | 117.2 | 115.6 | 97.5  | 121   | 114.9 |
| KIAA1553  | 117.3 | 155.1 | 150   | 131.9 | 113.1 | 104.6 | 122.1 | 127.9 |
| KIAA1553  | 111.7 | 123.6 | 124.6 | 123.9 | 121.8 | 104.3 | 128.4 | 140.4 |
| KIAA1559  | 120.9 | 130.6 | 135   | 124.6 | 115.6 | 106.8 | 120.9 | 129.3 |
| KIAA1576  | 126.2 | 119.8 | 124.9 | 122.7 | 118   | 104.1 | 124.8 | 131.1 |
| KIAA1586  | 129.6 | 125.6 | 113.1 | 136.8 | 109.4 | 105   | 115.7 | 114.3 |
| KIAA1598  | 279.5 | 186.6 | 366.8 | 275.1 | 146.7 | 332.8 | 205.9 | 131.9 |
| KIAA1600  | 398.3 | 326   | 389.3 | 423   | 323.6 | 390.9 | 388.3 | 440.8 |
| KIAA1604  | 119.1 | 127   | 121.8 | 124.4 | 116.2 | 115.3 | 124.2 | 147.5 |
| KIAA1609  | 123.2 | 117.6 | 120.8 | 126.3 | 103.7 | 105.6 | 128.4 | 111.7 |
| KIAA1618  | 233.5 | 242.7 | 221.8 | 333   | 242.3 | 183.2 | 283.2 | 288.5 |
| KIAA1622  | 111.6 | 115.3 | 116   | 121.7 | 116   | 104.8 | 122.4 | 115   |
| KIAA1622  | 105.5 | 113.5 | 103.7 | 118.6 | 106.1 | 91.9  | 112.8 | 118.6 |
| KIAA1622  | 112.7 | 113   | 112.3 | 126.7 | 108.6 | 99.5  | 116.6 | 121.1 |
| KIAA1627  | 123.9 | 110.5 | 121.3 | 142.6 | 119.2 | 111.1 | 121.4 | 132.6 |
| KIAA1632  | 131.7 | 121.3 | 140.4 | 130.9 | 118   | 107.5 | 140.6 | 137.5 |
| KIAA1641  | 127.8 | 128.5 | 128.9 | 129.2 | 119.4 | 109.2 | 130.1 | 121   |
| KIAA1683  | 138.5 | 135.3 | 139.3 | 139.4 | 136.7 | 103.4 | 156.7 | 227.4 |
| KIAA1688  | 121.2 | 114   | 115.7 | 122.1 | 104.4 | 97.8  | 118.8 | 114   |
| KIAA1698  | 188.7 | 239.4 | 163.4 | 200   | 187.4 | 156   | 202.4 | 210.6 |
| KIAA1704  | 121.7 | 118   | 123.7 | 115.7 | 103.3 | 92.5  | 120.2 | 114.3 |
| KIAA1706  | 137.7 | 122   | 157   | 153.4 | 119.5 | 152.9 | 156.9 | 131.4 |
| KIAA1712  | 399.8 | 384.7 | 484.7 | 449   | 306.6 | 349.9 | 387.8 | 319   |
| KIAA1715  | 267.8 | 283.5 | 262.4 | 293.6 | 222.6 | 218.2 | 236.6 | 236.3 |
| KIAA1727  | 111.8 | 115.8 | 120.9 | 119.7 | 111.2 | 96.8  | 121.2 | 112.4 |
| KIAA1729  | 393   | 332.4 | 380.7 | 397.3 | 392.1 | 323.6 | 349.3 | 370   |
| KIAA1737  | 263.1 | 235.8 | 234.2 | 246.1 | 190.3 | 220.2 | 228.2 | 198.7 |
| KIAA1751  | 433.5 | 442   | 492.7 | 694.1 | 503.1 | 331.6 | 531.4 | 495.7 |
| KIAA1754  | 308   | 357.1 | 248.3 | 338.7 | 234.7 | 236.3 | 305.6 | 294.2 |
| KIAA1754L | 128.7 | 134.6 | 123.5 | 139.2 | 131.5 | 104.9 | 148   | 138.4 |
| KIAA1754L | 119.3 | 119.6 | 123.8 | 130.3 | 120.4 | 106.7 | 141.1 | 129.2 |
| KIAA1754L | 116.5 | 116   | 112.9 | 119.4 | 112.5 | 97.4  | 115.6 | 114.2 |
| KIAA1755  | 115.8 | 113.5 | 132.9 | 135.1 | 115.4 | 116.3 | 128   | 127.2 |
| KIAA1772  | 120.6 | 115.4 | 113   | 112.9 | 106.6 | 100.1 | 118.7 | 114.5 |
| KIAA1787  | 174   | 181.1 | 153.2 | 169   | 164.6 | 129.6 | 198.1 | 176.3 |
| KIAA1794  | 126.6 | 139.4 | 119.7 | 130.4 | 120.6 | 106.8 | 126.2 | 118.1 |
| KIAA1797  | 123.8 | 135.2 | 119.2 | 136.6 | 127   | 106.2 | 119.1 | 141.2 |
| KIAA1799  | 114.8 | 110.4 | 122.4 | 118.8 | 105.9 | 97.5  | 121.8 | 116.8 |
| KIAA1804  | 119.5 | 109.2 | 122.2 | 125.9 | 111.9 | 106.1 | 125.8 | 132.2 |
| KIAA1815  | 143.6 | 129.5 | 147.5 | 173.3 | 153.2 | 139   | 143.2 | 138.8 |
| KIAA1822  | 107.3 | 112.6 | 111.3 | 116.3 | 111.2 | 100   | 117   | 110.7 |
| KIAA1822L | 134.2 | 127.5 | 136.5 | 134.6 | 115.2 | 109.5 | 125   | 125.9 |
| KIAA1826  | 298.4 | 294.5 | 287.1 | 286.2 | 255.8 | 214.6 | 252.2 | 304   |
| KIAA1838  | 525   | 661.4 | 686.9 | 531.5 | 536.7 | 533.7 | 495   | 488.2 |
| KIAA1840  | 606.1 | 551.8 | 548   | 550.2 | 370.3 | 445.3 | 439.6 | 479.5 |
| KIAA1841  | 111.6 | 101.6 | 111.8 | 113.6 | 112.5 | 91.3  | 113.1 | 118.1 |
| KIAA1853  | 111.9 | 114.8 | 128.1 | 124   | 109.6 | 103.5 | 120.5 | 129   |
| KIAA1862  | 149.2 | 155.1 | 143.4 | 141   | 132.4 | 113.3 | 157.4 | 127.1 |
| KIAA1875  | 154.9 | 149.5 | 155.7 | 151.4 | 124.1 | 115.2 | 141   | 145   |

|           |       |       |       |       |       |       |       |       |
|-----------|-------|-------|-------|-------|-------|-------|-------|-------|
| KIAA1893  | 111.9 | 115.9 | 115.3 | 112.3 | 106.8 | 104   | 124.8 | 117   |
| KIAA1900  | 106.7 | 127.4 | 127.3 | 120.6 | 112.7 | 97.1  | 117.2 | 113.4 |
| KIAA1904  | 125.9 | 116.9 | 129.8 | 114.7 | 121   | 114.2 | 118.9 | 126.5 |
| KIAA1909  | 100.3 | 112.5 | 118.9 | 114.1 | 107.2 | 94.5  | 105.6 | 116.5 |
| KIAA1912  | 120.9 | 103.9 | 114.7 | 110.5 | 105.3 | 108.2 | 113.7 | 124.1 |
| KIAA1913  | 115.8 | 132.5 | 120.3 | 121.8 | 114   | 103.4 | 121.8 | 119.5 |
| KIAA1914  | 164.7 | 150.9 | 136.5 | 140.7 | 122.3 | 109.7 | 138   | 125.3 |
| KIAA1919  | 111.8 | 116   | 121.2 | 124.5 | 117.6 | 105.4 | 110.1 | 104   |
| KIAA1920  | 118.6 | 118.3 | 125   | 119.7 | 106.2 | 101.1 | 119.1 | 116.1 |
| KIAA1924  | 110.9 | 116.5 | 118.9 | 129.2 | 117.2 | 114.5 | 113.8 | 112.2 |
| KIAA1944  | 110   | 124.8 | 114   | 110.7 | 107.1 | 90.8  | 127   | 118.2 |
| KIAA1946  | 117   | 129.9 | 121   | 129.5 | 109.9 | 102.6 | 116.4 | 123.1 |
| KIAA1958  | 122.7 | 134.7 | 130.3 | 134.6 | 120.7 | 102.5 | 143.6 | 134.3 |
| KIAA1961  | 109.4 | 115.1 | 115.2 | 119.4 | 109.7 | 96.5  | 112.3 | 117.7 |
| KIAA1961  | 322.3 | 354.3 | 289.6 | 416.8 | 318.6 | 228.1 | 353.2 | 433.2 |
| KIAA1967  | 183.7 | 197   | 161   | 196   | 163.3 | 150.6 | 184.4 | 208.6 |
| KIAA1967  | 116.3 | 117.1 | 115.3 | 122.9 | 118.4 | 97.9  | 116.6 | 132.5 |
| KIAA1967  | 120.6 | 124.4 | 123.5 | 130.7 | 116   | 105.7 | 126.2 | 121.4 |
| KIAA1970  | 150.9 | 145   | 167.2 | 150.2 | 145   | 126   | 155.5 | 136.9 |
| KIAA1984  | 114.8 | 122.8 | 119.4 | 119.2 | 106.2 | 106.5 | 123.1 | 117.8 |
| KIAA2010  | 118.8 | 107   | 118   | 113.7 | 103.2 | 94.1  | 117.4 | 112.9 |
| KIAA2010  | 434.7 | 504.5 | 410.7 | 513.5 | 584.3 | 397.2 | 558   | 673.7 |
| KIAA2013  | 268.5 | 256.8 | 227.4 | 255.7 | 189.7 | 173.2 | 229.1 | 214.3 |
| KIAA2018  | 97.8  | 119.8 | 111.6 | 119.5 | 109.3 | 106.8 | 109.5 | 127   |
| KIAA2022  | 111.6 | 118.3 | 124.7 | 118.8 | 111.9 | 102.8 | 113.7 | 118.1 |
| KIAA2026  | 252.8 | 304.8 | 254.3 | 300   | 320.1 | 239.8 | 355   | 306.8 |
| KIDINS220 | 393.4 | 445.2 | 406.9 | 447.6 | 390.5 | 451.3 | 449.5 | 506.7 |
| KIF11     | 117.3 | 115.8 | 111.8 | 112.7 | 117.2 | 98.1  | 127.8 | 121.6 |
| KIF12     | 109.9 | 112.2 | 112.3 | 115.2 | 108.6 | 97.8  | 115.7 | 107.8 |
| KIF13A    | 115.7 | 128   | 120   | 116.6 | 109.4 | 106.4 | 120.4 | 120.6 |
| KIF13B    | 230.2 | 236.4 | 260.3 | 272.4 | 200.5 | 205.6 | 302.4 | 305.4 |
| KIF14     | 135.3 | 131   | 119.8 | 123.9 | 120.2 | 103.5 | 128.7 | 116.7 |
| KIF15     | 113.4 | 107.2 | 117   | 119.5 | 106.2 | 96.7  | 112.3 | 116.6 |
| KIF17     | 115.3 | 110.5 | 116.9 | 122.9 | 106.6 | 100.9 | 117.2 | 120   |
| KIF18A    | 117   | 124.7 | 116   | 115.7 | 104.1 | 92.9  | 122.7 | 114.9 |
| KIF19     | 116.3 | 119.7 | 128.4 | 124.7 | 123   | 109.1 | 124.5 | 111.8 |
| KIF1A     | 111.8 | 118   | 115.8 | 120.4 | 108.7 | 91.7  | 110.3 | 112.1 |
| KIF1B     | 125.1 | 117.8 | 121.9 | 123.7 | 116   | 106.5 | 136   | 117.7 |
| KIF1B     | 123.2 | 129   | 129   | 140.2 | 123.9 | 111.6 | 159.9 | 143   |
| KIF1B     | 424.2 | 408.7 | 327.7 | 544.5 | 402.2 | 307.5 | 567   | 359.8 |
| KIF1C     | 131.1 | 123.4 | 134.7 | 153.2 | 109.6 | 117.4 | 132.9 | 123.7 |
| KIF2      | 532.8 | 612.5 | 290.4 | 625.2 | 510.9 | 334.5 | 657.1 | 536.2 |
| KIF20A    | 109.9 | 116.4 | 113.1 | 110.1 | 100.4 | 95.3  | 115.4 | 110.2 |
| KIF21A    | 137.7 | 124.8 | 146.9 | 167.6 | 135.2 | 104.5 | 143.1 | 157.7 |
| KIF21B    | 114.8 | 109.9 | 114.7 | 115   | 109.8 | 94.7  | 113.1 | 110.5 |
| KIF21B    | 162.3 | 133.8 | 167.2 | 144.8 | 134.3 | 133.5 | 173.9 | 164   |
| KIF23     | 111.9 | 118.6 | 109.9 | 120.9 | 112.3 | 98.5  | 119   | 111.7 |
| KIF23     | 117   | 121.8 | 115.6 | 120.9 | 114.7 | 103.3 | 123.6 | 118.3 |
| KIF25     | 119.6 | 110.3 | 110.8 | 115.2 | 102.2 | 88.4  | 106.8 | 103.9 |
| KIF25     | 128.1 | 117.6 | 129.1 | 129.7 | 111.3 | 106.3 | 124.8 | 117.3 |
| KIF26B    | 106.5 | 110.3 | 114.4 | 105.8 | 117   | 94.2  | 111.5 | 107.3 |

|          |       |       |       |       |       |       |       |       |
|----------|-------|-------|-------|-------|-------|-------|-------|-------|
| KIF27    | 127   | 119.2 | 130   | 130.2 | 106.2 | 99.1  | 123.4 | 135.1 |
| KIF27    | 116   | 116.4 | 117.4 | 115   | 121.7 | 96.5  | 120.3 | 115.7 |
| KIF2B    | 108.8 | 119.8 | 116   | 126.5 | 110.8 | 93.9  | 115.5 | 119.3 |
| KIF2C    | 118.7 | 112.4 | 121.9 | 122.1 | 113.8 | 101.7 | 129.8 | 118.4 |
| KIF3A    | 116.4 | 102.8 | 107.3 | 123.8 | 114.2 | 95.3  | 113   | 111.1 |
| KIF3B    | 167   | 176.9 | 150.9 | 170.7 | 171   | 166.6 | 160   | 151.4 |
| KIF3C    | 119.6 | 131.9 | 127.2 | 129.7 | 119.4 | 110.2 | 119.7 | 126.4 |
| KIF4A    | 125.7 | 119.8 | 126.1 | 120.3 | 109.4 | 96.2  | 115.8 | 118.4 |
| KIF5A    | 114.9 | 119   | 113.3 | 117.8 | 112.1 | 101.6 | 107.9 | 110   |
| KIF5B    | 176   | 172.5 | 190   | 188.7 | 160.4 | 160.7 | 186.2 | 175.9 |
| KIF5C    | 218.9 | 215.3 | 159.9 | 206.3 | 170.4 | 151.3 | 223.5 | 198.8 |
| KIF6     | 130.1 | 132.4 | 132.1 | 135   | 121.7 | 109.4 | 125.9 | 139.1 |
| KIF7     | 116.6 | 127.1 | 119.3 | 111.9 | 105.4 | 106   | 124.8 | 123.1 |
| KIF9     | 112.4 | 119.7 | 122.5 | 114.1 | 108.2 | 98.5  | 113   | 117.8 |
| KIFAP3   | 248.8 | 273.2 | 237.6 | 235.8 | 257.2 | 214   | 228.6 | 244.8 |
| KIFC1    | 119.2 | 111.8 | 122.9 | 124.2 | 114.3 | 98.9  | 122.9 | 118.3 |
| KIFC2    | 186.1 | 157.5 | 154.4 | 171.5 | 168   | 161.9 | 195.9 | 190.9 |
| KIFC3    | 109   | 124.9 | 126.8 | 121.1 | 108.2 | 109.9 | 122.9 | 124.2 |
| KIN      | 117.1 | 115.3 | 114.7 | 124.9 | 109   | 103.6 | 111.3 | 115.1 |
| KIR2DL1  | 130.8 | 238.8 | 140.1 | 132.6 | 202.1 | 112.3 | 137   | 177.5 |
| KIR2DL3  | 119.3 | 131   | 133.6 | 129.9 | 118   | 119.1 | 122   | 124.6 |
| KIR2DL3  | 256.1 | 297.1 | 264.5 | 274.7 | 263.9 | 310.7 | 228   | 251.5 |
| KIR2DL4  | 107.1 | 122.7 | 117.8 | 124.2 | 117.3 | 110.3 | 123.9 | 117.8 |
| KIR2DL5A | 121.9 | 128.8 | 133.2 | 127.9 | 122.7 | 109.4 | 111.1 | 128.5 |
| KIR2DL5A | 117.7 | 110.6 | 123.7 | 124.3 | 109   | 106.4 | 110.8 | 119.3 |
| KIR2DL5A | 119.6 | 116.7 | 119.2 | 113   | 102.7 | 104.3 | 110.9 | 111.5 |
| KIR2DL5B | 117.4 | 113.1 | 124.8 | 123.1 | 122.3 | 102.7 | 111.8 | 125.7 |
| KIR2DS1  | 128.6 | 108.7 | 114.6 | 134.6 | 110.6 | 96.5  | 123.8 | 129   |
| KIR2DS3  | 111.1 | 117.4 | 118.9 | 116   | 107.1 | 99.2  | 119.8 | 126.1 |
| KIR2DS4  | 122.6 | 118.7 | 114   | 122.4 | 119.5 | 110.1 | 118.8 | 117.1 |
| KIR2DS5  | 133.1 | 128.2 | 122.1 | 133.7 | 119.3 | 107.1 | 120.6 | 142.5 |
| KIR3DL1  | 144.6 | 173.5 | 163.7 | 146.2 | 127.6 | 136.5 | 141.5 | 145.1 |
| KIR3DL2  | 125   | 128.8 | 129.6 | 129.3 | 128.4 | 115.9 | 124.7 | 131.7 |
| KIR3DL3  | 127.1 | 132.5 | 125.7 | 136.9 | 117.9 | 109.9 | 122   | 124.9 |
| KIR3DP1  | 119.4 | 125.3 | 128.4 | 131.3 | 120.4 | 98.9  | 121   | 118.9 |
| KIRREL   | 113.7 | 113   | 120.3 | 113.2 | 115.4 | 105.4 | 113.2 | 109.2 |
| KIRREL2  | 120.4 | 115.5 | 125.4 | 121   | 114.7 | 104.4 | 114.3 | 109.2 |
| KIRREL2  | 113.5 | 118.8 | 113.4 | 126.2 | 108.8 | 100   | 127.7 | 111.5 |
| KIRREL2  | 113.5 | 116.3 | 112.3 | 122.4 | 102.1 | 97.1  | 111.6 | 114.8 |
| KIRREL3  | 118.4 | 127.5 | 122.7 | 113.2 | 110.1 | 100   | 113.8 | 116.3 |
| KISS1    | 117.2 | 123   | 111.3 | 126.1 | 104.4 | 99.6  | 121.9 | 129.6 |
| KISS1R   | 110.5 | 119.6 | 128.3 | 128.1 | 112.9 | 106.8 | 112.7 | 112.4 |
| KIT      | 171.3 | 155.5 | 176.5 | 152.2 | 138   | 117.9 | 134.2 | 128.4 |
| KITLG    | 108.4 | 115.6 | 117.4 | 125   | 112.1 | 156   | 127.1 | 113.5 |
| KITLG    | 112.2 | 115.4 | 113.8 | 118.6 | 106.9 | 96.7  | 120.2 | 115   |
| KL       | 106   | 121.2 | 106.9 | 113   | 101.7 | 98.2  | 105.1 | 107.1 |
| KLB      | 115.2 | 123.4 | 115.3 | 125.9 | 116.9 | 102.5 | 116.3 | 113.6 |
| KLC2     | 117   | 123.7 | 121.6 | 117   | 106.5 | 107.5 | 117.5 | 128.7 |
| KLC2     | 126.6 | 116.4 | 121.6 | 120.2 | 109.2 | 105.3 | 117.6 | 130   |
| KLC3     | 114.5 | 109   | 121.5 | 116.1 | 104   | 95.3  | 130.2 | 115.6 |
| KLC3     | 117.4 | 117.1 | 132.2 | 118   | 113.8 | 94.3  | 115.9 | 122   |

|         |        |        |        |        |        |        |        |        |
|---------|--------|--------|--------|--------|--------|--------|--------|--------|
| KLC4    | 122.1  | 111.1  | 128.9  | 124.5  | 109    | 95.6   | 121.3  | 117    |
| KLC4    | 113.8  | 124.7  | 113.1  | 111.1  | 106.4  | 101.9  | 121.6  | 104.5  |
| KLC4    | 115.5  | 129.6  | 124.8  | 125.7  | 122.2  | 97.4   | 120.9  | 121    |
| KLF1    | 116.1  | 112.2  | 127.9  | 128.8  | 105.9  | 100.2  | 117.3  | 112.5  |
| KLF10   | 121.5  | 112.4  | 129    | 129.4  | 113.2  | 105.8  | 131.3  | 122    |
| KLF10   | 121.3  | 127.3  | 136.9  | 132.9  | 124.1  | 107.5  | 132.8  | 120.8  |
| KLF10   | 109.8  | 110.2  | 130    | 112.5  | 109.2  | 106.1  | 130.3  | 125.7  |
| KLF11   | 131.9  | 109.7  | 131.9  | 127.8  | 113.6  | 100.5  | 123.8  | 123.4  |
| KLF11   | 211.6  | 206.1  | 284.3  | 223.9  | 186.5  | 206.3  | 241.2  | 307.1  |
| KLF12   | 196.4  | 192.6  | 169.8  | 180.2  | 175.5  | 174.8  | 207.3  | 190.8  |
| KLF12   | 129.3  | 127.4  | 129.1  | 133.2  | 121.6  | 107.9  | 126.1  | 135.4  |
| KLF13   | 1033.5 | 1286.2 | 1220.6 | 1439.8 | 922.7  | 1143.4 | 994.5  | 1122.4 |
| KLF14   | 107.2  | 111.2  | 112.2  | 114.7  | 110.6  | 104.9  | 128.7  | 118.2  |
| KLF15   | 117.5  | 133.7  | 118.6  | 125.2  | 129.8  | 114    | 121.5  | 124.2  |
| KLF16   | 119.7  | 114    | 112.4  | 108.3  | 107.6  | 94.9   | 116.4  | 119.6  |
| KLF17   | 117.8  | 128.6  | 119.3  | 115.7  | 106.4  | 94.2   | 110.3  | 125.5  |
| KLF2    | 3374.4 | 3309.7 | 2927.9 | 3112.9 | 3289.8 | 2735.6 | 3759.9 | 3348.7 |
| KLF3    | 120.9  | 140.7  | 129.3  | 140.7  | 122.8  | 107.1  | 121.9  | 124.2  |
| KLF4    | 131.7  | 126.4  | 132.5  | 122.4  | 115.3  | 116.4  | 141.2  | 142.8  |
| KLF5    | 117.7  | 115.5  | 111.8  | 117.1  | 111.5  | 96.2   | 118.7  | 119.8  |
| KLF6    | 413.3  | 330.8  | 411.7  | 516.2  | 436.8  | 454.8  | 493.6  | 528.2  |
| KLF6    | 1383.5 | 1259   | 1503.6 | 1583   | 955.3  | 1026   | 1420.9 | 1611.2 |
| KLF7    | 122.8  | 124.2  | 131    | 132.1  | 118.9  | 101.5  | 121.5  | 115.8  |
| KLF8    | 115.9  | 136.8  | 126.8  | 127.6  | 116.2  | 116.8  | 131.1  | 118.1  |
| KLF9    | 531.9  | 559.9  | 777.6  | 538.9  | 393    | 769.4  | 382.8  | 438.2  |
| KLHDC1  | 111.8  | 115.4  | 110.8  | 114    | 103.7  | 107.9  | 112.1  | 111.2  |
| KLHDC2  | 353    | 357.8  | 471.4  | 396.7  | 463.4  | 349.7  | 321.2  | 448.4  |
| KLHDC3  | 457.1  | 587.2  | 562.8  | 476.9  | 431.1  | 540.7  | 438.5  | 474.9  |
| KLHDC4  | 231    | 185.2  | 246.4  | 230.9  | 156.5  | 196.4  | 225.2  | 182.8  |
| KLHDC5  | 176.9  | 195    | 228.8  | 224.7  | 195    | 182.3  | 166    | 191.5  |
| KLHDC6  | 119.8  | 109.6  | 123.8  | 116.6  | 103.9  | 96.3   | 113.1  | 115.4  |
| KLHDC7A | 123    | 127.4  | 118.8  | 137.2  | 109.7  | 105.7  | 121.9  | 129.4  |
| KLHDC7B | 105.8  | 119.5  | 122.7  | 116.5  | 113.6  | 101.1  | 127.1  | 122.8  |
| KLHDC8A | 114.5  | 119.1  | 132.7  | 139.5  | 118.2  | 104.7  | 128.1  | 146.4  |
| KLHDC8B | 171.7  | 192    | 155.8  | 175.1  | 153.8  | 121.2  | 168.4  | 167.6  |
| KLHL1   | 118.3  | 123.2  | 112.6  | 122.8  | 117    | 98.1   | 122.4  | 107.3  |
| KLHL10  | 107.3  | 111.6  | 118.1  | 115.4  | 107    | 100.2  | 120.2  | 112.6  |
| KLHL11  | 110.4  | 119.4  | 121.6  | 117.1  | 107.4  | 95.3   | 119.9  | 128.6  |
| KLHL12  | 404.9  | 412.2  | 442.9  | 475    | 329.1  | 429    | 388.6  | 373.1  |
| KLHL13  | 109.8  | 125.3  | 113.1  | 121.4  | 114.1  | 101.7  | 116.4  | 111.7  |
| KLHL14  | 123.8  | 118.5  | 115.2  | 120.4  | 111.2  | 101.1  | 112.4  | 113.4  |
| KLHL15  | 103.7  | 118.3  | 119.3  | 112.9  | 108.4  | 103.3  | 114.2  | 116.6  |
| KLHL17  | 118    | 114.3  | 117    | 123.4  | 110.8  | 98     | 119.6  | 119.8  |
| KLHL17  | 157.3  | 174.8  | 147.5  | 162.7  | 124.2  | 119.3  | 167.3  | 137.3  |
| KLHL18  | 121.2  | 138.8  | 141.9  | 141.8  | 124.8  | 119.5  | 138.9  | 121.8  |
| KLHL2   | 144.4  | 168.1  | 153.8  | 178    | 142.7  | 134.9  | 182.5  | 163.6  |
| KLHL20  | 178.3  | 153.6  | 161.3  | 193    | 179.7  | 150.6  | 151.6  | 176.6  |
| KLHL21  | 184.1  | 218.2  | 160.3  | 261.1  | 200.3  | 177.6  | 395.3  | 446.3  |
| KLHL22  | 648    | 681.8  | 560    | 709.7  | 523.3  | 397.4  | 459.7  | 489.4  |
| KLHL23  | 116.2  | 120    | 126.3  | 117    | 100.3  | 100    | 124.3  | 116.2  |
| KLHL25  | 112.3  | 119.7  | 116.7  | 135.3  | 112.3  | 111    | 126.9  | 119.3  |

|        |        |        |        |        |       |        |        |       |
|--------|--------|--------|--------|--------|-------|--------|--------|-------|
| KLHL26 | 130.7  | 137.6  | 127.1  | 139.4  | 119.4 | 108.7  | 149    | 136.1 |
| KLHL3  | 280.5  | 280.2  | 330    | 315.1  | 298.8 | 215.7  | 226.1  | 228.1 |
| KLHL4  | 107    | 110.5  | 109.8  | 117.4  | 106.3 | 94.3   | 107.5  | 112.2 |
| KLHL4  | 109.2  | 107.2  | 111.7  | 111.3  | 102.6 | 100.8  | 112    | 108.5 |
| KLHL5  | 122.3  | 124.1  | 140.3  | 129.5  | 112.4 | 102.5  | 120.3  | 119.1 |
| KLHL5  | 415.4  | 429.9  | 491.4  | 530.9  | 338.9 | 397.5  | 500.5  | 363.7 |
| KLHL5  | 230.3  | 167.6  | 193.1  | 209    | 148.2 | 151.9  | 217.9  | 157   |
| KLHL7  | 171.2  | 240.9  | 211.2  | 244.4  | 183.3 | 170.4  | 223.8  | 199.5 |
| KLHL7  | 110.2  | 118.1  | 113.4  | 120.1  | 104   | 95.8   | 118    | 117.9 |
| KLHL8  | 365.6  | 431.6  | 371.6  | 418.9  | 322.4 | 228.7  | 337.9  | 313.4 |
| KLHL9  | 247.1  | 252.4  | 341.9  | 277.2  | 221.9 | 287    | 223.5  | 193.3 |
| KLK1   | 115.8  | 127.5  | 117.2  | 122.8  | 109.8 | 97.5   | 131.6  | 111.5 |
| KLK10  | 104.8  | 115    | 111.9  | 113.6  | 111.4 | 96     | 122.1  | 98.6  |
| KLK10  | 121.6  | 127.8  | 131.2  | 128.7  | 115.4 | 112.5  | 131.9  | 129.9 |
| KLK11  | 124.7  | 119.1  | 119.2  | 126.6  | 110.4 | 105.4  | 120.3  | 121.5 |
| KLK11  | 120.6  | 119.9  | 122.1  | 116.2  | 110.9 | 105.7  | 115.6  | 112.3 |
| KLK12  | 116.5  | 123.2  | 123.8  | 132.6  | 115.8 | 101.1  | 126.1  | 112.5 |
| KLK12  | 115.2  | 128.5  | 123.9  | 120.2  | 117.8 | 105.1  | 121.4  | 116.9 |
| KLK13  | 106.3  | 112.4  | 114.7  | 109.8  | 102.8 | 91.6   | 115.2  | 117.4 |
| KLK14  | 118.9  | 118.1  | 125.3  | 119.7  | 112.7 | 99.6   | 122.6  | 113.5 |
| KLK15  | 112.8  | 127.1  | 117.5  | 122.8  | 108   | 101.2  | 120.3  | 118.6 |
| KLK15  | 110.4  | 108.2  | 109.5  | 123.2  | 103.5 | 95.2   | 120.9  | 104.6 |
| KLK15  | 115.2  | 109.1  | 119.1  | 120.1  | 111.6 | 102.1  | 110.3  | 117.9 |
| KLK2   | 110.3  | 120.3  | 112.6  | 113.4  | 106.5 | 98.5   | 120    | 112.6 |
| KLK2   | 118.8  | 121    | 129.3  | 124.3  | 109.9 | 106.1  | 123.8  | 116.9 |
| KLK3   | 115.5  | 114.7  | 116.4  | 115.5  | 102.8 | 101.9  | 116.6  | 122.5 |
| KLK3   | 110.3  | 110.9  | 123    | 114.6  | 106.6 | 93.3   | 107.3  | 116.7 |
| KLK3   | 118.6  | 126.7  | 125.3  | 116.7  | 121.1 | 104.9  | 123.2  | 123.5 |
| KLK4   | 117.8  | 111.3  | 114.8  | 115.9  | 108.8 | 100.7  | 119.6  | 115.5 |
| KLK5   | 108.8  | 114.2  | 110.1  | 112    | 105.2 | 98.2   | 108.1  | 108   |
| KLK5   | 106.6  | 119.2  | 128.8  | 117.1  | 108   | 104.5  | 118.9  | 111.5 |
| KLK5   | 118.6  | 105    | 114.4  | 116.8  | 106.7 | 95.3   | 107.5  | 121.4 |
| KLK6   | 119.7  | 121.5  | 116.4  | 108    | 103.9 | 99     | 113.4  | 115.3 |
| KLK6   | 114.3  | 118    | 118.9  | 127.4  | 105.7 | 100.7  | 113.9  | 123.6 |
| KLK7   | 123    | 117.4  | 120.2  | 122.3  | 110.9 | 99.9   | 125.2  | 122.3 |
| KLK7   | 124    | 140.1  | 126.6  | 130.7  | 125.2 | 108.6  | 138.5  | 117.5 |
| KLK8   | 119.4  | 119.3  | 114.8  | 108.9  | 105.1 | 109.2  | 126    | 119.4 |
| KLK8   | 115.6  | 112.7  | 112.3  | 126.6  | 109.1 | 101.3  | 116.9  | 113.1 |
| KLK9   | 117.8  | 107.6  | 106.1  | 109.9  | 103.4 | 92.9   | 106.7  | 112.2 |
| KLKB1  | 142.9  | 128.3  | 136.8  | 141    | 121.7 | 115.3  | 126.6  | 140.9 |
| KLKBL4 | 105.9  | 105.3  | 111    | 109.6  | 101.5 | 99.9   | 113.9  | 107.3 |
| KLKP1  | 116.7  | 107.1  | 112.8  | 115.3  | 103.2 | 91.5   | 124.8  | 107.4 |
| KLP1   | 118.1  | 120.7  | 154    | 137.2  | 122.1 | 112.8  | 143.1  | 122.4 |
| KLRA1  | 124    | 122.1  | 132.1  | 133.1  | 119.3 | 106.9  | 118.7  | 123.2 |
| KLRB1  | 4737.6 | 4856.9 | 4945.5 | 5662.6 | 4192  | 4153.3 | 5639.7 | 5533  |
| KLRC1  | 157.1  | 189.6  | 161.3  | 163.2  | 159.6 | 127.3  | 141.2  | 168.5 |
| KLRC2  | 165.7  | 178.5  | 184    | 200.5  | 133.9 | 147.6  | 159.7  | 148   |
| KLRC3  | 110.9  | 111.3  | 107.2  | 108.5  | 108.7 | 105.5  | 115    | 114.2 |
| KLRC3  | 239.8  | 315.9  | 321.1  | 226.8  | 212.3 | 200.6  | 220.5  | 240.3 |
| KLRC3  | 111.9  | 126.4  | 119.4  | 118.6  | 102.9 | 100.8  | 111.9  | 122.8 |
| KLRC4  | 132.4  | 122.4  | 126.2  | 126.4  | 121.3 | 104.4  | 129.2  | 121.2 |

|         |        |        |        |        |        |       |        |        |
|---------|--------|--------|--------|--------|--------|-------|--------|--------|
| KLRD1   | 313.3  | 341.4  | 297.6  | 343.2  | 313.9  | 181.2 | 234.2  | 273.1  |
| KLRD1   | 114    | 123.8  | 121.2  | 120.6  | 110.3  | 110   | 114.8  | 109.8  |
| KLRF1   | 507.4  | 378.6  | 572.5  | 408.6  | 289.9  | 350   | 334    | 392.2  |
| KLRG1   | 116.1  | 112.7  | 115.4  | 111.8  | 113.1  | 98.9  | 117    | 117.6  |
| KLRG2   | 110.9  | 124.4  | 124.7  | 121.6  | 116.1  | 101.1 | 120.8  | 118.3  |
| KLRK1   | 128.3  | 139.7  | 137.6  | 139.4  | 134.8  | 111.1 | 125.5  | 135.5  |
| KMO     | 130.9  | 116.1  | 144.7  | 138.1  | 115.8  | 110.7 | 121.8  | 121.2  |
| KNDC1   | 108.7  | 109.2  | 117    | 117.8  | 112    | 105.6 | 125.6  | 124.3  |
| KNDC1   | 124.1  | 113.1  | 119.5  | 117.7  | 109.5  | 101.7 | 118    | 112.1  |
| KNG1    | 113.1  | 112.1  | 119.7  | 118.8  | 103.3  | 98.8  | 112.1  | 119.1  |
| KNS2    | 123    | 141.5  | 147.7  | 145.9  | 124.4  | 108.5 | 139.6  | 129.8  |
| KNS2    | 174.6  | 172.7  | 165.4  | 192.8  | 169.4  | 161.5 | 191.7  | 176.8  |
| KNTC1   | 195.9  | 198    | 200.7  | 204.5  | 192.3  | 171.8 | 201.7  | 199.1  |
| KNTC2   | 126.5  | 137.7  | 139.2  | 139.5  | 127.6  | 112.4 | 144.4  | 176.6  |
| KPNA2   | 137.1  | 135.5  | 136.9  | 143    | 120.1  | 118.3 | 130.1  | 131.3  |
| KPNA3   | 244    | 285.8  | 259.4  | 308.7  | 282.5  | 214.6 | 328.9  | 319.7  |
| KPNA4   | 513.1  | 605.9  | 509.9  | 664.3  | 583.8  | 444   | 924.3  | 1094.2 |
| KPNA5   | 153.4  | 137.9  | 141.2  | 157.9  | 136.3  | 116.6 | 137    | 172.7  |
| KPNA6   | 459.8  | 583.2  | 451.9  | 531    | 502    | 380.5 | 667.3  | 586.7  |
| KPNB1   | 1832.3 | 1755.1 | 1877.8 | 2064.7 | 1678.6 | 2632  | 2831.1 | 1980.1 |
| KPTN    | 118.2  | 115.6  | 118.8  | 108.2  | 107.3  | 97.3  | 122.3  | 120.9  |
| KRAS    | 244.7  | 243    | 274.9  | 240.6  | 256.8  | 275.7 | 290.8  | 319.2  |
| KRAS    | 111.5  | 113.9  | 119.2  | 117.7  | 108.7  | 95.6  | 118.1  | 117.2  |
| KRCC1   | 161.7  | 183.8  | 227.5  | 192.7  | 203.1  | 165.2 | 192.2  | 212.8  |
| KREMEN1 | 109.9  | 112.5  | 114.8  | 124.2  | 119.7  | 96.6  | 112    | 122.7  |
| KREMEN1 | 136.1  | 128.7  | 137.2  | 139.8  | 130.5  | 122.1 | 127.3  | 139.4  |
| KREMEN2 | 107.9  | 117.3  | 117    | 121.4  | 110.8  | 97.2  | 117.3  | 123.1  |
| KREMEN2 | 112.2  | 117.7  | 116.1  | 122.9  | 118.9  | 100   | 108.4  | 114.8  |
| KRIT1   | 119.4  | 110.3  | 117    | 116.9  | 113.4  | 98.6  | 120.8  | 113.1  |
| KRT1    | 105.8  | 127.4  | 116.6  | 120.6  | 126.7  | 96.5  | 115.4  | 131.2  |
| KRT10   | 633.1  | 728.5  | 606.3  | 683.1  | 610.7  | 447   | 590.9  | 566.8  |
| KRT12   | 103.4  | 111.2  | 106.8  | 113    | 106.4  | 95.3  | 108.9  | 109.5  |
| KRT13   | 119.8  | 112    | 122.1  | 131.9  | 108.2  | 101   | 123.1  | 121.7  |
| KRT14   | 111.2  | 105.6  | 112.4  | 113.8  | 102.7  | 94.7  | 110    | 110.6  |
| KRT15   | 117.5  | 115.8  | 118.4  | 112.6  | 116.4  | 102   | 105.7  | 106.5  |
| KRT16   | 109.1  | 110.1  | 111.5  | 120.2  | 113    | 103.4 | 115.3  | 117.6  |
| KRT17   | 116.3  | 132    | 126.3  | 120    | 113.1  | 105.7 | 124.2  | 117    |
| KRT18   | 120.3  | 114.4  | 116.5  | 121.2  | 109.3  | 105.6 | 115.6  | 115.6  |
| KRT18   | 130.2  | 120.2  | 134.3  | 133.2  | 118.9  | 112.4 | 130.6  | 118.7  |
| KRT19   | 112.2  | 110    | 113.5  | 111.2  | 110.1  | 93.9  | 111.6  | 107.4  |
| KRT1B   | 110.5  | 108.3  | 111.8  | 123.8  | 105    | 101.5 | 116.3  | 122.7  |
| KRT20   | 114.8  | 113.7  | 114.5  | 116.3  | 114.3  | 96.4  | 117.3  | 121.4  |
| KRT23   | 122.1  | 118.1  | 125.7  | 135.2  | 123.1  | 103.7 | 123.9  | 118    |
| KRT24   | 118.4  | 112.5  | 123.4  | 123.7  | 115.4  | 104.8 | 122    | 120.2  |
| KRT25A  | 105    | 104.4  | 117    | 118.3  | 107.1  | 101.5 | 111.8  | 104.5  |
| KRT25C  | 110.6  | 116.3  | 121.1  | 116.2  | 103.1  | 102.2 | 127.7  | 116.1  |
| KRT25D  | 111.5  | 115.6  | 108.2  | 108.2  | 107.2  | 107.8 | 117.1  | 111.3  |
| KRT26   | 117.1  | 119.3  | 114.2  | 120.4  | 114    | 101.4 | 117.4  | 113.8  |
| KRT2A   | 130.9  | 145.1  | 119    | 146    | 119.3  | 111.8 | 114    | 118.9  |
| KRT2B   | 116.4  | 113.8  | 115.5  | 118.4  | 105.7  | 98.8  | 112.3  | 113.2  |
| KRT3    | 116.2  | 121.1  | 111.6  | 119.3  | 106.9  | 92.5  | 127.4  | 110.4  |



|           |       |       |       |       |       |       |       |       |
|-----------|-------|-------|-------|-------|-------|-------|-------|-------|
| KRT33A    | 115.7 | 118   | 116.2 | 121.7 | 115.6 | 96.6  | 129.4 | 118.3 |
| KRT39     | 116.4 | 124.7 | 125   | 117.6 | 113.1 | 100.9 | 113.1 | 121.4 |
| KRT4      | 115.2 | 107   | 119.8 | 124   | 105.6 | 113.8 | 112.5 | 117   |
| KRT40     | 107.5 | 113.5 | 109.7 | 118.1 | 104   | 95.9  | 117.2 | 99.7  |
| KRT5      | 109   | 115.3 | 116.4 | 121.2 | 107.9 | 96.5  | 116.6 | 109.2 |
| KRT6A     | 117.9 | 118.2 | 121.1 | 116.8 | 106.5 | 94.2  | 112.3 | 114.9 |
| KRT6B     | 105.1 | 118.2 | 117.1 | 120.7 | 113.3 | 101.3 | 119.9 | 110.4 |
| KRT6E     | 113.4 | 109.2 | 116.7 | 121.1 | 114.2 | 95.8  | 118   | 107.7 |
| KRT6IRS   | 115.3 | 118   | 122.8 | 121.1 | 106.9 | 106.3 | 122.5 | 107.5 |
| KRT6L     | 119.7 | 113.7 | 110.5 | 107.2 | 105.4 | 96    | 111.3 | 109.8 |
| KRT7      | 108.3 | 123.9 | 119   | 124.3 | 108.2 | 97.6  | 120.5 | 101.8 |
| KRT8      | 114.6 | 115.5 | 115.4 | 118.5 | 103.7 | 107.4 | 123.8 | 112   |
| KRT86     | 118.5 | 124.7 | 179.9 | 133.3 | 112.7 | 122.9 | 115.2 | 117.7 |
| KRT9      | 132.9 | 128.4 | 133.1 | 121   | 118.5 | 105   | 152.4 | 124.5 |
| KRTAP10-1 | 109.6 | 115.3 | 129.8 | 122.3 | 106.7 | 99.6  | 125.4 | 110.4 |
| KRTAP10-1 | 135   | 120.7 | 138.1 | 126.3 | 119.6 | 96.5  | 117   | 127.9 |
| KRTAP10-1 | 130.1 | 110.2 | 124   | 122   | 105.2 | 99.4  | 120.3 | 118.5 |
| KRTAP10-1 | 106   | 114.1 | 110.9 | 113.3 | 104.6 | 94.5  | 115.1 | 110.7 |
| KRTAP10-2 | 114.8 | 115.5 | 118.3 | 122.7 | 117.2 | 110.8 | 120.6 | 126.2 |
| KRTAP10-2 | 108.1 | 109.8 | 105.8 | 111.2 | 117.6 | 94.5  | 101.4 | 112.8 |
| KRTAP10-3 | 113.3 | 117.1 | 120.2 | 133.8 | 101.1 | 95.9  | 116.6 | 111.7 |
| KRTAP10-4 | 110.5 | 125.4 | 123.3 | 127.2 | 112.4 | 97.9  | 122.2 | 115.1 |
| KRTAP10-5 | 116.6 | 128.6 | 116.2 | 132   | 118.8 | 124.2 | 121.8 | 122.9 |
| KRTAP10-7 | 105   | 118.4 | 108   | 115.5 | 100.7 | 97.9  | 113.4 | 117.9 |
| KRTAP10-8 | 111.6 | 114.6 | 120.7 | 117.8 | 104.2 | 97.1  | 128   | 108.1 |
| KRTAP10-9 | 112.9 | 116.4 | 122.7 | 115.1 | 114.2 | 96.6  | 119.6 | 121.5 |
| KRTAP1-1  | 109.9 | 111.1 | 114.2 | 120   | 108.7 | 101.2 | 118.4 | 118.4 |
| KRTAP11-1 | 109.5 | 116.6 | 117.4 | 119.6 | 109.4 | 108   | 120.1 | 118.5 |
| KRTAP12-1 | 118.6 | 122.3 | 115.4 | 120.7 | 110.6 | 99.3  | 119.4 | 119   |
| KRTAP12-2 | 117.7 | 115.4 | 117   | 117   | 104.2 | 94.5  | 128.6 | 117.1 |
| KRTAP12-3 | 112.1 | 117   | 115.9 | 124.3 | 112.7 | 101.2 | 110.1 | 114.3 |
| KRTAP12-4 | 111.5 | 124.8 | 119.2 | 120.3 | 117.5 | 105.8 | 120.4 | 130.3 |
| KRTAP1-3  | 109.1 | 120.7 | 120.8 | 120.9 | 105.4 | 96.7  | 118   | 121.4 |
| KRTAP13-1 | 110.1 | 109.7 | 106   | 121.2 | 109.4 | 103.6 | 119.7 | 107.9 |
| KRTAP13-2 | 103.6 | 117.7 | 114.4 | 111.4 | 115   | 101.4 | 124.7 | 114.8 |
| KRTAP13-3 | 118.2 | 115.2 | 115.4 | 113.4 | 106.9 | 96.4  | 119.6 | 121.9 |
| KRTAP13-4 | 107.9 | 114.4 | 119.9 | 114.7 | 107   | 101.3 | 121.8 | 112.8 |
| KRTAP15-1 | 106.9 | 98.6  | 116.8 | 131.1 | 103.2 | 99.5  | 126.8 | 107.2 |
| KRTAP17-1 | 118.2 | 110.2 | 122.7 | 123.5 | 114.8 | 101.8 | 123.3 | 110.9 |
| KRTAP19-1 | 111.4 | 108.5 | 112   | 110   | 106.4 | 97.1  | 113.3 | 113.9 |
| KRTAP19-2 | 116.6 | 112.5 | 112.7 | 116.5 | 99.2  | 102.6 | 117.6 | 111.3 |
| KRTAP19-3 | 103.6 | 114.7 | 116.4 | 113.6 | 104.7 | 96.8  | 115.5 | 104.3 |
| KRTAP19-4 | 115   | 108.8 | 122   | 128.7 | 104.2 | 99.5  | 120.3 | 119.6 |
| KRTAP19-5 | 129.4 | 122.4 | 129.3 | 115.5 | 112.5 | 108.1 | 131.7 | 114.3 |
| KRTAP19-6 | 114.2 | 134   | 122.7 | 139.1 | 124.8 | 100   | 124.6 | 122.1 |
| KRTAP19-7 | 113.7 | 127.2 | 107.5 | 133.6 | 118.8 | 112.7 | 120.8 | 120.5 |
| KRTAP20-1 | 109.3 | 107.9 | 103.9 | 116.2 | 98.7  | 97.2  | 107.7 | 111.2 |
| KRTAP20-2 | 111.6 | 130   | 118.9 | 130.5 | 118   | 112.8 | 115.7 | 130.7 |
| KRTAP21-1 | 120.2 | 107.4 | 117.4 | 113   | 109.4 | 99.5  | 112.2 | 112.2 |
| KRTAP21-2 | 117   | 111.4 | 115.3 | 118.5 | 113.9 | 94.7  | 120.5 | 118.2 |
| KRTAP22-1 | 115.1 | 130.9 | 117.4 | 121.5 | 110.1 | 103.2 | 118.8 | 119.3 |

|           |       |        |        |        |       |       |        |       |
|-----------|-------|--------|--------|--------|-------|-------|--------|-------|
| KRTAP23-1 | 110   | 123.3  | 112.6  | 120.1  | 106.8 | 95.3  | 125.2  | 111.1 |
| KRTAP26-1 | 127.2 | 121.1  | 126    | 125.5  | 122.5 | 115   | 125    | 120.5 |
| KRTAP27-1 | 116.6 | 117.3  | 121.1  | 114.5  | 121.1 | 100.1 | 119.3  | 116.8 |
| KRTAP3-1  | 110.1 | 105.3  | 116.5  | 111.1  | 104.3 | 96.7  | 109.8  | 108.1 |
| KRTAP3-2  | 111.8 | 114.9  | 110.9  | 113.7  | 108.9 | 102.9 | 120.7  | 112.7 |
| KRTAP4-10 | 117.6 | 112.3  | 120.3  | 114.7  | 104.2 | 101.9 | 115.6  | 117.9 |
| KRTAP4-12 | 117.7 | 115.5  | 128.1  | 119.8  | 114.8 | 107   | 123    | 118.1 |
| KRTAP4-14 | 114.3 | 111.7  | 115.8  | 121.8  | 111.3 | 100   | 121.8  | 115.6 |
| KRTAP4-2  | 104.8 | 106.6  | 111    | 111.3  | 100.8 | 96    | 105.4  | 107.9 |
| KRTAP4-4  | 106.8 | 117    | 122.4  | 129.3  | 110.3 | 101.7 | 111.2  | 120.7 |
| KRTAP4-5  | 108   | 112.3  | 114.8  | 110.7  | 100.8 | 99    | 116.2  | 106.7 |
| KRTAP4-7  | 118.1 | 122.5  | 122.9  | 132.4  | 116   | 95.7  | 116.5  | 132.7 |
| KRTAP5-1  | 106.3 | 115.5  | 121.3  | 120.7  | 102.1 | 94.2  | 111.6  | 111.1 |
| KRTAP5-10 | 113.4 | 111.5  | 113.4  | 122.7  | 110.8 | 98.8  | 117.1  | 121   |
| KRTAP5-11 | 121.7 | 118    | 125.2  | 122.1  | 112.6 | 101.3 | 115.7  | 114.3 |
| KRTAP5-2  | 117.7 | 114    | 113.1  | 111.6  | 102.6 | 99.4  | 116.6  | 115   |
| KRTAP5-3  | 113.9 | 112.9  | 117.9  | 119.5  | 110.8 | 102.1 | 130.1  | 119.9 |
| KRTAP5-4  | 115.4 | 109.6  | 113.7  | 119.7  | 106   | 99.2  | 118.9  | 117.1 |
| KRTAP5-5  | 114.5 | 109    | 111.1  | 113.9  | 105.3 | 102.4 | 107.1  | 107.8 |
| KRTAP5-6  | 107.3 | 111    | 106    | 111.2  | 98.8  | 90.9  | 103.6  | 115   |
| KRTAP5-7  | 114.9 | 120.1  | 109.6  | 117.6  | 109.9 | 92    | 118    | 115.7 |
| KRTAP5-8  | 107.5 | 118.2  | 111.6  | 114.9  | 110.8 | 99.7  | 108.2  | 118.2 |
| KRTAP5-9  | 112.6 | 117    | 130.2  | 123.6  | 113.2 | 103   | 121.4  | 118.2 |
| KRTAP6-1  | 119.4 | 118.3  | 111.2  | 122.5  | 110.9 | 95.9  | 120.2  | 113.4 |
| KRTAP6-2  | 122.9 | 112.8  | 120.7  | 118.6  | 107.1 | 94.5  | 120.7  | 116.6 |
| KRTAP6-3  | 115.2 | 113.3  | 116.8  | 110.1  | 109.5 | 102.5 | 127.9  | 110.8 |
| KRTAP8-1  | 113.6 | 113.7  | 119.4  | 116.7  | 109.5 | 94.1  | 111.8  | 105.2 |
| KRTAP9-3  | 107.7 | 115.9  | 116.6  | 110.8  | 100.3 | 93.6  | 124.5  | 108   |
| KRTAP9-4  | 116.5 | 116.6  | 129.7  | 115    | 113.7 | 98.3  | 124.8  | 112.1 |
| KRTCAP2   | 1244  | 1556.4 | 1411.3 | 1258.9 | 1158  | 880.3 | 1342.2 | 1201  |
| KRTCAP3   | 123.8 | 129.1  | 125.1  | 120.1  | 115.2 | 107   | 120.2  | 123.9 |
| KRTHA2    | 123.7 | 132.3  | 118.9  | 124.5  | 105.7 | 100.1 | 129.1  | 120.1 |
| KRTHA3B   | 115.5 | 112.6  | 112.1  | 116.3  | 106.3 | 102.2 | 114.1  | 119.4 |
| KRTHA4    | 110.3 | 109.2  | 115.3  | 112.9  | 118.1 | 100.6 | 119    | 112.5 |
| KRTHA5    | 113   | 113.9  | 111.2  | 113.7  | 105.4 | 100.7 | 109.9  | 108.8 |
| KRTHA6    | 115   | 123.5  | 120.6  | 137.9  | 109.5 | 98.4  | 117.2  | 114.4 |
| KRTHA7    | 124   | 118.4  | 117.4  | 125.9  | 110.2 | 114.5 | 129.1  | 112.3 |
| KRTHA8    | 106.6 | 117.8  | 109.1  | 109    | 107.8 | 95.1  | 110.2  | 107.4 |
| KRTHB1    | 112.1 | 120.8  | 129.7  | 122.3  | 119.3 | 121.2 | 122.9  | 120.4 |
| KRTHB2    | 111   | 125.2  | 120.4  | 116.7  | 109.9 | 97.7  | 108.7  | 126.6 |
| KRTHB3    | 123.4 | 123.4  | 121.6  | 125.7  | 116.9 | 102   | 117.5  | 120.5 |
| KRTHB4    | 111   | 107    | 116    | 122.1  | 115.7 | 98.2  | 120.5  | 114.6 |
| KRTHB5    | 114.2 | 118    | 108.4  | 110.8  | 105.7 | 96.3  | 117    | 125   |
| KSP37     | 1256  | 1024.9 | 2116   | 1629.1 | 916.9 | 1728  | 1275.8 | 678.9 |
| KSR1      | 126.6 | 112.7  | 119.7  | 131.5  | 104.9 | 94.7  | 133.9  | 117.5 |
| KSR2      | 106.1 | 112.4  | 117.7  | 113.3  | 107.6 | 98.9  | 121.6  | 122.7 |
| KTI12     | 175.3 | 197.2  | 172    | 187.7  | 164.9 | 139.6 | 164.4  | 163.7 |
| KTN1      | 296.2 | 298.7  | 253.6  | 247.3  | 308.3 | 246.4 | 309    | 402.2 |
| KTN1      | 176.3 | 170.6  | 167.7  | 210.8  | 187.5 | 151.8 | 249.5  | 223.4 |
| KUA       | 288   | 276.2  | 216.1  | 315.7  | 208.3 | 195.2 | 279.5  | 236.7 |
| KUA-UEV   | 126.7 | 123.5  | 135.3  | 142.9  | 122.1 | 101.7 | 130.6  | 122.2 |

|         |         |         |         |         |         |         |         |         |
|---------|---------|---------|---------|---------|---------|---------|---------|---------|
| KY      | 126.5   | 118.8   | 139.9   | 119.3   | 122.7   | 116.8   | 124.1   | 131.9   |
| KYNU    | 2504.4  | 2300.2  | 572.2   | 3376.5  | 1414.2  | 1741.6  | 2609.6  | 895.5   |
| KYNU    | 1204.2  | 878.2   | 249.9   | 1425.2  | 645.7   | 731.7   | 1107.6  | 376.7   |
| L1CAM   | 124.9   | 123.4   | 118.2   | 124.7   | 109.5   | 104.9   | 128     | 122.1   |
| L1CAM   | 130.1   | 128     | 132.2   | 144     | 125.5   | 106.7   | 130.2   | 127.2   |
| L3MBTL  | 113.3   | 112     | 115.1   | 128.2   | 100     | 96.1    | 117.9   | 108.5   |
| L3MBTL  | 114.7   | 115.1   | 125.6   | 117.8   | 117.7   | 103.2   | 119.8   | 121.7   |
| L3MBTL  | 117.3   | 117.4   | 116.6   | 120     | 110.3   | 101.6   | 120     | 119.9   |
| L3MBTL  | 118.2   | 129.2   | 124.5   | 128.6   | 114.5   | 117.3   | 119.7   | 124.5   |
| L3MBTL2 | 125.5   | 128.5   | 111.8   | 118.4   | 110.9   | 113.4   | 118.5   | 105.5   |
| L3MBTL2 | 430.5   | 460.3   | 424.2   | 409.8   | 303.7   | 329.5   | 343     | 300.5   |
| L3MBTL3 | 193.8   | 197.8   | 200.9   | 184.4   | 193.9   | 173.5   | 204.1   | 216.2   |
| L3MBTL3 | 118     | 120     | 126.3   | 100.5   | 104.1   | 100.9   | 120     | 131.7   |
| L3MBTL3 | 114.4   | 123.9   | 108.6   | 124.6   | 114.6   | 95.2    | 122.7   | 113.9   |
| L3MBTL4 | 111     | 115.2   | 117.2   | 114.3   | 104.8   | 105.2   | 110.6   | 115.8   |
| LACE1   | 116     | 114.5   | 119     | 110.2   | 111.3   | 99.7    | 122.3   | 124     |
| LACRT   | 115.5   | 108.6   | 116.8   | 119.5   | 105.5   | 99.5    | 126.3   | 121     |
| LACTB   | 159.5   | 144.7   | 180.7   | 174.2   | 147.4   | 148.2   | 165     | 154.3   |
| LACTB   | 938.8   | 636.8   | 770.5   | 991.2   | 453.2   | 805.2   | 664     | 570     |
| LACTB   | 161.2   | 141.5   | 154.1   | 153.9   | 139.1   | 118.7   | 160     | 148.8   |
| LACTB2  | 180.6   | 171.9   | 190.4   | 183.5   | 174.5   | 137.6   | 179.3   | 196.9   |
| LAD1    | 120.4   | 113.3   | 118.9   | 130.4   | 118     | 113.3   | 116     | 114.5   |
| LAD1    | 121.7   | 114.7   | 116.7   | 122.9   | 115.4   | 100.4   | 122.7   | 119.5   |
| LAG3    | 263.9   | 295.9   | 192.5   | 250.8   | 174.9   | 131.4   | 203     | 170     |
| LAIR1   | 140.8   | 132.6   | 194.1   | 141.7   | 130.7   | 113     | 125.3   | 121.3   |
| LAIR1   | 18779.5 | 16429.2 | 16965.8 | 19019.9 | 16050.6 | 14684.6 | 18487.5 | 18259.9 |
| LAIR2   | 126     | 120     | 143     | 128.3   | 119.6   | 109.8   | 130.2   | 115.4   |
| LAIR2   | 141.1   | 133.4   | 147.7   | 137.8   | 109.8   | 116.3   | 123.2   | 124.4   |
| LALBA   | 112.6   | 120.8   | 116.7   | 114.5   | 108.9   | 97.8    | 122.7   | 112.4   |
| LAMA1   | 113.4   | 117.1   | 110.7   | 121.1   | 101.9   | 98      | 108.6   | 111.4   |
| LAMA1   | 113.7   | 113.7   | 107.9   | 113.7   | 109.3   | 95.3    | 120.2   | 108.7   |
| LAMA2   | 118.5   | 122.8   | 111.3   | 119.3   | 111.3   | 97.8    | 130.2   | 122.7   |
| LAMA2   | 108.7   | 111     | 115.6   | 117.4   | 110.6   | 96.4    | 121.9   | 109.8   |
| LAMA3   | 109.9   | 116.2   | 113.8   | 106.6   | 112.7   | 96.7    | 115.5   | 106.4   |
| LAMA3   | 112.6   | 109.1   | 111.1   | 111.1   | 113.4   | 92.7    | 113.1   | 112.3   |
| LAMA3   | 117.2   | 119.3   | 125.1   | 130.6   | 106.1   | 102.4   | 116.5   | 120.4   |
| LAMA3   | 114     | 118.9   | 115.8   | 112.6   | 103.4   | 94      | 114.2   | 109     |
| LAMA4   | 128.1   | 108.7   | 115.5   | 122.9   | 115.8   | 98      | 124.4   | 116.8   |
| LAMA5   | 177.6   | 153.9   | 164.7   | 173.1   | 152.6   | 130.6   | 204.7   | 181.2   |
| LAMB1   | 106.3   | 111.7   | 115.1   | 118.7   | 100.4   | 99.2    | 117.6   | 112.6   |
| LAMB2   | 112     | 111.3   | 126     | 121.3   | 105.5   | 100     | 125.2   | 111.8   |
| LAMB3   | 127.1   | 119.3   | 118.2   | 119.9   | 106.6   | 103.5   | 131.6   | 124.6   |
| LAMB3   | 116.6   | 111.8   | 118.8   | 118.3   | 108     | 99.8    | 116     | 116.6   |
| LAMB3   | 113.2   | 122.6   | 117.5   | 115.1   | 108.3   | 100.7   | 120     | 110.2   |
| LAMB4   | 115.3   | 124.1   | 117.1   | 113.2   | 105.8   | 100.8   | 119.6   | 118.8   |
| LAMC1   | 134.3   | 123.5   | 152.6   | 164.3   | 121.2   | 156.5   | 182.5   | 124.7   |
| LAMC2   | 119.2   | 120.9   | 116.9   | 119.5   | 114.2   | 102     | 129.3   | 111.7   |
| LAMC2   | 104.2   | 110.3   | 113.6   | 118.1   | 109.4   | 92.2    | 119.5   | 110.9   |
| LAMC2   | 113     | 116.8   | 114.1   | 114.3   | 110.7   | 94      | 110.2   | 112.3   |
| LAMC3   | 110.3   | 121.3   | 130.5   | 118     | 102.8   | 117.2   | 129.8   | 117.7   |
| LAMP1   | 1310.5  | 1576.5  | 1128.5  | 1433.2  | 1334    | 1066.4  | 1541.9  | 1847.4  |

|          |        |        |        |        |        |        |        |        |
|----------|--------|--------|--------|--------|--------|--------|--------|--------|
| LAMP2    | 900.2  | 870.6  | 907.6  | 994.6  | 720.1  | 866.6  | 1058.2 | 1012.8 |
| LAMP2    | 248.6  | 231.1  | 276.7  | 263.5  | 189    | 255.1  | 253.9  | 176.7  |
| LAMP2    | 240.7  | 237.4  | 291.7  | 330    | 201.1  | 291    | 352.7  | 221.4  |
| LAMP3    | 156.7  | 152.5  | 154.8  | 162.4  | 132.7  | 126.9  | 159.1  | 133    |
| LANCL1   | 294.1  | 304.9  | 356.6  | 288.3  | 285.3  | 250.9  | 222.8  | 191.6  |
| LANCL2   | 139.8  | 151.7  | 146.9  | 138.1  | 141.2  | 123.6  | 166.7  | 137.4  |
| LANCL3   | 115.4  | 117.2  | 121.5  | 112.7  | 112.8  | 97.7   | 110.8  | 118.4  |
| LAP3     | 406.1  | 200.3  | 467.5  | 360.6  | 174.3  | 403.6  | 285.1  | 194    |
| LAPTM4A  | 148.6  | 149.3  | 143.7  | 152.6  | 143.8  | 140.5  | 163.4  | 185.9  |
| LAPTM4B  | 137.6  | 158.5  | 158.7  | 166    | 149.8  | 146.1  | 170.5  | 171.6  |
| LAPTM5   | 1307.4 | 1619.3 | 2081.8 | 1655.3 | 1430.6 | 2196.7 | 1317.4 | 1531.3 |
| LARGE    | 171.9  | 165.8  | 198.2  | 171.5  | 143    | 161.2  | 157.4  | 160.1  |
| LARGE    | 111.7  | 120.3  | 112    | 103    | 108    | 103.9  | 112.8  | 114.8  |
| LARGE    | 125.8  | 127.9  | 122.7  | 124    | 108.5  | 102.4  | 120.7  | 114.7  |
| LARP1    | 116    | 120.4  | 115.8  | 126.8  | 108.4  | 98.8   | 122.5  | 112.4  |
| LARP1    | 294.5  | 262.4  | 204.5  | 276.9  | 206    | 198.1  | 263.8  | 285.9  |
| LARP2    | 113.4  | 116.3  | 111    | 122    | 120.3  | 101.9  | 144.8  | 126    |
| LARP2    | 128.6  | 127.5  | 134.9  | 120.5  | 127.1  | 112.7  | 130    | 156.4  |
| LARP2    | 117.4  | 128.5  | 124.4  | 124    | 109    | 106.5  | 119.3  | 116.4  |
| LARP2    | 215.6  | 208.5  | 205.5  | 243.1  | 208.4  | 195.7  | 298.4  | 391.2  |
| LARP4    | 140.6  | 129.9  | 147.7  | 144.5  | 121.9  | 113    | 133.5  | 131.6  |
| LARP4    | 210.7  | 207.5  | 208.7  | 232.5  | 215.2  | 149.3  | 271    | 356.4  |
| LARP5    | 536.4  | 498    | 431.7  | 548.7  | 461.2  | 424.7  | 668.2  | 626.5  |
| LARP6    | 116.6  | 117.8  | 116.2  | 121.2  | 106.1  | 101.2  | 120.3  | 118    |
| LARP6    | 114.4  | 107.3  | 112.2  | 118.3  | 107.3  | 114.6  | 114.8  | 117.8  |
| LARP7    | 580.7  | 547.4  | 595.9  | 626.4  | 550.2  | 480.9  | 571.6  | 584.1  |
| LARS     | 254    | 239    | 253.2  | 236.5  | 235.7  | 205.4  | 240.3  | 204.9  |
| LARS2    | 147.6  | 139.1  | 137.1  | 156.6  | 125.9  | 113.1  | 148.1  | 148.2  |
| LAS1L    | 125.1  | 139.5  | 139.9  | 153.5  | 146.4  | 122.5  | 140.1  | 137.8  |
| LASP1    | 3055.1 | 2520.4 | 3057.5 | 3305.1 | 2083.1 | 2212.9 | 3319.2 | 2073   |
| LASS1    | 124.1  | 115.7  | 118.9  | 112.2  | 117.2  | 98.1   | 118.8  | 115.3  |
| LASS1    | 110.3  | 113.8  | 119.2  | 114.2  | 106    | 98     | 113.6  | 115.6  |
| LASS1    | 114.8  | 115.6  | 116.3  | 117.3  | 105.5  | 99.9   | 114.6  | 120.2  |
| LASS2    | 251    | 279.4  | 221.1  | 257.5  | 190.9  | 210.4  | 263.2  | 296.3  |
| LASS2    | 361.9  | 335.7  | 299.3  | 375.5  | 258.6  | 237.2  | 430.3  | 414.6  |
| LASS3    | 106.2  | 118.4  | 119    | 107.8  | 103.1  | 96.5   | 107.5  | 115    |
| LASS4    | 116    | 115.9  | 125.5  | 132.3  | 119.8  | 103.5  | 129.7  | 134.6  |
| LASS5    | 238.5  | 213.6  | 166.9  | 231.2  | 190.6  | 157.9  | 255.6  | 255.7  |
| LASS6    | 585    | 506.6  | 527.7  | 567.7  | 585.5  | 467.4  | 707.4  | 942.9  |
| LAT      | 1039.2 | 1110.2 | 863.8  | 986.5  | 688.1  | 678.6  | 724.6  | 726.4  |
| LAT      | 576.9  | 775.4  | 480    | 527.8  | 491.6  | 411.9  | 427.2  | 385.4  |
| LAT      | 111.7  | 108.4  | 115    | 111.2  | 105.6  | 95.9   | 108.8  | 111.9  |
| LAT      | 127.7  | 133.3  | 120.4  | 123.5  | 119.9  | 106.8  | 126    | 112.1  |
| LAT1-3TM | 292    | 246.9  | 383.8  | 326.9  | 235.2  | 310.8  | 372.9  | 364.1  |
| LAT1-3TM | 114    | 115.3  | 109.6  | 108.1  | 113.5  | 101.8  | 123.8  | 119.1  |
| LAT1-3TM | 112.8  | 116.5  | 127.3  | 125.1  | 115.8  | 99.8   | 123    | 114.8  |
| LAT2     | 185.3  | 156.3  | 411.3  | 197.5  | 124.2  | 246.1  | 190    | 157.8  |
| LAT2     | 181.9  | 147    | 384.4  | 201    | 126.9  | 234.9  | 164.1  | 147.3  |
| LAT2     | 118.4  | 122.4  | 140.8  | 120.4  | 105.3  | 103.5  | 129.1  | 110.4  |
| LATS1    | 117.6  | 138.5  | 127    | 131.9  | 115.3  | 114.1  | 136.4  | 122.8  |
| LATS2    | 131.4  | 139.6  | 136.6  | 133.4  | 127.4  | 103.7  | 137.6  | 148.2  |

|         |        |        |        |        |        |        |        |        |
|---------|--------|--------|--------|--------|--------|--------|--------|--------|
| LAX1    | 296.6  | 272.1  | 366.1  | 299.4  | 285.7  | 308.1  | 278.9  | 345.8  |
| LAYN    | 123.7  | 121.2  | 118.3  | 117.1  | 119.3  | 102.6  | 116.6  | 115.4  |
| LBH     | 136.8  | 145.2  | 130.6  | 131.1  | 139.2  | 98.9   | 127.9  | 135.3  |
| LBH     | 721.7  | 962    | 552.7  | 760.5  | 500.3  | 516.6  | 583.3  | 394.6  |
| LBP     | 124.5  | 123.9  | 132.9  | 128    | 116    | 111.3  | 124    | 125.3  |
| LBR     | 133.4  | 141.8  | 133.4  | 159.4  | 137.2  | 117.4  | 160.1  | 164.2  |
| LBR     | 238.5  | 258.3  | 222.8  | 321    | 342.6  | 204.3  | 436    | 584.2  |
| LBR     | 112.8  | 111.7  | 108.5  | 117.2  | 113.8  | 107.7  | 118.7  | 134.4  |
| LBX1    | 105    | 114.1  | 119.1  | 117.2  | 108.2  | 101.6  | 117.5  | 115.2  |
| LBX2    | 108.6  | 120.1  | 113.8  | 114.1  | 102.4  | 98.8   | 122.2  | 120    |
| LBXCOR1 | 111.5  | 118    | 118    | 121.7  | 113.1  | 103.1  | 129.7  | 111.7  |
| LCAP    | 116.6  | 133.1  | 116.4  | 127.3  | 113.1  | 104.2  | 132.1  | 123.8  |
| LCAT    | 128.6  | 110.2  | 123.7  | 129.8  | 113    | 105.6  | 132.7  | 121.7  |
| LCE1A   | 117.2  | 110.2  | 117    | 119.5  | 105.7  | 96.7   | 113.4  | 108    |
| LCE1B   | 112.7  | 116.5  | 116.7  | 124.5  | 109.6  | 108.4  | 124.4  | 121.5  |
| LCE1D   | 110.7  | 118.9  | 110.9  | 115.1  | 105.3  | 98.5   | 117.5  | 112.6  |
| LCE1E   | 121.1  | 118.8  | 123.8  | 128.6  | 117.7  | 104.5  | 115.6  | 114.5  |
| LCE1E   | 111.3  | 116.3  | 119.4  | 127.7  | 98.3   | 101.6  | 110.8  | 110.6  |
| LCE1F   | 117.1  | 129.3  | 124.3  | 128.8  | 113.4  | 101.8  | 115    | 121.3  |
| LCE2A   | 115.4  | 109.6  | 105.6  | 116.7  | 98.8   | 95.7   | 120.2  | 112.4  |
| LCE2B   | 111.8  | 113.1  | 123.4  | 119.3  | 112.2  | 101    | 112.9  | 113.7  |
| LCE2C   | 120.6  | 118.9  | 116.3  | 114.8  | 107.1  | 99.2   | 115.5  | 115.3  |
| LCE2D   | 115.1  | 113.6  | 115.9  | 109.1  | 101.3  | 91.7   | 117.4  | 114.8  |
| LCE3A   | 114.7  | 116.2  | 117.6  | 132.6  | 110.6  | 105.4  | 105.2  | 114.4  |
| LCE3B   | 106.9  | 115.6  | 115.1  | 116.4  | 101.5  | 106.8  | 113.8  | 110.9  |
| LCE3C   | 104.9  | 111.6  | 119.5  | 117.5  | 109.5  | 97.8   | 115.9  | 109    |
| LCE3D   | 120.9  | 106.2  | 125.1  | 131.7  | 113.9  | 104.7  | 124.7  | 119.3  |
| LCE3E   | 115.9  | 111.7  | 112.5  | 110.8  | 105.8  | 95.6   | 124    | 112.9  |
| LCE5A   | 116.8  | 114.6  | 117.5  | 114.7  | 107.5  | 102.9  | 114.9  | 113.2  |
| LCK     | 209    | 205.1  | 177.3  | 198.3  | 166.1  | 146.2  | 157.2  | 176.6  |
| LCK     | 164.5  | 217.8  | 149.9  | 164.4  | 179    | 141.4  | 153.8  | 139.6  |
| LCK     | 128.9  | 139.2  | 116.8  | 135.4  | 115.4  | 96.4   | 136.5  | 130.5  |
| LCMT1   | 494.5  | 560.4  | 516    | 515.4  | 354.6  | 304.9  | 407    | 319.9  |
| LCMT1   | 347.4  | 336.9  | 360.3  | 324.8  | 267.9  | 261.2  | 251.9  | 227.4  |
| LCMT1   | 241.8  | 271    | 268.2  | 280.6  | 234.7  | 195.4  | 203.9  | 185.4  |
| LCMT2   | 261.5  | 314.7  | 235.7  | 271    | 252.3  | 198.7  | 254    | 217.1  |
| LCN1    | 105.2  | 105.5  | 114.5  | 117.6  | 109.3  | 102    | 129.8  | 114.3  |
| LCN10   | 123.1  | 119.4  | 123    | 112.3  | 109.3  | 96.7   | 116.3  | 113.4  |
| LCN12   | 110.9  | 101.1  | 118    | 115.9  | 110.5  | 99.5   | 112.1  | 107    |
| LCN2    | 124.6  | 160.1  | 150.7  | 134.9  | 172.1  | 124.6  | 132.4  | 156.6  |
| LCN6    | 107.1  | 119.2  | 111    | 105.2  | 107.2  | 95.5   | 115.6  | 114.7  |
| LCN8    | 115.6  | 108.8  | 116.3  | 109.6  | 103    | 100.5  | 114.5  | 107.8  |
| LCN9    | 120.1  | 111.2  | 117.1  | 113.6  | 114.8  | 101.1  | 122.2  | 107.6  |
| LCOR    | 432.3  | 331.1  | 280.5  | 334.8  | 297.9  | 231.1  | 456.4  | 481.6  |
| LCORL   | 110.7  | 104.3  | 106.8  | 111.9  | 102.3  | 99.9   | 113.9  | 115.6  |
| LCP1    | 5626.2 | 4585.2 | 6203.3 | 5512.9 | 3438.1 | 5022.8 | 6141.9 | 5592.9 |
| LCP2    | 181.2  | 142    | 162.6  | 146.5  | 139.6  | 120.6  | 137.4  | 144.4  |
| LCT     | 114.7  | 119.5  | 117.2  | 109    | 107.9  | 102.4  | 116.7  | 122    |
| LCTL    | 117.9  | 119.1  | 132.8  | 130    | 126.6  | 111.1  | 119.9  | 126.3  |
| LDB1    | 121.2  | 124.7  | 133.6  | 135.1  | 128.4  | 106.5  | 131.9  | 118.7  |
| LDB2    | 127.8  | 155.5  | 159.8  | 142.2  | 134.7  | 118.4  | 119.5  | 131.1  |

|          |        |        |        |        |        |        |        |        |
|----------|--------|--------|--------|--------|--------|--------|--------|--------|
| LDB3     | 119    | 133.7  | 127.4  | 124.3  | 112.8  | 100.3  | 128.9  | 125.7  |
| LDB3     | 112.7  | 115.2  | 119.1  | 116.6  | 103    | 96.9   | 117.2  | 101.9  |
| LDB3     | 103.4  | 115.1  | 114.2  | 114.3  | 102.6  | 96.5   | 113.8  | 108    |
| LDHA     | 1778.7 | 1852.1 | 2001.1 | 1861.7 | 1425.9 | 1775.3 | 1853.7 | 1611.4 |
| LDHAL6A  | 120.8  | 128.6  | 132.7  | 142.1  | 118.2  | 95.8   | 119.6  | 121    |
| LDHAL6B  | 110.7  | 113.6  | 118.4  | 120.4  | 117.2  | 95.8   | 113.9  | 120.2  |
| LDHB     | 1043.6 | 1175.8 | 778.1  | 1453.4 | 828.8  | 798.3  | 798.3  | 959.1  |
| LDHC     | 121.8  | 132.7  | 121.2  | 130.9  | 115.5  | 96.5   | 127.7  | 129.8  |
| LDHC     | 119    | 113.8  | 106.1  | 119.6  | 103.4  | 94.9   | 114    | 111.7  |
| LDHD     | 113.7  | 113.6  | 107.3  | 114.8  | 114.1  | 101    | 114.6  | 109.5  |
| LDHD     | 111.4  | 114    | 112.5  | 114.9  | 98.5   | 107    | 111.4  | 111.2  |
| LDLR     | 506.2  | 480.3  | 377.6  | 401.8  | 260.4  | 234.8  | 327.6  | 300.8  |
| LDLRAD1  | 105.9  | 107.2  | 116.7  | 117.8  | 114.4  | 98     | 119.6  | 114.4  |
| LDLRAD2  | 121    | 115.7  | 111    | 116.7  | 108.5  | 100.4  | 109.8  | 114.5  |
| LDLRAD3  | 106.3  | 117.3  | 112.3  | 117.4  | 100.4  | 91.8   | 103.8  | 114.1  |
| LDLRAP1  | 316.6  | 325.1  | 370.1  | 281.2  | 236.5  | 265.3  | 230.1  | 239.4  |
| LDOC1    | 140.5  | 173.7  | 148.6  | 131.5  | 144.2  | 128.2  | 132.3  | 137.6  |
| LDOC1L   | 240.9  | 320.4  | 246.4  | 250.9  | 245.1  | 183.3  | 230.9  | 235.8  |
| LEAP2    | 136.1  | 157.4  | 141.6  | 148    | 140.8  | 109.7  | 144.3  | 151.9  |
| LECT1    | 123    | 132.9  | 124    | 128.5  | 114.1  | 101.7  | 122.1  | 113.1  |
| LECT2    | 106.9  | 116.4  | 101.5  | 110.2  | 100.5  | 91.9   | 108.7  | 107.3  |
| LEF1     | 2029.2 | 2199.8 | 1187.7 | 1716.5 | 1689.8 | 1161.9 | 1617.1 | 1905.4 |
| LEFTY1   | 120.2  | 116.7  | 118.1  | 127.9  | 106.8  | 100.4  | 121.7  | 116.7  |
| LEFTY2   | 111.8  | 114.3  | 118.6  | 125.4  | 106.7  | 94.8   | 121.9  | 120.9  |
| LELP1    | 117    | 119.5  | 115.5  | 123.5  | 105.4  | 100.1  | 116.4  | 116.3  |
| LEMD1    | 114.8  | 115.8  | 115    | 132.4  | 115.7  | 100.5  | 122.3  | 108.4  |
| LEMD2    | 289.8  | 325.5  | 275.2  | 285.6  | 234.4  | 236.4  | 300.5  | 305.2  |
| LEMD3    | 428.7  | 592.1  | 527.5  | 660.3  | 553.9  | 457.8  | 751.1  | 847.7  |
| LENEP    | 106.6  | 106.7  | 111.6  | 113.6  | 106.6  | 95.2   | 117.4  | 111.9  |
| LENG1    | 120.8  | 115.7  | 123.2  | 130.3  | 110.8  | 118    | 140.9  | 129    |
| LENG4    | 231.7  | 254.8  | 250.2  | 272.6  | 193.8  | 314.7  | 304.9  | 274.2  |
| LENG8    | 139.1  | 139.7  | 152.8  | 135.1  | 121.9  | 118.1  | 129.7  | 113.7  |
| LENG9    | 105.4  | 117.7  | 120.3  | 115.2  | 106.7  | 94.6   | 120.1  | 117.6  |
| LEO1     | 122.6  | 119.4  | 122.6  | 113.3  | 113.3  | 98.5   | 125.1  | 121.4  |
| LEP      | 213.4  | 171.7  | 195.1  | 196.8  | 220.8  | 136.6  | 227    | 207.3  |
| LEPR     | 121.5  | 122    | 127.6  | 112    | 109.2  | 100.2  | 107.5  | 123.5  |
| LEPR     | 114.3  | 127    | 116.2  | 115.6  | 114.2  | 116.2  | 119.4  | 113.1  |
| LEPR     | 110.1  | 109.8  | 113    | 116.9  | 102.8  | 99.5   | 111.3  | 121.7  |
| LEPRE1   | 199.2  | 169.4  | 174    | 176.1  | 155.4  | 143.8  | 180    | 176.8  |
| LEPREL1  | 124.2  | 124.6  | 131.5  | 121.5  | 107.3  | 116.2  | 115.7  | 113.1  |
| LEPREL2  | 104.3  | 116.3  | 115.9  | 111.2  | 103.5  | 105.6  | 113.3  | 109.6  |
| LEPROT   | 308.9  | 419.4  | 373.8  | 433.9  | 369.8  | 207.5  | 311.3  | 395.8  |
| LEPROTL1 | 1063.2 | 1522.9 | 944.9  | 1788.3 | 1292.6 | 711.5  | 1337.2 | 1614.5 |
| LETM1    | 131.8  | 133.6  | 121.8  | 128.7  | 109.4  | 108    | 139.5  | 143.2  |
| LETM2    | 116.4  | 118.4  | 123.2  | 118.6  | 107.3  | 103.8  | 121.4  | 112.9  |
| LETMD1   | 149.2  | 141.2  | 154.5  | 148.6  | 127    | 116.8  | 137.4  | 130.4  |
| LETMD1   | 377.4  | 403.4  | 432.5  | 396    | 312.9  | 336.5  | 373.9  | 333.8  |
| LFNG     | 117.4  | 111.4  | 126.2  | 115.7  | 114.7  | 103.3  | 133.1  | 112.8  |
| LFNG     | 129.1  | 138.6  | 124    | 126.1  | 118.6  | 99.9   | 135.6  | 114.3  |
| LFNG     | 1054.9 | 1274.4 | 1272.4 | 1064   | 657.6  | 906.6  | 660.4  | 434.8  |
| LGALS1   | 661.3  | 586.3  | 2162.8 | 672    | 365.5  | 1648.1 | 797.3  | 448.7  |

|          |       |       |       |       |       |       |        |       |
|----------|-------|-------|-------|-------|-------|-------|--------|-------|
| LGALS12  | 113.2 | 117.5 | 120.9 | 115.3 | 112.5 | 104   | 115.7  | 112.9 |
| LGALS13  | 108.9 | 117.6 | 115.1 | 118.8 | 117.1 | 107.5 | 119.9  | 122.6 |
| LGALS14  | 130   | 118.7 | 139.2 | 126.7 | 126.6 | 115.6 | 135.7  | 112.8 |
| LGALS14  | 106.7 | 113.7 | 117.2 | 114.7 | 112.8 | 95.1  | 124.6  | 113.5 |
| LGALS2   | 122.4 | 118.8 | 130.5 | 135.2 | 115.9 | 111.8 | 128.9  | 118.2 |
| LGALS3   | 398.1 | 326.7 | 422.8 | 389.5 | 216.9 | 255.8 | 343.3  | 277.4 |
| LGALS3BP | 160.8 | 168.7 | 121.6 | 146.5 | 139.9 | 118.6 | 141.9  | 132.4 |
| LGALS4   | 118.9 | 127.4 | 122.2 | 137.9 | 114.5 | 105.7 | 114.8  | 121.4 |
| LGALS7   | 124   | 127.9 | 128.4 | 121   | 119.5 | 99.5  | 132.5  | 114.2 |
| LGALS8   | 121.1 | 108.5 | 127   | 109.2 | 107.7 | 103.7 | 129.5  | 116.3 |
| LGALS8   | 172.9 | 241.6 | 255   | 191.7 | 175.6 | 175.4 | 201.6  | 198.4 |
| LGALS8   | 118.4 | 113   | 121.4 | 127.4 | 116.8 | 107.5 | 114.6  | 127.1 |
| LGALS8   | 285.9 | 205.8 | 289.4 | 276.1 | 223.7 | 226.9 | 242.8  | 208.9 |
| LGALS9   | 161.9 | 127.9 | 164   | 142.5 | 115.1 | 126.7 | 126.2  | 125.2 |
| LGALS9   | 136.2 | 127.6 | 124.5 | 131.2 | 109.7 | 108.1 | 133.9  | 120.8 |
| LGI1     | 115   | 117.3 | 115.1 | 121.9 | 104.3 | 98.6  | 118.1  | 108.4 |
| LGI2     | 134.2 | 120.8 | 119.5 | 136.9 | 121.3 | 119.1 | 128.8  | 136.5 |
| LGI3     | 111   | 105.9 | 119   | 117.7 | 108.7 | 93.2  | 102.3  | 123.6 |
| LGI4     | 120.2 | 121.6 | 129   | 119.3 | 124.8 | 111.6 | 135.9  | 118.5 |
| LGICZ1   | 124.9 | 115   | 118.3 | 120.7 | 114.4 | 107.5 | 117.8  | 122.4 |
| LGMN     | 209.6 | 131.2 | 306.5 | 227.6 | 130.9 | 257   | 194.8  | 138.6 |
| LGMN     | 120   | 109.3 | 124.4 | 125   | 111.5 | 105.9 | 126.9  | 119.1 |
| LGMN     | 253.6 | 151.7 | 540.5 | 345.5 | 130.6 | 450   | 234.2  | 176.1 |
| LGP1     | 187.5 | 193.8 | 189.5 | 173.5 | 144.1 | 134   | 163.1  | 170.9 |
| LGP2     | 151.9 | 167.6 | 175.8 | 176.9 | 135.1 | 137.1 | 138.6  | 152.2 |
| LGR4     | 115.8 | 107   | 108.7 | 124.4 | 102.5 | 95.5  | 113.3  | 103.4 |
| LGR5     | 115.7 | 116.5 | 116.6 | 119.1 | 103.5 | 100.6 | 118.7  | 121   |
| LGR6     | 111.5 | 122   | 125.6 | 118.6 | 119.8 | 97.9  | 120    | 119   |
| LGR6     | 126.6 | 128.4 | 125.5 | 136.8 | 118.7 | 108.6 | 125    | 113.4 |
| LGR6     | 116.2 | 116.3 | 124   | 123.2 | 117.5 | 104.1 | 117.7  | 123.3 |
| LGR6     | 112.4 | 110.8 | 118.8 | 121.6 | 108.3 | 97.9  | 117    | 108.5 |
| LGR7     | 115.6 | 108.6 | 108.2 | 114.5 | 108.8 | 100.7 | 108    | 115.9 |
| LGR8     | 107.9 | 107   | 110.2 | 118.9 | 103.9 | 95.8  | 114.6  | 108.1 |
| LGTN     | 255.1 | 284.2 | 296.1 | 298.8 | 199.3 | 243.6 | 247.1  | 254.3 |
| LHB      | 108.3 | 109.9 | 109.3 | 112.9 | 101.8 | 99.8  | 119.3  | 107.5 |
| LHCGR    | 120.6 | 112.3 | 118.3 | 115.9 | 110.6 | 108.9 | 107.4  | 114.4 |
| LHFP     | 118.9 | 112.8 | 114.5 | 113   | 107.9 | 100.5 | 113.6  | 114.8 |
| LHFPL1   | 135.9 | 141.2 | 161.1 | 151.2 | 118.4 | 132.1 | 139.4  | 137.7 |
| LHFPL2   | 649.5 | 240.3 | 382.5 | 872   | 461.3 | 857.8 | 1135.9 | 469.2 |
| LHFPL3   | 122.5 | 123.5 | 130.8 | 118.7 | 116.6 | 110.3 | 121.2  | 128.8 |
| LHFPL5   | 112.5 | 109.7 | 118   | 119   | 106.9 | 92.5  | 116    | 109.8 |
| LHPP     | 255   | 212.2 | 279.8 | 252.9 | 164.6 | 168.7 | 180.9  | 171.6 |
| LHX1     | 129.9 | 124   | 121.6 | 129.6 | 119.6 | 101.8 | 123.9  | 116.8 |
| LHX2     | 123.3 | 127.4 | 114.5 | 121.6 | 116.6 | 104.1 | 112.3  | 115.8 |
| LHX3     | 117.4 | 121   | 115.7 | 114.4 | 104.1 | 93.5  | 119.2  | 124.6 |
| LHX3     | 120.4 | 112.7 | 116.4 | 113.8 | 108.3 | 106.9 | 119.9  | 113.1 |
| LHX3     | 109.8 | 109.9 | 117.7 | 120.4 | 110.1 | 97.1  | 119.1  | 113.4 |
| LHX3     | 109   | 103.8 | 116.7 | 120.1 | 104   | 97.8  | 115.7  | 115.5 |
| LHX3     | 108.9 | 118   | 112.3 | 119.5 | 112.3 | 99.7  | 111.5  | 119.5 |
| LHX4     | 109.4 | 117.7 | 119.7 | 120   | 111.7 | 103.7 | 118.4  | 113.9 |
| LHX5     | 108.1 | 112.4 | 105.9 | 112.8 | 102.9 | 106.8 | 110.7  | 108.2 |

|        |         |        |         |         |         |        |         |         |
|--------|---------|--------|---------|---------|---------|--------|---------|---------|
| LHX6   | 132.6   | 135.7  | 136.3   | 142.8   | 134.3   | 119.9  | 149.9   | 146.2   |
| LHX6   | 111.8   | 119    | 111.6   | 122.3   | 109.9   | 103.4  | 118.9   | 109.9   |
| LHX8   | 118.6   | 104.5  | 110.2   | 111.8   | 103.2   | 101.8  | 124.2   | 109.6   |
| LHX9   | 110     | 105.9  | 108.1   | 114.8   | 103.8   | 89.4   | 107     | 107.3   |
| LHX9   | 118.8   | 112.7  | 113.2   | 116.4   | 108.7   | 99.5   | 116.8   | 114.3   |
| LIAS   | 140     | 136.1  | 148.3   | 136.8   | 121.1   | 123.8  | 142.9   | 123.6   |
| LIAS   | 261.3   | 229.1  | 343.5   | 270     | 225.3   | 226.9  | 218.8   | 246.7   |
| LIF    | 116.2   | 104.9  | 118.3   | 121.5   | 109     | 96     | 115.2   | 120.5   |
| LIFR   | 111.2   | 116.1  | 113.7   | 115.3   | 112.2   | 98.9   | 123.7   | 118.3   |
| LIG1   | 220.2   | 260.4  | 315.8   | 229.6   | 176.4   | 231.7  | 209.5   | 199.8   |
| LIG3   | 112.8   | 115.5  | 115.8   | 113.8   | 107.9   | 95     | 112     | 116.3   |
| LIG3   | 125.8   | 136.7  | 118.6   | 136.3   | 120.5   | 107.8  | 129.6   | 119.6   |
| LIG3   | 164.9   | 177.5  | 162.1   | 169     | 129.4   | 125.6  | 154.8   | 151.4   |
| LIG4   | 144.9   | 132.6  | 137.2   | 146.6   | 126.8   | 115.9  | 141.7   | 136.9   |
| LIG4   | 120.4   | 124.3  | 115.5   | 119.3   | 106.5   | 99.8   | 125.6   | 108.7   |
| LILRA1 | 117.5   | 116.5  | 125.7   | 119     | 110.9   | 101.3  | 118.2   | 120.4   |
| LILRA2 | 175.5   | 146.5  | 190.3   | 174.4   | 127.7   | 104.7  | 159.8   | 120.5   |
| LILRA3 | 132.8   | 121.7  | 312.2   | 128.9   | 111.2   | 173.9  | 135.8   | 120.1   |
| LILRA3 | 109.9   | 115    | 131.5   | 121.2   | 102.8   | 109.3  | 116.4   | 113.4   |
| LILRA4 | 123.4   | 133.6  | 131.5   | 128.4   | 116.6   | 113.4  | 141.2   | 125.3   |
| LILRA5 | 127.8   | 124.2  | 118.9   | 118.5   | 113.4   | 98.6   | 120.7   | 108.4   |
| LILRA5 | 156.1   | 108.5  | 237.6   | 130.9   | 106.8   | 114.9  | 119.4   | 106.3   |
| LILRA5 | 115.7   | 118    | 121.4   | 120.4   | 106.7   | 97.7   | 107.5   | 116.7   |
| LILRA6 | 104.4   | 136.8  | 113.9   | 121.4   | 107.1   | 102.9  | 113.8   | 111.5   |
| LILRB1 | 142.2   | 126.2  | 146.1   | 144.5   | 112.6   | 111.8  | 129     | 118.3   |
| LILRB1 | 2830.1  | 2505.8 | 2638.1  | 3018.9  | 2213.7  | 1675.8 | 2737.5  | 2450.4  |
| LILRB2 | 435.3   | 157.3  | 921.7   | 377.8   | 155.8   | 674    | 301.2   | 141.8   |
| LILRB3 | 662.5   | 302.3  | 626.4   | 624.5   | 277.9   | 446.9  | 570.5   | 292.7   |
| LILRB3 | 10747.6 | 8518.5 | 10418.1 | 11176.1 | 10394.3 | 5980.7 | 10777.5 | 11076.8 |
| LILRB4 | 151.5   | 120.2  | 189.8   | 170     | 124.8   | 169.7  | 138.5   | 122.7   |
| LILRB5 | 110.4   | 113.8  | 125.8   | 118.4   | 99.9    | 101.5  | 117.1   | 111.6   |
| LILRB5 | 123.7   | 122    | 122.9   | 135.4   | 117.8   | 101.5  | 125     | 126.5   |
| LIM2   | 111     | 121    | 124.6   | 121.9   | 106.5   | 103.1  | 106.8   | 105.4   |
| LIMA1  | 152.3   | 175.9  | 157     | 155.1   | 144.6   | 111    | 147     | 143.6   |
| LIMD1  | 108.2   | 108.6  | 109.9   | 106.3   | 102.7   | 93.8   | 117.4   | 109.1   |
| LIMD2  | 115.7   | 122.7  | 124.5   | 131.1   | 108.3   | 102.7  | 137.1   | 129.3   |
| LIME1  | 797.7   | 803.4  | 1384.1  | 904.6   | 756     | 946.4  | 677.2   | 604.1   |
| LIMK1  | 108.4   | 120.3  | 118.6   | 117.5   | 109.4   | 98     | 126.8   | 120.8   |
| LIMK1  | 120     | 125    | 117.2   | 117.2   | 110.9   | 101.7  | 118.1   | 122.9   |
| LIMK2  | 127.2   | 121.6  | 129.7   | 127.2   | 121     | 98.5   | 119.6   | 121.3   |
| LIMK2  | 111.1   | 115.7  | 120.2   | 121.5   | 109.5   | 101.5  | 115.6   | 119     |
| LIMK2  | 132.6   | 130    | 128.5   | 127.1   | 109.9   | 100.6  | 122.8   | 117.3   |
| LIMK2  | 114.1   | 120.6  | 104.1   | 115.2   | 108.1   | 96.3   | 119     | 106.8   |
| LIMS1  | 252.4   | 224.9  | 255.3   | 334.4   | 211.1   | 191.4  | 318.4   | 223.1   |
| LIMS1  | 118.5   | 122    | 141.5   | 125.1   | 120.3   | 102.1  | 118.3   | 126.5   |
| LIMS2  | 119.9   | 124.6  | 117.3   | 124.2   | 114.5   | 112.3  | 113.9   | 116.6   |
| LIMS3  | 103.1   | 116.9  | 123.7   | 132.9   | 106.5   | 104.5  | 135.7   | 112.4   |
| LIN10  | 154.8   | 156.3  | 151.2   | 167.7   | 146.7   | 136.9  | 189.8   | 147.3   |
| LIN28  | 112.3   | 118.1  | 117.4   | 112.6   | 108.3   | 96.6   | 120.1   | 112     |
| LIN28B | 124.8   | 128    | 114.7   | 122.2   | 113.9   | 102.9  | 119.5   | 127.4   |
| LIN7A  | 114.1   | 118.9  | 120.8   | 117.3   | 117.4   | 94.1   | 121.9   | 121.8   |



|        |        |        |        |        |        |        |        |        |
|--------|--------|--------|--------|--------|--------|--------|--------|--------|
| LIN7B  | 163.8  | 162.1  | 176.3  | 189.2  | 130.8  | 135.5  | 151.3  | 134.1  |
| LIN7C  | 159    | 133.5  | 138.6  | 155.7  | 132.1  | 126.5  | 159.5  | 134.4  |
| LIN9   | 131.6  | 139.8  | 124.8  | 147.4  | 127.3  | 116.7  | 134.8  | 134.2  |
| LINCR  | 115.6  | 124.2  | 128.3  | 123.4  | 107.7  | 99.8   | 122    | 117.2  |
| LINGO4 | 121.8  | 122.9  | 125.1  | 121.7  | 109.5  | 102.7  | 111.1  | 112.8  |
| LINS1  | 119.6  | 139.1  | 133    | 124.5  | 128.4  | 114.5  | 140.6  | 133    |
| LINS1  | 123    | 122.6  | 121.6  | 137.3  | 118.5  | 105.2  | 115.8  | 112    |
| LIPA   | 771.2  | 728.8  | 1339.6 | 690    | 603.4  | 712.6  | 598.6  | 484.4  |
| LIPC   | 115.8  | 116.6  | 118    | 118.3  | 112.5  | 97.5   | 107.8  | 110.4  |
| LIPE   | 120.2  | 145.7  | 129    | 123.2  | 122.5  | 110.8  | 126.4  | 133.3  |
| LIPF   | 116.5  | 115.8  | 120.9  | 117.6  | 108.7  | 105.5  | 119.9  | 110.7  |
| LIPG   | 116    | 107.5  | 110.8  | 110.5  | 108.6  | 97.1   | 115.2  | 120.3  |
| LIPH   | 115.6  | 116.8  | 113.2  | 111    | 110.8  | 108.6  | 115.2  | 112.4  |
| LIPI   | 117.3  | 117.6  | 109.6  | 119.3  | 107    | 101.7  | 109.1  | 115.3  |
| LIPK   | 135    | 120.3  | 129.7  | 122.3  | 115.8  | 104.2  | 130.9  | 133.7  |
| LIPL1  | 125.6  | 129.5  | 136.1  | 129.4  | 112.3  | 108.8  | 121.3  | 118.2  |
| LIPT1  | 227.2  | 245.9  | 268.2  | 238.9  | 205    | 238.9  | 192.3  | 215    |
| LIPT1  | 126.1  | 125.5  | 129.8  | 126.3  | 116.6  | 111.7  | 130.2  | 129.8  |
| LITAF  | 2291.3 | 2598.9 | 1935.7 | 2438.2 | 1939.4 | 2306.8 | 2401.1 | 2710.2 |
| LIX1   | 114    | 110.2  | 123.7  | 116.1  | 107    | 98     | 118.2  | 113.2  |
| LIX1L  | 200.2  | 208.2  | 192.3  | 195.8  | 175.8  | 162.1  | 152.9  | 154.3  |
| LKAP   | 1588.7 | 1614.6 | 1400   | 2040.5 | 1811.3 | 1749   | 2251.3 | 1679.3 |
| LLGL1  | 298    | 368.7  | 247.4  | 353.1  | 333.9  | 217.6  | 334.8  | 304.3  |
| LLGL2  | 115.4  | 125.2  | 121    | 111.4  | 118.9  | 104.9  | 118    | 126.1  |
| LMAN1  | 118    | 133.6  | 133.8  | 127.4  | 112.3  | 102    | 117.9  | 128.4  |
| LMAN1L | 122.8  | 135.1  | 119.4  | 134.2  | 124.4  | 108.1  | 124.5  | 134.2  |
| LMAN2  | 130.1  | 144.4  | 157    | 137.7  | 136.1  | 128.6  | 132.9  | 119.5  |
| LMAN2L | 148.7  | 142    | 141.6  | 149.6  | 129    | 140.4  | 148.5  | 157.1  |
| LMBR1  | 236.9  | 228.7  | 234.7  | 292.5  | 215.4  | 221    | 281.2  | 299    |
| LMBR1L | 115.7  | 125.5  | 117.6  | 136    | 122    | 105.7  | 138.8  | 146.7  |
| LMBRD1 | 555    | 568.5  | 613    | 654.9  | 509.5  | 465.6  | 483.6  | 597.8  |
| LMBRD2 | 121.7  | 114.2  | 127.5  | 130.4  | 106.4  | 103.2  | 114.6  | 134    |
| LMCD1  | 113.8  | 121.4  | 120.9  | 117.6  | 118.7  | 104.1  | 120.1  | 116.2  |
| LMLN   | 133.9  | 113.5  | 131.2  | 126.2  | 109.9  | 109.7  | 122.3  | 122.1  |
| LMNA   | 168.4  | 147.5  | 314.2  | 207.4  | 156.3  | 312.7  | 228.2  | 170.9  |
| LMNA   | 316.1  | 216.7  | 818.1  | 435.4  | 235.8  | 529    | 404.5  | 232.7  |
| LMNB1  | 156.2  | 127.9  | 127    | 143.1  | 132.8  | 131.2  | 119.9  | 114.5  |
| LMNB2  | 213.1  | 239.3  | 203.8  | 224.2  | 231.6  | 182.4  | 326.5  | 250.1  |
| LMO1   | 111.2  | 116.1  | 132    | 106.7  | 110.3  | 98.6   | 123.5  | 118.3  |
| LMO2   | 160.6  | 127.8  | 241.2  | 150.5  | 116.7  | 125.7  | 117.5  | 137.8  |
| LMO3   | 115.1  | 117.3  | 112.4  | 123.3  | 104.9  | 102.3  | 123.4  | 120.9  |
| LMO3   | 110.6  | 120.1  | 118    | 125.6  | 114.7  | 101.2  | 120.3  | 115.8  |
| LMO3   | 110.4  | 116.9  | 111.9  | 109.5  | 105    | 98.4   | 111.7  | 109.2  |
| LMO4   | 616.9  | 569.2  | 565.5  | 546.7  | 470    | 411.7  | 652.9  | 460.1  |
| LMO6   | 124.3  | 113.8  | 119.7  | 127.2  | 105.5  | 99.7   | 115.6  | 113    |
| LMO7   | 113.4  | 122.3  | 124.1  | 134.2  | 122.5  | 111.9  | 123.4  | 137.7  |
| LMOD1  | 125.8  | 121.3  | 114.4  | 125    | 113.3  | 94.1   | 113.3  | 116.1  |
| LMOD3  | 584.9  | 408    | 529.6  | 460.2  | 459.5  | 281.3  | 568.7  | 508    |
| LMTK2  | 125.1  | 134.7  | 129.9  | 120.9  | 123.3  | 100.8  | 131.4  | 118    |
| LMTK3  | 185.4  | 173.5  | 207.8  | 218    | 162.6  | 160.9  | 192.5  | 149.5  |
| LMX1A  | 109.1  | 106    | 115.6  | 109    | 107.1  | 96.9   | 115.5  | 105.7  |

|           |       |       |       |       |       |       |        |       |
|-----------|-------|-------|-------|-------|-------|-------|--------|-------|
| LMX1A     | 109   | 119.3 | 117.1 | 113.2 | 99.9  | 91.6  | 108.3  | 107.1 |
| LMX1A     | 118.7 | 114.6 | 109.2 | 122.1 | 101.7 | 95.4  | 116.5  | 110.2 |
| LMX1A     | 113.5 | 116.4 | 118.5 | 115.4 | 110.2 | 97.3  | 114.7  | 108   |
| LMX1B     | 120.7 | 114   | 123.5 | 115.1 | 115.9 | 99.7  | 120.9  | 118.7 |
| LNK       | 809.6 | 743.3 | 787.3 | 833.1 | 558   | 698.5 | 1089.3 | 747.9 |
| LNPEP     | 115.8 | 115.2 | 119.3 | 114.2 | 109.3 | 107.1 | 115.8  | 118.9 |
| LNPEP     | 186   | 182.8 | 181.4 | 176   | 178.6 | 159.1 | 204.6  | 186.5 |
| LNx1      | 117.5 | 122.9 | 121.5 | 117.4 | 129.3 | 100.4 | 115.5  | 120   |
| LNx2      | 151.5 | 163.2 | 148.7 | 165.5 | 142.4 | 147   | 142.3  | 176.9 |
| LOC112703 | 117.9 | 121.1 | 127.5 | 137.9 | 120.2 | 101.8 | 143.9  | 121.4 |
| LOC112714 | 124.8 | 120.3 | 132.6 | 121.8 | 124   | 101.2 | 121    | 116.7 |
| LOC112865 | 147.8 | 171.2 | 159.8 | 184   | 151.8 | 136.4 | 165.2  | 147.4 |
| LOC112865 | 363.6 | 374.1 | 260.2 | 410.6 | 279.2 | 202.5 | 372.6  | 298.5 |
| LOC113175 | 150.4 | 183.6 | 142.2 | 170.8 | 127.3 | 125.5 | 187.3  | 148.7 |
| LOC113386 | 247.2 | 396.8 | 261.3 | 252   | 281.6 | 212.8 | 213    | 284.7 |
| LOC113444 | 165.2 | 199   | 190.1 | 221.8 | 171.4 | 163.8 | 207.6  | 186.3 |
| LOC114984 | 148.9 | 141.9 | 161.4 | 156.9 | 137.5 | 141.8 | 139.9  | 136.2 |
| LOC115098 | 133.9 | 144.5 | 121   | 143.3 | 122.1 | 109.4 | 131.4  | 133.9 |
| LOC116143 | 158.8 | 163.4 | 142.8 | 142.4 | 145.6 | 113.2 | 140.9  | 138.1 |
| LOC116236 | 140.4 | 158   | 150.8 | 156   | 125.8 | 134.2 | 142.5  | 121.5 |
| LOC119710 | 130.8 | 133.6 | 145.6 | 130.4 | 122.9 | 126   | 122.8  | 127.6 |
| LOC120375 | 106   | 115.6 | 117.6 | 118.7 | 106.5 | 101.3 | 113.7  | 116.6 |
| LOC122258 | 115.9 | 114.5 | 106.5 | 123.2 | 111.4 | 98.2  | 115.6  | 115.7 |
| LOC123688 | 188.3 | 158.6 | 166.1 | 173.8 | 152.5 | 132.3 | 199.3  | 194.5 |
| LOC123876 | 107.7 | 111.6 | 110.8 | 125.3 | 109.7 | 98.3  | 117.9  | 115.5 |
| LOC124220 | 106.6 | 105.3 | 112.8 | 110   | 104.4 | 95.6  | 116.2  | 111.7 |
| LOC124446 | 376.6 | 448.8 | 542.4 | 434.6 | 327.1 | 347.2 | 348.4  | 288.9 |
| LOC124512 | 154.4 | 170.3 | 185.1 | 174.4 | 152.1 | 132.3 | 144.7  | 122.1 |
| LOC124512 | 189.3 | 182.7 | 176.2 | 182.7 | 160.1 | 130.1 | 150.1  | 149.4 |
| LOC124512 | 143.1 | 170.5 | 180.4 | 157.7 | 130.3 | 133.2 | 146.4  | 123.8 |
| LOC124751 | 122.4 | 114.9 | 128.6 | 129.8 | 114   | 101.9 | 122.5  | 112.3 |
| LOC124842 | 117.6 | 109.9 | 117.4 | 122   | 115.4 | 107.1 | 110.1  | 113.8 |
| LOC125893 | 323.7 | 369.2 | 342   | 316.7 | 244.7 | 261.1 | 249.2  | 233.7 |
| LOC126075 | 121.9 | 108.6 | 120.3 | 119.5 | 104.1 | 93.3  | 118.9  | 118.8 |
| LOC126147 | 114.2 | 111.5 | 119.1 | 114.2 | 107.9 | 97.7  | 108.8  | 115.6 |
| LOC126208 | 662.4 | 739.6 | 596.6 | 762.7 | 624.5 | 483.4 | 899    | 867.6 |
| LOC126248 | 108.9 | 114.7 | 125.7 | 123.9 | 110.8 | 107.6 | 121.1  | 108.7 |
| LOC126295 | 117.7 | 115   | 103.5 | 117.9 | 104.2 | 109.1 | 127.3  | 105.5 |
| LOC126536 | 118.7 | 120.8 | 126.9 | 115.3 | 110.7 | 99.4  | 117.6  | 116.2 |
| LOC128153 | 116.1 | 108.4 | 127.5 | 109.3 | 112.9 | 107.1 | 123.6  | 113.1 |
| LOC128435 | 132.1 | 141.3 | 150.9 | 141.4 | 118.9 | 109.7 | 133.3  | 122.7 |
| LOC128977 | 148   | 159.9 | 159.4 | 146.9 | 136.9 | 134.9 | 139.7  | 130.2 |
| LOC129138 | 191.4 | 211.8 | 166.1 | 181.1 | 170.6 | 141.6 | 192.1  | 227.4 |
| LOC129285 | 183.8 | 185.5 | 232.3 | 192.4 | 182   | 169.7 | 207.4  | 175.2 |
| LOC129530 | 171.8 | 141.5 | 147.5 | 152   | 144.7 | 127.5 | 147.5  | 147.3 |
| LOC129531 | 498.7 | 576.9 | 635.4 | 613.7 | 610.8 | 373.6 | 522.6  | 619.9 |
| LOC129607 | 132.7 | 117.2 | 129.5 | 122.3 | 106.9 | 97.1  | 115.5  | 115.1 |
| LOC130074 | 172.7 | 183.1 | 142.2 | 174.3 | 170.5 | 135.6 | 162.4  | 222.8 |
| LOC130355 | 128.1 | 149.5 | 151.9 | 142.8 | 125.2 | 132.3 | 145.9  | 140.3 |
| LOC130576 | 117   | 113.5 | 118.8 | 120.8 | 110   | 104.2 | 130.2  | 119.5 |
| LOC130940 | 111.8 | 116.1 | 116.6 | 113.9 | 101.7 | 95.4  | 121.1  | 116.1 |

|           |        |       |        |        |        |       |        |        |
|-----------|--------|-------|--------|--------|--------|-------|--------|--------|
| LOC130951 | 117.7  | 122.7 | 117.5  | 135.1  | 107.7  | 115.6 | 131.3  | 126.3  |
| LOC131149 | 114.7  | 118.6 | 121.9  | 107.6  | 106.2  | 100   | 117    | 118.8  |
| LOC132203 | 110.6  | 113.8 | 114.5  | 108.8  | 105.3  | 94.6  | 118.6  | 116.8  |
| LOC132241 | 129.3  | 118.9 | 110    | 125.9  | 115.7  | 106.7 | 119.3  | 133.7  |
| LOC132321 | 125.6  | 124.4 | 132.3  | 119.1  | 126.8  | 118.3 | 132.3  | 131.9  |
| LOC133308 | 119    | 115.5 | 120.3  | 128    | 105.8  | 111.6 | 114.4  | 115.8  |
| LOC133619 | 212.3  | 199.8 | 218.2  | 227.7  | 224.6  | 200.8 | 170.2  | 198.3  |
| LOC134145 | 117.5  | 117.4 | 115.5  | 117.2  | 108.5  | 97.7  | 113    | 123.2  |
| LOC134147 | 113.7  | 121.1 | 118.3  | 114.7  | 106.5  | 95.7  | 115.7  | 105.9  |
| LOC134997 | 1285.7 | 991   | 1452.1 | 1305.2 | 1135.9 | 850.1 | 1182.6 | 1310.1 |
| LOC136242 | 114.3  | 113.7 | 113.9  | 114.7  | 108    | 96.3  | 113.4  | 119.7  |
| LOC136263 | 117.6  | 116.5 | 129.9  | 117.7  | 106.8  | 108.1 | 127.8  | 124.6  |
| LOC136306 | 106    | 109.4 | 113.3  | 112.6  | 110.1  | 93.4  | 110.8  | 111    |
| LOC138046 | 107.1  | 107.5 | 114.2  | 112.7  | 99.9   | 95.3  | 121.8  | 109.8  |
| LOC138255 | 114.3  | 112.7 | 126.1  | 121.5  | 121.4  | 102.3 | 106.1  | 123    |
| LOC139886 | 247.4  | 235.3 | 231.9  | 221    | 157.7  | 138   | 176.1  | 159.2  |
| LOC143188 | 112.8  | 119.9 | 128.4  | 126.5  | 102.4  | 99.8  | 120.6  | 122    |
| LOC143543 | 172.4  | 177.2 | 159.9  | 167.2  | 153.6  | 160.5 | 175.3  | 174.7  |
| LOC143941 | 110    | 122.1 | 122.1  | 113    | 110.7  | 98.7  | 119.9  | 109.8  |
| LOC144097 | 141.3  | 122.6 | 144.5  | 133.7  | 111.7  | 115   | 126.3  | 132.1  |
| LOC144233 | 296.5  | 335.3 | 347    | 323.9  | 363.4  | 274.2 | 316.7  | 336.3  |
| LOC144363 | 475    | 411.6 | 676.4  | 440.1  | 373.1  | 413.3 | 347.6  | 285.3  |
| LOC144404 | 112.1  | 119.4 | 109.6  | 116.7  | 110.4  | 98    | 112.1  | 103.6  |
| LOC144404 | 109.4  | 109.5 | 116.5  | 120.6  | 107.3  | 98.4  | 113    | 107.4  |
| LOC144501 | 113.3  | 108.4 | 110.4  | 109.1  | 101.7  | 101.5 | 107.4  | 113.2  |
| LOC144501 | 106.5  | 109.9 | 128    | 117    | 112.8  | 103.9 | 120.3  | 113.8  |
| LOC144983 | 122    | 117.9 | 124.9  | 125.6  | 126.6  | 110.8 | 127.4  | 124.1  |
| LOC144983 | 108.4  | 110.6 | 116    | 108.8  | 105.8  | 95.6  | 114.5  | 112.7  |
| LOC146167 | 113.7  | 107   | 112.5  | 118    | 109.4  | 99.9  | 112.5  | 107.8  |
| LOC146325 | 113.6  | 120.3 | 111.8  | 108.1  | 108.8  | 93.2  | 112.3  | 102    |
| LOC146562 | 111.1  | 108.8 | 112    | 120.1  | 103.3  | 96.7  | 108.5  | 113.1  |
| LOC146713 | 119.4  | 111.3 | 109.4  | 108.2  | 103.6  | 104.1 | 110.7  | 118.9  |
| LOC146909 | 116.3  | 118.9 | 110.9  | 117.9  | 106.6  | 94.4  | 115.5  | 109.7  |
| LOC146909 | 107.1  | 113.1 | 115.5  | 112.5  | 100.9  | 97.1  | 113.8  | 111.3  |
| LOC147808 | 157.8  | 133.2 | 161.5  | 171    | 140.4  | 116.4 | 146.2  | 140.4  |
| LOC148898 | 119.2  | 129.5 | 123.2  | 132.5  | 112.5  | 114.6 | 114.9  | 122.5  |
| LOC149643 | 132.9  | 117.1 | 113.3  | 119.8  | 106.9  | 106.3 | 120.3  | 113    |
| LOC149950 | 120.7  | 110.1 | 123.3  | 111.6  | 108.9  | 101.2 | 126.5  | 115.6  |
| LOC150084 | 103.7  | 119.8 | 121.1  | 126.9  | 106.1  | 103.7 | 117    | 113.5  |
| LOC150223 | 152    | 149.8 | 173    | 152.4  | 137.9  | 140.2 | 160.6  | 157    |
| LOC150297 | 229.6  | 125.2 | 127.5  | 293.6  | 113.6  | 104.4 | 209.5  | 111.5  |
| LOC150383 | 113.8  | 113.6 | 121.1  | 126.3  | 119.8  | 100.5 | 114.7  | 126    |
| LOC150383 | 130.5  | 135   | 145.6  | 152.1  | 125.7  | 128.4 | 142.2  | 133.9  |
| LOC150383 | 119.3  | 120.8 | 124    | 120.6  | 106.2  | 110.4 | 120.2  | 119.6  |
| LOC150763 | 122.7  | 122.5 | 131.9  | 130.8  | 123.1  | 108.5 | 125.9  | 131.1  |
| LOC150786 | 114.9  | 117.2 | 121.5  | 110.4  | 110.7  | 106.4 | 112    | 109.6  |
| LOC151121 | 117.6  | 119.9 | 120.1  | 120.6  | 109    | 97.6  | 112.9  | 111.1  |
| LOC152195 | 116    | 111.9 | 119    | 113.2  | 105.8  | 97.1  | 114    | 118.3  |
| LOC152485 | 221.7  | 250   | 236.7  | 245    | 193.6  | 182.7 | 240.9  | 209.4  |
| LOC152573 | 109.4  | 110.4 | 109    | 119.8  | 111.7  | 97.1  | 112.5  | 118.8  |
| LOC152667 | 113.9  | 103.1 | 114.8  | 122.9  | 108.4  | 92.1  | 120.8  | 113.9  |

|           |       |       |       |       |       |       |        |       |
|-----------|-------|-------|-------|-------|-------|-------|--------|-------|
| LOC153222 | 768.9 | 800.2 | 573.6 | 886.8 | 810.7 | 584.1 | 1239.5 | 1579  |
| LOC153328 | 114.8 | 125.9 | 130.5 | 128.7 | 121.8 | 109.1 | 127.7  | 122.7 |
| LOC153364 | 169.4 | 187.1 | 164.2 | 170.7 | 172.3 | 130.5 | 136.4  | 150.9 |
| LOC154907 | 111.6 | 110   | 113.1 | 104.8 | 99    | 92.4  | 113.9  | 106.8 |
| LOC155100 | 113   | 112   | 119.2 | 111.7 | 109.4 | 103.8 | 115.3  | 105.9 |
| LOC158160 | 149   | 180   | 174.8 | 175   | 138.2 | 126.7 | 185.7  | 191.4 |
| LOC158160 | 121.3 | 120.4 | 133.1 | 116.3 | 110.2 | 101   | 122.6  | 117.8 |
| LOC158160 | 139.8 | 144.2 | 154.5 | 139.4 | 124.3 | 112.6 | 142.1  | 132.9 |
| LOC158381 | 119   | 120.2 | 119.9 | 122.9 | 119.5 | 107.9 | 126.3  | 117.8 |
| LOC158830 | 136.4 | 147.9 | 141.4 | 139.1 | 123.4 | 117.4 | 139.8  | 130.2 |
| LOC161247 | 143.5 | 137   | 142.4 | 148.4 | 139.4 | 114.3 | 124.1  | 136.7 |
| LOC161931 | 117.1 | 115.7 | 118.3 | 120.4 | 115.5 | 98.3  | 122.5  | 117.1 |
| LOC162073 | 111.8 | 116.1 | 117.7 | 123.3 | 103.1 | 108.2 | 114.1  | 120.6 |
| LOC162427 | 138.5 | 131.8 | 141   | 159   | 122.8 | 115.4 | 154.7  | 137.8 |
| LOC163131 | 113   | 118.6 | 120.7 | 119.1 | 108.2 | 98.8  | 123.1  | 114.7 |
| LOC164380 | 117.3 | 118.2 | 109.2 | 116.3 | 106.2 | 100.8 | 112.4  | 101.5 |
| LOC164714 | 117.6 | 119.9 | 111.1 | 118.2 | 109.3 | 104.1 | 117.1  | 114.7 |
| LOC165186 | 118.9 | 107.6 | 125.8 | 136.1 | 113.1 | 110.6 | 125.6  | 116.6 |
| LOC168474 | 120.4 | 117.1 | 124.8 | 115.4 | 105.4 | 96.5  | 119.2  | 122.6 |
| LOC168850 | 589.5 | 580.3 | 605.5 | 622.3 | 517.1 | 481.4 | 649.9  | 607.5 |
| LOC196264 | 116   | 127.5 | 118.2 | 124.9 | 114.3 | 116.3 | 129.2  | 123.5 |
| LOC196394 | 133   | 128.7 | 121.9 | 141.3 | 125.2 | 104   | 129.4  | 135.6 |
| LOC196463 | 144.5 | 138.7 | 174.2 | 156.1 | 112.6 | 154.3 | 145.7  | 122.2 |
| LOC196541 | 110.3 | 102.9 | 121.1 | 120.9 | 106.4 | 102.5 | 113.8  | 103.1 |
| LOC196913 | 122.6 | 119.1 | 126.2 | 117.2 | 105.7 | 104   | 122.4  | 110.1 |
| LOC197322 | 122.7 | 122.9 | 113.8 | 125.7 | 120.6 | 104.2 | 126.1  | 124.7 |
| LOC197336 | 141.2 | 138   | 123.9 | 132.6 | 129.4 | 109.9 | 136.4  | 134.1 |
| LOC198437 | 110   | 108   | 110   | 104.5 | 106.9 | 94.4  | 112.5  | 110.5 |
| LOC200312 | 120.4 | 111.2 | 119.4 | 113.3 | 102.6 | 95.5  | 114.8  | 107.8 |
| LOC200420 | 130.3 | 127.4 | 123.6 | 127.9 | 119.6 | 102   | 121.3  | 122.1 |
| LOC200810 | 140.5 | 130.4 | 123.5 | 126.5 | 106.6 | 119.1 | 132.7  | 124.1 |
| LOC201164 | 129.4 | 149.1 | 141.7 | 137.7 | 113.7 | 102.4 | 119.2  | 120.4 |
| LOC201175 | 114.5 | 120.3 | 123.9 | 121.8 | 122.4 | 112.2 | 121.5  | 119.8 |
| LOC201181 | 124.6 | 128.8 | 136   | 141.9 | 103.1 | 110.2 | 114.7  | 113.2 |
| LOC201225 | 119.4 | 120.6 | 115.7 | 117.8 | 111.4 | 112.3 | 122.5  | 112.3 |
| LOC201225 | 117.9 | 130   | 122.1 | 114.9 | 109.4 | 105.1 | 125.7  | 124.1 |
| LOC201725 | 118.1 | 127.4 | 129.7 | 127.1 | 119.7 | 104.3 | 124.3  | 131.9 |
| LOC202134 | 235.8 | 231.9 | 233.6 | 212.1 | 220   | 140.9 | 217.9  | 193.9 |
| LOC202455 | 120.9 | 118.7 | 125.6 | 120.1 | 114   | 101.1 | 125    | 120.6 |
| LOC203076 | 109.2 | 114.2 | 117.3 | 120.5 | 107.4 | 101.7 | 122    | 118.5 |
| LOC203413 | 111   | 114.8 | 115.5 | 115   | 102.2 | 100.3 | 121.4  | 113.5 |
| LOC203547 | 646.3 | 759.2 | 598.4 | 722.8 | 555.4 | 426.2 | 652.2  | 558.7 |
| LOC205251 | 129.8 | 138.3 | 146.9 | 131.3 | 137.2 | 120.8 | 129.7  | 118.6 |
| LOC219854 | 247.5 | 260.7 | 392   | 224   | 185.5 | 208.6 | 217.7  | 171   |
| LOC220115 | 111.5 | 117.4 | 108.8 | 110   | 108.6 | 90.6  | 113.8  | 111.2 |
| LOC220115 | 123.3 | 103.9 | 109.7 | 118.5 | 101.3 | 98.6  | 106.1  | 106.8 |
| LOC220425 | 115.9 | 119.8 | 122.4 | 122   | 111.5 | 92.3  | 117.9  | 109.9 |
| LOC221091 | 112   | 107.3 | 100.6 | 113.2 | 100.6 | 95.5  | 101.6  | 109.8 |
| LOC221091 | 119.1 | 110.4 | 120.1 | 114.7 | 109.4 | 99.8  | 116    | 126   |
| LOC221143 | 151.8 | 171.5 | 175.9 | 167.4 | 146.2 | 159.3 | 159    | 155.7 |
| LOC221711 | 116   | 121   | 117.4 | 116.5 | 106.9 | 97.1  | 119.7  | 117.4 |

|           |       |       |       |       |       |       |       |       |
|-----------|-------|-------|-------|-------|-------|-------|-------|-------|
| LOC22195E | 294   | 375.8 | 458.7 | 310.8 | 251.8 | 220.3 | 295   | 328.6 |
| LOC222967 | 113.9 | 124.8 | 115.5 | 127   | 108.8 | 97.6  | 131.1 | 122.3 |
| LOC222967 | 127.4 | 120.9 | 122.1 | 115   | 115   | 101.2 | 124.9 | 118.3 |
| LOC253012 | 115.2 | 120.5 | 126.9 | 127   | 115.6 | 98.5  | 126.2 | 118.4 |
| LOC253012 | 116.1 | 116   | 113.2 | 116.4 | 107.1 | 93.9  | 123.9 | 121.5 |
| LOC253012 | 107.3 | 112.7 | 107.6 | 111.5 | 104.9 | 105   | 105.7 | 109.4 |
| LOC255374 | 117.1 | 116.3 | 117.2 | 119.6 | 115.7 | 100.4 | 119.6 | 109.6 |
| LOC25735E | 112.9 | 109.5 | 119.9 | 120.7 | 105.7 | 102.6 | 114.4 | 117.4 |
| LOC26033E | 110.1 | 101   | 112   | 115.5 | 105.4 | 102.8 | 120.6 | 112.9 |
| LOC260341 | 115.8 | 117.7 | 126.6 | 121.3 | 105.9 | 98    | 121.9 | 115   |
| LOC28312E | 111.2 | 119.4 | 113.6 | 112.3 | 116.7 | 106.6 | 107.7 | 113.7 |
| LOC28312E | 114.5 | 104.9 | 111   | 112.5 | 99.3  | 94.3  | 114.5 | 110.5 |
| LOC28313C | 119.7 | 115   | 130.1 | 119.3 | 115.6 | 104   | 127.1 | 112   |
| LOC283152 | 112.2 | 118.3 | 114.9 | 109.9 | 110.5 | 102.5 | 110.7 | 110.8 |
| LOC283152 | 107.4 | 108.1 | 114.8 | 116.9 | 105.3 | 98.7  | 110.6 | 107.6 |
| LOC283174 | 131.6 | 133.8 | 118.9 | 131.1 | 133.3 | 106.8 | 119.4 | 129.1 |
| LOC28321E | 291.5 | 234.5 | 322.4 | 303.3 | 232.3 | 214.5 | 234.4 | 357.2 |
| LOC28334E | 475.9 | 559.1 | 470.8 | 487.3 | 437.7 | 468.9 | 537   | 576.9 |
| LOC283377 | 128.5 | 124.9 | 139.9 | 123.7 | 117.2 | 113   | 139.3 | 110.7 |
| LOC283392 | 111.5 | 111.3 | 108.8 | 117   | 108   | 102.2 | 117.6 | 112.1 |
| LOC283514 | 120   | 125.9 | 153.4 | 127.6 | 107.1 | 109.3 | 119.2 | 122.2 |
| LOC283537 | 291.3 | 257.3 | 299.9 | 232.8 | 215.4 | 189   | 179.9 | 189   |
| LOC283551 | 110.8 | 119.1 | 113.7 | 119.3 | 107.5 | 100.9 | 108.4 | 118.5 |
| LOC283677 | 115.8 | 127.8 | 118.3 | 113.3 | 113.2 | 96.1  | 108.2 | 120.4 |
| LOC28375E | 103.9 | 106.4 | 107.1 | 117   | 106   | 91.7  | 109.2 | 108.2 |
| LOC283871 | 167.2 | 165.4 | 155.5 | 149.9 | 130.4 | 122.1 | 144.3 | 129.7 |
| LOC283874 | 132.2 | 131.3 | 142.3 | 134.9 | 122.9 | 130.9 | 141.1 | 126.5 |
| LOC283951 | 234.9 | 231.1 | 208.6 | 260.1 | 218.2 | 205.8 | 251.1 | 234.4 |
| LOC28400E | 114.6 | 113.9 | 114.6 | 113.2 | 110.5 | 101.9 | 125.8 | 106.8 |
| LOC284194 | 116.7 | 137.8 | 126.7 | 130.6 | 117.4 | 115.6 | 124.1 | 122   |
| LOC284274 | 114.9 | 114.1 | 115.4 | 119.9 | 100.2 | 96.9  | 100.5 | 111   |
| LOC28432E | 109.6 | 116.2 | 118.5 | 120.1 | 113.6 | 101.7 | 112.7 | 116.2 |
| LOC284361 | 99.8  | 110.7 | 111.4 | 122.7 | 109.5 | 99    | 113.2 | 121.3 |
| LOC284361 | 124.7 | 113.1 | 124.5 | 125.6 | 109.8 | 102   | 122.1 | 110.3 |
| LOC28437E | 118.3 | 111   | 115.1 | 121.5 | 102   | 95    | 127.2 | 114.8 |
| LOC284402 | 105.5 | 115.6 | 114.9 | 112.5 | 110.7 | 100   | 114.8 | 105.9 |
| LOC284434 | 114.4 | 118.7 | 112   | 108.1 | 112   | 103.5 | 117   | 114.4 |
| LOC284441 | 109.3 | 115.4 | 126.1 | 123.4 | 113.4 | 97.8  | 130.1 | 116.4 |
| LOC28473E | 116.9 | 118.6 | 125.2 | 113.6 | 120.1 | 98.9  | 114.3 | 122.3 |
| LOC284751 | 125.8 | 116.9 | 118.6 | 114.2 | 114.6 | 101   | 114.4 | 117.4 |
| LOC284757 | 126.1 | 117.6 | 127.6 | 112.1 | 109.8 | 103.5 | 117.1 | 117.8 |
| LOC284912 | 107.6 | 118.7 | 139.4 | 128.2 | 112.3 | 105.5 | 117.5 | 119.3 |
| LOC28494E | 113.2 | 108.6 | 117.6 | 117.8 | 107.6 | 102.1 | 121.6 | 113.1 |
| LOC28501E | 120.2 | 113.6 | 122.2 | 134.5 | 108.7 | 101.5 | 119.9 | 111.5 |
| LOC28503E | 119.4 | 120.3 | 117.9 | 126.6 | 119   | 102.2 | 118.1 | 124.3 |
| LOC285074 | 315.7 | 433.7 | 469.3 | 325.6 | 347.9 | 315.7 | 429.9 | 433.2 |
| LOC28519E | 274.2 | 278.1 | 309.1 | 314.2 | 270.9 | 232.5 | 291.7 | 258.2 |
| LOC28535E | 115.5 | 129.2 | 133.3 | 129.5 | 110.6 | 104.4 | 121.7 | 122.3 |
| LOC285382 | 120   | 127   | 122.8 | 119.5 | 111.2 | 105.5 | 135.6 | 122.7 |
| LOC28542E | 130.6 | 131.2 | 144.9 | 122   | 110.4 | 111.5 | 126.3 | 138.6 |
| LOC28545E | 131.6 | 137.6 | 128.7 | 128.8 | 123.2 | 113.2 | 133.1 | 128.4 |

|          |        |        |        |        |        |       |        |       |
|----------|--------|--------|--------|--------|--------|-------|--------|-------|
| LOC28549 | 121.3  | 112.2  | 115.8  | 123.1  | 109.5  | 100.1 | 122.3  | 119.3 |
| LOC28551 | 139.7  | 148.3  | 153.7  | 153.5  | 133.9  | 120.1 | 151.1  | 160.3 |
| LOC28552 | 109.9  | 111.6  | 112.6  | 125.6  | 111.1  | 100.1 | 115.8  | 115.3 |
| LOC28563 | 401.9  | 365.9  | 420.9  | 443.9  | 356.5  | 344.1 | 406.2  | 416.2 |
| LOC28573 | 126.7  | 106.3  | 111.6  | 123.1  | 105    | 96.4  | 122.9  | 108.6 |
| LOC28590 | 123.8  | 114.8  | 131.3  | 133.1  | 121.2  | 115.4 | 131.2  | 134.3 |
| LOC28598 | 170.8  | 176.5  | 194.5  | 163.3  | 159.3  | 138.6 | 155.4  | 166.4 |
| LOC28598 | 111.4  | 121.6  | 110.5  | 116.2  | 108.7  | 101.5 | 114.3  | 112.7 |
| LOC28598 | 156.3  | 141    | 191.2  | 164.4  | 152.3  | 119.3 | 160.2  | 145.1 |
| LOC28607 | 118.4  | 106    | 120.4  | 114.9  | 104.3  | 92.9  | 106.7  | 111.6 |
| LOC28618 | 127    | 112.6  | 118.8  | 120.2  | 109.3  | 107.9 | 127.4  | 108.2 |
| LOC28652 | 110.1  | 113.3  | 108.5  | 117.9  | 108.1  | 93.6  | 117.6  | 108.8 |
| LOC33832 | 121.5  | 112.3  | 119    | 122.4  | 108    | 93.3  | 113.6  | 117.7 |
| LOC33832 | 108.5  | 111.8  | 111.8  | 112.5  | 110.9  | 99.8  | 117.9  | 110.3 |
| LOC33879 | 308.1  | 285.7  | 352.1  | 291.3  | 247.3  | 215   | 229.4  | 235.6 |
| LOC33912 | 1659.4 | 1804.6 | 1514.9 | 1811.9 | 1174.5 | 901.7 | 1099.3 | 945.6 |
| LOC33922 | 607.8  | 1020.9 | 852.3  | 643.2  | 570.1  | 421.9 | 563    | 429.6 |
| LOC33922 | 147.6  | 149.4  | 167.2  | 170.6  | 141.6  | 122.9 | 133.3  | 131.1 |
| LOC33924 | 117.3  | 116.1  | 125.1  | 114.5  | 114.9  | 100.8 | 116.2  | 122.9 |
| LOC33934 | 431.5  | 417.9  | 353.2  | 488.6  | 393    | 341.9 | 447.6  | 408.1 |
| LOC33945 | 112.9  | 121.1  | 111.5  | 124.2  | 104.4  | 93.8  | 111.3  | 108.9 |
| LOC33974 | 135.6  | 130.8  | 139.7  | 137.6  | 123    | 118.6 | 125.6  | 139.6 |
| LOC33997 | 109.7  | 117.5  | 122    | 118.6  | 108.3  | 105   | 114.7  | 119.8 |
| LOC34006 | 106.7  | 116.2  | 117.5  | 112.3  | 111    | 95.4  | 119.7  | 107.4 |
| LOC34015 | 113.9  | 118.2  | 126.3  | 138.1  | 115.1  | 96.7  | 123.7  | 124   |
| LOC34026 | 111.2  | 104.6  | 116    | 118.9  | 103.8  | 105.2 | 120.4  | 113.3 |
| LOC34052 | 116.3  | 110.9  | 133    | 125.9  | 116.4  | 106.4 | 117.6  | 123.3 |
| LOC34052 | 124.5  | 124.7  | 118.3  | 130.3  | 124.8  | 109.5 | 109.9  | 121.8 |
| LOC34052 | 116    | 115.8  | 111.1  | 116.3  | 111    | 94.1  | 112    | 113.6 |
| LOC34052 | 122.4  | 119.5  | 124.3  | 126.8  | 117.9  | 97.5  | 121.6  | 109.8 |
| LOC34057 | 112.1  | 120.6  | 116    | 118.7  | 103.4  | 100.6 | 121.2  | 108.1 |
| LOC34060 | 107.9  | 114.2  | 113.9  | 111.9  | 113.3  | 95.7  | 117    | 126.4 |
| LOC34084 | 138.7  | 115.5  | 135    | 130.2  | 108.9  | 109.8 | 133.5  | 117   |
| LOC34289 | 114.4  | 117.3  | 121.7  | 123.9  | 113.7  | 99.7  | 117.9  | 116.6 |
| LOC34306 | 121.8  | 109.5  | 128.8  | 117.1  | 113.8  | 103.3 | 112.8  | 110.3 |
| LOC34352 | 120.3  | 120.2  | 116.6  | 132    | 108.1  | 101.5 | 115.1  | 116.5 |
| LOC34440 | 128.2  | 135.3  | 147.3  | 128.3  | 126.3  | 118.7 | 132.7  | 119.2 |
| LOC34440 | 114.9  | 119.8  | 142    | 119.4  | 124.7  | 109.3 | 121.2  | 124.6 |
| LOC34465 | 121.4  | 114.1  | 128.5  | 114.3  | 99.6   | 99.7  | 122.2  | 118.2 |
| LOC34522 | 112.7  | 117.5  | 115.9  | 119.9  | 109    | 102.6 | 113.2  | 123.2 |
| LOC34522 | 112.8  | 121.5  | 114.7  | 119.5  | 106.2  | 100.2 | 122.2  | 121.8 |
| LOC34615 | 109    | 107.6  | 113.4  | 113.1  | 100.1  | 93.1  | 109.3  | 109.9 |
| LOC34665 | 112.3  | 122.9  | 116.2  | 118.2  | 102.8  | 102.1 | 108    | 110.7 |
| LOC34667 | 116.8  | 114    | 123.6  | 111.7  | 105.6  | 102.4 | 107.9  | 119.6 |
| LOC34727 | 133.3  | 131.9  | 135.4  | 124.6  | 129.5  | 115   | 143.9  | 130   |
| LOC34748 | 111.8  | 106.5  | 114.1  | 114.1  | 114.1  | 99.8  | 115    | 111.8 |
| LOC34817 | 116    | 113.7  | 125    | 124.4  | 108.1  | 97.8  | 127    | 119.7 |
| LOC34818 | 117.9  | 121.8  | 119    | 122.2  | 110.6  | 99    | 131.2  | 112.4 |
| LOC34818 | 137.7  | 126.7  | 135.4  | 134.9  | 117.3  | 100.8 | 118.2  | 132.3 |
| LOC34818 | 108.8  | 125.8  | 139.8  | 121.7  | 121.8  | 107.3 | 120.1  | 125.9 |
| LOC34826 | 207    | 205    | 201.8  | 203.4  | 172    | 150.1 | 159.1  | 149.6 |

|           |         |         |         |         |        |        |         |         |
|-----------|---------|---------|---------|---------|--------|--------|---------|---------|
| LOC34864E | 138.5   | 121.1   | 129.9   | 142.1   | 130.7  | 102.6  | 137.5   | 118.4   |
| LOC34884C | 126.6   | 121.9   | 118.7   | 121     | 117.6  | 116    | 145.3   | 126.9   |
| LOC349114 | 141.5   | 119.7   | 165     | 133     | 116.1  | 134.4  | 144.4   | 122.5   |
| LOC34913E | 136.2   | 121     | 142.5   | 132.4   | 116.8  | 111.4  | 132     | 120.6   |
| LOC34923E | 193.8   | 218.4   | 183     | 203.7   | 173.3  | 168.7  | 206.1   | 232.2   |
| LOC34933E | 176.7   | 173.1   | 199     | 183.1   | 147.2  | 179.5  | 178.3   | 198.9   |
| LOC35290E | 112.6   | 121.1   | 115.2   | 119.4   | 104.2  | 101.6  | 115.7   | 109.6   |
| LOC37439E | 981     | 966.7   | 1459.4  | 1027.1  | 648.3  | 971.1  | 686.3   | 561.4   |
| LOC374491 | 113.7   | 115     | 114     | 121.3   | 105.8  | 96     | 111.3   | 119.8   |
| LOC374491 | 116.7   | 119.8   | 116     | 131.7   | 118.5  | 93.6   | 120.5   | 132.8   |
| LOC37492C | 118.7   | 121.4   | 127.5   | 122.3   | 113.2  | 109.4  | 124.4   | 126.7   |
| LOC37532E | 108.4   | 115.1   | 113.5   | 119.3   | 110.6  | 97.6   | 131.9   | 109.8   |
| LOC37544E | 121.3   | 118.8   | 120.3   | 111.9   | 110.6  | 105.3  | 112.5   | 118.8   |
| LOC37574E | 118.3   | 117.6   | 112.4   | 115.9   | 120.6  | 102.5  | 118.5   | 119     |
| LOC387601 | 122     | 120     | 116.2   | 119.1   | 107.3  | 97.8   | 124     | 109.3   |
| LOC38764E | 113.8   | 115.2   | 110.8   | 121.1   | 102.1  | 102.6  | 113.1   | 111.3   |
| LOC38768C | 127     | 135.3   | 125.7   | 131.6   | 128.9  | 109.1  | 135.5   | 142.5   |
| LOC38775E | 120.5   | 119.2   | 128.3   | 128.4   | 105.8  | 98.8   | 126.2   | 112.1   |
| LOC38775E | 117.3   | 115.4   | 123     | 120     | 117.9  | 104.3  | 120.2   | 119     |
| LOC38777E | 119.7   | 124.1   | 118.3   | 115.2   | 117.9  | 100    | 119.4   | 125.8   |
| LOC38777E | 115.5   | 111.8   | 119.7   | 119.6   | 110.4  | 99.4   | 117.1   | 109.3   |
| LOC38777E | 119.2   | 109.1   | 109.3   | 122.9   | 108.7  | 101    | 120.8   | 120.1   |
| LOC38785E | 113.6   | 113.4   | 120.4   | 117.1   | 110.3  | 99.4   | 118.2   | 118.8   |
| LOC38785E | 114.4   | 126.1   | 118.8   | 123     | 116.5  | 96     | 122.7   | 114     |
| LOC38785E | 110.4   | 112.3   | 112.5   | 107.7   | 108.7  | 105.4  | 110.6   | 105.6   |
| LOC387911 | 123.6   | 135.2   | 141.1   | 129.6   | 111.9  | 109.6  | 122.6   | 116.7   |
| LOC387921 | 110.4   | 116.8   | 117.9   | 116.4   | 117    | 106    | 125     | 119.7   |
| LOC387921 | 184.2   | 200.3   | 272.1   | 228.8   | 218.4  | 195.6  | 142.9   | 154.4   |
| LOC38813E | 127.7   | 118.6   | 121.7   | 121.3   | 108.4  | 105.5  | 118.6   | 128.7   |
| LOC38819E | 115.9   | 108     | 109.4   | 108.2   | 109.9  | 99     | 115.8   | 112.4   |
| LOC388284 | 127.2   | 123.8   | 150.2   | 128     | 123.8  | 115.1  | 126.5   | 124     |
| LOC38832E | 105.2   | 118.8   | 108.9   | 117.1   | 101.5  | 88.5   | 113.1   | 110.6   |
| LOC38833E | 138.4   | 152.3   | 140.1   | 154.7   | 150.7  | 100.6  | 129.5   | 158.7   |
| LOC38838E | 120.1   | 111.3   | 110.1   | 118.5   | 115.5  | 97.6   | 119.5   | 116.7   |
| LOC388407 | 117.2   | 115.9   | 116.6   | 121.5   | 112.2  | 102    | 114.3   | 123.1   |
| LOC38841E | 108.9   | 100.7   | 118     | 117.5   | 111.3  | 100.4  | 109.6   | 103.6   |
| LOC38850E | 122     | 114.6   | 121.6   | 118.9   | 117.7  | 102    | 131.1   | 117.1   |
| LOC388524 | 12133.2 | 14031.2 | 14375.1 | 13645.8 | 8461.5 | 9216.9 | 13018.7 | 12107.6 |
| LOC38859E | 117.2   | 113.3   | 118.4   | 114     | 103    | 99.6   | 119.7   | 103.9   |
| LOC38861C | 113.1   | 113.3   | 118.8   | 117.7   | 109.8  | 98.9   | 117.3   | 116.6   |
| LOC388692 | 282.6   | 319.8   | 266.8   | 288.8   | 271.5  | 207.6  | 304.1   | 361.8   |
| LOC388882 | 109.6   | 116.3   | 112.6   | 116     | 109.3  | 96.6   | 111.6   | 120.2   |
| LOC38888E | 111.6   | 120.7   | 120.8   | 115.5   | 104.9  | 96.6   | 109.8   | 117.2   |
| LOC38891C | 111.8   | 119.2   | 121.1   | 124.9   | 105.9  | 92.1   | 109.7   | 108.3   |
| LOC38891E | 107.4   | 104.4   | 110     | 115.8   | 106.8  | 93.4   | 109.7   | 106.9   |
| LOC388931 | 110.9   | 111.9   | 115.6   | 125.8   | 103.5  | 94.5   | 122.6   | 119.1   |
| LOC38895E | 111.7   | 116.9   | 116.4   | 121.8   | 106.3  | 101.3  | 117.4   | 106.7   |
| LOC38896E | 121.1   | 115.7   | 115     | 117.7   | 109.3  | 106.7  | 116.5   | 114.2   |
| LOC389031 | 125.2   | 129.1   | 122.5   | 123.8   | 117.4  | 97.2   | 123.5   | 117.7   |
| LOC389072 | 112.7   | 115.7   | 116.8   | 119.6   | 100.2  | 97.7   | 119.5   | 115.8   |
| LOC38911E | 127.1   | 114.2   | 125.9   | 118.6   | 106.3  | 102    | 123.8   | 119.9   |

|           |        |        |        |        |        |       |        |        |
|-----------|--------|--------|--------|--------|--------|-------|--------|--------|
| LOC389151 | 108.3  | 119.4  | 117.1  | 117.5  | 102.9  | 93.4  | 118.5  | 115.6  |
| LOC389257 | 110.8  | 120.3  | 111.9  | 114.3  | 109.4  | 96.1  | 132.4  | 110.3  |
| LOC389257 | 123.6  | 116.2  | 114    | 119.9  | 120.5  | 98.3  | 118.3  | 119.4  |
| LOC389286 | 206.6  | 236.9  | 222    | 264.1  | 202.9  | 115.8 | 173.5  | 215    |
| LOC389293 | 104    | 115    | 111.2  | 110.2  | 108.7  | 95.2  | 109.5  | 113.1  |
| LOC389429 | 105.7  | 106.7  | 117    | 108.9  | 102.9  | 101.5 | 112.9  | 114.1  |
| LOC389432 | 113.2  | 108.6  | 123.4  | 120.4  | 101.1  | 102.2 | 115.5  | 107.7  |
| LOC389458 | 113.6  | 116.7  | 119.7  | 124    | 108    | 98.4  | 119.9  | 112    |
| LOC389517 | 108.6  | 112.3  | 111.8  | 119.1  | 100.1  | 92.6  | 111.5  | 107.7  |
| LOC389541 | 390    | 352.9  | 395.4  | 348.5  | 341.8  | 309.3 | 321.1  | 286.6  |
| LOC389549 | 113.7  | 113.5  | 118.8  | 116.9  | 106.9  | 96.7  | 121.1  | 109.7  |
| LOC389607 | 106.4  | 114.7  | 114.5  | 113.9  | 107.2  | 98.3  | 121.1  | 112.3  |
| LOC389813 | 109.4  | 110.1  | 119    | 110.2  | 112.7  | 97.6  | 114.8  | 117.7  |
| LOC389816 | 130.6  | 122.3  | 120.7  | 132.2  | 110    | 112   | 117.5  | 114.3  |
| LOC389816 | 129.7  | 114.7  | 120.1  | 110.4  | 109.2  | 107.4 | 117.5  | 110.9  |
| LOC389827 | 116    | 116.5  | 113.1  | 114.6  | 107.9  | 102.3 | 124.2  | 117.6  |
| LOC389827 | 119.3  | 107.8  | 105.8  | 118.1  | 105.4  | 100.2 | 115    | 118.4  |
| LOC389832 | 116.8  | 125.5  | 122    | 122.9  | 115.4  | 108   | 115.1  | 119.1  |
| LOC389834 | 120.6  | 133.5  | 115.5  | 110.4  | 141.2  | 101.3 | 108.4  | 131.3  |
| LOC389936 | 104.4  | 115    | 111.1  | 117.8  | 106.6  | 98.7  | 117.7  | 117.1  |
| LOC390110 | 112    | 109    | 118.5  | 115.8  | 103    | 97.1  | 119.4  | 119    |
| LOC390243 | 107.5  | 108.5  | 103.1  | 113.4  | 107.3  | 92.1  | 116.9  | 117.9  |
| LOC390243 | 111.4  | 112.3  | 116.9  | 117.3  | 97     | 97.1  | 116.1  | 105.9  |
| LOC390637 | 117.8  | 118    | 122.5  | 119.7  | 110.1  | 103.4 | 113.3  | 124.5  |
| LOC390667 | 116.8  | 131.4  | 151.6  | 137.5  | 121.7  | 109.4 | 131.1  | 128.9  |
| LOC390688 | 119.2  | 126.4  | 124    | 122.8  | 124.5  | 96.3  | 128    | 117.5  |
| LOC390748 | 113.8  | 113.1  | 120.6  | 113.7  | 98.7   | 101.9 | 118.4  | 119.7  |
| LOC390748 | 122.9  | 122.8  | 118.4  | 120.9  | 113.8  | 104.5 | 121.3  | 125.6  |
| LOC390927 | 118.5  | 121.8  | 113.4  | 116.4  | 107    | 98.9  | 121    | 114.2  |
| LOC390999 | 119.2  | 115.1  | 116    | 116    | 107.7  | 103   | 117.1  | 119.3  |
| LOC391356 | 132    | 178.7  | 146.1  | 147.4  | 138.8  | 123.5 | 161.4  | 144.4  |
| LOC392196 | 106.3  | 111.1  | 109.8  | 103.3  | 104.4  | 94.3  | 100.1  | 105.1  |
| LOC392399 | 111.1  | 125    | 112.2  | 122.2  | 114.1  | 96.9  | 114.5  | 113.4  |
| LOC392469 | 111.2  | 127.4  | 128.5  | 134.4  | 135.3  | 114   | 131.4  | 128.5  |
| LOC399706 | 115.8  | 115.3  | 108.2  | 117    | 100.5  | 99.8  | 118.1  | 118.1  |
| LOC399744 | 118.1  | 131.2  | 122.6  | 139.2  | 114.5  | 111.7 | 143.5  | 130.3  |
| LOC399818 | 119.9  | 122.1  | 114.6  | 132.6  | 109.6  | 104.2 | 121    | 126.6  |
| LOC399898 | 105.9  | 105.6  | 116.2  | 115.7  | 106.4  | 97.5  | 114.2  | 113.3  |
| LOC399900 | 5719.9 | 5388.7 | 5602.7 | 4990.5 | 6452.1 | 4509  | 7401.9 | 6639.1 |
| LOC399947 | 113.4  | 113.1  | 110.4  | 120.9  | 104.9  | 98.4  | 116.1  | 114.9  |
| LOC400120 | 122.5  | 140.8  | 123.4  | 136.9  | 119.5  | 115.6 | 131.2  | 135    |
| LOC400258 | 115.2  | 115.4  | 116.5  | 119.9  | 107.9  | 101.9 | 124.8  | 118.5  |
| LOC400451 | 115.3  | 130.4  | 121.6  | 123.1  | 109.3  | 112.1 | 125.5  | 124.7  |
| LOC400464 | 170.4  | 153.4  | 205.2  | 180.1  | 138.5  | 142   | 158.4  | 139.4  |
| LOC400464 | 140.1  | 146.1  | 156    | 141.2  | 164.7  | 106.7 | 151.8  | 143.6  |
| LOC400499 | 110.9  | 108.1  | 117    | 122.5  | 109.6  | 98.5  | 120.7  | 127.2  |
| LOC400506 | 118.2  | 117.3  | 130.1  | 136.2  | 117.1  | 91.6  | 121.9  | 125.6  |
| LOC400566 | 112.9  | 116.7  | 130.1  | 118.3  | 112.1  | 106.3 | 115.6  | 121.7  |
| LOC400566 | 108.4  | 119.1  | 127.4  | 124.2  | 115.3  | 114.2 | 131.2  | 115.1  |
| LOC400657 | 363.7  | 375.3  | 321    | 349    | 269    | 309.6 | 318.6  | 364.7  |
| LOC400707 | 115.3  | 109.3  | 109.8  | 108.8  | 110.1  | 99.1  | 108.7  | 117.6  |



|           |        |        |        |        |        |        |        |        |
|-----------|--------|--------|--------|--------|--------|--------|--------|--------|
| LOC400891 | 120    | 115.4  | 112.6  | 119.9  | 110.4  | 96.9   | 121.6  | 113.3  |
| LOC400924 | 144.7  | 129.7  | 133.3  | 132.8  | 120.2  | 117.4  | 148.7  | 129.4  |
| LOC400965 | 119.9  | 111.4  | 117    | 120.9  | 111.6  | 98.6   | 117.4  | 113.3  |
| LOC400986 | 114.2  | 106.9  | 110.3  | 119.8  | 102.8  | 93.8   | 120.5  | 114.8  |
| LOC400986 | 149.7  | 152.7  | 160.5  | 147    | 162.7  | 116.6  | 147.3  | 150.3  |
| LOC401010 | 118.1  | 113.8  | 110.1  | 123.6  | 116.3  | 110.7  | 124.4  | 115    |
| LOC401015 | 4186.2 | 3121.2 | 4664.3 | 3317.3 | 2312.3 | 2880   | 3467   | 3879.7 |
| LOC401052 | 143.6  | 135.2  | 163.9  | 137.4  | 120.1  | 131.8  | 154.6  | 127    |
| LOC401072 | 107.4  | 117.1  | 113.1  | 117.7  | 105.6  | 103.3  | 123.2  | 114.8  |
| LOC401137 | 117.8  | 115.9  | 126.2  | 126.2  | 116.5  | 99.2   | 118.9  | 119.1  |
| LOC401152 | 448.7  | 430.2  | 499.9  | 478.5  | 329.9  | 334.3  | 393.2  | 334.7  |
| LOC401233 | 154.8  | 131.5  | 188.9  | 181.3  | 131.1  | 151.5  | 147.9  | 139.5  |
| LOC401252 | 106.7  | 104.9  | 116.8  | 114.6  | 114.8  | 103    | 117.2  | 115.2  |
| LOC401286 | 108.8  | 107.2  | 114.2  | 111.5  | 106.6  | 107    | 115.1  | 113.9  |
| LOC401296 | 112    | 125.1  | 120.4  | 118.8  | 113.6  | 101.8  | 117.9  | 114.5  |
| LOC401357 | 197.5  | 150.8  | 180.4  | 225.5  | 150.2  | 176    | 183.9  | 149.7  |
| LOC401387 | 111.2  | 109    | 129.9  | 121.6  | 112.3  | 107.7  | 121.3  | 113.7  |
| LOC401398 | 112.2  | 115.2  | 109.3  | 112.7  | 106.7  | 93.5   | 121.9  | 115.6  |
| LOC401410 | 116.4  | 124    | 125.1  | 124.6  | 103.7  | 94.9   | 115.9  | 106.6  |
| LOC401431 | 165.6  | 172.8  | 159    | 154.5  | 151.9  | 119.1  | 161.6  | 153.3  |
| LOC401498 | 118.7  | 120.6  | 110.8  | 108.1  | 108.3  | 98.6   | 119.9  | 118.1  |
| LOC401551 | 118.5  | 116.6  | 116.5  | 129.9  | 118.7  | 101.2  | 120.5  | 127.9  |
| LOC401565 | 112.9  | 123.7  | 116.7  | 113    | 116.5  | 100.5  | 117.2  | 111.5  |
| LOC401589 | 116.6  | 121.4  | 126.5  | 115.8  | 115.4  | 98.9   | 121    | 120.2  |
| LOC401898 | 121.1  | 124.2  | 114.6  | 125.4  | 116.9  | 100.5  | 117.6  | 118.8  |
| LOC402055 | 134.1  | 126.1  | 139.8  | 137    | 125.6  | 110.2  | 123.7  | 123.3  |
| LOC402057 | 169.8  | 140.8  | 174.7  | 168.8  | 127.3  | 169.9  | 177.9  | 143.5  |
| LOC402110 | 121.9  | 120.9  | 121.4  | 122.2  | 109.4  | 98.3   | 113.3  | 121.8  |
| LOC402117 | 118.8  | 111.8  | 121.7  | 118.3  | 109    | 95.3   | 120.6  | 113.3  |
| LOC402176 | 137.8  | 144.9  | 145.3  | 132.8  | 148.7  | 112.2  | 149.4  | 185    |
| LOC402573 | 112.2  | 120.7  | 118.8  | 125    | 116.8  | 105.3  | 129.2  | 131.3  |
| LOC402682 | 133.1  | 139.8  | 128.9  | 137    | 115.9  | 100.8  | 127.1  | 127.9  |
| LOC405753 | 123.1  | 107.6  | 129.9  | 125.4  | 118.8  | 103.1  | 119.6  | 120.1  |
| LOC407835 | 260.6  | 292.1  | 302.8  | 288.8  | 221.4  | 255.1  | 325.2  | 232.4  |
| LOC432369 | 6106.5 | 7472.7 | 9392.8 | 6488.4 | 6337.4 | 6675.5 | 7446.9 | 7464.9 |
| LOC439985 | 111.6  | 113.7  | 110.5  | 120.8  | 105.4  | 99.3   | 125.1  | 117.1  |
| LOC440053 | 109.3  | 109.4  | 111.4  | 105.2  | 100.3  | 97     | 117.1  | 118.8  |
| LOC440087 | 110.2  | 118.6  | 118    | 123.9  | 105.3  | 97.9   | 108    | 118.2  |
| LOC440093 | 125.5  | 110.2  | 112.2  | 109.7  | 108.7  | 98.5   | 123.9  | 120.5  |
| LOC440145 | 150.2  | 148    | 144.7  | 150.2  | 141.1  | 142    | 158.5  | 130.3  |
| LOC440145 | 123.2  | 136.9  | 137.3  | 147.1  | 133.2  | 117.1  | 135.2  | 143.1  |
| LOC440157 | 141.2  | 133.7  | 139.1  | 138.3  | 134.7  | 109.2  | 132.3  | 137.2  |
| LOC440248 | 115.9  | 120.1  | 122.8  | 127.3  | 105.7  | 103.5  | 114.9  | 122    |
| LOC440295 | 117.1  | 114.6  | 112.8  | 115.4  | 114.1  | 103    | 118.3  | 125.5  |
| LOC440313 | 111.4  | 117.9  | 123.6  | 130.8  | 102.5  | 101.2  | 120.3  | 114.2  |
| LOC440348 | 341.4  | 366.5  | 328.7  | 294    | 335    | 255.2  | 418.1  | 470.5  |
| LOC440350 | 129.9  | 129.5  | 127.4  | 126    | 121.2  | 101.5  | 129.3  | 125.1  |
| LOC440354 | 131.1  | 127.5  | 134.4  | 143.2  | 124.1  | 104.2  | 134.3  | 145.4  |
| LOC440396 | 111.3  | 118.9  | 122.3  | 124.5  | 105    | 100.6  | 114.8  | 126.3  |
| LOC440508 | 119    | 115    | 114.7  | 118.2  | 103.8  | 109.6  | 116.3  | 120    |
| LOC440508 | 105.9  | 112.3  | 109.8  | 115.6  | 112.1  | 101.4  | 111.9  | 111.4  |

|           |       |       |       |       |       |       |       |       |
|-----------|-------|-------|-------|-------|-------|-------|-------|-------|
| LOC440558 | 106.4 | 104.6 | 112.5 | 112   | 98.6  | 95.7  | 114.5 | 114.4 |
| LOC440570 | 104.9 | 105.6 | 111   | 123.8 | 107.3 | 96.2  | 109.8 | 112.9 |
| LOC440686 | 129.5 | 118.5 | 125.7 | 124.7 | 118.2 | 100.1 | 125.3 | 135.4 |
| LOC440742 | 115.1 | 119.6 | 118   | 117.6 | 117.2 | 102.4 | 118.6 | 121   |
| LOC440795 | 112.8 | 102.9 | 125   | 124.6 | 105   | 98.5  | 115.6 | 113.2 |
| LOC440836 | 114.6 | 112.5 | 130.9 | 122.3 | 104.7 | 99.1  | 120   | 111.4 |
| LOC440925 | 108.8 | 112.6 | 122.2 | 115.4 | 103.8 | 101.2 | 116.6 | 112   |
| LOC440926 | 216.7 | 220.4 | 249.3 | 253.6 | 194.8 | 268.7 | 236.2 | 232   |
| LOC440944 | 119.6 | 119.6 | 116.1 | 119.8 | 109.4 | 102.8 | 121.7 | 115.2 |
| LOC441046 | 111.9 | 117   | 118.8 | 128.8 | 114.8 | 99.8  | 117.1 | 117.2 |
| LOC441070 | 112.7 | 138.2 | 121.7 | 132.3 | 117.3 | 111.2 | 125.1 | 132   |
| LOC441108 | 122.4 | 119.1 | 133.2 | 131.9 | 111.5 | 95.3  | 124.8 | 127.2 |
| LOC441120 | 122.2 | 114.8 | 121.8 | 123   | 112   | 101   | 114.9 | 114.7 |
| LOC441150 | 154.6 | 162.4 | 200.5 | 180.1 | 139.8 | 132.5 | 144.7 | 129.1 |
| LOC441161 | 119.7 | 119.3 | 117.1 | 122.6 | 113.3 | 100.8 | 121.8 | 122.9 |
| LOC441168 | 156.8 | 132.3 | 175.4 | 138.8 | 130.5 | 123.6 | 127.8 | 125.5 |
| LOC441177 | 103.8 | 108.2 | 110   | 113.1 | 105.1 | 97.3  | 107.5 | 109.4 |
| LOC441178 | 108.8 | 115.6 | 120.6 | 121.7 | 110.6 | 100.6 | 111.5 | 110.6 |
| LOC441208 | 110.8 | 120.5 | 115.9 | 124   | 105.2 | 104.3 | 113.8 | 119.9 |
| LOC441235 | 114.9 | 112.1 | 114.1 | 114.1 | 104.5 | 105.1 | 117.7 | 115.9 |
| LOC441242 | 127.1 | 133.5 | 115.7 | 121   | 114.7 | 96.6  | 119.2 | 118   |
| LOC441244 | 122.8 | 123.6 | 141.6 | 122.4 | 114.8 | 108.8 | 134.9 | 133   |
| LOC441251 | 119.6 | 116   | 127.4 | 126.7 | 113.4 | 107.2 | 123.6 | 110.2 |
| LOC441257 | 106   | 116.9 | 114.6 | 116.5 | 107.8 | 102.3 | 113.4 | 113.6 |
| LOC441268 | 232.7 | 198.2 | 153.2 | 184.9 | 156.9 | 126.3 | 154.5 | 140.1 |
| LOC441282 | 109.3 | 114.9 | 116.7 | 107.9 | 110.2 | 101.8 | 107.5 | 119.8 |
| LOC441294 | 118.2 | 126.7 | 125.5 | 134.5 | 122.5 | 109.9 | 125.4 | 120.4 |
| LOC441376 | 105.8 | 106.3 | 110.1 | 116   | 107.5 | 93.5  | 115   | 104.4 |
| LOC441426 | 116   | 109.9 | 123.1 | 117.9 | 111.9 | 97.9  | 112.6 | 103.6 |
| LOC441476 | 118.1 | 113.7 | 112.8 | 118.2 | 104.7 | 108.4 | 123   | 116.2 |
| LOC441581 | 112.1 | 119.2 | 119.4 | 120.1 | 115.7 | 97    | 118   | 122.7 |
| LOC441581 | 112.5 | 123.7 | 116.8 | 120   | 108.7 | 97.8  | 122.6 | 113.4 |
| LOC441601 | 122.3 | 116.4 | 119   | 109.7 | 103.1 | 105   | 114.6 | 117.3 |
| LOC441734 | 111.3 | 110.7 | 110.2 | 109.5 | 104.4 | 92.7  | 111.6 | 115.7 |
| LOC441743 | 188.1 | 188.1 | 162.2 | 204   | 159.6 | 146.1 | 162.1 | 168.9 |
| LOC441931 | 119.4 | 108.6 | 128.3 | 117.9 | 107.5 | 99.6  | 117.2 | 115.1 |
| LOC441956 | 118.1 | 115.8 | 117.2 | 119.6 | 99.1  | 98.4  | 120.1 | 117.3 |
| LOC441956 | 118   | 113.4 | 111.8 | 117.6 | 104.6 | 97    | 116.5 | 111.8 |
| LOC442213 | 118.1 | 124.4 | 122.4 | 128.8 | 110.9 | 103.6 | 135.8 | 126.4 |
| LOC442245 | 115.1 | 122.1 | 135.2 | 128.6 | 113.3 | 98.1  | 118.3 | 120.6 |
| LOC442424 | 111.4 | 110.9 | 111.4 | 120.7 | 100.2 | 94.4  | 123.1 | 115.3 |
| LOC442425 | 113.6 | 109.6 | 122.2 | 129   | 108.3 | 113.9 | 123.3 | 128.6 |
| LOC442578 | 933.8 | 764.6 | 790.6 | 793.1 | 898.6 | 449   | 548.8 | 582.3 |
| LOC442582 | 144.1 | 126.7 | 135.5 | 146.4 | 122.9 | 117.7 | 134.4 | 132.8 |
| LOC442715 | 115.9 | 111.3 | 117.3 | 114.7 | 109.4 | 107.2 | 122.3 | 120.2 |
| LOC492303 | 107.2 | 112.9 | 117.5 | 115.7 | 105.9 | 97.6  | 113.2 | 116.1 |
| LOC492311 | 238.6 | 199.1 | 253   | 249.9 | 204.3 | 188.2 | 202.2 | 156.1 |
| LOC493825 | 141.3 | 119.5 | 120   | 117.6 | 110.4 | 102.8 | 115.7 | 127.8 |
| LOC493856 | 133.3 | 155.9 | 155.2 | 148.9 | 133.5 | 130.6 | 135.1 | 148.7 |
| LOC493860 | 117.9 | 111.8 | 104.4 | 114.2 | 103.9 | 96    | 119.1 | 102   |
| LOC493865 | 108.2 | 106.1 | 111.6 | 112   | 111   | 100.9 | 120.2 | 109.9 |

|           |        |        |        |        |        |        |        |        |
|-----------|--------|--------|--------|--------|--------|--------|--------|--------|
| LOC49719C | 113.8  | 114.6  | 128.3  | 117.9  | 109.3  | 96.7   | 124.6  | 117    |
| LOC497661 | 137.1  | 164.4  | 182    | 144.3  | 130.2  | 144.5  | 146    | 152.5  |
| LOC51035  | 1566.1 | 1935.2 | 1538   | 1683.8 | 1053.1 | 1192.7 | 1706   | 1444.6 |
| LOC51057  | 118.6  | 112.4  | 125.2  | 121    | 123.7  | 103.7  | 120.7  | 119.1  |
| LOC51057  | 112.7  | 127.4  | 121.5  | 112    | 117.7  | 106.7  | 123.5  | 118.3  |
| LOC51136  | 172.1  | 131.3  | 191    | 170.7  | 131.9  | 147.5  | 144    | 135.8  |
| LOC51149  | 117.8  | 124.7  | 127.5  | 127.9  | 124.2  | 104.7  | 125.3  | 128    |
| LOC51149  | 107.7  | 109.9  | 117.3  | 106.5  | 105.6  | 100.4  | 121.4  | 116.6  |
| LOC51233  | 115.9  | 116.4  | 110.7  | 117.4  | 109.6  | 97.7   | 118.2  | 107.2  |
| LOC51252  | 120    | 122.9  | 121.4  | 129    | 103.7  | 99.4   | 122.4  | 117.4  |
| LOC51255  | 524.5  | 658.2  | 791.3  | 632.3  | 422    | 695.3  | 544.7  | 577.4  |
| LOC51333  | 127.6  | 124.1  | 132    | 133    | 125.4  | 101.8  | 134.2  | 137.3  |
| LOC51334  | 131.6  | 123.2  | 128.8  | 129.7  | 120.6  | 110.8  | 132.7  | 118.1  |
| LOC54103  | 133.4  | 116.6  | 145.9  | 148.3  | 118.3  | 116.3  | 136.3  | 128    |
| LOC54146E | 128.8  | 121.1  | 138.5  | 130.3  | 111.6  | 107.9  | 117.8  | 115.3  |
| LOC54147E | 117.3  | 123.1  | 116.2  | 128.6  | 108.6  | 108.7  | 124.7  | 111.1  |
| LOC550631 | 131.6  | 140.3  | 124.7  | 116.6  | 113.2  | 95.1   | 124.8  | 115.6  |
| LOC552891 | 111.9  | 112.6  | 113.8  | 120.2  | 106.6  | 97.7   | 110.7  | 127.9  |
| LOC55422E | 113.2  | 112.8  | 110.9  | 107    | 110    | 95.3   | 118    | 124.1  |
| LOC55423E | 118.1  | 125.1  | 113.7  | 123.8  | 109.9  | 107    | 118.8  | 114.8  |
| LOC554251 | 122.7  | 118.9  | 121.6  | 128.8  | 127.3  | 105.8  | 116.3  | 108.7  |
| LOC55565  | 193.8  | 170.4  | 177.8  | 170.8  | 134    | 125    | 134.8  | 132.3  |
| LOC55908  | 129.5  | 126.4  | 125.5  | 124.5  | 108.4  | 99.3   | 130.7  | 120.7  |
| LOC56901  | 121    | 107.8  | 109.4  | 126.3  | 116.1  | 100.4  | 119.5  | 113.8  |
| LOC56902  | 145.2  | 141.7  | 140.7  | 140.3  | 130.9  | 122.3  | 148.4  | 140.2  |
| LOC56964  | 108.9  | 115.2  | 110.5  | 104.6  | 111.4  | 99.8   | 117.2  | 111    |
| LOC57149  | 370.2  | 417.5  | 561.4  | 485.8  | 402.1  | 480.8  | 559.2  | 726.8  |
| LOC57228  | 126    | 134.8  | 124.1  | 142.3  | 136.2  | 117.6  | 140.8  | 138    |
| LOC57228  | 190.6  | 221.1  | 172    | 219.4  | 187    | 135.3  | 271.4  | 272.1  |
| LOC57228  | 111.7  | 111.9  | 124    | 116.4  | 107    | 104.3  | 113.2  | 119.8  |
| LOC57228  | 118.8  | 117.3  | 120.6  | 125.7  | 109.3  | 96.5   | 122.2  | 116.1  |
| LOC594834 | 112.3  | 117.5  | 108.8  | 112.9  | 103.3  | 95     | 110    | 113.5  |
| LOC594834 | 115    | 108.2  | 123.2  | 129.3  | 127.8  | 95.2   | 113.2  | 120.7  |
| LOC594834 | 116.6  | 115.9  | 126.6  | 125.4  | 107.5  | 103.2  | 113.4  | 122.1  |
| LOC595101 | 124.3  | 130.5  | 128.2  | 123.6  | 120.8  | 107.1  | 129.7  | 127    |
| LOC60649E | 113.9  | 116    | 122.2  | 131.8  | 114.4  | 102.6  | 122.5  | 114.5  |
| LOC606724 | 834.4  | 1013   | 804.8  | 812.6  | 531.3  | 704.5  | 700.8  | 716.8  |
| LOC613037 | 2102.4 | 1700.7 | 1352.4 | 1872.8 | 1615.1 | 725.3  | 2608.9 | 2204.7 |
| LOC613212 | 121.6  | 119.7  | 109.2  | 113.5  | 106.3  | 99.9   | 114.9  | 114.4  |
| LOC619207 | 112.4  | 119.6  | 121.2  | 117.5  | 108.4  | 103.5  | 125.5  | 115.7  |
| LOC61920E | 117.7  | 123.1  | 127.6  | 117.5  | 111.9  | 102.7  | 123.1  | 118.4  |
| LOC63920  | 116.5  | 137.7  | 140.9  | 135.6  | 119.3  | 112.5  | 123.7  | 125.7  |
| LOC63928  | 109    | 111.6  | 123.6  | 125.2  | 107.1  | 104.4  | 126.1  | 119.7  |
| LOC641522 | 121.2  | 121.6  | 123.7  | 122.4  | 115.5  | 98.1   | 127.5  | 123.4  |
| LOC641847 | 113.6  | 114.7  | 111.5  | 123.9  | 110    | 94.4   | 117.6  | 117.3  |
| LOC64194E | 131.5  | 124.6  | 127.8  | 125.7  | 112.7  | 105.2  | 116.9  | 129.9  |
| LOC64209C | 333.5  | 431.6  | 333.9  | 435.2  | 378.8  | 287.5  | 495    | 479.4  |
| LOC642181 | 104.1  | 107.6  | 108    | 107.3  | 105.1  | 94.7   | 118    | 105.2  |
| LOC642201 | 114.1  | 111.8  | 118.2  | 115.8  | 110.8  | 98.2   | 113.3  | 111    |
| LOC64226E | 115.9  | 113.1  | 110.9  | 113.1  | 110.9  | 91.5   | 105.9  | 109.1  |
| LOC64229E | 112.5  | 108.3  | 106.4  | 108.2  | 107.4  | 91.3   | 112.7  | 110.7  |

|           |        |         |         |         |         |         |         |         |
|-----------|--------|---------|---------|---------|---------|---------|---------|---------|
| LOC64231€ | 110.4  | 112.3   | 114.4   | 121.9   | 110.9   | 96.8    | 116.2   | 111.8   |
| LOC64232€ | 125.8  | 138.1   | 148.7   | 154.8   | 136.8   | 110.7   | 143     | 136.3   |
| LOC64278€ | 118.6  | 116.6   | 120.8   | 122.9   | 108.9   | 101.1   | 116.6   | 108.1   |
| LOC64294€ | 115.6  | 110.2   | 114.8   | 112.8   | 112.4   | 99.9    | 117.8   | 121.8   |
| LOC64294€ | 4886.9 | 5226.2  | 4816.2  | 6273    | 5431.8  | 2616.7  | 4997.7  | 6101.6  |
| LOC64296€ | 128.6  | 120.4   | 117.2   | 124.9   | 117.2   | 102     | 124.1   | 116.5   |
| LOC64298€ | 113.4  | 125.3   | 121.2   | 124.9   | 104.4   | 100     | 121.7   | 122.8   |
| LOC64298€ | 120.5  | 127.9   | 118.1   | 122.6   | 115.7   | 106.3   | 123.5   | 120.6   |
| LOC64305€ | 22298  | 19164.3 | 18661.8 | 20836.3 | 14684.6 | 18465.6 | 21352.9 | 23919.7 |
| LOC64316€ | 126.6  | 125.4   | 112.5   | 130.5   | 106.5   | 100     | 132.2   | 123.9   |
| LOC64319€ | 118    | 108.3   | 119.8   | 120.4   | 109.1   | 103.3   | 123.6   | 121.3   |
| LOC64322€ | 115.4  | 111.7   | 117.7   | 112.7   | 108.4   | 100.4   | 118.7   | 103.7   |
| LOC64322€ | 104    | 107.6   | 105.3   | 112.6   | 107.1   | 102.1   | 118.1   | 113.5   |
| LOC64325€ | 112.8  | 122.1   | 112     | 118     | 110.5   | 91.3    | 122.6   | 108.5   |
| LOC64329€ | 124.7  | 120.8   | 121.8   | 127.8   | 121.6   | 104.5   | 131.9   | 132.9   |
| LOC64336€ | 117.8  | 131.8   | 114.2   | 115.3   | 117.7   | 114.5   | 134.6   | 127.7   |
| LOC64339€ | 115.3  | 119.4   | 118.2   | 121.5   | 108.6   | 100.9   | 113.8   | 113.4   |
| LOC64341€ | 115.4  | 117.3   | 110.1   | 118.7   | 106.2   | 96.2    | 113.9   | 106.6   |
| LOC64342€ | 114.9  | 111.4   | 116.3   | 116.8   | 113.5   | 101.5   | 109.9   | 113.4   |
| LOC64351€ | 827.2  | 4082    | 983.9   | 830.2   | 2973.3  | 687.4   | 805     | 3891.3  |
| LOC64354€ | 110.6  | 114     | 118.8   | 118.2   | 111.5   | 100.8   | 117.4   | 115.4   |
| LOC64359€ | 177.5  | 157.3   | 169.1   | 193.3   | 189.6   | 118.9   | 156     | 156.9   |
| LOC64366€ | 1136.3 | 907.5   | 1485.9  | 1265.7  | 1052.6  | 1210.4  | 1438    | 1497    |
| LOC64373€ | 116.4  | 116.8   | 115.8   | 121.3   | 110     | 102.6   | 124.6   | 120.9   |
| LOC64381€ | 128.2  | 120.8   | 125     | 117.1   | 123.3   | 109.6   | 121.2   | 122.6   |
| LOC64384€ | 123.9  | 117.2   | 122.2   | 131.1   | 113.6   | 100.6   | 111.2   | 120.8   |
| LOC64385€ | 112.4  | 119.1   | 111     | 118.5   | 116     | 94.5    | 117.9   | 119.9   |
| LOC64385€ | 116.3  | 118.6   | 120.1   | 118.7   | 113     | 106.2   | 125.5   | 120.8   |
| LOC64386€ | 117    | 118.4   | 117.6   | 120     | 107.4   | 97.5    | 117.3   | 119     |
| LOC64390€ | 111.9  | 115.2   | 107.2   | 109.6   | 95.8    | 96.8    | 115.3   | 107     |
| LOC64392€ | 113.3  | 121.9   | 120     | 118.8   | 106.1   | 98.8    | 112.2   | 111.5   |
| LOC64392€ | 120.4  | 113.4   | 110     | 121     | 110.2   | 100     | 125.8   | 113.6   |
| LOC64394€ | 382    | 374.1   | 486.5   | 470.2   | 366.1   | 394.7   | 473.2   | 568.5   |
| LOC64399€ | 158.4  | 134.1   | 143.7   | 136.3   | 129.9   | 112.5   | 139.2   | 148.9   |
| LOC64407€ | 108    | 118.6   | 119.9   | 115.3   | 103.7   | 94.3    | 116.3   | 109.1   |
| LOC64409€ | 383.6  | 429.3   | 405.4   | 447.8   | 341.2   | 307.5   | 356.5   | 291.8   |
| LOC64416€ | 113.7  | 116.2   | 114.1   | 122.4   | 108     | 103     | 109.9   | 110.9   |
| LOC64437€ | 111.9  | 112.1   | 120.3   | 119.8   | 112.7   | 104     | 111.8   | 120.5   |
| LOC64439€ | 114.1  | 125.7   | 117.6   | 132.2   | 104.3   | 106.9   | 116.2   | 116.6   |
| LOC64440€ | 114.9  | 119.8   | 124     | 117.1   | 116.4   | 97.2    | 131.3   | 116.2   |
| LOC64452€ | 120.7  | 118.1   | 124.5   | 117     | 110.4   | 100.1   | 121.6   | 128.5   |
| LOC64461€ | 114.7  | 127     | 113.9   | 121.8   | 102.4   | 91.9    | 127.3   | 121.1   |
| LOC64461€ | 159.7  | 130.7   | 130.8   | 132.3   | 108.8   | 110.4   | 123.6   | 119.5   |
| LOC64468€ | 116.2  | 115.3   | 123.7   | 119     | 115.5   | 105.7   | 133     | 131.9   |
| LOC64478€ | 119.8  | 118.3   | 119.4   | 123.9   | 103     | 103.9   | 127.3   | 115.7   |
| LOC64479€ | 115.5  | 119.2   | 123.2   | 118.2   | 123.5   | 95.6    | 127.1   | 115.1   |
| LOC64489€ | 114.6  | 115.8   | 121     | 124.7   | 110.5   | 110.2   | 127.9   | 112.6   |
| LOC64494€ | 116.8  | 117.3   | 105.6   | 114.5   | 114.1   | 92.7    | 116.3   | 117.2   |
| LOC64499€ | 114.7  | 123.6   | 112     | 118.4   | 103     | 96.3    | 122.2   | 113.5   |
| LOC64499€ | 118    | 117.2   | 138.8   | 121.6   | 119.8   | 110.7   | 116.9   | 127.3   |
| LOC64503€ | 120.1  | 116.7   | 117.2   | 123.6   | 108.1   | 92.7    | 123.3   | 111.3   |

|           |        |        |        |        |        |        |        |        |
|-----------|--------|--------|--------|--------|--------|--------|--------|--------|
| LOC645437 | 117.4  | 114.7  | 135    | 117.6  | 109.4  | 111.2  | 124.4  | 116.4  |
| LOC645562 | 113.7  | 115    | 118.4  | 121.6  | 108.8  | 94.3   | 115.2  | 118    |
| LOC645849 | 115.3  | 107.4  | 114.2  | 118.8  | 109.6  | 99.9   | 119.9  | 114.7  |
| LOC645922 | 103.5  | 112.5  | 110.3  | 113.7  | 103.1  | 86.3   | 121    | 106.8  |
| LOC645974 | 116.3  | 111.8  | 112.9  | 126.7  | 111    | 100.5  | 119.8  | 110.5  |
| LOC645974 | 109.3  | 107.5  | 120.4  | 117.5  | 103    | 101    | 114.9  | 114.9  |
| LOC646182 | 109.3  | 115.7  | 113.7  | 114.3  | 109.7  | 93.6   | 112.9  | 110    |
| LOC646200 | 4535.9 | 4612.1 | 5617.3 | 4743.8 | 4800.5 | 3958.9 | 4616.8 | 5937.3 |
| LOC646480 | 104.2  | 105.2  | 112    | 113.5  | 99.3   | 95.3   | 116.4  | 107.8  |
| LOC646600 | 105.3  | 114.7  | 108.3  | 113.5  | 107.6  | 99.3   | 112.1  | 108.8  |
| LOC646962 | 113.2  | 107.1  | 111.9  | 108.6  | 104.5  | 98.1   | 124.4  | 106.8  |
| LOC647043 | 113.9  | 108.7  | 115.1  | 115.2  | 110.2  | 100.4  | 112.8  | 112.8  |
| LOC647141 | 119.4  | 112.7  | 119.1  | 118.7  | 109.3  | 107.8  | 123.4  | 114    |
| LOC647649 | 101.5  | 111.1  | 109.5  | 103.8  | 105.8  | 94     | 104.2  | 116.9  |
| LOC647649 | 108.9  | 117.2  | 120.1  | 122.9  | 110.3  | 94.3   | 121.9  | 112.5  |
| LOC647760 | 116.7  | 128    | 121.7  | 119.1  | 117.4  | 100.6  | 118.3  | 120    |
| LOC647881 | 115.3  | 124.8  | 130.5  | 128.1  | 105    | 106.8  | 124.8  | 123.9  |
| LOC648148 | 111.5  | 108.5  | 109.6  | 110.2  | 106.9  | 90.8   | 114    | 105.3  |
| LOC648293 | 470.5  | 531.2  | 567.3  | 494.5  | 487.9  | 428.6  | 502.7  | 698.3  |
| LOC648303 | 113.3  | 128.3  | 130    | 126.8  | 119.7  | 101.7  | 121    | 117.3  |
| LOC648367 | 121    | 121.4  | 112.2  | 127.5  | 110.1  | 95.9   | 115.2  | 118.7  |
| LOC648832 | 111.9  | 111    | 118.7  | 122.7  | 118    | 101.8  | 123.1  | 111.4  |
| LOC649019 | 113.8  | 123.4  | 106.8  | 117.6  | 107.9  | 101    | 117.1  | 116.1  |
| LOC649159 | 110    | 112.6  | 113.1  | 116.9  | 104.8  | 95     | 106.1  | 105.4  |
| LOC649159 | 130.8  | 122.2  | 127.6  | 119.8  | 116.6  | 99.2   | 117.8  | 125.9  |
| LOC649230 | 111.5  | 112.2  | 123.5  | 121.5  | 105.3  | 105.3  | 122    | 111.9  |
| LOC649377 | 123    | 124.9  | 136.2  | 133.1  | 109.5  | 105.6  | 124.3  | 118.4  |
| LOC649387 | 121.4  | 133    | 128.8  | 130.8  | 118.6  | 114    | 139.4  | 133.3  |
| LOC649387 | 114.4  | 108.1  | 120.9  | 115.8  | 116.7  | 93.6   | 110.6  | 118.3  |
| LOC649431 | 110.4  | 124.2  | 122.7  | 114.1  | 105    | 97     | 116.5  | 131.6  |
| LOC649446 | 113.8  | 108.2  | 122    | 116.7  | 115.3  | 95.6   | 113.6  | 113.3  |
| LOC649516 | 119.5  | 128.2  | 118.2  | 120.5  | 104.4  | 105.2  | 121.7  | 121.1  |
| LOC649555 | 115.9  | 115.8  | 124.1  | 134.6  | 115.4  | 105.7  | 128.4  | 113.9  |
| LOC649588 | 119    | 109.7  | 112.8  | 119.4  | 109.7  | 98.6   | 121.7  | 121.7  |
| LOC649708 | 122.4  | 127.3  | 121.1  | 124.9  | 115    | 110.9  | 119.6  | 120.7  |
| LOC649853 | 1318.5 | 1222.5 | 2217.8 | 1721.1 | 1255.1 | 1608.9 | 1256.1 | 666.2  |
| LOC649946 | 1227.6 | 1216.5 | 1396.4 | 1256.3 | 728    | 817.2  | 1130.9 | 1085.1 |
| LOC650000 | 108.1  | 112.4  | 111.4  | 116.6  | 114.8  | 98.7   | 113.8  | 106.5  |
| LOC650040 | 113.2  | 116.2  | 131.8  | 136.7  | 109.9  | 105.6  | 114.5  | 116    |
| LOC650137 | 112.8  | 119.4  | 119.8  | 127.7  | 106.5  | 103.7  | 132.2  | 121.4  |
| LOC650137 | 104.1  | 109.7  | 108.6  | 124.5  | 110.1  | 99.7   | 125.1  | 111.8  |
| LOC650239 | 116    | 116.4  | 113.7  | 121    | 109.8  | 104.8  | 113.2  | 119.5  |
| LOC650254 | 121.8  | 113.9  | 120.4  | 125.7  | 106.9  | 100.9  | 114.2  | 110.9  |
| LOC650293 | 109.2  | 110.9  | 108.9  | 118    | 109.7  | 94     | 122    | 117.8  |
| LOC650586 | 124.3  | 128.6  | 131.3  | 118    | 126.8  | 105    | 136.8  | 143.1  |
| LOC650645 | 121.1  | 115.6  | 126    | 121    | 111.2  | 104.5  | 122.8  | 123.8  |
| LOC650695 | 108.2  | 112.4  | 105.8  | 107.4  | 109.3  | 93     | 123.6  | 110    |
| LOC650798 | 128.2  | 115.6  | 117.9  | 113.1  | 111.8  | 109.3  | 115.6  | 124.9  |
| LOC651076 | 147.3  | 145.5  | 148.4  | 148.7  | 144    | 112.3  | 148.5  | 129.4  |
| LOC651137 | 106.9  | 101.8  | 116.4  | 109.4  | 109.2  | 91.9   | 119.2  | 112.2  |
| LOC651321 | 117.8  | 130.3  | 127.4  | 120.3  | 116    | 98.7   | 116.7  | 117.9  |

|           |        |        |        |        |        |        |        |        |
|-----------|--------|--------|--------|--------|--------|--------|--------|--------|
| LOC651423 | 188.9  | 217.7  | 201.7  | 215.9  | 170.8  | 153.5  | 197.2  | 203.6  |
| LOC651503 | 123.9  | 123.2  | 116.1  | 122.5  | 111.7  | 109    | 120.8  | 115.8  |
| LOC652020 | 125.3  | 107.5  | 118.7  | 116.4  | 118.8  | 103.4  | 118.3  | 111.5  |
| LOC652236 | 116.4  | 118    | 116.9  | 117.9  | 114.3  | 98.6   | 121.5  | 125.8  |
| LOC652461 | 118.5  | 126    | 133.1  | 126    | 119.9  | 120    | 133.1  | 129.8  |
| LOC652480 | 108    | 123.3  | 115.1  | 115.4  | 105.9  | 107.5  | 129.2  | 118.6  |
| LOC652705 | 114.1  | 114.7  | 118.2  | 120.1  | 106.8  | 101.2  | 129.2  | 109.1  |
| LOC652744 | 112.7  | 117.6  | 114.6  | 112.8  | 105.7  | 101.9  | 117.4  | 116.1  |
| LOC652870 | 119.1  | 111.7  | 120    | 109    | 109.8  | 96.6   | 117.5  | 107.8  |
| LOC652888 | 114.4  | 124.2  | 122.4  | 128.1  | 104.7  | 94.3   | 118.4  | 121.1  |
| LOC652924 | 124.2  | 126.8  | 133.9  | 139.7  | 124.7  | 110.4  | 126.4  | 120.9  |
| LOC652968 | 137.3  | 159.5  | 150.7  | 151.2  | 149.8  | 133.6  | 141    | 151.6  |
| LOC653033 | 113.3  | 121.7  | 117.5  | 113.8  | 106.3  | 104    | 110.7  | 113.8  |
| LOC653056 | 118.3  | 121.8  | 125.4  | 128.6  | 112.9  | 104.2  | 118.1  | 118.1  |
| LOC653062 | 109.4  | 104.4  | 118.3  | 123    | 108.6  | 95.2   | 119.6  | 121.8  |
| LOC653084 | 118.7  | 125.3  | 115    | 120.2  | 111.6  | 102.3  | 113.9  | 113.6  |
| LOC653098 | 125.7  | 124.6  | 137.5  | 141.8  | 107.3  | 116.5  | 123.8  | 125.1  |
| LOC653101 | 121.7  | 119.5  | 137.7  | 139.1  | 116.3  | 117.5  | 137.1  | 122.6  |
| LOC653122 | 107.8  | 108.9  | 117.2  | 112.7  | 103.1  | 101.4  | 109.7  | 112.9  |
| LOC653131 | 116.2  | 117    | 122.8  | 117.7  | 107    | 98.4   | 119    | 124.6  |
| LOC653133 | 152.8  | 145.2  | 155.3  | 180    | 136.4  | 161.3  | 160.6  | 139.9  |
| LOC653142 | 113.4  | 106.1  | 111.9  | 111.8  | 105.8  | 93     | 101.7  | 116.9  |
| LOC653150 | 133    | 143.1  | 136.3  | 127.8  | 131.7  | 121.8  | 145.6  | 130.4  |
| LOC653152 | 124.7  | 125.9  | 141.4  | 148.7  | 118.9  | 103.9  | 132.1  | 136    |
| LOC653170 | 114    | 113.4  | 122.5  | 122.4  | 104.6  | 101.4  | 115.6  | 120.7  |
| LOC653175 | 125.4  | 138.6  | 121.7  | 119.4  | 120.6  | 103.5  | 131.6  | 125.8  |
| LOC653216 | 108.9  | 116.1  | 123.5  | 123.3  | 110.1  | 103    | 116.1  | 110.1  |
| LOC653216 | 120.5  | 121.6  | 127.1  | 114.3  | 119.5  | 101.8  | 120.4  | 115.2  |
| LOC653216 | 108.1  | 116.5  | 118.7  | 113.2  | 106    | 100    | 117.3  | 107.5  |
| LOC653281 | 125.5  | 121    | 109.9  | 120.1  | 111.3  | 103.1  | 128    | 119.9  |
| LOC653282 | 116.5  | 115.6  | 120.8  | 120.8  | 109.1  | 100.9  | 119.4  | 115.3  |
| LOC653285 | 120.1  | 117.9  | 123.9  | 121.4  | 112.8  | 106.1  | 122.7  | 118.4  |
| LOC653314 | 1580.3 | 2224.7 | 1637.4 | 1959.8 | 1825.7 | 974.3  | 1762.7 | 2387.8 |
| LOC653316 | 121.1  | 113.2  | 108.1  | 118.9  | 99.3   | 91.5   | 111.2  | 109.8  |
| LOC653319 | 110.8  | 117.6  | 122.5  | 132.7  | 112.2  | 98.7   | 123.4  | 119.7  |
| LOC653328 | 3273.7 | 2998.7 | 3525.2 | 3499.9 | 2477.3 | 2904.1 | 4047.9 | 4335.4 |
| LOC653375 | 127.5  | 131.6  | 127.4  | 127.3  | 127.2  | 122.4  | 128    | 123.1  |
| LOC653386 | 118.7  | 131.8  | 112.6  | 122.9  | 117.3  | 103.4  | 127.8  | 119.8  |
| LOC653417 | 124.2  | 123.4  | 132.6  | 116.2  | 117.6  | 115.9  | 129.3  | 118.1  |
| LOC653419 | 114.4  | 116.6  | 134.3  | 123.2  | 105.9  | 113.5  | 113.5  | 115.8  |
| LOC653423 | 115.8  | 114.1  | 127.9  | 112.8  | 114.6  | 105.2  | 125.9  | 122.2  |
| LOC653466 | 121.6  | 115.2  | 115    | 116.5  | 107.4  | 96.7   | 122.2  | 117.7  |
| LOC653484 | 138.3  | 126.6  | 126.4  | 143.5  | 119.3  | 119    | 126.8  | 121.8  |
| LOC653490 | 115.1  | 121.6  | 119.6  | 119.9  | 118.9  | 105.1  | 125.3  | 121.1  |
| LOC653495 | 119.4  | 113.8  | 111.8  | 122    | 109.3  | 99.8   | 120.4  | 119.4  |
| LOC653502 | 115    | 123.4  | 122    | 131.3  | 113.2  | 106.9  | 134.5  | 119.4  |
| LOC653517 | 117.4  | 107.7  | 116.3  | 105.5  | 106.6  | 107    | 110.6  | 122.9  |
| LOC653542 | 145.9  | 141.3  | 196.5  | 153.5  | 158.7  | 149.3  | 158    | 150.6  |
| LOC653546 | 112.5  | 112.7  | 114.6  | 117.9  | 112    | 96.9   | 112.6  | 105.8  |
| LOC653558 | 115    | 116.9  | 117    | 125.6  | 108.9  | 101.5  | 115.2  | 108.3  |
| LOC653566 | 212.4  | 185.6  | 341.4  | 257.4  | 256.3  | 283.9  | 259.8  | 219.3  |

|           |       |       |       |       |       |       |       |       |
|-----------|-------|-------|-------|-------|-------|-------|-------|-------|
| LOC653568 | 105.7 | 115.3 | 116.2 | 112.8 | 106.6 | 98.5  | 114.3 | 110   |
| LOC653600 | 167.6 | 767.9 | 328.3 | 214.5 | 579.3 | 274.6 | 179.4 | 770.4 |
| LOC653602 | 113.4 | 121.5 | 119.1 | 117.4 | 110.4 | 107.2 | 114.4 | 115.1 |
| LOC653613 | 106.5 | 108.2 | 108   | 115.4 | 110.1 | 92.1  | 114.5 | 112.1 |
| LOC653614 | 116.3 | 112.6 | 114.3 | 116.4 | 106.5 | 101.3 | 121.3 | 116.6 |
| LOC653620 | 112.6 | 112.9 | 114.5 | 125.8 | 107.8 | 100   | 120.7 | 111.7 |
| LOC653623 | 108.5 | 114   | 119.3 | 113.3 | 106.4 | 98.1  | 130.2 | 118.3 |
| LOC653626 | 111.4 | 113.5 | 114.2 | 120.6 | 108.1 | 107.8 | 119.2 | 112.5 |
| LOC653655 | 109.5 | 120.6 | 139.5 | 123.2 | 104.2 | 103.1 | 123.8 | 129.9 |
| LOC653685 | 123.5 | 118.4 | 126.4 | 125.2 | 109.7 | 100.4 | 127.7 | 110.4 |
| LOC653686 | 103.8 | 112   | 110.8 | 116.2 | 98.4  | 94.2  | 115.3 | 104.6 |
| LOC653693 | 109.7 | 114.9 | 121.6 | 122.1 | 107.3 | 100.8 | 122.2 | 114.3 |
| LOC653697 | 109.5 | 123.1 | 118.2 | 114   | 107   | 95.1  | 112.6 | 105.3 |
| LOC653703 | 112.7 | 121.3 | 116.9 | 119.2 | 104   | 98.2  | 119.3 | 114.5 |
| LOC653705 | 114.4 | 109.5 | 124   | 111.2 | 112.5 | 99.1  | 117.5 | 115.7 |
| LOC653709 | 123.6 | 128.9 | 138.3 | 131.2 | 117.7 | 117.8 | 138   | 144.7 |
| LOC653716 | 104.9 | 108   | 116.5 | 102.9 | 115.7 | 93.5  | 111.8 | 109.5 |
| LOC653723 | 117.3 | 117.3 | 122.6 | 128.7 | 110.4 | 105.9 | 118.3 | 123.4 |
| LOC653742 | 133.2 | 121.1 | 124.4 | 135.6 | 127.7 | 110.5 | 124.4 | 122.6 |
| LOC653744 | 118.9 | 119.3 | 119   | 113.7 | 104.1 | 102.1 | 118.5 | 112.7 |
| LOC653745 | 167.9 | 174.2 | 148.6 | 164.2 | 146.6 | 109.3 | 158.5 | 148.3 |
| LOC653746 | 104.5 | 113   | 118   | 112.4 | 98.9  | 95.9  | 112.7 | 116.6 |
| LOC653749 | 114.6 | 117.2 | 116.8 | 112.2 | 106.6 | 105.9 | 126.4 | 116.1 |
| LOC653757 | 150.7 | 147.8 | 145.2 | 148.9 | 129   | 130.8 | 136   | 128.4 |
| LOC653759 | 109   | 114   | 105.6 | 115.5 | 108.6 | 91.9  | 112.7 | 108.2 |
| LOC653762 | 117   | 123.5 | 127.7 | 119.7 | 115.8 | 102.3 | 127.5 | 122.5 |
| LOC653767 | 112.8 | 121.3 | 116.2 | 113   | 104.5 | 102.9 | 127.3 | 115.5 |
| LOC653771 | 117.1 | 109.5 | 107   | 120.3 | 114.4 | 99.3  | 121.3 | 105   |
| LOC653792 | 104.1 | 110   | 116.1 | 107.3 | 102.3 | 91.7  | 111.3 | 112   |
| LOC653795 | 116.3 | 110.3 | 120.8 | 115.1 | 104.4 | 97.9  | 120.1 | 111.5 |
| LOC653797 | 118   | 120   | 124.2 | 122.3 | 110.5 | 96.8  | 114.8 | 114.8 |
| LOC653803 | 124.6 | 120.5 | 126.2 | 118.7 | 113.5 | 104.4 | 118   | 124.3 |
| LOC653813 | 112.7 | 108.8 | 110.1 | 122.7 | 105.2 | 104.7 | 112.1 | 109.3 |
| LOC653814 | 111.9 | 112.2 | 119.5 | 119.7 | 107.2 | 94.4  | 119.2 | 113.4 |
| LOC653827 | 112   | 105.3 | 103.8 | 120.7 | 97.7  | 96.7  | 109.7 | 114.7 |
| LOC653866 | 126.2 | 110.8 | 120   | 121.4 | 103.1 | 98.2  | 115.7 | 110.5 |
| LOC653906 | 110.5 | 119.8 | 115   | 117.7 | 104.7 | 95.6  | 124   | 106.6 |
| LOC653950 | 118.5 | 114.6 | 113.8 | 122.2 | 114   | 107.5 | 107.8 | 118.9 |
| LOC653980 | 115.5 | 106.4 | 112.6 | 117.3 | 116.5 | 99.4  | 111.6 | 117.7 |
| LOC653980 | 118.6 | 120   | 128.9 | 139.8 | 117.2 | 98.3  | 132   | 124.1 |
| LOC654017 | 173   | 226.1 | 231.4 | 221.6 | 199.2 | 170.3 | 211.8 | 185.9 |
| LOC654052 | 135.9 | 151   | 128.9 | 157.5 | 138.2 | 110.8 | 159.4 | 142.3 |
| LOC654084 | 118.7 | 114.8 | 117.5 | 123.2 | 107.4 | 105.9 | 117.5 | 122.8 |
| LOC654115 | 112.9 | 112.9 | 107   | 115.2 | 108.8 | 96.3  | 117.4 | 109.1 |
| LOC654123 | 151.1 | 152.7 | 142.8 | 153.7 | 142.3 | 129.3 | 157.4 | 129.6 |
| LOC654123 | 117.6 | 120.3 | 114.7 | 117.1 | 107.9 | 102.9 | 116.4 | 121.1 |
| LOC654129 | 115.6 | 122   | 117.5 | 123.7 | 109.8 | 100.8 | 121.3 | 118   |
| LOC654146 | 109.3 | 117.7 | 114.8 | 119.5 | 107.6 | 101   | 123   | 124.1 |
| LOC654151 | 111.9 | 125   | 122.1 | 116   | 102.3 | 95.1  | 121.6 | 109.9 |
| LOC654182 | 117.1 | 111.9 | 125   | 110.9 | 107.3 | 96.9  | 116.8 | 125.6 |
| LOC654225 | 113.7 | 121   | 115.5 | 131   | 120.5 | 100.9 | 110.2 | 113.7 |

|           |         |         |         |         |         |         |         |         |
|-----------|---------|---------|---------|---------|---------|---------|---------|---------|
| LOC65434€ | 111.8   | 108.8   | 132.5   | 132.2   | 112.6   | 103.4   | 133.8   | 119.5   |
| LOC72397Z | 131.6   | 123.5   | 137.8   | 142.8   | 128.4   | 118.9   | 124.9   | 128.5   |
| LOC72793€ | 107.5   | 110.6   | 116.4   | 120.7   | 114.3   | 99.6    | 126.3   | 117.4   |
| LOC728137 | 120.6   | 115.9   | 136.1   | 136.9   | 115.3   | 112.2   | 118.6   | 124.4   |
| LOC72821€ | 111.4   | 113.8   | 106.8   | 117.8   | 108.2   | 102.2   | 113     | 116.8   |
| LOC72826€ | 118.2   | 121.9   | 127     | 128.5   | 116.3   | 99.5    | 119.1   | 117.9   |
| LOC72848€ | 491.3   | 587.3   | 426     | 548.5   | 398.5   | 270.3   | 481.7   | 477.3   |
| LOC728621 | 110.3   | 107     | 114.3   | 114.3   | 108.2   | 102.1   | 105.5   | 123.8   |
| LOC72863€ | 123.7   | 106     | 119.1   | 124.2   | 110.8   | 99.6    | 140.2   | 118.3   |
| LOC72864€ | 239.9   | 219.1   | 259.9   | 292.9   | 234.9   | 202.4   | 297.9   | 305.8   |
| LOC72875€ | 173     | 176.4   | 197.8   | 183.2   | 165.4   | 124.9   | 190.1   | 180.4   |
| LOC729164 | 120.4   | 125.6   | 113.8   | 115.2   | 104.4   | 93.6    | 124.3   | 114.8   |
| LOC72944€ | 111.2   | 126     | 135.6   | 123.4   | 128.8   | 101.8   | 132.3   | 133     |
| LOC72960€ | 4482.3  | 2693.3  | 4274.4  | 3829    | 4821.2  | 2175.5  | 3516.2  | 4310.4  |
| LOC81558  | 113.9   | 140     | 126.1   | 133.7   | 135.7   | 106.6   | 128.1   | 121     |
| LOC81691  | 135.5   | 153.1   | 144.6   | 151.8   | 142.5   | 123.8   | 148.5   | 146.4   |
| LOC84661  | 767.5   | 1017.5  | 1176.7  | 898.9   | 886.6   | 885.8   | 820.4   | 785.8   |
| LOC89944  | 122.8   | 128.6   | 121     | 123.1   | 108.4   | 98.1    | 124.7   | 113.6   |
| LOC90167  | 105.5   | 115.9   | 123.6   | 111.3   | 107.3   | 99.1    | 117.1   | 112.2   |
| LOC90321  | 113.4   | 121.6   | 143.9   | 134.3   | 136.3   | 112.7   | 130.1   | 131.5   |
| LOC90355  | 139.5   | 127.3   | 143     | 141.1   | 122.2   | 108.3   | 160.9   | 138     |
| LOC90379  | 113     | 112.8   | 121.1   | 117.3   | 103.4   | 93.7    | 112.4   | 110     |
| LOC90379  | 188.4   | 241.1   | 200.3   | 206.9   | 169.8   | 165.5   | 272.5   | 212.8   |
| LOC90580  | 232     | 265.7   | 202.6   | 282.8   | 205.8   | 185.8   | 274.7   | 218     |
| LOC90586  | 2052.3  | 1544.7  | 1900.8  | 1454.3  | 1644    | 1041.3  | 1830    | 2215.3  |
| LOC90639  | 336.2   | 356.9   | 380.4   | 370.9   | 383.5   | 278     | 407.9   | 502.3   |
| LOC90693  | 132.9   | 153.4   | 133.2   | 141.2   | 140.8   | 118.4   | 148.7   | 132.9   |
| LOC90826  | 149.1   | 144.4   | 159.1   | 154.4   | 135.3   | 135.7   | 158.7   | 145.1   |
| LOC90835  | 136.4   | 140.2   | 174.7   | 142.3   | 117.1   | 109.3   | 136     | 144.3   |
| LOC90925  | 180.1   | 156.2   | 282.5   | 168.8   | 127.1   | 270.4   | 134.6   | 119.6   |
| LOC91137  | 266.3   | 279.4   | 290.4   | 307.6   | 256.6   | 188.5   | 267.6   | 242.9   |
| LOC91353  | 128.7   | 137.2   | 122.7   | 138.2   | 112.8   | 111.9   | 143.6   | 133.4   |
| LOC91431  | 124.1   | 133.8   | 138.1   | 142.5   | 124     | 104.9   | 129.9   | 133.2   |
| LOC91461  | 121.8   | 118.6   | 117.2   | 118.9   | 110.4   | 100.7   | 115.9   | 121.5   |
| LOC91561  | 25979.7 | 28269.2 | 23119.3 | 26371.9 | 21446.3 | 21199.6 | 26520.5 | 28801.2 |
| LOC91614  | 111.6   | 123.7   | 121.5   | 118.1   | 106.9   | 100.2   | 121.2   | 126.3   |
| LOC91689  | 185.1   | 167.5   | 208.2   | 186.1   | 157.6   | 169.5   | 166.9   | 159.7   |
| LOC92017  | 155.2   | 135.8   | 138.7   | 145.9   | 141.2   | 109.9   | 136.1   | 137.6   |
| LOC92196  | 114.3   | 137.9   | 117.7   | 123.9   | 115.1   | 104.9   | 123.2   | 120.7   |
| LOC92270  | 124.1   | 123.8   | 143.8   | 135.2   | 120.6   | 120.3   | 150.3   | 128.5   |
| LOC92345  | 128.7   | 129.6   | 137     | 135.6   | 129     | 103.6   | 123.5   | 135.8   |
| LOC92689  | 110     | 111     | 111.5   | 110.9   | 107.7   | 96      | 116.2   | 117.1   |
| LOC92691  | 130.5   | 124.4   | 140.5   | 129     | 116.3   | 112.4   | 124.7   | 118.9   |
| LOC93081  | 807.2   | 726.7   | 687.7   | 889.9   | 710.9   | 645.1   | 686.7   | 887.4   |
| LOC93349  | 121.7   | 131.4   | 120.1   | 137.7   | 109.8   | 103.1   | 134.2   | 115.7   |
| LOC93622  | 245.5   | 379.2   | 330.5   | 309.3   | 229.6   | 270.8   | 243.4   | 306.9   |
| LOH11CR2, | 121.5   | 138.8   | 131.5   | 131.3   | 123.3   | 116.6   | 125.5   | 113.8   |
| LOH11CR2, | 127.1   | 114.6   | 139.7   | 137.9   | 120.2   | 101.5   | 135.3   | 127.7   |
| LOH12CR1  | 124.7   | 117.8   | 110.7   | 120.2   | 112.7   | 102.6   | 127.9   | 124.1   |
| LOH3CR2A  | 107.5   | 110.1   | 113.7   | 114.9   | 106.5   | 102.7   | 111.9   | 111.7   |
| LONP2     | 133.3   | 138.4   | 140.3   | 150     | 134.9   | 107.5   | 135.4   | 133.5   |



|        |        |        |        |        |        |        |        |        |
|--------|--------|--------|--------|--------|--------|--------|--------|--------|
| LONRF1 | 138.8  | 148.6  | 139    | 161.6  | 128    | 126.6  | 138.2  | 165.2  |
| LONRF2 | 110.7  | 112.2  | 111.7  | 123.4  | 106.2  | 94.1   | 116.1  | 128.2  |
| LONRF3 | 150.6  | 164.8  | 140    | 134    | 149.2  | 111.1  | 173.4  | 153.9  |
| LONRF3 | 111.9  | 112.1  | 110.1  | 113.4  | 112.4  | 109.1  | 115.4  | 126.9  |
| LOR    | 126.8  | 113.1  | 106.7  | 112.3  | 95.8   | 103.5  | 114.9  | 112.2  |
| LOX    | 110.6  | 109.9  | 121.1  | 105.9  | 109.2  | 101.9  | 119.9  | 119.3  |
| LOXHD1 | 124.6  | 129.4  | 124.4  | 135.1  | 121.3  | 100.4  | 137.4  | 122.9  |
| LOXL1  | 108.4  | 117    | 113.3  | 114    | 110    | 99.4   | 109.8  | 111.8  |
| LOXL1  | 106    | 107    | 117.3  | 114.4  | 104.6  | 99.2   | 114.1  | 113.7  |
| LOXL2  | 107    | 115.4  | 115.4  | 113.9  | 108.3  | 94.8   | 103.2  | 111.8  |
| LOXL3  | 119.6  | 117.7  | 144.4  | 123    | 108.7  | 100.4  | 112.7  | 118.8  |
| LOXL4  | 109.6  | 107.9  | 117.3  | 117.8  | 113    | 91.4   | 115.6  | 109.5  |
| LPA    | 122.8  | 109.5  | 123.1  | 116.8  | 111.4  | 94.6   | 133.6  | 115.7  |
| LPA    | 106.8  | 109.6  | 115.6  | 117.2  | 100.9  | 95.2   | 114.9  | 116.2  |
| LPAL2  | 121.8  | 112.5  | 129.6  | 133.5  | 109.3  | 101.5  | 121    | 113.4  |
| LPAL2  | 122.1  | 113.4  | 123.8  | 115.1  | 110    | 98.7   | 118.3  | 110.3  |
| LPAL2  | 112.1  | 119.5  | 118.6  | 112.8  | 111.3  | 98.4   | 116.8  | 106    |
| LPGAT1 | 117.7  | 118.7  | 130.9  | 117.7  | 104.5  | 98.5   | 122.1  | 119.3  |
| LPHN1  | 241    | 264.4  | 206.8  | 251.2  | 205.3  | 191.8  | 274.9  | 287.2  |
| LPHN1  | 115.6  | 123.9  | 122.7  | 119.6  | 104.8  | 103.9  | 111.7  | 121.7  |
| LPHN2  | 124.2  | 125    | 134.5  | 129.1  | 116.4  | 106.6  | 126.5  | 116.3  |
| LPHN3  | 128.7  | 112.4  | 126.6  | 116.5  | 115.5  | 101.6  | 114.2  | 122.8  |
| LPIN1  | 1257.6 | 1256.6 | 1340.2 | 1274.2 | 1308   | 1204.6 | 1251.4 | 1632.3 |
| LPIN2  | 141    | 126.2  | 126.3  | 141.7  | 134.1  | 109.2  | 148.4  | 143.8  |
| LPIN3  | 117.5  | 119.4  | 110.4  | 120.2  | 111.3  | 99.5   | 116    | 106.3  |
| LPL    | 135.7  | 148    | 124.4  | 125.4  | 111.2  | 98.6   | 130.3  | 112.1  |
| LPO    | 111.6  | 115.7  | 109.8  | 115.5  | 108.1  | 100.8  | 115.2  | 116.3  |
| LPP    | 265.6  | 274.9  | 252.6  | 266.7  | 294.2  | 178.4  | 233.9  | 243.3  |
| LPPR2  | 118.3  | 123.8  | 143    | 129.5  | 109.2  | 119    | 129.2  | 123.8  |
| LPPR4  | 113.9  | 104.2  | 125.1  | 114    | 105.5  | 97.3   | 122.1  | 127.7  |
| LPXN   | 2734.8 | 2571.4 | 3278.5 | 2935.9 | 2489.5 | 3180.1 | 3679.9 | 2993.3 |
| LRAP   | 3554.8 | 3262.7 | 3989.9 | 2853.7 | 3417   | 2415.2 | 3758.6 | 3647.1 |
| LRAT   | 111.5  | 118.2  | 117.6  | 110.9  | 112.1  | 95.5   | 117.5  | 114.6  |
| LRBA   | 353.8  | 394    | 339.5  | 370.5  | 337.1  | 286.5  | 451.6  | 377.2  |
| LRCH1  | 112    | 106.4  | 115.1  | 110.6  | 112.1  | 93.9   | 122.5  | 107.5  |
| LRCH2  | 124    | 121.8  | 127.9  | 122.4  | 108.9  | 104.2  | 112.9  | 110    |
| LRCH3  | 171.2  | 160.8  | 170    | 166.9  | 162.7  | 127.6  | 171.9  | 188.1  |
| LRCH4  | 669.1  | 689.1  | 519.7  | 696.2  | 465.6  | 273.6  | 507.1  | 468.4  |
| LRDD   | 197.3  | 202.3  | 210.6  | 195.9  | 186.7  | 156.2  | 201    | 191.5  |
| LRDD   | 166.3  | 168.2  | 165.1  | 165.6  | 141.5  | 152.4  | 182.5  | 177.3  |
| LRDD   | 112    | 113.4  | 113.4  | 117.4  | 106.8  | 102.6  | 117.6  | 112.7  |
| LRFN2  | 108.4  | 105.2  | 112.7  | 118.4  | 103.6  | 97.7   | 116.7  | 110    |
| LRFN3  | 339.2  | 443.7  | 216    | 304.8  | 257.4  | 174    | 245.1  | 198.6  |
| LRFN4  | 116.1  | 133.3  | 129.2  | 128.1  | 115.5  | 113    | 115.2  | 117    |
| LRFN5  | 110.7  | 110.5  | 113.9  | 118.2  | 107.9  | 96.9   | 114.9  | 108.2  |
| LRG1   | 111.9  | 118.4  | 136.5  | 137.7  | 122.4  | 95.2   | 121.7  | 124.9  |
| LRIG1  | 514.6  | 515.2  | 449    | 539.2  | 480.5  | 395.1  | 640.3  | 563.5  |
| LRIG2  | 142.3  | 173.7  | 165    | 153.6  | 141.7  | 124    | 162.5  | 146.8  |
| LRIG3  | 115.7  | 111.4  | 111.8  | 113.6  | 103.3  | 94.8   | 115    | 114.6  |
| LRMP   | 265.3  | 293.6  | 321.7  | 333.1  | 231.3  | 248.5  | 263.5  | 239.5  |
| LRP1   | 112.1  | 107.7  | 120    | 118.6  | 103.9  | 107.1  | 116.6  | 116.3  |

|          |       |       |       |       |       |       |       |       |
|----------|-------|-------|-------|-------|-------|-------|-------|-------|
| LRP10    | 189.9 | 179.9 | 186.3 | 224.8 | 172.3 | 177.2 | 206   | 170   |
| LRP11    | 111.8 | 116.3 | 111.8 | 125.7 | 110.1 | 103.1 | 127.3 | 113.6 |
| LRP12    | 116.5 | 116.3 | 114.2 | 127.3 | 123.4 | 96.2  | 117.7 | 124.1 |
| LRP16    | 118.2 | 121.2 | 121.8 | 127.1 | 118.2 | 101   | 124.2 | 117.2 |
| LRP1B    | 109.1 | 119.1 | 119.2 | 124.1 | 109.4 | 105   | 122.1 | 112.7 |
| LRP2     | 119.8 | 110.8 | 108.2 | 115.9 | 99.3  | 95.5  | 114.9 | 112.3 |
| LRP2BP   | 118.1 | 120.8 | 117.2 | 115.8 | 107.2 | 105.8 | 119.1 | 117.6 |
| LRP3     | 133.8 | 158   | 140.3 | 149.4 | 115.6 | 107.5 | 133.1 | 115.8 |
| LRP4     | 121.2 | 110.5 | 112.5 | 117.6 | 110.1 | 93.7  | 113   | 118.8 |
| LRP5     | 104.9 | 112.1 | 119   | 111.3 | 102.6 | 99.8  | 125   | 125.1 |
| LRP5L    | 208.8 | 258.4 | 271.9 | 237.2 | 219   | 156.9 | 217   | 246   |
| LRP6     | 123.1 | 138.9 | 135.6 | 136.3 | 116.2 | 114.1 | 132.4 | 133.3 |
| LRP8     | 121.2 | 115.7 | 126.7 | 125.9 | 108.1 | 101   | 119.8 | 116.4 |
| LRP8     | 122.1 | 124   | 143.1 | 146.2 | 131.6 | 152.4 | 140   | 141.5 |
| LRPAP1   | 220.9 | 264.6 | 235.5 | 233.8 | 208.9 | 210.7 | 206.8 | 191.3 |
| LRPPRC   | 242.6 | 266.9 | 208.2 | 261.7 | 240.3 | 190   | 223.3 | 185.8 |
| LRRC1    | 121.5 | 117.9 | 118.6 | 120.7 | 117.7 | 103.7 | 115.7 | 110.4 |
| LRRC1    | 186.8 | 172.9 | 147.7 | 187.9 | 163.9 | 125.2 | 178.3 | 159.2 |
| LRRC10   | 102.3 | 117.9 | 118   | 121.4 | 104.9 | 98.8  | 125   | 111.9 |
| LRRC14   | 180.8 | 142.4 | 174.5 | 161.4 | 135.3 | 137.5 | 155.6 | 134.1 |
| LRRC15   | 123.9 | 122.1 | 125.1 | 136   | 122.3 | 102.5 | 133.7 | 133.9 |
| LRRC16   | 120.3 | 132.8 | 122.7 | 125   | 119.1 | 106.6 | 117.8 | 118.3 |
| LRRC17   | 111.5 | 117.4 | 114.5 | 117.5 | 109.3 | 108.8 | 110.3 | 104.8 |
| LRRC17   | 116.5 | 121.6 | 109.9 | 114.8 | 108   | 99.1  | 122.1 | 112.9 |
| LRRC17   | 110   | 107.9 | 108.4 | 109.9 | 110.3 | 98.5  | 111.8 | 114.5 |
| LRRC18   | 121.2 | 112.9 | 117.5 | 127.2 | 122.6 | 102.4 | 115.5 | 111.1 |
| LRRC19   | 117.6 | 117.4 | 129.5 | 126   | 110.7 | 97.5  | 117.6 | 114.9 |
| LRRC2    | 109.9 | 113.4 | 118.3 | 115.5 | 119   | 103   | 119.4 | 116.3 |
| LRRC20   | 111.3 | 106.6 | 113.8 | 124.9 | 100.8 | 91.4  | 101.3 | 104.2 |
| LRRC20   | 158.9 | 173.5 | 144.8 | 163.7 | 145.8 | 105.2 | 129.9 | 122.1 |
| LRRC20   | 112.1 | 115.2 | 125.2 | 122.1 | 103.3 | 107.9 | 120.2 | 109.9 |
| LRRC21   | 124.1 | 118.9 | 118.9 | 121.4 | 104.1 | 98.2  | 115.5 | 110   |
| LRRC22   | 112.7 | 109.8 | 110.7 | 112.1 | 104.2 | 91.2  | 112.9 | 115.2 |
| LRRC23   | 111.7 | 123.1 | 133.6 | 125.4 | 115.9 | 112.3 | 131.6 | 135.4 |
| LRRC23   | 120.2 | 116.8 | 119.6 | 118.5 | 110.4 | 103   | 126.7 | 120.6 |
| LRRC24   | 111.8 | 111.7 | 120.8 | 123.4 | 108.7 | 99.2  | 112.8 | 120   |
| LRRC25   | 195   | 124.1 | 292.3 | 201   | 107.6 | 218.2 | 169.3 | 109.2 |
| LRRC27   | 118.7 | 121.4 | 117.1 | 114.7 | 115.1 | 103.4 | 122.4 | 121.3 |
| LRRC28   | 157.2 | 139.8 | 167   | 155.8 | 122.9 | 117.5 | 148.4 | 139.2 |
| LRRC29   | 112.9 | 123.7 | 112.5 | 115.8 | 106.3 | 103.1 | 118.7 | 111.7 |
| LRRC29   | 127.5 | 138.3 | 148.4 | 135.9 | 124.8 | 117.6 | 126.6 | 123.2 |
| LRRC3    | 118.3 | 120.3 | 137.6 | 126   | 97.7  | 100.4 | 120.3 | 114.8 |
| LRRC31   | 115.6 | 116.3 | 122.9 | 115   | 112.9 | 103.7 | 113.5 | 121.2 |
| LRRC32   | 118.6 | 120.5 | 109   | 115.7 | 111.4 | 95.1  | 116.2 | 118.2 |
| LRRC33   | 220.7 | 204.1 | 285.8 | 208.3 | 169.9 | 165.5 | 206.8 | 150.8 |
| LRRC34   | 104.6 | 108.1 | 134.3 | 114.8 | 110.1 | 97.6  | 115.3 | 109   |
| LRRC35   | 121.6 | 124.3 | 121.9 | 119.1 | 113.3 | 120.6 | 119.6 | 122   |
| LRRC36   | 111.4 | 115.2 | 130.1 | 122.8 | 110.5 | 100.3 | 124.6 | 110.3 |
| LRRC37A2 | 125.9 | 121.5 | 109   | 107.1 | 111.4 | 96.1  | 118.9 | 112.6 |
| LRRC37B  | 433.5 | 454.4 | 395.7 | 436.1 | 478.5 | 295.4 | 448.4 | 542.4 |
| LRRC39   | 121.9 | 110.6 | 113.5 | 116.9 | 113.7 | 96    | 112.4 | 122.2 |

|         |        |        |        |       |        |       |        |        |
|---------|--------|--------|--------|-------|--------|-------|--------|--------|
| LRR3B   | 109.1  | 121.8  | 106.3  | 120.4 | 108.7  | 90.3  | 111    | 114.7  |
| LRR4    | 116.4  | 116.5  | 129    | 126.2 | 112.2  | 93.7  | 121.2  | 120.1  |
| LRR40   | 127.1  | 119.4  | 120.9  | 129.4 | 122.9  | 109.8 | 125    | 143.4  |
| LRR41   | 135.9  | 153.8  | 148.6  | 150.1 | 141    | 99.6  | 144.5  | 170.6  |
| LRR42   | 286    | 285.9  | 265.9  | 331.6 | 271.1  | 238.4 | 451.7  | 498.3  |
| LRR43   | 110.9  | 109.3  | 132.9  | 113.4 | 110.5  | 95.3  | 109.6  | 109.3  |
| LRR45   | 158.3  | 151    | 157.4  | 142.2 | 124.5  | 111.4 | 140.9  | 118.5  |
| LRR45   | 118.8  | 115.1  | 113.6  | 110.9 | 111.5  | 101.9 | 119    | 119.3  |
| LRR46   | 119.5  | 113.6  | 131.6  | 130.5 | 111.2  | 111.5 | 127.1  | 114.8  |
| LRR47   | 266.1  | 236.6  | 230.5  | 214.1 | 184.7  | 188   | 235.1  | 241.5  |
| LRR48   | 107.5  | 109.4  | 117.2  | 110.3 | 110.6  | 98.8  | 116.9  | 109.5  |
| LRR48   | 107.4  | 112.6  | 117.1  | 120.1 | 107.9  | 99.9  | 131.2  | 115.5  |
| LRR49   | 104.9  | 114.1  | 118.5  | 119.6 | 116    | 99.4  | 121.8  | 113.2  |
| LRR4B   | 127.4  | 109.7  | 118.3  | 114.2 | 107.6  | 97.1  | 126.3  | 118.2  |
| LRR4C   | 121.6  | 111.9  | 114.6  | 120.5 | 111.3  | 109.7 | 111.4  | 114.3  |
| LRR50   | 121.6  | 129.7  | 122.5  | 120   | 109    | 103.1 | 116.9  | 111    |
| LRR51   | 121.8  | 112.1  | 118    | 129.7 | 113.9  | 105.4 | 119.9  | 120.2  |
| LRR52   | 115.5  | 113.2  | 120.9  | 110.8 | 107.1  | 91.9  | 112.6  | 118.7  |
| LRR54   | 114.3  | 114.9  | 107    | 121.4 | 104.1  | 93.7  | 110    | 108.5  |
| LRR55   | 112.7  | 112.1  | 116.9  | 117.7 | 103.2  | 100.3 | 120.9  | 112.9  |
| LRR56   | 131.1  | 125    | 125.7  | 139.7 | 113    | 103.8 | 130.6  | 119.2  |
| LRR57   | 131.4  | 134.1  | 148.2  | 139.7 | 131.3  | 121.3 | 142.2  | 124.6  |
| LRR59   | 124.3  | 120.6  | 127.1  | 112.5 | 117    | 107.3 | 129.3  | 118.3  |
| LRR6    | 123.6  | 113.6  | 115.7  | 131.7 | 111.2  | 107.7 | 125.6  | 118.5  |
| LRR61   | 116.3  | 129.6  | 117.3  | 114.7 | 111.9  | 100.3 | 130.7  | 111.3  |
| LRR7    | 110.1  | 111.3  | 114    | 111   | 106.7  | 91.7  | 117.1  | 106.2  |
| LRR8A   | 168.5  | 174.8  | 144.4  | 176.2 | 147    | 131.3 | 187.8  | 204.8  |
| LRR8B   | 115.4  | 119.7  | 118.5  | 121.4 | 113.7  | 100.8 | 114.2  | 120.4  |
| LRR8C   | 148.4  | 221.1  | 166.6  | 167.2 | 207.3  | 137.2 | 203.3  | 246    |
| LRR8D   | 152.9  | 184.7  | 159.5  | 185   | 187.8  | 136.6 | 189.9  | 219.5  |
| LRR8E   | 118.9  | 127.5  | 127    | 117   | 105.4  | 111.9 | 126.3  | 132.6  |
| LRRCC1  | 110.9  | 111.1  | 119.7  | 121.3 | 106.2  | 92    | 109.9  | 113.7  |
| LRRCC1  | 145.4  | 162.6  | 148.9  | 168.3 | 186.4  | 118.2 | 145.6  | 159.6  |
| LRRCC1  | 115.4  | 104    | 118.8  | 110.6 | 113.5  | 93.5  | 113.6  | 117.4  |
| LRRFIP1 | 1116.2 | 938    | 1324.6 | 1189  | 1110.4 | 1168  | 1362.5 | 1104.4 |
| LRRFIP2 | 103.9  | 111.6  | 112.8  | 117.7 | 105.2  | 91.2  | 107.7  | 112.9  |
| LRRFIP2 | 253.5  | 274.9  | 244.1  | 326   | 262.6  | 247.9 | 418.8  | 313.2  |
| LRRFIP2 | 171.5  | 211    | 169.6  | 211.9 | 169.7  | 169.7 | 202.9  | 179.5  |
| LRRIQ1  | 102.6  | 111.3  | 104.3  | 115.2 | 107.3  | 96.2  | 117.1  | 112.8  |
| LRRIQ2  | 113.2  | 104.4  | 108.7  | 112.6 | 101.4  | 94.9  | 112.4  | 107.9  |
| LRRK1   | 114.3  | 120.9  | 120    | 128.7 | 110.6  | 108.1 | 125.1  | 111.2  |
| LRRK2   | 114.7  | 121.5  | 121.4  | 125.1 | 103    | 96.1  | 124.6  | 111.4  |
| LRRK2   | 132.8  | 126.7  | 133.1  | 141.9 | 112.9  | 112.2 | 124.3  | 120.7  |
| LRRN1   | 113.7  | 126.6  | 119.8  | 126.8 | 114.6  | 98.3  | 114.7  | 118.5  |
| LRRN3   | 743.7  | 1031.4 | 353.8  | 640.5 | 628.1  | 311.6 | 557.6  | 886.8  |
| LRRN5   | 114.4  | 112.7  | 118.8  | 128.7 | 103.9  | 91.4  | 119.7  | 114.7  |
| LRRN5   | 121.8  | 117.2  | 105.9  | 119.1 | 107.2  | 106.1 | 116.6  | 109.9  |
| LRRN5   | 112.1  | 119.5  | 106.8  | 127.5 | 106.5  | 97.9  | 117.2  | 118.4  |
| LRRN6A  | 114.5  | 121.9  | 116    | 122.1 | 105.6  | 103.5 | 116.5  | 113.3  |
| LRRN6C  | 124.7  | 120.4  | 124.3  | 139   | 112.2  | 103.2 | 134.9  | 128.1  |
| LRRTM1  | 113.9  | 120    | 105.8  | 123.5 | 106.4  | 96.4  | 116.2  | 113.6  |

|           |        |        |        |        |        |        |        |        |
|-----------|--------|--------|--------|--------|--------|--------|--------|--------|
| LRRTM2    | 118.3  | 115.1  | 115.2  | 130    | 114.5  | 99.5   | 124.9  | 113.4  |
| LRRTM3    | 108.1  | 118.1  | 105.5  | 112.5  | 99.6   | 102.1  | 122.1  | 113.6  |
| LRRTM4    | 115    | 109.9  | 115.5  | 119.4  | 112.4  | 103.9  | 123    | 126.8  |
| LRSAM1    | 110.8  | 117.9  | 118.8  | 124.8  | 111.2  | 98.9   | 116.7  | 106    |
| LRSAM1    | 293.9  | 249    | 291.3  | 265.5  | 226.1  | 200.5  | 240.8  | 234.8  |
| LRSAM1    | 116.8  | 119.5  | 118.8  | 126.3  | 109.8  | 106    | 122.7  | 112.4  |
| LRTM1     | 108.8  | 114.6  | 129.3  | 121.2  | 110.4  | 102.4  | 130.8  | 124.2  |
| LRTM2     | 124.2  | 131.8  | 122.7  | 129.5  | 117.5  | 110.9  | 120.5  | 123    |
| LSAMP     | 113.2  | 128.2  | 123.8  | 118    | 122.2  | 113.9  | 125.7  | 121.3  |
| LSDP5     | 159.7  | 137.4  | 158.2  | 157    | 148.5  | 132.6  | 158    | 171.4  |
| LSG1      | 150.7  | 150.2  | 162.5  | 165.5  | 142.9  | 113.5  | 147    | 148.4  |
| LSM1      | 1539.5 | 1762.4 | 1889.9 | 1820.2 | 1761.9 | 1464.9 | 2050.3 | 2171.9 |
| LSM10     | 268.2  | 236.8  | 294.9  | 287    | 242.8  | 210    | 233.4  | 208.2  |
| LSM11     | 115.1  | 119.4  | 124.1  | 138.5  | 114.5  | 102.5  | 130.1  | 116.7  |
| LSM12     | 157.8  | 155.9  | 155.7  | 176    | 159.7  | 132.1  | 164.4  | 154.3  |
| LSM14A    | 1332.4 | 1550   | 1177.9 | 1439   | 1372.2 | 1051.7 | 1648   | 1663.1 |
| LSM14B    | 122.2  | 127.3  | 132.1  | 138.7  | 118.7  | 105.5  | 125    | 132.5  |
| LSM16     | 169.5  | 186    | 181.7  | 178.9  | 151.2  | 141.7  | 165.2  | 158.2  |
| LSM2      | 450.2  | 507.7  | 609.9  | 329.9  | 472.5  | 534.5  | 372.9  | 442    |
| LSM3      | 472.2  | 624    | 803.4  | 588.2  | 576.6  | 649.3  | 578.3  | 560.2  |
| LSM4      | 316.2  | 474.3  | 572.3  | 475.3  | 320.8  | 316.2  | 392.4  | 375.1  |
| LSM5      | 166.2  | 151.7  | 196.8  | 170.4  | 150.5  | 129.9  | 146.8  | 168.5  |
| LSM6      | 135.2  | 133.2  | 134.6  | 123.1  | 123.6  | 118    | 119    | 124.1  |
| LSM7      | 692    | 723.2  | 862.5  | 730.4  | 543.2  | 720.9  | 563.5  | 557.2  |
| LSM8      | 164.9  | 183.6  | 173    | 174.1  | 163.5  | 158.6  | 162.5  | 167.6  |
| LSMD1     | 140.9  | 169.9  | 190.6  | 163    | 135.9  | 122.7  | 134.5  | 133.7  |
| LSP1      | 160.1  | 207.1  | 162.7  | 184.4  | 134.8  | 154.7  | 153.3  | 152.8  |
| LSP1      | 117    | 110.9  | 117.8  | 116.5  | 110.8  | 98.8   | 120.8  | 120.5  |
| LSP1      | 203.9  | 196.2  | 219.3  | 189.7  | 160.6  | 250.8  | 170.6  | 164.5  |
| LSP1      | 122.5  | 102.2  | 113    | 119.6  | 108.8  | 103.1  | 116.5  | 107.3  |
| LSR       | 125.2  | 132.5  | 125.2  | 123.5  | 111.2  | 108    | 131.3  | 121.6  |
| LSR       | 124.4  | 113.3  | 123.4  | 126    | 115.4  | 114.5  | 117.2  | 124.9  |
| LSR       | 121.2  | 131    | 145.2  | 136.8  | 113.1  | 121.6  | 121.7  | 122.4  |
| LSS       | 130.9  | 117.6  | 119.2  | 116.8  | 113.4  | 100.5  | 121.9  | 121.1  |
| LSS       | 120.3  | 116.8  | 113.9  | 123.3  | 112.7  | 99.3   | 122.9  | 117.1  |
| LSS       | 259.7  | 252.1  | 241.5  | 266.3  | 179.8  | 166.5  | 280.4  | 222.6  |
| LST1      | 277    | 185.9  | 1154.4 | 265.3  | 159    | 377.1  | 190.8  | 150.8  |
| LST1      | 111.1  | 110.2  | 112.1  | 117.8  | 107    | 97     | 115.9  | 116.7  |
| LST1      | 163.7  | 138.7  | 284.6  | 166.6  | 120.2  | 156.5  | 152    | 139.9  |
| LST1      | 196.4  | 158.1  | 320    | 174.9  | 120.5  | 134.7  | 147.8  | 141.2  |
| LST-3TM12 | 119.2  | 118.5  | 119.8  | 123.7  | 111    | 101.8  | 129.4  | 118.4  |
| LTA       | 355.9  | 405.1  | 301.7  | 385.5  | 338.1  | 234.4  | 326.7  | 410.1  |
| LTA4H     | 1621.8 | 750.7  | 1573.7 | 1050.8 | 557.7  | 961.6  | 566.1  | 525.7  |
| LTB       | 5773.7 | 7226.9 | 3602.3 | 5926   | 5234.3 | 2967   | 5716.2 | 4579.3 |
| LTB       | 2003   | 2259.3 | 818.7  | 1928.2 | 1782.9 | 1034   | 1714.6 | 1710.8 |
| LTB4DH    | 173    | 180    | 125.4  | 290.1  | 227    | 145.4  | 373.6  | 245.2  |
| LTB4R     | 124.1  | 141.5  | 164.4  | 130.8  | 102.4  | 107.9  | 124.1  | 117.3  |
| LTB4R2    | 113.4  | 113    | 116.1  | 119.8  | 100.5  | 101.3  | 118.1  | 117    |
| LTBP1     | 118.2  | 117.7  | 112.4  | 114.8  | 101.5  | 104.5  | 111.9  | 109.7  |
| LTBP1     | 109.1  | 119.8  | 120    | 121.5  | 112.7  | 98.5   | 111.5  | 116.9  |
| LTBP3     | 128.2  | 117.9  | 123.2  | 113    | 109.7  | 95.8   | 121.7  | 116.7  |

|        |        |        |        |        |       |        |        |       |
|--------|--------|--------|--------|--------|-------|--------|--------|-------|
| LTBP3  | 115.7  | 107.3  | 111.2  | 118.5  | 116.8 | 95.3   | 109.2  | 118.6 |
| LTBP3  | 362.1  | 322.6  | 336.8  | 332.2  | 249.6 | 266.6  | 249.4  | 218.8 |
| LTBP4  | 124.8  | 110.3  | 124.6  | 122.1  | 108.9 | 105.1  | 123.7  | 110.1 |
| LTBP4  | 143.2  | 138.2  | 156.5  | 142.1  | 121   | 133.6  | 149.1  | 148.4 |
| LTBR   | 234    | 145.7  | 297.4  | 243.8  | 126.8 | 282.6  | 202    | 159.5 |
| LTC4S  | 111.8  | 116.6  | 136.1  | 125.7  | 108.6 | 100.2  | 120.6  | 113.4 |
| LTF    | 128.1  | 125.8  | 131.1  | 136.5  | 120.2 | 107.5  | 144.7  | 116.6 |
| LTK    | 137.9  | 117.4  | 144.1  | 129.1  | 117.8 | 104.4  | 113.7  | 138.2 |
| LTK    | 119.7  | 117.1  | 110.7  | 117.8  | 109.3 | 110.6  | 123    | 124.3 |
| LTV1   | 242.3  | 202.1  | 211.9  | 208.6  | 168   | 161.8  | 169.1  | 159.6 |
| LUC7L  | 122.3  | 121.8  | 119.3  | 134.4  | 119.9 | 107.7  | 127.4  | 122.9 |
| LUC7L  | 362.8  | 419.8  | 429.5  | 346    | 309.4 | 298    | 302.1  | 322.2 |
| LUC7L2 | 145.8  | 145.6  | 165.3  | 154.2  | 142.9 | 141    | 188.4  | 159.8 |
| LUM    | 110    | 118.5  | 114.6  | 117    | 110.9 | 97.8   | 118.6  | 112.3 |
| LUZP1  | 331.4  | 444.1  | 318.7  | 357.4  | 300.9 | 329.2  | 488.9  | 617   |
| LUZP2  | 119.3  | 120.5  | 120.8  | 119.6  | 105.8 | 103.2  | 115.5  | 116.3 |
| LUZP4  | 111.8  | 122.3  | 113    | 116.8  | 104.7 | 97.2   | 121.5  | 118.2 |
| LXN    | 175    | 215.2  | 233.7  | 208.6  | 180.8 | 144.3  | 167.7  | 193.3 |
| LY6D   | 115.7  | 120.8  | 121.8  | 117.9  | 97.2  | 107.4  | 121    | 114.3 |
| LY6E   | 423.9  | 447.5  | 368.7  | 457    | 264.9 | 294.3  | 322.3  | 271.6 |
| LY6G5B | 111.9  | 124.8  | 126.3  | 116.5  | 113.9 | 102.7  | 121.2  | 121.1 |
| LY6G5C | 139.3  | 149.1  | 147    | 146.9  | 128.7 | 111.6  | 127.3  | 147.6 |
| LY6G5C | 119.8  | 133.2  | 132.3  | 116.8  | 115.9 | 107.5  | 127.1  | 116.7 |
| LY6G5C | 116.5  | 121.8  | 116.9  | 115    | 106.3 | 94.6   | 119    | 115.5 |
| LY6G6C | 124.7  | 113.6  | 141.9  | 130.6  | 114.5 | 111.9  | 120.8  | 122.8 |
| LY6G6D | 116.4  | 118.5  | 121.9  | 119.7  | 106.5 | 95.9   | 117.5  | 124.8 |
| LY6H   | 144.3  | 153.8  | 167.2  | 132.2  | 129.7 | 123.1  | 123.9  | 125.8 |
| LY6H   | 106.1  | 113.7  | 133.2  | 122.3  | 115   | 101    | 117.7  | 118.7 |
| LY6K   | 113.2  | 104    | 116.2  | 118    | 110.7 | 103.3  | 114.3  | 115.4 |
| LY75   | 126.3  | 114.8  | 119.7  | 129.9  | 113.4 | 92.1   | 122    | 112.1 |
| LY86   | 214.6  | 162.4  | 374.1  | 183.9  | 142.5 | 161.6  | 154.9  | 143.4 |
| LY9    | 347    | 386    | 281.9  | 336.9  | 265.9 | 201    | 288.3  | 309.8 |
| LY9    | 276.4  | 364.1  | 253    | 320.7  | 316.6 | 229.8  | 365.4  | 445.7 |
| LY9    | 126.9  | 121.8  | 127.4  | 134.3  | 124.1 | 106    | 119.3  | 119.6 |
| LY96   | 726.3  | 454.3  | 892.9  | 721.5  | 433.3 | 739.6  | 705.1  | 477.3 |
| LYAR   | 679.8  | 847    | 885.5  | 740.8  | 650.6 | 502.3  | 967.9  | 901.9 |
| LYCAT  | 115.1  | 114.6  | 112.6  | 118.6  | 115.8 | 109.6  | 114.9  | 111.2 |
| LYCAT  | 206.2  | 440.3  | 210.3  | 199.5  | 252.3 | 167.1  | 171.6  | 215.3 |
| LYG2   | 107.7  | 105.9  | 113.6  | 125.9  | 106.4 | 100.2  | 114.3  | 119.9 |
| LYK5   | 129.8  | 116.4  | 121.5  | 119.8  | 107.1 | 104.3  | 109.4  | 103.9 |
| LYK5   | 339.2  | 352.5  | 373.4  | 423.4  | 276   | 340.3  | 319.5  | 318.2 |
| LYK5   | 134.9  | 149.3  | 148.1  | 142    | 112.3 | 115.3  | 144    | 134.8 |
| LYL1   | 496.3  | 324.1  | 711    | 397    | 235.3 | 350.3  | 263    | 211.9 |
| LYN    | 2061.9 | 1114.6 | 2360.8 | 1867.6 | 682.5 | 1578.6 | 1604.1 | 602.7 |
| LYNX1  | 113.8  | 130    | 107.5  | 121.4  | 110.5 | 95.1   | 121.8  | 123.4 |
| LYNX1  | 102.6  | 122.3  | 126.9  | 118.5  | 105.1 | 97.7   | 112.2  | 110.6 |
| LYNX1  | 116.5  | 122.9  | 118.3  | 122    | 114.9 | 100.2  | 123.4  | 121.3 |
| LYPD1  | 124.1  | 112.4  | 114.7  | 128.6  | 109   | 101.3  | 130.1  | 118.3 |
| LYPD1  | 123    | 125.2  | 128.6  | 133    | 112.9 | 105.6  | 125.4  | 133.2 |
| LYPD2  | 124.1  | 118.6  | 129.8  | 117.9  | 110.1 | 111.6  | 124.6  | 119.2 |
| LYPD3  | 128.1  | 122.3  | 124.8  | 130.9  | 117.1 | 106.1  | 127.9  | 124.4 |

|          |        |        |       |        |        |       |       |       |
|----------|--------|--------|-------|--------|--------|-------|-------|-------|
| LYPD4    | 111.5  | 100.1  | 111.1 | 112.2  | 112.5  | 97.9  | 123.3 | 114.9 |
| LYPD5    | 109    | 112.4  | 117.8 | 112.4  | 108.5  | 98.6  | 121.4 | 117.6 |
| LYPD5    | 116.9  | 115.5  | 125.3 | 125.6  | 100.1  | 97.6  | 129.3 | 120.5 |
| LYPD5    | 106.9  | 106.1  | 108.7 | 117.8  | 109.6  | 98.9  | 118.4 | 108.7 |
| LYPLA1   | 112.6  | 118    | 109.8 | 114.2  | 109.7  | 100.6 | 114   | 110.5 |
| LYPLA2   | 150.9  | 164    | 163.3 | 153.3  | 141.6  | 124.5 | 177   | 151.5 |
| LYPLA2P1 | 124.1  | 119.6  | 129.5 | 121.1  | 113.6  | 112.2 | 111.9 | 124.9 |
| LYPLA3   | 129.9  | 136.5  | 137   | 149.1  | 112.9  | 132.8 | 140.8 | 128.6 |
| LYPLAL1  | 214    | 228.4  | 307.7 | 243.6  | 229.3  | 262.3 | 217.8 | 223.9 |
| LYSMD1   | 117.7  | 114.3  | 114.7 | 129.2  | 106.2  | 96.6  | 118.6 | 126.6 |
| LYSMD2   | 1349.1 | 1315.5 | 1451  | 1356.3 | 1159.1 | 864.7 | 926.8 | 779.3 |
| LYSMD3   | 124    | 118.5  | 123.8 | 130    | 124.6  | 108.1 | 132.2 | 127.9 |
| LYSMD3   | 109.1  | 109.2  | 119.4 | 118.2  | 98.6   | 97.8  | 124.6 | 111.4 |
| LYSMD4   | 204.9  | 208.1  | 268   | 209.3  | 207.1  | 200.9 | 221.4 | 193.4 |
| LYST     | 265.1  | 196.8  | 152.1 | 240.5  | 212.8  | 147.9 | 276.1 | 177.1 |
| LYST     | 109.5  | 120.1  | 119.8 | 122.9  | 104.1  | 100   | 119.6 | 113.1 |
| LYST     | 112.8  | 116.8  | 114.6 | 121.7  | 109    | 99.7  | 117.5 | 119.7 |
| LYZ      | 371.2  | 287    | 483.3 | 395.8  | 161.7  | 283.2 | 213.9 | 180.4 |
| LYZL1    | 121    | 123.3  | 111.1 | 114.6  | 106.6  | 101.1 | 108.8 | 111.2 |
| LYZL2    | 116.6  | 120.4  | 113.5 | 110.4  | 107.6  | 101.4 | 120.8 | 113.7 |
| LYZL4    | 114    | 110.9  | 109.1 | 117.6  | 99.3   | 92.8  | 115.8 | 115.2 |
| LYZL6    | 137.3  | 124.6  | 122.4 | 134.9  | 121    | 103.4 | 120.2 | 115.9 |
| LZIC     | 134.3  | 147.6  | 146.6 | 154.5  | 132.8  | 122.8 | 137   | 142.9 |
| LZTFL1   | 157.1  | 153.6  | 157.9 | 163.8  | 142.7  | 129   | 141.9 | 152.4 |
| LZTR1    | 735.2  | 850.4  | 665.2 | 760.4  | 553.3  | 431.2 | 747.9 | 749.2 |
| LZTR2    | 122.1  | 120.9  | 124.1 | 114.6  | 110.8  | 96.3  | 127.5 | 116.1 |
| LZTS1    | 116.4  | 114.2  | 111.3 | 123.3  | 105    | 94.6  | 116.3 | 112.9 |
| LZTS2    | 136.7  | 119.9  | 126.3 | 138.4  | 117.3  | 106.1 | 122.1 | 131.8 |
| M160     | 115.2  | 111.3  | 192.4 | 121.5  | 106.3  | 150   | 114.9 | 105.2 |
| M6PR     | 551.5  | 549.5  | 677.2 | 550.4  | 532.1  | 430.1 | 524.4 | 445.9 |
| M6PRBP1  | 578.1  | 495.7  | 714.7 | 630.9  | 482    | 847.1 | 708.2 | 498.5 |
| MAB21L1  | 122.7  | 117.3  | 124.3 | 132.8  | 113.4  | 104.8 | 118.8 | 118.4 |
| MAB21L2  | 103.8  | 117.3  | 115.9 | 120.6  | 102.2  | 102.6 | 111   | 108.1 |
| MAB21L2  | 127    | 118.3  | 115.4 | 121.5  | 111.7  | 104.4 | 109.1 | 125.9 |
| MACF1    | 128.7  | 127.5  | 132.6 | 126.8  | 121.8  | 105.7 | 132.7 | 151.9 |
| MACF1    | 117    | 117.9  | 114.6 | 117.5  | 111.3  | 100.4 | 114.8 | 105.7 |
| MACF1    | 380    | 386.5  | 311.6 | 346.8  | 439    | 246.6 | 337.3 | 327.1 |
| MAD1L1   | 296    | 247.5  | 283   | 254.5  | 191.3  | 219   | 245.5 | 202.2 |
| MAD2L1   | 119.1  | 121.5  | 123.7 | 111    | 104.9  | 109.4 | 127.7 | 110.3 |
| MAD2L1BP | 112.4  | 111.5  | 113.4 | 121.6  | 106.1  | 105.6 | 112.6 | 124.9 |
| MAD2L1BP | 187.3  | 190    | 186.2 | 216.3  | 165.9  | 142.4 | 165   | 174.6 |
| MAD2L1BP | 336.1  | 380.4  | 292.2 | 327.3  | 312.9  | 248   | 309   | 534.1 |
| MAD2L2   | 604.9  | 650.9  | 597   | 633.9  | 413.4  | 497.1 | 595.2 | 472.8 |
| MADCAM1  | 114.7  | 118.4  | 118.3 | 119.3  | 107.4  | 92.6  | 118.9 | 112.9 |
| MADCAM1  | 110.5  | 118.8  | 124.2 | 116.6  | 112.9  | 97    | 118.1 | 111.3 |
| MADD     | 110.9  | 108    | 112.4 | 109.7  | 99.1   | 93.6  | 111.9 | 115.1 |
| MADD     | 298.3  | 276.7  | 206.9 | 255.8  | 229.9  | 178.9 | 264.4 | 251.9 |
| MADD     | 236.1  | 277.3  | 207   | 237.6  | 172.8  | 162.4 | 210.3 | 252.8 |
| MAEA     | 292.6  | 275.8  | 385.2 | 304.9  | 322.3  | 332   | 316.7 | 333.6 |
| MAEA     | 141.1  | 148.4  | 154.6 | 157.6  | 147.1  | 142.4 | 140.7 | 140.8 |
| MAEL     | 106.4  | 113.6  | 117.6 | 119.2  | 106.1  | 96.4  | 111.3 | 115   |

|         |       |       |        |        |       |        |        |       |
|---------|-------|-------|--------|--------|-------|--------|--------|-------|
| MAF     | 131.7 | 118.2 | 135.3  | 123.9  | 114.3 | 109    | 119    | 120.9 |
| MAF     | 294.1 | 275.3 | 318.5  | 281.9  | 207.8 | 196.1  | 195.2  | 194   |
| MAF1    | 212.8 | 237.9 | 200    | 218.8  | 155.9 | 183    | 209.7  | 184.2 |
| MAFA    | 120.5 | 133.7 | 125.2  | 140.5  | 121.4 | 107.5  | 130.2  | 138.9 |
| MAFB    | 682.9 | 253.4 | 1900.1 | 1110.9 | 364.6 | 2252.8 | 1081.2 | 394.2 |
| MAFF    | 108   | 115.9 | 116.4  | 112.6  | 107   | 102.6  | 115.9  | 116.1 |
| MAFF    | 249.1 | 239.1 | 158.6  | 212.9  | 191.7 | 161.8  | 175.4  | 198.4 |
| MAFF    | 116.6 | 126.9 | 124.1  | 120.2  | 115.2 | 112.2  | 122.6  | 134   |
| MAFG    | 155.6 | 172.2 | 147.7  | 203.3  | 155   | 116.8  | 278.8  | 269.5 |
| MAFG    | 109.5 | 114.8 | 126.2  | 127.6  | 102.7 | 104.2  | 127.2  | 125.8 |
| MAFK    | 123.3 | 123   | 135.3  | 141.6  | 108.7 | 108.8  | 132    | 123.6 |
| MAG     | 108.8 | 119.1 | 120.8  | 126    | 102.3 | 104.3  | 112.5  | 116.2 |
| MAG     | 119.2 | 119.3 | 106.8  | 115.4  | 109.6 | 101.4  | 115.7  | 113.2 |
| MAGEA1  | 120.4 | 121.1 | 112.9  | 124.9  | 110.6 | 102.9  | 112.8  | 116.4 |
| MAGEA10 | 110.3 | 114.9 | 117.4  | 117.4  | 102.2 | 99.5   | 109.8  | 108   |
| MAGEA10 | 108.1 | 112.3 | 117.8  | 114.6  | 103.2 | 101.9  | 111.8  | 111.7 |
| MAGEA11 | 118.2 | 119.6 | 123.1  | 123.8  | 119.3 | 95.2   | 116.4  | 113.7 |
| MAGEA11 | 113.5 | 114.1 | 115.9  | 118.4  | 102.7 | 102    | 121.5  | 111.2 |
| MAGEA11 | 128   | 117.3 | 114.8  | 125.8  | 112.7 | 100.4  | 123.3  | 125.4 |
| MAGEA11 | 109.1 | 118.9 | 121.1  | 112.1  | 112.8 | 106.7  | 126.6  | 116   |
| MAGEA12 | 121.9 | 112.4 | 118.4  | 123.8  | 105.9 | 96.2   | 131.7  | 112.3 |
| MAGEA2  | 112   | 112.4 | 109.5  | 116.3  | 100.4 | 95     | 117.8  | 107.4 |
| MAGEA2  | 111.7 | 107.2 | 111.3  | 112.4  | 105.6 | 95.4   | 116.7  | 120.2 |
| MAGEA2B | 113   | 116.4 | 116.6  | 118    | 98.5  | 96.8   | 103.9  | 111.2 |
| MAGEA3  | 105.6 | 109.5 | 119.8  | 122.1  | 106.1 | 99.6   | 114.7  | 106   |
| MAGEA4  | 112.6 | 106.7 | 113.8  | 110.5  | 100.9 | 97.9   | 126.5  | 118.9 |
| MAGEA5  | 119.2 | 119.1 | 137    | 120.8  | 119.5 | 101    | 123    | 129.7 |
| MAGEA6  | 127.7 | 129.6 | 129.4  | 126.1  | 112   | 109.9  | 127.8  | 130.9 |
| MAGEA8  | 114.3 | 117.9 | 105    | 113.3  | 102.6 | 89.1   | 106.9  | 115   |
| MAGEB1  | 107.9 | 108.9 | 110.2  | 113    | 102.9 | 94.1   | 111.5  | 112.5 |
| MAGEB1  | 109.7 | 105.1 | 108.5  | 116.7  | 109.5 | 100.1  | 127.3  | 118.1 |
| MAGEB10 | 101.7 | 112   | 119.1  | 121.4  | 104.7 | 98.4   | 107.8  | 114.4 |
| MAGEB18 | 113   | 112.6 | 115.5  | 122.4  | 112.6 | 98.7   | 117    | 119.2 |
| MAGEB2  | 113.8 | 119.4 | 123.9  | 130.2  | 111.2 | 95.9   | 121.2  | 115.1 |
| MAGEB3  | 118.1 | 119.6 | 130.4  | 123.2  | 115.4 | 105.8  | 122.5  | 123.7 |
| MAGEB4  | 110.7 | 115.9 | 122.7  | 111.8  | 103.9 | 98.2   | 119    | 114.3 |
| MAGEB6  | 143.6 | 108   | 125.4  | 122.7  | 106.9 | 99.7   | 124.6  | 112   |
| MAGEC1  | 110.3 | 115.4 | 113.4  | 108.2  | 109.8 | 99.1   | 119    | 114.7 |
| MAGEC1  | 106.4 | 108.8 | 115.6  | 110.3  | 104.6 | 94.8   | 112.9  | 101.3 |
| MAGEC2  | 119.2 | 117.5 | 118.3  | 116.7  | 103.5 | 98.6   | 120.7  | 118.1 |
| MAGEC3  | 112.1 | 112.9 | 114.9  | 114.3  | 112.2 | 86.7   | 121.1  | 105.8 |
| MAGEC3  | 117.7 | 118.3 | 120.4  | 118    | 102.6 | 104    | 117.8  | 111.9 |
| MAGEC3  | 104.6 | 98.3  | 116.2  | 117.2  | 106.8 | 95.5   | 114.9  | 114   |
| MAGED1  | 510.1 | 576.4 | 439    | 568.4  | 443.8 | 354.1  | 406    | 362.7 |
| MAGED1  | 214.9 | 221.5 | 186    | 202.6  | 170.7 | 151.9  | 168.1  | 173.1 |
| MAGED1  | 117.5 | 113.4 | 121.2  | 116.5  | 115.3 | 98.6   | 120.8  | 121.3 |
| MAGED1  | 123.6 | 113   | 118.2  | 123.9  | 104.1 | 96.4   | 117.7  | 118.2 |
| MAGED2  | 127.3 | 124.9 | 127.1  | 139.9  | 130.1 | 110.2  | 125.9  | 131.8 |
| MAGED2  | 128   | 123.2 | 125.7  | 130.2  | 119.9 | 125.7  | 139.6  | 121.6 |
| MAGED2  | 131.9 | 133.3 | 150.3  | 140.6  | 116.5 | 119.1  | 124.1  | 133.5 |
| MAGED2  | 126.1 | 126.3 | 134.4  | 128.5  | 134.1 | 117.2  | 138.5  | 126   |

|        |        |        |       |       |        |       |       |       |
|--------|--------|--------|-------|-------|--------|-------|-------|-------|
| MAGED4 | 118.8  | 126.6  | 142.2 | 143   | 122.9  | 115.6 | 134.8 | 127.8 |
| MAGEE1 | 366.9  | 342    | 291.8 | 298.4 | 251.6  | 209.2 | 236.5 | 257.6 |
| MAGEE2 | 125    | 113    | 116.8 | 112.9 | 104.1  | 94.9  | 122.7 | 109.2 |
| MAGEF1 | 120    | 115.3  | 112   | 126.3 | 113.7  | 99.9  | 124.9 | 114   |
| MAGEH1 | 154    | 144    | 154.2 | 146.2 | 140.2  | 125.1 | 128.1 | 146.5 |
| MAGI1  | 108.1  | 122.5  | 107.7 | 111.1 | 101.5  | 103   | 124.7 | 125.6 |
| MAGI1  | 102.6  | 113.2  | 112.9 | 111   | 112.7  | 105.1 | 116.3 | 108.4 |
| MAGI1  | 115.6  | 124.9  | 134.6 | 122.8 | 111    | 113.1 | 118.8 | 122.7 |
| MAGI2  | 117.9  | 114.7  | 123.8 | 118.5 | 109.1  | 100.1 | 112.6 | 107.5 |
| MAGI3  | 105.4  | 114    | 111.7 | 115.5 | 108.5  | 93.9  | 106.9 | 114.8 |
| MAGI3  | 108.2  | 118.9  | 120.1 | 117.7 | 110.2  | 99.6  | 115.4 | 113.1 |
| MAGMAS | 253.2  | 274.8  | 316.1 | 251.4 | 220.6  | 257.4 | 210.7 | 209.3 |
| MAGOH  | 189    | 205.3  | 189   | 192   | 185.9  | 183.7 | 194.8 | 198.9 |
| MAK    | 113.8  | 109.8  | 121.5 | 119.5 | 110.3  | 102.3 | 122   | 116.9 |
| MAK10  | 112.9  | 113.2  | 117.2 | 118.8 | 116.8  | 100.7 | 114.3 | 112.7 |
| MAL    | 1106.9 | 1286.7 | 999.5 | 1218  | 1032.1 | 815.4 | 646.9 | 708.3 |
| MAL    | 447.9  | 581.5  | 451.6 | 487.7 | 368.9  | 390.2 | 307.6 | 380.5 |
| MAL2   | 117.2  | 110.7  | 116.2 | 115.5 | 115    | 102.2 | 124.2 | 115.2 |
| MALAT1 | 110.1  | 114.1  | 118.5 | 134.4 | 105.1  | 98    | 109.9 | 116.6 |
| MALL   | 109.8  | 115.4  | 109   | 112.7 | 113.9  | 96.5  | 115.8 | 113   |
| MALT1  | 256    | 229.9  | 216   | 290.8 | 206.2  | 177.9 | 243.2 | 265   |
| MALT1  | 113.4  | 114.8  | 117.9 | 120.7 | 108.9  | 98.8  | 121.8 | 114.1 |
| MAMDC1 | 112.5  | 111.5  | 120   | 111.4 | 108.5  | 100.4 | 121.6 | 117.6 |
| MAMDC2 | 107    | 115.3  | 109.2 | 109   | 115.1  | 102   | 109.2 | 104.5 |
| MAMDC4 | 120.2  | 123.6  | 122.5 | 121.4 | 106.7  | 103.1 | 125.4 | 113.6 |
| MAML1  | 114.4  | 114.1  | 123.5 | 117.1 | 111.8  | 96.7  | 122.2 | 125.7 |
| MAML1  | 161.5  | 172.5  | 163.9 | 176.1 | 158.8  | 131.1 | 176.5 | 176.8 |
| MAML2  | 131.3  | 127.2  | 130.8 | 135   | 126.7  | 108.7 | 127.4 | 136.2 |
| MAML3  | 114.7  | 106.5  | 109.2 | 116.7 | 104.7  | 100.3 | 125.8 | 116.6 |
| MAN1A1 | 149    | 144.8  | 140.2 | 160.5 | 138.4  | 121.7 | 140   | 160.3 |
| MAN1A2 | 117.1  | 115.1  | 114.2 | 121.2 | 122.8  | 95.2  | 122.1 | 115.8 |
| MAN1B1 | 423.3  | 467.1  | 462   | 466.4 | 330.9  | 320.8 | 362.8 | 377.3 |
| MAN1C1 | 243    | 327.9  | 310.6 | 244.1 | 222.1  | 258   | 176.3 | 166.7 |
| MAN2A1 | 109.5  | 121.5  | 113.2 | 124.6 | 102.7  | 101.9 | 112.4 | 106.8 |
| MAN2A2 | 192.6  | 216.6  | 213.6 | 185.8 | 172.1  | 167.1 | 180   | 176.1 |
| MAN2B1 | 197.6  | 200.5  | 344.2 | 227.6 | 157.7  | 238.5 | 169.1 | 158.3 |
| MAN2B2 | 174    | 190.2  | 171.9 | 167   | 152    | 166.5 | 196.3 | 149.1 |
| MAN2C1 | 301.7  | 307.4  | 296.1 | 260.3 | 206.9  | 251.3 | 215.2 | 240.1 |
| MANBA  | 234.9  | 167.3  | 252.2 | 209   | 168.3  | 190.4 | 159.6 | 166.3 |
| MANBAL | 346.5  | 322    | 427.7 | 452   | 292.7  | 329   | 360.2 | 270.4 |
| MANBAL | 112.2  | 108.9  | 115.1 | 112.4 | 104.4  | 100.6 | 113.2 | 106.3 |
| MANBAL | 130.9  | 136.2  | 151.6 | 143.6 | 117.1  | 118.7 | 139.4 | 129.9 |
| MANEA  | 122.4  | 106    | 122.7 | 114.7 | 102.9  | 98.2  | 111.3 | 114.4 |
| MANEA  | 135.7  | 124.8  | 152.7 | 146.9 | 124    | 112.1 | 126.6 | 125.7 |
| MANEAL | 109.9  | 115.1  | 117.7 | 116.2 | 107.7  | 100.2 | 114.9 | 119.4 |
| MANEAL | 113.2  | 124.5  | 116.1 | 121.7 | 106.4  | 99    | 110.7 | 113.4 |
| MANEAL | 124.8  | 126.3  | 113.1 | 117.9 | 108.6  | 103.3 | 118.9 | 103   |
| MANSC1 | 111.9  | 118.6  | 106.9 | 116.8 | 115.5  | 107.7 | 123.2 | 117.8 |
| MAOA   | 109.7  | 121.6  | 120.7 | 113.8 | 104.8  | 101.8 | 123.5 | 110.3 |
| MAOB   | 107.9  | 109.8  | 122.2 | 128.6 | 110.3  | 104.3 | 109.2 | 118.4 |
| MAP1A  | 140.1  | 131.2  | 137.9 | 146   | 130.2  | 117.9 | 151.6 | 134   |



|           |        |       |       |        |        |       |        |        |
|-----------|--------|-------|-------|--------|--------|-------|--------|--------|
| MAP1B     | 110.8  | 113.7 | 111.6 | 118.4  | 109.1  | 101.1 | 113.6  | 112.4  |
| MAP1B     | 158.6  | 146   | 142.4 | 151.6  | 145.3  | 119.4 | 141.2  | 150.2  |
| MAP1B     | 119.8  | 118.8 | 114.2 | 110.6  | 112    | 97.4  | 122.4  | 112.3  |
| MAP1D     | 114    | 124   | 127.2 | 131.9  | 119.3  | 106.4 | 127.1  | 131.2  |
| MAP1LC3A  | 100.8  | 117.8 | 111.8 | 114.4  | 107    | 93.1  | 113.1  | 108.5  |
| MAP1LC3A  | 116.9  | 104.5 | 120.1 | 114.4  | 105.1  | 94.5  | 125.2  | 121.9  |
| MAP1LC3A  | 212.1  | 234.2 | 195.8 | 233.1  | 204.9  | 191.6 | 364.9  | 364.8  |
| MAP1LC3B  | 467.5  | 450.4 | 505.3 | 554.2  | 467.9  | 473.8 | 696.6  | 916.1  |
| MAP1LC3C  | 129.6  | 115.5 | 121.5 | 128    | 108.8  | 94.7  | 115.7  | 118.5  |
| MAP2      | 109.8  | 116.2 | 119   | 119.8  | 113.4  | 100.7 | 112.9  | 112.8  |
| MAP2      | 116.9  | 113.6 | 116.6 | 119.9  | 106.9  | 97.1  | 121.5  | 114.9  |
| MAP2      | 110.6  | 118.2 | 109.5 | 113.2  | 113.8  | 100.6 | 121.9  | 105.3  |
| MAP2      | 117.5  | 118.1 | 125.1 | 124.2  | 109.1  | 103.6 | 115.2  | 110.1  |
| MAP2K1    | 459.6  | 451.8 | 427.5 | 456.4  | 345.7  | 421.5 | 489.2  | 418.6  |
| MAP2K1IP: | 533.7  | 554.2 | 617.5 | 549.6  | 474.9  | 478.2 | 648.4  | 682.1  |
| MAP2K3    | 110.9  | 108   | 113.7 | 121.3  | 108.5  | 96.6  | 123.7  | 112.1  |
| MAP2K3    | 117    | 124.7 | 123.1 | 140.2  | 117.6  | 111.2 | 129.6  | 126.5  |
| MAP2K3    | 117.9  | 122.2 | 121.1 | 113.8  | 114.1  | 99    | 128.7  | 114.6  |
| MAP2K3    | 122.2  | 114.7 | 124.1 | 140.9  | 120.4  | 100.3 | 123.9  | 113.5  |
| MAP2K4    | 257.1  | 252.4 | 222.9 | 254.6  | 203.1  | 205.6 | 290.4  | 256.7  |
| MAP2K5    | 150.5  | 152.8 | 173   | 162.2  | 135.9  | 149.4 | 140.9  | 137.5  |
| MAP2K5    | 133.7  | 134.5 | 130.6 | 140.1  | 118.5  | 117.9 | 132.7  | 129.1  |
| MAP2K6    | 121.8  | 116.1 | 114.6 | 119.4  | 108.5  | 94.4  | 110.3  | 110.1  |
| MAP2K7    | 138.8  | 136.2 | 142.8 | 132.6  | 130.3  | 110   | 150.1  | 137.6  |
| MAP3K10   | 125.6  | 116.1 | 136.4 | 130.1  | 112    | 108.1 | 118    | 120.7  |
| MAP3K11   | 282.2  | 267.9 | 281.4 | 273    | 197    | 217.4 | 353.4  | 261.5  |
| MAP3K12   | 129.9  | 149.1 | 133.1 | 142.7  | 135.3  | 107.6 | 127.7  | 126.1  |
| MAP3K13   | 110.1  | 111.8 | 117.1 | 120    | 109.1  | 96.7  | 118.9  | 120.7  |
| MAP3K14   | 168.1  | 159.8 | 160.2 | 184.1  | 124.2  | 165.8 | 191.3  | 151.4  |
| MAP3K15   | 119.6  | 129   | 129.1 | 128.5  | 123.9  | 100.9 | 136.4  | 126    |
| MAP3K2    | 133.9  | 207.4 | 139.3 | 142.3  | 192.6  | 119.5 | 158    | 214    |
| MAP3K3    | 117.6  | 115   | 124.5 | 116.3  | 109.4  | 98.8  | 111.9  | 113.4  |
| MAP3K4    | 122.2  | 120   | 128.2 | 119.1  | 113.3  | 106.7 | 129.9  | 118.1  |
| MAP3K4    | 383.6  | 453.8 | 360.3 | 428.7  | 484.9  | 290.5 | 366.7  | 357.6  |
| MAP3K6    | 123.8  | 131   | 128.8 | 137.9  | 123    | 106   | 126    | 120.2  |
| MAP3K7    | 139.8  | 143.8 | 142   | 135.7  | 120.4  | 123.4 | 140.6  | 140.6  |
| MAP3K7    | 472.4  | 439   | 459.4 | 407.7  | 376.8  | 353.5 | 469.4  | 437    |
| MAP3K7IP: | 115.7  | 122.5 | 129.5 | 114.6  | 113    | 102   | 121.4  | 122.2  |
| MAP3K7IP: | 157.9  | 180.5 | 166.4 | 170.9  | 144.9  | 152.4 | 165.1  | 148.8  |
| MAP3K7IP: | 123.4  | 115.8 | 124   | 127.8  | 114.7  | 104.7 | 120.5  | 115.5  |
| MAP3K7IP: | 146.1  | 145.9 | 150.9 | 166.7  | 131    | 120.2 | 143.4  | 142.4  |
| MAP3K8    | 284.6  | 188.9 | 280.2 | 390.4  | 215.4  | 303.5 | 336.6  | 244.2  |
| MAP3K9    | 131.7  | 113.1 | 118.6 | 118.8  | 112.4  | 95.2  | 109.9  | 127.1  |
| MAP4      | 132.1  | 143.2 | 133   | 136.4  | 124.5  | 109.1 | 156.8  | 160.7  |
| MAP4      | 115.2  | 120.8 | 116.4 | 109.4  | 111.7  | 96.4  | 115.4  | 106    |
| MAP4      | 122.3  | 110.1 | 115.4 | 116.2  | 103.2  | 98.9  | 122.8  | 113.1  |
| MAP4K1    | 536.4  | 741.5 | 531.9 | 634.3  | 449.7  | 429.1 | 368    | 485.2  |
| MAP4K1    | 388.1  | 450.9 | 398.2 | 433.9  | 331.8  | 438.1 | 353.1  | 326    |
| MAP4K2    | 2360.2 | 2251  | 2020  | 2128.3 | 1500.4 | 1388  | 1540.5 | 1358.8 |
| MAP4K3    | 142.1  | 139.3 | 146.5 | 137    | 131.7  | 111.1 | 144.1  | 124.3  |
| MAP4K4    | 105.5  | 122.4 | 119.7 | 118.5  | 107.6  | 97.3  | 117.1  | 107.5  |

|          |       |       |       |       |       |       |        |        |
|----------|-------|-------|-------|-------|-------|-------|--------|--------|
| MAP4K4   | 184.4 | 225.1 | 215   | 224.2 | 209.7 | 165.9 | 221.7  | 249.8  |
| MAP4K5   | 110.8 | 131.2 | 153.3 | 140.5 | 132.1 | 115.1 | 131.8  | 134    |
| MAP4K5   | 165.5 | 199.5 | 213.7 | 194.4 | 170.4 | 153.6 | 181.9  | 193.9  |
| MAP6     | 106.4 | 108.8 | 110.9 | 116.9 | 104.6 | 95.1  | 109.2  | 112.5  |
| MAP6     | 105.1 | 109.3 | 114.7 | 111.8 | 100.1 | 91.3  | 114.2  | 108.9  |
| MAP6     | 112.3 | 115.4 | 121.7 | 125.8 | 105.8 | 102.9 | 122.5  | 111.6  |
| MAP6D1   | 156.5 | 165.5 | 161.8 | 177.6 | 129.8 | 120.7 | 158.6  | 168.8  |
| MAP7     | 120.7 | 130.5 | 125.4 | 128.6 | 116   | 110.2 | 124.2  | 134.5  |
| MAP7D2   | 123.5 | 107.5 | 108.9 | 113.3 | 100.9 | 96.2  | 109    | 100.2  |
| MAPBPIP  | 327.8 | 297.8 | 436.1 | 286.5 | 273.4 | 305.6 | 247.4  | 179    |
| MAPK1    | 144.6 | 127   | 139.3 | 152.2 | 130.1 | 126.1 | 146.5  | 143.1  |
| MAPK1    | 429.9 | 540.4 | 539.7 | 544.5 | 536.6 | 601.9 | 549.8  | 594.6  |
| MAPK1    | 256.8 | 280.5 | 311   | 348.1 | 303.5 | 312.8 | 323.5  | 279.6  |
| MAPK10   | 115.7 | 112.2 | 112.2 | 128.5 | 110.1 | 104.5 | 116.1  | 116.8  |
| MAPK10   | 117.2 | 119.8 | 120.3 | 120.6 | 110.2 | 100.3 | 120.9  | 118.5  |
| MAPK10   | 108.7 | 118.7 | 120.1 | 123.5 | 114.2 | 99.3  | 128.9  | 115.4  |
| MAPK10   | 113.5 | 113.3 | 120   | 121.7 | 105.9 | 97.4  | 116    | 110.9  |
| MAPK10   | 115.1 | 108.8 | 114   | 117   | 111.1 | 102.2 | 123.2  | 116.6  |
| MAPK11   | 121.7 | 119.8 | 116.3 | 113.2 | 111.6 | 99.3  | 115.2  | 110.7  |
| MAPK11   | 112.5 | 135.1 | 119.6 | 117.6 | 108.5 | 108.1 | 122.6  | 113.1  |
| MAPK12   | 122.3 | 116.1 | 119.9 | 112   | 108.3 | 103.4 | 117.5  | 116.4  |
| MAPK13   | 245   | 266   | 272.2 | 237.3 | 215.2 | 199.3 | 203.6  | 192.6  |
| MAPK14   | 115.6 | 117.3 | 124.6 | 124.2 | 109.7 | 106.6 | 118.5  | 124.8  |
| MAPK14   | 123.6 | 129.9 | 127.6 | 130.7 | 125.6 | 113   | 123.7  | 120.1  |
| MAPK14   | 124.4 | 138.6 | 119.3 | 123.2 | 117   | 102.4 | 118    | 131.2  |
| MAPK15   | 111   | 115.8 | 118.8 | 118.2 | 113.1 | 94.6  | 118.5  | 126    |
| MAPK3    | 491.2 | 434.8 | 581.8 | 441.6 | 376.1 | 455.5 | 487    | 346.3  |
| MAPK3    | 230.4 | 216.9 | 332   | 248.5 | 187   | 345   | 244.2  | 207.4  |
| MAPK4    | 108.4 | 104.9 | 116.7 | 122.2 | 103.8 | 101.8 | 120.6  | 111.8  |
| MAPK6    | 408.4 | 388.9 | 400.1 | 485.8 | 433.5 | 502.7 | 611.1  | 623.4  |
| MAPK7    | 128.2 | 128   | 117.1 | 135.1 | 112.5 | 104.9 | 136.8  | 117.6  |
| MAPK7    | 184.8 | 166.5 | 164   | 201.9 | 148.3 | 156.7 | 216.6  | 183.3  |
| MAPK7    | 116.7 | 119.2 | 121   | 116.7 | 111.1 | 104.1 | 121.4  | 121.2  |
| MAPK8    | 115.5 | 110.9 | 111.8 | 115.2 | 104.6 | 107.2 | 121.2  | 122.7  |
| MAPK8    | 104.2 | 107.6 | 108.1 | 120.1 | 108.4 | 98.5  | 110.7  | 107.8  |
| MAPK8IP1 | 113.7 | 108.7 | 127.5 | 120.7 | 102.3 | 96.2  | 113.2  | 120.9  |
| MAPK8IP2 | 117.4 | 123.6 | 153.5 | 124.8 | 128.3 | 104.7 | 131.1  | 128.4  |
| MAPK8IP2 | 111.6 | 118.2 | 112.7 | 113.2 | 108.5 | 96.7  | 117.5  | 110.8  |
| MAPK8IP2 | 113.3 | 116.2 | 113.3 | 121.1 | 110.4 | 101.7 | 115.2  | 112.5  |
| MAPK8IP2 | 118.2 | 111   | 118.6 | 114.5 | 110.9 | 99    | 125.2  | 124.4  |
| MAPK8IP3 | 121.8 | 119.8 | 122   | 119   | 108.6 | 93.7  | 126.5  | 117.9  |
| MAPK8IP3 | 683.2 | 627.6 | 676.4 | 629.4 | 376.2 | 507.6 | 813.4  | 708    |
| MAPK9    | 300.2 | 358.7 | 350.5 | 334.5 | 270.7 | 268.8 | 237.9  | 241    |
| MAPKAP1  | 116.8 | 127.7 | 124.4 | 123.7 | 123.4 | 121.3 | 149.5  | 145.1  |
| MAPKAP1  | 177.2 | 170.5 | 207.8 | 174   | 169.4 | 176.8 | 157.6  | 168.7  |
| MAPKAPK2 | 121   | 114   | 121.7 | 114.2 | 111.7 | 113.4 | 114.1  | 121    |
| MAPKAPK2 | 165.2 | 158.9 | 155   | 159.2 | 122.9 | 125.4 | 186.6  | 162.8  |
| MAPKAPK3 | 494.9 | 453.9 | 791.9 | 518.6 | 289.1 | 423.3 | 321    | 309.5  |
| MAPKAPK5 | 186.1 | 188.8 | 178.6 | 228.9 | 172.9 | 149.2 | 181    | 221.8  |
| MAPKBP1  | 127.7 | 138.9 | 127.5 | 131.5 | 126.1 | 110   | 139.1  | 130.5  |
| MAPRE1   | 742.9 | 816.1 | 993.3 | 789.9 | 640.5 | 1003  | 1035.9 | 1314.1 |

|          |       |        |        |        |        |       |        |        |
|----------|-------|--------|--------|--------|--------|-------|--------|--------|
| MAPRE2   | 466.6 | 606    | 596.9  | 541.7  | 445.2  | 401.6 | 536.2  | 522.6  |
| MAPRE3   | 141.4 | 140.8  | 149.8  | 134.2  | 133.6  | 121.5 | 146.4  | 149.3  |
| MAPT     | 111.8 | 120    | 117.6  | 113.7  | 115.1  | 107.9 | 118.7  | 121.6  |
| MAPT     | 118.3 | 118.2  | 116.1  | 115.1  | 108.5  | 101.7 | 119.3  | 117.3  |
| MAPT     | 115.7 | 115.4  | 112.3  | 120.7  | 106.7  | 89.1  | 108.4  | 122.1  |
| Mar-01   | 116   | 122.5  | 138.1  | 135.5  | 112    | 114.8 | 137.1  | 121.4  |
| Mar-02   | 140.4 | 149.1  | 182.2  | 152.1  | 124.9  | 150   | 134.9  | 142.4  |
| Mar-02   | 121.1 | 114.2  | 145    | 134.1  | 116.7  | 120.5 | 130.8  | 115.7  |
| Mar-02   | 118.3 | 121.7  | 123.6  | 128.2  | 110.2  | 103.2 | 118.3  | 117.6  |
| Mar-02   | 116   | 123.6  | 105.8  | 120.2  | 102    | 104.2 | 126.4  | 113.9  |
| Mar-03   | 142.8 | 135    | 141.8  | 134.2  | 135.5  | 111.1 | 135.1  | 136.2  |
| Mar-03   | 297.6 | 312.5  | 271.8  | 312.5  | 249.3  | 188.9 | 296    | 296.5  |
| Mar-03   | 277.9 | 315.1  | 233.8  | 264.3  | 230.6  | 183.7 | 298.9  | 257.4  |
| Mar-04   | 117.8 | 107.4  | 113.1  | 121.8  | 108.5  | 96.9  | 115.5  | 114.8  |
| Mar-05   | 122.1 | 127.3  | 147.7  | 137.7  | 126.8  | 118   | 121.5  | 125.6  |
| Mar-06   | 272.9 | 282    | 241.4  | 316.3  | 332.9  | 233.3 | 410.9  | 381.4  |
| Mar-07   | 1461  | 1477.9 | 1284.4 | 1611.2 | 1232.1 | 953.9 | 1634.2 | 2023.5 |
| Mar-08   | 117.4 | 107.2  | 115.5  | 115.4  | 108.1  | 91.8  | 113    | 107.6  |
| Mar-08   | 130.8 | 134.1  | 126.6  | 128.9  | 113.8  | 102.8 | 140.9  | 136.9  |
| Mar-08   | 106.9 | 112.9  | 115.6  | 108.8  | 113.9  | 96.4  | 111.3  | 109.1  |
| Mar-09   | 126.2 | 113.7  | 108.6  | 140    | 105.4  | 94.4  | 132.3  | 127.3  |
| MARCKS   | 728.2 | 440.3  | 2081.8 | 514.5  | 276.2  | 632.4 | 356.7  | 210.7  |
| MARCKSL1 | 539.9 | 506.5  | 503.7  | 521.8  | 401.6  | 508.2 | 642.4  | 735.2  |
| MARCO    | 123.2 | 119    | 127.5  | 133.1  | 108.4  | 106.8 | 119.9  | 117.7  |
| MARK1    | 124.1 | 118.4  | 112.6  | 125.9  | 110.1  | 91.2  | 126.7  | 118.5  |
| MARK2    | 122.4 | 127.9  | 124.5  | 126.3  | 114.3  | 99.2  | 130.3  | 130.5  |
| MARK2    | 117.8 | 119.3  | 120.3  | 122.8  | 109.4  | 104.2 | 122.5  | 121.7  |
| MARK2    | 132.3 | 136.8  | 133.6  | 147.9  | 136.2  | 133.8 | 178.1  | 167.2  |
| MARK3    | 161.4 | 146.5  | 149.7  | 163.1  | 152    | 146.7 | 177.2  | 156.3  |
| MARK4    | 124.5 | 121.3  | 132.9  | 131.3  | 132.3  | 126.8 | 138.5  | 128.5  |
| MARS     | 218   | 202.6  | 187.9  | 221.5  | 195.9  | 182.2 | 211.9  | 248    |
| MARS2    | 118.5 | 125.8  | 130.9  | 138.1  | 118.7  | 107   | 113.4  | 120.6  |
| MARVELD2 | 125.7 | 122.1  | 112.9  | 120.1  | 113.9  | 99.1  | 139.7  | 141.2  |
| MARVELD2 | 116.8 | 118    | 108.7  | 121.3  | 106    | 91.8  | 116.3  | 114.5  |
| MARVELD2 | 104.5 | 108    | 102.2  | 109.9  | 102.3  | 87.8  | 110.8  | 106.2  |
| MARVELD3 | 111.8 | 112.4  | 109.8  | 122.7  | 107.2  | 96.5  | 119.5  | 112.5  |
| MARVELD3 | 112.4 | 117.5  | 112.7  | 118.5  | 109.6  | 93.9  | 121    | 124    |
| MARVELD3 | 104.6 | 113.7  | 108.4  | 112.5  | 107.3  | 98.9  | 99.2   | 107.7  |
| MAS1     | 124.7 | 113.2  | 117.8  | 114.8  | 110.9  | 98.5  | 108.9  | 112.7  |
| MAS1L    | 118.7 | 116.9  | 114.9  | 123.5  | 110.2  | 111.3 | 119.6  | 120.4  |
| MASA     | 390.1 | 471.8  | 385.4  | 465.4  | 461.1  | 317.4 | 429    | 488.4  |
| MASK     | 480.8 | 513.2  | 528.4  | 630.3  | 431.5  | 512.9 | 637.9  | 688.8  |
| MASK-BP3 | 135.2 | 124    | 119.1  | 129.6  | 127.7  | 115.2 | 132.1  | 132.4  |
| MASP1    | 115.7 | 121.2  | 125    | 114.6  | 109.9  | 107.9 | 109.5  | 113.8  |
| MASP1    | 133.8 | 125.8  | 111    | 116.6  | 118.2  | 97.1  | 113.5  | 122    |
| MASP1    | 113.2 | 117.1  | 123.1  | 109.6  | 118.2  | 108.3 | 109.3  | 134.3  |
| MASP1    | 117.9 | 111    | 117    | 122.1  | 109.3  | 93.5  | 124.5  | 119    |
| MASP2    | 120.2 | 111.6  | 109.5  | 123.5  | 111.2  | 99.7  | 118.8  | 123.3  |
| MASP2    | 106.3 | 108.5  | 107.7  | 116.6  | 106.1  | 95    | 116.1  | 114.4  |
| MASP2    | 113.3 | 119.4  | 122.9  | 124.2  | 100.4  | 105.1 | 119.7  | 114.2  |
| MASS1    | 117.2 | 113.5  | 113.4  | 114    | 112.7  | 96.6  | 114.8  | 111    |

|        |        |        |        |        |        |        |        |        |
|--------|--------|--------|--------|--------|--------|--------|--------|--------|
| MAST1  | 114.4  | 115.1  | 122.1  | 114.4  | 108.7  | 85.8   | 115.4  | 107.2  |
| MAST2  | 119.1  | 124.9  | 144.2  | 137.3  | 126.5  | 108.1  | 118.7  | 136.9  |
| MASTL  | 136.3  | 119    | 118.2  | 139.6  | 127    | 107.5  | 130.5  | 126.5  |
| MAT1A  | 114.4  | 118.3  | 119.1  | 115.5  | 106.5  | 96.6   | 121.2  | 120.6  |
| MAT2A  | 2071.1 | 2253.4 | 1454.5 | 2204.3 | 1701.2 | 978    | 2650.9 | 2867.8 |
| MAT2B  | 2081.5 | 2326.9 | 2027   | 1756.5 | 1605.3 | 1977.2 | 2519.2 | 1865.9 |
| MAT2B  | 141.8  | 161.8  | 170.1  | 161.5  | 134.6  | 138.6  | 135.1  | 139.4  |
| MAT2B  | 117.4  | 118.8  | 131.9  | 115.4  | 109.9  | 103.4  | 113.6  | 117.5  |
| MATK   | 131.7  | 127.6  | 124.5  | 115.1  | 115    | 106.9  | 117.5  | 131.9  |
| MATK   | 519.4  | 561.5  | 503.9  | 567    | 364.3  | 305.1  | 391.1  | 368.2  |
| MATK   | 138.5  | 143.9  | 157.7  | 142.3  | 140.5  | 116    | 125    | 133.1  |
| MATN1  | 106.2  | 109.3  | 114.2  | 108    | 105.6  | 97.5   | 109.9  | 111.7  |
| MATN2  | 117.1  | 111.3  | 112.4  | 115.7  | 108.7  | 96.5   | 113.5  | 112.3  |
| MATN2  | 114.8  | 116.8  | 106.8  | 118.4  | 104    | 102.7  | 112.4  | 115.5  |
| MATN3  | 116.5  | 121.3  | 131.4  | 123.9  | 109.6  | 94.1   | 126.8  | 118.6  |
| MATN4  | 105    | 112.7  | 103    | 118.4  | 101.9  | 97.2   | 116.9  | 104.9  |
| MATN4  | 123.4  | 122.6  | 117.8  | 117.8  | 104    | 103.1  | 117.3  | 110.2  |
| MATN4  | 111.9  | 119.4  | 113.5  | 121.1  | 101.2  | 104    | 109.2  | 110.8  |
| MATR3  | 118.4  | 114.8  | 132    | 128.3  | 114.5  | 99.4   | 124.6  | 126.5  |
| MATR3  | 119    | 119.1  | 131.6  | 128.2  | 126.8  | 108.4  | 121.5  | 120.5  |
| MATR3  | 706.1  | 586.7  | 755.2  | 794.7  | 900.1  | 547.4  | 986.2  | 1257.8 |
| MATR3  | 200.5  | 219.7  | 266.4  | 224.2  | 254.7  | 201.5  | 233.9  | 226.8  |
| MAWBP  | 109.7  | 109.3  | 110.3  | 117    | 104.6  | 99.9   | 112.6  | 104.6  |
| MAWBP  | 115.5  | 112.1  | 122.9  | 110.3  | 105.9  | 97.9   | 118.4  | 113.7  |
| MAWBP  | 116.1  | 106.7  | 110.1  | 109.3  | 110.1  | 90.9   | 113.9  | 114.5  |
| MAX    | 145.4  | 170.5  | 157.6  | 184    | 136.2  | 124.4  | 190.9  | 182    |
| MAX    | 133.2  | 139.6  | 140    | 143.7  | 116.1  | 109.7  | 126.1  | 137.5  |
| MAX    | 133.9  | 140.9  | 133.5  | 142.2  | 141    | 119.8  | 143    | 154.6  |
| MAX    | 125.9  | 134.1  | 129.5  | 137.5  | 125.8  | 105.2  | 122.3  | 133.1  |
| MAX    | 120.8  | 114.5  | 117.1  | 126.2  | 105.2  | 99.8   | 119.5  | 120.2  |
| MAZ    | 115.3  | 128.5  | 136.2  | 126    | 117.5  | 107.9  | 136.9  | 115.2  |
| MAZ    | 116.6  | 111.3  | 117.1  | 114.9  | 106    | 91.1   | 116.9  | 123.6  |
| MAZ    | 147.1  | 145.7  | 125.7  | 160.1  | 129.8  | 122.2  | 151    | 126.7  |
| MB     | 122.8  | 120    | 113.4  | 122.6  | 109.3  | 106.2  | 118.9  | 127    |
| MB     | 126.4  | 113.7  | 109.5  | 119    | 110.5  | 100.4  | 123.7  | 118    |
| MB     | 114.2  | 121    | 133.3  | 132    | 107.5  | 98.6   | 122.3  | 114.8  |
| MB     | 109.2  | 108.2  | 112.1  | 121.5  | 102    | 99.6   | 127.8  | 111.6  |
| MBD1   | 174.8  | 179.9  | 173.4  | 211.9  | 163.4  | 156.8  | 221    | 206    |
| MBD1   | 201    | 204.4  | 184.6  | 208.3  | 202.5  | 160.3  | 236.6  | 215.6  |
| MBD2   | 111.4  | 108.8  | 116.6  | 117.6  | 104.4  | 99.6   | 122.3  | 110.9  |
| MBD2   | 113.8  | 108.1  | 111.4  | 114.4  | 103.4  | 95.2   | 121.6  | 110.6  |
| MBD2   | 118.9  | 118.2  | 128.3  | 125.1  | 113.7  | 94.1   | 111.3  | 121.2  |
| MBD3   | 195.7  | 208.4  | 190.4  | 216.7  | 170.7  | 149.6  | 228.9  | 207.7  |
| MBD3L1 | 109.2  | 112.9  | 110.2  | 116.6  | 111.5  | 97.9   | 115.3  | 107.6  |
| MBD3L2 | 122.4  | 106.3  | 114.4  | 116.7  | 110.7  | 100.5  | 122.5  | 120.9  |
| MBD4   | 1360.7 | 1323.6 | 1495.1 | 1488.6 | 1418.4 | 836.1  | 1571   | 1580.1 |
| MBD5   | 115.6  | 125.3  | 114.8  | 117.7  | 115    | 108.3  | 125.3  | 117.2  |
| MBD6   | 469.6  | 407.9  | 468.9  | 455.6  | 362.5  | 271    | 433.4  | 391.2  |
| MBIP   | 158.2  | 188.2  | 189.3  | 189.1  | 155.5  | 176.2  | 142.7  | 160.4  |
| MBL2   | 116.1  | 126    | 105.6  | 116.8  | 105.7  | 102.1  | 118.4  | 115.8  |
| MBNL1  | 371.5  | 530.9  | 344    | 327.6  | 347.7  | 267.5  | 371.1  | 513.8  |

|         |        |        |        |        |        |        |        |        |
|---------|--------|--------|--------|--------|--------|--------|--------|--------|
| MBNL1   | 683.9  | 711.7  | 692    | 804.4  | 848.4  | 388.1  | 747    | 848.8  |
| MBNL1   | 116.9  | 116.1  | 115.4  | 125.1  | 103.1  | 103.1  | 125.1  | 110.4  |
| MBNL2   | 111.6  | 106.4  | 105.4  | 121.3  | 101.9  | 101.4  | 118.9  | 114    |
| MBNL2   | 333.8  | 374.4  | 365.1  | 397.6  | 268.1  | 234.1  | 271.8  | 403.4  |
| MBNL2   | 182.5  | 187.5  | 202.7  | 236.6  | 174.7  | 167    | 187.3  | 211    |
| MBNL3   | 114    | 125.7  | 111.1  | 126.7  | 105.2  | 107.9  | 115    | 124    |
| MBNL3   | 122    | 118.2  | 114.4  | 117.8  | 110.1  | 95.1   | 116.6  | 110.1  |
| MBOAT1  | 116.2  | 124.5  | 114.4  | 123    | 107.5  | 113    | 116.4  | 119    |
| MBOAT2  | 139.5  | 132.2  | 140.4  | 138.9  | 121.9  | 103.2  | 143.3  | 146.9  |
| MBP     | 490.2  | 397    | 546.9  | 630.2  | 341.4  | 340.2  | 552.7  | 447.5  |
| MBP     | 2509.6 | 2504.9 | 2092.5 | 2628.8 | 2097.4 | 1869.8 | 3026.3 | 2486.6 |
| MBP     | 361.9  | 312.4  | 451.5  | 451.9  | 314.9  | 304.3  | 362.2  | 380.5  |
| MBTD1   | 132.3  | 139.3  | 123.6  | 135    | 142.9  | 106.4  | 125.1  | 145.8  |
| MBTPS1  | 647.1  | 607.7  | 537.3  | 605.7  | 462.7  | 510    | 622.9  | 593.7  |
| MBTPS1  | 169.7  | 151.8  | 158.1  | 175.4  | 135.2  | 138.1  | 174.6  | 163.7  |
| MBTPS2  | 117.2  | 112.2  | 129.5  | 120.2  | 116.8  | 102.8  | 120.4  | 120.3  |
| MC1R    | 141.7  | 132.6  | 150    | 134.8  | 128.6  | 119.3  | 197.2  | 237.4  |
| MC2R    | 115.8  | 117.9  | 118.7  | 118.7  | 109.2  | 100.4  | 115.7  | 114.1  |
| MC3R    | 114.5  | 119.3  | 110.7  | 118.8  | 100.7  | 95.8   | 108.3  | 109.8  |
| MC4R    | 117.8  | 126.1  | 115.2  | 124.1  | 112    | 108.1  | 120.5  | 123.2  |
| MC5R    | 120.1  | 113.5  | 116.4  | 123.4  | 113.2  | 99.6   | 119.9  | 116    |
| MCAM    | 114.4  | 120.1  | 118.5  | 130.4  | 109.9  | 94.1   | 117    | 118.6  |
| MCART1  | 123.3  | 119.8  | 121    | 123.3  | 133.8  | 108.9  | 128.6  | 130.7  |
| MCART2  | 117.3  | 117    | 107.6  | 106.2  | 110.6  | 97.6   | 120.6  | 112.9  |
| MCART6  | 122.4  | 130    | 165.3  | 125    | 114.3  | 134.4  | 120.6  | 115.7  |
| MCC     | 121.6  | 116.7  | 121    | 126.3  | 112.6  | 96.6   | 121.6  | 127.9  |
| MCCC1   | 260.8  | 285.9  | 337.4  | 272.2  | 254.5  | 192.9  | 220.2  | 222.7  |
| MCCC2   | 129.6  | 132.5  | 125    | 127.6  | 120.2  | 114    | 128.6  | 122.9  |
| MCCD1   | 117.8  | 120.2  | 123.7  | 114.5  | 119.6  | 106.4  | 122.9  | 130.3  |
| MCEE    | 345.2  | 273.9  | 451.8  | 315.4  | 304.6  | 243.7  | 247.2  | 250.9  |
| MCEMP1  | 403.8  | 428.3  | 200.9  | 462.5  | 261.5  | 132    | 368    | 192.1  |
| MCF2    | 116.4  | 122.6  | 124    | 124.4  | 107.6  | 106.5  | 127.7  | 122.9  |
| MCF2L   | 107.6  | 110.6  | 117.8  | 115.5  | 108.9  | 100.7  | 120.9  | 115.1  |
| MCF2L2  | 116.1  | 122.3  | 118.7  | 113.9  | 108.5  | 107.6  | 122.8  | 117.8  |
| MCFD2   | 132.4  | 143.9  | 146.4  | 149.9  | 127.3  | 115.4  | 157.2  | 137.5  |
| MCHR2   | 115.6  | 114.5  | 111.4  | 125.1  | 108.9  | 101.5  | 119.5  | 112    |
| MCHR2   | 128.1  | 116.5  | 126.5  | 138.6  | 119.4  | 113.4  | 124.3  | 134.4  |
| MCL1    | 279.6  | 280.5  | 300.1  | 300.3  | 267.2  | 202.7  | 217.7  | 260.5  |
| MCL1    | 161    | 164.3  | 139.3  | 185.2  | 146    | 141.2  | 139.2  | 156.9  |
| MCM10   | 104.3  | 104.7  | 105.2  | 114.1  | 107.9  | 97.7   | 108.8  | 116.9  |
| MCM10   | 113.4  | 105.8  | 113.1  | 114.1  | 107.5  | 99.4   | 119.7  | 124.8  |
| MCM2    | 141    | 134.6  | 141.2  | 144.9  | 131.5  | 119.5  | 146.7  | 133.6  |
| MCM3    | 1367.2 | 1583.1 | 1054.7 | 1370.7 | 1100.1 | 801.7  | 983.2  | 932.2  |
| MCM3AP  | 414.5  | 376.8  | 369.6  | 410.9  | 326.8  | 263.4  | 358.5  | 400    |
| MCM3APA | 139.1  | 139.1  | 130.9  | 137.3  | 153.9  | 100.9  | 153.7  | 150.9  |
| MCM4    | 118.8  | 118.4  | 116.5  | 122    | 121.7  | 102.3  | 122.2  | 127.5  |
| MCM4    | 144.6  | 137.7  | 143    | 151.2  | 133.1  | 112.1  | 145.6  | 137.5  |
| MCM5    | 228.3  | 264.7  | 299.6  | 301.7  | 197    | 252.2  | 472.9  | 413.1  |
| MCM6    | 694.5  | 1004.9 | 586.6  | 677.5  | 751.3  | 478.8  | 404.5  | 507.1  |
| MCM7    | 124    | 133.2  | 118.6  | 119.8  | 117.8  | 103.6  | 123.1  | 117.2  |
| MCM7    | 830.1  | 1140.1 | 727.4  | 812.8  | 723.2  | 604.5  | 891.2  | 1076.7 |

|        |        |        |        |        |        |        |        |        |
|--------|--------|--------|--------|--------|--------|--------|--------|--------|
| MCM7   | 117.4  | 131.9  | 125.1  | 150.9  | 112.2  | 113.4  | 136.3  | 131.2  |
| MCM8   | 118    | 131    | 137.9  | 136.5  | 121.8  | 104.6  | 131.6  | 122.4  |
| MCM8   | 113.5  | 123.7  | 121.1  | 127.4  | 119.1  | 101.6  | 120.8  | 110.7  |
| MCM8   | 1177.7 | 796.2  | 726.9  | 855.4  | 867.3  | 622.5  | 1167.7 | 1309.1 |
| MCMD1  | 122.2  | 110.8  | 128.2  | 121.4  | 115.8  | 102.6  | 123.5  | 121.1  |
| MCOLN1 | 329.3  | 258    | 365.9  | 328.8  | 205.9  | 291.2  | 396.1  | 244.2  |
| MCOLN2 | 237.5  | 241.5  | 253.3  | 237.2  | 191.8  | 213.5  | 184.2  | 189.5  |
| MCOLN3 | 124.1  | 116.3  | 109.7  | 119.8  | 106.9  | 94.6   | 113.2  | 114.4  |
| MCPH1  | 155.9  | 144.2  | 151.1  | 159.1  | 140.5  | 133.4  | 147.2  | 146.7  |
| MCRS1  | 653.1  | 723.7  | 659.6  | 731.5  | 564.3  | 513.7  | 600    | 533.6  |
| MCRS1  | 159    | 146.9  | 184.1  | 162.4  | 154.3  | 141.9  | 163.8  | 142.3  |
| MCTP1  | 107.8  | 110.7  | 113.3  | 116.7  | 108.3  | 101.6  | 115.1  | 112.8  |
| MCTP1  | 139.8  | 110.2  | 139.2  | 110.7  | 119.2  | 102.1  | 127.3  | 114.4  |
| MCTP1  | 112    | 114.8  | 116.9  | 116.6  | 110.7  | 94.8   | 119.5  | 111.5  |
| MCTP2  | 121.8  | 120.8  | 132.2  | 126    | 123.5  | 97.9   | 126.4  | 113.9  |
| MCTS1  | 149.7  | 157.1  | 159.3  | 157.3  | 123.2  | 144.6  | 167.8  | 160.9  |
| MDAC1  | 109.8  | 113.2  | 120.2  | 114.7  | 103.7  | 96.4   | 110.7  | 116.3  |
| MDC1   | 263.5  | 256.3  | 255.1  | 237.8  | 219.3  | 219.3  | 247.6  | 232.1  |
| MDFI   | 121.6  | 137.8  | 131.4  | 128.1  | 114.4  | 107    | 146.2  | 134.2  |
| MDFIC  | 162.6  | 149.2  | 200.7  | 190.1  | 161.6  | 151.9  | 162    | 144.1  |
| MDGA1  | 113.8  | 108.4  | 122.5  | 123.9  | 106.2  | 100.4  | 122.9  | 116.6  |
| MDH1   | 1565.3 | 1483.9 | 1762.8 | 1626.1 | 1037.2 | 1134.1 | 1271.9 | 1110.9 |
| MDH1B  | 112.8  | 107.2  | 116.5  | 118.6  | 107.8  | 87.5   | 114.2  | 112.1  |
| MDH2   | 2474   | 2779.2 | 2838.5 | 2344.1 | 1782.6 | 1774.6 | 1637.1 | 1353.3 |
| MDK    | 104.4  | 112.8  | 111    | 111.9  | 107.2  | 92     | 114.5  | 112.6  |
| MDK    | 117.5  | 114.8  | 120    | 119.7  | 106.9  | 105.2  | 124.5  | 116.4  |
| MDK    | 114.4  | 124    | 119.8  | 121.7  | 108.6  | 103.1  | 120.3  | 120.8  |
| MDK    | 131.2  | 116.7  | 133.1  | 130.5  | 112.3  | 104.4  | 127.5  | 129.8  |
| MDK    | 112.7  | 118.9  | 118.8  | 123.4  | 108.5  | 94.6   | 114.3  | 109.4  |
| MDM1   | 109.7  | 110    | 111.9  | 117.3  | 110.7  | 99.6   | 114.8  | 110.8  |
| MDM1   | 128.5  | 119.4  | 130.3  | 122    | 114.4  | 107.5  | 120.5  | 120.3  |
| MDM1   | 128.7  | 136.6  | 134.2  | 125.7  | 121.1  | 97.3   | 120.5  | 134.3  |
| MDM2   | 118    | 112.1  | 123.1  | 124.8  | 107.1  | 99.7   | 126.9  | 123.9  |
| MDM2   | 122.5  | 112.9  | 116.8  | 122    | 106.5  | 101.9  | 113.3  | 115.8  |
| MDM4   | 126.8  | 120.4  | 127.1  | 134.7  | 128.4  | 98.5   | 141.7  | 125.9  |
| MDN1   | 134.8  | 137.8  | 121.3  | 131.1  | 124    | 105.1  | 139.1  | 131.8  |
| MDP-1  | 133.5  | 132.8  | 153.2  | 144.7  | 138.8  | 121.7  | 133.7  | 125.6  |
| MDS028 | 507.4  | 525.3  | 527.2  | 449.4  | 378.3  | 348.5  | 368.6  | 276.4  |
| MDS032 | 140.5  | 179.8  | 131.7  | 153.1  | 129.7  | 123.7  | 153.7  | 139.1  |
| MDS1   | 118.8  | 111.4  | 123.2  | 119.8  | 109.5  | 102.4  | 112.5  | 109.7  |
| ME1    | 289.3  | 250.6  | 180.6  | 486.6  | 300.2  | 418.9  | 566.9  | 271    |
| ME2    | 247.6  | 235    | 313.4  | 278.3  | 231.8  | 226.8  | 283    | 272.9  |
| ME3    | 117.3  | 119    | 117.7  | 121.7  | 113.2  | 103.2  | 120.4  | 118.5  |
| ME3    | 111.7  | 124.7  | 128.3  | 123.4  | 113.4  | 101.2  | 130.5  | 120.2  |
| ME3    | 114    | 118.4  | 105.5  | 115.2  | 106.3  | 102.1  | 109.4  | 115.1  |
| MEA1   | 209.1  | 199.6  | 203.4  | 207.6  | 193.6  | 157.2  | 201.3  | 220.2  |
| MECP2  | 154.5  | 143.8  | 121.3  | 152.5  | 133.2  | 117.8  | 143.2  | 155    |
| MECR   | 120.6  | 131.6  | 107.6  | 119.4  | 115.6  | 98.4   | 130    | 109.9  |
| MECR   | 121    | 136.2  | 123.2  | 131.4  | 123.2  | 111.6  | 124.4  | 138.3  |
| MED12  | 194.2  | 190.3  | 159    | 180.6  | 175.4  | 137.2  | 199.1  | 183.6  |
| MED12L | 112.7  | 109.1  | 111.9  | 121.8  | 110.6  | 95.7   | 114.9  | 114    |

|         |       |       |       |       |       |       |        |       |
|---------|-------|-------|-------|-------|-------|-------|--------|-------|
| MED18   | 106.9 | 120.9 | 108.4 | 116.7 | 112.2 | 91.1  | 106.4  | 119.8 |
| MED19   | 275.5 | 277.2 | 272.9 | 281.7 | 263.4 | 213.7 | 299.5  | 260.4 |
| MED25   | 192.7 | 174.5 | 194.9 | 187.8 | 138.9 | 176.5 | 161.2  | 137.8 |
| MED28   | 413.9 | 424.5 | 435.7 | 524.2 | 360.5 | 417.8 | 503.1  | 382.7 |
| MED31   | 104   | 113   | 119   | 124.8 | 106.8 | 98.8  | 121.9  | 102.6 |
| MED4    | 308.4 | 565.4 | 339   | 391.8 | 529.6 | 347.8 | 429.4  | 576.4 |
| MED6    | 722.3 | 838.6 | 842   | 921.3 | 799.9 | 783.6 | 1038.9 | 977.7 |
| MED8    | 175.2 | 170.6 | 130.9 | 146.5 | 132.7 | 128.7 | 149.9  | 157.3 |
| MED8    | 155.7 | 183.5 | 167.5 | 159.1 | 154.6 | 143   | 166.6  | 149.3 |
| MED8    | 150.3 | 139.2 | 157.3 | 176.9 | 139.1 | 140.3 | 157.1  | 136   |
| MED9    | 119.9 | 140   | 122.2 | 136.2 | 122.8 | 111.3 | 131.3  | 126.8 |
| MEF2A   | 153.4 | 136.8 | 144.2 | 138.1 | 130.7 | 117.1 | 161.8  | 156.4 |
| MEF2B   | 114   | 122.8 | 123.2 | 125.9 | 121.5 | 102.2 | 126    | 121   |
| MEF2C   | 166.4 | 152.6 | 196.8 | 181.1 | 121   | 123.6 | 156.8  | 128.5 |
| MEF2D   | 491.2 | 543.7 | 492.3 | 570.8 | 536   | 398.6 | 649.6  | 871.3 |
| MEFV    | 115   | 113.5 | 122.5 | 117.4 | 111.9 | 96.4  | 116.9  | 116.3 |
| MEG3    | 116.2 | 114.3 | 124.1 | 122.3 | 113.1 | 106.8 | 119.6  | 123.1 |
| MEG3    | 116.5 | 110.9 | 116.8 | 115.7 | 107.1 | 96.9  | 113.1  | 109.4 |
| MEGF10  | 110.5 | 104.3 | 108.9 | 117.2 | 102.8 | 93.9  | 119.2  | 108   |
| MEGF11  | 110.2 | 112.3 | 126.4 | 120.2 | 115.7 | 97.6  | 115    | 103.9 |
| MEGF8   | 107.9 | 114   | 110.7 | 123   | 102.5 | 103.4 | 116.7  | 119.5 |
| MEGF9   | 129.8 | 123.6 | 139.6 | 146   | 110.8 | 122.4 | 134.1  | 119.8 |
| MEI1    | 147.9 | 160.8 | 147.3 | 175.8 | 137.6 | 126   | 144.9  | 152.4 |
| MEIG1   | 113.7 | 107.9 | 106.6 | 115   | 110   | 93.9  | 116.9  | 112   |
| MEIS2   | 118   | 119.5 | 120.2 | 123.8 | 110.1 | 100.4 | 119.4  | 124.3 |
| MEIS2   | 110.4 | 116.6 | 117.2 | 110.9 | 104.8 | 99.9  | 119.4  | 114.3 |
| MEIS2   | 145.3 | 115.9 | 129.2 | 120   | 111.2 | 102.6 | 111.1  | 121.3 |
| MEIS2   | 112.9 | 110.7 | 124.5 | 122.8 | 112.3 | 105.5 | 114.7  | 119.3 |
| MEIS3   | 114.2 | 109.7 | 122.1 | 118.2 | 115.1 | 104.1 | 115.3  | 117.2 |
| MEIS3P1 | 122.3 | 125.2 | 119.5 | 122.1 | 120   | 109.4 | 128.2  | 125.1 |
| MELK    | 109.9 | 107.4 | 113.5 | 120.4 | 99.9  | 100   | 116    | 117.6 |
| MEN1    | 133.3 | 133.3 | 120.5 | 140.2 | 117.6 | 109.1 | 145.9  | 131.3 |
| MEN1    | 116.4 | 120.3 | 108.8 | 118.1 | 110.1 | 97.2  | 126.4  | 110.4 |
| MEN1    | 129.3 | 117.7 | 118   | 127.2 | 122.1 | 105.2 | 129.8  | 126.2 |
| MEN1    | 182.1 | 182   | 153.9 | 185.1 | 153.5 | 141.8 | 187.1  | 159.1 |
| MEOX1   | 118.9 | 135.2 | 129.3 | 125.5 | 111.2 | 99.3  | 109.2  | 110.3 |
| MEOX1   | 116   | 118   | 111.5 | 114.9 | 100.4 | 101.8 | 107.9  | 108.9 |
| MEOX1   | 110   | 123.8 | 124.3 | 122   | 113.6 | 110.6 | 130.1  | 121.6 |
| MEOX2   | 109.8 | 116.1 | 118.6 | 122.6 | 101.6 | 102.6 | 118    | 113.2 |
| MEP1A   | 128.9 | 119.2 | 128.8 | 136.9 | 108.7 | 115.8 | 133.3  | 123.2 |
| MEP1B   | 117.4 | 117.6 | 116.1 | 119.2 | 109.5 | 98.1  | 113.7  | 112.4 |
| MEPE    | 115.9 | 115.3 | 109.2 | 125   | 111.2 | 97.5  | 132    | 113.7 |
| MERTK   | 133.2 | 117.7 | 287.7 | 147.3 | 123.8 | 306   | 141.7  | 130.7 |
| MESDC1  | 129   | 137   | 124.3 | 147.4 | 137.8 | 142.8 | 181.9  | 143.7 |
| MESDC2  | 116.2 | 118.5 | 122.8 | 119.6 | 115.4 | 96.8  | 115.8  | 109.2 |
| MESP1   | 119.5 | 122.2 | 121.2 | 121.2 | 114.2 | 99.6  | 118.2  | 113   |
| MEST    | 114.2 | 114   | 101.5 | 110.1 | 104.8 | 92.6  | 108    | 102.4 |
| MEST    | 109.8 | 118.1 | 114.5 | 116.7 | 110.1 | 104.3 | 119.9  | 110.1 |
| MEST    | 107   | 109   | 114   | 112.9 | 104.3 | 102.2 | 110.8  | 104.6 |
| MET     | 111   | 117.5 | 118.8 | 110.4 | 122.2 | 110.8 | 122.3  | 114.6 |
| METAP1  | 811.7 | 833.6 | 701.5 | 791.2 | 745.5 | 502.9 | 750.2  | 815.4 |

|          |       |        |        |       |       |       |       |        |
|----------|-------|--------|--------|-------|-------|-------|-------|--------|
| METAP2   | 759.9 | 910.3  | 697.3  | 961.3 | 769.9 | 651   | 1123  | 1043.3 |
| METRNL   | 125.2 | 139.7  | 117.6  | 131   | 114.9 | 117.3 | 133.5 | 120.1  |
| METRNL   | 159.1 | 146.2  | 158.2  | 171.8 | 149.1 | 161   | 178.9 | 165.3  |
| METRNL   | 109   | 113.5  | 120.4  | 121.9 | 105.4 | 108.5 | 122.1 | 123.9  |
| METRNL   | 113.2 | 118.8  | 140.2  | 137.1 | 117.7 | 124.1 | 155.3 | 134.2  |
| METT10D  | 136.4 | 140    | 137.5  | 157.3 | 146.2 | 120   | 164.5 | 144.5  |
| METT11D1 | 112.7 | 111    | 107.5  | 114.7 | 106.4 | 100.6 | 116.3 | 110.4  |
| METT11D1 | 161.7 | 159.5  | 162.2  | 172.8 | 138.6 | 126.5 | 150.9 | 138    |
| METT5D1  | 129.9 | 123    | 151.3  | 155   | 131   | 111.9 | 130.4 | 128.1  |
| METTTL1  | 149.2 | 164.2  | 135.6  | 152.4 | 135.7 | 115.2 | 152.1 | 135.3  |
| METTTL1  | 111.7 | 120.4  | 129.2  | 115.1 | 130.1 | 103.4 | 128   | 117    |
| METTTL2A | 131.3 | 142.2  | 145.2  | 154.3 | 141.3 | 111.4 | 178.9 | 158.4  |
| METTTL2A | 113.6 | 116.1  | 119.8  | 117.9 | 113.8 | 103.5 | 119.3 | 120.1  |
| METTTL2B | 117.4 | 114.1  | 126.2  | 118.2 | 109.1 | 92    | 131.4 | 114.4  |
| METTTL3  | 357.3 | 456.7  | 458.5  | 434.4 | 403   | 327.4 | 336.9 | 298.8  |
| METTTL4  | 203.2 | 203.9  | 190.4  | 209.4 | 196.9 | 157.2 | 245.8 | 243.7  |
| METTTL5  | 384.6 | 519.7  | 590.2  | 445.7 | 376.1 | 440.1 | 354.3 | 411.1  |
| METTTL6  | 112.8 | 129.4  | 125.6  | 116.8 | 112.2 | 92    | 119.8 | 104.3  |
| METTTL7A | 145.4 | 161.7  | 190.9  | 160.3 | 148.7 | 130.9 | 135.4 | 133    |
| METTTL7B | 143.4 | 160.6  | 112.7  | 135.4 | 138.1 | 101   | 146.5 | 114.6  |
| METTTL9  | 111.8 | 130.8  | 119.5  | 122.6 | 117.8 | 101.3 | 121   | 129.7  |
| MFAP1    | 185.2 | 171.2  | 193.6  | 177.8 | 174.6 | 172.5 | 199.4 | 211.2  |
| MFAP2    | 123.8 | 110.6  | 117.9  | 119.7 | 109.1 | 110.7 | 132.2 | 113.2  |
| MFAP2    | 111.4 | 104.6  | 109.4  | 118.6 | 105   | 104.4 | 118.6 | 110.2  |
| MFAP2    | 115.2 | 121.2  | 124.2  | 118.2 | 107.7 | 102.4 | 120.7 | 111.9  |
| MFAP3    | 159.8 | 170.2  | 154.9  | 160.2 | 149.7 | 132.4 | 166.8 | 159    |
| MFAP3L   | 118.8 | 111.6  | 125.5  | 111.7 | 114.2 | 102.5 | 120.1 | 109    |
| MFAP3L   | 114.6 | 110.5  | 116.4  | 123.6 | 110.9 | 96.3  | 123.4 | 114.3  |
| MFAP3L   | 119.1 | 131.2  | 122    | 107.8 | 102.8 | 99.8  | 111.7 | 115.5  |
| MFAP4    | 112.2 | 110.7  | 112.5  | 120.1 | 114.8 | 103.4 | 118.3 | 122.7  |
| MFAP5    | 116.7 | 114    | 130.5  | 117.1 | 106.9 | 104.5 | 127.9 | 115.6  |
| MFGE8    | 560.1 | 602.3  | 646.1  | 528.9 | 522.9 | 318.9 | 342.2 | 465.7  |
| MFHAS1   | 149.6 | 167.1  | 144    | 163   | 143.4 | 117.2 | 152.7 | 174.4  |
| MFI2     | 111.1 | 129.2  | 123.7  | 124.7 | 118.7 | 106.3 | 122.4 | 122.2  |
| MFI2     | 112.6 | 117.6  | 116.4  | 121.1 | 109   | 96.5  | 120.9 | 124.8  |
| MFI2     | 114.4 | 117.6  | 121.6  | 120.5 | 108.4 | 94.8  | 117.2 | 116.2  |
| MFN1     | 115.3 | 112.8  | 113.8  | 117.1 | 100.5 | 101.4 | 123.3 | 109.5  |
| MFN1     | 125   | 140.7  | 135    | 141.7 | 129.2 | 106.2 | 128.6 | 130.1  |
| MFN2     | 172.3 | 224.3  | 191.8  | 218.3 | 171.1 | 155.7 | 236.6 | 211.3  |
| MFNG     | 896.5 | 1029.2 | 1033.9 | 858.6 | 776.9 | 870.1 | 781   | 695.6  |
| MFRP     | 118.4 | 111.2  | 111.9  | 115.2 | 111.2 | 99.1  | 115.7 | 115.1  |
| MFSD1    | 582.9 | 561.7  | 970.5  | 547.2 | 411.5 | 693.8 | 404.6 | 558.8  |
| MFSD2    | 117.7 | 112.7  | 116.5  | 126.2 | 110   | 103.6 | 124.7 | 115.8  |
| MFSD3    | 263.8 | 316.8  | 282.6  | 244   | 188.7 | 142.6 | 167   | 160.4  |
| MFSD4    | 120.5 | 113.2  | 115.8  | 122.1 | 102.9 | 101.9 | 120.2 | 106    |
| MFSD5    | 352.4 | 358.6  | 280.5  | 362.2 | 264.8 | 260.3 | 312.1 | 304.6  |
| MFSD7    | 118.4 | 125.5  | 127.4  | 123.8 | 110.5 | 95.7  | 121.2 | 118.3  |
| MFSD8    | 256.8 | 311.3  | 372.2  | 337.7 | 278.7 | 245.7 | 220.9 | 216    |
| MGA      | 167.6 | 167.8  | 150.3  | 157.6 | 169.5 | 120.4 | 189.5 | 170.8  |
| MGAM     | 124.4 | 115.5  | 120.4  | 113.3 | 114.9 | 109.6 | 123.5 | 112.9  |
| MGAM     | 110.4 | 115    | 130.1  | 119.2 | 109.9 | 102.8 | 113.9 | 115.9  |



|          |        |        |        |        |        |        |        |        |
|----------|--------|--------|--------|--------|--------|--------|--------|--------|
| MGAT1    | 934.1  | 843.8  | 737.1  | 1003.5 | 485.2  | 582.2  | 1286.2 | 1056.9 |
| MGAT2    | 412    | 416.4  | 388    | 438.3  | 368.6  | 350.9  | 477.9  | 385.7  |
| MGAT2    | 111.7  | 125    | 127.6  | 120.4  | 107.7  | 102    | 112.4  | 121.9  |
| MGAT3    | 101.9  | 112.5  | 110.5  | 112.2  | 105.2  | 99.1   | 125.6  | 112.6  |
| MGAT4A   | 398.5  | 467.8  | 368.6  | 450.8  | 439.7  | 241.1  | 493.7  | 499.9  |
| MGAT4B   | 110.6  | 114.3  | 124.6  | 131.1  | 123.8  | 114.3  | 134.9  | 123.1  |
| MGAT4B   | 114    | 106    | 113.8  | 124.6  | 107    | 98.2   | 121.2  | 111.1  |
| MGAT4B   | 164.7  | 188.8  | 154.8  | 191.7  | 167.6  | 149.9  | 184.8  | 192.1  |
| MGAT4C   | 111.8  | 110.5  | 112.2  | 120.4  | 115.6  | 97.3   | 112.9  | 115.4  |
| MGAT5    | 129    | 124.8  | 121.5  | 117    | 111.8  | 101.3  | 125.3  | 119.7  |
| MGAT5B   | 120.9  | 120.2  | 115.4  | 117    | 108.2  | 99.4   | 113.3  | 117.3  |
| MGAT5B   | 109.7  | 115.4  | 111.9  | 111    | 103.7  | 94.5   | 114.5  | 110.3  |
| MGC10334 | 159.6  | 161.9  | 157.4  | 173.8  | 135.5  | 128.7  | 160.1  | 153.6  |
| MGC10433 | 354    | 372.2  | 354.6  | 377.9  | 226.6  | 383.4  | 360.7  | 368.9  |
| MGC10471 | 2082.1 | 1806.1 | 2827.1 | 2159.1 | 1629.5 | 1834.6 | 1874.4 | 1596.2 |
| MGC10911 | 136.8  | 161    | 145.1  | 157.5  | 134.6  | 136.8  | 132.6  | 139.6  |
| MGC10992 | 291.1  | 350.6  | 260.8  | 252.7  | 236.7  | 179.7  | 209.8  | 267.4  |
| MGC10993 | 169.2  | 206.5  | 178.9  | 176.3  | 173.7  | 138.1  | 164.2  | 166.8  |
| MGC10997 | 1009.7 | 1055.2 | 916.9  | 956.8  | 863    | 523.3  | 998    | 1179.9 |
| MGC11102 | 126.1  | 129.6  | 133.9  | 139.7  | 113.7  | 118.3  | 123.6  | 123.7  |
| MGC11257 | 325.3  | 326.4  | 790.3  | 304.5  | 257.3  | 363.6  | 219.9  | 254.2  |
| MGC11271 | 117.9  | 113.1  | 121.6  | 118.5  | 104.6  | 97.4   | 118.4  | 112.4  |
| MGC11332 | 124.7  | 125.4  | 122.2  | 119.7  | 113.9  | 101.7  | 132    | 125.8  |
| MGC11335 | 166.1  | 172.3  | 155.4  | 175.1  | 160.2  | 122.8  | 169.1  | 193.6  |
| MGC11929 | 128    | 126.3  | 144.4  | 129.7  | 119.1  | 104.3  | 126.6  | 128.6  |
| MGC12965 | 136.2  | 142.5  | 147.4  | 155.7  | 142.6  | 115.3  | 135.8  | 148.4  |
| MGC12966 | 129    | 111.7  | 127.5  | 125.3  | 110.1  | 112.9  | 116.5  | 125.4  |
| MGC12966 | 425.1  | 414.7  | 486    | 455.2  | 385.7  | 287.3  | 381.6  | 407.8  |
| MGC12981 | 326.4  | 360.8  | 390.1  | 385.6  | 335.3  | 370.9  | 242.6  | 239.3  |
| MGC13017 | 6429.5 | 4451.9 | 5267.3 | 5824.7 | 4988.7 | 3341.9 | 6211.2 | 6026.1 |
| MGC13024 | 122.9  | 128.2  | 134.9  | 131.5  | 119    | 110.9  | 139.7  | 119.6  |
| MGC13034 | 114.7  | 115.5  | 131.2  | 127.7  | 122    | 97.4   | 119.4  | 113.3  |
| MGC13057 | 101.3  | 116.5  | 115    | 113.9  | 107.1  | 104.9  | 108.6  | 109.3  |
| MGC13057 | 109.9  | 115.8  | 122.3  | 120.1  | 106.5  | 106.2  | 117.1  | 106.2  |
| MGC13096 | 222.2  | 233.9  | 174.4  | 239.8  | 182.5  | 134.2  | 192.8  | 187.6  |
| MGC13114 | 260    | 296.6  | 246.6  | 229.2  | 210.5  | 194.5  | 206.6  | 202.4  |
| MGC13114 | 137    | 138.4  | 129.4  | 129.2  | 124    | 110.4  | 149.7  | 132.7  |
| MGC13125 | 148    | 166.8  | 152.4  | 153.3  | 142.1  | 123.1  | 143.7  | 152    |
| MGC13138 | 117.9  | 122.2  | 137.4  | 129.4  | 122.2  | 110.7  | 129.5  | 116.9  |
| MGC13170 | 127.6  | 112.5  | 119.5  | 120.1  | 115.4  | 104.6  | 112.9  | 118.6  |
| MGC13170 | 180.1  | 236.6  | 171.9  | 217.9  | 184.9  | 154.8  | 230.9  | 211.7  |
| MGC13379 | 313.9  | 373.7  | 316.7  | 319.8  | 282.6  | 202.8  | 250    | 207.6  |
| MGC14141 | 157.2  | 139.8  | 169    | 152.3  | 118.2  | 133.1  | 148.9  | 144.5  |
| MGC14327 | 738.4  | 731.1  | 733.1  | 680.8  | 613.1  | 689.7  | 631.9  | 648.9  |
| MGC14376 | 248.7  | 254.7  | 219.1  | 397    | 313.2  | 419.2  | 667.5  | 678.5  |
| MGC15416 | 141.7  | 151.7  | 145.5  | 151.6  | 141.2  | 119.6  | 132.4  | 128.3  |
| MGC15476 | 122.9  | 140.4  | 137.1  | 148.4  | 126.5  | 114.9  | 135.1  | 154.7  |
| MGC15523 | 151    | 157.6  | 167.6  | 156.3  | 137.8  | 127.6  | 149.4  | 159.6  |
| MGC15523 | 115.3  | 120.7  | 120.6  | 115.9  | 101    | 103.5  | 115.5  | 116    |
| MGC15523 | 139.8  | 141.6  | 137.3  | 148    | 120.5  | 124.4  | 140    | 129.3  |
| MGC15619 | 161.6  | 166.7  | 223.5  | 171    | 144.5  | 144.7  | 141.6  | 147.1  |

|          |        |        |        |        |        |        |        |        |
|----------|--------|--------|--------|--------|--------|--------|--------|--------|
| MGC15619 | 190.3  | 164.7  | 265.2  | 185.1  | 142.5  | 147.4  | 155.9  | 141.3  |
| MGC15763 | 191.8  | 228.1  | 306.3  | 222.5  | 221.9  | 226.4  | 181.4  | 184.5  |
| MGC15875 | 339    | 326.6  | 299.3  | 317.6  | 219.5  | 221.7  | 283.7  | 274.8  |
| MGC15875 | 135.9  | 147.4  | 143.3  | 139.2  | 119.7  | 121    | 138.4  | 130.5  |
| MGC15912 | 190    | 177.8  | 200.5  | 175.9  | 192.8  | 156.5  | 193.6  | 207.2  |
| MGC16028 | 168.7  | 178.3  | 202.7  | 175.9  | 183    | 181.4  | 143.8  | 153.8  |
| MGC16169 | 136.8  | 152.2  | 159.3  | 155.4  | 124    | 137.5  | 136.1  | 125.1  |
| MGC16186 | 124    | 120.3  | 131.6  | 131    | 116.1  | 113.5  | 126.7  | 125.3  |
| MGC16291 | 105.9  | 106.6  | 116.7  | 119.8  | 101.6  | 91.9   | 113.9  | 106.8  |
| MGC16372 | 116.4  | 112.6  | 117.7  | 119.4  | 106.9  | 99.4   | 116.9  | 114.8  |
| MGC16703 | 8003.9 | 7050.1 | 7398.1 | 7805.7 | 7961.1 | 4184.5 | 8480.4 | 8986.9 |
| MGC16824 | 122.4  | 120.5  | 135.8  | 133.2  | 117.6  | 112.1  | 129.6  | 121.9  |
| MGC16943 | 115    | 117.5  | 128.2  | 120.4  | 116.4  | 107.1  | 118.3  | 113.1  |
| MGC17330 | 1926.2 | 2238.4 | 2520   | 1803.3 | 1380.5 | 1912.2 | 1298.4 | 1194   |
| MGC17624 | 125.7  | 143.2  | 119.4  | 163.6  | 125    | 105.7  | 126.5  | 128.7  |
| MGC17839 | 110.3  | 119    | 114.6  | 117.2  | 104.3  | 99.2   | 128.7  | 102.4  |
| MGC18079 | 165.6  | 232.1  | 307.7  | 222.8  | 245    | 249.1  | 258.3  | 218.9  |
| MGC18216 | 118.1  | 130.3  | 152    | 129.3  | 138.1  | 139.8  | 137.9  | 154.4  |
| MGC19604 | 167.7  | 169.9  | 181.3  | 165.7  | 146.4  | 139.2  | 137.4  | 149.3  |
| MGC19764 | 180.1  | 216.3  | 195.5  | 190.7  | 220.7  | 132.1  | 171.4  | 169.1  |
| MGC20255 | 246.2  | 279.4  | 274    | 298.6  | 206.5  | 238.6  | 325.6  | 279.9  |
| MGC20470 | 112.2  | 112.5  | 124    | 115.9  | 106    | 102.3  | 129.1  | 116.3  |
| MGC20983 | 114.8  | 113.5  | 110.6  | 117.8  | 106.7  | 96.8   | 122.2  | 117.4  |
| MGC21644 | 118.2  | 114.3  | 114.3  | 119.8  | 108.5  | 96.9   | 118.4  | 113.5  |
| MGC21675 | 120.5  | 124.6  | 115.8  | 127.4  | 105.9  | 100.8  | 128.1  | 116.9  |
| MGC21830 | 179.7  | 154    | 168.2  | 171.8  | 159.2  | 147    | 170    | 158.7  |
| MGC22001 | 106.7  | 117.3  | 110.8  | 112.2  | 95     | 95.6   | 115.1  | 109.7  |
| MGC22793 | 356.6  | 473.6  | 494.6  | 341.8  | 355.5  | 461.8  | 331.5  | 260.6  |
| MGC23280 | 136.7  | 127    | 158.6  | 138.4  | 136.3  | 108.4  | 141.1  | 125    |
| MGC23909 | 155.2  | 147    | 186    | 148.8  | 151.1  | 128.2  | 136.8  | 135.6  |
| MGC23985 | 119    | 109.6  | 116.7  | 111.1  | 110.5  | 98.4   | 114.7  | 114    |
| MGC24039 | 130.1  | 135.9  | 133.7  | 143.2  | 126    | 106    | 123.4  | 124.7  |
| MGC2408  | 136.2  | 158.1  | 135.1  | 147.1  | 122.1  | 120.1  | 133.2  | 140.1  |
| MGC24381 | 148.1  | 169.4  | 157.9  | 157    | 145.8  | 132.3  | 148.5  | 151.3  |
| MGC2463  | 1055.2 | 1098.2 | 1002.2 | 971    | 649.7  | 844.7  | 545.6  | 430.8  |
| MGC24665 | 150.4  | 168.5  | 149.7  | 147.2  | 133.7  | 109.4  | 148.3  | 136.9  |
| MGC2474  | 122.7  | 112.4  | 127.5  | 121.2  | 108.8  | 105.4  | 122.1  | 114.7  |
| MGC24975 | 116.7  | 135.3  | 128.7  | 134.3  | 110.2  | 109.3  | 126.2  | 123.6  |
| MGC2654  | 208.7  | 213.6  | 224.6  | 209.8  | 187.4  | 182.6  | 219.1  | 212.4  |
| MGC26647 | 119.3  | 120.5  | 126.1  | 122.4  | 113    | 102.6  | 134.8  | 115.8  |
| MGC26718 | 126.1  | 109.9  | 125.9  | 134.6  | 122    | 103.5  | 117.9  | 120.6  |
| MGC26733 | 115.5  | 117.4  | 114.9  | 121.2  | 116.3  | 101.7  | 116.2  | 127.8  |
| MGC26816 | 109.3  | 111.5  | 114.2  | 108.1  | 102.2  | 97.5   | 120.3  | 116.9  |
| MGC26856 | 112.6  | 120    | 114.2  | 116.5  | 111.1  | 97.1   | 113.7  | 116.3  |
| MGC26885 | 149.5  | 149.7  | 163    | 170    | 164    | 117.6  | 171.2  | 160.1  |
| MGC26963 | 117.3  | 116    | 129.5  | 114.5  | 105.6  | 100.9  | 116.2  | 117.7  |
| MGC27016 | 105.6  | 104.5  | 105.3  | 116.6  | 100.7  | 92.6   | 104.1  | 104.4  |
| MGC27121 | 112    | 115.7  | 115.6  | 112.9  | 110.8  | 96.1   | 115.2  | 112.2  |
| MGC2747  | 163.2  | 164    | 182.7  | 167.5  | 160.5  | 138.6  | 128.3  | 139.8  |
| MGC2749  | 174.5  | 181.9  | 208.9  | 192.5  | 181.3  | 182.6  | 195    | 193.7  |
| MGC2752  | 131.6  | 131.3  | 141.1  | 137.4  | 130.2  | 110.4  | 129.9  | 134.4  |

|          |        |        |        |       |        |        |        |        |
|----------|--------|--------|--------|-------|--------|--------|--------|--------|
| MGC2803  | 239.3  | 264.9  | 261.4  | 297.2 | 312.2  | 206.3  | 401.2  | 316.8  |
| MGC29506 | 131.9  | 127.5  | 143.2  | 161   | 123    | 111.2  | 124    | 119.8  |
| MGC29671 | 121.7  | 121.6  | 147.3  | 127.5 | 117.5  | 108.9  | 129.2  | 115.7  |
| MGC29891 | 3873.1 | 2876.8 | 3652.9 | 3457  | 3559.7 | 1535.7 | 4235.2 | 4434.3 |
| MGC3101  | 112.2  | 111    | 114.3  | 123.7 | 111.5  | 94.3   | 122    | 125.7  |
| MGC3121  | 796.6  | 1053.2 | 726.9  | 914.2 | 732.8  | 566.6  | 867    | 793.8  |
| MGC3123  | 119.6  | 115.7  | 126.5  | 119.7 | 107.6  | 109.8  | 130.4  | 129.3  |
| MGC3196  | 193    | 197.6  | 210.9  | 198.2 | 168    | 151.2  | 164.7  | 157.6  |
| MGC3196  | 164.2  | 169.1  | 162.7  | 155   | 140    | 114.6  | 140.9  | 136.9  |
| MGC31967 | 158    | 161.4  | 165.2  | 149.5 | 118.9  | 122.8  | 134.8  | 129.4  |
| MGC3207  | 559.1  | 549.2  | 621.1  | 524.2 | 466.7  | 416.8  | 265.1  | 272.8  |
| MGC3207  | 130.1  | 115.8  | 134.7  | 130.3 | 114.4  | 121.1  | 121.2  | 116.2  |
| MGC3207  | 228.9  | 228.3  | 250.3  | 209   | 175.2  | 140.7  | 171    | 149.3  |
| MGC3207  | 736.4  | 1019.9 | 1111.2 | 845.6 | 757.3  | 561    | 479.2  | 424.2  |
| MGC3265  | 121.9  | 111    | 125.9  | 123.4 | 107.7  | 100.3  | 121    | 110.9  |
| MGC33212 | 117.3  | 127    | 136.1  | 128.3 | 131.9  | 107.4  | 139.7  | 145.9  |
| MGC33212 | 252.4  | 320.8  | 301.5  | 318.1 | 319.9  | 301    | 322.7  | 457.2  |
| MGC33214 | 124.7  | 125.9  | 133.4  | 124.4 | 115.1  | 124.6  | 128.1  | 137.3  |
| MGC33407 | 118.7  | 130.7  | 128.9  | 115.4 | 104.9  | 103.7  | 119.3  | 112.6  |
| MGC33486 | 106.4  | 113.6  | 113.4  | 117   | 110    | 97.9   | 110.8  | 107.8  |
| MGC33530 | 110.2  | 109.3  | 118.9  | 116.9 | 112.8  | 104.8  | 121.5  | 115.9  |
| MGC33556 | 218.9  | 337.9  | 259.2  | 236.4 | 170.5  | 162.3  | 154    | 164.4  |
| MGC33584 | 155.4  | 158.2  | 138    | 158   | 120.8  | 137.8  | 146.4  | 141.5  |
| MGC33600 | 112.2  | 106.7  | 108.9  | 113.5 | 103.9  | 93.1   | 116.6  | 114.1  |
| MGC33648 | 163.8  | 215.3  | 155.9  | 184.2 | 169.7  | 143.1  | 190.5  | 333.8  |
| MGC33657 | 124.7  | 124.6  | 117.5  | 125.7 | 113.2  | 104.1  | 123.1  | 122.5  |
| MGC33692 | 156.8  | 152.4  | 195.6  | 150   | 125.9  | 118.7  | 132.4  | 129.4  |
| MGC33846 | 115.2  | 107.1  | 116.9  | 113.1 | 108    | 95.2   | 122    | 114.5  |
| MGC33887 | 125.6  | 122.4  | 124    | 126.3 | 118    | 100.7  | 118.2  | 122.4  |
| MGC33894 | 109.6  | 114.5  | 108    | 120.1 | 111.4  | 93.3   | 110    | 108.2  |
| MGC34646 | 110.3  | 118.9  | 112.7  | 125.9 | 107.2  | 102.1  | 124    | 116    |
| MGC34647 | 112.5  | 119.9  | 119.1  | 123.7 | 108.1  | 98.4   | 112.3  | 124.9  |
| MGC34725 | 116.2  | 116.9  | 113.5  | 117.2 | 106.9  | 101.4  | 114.8  | 109.2  |
| MGC34732 | 114.4  | 119.4  | 117.9  | 114   | 113.7  | 100    | 117.7  | 121.9  |
| MGC34761 | 118.5  | 120.7  | 120.4  | 128.4 | 113.9  | 105.4  | 136.2  | 121.3  |
| MGC34774 | 103.9  | 114    | 104.1  | 108.3 | 107    | 98.8   | 105.2  | 100.6  |
| MGC34821 | 113.1  | 123    | 121.2  | 121.5 | 110    | 100.1  | 118.3  | 110.7  |
| MGC34824 | 124.1  | 123    | 135.2  | 136.8 | 115.4  | 102.6  | 132.7  | 123.7  |
| MGC34830 | 116.8  | 125.6  | 117.4  | 121.8 | 112.9  | 98.2   | 114.7  | 119.8  |
| MGC35043 | 114.1  | 123.3  | 117.7  | 128.3 | 113.1  | 110.8  | 126    | 128.1  |
| MGC35154 | 118    | 115.3  | 121    | 111.8 | 114.6  | 105.7  | 119.7  | 110.2  |
| MGC35206 | 118.2  | 122.3  | 125.4  | 125.1 | 119.5  | 110.4  | 124.3  | 109.4  |
| MGC35212 | 117.6  | 115    | 123.1  | 125.7 | 102.7  | 97     | 114    | 119.3  |
| MGC35295 | 110.8  | 114.4  | 119.1  | 115.9 | 113.5  | 95.4   | 121    | 116.6  |
| MGC35308 | 120.5  | 116.6  | 126.8  | 123.4 | 113.4  | 103.9  | 119.6  | 121.2  |
| MGC35361 | 132.6  | 125.4  | 122.7  | 132.6 | 113.5  | 108.7  | 121.2  | 121    |
| MGC35402 | 111.7  | 120.6  | 112.1  | 115.9 | 115.8  | 96.7   | 113.6  | 118    |
| MGC35440 | 108.8  | 128.9  | 132.1  | 123.6 | 112.9  | 104.3  | 126.1  | 117.3  |
| MGC39497 | 118.4  | 113.4  | 113.8  | 121   | 108.8  | 104.8  | 124.8  | 117    |
| MGC39581 | 117.9  | 118.8  | 123.1  | 121   | 110.3  | 102.7  | 123.4  | 115.5  |
| MGC39606 | 122.5  | 118.1  | 117.8  | 121.8 | 111.7  | 101.4  | 119.9  | 106.7  |

|          |       |       |       |       |       |       |       |        |
|----------|-------|-------|-------|-------|-------|-------|-------|--------|
| MGC39633 | 146.2 | 161   | 205.4 | 159.6 | 132.9 | 138.1 | 134.7 | 125.8  |
| MGC39662 | 107.1 | 114   | 111.4 | 109.4 | 100.6 | 104.2 | 118.5 | 105.3  |
| MGC39681 | 125.5 | 105.1 | 115.5 | 121.4 | 106.3 | 99.4  | 116.3 | 115.2  |
| MGC39715 | 120.4 | 121.6 | 119.2 | 113.3 | 106.8 | 106.2 | 131.6 | 119.9  |
| MGC39900 | 140.7 | 142.8 | 152.4 | 133.9 | 124   | 118.6 | 133.6 | 132.7  |
| MGC39900 | 113.1 | 121   | 129   | 130.8 | 118.4 | 110   | 119.2 | 127.1  |
| MGC39900 | 128.8 | 134.7 | 144.6 | 127   | 129.8 | 120.7 | 128.8 | 126.5  |
| MGC40069 | 152.6 | 152.7 | 157.9 | 148.4 | 130.8 | 116.4 | 135.8 | 125.1  |
| MGC40222 | 110.6 | 114.4 | 115.4 | 119.4 | 106.1 | 99    | 106.9 | 115.4  |
| MGC40405 | 258.4 | 305.6 | 253.9 | 290.2 | 227.7 | 236.5 | 279   | 354.4  |
| MGC40405 | 268   | 277.1 | 267.6 | 281.7 | 228.9 | 176.3 | 254.5 | 258.1  |
| MGC40499 | 125.3 | 138.7 | 140.6 | 127.7 | 124.5 | 111.2 | 144.6 | 127.5  |
| MGC40499 | 142.1 | 149.4 | 135.5 | 145.7 | 125.5 | 120.8 | 120.3 | 123    |
| MGC40579 | 180.7 | 149.5 | 168.4 | 203.6 | 162.6 | 119   | 163.6 | 141.7  |
| MGC4093  | 178.8 | 194.9 | 192.4 | 210.6 | 176   | 145.4 | 182   | 184    |
| MGC4172  | 138.3 | 127.4 | 168.5 | 141.3 | 118.8 | 135.5 | 131.7 | 143.6  |
| MGC41945 | 118.3 | 126.6 | 130   | 138.5 | 118.9 | 106.2 | 135.2 | 130.5  |
| MGC41945 | 132.3 | 113.8 | 112.8 | 122.5 | 109.6 | 103.1 | 112.9 | 114.1  |
| MGC42090 | 114.7 | 113.3 | 108.7 | 109.9 | 103.6 | 96.3  | 116.7 | 110.4  |
| MGC42105 | 111.9 | 111   | 113.2 | 111.1 | 103.6 | 98    | 121   | 107.1  |
| MGC42174 | 161.8 | 150   | 165.7 | 165.7 | 149.1 | 141.6 | 160.8 | 145    |
| MGC42367 | 193.8 | 150.8 | 177.2 | 161.3 | 148.7 | 128.9 | 201.6 | 187.2  |
| MGC4266  | 116.5 | 116.4 | 125.7 | 118.5 | 115.5 | 97.7  | 119.4 | 106.6  |
| MGC4268  | 149.9 | 165.3 | 152.5 | 164.7 | 152.1 | 128.7 | 160.6 | 205.7  |
| MGC4399  | 120.7 | 120.9 | 120.6 | 122.5 | 106.6 | 96.3  | 125.3 | 123.9  |
| MGC44328 | 117.5 | 109.3 | 116.9 | 123.8 | 109.4 | 102.3 | 130   | 114.9  |
| MGC44505 | 120.8 | 116.7 | 129.8 | 121.8 | 116.2 | 103.3 | 129.7 | 117.2  |
| MGC45438 | 116.9 | 130.7 | 118.8 | 121.6 | 120.1 | 108.9 | 122.7 | 118.3  |
| MGC45491 | 105.4 | 120.5 | 120.5 | 127.4 | 110.3 | 98.6  | 115.6 | 107.1  |
| MGC4562  | 346.4 | 457   | 462.9 | 414.6 | 501.6 | 317.2 | 300   | 371.7  |
| MGC45800 | 111.5 | 116.7 | 112.4 | 111.1 | 108.7 | 99.3  | 132.2 | 114.4  |
| MGC45840 | 139   | 137.1 | 147.6 | 145.1 | 131   | 122   | 147.2 | 139.7  |
| MGC4618  | 272.2 | 291.2 | 390.6 | 255.2 | 197.1 | 202.8 | 194.9 | 183.9  |
| MGC46496 | 115.4 | 107.7 | 122.7 | 116.5 | 103   | 99.4  | 126.9 | 114.3  |
| MGC4655  | 111.6 | 115.5 | 116.8 | 125.7 | 114   | 103.4 | 130.8 | 112.2  |
| MGC4677  | 105.4 | 113.8 | 115.8 | 114.4 | 102.4 | 104.4 | 113.9 | 115.2  |
| MGC4677  | 519.9 | 672.9 | 677.2 | 719.4 | 573.4 | 668.1 | 980.2 | 1009.2 |
| MGC4728  | 239.5 | 222.4 | 253.3 | 235.5 | 223.2 | 222.8 | 260.5 | 221.3  |
| MGC4825  | 145.7 | 145.6 | 135.4 | 164.7 | 146.9 | 125.5 | 162.9 | 150.1  |
| MGC48595 | 108.4 | 109.2 | 122.2 | 118.5 | 107.7 | 97.7  | 116.2 | 112.6  |
| MGC48628 | 117.6 | 118.5 | 114.9 | 128.8 | 111.6 | 101   | 116.9 | 109.4  |
| MGC48915 | 111.9 | 103.3 | 112.2 | 116.7 | 111.7 | 95.3  | 109.3 | 114.6  |
| MGC50273 | 120.6 | 106.3 | 119.9 | 113.7 | 97.8  | 95.9  | 112.4 | 114.5  |
| MGC50372 | 114.4 | 116.1 | 111.9 | 115.3 | 105.5 | 93.8  | 116.8 | 116.5  |
| MGC50559 | 121.4 | 115.5 | 111.4 | 123.9 | 109.3 | 108.3 | 122.3 | 109.2  |
| MGC50721 | 110.2 | 112.4 | 119.2 | 120.2 | 106.6 | 100.2 | 121   | 122.1  |
| MGC50722 | 120.6 | 121.1 | 122.2 | 123.5 | 112.6 | 103.5 | 127.4 | 122    |
| MGC50811 | 114.5 | 112.1 | 116.5 | 116.4 | 105.2 | 92.6  | 108.3 | 115.8  |
| MGC51025 | 110.2 | 112.9 | 115   | 116.6 | 110.9 | 97.9  | 109.7 | 111.9  |
| MGC5139  | 112.9 | 117.7 | 107.1 | 116.3 | 113.7 | 102.2 | 116.1 | 115.8  |
| MGC52057 | 116.1 | 116.5 | 113.8 | 125.3 | 113.9 | 104.5 | 113.2 | 113.7  |

|          |        |        |        |        |        |        |        |        |
|----------|--------|--------|--------|--------|--------|--------|--------|--------|
| MGC52110 | 315.9  | 313.6  | 408.8  | 266.7  | 261.4  | 224.4  | 222.3  | 211.2  |
| MGC5242  | 133.6  | 165.8  | 138.7  | 148.9  | 124.1  | 118.6  | 132.4  | 120.7  |
| MGC52498 | 259.1  | 268.9  | 274.8  | 238.5  | 180.7  | 243.3  | 200.4  | 185.1  |
| MGC5509  | 161.9  | 157.3  | 156.8  | 155.8  | 148    | 125.1  | 158.8  | 167.5  |
| MGC57359 | 104.5  | 115.4  | 114.1  | 120.6  | 110.7  | 99.7   | 116.4  | 110    |
| MGC57359 | 121.9  | 113.2  | 128.2  | 115.7  | 107    | 109.3  | 111.6  | 108.9  |
| MGC59937 | 113.2  | 111.8  | 116.8  | 120    | 105.6  | 98.7   | 120.4  | 122.2  |
| MGC61571 | 155.9  | 160.6  | 162.7  | 174.5  | 142.8  | 133.3  | 135.6  | 146.4  |
| MGC61598 | 116.1  | 110.4  | 117.3  | 116    | 102.6  | 89.6   | 117    | 106.8  |
| MGC62100 | 110.1  | 120.5  | 124    | 118.7  | 125.1  | 102.1  | 114.2  | 122.2  |
| MGC7036  | 272    | 278.6  | 213.3  | 273.2  | 260    | 205.3  | 221.3  | 246    |
| MGC70857 | 180    | 159.6  | 168.8  | 184.3  | 133.6  | 142.8  | 160.1  | 143.7  |
| MGC70863 | 112.3  | 118.4  | 120.3  | 127.9  | 105.3  | 102.1  | 118.2  | 114.4  |
| MGC70863 | 118.3  | 133.9  | 120.7  | 120.9  | 117    | 108.2  | 133.8  | 124.1  |
| MGC70870 | 107.9  | 114    | 109.6  | 115.8  | 104.3  | 100.2  | 119.1  | 108.8  |
| MGC70924 | 115.7  | 121.8  | 127.5  | 135.2  | 112.4  | 93.2   | 134.1  | 117    |
| MGC71993 | 1108.3 | 1562.8 | 1293.7 | 1543.5 | 921.7  | 1169   | 1521.5 | 1264.3 |
| MGC72075 | 123.9  | 119.2  | 128.1  | 129.7  | 110.3  | 113.4  | 127.8  | 122.4  |
| MGC72080 | 126.4  | 121.8  | 132.5  | 127.5  | 114.5  | 111    | 127.4  | 124.2  |
| MGC75360 | 117.9  | 112.4  | 111.4  | 118.7  | 105.9  | 99     | 110.6  | 112.2  |
| MGC87631 | 114.7  | 125.9  | 124.5  | 135.3  | 109.9  | 98     | 115.7  | 120.4  |
| MGC88374 | 107.1  | 109.9  | 118.7  | 116.7  | 103.7  | 96.1   | 112.8  | 109.6  |
| MGC88387 | 124.2  | 128.6  | 123.2  | 129.4  | 123.1  | 107.9  | 124.2  | 116.1  |
| MGC9712  | 101.2  | 123.9  | 120.4  | 111.1  | 102.2  | 96.5   | 108.2  | 109.4  |
| MGC9850  | 229.8  | 244.1  | 226.9  | 237.1  | 220.7  | 234.8  | 252.1  | 239.9  |
| MGC99813 | 117.9  | 126.6  | 124.2  | 125.5  | 117.5  | 112.2  | 121.5  | 127.7  |
| MGEA5    | 1435.7 | 1418.8 | 1320.2 | 1602.7 | 1480.5 | 1396.6 | 1992.5 | 2715.2 |
| MGLL     | 129    | 126    | 115.6  | 128.3  | 122.8  | 105.6  | 126.6  | 108.8  |
| MGLL     | 118.1  | 118.3  | 114.4  | 125    | 99.4   | 99.9   | 125    | 116.8  |
| MGLL     | 147.5  | 143.5  | 151    | 154.2  | 117    | 148.1  | 136    | 114.6  |
| MGMT     | 186.8  | 194.2  | 244.5  | 215.7  | 175.2  | 180.6  | 163.6  | 176.7  |
| MGP      | 115.7  | 106    | 119.5  | 114    | 106.4  | 108.8  | 126    | 134.8  |
| MGRN1    | 222.6  | 209.7  | 200.6  | 210.1  | 153.7  | 162.6  | 230.2  | 185.5  |
| MGST1    | 121.6  | 112    | 116.5  | 116.5  | 104.5  | 97.1   | 114.7  | 116.7  |
| MGST1    | 144.9  | 176.8  | 148.9  | 227.3  | 187.6  | 174.6  | 199.9  | 157.7  |
| MGST1    | 112.8  | 115    | 127    | 127.3  | 116.1  | 105    | 124.5  | 113.5  |
| MGST1    | 194    | 320.2  | 223.2  | 441.7  | 371.3  | 376.7  | 433.1  | 337.6  |
| MGST2    | 167.9  | 144.6  | 332.5  | 147.9  | 129.6  | 153.7  | 140.2  | 118.6  |
| MGST3    | 792.1  | 742.5  | 1248.9 | 761.8  | 634.2  | 821.7  | 561.1  | 439.8  |
| MIA      | 117.3  | 108.2  | 133.5  | 120.4  | 124.9  | 108.7  | 121.1  | 122    |
| MIA2     | 106.5  | 116.7  | 106.5  | 110.3  | 108.3  | 101.6  | 113.8  | 106    |
| MIA3     | 128.6  | 128.7  | 136    | 125.4  | 120.8  | 109.4  | 123.6  | 127    |
| MIB1     | 135.5  | 133.6  | 132.7  | 144.5  | 127.6  | 119.8  | 140.8  | 128.9  |
| MIB2     | 284.4  | 332.3  | 256.4  | 302.9  | 267.1  | 224.6  | 332.8  | 292.6  |
| MIB2     | 233.6  | 275    | 192.2  | 275.5  | 195.5  | 144.1  | 290.9  | 276.8  |
| MICA     | 129.3  | 117    | 129.7  | 135.5  | 135.2  | 118.5  | 133.2  | 122    |
| MICAL1   | 237.8  | 198    | 284    | 220.8  | 171.7  | 210.3  | 217.6  | 194.2  |
| MICAL2   | 111.9  | 114.5  | 116.4  | 129.3  | 114.6  | 105    | 121.5  | 117.7  |
| MICALCL  | 122.8  | 116    | 112.8  | 118.9  | 115.8  | 99.6   | 121.9  | 121.4  |
| MICAL-L1 | 175    | 171.5  | 154.4  | 188.6  | 130.7  | 140.5  | 196.7  | 176.2  |
| MICAL-L2 | 122.8  | 116.1  | 120.5  | 123.6  | 111.2  | 101.1  | 119.8  | 122.2  |

|          |       |        |        |        |       |        |        |        |
|----------|-------|--------|--------|--------|-------|--------|--------|--------|
| MICAL-L2 | 116.3 | 111.9  | 119.9  | 119.8  | 108.3 | 100.9  | 120    | 119.4  |
| MICB     | 323.1 | 347.1  | 274.3  | 317.2  | 210.3 | 249.1  | 321.1  | 275.3  |
| MID1     | 130.2 | 149.4  | 135.4  | 136.9  | 136.5 | 122.8  | 132.7  | 139.5  |
| MID1     | 109   | 110.5  | 114.8  | 115.1  | 108.6 | 99.6   | 114.6  | 110.9  |
| MID1     | 118.5 | 102.8  | 115.5  | 117.3  | 104.9 | 101.4  | 117.7  | 110.7  |
| MID1IP1  | 206.9 | 253.7  | 191.2  | 218.1  | 165.9 | 199.5  | 185.4  | 199.5  |
| MID2     | 124.8 | 126.1  | 121.8  | 122.1  | 125.4 | 105.3  | 121.5  | 133.7  |
| MID2     | 118   | 126.5  | 120.1  | 116.8  | 114.3 | 98.8   | 120.4  | 120.2  |
| MID2     | 129.9 | 147.3  | 133.1  | 157.7  | 138.1 | 110    | 140.4  | 136.9  |
| MIDN     | 250.9 | 196.7  | 304.4  | 252.4  | 229.2 | 249.3  | 333.3  | 309.9  |
| MIER1    | 113.2 | 122.7  | 120.6  | 117.4  | 109   | 100.7  | 115.4  | 114.3  |
| MIER1    | 301.6 | 350    | 288.2  | 316.8  | 303.3 | 239.3  | 422    | 484.8  |
| MIF      | 819.6 | 878.2  | 815.7  | 837.5  | 743.4 | 576.6  | 504.1  | 774    |
| MIF4GD   | 174.9 | 185    | 200.1  | 160    | 144.7 | 147    | 167.7  | 148.1  |
| MIMITIN  | 226.1 | 234.4  | 257.5  | 231    | 241.1 | 214.2  | 278.7  | 326.5  |
| MINA     | 134   | 136.9  | 122.3  | 151.6  | 134.2 | 105.6  | 122.8  | 125.5  |
| MINA     | 122   | 116.6  | 117.2  | 121.1  | 108.1 | 104.4  | 116.5  | 118.6  |
| MINK1    | 122.7 | 115.3  | 124.2  | 121.9  | 110.6 | 94.8   | 110.2  | 126.6  |
| MINK1    | 124.7 | 128.2  | 119    | 131    | 119   | 98.3   | 132.7  | 129.8  |
| MINPP1   | 127.6 | 143    | 134.2  | 143.1  | 122.7 | 113.3  | 124.5  | 124.5  |
| MIOX     | 115.9 | 113.3  | 121    | 125.5  | 105.2 | 96.6   | 112.4  | 110.8  |
| MIP      | 108.6 | 104.4  | 106.6  | 118.6  | 106.1 | 90.5   | 118.8  | 112.5  |
| MIPEP    | 125.8 | 140.7  | 143.4  | 129    | 119.4 | 117.9  | 120.6  | 121.3  |
| MIPOL1   | 111.6 | 116.4  | 119.5  | 118.8  | 105.3 | 91.3   | 113.7  | 118    |
| MIR16    | 197.2 | 197.4  | 237    | 207.1  | 165.2 | 179.6  | 199.1  | 180.7  |
| MIS12    | 732.5 | 636.4  | 657.9  | 769.4  | 577.9 | 501.8  | 862.4  | 729.9  |
| MIST     | 118.5 | 119.8  | 126.9  | 125.5  | 110.4 | 97.5   | 128    | 121.3  |
| MITF     | 155.9 | 127.3  | 134    | 161.6  | 122.9 | 123    | 145.7  | 132.5  |
| MITF     | 135.3 | 108.4  | 119.3  | 117.4  | 109.2 | 99.1   | 117    | 121.4  |
| MITF     | 110.5 | 129.3  | 116.1  | 144.2  | 109.3 | 111.3  | 118.9  | 127.6  |
| MIXL1    | 110.1 | 108.1  | 119.4  | 119.4  | 107.6 | 95.9   | 121.2  | 114.9  |
| MIZF     | 125   | 116.4  | 115.9  | 122.1  | 117   | 104.2  | 115.7  | 114.4  |
| MIZF     | 252.1 | 273.5  | 206    | 242.2  | 232.2 | 178.5  | 255.3  | 266.9  |
| MIZF     | 201.6 | 276.2  | 175.6  | 213.4  | 189.1 | 151    | 230.2  | 241.9  |
| MKI67    | 111.7 | 112.9  | 120.5  | 125.9  | 110.2 | 105.4  | 111.5  | 120.4  |
| MKI67IP  | 487.5 | 435.3  | 390.5  | 431    | 398.6 | 327.4  | 432.7  | 471.5  |
| MKKS     | 138.5 | 122    | 146.1  | 121.2  | 111.9 | 120.3  | 127.5  | 114.2  |
| MKKS     | 335.9 | 508.5  | 332.6  | 417.6  | 333.2 | 285.8  | 404.1  | 422.2  |
| MKKS     | 111   | 108.8  | 131.5  | 115.5  | 119   | 108.3  | 128.2  | 107.7  |
| MKL1     | 220.5 | 271.5  | 214.1  | 257.4  | 183   | 204.3  | 244    | 277.2  |
| MKL2     | 140.8 | 147.5  | 144.5  | 161.7  | 140   | 126.3  | 120.6  | 122.4  |
| MKLN1    | 560.1 | 556.1  | 574.6  | 717    | 645.1 | 411.3  | 745.8  | 751.4  |
| MKNK1    | 117   | 115    | 114.3  | 119.2  | 106.5 | 96.9   | 119.6  | 113.7  |
| MKNK1    | 470.1 | 400.7  | 659.3  | 572.7  | 334.9 | 674    | 490.1  | 383    |
| MKNK2    | 790.1 | 720.4  | 704.2  | 688.7  | 616.4 | 448.9  | 808.7  | 543.4  |
| MKNK2    | 214   | 198.9  | 190.7  | 207.3  | 159.1 | 150.6  | 210.2  | 162.9  |
| MKRN1    | 1659  | 2040.9 | 2070.9 | 1899.1 | 1377  | 1481.4 | 2050.6 | 1726.8 |
| MKRN2    | 372   | 400.1  | 407.3  | 444.3  | 337.3 | 374.5  | 422.6  | 370.9  |
| MKRN3    | 107.3 | 124.8  | 126.9  | 133.4  | 126.5 | 103.6  | 126.3  | 113.2  |
| MKS1     | 117   | 120.8  | 124.9  | 118.4  | 125.3 | 99.2   | 113.4  | 118.6  |
| MLANA    | 109.4 | 108    | 101.8  | 109.1  | 109   | 95.2   | 123.7  | 111    |

|        |       |       |       |       |       |       |       |       |
|--------|-------|-------|-------|-------|-------|-------|-------|-------|
| MLC1   | 114.7 | 121   | 108.1 | 124.9 | 108.5 | 95.9  | 120.5 | 116.4 |
| MLC1   | 125.3 | 122.7 | 123.2 | 114.5 | 118.2 | 106.1 | 122.7 | 114.8 |
| MLC1   | 120.9 | 117.2 | 121.2 | 127   | 110.5 | 108.5 | 130.7 | 109.8 |
| MLC1SA | 261.5 | 273.4 | 173   | 228.8 | 182.2 | 141.8 | 193.5 | 176.6 |
| MLCK   | 116.1 | 116.4 | 121.2 | 123.5 | 106.4 | 93.9  | 124.8 | 117.4 |
| MLF1   | 106.6 | 117.7 | 118.6 | 114.9 | 102.1 | 94.8  | 113.8 | 120.1 |
| MLF1IP | 118.2 | 114.2 | 113.7 | 125.6 | 120.5 | 111.9 | 121.9 | 123.9 |
| MLF2   | 297.3 | 313.6 | 304.1 | 322.4 | 191.1 | 301.6 | 360.3 | 314.6 |
| MLH1   | 153.7 | 138.9 | 191.2 | 165.2 | 150.1 | 165   | 177.8 | 153   |
| MLH3   | 161.8 | 152.2 | 153.8 | 158   | 124.7 | 109.2 | 156.7 | 126.6 |
| MLH3   | 123.7 | 121.4 | 122   | 134.9 | 120   | 108.8 | 117.7 | 116.3 |
| MLKL   | 192.5 | 203.2 | 212.4 | 188.8 | 140.4 | 136.5 | 147.7 | 161.6 |
| MLKL   | 122.2 | 127.3 | 141.4 | 127.1 | 114.8 | 115.1 | 116.1 | 115.6 |
| MLL    | 177.9 | 196.5 | 143   | 157.3 | 149.6 | 133.6 | 209.6 | 188   |
| MLL2   | 128.5 | 134   | 136.7 | 135.8 | 126.8 | 113.3 | 125.4 | 117.2 |
| MLL3   | 135.9 | 119.8 | 143.1 | 141.3 | 148.7 | 103.8 | 147   | 148.6 |
| MLL3   | 147.9 | 135.7 | 125.1 | 154.5 | 152.6 | 119.6 | 147.7 | 152.5 |
| MLL3   | 122.8 | 114.8 | 122.9 | 127.7 | 114.6 | 93.5  | 119.8 | 117.2 |
| MLL3   | 190.2 | 192.5 | 194.9 | 230.4 | 209.9 | 157.5 | 234.9 | 254.1 |
| MLL4   | 280.7 | 237.7 | 191.3 | 247.5 | 208.5 | 184.1 | 332   | 299.9 |
| MLL5   | 161   | 155.1 | 137.9 | 178   | 159.4 | 134.8 | 176   | 196.6 |
| MLL5   | 146.8 | 133   | 128.6 | 136.2 | 119   | 107.6 | 134   | 130   |
| MLL5   | 390.9 | 417.8 | 408.9 | 482.7 | 410.4 | 253   | 348.1 | 439.4 |
| MLLT1  | 110.9 | 103.8 | 111.4 | 109.4 | 107.8 | 95.5  | 115.8 | 113.1 |
| MLLT10 | 113   | 115.7 | 132.4 | 120.4 | 101.9 | 112.8 | 125.2 | 117.5 |
| MLLT10 | 287.2 | 270.7 | 227.4 | 276.3 | 308.1 | 210.1 | 224   | 207.2 |
| MLLT11 | 232.9 | 270.4 | 210.1 | 254.1 | 237.7 | 189.6 | 299.4 | 433   |
| MLLT3  | 106.1 | 121.1 | 118.5 | 116.8 | 107.8 | 96.9  | 118.9 | 124   |
| MLLT6  | 780.5 | 790.1 | 726   | 680.4 | 622.9 | 417   | 530.5 | 494.7 |
| MLLT7  | 209.5 | 205.2 | 180.9 | 196.5 | 196.6 | 197.7 | 199.3 | 207.7 |
| MLN    | 112.8 | 108.2 | 122.3 | 114.1 | 113.7 | 103   | 123.1 | 111.3 |
| MLN    | 111.9 | 117.5 | 128.4 | 128.3 | 110.4 | 106.8 | 128.1 | 130.4 |
| MLNR   | 114.2 | 109.4 | 116.1 | 115   | 108.9 | 98.4  | 117.5 | 110   |
| MLPH   | 114.3 | 121.8 | 121.3 | 113.8 | 103.5 | 98.8  | 122.9 | 115.9 |
| MLSTD1 | 131.5 | 129.7 | 155.1 | 137.3 | 119.6 | 113.5 | 144.4 | 113.8 |
| MLSTD2 | 222.3 | 229.2 | 268.2 | 264.9 | 218.1 | 210.3 | 250.7 | 273.7 |
| MLX    | 115.4 | 118.1 | 116.7 | 127.6 | 101.3 | 92.8  | 114.2 | 102.4 |
| MLX    | 191.4 | 193.2 | 160.8 | 160   | 148.7 | 121.4 | 146.5 | 146.2 |
| MLXIP  | 105.1 | 112.7 | 113.8 | 124.5 | 112.2 | 92.8  | 120.7 | 114.2 |
| MLXIPL | 116   | 113.9 | 118.5 | 115.8 | 109.4 | 93.1  | 118.1 | 110.7 |
| MLYCD  | 151.5 | 147.6 | 155.4 | 171.4 | 143.4 | 112.8 | 147.9 | 132.4 |
| MLZE   | 116.6 | 123.8 | 116   | 120.3 | 104.2 | 97.1  | 109.6 | 118.7 |
| MMAA   | 119.1 | 120   | 126.1 | 116.9 | 117   | 98.9  | 124.8 | 112   |
| MMAB   | 150.5 | 135.5 | 155.6 | 146.9 | 132.4 | 119.5 | 137   | 137.1 |
| MMACHC | 129.1 | 134.8 | 135.7 | 140.2 | 129.7 | 111.2 | 135.2 | 140.2 |
| MMD    | 188.5 | 164.1 | 268.6 | 185   | 178   | 174.9 | 186.4 | 212.5 |
| MMD2   | 103.5 | 118.2 | 114.9 | 112.2 | 102.1 | 92.9  | 112.4 | 108.6 |
| MME    | 121.1 | 113.6 | 103.9 | 131.9 | 109.4 | 104.4 | 111.4 | 125.4 |
| MME    | 108.4 | 114.2 | 99.5  | 106.7 | 105.8 | 97.1  | 115.8 | 105.2 |
| MME    | 111.6 | 113   | 116.3 | 125.5 | 113.7 | 100.1 | 110.9 | 115.8 |
| MME    | 110   | 112.4 | 110.1 | 115.6 | 102.4 | 107.5 | 124.6 | 106.4 |

|        |        |       |        |        |       |        |        |       |
|--------|--------|-------|--------|--------|-------|--------|--------|-------|
| MMEL1  | 115.6  | 120.2 | 107.9  | 128.1  | 103.2 | 99.5   | 110.5  | 106.6 |
| MMP1   | 107.5  | 110.8 | 111.8  | 119.7  | 107.9 | 96.4   | 119.4  | 114   |
| MMP10  | 116.4  | 112.5 | 111.1  | 112    | 104.2 | 100.2  | 118.3  | 111.2 |
| MMP11  | 127.4  | 106.2 | 115.2  | 115.3  | 119   | 108.2  | 116.7  | 114.2 |
| MMP12  | 110.4  | 113   | 114.9  | 118.4  | 103   | 97.3   | 116.2  | 112.3 |
| MMP13  | 112.1  | 111.2 | 113.7  | 108.7  | 102.7 | 98.5   | 103.1  | 107.5 |
| MMP14  | 111.3  | 118.2 | 128.3  | 121.4  | 103.6 | 94     | 114.6  | 114.5 |
| MMP15  | 131.1  | 133.7 | 148.2  | 124.5  | 120   | 100.1  | 135.8  | 133.8 |
| MMP16  | 110.3  | 112.8 | 110.1  | 108.4  | 110.1 | 87.6   | 113.5  | 110.7 |
| MMP16  | 110.3  | 107.4 | 105.2  | 114.3  | 102.6 | 102.2  | 114.4  | 111.9 |
| MMP16  | 127.9  | 115.2 | 122.3  | 125.3  | 113.4 | 111.4  | 122.7  | 129.2 |
| MMP17  | 122.7  | 116.2 | 124.3  | 107.1  | 114.9 | 97.7   | 121.1  | 137.3 |
| MMP19  | 114    | 114   | 109.2  | 116.3  | 104.9 | 98.1   | 122.5  | 122.1 |
| MMP19  | 112.6  | 113.9 | 122.3  | 119.2  | 111   | 106.3  | 119.7  | 115.4 |
| MMP2   | 119.6  | 136.9 | 129    | 125.4  | 112   | 102.6  | 126.7  | 122   |
| MMP20  | 119.7  | 112   | 119.4  | 117.2  | 108.1 | 99.5   | 122.6  | 116.5 |
| MMP21  | 111.9  | 122.7 | 109.3  | 116.5  | 109.1 | 95.8   | 118.8  | 111.3 |
| MMP23A | 124.8  | 132.9 | 133.5  | 123.8  | 116.9 | 111.1  | 122.1  | 118.2 |
| MMP23B | 196.9  | 207.2 | 169.1  | 176.7  | 155.1 | 134.5  | 170.1  | 151.8 |
| MMP24  | 119.3  | 121.1 | 120.2  | 126.8  | 114   | 104.6  | 129.5  | 111.6 |
| MMP25  | 105.8  | 115.4 | 111.6  | 114.5  | 105.6 | 91.2   | 107.2  | 113.9 |
| MMP25  | 131.2  | 131   | 138.6  | 133.2  | 123.5 | 105.3  | 127    | 118.4 |
| MMP26  | 108.5  | 113.4 | 111.2  | 124.3  | 108.9 | 97.2   | 110.4  | 108.4 |
| MMP27  | 115.6  | 110.8 | 120.1  | 119.4  | 105.6 | 97.3   | 115    | 110.4 |
| MMP28  | 115.2  | 112.4 | 117.8  | 123.6  | 115.7 | 98.5   | 120.9  | 114.6 |
| MMP28  | 215.5  | 264.8 | 284.1  | 211.5  | 172.1 | 179.8  | 144.4  | 143.1 |
| MMP3   | 111.6  | 115.9 | 117.3  | 129.7  | 115.8 | 96.1   | 114.2  | 128.7 |
| MMP7   | 113.3  | 149.7 | 148.7  | 133.8  | 125.3 | 122.7  | 127.7  | 118.7 |
| MMP8   | 103.8  | 106.9 | 115.8  | 113.6  | 102   | 98.5   | 122.2  | 113.5 |
| MMP9   | 1122.2 | 546.9 | 1536.7 | 1443.2 | 485.5 | 1762.1 | 1153.8 | 246.9 |
| MMRN1  | 103.7  | 120.3 | 112.6  | 119.1  | 107.3 | 99.9   | 123.7  | 106.8 |
| MMRN2  | 122.9  | 143.6 | 132.5  | 134.9  | 124.1 | 109.7  | 130.3  | 112.8 |
| MMS19L | 682.5  | 616.6 | 601.3  | 702.1  | 550.5 | 434    | 670.4  | 656.7 |
| MN1    | 116    | 115.3 | 157.8  | 127.1  | 106.3 | 131.3  | 117.2  | 129.8 |
| MNAB   | 158.2  | 163.3 | 158.9  | 160.2  | 137.8 | 129.7  | 169.2  | 208.7 |
| MNAT1  | 116    | 114.1 | 121.8  | 118.5  | 113.2 | 110    | 116.1  | 114.9 |
| MND1   | 113.1  | 105.8 | 114.8  | 120.6  | 111.8 | 90.7   | 118.5  | 113.7 |
| MNDA   | 142.2  | 149.8 | 386    | 126    | 118.2 | 134.9  | 126.6  | 127.1 |
| MNS1   | 110.9  | 113.5 | 111.9  | 120.1  | 99.7  | 104.4  | 115.2  | 122.6 |
| MNT    | 261.1  | 272.3 | 231.4  | 271.1  | 262.1 | 246.5  | 328.4  | 315.1 |
| MOAP1  | 425.6  | 514.9 | 451.8  | 618.9  | 495.8 | 487.2  | 542.3  | 662.1 |
| MOBK1B | 121.5  | 116.2 | 115.9  | 116.6  | 118.9 | 90     | 113    | 113.9 |
| MOBK1A | 112.2  | 112   | 132.5  | 151.8  | 120.4 | 113.8  | 129.8  | 128.7 |
| MOBK2A | 293.7  | 273.7 | 312.9  | 335.9  | 204.4 | 249.9  | 257.8  | 223.8 |
| MOBK2B | 114.6  | 115.6 | 117.6  | 120.7  | 110.1 | 98.3   | 117.4  | 113.7 |
| MOBK2C | 114.7  | 118.6 | 129.1  | 120.6  | 106.2 | 112.8  | 119.4  | 115.3 |
| MOBK2C | 490.5  | 419.6 | 366.3  | 542.7  | 375.5 | 426.7  | 595.7  | 435.9 |
| MOBK2C | 104.1  | 110.1 | 114.3  | 116.8  | 106.4 | 94.3   | 116.5  | 111.7 |
| MOBP   | 105.2  | 113.5 | 116    | 118.7  | 99.7  | 93.8   | 118    | 117.4 |
| MOBP   | 118.7  | 114.7 | 119.1  | 112.4  | 112   | 99.9   | 118    | 121.1 |
| MOBP   | 126.7  | 110.8 | 136.1  | 120.8  | 110.8 | 101.7  | 121.6  | 109.8 |



|          |       |       |       |       |       |       |       |       |
|----------|-------|-------|-------|-------|-------|-------|-------|-------|
| MOBP     | 111.1 | 115.9 | 112.9 | 114.8 | 114.7 | 100.1 | 117.9 | 113.6 |
| MOCOS    | 120   | 116.5 | 118.6 | 135.2 | 118.5 | 111.9 | 119   | 126   |
| MOCS1    | 136.4 | 146.2 | 151.5 | 149.4 | 116.3 | 104.2 | 140.3 | 132   |
| MOCS1    | 116.9 | 128   | 111.7 | 123.4 | 114.4 | 104.3 | 117.6 | 114.2 |
| MOCS1    | 131   | 136.8 | 120.5 | 143.7 | 108.7 | 110.7 | 120.7 | 125.7 |
| MOCS2    | 115.4 | 120.9 | 118   | 115.2 | 109.3 | 98    | 118.3 | 123.1 |
| MOCS2    | 125.5 | 125.2 | 117.4 | 126.1 | 110.4 | 105.3 | 121.2 | 125.7 |
| MOCS2    | 145.5 | 139.7 | 170.8 | 159.1 | 155.3 | 135.3 | 145.9 | 155.1 |
| MOCS3    | 120.3 | 116.7 | 126.6 | 124.2 | 115.8 | 102.1 | 133.7 | 121.7 |
| MOG      | 110   | 114.5 | 115.5 | 109.6 | 109.3 | 95.3  | 109.6 | 116.3 |
| MOGAT1   | 116.2 | 118.7 | 112.9 | 116.2 | 115.4 | 103.1 | 122.5 | 122.6 |
| MOGAT2   | 118.2 | 107.1 | 117.7 | 120.6 | 108.9 | 108   | 109.7 | 111   |
| MOGAT3   | 107   | 113.8 | 108.9 | 113.9 | 99.6  | 93.3  | 113.1 | 104.2 |
| MON1A    | 112.2 | 130.3 | 116.1 | 124.9 | 112.3 | 107.9 | 128.9 | 115.2 |
| MON1B    | 205.7 | 199.6 | 214   | 200.5 | 187.2 | 180.9 | 252.1 | 229.9 |
| MON2     | 395.2 | 404.8 | 349.9 | 465.9 | 386.2 | 288.7 | 368.4 | 374.8 |
| MORC1    | 116.4 | 125.5 | 113.3 | 125.6 | 108.4 | 103.3 | 131.4 | 111.2 |
| MORC2    | 191.9 | 189.3 | 151   | 194.8 | 178.8 | 139.8 | 179.5 | 169.4 |
| MORC3    | 173.4 | 182.3 | 262.3 | 209.7 | 207   | 204.2 | 176.8 | 198.8 |
| MORC4    | 105.1 | 127.6 | 117   | 118.7 | 113.4 | 99.5  | 124.4 | 123.3 |
| MORF4    | 131.4 | 118.8 | 118.4 | 129.1 | 110.8 | 98.1  | 121   | 121.2 |
| MORF4L1  | 800.4 | 588.4 | 787.3 | 751.5 | 523   | 843.8 | 774.2 | 705.8 |
| MORF4L1  | 112.3 | 103.5 | 105   | 113   | 104.5 | 91.4  | 116.6 | 109.1 |
| MORG1    | 131.1 | 143.8 | 141.4 | 139.9 | 131   | 110.3 | 145.1 | 160.9 |
| MORN1    | 121.5 | 118.1 | 124.4 | 118.6 | 119.9 | 99.7  | 130.5 | 125.5 |
| MORN3    | 132.1 | 131.5 | 128.1 | 127.7 | 111.2 | 106   | 125.3 | 129.2 |
| MOS      | 105.9 | 108   | 127.1 | 133.2 | 111.6 | 100.9 | 116.2 | 106.6 |
| MOSC1    | 109.8 | 109.2 | 106.1 | 121   | 96.4  | 93.1  | 113   | 119   |
| MOSC2    | 114.2 | 117   | 116.8 | 129.1 | 108.3 | 105.8 | 119.9 | 117.7 |
| MOSPD2   | 119.5 | 114   | 124.1 | 118.4 | 121.3 | 104.4 | 127.4 | 133.1 |
| MOSPD3   | 143.3 | 154.6 | 152.4 | 134.6 | 126   | 119.6 | 148.2 | 146.3 |
| MOSPD3   | 136.4 | 130.2 | 130.2 | 131.6 | 121   | 116.8 | 131.1 | 128.5 |
| MOV10    | 200.6 | 220.1 | 220.3 | 200.9 | 149.6 | 173.3 | 197.8 | 161.3 |
| MOV10L1  | 117.8 | 115.8 | 121.6 | 133   | 111   | 107.4 | 123.7 | 119.2 |
| MOXD1    | 115.4 | 121.3 | 122.1 | 131.4 | 112.1 | 99.3  | 130.3 | 114.9 |
| MOXD1    | 110.8 | 112.9 | 113.6 | 123.1 | 109.3 | 96.2  | 116.9 | 115.8 |
| MPDU1    | 147.8 | 152.7 | 178.4 | 146.8 | 127.2 | 123.2 | 145.5 | 133   |
| MPDZ     | 111.2 | 117.8 | 115.5 | 116.1 | 106.8 | 101.4 | 121   | 124.5 |
| MPFL     | 119.5 | 115.2 | 129.6 | 119.5 | 102.2 | 97.4  | 117.1 | 116.3 |
| MPG      | 105.4 | 113.3 | 109.5 | 109.9 | 106.5 | 100.2 | 113.2 | 119.5 |
| MPG      | 126.6 | 116.3 | 117.5 | 128   | 111.6 | 98.4  | 122.5 | 112.7 |
| MPG      | 118.5 | 118.8 | 115   | 120.2 | 102.9 | 102.2 | 108.1 | 103.5 |
| MPHOSPH: | 212   | 227.8 | 200   | 253.5 | 188.9 | 166.6 | 198.2 | 174.8 |
| MPHOSPH: | 119.3 | 113.9 | 113.5 | 117.4 | 113.9 | 94.4  | 110.1 | 129.4 |
| MPHOSPH: | 145.3 | 124.3 | 141.9 | 139.7 | 119.9 | 123.3 | 127.1 | 136.2 |
| MPI      | 135.7 | 154.9 | 142.5 | 151.1 | 116   | 110.3 | 147   | 122.8 |
| MPL      | 128.8 | 114.9 | 139.2 | 128.7 | 113.5 | 105.9 | 125.8 | 119.9 |
| MPN2     | 109.2 | 111   | 122.9 | 116.3 | 114   | 97.1  | 116.8 | 112.8 |
| MPND     | 125.3 | 133.1 | 129.2 | 116.4 | 114.1 | 105.8 | 122.4 | 125.4 |
| MPO      | 123.2 | 191.2 | 133.2 | 138.5 | 139   | 96.3  | 121.7 | 148.7 |
| MPP1     | 315.3 | 159.3 | 314.2 | 503.6 | 194.3 | 313.4 | 392.4 | 203.2 |

|          |        |        |        |        |        |        |        |        |
|----------|--------|--------|--------|--------|--------|--------|--------|--------|
| MPP2     | 116.2  | 118.9  | 125.7  | 109    | 108.2  | 93.1   | 125.1  | 116    |
| MPP3     | 115.1  | 116.2  | 114.6  | 121.7  | 111.4  | 104.2  | 114.6  | 118.6  |
| MPP4     | 101.3  | 110    | 104.9  | 114    | 99.7   | 92.1   | 116.9  | 106.1  |
| MPP5     | 165.2  | 185.1  | 184.9  | 171.1  | 138.2  | 134.4  | 149.1  | 156.5  |
| MPP6     | 185.7  | 178.1  | 163.8  | 167.4  | 147.5  | 135.2  | 169.4  | 184.5  |
| MPP7     | 117.4  | 127    | 118.9  | 124.5  | 117.8  | 98.7   | 123.8  | 116.8  |
| MPPE1    | 385    | 442    | 569    | 485.4  | 354.7  | 303.2  | 301.3  | 386.6  |
| MPPED1   | 114.1  | 119.8  | 116.5  | 119.3  | 119.7  | 101.4  | 126.4  | 109.9  |
| MPPED2   | 112    | 122.7  | 112    | 111.7  | 108.9  | 97     | 108.7  | 117.8  |
| MPST     | 123.8  | 123.9  | 134.8  | 131.3  | 111.5  | 128.9  | 127.9  | 131.4  |
| MPST     | 127.8  | 129.4  | 135.5  | 136.5  | 115.3  | 101.4  | 129.9  | 147.4  |
| MPST     | 129.8  | 125.5  | 125.2  | 123.2  | 114.9  | 104.6  | 129.6  | 132.9  |
| MPV17    | 274.5  | 286.5  | 314.4  | 281.3  | 239.5  | 243.5  | 211.3  | 243.7  |
| MPZ      | 123.7  | 121.7  | 128.8  | 120.6  | 109.5  | 112.8  | 115.2  | 108.1  |
| MPZL1    | 121.5  | 108.2  | 121.1  | 116.8  | 106.2  | 94.6   | 122.1  | 110.7  |
| MPZL1    | 132.3  | 136    | 126    | 132.1  | 120    | 99.8   | 140.7  | 119.2  |
| MR1      | 175    | 147.1  | 198.7  | 182.7  | 146.3  | 146.1  | 160.3  | 158.1  |
| MRAP     | 111    | 115.8  | 108.2  | 110.5  | 100.8  | 95.2   | 116.3  | 114.5  |
| MRAP     | 108.5  | 119.2  | 118.7  | 119.9  | 102.5  | 100.2  | 122.8  | 110    |
| MRAS     | 120.1  | 122.5  | 116.7  | 134    | 107.2  | 96.3   | 126.5  | 115.2  |
| MRC1     | 113.1  | 116.4  | 113.8  | 111.3  | 112.7  | 92.1   | 107.3  | 113.1  |
| MRC1L1   | 119.1  | 116.9  | 117.2  | 118.8  | 103.1  | 106.7  | 117.2  | 118.6  |
| MRC2     | 106.7  | 118.7  | 121.5  | 112.9  | 109.2  | 91.9   | 112.6  | 114.5  |
| MRCL3    | 3707.6 | 3494.3 | 3610.3 | 2998.2 | 3394.8 | 4280.2 | 3770.9 | 3072.4 |
| MRE11A   | 110.9  | 133.5  | 130.5  | 119.9  | 117.2  | 110.3  | 121.7  | 124    |
| MRE11A   | 131.1  | 138.3  | 134    | 138.7  | 129.4  | 110.4  | 130.6  | 130.9  |
| MRE11A   | 152.2  | 146    | 153    | 143.7  | 125.6  | 121.5  | 135.3  | 137.7  |
| MRFAP1   | 1152.4 | 1163.1 | 1232   | 1197.1 | 1010   | 908.2  | 982.3  | 975.2  |
| MRFAP1L1 | 1568.7 | 2060.4 | 1475.8 | 1572.5 | 1301.9 | 1178.4 | 1376.1 | 1597.3 |
| MRFAP1L1 | 184.3  | 189.7  | 167.4  | 222.6  | 218.5  | 145    | 191.3  | 209    |
| MRFAP1L1 | 125.9  | 132.2  | 143.7  | 133.5  | 114.3  | 107.1  | 123.9  | 130.6  |
| MRGPRD   | 113.3  | 114.5  | 122.3  | 118.6  | 109.8  | 99.3   | 121.3  | 125.2  |
| MRGPRE   | 123    | 112.7  | 136.9  | 128.7  | 118.9  | 108.6  | 130.2  | 116.4  |
| MRGPRF   | 108.4  | 109    | 111.7  | 118.1  | 105.3  | 94.8   | 121.5  | 108.5  |
| MRGPRX1  | 106.9  | 109.6  | 118.6  | 109.8  | 107.4  | 100.4  | 113    | 117.9  |
| MRGPRX2  | 110.1  | 114.7  | 112.5  | 116.7  | 96.4   | 103.6  | 103.6  | 110.6  |
| MRGPRX3  | 124.4  | 117.1  | 111.6  | 117.1  | 105.8  | 104.6  | 126.3  | 119.2  |
| MRGPRX4  | 121.9  | 106.4  | 103.3  | 117.3  | 97.4   | 95.8   | 122.1  | 115.5  |
| M-RIP    | 116    | 120.6  | 125.4  | 118.8  | 109.3  | 98.6   | 122    | 115.6  |
| M-RIP    | 299.3  | 314.7  | 214    | 298.9  | 309.1  | 199.8  | 241.9  | 264.3  |
| MRLC2    | 3129.7 | 3082.4 | 4311.6 | 3308   | 3068.3 | 3627   | 3644.9 | 4100.4 |
| MRM1     | 112.2  | 120.5  | 122.9  | 112.2  | 105.9  | 103.2  | 112.9  | 108.5  |
| MRO      | 104.1  | 118    | 120.4  | 111    | 102.3  | 93.4   | 109.4  | 113.9  |
| MRP63    | 220.1  | 217.5  | 222.9  | 226.2  | 183.3  | 163.8  | 207.1  | 170    |
| MRPL1    | 172.2  | 156.2  | 147.5  | 181.8  | 165.6  | 111.3  | 135.5  | 139.1  |
| MRPL10   | 133.3  | 144.1  | 140.8  | 165.6  | 140.1  | 141.6  | 124.7  | 136.4  |
| MRPL10   | 115.5  | 124.6  | 136    | 132.2  | 108.8  | 104.6  | 127.6  | 120.5  |
| MRPL11   | 193    | 179    | 196.3  | 199.5  | 168.8  | 147.1  | 192.5  | 182    |
| MRPL11   | 110.6  | 114.6  | 131.1  | 129.1  | 118.3  | 100.9  | 121.8  | 125    |
| MRPL11   | 429    | 417.2  | 477    | 385.1  | 348.7  | 318.6  | 330.6  | 362.8  |
| MRPL12   | 214.3  | 230.7  | 204    | 222.5  | 193.6  | 163.4  | 220.4  | 161.5  |

|          |        |        |        |        |        |        |        |        |
|----------|--------|--------|--------|--------|--------|--------|--------|--------|
| MRPL13   | 184.1  | 184.7  | 199.7  | 196.1  | 197.9  | 175.8  | 206.1  | 248.9  |
| MRPL14   | 418.5  | 598.6  | 531.7  | 598.7  | 559.3  | 418.7  | 574.1  | 562.3  |
| MRPL15   | 239.5  | 247.3  | 260.8  | 247    | 198.4  | 176.6  | 199.8  | 175.1  |
| MRPL16   | 130.8  | 140.7  | 152.3  | 149.3  | 136.1  | 115.8  | 150.6  | 130    |
| MRPL17   | 314.1  | 324    | 246.2  | 307.9  | 285.1  | 162.3  | 235.2  | 187.2  |
| MRPL18   | 432    | 419.4  | 536.2  | 408.9  | 415.2  | 397.1  | 630.7  | 862.2  |
| MRPL19   | 117.6  | 123.6  | 121.9  | 132.6  | 119    | 108.2  | 121.7  | 119.2  |
| MRPL2    | 177.2  | 182    | 161.6  | 179.2  | 145    | 135.9  | 158.3  | 156.3  |
| MRPL20   | 227.4  | 283    | 297.3  | 248.3  | 258.2  | 256.8  | 204.8  | 247.5  |
| MRPL21   | 223.1  | 319.1  | 297.8  | 241.4  | 234.2  | 214.9  | 183.1  | 202.9  |
| MRPL21   | 316.4  | 318.8  | 485    | 391.2  | 306.1  | 343.5  | 271.4  | 289.8  |
| MRPL22   | 250.2  | 254.9  | 281.6  | 264.6  | 269.2  | 181.9  | 248.4  | 280.9  |
| MRPL22   | 441    | 424    | 477.2  | 498.8  | 388.9  | 365.7  | 466.4  | 581    |
| MRPL23   | 357.7  | 411.1  | 587.3  | 435.8  | 358.7  | 370    | 385.6  | 344.3  |
| MRPL24   | 172.5  | 139.8  | 165.5  | 166.7  | 148.8  | 159.3  | 155.6  | 162.5  |
| MRPL24   | 414.9  | 439.4  | 632    | 494.9  | 494.6  | 446.1  | 428.7  | 398.5  |
| MRPL27   | 216.9  | 231.5  | 270.4  | 242.3  | 192.8  | 155.1  | 222.4  | 217.4  |
| MRPL27   | 111    | 112.5  | 121.2  | 120.4  | 116.2  | 98.1   | 114.6  | 118.2  |
| MRPL27   | 120.5  | 138.2  | 147.8  | 144.3  | 125.4  | 120.8  | 133.3  | 145.6  |
| MRPL28   | 120.2  | 124.9  | 145.1  | 147.2  | 124.6  | 112.3  | 147.2  | 146.8  |
| MRPL3    | 123.9  | 114.8  | 120.5  | 118.1  | 111.6  | 102.6  | 118.7  | 114.6  |
| MRPL30   | 123.7  | 121    | 138    | 119.4  | 113.8  | 109.6  | 131.8  | 126.1  |
| MRPL30   | 138.3  | 132.5  | 169.4  | 133.2  | 138.9  | 134.2  | 139    | 123.2  |
| MRPL32   | 282.1  | 225.1  | 335.9  | 333.5  | 266.7  | 202.6  | 270.7  | 303.1  |
| MRPL33   | 337.8  | 381.7  | 369.6  | 351.2  | 346.1  | 294.2  | 314    | 385.6  |
| MRPL33   | 1527.4 | 1947.9 | 2235.7 | 1539.1 | 1731.5 | 1474.2 | 1682.3 | 1698.7 |
| MRPL34   | 398    | 426    | 372.5  | 416    | 337.4  | 312.1  | 319.3  | 252    |
| MRPL35   | 294.7  | 317.3  | 432.1  | 303.3  | 254.2  | 293.3  | 211.1  | 231.4  |
| MRPL35   | 139.3  | 147    | 159.6  | 141.4  | 133.5  | 118.7  | 134.2  | 152.6  |
| MRPL35   | 145.9  | 144.6  | 184.1  | 137.8  | 142.4  | 138.7  | 137.5  | 132    |
| MRPL36   | 507.3  | 493.7  | 397.4  | 486.8  | 517.7  | 304.2  | 504.1  | 567.5  |
| MRPL37   | 508.3  | 626.3  | 606.3  | 617.1  | 423.7  | 400.9  | 449.8  | 428.1  |
| MRPL38   | 166.3  | 159.7  | 141.8  | 170.5  | 139.4  | 122.4  | 166    | 163.5  |
| MRPL39   | 120.3  | 122.3  | 114.7  | 119    | 114.9  | 105.4  | 121.3  | 124.6  |
| MRPL39   | 320    | 320    | 364.4  | 347    | 327.6  | 283.4  | 298.4  | 284.2  |
| MRPL4    | 110.7  | 118.1  | 115.4  | 119.1  | 109.9  | 98.3   | 121.3  | 121    |
| MRPL4    | 132.5  | 138.4  | 126.1  | 133.4  | 122.7  | 120.4  | 122    | 131    |
| MRPL4    | 122.4  | 133.2  | 137.9  | 133.1  | 121.2  | 105.7  | 152.3  | 125.6  |
| MRPL40   | 263.8  | 246.3  | 282.9  | 221    | 223    | 198.6  | 179.4  | 196.6  |
| MRPL41   | 398    | 429.6  | 653    | 488    | 320.1  | 369.9  | 333.6  | 289.2  |
| MRPL42   | 131.7  | 140    | 132.6  | 140.9  | 109.2  | 107.5  | 138.4  | 122.3  |
| MRPL42P5 | 115.5  | 122.1  | 117.3  | 120.9  | 113.4  | 98.7   | 124.5  | 112.6  |
| MRPL43   | 567.6  | 506.6  | 674    | 650.4  | 403.8  | 462.3  | 429.8  | 351.1  |
| MRPL43   | 140.7  | 150.5  | 143.8  | 137    | 125.2  | 112.6  | 137.7  | 134.3  |
| MRPL43   | 143.8  | 217.6  | 218.4  | 159.4  | 170.8  | 185.8  | 147.7  | 158    |
| MRPL44   | 109.1  | 117    | 116.7  | 123.2  | 117.6  | 109.5  | 128    | 117.7  |
| MRPL45   | 225    | 234.1  | 211.4  | 225.1  | 203.6  | 204    | 220.4  | 305    |
| MRPL45   | 181.9  | 171.1  | 216.7  | 244.6  | 163.5  | 182.9  | 191    | 174.8  |
| MRPL46   | 290.3  | 327.8  | 303.4  | 355.8  | 285.9  | 200.7  | 211.5  | 244.5  |
| MRPL47   | 123.8  | 142.8  | 139.4  | 143.2  | 128.5  | 121.4  | 127.4  | 141.6  |
| MRPL47   | 161.9  | 170    | 165.9  | 181.9  | 158.7  | 124.6  | 181.3  | 192.2  |

|         |       |        |        |        |        |        |         |        |
|---------|-------|--------|--------|--------|--------|--------|---------|--------|
| MRPL48  | 216.2 | 250.9  | 191.9  | 222.6  | 179.7  | 154.6  | 190.2   | 190.2  |
| MRPL49  | 227.7 | 255.8  | 233.7  | 246.6  | 202.5  | 204.4  | 238.6   | 254.7  |
| MRPL50  | 349.2 | 432    | 359.1  | 328.8  | 351.5  | 266.5  | 438.9   | 412.8  |
| MRPL51  | 656.2 | 696.6  | 683.1  | 817.9  | 658    | 644    | 558.4   | 720.8  |
| MRPL52  | 215.3 | 228.9  | 264.6  | 222.9  | 216.8  | 163.4  | 260.3   | 262.9  |
| MRPL52  | 157.2 | 158.9  | 152.4  | 172.7  | 167.1  | 151.1  | 181.1   | 223.8  |
| MRPL53  | 213.9 | 200.6  | 242.9  | 214.4  | 175.6  | 194.4  | 195.9   | 198.6  |
| MRPL54  | 275.1 | 408.5  | 377    | 323.2  | 311.1  | 227.1  | 283.8   | 201.8  |
| MRPL55  | 316.8 | 226.1  | 339.2  | 245.7  | 234.7  | 257.6  | 297.2   | 273.3  |
| MRPL55  | 246.8 | 213.8  | 280.1  | 224.6  | 174.7  | 174    | 184.9   | 181    |
| MRPL55  | 296.9 | 391.1  | 315.5  | 329.8  | 235.1  | 269.6  | 221.2   | 209.3  |
| MRPL9   | 192.6 | 197.9  | 199    | 181.4  | 178.9  | 149.4  | 180.2   | 190.7  |
| MRPS10  | 550.9 | 620.6  | 569.8  | 551.1  | 526.5  | 360.5  | 503.4   | 494    |
| MRPS11  | 453.5 | 519.9  | 523.5  | 512.4  | 374.7  | 390.9  | 389.8   | 388.7  |
| MRPS11  | 259.5 | 263.6  | 275.5  | 245.6  | 227.5  | 218.2  | 240.3   | 222.8  |
| MRPS12  | 448.7 | 559.3  | 448.9  | 465.6  | 405.7  | 307.3  | 429     | 418.6  |
| MRPS12  | 119.2 | 120.4  | 129.6  | 129    | 111.5  | 100.3  | 121.7   | 124.3  |
| MRPS12  | 229.5 | 254.3  | 212.5  | 223.6  | 182.2  | 183.1  | 216.4   | 198.4  |
| MRPS12  | 140   | 149.3  | 139.2  | 144.9  | 141.4  | 110.2  | 141.3   | 134.9  |
| MRPS14  | 127.3 | 135.8  | 133.7  | 136.4  | 121.8  | 109.6  | 136.2   | 131.9  |
| MRPS15  | 340.7 | 391.7  | 475.5  | 373.6  | 302.3  | 324.3  | 357.1   | 341.7  |
| MRPS16  | 163.2 | 237.7  | 212.6  | 211.2  | 204.8  | 182.2  | 236.8   | 252.5  |
| MRPS17  | 185.7 | 200    | 233    | 205.9  | 196.8  | 186.1  | 190.9   | 184.4  |
| MRPS18A | 158.2 | 192.9  | 166.8  | 180.3  | 159.2  | 153    | 173.6   | 192.5  |
| MRPS18B | 334.1 | 363.2  | 384.3  | 436.2  | 378.6  | 372.1  | 405.3   | 397.4  |
| MRPS18C | 124   | 116.1  | 121.5  | 121    | 115    | 100.5  | 119     | 119.6  |
| MRPS2   | 220.6 | 241.3  | 201.2  | 247    | 180.2  | 164.6  | 218.8   | 184    |
| MRPS21  | 497.7 | 445.4  | 629.4  | 539.7  | 308.2  | 452.6  | 299     | 298.2  |
| MRPS21  | 349   | 321.3  | 520.8  | 312.2  | 277.1  | 299.2  | 249.9   | 226.4  |
| MRPS22  | 577.9 | 526.8  | 591.8  | 596.5  | 573.1  | 533.6  | 631.7   | 575.8  |
| MRPS23  | 168.8 | 177.7  | 171.7  | 186    | 158.6  | 133.1  | 170.1   | 170.6  |
| MRPS24  | 676.1 | 846.6  | 706.5  | 736.8  | 671.8  | 507.9  | 540.1   | 479.7  |
| MRPS26  | 222.5 | 216.2  | 195.1  | 236.1  | 178.6  | 126    | 193     | 153    |
| MRPS27  | 219.8 | 307.3  | 277.2  | 303.1  | 245.3  | 248.1  | 294.7   | 282.3  |
| MRPS28  | 198.9 | 186.6  | 242.3  | 193.9  | 152.7  | 147.1  | 167.2   | 186.7  |
| MRPS30  | 542.8 | 671.2  | 542.5  | 565    | 505.7  | 418.3  | 607.3   | 535.9  |
| MRPS31  | 524   | 575.8  | 596.9  | 573.3  | 427.6  | 408.6  | 448.8   | 535.8  |
| MRPS33  | 432   | 493.1  | 538.7  | 483.4  | 453.7  | 381.3  | 394.2   | 467    |
| MRPS33  | 148.2 | 153.6  | 151.2  | 161.3  | 158.3  | 141.2  | 158.4   | 161.3  |
| MRPS34  | 147.4 | 157.2  | 138.5  | 149.9  | 146.6  | 115.2  | 127.5   | 129.2  |
| MRPS35  | 181.3 | 199.7  | 196.5  | 176    | 168.9  | 158.8  | 198.9   | 176.5  |
| MRPS36  | 168.1 | 183.4  | 168    | 163    | 151.9  | 149.9  | 183.1   | 199.6  |
| MRPS5   | 277.4 | 292.9  | 306.9  | 344.6  | 272.4  | 219    | 288.5   | 337.8  |
| MRPS6   | 6675  | 5828.5 | 3068.1 | 8515.4 | 6256.4 | 3339.6 | 10515.4 | 7335.2 |
| MRPS7   | 234.1 | 270.4  | 312.2  | 239.3  | 201.1  | 161.2  | 181.6   | 188.3  |
| MRPS9   | 399.7 | 472.7  | 431.7  | 428.4  | 373.4  | 382.3  | 371     | 405.7  |
| MRRF    | 243.6 | 209.4  | 238.5  | 263.3  | 219.5  | 178.3  | 228.7   | 228.4  |
| MRRF    | 246.4 | 217.6  | 266.2  | 225.4  | 208.4  | 182.2  | 240.4   | 214.2  |
| MRRF    | 120.5 | 118    | 123.7  | 129.4  | 108.4  | 102.7  | 120.7   | 126.6  |
| MRS2L   | 142   | 139.8  | 166.9  | 166.1  | 133.9  | 135.5  | 144     | 127.1  |
| MRVI1   | 114.7 | 104.7  | 114.9  | 126.4  | 105    | 102.7  | 117.1   | 112.9  |

|        |        |        |        |        |        |        |        |        |
|--------|--------|--------|--------|--------|--------|--------|--------|--------|
| MRVI1  | 112.4  | 119.5  | 120.8  | 120.7  | 110    | 99     | 111.6  | 119.7  |
| MS4A1  | 137.9  | 141.1  | 146.8  | 154.2  | 146.8  | 119.9  | 156    | 140.4  |
| MS4A1  | 110    | 110.9  | 119.7  | 115.3  | 102.9  | 90.7   | 111.2  | 114.1  |
| MS4A1  | 148.4  | 138.2  | 163.6  | 153.8  | 129.5  | 114.8  | 109.2  | 123    |
| MS4A10 | 111.5  | 113.9  | 109    | 117.5  | 112.2  | 93.2   | 113    | 106.7  |
| MS4A12 | 115.5  | 126.8  | 126.5  | 109.9  | 106    | 102.7  | 117.8  | 119.9  |
| MS4A13 | 115.1  | 115.7  | 126.6  | 120    | 114.6  | 100.8  | 121.1  | 116    |
| MS4A2  | 122.2  | 113.8  | 136.6  | 118.1  | 113.4  | 104.3  | 126.2  | 120.8  |
| MS4A3  | 112.4  | 122.3  | 120.6  | 128.1  | 116.7  | 103.1  | 119.6  | 118.9  |
| MS4A3  | 112.7  | 117.3  | 112    | 108.1  | 105.8  | 97.7   | 125.6  | 121.2  |
| MS4A3  | 116.2  | 156.5  | 174.3  | 130    | 146.8  | 119    | 121.3  | 150.5  |
| MS4A4A | 96.7   | 105.9  | 119.1  | 120.5  | 113.2  | 95.6   | 117.9  | 114.5  |
| MS4A4A | 114.7  | 120.5  | 121    | 118.7  | 110.6  | 94.2   | 113.2  | 124.8  |
| MS4A4A | 119.4  | 113.8  | 122.8  | 113.5  | 111    | 98.8   | 120.8  | 118.9  |
| MS4A5  | 113.1  | 108.4  | 108.4  | 120.5  | 102.2  | 97.5   | 130.7  | 113    |
| MS4A6A | 123.4  | 117.6  | 371.9  | 120.6  | 111    | 107.2  | 123.7  | 123.9  |
| MS4A6A | 120.2  | 129.4  | 254.6  | 119.9  | 118.8  | 110.6  | 131.9  | 110.8  |
| MS4A6A | 121.6  | 114.1  | 243.5  | 120.6  | 112.4  | 102.4  | 119.4  | 115.8  |
| MS4A6E | 117.6  | 116.1  | 120.8  | 120.1  | 103.9  | 105.6  | 124.1  | 110.2  |
| MS4A7  | 465.2  | 157.6  | 1492.8 | 366.7  | 118.8  | 890.1  | 292.4  | 130.5  |
| MS4A8B | 110.2  | 121.8  | 115.4  | 119.6  | 112.7  | 97.9   | 125.2  | 118.5  |
| MSC    | 211.6  | 330.9  | 134    | 218.4  | 172.2  | 195.8  | 224.5  | 150.2  |
| MSH2   | 121.7  | 115.5  | 118.4  | 116.9  | 113.3  | 97.8   | 125.2  | 125.8  |
| MSH3   | 8031.9 | 7270.5 | 6743.2 | 7601.4 | 7378.9 | 3449.1 | 5725.2 | 8450.2 |
| MSH4   | 127.2  | 121.6  | 123.8  | 119    | 113.9  | 102.7  | 135.1  | 116.9  |
| MSH5   | 126.4  | 129.4  | 135.8  | 133.1  | 124.2  | 102    | 122.8  | 125.1  |
| MSH5   | 136.4  | 119.3  | 121.3  | 116.2  | 110.5  | 98.2   | 111.1  | 108.7  |
| MSH5   | 118.9  | 112.8  | 119.7  | 124.5  | 112.6  | 98.4   | 118.7  | 125.5  |
| MSH5   | 117.2  | 116.7  | 124.9  | 123.3  | 109.7  | 96.6   | 124.3  | 115.1  |
| MSH5   | 120.1  | 115.4  | 114.2  | 131.2  | 113.1  | 102.5  | 124.7  | 128.6  |
| MSH6   | 615.3  | 816.8  | 527.1  | 765.7  | 582.7  | 357.2  | 603.7  | 849.3  |
| MSI1   | 109.6  | 123.4  | 120.3  | 122.6  | 112.7  | 99.1   | 117.7  | 111.8  |
| MSI2   | 112.8  | 116.6  | 114.1  | 118.6  | 107.7  | 98.4   | 121    | 115.4  |
| MSI2   | 132.1  | 137.6  | 129.7  | 148.1  | 121.3  | 99.5   | 143.5  | 140.5  |
| MSI2   | 137.4  | 164.1  | 149.9  | 157.9  | 144.3  | 126    | 170.8  | 181.4  |
| MSL2L1 | 123.7  | 117.7  | 133.2  | 118.5  | 115.4  | 99.2   | 124.2  | 112.3  |
| MSL3L1 | 461.7  | 381.3  | 314.4  | 466.1  | 514.7  | 271.1  | 473.3  | 595.3  |
| MSL3L1 | 121.7  | 110.3  | 112.3  | 120    | 111.9  | 94.7   | 122.2  | 111.9  |
| MSL3L1 | 174.9  | 204.3  | 180.2  | 198    | 162.2  | 156.1  | 161.2  | 184.3  |
| MSL3L1 | 202    | 201.6  | 233.5  | 186.7  | 178.1  | 178.4  | 178.1  | 171.9  |
| MSLN   | 104.5  | 106.6  | 102.9  | 106.7  | 108.1  | 100.5  | 108.3  | 109.1  |
| MSMB   | 113.5  | 116.7  | 118.2  | 127    | 110.2  | 97.7   | 119.1  | 110.3  |
| MSMB   | 107.6  | 111.3  | 108    | 110.5  | 100.6  | 88.8   | 110.5  | 114.1  |
| MSMB   | 114.2  | 118.4  | 113.1  | 114.9  | 108.4  | 101.1  | 126.6  | 113.5  |
| MSN    | 1808.6 | 2119.3 | 1774.1 | 1800.1 | 1602.7 | 1868.4 | 2559.1 | 3096.5 |
| MSR1   | 108.7  | 94.2   | 119.9  | 116.8  | 104.2  | 114.2  | 114.7  | 105.5  |
| MSR1   | 122.4  | 118.4  | 135.6  | 133.2  | 119    | 110.4  | 128.1  | 127    |
| MSR1   | 111.2  | 109.9  | 125.7  | 110.5  | 104.7  | 103    | 117.7  | 109.6  |
| MSRA   | 226.1  | 234    | 251.8  | 247.5  | 192.7  | 186.8  | 211.1  | 183.4  |
| MSRB2  | 214.1  | 220.6  | 364    | 225.4  | 203    | 192.7  | 167.7  | 191.8  |
| MSRB3  | 107.4  | 117.8  | 120.7  | 120.5  | 95.4   | 96.1   | 121.8  | 109.4  |

|         |        |        |        |        |        |        |        |       |
|---------|--------|--------|--------|--------|--------|--------|--------|-------|
| MSRB3   | 115.3  | 118    | 113.2  | 105.1  | 100.9  | 96.8   | 110.7  | 114.3 |
| MSRB3   | 112.8  | 113.4  | 109.6  | 121.4  | 113.8  | 95.7   | 113.4  | 124.5 |
| MST150  | 134.5  | 129.8  | 129.2  | 131.4  | 127    | 111.5  | 136.1  | 138.9 |
| MST1R   | 121.8  | 115.2  | 122.3  | 124.8  | 114.1  | 96.5   | 114.7  | 120.4 |
| MST4    | 324    | 336.3  | 264.6  | 344.3  | 351.2  | 296.4  | 348.4  | 475.8 |
| MSTP9   | 121.6  | 126.2  | 123.9  | 140.2  | 110.1  | 113.5  | 129.8  | 117   |
| MSX1    | 108.1  | 104.5  | 107.6  | 110    | 101.6  | 96     | 110.7  | 119.4 |
| MSX2    | 117.5  | 112.2  | 117.1  | 124.8  | 116    | 111.1  | 130.2  | 124.6 |
| MSX2P   | 118.1  | 124.7  | 117.7  | 110.5  | 112.6  | 96.9   | 119.2  | 115.6 |
| MT      | 119.2  | 131.8  | 125.4  | 142.7  | 127.2  | 108.9  | 119.5  | 122.1 |
| MT      | 114.3  | 118.7  | 135.9  | 123.8  | 116.6  | 104.8  | 118.5  | 125.1 |
| MT1A    | 400.9  | 582.3  | 455.2  | 392.7  | 311    | 257    | 1014.5 | 556.1 |
| MT1B    | 114.6  | 117.4  | 107.4  | 116.9  | 102.2  | 98.1   | 119.3  | 117   |
| MT1E    | 135.3  | 136.9  | 132.6  | 145.8  | 125.3  | 110.3  | 183.3  | 155.3 |
| MT1F    | 325.4  | 493.4  | 309.9  | 371.1  | 354.6  | 201    | 598    | 354.7 |
| MT1G    | 120.4  | 149.6  | 129.6  | 175.2  | 182    | 100    | 510.8  | 319.1 |
| MT1H    | 129    | 153.4  | 122.7  | 172.7  | 123.4  | 98.3   | 286.1  | 178.2 |
| MT1M    | 120.3  | 119.4  | 122.6  | 134.5  | 114.5  | 93.3   | 146.3  | 125.1 |
| MT1P2   | 116.4  | 109.7  | 114.9  | 115.4  | 105.2  | 100    | 116.7  | 123.1 |
| MT1X    | 339.1  | 531.8  | 392.4  | 324.9  | 352.4  | 213.9  | 552.9  | 447.9 |
| MT2A    | 362.9  | 357.7  | 363.5  | 411.5  | 304.2  | 217.1  | 928.5  | 493.2 |
| MT3     | 110.5  | 112.5  | 121    | 123.5  | 111.1  | 98     | 119.6  | 111.6 |
| MT4     | 109.8  | 110.6  | 103.7  | 112.7  | 105.8  | 100.4  | 111.6  | 102.8 |
| MTA1    | 275.8  | 296.9  | 247.3  | 268.1  | 223.3  | 207    | 309    | 261   |
| MTA2    | 219.4  | 249.4  | 225.7  | 258.1  | 230.2  | 253    | 299.8  | 239.2 |
| MTA3    | 126.4  | 130.3  | 131.4  | 130    | 126.8  | 108    | 130.7  | 127.2 |
| MTAC2D1 | 241.8  | 354.3  | 263.1  | 337.7  | 306.7  | 191.9  | 192.8  | 243.6 |
| MTAP    | 221.1  | 260    | 196.7  | 278.6  | 209.3  | 165.8  | 233.3  | 169.7 |
| MTBP    | 125.6  | 136.9  | 128.6  | 125.7  | 127.3  | 109.1  | 131.8  | 124.4 |
| MTCH1   | 2658.2 | 2951.9 | 3426.8 | 2731.1 | 2307.4 | 2678.7 | 2793.1 | 3207  |
| MTCH2   | 107.7  | 120.2  | 129.4  | 134.9  | 117.5  | 107.7  | 122.2  | 126.9 |
| MTCP1   | 410.1  | 442.2  | 551.5  | 451.5  | 404.4  | 493.9  | 371.6  | 433.3 |
| MTDH    | 248.4  | 224.8  | 270    | 232.6  | 224    | 215    | 274.4  | 298.3 |
| MTE     | 125.2  | 131.8  | 131.2  | 126    | 115.4  | 109.2  | 140.2  | 126.6 |
| MTERF   | 111.9  | 126.4  | 111    | 121.6  | 110.8  | 100.8  | 119.7  | 115.4 |
| MTERFD1 | 226.5  | 223    | 265.2  | 237.7  | 216.4  | 189.9  | 227.5  | 251.2 |
| MTERFD2 | 134.4  | 119.5  | 132.6  | 135.6  | 126.7  | 112.5  | 134.2  | 130.9 |
| MTERFD3 | 111.7  | 108.8  | 110.9  | 118.6  | 104.9  | 100.4  | 125.6  | 116.1 |
| MTERFD3 | 117.8  | 122.7  | 116.8  | 119.6  | 113.4  | 101.6  | 120.2  | 122.4 |
| MTF1    | 327.7  | 301.9  | 270.1  | 391.7  | 253.9  | 246.3  | 387.7  | 368.6 |
| MTF2    | 174.8  | 188.4  | 171.9  | 227.9  | 206.2  | 146.8  | 199    | 244.4 |
| MTFMT   | 111.5  | 117.5  | 113.9  | 114.9  | 104.4  | 96.6   | 114.9  | 109.9 |
| MTFR1   | 176.1  | 170.7  | 174.1  | 187.4  | 181.6  | 140.2  | 193.5  | 169   |
| MTG1    | 158.1  | 171.8  | 143.4  | 154.6  | 129.7  | 119.5  | 136.2  | 135.8 |
| MTHFD1  | 121.5  | 118.4  | 123.7  | 127.8  | 116    | 103.1  | 132.6  | 116.8 |
| MTHFD1L | 152.6  | 162.5  | 137.6  | 182.6  | 139.5  | 117.1  | 170.6  | 149.7 |
| MTHFD2  | 163.9  | 152.7  | 142.9  | 186.9  | 136.6  | 177.2  | 200.8  | 240.2 |
| MTHFD2  | 116.3  | 111.8  | 106.4  | 113.1  | 111.5  | 88.7   | 121.8  | 109.2 |
| MTHFD2  | 359.4  | 291.9  | 368.6  | 370.3  | 275.4  | 392.1  | 392.6  | 587.8 |
| MTHFD2L | 138.6  | 157.3  | 163.2  | 164.1  | 176.6  | 151.1  | 244.7  | 191.9 |
| MTHFR   | 243.8  | 212.7  | 235.9  | 243.1  | 159.6  | 169.6  | 241.6  | 243.7 |

|        |        |        |        |        |       |        |        |        |
|--------|--------|--------|--------|--------|-------|--------|--------|--------|
| MTHFS  | 325    | 325.1  | 336.1  | 393.6  | 275.9 | 259.7  | 342.8  | 288.5  |
| MTIF2  | 268.5  | 290.9  | 402.2  | 292.4  | 307.1 | 253.9  | 241    | 243.7  |
| MTIF2  | 112.1  | 115.4  | 119.7  | 119.7  | 107.2 | 98.9   | 122.6  | 112.7  |
| MTIF3  | 286.1  | 219.6  | 301.8  | 259.6  | 214.6 | 253.7  | 243.2  | 226.2  |
| MTL5   | 119.3  | 123.1  | 117.1  | 126.4  | 100.5 | 105.2  | 118.3  | 110.5  |
| MTL5   | 116.1  | 114.6  | 113.4  | 122.5  | 115.9 | 97.7   | 127    | 115.8  |
| MTM1   | 180.3  | 210    | 183    | 218.6  | 187.2 | 168.1  | 193    | 191.6  |
| MTMR1  | 106.3  | 112.3  | 116.4  | 117    | 102.2 | 99.2   | 128.4  | 111.5  |
| MTMR11 | 127.9  | 120.7  | 117    | 129.3  | 113.8 | 108.1  | 124.1  | 122.8  |
| MTMR12 | 138.4  | 133.6  | 132.6  | 142.2  | 133   | 112.8  | 145.5  | 166.3  |
| MTMR14 | 146    | 130.6  | 152    | 158.8  | 129.1 | 123.1  | 149.2  | 164    |
| MTMR15 | 118.6  | 134    | 158    | 157.1  | 137.7 | 128.1  | 139.5  | 134.2  |
| MTMR2  | 113.1  | 120.2  | 116.9  | 116.3  | 104   | 102.7  | 118.6  | 122.7  |
| MTMR2  | 125.9  | 126.5  | 129.5  | 128.2  | 124   | 109.7  | 128.3  | 130.1  |
| MTMR3  | 473.6  | 562.9  | 394.9  | 602.8  | 417.5 | 389.5  | 644.8  | 675    |
| MTMR3  | 107.7  | 109.9  | 112.2  | 120.2  | 104.4 | 102.5  | 117.5  | 119    |
| MTMR3  | 139.2  | 128.2  | 142    | 148    | 141.3 | 119.7  | 141.5  | 155    |
| MTMR4  | 242.4  | 238.7  | 269.6  | 274.2  | 229   | 312    | 242.7  | 304.6  |
| MTMR6  | 258    | 266.3  | 237.5  | 358.7  | 258.1 | 208.2  | 338.5  | 373    |
| MTMR7  | 110.4  | 115.1  | 112    | 115.1  | 110.7 | 93.9   | 114.9  | 115.8  |
| MTMR8  | 122.6  | 115    | 118.3  | 124.2  | 119   | 102.1  | 120.3  | 115.1  |
| MTMR9  | 381.7  | 343    | 408.2  | 398.8  | 340.3 | 309.9  | 439.3  | 381    |
| MTNR1A | 114.4  | 117.9  | 112.9  | 111.3  | 110.3 | 107.3  | 115.9  | 115.4  |
| MTNR1B | 110.7  | 115    | 117.6  | 118.8  | 108   | 94.3   | 109.8  | 115.3  |
| MTO1   | 120    | 131.3  | 118    | 128.4  | 113.7 | 102    | 113.4  | 122.3  |
| MTO1   | 437    | 536.1  | 512.2  | 510.1  | 361.4 | 405.7  | 418.1  | 367.1  |
| MTP18  | 148    | 160.2  | 149.5  | 145.2  | 130.8 | 115.9  | 150.9  | 155.4  |
| MTP18  | 127    | 132.5  | 114.9  | 140.9  | 118.8 | 94.7   | 131.2  | 120.9  |
| MTP18  | 245.5  | 243.8  | 250.8  | 245.4  | 244.9 | 176.8  | 230.6  | 240.1  |
| MTPN   | 1418.8 | 1312.9 | 2032.5 | 1568.8 | 1432  | 1472.4 | 2094.4 | 1715.4 |
| MTR    | 140    | 157.9  | 160.4  | 162    | 169.1 | 139.4  | 168.5  | 156.2  |
| MTRF1  | 141.5  | 139.4  | 136.9  | 147.1  | 136.4 | 109.6  | 141.9  | 140.4  |
| MTRF1L | 326.2  | 258.6  | 306.1  | 272.4  | 234.6 | 203.6  | 273.7  | 273.7  |
| MTRR   | 118.9  | 123.4  | 126.7  | 119.5  | 115   | 99.6   | 122.5  | 114.3  |
| MTRR   | 122.5  | 122.4  | 127.5  | 139.1  | 115.6 | 109.3  | 132.6  | 131.7  |
| MTRR   | 379.8  | 546.2  | 320.2  | 395.3  | 501.7 | 220.7  | 375.1  | 506.2  |
| MTSS1  | 525.3  | 464.9  | 539.8  | 567.7  | 349   | 383.6  | 543.2  | 328.2  |
| MTTP   | 109.6  | 110.4  | 100.1  | 124.6  | 109.1 | 101.5  | 113.7  | 114.6  |
| MTUS1  | 107.9  | 110.4  | 107    | 116.4  | 103.2 | 98.6   | 118.5  | 105.7  |
| MTUS1  | 121.8  | 112.2  | 121.8  | 124.2  | 115.8 | 103.8  | 123.1  | 117.2  |
| MTUS1  | 116    | 119.2  | 112.4  | 124.1  | 113.5 | 105.4  | 120.8  | 118.6  |
| MTUS1  | 105.4  | 115.5  | 112.7  | 108    | 115.1 | 100.1  | 111.1  | 110.8  |
| MTUS1  | 129.1  | 136    | 133.3  | 138.4  | 131   | 104    | 127.7  | 131.9  |
| MTX1   | 138.3  | 148.1  | 163.7  | 150.7  | 146   | 134.8  | 148.8  | 139.5  |
| MTX1   | 186.4  | 204.3  | 207.9  | 204    | 189.2 | 151.1  | 192.1  | 195.5  |
| MTX2   | 200.2  | 257.8  | 229    | 202.8  | 223.8 | 215.9  | 233.1  | 229.7  |
| MTX2   | 117.3  | 105.4  | 117.7  | 118.9  | 107.6 | 94.4   | 116.2  | 115.2  |
| MTX3   | 217.4  | 214.3  | 253    | 248.6  | 192   | 183.6  | 167.5  | 166.8  |
| MUC1   | 113.9  | 116.9  | 120.9  | 127.5  | 114   | 101.2  | 120.2  | 123.7  |
| MUC1   | 113.7  | 124.2  | 128.3  | 108    | 112.5 | 101.7  | 119.2  | 114.1  |
| MUC1   | 124.7  | 124.6  | 130.3  | 143.2  | 130.9 | 109.6  | 138.5  | 126.6  |

|         |        |       |        |        |        |        |        |        |
|---------|--------|-------|--------|--------|--------|--------|--------|--------|
| MUC13   | 109.1  | 114.9 | 124.7  | 121.5  | 106.3  | 99.1   | 114.4  | 118.7  |
| MUC15   | 118.1  | 106.6 | 116.1  | 138.1  | 114.3  | 97.3   | 115.4  | 119.7  |
| MUC16   | 116.4  | 121   | 115.8  | 115.3  | 113    | 105.3  | 127.7  | 116.9  |
| MUC17   | 113.1  | 112.5 | 122.1  | 130.6  | 115.9  | 110.6  | 119.8  | 110.3  |
| MUC2    | 124.7  | 115.2 | 124.7  | 131.1  | 122.2  | 106.4  | 136.4  | 126.7  |
| MUC20   | 154    | 137.3 | 136.5  | 151.8  | 120    | 116.2  | 154    | 134.8  |
| MUC4    | 112.1  | 124.5 | 131.6  | 138.4  | 114.6  | 102.2  | 113.9  | 119    |
| MUC4    | 117    | 116.5 | 117.1  | 121.9  | 107.3  | 99.2   | 110.8  | 120.7  |
| MUC4    | 105.7  | 116.5 | 110.4  | 118    | 105    | 92.9   | 105.8  | 111.6  |
| MUC4    | 117.6  | 115.7 | 135.4  | 123    | 113.2  | 102.6  | 121.1  | 124.5  |
| MUC7    | 110.3  | 113.6 | 111.3  | 112.8  | 103.9  | 101    | 114.1  | 112.5  |
| MUCDHL  | 109.1  | 114.6 | 112    | 113.9  | 102.5  | 104.6  | 118.3  | 109.7  |
| MUCDHL  | 114.9  | 105.7 | 126.2  | 118    | 108.2  | 99.2   | 125.3  | 119.7  |
| MULK    | 205.5  | 222.7 | 227.9  | 228.3  | 211.7  | 151.2  | 207.8  | 199.6  |
| MUM1    | 323.8  | 411   | 364.5  | 361.1  | 282.3  | 314.4  | 528.1  | 634.5  |
| MUM1L1  | 110.3  | 119.7 | 108.4  | 112.9  | 108.6  | 100.9  | 115.2  | 111.1  |
| MUS81   | 271.7  | 310   | 291    | 260.9  | 202.2  | 192.4  | 231.9  | 247.3  |
| MUSK    | 135    | 129.3 | 136.9  | 141.4  | 126.4  | 112    | 139.3  | 130.4  |
| MUSTN1  | 118.5  | 135.4 | 129.8  | 121.4  | 118.4  | 108.8  | 113.2  | 126.5  |
| MUT     | 114.1  | 111.4 | 112.2  | 119.3  | 117.2  | 99.7   | 123.7  | 111.9  |
| MUTED   | 336.3  | 347.4 | 293.5  | 332.9  | 233.9  | 196.4  | 247    | 242.7  |
| MUTYH   | 133.3  | 144.7 | 124    | 123.6  | 125.9  | 104    | 135.2  | 123.3  |
| MUTYH   | 322.3  | 314.9 | 236.5  | 307.2  | 230.2  | 209.2  | 256.7  | 259.6  |
| MUTYH   | 118.9  | 131.1 | 120.8  | 140.5  | 115.4  | 109.1  | 116.8  | 118.2  |
| MVD     | 174.4  | 154.1 | 155.9  | 158.3  | 129.9  | 138.4  | 170.3  | 176.4  |
| MVK     | 128.7  | 138.4 | 130.4  | 146.4  | 121.5  | 100.1  | 134.7  | 124.3  |
| MVP     | 198.9  | 182.9 | 196.3  | 242.7  | 142    | 184    | 174.9  | 143.4  |
| MVP     | 472.5  | 544.7 | 470.6  | 423.9  | 298    | 309.4  | 407.5  | 331.3  |
| MX1     | 1585.7 | 1318  | 832.5  | 1442.7 | 910.6  | 611.3  | 858.1  | 794.4  |
| MX2     | 307.7  | 309.3 | 317.4  | 293.2  | 268    | 233.6  | 250.7  | 229.7  |
| MXD1    | 230.5  | 206.7 | 207.3  | 240    | 201.7  | 268.9  | 360.5  | 429.8  |
| MXD3    | 138.5  | 140.6 | 129.5  | 144    | 115.6  | 106.4  | 133.8  | 140.6  |
| MXD4    | 1549.8 | 1481  | 1867.9 | 1574   | 1025.8 | 1616.6 | 1503.8 | 1537.6 |
| MXI1    | 121.8  | 116.8 | 118.6  | 124.9  | 107.1  | 99.4   | 118.5  | 118.9  |
| MXI1    | 105.7  | 109.5 | 116    | 112.9  | 109.9  | 97     | 112.7  | 116.7  |
| MXI1    | 125.3  | 129.9 | 137.8  | 145.8  | 133.1  | 101.5  | 134.9  | 130.2  |
| MXI1    | 107.1  | 116.9 | 122.5  | 125.7  | 108.3  | 98     | 123.9  | 115    |
| MXRA5   | 115    | 127.1 | 134.3  | 114.2  | 135.9  | 97.6   | 130.1  | 123.1  |
| MXRA7   | 120.5  | 118.1 | 129.6  | 137.9  | 121    | 111.7  | 125.7  | 115.9  |
| MXRA7   | 162.8  | 156.6 | 140.3  | 191.5  | 140.2  | 132.6  | 147.9  | 139    |
| MXRA7   | 129.6  | 130.3 | 123.2  | 126.1  | 111.7  | 101.3  | 114.7  | 112.4  |
| MXRA8   | 109.4  | 113.7 | 127    | 114    | 106.1  | 101.2  | 108.1  | 116.3  |
| MYADM   | 113.4  | 124.3 | 120.5  | 133.3  | 97.9   | 99.2   | 117.9  | 117.4  |
| MYADM   | 127.7  | 134.7 | 134.4  | 113.7  | 107.7  | 102.4  | 127.3  | 129.2  |
| MYADM   | 563.8  | 585.1 | 604.5  | 478    | 470.6  | 348.3  | 424.3  | 563.4  |
| MYADML  | 116.2  | 116.3 | 111.4  | 122.2  | 111    | 109.6  | 131.7  | 113.5  |
| MYB     | 199.9  | 225.9 | 182.1  | 203.5  | 211.5  | 136.7  | 216.4  | 209.7  |
| MYBBP1A | 132.4  | 121.4 | 146.4  | 125.2  | 113    | 112.7  | 134.7  | 134.9  |
| MYBL2   | 133.7  | 116.6 | 124.5  | 131.8  | 121    | 99.7   | 119.1  | 125    |
| MYBPC1  | 108.4  | 111.4 | 116.4  | 105.4  | 104.6  | 95.6   | 112.3  | 112.9  |
| MYBPC1  | 123.6  | 106   | 117.9  | 119.4  | 104.7  | 105.5  | 122.1  | 107.9  |



|         |        |        |        |        |        |        |        |        |
|---------|--------|--------|--------|--------|--------|--------|--------|--------|
| MYBPC1  | 128.6  | 120.9  | 127.6  | 119.1  | 116.9  | 103.8  | 132.1  | 118.7  |
| MYBPC1  | 116.9  | 121.5  | 119.4  | 124.2  | 107.9  | 98.9   | 123.4  | 120.5  |
| MYBPC2  | 106.2  | 106.1  | 121.4  | 118.4  | 105.8  | 99.6   | 120.3  | 116.4  |
| MYBPC3  | 123.3  | 116.7  | 135.2  | 120.8  | 105.5  | 114.8  | 130.5  | 109.7  |
| MYBPH   | 136.8  | 112.4  | 118.3  | 123.8  | 110    | 97.2   | 127.8  | 111.5  |
| MYBPHL  | 103.6  | 104.3  | 110.3  | 116    | 115.4  | 94.5   | 111.4  | 108.9  |
| MYC     | 336.3  | 381.6  | 222.6  | 288.1  | 256.3  | 228    | 293.5  | 326.5  |
| MYCBP   | 116.8  | 122.6  | 136    | 122.1  | 118.5  | 120.7  | 119.6  | 119.4  |
| MYCBP2  | 855.7  | 1044.7 | 736.9  | 1126   | 920    | 594.7  | 1060.4 | 991.6  |
| MYCBPAP | 120.4  | 120.6  | 120.9  | 120.7  | 106.2  | 100.7  | 119.2  | 124.5  |
| MYCL1   | 109.5  | 115.3  | 116.3  | 119.4  | 121.9  | 99.5   | 116.7  | 115.7  |
| MYCL1   | 126.9  | 125.5  | 134.8  | 136.4  | 115.2  | 106.1  | 131.3  | 122.7  |
| MYCL1   | 117.8  | 125.5  | 139.4  | 134.9  | 120.6  | 105.5  | 140.1  | 129.8  |
| MYCN    | 115.2  | 120.6  | 133.2  | 125    | 120.4  | 112.4  | 114.8  | 124.3  |
| MYCT1   | 129    | 124.5  | 122.3  | 123.9  | 113.7  | 97.4   | 124.4  | 126.4  |
| MYD88   | 391.7  | 356.3  | 401.7  | 286.2  | 236.6  | 279.4  | 285.7  | 219.7  |
| MYEF2   | 123.4  | 119.3  | 131.8  | 120.9  | 117.8  | 109.4  | 137.6  | 129.2  |
| MYEOV   | 120.7  | 119.3  | 113.4  | 112    | 99.6   | 97.3   | 113.9  | 118.6  |
| MYEOV2  | 116.5  | 120.9  | 128.7  | 139.2  | 117.8  | 113.5  | 126.7  | 119.9  |
| MYF5    | 109.4  | 112    | 120.1  | 109.1  | 112.2  | 97     | 117    | 103.7  |
| MYF6    | 107.4  | 105.3  | 124.8  | 113.9  | 111.6  | 96.1   | 110.6  | 115.2  |
| MYH1    | 112    | 111.5  | 116.9  | 117.9  | 110.3  | 97.9   | 114.2  | 115    |
| MYH10   | 133.5  | 146.1  | 123.4  | 151.4  | 120.8  | 95.8   | 144.8  | 134    |
| MYH11   | 128.6  | 122.6  | 117.1  | 112.5  | 111.7  | 104.9  | 123    | 121.2  |
| MYH11   | 108.3  | 110.5  | 107.8  | 108.8  | 109.6  | 93     | 120.8  | 108.9  |
| MYH13   | 115.7  | 116.1  | 137.6  | 121.3  | 105.2  | 99.5   | 113.5  | 117    |
| MYH14   | 115.4  | 107.6  | 115.2  | 121.5  | 105.9  | 100    | 124.3  | 115.5  |
| MYH14   | 106.2  | 113.7  | 109.7  | 127.4  | 111.3  | 94.3   | 111.5  | 101.7  |
| MYH16   | 111.6  | 116.5  | 124.9  | 118.3  | 116.6  | 100.1  | 120.8  | 115    |
| MYH2    | 110.3  | 119.8  | 116.7  | 113.5  | 97.2   | 96.4   | 119.9  | 114.5  |
| MYH3    | 166    | 155.5  | 149.4  | 174.4  | 166.2  | 121.5  | 176.1  | 180.8  |
| MYH4    | 152.7  | 128.1  | 158.9  | 138.4  | 120.7  | 114.3  | 141.2  | 140.5  |
| MYH6    | 116.8  | 110.9  | 115.9  | 127.5  | 117.2  | 111.2  | 118.9  | 127.5  |
| MYH7    | 120.2  | 112.4  | 114.6  | 122.5  | 108.4  | 103.6  | 115.4  | 113.4  |
| MYH7B   | 113.7  | 115    | 116.8  | 120.8  | 108.2  | 96.8   | 122.6  | 116.3  |
| MYH8    | 110.2  | 110.7  | 113.1  | 116.5  | 113.5  | 96.4   | 117.3  | 119.9  |
| MYH9    | 3114.2 | 3461.5 | 3493.3 | 3654.1 | 3338   | 3308.9 | 3043.2 | 3181.1 |
| MYL1    | 116.9  | 112.3  | 114.1  | 124.4  | 104.8  | 104.6  | 123.3  | 121.6  |
| MYL1    | 113.9  | 115    | 117.9  | 114.2  | 103.1  | 99.2   | 114.7  | 109.8  |
| MYL2    | 107.4  | 113.3  | 112.3  | 120.4  | 100.4  | 103.8  | 113.4  | 104.5  |
| MYL4    | 111.4  | 121    | 105.8  | 114.2  | 107.4  | 95.2   | 113.8  | 118    |
| MYL4    | 116.7  | 109    | 115.5  | 119.9  | 106.5  | 100.4  | 118.9  | 118.4  |
| MYL5    | 160.9  | 166.8  | 187.9  | 160.5  | 144.6  | 170.8  | 162.2  | 147.9  |
| MYL6    | 5852.2 | 6320.6 | 8385.9 | 6414.1 | 4909.7 | 7303.1 | 5807.1 | 5462.5 |
| MYL6    | 5666.2 | 6319.1 | 8103.8 | 6142   | 5320.3 | 6605.7 | 5746   | 5535.5 |
| MYL7    | 120.1  | 120.8  | 111.9  | 139.6  | 115.2  | 102.6  | 126.8  | 120.2  |
| MYL9    | 110.9  | 128.4  | 117.7  | 115.4  | 120.7  | 107.7  | 125.8  | 126.2  |
| MYL9    | 113.3  | 123.5  | 115.5  | 110.8  | 110.3  | 99.2   | 111.8  | 108.5  |
| MYLC2PL | 110.9  | 120.3  | 115.4  | 109.7  | 109.6  | 93.3   | 112.5  | 105.1  |
| MYLIP   | 419.7  | 306.7  | 384.2  | 447.5  | 349.5  | 261.4  | 506.5  | 523.3  |
| MYLK    | 117.5  | 133.1  | 112    | 115.2  | 107.6  | 100.6  | 110.9  | 118.9  |

|        |        |        |        |        |       |        |        |       |
|--------|--------|--------|--------|--------|-------|--------|--------|-------|
| MYLK   | 107.6  | 105.8  | 107.9  | 130.6  | 115.5 | 96.8   | 109.9  | 110.1 |
| MYLK2  | 106.9  | 120.6  | 109.1  | 113.1  | 103   | 94.1   | 106.9  | 113.7 |
| MYLPF  | 119.3  | 116.7  | 114.9  | 120    | 118.8 | 108.4  | 110.3  | 127   |
| MYNN   | 111.2  | 127.1  | 120.1  | 114.4  | 100.6 | 95.5   | 110.7  | 114.8 |
| MYO10  | 122.9  | 119    | 117.4  | 124.2  | 105.6 | 110.3  | 124.8  | 122.8 |
| MYO15A | 115.6  | 108.4  | 116.4  | 121.8  | 112.3 | 110.8  | 109.4  | 115.9 |
| MYO18A | 134.6  | 163.9  | 174.6  | 149.4  | 120.3 | 126.4  | 141.5  | 129.2 |
| MYO18A | 113.9  | 125.6  | 113.9  | 122.2  | 108.1 | 96.3   | 111.3  | 118.5 |
| MYO18B | 111.2  | 111.4  | 115.6  | 125.7  | 108.4 | 98.6   | 115.3  | 113.2 |
| MYO1A  | 116.2  | 114.1  | 117.5  | 121.3  | 116.5 | 100.4  | 120.3  | 122.6 |
| MYO1B  | 103    | 114    | 110.2  | 123.8  | 116.2 | 99.4   | 119.4  | 115.4 |
| MYO1C  | 117.9  | 119.1  | 119.3  | 115.7  | 115.1 | 106.8  | 117.4  | 120.5 |
| MYO1C  | 119.2  | 109    | 110.8  | 117    | 102.6 | 88.7   | 113.2  | 112.6 |
| MYO1C  | 136.8  | 122.8  | 148.3  | 138.7  | 117.6 | 127.4  | 149.5  | 146.4 |
| MYO1D  | 139.6  | 147    | 127.1  | 132.1  | 118.6 | 120.1  | 139.1  | 119.5 |
| MYO1E  | 119.9  | 120.6  | 122.9  | 123.3  | 114.5 | 110    | 120.7  | 125.9 |
| MYO1F  | 278.3  | 271.8  | 262.8  | 278.2  | 170.3 | 299.6  | 306.2  | 176.9 |
| MYO1G  | 307.3  | 285.1  | 366.3  | 276    | 216.7 | 286.3  | 242.8  | 194.1 |
| MYO3A  | 117.2  | 113.4  | 102.2  | 112.3  | 108.2 | 96.3   | 117.6  | 115.7 |
| MYO3B  | 176.7  | 189.4  | 159.9  | 180.2  | 176.9 | 142.1  | 214.8  | 170.9 |
| MYO5A  | 185.8  | 192.3  | 201.6  | 204.7  | 175.7 | 228.4  | 240.9  | 210.9 |
| MYO5B  | 113.7  | 112.8  | 120.1  | 110.2  | 112.9 | 101.6  | 121.1  | 122.1 |
| MYO5C  | 118.4  | 123.6  | 119.2  | 115.7  | 115.9 | 105.2  | 112.2  | 129.4 |
| MYO6   | 117    | 113.4  | 126.6  | 130.5  | 109.3 | 102.5  | 125.6  | 116.3 |
| MYO7A  | 120.5  | 115.5  | 125    | 126.5  | 107.4 | 99.8   | 114.5  | 114.3 |
| MYO7B  | 121.5  | 127.3  | 121.4  | 114.2  | 101.6 | 97.7   | 116.6  | 119.8 |
| MYO9A  | 258.4  | 254.6  | 201    | 286.6  | 269.9 | 193.2  | 410.6  | 371.8 |
| MYO9B  | 344.9  | 311.2  | 283.8  | 318.7  | 280.4 | 304.8  | 467.8  | 352   |
| MYOC   | 102.4  | 125.2  | 118.1  | 124.1  | 111.7 | 102.8  | 112.2  | 113   |
| MYOCD  | 113.7  | 109    | 119.7  | 122.8  | 113.5 | 103.3  | 112.9  | 110.8 |
| MYOD1  | 115.7  | 119.1  | 115.7  | 127.5  | 109.1 | 98.3   | 114.7  | 122.6 |
| MYOG   | 117.9  | 118.1  | 126.9  | 125.9  | 110.6 | 104.9  | 116.2  | 115.1 |
| MYOHD1 | 117.6  | 106.7  | 109.8  | 110.1  | 113.4 | 89.9   | 105.4  | 120.3 |
| MYOHD1 | 115.6  | 118.5  | 126.1  | 136.3  | 106.4 | 101.6  | 121.5  | 125.8 |
| MYOHD1 | 123.5  | 126.2  | 127.2  | 135.2  | 114.5 | 112.3  | 149.8  | 135   |
| MYOM1  | 140.1  | 144.6  | 172.2  | 153.8  | 144.9 | 129    | 162    | 151.3 |
| MYOM2  | 208    | 184.4  | 186.7  | 229.9  | 167.6 | 144.2  | 262.3  | 276.3 |
| MYOM3  | 117.2  | 119.6  | 118.8  | 119.3  | 110.8 | 103.8  | 109.9  | 112.5 |
| MYOT   | 117.2  | 119.4  | 110.7  | 120.9  | 108.8 | 108.9  | 114.3  | 122.9 |
| MYOZ1  | 117.7  | 112.8  | 112.9  | 119.2  | 109.6 | 102.1  | 117.4  | 114.7 |
| MYOZ2  | 113.8  | 128.6  | 116.2  | 116.5  | 107.9 | 102.7  | 123.6  | 118.9 |
| MYOZ3  | 118.3  | 117.4  | 130.1  | 119.9  | 109.1 | 95.2   | 116.1  | 114   |
| MYPN   | 115.9  | 110.3  | 119.4  | 118.6  | 103.9 | 98.7   | 117.1  | 115.9 |
| MYR8   | 109    | 124.4  | 113.5  | 122.5  | 109.8 | 100.8  | 112.9  | 123.2 |
| MYRIP  | 108.7  | 114.9  | 111.9  | 115.7  | 106.5 | 97.1   | 117.6  | 114.2 |
| MYST1  | 242.4  | 272.5  | 207.2  | 223.2  | 211.9 | 187    | 227.5  | 194.7 |
| MYST2  | 131.9  | 135.9  | 138.1  | 143    | 117.6 | 113    | 127.5  | 136.1 |
| MYST3  | 1017.3 | 1050.1 | 1060.5 | 1137.3 | 874.9 | 1114.8 | 1659.3 | 1575  |
| MYST4  | 155.2  | 137.6  | 136.5  | 161.8  | 144.4 | 106.3  | 151.6  | 157.2 |
| MYT1   | 116.5  | 130.4  | 113.4  | 119.3  | 121.3 | 102.5  | 117    | 129.4 |
| MYT1L  | 115.2  | 118.1  | 125.5  | 118.6  | 102.9 | 98     | 117.5  | 105.9 |

|          |        |        |        |        |        |        |        |        |
|----------|--------|--------|--------|--------|--------|--------|--------|--------|
| N4BP1    | 221    | 271.2  | 211.9  | 248.3  | 213.8  | 226    | 281.3  | 296.5  |
| N4BP2    | 556.3  | 347.4  | 413.5  | 389.9  | 595.4  | 230.8  | 444.2  | 474.1  |
| N4BP3    | 118.4  | 115.1  | 130.9  | 129.5  | 117    | 104.9  | 126.2  | 113.5  |
| N6AMT1   | 183.1  | 213.3  | 183.4  | 187.9  | 143.8  | 133.1  | 154.9  | 141.1  |
| NAALAD2  | 119.5  | 123.5  | 141.9  | 127    | 116.7  | 106.2  | 130.7  | 134.9  |
| NAALADL1 | 148.9  | 155.3  | 159.4  | 152    | 123.8  | 133.9  | 137.2  | 135.9  |
| NAALADL2 | 115.1  | 108.1  | 111.2  | 112.9  | 114.5  | 102.4  | 116.6  | 111.1  |
| NAB1     | 188.4  | 169.8  | 206.8  | 187.2  | 176.3  | 207.6  | 224.4  | 190.6  |
| NAB2     | 130.7  | 123.6  | 114.9  | 131.1  | 122.6  | 118.1  | 142.5  | 119.9  |
| NACA     | 3813.1 | 4319.6 | 3622.7 | 3738.3 | 3167.5 | 2772.7 | 3128.4 | 4344.2 |
| NACAL    | 117.1  | 106.4  | 109.9  | 115.4  | 103.5  | 102.7  | 113.4  | 111    |
| NACAP1   | 243.1  | 162.4  | 246.5  | 211.9  | 222.9  | 172.2  | 289.6  | 238.3  |
| NADSYN1  | 182.9  | 184.7  | 217.6  | 213.9  | 145.7  | 203.2  | 164.5  | 179    |
| NAG      | 152.7  | 145.6  | 162.2  | 151.4  | 129.5  | 123    | 154.8  | 141.1  |
| NAG18    | 7462.5 | 7742.8 | 5650.4 | 5572   | 7248.8 | 5690.8 | 7881.9 | 7301.7 |
| NAG6     | 189.4  | 268.1  | 157    | 199    | 174.2  | 117.2  | 156.9  | 172.2  |
| NAG8     | 172    | 160.6  | 150.8  | 190.3  | 219.5  | 128.4  | 204.1  | 200.8  |
| NAGA     | 117.5  | 123.3  | 142.9  | 122.2  | 109.4  | 115.1  | 117.1  | 119.4  |
| NAGK     | 841.9  | 526.5  | 980.8  | 644.9  | 414.2  | 360.8  | 509.9  | 528.8  |
| NAGLU    | 145.2  | 126.4  | 169.1  | 149.1  | 141.3  | 112.3  | 148    | 138.7  |
| NAGPA    | 355.1  | 353.6  | 369.3  | 386.8  | 240.3  | 266.2  | 382.7  | 276.9  |
| NAGS     | 115.5  | 114    | 134.5  | 121.1  | 111.9  | 107.1  | 119.6  | 125    |
| NAIP     | 110.6  | 127.8  | 121.4  | 119    | 111.2  | 98.9   | 122.3  | 122.2  |
| NAIP     | 112.5  | 111.7  | 127.3  | 122.1  | 118.9  | 102    | 120.2  | 106.9  |
| NALP1    | 133.4  | 130.7  | 124.5  | 121.1  | 114.7  | 106.3  | 121.4  | 132    |
| NALP10   | 118.1  | 108.7  | 123.3  | 119.4  | 105.7  | 103.8  | 121.8  | 115.1  |
| NALP11   | 111    | 108.2  | 118.3  | 113.9  | 110.8  | 98.9   | 113.2  | 109.9  |
| NALP12   | 115.1  | 126.7  | 135.2  | 121.6  | 107.5  | 114.9  | 119    | 114.5  |
| NALP12   | 116.3  | 111.2  | 182    | 137    | 110.4  | 124.3  | 125    | 122.5  |
| NALP12   | 104.6  | 109.8  | 117.2  | 118.6  | 115    | 96.8   | 123.1  | 118.2  |
| NALP13   | 110.2  | 117.4  | 112.7  | 110.2  | 105.6  | 101.1  | 117.8  | 119.8  |
| NALP14   | 113.2  | 115.1  | 114.7  | 120.8  | 110.4  | 100.5  | 106.3  | 109    |
| NALP2    | 140.3  | 117.8  | 118.6  | 142.8  | 104.4  | 108.2  | 133    | 109.3  |
| NALP4    | 114.9  | 117.7  | 124.2  | 120.6  | 103.4  | 99.9   | 128.3  | 118.9  |
| NALP5    | 105    | 122.7  | 112.5  | 109.8  | 114.7  | 102.4  | 113.7  | 108    |
| NALP6    | 119.4  | 120.6  | 115.9  | 118.1  | 111.8  | 97.6   | 119.2  | 110.2  |
| NALP7    | 119    | 116    | 127.1  | 119.7  | 118.3  | 98.5   | 128.8  | 113.7  |
| NALP7    | 126.5  | 118.5  | 115.9  | 127.4  | 105.1  | 105.9  | 117.8  | 111.4  |
| NALP7    | 113.7  | 111.5  | 107.1  | 111.5  | 101.6  | 99     | 111.4  | 120.8  |
| NALP9    | 109.9  | 115.9  | 112.4  | 112.9  | 114.9  | 98.6   | 113.6  | 119.2  |
| NANOG    | 110.9  | 116.6  | 114.4  | 119.5  | 100.7  | 96.2   | 116.9  | 110.9  |
| NANOS1   | 125.3  | 145.4  | 134.9  | 137.5  | 122.5  | 107.7  | 138.3  | 137.3  |
| NANOS1   | 101.8  | 104.6  | 117.6  | 100.3  | 93.9   | 92.4   | 110.1  | 101.4  |
| NANOS1   | 114.9  | 111.2  | 116    | 114.6  | 105.7  | 95.9   | 109    | 109.2  |
| NANOS2   | 126.8  | 120.2  | 124.7  | 124.8  | 114.8  | 100.1  | 120.8  | 112.2  |
| NANP     | 113.7  | 98.8   | 113.7  | 122.6  | 105.3  | 98.8   | 118.6  | 107.3  |
| NANS     | 148.2  | 131.4  | 131.6  | 143.2  | 120.8  | 122.3  | 131.8  | 147.7  |
| NAP1L1   | 298.9  | 271.5  | 199.3  | 401.9  | 225.3  | 147.2  | 249    | 245.1  |
| NAP1L1   | 118.3  | 126.8  | 136.2  | 127.1  | 108.6  | 99.4   | 122    | 116.5  |
| NAP1L2   | 120.9  | 119.5  | 116.4  | 112    | 101.8  | 96.6   | 114.6  | 117.2  |
| NAP1L3   | 123.9  | 105.9  | 121.3  | 120.7  | 114.7  | 111    | 115.2  | 107.3  |

|           |        |        |        |        |        |        |        |        |
|-----------|--------|--------|--------|--------|--------|--------|--------|--------|
| NAP1L4    | 1185.3 | 1376.6 | 1264.4 | 1516.1 | 1312.8 | 1312.7 | 2307.1 | 2197.6 |
| NAP1L5    | 136.8  | 168.6  | 128    | 155.4  | 147.1  | 119.3  | 153.4  | 177.5  |
| NAP5      | 109.6  | 109.5  | 112.6  | 116.3  | 106.2  | 91.6   | 111.4  | 113.4  |
| NAP5      | 126.1  | 115.7  | 131.9  | 119.5  | 117.2  | 101.6  | 109.3  | 117.7  |
| NAP5      | 109.7  | 109    | 116.4  | 100.3  | 99.9   | 101.7  | 112.6  | 114.6  |
| NAPA      | 122    | 126.9  | 131.2  | 120.4  | 124.5  | 112.3  | 124.3  | 126.9  |
| NAPB      | 285.7  | 208.8  | 300.9  | 252    | 245.3  | 204.3  | 248    | 186.2  |
| NAPE-PLD  | 151.4  | 150.2  | 131.1  | 145.8  | 135    | 118.9  | 129.2  | 122.6  |
| NAPG      | 130.9  | 131.5  | 135.7  | 135.1  | 113.2  | 106.9  | 149.2  | 124.4  |
| NAPRT1    | 194.3  | 245.9  | 395.1  | 252.1  | 222.9  | 212.3  | 188.4  | 228.6  |
| NAPSA     | 121    | 132.3  | 140.4  | 130.2  | 118.3  | 104.8  | 118.4  | 124.9  |
| NAPSB     | 190.3  | 168.7  | 279    | 189.2  | 146.7  | 197.5  | 145.9  | 156.8  |
| NARF      | 355.2  | 439.1  | 416.5  | 438.3  | 334.9  | 266.7  | 435.9  | 378.8  |
| NARFL     | 141.6  | 185.3  | 164.1  | 171.4  | 144.6  | 149.4  | 173    | 167.2  |
| NARG1     | 139    | 145.2  | 153.4  | 154.8  | 134.2  | 118.4  | 152.9  | 162    |
| NARG1L    | 217.4  | 222.5  | 197.9  | 210.7  | 207.8  | 169.5  | 209.4  | 297.6  |
| NARG1L    | 167    | 189.3  | 160    | 194.1  | 195.7  | 143.3  | 205    | 243.9  |
| NARG1L    | 122.2  | 115.1  | 128    | 124.1  | 120.1  | 106.5  | 113.5  | 118.1  |
| NARG2     | 132    | 123.6  | 124.9  | 124.9  | 127.5  | 120.5  | 133.9  | 135    |
| NARG2     | 121.8  | 129.1  | 126.8  | 128.1  | 123.9  | 109    | 123.3  | 126.6  |
| NARG2     | 129.6  | 129.2  | 131.3  | 133.8  | 116.6  | 112.8  | 130.7  | 122.9  |
| NARS      | 897.3  | 1154.8 | 775.6  | 798.7  | 507    | 433.4  | 749.9  | 939.4  |
| NARS2     | 165.6  | 168.7  | 179.6  | 190.4  | 133.8  | 136.6  | 162.9  | 156.5  |
| NASP      | 116.6  | 120.1  | 121.2  | 132.1  | 117.7  | 96.7   | 118.8  | 129.7  |
| NASP      | 203.4  | 206.1  | 199.7  | 205.7  | 201.1  | 148    | 208.7  | 207.2  |
| NAT1      | 121.7  | 113.7  | 123    | 123.1  | 107.4  | 93.3   | 118.4  | 116.9  |
| NAT1      | 165.4  | 149.6  | 154.4  | 154.9  | 139.2  | 147.9  | 142.9  | 134.4  |
| NAT10     | 457.3  | 498.2  | 323.7  | 457.4  | 413.9  | 293.5  | 451.9  | 387.3  |
| NAT11     | 120.6  | 135.5  | 133.3  | 138.5  | 123.7  | 104    | 116.8  | 118.7  |
| NAT12     | 129.7  | 123.3  | 143.1  | 148    | 134.1  | 107.7  | 155.8  | 150.7  |
| NAT13     | 134.4  | 152.8  | 157.1  | 162.5  | 143    | 138.8  | 176    | 150.5  |
| NAT2      | 108.7  | 117.7  | 120.2  | 116.2  | 107.8  | 105.1  | 119.3  | 108    |
| NAT5      | 1306.7 | 1280.4 | 1525.1 | 1350.8 | 960.6  | 1065.4 | 1212.6 | 1106.3 |
| NAT5      | 114.3  | 118.2  | 112.4  | 126.5  | 109.8  | 96.6   | 115    | 120.1  |
| NAT5      | 606.9  | 635.8  | 754.5  | 571.1  | 568.1  | 543.4  | 478.3  | 500.3  |
| NAT6      | 200.6  | 199.7  | 191.8  | 203.5  | 140.7  | 181.1  | 158.4  | 140.5  |
| NAT8      | 110.7  | 105.9  | 117.4  | 108.4  | 102    | 96.4   | 111.1  | 119.5  |
| NAT9      | 332.4  | 317.4  | 273.3  | 351.6  | 246.1  | 231.8  | 289.9  | 367.5  |
| NAV1      | 118.4  | 112.9  | 124.4  | 121.4  | 108.9  | 96.4   | 133.5  | 116.5  |
| NAV2      | 118.9  | 109.4  | 118.4  | 130.6  | 105.8  | 99.3   | 120.6  | 121.1  |
| NAV2      | 121.7  | 120.4  | 147.4  | 126.7  | 118.5  | 107.8  | 127.6  | 116.4  |
| NAV3      | 117.1  | 123.3  | 118.9  | 127.1  | 126.3  | 95.8   | 133.1  | 130.8  |
| NBEA      | 112.8  | 95.1   | 105    | 107.5  | 101.4  | 91.3   | 88     | 96.9   |
| NBEAL1    | 120    | 114.6  | 110.5  | 108.6  | 101.7  | 93.8   | 119.1  | 103.9  |
| NBL1      | 242.5  | 193.2  | 314.6  | 279.3  | 181.5  | 376.4  | 353    | 259.5  |
| NBL1      | 159.7  | 154.9  | 184.4  | 190.1  | 127.1  | 168.8  | 177.5  | 178    |
| NBLA1038: | 153.8  | 144    | 156.4  | 152    | 139.6  | 112.7  | 161.2  | 144.1  |
| NBN       | 109.2  | 116.7  | 122.5  | 119    | 112.6  | 102.9  | 124    | 121.5  |
| NBN       | 134.8  | 130.1  | 138    | 127.2  | 125.1  | 107.6  | 121.9  | 123.1  |
| NBPF1     | 157.8  | 156.6  | 188.2  | 167.2  | 156.7  | 109.6  | 154.3  | 132.9  |
| NBPF1     | 109.5  | 124.1  | 125.2  | 132.9  | 117    | 102.3  | 135.1  | 126.6  |

|         |        |        |        |        |        |        |         |         |
|---------|--------|--------|--------|--------|--------|--------|---------|---------|
| NBPF10  | 4055   | 4800.4 | 3664.8 | 4552.6 | 6509   | 1729.1 | 5101.3  | 5907.9  |
| NBPF11  | 929.2  | 765.1  | 731.8  | 895.9  | 771.1  | 598    | 805.5   | 788.2   |
| NBPF14  | 210.4  | 224.8  | 215.6  | 227.5  | 275.3  | 158.1  | 257.5   | 243.2   |
| NBPF15  | 107.5  | 101.3  | 113.1  | 117.2  | 105.7  | 91.2   | 114.6   | 107.5   |
| NBPF20  | 7123.2 | 7089   | 4425   | 8389.5 | 9599.6 | 2895.6 | 10482.6 | 10340.5 |
| NBPF3   | 349.4  | 318.9  | 286.8  | 349.5  | 362    | 306.4  | 309.7   | 355     |
| NBPF3   | 116.6  | 124.1  | 123.8  | 118.1  | 113.6  | 97.9   | 111.8   | 110.1   |
| NBPF7   | 109.6  | 126.7  | 119.5  | 118.8  | 115.5  | 95.7   | 123.4   | 112.8   |
| NBPF9   | 136.5  | 121.9  | 134.6  | 146.7  | 125.3  | 103.4  | 121.7   | 127.5   |
| NBR1    | 120.9  | 125.6  | 125.4  | 131.9  | 123.4  | 102.1  | 124.2   | 122.7   |
| NBR1    | 122.6  | 112.5  | 115.6  | 116.6  | 106    | 104.6  | 114.8   | 111.9   |
| NBR2    | 114.2  | 112.5  | 115.3  | 112.8  | 108.3  | 105.5  | 110.7   | 115.3   |
| NCALD   | 256.9  | 301    | 230.2  | 251.1  | 233.7  | 164.5  | 205.4   | 184     |
| NCALD   | 246.1  | 261.4  | 197.4  | 204.3  | 197.5  | 163.8  | 176.2   | 178.6   |
| NCALD   | 122.8  | 107.1  | 106.6  | 115.1  | 102.2  | 99.6   | 111.7   | 113.2   |
| NCAM1   | 102.8  | 108    | 122.2  | 133.1  | 109.4  | 100.9  | 112.2   | 111.4   |
| NCAM1   | 109    | 109.7  | 108.4  | 111.8  | 102.6  | 93.8   | 106     | 107.8   |
| NCAM1   | 160.7  | 138.4  | 146.1  | 162.7  | 121.8  | 118.9  | 138.7   | 132.5   |
| NCAM2   | 112.4  | 117.8  | 120.8  | 119.5  | 113.5  | 100.8  | 117     | 118.6   |
| NCAPG2  | 126.8  | 140.6  | 132.2  | 132.1  | 127.4  | 107.4  | 131.3   | 139     |
| NCBP1   | 202.6  | 225.5  | 216.1  | 200.1  | 169.5  | 196.7  | 201.5   | 202.4   |
| NCBP2   | 258.3  | 344.7  | 323.9  | 340.4  | 275.3  | 267.4  | 298.4   | 327.6   |
| NCBP2   | 133.3  | 129.9  | 132    | 118.9  | 116.6  | 99.4   | 125.3   | 116.2   |
| NCBP2   | 154.2  | 149.9  | 180.7  | 161.9  | 142    | 127.6  | 146     | 139.7   |
| NCDN    | 124.3  | 141.2  | 128.5  | 139.7  | 122.2  | 116.8  | 142.3   | 132.6   |
| NCDN    | 121.9  | 132.4  | 140.4  | 137.2  | 123.5  | 105.3  | 119.3   | 125.7   |
| NCDN    | 148.4  | 159.5  | 131    | 159.7  | 138.8  | 126.1  | 149     | 144.4   |
| NCF1    | 526.2  | 229.8  | 861.4  | 427.7  | 162.4  | 827.5  | 185.5   | 139.3   |
| NCF1B   | 134.5  | 116.9  | 137.7  | 137.4  | 112.9  | 126.4  | 130.3   | 121.9   |
| NCF1C   | 233    | 170.8  | 271.3  | 193.8  | 147.6  | 212.6  | 159     | 122.2   |
| NCF2    | 172.6  | 163.8  | 154.3  | 208.1  | 150.9  | 153.6  | 212.8   | 140.7   |
| NCF4    | 144.4  | 127.4  | 178.6  | 132    | 122.1  | 140    | 127.3   | 118.4   |
| NCF4    | 152.1  | 129.3  | 170.6  | 153.9  | 112.1  | 136.7  | 135.1   | 126.3   |
| NCF4    | 235.5  | 179.3  | 673.7  | 212.4  | 140.8  | 361.3  | 156.9   | 137.5   |
| NCK1    | 584.9  | 619.2  | 576.5  | 726.7  | 603.5  | 477.3  | 604.5   | 661     |
| NCK2    | 128.4  | 132.5  | 125.8  | 117.8  | 119.4  | 111    | 134.4   | 123.6   |
| NCKAP1  | 120.9  | 113.9  | 119.8  | 118.7  | 112.9  | 98     | 111.2   | 121.3   |
| NCKAP1  | 120.9  | 121.7  | 111.6  | 123    | 107.4  | 100.3  | 126.4   | 125.5   |
| NCKIPSD | 125.7  | 128.6  | 122.9  | 122.7  | 117.9  | 107.6  | 123.3   | 113     |
| NCKIPSD | 155.9  | 171    | 151.9  | 159    | 146.8  | 116.8  | 143.4   | 129     |
| NCL     | 1288.4 | 1095.6 | 978.4  | 1044.6 | 804.4  | 773.6  | 1037.7  | 1282.1  |
| NCOA1   | 419    | 475.4  | 445.2  | 532.2  | 438.2  | 325.2  | 625.9   | 663.2   |
| NCOA1   | 149.1  | 135.5  | 137.7  | 165.3  | 126.4  | 135    | 171.3   | 170     |
| NCOA1   | 135.7  | 122.2  | 120.6  | 119    | 119.9  | 110.5  | 154.5   | 138.3   |
| NCOA2   | 107.6  | 117.8  | 119.5  | 128.3  | 103.3  | 102.1  | 116.1   | 117.6   |
| NCOA3   | 118.3  | 116.9  | 125.5  | 124.3  | 115    | 113.6  | 126.2   | 129.2   |
| NCOA3   | 758    | 599.1  | 786.4  | 962.4  | 737.7  | 809    | 1089.7  | 1057.4  |
| NCOA4   | 5722.6 | 5377.4 | 5917.2 | 5955.7 | 3782.5 | 4656.5 | 4884.5  | 4108.8  |
| NCOA5   | 478    | 470.2  | 352.5  | 469.2  | 328    | 328.1  | 560.6   | 491.3   |
| NCOA6   | 617.8  | 526.2  | 392.5  | 629.1  | 575.7  | 380.2  | 744.3   | 764.3   |
| NCOA6IP | 154.7  | 147.9  | 149.5  | 140.2  | 134.5  | 116.1  | 165.7   | 145.1   |

|         |        |        |        |        |        |        |        |        |
|---------|--------|--------|--------|--------|--------|--------|--------|--------|
| NCOA7   | 615.5  | 721.9  | 454.7  | 603.3  | 634.8  | 378.4  | 714.2  | 912.5  |
| NCOR1   | 184.3  | 184.1  | 171.7  | 178.1  | 167.9  | 145.4  | 175.9  | 176.8  |
| NCOR2   | 244.6  | 222.8  | 248.3  | 268.2  | 218    | 230.2  | 317.4  | 288.8  |
| NCOR2   | 635.2  | 692.2  | 797.7  | 708.8  | 485.9  | 556.2  | 948.6  | 655.1  |
| NCOR2   | 112.9  | 118.9  | 116.6  | 114.2  | 108    | 104.2  | 121.7  | 119    |
| NCR1    | 137.5  | 128.8  | 137.4  | 138.3  | 117.3  | 114.3  | 143.2  | 108.5  |
| NCR2    | 105.1  | 111.6  | 123.7  | 115.5  | 109.4  | 98.2   | 121.6  | 113.1  |
| NCR3    | 271.5  | 289.7  | 160.5  | 293.6  | 214.5  | 126.6  | 246.6  | 163.2  |
| NCSTN   | 660.8  | 693.3  | 860.6  | 722.1  | 619.6  | 883.3  | 647.9  | 609.9  |
| NDE1    | 465.5  | 474.4  | 483.2  | 653.8  | 450    | 275.9  | 430.7  | 439.4  |
| NDEL1   | 1217.1 | 1479.3 | 1193.2 | 1731.8 | 1388   | 1233.2 | 1949.9 | 2144.8 |
| NDEL1   | 161.5  | 193    | 161.7  | 178.3  | 153.8  | 144.6  | 171.4  | 221.3  |
| NDFIP1  | 183.3  | 207.3  | 211.5  | 196.7  | 196.4  | 168.2  | 226.4  | 233.2  |
| NDFIP2  | 186.5  | 181.9  | 164.3  | 196.3  | 168.4  | 121.6  | 212.5  | 217.7  |
| NDN     | 111.8  | 113.3  | 130.2  | 124.1  | 100.3  | 98.9   | 124.7  | 113.3  |
| NDNL2   | 129.2  | 125.4  | 131.9  | 140    | 127    | 118.4  | 141.1  | 132.3  |
| NDOR1   | 107.4  | 124.2  | 124.5  | 130.8  | 113.9  | 114.5  | 123.6  | 121.7  |
| NDP     | 111.2  | 120.2  | 125.3  | 130    | 119.4  | 102.7  | 126.3  | 115.4  |
| NDRG1   | 204.1  | 193.9  | 192.7  | 202.6  | 162.1  | 172.1  | 189.6  | 237.6  |
| NDRG2   | 120.2  | 122    | 148.7  | 124.3  | 132.2  | 113.1  | 121.4  | 115.7  |
| NDRG2   | 153.3  | 176.4  | 169    | 159.1  | 146.1  | 146.1  | 158.1  | 139    |
| NDRG3   | 222.4  | 228.9  | 217    | 207    | 177.2  | 184.4  | 157    | 192.7  |
| NDRG3   | 162    | 175.5  | 176    | 173.7  | 176.6  | 149.5  | 173.6  | 157.2  |
| NDRG4   | 127.8  | 124.3  | 121.6  | 124.9  | 118.2  | 113.2  | 127.1  | 130.4  |
| NDRG4   | 111.1  | 112.1  | 120.7  | 123.6  | 118.5  | 100.7  | 116.5  | 123.2  |
| NDRG4   | 134.7  | 122.6  | 134.4  | 131.1  | 108.7  | 108.1  | 135.7  | 121.5  |
| NDST1   | 114.8  | 124.8  | 126.6  | 137.1  | 115.4  | 111.9  | 129.8  | 125.4  |
| NDST2   | 490.5  | 463    | 430.5  | 448    | 353.9  | 406.3  | 412.8  | 397.9  |
| NDST3   | 117.8  | 117.7  | 111.1  | 116.7  | 106.4  | 96     | 122.1  | 114.2  |
| NDST4   | 110.7  | 117.7  | 111.1  | 121.8  | 101    | 98.4   | 109.6  | 121.2  |
| NDUFA1  | 3653   | 5004.7 | 5595.5 | 4583.1 | 4681.2 | 3669.2 | 4333.7 | 3907.5 |
| NDUFA10 | 148.9  | 134.4  | 163    | 138.9  | 129.9  | 134.5  | 130    | 143.4  |
| NDUFA11 | 645.8  | 666.1  | 1078.6 | 637.8  | 555.5  | 602.2  | 457.4  | 412.2  |
| NDUFA12 | 1027.1 | 1406.4 | 1104   | 1152.5 | 1329.3 | 811.5  | 1002.1 | 1424.6 |
| NDUFA13 | 563.3  | 580.6  | 588.6  | 618.9  | 530.4  | 672.1  | 428.4  | 555.4  |
| NDUFA3  | 1094.4 | 1549.3 | 1562.6 | 1039.5 | 1423   | 1336.4 | 800.1  | 796.2  |
| NDUFA4  | 1874.5 | 2057.1 | 2605.2 | 1779.8 | 1287.9 | 2024.8 | 1844.3 | 1925.6 |
| NDUFA5  | 116.5  | 118    | 116.1  | 124.1  | 110.9  | 105.4  | 114.9  | 114.3  |
| NDUFA7  | 185.9  | 208.8  | 276.5  | 218.8  | 194.4  | 197.7  | 174.5  | 179.2  |
| NDUFA8  | 629.6  | 717.4  | 706    | 564.8  | 553.5  | 514.7  | 586.6  | 620.5  |
| NDUFA9  | 280.1  | 260.6  | 339.7  | 294.8  | 257.4  | 233    | 244.5  | 229    |
| NDUFAB1 | 713.6  | 714.3  | 859.9  | 732.9  | 766.2  | 643.6  | 673.7  | 647.1  |
| NDUFAB1 | 164.1  | 157.6  | 194.1  | 183.4  | 157.2  | 160.7  | 188.8  | 164.6  |
| NDUFB1  | 124.3  | 133.1  | 133.3  | 128.7  | 122.2  | 105    | 125.2  | 126.9  |
| NDUFB10 | 371    | 339.6  | 269.5  | 262    | 245.4  | 195    | 294.3  | 194.1  |
| NDUFB11 | 923.4  | 1202.1 | 1019.6 | 1099.6 | 807    | 807.3  | 956.6  | 1111.3 |
| NDUFB2  | 1362   | 1395.4 | 1356   | 1272.1 | 1192.2 | 931    | 1000.2 | 1330.9 |
| NDUFB3  | 778.8  | 726    | 1085.8 | 885.2  | 764.6  | 896.3  | 862.5  | 1000.7 |
| NDUFB4  | 111.5  | 112    | 122.4  | 111.6  | 100.8  | 98.6   | 117.3  | 110.7  |
| NDUFB5  | 1149.1 | 1291.5 | 2117.8 | 1452.2 | 1238.7 | 1225.1 | 1455.7 | 1540.5 |
| NDUFB6  | 223.6  | 316.2  | 323.7  | 239.9  | 244.5  | 216.7  | 217    | 240.5  |

|        |        |        |        |        |        |        |        |        |
|--------|--------|--------|--------|--------|--------|--------|--------|--------|
| NDUFB7 | 542.6  | 715.7  | 735.1  | 576.1  | 449.2  | 414.1  | 395.2  | 357.5  |
| NDUFB8 | 2818.3 | 2958.6 | 3285   | 3013.7 | 2492   | 2421   | 2444.8 | 2411.8 |
| NDUFC1 | 225.2  | 235    | 293.9  | 230.2  | 213.4  | 309.2  | 211    | 230.9  |
| NDUFC2 | 122.5  | 123.7  | 125.6  | 128    | 108.8  | 100.7  | 125.8  | 115    |
| NDUFS1 | 149.4  | 170    | 134.8  | 134.4  | 138.8  | 116.4  | 167.9  | 155.4  |
| NDUFS2 | 109.8  | 125.8  | 86.3   | 126.7  | 125.8  | 111.3  | 135.6  | 120.4  |
| NDUFS3 | 579.2  | 700.2  | 482.6  | 544.6  | 523.9  | 382.2  | 450    | 445.4  |
| NDUFS4 | 393.6  | 383.8  | 721.5  | 454    | 360    | 571.9  | 310.3  | 330.8  |
| NDUFS5 | 1214.6 | 1389.5 | 2259.3 | 1440.8 | 1239.2 | 1628.6 | 1286.1 | 1069.5 |
| NDUFS6 | 111.1  | 116.3  | 118.5  | 116.4  | 109.8  | 95.4   | 122.2  | 116.9  |
| NDUFS7 | 716.9  | 814.3  | 976.4  | 717.4  | 510.2  | 506.5  | 519.5  | 435.6  |
| NDUFS8 | 768.1  | 1073   | 917.9  | 816    | 621.3  | 627.5  | 654.2  | 624.2  |
| NDUFV1 | 658.5  | 669.8  | 815    | 587.6  | 438.8  | 459.7  | 488.2  | 419.3  |
| NDUFV2 | 765.7  | 696.3  | 857.9  | 860.2  | 659.1  | 745.4  | 868.2  | 663.6  |
| NDUFV3 | 108.6  | 115.1  | 118.4  | 116.3  | 111.6  | 100.4  | 118.2  | 119.3  |
| NDUFV3 | 132.4  | 132.8  | 143    | 132.2  | 129    | 111    | 130.9  | 132.3  |
| NEB    | 124.5  | 117.4  | 122.7  | 127.9  | 116.6  | 100    | 120.7  | 117.7  |
| NEBL   | 113.4  | 116.3  | 123.4  | 114.9  | 116.5  | 113    | 125.6  | 117.7  |
| NEBL   | 110.1  | 109.3  | 109.9  | 119.2  | 101.6  | 98.6   | 114    | 109.3  |
| NEBL   | 117.1  | 127.8  | 127.4  | 124.4  | 120    | 103.5  | 115.7  | 122.7  |
| NECAP1 | 553.1  | 452.7  | 561.3  | 463.2  | 388.7  | 463.9  | 474.7  | 421.6  |
| NECAP2 | 814.8  | 1049.1 | 925.7  | 1225.2 | 830.6  | 752.4  | 1210   | 1108.2 |
| NEDD1  | 120    | 111.8  | 129.8  | 126.5  | 111.3  | 104.8  | 125.2  | 120.6  |
| NEDD4  | 117.7  | 116.2  | 121.3  | 119.8  | 117.2  | 93.9   | 118.8  | 123.3  |
| NEDD4  | 113.7  | 111.8  | 110.3  | 117    | 105.3  | 107.2  | 117.1  | 112.3  |
| NEDD4  | 133    | 129.9  | 117.7  | 123    | 125.5  | 105    | 128.1  | 134.5  |
| NEDD4L | 121.2  | 119    | 127.1  | 126.6  | 113.9  | 98.9   | 126.3  | 131.5  |
| NEDD8  | 3915.7 | 4279.1 | 5004.8 | 4635   | 3265.7 | 3459.8 | 3674.9 | 3834.5 |
| NEDD9  | 128.3  | 118.9  | 121.3  | 123.1  | 121.5  | 95.6   | 125.4  | 114.8  |
| NEDD9  | 149    | 167.9  | 147.2  | 161.5  | 137.3  | 124.6  | 138.6  | 142.1  |
| NEDD9  | 125.4  | 147.1  | 141.2  | 140    | 127.6  | 122.6  | 135.7  | 138.3  |
| NEFH   | 129.7  | 137.2  | 129.4  | 125.4  | 116.3  | 116.7  | 125.5  | 126.6  |
| NEFL   | 120.5  | 120.2  | 114.6  | 119.7  | 107.2  | 99.1   | 118.9  | 115.5  |
| NEFM   | 110    | 115.3  | 101.6  | 124.9  | 106.1  | 98.4   | 113.4  | 104.9  |
| NEGR1  | 110.6  | 113.2  | 116    | 121.3  | 108.1  | 102.6  | 113.2  | 113.3  |
| NEIL1  | 118.3  | 131.8  | 136.6  | 126.7  | 124.3  | 111.4  | 122.3  | 137.2  |
| NEIL2  | 131    | 127.9  | 150.7  | 148.7  | 115.2  | 119    | 143.6  | 133.6  |
| NEIL3  | 105.3  | 116.1  | 117.4  | 117.3  | 115.2  | 106    | 118.1  | 116.9  |
| NEK1   | 200.4  | 208.7  | 178.7  | 207.6  | 176.3  | 153.7  | 212.5  | 211.7  |
| NEK10  | 118.2  | 133.2  | 129    | 139    | 120.9  | 101.7  | 126.6  | 122.5  |
| NEK10  | 128.4  | 113    | 124    | 121    | 122.7  | 104.6  | 119.3  | 118    |
| NEK11  | 114.5  | 121.1  | 120.2  | 119.8  | 113.6  | 103    | 115.9  | 117.1  |
| NEK11  | 122.4  | 125.6  | 123    | 116.5  | 119    | 104.9  | 120.5  | 126    |
| NEK2   | 114.6  | 122.9  | 117.1  | 108.6  | 116.6  | 98.2   | 123    | 117.7  |
| NEK3   | 109.7  | 114.7  | 123.2  | 119.4  | 106.5  | 99.9   | 117.8  | 119.6  |
| NEK3   | 121.3  | 133.9  | 122.7  | 114.8  | 114    | 108    | 121.8  | 118.3  |
| NEK3   | 117.3  | 124.6  | 121.3  | 130.5  | 119.2  | 99.2   | 114.6  | 121.8  |
| NEK4   | 121.7  | 115.4  | 129.4  | 119.1  | 115    | 104.8  | 126.9  | 120.2  |
| NEK5   | 109.4  | 113.2  | 116.6  | 110.8  | 102.4  | 97.6   | 115.2  | 117.3  |
| NEK6   | 151.6  | 155.9  | 182.5  | 153.9  | 129.6  | 133.7  | 171.5  | 136    |
| NEK7   | 121.9  | 114.9  | 124.7  | 115.9  | 114.4  | 102.1  | 129.2  | 103.3  |

|          |       |        |        |        |        |        |        |        |
|----------|-------|--------|--------|--------|--------|--------|--------|--------|
| NEK8     | 155.3 | 152.1  | 156.9  | 152.7  | 148    | 118.5  | 161.1  | 146.7  |
| NEK9     | 118.6 | 108.4  | 117.4  | 119.2  | 107.3  | 103.6  | 117.6  | 114.5  |
| NELF     | 142.9 | 147.7  | 169.2  | 171.9  | 141.3  | 140.2  | 170.2  | 181.4  |
| NELL1    | 107.7 | 115.5  | 129.4  | 118.7  | 112.6  | 99.7   | 118.8  | 119    |
| NELL2    | 1810  | 2246.7 | 1280.9 | 2058.6 | 1823.8 | 1190.7 | 2056.9 | 2502.2 |
| NENF     | 539.4 | 656.7  | 599.6  | 779.9  | 463.9  | 422.3  | 754.6  | 528.3  |
| NEO1     | 125.7 | 149.8  | 142    | 169.2  | 124.4  | 117.2  | 170    | 154    |
| NES      | 111   | 117.8  | 119.9  | 121.1  | 110    | 94.1   | 115.2  | 118.5  |
| NET1     | 276.4 | 317.4  | 265    | 368.2  | 253.6  | 263.6  | 304.3  | 322.5  |
| NET1     | 129.4 | 128.7  | 122    | 130.3  | 113.5  | 105.3  | 127.3  | 116.7  |
| NET1     | 120.7 | 133.8  | 124.7  | 134.8  | 130.4  | 106.9  | 127.7  | 120.3  |
| NETO1    | 111.1 | 116.2  | 116.7  | 122.5  | 106.3  | 93.5   | 120.4  | 112.6  |
| NETO1    | 110.7 | 112.8  | 117.8  | 121.3  | 109.5  | 98.6   | 122.2  | 113    |
| NETO1    | 120   | 102    | 114.1  | 112.8  | 99.5   | 99.2   | 119.1  | 114.9  |
| NETO1    | 119.3 | 116.6  | 118.7  | 103.4  | 109    | 100.5  | 123.9  | 112    |
| NETO2    | 145   | 144    | 191.1  | 183.3  | 137.4  | 150.3  | 208.8  | 179.5  |
| NEU1     | 244.2 | 236.6  | 233.3  | 287.3  | 226.5  | 221.3  | 320.8  | 315.6  |
| NEU2     | 112.1 | 115    | 109.2  | 117.3  | 107.1  | 97.4   | 116.8  | 111.9  |
| NEU3     | 118.6 | 120    | 120.4  | 136    | 116.3  | 100.9  | 120.1  | 124.2  |
| NEU4     | 108   | 110.6  | 103.9  | 107.3  | 105.9  | 98.7   | 111    | 112.8  |
| NEURL    | 121.8 | 132.9  | 131.2  | 128.7  | 114    | 108.4  | 127.7  | 112.5  |
| NEURL2   | 128.1 | 130.4  | 129.1  | 141.2  | 117.3  | 108    | 130.8  | 127.7  |
| NEUROD1  | 121.4 | 116    | 119    | 114.6  | 111.6  | 101.7  | 113.8  | 116.6  |
| NEUROD2  | 104.7 | 121.8  | 100.1  | 120.4  | 100.6  | 102.4  | 117.9  | 108.8  |
| NEUROD4  | 117.2 | 115.3  | 113.7  | 116.8  | 106.2  | 95     | 113.9  | 114.7  |
| NEUROD6  | 122.7 | 125.5  | 119    | 122.1  | 103.5  | 99.7   | 122.5  | 116    |
| NEUROG1  | 123.9 | 111.2  | 117.7  | 117.3  | 105.9  | 104.5  | 114.4  | 119.4  |
| NEUROG2  | 104.2 | 116.8  | 121.2  | 116.7  | 107.3  | 112.3  | 116.4  | 120.9  |
| NEUROG3  | 123.2 | 119.8  | 120.7  | 117.2  | 116.6  | 106.4  | 112    | 122.2  |
| NEXN     | 135.9 | 136.9  | 130.9  | 130.4  | 115.2  | 105.2  | 121.5  | 132    |
| NF1      | 127.3 | 117    | 120    | 122.9  | 123.3  | 110.5  | 130.6  | 121.4  |
| NF2      | 109.2 | 113.8  | 122    | 123.3  | 106    | 98     | 117.7  | 121.2  |
| NF2      | 110.6 | 121.6  | 118.5  | 119.2  | 104.2  | 99.2   | 115.3  | 111.3  |
| NF2      | 126.6 | 122.8  | 126.9  | 124.1  | 114.2  | 108.5  | 118.5  | 119    |
| NFAM1    | 131.4 | 119.9  | 143.3  | 144.2  | 124.5  | 122.2  | 124.6  | 141.5  |
| NFASC    | 112.1 | 117.7  | 117.7  | 124.3  | 100.5  | 99.8   | 120.4  | 109.9  |
| NFAT5    | 121.2 | 119    | 116.2  | 136.2  | 123.8  | 101.4  | 130.3  | 128.2  |
| NFAT5    | 154.6 | 129.1  | 136.8  | 144.7  | 133.9  | 107.6  | 155.2  | 165.4  |
| NFAT5    | 109.6 | 120.5  | 114.6  | 110.9  | 107.2  | 97.7   | 120.9  | 112.8  |
| NFATC1   | 162.4 | 157.6  | 138    | 167.7  | 129    | 133.9  | 192.2  | 186.6  |
| NFATC1   | 128.7 | 131.6  | 122.6  | 122.1  | 119.3  | 109.8  | 137.2  | 123    |
| NFATC1   | 117.8 | 123.2  | 124.4  | 116    | 109.8  | 106.1  | 118.7  | 113.6  |
| NFATC1   | 116.4 | 110.6  | 118.9  | 119.3  | 107.6  | 100.7  | 118.3  | 107.2  |
| NFATC2   | 118.1 | 114.5  | 117.2  | 112    | 100.5  | 84.7   | 119    | 110.6  |
| NFATC2   | 108   | 117.8  | 113.6  | 120.4  | 104.3  | 99.9   | 115.5  | 117.9  |
| NFATC2IP | 136   | 152.3  | 154    | 153.9  | 136.5  | 135.2  | 151.2  | 142.8  |
| NFATC2IP | 119   | 129.6  | 128    | 116.9  | 115.6  | 99.6   | 119.7  | 122.5  |
| NFATC3   | 227.7 | 265.3  | 227.3  | 255.7  | 261    | 173.3  | 259.6  | 249.2  |
| NFATC3   | 131.2 | 117.5  | 119    | 126.3  | 121.8  | 102.8  | 119    | 115    |
| NFATC3   | 246.3 | 229.2  | 173.7  | 210.8  | 214.7  | 146.1  | 230.4  | 240.9  |
| NFATC3   | 154.3 | 170.2  | 148.8  | 197.9  | 157    | 128.3  | 167.8  | 164.7  |



|           |        |        |        |        |        |        |        |        |
|-----------|--------|--------|--------|--------|--------|--------|--------|--------|
| NFATC3    | 147    | 133.3  | 117.5  | 137.6  | 121.9  | 112    | 132.4  | 145.2  |
| NFATC4    | 125.4  | 122.5  | 115.6  | 123.9  | 106.6  | 103    | 119.8  | 113.5  |
| NFE2      | 134.9  | 137.2  | 147.5  | 159.6  | 120.8  | 127.4  | 132.4  | 116.1  |
| NFE2L1    | 325.3  | 289.7  | 281.9  | 310.4  | 225.7  | 319.9  | 399.8  | 389.4  |
| NFE2L2    | 751.3  | 611.8  | 546.3  | 746.4  | 592.7  | 686.6  | 788    | 955.7  |
| NFE2L3    | 184.3  | 150.9  | 198.6  | 155.6  | 126.3  | 116.4  | 138.9  | 121.1  |
| NFIA      | 116.8  | 127.8  | 117.7  | 126.1  | 115.5  | 94.1   | 113.3  | 115.8  |
| NFIB      | 122.7  | 120.5  | 129.8  | 126.1  | 109.2  | 103.8  | 123.3  | 120.8  |
| NFIC      | 121.8  | 113.1  | 126.2  | 118.8  | 106.3  | 100.7  | 117.4  | 121.1  |
| NFIC      | 112.8  | 119.2  | 114.6  | 114.8  | 105.2  | 95.9   | 122.4  | 115.3  |
| NFIC      | 130.5  | 123.1  | 119.9  | 126    | 109.6  | 95.9   | 121.4  | 117.7  |
| NFIL3     | 125.9  | 123    | 134.4  | 131.5  | 118.4  | 112.4  | 130.5  | 140.4  |
| NFIX      | 167.6  | 165.9  | 140.9  | 151.6  | 124.7  | 121.4  | 145.8  | 132    |
| NFKB1     | 2512.5 | 2374.3 | 2001.8 | 2329.6 | 2203.2 | 1484.7 | 2628.5 | 2440.4 |
| NFKB2     | 141.1  | 180.5  | 125.1  | 156.3  | 135.5  | 130.5  | 209.9  | 186.2  |
| NFKB2     | 147.5  | 171.9  | 133.5  | 154.6  | 140.1  | 124.4  | 189.9  | 196.3  |
| NFKB2     | 120.2  | 112.7  | 110.8  | 116.4  | 102.3  | 95     | 126.5  | 124.7  |
| NFKBIB    | 133.4  | 136.1  | 116.8  | 156.6  | 110.7  | 122    | 132.7  | 142.2  |
| NFKBIB    | 115.4  | 120.9  | 130.5  | 129.1  | 113.6  | 115.7  | 115.4  | 134.9  |
| NFKBIB    | 156.4  | 147.7  | 129.7  | 135.9  | 140.2  | 117.4  | 149.6  | 149.3  |
| NFKBIE    | 232.8  | 226.9  | 223    | 273.2  | 170.7  | 182.4  | 222.7  | 216.5  |
| NFKBIL1   | 117.3  | 122.9  | 115.5  | 123.6  | 110.2  | 105.8  | 121.8  | 115.1  |
| NFKBIL2   | 117.2  | 111.9  | 113    | 130.1  | 109.1  | 95.3   | 119.9  | 111.1  |
| NFKBIZ    | 122.2  | 129.5  | 122.1  | 123.2  | 106.4  | 110.7  | 125.4  | 127.7  |
| NFKBIZ    | 677.9  | 672.7  | 745.7  | 615.1  | 616.4  | 438.9  | 991.2  | 1056.5 |
| NFRKB     | 136.4  | 141.3  | 127.9  | 141.7  | 137.8  | 122.7  | 150.9  | 156.1  |
| NFS1      | 121.4  | 132.6  | 136.8  | 126    | 117.6  | 104.7  | 121.7  | 122.2  |
| NFS1      | 618.4  | 614.7  | 1141.2 | 567.6  | 545.1  | 600    | 450.3  | 426.3  |
| NFU1      | 342.2  | 472.4  | 396.9  | 402    | 312    | 352.2  | 323    | 360.2  |
| NFX1      | 150.9  | 136.5  | 148.4  | 158.6  | 142.3  | 125.2  | 176.2  | 177.4  |
| NFX1      | 171.7  | 176.6  | 181.8  | 209.7  | 156    | 131.3  | 185.6  | 186.1  |
| NFX1      | 183    | 167.7  | 159.4  | 175    | 160.3  | 118.4  | 191.8  | 192.7  |
| NFX1      | 307.1  | 331.6  | 310.9  | 310.9  | 331.4  | 297.5  | 332    | 396.8  |
| NFXL1     | 265.9  | 231.1  | 364.5  | 250.6  | 181.9  | 246.5  | 218.8  | 216.7  |
| NFYA      | 145.1  | 140.9  | 160.8  | 159.7  | 134    | 138.5  | 136.7  | 151.9  |
| NFYA      | 120.7  | 110.7  | 121.1  | 122.4  | 110.6  | 100.9  | 117.3  | 111.6  |
| NFYB      | 120.8  | 129    | 135.5  | 133.2  | 122.1  | 109.2  | 134    | 138.5  |
| NFYC      | 210.5  | 239.8  | 207.4  | 225.8  | 184.3  | 207.6  | 227.8  | 209.2  |
| NGB       | 120.4  | 124.6  | 117.9  | 121.5  | 109.1  | 101.8  | 131.7  | 120    |
| NGDN      | 151.5  | 134.8  | 152.8  | 147.3  | 141.8  | 128.5  | 139.9  | 137    |
| NGDN      | 495.1  | 511.2  | 438    | 594.5  | 497.1  | 468.1  | 583.2  | 605.6  |
| NGEF      | 116.1  | 118.9  | 113.3  | 106.6  | 99.4   | 97.7   | 121.6  | 111    |
| NGFB      | 124.2  | 116    | 121    | 129.6  | 123.1  | 108.5  | 129.9  | 124.4  |
| NGFR      | 115.9  | 110.1  | 119.9  | 126.1  | 121.4  | 117.1  | 117.1  | 125.6  |
| NGFRAP1   | 165.9  | 164.7  | 162.7  | 153.3  | 156    | 120.7  | 140.1  | 129    |
| NGFRAP1   | 155.6  | 159.9  | 170.8  | 159.2  | 141.2  | 119    | 136.2  | 126.6  |
| NGFRAP1   | 429.5  | 489.7  | 367.2  | 494.8  | 280.6  | 277.6  | 250.8  | 232.4  |
| NGFRAP1L: | 143.9  | 160.6  | 147.1  | 147.9  | 142.2  | 124.2  | 151.7  | 174.7  |
| NGLY1     | 244.5  | 235.6  | 232.6  | 272.3  | 195.6  | 175.7  | 283.7  | 268.4  |
| NGRN      | 1367.1 | 1373.9 | 1390.8 | 1413.7 | 1197.3 | 1123   | 1472.9 | 1570.7 |
| NGRN      | 199.5  | 182.4  | 263.2  | 213.9  | 200.4  | 181    | 218.3  | 199.2  |

|           |        |        |        |        |        |        |        |        |
|-----------|--------|--------|--------|--------|--------|--------|--------|--------|
| NHLH1     | 113.6  | 110.6  | 116.1  | 123.4  | 103.9  | 101.8  | 113.3  | 120.9  |
| NHLH2     | 114.9  | 115.9  | 130.1  | 129.2  | 113.9  | 106.6  | 118.5  | 116.6  |
| NHLRC1    | 114.1  | 110.6  | 113.5  | 125.1  | 113.7  | 105.3  | 109.5  | 114.6  |
| NHLRC2    | 155.3  | 165.9  | 139.1  | 147.8  | 125.6  | 126.3  | 143.8  | 133.7  |
| NHN1      | 185.4  | 158.2  | 173.5  | 177.1  | 138.5  | 150.1  | 182.3  | 175.2  |
| NHP2L1    | 798.1  | 860    | 629.1  | 875.5  | 624.1  | 645.4  | 790.8  | 942    |
| NHP2L1    | 336.9  | 307.8  | 377.1  | 336.9  | 356.8  | 289.5  | 341.3  | 382.6  |
| NHP2L1    | 135.2  | 133.6  | 166.8  | 147.2  | 152.9  | 131.9  | 145.2  | 155.6  |
| NHS       | 116.9  | 117.9  | 116.3  | 110.9  | 112    | 93.9   | 112.6  | 117.9  |
| NIBP      | 140.7  | 147.1  | 140.6  | 141.7  | 125.9  | 131    | 143.3  | 145.2  |
| NICN1     | 345.9  | 339.2  | 304.7  | 281.8  | 251.9  | 189.4  | 198.2  | 214.6  |
| NID1      | 110.7  | 114.1  | 113.1  | 119.4  | 110.1  | 94.5   | 119.2  | 116.7  |
| NID2      | 121.5  | 118.3  | 125.2  | 129.6  | 113.6  | 99.4   | 120.5  | 123.1  |
| NIF3L1    | 473.8  | 613.6  | 702.7  | 532.2  | 448.9  | 539    | 397.3  | 369.7  |
| NIF3L1BP1 | 692.8  | 721.3  | 979.4  | 730.6  | 690.2  | 744.6  | 658    | 964.4  |
| NIFIE14   | 663.2  | 752.9  | 876.3  | 741.4  | 559.8  | 552.8  | 497.8  | 382    |
| NIFUN     | 273.9  | 259.9  | 230.8  | 293.6  | 248.8  | 203.3  | 255.3  | 264.9  |
| NIN       | 153.5  | 160.8  | 174.6  | 167    | 162.6  | 128.2  | 159.3  | 140.1  |
| NIN       | 166.2  | 165    | 166.8  | 176.5  | 160.1  | 154.2  | 175.3  | 158.6  |
| NIN       | 116.6  | 106.4  | 114    | 124.5  | 108.9  | 99.9   | 113.7  | 119    |
| NIN       | 697.2  | 815.2  | 689.9  | 830    | 797.1  | 495.7  | 639.9  | 680.6  |
| NINJ1     | 1205.7 | 973.3  | 870.5  | 1247.7 | 642.1  | 1153.9 | 797.9  | 453.8  |
| NINJ2     | 230.4  | 258.2  | 216.9  | 244.5  | 198    | 165.5  | 254.9  | 265.2  |
| NIP       | 114.9  | 112.4  | 110.8  | 123.6  | 111.6  | 104    | 117.5  | 117.5  |
| NIP30     | 143.9  | 168.2  | 167.9  | 169.4  | 142.7  | 137.9  | 151.3  | 131.8  |
| NIP7      | 351    | 493    | 399.1  | 444.6  | 408.4  | 336.6  | 438.9  | 485.7  |
| NIPA1     | 196    | 188.6  | 172.1  | 194.8  | 170.6  | 137.2  | 182.7  | 193.3  |
| NIPA2     | 118.9  | 130.9  | 120.6  | 121.3  | 108.9  | 109.7  | 124    | 117.3  |
| NIPA2     | 696.8  | 658.2  | 545.5  | 716    | 632.3  | 566.4  | 902.8  | 1069.8 |
| NIPBL     | 114.5  | 108    | 111.1  | 117.8  | 101.2  | 104    | 117.7  | 115.6  |
| NIPBL     | 148.8  | 158.6  | 152    | 148.4  | 157.3  | 136.9  | 162.4  | 177.5  |
| NIPBL     | 531.7  | 496.9  | 470.1  | 574.7  | 618    | 370.3  | 764.2  | 921    |
| NIPSNAP1  | 174.4  | 150.5  | 183.1  | 160    | 152.7  | 147    | 134.1  | 126.3  |
| NIPSNAP3A | 112    | 112    | 110.7  | 110.7  | 102.6  | 93     | 115.7  | 105.1  |
| NIPSNAP3E | 127.6  | 115.1  | 136.5  | 122.4  | 116.2  | 109.1  | 130.4  | 126.1  |
| NISCH     | 750.4  | 569.9  | 927.5  | 827.5  | 409.3  | 875.8  | 656.2  | 577.1  |
| NIT1      | 132.5  | 127.2  | 144.8  | 146.5  | 116.4  | 120    | 123.6  | 125.6  |
| NIT2      | 186.2  | 188.6  | 203.4  | 194.7  | 178.2  | 145.4  | 178.4  | 170    |
| NKAP      | 127.1  | 120.1  | 111.5  | 138.6  | 106.6  | 105.5  | 122.7  | 133.4  |
| NKD1      | 118.7  | 117.4  | 145.1  | 122.8  | 117.6  | 115.2  | 122.9  | 122.3  |
| NKD2      | 108.6  | 118    | 110.7  | 106.4  | 104.7  | 100.2  | 105.7  | 113.3  |
| NKG7      | 2374.2 | 3275.9 | 1733.7 | 2443.2 | 2076.1 | 1446.7 | 2518.8 | 2502.9 |
| NKIRAS1   | 155.4  | 177.9  | 162.2  | 193.3  | 172.3  | 140.9  | 159.6  | 216.3  |
| NKIRAS2   | 107.1  | 124    | 119.8  | 125.9  | 107.4  | 102.1  | 121    | 114.4  |
| NKIRAS2   | 114.3  | 114.5  | 116.1  | 118.4  | 115.6  | 104.4  | 121.7  | 117.9  |
| NKIRAS2   | 147.1  | 134.5  | 140.5  | 156    | 121.7  | 131.8  | 119    | 150.2  |
| NKPD1     | 114.2  | 125.7  | 109.2  | 127.2  | 110    | 97.3   | 123.7  | 106.8  |
| NKRF      | 199.1  | 231.6  | 201.1  | 188.2  | 163.2  | 149.9  | 191.6  | 231.3  |
| NKTR      | 213.7  | 210.2  | 230.1  | 204.2  | 253.2  | 185.8  | 192    | 222.4  |
| NKTR      | 1360.4 | 1180.3 | 1424.8 | 1402.6 | 1038.2 | 777.1  | 1063.7 | 1047   |
| NKX2-2    | 115.8  | 111.3  | 118.7  | 113.2  | 109.3  | 92     | 113.1  | 101    |

|          |        |        |       |        |        |       |        |        |
|----------|--------|--------|-------|--------|--------|-------|--------|--------|
| NKX2-3   | 111.9  | 122.7  | 112.9 | 125.5  | 106.8  | 100.9 | 113.1  | 119    |
| NKX2-5   | 109    | 109.7  | 114.7 | 109.9  | 111.5  | 98.8  | 109.2  | 105.3  |
| NKX2-8   | 118.1  | 136.8  | 133.8 | 123.7  | 103.7  | 112.8 | 123.5  | 115.7  |
| NKX3-1   | 116.3  | 130.6  | 136.6 | 132.1  | 137.3  | 96.8  | 135.4  | 130.5  |
| NKX6-1   | 117.1  | 100.4  | 115.5 | 118.6  | 117.9  | 105.4 | 110.3  | 113.2  |
| NKX6-2   | 118.4  | 114.1  | 104.7 | 118.7  | 104.5  | 97.6  | 104.4  | 114    |
| NKX6-3   | 128.8  | 122.3  | 154.3 | 129.3  | 129.1  | 119.3 | 122.7  | 124.1  |
| NLE1     | 120.3  | 125.8  | 119   | 125    | 115.5  | 110.8 | 129.8  | 114.4  |
| NLE1     | 131.7  | 133.8  | 116.8 | 124.8  | 118    | 100.2 | 134.2  | 126.7  |
| NLF1     | 108.1  | 115.9  | 111.3 | 106.2  | 109.4  | 95.8  | 116.7  | 112    |
| NLF2     | 114.7  | 104.8  | 119.5 | 126.3  | 106.8  | 94.4  | 120.3  | 105.5  |
| NLF2     | 115.6  | 117.7  | 123.8 | 120.2  | 114.4  | 113.6 | 119.6  | 125.4  |
| NLGN1    | 111.5  | 110.9  | 111.8 | 123.3  | 107    | 92.9  | 121    | 112.4  |
| NLGN2    | 147.3  | 148.9  | 131.4 | 145.6  | 121    | 110.4 | 140.6  | 151    |
| NLGN3    | 120.3  | 117.2  | 121   | 117.1  | 108.7  | 97.7  | 120.3  | 118.9  |
| NLGN4X   | 119.8  | 115.7  | 115.3 | 106.4  | 103    | 100   | 115.4  | 125.2  |
| NLGN4X   | 110.3  | 111.3  | 117   | 122.4  | 112.8  | 94.6  | 115.7  | 118.9  |
| NLGN4Y   | 107.3  | 106.9  | 112   | 113    | 108.9  | 93.5  | 108.5  | 112.1  |
| NLK      | 141.5  | 143.8  | 141.8 | 127.1  | 124.7  | 115.3 | 128.9  | 123.3  |
| NLN      | 117.7  | 118.1  | 126.5 | 134.7  | 124.5  | 110.6 | 133.6  | 129.1  |
| NLRP1    | 145.6  | 163.2  | 177   | 146    | 140.3  | 126.1 | 140    | 137    |
| NLRP3    | 128    | 132.5  | 163.4 | 151.9  | 121.2  | 141.5 | 131.2  | 121.9  |
| NLRP8    | 2479.7 | 1692.4 | 2034  | 1849.6 | 2325.2 | 946.7 | 1727.3 | 2168.5 |
| NMB      | 144.4  | 164.1  | 132.1 | 140.3  | 136.7  | 116.2 | 145    | 145.3  |
| NMBR     | 111.4  | 114.8  | 116.1 | 112.7  | 109.7  | 96.1  | 117.2  | 117.2  |
| NMD3     | 252.6  | 179.3  | 216   | 253.4  | 187.3  | 154.6 | 204.4  | 185.3  |
| NME1     | 430.3  | 443.6  | 523.4 | 472.5  | 342.4  | 237.8 | 418.1  | 348.4  |
| NME1     | 110.5  | 121.4  | 136.9 | 124.6  | 110.2  | 98.7  | 112    | 111.5  |
| NME1     | 122.5  | 129.8  | 129.3 | 124.4  | 119.1  | 96.4  | 122.9  | 127.6  |
| NME1-NMI | 119.8  | 129.3  | 118.1 | 117.8  | 109.5  | 111.5 | 125.4  | 119.8  |
| NME2     | 125.7  | 116.9  | 115.9 | 119    | 110    | 97.5  | 118    | 106    |
| NME2     | 131.1  | 158.4  | 139.2 | 161.3  | 150.5  | 110.4 | 145.8  | 157.6  |
| NME2     | 121.6  | 115.6  | 120.8 | 124.8  | 113.2  | 101.2 | 129.6  | 121.1  |
| NME2     | 149.7  | 133.5  | 171.5 | 146.7  | 126.4  | 105.8 | 143    | 155.8  |
| NME2P1   | 124.8  | 111.4  | 120.8 | 111.8  | 111.3  | 102.7 | 120.1  | 117.6  |
| NME3     | 613.5  | 635.1  | 777.2 | 532.8  | 413.5  | 453.7 | 319.4  | 284.3  |
| NME4     | 291.1  | 293.7  | 297.2 | 284.1  | 229.4  | 271.1 | 281.5  | 207.3  |
| NME5     | 109.7  | 110.6  | 115.9 | 116.2  | 114.9  | 97.4  | 113.4  | 114.5  |
| NME6     | 182    | 187.7  | 180.1 | 204.2  | 167.8  | 129.5 | 180    | 180.3  |
| NME7     | 116.9  | 124.5  | 132.6 | 139    | 108.1  | 101.4 | 124.6  | 124.8  |
| NME7     | 163.1  | 156    | 157.6 | 159.8  | 138.8  | 134.5 | 136.5  | 171    |
| NMI      | 385.7  | 276.1  | 348.6 | 372.3  | 308.5  | 318.1 | 344.9  | 318.2  |
| NMNAT1   | 122.2  | 114.2  | 123.2 | 122.9  | 106.6  | 106.2 | 115.9  | 118.2  |
| NMNAT2   | 113.2  | 111.5  | 120.7 | 118.3  | 117.1  | 103   | 116.9  | 118.1  |
| NMNAT2   | 106.2  | 116    | 124.8 | 123    | 105.2  | 97.9  | 110.8  | 114    |
| NMNAT2   | 110.5  | 120.5  | 114.8 | 120.4  | 104    | 97.3  | 113.8  | 110.3  |
| NMNAT3   | 128.5  | 148.7  | 153.2 | 150.8  | 121.6  | 119   | 148.6  | 129.1  |
| NMS      | 124    | 111.8  | 111.6 | 115.6  | 111.3  | 94.5  | 111.8  | 115.3  |
| NMT1     | 163.7  | 191.4  | 181.2 | 200.6  | 187.5  | 146.8 | 218.1  | 262.1  |
| NMT2     | 184.5  | 193.2  | 161.5 | 211.1  | 162.9  | 165.3 | 162    | 162.6  |
| NMU      | 106.5  | 112.8  | 106.5 | 106.4  | 100.9  | 91.8  | 113.2  | 104.6  |

|          |        |        |        |        |        |        |        |        |
|----------|--------|--------|--------|--------|--------|--------|--------|--------|
| NMUR1    | 131.1  | 120.5  | 122.9  | 126.2  | 111.8  | 97.9   | 121    | 109.9  |
| NMUR2    | 116    | 113.4  | 113.4  | 112.9  | 113.5  | 102.5  | 123.4  | 112.8  |
| NNAT     | 119.9  | 120.8  | 114.4  | 118.6  | 108    | 99.8   | 118.1  | 119.2  |
| NNAT     | 121.3  | 117.7  | 124.7  | 119.7  | 119.6  | 106.6  | 132.9  | 118.6  |
| NNMT     | 134.1  | 132.6  | 142.3  | 151.8  | 134.2  | 139    | 162.3  | 142.7  |
| NNT      | 105.7  | 116.6  | 103.4  | 114.4  | 102.6  | 98.6   | 117.2  | 122.9  |
| NNT      | 218.6  | 277.2  | 248.3  | 258.2  | 224.4  | 190.8  | 160.8  | 219.6  |
| NNT      | 177.8  | 158.4  | 176    | 198    | 171.8  | 139    | 148.3  | 154    |
| NOB1P    | 152.2  | 154.1  | 134.5  | 161.7  | 122.1  | 131    | 155.6  | 161.6  |
| NOBOX    | 115.3  | 116.5  | 113    | 111.7  | 109.4  | 92.5   | 112.6  | 106.8  |
| NOBOX    | 118.9  | 131.2  | 119.6  | 127.8  | 114.6  | 106.3  | 121.3  | 119.8  |
| NOC2L    | 110    | 113.6  | 108    | 119.9  | 114.3  | 106.5  | 118.7  | 128.4  |
| NOC3L    | 287.9  | 383.9  | 308.5  | 320.7  | 323.2  | 196.3  | 262    | 253.7  |
| NOC4L    | 118.9  | 132.7  | 120.2  | 129.7  | 104.6  | 100.1  | 116.7  | 112.8  |
| NOC4L    | 144.8  | 149.9  | 151.4  | 153.7  | 130.3  | 119.7  | 144.7  | 161.9  |
| NOD1     | 151.3  | 148.6  | 174.6  | 153.1  | 129.2  | 127.7  | 144.9  | 133.4  |
| NOD27    | 205.2  | 226.6  | 222.4  | 195.3  | 199.7  | 199    | 161.6  | 159.2  |
| NOD3     | 122.1  | 121.4  | 125.2  | 127.4  | 113.6  | 103.9  | 120.7  | 125.7  |
| NOD9     | 159.4  | 164.4  | 176.1  | 157.2  | 141.5  | 136.4  | 162.4  | 163.8  |
| NOD9     | 129    | 123.5  | 118.1  | 135.3  | 114    | 113.4  | 134    | 125.2  |
| NODAL    | 107.7  | 118.6  | 113.2  | 115.3  | 114    | 93.8   | 121.7  | 110.3  |
| NOG      | 148.1  | 175.9  | 150.2  | 153.5  | 140.6  | 129.9  | 138.8  | 122.2  |
| NOL1     | 925.1  | 1163.7 | 726.9  | 1083.5 | 771.6  | 472.3  | 1060.4 | 876.1  |
| NOL1     | 115.3  | 116.5  | 120.7  | 115    | 119.1  | 106    | 116.3  | 125.1  |
| NOL1     | 148.8  | 133.7  | 142.8  | 151.9  | 134.6  | 131.2  | 145.7  | 145.4  |
| NOL10    | 125.2  | 121.3  | 123.8  | 138.4  | 121.4  | 109.3  | 130.4  | 125.4  |
| NOL11    | 340.7  | 341.4  | 341.7  | 364.4  | 336.7  | 308.4  | 386.2  | 374    |
| NOL12    | 281.3  | 239.1  | 351.9  | 253.9  | 183.5  | 228.1  | 232.8  | 213    |
| NOL3     | 123.7  | 111.3  | 116.2  | 127.8  | 116.3  | 113.6  | 132.5  | 124.1  |
| NOL4     | 120.8  | 126.6  | 118.9  | 125.4  | 115    | 97.8   | 117.3  | 120.1  |
| NOL5A    | 663    | 633    | 478.8  | 508.2  | 438.7  | 192    | 448.3  | 574    |
| NOL6     | 273    | 376.7  | 341.6  | 351.8  | 306.5  | 192.4  | 325.5  | 327.8  |
| NOL6     | 123.2  | 119.6  | 112.7  | 122.7  | 113.6  | 109.7  | 123.2  | 111.5  |
| NOL7     | 1761.6 | 1888.2 | 1600.8 | 1834.2 | 1199.6 | 1157.3 | 1490   | 1436.8 |
| NOL8     | 244.7  | 235.2  | 256.9  | 230.4  | 186.1  | 239.3  | 180.5  | 241.9  |
| NOL9     | 142    | 141.7  | 128.4  | 140.4  | 129    | 103.3  | 141.4  | 121.4  |
| NOLA1    | 177.3  | 174.4  | 156.3  | 184    | 173.3  | 132.8  | 161.7  | 193.3  |
| NOLA1    | 592.7  | 810.9  | 509.3  | 637.9  | 674.3  | 436.4  | 697.9  | 839.7  |
| NOLA1    | 161.2  | 159.8  | 165.2  | 181.1  | 153.8  | 138.7  | 174.6  | 160.2  |
| NOLA2    | 180.3  | 207.8  | 190.9  | 208.4  | 181.1  | 176.2  | 214.3  | 185.5  |
| NOLA2    | 171.2  | 188.3  | 170.7  | 167.6  | 148.5  | 147.9  | 168.1  | 156.1  |
| NOLA3    | 1645.3 | 1926.8 | 1965.2 | 1937.1 | 1801.9 | 1665.9 | 1758.8 | 2277.6 |
| NOLC1    | 174.7  | 171.3  | 168.3  | 164.4  | 147.2  | 125.4  | 190.7  | 172.7  |
| NOM1     | 116.8  | 118.6  | 116.5  | 121.4  | 110.8  | 96.7   | 120.5  | 117.2  |
| NOMO1    | 137.2  | 161.7  | 124.3  | 172.6  | 152.8  | 144.7  | 152.4  | 159.6  |
| NOMO2    | 123    | 122.1  | 113.3  | 117.9  | 107.2  | 100    | 127.3  | 117.2  |
| NOMO3    | 128.1  | 117.8  | 130.1  | 132.4  | 112.1  | 103.9  | 123.6  | 122.9  |
| NONO     | 1476.8 | 1123   | 1429.6 | 1511.6 | 1237.6 | 1486.4 | 1431.2 | 1753.5 |
| NOP5/NOP | 194.1  | 235.5  | 214    | 159.5  | 190.8  | 137.1  | 174.2  | 196.6  |
| NOPE     | 119.3  | 122.7  | 120.6  | 117.1  | 116.9  | 103.5  | 115.4  | 123.4  |
| NOS1     | 118.2  | 110.5  | 110.9  | 119.1  | 104.6  | 93.6   | 117.9  | 115.8  |

|          |        |        |         |        |        |        |        |        |
|----------|--------|--------|---------|--------|--------|--------|--------|--------|
| NOS1AP   | 107.4  | 120.5  | 106     | 123.1  | 107.7  | 96.7   | 116.6  | 112.5  |
| NOS2A    | 109.1  | 116.8  | 116.6   | 116.7  | 110.3  | 105.2  | 109.9  | 114.2  |
| NOS2A    | 110.5  | 124.5  | 116.3   | 110.6  | 103.5  | 95.3   | 126.7  | 119.6  |
| NOS3     | 117.3  | 115.8  | 118.7   | 123.1  | 100.3  | 96.6   | 117.1  | 117.7  |
| NOSIP    | 994.1  | 1282.2 | 975.4   | 1052.5 | 867.7  | 624.8  | 984.3  | 1026   |
| NOSTRIN  | 118.3  | 116.4  | 109.4   | 117    | 108.5  | 92.2   | 120    | 125.5  |
| NOTCH1   | 557.8  | 498    | 719.3   | 525.9  | 491.8  | 341    | 702.8  | 1033.2 |
| NOTCH2   | 187.8  | 166.6  | 178.6   | 202.4  | 162.8  | 153.4  | 196    | 175.5  |
| NOTCH2NL | 122    | 114.6  | 121.1   | 123.6  | 112.5  | 99.8   | 114.8  | 110.9  |
| NOTCH3   | 153.4  | 176.5  | 113.6   | 240.8  | 164.6  | 191.8  | 222.2  | 159.1  |
| NOTCH4   | 114.6  | 113.9  | 126.8   | 118.9  | 100.7  | 114.2  | 136.5  | 118.6  |
| NOTUM    | 110.2  | 130.4  | 127.4   | 121.8  | 113.8  | 104.1  | 129.5  | 108.9  |
| NOV      | 109.7  | 110.4  | 109.6   | 119.5  | 104.7  | 96.3   | 118    | 113    |
| NOVA1    | 114.1  | 114.1  | 124.4   | 115.9  | 105.8  | 98.2   | 115.5  | 112    |
| NOVA1    | 108.5  | 107.9  | 118.5   | 115.2  | 105.6  | 93.9   | 115.6  | 108.5  |
| NOVA2    | 116.8  | 127.5  | 121.6   | 124.9  | 106.9  | 102.8  | 121.6  | 117    |
| NOX1     | 117.5  | 126.3  | 119.1   | 121    | 104.3  | 105.2  | 128.1  | 119.4  |
| NOX1     | 106.9  | 117.6  | 114.3   | 106.8  | 104.5  | 98.4   | 110.6  | 104.7  |
| NOX1     | 113.2  | 114.9  | 110.4   | 122.3  | 110.7  | 101.4  | 119.2  | 112.3  |
| NOX3     | 107.3  | 114.2  | 117.3   | 124.6  | 111.8  | 97.4   | 115    | 112    |
| NOX4     | 114.7  | 120.2  | 118     | 129.7  | 110.1  | 101    | 128.6  | 120.5  |
| NOX5     | 110.7  | 106.4  | 107.5   | 108.9  | 108.7  | 106.1  | 111.7  | 109.3  |
| NOXA1    | 129.1  | 119.2  | 171.2   | 149.8  | 118.1  | 132.5  | 120.2  | 112.9  |
| NOXO1    | 116.5  | 128.2  | 128.8   | 134.6  | 115.4  | 111.1  | 128.3  | 135.4  |
| NOXO1    | 113.5  | 125.2  | 115.1   | 117.1  | 111.6  | 100.1  | 121.4  | 124.5  |
| NOXO1    | 129.3  | 126    | 129.2   | 129.6  | 115.3  | 111.5  | 116.6  | 132.8  |
| NP       | 363.1  | 501.8  | 482.6   | 404.9  | 438    | 344.7  | 360.6  | 439.8  |
| N-PAC    | 188.2  | 251.9  | 278.2   | 237.4  | 240.3  | 240.9  | 408.1  | 280.2  |
| NPAL1    | 119.9  | 112.7  | 121.3   | 119.7  | 103.6  | 95.3   | 122.3  | 121    |
| NPAL2    | 113.8  | 107.6  | 112.8   | 118.6  | 100.5  | 94.9   | 114.9  | 110.6  |
| NPAL3    | 319.1  | 322.6  | 237.7   | 290.7  | 324.9  | 199.6  | 322.8  | 308.1  |
| NPAS1    | 120.9  | 121.7  | 118     | 121    | 111.4  | 100.2  | 124.4  | 115.5  |
| NPAS2    | 120.9  | 117.4  | 121.1   | 140.3  | 113.1  | 103.8  | 134.6  | 122.8  |
| NPAS3    | 115.3  | 109.6  | 117.5   | 119.8  | 112.7  | 96.5   | 122.8  | 108.3  |
| NPAS3    | 114.3  | 110.5  | 111.6   | 112.5  | 113.4  | 105.5  | 116.8  | 116.2  |
| NPAS3    | 108.8  | 121.7  | 114.3   | 114.9  | 102.7  | 100    | 116.5  | 115.2  |
| NPAS4    | 115.4  | 117.4  | 119.5   | 116.4  | 102.5  | 94.3   | 115.5  | 106.4  |
| NPAT     | 173.8  | 242.8  | 180.6   | 223.4  | 212.1  | 176.9  | 269.7  | 241.7  |
| NPB      | 116.1  | 123    | 120.2   | 121.1  | 110.6  | 99.3   | 123.6  | 121.1  |
| NPBWR1   | 113.9  | 115.1  | 111     | 121.6  | 104.4  | 99.3   | 113    | 117    |
| NPBWR2   | 117.6  | 116.2  | 119.4   | 118.3  | 112.7  | 98.1   | 128.9  | 123.5  |
| NPC1     | 449.5  | 512.4  | 315.8   | 492.3  | 513.1  | 311.8  | 759.1  | 956.3  |
| NPC1L1   | 118.3  | 120.6  | 112.8   | 112.2  | 107    | 100.6  | 130.7  | 134.4  |
| NPC2     | 5912.7 | 2297.2 | 11749.2 | 6750.8 | 2525.6 | 8237.2 | 5930.5 | 2934.2 |
| NPDC1    | 114.7  | 108.3  | 111.7   | 117.9  | 110.5  | 100.4  | 107.4  | 115    |
| NPEPL1   | 349.4  | 358.9  | 427.8   | 315.1  | 254.5  | 266.9  | 224.8  | 193    |
| NPEPPS   | 282.2  | 322.2  | 263.4   | 379.4  | 276.8  | 239.5  | 272.6  | 295.2  |
| NPFF     | 121.7  | 112.8  | 125.2   | 129.9  | 111.5  | 97.6   | 119.9  | 123.7  |
| NPFFR1   | 120.4  | 117    | 114.8   | 118.1  | 105.8  | 96.1   | 115.3  | 119.4  |
| NPFFR2   | 113.1  | 114.2  | 124.9   | 120.8  | 112.5  | 97.5   | 124.9  | 119.1  |
| NPFFR2   | 118.6  | 127.7  | 118.3   | 132.4  | 120.5  | 115.9  | 118.2  | 122.3  |

|        |        |        |        |        |       |        |        |        |
|--------|--------|--------|--------|--------|-------|--------|--------|--------|
| NPHP1  | 119.6  | 110.8  | 119.5  | 119.5  | 113.3 | 101.5  | 114.2  | 110.3  |
| NPHP1  | 111.2  | 108.1  | 122.8  | 129.5  | 106   | 100.9  | 115.7  | 114.8  |
| NPHP1  | 106.4  | 116.5  | 116.4  | 119.7  | 105.5 | 93.2   | 118.5  | 116.4  |
| NPHP3  | 264.2  | 288.1  | 391.8  | 321.2  | 339.1 | 248.2  | 302.8  | 372.9  |
| NPHP4  | 136.4  | 147.3  | 126.8  | 131    | 124.5 | 114.9  | 139.7  | 146.9  |
| NPHS1  | 104.9  | 110    | 110.1  | 111.9  | 103.1 | 98.3   | 122.1  | 105.9  |
| NPHS2  | 108.5  | 123.5  | 126.2  | 116    | 116.9 | 104    | 114.4  | 115.4  |
| NPIP   | 286.8  | 264.8  | 226.2  | 300.4  | 248   | 173.6  | 300.2  | 331.3  |
| NPL    | 425.5  | 184    | 665.5  | 675.3  | 225.9 | 921.1  | 615    | 266.6  |
| NPLOC4 | 164.5  | 189.6  | 165.4  | 192.5  | 155.3 | 178.5  | 226.6  | 225.8  |
| NPM1   | 113.8  | 114.6  | 108.1  | 123.4  | 112.2 | 98.8   | 110.2  | 116.9  |
| NPM2   | 116    | 117.2  | 116.5  | 121    | 109.1 | 98.2   | 116.7  | 115.5  |
| NPM3   | 262.1  | 271.4  | 220.4  | 237.5  | 243   | 181.3  | 234.9  | 224.5  |
| NPNT   | 111.3  | 101.8  | 105.8  | 114.6  | 100   | 95.8   | 109    | 109.2  |
| NPPA   | 113.4  | 106    | 119.7  | 115.2  | 101   | 99.6   | 108.1  | 121.8  |
| NPPB   | 111.3  | 112.7  | 115.9  | 111.6  | 107.6 | 96.9   | 114.8  | 115.5  |
| NPPC   | 115.9  | 116.8  | 123.4  | 129.1  | 111.9 | 100.6  | 119.7  | 127.2  |
| NPR1   | 131.8  | 110.6  | 130.1  | 131.4  | 114.5 | 107.3  | 120.9  | 122.5  |
| NPR2   | 155    | 168.5  | 155.1  | 161.9  | 134.7 | 123    | 154.3  | 161.1  |
| NPR3   | 117.9  | 108.2  | 115.8  | 111.5  | 104.8 | 95.5   | 117.1  | 110    |
| NPTN   | 1772.9 | 1608.9 | 2014.9 | 2079.1 | 1251  | 1937.6 | 1881.4 | 1390.5 |
| NPTX1  | 106.3  | 101.3  | 113    | 119.3  | 99.1  | 101.8  | 114.6  | 122.2  |
| NPTX1  | 127.1  | 114.3  | 120.9  | 123.8  | 112.4 | 106.3  | 128    | 119.3  |
| NPTX2  | 111.5  | 111.1  | 113.9  | 119.5  | 103.4 | 94     | 116.2  | 112.3  |
| NPTXR  | 121.5  | 129.3  | 108.5  | 131.7  | 113.5 | 98.3   | 127.9  | 116    |
| NPY    | 108.4  | 114.6  | 111.6  | 118    | 99.5  | 97.5   | 118    | 114.4  |
| NPY2R  | 119.3  | 115.5  | 117.9  | 117.4  | 112.8 | 96.6   | 119.8  | 113.8  |
| NPY5R  | 123.4  | 105.5  | 115.2  | 126.3  | 121.7 | 111.2  | 117.4  | 114.4  |
| NPY6R  | 121.7  | 112.3  | 117.8  | 120.4  | 106   | 95.1   | 115.8  | 115.6  |
| NQO1   | 123    | 114.3  | 126.5  | 126.4  | 115.6 | 104.9  | 129.9  | 116.5  |
| NQO1   | 217.3  | 229.7  | 188.8  | 588.8  | 401.3 | 619.7  | 957.4  | 841.8  |
| NQO2   | 142.5  | 121.6  | 171.5  | 152.9  | 128.1 | 138.3  | 158.7  | 207.2  |
| NR0B1  | 121.2  | 111.9  | 116.7  | 122.3  | 96.4  | 100.9  | 110.6  | 112.6  |
| NR0B2  | 105.8  | 116.1  | 111.8  | 114.4  | 104.1 | 95.1   | 109.5  | 114.4  |
| NR1D1  | 121.2  | 114.6  | 119.8  | 112.7  | 105.7 | 101    | 119.7  | 118.2  |
| NR1D2  | 178.6  | 177.9  | 153.7  | 163.7  | 187.3 | 119.7  | 165.5  | 226.2  |
| NR1H2  | 218.6  | 240.3  | 229.4  | 253.1  | 191.6 | 198.2  | 259.3  | 264.2  |
| NR1H3  | 142.8  | 146.6  | 136.4  | 150.9  | 118.3 | 111.7  | 155    | 137.2  |
| NR1H4  | 114.8  | 126.5  | 110    | 112.4  | 106.5 | 99.9   | 113.4  | 112.9  |
| NR1I2  | 110.5  | 106.3  | 121.4  | 110.4  | 109.1 | 98.8   | 128.5  | 106    |
| NR1I2  | 128.8  | 123.3  | 117.4  | 140.4  | 105.7 | 116    | 114.8  | 134.2  |
| NR1I3  | 111.6  | 114.7  | 120    | 131.1  | 110.2 | 99     | 112.6  | 120.2  |
| NR1I3  | 108.1  | 112.4  | 105.8  | 116.3  | 107.7 | 100.6  | 117.9  | 111.6  |
| NR2C1  | 151.7  | 158.5  | 157.3  | 145.2  | 132.4 | 109.7  | 126    | 139.1  |
| NR2C1  | 142.9  | 133.5  | 139.2  | 149.4  | 122.9 | 115.8  | 136.8  | 131.7  |
| NR2C1  | 174    | 167    | 165.3  | 169.4  | 161.1 | 121    | 129.9  | 137.5  |
| NR2C2  | 164.8  | 165.3  | 141.4  | 203.9  | 166.2 | 142.4  | 234.6  | 208.8  |
| NR2E1  | 118    | 112.9  | 120.7  | 117    | 109.7 | 103.2  | 116.2  | 114    |
| NR2E3  | 120    | 113.7  | 123    | 123.7  | 109   | 99.8   | 122.2  | 119.6  |
| NR2E3  | 106.5  | 114.9  | 116.3  | 112.7  | 105.1 | 95.2   | 112.5  | 116.9  |
| NR2E3  | 116.8  | 116.2  | 120.9  | 113.4  | 109.3 | 92.9   | 121.5  | 110.7  |

|       |        |       |       |       |       |       |        |        |
|-------|--------|-------|-------|-------|-------|-------|--------|--------|
| NR2F1 | 104.6  | 105.4 | 112   | 113.7 | 104.1 | 89.4  | 120.5  | 106.4  |
| NR2F2 | 112    | 117.3 | 120.6 | 130.4 | 107.9 | 103.3 | 115.8  | 119.5  |
| NR2F6 | 130.1  | 155.2 | 134.1 | 138.4 | 121.1 | 107.7 | 122.5  | 122.9  |
| NR3C1 | 152.5  | 164.9 | 148.7 | 161.2 | 145.5 | 124.2 | 178.6  | 177.1  |
| NR3C1 | 129.7  | 123.4 | 135.2 | 115.9 | 124.7 | 106.9 | 122.4  | 116.7  |
| NR3C1 | 115.2  | 129.6 | 145.4 | 125.6 | 121.6 | 103.5 | 123.2  | 121.7  |
| NR3C2 | 193.4  | 220   | 206   | 184.3 | 175.9 | 170.3 | 162.9  | 180.9  |
| NR4A1 | 113    | 109.7 | 124.1 | 116.8 | 106.8 | 100.2 | 125.2  | 116.4  |
| NR4A1 | 113.4  | 119.2 | 118.1 | 106.6 | 110.2 | 101.2 | 125.7  | 113.2  |
| NR4A1 | 121.4  | 120.4 | 110.5 | 108.6 | 100.6 | 99.6  | 102.9  | 104.7  |
| NR4A2 | 115.8  | 122.3 | 120   | 139.3 | 118.2 | 98.5  | 145.8  | 179.6  |
| NR4A3 | 117.9  | 114.1 | 117.6 | 110.6 | 110.1 | 100.1 | 107.8  | 113.2  |
| NR4A3 | 112    | 121.9 | 117.6 | 118.9 | 107.8 | 102.5 | 117.3  | 114.4  |
| NR4A3 | 112.7  | 105.1 | 109.2 | 106.1 | 99.6  | 100.4 | 113.4  | 107.3  |
| NR4A3 | 114.5  | 116.8 | 111.1 | 119.9 | 108.7 | 100.9 | 121.7  | 117.1  |
| NR4A3 | 114.8  | 116.9 | 115.2 | 116.4 | 107   | 95.4  | 118.7  | 117.4  |
| NR5A1 | 111.1  | 109.8 | 112.5 | 105.7 | 102.1 | 100.5 | 115.3  | 112.4  |
| NR5A2 | 110.8  | 107.6 | 117.5 | 119.6 | 109.2 | 95.9  | 110.9  | 112.4  |
| NR5A2 | 119.7  | 107.7 | 110.2 | 100.7 | 108.1 | 99.8  | 124.8  | 104.8  |
| NR5A2 | 121.7  | 122.1 | 125.6 | 131.4 | 120.7 | 112.4 | 124.3  | 124.1  |
| NR6A1 | 126    | 114.9 | 118.3 | 113.3 | 98.7  | 103.6 | 115.9  | 119.4  |
| NR6A1 | 113.2  | 114.9 | 118.6 | 115.4 | 112.3 | 91.6  | 111.2  | 116.3  |
| NRAP  | 107.7  | 116.5 | 112.6 | 113.1 | 101.4 | 95.2  | 117    | 103.1  |
| NRAP  | 110.2  | 122.6 | 113.1 | 119.8 | 108.9 | 99.6  | 110.6  | 116.5  |
| NRAS  | 195.5  | 242.4 | 200.8 | 234.7 | 194.1 | 187   | 252.6  | 232.6  |
| NRBP1 | 160.6  | 143.8 | 154.1 | 169.3 | 144.2 | 129.3 | 179.1  | 171.4  |
| NRBP2 | 238.9  | 228.8 | 319.1 | 250.5 | 196.3 | 269.9 | 201.4  | 214    |
| NRCAM | 121.6  | 122.3 | 132.8 | 119.6 | 115.2 | 106.2 | 112.4  | 126.3  |
| NRCAM | 114.3  | 130.4 | 136.7 | 116.3 | 107.6 | 114.4 | 120.1  | 123.4  |
| NRD1  | 1057.7 | 874.3 | 823.7 | 1151  | 757.8 | 803.2 | 1134.2 | 1056.6 |
| NRF1  | 125    | 120.9 | 119.4 | 108.6 | 109   | 98.7  | 122.7  | 125    |
| NRF1  | 130.3  | 131.8 | 121.5 | 132.2 | 124.5 | 109.2 | 133.4  | 129.5  |
| NRF1  | 115    | 114.8 | 115.2 | 118.4 | 119.3 | 101.2 | 117.5  | 119.6  |
| NRG1  | 102.7  | 115.6 | 103.3 | 116.7 | 106.6 | 94.1  | 115.7  | 109.9  |
| NRG1  | 118.6  | 114.2 | 154.9 | 119.2 | 99.1  | 106.1 | 125    | 110.3  |
| NRG1  | 126.6  | 121.4 | 114.2 | 114.2 | 108   | 99.7  | 117.8  | 118.4  |
| NRG1  | 117.7  | 122.4 | 115.4 | 124.3 | 113.1 | 110.9 | 123.2  | 113.9  |
| NRG2  | 121.7  | 114   | 124.5 | 119.8 | 118.3 | 116.6 | 124.9  | 117.3  |
| NRG2  | 111.9  | 112.5 | 110.4 | 133.9 | 104.4 | 89.7  | 115.7  | 115    |
| NRG3  | 113.8  | 113.2 | 115.3 | 117   | 108.7 | 99.4  | 112    | 119.8  |
| NRG4  | 115.6  | 110.9 | 112.9 | 113.1 | 96.6  | 95.8  | 114.8  | 112.3  |
| NRGN  | 125.2  | 113.9 | 133.8 | 150.4 | 113.3 | 101.5 | 124.1  | 128.1  |
| NRIP1 | 254.9  | 305.3 | 317   | 316.6 | 308.5 | 288.1 | 299.2  | 267.8  |
| NRIP2 | 113.2  | 126.3 | 136.4 | 126.2 | 128   | 108.4 | 133.1  | 137.9  |
| NRIP3 | 132.7  | 164.9 | 124.5 | 221.5 | 192.7 | 122.9 | 520.1  | 359.2  |
| NRK   | 129.3  | 121   | 141.1 | 130.2 | 131.7 | 117.1 | 137.4  | 129.5  |
| NRL   | 106    | 114.9 | 118.6 | 112.5 | 110.3 | 100.9 | 107.1  | 111.1  |
| NRM   | 148    | 121.8 | 134.1 | 141.6 | 116.3 | 102.8 | 126.1  | 126.5  |
| NRN1  | 104.5  | 108.1 | 122.9 | 113.1 | 105   | 96.3  | 120.7  | 110.9  |
| NRP1  | 115.2  | 113.7 | 124.7 | 134   | 116   | 103.7 | 130.8  | 127.7  |
| NRP1  | 154.8  | 147.4 | 161.7 | 227   | 205   | 129.6 | 319.5  | 219.2  |

|         |       |       |       |       |       |       |       |        |
|---------|-------|-------|-------|-------|-------|-------|-------|--------|
| NRP2    | 117.3 | 111.4 | 117.8 | 126.8 | 112.2 | 103.6 | 116.3 | 116.1  |
| NRP2    | 107.6 | 104.4 | 110.8 | 115.5 | 101.8 | 94.4  | 118.6 | 112.7  |
| NRP2    | 110.3 | 117.1 | 113.9 | 119.2 | 111   | 99.7  | 120.9 | 112.6  |
| NRTN    | 108.3 | 119.1 | 112.2 | 124.7 | 118.6 | 98.6  | 122.5 | 109.6  |
| NRXN1   | 119.5 | 121.4 | 122.7 | 116.9 | 112.6 | 96.8  | 116.1 | 116    |
| NRXN1   | 111.8 | 113.1 | 116   | 113   | 104.6 | 100.7 | 119   | 115.3  |
| NRXN1   | 109.9 | 107.9 | 118.5 | 121.9 | 109.1 | 101.7 | 116.8 | 118.6  |
| NRXN2   | 111.8 | 104.5 | 110.9 | 120.9 | 107.4 | 99.7  | 112.3 | 114    |
| NRXN2   | 122.5 | 121.5 | 123   | 119.7 | 117   | 94.6  | 136.8 | 118.1  |
| NRXN3   | 103.7 | 111.4 | 110.7 | 117.4 | 107.3 | 88.7  | 113   | 104.3  |
| NRXN3   | 106.4 | 110.8 | 116.9 | 109.7 | 107.8 | 92    | 119.8 | 109.5  |
| NRXN3   | 122.2 | 128.6 | 129.8 | 119.6 | 108.7 | 101.1 | 129.4 | 111.5  |
| NS4ATP2 | 162.4 | 211.8 | 172.3 | 179.4 | 167.3 | 195   | 183   | 174.2  |
| NSBP1   | 108.1 | 111.3 | 110.9 | 113.2 | 103.5 | 97.2  | 112.1 | 108.1  |
| NSD1    | 127.6 | 121.2 | 124.6 | 144.4 | 112.5 | 109.3 | 122.9 | 129.1  |
| NSD1    | 148.3 | 134.8 | 130.5 | 143.7 | 158.8 | 112.6 | 126.9 | 117.6  |
| NSDHL   | 168.6 | 200.5 | 211.3 | 192.6 | 161   | 169.7 | 170.2 | 177    |
| NSF     | 115.1 | 123.7 | 120.9 | 103.1 | 108   | 101   | 118.2 | 116    |
| NSF     | 176.3 | 176   | 195   | 170.6 | 160   | 189.9 | 170.3 | 157.8  |
| NSF     | 805.9 | 762.7 | 877.7 | 844.3 | 652.6 | 662.9 | 619.2 | 539.1  |
| NSFL1C  | 161.5 | 195.2 | 226.3 | 203.3 | 157.4 | 196.8 | 208.3 | 210.6  |
| NSFL1C  | 223.8 | 225.2 | 288.2 | 220.5 | 211.9 | 181.4 | 251.9 | 253.5  |
| NSL1    | 115.1 | 120.6 | 132.4 | 115.7 | 105.8 | 97.8  | 118.7 | 119.8  |
| NSL1    | 121.6 | 124.4 | 140.2 | 127   | 111.2 | 97.4  | 122   | 122.5  |
| NSMAF   | 776   | 818.1 | 730.7 | 937.8 | 651.7 | 684.2 | 1171  | 727.2  |
| NSMCE1  | 282.4 | 228.5 | 278.3 | 250.8 | 256.8 | 214.3 | 204.1 | 244.6  |
| NSUN2   | 490.3 | 586.4 | 515.3 | 655.8 | 541.6 | 445.4 | 702.4 | 601.2  |
| NSUN3   | 141.6 | 157.7 | 155.6 | 156.8 | 144.2 | 121   | 176.3 | 155.1  |
| NSUN4   | 222.8 | 236.7 | 265   | 233.2 | 213.4 | 204.8 | 216.4 | 219.7  |
| NSUN5   | 285   | 291.4 | 305.4 | 254.3 | 200.2 | 247.1 | 228.8 | 179.7  |
| NSUN5   | 211.9 | 200.7 | 175   | 182.1 | 158.1 | 132.3 | 170.8 | 148.9  |
| NSUN5   | 184.9 | 161.6 | 209.2 | 184.2 | 164.8 | 149.1 | 164.1 | 159.3  |
| NSUN5B  | 306.8 | 267.6 | 345.8 | 304.4 | 229.9 | 213.5 | 191.2 | 188.4  |
| NSUN5C  | 135   | 137.7 | 135.4 | 131.1 | 131.4 | 114.2 | 137.9 | 129.4  |
| NSUN5C  | 110.1 | 121.6 | 148.7 | 138.8 | 116.1 | 113.8 | 121.6 | 123.1  |
| NSUN6   | 121.2 | 122.7 | 148.6 | 121.8 | 131.7 | 120.4 | 132.4 | 121.4  |
| NSUN7   | 124.5 | 119.5 | 127.9 | 130.1 | 109   | 110.7 | 120.1 | 125.5  |
| NT5C    | 597   | 615   | 653.9 | 609.9 | 452.2 | 315.5 | 355.2 | 369.5  |
| NT5C1A  | 106.4 | 108.9 | 127.5 | 112.5 | 107.2 | 95.9  | 114.4 | 114.2  |
| NT5C1B  | 115.2 | 106.1 | 111.1 | 122   | 107.7 | 97    | 118.8 | 111.6  |
| NT5C1B  | 112.9 | 119.1 | 119.9 | 117.9 | 111.9 | 95.5  | 108.5 | 112.6  |
| NT5C2   | 333   | 381.7 | 337.5 | 393   | 283.7 | 352.2 | 605.9 | 449.5  |
| NT5C3   | 631.6 | 671.3 | 702.3 | 807.3 | 730   | 444   | 641.1 | 1080.5 |
| NT5C3L  | 162.6 | 171.8 | 155.5 | 158.8 | 155   | 132.9 | 194.6 | 185.5  |
| NT5DC1  | 116.8 | 121.8 | 118.3 | 126.9 | 112.7 | 115.5 | 120.8 | 116.3  |
| NT5DC2  | 161   | 142.1 | 192.7 | 189.5 | 131.3 | 184.3 | 146.1 | 129.5  |
| NT5DC3  | 123.8 | 110.6 | 125.7 | 122.1 | 107.1 | 99.6  | 119.9 | 112.7  |
| NT5DC3  | 157.9 | 161.6 | 144.5 | 147.5 | 136.6 | 120.3 | 154.5 | 144.3  |
| NT5E    | 159.1 | 163.3 | 133.3 | 145.3 | 130.5 | 119.2 | 134.2 | 140.6  |
| NT5M    | 110.2 | 124.4 | 116.4 | 115.3 | 111.2 | 102.6 | 112.9 | 117.2  |
| NTAN1   | 383.8 | 348.3 | 355.1 | 427.6 | 305.3 | 344.3 | 470.5 | 352.7  |



|          |        |        |        |        |        |        |        |        |
|----------|--------|--------|--------|--------|--------|--------|--------|--------|
| NTE      | 741.2  | 706.7  | 895    | 831.1  | 448.4  | 762.8  | 840.2  | 595.1  |
| NTF3     | 114.2  | 136.9  | 117.4  | 115    | 109    | 98.9   | 121.2  | 117.9  |
| NTF5     | 113.9  | 116.5  | 126.1  | 118.2  | 112.9  | 92.6   | 129.4  | 119.5  |
| NTHL1    | 161.9  | 164.9  | 133.4  | 161.2  | 144.8  | 131.6  | 131.2  | 132.4  |
| NTN1     | 118.7  | 123.3  | 118.4  | 125.5  | 109.7  | 98.7   | 120.8  | 123.3  |
| NTN2L    | 109.6  | 109.7  | 120.2  | 117.6  | 108.1  | 102.5  | 116.9  | 104    |
| NTN4     | 115.5  | 113.9  | 130.7  | 124.2  | 115.7  | 105.5  | 126.6  | 116.5  |
| NTNG1    | 100.7  | 114.4  | 107.2  | 107.8  | 109.2  | 94     | 114.7  | 108.5  |
| NTNG2    | 116.4  | 118    | 124    | 123.3  | 111.6  | 104.9  | 121.7  | 117.6  |
| NTRK1    | 120.6  | 117.5  | 127.2  | 117.8  | 112.1  | 104.2  | 122.1  | 117.7  |
| NTRK1    | 126.9  | 118.6  | 126.7  | 128.5  | 106.8  | 102.9  | 119    | 131.1  |
| NTRK1    | 127.2  | 118.6  | 122.9  | 129.4  | 116.3  | 101.4  | 123.2  | 112.9  |
| NTRK2    | 117.1  | 108.3  | 118    | 121.2  | 110.8  | 99.8   | 106.4  | 114.6  |
| NTRK2    | 117    | 121.5  | 119.9  | 126.2  | 112.5  | 102.4  | 111.9  | 116.4  |
| NTRK2    | 114.6  | 112.3  | 116.5  | 114.1  | 103.5  | 94.1   | 113.2  | 109.1  |
| NTRK3    | 120.6  | 120.1  | 118.4  | 120.7  | 118.5  | 100.6  | 116    | 121.4  |
| NTRK3    | 115    | 116.9  | 122.3  | 114.8  | 115.5  | 97.5   | 134.6  | 117.4  |
| NTS      | 111.5  | 109    | 117.7  | 115.4  | 107.1  | 99.1   | 109.2  | 110    |
| NTSR1    | 124.7  | 122.6  | 117.5  | 117.7  | 109.4  | 102.8  | 118.4  | 112.4  |
| NTSR2    | 114.3  | 118.6  | 119.7  | 125.5  | 102.7  | 100.1  | 118.6  | 125.3  |
| NTSR2    | 114.7  | 118.8  | 121.4  | 121.1  | 111.1  | 101.1  | 119.4  | 121.2  |
| NUAK1    | 119.9  | 128.6  | 112.2  | 116.7  | 105.8  | 99.6   | 119.3  | 124.6  |
| NUAK2    | 190.7  | 194.8  | 185    | 207.5  | 158.7  | 178.8  | 159.5  | 171.7  |
| NUB1     | 114.8  | 119.8  | 119.3  | 114.8  | 107.7  | 103.9  | 116.7  | 120.5  |
| NUBP1    | 242.2  | 276.4  | 250.6  | 260.9  | 183.1  | 211.2  | 212.3  | 228.6  |
| NUBP2    | 136    | 151.3  | 148.8  | 157.9  | 123.4  | 123.9  | 146.9  | 142.2  |
| NUBPL    | 726.2  | 531.2  | 715.8  | 748.8  | 689.4  | 419.1  | 639.5  | 751.6  |
| NUCB1    | 2348.1 | 2517   | 3257.7 | 2794.3 | 1768.8 | 3256.1 | 2403.5 | 2406.5 |
| NUCB2    | 328.5  | 379.1  | 304.2  | 358.1  | 368.4  | 278.3  | 332.4  | 376.7  |
| NUCKS1   | 126.2  | 123.6  | 135    | 135.9  | 124.1  | 113.1  | 153.3  | 146    |
| NUDC     | 1069.2 | 1141.5 | 926.1  | 1000.9 | 738    | 551.7  | 970.2  | 1203.5 |
| NUDCD1   | 120.4  | 120.5  | 126.2  | 138.3  | 113.2  | 99.4   | 123    | 124.2  |
| NUDCD2   | 142.7  | 144.2  | 146.5  | 151.2  | 131.2  | 118.2  | 137.9  | 134.7  |
| NUDCD3   | 259.2  | 285.9  | 228.1  | 227.3  | 176.8  | 180.5  | 254.2  | 212.2  |
| NUDT1    | 120.9  | 114.7  | 115.3  | 120.9  | 117    | 103.2  | 109.7  | 116.8  |
| NUDT1    | 303.4  | 299.9  | 397.6  | 244.8  | 246.7  | 187.7  | 209.2  | 202.1  |
| NUDT10   | 115.7  | 114.5  | 116.4  | 113.5  | 106.9  | 102    | 124.5  | 123.8  |
| NUDT11   | 126.2  | 117.5  | 128    | 130.6  | 115.5  | 112    | 127.9  | 136.5  |
| NUDT12   | 107.4  | 112.8  | 116.5  | 119.8  | 105.5  | 99.2   | 119    | 109.5  |
| NUDT13   | 124.2  | 118.1  | 130.6  | 129.6  | 125.2  | 101.5  | 135    | 124.9  |
| NUDT14   | 277.7  | 315    | 304.3  | 309.7  | 201    | 218.3  | 280.5  | 230.1  |
| NUDT15   | 126.1  | 126.8  | 125.9  | 132.9  | 107.3  | 103.9  | 122    | 118.5  |
| NUDT16   | 128.8  | 121.1  | 146.6  | 122.3  | 117.3  | 106.6  | 126.9  | 124.3  |
| NUDT16L1 | 334.6  | 406    | 353.6  | 356.6  | 328.9  | 293    | 292.5  | 342.9  |
| NUDT17   | 115.2  | 116.2  | 119.2  | 118    | 120.8  | 108.2  | 130.3  | 111.2  |
| NUDT18   | 248.6  | 216.5  | 241.8  | 200.7  | 140.3  | 167.2  | 161.5  | 140.8  |
| NUDT2    | 144    | 143.3  | 179.6  | 150.6  | 149.1  | 164.2  | 160.6  | 159.9  |
| NUDT2    | 213.6  | 201.6  | 286.7  | 221.8  | 182.4  | 222.4  | 225.8  | 211.1  |
| NUDT21   | 116.1  | 125.9  | 144.7  | 126.3  | 116.4  | 110.7  | 113.1  | 121.4  |
| NUDT22   | 169    | 173.2  | 212.9  | 191.3  | 172.5  | 153.8  | 152.7  | 160.2  |
| NUDT3    | 268.4  | 283.6  | 349.5  | 314.2  | 265.7  | 266.2  | 315.2  | 302.1  |

|         |        |        |        |        |        |        |        |        |
|---------|--------|--------|--------|--------|--------|--------|--------|--------|
| NUDT4   | 117.2  | 107.8  | 110    | 111.5  | 110.2  | 97.7   | 117.5  | 124.6  |
| NUDT4P1 | 127.4  | 117.2  | 112.9  | 129.3  | 102.7  | 104.7  | 124.9  | 130.9  |
| NUDT5   | 358.1  | 297.9  | 310.2  | 327.7  | 257.9  | 233    | 241.1  | 261.9  |
| NUDT6   | 112    | 117.1  | 125.9  | 110.6  | 114.3  | 96.9   | 113.3  | 117.6  |
| NUDT6   | 121.2  | 114.9  | 117.8  | 119.1  | 101.7  | 94.6   | 117.9  | 107.2  |
| NUDT6   | 117.8  | 117.5  | 120.8  | 123.7  | 105.1  | 100.2  | 120.5  | 121.7  |
| NUDT8   | 121.6  | 123.5  | 118.2  | 114.9  | 107.1  | 100.9  | 109.2  | 112.2  |
| NUDT9   | 129    | 125.3  | 125.9  | 133.1  | 112.8  | 102.5  | 130.2  | 132.8  |
| NUDT9   | 317    | 371.1  | 340.6  | 367.5  | 313    | 280.4  | 331.3  | 344.9  |
| NUDT9   | 126.7  | 116.3  | 120    | 121.8  | 113    | 101.2  | 118.7  | 117.9  |
| NUDT9P1 | 110.1  | 114.5  | 117.5  | 119.3  | 104.4  | 104.8  | 123.7  | 135.2  |
| NUF2    | 109.7  | 115.3  | 133.7  | 122.5  | 114    | 102.3  | 119    | 123.2  |
| NUF2    | 113.1  | 110.4  | 108.3  | 109.6  | 107.6  | 95.7   | 124.4  | 115.8  |
| NUFIP1  | 120.5  | 132.9  | 134.5  | 134.3  | 117.9  | 108.6  | 109.3  | 120.5  |
| NUFIP2  | 437.4  | 524.5  | 269.3  | 392.5  | 294.8  | 282.3  | 524.4  | 628.5  |
| NULP1   | 1058.7 | 1075.7 | 931.8  | 1067   | 977.2  | 734.5  | 1330   | 1206.4 |
| NUMA1   | 261.8  | 276    | 253.8  | 245.7  | 228.5  | 240.5  | 312.5  | 287.6  |
| NUMB    | 602    | 628.3  | 519.2  | 839.6  | 552.5  | 666.8  | 1135.8 | 641.3  |
| NUMBL   | 125.4  | 134.4  | 139.8  | 139.8  | 130.9  | 108.8  | 132    | 125.5  |
| NUP107  | 192.9  | 240.4  | 245.2  | 195    | 208.4  | 208.1  | 213.1  | 223.9  |
| NUP133  | 305.1  | 304.7  | 335.8  | 301.1  | 269.1  | 283.4  | 288    | 279.1  |
| NUP153  | 364.3  | 420.9  | 281.7  | 437.1  | 334.6  | 330.7  | 506.6  | 627.6  |
| NUP155  | 115    | 123.1  | 113.3  | 122.1  | 107.4  | 101.8  | 125.5  | 111.4  |
| NUP155  | 239.3  | 300.7  | 290.9  | 274.8  | 223.7  | 242.4  | 279.2  | 249    |
| NUP160  | 633.4  | 587.9  | 465.3  | 651.6  | 502.5  | 372.6  | 688.5  | 686.6  |
| NUP188  | 283.6  | 220.9  | 201.1  | 264.5  | 197.4  | 166.4  | 265.6  | 254.6  |
| NUP205  | 478.2  | 431.4  | 328.7  | 474.4  | 412.4  | 393.4  | 482.9  | 495.5  |
| NUP210  | 198.2  | 203.6  | 206.2  | 169.1  | 178.9  | 152.9  | 223.8  | 169.5  |
| NUP210L | 115    | 114.7  | 112    | 120.5  | 111.9  | 99.3   | 106    | 127.6  |
| NUP214  | 387.9  | 322.6  | 680.9  | 401.2  | 247.9  | 462.2  | 393    | 294.6  |
| NUP35   | 131.6  | 162.1  | 166.4  | 160.2  | 137.8  | 124.6  | 141.3  | 136    |
| NUP35   | 126.4  | 127.3  | 134    | 127.1  | 131.1  | 98.7   | 136.1  | 128.3  |
| NUP37   | 337    | 306.1  | 501.1  | 291.1  | 263.1  | 305.5  | 251    | 232.1  |
| NUP43   | 137.6  | 117.9  | 160.4  | 126.7  | 122.7  | 114.1  | 123.7  | 112.3  |
| NUP50   | 174.3  | 170    | 203.4  | 210    | 142.8  | 160    | 184.3  | 158.7  |
| NUP50   | 114.1  | 119.6  | 107.9  | 115.1  | 106.4  | 102.3  | 113.9  | 122.5  |
| NUP50   | 118.2  | 119.1  | 117.9  | 114.8  | 114.9  | 98.7   | 124.5  | 120.4  |
| NUP54   | 485.2  | 551.6  | 526.2  | 475.8  | 511.5  | 469.3  | 441.8  | 541.2  |
| NUP62   | 160    | 155.8  | 131.9  | 154.9  | 129.7  | 132.1  | 172.3  | 152.2  |
| NUP62   | 1731.5 | 1560.7 | 1894.6 | 1560.9 | 1236.3 | 1409.6 | 1518.4 | 1528   |
| NUP85   | 447.5  | 382.5  | 448.3  | 440.6  | 336.7  | 297.7  | 361.2  | 328.7  |
| NUP88   | 620.7  | 679.2  | 632    | 638.9  | 520.1  | 469.4  | 720.2  | 719.8  |
| NUP93   | 229.9  | 289.9  | 258.5  | 252.3  | 256.2  | 205    | 211.1  | 203.8  |
| NUP98   | 120.5  | 128.4  | 119.2  | 122.9  | 125.7  | 106.3  | 127.5  | 132.7  |
| NUP98   | 144.7  | 164.1  | 140.5  | 155.6  | 141.5  | 119.4  | 166.6  | 158.7  |
| NUP98   | 122.6  | 117.9  | 125.1  | 133.4  | 128.6  | 104.9  | 135.3  | 117.3  |
| NUPL1   | 106.5  | 114.8  | 124.7  | 112.8  | 107.3  | 92.9   | 124.4  | 121.3  |
| NUPL1   | 118    | 127.4  | 136.4  | 131.8  | 125.4  | 103.6  | 139.6  | 131.8  |
| NUPL1   | 143.7  | 139.1  | 146    | 150.4  | 137.7  | 117.9  | 147.5  | 166.6  |
| NUPL2   | 341.5  | 261.1  | 280    | 275.8  | 210.1  | 174    | 243.6  | 217.7  |
| NUPR1   | 133.4  | 121.5  | 119.3  | 136.4  | 115.1  | 105.9  | 121.7  | 121    |

|           |         |         |         |         |       |         |         |        |
|-----------|---------|---------|---------|---------|-------|---------|---------|--------|
| NUS1      | 135     | 132.3   | 135     | 137.1   | 123   | 112.3   | 137.3   | 147.1  |
| NUSAP1    | 126.8   | 134     | 170.2   | 147     | 134.9 | 126.3   | 158.2   | 167.7  |
| NUSAP1    | 114.6   | 127.3   | 135.9   | 115.1   | 116.5 | 106.1   | 130.1   | 121.4  |
| NUT       | 112.4   | 115.3   | 111.8   | 114.5   | 102   | 98.7    | 122.1   | 113.9  |
| NUTF2     | 118.3   | 122.6   | 120.3   | 127.2   | 113.3 | 109.9   | 121.5   | 124.8  |
| NVL       | 115.1   | 122.3   | 112.8   | 118.9   | 107   | 95.8    | 122.3   | 113.6  |
| NVL       | 172.6   | 216.1   | 167.7   | 190.5   | 158.4 | 130.2   | 167.3   | 178.9  |
| NXF1      | 769.4   | 746.6   | 631.6   | 790.3   | 710.3 | 793.4   | 958.7   | 1400.3 |
| NXF1      | 761.7   | 673.2   | 663.7   | 782.1   | 586.8 | 423.2   | 958.9   | 1309   |
| NXF2      | 126.3   | 128.4   | 118.4   | 130.4   | 110.1 | 101.8   | 123.2   | 113.5  |
| NXF2      | 115.1   | 114.4   | 110.3   | 113.4   | 105.3 | 93.1    | 118.9   | 110.3  |
| NXF3      | 110.4   | 125.6   | 128.4   | 129     | 110.8 | 104.3   | 125.4   | 119.1  |
| NXF4      | 120.1   | 115.3   | 122.9   | 114.7   | 108.4 | 109.4   | 119.6   | 106.4  |
| NXF5      | 104.9   | 120.5   | 111.8   | 121.1   | 107.8 | 101.9   | 120.5   | 114.7  |
| NXN       | 120     | 123.1   | 117.3   | 119.2   | 114   | 100.5   | 123.3   | 119.3  |
| NXPH1     | 128.7   | 114     | 120.6   | 122     | 112.2 | 99.4    | 112.6   | 119.8  |
| NXPH2     | 104.1   | 103     | 115.3   | 113.8   | 102.2 | 103.6   | 114.2   | 109.3  |
| NXPH3     | 115     | 115.6   | 116.3   | 106.5   | 115.7 | 96.5    | 116.5   | 117.3  |
| NXPH4     | 111.9   | 115.8   | 133.9   | 117.2   | 105.3 | 115.4   | 115.9   | 115.1  |
| NXPH4     | 105.6   | 104.3   | 119     | 113.9   | 102.2 | 95.2    | 113.4   | 120.3  |
| NXT1      | 584     | 695.4   | 534.1   | 673.2   | 587.5 | 342.9   | 680.9   | 624.2  |
| NXT2      | 144.3   | 137.4   | 168.4   | 153.1   | 120.4 | 132.1   | 146.9   | 158    |
| NYD-SP14  | 117     | 125     | 114.9   | 120.3   | 106   | 95.1    | 116.6   | 112.7  |
| NYD-SP18  | 110     | 105.5   | 113.1   | 117.8   | 103.4 | 100.3   | 110.6   | 111    |
| NYD-SP21  | 146.3   | 116.4   | 208.1   | 140.9   | 109.7 | 147.6   | 155.4   | 118.9  |
| NYD-SP21  | 133.3   | 119.9   | 152.1   | 116.6   | 120.6 | 136.1   | 132.9   | 118.4  |
| NYD-SP26  | 117.8   | 113.6   | 117.7   | 116.1   | 109.8 | 97.6    | 109.9   | 117.2  |
| NY-REN-7  | 110.2   | 118.7   | 115.8   | 116.6   | 112.2 | 101.1   | 120.9   | 113.4  |
| NY-SAR-48 | 132.6   | 137.5   | 124.4   | 131.8   | 118.7 | 118.8   | 135     | 122.7  |
| NY-SAR-48 | 153.1   | 146.6   | 147.7   | 160.8   | 134.5 | 117.2   | 164.4   | 162    |
| NYX       | 111.8   | 109.1   | 120.4   | 112.6   | 108.2 | 100.6   | 115.5   | 114.6  |
| OACT2     | 109     | 117.9   | 121.1   | 118.5   | 111   | 102.2   | 120.1   | 115.5  |
| OACT5     | 173.6   | 138.3   | 153.3   | 136.2   | 130.9 | 125.4   | 147.8   | 147    |
| OAF       | 169.2   | 139.9   | 147.3   | 167.7   | 135.5 | 127.2   | 175.2   | 133.3  |
| OAS1      | 114.8   | 119.2   | 118.1   | 118.2   | 107.3 | 97.9    | 120.4   | 107.4  |
| OAS1      | 156.4   | 129.5   | 140.6   | 139.9   | 116.2 | 111.4   | 131.8   | 124.1  |
| OAS1      | 176.8   | 132.9   | 148.1   | 174.8   | 121.8 | 114.4   | 139.5   | 122.6  |
| OAS1      | 138.7   | 143.7   | 137.8   | 139.3   | 126.4 | 116     | 123.1   | 131.7  |
| OAS2      | 167.6   | 147.4   | 146.4   | 154.3   | 144.7 | 131     | 140.1   | 126    |
| OAS2      | 137.9   | 149.3   | 143.3   | 138.3   | 132.2 | 118.7   | 123.3   | 135.4  |
| OAS2      | 122.8   | 116     | 115.7   | 123.8   | 107.4 | 106.1   | 118.1   | 108.1  |
| OAS2      | 1151    | 1226.8  | 785.2   | 1252.2  | 713.6 | 565.7   | 749.6   | 621.7  |
| OAS3      | 107.2   | 108.5   | 112.2   | 115.9   | 104.1 | 108.5   | 114.3   | 108.9  |
| OASL      | 125.7   | 117.7   | 142.1   | 136.8   | 107.5 | 105.8   | 114.3   | 109.4  |
| OASL      | 226.7   | 179.5   | 255     | 215.8   | 134.8 | 223.7   | 169.2   | 149.9  |
| OAT       | 364     | 319.5   | 303.2   | 310.1   | 275.8 | 272.8   | 334.9   | 347.8  |
| OATL1     | 122.8   | 111.2   | 133.7   | 124.2   | 117.2 | 104.2   | 112.3   | 122.8  |
| OATL1     | 134.7   | 155.1   | 130     | 141.1   | 126   | 121.9   | 174.3   | 170.5  |
| OAZ1      | 15474.9 | 16280.3 | 19165.5 | 18429.7 | 13848 | 17365.7 | 18675.1 | 18730  |
| OAZ3      | 136.9   | 131.5   | 127.6   | 121.9   | 122.4 | 107.1   | 134.2   | 126.1  |
| OBFC1     | 282     | 312.7   | 320.1   | 299.2   | 225.2 | 219.6   | 228.8   | 189.4  |

|        |        |        |        |        |        |        |        |        |
|--------|--------|--------|--------|--------|--------|--------|--------|--------|
| OBFC2A | 286.5  | 305.4  | 290    | 348.9  | 247.2  | 246    | 353.7  | 414.5  |
| OBFC2B | 197    | 251.6  | 197    | 194.7  | 173.9  | 143.2  | 240.7  | 207.7  |
| OBP2A  | 116.3  | 117    | 117.9  | 124.8  | 118.4  | 103.9  | 120.2  | 126.3  |
| OBSCN  | 140    | 140.9  | 118.9  | 131.1  | 119.2  | 101.5  | 150.1  | 130.3  |
| OC90   | 111.7  | 119.8  | 135.1  | 121.8  | 104.1  | 95.9   | 120.7  | 105.5  |
| OCA2   | 118.7  | 115.4  | 114.2  | 113.1  | 113.3  | 104.6  | 122    | 116    |
| OCIAD1 | 1669.3 | 1207.3 | 1513.2 | 2171.6 | 2037.1 | 995.3  | 1870.5 | 1974.9 |
| OCIAD1 | 894.6  | 1072.2 | 897.7  | 909.5  | 925.3  | 994.4  | 729.3  | 988.4  |
| OCIAD2 | 402.6  | 419.8  | 574.9  | 431.1  | 321.7  | 564.1  | 291.3  | 285.8  |
| OCIAD2 | 1377   | 1863.6 | 4176.8 | 1683.8 | 1805.5 | 3171.2 | 1546.4 | 1697   |
| OCLM   | 117.3  | 124.9  | 124.6  | 127.4  | 110.8  | 102.8  | 126.4  | 119.7  |
| OCLN   | 111.1  | 115.1  | 114.1  | 110    | 109.5  | 94     | 109.7  | 108.3  |
| OCLN   | 117.3  | 119.2  | 108    | 121.6  | 108.5  | 98.1   | 118.5  | 120.2  |
| OCM    | 113.2  | 114.4  | 109.6  | 121.5  | 103.6  | 102.4  | 116    | 114    |
| OCRL   | 123.5  | 124.6  | 136.7  | 127.7  | 116.1  | 110.5  | 131.7  | 122.4  |
| OCRL   | 137.7  | 127.1  | 125.4  | 125.9  | 109.5  | 108.1  | 115    | 116.7  |
| ODC1   | 267    | 247.4  | 300.3  | 286.6  | 197    | 241.6  | 427.7  | 518.5  |
| ODF1   | 123    | 121.3  | 119.4  | 113.4  | 109.8  | 99.8   | 111.6  | 113    |
| ODF2   | 131.4  | 135.2  | 140.4  | 126.5  | 130.5  | 120.7  | 133.8  | 132.9  |
| ODF2   | 108.2  | 119.2  | 122.5  | 122.5  | 107.3  | 102.8  | 124.8  | 121.3  |
| ODF2   | 180.7  | 203.4  | 179.8  | 178.5  | 166    | 172.1  | 208.6  | 210.2  |
| ODF2L  | 138.4  | 141    | 154.1  | 145.6  | 140.1  | 116.1  | 125.6  | 138.5  |
| ODF2L  | 119.8  | 108.4  | 113.9  | 116.9  | 100.2  | 96.4   | 121    | 114.6  |
| ODF3L1 | 128.5  | 118.6  | 124.9  | 130.6  | 113.8  | 107.2  | 125.8  | 124.4  |
| ODF4   | 124.4  | 115.5  | 118.6  | 126.3  | 110.8  | 108.6  | 122.1  | 117.7  |
| ODZ1   | 108.8  | 108.9  | 109.2  | 115.7  | 100.3  | 93.8   | 111.4  | 109.9  |
| ODZ2   | 125.2  | 120.4  | 118.5  | 130.2  | 119.6  | 107.8  | 117.8  | 118.9  |
| ODZ3   | 120.6  | 116.3  | 116.6  | 135.4  | 116.3  | 102.4  | 111    | 119.2  |
| OFCC1  | 112.4  | 106.9  | 115.7  | 112    | 105.7  | 98.5   | 114.3  | 117.3  |
| OFD1   | 191.6  | 192.2  | 197    | 218.1  | 199.1  | 220.2  | 205.5  | 213.7  |
| OGDH   | 136.4  | 132.1  | 131.7  | 130.7  | 119.6  | 110.3  | 127.7  | 130.8  |
| OGDH   | 125.9  | 102.4  | 117.4  | 123.7  | 117.7  | 99.4   | 110.6  | 117.4  |
| OGDH   | 229.4  | 280.6  | 205.9  | 219.7  | 189.7  | 160.9  | 267.2  | 222.6  |
| OGDHL  | 112.9  | 113    | 119.9  | 118.1  | 103.7  | 95.6   | 119.4  | 108.1  |
| OGFOD1 | 104.7  | 108.7  | 113.2  | 113.1  | 105.7  | 99.3   | 120.9  | 115.8  |
| OGFOD1 | 184.7  | 204.5  | 184.5  | 184.9  | 163.5  | 173.8  | 188.3  | 193.9  |
| OGFOD1 | 267.3  | 338.6  | 376.5  | 339.5  | 351.1  | 309.5  | 340    | 319.3  |
| OGFOD2 | 123.5  | 121.3  | 121.6  | 133.6  | 122.1  | 109.6  | 126.7  | 125.8  |
| OGFR   | 399.8  | 430.4  | 344.3  | 449.2  | 272.9  | 310.4  | 431.7  | 361.1  |
| OGFRL1 | 128.2  | 119.6  | 176.2  | 126.9  | 126.4  | 134.6  | 120.7  | 123.6  |
| OGG1   | 130    | 125.9  | 126.2  | 129.8  | 114.1  | 104.8  | 132.2  | 116.3  |
| OGG1   | 174.7  | 152.6  | 158.4  | 156.3  | 141.3  | 130.7  | 142.4  | 134.7  |
| OGN    | 107.2  | 112.8  | 123.7  | 130.1  | 111.2  | 107.7  | 124.4  | 118.3  |
| OGN    | 121    | 111    | 118.5  | 113.2  | 108.3  | 104.7  | 108.7  | 114.4  |
| OGN    | 113.9  | 107.3  | 107.1  | 113.4  | 103.7  | 92.7   | 121.1  | 119.2  |
| OGT    | 1579.1 | 1970.1 | 2388.1 | 1646   | 1710.1 | 1329.8 | 1583.7 | 1445.8 |
| OGT    | 533.8  | 645.9  | 1015.6 | 539.6  | 683.9  | 510    | 407.7  | 361    |
| OIP5   | 137.5  | 126.1  | 132.9  | 142.1  | 107.1  | 94.1   | 128.2  | 123.1  |
| OIT3   | 125.4  | 107.7  | 126.5  | 123.1  | 116.4  | 93.5   | 118.4  | 120.1  |
| OLFM1  | 118.3  | 124.1  | 121    | 121.2  | 108.7  | 100.5  | 116.2  | 115.5  |
| OLFM1  | 115.6  | 117.9  | 199.4  | 115    | 105.1  | 108.9  | 119.9  | 117.8  |

|         |       |       |       |       |       |       |       |       |
|---------|-------|-------|-------|-------|-------|-------|-------|-------|
| OLFM1   | 119.8 | 115.5 | 135.6 | 115.5 | 116.2 | 103   | 124.7 | 125   |
| OLFM2   | 117.1 | 118   | 124.1 | 124.6 | 119   | 95.9  | 117.2 | 125   |
| OLFM3   | 116.1 | 111.8 | 109.8 | 105.9 | 104.6 | 91.5  | 105.4 | 97.8  |
| OLFM4   | 127.1 | 167.3 | 137.7 | 140.2 | 140.3 | 119.3 | 126.8 | 138.6 |
| OLFML1  | 115   | 107.3 | 117.6 | 114.5 | 111.3 | 101.4 | 121.4 | 113.3 |
| OLFML2A | 115.6 | 115.8 | 118.9 | 110.1 | 111.6 | 104.4 | 115.9 | 115.8 |
| OLFML2B | 116   | 121.4 | 140.2 | 122.3 | 108.7 | 122.7 | 117.6 | 112.8 |
| OLFML3  | 125.5 | 118.9 | 134   | 125   | 110.7 | 104.9 | 111.5 | 113.7 |
| OLIG2   | 118.7 | 116.2 | 117.4 | 123.1 | 110.7 | 95.3  | 120.6 | 114.9 |
| OLIG3   | 110.6 | 120.9 | 124.1 | 116.9 | 116.2 | 107.9 | 125.4 | 120.3 |
| OLR1    | 120.5 | 131.7 | 834.8 | 130   | 128   | 337   | 125.1 | 132.4 |
| OMA1    | 129.7 | 129.4 | 148.1 | 135.8 | 124.6 | 109.2 | 125.4 | 121.5 |
| OMD     | 105.5 | 126.3 | 121.8 | 116.9 | 110.9 | 105.2 | 116.3 | 114.7 |
| OMG     | 106.8 | 121.4 | 124.3 | 114.8 | 121.4 | 98.7  | 134.2 | 136.7 |
| OMP     | 105.8 | 106.1 | 117.4 | 106.4 | 97.2  | 92    | 115   | 114.5 |
| ONECUT1 | 112.8 | 109.7 | 112.9 | 118.3 | 98.9  | 95.4  | 112.6 | 112   |
| ONECUT2 | 118.1 | 128.5 | 123.1 | 118.8 | 113.4 | 102.4 | 127.8 | 124.7 |
| ONECUT3 | 112.6 | 113.5 | 117   | 117.8 | 112.2 | 104.2 | 119.4 | 115.9 |
| OPA1    | 181.7 | 187   | 179   | 183.4 | 180.7 | 161.6 | 189.7 | 186.2 |
| OPA1    | 103.7 | 113.9 | 119.3 | 119.3 | 102.7 | 96.1  | 120.8 | 117.5 |
| OPA3    | 122.6 | 113   | 120   | 127.3 | 109.1 | 115.8 | 123.5 | 113.7 |
| OPA3    | 191.9 | 178.9 | 176.3 | 194   | 168.7 | 129.2 | 201.9 | 173.8 |
| OPCML   | 113.8 | 108.4 | 119.4 | 111.6 | 108.2 | 93.2  | 114   | 107.2 |
| OPCML   | 117   | 118.6 | 121.4 | 126.9 | 116.2 | 102.8 | 117.6 | 115.8 |
| OPHN1   | 115.1 | 111.3 | 126.5 | 118.9 | 118.5 | 97.6  | 112.6 | 113.1 |
| OPLAH   | 114.3 | 110.8 | 118.5 | 123.2 | 100.1 | 97.8  | 101.7 | 104   |
| OPLAH   | 139.5 | 123.7 | 156   | 131.9 | 110   | 102.7 | 128.6 | 104.8 |
| OPN1LW  | 121.2 | 112.7 | 111.5 | 116.9 | 104.4 | 100   | 124.5 | 122.7 |
| OPN1MW  | 118.9 | 121.4 | 118   | 131   | 115.1 | 99.5  | 118   | 113.9 |
| OPN1SW  | 121.4 | 119.1 | 125.6 | 127.7 | 114.3 | 107.2 | 118.2 | 124.8 |
| OPN3    | 201.1 | 191.8 | 255.4 | 208.2 | 177.7 | 175.3 | 182.4 | 153.6 |
| OPN3    | 129.5 | 129.2 | 132.5 | 128.5 | 110.6 | 105.9 | 115.3 | 117.4 |
| OPN3    | 118.5 | 121.2 | 128.2 | 131   | 112.6 | 99.6  | 123.3 | 121.9 |
| OPN4    | 114.5 | 109   | 125.7 | 112.2 | 105.2 | 98.9  | 120.5 | 112.2 |
| OPN4    | 109.6 | 111.8 | 112.7 | 122.2 | 106.8 | 99.3  | 117.7 | 114.3 |
| OPN5    | 110.9 | 117.6 | 123.2 | 111.7 | 109.9 | 97    | 123.9 | 109.6 |
| OPN5    | 122   | 111.1 | 122.6 | 123.4 | 117.1 | 100   | 112   | 119.6 |
| OPRD1   | 125.6 | 115.2 | 115   | 122.8 | 112.1 | 99.9  | 126.2 | 114.5 |
| OPRK1   | 119.3 | 123.7 | 116.5 | 120.1 | 118   | 96.9  | 114.3 | 120   |
| OPRL1   | 135.7 | 123.5 | 149.7 | 137.9 | 122   | 119   | 130.9 | 124   |
| OPRL1   | 114.1 | 117.4 | 131.8 | 119.1 | 111.7 | 105.5 | 124.8 | 122.1 |
| OPRL1   | 111.9 | 109.9 | 104.4 | 108.1 | 107.9 | 95.9  | 113.2 | 109.4 |
| OPRM1   | 114.1 | 119   | 126.4 | 120.3 | 109.8 | 102.5 | 126.1 | 122.5 |
| OPRM1   | 116.9 | 109.4 | 113.6 | 117.8 | 108   | 96.1  | 107.9 | 111.2 |
| OPRM1   | 118.1 | 113.3 | 113.1 | 132.8 | 110.6 | 99.6  | 129.1 | 122.7 |
| OPRM1   | 108.3 | 112.1 | 119.6 | 112.9 | 99.1  | 97.7  | 108.7 | 112.1 |
| OPRM1   | 104.9 | 110.2 | 110.3 | 111   | 99.9  | 96.5  | 111.1 | 108.2 |
| OPRM1   | 119.8 | 113.7 | 130   | 115.9 | 114.9 | 106.9 | 127.6 | 112.7 |
| OPRS1   | 130.8 | 148   | 145.7 | 138.9 | 117.3 | 120.3 | 119.2 | 126.3 |
| OPRS1   | 208.8 | 188.7 | 170.8 | 173.4 | 144.3 | 160.1 | 157.2 | 143.1 |
| OPTC    | 120.1 | 123.5 | 116.5 | 113   | 105.2 | 100.1 | 122.5 | 108.4 |

|         |       |       |       |       |       |       |       |       |
|---------|-------|-------|-------|-------|-------|-------|-------|-------|
| OPTN    | 515.3 | 674   | 445.2 | 562.6 | 631.7 | 448.6 | 790.2 | 858.5 |
| OR10A2  | 110.1 | 115.7 | 118.6 | 115.9 | 105.1 | 99.8  | 129.4 | 115.1 |
| OR10A3  | 113.7 | 113.1 | 128.7 | 118.1 | 112.2 | 102   | 123   | 114.4 |
| OR10A4  | 114.6 | 113.4 | 129.3 | 111.8 | 108.1 | 101.6 | 122.8 | 107.9 |
| OR10A5  | 105.2 | 113   | 104.7 | 114.8 | 113.5 | 101   | 103.4 | 112.3 |
| OR10A6  | 116.5 | 118.5 | 110.3 | 114.3 | 114.4 | 98.7  | 113.3 | 122.6 |
| OR10A7  | 116.4 | 108.2 | 121.5 | 122   | 110.7 | 108.5 | 130.1 | 115.8 |
| OR10AD1 | 113.7 | 117.9 | 119.2 | 112.2 | 109.1 | 101.5 | 109.3 | 115.2 |
| OR10AG1 | 113.9 | 111.9 | 120.3 | 112.6 | 109   | 99    | 121.9 | 108.6 |
| OR10C1  | 125.7 | 109.1 | 114.9 | 118   | 103.1 | 95.1  | 113.7 | 116.4 |
| OR10G2  | 118.5 | 109.2 | 116.9 | 122.3 | 102.8 | 107.3 | 120.4 | 121.9 |
| OR10G3  | 116.7 | 117.6 | 116   | 112.7 | 108.7 | 104.3 | 116.9 | 120.7 |
| OR10G4  | 111.7 | 112.1 | 119   | 121.7 | 107.4 | 104.4 | 117.2 | 118.4 |
| OR10G7  | 114.3 | 121.1 | 123   | 119.4 | 111   | 100.8 | 121.7 | 112.5 |
| OR10G8  | 111.1 | 112.5 | 123.1 | 112   | 109.8 | 98.7  | 115.8 | 128.8 |
| OR10G9  | 108.1 | 120.8 | 120.8 | 120   | 106   | 98.8  | 114.8 | 113.6 |
| OR10H1  | 112.2 | 114.6 | 115   | 112.3 | 107.7 | 95.1  | 117.5 | 109.5 |
| OR10H2  | 118.1 | 105.6 | 114.8 | 114.4 | 118.5 | 94.6  | 108.3 | 105.7 |
| OR10H3  | 108.5 | 122.7 | 114.8 | 115.8 | 106.7 | 97.6  | 111.6 | 116.4 |
| OR10H4  | 109.9 | 110.6 | 116.1 | 113.6 | 112.2 | 95    | 117   | 113.9 |
| OR10H5  | 110.6 | 118.5 | 109.8 | 121.3 | 106.7 | 93.8  | 117.7 | 109.9 |
| OR10J1  | 121   | 121.6 | 126.1 | 127.5 | 113.7 | 109.8 | 124.1 | 122.3 |
| OR10J3  | 109.1 | 111.8 | 120.6 | 113.3 | 109.5 | 95.6  | 122.8 | 111.9 |
| OR10J5  | 110.4 | 119.6 | 123   | 120.7 | 116.2 | 100.6 | 114.9 | 123.7 |
| OR10K1  | 118.8 | 119.5 | 113.6 | 117.2 | 109.5 | 97.5  | 110.7 | 114.2 |
| OR10K2  | 106.8 | 112   | 118.9 | 121.8 | 106.7 | 95.3  | 109.2 | 112.3 |
| OR10P1  | 116.2 | 113.5 | 107.7 | 111.7 | 109.5 | 103.3 | 112.1 | 109   |
| OR10Q1  | 118.1 | 117.5 | 116.6 | 122.2 | 104   | 101.3 | 118.9 | 116.2 |
| OR10R2  | 111.6 | 113.5 | 116.6 | 114.1 | 116.8 | 99.2  | 121.1 | 112.1 |
| OR10S1  | 120.3 | 120.8 | 122.8 | 127.4 | 115.9 | 106.5 | 119.7 | 122.1 |
| OR10T2  | 119.2 | 111.1 | 116.1 | 116.8 | 113.4 | 103.3 | 123   | 111.3 |
| OR10V1  | 119.5 | 120.9 | 122.8 | 119.5 | 108.1 | 104.7 | 119.4 | 114.9 |
| OR10W1  | 110.4 | 113.5 | 108.5 | 112.5 | 113.3 | 92.9  | 124.8 | 106.5 |
| OR10X1  | 115.7 | 109.5 | 126.9 | 121.3 | 111.8 | 96.5  | 119.9 | 107.8 |
| OR10Z1  | 115.9 | 112.9 | 109   | 117.6 | 112   | 94.2  | 112.1 | 114.5 |
| OR11A1  | 107.7 | 112.9 | 113   | 117   | 108.3 | 99.5  | 113.2 | 115.9 |
| OR11G2  | 120.2 | 112.9 | 113.7 | 119.1 | 98    | 92.9  | 111.7 | 108.8 |
| OR11H1  | 110.9 | 119.3 | 113.8 | 120.5 | 106.5 | 113.4 | 124.7 | 116.4 |
| OR11H12 | 114.6 | 127.4 | 118   | 115.3 | 102.9 | 113.9 | 124.9 | 127.2 |
| OR11H12 | 139   | 109.9 | 134.6 | 138.4 | 109.2 | 107.3 | 129.8 | 119   |
| OR11H4  | 116   | 114.1 | 116.7 | 122.2 | 111.3 | 101.7 | 126.1 | 117.5 |
| OR11H6  | 113   | 116.6 | 117   | 126.3 | 106.8 | 93.7  | 112.8 | 104.3 |
| OR11L1  | 136.9 | 123.2 | 133.1 | 140.5 | 117.9 | 114.5 | 124.2 | 133.7 |
| OR12D2  | 125.7 | 128.2 | 130.5 | 131.3 | 115.4 | 109.4 | 116.3 | 122.4 |
| OR12D3  | 119   | 114.9 | 115.8 | 114   | 97.6  | 93.7  | 112.5 | 117.2 |
| OR13A1  | 120.9 | 116.1 | 108.7 | 122.2 | 115   | 102   | 118.3 | 112   |
| OR13C2  | 116.7 | 100.7 | 110.4 | 115.4 | 108   | 95.9  | 113.2 | 111   |
| OR13C3  | 119   | 118.6 | 113.5 | 110.9 | 114.2 | 98.4  | 121.7 | 114.2 |
| OR13C4  | 118   | 103.8 | 111.6 | 125   | 114.8 | 95.6  | 122   | 110   |
| OR13C5  | 113   | 122.3 | 124.3 | 124   | 105.7 | 99.5  | 124.5 | 112.2 |
| OR13C8  | 111.9 | 116   | 114.8 | 117.5 | 104.6 | 102.2 | 121.2 | 115.8 |

|         |       |       |       |       |       |       |       |       |
|---------|-------|-------|-------|-------|-------|-------|-------|-------|
| OR13C9  | 114.2 | 125.7 | 115.3 | 120.9 | 110.7 | 99.7  | 124.3 | 118.7 |
| OR13D1  | 112.5 | 116.4 | 104   | 104.8 | 104.6 | 93.5  | 125.6 | 105.7 |
| OR13F1  | 102.7 | 116.9 | 111.4 | 114.3 | 97.2  | 96.5  | 110.6 | 105.8 |
| OR13G1  | 116.2 | 112.9 | 117.3 | 127.6 | 105.7 | 98.7  | 114.4 | 110.1 |
| OR13H1  | 106.5 | 118.2 | 121.2 | 112.1 | 99.7  | 94.3  | 121.5 | 107.8 |
| OR13J1  | 112.7 | 126.7 | 112.1 | 111.5 | 109.6 | 94.4  | 115.6 | 114.7 |
| OR1A1   | 112.9 | 123.8 | 113.6 | 112.5 | 117.4 | 96.3  | 117.8 | 119.1 |
| OR1A2   | 116.2 | 126.7 | 121.6 | 123.7 | 111.7 | 101.6 | 132.3 | 128.7 |
| OR1B1   | 113.8 | 117.7 | 106.9 | 118.4 | 108.4 | 93.1  | 112.6 | 110   |
| OR1C1   | 114.6 | 119.7 | 123.2 | 115.8 | 115.1 | 109   | 106.2 | 122.2 |
| OR1D2   | 119.6 | 118.5 | 118.2 | 117.9 | 111.1 | 110   | 122.1 | 119.2 |
| OR1D4   | 116.4 | 118.7 | 118.7 | 121.3 | 105.8 | 107.7 | 121.8 | 114.4 |
| OR1E1   | 115.1 | 114.8 | 112.3 | 114.5 | 108   | 98.1  | 123.4 | 123.5 |
| OR1E2   | 106.1 | 112.1 | 116.6 | 130.4 | 104.1 | 95.3  | 117.6 | 104.9 |
| OR1F1   | 110.4 | 113   | 117.9 | 118.8 | 104.8 | 102   | 114.7 | 112.6 |
| OR1F2   | 105.6 | 113.6 | 106.4 | 105.6 | 103.4 | 102.7 | 115.6 | 114.6 |
| OR1G1   | 108   | 112   | 116.2 | 113   | 114.3 | 101.8 | 110.3 | 113.8 |
| OR1I1   | 105.5 | 112.6 | 124.5 | 121.7 | 109.9 | 107.1 | 115.2 | 112.8 |
| OR1J1   | 118.5 | 117   | 135.5 | 127.3 | 112.6 | 96.4  | 122.1 | 125.4 |
| OR1J2   | 114.2 | 120   | 112.8 | 127.7 | 110.1 | 101.1 | 129.5 | 120.3 |
| OR1J4   | 122   | 116.7 | 127.5 | 129.6 | 115.8 | 97.8  | 118.6 | 122.2 |
| OR1K1   | 111.8 | 119.9 | 113.9 | 110.1 | 109.4 | 92.9  | 117.3 | 122.6 |
| OR1L1   | 123.6 | 109   | 119.8 | 119.8 | 105.7 | 108.5 | 105.2 | 115.7 |
| OR1L3   | 110.5 | 108.8 | 110.3 | 120   | 96.8  | 96.2  | 109.8 | 110.9 |
| OR1L4   | 115.8 | 111.2 | 125.8 | 119.3 | 102.2 | 94.6  | 126.3 | 119.1 |
| OR1L6   | 110.1 | 113.6 | 121.2 | 120.3 | 115.2 | 101.7 | 116.3 | 114.8 |
| OR1L8   | 117.4 | 120.1 | 114.4 | 117.4 | 113.2 | 106   | 122.6 | 117.4 |
| OR1M1   | 114.9 | 117.7 | 113.2 | 108.7 | 106   | 100   | 120.1 | 113.8 |
| OR1N1   | 111.5 | 121.4 | 114.6 | 113.7 | 107.1 | 100.3 | 120   | 115.8 |
| OR1N2   | 120.2 | 115.7 | 115.4 | 130   | 109.6 | 106.2 | 125.9 | 118.9 |
| OR1Q1   | 101.9 | 105.7 | 110.3 | 102.4 | 106.7 | 97    | 111.7 | 106.9 |
| OR1S1   | 104.4 | 116.4 | 115.1 | 110.6 | 105.7 | 92.2  | 119.1 | 114.4 |
| OR1S2   | 113.6 | 117.7 | 119.7 | 118.7 | 112.7 | 99.3  | 119.4 | 120.3 |
| OR2A1   | 133.9 | 134.5 | 135   | 138.1 | 124.6 | 101.7 | 133   | 129.2 |
| OR2A12  | 112.1 | 111.3 | 128.6 | 112.2 | 104.2 | 99.1  | 111.3 | 110.7 |
| OR2A14  | 122.7 | 113.2 | 111   | 122.2 | 115.5 | 106   | 129.3 | 110   |
| OR2A2   | 123.7 | 126.5 | 119.2 | 116.4 | 114.5 | 97.2  | 114.9 | 129   |
| OR2A20P | 118   | 113.4 | 114.8 | 124.3 | 114.4 | 100.4 | 113.4 | 112.7 |
| OR2A25  | 112.7 | 119.7 | 112.7 | 117.2 | 108.8 | 95.4  | 125   | 118.4 |
| OR2A42  | 123.4 | 120.7 | 117.8 | 127.4 | 115.4 | 100.8 | 125.4 | 121.4 |
| OR2A5   | 115.2 | 127.3 | 125.6 | 125.9 | 111.5 | 103.1 | 124.1 | 113.5 |
| OR2A7   | 123.3 | 122.8 | 122.4 | 123.9 | 109   | 104.1 | 126.1 | 113.8 |
| OR2A9P  | 189.3 | 182.6 | 168.5 | 174.8 | 169.2 | 147.2 | 168.1 | 198.7 |
| OR2AE1  | 112.2 | 120.9 | 108.9 | 116   | 108.6 | 101.5 | 131.8 | 113.4 |
| OR2AG1  | 115.8 | 119.4 | 119.8 | 124.2 | 109.1 | 103.7 | 120   | 116.5 |
| OR2AG2  | 123.6 | 120.9 | 113.7 | 121.2 | 106.1 | 95    | 117.9 | 126   |
| OR2AK2  | 113.8 | 124.4 | 113.4 | 124   | 127.4 | 108.2 | 115   | 114.9 |
| OR2AT4  | 118.2 | 115.3 | 116   | 116.2 | 109   | 105.2 | 118.4 | 117.5 |
| OR2B11  | 109.3 | 110.6 | 111.3 | 111   | 105.7 | 100.9 | 120.3 | 123   |
| OR2B2   | 111.1 | 120.8 | 113.7 | 112.2 | 113.5 | 99.6  | 129   | 113.2 |
| OR2B3   | 111.4 | 118.6 | 114.9 | 116.3 | 105.8 | 95.9  | 113.7 | 106.6 |

|        |       |       |       |       |       |       |       |       |
|--------|-------|-------|-------|-------|-------|-------|-------|-------|
| OR2B6  | 114   | 117.4 | 120.2 | 108.7 | 107.5 | 100.9 | 109.8 | 109.8 |
| OR2C1  | 116.3 | 117.4 | 124.6 | 125.9 | 111.6 | 95.7  | 115.6 | 127.2 |
| OR2C3  | 112.6 | 103.9 | 112.3 | 116.9 | 104.7 | 99.4  | 109.6 | 112   |
| OR2D2  | 117.4 | 111   | 111.2 | 116   | 103.1 | 100.7 | 114.4 | 113.6 |
| OR2D3  | 116.6 | 120.4 | 114.3 | 117.4 | 108.1 | 105.2 | 112.4 | 108.6 |
| OR2F1  | 105.7 | 111.4 | 111.1 | 127.4 | 103.3 | 100.4 | 119.3 | 107.7 |
| OR2F2  | 117.6 | 117.6 | 115.8 | 125.6 | 103.3 | 98.9  | 114.6 | 115.3 |
| OR2G2  | 113.2 | 118   | 112.2 | 106.5 | 97.7  | 97.5  | 116.7 | 109.5 |
| OR2G3  | 115.1 | 110.1 | 124.4 | 126.5 | 118   | 103.1 | 119.6 | 113.7 |
| OR2G6  | 109.1 | 112.6 | 103.4 | 106   | 102.3 | 96.1  | 110.1 | 106   |
| OR2H1  | 116.5 | 109.3 | 110.9 | 116.6 | 106.5 | 106.5 | 116.6 | 110.9 |
| OR2H2  | 126.6 | 124.6 | 131   | 136.1 | 129.4 | 112.7 | 137.9 | 132.9 |
| OR2J2  | 112.6 | 106.7 | 109.6 | 114.8 | 99.3  | 97    | 118.9 | 117.1 |
| OR2J3  | 123   | 112.3 | 118.8 | 114.1 | 113   | 95.6  | 119.1 | 112.6 |
| OR2K2  | 111.4 | 110.8 | 98.6  | 117.2 | 107.1 | 95.6  | 115   | 107.9 |
| OR2L13 | 113.6 | 117   | 113.5 | 114.4 | 106.5 | 94.5  | 110.8 | 116.4 |
| OR2L1P | 108.4 | 105.2 | 116.1 | 111.4 | 95    | 98    | 118.4 | 107.8 |
| OR2L2  | 111.2 | 112.3 | 105.7 | 111.8 | 102.8 | 91.9  | 110.1 | 109.2 |
| OR2L3  | 119.7 | 117.3 | 127.8 | 127.7 | 114.7 | 117.8 | 122.1 | 124.7 |
| OR2L8  | 126.6 | 124.3 | 121.2 | 130.2 | 116.7 | 100.3 | 124.4 | 116.4 |
| OR2M1P | 118.8 | 111.1 | 130.2 | 113.1 | 110.5 | 94.1  | 115.6 | 108   |
| OR2M2  | 112.4 | 123.8 | 114.7 | 115.2 | 107.3 | 101.1 | 119.3 | 119.7 |
| OR2M3  | 116.5 | 123.1 | 117.8 | 120.4 | 104.4 | 100.6 | 122.4 | 115.5 |
| OR2M4  | 112.1 | 109.4 | 116   | 123.5 | 107.6 | 94.3  | 117.4 | 111.1 |
| OR2M5  | 116.8 | 120.3 | 120.7 | 123.4 | 108.7 | 98.7  | 117   | 123.6 |
| OR2M7  | 110.8 | 112.8 | 114.6 | 111.8 | 105.7 | 93.1  | 116.1 | 112.5 |
| OR2S2  | 113.1 | 123   | 121.6 | 117.2 | 110.8 | 90.5  | 124.6 | 116.7 |
| OR2T1  | 134.6 | 120.1 | 130.8 | 143   | 124.4 | 114.6 | 122.8 | 126.8 |
| OR2T10 | 117.4 | 120.9 | 124   | 120.8 | 102.9 | 101   | 125.5 | 119.5 |
| OR2T11 | 112.9 | 114.5 | 121.8 | 129.4 | 118.3 | 110.8 | 126   | 125.7 |
| OR2T12 | 120.9 | 111.9 | 115.3 | 113.6 | 105.7 | 97    | 114.1 | 114   |
| OR2T27 | 104.4 | 123.2 | 112   | 110.1 | 108.1 | 100   | 106.8 | 107.7 |
| OR2T3  | 118.5 | 105   | 123.7 | 110.9 | 110   | 92.2  | 130.4 | 108.6 |
| OR2T33 | 123.4 | 117.7 | 119.8 | 132.5 | 113.2 | 104.3 | 119   | 110.7 |
| OR2T35 | 114   | 111.5 | 115   | 114.9 | 115.4 | 98.6  | 114.6 | 119.3 |
| OR2T4  | 111.6 | 110.8 | 116.8 | 120.5 | 104.2 | 95    | 108.7 | 115.6 |
| OR2T5  | 116.5 | 111.6 | 122.7 | 120.9 | 108.1 | 96.5  | 114.9 | 114   |
| OR2T6  | 122.7 | 121.9 | 116.9 | 126.5 | 113   | 100.2 | 123.5 | 117.5 |
| OR2T8  | 116   | 115.1 | 130.3 | 120.3 | 103.1 | 105.1 | 126.3 | 114.1 |
| OR2V2  | 115.6 | 119   | 115.9 | 111.7 | 115.7 | 100.3 | 110.5 | 115.2 |
| OR2W1  | 107.9 | 111.3 | 111.9 | 125.6 | 105.6 | 94.9  | 113.9 | 111.8 |
| OR2W3  | 118.2 | 124.1 | 109.6 | 120.7 | 107.3 | 96.6  | 110.3 | 115   |
| OR2W5  | 127.7 | 119.6 | 124.9 | 129.9 | 120.8 | 102.8 | 126.3 | 122.4 |
| OR2Y1  | 107.6 | 107   | 111.8 | 112.8 | 101.1 | 100   | 121.5 | 114.9 |
| OR2Z1  | 114.8 | 117.2 | 121.3 | 116   | 107.3 | 101.8 | 121.3 | 115   |
| OR3A1  | 119.1 | 113.4 | 122.1 | 116.7 | 113   | 109.1 | 119.2 | 114.6 |
| OR3A2  | 114.3 | 119.6 | 117.6 | 120.3 | 117.5 | 108.6 | 129.4 | 114.7 |
| OR3A3  | 115.1 | 107.5 | 109.4 | 108.9 | 105.7 | 88.3  | 116.8 | 108.9 |
| OR3A4  | 118   | 118.4 | 119.2 | 130.5 | 120.6 | 109.3 | 131.5 | 129.8 |
| OR4A15 | 122.8 | 112.7 | 126   | 126.3 | 115.5 | 106.5 | 126.2 | 123.3 |
| OR4A16 | 111.6 | 118.5 | 114.9 | 117.9 | 112.2 | 93.3  | 119.5 | 111.3 |



|        |       |       |       |       |       |       |       |       |
|--------|-------|-------|-------|-------|-------|-------|-------|-------|
| OR4A47 | 110.9 | 121.1 | 115.1 | 113.7 | 106.7 | 98.8  | 120.7 | 118.8 |
| OR4A5  | 102.8 | 105   | 108.6 | 112.7 | 109.7 | 93.5  | 116.4 | 111.5 |
| OR4B1  | 118.5 | 113.9 | 125.6 | 122.8 | 112   | 98.3  | 122.8 | 120.1 |
| OR4C11 | 116.2 | 116.5 | 115.2 | 118.1 | 110.5 | 98.9  | 119.2 | 110.8 |
| OR4C12 | 111.8 | 113.5 | 115.2 | 118.5 | 115   | 100.2 | 125.4 | 110.9 |
| OR4C13 | 111.5 | 124.3 | 112.7 | 121.9 | 107   | 101.6 | 115.8 | 117.1 |
| OR4C15 | 109.8 | 120.5 | 119.7 | 118   | 115.6 | 99.8  | 114.2 | 123.9 |
| OR4C16 | 125.5 | 120   | 124.1 | 120.2 | 111.8 | 105.9 | 114.8 | 122.5 |
| OR4C3  | 114.5 | 114.2 | 113.4 | 114.2 | 100.2 | 99.5  | 119.4 | 114   |
| OR4C45 | 130.3 | 121.7 | 118.1 | 123.3 | 110.7 | 100.3 | 122   | 122.7 |
| OR4C46 | 116.5 | 115.9 | 112.1 | 120.2 | 100.4 | 100.2 | 126.5 | 106   |
| OR4C6  | 113.7 | 114.4 | 124.9 | 108.1 | 112.8 | 97.9  | 121.4 | 110.5 |
| OR4D1  | 101.1 | 112.9 | 110.4 | 117.6 | 111.2 | 110.3 | 125.2 | 118.5 |
| OR4D10 | 110.1 | 111.8 | 110   | 118.6 | 106.8 | 103.4 | 117.2 | 121.5 |
| OR4D11 | 120.2 | 104.8 | 112.2 | 121.4 | 112.9 | 105.6 | 131.4 | 122.8 |
| OR4D2  | 113.7 | 116.1 | 118.4 | 124.7 | 108.3 | 96.6  | 117.9 | 117.2 |
| OR4D5  | 118.7 | 119.1 | 114.7 | 124.4 | 118.9 | 113.7 | 120   | 115.7 |
| OR4D6  | 110.2 | 122.6 | 119.7 | 114.1 | 106.6 | 108.7 | 120.1 | 115.5 |
| OR4D9  | 113.4 | 119.4 | 105.1 | 114.9 | 100.9 | 89.5  | 115   | 113.4 |
| OR4E2  | 110.9 | 121.1 | 110.6 | 118   | 110.5 | 95.9  | 117.2 | 115.9 |
| OR4F15 | 112.8 | 118.7 | 107.9 | 121.6 | 110.8 | 102   | 124   | 103.4 |
| OR4F21 | 111.4 | 119.9 | 118.3 | 120.9 | 120   | 101.7 | 121.1 | 114   |
| OR4F3  | 108.5 | 122.4 | 119.5 | 118.4 | 108.2 | 99.5  | 111.5 | 114.9 |
| OR4F4  | 121.8 | 123.8 | 126.5 | 126.1 | 120.7 | 106.3 | 124.9 | 116.8 |
| OR4F5  | 116.3 | 119   | 116.4 | 113.8 | 108.7 | 101.2 | 129.9 | 120.5 |
| OR4F6  | 115.7 | 112.7 | 116.6 | 117.5 | 106.7 | 100.9 | 115.6 | 109.1 |
| OR4K1  | 120   | 119.8 | 117.5 | 116.9 | 107.9 | 98.8  | 129.2 | 110.7 |
| OR4K13 | 107.5 | 104.8 | 111.2 | 121.7 | 103.6 | 104.3 | 122.9 | 111.5 |
| OR4K14 | 109.2 | 118.6 | 117.7 | 118.3 | 102.9 | 99.1  | 115.8 | 113   |
| OR4K15 | 116.1 | 115   | 116.4 | 113.4 | 108.6 | 103.6 | 124   | 118.7 |
| OR4K17 | 108.9 | 118   | 126.8 | 110.6 | 117   | 102   | 122.7 | 109.1 |
| OR4K2  | 109.5 | 111.2 | 122.7 | 115   | 104.9 | 102.7 | 115.6 | 117.2 |
| OR4K5  | 113.7 | 119.3 | 117.8 | 117.3 | 109.2 | 103.1 | 111.9 | 112.9 |
| OR4L1  | 111.8 | 116   | 114   | 119.1 | 109.6 | 102   | 119.9 | 116.2 |
| OR4M1  | 115.1 | 109   | 113.7 | 126.2 | 102.6 | 94.1  | 120   | 119.2 |
| OR4M2  | 109.6 | 110.6 | 114.1 | 115.9 | 109.4 | 105.7 | 124.5 | 122   |
| OR4N2  | 118.6 | 111.1 | 116.6 | 128   | 115.1 | 102   | 119   | 123.1 |
| OR4N4  | 117.3 | 116   | 115.9 | 114.2 | 101.4 | 100.1 | 114.5 | 118.3 |
| OR4N5  | 119.8 | 114.1 | 122.9 | 112   | 106   | 93.4  | 125.5 | 111.1 |
| OR4P4  | 109.2 | 113.1 | 116   | 121.5 | 107.5 | 97.4  | 113.1 | 113.5 |
| OR4Q3  | 114.2 | 107.6 | 110.5 | 114.9 | 103   | 97.1  | 114.4 | 107.8 |
| OR4S1  | 120   | 121.2 | 112.8 | 135.4 | 105.2 | 105.7 | 126.4 | 118.3 |
| OR4S2  | 112.8 | 117.3 | 117.1 | 120.8 | 112.2 | 102.2 | 111.4 | 117.3 |
| OR4X1  | 120.1 | 119.3 | 113.6 | 125.7 | 107.6 | 101.4 | 117.6 | 119.8 |
| OR4X2  | 108.2 | 112.1 | 108.8 | 121.9 | 102.7 | 92.8  | 113.3 | 107.1 |
| OR51A2 | 111.1 | 112.7 | 115.3 | 117.1 | 101.6 | 102.3 | 113.8 | 126   |
| OR51A4 | 102.2 | 111.5 | 114.7 | 110.7 | 103.5 | 97.8  | 121   | 116   |
| OR51A7 | 116.7 | 110.9 | 117.7 | 121   | 100.2 | 102.6 | 127.1 | 117.2 |
| OR51B2 | 121.7 | 110.3 | 110.6 | 112.5 | 114   | 102.9 | 122.5 | 118.2 |
| OR51B4 | 118   | 112.7 | 115.2 | 112.5 | 103   | 95.8  | 121.1 | 113.8 |
| OR51B5 | 116.3 | 118.9 | 119.1 | 118.7 | 111.6 | 97.3  | 119.9 | 108.6 |

|        |       |       |       |       |       |       |       |       |
|--------|-------|-------|-------|-------|-------|-------|-------|-------|
| OR51B6 | 115   | 120   | 123.4 | 122.2 | 112.1 | 100.4 | 119.5 | 115.6 |
| OR51D1 | 118.4 | 124.5 | 122.6 | 115.3 | 110.6 | 109.3 | 118.1 | 112.4 |
| OR51E1 | 112.3 | 114.3 | 113.5 | 118.3 | 107.2 | 96.4  | 105.5 | 104.9 |
| OR51E2 | 130.5 | 122.8 | 123.9 | 120.8 | 115.1 | 100.4 | 116.3 | 111.4 |
| OR51F1 | 111.6 | 111.3 | 104.9 | 105.3 | 103.6 | 97.9  | 114   | 112.7 |
| OR51F2 | 116.8 | 110.1 | 117.3 | 112.6 | 105.8 | 96.5  | 114.2 | 115.4 |
| OR51G1 | 118.3 | 116.2 | 121.9 | 115.6 | 113.6 | 101.7 | 115.2 | 119.1 |
| OR51G2 | 114   | 120   | 118.8 | 116.2 | 112.3 | 102.5 | 117.5 | 120.2 |
| OR51I1 | 112.7 | 110   | 115.8 | 112.5 | 101.9 | 95.8  | 114.4 | 114.9 |
| OR51I2 | 108.4 | 115.1 | 114.8 | 117.6 | 105.4 | 99.1  | 117.2 | 115.7 |
| OR51L1 | 104.8 | 111.7 | 114.7 | 119.4 | 105.4 | 98.9  | 110.8 | 109.5 |
| OR51M1 | 117.3 | 110.6 | 116.5 | 120.5 | 110.5 | 99.2  | 116.4 | 118.8 |
| OR51Q1 | 115.8 | 114.8 | 124.1 | 118   | 101   | 107   | 115   | 117.2 |
| OR51S1 | 116.5 | 107.9 | 109.6 | 121.7 | 103.4 | 102.6 | 119.8 | 115.9 |
| OR51T1 | 124.5 | 122   | 127.7 | 115   | 115.3 | 105.6 | 130.8 | 135.4 |
| OR51V1 | 108.2 | 109.4 | 109.3 | 116.8 | 98.4  | 92    | 104.6 | 108.7 |
| OR52A1 | 105.9 | 108   | 116.1 | 121.9 | 106   | 97.4  | 115.5 | 123.3 |
| OR52A4 | 117.8 | 110.7 | 130.1 | 118.5 | 108.3 | 96.3  | 109.6 | 111.6 |
| OR52A5 | 118.5 | 126.5 | 124.6 | 123.2 | 110.1 | 101.5 | 126.9 | 121.8 |
| OR52B2 | 119.8 | 107.8 | 122.7 | 115.1 | 109.3 | 100.6 | 113.9 | 113.1 |
| OR52B4 | 113.3 | 109.4 | 118.3 | 117.2 | 113.4 | 97.6  | 117.8 | 108.1 |
| OR52B6 | 116   | 123.5 | 122.5 | 114.9 | 109.3 | 105   | 121.7 | 121   |
| OR52D1 | 114.3 | 115.1 | 131.9 | 119.3 | 109.7 | 106.1 | 120.8 | 118.6 |
| OR52E2 | 117.5 | 112   | 112.4 | 112.8 | 100.9 | 96    | 120.1 | 111.5 |
| OR52E4 | 108.7 | 122   | 114   | 115.4 | 118.4 | 113.8 | 126.7 | 114.5 |
| OR52E6 | 120.3 | 116.8 | 116.2 | 118.6 | 114.2 | 97.1  | 118.5 | 117.9 |
| OR52E8 | 114.6 | 113.7 | 109   | 111.4 | 109   | 95.5  | 114.4 | 112   |
| OR52H1 | 112.6 | 111.9 | 115.5 | 121.1 | 109.6 | 100   | 116.6 | 113.2 |
| OR52I1 | 111.3 | 114.3 | 109.4 | 111.5 | 110.2 | 99.8  | 117.2 | 110.3 |
| OR52I2 | 116   | 116.2 | 119.7 | 127.8 | 106.2 | 103.3 | 120   | 103.5 |
| OR52J3 | 110.1 | 122.2 | 117.4 | 117   | 110.4 | 100.8 | 118.3 | 121.5 |
| OR52K1 | 122.3 | 127.3 | 117.6 | 133.3 | 117.8 | 110.7 | 129.8 | 120.5 |
| OR52K2 | 116.7 | 116.5 | 115.4 | 115.8 | 107.4 | 101.2 | 118.5 | 127.6 |
| OR52L1 | 114.7 | 115.7 | 109.7 | 120   | 109.1 | 96.2  | 122.2 | 110.9 |
| OR52M1 | 109.9 | 121.8 | 114.6 | 120.7 | 111.8 | 105.4 | 123.8 | 111.7 |
| OR52N1 | 124.3 | 126.6 | 118.7 | 116.4 | 113.8 | 97.8  | 121.7 | 113.3 |
| OR52N2 | 130.4 | 118.2 | 133.3 | 125.2 | 118.9 | 106.6 | 130.2 | 121.6 |
| OR52N4 | 111.2 | 115.2 | 109.5 | 110.8 | 104.8 | 101   | 109.4 | 111.9 |
| OR52N5 | 119   | 116.6 | 130.4 | 118.2 | 115.5 | 113.3 | 118.2 | 117.7 |
| OR52R1 | 117.3 | 109.4 | 125.9 | 122.2 | 108.1 | 105.5 | 129.5 | 116.7 |
| OR52W1 | 115   | 111   | 124.1 | 111.3 | 108.8 | 96.7  | 114.6 | 119.6 |
| OR56A1 | 111.4 | 122.6 | 114.3 | 111.4 | 104.1 | 98.6  | 119.7 | 113   |
| OR56A3 | 115.6 | 116.6 | 108.3 | 112   | 104.3 | 92.2  | 113.2 | 112.4 |
| OR56A4 | 113.4 | 113   | 114.2 | 109.6 | 102.9 | 94.4  | 104.6 | 110.1 |
| OR56B1 | 117.5 | 121.5 | 128.2 | 126.3 | 124.2 | 101.7 | 121.4 | 132.1 |
| OR56B4 | 116.4 | 121.6 | 130.9 | 120.9 | 106   | 105.6 | 117.2 | 120.6 |
| OR5A1  | 109.3 | 126.1 | 117.1 | 110.4 | 114.4 | 97.1  | 116.4 | 107.8 |
| OR5A2  | 115.5 | 113.7 | 118.1 | 116   | 103.9 | 94.2  | 120.5 | 108.8 |
| OR5AC2 | 112.9 | 109.6 | 126   | 111.7 | 104.6 | 96.5  | 114.7 | 114.9 |
| OR5AK2 | 114.1 | 117.6 | 118.6 | 118   | 104.9 | 99.2  | 110.2 | 104   |
| OR5AN1 | 116.4 | 113.4 | 109.7 | 116.8 | 107.3 | 102.2 | 112.3 | 112.2 |

|        |       |       |       |       |       |       |       |       |
|--------|-------|-------|-------|-------|-------|-------|-------|-------|
| OR5AP2 | 114   | 127.1 | 119.3 | 122.4 | 105.2 | 103.2 | 111.5 | 122.4 |
| OR5AR1 | 124   | 109.8 | 119.4 | 123.6 | 104.3 | 103.2 | 122.9 | 116   |
| OR5AS1 | 121.1 | 110.8 | 111.7 | 115.9 | 114.3 | 100.6 | 117.9 | 116.5 |
| OR5AT1 | 119.7 | 109.5 | 127.8 | 117.1 | 111.4 | 98.7  | 118.1 | 113.7 |
| OR5AU1 | 109.2 | 124.1 | 116.8 | 122.3 | 110   | 96.6  | 115.2 | 114.7 |
| OR5AY1 | 116.7 | 107.7 | 114.4 | 115.1 | 104.1 | 96.5  | 107.3 | 111.9 |
| OR5B12 | 120.8 | 113.7 | 122.7 | 121.5 | 107.8 | 101.7 | 115.9 | 114.5 |
| OR5B17 | 106.5 | 122.3 | 114   | 111.8 | 97.9  | 100.3 | 118.7 | 121.1 |
| OR5B2  | 118.4 | 121.9 | 123.4 | 124.2 | 109.1 | 98.9  | 116.9 | 123.9 |
| OR5B21 | 110.8 | 113.2 | 117.7 | 119.5 | 121.1 | 103   | 125.1 | 115.3 |
| OR5B3  | 116   | 118.6 | 118.4 | 121.6 | 107.8 | 107.4 | 105.7 | 110.5 |
| OR5BF1 | 119.1 | 120.7 | 121.5 | 118.5 | 108.3 | 101.1 | 114.1 | 109.3 |
| OR5BU1 | 111.8 | 115   | 111.7 | 123.7 | 114.8 | 97.7  | 117.2 | 114.2 |
| OR5C1  | 114.3 | 113.9 | 119.6 | 114.6 | 108.7 | 96.4  | 125.8 | 113.9 |
| OR5D13 | 112.1 | 108.6 | 114.6 | 111.6 | 108.3 | 96.2  | 120   | 105.3 |
| OR5D14 | 111   | 124.9 | 118.7 | 124   | 103.4 | 105.5 | 124.1 | 111.4 |
| OR5D16 | 110.4 | 120.9 | 117.9 | 116.8 | 119.3 | 107.5 | 126.9 | 124.5 |
| OR5D18 | 107.6 | 112.9 | 111.4 | 114.5 | 103.4 | 92.3  | 104.2 | 110.5 |
| OR5F1  | 116.8 | 115.6 | 120.7 | 115   | 104.3 | 105.2 | 111   | 114   |
| OR5H1  | 117   | 114.3 | 113.1 | 116.9 | 112.6 | 107.8 | 112.8 | 120.6 |
| OR5H14 | 105.8 | 115.7 | 115.7 | 101.8 | 101   | 91.2  | 114.4 | 104.5 |
| OR5H15 | 110.9 | 115.4 | 116.6 | 116.1 | 98.3  | 103.2 | 121.5 | 112   |
| OR5H2  | 109.7 | 109.5 | 112.6 | 113.3 | 102.3 | 91.9  | 113.3 | 108   |
| OR5H6  | 115   | 120.7 | 116.5 | 112.2 | 115.5 | 90.5  | 117.9 | 117.1 |
| OR5I1  | 118.6 | 115.6 | 113.1 | 115.7 | 101.9 | 95.6  | 117.5 | 115.2 |
| OR5J2  | 111.8 | 114.7 | 120.2 | 114.3 | 109.4 | 104.2 | 113.4 | 109.8 |
| OR5K1  | 109.2 | 107.2 | 111.2 | 114.8 | 108.5 | 101.5 | 119.8 | 120.5 |
| OR5K2  | 112.9 | 122.2 | 131.8 | 120.5 | 108.7 | 106.5 | 113.7 | 113.7 |
| OR5K3  | 110.8 | 114.7 | 112.6 | 112.5 | 105.1 | 102.6 | 107.6 | 107.6 |
| OR5K4  | 111.7 | 125.8 | 128.6 | 129.6 | 108.9 | 104.2 | 111.4 | 120.2 |
| OR5L1  | 121.3 | 122.4 | 119.6 | 123.8 | 111.6 | 99.6  | 113.4 | 122.9 |
| OR5L2  | 118.5 | 115.9 | 122.2 | 115.9 | 107.3 | 92.2  | 118.3 | 115   |
| OR5M10 | 111.4 | 117.8 | 119.8 | 121.1 | 113.4 | 103.8 | 118.5 | 109.5 |
| OR5M11 | 110.4 | 114.8 | 108.6 | 119.5 | 105.3 | 99    | 112.5 | 114.4 |
| OR5M3  | 115.4 | 108.4 | 121.4 | 123.6 | 111.6 | 101.5 | 112.2 | 118.2 |
| OR5M8  | 122.5 | 118.3 | 115.5 | 117.6 | 105.4 | 97.2  | 122.9 | 120.9 |
| OR5M9  | 118.8 | 119.9 | 112.5 | 121   | 107   | 102.8 | 125.3 | 110.1 |
| OR5P2  | 104.8 | 107.6 | 110.2 | 107.8 | 102.3 | 93.3  | 110.7 | 111.6 |
| OR5P3  | 121.4 | 120.4 | 118.5 | 118.3 | 116.6 | 101.1 | 125.6 | 109.7 |
| OR5R1  | 116.8 | 118.3 | 120   | 115.3 | 116.1 | 100.4 | 128.7 | 119.5 |
| OR5T1  | 123.8 | 118.7 | 118.9 | 111.9 | 113.9 | 99.1  | 117.9 | 116.6 |
| OR5T2  | 107.6 | 109   | 106.5 | 120.1 | 105.7 | 88.9  | 110.3 | 102.3 |
| OR5T3  | 113.1 | 113.7 | 110.2 | 125.7 | 105.2 | 96    | 124.3 | 116.6 |
| OR5U1  | 115.7 | 114.8 | 114.7 | 108.9 | 117.3 | 96.5  | 122.9 | 112.5 |
| OR5V1  | 114.5 | 128   | 112   | 121.2 | 109.9 | 99    | 108.8 | 118.3 |
| OR5W2  | 115.9 | 126.5 | 123.4 | 114.6 | 108.1 | 103.6 | 114.9 | 113.6 |
| OR6A2  | 125.5 | 114.9 | 131.7 | 120.6 | 106   | 101.2 | 115.4 | 117.8 |
| OR6B1  | 115.6 | 118.2 | 117.3 | 117.9 | 105.9 | 90.8  | 112.4 | 118.3 |
| OR6B2  | 113.5 | 123   | 120.4 | 127.8 | 112.2 | 105.1 | 115.8 | 122.2 |
| OR6B3  | 115.1 | 112.8 | 123.6 | 121.4 | 105.2 | 103.7 | 114.5 | 116.4 |
| OR6C1  | 112.4 | 119.5 | 125.3 | 118.3 | 110.5 | 101.4 | 117.5 | 118   |

|          |       |       |       |       |       |       |       |       |
|----------|-------|-------|-------|-------|-------|-------|-------|-------|
| OR6C2    | 108.2 | 114   | 115.9 | 109   | 106.9 | 98.4  | 120.2 | 111.7 |
| OR6C3    | 113.7 | 114.4 | 112.6 | 129.2 | 106.3 | 98.5  | 110.4 | 107.7 |
| OR6C4    | 117.8 | 113.3 | 120.9 | 117.5 | 102.1 | 101   | 115.7 | 112.2 |
| OR6C6    | 107   | 119.5 | 104.8 | 114.7 | 102.8 | 98.8  | 112   | 111.5 |
| OR6C65   | 113.9 | 113.9 | 111.2 | 113.6 | 100.5 | 95    | 114.5 | 114.7 |
| OR6C68   | 117.6 | 113.4 | 112.3 | 123.4 | 102.1 | 96.6  | 105.1 | 111.1 |
| OR6C70   | 104   | 119.3 | 104.8 | 101.7 | 111.7 | 98    | 114.3 | 112.7 |
| OR6C74   | 112.3 | 110.1 | 121.8 | 107.5 | 105   | 92.4  | 109.6 | 109.9 |
| OR6C75   | 111.9 | 115.1 | 116.7 | 111.6 | 104.8 | 93    | 108   | 114.4 |
| OR6C76   | 102.4 | 110.1 | 105.2 | 119.8 | 117.8 | 99.1  | 113.6 | 105.7 |
| OR6F1    | 115.6 | 117.9 | 127.9 | 115.8 | 112   | 98.5  | 127.4 | 123.1 |
| OR6K2    | 115.7 | 127.6 | 126.1 | 104.3 | 110.3 | 95.8  | 131.2 | 114.4 |
| OR6K3    | 119.4 | 120   | 118.5 | 111   | 113.9 | 101.1 | 117.1 | 112.9 |
| OR6K6    | 120   | 104   | 120.9 | 114.9 | 100.3 | 94.7  | 117.3 | 112.7 |
| OR6M1    | 128.1 | 109.7 | 114.2 | 122   | 113.7 | 101.5 | 124.7 | 113.3 |
| OR6N1    | 117.2 | 113.4 | 118.5 | 121.9 | 111.8 | 101.5 | 118.4 | 125   |
| OR6N2    | 114.9 | 107.8 | 124.6 | 123.1 | 124.1 | 108.8 | 124.6 | 124.6 |
| OR6Q1    | 117.8 | 115.6 | 111.4 | 122.4 | 108.3 | 93.9  | 114.8 | 120.3 |
| OR6S1    | 106.9 | 109.4 | 115.4 | 118.8 | 100   | 106.9 | 112.8 | 113.3 |
| OR6T1    | 107.8 | 107.2 | 112.2 | 111.6 | 106.2 | 95.4  | 111.7 | 104   |
| OR6V1    | 121.1 | 126.9 | 132.8 | 118.5 | 115.1 | 107.8 | 120.4 | 119.4 |
| OR6W1P   | 115.9 | 131.2 | 133.3 | 115.4 | 112.5 | 105.4 | 123.6 | 124.4 |
| OR6X1    | 120.4 | 112.2 | 121.8 | 122.1 | 99.4  | 98.8  | 125.3 | 115.9 |
| OR6Y1    | 108.5 | 116.6 | 110.1 | 123.3 | 114.9 | 98.8  | 120.9 | 113.5 |
| OR7A10   | 114.6 | 117.6 | 117.2 | 120.3 | 104.4 | 98.8  | 119.7 | 117.3 |
| OR7A17   | 124.2 | 123.5 | 142.9 | 125.2 | 127   | 107.3 | 127.1 | 121.2 |
| OR7A5    | 114.7 | 115.9 | 116   | 116.1 | 100.6 | 101.7 | 117   | 113.2 |
| OR7C1    | 112.8 | 118.7 | 120.1 | 115   | 107.3 | 95.9  | 118.1 | 118.8 |
| OR7C2    | 117.5 | 119   | 118.4 | 116.3 | 110.5 | 105.3 | 116.8 | 109.5 |
| OR7D2    | 143.5 | 119.3 | 138.2 | 132.8 | 108.6 | 106.7 | 130.4 | 111.7 |
| OR7D4    | 111.9 | 108.1 | 111.6 | 116.5 | 104.1 | 102.6 | 116.9 | 109.2 |
| OR7E156P | 128.5 | 134.7 | 139.5 | 140.5 | 120.1 | 106.6 | 131.4 | 132.9 |
| OR7E24   | 117.3 | 119.7 | 128.6 | 121.2 | 106.4 | 100.2 | 122.1 | 118.9 |
| OR7E37P  | 113.5 | 114.6 | 109.6 | 116   | 106.2 | 99.2  | 112.5 | 115.2 |
| OR7E91P  | 117.8 | 113.3 | 111.1 | 115.5 | 107.7 | 96.7  | 123.7 | 129.4 |
| OR7G1    | 113.7 | 125.1 | 124.7 | 124.1 | 117.9 | 105.4 | 108.1 | 117.8 |
| OR7G2    | 121.7 | 115.8 | 128.3 | 129.4 | 124.1 | 128.1 | 121.2 | 127.2 |
| OR7G3    | 119   | 122.7 | 130.6 | 124.5 | 113.1 | 106.6 | 130.3 | 119.8 |
| OR8A1    | 114.1 | 113.8 | 112.8 | 115.7 | 114.9 | 104.4 | 118.8 | 115   |
| OR8B12   | 130.3 | 121.4 | 137.2 | 128.1 | 109.1 | 105.6 | 124.6 | 121.5 |
| OR8B2    | 114.4 | 117.3 | 118.1 | 122.4 | 119.1 | 102   | 123.9 | 121.5 |
| OR8B3    | 111.2 | 115.4 | 113.4 | 118.2 | 111.1 | 99    | 120.1 | 112.8 |
| OR8B4    | 113.5 | 114.6 | 124   | 120.5 | 120.7 | 98.4  | 125.4 | 110.8 |
| OR8B8    | 108.5 | 119   | 113.4 | 121   | 108   | 103.7 | 113.5 | 111.5 |
| OR8D1    | 121.8 | 119.5 | 113.6 | 124   | 111.2 | 99.6  | 125.5 | 113.3 |
| OR8D2    | 118.1 | 110.5 | 113.8 | 121.4 | 109.2 | 101.2 | 126.4 | 115   |
| OR8D4    | 121.9 | 109   | 118.9 | 120.2 | 111.5 | 92.4  | 115.8 | 110.5 |
| OR8G1    | 116.6 | 122.1 | 124.3 | 119.8 | 116.8 | 105.9 | 113.9 | 119.8 |
| OR8G2    | 114   | 126.8 | 130.4 | 121   | 105.2 | 108.6 | 121.4 | 118.7 |
| OR8G5    | 116   | 117.6 | 119.7 | 114.4 | 106.6 | 97.7  | 115.6 | 109   |
| OR8H1    | 113.7 | 111.5 | 113.1 | 125.5 | 111.4 | 97    | 126.6 | 124   |

|           |        |        |        |        |        |        |        |        |
|-----------|--------|--------|--------|--------|--------|--------|--------|--------|
| OR8H2     | 113.4  | 108.8  | 109.9  | 114.9  | 98.2   | 93.9   | 114.6  | 115.5  |
| OR8H3     | 115    | 117.7  | 141.1  | 118.7  | 113.1  | 110.3  | 120    | 118    |
| OR8I2     | 120    | 107.3  | 105.2  | 110.3  | 98.2   | 100.3  | 107    | 107.9  |
| OR8J1     | 112.4  | 114.6  | 113.1  | 108.7  | 103.9  | 97     | 117.2  | 113.5  |
| OR8J3     | 110.5  | 120.1  | 114.9  | 119.3  | 100.8  | 99.8   | 114.3  | 113.5  |
| OR8K1     | 107    | 104    | 112    | 113.4  | 108.5  | 101.4  | 111    | 114.3  |
| OR8K3     | 117.1  | 118.4  | 137.2  | 117.7  | 113.3  | 107.3  | 113.6  | 118.5  |
| OR8K5     | 117.9  | 119.8  | 116.7  | 123.5  | 113.6  | 94.2   | 115    | 114.1  |
| OR8S1     | 112    | 106.7  | 117.2  | 122.6  | 110.7  | 99.8   | 110.3  | 112.6  |
| OR8U1     | 122.1  | 111.5  | 117.4  | 122.4  | 105.7  | 101.9  | 115.6  | 117.4  |
| OR8U8     | 113.4  | 114.4  | 110.4  | 116.8  | 103.5  | 93.3   | 114.6  | 109.2  |
| OR8U9     | 102.5  | 114    | 111.2  | 112.4  | 109.9  | 91     | 105.4  | 112.6  |
| OR9A2     | 113.5  | 107.6  | 121.6  | 118    | 105.1  | 96.9   | 124.7  | 118.2  |
| OR9A4     | 113.2  | 113.8  | 143.1  | 120.2  | 105.7  | 99.7   | 123.7  | 111.4  |
| OR9G1     | 112    | 122.5  | 122.1  | 112    | 111    | 99.6   | 125.6  | 119.1  |
| OR9G4     | 109.9  | 114.4  | 121.4  | 123    | 104.8  | 101    | 113.4  | 107    |
| OR9G9     | 112.6  | 113.2  | 115.6  | 119    | 108.7  | 91.4   | 110.7  | 114.8  |
| OR9I1     | 115    | 124.2  | 113.4  | 120.3  | 112.8  | 105.7  | 115.3  | 122.7  |
| OR9K2     | 118.4  | 107.4  | 111.3  | 117    | 102.7  | 97     | 118.1  | 112.8  |
| OR9Q1     | 107.9  | 110.9  | 107.8  | 111.9  | 97.6   | 97.1   | 104.5  | 113.3  |
| OR9Q2     | 111.7  | 115.3  | 119.4  | 112.3  | 107.6  | 100.8  | 115.2  | 116.2  |
| ORAQV1    | 315.8  | 339.9  | 319.5  | 315.5  | 332.2  | 186.9  | 322.4  | 346.5  |
| ORC1L     | 108.5  | 117.8  | 120.2  | 125.1  | 119.5  | 99.2   | 128.4  | 125.1  |
| ORC2L     | 342.9  | 430.4  | 336.3  | 365.6  | 327.1  | 237.4  | 359.9  | 400.6  |
| ORC3L     | 192.8  | 172.8  | 221.2  | 200.8  | 167.6  | 221.6  | 184.9  | 183.4  |
| ORC4L     | 133.3  | 130.9  | 123    | 147.5  | 128.8  | 117.2  | 144.7  | 137.2  |
| ORC5L     | 273.1  | 321.6  | 285.6  | 319.5  | 286.5  | 236    | 283.7  | 278.4  |
| ORC5L     | 111.9  | 121.8  | 112.5  | 122    | 118.4  | 95.8   | 127.7  | 126.2  |
| ORC5L     | 122.1  | 114.1  | 124.7  | 123.6  | 105.6  | 100.8  | 110.2  | 117.4  |
| ORC6L     | 8893.3 | 8168.7 | 7169.8 | 6445.5 | 7790.6 | 4695.2 | 7198.3 | 8495.9 |
| ORF1-FL49 | 182.2  | 158.5  | 140.6  | 173.9  | 130.2  | 139.7  | 183.3  | 225.3  |
| ORM1      | 115.5  | 129.4  | 124.1  | 125.3  | 115.2  | 104    | 117.2  | 112.7  |
| ORM2      | 117.6  | 122.6  | 118.7  | 119.5  | 113.3  | 94     | 116.5  | 123    |
| ORMDL1    | 136.1  | 123.6  | 124.9  | 133.2  | 123.5  | 113.6  | 127.1  | 119.8  |
| ORMDL2    | 138.1  | 119.5  | 130.8  | 125    | 116.6  | 108.7  | 135.9  | 129.8  |
| ORMDL3    | 179.3  | 204.6  | 154.5  | 186.2  | 187.1  | 155.1  | 167.7  | 157.3  |
| OS9       | 134.8  | 141.6  | 170.3  | 146.1  | 129.5  | 151.6  | 158.4  | 158.5  |
| OSAP      | 112.4  | 119.9  | 118.3  | 119.9  | 116.3  | 106    | 123    | 115.8  |
| OSBP      | 764.1  | 875.3  | 725.8  | 962.2  | 690.1  | 661.3  | 946.7  | 1296.7 |
| OSBP2     | 112.2  | 106.7  | 114.9  | 116.4  | 109.9  | 100.7  | 120.1  | 115.3  |
| OSBPL10   | 193.1  | 170.9  | 152.6  | 204.7  | 157.7  | 127.2  | 169.4  | 140.5  |
| OSBPL11   | 147    | 153.9  | 165.4  | 163.1  | 136.9  | 136.8  | 159.4  | 151.4  |
| OSBPL1A   | 121.3  | 126.3  | 121.3  | 124.5  | 109.8  | 107.5  | 126.7  | 116.3  |
| OSBPL1A   | 124.2  | 119.1  | 126.8  | 118.5  | 123.9  | 103.3  | 118.7  | 117    |
| OSBPL1A   | 132.5  | 125.6  | 147.1  | 129    | 115.5  | 110.3  | 129.5  | 124.8  |
| OSBPL2    | 130.8  | 121.1  | 114.8  | 130.2  | 113.1  | 103.6  | 120.1  | 134.1  |
| OSBPL2    | 226.5  | 249.2  | 188.2  | 204.5  | 189.4  | 158.2  | 228.7  | 196.6  |
| OSBPL3    | 134    | 126.1  | 121    | 128    | 113.4  | 100.1  | 132    | 121.9  |
| OSBPL3    | 134.5  | 157.7  | 163.1  | 164.1  | 185    | 120.2  | 184.4  | 179.2  |
| OSBPL5    | 220.6  | 219.7  | 217.4  | 242    | 166.9  | 166.6  | 222.4  | 182.2  |
| OSBPL5    | 254.9  | 248.5  | 243.2  | 267    | 168.6  | 170.8  | 217.3  | 185.3  |

|          |       |       |        |        |       |        |       |       |
|----------|-------|-------|--------|--------|-------|--------|-------|-------|
| OSBPL6   | 134.5 | 142.2 | 144.3  | 136.3  | 134.6 | 117    | 141   | 154.5 |
| OSBPL6   | 120.7 | 116.2 | 109.5  | 115.5  | 108   | 95.9   | 114.1 | 115.7 |
| OSBPL7   | 337.3 | 255.7 | 289.1  | 264.9  | 206.5 | 237.1  | 235.6 | 198.1 |
| OSBPL7   | 130.9 | 128   | 122    | 125    | 113.7 | 107.6  | 134.8 | 121.8 |
| OSBPL8   | 272.7 | 254.6 | 253.3  | 379.5  | 205.2 | 168    | 290.2 | 344.5 |
| OSBPL8   | 222.7 | 316.4 | 221.6  | 195.8  | 261.9 | 204.5  | 248   | 322.2 |
| OSBPL9   | 105.4 | 113.4 | 109.2  | 122    | 112.8 | 94.6   | 128.9 | 121.5 |
| OSBPL9   | 396.7 | 459.2 | 447    | 491.8  | 471.1 | 344.7  | 388.1 | 433.8 |
| OSCAR    | 131.4 | 134.3 | 191.6  | 132.6  | 107.8 | 150.9  | 126.4 | 118.2 |
| OSCAR    | 215   | 164   | 319.7  | 169.8  | 128.4 | 178.8  | 145.3 | 135.2 |
| OSGEP    | 160   | 167.1 | 173.9  | 155.6  | 159.1 | 115.3  | 135.3 | 138.1 |
| OSGEPL1  | 169.5 | 162.9 | 196.8  | 177.9  | 167.2 | 158.7  | 142.9 | 123.9 |
| OSGIN1   | 119.1 | 117.6 | 121.3  | 128.8  | 110.7 | 108.9  | 139.8 | 137.3 |
| OSGIN1   | 116.5 | 109   | 115.3  | 112.6  | 109.5 | 100    | 120.4 | 113.3 |
| OSM      | 115.2 | 121.6 | 123.5  | 125.1  | 116.6 | 108.7  | 132.9 | 126.4 |
| OSMR     | 112   | 116.8 | 107.2  | 105.7  | 111.9 | 96.6   | 113.4 | 113.4 |
| OSR1     | 111.6 | 108.6 | 112    | 108.4  | 109   | 93.3   | 112.4 | 100.5 |
| OSR2     | 118.8 | 122.9 | 127.2  | 117.8  | 111.6 | 95.4   | 131.1 | 115.5 |
| OSR2     | 115.3 | 112.9 | 117.5  | 116.7  | 108.3 | 109.4  | 128.1 | 117.6 |
| OSRF     | 161   | 152.8 | 156.5  | 156.8  | 156.8 | 155    | 173.6 | 189.8 |
| OSTALPHA | 108   | 124.7 | 118.4  | 110.1  | 109.5 | 100.7  | 107.1 | 111.9 |
| OSTBETA  | 116.3 | 120.1 | 115.1  | 116.6  | 102.9 | 95.6   | 119.9 | 115.7 |
| OSTF1    | 933.6 | 918.3 | 1457.9 | 1002.5 | 869.8 | 1002.3 | 921.7 | 531   |
| OSTM1    | 178.3 | 189.5 | 198.8  | 226.6  | 150.1 | 164.5  | 200.1 | 178.5 |
| OSTN     | 112.2 | 108.9 | 109.4  | 117    | 106   | 102.3  | 113.4 | 114.3 |
| OTC      | 106.7 | 109.3 | 115.7  | 112.9  | 115.3 | 105.5  | 118.9 | 107.5 |
| OTEX     | 117.2 | 120.2 | 101.6  | 122.3  | 109.3 | 98.7   | 117.4 | 112.2 |
| OTOA     | 110.7 | 111.1 | 110.2  | 122.7  | 104.8 | 94.4   | 118   | 115.6 |
| OTOA     | 118.2 | 116.8 | 115.4  | 126.4  | 105.4 | 97     | 117.9 | 120   |
| OTOA     | 118.9 | 121   | 117.4  | 112.2  | 112.2 | 100.9  | 118.1 | 121.1 |
| OTOF     | 106.7 | 111.8 | 114.6  | 112.1  | 108.7 | 95.3   | 107.8 | 119.7 |
| OTOF     | 121.9 | 121.2 | 129    | 138.6  | 103.6 | 104.1  | 119.1 | 125.4 |
| OTOF     | 113.3 | 103.9 | 120.6  | 124.4  | 110   | 95     | 114.7 | 112.6 |
| OTOP1    | 113.1 | 111.5 | 122.2  | 122.5  | 109.5 | 101.5  | 116.1 | 119.8 |
| OTOP2    | 112.4 | 107.7 | 113.4  | 110    | 113.2 | 98.5   | 112.2 | 122.8 |
| OTOP3    | 118.4 | 116.5 | 119.9  | 120    | 109.1 | 98.9   | 111.5 | 105.9 |
| OTOR     | 118.5 | 109.7 | 124.8  | 115.7  | 96.4  | 90     | 128.8 | 109.4 |
| OTOS     | 107.5 | 112   | 114.2  | 112.3  | 101.6 | 93.9   | 110.9 | 111.7 |
| OTP      | 128   | 119   | 125.5  | 144.3  | 119.4 | 111.8  | 117   | 107.6 |
| OTUB1    | 118.9 | 120.3 | 118.4  | 123    | 115.3 | 110    | 122.8 | 116.2 |
| OTUB1    | 137.4 | 130.7 | 128.5  | 136.5  | 118.2 | 121.9  | 143.4 | 140.4 |
| OTUB1    | 161.7 | 170.7 | 188.8  | 172.2  | 144.8 | 135.8  | 172.3 | 178.4 |
| OTUB2    | 125.9 | 118   | 124    | 125.9  | 111.9 | 101.7  | 120.6 | 119.9 |
| OTUD4    | 258.6 | 219.5 | 240.4  | 279    | 209.3 | 198.2  | 226.7 | 225.4 |
| OTUD4    | 112   | 120.1 | 122.9  | 114.7  | 105.3 | 101    | 116.4 | 110.9 |
| OTUD4    | 113.3 | 122.1 | 129.9  | 112.4  | 112.5 | 100.6  | 129.8 | 127.2 |
| OTUD5    | 129.4 | 128.4 | 136.5  | 126.9  | 121.3 | 119.7  | 152.4 | 157.6 |
| OTUD6A   | 106   | 116   | 122.5  | 111.6  | 99.3  | 101.7  | 120.6 | 120.3 |
| OTUD6B   | 177.4 | 169.5 | 198    | 154.6  | 143.2 | 127.6  | 159.2 | 142.4 |
| OTUD7    | 110.7 | 109.2 | 112.9  | 119.6  | 110.2 | 103.1  | 108   | 112.8 |
| OTUD7A   | 122.1 | 123   | 122.5  | 133.7  | 108.8 | 109.1  | 115.4 | 112.7 |

|        |       |       |       |       |       |       |       |       |
|--------|-------|-------|-------|-------|-------|-------|-------|-------|
| OTX1   | 109.6 | 117.1 | 105.4 | 124.5 | 107.2 | 98.2  | 113   | 114   |
| OTX2   | 120.8 | 116.2 | 116.5 | 114.2 | 107.8 | 93.7  | 121.5 | 120.4 |
| OTX2   | 120.9 | 118.8 | 115.4 | 120.5 | 110.1 | 98.1  | 118.3 | 113.3 |
| OTX2   | 123.2 | 117.4 | 124.2 | 117.1 | 115.9 | 100.9 | 122.3 | 116.3 |
| OVCA2  | 128.9 | 128.2 | 118.8 | 134   | 118.9 | 104.6 | 131.7 | 132.2 |
| OVCH1  | 113.5 | 121.9 | 123   | 104.2 | 110.9 | 101.3 | 117.9 | 105.9 |
| OVCH2  | 117.7 | 116.2 | 110.6 | 114.7 | 115   | 105.9 | 123.2 | 118   |
| OVGP1  | 167.2 | 192.5 | 200.3 | 194.2 | 185.1 | 147.7 | 191.6 | 218.1 |
| OVOL1  | 111.2 | 114.5 | 110.8 | 109.2 | 108.5 | 96.8  | 104.8 | 109   |
| OVOL2  | 122.3 | 118.4 | 125.1 | 117.7 | 102.2 | 97.2  | 118.4 | 112.7 |
| OVOS2  | 111   | 111.4 | 111.6 | 117.7 | 104   | 95.5  | 120.5 | 102.2 |
| OVOS2  | 131   | 124.5 | 125.9 | 129.6 | 124.2 | 104.5 | 126.3 | 123.6 |
| OXA1L  | 484.6 | 589.6 | 485.8 | 503.9 | 397.2 | 377.7 | 352.3 | 343.7 |
| OXCT1  | 130.2 | 154.6 | 154.3 | 147.8 | 129.2 | 124.7 | 158.1 | 159.3 |
| OXCT2  | 115.8 | 129.6 | 121.4 | 120.3 | 107   | 104.5 | 119.6 | 123.7 |
| OXER1  | 120.4 | 122.3 | 121.3 | 124   | 102.6 | 103.6 | 110.1 | 112.3 |
| OXGR1  | 111   | 115.2 | 108.4 | 114.3 | 107.4 | 93.1  | 117.1 | 115.6 |
| OXR1   | 835.1 | 725.2 | 807.8 | 835.7 | 570.6 | 585   | 715.4 | 666.9 |
| OXSM   | 128.6 | 125.8 | 127.1 | 128.1 | 115.8 | 99.2  | 124.4 | 124.4 |
| OXSR1  | 617.1 | 609   | 497.6 | 713.9 | 651.6 | 490   | 787.1 | 756.8 |
| OXT    | 129   | 124.6 | 120.6 | 123.1 | 101.3 | 104.9 | 119.9 | 119.5 |
| OXTR   | 131.5 | 136.1 | 126.8 | 128.3 | 123.1 | 113.8 | 129.4 | 125.9 |
| P11    | 120.4 | 118.7 | 118.8 | 118.7 | 106   | 109.1 | 124.3 | 112.7 |
| P15RS  | 365.7 | 438.8 | 340.5 | 423.4 | 343.5 | 343.4 | 346.1 | 301.3 |
| P18SRP | 112.6 | 116   | 113.7 | 115.7 | 120.6 | 95    | 123.1 | 113.9 |
| P2RX1  | 137.9 | 119.5 | 144.4 | 135.9 | 112.6 | 110   | 129.4 | 117.2 |
| P2RX2  | 114.1 | 120.4 | 113.6 | 119.9 | 106.6 | 97.7  | 119.1 | 112.6 |
| P2RX2  | 108   | 110.2 | 112.4 | 113.3 | 106.1 | 94.7  | 109.3 | 107.8 |
| P2RX2  | 121.4 | 112.8 | 116.5 | 118   | 116.5 | 97.6  | 119   | 127.2 |
| P2RX2  | 122.1 | 130.1 | 140.7 | 133   | 127.3 | 113.8 | 133.9 | 117.6 |
| P2RX3  | 115   | 120.4 | 123.4 | 125.5 | 106.3 | 98.4  | 113.3 | 114.2 |
| P2RX3  | 111.8 | 102.3 | 107.6 | 110   | 107.8 | 100.9 | 118.7 | 110.8 |
| P2RX4  | 359.6 | 241.3 | 342.7 | 312.2 | 197.6 | 277.7 | 293   | 193.1 |
| P2RX5  | 127.6 | 140.2 | 126.8 | 129.4 | 121.4 | 106.9 | 129   | 113.9 |
| P2RX5  | 113.4 | 113.2 | 119.1 | 125.2 | 107.7 | 100.5 | 107.6 | 122.1 |
| P2RX7  | 301.3 | 153.9 | 216.8 | 214.4 | 156.2 | 176.1 | 209.1 | 155.6 |
| P2RXL1 | 113.3 | 118.5 | 124.4 | 114.1 | 98.3  | 101.8 | 114.3 | 116   |
| P2RY1  | 119.3 | 115.3 | 113.9 | 118.1 | 105.5 | 99.1  | 114.3 | 121.6 |
| P2RY10 | 468.9 | 543.8 | 448.3 | 607.6 | 420.1 | 343.7 | 530.4 | 664.7 |
| P2RY10 | 151.1 | 160.6 | 195.2 | 170.4 | 184.6 | 161.2 | 201.7 | 191.8 |
| P2RY11 | 218.1 | 206.2 | 323.8 | 229.2 | 161.8 | 224.1 | 208.8 | 193.7 |
| P2RY13 | 115.7 | 122.4 | 131.6 | 123.4 | 110   | 94.7  | 116.9 | 119.3 |
| P2RY13 | 130   | 124.5 | 120.9 | 125.8 | 107.9 | 101.2 | 122.3 | 113.7 |
| P2RY13 | 104.9 | 108.4 | 108.8 | 108   | 98.5  | 88.9  | 110.6 | 108.1 |
| P2RY14 | 110.3 | 110.1 | 113.2 | 121.6 | 103.1 | 96.6  | 110.1 | 116.1 |
| P2RY14 | 111.7 | 113.7 | 116.3 | 119.5 | 105.5 | 94.2  | 105.7 | 111.6 |
| P2RY14 | 111.1 | 121.1 | 109.9 | 116.5 | 104.8 | 102.7 | 112.3 | 110.6 |
| P2RY2  | 116   | 111.9 | 120.6 | 126.2 | 106   | 105.1 | 114.4 | 120.1 |
| P2RY2  | 120.2 | 120.8 | 116.4 | 130   | 115.7 | 105.8 | 125.1 | 118.7 |
| P2RY2  | 116   | 115.6 | 131.9 | 113.8 | 104.7 | 103.3 | 109.1 | 115.5 |
| P2RY2  | 115.5 | 100.4 | 107.9 | 122.4 | 114.2 | 104.8 | 122.7 | 114.5 |

|          |        |        |        |        |        |       |        |        |
|----------|--------|--------|--------|--------|--------|-------|--------|--------|
| P2RY4    | 125.3  | 111.8  | 111.3  | 123.4  | 108.2  | 107.7 | 112.1  | 108    |
| P2RY5    | 356.8  | 376.4  | 893.9  | 465.1  | 296.4  | 784.1 | 312.1  | 279    |
| P2RY6    | 121.6  | 116.9  | 124.8  | 124.4  | 112.9  | 100.6 | 123.8  | 119.3  |
| P2RY6    | 133.1  | 114    | 178.8  | 118.9  | 102    | 129   | 121.8  | 121.1  |
| P2RY6    | 118.1  | 115.2  | 137.9  | 135.4  | 107.4  | 111.9 | 131.4  | 115.6  |
| P2RY8    | 1763.3 | 2439.1 | 1057.3 | 1778.6 | 1304.5 | 830.2 | 1409.4 | 966.4  |
| P4HA1    | 111.1  | 112    | 112.7  | 110.1  | 108.7  | 102.5 | 115.1  | 107.2  |
| P4HA1    | 152.2  | 163.6  | 141.8  | 155.3  | 127    | 128.2 | 142.9  | 200.8  |
| P4HA2    | 109.6  | 113.9  | 112.1  | 114.3  | 105.4  | 100   | 112.5  | 117.4  |
| P4HA2    | 109.8  | 112.2  | 115.1  | 119.9  | 104.5  | 102.6 | 120.3  | 110    |
| P4HA3    | 104.4  | 110.7  | 127.5  | 114    | 105.6  | 108.4 | 117    | 118.5  |
| P518     | 122.4  | 119.3  | 118.3  | 123.9  | 112.8  | 104.5 | 127.5  | 117.5  |
| P53AIP1  | 110.1  | 113.8  | 122.9  | 110.8  | 103.1  | 99.7  | 116.8  | 107.6  |
| P8       | 124.2  | 117.5  | 133.7  | 123.4  | 108    | 103.7 | 128    | 124.4  |
| PA2G4    | 336    | 300.4  | 277.6  | 314.2  | 284.7  | 297.3 | 377.2  | 336.2  |
| PA2G4P4  | 114.4  | 115    | 129.5  | 134.8  | 113.1  | 113   | 122.9  | 118.8  |
| PABPC1   | 363.4  | 324.5  | 481    | 440.2  | 462.6  | 648.3 | 744.4  | 360.3  |
| PABPC3   | 108.5  | 117    | 113.2  | 112.8  | 112.5  | 97.6  | 117.8  | 109.1  |
| PABPC4   | 1132   | 1109.7 | 954.4  | 1386.5 | 1050.9 | 1143  | 1479.7 | 1274.6 |
| PABPC5   | 96.1   | 109.8  | 119    | 121.3  | 95.5   | 94.3  | 110.1  | 113.9  |
| PABPC5   | 120.5  | 105    | 116.4  | 117.7  | 110.5  | 101.1 | 121.7  | 116    |
| PABPC5   | 113.3  | 110.6  | 116.5  | 124.2  | 103.5  | 101.4 | 122.6  | 115.5  |
| PABPN1   | 551    | 615.6  | 511.6  | 594.8  | 519.7  | 407.7 | 666.7  | 595.1  |
| PACRG    | 116.7  | 115.9  | 121.8  | 121.3  | 121.9  | 96.8  | 111.3  | 120.3  |
| PACRG    | 108.8  | 113.4  | 123.3  | 122.5  | 114.8  | 102.6 | 119    | 109    |
| PACRG    | 119.5  | 107.7  | 118.7  | 111.6  | 102.2  | 99    | 118.6  | 116    |
| PACRG    | 109.1  | 112.3  | 114.6  | 112.8  | 104    | 101.2 | 111.2  | 112.8  |
| PACS1    | 284.5  | 338    | 248.6  | 285.8  | 212.2  | 241.8 | 304.7  | 278    |
| PACS2    | 165.5  | 150.5  | 145.2  | 144.6  | 123.3  | 124.1 | 156.1  | 129.6  |
| PACSIN1  | 146.3  | 170.4  | 162.5  | 146.4  | 149.1  | 117.2 | 143.2  | 137.6  |
| PACSIN2  | 749.7  | 676.4  | 659.3  | 735.9  | 492.7  | 544.1 | 635.3  | 617.1  |
| PACSIN3  | 118.9  | 121.3  | 125.3  | 127.1  | 112.7  | 102.9 | 130.7  | 123.3  |
| PADI1    | 112.5  | 118.5  | 127.8  | 114.6  | 115.8  | 93    | 120.3  | 124.5  |
| PADI2    | 118.4  | 117.3  | 147.6  | 142.5  | 118.2  | 108.9 | 130.2  | 139.1  |
| PADI3    | 107.8  | 111.7  | 117.4  | 124    | 110.7  | 96.4  | 115.5  | 117.2  |
| PADI4    | 139.5  | 171.3  | 182.5  | 153.2  | 162.5  | 131.7 | 128.8  | 136.9  |
| PADI6    | 125.2  | 114.9  | 111.9  | 115.5  | 112.5  | 115.2 | 124.8  | 131.9  |
| PAEP     | 113.4  | 116    | 117.1  | 115.1  | 103.5  | 96.8  | 116.6  | 113.3  |
| PAEP     | 120.3  | 119.8  | 114.4  | 116.3  | 110.8  | 105.6 | 110.9  | 108.6  |
| PAF1     | 316.5  | 373.3  | 220.4  | 273.3  | 238.4  | 224.4 | 267.9  | 290.6  |
| PAFAH1B1 | 375.1  | 421.9  | 340.3  | 378.2  | 315.5  | 377.1 | 550.5  | 604.8  |
| PAFAH1B2 | 117.7  | 116    | 115.8  | 120.7  | 103.9  | 109.5 | 117.9  | 113.7  |
| PAFAH1B3 | 467.7  | 554.4  | 305.6  | 388.6  | 345.1  | 197.2 | 311.3  | 313.2  |
| PAFAH2   | 233.5  | 256.5  | 271.5  | 249    | 222.4  | 272.1 | 229.2  | 234.7  |
| PAG1     | 510.6  | 635.7  | 414.3  | 541.7  | 573.1  | 310.5 | 472.6  | 614.1  |
| PAGE1    | 110.2  | 108.2  | 118    | 108.3  | 113.3  | 90.1  | 118.6  | 114.4  |
| PAGE2    | 116.8  | 121    | 120.1  | 119    | 112.4  | 100.9 | 115.3  | 119.7  |
| PAGE2B   | 114.3  | 108.6  | 113.9  | 117.2  | 110.4  | 110.6 | 120.8  | 112.7  |
| PAGE3    | 115.6  | 115.9  | 114.5  | 126    | 99.6   | 98.8  | 115.6  | 125.3  |
| PAGE4    | 112.6  | 113.4  | 120.1  | 112.9  | 104.2  | 104.8 | 112.5  | 105.8  |
| PAGE5    | 111.4  | 113.8  | 119.2  | 116.8  | 108.2  | 101.2 | 115    | 120.3  |



|          |        |        |        |        |        |        |        |        |
|----------|--------|--------|--------|--------|--------|--------|--------|--------|
| PAGE5    | 117.8  | 107.1  | 118.4  | 116.7  | 98.3   | 97.3   | 115.7  | 131.1  |
| PAH      | 104.4  | 115.1  | 121.1  | 116.4  | 104.9  | 98.3   | 115.2  | 113.4  |
| PAICS    | 358.1  | 402.2  | 298    | 433.6  | 423.1  | 268.1  | 513.8  | 463.3  |
| PAICS    | 112.8  | 114.5  | 112.2  | 116.5  | 105.3  | 102.8  | 111.7  | 115.9  |
| PAICS    | 444.1  | 559.5  | 399.1  | 548    | 478.7  | 334.4  | 511.5  | 531.2  |
| PAIP1    | 132    | 134.7  | 142.4  | 136.9  | 130.4  | 120.8  | 137.1  | 145.6  |
| PAIP1    | 120.9  | 123.8  | 119.4  | 113.7  | 105.9  | 98.5   | 119.4  | 120.3  |
| PAIP2    | 1487.7 | 1422.7 | 2066.9 | 1794.9 | 1535.3 | 1679.4 | 1906.3 | 2222.7 |
| PAIP2    | 113.2  | 114.2  | 107.7  | 114.5  | 108.5  | 94.6   | 119.8  | 110.2  |
| PAIP2    | 129    | 129.2  | 136    | 138.1  | 126.1  | 110.1  | 130.8  | 126.7  |
| PAK1     | 139.7  | 126    | 198.4  | 142.4  | 122.1  | 176.7  | 150.5  | 138.3  |
| PAK1IP1  | 120.1  | 126.5  | 125.7  | 126.8  | 125    | 105.7  | 139.9  | 130.6  |
| PAK2     | 356.2  | 343.1  | 298.8  | 312.7  | 267.1  | 221.5  | 412.4  | 380.6  |
| PAK2     | 303.7  | 287.4  | 239.5  | 366    | 328    | 157.3  | 375.3  | 395.8  |
| PAK3     | 117.6  | 123.4  | 121.8  | 114.3  | 108.1  | 99.6   | 115.2  | 118.8  |
| PAK4     | 115.1  | 117.6  | 116.1  | 118    | 109.2  | 96.3   | 124.2  | 132.1  |
| PAK4     | 119    | 118.3  | 108.3  | 110.4  | 107.8  | 101.6  | 137.7  | 114.4  |
| PAK4     | 141.8  | 136.2  | 131.1  | 170.1  | 114    | 110.5  | 140.5  | 148.4  |
| PAK6     | 111.4  | 114.7  | 110    | 124.3  | 100.1  | 110.2  | 114.4  | 124.6  |
| PAK7     | 112    | 109.5  | 109.8  | 111.9  | 110.3  | 99     | 114.3  | 119.6  |
| PAK7     | 116.7  | 111.4  | 112.3  | 117.1  | 112.3  | 96.6   | 116.5  | 111.2  |
| PALLD    | 145.3  | 133.6  | 143.3  | 147.5  | 121.5  | 119.3  | 135.2  | 127.6  |
| PALM     | 108    | 102.5  | 103    | 120.4  | 102.8  | 91.7   | 107.9  | 109.3  |
| PALM     | 124    | 119.7  | 121.1  | 110.4  | 115.2  | 102.1  | 124.9  | 124.8  |
| PALM     | 118.6  | 115.1  | 131.7  | 120.5  | 115.4  | 106    | 120.6  | 117.2  |
| PALM2    | 110.7  | 110.4  | 126.1  | 114.2  | 105.5  | 108.8  | 128.9  | 116    |
| PALM2    | 112.2  | 123    | 113    | 127.8  | 109.6  | 98.7   | 113.4  | 110.7  |
| PALM2-AK | 113.1  | 121.1  | 111.2  | 124.5  | 106.8  | 96.6   | 116.4  | 109.1  |
| PALM2-AK | 113.6  | 113.2  | 128    | 115.5  | 111.3  | 94     | 114.9  | 106.9  |
| PALMD    | 116.5  | 126.7  | 116.8  | 126.4  | 122.3  | 104.5  | 131.5  | 123.6  |
| PAM      | 378.4  | 404    | 409.7  | 416    | 397    | 332    | 391.4  | 447.8  |
| PAMCI    | 119.4  | 110.9  | 123.1  | 121.3  | 108.1  | 103.4  | 131.7  | 115.1  |
| PAN3     | 739    | 778.4  | 708.6  | 885.9  | 797.8  | 606.6  | 1063.7 | 920.5  |
| PANK1    | 120.2  | 116    | 114.1  | 126.5  | 114.2  | 97.8   | 121.9  | 111.6  |
| PANK1    | 119.7  | 148    | 115.4  | 132.8  | 121    | 98.7   | 126.9  | 126.2  |
| PANK2    | 506    | 636.8  | 757.6  | 623.6  | 443.7  | 516.4  | 661    | 638.6  |
| PANK2    | 338.8  | 337.6  | 404    | 321.5  | 293.7  | 318.9  | 343    | 458.9  |
| PANK2    | 105.8  | 115.6  | 119.8  | 115    | 107.6  | 95     | 117.3  | 113.4  |
| PANK3    | 118.8  | 121.9  | 126.8  | 159.5  | 112.3  | 107    | 126    | 129    |
| PANK4    | 252.4  | 256.7  | 224.6  | 248    | 185.7  | 175.2  | 240.8  | 223.7  |
| PANX1    | 121.9  | 130.9  | 132.6  | 163.3  | 119.2  | 103.3  | 129.6  | 124.7  |
| PANX2    | 112.3  | 122.6  | 117.1  | 127.7  | 123.9  | 128.2  | 147.4  | 130    |
| PANX3    | 119.1  | 119.5  | 111.2  | 126.6  | 119.5  | 105.6  | 123.8  | 120.1  |
| PAOX     | 135.1  | 141.5  | 141.4  | 135.6  | 120.7  | 115.5  | 124.6  | 120.9  |
| PAOX     | 215.5  | 209.7  | 224.4  | 184.6  | 157.4  | 139.4  | 155.9  | 147    |
| PAOX     | 115    | 121.3  | 148.8  | 131.6  | 115.3  | 117.9  | 135.2  | 125.3  |
| PAP2     | 106.5  | 115.8  | 117.9  | 114.9  | 107.4  | 101.8  | 109.9  | 114.8  |
| PAP2D    | 103.6  | 103    | 107.5  | 112.4  | 104.4  | 98.4   | 117.4  | 108.3  |
| PAPD1    | 289.9  | 323.9  | 339.3  | 323.2  | 300.3  | 211.9  | 265.1  | 260.7  |
| PAPD4    | 554.4  | 553.5  | 648.7  | 642.4  | 504.3  | 601.3  | 585.9  | 507    |
| PAPD5    | 199.3  | 239.4  | 212.2  | 227.2  | 239    | 136.6  | 242.5  | 284.4  |

|        |        |        |        |        |       |       |        |        |
|--------|--------|--------|--------|--------|-------|-------|--------|--------|
| PAPLN  | 113.1  | 115.1  | 112.6  | 124    | 104.2 | 101.8 | 112.5  | 111.8  |
| PAPOLA | 1109.7 | 1213.3 | 1100   | 1223.4 | 791.2 | 841.7 | 1757.9 | 1569.8 |
| PAPOLB | 115.6  | 109.7  | 110.9  | 122.7  | 111.9 | 93.4  | 113.6  | 111.4  |
| PAPOLG | 142.2  | 126.5  | 135.3  | 142.4  | 137   | 112.7 | 143.9  | 139.4  |
| PAPPA  | 106.3  | 109    | 109    | 113.8  | 102.8 | 92.8  | 118.5  | 117.8  |
| PAPPA2 | 110.5  | 115.2  | 115.3  | 110.6  | 109.2 | 99.1  | 119.7  | 116.5  |
| PAPPA2 | 113.6  | 117.4  | 120.8  | 119.1  | 105.6 | 93.1  | 119.7  | 112.7  |
| PAPSS1 | 220.8  | 179    | 198    | 237.6  | 151   | 153.7 | 179.1  | 153.6  |
| PAPSS2 | 116.5  | 116    | 110.2  | 118.4  | 114   | 103.8 | 111.6  | 122.3  |
| PAQR3  | 181.2  | 179.7  | 162.3  | 186.1  | 162.9 | 130.2 | 182.8  | 160.4  |
| PAQR4  | 134    | 124.5  | 191.2  | 135.8  | 114.9 | 130.2 | 137.9  | 116.9  |
| PAQR5  | 104.4  | 117.6  | 115.2  | 118.5  | 108.4 | 98.5  | 121.5  | 109.7  |
| PAQR6  | 125.6  | 114.4  | 150.1  | 136.4  | 117.6 | 112.3 | 121.3  | 120.3  |
| PAQR6  | 114.6  | 118.5  | 120.6  | 111.9  | 114.7 | 94.8  | 120.2  | 111.8  |
| PAQR6  | 119.6  | 118.3  | 117.9  | 126.6  | 108.1 | 96.1  | 116.6  | 112    |
| PAQR7  | 142.8  | 140.5  | 122    | 139    | 108.7 | 103.6 | 140.8  | 121.8  |
| PAQR8  | 291.5  | 270.3  | 304.2  | 308.2  | 270.3 | 177.8 | 256    | 205.4  |
| PAQR9  | 116.1  | 117.5  | 114    | 116.9  | 104.8 | 101.4 | 119.5  | 117    |
| PARC   | 139.3  | 154.5  | 154.1  | 162.1  | 131.3 | 126.6 | 141.7  | 146.5  |
| PARD3  | 117.8  | 117.4  | 123.8  | 127.4  | 117.8 | 103.7 | 122.9  | 113.7  |
| PARD3B | 116.1  | 122.8  | 120.7  | 121.3  | 121.3 | 105.8 | 129.1  | 121    |
| PARD6A | 180    | 181    | 144.6  | 171.5  | 164.6 | 125.6 | 146.3  | 152.2  |
| PARD6A | 181.6  | 168.2  | 147    | 166.4  | 156.2 | 121.4 | 147.8  | 146.3  |
| PARD6B | 119.7  | 110.3  | 120.2  | 116.3  | 109.2 | 102   | 125.4  | 120.2  |
| PARD6G | 112.8  | 114.3  | 120.7  | 121.3  | 109   | 99.2  | 109.8  | 115.4  |
| PARD6G | 113.4  | 108.7  | 110.8  | 119.8  | 104.9 | 99.2  | 118    | 117.2  |
| PARG   | 137.2  | 110    | 136.8  | 122.5  | 115.3 | 106.4 | 123.9  | 114.9  |
| PARK2  | 111.8  | 110.5  | 117.4  | 113.5  | 102.1 | 98.2  | 129.6  | 119.1  |
| PARK2  | 112.3  | 127.4  | 112.8  | 119.3  | 111.6 | 95.8  | 122.1  | 114.5  |
| PARK7  | 879.1  | 919.9  | 1076.7 | 1093   | 820.7 | 625.5 | 825.6  | 964    |
| PARL   | 480.9  | 522.4  | 854.3  | 484.4  | 488.3 | 521.7 | 471.2  | 395.6  |
| PARL   | 202.1  | 222.8  | 265.6  | 224.5  | 205.3 | 227.3 | 180.4  | 175.6  |
| PARN   | 141    | 146.2  | 170.2  | 175.6  | 153.4 | 149.7 | 142.6  | 163.9  |
| PARP1  | 845.9  | 970.5  | 895.4  | 870.6  | 715.1 | 639   | 947.6  | 905    |
| PARP10 | 141.4  | 130.8  | 140.9  | 146.1  | 114.4 | 123.4 | 140.6  | 126.3  |
| PARP10 | 237.1  | 250.6  | 211.1  | 241.9  | 167.5 | 155.3 | 190.2  | 180.7  |
| PARP11 | 160.4  | 170.6  | 155    | 164.2  | 152.7 | 148.9 | 142.2  | 162.5  |
| PARP12 | 456.7  | 448.8  | 383.9  | 400.3  | 281.7 | 272.9 | 291.9  | 269.4  |
| PARP14 | 291.8  | 249    | 219.7  | 302.7  | 200.7 | 205.1 | 254.2  | 211.3  |
| PARP15 | 143.8  | 134.2  | 147.6  | 146.9  | 133.8 | 122.3 | 137.1  | 136.6  |
| PARP16 | 139.1  | 152.1  | 145.9  | 152.7  | 123.6 | 117.1 | 142.4  | 125.3  |
| PARP2  | 163.5  | 170.3  | 174.7  | 189.1  | 155.7 | 175   | 167.3  | 159.6  |
| PARP2  | 117.5  | 127.6  | 136.8  | 152.5  | 123   | 116.7 | 151.4  | 138.9  |
| PARP3  | 116.7  | 112.2  | 127.7  | 132.2  | 108.1 | 97.6  | 117.7  | 131.1  |
| PARP3  | 184.9  | 210.1  | 252.4  | 217.1  | 171.6 | 189.2 | 176.9  | 182.3  |
| PARP3  | 139.8  | 149.7  | 144    | 131    | 113.7 | 115   | 132.9  | 119.1  |
| PARP4  | 698.4  | 853.2  | 756    | 810.1  | 670.1 | 523.4 | 609.5  | 633.1  |
| PARP6  | 137.9  | 129.3  | 123.7  | 139.8  | 126.9 | 126.8 | 129.1  | 133.2  |
| PARP6  | 161.2  | 175.7  | 159.4  | 200.4  | 146.1 | 131.2 | 188.8  | 218.3  |
| PARP6  | 126.8  | 125.2  | 130.7  | 119.9  | 107.6 | 107.1 | 124.6  | 131    |
| PARP8  | 225.8  | 260.2  | 245.4  | 292    | 324.2 | 243.3 | 309.9  | 361.5  |

|        |        |        |        |        |        |        |        |        |
|--------|--------|--------|--------|--------|--------|--------|--------|--------|
| PARP9  | 150.2  | 141.4  | 163.8  | 143    | 117.9  | 107.1  | 156.4  | 138.6  |
| PARS2  | 116    | 114.7  | 107.4  | 122.1  | 115.9  | 108.3  | 114.7  | 118.5  |
| PART1  | 113.6  | 123.9  | 117.7  | 125.3  | 110.7  | 107.5  | 116.2  | 121    |
| PARVA  | 117.7  | 115.3  | 118.4  | 108.9  | 103.4  | 97.4   | 113.2  | 117.4  |
| PARVB  | 150    | 137.1  | 162.1  | 153.2  | 127.2  | 118.4  | 144.6  | 126.5  |
| PARVB  | 131.3  | 140.2  | 136.6  | 143.9  | 129.3  | 104.2  | 136.1  | 148.7  |
| PARVB  | 117.6  | 116.1  | 118.7  | 129.2  | 104.8  | 111.4  | 124.1  | 122.1  |
| PARVG  | 929.1  | 810.9  | 1162   | 846.2  | 453.7  | 592.2  | 712.4  | 437.8  |
| PASD1  | 114.4  | 101.4  | 108    | 121.8  | 111    | 98.7   | 118.9  | 107.1  |
| PASK   | 1214.9 | 2013.6 | 1206   | 1227.4 | 1669.7 | 981.8  | 1147.2 | 1723.1 |
| PATE   | 119.8  | 119.4  | 117.8  | 118.5  | 105    | 101    | 113.2  | 119    |
| PATZ1  | 120.9  | 128.5  | 139.4  | 137.7  | 124.8  | 111.3  | 128.1  | 121    |
| PAX1   | 120.4  | 121.5  | 117.4  | 137.2  | 119.2  | 106.5  | 123.2  | 121.3  |
| PAX2   | 122.3  | 124.2  | 120.4  | 123.2  | 106.5  | 94.9   | 121.7  | 118.2  |
| PAX2   | 110.8  | 120.2  | 116.6  | 115.6  | 110.3  | 93     | 120.4  | 118.6  |
| PAX2   | 119.6  | 114    | 121    | 114.8  | 113.2  | 97.7   | 122.2  | 114.1  |
| PAX3   | 117    | 117.7  | 115.5  | 114.6  | 109    | 97.9   | 120.6  | 106.3  |
| PAX3   | 117    | 124.5  | 127.7  | 122.8  | 115.4  | 103.9  | 137.8  | 126.4  |
| PAX3   | 111.5  | 109.3  | 117.6  | 121.4  | 110    | 105.5  | 122.7  | 112.4  |
| PAX3   | 108.1  | 114.6  | 114.6  | 113.5  | 107.3  | 103.9  | 115.6  | 107.1  |
| PAX4   | 115.9  | 115.5  | 138.5  | 123.8  | 116.2  | 105.6  | 120    | 119.9  |
| PAX5   | 112.2  | 113.6  | 108    | 116.3  | 106.3  | 104.6  | 119.5  | 113.1  |
| PAX6   | 109    | 115.6  | 119.4  | 115.8  | 110.9  | 92.2   | 119.8  | 110    |
| PAX6   | 131.3  | 123.7  | 119    | 122.9  | 126.8  | 95.6   | 122.1  | 123.9  |
| PAX7   | 195.3  | 213.6  | 189    | 223.2  | 177.1  | 185.4  | 212    | 227    |
| PAX8   | 115.7  | 118.7  | 129.9  | 135.4  | 115.1  | 108.9  | 124.4  | 112.6  |
| PAX8   | 118.4  | 108    | 123.1  | 128.7  | 113.2  | 103    | 120.5  | 117.1  |
| PAX8   | 110    | 120.9  | 108.6  | 121.6  | 111.7  | 97     | 118.2  | 118.7  |
| PAX9   | 121.8  | 123.7  | 119.9  | 116.2  | 106.4  | 107.1  | 127.8  | 116.5  |
| PAXIP1 | 254.6  | 251.5  | 253.8  | 247.6  | 203.7  | 189.2  | 265.6  | 249.8  |
| PB1    | 126.9  | 126.4  | 136.1  | 126.5  | 110.7  | 105.7  | 128.6  | 124.2  |
| PB1    | 129.1  | 132.7  | 132.8  | 139.2  | 132.6  | 106.4  | 130    | 132.6  |
| PB1    | 156.1  | 152.3  | 148.8  | 153.3  | 131.2  | 127.7  | 152.1  | 140.3  |
| PBEF1  | 159.9  | 163.5  | 150.6  | 228.6  | 182    | 217.1  | 187.2  | 177    |
| PBEF1  | 175.3  | 146.8  | 132.2  | 213.7  | 181    | 264    | 232.7  | 179.4  |
| PBK    | 112.9  | 113.5  | 115.2  | 115.9  | 95.7   | 100.3  | 120.7  | 118.2  |
| PBOV1  | 117.9  | 123.3  | 114.5  | 117.4  | 110.1  | 101.5  | 119.6  | 119.3  |
| PBX1   | 118.9  | 123.5  | 114.5  | 120.2  | 113.4  | 99.4   | 121.4  | 111.1  |
| PBX2   | 320.1  | 363.2  | 290.4  | 366.8  | 301.6  | 213.9  | 357.1  | 343    |
| PBX3   | 306.3  | 285.7  | 489    | 308.8  | 300.8  | 334.3  | 309.8  | 309.9  |
| PBX4   | 193.6  | 218.4  | 217.1  | 193.9  | 208.7  | 184    | 207.9  | 173.3  |
| PBXIP1 | 338.5  | 324    | 287.3  | 347    | 230.3  | 208.4  | 344.3  | 287.4  |
| PC     | 111.2  | 113.4  | 110.7  | 111.8  | 114.2  | 104    | 122.6  | 111.8  |
| PC     | 126.9  | 118.4  | 109.4  | 134.1  | 111.3  | 108.6  | 142.3  | 123.3  |
| PC     | 132.8  | 117.6  | 134.2  | 135.2  | 122    | 127.1  | 128.6  | 123.8  |
| PC-3   | 127.3  | 127    | 132.5  | 126.9  | 114.6  | 116.9  | 122.9  | 130.8  |
| PCAF   | 126.2  | 114.3  | 125.4  | 119.7  | 113.1  | 106.8  | 121.6  | 116.4  |
| PCBD1  | 133.5  | 139.7  | 153.4  | 132    | 131.3  | 130.1  | 138.1  | 148.8  |
| PCBD1  | 158.7  | 167.4  | 211.4  | 162.9  | 165    | 142.6  | 166.2  | 180.8  |
| PCBD2  | 137.5  | 143.6  | 141.1  | 138.2  | 133.2  | 122    | 134.6  | 134.5  |
| PCBP1  | 3276.1 | 3961.8 | 3194.9 | 4082.3 | 3305.3 | 2953.2 | 4045.7 | 3421.4 |

|         |        |        |       |        |        |        |        |        |
|---------|--------|--------|-------|--------|--------|--------|--------|--------|
| PCBP2   | 2915.5 | 3046.6 | 2765  | 3052.1 | 2922.3 | 2457.3 | 3173.9 | 3211.9 |
| PCBP2   | 1284.6 | 1121   | 744.9 | 966.3  | 713.4  | 983.7  | 1318.6 | 1514.7 |
| PCBP3   | 113    | 114.9  | 110.8 | 117.1  | 110.3  | 93.2   | 118    | 105.1  |
| PCBP4   | 139.8  | 157.3  | 158   | 156.7  | 143.5  | 151.9  | 150.3  | 152.4  |
| PCBP4   | 119.2  | 116.3  | 121.4 | 120.1  | 112.9  | 103.7  | 117.1  | 116    |
| PCBP4   | 111.2  | 118.6  | 134.6 | 116.7  | 111.9  | 122.8  | 127.4  | 112    |
| PCBP4   | 188.2  | 140.2  | 170.2 | 183    | 133.6  | 129.9  | 175.9  | 163.5  |
| PCCA    | 155.1  | 139.5  | 140.7 | 150.3  | 122.5  | 118.8  | 135.1  | 136.9  |
| PCCB    | 322.8  | 313.5  | 392.5 | 355.9  | 242.2  | 216    | 253.9  | 252.4  |
| PCDH1   | 113.9  | 114.9  | 128.1 | 129.9  | 104.3  | 100.1  | 119.7  | 113.9  |
| PCDH1   | 120.4  | 128.2  | 120   | 120.3  | 118.3  | 98.7   | 121.8  | 114.4  |
| PCDH10  | 109.3  | 114.1  | 111.1 | 116    | 104.9  | 104.8  | 114.3  | 113.5  |
| PCDH10  | 117.1  | 120.2  | 106.9 | 135.3  | 108.1  | 99.1   | 123.3  | 117.5  |
| PCDH10  | 113.7  | 114.4  | 112.5 | 120.4  | 109.6  | 98.8   | 120.3  | 119    |
| PCDH11X | 120.5  | 120    | 124.7 | 120.2  | 109.7  | 97.9   | 119.8  | 114.1  |
| PCDH11X | 109.4  | 123.9  | 108.9 | 115.2  | 109.8  | 99.9   | 119.7  | 118.3  |
| PCDH11X | 120.8  | 113.3  | 123.1 | 119.7  | 114.2  | 101.8  | 125.1  | 112.7  |
| PCDH11Y | 105.3  | 109.3  | 112.4 | 107.4  | 104.4  | 97.8   | 114.1  | 105    |
| PCDH11Y | 113.5  | 108.5  | 119.4 | 116.7  | 109.3  | 102.4  | 111.6  | 115.5  |
| PCDH11Y | 115.6  | 113.1  | 112.7 | 123.3  | 109.3  | 104.1  | 124    | 116.7  |
| PCDH12  | 118.6  | 131.9  | 132.3 | 128.1  | 118.8  | 113.9  | 111.3  | 126.1  |
| PCDH15  | 105.9  | 114.8  | 120.8 | 112.7  | 106.6  | 94.6   | 115    | 114.8  |
| PCDH17  | 106.6  | 121.5  | 119.9 | 127.4  | 100.3  | 98.8   | 124.1  | 104.3  |
| PCDH18  | 124.8  | 125.1  | 121.8 | 134.1  | 119.4  | 106.9  | 127.3  | 138.3  |
| PCDH19  | 121.8  | 126    | 114.4 | 126.6  | 109.5  | 95.3   | 116.3  | 114.9  |
| PCDH20  | 105.9  | 115.2  | 111.4 | 116.7  | 106.7  | 95     | 115.1  | 115.8  |
| PCDH21  | 113.7  | 120.2  | 122.6 | 128.9  | 117.8  | 106.8  | 118.1  | 114.9  |
| PCDH7   | 113    | 117.7  | 120.7 | 113.8  | 112.4  | 98.4   | 128.7  | 115.3  |
| PCDH7   | 114.4  | 109.7  | 117.5 | 114.4  | 103.3  | 94.4   | 118.7  | 116.9  |
| PCDH7   | 117.6  | 130.2  | 135.6 | 115.6  | 105.5  | 104.3  | 119.1  | 139.3  |
| PCDH7   | 110.6  | 105.6  | 113.4 | 114    | 105.2  | 93.8   | 117.3  | 122.4  |
| PCDH8   | 111.7  | 106.1  | 113   | 121.6  | 109.5  | 91.1   | 117.9  | 105.3  |
| PCDH8   | 112.7  | 113.9  | 105.6 | 117.6  | 103.8  | 98.4   | 116    | 111.2  |
| PCDH9   | 111.8  | 108.7  | 116.3 | 114.4  | 107.4  | 100.1  | 112.4  | 112.3  |
| PCDH9   | 111.1  | 117.9  | 116.9 | 111.7  | 116.2  | 103    | 116.9  | 109.5  |
| PCDH9   | 121.5  | 134.9  | 128.2 | 118.8  | 120.5  | 112.7  | 128    | 121.4  |
| PCDHA1  | 116.4  | 124.7  | 131   | 127.5  | 111.7  | 100.9  | 117.7  | 114.1  |
| PCDHA1  | 120.5  | 118.7  | 120.3 | 123.1  | 108    | 100.5  | 116    | 113.2  |
| PCDHA1  | 111.1  | 114.3  | 112.4 | 120.8  | 108.5  | 100.8  | 116.9  | 109.9  |
| PCDHA10 | 110.8  | 109.4  | 117.7 | 118.9  | 107.3  | 98.7   | 121.8  | 113.1  |
| PCDHA10 | 111    | 122.1  | 111.5 | 117.3  | 114.3  | 96.3   | 124.7  | 107.9  |
| PCDHA11 | 116.6  | 120.8  | 117.7 | 122.8  | 119.2  | 102.8  | 115.5  | 123.6  |
| PCDHA12 | 121.1  | 115.9  | 120.2 | 114.4  | 107.9  | 100.3  | 120.9  | 120.5  |
| PCDHA12 | 109    | 119.1  | 115.9 | 120.3  | 114.3  | 100.7  | 124.8  | 120.3  |
| PCDHA13 | 116.1  | 111    | 107.5 | 106.1  | 103.5  | 91.5   | 102.7  | 116.3  |
| PCDHA2  | 116    | 119.4  | 112.8 | 112.9  | 110.9  | 98.1   | 114.6  | 123.3  |
| PCDHA3  | 118.2  | 117.1  | 125.6 | 115.6  | 106.6  | 95.4   | 124.9  | 115    |
| PCDHA3  | 107.8  | 111.6  | 115.5 | 107.2  | 108.1  | 95.1   | 111.8  | 109.8  |
| PCDHA3  | 118    | 125.5  | 113   | 120.2  | 107.7  | 91.7   | 108.8  | 118.5  |
| PCDHA4  | 119    | 113.8  | 125.8 | 119.8  | 127.2  | 102.7  | 125.7  | 133.9  |
| PCDHA5  | 125.2  | 123.4  | 122.7 | 109    | 119.6  | 107.3  | 126.3  | 112.9  |

|          |       |       |       |       |       |       |       |       |
|----------|-------|-------|-------|-------|-------|-------|-------|-------|
| PCDHA6   | 110.8 | 113.4 | 115.7 | 119.8 | 104.1 | 102.9 | 117.1 | 114.6 |
| PCDHA6   | 112.5 | 108.7 | 112.6 | 108.5 | 107.8 | 94.1  | 125   | 105   |
| PCDHA7   | 117.2 | 119.3 | 125.3 | 130   | 106.4 | 100.5 | 123.2 | 117.4 |
| PCDHA7   | 130.8 | 125.4 | 127.3 | 138.8 | 122.7 | 111.2 | 123.4 | 122.8 |
| PCDHA7   | 104.3 | 112   | 122.3 | 120.7 | 110.4 | 97.9  | 119.6 | 122.5 |
| PCDHA8   | 109.6 | 117   | 112.7 | 120   | 104.6 | 95    | 124.1 | 107.8 |
| PCDHA9   | 113.8 | 115.4 | 121.5 | 114.2 | 103   | 96.4  | 115.8 | 114.7 |
| PCDHA9   | 112.6 | 108.9 | 108.9 | 111.8 | 111.6 | 97.3  | 112.1 | 111.2 |
| PCDHAC1  | 109.5 | 110.4 | 118.4 | 116.8 | 111.1 | 100.2 | 121.6 | 117.3 |
| PCDHAC1  | 104.5 | 107   | 116.1 | 115.7 | 111   | 99.6  | 120.8 | 111   |
| PCDHAC2  | 123.7 | 132.6 | 122.4 | 128.2 | 115.1 | 103   | 131.1 | 130.9 |
| PCDHAC2  | 117.8 | 115.1 | 113.6 | 118.8 | 112.8 | 98.1  | 116   | 108.1 |
| PCDHAC2  | 98.3  | 112   | 112.8 | 110.4 | 102.6 | 95.4  | 111.4 | 105.3 |
| PCDHB1   | 101.3 | 111.4 | 110.6 | 113.1 | 115.1 | 96.2  | 113.4 | 107.9 |
| PCDHB10  | 114.4 | 109.6 | 113.5 | 115.3 | 105.1 | 97.6  | 112.9 | 119.3 |
| PCDHB11  | 113.3 | 115.2 | 107.3 | 114.3 | 109.1 | 100.2 | 113.8 | 109.7 |
| PCDHB12  | 108   | 112   | 109.1 | 115   | 103.2 | 95.1  | 116.7 | 110.4 |
| PCDHB13  | 104.6 | 113.8 | 113.7 | 120.2 | 106.4 | 94.1  | 114.4 | 119.6 |
| PCDHB14  | 125.2 | 124.6 | 129.4 | 136.2 | 104   | 103.7 | 122.8 | 116.7 |
| PCDHB15  | 113.5 | 122.7 | 112.4 | 119.2 | 107.4 | 100.5 | 115   | 108.9 |
| PCDHB16  | 106   | 122.5 | 118.2 | 119.6 | 111.6 | 89.4  | 115.4 | 113.8 |
| PCDHB17  | 113.4 | 112.8 | 125.2 | 119.3 | 105.6 | 104.1 | 119.4 | 116.4 |
| PCDHB18  | 107   | 112.5 | 119.9 | 110.2 | 105.6 | 96.8  | 101.9 | 108.7 |
| PCDHB2   | 109.3 | 113.7 | 118.7 | 117.9 | 109.5 | 105.9 | 114.8 | 110.6 |
| PCDHB3   | 112.6 | 113.3 | 108.6 | 111.5 | 116.3 | 101.1 | 122.8 | 110.2 |
| PCDHB4   | 110.7 | 112.8 | 118.6 | 118.9 | 108.4 | 104.2 | 113.5 | 115.9 |
| PCDHB5   | 108.1 | 113.2 | 108.6 | 122.7 | 102.2 | 97.7  | 115.1 | 106   |
| PCDHB6   | 108.1 | 104.1 | 114.1 | 110.7 | 103.9 | 83.9  | 112.9 | 104.2 |
| PCDHB7   | 109.6 | 105.1 | 112.9 | 116.4 | 111.9 | 100.1 | 109.9 | 107.7 |
| PCDHB8   | 108.5 | 110.6 | 119.7 | 123.1 | 113.5 | 99.6  | 117.6 | 108.2 |
| PCDHB9   | 206.7 | 198.7 | 247   | 213.8 | 248.8 | 154.7 | 260.2 | 301.5 |
| PCDHGA1  | 121.8 | 115.2 | 129.9 | 121.5 | 113.9 | 98.9  | 110.1 | 116.8 |
| PCDHGA1  | 122.7 | 113.1 | 119.5 | 118.6 | 113.8 | 94.3  | 117.4 | 111.1 |
| PCDHGA1  | 113.2 | 116.9 | 129.6 | 110.9 | 104.4 | 91.8  | 115.6 | 114.6 |
| PCDHGA10 | 121   | 116.9 | 124.7 | 124.8 | 109.2 | 95    | 125.5 | 118   |
| PCDHGA11 | 114.5 | 116.7 | 110.1 | 113.9 | 105.8 | 100   | 116.8 | 107.3 |
| PCDHGA11 | 118.4 | 115.4 | 116.5 | 115.2 | 108.1 | 98.9  | 113.8 | 115.4 |
| PCDHGA12 | 117.4 | 124.4 | 111.1 | 112.5 | 109.6 | 94.4  | 121.5 | 115.6 |
| PCDHGA2  | 107.2 | 112   | 112   | 117.3 | 102.5 | 100.2 | 109.3 | 113.5 |
| PCDHGA3  | 112.1 | 114.4 | 109.6 | 112.7 | 111.1 | 98.6  | 107.7 | 114.3 |
| PCDHGA3  | 114.6 | 117.9 | 120.6 | 122.6 | 102.7 | 99.1  | 125.3 | 114.3 |
| PCDHGA4  | 113.4 | 114.3 | 111   | 110.4 | 106.3 | 94    | 114.7 | 103.5 |
| PCDHGA4  | 113.1 | 109.9 | 111.7 | 119.9 | 98.6  | 93.5  | 109.6 | 107.2 |
| PCDHGA5  | 115.2 | 114.2 | 112.8 | 114.5 | 113.1 | 100.6 | 114.3 | 112.3 |
| PCDHGA5  | 115.3 | 122.5 | 117.5 | 117.3 | 103.9 | 105.6 | 119   | 103.9 |
| PCDHGA6  | 123.8 | 109.8 | 118.2 | 120.3 | 119.4 | 104.2 | 120.5 | 114.2 |
| PCDHGA7  | 104.8 | 113.1 | 119   | 112.6 | 106.2 | 95.2  | 122.6 | 112.2 |
| PCDHGA7  | 105.4 | 107.6 | 116.5 | 116   | 99.2  | 94    | 112.3 | 108.5 |
| PCDHGA8  | 114.2 | 116.8 | 118.7 | 122.2 | 107.8 | 102.9 | 114.2 | 118.1 |
| PCDHGA9  | 115.3 | 129.8 | 123.9 | 129.6 | 115.5 | 104   | 132.7 | 104.2 |
| PCDHGA9  | 126.1 | 118.8 | 123.8 | 123.5 | 112.2 | 96.6  | 124.7 | 119.8 |

|         |        |        |        |        |        |        |        |        |
|---------|--------|--------|--------|--------|--------|--------|--------|--------|
| PCDHGB1 | 115.4  | 119.6  | 114    | 112.6  | 104.4  | 101.8  | 121.4  | 117.4  |
| PCDHGB2 | 119    | 123    | 103.4  | 118.9  | 109    | 98.1   | 117.5  | 106    |
| PCDHGB3 | 119.9  | 116.6  | 114.6  | 122.1  | 108.1  | 101.2  | 121.5  | 122.4  |
| PCDHGB4 | 111.2  | 109.5  | 130.9  | 121.1  | 117.6  | 109.5  | 119.1  | 121.6  |
| PCDHGB5 | 121.6  | 113.3  | 122.5  | 117.3  | 111    | 97.8   | 113.9  | 113.1  |
| PCDHGB6 | 107.6  | 116.3  | 109.6  | 117    | 103.6  | 99.7   | 112.3  | 118.2  |
| PCDHGB6 | 145.2  | 153.4  | 150.2  | 149.4  | 131    | 119.1  | 138.4  | 139.9  |
| PCDHGB7 | 112.3  | 107.6  | 115.7  | 118.4  | 104.8  | 100.7  | 115.4  | 116.8  |
| PCDHGB7 | 109    | 112.2  | 113.6  | 115.6  | 94.9   | 94.6   | 112.5  | 107.3  |
| PCDHGC3 | 116.5  | 110.8  | 118.9  | 117.9  | 109.7  | 99.4   | 121.2  | 120.1  |
| PCDHGC3 | 114.5  | 119.6  | 116.6  | 116    | 106.9  | 103.3  | 119.2  | 115.8  |
| PCDHGC3 | 119.7  | 120.6  | 116.3  | 123    | 122.3  | 103.9  | 134.4  | 124.2  |
| PCDHGC4 | 109.5  | 120.3  | 119.7  | 119.9  | 108.5  | 94.7   | 122.8  | 117    |
| PCDHGC4 | 105.9  | 110.8  | 114    | 111.6  | 110    | 95.6   | 113.4  | 110.9  |
| PCDHGC5 | 111.3  | 109.5  | 112.7  | 120.1  | 99.8   | 100.5  | 113.3  | 113.7  |
| PCDHGC5 | 110.2  | 110    | 120.1  | 117.6  | 111.4  | 100.8  | 117.4  | 122.6  |
| PCF11   | 242    | 243.6  | 257.5  | 235.5  | 306.2  | 238.1  | 348.1  | 535.1  |
| PCGF1   | 155.8  | 177.1  | 194    | 178.8  | 136.6  | 146    | 187.9  | 173.5  |
| PCGF2   | 117.6  | 106    | 109.8  | 120.7  | 100.4  | 93.7   | 121.1  | 108.3  |
| PCGF3   | 127.3  | 121.5  | 131.2  | 121.3  | 114.9  | 104.8  | 129.5  | 122.3  |
| PCGF4   | 626.8  | 712.9  | 528.7  | 645.1  | 660.6  | 512.7  | 555.1  | 660.5  |
| PCGF5   | 135.9  | 132.6  | 133.2  | 146.8  | 130    | 113.7  | 127.9  | 132.1  |
| PCGF6   | 165.3  | 145.9  | 181.4  | 152.1  | 142.9  | 126.7  | 151.3  | 169.2  |
| PCGF6   | 127    | 122.6  | 139.7  | 133.2  | 122.1  | 108.9  | 122.1  | 114.4  |
| PCID1   | 348.9  | 310    | 534.2  | 374.2  | 358.8  | 283.8  | 301.6  | 398.5  |
| PCK1    | 117.2  | 109.8  | 115.5  | 120.4  | 106.7  | 102.5  | 112.9  | 113.3  |
| PCK2    | 116.2  | 125.7  | 124.4  | 120.6  | 106.2  | 115.2  | 103.7  | 113.4  |
| PCK2    | 263.5  | 199.6  | 265    | 219.4  | 177.7  | 303.3  | 225.9  | 238.1  |
| PCK2    | 112.1  | 116.1  | 116.2  | 131.2  | 109.8  | 97.1   | 112.6  | 114.2  |
| PCLKC   | 126.4  | 128.4  | 120.1  | 133    | 107.9  | 111.9  | 132.8  | 131.8  |
| PCM1    | 471.1  | 364.7  | 530.7  | 554.7  | 399.6  | 414.8  | 496.6  | 455    |
| PCMT1   | 1620.2 | 1689.8 | 1416.4 | 1607   | 1271.9 | 1132.7 | 1692.4 | 1524.7 |
| PCMTD1  | 310.4  | 248    | 268    | 345.2  | 333.3  | 266.5  | 302.9  | 304    |
| PCMTD2  | 632.7  | 878    | 673.5  | 754.7  | 852.3  | 503.2  | 574.6  | 609.7  |
| PCNA    | 121.8  | 128.8  | 129    | 127.6  | 122.9  | 107.8  | 115.6  | 116.3  |
| PCNA    | 115.1  | 125.6  | 126.4  | 124.4  | 121.2  | 109.4  | 125.1  | 131.9  |
| PCNA    | 284.2  | 308.1  | 304.7  | 406.2  | 275.5  | 287.2  | 395.9  | 376.7  |
| PCNP    | 1414.3 | 1626.8 | 1940.2 | 1917.5 | 1669.9 | 1719.6 | 2201.6 | 2454.9 |
| PCNT2   | 368.8  | 478.8  | 357    | 441    | 403.8  | 287    | 551.8  | 595.5  |
| PCNX    | 596.3  | 628.6  | 405.6  | 729.2  | 577.3  | 387    | 848.9  | 757    |
| PCNXL2  | 134.2  | 129    | 143.3  | 143.8  | 122.9  | 114.9  | 133.9  | 126.6  |
| PCNXL2  | 122    | 131.2  | 127.4  | 115.9  | 123.9  | 104.3  | 117.7  | 125.2  |
| PCNXL2  | 132    | 140.2  | 140.1  | 142.4  | 127.6  | 115.6  | 134    | 131.2  |
| PCOLCE  | 125.4  | 130.8  | 125.7  | 141.8  | 109.4  | 108.1  | 123.7  | 118.3  |
| PCOLCE2 | 115    | 127.5  | 121.7  | 117.3  | 115.8  | 98.2   | 116.7  | 120.9  |
| PCOLN3  | 319.8  | 289.2  | 279.4  | 355.3  | 214.1  | 300.8  | 436.1  | 415.2  |
| PCP2    | 116.2  | 113.9  | 132.8  | 128.7  | 118.4  | 100.7  | 119.4  | 121.1  |
| PCP4    | 127    | 127.3  | 132.7  | 121.5  | 117.6  | 96.1   | 116.9  | 131.6  |
| PCQAP   | 156.7  | 147.1  | 139.4  | 142.5  | 141.2  | 132    | 140.3  | 152.6  |
| PCQAP   | 143.8  | 141.7  | 149.8  | 152.6  | 140.8  | 112.8  | 149    | 148.2  |
| PCSK1   | 114    | 113.8  | 124.6  | 122.1  | 111.6  | 99.5   | 121.4  | 110.4  |

|          |        |        |        |        |        |        |        |        |
|----------|--------|--------|--------|--------|--------|--------|--------|--------|
| PCSK1N   | 118.9  | 117.6  | 121.7  | 133.7  | 102.9  | 99.2   | 119.2  | 114.2  |
| PCSK2    | 120.7  | 108.7  | 125    | 128.1  | 113.4  | 97.4   | 119.9  | 112.1  |
| PCSK4    | 118.2  | 109.9  | 123.8  | 125.7  | 104.3  | 105.9  | 125.1  | 127.9  |
| PCSK6    | 118.7  | 110.1  | 105    | 114.9  | 100.9  | 96     | 113.9  | 106    |
| PCSK6    | 111    | 108.1  | 117.9  | 121    | 115    | 102.5  | 114.4  | 111.4  |
| PCSK6    | 113.2  | 115.3  | 116    | 114.3  | 112    | 92.8   | 119.2  | 115.2  |
| PCSK6    | 111    | 117.3  | 108.1  | 112.1  | 108.2  | 100.7  | 118.1  | 103.8  |
| PCSK6    | 112.1  | 110.1  | 117.9  | 119.8  | 107.7  | 95.6   | 126.6  | 119.5  |
| PCSK7    | 370    | 398.1  | 332.8  | 326.5  | 305.2  | 204.8  | 327.2  | 299.6  |
| PCSK9    | 110.4  | 121.5  | 122.2  | 131.2  | 116.6  | 98.7   | 126.6  | 129.7  |
| PCTK1    | 112    | 119.3  | 111.5  | 116.2  | 109.8  | 101.3  | 116.1  | 112    |
| PCTK1    | 111.9  | 114.9  | 114    | 112.2  | 106.3  | 94.4   | 114.6  | 116.6  |
| PCTK2    | 130.1  | 131.1  | 131.3  | 137.9  | 121.6  | 118    | 123.6  | 133.1  |
| PCTK3    | 134.4  | 125.7  | 118.6  | 136.5  | 117.7  | 94.3   | 132.1  | 122.1  |
| PCTK3    | 107.2  | 120.4  | 124    | 123.2  | 109    | 101.8  | 120.1  | 115.9  |
| PCTK3    | 117    | 106.6  | 120.6  | 114    | 117.8  | 104.4  | 121    | 121.7  |
| PCTK3    | 107.2  | 117    | 119.5  | 110.8  | 98.6   | 101.2  | 114.4  | 109    |
| PCTP     | 119.4  | 123    | 138.8  | 131.2  | 117    | 107.4  | 133.8  | 124.5  |
| PCYOX1   | 326.1  | 268.4  | 380.2  | 347.1  | 184.3  | 245.1  | 255.4  | 228.7  |
| PCYT1A   | 112.9  | 122.5  | 130.6  | 121.6  | 105.7  | 99.5   | 132.9  | 119.2  |
| PCYT1B   | 128    | 118.6  | 118    | 125.4  | 108.8  | 99     | 115.7  | 105.7  |
| PCYT2    | 125.1  | 124.8  | 129.4  | 134.6  | 127.5  | 103.3  | 129.2  | 119.1  |
| PDAP1    | 113.2  | 135.9  | 121.7  | 129    | 123.7  | 127.2  | 131    | 124.8  |
| PDC      | 111.8  | 124    | 125.3  | 124.2  | 110.4  | 104.1  | 109.6  | 109.9  |
| PDC      | 115.3  | 103.6  | 109.5  | 108.2  | 102.6  | 97.5   | 112.6  | 107.6  |
| PDCD1    | 128.7  | 133.6  | 123.7  | 127.9  | 119.4  | 108.2  | 135.8  | 137.1  |
| PDCD10   | 153.7  | 164.5  | 163.5  | 166.6  | 149.7  | 129.4  | 153    | 142    |
| PDCD10   | 117.8  | 113.7  | 119.5  | 109.3  | 108.4  | 101.2  | 119.3  | 115.4  |
| PDCD10   | 372    | 473.7  | 422.2  | 447.7  | 368.9  | 369.1  | 448    | 473.8  |
| PDCD10   | 151.2  | 135.2  | 185.5  | 169.2  | 141.2  | 129.9  | 163.6  | 162.3  |
| PDCD1LG2 | 114.2  | 107.1  | 106.3  | 109.7  | 104.5  | 100    | 121.8  | 100.7  |
| PDCD2    | 330.6  | 423.7  | 331.5  | 326.9  | 270.7  | 250.2  | 305.9  | 219.5  |
| PDCD2    | 626.7  | 758.9  | 620.2  | 704.9  | 508.9  | 442.8  | 696.4  | 732.8  |
| PDCD4    | 2513.7 | 2777.2 | 2761.3 | 2637.1 | 2198.6 | 2174   | 3437.4 | 3232.5 |
| PDCD5    | 237.4  | 282.6  | 294.8  | 311.1  | 272.6  | 221.7  | 282.2  | 289.1  |
| PDCD6    | 810.3  | 1050.5 | 901.2  | 933.4  | 716.5  | 750.8  | 742.1  | 809.9  |
| PDCD6IP  | 118.6  | 115.4  | 107.4  | 122.1  | 108.3  | 99.8   | 116.9  | 114.8  |
| PDCD7    | 4260   | 4285.2 | 3396.8 | 4386.6 | 3360.2 | 3089.5 | 5076.5 | 3613   |
| PDCD8    | 141.3  | 127.5  | 146.1  | 135    | 123.2  | 112    | 124.2  | 129.9  |
| PDCD8    | 157.2  | 169.4  | 173.6  | 188.1  | 149.6  | 141.3  | 167.8  | 164.1  |
| PDCD8    | 117.7  | 121.6  | 129.4  | 115.5  | 118.6  | 101.9  | 123.6  | 130.6  |
| PDCL     | 148.1  | 160.8  | 137.3  | 151.2  | 141.6  | 110.7  | 150.2  | 142.8  |
| PDCL2    | 126.3  | 109.7  | 121.3  | 114.9  | 108.4  | 96.7   | 123.7  | 113.7  |
| PDCL3    | 238.9  | 286.9  | 211.3  | 234.1  | 212.4  | 145.9  | 243.1  | 231.4  |
| PDDC1    | 122.7  | 118.1  | 114.4  | 111.6  | 99.2   | 100    | 117.8  | 113    |
| PDDC1    | 181.5  | 210.1  | 200.6  | 198.3  | 173.6  | 154    | 204.4  | 176.2  |
| PDE10A   | 113.7  | 119    | 119.9  | 112.8  | 117.4  | 100.9  | 119.5  | 110.7  |
| PDE11A   | 112.7  | 117.6  | 118.6  | 121.7  | 106.2  | 100.8  | 110.7  | 115.1  |
| PDE11A   | 111.6  | 116.2  | 114.5  | 114.2  | 112.6  | 99.4   | 123.2  | 117.9  |
| PDE11A   | 114.1  | 112.2  | 113    | 123    | 109.2  | 103.2  | 116.9  | 122    |
| PDE1A    | 98.1   | 111.5  | 109.8  | 119.2  | 106.8  | 95.1   | 110.2  | 117.1  |

|         |       |        |       |       |       |       |       |       |
|---------|-------|--------|-------|-------|-------|-------|-------|-------|
| PDE1A   | 113.8 | 113.3  | 119.6 | 114.4 | 109.8 | 96.5  | 113.5 | 112.7 |
| PDE1A   | 131.5 | 118.2  | 115.2 | 115.8 | 111.3 | 104.3 | 117.9 | 119.1 |
| PDE1B   | 131.4 | 118    | 123.4 | 125.1 | 115   | 116.5 | 133.2 | 122.2 |
| PDE1C   | 113.4 | 113.3  | 107.1 | 118.5 | 110.7 | 91.7  | 119.4 | 115.3 |
| PDE2A   | 122.7 | 103.8  | 116.7 | 123.3 | 108   | 96.1  | 113.3 | 110.3 |
| PDE3A   | 104.2 | 118.7  | 111.3 | 116.3 | 109.4 | 105.7 | 116.3 | 118.7 |
| PDE3B   | 711.2 | 1139.7 | 561   | 722.6 | 828.2 | 548.1 | 726.1 | 863.4 |
| PDE4A   | 121.1 | 124.2  | 124.3 | 129   | 111.4 | 101.1 | 117   | 119.5 |
| PDE4B   | 526   | 483    | 519   | 538.9 | 468.5 | 491.8 | 430.1 | 385.2 |
| PDE4B   | 169.1 | 176.7  | 190.2 | 171.5 | 167.5 | 164.9 | 157.5 | 142.1 |
| PDE4B   | 116.6 | 113.6  | 113.5 | 123   | 111.3 | 94.4  | 115.2 | 113.1 |
| PDE4B   | 124.6 | 119.3  | 124.2 | 113.9 | 105.2 | 103.9 | 129.7 | 111.1 |
| PDE4C   | 116.1 | 110.8  | 113.1 | 114.2 | 118.5 | 104   | 125.2 | 110.9 |
| PDE4D   | 220.4 | 255.4  | 217.7 | 261.5 | 237.3 | 177.7 | 225.6 | 250.6 |
| PDE4DIP | 122.8 | 123.3  | 127.3 | 126   | 112.3 | 104.8 | 125.8 | 111.9 |
| PDE4DIP | 108.6 | 107.1  | 109.3 | 116.2 | 99.7  | 96.5  | 110.1 | 108.8 |
| PDE4DIP | 115.5 | 105    | 111.7 | 120.4 | 107.6 | 98.3  | 117.5 | 108.1 |
| PDE5A   | 113.3 | 114.6  | 110.9 | 112.7 | 103.2 | 100.7 | 112.4 | 112   |
| PDE5A   | 136.9 | 135.8  | 130   | 146.2 | 118.2 | 108.1 | 136.8 | 139.3 |
| PDE5A   | 115.9 | 108.9  | 124.3 | 117.3 | 108.3 | 94.3  | 121.3 | 104.9 |
| PDE5A   | 117.4 | 113.6  | 116.3 | 123   | 113.5 | 100.8 | 125.4 | 112.4 |
| PDE5A   | 108.7 | 106    | 112.2 | 131.3 | 109.5 | 99.7  | 117.2 | 113.5 |
| PDE6A   | 115   | 108.8  | 111   | 112.1 | 109.9 | 95.4  | 114.8 | 116.3 |
| PDE6B   | 119.5 | 122.9  | 133.8 | 119.5 | 110.7 | 103.3 | 112.2 | 118.6 |
| PDE6C   | 113.7 | 112.8  | 118.2 | 132.6 | 106.9 | 98.3  | 111.4 | 118   |
| PDE6D   | 134.3 | 155.8  | 139.7 | 162.6 | 133.3 | 117.2 | 152.6 | 149.6 |
| PDE6G   | 128.4 | 135    | 127   | 131.9 | 106.4 | 108.1 | 129.3 | 129.1 |
| PDE6H   | 115.4 | 121.9  | 118.9 | 120.2 | 121   | 109.7 | 123.5 | 118.7 |
| PDE7A   | 183.9 | 171.4  | 183.1 | 189.3 | 202.7 | 149.2 | 146.8 | 160.7 |
| PDE7A   | 509.7 | 398.5  | 411   | 462.8 | 553.7 | 263.4 | 365.4 | 358.6 |
| PDE7A   | 114.6 | 113.9  | 124.4 | 130.2 | 112.9 | 99.2  | 131.6 | 109.8 |
| PDE7B   | 126.8 | 118.3  | 134.2 | 136.7 | 120.3 | 100.5 | 124.6 | 119.1 |
| PDE8A   | 138.7 | 126.9  | 124.5 | 144.3 | 138.3 | 125.1 | 130.3 | 147.6 |
| PDE8A   | 117.1 | 114.2  | 130.1 | 133.2 | 120.2 | 106.6 | 118.2 | 116.3 |
| PDE8A   | 118.1 | 120.4  | 118.6 | 117.5 | 104.2 | 98.5  | 119.3 | 108.9 |
| PDE8B   | 118.3 | 122.2  | 118.9 | 129.9 | 120.2 | 107.6 | 125.9 | 123.5 |
| PDE8B   | 111.9 | 115    | 110.3 | 114.3 | 97.5  | 96.5  | 113   | 110.3 |
| PDE9A   | 116.3 | 108.5  | 108.3 | 117   | 110.6 | 103.7 | 120.1 | 116.6 |
| PDE9A   | 121.8 | 180.5  | 162.7 | 138.1 | 151.2 | 125.6 | 128.9 | 154.3 |
| PDE9A   | 115.8 | 124.6  | 119.7 | 126.4 | 110.7 | 107.9 | 134.6 | 121.3 |
| PDE9A   | 119.5 | 108.8  | 118.2 | 127.6 | 106.8 | 108.7 | 127.9 | 115.5 |
| PDF     | 109.8 | 118.8  | 117.8 | 118.1 | 108.1 | 101.4 | 115.4 | 108.2 |
| PDGFA   | 126.8 | 110    | 124.7 | 107.2 | 113.3 | 102.7 | 121.6 | 122.4 |
| PDGFA   | 116.5 | 115.6  | 123   | 112.6 | 108.7 | 105.2 | 114.3 | 116.2 |
| PDGFB   | 121.6 | 121    | 120.9 | 119.4 | 118   | 104.6 | 119.3 | 121.7 |
| PDGFB   | 130.2 | 116.8  | 128.2 | 122.1 | 112.4 | 115.1 | 126.8 | 116.4 |
| PDGFB   | 125.1 | 128.4  | 122.1 | 126.3 | 111.3 | 101.4 | 124   | 125   |
| PDGFC   | 130   | 115    | 133.8 | 139.1 | 110.8 | 104.7 | 128.1 | 113.7 |
| PDGFD   | 127.1 | 122.9  | 122.1 | 128.8 | 105.6 | 100.8 | 121.4 | 112.4 |
| PDGFD   | 127.2 | 133.3  | 130.5 | 147.5 | 112.8 | 106.7 | 132.6 | 119.1 |
| PDGFRA  | 129.5 | 126.7  | 120.2 | 107.1 | 137.3 | 99.8  | 134.1 | 121   |



|          |        |        |        |        |        |        |        |        |
|----------|--------|--------|--------|--------|--------|--------|--------|--------|
| PDGFRB   | 125.1  | 159.1  | 133    | 126.8  | 138    | 103    | 139    | 122.1  |
| PDGFRL   | 113.4  | 117.5  | 108.1  | 113.7  | 113.3  | 91     | 118.1  | 114.1  |
| PDHA1    | 180.4  | 191.1  | 204    | 221.7  | 185.5  | 178.2  | 190.9  | 221.2  |
| PDHA2    | 106.4  | 112.3  | 112.1  | 106.6  | 100.4  | 93.7   | 114    | 104.4  |
| PDHB     | 1729.5 | 1744.2 | 1765.9 | 1818.4 | 1341.3 | 1092.9 | 1270.8 | 1095.2 |
| PDHX     | 209.2  | 220.4  | 226.9  | 221.9  | 181    | 161.9  | 209.6  | 196.5  |
| PDIA2    | 112.7  | 104.2  | 113.1  | 116.6  | 115.9  | 95.1   | 112.1  | 114.2  |
| PDIA3    | 128.8  | 126.4  | 130.9  | 132.3  | 123.4  | 113.4  | 126.9  | 123.9  |
| PDIA3P   | 130.8  | 141.1  | 141.8  | 132.7  | 126.7  | 130.5  | 152.1  | 146.8  |
| PDIA4    | 120.3  | 136.4  | 124.2  | 130.5  | 109.6  | 113.8  | 132.7  | 125.3  |
| PDIA5    | 120.1  | 136.5  | 137.9  | 123.7  | 119    | 109.7  | 122.7  | 122.5  |
| PDIA6    | 163.7  | 164.2  | 233.7  | 199.6  | 168.5  | 174.6  | 174.9  | 188.4  |
| PDIK1L   | 233.5  | 268.1  | 223.6  | 233.2  | 219.9  | 189.3  | 209.8  | 186.2  |
| PDILT    | 112.5  | 108    | 113.7  | 116.5  | 113.3  | 100.8  | 126.6  | 119.6  |
| PDK1     | 128.6  | 129.9  | 134.7  | 153    | 126.7  | 118.2  | 130    | 136.6  |
| PDK2     | 134.8  | 117.2  | 128    | 124.5  | 118.1  | 120.8  | 128    | 122.4  |
| PDK3     | 137.1  | 146.6  | 160.1  | 147.9  | 116    | 120    | 136.4  | 135.5  |
| PDK4     | 126.5  | 115    | 309.3  | 141.3  | 118    | 195.6  | 126    | 111.6  |
| PDLIM1   | 158.9  | 145.7  | 142.7  | 155    | 123.7  | 126.3  | 131.3  | 128.3  |
| PDLIM2   | 115.9  | 109    | 120.9  | 128.1  | 119.3  | 98.6   | 120.1  | 118.1  |
| PDLIM2   | 108.3  | 113.8  | 120    | 125.6  | 115.2  | 97.1   | 110.7  | 115.6  |
| PDLIM3   | 122.3  | 110.2  | 104.2  | 123    | 102.7  | 100.4  | 127.7  | 108.7  |
| PDLIM4   | 109.4  | 117.4  | 113.4  | 115.8  | 104.4  | 96.6   | 109.6  | 107.6  |
| PDLIM5   | 130.1  | 125.4  | 120.4  | 132.2  | 117    | 106.8  | 128.4  | 126.7  |
| PDLIM5   | 121.1  | 108.8  | 113.3  | 127.7  | 115.7  | 115.5  | 124.7  | 124    |
| PDLIM5   | 118    | 116.3  | 112.4  | 128.7  | 114.6  | 101.2  | 118.5  | 126.2  |
| PDLIM7   | 113.1  | 114.7  | 119.7  | 120.6  | 114.2  | 104.9  | 114.1  | 103.6  |
| PDLIM7   | 136.8  | 137.3  | 145.6  | 137.6  | 129.3  | 128.1  | 141.5  | 139.6  |
| PDLIM7   | 162.7  | 143.7  | 210.4  | 196.5  | 137.2  | 182.6  | 144.1  | 133    |
| PDP2     | 137.2  | 125.2  | 140.3  | 145.6  | 122.4  | 114.9  | 137.4  | 140.4  |
| PDPK1    | 117.4  | 127.6  | 123.5  | 120.4  | 108.6  | 101.9  | 127.1  | 116.7  |
| PDPK1    | 194.3  | 211.7  | 202.9  | 243    | 225.1  | 156.2  | 222.4  | 223.9  |
| PDPK1    | 761.7  | 686.5  | 538.1  | 818.9  | 746.9  | 571.4  | 848.9  | 874.8  |
| PDPN     | 113.2  | 121.4  | 124.8  | 124.2  | 110.2  | 114.4  | 117.9  | 113.4  |
| PDPN     | 116.9  | 115.2  | 116    | 117.9  | 99.6   | 106.8  | 115.8  | 122    |
| PDPR     | 275.1  | 184.6  | 245.5  | 241.3  | 164.2  | 200.9  | 281.4  | 194.3  |
| PDPR     | 479.5  | 352.8  | 454.7  | 489.2  | 326.9  | 351.7  | 649.6  | 348.7  |
| PDPR     | 121.6  | 118.2  | 126.1  | 121.9  | 107.3  | 98.6   | 117.4  | 114.2  |
| PDRG1    | 199    | 235    | 230.9  | 261    | 196.4  | 218.7  | 248.4  | 267.5  |
| PDSS1    | 141.3  | 142.6  | 142.7  | 139.3  | 146.9  | 127.1  | 147.5  | 148.9  |
| PDSS2    | 416.6  | 457.1  | 382.9  | 373.6  | 438.6  | 300.8  | 364.2  | 403.9  |
| PDXK     | 610.2  | 707.3  | 723.9  | 765.2  | 562.8  | 506.1  | 829.8  | 768    |
| PDXP     | 390.7  | 426.8  | 332.5  | 378.7  | 245.2  | 183.9  | 245.2  | 209.5  |
| PDYN     | 124.4  | 118.4  | 126.3  | 120.9  | 108.8  | 104.7  | 120    | 111.1  |
| PDZD11   | 112.8  | 109.8  | 114.3  | 121.9  | 110.6  | 95.6   | 124.3  | 116.1  |
| PDZD3    | 110.5  | 112.9  | 109.6  | 112.9  | 103    | 87.5   | 112.6  | 107.1  |
| PDZD4    | 119.1  | 119.3  | 131.1  | 132.8  | 112.1  | 105.9  | 119.4  | 116.8  |
| PDZD7    | 108.3  | 114    | 117    | 110.8  | 103.6  | 98.7   | 117.5  | 106    |
| PDZD8    | 161.3  | 171.9  | 149.4  | 157.6  | 137.3  | 132.6  | 159.7  | 172.6  |
| PDZK1    | 107.6  | 115.7  | 124.6  | 121.5  | 115.9  | 103.8  | 121.9  | 111.9  |
| PDZK1IP1 | 109    | 111.2  | 111.2  | 119.6  | 101.5  | 101    | 119.5  | 104    |

|         |       |       |       |       |       |        |       |       |
|---------|-------|-------|-------|-------|-------|--------|-------|-------|
| PDZK3   | 118.7 | 116   | 106.9 | 115   | 105.5 | 103.1  | 115.1 | 111.8 |
| PDZK3   | 105.5 | 112.8 | 115.7 | 114.4 | 106   | 94.9   | 111.6 | 107.6 |
| PDZK5B  | 123.7 | 108.7 | 119   | 118.9 | 109.8 | 94.5   | 107.8 | 108.2 |
| PDZK5B  | 111   | 106.8 | 110.2 | 103.4 | 117.2 | 93.7   | 118   | 113.4 |
| PDZK5B  | 113.9 | 111.4 | 118.4 | 120   | 113.8 | 101.5  | 116.9 | 121.7 |
| PDZRN3  | 121.1 | 117.4 | 126   | 125.4 | 105.4 | 103    | 111.7 | 117.2 |
| PDZRN3  | 110.4 | 113   | 115.3 | 111.1 | 106   | 96     | 118.7 | 112.8 |
| PDZRN3  | 109.5 | 126.1 | 127.8 | 122.7 | 112.2 | 94.4   | 118.8 | 117.6 |
| PDZRN4  | 117.5 | 112.3 | 121.6 | 118.6 | 107.9 | 99.7   | 117.4 | 110.3 |
| PEA15   | 694.9 | 572   | 1492  | 717.2 | 475.2 | 1082.2 | 803.1 | 571.1 |
| PEAR1   | 127.7 | 133.4 | 116.4 | 128.8 | 105.8 | 87.4   | 117.5 | 113.8 |
| PEBP1   | 217.3 | 228.5 | 207.7 | 195.6 | 216.1 | 224.5  | 165.6 | 194.2 |
| PEBP4   | 119.6 | 114   | 124.7 | 123.9 | 116.8 | 101.4  | 118.7 | 111.9 |
| PECAM1  | 201.1 | 237.8 | 314.4 | 198.6 | 175.2 | 211.4  | 154.7 | 177   |
| PECI    | 191.5 | 272.5 | 292.8 | 285.6 | 248.3 | 236.9  | 233.6 | 184.2 |
| PECI    | 258.1 | 235.3 | 314.5 | 300.1 | 218.3 | 240.8  | 191   | 213.1 |
| PECR    | 182.7 | 182.1 | 188.4 | 173.5 | 164.6 | 136.4  | 129.7 | 140.5 |
| PEF1    | 248.4 | 246.1 | 237.1 | 234.3 | 196.2 | 226.4  | 289.2 | 384.5 |
| PEG10   | 111.8 | 123.4 | 118.9 | 132.9 | 117.6 | 109.8  | 129   | 121.5 |
| PEG3    | 122.5 | 116.1 | 117.7 | 117.7 | 102.2 | 102.4  | 118.7 | 124   |
| PELI1   | 204.2 | 211.5 | 234   | 278.8 | 237.9 | 236.9  | 377.4 | 315.2 |
| PELI2   | 187.1 | 203.9 | 183.3 | 218.4 | 205.1 | 199.2  | 247.4 | 292.3 |
| PELI3   | 121.2 | 116.8 | 111.4 | 120.8 | 110.9 | 106.1  | 113.2 | 112.5 |
| PELO    | 485.7 | 596.3 | 510.5 | 611.4 | 415.7 | 598.9  | 783.4 | 652.5 |
| PELP1   | 208.8 | 229.1 | 160.9 | 170.7 | 167.4 | 145.2  | 170.6 | 169   |
| PEMT    | 197.1 | 209   | 257.3 | 195.6 | 161.3 | 154.2  | 197.2 | 163.3 |
| PEMT    | 113.1 | 114.2 | 115.4 | 115   | 101.1 | 93.6   | 108.7 | 110.7 |
| PEMT    | 114.1 | 122.2 | 111.9 | 119.6 | 115.2 | 105.9  | 122.7 | 116.2 |
| PEMT    | 126.1 | 129   | 149.1 | 125.6 | 118.4 | 100.2  | 133.2 | 134.6 |
| PENK    | 118.2 | 107.2 | 112   | 115.1 | 107   | 95.3   | 115.7 | 111.1 |
| PEO1    | 162.5 | 130.1 | 140.3 | 144   | 132.9 | 117.7  | 145.2 | 129.9 |
| PEPD    | 558.5 | 591   | 592.2 | 584.5 | 423.8 | 374.8  | 532   | 433.4 |
| PER1    | 131.6 | 130.3 | 126   | 126.5 | 116.3 | 118.2  | 125.7 | 136.7 |
| PER2    | 119.2 | 109.1 | 112.4 | 117.7 | 104.7 | 92.5   | 102.3 | 107.1 |
| PER2    | 204.5 | 239.1 | 201.5 | 228.8 | 195.6 | 167.9  | 220.4 | 217.7 |
| PERF15  | 114.6 | 115.7 | 113.9 | 123.6 | 110   | 101.8  | 115.4 | 112.1 |
| PERLD1  | 262.1 | 272.9 | 296.1 | 254.4 | 219.3 | 182.7  | 200.9 | 217.1 |
| PERP    | 105.8 | 117.9 | 113.5 | 120.8 | 100   | 100    | 107.9 | 116.8 |
| PERQ1   | 134   | 132.2 | 138.4 | 139.6 | 128.5 | 106.7  | 139.8 | 152.8 |
| PES1    | 118.9 | 138.7 | 138.1 | 134.5 | 122.3 | 106.8  | 123.8 | 115.8 |
| PET112L | 147.2 | 155.4 | 186.8 | 159.5 | 147.9 | 119    | 150.1 | 156.1 |
| PEX1    | 178.3 | 187.7 | 181.6 | 175.7 | 146.8 | 149.2  | 185.3 | 171.7 |
| PEX10   | 116.3 | 124.6 | 140.6 | 139.6 | 126.6 | 103.2  | 129.9 | 120.9 |
| PEX10   | 111.7 | 116.9 | 113.1 | 124.1 | 108.3 | 108.2  | 120.2 | 118.8 |
| PEX11A  | 124.4 | 117.2 | 129.3 | 132   | 127.7 | 117.9  | 128.9 | 138.7 |
| PEX11B  | 547.8 | 517.3 | 579.6 | 504.5 | 497.4 | 500.3  | 409.8 | 386.8 |
| PEX11G  | 116   | 121.2 | 127.4 | 129.4 | 112   | 98.9   | 126.6 | 112   |
| PEX12   | 107.1 | 132.3 | 125.5 | 133   | 111.9 | 101    | 117.7 | 111.2 |
| PEX13   | 107   | 110.7 | 119.7 | 113.5 | 105.3 | 106.8  | 108.8 | 109.2 |
| PEX14   | 137.5 | 168.6 | 150.5 | 177.3 | 137.6 | 138.4  | 160.6 | 154.5 |
| PEX16   | 450.6 | 422.5 | 427.9 | 430.6 | 335.3 | 263.3  | 427.1 | 358.2 |

|        |        |        |        |        |        |        |        |        |
|--------|--------|--------|--------|--------|--------|--------|--------|--------|
| PEX16  | 119.2  | 124.4  | 124.3  | 129.1  | 126.3  | 112.3  | 131.3  | 125.7  |
| PEX16  | 492.1  | 581.7  | 466.4  | 480.6  | 393.8  | 399    | 454.1  | 386.3  |
| PEX19  | 237.2  | 281.5  | 251.5  | 241.1  | 240.5  | 189.7  | 235.6  | 268.9  |
| PEX26  | 113.3  | 112.9  | 122.5  | 120.9  | 108.9  | 101.8  | 111.3  | 122.3  |
| PEX3   | 122.4  | 122.7  | 122.8  | 123.8  | 116.9  | 95.7   | 114.9  | 118.1  |
| PEX5   | 445.7  | 399.2  | 372.7  | 464.4  | 400.7  | 295.6  | 494.1  | 398.9  |
| PEX5L  | 115.6  | 113.8  | 119.2  | 119.6  | 114.9  | 98.1   | 119.2  | 118.2  |
| PEX6   | 140.8  | 148.3  | 135.3  | 163.6  | 136.1  | 123.6  | 150.1  | 154.3  |
| PEX7   | 144.1  | 154.2  | 166.8  | 147.6  | 123.5  | 127.5  | 136.5  | 128.5  |
| PF4    | 110.2  | 108.2  | 107.4  | 110.9  | 107.6  | 93.5   | 115.5  | 111.4  |
| PF4V1  | 120.8  | 125.8  | 123.3  | 121.2  | 125.6  | 105.6  | 122.4  | 126.4  |
| PFAAP5 | 314.7  | 261.7  | 392.8  | 335.8  | 266.9  | 282.4  | 273.6  | 226.6  |
| PFAS   | 182    | 178.1  | 160.4  | 185.5  | 168.4  | 124.5  | 152.9  | 138.8  |
| PFC    | 121.1  | 141.6  | 186.4  | 140.7  | 117    | 120.1  | 126.9  | 120.5  |
| PFDN1  | 457    | 539.8  | 541.3  | 494    | 346.2  | 446.9  | 496.6  | 476.7  |
| PFDN2  | 128.2  | 127.7  | 122.4  | 140.2  | 117    | 112.1  | 116.6  | 121.1  |
| PFDN4  | 118.6  | 133.4  | 125.9  | 123.9  | 110.6  | 99.8   | 133.1  | 132.1  |
| PFDN5  | 1768.4 | 2567.1 | 3189   | 2358.7 | 2280.9 | 2948   | 2517.7 | 2984.6 |
| PFDN5  | 1301.3 | 1828.4 | 1892.6 | 2535.7 | 1993.9 | 1620.5 | 1942.3 | 1433.2 |
| PFDN6  | 157.2  | 171.9  | 178.3  | 195.2  | 179.9  | 152.4  | 160.6  | 170.4  |
| PFKFB1 | 120.5  | 121    | 117.6  | 117.1  | 121.8  | 106.3  | 115.4  | 120    |
| PFKFB2 | 113.7  | 139.1  | 112.8  | 119    | 106.8  | 104.3  | 125.5  | 121.9  |
| PFKFB2 | 122.6  | 128.4  | 110    | 122.3  | 107.2  | 100.4  | 116.3  | 112.3  |
| PFKFB2 | 121.1  | 120.2  | 123    | 122.1  | 109.2  | 105.7  | 135.7  | 120.1  |
| PFKFB3 | 627.3  | 668.4  | 947.1  | 989.1  | 565.2  | 1026.6 | 1235   | 551    |
| PFKFB4 | 188.1  | 204.4  | 200.6  | 222.5  | 160    | 148.8  | 238.5  | 192.6  |
| PFKL   | 113    | 115.1  | 114.2  | 122.5  | 105.3  | 93.3   | 118.6  | 121.9  |
| PFKL   | 234.1  | 205.2  | 279.5  | 248.3  | 152.6  | 243.6  | 204.4  | 176.8  |
| PFKM   | 158.9  | 153.3  | 133.9  | 161.6  | 138.6  | 111.7  | 145.1  | 127    |
| PFKP   | 256.7  | 245    | 242.8  | 277.5  | 200.7  | 282.6  | 331.6  | 258    |
| PFN1   | 6967   | 8885.6 | 8455.3 | 7031.8 | 6552.7 | 8019   | 7852.3 | 5900.9 |
| PFN2   | 113.1  | 109.1  | 120.1  | 123.6  | 111.8  | 99.3   | 118.5  | 114.3  |
| PFN2   | 123.4  | 124.4  | 134.1  | 124.6  | 125.5  | 108    | 149    | 126.7  |
| PFN3   | 115.5  | 113.2  | 122.3  | 121.8  | 106.8  | 105    | 126.8  | 121.3  |
| PFN4   | 113.1  | 117.6  | 116.8  | 118    | 110.4  | 102.6  | 118.2  | 108.2  |
| PFS2   | 129.1  | 111    | 130.4  | 125.6  | 118.6  | 103.9  | 129.7  | 130.6  |
| PFTK1  | 134.3  | 134.5  | 133.9  | 133    | 105.2  | 105.5  | 125.6  | 125.1  |
| PGA3   | 126.1  | 114.9  | 126.8  | 108.9  | 110.7  | 111.6  | 117.3  | 113.5  |
| PGA4   | 114.1  | 117.9  | 130.3  | 114    | 111.4  | 103.4  | 121.2  | 106.8  |
| PGA5   | 117.5  | 109.9  | 118.5  | 110.4  | 104.6  | 96.3   | 122    | 118.6  |
| PGAM1  | 465.6  | 489.4  | 553.6  | 535.1  | 392.8  | 422.2  | 418.1  | 479.5  |
| PGAM2  | 114.8  | 126.6  | 122.3  | 123.6  | 113.9  | 104.2  | 121.5  | 125.2  |
| PGAM4  | 122.2  | 121.6  | 113.8  | 111.6  | 112.5  | 100.5  | 118.3  | 114.8  |
| PGAM5  | 106.1  | 114.7  | 115.3  | 113.9  | 105.6  | 102.1  | 113.6  | 113.4  |
| PGAP1  | 116.3  | 111.4  | 111.3  | 121.3  | 115.6  | 105    | 130.1  | 120.6  |
| PGBD1  | 123.4  | 132.6  | 129.8  | 133.4  | 129.8  | 109.6  | 130.8  | 124.8  |
| PGBD2  | 195    | 178.6  | 182.9  | 201.2  | 202.4  | 132.4  | 188.5  | 197    |
| PGBD2  | 122.6  | 120.8  | 122.2  | 109.8  | 109.1  | 97.2   | 130.2  | 123.9  |
| PGBD3  | 119.1  | 130.8  | 116.2  | 127.1  | 113.8  | 107.5  | 124.1  | 116.6  |
| PGBD4  | 123.4  | 123.1  | 123.3  | 120.3  | 117.7  | 103    | 124.6  | 125.9  |
| PGBD5  | 116.1  | 118.6  | 127.5  | 121.9  | 112.7  | 102.9  | 122.6  | 117.1  |

|         |        |       |       |       |        |        |        |       |
|---------|--------|-------|-------|-------|--------|--------|--------|-------|
| PGC     | 118.5  | 106.6 | 116.3 | 123   | 96.5   | 96.5   | 107    | 111.2 |
| PGCP    | 281.2  | 197   | 374.1 | 307.6 | 148.8  | 307.7  | 224.8  | 148.7 |
| PGD     | 1304.4 | 870.3 | 908.9 | 2380  | 1052.2 | 2194.6 | 2181.9 | 910.6 |
| PGDS    | 115.6  | 106.9 | 111.7 | 117   | 107.8  | 97     | 117.9  | 110.5 |
| PGEA1   | 162.4  | 196   | 221.9 | 171.1 | 178.7  | 188.4  | 171.8  | 150.3 |
| PGEA1   | 116.6  | 115.7 | 116.1 | 120.7 | 109.9  | 111.6  | 118.7  | 111.4 |
| PGF     | 111.6  | 111.3 | 115.4 | 111.3 | 101.5  | 95.6   | 115.5  | 112.5 |
| PGGT1B  | 123.5  | 133.1 | 136.1 | 141.8 | 136.1  | 115.1  | 137.9  | 137.4 |
| PGK1    | 355.8  | 294.3 | 432.1 | 409.9 | 347.9  | 314.7  | 466.5  | 550.6 |
| PGK2    | 108.7  | 112.2 | 110.4 | 121.2 | 106.7  | 100.5  | 115.5  | 116.3 |
| PGLS    | 473.9  | 462.6 | 548.1 | 520   | 344.6  | 380.4  | 495.6  | 399.4 |
| PGLYRP1 | 115.7  | 138.2 | 125.6 | 125.2 | 130.7  | 104.8  | 123.5  | 137.1 |
| PGLYRP2 | 117.1  | 117   | 130.6 | 114.2 | 110.9  | 105.8  | 114.5  | 115.4 |
| PGLYRP3 | 112.9  | 111.2 | 114   | 118.1 | 107.9  | 101.9  | 122.1  | 115.8 |
| PGLYRP4 | 120.1  | 119   | 122.6 | 125.3 | 117.5  | 102.8  | 124.1  | 122.8 |
| PGM1    | 449.4  | 652.4 | 407   | 543.2 | 397.6  | 297.1  | 450.9  | 442.2 |
| PGM2    | 133.7  | 142.9 | 168.3 | 147.5 | 143.3  | 117.1  | 150    | 142.1 |
| PGM2L1  | 278.8  | 249   | 233.8 | 243.5 | 252    | 211.2  | 297.1  | 325.6 |
| PGM3    | 141    | 133.6 | 145.9 | 130.5 | 118.9  | 109.5  | 137.1  | 126.8 |
| PGM5    | 111.4  | 104.7 | 105   | 101.8 | 110.2  | 99     | 115.9  | 116.5 |
| PGM5    | 110.6  | 113.5 | 112.1 | 114.4 | 105.7  | 94.4   | 107.6  | 121.7 |
| PGM5    | 108.9  | 113.3 | 107.7 | 118   | 102.5  | 99.5   | 112    | 105.4 |
| PGM5P2  | 120.6  | 117.1 | 108.5 | 118.5 | 110.8  | 97.5   | 118.9  | 111.7 |
| PGM5P2  | 112.3  | 102.3 | 125.4 | 121.4 | 109.4  | 105.9  | 115.9  | 115.3 |
| PGPEP1  | 115.8  | 110   | 122.8 | 118.8 | 116.4  | 100.8  | 114.2  | 107.8 |
| PGR     | 109    | 117   | 115.2 | 119.7 | 107.5  | 96.1   | 123.3  | 115.6 |
| PGRMC1  | 325.5  | 316.9 | 391.6 | 306.3 | 284.9  | 359.6  | 328.6  | 326.5 |
| PGRMC2  | 878.7  | 965.8 | 892.1 | 895.5 | 833.3  | 750.4  | 1004.8 | 937.8 |
| PGS1    | 354.7  | 345.8 | 332.8 | 339.8 | 249    | 255.6  | 265.5  | 248.8 |
| PH-4    | 132.5  | 136.3 | 137.1 | 123.8 | 119.2  | 118.2  | 135.1  | 121   |
| PH-4    | 140.7  | 156.5 | 154.3 | 161.1 | 141    | 129.8  | 133.3  | 129.8 |
| PH-4    | 213.2  | 210.7 | 274.9 | 194.5 | 176.6  | 181.5  | 185.7  | 179.3 |
| PHACS   | 125    | 132.8 | 139   | 121.5 | 123.8  | 104.5  | 126.8  | 120.8 |
| PHACTR1 | 129.1  | 129.4 | 125.8 | 135.3 | 119.5  | 104.4  | 173    | 166.4 |
| PHACTR2 | 353.6  | 381   | 284.6 | 395.4 | 391    | 193.8  | 294    | 315.4 |
| PHACTR3 | 112.3  | 113.9 | 120.7 | 121.9 | 115    | 101.7  | 115.9  | 116.3 |
| PHACTR3 | 114.8  | 118.6 | 126.7 | 116.6 | 104.9  | 97.6   | 112.7  | 113.3 |
| PHACTR3 | 119.1  | 107.1 | 115   | 112.2 | 102    | 100.2  | 117.2  | 112.4 |
| PHACTR4 | 603    | 780.5 | 607.8 | 721.1 | 673.3  | 445    | 552    | 585.6 |
| PHACTR4 | 126.6  | 125.4 | 122.9 | 129.4 | 110.6  | 102.8  | 123.9  | 127.7 |
| PHACTR4 | 116.3  | 105.7 | 116.2 | 116.8 | 108    | 100.2  | 122.8  | 114.3 |
| PHB     | 337    | 372.2 | 282.2 | 393.1 | 270.3  | 203.6  | 327.4  | 316.7 |
| PHB2    | 196    | 246.3 | 215.8 | 215.7 | 171.3  | 212.2  | 215.2  | 260.3 |
| PHC1    | 190.5  | 155.3 | 168.6 | 147.8 | 146.8  | 124.4  | 155.3  | 155.6 |
| PHC2    | 112.8  | 114.8 | 120.4 | 121   | 112.3  | 96.5   | 125.6  | 119.6 |
| PHC2    | 142.5  | 139.4 | 157.4 | 148.4 | 143.5  | 128.7  | 173    | 165.9 |
| PHC2    | 124.9  | 126.2 | 126.1 | 125.2 | 112.8  | 105.6  | 121.2  | 122.2 |
| PHC3    | 160.3  | 162.1 | 146.6 | 168.8 | 170.5  | 132.3  | 195.3  | 182.6 |
| PHCA    | 178    | 169.9 | 220.3 | 194.5 | 156.1  | 149.4  | 252.3  | 219.2 |
| PHEX    | 106.9  | 113.6 | 120.1 | 118.1 | 106.7  | 109.1  | 123.2  | 108.7 |
| PHF1    | 136.9  | 126.6 | 120   | 125.9 | 130.9  | 122.2  | 144.5  | 132.2 |

|         |        |        |        |        |        |        |        |        |
|---------|--------|--------|--------|--------|--------|--------|--------|--------|
| PHF1    | 222.9  | 223.1  | 167.9  | 220.9  | 164.1  | 167.1  | 258.4  | 209.6  |
| PHF1    | 303.5  | 272.1  | 248.2  | 278    | 213.3  | 300.4  | 328.1  | 294.6  |
| PHF10   | 187.2  | 167.2  | 207    | 194.2  | 181.1  | 199.2  | 206.3  | 213.2  |
| PHF11   | 1154.7 | 1289.3 | 1177.6 | 1211.8 | 1197.2 | 974.9  | 808.4  | 1157.6 |
| PHF11   | 1260.2 | 1505.9 | 1953.9 | 1711   | 1339   | 1170.7 | 1354.6 | 1211.4 |
| PHF11   | 121.7  | 130.2  | 129.3  | 141.4  | 119    | 116.3  | 119.4  | 118.9  |
| PHF12   | 119.5  | 114.7  | 129.3  | 112.5  | 118.8  | 107.9  | 122.6  | 107    |
| PHF12   | 222.4  | 187.1  | 180.6  | 179.3  | 163.9  | 134.4  | 188.7  | 170    |
| PHF12   | 112.8  | 125.2  | 111    | 113.4  | 109.3  | 93.8   | 112.3  | 114.5  |
| PHF13   | 338.6  | 432.8  | 276.1  | 448.5  | 386.1  | 316.5  | 627.3  | 711.9  |
| PHF14   | 121.3  | 123.6  | 128.3  | 121.3  | 115.1  | 100.8  | 117.9  | 129.8  |
| PHF14   | 126.5  | 117.8  | 126.3  | 127.5  | 112.9  | 110.9  | 122.5  | 109.1  |
| PHF14   | 162.9  | 160.5  | 145.9  | 136.3  | 138.2  | 130.9  | 138.5  | 141    |
| PHF15   | 860.3  | 1125.5 | 543.4  | 837.7  | 769.7  | 556.8  | 878.8  | 797    |
| PHF16   | 135.8  | 143.7  | 147.2  | 134.1  | 133    | 147.5  | 167.9  | 157.3  |
| PHF16   | 121.6  | 121.9  | 143.1  | 127    | 107.8  | 108.5  | 133.6  | 118.9  |
| PHF17   | 120.2  | 127    | 130.5  | 124    | 125.1  | 106.4  | 123    | 128.9  |
| PHF17   | 237    | 275.4  | 265    | 246.7  | 208.6  | 222.2  | 210.3  | 213.2  |
| PHF17   | 144.2  | 120.6  | 148    | 137.6  | 122.6  | 125.1  | 138.2  | 140.6  |
| PHF19   | 212.2  | 224.6  | 182.7  | 192.2  | 209.9  | 165    | 196.5  | 195.8  |
| PHF19   | 190.4  | 189.2  | 163.5  | 188.6  | 165    | 129    | 184.5  | 188.7  |
| PHF19   | 167.3  | 165    | 152.4  | 153.1  | 152    | 115.2  | 174.5  | 155.8  |
| PHF2    | 124.7  | 123.4  | 125.3  | 125.9  | 117.2  | 108.4  | 114.1  | 119.1  |
| PHF2    | 258.1  | 308.1  | 290    | 262.7  | 237.4  | 279.5  | 306.6  | 338    |
| PHF20   | 166.2  | 197.5  | 192.7  | 218.8  | 192.1  | 162.4  | 211.2  | 204.3  |
| PHF20L1 | 123    | 122.8  | 130.6  | 154.9  | 141.7  | 118.2  | 134.3  | 129.8  |
| PHF20L1 | 442.7  | 452    | 390.1  | 482.4  | 362.8  | 352.7  | 466.7  | 471.6  |
| PHF20L1 | 127.7  | 119.6  | 127.8  | 129.1  | 111.2  | 108.2  | 126.6  | 111.4  |
| PHF20L1 | 129.3  | 119.7  | 114.9  | 130.2  | 117.4  | 109.2  | 128.6  | 139.1  |
| PHF20L1 | 162.8  | 157.7  | 178.8  | 184.6  | 158.2  | 141.3  | 172.8  | 178.9  |
| PHF21A  | 864.7  | 852.4  | 700.5  | 881.5  | 706.6  | 541.4  | 1004.8 | 1025   |
| PHF21B  | 116.4  | 116.6  | 119.8  | 120.5  | 106.1  | 104.9  | 113.8  | 123.5  |
| PHF22   | 307    | 421.3  | 443.3  | 403.4  | 320.6  | 342.3  | 429.7  | 403    |
| PHF23   | 179.4  | 153    | 134.4  | 164.8  | 178    | 121.5  | 168.5  | 160.7  |
| PHF3    | 156.4  | 149.1  | 130.5  | 146.6  | 145.8  | 124    | 151.4  | 144.6  |
| PHF5A   | 440.5  | 447    | 618.4  | 453.2  | 430.7  | 363.5  | 430.4  | 443.5  |
| PHF6    | 117.5  | 124.7  | 122.4  | 114.6  | 105.5  | 97     | 126.8  | 114.3  |
| PHF6    | 112.2  | 111.2  | 104.7  | 110.9  | 103.5  | 99     | 112.5  | 116.6  |
| PHF7    | 116.8  | 121.8  | 121.6  | 127.4  | 114.3  | 105.3  | 119    | 120.5  |
| PHF7    | 111.9  | 120.3  | 120.6  | 115.3  | 110.1  | 96.1   | 113.7  | 108.2  |
| PHF7    | 115.4  | 115    | 120.8  | 125.6  | 110.7  | 102.1  | 124.5  | 129.7  |
| PHF8    | 110.9  | 108.1  | 120.6  | 123.3  | 108.6  | 106.5  | 119.2  | 115.3  |
| PHGDH   | 225.7  | 315    | 167.3  | 281.7  | 272.8  | 178.2  | 192.9  | 292.3  |
| PHGDHL1 | 251.2  | 279.1  | 285.5  | 292    | 269.8  | 205.3  | 268    | 263.5  |
| PHIP    | 321.8  | 422.1  | 309    | 328.3  | 332.1  | 296.2  | 432.7  | 439.1  |
| PHKA1   | 144.1  | 129.5  | 123.7  | 123.7  | 127.8  | 103.1  | 122.2  | 121.9  |
| PHKA2   | 339.7  | 331.3  | 319.2  | 376.6  | 315.6  | 239.4  | 412.1  | 425.7  |
| PHKB    | 166.6  | 150.7  | 196.5  | 177.4  | 145.9  | 166.6  | 159.3  | 169.1  |
| PHKB    | 122.3  | 123.3  | 154.3  | 148.6  | 120.2  | 123.6  | 131.9  | 129.7  |
| PHKB    | 322.8  | 332.1  | 428.2  | 365.3  | 292.5  | 353.5  | 312    | 312.5  |
| PHKG1   | 133.7  | 128.1  | 140.6  | 133.2  | 124.7  | 98.3   | 126.3  | 126.8  |

|          |       |       |       |       |       |       |       |       |
|----------|-------|-------|-------|-------|-------|-------|-------|-------|
| PHKG2    | 139.5 | 148.5 | 161.5 | 163.1 | 131.6 | 122.4 | 154.5 | 150.1 |
| PHLDA1   | 142.5 | 161.9 | 165.1 | 184.6 | 208   | 354.7 | 237.6 | 198.3 |
| PHLDA2   | 117.8 | 122.6 | 129.5 | 125   | 114.4 | 101.3 | 121.6 | 121.4 |
| PHLDA3   | 116.9 | 114.6 | 117.9 | 114.7 | 109.1 | 100.9 | 112.3 | 110.2 |
| PHLDB1   | 127.9 | 135.7 | 132.7 | 132.4 | 119.5 | 104.6 | 130.8 | 126.1 |
| PHLDB2   | 122.8 | 125.5 | 130.2 | 134.4 | 114.7 | 108.7 | 125.4 | 118.5 |
| PHLDB3   | 126.9 | 120.3 | 114.3 | 114.7 | 109.2 | 106.5 | 121.3 | 115.9 |
| PHLPP    | 129.6 | 123.2 | 116.1 | 121.8 | 113.7 | 109.9 | 124.1 | 121.5 |
| PHLPPL   | 151.9 | 150.6 | 150.3 | 145.7 | 155.6 | 135.5 | 206.7 | 209.6 |
| PHOSPHO1 | 109.6 | 114.3 | 113.8 | 121.8 | 105.9 | 93.5  | 117.6 | 118.1 |
| PHOSPHO2 | 104.8 | 112   | 105.6 | 114.9 | 103.9 | 97.3  | 117   | 104.8 |
| PHOX2A   | 115.9 | 114.1 | 119   | 112   | 106.9 | 98.4  | 119.5 | 115.7 |
| PHOX2B   | 114.8 | 111.4 | 118.2 | 122.3 | 112.8 | 93.2  | 108.4 | 111.1 |
| PHPT1    | 219.8 | 220   | 300.1 | 207   | 186   | 190.3 | 227.2 | 184.7 |
| PHTF1    | 148.3 | 121.5 | 166.8 | 152.3 | 161.1 | 160.5 | 177.7 | 230.8 |
| PHTF2    | 114.5 | 114.4 | 121.6 | 132.9 | 114.2 | 107.1 | 126.5 | 122.5 |
| PHYH     | 121.3 | 116.9 | 115   | 118   | 107.3 | 110   | 129   | 121.2 |
| PHYH     | 112.4 | 118.9 | 142.9 | 133.1 | 119.6 | 112.4 | 122.9 | 127.5 |
| PHYH     | 161.1 | 162   | 211.9 | 164.7 | 155   | 167   | 164.7 | 167.2 |
| PHYH2    | 393   | 401.4 | 526.1 | 516.8 | 356   | 474.7 | 549.2 | 680.5 |
| PHYHD1   | 114.1 | 109.6 | 111.6 | 116.9 | 99.5  | 92.7  | 104   | 112   |
| PHYHIP   | 120.1 | 119.4 | 139.9 | 119.5 | 107.8 | 97.1  | 115   | 125.6 |
| PHYHIPL  | 107.2 | 109.8 | 110.7 | 106.4 | 98.5  | 94.4  | 106.7 | 114.4 |
| PI15     | 135   | 133   | 117   | 123.9 | 115.7 | 116.3 | 141.3 | 114.7 |
| PI16     | 118.7 | 145.1 | 130.8 | 126.7 | 116.5 | 108.2 | 113.9 | 119.5 |
| PI3      | 111.4 | 122.6 | 122   | 119.3 | 109.9 | 92.6  | 110   | 114.8 |
| PI4K2B   | 135.3 | 129.2 | 127.7 | 132.5 | 138   | 104   | 124.8 | 128.2 |
| PI4KII   | 167.1 | 181.7 | 161.1 | 228.6 | 153.7 | 144.9 | 259.2 | 176.4 |
| PIAS1    | 404.3 | 295.8 | 370.6 | 329   | 292.5 | 227   | 355.9 | 374.9 |
| PIAS2    | 108.9 | 116.5 | 121.1 | 108.4 | 99.7  | 93.3  | 109.8 | 108.5 |
| PIAS2    | 162.8 | 143.1 | 196.3 | 149.3 | 147.5 | 160.5 | 165.1 | 165.9 |
| PIAS2    | 117.2 | 124.9 | 124.5 | 122   | 118.4 | 111.3 | 126   | 116.1 |
| PIAS3    | 131.9 | 144.5 | 145.2 | 138.5 | 121.1 | 120.2 | 133.6 | 142.8 |
| PIAS4    | 694.4 | 814.6 | 554.4 | 809.3 | 766.9 | 420.6 | 893.4 | 910.8 |
| PIB5PA   | 115.5 | 112.3 | 120.7 | 121.6 | 106   | 100.6 | 123   | 110.8 |
| PIB5PA   | 108.6 | 117.5 | 109.2 | 111.5 | 115   | 99.7  | 116.2 | 112.5 |
| PICALM   | 125.4 | 116.9 | 137.5 | 130.1 | 122.1 | 106.1 | 128.7 | 136.8 |
| PICALM   | 515.1 | 286.9 | 564.2 | 513   | 331   | 493.4 | 513.5 | 531.7 |
| PICK1    | 209.8 | 268.5 | 216.4 | 191.4 | 183.1 | 154.3 | 254.1 | 218.4 |
| PIF1     | 113.5 | 118.8 | 118.5 | 120.8 | 106.1 | 102.2 | 132.9 | 111.9 |
| PIG38    | 113.4 | 122.2 | 123.8 | 124.3 | 112.1 | 115.5 | 126   | 124.8 |
| PIGA     | 366.9 | 328.2 | 402.5 | 392.3 | 346.8 | 293.8 | 369.3 | 423.2 |
| PIGA     | 114.4 | 109.5 | 124.4 | 129.6 | 109.7 | 109.7 | 115   | 106   |
| PIGA     | 122.4 | 120.7 | 144.5 | 131.7 | 118.8 | 113.6 | 127.8 | 115.7 |
| PIGB     | 193.2 | 198   | 247.4 | 205.3 | 194.7 | 187.5 | 184.4 | 186.6 |
| PIGC     | 535.7 | 567.7 | 819.6 | 508.3 | 400.2 | 612.9 | 386.2 | 304.5 |
| PIGC     | 195.9 | 200.6 | 251   | 217   | 183.7 | 186.7 | 155.7 | 144.8 |
| PIGF     | 243.3 | 239.6 | 357.2 | 243.4 | 185.6 | 271   | 215.2 | 164.6 |
| PIGF     | 117.6 | 130.7 | 137.6 | 133.3 | 118.1 | 107   | 124.8 | 124.5 |
| PIGG     | 135.5 | 130.1 | 162.4 | 150.9 | 138.9 | 118.5 | 133.9 | 169.9 |
| PIGH     | 238.6 | 181.4 | 224.6 | 203.3 | 175.4 | 136.3 | 161   | 203.7 |

|         |        |        |        |        |       |       |        |        |
|---------|--------|--------|--------|--------|-------|-------|--------|--------|
| PIGK    | 162.2  | 186.3  | 173    | 176.5  | 144.3 | 149.3 | 151.1  | 148.3  |
| PIGL    | 116    | 117.2  | 125    | 123.6  | 110.8 | 109.1 | 132.1  | 125.5  |
| PIGM    | 144.7  | 143.4  | 148.7  | 186.6  | 151   | 121   | 142.5  | 144.3  |
| PIGN    | 117.7  | 122.1  | 119.4  | 123.4  | 109.4 | 99    | 114.2  | 120.1  |
| PIGN    | 159.5  | 157.3  | 210.5  | 182.1  | 143.6 | 127   | 162.3  | 143.5  |
| PIGN    | 201.5  | 202.7  | 238    | 197.6  | 199.9 | 179.7 | 192.6  | 203    |
| PIGO    | 142.4  | 129.2  | 139.3  | 144.8  | 118.9 | 122.9 | 133.7  | 129.1  |
| PIGO    | 172.6  | 196.8  | 206    | 183    | 166.1 | 174.4 | 181.3  | 158.9  |
| PIGO    | 115.4  | 122.2  | 135.5  | 132.8  | 115.1 | 103.8 | 133.2  | 127.2  |
| PIGQ    | 188.1  | 189.1  | 193.7  | 205    | 157.9 | 158.6 | 153.3  | 184.2  |
| PIGR    | 121    | 119.2  | 111.8  | 121.2  | 107.9 | 99.5  | 119.2  | 113    |
| PIGS    | 205.5  | 221.3  | 243.2  | 204.2  | 182.2 | 210.6 | 210.5  | 194.1  |
| PIGT    | 230.4  | 249.6  | 280.3  | 258.3  | 178.6 | 196.8 | 232.3  | 184    |
| PIGV    | 248.8  | 277.1  | 253.6  | 248.4  | 231.2 | 199.7 | 228.4  | 244.9  |
| PIGW    | 123.5  | 129.7  | 135.8  | 135.2  | 111   | 101.5 | 122.7  | 111.6  |
| PIGX    | 152    | 136.3  | 143.4  | 151.4  | 139.8 | 122.5 | 151.3  | 161.8  |
| PIGY    | 729.9  | 974.2  | 937.9  | 748.1  | 697.8 | 826.9 | 756.1  | 706.4  |
| PIGZ    | 116.4  | 120.6  | 124.1  | 116.9  | 101.7 | 98.5  | 125.3  | 108.9  |
| PIK3AP1 | 192.9  | 145.4  | 185.8  | 172.4  | 124.9 | 149.6 | 207.3  | 147.8  |
| PIK3C2A | 124.5  | 115.7  | 124    | 142.7  | 121.5 | 107.8 | 134.8  | 127.6  |
| PIK3C2B | 135.1  | 131.8  | 121.1  | 141.2  | 135.4 | 120.4 | 137.1  | 125.2  |
| PIK3C2G | 111.5  | 108.9  | 111.9  | 107.7  | 107.8 | 96.5  | 110.6  | 99.8   |
| PIK3C3  | 125.3  | 123.6  | 128.7  | 129.8  | 107.5 | 110.3 | 120.4  | 127.8  |
| PIK3CA  | 145.7  | 148.2  | 140.7  | 159.3  | 155.3 | 125.7 | 179.2  | 147.8  |
| PIK3CB  | 130.3  | 115.7  | 143.3  | 130.5  | 132.9 | 114.8 | 137    | 113.8  |
| PIK3CD  | 476.9  | 597.6  | 467.1  | 570.9  | 531.7 | 379.2 | 543.2  | 541.1  |
| PIK3CG  | 169.4  | 181.2  | 198.3  | 191.1  | 150.4 | 141.4 | 166.7  | 158.8  |
| PIK3R1  | 510.7  | 706.9  | 310.5  | 565.1  | 548.3 | 250.8 | 487.7  | 560.8  |
| PIK3R1  | 112    | 101.3  | 112.3  | 112.2  | 111.1 | 97.4  | 125.9  | 109.7  |
| PIK3R1  | 117.5  | 125.5  | 129.6  | 142.4  | 121.2 | 106.8 | 129.3  | 120.1  |
| PIK3R1  | 112.1  | 107.9  | 120    | 118.5  | 105.8 | 107.4 | 119    | 114.3  |
| PIK3R1  | 157.4  | 135.2  | 137.3  | 149.9  | 147.6 | 114.7 | 149.1  | 143.6  |
| PIK3R2  | 592.8  | 638.3  | 507    | 541    | 424.3 | 345.7 | 328.6  | 277.8  |
| PIK3R3  | 123.8  | 122.9  | 125.6  | 130.4  | 112.9 | 112.9 | 137.2  | 140.1  |
| PIK3R4  | 131.5  | 116.3  | 130.2  | 130.7  | 128.3 | 124.1 | 123.6  | 122.4  |
| PIK3R5  | 143.1  | 130.6  | 159.8  | 143    | 117   | 136.7 | 138.8  | 148.9  |
| PIK4CA  | 1299.8 | 1179.3 | 856.8  | 1414.5 | 840   | 592.8 | 1192.7 | 1524.8 |
| PIK4CB  | 247.6  | 304.6  | 246.9  | 283.8  | 275.2 | 203.1 | 322.4  | 301.3  |
| PILRA   | 417.8  | 226.5  | 626.7  | 469.7  | 190.7 | 580.1 | 472.8  | 223.5  |
| PILRA   | 206.7  | 140    | 288.7  | 206.8  | 131.2 | 236.4 | 205.6  | 151.3  |
| PILRA   | 280.6  | 152    | 354.1  | 284.6  | 141.7 | 342.9 | 273.7  | 147.9  |
| PILRB   | 130.7  | 123.3  | 127.7  | 136.8  | 116.9 | 103.6 | 126.2  | 120    |
| PILRB   | 297.3  | 340.7  | 356    | 327.7  | 275.8 | 223.1 | 309.4  | 333.2  |
| PILRB   | 126.9  | 118.8  | 118.3  | 115.9  | 104.3 | 103   | 124.9  | 120.3  |
| PILRB   | 120    | 118.4  | 119.9  | 143.8  | 110.7 | 93.4  | 114.3  | 121.6  |
| PIM1    | 684    | 745.2  | 624.4  | 655.8  | 552.4 | 584.7 | 650.7  | 562.2  |
| PIM2    | 669.8  | 948.8  | 421.6  | 651.4  | 513.4 | 415.7 | 679    | 492.1  |
| PIM3    | 218.8  | 231.6  | 169.3  | 264.5  | 203.4 | 160.6 | 278.5  | 200.4  |
| PIM3    | 105.5  | 111.7  | 114.6  | 121.1  | 101.6 | 99.7  | 128    | 111.4  |
| PIN1    | 847.2  | 788.2  | 1200.5 | 754.1  | 701.4 | 721.6 | 722.1  | 639.1  |
| PINK1   | 155.8  | 172.2  | 156    | 188.5  | 163.3 | 141.1 | 174.6  | 192.9  |

|         |        |        |        |       |       |       |        |        |
|---------|--------|--------|--------|-------|-------|-------|--------|--------|
| PINX1   | 143    | 139.1  | 139.1  | 140.3 | 125.6 | 110   | 140    | 132.2  |
| PIP     | 121.8  | 100.6  | 113    | 114.5 | 113.6 | 102   | 112.3  | 106    |
| PIP3-E  | 293.5  | 226.2  | 227.2  | 259.5 | 245   | 185.8 | 265.7  | 309    |
| PIP5K1A | 122.3  | 130.8  | 129.8  | 127.6 | 115.7 | 111.6 | 126.6  | 124.1  |
| PIP5K1B | 116.2  | 115.3  | 113.4  | 116.4 | 105.7 | 97.6  | 130.5  | 124.1  |
| PIP5K1C | 327.2  | 289.7  | 274.4  | 318.5 | 223   | 273   | 343.4  | 276.9  |
| PIP5K2A | 153.3  | 188.7  | 168.8  | 166.9 | 167.1 | 143   | 193    | 194.6  |
| PIP5K2B | 135.9  | 161.2  | 132.4  | 143.4 | 128.5 | 107.6 | 128    | 131.8  |
| PIP5K2B | 115.4  | 118.5  | 121.7  | 138.6 | 117.9 | 101.2 | 130.1  | 127.1  |
| PIP5K2C | 130.9  | 131.8  | 134.8  | 141.3 | 137.6 | 131.6 | 128.9  | 137.4  |
| PIP5K3  | 125.3  | 115.8  | 116.5  | 127   | 112.7 | 100.8 | 121.2  | 111.4  |
| PIP5K3  | 111.7  | 111.4  | 106.2  | 108.5 | 110.4 | 99.2  | 111.1  | 109.9  |
| PIP5K3  | 110.4  | 124.7  | 114.7  | 124   | 113.3 | 97.3  | 134.6  | 112.2  |
| PIP5KL1 | 116.4  | 117    | 111.5  | 116.4 | 111.2 | 97.1  | 117.4  | 112.3  |
| PIPOX   | 111.9  | 117.8  | 116    | 108.1 | 104.8 | 100   | 120.7  | 115.3  |
| PIR     | 134.8  | 116.4  | 139.5  | 155.7 | 134.4 | 152.3 | 154    | 136.1  |
| PIR     | 135.3  | 120.9  | 131.2  | 149.3 | 132.5 | 161.6 | 162.7  | 134.2  |
| PISD    | 196.2  | 195.3  | 177.2  | 214.8 | 190   | 178.2 | 211.5  | 187.9  |
| PITPNA  | 134.8  | 151.3  | 130.6  | 150.6 | 123.3 | 120.7 | 156.2  | 154.5  |
| PITPNB  | 232.5  | 269.8  | 206.6  | 260.7 | 207.5 | 190.3 | 262.8  | 309.5  |
| PITPNC1 | 340.7  | 483.7  | 378    | 471.8 | 363   | 401.9 | 373.4  | 425.4  |
| PITPNC1 | 153.9  | 201.4  | 139.5  | 166.1 | 158.2 | 136.8 | 171.5  | 172.6  |
| PITPNM1 | 1135.4 | 1303.5 | 984.6  | 1174  | 661.5 | 889.7 | 1187.9 | 1197.8 |
| PITPNM2 | 151.6  | 141.3  | 188.6  | 168.4 | 132   | 109   | 131.1  | 130.6  |
| PITPNM3 | 111.4  | 108.6  | 119.1  | 112.3 | 112.9 | 101.4 | 115    | 113.2  |
| PITRM1  | 202.6  | 205.7  | 200.7  | 256.9 | 203.3 | 174.8 | 245.6  | 236.3  |
| PITX1   | 108.1  | 105.6  | 112.3  | 120.4 | 107.5 | 97.4  | 108.6  | 110.3  |
| PITX2   | 117.3  | 123.2  | 123.7  | 126.7 | 103.2 | 97.4  | 121.2  | 117.9  |
| PITX2   | 133.7  | 128.4  | 132.3  | 128.2 | 124.1 | 109.7 | 124.6  | 123.9  |
| PITX2   | 113.7  | 116.6  | 118.1  | 112.5 | 104.1 | 103.4 | 115.7  | 120    |
| PITX3   | 110.1  | 109.4  | 113.8  | 107.4 | 107.7 | 95.7  | 121    | 110.4  |
| PIWIL1  | 113    | 111.7  | 105.6  | 119   | 111   | 100.4 | 116.6  | 114.8  |
| PIWIL2  | 116.3  | 115.9  | 131.9  | 119.2 | 104.8 | 99.3  | 132.8  | 121.7  |
| PIWIL2  | 114.3  | 102.9  | 116.5  | 107.2 | 104.1 | 91.7  | 115.1  | 113.2  |
| PIWIL3  | 125.8  | 107.4  | 123    | 117.9 | 104.9 | 102.9 | 119.2  | 118.4  |
| PIWIL4  | 113.3  | 123.9  | 118    | 128.3 | 108.6 | 102.2 | 133.5  | 134.5  |
| PJA1    | 125.5  | 116.7  | 114.9  | 132.1 | 114   | 114.6 | 127.3  | 111.1  |
| PJA1    | 241.4  | 275.6  | 245.6  | 272   | 238.9 | 204.7 | 228.3  | 245.9  |
| PJA1    | 109    | 114.5  | 130.2  | 123.5 | 105.4 | 102.6 | 107.6  | 120.2  |
| PJA2    | 1117.6 | 949.8  | 1163.8 | 990.6 | 715.3 | 971   | 1103.7 | 964    |
| PJCG6   | 113.4  | 125.1  | 112    | 116   | 111.8 | 103.2 | 127    | 114    |
| PKD1    | 174.3  | 185.5  | 162.3  | 217.1 | 175.5 | 174.4 | 253.9  | 209.1  |
| PKD1    | 140.5  | 142.2  | 153.2  | 160.7 | 131.5 | 129.3 | 149.3  | 150.7  |
| PKD1L1  | 116.4  | 130.8  | 119.2  | 131.3 | 110.9 | 108.3 | 127.6  | 123.6  |
| PKD1L2  | 115.5  | 104.7  | 119.2  | 114.3 | 107.6 | 92.8  | 134.5  | 110.1  |
| PKD1L2  | 117    | 124.9  | 116.2  | 122   | 105.1 | 100.1 | 121.7  | 122.8  |
| PKD1L2  | 117.5  | 102.8  | 118.4  | 118.2 | 103   | 97.8  | 110.7  | 125.2  |
| PKD1L2  | 119.5  | 113.4  | 113.1  | 112   | 106.8 | 89.5  | 127.5  | 109.4  |
| PKD1L3  | 124.3  | 113.1  | 127.6  | 130.5 | 112.4 | 101.2 | 114.5  | 123.7  |
| PKD2    | 155.3  | 160    | 172.7  | 138.5 | 144.3 | 137.3 | 164.6  | 152.5  |
| PKD2L1  | 115.4  | 114.7  | 118.3  | 107.7 | 111.9 | 105   | 120.6  | 111.4  |



|          |       |        |        |        |       |       |        |        |
|----------|-------|--------|--------|--------|-------|-------|--------|--------|
| PKD2L2   | 112.8 | 109.4  | 108.7  | 117.6  | 109.4 | 94.6  | 113.3  | 109.3  |
| PKDREJ   | 116.2 | 114    | 112.6  | 112    | 106.6 | 104.3 | 116.3  | 119.3  |
| PKHD1    | 116.7 | 113.1  | 116.7  | 129.2  | 107.2 | 100   | 120.8  | 115.2  |
| PKHD1    | 124.7 | 114.1  | 121.5  | 118.8  | 102.4 | 103.2 | 120.2  | 116.4  |
| PKHD1    | 127.2 | 121.1  | 142.2  | 124.5  | 118.6 | 119   | 124.7  | 131.5  |
| PKHD1L1  | 116.3 | 128.2  | 123.9  | 125.8  | 115.9 | 107   | 115.4  | 117.8  |
| PKIA     | 378.5 | 402.2  | 487    | 342.4  | 395.8 | 308.6 | 343.2  | 316.8  |
| PKIA     | 118.9 | 120.1  | 113.7  | 119.4  | 105.5 | 104.5 | 128.1  | 122.1  |
| PKIA     | 166.2 | 166.1  | 189.6  | 163.4  | 168.3 | 105.6 | 126    | 141.5  |
| PKIB     | 117.4 | 125.2  | 115.8  | 118.1  | 105.5 | 98.7  | 109.7  | 114.7  |
| PKIB     | 120.1 | 121.4  | 142.9  | 123.4  | 109.3 | 117   | 119.3  | 116.9  |
| PKIG     | 106.1 | 126.8  | 122.5  | 128.9  | 108.4 | 110.2 | 108.2  | 129    |
| PKIG     | 132.5 | 119.6  | 125.1  | 134.2  | 122.4 | 113   | 122.7  | 126.8  |
| PKIG     | 115.2 | 113.7  | 132.8  | 115    | 117.3 | 110.7 | 125.7  | 128.5  |
| PKLR     | 122.1 | 120    | 118    | 119.5  | 104   | 101.7 | 123    | 116.2  |
| PKLR     | 105.9 | 119.8  | 121.3  | 120.4  | 110.2 | 96.1  | 114.1  | 116.9  |
| PKLR     | 116.9 | 117    | 121.8  | 119.8  | 115.2 | 105.9 | 120    | 107.9  |
| PKLR     | 121.8 | 118.7  | 118.4  | 117.8  | 108.2 | 93.2  | 127.4  | 116.4  |
| PKM2     | 1117  | 1179.2 | 935.5  | 1357.8 | 523.7 | 804.5 | 1379.1 | 1018.6 |
| PKM2     | 207.9 | 209    | 168.6  | 223.3  | 151.1 | 169.1 | 260.2  | 193.1  |
| PKM2     | 201.5 | 154.1  | 139.9  | 187.1  | 141.6 | 154.5 | 207.1  | 166.1  |
| PKMYT1   | 115.8 | 117.9  | 117.7  | 109.9  | 119.2 | 101.9 | 118    | 112.2  |
| PKN1     | 106.7 | 111.6  | 124.8  | 114.1  | 106.9 | 105.3 | 113.5  | 111.7  |
| PKN1     | 131.6 | 131.9  | 123    | 139.8  | 113.9 | 106.6 | 128.8  | 138.2  |
| PKN1     | 155.9 | 148.6  | 137.7  | 152.4  | 119.9 | 118.8 | 166.6  | 144.9  |
| PKN1     | 134.2 | 121.6  | 140.4  | 138.5  | 134.9 | 122.5 | 134.1  | 120    |
| PKN2     | 133.7 | 128.6  | 118    | 142.1  | 127.6 | 106.5 | 129.8  | 125    |
| PKN3     | 119.5 | 120.8  | 122.7  | 117    | 121.8 | 95.9  | 113.2  | 133.8  |
| PKNOX1   | 167.2 | 164.3  | 160.8  | 156.1  | 139.2 | 126.2 | 169.6  | 207.4  |
| PKNOX1   | 131.6 | 123.7  | 131.2  | 131.9  | 113.9 | 104.3 | 131.7  | 121    |
| PKNOX2   | 118.8 | 109    | 117.5  | 115.2  | 103.2 | 97.4  | 113.9  | 110.6  |
| PKP1     | 121   | 109.5  | 112.9  | 127.6  | 103.8 | 103.3 | 120.8  | 118.2  |
| PKP1     | 116.4 | 109.8  | 123.1  | 126.2  | 108.6 | 101.7 | 121.1  | 110    |
| PKP2     | 113.2 | 111.7  | 119.3  | 115.6  | 117.1 | 94.9  | 112.1  | 115.4  |
| PKP3     | 124.3 | 127.4  | 129.5  | 123.4  | 103   | 100.7 | 112.8  | 111.8  |
| PKP4     | 115.6 | 110.3  | 129.5  | 122.5  | 110.9 | 98.1  | 120.5  | 109.9  |
| PKP4     | 164.3 | 161.5  | 202.8  | 176    | 165.1 | 200   | 190.7  | 185.6  |
| PLA1A    | 115.9 | 119.8  | 119.4  | 111.5  | 107.7 | 100.6 | 117.7  | 114.2  |
| PLA2G10  | 114.3 | 123.4  | 123    | 115    | 112.7 | 103.8 | 116.1  | 119.3  |
| PLA2G12A | 121   | 112.2  | 119.7  | 122.3  | 113   | 102.2 | 118    | 113.4  |
| PLA2G12B | 116.8 | 122.8  | 121.2  | 120.1  | 107   | 107.6 | 120.8  | 115    |
| PLA2G1B  | 112.9 | 113.6  | 117    | 118.1  | 101.3 | 100.8 | 116.4  | 117.4  |
| PLA2G2A  | 110.1 | 123.3  | 112.9  | 121.7  | 105.6 | 102.5 | 124.5  | 116.3  |
| PLA2G2D  | 201.9 | 158.7  | 222.6  | 188.5  | 218   | 134.8 | 224.6  | 190.3  |
| PLA2G2E  | 112.4 | 110.1  | 124.5  | 122.9  | 108.2 | 97.1  | 120.1  | 120.2  |
| PLA2G2F  | 108.2 | 121.1  | 114.1  | 114.3  | 109.7 | 99.3  | 114.1  | 121.1  |
| PLA2G3   | 114.3 | 111.5  | 125.7  | 122.1  | 109.8 | 105.3 | 119.3  | 113.3  |
| PLA2G4A  | 112.9 | 113    | 132    | 123.2  | 107.3 | 138   | 120.9  | 113.7  |
| PLA2G4B  | 954.3 | 870.1  | 1033.3 | 866.9  | 589   | 682.8 | 695.5  | 530.8  |
| PLA2G4C  | 151.9 | 151.3  | 139.1  | 149.9  | 133.3 | 126.2 | 145.7  | 172.3  |
| PLA2G4D  | 109.3 | 116.6  | 129.8  | 116.7  | 117.6 | 101.3 | 113.7  | 116.3  |

|         |        |        |        |        |       |        |       |       |
|---------|--------|--------|--------|--------|-------|--------|-------|-------|
| PLA2G4E | 112.8  | 118    | 118.6  | 110.7  | 112.3 | 96.1   | 115.3 | 120.5 |
| PLA2G4F | 112.8  | 104.8  | 113.5  | 108.9  | 103.6 | 95.4   | 119.1 | 117.1 |
| PLA2G5  | 106.6  | 114.9  | 113.6  | 120.9  | 102   | 99.2   | 109.5 | 108.5 |
| PLA2G6  | 133.7  | 130.5  | 134.1  | 151.3  | 127   | 121.4  | 131.9 | 134.4 |
| PLA2G6  | 114.5  | 112.4  | 120.1  | 112.4  | 104.8 | 104    | 119   | 114.7 |
| PLA2G7  | 1407.2 | 612.6  | 1342.7 | 2255.2 | 788.2 | 2784.9 | 1670  | 529.6 |
| PLA2R1  | 114.3  | 120.4  | 115.1  | 124.9  | 110.8 | 95.3   | 125   | 120.4 |
| PLA2R1  | 113.6  | 106.2  | 120    | 114.7  | 108.8 | 93.9   | 111.9 | 107.6 |
| PLAA    | 131.2  | 134    | 136.5  | 126    | 118.8 | 106.4  | 117.3 | 123.4 |
| PLAA    | 121.1  | 115.5  | 111    | 115.7  | 119.3 | 101.3  | 119.6 | 118   |
| PLAA    | 126.7  | 132.4  | 131.1  | 138.3  | 125.1 | 115.4  | 140.6 | 135.5 |
| PLAC1   | 114.2  | 113    | 108.1  | 117.6  | 104.8 | 97.5   | 113   | 120.4 |
| PLAC2   | 130.2  | 120.3  | 129.4  | 133.6  | 109.9 | 115.4  | 132.5 | 133.8 |
| PLAC4   | 118.9  | 117.2  | 122.7  | 126.1  | 117   | 91.7   | 116   | 115.6 |
| PLAC8   | 924.4  | 711.6  | 711.8  | 820.8  | 720.5 | 706.8  | 915.1 | 814.7 |
| PLAC8L1 | 134.2  | 128    | 115.8  | 144.9  | 124.8 | 101.9  | 155.8 | 139.9 |
| PLAC9   | 113    | 115.9  | 117.1  | 118.1  | 106.3 | 95.8   | 119.5 | 116.9 |
| PLAG1   | 118.7  | 119.4  | 130.4  | 117.7  | 111.3 | 100.5  | 128.1 | 118.7 |
| PLAG1   | 148.9  | 160    | 148.3  | 154.7  | 138.5 | 131.1  | 140.8 | 142.8 |
| PLAGL1  | 135    | 134    | 131.7  | 140.6  | 115.2 | 105.4  | 133.3 | 129.6 |
| PLAGL1  | 123.5  | 109.5  | 118.4  | 117.8  | 103.6 | 102.4  | 124.2 | 127.2 |
| PLAGL2  | 261.1  | 248.1  | 174.5  | 264.3  | 210.7 | 188.1  | 328.3 | 379.5 |
| PLAT    | 112.4  | 104.7  | 106.7  | 119.3  | 107.4 | 98.8   | 115.3 | 109.2 |
| PLAU    | 130.4  | 120.9  | 172.7  | 126.6  | 107.7 | 109.3  | 116.2 | 116.2 |
| PLAUR   | 154.2  | 134.8  | 146.9  | 181    | 155.7 | 159.5  | 236.2 | 143   |
| PLAUR   | 148    | 141.2  | 164.7  | 208.9  | 147   | 177.2  | 249.1 | 160.2 |
| PLAUR   | 226.9  | 193.6  | 261.7  | 436.1  | 338   | 430.8  | 613.1 | 318.6 |
| PLB1    | 116.4  | 119.1  | 122.9  | 117.8  | 110   | 100.7  | 111.7 | 121.1 |
| PLCB1   | 142.3  | 143.7  | 138.1  | 161.2  | 123.3 | 142.7  | 155.9 | 133.2 |
| PLCB1   | 111.7  | 108.7  | 125.1  | 115.6  | 108.2 | 102.5  | 116.2 | 110.4 |
| PLCB2   | 276.8  | 254.6  | 284    | 222.1  | 200.1 | 237.2  | 187.6 | 171.6 |
| PLCB3   | 124.3  | 122.2  | 119.8  | 121.7  | 118.3 | 100.1  | 127.2 | 114.6 |
| PLCB4   | 127.7  | 122.2  | 130.9  | 130.3  | 117.7 | 93.6   | 131   | 126.9 |
| PLCB4   | 123.2  | 116.2  | 124.6  | 118.1  | 108.3 | 100.1  | 120.1 | 114.1 |
| PLCD1   | 169.5  | 198.2  | 147.9  | 161.5  | 159.8 | 147.5  | 153.6 | 146.8 |
| PLCD3   | 120.2  | 108.9  | 116.7  | 131.2  | 113.9 | 112.1  | 120.6 | 113.9 |
| PLCD4   | 111.7  | 114.8  | 110.3  | 109.5  | 119.1 | 97.2   | 117.9 | 116.9 |
| PLCE1   | 120.5  | 118.7  | 123.8  | 133.7  | 102.9 | 105.6  | 118.4 | 119.8 |
| PLCG1   | 169.9  | 175.6  | 153.9  | 173.6  | 181.5 | 138.4  | 144.6 | 148.4 |
| PLCG1   | 274.7  | 254    | 227.2  | 259.8  | 239.6 | 214.2  | 212.5 | 213.2 |
| PLCG2   | 643.6  | 475    | 608    | 771.8  | 329.6 | 524.3  | 495.2 | 319.8 |
| PLCH1   | 121.7  | 106.3  | 123.4  | 116.3  | 104.7 | 100.1  | 116.8 | 105.6 |
| PLCH2   | 259.8  | 181.4  | 330.4  | 225.9  | 152.4 | 189.7  | 174.4 | 162   |
| PLCL1   | 132    | 129.8  | 132.1  | 127.7  | 127.8 | 112.5  | 132.1 | 147   |
| PLCL2   | 789    | 1073.5 | 586.6  | 874.5  | 765.5 | 475.9  | 798.7 | 575.6 |
| PLCXD1  | 213.3  | 188    | 268.5  | 223.9  | 172.9 | 157.3  | 229.1 | 243.7 |
| PLCXD2  | 109    | 115.7  | 121.2  | 120.7  | 111.2 | 96.9   | 114.5 | 119.7 |
| PLCXD3  | 104.9  | 117.1  | 113.3  | 114.8  | 113.6 | 98     | 115.7 | 107.2 |
| PLCZ1   | 109.5  | 114.7  | 116    | 114.2  | 105.6 | 100.9  | 126.1 | 113.8 |
| PLD1    | 119.4  | 124.1  | 130.6  | 136.3  | 121.7 | 108.2  | 117.4 | 129.1 |
| PLD2    | 133.9  | 123.2  | 141.1  | 141.9  | 109.3 | 119.9  | 143.6 | 128.9 |

|         |        |        |       |        |       |       |        |        |
|---------|--------|--------|-------|--------|-------|-------|--------|--------|
| PLD3    | 121.3  | 120.2  | 127.3 | 124.2  | 107   | 107.9 | 125.6  | 120    |
| PLD3    | 1416.6 | 898.4  | 992   | 1289.2 | 641.1 | 641.6 | 920.8  | 529.8  |
| PLD3    | 117.6  | 124    | 117.2 | 122.2  | 104.6 | 100.5 | 125.9  | 105.7  |
| PLD4    | 121.2  | 123.4  | 118.8 | 131.7  | 115.9 | 99.6  | 135.2  | 131.1  |
| PLD5    | 107.3  | 112.7  | 116.7 | 120    | 105.9 | 100.5 | 110.4  | 114.2  |
| PLDN    | 617.4  | 653.3  | 686.7 | 590.1  | 512.9 | 593.1 | 728.9  | 687.8  |
| PLEC1   | 191    | 165.7  | 239.1 | 200.7  | 145.9 | 203   | 164.1  | 145.7  |
| PLEC1   | 111.4  | 121    | 121.2 | 124.1  | 113.7 | 99.7  | 119.7  | 109.6  |
| PLEC1   | 124.7  | 113.5  | 108.1 | 126.5  | 102.5 | 95.9  | 121    | 111.7  |
| PLEC1   | 117.7  | 116.7  | 121.6 | 121.7  | 112.9 | 102   | 122.5  | 120.1  |
| PLEC1   | 115.5  | 113.1  | 113.2 | 119    | 107   | 95.5  | 121.9  | 113    |
| PLEC1   | 110.2  | 124    | 117.1 | 115.8  | 107.2 | 94.9  | 121.5  | 125    |
| PLEC1   | 121.6  | 113.1  | 115.1 | 130    | 117.8 | 102.2 | 110.2  | 112.7  |
| PLEC1   | 110.8  | 116.5  | 125.5 | 130.1  | 119.5 | 91.1  | 113.5  | 114.2  |
| PLEK    | 822.3  | 513.6  | 665.7 | 859.9  | 568   | 492.2 | 1084.5 | 885.2  |
| PLEK2   | 124.6  | 128.5  | 132   | 127.2  | 115.1 | 120.1 | 123.7  | 124    |
| PLEKHA1 | 825.4  | 718.4  | 762.8 | 1032.1 | 968.5 | 434.4 | 1171.8 | 1005.7 |
| PLEKHA1 | 738.8  | 1004.8 | 577.9 | 756.9  | 692.8 | 542.5 | 855.7  | 757.6  |
| PLEKHA3 | 165.2  | 154.2  | 164.5 | 169.9  | 155.7 | 131   | 183.8  | 169.2  |
| PLEKHA4 | 130.3  | 122.4  | 122   | 115.9  | 109.1 | 95.9  | 117.9  | 134.1  |
| PLEKHA5 | 133.5  | 132.9  | 116.4 | 129.3  | 113.9 | 108.2 | 131.3  | 122.2  |
| PLEKHA6 | 112.2  | 115.6  | 124.5 | 120.9  | 110.4 | 95    | 123.4  | 120.1  |
| PLEKHA7 | 114.6  | 123.9  | 124   | 125.6  | 113.3 | 101.3 | 115.8  | 122.6  |
| PLEKHA8 | 120.8  | 109.2  | 117.1 | 132.9  | 107.1 | 107.8 | 113.7  | 122.2  |
| PLEKHA9 | 183    | 208.4  | 188.6 | 192.1  | 138.9 | 145.3 | 167.5  | 158.9  |
| PLEKHB1 | 248.9  | 244.1  | 205.3 | 230.5  | 168.6 | 184.4 | 183.5  | 155.3  |
| PLEKHB2 | 195.8  | 197.2  | 242.1 | 244.3  | 169.1 | 173   | 273    | 282.1  |
| PLEKHB2 | 253.2  | 204.5  | 346.3 | 285.9  | 240.9 | 221.6 | 295.2  | 310.9  |
| PLEKHB2 | 116.1  | 112.6  | 121.2 | 119.2  | 110.9 | 108   | 122.1  | 116.8  |
| PLEKHC1 | 114.8  | 122.5  | 115.8 | 112.2  | 116.6 | 105.1 | 136.1  | 145.2  |
| PLEKHF1 | 768.5  | 882.7  | 711.1 | 953.4  | 642.8 | 602   | 1090.3 | 1176.3 |
| PLEKHF2 | 120    | 133.4  | 135.1 | 120.8  | 126.3 | 123.3 | 141    | 128.4  |
| PLEKHG1 | 125.8  | 116.8  | 120.3 | 124.5  | 111.6 | 110.3 | 129.3  | 120    |
| PLEKHG2 | 119.9  | 134.2  | 124.2 | 130.7  | 113.5 | 99.7  | 118.2  | 114.2  |
| PLEKHG3 | 226.5  | 218.9  | 168.1 | 218.4  | 166.6 | 149.8 | 176.5  | 179.9  |
| PLEKHG4 | 170.6  | 162.5  | 157.4 | 182.9  | 141.3 | 128.3 | 145.5  | 122.6  |
| PLEKHG5 | 116.5  | 120.7  | 112.6 | 116.7  | 105   | 96.2  | 113.2  | 110.9  |
| PLEKHG5 | 123.2  | 111.7  | 122.1 | 125.5  | 110.5 | 117.7 | 126.4  | 126.8  |
| PLEKHG5 | 107.6  | 113.9  | 108.9 | 120.4  | 106.6 | 104.8 | 114.8  | 115.4  |
| PLEKHG5 | 115.1  | 119.1  | 116.8 | 118.2  | 109.9 | 98.2  | 112.9  | 121.4  |
| PLEKHG5 | 122.7  | 119    | 123.3 | 118.1  | 117.3 | 95.8  | 120.7  | 129.7  |
| PLEKHG6 | 122.2  | 115.6  | 112.7 | 112.6  | 110.1 | 105.2 | 113.7  | 110.6  |
| PLEKHH1 | 113.6  | 110.5  | 115.7 | 115.1  | 106.1 | 99.8  | 124.4  | 120.9  |
| PLEKHH2 | 117.5  | 118.6  | 119.4 | 120.8  | 117.6 | 96.9  | 116.7  | 125.4  |
| PLEKHH3 | 119    | 121.1  | 130.8 | 119.3  | 116   | 101.3 | 125.5  | 120.7  |
| PLEKHJ1 | 153.5  | 163.1  | 158.7 | 158.5  | 138.8 | 130.7 | 138.5  | 122.8  |
| PLEKHM1 | 201.9  | 202.9  | 196   | 210.5  | 164.2 | 191.1 | 252.4  | 228.1  |
| PLEKHN1 | 127.6  | 127.8  | 126.7 | 129    | 124.7 | 112.6 | 130.6  | 129.9  |
| PLEKHO1 | 377.7  | 398.4  | 386.9 | 384.7  | 296.6 | 394.9 | 374.2  | 294.4  |
| PLEKHQ1 | 195.7  | 166.6  | 230.7 | 255    | 159.8 | 265.9 | 287.3  | 204.2  |
| PLG     | 118.2  | 117.2  | 113.5 | 119.3  | 109.4 | 101.3 | 116.4  | 112.6  |

|         |       |       |        |        |       |        |        |        |
|---------|-------|-------|--------|--------|-------|--------|--------|--------|
| PLGLB1  | 195.3 | 183.5 | 189.7  | 203.8  | 206.2 | 126.4  | 199.6  | 233.6  |
| PLIN    | 116.7 | 111.8 | 131.2  | 116.6  | 120   | 104.9  | 124    | 115.9  |
| PLK1    | 127.5 | 136   | 138.9  | 146.1  | 121.3 | 117.2  | 143    | 143.2  |
| PLK2    | 124   | 118.4 | 123.5  | 113.9  | 118.1 | 106.4  | 121.3  | 114.8  |
| PLK3    | 126.8 | 141.2 | 153.9  | 159.9  | 139.4 | 125.9  | 136.8  | 140.7  |
| PLK4    | 138.3 | 133.7 | 134.4  | 128.8  | 113.5 | 113.9  | 131.3  | 128.7  |
| PLN     | 117.8 | 122.5 | 130.6  | 118.1  | 115.5 | 103.8  | 129.9  | 120.8  |
| PLOD1   | 241.5 | 174.2 | 382.9  | 296.4  | 139.2 | 188.9  | 256.1  | 157.2  |
| PLOD2   | 115.7 | 120.3 | 115.9  | 117.4  | 121.7 | 97.9   | 108.5  | 108.1  |
| PLOD2   | 110.2 | 117.9 | 114    | 122.2  | 106.5 | 99.1   | 119.7  | 117.8  |
| PLOD2   | 122.4 | 120.3 | 129.9  | 129.6  | 118.6 | 115.5  | 126.4  | 121.6  |
| PLOD3   | 380.1 | 332   | 437.4  | 378.3  | 259.4 | 361.5  | 432.8  | 343.4  |
| PLP1    | 111.7 | 117.2 | 113.9  | 113.2  | 100.6 | 96.9   | 113.6  | 117.7  |
| PLP1    | 112.5 | 107.9 | 115.6  | 113.6  | 111.1 | 99.4   | 117    | 122.8  |
| PLP1    | 121.4 | 124.5 | 120.8  | 130.6  | 119.3 | 103.8  | 122.1  | 127.3  |
| PLP2    | 131.3 | 134.7 | 150.3  | 124.2  | 125.3 | 128.1  | 139.5  | 123.7  |
| PLRG1   | 388.5 | 479.9 | 501.1  | 437.8  | 399.7 | 379.9  | 385.5  | 381.6  |
| PLS1    | 150.1 | 158.5 | 133.5  | 151.9  | 136.5 | 111.3  | 156.3  | 152.1  |
| PLS3    | 116.8 | 109.2 | 110.5  | 114.4  | 109.6 | 102.5  | 113.4  | 102.8  |
| PLSCR1  | 124.6 | 119.2 | 124.1  | 118.9  | 108.8 | 108    | 117.4  | 121.4  |
| PLSCR2  | 117.4 | 117.5 | 115.4  | 124.6  | 106.1 | 103.2  | 115.7  | 118.4  |
| PLSCR3  | 2782  | 3167  | 1910.5 | 2759.1 | 2432  | 1705.1 | 2035.5 | 2007.2 |
| PLSCR4  | 119.2 | 133.7 | 115.6  | 123.4  | 102.9 | 99.9   | 112    | 128.5  |
| PLTP    | 118.4 | 109.6 | 128.2  | 112.9  | 111.4 | 103.2  | 119.2  | 116.3  |
| PLTP    | 115.4 | 117.1 | 119.1  | 125.4  | 124.2 | 103.4  | 124.6  | 115.6  |
| PLUNC   | 109.1 | 115.6 | 106.7  | 114.8  | 105.3 | 97.5   | 113.1  | 108.3  |
| PLVAP   | 110.4 | 109.8 | 126.9  | 112.5  | 107.3 | 101    | 111.9  | 109.1  |
| PLXDC1  | 118.9 | 125.6 | 124.5  | 125.7  | 112.5 | 98.4   | 120.2  | 129.2  |
| PLXDC2  | 169   | 137.7 | 246.7  | 127    | 110.3 | 187.5  | 127.7  | 117.2  |
| PLXNA1  | 140.4 | 142   | 138.2  | 146.1  | 149.3 | 122.2  | 161.1  | 162.9  |
| PLXNA2  | 116.3 | 126.6 | 125.6  | 144.3  | 118.5 | 113.6  | 136.3  | 116.4  |
| PLXNA3  | 164.8 | 150.2 | 139.2  | 148.3  | 143.1 | 117.3  | 164.3  | 139.3  |
| PLXNA4B | 107.6 | 107.8 | 114.1  | 111.3  | 104.9 | 101.3  | 126.4  | 108.6  |
| PLXNB1  | 113.1 | 130   | 117.5  | 132.3  | 110.3 | 96     | 122.3  | 109.1  |
| PLXNB3  | 124.5 | 110.8 | 115.5  | 114.2  | 109.4 | 96.5   | 120.1  | 113.4  |
| PLXNC1  | 125.1 | 127.6 | 143.6  | 131.8  | 120.4 | 101.8  | 115    | 114.1  |
| PLXND1  | 107.5 | 129   | 146.3  | 150.2  | 124.4 | 111.7  | 135.1  | 123.8  |
| PMAIP1  | 158.2 | 150.2 | 136    | 155.7  | 151.4 | 134.5  | 293    | 363.1  |
| PMCH    | 119.6 | 117.7 | 112.5  | 120.1  | 113.5 | 105.4  | 115.7  | 122    |
| PMCHL1  | 112.8 | 123.3 | 133.4  | 126.5  | 112.5 | 111.3  | 125.8  | 126.1  |
| PMFBP1  | 138   | 129.9 | 144.1  | 131.1  | 114.3 | 107.7  | 125    | 112.6  |
| PML     | 120.5 | 122.4 | 128.8  | 124.6  | 113   | 108    | 126.3  | 109.9  |
| PML     | 113.1 | 115   | 115.4  | 119.4  | 102.5 | 98.7   | 126.8  | 110.3  |
| PML     | 127.6 | 121   | 127.9  | 133.8  | 103.5 | 104    | 129.5  | 126    |
| PML     | 129.9 | 122.4 | 123.5  | 118.5  | 111.9 | 102.3  | 122    | 116.3  |
| PML     | 116.6 | 106   | 119.2  | 123.5  | 110.1 | 103.4  | 118.4  | 117.7  |
| PMM1    | 334.3 | 348.8 | 373.8  | 380.2  | 284.8 | 350.8  | 381.8  | 402.7  |
| PMM2    | 159   | 164.5 | 169.9  | 154.5  | 150.4 | 137.2  | 166.1  | 172.3  |
| PMP2    | 117   | 118.7 | 110    | 117.4  | 108.7 | 95     | 117.3  | 118.6  |
| PMP22   | 108.9 | 119.5 | 117.8  | 117.2  | 109.5 | 94     | 116.6  | 114.8  |
| PMP22   | 120.7 | 119.3 | 121.6  | 122.3  | 108.5 | 106.9  | 125.3  | 110.2  |

|          |        |        |        |        |        |        |        |       |
|----------|--------|--------|--------|--------|--------|--------|--------|-------|
| PMP22    | 129.3  | 115.2  | 314.9  | 137.6  | 110.4  | 148.1  | 132.9  | 111.4 |
| PMP22CD  | 112.9  | 116.4  | 123.9  | 149.8  | 102.8  | 103.8  | 117.3  | 118.3 |
| PMPCA    | 339    | 394.3  | 322.4  | 319.8  | 227.4  | 250.9  | 325.8  | 279.8 |
| PMPCB    | 495.7  | 620.1  | 730    | 459    | 367.5  | 554.7  | 383.7  | 531.3 |
| PMS1     | 148.7  | 146.5  | 156    | 143.6  | 138.7  | 110.3  | 135.2  | 136.4 |
| PMS2     | 130.9  | 139.1  | 128.7  | 140.8  | 132.8  | 107.4  | 129    | 129.8 |
| PMS2     | 117.7  | 119.9  | 123.2  | 123.9  | 117.1  | 100.3  | 120.3  | 119.1 |
| PMS2CL   | 121.6  | 124    | 137.7  | 142.2  | 117.7  | 101.8  | 131    | 128   |
| PMS2CL   | 109.8  | 113.3  | 116.7  | 111.4  | 110    | 99.9   | 105.7  | 123.1 |
| PMS2L2   | 117.2  | 115.8  | 119.3  | 117.4  | 110.4  | 100.4  | 123.2  | 120.3 |
| PMS2L3   | 142.1  | 151.5  | 160.5  | 149    | 125.7  | 128.6  | 138.1  | 120.5 |
| PMS2L5   | 147.5  | 124.5  | 152.8  | 132    | 128    | 123    | 144.3  | 148.9 |
| PMVK     | 140    | 160.7  | 174.9  | 167.5  | 150.8  | 127.1  | 156.3  | 156   |
| PNCK     | 117.1  | 124    | 118.3  | 129.8  | 119.4  | 100.4  | 126.3  | 128   |
| PNKD     | 205.9  | 171.1  | 171.5  | 300.1  | 189.1  | 384.8  | 346.1  | 295.2 |
| PNKD     | 142.1  | 125.9  | 140.5  | 135.7  | 118.4  | 110.1  | 133.3  | 133.1 |
| PNKD     | 148.3  | 146.4  | 166    | 148.1  | 137.1  | 114.7  | 120.8  | 131.9 |
| PNKP     | 300.5  | 339.7  | 297.9  | 323.8  | 235.5  | 240.3  | 261.1  | 239.3 |
| PNLDC1   | 121.5  | 101.6  | 110.7  | 115.6  | 112.9  | 101.4  | 120.9  | 124.6 |
| PNLIP    | 117.1  | 124.3  | 119.4  | 119.1  | 109.5  | 97.6   | 124    | 120   |
| PNLIPRP1 | 113    | 115.7  | 113.6  | 121.3  | 105.7  | 99.7   | 112.5  | 111.6 |
| PNLIPRP2 | 107.6  | 105.5  | 109.4  | 111.8  | 108.3  | 91.1   | 106.6  | 111.5 |
| PNLIPRP3 | 103.7  | 109.9  | 111.9  | 107.3  | 98.9   | 95.1   | 113.1  | 112.5 |
| PNMA1    | 151.7  | 193.9  | 178.7  | 172.4  | 157.4  | 142.7  | 170.1  | 153.2 |
| PNMA2    | 125.2  | 119.8  | 124.7  | 128    | 117    | 103.6  | 123.4  | 131   |
| PNMA3    | 195.5  | 215.1  | 182.6  | 190.3  | 178.5  | 127.2  | 150.6  | 146.5 |
| PNMA5    | 106.9  | 118.3  | 114.5  | 114.3  | 113    | 99.5   | 117.4  | 112.5 |
| PNMA6A   | 116.6  | 116.2  | 129.7  | 116.2  | 112.5  | 104.2  | 118.7  | 121.4 |
| PNMT     | 104    | 110.3  | 110.9  | 112.6  | 99.2   | 96.3   | 114    | 113.3 |
| PNN      | 659.8  | 653.5  | 833.4  | 557.1  | 557.6  | 553.3  | 725.6  | 585.7 |
| PNOC     | 116.5  | 113.9  | 113.4  | 114.1  | 108.6  | 106.9  | 115.9  | 113.7 |
| PNPLA1   | 113.5  | 112.8  | 118.9  | 114.1  | 102.4  | 98     | 122.2  | 114.1 |
| PNPLA1   | 110.3  | 120.9  | 120.4  | 125.5  | 115.2  | 104.7  | 127.2  | 106.1 |
| PNPLA2   | 219.6  | 286    | 218.8  | 258    | 167.7  | 193.8  | 278.2  | 289.8 |
| PNPLA4   | 110.1  | 124    | 113.6  | 110    | 112.4  | 103.2  | 115.2  | 109.5 |
| PNPLA5   | 111.1  | 111.9  | 111.7  | 116.3  | 102.7  | 99.7   | 110.5  | 103.4 |
| PNPLA8   | 160.7  | 171.8  | 158.3  | 155.2  | 164.7  | 126.1  | 152.9  | 157.3 |
| PNPO     | 325.9  | 298.9  | 342    | 306.3  | 211.7  | 222.5  | 218.8  | 221.4 |
| PNPT1    | 3843.1 | 4010.9 | 2845.2 | 3966.7 | 3725.7 | 1287.5 | 4623.6 | 4535  |
| PNRC1    | 129.2  | 138.8  | 140.8  | 129.9  | 117.5  | 107.1  | 116.8  | 133.2 |
| PNRC2    | 776.5  | 887.6  | 760.3  | 924.8  | 803.2  | 773.9  | 890.1  | 950.3 |
| PODN     | 119.1  | 126    | 125.6  | 129.8  | 118    | 99.2   | 117.4  | 117.7 |
| PODXL    | 115.7  | 115.5  | 120.8  | 130.3  | 114.8  | 98.3   | 122.9  | 126.7 |
| PODXL    | 116.1  | 108.1  | 108.3  | 123.3  | 103.4  | 101.2  | 118    | 109.9 |
| PODXL    | 125.4  | 118.5  | 122    | 127.9  | 110.9  | 98.8   | 122.2  | 130.9 |
| PODXL2   | 127.3  | 124.6  | 136.1  | 125.9  | 114.3  | 99     | 116.2  | 123.5 |
| POF1B    | 117    | 121    | 123.7  | 134    | 110.7  | 110.6  | 127.7  | 129.2 |
| POFUT1   | 590.7  | 856.3  | 823.9  | 763.2  | 890.4  | 559    | 1024.2 | 885.4 |
| POFUT1   | 119.5  | 112.2  | 110.5  | 114.2  | 119.3  | 96.1   | 110.7  | 117.3 |
| POFUT1   | 119.9  | 111.2  | 116.4  | 113.4  | 108.2  | 94.6   | 113.8  | 110.7 |
| POFUT2   | 246.7  | 254.6  | 273.2  | 250.6  | 197.3  | 228.7  | 289.9  | 265.4 |

|         |        |        |        |        |        |        |        |        |
|---------|--------|--------|--------|--------|--------|--------|--------|--------|
| POFUT2  | 127.5  | 116.7  | 131.8  | 155    | 119.1  | 115.2  | 131.7  | 125.3  |
| POFUT2  | 225.3  | 241.6  | 239.7  | 240.5  | 206.5  | 216.5  | 287.7  | 222    |
| POGK    | 899.4  | 1050.6 | 744.8  | 964.1  | 760.3  | 621    | 1054.4 | 1049.9 |
| POGZ    | 153.3  | 148.5  | 147.4  | 160.4  | 147.1  | 112.4  | 143.2  | 149.1  |
| POGZ    | 129.1  | 122.6  | 135.9  | 133.5  | 119.9  | 107.6  | 134.3  | 128.6  |
| POGZ    | 122.7  | 120.3  | 115.9  | 126.4  | 124.4  | 106    | 114.4  | 117    |
| POL3S   | 153.1  | 148    | 127.9  | 148.4  | 131.6  | 106.2  | 145.1  | 134.7  |
| POLA1   | 114.5  | 127.4  | 123.5  | 124    | 122.2  | 97.1   | 118.6  | 135.9  |
| POLA2   | 193.6  | 202.8  | 207.5  | 207.7  | 164.5  | 157.6  | 165.5  | 150.3  |
| POLB    | 296.1  | 326.4  | 422.6  | 322.8  | 298.8  | 269.6  | 258.3  | 331.3  |
| POLD1   | 170.3  | 177.4  | 158.5  | 163.1  | 138.9  | 132.9  | 177.9  | 148.3  |
| POLD3   | 110.5  | 121.5  | 126.8  | 125.2  | 115    | 104    | 115.5  | 125.4  |
| POLD4   | 149.9  | 172.1  | 144.8  | 145.1  | 122.3  | 129.2  | 134    | 134    |
| POLDIP2 | 156    | 158.8  | 147.5  | 174.2  | 147.4  | 130.9  | 159.4  | 164.6  |
| POLDIP3 | 322.5  | 352.6  | 350.1  | 410.7  | 279.4  | 393.9  | 445.9  | 466.3  |
| POLDIP3 | 119.3  | 127.6  | 122.8  | 131    | 114.5  | 101.7  | 129.7  | 117.4  |
| POLE    | 158.4  | 159.6  | 150.5  | 161    | 145.3  | 137.4  | 195.3  | 200.1  |
| POLE2   | 128.9  | 133.1  | 127.5  | 144.6  | 117.3  | 96.6   | 128.9  | 125    |
| POLE3   | 1328.9 | 1443.4 | 1534.3 | 1610.3 | 1232.5 | 987.3  | 1563.1 | 1512   |
| POLE4   | 1005.1 | 1255.7 | 1058.1 | 1164.5 | 970.9  | 716.4  | 1092.1 | 1106.5 |
| POLG    | 299.2  | 333.3  | 300.5  | 421.8  | 288.7  | 265    | 301.7  | 340.3  |
| POLG2   | 111.1  | 120.8  | 131.5  | 134.9  | 125.1  | 128.8  | 144    | 123.8  |
| POLH    | 130.6  | 124.2  | 118    | 127.4  | 110.7  | 104.2  | 116.7  | 115.8  |
| POLI    | 113.2  | 113.5  | 120.7  | 116.8  | 108.1  | 104.5  | 113    | 113.5  |
| POLK    | 118.8  | 119.3  | 115    | 114.1  | 100.1  | 97.8   | 122.5  | 120.7  |
| POLL    | 127.1  | 127.3  | 138.6  | 128.5  | 115.8  | 118.9  | 131    | 133.2  |
| POLM    | 196.8  | 204.3  | 238.9  | 207.2  | 162.7  | 215.8  | 228.2  | 192.3  |
| POLN    | 119.5  | 121.7  | 123.8  | 132.7  | 117.5  | 99.6   | 130.3  | 130.4  |
| POLQ    | 116.2  | 106.3  | 127.4  | 121.3  | 116.2  | 104.6  | 123.4  | 115.1  |
| POLR1A  | 116.3  | 119.6  | 110.7  | 128.7  | 115.2  | 103.4  | 128    | 124.5  |
| POLR1B  | 125.7  | 126.3  | 117    | 118.4  | 118.2  | 103.6  | 130.3  | 109.8  |
| POLR1C  | 311.5  | 386.3  | 257.3  | 336.3  | 303.9  | 204.6  | 351.1  | 324.3  |
| POLR1C  | 291.1  | 285.9  | 286.2  | 283.9  | 286.8  | 202.2  | 282.8  | 242.1  |
| POLR1D  | 1944.1 | 2337   | 2316.3 | 1867.1 | 1950.4 | 1675.2 | 1945   | 2431.1 |
| POLR1E  | 239.7  | 254.4  | 300.2  | 263.7  | 209    | 212    | 271.6  | 284.2  |
| POLR2A  | 841.9  | 809.3  | 605.9  | 899.3  | 753.2  | 619.9  | 1311.1 | 1468.2 |
| POLR2B  | 277.7  | 284.1  | 292.1  | 277.8  | 273.8  | 298.9  | 344.5  | 244.6  |
| POLR2C  | 142.2  | 150.4  | 159.2  | 159.5  | 136.3  | 143.6  | 168.6  | 144.8  |
| POLR2C  | 587.1  | 568.4  | 549.9  | 641.4  | 430.1  | 421.2  | 691.6  | 672.2  |
| POLR2D  | 206.5  | 207.4  | 178.7  | 205    | 190.3  | 167.9  | 238    | 221    |
| POLR2F  | 680.3  | 812.6  | 748.7  | 775.5  | 545.5  | 611.3  | 541.5  | 515.4  |
| POLR2G  | 503.3  | 600    | 493.9  | 585.7  | 483.1  | 610.1  | 424.1  | 481.8  |
| POLR2H  | 284.3  | 382    | 260.1  | 352.5  | 264.2  | 279    | 310.5  | 263    |
| POLR2I  | 308.6  | 318.1  | 385.1  | 370.5  | 265.2  | 289.8  | 254.6  | 221.8  |
| POLR2J  | 159.4  | 180.4  | 148.9  | 193    | 136    | 143.2  | 168.9  | 153.5  |
| POLR2J2 | 112.8  | 117.4  | 122.8  | 120.7  | 112.2  | 101.2  | 119.4  | 127.8  |
| POLR2J2 | 122.2  | 127.8  | 127.4  | 118.7  | 132.4  | 106.7  | 130.2  | 139.9  |
| POLR2J3 | 277.4  | 214.9  | 287    | 286.6  | 191.2  | 150.4  | 169.4  | 206.7  |
| POLR2K  | 126.5  | 135.9  | 130.6  | 127.2  | 112.8  | 117.7  | 135.5  | 142.3  |
| POLR2L  | 171.5  | 183.7  | 202.6  | 219.6  | 146.4  | 163.7  | 200.2  | 175.1  |
| POLR3A  | 220.6  | 224    | 219.9  | 243.4  | 213.5  | 191    | 246.5  | 235.4  |

|         |       |       |       |       |       |       |       |       |
|---------|-------|-------|-------|-------|-------|-------|-------|-------|
| POLR3B  | 218.6 | 272   | 224.6 | 261.6 | 215.8 | 161.1 | 209.3 | 184.1 |
| POLR3C  | 407.2 | 501.5 | 574.8 | 468   | 329.5 | 395   | 489   | 414.2 |
| POLR3D  | 136.4 | 133.8 | 129.2 | 132   | 119.8 | 110.5 | 127.5 | 125   |
| POLR3F  | 126.3 | 135   | 124.7 | 136.8 | 119.7 | 120.6 | 128.5 | 131   |
| POLR3G  | 117   | 115.8 | 118.3 | 115.2 | 108.5 | 103.3 | 105   | 119.7 |
| POLR3GL | 583.8 | 610.4 | 806   | 737.6 | 580.3 | 687.3 | 526.1 | 546.7 |
| POLR3H  | 288.4 | 352.5 | 283.4 | 318.4 | 258.5 | 202.5 | 319.5 | 313.8 |
| POLR3H  | 120.8 | 111.6 | 123.2 | 124.4 | 106.6 | 96.2  | 123.5 | 120.7 |
| POLR3H  | 107.1 | 114.2 | 104.4 | 108.8 | 101.8 | 99.5  | 132.9 | 112.4 |
| POLR3K  | 212.6 | 273.1 | 247.4 | 237.4 | 209.4 | 200.3 | 220.5 | 202.1 |
| POLRMT  | 364.4 | 364.3 | 309.5 | 325   | 256.8 | 236.3 | 306.1 | 269.4 |
| POLS    | 292.1 | 314   | 273.9 | 342.4 | 317.9 | 249.5 | 338.7 | 337.2 |
| POM121  | 110.6 | 113.7 | 108.8 | 118.6 | 115.4 | 100.9 | 125.9 | 123   |
| POMC    | 140.4 | 138.7 | 142.8 | 144.1 | 120.5 | 115.3 | 137.3 | 127   |
| POMC    | 107.7 | 117.7 | 110.2 | 114.4 | 117.1 | 105.4 | 116.2 | 124.9 |
| POMGNT1 | 184.4 | 194.7 | 212.6 | 213.8 | 163.8 | 142.9 | 185.2 | 186.7 |
| POMP    | 106.9 | 114.2 | 119.4 | 116.1 | 105.4 | 95.7  | 110.7 | 107.9 |
| POMT1   | 126.2 | 126.7 | 132.4 | 126.7 | 118.4 | 106   | 121.2 | 118.9 |
| POMT1   | 226.9 | 205.2 | 198.1 | 197.7 | 151.8 | 150.4 | 175.9 | 172   |
| POMT2   | 162.2 | 145.3 | 146.4 | 173.6 | 123.5 | 122.1 | 163.3 | 158.7 |
| POMZP3  | 123.4 | 129.2 | 120   | 128.3 | 115.7 | 107.1 | 125.3 | 123.9 |
| PON1    | 110.8 | 112   | 112.9 | 122.6 | 108.4 | 90.5  | 116.9 | 114.8 |
| PON2    | 150.9 | 142.8 | 235   | 158.8 | 144.9 | 109.5 | 155.4 | 137.3 |
| PON3    | 102   | 110.9 | 116.2 | 113   | 114.5 | 93.9  | 123.8 | 111.9 |
| POP1    | 138.8 | 134.2 | 142.6 | 143.4 | 125   | 121.4 | 130.9 | 136.6 |
| POP4    | 134.7 | 146.8 | 147.1 | 147.2 | 131.4 | 133.8 | 152.9 | 146.3 |
| POP5    | 213.5 | 219.8 | 221.3 | 222.4 | 188.4 | 142   | 180.6 | 148.7 |
| POP7    | 175.1 | 188.5 | 198.5 | 172.8 | 175.6 | 151.4 | 178.7 | 191.1 |
| POPDC2  | 112.1 | 118.7 | 120.9 | 118.5 | 108.6 | 103.6 | 121.9 | 119   |
| POPDC3  | 112.1 | 119.4 | 126.3 | 130.4 | 113.9 | 101.9 | 122.4 | 108.1 |
| POR     | 173.4 | 196.4 | 150.7 | 189.2 | 148.1 | 195.5 | 255.7 | 186.6 |
| PORCN   | 134.2 | 144.1 | 143.7 | 135.8 | 121.1 | 102.8 | 124.6 | 117.1 |
| PORCN   | 127.9 | 122.7 | 141   | 136.9 | 125.4 | 110   | 137.6 | 134.4 |
| POSTN   | 109.3 | 114.2 | 119.8 | 119.9 | 103.5 | 103.4 | 118.2 | 125.2 |
| POT1    | 116.1 | 119.1 | 122.8 | 130.1 | 106.5 | 101.5 | 109.2 | 125.6 |
| POT1    | 126   | 137.1 | 140.2 | 140.3 | 120.8 | 117.7 | 126.6 | 148.2 |
| POT1    | 115.7 | 113.7 | 118.8 | 114.5 | 100.6 | 105.8 | 118.2 | 106.2 |
| POTE15  | 120.5 | 121   | 126.1 | 130.9 | 107   | 104.2 | 116.6 | 119.1 |
| POTE2   | 109.9 | 116   | 102.4 | 108.6 | 108.3 | 90.4  | 115.1 | 105.5 |
| POTE8   | 111.9 | 121.1 | 116.7 | 111.7 | 102.3 | 101.2 | 111   | 123.5 |
| POU1F1  | 110.2 | 113.7 | 105.9 | 115.1 | 102   | 103.5 | 110   | 111.9 |
| POU2AF1 | 133.2 | 145.3 | 141.5 | 161.4 | 122.8 | 119.2 | 133.1 | 121.3 |
| POU2F1  | 131.7 | 146.9 | 142.7 | 140.9 | 140.9 | 137.3 | 164.1 | 146.2 |
| POU2F2  | 124.3 | 141.5 | 111.6 | 118.1 | 119.8 | 96.3  | 129.4 | 117.7 |
| POU2F3  | 118.6 | 128   | 129.4 | 124.5 | 108.7 | 100.7 | 127.9 | 127.2 |
| POU3F1  | 109.2 | 116.3 | 117.8 | 120.6 | 105.4 | 96    | 111.9 | 110.4 |
| POU3F2  | 121.4 | 117.2 | 126.9 | 115.6 | 107.5 | 102   | 124.8 | 111.1 |
| POU3F3  | 127.8 | 115.8 | 115.8 | 124.5 | 110.7 | 108.3 | 119.1 | 108.1 |
| POU3F4  | 128.9 | 116.9 | 123.7 | 111.1 | 103.5 | 96.2  | 125.3 | 109.2 |
| POU4F1  | 117.2 | 112.4 | 108.5 | 119.6 | 102.2 | 96.5  | 121.5 | 117.9 |
| POU4F2  | 104.3 | 115.9 | 116.1 | 117.6 | 107.1 | 98.5  | 119.7 | 112.5 |

|           |        |        |        |        |        |        |        |        |
|-----------|--------|--------|--------|--------|--------|--------|--------|--------|
| POU4F3    | 115.7  | 114.4  | 117.4  | 108.9  | 111    | 99.8   | 116.3  | 118    |
| POU5F1    | 102.5  | 116.1  | 106.8  | 118.4  | 105.8  | 93.6   | 115.3  | 114.2  |
| POU5F1P1  | 115    | 125.1  | 125.7  | 113.7  | 111    | 103.1  | 107.3  | 117.2  |
| POU6F1    | 127.3  | 134.3  | 144    | 134.3  | 120.8  | 109.3  | 118.6  | 123.7  |
| POU6F2    | 112.7  | 111.3  | 111.9  | 109.1  | 104.9  | 94.8   | 107.1  | 108.4  |
| PP2447    | 1502.7 | 2263.7 | 2742.1 | 1841.2 | 1333.3 | 1505.6 | 1084.4 | 982.2  |
| PP8961    | 114.9  | 120.4  | 115.7  | 120.7  | 116.2  | 104.7  | 120.2  | 116.7  |
| PPA1      | 1488.8 | 1458.4 | 1376.8 | 1745.6 | 1197.4 | 1194.1 | 1681.2 | 1580.9 |
| PPA2      | 293.7  | 246.5  | 327.1  | 291.1  | 205.5  | 316.1  | 257.8  | 205.9  |
| PPA2      | 2538.1 | 1916.2 | 1633.3 | 2107.1 | 2040.5 | 1042.3 | 2207.1 | 2198.4 |
| PPA2      | 112.4  | 113.7  | 118.7  | 121.7  | 101.4  | 100    | 124.7  | 117.7  |
| PPAN      | 228.3  | 190.1  | 186.3  | 191.4  | 187.8  | 139.2  | 187.8  | 155.1  |
| PPAN-P2RY | 114.7  | 120.2  | 108.6  | 126.4  | 112.3  | 105.5  | 128    | 116    |
| PPAP2A    | 112.5  | 126.5  | 117    | 120.9  | 114    | 102.5  | 127.2  | 112.9  |
| PPAP2A    | 121.1  | 120.2  | 126    | 141.4  | 121.7  | 104.3  | 131.8  | 124.2  |
| PPAP2A    | 151    | 149.9  | 129.6  | 149.8  | 140.8  | 110.4  | 163.1  | 154.2  |
| PPAP2B    | 129.8  | 125.5  | 136.9  | 113.7  | 120.7  | 99.4   | 113    | 127.4  |
| PPAP2B    | 112.9  | 115.8  | 110.1  | 113.3  | 120.5  | 96.9   | 127.5  | 118.5  |
| PPAP2C    | 131.9  | 113.7  | 125.5  | 132.4  | 120.3  | 106.9  | 134.8  | 125    |
| PPAP2C    | 118.8  | 118.9  | 121.5  | 124    | 110    | 106.5  | 127    | 122    |
| PPAP2C    | 113.2  | 120    | 118.4  | 122    | 111.7  | 97.9   | 124.8  | 130    |
| PPAPDC1A  | 113.1  | 112.6  | 123.5  | 122.8  | 100.8  | 102.8  | 116.7  | 117.7  |
| PPAPDC1B  | 145.7  | 145.2  | 159.8  | 141.1  | 125.5  | 104.2  | 154    | 145.6  |
| PPAPDC2   | 169    | 164.7  | 221.8  | 209.3  | 159.8  | 179.9  | 150.8  | 138.6  |
| PPAPDC3   | 121.2  | 105.9  | 123.4  | 113.2  | 110.1  | 94.9   | 115.5  | 111.5  |
| PPARA     | 110.4  | 119.4  | 116.1  | 120.4  | 116.7  | 107    | 121.5  | 121    |
| PPARA     | 120.2  | 119.6  | 115.5  | 119.5  | 112.3  | 94.9   | 120.2  | 121.8  |
| PPARBP    | 184.9  | 187.5  | 159.1  | 194.9  | 143.8  | 137.5  | 182.5  | 174.2  |
| PPARD     | 120.1  | 118.7  | 118.2  | 122.3  | 118.3  | 98     | 125.3  | 116.6  |
| PPARD     | 169.8  | 173.2  | 155.7  | 187.9  | 138.2  | 139.6  | 163.8  | 149.9  |
| PPARG     | 114.3  | 117.3  | 118.2  | 114.4  | 109.5  | 99.9   | 121.9  | 112.8  |
| PPARG     | 117    | 145    | 147.2  | 116.5  | 122.7  | 113.4  | 128.9  | 119.4  |
| PPARG     | 116.5  | 121.3  | 117.8  | 128.9  | 114.2  | 96.2   | 124.4  | 118.2  |
| PPARG     | 122.1  | 118.9  | 121.7  | 131.7  | 113.1  | 97.3   | 119.9  | 131.4  |
| PPARGC1A  | 111.9  | 129.1  | 123.8  | 114    | 120.6  | 98.4   | 122.9  | 111.5  |
| PPARGC1B  | 116.1  | 131.8  | 120    | 122.3  | 124.2  | 96.6   | 121.2  | 117.3  |
| PPAT      | 155    | 158.1  | 147    | 151.7  | 143.2  | 122.8  | 147.7  | 155.9  |
| PPBP      | 126.5  | 116.3  | 140.5  | 118.4  | 108.7  | 114.4  | 123.2  | 113.9  |
| PPCDC     | 117.1  | 120.8  | 121    | 130.6  | 110.6  | 99.6   | 118.5  | 124.1  |
| PPCS      | 334.7  | 398.7  | 571.7  | 378.3  | 300.1  | 468.9  | 255.5  | 221.3  |
| PPCS      | 465    | 542.5  | 763.8  | 477.7  | 444.4  | 465.6  | 400.5  | 327.4  |
| PPEF1     | 112.4  | 121.2  | 127.1  | 128    | 103.7  | 100.8  | 118.8  | 117.6  |
| PPEF1     | 114.4  | 114.3  | 121.6  | 123.8  | 110    | 97.5   | 116.9  | 117.2  |
| PPEF2     | 113.3  | 110.6  | 111.6  | 120.3  | 104.5  | 95.5   | 122.3  | 117    |
| PPFIA1    | 385    | 300.3  | 421.5  | 483.2  | 393    | 373.6  | 594    | 531.8  |
| PPFIA1    | 141.8  | 140.8  | 154.6  | 155.9  | 147.3  | 113.7  | 151.1  | 137.8  |
| PPFIA1    | 153.9  | 154.8  | 180.6  | 165.4  | 144.5  | 146.9  | 154.1  | 168.6  |
| PPFIA2    | 117.6  | 121.5  | 119.5  | 126.1  | 111.5  | 103.5  | 121.7  | 118    |
| PPFIA3    | 109.5  | 115.8  | 112.1  | 116.7  | 111.2  | 93.5   | 112.3  | 104.3  |
| PPFIA4    | 120.8  | 121.4  | 120.1  | 120.5  | 108.5  | 95.1   | 111.9  | 118.7  |
| PPFIBP1   | 111.7  | 112.1  | 113.2  | 117.2  | 106.5  | 98.1   | 115.4  | 108.7  |



|         |        |        |        |        |        |       |        |        |
|---------|--------|--------|--------|--------|--------|-------|--------|--------|
| PPFIBP1 | 117.3  | 113.5  | 113    | 119    | 106.6  | 98.3  | 117.1  | 113.1  |
| PPFIBP1 | 109.1  | 117.7  | 118.6  | 121.1  | 111    | 102.7 | 113.4  | 120.3  |
| PPFIBP2 | 242.3  | 259.5  | 279    | 277.9  | 213.4  | 176.2 | 259.2  | 259.3  |
| PPGB    | 245.7  | 197.3  | 234.6  | 231.5  | 157.4  | 189.6 | 194.2  | 168.1  |
| PPHLN1  | 386.8  | 327.1  | 419.8  | 382.3  | 418.8  | 315   | 336.7  | 308.5  |
| PPHLN1  | 124.4  | 121.9  | 136.4  | 133.9  | 123.8  | 112.6 | 124    | 132.6  |
| PPHLN1  | 139.8  | 127.8  | 135.7  | 139.3  | 123.1  | 107.2 | 134.4  | 136.5  |
| PPHLN1  | 417.6  | 380.7  | 509.1  | 443    | 407.2  | 404.3 | 385.6  | 405    |
| PPIA    | 131.1  | 124.1  | 131.5  | 133.7  | 110    | 115.3 | 131.8  | 136.3  |
| PPIB    | 137.8  | 147    | 139.7  | 131.4  | 115.1  | 118.4 | 137.6  | 135.2  |
| PPIC    | 115.8  | 102.4  | 99.1   | 117    | 107.9  | 105.6 | 109    | 115.5  |
| PPID    | 118.6  | 121.4  | 118.6  | 123.4  | 110.6  | 94.5  | 121.9  | 122    |
| PPIE    | 218.6  | 231.9  | 263    | 220.1  | 205.5  | 222.4 | 185.4  | 193.5  |
| PPIE    | 127.1  | 113.2  | 126.4  | 125.4  | 121.6  | 110.8 | 128.4  | 117.8  |
| PPIF    | 128.8  | 145.3  | 128.4  | 142.2  | 116.8  | 114.4 | 174.6  | 136    |
| PPIG    | 128.3  | 122.1  | 134.2  | 125.8  | 120.8  | 112.9 | 121    | 118.4  |
| PPIH    | 234.6  | 223.3  | 267.7  | 201.8  | 183.6  | 202.6 | 172.4  | 156.9  |
| PPIL1   | 176.2  | 184.7  | 180.7  | 186.8  | 167.8  | 130.9 | 174.6  | 194.5  |
| PPIL2   | 118.4  | 110.3  | 125.7  | 122.8  | 108.6  | 102.6 | 123.5  | 121.9  |
| PPIL2   | 126.1  | 124.2  | 117.3  | 123.6  | 116.1  | 104.7 | 134.1  | 118.8  |
| PPIL2   | 113    | 117.6  | 111    | 122.2  | 111.1  | 94.9  | 125.2  | 107.3  |
| PPIL3   | 124.5  | 151.9  | 144    | 137.9  | 120.4  | 107.9 | 134.7  | 126.5  |
| PPIL3   | 102    | 113.8  | 120.7  | 112.1  | 111.3  | 99.9  | 118.8  | 119.2  |
| PPIL3   | 729.5  | 701.7  | 942.1  | 847.6  | 682.9  | 597   | 543.4  | 551.5  |
| PPIL3   | 130.8  | 132.8  | 154.3  | 136.9  | 127.2  | 103.4 | 118.8  | 127.4  |
| PPIL4   | 117    | 121.4  | 122.5  | 119.1  | 118.6  | 104.4 | 112.5  | 108.5  |
| PPIL5   | 289.3  | 242.8  | 284.6  | 304.1  | 225    | 263.1 | 358    | 291.4  |
| PPIL5   | 109.3  | 112.2  | 109.5  | 111.4  | 115.1  | 97.6  | 111.8  | 110.3  |
| PPIL5   | 113.8  | 117.6  | 115.3  | 116    | 107.3  | 102.1 | 127.5  | 117.4  |
| PPIL6   | 106.2  | 102.1  | 112.6  | 122.8  | 111.5  | 101.1 | 120    | 118.8  |
| PPL     | 110.4  | 113.7  | 117.4  | 120    | 97.6   | 95.7  | 114.5  | 107.9  |
| PPM1A   | 114.2  | 110.4  | 113.4  | 115.6  | 107    | 100.6 | 114.7  | 106.1  |
| PPM1A   | 169.8  | 177.1  | 179.2  | 198.4  | 190.2  | 137.5 | 192.7  | 184.3  |
| PPM1A   | 121.8  | 126.9  | 134    | 127.7  | 122.7  | 108.4 | 123.1  | 119.6  |
| PPM1A   | 125.1  | 127    | 134.5  | 140.5  | 134.2  | 112.3 | 127    | 139.1  |
| PPM1B   | 107.7  | 119.9  | 128.8  | 119.9  | 114.6  | 107.4 | 117.6  | 121.6  |
| PPM1B   | 1121.6 | 980.2  | 970.8  | 1039.9 | 857    | 713.6 | 1173.6 | 1022.8 |
| PPM1B   | 183    | 148.4  | 147.5  | 156.2  | 174.1  | 108.5 | 169.3  | 174.5  |
| PPM1B   | 138.2  | 132.2  | 154.5  | 152.6  | 131.2  | 116.3 | 126.7  | 129.6  |
| PPM1B   | 124.4  | 119.5  | 121.6  | 124.5  | 117.1  | 104.7 | 117.8  | 123.9  |
| PPM1D   | 231    | 265    | 178.3  | 281.5  | 172    | 174.9 | 275.6  | 342.3  |
| PPM1E   | 126.1  | 118.1  | 130.2  | 124    | 116.6  | 94.9  | 123.3  | 120.2  |
| PPM1F   | 512    | 514    | 587.8  | 555.5  | 390.5  | 325.8 | 371.9  | 328.4  |
| PPM1G   | 111.6  | 115.7  | 121.3  | 119.1  | 111    | 101.4 | 117.2  | 110.9  |
| PPM1G   | 1241   | 1416.7 | 1057.3 | 1392.7 | 1138.9 | 754.2 | 1321.5 | 1044.7 |
| PPM1J   | 115.6  | 116.8  | 124.8  | 116.6  | 105.7  | 96.7  | 117.6  | 119.4  |
| PPM1K   | 231.1  | 186.9  | 196    | 198.2  | 198.1  | 131.7 | 202.6  | 201.4  |
| PPM1L   | 116.4  | 114.4  | 122.3  | 116.1  | 113.8  | 99.1  | 122.8  | 120.6  |
| PPM1M   | 945.1  | 1123.8 | 1273.5 | 1033.7 | 596.7  | 816.7 | 616.6  | 505.7  |
| PPM2C   | 152.7  | 144.6  | 149.8  | 141.2  | 131.4  | 139.6 | 168.5  | 145.3  |
| PPME1   | 145.9  | 168.6  | 158.6  | 172.1  | 139.7  | 124.6 | 155.3  | 149.5  |

|          |        |        |        |        |        |        |        |        |
|----------|--------|--------|--------|--------|--------|--------|--------|--------|
| PPOX     | 212.7  | 166.5  | 247.2  | 164.3  | 148.1  | 160.3  | 132.9  | 126.9  |
| PPP1CA   | 219.8  | 240.6  | 226.3  | 257.5  | 187.1  | 202.3  | 221.9  | 208    |
| PPP1CB   | 411.7  | 485.8  | 459.8  | 431.8  | 445.8  | 335.2  | 488.6  | 624.4  |
| PPP1CC   | 1651.5 | 2046.6 | 1556.9 | 1600.9 | 928.6  | 819.2  | 1346.4 | 1638.1 |
| PPP1R10  | 168.7  | 153.1  | 143.8  | 169.6  | 172.8  | 142.6  | 226.4  | 262.1  |
| PPP1R11  | 1241.5 | 1399.8 | 1381.4 | 1329.9 | 1061   | 1323.9 | 1291.3 | 1357.9 |
| PPP1R12A | 216    | 211.5  | 157.2  | 239.6  | 215.6  | 174.8  | 281    | 219.3  |
| PPP1R12B | 135    | 125.4  | 134.7  | 131.7  | 126.4  | 109.4  | 132.3  | 143    |
| PPP1R12C | 170.8  | 161.5  | 155.5  | 148.4  | 130.6  | 118.4  | 139.2  | 144.2  |
| PPP1R13B | 188.8  | 211.4  | 206.5  | 199.4  | 171.3  | 168.8  | 226.6  | 248    |
| PPP1R13L | 139.1  | 120.7  | 125.7  | 135.8  | 110.3  | 108.3  | 119.4  | 116.7  |
| PPP1R14A | 136.7  | 148.5  | 145    | 139.7  | 127.5  | 110.2  | 130.8  | 133.4  |
| PPP1R14B | 451.7  | 597.8  | 992.9  | 445.9  | 445.5  | 843.1  | 391    | 338    |
| PPP1R14C | 112.1  | 119.9  | 121.4  | 115.9  | 112.7  | 105.4  | 117.8  | 118.4  |
| PPP1R14D | 113.6  | 130.3  | 120.1  | 127.6  | 114.6  | 109.7  | 130.5  | 116.6  |
| PPP1R15A | 682.6  | 836.1  | 556.5  | 1246.6 | 1004.2 | 781.1  | 1926.7 | 2536.3 |
| PPP1R15B | 135.7  | 144.1  | 135.9  | 134.4  | 114.5  | 104.1  | 138.8  | 125.8  |
| PPP1R16A | 135.6  | 123.3  | 133.6  | 139.3  | 119.1  | 108.9  | 119.5  | 119    |
| PPP1R16B | 329.9  | 451.5  | 435.6  | 453.1  | 348.1  | 405.7  | 470.2  | 479.6  |
| PPP1R1A  | 120.9  | 109.3  | 118.5  | 115.1  | 103.9  | 101.8  | 121.3  | 114.3  |
| PPP1R1B  | 112.5  | 117.7  | 128.8  | 110.2  | 108.1  | 102.4  | 119.9  | 126.8  |
| PPP1R1B  | 110.4  | 110.2  | 112.8  | 112.1  | 107.4  | 104.2  | 122.4  | 116.2  |
| PPP1R1B  | 122.2  | 124.5  | 132.6  | 138.6  | 117.7  | 116.2  | 131    | 136.6  |
| PPP1R1C  | 113.9  | 115.7  | 114.4  | 118    | 104    | 106    | 113    | 122.3  |
| PPP1R2   | 304.7  | 339.3  | 381.7  | 322.3  | 293    | 378.8  | 484.7  | 620.7  |
| PPP1R2P3 | 102.4  | 112    | 109.6  | 112.3  | 109.4  | 101.2  | 105    | 107.9  |
| PPP1R2P9 | 116    | 113.5  | 114.6  | 114.7  | 106.6  | 100.1  | 123.3  | 112.2  |
| PPP1R3A  | 113.7  | 109    | 122.1  | 119.6  | 115.9  | 106.5  | 120.8  | 114.9  |
| PPP1R3B  | 104.5  | 118.3  | 113.3  | 118.3  | 103.3  | 99.2   | 116.5  | 122.6  |
| PPP1R3C  | 117.3  | 108.4  | 104.4  | 121.3  | 103.7  | 97.2   | 116    | 111.7  |
| PPP1R3D  | 164.3  | 152.3  | 145.2  | 156.5  | 158.7  | 128.2  | 147.2  | 135.9  |
| PPP1R3F  | 236.8  | 252.3  | 181.4  | 246.6  | 201.5  | 146.4  | 272.4  | 291.8  |
| PPP1R7   | 216.5  | 243.2  | 285.1  | 278    | 247.2  | 313.6  | 270    | 226.7  |
| PPP1R8   | 180    | 220.4  | 210.3  | 205.2  | 215.8  | 173.6  | 195.2  | 191.8  |
| PPP1R8   | 124.8  | 154    | 142.2  | 141.1  | 125.3  | 108    | 140.1  | 150.4  |
| PPP1R8   | 107.8  | 116.2  | 119    | 119.4  | 108.8  | 104.8  | 112.1  | 110.7  |
| PPP1R9A  | 117.1  | 121.7  | 110.8  | 116.6  | 106.8  | 105.9  | 111.9  | 109.8  |
| PPP1R9B  | 124.8  | 128    | 125.5  | 121.4  | 100    | 100.3  | 120.5  | 112    |
| PPP2CA   | 584.8  | 648.4  | 648.8  | 756.3  | 528.1  | 560.1  | 821.9  | 957.1  |
| PPP2CB   | 118.6  | 121.7  | 128.4  | 132.8  | 112.3  | 101.6  | 134.9  | 125    |
| PPP2CB   | 149.7  | 170.3  | 160    | 175.4  | 144.6  | 136    | 207    | 208    |
| PPP2R1A  | 432.8  | 508.1  | 558.5  | 641.7  | 466.8  | 511.1  | 853    | 664.6  |
| PPP2R1B  | 116.9  | 118.9  | 119    | 131.8  | 113.5  | 103.6  | 115.2  | 122.6  |
| PPP2R1B  | 116.8  | 115.3  | 125.5  | 119.4  | 115.2  | 99.2   | 120.3  | 126.9  |
| PPP2R1B  | 118    | 131    | 123.2  | 140.3  | 124.4  | 113.6  | 126    | 128.5  |
| PPP2R2A  | 728.1  | 774.9  | 557.1  | 885.5  | 658.2  | 550.9  | 1219.3 | 1332   |
| PPP2R2B  | 205.4  | 209.6  | 188.3  | 172.2  | 148.1  | 138.2  | 197.9  | 196    |
| PPP2R2B  | 111.8  | 118.4  | 124.9  | 135.7  | 115.1  | 106.3  | 124.6  | 115.6  |
| PPP2R2B  | 113.9  | 114.6  | 112    | 111.9  | 114.9  | 96.6   | 116.2  | 112.7  |
| PPP2R2B  | 121.4  | 118.9  | 119.5  | 113.8  | 110.3  | 101.3  | 117.3  | 122.6  |
| PPP2R2B  | 371.3  | 318.6  | 344.8  | 376.3  | 294.5  | 233    | 304.3  | 268    |

|         |        |        |        |        |        |        |        |        |
|---------|--------|--------|--------|--------|--------|--------|--------|--------|
| PPP2R2B | 112    | 106.8  | 118.2  | 115.7  | 105.2  | 97.4   | 120.2  | 121.8  |
| PPP2R2C | 125.4  | 118.6  | 122.6  | 120.9  | 106    | 106.7  | 116.3  | 110.5  |
| PPP2R2C | 119.8  | 127.6  | 121    | 114.7  | 106.5  | 98.3   | 117.9  | 119.2  |
| PPP2R2C | 115.4  | 115.7  | 121.3  | 123.8  | 105.2  | 98.6   | 123    | 120.1  |
| PPP2R2C | 115    | 108.6  | 126.1  | 123.9  | 106.7  | 95.9   | 123.4  | 120.9  |
| PPP2R2D | 125.6  | 127.3  | 151.4  | 146.1  | 134.6  | 123.1  | 152.5  | 134.5  |
| PPP2R2D | 119.2  | 126.9  | 126.5  | 134    | 119.8  | 99.7   | 117.1  | 125.7  |
| PPP2R2D | 311.1  | 397.6  | 318    | 393.9  | 360.3  | 269.5  | 422.6  | 423.6  |
| PPP2R3A | 109.1  | 120.5  | 120    | 126.4  | 111.4  | 104.9  | 121.3  | 120.5  |
| PPP2R3A | 115.1  | 121.3  | 119.7  | 119.4  | 114.1  | 101.7  | 120.3  | 113.9  |
| PPP2R3A | 116.3  | 118.8  | 138.7  | 120    | 110.5  | 116.7  | 126.6  | 125.7  |
| PPP2R3B | 121.7  | 138.7  | 114.7  | 126.3  | 117    | 107.9  | 123.9  | 123.4  |
| PPP2R3B | 139.4  | 137.8  | 131.6  | 132.4  | 126.3  | 110.8  | 140.3  | 128.6  |
| PPP2R3B | 127.4  | 126.1  | 128.9  | 117.3  | 118.8  | 113.6  | 117    | 115.9  |
| PPP2R3C | 433.9  | 493.7  | 495.5  | 431.7  | 413    | 304.4  | 460.6  | 480    |
| PPP2R4  | 108.2  | 122.6  | 120.1  | 116.9  | 107.5  | 95.1   | 127.7  | 118.3  |
| PPP2R4  | 116.6  | 121.5  | 127.4  | 140.9  | 113.2  | 100.2  | 121.3  | 131.7  |
| PPP2R4  | 109.9  | 123.8  | 116.8  | 122.5  | 118.3  | 102.1  | 124.1  | 118.5  |
| PPP2R4  | 240.2  | 299.9  | 383.1  | 360.2  | 245.8  | 280.5  | 276.6  | 286.3  |
| PPP2R5A | 318.2  | 371.4  | 386.4  | 372.1  | 319    | 336    | 386.2  | 409.1  |
| PPP2R5B | 178.1  | 201.1  | 156.2  | 179.6  | 149.7  | 126.2  | 174.5  | 160.7  |
| PPP2R5C | 979.6  | 965.7  | 985.5  | 1105.5 | 1022.3 | 1062.5 | 1120.5 | 1122.8 |
| PPP2R5C | 122.7  | 129    | 127.2  | 133.2  | 122.8  | 116.9  | 133.8  | 139.9  |
| PPP2R5C | 135.1  | 128.8  | 145.2  | 148.2  | 125    | 117.1  | 136.9  | 131    |
| PPP2R5D | 119    | 118.5  | 119.3  | 129.6  | 119.7  | 109.9  | 131.1  | 115.9  |
| PPP2R5D | 127.6  | 150.9  | 139.1  | 138.3  | 117.3  | 122.1  | 145.1  | 148.7  |
| PPP2R5D | 194.4  | 179.4  | 203.5  | 216.4  | 166.3  | 177.8  | 199.1  | 196.7  |
| PPP2R5E | 867.6  | 893.7  | 790.4  | 865.7  | 737.3  | 479.2  | 1037.2 | 1164.5 |
| PPP3CA  | 144.3  | 135.3  | 138    | 134.7  | 120.7  | 126.7  | 122.3  | 135.2  |
| PPP3CB  | 871.2  | 854    | 783.8  | 891.8  | 716.6  | 743.3  | 868.9  | 799.4  |
| PPP3CC  | 297.8  | 344.1  | 254.5  | 327.7  | 349.9  | 214.8  | 302.9  | 316.8  |
| PPP3R1  | 500.5  | 666.4  | 419.9  | 687.2  | 644.3  | 409.3  | 636.8  | 687.3  |
| PPP3R2  | 117.4  | 126.1  | 115.1  | 112    | 116.8  | 90.7   | 125.3  | 109    |
| PPP4R1  | 254.7  | 308    | 216.7  | 241.5  | 201.1  | 244.1  | 293.6  | 370.6  |
| PPP4R1  | 163.9  | 196.9  | 172.8  | 227.4  | 178.6  | 158    | 275.4  | 265.6  |
| PPP4R1L | 119.5  | 116.5  | 122.6  | 123    | 115.5  | 95.6   | 121.7  | 114.7  |
| PPP4R2  | 115.8  | 107.3  | 115.4  | 116.2  | 105.4  | 98.7   | 119.9  | 113.4  |
| PPP5C   | 119.4  | 129.2  | 136.1  | 137.5  | 129.4  | 102.3  | 121.7  | 113.6  |
| PPP6C   | 1051.6 | 969.2  | 957.3  | 1201.9 | 905.6  | 880.2  | 1086.5 | 1244.1 |
| PPRC1   | 337.7  | 361    | 235.5  | 401.2  | 278.7  | 181.4  | 422.8  | 450.8  |
| PPT1    | 1401   | 1159.5 | 1824.9 | 1581   | 963    | 1178.5 | 1366.6 | 748.1  |
| PPT2    | 115.6  | 108.3  | 114.3  | 115    | 116.2  | 99.9   | 116.8  | 111    |
| PPT2    | 138.1  | 129.9  | 117.7  | 139.5  | 114.4  | 102.2  | 122.9  | 123.5  |
| PPWD1   | 293.6  | 319.7  | 383.1  | 372    | 465.3  | 302.2  | 286.9  | 385.2  |
| PPY     | 117.9  | 113.4  | 112.8  | 112.8  | 98.6   | 96     | 114    | 107.8  |
| PPY2    | 109    | 110.6  | 128.8  | 114.2  | 111.6  | 110.3  | 116.2  | 125.5  |
| PPYR1   | 115    | 111.9  | 116.9  | 118.2  | 110.1  | 96.2   | 108.7  | 110.1  |
| PQBP1   | 133.4  | 139    | 141.2  | 138.6  | 113.3  | 114.6  | 119.3  | 147.1  |
| PQBP1   | 339.2  | 284.2  | 330.8  | 345.3  | 288.2  | 217.2  | 327.2  | 280.8  |
| PQBP1   | 137.2  | 143.3  | 128.8  | 137.6  | 116.5  | 104.7  | 131.8  | 122.8  |
| PQLC1   | 732.5  | 776.4  | 918.9  | 939.3  | 562.4  | 733.3  | 888.4  | 803.3  |

|          |        |        |        |        |       |       |       |       |
|----------|--------|--------|--------|--------|-------|-------|-------|-------|
| PQLC2    | 114.2  | 112.7  | 115.6  | 120.4  | 109.8 | 98.9  | 123.4 | 121   |
| PQLC2    | 114.5  | 116.4  | 112    | 112.1  | 104.9 | 97.5  | 113.4 | 117.3 |
| PQLC3    | 455.9  | 381.3  | 915.4  | 481.5  | 342.1 | 521.3 | 334.3 | 294.5 |
| PRAC     | 122.7  | 123.9  | 114.5  | 114.9  | 106.5 | 101.8 | 127.1 | 108.5 |
| PRAF2    | 144.5  | 135    | 132.3  | 129.9  | 118.4 | 104.5 | 125.8 | 127.7 |
| PRAM1    | 125.2  | 134.9  | 167.5  | 120.8  | 113.3 | 105.9 | 118.6 | 116.8 |
| PRAME    | 108.4  | 117.3  | 125.5  | 129.4  | 115.5 | 105.4 | 111.4 | 112.3 |
| PRAME    | 135.3  | 159.5  | 128.5  | 142.5  | 138.3 | 119.1 | 148.5 | 139.2 |
| PRAME    | 119.5  | 118.1  | 120.2  | 117.3  | 108.7 | 103.5 | 117.3 | 126.1 |
| PRAMEF1  | 113.6  | 118.5  | 115.6  | 126.2  | 109.5 | 93.9  | 112.5 | 114.2 |
| PRAMEF10 | 115.5  | 123.7  | 118.7  | 119.8  | 118.8 | 103.7 | 127.9 | 116.1 |
| PRAMEF10 | 101.5  | 108.9  | 109.2  | 106.7  | 100.2 | 96.8  | 109.6 | 102.1 |
| PRAMEF10 | 106.3  | 119.6  | 109.7  | 115.6  | 98    | 96    | 113   | 110.9 |
| PRAMEF16 | 108.5  | 121    | 113.6  | 117.5  | 107.2 | 94.8  | 120.5 | 113   |
| PRAMEF4  | 117    | 112.9  | 122    | 124.8  | 113.2 | 103.8 | 122.5 | 106.8 |
| PRAMEF5  | 142.5  | 160.2  | 142.8  | 146.8  | 146.7 | 126.8 | 148   | 159.8 |
| PRAMEF6  | 116.9  | 109.3  | 112.7  | 107    | 108.2 | 102.5 | 117.2 | 114.8 |
| PRAMEF7  | 115.6  | 108    | 121.1  | 123.1  | 117   | 97.7  | 126.9 | 115.9 |
| PRAMEF8  | 120.7  | 118.6  | 125.3  | 125    | 108.9 | 100.2 | 126.5 | 116.9 |
| PRAMEF9  | 117    | 121.6  | 134.4  | 119.5  | 105.2 | 104.1 | 115.7 | 117.1 |
| PRAP1    | 121.1  | 109.8  | 123.2  | 117.2  | 108.7 | 101.8 | 126.8 | 115.5 |
| PRB1     | 105.8  | 112.7  | 116.6  | 107.9  | 108.1 | 96.9  | 110.8 | 111.5 |
| PRB1     | 118    | 116.9  | 112.2  | 119.7  | 102.3 | 101.4 | 114.5 | 119.2 |
| PRB2     | 116.2  | 120.5  | 119.6  | 119.1  | 102.2 | 95.2  | 113.8 | 115.2 |
| PRB3     | 115.9  | 125.1  | 117.5  | 119    | 108.1 | 97    | 121   | 119   |
| PRB4     | 111.3  | 114.9  | 112.1  | 115.8  | 112.4 | 89.9  | 116.2 | 115.7 |
| PRC1     | 138.7  | 142.8  | 161.9  | 143.4  | 130.9 | 135.9 | 142.8 | 148.5 |
| PRCC     | 134.6  | 136.6  | 124.9  | 139    | 131.1 | 115.5 | 127.3 | 130.1 |
| PRCC     | 178.9  | 182.6  | 187.5  | 187.6  | 159   | 145.8 | 213.5 | 184   |
| PRCP     | 1109.9 | 1200.7 | 1464.2 | 1085.2 | 693.5 | 760.9 | 890   | 684.5 |
| PRCP     | 364.5  | 290    | 415.2  | 271.7  | 212.5 | 199.9 | 326.9 | 258.6 |
| PRDM1    | 118.4  | 134.3  | 116.5  | 128.6  | 117.6 | 103.8 | 123.7 | 125.6 |
| PRDM1    | 141.2  | 134.4  | 128.8  | 130.4  | 120.1 | 112.8 | 131.1 | 107.2 |
| PRDM1    | 119.2  | 122.2  | 124.3  | 127.4  | 110.6 | 96.4  | 121.8 | 113.7 |
| PRDM1    | 675    | 405.3  | 612.4  | 551.9  | 352.4 | 406.9 | 554.8 | 538.5 |
| PRDM10   | 277.6  | 284.5  | 219.1  | 292.3  | 331.7 | 185.4 | 379.4 | 372.5 |
| PRDM11   | 115.7  | 108.7  | 105.9  | 110.4  | 104.1 | 98.3  | 120   | 114.8 |
| PRDM12   | 113.7  | 113.7  | 113.6  | 116.5  | 103.4 | 95.3  | 115.9 | 119.2 |
| PRDM13   | 112.1  | 128.6  | 125.6  | 116.1  | 114.4 | 101   | 119.7 | 123   |
| PRDM14   | 111    | 112.6  | 115.7  | 116.7  | 100.9 | 100.1 | 114.5 | 113.2 |
| PRDM15   | 122.9  | 117.8  | 120.1  | 122.8  | 102   | 102.3 | 120.3 | 115   |
| PRDM16   | 123.2  | 119.7  | 113.5  | 117.9  | 113.3 | 100.9 | 116.2 | 121.2 |
| PRDM16   | 114.9  | 108.7  | 122.2  | 120    | 107.1 | 91.5  | 120.2 | 117.7 |
| PRDM16   | 118.2  | 117.1  | 113.9  | 125    | 108   | 99.3  | 133   | 114.3 |
| PRDM2    | 146    | 152.7  | 138.8  | 142.4  | 125.7 | 116   | 138   | 132.6 |
| PRDM2    | 115.8  | 125.9  | 108.4  | 110.1  | 110.1 | 95.4  | 125.7 | 110.8 |
| PRDM4    | 288.8  | 259.9  | 222.4  | 284.1  | 265.4 | 211.7 | 310.7 | 367.7 |
| PRDM5    | 112.7  | 115    | 121.4  | 124.3  | 105.7 | 101.5 | 120.9 | 120.1 |
| PRDM7    | 112.4  | 132.4  | 108.3  | 114.5  | 108.8 | 99.8  | 118.1 | 125.8 |
| PRDM8    | 263.7  | 287.6  | 234.8  | 256.4  | 222.9 | 185.5 | 208.2 | 256.2 |
| PRDM9    | 123.6  | 120.1  | 120.9  | 123.6  | 114.6 | 110.7 | 122.5 | 120.6 |

|          |        |        |        |        |        |        |        |        |
|----------|--------|--------|--------|--------|--------|--------|--------|--------|
| PRDX1    | 2819.1 | 1914.1 | 2981.6 | 4059.7 | 2420.4 | 3987.7 | 4418.9 | 3773.5 |
| PRDX1    | 1203.5 | 790.4  | 1107.6 | 1340.7 | 835.3  | 1486.9 | 1477.7 | 1742.9 |
| PRDX2    | 112.8  | 109.5  | 114.8  | 113.2  | 105.4  | 98.8   | 116.6  | 110.3  |
| PRDX2    | 293.2  | 303.7  | 229.4  | 271    | 268.4  | 181.3  | 221.4  | 202.7  |
| PRDX3    | 607.6  | 692.6  | 607.2  | 692    | 486.1  | 461.8  | 561.4  | 651.8  |
| PRDX4    | 250.2  | 165.8  | 311.6  | 222.4  | 217.7  | 184.3  | 232    | 223.9  |
| PRDX5    | 580    | 621.6  | 689.7  | 598.5  | 496.3  | 439.1  | 452.2  | 470.2  |
| PRDX5    | 1875.2 | 1752.1 | 2092.7 | 1605.4 | 1277.3 | 1166.6 | 1320.1 | 1299.6 |
| PRDX5    | 1628.4 | 1701   | 1989.6 | 1657.5 | 1492.4 | 1231   | 1332.4 | 1316.1 |
| PRDX6    | 942.8  | 1103.4 | 876.3  | 1118.1 | 888.8  | 793.8  | 1297.7 | 1545.1 |
| PREB     | 239.1  | 214.2  | 209.9  | 208.7  | 162.3  | 184.3  | 242.6  | 209    |
| PRED57   | 107.8  | 112.7  | 113.1  | 118.9  | 94.9   | 105.9  | 118    | 119    |
| PREI3    | 239.2  | 243.7  | 233.6  | 248    | 236.5  | 194.8  | 258.5  | 262.6  |
| PREI3    | 146.2  | 155.6  | 153.5  | 171.4  | 131.5  | 124.2  | 145.4  | 159.5  |
| PREI3    | 114.7  | 116.9  | 124    | 117.3  | 100.4  | 99.6   | 113.9  | 105.7  |
| PRELID1  | 417.7  | 454.8  | 530.2  | 481    | 294.9  | 349.7  | 393.8  | 349.1  |
| PRELID2  | 117.1  | 113    | 119.3  | 114.2  | 117.2  | 94.1   | 113    | 112    |
| PRELP    | 117.8  | 123.5  | 124.6  | 118.8  | 111.3  | 103.1  | 116.7  | 119.8  |
| PREP     | 161.3  | 151.6  | 155    | 162.9  | 137.2  | 164.2  | 142.1  | 143.6  |
| PREPL    | 191.2  | 204.9  | 198.5  | 177.5  | 179.4  | 156.6  | 158.6  | 164.3  |
| PREX1    | 153.1  | 159.5  | 188.1  | 164.9  | 136.3  | 143.3  | 139.9  | 138.6  |
| PRF1     | 816.2  | 815.3  | 445.3  | 769.3  | 472.6  | 404.4  | 1034.6 | 704.6  |
| PRG2     | 114.3  | 109.3  | 117.8  | 117.2  | 112.2  | 89.7   | 126.8  | 110.4  |
| PRG2     | 128.1  | 116.2  | 136.8  | 124.4  | 120.8  | 102.5  | 125.1  | 113.2  |
| PRG3     | 115.7  | 115.1  | 114.8  | 127.5  | 108.9  | 103.5  | 111.6  | 118    |
| PRG-3    | 118    | 124    | 129.2  | 115.3  | 116.1  | 106.1  | 130.8  | 123.6  |
| PRG-3    | 110.6  | 108.4  | 117.8  | 112.6  | 105.7  | 99.2   | 118.1  | 117.5  |
| PRG-3    | 110.9  | 103.5  | 108.6  | 113.1  | 110.9  | 98.7   | 105.4  | 112.8  |
| PRH1     | 110.9  | 106.6  | 125.7  | 122.2  | 108    | 108    | 126    | 120    |
| PRH2     | 117.5  | 113.5  | 110    | 119.3  | 106    | 104.8  | 114.9  | 115.3  |
| PRIC285  | 517.2  | 348.4  | 372.8  | 548.5  | 298.2  | 336    | 343.4  | 274.7  |
| PRICKLE1 | 173.9  | 152.7  | 153.3  | 173.1  | 141.1  | 117    | 171.2  | 133.6  |
| PRICKLE2 | 107.3  | 116.6  | 119.5  | 116.9  | 101    | 106.2  | 114.6  | 113.8  |
| PRIM1    | 241.7  | 269.4  | 220.3  | 254.8  | 205.9  | 182.4  | 241.7  | 210.6  |
| PRIM2A   | 114.3  | 119    | 118.4  | 124.4  | 111.8  | 103.9  | 129.7  | 119.3  |
| PRIMA1   | 112.6  | 114.4  | 116.8  | 111.4  | 109.1  | 96     | 119.2  | 124.7  |
| PRKAA1   | 228.6  | 249.4  | 218    | 244.3  | 215.4  | 162.2  | 227.6  | 253.5  |
| PRKAA1   | 370.7  | 433.9  | 330.1  | 422.1  | 368.3  | 292.8  | 419.4  | 418.8  |
| PRKAA2   | 114.1  | 113.6  | 113.6  | 109.7  | 105.4  | 103.7  | 118.9  | 109.4  |
| PRKAB1   | 168.5  | 192.9  | 181.2  | 169.5  | 159.4  | 144.6  | 173.2  | 167.9  |
| PRKAB2   | 147    | 163.6  | 188.1  | 166.9  | 162.7  | 141    | 136.6  | 148.8  |
| PRKACA   | 126.1  | 118.1  | 131.3  | 129.9  | 121.4  | 101    | 127.2  | 122.3  |
| PRKACA   | 118.7  | 132.1  | 119.4  | 127.9  | 108.9  | 100.8  | 117.8  | 118.3  |
| PRKACB   | 130.6  | 115.4  | 127.4  | 123.3  | 109.4  | 101.7  | 119.3  | 124.6  |
| PRKACB   | 126.3  | 142.2  | 154.6  | 138.2  | 146.8  | 129.8  | 133.7  | 141    |
| PRKACB   | 121.4  | 122.3  | 131.8  | 124.6  | 113.1  | 106.2  | 116    | 119.9  |
| PRKACB   | 115.4  | 121.1  | 125.9  | 118.8  | 101.4  | 100.9  | 127.3  | 119.1  |
| PRKACG   | 118.4  | 122.7  | 130.4  | 127.7  | 107.6  | 99.7   | 115    | 118.6  |
| PRKAG1   | 147.7  | 171.9  | 206    | 174.2  | 148.3  | 157.2  | 174.6  | 155.7  |
| PRKAG1   | 224.6  | 234.6  | 276.4  | 227    | 234.7  | 233.7  | 236.8  | 264.9  |
| PRKAG2   | 302.7  | 317.4  | 279    | 327.6  | 275.4  | 272.1  | 342.2  | 282    |

|         |        |        |        |        |        |        |        |        |
|---------|--------|--------|--------|--------|--------|--------|--------|--------|
| PRKAG2  | 142.6  | 145.5  | 150.9  | 150    | 142.9  | 119.8  | 155.5  | 144.2  |
| PRKAG2  | 118.3  | 110.3  | 117.2  | 122.3  | 103.5  | 101.4  | 122.4  | 118.3  |
| PRKAG3  | 113.3  | 124.9  | 120.4  | 123.8  | 110.6  | 99     | 118.5  | 113.4  |
| PRKAR1A | 112.3  | 112.1  | 118.1  | 117.8  | 98.3   | 98.8   | 113.5  | 113.3  |
| PRKAR1A | 944.5  | 468.8  | 839.1  | 754.4  | 456    | 630.1  | 778.6  | 593.2  |
| PRKAR1B | 134.4  | 129.5  | 123.3  | 140.4  | 136.6  | 112.9  | 126.3  | 120.7  |
| PRKAR2A | 125.5  | 132.5  | 124.1  | 134.3  | 134.8  | 97.9   | 121.6  | 120.4  |
| PRKAR2B | 108.5  | 118.5  | 117.7  | 118.9  | 110.5  | 95.7   | 123.3  | 126.4  |
| PRKCA   | 429.9  | 586.7  | 351.5  | 543.7  | 395.9  | 266.1  | 519.4  | 595.3  |
| PRKCABP | 122    | 147.4  | 131.6  | 144.6  | 113.3  | 99.7   | 117.2  | 139.7  |
| PRKCB1  | 153.4  | 143.1  | 139.9  | 187.7  | 151.6  | 118.1  | 163.3  | 162.9  |
| PRKCB1  | 192.1  | 187.1  | 168.2  | 232.3  | 257.7  | 155.8  | 350.5  | 272    |
| PRKCB1  | 1037.7 | 1114   | 765    | 1857.2 | 1856.3 | 752.3  | 2243.3 | 2200.3 |
| PRKCBP1 | 193.7  | 190.5  | 191.1  | 245.4  | 194.1  | 149.4  | 172.1  | 159.9  |
| PRKCBP1 | 124.1  | 122.9  | 133.6  | 125.5  | 110.4  | 108.5  | 117.9  | 117.4  |
| PRKCD   | 570.3  | 449.1  | 837.8  | 564.2  | 321.3  | 449.3  | 620.3  | 483.7  |
| PRKCD   | 116.7  | 114.8  | 127.2  | 119.8  | 119.3  | 108.9  | 121.8  | 116.8  |
| PRKCDBP | 114    | 129.1  | 134.1  | 131    | 105.6  | 106.3  | 113.8  | 115.8  |
| PRKCE   | 133.6  | 141.3  | 125.7  | 166.1  | 113.1  | 113.3  | 113.3  | 136.3  |
| PRKCG   | 115.1  | 113.4  | 117    | 124.1  | 115.3  | 98.2   | 110    | 118.4  |
| PRKCH   | 1595.3 | 1887   | 1151.4 | 1728.5 | 1597.5 | 1042.1 | 2329.5 | 2452.3 |
| PRKCI   | 145.8  | 146.2  | 148.6  | 147    | 133.2  | 116.1  | 142.3  | 133.2  |
| PRKCQ   | 466.7  | 578    | 416.6  | 518.8  | 511.1  | 367.4  | 498.1  | 417    |
| PRKCSH  | 299.4  | 349.9  | 345.2  | 298.3  | 240.9  | 296.1  | 286.7  | 295.2  |
| PRKCSH  | 121.3  | 131.2  | 134.4  | 125    | 106.6  | 110.6  | 125    | 121.1  |
| PRKCZ   | 122.1  | 126.2  | 129.5  | 122.3  | 119.3  | 102.9  | 121.1  | 127.4  |
| PRKCZ   | 110.2  | 108.8  | 122    | 118.9  | 113.9  | 93.6   | 115.6  | 116.6  |
| PRKCZ   | 171.6  | 187.4  | 152.8  | 188.4  | 181.6  | 138.9  | 196.6  | 195.8  |
| PRKCZ   | 105.4  | 114.7  | 114.3  | 117.1  | 114.5  | 97     | 123.2  | 114.1  |
| PRKD1   | 104.2  | 119.7  | 106.3  | 118.9  | 114.7  | 96.3   | 116.3  | 111    |
| PRKD2   | 171.5  | 163.7  | 139.5  | 147.3  | 143    | 155.2  | 165.5  | 192    |
| PRKD2   | 131.8  | 146.2  | 123.3  | 119.8  | 112.9  | 111.8  | 135    | 131.9  |
| PRKD3   | 120.5  | 127.7  | 137    | 126.3  | 122.7  | 114.5  | 129.4  | 132.6  |
| PRKDC   | 220.4  | 237.1  | 172.5  | 196.5  | 209.3  | 137    | 200.3  | 219    |
| PRKDC   | 129.8  | 131.4  | 117.9  | 127.6  | 114    | 107.5  | 124.2  | 118    |
| PRKDC   | 122.7  | 128.6  | 122.2  | 120.4  | 117.1  | 100.8  | 122.4  | 123.6  |
| PRKG1   | 117.2  | 118.6  | 116    | 113.1  | 104.5  | 97.1   | 118.3  | 110.6  |
| PRKG2   | 109.6  | 120.9  | 111.1  | 116.2  | 101.1  | 95     | 106.1  | 112.6  |
| PRKRIP1 | 251    | 245.5  | 297.8  | 245    | 206.3  | 185.5  | 248.4  | 230.1  |
| PRKRIR  | 1174.2 | 1305.4 | 1268.4 | 1405   | 1035.9 | 1053.3 | 1350.2 | 1138.5 |
| PRKX    | 251.5  | 230.4  | 229.2  | 217.4  | 201.9  | 175.4  | 273.9  | 237.9  |
| PRKY    | 233.8  | 215.4  | 183.4  | 193.7  | 210.5  | 127.6  | 206.1  | 182.7  |
| PRL     | 105    | 124.1  | 111.1  | 117.6  | 106.2  | 94.4   | 128.1  | 115.7  |
| PRLH    | 119.2  | 117.4  | 120.8  | 115.8  | 107.6  | 103.2  | 116.5  | 117.4  |
| PRLHR   | 105.3  | 109.1  | 112.8  | 120.2  | 96.9   | 96.6   | 114.1  | 108.4  |
| PRLR    | 104.8  | 112    | 114.2  | 105.7  | 110.9  | 94     | 114    | 103.4  |
| PRM1    | 115.1  | 111.8  | 120.2  | 113.8  | 102.6  | 96.8   | 126.3  | 113.9  |
| PRM2    | 108.2  | 105.5  | 112.7  | 115.1  | 106    | 88.8   | 119    | 114.1  |
| PRM3    | 107.1  | 122    | 119.9  | 115.1  | 105    | 100.1  | 121    | 107.8  |
| PRM3    | 120    | 111.8  | 128.6  | 131.7  | 113    | 101.5  | 114.7  | 123.3  |
| PRMT1   | 130.9  | 126.2  | 123.5  | 128.4  | 119.3  | 98.6   | 125.7  | 116.7  |

|           |        |        |        |        |        |        |        |        |
|-----------|--------|--------|--------|--------|--------|--------|--------|--------|
| PRMT1     | 411.7  | 424.2  | 329.3  | 390.3  | 349.3  | 240.2  | 323.6  | 280.1  |
| PRMT1     | 896.5  | 934.9  | 784.5  | 897.8  | 681.2  | 611.9  | 803.6  | 729.9  |
| PRMT2     | 330.8  | 524.4  | 529.1  | 394.6  | 426.6  | 376    | 346.3  | 389.3  |
| PRMT2     | 143.1  | 188.7  | 254.4  | 143.3  | 169.7  | 152.3  | 141.1  | 182    |
| PRMT2     | 503.8  | 708.5  | 603.2  | 409.9  | 523.4  | 444.8  | 380.9  | 563.8  |
| PRMT5     | 171    | 176    | 146.9  | 181.9  | 152.3  | 135.1  | 198.6  | 188.4  |
| PRMT5     | 175.8  | 160.9  | 185.7  | 156.8  | 161.4  | 141.7  | 204.2  | 161.8  |
| PRMT6     | 177.2  | 231.8  | 198.8  | 179.6  | 218.3  | 143.2  | 139.9  | 160.5  |
| PRMT7     | 138.2  | 146.3  | 141.7  | 131.7  | 127.2  | 111.5  | 136.1  | 131    |
| PRMT8     | 127.9  | 112.8  | 128.2  | 121.3  | 106.5  | 106.2  | 119.9  | 124.1  |
| PRND      | 110.5  | 110.4  | 129.4  | 111.2  | 107.4  | 93.3   | 119.7  | 117.6  |
| PRNP      | 346.3  | 370.9  | 401.3  | 445.3  | 324    | 360.1  | 462.1  | 595.7  |
| PRNP      | 1659.5 | 1876.1 | 1480.1 | 1949.2 | 1637.3 | 1705.3 | 2625.8 | 2935.1 |
| PRNPIP    | 127.7  | 115    | 123.6  | 121.5  | 107.2  | 115.6  | 118.7  | 118.6  |
| PRNT      | 124.5  | 108.8  | 118.9  | 111.4  | 111.1  | 97.5   | 113.9  | 115.2  |
| PRO0149   | 426.4  | 407.5  | 397.2  | 524.2  | 337.6  | 348.3  | 723.5  | 643    |
| PRO0611   | 106.3  | 119.3  | 122.8  | 113    | 115.1  | 105    | 123.2  | 114.5  |
| PRO0628   | 138.7  | 133    | 143.9  | 173.3  | 136.1  | 103.8  | 185.4  | 187.1  |
| PRO1853   | 200.3  | 139    | 167.8  | 161.6  | 146.4  | 127.9  | 170.6  | 193    |
| PRO1853   | 121.4  | 126.1  | 136.3  | 137.9  | 130.5  | 112.2  | 124.4  | 125.1  |
| PROC      | 116.2  | 114.5  | 147.3  | 113.5  | 110.3  | 110.6  | 110.8  | 117.4  |
| PROCA1    | 115.1  | 121.5  | 107.7  | 121.4  | 111.4  | 106.8  | 113.4  | 118.5  |
| PROCR     | 115.9  | 127.2  | 127    | 126.4  | 112.6  | 108.5  | 118    | 120.7  |
| PRODH     | 108.7  | 111.6  | 115    | 124.6  | 102.4  | 96.1   | 114.8  | 112    |
| PRODH2    | 128.1  | 129.1  | 123    | 131.8  | 109.7  | 110.5  | 116    | 116.3  |
| PROK1     | 128    | 125.4  | 127.5  | 118.3  | 114.1  | 100.7  | 121.5  | 117.3  |
| PROK2     | 197.2  | 142.4  | 212.2  | 223.8  | 151.4  | 184.3  | 248.9  | 168    |
| PROKR1    | 114.9  | 114.4  | 116.3  | 131.8  | 97.5   | 94.4   | 121.3  | 109.3  |
| PROKR2    | 109.7  | 113    | 106.5  | 121.9  | 100.2  | 100.7  | 120.1  | 116.4  |
| PROL1     | 103.4  | 118.8  | 103.7  | 117.1  | 100.5  | 100.2  | 114.6  | 108.9  |
| PROM1     | 113.9  | 108.9  | 124    | 127.6  | 109.9  | 103.1  | 118    | 118.3  |
| PROM2     | 116.5  | 113.7  | 116.7  | 130.6  | 106.9  | 109.6  | 116.1  | 112.1  |
| PROP1     | 119    | 109.4  | 115.3  | 117.5  | 118.2  | 102.5  | 115.1  | 108.5  |
| PROS1     | 112.9  | 114.8  | 107.3  | 120.7  | 108.7  | 100.1  | 124.3  | 110.1  |
| PROSAPIP1 | 141.3  | 143.4  | 161.7  | 147.5  | 139.1  | 138.1  | 151.9  | 147.7  |
| PROSC     | 673    | 682.5  | 818.7  | 734.4  | 669    | 690.6  | 706.2  | 724.4  |
| PROX1     | 109.5  | 120.5  | 113.6  | 116.3  | 106.4  | 105.9  | 120.1  | 121    |
| PROZ      | 111.5  | 112.3  | 112.4  | 113.1  | 100.4  | 93.8   | 116.1  | 107.3  |
| PRP2      | 109.3  | 115.7  | 114.2  | 116.9  | 108.5  | 94.3   | 121.2  | 117.2  |
| PRPF18    | 170.4  | 168.9  | 167.9  | 178.9  | 161.6  | 141.9  | 176.4  | 157.1  |
| PRPF19    | 149.7  | 195.9  | 178.1  | 214.2  | 158    | 123.9  | 186.6  | 170.8  |
| PRPF3     | 387.5  | 314.5  | 360.8  | 391.6  | 302.2  | 314.4  | 388.5  | 299.9  |
| PRPF31    | 331    | 268.6  | 403.9  | 342.9  | 261    | 337.8  | 379.3  | 220.7  |
| PRPF38A   | 190.8  | 206.2  | 208.4  | 209.4  | 201.1  | 168.4  | 224.7  | 212.5  |
| PRPF38A   | 113.8  | 124.4  | 127.3  | 134.1  | 112.3  | 102.1  | 126.6  | 118.7  |
| PRPF38B   | 192.4  | 222.1  | 244.7  | 247.5  | 216.2  | 164.7  | 232    | 226.8  |
| PRPF39    | 127.3  | 130.8  | 117.8  | 127.6  | 112.1  | 107.1  | 120.8  | 120.8  |
| PRPF4     | 364.7  | 441.1  | 406.9  | 399.2  | 459.3  | 400.2  | 491.4  | 479    |
| PRPF40B   | 114.3  | 115.4  | 109.1  | 116.2  | 106.9  | 102    | 115.4  | 108.8  |
| PRPF40B   | 111.4  | 113.9  | 115.6  | 111.9  | 103.4  | 95.9   | 114.5  | 109    |
| PRPF4B    | 136    | 136.7  | 148.5  | 130.3  | 130.6  | 127.3  | 149    | 156.6  |

|         |        |        |        |        |        |        |        |        |
|---------|--------|--------|--------|--------|--------|--------|--------|--------|
| PRPF4B  | 106.4  | 104.9  | 114    | 111.7  | 106.7  | 98.1   | 114.9  | 108.2  |
| PRPF4B  | 338.3  | 300.9  | 313.2  | 375.7  | 330.1  | 239.4  | 290.5  | 272    |
| PRPF8   | 597.9  | 811.3  | 598.1  | 908.4  | 519.9  | 530.4  | 948.2  | 832.3  |
| PRPH    | 114.6  | 118.8  | 122.5  | 122.3  | 115.2  | 114.1  | 129.4  | 112    |
| PRPS1   | 360.5  | 463.5  | 450.3  | 487.4  | 358.2  | 344    | 353.9  | 422.9  |
| PRPS1L1 | 115.2  | 119.6  | 126    | 115    | 103.5  | 97.3   | 119.1  | 113.8  |
| PRPS2   | 177.4  | 167.4  | 170.2  | 161    | 157.7  | 123.9  | 147.9  | 152.3  |
| PRPS2   | 178    | 191.3  | 194.2  | 197.6  | 172.7  | 162.2  | 190    | 184    |
| PRPSAP1 | 751.2  | 636.6  | 536.2  | 645.5  | 611.1  | 431.3  | 603.5  | 464.5  |
| PRPSAP2 | 337.1  | 310.4  | 327    | 341.8  | 279.2  | 241.6  | 358.8  | 329.2  |
| PRR11   | 118.1  | 122.9  | 126.9  | 111.6  | 117    | 99.8   | 128.8  | 124.6  |
| PRR13   | 4530.4 | 4788.9 | 6304.4 | 4747.4 | 4133.8 | 5524.4 | 4773.6 | 4201.3 |
| PRR15   | 134.2  | 122.9  | 127.6  | 133.5  | 119.2  | 114    | 130.8  | 122.3  |
| PRR3    | 131.9  | 125    | 138.6  | 143    | 114.6  | 108.2  | 124.7  | 121.8  |
| PRR3    | 119.2  | 148.2  | 121.3  | 125.7  | 122.5  | 110.7  | 127.3  | 128    |
| PRR4    | 118.3  | 113.8  | 121    | 121.7  | 108    | 103.8  | 117.9  | 117.2  |
| PRR5    | 111.2  | 113.4  | 114.2  | 121    | 108.1  | 100.5  | 114.5  | 121.7  |
| PRR5    | 311.9  | 402.9  | 288.1  | 393.2  | 280.7  | 249.7  | 392.5  | 437.2  |
| PRR5    | 175.1  | 241.4  | 179.2  | 208.9  | 208.2  | 173.2  | 255.2  | 258.8  |
| PRR6    | 196.3  | 250.4  | 220.7  | 199.9  | 183.1  | 168.1  | 219.7  | 226.2  |
| PRR7    | 130.9  | 137.3  | 128.6  | 139.6  | 113.3  | 99.9   | 137.9  | 166.4  |
| PRR8    | 126.5  | 126    | 124.7  | 123.9  | 110.7  | 107.7  | 122.8  | 118.3  |
| PRRG1   | 122.8  | 107.7  | 118.4  | 122.5  | 107.7  | 97.1   | 121.3  | 117.7  |
| PRRG2   | 121.5  | 127.9  | 114.6  | 127    | 119    | 90.1   | 126.4  | 126.8  |
| PRRG3   | 109    | 109    | 109.9  | 122.4  | 108.9  | 97.3   | 113.5  | 120.5  |
| PRRG4   | 139.7  | 155    | 148.9  | 131.1  | 138.2  | 122.7  | 175.4  | 150.3  |
| PRRT1   | 124.8  | 118.8  | 119.6  | 126.3  | 102.6  | 100.1  | 116.5  | 111.9  |
| PRRT2   | 137.7  | 145.7  | 150.8  | 141.3  | 122.7  | 115.6  | 135    | 124.1  |
| PRRT3   | 125.7  | 128.2  | 145    | 150    | 145.3  | 122.2  | 148.1  | 129.1  |
| PRRX1   | 113.5  | 117.3  | 119.9  | 122.4  | 110.9  | 105.1  | 125    | 110.2  |
| PRRX1   | 112.9  | 117.6  | 129.2  | 126.1  | 103.3  | 96.3   | 113.9  | 107.8  |
| PRRX2   | 118.2  | 110.1  | 118.4  | 124.4  | 108.5  | 103.9  | 121.1  | 108.3  |
| PRSS1   | 117    | 102.7  | 126.6  | 118.8  | 107.3  | 91.8   | 113    | 112.8  |
| PRSS12  | 110.1  | 115.2  | 120.5  | 122.6  | 111.5  | 97.7   | 115.2  | 109.5  |
| PRSS15  | 351.8  | 462.8  | 301.6  | 396.7  | 249.4  | 276.5  | 400.2  | 377.2  |
| PRSS16  | 116.3  | 118.7  | 119.7  | 114.7  | 110.5  | 91.5   | 113.3  | 111.5  |
| PRSS2   | 119.7  | 119    | 114.3  | 122.8  | 117    | 109.8  | 124.1  | 105.7  |
| PRSS21  | 119.9  | 127.1  | 143.9  | 128.4  | 114.3  | 115    | 126.1  | 125.2  |
| PRSS21  | 112.5  | 111.3  | 114    | 116.8  | 106.3  | 98.9   | 117.7  | 114.6  |
| PRSS22  | 116.6  | 118.4  | 127.3  | 124.1  | 108.6  | 104.4  | 128.9  | 125.5  |
| PRSS23  | 135.1  | 124.4  | 127.1  | 135.1  | 115.7  | 114.7  | 135.1  | 124.3  |
| PRSS27  | 113.6  | 114.4  | 125.8  | 110.6  | 106.7  | 103.8  | 115.5  | 123.4  |
| PRSS3   | 118.8  | 114.9  | 116.5  | 116.4  | 109.4  | 99.6   | 112.3  | 115.7  |
| PRSS33  | 110.1  | 115.2  | 119.2  | 112    | 115.7  | 93.7   | 110.9  | 115.8  |
| PRSS35  | 134.9  | 160.3  | 158.8  | 145.5  | 149.9  | 130    | 141.2  | 143    |
| PRSS7   | 131.1  | 139.8  | 134.8  | 137.7  | 127.1  | 122.1  | 131.5  | 139.7  |
| PRSS8   | 112.1  | 125.4  | 128.9  | 128.2  | 113.4  | 107.9  | 125.3  | 117.2  |
| PRSSL1  | 116    | 115.6  | 126.7  | 133.5  | 113.4  | 106.9  | 112.6  | 122.1  |
| PRTFDC1 | 119.1  | 122.1  | 118.9  | 127.2  | 121.3  | 96.5   | 110.4  | 113.8  |
| PRTG    | 113.7  | 125    | 116.8  | 118.1  | 111    | 101.1  | 119.5  | 114.4  |
| PRTG    | 120    | 110.3  | 114.7  | 113.1  | 105.9  | 99     | 118.3  | 109    |



|           |        |        |        |        |        |        |        |        |
|-----------|--------|--------|--------|--------|--------|--------|--------|--------|
| PRTN3     | 119.9  | 116.8  | 122.1  | 132.8  | 113.9  | 105.1  | 120.3  | 118.3  |
| PRUNE     | 189.2  | 248    | 181.2  | 220    | 202.6  | 167.7  | 220.5  | 218.9  |
| PRUNE2    | 124.8  | 123    | 124.9  | 131.1  | 120.6  | 99.8   | 122.4  | 115.6  |
| PRX       | 121.8  | 125.1  | 123.3  | 126.5  | 114.3  | 108.5  | 111.9  | 132.3  |
| PRX       | 112.4  | 123.8  | 123.3  | 126    | 116.8  | 111.2  | 116.8  | 116.5  |
| PRX       | 113.4  | 118.9  | 116.2  | 119    | 108.7  | 105.7  | 120    | 122.5  |
| PRY       | 113.6  | 122    | 115.5  | 121.8  | 108.2  | 105.7  | 116.2  | 113.6  |
| PSAP      | 1983.3 | 1471   | 3207.3 | 1803.7 | 1087.1 | 2277.4 | 2216.4 | 1574.6 |
| PSAP      | 2231.1 | 1674.7 | 3374.1 | 2465.7 | 1509.6 | 2535.1 | 2192.5 | 1710.6 |
| PSARL     | 504.7  | 542.8  | 865.3  | 577    | 486.1  | 616.6  | 552    | 450.7  |
| PSAT1     | 153.7  | 183.4  | 145.5  | 190.1  | 180.5  | 136.9  | 182.1  | 270.1  |
| PSAT1     | 106.2  | 114.5  | 108.3  | 117    | 100.5  | 97.2   | 119.4  | 114    |
| PSCA      | 117.1  | 130.2  | 118.9  | 114.4  | 107.5  | 102.5  | 118.2  | 114.5  |
| PSCD1     | 310.9  | 294.6  | 227.1  | 338.7  | 248.7  | 195.2  | 381.7  | 406.5  |
| PSCD1     | 3450.8 | 3122.3 | 2446.8 | 3669.5 | 2566.5 | 2068   | 4592.7 | 4251.1 |
| PSCD2     | 132.5  | 137.6  | 144.9  | 130.3  | 125.2  | 130    | 166.4  | 156.1  |
| PSCD2     | 125.8  | 126.5  | 145.5  | 135    | 114.6  | 112.5  | 135.4  | 136.9  |
| PSCD3     | 140.6  | 157.3  | 138.1  | 151.8  | 136.3  | 127.3  | 168.3  | 162.3  |
| PSCD4     | 1010   | 1007   | 1394.7 | 1193   | 719.9  | 1159.3 | 880.5  | 407.5  |
| PSCDBP    | 127.8  | 141.2  | 131    | 147.6  | 130.4  | 136.9  | 152.4  | 145.9  |
| PSD       | 114    | 117    | 114    | 116.7  | 113.9  | 94.5   | 110.5  | 119    |
| PSD2      | 112.5  | 119    | 126.8  | 131    | 101.6  | 104    | 123.3  | 116.2  |
| PSD3      | 120.8  | 125.9  | 123    | 126.8  | 111.1  | 99.1   | 125.4  | 116.7  |
| PSD3      | 142.3  | 132.2  | 140    | 140.9  | 127.4  | 118    | 130.1  | 125.8  |
| PSD3      | 121.1  | 119    | 128.8  | 124.4  | 121    | 104.1  | 118.8  | 126.1  |
| PSD4      | 378.1  | 419.6  | 464.8  | 367.1  | 257    | 339.4  | 283.6  | 226.1  |
| PSEN1     | 123.5  | 117.1  | 124.5  | 121.1  | 108.8  | 102.3  | 120.6  | 127.2  |
| PSEN1     | 110.6  | 114.4  | 120.4  | 123.9  | 103.5  | 122    | 115.4  | 112.9  |
| PSEN2     | 141.8  | 126.1  | 143.8  | 149.3  | 112.8  | 116.4  | 128    | 134.9  |
| PSEN2     | 157.8  | 154.4  | 164.9  | 151.9  | 118.8  | 125    | 136.2  | 134.4  |
| PSENEN    | 142.8  | 138.4  | 163.6  | 153.7  | 125.7  | 124.1  | 144.3  | 128    |
| PSF1      | 118.7  | 120    | 142.9  | 120.7  | 125    | 95     | 133.1  | 128.2  |
| PSG1      | 115.1  | 113    | 117.6  | 113.1  | 101.3  | 94.3   | 112.2  | 112.8  |
| PSG11     | 120.9  | 111.8  | 118.7  | 123.6  | 105.7  | 96.4   | 118.3  | 108.3  |
| PSG2      | 105.3  | 109.6  | 110.8  | 113.8  | 104    | 98.3   | 114    | 115.4  |
| PSG3      | 115.8  | 118.4  | 126    | 121.8  | 110.2  | 105.9  | 122.8  | 113.6  |
| PSG4      | 111.1  | 117.6  | 112.9  | 120.4  | 110.1  | 92.6   | 115.7  | 112    |
| PSG4      | 118.3  | 121.9  | 124    | 138    | 118.7  | 97.1   | 127.8  | 132    |
| PSG4      | 115.5  | 118.4  | 108.8  | 123.4  | 104.7  | 97.1   | 112.1  | 106.9  |
| PSG5      | 122    | 108.9  | 106.4  | 118.6  | 110.3  | 95.6   | 114.6  | 106.7  |
| PSG6      | 112.9  | 108.8  | 113.5  | 116.1  | 112.6  | 98.4   | 120.8  | 108.6  |
| PSG6      | 122    | 114.1  | 118.9  | 127.4  | 119.5  | 99.1   | 112.6  | 113.7  |
| PSG6      | 110.7  | 110.4  | 112.3  | 120.5  | 111.5  | 97.3   | 117.7  | 109.1  |
| PSG7      | 114.9  | 111.5  | 113.6  | 125    | 106.3  | 98.3   | 122    | 107.4  |
| PSG8      | 105.6  | 127.3  | 125.1  | 122.4  | 104    | 102.9  | 124    | 109.7  |
| PSG9      | 109.9  | 119.5  | 114.8  | 124.5  | 106.1  | 94.4   | 119.9  | 124.7  |
| PSIP1     | 111.1  | 116.7  | 109    | 112.8  | 120    | 106.7  | 105.9  | 109.7  |
| PSIP1     | 396.9  | 462.3  | 468    | 398.4  | 447.1  | 413.5  | 350.6  | 244.8  |
| PSITPTE22 | 105    | 110.6  | 108.3  | 110.5  | 103    | 93.1   | 117.2  | 107.3  |
| PSKH1     | 110.6  | 122.7  | 127.3  | 119.8  | 109.7  | 98.5   | 126.1  | 119    |
| PSKH2     | 111.6  | 111.2  | 119.6  | 109.2  | 98.1   | 106.3  | 111.2  | 106.3  |

|         |        |        |        |        |        |        |        |        |
|---------|--------|--------|--------|--------|--------|--------|--------|--------|
| PSMA1   | 108.1  | 137.1  | 120.1  | 119.3  | 124.4  | 99.9   | 123.8  | 125.8  |
| PSMA1   | 196.2  | 195.9  | 207.1  | 230.2  | 227.5  | 187.3  | 266.6  | 323.4  |
| PSMA1   | 925.2  | 945.3  | 1408.2 | 1522.4 | 1258   | 1286.9 | 1814.5 | 1677.6 |
| PSMA2   | 292.6  | 228    | 228.4  | 262    | 194.1  | 160.1  | 271.3  | 301    |
| PSMA3   | 360.5  | 424.6  | 364.8  | 425.1  | 371.5  | 608.3  | 511.3  | 716.1  |
| PSMA3   | 131.6  | 148.3  | 169.1  | 176    | 146.3  | 171.3  | 200.9  | 229.1  |
| PSMA4   | 300.6  | 339.3  | 471    | 452.7  | 402    | 412.9  | 458.4  | 403.7  |
| PSMA5   | 1272.4 | 1209.7 | 1451.2 | 1343.1 | 926.1  | 1375.4 | 1000.6 | 1188.5 |
| PSMA6   | 3371.7 | 3256.7 | 4014.2 | 3524.3 | 2632.7 | 3809.5 | 4052.2 | 3585.5 |
| PSMA8   | 111.1  | 134    | 119.9  | 124.8  | 105.9  | 101.8  | 124    | 106.6  |
| PSMAL   | 118.3  | 116.4  | 113.8  | 116.2  | 104.6  | 96.5   | 120.5  | 106.3  |
| PSMB1   | 1577.3 | 1518.1 | 1568.7 | 1834.4 | 1652.1 | 1832.4 | 1522.6 | 1865.1 |
| PSMB10  | 1783.4 | 1853.4 | 2147.7 | 1623.3 | 1176.5 | 1372.9 | 1050.5 | 712.2  |
| PSMB2   | 392    | 420.2  | 484.4  | 426    | 344.5  | 475.1  | 475.3  | 451.1  |
| PSMB3   | 1484.7 | 1529.3 | 1612.9 | 1542.1 | 1065.6 | 1373.3 | 1373   | 1160.1 |
| PSMB4   | 1055.8 | 966.1  | 1122   | 1283.7 | 784.6  | 1057.9 | 954.2  | 1025.4 |
| PSMB5   | 273.1  | 260.6  | 273.1  | 319.7  | 255    | 238.9  | 358    | 345.7  |
| PSMB6   | 1333.5 | 1424.5 | 1458.7 | 1676.7 | 1323.9 | 1372.8 | 1877.8 | 2198.4 |
| PSMB7   | 1036   | 1091   | 1141.2 | 1178.3 | 794.2  | 996.3  | 1143.5 | 1312.6 |
| PSMB8   | 296.5  | 219.9  | 317    | 237.9  | 188.6  | 180.6  | 169.2  | 155.7  |
| PSMB8   | 145.1  | 162.7  | 186    | 166    | 143.2  | 125.7  | 155.3  | 135.6  |
| PSMB8   | 135.3  | 137.5  | 117.7  | 142.1  | 139.5  | 110.1  | 126.2  | 130.3  |
| PSMB8   | 1264.9 | 1371.5 | 1326.7 | 1162   | 728.5  | 840.1  | 712.1  | 687.9  |
| PSMB9   | 350.5  | 441.7  | 621.5  | 327.4  | 290.1  | 307    | 179.2  | 183.7  |
| PSMB9   | 134.1  | 151    | 148    | 146.3  | 139.7  | 120.2  | 128.4  | 123.8  |
| PSMC1   | 1743.7 | 1709.4 | 2177.8 | 1954   | 1481.1 | 1833.7 | 2390.1 | 2572.1 |
| PSMC2   | 814.9  | 815    | 1079.5 | 1006.6 | 779.2  | 879.1  | 1036.5 | 1372.8 |
| PSMC3   | 295.6  | 274.7  | 335    | 343    | 320.6  | 245.6  | 400.5  | 379.7  |
| PSMC3IP | 116.2  | 117.2  | 110    | 114.9  | 109.7  | 93.3   | 125.8  | 121.5  |
| PSMC3IP | 124.1  | 116.4  | 127    | 123.5  | 112.5  | 105.9  | 121.3  | 123.7  |
| PSMC4   | 282.7  | 299.9  | 361.3  | 382.3  | 258.2  | 327.7  | 330.1  | 331.6  |
| PSMC4   | 197.4  | 218.3  | 244.2  | 200.3  | 185.3  | 185.9  | 210.2  | 198.6  |
| PSMC5   | 432.2  | 463.1  | 353.5  | 667.6  | 388.4  | 465.7  | 357.6  | 547.7  |
| PSMC6   | 126.7  | 129.1  | 132.4  | 136.9  | 117.1  | 116    | 141    | 133.5  |
| PSMD1   | 348.8  | 373.4  | 445.2  | 420.7  | 365.5  | 520.3  | 612.9  | 577.2  |
| PSMD10  | 437.1  | 532.1  | 544.3  | 564.3  | 498.2  | 479.9  | 543.9  | 546.2  |
| PSMD10  | 121.2  | 131.7  | 111.8  | 121.4  | 114.5  | 106.3  | 123.5  | 108.3  |
| PSMD10  | 155.5  | 190.1  | 196.5  | 199.7  | 188.6  | 189.6  | 180.9  | 191.1  |
| PSMD11  | 136.2  | 146.5  | 146.3  | 165    | 134.5  | 121.8  | 163.1  | 148.9  |
| PSMD12  | 381.7  | 399.4  | 384.7  | 408.3  | 302.8  | 340.2  | 420.1  | 611.8  |
| PSMD13  | 131    | 125.2  | 121.9  | 120.9  | 116    | 108.3  | 113.6  | 122.5  |
| PSMD13  | 158.8  | 131.8  | 153.7  | 147.6  | 149.7  | 134.1  | 162.1  | 154.7  |
| PSMD14  | 195.3  | 262    | 297.9  | 244.7  | 234.5  | 246.6  | 330.7  | 434.6  |
| PSMD2   | 290.8  | 352    | 286.5  | 338.3  | 268.2  | 256.2  | 374.8  | 413.1  |
| PSMD3   | 129.1  | 133.6  | 137    | 144.7  | 130.7  | 107.1  | 138.1  | 148.6  |
| PSMD4   | 108.1  | 116.7  | 104.4  | 101.5  | 103.5  | 98.3   | 143.4  | 131.3  |
| PSMD4   | 431.4  | 504.4  | 591.4  | 548.8  | 402.4  | 459.4  | 453.2  | 590    |
| PSMD4   | 804.4  | 878.6  | 962.7  | 962.2  | 666    | 742.3  | 948    | 946.7  |
| PSMD5   | 149.9  | 158.8  | 133.9  | 160.2  | 136    | 128.7  | 148.2  | 152.6  |
| PSMD6   | 1103.7 | 994.1  | 794.6  | 1028   | 886.1  | 784.3  | 1160.3 | 1292.4 |
| PSMD7   | 536.9  | 723.1  | 694.1  | 736    | 677    | 750.8  | 950.9  | 870.9  |

|          |        |        |        |        |        |        |        |        |
|----------|--------|--------|--------|--------|--------|--------|--------|--------|
| PSMD8    | 241.7  | 321.3  | 290.7  | 325.5  | 257    | 230.4  | 338.3  | 366.3  |
| PSMD9    | 139    | 131.6  | 132.6  | 138.6  | 120.1  | 115.1  | 153.8  | 133.5  |
| PSME1    | 3243.9 | 2871.2 | 3693.8 | 3245.3 | 1671   | 3055.9 | 1926.2 | 1895.7 |
| PSME1    | 141.7  | 138.2  | 127.3  | 140.7  | 133.3  | 117.3  | 145.5  | 143.3  |
| PSME2    | 709.7  | 514.5  | 975.2  | 600.8  | 452.7  | 591.1  | 522.9  | 414.5  |
| PSME3    | 334.4  | 344.6  | 309.3  | 327.5  | 295.1  | 284    | 299    | 321.2  |
| PSME3    | 264    | 290.5  | 279.7  | 307.1  | 236.8  | 281    | 313.9  | 305.3  |
| PSME4    | 485.2  | 550.8  | 335.8  | 500.7  | 449    | 331.2  | 575.5  | 494.6  |
| PSMF1    | 108.3  | 107.6  | 112    | 124.7  | 112.9  | 103.9  | 119.1  | 119.6  |
| PSMF1    | 597.3  | 702.3  | 900.8  | 800.4  | 520.2  | 581.4  | 566    | 644.4  |
| PSORS1C1 | 125.2  | 135.4  | 132    | 130.4  | 119    | 111.3  | 131.8  | 128.6  |
| PSORS1C2 | 109.6  | 118.9  | 120.1  | 115.6  | 112.7  | 102.1  | 122.8  | 119.9  |
| PSPC1    | 134.8  | 142.9  | 137.4  | 156.7  | 128.3  | 127.8  | 146.1  | 160.4  |
| PSPH     | 122.5  | 118.8  | 114.2  | 112.6  | 117    | 94.5   | 116.3  | 117.9  |
| PSPN     | 105.4  | 114.7  | 108.6  | 123.6  | 108.6  | 102.3  | 119.8  | 110.6  |
| PSRC1    | 120.6  | 122.7  | 123.6  | 122.4  | 105.9  | 101.7  | 118.1  | 115    |
| PSRC1    | 115.5  | 104.4  | 115.2  | 127.1  | 116.6  | 102.2  | 115.3  | 119.2  |
| PSRC1    | 118.3  | 118.7  | 128.1  | 128.9  | 123.4  | 92.6   | 125.4  | 122.2  |
| PSRC2    | 186.4  | 193.7  | 191.8  | 154.9  | 156.9  | 137.8  | 155.2  | 145.5  |
| PSTPIP1  | 240.2  | 267.8  | 209.6  | 206.1  | 180.6  | 188.2  | 179.2  | 165.6  |
| PSTPIP2  | 153    | 130.7  | 182.9  | 142.9  | 113.7  | 121.4  | 123    | 114.6  |
| PTAFR    | 133.2  | 118.5  | 176.7  | 152    | 123.6  | 178.7  | 150.7  | 119.7  |
| PTBP1    | 2488.3 | 2907   | 2123.1 | 3170.5 | 2353.9 | 2214.2 | 4218.7 | 3594.8 |
| PTBP1    | 4733.7 | 5310.9 | 3509.7 | 4898.1 | 4641.9 | 3269   | 7140   | 6377.8 |
| PTBP2    | 189.1  | 196.3  | 189.3  | 228.2  | 209.5  | 160.5  | 237.7  | 243.6  |
| PTCD1    | 306    | 373.1  | 339.7  | 329.4  | 261.1  | 224.6  | 297.8  | 352.3  |
| PTCD2    | 136.8  | 133    | 148.4  | 140.3  | 136.5  | 124.6  | 129    | 124.7  |
| PTCH     | 137.7  | 131.7  | 130.7  | 135    | 131.9  | 107.8  | 133.6  | 122.6  |
| PTCH2    | 121.4  | 119    | 117.9  | 121.2  | 111.2  | 102.1  | 119.9  | 118.4  |
| PTCHD1   | 113.3  | 108.3  | 105.3  | 116.4  | 106.9  | 91.7   | 117.8  | 113    |
| PTCHD3   | 115.6  | 129.4  | 116.7  | 128.3  | 111.4  | 95     | 115.2  | 118.6  |
| PTCRA    | 112.1  | 108.1  | 120.7  | 108.7  | 106.1  | 99     | 112.2  | 106    |
| PTD004   | 123.3  | 116.8  | 118.9  | 117.4  | 113.1  | 98.2   | 126.6  | 117.7  |
| PTD004   | 108.1  | 112.1  | 116.3  | 116    | 111.3  | 102.2  | 115.5  | 113.8  |
| PTD008   | 692.5  | 808.7  | 757.4  | 719    | 513.7  | 609.7  | 761.4  | 759.9  |
| PTD015   | 140.2  | 143    | 174.8  | 148.2  | 142    | 162.8  | 129    | 141.6  |
| PTDSR    | 123.2  | 115.7  | 119.4  | 115.2  | 110.4  | 100    | 116.7  | 119.9  |
| PTDSR    | 148.7  | 146.8  | 141.5  | 156.1  | 133.8  | 130.4  | 170.3  | 211.3  |
| PTDSS1   | 941.4  | 1264.6 | 771.3  | 1143.4 | 891.8  | 704.9  | 1076.7 | 1122   |
| PTDSS2   | 136.7  | 132.2  | 152.1  | 142.8  | 119.7  | 124.9  | 138.6  | 142.9  |
| PTEN     | 448.2  | 440.4  | 363.8  | 468.8  | 367.6  | 324.2  | 459.3  | 449.9  |
| PTER     | 112.4  | 116.2  | 116.7  | 121.5  | 111    | 102.9  | 116.6  | 116.1  |
| PTER     | 117.4  | 118.6  | 115.9  | 121    | 105.3  | 107.2  | 119    | 123.2  |
| PTER     | 187.4  | 179.8  | 186.1  | 199.1  | 179.4  | 126.4  | 200.3  | 184.6  |
| PTF1A    | 113.8  | 107    | 109.8  | 123.6  | 106.8  | 102.4  | 113.2  | 105.9  |
| PTGDR    | 169.2  | 164.9  | 160    | 165    | 141    | 119    | 141    | 131.6  |
| PTGDS    | 114.6  | 118.3  | 114.8  | 113.4  | 111    | 107.2  | 124.4  | 119.7  |
| PTGER1   | 117.2  | 111.2  | 117.4  | 113.4  | 98     | 101    | 113.1  | 100.7  |
| PTGER2   | 481.7  | 329.6  | 426.1  | 384.1  | 217.7  | 208.1  | 302.7  | 244.2  |
| PTGER3   | 109.9  | 119.5  | 115.2  | 121.6  | 104.8  | 93.1   | 108.5  | 109.4  |
| PTGER3   | 114.7  | 122.1  | 120.8  | 116.9  | 111    | 110    | 114.7  | 114.6  |

|         |        |        |        |        |        |        |        |        |
|---------|--------|--------|--------|--------|--------|--------|--------|--------|
| PTGER3  | 114    | 117.9  | 111    | 110.6  | 107.8  | 99.7   | 122.7  | 111.7  |
| PTGER3  | 107.4  | 109.7  | 112.8  | 115.2  | 106.3  | 94.4   | 104.1  | 105.4  |
| PTGER3  | 118.1  | 117    | 119.8  | 120.5  | 112.1  | 111.3  | 123    | 116    |
| PTGER3  | 114.7  | 111.9  | 112.8  | 119.1  | 105.8  | 96.3   | 120.3  | 122.3  |
| PTGER4  | 327    | 333.6  | 566.8  | 367.2  | 345.3  | 315    | 438.5  | 450.6  |
| PTGES   | 109.2  | 115.4  | 119    | 119.2  | 106.1  | 92.3   | 117.5  | 106.6  |
| PTGES2  | 292.3  | 270.7  | 286.1  | 215.2  | 219.4  | 184.8  | 189.2  | 201.9  |
| PTGES2  | 346.2  | 444.9  | 478.8  | 430.6  | 270.7  | 273.4  | 288.4  | 260.2  |
| PTGES3  | 652.4  | 738.7  | 891.5  | 764.7  | 678.6  | 722.4  | 1198.7 | 1663.4 |
| PTGFR   | 116.9  | 117.5  | 124.6  | 122.5  | 111.6  | 99.2   | 124    | 115.5  |
| PTGFR   | 113.7  | 117    | 129.9  | 132.1  | 125.1  | 110.9  | 124.9  | 129.8  |
| PTGFRN  | 122.7  | 127.5  | 121.4  | 122.8  | 112    | 102.4  | 107.3  | 118.4  |
| PTGIR   | 119.1  | 118.5  | 111.2  | 118.1  | 109    | 103.4  | 113.1  | 116.3  |
| PTGIS   | 108.1  | 116.5  | 112.5  | 116.9  | 102.2  | 95.7   | 113.6  | 108.4  |
| PTGS1   | 119.9  | 120.4  | 160.5  | 114.8  | 104.9  | 103.9  | 112    | 114.4  |
| PTGS1   | 113.9  | 127.6  | 139.6  | 127.3  | 117.8  | 107.6  | 121.7  | 121.3  |
| PTGS2   | 149.6  | 143.1  | 182.1  | 165.6  | 126.9  | 134    | 151.6  | 130.7  |
| PTH     | 119.1  | 110.1  | 113.7  | 123    | 112.2  | 104.6  | 114.7  | 113.1  |
| PTHLH   | 115.7  | 119.7  | 104.6  | 116.8  | 105.4  | 102.2  | 110.6  | 117.4  |
| PTHLH   | 119.5  | 119.1  | 120.4  | 125.7  | 113    | 100.6  | 110.4  | 109.6  |
| PTHR1   | 136.8  | 130.9  | 127.1  | 139.3  | 127.5  | 100.1  | 130.9  | 129.7  |
| PTHR2   | 112.4  | 122    | 114.3  | 121.8  | 112.4  | 103.7  | 119.8  | 115.7  |
| PTK2    | 203.1  | 214.4  | 310    | 211.9  | 207.8  | 292.4  | 290.8  | 252.1  |
| PTK2    | 110.4  | 118.1  | 110.1  | 117.6  | 100.5  | 98.4   | 120.6  | 110.4  |
| PTK2B   | 122.7  | 114.8  | 117.3  | 123.1  | 127.2  | 114.7  | 123.6  | 116.4  |
| PTK2B   | 138.4  | 125.2  | 145.3  | 135.6  | 119.9  | 106.7  | 138.6  | 131.4  |
| PTK2B   | 120.8  | 117.9  | 122.6  | 124.7  | 127.6  | 102.3  | 124.5  | 119.3  |
| PTK6    | 120.5  | 132.1  | 133.9  | 128.7  | 122.7  | 111.3  | 140.7  | 139    |
| PTK7    | 114.8  | 120    | 119.8  | 125.3  | 107    | 97.2   | 120.4  | 119.5  |
| PTK7    | 113.6  | 116.7  | 125.3  | 124.5  | 109.7  | 107    | 125.3  | 123.5  |
| PTK9    | 118.6  | 114.9  | 120    | 119.9  | 108    | 102.4  | 129.5  | 124.8  |
| PTK9    | 121.9  | 121.3  | 123    | 118.4  | 125    | 109.2  | 116.8  | 112.8  |
| PTK9L   | 658    | 791.6  | 571.2  | 781.6  | 482.5  | 551.9  | 707.7  | 487    |
| PTMA    | 512.1  | 343    | 766.6  | 452.4  | 310.9  | 788.8  | 507.6  | 410.8  |
| PTMS    | 131.6  | 138.9  | 152.4  | 166    | 122.2  | 128.3  | 150.7  | 135.7  |
| PTN     | 132.6  | 166.3  | 170.5  | 158.9  | 141    | 131.5  | 147.7  | 153.3  |
| PTOV1   | 672.1  | 669.1  | 638.1  | 750.4  | 495.2  | 600.4  | 740.4  | 756.5  |
| PTP4A1  | 114    | 122.3  | 123.8  | 115.7  | 113.3  | 101.2  | 124.2  | 123.8  |
| PTP4A2  | 3026.9 | 3918.9 | 2872.1 | 3311.3 | 2667.5 | 2407.6 | 4415   | 4331.6 |
| PTP4A3  | 115.8  | 114.2  | 129.4  | 123.5  | 114.9  | 110.5  | 119.3  | 113.4  |
| PTP4A3  | 119.3  | 123.3  | 125.1  | 126.3  | 111.9  | 106.2  | 130.6  | 121.3  |
| PTPDC1  | 111.3  | 112    | 121.3  | 113.5  | 106.9  | 98.7   | 112.7  | 110.6  |
| PTPDC1  | 147.1  | 145.2  | 142.5  | 147    | 127.9  | 126.3  | 151.4  | 137.4  |
| PTPDC1  | 110.5  | 112.1  | 111.5  | 115.4  | 114.5  | 96.2   | 117.9  | 111.3  |
| PTPLA   | 128.9  | 127.5  | 132.1  | 140    | 124    | 109.1  | 138.5  | 123.7  |
| PTPLAD1 | 359.3  | 375.1  | 317.3  | 419.7  | 335.9  | 218.8  | 284.5  | 300.9  |
| PTPLAD2 | 308    | 308.6  | 314.5  | 318.3  | 305.3  | 197.4  | 320.3  | 347.5  |
| PTPLB   | 847.4  | 934.5  | 899.1  | 1009.6 | 699.5  | 676.9  | 995.4  | 934.7  |
| PTPN1   | 766.4  | 652.2  | 504.2  | 740.2  | 485.8  | 411.3  | 732    | 631.2  |
| PTPN11  | 464.9  | 435.3  | 393.1  | 430.8  | 422.3  | 443.3  | 474.6  | 525.3  |
| PTPN12  | 584.7  | 420    | 389.5  | 637.6  | 400.2  | 434.1  | 549.9  | 348.4  |

|         |       |        |       |        |        |        |        |       |
|---------|-------|--------|-------|--------|--------|--------|--------|-------|
| PTPN13  | 107.2 | 111.2  | 119.7 | 124.2  | 115.3  | 95.7   | 104.7  | 113.1 |
| PTPN14  | 111.1 | 108.6  | 112.3 | 111.1  | 104.2  | 99     | 113.7  | 122.1 |
| PTPN18  | 110.5 | 124.6  | 119.6 | 114.5  | 106.8  | 98.8   | 131.2  | 118.6 |
| PTPN2   | 115.5 | 111.5  | 113.7 | 109.5  | 109.3  | 96.6   | 122.4  | 115.8 |
| PTPN2   | 250.2 | 254.1  | 255.1 | 255.9  | 215.5  | 195    | 208.3  | 214.7 |
| PTPN20A | 102.5 | 115.3  | 111.1 | 108.6  | 102    | 92.7   | 115    | 117.6 |
| PTPN20B | 105.5 | 112.8  | 107.6 | 107.1  | 103.1  | 96.4   | 110.4  | 109.3 |
| PTPN21  | 114.1 | 112.8  | 113.8 | 120.9  | 101.5  | 98.9   | 112.7  | 108.3 |
| PTPN22  | 143   | 147.2  | 145.1 | 155.8  | 134.5  | 114.3  | 132.6  | 136.9 |
| PTPN22  | 122.8 | 118.4  | 112.9 | 119.7  | 103.9  | 94.3   | 116.2  | 108.6 |
| PTPN22  | 281.1 | 330.8  | 267.1 | 269.4  | 236    | 198.1  | 307.4  | 355.2 |
| PTPN23  | 156.5 | 156.1  | 141.8 | 171.8  | 127.5  | 125.2  | 183.5  | 146.1 |
| PTPN3   | 116.1 | 117.5  | 111   | 121.7  | 109.3  | 92.2   | 118.9  | 115.6 |
| PTPN4   | 610.7 | 607.2  | 630.9 | 733.4  | 502.1  | 448.5  | 637.6  | 565.7 |
| PTPN5   | 126.2 | 116.1  | 141.7 | 120.2  | 116.1  | 138.4  | 119.8  | 123.3 |
| PTPN5   | 134.7 | 133    | 130.9 | 130.9  | 135.8  | 107.6  | 128.3  | 123   |
| PTPN6   | 120.1 | 125.7  | 126.8 | 120    | 115    | 104.4  | 118.5  | 121.4 |
| PTPN6   | 694.6 | 680.5  | 742.9 | 810.2  | 329.2  | 620.6  | 493.7  | 262.3 |
| PTPN7   | 111   | 118.6  | 123.7 | 119.2  | 109.6  | 98.7   | 130.2  | 117.5 |
| PTPN7   | 261.8 | 244.4  | 214.1 | 251.4  | 178.5  | 196.1  | 292    | 272.5 |
| PTPN9   | 133.9 | 118.3  | 129.3 | 138.8  | 128.8  | 122.2  | 136.4  | 140   |
| PTPN9   | 113.2 | 124.6  | 123.2 | 127.3  | 117    | 102.1  | 123.3  | 111.3 |
| PTPNS1  | 563.6 | 349.2  | 426.6 | 797.2  | 316.8  | 775    | 607.6  | 274.5 |
| PTPNS1  | 281.9 | 183.6  | 212.4 | 311.5  | 154.5  | 281    | 285.1  | 153.5 |
| PTPRA   | 124.8 | 128.1  | 121.1 | 127.1  | 109.6  | 100.2  | 125.6  | 117.1 |
| PTPRA   | 231.4 | 200.5  | 213.3 | 223.9  | 192.6  | 155    | 198.6  | 182.8 |
| PTPRA   | 190.9 | 181.9  | 219.7 | 190.6  | 165    | 162.9  | 169.3  | 181   |
| PTPRA   | 144.5 | 148.8  | 155.6 | 161    | 143.8  | 111.7  | 143    | 132.9 |
| PTPRB   | 109.8 | 117.9  | 114.4 | 110    | 109.7  | 96.6   | 119.3  | 109.1 |
| PTPRC   | 106.3 | 109.2  | 107.1 | 112.6  | 103.4  | 96.2   | 105.9  | 107.7 |
| PTPRC   | 162.8 | 150.9  | 153.1 | 162    | 152.8  | 109.1  | 141.8  | 160.5 |
| PTPRC   | 189   | 183.9  | 192.6 | 197    | 197    | 128.1  | 172.1  | 168.7 |
| PTPRC   | 125.4 | 135.6  | 122.3 | 143.7  | 136.7  | 109    | 134.1  | 135   |
| PTPRCAP | 702.3 | 996    | 554.6 | 700    | 462.7  | 390.4  | 649    | 514.9 |
| PTPRD   | 112.8 | 116    | 122.6 | 112.4  | 111.3  | 111.9  | 119.6  | 127.8 |
| PTPRD   | 106.1 | 117.1  | 119.7 | 113.2  | 108.7  | 99.7   | 123.1  | 122.5 |
| PTPRE   | 1575  | 1241.3 | 698.5 | 1971.1 | 1100.4 | 1101.2 | 2093.8 | 1119  |
| PTPRE   | 110.2 | 100.8  | 108.8 | 118.4  | 114.3  | 96.8   | 115.1  | 108.1 |
| PTPRE   | 138   | 150    | 130.7 | 139.2  | 117.4  | 112.1  | 152.5  | 131   |
| PTPRF   | 109.5 | 122    | 136   | 125.4  | 110.3  | 98.3   | 123.5  | 117.7 |
| PTPRF   | 105.1 | 111.7  | 114   | 118.6  | 102.9  | 98.5   | 117.6  | 113.8 |
| PTPRG   | 139   | 125    | 138.7 | 128.3  | 131.2  | 116    | 125.6  | 125.6 |
| PTPRH   | 120   | 127.8  | 129.3 | 120.8  | 116.1  | 113.4  | 124.3  | 117.1 |
| PTPRK   | 122.4 | 143    | 125.8 | 118.5  | 126.3  | 137.7  | 137.5  | 156.5 |
| PTPRM   | 152.8 | 192.5  | 132.9 | 146.9  | 166.9  | 112.9  | 149.9  | 149.9 |
| PTPRN   | 118.6 | 106.6  | 113.4 | 120.2  | 107.8  | 101.5  | 113.8  | 116.3 |
| PTPRN2  | 121   | 118.8  | 121.1 | 134.9  | 121.9  | 103.3  | 128.7  | 111.7 |
| PTPRO   | 150.8 | 145.3  | 259.8 | 164.9  | 116    | 148.2  | 139.8  | 133.6 |
| PTPRO   | 146.5 | 131.1  | 242.8 | 149.2  | 120.3  | 142.5  | 128.6  | 118.7 |
| PTPRR   | 118.1 | 110.7  | 115.8 | 123.4  | 113.2  | 107.2  | 121.3  | 122.2 |
| PTPRR   | 124.8 | 129.9  | 123.6 | 141.1  | 120.1  | 114    | 126    | 133.6 |

|         |        |        |        |        |        |       |        |        |
|---------|--------|--------|--------|--------|--------|-------|--------|--------|
| PTPRS   | 119.4  | 122.6  | 120.8  | 116.4  | 101.8  | 100.8 | 116.7  | 117.2  |
| PTPRS   | 121.2  | 112.9  | 121.9  | 116    | 107.6  | 101.9 | 115.4  | 113.3  |
| PTPRT   | 113.3  | 115.9  | 114.8  | 110.2  | 106.6  | 103.5 | 121.9  | 116.4  |
| PTPRT   | 112.7  | 120.3  | 119.4  | 114.4  | 94.7   | 105.9 | 114.1  | 112.1  |
| PTPRT   | 115.8  | 112    | 114.3  | 111.1  | 104.7  | 92.7  | 121.8  | 121.5  |
| PTPRU   | 117.1  | 123.7  | 127.6  | 125.9  | 118.2  | 103.6 | 123.2  | 113.9  |
| PTPRU   | 112.6  | 107.7  | 123.1  | 129.7  | 117.6  | 109.2 | 130.3  | 123.6  |
| PTPRZ1  | 115.3  | 121.3  | 123.6  | 117.1  | 103.2  | 99.2  | 124.4  | 115.4  |
| PTRF    | 120    | 128.7  | 138.4  | 137.4  | 110.7  | 110   | 127.4  | 118.8  |
| PTRH1   | 152.3  | 167.5  | 167.9  | 148.1  | 125.8  | 128.8 | 144.6  | 127.7  |
| PTRH2   | 398.1  | 445.9  | 388.7  | 422.5  | 327.2  | 311.8 | 415.3  | 386.3  |
| PTRH2   | 118.9  | 120.4  | 125.7  | 117.8  | 123.5  | 103.9 | 126.8  | 129.9  |
| PTS     | 189.7  | 254.9  | 233.5  | 245.7  | 199.9  | 216.2 | 304.5  | 281    |
| PTTG1   | 148.9  | 194.9  | 201    | 159.7  | 135.8  | 141.5 | 192.1  | 200.8  |
| PTTG1IP | 869    | 769    | 1258.6 | 1114.6 | 652.8  | 883.8 | 859.6  | 754.9  |
| PTTG2   | 126.4  | 152.4  | 149.6  | 130.6  | 131.1  | 107   | 132.4  | 126.8  |
| PTTG3   | 125.3  | 150.1  | 159.9  | 141.3  | 128.2  | 120   | 154    | 141.6  |
| PTX3    | 125    | 109.8  | 113.9  | 119.3  | 106.5  | 100.6 | 116.7  | 117.6  |
| PUM1    | 1176.8 | 1221.3 | 958.3  | 1345.2 | 1203.1 | 788.1 | 1767.2 | 1774.5 |
| PUM1    | 848.4  | 995    | 750.1  | 1006.1 | 969.6  | 583.4 | 941.6  | 1015.4 |
| PUM2    | 855.3  | 970.3  | 726.7  | 1047   | 1050   | 722.1 | 1091.4 | 1244.9 |
| PUNC    | 114.4  | 119.1  | 114.2  | 115.4  | 105.8  | 96.1  | 114.3  | 104.8  |
| PURA    | 253.3  | 336.6  | 272.7  | 281    | 293.2  | 269   | 251.8  | 242    |
| PURB    | 729.7  | 757.5  | 650.8  | 919.8  | 858.4  | 691.4 | 1121.5 | 1092.8 |
| PURG    | 140.5  | 147.8  | 138.4  | 139.9  | 143    | 114.9 | 151.8  | 137.4  |
| PURG    | 114.2  | 110    | 110.3  | 121.1  | 104.9  | 101.9 | 106.1  | 116.7  |
| PUS1    | 681.6  | 600.8  | 580.3  | 601.1  | 519.9  | 346.1 | 580.9  | 423.6  |
| PUS1    | 121.1  | 117.2  | 129.3  | 120.3  | 111.1  | 101.7 | 125.8  | 123.4  |
| PUS1    | 149.6  | 207.5  | 159.1  | 176.7  | 162.9  | 144.7 | 182.3  | 156.5  |
| PUS3    | 160.8  | 165.7  | 163.7  | 164.1  | 145.3  | 143.2 | 146.2  | 157.7  |
| PUS7    | 205.2  | 192.4  | 182    | 215.6  | 175    | 120   | 242.8  | 203.9  |
| PUS7L   | 137.3  | 147.2  | 159.8  | 140.9  | 130    | 127.2 | 136.9  | 140    |
| PUSL1   | 132.8  | 136.1  | 121.6  | 154.4  | 137.6  | 123.6 | 137.9  | 126.8  |
| PVALB   | 104.9  | 111.4  | 119.8  | 112.4  | 109.6  | 97.8  | 120.5  | 117.5  |
| PVR     | 120.1  | 115.5  | 130.9  | 128.4  | 110.7  | 101.9 | 125.2  | 122.3  |
| PVRL1   | 115.4  | 113.4  | 116.4  | 120.1  | 104    | 93.7  | 110.3  | 117.2  |
| PVRL1   | 116.2  | 118.3  | 115.3  | 121.1  | 109    | 101.4 | 108.8  | 123.8  |
| PVRL1   | 121.1  | 113.4  | 116.5  | 123.6  | 116.1  | 96.4  | 121.6  | 122    |
| PVRL1   | 107.7  | 110.8  | 112.7  | 105.7  | 101.2  | 99.8  | 124.7  | 105    |
| PVRL2   | 126.7  | 119.2  | 131.4  | 116.1  | 107.1  | 119.9 | 135.7  | 124.2  |
| PVRL2   | 134.7  | 128.5  | 156    | 158.1  | 112.7  | 167.3 | 158.8  | 129.5  |
| PVRL2   | 112.8  | 112    | 113.6  | 118.6  | 102.7  | 110   | 132.2  | 121.3  |
| PVRL3   | 133.8  | 156.6  | 142.9  | 153.6  | 141.3  | 112.2 | 140.7  | 146.7  |
| PVRL4   | 118.3  | 113.6  | 118    | 114.7  | 109.2  | 106.3 | 112.6  | 116.6  |
| PWP1    | 452.2  | 494    | 389.1  | 467.3  | 373.1  | 382.4 | 418.1  | 418.8  |
| PWP2H   | 124.5  | 119.7  | 125.6  | 127.8  | 122.9  | 119.3 | 132.5  | 117.3  |
| PWWP2   | 199.8  | 193.3  | 171.3  | 203.9  | 171.1  | 143.3 | 210.3  | 202.8  |
| PWWP2   | 112.2  | 138.3  | 136.3  | 141.3  | 124.9  | 106.3 | 137.5  | 134.1  |
| PXDN    | 123.3  | 105    | 129.3  | 124.9  | 126.1  | 108.1 | 119.6  | 118.3  |
| PXDNL   | 107    | 113.3  | 109.5  | 115.8  | 110.4  | 96.5  | 107.9  | 114.1  |
| PXK     | 135.4  | 138.5  | 142.4  | 148.3  | 125.8  | 135.9 | 148.3  | 134.3  |

|         |        |        |        |        |        |        |        |        |
|---------|--------|--------|--------|--------|--------|--------|--------|--------|
| PXMP2   | 198.8  | 224.4  | 177.1  | 204.8  | 166.9  | 155.9  | 169.3  | 168.7  |
| PXMP2   | 135.5  | 143    | 136.3  | 134.2  | 132.9  | 110.1  | 131.1  | 126.8  |
| PXMP3   | 269.2  | 317.9  | 407.2  | 277.1  | 237    | 281.6  | 227.7  | 249.6  |
| PXMP4   | 122.4  | 124.4  | 137.5  | 127.3  | 118    | 109.3  | 124    | 122.2  |
| PXMP4   | 127.5  | 134.1  | 139.9  | 131.3  | 124.5  | 113.3  | 123.6  | 117.4  |
| PXN     | 138.4  | 138.2  | 120.6  | 141.7  | 134.7  | 104.7  | 126.2  | 148.3  |
| PXT1    | 112.4  | 106.5  | 115.5  | 118.5  | 106.9  | 93.6   | 113.1  | 110.9  |
| PYCARD  | 122    | 132.4  | 146.3  | 123.5  | 125    | 107.6  | 119.4  | 123.1  |
| PYCARD  | 608.7  | 695    | 1326.3 | 518.9  | 429.6  | 434.1  | 287.5  | 235.7  |
| PYCR1   | 108.8  | 120.9  | 109.9  | 113.4  | 103.9  | 102.2  | 124.6  | 121.1  |
| PYCR2   | 408.4  | 535.4  | 355.9  | 391.9  | 459.2  | 314.4  | 359.7  | 361.7  |
| PYCR1   | 109.2  | 120.1  | 120.9  | 126.8  | 108.1  | 101.4  | 115.9  | 124.3  |
| PYDC1   | 113.8  | 111.8  | 118.3  | 116.1  | 109.4  | 91.5   | 112.7  | 114    |
| PYGB    | 219    | 192.5  | 211.5  | 193.5  | 142.8  | 144.6  | 195    | 172.9  |
| PYGL    | 134.1  | 122.4  | 153.5  | 120.1  | 107.6  | 113.2  | 120.9  | 120.6  |
| PYGM    | 114.4  | 117.3  | 120.7  | 123.6  | 110.6  | 103.2  | 128.7  | 126.5  |
| PYGO1   | 112.8  | 119.3  | 120.3  | 109.9  | 116.9  | 97.4   | 120.5  | 117    |
| PYGO2   | 148.7  | 157.9  | 138.4  | 157.6  | 139.4  | 127.1  | 171.6  | 135.6  |
| PYHIN1  | 182.7  | 220    | 162.3  | 194.2  | 207.2  | 180.2  | 199.4  | 239.5  |
| PYHIN1  | 544.2  | 583.9  | 486.9  | 651.8  | 535.8  | 449    | 597.7  | 566.3  |
| PYHIN1  | 657.6  | 650    | 496.6  | 689.7  | 598    | 370.2  | 656.1  | 593.5  |
| PYY     | 103.9  | 112.9  | 111.9  | 112.7  | 104.7  | 95.4   | 111.5  | 120.3  |
| PYY2    | 104.1  | 107.7  | 111.8  | 112.2  | 104.5  | 97.8   | 112.1  | 100.1  |
| PZP     | 116.4  | 116    | 118.1  | 115.9  | 105.7  | 98.3   | 117.9  | 125.7  |
| QARS    | 1688   | 1593.2 | 1694   | 1344.2 | 1177.9 | 1070.7 | 1233.7 | 1343.9 |
| QDPR    | 239.6  | 273    | 333.7  | 277.6  | 206.5  | 229.2  | 220.2  | 192.9  |
| QIL1    | 622.7  | 647.8  | 733.6  | 515.8  | 446.9  | 436.8  | 376.9  | 397.7  |
| QKI     | 126.8  | 119.3  | 134.6  | 123.5  | 116.2  | 106.2  | 118    | 127.7  |
| QKI     | 138.8  | 117.3  | 131    | 127.4  | 121.8  | 109.6  | 127.5  | 129.8  |
| QKI     | 122.5  | 129.4  | 133.8  | 124.4  | 124.3  | 107.9  | 132.2  | 130.5  |
| QP-C    | 1060.3 | 1309   | 1929   | 1188.4 | 1017.5 | 1138.6 | 824.2  | 642.2  |
| QPCT    | 127.8  | 132.4  | 143.2  | 141.1  | 126.7  | 123.8  | 139.7  | 137.9  |
| QPCTL   | 119    | 135.7  | 124    | 125.8  | 106.7  | 98.8   | 121.9  | 118.5  |
| QPRT    | 122.4  | 119.2  | 114.8  | 118.7  | 119.2  | 96.5   | 131.4  | 123.2  |
| QRICH1  | 128.9  | 107    | 126.1  | 125    | 114.9  | 99.2   | 127.7  | 118.2  |
| QRICH1  | 115.4  | 115.8  | 119.9  | 111    | 104.9  | 100.7  | 113.5  | 122.3  |
| QRICH1  | 857.5  | 1048.4 | 918.6  | 1115.5 | 996.2  | 570.7  | 1145.8 | 1105.3 |
| QRICH2  | 110.4  | 105.8  | 109.7  | 111    | 107.5  | 95.9   | 126.2  | 119    |
| QRSL1   | 126.6  | 139    | 128.9  | 125.6  | 122.6  | 104.9  | 132.6  | 125.2  |
| QSCN6   | 141.9  | 125.8  | 159.8  | 130.6  | 123    | 147.9  | 135.9  | 131.4  |
| QSCN6   | 123.4  | 116.8  | 124.7  | 120.6  | 105.9  | 100.9  | 113.9  | 112.9  |
| QSCN6L1 | 219.4  | 198.5  | 189.3  | 204.2  | 167.6  | 135.5  | 219.8  | 163.4  |
| QSER1   | 128.2  | 122.3  | 135.9  | 132.1  | 113.4  | 101.9  | 123.5  | 123.5  |
| QTRT1   | 127.9  | 148.3  | 141.3  | 134.6  | 122.1  | 101.3  | 135.4  | 120.1  |
| QTRTD1  | 130.8  | 123    | 133.5  | 137.8  | 118.4  | 120.2  | 138.8  | 127.5  |
| R3HDM1  | 145.5  | 138.4  | 127.1  | 143    | 137.6  | 115.4  | 146.2  | 130.7  |
| R3HDM2  | 140.9  | 134    | 130.2  | 139.6  | 106.4  | 115.9  | 138.6  | 132.5  |
| R3HDM1  | 121.5  | 112.2  | 111.2  | 116.8  | 108.1  | 97.9   | 115.1  | 112.8  |
| RAB10   | 1578.4 | 1461.1 | 1449.3 | 2036.2 | 1464.9 | 1582.3 | 3095.2 | 2089.3 |
| RAB11A  | 608    | 690.3  | 690.9  | 750.4  | 642.7  | 558.9  | 727.3  | 726.7  |
| RAB11B  | 112.6  | 117.7  | 113.9  | 122.4  | 108.6  | 98.1   | 119.4  | 117.7  |

|           |       |       |        |       |       |        |        |        |
|-----------|-------|-------|--------|-------|-------|--------|--------|--------|
| RAB11FIP1 | 109.5 | 112.2 | 120.9  | 109.4 | 111.2 | 103.8  | 128.5  | 124.1  |
| RAB11FIP1 | 121.6 | 122.4 | 125.4  | 126.1 | 118   | 107.3  | 126.6  | 119.2  |
| RAB11FIP1 | 494.2 | 410.9 | 601.6  | 494.5 | 377.5 | 382.4  | 417.9  | 370.8  |
| RAB11FIP2 | 325.5 | 324.7 | 318.6  | 348.2 | 316   | 262    | 271.4  | 266.5  |
| RAB11FIP3 | 381.1 | 344.8 | 303.6  | 354.7 | 347.8 | 238.2  | 404.2  | 404.4  |
| RAB11FIP4 | 138.1 | 158.4 | 171.7  | 159.6 | 142.9 | 140.4  | 139.3  | 141.5  |
| RAB11FIP5 | 253.5 | 287.4 | 192.5  | 251.3 | 202.8 | 130.6  | 249.3  | 254.2  |
| RAB12     | 119.2 | 116.9 | 132.8  | 116   | 116.5 | 102.6  | 120.2  | 121.7  |
| RAB13     | 116.5 | 132.1 | 124.3  | 132.5 | 108.8 | 106.1  | 117.7  | 111.4  |
| RAB14     | 113.7 | 129.4 | 121.8  | 116   | 104.4 | 99.7   | 125    | 118.2  |
| RAB15     | 136.7 | 113.5 | 119.7  | 129.5 | 109.2 | 99.8   | 119.2  | 117.3  |
| RAB17     | 112.9 | 108.6 | 108.2  | 109.3 | 93.8  | 101.2  | 112.7  | 110.1  |
| RAB18     | 142.6 | 143.8 | 143.1  | 181.3 | 135   | 134.3  | 157.9  | 147.4  |
| RAB19B    | 122.8 | 116.5 | 115.5  | 122.3 | 114   | 99.8   | 108.5  | 115.9  |
| RAB1A     | 191   | 167.5 | 204.1  | 211   | 162   | 167.7  | 228.2  | 219.8  |
| RAB1B     | 144   | 161.7 | 128.4  | 145.4 | 127.5 | 121.7  | 151.3  | 128    |
| RAB2      | 182.1 | 178.2 | 211.2  | 213.7 | 192.8 | 199.6  | 264.1  | 253.3  |
| RAB20     | 136.9 | 119.3 | 127    | 134.8 | 115.5 | 100.6  | 130.8  | 121.6  |
| RAB21     | 222.5 | 258.1 | 227.1  | 373.5 | 264.3 | 234    | 336.4  | 383.5  |
| RAB22A    | 591.7 | 657   | 496.1  | 664.3 | 576.4 | 444.6  | 614.1  | 602.9  |
| RAB23     | 108.2 | 119.3 | 108.7  | 113.8 | 106.5 | 95.6   | 111.4  | 107    |
| RAB23     | 113.2 | 123.5 | 112.3  | 126.9 | 115.2 | 99.2   | 117.3  | 111.4  |
| RAB23     | 240.2 | 287.9 | 155.7  | 261.5 | 228.2 | 139.2  | 251.6  | 268.3  |
| RAB24     | 159.6 | 149.3 | 163.1  | 148.7 | 126.5 | 116.7  | 139.1  | 123.6  |
| RAB24     | 437.4 | 418.3 | 517.1  | 345.7 | 245.8 | 303.2  | 263.6  | 258.8  |
| RAB24     | 201.3 | 216.3 | 186.3  | 190.6 | 136.9 | 133.1  | 186    | 141.9  |
| RAB24     | 136.3 | 132.1 | 140.3  | 134   | 122   | 108.1  | 125.7  | 129.4  |
| RAB25     | 117.9 | 117.2 | 121.9  | 124.8 | 114.8 | 100.5  | 119.6  | 127.2  |
| RAB26     | 117.8 | 116.2 | 118.6  | 120.3 | 107.7 | 94.6   | 118.6  | 121.7  |
| RAB27A    | 161.9 | 182.3 | 213    | 192.6 | 158.3 | 183.1  | 193.2  | 173.8  |
| RAB27A    | 115.6 | 110   | 122.2  | 114.1 | 109.9 | 101    | 116.2  | 110    |
| RAB27A    | 109.4 | 115.9 | 120.9  | 110.2 | 104.9 | 89     | 112    | 108    |
| RAB27B    | 119   | 117.8 | 125.3  | 124.8 | 101.3 | 96.9   | 120.8  | 123    |
| RAB28     | 158.4 | 162.1 | 157.5  | 140.8 | 150.7 | 134.4  | 145.2  | 133.1  |
| RAB28     | 163.2 | 153.6 | 158.9  | 165.5 | 161.6 | 136.2  | 140.8  | 158.9  |
| RAB2B     | 815.8 | 896.1 | 871.2  | 883.6 | 856.5 | 653.2  | 1144.2 | 1015.3 |
| RAB30     | 132.3 | 140.1 | 143    | 144.6 | 122.7 | 115.6  | 147.6  | 134.6  |
| RAB31     | 564   | 353.3 | 2224.4 | 592.5 | 250.9 | 1281.7 | 380.4  | 223.5  |
| RAB32     | 276   | 157.8 | 681    | 304.8 | 167.7 | 512.1  | 336.2  | 196.5  |
| RAB33A    | 161.1 | 169.1 | 286.9  | 157.9 | 150.4 | 221.6  | 128.7  | 137.6  |
| RAB33B    | 196.5 | 194.7 | 221.6  | 212.9 | 173.7 | 147.2  | 205.4  | 168.4  |
| RAB34     | 140.4 | 122.5 | 136.5  | 144.8 | 100.8 | 123.6  | 132.3  | 120.1  |
| RAB35     | 336.9 | 370.2 | 335    | 423.3 | 298.3 | 291.8  | 420.6  | 477.2  |
| RAB36     | 118.6 | 116.6 | 123.7  | 113.2 | 123.3 | 95.5   | 118.8  | 123.4  |
| RAB37     | 207   | 234.8 | 223.5  | 212.9 | 155.9 | 158.6  | 139.1  | 127.9  |
| RAB37     | 154.5 | 164.7 | 149.2  | 141.5 | 128.5 | 119.7  | 134.5  | 126.2  |
| RAB37     | 130.5 | 125.9 | 117    | 132.6 | 115   | 100.7  | 122.7  | 113.7  |
| RAB38     | 116.4 | 176.4 | 129.1  | 127   | 119.5 | 106.8  | 126.5  | 122.3  |
| RAB39     | 113.3 | 112.4 | 118    | 109.6 | 113.4 | 100.2  | 120    | 115    |
| RAB39B    | 112.3 | 119.6 | 117.8  | 123.1 | 119   | 102.3  | 114.7  | 112.4  |
| RAB3A     | 114.3 | 125.8 | 121.4  | 131.9 | 114.9 | 102.1  | 125    | 118.7  |



|          |        |        |        |        |        |        |        |        |
|----------|--------|--------|--------|--------|--------|--------|--------|--------|
| RAB3B    | 115.5  | 115.2  | 119.6  | 137.4  | 119.1  | 98.4   | 114.7  | 119.4  |
| RAB3C    | 113.1  | 118.8  | 132.9  | 110.9  | 113.1  | 100.6  | 123.6  | 116.7  |
| RAB3D    | 120.9  | 106.7  | 115.6  | 130.9  | 118.1  | 102.3  | 131.9  | 122.2  |
| RAB3GAP1 | 843.3  | 888.4  | 871.9  | 1000.6 | 711.4  | 830    | 1013.1 | 960.4  |
| RAB3IL1  | 119    | 115.8  | 134.1  | 119.9  | 113.2  | 99.2   | 116.7  | 116.2  |
| RAB3IP   | 254.8  | 247.4  | 304.9  | 290.3  | 254    | 221.6  | 264.1  | 235.2  |
| RAB3IP   | 382.5  | 390.4  | 339.2  | 496.2  | 375.8  | 266.9  | 585.5  | 412.3  |
| RAB40A   | 110.5  | 107.4  | 111.9  | 114.7  | 106.1  | 90     | 107.3  | 106.3  |
| RAB40B   | 148.9  | 135.7  | 170.5  | 141.3  | 138.7  | 147    | 146.9  | 141.8  |
| RAB40C   | 708.8  | 677.7  | 582.6  | 672.7  | 500    | 434.9  | 643.2  | 536.7  |
| RAB41    | 119.4  | 116.1  | 125.1  | 115.9  | 114.3  | 101.1  | 123    | 109.3  |
| RAB42    | 116.1  | 122.9  | 125.5  | 130.2  | 112.1  | 101.3  | 123.8  | 119.2  |
| RAB43    | 489.2  | 524.4  | 310.5  | 461.2  | 297.8  | 285    | 553    | 577.8  |
| RAB4A    | 146.9  | 158.1  | 165.7  | 159    | 135.3  | 142.7  | 132.4  | 129    |
| RAB4B    | 193.7  | 186.2  | 229.5  | 213.3  | 163.3  | 180.8  | 183.7  | 170.1  |
| RAB5A    | 268    | 285.5  | 315.5  | 281.2  | 278.3  | 292.7  | 340.3  | 334.5  |
| RAB5B    | 1058.2 | 1110.3 | 1106.4 | 1132.5 | 960.6  | 961.6  | 1192.4 | 1053.1 |
| RAB5C    | 319.8  | 250.8  | 340.4  | 326.5  | 203    | 271.3  | 434.2  | 266.7  |
| RAB5C    | 165.5  | 187.3  | 182.4  | 180.3  | 186.1  | 192.9  | 180.4  | 178.3  |
| RAB6A    | 130.3  | 135.6  | 139.3  | 160.1  | 128    | 117.7  | 153.7  | 145.4  |
| RAB6B    | 125.9  | 121.1  | 138.4  | 124.6  | 114.5  | 100.1  | 125.5  | 126.4  |
| RAB6C    | 115.1  | 117.6  | 118.5  | 113.8  | 102.5  | 99.6   | 117.5  | 118.7  |
| RAB6IP1  | 584.3  | 673.7  | 589.3  | 670.9  | 636.4  | 474.5  | 881.8  | 1277.6 |
| RAB6IP2  | 116.1  | 113.8  | 125.5  | 121.1  | 112.3  | 99.3   | 120.5  | 115.7  |
| RAB7     | 1326   | 1500.3 | 1606.3 | 1727.4 | 1517.5 | 1420.7 | 2342.9 | 2498.8 |
| RAB7B    | 172.8  | 159.2  | 198.1  | 245.9  | 178.3  | 271.2  | 315.3  | 172.8  |
| RAB7L1   | 526.3  | 534.9  | 414.1  | 555.5  | 467.2  | 278.8  | 460.7  | 388.5  |
| RAB8A    | 601.6  | 720.5  | 753.2  | 729.2  | 578.6  | 657.5  | 801.9  | 770.1  |
| RAB8B    | 551.4  | 685.4  | 559.6  | 667.6  | 745.8  | 560.9  | 1177.8 | 1463.3 |
| RAB9A    | 543.2  | 552.4  | 533.4  | 736.7  | 487.1  | 485.9  | 625.4  | 628.4  |
| RAB9B    | 114.4  | 119.6  | 123.5  | 123.2  | 126.2  | 97.3   | 122.2  | 128.2  |
| RABAC1   | 579.7  | 499.7  | 602    | 617    | 400.5  | 444.1  | 472    | 377.5  |
| RABEP1   | 447.4  | 619.5  | 479.3  | 545.4  | 493.3  | 360.7  | 496.1  | 616.8  |
| RABEP2   | 112    | 122.7  | 112.2  | 127.9  | 105.9  | 99.7   | 124.5  | 107.1  |
| RABEP2   | 119.6  | 117.2  | 117.9  | 126    | 101.5  | 93.6   | 119.6  | 105.6  |
| RABEPK   | 282.5  | 322.1  | 296.6  | 313    | 239.1  | 260.4  | 283.5  | 275.2  |
| RABGAP1  | 546.4  | 655.4  | 527.4  | 628.8  | 449.2  | 402.8  | 774.6  | 622.1  |
| RABGEF1  | 127.9  | 128.3  | 122.7  | 174.9  | 138.5  | 113.8  | 141.4  | 167.4  |
| RABGGTA  | 114.5  | 122.5  | 120.5  | 119.9  | 113.5  | 93.9   | 114.2  | 117.6  |
| RABGGTA  | 145.4  | 117.5  | 130.8  | 131.5  | 114.3  | 104.1  | 121    | 113.1  |
| RABGGTB  | 246.5  | 255.6  | 250.9  | 324.7  | 252    | 219.5  | 283.6  | 261.5  |
| RABIF    | 120.1  | 118    | 144.7  | 138.2  | 106.4  | 104.6  | 139.2  | 122.9  |
| RABL2A   | 113.8  | 123.3  | 135.1  | 126    | 118.5  | 118.5  | 132.7  | 128    |
| RABL2A   | 188.1  | 181.3  | 214.4  | 143.8  | 144.6  | 141    | 141.5  | 123.1  |
| RABL2B   | 253.7  | 280.6  | 272.3  | 215.9  | 235.6  | 164.2  | 151.2  | 164.8  |
| RABL3    | 185.8  | 178.7  | 183.2  | 210.3  | 171.2  | 162.2  | 155.9  | 149.6  |
| RABL4    | 150    | 157.8  | 170.8  | 162.4  | 124.8  | 146.6  | 157.3  | 160.3  |
| RABL5    | 125.4  | 116.4  | 132.4  | 117.9  | 110.8  | 102    | 121.2  | 115.7  |
| RAC1     | 921.6  | 1116.1 | 1473.1 | 978.7  | 788.2  | 1056.1 | 925.9  | 913.9  |
| RAC1     | 115.4  | 114.4  | 123.8  | 117.5  | 115.1  | 104    | 108.6  | 107.6  |
| RAC1     | 106.7  | 110.6  | 116.1  | 110.1  | 102.5  | 93.2   | 112.9  | 111.5  |

|          |        |        |        |        |        |        |        |        |
|----------|--------|--------|--------|--------|--------|--------|--------|--------|
| RAC2     | 2458.2 | 2886.7 | 2220.9 | 2209.9 | 2609.6 | 1752.3 | 1938.1 | 1445.3 |
| RAC3     | 125    | 131.6  | 123.7  | 125.2  | 120.9  | 106.6  | 129.5  | 115.1  |
| RACGAP1  | 153.1  | 140.5  | 157.7  | 164.9  | 153.4  | 135.8  | 164.9  | 167.9  |
| RAD1     | 133.4  | 131.8  | 163.4  | 147.7  | 124.4  | 126.7  | 151.8  | 156.8  |
| RAD1     | 108.9  | 112.1  | 114    | 116.9  | 105.8  | 96.8   | 120    | 116.9  |
| RAD17    | 118.8  | 113.1  | 111.6  | 115.9  | 115.6  | 103.8  | 115.5  | 114.1  |
| RAD17    | 148.7  | 146.5  | 156.7  | 151.9  | 151.9  | 120.8  | 132.8  | 145.9  |
| RAD17    | 116.8  | 121    | 123.5  | 121.4  | 116    | 104.3  | 112.4  | 118.3  |
| RAD18    | 115.4  | 110.2  | 113.8  | 110.3  | 100.2  | 93.8   | 122.7  | 117.6  |
| RAD21    | 596.6  | 566.8  | 646.2  | 544    | 551.1  | 338.9  | 733    | 695.2  |
| RAD23A   | 456.4  | 407.9  | 338.1  | 416.8  | 296.3  | 370.7  | 431.7  | 599.9  |
| RAD23B   | 264.5  | 299.4  | 267.1  | 320    | 346.6  | 246    | 368.4  | 377.6  |
| RAD50    | 171.6  | 218.9  | 157.1  | 201.9  | 181    | 127.6  | 195.6  | 187    |
| RAD50    | 114.6  | 120.6  | 119.9  | 117.1  | 109.1  | 103.9  | 131.8  | 118.1  |
| RAD51    | 162.3  | 163.6  | 152.1  | 165.4  | 143    | 130.6  | 146.5  | 154.2  |
| RAD51    | 123.4  | 123.5  | 129.6  | 140.8  | 115.1  | 106.8  | 130.5  | 124.5  |
| RAD51    | 119.7  | 111.1  | 111.3  | 117.2  | 106.4  | 97.3   | 115.5  | 110.1  |
| RAD51AP1 | 130.8  | 122    | 135.6  | 119.3  | 119.8  | 101.4  | 136    | 127.5  |
| RAD51C   | 201.5  | 234.3  | 196.8  | 226.4  | 195.4  | 163.5  | 182    | 177.3  |
| RAD51C   | 109.5  | 110.8  | 117    | 110.3  | 110.2  | 93.7   | 118.6  | 112.3  |
| RAD51C   | 204.5  | 218.3  | 252.1  | 207.7  | 179.8  | 166.9  | 161.4  | 149.2  |
| RAD51L1  | 125.4  | 125.2  | 109.8  | 118.2  | 106.9  | 97.7   | 107.3  | 110.2  |
| RAD51L1  | 120.1  | 122.9  | 120    | 121.7  | 108.5  | 106.1  | 126.9  | 126    |
| RAD51L1  | 104.8  | 112.3  | 124.5  | 129.3  | 111.5  | 99.9   | 127.5  | 113.3  |
| RAD51L3  | 125.1  | 132.2  | 120.1  | 117.6  | 115    | 105.2  | 116.3  | 118.6  |
| RAD51L3  | 118.6  | 112.1  | 121.9  | 118    | 104.7  | 92.9   | 121.4  | 115.3  |
| RAD51L3  | 124.8  | 119.1  | 121.2  | 116.8  | 119.5  | 103.9  | 122.3  | 123.8  |
| RAD52    | 111.7  | 116.3  | 115.5  | 114.9  | 107.1  | 93.2   | 121.1  | 116.8  |
| RAD52B   | 125.8  | 129.1  | 133.1  | 125.9  | 124.8  | 108.4  | 132.5  | 111.5  |
| RAD54B   | 112.1  | 108.6  | 110.4  | 117    | 98.1   | 97.2   | 114.1  | 116.1  |
| RAD54B   | 127.5  | 132.9  | 135.1  | 128.6  | 122.2  | 109.1  | 128.1  | 133.2  |
| RAD54L   | 117.4  | 125.8  | 116.6  | 126.8  | 114.5  | 94.7   | 125.1  | 116.3  |
| RAD9A    | 233.7  | 238.5  | 254.9  | 248.3  | 189.9  | 228.3  | 321.9  | 267.3  |
| RAD9B    | 113.4  | 117.5  | 123.2  | 117    | 115.1  | 95.4   | 123.6  | 121.8  |
| RAE1     | 122.7  | 131.3  | 132.4  | 140    | 121.6  | 125.4  | 133.8  | 135.6  |
| RAE1     | 107.6  | 107.6  | 119.1  | 105.9  | 104.7  | 97.1   | 110.9  | 111.8  |
| RAE1     | 409.5  | 431.8  | 446.6  | 466.6  | 386.4  | 362.7  | 497.7  | 528.9  |
| RAET1E   | 119    | 113.3  | 115.3  | 115.6  | 106.4  | 104.3  | 116.6  | 113.6  |
| RAET1G   | 117    | 115.2  | 109    | 111.3  | 106.2  | 102.5  | 104    | 110    |
| RAET1L   | 123    | 122.4  | 108.7  | 119.3  | 106.7  | 100.3  | 122.4  | 112.2  |
| RAF1     | 298.3  | 348.9  | 255    | 299.2  | 225.9  | 211.1  | 309.6  | 314.5  |
| RAFTLIN  | 540.6  | 484.4  | 607.6  | 486.2  | 553.9  | 560.4  | 457.8  | 366.9  |
| RAG1     | 113    | 118.4  | 119.7  | 123.3  | 102.2  | 96     | 126.8  | 116.5  |
| RAG1AP1  | 123.6  | 131.4  | 137.8  | 132.3  | 126.2  | 118    | 124.5  | 132.8  |
| RAG2     | 107.7  | 122.6  | 111.9  | 111.2  | 107.9  | 96.2   | 112    | 114.9  |
| RAGE     | 150.9  | 162.7  | 156.9  | 144.3  | 139.6  | 130.1  | 151.1  | 131    |
| RAI1     | 179.5  | 244.2  | 186.2  | 194.3  | 165.3  | 152.3  | 207.2  | 223.6  |
| RAI14    | 119.5  | 135.7  | 118.3  | 136.4  | 131.6  | 109.5  | 137.2  | 130    |
| RAI16    | 141.9  | 132.6  | 140.6  | 142.3  | 125.8  | 117.3  | 130.9  | 138.3  |
| RAI17    | 445.2  | 410.8  | 576.2  | 639.2  | 390.9  | 489.9  | 630.5  | 334.1  |
| RALA     | 1146.3 | 1002.4 | 847.7  | 1122   | 786.3  | 792.9  | 1099.6 | 876.3  |

|          |        |        |        |        |        |        |        |        |
|----------|--------|--------|--------|--------|--------|--------|--------|--------|
| RALB     | 289.3  | 313.3  | 577.6  | 354.8  | 270.2  | 457.6  | 304.6  | 277.4  |
| RALBP1   | 222.3  | 201.3  | 207.9  | 247.1  | 210.5  | 197.9  | 261.3  | 239.4  |
| RALGDS   | 116.5  | 102.3  | 112.3  | 110    | 110.6  | 91     | 115.8  | 106.8  |
| RALGDS   | 1741.3 | 1983.3 | 2022.1 | 1767.2 | 1287.4 | 1506.5 | 1703   | 1647.5 |
| RALGPS1  | 153.4  | 161    | 135.8  | 152    | 144.1  | 110.4  | 133    | 150.1  |
| RALGPS2  | 122    | 122.5  | 128.8  | 123    | 111.9  | 106.1  | 126.4  | 114.4  |
| RALGPS2  | 114.6  | 119.7  | 122.2  | 142.1  | 107.4  | 106.3  | 124.2  | 124.4  |
| RALGPS2  | 124.4  | 113.6  | 116.7  | 113.1  | 105.9  | 100.3  | 119.6  | 110.2  |
| RALY     | 279.3  | 354.7  | 270.7  | 382.9  | 311    | 295    | 356.6  | 381    |
| RALY     | 683.1  | 852.8  | 666.3  | 806.5  | 539.9  | 683.3  | 994.6  | 1007.4 |
| RAMP1    | 109.8  | 121.3  | 116.7  | 122.1  | 118    | 105.5  | 118.4  | 131.9  |
| RAMP2    | 128.2  | 129.5  | 133.6  | 137.6  | 117.2  | 110.1  | 133.5  | 134.1  |
| RAMP3    | 122.9  | 117.5  | 116.1  | 128.6  | 116.2  | 101.4  | 128.1  | 120.2  |
| RAN      | 198.9  | 213.7  | 191.5  | 241.6  | 228.1  | 193.5  | 268.8  | 337.6  |
| RANBP1   | 264.4  | 255.9  | 353.5  | 251.5  | 262.4  | 248.3  | 285.4  | 294.6  |
| RANBP10  | 197.3  | 215.9  | 189.8  | 231.8  | 169.1  | 186.4  | 220.1  | 205    |
| RANBP17  | 114.7  | 119.3  | 115    | 119    | 109.4  | 98.8   | 118    | 100.8  |
| RANBP2   | 110.4  | 118.7  | 130.3  | 125.1  | 120.1  | 105.5  | 121.2  | 123.6  |
| RANBP3   | 236.9  | 298.7  | 273.1  | 301.1  | 238.8  | 273.1  | 339    | 277.3  |
| RANBP3   | 168.1  | 152.9  | 161.6  | 158.7  | 140.8  | 128.3  | 189.2  | 173.1  |
| RANBP3L  | 109    | 116    | 106.5  | 128.5  | 103.4  | 97.8   | 110.7  | 110.8  |
| RANBP5   | 129.1  | 131.1  | 138.3  | 138.4  | 135.6  | 112.3  | 137.9  | 159.2  |
| RANBP6   | 125.7  | 121.9  | 134.1  | 118.5  | 113.9  | 104.5  | 121.9  | 114.5  |
| RANBP9   | 119.5  | 135.2  | 125.9  | 133.9  | 111.4  | 100.4  | 129.1  | 142.2  |
| RANGAP1  | 755.4  | 775.5  | 559.3  | 660.3  | 561.5  | 416.1  | 902.6  | 826    |
| RANGNRF  | 129.7  | 125.6  | 117.2  | 119.6  | 118.1  | 102.9  | 127.9  | 127.9  |
| RAP1A    | 129.1  | 142.1  | 142.5  | 135.3  | 125.5  | 116.7  | 131.1  | 149.7  |
| RAP1A    | 135.7  | 131.3  | 128.1  | 137.1  | 144.5  | 107.4  | 131.8  | 150.8  |
| RAP1B    | 123    | 144.8  | 134.6  | 140.2  | 120.6  | 107.7  | 135.8  | 129.1  |
| RAP1B    | 279.8  | 297.5  | 301.8  | 266.7  | 223.3  | 280.1  | 368.2  | 341.2  |
| RAP1GA1  | 116.8  | 117.8  | 118.8  | 133.2  | 106.7  | 95.9   | 124.7  | 122.5  |
| RAP1GDS1 | 187.8  | 144.3  | 216.9  | 159.4  | 136.9  | 153.9  | 165    | 147.8  |
| RAP2A    | 353.2  | 308.7  | 486.6  | 350.7  | 325.7  | 374.3  | 470.1  | 509.1  |
| RAP2B    | 119.2  | 124.7  | 122    | 121.6  | 115    | 108.1  | 128.9  | 116.4  |
| RAP2C    | 188    | 180.9  | 196.7  | 177.5  | 168.1  | 164.3  | 178.8  | 182.2  |
| RAP80    | 806.3  | 933.9  | 611.7  | 891.7  | 823.3  | 411.2  | 1046.3 | 1121.4 |
| RAPGEF1  | 114.5  | 125.2  | 121.5  | 125.4  | 116.2  | 109.9  | 126.6  | 121.9  |
| RAPGEF1  | 1265   | 1238   | 1075.8 | 1428.4 | 838.3  | 1054.9 | 1530.9 | 1108.3 |
| RAPGEF1  | 119.2  | 118.7  | 111.3  | 136    | 130.3  | 103.8  | 134.2  | 117.6  |
| RAPGEF3  | 119.2  | 114.6  | 113.8  | 114.9  | 107.1  | 95.8   | 115.9  | 117.3  |
| RAPGEF4  | 133.9  | 126.5  | 128    | 128.3  | 120.5  | 105.1  | 122.7  | 119.2  |
| RAPGEF6  | 438.8  | 672    | 485.4  | 569.3  | 709.9  | 679.8  | 669.8  | 660.9  |
| RAPGEFL1 | 149.2  | 133.4  | 128.7  | 131.6  | 125    | 108.7  | 129.3  | 129.4  |
| RAPH1    | 115.7  | 105.3  | 124.6  | 119.3  | 103.7  | 97.2   | 107.9  | 105.6  |
| RAPH1    | 117.4  | 114.4  | 126.6  | 120.3  | 110.9  | 96.7   | 120.2  | 113.1  |
| RAPH1    | 117.3  | 115.2  | 115.5  | 114.5  | 106.6  | 98.4   | 123.6  | 113.2  |
| RAPH1    | 119.2  | 115.1  | 123.7  | 113.4  | 108    | 95.1   | 130.8  | 123.1  |
| RAPSN    | 136.4  | 151.5  | 127.1  | 144.4  | 130.7  | 107.9  | 155.4  | 131.4  |
| RAPSN    | 121.3  | 121.4  | 119.2  | 121.2  | 114.5  | 105.9  | 125.8  | 124.6  |
| RAPTOR   | 114.8  | 115.7  | 118.9  | 112.9  | 104.9  | 98     | 109.4  | 113.5  |
| RARA     | 127.1  | 128.1  | 149.8  | 125.8  | 123.9  | 110.6  | 126.7  | 120.1  |

|          |        |        |        |        |        |        |        |        |
|----------|--------|--------|--------|--------|--------|--------|--------|--------|
| RARA     | 503.9  | 642.1  | 780.8  | 606.2  | 444.1  | 600.2  | 721.8  | 582.2  |
| RARA     | 108.4  | 116    | 112.8  | 114.5  | 111    | 100.3  | 112.3  | 114.9  |
| RARB     | 114.8  | 131.5  | 127.8  | 135.9  | 115.1  | 102.5  | 132.5  | 121.3  |
| RARB     | 113.8  | 114.3  | 105.5  | 124.8  | 111.3  | 87.3   | 120.1  | 104.4  |
| RARB     | 119.4  | 115.7  | 113.1  | 117.2  | 103.6  | 97.7   | 114.7  | 114.7  |
| RARG     | 111.4  | 121.4  | 116.8  | 126    | 110.7  | 96.3   | 115.4  | 116.9  |
| RARRES1  | 110    | 112.4  | 107.2  | 108.9  | 100.6  | 87.6   | 116.4  | 100.9  |
| RARRES1  | 102.9  | 109.5  | 123.1  | 116.6  | 109.4  | 101.6  | 113.2  | 108.6  |
| RARRES1  | 110.4  | 116    | 114.3  | 123.7  | 106.6  | 100.1  | 126.1  | 114.8  |
| RARRES2  | 116.6  | 115.9  | 118.7  | 117.4  | 104.8  | 97     | 113.5  | 120.6  |
| RARRES3  | 1600.8 | 1681.9 | 2407.9 | 1694.1 | 1372.8 | 2101   | 1080.6 | 1169.1 |
| RARS     | 699.1  | 705    | 664.4  | 738.3  | 490.1  | 495    | 608.3  | 612.3  |
| RARSL    | 274.1  | 312.1  | 360.1  | 313    | 299.8  | 267.4  | 336.2  | 268.2  |
| RASA1    | 111.8  | 110.4  | 120.8  | 125.2  | 115.8  | 97.9   | 129    | 110.9  |
| RASA1    | 458.3  | 539.5  | 595.3  | 536.4  | 428.1  | 442.4  | 510.3  | 596.4  |
| RASA1    | 108.7  | 121.2  | 111.2  | 112.9  | 108.7  | 93.7   | 119.5  | 115.6  |
| RASA2    | 187.4  | 209.3  | 189.5  | 233.2  | 220.3  | 131.3  | 252    | 247.9  |
| RASA3    | 195.8  | 224.1  | 204.8  | 218.3  | 178.8  | 174.9  | 186    | 186.8  |
| RASA4    | 119.6  | 112    | 118.6  | 112.4  | 106.7  | 102.1  | 115.5  | 117.5  |
| RASAL1   | 128    | 144.2  | 176.9  | 161.5  | 125.4  | 180    | 137.6  | 128.6  |
| RASAL2   | 125.8  | 121.2  | 132.4  | 134.4  | 115    | 112.9  | 114    | 126.6  |
| RASAL2   | 103.4  | 117.1  | 111.9  | 110.7  | 104.6  | 103.9  | 107    | 112.2  |
| RASAL2   | 106.8  | 112.6  | 108    | 119.6  | 104.4  | 103.8  | 111.2  | 113.5  |
| RASD1    | 123.9  | 118.2  | 117.2  | 121.4  | 117.3  | 104.3  | 120.3  | 129.3  |
| RASD2    | 112.2  | 109.3  | 119.5  | 121.7  | 104.4  | 100.4  | 117.6  | 127.2  |
| RASEF    | 110.1  | 129.8  | 119.2  | 123.6  | 114.6  | 104.3  | 122.7  | 112.2  |
| RASGEF1A | 104.8  | 105.6  | 107.2  | 109.3  | 102.4  | 93.8   | 108.2  | 110.6  |
| RASGEF1B | 123.6  | 124.2  | 118.2  | 114.7  | 103.4  | 95.3   | 109.7  | 117.3  |
| RASGEF1C | 114.4  | 123.8  | 134.2  | 118.2  | 112.2  | 101.4  | 121.7  | 122.4  |
| RASGEF1C | 113.8  | 116.1  | 104.5  | 119.6  | 98.8   | 90.7   | 108.6  | 109.5  |
| RASGEF1C | 117.8  | 126    | 112.7  | 114.6  | 109    | 106.7  | 115    | 113.7  |
| RASGRF1  | 117.2  | 119.9  | 121.3  | 122.6  | 108.1  | 104.3  | 115.1  | 117.7  |
| RASGRF1  | 120.3  | 117.4  | 122.7  | 119.4  | 109.5  | 107.6  | 127.7  | 124    |
| RASGRF2  | 120.5  | 127    | 117.4  | 119.4  | 114    | 91.2   | 124.1  | 113    |
| RASGRP1  | 445.6  | 514.8  | 391.3  | 553.1  | 353.1  | 346    | 402    | 563.5  |
| RASGRP2  | 1505.1 | 1327.6 | 1314.3 | 1585.9 | 1050.6 | 1110.4 | 1090.2 | 1113.1 |
| RASGRP2  | 621.1  | 649.1  | 525.8  | 627.6  | 497.2  | 402    | 502.4  | 553.2  |
| RASGRP2  | 144.6  | 162.9  | 140.4  | 149.4  | 156.5  | 112.2  | 133.4  | 131.6  |
| RASGRP3  | 325.7  | 228.9  | 216    | 384.7  | 192.2  | 140.5  | 308.7  | 179.6  |
| RASGRP4  | 115    | 119.3  | 113.8  | 119.8  | 106    | 101.6  | 120.8  | 110.8  |
| RASGRP4  | 113.4  | 121.9  | 121.5  | 118.2  | 117.9  | 98.5   | 118    | 114.5  |
| RASGRP4  | 106.8  | 112.4  | 115.1  | 107.4  | 110.5  | 90.4   | 112    | 111.9  |
| RASIP1   | 116.8  | 122.2  | 113.7  | 120.9  | 107.8  | 101    | 115.3  | 112.9  |
| RASL10B  | 118.6  | 114.7  | 123.5  | 117.5  | 109.7  | 97     | 118    | 105.8  |
| RASL11A  | 114.4  | 122.2  | 121.3  | 118.8  | 112.8  | 102.1  | 121.7  | 115.6  |
| RASL11B  | 111.4  | 109.1  | 113    | 110.1  | 110.9  | 102.4  | 123.2  | 115.5  |
| RASL12   | 117.5  | 114.7  | 116.2  | 121.5  | 113.3  | 98.7   | 114.3  | 112.2  |
| RASSF1   | 355.7  | 339.5  | 302    | 395.9  | 245.2  | 224.2  | 336.7  | 309.1  |
| RASSF1   | 494.5  | 467.5  | 488.3  | 464.8  | 379.2  | 308.9  | 424.9  | 433.4  |
| RASSF1   | 116.9  | 116.5  | 116.8  | 121.6  | 110.5  | 102.7  | 117.8  | 113    |
| RASSF1   | 149.5  | 142.2  | 141.5  | 132.5  | 148    | 121.2  | 184.5  | 180.5  |

|         |        |        |        |        |        |        |        |        |
|---------|--------|--------|--------|--------|--------|--------|--------|--------|
| RASSF2  | 266    | 345.8  | 434.8  | 273.4  | 279.3  | 414.6  | 285.9  | 292.3  |
| RASSF2  | 118.9  | 107.8  | 128.6  | 127.3  | 115.1  | 104.1  | 131.5  | 121.2  |
| RASSF2  | 541.8  | 766.9  | 964    | 829    | 667.5  | 1065.9 | 748.1  | 815.4  |
| RASSF3  | 112.2  | 113.4  | 102.5  | 107.1  | 104.1  | 102.8  | 122.6  | 116.5  |
| RASSF4  | 125.5  | 118.1  | 161.4  | 122.3  | 110    | 101.4  | 115    | 116.2  |
| RASSF4  | 116.2  | 129.9  | 124.5  | 121.6  | 114.8  | 103.5  | 119    | 115.2  |
| RASSF5  | 144.9  | 140.1  | 146.9  | 151.8  | 129.2  | 133.5  | 131.6  | 153.4  |
| RASSF5  | 131.7  | 136.5  | 115    | 122.6  | 119.1  | 97.5   | 116.2  | 117.4  |
| RASSF5  | 1385.6 | 1912.8 | 1317.3 | 1640.4 | 1297.3 | 1219.3 | 1170.2 | 1208.2 |
| RASSF6  | 144.3  | 154.3  | 175.3  | 151.5  | 152.2  | 131.2  | 179    | 159.3  |
| RASSF6  | 109.3  | 111.4  | 108    | 115.3  | 105.9  | 97.7   | 114.9  | 103.8  |
| RASSF6  | 112.2  | 123.2  | 117.6  | 127.2  | 113.3  | 106.7  | 114    | 117.7  |
| RASSF7  | 547.7  | 698.2  | 856.3  | 674.9  | 530.9  | 630.2  | 670    | 636.9  |
| RASSF8  | 123.3  | 118.3  | 124.4  | 116.9  | 108    | 103.7  | 117    | 117.1  |
| RAVER1  | 256    | 298.7  | 191    | 313.7  | 206.8  | 236.8  | 304.7  | 275.5  |
| RAVER2  | 119.6  | 117    | 124.8  | 115.1  | 118.1  | 108.3  | 126.3  | 135.3  |
| RAX     | 120.3  | 121.5  | 117.7  | 109.4  | 115.4  | 103.9  | 117.7  | 107.1  |
| RAXL1   | 305.8  | 225.6  | 215.7  | 255.4  | 268.2  | 142.5  | 246.7  | 248.7  |
| RAXLX   | 120.2  | 122.5  | 115.7  | 110.2  | 108.2  | 95.7   | 112.3  | 119.9  |
| RB1     | 162.3  | 143.5  | 174    | 175.9  | 144.2  | 155.7  | 178.1  | 164    |
| RB1CC1  | 386    | 479.7  | 330.3  | 507.1  | 371.8  | 345.9  | 508.4  | 572    |
| RBAF600 | 494.6  | 487.1  | 377.4  | 587.4  | 551.2  | 380.2  | 885.5  | 858    |
| RBAK    | 148.1  | 136.5  | 135.6  | 134.4  | 116.2  | 102.9  | 134.9  | 128.6  |
| RBBP4   | 131.6  | 138.5  | 132.4  | 142.6  | 117.9  | 112.7  | 138.1  | 141.6  |
| RBBP5   | 168.7  | 188.7  | 161.3  | 184.7  | 183.7  | 177.2  | 193.6  | 189.2  |
| RBBP6   | 102.2  | 110.2  | 114.5  | 109.6  | 107    | 94.3   | 114.4  | 112.7  |
| RBBP6   | 125.2  | 123.6  | 124.1  | 129.1  | 121.4  | 115.3  | 120.6  | 133.8  |
| RBBP6   | 116.1  | 113.5  | 117.4  | 119.9  | 108.6  | 96.4   | 118.7  | 110    |
| RBBP7   | 211.3  | 154.7  | 162.6  | 172.9  | 154.8  | 148.9  | 191.4  | 176.7  |
| RBBP8   | 113    | 110.8  | 123.3  | 116.2  | 110.1  | 100.5  | 125.5  | 122.3  |
| RBBP8   | 130.7  | 116.6  | 120.8  | 132.2  | 115.6  | 106.1  | 117.5  | 121    |
| RBBP8   | 187.1  | 197    | 174.3  | 225.5  | 213.3  | 208    | 288.3  | 302.9  |
| RBBP9   | 112.1  | 132    | 131.6  | 128.7  | 108.7  | 109.5  | 125.3  | 121.8  |
| RBBP9   | 247.5  | 256.7  | 241.5  | 220.2  | 204.8  | 181.7  | 208.8  | 197.4  |
| RBCK1   | 193.6  | 171.2  | 188.6  | 187.9  | 157.9  | 143.5  | 172.5  | 207.9  |
| RBCK1   | 200.7  | 205.5  | 213.9  | 201.4  | 166.6  | 161.7  | 200.2  | 195.5  |
| RBED1   | 160.1  | 145.6  | 165.6  | 153.6  | 130.7  | 125.7  | 142.2  | 141.9  |
| RBJ     | 185.5  | 193.6  | 225.7  | 204.4  | 192.7  | 188    | 178    | 214    |
| RBKS    | 139.6  | 143.4  | 140.4  | 137.8  | 122.5  | 121.6  | 133.3  | 134.7  |
| RBL1    | 115.3  | 117.1  | 109.3  | 110.9  | 101.9  | 104.7  | 118.8  | 108    |
| RBL1    | 128.7  | 134.4  | 138.3  | 152.4  | 130.6  | 118.6  | 138.1  | 131.7  |
| RBL2    | 1515.9 | 1650   | 1457.3 | 1685.8 | 1292.4 | 967.5  | 1100.2 | 1034.5 |
| RBM10   | 163.6  | 185.7  | 171.7  | 198.2  | 154.8  | 139.6  | 191.3  | 272.1  |
| RBM10   | 1279.9 | 1188.6 | 1264.1 | 1367.3 | 1118.9 | 1116.1 | 1700.5 | 1878.2 |
| RBM10   | 118.8  | 117.8  | 126.5  | 132.8  | 112.5  | 93.5   | 124.5  | 122.1  |
| RBM11   | 125.4  | 127.3  | 130.6  | 133.7  | 127.5  | 107    | 147.7  | 130.8  |
| RBM12   | 158.9  | 162.5  | 154    | 151.9  | 141.1  | 124.7  | 153    | 187    |
| RBM12   | 270.5  | 286.5  | 291.8  | 267.1  | 264.7  | 281.4  | 381.8  | 446.5  |
| RBM12B  | 178.6  | 141.5  | 204.3  | 188    | 196    | 118.9  | 168.9  | 232    |
| RBM13   | 195.8  | 202.6  | 195.1  | 224    | 184.5  | 157.8  | 185.5  | 196.9  |
| RBM14   | 694.8  | 587.2  | 592.2  | 544.6  | 475.3  | 434.3  | 601.7  | 805.3  |

|          |        |        |        |        |        |        |        |        |
|----------|--------|--------|--------|--------|--------|--------|--------|--------|
| RBM15    | 413.7  | 418.7  | 357.2  | 445.8  | 462.1  | 291.1  | 403.1  | 396.2  |
| RBM15B   | 133.1  | 156.9  | 129.6  | 136.2  | 134.8  | 121.8  | 166    | 134.7  |
| RBM17    | 544    | 730    | 695.3  | 641.7  | 578.2  | 564.8  | 583.7  | 486.2  |
| RBM18    | 198    | 159.2  | 192.6  | 181.6  | 159.7  | 149.3  | 186.7  | 161.4  |
| RBM19    | 121.9  | 114.3  | 134.8  | 128    | 115.2  | 104.9  | 122.8  | 127.7  |
| RBM21    | 158.4  | 154.7  | 152    | 159    | 135.6  | 135.1  | 157.2  | 142    |
| RBM22    | 2097.8 | 2259.5 | 1858.9 | 2121.5 | 1896.7 | 1560.3 | 3297.4 | 3282.2 |
| RBM23    | 412.2  | 447.9  | 386.1  | 430.5  | 345.5  | 320.3  | 664.4  | 573    |
| RBM23    | 1032.6 | 1134   | 780.4  | 1129.6 | 764.8  | 804.1  | 1611.4 | 1592.7 |
| RBM24    | 107.5  | 118.8  | 110.3  | 118.6  | 107.4  | 97.3   | 109.8  | 107    |
| RBM25    | 462.7  | 367.5  | 318.1  | 432.4  | 356.5  | 225    | 401    | 375.2  |
| RBM28    | 171.6  | 168.3  | 155.5  | 176    | 146.7  | 131.3  | 182.8  | 168.4  |
| RBM3     | 115.5  | 117    | 138.3  | 129.6  | 110.5  | 105    | 120.9  | 126.3  |
| RBM3     | 149.7  | 162.9  | 161    | 185.7  | 145.3  | 129.7  | 152.3  | 156.2  |
| RBM33    | 716.1  | 746.1  | 707.1  | 679.4  | 676.8  | 500.6  | 695.1  | 683.5  |
| RBM34    | 206.9  | 194.5  | 243.5  | 240.2  | 194.4  | 228.7  | 261.6  | 224.6  |
| RBM35B   | 131.6  | 141.4  | 135    | 140.2  | 124.3  | 93.9   | 124    | 143.8  |
| RBM38    | 448    | 307.4  | 416.2  | 377    | 252.3  | 404    | 470.4  | 502.2  |
| RBM39    | 424.1  | 468.3  | 357.6  | 500.6  | 590.3  | 302.8  | 666.8  | 720.1  |
| RBM4     | 219.2  | 209.9  | 208.8  | 234.9  | 231.3  | 174.6  | 227.6  | 216.9  |
| RBM4     | 517.7  | 586    | 500.5  | 447.9  | 513.6  | 453.4  | 564.1  | 624.6  |
| RBM4     | 155.9  | 198.9  | 191.2  | 191    | 185.3  | 151.8  | 196.1  | 208.1  |
| RBM41    | 109.3  | 107.4  | 122.8  | 123.6  | 106.9  | 92.8   | 115    | 107.8  |
| RBM4B    | 223.1  | 235.4  | 214    | 228    | 184    | 169.2  | 193.7  | 196.8  |
| RBM5     | 1350.9 | 1268.8 | 1430   | 1328   | 1261.2 | 1227.4 | 1607.6 | 1523.4 |
| RBM6     | 334.4  | 400.5  | 338.6  | 439.8  | 376.2  | 306    | 350.4  | 340.5  |
| RBM7     | 174.4  | 207.2  | 157.3  | 190.4  | 166.6  | 146.6  | 187.5  | 221.7  |
| RBM8A    | 133.2  | 137    | 115.5  | 133.2  | 116.2  | 110.3  | 140.6  | 126    |
| RBM9     | 122.9  | 127.6  | 130.8  | 131.1  | 123.3  | 101.4  | 147.5  | 157.3  |
| RBM9     | 113.7  | 110    | 117.5  | 126.7  | 115.4  | 100.4  | 121.3  | 117.2  |
| RBMS1    | 362.6  | 373.2  | 417.6  | 384.3  | 361.9  | 254.9  | 305.2  | 347.4  |
| RBMS1    | 116.6  | 117.6  | 108.6  | 116.7  | 106    | 99     | 125.1  | 115.9  |
| RBMS2    | 116.3  | 113.7  | 120    | 116.2  | 106    | 102.6  | 125    | 112.4  |
| RBMS3    | 110.1  | 109.5  | 111.4  | 111.1  | 106.9  | 92.8   | 124.4  | 110.8  |
| RBMS3    | 114.9  | 120.8  | 119.8  | 118.6  | 113.3  | 102.6  | 130.7  | 118.7  |
| RBMS3    | 111.5  | 114.5  | 118.6  | 136.5  | 111.3  | 98.3   | 119.7  | 112    |
| RBMX     | 347.6  | 360.2  | 422.6  | 369.1  | 382.2  | 315.7  | 386.9  | 398.9  |
| RBMX2    | 132.1  | 139    | 141.3  | 137.2  | 144.6  | 162.7  | 140.3  | 153.4  |
| RBMXL1   | 105.6  | 107    | 114.5  | 117    | 107.6  | 110.6  | 124.4  | 128.6  |
| RBMY1A1  | 113.6  | 111.8  | 120.8  | 114.1  | 108.8  | 94.7   | 111.8  | 112.9  |
| RBMY1A1  | 105.8  | 122    | 106.8  | 111.6  | 110.6  | 97     | 115.3  | 116.2  |
| RBMY1A3P | 111.1  | 116.8  | 118.2  | 117.4  | 101.9  | 106.8  | 116.7  | 117.1  |
| RBMY1B   | 114.9  | 112.5  | 112.6  | 119.5  | 103.8  | 97.2   | 112.2  | 117    |
| RBMY1E   | 112.7  | 120.4  | 117.4  | 124.4  | 106.1  | 104.3  | 117.1  | 126.2  |
| RBMY1F   | 123.8  | 106    | 118.3  | 116.2  | 110.9  | 97.2   | 120.3  | 114.9  |
| RBMY1J   | 122.2  | 104.5  | 119.3  | 114.2  | 107.3  | 98.7   | 121.2  | 118.1  |
| RBMY2EP  | 116.2  | 115.2  | 129    | 124.8  | 105.3  | 93.7   | 105.7  | 119.9  |
| RBMY2FP  | 119.7  | 117    | 113.3  | 114.6  | 120    | 100.6  | 119.9  | 119.1  |
| RBP1     | 113.8  | 120    | 132.2  | 110.3  | 109    | 101.5  | 119.6  | 115.7  |
| RBP2     | 111.8  | 113.5  | 108.4  | 114.4  | 105.7  | 98.3   | 115.1  | 112.9  |
| RBP3     | 112    | 118.3  | 115.6  | 118    | 110.1  | 103.3  | 104.2  | 115.8  |

|         |        |        |        |        |        |       |        |        |
|---------|--------|--------|--------|--------|--------|-------|--------|--------|
| RBP4    | 113.2  | 115.9  | 117.8  | 114    | 106.5  | 100.9 | 121.6  | 111.3  |
| RBP5    | 112.9  | 121.4  | 120.8  | 117.3  | 106.7  | 98.7  | 118.1  | 114.1  |
| RBP7    | 111.1  | 117.9  | 179    | 115    | 109.4  | 111.7 | 131.4  | 119.1  |
| RBPJ    | 106.5  | 116.7  | 110.2  | 119    | 109.9  | 95.3  | 121.7  | 113.7  |
| RBPMS   | 114.5  | 118.2  | 120.5  | 120    | 110    | 101.6 | 119.5  | 119.2  |
| RBPMS   | 110.1  | 105.2  | 118.3  | 115.3  | 113    | 101.9 | 121.5  | 109.8  |
| RBPMS   | 126.1  | 111.5  | 116.6  | 123.9  | 103.5  | 95.9  | 116    | 112.7  |
| RBPMS2  | 123    | 163.4  | 120.2  | 132.3  | 135.9  | 110.3 | 130.8  | 179.6  |
| RBPSUH  | 109    | 113.3  | 130.2  | 116.1  | 105.6  | 101   | 120.1  | 127.2  |
| RBPSUH  | 326.1  | 353.8  | 453.4  | 375.1  | 316    | 306.6 | 313.4  | 332.6  |
| RBPSUHL | 110.8  | 111.3  | 122.1  | 119.8  | 121.9  | 112   | 115.4  | 117.9  |
| RBX1    | 713.5  | 662.1  | 798.2  | 715.9  | 627.7  | 496.1 | 846.2  | 870    |
| RC3H1   | 116.9  | 116.6  | 118    | 118.7  | 117    | 94.4  | 138.4  | 115.6  |
| RC74    | 267.3  | 324.8  | 286.3  | 338.5  | 261.9  | 205.3 | 311.5  | 286    |
| RCBTB1  | 136.4  | 128.5  | 141.6  | 149.6  | 125.8  | 108   | 133.4  | 121.3  |
| RCBTB2  | 566.1  | 389.4  | 833.6  | 818.6  | 480.9  | 1029  | 626.3  | 338.1  |
| RCC1    | 122.8  | 124.5  | 123.9  | 121.4  | 105.2  | 95.8  | 120.4  | 125.4  |
| RCC2    | 947    | 1103.5 | 778.8  | 1012.9 | 896.3  | 593.6 | 1027.4 | 953.9  |
| RCCD1   | 112.3  | 126.6  | 122.9  | 116.7  | 111.4  | 97.5  | 115    | 120.3  |
| RCCD1   | 110.6  | 114.9  | 117.6  | 118.5  | 107.2  | 105.9 | 116.6  | 113.3  |
| RCCD1   | 128.3  | 130.9  | 152.4  | 127.5  | 121.7  | 105.5 | 119.3  | 138.9  |
| RCD-8   | 684.4  | 740    | 537.2  | 679.1  | 530.8  | 415.9 | 814.1  | 760.5  |
| RCE1    | 270.2  | 326.5  | 282.5  | 291.6  | 193.6  | 218.8 | 327.8  | 274.2  |
| RCE1    | 143.5  | 145.7  | 133.2  | 143.2  | 126.3  | 106   | 140.8  | 140.7  |
| RCHY1   | 131    | 138.1  | 159.7  | 150.5  | 134    | 128.1 | 150    | 147.7  |
| RCHY1   | 118.5  | 123.3  | 127.4  | 129    | 115.2  | 105.8 | 121.8  | 122.9  |
| RCL1    | 171.5  | 145.8  | 150    | 166.9  | 150.2  | 132.2 | 167    | 161.5  |
| RCN1    | 108.7  | 115.8  | 107.2  | 117.1  | 115.4  | 103.7 | 103.4  | 106.5  |
| RCN2    | 117.6  | 121.2  | 120.5  | 119.7  | 114.8  | 99.2  | 117.3  | 110.9  |
| RCN3    | 128.3  | 129.8  | 136.6  | 126.2  | 104.6  | 111.4 | 122.4  | 116    |
| RCOR1   | 110.9  | 107.7  | 105.3  | 114.7  | 105.2  | 95.7  | 116.5  | 115.2  |
| RCOR2   | 109.4  | 104.9  | 106.4  | 125.4  | 100.5  | 103.2 | 115.6  | 110.4  |
| RCOR3   | 447    | 472.6  | 443.3  | 443.3  | 409.5  | 331.1 | 353.9  | 384    |
| RCP9    | 883.8  | 734.5  | 612.8  | 742.8  | 785.1  | 368.4 | 613.7  | 687.1  |
| RCP9    | 112.8  | 117.6  | 114.3  | 123.6  | 111.5  | 97.9  | 114.5  | 120    |
| RCP9    | 106    | 102.9  | 104.2  | 111    | 110.2  | 89.7  | 114.3  | 114    |
| RCSD1   | 333.6  | 289.2  | 281.7  | 310.7  | 242.9  | 256.3 | 214.2  | 202    |
| RCV1    | 124.6  | 120.9  | 136.8  | 116.8  | 108.8  | 118.3 | 118.4  | 117.6  |
| RDBP    | 195.6  | 170.5  | 197    | 189.4  | 162.3  | 146.4 | 178.2  | 164.2  |
| RDH10   | 185.6  | 191.1  | 155.8  | 241.4  | 189.1  | 140.7 | 276.4  | 284    |
| RDH11   | 238.7  | 224.7  | 232.2  | 234.1  | 181.8  | 202.8 | 196.1  | 221.8  |
| RDH12   | 105.7  | 114.6  | 112.3  | 118.8  | 105.9  | 105.8 | 124.3  | 110.7  |
| RDH13   | 146.6  | 176.5  | 173.7  | 158.6  | 154.1  | 129.3 | 140.1  | 150.9  |
| RDH14   | 1603.6 | 1680.9 | 1137.6 | 1473.2 | 1178.2 | 810.4 | 1547.3 | 1516.8 |
| RDH16   | 126.3  | 128    | 121.7  | 129.5  | 117.4  | 98.5  | 119.5  | 125.1  |
| RDH5    | 197.1  | 232.7  | 198.6  | 175.7  | 187.9  | 143.1 | 185.8  | 206.6  |
| RDH8    | 116.9  | 114.1  | 124.4  | 110.8  | 110.3  | 97.2  | 116.1  | 117    |
| RDHE2   | 113.2  | 119.6  | 125.4  | 111.4  | 108.8  | 105.4 | 116.7  | 114.3  |
| RDM1    | 119.5  | 121.1  | 120.6  | 107.7  | 109.3  | 98.8  | 109    | 104.2  |
| RDS     | 122.2  | 128.7  | 112.8  | 114.3  | 125.8  | 105.9 | 115.3  | 115.9  |
| REC8L1  | 268    | 238.4  | 275.6  | 310.3  | 214.7  | 187.3 | 284.4  | 264    |

|        |       |       |       |       |       |       |       |       |
|--------|-------|-------|-------|-------|-------|-------|-------|-------|
| REC8L1 | 160.6 | 149.1 | 140.3 | 152.5 | 143.4 | 107.2 | 164   | 158.6 |
| RECK   | 189   | 216.9 | 213.2 | 224.4 | 155.1 | 140.6 | 177.6 | 190.5 |
| RECQL  | 288.8 | 223.6 | 254.3 | 254.5 | 204.1 | 178.7 | 247.9 | 281.2 |
| RECQL  | 342.4 | 377.1 | 392.4 | 429.2 | 340.2 | 277.7 | 364.2 | 348.7 |
| RECQL4 | 109.3 | 115.9 | 115.1 | 119   | 112.2 | 102.2 | 127.1 | 112.4 |
| RECQL5 | 112.3 | 120.3 | 120.9 | 120.9 | 114.3 | 101.1 | 121.9 | 115   |
| RECQL5 | 143.6 | 141.9 | 134.6 | 154.5 | 131.4 | 112.8 | 149.8 | 137.7 |
| RECQL5 | 117.5 | 140.5 | 118.3 | 121.5 | 118.3 | 104.7 | 123.6 | 126.2 |
| REEP1  | 115.3 | 117.1 | 111.5 | 109.3 | 101.9 | 100   | 110.8 | 105.7 |
| REEP2  | 114.8 | 117.2 | 110.5 | 114.1 | 116.9 | 93.9  | 114.6 | 107.7 |
| REEP3  | 115.6 | 118.2 | 121.2 | 122.9 | 118.2 | 101.4 | 116.6 | 120.5 |
| REEP4  | 150.4 | 164.2 | 167.9 | 155   | 129.6 | 125.4 | 141.7 | 122.2 |
| REEP5  | 640.4 | 755.4 | 821.6 | 690.1 | 610.2 | 732.5 | 623.4 | 644   |
| REEP6  | 132.4 | 134.8 | 140.8 | 138.8 | 110.7 | 106.7 | 124.4 | 131.6 |
| REG1A  | 118.6 | 116.2 | 117.7 | 111.8 | 95.6  | 97.5  | 111.1 | 109.8 |
| REG1B  | 111.9 | 118   | 112.6 | 119.4 | 102   | 100.4 | 127.9 | 119   |
| REG3A  | 114.5 | 121.6 | 126.1 | 142.2 | 114.2 | 101   | 121.8 | 122.9 |
| REG3A  | 112.3 | 120   | 125   | 114.8 | 111.2 | 99.5  | 125.5 | 109.3 |
| REG3G  | 106.2 | 113.9 | 111.5 | 109   | 108.3 | 101.7 | 112.9 | 107.6 |
| REG3G  | 111.2 | 122   | 121.8 | 124.3 | 110.9 | 100.4 | 126.6 | 116.3 |
| REG4   | 126.8 | 137.6 | 118.9 | 131.6 | 152.7 | 103.5 | 129.8 | 154.4 |
| REL    | 135.3 | 132.6 | 129   | 127.7 | 127.2 | 125.2 | 133.6 | 142.5 |
| RELA   | 169.5 | 186.6 | 150.8 | 191.8 | 148.9 | 127.6 | 182.6 | 158.7 |
| RELB   | 229.4 | 257.8 | 166.1 | 252.5 | 210.5 | 171.7 | 411.6 | 399.3 |
| RELN   | 129.2 | 117.5 | 129.3 | 121.2 | 113.9 | 94.8  | 120.2 | 121.5 |
| RELN   | 117   | 115.5 | 123.3 | 126.2 | 118.1 | 107.7 | 121   | 120.3 |
| REM1   | 112.5 | 115.9 | 107.1 | 117.6 | 106.8 | 88.3  | 122.9 | 110.6 |
| REN    | 113   | 124.3 | 118.5 | 119.4 | 116.7 | 103   | 119.2 | 122.9 |
| RENBP  | 285.4 | 215.4 | 391   | 258.7 | 185.2 | 242.5 | 239.4 | 169.6 |
| RENT1  | 207.7 | 263.6 | 172.2 | 228.6 | 194.1 | 157.5 | 263.7 | 300.5 |
| REP15  | 108.2 | 110.5 | 109.9 | 100   | 105.6 | 90.7  | 116.5 | 118.3 |
| REPIN1 | 110.3 | 118.2 | 121.8 | 129.1 | 117.5 | 103   | 122.6 | 112.2 |
| REPIN1 | 116.6 | 125.9 | 109.3 | 122.5 | 115.6 | 96.5  | 127.7 | 126.5 |
| REPIN1 | 660.8 | 630.7 | 598.8 | 491.4 | 358.7 | 312.4 | 349.3 | 338.1 |
| REPS1  | 125.3 | 133.6 | 130.3 | 136.5 | 137.8 | 112.6 | 142.5 | 149.9 |
| REPS2  | 115.7 | 122.2 | 125.6 | 135.6 | 116.6 | 98.5  | 124.6 | 120.4 |
| REPS2  | 120.8 | 115.4 | 124.5 | 124.7 | 109.7 | 100.8 | 121.5 | 117.4 |
| REPS2  | 121.5 | 120.3 | 123   | 118.7 | 106.8 | 101.9 | 116.4 | 114   |
| REPS2  | 124.7 | 115   | 200.4 | 128.5 | 107.5 | 110   | 130.2 | 120.2 |
| REPS2  | 118.8 | 122   | 113.5 | 111.6 | 108.5 | 98.4  | 122.9 | 120.4 |
| RER1   | 145   | 135.4 | 131.8 | 128.7 | 123.6 | 117   | 131.2 | 135.6 |
| RERE   | 322.4 | 349.2 | 330.8 | 378.9 | 385.4 | 252.9 | 375.3 | 353.5 |
| RERE   | 121   | 111.8 | 127.9 | 118.6 | 112.9 | 101.4 | 122.8 | 115.4 |
| RERE   | 185.3 | 192.4 | 180   | 182.8 | 177.4 | 144.2 | 189   | 204.4 |
| RRRG   | 117.7 | 114.1 | 117.7 | 109   | 101.5 | 96.2  | 120.3 | 107.3 |
| RESP18 | 125.1 | 109.2 | 117.6 | 124.3 | 113.1 | 103.1 | 129.2 | 118.8 |
| REST   | 123.6 | 126.2 | 120.3 | 128.8 | 119.9 | 105.1 | 136.5 | 131.9 |
| RET    | 122.3 | 118.3 | 119.4 | 124.6 | 113.8 | 102   | 117   | 121.3 |
| RET    | 119.7 | 113.6 | 119   | 127.7 | 109.8 | 105.1 | 113.6 | 107.8 |
| RET    | 128   | 105.7 | 123.1 | 121.8 | 108.6 | 102.3 | 116   | 114.2 |
| RETN   | 135   | 105.7 | 118   | 119.1 | 107.1 | 97.4  | 115.5 | 117.8 |



|         |       |       |       |        |       |       |       |        |
|---------|-------|-------|-------|--------|-------|-------|-------|--------|
| RETNLB  | 112.5 | 117   | 121.1 | 123.1  | 107.6 | 100.9 | 118.7 | 114.6  |
| RETSAT  | 152.8 | 155.6 | 159.3 | 166.3  | 142.8 | 133.1 | 166   | 149.6  |
| REV1    | 253.5 | 290.2 | 278.5 | 299.1  | 202.9 | 205.2 | 254.8 | 304.3  |
| REV1L   | 273.9 | 379.9 | 323.9 | 322    | 318.2 | 249.1 | 326.3 | 442.5  |
| REV3L   | 119.4 | 134.8 | 126.3 | 126.5  | 122.2 | 110.8 | 129.1 | 122.2  |
| REXO1   | 169.5 | 165.3 | 159.6 | 174.7  | 156.6 | 127.8 | 181.5 | 178.1  |
| REXO1L1 | 113.1 | 115   | 122.7 | 129.1  | 105.7 | 102   | 117.8 | 113    |
| REXO2   | 969.2 | 910.1 | 718.8 | 1039.7 | 927.2 | 588.4 | 966.7 | 1179.2 |
| REXO4   | 251.8 | 320   | 207.3 | 271    | 230.3 | 168.7 | 256.3 | 245    |
| RFC1    | 293.2 | 349.1 | 253   | 310.1  | 258.9 | 223.6 | 235.6 | 246.5  |
| RFC2    | 118.4 | 136.8 | 121.3 | 121    | 112.7 | 99.3  | 134   | 125.2  |
| RFC2    | 122.9 | 133   | 130.7 | 132.3  | 129.7 | 124.7 | 125.4 | 131    |
| RFC3    | 118.8 | 117.7 | 127.6 | 123.7  | 111.4 | 107.9 | 123   | 113.9  |
| RFC3    | 127.9 | 130.6 | 133.8 | 118.5  | 111.1 | 109.1 | 116.6 | 113.4  |
| RFC3    | 113   | 122.8 | 110.8 | 115.9  | 107.6 | 106.8 | 123   | 116.1  |
| RFC4    | 225.6 | 227.8 | 235.3 | 167.8  | 193.3 | 193.2 | 179.2 | 182.3  |
| RFC4    | 207.6 | 229.8 | 265.5 | 263    | 189.2 | 199.3 | 172.7 | 174.9  |
| RFC5    | 216.9 | 225.5 | 228.2 | 219.9  | 174.9 | 161.3 | 171.2 | 167.7  |
| RFC5    | 112.2 | 113.3 | 114.2 | 119.3  | 111.6 | 91.4  | 112.3 | 107.2  |
| RFESD   | 143.6 | 161.8 | 167.9 | 155.8  | 126.3 | 125.9 | 148   | 146    |
| RFFL    | 114.8 | 121.8 | 109   | 115.6  | 107.4 | 96.5  | 111.1 | 113.1  |
| RFFL    | 111.1 | 113.5 | 112.6 | 124.6  | 109.6 | 108.4 | 121.7 | 114.5  |
| RFK     | 122.7 | 117.6 | 131   | 125    | 107.1 | 104.9 | 129.6 | 116.8  |
| RFNG    | 121.6 | 115.2 | 123.5 | 129.6  | 119.1 | 101.1 | 122.9 | 113.7  |
| RFNG    | 399.2 | 480.8 | 450.7 | 456.2  | 303.9 | 436.1 | 405.6 | 360.3  |
| RFNG    | 113   | 121.8 | 131   | 120.6  | 111.9 | 103.2 | 119.4 | 117.3  |
| RFP     | 170.2 | 171.5 | 166.8 | 170.3  | 130.6 | 134.6 | 139   | 148.2  |
| RFP2    | 116.1 | 129.5 | 126   | 130.5  | 115.5 | 101.7 | 125.3 | 117.1  |
| RFPL1S  | 109.2 | 118.5 | 130.4 | 120    | 106.5 | 100.4 | 116.2 | 116.8  |
| RFPL3S  | 127.4 | 135.7 | 121.7 | 116.7  | 110.9 | 108.7 | 122.1 | 129.4  |
| RFPL3S  | 119.3 | 122.5 | 135.1 | 128.8  | 112.6 | 101.1 | 124.9 | 122.3  |
| RFPL4B  | 112   | 110.9 | 110   | 111.1  | 106.2 | 91.4  | 110   | 109.6  |
| RFT1    | 113.8 | 121.4 | 112.9 | 120.4  | 110.3 | 109.8 | 120.5 | 118.4  |
| RFWD2   | 561.9 | 598.4 | 699.1 | 651.2  | 558.4 | 563.3 | 594.2 | 536.3  |
| RFWD2   | 114.7 | 114.8 | 125.7 | 121.9  | 116   | 99.4  | 113.8 | 118.1  |
| RFWD2   | 532.4 | 569.1 | 708.4 | 664.1  | 457.7 | 476.5 | 672.8 | 593.7  |
| RFWD3   | 245.8 | 259.2 | 260   | 249.7  | 240.3 | 185.9 | 249.9 | 233.3  |
| RFX1    | 228.4 | 229   | 203.6 | 213.7  | 197.5 | 183.5 | 230.7 | 183.9  |
| RFX2    | 121.5 | 117.6 | 120   | 117.4  | 119.7 | 108.7 | 117.1 | 127.3  |
| RFX2    | 117.6 | 113.5 | 112.3 | 122.4  | 107.1 | 104.9 | 122   | 113.8  |
| RFX3    | 115.7 | 115   | 131.9 | 123    | 110.8 | 102.8 | 127.9 | 115.2  |
| RFX3    | 121.8 | 132.2 | 134.2 | 136.6  | 119   | 117.1 | 138.1 | 129.7  |
| RFX3    | 110.2 | 115.8 | 125.8 | 120.2  | 106.8 | 106.8 | 126.1 | 114.3  |
| RFX4    | 104.6 | 113.3 | 112.1 | 108.3  | 106.7 | 106.2 | 109.5 | 118.3  |
| RFX4    | 120.4 | 131.9 | 129   | 122    | 109.3 | 103.2 | 119.9 | 120.7  |
| RFX4    | 117.5 | 112.2 | 111.4 | 124.4  | 110.2 | 95.4  | 114.7 | 117    |
| RFX4    | 121.8 | 111.5 | 110   | 122.2  | 112   | 99.4  | 114.1 | 115.5  |
| RFX5    | 123.2 | 126.8 | 126.6 | 119.3  | 113.1 | 104.9 | 115.5 | 116.1  |
| RFX5    | 748.8 | 647.3 | 621.7 | 706.1  | 421.2 | 421.3 | 512   | 445.5  |
| RFXANK  | 173.3 | 159   | 192.5 | 174.9  | 152.1 | 141.4 | 157.9 | 151.1  |
| RFXANK  | 129.3 | 141   | 128.3 | 134.5  | 120.2 | 108.3 | 124.8 | 129.9  |

|         |        |        |        |        |        |        |        |        |
|---------|--------|--------|--------|--------|--------|--------|--------|--------|
| RFXANK  | 360.4  | 407.8  | 394.6  | 375.2  | 255.5  | 284.3  | 356.7  | 280.2  |
| RFXAP   | 133.1  | 111.5  | 127.6  | 121.9  | 106.2  | 96.6   | 121.5  | 117.6  |
| RFXDC1  | 112.7  | 113.2  | 115    | 117.2  | 107.4  | 100.1  | 116.7  | 115.1  |
| RFXDC2  | 152.3  | 155.2  | 143.2  | 149.3  | 136.5  | 130.9  | 158.6  | 139.4  |
| RG9MTD1 | 208    | 217    | 195.5  | 227.7  | 181.5  | 180.6  | 218.7  | 237.2  |
| RG9MTD2 | 130.7  | 116.2  | 132.3  | 125    | 120.1  | 113.3  | 141.9  | 128.3  |
| RG9MTD3 | 148.7  | 145.8  | 165.4  | 188.7  | 152.6  | 120.7  | 156.5  | 157.6  |
| RGAG1   | 120.8  | 112.5  | 129.8  | 120.5  | 112.4  | 101.2  | 111.3  | 123.5  |
| RGAG4   | 111.7  | 120.8  | 121.7  | 126    | 104.8  | 106.1  | 113.6  | 114.2  |
| RGAG4   | 136.4  | 119.6  | 140.7  | 129.7  | 110.8  | 120.6  | 125.7  | 118.6  |
| RGC32   | 3908.8 | 5331.1 | 2974.4 | 5274.3 | 5284.8 | 3567.1 | 5536.3 | 3724.8 |
| RGL1    | 689.9  | 240    | 1088.6 | 855.4  | 191.5  | 1280.2 | 526.5  | 180.4  |
| RGL2    | 169.6  | 162.7  | 163.9  | 161.2  | 137.1  | 126.6  | 143.3  | 159.5  |
| RGL3    | 117.5  | 130    | 133.5  | 117.4  | 114.6  | 118.1  | 138.5  | 122.9  |
| RGMA    | 179.7  | 151.5  | 145.9  | 250    | 119.4  | 118    | 200.3  | 122    |
| RGMB    | 114.2  | 120    | 122.7  | 122.1  | 109.8  | 100.4  | 117.4  | 117.7  |
| RGMB    | 141.2  | 185.6  | 142.1  | 156.4  | 151    | 135.1  | 134.8  | 180.2  |
| RGMB    | 126.2  | 119.8  | 116.1  | 122.2  | 108.5  | 99.5   | 124.1  | 116    |
| RGN     | 121.9  | 109.4  | 114.5  | 124.2  | 115.7  | 109.8  | 124.1  | 133.6  |
| RGN     | 118.1  | 114.7  | 122.2  | 126.3  | 109.8  | 100.9  | 114.1  | 112.9  |
| RGNEF   | 130.1  | 127.1  | 125.2  | 116.4  | 116.3  | 113    | 120.7  | 117.6  |
| RGNEF   | 109    | 114.6  | 110.1  | 109.4  | 105.6  | 96.2   | 113.7  | 105.6  |
| RGPD1   | 161.8  | 248.8  | 236.5  | 171.5  | 216.8  | 229.9  | 169.8  | 222.7  |
| RGPD2   | 122.7  | 121.3  | 130    | 119.7  | 114.6  | 104.5  | 123    | 122.3  |
| RGPD5   | 116.8  | 112.7  | 122.4  | 114    | 106.9  | 101.8  | 111.6  | 114.7  |
| RGPD5   | 110.8  | 110.1  | 114.4  | 112.5  | 102.9  | 101.1  | 113.5  | 107.7  |
| RGPD5   | 120.2  | 121.8  | 117.2  | 122.4  | 118.6  | 93.3   | 121.3  | 113    |
| RGPD7   | 127.2  | 119    | 117    | 121.9  | 120.7  | 94.4   | 125.2  | 113.8  |
| RGR     | 107.4  | 115.9  | 111    | 123.7  | 104.5  | 102.7  | 116.2  | 117.4  |
| RGR     | 124.8  | 126.1  | 133.2  | 137.6  | 115.3  | 107.7  | 138.9  | 134.1  |
| RGR     | 134.1  | 169.7  | 203.5  | 133.5  | 149.7  | 169.5  | 131.3  | 145.9  |
| RGS1    | 187.7  | 241.8  | 171.5  | 206.2  | 196.2  | 158.5  | 335.3  | 530.4  |
| RGS10   | 332.1  | 378.5  | 668.6  | 368.7  | 332.2  | 457.7  | 284.3  | 300.9  |
| RGS10   | 581.2  | 517.3  | 988.4  | 479.5  | 639.2  | 633.1  | 434.5  | 655.7  |
| RGS10   | 118.6  | 114.3  | 122.4  | 116.4  | 109.2  | 98.6   | 117.4  | 132.4  |
| RGS11   | 120.5  | 121.4  | 127.9  | 124.2  | 105.9  | 106.9  | 118.4  | 111    |
| RGS11   | 117.1  | 113.2  | 123.5  | 117.7  | 117.1  | 100.2  | 123    | 116.4  |
| RGS12   | 120.5  | 116.5  | 120.8  | 118.7  | 111.4  | 101.6  | 117    | 117.3  |
| RGS12   | 182.5  | 159.7  | 348.5  | 172.9  | 133.8  | 151    | 211.9  | 153.1  |
| RGS12   | 111.9  | 106.1  | 110.1  | 118.2  | 105.1  | 102.8  | 117.1  | 114.4  |
| RGS13   | 120    | 112.6  | 117.8  | 115.7  | 103    | 98.2   | 120.4  | 116.2  |
| RGS14   | 152.6  | 146.8  | 144.9  | 154.7  | 140.1  | 132.2  | 145.1  | 134.5  |
| RGS16   | 115.6  | 119.4  | 117    | 116.6  | 104.6  | 102.7  | 121.9  | 107.8  |
| RGS17   | 122.1  | 121.5  | 122.8  | 123.5  | 115.9  | 94.4   | 122.2  | 123.9  |
| RGS18   | 140.7  | 195    | 270.2  | 149.2  | 160.3  | 185.2  | 153.5  | 148.8  |
| RGS19   | 464.2  | 416.8  | 698    | 467.5  | 247.1  | 443    | 337.8  | 328.5  |
| RGS2    | 574.7  | 602.1  | 597.4  | 606.6  | 528.1  | 752.5  | 755.3  | 1014.4 |
| RGS20   | 108.9  | 111.9  | 115.3  | 118.2  | 108.4  | 97.4   | 115.6  | 108.6  |
| RGS20   | 109.3  | 112.3  | 110.6  | 115.6  | 101.6  | 96.9   | 119.1  | 107.9  |
| RGS22   | 112.2  | 116.3  | 107.6  | 118.8  | 111.7  | 100.2  | 113.1  | 112    |
| RGS3    | 118.9  | 116.5  | 117    | 117.2  | 105.2  | 103    | 112.5  | 106.9  |

|         |        |        |        |        |        |        |        |        |
|---------|--------|--------|--------|--------|--------|--------|--------|--------|
| RGS3    | 113.8  | 113.6  | 109    | 115.8  | 111.6  | 106.9  | 117.8  | 109    |
| RGS3    | 120.4  | 107.8  | 119.1  | 114.1  | 105.4  | 99.3   | 120.3  | 134.8  |
| RGS3    | 102.3  | 108.4  | 104.3  | 119.1  | 101.6  | 102    | 115.2  | 103.8  |
| RGS3    | 113.6  | 117.6  | 115.1  | 120.4  | 125.2  | 102.6  | 122.1  | 113.4  |
| RGS3    | 126.2  | 137.5  | 126.7  | 126.1  | 113.6  | 103.4  | 131.2  | 115.6  |
| RGS4    | 117.1  | 117.5  | 114.2  | 119.8  | 111.7  | 99.5   | 126.8  | 122.8  |
| RGS5    | 111.9  | 114.2  | 120.4  | 110    | 105.9  | 99.3   | 132.2  | 125.7  |
| RGS6    | 119.8  | 111.9  | 122    | 117.1  | 115.9  | 104.7  | 119.3  | 119    |
| RGS7    | 112.1  | 113.5  | 113.6  | 108.9  | 103.6  | 94.2   | 124.6  | 107    |
| RGS8    | 118    | 111.2  | 126.2  | 129.7  | 111.9  | 103.9  | 120.4  | 122.6  |
| RGS9    | 112.9  | 116.9  | 128    | 129.5  | 113.4  | 106.8  | 117.8  | 124.1  |
| RGS9    | 110.3  | 112.6  | 115.1  | 115.8  | 101.3  | 92.5   | 120.1  | 116.9  |
| RGS9BP  | 112.5  | 115.7  | 121    | 117    | 104.7  | 101.4  | 115.9  | 109    |
| RHAG    | 107.9  | 117.3  | 114.1  | 110.2  | 105.9  | 100.9  | 117.7  | 110.1  |
| RHBDD1  | 165.8  | 151.5  | 192.9  | 173.4  | 131.6  | 159.8  | 189.3  | 148.5  |
| RHBDD2  | 1378   | 1299.6 | 758.3  | 1545.3 | 514.7  | 1222.2 | 1231.9 | 718.7  |
| RHBDD2  | 1069.4 | 1305.6 | 841.6  | 1439.1 | 593.9  | 1073.4 | 1180.9 | 672.2  |
| RHBDD3  | 126.8  | 138.4  | 160.4  | 142.2  | 141.9  | 117.5  | 148.9  | 153.6  |
| RHBDF1  | 118.9  | 123.8  | 126.2  | 132.6  | 111.8  | 104.9  | 122.3  | 141.1  |
| RHBDF2  | 511.4  | 447.2  | 466.1  | 491.8  | 420.7  | 313.3  | 445.7  | 426.4  |
| RHBDF2  | 131.3  | 127.9  | 143.8  | 132    | 111.9  | 108.1  | 137.4  | 124.8  |
| RHBDF2  | 421.4  | 395.2  | 381.4  | 450.7  | 314.1  | 265.4  | 382.7  | 430.9  |
| RHBDF2  | 115.2  | 105.2  | 106.3  | 115    | 106.9  | 96     | 116.9  | 108.2  |
| RHBDL1  | 112.3  | 120.6  | 115.1  | 133.3  | 111.8  | 102.2  | 127.3  | 122.4  |
| RHBDL2  | 143.8  | 129    | 139    | 137.8  | 119.6  | 111.2  | 135.7  | 129.2  |
| RHBDL3  | 121    | 117.5  | 114.2  | 119.6  | 108.7  | 104.4  | 117.7  | 111.6  |
| RHBG    | 104.8  | 110.5  | 110.9  | 117.1  | 110.2  | 101.4  | 116    | 119.5  |
| RHCE    | 120    | 120.6  | 116.8  | 124.6  | 107.4  | 101.9  | 118.2  | 114.1  |
| RHCE    | 117.5  | 114.7  | 126    | 115    | 110.5  | 101.9  | 118.2  | 124.7  |
| RHCG    | 110.6  | 120.2  | 117.3  | 116.2  | 104.1  | 95.4   | 121.1  | 119.1  |
| RHD     | 116.1  | 112.9  | 107.3  | 110    | 110.3  | 98.7   | 118.1  | 111.4  |
| RHEB    | 588.3  | 514    | 483.9  | 719.1  | 551.8  | 506.6  | 973.2  | 953    |
| RHEBL1  | 128.7  | 115.1  | 128    | 124.3  | 117.3  | 104.6  | 128.6  | 127.5  |
| RHO     | 118.7  | 114.6  | 122.9  | 117.7  | 110.5  | 88.3   | 116.3  | 126.4  |
| RHOA    | 1135.3 | 1075.1 | 1770.6 | 1119.6 | 1384.1 | 1746.1 | 1916.9 | 1826.2 |
| RHOB    | 115.5  | 114.9  | 114    | 124.3  | 108.6  | 98.4   | 131.1  | 112.9  |
| RHOBTB1 | 104.8  | 103.3  | 108.3  | 111.1  | 100    | 100.3  | 110.8  | 118.3  |
| RHOBTB1 | 106.8  | 106.5  | 112.3  | 115.3  | 96.6   | 87.9   | 102.9  | 103.5  |
| RHOBTB1 | 115.1  | 98.9   | 112.3  | 110.7  | 102.2  | 90     | 112.5  | 109.4  |
| RHOBTB1 | 124.3  | 117.9  | 121.6  | 118.5  | 113.1  | 101    | 125.3  | 120.7  |
| RHOBTB2 | 122.3  | 124.2  | 131.5  | 112.5  | 105.4  | 114.3  | 121.9  | 122.3  |
| RHOBTB3 | 163.2  | 150.4  | 181.4  | 182.8  | 163.5  | 136    | 193.7  | 154.2  |
| RHOC    | 220.6  | 226    | 215.6  | 236.8  | 232.5  | 211.7  | 257.6  | 246.2  |
| RHOC    | 142.2  | 155.9  | 152.1  | 172.3  | 166.6  | 128.8  | 174    | 168.5  |
| RHOD    | 117.1  | 117.8  | 117.2  | 124.2  | 109.7  | 100.7  | 114.8  | 117    |
| RHOF    | 124.8  | 136.4  | 123.5  | 128.9  | 124.8  | 111.8  | 118.6  | 125.9  |
| RHOG    | 1489.5 | 1433.5 | 1727.5 | 1512   | 845.4  | 1520.5 | 1777.4 | 1521   |
| RHOH    | 121.1  | 124.3  | 121.8  | 133    | 113.1  | 99.4   | 121.6  | 117.3  |
| RHOJ    | 119.2  | 123    | 111.8  | 124.3  | 108.3  | 103    | 114.8  | 119.9  |
| RHOQ    | 1129.5 | 872.7  | 958.4  | 1030.3 | 759.1  | 489.8  | 1161.7 | 812    |
| RHOT1   | 207.2  | 233.3  | 301.6  | 243.8  | 238.4  | 191.8  | 179.4  | 167.6  |

|        |        |        |       |       |        |       |        |        |
|--------|--------|--------|-------|-------|--------|-------|--------|--------|
| RHOT1  | 345.2  | 363.2  | 441.8 | 327.4 | 327.3  | 259.6 | 275.7  | 251.8  |
| RHOT1  | 118.2  | 129.3  | 118   | 134.3 | 132.1  | 129.5 | 126.5  | 129.9  |
| RHOT2  | 570.2  | 539.3  | 479.7 | 499.1 | 308    | 394   | 563.9  | 438.3  |
| RHOV   | 128.6  | 111.9  | 118.2 | 113.3 | 108.8  | 102.7 | 116.9  | 105.7  |
| RHPN1  | 125.8  | 136.8  | 133.6 | 142.2 | 131.2  | 110.4 | 134.4  | 137.4  |
| RHPN2  | 140.3  | 139.8  | 137.1 | 145.9 | 120.2  | 115.9 | 151.9  | 146.9  |
| RIBC1  | 130.6  | 133    | 155.3 | 126.7 | 130.4  | 124.7 | 134.5  | 138.9  |
| RIBC1  | 113.5  | 116.8  | 109   | 125.4 | 110.1  | 102.1 | 119.8  | 112.3  |
| RIBC2  | 112.8  | 117.3  | 121   | 118.1 | 109    | 103.1 | 118.6  | 126.2  |
| RIC3   | 119.7  | 117.3  | 119.9 | 118   | 106    | 96    | 113.6  | 112.2  |
| RIC8A  | 569    | 669    | 543.6 | 576.5 | 459.9  | 520.7 | 666.1  | 593    |
| RIC8B  | 123.9  | 114.2  | 129.6 | 139.3 | 119.6  | 103   | 125.6  | 135.7  |
| RICS   | 158.5  | 141.8  | 136.1 | 154   | 150.1  | 117.1 | 172    | 176.8  |
| RICTOR | 116.5  | 124.2  | 121.2 | 118.5 | 103.1  | 112.9 | 113.7  | 114.2  |
| RIF1   | 187.9  | 182.3  | 202.5 | 217.6 | 201.4  | 169.5 | 240.4  | 198    |
| RILP   | 138.5  | 134    | 152.7 | 159.7 | 119.1  | 127.8 | 144.3  | 130.8  |
| RIMBP2 | 115.4  | 117.4  | 109.8 | 111.5 | 112    | 97.7  | 117.3  | 111.3  |
| RIMS1  | 112.3  | 113.6  | 115.8 | 113.1 | 106.7  | 101.5 | 113.6  | 109.9  |
| RIMS2  | 118.1  | 117.9  | 121   | 122.2 | 115    | 104.9 | 117.5  | 120.6  |
| RIMS3  | 166.7  | 157.9  | 150.4 | 165   | 136    | 134   | 168.4  | 153.7  |
| RIMS4  | 118.4  | 111    | 122.4 | 117.1 | 116.1  | 103.5 | 132.1  | 123.1  |
| RIN1   | 115.2  | 138.2  | 133.4 | 131.6 | 110.4  | 107.1 | 110.3  | 120.9  |
| RIN2   | 234.7  | 133.3  | 373   | 252.2 | 118.1  | 294.6 | 234.3  | 114.9  |
| RIN3   | 152    | 141.4  | 139.2 | 150.3 | 144.2  | 118.5 | 148.9  | 132.9  |
| RING1  | 1408.4 | 1131.2 | 975.9 | 1355  | 1193.1 | 849.2 | 1217.6 | 1091.9 |
| RINT-1 | 141    | 157.5  | 144   | 143.6 | 154.1  | 121.5 | 153.7  | 152.7  |
| RIOK1  | 286.9  | 310.9  | 241.9 | 312.5 | 273.6  | 175.7 | 331.2  | 341.8  |
| RIOK1  | 112.2  | 109.2  | 114.5 | 106.6 | 109    | 100.3 | 113.3  | 109    |
| RIOK1  | 128.8  | 135.9  | 137.3 | 144.6 | 135    | 108.9 | 143.7  | 146.6  |
| RIOK2  | 260.1  | 293.1  | 303.1 | 233.2 | 255.6  | 233.5 | 278.1  | 253.9  |
| RIOK3  | 228.8  | 208    | 329.9 | 296.1 | 203.7  | 209.4 | 298    | 273.5  |
| RIOK3  | 486.5  | 429.6  | 638.2 | 533.6 | 491.3  | 463.4 | 544.3  | 646.7  |
| RIOK3  | 120.1  | 116.5  | 123.1 | 118.5 | 117.6  | 100.4 | 114.4  | 116.5  |
| RIP    | 815.4  | 892    | 926.5 | 813.1 | 660.8  | 565.6 | 637.1  | 710.3  |
| RIPK1  | 285    | 348.7  | 274.6 | 349.3 | 279.8  | 227.7 | 370    | 417.2  |
| RIPK2  | 341.6  | 281.2  | 258.9 | 307.5 | 234.1  | 196.9 | 231.7  | 215.3  |
| RIPK3  | 167.5  | 186.7  | 217.1 | 181.7 | 125.6  | 156.3 | 180.3  | 160.6  |
| RIPK4  | 124.3  | 141.7  | 145   | 143.9 | 120    | 112.7 | 142.8  | 134.5  |
| RIPK5  | 161.8  | 167.8  | 162.8 | 167.8 | 146.8  | 133.4 | 171.1  | 139.5  |
| RIPK5  | 296.9  | 256.9  | 296.9 | 288.6 | 263.5  | 216.2 | 236.2  | 250.7  |
| RIS1   | 248.1  | 242.6  | 212.6 | 384.1 | 200.9  | 480.6 | 357.5  | 165.9  |
| RIT1   | 180.7  | 174.8  | 190.1 | 304.7 | 216.8  | 246.6 | 398.1  | 295.7  |
| RIT2   | 112.1  | 115.1  | 108.4 | 114.4 | 99.5   | 94.4  | 117.6  | 113.5  |
| RKHD1  | 121.8  | 121.5  | 125.6 | 114.3 | 108.4  | 102.8 | 125.1  | 108.1  |
| RKHD2  | 416.3  | 480.9  | 433.2 | 496.8 | 497.8  | 386.4 | 543.4  | 557.9  |
| RKHD3  | 111    | 116    | 127.7 | 124.3 | 122    | 110.1 | 117.4  | 126.4  |
| RLBP1  | 109.5  | 117.2  | 110.2 | 121.2 | 114.7  | 100.1 | 123.2  | 120.4  |
| RLF    | 134.5  | 140.5  | 154.7 | 150.7 | 138.7  | 116.9 | 137.3  | 157    |
| RLN1   | 113.5  | 130.2  | 136.5 | 121.1 | 113.4  | 108.9 | 121.3  | 125.8  |
| RLN2   | 120    | 127    | 122.2 | 116.5 | 113.1  | 104.6 | 113.8  | 122.1  |
| RLN2   | 127    | 125.7  | 144   | 129.9 | 131.9  | 111.8 | 137.4  | 136.4  |

|          |        |        |        |         |        |        |        |        |
|----------|--------|--------|--------|---------|--------|--------|--------|--------|
| RLN3     | 107.5  | 112.6  | 117.4  | 118.2   | 109.5  | 98.2   | 121    | 119.6  |
| RLN3R1   | 118.8  | 115.5  | 110.7  | 118.2   | 108    | 103.3  | 121.8  | 117.5  |
| RLN3R2   | 116.5  | 120.7  | 123.8  | 116.4   | 105.5  | 100.2  | 123.2  | 115.8  |
| RLTPR    | 166.6  | 196.2  | 170.4  | 199.2   | 155    | 163.3  | 166.4  | 172.4  |
| RMI1     | 206.2  | 181.2  | 184.3  | 200.1   | 148.6  | 155.6  | 215.8  | 227.2  |
| RN7SK    | 810    | 498.5  | 402.7  | 797.2   | 623.6  | 289.7  | 1494.7 | 1264.8 |
| RN7SL1   | 9516.3 | 9389.8 | 8669.7 | 10940.9 | 9267.6 | 7216.8 | 9524.5 | 11018  |
| RNASE1   | 126.6  | 119.2  | 417.2  | 120.7   | 106.7  | 324.5  | 115.9  | 112.6  |
| RNASE1   | 136.5  | 120.4  | 1081.7 | 141.7   | 113.9  | 789.2  | 136.4  | 124.6  |
| RNASE10  | 146.2  | 134.5  | 133.4  | 134.9   | 121    | 109.1  | 135.2  | 128.3  |
| RNASE11  | 119.1  | 118.8  | 118    | 120.6   | 108.8  | 98.2   | 119.9  | 109.6  |
| RNASE12  | 120.7  | 113.3  | 109.3  | 114.2   | 105.8  | 100.9  | 118.7  | 118    |
| RNASE13  | 110    | 110.8  | 120.1  | 113.9   | 109.9  | 98.2   | 115.7  | 105.4  |
| RNASE2   | 124    | 135.5  | 146.4  | 124.1   | 130.1  | 109.9  | 121.7  | 132.1  |
| RNASE3   | 114.2  | 138.5  | 108    | 114.7   | 121.3  | 102.8  | 118.5  | 133.9  |
| RNASE4   | 113.4  | 112.9  | 116.7  | 116.2   | 110.9  | 96.3   | 122.5  | 116.1  |
| RNASE4   | 121.7  | 113    | 136.4  | 115.9   | 105.4  | 115.8  | 121.9  | 130.4  |
| RNASE4   | 133.4  | 123.9  | 201.2  | 134.3   | 116.5  | 173.6  | 128.6  | 123.8  |
| RNASE4   | 118.6  | 122.8  | 157.4  | 130.3   | 109.5  | 142.5  | 118.8  | 129.4  |
| RNASE6   | 150.5  | 141.2  | 505.7  | 143.1   | 122.2  | 395    | 126.3  | 116.7  |
| RNASE7   | 109.3  | 114.5  | 119.7  | 118.3   | 106.7  | 92.8   | 127.7  | 113.8  |
| RNASE8   | 126.6  | 112.3  | 111.2  | 109.1   | 101.8  | 100.3  | 127    | 112    |
| RNASE9   | 106.7  | 113.4  | 109.2  | 112.7   | 104.3  | 100.6  | 109.2  | 108.4  |
| RNASEH1  | 490.4  | 460.2  | 428.1  | 507.9   | 384.6  | 329.4  | 438.7  | 439.3  |
| RNASEH2A | 139.4  | 150.1  | 141.5  | 147.3   | 140    | 109.7  | 140.7  | 132.9  |
| RNASEL   | 250.4  | 240.6  | 307.9  | 278.4   | 222.2  | 210.5  | 209.9  | 199.5  |
| RNASEN   | 115.9  | 118.1  | 125.7  | 119.5   | 107.6  | 104    | 122.1  | 116.8  |
| RNASET2  | 2307.8 | 2939.9 | 2392.9 | 2119.3  | 2133.6 | 1199.2 | 993.9  | 1508.8 |
| RND1     | 138.7  | 123.5  | 120.2  | 118.6   | 117    | 97.6   | 128.4  | 135.7  |
| RND2     | 120.7  | 125.9  | 125.7  | 120.7   | 111.1  | 99.9   | 121.8  | 136.8  |
| RND3     | 107.7  | 112.1  | 106.9  | 113.9   | 104.9  | 102.5  | 104.6  | 111.1  |
| RNF10    | 168.7  | 183.2  | 189.4  | 194     | 171    | 154.6  | 191.3  | 189.1  |
| RNF11    | 127    | 126.8  | 127.9  | 122     | 116.1  | 110.4  | 120.4  | 141.2  |
| RNF111   | 118.4  | 114.2  | 125.4  | 136.4   | 114.1  | 107.4  | 122.7  | 108.9  |
| RNF113A  | 216.8  | 255.9  | 248    | 198.5   | 223.5  | 180    | 209    | 245.3  |
| RNF113B  | 112    | 127.8  | 118.7  | 127.7   | 118.6  | 99.5   | 110.4  | 123.1  |
| RNF12    | 111.2  | 116.6  | 117    | 113     | 117.1  | 101.1  | 121.9  | 110.1  |
| RNF12    | 124.7  | 115.5  | 115.6  | 124.9   | 105.4  | 96     | 120.1  | 115.5  |
| RNF12    | 117.1  | 114.9  | 117.7  | 131.2   | 114.1  | 103.3  | 115.3  | 110.4  |
| RNF121   | 157.2  | 146.3  | 148.7  | 173.6   | 139.4  | 142.2  | 146.5  | 157.1  |
| RNF121   | 294.9  | 309.8  | 288.9  | 333.3   | 218.2  | 228.4  | 296    | 281.4  |
| RNF122   | 126.3  | 138.1  | 135.7  | 135     | 131.2  | 112.1  | 130.1  | 132.1  |
| RNF123   | 189.5  | 197.4  | 174.4  | 186     | 164.4  | 164.9  | 217.4  | 215.2  |
| RNF125   | 175.4  | 224.1  | 219.5  | 188.6   | 218.6  | 143.4  | 170.9  | 185.6  |
| RNF126   | 371.9  | 353    | 333.7  | 351.3   | 257.6  | 212.1  | 345.2  | 254    |
| RNF126   | 168    | 164.9  | 188.7  | 198.7   | 138    | 138.4  | 161.7  | 168.1  |
| RNF126P1 | 124.6  | 125.4  | 125.1  | 127.2   | 122    | 106.1  | 127.9  | 129.4  |
| RNF126P1 | 116.7  | 125.3  | 114.2  | 121.1   | 107.7  | 103.4  | 115.4  | 116.5  |
| RNF128   | 106    | 119.5  | 127    | 123.8   | 113.1  | 102.8  | 121.9  | 114.4  |
| RNF128   | 128.1  | 122.9  | 131    | 130.9   | 114.6  | 108.8  | 131.7  | 134.3  |
| RNF128   | 115.5  | 132.4  | 138.6  | 140.3   | 141    | 110.4  | 133.6  | 136.3  |

|        |       |       |       |       |       |       |       |        |
|--------|-------|-------|-------|-------|-------|-------|-------|--------|
| RNF13  | 347.1 | 275.2 | 279.4 | 409   | 246.4 | 345.4 | 449.5 | 284.5  |
| RNF13  | 118.1 | 107.4 | 114.8 | 129.8 | 117.4 | 109.8 | 117.7 | 122.6  |
| RNF130 | 293.2 | 243.7 | 358.1 | 260   | 161.3 | 249.9 | 227.7 | 184.6  |
| RNF133 | 122.5 | 114.2 | 122.9 | 120.7 | 112.8 | 98.9  | 121.2 | 114.8  |
| RNF135 | 204.7 | 160.5 | 315.3 | 187.9 | 139.5 | 329.6 | 173.1 | 161.8  |
| RNF135 | 131.8 | 128.8 | 194.3 | 138.3 | 110.9 | 149.9 | 134.6 | 128.2  |
| RNF135 | 117.2 | 126.8 | 142.8 | 122.2 | 100.5 | 122.2 | 114.2 | 123.6  |
| RNF138 | 165.5 | 193.3 | 209.7 | 206   | 170.6 | 160.6 | 192.8 | 299.7  |
| RNF139 | 119.1 | 123.1 | 124.8 | 122.6 | 134.2 | 118.7 | 118.5 | 139.1  |
| RNF14  | 122.1 | 122.3 | 127.5 | 122.5 | 105.9 | 105.2 | 120   | 112.8  |
| RNF14  | 243   | 218.2 | 324.2 | 304.3 | 248.1 | 235.7 | 358.6 | 389.7  |
| RNF14  | 209.2 | 186.9 | 271   | 252.3 | 179.8 | 193.4 | 250.3 | 260.8  |
| RNF141 | 127.6 | 140.4 | 151.2 | 131.6 | 130.3 | 113.6 | 138.1 | 115.5  |
| RNF144 | 264.8 | 322.8 | 301.2 | 285   | 244   | 233.1 | 249.1 | 223.1  |
| RNF146 | 200.1 | 222.9 | 216.7 | 220.7 | 210.4 | 197.7 | 218.1 | 206.9  |
| RNF148 | 117.2 | 116.5 | 118.6 | 121   | 109.8 | 100.8 | 118.4 | 119.4  |
| RNF149 | 142.4 | 153.9 | 157   | 180.7 | 146.7 | 130.6 | 174.4 | 213.6  |
| RNF150 | 118.9 | 111   | 114.3 | 126.5 | 112.3 | 99.5  | 114.6 | 116.3  |
| RNF151 | 110.3 | 124.4 | 109.8 | 113.9 | 104.7 | 94.4  | 116.2 | 109.1  |
| RNF151 | 114.5 | 115.1 | 107.7 | 111.4 | 111.8 | 100.1 | 110.4 | 102.9  |
| RNF152 | 117.4 | 114.6 | 111.3 | 119.2 | 110.9 | 98    | 115.6 | 121.5  |
| RNF157 | 156.7 | 174.7 | 154.5 | 185.7 | 166.3 | 122.9 | 168.4 | 175.9  |
| RNF165 | 133   | 128   | 126.5 | 136.6 | 111.2 | 107   | 127.1 | 131.5  |
| RNF166 | 139.3 | 141.9 | 138   | 143.4 | 120.8 | 112.8 | 138.4 | 139.1  |
| RNF167 | 167.9 | 224.5 | 154.7 | 191.9 | 176.6 | 164.3 | 177.1 | 256    |
| RNF168 | 119.4 | 123.4 | 123.5 | 114.6 | 114.3 | 100.3 | 118.3 | 119.8  |
| RNF17  | 114.4 | 105.8 | 116.6 | 110.6 | 98.6  | 100.7 | 120.4 | 115.7  |
| RNF17  | 112.8 | 110   | 109.7 | 106.6 | 107.3 | 97.2  | 126.2 | 110.4  |
| RNF170 | 152.6 | 140.4 | 187.1 | 158.8 | 148.1 | 130.7 | 173.2 | 161.5  |
| RNF175 | 152.2 | 157.6 | 151.2 | 183.7 | 151.6 | 116.1 | 171.2 | 138.8  |
| RNF180 | 109.6 | 120.4 | 112.7 | 117.4 | 109.7 | 102.7 | 126.9 | 109.4  |
| RNF183 | 141.8 | 115.7 | 125.1 | 134.3 | 117.3 | 97.4  | 124.4 | 136.6  |
| RNF185 | 144.1 | 150.1 | 148.2 | 154.9 | 129.8 | 118.5 | 165.6 | 192.4  |
| RNF186 | 122.3 | 112.5 | 127.6 | 128.5 | 113.6 | 105.9 | 107.7 | 115.7  |
| RNF19  | 164.6 | 154.3 | 167.8 | 168.8 | 149   | 108.9 | 153.6 | 140    |
| RNF19  | 116.5 | 116.3 | 124.3 | 122.6 | 112.4 | 99.5  | 115.9 | 113.9  |
| RNF19  | 406.5 | 409.9 | 474.1 | 421.6 | 366.9 | 396.4 | 332.9 | 377.2  |
| RNF190 | 114   | 124.3 | 109.7 | 117.2 | 121.2 | 99.5  | 116.4 | 124.7  |
| RNF2   | 119.5 | 112.7 | 115.6 | 125   | 114.2 | 103.8 | 130.9 | 110.2  |
| RNF20  | 312.5 | 319.5 | 385.6 | 352.6 | 287   | 315.3 | 313.2 | 301.1  |
| RNF24  | 184.9 | 192   | 190.9 | 255   | 191.2 | 222.8 | 318.1 | 204.2  |
| RNF25  | 109.5 | 129.3 | 134.2 | 143.7 | 116.5 | 109.2 | 132.8 | 128.7  |
| RNF26  | 145.4 | 153   | 159.3 | 131.7 | 117.3 | 132.5 | 155.8 | 145.4  |
| RNF31  | 246.4 | 216.1 | 218.6 | 269.2 | 211.2 | 173.3 | 237   | 258    |
| RNF32  | 123.9 | 105.2 | 113.2 | 117.3 | 105.8 | 96.8  | 119.8 | 114    |
| RNF34  | 975.1 | 894.3 | 964.7 | 1036  | 826.4 | 884.3 | 951.9 | 1071.6 |
| RNF34  | 119.2 | 128.5 | 126.1 | 129.9 | 117.7 | 112.7 | 121.1 | 129    |
| RNF34  | 107   | 111.9 | 118.8 | 117.8 | 118   | 98.6  | 113   | 113.6  |
| RNF36  | 153.6 | 144.6 | 133.4 | 161   | 132.6 | 120.7 | 156.9 | 159    |
| RNF36  | 122.8 | 134.3 | 132.2 | 130.9 | 121   | 102.8 | 130.2 | 133.9  |
| RNF38  | 120.6 | 127.6 | 169.7 | 132   | 128.5 | 112.1 | 152   | 135    |

|         |        |        |        |        |       |        |        |        |
|---------|--------|--------|--------|--------|-------|--------|--------|--------|
| RNF38   | 133.2  | 141.7  | 146.1  | 161.8  | 138.7 | 130.8  | 156.2  | 139.9  |
| RNF38   | 668.8  | 713    | 545.2  | 700.8  | 588.8 | 503.5  | 727.8  | 757    |
| RNF39   | 111.2  | 119.5  | 120.8  | 118.7  | 112.8 | 97.1   | 115.2  | 119.8  |
| RNF39   | 122.8  | 109.4  | 116.2  | 126.7  | 107.5 | 99.8   | 122.5  | 118.4  |
| RNF4    | 190.6  | 197.1  | 183.9  | 248.1  | 151.8 | 160    | 222.8  | 186.9  |
| RNF40   | 203.6  | 262.2  | 200.1  | 244.5  | 176.1 | 188.8  | 293.3  | 205.5  |
| RNF41   | 151.8  | 142.8  | 146.3  | 179    | 132.1 | 127.2  | 153.6  | 160.9  |
| RNF41   | 116.4  | 116.4  | 114.9  | 126.8  | 113   | 105.2  | 128.3  | 120.5  |
| RNF43   | 120.5  | 119.1  | 116.8  | 116.1  | 120   | 103.2  | 121.1  | 121.1  |
| RNF44   | 471.1  | 502.4  | 378.3  | 476.4  | 373.7 | 296.9  | 442.2  | 494.4  |
| RNF5    | 178.9  | 164.7  | 186.6  | 202.6  | 139.3 | 166.6  | 183.8  | 182.2  |
| RNF5P1  | 456.5  | 501.3  | 447.4  | 466.4  | 407   | 330.5  | 410.5  | 353.9  |
| RNF5P1  | 170.7  | 180.1  | 195.3  | 182.9  | 155.7 | 153.2  | 169.2  | 163.8  |
| RNF6    | 134.3  | 134.1  | 131.9  | 133.8  | 117.5 | 110.4  | 127.5  | 126    |
| RNF6    | 108.3  | 113.6  | 112.1  | 121.4  | 109.8 | 107    | 112.8  | 120    |
| RNF6    | 117.4  | 112.9  | 118.5  | 121.4  | 110.1 | 106.5  | 129.4  | 118.8  |
| RNF7    | 109.9  | 118.6  | 126.5  | 126.2  | 107.6 | 107.7  | 112.4  | 112.6  |
| RNF8    | 119.7  | 114.3  | 122.8  | 134.1  | 110.7 | 104.1  | 118.1  | 113.5  |
| RNF8    | 128.6  | 134.4  | 152.4  | 145.1  | 129.4 | 117.8  | 133.7  | 127.9  |
| RNGTT   | 316.5  | 425.2  | 385.6  | 342.9  | 351.7 | 280.4  | 355.2  | 361.4  |
| RNH1    | 399.2  | 348.9  | 431.5  | 378.3  | 263.4 | 322.2  | 422.5  | 305.5  |
| RNH1    | 153.9  | 149.5  | 180.9  | 170.3  | 135.8 | 172.1  | 198.6  | 169.9  |
| RNMT    | 297    | 406.1  | 326.2  | 362.1  | 304.4 | 298.8  | 406    | 362.1  |
| RNMTL1  | 245.3  | 292.4  | 287.7  | 268.2  | 230.7 | 197.7  | 244.1  | 235.2  |
| RNPC1   | 191    | 218.4  | 248.3  | 235.2  | 190.1 | 246.7  | 292.9  | 264.6  |
| RNPC2   | 117.2  | 115.9  | 107.8  | 121.8  | 113.9 | 100.1  | 118.5  | 117.9  |
| RNPC3   | 140.2  | 151.7  | 208.2  | 157.3  | 140.9 | 144.4  | 140    | 164.3  |
| RNPEP   | 146.2  | 149.6  | 170.3  | 150.6  | 142   | 127.7  | 134.3  | 136.3  |
| RNPEPL1 | 169.5  | 179.3  | 153.5  | 178.3  | 123   | 123.7  | 164.7  | 145.2  |
| RNPS1   | 494.9  | 453.8  | 456.5  | 643.2  | 376.1 | 346.8  | 680.3  | 534    |
| RNPS1   | 134.2  | 130.9  | 138    | 133.5  | 115.8 | 113.8  | 138.9  | 136.7  |
| RNU2    | 118.5  | 121    | 111.3  | 126.9  | 111.6 | 107.5  | 114    | 113.3  |
| RNU3IP2 | 120    | 118.4  | 138.3  | 130.4  | 119.5 | 110.1  | 132.9  | 120.7  |
| RNUT1   | 297.1  | 340.5  | 263.8  | 275.3  | 284.9 | 239.8  | 349.8  | 317.1  |
| RNUXA   | 269.4  | 205.7  | 239.3  | 215.2  | 199.6 | 162.8  | 202.9  | 233.9  |
| ROBO1   | 120.4  | 116.3  | 112.8  | 116.8  | 104.5 | 96     | 117.3  | 107.7  |
| ROBO1   | 111.7  | 121.1  | 109.8  | 117.2  | 107.1 | 92.7   | 113.3  | 110.5  |
| ROBO1   | 132    | 122.9  | 116.8  | 120.2  | 112.3 | 91.1   | 123.4  | 125.4  |
| ROBO2   | 110.8  | 108.9  | 117.5  | 111    | 104.1 | 103.2  | 116    | 111.3  |
| ROBO3   | 129.6  | 121.6  | 127    | 127.4  | 114.2 | 107.2  | 131.7  | 124.9  |
| ROBO4   | 113.9  | 114.7  | 116.5  | 120.5  | 110.8 | 96     | 124.8  | 116.3  |
| ROCK1   | 200.5  | 198.5  | 153.7  | 230.1  | 184.3 | 136.4  | 266.9  | 276    |
| ROCK2   | 6157.2 | 7347.3 | 6171   | 6996.4 | 6190  | 3706.8 | 6402.9 | 7041.6 |
| ROD1    | 1156.4 | 961.9  | 1116.6 | 1043.3 | 810.3 | 799.1  | 1289.8 | 850.6  |
| ROM1    | 135.9  | 119    | 153.4  | 132.2  | 121.1 | 117.4  | 117.6  | 131.1  |
| ROPN1   | 117.8  | 114    | 120.6  | 119    | 116.1 | 107.1  | 134.7  | 127.1  |
| ROPN1B  | 109.1  | 119.9  | 117    | 118.7  | 103.5 | 102.8  | 113.8  | 109.9  |
| ROPN1B  | 126.9  | 113    | 128.1  | 115.6  | 116.9 | 100.1  | 125.1  | 117.6  |
| ROPN1L  | 122.7  | 110.5  | 118.8  | 120.2  | 111.7 | 98     | 130.8  | 130.9  |
| ROR1    | 107.4  | 114.8  | 126.4  | 126    | 117.3 | 103.4  | 121.5  | 106.3  |
| ROR2    | 107.9  | 114    | 112.7  | 123.7  | 119.4 | 101.1  | 114.9  | 117.4  |

|            |        |         |         |         |         |         |        |         |
|------------|--------|---------|---------|---------|---------|---------|--------|---------|
| RORA       | 286.7  | 308.7   | 184.3   | 300.8   | 330     | 146.9   | 318.4  | 400.6   |
| RORA       | 131.6  | 137.6   | 120.2   | 133.8   | 140.2   | 118.2   | 128.6  | 152.8   |
| RORA       | 127.2  | 122.3   | 121.3   | 123.6   | 110     | 98.5    | 132.6  | 118.5   |
| RORA       | 123    | 123.6   | 118.9   | 115.1   | 111.4   | 104.4   | 125.2  | 117.2   |
| RORA       | 114.9  | 114.4   | 124.3   | 116.9   | 98.2    | 99.9    | 118.8  | 110.7   |
| RORA       | 117.9  | 116.3   | 115.3   | 124.1   | 112.1   | 93.6    | 120    | 111.3   |
| RORB       | 125.3  | 130.9   | 125.6   | 125.9   | 115.1   | 99.2    | 120.1  | 109.1   |
| RORC       | 128.6  | 126.1   | 114.3   | 120.6   | 106.4   | 92.4    | 122.4  | 120.4   |
| RORC       | 110.8  | 107.8   | 121.8   | 118.6   | 108     | 96.4    | 125.6  | 109.6   |
| RORC       | 123.8  | 142.5   | 125.8   | 135.2   | 125.3   | 107.6   | 127.3  | 137.5   |
| RORC       | 116.5  | 114     | 123.7   | 126.2   | 121.6   | 102.6   | 112.8  | 114.6   |
| ROS1       | 113    | 118.7   | 116.5   | 123.2   | 108.5   | 105.5   | 120.1  | 112.8   |
| RP1        | 119.1  | 124.5   | 113.4   | 115.8   | 108.5   | 94.2    | 117.1  | 113     |
| RP1-112K5  | 287    | 244.3   | 241.6   | 302.9   | 242.6   | 256.3   | 253.4  | 315.9   |
| RP11-19J3. | 130.2  | 127.5   | 117.9   | 122.9   | 108.6   | 100.6   | 122.1  | 118.6   |
| RP11-450P  | 127.7  | 121.5   | 138.8   | 123.9   | 115.7   | 120     | 112.2  | 111.5   |
| RP11-529I1 | 114.1  | 112.7   | 114.8   | 115.1   | 108.9   | 95.9    | 110.4  | 115.4   |
| RP11-564C  | 120    | 132.3   | 131.3   | 117     | 112.3   | 107.3   | 121.4  | 128.7   |
| RP13-11B7  | 117.8  | 126.8   | 125.1   | 125     | 126.1   | 103.7   | 125.2  | 127.8   |
| RP13-15M:  | 108.8  | 109.7   | 114.2   | 120.3   | 105.2   | 98.9    | 118.4  | 110.4   |
| RP13-15M:  | 113.4  | 114     | 113.6   | 115.8   | 108.4   | 94.5    | 118    | 118.1   |
| RP1-32F7.2 | 114.1  | 113.1   | 122.7   | 114.6   | 104.4   | 100.1   | 127.1  | 121     |
| RP1L1      | 126    | 116.3   | 117.5   | 119.8   | 108.1   | 100.3   | 120.4  | 111.9   |
| RP2        | 209.9  | 184.4   | 208.6   | 219.9   | 169.2   | 244.1   | 210.5  | 170.5   |
| RP9        | 289.3  | 328.8   | 266.5   | 295.6   | 261.1   | 240     | 278.3  | 259.7   |
| RPA1       | 686.4  | 377.3   | 693     | 750.7   | 309.7   | 584.1   | 574.9  | 398.5   |
| RPA2       | 1191.1 | 1559    | 1298    | 1384.5  | 1443.6  | 1347.1  | 1466.1 | 1315.3  |
| RPA3       | 533.1  | 574.7   | 653.7   | 727.5   | 554.8   | 573.4   | 621.9  | 616.7   |
| RPA4       | 116.7  | 122.9   | 114.7   | 119.8   | 109.7   | 96.4    | 127.7  | 135.3   |
| RPAIN      | 1214.8 | 1289.7  | 1386.8  | 1340.3  | 1307.6  | 1118.4  | 1045.8 | 1126.8  |
| RPAP1      | 131    | 128.7   | 129.2   | 127.1   | 118.3   | 114     | 146.5  | 129     |
| RPE        | 120.2  | 123.7   | 126.7   | 119.9   | 114.3   | 100.6   | 128.4  | 132.6   |
| RPE        | 160.1  | 166.5   | 160.5   | 179.8   | 134.9   | 119.6   | 156.7  | 128.4   |
| RPE        | 111.6  | 117.1   | 118.8   | 120.3   | 110.7   | 96.9    | 125.4  | 120.8   |
| RPE65      | 116.1  | 115.5   | 123.6   | 119.3   | 108.5   | 105.8   | 111.7  | 111.7   |
| RPESP      | 123.4  | 119.9   | 122.9   | 141.6   | 114.7   | 95.3    | 128.7  | 123.2   |
| RPGR       | 110.2  | 114.7   | 118.1   | 126.2   | 105.6   | 99      | 112.2  | 113     |
| RPGR       | 121.1  | 137.9   | 143.2   | 124.3   | 142.9   | 107.2   | 129.9  | 118.5   |
| RPGR       | 117.4  | 116.7   | 122.1   | 127.3   | 120.8   | 105.3   | 119.8  | 118.6   |
| RPGRIP1    | 111.7  | 126.3   | 114.6   | 115.8   | 104.8   | 104.1   | 116    | 116     |
| RPH3A      | 116.8  | 120.9   | 123.4   | 118.8   | 113.3   | 103.7   | 120.3  | 114.2   |
| RPH3AL     | 120.6  | 127.4   | 139.8   | 121.1   | 108.1   | 115.1   | 117.3  | 108.7   |
| RPIA       | 263.5  | 270.5   | 246.3   | 233.7   | 229.1   | 156     | 204.1  | 244.6   |
| RPIB9      | 109.4  | 114.8   | 121.5   | 125     | 110     | 103     | 121.4  | 121.1   |
| RPIP8      | 101.1  | 110.8   | 108.6   | 107.9   | 105     | 96.4    | 115.2  | 104.8   |
| RPL10      | 113.2  | 113.8   | 120.8   | 126.3   | 124.8   | 103.5   | 125.1  | 119.6   |
| RPL10A     | 5888.1 | 7847.6  | 8409.7  | 6527.7  | 7105.1  | 7440.6  | 6800.4 | 7183.5  |
| RPL10L     | 135.5  | 133     | 138.3   | 143.2   | 123.1   | 117.6   | 140.5  | 132.5   |
| RPL11      | 9011.5 | 10494.3 | 9311.4  | 10195.6 | 9397.7  | 7169.5  | 9525.6 | 9886.2  |
| RPL12      | 8535   | 13109.8 | 12450.3 | 10124.1 | 11383.4 | 11933.7 | 7948.3 | 13189.7 |
| RPL13      | 133.9  | 132.8   | 128.5   | 127     | 113.7   | 95.2    | 125.1  | 125.2   |



|           |         |         |         |         |         |         |         |         |
|-----------|---------|---------|---------|---------|---------|---------|---------|---------|
| RPL13     | 556.1   | 534.2   | 554.5   | 663.5   | 413.3   | 384.9   | 580     | 787     |
| RPL13A    | 1705.5  | 1951.1  | 1274.1  | 1601.4  | 1505.3  | 1039.8  | 1435.4  | 2008.7  |
| RPL14     | 452.7   | 510.8   | 369.2   | 414.3   | 268.1   | 388.3   | 365.6   | 451.9   |
| RPL14     | 361.1   | 925.8   | 315.4   | 319.5   | 547.3   | 252.6   | 339.7   | 901.3   |
| RPL17     | 9203.9  | 10124.9 | 12234.7 | 10176.4 | 8625    | 7827.4  | 11408.3 | 10406   |
| RPL17     | 1477.7  | 1626.2  | 2440.4  | 1869    | 1623.5  | 1601.6  | 1474.5  | 1723.6  |
| RPL18     | 9265.2  | 11768.8 | 11476   | 10886.5 | 10978.8 | 10798.2 | 10075   | 14415   |
| RPL18A    | 13006.2 | 15182.9 | 17043.9 | 17629.8 | 12787.9 | 14203.4 | 15301   | 18065.8 |
| RPL19     | 10735.4 | 13136.5 | 12945.5 | 13731.2 | 12025.9 | 11431.1 | 14098.2 | 13577   |
| RPL21     | 3623.8  | 4537.9  | 3984.8  | 3173.4  | 3891.9  | 3005.2  | 3538.5  | 5123.4  |
| RPL22     | 1866.7  | 2334.5  | 2167.7  | 2084.8  | 2187.4  | 1891.4  | 1939.5  | 2224.2  |
| RPL23     | 1177.2  | 1138    | 1467.2  | 1466.9  | 918.4   | 1163.5  | 999.7   | 1049.6  |
| RPL23A    | 258.8   | 265.6   | 239.8   | 219.3   | 201     | 274.7   | 212.6   | 271.9   |
| RPL23AP13 | 136.6   | 140.7   | 149.6   | 141.3   | 118.1   | 126.8   | 144.5   | 138.6   |
| RPL23AP7  | 185     | 201.7   | 225.3   | 195.1   | 198.4   | 147.8   | 209.2   | 207.5   |
| RPL24     | 8847.1  | 10028   | 13078.5 | 10340.4 | 10704.1 | 8950.7  | 9643.3  | 10620.7 |
| RPL26     | 2534.3  | 3174.6  | 3256.8  | 3080.3  | 2768.9  | 2467.4  | 2856    | 3760.6  |
| RPL26L1   | 258.4   | 257.2   | 333.5   | 230.5   | 230.7   | 262.7   | 250     | 244.8   |
| RPL27     | 12612   | 12826.5 | 15214   | 12218.8 | 12121.4 | 10891.8 | 12985.3 | 14460.3 |
| RPL27A    | 5679.9  | 5962.3  | 7997.9  | 5218.4  | 5365.3  | 6203.7  | 5870.2  | 5065    |
| RPL28     | 185.5   | 202.4   | 174.6   | 240.3   | 170.3   | 172.9   | 254     | 239.8   |
| RPL29     | 127.6   | 141.3   | 129.1   | 161.6   | 150     | 121.4   | 164.8   | 173.6   |
| RPL29P2   | 132.8   | 136.6   | 130     | 140.3   | 123.8   | 107     | 131.3   | 123.3   |
| RPL3      | 4393.2  | 4739.9  | 4613.6  | 5268.2  | 4348.1  | 4770.8  | 4921.1  | 6359.9  |
| RPL3      | 6682.9  | 6234.7  | 5574.2  | 7767    | 5175.4  | 7359    | 6955.1  | 6935.9  |
| RPL30     | 10540.8 | 12413.6 | 12590.2 | 12070.3 | 11653.2 | 9566.8  | 11482.2 | 13522.7 |
| RPL31     | 1688.9  | 2104.9  | 1589.4  | 2088.2  | 1942.2  | 2255.9  | 1692.9  | 2502.9  |
| RPL32     | 180.7   | 215.7   | 223.1   | 208     | 192.6   | 154.5   | 205.5   | 234.5   |
| RPL32P3   | 130.6   | 129     | 125.7   | 143.1   | 122.8   | 106.3   | 133.2   | 129.6   |
| RPL34     | 511.2   | 622.3   | 446.7   | 536.6   | 501.9   | 320.8   | 533.5   | 583.6   |
| RPL34     | 187.9   | 265.4   | 225.9   | 251.6   | 184.4   | 161.5   | 212.5   | 203.2   |
| RPL35     | 3582.8  | 4858.1  | 3761    | 4110.3  | 4053.7  | 3319.4  | 3848.6  | 6198.5  |
| RPL35A    | 16875.6 | 16667.2 | 20213.2 | 17451.7 | 18931.1 | 16397.6 | 17509.5 | 18399.2 |
| RPL36     | 1867.3  | 2282.8  | 3735.4  | 2715.2  | 2521.2  | 2990.1  | 2181.3  | 2755.6  |
| RPL36     | 141.4   | 150.1   | 135.8   | 149.6   | 137.9   | 112.2   | 151.9   | 153.1   |
| RPL36A    | 143.9   | 125.5   | 129.1   | 134.3   | 114.1   | 112.7   | 117.6   | 128.5   |
| RPL36AL   | 2290.8  | 2886.2  | 2938.4  | 2765.5  | 2408.7  | 2700.3  | 3813.2  | 2513.9  |
| RPL37     | 133.5   | 126.8   | 140.4   | 151.5   | 128.4   | 110.3   | 155     | 120.9   |
| RPL37A    | 2619.9  | 3491.5  | 3026.4  | 2817.3  | 2893.9  | 2401.6  | 3622.4  | 3913.3  |
| RPL38     | 16422.9 | 20716.9 | 25618.9 | 21970.4 | 20737.9 | 21390.3 | 25028.8 | 22274.4 |
| RPL38     | 13614.9 | 17085.8 | 14799.9 | 13043   | 9712.4  | 12503.6 | 13817.5 | 16239.2 |
| RPL39     | 15512   | 17762   | 18064.4 | 17288.2 | 15096.8 | 15211.2 | 15974.5 | 17173.5 |
| RPL39L    | 206.4   | 174.5   | 198.5   | 184.1   | 157.8   | 141.4   | 175     | 172.5   |
| RPL3L     | 108     | 107.8   | 109.8   | 114.6   | 108     | 95.6    | 111     | 117.1   |
| RPL4      | 3674.5  | 3679.1  | 3804.2  | 4195.9  | 2764.3  | 2623.2  | 3831.3  | 4359.1  |
| RPL41     | 127.5   | 136.8   | 137.3   | 147.5   | 120.1   | 114.8   | 155.8   | 153.3   |
| RPL41     | 20227.7 | 21684.5 | 23926.4 | 19178.4 | 19452.2 | 19407.5 | 21973.4 | 21240.1 |
| RPL5      | 4199    | 3984.7  | 4115.1  | 4945.6  | 3629    | 3371.4  | 4366.6  | 4933    |
| RPL6      | 205.9   | 189.9   | 174.3   | 193.2   | 188.4   | 129.7   | 180.5   | 190.1   |
| RPL7      | 496.3   | 379.4   | 438.4   | 492.9   | 438.6   | 432.8   | 448.1   | 540.1   |
| RPL7A     | 187     | 169.2   | 185.7   | 236.6   | 202.2   | 174.9   | 198     | 206.9   |

|          |         |         |         |         |         |         |         |         |
|----------|---------|---------|---------|---------|---------|---------|---------|---------|
| RPL7L1   | 3052.6  | 2879.4  | 3251    | 3493.2  | 3225.9  | 1657.6  | 3417.5  | 3546.6  |
| RPL8     | 156.9   | 163.9   | 173.4   | 156.6   | 162.2   | 137.2   | 151.5   | 143.6   |
| RPL8     | 8904.8  | 10838.2 | 11319.5 | 9871.6  | 9110.3  | 9167.4  | 9390.7  | 11765.6 |
| RPL9     | 270.1   | 317.2   | 380.1   | 351     | 310.5   | 278.5   | 369.3   | 385.4   |
| RPL9     | 1710    | 1816.2  | 1781.6  | 1316    | 1258.5  | 1713.3  | 2085    | 1879.1  |
| RPLP0    | 112.6   | 111.1   | 111.7   | 114.4   | 101.8   | 95.4    | 120.8   | 118.4   |
| RPLP0    | 822.7   | 831.3   | 632.9   | 861     | 742.6   | 544.9   | 745.2   | 880.3   |
| RPLPOP2  | 117.5   | 117.7   | 126.9   | 120.8   | 111.5   | 103.2   | 129.6   | 122.8   |
| RPLP1    | 9209.9  | 10531.6 | 8432.2  | 7899.4  | 10277.2 | 6493.2  | 8585.6  | 8845.2  |
| RPLP1    | 4507.4  | 3390.8  | 3683    | 5000.6  | 3950.9  | 2933.3  | 4372.4  | 5349.6  |
| RPLP2    | 10110.6 | 12236.1 | 15300.8 | 12738.4 | 13300.5 | 11290.5 | 14083.7 | 15081.7 |
| RPN1     | 1305.8  | 1173.8  | 1278.4  | 1482.5  | 993.5   | 1041.3  | 1384.4  | 1240    |
| RPN2     | 208     | 206.2   | 280     | 242.6   | 168.1   | 210.3   | 229.1   | 260.5   |
| RPP14    | 116.9   | 120.5   | 110.1   | 131.8   | 114.9   | 108     | 112.1   | 113     |
| RPP21    | 1165.5  | 1365.9  | 1083.2  | 1376.2  | 1098.9  | 712.6   | 1214.9  | 1342.1  |
| RPP25    | 121.7   | 117.3   | 116.2   | 118.9   | 112.9   | 103.5   | 119.3   | 121.7   |
| RPP30    | 105.6   | 116.7   | 109     | 123.2   | 108.2   | 98.1    | 112.8   | 110.9   |
| RPP38    | 168.8   | 223     | 183.7   | 171.2   | 189.5   | 138.8   | 160.4   | 179.9   |
| RPP38    | 112.7   | 123.6   | 126.5   | 126     | 107.6   | 107.1   | 119.3   | 119.4   |
| RPP40    | 293     | 357.5   | 271.2   | 300     | 321.5   | 175.7   | 275.9   | 289.3   |
| RPRC1    | 2271    | 2539    | 1907.1  | 2988.2  | 2139    | 1933.3  | 2840.1  | 2577.6  |
| RPRM     | 113.7   | 127     | 129     | 125.6   | 110     | 103.2   | 119.6   | 108.2   |
| RPRML    | 115.3   | 115.2   | 115.7   | 113.7   | 108.1   | 103.3   | 111.1   | 113     |
| RPS10    | 14359.7 | 13598.8 | 15826.3 | 13166.8 | 14118   | 13598.9 | 15200.1 | 16129   |
| RPS11    | 11697   | 13080.8 | 12607.3 | 12550.6 | 9917.8  | 9069.2  | 13484.3 | 11457.5 |
| RPS12    | 19243.8 | 20139.1 | 20836.8 | 20620.6 | 19065.9 | 16888.1 | 19816.2 | 22602.4 |
| RPS13    | 3517.6  | 5443.1  | 6309.7  | 4813.6  | 4970.5  | 4453.8  | 4594    | 5712.6  |
| RPS14    | 9075.8  | 9571.2  | 10377.8 | 9664.8  | 10227.6 | 7681.5  | 7469.8  | 10683.9 |
| RPS14    | 4429.2  | 5519.7  | 5259.9  | 4567    | 4991.6  | 4170.7  | 4321.7  | 6054.8  |
| RPS15    | 3107.8  | 4402.1  | 4383.2  | 5309.9  | 3722.4  | 4418    | 3330.9  | 4581.6  |
| RPS15A   | 2098.9  | 1941.1  | 2538.1  | 2028    | 1823.6  | 1589.3  | 1635.9  | 2316.9  |
| RPS15A   | 14582.2 | 16828.5 | 17348.4 | 17284   | 13845.7 | 11195.3 | 15753.7 | 16389.1 |
| RPS15A   | 1391    | 1545.2  | 1814.5  | 1927.8  | 1438.1  | 1529.1  | 1346.1  | 1911.5  |
| RPS16    | 12874.6 | 14783.2 | 14462.3 | 11330   | 11272.7 | 9953.5  | 11527   | 11687.2 |
| RPS17    | 11412.5 | 11649.4 | 12363.3 | 11563.7 | 10127.3 | 11246.5 | 13358.6 | 11809.4 |
| RPS19    | 4421.6  | 5262    | 3969.9  | 3903.4  | 3109.4  | 4171.4  | 5843.2  | 5224    |
| RPS19BP1 | 300.6   | 328.5   | 281.5   | 309.3   | 300.7   | 265.7   | 284.1   | 299.6   |
| RPS2     | 6115.1  | 7598.1  | 7478.3  | 5940.2  | 6383.5  | 5192.3  | 5533.4  | 7616.1  |
| RPS20    | 6100.4  | 6373.6  | 8686.3  | 8794.2  | 5901.7  | 5748.8  | 6014.6  | 6558.3  |
| RPS21    | 345.7   | 391     | 489.6   | 404.8   | 377     | 333.3   | 378.7   | 426.1   |
| RPS23    | 463.3   | 2158    | 383.7   | 518.2   | 1914.7  | 368     | 523.4   | 2511.2  |
| RPS24    | 182.6   | 182.1   | 218.7   | 194.4   | 191     | 179.9   | 192.5   | 248.2   |
| RPS24    | 1332.5  | 1481.2  | 1944.8  | 1461.3  | 1535.3  | 1752.3  | 2176.9  | 2117.3  |
| RPS25    | 25748.8 | 26790.5 | 32115.2 | 30199.1 | 27069.5 | 22958.4 | 27197.6 | 30203.8 |
| RPS26    | 654.9   | 2519    | 723.7   | 640.3   | 2248.2  | 841.3   | 635     | 1850.8  |
| RPS26L   | 396.7   | 1346.4  | 358.2   | 427.3   | 830.9   | 440.8   | 390.1   | 1474.5  |
| RPS26L1  | 112.3   | 123.2   | 119.8   | 121.2   | 108.7   | 108     | 114.4   | 112.9   |
| RPS27    | 30628.2 | 32712.2 | 31420   | 36033.3 | 29543.9 | 24684.5 | 34847.4 | 33196.8 |
| RPS27A   | 21738.7 | 18185.5 | 23149   | 20061.2 | 20600   | 16037.6 | 22282.3 | 25626.2 |
| RPS27L   | 113     | 115.3   | 112.2   | 115.6   | 115.7   | 101.2   | 123.6   | 112.9   |
| RPS28    | 2303.2  | 1582.5  | 2901.1  | 1803.4  | 2369.4  | 2156.6  | 2156.2  | 2680.7  |

|         |         |         |         |         |         |         |         |         |
|---------|---------|---------|---------|---------|---------|---------|---------|---------|
| RPS29   | 6306.9  | 7747.5  | 7246.7  | 6897.2  | 6821.9  | 6721.3  | 7123.5  | 7607    |
| RPS29   | 894.3   | 786.9   | 842.8   | 914.7   | 574.3   | 579     | 900.3   | 786.6   |
| RPS29   | 22711.6 | 28200.5 | 27390.2 | 29628.2 | 25830.3 | 18227.7 | 26900.7 | 29749   |
| RPS29   | 14808.1 | 14367.4 | 19110.4 | 16385.4 | 11978.2 | 13733.2 | 17403.5 | 18476.2 |
| RPS3    | 11901.8 | 17652.9 | 20120.8 | 14955.1 | 15216.2 | 15783.4 | 15515.8 | 18365.8 |
| RPS3A   | 2619.7  | 5030.2  | 5626.3  | 4692.2  | 3273.7  | 4376.3  | 4237.9  | 5725.5  |
| RPS4X   | 4037.5  | 5830.6  | 5366.9  | 4316    | 4197.4  | 3230.9  | 4440.7  | 5215.7  |
| RPS4Y1  | 1442.8  | 1840.2  | 1710.8  | 1710.6  | 1237.9  | 1702.3  | 1606.8  | 1745    |
| RPS4Y2  | 227.3   | 238.8   | 229.8   | 245     | 194.4   | 175.9   | 217.2   | 220.3   |
| RPS5    | 6009.5  | 5011.3  | 5480.9  | 5813.8  | 4577.6  | 4653.3  | 7111.1  | 7033.9  |
| RPS6    | 4949.2  | 3705.9  | 4469.2  | 5139.3  | 3260.4  | 2778.6  | 4034.1  | 5664.1  |
| RPS6KA1 | 113.7   | 109     | 116.4   | 121.1   | 106.4   | 91.9    | 110.9   | 114     |
| RPS6KA1 | 388.2   | 486.6   | 277.5   | 661     | 314.2   | 254.2   | 554.9   | 309.4   |
| RPS6KA2 | 116.8   | 109.1   | 123.4   | 122.8   | 104.9   | 102.3   | 113.5   | 111.3   |
| RPS6KA2 | 214.7   | 195.2   | 209.1   | 252.2   | 167.2   | 187.2   | 216.9   | 169.9   |
| RPS6KA2 | 114.4   | 127     | 111.4   | 121.2   | 111.4   | 104     | 116.7   | 111.1   |
| RPS6KA3 | 270.6   | 280.6   | 214.6   | 290.2   | 255.2   | 170.5   | 255.1   | 275.5   |
| RPS6KA3 | 119     | 124.8   | 120.8   | 124.1   | 117.2   | 113.3   | 127     | 135.2   |
| RPS6KA3 | 144.5   | 135.2   | 146.9   | 144.7   | 131.4   | 113.3   | 141.2   | 151.9   |
| RPS6KA4 | 159.8   | 151.2   | 169.7   | 150.7   | 134.2   | 137.1   | 147     | 142     |
| RPS6KA5 | 375.9   | 405.5   | 278.3   | 407.1   | 358.4   | 240.9   | 354.2   | 343.4   |
| RPS6KA5 | 118.3   | 112.1   | 116.3   | 117.8   | 106.9   | 92.1    | 112.4   | 112.2   |
| RPS6KA6 | 115.1   | 129.2   | 106.1   | 114.1   | 105.1   | 98.9    | 122.2   | 115.5   |
| RPS6KB1 | 616.4   | 649.5   | 547     | 805.2   | 557.5   | 404.1   | 644.6   | 681.1   |
| RPS6KB2 | 875.7   | 999.7   | 977     | 954.9   | 769.8   | 524.1   | 880.1   | 765.4   |
| RPS6KC1 | 136.5   | 135.6   | 159.9   | 151.5   | 144.7   | 144.9   | 139.8   | 144.2   |
| RPS6KL1 | 119.9   | 130.2   | 130.6   | 131.8   | 115.2   | 102.1   | 128.1   | 125.2   |
| RPS7    | 125.7   | 118.2   | 153.5   | 142.4   | 141.6   | 129.1   | 208.2   | 301.6   |
| RPS9    | 4238    | 4207.1  | 4513.8  | 4729    | 4447.4  | 3592.5  | 4282    | 5001.7  |
| RPS9    | 5259.7  | 7144.9  | 6010.4  | 6186.8  | 5473.6  | 4889.7  | 5964.2  | 6362.1  |
| RPSA    | 13510.9 | 16259.4 | 16014   | 17221.1 | 14352.7 | 13576.5 | 15172.8 | 17956.8 |
| RPSA    | 134.8   | 129     | 132.8   | 137.9   | 120.3   | 117.9   | 134.2   | 153.5   |
| RPUSD1  | 229     | 266.4   | 214.9   | 272.7   | 191.7   | 170.7   | 263.8   | 229.6   |
| RPUSD2  | 462.1   | 470.7   | 424.4   | 484.3   | 326.1   | 285.9   | 333.9   | 294.2   |
| RPUSD3  | 312.3   | 342     | 398.4   | 354.9   | 236.5   | 273.3   | 283     | 255     |
| RPUSD4  | 775     | 938     | 752.3   | 815.6   | 604.3   | 491.5   | 826.3   | 790.1   |
| RQCD1   | 205.6   | 210.2   | 257.8   | 210.5   | 188.8   | 196.3   | 246.7   | 203.9   |
| RRAD    | 110.1   | 112.9   | 114.9   | 114.1   | 107.1   | 99.8    | 114.5   | 110.4   |
| RRAGA   | 1372    | 1352.7  | 1162.9  | 1325.2  | 800.2   | 967.9   | 1283.5  | 769.8   |
| RRAGB   | 118.5   | 123.2   | 156.4   | 159.2   | 117.4   | 111.9   | 135.4   | 139.9   |
| RRAGB   | 112.7   | 108.6   | 112.3   | 116.5   | 104.9   | 92.7    | 107.6   | 104.1   |
| RRAGB   | 221.9   | 251.8   | 291.9   | 250.9   | 230.2   | 188.3   | 225.7   | 244     |
| RRAGC   | 303.8   | 305.8   | 249.1   | 353.1   | 321.7   | 226.6   | 470.8   | 543.3   |
| RRAGD   | 187.6   | 162     | 185.7   | 215.9   | 175.8   | 173.8   | 298.2   | 268.5   |
| RRAS    | 201     | 170.1   | 367     | 170     | 134     | 250.8   | 180.1   | 155.4   |
| RRAS2   | 218.2   | 222.4   | 202.3   | 245.8   | 220.5   | 186.7   | 267.5   | 238.4   |
| RRBP1   | 137.5   | 129.5   | 130.7   | 132.2   | 121.1   | 106.8   | 133.6   | 137.8   |
| RRBP1   | 341     | 298.8   | 342.9   | 349.6   | 293.7   | 299.4   | 376.1   | 438.8   |
| RRBP1   | 138.3   | 138.3   | 153.5   | 139.6   | 133.9   | 100.9   | 129.2   | 150.7   |
| RREB1   | 121.6   | 113.1   | 111.3   | 120.8   | 117.1   | 108     | 117.2   | 127.8   |
| RREB1   | 120     | 119.7   | 131.2   | 131.3   | 108     | 108.8   | 127.4   | 120.8   |

|        |       |       |       |       |       |       |       |       |
|--------|-------|-------|-------|-------|-------|-------|-------|-------|
| RREB1  | 111.3 | 110.4 | 111   | 116.7 | 106.3 | 99.1  | 119.9 | 119.6 |
| RREB1  | 119.8 | 120   | 119.8 | 117.7 | 108.1 | 100.4 | 126.1 | 124.6 |
| RRH    | 108.9 | 118.7 | 110.5 | 114.9 | 98.9  | 93.3  | 118   | 107.7 |
| RRM1   | 704.1 | 846.6 | 922.7 | 808.6 | 622.1 | 743.4 | 748.7 | 720.3 |
| RRM2   | 113.9 | 112.8 | 120.2 | 128.7 | 109.5 | 105.9 | 130.4 | 112.9 |
| RRM2B  | 134   | 147.2 | 154.3 | 152.4 | 130.6 | 148.1 | 139.9 | 156.1 |
| RRN3   | 140.7 | 161.6 | 164.9 | 185.2 | 146.7 | 140.7 | 156.6 | 157.9 |
| RRP22  | 115   | 122.4 | 127.5 | 123.3 | 109.5 | 97.4  | 131.7 | 120.5 |
| RRP22  | 119.3 | 120.3 | 130.4 | 123.9 | 113.9 | 102.7 | 113.7 | 117   |
| RRS1   | 252.7 | 317.9 | 187.2 | 223.8 | 199.3 | 164.5 | 186.9 | 192.2 |
| RS1    | 111.9 | 111.2 | 109.8 | 124.7 | 107.3 | 103.5 | 113.7 | 119.3 |
| RSAD1  | 138.1 | 146.5 | 151.2 | 157.1 | 126   | 123.1 | 139.7 | 150.7 |
| RSAD2  | 124.3 | 120.5 | 122.8 | 133.6 | 111.5 | 101   | 118.7 | 124.9 |
| RSAFD1 | 196.4 | 185.2 | 154.3 | 176.2 | 169.8 | 136   | 175.8 | 178.8 |
| RSBN1  | 801.2 | 929   | 671.7 | 902.9 | 919   | 558.4 | 672.8 | 734.1 |
| RSBN1L | 205.9 | 271.7 | 208.5 | 197.1 | 201.1 | 168.2 | 212.5 | 237.5 |
| RSC1A1 | 140.2 | 144.5 | 139.7 | 137   | 123.7 | 106.5 | 140.4 | 128.1 |
| RSHL1  | 107.6 | 116.8 | 110.3 | 109.7 | 108.8 | 101.4 | 115.6 | 114.9 |
| RSHL2  | 125.2 | 135.5 | 152.1 | 123.1 | 122.9 | 111.1 | 126.2 | 121.3 |
| RSHL3  | 106.5 | 120   | 114.4 | 114.5 | 116.7 | 93.1  | 125.8 | 121.3 |
| RSL1D1 | 560   | 677.8 | 653.8 | 641.6 | 592.2 | 497.6 | 651.7 | 692.5 |
| RSN    | 104.8 | 117.6 | 119.5 | 121   | 129.3 | 104.4 | 135.3 | 127.4 |
| RSNL2  | 210   | 220.6 | 238.7 | 217.2 | 248.5 | 177.5 | 214.4 | 218.2 |
| RSPO1  | 111.5 | 127.6 | 110.9 | 116.6 | 110.8 | 96.6  | 114.5 | 110.2 |
| RSPO2  | 134.8 | 135.4 | 160.9 | 137.1 | 144.4 | 115.8 | 157   | 150.7 |
| RSPO3  | 124.7 | 124.6 | 118.7 | 112.8 | 113.1 | 101   | 130.5 | 129.5 |
| RSPO4  | 121.9 | 120.2 | 123.9 | 120.7 | 107   | 97.4  | 114.6 | 121.8 |
| RSPO4  | 120.6 | 111.4 | 122.5 | 114.8 | 111.7 | 95.2  | 111.1 | 116   |
| RSPRY1 | 634.8 | 606   | 501.9 | 683.1 | 601.4 | 335.4 | 846.9 | 873.1 |
| RSRC1  | 181.2 | 158.1 | 168   | 182.3 | 167.3 | 149.8 | 156.4 | 148.8 |
| RSRC2  | 236.7 | 308.7 | 293   | 318.1 | 343.6 | 294.2 | 347.5 | 507.3 |
| RSU1   | 438.8 | 461.4 | 408.9 | 361.5 | 349.1 | 261.4 | 281   | 275.6 |
| RSU1   | 126.2 | 124   | 131.3 | 132.7 | 123.2 | 106.5 | 130.5 | 126.3 |
| RTBDN  | 113.2 | 105.4 | 112.3 | 123.5 | 108.9 | 102.9 | 116.8 | 114.5 |
| RTBDN  | 120.7 | 115.5 | 115.6 | 120.6 | 106   | 99.5  | 113.6 | 117.4 |
| RTBDN  | 108.5 | 106.4 | 116   | 119.2 | 104.5 | 93    | 111.1 | 114.3 |
| RTCD1  | 137.8 | 151.8 | 173.4 | 181.7 | 156.1 | 141.7 | 159.9 | 173.2 |
| RTDR1  | 111   | 117.2 | 107.8 | 106.8 | 108.2 | 98.3  | 125.4 | 102.9 |
| RTL1   | 116.9 | 119.2 | 131.3 | 113.7 | 121   | 101.8 | 130.9 | 130.5 |
| RTL1   | 115.8 | 111.1 | 134.5 | 133.4 | 111.5 | 102.6 | 131.8 | 118.4 |
| RTF1   | 125.7 | 124.9 | 134.4 | 129.8 | 119.3 | 117.1 | 142.8 | 176.8 |
| RTKN   | 118.1 | 125.5 | 123.2 | 136.1 | 118.2 | 103.2 | 131.9 | 120.3 |
| RTKN   | 124.6 | 135.4 | 128.7 | 125.1 | 131.1 | 106.9 | 132   | 119.8 |
| RTKN   | 120.2 | 128.6 | 126.3 | 119   | 115.1 | 113.3 | 115.7 | 121.5 |
| RTKN   | 120.5 | 115.4 | 109.8 | 113.9 | 103.8 | 101.8 | 112.6 | 118.4 |
| RTN1   | 108   | 114.5 | 112.6 | 118.1 | 102.6 | 97.8  | 115   | 112.3 |
| RTN1   | 121.3 | 118.8 | 121.1 | 123.4 | 106.1 | 103.1 | 108.9 | 117   |
| RTN1   | 211.9 | 144.4 | 452.9 | 174.3 | 110.8 | 173.2 | 129.7 | 121.1 |
| RTN2   | 129.4 | 113.5 | 132   | 125.4 | 123   | 106.7 | 119.9 | 124.8 |
| RTN2   | 261   | 289.2 | 320.5 | 299.2 | 252   | 232.9 | 269.4 | 242.4 |
| RTN2   | 120.3 | 114.6 | 134.6 | 153.1 | 112.9 | 96.7  | 115.9 | 118.1 |

|         |        |        |        |        |        |        |        |        |
|---------|--------|--------|--------|--------|--------|--------|--------|--------|
| RTN3    | 167.5  | 166.7  | 162.9  | 178.2  | 172.8  | 139.7  | 183.2  | 172    |
| RTN3    | 120    | 115.2  | 122.4  | 135.3  | 104    | 95.4   | 122.5  | 119.5  |
| RTN3    | 108    | 121.5  | 110    | 111    | 109.3  | 96.2   | 120.6  | 117.8  |
| RTN3    | 402.3  | 373.8  | 327.8  | 398.1  | 338    | 285.4  | 585.5  | 510.4  |
| RTN4    | 377.8  | 344.8  | 523    | 443.4  | 325.4  | 554.4  | 412.8  | 502.3  |
| RTN4    | 110.2  | 108.7  | 107.4  | 109.3  | 106.8  | 99.3   | 108.6  | 109    |
| RTN4    | 1884.7 | 1307.8 | 2433.7 | 2028.8 | 1340.1 | 2358.9 | 2378.7 | 2355.4 |
| RTN4    | 119.6  | 112.1  | 128.6  | 126    | 109.8  | 101.3  | 123.8  | 114.1  |
| RTN4IP1 | 131.8  | 125.4  | 154.5  | 142.6  | 120.6  | 114.9  | 132.1  | 128.8  |
| RTN4R   | 124    | 129.1  | 125.2  | 122.7  | 119.2  | 100    | 112.3  | 117.1  |
| RTN4RL1 | 127.7  | 119.7  | 118.2  | 121.6  | 114.4  | 93.9   | 132    | 124.9  |
| RTN4RL2 | 114.2  | 118.1  | 114.4  | 121.3  | 108.4  | 96.6   | 113.2  | 109.8  |
| RTP1    | 119.2  | 119.2  | 121.8  | 120.7  | 112.9  | 103    | 116.6  | 112    |
| RTP2    | 119.5  | 109.7  | 107.1  | 122.7  | 106.3  | 96.7   | 129.1  | 109.3  |
| RTP3    | 113    | 111.6  | 113.9  | 129    | 106.8  | 90.1   | 117.4  | 107.3  |
| RTP4    | 129.3  | 141.5  | 149.2  | 127.5  | 121.5  | 125.1  | 138.9  | 119.6  |
| RUFY1   | 126    | 116.2  | 114.2  | 112.9  | 107.4  | 93.2   | 111.4  | 117.5  |
| RUFY1   | 157.1  | 172.3  | 172.2  | 166.4  | 126.6  | 136.6  | 162.8  | 149.5  |
| RUFY2   | 122.2  | 126.4  | 131.2  | 132    | 115.5  | 110.2  | 129.6  | 123.7  |
| RUFY2   | 131.7  | 142.6  | 141.1  | 137.6  | 117.2  | 109.5  | 137.2  | 130.3  |
| RUFY2   | 116.9  | 109.5  | 120    | 113.7  | 107.1  | 98.9   | 112.3  | 117.2  |
| RUFY3   | 139.4  | 126.1  | 146.9  | 137.7  | 134.4  | 129.2  | 145.7  | 151.9  |
| RUFY3   | 126.3  | 137.8  | 144.2  | 131.8  | 132.9  | 104.6  | 142.8  | 156    |
| RUFY3   | 102.8  | 119.7  | 110.1  | 120.2  | 104.9  | 102.4  | 113.1  | 117.1  |
| RUNDC1  | 380.1  | 351.4  | 341.4  | 370.1  | 266.7  | 277.2  | 252.3  | 193.4  |
| RUNDC2A | 122.8  | 120.9  | 136.2  | 140.7  | 117.1  | 108.9  | 132.4  | 123    |
| RUNX1   | 117.7  | 126    | 126.4  | 113.6  | 112.4  | 96.4   | 113.8  | 114.8  |
| RUNX1   | 134.1  | 114    | 114.5  | 131.2  | 127.1  | 106    | 124.5  | 126.8  |
| RUNX1   | 246.9  | 236.8  | 229.7  | 303.7  | 224.6  | 197.5  | 219.8  | 177.7  |
| RUNX1T1 | 116.7  | 121.1  | 123.2  | 114.2  | 110.7  | 103.1  | 121.3  | 107.4  |
| RUNX1T1 | 118.8  | 117.5  | 119.5  | 129.9  | 105.2  | 103.4  | 125.1  | 113    |
| RUNX1T1 | 114    | 112.8  | 107.4  | 124.3  | 104.5  | 97.4   | 122.1  | 113.7  |
| RUNX1T1 | 113.9  | 131.1  | 134.9  | 120.8  | 118.5  | 101.5  | 127.6  | 126.7  |
| RUNX1T1 | 114.7  | 109.7  | 114    | 116.9  | 107.5  | 99.2   | 123.4  | 115    |
| RUNX2   | 120.6  | 132.3  | 133.8  | 143.6  | 113.4  | 106.7  | 128.9  | 139.2  |
| RUNX2   | 138    | 158.3  | 126.3  | 127.6  | 127.1  | 105.5  | 121.3  | 123.6  |
| RUNX2   | 116.4  | 119.1  | 107.6  | 118.3  | 108.3  | 96.9   | 113.5  | 112.5  |
| RUNX3   | 2118.9 | 2638.1 | 2130.8 | 2300.8 | 1906.7 | 1632.2 | 2659.1 | 2225   |
| RUNX3   | 117.3  | 116.7  | 125.4  | 126.6  | 114.1  | 102.2  | 116    | 128.1  |
| RUSC1   | 480    | 501    | 515.2  | 514.2  | 384.7  | 417.3  | 548.6  | 538.5  |
| RUSC2   | 130.2  | 109    | 124.2  | 121.1  | 109.4  | 108.3  | 132.2  | 127.4  |
| RUTBC1  | 1832   | 2021.8 | 2453.6 | 1903.5 | 1726.1 | 1694.3 | 1892.1 | 2144.4 |
| RUTBC2  | 112.5  | 114.3  | 117.6  | 109.2  | 105.7  | 98     | 117.9  | 108.8  |
| RUTBC3  | 162.2  | 165.7  | 148.2  | 155.3  | 123.7  | 135.2  | 172.4  | 149    |
| RUVBL1  | 125.5  | 165.9  | 143.9  | 148.3  | 120.1  | 123.1  | 136.9  | 129.5  |
| RUVBL2  | 172.3  | 184.4  | 192    | 178.8  | 148.4  | 143.8  | 162.8  | 170.9  |
| RWDD1   | 116.2  | 118.8  | 120.8  | 132.6  | 115.1  | 101.8  | 122.3  | 140.8  |
| RWDD1   | 1209   | 1303.8 | 1515.5 | 1248.5 | 1194.3 | 1025.3 | 1298   | 1256.8 |
| RWDD2   | 182.2  | 231.6  | 269.7  | 231    | 163.2  | 198.6  | 177.1  | 180.5  |
| RWDD4A  | 303.9  | 259    | 334.2  | 324.6  | 242.5  | 260.8  | 298.3  | 313.3  |
| RXRA    | 474.5  | 409.8  | 1100.3 | 702.5  | 411.8  | 1245.5 | 771.8  | 380    |

|          |        |        |         |        |        |        |        |        |
|----------|--------|--------|---------|--------|--------|--------|--------|--------|
| RXRB     | 230.4  | 222.5  | 219.3   | 229    | 227.8  | 173.9  | 237.3  | 271.6  |
| RXRG     | 122.2  | 117.7  | 115     | 112.2  | 103.7  | 96.7   | 122.4  | 116.2  |
| RXRG     | 111.2  | 106    | 111.6   | 112.3  | 103.8  | 100.1  | 110.3  | 108.5  |
| RXRG     | 117.7  | 115.8  | 116.9   | 115.8  | 107.7  | 102.7  | 122.7  | 116.5  |
| RY1      | 435.8  | 422.2  | 427.7   | 424.4  | 330.9  | 343.4  | 358.1  | 351.9  |
| RYBP     | 438.5  | 609.4  | 432.6   | 534.5  | 613.3  | 232.2  | 730    | 1148.5 |
| RYK      | 157.1  | 166.6  | 148.3   | 162.4  | 155.5  | 124.5  | 157.2  | 143.9  |
| RYK      | 218    | 224.6  | 205.2   | 212    | 214.9  | 173.2  | 207.2  | 165.5  |
| RYK      | 409.1  | 486.9  | 411.6   | 517.9  | 486.2  | 322.5  | 393.8  | 328.6  |
| RYR1     | 111.5  | 113.5  | 121.8   | 116.7  | 114.3  | 90.5   | 117.9  | 115.8  |
| RYR1     | 121.5  | 132.2  | 126.4   | 124.7  | 108.7  | 105.1  | 121.3  | 126.9  |
| RYR2     | 114.5  | 115.8  | 119.9   | 120.9  | 114.8  | 98.8   | 121.7  | 106.4  |
| RYR3     | 114.9  | 114.8  | 117.1   | 126.3  | 100.6  | 95.1   | 137.7  | 118    |
| S100A1   | 119.4  | 109.7  | 120.4   | 118.9  | 112.4  | 106.1  | 136.8  | 122.2  |
| S100A10  | 2424.8 | 2735.8 | 4716.8  | 3011.1 | 2054   | 3769.5 | 2733.6 | 2353.4 |
| S100A11  | 381.3  | 314.3  | 597     | 432.1  | 269.2  | 633.8  | 454.9  | 332.4  |
| S100A12  | 164.6  | 135.8  | 278.2   | 157.9  | 114.8  | 235    | 152.1  | 124.2  |
| S100A13  | 108.3  | 113.8  | 114.3   | 125    | 105.1  | 97.3   | 116.9  | 114.6  |
| S100A13  | 110.3  | 113.9  | 117.5   | 117.3  | 114.1  | 95.6   | 110.3  | 110.4  |
| S100A13  | 118.8  | 125.7  | 126.4   | 126.9  | 111.5  | 106    | 112.5  | 118.9  |
| S100A13  | 135.3  | 123.1  | 141.4   | 139.7  | 131.9  | 119.8  | 148.8  | 134.9  |
| S100A13  | 119.5  | 114.8  | 115     | 116.6  | 113.1  | 100.2  | 127.5  | 127    |
| S100A13  | 125    | 117.7  | 119.1   | 124.1  | 116.1  | 105.6  | 121    | 136.8  |
| S100A14  | 116.9  | 112.2  | 124.6   | 124.7  | 108.7  | 106.1  | 123.7  | 119.1  |
| S100A16  | 126.1  | 113.3  | 126.7   | 127.5  | 102.8  | 100.6  | 117.5  | 117.5  |
| S100A2   | 130.1  | 133    | 135.4   | 137.4  | 111.3  | 115.1  | 132.9  | 134.5  |
| S100A3   | 109.1  | 117.9  | 114.7   | 127.8  | 109.5  | 107.8  | 117.3  | 114.9  |
| S100A4   | 6111.4 | 4610.3 | 9610.7  | 5224.5 | 2831.7 | 4677.9 | 3045   | 2015.2 |
| S100A4   | 6872.2 | 5369   | 12823.5 | 6471.6 | 3768   | 6373.1 | 3477.6 | 1688   |
| S100A5   | 120.4  | 124.3  | 138.2   | 129.4  | 120.8  | 104.1  | 119.7  | 121.5  |
| S100A6   | 1490.1 | 1062.9 | 1973.4  | 1220.2 | 677.8  | 1211.5 | 943.1  | 546.3  |
| S100A7   | 119.6  | 119.8  | 114.4   | 111.8  | 107.7  | 92.9   | 112.9  | 105.7  |
| S100A7L1 | 117.2  | 116.4  | 112.3   | 108.4  | 106.1  | 98.4   | 116.9  | 114.7  |
| S100A7L2 | 121    | 101.7  | 115.3   | 113.5  | 112.8  | 106.1  | 115.2  | 125.4  |
| S100A8   | 667    | 472.9  | 2702.1  | 790.9  | 363.6  | 1740.9 | 465.1  | 451    |
| S100A9   | 482.2  | 317.2  | 2817.4  | 749.9  | 446    | 1656.7 | 595.7  | 379.6  |
| S100B    | 109.6  | 115.6  | 118.1   | 116.2  | 109.5  | 96.6   | 110.9  | 108.7  |
| S100G    | 112.2  | 110.6  | 120     | 125.9  | 117.7  | 102.2  | 110.9  | 118.2  |
| S100P    | 116.1  | 129.2  | 131.5   | 123.9  | 131.7  | 117.7  | 125.3  | 146    |
| S100PBP  | 132.9  | 123.6  | 137.2   | 139.7  | 114.3  | 109.1  | 128.1  | 120.6  |
| S100PBP  | 159.6  | 136.9  | 183.2   | 160.1  | 135.6  | 107.2  | 147.7  | 141.9  |
| S100Z    | 109.3  | 110.7  | 110.7   | 113.8  | 108.9  | 88.5   | 113.4  | 114.5  |
| SAA1     | 119.2  | 116.5  | 124.9   | 119.9  | 119.4  | 106.9  | 119.2  | 129.3  |
| SAA1     | 116.9  | 120.8  | 131.8   | 121.5  | 115.6  | 105    | 119.1  | 117.8  |
| SAA1     | 120.6  | 112.4  | 125.9   | 126.6  | 117.7  | 98     | 127.4  | 131.2  |
| SAA2     | 111.9  | 115.7  | 121.6   | 129.1  | 108.5  | 105.6  | 122    | 109.7  |
| SAA4     | 113.5  | 111.5  | 122.9   | 111.9  | 102    | 94.9   | 105.1  | 111.1  |
| SAAL1    | 191.7  | 213.3  | 192.5   | 198.7  | 229.6  | 159.2  | 192.6  | 179.9  |
| SAC      | 117.8  | 128.8  | 122.2   | 126.6  | 111.6  | 104.4  | 109.8  | 108.2  |
| SACM1L   | 527    | 380.6  | 525.2   | 678.3  | 391.8  | 387.4  | 548.1  | 593.9  |
| SACS     | 167.5  | 143.2  | 163.1   | 162.7  | 145.1  | 144    | 163.4  | 174.1  |

|         |       |        |        |        |        |        |        |        |
|---------|-------|--------|--------|--------|--------|--------|--------|--------|
| SAE1    | 1444  | 1414.8 | 1358.2 | 1635.6 | 1345.4 | 1204.9 | 2106.1 | 2087.8 |
| SAFB    | 536.9 | 578.8  | 403.7  | 587.6  | 482.9  | 285.9  | 640.2  | 715.5  |
| SAFB2   | 404.3 | 459.6  | 372.1  | 414.2  | 346.8  | 390.9  | 487.5  | 422.4  |
| SAG     | 111.3 | 115.6  | 116.4  | 108.4  | 117    | 104.6  | 119.4  | 113.1  |
| SAGE1   | 108.5 | 112.1  | 106.9  | 111.7  | 102.2  | 96.6   | 106.6  | 110.4  |
| SALF    | 121.2 | 112.7  | 110    | 121.2  | 101.4  | 100.6  | 117.8  | 116.3  |
| SALL1   | 114   | 116.1  | 118.4  | 127.8  | 112.9  | 100.8  | 113.5  | 109.4  |
| SALL2   | 169.7 | 198.7  | 150.1  | 168.6  | 153.9  | 144.8  | 156.4  | 148.1  |
| SALL3   | 155.2 | 173.7  | 165.4  | 162.6  | 155.3  | 146.8  | 158.2  | 160.1  |
| SALL4   | 119.1 | 112.3  | 112.4  | 125    | 111.2  | 103.1  | 123.3  | 111.4  |
| SAMD1   | 129.3 | 133.8  | 131.4  | 139.5  | 116.7  | 111.3  | 150.8  | 145.9  |
| SAMD10  | 124.7 | 121.3  | 122.6  | 141.2  | 117.9  | 114.9  | 116.7  | 126    |
| SAMD11  | 129.1 | 134.1  | 127.2  | 131.5  | 121.4  | 105.9  | 133    | 121.7  |
| SAMD12  | 112.6 | 110.2  | 124.6  | 115.7  | 109.7  | 105.7  | 124.2  | 127.9  |
| SAMD13  | 116.6 | 117.8  | 114.9  | 117.5  | 106.2  | 93.9   | 116.9  | 111.9  |
| SAMD14  | 127.8 | 130.1  | 141.1  | 129.1  | 104.4  | 105.6  | 121.4  | 123.6  |
| SAMD3   | 756.7 | 821.1  | 617.8  | 773    | 710.9  | 402.2  | 622.7  | 584.4  |
| SAMD3   | 170.3 | 174    | 162.5  | 188.5  | 173.4  | 138.1  | 171    | 165.7  |
| SAMD3   | 146.5 | 176.8  | 166.5  | 165.3  | 182.9  | 128.6  | 166.4  | 157.9  |
| SAMD4A  | 110.5 | 105.1  | 105.4  | 113.9  | 102.2  | 96.2   | 115.2  | 100.7  |
| SAMD4B  | 176.5 | 158.4  | 154.5  | 178.3  | 148.9  | 154.2  | 240.5  | 233.3  |
| SAMD7   | 124.3 | 116.6  | 122    | 133.9  | 110.6  | 96.6   | 132.6  | 120.1  |
| SAMD8   | 117.5 | 114.2  | 118.7  | 107.4  | 107.2  | 97.3   | 116.2  | 111.9  |
| SAMD9   | 576   | 582.8  | 569.6  | 579    | 404.6  | 398.7  | 441.1  | 472.6  |
| SAMD9L  | 213.1 | 170.6  | 287.8  | 234.2  | 146.7  | 246.3  | 192.9  | 151.2  |
| SAMHD1  | 113.4 | 118.6  | 126.2  | 140.6  | 115    | 110.4  | 131.8  | 132.6  |
| SAMM50  | 604.1 | 704.6  | 640.4  | 609.1  | 516.1  | 459.6  | 486.6  | 472.9  |
| SAMSN1  | 121.9 | 126.7  | 145.8  | 143.3  | 113.2  | 124.1  | 124.9  | 136.4  |
| SAP130  | 231   | 267.8  | 257.9  | 275.8  | 238.8  | 233.1  | 313.2  | 351.5  |
| SAP18   | 207.5 | 249.3  | 243.1  | 255.3  | 205.2  | 221.3  | 302.3  | 302.1  |
| SAP30   | 193.4 | 170.4  | 260    | 197.4  | 156.1  | 144.3  | 181.8  | 210.7  |
| SAP30BP | 145.4 | 169.5  | 153.8  | 160.4  | 133.1  | 122.9  | 178.9  | 156.8  |
| SAPS1   | 226.5 | 260.8  | 216.6  | 287    | 217.7  | 166.6  | 274.2  | 271.1  |
| SAPS2   | 119   | 114.6  | 127.1  | 113.6  | 126.5  | 100.5  | 104.3  | 114.6  |
| SAPS3   | 453.1 | 511.9  | 369.9  | 470.3  | 306.1  | 301.8  | 735.7  | 687.9  |
| SAR1A   | 177.1 | 164.3  | 168.9  | 203.3  | 165.2  | 161.6  | 206.6  | 214    |
| SAR1B   | 122.2 | 116    | 110.9  | 122.7  | 114.1  | 105.2  | 127    | 138.4  |
| SAR1B   | 428.4 | 363.5  | 442.7  | 517.6  | 350.9  | 398.9  | 460.1  | 430.8  |
| SAR1B   | 173.9 | 154    | 187.4  | 173    | 151.3  | 174.7  | 170.9  | 187.9  |
| SARDH   | 118.9 | 115.8  | 135    | 115.6  | 112.6  | 109.8  | 112.9  | 116.7  |
| SARM1   | 182.8 | 176.6  | 146.3  | 182.9  | 148.2  | 123.6  | 179.4  | 146.7  |
| SARS    | 145.4 | 202.4  | 160.4  | 158.9  | 128.5  | 141.5  | 152.8  | 154.1  |
| SARS2   | 192.7 | 168.3  | 201.6  | 190.2  | 158.8  | 164.6  | 172    | 144.5  |
| SART1   | 130.4 | 126.3  | 124.8  | 141.3  | 125.2  | 101.7  | 132.3  | 126.2  |
| SART2   | 111.8 | 110.9  | 114.3  | 115.6  | 100.5  | 94     | 105.7  | 109.1  |
| SART2   | 111.8 | 116.6  | 124.2  | 114.3  | 110.5  | 104.5  | 120.4  | 112.5  |
| SART2   | 525.9 | 390.6  | 1150.6 | 571.1  | 232.3  | 711.9  | 406.4  | 268.9  |
| SART3   | 147.8 | 156.3  | 189.6  | 156.4  | 137.7  | 138.1  | 151.9  | 154    |
| SAS10   | 113.4 | 112    | 114.4  | 112    | 105.2  | 100.8  | 114.8  | 111    |
| SASH1   | 142.6 | 119.7  | 158.7  | 137.7  | 119.9  | 110.8  | 139.8  | 131    |
| SASS6   | 138   | 151.4  | 133.6  | 146    | 128.8  | 115    | 141.6  | 135.4  |

|          |        |       |        |       |       |        |        |       |
|----------|--------|-------|--------|-------|-------|--------|--------|-------|
| SAS-ZFAT | 115.4  | 117.7 | 114.5  | 126.8 | 114   | 96.6   | 107.5  | 120   |
| SAT      | 1227.2 | 888.8 | 1719.2 | 1587  | 866.7 | 2669.6 | 1782.9 | 942.7 |
| SAT2     | 246.2  | 226.2 | 271.3  | 305.6 | 190.4 | 256.4  | 302.4  | 300.1 |
| SATB1    | 144.3  | 138.9 | 125.7  | 150.8 | 134.4 | 104.4  | 140.1  | 153.8 |
| SATB2    | 114    | 119.7 | 118.9  | 124.1 | 108.1 | 109    | 118.2  | 117.1 |
| SATL1    | 112.3  | 128.2 | 126.3  | 132.6 | 113.1 | 100.5  | 116.6  | 115.8 |
| SAV1     | 142.5  | 143.8 | 143.6  | 135.8 | 123.7 | 129.9  | 147.4  | 134.3 |
| SBDS     | 330.6  | 348.1 | 380.4  | 344.8 | 307.1 | 244.4  | 444.9  | 448.6 |
| SBDSP    | 154.2  | 134.2 | 152.1  | 139.3 | 140.9 | 120.6  | 166.6  | 173.3 |
| SBEM     | 111    | 118.6 | 119.8  | 116.5 | 103.8 | 105.2  | 119.6  | 115   |
| SBF1     | 745.7  | 784.9 | 693.5  | 722   | 495.4 | 561.9  | 648.3  | 649   |
| SBF2     | 116.8  | 116.1 | 127.4  | 116.8 | 109.8 | 102.5  | 117.5  | 118.5 |
| SBK1     | 110.3  | 111.2 | 121.8  | 121.5 | 99.2  | 95.8   | 125    | 102   |
| SBK1     | 769.2  | 850.5 | 513.2  | 609.9 | 703.9 | 356.3  | 451    | 492.4 |
| SBNO1    | 111.4  | 111.2 | 115.5  | 127.6 | 118.6 | 95.5   | 120.4  | 122.4 |
| SBP1     | 115.4  | 132.1 | 135.7  | 133.1 | 123   | 110.1  | 125.9  | 131.7 |
| SBSN     | 107.5  | 110.4 | 111.4  | 113.3 | 107.9 | 95.6   | 112.4  | 115.8 |
| SC4MOL   | 136.1  | 154.7 | 132.5  | 146.2 | 137.7 | 117.2  | 134.2  | 134.2 |
| SC4MOL   | 244.5  | 264   | 245.2  | 231.8 | 206.5 | 141.9  | 229.5  | 201.3 |
| SC4MOL   | 110.8  | 122.9 | 121.6  | 123.9 | 114   | 99.2   | 118.6  | 115.6 |
| SC5DL    | 286.6  | 291.9 | 239.7  | 310.8 | 222.7 | 184.6  | 307.7  | 288.1 |
| SC65     | 124.6  | 141.2 | 138.6  | 144.9 | 120.6 | 108.9  | 134.6  | 119.1 |
| SCAMP1   | 799    | 706.4 | 732.3  | 716.1 | 521.9 | 574.8  | 763.1  | 536.8 |
| SCAMP1   | 134.2  | 134.2 | 148.6  | 140   | 124.8 | 108    | 129.7  | 131   |
| SCAMP2   | 189.9  | 165   | 182.4  | 183.2 | 148.8 | 125.7  | 179.5  | 182.6 |
| SCAMP3   | 134.2  | 129.3 | 141    | 128.3 | 129.2 | 110.2  | 148.3  | 127.7 |
| SCAMP3   | 670.9  | 632.7 | 628.4  | 675.6 | 496.1 | 478.3  | 623.9  | 614.6 |
| SCAMP4   | 121.7  | 127.5 | 134.8  | 125.1 | 116.9 | 110.9  | 126.8  | 107.2 |
| SCAMP5   | 118.8  | 117.1 | 122.5  | 126.5 | 115.9 | 107.3  | 119.2  | 114.5 |
| SCAND1   | 224.9  | 277.8 | 267.5  | 278   | 226.7 | 217.8  | 250.4  | 254   |
| SCAND1   | 146.9  | 136.8 | 146.4  | 159.6 | 128.4 | 129.3  | 149.9  | 158.9 |
| SCAND1   | 424.8  | 464.9 | 452.6  | 422.9 | 400.9 | 381.2  | 445    | 404.8 |
| SCAP     | 331.1  | 437.9 | 352.9  | 386   | 357.1 | 239.9  | 352.2  | 366.1 |
| SCAP1    | 402    | 437.7 | 459.4  | 533.4 | 441.3 | 399.2  | 381.4  | 308.2 |
| SCARA3   | 124.5  | 117.2 | 117.7  | 119.7 | 112.5 | 101.5  | 111.4  | 119.6 |
| SCARA3   | 110    | 115.8 | 117.4  | 118.5 | 103.8 | 92.6   | 113.5  | 110.7 |
| SCARA3   | 110.8  | 112.8 | 106.9  | 114.8 | 107.7 | 96.7   | 109.7  | 113.8 |
| SCARA5   | 111.3  | 113   | 108.5  | 114   | 99.5  | 91.9   | 117.4  | 113.3 |
| SCARB1   | 116.4  | 109.6 | 123.4  | 112.7 | 110.6 | 96.4   | 124.1  | 119.2 |
| SCARB2   | 688.5  | 478.7 | 1262.5 | 881.5 | 417.9 | 1011.4 | 910    | 528.1 |
| SCARF1   | 112.8  | 116.6 | 114.3  | 118   | 103.4 | 95     | 116.1  | 111   |
| SCARF1   | 115.3  | 128.7 | 124.7  | 125.2 | 118.6 | 108.8  | 119.7  | 120.2 |
| SCARF2   | 113.4  | 116.3 | 114.4  | 131.9 | 115.8 | 102.5  | 137.4  | 111.6 |
| SCARF2   | 120.2  | 104   | 121.3  | 120.1 | 113.9 | 100.6  | 115.9  | 107.8 |
| SCARNA15 | 117.8  | 109.4 | 109.4  | 108.7 | 104.2 | 94.3   | 110.6  | 112.3 |
| SCC-112  | 322    | 275.2 | 222.1  | 270.6 | 298.6 | 280.1  | 297.1  | 331.4 |
| SCCPDH   | 114.9  | 124.4 | 119.6  | 120.4 | 107.1 | 100.1  | 122.4  | 118.9 |
| SCD      | 203.9  | 194.7 | 233.8  | 164.6 | 157.2 | 126.8  | 181.8  | 185   |
| SCD5     | 140.4  | 121.2 | 125.2  | 131.3 | 118   | 102.1  | 139.5  | 131.6 |
| SCD5     | 114.6  | 112.7 | 118.4  | 117.3 | 100.2 | 91.9   | 119.1  | 109.4 |
| SCD5     | 119.6  | 128.2 | 133.2  | 135.5 | 128.6 | 113.7  | 122.4  | 122.5 |



|         |       |       |       |       |       |       |       |       |
|---------|-------|-------|-------|-------|-------|-------|-------|-------|
| SCDR10  | 130.6 | 147.5 | 126.3 | 130   | 121.7 | 109.2 | 136.1 | 126.6 |
| SCEL    | 115   | 128.8 | 115   | 118   | 111.5 | 110.9 | 113.2 | 111.1 |
| SCFD1   | 678.9 | 614.5 | 656.8 | 720.2 | 470.3 | 478.9 | 721.1 | 623.5 |
| SCFD1   | 123.9 | 122.3 | 116.5 | 113.6 | 115.6 | 103.9 | 118   | 120.3 |
| SCFD2   | 128.1 | 113.3 | 128.7 | 128.3 | 118.8 | 107.8 | 128.2 | 119.4 |
| SCG2    | 117.2 | 115.2 | 118.7 | 117.2 | 113.2 | 98.1  | 118.7 | 111.3 |
| SCG3    | 112.2 | 116.4 | 121.8 | 117.8 | 109.5 | 104   | 117.8 | 108.3 |
| SCG5    | 118.6 | 118   | 112.8 | 124.7 | 116.3 | 101.5 | 123.4 | 116.2 |
| SCGB1A1 | 114.2 | 122.3 | 122.6 | 111.6 | 110.9 | 107   | 116.2 | 120.4 |
| SCGB1C1 | 114.6 | 110.6 | 118.9 | 111.6 | 108.5 | 98.9  | 120   | 109   |
| SCGB1D1 | 116.2 | 113.9 | 119.7 | 123.3 | 109.7 | 99.6  | 122.5 | 113.3 |
| SCGB1D2 | 119.8 | 115.1 | 111.3 | 117.6 | 114.5 | 95.9  | 128   | 113.3 |
| SCGB1D4 | 109.6 | 109.8 | 120.7 | 113.7 | 103.8 | 102.6 | 110.1 | 121.6 |
| SCGB2A1 | 116.6 | 119.4 | 116.4 | 121   | 110.6 | 96.1  | 118.2 | 113.6 |
| SCGB2A2 | 115.8 | 121.4 | 126   | 128.6 | 107.1 | 101.2 | 119.7 | 116.6 |
| SCGB3A1 | 160.7 | 120.4 | 223.2 | 184.2 | 109.1 | 182.3 | 136.1 | 114.5 |
| SCGB3A2 | 116   | 122.4 | 120.6 | 138.4 | 112.2 | 95.8  | 118.2 | 116.6 |
| SCGN    | 119   | 114.2 | 109.7 | 112.2 | 115.4 | 95.8  | 118.4 | 110.2 |
| SCHIP1  | 118.3 | 129.8 | 116.9 | 127.8 | 113.6 | 106.2 | 127.8 | 122.7 |
| SCIN    | 115.3 | 115.1 | 109.7 | 114.3 | 113   | 94    | 113.7 | 119.7 |
| SCLY    | 144.4 | 145.8 | 141.9 | 142.5 | 128.8 | 118.1 | 156.1 | 150.6 |
| SCMH1   | 119.3 | 104.4 | 104.2 | 117.2 | 105.9 | 101.8 | 110.2 | 116.3 |
| SCMH1   | 165.8 | 163.7 | 147.4 | 155.5 | 134.7 | 136.1 | 180.7 | 158.9 |
| SCMH1   | 125.3 | 118.2 | 114.8 | 116.4 | 114.5 | 100.2 | 125.1 | 118.9 |
| SCMH1   | 120.4 | 116.5 | 131.6 | 128.1 | 122.6 | 110.6 | 127.5 | 122.6 |
| SCML1   | 230.3 | 122.4 | 329   | 222.9 | 123.6 | 273.9 | 254.3 | 146.9 |
| SCML1   | 177.9 | 148.7 | 216.6 | 177.4 | 141.1 | 164.7 | 181.7 | 201.9 |
| SCML1   | 107.3 | 108.8 | 120.8 | 114.7 | 107.6 | 96.6  | 115.2 | 111.3 |
| SCML2   | 140.6 | 128.9 | 136.1 | 149.2 | 126.1 | 117.6 | 149.5 | 142   |
| SCML4   | 144.7 | 140.3 | 149.3 | 135.6 | 123.6 | 115.6 | 121.2 | 117.8 |
| SCN10A  | 114   | 118.2 | 117.5 | 123   | 109.1 | 103.4 | 122.9 | 122.5 |
| SCN11A  | 112.5 | 108.4 | 117.5 | 126.3 | 102.9 | 94.3  | 118.2 | 110.2 |
| SCN1A   | 107.2 | 117.2 | 107.5 | 130.4 | 103.1 | 100.2 | 120.9 | 122.5 |
| SCN1B   | 107.8 | 112.3 | 113.4 | 113.3 | 115.2 | 100   | 123   | 118.2 |
| SCN1B   | 120.7 | 113.3 | 107.6 | 119.9 | 111.2 | 100.7 | 114.9 | 113   |
| SCN2A2  | 110   | 109.3 | 118.8 | 122.5 | 103.6 | 96.3  | 116.6 | 115.5 |
| SCN2A2  | 110.2 | 109.5 | 117.3 | 133.3 | 114   | 98.3  | 121.4 | 119.4 |
| SCN2A2  | 118.1 | 117.7 | 117.7 | 126.2 | 103   | 100.5 | 115.6 | 119.6 |
| SCN2B   | 115.2 | 119.4 | 108.4 | 115.9 | 116.9 | 107.2 | 119.8 | 117.3 |
| SCN3A   | 114.5 | 111.8 | 116   | 111.5 | 102.5 | 97.4  | 111.3 | 117.6 |
| SCN3A   | 161.5 | 159.5 | 164.6 | 176.7 | 124.8 | 127.2 | 157.4 | 144   |
| SCN3A   | 123.5 | 121.7 | 124.7 | 121.7 | 117.7 | 101.8 | 124.9 | 125.2 |
| SCN3B   | 110   | 110.5 | 113.2 | 114.5 | 107.6 | 101.5 | 114.3 | 113   |
| SCN3B   | 115.5 | 110.9 | 104.6 | 116.5 | 102.4 | 97.7  | 122.7 | 104.6 |
| SCN4A   | 128.3 | 114.5 | 121.2 | 118.8 | 111.9 | 100.6 | 108.5 | 114.1 |
| SCN4B   | 123.5 | 127.7 | 124   | 127   | 118.6 | 105.6 | 125.4 | 125.3 |
| SCN5A   | 105.7 | 112.3 | 115.8 | 115.4 | 109.3 | 98.9  | 107   | 105.7 |
| SCN5A   | 111.5 | 121   | 116.9 | 120.4 | 105   | 103.2 | 117.5 | 114.8 |
| SCN7A   | 115   | 122.2 | 118.5 | 122.6 | 111.8 | 101.3 | 114.4 | 114.3 |
| SCN8A   | 115.4 | 117.2 | 109   | 120.3 | 109.3 | 93    | 112.7 | 110.8 |
| SCN9A   | 110.7 | 118.1 | 121   | 116.3 | 106.1 | 97.8  | 121   | 122   |

|          |        |       |        |        |       |        |        |       |
|----------|--------|-------|--------|--------|-------|--------|--------|-------|
| SCNM1    | 219.6  | 215.9 | 243.4  | 234.8  | 207.7 | 183.1  | 235.3  | 234.6 |
| SCNM1    | 232.5  | 249.5 | 322.4  | 264.6  | 228.6 | 197.8  | 222.4  | 251.5 |
| SCNN1A   | 132.2  | 129.6 | 136.6  | 137.7  | 122.8 | 112.5  | 125.8  | 121.7 |
| SCNN1B   | 115.1  | 118.4 | 112.2  | 130.6  | 111.9 | 101.8  | 120.7  | 116   |
| SCNN1D   | 146.2  | 141.2 | 159.4  | 162.9  | 130.6 | 121.5  | 142.4  | 142.2 |
| SCNN1G   | 115.4  | 110.7 | 122.6  | 124.6  | 101.8 | 98.7   | 115.7  | 115.9 |
| SCO1     | 292.1  | 331.4 | 381.6  | 333.8  | 249.8 | 255.6  | 326.3  | 238.9 |
| SCO2     | 326.7  | 340.6 | 562.3  | 322.6  | 242.7 | 275.1  | 283.6  | 250   |
| SCOC     | 278.6  | 236.9 | 256.4  | 294.4  | 204.6 | 210.7  | 237.4  | 217.1 |
| SCOTIN   | 926.3  | 694.4 | 1204.8 | 869.6  | 679.8 | 1127.7 | 825.8  | 841.4 |
| SCP2     | 121.1  | 128.7 | 118.4  | 118.1  | 113.2 | 104.9  | 126.3  | 111.4 |
| SCP2     | 116.8  | 130.3 | 123.2  | 126    | 116.5 | 101.6  | 120.3  | 116.6 |
| SCPEP1   | 283.8  | 246   | 446.4  | 310.8  | 214.1 | 253.3  | 264.4  | 253.7 |
| SCRG1    | 115.1  | 105.8 | 114.6  | 112.9  | 107.4 | 97.8   | 111.2  | 113   |
| SCRIB    | 120.6  | 129.2 | 123.1  | 133    | 118.7 | 105.7  | 130.7  | 126   |
| SCRIB    | 300.1  | 302.7 | 222.2  | 282.7  | 232.9 | 178.9  | 238    | 319.5 |
| SCRIB    | 109.1  | 115.9 | 118.5  | 126    | 116.6 | 98.8   | 120.9  | 113.4 |
| SCRL     | 107.8  | 115.3 | 106.6  | 119.8  | 104.9 | 99.7   | 111.4  | 113.9 |
| SCRN1    | 189.7  | 196.5 | 192    | 202.9  | 174.7 | 153.5  | 212    | 182.1 |
| SCRN2    | 117.7  | 130   | 132.9  | 129.7  | 117.4 | 113.6  | 123.4  | 131.2 |
| SCRN3    | 127.9  | 119.4 | 129    | 130.1  | 110.1 | 101.6  | 121.8  | 112.1 |
| SCRT1    | 120.5  | 108   | 108.9  | 119.1  | 107.4 | 97.2   | 114    | 117   |
| SCRT2    | 116.5  | 123.3 | 121.4  | 122.4  | 110.7 | 102.8  | 120.2  | 115.8 |
| SCT      | 127.1  | 116.1 | 119.9  | 131.2  | 121.6 | 104.6  | 125.2  | 123.1 |
| SCTR     | 119.3  | 131.2 | 142    | 135.2  | 118.9 | 104.1  | 122.7  | 131.3 |
| SCUBE1   | 111.1  | 123   | 118    | 119.9  | 118.9 | 102.6  | 110.2  | 120.2 |
| SCUBE2   | 110.8  | 110.8 | 112.7  | 114.8  | 107.5 | 95.6   | 127.1  | 117.7 |
| SCUBE3   | 112.9  | 110.2 | 117.4  | 117.7  | 111.8 | 99.1   | 114.6  | 122.6 |
| SCYE1    | 115.6  | 114.2 | 113.2  | 111.6  | 106.6 | 95.1   | 120.8  | 109.5 |
| SCYL1    | 183.5  | 177.4 | 168.1  | 182.4  | 158.9 | 178.3  | 200.4  | 180.8 |
| SCYL1    | 538    | 335.8 | 431.8  | 561.9  | 338.3 | 358.7  | 490.9  | 491   |
| SCYL1BP1 | 143.8  | 148.2 | 158.5  | 155.9  | 139.5 | 110.5  | 127.8  | 143.8 |
| SCYL2    | 389    | 443   | 404.2  | 523.1  | 345.6 | 421.1  | 576.4  | 632.5 |
| SCYL3    | 169.8  | 196.5 | 183.2  | 186.2  | 176.8 | 142.2  | 177.5  | 229   |
| SCYL3    | 148    | 179.8 | 144.2  | 193.4  | 151.7 | 121.8  | 159.3  | 174.2 |
| SCYL3    | 118.5  | 120.3 | 121    | 111.1  | 112.9 | 106.4  | 125.5  | 116.7 |
| SDAD1    | 871.1  | 956.3 | 837    | 831.9  | 783.4 | 742.3  | 932.9  | 678.8 |
| SDC1     | 126.8  | 115.8 | 122.3  | 133.8  | 113.1 | 101.3  | 119.1  | 125.5 |
| SDC1     | 116.4  | 126.2 | 121.2  | 120.2  | 123.7 | 101    | 130.4  | 119.3 |
| SDC1     | 113.6  | 115.8 | 117.9  | 122.3  | 106.3 | 91.9   | 111.7  | 111.8 |
| SDC2     | 113.7  | 123.3 | 129.7  | 136.9  | 114.1 | 142.2  | 137.5  | 119.2 |
| SDC3     | 124.7  | 115.2 | 122.4  | 128.6  | 105.4 | 103.2  | 110.1  | 118.1 |
| SDC3     | 116.7  | 107.5 | 109.7  | 116.9  | 109   | 95.8   | 112.8  | 118.9 |
| SDC4     | 107    | 108.4 | 120.4  | 119    | 107.4 | 113.3  | 118.7  | 114.1 |
| SDCBP    | 1496.1 | 912.9 | 814.5  | 1273.5 | 932.2 | 1453.6 | 1403.3 | 1143  |
| SDCBP2   | 115.5  | 122.5 | 120.1  | 127.2  | 111.8 | 105.8  | 137    | 129.5 |
| SDCBP2   | 102.1  | 113.6 | 114.6  | 120.1  | 110.1 | 91.4   | 110    | 119.1 |
| SDCBP2   | 112.4  | 120   | 122.4  | 123.2  | 107.9 | 102.1  | 136    | 125.2 |
| SDCBP2   | 107.5  | 111.3 | 123    | 120.8  | 109.9 | 101.3  | 117.3  | 114.2 |
| SDCCAG1  | 283.6  | 250.3 | 286.5  | 255.1  | 240.9 | 182.8  | 242.2  | 210.3 |
| SDCCAG10 | 245.4  | 263.7 | 277.8  | 231.2  | 210.6 | 209.7  | 212.5  | 239.4 |

|          |        |        |        |        |       |        |        |        |
|----------|--------|--------|--------|--------|-------|--------|--------|--------|
| SDCCAG3  | 228.2  | 261.5  | 178.1  | 196.1  | 201.3 | 150.6  | 180.8  | 166.1  |
| SDCCAG3  | 129.8  | 131.9  | 128.9  | 132    | 119.6 | 108.8  | 135.9  | 142.3  |
| SDCCAG3  | 503.9  | 539.1  | 402.7  | 519.2  | 358.8 | 306.7  | 414.3  | 359.9  |
| SDCCAG33 | 331.5  | 428    | 290.4  | 342.3  | 336.6 | 253.8  | 277.5  | 312.1  |
| SDCCAG8  | 129.7  | 116.2  | 146.5  | 126.6  | 120.9 | 117.6  | 148.5  | 129.1  |
| SDF2     | 586.2  | 584.5  | 539.1  | 635    | 537.4 | 538.8  | 634.8  | 787.6  |
| SDF2L1   | 660    | 846.2  | 1268.7 | 720    | 534   | 713.8  | 666.4  | 718.4  |
| SDF4     | 404.8  | 541.9  | 433.1  | 453.2  | 368.8 | 458.7  | 492.3  | 573.6  |
| SDF4     | 115.5  | 122    | 114.2  | 117.8  | 105.3 | 100.6  | 122    | 112.6  |
| SDF4     | 202.6  | 287.3  | 228.8  | 244.5  | 219.2 | 212.9  | 260.7  | 211.4  |
| SDFR1    | 241.3  | 221    | 294.6  | 283.9  | 244.8 | 415.7  | 276.3  | 230.7  |
| SDFR1    | 131.5  | 110.5  | 116.3  | 122.2  | 108.5 | 97.6   | 128.2  | 126    |
| SDHA     | 417.3  | 374.6  | 425.1  | 511.7  | 382.2 | 364.4  | 356.8  | 380.5  |
| SDHAP3   | 142.1  | 127.8  | 125.8  | 170.3  | 124.5 | 101.7  | 125.8  | 145.3  |
| SDHB     | 1158   | 1099.2 | 1068.5 | 1110.3 | 730.5 | 799.8  | 1210.6 | 1062.2 |
| SDHC     | 156.2  | 177.2  | 184.4  | 169    | 175.3 | 166.5  | 196.5  | 204.9  |
| SDHD     | 288.8  | 345.2  | 384.4  | 282.1  | 246.2 | 330.5  | 382.6  | 341.6  |
| SDK1     | 117.9  | 110.9  | 109.3  | 120.6  | 109.8 | 96     | 117.7  | 117.3  |
| SDK1     | 118    | 116.2  | 117.6  | 117.8  | 108.2 | 102.4  | 114    | 118.2  |
| SDK2     | 129.6  | 120.8  | 129.8  | 133.8  | 123   | 107.6  | 132.1  | 122.5  |
| SDPR     | 125.8  | 135    | 145.4  | 123.7  | 119.2 | 116.3  | 138.6  | 134.5  |
| SDR-O    | 110.8  | 119.8  | 120.1  | 125.3  | 109.6 | 110.2  | 118.3  | 106.8  |
| SDS      | 112.5  | 114.6  | 127.1  | 120    | 105.3 | 104.2  | 117.9  | 121.7  |
| SDSL     | 122.1  | 115.6  | 134.4  | 128.9  | 108.9 | 101.8  | 113.9  | 115.1  |
| SEBOX    | 111.9  | 122.7  | 108    | 114.9  | 105.2 | 96.7   | 111.1  | 111.7  |
| SEC10L1  | 142.1  | 145.3  | 150.5  | 133.6  | 142.5 | 118.3  | 140.6  | 137.6  |
| SEC11L1  | 1064.7 | 1074.7 | 1554.5 | 1173   | 1062  | 1222.7 | 1234.8 | 1598.7 |
| SEC11L3  | 175.5  | 173.6  | 253.3  | 206.7  | 179.3 | 196.9  | 171.7  | 227.8  |
| SEC14L1  | 152    | 166.9  | 145.4  | 187.4  | 132.4 | 149.7  | 195.5  | 154.7  |
| SEC14L1  | 209    | 181.8  | 149    | 211.1  | 153.1 | 157.5  | 196.4  | 171.1  |
| SEC14L2  | 117.6  | 122.2  | 113.2  | 117.8  | 111.8 | 98.6   | 116.9  | 108.6  |
| SEC14L3  | 111.8  | 119.8  | 120.6  | 120.8  | 109.6 | 90.6   | 110.6  | 108.5  |
| SEC14L4  | 123.2  | 126.7  | 129.6  | 123.2  | 115.2 | 105.3  | 113.2  | 128.4  |
| SEC22C   | 382.7  | 424.2  | 397.3  | 414.7  | 352.2 | 420    | 328.4  | 321.4  |
| SEC22C   | 185.7  | 181.9  | 199.2  | 201.4  | 171.1 | 170    | 182.2  | 173    |
| SEC22L1  | 314.2  | 374.5  | 333.7  | 412    | 314.2 | 259.7  | 375.2  | 338    |
| SEC22L2  | 219.6  | 241.6  | 215.9  | 264.9  | 227.5 | 235.7  | 250.6  | 270.3  |
| SEC22L3  | 134.8  | 139.4  | 150.2  | 144.1  | 135.1 | 118.2  | 162.5  | 132.1  |
| SEC23A   | 103.9  | 115.6  | 114.1  | 123    | 110.3 | 103.9  | 116.5  | 113.4  |
| SEC23B   | 267.6  | 196.1  | 246.8  | 277.9  | 177.7 | 230.6  | 301.8  | 251.4  |
| SEC23B   | 366    | 390.8  | 373.2  | 378.9  | 293.9 | 371    | 442    | 505.5  |
| SEC23IP  | 190.2  | 189.5  | 224    | 225.7  | 200.6 | 186.5  | 227.6  | 185.1  |
| SEC24A   | 123    | 134.9  | 135.2  | 143    | 143   | 110.9  | 154.2  | 163.4  |
| SEC24B   | 342.9  | 246.2  | 216.6  | 258.9  | 254.3 | 197.8  | 261.1  | 332.1  |
| SEC24B   | 112.7  | 114    | 117    | 116.6  | 108.6 | 100.2  | 107.2  | 109.3  |
| SEC24B   | 148.4  | 154.1  | 141.9  | 181.3  | 148.4 | 142.7  | 165.2  | 164.2  |
| SEC24B   | 134.6  | 139.1  | 135.8  | 142.4  | 145.2 | 123.1  | 133.4  | 148.8  |
| SEC24C   | 1281.8 | 1351.3 | 1106.8 | 1552.8 | 856.6 | 970.1  | 1591.6 | 1483.5 |
| SEC24C   | 142.7  | 139.5  | 137.5  | 151.1  | 120.4 | 122.1  | 134    | 129.2  |
| SEC24D   | 162.2  | 139.5  | 155.2  | 166.6  | 133.2 | 163.7  | 156.9  | 178.3  |
| SEC31L1  | 119.6  | 124.9  | 121.3  | 129.5  | 117.6 | 111.2  | 133.4  | 128.3  |

|          |        |        |        |        |        |        |        |        |
|----------|--------|--------|--------|--------|--------|--------|--------|--------|
| SEC31L1  | 461.1  | 549.2  | 508.3  | 435.4  | 324.6  | 272.4  | 529    | 647.2  |
| SEC31L2  | 119.5  | 107    | 119.2  | 110.1  | 109    | 98.3   | 113.8  | 106.3  |
| SEC31L2  | 134.4  | 117.9  | 114.3  | 126.6  | 109.9  | 114.5  | 128.9  | 121.6  |
| SEC61A1  | 1029.2 | 1154.6 | 891.8  | 1201.7 | 854.4  | 877.3  | 1469.8 | 1336.9 |
| SEC61A2  | 126.6  | 128    | 123.5  | 137.2  | 125.4  | 106.1  | 143.5  | 135.8  |
| SEC61B   | 860.7  | 822.8  | 988.5  | 799.4  | 830.1  | 1003.6 | 1040   | 1038.4 |
| SEC61G   | 1374.1 | 1496.4 | 2480.1 | 1374.1 | 1588.2 | 1880.2 | 1527.9 | 1595.9 |
| SEC61G   | 1416.6 | 1780.1 | 2067.7 | 1749.7 | 1290   | 1778   | 1350.9 | 1940   |
| SEC63    | 113.9  | 116.3  | 116.5  | 119    | 111.2  | 98.6   | 112.6  | 121.4  |
| SEC6L1   | 319.1  | 314    | 342    | 355.7  | 251.3  | 319.6  | 294.7  | 215.7  |
| SEC8L1   | 117.2  | 121.1  | 141.1  | 140.7  | 112.9  | 112.8  | 127.9  | 132.1  |
| SECISBP2 | 244.1  | 262.3  | 264.1  | 272.8  | 260.2  | 213.9  | 263.9  | 236.1  |
| SECTM1   | 118.5  | 126.2  | 124.3  | 121.1  | 116.2  | 106.1  | 120.8  | 126    |
| SEDLP    | 143.9  | 166.5  | 140.7  | 148.4  | 165.2  | 163.7  | 139.9  | 170    |
| SEH1L    | 170.9  | 191.1  | 148.2  | 159.4  | 148.6  | 127.2  | 178.4  | 155.3  |
| SEH1L    | 134.3  | 141.8  | 146    | 159.5  | 130.4  | 116.4  | 137.5  | 153.1  |
| SEH1L    | 159.7  | 154.4  | 174.7  | 174    | 160.1  | 147.4  | 178    | 181.2  |
| SEL1L    | 130.3  | 140.6  | 146.9  | 132.1  | 129.4  | 123.5  | 154.6  | 148.9  |
| SELE     | 124.4  | 118.4  | 125.2  | 137.6  | 116.6  | 94.1   | 128.5  | 114    |
| SELENBP1 | 111.2  | 116.8  | 116.6  | 119.7  | 105.4  | 115.4  | 115.4  | 112.5  |
| SELI     | 164.8  | 139.2  | 140.1  | 173.4  | 138.2  | 119.2  | 166.8  | 168.7  |
| SELK     | 336.7  | 390.7  | 363.7  | 464.4  | 289.8  | 301.2  | 492.6  | 656.3  |
| SELL     | 889.7  | 1333.6 | 866.9  | 1273.9 | 981.6  | 1018   | 1433.9 | 1388.3 |
| SELM     | 173    | 153.1  | 221.4  | 186.1  | 136.9  | 196    | 167.8  | 120.8  |
| SELO     | 250.3  | 235.8  | 251.9  | 221.1  | 180    | 184.2  | 225.9  | 230.6  |
| SELP     | 112.9  | 108.7  | 111.3  | 118.1  | 103.8  | 99.2   | 109.5  | 110.9  |
| SELPLG   | 222.5  | 266.8  | 202.1  | 276.6  | 259.4  | 133.7  | 200.8  | 280.4  |
| SELS     | 119.7  | 112.2  | 126.5  | 132.6  | 122.4  | 110.3  | 124.3  | 128.9  |
| SELS     | 895.5  | 1067.8 | 927.1  | 1239.1 | 776.1  | 1075   | 1228.7 | 1228.6 |
| SELS     | 356.1  | 347    | 313.4  | 412.2  | 324.8  | 292.7  | 394.4  | 413.5  |
| SELT     | 110.2  | 111.7  | 119.9  | 122.9  | 109.2  | 104.5  | 126.1  | 115.6  |
| SELV     | 117.8  | 124.1  | 116.3  | 108.6  | 102.8  | 97.8   | 117.8  | 112.5  |
| SEMA3A   | 117.3  | 114.8  | 127.7  | 124.7  | 114.3  | 101.5  | 130.6  | 120.2  |
| SEMA3B   | 119.5  | 129.6  | 117.5  | 132.4  | 109.5  | 103.6  | 141.8  | 122.4  |
| SEMA3B   | 120.2  | 122.7  | 115.8  | 117.1  | 118.9  | 106.2  | 128.1  | 122.5  |
| SEMA3C   | 122.5  | 120.7  | 107.9  | 112.7  | 109.7  | 102.6  | 110.4  | 122.4  |
| SEMA3D   | 115    | 105.6  | 112.6  | 110.1  | 106.3  | 98.7   | 116    | 112.5  |
| SEMA3E   | 756.1  | 657.5  | 864.8  | 633.5  | 609.2  | 565.4  | 838.1  | 846.3  |
| SEMA3F   | 115.7  | 118.8  | 115.1  | 119.2  | 110.4  | 98.3   | 123.3  | 109.2  |
| SEMA3G   | 124.5  | 131.3  | 126.7  | 121.5  | 112.4  | 108    | 117.6  | 118.3  |
| SEMA4A   | 149    | 133    | 178.9  | 142.4  | 119.6  | 139.7  | 131.8  | 122.4  |
| SEMA4B   | 223.1  | 206.8  | 192.3  | 201.6  | 165.3  | 171.9  | 190.6  | 170.1  |
| SEMA4B   | 112.6  | 109.8  | 116.7  | 112.6  | 105.1  | 93     | 117.7  | 117.6  |
| SEMA4C   | 124.8  | 128.8  | 129.1  | 126.1  | 117    | 109.1  | 117.4  | 115    |
| SEMA4D   | 1949.3 | 2429.5 | 1448.7 | 1882.5 | 1482.7 | 1297.3 | 1622   | 1719   |
| SEMA4F   | 172    | 190.3  | 172.5  | 199.4  | 150.1  | 145.3  | 209.3  | 180    |
| SEMA4G   | 111.5  | 109.5  | 118.7  | 112.9  | 112.4  | 99.1   | 112.3  | 125    |
| SEMA5A   | 110.5  | 117.6  | 114.7  | 114.2  | 109.8  | 96.3   | 111.1  | 114.3  |
| SEMA5B   | 111.2  | 116.9  | 116.2  | 121.6  | 110.5  | 96.7   | 117.2  | 117.6  |
| SEMA6B   | 135    | 131    | 168    | 140.7  | 123.9  | 206.7  | 168.7  | 128.4  |
| SEMA6B   | 116.4  | 113.2  | 115.1  | 124.2  | 109.2  | 100.3  | 116.8  | 117.8  |

|        |        |        |        |        |        |        |        |        |
|--------|--------|--------|--------|--------|--------|--------|--------|--------|
| SEMA6B | 114    | 107    | 111    | 118.8  | 111.9  | 101.6  | 118.7  | 121    |
| SEMA6C | 120    | 120.2  | 134.6  | 127.2  | 120.8  | 107.1  | 126.4  | 130    |
| SEMA6D | 114.7  | 113.8  | 110    | 124    | 118.6  | 101.3  | 130    | 112.9  |
| SEMA6D | 111.6  | 104.7  | 115.9  | 117.1  | 103.7  | 97.1   | 117.6  | 109    |
| SEMA6D | 114    | 124.1  | 128.2  | 127.2  | 122.8  | 110.4  | 123.5  | 128    |
| SEMA7A | 115.8  | 116.3  | 118.7  | 124.2  | 113.9  | 102.6  | 120.9  | 121.3  |
| SEMG1  | 129    | 114.4  | 117.2  | 123.8  | 107.5  | 102.5  | 125.1  | 115.2  |
| SEMG1  | 130.2  | 128    | 125.5  | 138.5  | 119.3  | 96.9   | 123.7  | 115.6  |
| SEMG2  | 113.3  | 108.8  | 112    | 113.3  | 105.8  | 96.2   | 110.5  | 107.7  |
| SENP2  | 167.9  | 183.9  | 153.9  | 171.4  | 139.7  | 139.2  | 205.8  | 185    |
| SENP3  | 120.8  | 125.2  | 130.3  | 126.6  | 116.4  | 106.3  | 118.1  | 130.7  |
| SENP5  | 122.7  | 122.2  | 130.9  | 131.3  | 128    | 112.2  | 140.5  | 133.3  |
| SENP6  | 120.6  | 123.4  | 125.4  | 135.3  | 110.1  | 95.9   | 128.6  | 131.8  |
| SENP7  | 123.6  | 133.9  | 153.1  | 149.2  | 139.9  | 119.9  | 124.3  | 128    |
| SENP7  | 312    | 373.4  | 381.5  | 293.6  | 361.4  | 273    | 294.3  | 327.3  |
| SENP8  | 115.2  | 112.3  | 117.2  | 117.2  | 108.1  | 109.2  | 110.2  | 113.6  |
| Sep-15 | 1480.1 | 1493.8 | 1681   | 1912.8 | 1496.9 | 1522.4 | 1943.4 | 1816.5 |
| SEPHS1 | 268.2  | 263.7  | 291.3  | 255.7  | 241.9  | 217.3  | 262.4  | 331.8  |
| SEPHS2 | 168.4  | 163.4  | 170.6  | 147.6  | 138    | 125.6  | 155.1  | 148.8  |
| SEPN1  | 109.5  | 114.3  | 117.6  | 115.8  | 105.6  | 100.1  | 113.4  | 109.3  |
| SEPN1  | 143.7  | 136.6  | 153.5  | 162.2  | 136.3  | 121.7  | 140    | 139.7  |
| SEPN1  | 254    | 293.8  | 294.8  | 224.3  | 176.7  | 308.4  | 236.7  | 191.7  |
| SEPP1  | 116.8  | 115.2  | 109.6  | 116    | 104.7  | 98.1   | 122.8  | 114.9  |
| Sep-01 | 129.9  | 131.1  | 129.7  | 132.1  | 110.3  | 109.4  | 116.6  | 124.6  |
| Sep-10 | 115.4  | 111    | 113.3  | 116.3  | 103.6  | 108.8  | 111.7  | 117.3  |
| Sep-10 | 108.6  | 114.3  | 121.9  | 117.8  | 97.1   | 92.5   | 109.3  | 107.7  |
| Sep-11 | 209.5  | 217.2  | 189    | 228.6  | 155.6  | 151.1  | 173.6  | 186.9  |
| Sep-02 | 2190.2 | 2236   | 2669.5 | 2723.5 | 2087.2 | 1908.9 | 2561.2 | 2757.9 |
| Sep-02 | 1672.5 | 1825.7 | 2224.9 | 1938.4 | 1948.8 | 2270.6 | 2134.8 | 2838.5 |
| Sep-02 | 119.3  | 114.2  | 135.7  | 130.5  | 115.5  | 101.5  | 134.3  | 121.8  |
| Sep-02 | 119.9  | 120    | 131.1  | 140.8  | 121.7  | 99.7   | 110.7  | 118.2  |
| Sep-03 | 108.8  | 110.9  | 115.7  | 113.4  | 104.9  | 100.7  | 117.6  | 110.7  |
| Sep-03 | 120.5  | 113.5  | 133.6  | 122.9  | 111.9  | 91.9   | 129.9  | 117.7  |
| Sep-04 | 124.3  | 123.5  | 116.3  | 127.6  | 106.7  | 95.5   | 120.3  | 119.8  |
| Sep-04 | 122.9  | 119.6  | 124.1  | 127.2  | 113.1  | 106.2  | 120.6  | 116.5  |
| Sep-04 | 115.3  | 116.6  | 123.7  | 124.3  | 111.2  | 110.5  | 115.2  | 113.9  |
| Sep-04 | 107.3  | 115.7  | 112.5  | 102    | 105.4  | 107.6  | 120.6  | 118.1  |
| Sep-05 | 115.6  | 125.7  | 122.6  | 121.3  | 108.4  | 101.1  | 121.3  | 117.3  |
| Sep-06 | 123    | 143.3  | 119.1  | 129.8  | 118.6  | 106.8  | 127.2  | 123.1  |
| Sep-06 | 281.4  | 312.2  | 282.4  | 298.6  | 256.1  | 212.1  | 212.5  | 204.6  |
| Sep-06 | 308.4  | 352.6  | 388.4  | 283.5  | 270.4  | 179.1  | 221.6  | 208.2  |
| Sep-07 | 151.7  | 161.5  | 142.8  | 153    | 153.3  | 139.7  | 178.5  | 156    |
| Sep-09 | 7908.1 | 9663.5 | 7706.2 | 7832.4 | 6294.9 | 6584.3 | 5733.9 | 4988.2 |
| SEPW1  | 286    | 287.6  | 367.7  | 254.5  | 190.5  | 242.8  | 208.9  | 232.1  |
| SEPX1  | 497.1  | 466.5  | 578.8  | 570.5  | 337.3  | 662.7  | 546.6  | 432.4  |
| SERAC1 | 107.8  | 117.9  | 123.2  | 121.2  | 112.6  | 100.8  | 135.2  | 117.6  |
| SERF1A | 116.7  | 114.9  | 114.4  | 128.3  | 116.4  | 93     | 130.5  | 126.9  |
| SERF1A | 115.8  | 129.8  | 128.6  | 133.3  | 115.4  | 101.7  | 123.5  | 115.7  |
| SERF1B | 109    | 109.4  | 110.2  | 116.9  | 109.4  | 98     | 114.8  | 115.3  |
| SERF2  | 1467.2 | 1505.3 | 1990.9 | 1538.2 | 1365.9 | 1695.4 | 1099.4 | 1198.9 |
| SERGEF | 214.7  | 260.7  | 247.4  | 254.7  | 186.7  | 193.7  | 216.1  | 197.4  |

|           |       |       |       |        |        |       |        |        |
|-----------|-------|-------|-------|--------|--------|-------|--------|--------|
| SERHL     | 120.4 | 118.3 | 120.4 | 124.1  | 120.4  | 104.9 | 116.2  | 125    |
| SERHL2    | 112.7 | 111.1 | 114.6 | 117.8  | 112.2  | 98.4  | 114.6  | 113    |
| SERINC1   | 222.7 | 326.6 | 235.6 | 282.4  | 239.3  | 355.7 | 329.4  | 399.8  |
| SERINC2   | 113.5 | 115.1 | 121.5 | 110.4  | 104.8  | 96.3  | 116.6  | 116.8  |
| SERINC3   | 116.2 | 132.1 | 121   | 132.2  | 119.5  | 100.8 | 114    | 148.2  |
| SERINC3   | 123.9 | 126.6 | 130.2 | 145.3  | 126.8  | 116.6 | 129.1  | 140.2  |
| SERINC3   | 906.2 | 1178  | 803.8 | 1246.3 | 1032.2 | 607   | 1171.8 | 1417.2 |
| SERINC4   | 125.6 | 116.6 | 131.7 | 109    | 121.1  | 109.2 | 119.3  | 114.9  |
| SERINC5   | 134   | 140.9 | 129.8 | 141.4  | 141.8  | 110.8 | 133    | 139.5  |
| SERP1     | 140.6 | 153.6 | 172.1 | 167.6  | 146.5  | 159.8 | 161.6  | 244.8  |
| SERPINA1  | 162.4 | 118.2 | 485.7 | 153.6  | 108.9  | 267.4 | 155.8  | 118    |
| SERPINA1  | 106.5 | 114.2 | 115.1 | 108.1  | 100.7  | 96.9  | 111.5  | 104.3  |
| SERPINA1  | 160.8 | 116.4 | 530.6 | 164.1  | 110    | 269.6 | 143.3  | 121.5  |
| SERPINA1  | 100.7 | 116.5 | 122.4 | 120.7  | 107.4  | 90.2  | 116.2  | 116.7  |
| SERPINA10 | 113.5 | 115.7 | 114.9 | 115.5  | 114    | 99.8  | 116.2  | 116.1  |
| SERPINA11 | 117.2 | 127.6 | 117   | 132.7  | 117.2  | 105.8 | 122.1  | 128.8  |
| SERPINA11 | 113.9 | 117.7 | 107.9 | 116.5  | 109.2  | 104   | 117.1  | 117.6  |
| SERPINA12 | 111.7 | 119.7 | 109.2 | 117.4  | 114.5  | 97.5  | 116    | 116.6  |
| SERPINA13 | 113.3 | 116.6 | 118   | 115.9  | 108.2  | 97.3  | 115.4  | 114.2  |
| SERPINA3  | 103.8 | 112.5 | 124.5 | 112.1  | 103.6  | 88.7  | 114.6  | 107.9  |
| SERPINA4  | 114.8 | 121.7 | 112   | 128.7  | 117.8  | 105   | 136.5  | 130.1  |
| SERPINA5  | 113.4 | 111.3 | 117.9 | 121.3  | 108.6  | 101.5 | 118.8  | 115.9  |
| SERPINA6  | 117.9 | 119.2 | 123.9 | 114.3  | 113.3  | 98    | 118.9  | 116.2  |
| SERPINA7  | 123.5 | 117.1 | 121.2 | 120.5  | 107.5  | 99.9  | 124.6  | 122.1  |
| SERPINA9  | 118.3 | 116.4 | 118.1 | 118.4  | 110.8  | 97.9  | 113.2  | 116.3  |
| SERPINA9  | 107.1 | 116.7 | 113.8 | 122.7  | 104    | 97.2  | 117.8  | 112.1  |
| SERPINB1  | 324.6 | 292.2 | 363.2 | 312    | 227.4  | 268.7 | 235.4  | 199.8  |
| SERPINB10 | 122.3 | 122.1 | 125.6 | 118.6  | 114.5  | 103.6 | 125.8  | 110.7  |
| SERPINB11 | 123.1 | 116.1 | 115.3 | 116.1  | 109.1  | 103.7 | 119.2  | 115.2  |
| SERPINB12 | 103   | 101.9 | 114.9 | 103.9  | 98     | 97.1  | 108.8  | 104.8  |
| SERPINB13 | 124.8 | 114.1 | 119.1 | 123.7  | 112.7  | 102.6 | 112.4  | 124.1  |
| SERPINB2  | 251.9 | 324.6 | 124.1 | 528.1  | 529.6  | 738.7 | 558.9  | 419.8  |
| SERPINB3  | 120.4 | 119.7 | 122.6 | 122.3  | 114.9  | 102.3 | 118.8  | 109.2  |
| SERPINB4  | 112.3 | 116   | 107.9 | 118.8  | 108.8  | 97.2  | 108.9  | 117.2  |
| SERPINB5  | 111   | 122.2 | 124.2 | 125.7  | 116.6  | 104.2 | 129.2  | 119.4  |
| SERPINB6  | 541   | 460.5 | 730.9 | 652.9  | 351.1  | 420.2 | 436.8  | 349.6  |
| SERPINB7  | 113.1 | 109.1 | 105.4 | 122.8  | 99.8   | 104.3 | 129.2  | 112.7  |
| SERPINB7  | 112.9 | 117.7 | 119.7 | 124.2  | 117.3  | 97.2  | 120.1  | 125.6  |
| SERPINB8  | 192.7 | 193.2 | 230.9 | 208.7  | 162.9  | 197.5 | 248.4  | 162.7  |
| SERPINB8  | 166.9 | 189.6 | 231.8 | 227.8  | 163.6  | 187.4 | 245.8  | 163.5  |
| SERPINB9  | 114.1 | 119.2 | 116.5 | 116.5  | 108.7  | 104.2 | 109.9  | 116.2  |
| SERPINC1  | 110.7 | 108.9 | 123.1 | 118.1  | 105.1  | 96    | 115.1  | 119.2  |
| SERPIND1  | 109.4 | 124   | 111.2 | 121.1  | 103.7  | 106.1 | 120.4  | 115.8  |
| SERPINE1  | 113.2 | 121   | 108.5 | 142.5  | 133.3  | 140.8 | 138.2  | 117    |
| SERPINE2  | 240.8 | 356.4 | 239.9 | 285.6  | 296.2  | 189   | 388.4  | 449.3  |
| SERPINF1  | 117.4 | 122.3 | 117.1 | 116.3  | 101.1  | 102   | 120.7  | 114    |
| SERPINF2  | 113.6 | 124.8 | 115.2 | 115    | 104.9  | 103.7 | 119.9  | 117.7  |
| SERPING1  | 126.2 | 121   | 124.8 | 126.7  | 127.1  | 106.6 | 120.3  | 123.7  |
| SERPING1  | 116.5 | 118.9 | 125   | 130.3  | 122.4  | 103.6 | 132.3  | 129.2  |
| SERPINH1  | 139.1 | 137.4 | 124.5 | 138.7  | 116.6  | 121.4 | 131.8  | 180.4  |
| SERPINI1  | 124.1 | 112.1 | 118.4 | 121.6  | 107.1  | 113.2 | 121.4  | 122.8  |

|          |        |        |        |        |        |        |        |        |
|----------|--------|--------|--------|--------|--------|--------|--------|--------|
| SERPINI2 | 127.5  | 115.7  | 126.9  | 113.3  | 107    | 100.2  | 111    | 117.2  |
| SERTAD1  | 314.9  | 348.8  | 249.1  | 380.3  | 274    | 272.3  | 632.8  | 577.1  |
| SERTAD2  | 904.7  | 956.1  | 948.1  | 983    | 1142.4 | 633.1  | 897.4  | 1033.3 |
| SERTAD3  | 170.1  | 178.6  | 194    | 207.6  | 167.6  | 208.1  | 243.1  | 245.6  |
| SERTAD3  | 115.7  | 115.1  | 118.9  | 124.6  | 110.6  | 97     | 121.3  | 109.9  |
| SERTAD3  | 127.2  | 121.7  | 146.3  | 138.3  | 118.2  | 121    | 139    | 133.1  |
| SERTAD4  | 116.6  | 126.1  | 124.6  | 120.2  | 120.7  | 99.5   | 124.1  | 114.6  |
| SESN1    | 316.1  | 481.1  | 347.6  | 329.9  | 298.6  | 339.8  | 368.2  | 343.9  |
| SESN2    | 130.1  | 118.7  | 125.1  | 123.4  | 117.1  | 100.4  | 128.7  | 120.5  |
| SESN3    | 161.4  | 179.9  | 133.9  | 197.4  | 162.5  | 121.4  | 169.7  | 170.4  |
| SESTD1   | 178.7  | 169.4  | 191    | 207.7  | 148.3  | 204.1  | 200.6  | 178.5  |
| SET      | 591.1  | 696.8  | 584.6  | 786.7  | 538.9  | 646.6  | 876.3  | 744.6  |
| SET7     | 116.5  | 106.2  | 108.4  | 118.1  | 114.6  | 96.2   | 114.3  | 114.2  |
| SETBP1   | 158.6  | 146.1  | 142.8  | 159.7  | 132.6  | 117.1  | 136.8  | 129.3  |
| SETD1A   | 403.8  | 439.5  | 309.6  | 431    | 245.3  | 266.6  | 499.9  | 457.5  |
| SETD3    | 113.2  | 134.1  | 129.1  | 129.9  | 127.1  | 111.8  | 126.6  | 124.9  |
| SETD3    | 124.1  | 122.6  | 113.2  | 125.1  | 105.7  | 107.7  | 116.5  | 128.6  |
| SETD3    | 969.1  | 1156.3 | 1087.4 | 1295   | 916.5  | 884    | 1424.8 | 1270.8 |
| SETD4    | 136.2  | 150.5  | 146.1  | 133.8  | 136.2  | 128.6  | 136.2  | 122.7  |
| SETD6    | 116.8  | 123.6  | 117.8  | 126.1  | 117.5  | 101.9  | 122.4  | 125.5  |
| SETD8    | 149.2  | 153.8  | 172.3  | 167.5  | 143.1  | 142.6  | 190.6  | 183.6  |
| SETDB1   | 226.1  | 229.2  | 234.6  | 248.1  | 178.9  | 189.4  | 224.6  | 211.6  |
| SETDB2   | 184.9  | 217.7  | 224.9  | 212.6  | 162.8  | 158.8  | 213.9  | 178.9  |
| SETMAR   | 236.3  | 194.6  | 188.7  | 209.5  | 192    | 148.8  | 197.9  | 193.5  |
| SETX     | 154.8  | 150.7  | 158    | 176.2  | 188.4  | 127    | 169.3  | 186.6  |
| SEZ6     | 117.1  | 121.5  | 122.6  | 120.3  | 106.6  | 101.3  | 115.5  | 126    |
| SEZ6L    | 113.2  | 108.9  | 110.2  | 104.8  | 101.6  | 92.7   | 121.8  | 109    |
| SEZ6L2   | 118.7  | 124.7  | 112.5  | 130.8  | 107.2  | 110.8  | 120.8  | 114.2  |
| SEZ6L2   | 112.6  | 115.4  | 122.9  | 106.4  | 110.6  | 105.7  | 106.3  | 113.2  |
| SEZ6L2   | 106    | 114.1  | 110.2  | 110.6  | 106.5  | 101.2  | 119.5  | 114.8  |
| SF1      | 128.3  | 121.7  | 128.4  | 126.2  | 124.7  | 99.6   | 127.4  | 125.5  |
| SF1      | 182.6  | 180.2  | 134    | 207.4  | 210.3  | 107.2  | 195.6  | 194.3  |
| SF1      | 145.2  | 154.6  | 152.7  | 153.2  | 123.5  | 117.6  | 141.5  | 132.2  |
| SF3A1    | 113.5  | 117.2  | 119.6  | 109.8  | 109.1  | 103.3  | 117.9  | 114.9  |
| SF3A1    | 241.2  | 373.8  | 233.7  | 233.6  | 246.8  | 220.8  | 227.8  | 299.3  |
| SF3A2    | 638.8  | 741.7  | 715.8  | 627.3  | 492.8  | 721.2  | 826.6  | 872.2  |
| SF3A3    | 499.2  | 639.2  | 691.6  | 609.1  | 455.7  | 428.2  | 624.2  | 687.9  |
| SF3B1    | 119.6  | 125.6  | 136.2  | 136.1  | 133.6  | 121.3  | 127.7  | 122.1  |
| SF3B1    | 1371.5 | 1421.4 | 1464.5 | 1393.9 | 1252.5 | 1177.9 | 1658.3 | 1588.6 |
| SF3B1    | 225.5  | 207.1  | 235.8  | 217.9  | 221.7  | 136.4  | 222.5  | 272.4  |
| SF3B14   | 161.4  | 228.9  | 225.6  | 226.5  | 207.9  | 251.5  | 195.2  | 229.5  |
| SF3B2    | 589.8  | 669.1  | 368    | 477.6  | 409.7  | 359.7  | 541.4  | 479.3  |
| SF3B3    | 370    | 414    | 341.7  | 443.3  | 379.1  | 303.8  | 489.1  | 475.4  |
| SF3B4    | 663.6  | 880.9  | 610.6  | 818.6  | 718.1  | 773.5  | 976.9  | 1073   |
| SF3B5    | 787.9  | 891.7  | 940.5  | 867.3  | 826.3  | 813.6  | 644.5  | 632.3  |
| SF4      | 348    | 301.9  | 285.7  | 268.3  | 218.4  | 225.2  | 321.9  | 255.8  |
| SFI1     | 112.4  | 129.1  | 127.9  | 124.8  | 116    | 100.6  | 121    | 125.8  |
| SFI1     | 156.8  | 163.1  | 129    | 145.8  | 133    | 111.9  | 149.2  | 141.8  |
| SFI1     | 130.1  | 139.8  | 135.4  | 126.6  | 117.4  | 113.2  | 113.6  | 126.6  |
| SFMBT1   | 151.3  | 175.7  | 155.1  | 183.2  | 201.7  | 137.2  | 224.5  | 234    |
| SFMBT1   | 191    | 196.7  | 191.9  | 216.9  | 196.3  | 168.2  | 259.6  | 286.5  |

|         |        |        |        |        |        |        |        |        |
|---------|--------|--------|--------|--------|--------|--------|--------|--------|
| SFMBT1  | 114    | 117.6  | 116.4  | 113.3  | 109.3  | 101.7  | 112.9  | 115.5  |
| SFMBT2  | 142.8  | 141.4  | 123.5  | 148.8  | 140    | 106.3  | 140.4  | 136.4  |
| SFN     | 112.6  | 105.6  | 120.9  | 122.2  | 108.5  | 94.5   | 121.5  | 111.6  |
| SFPQ    | 138.7  | 135.8  | 156.2  | 154.3  | 138.8  | 123.2  | 164.7  | 159.8  |
| SFRP1   | 109.7  | 98.5   | 112.7  | 110.3  | 110.8  | 92.7   | 125.6  | 112.3  |
| SFRP2   | 118.5  | 114.8  | 114.2  | 115.5  | 104    | 97.3   | 122    | 110.3  |
| SFRP4   | 116.1  | 112.8  | 126.9  | 116.6  | 110.1  | 105.7  | 115.6  | 117.5  |
| SFRP5   | 108.1  | 118.6  | 112.4  | 118.5  | 127    | 93.9   | 117.2  | 113    |
| SFRS1   | 494.6  | 567.9  | 465.2  | 737.1  | 545.8  | 497.5  | 508.8  | 397.6  |
| SFRS10  | 791.2  | 817.2  | 1017.9 | 953.6  | 773.5  | 853.1  | 979.1  | 1368.2 |
| SFRS11  | 193.6  | 208.3  | 200    | 207    | 212.5  | 184.3  | 175.2  | 294.7  |
| SFRS12  | 188.6  | 181.8  | 166.1  | 182.2  | 147.6  | 109.9  | 194.4  | 191.9  |
| SFRS12  | 244.5  | 261.6  | 209.6  | 311.2  | 277    | 155.9  | 333.9  | 317.1  |
| SFRS12  | 128.4  | 126.4  | 134.6  | 140.1  | 116.2  | 98.5   | 127.1  | 120.6  |
| SFRS14  | 693.5  | 593.5  | 519.4  | 549.9  | 425.4  | 348    | 511.3  | 466.5  |
| SFRS14  | 314.2  | 282.8  | 266.4  | 260.5  | 197.1  | 193.8  | 223.7  | 259.4  |
| SFRS14  | 160.6  | 161.8  | 174.6  | 171    | 133.6  | 122.4  | 164.3  | 152.4  |
| SFRS15  | 255    | 240.3  | 224.6  | 314.6  | 248    | 183.3  | 377.3  | 414    |
| SFRS16  | 149.4  | 172    | 152.5  | 145.6  | 143.2  | 113.6  | 179    | 146.1  |
| SFRS2   | 3406.6 | 3190.3 | 3307.5 | 3514.3 | 3052.8 | 2571.9 | 3272.8 | 3986.3 |
| SFRS2IP | 287.9  | 303.4  | 300    | 279.5  | 258.1  | 224.6  | 268.4  | 286.5  |
| SFRS3   | 115.7  | 112.6  | 116.8  | 124.1  | 115.2  | 102    | 123.6  | 125.5  |
| SFRS4   | 1453.4 | 1907.2 | 1212.2 | 1901.7 | 1614.1 | 1271.4 | 1499.6 | 1429.4 |
| SFRS5   | 3135.6 | 2567.6 | 3155.8 | 2458.2 | 1866.2 | 1605.2 | 1860.3 | 1674.9 |
| SFRS5   | 3107.6 | 3011   | 3262.9 | 2877.9 | 2267.7 | 1935.8 | 1944.9 | 1903.5 |
| SFRS6   | 2861   | 2798.3 | 2423.9 | 2985.6 | 2331.8 | 1889   | 2971.4 | 3321   |
| SFRS7   | 425.7  | 374.2  | 552.6  | 421.7  | 411.9  | 393.8  | 349.7  | 470.8  |
| SFRS8   | 131.6  | 149.8  | 126.1  | 163.4  | 138    | 134.4  | 156.1  | 154.6  |
| SFRS9   | 1472.9 | 1459.4 | 1713.4 | 1521.8 | 1285.8 | 1302.5 | 1532.6 | 1423.7 |
| SFT2D1  | 1245.7 | 1012.2 | 2142.9 | 1515.6 | 812.6  | 1697.3 | 1064.1 | 610.9  |
| SFT2D2  | 128.9  | 123.6  | 124.1  | 125.4  | 116.4  | 105.1  | 114.5  | 123.6  |
| SFT2D3  | 129    | 156.8  | 143.3  | 141.8  | 131.5  | 121.7  | 119.5  | 142.7  |
| SFTPA1  | 111.9  | 112.3  | 121.6  | 119.9  | 105.7  | 102.4  | 105.3  | 106.1  |
| SFTPA2  | 113.1  | 120    | 106.7  | 118.3  | 110.3  | 98.3   | 119.2  | 107.1  |
| SFTPB   | 117.6  | 104.8  | 118.6  | 115.7  | 108.2  | 96     | 113.5  | 119.3  |
| SFTPB   | 115.5  | 120.7  | 107.1  | 115.3  | 119.1  | 96.9   | 130.8  | 113.4  |
| SFTPC   | 118.2  | 115.6  | 120.3  | 110.2  | 105.3  | 97.5   | 114.5  | 113.5  |
| SFTPD   | 110.2  | 105.3  | 125.6  | 121.1  | 104.7  | 98.3   | 112.4  | 119.6  |
| SFTPG   | 111.6  | 114.6  | 111.8  | 124.6  | 106.9  | 96.8   | 124.5  | 123    |
| SFXN1   | 178    | 175.5  | 151.6  | 169.5  | 170    | 129.4  | 165.2  | 153.4  |
| SFXN2   | 126.5  | 120.4  | 115.9  | 131.3  | 117.9  | 101.2  | 116.2  | 115.4  |
| SFXN3   | 123.1  | 120.6  | 115.9  | 121.6  | 109.1  | 97.9   | 127.4  | 118    |
| SFXN4   | 183.3  | 209.6  | 220.5  | 176.5  | 180.7  | 162    | 186.6  | 192.3  |
| SFXN4   | 461.1  | 420.6  | 435.7  | 376.4  | 236.5  | 223.8  | 299.7  | 259.8  |
| SFXN4   | 148.4  | 128.6  | 135.9  | 148.5  | 130.4  | 121    | 142.8  | 126.1  |
| SFXN5   | 141.7  | 153.6  | 135.2  | 139.2  | 125.9  | 124.4  | 169.4  | 159.8  |
| SGCA    | 125.2  | 130.5  | 128.3  | 119.1  | 107.3  | 100.7  | 127.2  | 116.7  |
| SGCB    | 122.6  | 124    | 116.2  | 140.4  | 111.1  | 104.3  | 124.9  | 116.4  |
| SGCD    | 116.5  | 112    | 120.2  | 115.8  | 105.2  | 94.4   | 119.2  | 118.6  |
| SGCD    | 107.8  | 113.7  | 120.9  | 115.8  | 107.4  | 101.8  | 114.4  | 116.8  |
| SGCD    | 107.2  | 123    | 114.3  | 122.1  | 108    | 96.8   | 122.7  | 114.5  |



|          |        |        |        |        |        |        |        |        |
|----------|--------|--------|--------|--------|--------|--------|--------|--------|
| SGCE     | 153.4  | 132.5  | 145.6  | 142.6  | 137.2  | 123.9  | 147.1  | 130.1  |
| SGCG     | 117.1  | 120.5  | 112.5  | 123    | 109.6  | 99.9   | 112.5  | 118.6  |
| SGCZ     | 117.8  | 112.1  | 113.7  | 121.1  | 109.5  | 99.3   | 119.3  | 114.2  |
| SGEF     | 112.7  | 108.8  | 115.1  | 112.6  | 105.9  | 101.1  | 116.4  | 117.2  |
| SGIP1    | 109.9  | 107.5  | 111.7  | 122.6  | 109.3  | 98.5   | 115.1  | 114.4  |
| SGK      | 1278   | 1154.7 | 750.6  | 1369.1 | 915.6  | 587.9  | 2265.8 | 1660.3 |
| SGK2     | 111.4  | 109.6  | 108.4  | 117.8  | 99.3   | 94.5   | 110.1  | 108.7  |
| SGK2     | 113.6  | 111    | 99     | 117.3  | 103.2  | 99.4   | 121.3  | 103    |
| SGK2     | 118.1  | 123.3  | 125.4  | 128    | 123    | 108.2  | 136.5  | 120.9  |
| SGK3     | 118.8  | 113.1  | 121.4  | 123.6  | 109.6  | 96.8   | 116.7  | 128.2  |
| SGK3     | 331.4  | 310    | 453.1  | 347    | 280.5  | 279.1  | 368.7  | 275.3  |
| SGK3     | 251.1  | 218.2  | 334.1  | 297.8  | 196.7  | 171.6  | 287.1  | 226.4  |
| SGOL1    | 119.8  | 111.2  | 111.5  | 121.5  | 105.5  | 95.2   | 120.4  | 114    |
| SGOL2    | 118.3  | 117.8  | 107.4  | 123.2  | 111.6  | 108.9  | 111.8  | 117.4  |
| SGPL1    | 176.4  | 175.8  | 189.5  | 175.2  | 137.5  | 156.7  | 169.9  | 175.4  |
| SGPP1    | 116    | 107.5  | 127.4  | 113.3  | 110.8  | 99.8   | 119.4  | 115.2  |
| SGPP2    | 115.8  | 115.4  | 119.9  | 138.6  | 116.7  | 119.3  | 122.3  | 126.2  |
| SGPP2    | 111.8  | 118    | 119.6  | 119    | 111.8  | 95.5   | 118.9  | 119.7  |
| SGSH     | 721.5  | 541.9  | 527.2  | 656.4  | 362.5  | 503.9  | 654.3  | 379.7  |
| SGTA     | 130    | 130.7  | 109.9  | 126.8  | 115.8  | 110.2  | 124.4  | 125.5  |
| SGTB     | 115.2  | 123.3  | 127.9  | 119.7  | 109.3  | 108.2  | 117.4  | 125.1  |
| SH2B1    | 213.2  | 198.4  | 191.7  | 205    | 159.7  | 175.9  | 192    | 184.7  |
| SH2D1A   | 370.1  | 529.9  | 366.8  | 361    | 452.6  | 342.1  | 378.6  | 579.2  |
| SH2D1B   | 313.3  | 283.2  | 469.3  | 356.3  | 236.7  | 374.1  | 227.1  | 211.7  |
| SH2D2A   | 129    | 116.1  | 122.1  | 133.1  | 122.1  | 101.9  | 128.2  | 137.1  |
| SH2D3A   | 124.4  | 144.1  | 135.4  | 138.6  | 127.4  | 106    | 144.7  | 118.2  |
| SH2D3C   | 413.9  | 401.4  | 349.6  | 357.2  | 240    | 299.9  | 296    | 229.7  |
| SH2D3C   | 125.3  | 149.7  | 136.5  | 128.6  | 128.8  | 108.2  | 139.1  | 136.1  |
| SH2D3C   | 113.2  | 122.5  | 138.6  | 129.4  | 118.8  | 106    | 114.7  | 129    |
| SH2D4A   | 111.6  | 113.9  | 119.4  | 115.8  | 111    | 104.4  | 123.8  | 113.1  |
| SH2D4B   | 114.8  | 112.7  | 120.8  | 116    | 113    | 107.4  | 117.4  | 107.3  |
| SH3BGR   | 125.1  | 127.6  | 132.9  | 144.5  | 108.4  | 99.6   | 124.9  | 125.2  |
| SH3BGR   | 123.5  | 117.4  | 118.7  | 127.4  | 119    | 102    | 126.9  | 125.7  |
| SH3BGRL  | 113.5  | 115.3  | 113.5  | 112.9  | 106.8  | 100.5  | 109.9  | 117    |
| SH3BGRL2 | 135.3  | 164.5  | 126.5  | 135.4  | 161.8  | 108.6  | 156.8  | 179.3  |
| SH3BGRL3 | 1681   | 1563.2 | 2164.2 | 1671.3 | 1104.7 | 1677.7 | 1574.1 | 1096.8 |
| SH3BP1   | 301    | 268.4  | 246.5  | 275.7  | 170.4  | 224.1  | 234.8  | 185.5  |
| SH3BP2   | 114.6  | 118.6  | 125.3  | 116.4  | 113.1  | 105.2  | 115.9  | 117.9  |
| SH3BP4   | 135.6  | 119.4  | 129.3  | 132.8  | 112.6  | 134.4  | 134.7  | 115.3  |
| SH3BP5   | 116.7  | 111.8  | 113    | 119.8  | 113.2  | 94     | 111.5  | 117.3  |
| SH3BP5   | 109.4  | 115.7  | 115.2  | 115.1  | 109.1  | 92.9   | 121.6  | 115.8  |
| SH3BP5L  | 243    | 214.8  | 232.5  | 263.6  | 188.5  | 222.1  | 264.4  | 252.9  |
| SH3D19   | 108.3  | 118.8  | 104    | 112.6  | 101.7  | 91.1   | 108.7  | 107    |
| SH3GL1   | 125.2  | 151.5  | 162.5  | 153.8  | 125.9  | 119.2  | 147.7  | 137.2  |
| SH3GL2   | 116.7  | 124.9  | 114.7  | 123.4  | 101.7  | 102.4  | 119.7  | 119.4  |
| SH3GL3   | 115.8  | 114.1  | 115.2  | 121.7  | 110.3  | 96.7   | 120.9  | 106.4  |
| SH3GLB1  | 559    | 587.3  | 521.1  | 722.8  | 650    | 567.8  | 781.6  | 662.6  |
| SH3GLB2  | 930.4  | 1006.5 | 1068.4 | 968.6  | 497.3  | 725.3  | 526.9  | 453.2  |
| SH3KBP1  | 1551.4 | 1596.1 | 2034   | 1669.8 | 1689.7 | 1284.7 | 1543.2 | 1587.4 |
| SH3KBP1  | 203.4  | 199.9  | 192.1  | 233.3  | 200.9  | 129.5  | 178.5  | 177.9  |
| SH3KBP1  | 1713.6 | 1980.8 | 1455.9 | 1852.3 | 1413.6 | 1206.2 | 2043.5 | 1847.5 |

|          |        |        |        |        |        |        |        |        |
|----------|--------|--------|--------|--------|--------|--------|--------|--------|
| SH3MD2   | 106.4  | 119.4  | 117.8  | 124.5  | 109.7  | 105    | 119.2  | 116.9  |
| SH3PX3   | 127.3  | 118.8  | 116.8  | 118.3  | 113.9  | 100.8  | 122.9  | 122.3  |
| SH3PXD2A | 390.9  | 319.2  | 324.4  | 361.4  | 257.4  | 254.3  | 304.4  | 209.2  |
| SH3PXD2B | 123.7  | 115.4  | 120.7  | 124.6  | 117    | 109.8  | 121.3  | 118.7  |
| SH3RF2   | 118.7  | 140    | 117    | 123.8  | 112.3  | 100    | 120.8  | 116.1  |
| SH3TC1   | 146.1  | 155.6  | 155.8  | 167.3  | 143.7  | 134.2  | 172.2  | 153.9  |
| SH3TC2   | 119.4  | 113.3  | 113.2  | 119.3  | 109    | 104.3  | 120.6  | 124.2  |
| SH3YL1   | 180.6  | 174.9  | 183.9  | 193.4  | 148.9  | 125.8  | 162    | 170    |
| SHANK1   | 119.4  | 114.7  | 113.9  | 113.7  | 113.5  | 92.7   | 110.7  | 115.2  |
| SHANK2   | 115.2  | 105.1  | 129    | 116.3  | 107.5  | 97.7   | 121.2  | 109.8  |
| SHANK2   | 108.6  | 111.8  | 112.3  | 113.4  | 114.2  | 96.8   | 121    | 121    |
| SHANK3   | 112.7  | 119.1  | 120.2  | 118.6  | 111.8  | 99.3   | 126.9  | 114.5  |
| SHARPIN  | 143.2  | 142.6  | 144.1  | 141.3  | 123.5  | 124.4  | 129.8  | 128.8  |
| SHB      | 130.9  | 138    | 135.6  | 143.6  | 116.4  | 116.2  | 136.8  | 135.4  |
| SHBG     | 107.2  | 110.7  | 106.5  | 116.7  | 101.9  | 98.6   | 120.6  | 116.5  |
| SHC1     | 117.5  | 113.3  | 119.8  | 122.8  | 110.5  | 107.2  | 122.3  | 108.4  |
| SHC1     | 115.5  | 118.2  | 121.4  | 115.7  | 103.7  | 100.7  | 121.8  | 118    |
| SHC1     | 624.1  | 468.7  | 499.6  | 516.2  | 418    | 543.3  | 556.3  | 802.4  |
| SHC3     | 121.7  | 110    | 128.2  | 136.3  | 110.7  | 107.2  | 118.4  | 129.4  |
| SHC4     | 114.2  | 116.6  | 128.6  | 111.5  | 107.9  | 103.8  | 124.7  | 110.8  |
| SHCBP1   | 4118.8 | 3107.9 | 3342.9 | 3949.4 | 3354   | 1834.2 | 3669.3 | 3614.8 |
| SHD      | 109.2  | 119.9  | 116.1  | 129.2  | 106.2  | 99.8   | 126.6  | 119.1  |
| SHE      | 124.7  | 119.8  | 122.8  | 120.6  | 114.7  | 100.5  | 114.2  | 116.4  |
| SHF      | 119.7  | 119.9  | 127.6  | 121    | 115.4  | 98.6   | 121.1  | 130.3  |
| SHFM1    | 1390   | 1566.5 | 2269.9 | 1839   | 1662.4 | 1952.2 | 1389.7 | 1596.7 |
| SHH      | 125.2  | 112.6  | 125.9  | 120.1  | 110.8  | 101.7  | 115.7  | 126.1  |
| SHKBP1   | 230.2  | 187.3  | 188.9  | 200.9  | 143    | 173.7  | 213.2  | 162.5  |
| SHMT1    | 197.9  | 203.6  | 169.5  | 189    | 154.9  | 129.5  | 171.7  | 139.9  |
| SHMT1    | 134    | 135.1  | 119.1  | 137.4  | 126    | 113.4  | 127.3  | 133.5  |
| SHMT1    | 122.2  | 118.7  | 126.6  | 123.3  | 111.8  | 99.3   | 116.6  | 118.3  |
| SHMT2    | 930.9  | 930.8  | 718.5  | 835.8  | 568.8  | 565    | 589.5  | 493.5  |
| SHOC2    | 143.8  | 151.8  | 149    | 163.7  | 155.8  | 130.5  | 180    | 177.2  |
| SHOX     | 111.4  | 107.1  | 110.4  | 116.3  | 106    | 104.4  | 109    | 114.1  |
| SHOX     | 114.2  | 110.4  | 119    | 120.1  | 108.5  | 103.7  | 113.1  | 115.4  |
| SHOX2    | 142.1  | 133.4  | 134.5  | 129.8  | 117    | 106.4  | 132.7  | 140.8  |
| SHOX2    | 106.5  | 122.9  | 117.5  | 120.9  | 108.5  | 101.3  | 118.7  | 120    |
| SHPRH    | 121.5  | 123.6  | 118.3  | 129.1  | 115.2  | 103.2  | 126.2  | 116.5  |
| SHPRH    | 132.8  | 144.4  | 134.8  | 147.2  | 150.2  | 107.5  | 141.6  | 120.9  |
| SHQ1     | 143.4  | 134.6  | 164.5  | 172.8  | 148.5  | 125.8  | 135.1  | 134    |
| SHRM     | 113    | 124.4  | 113.2  | 122.8  | 102.1  | 103.1  | 121.1  | 112    |
| SHROOM4  | 1124.9 | 883.1  | 1218.4 | 871.8  | 980.6  | 764    | 1339.6 | 1177.8 |
| SI       | 112.6  | 117.8  | 116    | 127    | 113.9  | 96.7   | 121.5  | 109.7  |
| SIAE     | 124.4  | 125.7  | 114.5  | 119.8  | 107.6  | 101.9  | 118.8  | 118.7  |
| SIAH1    | 114.6  | 110.8  | 116    | 115.3  | 110.3  | 107.1  | 116.6  | 116.1  |
| SIAH1    | 114.3  | 116    | 115    | 117.3  | 109.2  | 97.6   | 106.8  | 109.3  |
| SIAH1    | 303.1  | 332.1  | 259.3  | 319.5  | 290.2  | 216.4  | 385.6  | 427.4  |
| SIAH2    | 163.7  | 148.7  | 153.7  | 167.3  | 145.4  | 143.8  | 167.2  | 153.2  |
| SIAHBP1  | 1473.8 | 1783.3 | 1188.1 | 1627.3 | 1074   | 865.3  | 1656.6 | 1655.5 |
| SIDT1    | 177.8  | 150.9  | 206.1  | 167.4  | 151    | 171.9  | 153.2  | 153.8  |
| SIDT2    | 273.7  | 286.9  | 415.6  | 319.2  | 239.9  | 294    | 268.5  | 259.4  |
| SIGIRR   | 144.7  | 151.6  | 153.5  | 138    | 141.7  | 114.3  | 131.9  | 153.8  |

|           |       |       |       |       |       |       |       |       |
|-----------|-------|-------|-------|-------|-------|-------|-------|-------|
| SIGIRR    | 162.2 | 167.7 | 182.7 | 165.1 | 155.6 | 125.7 | 140.3 | 144.4 |
| SIGLEC10  | 107.3 | 114   | 142   | 111   | 99.7  | 105.2 | 117.1 | 106.1 |
| SIGLEC11  | 112.8 | 112.4 | 112.8 | 111.1 | 104.6 | 91.8  | 115.1 | 117.4 |
| SIGLEC12  | 114.7 | 132.7 | 125   | 125.4 | 123   | 110.5 | 133.5 | 126.7 |
| SIGLEC12  | 113.9 | 115   | 124.5 | 121.3 | 102   | 101.3 | 119.8 | 121.3 |
| SIGLEC12  | 120.3 | 114.9 | 114.9 | 115.5 | 107   | 107.1 | 119.9 | 105.8 |
| SIGLEC5   | 111.7 | 119.9 | 125.3 | 115.3 | 114.2 | 97.9  | 119.3 | 110.1 |
| SIGLEC6   | 114.8 | 114.7 | 119   | 115.4 | 111.7 | 95.4  | 121.9 | 113.6 |
| SIGLEC7   | 119.5 | 130.4 | 135.4 | 130.8 | 116.9 | 104.2 | 124.5 | 122.7 |
| SIGLEC7   | 116.5 | 118.7 | 129.9 | 122.1 | 111.3 | 99.4  | 118.3 | 108.6 |
| SIGLEC7   | 115.7 | 116.6 | 126   | 125.6 | 117.2 | 102.3 | 126   | 118.3 |
| SIGLEC8   | 116.9 | 109.9 | 106.8 | 106.4 | 109   | 100.4 | 110.6 | 113.6 |
| SIGLEC9   | 148.2 | 128.5 | 158.8 | 154.3 | 119.7 | 136.4 | 151.4 | 116.4 |
| SIGLECP16 | 123.2 | 118   | 206.8 | 119.2 | 105   | 108.2 | 111.4 | 112.8 |
| SIGLECP3  | 117.8 | 120.1 | 118.1 | 112.6 | 110   | 102.9 | 126.1 | 113.9 |
| SIGLECP3  | 121   | 126   | 109.4 | 132.6 | 114.4 | 103.5 | 129.3 | 114.9 |
| SIKE      | 121.9 | 123   | 126.6 | 127.9 | 117.5 | 106   | 153.6 | 134.7 |
| SIL1      | 136.6 | 109.1 | 152.1 | 137.7 | 105.2 | 119.3 | 134.6 | 121.6 |
| SIL1      | 117.5 | 114.7 | 130.9 | 120.2 | 116.8 | 99.3  | 111.3 | 108.8 |
| SIL1      | 195.4 | 172.9 | 302.4 | 196   | 166.1 | 189.7 | 176.1 | 193.3 |
| SILV      | 113.5 | 120.5 | 108.1 | 113.6 | 105.4 | 98.6  | 119.5 | 113   |
| SIM1      | 116.1 | 117.5 | 121.3 | 118.9 | 104.2 | 95.5  | 114   | 113.9 |
| SIM2      | 114.5 | 110.3 | 114.7 | 110.1 | 110.2 | 97.1  | 113.7 | 110   |
| SIM2      | 120.7 | 111.8 | 118.4 | 122.8 | 108.9 | 112.8 | 118.5 | 116.2 |
| SIN3A     | 581.1 | 678.4 | 524.8 | 675.9 | 592.9 | 520.5 | 787.4 | 776.4 |
| SIN3B     | 136.4 | 140.1 | 147   | 142.3 | 128   | 135   | 152.9 | 140.9 |
| SIP1      | 208.2 | 218.1 | 259   | 247.6 | 219.9 | 191.5 | 213.8 | 208.3 |
| SIPA1     | 146.1 | 148.3 | 159.4 | 166.9 | 126   | 118.2 | 135   | 140.8 |
| SIPA1     | 654.7 | 813.4 | 760.3 | 679.7 | 498.3 | 567.6 | 453.6 | 476.8 |
| SIPA1L1   | 130.1 | 128.8 | 120.9 | 134.4 | 105.5 | 96.2  | 125.3 | 114.2 |
| SIPA1L2   | 212.1 | 193.2 | 190.8 | 269.8 | 160.7 | 194.8 | 303.4 | 217   |
| SIPA1L3   | 123.7 | 125.2 | 139.9 | 144.6 | 113.6 | 130.9 | 141.2 | 119.6 |
| SIRPB1    | 119   | 113.4 | 143   | 121.2 | 100.9 | 117   | 114.8 | 117.6 |
| SIRPB2    | 120.5 | 134   | 130.4 | 132.3 | 117.4 | 113.3 | 118   | 124.7 |
| SIRPD     | 116.7 | 107.7 | 122.8 | 128.6 | 122.8 | 104.3 | 120.6 | 120.8 |
| SIRPG     | 200.5 | 227.3 | 234.9 | 241.7 | 160.5 | 233.8 | 204.5 | 204.8 |
| SIRPG     | 145   | 160.7 | 153.5 | 145.8 | 139.1 | 146.2 | 137.1 | 139.9 |
| SIRT1     | 318.2 | 347.7 | 291.5 | 423.9 | 336.1 | 292.4 | 493.6 | 447.6 |
| SIRT2     | 134.8 | 143.3 | 156.5 | 129.8 | 123.4 | 119.9 | 133.8 | 138   |
| SIRT2     | 117.8 | 119.4 | 126.8 | 126.5 | 116.6 | 96.4  | 120.1 | 122.1 |
| SIRT3     | 117.9 | 115.6 | 127.7 | 125.8 | 120.9 | 96.7  | 125.9 | 118.1 |
| SIRT3     | 120.1 | 129.9 | 134.9 | 111.8 | 119.3 | 111.4 | 130.9 | 118.6 |
| SIRT4     | 178.8 | 174.8 | 158.4 | 176.8 | 157.3 | 122.7 | 158.5 | 169.9 |
| SIRT5     | 136.8 | 139.8 | 147.8 | 157.6 | 126.8 | 122.3 | 132.5 | 147.1 |
| SIRT5     | 123   | 130.2 | 129.1 | 135.1 | 126.6 | 109.3 | 146.6 | 130.4 |
| SIRT5     | 166.7 | 185.9 | 205.9 | 195.2 | 172.7 | 177.6 | 189.2 | 205.3 |
| SIRT6     | 120.2 | 124.2 | 128.6 | 121.5 | 119   | 105   | 135.8 | 120.7 |
| SIT1      | 140.2 | 135.4 | 123.9 | 128.8 | 113.2 | 109.4 | 123.5 | 119.2 |
| SIVA      | 549.7 | 603.1 | 484.7 | 493.9 | 410.8 | 397.2 | 458.3 | 349.1 |
| SIVA      | 285.9 | 314.3 | 368.9 | 289.1 | 250.7 | 296.5 | 269.7 | 222.4 |
| SIX1      | 113.3 | 112.6 | 118.8 | 111.5 | 107   | 98.7  | 115.7 | 119.9 |

|         |        |        |        |        |        |       |        |       |
|---------|--------|--------|--------|--------|--------|-------|--------|-------|
| SIX2    | 101.6  | 114.3  | 115.8  | 108.7  | 97.4   | 94.8  | 112    | 109.6 |
| SIX3    | 119.7  | 117.1  | 110.3  | 120.3  | 110.7  | 97.1  | 119.1  | 118.2 |
| SIX4    | 121.5  | 116.2  | 121.7  | 123.5  | 111.3  | 100.6 | 112.2  | 119.5 |
| SIX5    | 112.6  | 120.1  | 119.2  | 117.3  | 111.5  | 106.4 | 117.3  | 118.5 |
| SIX6    | 115.2  | 121.3  | 126.4  | 121.7  | 117.6  | 100.4 | 117.8  | 118.3 |
| SKAP1   | 190.3  | 218.7  | 269.2  | 275.3  | 230.1  | 210.2 | 218    | 206.2 |
| SKAP2   | 167    | 143.9  | 180.2  | 147.9  | 137.3  | 139.1 | 167.2  | 139.2 |
| SKI     | 144.4  | 157.5  | 152.7  | 164.1  | 155.8  | 133.2 | 143.3  | 149   |
| SKIL    | 111.1  | 117.8  | 109.3  | 112    | 106    | 98.7  | 119.6  | 108.8 |
| SKIP    | 124.1  | 135.5  | 116.1  | 119.1  | 132.6  | 104.7 | 135.8  | 125.1 |
| SKIP    | 111.2  | 116.9  | 120.8  | 111.6  | 104.2  | 102.2 | 113.5  | 117.8 |
| SKIV2L  | 547.1  | 566.4  | 475.9  | 563    | 392.5  | 312.9 | 505    | 341.5 |
| SKIV2L2 | 252.3  | 259    | 255.9  | 287.2  | 214    | 205   | 257.2  | 247.1 |
| SKP1A   | 420.2  | 440.7  | 472.4  | 490.3  | 366.5  | 446.7 | 410.3  | 475.4 |
| SKP1A   | 112.6  | 111.8  | 116.7  | 110.7  | 108.6  | 99.3  | 117.1  | 118.7 |
| SKP2    | 249.3  | 329.9  | 358.2  | 291    | 264    | 267.2 | 217.3  | 200.9 |
| SKP2    | 118.2  | 135    | 142.3  | 129.2  | 112.7  | 117.1 | 124.9  | 124.6 |
| SKP2    | 128.2  | 115.7  | 121.1  | 116.8  | 104.5  | 109.6 | 123.2  | 124.5 |
| SLA     | 136.2  | 135.1  | 161.4  | 141.9  | 131.6  | 109.4 | 130.1  | 116.8 |
| SLA     | 212.1  | 253.9  | 269.6  | 249.4  | 206.8  | 205.9 | 231    | 215.2 |
| SLA/LP  | 137.6  | 137.6  | 139.6  | 136.2  | 127.9  | 122.2 | 124.9  | 112.9 |
| SLA/LP  | 116.3  | 122    | 124.9  | 119.7  | 113.4  | 102.6 | 123.6  | 120   |
| SLA2    | 119.2  | 122.1  | 122.8  | 133.3  | 110.9  | 96.2  | 127.3  | 120.5 |
| SLA2    | 223.8  | 247.1  | 189.9  | 226.3  | 166.2  | 195.4 | 196    | 172.9 |
| SLAMF1  | 303.9  | 452.7  | 244.9  | 360.7  | 355.3  | 196.7 | 523.1  | 569.8 |
| SLAMF6  | 1497.1 | 1658.9 | 1266.9 | 1546.8 | 1030.9 | 803.7 | 1133.6 | 898.8 |
| SLAMF7  | 151.8  | 133.8  | 138.9  | 148.1  | 124.7  | 112.3 | 153.3  | 152.7 |
| SLAMF8  | 223.2  | 152    | 235.9  | 247.1  | 139.3  | 208.6 | 215    | 148.5 |
| SLAMF9  | 127.2  | 114.4  | 117.1  | 120.3  | 112.3  | 98.8  | 108.9  | 110.7 |
| SLBP    | 193.7  | 208.9  | 247.1  | 250.7  | 224.4  | 191.5 | 274.4  | 318.1 |
| SLC10A1 | 117.8  | 111.2  | 117.3  | 116.5  | 104.6  | 96.2  | 110.3  | 112.9 |
| SLC10A2 | 114.6  | 112.5  | 119.1  | 124.5  | 114.2  | 110.2 | 120.2  | 108.9 |
| SLC10A3 | 278.7  | 268.9  | 231.4  | 283.9  | 202.4  | 236.9 | 263.7  | 280.3 |
| SLC10A4 | 107.7  | 108.8  | 109.1  | 118.4  | 109.8  | 93.9  | 111.2  | 109.6 |
| SLC10A5 | 119.6  | 110.3  | 121.7  | 113.2  | 108.7  | 104.9 | 124.9  | 111   |
| SLC10A6 | 113.8  | 109.8  | 112.2  | 117.4  | 106.9  | 97.4  | 109.4  | 106.7 |
| SLC10A7 | 113.5  | 103.3  | 122.4  | 117    | 104.9  | 94.1  | 111.4  | 110.7 |
| SLC11A1 | 203.6  | 148.4  | 430    | 253.8  | 151.8  | 276.7 | 240.5  | 126.7 |
| SLC11A1 | 108.1  | 115    | 112.2  | 100.9  | 97.6   | 97.9  | 119.5  | 103.3 |
| SLC11A2 | 372.5  | 283.2  | 359.4  | 314.8  | 269.9  | 246.5 | 297.9  | 229.3 |
| SLC12A1 | 114    | 121.8  | 125    | 113    | 106.5  | 93.2  | 111.1  | 119.8 |
| SLC12A2 | 152.2  | 151.8  | 125.7  | 157.5  | 136.1  | 116.5 | 168    | 174.1 |
| SLC12A3 | 111.7  | 113.2  | 113    | 114.1  | 104.5  | 92.5  | 113.1  | 103.5 |
| SLC12A4 | 113.7  | 136.5  | 129.7  | 129.6  | 121.8  | 104.5 | 118.9  | 126.6 |
| SLC12A5 | 114.1  | 123.5  | 110.2  | 116.6  | 112    | 96.9  | 120.7  | 121   |
| SLC12A6 | 147.9  | 128.5  | 138.9  | 144.8  | 113.3  | 114.1 | 144.1  | 141   |
| SLC12A6 | 110.7  | 106.3  | 117.8  | 105.1  | 105.9  | 100.1 | 109.2  | 110.5 |
| SLC12A7 | 106.8  | 109.6  | 113.2  | 112.3  | 112.4  | 101.8 | 118.3  | 111.1 |
| SLC12A8 | 134.3  | 140.8  | 112.6  | 163.5  | 125.4  | 110.2 | 195.8  | 166.7 |
| SLC12A9 | 748.4  | 831.1  | 670    | 702.4  | 526.1  | 404.5 | 479    | 437.7 |
| SLC13A1 | 109.6  | 111.4  | 120.2  | 116.8  | 108.4  | 98    | 127.3  | 114.9 |

|          |        |        |        |        |        |        |        |        |
|----------|--------|--------|--------|--------|--------|--------|--------|--------|
| SLC13A2  | 114.4  | 117    | 119.7  | 120.7  | 111.3  | 104.7  | 127.1  | 120.4  |
| SLC13A3  | 157.6  | 171.2  | 185.2  | 175.4  | 179.3  | 141.8  | 173.8  | 175.8  |
| SLC13A3  | 109    | 115.1  | 115.1  | 122    | 120.2  | 97.9   | 118.6  | 120.1  |
| SLC13A3  | 116.6  | 109.8  | 115.6  | 110.3  | 101    | 97.4   | 126.8  | 107.8  |
| SLC13A4  | 107.8  | 115.9  | 117.9  | 111.7  | 106.5  | 105.9  | 126.5  | 124.6  |
| SLC13A5  | 111.8  | 109.9  | 123.8  | 130.1  | 115.8  | 99.8   | 130.5  | 125.9  |
| SLC14A1  | 117.8  | 117.9  | 120.5  | 118.8  | 120.8  | 102    | 118.4  | 111.4  |
| SLC14A2  | 119.4  | 112.7  | 116.3  | 113.6  | 118    | 101.4  | 116.2  | 126.4  |
| SLC15A1  | 114.7  | 116.5  | 124.4  | 125.9  | 113.6  | 98.7   | 120.1  | 113.9  |
| SLC15A2  | 119.6  | 124.1  | 119.3  | 120.6  | 117.2  | 100.6  | 127.2  | 121.2  |
| SLC15A3  | 623.3  | 337.9  | 657.9  | 509.9  | 240.5  | 380.2  | 485.9  | 259.2  |
| SLC15A4  | 409    | 316.7  | 529    | 431.9  | 341.1  | 345.2  | 482.8  | 342.2  |
| SLC16A1  | 110.8  | 116.9  | 127.3  | 132.6  | 109.9  | 98.6   | 112.9  | 109.7  |
| SLC16A10 | 204.7  | 222.5  | 201.7  | 218.9  | 250.6  | 204.5  | 224.4  | 263.2  |
| SLC16A11 | 122.7  | 114.1  | 124.9  | 112.6  | 113.5  | 97.6   | 121    | 122    |
| SLC16A12 | 3360.6 | 2950.4 | 3107   | 3757   | 4236.3 | 1693.4 | 3990.7 | 4026   |
| SLC16A13 | 115.3  | 121.3  | 118.3  | 135.3  | 111.9  | 112.3  | 111.5  | 125.5  |
| SLC16A14 | 109.8  | 116.2  | 121.1  | 117.9  | 104.7  | 97.2   | 107.7  | 114.2  |
| SLC16A2  | 127.1  | 119.2  | 127    | 121.5  | 107.2  | 96.9   | 126.6  | 120.6  |
| SLC16A3  | 637.9  | 559.1  | 1012.4 | 858.7  | 328.3  | 1123.8 | 550    | 265.7  |
| SLC16A4  | 111.8  | 135.3  | 130.5  | 135.7  | 111.4  | 103    | 127.6  | 114.8  |
| SLC16A5  | 191.1  | 174.1  | 248    | 172    | 149.8  | 144.8  | 152.9  | 146.7  |
| SLC16A6  | 145.9  | 185.3  | 163.5  | 247.2  | 202.1  | 261.6  | 231.1  | 140.6  |
| SLC16A7  | 119.3  | 121.6  | 121    | 131.1  | 117.7  | 103.3  | 134.8  | 125.3  |
| SLC16A8  | 108.9  | 117.1  | 121.5  | 124.5  | 108.7  | 100.8  | 122.5  | 118.8  |
| SLC16A9  | 109.6  | 125.3  | 117    | 116.2  | 112.7  | 104.1  | 116.8  | 119    |
| SLC17A1  | 127.2  | 104.8  | 133.2  | 123.6  | 111.8  | 105.3  | 121.7  | 112.6  |
| SLC17A2  | 116.6  | 117.7  | 115.1  | 129.7  | 111    | 100.5  | 122.8  | 115.9  |
| SLC17A3  | 119.2  | 115.6  | 124.1  | 136.9  | 106.4  | 111.6  | 131.4  | 129.9  |
| SLC17A4  | 103.2  | 112.7  | 113    | 115.2  | 108.1  | 97.7   | 125.5  | 110.2  |
| SLC17A5  | 106    | 104    | 115.9  | 113.6  | 111.3  | 95.8   | 119.2  | 120.3  |
| SLC17A6  | 117.4  | 118.5  | 114.5  | 113.5  | 112.2  | 102.6  | 116    | 112.4  |
| SLC17A7  | 118.5  | 120.1  | 123.3  | 121.4  | 112.1  | 105.1  | 120.3  | 124.1  |
| SLC17A8  | 110.5  | 114.3  | 108.5  | 112.4  | 108.6  | 103.7  | 110.7  | 116    |
| SLC18A1  | 129.2  | 120.2  | 123.9  | 121.5  | 111.9  | 106.3  | 121.5  | 111.7  |
| SLC18A2  | 116    | 111.6  | 111.5  | 111.6  | 106.3  | 106.2  | 110.8  | 113.1  |
| SLC18A3  | 102.5  | 115    | 114.7  | 121.1  | 105.7  | 96.4   | 109.6  | 104.3  |
| SLC19A1  | 119.7  | 126.4  | 135.6  | 124.7  | 109.1  | 105    | 122.8  | 118.6  |
| SLC19A2  | 111    | 116.3  | 121.5  | 122.1  | 104.1  | 101.9  | 109.7  | 113.6  |
| SLC19A3  | 111.5  | 110.8  | 121.1  | 127    | 112    | 95.4   | 122    | 119.1  |
| SLC1A1   | 110.8  | 108.8  | 116.5  | 113.9  | 103.2  | 97.6   | 116.2  | 118.8  |
| SLC1A2   | 122.7  | 130.8  | 134.7  | 138.1  | 125.2  | 121.2  | 116    | 118    |
| SLC1A3   | 183.4  | 171.8  | 128.7  | 196.1  | 156.7  | 102.3  | 226.1  | 159.9  |
| SLC1A4   | 123.9  | 132.5  | 135.1  | 131.7  | 121.1  | 111.9  | 142.4  | 126.9  |
| SLC1A5   | 165.5  | 139.5  | 168.6  | 142.9  | 121    | 172.7  | 145    | 182.6  |
| SLC1A6   | 108.7  | 108.6  | 106.1  | 113.1  | 110    | 96.2   | 110.5  | 110    |
| SLC1A7   | 129    | 125.2  | 135.8  | 124.6  | 126.2  | 106.2  | 119.2  | 124.2  |
| SLC20A1  | 1054.4 | 1152.8 | 788    | 1200.4 | 955.6  | 564.7  | 1245.2 | 1162.3 |
| SLC20A2  | 137.1  | 154.5  | 158.8  | 149.8  | 140.6  | 131.3  | 173.2  | 129.5  |
| SLC22A1  | 120.9  | 124    | 129.5  | 141.9  | 113.2  | 107    | 117.3  | 128.8  |
| SLC22A1  | 123    | 122.6  | 115.1  | 119.5  | 115.9  | 101.5  | 124    | 124.4  |

|           |       |       |       |       |       |       |       |       |
|-----------|-------|-------|-------|-------|-------|-------|-------|-------|
| SLC22A10  | 114.7 | 111.9 | 108.5 | 114.9 | 101.2 | 93.2  | 126.1 | 115.7 |
| SLC22A11  | 119.1 | 113.6 | 112.8 | 134.1 | 102.4 | 98.1  | 120.2 | 115   |
| SLC22A12  | 113.4 | 117.2 | 119.4 | 119.3 | 110.8 | 92.5  | 121.1 | 116.7 |
| SLC22A12  | 113.6 | 114.3 | 121.2 | 132.5 | 107.1 | 94.8  | 115.8 | 119.1 |
| SLC22A12  | 110.2 | 116.4 | 120.6 | 111.8 | 102.5 | 97.9  | 122.1 | 115.3 |
| SLC22A13  | 128.1 | 115   | 113.7 | 120   | 108.7 | 109   | 114.3 | 112.2 |
| SLC22A14  | 120.4 | 120.6 | 113.8 | 117.5 | 113.4 | 101.9 | 115.8 | 122.4 |
| SLC22A15  | 121.4 | 116.3 | 116.2 | 115.9 | 106.6 | 99.2  | 111.2 | 107.4 |
| SLC22A16  | 107   | 116.9 | 109   | 113.8 | 112.5 | 93    | 115.3 | 114   |
| SLC22A17  | 127.7 | 110.5 | 121.9 | 121.1 | 107.9 | 105.6 | 119.8 | 107.4 |
| SLC22A17  | 214.6 | 181.6 | 228.9 | 208.7 | 149.4 | 169   | 173.7 | 158.8 |
| SLC22A18  | 109.7 | 115.5 | 132.8 | 117.4 | 109.2 | 104.9 | 116.1 | 118   |
| SLC22A18  | 141.4 | 139.3 | 177   | 146.8 | 124.1 | 122.1 | 133.3 | 138.2 |
| SLC22A18A | 125   | 124.1 | 142.4 | 128.4 | 115.9 | 115.4 | 131.4 | 127.9 |
| SLC22A2   | 114   | 114.8 | 115.1 | 122.2 | 114.9 | 103.5 | 126.3 | 115.2 |
| SLC22A2   | 118.1 | 108.1 | 120.1 | 110.5 | 108   | 106.9 | 105.7 | 107.2 |
| SLC22A3   | 109   | 116   | 118.1 | 118.5 | 107.3 | 97.2  | 111.3 | 111.5 |
| SLC22A4   | 116.6 | 106.4 | 130.3 | 121.6 | 115.1 | 113.7 | 116.9 | 114.6 |
| SLC22A5   | 131.9 | 142.6 | 130.6 | 138.5 | 127.1 | 117   | 135.9 | 134.6 |
| SLC22A6   | 114   | 122   | 115   | 125.8 | 107.7 | 100.1 | 114.8 | 123.7 |
| SLC22A6   | 111.8 | 120.6 | 117.9 | 112.4 | 104.3 | 100.4 | 114.9 | 109.3 |
| SLC22A7   | 111.7 | 107.2 | 120.8 | 110.7 | 108.3 | 99.7  | 126.5 | 115.3 |
| SLC22A7   | 109.4 | 115.6 | 106.6 | 110.3 | 102.8 | 97.5  | 108.1 | 106.5 |
| SLC22A8   | 121.9 | 113.2 | 113.9 | 119.3 | 111.6 | 105.4 | 107.7 | 114.7 |
| SLC22A9   | 103.3 | 109.4 | 115.8 | 114.6 | 110.6 | 100.2 | 112.3 | 116.9 |
| SLC23A1   | 128.4 | 116.9 | 128.6 | 112.8 | 107   | 122.6 | 121.4 | 119   |
| SLC23A1   | 123.6 | 125.6 | 131.1 | 128.3 | 118.8 | 109.1 | 128.9 | 141.7 |
| SLC23A2   | 122.4 | 115.7 | 114.7 | 115.3 | 113.6 | 111   | 117.2 | 114.9 |
| SLC23A2   | 174   | 153.2 | 200.7 | 249.9 | 158.2 | 273.5 | 253.8 | 185.6 |
| SLC23A2   | 115.4 | 111.9 | 120.2 | 122   | 112.7 | 96.4  | 115   | 113.5 |
| SLC23A3   | 131.1 | 124.6 | 144.5 | 146.3 | 117.1 | 103.6 | 132   | 131.2 |
| SLC24A1   | 120.3 | 120.3 | 129.8 | 128.1 | 111.3 | 107.6 | 125   | 117.9 |
| SLC24A2   | 116.1 | 108.5 | 114.7 | 123.2 | 106.5 | 96.8  | 115.4 | 107.5 |
| SLC24A3   | 108.2 | 121.1 | 130.6 | 123.4 | 117.4 | 106.5 | 135.5 | 125.6 |
| SLC24A4   | 114.5 | 101.9 | 115.4 | 113.3 | 106.3 | 105.8 | 117   | 110.5 |
| SLC24A4   | 114.6 | 119   | 124.4 | 119.8 | 110   | 106.4 | 131.8 | 115.6 |
| SLC24A4   | 123.1 | 123.5 | 121.2 | 134.5 | 114.9 | 107.8 | 119.7 | 122.4 |
| SLC24A5   | 113   | 113.6 | 118.6 | 124.5 | 109.8 | 105   | 124.4 | 115.7 |
| SLC24A6   | 511.7 | 444.2 | 496.2 | 628.1 | 454.9 | 433.6 | 547.6 | 689.2 |
| SLC25A1   | 269.4 | 315.5 | 255.2 | 266.4 | 210.5 | 210.6 | 289.4 | 243.8 |
| SLC25A10  | 128.5 | 132.2 | 128.1 | 122.2 | 116.3 | 97.2  | 117.1 | 123   |
| SLC25A11  | 148.2 | 141.5 | 132.7 | 156.9 | 131.1 | 123.2 | 134.6 | 138.8 |
| SLC25A12  | 174.2 | 161.8 | 162   | 163.9 | 142.1 | 134.9 | 147.8 | 148.5 |
| SLC25A13  | 173.2 | 143.3 | 151.3 | 166.4 | 133.6 | 121.3 | 160.6 | 152.3 |
| SLC25A14  | 155   | 142.9 | 147.8 | 162   | 132.1 | 117.3 | 129.8 | 134.9 |
| SLC25A14  | 131.7 | 152.6 | 146   | 152.1 | 121.5 | 109.8 | 122.5 | 120   |
| SLC25A15  | 128.2 | 135.5 | 125.1 | 126.9 | 116.4 | 103   | 126.1 | 126.3 |
| SLC25A16  | 122.2 | 118.8 | 132.3 | 128.2 | 112.1 | 97.6  | 116.5 | 108.7 |
| SLC25A17  | 133.6 | 143.3 | 151.5 | 157.6 | 135.6 | 123.7 | 136.4 | 154.3 |
| SLC25A18  | 112   | 116.4 | 108.3 | 120.7 | 101.6 | 96.3  | 113.6 | 117   |
| SLC25A19  | 213.6 | 204.9 | 310.8 | 212.5 | 149   | 218.1 | 140.6 | 187.9 |

|          |        |        |        |        |        |        |        |        |
|----------|--------|--------|--------|--------|--------|--------|--------|--------|
| SLC25A2  | 109.5  | 114.9  | 115.1  | 115.1  | 105.8  | 95.5   | 113.9  | 121.4  |
| SLC25A20 | 129    | 132.8  | 147.2  | 125.7  | 115.8  | 126.3  | 124.4  | 124.9  |
| SLC25A21 | 107.1  | 111.2  | 110.1  | 124.6  | 110.4  | 95.2   | 116.5  | 109.3  |
| SLC25A22 | 223.6  | 238.2  | 184.7  | 219.9  | 198.1  | 136.7  | 193.6  | 206    |
| SLC25A23 | 399.7  | 427.1  | 350.2  | 384.9  | 243    | 257.1  | 256.4  | 201.4  |
| SLC25A24 | 122.9  | 114    | 121.2  | 119.2  | 110    | 99.7   | 114    | 122.7  |
| SLC25A24 | 114.5  | 123.7  | 126.2  | 132    | 113    | 101.9  | 123.9  | 120.9  |
| SLC25A24 | 130.8  | 116.5  | 146.1  | 134.4  | 125.3  | 126.5  | 134.4  | 136.7  |
| SLC25A25 | 341.4  | 365.3  | 329.1  | 368.7  | 277.5  | 266.5  | 319.4  | 310.9  |
| SLC25A25 | 117.7  | 119.6  | 116.9  | 121.3  | 107    | 109.4  | 114.4  | 121.4  |
| SLC25A25 | 116.7  | 123.1  | 114.1  | 124.9  | 110.8  | 105.3  | 125.9  | 125.1  |
| SLC25A25 | 132.8  | 131.8  | 123.1  | 125.2  | 122.7  | 105.3  | 129.4  | 118    |
| SLC25A26 | 190.1  | 165.7  | 171.7  | 190.6  | 171.7  | 163.1  | 168.2  | 170.8  |
| SLC25A26 | 126.2  | 144.4  | 133.5  | 136.9  | 133.9  | 124.1  | 140.1  | 129.9  |
| SLC25A26 | 133.1  | 134    | 143.7  | 129.2  | 121.9  | 109.1  | 126.7  | 130    |
| SLC25A27 | 121.3  | 109.6  | 121.6  | 122.3  | 113.9  | 103.7  | 124    | 118.8  |
| SLC25A28 | 499.5  | 495.3  | 635.3  | 467.8  | 407.3  | 437.4  | 449.4  | 459.2  |
| SLC25A29 | 124.5  | 125.2  | 119.8  | 137.8  | 113.9  | 99.8   | 124.5  | 135.3  |
| SLC25A29 | 135.9  | 130.3  | 142.2  | 129.8  | 131.1  | 111.4  | 133.4  | 153.5  |
| SLC25A3  | 1589.2 | 1908.4 | 1907   | 1470.4 | 1516.9 | 1497.3 | 1674.2 | 1581   |
| SLC25A3  | 116.4  | 130.1  | 120.8  | 111    | 129.1  | 111.1  | 129    | 125.4  |
| SLC25A30 | 120.5  | 118.2  | 117.9  | 120.8  | 115.9  | 108    | 118.1  | 124.9  |
| SLC25A31 | 121    | 116.4  | 124    | 111.6  | 107.4  | 101.2  | 113.6  | 116.1  |
| SLC25A32 | 119.8  | 115.2  | 127.3  | 119.4  | 113.4  | 104.7  | 109.3  | 117.5  |
| SLC25A34 | 122.9  | 120.8  | 126.7  | 129.3  | 114.7  | 103.4  | 139.3  | 127.9  |
| SLC25A35 | 115.8  | 117.7  | 131.3  | 121.7  | 110.8  | 103.8  | 126    | 116.3  |
| SLC25A36 | 244    | 215.4  | 203.8  | 270.4  | 217    | 142.5  | 236.1  | 240.6  |
| SLC25A37 | 161.9  | 183.5  | 180    | 169.7  | 148.3  | 145.3  | 166.6  | 154.2  |
| SLC25A4  | 379.5  | 461    | 256.6  | 374    | 290.3  | 197.5  | 326.4  | 270    |
| SLC25A40 | 165.3  | 169.4  | 205.2  | 166.7  | 139.3  | 135.2  | 155.2  | 139.9  |
| SLC25A42 | 752    | 811.9  | 648.5  | 680.9  | 441.8  | 483.9  | 491.6  | 457.2  |
| SLC25A43 | 218    | 198.4  | 255.7  | 184.3  | 155    | 139    | 156    | 142.2  |
| SLC25A45 | 115.4  | 118.6  | 124.1  | 117.2  | 112.9  | 106.2  | 123.5  | 119.5  |
| SLC25A5  | 3591   | 4106.7 | 3326.7 | 3813.9 | 2807.3 | 2532.3 | 4252.2 | 4511.9 |
| SLC26A1  | 114.8  | 122.6  | 120    | 124.5  | 117.8  | 100.6  | 125.6  | 126.7  |
| SLC26A1  | 122.4  | 126    | 116.2  | 116.9  | 105.5  | 106.5  | 128.4  | 121.7  |
| SLC26A1  | 105.9  | 119.9  | 119.6  | 115.7  | 111.8  | 100.1  | 108.3  | 111.8  |
| SLC26A10 | 118.6  | 111.1  | 117.4  | 115.8  | 112.5  | 106.1  | 126.5  | 119.6  |
| SLC26A11 | 113.1  | 116.5  | 122.2  | 115.2  | 106.5  | 103.1  | 114.4  | 113.6  |
| SLC26A11 | 244.4  | 265.9  | 155.3  | 267.6  | 196.6  | 149.8  | 313.9  | 291.2  |
| SLC26A2  | 121.8  | 116.7  | 132    | 122.3  | 122.2  | 120.4  | 123.2  | 128.2  |
| SLC26A3  | 109.4  | 117.9  | 118.6  | 111.3  | 110.1  | 95.4   | 114.2  | 114.5  |
| SLC26A4  | 113    | 113.9  | 121.5  | 122.1  | 109.2  | 107.6  | 109.3  | 113.6  |
| SLC26A5  | 115.4  | 119.6  | 114.4  | 109.8  | 113.9  | 103.9  | 110.3  | 109.2  |
| SLC26A5  | 122.3  | 127.3  | 119.7  | 120.7  | 104.9  | 104.7  | 129    | 116.5  |
| SLC26A5  | 123.7  | 123.6  | 115.5  | 115    | 112.1  | 105.2  | 117.7  | 110.8  |
| SLC26A6  | 220.5  | 210.1  | 237.7  | 238.1  | 180    | 157.3  | 177.2  | 174.1  |
| SLC26A6  | 119.6  | 107.3  | 115    | 114.6  | 97.2   | 88.2   | 114.7  | 103.4  |
| SLC26A6  | 119    | 121.7  | 124.6  | 112.8  | 111    | 97.1   | 115.3  | 109.7  |
| SLC26A7  | 111.8  | 114.6  | 118.5  | 116.3  | 105.1  | 102.5  | 116.7  | 114    |
| SLC26A7  | 117    | 121.2  | 122.8  | 112.2  | 109    | 104    | 124.4  | 115.9  |

|          |        |        |        |        |       |        |        |        |
|----------|--------|--------|--------|--------|-------|--------|--------|--------|
| SLC26A8  | 108.5  | 117.3  | 128.5  | 133.2  | 111   | 100.7  | 126.8  | 116.4  |
| SLC26A8  | 109    | 115.5  | 107.7  | 109.5  | 111.7 | 93.8   | 117.1  | 113.2  |
| SLC26A9  | 102.7  | 117.2  | 116.4  | 123.1  | 110.2 | 104    | 107.5  | 117.5  |
| SLC26A9  | 112    | 126.9  | 123.5  | 110.2  | 104.7 | 105.5  | 136.9  | 124.5  |
| SLC26A9  | 114.5  | 108.7  | 115.8  | 113.8  | 104.5 | 100.5  | 116.5  | 112    |
| SLC27A1  | 170.9  | 173.1  | 215.3  | 165.1  | 140.9 | 158.8  | 166    | 142.2  |
| SLC27A2  | 113.5  | 124.7  | 128.4  | 118    | 120.4 | 108.1  | 122.6  | 118.1  |
| SLC27A3  | 222.6  | 231.2  | 261    | 194.5  | 173.2 | 145.6  | 147.4  | 154.5  |
| SLC27A4  | 120.6  | 113.6  | 140.8  | 151.4  | 113.3 | 106.7  | 128.3  | 121.6  |
| SLC27A5  | 146.6  | 127.7  | 139.6  | 133.4  | 114.9 | 119.3  | 125    | 135.2  |
| SLC27A6  | 116.6  | 123.1  | 119.3  | 114.5  | 104.7 | 103.9  | 113.8  | 121.6  |
| SLC27A6  | 117    | 130.7  | 119.1  | 114.6  | 112.5 | 104.5  | 107.1  | 125.8  |
| SLC28A1  | 109.5  | 118.4  | 113.6  | 121.5  | 102.1 | 96.3   | 110.7  | 101.6  |
| SLC28A1  | 132.7  | 135.2  | 134    | 127.6  | 129.6 | 117.5  | 132.8  | 126    |
| SLC28A1  | 112.6  | 119.6  | 126.1  | 120.8  | 110.1 | 105.8  | 119.6  | 110.7  |
| SLC28A3  | 115.1  | 106.6  | 119.5  | 120.6  | 106.5 | 101.6  | 125.9  | 101.9  |
| SLC29A1  | 120.6  | 114.6  | 130.5  | 119.1  | 124.3 | 109.6  | 125.1  | 121.3  |
| SLC29A1  | 118.3  | 123.3  | 120.4  | 119.2  | 108.4 | 102.6  | 123.4  | 115.9  |
| SLC29A1  | 112.3  | 124.1  | 123.9  | 123.6  | 104.8 | 106.6  | 116.8  | 126.3  |
| SLC29A2  | 147.6  | 143.2  | 155.8  | 159.4  | 140.1 | 128.4  | 143.9  | 136.8  |
| SLC29A3  | 145.3  | 137.5  | 138.5  | 126.3  | 126   | 118.2  | 144    | 137.3  |
| SLC29A4  | 116.1  | 115.4  | 114.5  | 116.5  | 110.8 | 96.8   | 122.8  | 121.1  |
| SLC2A1   | 290.9  | 320.1  | 267.8  | 298.3  | 240.5 | 186.6  | 285.6  | 311.1  |
| SLC2A10  | 112.6  | 110.4  | 115    | 115    | 105.8 | 96     | 114.4  | 109.4  |
| SLC2A11  | 115.8  | 115.2  | 130.6  | 119.2  | 116.4 | 102.3  | 114.4  | 109    |
| SLC2A11  | 129.9  | 120.9  | 145.6  | 124.8  | 117.7 | 111    | 130.8  | 113.8  |
| SLC2A11  | 137.6  | 132.5  | 130    | 139.4  | 128.8 | 115.2  | 137    | 136.5  |
| SLC2A12  | 109.2  | 109.6  | 118.7  | 119.3  | 102.7 | 101    | 122.6  | 111.4  |
| SLC2A13  | 108.9  | 118.1  | 104.4  | 124.3  | 105.7 | 101.2  | 118.2  | 107.1  |
| SLC2A14  | 131.3  | 131.1  | 118.6  | 146.8  | 130.7 | 108.4  | 122.8  | 131.5  |
| SLC2A2   | 110.4  | 117.2  | 110.5  | 115.4  | 109.8 | 101.2  | 115.5  | 113.3  |
| SLC2A3   | 1626.7 | 1834.2 | 1210.5 | 1922.6 | 1608  | 1257.6 | 2280.4 | 2227.9 |
| SLC2A4   | 115.7  | 115.6  | 125.4  | 129    | 115.9 | 105.7  | 119.1  | 124    |
| SLC2A4RG | 147.9  | 161    | 167.6  | 175.7  | 133   | 125.9  | 164    | 164.4  |
| SLC2A5   | 198.2  | 197.4  | 200.9  | 191.8  | 144.7 | 155.7  | 153    | 136.2  |
| SLC2A6   | 339.3  | 285.1  | 225.7  | 256.6  | 157.2 | 143    | 155.8  | 144.6  |
| SLC2A7   | 105.6  | 107.7  | 114.7  | 110.5  | 100.6 | 105.6  | 109.8  | 110.2  |
| SLC2A8   | 164.4  | 156.1  | 209.9  | 178.5  | 143.4 | 167.9  | 160.5  | 172.5  |
| SLC2A9   | 112.7  | 119.6  | 116.2  | 133.3  | 119.3 | 116    | 133.5  | 129.5  |
| SLC2A9   | 122.9  | 106.4  | 112.4  | 135.3  | 116.8 | 98.4   | 121.1  | 122.8  |
| SLC2A9   | 117.1  | 122.9  | 138.7  | 119.2  | 107.5 | 103.1  | 123.9  | 112.7  |
| SLC30A1  | 161.2  | 153.6  | 151.8  | 183.9  | 177.9 | 183.2  | 286    | 197.1  |
| SLC30A10 | 112.2  | 124.7  | 119.8  | 117    | 105.6 | 99.7   | 119    | 114.3  |
| SLC30A2  | 113.4  | 119.3  | 112.4  | 116.2  | 110.9 | 95.1   | 123.4  | 119    |
| SLC30A2  | 116.7  | 120.4  | 131    | 112.3  | 114.3 | 106.6  | 124.3  | 122.3  |
| SLC30A3  | 119.9  | 130.3  | 128.1  | 130.6  | 112.7 | 104.8  | 130.8  | 125    |
| SLC30A4  | 114.1  | 120.9  | 120    | 122    | 112   | 98.3   | 122.6  | 114    |
| SLC30A5  | 269.6  | 335.9  | 287.7  | 317    | 250.7 | 200.7  | 276.4  | 257.3  |
| SLC30A5  | 138.8  | 138.6  | 131    | 133.9  | 113.4 | 116.4  | 132.3  | 134.2  |
| SLC30A5  | 118.3  | 123.6  | 123.8  | 117.4  | 110.3 | 106.9  | 126.2  | 118.9  |
| SLC30A6  | 118.7  | 128.3  | 130    | 130    | 110.7 | 103.5  | 123.6  | 110.7  |



|         |        |        |       |        |        |       |        |        |
|---------|--------|--------|-------|--------|--------|-------|--------|--------|
| SLC30A7 | 379.3  | 330.8  | 361.5 | 391.9  | 434.7  | 306.1 | 471    | 506.8  |
| SLC30A8 | 116.6  | 104.3  | 105.3 | 123.6  | 102.5  | 105.5 | 113.8  | 115.3  |
| SLC30A9 | 260.6  | 250    | 288.4 | 237    | 217.3  | 204.2 | 225.4  | 220.8  |
| SLC31A2 | 484.6  | 344    | 448.6 | 650.5  | 365.2  | 571.4 | 689.6  | 392.3  |
| SLC32A1 | 108.6  | 104.3  | 108.3 | 113.8  | 103.6  | 88.6  | 114.4  | 111.5  |
| SLC33A1 | 139.1  | 134    | 144.7 | 155.6  | 133.1  | 117.1 | 128.1  | 129.4  |
| SLC34A1 | 107    | 108.8  | 119.6 | 115.6  | 106    | 99.7  | 119.3  | 111    |
| SLC34A2 | 109    | 110.4  | 109.5 | 110.9  | 107.8  | 95.5  | 114.2  | 111.9  |
| SLC34A3 | 116.6  | 127.7  | 121.1 | 126.3  | 115.8  | 95.4  | 121.7  | 119.5  |
| SLC35A1 | 555.4  | 647.1  | 693.2 | 740.9  | 526.2  | 518.1 | 532.6  | 398    |
| SLC35A2 | 248.7  | 271.2  | 236.1 | 283.5  | 214.4  | 254.9 | 284.9  | 324.3  |
| SLC35A2 | 118.2  | 117.8  | 122.8 | 112    | 107    | 100.1 | 123.7  | 104.4  |
| SLC35A2 | 122    | 123.5  | 129.3 | 126.5  | 105.3  | 110.8 | 135.7  | 121.6  |
| SLC35A2 | 116.1  | 127.2  | 122   | 110.1  | 106.1  | 105.7 | 128.5  | 121.8  |
| SLC35A3 | 195.2  | 206.7  | 216.8 | 189.3  | 190.9  | 165.7 | 193.3  | 180    |
| SLC35A4 | 275.3  | 295.9  | 274.3 | 339    | 179.1  | 307.6 | 339.6  | 306.4  |
| SLC35A5 | 392.7  | 357.5  | 523.6 | 478.3  | 328.6  | 363   | 380.3  | 285.2  |
| SLC35B1 | 534.8  | 489.8  | 777.3 | 529.7  | 392    | 511.8 | 487.7  | 560.2  |
| SLC35B2 | 396.8  | 421.7  | 336.5 | 423.4  | 383    | 256.2 | 406.8  | 323.8  |
| SLC35B3 | 297.8  | 326    | 311.5 | 340.6  | 283    | 258.4 | 414.8  | 477.9  |
| SLC35B4 | 136.8  | 129.2  | 143.3 | 144.3  | 133.5  | 119.3 | 134.8  | 143.7  |
| SLC35C1 | 168    | 192.4  | 169.9 | 195.3  | 138.8  | 138.2 | 196.1  | 178.9  |
| SLC35C2 | 180.2  | 183.9  | 190.4 | 193.9  | 152.3  | 165   | 177.9  | 149    |
| SLC35C2 | 267    | 280.9  | 261.4 | 238    | 191.2  | 192.3 | 241.9  | 289.9  |
| SLC35C2 | 112.2  | 109.9  | 111   | 112.5  | 114.7  | 94.5  | 118.4  | 112.5  |
| SLC35D1 | 110    | 122.3  | 116.6 | 124.8  | 109.8  | 100.3 | 122.9  | 113.2  |
| SLC35D2 | 203.5  | 215.2  | 231.4 | 189.5  | 168.3  | 173.2 | 170    | 203.2  |
| SLC35D3 | 120.9  | 113.2  | 120.6 | 111.6  | 109.2  | 101.2 | 110.3  | 111.6  |
| SLC35E1 | 783.4  | 531    | 681   | 700.7  | 740    | 420.1 | 697.4  | 727.1  |
| SLC35E2 | 126.9  | 132.2  | 123.5 | 156    | 133.6  | 107.3 | 144.8  | 130.8  |
| SLC35E3 | 356.6  | 315.2  | 326.9 | 373    | 291.2  | 225.6 | 252.1  | 211.8  |
| SLC35E4 | 118.4  | 114.9  | 125.3 | 134.8  | 105.2  | 105.2 | 117.3  | 115.6  |
| SLC35F1 | 115.5  | 115.5  | 117.3 | 126.3  | 107.4  | 98.6  | 117.6  | 111.4  |
| SLC35F2 | 153.4  | 150.4  | 163.3 | 159.7  | 136.9  | 128.1 | 149.5  | 149.6  |
| SLC35F3 | 112    | 123.5  | 114.6 | 118.9  | 106.9  | 101.2 | 116.7  | 109.6  |
| SLC35F3 | 118.4  | 113.3  | 123.4 | 116.4  | 117.5  | 102.4 | 118.9  | 114.3  |
| SLC35F4 | 119.4  | 112.4  | 121.2 | 117.1  | 114.8  | 98.2  | 116.7  | 125.8  |
| SLC35F5 | 140    | 134.9  | 138.9 | 145.7  | 122.1  | 122.1 | 142    | 150.3  |
| SLC36A1 | 130.2  | 123.2  | 137.9 | 127.4  | 115.5  | 121   | 120.8  | 120.8  |
| SLC36A2 | 110.3  | 112.7  | 104.9 | 107.6  | 106.8  | 94    | 110.6  | 117.1  |
| SLC36A3 | 114.7  | 116.6  | 112.7 | 118    | 107.6  | 105.5 | 119.9  | 116.2  |
| SLC36A4 | 310.4  | 297.6  | 299.4 | 352.9  | 293.7  | 232.5 | 380.4  | 337.2  |
| SLC37A1 | 133.3  | 126.4  | 147.3 | 138.5  | 122.5  | 123.2 | 137.8  | 139.5  |
| SLC37A2 | 118.7  | 112.8  | 118.5 | 119.3  | 106.6  | 97.1  | 117.7  | 115.2  |
| SLC37A3 | 196    | 188.3  | 218.6 | 187.4  | 179.2  | 151.4 | 207.8  | 198.2  |
| SLC37A3 | 121    | 121    | 117.4 | 120.8  | 111.5  | 108.2 | 122.4  | 116.7  |
| SLC37A4 | 254.4  | 262.9  | 261.9 | 227.2  | 198.4  | 174.9 | 227.9  | 232.6  |
| SLC38A1 | 122.5  | 125.4  | 118.6 | 126.1  | 115.8  | 104.4 | 134.5  | 127.2  |
| SLC38A1 | 828.2  | 997.7  | 653.5 | 1117.6 | 1527.2 | 401.6 | 1419.4 | 1836.8 |
| SLC38A2 | 1381.5 | 1218.8 | 574.7 | 1452.3 | 1011.6 | 717.3 | 1967.4 | 1853.4 |
| SLC38A3 | 114.7  | 122.3  | 119   | 106.7  | 99.9   | 95.8  | 117.7  | 127.1  |

|          |        |        |        |        |        |        |        |        |
|----------|--------|--------|--------|--------|--------|--------|--------|--------|
| SLC38A5  | 132.5  | 137.9  | 148.8  | 130.2  | 124    | 119.9  | 132.2  | 138.8  |
| SLC38A6  | 210.4  | 137.5  | 214.1  | 238    | 130.6  | 245.4  | 248.7  | 164.1  |
| SLC39A1  | 487.9  | 467.8  | 474.4  | 498.3  | 277.7  | 338.9  | 378.5  | 345.4  |
| SLC39A10 | 145    | 173.4  | 136.3  | 161    | 168.6  | 128.9  | 164.7  | 166.5  |
| SLC39A11 | 136.8  | 130.6  | 198.5  | 144.9  | 120.9  | 139.1  | 135.7  | 120.2  |
| SLC39A12 | 116.1  | 112.6  | 117.5  | 112    | 109.4  | 101.7  | 126.7  | 112.4  |
| SLC39A13 | 127.3  | 130.6  | 125.8  | 136.1  | 121.2  | 117.9  | 128.5  | 137    |
| SLC39A14 | 132.8  | 137.2  | 124.8  | 141.6  | 130.9  | 118.3  | 162.9  | 149.2  |
| SLC39A2  | 122.1  | 124.2  | 121    | 129.2  | 108.4  | 102.2  | 123.3  | 114.4  |
| SLC39A3  | 134.3  | 129.7  | 145.4  | 143.1  | 130.8  | 105.4  | 143.6  | 129.9  |
| SLC39A3  | 342.7  | 376.6  | 418.3  | 364.8  | 274    | 278.9  | 259.9  | 225.2  |
| SLC39A3  | 127.4  | 146.1  | 132.7  | 133    | 116.9  | 123.3  | 136.5  | 135.8  |
| SLC39A4  | 113.2  | 108.6  | 104.1  | 112.9  | 107.8  | 94.2   | 111.9  | 110.1  |
| SLC39A4  | 113.9  | 123.4  | 117.7  | 133.9  | 126.2  | 119.9  | 132.3  | 116.5  |
| SLC39A5  | 123.9  | 115.4  | 122.2  | 117.1  | 111.2  | 99.4   | 115.9  | 113.5  |
| SLC39A6  | 148.9  | 172.2  | 154    | 158.5  | 176.6  | 132.1  | 173.5  | 207.7  |
| SLC39A7  | 118    | 126.6  | 138.2  | 136.4  | 114.1  | 120.5  | 136.7  | 156.7  |
| SLC39A7  | 120.4  | 135.7  | 123.7  | 138.8  | 116.7  | 114.2  | 126.5  | 134.5  |
| SLC39A8  | 166.8  | 122.2  | 178.3  | 158    | 116.1  | 172.8  | 171.7  | 123.1  |
| SLC39A9  | 121.5  | 127.4  | 125.9  | 126    | 123.4  | 116.1  | 124.5  | 112.9  |
| SLC3A1   | 113.1  | 117.4  | 117.3  | 111.2  | 105.1  | 99     | 114.9  | 109.3  |
| SLC3A2   | 214.8  | 258.4  | 203.3  | 305.5  | 283.9  | 328.6  | 350.7  | 488    |
| SLC3A2   | 131    | 140.2  | 132.8  | 141.1  | 120.6  | 125.1  | 137.5  | 149.7  |
| SLC3A2   | 358.5  | 371.8  | 261.1  | 414.9  | 309.1  | 474.8  | 859.1  | 808    |
| SLC40A1  | 308.6  | 276.7  | 298    | 262.6  | 203.9  | 239.9  | 259.3  | 195.1  |
| SLC41A1  | 151.6  | 152    | 141.1  | 144.7  | 138.8  | 121.4  | 164.2  | 172.4  |
| SLC41A2  | 118.3  | 135.6  | 109.7  | 133.8  | 120.2  | 109    | 149.9  | 114.4  |
| SLC41A3  | 380.5  | 417.2  | 375    | 400.1  | 331.7  | 271.3  | 440.5  | 476    |
| SLC41A3  | 113.2  | 114.1  | 118    | 112.6  | 104.9  | 93.9   | 118.5  | 117.8  |
| SLC41A3  | 195    | 195.1  | 202.8  | 251.9  | 194.7  | 164.5  | 255.3  | 215.8  |
| SLC43A1  | 102.4  | 105.3  | 122.8  | 124.7  | 109.8  | 99.4   | 120.5  | 104.7  |
| SLC43A2  | 236.4  | 152.1  | 347.1  | 247.4  | 129.5  | 276.3  | 193.8  | 145.2  |
| SLC43A3  | 242.2  | 197.2  | 180.8  | 181.4  | 147.7  | 133.5  | 237    | 154.9  |
| SLC43A3  | 115.7  | 119.9  | 120.7  | 134.6  | 102    | 100.3  | 115.6  | 122    |
| SLC43A3  | 133    | 121.1  | 128.6  | 140.8  | 120.5  | 108.2  | 133.1  | 121.7  |
| SLC43A3  | 111.7  | 118    | 120.4  | 129.4  | 110.5  | 104.3  | 121.8  | 117.3  |
| SLC44A1  | 1125   | 1000.4 | 568    | 1961.5 | 1143.8 | 539.5  | 1886.5 | 635.5  |
| SLC44A1  | 671.7  | 520.2  | 254.9  | 1032.3 | 410    | 414.9  | 835.3  | 304.4  |
| SLC44A2  | 864.2  | 1020.5 | 926.9  | 865.3  | 710.9  | 637.4  | 923.3  | 1112.7 |
| SLC44A3  | 119.3  | 119.9  | 121.6  | 125.5  | 114.8  | 104.7  | 127.6  | 117.1  |
| SLC44A4  | 110.6  | 115.9  | 119.4  | 121.6  | 117.4  | 98.5   | 120    | 111.5  |
| SLC44A4  | 4178.9 | 2891.5 | 2961.8 | 3021.1 | 3727.4 | 1593.9 | 3633.3 | 2737.1 |
| SLC44A4  | 112.7  | 112.1  | 109.4  | 106.6  | 107.8  | 97.3   | 119.3  | 114.3  |
| SLC44A5  | 111.1  | 116.8  | 118    | 118    | 114.2  | 102    | 112.4  | 111.8  |
| SLC45A1  | 120.6  | 123    | 127.1  | 133.5  | 124.4  | 111.6  | 132.9  | 134.7  |
| SLC45A2  | 123    | 124.9  | 133.4  | 134.9  | 116.1  | 104.7  | 119.2  | 124.9  |
| SLC45A2  | 113.3  | 114    | 112.5  | 112.3  | 109.3  | 97.8   | 114.1  | 111.2  |
| SLC45A2  | 114.6  | 125.3  | 129.9  | 123.6  | 118.2  | 104.1  | 130    | 118.3  |
| SLC45A3  | 120.9  | 120.5  | 131.1  | 124.9  | 114.3  | 112    | 122.3  | 135.9  |
| SLC45A4  | 159.7  | 167.8  | 158.1  | 163.3  | 137.4  | 134.5  | 163.4  | 157.2  |
| SLC4A1   | 124    | 124.3  | 129.7  | 126    | 108.8  | 108.8  | 119.1  | 119.7  |

|          |       |       |       |       |       |       |       |       |
|----------|-------|-------|-------|-------|-------|-------|-------|-------|
| SLC4A10  | 115.2 | 121.4 | 124.3 | 120.8 | 112   | 101.2 | 116.7 | 115.1 |
| SLC4A11  | 121.2 | 124.3 | 120   | 126.3 | 110.7 | 104.8 | 128.2 | 121.1 |
| SLC4A1AP | 134.2 | 120.6 | 143.8 | 136.2 | 127.6 | 114.4 | 137.6 | 128.2 |
| SLC4A2   | 143.8 | 161.3 | 128   | 155.5 | 130   | 115.2 | 176.3 | 143.8 |
| SLC4A3   | 119.6 | 124.4 | 121.9 | 132.5 | 110.5 | 104.8 | 112.9 | 121   |
| SLC4A3   | 124.5 | 120.4 | 133   | 119.8 | 120.9 | 111.8 | 125   | 127.7 |
| SLC4A4   | 114.9 | 118.6 | 123.6 | 129.3 | 108.1 | 100.9 | 122.9 | 116.3 |
| SLC4A5   | 451.5 | 367.8 | 407.6 | 438.2 | 391.1 | 194.2 | 417.7 | 415.9 |
| SLC4A5   | 112.1 | 107.3 | 126.2 | 118.6 | 111.1 | 98.1  | 116.9 | 114.1 |
| SLC4A5   | 116.1 | 123.1 | 118.8 | 111.8 | 109.2 | 99.7  | 120.8 | 111.8 |
| SLC4A7   | 592.2 | 478.8 | 613.9 | 617.2 | 416.8 | 454.6 | 558   | 488.5 |
| SLC4A8   | 110.7 | 114.7 | 120.8 | 132.4 | 109.6 | 101.7 | 123.9 | 116.3 |
| SLC4A8   | 121.3 | 104.5 | 109.3 | 112.2 | 108.9 | 92.2  | 127   | 113.1 |
| SLC4A9   | 121.3 | 109.2 | 110   | 120.3 | 105.1 | 97.3  | 108.8 | 109.7 |
| SLC5A1   | 109.5 | 106.5 | 114.1 | 115.5 | 102.7 | 96.1  | 125   | 111.1 |
| SLC5A10  | 115.3 | 112.1 | 111.3 | 113.2 | 103.7 | 91.4  | 114.1 | 113.8 |
| SLC5A10  | 109.9 | 118.5 | 112.7 | 114.6 | 108.4 | 95.5  | 115.9 | 111.1 |
| SLC5A10  | 107.1 | 113.1 | 110.8 | 118.9 | 110.1 | 94    | 108.6 | 114.3 |
| SLC5A10  | 113.1 | 130.4 | 129   | 136.4 | 105.5 | 107.4 | 132.1 | 123   |
| SLC5A11  | 128   | 119.3 | 115.4 | 121.3 | 111.1 | 109.5 | 117.2 | 119.2 |
| SLC5A12  | 118.5 | 109.5 | 106.6 | 112.5 | 103.6 | 96.2  | 120.2 | 107.5 |
| SLC5A12  | 117.7 | 120   | 111.9 | 120.3 | 112.2 | 94    | 117   | 109.8 |
| SLC5A12  | 113.4 | 110.2 | 115.3 | 109.3 | 110.4 | 97.3  | 109.6 | 108.4 |
| SLC5A2   | 109.6 | 103.8 | 102.4 | 115.8 | 104.8 | 97.6  | 115.5 | 101.4 |
| SLC5A3   | 242.2 | 192   | 118.3 | 311.6 | 196.6 | 114.5 | 355.6 | 314.8 |
| SLC5A4   | 111.5 | 111.7 | 116.7 | 117.7 | 106.5 | 99.9  | 114.9 | 112.8 |
| SLC5A5   | 110.7 | 118.3 | 112.7 | 124.8 | 105.7 | 101.7 | 121.7 | 123.2 |
| SLC5A6   | 230.9 | 247.8 | 227.4 | 280.1 | 191.5 | 189   | 269.7 | 242   |
| SLC5A7   | 114.4 | 114.6 | 111.6 | 119.4 | 105.7 | 94.1  | 108.2 | 110.1 |
| SLC5A8   | 205.2 | 182.3 | 184.3 | 185.9 | 176.3 | 133.9 | 191.3 | 200.2 |
| SLC5A9   | 118.3 | 122.6 | 109.6 | 124.7 | 106.6 | 98.5  | 113.7 | 112.5 |
| SLC6A1   | 111.5 | 111.1 | 119   | 116.5 | 110.9 | 93.5  | 120.4 | 120.1 |
| SLC6A11  | 114   | 116.9 | 113.3 | 118.2 | 109   | 98.5  | 128.6 | 122.6 |
| SLC6A12  | 140.3 | 138.9 | 142.2 | 131.4 | 120.7 | 109.5 | 133.6 | 131.2 |
| SLC6A13  | 120   | 132.5 | 126.3 | 122.1 | 119.7 | 100.9 | 135.6 | 128.2 |
| SLC6A14  | 109.4 | 112.7 | 110.4 | 120.1 | 103.6 | 90.3  | 114.9 | 110   |
| SLC6A15  | 122.9 | 121   | 131.7 | 114.1 | 111.4 | 99.3  | 116.7 | 127.5 |
| SLC6A15  | 116.6 | 112.8 | 116.6 | 121.1 | 113.6 | 97    | 114.2 | 109.6 |
| SLC6A15  | 114.2 | 109.2 | 110.7 | 113.1 | 110.6 | 95.8  | 116.7 | 117.3 |
| SLC6A16  | 182.3 | 161.1 | 178.5 | 180.4 | 177.2 | 122.1 | 171.5 | 166   |
| SLC6A17  | 111.5 | 113.2 | 113.2 | 127.2 | 116   | 100.8 | 124.4 | 108.6 |
| SLC6A18  | 110.6 | 112.5 | 120.3 | 113   | 114.3 | 101.5 | 123.6 | 110.6 |
| SLC6A19  | 120.8 | 108.8 | 128.9 | 112.4 | 114.2 | 95.4  | 105.3 | 120.5 |
| SLC6A2   | 109.1 | 113.8 | 117.2 | 123.5 | 101.1 | 93.5  | 114.7 | 113.4 |
| SLC6A20  | 109.7 | 120.6 | 120.3 | 127.2 | 112.6 | 101.5 | 118.3 | 119.4 |
| SLC6A20  | 109   | 117.6 | 124.7 | 124.5 | 109.3 | 99.5  | 118.9 | 113.7 |
| SLC6A20  | 109.8 | 115.7 | 117.8 | 118.3 | 105.3 | 98.6  | 121.3 | 113.3 |
| SLC6A3   | 114.6 | 100.3 | 112.6 | 122   | 107.7 | 101   | 120.3 | 118.7 |
| SLC6A4   | 112.6 | 113.9 | 120   | 115.4 | 104.6 | 97.6  | 120.8 | 115.9 |
| SLC6A5   | 110.2 | 105.9 | 106.4 | 116.1 | 110.6 | 96    | 110.9 | 98.3  |
| SLC6A6   | 140.2 | 152.8 | 127.5 | 184.7 | 131.5 | 141.5 | 217.8 | 139.4 |

|          |       |       |       |       |       |       |       |       |
|----------|-------|-------|-------|-------|-------|-------|-------|-------|
| SLC6A7   | 119.3 | 110.7 | 131.8 | 117.6 | 123.4 | 105.1 | 123.7 | 115.8 |
| SLC6A8   | 125   | 121.4 | 118.4 | 132   | 107.5 | 109.1 | 133.6 | 128.1 |
| SLC6A9   | 114.9 | 116.7 | 112.2 | 122.7 | 113.1 | 99.8  | 124.6 | 112.8 |
| SLC6A9   | 111.5 | 120.4 | 119.8 | 118.4 | 108.5 | 106.4 | 118.4 | 111.8 |
| SLC6A9   | 122   | 113.2 | 115   | 126.7 | 107.5 | 105.5 | 116.3 | 124.7 |
| SLC7A1   | 249.4 | 270.9 | 190.7 | 282.6 | 218.1 | 235   | 287.9 | 364.8 |
| SLC7A10  | 108.1 | 112.8 | 114.1 | 119.2 | 112.9 | 91.4  | 123.1 | 115.9 |
| SLC7A11  | 237.2 | 266.9 | 130   | 460.9 | 251.3 | 392   | 433.8 | 200.3 |
| SLC7A13  | 113.2 | 118   | 112.6 | 120.7 | 103.7 | 101.9 | 122.5 | 115.6 |
| SLC7A14  | 117.3 | 114.1 | 129.1 | 120.5 | 110.5 | 107.5 | 122   | 120.4 |
| SLC7A2   | 124.7 | 126.6 | 123.1 | 120.7 | 112.5 | 98    | 119.2 | 119.5 |
| SLC7A2   | 103.8 | 110.2 | 106.3 | 116.7 | 113.4 | 101.1 | 112.8 | 109.7 |
| SLC7A2   | 99.2  | 109.9 | 111.9 | 115.1 | 105.5 | 93.8  | 110.2 | 111.2 |
| SLC7A3   | 115.1 | 121.2 | 123.1 | 116.5 | 104   | 99.2  | 129.8 | 122.6 |
| SLC7A3   | 113.9 | 123.2 | 118.1 | 119.5 | 108   | 98.4  | 123   | 114   |
| SLC7A4   | 111.5 | 108.8 | 109.4 | 120.8 | 99.8  | 99.7  | 111.5 | 116.1 |
| SLC7A5   | 249.4 | 238.1 | 224.2 | 299.8 | 193.4 | 337.2 | 446.9 | 546.8 |
| SLC7A6   | 218   | 282.9 | 264.7 | 289.8 | 222.4 | 205   | 202   | 249.1 |
| SLC7A6   | 223.8 | 257.5 | 222.7 | 191   | 243.4 | 169.7 | 181.7 | 225.5 |
| SLC7A6OS | 157.6 | 132.2 | 149.8 | 167.6 | 132.7 | 110.3 | 135.2 | 156.4 |
| SLC7A7   | 247.1 | 128.2 | 954.3 | 162.8 | 121.8 | 159.8 | 132.7 | 117.6 |
| SLC7A8   | 110.8 | 118.8 | 119.7 | 134.1 | 121.2 | 111   | 112   | 120.7 |
| SLC7A8   | 116.5 | 111   | 115.1 | 124.1 | 111.7 | 104.4 | 108.7 | 113.4 |
| SLC7A8   | 116.6 | 135.2 | 165.6 | 129.1 | 112.6 | 184.2 | 130.4 | 119.5 |
| SLC7A9   | 115.8 | 133   | 125.6 | 127.9 | 122.8 | 107.9 | 133.9 | 121.7 |
| SLC8A1   | 112.6 | 109.2 | 118.4 | 116.5 | 123.8 | 98.4  | 117.8 | 119.8 |
| SLC8A2   | 112.6 | 115.8 | 117.8 | 135.3 | 104.9 | 97.9  | 119.5 | 110.4 |
| SLC8A3   | 105.5 | 119.8 | 114.3 | 121.1 | 104.7 | 100   | 114.3 | 108.3 |
| SLC8A3   | 122.2 | 115.4 | 116.2 | 120.9 | 109.2 | 101.9 | 120.1 | 113.2 |
| SLC8A3   | 111.6 | 119.8 | 117.6 | 118.8 | 106.8 | 103.2 | 125   | 112.7 |
| SLC9A1   | 388.1 | 408.4 | 332.2 | 370.7 | 281.5 | 206.3 | 339.3 | 272.9 |
| SLC9A10  | 113.5 | 116   | 115.1 | 112.5 | 111.5 | 96.3  | 119.2 | 117.5 |
| SLC9A11  | 116.3 | 109.7 | 112.6 | 121.5 | 101.6 | 101.3 | 118.1 | 107.2 |
| SLC9A2   | 112.3 | 124.7 | 125.2 | 134.6 | 117.6 | 107.6 | 120.5 | 115.6 |
| SLC9A3   | 124.7 | 124.6 | 124.2 | 128.2 | 118.4 | 105.6 | 138.4 | 124.9 |
| SLC9A3R1 | 721   | 847.8 | 755.8 | 745.1 | 576.2 | 487.7 | 587.2 | 565   |
| SLC9A3R2 | 127.3 | 112.5 | 121   | 118.7 | 105.7 | 99.2  | 114.1 | 106.1 |
| SLC9A4   | 136.6 | 142.5 | 165.1 | 158.9 | 118.1 | 114.4 | 128.2 | 145.7 |
| SLC9A5   | 111.2 | 119.5 | 116.4 | 117.5 | 103.9 | 98.5  | 120.4 | 122   |
| SLC9A6   | 123   | 108.4 | 129.1 | 118.2 | 119.3 | 97.4  | 115.2 | 120.3 |
| SLC9A6   | 106.5 | 111.6 | 118   | 113.6 | 107.8 | 99.6  | 121.7 | 114.1 |
| SLC9A6   | 272.8 | 307.6 | 250.2 | 285.3 | 274.8 | 286.3 | 263.7 | 262.5 |
| SLC9A7   | 120   | 120.8 | 112.8 | 125   | 107   | 99.7  | 129.3 | 124.5 |
| SLC9A8   | 156.7 | 155.4 | 155   | 156.7 | 148.5 | 120.3 | 168.8 | 173.5 |
| SLC9A9   | 128.1 | 127.6 | 161.8 | 139.6 | 121.7 | 120.8 | 144.2 | 124   |
| SLCO1A2  | 108.5 | 110.7 | 112.9 | 107.1 | 102.5 | 92.9  | 112.8 | 115.9 |
| SLCO1A2  | 110.7 | 113.6 | 114.3 | 123.6 | 106.4 | 100.1 | 121.4 | 124.6 |
| SLCO1A2  | 112.1 | 111.6 | 108.1 | 117.1 | 106.8 | 94.6  | 110.6 | 117.9 |
| SLCO1A2  | 110   | 127.5 | 128.1 | 113.8 | 106   | 94.9  | 122.2 | 127   |
| SLCO1A2  | 113.7 | 117.9 | 117   | 122.5 | 116.3 | 106.6 | 120.2 | 117.9 |
| SLCO1B1  | 114.6 | 116.5 | 114.3 | 116.7 | 104.1 | 98    | 111.1 | 106.4 |

|         |       |       |       |        |       |       |       |        |
|---------|-------|-------|-------|--------|-------|-------|-------|--------|
| SLCO1B3 | 109.1 | 115.8 | 106.6 | 115.2  | 106.7 | 99.7  | 121   | 107.1  |
| SLCO1C1 | 106.7 | 113.6 | 118.7 | 121.2  | 113.3 | 98.5  | 109.3 | 105.2  |
| SLCO2A1 | 120.2 | 119.4 | 113.8 | 120    | 110.9 | 108.1 | 123.1 | 111.3  |
| SLCO2B1 | 132.2 | 121.3 | 410.2 | 139.4  | 111   | 143.1 | 139.2 | 120.5  |
| SLCO3A1 | 130.8 | 137.2 | 133.3 | 129.9  | 130   | 108.7 | 136.6 | 129.3  |
| SLCO3A1 | 123.9 | 118.7 | 121.1 | 131    | 115.8 | 134.2 | 147.1 | 132.1  |
| SLCO4A1 | 132.6 | 149.4 | 136.4 | 166.4  | 141.9 | 128.2 | 181.4 | 171.8  |
| SLCO4C1 | 120.8 | 116.7 | 124.5 | 134.6  | 114.9 | 102.4 | 120.9 | 116.4  |
| SLCO5A1 | 109   | 113.4 | 116.8 | 121.5  | 105.2 | 104.8 | 118.8 | 117.7  |
| SLCO6A1 | 111   | 120.1 | 122.7 | 117    | 111.1 | 97.7  | 119   | 114.7  |
| SLD5    | 129.7 | 119.4 | 131.1 | 133.7  | 116.2 | 102.5 | 126.2 | 121.7  |
| SLFN11  | 204.9 | 167.4 | 206.7 | 194.1  | 159.7 | 136   | 198.1 | 186.7  |
| SLFN13  | 160.2 | 133.5 | 158.8 | 151.6  | 141.2 | 124   | 137.2 | 119.4  |
| SLIC1   | 119.6 | 130.7 | 125.8 | 123.4  | 111.6 | 108.1 | 123.4 | 123.6  |
| SLIC1   | 123.1 | 110.6 | 130.8 | 114.5  | 126.9 | 97.7  | 125.8 | 126.5  |
| SLIT1   | 112.7 | 117.1 | 114.6 | 113.5  | 104.8 | 97.1  | 122.8 | 118.7  |
| SLIT2   | 114.3 | 112.2 | 122.4 | 111.8  | 108.9 | 94.4  | 113   | 110    |
| SLIT3   | 105.6 | 110.7 | 109.7 | 111.3  | 106.2 | 94    | 111.5 | 120.2  |
| SLITL2  | 120.4 | 104.3 | 116.1 | 118.3  | 115.7 | 108.6 | 136.9 | 127.5  |
| SLITRK1 | 116.1 | 112.6 | 123.8 | 124    | 110.9 | 101   | 123   | 109.7  |
| SLITRK2 | 115.2 | 119.6 | 122.4 | 114.1  | 114   | 98.6  | 111.9 | 116.6  |
| SLITRK3 | 118.8 | 116.5 | 122.2 | 120    | 111.3 | 101.8 | 115.5 | 118.5  |
| SLITRK4 | 121.9 | 117.5 | 121.8 | 121.1  | 112.5 | 96.8  | 107.9 | 114.9  |
| SLITRK5 | 108   | 117.6 | 115.9 | 118    | 105.1 | 99.9  | 118.2 | 103.8  |
| SLITRK6 | 116.5 | 119.5 | 119.4 | 118.3  | 106.3 | 104.1 | 121.5 | 111.5  |
| SLK     | 277   | 256.1 | 234.3 | 262.7  | 238.2 | 212.7 | 212.7 | 260.5  |
| SLMAP   | 429.6 | 430.8 | 364   | 394.2  | 414.2 | 282.6 | 522.5 | 615.6  |
| SLMO1   | 121.8 | 118.1 | 127.6 | 112.7  | 108.5 | 106.1 | 115.1 | 120.3  |
| SLN     | 120.3 | 115.1 | 122.7 | 112.5  | 112.1 | 96.5  | 119.4 | 117.6  |
| SLPI    | 118.4 | 112.6 | 121.3 | 122.3  | 115   | 98.6  | 111.5 | 123.1  |
| SLTM    | 867.8 | 774.4 | 717.4 | 1100.6 | 977.5 | 637.2 | 922.4 | 1338.4 |
| SLTM    | 505.2 | 415.4 | 436.1 | 540    | 389.2 | 363.3 | 425.5 | 761.2  |
| SLTM    | 193.6 | 185.6 | 198.3 | 199.9  | 199.5 | 143.7 | 231.6 | 282.5  |
| SLU7    | 297.2 | 277.3 | 308   | 307.7  | 248.2 | 369.2 | 416.1 | 306.4  |
| SLURP1  | 110.2 | 121.8 | 114.4 | 120.6  | 104.6 | 101.4 | 126.2 | 112.8  |
| SMA4    | 149.9 | 200.3 | 152.1 | 151    | 157.3 | 123   | 134.3 | 154.7  |
| SMA5    | 112.4 | 111.4 | 113.5 | 119.9  | 113.8 | 93.8  | 119.1 | 108.9  |
| SMAD1   | 119.2 | 114.5 | 108.1 | 135.5  | 107.6 | 98.2  | 111.9 | 109.7  |
| SMAD1   | 112.3 | 115.3 | 125.1 | 112.6  | 109.2 | 106.8 | 121.9 | 114    |
| SMAD2   | 140.9 | 138.2 | 130.5 | 154.1  | 154.3 | 137.1 | 167.6 | 143.8  |
| SMAD2   | 116.8 | 129   | 123.4 | 122.3  | 124   | 107   | 126.6 | 109.7  |
| SMAD3   | 440.9 | 432.1 | 434.9 | 481.3  | 413.6 | 321.4 | 504.6 | 513.9  |
| SMAD4   | 414.3 | 594   | 441   | 514.9  | 490.1 | 413.7 | 554.4 | 545.3  |
| SMAD5   | 118.7 | 118   | 118.9 | 123.5  | 104.3 | 94.9  | 122   | 119.8  |
| SMAD5   | 117.6 | 121.8 | 118.4 | 127    | 116.9 | 105.3 | 123.3 | 118    |
| SMAD5   | 253.9 | 275.7 | 289.7 | 276.7  | 219.6 | 168.8 | 199.7 | 213.6  |
| SMAD6   | 108.2 | 121   | 139.9 | 114.9  | 111.6 | 94.5  | 120   | 118.1  |
| SMAD7   | 151.9 | 156.8 | 257   | 166.8  | 138.2 | 148.4 | 188.6 | 166.1  |
| SMAD9   | 119   | 116.9 | 125.8 | 115.3  | 113   | 101.6 | 121.3 | 122.3  |
| SMAF1   | 116.3 | 115.4 | 116.7 | 124.1  | 105.1 | 95.2  | 130.6 | 122.9  |
| SMAP    | 136.8 | 135.1 | 120   | 139.4  | 111.5 | 113.3 | 136.8 | 125    |

|          |        |        |        |        |        |        |        |        |
|----------|--------|--------|--------|--------|--------|--------|--------|--------|
| SMAP1    | 340.4  | 371.3  | 342.2  | 379.8  | 318.4  | 326.3  | 389.7  | 368.1  |
| SMAP1    | 125.1  | 137.4  | 129.1  | 171.9  | 115.2  | 117.9  | 130.8  | 136.8  |
| SMAP1L   | 1837.7 | 2360.8 | 1834.3 | 2322.1 | 1702.5 | 1529.8 | 1835.9 | 2032.8 |
| SMARCA1  | 108.9  | 109.4  | 117.4  | 121.5  | 104.9  | 101.1  | 119.3  | 119.6  |
| SMARCA2  | 114.3  | 109.5  | 125.9  | 115.5  | 113.7  | 99.2   | 125.4  | 121.1  |
| SMARCA2  | 990.1  | 1050.8 | 885.3  | 947.4  | 749    | 858.5  | 720    | 713.5  |
| SMARCA3  | 126.2  | 137.6  | 126.1  | 128.5  | 119.6  | 108.3  | 119.2  | 125.1  |
| SMARCA3  | 242.1  | 248    | 230.4  | 296.3  | 244.6  | 156.9  | 205.5  | 195.4  |
| SMARCA4  | 374.4  | 451.9  | 312.1  | 441.4  | 385.1  | 252.2  | 463.3  | 574.1  |
| SMARCA5  | 168.4  | 144.6  | 166.5  | 181.1  | 147.9  | 140.9  | 183.5  | 147.3  |
| SMARCAD1 | 158.3  | 168.4  | 178.5  | 151.8  | 143.3  | 130.2  | 143.3  | 140.1  |
| SMARCAL1 | 264.6  | 255.7  | 201    | 234.5  | 217.8  | 192.1  | 227.4  | 217.9  |
| SMARCB1  | 182.2  | 170.3  | 181.3  | 175.1  | 135.5  | 137.2  | 190    | 160.6  |
| SMARCB1  | 211    | 219.2  | 262.6  | 278.1  | 184.9  | 222.4  | 194.1  | 177.2  |
| SMARCC1  | 451.3  | 502.8  | 367.1  | 442.4  | 474.4  | 337    | 477.1  | 537.9  |
| SMARCC2  | 118.6  | 105.4  | 122    | 118.3  | 108.2  | 104.5  | 115.9  | 118.3  |
| SMARCC2  | 595.9  | 585.1  | 499.4  | 617.2  | 528    | 494.8  | 754.8  | 566.7  |
| SMARCC2  | 152.5  | 168    | 145.4  | 172.4  | 149.9  | 130.8  | 173.6  | 184.4  |
| SMARCD1  | 111.8  | 118.9  | 122.8  | 118.5  | 108.9  | 105    | 118    | 112.5  |
| SMARCD1  | 552.4  | 580.7  | 434.3  | 585    | 437.2  | 424.7  | 644.7  | 577.3  |
| SMARCD2  | 219.7  | 237.9  | 216.1  | 254.6  | 234.2  | 200.5  | 261.6  | 231    |
| SMARCD3  | 116    | 126    | 123.1  | 123.2  | 109.3  | 108.7  | 115    | 114.2  |
| SMARCD3  | 113.9  | 110.4  | 122.4  | 129.6  | 101.4  | 100.3  | 123.7  | 107.4  |
| SMARCD3  | 131.3  | 137.1  | 159.9  | 131.8  | 147.2  | 159.2  | 118.4  | 149.4  |
| SMARCE1  | 200.1  | 203.3  | 193.1  | 188.2  | 178.9  | 161.5  | 196.5  | 214    |
| SMBP     | 178.8  | 194    | 202.6  | 245.7  | 176.9  | 194.9  | 240.6  | 234.7  |
| SMC1L1   | 143.4  | 168.9  | 143.8  | 154.3  | 138    | 118    | 139    | 144.8  |
| SMC1L2   | 114.9  | 116.4  | 116.7  | 123.4  | 115    | 99.8   | 126.7  | 123.4  |
| SMC2     | 115.6  | 112.6  | 125.2  | 121.4  | 103    | 103.9  | 126.7  | 113.7  |
| SMC2     | 183.5  | 197    | 189.8  | 177.7  | 166    | 138    | 165.2  | 154.9  |
| SMC2L1   | 135.6  | 142    | 146.2  | 146.8  | 123.2  | 120.6  | 131.8  | 125    |
| SMC3     | 122.2  | 128.7  | 136.8  | 129.5  | 124.7  | 117.3  | 125.5  | 122.5  |
| SMC4     | 297.8  | 346.3  | 275    | 308.6  | 309.8  | 233.1  | 415.9  | 440.1  |
| SMC4     | 121.9  | 116.9  | 126.7  | 138.1  | 110.3  | 108.6  | 132.4  | 125.5  |
| SMC4L1   | 126.1  | 108    | 115    | 114.5  | 107.4  | 94.9   | 122.2  | 122.1  |
| SMC5L1   | 117.6  | 115.5  | 124    | 118.5  | 105.7  | 100.4  | 119.5  | 103.9  |
| SMC6L1   | 165.5  | 151    | 165.6  | 172.3  | 132.3  | 114.1  | 156.3  | 141.9  |
| SMCP     | 120.5  | 122.9  | 131.4  | 128.9  | 108.6  | 108.6  | 112.3  | 120.2  |
| SMCR7    | 117.5  | 122.8  | 114    | 123.2  | 101.2  | 97.8   | 117.1  | 121.1  |
| SMCR7    | 119.5  | 125.4  | 123.8  | 128.2  | 114.5  | 109.8  | 113.8  | 119.1  |
| SMCR8    | 114.5  | 114.5  | 112.7  | 123.8  | 105.1  | 92.8   | 114    | 109    |
| SMCX     | 118.3  | 121.3  | 114.6  | 120.4  | 109.9  | 109.4  | 123.1  | 122.4  |
| SMCY     | 265.4  | 291.7  | 277.1  | 275.9  | 234.9  | 211    | 248.1  | 234.6  |
| SMEK2    | 367.1  | 388.7  | 334.3  | 480.2  | 348.9  | 320.3  | 472.5  | 426.3  |
| SMEK3P   | 115.8  | 102.2  | 118.3  | 111.3  | 105.4  | 98.5   | 110.3  | 113.1  |
| SMG1     | 567.8  | 551.2  | 583.3  | 680.6  | 677    | 451    | 628.1  | 919    |
| SMG5     | 194.7  | 227.3  | 224.7  | 236.5  | 162.1  | 150.4  | 198.6  | 196.9  |
| SMG6     | 118.5  | 134.4  | 125.4  | 135.7  | 117.6  | 115.4  | 147.6  | 141.1  |
| SMG7     | 168.9  | 152.4  | 152.2  | 167.1  | 134.3  | 128.1  | 150.2  | 138.5  |
| SMG7     | 124.2  | 115.9  | 119.2  | 125.3  | 117.1  | 100.5  | 134.4  | 119.8  |
| SMG7     | 285.9  | 278    | 231    | 257.4  | 244.9  | 200.6  | 300.2  | 290    |

|         |       |       |       |       |       |       |       |       |
|---------|-------|-------|-------|-------|-------|-------|-------|-------|
| SMN1    | 120.3 | 118.5 | 128.2 | 119.2 | 107.8 | 101.9 | 119.5 | 122.3 |
| SMN2    | 135.9 | 133.4 | 131.5 | 134.4 | 119   | 113.3 | 144.3 | 125.1 |
| SMNDC1  | 440.9 | 450.4 | 466.3 | 520.4 | 351.5 | 385.6 | 617.6 | 493.1 |
| SMO     | 122.6 | 128.9 | 124.6 | 123.2 | 111.1 | 108.6 | 133.2 | 111.8 |
| SMOC1   | 105.2 | 103.3 | 112.1 | 119   | 115   | 108   | 115.1 | 117.7 |
| SMOC1   | 119.4 | 121.1 | 124.9 | 125.1 | 113.2 | 96.5  | 111.3 | 118.4 |
| SMOC2   | 115.4 | 115.2 | 119.3 | 109.2 | 105.2 | 99.9  | 116.8 | 109.3 |
| SMOX    | 115.9 | 127.9 | 129.3 | 133   | 120.3 | 110.3 | 143.3 | 123.6 |
| SMOX    | 115.3 | 115.8 | 117.4 | 131.5 | 109.7 | 101.4 | 122.9 | 112   |
| SMOX    | 115.5 | 116.4 | 111   | 110.6 | 111.5 | 108.1 | 111.9 | 116.8 |
| SMPD1   | 118.4 | 133.2 | 152.3 | 145.4 | 127.9 | 117.6 | 128.6 | 122.5 |
| SMPD1   | 131.7 | 136.8 | 123.7 | 129.9 | 126   | 119.2 | 131.1 | 136.3 |
| SMPD2   | 137   | 165.5 | 139.7 | 157.2 | 130.6 | 124.6 | 155.9 | 134.6 |
| SMPD3   | 119.2 | 124.9 | 128.3 | 124.7 | 105.4 | 107.1 | 115.7 | 122   |
| SMPDL3A | 123   | 107.7 | 119.6 | 115.7 | 106.4 | 100   | 109.1 | 110.7 |
| SMPDL3B | 120.7 | 114.7 | 118.4 | 115.5 | 106.6 | 100.5 | 113   | 114.8 |
| SMPDL3B | 114.9 | 107.7 | 121.1 | 115.5 | 103.7 | 101   | 118.3 | 117.6 |
| SMPDL3B | 121.1 | 114.2 | 118.9 | 117.1 | 115.4 | 104.6 | 124.5 | 118.6 |
| SMPX    | 105.7 | 109.6 | 111.6 | 112.8 | 109.6 | 92.3  | 108.8 | 113.9 |
| SMR3A   | 108.9 | 115.8 | 121.1 | 110.3 | 105.3 | 95.9  | 119.5 | 119.5 |
| SMR3B   | 125.5 | 115.3 | 111.8 | 121.8 | 110.3 | 101   | 119.9 | 116.9 |
| SMS     | 221   | 207.6 | 320.1 | 216.1 | 221.6 | 238.5 | 200.3 | 170   |
| SMTN    | 115.4 | 114.5 | 118.4 | 114.8 | 103.5 | 107.5 | 125.6 | 109   |
| SMTN    | 117.4 | 118.6 | 121.8 | 121.7 | 104   | 101.7 | 117.3 | 122.1 |
| SMTN    | 139   | 133.8 | 125.7 | 149.1 | 121.8 | 115.4 | 160.1 | 138   |
| SMU1    | 135   | 158.1 | 166.8 | 158.3 | 149.1 | 125.6 | 140.8 | 137   |
| SMUG1   | 231.2 | 201.4 | 231.1 | 225.9 | 193.1 | 178.9 | 180.1 | 164.3 |
| SMURF1  | 115.4 | 114.7 | 118.9 | 128.7 | 105.3 | 105.7 | 129.2 | 121.4 |
| SMURF1  | 112.6 | 113.1 | 116.5 | 122.1 | 105.4 | 99.2  | 109.6 | 113.4 |
| SMURF2  | 130   | 137.3 | 141.7 | 131.2 | 123   | 103.8 | 125.3 | 138.2 |
| SMYD1   | 111.3 | 115.9 | 109.6 | 111   | 105.9 | 99.8  | 110.4 | 105.9 |
| SMYD2   | 169.7 | 191.2 | 213.2 | 177.6 | 154.8 | 131.3 | 153.7 | 138.3 |
| SMYD3   | 155.1 | 164.1 | 158.9 | 155.2 | 140.5 | 142.5 | 148.1 | 144.5 |
| SMYD4   | 188.3 | 170.7 | 240.2 | 200.9 | 195.9 | 210.6 | 175.5 | 186.4 |
| SMYD5   | 123.1 | 127.3 | 135.8 | 121.2 | 117.5 | 99.5  | 125.5 | 122.1 |
| SN      | 115.6 | 113.8 | 111.6 | 124.8 | 110.8 | 103   | 106.7 | 111   |
| SNAG1   | 127.6 | 120.9 | 122.7 | 128   | 112.7 | 104.9 | 120.5 | 129.8 |
| SNAI1   | 103.5 | 115.8 | 102.3 | 112.5 | 98.3  | 90.9  | 116.3 | 111.7 |
| SNAI2   | 113.1 | 107.3 | 105.2 | 102.2 | 106.4 | 94.3  | 107.3 | 110.4 |
| SNAI3   | 141.9 | 159.2 | 132.7 | 138.8 | 125.7 | 111.7 | 145.7 | 131.6 |
| SNAP23  | 144.4 | 140.8 | 182.4 | 151.6 | 133.5 | 160.2 | 135.2 | 144.7 |
| SNAP23  | 216.6 | 245.7 | 231   | 256.4 | 187.1 | 200.4 | 210.8 | 222.8 |
| SNAP25  | 126   | 124   | 128.3 | 120.1 | 112.5 | 111   | 124.6 | 125.4 |
| SNAP25  | 117.6 | 119.5 | 120.6 | 123.9 | 104.1 | 97.5  | 121.7 | 112.2 |
| SNAP29  | 179.6 | 181.7 | 192   | 202.3 | 182.9 | 148.6 | 175.4 | 201.8 |
| SNAP91  | 106.9 | 109.6 | 117.2 | 116.2 | 98.8  | 96.9  | 117.8 | 112.3 |
| SNAPAP  | 145.7 | 126.5 | 129.2 | 142.6 | 124.5 | 120.6 | 135.7 | 130.2 |
| SNAPC1  | 193.9 | 182.9 | 208.7 | 205.1 | 244.3 | 142.3 | 210.4 | 227.1 |
| SNAPC2  | 198.8 | 217.5 | 225.8 | 243.6 | 160.2 | 188   | 221.4 | 213.3 |
| SNAPC3  | 106   | 110   | 125.6 | 123.6 | 108.9 | 101.1 | 121.7 | 115.6 |
| SNAPC4  | 463.4 | 546.1 | 391.5 | 449.6 | 376.2 | 288.4 | 473.8 | 428   |

|           |        |        |        |        |        |        |        |        |
|-----------|--------|--------|--------|--------|--------|--------|--------|--------|
| SNAPC5    | 143.6  | 136.7  | 146.9  | 140    | 122.4  | 119    | 141.4  | 136.1  |
| SNCA      | 254.5  | 168.9  | 237.1  | 229    | 148.3  | 169.1  | 307.4  | 160.1  |
| SNCA      | 121.3  | 119.7  | 131.9  | 138.5  | 111.2  | 102.6  | 151    | 116.9  |
| SNCAIP    | 109.8  | 110.4  | 110.7  | 116.3  | 103.3  | 94.8   | 119.1  | 113.5  |
| SNCB      | 112.3  | 106.1  | 118    | 111.8  | 104    | 99.6   | 102.6  | 108.9  |
| SNCB      | 110.9  | 111.1  | 112.5  | 117.9  | 108.9  | 97.5   | 118.5  | 100.9  |
| SNCG      | 105    | 118.8  | 122.2  | 124.3  | 111.3  | 94.2   | 126.2  | 118    |
| SND1      | 391.8  | 382.2  | 386.1  | 465.9  | 302.9  | 330.2  | 423.6  | 402.5  |
| SNF1LK    | 123.8  | 118.9  | 122.8  | 139.3  | 119.2  | 110.8  | 153.7  | 160.7  |
| SNF1LK2   | 124.7  | 119.8  | 112.8  | 127.8  | 112.1  | 99.4   | 125.4  | 117.6  |
| SNF8      | 152.1  | 175.3  | 164.9  | 163.8  | 156.1  | 136.4  | 161.1  | 154.6  |
| SNFT      | 136.2  | 130.1  | 128.3  | 128.8  | 129.4  | 110.3  | 131.9  | 158.3  |
| SNHG10    | 117.4  | 122.4  | 126.3  | 122.2  | 113    | 98.4   | 116.5  | 115.9  |
| SNHG3     | 107.8  | 114.9  | 124.3  | 126.7  | 113.9  | 104.5  | 124.8  | 109.8  |
| SNHG3-RCI | 112    | 124    | 120.2  | 116.7  | 105.5  | 99.3   | 103.3  | 110.9  |
| SNHG5     | 1325   | 2831.9 | 1332.9 | 1421.8 | 2209.5 | 969.5  | 1215.3 | 2499.9 |
| SNHG8     | 116.9  | 125.6  | 126    | 118.9  | 112    | 98.4   | 129.3  | 109.1  |
| SNIP      | 114.7  | 121.2  | 102.8  | 106.7  | 105.3  | 91.4   | 110.4  | 108.5  |
| SNIP1     | 214.9  | 231.2  | 201.5  | 224.5  | 213    | 171.9  | 265.4  | 265.3  |
| SNN       | 138.3  | 143    | 144.8  | 147.1  | 125.4  | 111.6  | 133.1  | 190.1  |
| SNORA32   | 174.9  | 153.6  | 177.9  | 173.6  | 129.8  | 134.8  | 157    | 148    |
| SNORD107  | 109.1  | 115.3  | 112    | 119.9  | 106.8  | 96.7   | 114    | 120.6  |
| SNORD116  | 118.5  | 116.2  | 111.7  | 124.2  | 112.5  | 100.7  | 118.4  | 113.7  |
| SNORD116  | 111.8  | 109.7  | 115.6  | 125.1  | 100.9  | 92.4   | 120    | 109.2  |
| SNORD36A  | 149.2  | 151.5  | 148.8  | 148.9  | 144.3  | 123.9  | 128.1  | 125.4  |
| SNORD36C  | 154.6  | 190.4  | 148.9  | 168.1  | 164.5  | 134.8  | 172    | 154.2  |
| SNORD48   | 132.5  | 139.6  | 119.2  | 127.5  | 128.8  | 106.6  | 123.6  | 133.6  |
| SNORD56   | 267.8  | 275.6  | 189.9  | 290.3  | 278.4  | 159    | 345.5  | 384.8  |
| SNPH      | 144.4  | 148.7  | 141.3  | 145.1  | 130.6  | 131.2  | 119.4  | 128.8  |
| SNRK      | 1458.4 | 1728.1 | 1114.7 | 1585.4 | 1270.9 | 812.9  | 1597.4 | 1993.5 |
| SNRP70    | 207.7  | 192.3  | 195.5  | 206.6  | 188.5  | 188.3  | 198.6  | 175.4  |
| SNRP70    | 1892.9 | 1453.2 | 2033.4 | 1809.1 | 1109.2 | 1320.7 | 1492.3 | 1479.3 |
| SNRP70    | 114    | 115.1  | 110.6  | 110.8  | 101.1  | 97     | 118    | 117.2  |
| SNRPA     | 196.5  | 208.8  | 270.7  | 196    | 170.1  | 191.3  | 164.7  | 170.8  |
| SNRPA1    | 928.7  | 1004.5 | 1161.7 | 1025   | 800.7  | 749.5  | 873.2  | 893.8  |
| SNRPB     | 775.9  | 750.6  | 618.8  | 738.8  | 569.9  | 586.8  | 755.8  | 917.4  |
| SNRPB     | 1214.2 | 1404.5 | 1167.6 | 1366.5 | 1160.8 | 1202   | 1983.3 | 1991.6 |
| SNRPB2    | 1112.5 | 982.7  | 1121.3 | 1008.8 | 889.9  | 986.9  | 935.5  | 1155.7 |
| SNRPB2    | 566.7  | 686.5  | 664.4  | 654    | 589    | 469.8  | 514.7  | 572.4  |
| SNRPC     | 288.1  | 251.8  | 260.4  | 272.3  | 210.7  | 266.1  | 209.4  | 217.1  |
| SNRPD1    | 122    | 116.9  | 142.5  | 128.8  | 128.6  | 109.2  | 126.2  | 123.7  |
| SNRPD2    | 133.5  | 124.5  | 126    | 131.5  | 113.7  | 101    | 129.7  | 120.7  |
| SNRPD2    | 5899.7 | 6705.8 | 7235.8 | 6571.1 | 5724.7 | 4925.1 | 5872.6 | 6580.4 |
| SNRPD3    | 221.1  | 175.7  | 225.1  | 207.1  | 171.1  | 137.1  | 173.3  | 185.6  |
| SNRPE     | 107.5  | 105.9  | 116.5  | 112.4  | 105.7  | 91.4   | 110.7  | 115.1  |
| SNRPF     | 1044.1 | 1219.3 | 1357.5 | 1192.1 | 1077.4 | 869.7  | 1020.9 | 1195.1 |
| SNRPG     | 2767.2 | 2867.7 | 3455.6 | 2889   | 2715   | 2890.5 | 3052.5 | 3106.8 |
| SNRPN     | 806.3  | 971.2  | 777.5  | 798.3  | 581.7  | 564    | 551.9  | 586.4  |
| SNRPN     | 121.4  | 110.7  | 120.9  | 117    | 106.6  | 106.4  | 119.8  | 115.3  |
| SNTA1     | 175.1  | 157.4  | 163.8  | 159.3  | 134.6  | 139.2  | 170.1  | 161.9  |
| SNTB1     | 204.6  | 208.2  | 271.8  | 234.4  | 201.9  | 175.1  | 179.6  | 179.5  |



|       |        |        |        |        |        |        |        |        |
|-------|--------|--------|--------|--------|--------|--------|--------|--------|
| SNTB2 | 116.6  | 129.3  | 122.3  | 131.3  | 123.2  | 106.6  | 133.8  | 127.2  |
| SNTB2 | 302.6  | 357.2  | 321.1  | 345.2  | 299.2  | 199.1  | 344.6  | 326.5  |
| SNTG1 | 118.1  | 110    | 110    | 119.2  | 108.7  | 97.7   | 105.2  | 108.8  |
| SNTG2 | 112.9  | 120.3  | 122.1  | 118.9  | 111.5  | 97.5   | 119.6  | 116.5  |
| SNUPN | 234.7  | 267.1  | 227.7  | 217.6  | 237    | 180.5  | 256    | 244.6  |
| SNURF | 629.1  | 839.4  | 747.9  | 714.4  | 629.9  | 547.3  | 368.9  | 456.2  |
| SNURF | 120.7  | 129.7  | 135.7  | 130.3  | 119.6  | 109.7  | 121.2  | 118.4  |
| SNW1  | 133.4  | 117.8  | 155.9  | 159.6  | 140    | 111.2  | 144.2  | 132.8  |
| SNX1  | 172.9  | 182.2  | 189.1  | 187    | 175.2  | 178    | 153.7  | 179.5  |
| SNX10 | 350.5  | 211.6  | 338.6  | 246.2  | 162.9  | 176.8  | 173.3  | 179.8  |
| SNX11 | 332.1  | 326.5  | 375.9  | 324.4  | 232.3  | 296.3  | 324    | 322.6  |
| SNX11 | 119.2  | 113    | 116.2  | 122.7  | 110    | 95.2   | 128.4  | 114.8  |
| SNX12 | 132.9  | 130.4  | 151.3  | 132.4  | 125.2  | 108.7  | 129    | 133.1  |
| SNX13 | 136.7  | 138.3  | 140.5  | 148.1  | 140.2  | 123.8  | 152.5  | 143.7  |
| SNX14 | 109    | 115.5  | 107.8  | 105.7  | 101.6  | 98.9   | 106    | 113.7  |
| SNX14 | 284    | 300.5  | 290.6  | 306.9  | 260.1  | 197.8  | 305.7  | 257.9  |
| SNX15 | 128.7  | 124.3  | 117.2  | 134.3  | 115.1  | 107    | 131.3  | 122.7  |
| SNX15 | 119.3  | 119.5  | 118.5  | 131.5  | 114.4  | 101.1  | 121.5  | 129.8  |
| SNX16 | 178    | 208    | 158.6  | 201.8  | 203.3  | 123.2  | 204.4  | 258.5  |
| SNX16 | 110.4  | 106.6  | 114.4  | 120.2  | 104.2  | 91.3   | 113.6  | 117.6  |
| SNX17 | 885    | 916.3  | 946.4  | 957.8  | 591.3  | 669.7  | 621.4  | 613.8  |
| SNX19 | 205.7  | 182.8  | 172.7  | 214.7  | 155    | 148.5  | 174    | 173.1  |
| SNX2  | 695    | 628.4  | 875.2  | 630.5  | 467.8  | 581.8  | 817    | 607.2  |
| SNX21 | 113.3  | 104    | 113.8  | 117.3  | 104.1  | 95.9   | 114.3  | 111.1  |
| SNX22 | 107.2  | 109.7  | 117.8  | 117.9  | 112    | 102    | 102.8  | 116.3  |
| SNX24 | 112.4  | 120.9  | 124.3  | 125.1  | 111.5  | 112.4  | 125.4  | 112.4  |
| SNX25 | 217.2  | 231.7  | 289.3  | 276.6  | 198.3  | 198.1  | 225.1  | 227.9  |
| SNX26 | 163    | 164    | 212.8  | 204.1  | 163.4  | 156.8  | 165.3  | 158.5  |
| SNX27 | 754.4  | 672.8  | 578.4  | 745.8  | 592.9  | 411.3  | 567.3  | 548.5  |
| SNX3  | 1348.6 | 1378.9 | 2015.3 | 1593.7 | 1120.5 | 1324.2 | 1576.8 | 1981.3 |
| SNX4  | 237    | 241    | 252.4  | 256.9  | 263.5  | 199    | 253.6  | 266.7  |
| SNX5  | 140.7  | 136.8  | 154.3  | 131.7  | 127.6  | 121.6  | 140.1  | 129.4  |
| SNX5  | 203.8  | 225.4  | 194.3  | 208.4  | 202.5  | 189    | 182.5  | 173.1  |
| SNX6  | 326.2  | 424.2  | 265.7  | 476.8  | 315.6  | 252    | 515.6  | 528.9  |
| SNX6  | 126    | 119.4  | 132.1  | 129.4  | 115.2  | 109.1  | 135    | 127.9  |
| SNX7  | 106.6  | 113.1  | 109.2  | 111.9  | 101.1  | 95.4   | 115    | 105.6  |
| SNX7  | 102.7  | 112.1  | 114.8  | 116.5  | 111.1  | 98.1   | 119.9  | 115.7  |
| SNX7  | 106.2  | 111.3  | 124.3  | 112.9  | 107    | 102.2  | 114.2  | 104.1  |
| SNX8  | 146.2  | 135.7  | 173.3  | 165.8  | 115    | 148.5  | 186.5  | 138.6  |
| SNX9  | 108.7  | 107.8  | 115.7  | 112    | 105.8  | 100.7  | 120.1  | 110.3  |
| SOAT1 | 156.1  | 129.4  | 144.7  | 143.3  | 129.7  | 123.5  | 161.5  | 139.6  |
| SOAT2 | 113.1  | 111.2  | 114.3  | 113.3  | 96.7   | 92.3   | 114.8  | 115.6  |
| SOCS1 | 144    | 141.3  | 139.7  | 138.5  | 118.9  | 122.5  | 134    | 131.8  |
| SOCS2 | 143.1  | 170.9  | 145.6  | 155.4  | 145.2  | 109.2  | 136.1  | 161.6  |
| SOCS3 | 109.5  | 111.8  | 113.2  | 119    | 106    | 94.4   | 114.1  | 109.4  |
| SOCS4 | 127.5  | 124.6  | 132.9  | 145.9  | 128.4  | 108.2  | 148.8  | 138.4  |
| SOCS4 | 273.6  | 275.6  | 235.3  | 307.7  | 217.9  | 230.6  | 276.9  | 252.1  |
| SOCS5 | 112.2  | 114.3  | 116.6  | 121.3  | 105.4  | 99.2   | 118.6  | 116.3  |
| SOCS5 | 111.4  | 111.2  | 113.6  | 121.7  | 112.6  | 99.1   | 119.9  | 114.7  |
| SOCS5 | 128.5  | 117.6  | 124.1  | 136.6  | 122.2  | 111.7  | 131.3  | 125.9  |
| SOCS6 | 116    | 115    | 120.7  | 129    | 120.1  | 102.6  | 119.5  | 120.1  |

|         |        |        |        |        |        |        |        |        |
|---------|--------|--------|--------|--------|--------|--------|--------|--------|
| SOCS7   | 119.4  | 118.3  | 125.6  | 119.1  | 107.7  | 98.6   | 125.8  | 118    |
| SOCS7   | 119.2  | 116.9  | 125.2  | 138.2  | 117.2  | 105.1  | 125.8  | 112.8  |
| SOD1    | 1640.4 | 1591.9 | 1338.7 | 1495.5 | 1588.7 | 1516.8 | 2854.2 | 4594.3 |
| SOD2    | 460.9  | 363.1  | 220.3  | 390.6  | 209    | 206.9  | 235    | 227.3  |
| SOD2    | 3213.5 | 2851.5 | 1481   | 2658.7 | 1083.6 | 1481.7 | 1975.5 | 1442   |
| SOD2    | 123.5  | 126    | 114.6  | 120.5  | 104.3  | 94.6   | 118.8  | 105.3  |
| SOD3    | 117.1  | 113.5  | 117.2  | 119.8  | 110.6  | 92.6   | 114    | 112.5  |
| SOHLH2  | 109.8  | 114.7  | 114.7  | 113.5  | 113.7  | 96.8   | 117.8  | 116.9  |
| SOLH    | 122.3  | 137.4  | 140    | 142.5  | 127.5  | 107.6  | 136.3  | 138.3  |
| SON     | 251.2  | 267.9  | 242.5  | 252.2  | 261.5  | 222.3  | 264.8  | 270.2  |
| SON     | 141.8  | 139.4  | 168    | 147.4  | 127.9  | 117.2  | 150    | 145.4  |
| SON     | 181.3  | 193.8  | 170.1  | 212.4  | 196.3  | 147.1  | 210.1  | 257.3  |
| SON     | 1126.7 | 1364.7 | 1172.2 | 1521   | 1646.5 | 1203.5 | 1980.9 | 2255.3 |
| SORBS1  | 122.8  | 110.5  | 126.3  | 123.8  | 107.7  | 95.7   | 124.3  | 126.5  |
| SORBS1  | 125.1  | 123.4  | 127.3  | 124.5  | 112.9  | 93.9   | 126.1  | 122.5  |
| SORBS1  | 123    | 114.1  | 115    | 126.2  | 100.8  | 93.6   | 113.6  | 105    |
| SORBS1  | 114    | 107    | 133.5  | 121.7  | 125.9  | 90.5   | 112    | 110.1  |
| SORBS1  | 116.3  | 116.4  | 112.2  | 121.7  | 109.1  | 94.5   | 118.4  | 106.8  |
| SORBS2  | 113.5  | 120.1  | 119.9  | 130.6  | 111.2  | 106.5  | 112.8  | 114.1  |
| SORBS2  | 110.4  | 113.9  | 111.9  | 106.4  | 106    | 98.3   | 111.7  | 119.2  |
| SORBS2  | 112    | 114.4  | 117    | 118.9  | 117.3  | 100.4  | 120.1  | 109    |
| SORBS3  | 108    | 122.4  | 119.4  | 121.5  | 107.5  | 102.6  | 117    | 116.8  |
| SORBS3  | 127.4  | 126.1  | 119.4  | 122    | 115.8  | 105.2  | 123.3  | 114.6  |
| SORBS3  | 206.4  | 205.6  | 177.3  | 195.8  | 160.5  | 136.7  | 184.3  | 166.8  |
| SORCS1  | 115.2  | 118.6  | 115.8  | 122.3  | 104.2  | 94.7   | 120.2  | 115.7  |
| SORCS1  | 124    | 117.8  | 127.2  | 115.7  | 113.2  | 108.1  | 121.1  | 136.1  |
| SORCS1  | 112.5  | 120.4  | 116.8  | 118.6  | 107.8  | 95.9   | 116.2  | 113.5  |
| SORCS2  | 111.3  | 107.7  | 117.6  | 110.9  | 104.1  | 97.8   | 116.7  | 100.4  |
| SORCS3  | 107.3  | 112    | 112.1  | 118.6  | 106.9  | 103.4  | 112    | 107.3  |
| SORD    | 114.8  | 115.7  | 110.9  | 120.1  | 105.2  | 97.8   | 121.7  | 112.5  |
| SORD    | 129    | 116.7  | 129.6  | 115.4  | 117.1  | 102.6  | 115.5  | 118.4  |
| SORL1   | 540.1  | 678    | 505.1  | 697.7  | 559.3  | 432.9  | 473.8  | 510.4  |
| SORT1   | 147.7  | 139.4  | 167.6  | 141.2  | 119.5  | 114.4  | 140.4  | 118.2  |
| SOS1    | 155    | 160.5  | 142.9  | 159.8  | 135.8  | 128.9  | 136.8  | 167.4  |
| SOS2    | 131.5  | 121.9  | 138.1  | 129.8  | 124.9  | 119.6  | 128.1  | 133.8  |
| SOST    | 117.3  | 115.4  | 113.7  | 118    | 103.5  | 101.1  | 123.2  | 111.3  |
| SOSTDC1 | 112.1  | 116.1  | 122.2  | 126.7  | 108.8  | 100.1  | 133.7  | 117.7  |
| SOX1    | 106.6  | 111    | 120.3  | 122.4  | 115    | 97.4   | 112.3  | 117.6  |
| SOX10   | 113.8  | 108.6  | 119.6  | 113.3  | 116.5  | 109.2  | 120.5  | 119.4  |
| SOX11   | 113.5  | 111.3  | 119.3  | 113.8  | 119.9  | 98.4   | 122.9  | 122.3  |
| SOX12   | 120.7  | 132.5  | 133.9  | 131.1  | 120.4  | 104.7  | 127.7  | 131.1  |
| SOX13   | 133.3  | 126.9  | 129.4  | 136.4  | 136.8  | 105.4  | 129    | 132.7  |
| SOX14   | 124.7  | 121.2  | 131    | 126.2  | 114.5  | 108.9  | 119.2  | 116    |
| SOX15   | 113.6  | 116.8  | 117.9  | 117.8  | 109    | 95.3   | 129.5  | 124.5  |
| SOX17   | 103.7  | 117.3  | 110.6  | 112    | 109.1  | 99.3   | 117.1  | 110.6  |
| SOX18   | 106.7  | 118.5  | 124.1  | 112.1  | 110.6  | 98.4   | 121.8  | 119.4  |
| SOX2    | 115    | 109.5  | 107.4  | 111.6  | 100.4  | 96.8   | 113.5  | 110    |
| SOX21   | 111.2  | 112.2  | 118.5  | 105.9  | 109.7  | 107.2  | 109.5  | 110.8  |
| SOX3    | 123.9  | 120.4  | 115.5  | 125    | 111.2  | 98.7   | 108.5  | 107.8  |
| SOX30   | 109.5  | 116.6  | 127.9  | 117.1  | 109.9  | 99.8   | 125.3  | 117.2  |
| SOX30   | 122.1  | 115.8  | 130.9  | 119.8  | 106.8  | 106.3  | 126.5  | 119.5  |

|         |       |       |       |       |       |       |       |       |
|---------|-------|-------|-------|-------|-------|-------|-------|-------|
| SOX4    | 126.8 | 126.6 | 133.5 | 141.6 | 127.7 | 116.7 | 120.9 | 129.3 |
| SOX5    | 113.9 | 115.9 | 108   | 114.5 | 110.7 | 91.7  | 110.7 | 109.4 |
| SOX5    | 120.2 | 109.1 | 121.4 | 120   | 107.3 | 88.6  | 124.8 | 110.1 |
| SOX5    | 120.2 | 118.3 | 113.3 | 113   | 107   | 93.4  | 117.5 | 113.3 |
| SOX6    | 115.9 | 116.9 | 115.2 | 118.8 | 105.9 | 91.6  | 113   | 112   |
| SOX6    | 102.1 | 112.2 | 114.7 | 114   | 99.1  | 93.9  | 117.7 | 112.6 |
| SOX6    | 105.6 | 110.6 | 113.7 | 119.6 | 108.2 | 91.5  | 109.2 | 107.6 |
| SOX6    | 105.9 | 107.9 | 112.3 | 109.6 | 104.1 | 96.5  | 114.7 | 108.5 |
| SOX7    | 116.3 | 110.1 | 117.7 | 116.3 | 115.7 | 97.2  | 116.7 | 114.4 |
| SOX8    | 324.3 | 384.2 | 191.1 | 283.5 | 272.5 | 141.8 | 284.5 | 253.4 |
| SOX9    | 116.6 | 108.6 | 109.4 | 116.5 | 106.1 | 94.4  | 121.4 | 112   |
| SP1     | 192.8 | 229.2 | 225.6 | 241.6 | 184.2 | 161   | 280.2 | 263.3 |
| SP100   | 196.7 | 198.9 | 186.7 | 234   | 164.4 | 151.8 | 226.7 | 184.9 |
| SP100   | 142.6 | 150.2 | 147   | 164.4 | 139.4 | 128.9 | 168.7 | 188.4 |
| SP100   | 180   | 142.2 | 171.8 | 208.1 | 162.7 | 142.2 | 188.3 | 209.8 |
| SP110   | 751.6 | 713.6 | 807.9 | 767.2 | 603.5 | 552.8 | 605.3 | 697.8 |
| SP110   | 682.1 | 549.7 | 548.4 | 658   | 498   | 482.2 | 421.2 | 527.7 |
| SP110   | 182.2 | 172.2 | 167.4 | 163.3 | 157.4 | 113.8 | 155.1 | 140.5 |
| SP140   | 144.3 | 139   | 154   | 147.3 | 126   | 120.3 | 137.3 | 137.6 |
| SP140   | 212.7 | 190.1 | 247   | 229   | 182.3 | 182.9 | 184.6 | 189.4 |
| SP140   | 178.2 | 197   | 185.1 | 183.7 | 179.5 | 147.2 | 184.3 | 183.9 |
| SP2     | 287.3 | 268.9 | 268   | 330.7 | 264   | 242.7 | 354.1 | 334.8 |
| SP3     | 209.9 | 159.6 | 199.1 | 185.1 | 194.6 | 134.3 | 235.7 | 215.3 |
| SP3     | 113.6 | 118.6 | 116.1 | 130.3 | 110.7 | 105.4 | 125.4 | 122.4 |
| SP3     | 123.2 | 110.7 | 110.3 | 123.1 | 104.1 | 100.7 | 115.7 | 116.8 |
| SP4     | 210.4 | 201.7 | 204.9 | 209.7 | 175.6 | 160.2 | 249.7 | 207.6 |
| SP5     | 118.5 | 124.2 | 124.5 | 129.2 | 107.7 | 109.4 | 121.9 | 117.5 |
| SP6     | 115.8 | 114.6 | 115.8 | 120   | 103.6 | 105.8 | 117.3 | 118.1 |
| SP7     | 111.3 | 125   | 124.8 | 123   | 107.4 | 103.3 | 123.6 | 125.7 |
| SP8     | 112.7 | 117   | 116.4 | 120.8 | 110.1 | 97.4  | 114.9 | 116.2 |
| SP8     | 118.6 | 108.5 | 121.9 | 108.4 | 99.4  | 93.6  | 119   | 115.9 |
| SPA17   | 109.3 | 120.9 | 133   | 121.7 | 116.2 | 110.4 | 116.5 | 121.6 |
| SPACA1  | 121.1 | 112   | 116.1 | 121.4 | 106.2 | 102.8 | 118.7 | 118.2 |
| SPACA3  | 122.6 | 125.4 | 124.8 | 123.6 | 118.9 | 104.5 | 123.1 | 120.9 |
| SPACA4  | 114.2 | 112.3 | 119.4 | 115.5 | 111.7 | 98.5  | 110.2 | 114.8 |
| SPACA5  | 122.8 | 123.1 | 109.6 | 121.8 | 109   | 99.7  | 113.6 | 117.7 |
| SPACA5B | 114   | 113.4 | 113.1 | 122.4 | 101.8 | 96.8  | 112.2 | 114.7 |
| SPAG1   | 117.6 | 126.6 | 114.7 | 123.3 | 110.8 | 102.3 | 132.1 | 120.1 |
| SPAG1   | 115   | 119.3 | 108.6 | 111.7 | 111.7 | 96.6  | 119.4 | 115.2 |
| SPAG1   | 119.4 | 108   | 124.3 | 116.9 | 113.5 | 99.4  | 124.9 | 121.3 |
| SPAG11  | 109.1 | 116.8 | 112   | 107.9 | 103   | 96.3  | 116.7 | 108.7 |
| SPAG11A | 120.7 | 124.6 | 121.9 | 122.6 | 106.8 | 102.4 | 122   | 125   |
| SPAG16  | 113.7 | 109.4 | 113.1 | 119.5 | 105.9 | 100.4 | 118   | 108.1 |
| SPAG16  | 125.4 | 139.7 | 150.1 | 123.1 | 120.4 | 120.1 | 121.7 | 127.7 |
| SPAG16  | 116.6 | 119.3 | 113   | 118.3 | 107.2 | 99.9  | 131.1 | 124.6 |
| SPAG17  | 119.1 | 125.6 | 117   | 122.3 | 111.9 | 96.9  | 117.7 | 113   |
| SPAG4   | 126.1 | 111.1 | 126.9 | 119.2 | 115.4 | 105.6 | 125   | 123.2 |
| SPAG4L  | 116.2 | 120.3 | 121.3 | 136.6 | 106.5 | 107   | 117.5 | 121.7 |
| SPAG5   | 118.7 | 136.1 | 118.4 | 115.1 | 121.3 | 102.8 | 119   | 119.4 |
| SPAG6   | 114.3 | 119.3 | 122.7 | 117.7 | 105   | 98.1  | 121.6 | 123.1 |
| SPAG6   | 114.4 | 111.2 | 115.4 | 123.4 | 104.1 | 103.7 | 123.1 | 116.2 |

|          |        |        |        |        |       |        |        |        |
|----------|--------|--------|--------|--------|-------|--------|--------|--------|
| SPAG7    | 217.9  | 225.1  | 202.1  | 215.5  | 173.1 | 174.9  | 227    | 202.6  |
| SPAG8    | 125.6  | 114.1  | 110    | 103.3  | 96.2  | 101.4  | 105.2  | 101    |
| SPAG8    | 101.8  | 104.2  | 112.5  | 115.1  | 101.6 | 98.4   | 115.3  | 109.6  |
| SPAG9    | 150.7  | 169.1  | 168.1  | 196.5  | 160.5 | 145.6  | 246.2  | 204.8  |
| SPAG9    | 132.2  | 126.6  | 138.4  | 132.7  | 126.1 | 113.8  | 138.7  | 132.4  |
| SPAG9    | 292    | 359.1  | 281.4  | 575    | 402.2 | 302.1  | 1014.5 | 713.1  |
| SPAM1    | 120.3  | 121.4  | 119.4  | 122.8  | 114.4 | 96.8   | 122    | 127.6  |
| SPAM1    | 117.7  | 113.2  | 115.4  | 118    | 107.9 | 95.9   | 119.3  | 113.3  |
| SPANXA1  | 113.4  | 119.1  | 112.1  | 107.5  | 101.6 | 93.7   | 110.4  | 116.8  |
| SPANXB1  | 108.3  | 114.2  | 115.4  | 117.6  | 105.6 | 94.7   | 107.8  | 109.9  |
| SPANXC   | 109.8  | 111.3  | 111    | 108    | 102.1 | 98.7   | 114.5  | 106    |
| SPANXE   | 117.3  | 109    | 122.1  | 120.4  | 102.9 | 98.6   | 115.5  | 105.8  |
| SPANX-N1 | 107.6  | 118    | 114.9  | 117.3  | 106.8 | 96.6   | 116.9  | 118.9  |
| SPANX-N2 | 108.6  | 115.9  | 120.2  | 103.1  | 106.3 | 94.4   | 114.7  | 113.7  |
| SPANX-N3 | 121.5  | 112.1  | 123.6  | 113.8  | 112.6 | 107    | 112.3  | 123.3  |
| SPANX-N4 | 118.8  | 108.8  | 118.4  | 111.7  | 105.9 | 90.4   | 114.6  | 111.6  |
| SPANX-N5 | 111    | 106.3  | 106    | 111    | 105.9 | 93.7   | 116    | 109    |
| SPARC    | 108.5  | 105.7  | 119.4  | 113.7  | 108.3 | 97.4   | 115.3  | 111.8  |
| SPARCL1  | 114.7  | 105.8  | 118.7  | 114.2  | 110.1 | 99.6   | 112.5  | 110.2  |
| SPAST    | 148.6  | 144.1  | 159.5  | 137.5  | 143.5 | 142.3  | 170.2  | 162.1  |
| SPAST    | 119.7  | 116.7  | 117.6  | 126.8  | 110.5 | 100.7  | 114.7  | 115    |
| SPATA1   | 109.7  | 117.8  | 113.2  | 117.5  | 106.7 | 99.6   | 113.1  | 112.2  |
| SPATA12  | 117.7  | 120.1  | 124.5  | 128.1  | 106.4 | 108.4  | 114.3  | 114    |
| SPATA13  | 226.1  | 215.1  | 249    | 218.3  | 165.1 | 136.2  | 211    | 221.4  |
| SPATA16  | 113.6  | 113.8  | 114.3  | 112.9  | 118.8 | 98.1   | 110.8  | 109.7  |
| SPATA18  | 116.5  | 114.6  | 114.4  | 113.7  | 107.4 | 101.8  | 118.4  | 114.1  |
| SPATA19  | 119.2  | 120.5  | 119.3  | 116.5  | 116.3 | 99.4   | 97.2   | 118.4  |
| SPATA2   | 143.8  | 142.8  | 134.4  | 153.4  | 133.6 | 123.9  | 160.4  | 160.8  |
| SPATA20  | 185.2  | 238.4  | 183.2  | 203.9  | 169.5 | 134.8  | 152.3  | 161.1  |
| SPATA21  | 110.8  | 111.5  | 115    | 121.2  | 109.1 | 101    | 123    | 109.4  |
| SPATA22  | 109.9  | 111.4  | 119.5  | 113.9  | 103   | 99.2   | 112.2  | 115.2  |
| SPATA3   | 112.8  | 111.3  | 118.6  | 122.3  | 102.4 | 102.5  | 117    | 114.6  |
| SPATA4   | 114.4  | 121.7  | 113.8  | 116.2  | 106.3 | 99.6   | 107.3  | 114.3  |
| SPATA5   | 103.3  | 114.6  | 112.3  | 119.6  | 108.1 | 100.4  | 109.6  | 116.9  |
| SPATA5L1 | 239.7  | 261.6  | 293.5  | 298.7  | 259.6 | 242.9  | 245.9  | 237.2  |
| SPATA6   | 117.7  | 119.2  | 121.5  | 116.2  | 115.7 | 98.8   | 117.4  | 110.2  |
| SPATA7   | 124.2  | 148.4  | 121    | 136.7  | 112   | 113.8  | 113.4  | 108.9  |
| SPATA7   | 116.7  | 122.3  | 123.3  | 120.4  | 105.3 | 104.4  | 122.6  | 118    |
| SPATA7   | 99.4   | 119.5  | 117.2  | 124.7  | 112.8 | 103.9  | 116.2  | 123    |
| SPATA8   | 117.4  | 114    | 118.1  | 118.2  | 110.1 | 99.9   | 131.3  | 112.8  |
| SPATA9   | 115    | 116.2  | 108.6  | 124    | 105   | 108.9  | 119.7  | 120.5  |
| SPATC1   | 124.2  | 115.8  | 124.1  | 112.7  | 102.1 | 102.5  | 124.5  | 119.1  |
| SPATC1   | 112.5  | 111.7  | 121    | 116.8  | 111.3 | 101.4  | 116.1  | 117.6  |
| SPATS1   | 107.5  | 106.4  | 106.4  | 108    | 106.6 | 99     | 121.9  | 108.4  |
| SPATS2   | 129.6  | 120    | 125.8  | 146.4  | 115.8 | 112.1  | 150.1  | 137.6  |
| SPC24    | 141.2  | 128.4  | 137.4  | 135.1  | 120.9 | 118.3  | 120.1  | 138.4  |
| SPC25    | 119    | 114.1  | 118.3  | 110.5  | 110.5 | 100    | 123.3  | 108.9  |
| SPCS1    | 2200.7 | 2326.7 | 2419.8 | 2050.2 | 1836  | 2183.7 | 1471.5 | 1556.1 |
| SPCS2    | 111.9  | 119.7  | 122.3  | 115.2  | 109   | 107.4  | 110.3  | 120.8  |
| SPCS3    | 144.9  | 148.5  | 180.3  | 168.8  | 136.1 | 153    | 144.4  | 136.7  |
| SPDEF    | 118    | 113    | 108.5  | 109.3  | 110   | 92.5   | 113.9  | 107.7  |

|          |        |       |        |        |       |       |       |       |
|----------|--------|-------|--------|--------|-------|-------|-------|-------|
| SPDY1    | 117.6  | 120.3 | 125.3  | 120.4  | 109.6 | 100.4 | 120.5 | 124.3 |
| SPDY1    | 119.2  | 116.5 | 117.4  | 122.3  | 109   | 94.4  | 120.2 | 133.8 |
| SPDY1    | 111.6  | 107.6 | 107.3  | 112.5  | 102.1 | 95.5  | 106.4 | 106.1 |
| SPECC1   | 116    | 113.6 | 125.9  | 127.4  | 120.8 | 103.9 | 114.2 | 109.7 |
| SPECC1   | 112.3  | 116.9 | 121.7  | 116.1  | 105.1 | 95.3  | 111.3 | 119.7 |
| SPEN     | 665.4  | 747   | 558.5  | 740.7  | 679.2 | 565.9 | 862.2 | 817.9 |
| SPERT    | 112.4  | 106.9 | 117.7  | 137.8  | 104.6 | 96.6  | 113.4 | 127.9 |
| SPESP1   | 119    | 115.6 | 120    | 119.7  | 116.2 | 102.5 | 132.4 | 124.2 |
| SPFH1    | 129    | 122.8 | 128.1  | 122.3  | 123   | 104.6 | 130.3 | 129.8 |
| SPFH2    | 116.8  | 128.3 | 124.4  | 119.1  | 110.7 | 97.1  | 121.4 | 107.3 |
| SPFH2    | 164    | 157.6 | 193.2  | 166.4  | 140.7 | 133.8 | 152.5 | 145.1 |
| SPG20    | 149.5  | 132.8 | 142    | 148.3  | 146   | 111.1 | 185.1 | 177.4 |
| SPG21    | 129.1  | 131.1 | 154.8  | 138    | 123.9 | 127.4 | 126.3 | 121.5 |
| SPG21    | 256.6  | 257.2 | 418.9  | 260.6  | 265.2 | 256.2 | 223   | 176   |
| SPG3A    | 129.2  | 141.4 | 124.1  | 133.2  | 132.9 | 113.1 | 118.4 | 138.8 |
| SPG7     | 156    | 156.6 | 154.9  | 147.5  | 141.4 | 114   | 142.3 | 142.7 |
| SPG7     | 127.2  | 119.1 | 115.3  | 119.3  | 120.2 | 108.2 | 125.9 | 114.5 |
| SPG7     | 1143.7 | 1140  | 1015.1 | 1181.2 | 919.5 | 554.8 | 896.4 | 869.3 |
| SPHAR    | 119.5  | 118.4 | 129.7  | 134.8  | 113.1 | 105.9 | 135.5 | 125.4 |
| SPHK1    | 231.5  | 273   | 145.2  | 318.3  | 178   | 184.3 | 382.6 | 224.3 |
| SPHK1    | 114.1  | 108.4 | 126.8  | 108.7  | 102.6 | 104.2 | 113.4 | 112.1 |
| SPHK2    | 621.9  | 592.2 | 530    | 661.9  | 491.2 | 413.5 | 806.3 | 820.4 |
| SPI1     | 164.6  | 144.2 | 217.2  | 201.2  | 125.6 | 231.3 | 170.1 | 133.1 |
| SPI1     | 317.5  | 240.5 | 425.6  | 422.6  | 190.5 | 484.6 | 334.3 | 149.3 |
| SPIB     | 144.3  | 133.3 | 147.2  | 140.6  | 109.1 | 121.6 | 124.8 | 110.2 |
| SPIC     | 113.5  | 110.2 | 124.3  | 115.1  | 97.8  | 94.1  | 112.5 | 115.7 |
| SPIN     | 163.8  | 197.3 | 175.5  | 217.7  | 183.2 | 115.6 | 192.9 | 197.9 |
| SPIN1    | 442.6  | 369.6 | 406.7  | 454.7  | 325.3 | 267.9 | 399   | 377   |
| SPIN2    | 116    | 119.4 | 113.8  | 117.8  | 107.2 | 95.4  | 117.2 | 119.7 |
| SPIN-2   | 128.9  | 140.4 | 130.9  | 139.1  | 119   | 116.8 | 133.7 | 126.4 |
| SPIN2B   | 109.7  | 119.3 | 126    | 122.9  | 121.4 | 111.9 | 118.4 | 105.2 |
| SPINK1   | 326.8  | 419.5 | 115.4  | 532.4  | 537.2 | 94.7  | 724.6 | 751.1 |
| SPINK2   | 132.5  | 117.2 | 124.7  | 141.4  | 115.6 | 112.9 | 120.5 | 118.7 |
| SPINK4   | 112.7  | 109.5 | 108.7  | 112.6  | 104.1 | 92.9  | 112.9 | 109.5 |
| SPINK5   | 117.8  | 114.8 | 109.4  | 121.1  | 108   | 96.6  | 121   | 118.3 |
| SPINK5L2 | 109.4  | 114.3 | 114.4  | 111    | 106.7 | 100.9 | 116.1 | 119.9 |
| SPINK6   | 107.8  | 122.6 | 119.4  | 128.2  | 107.7 | 101.7 | 121.2 | 117   |
| SPINK7   | 116    | 113.4 | 116.4  | 113.1  | 109.7 | 99.9  | 115   | 112.5 |
| SPINK9   | 128    | 117   | 125.1  | 132.7  | 111.7 | 105.7 | 120.1 | 120.2 |
| SPINLW1  | 113.2  | 119.1 | 116.3  | 113.7  | 104.6 | 101.8 | 115.6 | 113.9 |
| SPINLW1  | 127.6  | 127.9 | 129.2  | 129.9  | 126.5 | 104.3 | 129.9 | 125.4 |
| SPINLW1  | 113.6  | 115.4 | 119.9  | 124.3  | 111.5 | 106   | 116.8 | 115.4 |
| SPINT1   | 116    | 113.7 | 126.3  | 124.3  | 115   | 101.1 | 125.1 | 110.3 |
| SPINT1   | 114.9  | 118.9 | 114.5  | 122.7  | 114.3 | 95.6  | 116.1 | 107.6 |
| SPINT2   | 291.2  | 263.5 | 288.6  | 277.3  | 188.9 | 214   | 207.7 | 194.9 |
| SPINT4   | 108.7  | 120.3 | 128.3  | 119.2  | 110.6 | 102.5 | 116.5 | 122.6 |
| SPIRE1   | 198    | 151.8 | 189.6  | 224.9  | 144.1 | 191.7 | 336.7 | 198.5 |
| SPIRE2   | 129.8  | 131.6 | 125.7  | 137.1  | 119.1 | 107.2 | 124.4 | 129.1 |
| SPN      | 627.3  | 657.1 | 908.6  | 674    | 641.8 | 480   | 401   | 360.5 |
| SPN      | 118.7  | 113.5 | 123.9  | 117    | 113.2 | 107   | 130.1 | 125.3 |
| SPN      | 109.9  | 139.3 | 135.3  | 127.4  | 114.4 | 103.2 | 123.8 | 135.1 |

|        |        |        |        |        |        |        |        |        |
|--------|--------|--------|--------|--------|--------|--------|--------|--------|
| SPO11  | 114.6  | 112.9  | 113.8  | 116.1  | 106.3  | 98.7   | 122.2  | 112    |
| SPO11  | 117.6  | 130.3  | 139.7  | 137.9  | 122.6  | 106.6  | 127.3  | 124.6  |
| SPOCD1 | 122.7  | 122.1  | 133.1  | 123.7  | 110.2  | 112.5  | 119.6  | 125.1  |
| SPOCK  | 114.6  | 115.2  | 117.9  | 119    | 113.3  | 103.8  | 117.9  | 127.3  |
| SPOCK2 | 4363.6 | 5250   | 6564.8 | 4527.4 | 3347.7 | 5269.4 | 3667.6 | 3682.1 |
| SPOCK3 | 110.7  | 117.8  | 121.8  | 103.6  | 107.1  | 96.3   | 111.1  | 112.5  |
| SPON1  | 309.6  | 396.9  | 392.2  | 287.5  | 290.7  | 248.3  | 237.7  | 247.1  |
| SPON2  | 125.1  | 117.2  | 137.1  | 126.9  | 112.1  | 109.6  | 119.5  | 116.9  |
| SPOP   | 1183.4 | 1378.2 | 1052.5 | 1313.9 | 1245.9 | 740.1  | 1477.1 | 1674.5 |
| SPOP   | 118    | 122.3  | 127.6  | 120.9  | 104.3  | 111.8  | 136.9  | 121.2  |
| SPP1   | 141    | 223    | 126.1  | 214.7  | 230.8  | 101.7  | 224.7  | 170.7  |
| SPP1   | 138.8  | 188.7  | 116.1  | 179.1  | 172.7  | 97.5   | 182.3  | 144.9  |
| SPP2   | 109.9  | 118    | 116.3  | 116    | 112.3  | 97.6   | 128.9  | 113.7  |
| SPPL2A | 622.7  | 557.9  | 829.7  | 711.8  | 334.3  | 633.3  | 562.7  | 381.9  |
| SPPL2B | 122.4  | 123.5  | 121.5  | 127.9  | 113.1  | 104.3  | 124.8  | 111.9  |
| SPPL2B | 110.8  | 109.9  | 113.3  | 109.1  | 99.4   | 99.6   | 115    | 111.1  |
| SPPL2B | 136.2  | 125.2  | 183.1  | 131.8  | 113.4  | 118.9  | 135.7  | 122.2  |
| SPPL3  | 120.4  | 116    | 124.1  | 126.3  | 114.5  | 110.2  | 120.1  | 120.7  |
| SPR    | 120.2  | 128.8  | 116.4  | 134    | 106.7  | 109.6  | 116.8  | 107.4  |
| SPRED1 | 245.3  | 153.4  | 585.6  | 211    | 136.1  | 431.8  | 163.8  | 128.8  |
| SPRED2 | 121.2  | 120.7  | 130.8  | 128.2  | 107.7  | 112.9  | 129.1  | 116.5  |
| SPRED3 | 116.5  | 134.8  | 135.6  | 134    | 116.2  | 105.1  | 126.9  | 110.5  |
| SPRED3 | 112.5  | 123.9  | 118.9  | 124.4  | 114.4  | 102.4  | 116.2  | 121.1  |
| SPRED3 | 105    | 116.3  | 115.7  | 123.8  | 118    | 94.1   | 108.6  | 113.5  |
| SPRN   | 111.8  | 117.5  | 116.2  | 126    | 110.8  | 103.1  | 134.9  | 114.9  |
| SPRR1A | 122.5  | 126    | 130.4  | 146.9  | 122.2  | 130    | 144.3  | 116.8  |
| SPRR1B | 128.1  | 137.8  | 122.8  | 124.7  | 115.5  | 112.1  | 123.6  | 121    |
| SPRR2A | 113.3  | 120.3  | 125    | 114.6  | 105    | 90.8   | 114.4  | 113.1  |
| SPRR2B | 114    | 113.8  | 126    | 122.3  | 110.3  | 104    | 129.2  | 111.2  |
| SPRR2C | 109.1  | 123.4  | 113.8  | 121.3  | 104.7  | 95.3   | 114    | 116    |
| SPRR2D | 106.9  | 110.9  | 120.7  | 112    | 102    | 96.2   | 109.4  | 112.9  |
| SPRR2E | 106.1  | 107.6  | 107.1  | 112.3  | 106.5  | 91     | 112.4  | 100.4  |
| SPRR2F | 107    | 110.6  | 111.4  | 106.1  | 100.4  | 94.9   | 108.3  | 108    |
| SPRR2G | 110.3  | 126.9  | 113.6  | 119.2  | 116.3  | 112.7  | 127.3  | 117.1  |
| SPRR3  | 122.7  | 123.4  | 132.7  | 116.3  | 111.4  | 104.7  | 127    | 116.6  |
| SPRR4  | 115.1  | 114.6  | 125.3  | 124.2  | 106.8  | 105.7  | 114.6  | 118    |
| SPRY1  | 104.9  | 115.7  | 116.4  | 117.4  | 106.8  | 95.7   | 105.8  | 111.9  |
| SPRY1  | 165    | 151.5  | 186.6  | 162.6  | 125.4  | 124    | 135.9  | 142.7  |
| SPRY2  | 119.8  | 130.1  | 122    | 135.1  | 116.7  | 98.8   | 119.2  | 116.2  |
| SPRY3  | 124.4  | 112.2  | 126.8  | 115.6  | 115.4  | 100.9  | 125.4  | 121.8  |
| SPRY4  | 109.6  | 112.7  | 110.2  | 125.2  | 107.6  | 102.3  | 109    | 103.8  |
| SPRYD3 | 261.1  | 358.7  | 300.3  | 265.3  | 239.8  | 188.4  | 184.6  | 221.4  |
| SPSB1  | 126.8  | 125.2  | 133.7  | 152.5  | 128.6  | 125    | 154.4  | 137.5  |
| SPSB2  | 173    | 131.3  | 170.2  | 146    | 137.5  | 134.1  | 160.1  | 157    |
| SPSB3  | 1831.8 | 2294.2 | 2031.3 | 2189.1 | 1778.2 | 1178   | 1888.7 | 2397   |
| SPSB4  | 111.3  | 118.8  | 126.3  | 125.5  | 119.8  | 107.3  | 127.6  | 114.8  |
| SPTA1  | 114.7  | 125.6  | 117.7  | 132.8  | 108.6  | 105.5  | 129.2  | 123.2  |
| SPTAN1 | 630.1  | 727.4  | 452.4  | 638.7  | 507.3  | 367.8  | 624.2  | 498.5  |
| SPTB   | 104.5  | 122.5  | 128.3  | 125.4  | 107.9  | 104.9  | 117.2  | 115.9  |
| SPTB   | 118.5  | 116.8  | 107.5  | 117.9  | 106.8  | 109.6  | 113.2  | 115.9  |
| SPTBN1 | 128.6  | 117.1  | 116.2  | 124.6  | 105    | 100.3  | 120.5  | 121.7  |

|          |        |        |        |        |        |        |        |        |
|----------|--------|--------|--------|--------|--------|--------|--------|--------|
| SPTBN1   | 121.6  | 126.5  | 124.8  | 118.5  | 104.5  | 106.7  | 118.9  | 119.9  |
| SPTBN1   | 168.4  | 185.5  | 169.6  | 186.4  | 198.4  | 135.8  | 160.4  | 166.9  |
| SPTBN2   | 120.3  | 121.6  | 117    | 123.7  | 114.5  | 105.5  | 125.6  | 121.6  |
| SPTBN4   | 112.1  | 115.2  | 125.3  | 122.5  | 108.6  | 103.9  | 123.4  | 116.3  |
| SPTBN4   | 114.2  | 111.3  | 128.8  | 120.7  | 112.5  | 103.8  | 121.2  | 122    |
| SPTBN5   | 145.6  | 119.6  | 133    | 129.8  | 107.1  | 105.5  | 118.5  | 124.7  |
| SPTLC1   | 2265.1 | 1673.4 | 1876.4 | 1810.7 | 1369.4 | 1407.7 | 1819.7 | 2401.2 |
| SPTLC1   | 135.9  | 131.6  | 141.1  | 141.2  | 142.6  | 124.6  | 137.5  | 132    |
| SPTLC1   | 140.3  | 147.5  | 147.7  | 160.9  | 139.1  | 155    | 150.6  | 151.7  |
| SPTLC2   | 166.5  | 169.6  | 174.9  | 176.4  | 164    | 137.4  | 172.4  | 147.7  |
| SPTLC3   | 113.4  | 122    | 115.4  | 121.2  | 110.6  | 96.8   | 122.1  | 114    |
| SPTY2D1  | 177.5  | 205.4  | 205.2  | 209.3  | 189.9  | 177.6  | 219.6  | 249.6  |
| SPZ1     | 118.6  | 119.8  | 119.4  | 124.9  | 101.5  | 106.1  | 120.3  | 124.4  |
| SQLE     | 339.9  | 318    | 304.9  | 285    | 247.8  | 195.6  | 302.4  | 247    |
| SQRDL    | 243.7  | 217.2  | 320.7  | 291.5  | 205.9  | 250.2  | 285.9  | 203.3  |
| SQSTM1   | 665.7  | 1112   | 410.8  | 1309.3 | 989.6  | 890    | 2046.1 | 3659.3 |
| SR140    | 317.9  | 304.6  | 280    | 353.3  | 320.9  | 245.3  | 295.6  | 338.4  |
| SRA1     | 181.9  | 158.4  | 168.4  | 189.4  | 134.9  | 165    | 178.6  | 146.9  |
| SR-A1    | 120.4  | 118.7  | 122.6  | 127.7  | 112.1  | 100.5  | 125.2  | 124    |
| SRC      | 113.3  | 120.3  | 116.8  | 110.2  | 116.2  | 99.7   | 118.7  | 113    |
| SRC      | 114.6  | 121.3  | 128.8  | 119.8  | 107.1  | 103.1  | 126.9  | 119.7  |
| SRC      | 433.6  | 345.8  | 330.2  | 487.2  | 260    | 502.2  | 525.5  | 227.2  |
| SRCAP    | 134    | 137    | 136.3  | 134.4  | 122.9  | 112.9  | 129.9  | 123.2  |
| SRCRB4D  | 115.6  | 121.8  | 121.3  | 110.7  | 99.6   | 96     | 116.7  | 116.4  |
| SRD5A1   | 110.8  | 130.1  | 125.6  | 130.1  | 121.4  | 106.3  | 131.3  | 124.1  |
| SRD5A2   | 128.2  | 114.3  | 125.5  | 117.1  | 120    | 107.8  | 126.3  | 116.1  |
| SRD5A2L  | 113.4  | 114.9  | 131.1  | 125.1  | 105.1  | 104.7  | 118.5  | 105.9  |
| SRD5A2L2 | 114.1  | 108    | 109.8  | 103    | 106.4  | 99.5   | 113.7  | 112.3  |
| SREBF1   | 139.9  | 149.3  | 150.6  | 137.7  | 127.6  | 117.7  | 161.7  | 161.3  |
| SREBF1   | 123.7  | 120.9  | 135.4  | 122.6  | 107.1  | 115.1  | 120.1  | 106.2  |
| SREBF1   | 134.3  | 139.3  | 127.1  | 123.2  | 128.5  | 116.8  | 138.5  | 147.7  |
| SREBF2   | 105.1  | 124.2  | 119.3  | 117    | 127.1  | 109.5  | 122.9  | 119.2  |
| SRF      | 459.9  | 480.3  | 433.1  | 531.7  | 399.2  | 404.6  | 424.2  | 489.9  |
| SRFBP1   | 183.3  | 203.4  | 186.4  | 167.1  | 169    | 113.4  | 179.4  | 166.7  |
| SRGAP1   | 111.5  | 110    | 121.1  | 119.4  | 127.1  | 98     | 121.3  | 103.7  |
| SRGAP2   | 139.1  | 124.7  | 151.8  | 128.1  | 126.2  | 112.6  | 127.8  | 132.5  |
| SRGAP2   | 112    | 116.3  | 112.2  | 107    | 100.9  | 94.4   | 110.4  | 106.7  |
| SRGAP2   | 123.9  | 128.2  | 125    | 128.1  | 121.2  | 107    | 123.8  | 128.6  |
| SRGAP2   | 117.9  | 117.3  | 109.5  | 116    | 115.9  | 95.9   | 121.3  | 117.9  |
| SRGAP3   | 129.7  | 117.8  | 135    | 126.8  | 111    | 105.5  | 123.4  | 118.6  |
| SRGAP3   | 130.1  | 129.1  | 147.7  | 129    | 129.5  | 107.3  | 135.9  | 127.5  |
| SRGN     | 1450.8 | 1410.6 | 2334.9 | 2148.5 | 2185.7 | 2750.8 | 2378.5 | 3390.4 |
| SRI      | 109.9  | 108.5  | 117.7  | 109    | 108.9  | 96.1   | 119.7  | 109.3  |
| SRI      | 154.5  | 161.5  | 158.8  | 172.6  | 145    | 131.5  | 133.1  | 133.8  |
| SRI      | 183    | 203.3  | 215.2  | 210.2  | 163.4  | 177.8  | 193.4  | 188.8  |
| SRM      | 280.2  | 261.8  | 254.1  | 232.9  | 161.7  | 164.6  | 221.6  | 216.8  |
| SRMS     | 113.7  | 117.1  | 128.8  | 117.6  | 108.7  | 103.5  | 130    | 111.8  |
| SRP14    | 1649.6 | 1584.4 | 1669   | 1719.6 | 1976.4 | 1325.3 | 1497.2 | 1813.7 |
| SRP14P1  | 515.7  | 469.6  | 441.6  | 516.8  | 381.1  | 473.1  | 421.1  | 722.4  |
| SRP19    | 281    | 316.9  | 386.2  | 318.2  | 318.5  | 278.3  | 265.4  | 322.8  |
| SRP46    | 594.6  | 650.4  | 554.5  | 632.6  | 477.1  | 453.8  | 419.5  | 464.1  |

|        |        |        |        |        |        |        |        |        |
|--------|--------|--------|--------|--------|--------|--------|--------|--------|
| SRP54  | 626.7  | 539    | 710.5  | 923.8  | 573.3  | 675.6  | 783.6  | 840    |
| SRP68  | 553.8  | 508.4  | 398.1  | 514.9  | 427.3  | 474.5  | 466.2  | 564    |
| SRP72  | 213.8  | 181.6  | 215.8  | 227    | 158.2  | 159.8  | 189.1  | 192.5  |
| SRP9   | 1772.2 | 1684.1 | 2055.6 | 1455   | 1504.8 | 1561.7 | 1791.1 | 1970   |
| SRPK1  | 495    | 384.7  | 343.6  | 433.9  | 441.4  | 290    | 435    | 382.1  |
| SRPK2  | 161.4  | 199.7  | 199.7  | 180.1  | 186    | 144.5  | 159.4  | 168.9  |
| SRPK2  | 130    | 135.8  | 149.9  | 136.9  | 130.2  | 111.9  | 137.7  | 131.9  |
| SRPK2  | 137.8  | 125.2  | 129.2  | 143.4  | 134.4  | 107.3  | 130.3  | 132.2  |
| SRPR   | 276    | 324.4  | 289.8  | 361.5  | 246.9  | 270    | 340.8  | 294.5  |
| SRPRB  | 540.5  | 721.3  | 572.6  | 548.5  | 564.5  | 347.3  | 614.4  | 602.1  |
| SRPX   | 110.4  | 110.1  | 114.2  | 115.9  | 109.4  | 99.4   | 117.7  | 115    |
| SRPX2  | 110.5  | 109.9  | 114.1  | 121.9  | 104.2  | 98.3   | 111.6  | 116    |
| SRR    | 123.9  | 127.9  | 131.3  | 122.3  | 120.7  | 110.7  | 142    | 140    |
| SRRM1  | 867.3  | 1006.3 | 956.4  | 1087.3 | 1091.5 | 719.4  | 1075.8 | 983.5  |
| SRRM2  | 2453.8 | 2455.2 | 2498.1 | 2516.1 | 2152   | 1813.3 | 2552.4 | 2407.4 |
| SRRP35 | 106.7  | 117.9  | 113.5  | 120.7  | 115.6  | 101.7  | 123.2  | 120.4  |
| SRXN1  | 653.4  | 599.8  | 254.1  | 841.7  | 501    | 710.7  | 1439.7 | 1149   |
| SRY    | 111.1  | 111.6  | 117    | 120.1  | 107.3  | 102.2  | 118.7  | 113    |
| SS18   | 130.6  | 143.2  | 144.2  | 140.3  | 121.9  | 104.4  | 134.8  | 128.4  |
| SS18   | 110.3  | 116.8  | 126.9  | 126.4  | 109.1  | 100.6  | 121.7  | 120.2  |
| SS18L1 | 153.7  | 162.5  | 190.1  | 165.4  | 175.5  | 154.5  | 168.9  | 155.6  |
| SS18L1 | 114.1  | 109.7  | 134.3  | 115    | 108.4  | 111.2  | 136.1  | 114.1  |
| SS18L2 | 3099.8 | 3569.4 | 3129.7 | 3514.4 | 2702.9 | 2345.1 | 2982.1 | 2689.6 |
| SSB    | 128.4  | 134.8  | 116.9  | 121.8  | 107.9  | 101.9  | 121.3  | 117.2  |
| SSBP1  | 607.7  | 724.5  | 577.9  | 727.3  | 493.7  | 703    | 658.6  | 657.4  |
| SSBP2  | 242.7  | 268.9  | 266.7  | 258    | 213.4  | 239.1  | 220.7  | 215.8  |
| SSBP3  | 152.3  | 135.9  | 142.8  | 146    | 129.3  | 111.6  | 152.8  | 129.5  |
| SSBP3  | 138.2  | 149.4  | 134.6  | 137.9  | 109.9  | 116.1  | 147.8  | 121.5  |
| SSBP4  | 201.4  | 194.4  | 178.6  | 165.5  | 126    | 140.7  | 133.6  | 122.7  |
| SSFA2  | 129    | 124    | 115.2  | 135.9  | 107.9  | 108.8  | 125.8  | 128.1  |
| SSH1   | 174.5  | 185.6  | 164.1  | 208.1  | 172.5  | 127.7  | 239.3  | 184.9  |
| SSH2   | 316.5  | 282.7  | 263.8  | 358.3  | 293.2  | 329    | 340.8  | 236.6  |
| SSH3   | 125    | 141.1  | 166.4  | 143.4  | 138.3  | 133.1  | 141    | 144    |
| SSH3   | 108    | 118    | 115.7  | 118.5  | 107.3  | 92.6   | 115.1  | 108    |
| SSNA1  | 287.1  | 370    | 326.9  | 321.3  | 293.5  | 262.6  | 326    | 319.4  |
| SSPN   | 123.5  | 125.3  | 120.6  | 129.3  | 111.7  | 100    | 134.3  | 115.4  |
| SSR1   | 780.9  | 966    | 832.3  | 857.2  | 755.7  | 615.3  | 653.5  | 759.4  |
| SSR2   | 626.9  | 717.8  | 828.6  | 740.5  | 640.9  | 625.9  | 547.5  | 716.1  |
| SSR3   | 132.7  | 124.8  | 139.5  | 128    | 114    | 112.7  | 130.2  | 113.7  |
| SSR4   | 1216.3 | 1401.5 | 1534.4 | 1358.2 | 1109.4 | 1167.7 | 1123.8 | 1288.9 |
| SSRP1  | 152.6  | 155.3  | 130.7  | 153.4  | 146.4  | 110.4  | 150.2  | 144.1  |
| SSSCA1 | 118.4  | 135.8  | 126.4  | 138.5  | 111    | 114.5  | 141.7  | 132.1  |
| SST    | 103.8  | 116.3  | 109    | 112.9  | 103.2  | 96.8   | 114.3  | 106.5  |
| SSTR1  | 102.3  | 115.3  | 124.2  | 112.1  | 112    | 104.8  | 116.9  | 118.9  |
| SSTR2  | 315.7  | 288.2  | 294.6  | 279.5  | 201.7  | 183.5  | 317.8  | 293.5  |
| SSTR3  | 113.4  | 125.7  | 118.2  | 124.8  | 115.7  | 98.7   | 122.5  | 119.5  |
| SSTR4  | 111.5  | 117    | 111.7  | 116.1  | 105    | 99.1   | 109.9  | 117.8  |
| SSTR5  | 109.6  | 116.2  | 116.8  | 121    | 110.6  | 91.9   | 114.9  | 108    |
| SSU72  | 3424.2 | 3433.4 | 2661.8 | 3621.8 | 2430.7 | 2460.4 | 4027.5 | 3138.8 |
| SSX1   | 115.8  | 115    | 112.1  | 119    | 105.3  | 100.8  | 112.8  | 111.1  |
| SSX2   | 115.3  | 114    | 114.1  | 114.5  | 116.7  | 105.6  | 117.8  | 110.3  |



|           |       |       |       |       |       |       |       |       |
|-----------|-------|-------|-------|-------|-------|-------|-------|-------|
| SSX2      | 113.6 | 117.2 | 123.7 | 118.4 | 112.1 | 99    | 121.7 | 118.5 |
| SSX2IP    | 116.6 | 121.3 | 130.6 | 119.4 | 118.3 | 99.3  | 128.1 | 115.8 |
| SSX3      | 113.4 | 120.5 | 116.2 | 124.4 | 108.8 | 100.6 | 117.3 | 110.2 |
| SSX3      | 121.3 | 120.3 | 129.7 | 118.2 | 113.9 | 112.5 | 134   | 115.6 |
| SSX3      | 113   | 123.1 | 122.5 | 111.5 | 109.4 | 96.9  | 111.1 | 106.5 |
| SSX4      | 115.4 | 115.5 | 108.2 | 110.5 | 105.5 | 106.8 | 120.2 | 119.3 |
| SSX4      | 121.3 | 120.7 | 118.2 | 113.4 | 109.8 | 100   | 115.6 | 120.5 |
| SSX4B     | 107.1 | 110.7 | 115.5 | 122   | 106.9 | 102.8 | 123.1 | 121.3 |
| SSX4B     | 116.9 | 119.6 | 121.2 | 125.2 | 110.3 | 98.9  | 118.6 | 111.8 |
| SSX5      | 124.9 | 118.6 | 120.9 | 131.7 | 110.9 | 102.7 | 117.2 | 129.2 |
| SSX5      | 113.8 | 113.7 | 110.5 | 113.9 | 102   | 106.5 | 117.7 | 117.1 |
| SSX6      | 114.5 | 114.3 | 122.5 | 120.5 | 108.5 | 100.1 | 116.3 | 112.8 |
| SSX7      | 112.6 | 110.3 | 121   | 113.5 | 107.2 | 97.3  | 118.9 | 111.7 |
| SSX9      | 109.5 | 117.8 | 114.8 | 120.8 | 110   | 101.9 | 117.7 | 121.3 |
| SSX9      | 112.5 | 122.3 | 110.3 | 112.8 | 101.8 | 92.8  | 111.8 | 108.7 |
| ST13      | 307.3 | 347.6 | 306.4 | 482.3 | 272.3 | 277.6 | 545.4 | 703.8 |
| ST14      | 122.2 | 125.4 | 131.8 | 122.6 | 114.7 | 105.4 | 130.5 | 117.1 |
| ST18      | 111   | 110   | 115   | 112.2 | 112.3 | 91    | 127.2 | 108   |
| ST3GAL1   | 782.4 | 887.9 | 488.7 | 888.5 | 592.3 | 456.9 | 799.5 | 861.1 |
| ST3GAL1   | 136.1 | 124.1 | 136.7 | 146.1 | 137.3 | 112.9 | 127.9 | 124.2 |
| ST3GAL2   | 162.6 | 165.8 | 160   | 177.3 | 145.4 | 114.9 | 149   | 144.6 |
| ST3GAL3   | 117.5 | 125.2 | 119.1 | 125.9 | 117.7 | 105.2 | 120.8 | 113.9 |
| ST3GAL3   | 123.7 | 125.1 | 133.7 | 126.4 | 115.9 | 117.5 | 130.7 | 117.5 |
| ST3GAL4   | 123.4 | 122.2 | 120.5 | 129.3 | 114.6 | 107   | 129.2 | 117   |
| ST3GAL5   | 159.2 | 152.3 | 193.7 | 181.7 | 151.3 | 151.6 | 148.7 | 129.1 |
| ST3GAL5   | 316.5 | 263.5 | 367   | 306   | 252   | 249.9 | 220.6 | 212   |
| ST3GAL6   | 145.8 | 136.7 | 175.7 | 171   | 141.3 | 140.2 | 238.1 | 156.8 |
| ST5       | 118.7 | 111.1 | 125.1 | 122   | 102.7 | 105   | 115.9 | 119.7 |
| ST5       | 124.1 | 110.9 | 121.4 | 125.6 | 108.5 | 106.4 | 122.9 | 122.4 |
| ST5       | 104.5 | 117.8 | 121.1 | 111.4 | 106.2 | 99    | 115.2 | 106.2 |
| ST5       | 113.7 | 116.6 | 114.3 | 118   | 104.9 | 100.6 | 121.8 | 121.2 |
| ST6GAL1   | 123.6 | 129   | 124.8 | 134.6 | 117.8 | 108.8 | 122   | 119.1 |
| ST6GAL1   | 768.9 | 738.8 | 738.7 | 837.7 | 718.4 | 701.4 | 597.8 | 745.4 |
| ST6GAL1   | 124.8 | 120.6 | 114.7 | 132.3 | 121.5 | 100.7 | 141.5 | 121.4 |
| ST6GAL2   | 113.8 | 117.3 | 114.9 | 127.5 | 106.9 | 100.8 | 128.4 | 117.4 |
| ST6GALNAI | 114.1 | 117.6 | 121.2 | 117.2 | 102.7 | 97.4  | 114.2 | 108.4 |
| ST6GALNAI | 117   | 128.5 | 120.5 | 120.7 | 110.8 | 106.2 | 128.7 | 125.1 |
| ST6GALNAI | 120.6 | 125.2 | 122.8 | 131   | 112.9 | 105.1 | 123   | 112.1 |
| ST6GALNAI | 159.9 | 197.2 | 178.2 | 188.3 | 171.7 | 153.7 | 206.3 | 144.5 |
| ST6GALNAI | 108.4 | 107.3 | 120.4 | 113.3 | 110.9 | 99.7  | 120.1 | 111.6 |
| ST6GALNAI | 145.4 | 163.6 | 161.2 | 169   | 135.8 | 130.4 | 159   | 149.3 |
| ST6GALNAI | 108.2 | 122   | 122.6 | 124.6 | 108.5 | 105.7 | 117.5 | 122.9 |
| ST6GALNAI | 325.5 | 439.3 | 438.6 | 331.1 | 325   | 302.1 | 417   | 371.1 |
| ST7       | 118.2 | 136.2 | 145.5 | 139.5 | 115.8 | 103.4 | 121.6 | 120.6 |
| ST7       | 110   | 123.6 | 128.4 | 127.4 | 118.1 | 111.4 | 133   | 121.5 |
| ST7       | 123.2 | 127.4 | 130.5 | 135   | 116.4 | 117.6 | 123.8 | 128.5 |
| ST7L      | 102.1 | 108.9 | 122.2 | 109.5 | 108.9 | 94    | 115.9 | 117.7 |
| ST7L      | 105.5 | 110.8 | 133.2 | 116.5 | 114.5 | 101.1 | 111   | 112.2 |
| ST7L      | 108.5 | 112.9 | 120.4 | 114.8 | 107.5 | 97    | 120.7 | 114.3 |
| ST8SIA1   | 113.3 | 117.9 | 114.3 | 121.5 | 101.4 | 100.1 | 128.1 | 111.8 |
| ST8SIA2   | 110.4 | 116.6 | 113.1 | 118.6 | 111.9 | 100.6 | 117.7 | 118.1 |

|          |        |        |        |        |        |        |        |        |
|----------|--------|--------|--------|--------|--------|--------|--------|--------|
| ST8SIA3  | 109.3  | 124    | 121.4  | 122.1  | 108    | 101.5  | 116.5  | 113.5  |
| ST8SIA4  | 129    | 116.1  | 130.1  | 120.2  | 111.2  | 134.5  | 124.2  | 120.2  |
| ST8SIA4  | 110.8  | 109.6  | 113.4  | 113.6  | 109.6  | 97.8   | 123.8  | 109.4  |
| ST8SIA4  | 166.1  | 168.1  | 234.3  | 166.9  | 137    | 206    | 143.8  | 141.3  |
| ST8SIA5  | 115    | 109    | 117.4  | 111.1  | 103.1  | 98.2   | 116.7  | 115.5  |
| ST8SIA6  | 119.3  | 115.9  | 116.5  | 117.2  | 113.2  | 99.2   | 119.3  | 119    |
| STAB1    | 195.1  | 147.4  | 612.5  | 177.3  | 116.2  | 327.1  | 154.4  | 126.9  |
| STAB2    | 116    | 104.8  | 109.5  | 106.8  | 101.9  | 98.4   | 114.4  | 104.2  |
| STAC     | 111.4  | 115.6  | 134.7  | 120.6  | 114.4  | 91.9   | 114.7  | 116.9  |
| STAC2    | 120.5  | 121.6  | 118.5  | 123.5  | 121.7  | 105.9  | 117.6  | 119.5  |
| STAC3    | 115.9  | 119.5  | 127.2  | 129.9  | 111.8  | 102.4  | 110.7  | 132.4  |
| STAG1    | 368.1  | 353.2  | 278    | 390.4  | 278    | 241.6  | 388.8  | 406    |
| STAG2    | 125.1  | 125.7  | 116.6  | 131.2  | 119    | 105.8  | 131    | 140.7  |
| STAG2    | 432.4  | 500.8  | 391.7  | 552.7  | 346.9  | 318.8  | 511    | 593.6  |
| STAG2    | 116.2  | 127.8  | 132.8  | 129.9  | 133.7  | 113.7  | 150.5  | 128.1  |
| STAG3    | 118.3  | 122.2  | 129.5  | 120.5  | 111.9  | 109.2  | 123.6  | 124    |
| STAM     | 239.8  | 264.8  | 235.2  | 236.5  | 225.6  | 188    | 263.6  | 247.3  |
| STAM2    | 132.3  | 124.7  | 145.3  | 132.5  | 117.6  | 110    | 130.7  | 127.8  |
| STAMBP   | 391    | 502    | 500.8  | 441.7  | 317.6  | 358.1  | 400.2  | 405.9  |
| STAMBP   | 112.1  | 108.7  | 114.7  | 115.5  | 114.5  | 94     | 104.6  | 113.2  |
| STAMBP   | 232.8  | 247.1  | 270.4  | 223.7  | 210    | 227.8  | 184.3  | 192.2  |
| STAMBPL1 | 266.7  | 359.2  | 429.6  | 274.5  | 292.8  | 330.9  | 225    | 197.5  |
| STAP2    | 118.6  | 119.2  | 126.1  | 119.2  | 105.7  | 95.7   | 121.7  | 112.7  |
| STAP2    | 115.2  | 109.8  | 113.5  | 120.6  | 117.1  | 104.9  | 116.3  | 114.4  |
| STAP2    | 123    | 124.5  | 139.1  | 129.8  | 119.8  | 100.8  | 121.7  | 125.1  |
| STAP2    | 109.2  | 119    | 114.6  | 122.4  | 112.9  | 103.4  | 128.2  | 119.1  |
| STAR     | 121.5  | 112.4  | 110.1  | 113.4  | 108.7  | 95.6   | 123.6  | 118.5  |
| STAR     | 109.9  | 124.3  | 119.8  | 115.4  | 108.9  | 101.4  | 119.6  | 112    |
| STAR     | 125.4  | 121.5  | 127.4  | 123.2  | 125.5  | 107.1  | 129.4  | 129.7  |
| STARD10  | 225.3  | 210.2  | 163.1  | 220.8  | 177.4  | 141.7  | 217.9  | 180.2  |
| STARD13  | 106.7  | 113.8  | 99.4   | 124.2  | 101.8  | 99.5   | 118.6  | 113.7  |
| STARD13  | 112.1  | 120.6  | 127.1  | 122.1  | 108.2  | 98     | 119    | 106    |
| STARD13  | 118.4  | 120.7  | 119.5  | 118.2  | 113.2  | 99.7   | 117.8  | 118.9  |
| STARD13  | 125.7  | 132.6  | 125.4  | 124.7  | 123.4  | 105.1  | 132.8  | 133.2  |
| STARD3   | 176    | 156.5  | 176.6  | 181.9  | 131.8  | 158.4  | 150.9  | 163.9  |
| STARD3NL | 214.8  | 217.3  | 215.3  | 255.8  | 199.8  | 202.9  | 233.6  | 210.2  |
| STARD4   | 112.4  | 103.9  | 115.1  | 115    | 105.6  | 96.6   | 128    | 118.1  |
| STARD5   | 114.6  | 122.9  | 124.5  | 118.5  | 120.1  | 125.3  | 119.3  | 109.6  |
| STARD5   | 165.1  | 159.7  | 156.1  | 168.8  | 144.1  | 129.5  | 156.8  | 140.3  |
| STARD6   | 109.6  | 115.1  | 106.2  | 128.8  | 101.2  | 97.7   | 108.7  | 103.5  |
| STARD7   | 1620   | 1718.2 | 1275.4 | 1818.6 | 1359.2 | 1330.7 | 1728   | 1131.3 |
| STARD7   | 486.3  | 474.4  | 431.5  | 567.6  | 372.1  | 392.3  | 457.4  | 365.7  |
| STARD7   | 109.5  | 117.4  | 127.2  | 115.1  | 101.7  | 100.1  | 120.4  | 111.7  |
| STARD8   | 116.2  | 119.9  | 144    | 136.8  | 123    | 103.2  | 114.8  | 126.3  |
| STAT1    | 540.9  | 221.7  | 697.9  | 424.4  | 185.8  | 496.1  | 195.9  | 122.4  |
| STAT1    | 2155.5 | 897.1  | 3241.8 | 1663.5 | 556.4  | 2001.9 | 880.8  | 326.4  |
| STAT1    | 2931.8 | 1590.5 | 3305.7 | 2536.4 | 787.4  | 1872.2 | 1330.1 | 614.3  |
| STAT2    | 1938.7 | 1469.6 | 1541.5 | 1735.3 | 1121.4 | 1019.8 | 1283.2 | 970.3  |
| STAT3    | 493.8  | 421.3  | 354.3  | 413.5  | 424.1  | 412.9  | 550.6  | 431.9  |
| STAT4    | 1397.7 | 1409.2 | 1554   | 1378.3 | 1420.8 | 1217.9 | 1194   | 1283.6 |
| STAT5A   | 632    | 704.5  | 543.9  | 704.3  | 484    | 500.4  | 555    | 451.7  |

|         |        |        |        |        |        |       |        |        |
|---------|--------|--------|--------|--------|--------|-------|--------|--------|
| STAT5B  | 557.2  | 671.6  | 388.1  | 569.9  | 594.1  | 374.4 | 531.3  | 503    |
| STAT6   | 482.9  | 564.4  | 426.5  | 487.8  | 459.5  | 303.1 | 437.6  | 561.8  |
| STATH   | 108.9  | 126.2  | 126.6  | 121.1  | 114.4  | 100.5 | 118.2  | 122.2  |
| STATIP1 | 278.7  | 260.5  | 287.2  | 306.5  | 209.5  | 217.4 | 275.8  | 248.4  |
| STAU    | 116.8  | 120.6  | 124.5  | 126.2  | 114.8  | 99.9  | 129.7  | 122.7  |
| STAU    | 292.7  | 329.4  | 305.4  | 369    | 325.8  | 318.6 | 364.8  | 421.4  |
| STAU1   | 1472.3 | 1737.5 | 1312.9 | 1756.1 | 1640.9 | 1491  | 2311.9 | 1937.8 |
| STAU2   | 159.7  | 160    | 164.8  | 174.5  | 155.2  | 150.2 | 163.5  | 146.9  |
| STC1    | 111.8  | 124.2  | 120.7  | 121    | 117.6  | 100.4 | 118.1  | 111.4  |
| STC2    | 113    | 105.5  | 120.1  | 120.2  | 109.7  | 97.2  | 118    | 111.9  |
| STCH    | 184.8  | 214.8  | 183.8  | 219.4  | 173.1  | 147.4 | 251.7  | 281.4  |
| STEAP1  | 109.7  | 110    | 117.8  | 114.5  | 105.8  | 93    | 117.4  | 114.2  |
| STEAP2  | 109.5  | 106.2  | 106.3  | 110.1  | 100    | 96.2  | 109.8  | 114    |
| STEAP2  | 104.3  | 107.8  | 105.2  | 118.5  | 104.8  | 94.7  | 102.7  | 112.6  |
| STEAP2  | 118    | 114    | 118.3  | 126.3  | 109    | 107.1 | 120    | 110.4  |
| STEAP3  | 112    | 105.5  | 119.1  | 122    | 103.9  | 95.3  | 126.5  | 109.1  |
| STEAP3  | 117.1  | 107.2  | 112.9  | 118    | 117.6  | 96.5  | 118.6  | 117.8  |
| STEAP3  | 102    | 101.9  | 124.2  | 102.4  | 108.7  | 92.7  | 108.5  | 117.1  |
| STEAP4  | 119.9  | 117.1  | 111.3  | 126.9  | 107    | 95.7  | 115.2  | 109.9  |
| STGC3   | 118.8  | 119.9  | 117    | 108    | 100.9  | 98.2  | 112.1  | 109.5  |
| STH     | 113.7  | 122.3  | 119.4  | 116.9  | 112.3  | 99.4  | 121    | 127.9  |
| STIL    | 160.9  | 169.9  | 152.4  | 164.8  | 138.9  | 120.1 | 167.7  | 188.3  |
| STIM1   | 193.5  | 175.7  | 172.3  | 167.1  | 156    | 154.8 | 168.5  | 177    |
| STIM2   | 153.8  | 146.8  | 135.9  | 148.5  | 129.5  | 119.4 | 146.2  | 154.8  |
| STIP1   | 370.7  | 370.4  | 276.9  | 448.9  | 388.7  | 315   | 1040.1 | 1343.6 |
| STK10   | 421.6  | 501.6  | 317    | 416.6  | 329.4  | 271   | 516.8  | 431.4  |
| STK11   | 128.4  | 155.7  | 130.1  | 150.2  | 151.4  | 118.3 | 138.4  | 156.2  |
| STK11IP | 258.5  | 288.9  | 256.4  | 252.7  | 188.3  | 184   | 301.9  | 286.8  |
| STK16   | 123.5  | 110.9  | 121.8  | 117.7  | 116    | 104.5 | 119.5  | 111.5  |
| STK16   | 125    | 119.4  | 155.3  | 126    | 117.4  | 120.2 | 116.9  | 121    |
| STK16   | 118.8  | 122.3  | 124.8  | 119.6  | 113.7  | 104.2 | 131.6  | 128.8  |
| STK17A  | 112.6  | 128.8  | 131.8  | 125.6  | 122.1  | 107.5 | 132.8  | 134.8  |
| STK17B  | 115.8  | 116.8  | 129.1  | 126.1  | 109.1  | 105.7 | 115.1  | 120.5  |
| STK19   | 287.1  | 315.2  | 221.4  | 263.3  | 264.3  | 215.8 | 278.4  | 308.6  |
| STK19   | 197.3  | 233.3  | 227.9  | 245.9  | 187.3  | 225.3 | 264.2  | 227.1  |
| STK23   | 111    | 125.5  | 114.5  | 123    | 104.2  | 98    | 119    | 108.8  |
| STK24   | 108.6  | 114.8  | 121.9  | 121.2  | 113.7  | 97.1  | 126.8  | 118.8  |
| STK24   | 108.5  | 131.8  | 125.6  | 123.5  | 110.4  | 100.6 | 118.3  | 112    |
| STK24   | 2267.7 | 2643.5 | 2480.9 | 2582.7 | 2109   | 1975  | 2110.2 | 1974.5 |
| STK25   | 318.7  | 364.9  | 351.7  | 355.9  | 271.2  | 285.7 | 300.1  | 234.1  |
| STK3    | 209.7  | 201.9  | 222.8  | 247.5  | 188.2  | 195.6 | 366.6  | 259.3  |
| STK31   | 123    | 117.5  | 111.7  | 120.1  | 116.4  | 105.3 | 113.9  | 115.7  |
| STK31   | 115.1  | 117.1  | 118.6  | 119.4  | 106.5  | 97.9  | 122.5  | 126.2  |
| STK31   | 117.4  | 114.3  | 115.7  | 121    | 108.9  | 98.7  | 109    | 125.4  |
| STK32A  | 120.1  | 109.7  | 113.2  | 122.3  | 106.9  | 100.8 | 115.4  | 116.7  |
| STK32B  | 118.3  | 105.8  | 113.6  | 114.4  | 107.6  | 92.1  | 116.1  | 115.3  |
| STK32C  | 124.9  | 126.8  | 134.1  | 128.1  | 124.3  | 108   | 119.2  | 122.5  |
| STK33   | 119.1  | 121.3  | 125.3  | 123.7  | 114.4  | 103.2 | 114.6  | 110.3  |
| STK35   | 142.4  | 142    | 135.5  | 137.5  | 126    | 134.1 | 155.4  | 148.5  |
| STK36   | 335.6  | 331.5  | 312.1  | 295.1  | 219.7  | 174.1 | 224.3  | 219.5  |
| STK38   | 2121.1 | 1994.4 | 1059.7 | 2211.6 | 1920.3 | 1009  | 1760   | 1604.5 |

|        |        |        |        |        |        |        |        |        |
|--------|--------|--------|--------|--------|--------|--------|--------|--------|
| STK38L | 131    | 124.5  | 124.1  | 143.3  | 118    | 109.7  | 131.2  | 123.5  |
| STK39  | 483.9  | 562.2  | 514.3  | 536.5  | 471.8  | 436.1  | 420.9  | 395.5  |
| STK4   | 2156.7 | 2734.6 | 2115.6 | 2774   | 2533.5 | 3018.2 | 3342.3 | 3313   |
| STK40  | 794.6  | 796.4  | 658.8  | 1057.3 | 531.9  | 1004.5 | 1445.8 | 1229.5 |
| STK6P  | 120.8  | 120.1  | 114.8  | 134.2  | 124.4  | 106.9  | 130.1  | 136.3  |
| STMN1  | 117.7  | 120.6  | 110.4  | 103.5  | 111.9  | 97     | 112.5  | 113.2  |
| STMN1  | 271.3  | 273.9  | 226.7  | 253.9  | 216.3  | 197.4  | 334.1  | 325.5  |
| STMN1  | 129.5  | 139.6  | 139.7  | 144.2  | 144.1  | 126.3  | 142.8  | 173    |
| STMN1  | 117.4  | 124.5  | 122.4  | 140.2  | 111.3  | 106.8  | 127.9  | 128.7  |
| STMN2  | 126.2  | 118.6  | 116.5  | 132.7  | 113    | 102.7  | 118.5  | 118.3  |
| STMN4  | 120.3  | 112    | 117.8  | 115    | 104.8  | 94.8   | 119.1  | 115.2  |
| STOM   | 397.1  | 464.6  | 464.6  | 482.7  | 373.3  | 329    | 422.7  | 569.7  |
| STOM   | 153.6  | 165    | 197.9  | 152.8  | 138.7  | 130.2  | 149.7  | 156.9  |
| STOML1 | 120.2  | 136.4  | 122.7  | 131.9  | 115.4  | 108.7  | 115.8  | 127.1  |
| STOML2 | 474.9  | 587.7  | 469.8  | 560.3  | 463.7  | 368.5  | 464.7  | 408.1  |
| STOML3 | 114.7  | 114.4  | 125.4  | 114.5  | 115.7  | 102.4  | 111.6  | 111.8  |
| STON1  | 112.4  | 113    | 128.9  | 116.3  | 107.6  | 99.7   | 114.6  | 118    |
| STON2  | 121.9  | 109.9  | 125.9  | 123.2  | 106.7  | 94.9   | 118    | 112.7  |
| STOX1  | 119.1  | 126.4  | 126.8  | 123.1  | 110.6  | 105.4  | 117.2  | 122.4  |
| STOX2  | 112.1  | 120.9  | 111.8  | 118    | 110.3  | 103.4  | 130.4  | 117.8  |
| STRA13 | 405.5  | 444    | 510    | 498.9  | 325.6  | 342.7  | 418.5  | 385.4  |
| STRA6  | 109.1  | 114.6  | 110.3  | 113.7  | 102.4  | 98.5   | 111.5  | 112.9  |
| STRAP  | 226.4  | 234.2  | 254.4  | 218.2  | 223    | 207.5  | 239.3  | 323.8  |
| STRBP  | 196.3  | 249.6  | 281.5  | 219.8  | 219.4  | 206    | 229.5  | 227.8  |
| STRC   | 126.6  | 143.9  | 161.1  | 134.1  | 148.1  | 113.5  | 133.1  | 150.4  |
| STRN   | 127.3  | 126    | 132.7  | 133.4  | 114    | 103.5  | 138.2  | 133.7  |
| STRN3  | 347.4  | 365    | 307.2  | 439.6  | 316.2  | 198    | 403.2  | 456.7  |
| STRN4  | 154.4  | 167.6  | 149.7  | 163.6  | 142.7  | 141.4  | 181.5  | 184.3  |
| STRN4  | 121.6  | 120    | 120.2  | 119.8  | 100.4  | 103.7  | 122.2  | 124.3  |
| STS    | 121.2  | 111.3  | 123.6  | 117.5  | 105.2  | 97.3   | 118.4  | 116.6  |
| STS-1  | 323.1  | 388.3  | 333.3  | 329    | 321.1  | 286.2  | 257    | 266    |
| STT3A  | 309.3  | 301.2  | 331.6  | 331.3  | 298.8  | 267.3  | 306.7  | 296.4  |
| STT3B  | 160.1  | 191.1  | 187.3  | 210.8  | 173.5  | 168.8  | 181.8  | 167.1  |
| STUB1  | 279.9  | 303.3  | 333    | 300.2  | 300    | 280.4  | 321    | 282.2  |
| STX10  | 508.9  | 566    | 610.5  | 472.1  | 388.4  | 400.9  | 385.3  | 321.5  |
| STX11  | 390.6  | 227.7  | 310    | 376.4  | 203.3  | 319.3  | 288.7  | 237.2  |
| STX12  | 162.8  | 169.5  | 175.9  | 176.3  | 154.2  | 154.6  | 188.9  | 182.3  |
| STX16  | 112.5  | 112.2  | 114    | 127.6  | 106.9  | 105.4  | 110.6  | 120.9  |
| STX16  | 1041   | 946    | 1393.3 | 1045.2 | 925.2  | 676.3  | 684.5  | 737.4  |
| STX17  | 120.3  | 127.6  | 116.9  | 118.7  | 113    | 108.5  | 119.7  | 122.7  |
| STX18  | 121.1  | 141    | 134.2  | 108.8  | 116.7  | 109.9  | 122    | 124.4  |
| STX19  | 113.1  | 113.4  | 117.2  | 121.5  | 106.6  | 96.5   | 118.9  | 123.1  |
| STX1A  | 123.8  | 148.7  | 124.1  | 130.9  | 116.1  | 109.6  | 129.9  | 151.2  |
| STX1B2 | 120.2  | 111.5  | 119.2  | 118.4  | 111.2  | 102.3  | 126.7  | 112.7  |
| STX2   | 355.4  | 367.6  | 282.7  | 367.6  | 273.3  | 208.3  | 324.6  | 270.7  |
| STX2   | 386.7  | 396.9  | 335.5  | 359.5  | 354.8  | 247    | 347.5  | 344.4  |
| STX3A  | 183.3  | 165    | 167.2  | 184.2  | 157    | 139.7  | 255.5  | 222.5  |
| STX4A  | 520.7  | 530.1  | 444.5  | 564.4  | 440    | 433.4  | 579.1  | 489.2  |
| STX5A  | 857.8  | 1040.8 | 899.2  | 1042.3 | 821.8  | 1025.2 | 1289.3 | 1184.9 |
| STX5A  | 112.8  | 115.5  | 117.4  | 129    | 107.6  | 105.7  | 127.4  | 118.3  |
| STX5A  | 232.5  | 212.1  | 273.4  | 271.2  | 201.5  | 263.8  | 404    | 335.4  |

|         |       |       |        |        |        |       |        |        |
|---------|-------|-------|--------|--------|--------|-------|--------|--------|
| STX6    | 419   | 386.2 | 476.6  | 409.5  | 280.8  | 314.7 | 420.2  | 306    |
| STX7    | 121.5 | 107.7 | 120.8  | 117.3  | 109.5  | 102   | 119.2  | 128    |
| STX8    | 151.6 | 183.8 | 239.1  | 161.4  | 155.2  | 144.9 | 147.4  | 141.8  |
| STXBP1  | 125.8 | 119.2 | 123.3  | 129.5  | 106.3  | 98.6  | 122.5  | 128.8  |
| STXBP1  | 120.5 | 125.2 | 122    | 150    | 122.7  | 116.7 | 134.3  | 122.9  |
| STXBP1  | 127.4 | 123.9 | 123.8  | 109.9  | 115.4  | 98.5  | 120.9  | 127.5  |
| STXBP2  | 474.5 | 401.2 | 453.2  | 404.4  | 267.3  | 476.2 | 380.8  | 308.6  |
| STXBP3  | 253.3 | 269.1 | 251.9  | 272.2  | 234.7  | 204.8 | 257.3  | 290.8  |
| STXBP5  | 257   | 267.9 | 253.5  | 283.7  | 232    | 225.6 | 350.2  | 390.7  |
| STXBP6  | 106.2 | 107.2 | 124    | 120.7  | 99.3   | 98.1  | 107.8  | 108.5  |
| STYK1   | 111.7 | 105.2 | 116.8  | 117.7  | 101.8  | 95.2  | 118.6  | 113.7  |
| STYX    | 108.1 | 113.2 | 120.5  | 113.3  | 108.5  | 96.1  | 114.9  | 109.5  |
| STYXL1  | 228.1 | 194.7 | 296.5  | 227.8  | 196    | 267.2 | 209.1  | 181.1  |
| SUB1    | 322.6 | 347.1 | 338    | 297.9  | 265.1  | 255.9 | 331.5  | 415.9  |
| SUCLA2  | 303.3 | 274.8 | 311.5  | 299.1  | 226.1  | 220.1 | 261.5  | 178.1  |
| SUCLG1  | 444.1 | 421.6 | 375.4  | 483.3  | 394.7  | 294.9 | 389.9  | 395.2  |
| SUCLG2  | 174   | 160.6 | 201.7  | 222.9  | 152.6  | 147.4 | 143.5  | 128.2  |
| SUDS3   | 118.7 | 128.1 | 115.8  | 119.2  | 121.2  | 107   | 122.7  | 117.1  |
| SUFU    | 107.7 | 113.6 | 113.8  | 111.2  | 108    | 91.7  | 110.1  | 117.3  |
| SUGT1   | 230.4 | 218.9 | 196.5  | 212    | 226    | 185.3 | 215.9  | 225.8  |
| SUHW1   | 116.9 | 113.2 | 109.5  | 109.3  | 109.7  | 98    | 111.5  | 104.2  |
| SUHW2   | 119   | 114.2 | 124.8  | 122.2  | 108.7  | 115.8 | 117.4  | 111.3  |
| SUHW3   | 166.4 | 167.2 | 152    | 197.4  | 172.8  | 137   | 187.2  | 219    |
| SUHW4   | 145.4 | 155.3 | 158.2  | 150.7  | 125.8  | 126.5 | 136.5  | 121.9  |
| SUHW4   | 134.1 | 128.8 | 145.8  | 142.2  | 110.4  | 122.3 | 132.3  | 126    |
| SUHW4   | 128.4 | 114.8 | 125.8  | 116.7  | 115.2  | 105   | 117.8  | 123.2  |
| SULF1   | 110.4 | 124.2 | 114.4  | 127.1  | 106.5  | 102   | 114    | 114.3  |
| SULF2   | 119.6 | 117.4 | 138    | 134.4  | 125.6  | 112.3 | 128.9  | 120.6  |
| SULF2   | 114.5 | 122   | 112.4  | 111.7  | 113.6  | 96.8  | 121.6  | 107.4  |
| SULT1A1 | 133.3 | 134.8 | 127.1  | 123.9  | 117.7  | 111.8 | 130.5  | 132    |
| SULT1A1 | 118.3 | 109   | 115.2  | 121.7  | 104.6  | 97.8  | 114.4  | 114.5  |
| SULT1A1 | 1438  | 1433  | 1179.9 | 1330   | 1012.7 | 765.4 | 1829.6 | 1196.4 |
| SULT1A1 | 115.8 | 115   | 124.5  | 129.2  | 115    | 105.8 | 112.9  | 119.6  |
| SULT1A2 | 118.8 | 107.7 | 118.9  | 120.2  | 107.6  | 98.8  | 128.3  | 117.9  |
| SULT1A2 | 138.9 | 146.1 | 174.8  | 156.8  | 135.8  | 126.8 | 158.8  | 173.3  |
| SULT1A3 | 128.9 | 127.3 | 130.4  | 134.7  | 116.4  | 108.1 | 124.1  | 121.7  |
| SULT1A4 | 242.4 | 274.7 | 264.4  | 242.4  | 221.1  | 203.3 | 255.4  | 256.6  |
| SULT1C1 | 114.3 | 111.9 | 118.3  | 121.6  | 104    | 96.4  | 110.4  | 115.8  |
| SULT1C1 | 108.1 | 104.6 | 108.7  | 118.9  | 103.8  | 92.8  | 105.1  | 106.3  |
| SULT1C2 | 112.1 | 115   | 122.8  | 108.5  | 107.2  | 91.7  | 118.5  | 116.5  |
| SULT1C3 | 111.5 | 114.2 | 115    | 116.1  | 105.1  | 96.7  | 111    | 109.2  |
| SULT1E1 | 116.7 | 124.9 | 119.1  | 127    | 118.4  | 101.3 | 118.4  | 126.7  |
| SULT2A1 | 114.9 | 113.5 | 112.7  | 114    | 107.9  | 96.2  | 115.5  | 109.3  |
| SULT2B1 | 109.4 | 115.6 | 113.7  | 114    | 107.4  | 104   | 124.3  | 118.5  |
| SULT2B1 | 145   | 149.6 | 153.4  | 160.1  | 126.6  | 138.1 | 167.3  | 153.5  |
| SULT2B1 | 111.5 | 113.4 | 113.1  | 120.9  | 106.4  | 99.1  | 115.7  | 112.9  |
| SULT4A1 | 116   | 117.8 | 119.5  | 117.9  | 106.7  | 103   | 110.4  | 109.4  |
| SULT6B1 | 126.4 | 128.9 | 121.5  | 125.6  | 119.4  | 104.4 | 130.6  | 120.6  |
| SUMF1   | 218.9 | 169.1 | 219.6  | 211    | 143.9  | 164   | 166.7  | 184.7  |
| SUMF2   | 141.7 | 135.7 | 148.3  | 142.4  | 142.3  | 126.8 | 126.1  | 131.1  |
| SUMF2   | 924.9 | 929.9 | 1311.2 | 1057.1 | 983.1  | 892.9 | 836.5  | 839.8  |

|          |        |        |        |        |        |        |        |        |
|----------|--------|--------|--------|--------|--------|--------|--------|--------|
| SUMO1    | 117.5  | 124.1  | 130    | 124.6  | 115.5  | 130.6  | 127.1  | 135.2  |
| SUMO1    | 117.3  | 118.5  | 114.7  | 121.7  | 114.8  | 103.5  | 123.7  | 113.7  |
| SUMO1P1  | 122.4  | 113    | 123.3  | 118.2  | 114.2  | 98.2   | 112    | 113.5  |
| SUMO1P3  | 113.8  | 103    | 116.4  | 106.9  | 111.3  | 98.1   | 118.2  | 111.5  |
| SUMO2    | 293.5  | 330.6  | 406.8  | 290.7  | 286.1  | 417.1  | 364    | 394.4  |
| SUMO2    | 1107.1 | 1077.1 | 987.9  | 1107.5 | 1083.9 | 690.3  | 895.5  | 928.3  |
| SUMO3    | 1491.7 | 1605.3 | 2110   | 1533   | 1144.7 | 1498.9 | 1222.7 | 1149.8 |
| SUMO4    | 116    | 120    | 120.4  | 116.2  | 116.2  | 96.5   | 121.7  | 100.9  |
| SUNC1    | 126.7  | 114.7  | 118.9  | 129.6  | 115.7  | 109    | 128.9  | 122.5  |
| SUNC1    | 114.2  | 117.3  | 120.2  | 130.5  | 114.8  | 96.5   | 111.8  | 114.2  |
| SUOX     | 157    | 144.3  | 206.9  | 158.3  | 133.7  | 152.6  | 170.2  | 197.5  |
| SUOX     | 119    | 111.5  | 110.9  | 117.7  | 115.1  | 103.8  | 123.9  | 113.4  |
| SUOX     | 114.3  | 115.7  | 132    | 124.7  | 101.4  | 101.7  | 115.9  | 132.9  |
| SUPT16H  | 591.4  | 669.7  | 542.3  | 687.4  | 596.4  | 499.2  | 693.7  | 657.1  |
| SUPT3H   | 116.1  | 115    | 130.7  | 118.9  | 114.2  | 114.9  | 123    | 120.7  |
| SUPT3H   | 148.2  | 135.5  | 148.5  | 132.5  | 107.1  | 150.8  | 124.7  | 118.5  |
| SUPT4H1  | 338.3  | 385.2  | 456.4  | 390.2  | 308.2  | 381.7  | 426.5  | 416.6  |
| SUPT5H   | 472.7  | 461.4  | 450.5  | 514.1  | 388.7  | 350.1  | 554    | 556    |
| SUPT6H   | 125.1  | 134.5  | 130.8  | 142.7  | 135.2  | 118.6  | 158.1  | 140.2  |
| SUPT7L   | 120    | 131    | 133.8  | 117.9  | 123.4  | 102    | 115.7  | 117.5  |
| SUPV3L1  | 179.7  | 210.8  | 179    | 191.8  | 176.6  | 137.5  | 185.4  | 170.6  |
| SURB7    | 122.9  | 124.6  | 132.9  | 133.3  | 121    | 105.6  | 123.4  | 122.9  |
| SURF1    | 249.5  | 240.6  | 304.7  | 211.5  | 200.2  | 219    | 208.9  | 155.5  |
| SURF2    | 133    | 130    | 143.1  | 139.1  | 128.2  | 103.2  | 129.6  | 135.3  |
| SURF4    | 428.4  | 452.8  | 451.3  | 450.7  | 344.8  | 458.2  | 558.4  | 555.4  |
| SURF5    | 140.3  | 155.8  | 149.5  | 156.8  | 134.6  | 134.8  | 142.1  | 134.6  |
| SURF5    | 401.3  | 479.2  | 453.5  | 502.1  | 374    | 310.8  | 435.4  | 369.8  |
| SURF6    | 329.6  | 426.9  | 309.1  | 349.5  | 339.8  | 286.3  | 371.3  | 323.1  |
| SUSD1    | 205.4  | 179.1  | 273    | 255.3  | 153.2  | 219.5  | 250.2  | 186.9  |
| SUSD2    | 131.6  | 122.1  | 132.9  | 130.3  | 110.5  | 105.8  | 131.7  | 120.3  |
| SUSD3    | 461.1  | 506.4  | 565.5  | 422.1  | 388.9  | 462.6  | 321.2  | 344    |
| SUSD4    | 116.8  | 114.3  | 105.8  | 113.4  | 106.9  | 90.2   | 111.5  | 106.1  |
| SUSD4    | 121.7  | 101.4  | 128.8  | 114.4  | 112.6  | 96.6   | 108.7  | 122.4  |
| SUV39H1  | 281    | 310.5  | 278.3  | 306.5  | 221.3  | 195.7  | 240.9  | 256.6  |
| SUV39H2  | 137.9  | 146.6  | 131.5  | 147.4  | 125.4  | 112.6  | 141.2  | 133.4  |
| SUV420H1 | 126.4  | 118    | 116.8  | 136.6  | 130.4  | 110.3  | 140.1  | 134.9  |
| SUV420H1 | 170.2  | 166.4  | 178.5  | 167.1  | 160.9  | 136.6  | 148.2  | 159.4  |
| SUV420H1 | 129.9  | 167.3  | 154    | 145.4  | 137.6  | 151.2  | 163.7  | 145.2  |
| SUV420H2 | 112.9  | 118.9  | 122.2  | 136.3  | 114.9  | 104.4  | 126    | 109.4  |
| SUZ12    | 2059.5 | 2312.1 | 1983.1 | 2552.6 | 2078.2 | 1542.8 | 2213.2 | 2679.9 |
| SV2A     | 131.8  | 142    | 140.4  | 132.2  | 118.3  | 99.1   | 122.2  | 121.3  |
| SV2B     | 112.7  | 125.8  | 119.7  | 130.9  | 110.9  | 110    | 121.2  | 111.5  |
| SV2C     | 114.1  | 110.9  | 123.8  | 113.9  | 108.3  | 98     | 118.8  | 116    |
| SVEP1    | 109.9  | 116.1  | 119.7  | 119.7  | 107.9  | 103.8  | 118.1  | 119.4  |
| SVIL     | 115.5  | 115.7  | 109    | 118.3  | 103.4  | 98.1   | 116.1  | 115.3  |
| SVIL     | 139.5  | 135.3  | 137.3  | 143.8  | 130.7  | 106    | 137.9  | 137.2  |
| SVIL     | 354.6  | 353.6  | 250.7  | 356    | 245.1  | 221.2  | 260.9  | 275.3  |
| SVOP     | 118.6  | 115.6  | 109.8  | 123.3  | 107.5  | 101.8  | 114.9  | 114.3  |
| SWAP70   | 481.8  | 315.2  | 547.8  | 557.1  | 309.1  | 675.9  | 514    | 386.2  |
| SYAP1    | 187.9  | 183.7  | 173.5  | 205.8  | 160.9  | 141.8  | 181.1  | 194.7  |
| SYBL1    | 462.7  | 455.7  | 582.5  | 558.1  | 449.5  | 501.2  | 553.6  | 440.6  |

|         |        |        |        |        |        |        |        |        |
|---------|--------|--------|--------|--------|--------|--------|--------|--------|
| SYCE1   | 111.1  | 116.6  | 113.7  | 129.5  | 112.4  | 100.4  | 123.9  | 115    |
| SYCE1   | 107.2  | 114.6  | 111.2  | 121.6  | 102.7  | 101.7  | 120.2  | 114    |
| SYCN    | 111.5  | 115.3  | 119.8  | 113.9  | 114.5  | 99.6   | 117.3  | 116.3  |
| SYCP1   | 121    | 113.6  | 111.7  | 115.3  | 104.8  | 93.4   | 112.5  | 109    |
| SYCP2   | 122.8  | 119.7  | 121.9  | 132.8  | 116.2  | 102.8  | 122.8  | 116.7  |
| SYCP3   | 116.7  | 114.8  | 121.7  | 115    | 110.6  | 103    | 125.9  | 119.7  |
| SYDE1   | 118.2  | 115.9  | 127.1  | 107.9  | 105.2  | 99.3   | 116.7  | 108.3  |
| SYF2    | 508.3  | 561.9  | 544.1  | 612.6  | 510.3  | 472.2  | 633.5  | 714.3  |
| SYF2    | 117.2  | 114.3  | 117.2  | 111.9  | 107.1  | 99.1   | 117.9  | 106.7  |
| SYF2    | 1215.8 | 1341.2 | 1300.4 | 1570.4 | 1204.8 | 1083.1 | 1238.4 | 1730.8 |
| SYK     | 358.7  | 300.2  | 551.5  | 380.6  | 230.7  | 331.1  | 272.5  | 220.4  |
| SYMPK   | 143.5  | 152.3  | 156.7  | 144.6  | 128.7  | 118.4  | 143    | 139.9  |
| SYN1    | 116.3  | 106.5  | 113.7  | 117.8  | 109    | 96.5   | 112.9  | 106.7  |
| SYN1    | 128.8  | 139.7  | 120.7  | 133.9  | 127.6  | 103    | 134    | 137.3  |
| SYN1    | 107.9  | 116.6  | 113.3  | 119.4  | 105.6  | 98.7   | 115.1  | 116.5  |
| SYN2    | 110    | 122.3  | 132.8  | 117    | 115.3  | 102.9  | 118.9  | 114.2  |
| SYN2    | 108.9  | 109.5  | 115.2  | 117.8  | 109.4  | 99.7   | 119.2  | 111.7  |
| SYN3    | 116.9  | 116.8  | 129.2  | 114    | 107.4  | 97.5   | 112.6  | 116.7  |
| SYN3    | 124    | 111    | 112.8  | 134.4  | 114.7  | 98.4   | 125.3  | 121.7  |
| SYNC1   | 119.2  | 114.8  | 125.3  | 120.9  | 111.7  | 102.2  | 126    | 122.7  |
| SYNCRIP | 280.4  | 346.2  | 290.7  | 333.6  | 335.5  | 237.4  | 309.3  | 335.7  |
| SYNE1   | 112.2  | 119.6  | 120.2  | 125.6  | 113    | 106.1  | 118.9  | 119.5  |
| SYNE1   | 119.9  | 111.5  | 115.1  | 119.1  | 108.9  | 94.5   | 116.5  | 115.3  |
| SYNE1   | 128    | 129.4  | 136    | 119.6  | 110.2  | 108    | 126.7  | 130.8  |
| SYNE1   | 124.9  | 119.1  | 118.7  | 115.2  | 109.9  | 103.9  | 123.3  | 117.2  |
| SYNE2   | 129    | 130.2  | 144.6  | 164.6  | 133.5  | 126.5  | 153.3  | 139.2  |
| SYNE2   | 167.3  | 211.1  | 145    | 171.7  | 190.4  | 149.9  | 201.9  | 185.5  |
| SYNE2   | 114.8  | 126.5  | 119.2  | 120.9  | 108.5  | 104.3  | 126.7  | 136.7  |
| SYNE2   | 109.3  | 116.2  | 118.9  | 116.3  | 119.1  | 94.6   | 121.3  | 107.1  |
| SYNGAP1 | 117    | 115.4  | 120    | 115.3  | 113.1  | 99.5   | 123.7  | 109.6  |
| SYNGR1  | 112.5  | 116.8  | 123    | 123.1  | 109.4  | 103.9  | 127.5  | 117.5  |
| SYNGR1  | 124.9  | 118.8  | 133    | 119.6  | 118.1  | 98.7   | 116    | 118.3  |
| SYNGR1  | 118.5  | 118.4  | 119.9  | 129.9  | 125.1  | 105.2  | 120.2  | 122.8  |
| SYNGR1  | 141.9  | 146.5  | 152.7  | 147.3  | 125.8  | 110.3  | 130.8  | 118.5  |
| SYNGR2  | 104.3  | 110    | 113.7  | 115.3  | 108.9  | 100.2  | 113    | 115.2  |
| SYNGR3  | 108.2  | 108.2  | 111.4  | 105.4  | 111.5  | 101.6  | 113.4  | 108.6  |
| SYNGR4  | 114.5  | 108    | 119.8  | 123.6  | 118.5  | 97     | 119.7  | 114.9  |
| SYNJ1   | 220    | 198    | 191.1  | 247.4  | 212.5  | 179    | 286.6  | 238.9  |
| SYNJ1   | 121.8  | 110.1  | 128.1  | 126.8  | 107.2  | 108.3  | 126    | 114.2  |
| SYNJ1   | 102.2  | 107.7  | 118.4  | 116.9  | 103.9  | 97.2   | 101.7  | 114.3  |
| SYNJ2   | 159.8  | 178.3  | 147.2  | 175.8  | 164.2  | 125.6  | 187.8  | 214.3  |
| SYNJ2BP | 272.4  | 284.2  | 348    | 255.4  | 231.8  | 184.6  | 217.7  | 213.8  |
| SYNPO   | 124.3  | 116.7  | 117.2  | 125.6  | 111.7  | 101.4  | 131.8  | 121.1  |
| SYNPO2  | 115.7  | 118.9  | 113.9  | 116.9  | 107.5  | 99.6   | 128    | 119.2  |
| SYNPO2  | 117.4  | 121.9  | 127.2  | 119.2  | 114.7  | 101.5  | 119.6  | 117.7  |
| SYNPO2L | 110.3  | 109.7  | 118.9  | 113.2  | 112.8  | 104.7  | 117.6  | 103    |
| SYNPR   | 113.8  | 108.1  | 116.2  | 115.8  | 107    | 96.9   | 107.2  | 111.7  |
| SYP     | 116.3  | 123.1  | 125.4  | 130.9  | 110.3  | 101.3  | 109.7  | 119.7  |
| SYPL1   | 791.7  | 650.4  | 829.9  | 741.5  | 798.5  | 659.5  | 763.2  | 833.9  |
| SYPL1   | 174    | 166.1  | 173    | 173.4  | 151.2  | 144.4  | 160    | 157.6  |
| SYPL1   | 117.1  | 114.7  | 120.2  | 120.8  | 115.5  | 102.5  | 114.7  | 116.8  |

|       |       |        |        |        |        |       |        |        |
|-------|-------|--------|--------|--------|--------|-------|--------|--------|
| SYPL2 | 117.5 | 118.5  | 114.2  | 119.4  | 104.6  | 101.3 | 108.2  | 112.3  |
| SYT1  | 113.4 | 109.6  | 113.4  | 115.5  | 109.9  | 94.6  | 119.9  | 112.2  |
| SYT10 | 109.9 | 113.5  | 113.2  | 114.1  | 108.3  | 98.6  | 124.4  | 119.5  |
| SYT11 | 571.9 | 670    | 692.6  | 769.6  | 598.6  | 350.8 | 585.6  | 542.1  |
| SYT12 | 121.9 | 107.1  | 119.1  | 118.1  | 113.8  | 94.1  | 125.8  | 117.6  |
| SYT13 | 113.9 | 115.7  | 113.3  | 111.6  | 106.3  | 92    | 110.8  | 113.7  |
| SYT14 | 110   | 120    | 111.9  | 112.3  | 100.5  | 95.9  | 116.6  | 115.9  |
| SYT15 | 146.4 | 152.8  | 154.2  | 141    | 143.4  | 128.8 | 142.1  | 157.8  |
| SYT15 | 129.2 | 131.1  | 125.1  | 139.5  | 119.7  | 99.9  | 119.4  | 119.5  |
| SYT16 | 122.6 | 111.8  | 133.2  | 122.2  | 108.3  | 108.5 | 135.5  | 135.5  |
| SYT17 | 118.8 | 128.8  | 117.6  | 125.1  | 113.6  | 101.8 | 125.7  | 112.2  |
| SYT2  | 109.9 | 111.4  | 112.6  | 116.5  | 107.2  | 97.9  | 111.2  | 105.3  |
| SYT3  | 113.4 | 126.8  | 143.3  | 142.3  | 124.4  | 105.8 | 137.9  | 131.3  |
| SYT4  | 122.5 | 119.2  | 115.7  | 124.1  | 106.5  | 102.4 | 118.6  | 112.6  |
| SYT5  | 127.5 | 110.6  | 126.6  | 118.8  | 105.3  | 97.1  | 115.8  | 121.3  |
| SYT6  | 115.2 | 109.3  | 123.7  | 121.2  | 105.8  | 100   | 122.2  | 108.7  |
| SYT7  | 117.1 | 129.6  | 122.5  | 145.7  | 113.5  | 109.3 | 123.6  | 111.5  |
| SYT7  | 141.3 | 131.1  | 125    | 130.5  | 115.3  | 112.4 | 131.6  | 123.6  |
| SYT8  | 111   | 115    | 113.5  | 111.4  | 107.6  | 101.1 | 116.5  | 116.5  |
| SYT9  | 108   | 115.5  | 104.2  | 119.7  | 104.2  | 102.3 | 119.7  | 133.9  |
| SYTL1 | 252.2 | 202.2  | 226.5  | 186.2  | 147    | 157.4 | 172.2  | 122.1  |
| SYTL2 | 121.8 | 116.6  | 123    | 119.6  | 114.4  | 99.9  | 137.5  | 127.8  |
| SYTL2 | 131.1 | 141.9  | 123    | 121.7  | 109.2  | 107.3 | 122.9  | 116.4  |
| SYTL2 | 119.1 | 109.6  | 118.3  | 124.9  | 105.8  | 101   | 117.3  | 120.3  |
| SYTL2 | 604.1 | 529.7  | 412.5  | 808    | 466.6  | 323.2 | 916.4  | 864    |
| SYTL3 | 215.1 | 213.5  | 151.6  | 193.4  | 171.5  | 141.6 | 188.8  | 197.7  |
| SYTL4 | 113.5 | 107.4  | 106.2  | 120.6  | 107.3  | 99.8  | 114.7  | 119.8  |
| SYTL5 | 125.3 | 115.2  | 127.3  | 132.7  | 103.9  | 104.1 | 118.6  | 122.3  |
| SYVN1 | 294.3 | 257.5  | 224.8  | 354.4  | 239.2  | 224.8 | 284.7  | 275.2  |
| SYVN1 | 129.6 | 120.7  | 126.3  | 127.6  | 119    | 109.2 | 136.7  | 134.7  |
| T     | 110.8 | 107.6  | 103.2  | 106    | 103.8  | 95.4  | 112.8  | 112.1  |
| T2R55 | 109.7 | 114.8  | 122    | 119.7  | 109.7  | 100.9 | 126.6  | 115    |
| TAAR1 | 122.5 | 127.5  | 126.2  | 121.9  | 117.6  | 103   | 125    | 118.1  |
| TAAR2 | 112.1 | 111.1  | 128.2  | 119.1  | 111.8  | 99.4  | 112.3  | 121    |
| TAAR5 | 117.7 | 119.7  | 120.5  | 118.3  | 117.6  | 99.6  | 119    | 114.7  |
| TAAR8 | 128.4 | 131.8  | 123.6  | 130.3  | 111.1  | 96.8  | 116.7  | 125.6  |
| TAAR9 | 116   | 111.6  | 121.9  | 115.1  | 108    | 104   | 118.1  | 110.5  |
| TAB3  | 119.3 | 111.1  | 111.7  | 116.2  | 105.4  | 98.7  | 130.6  | 112.9  |
| TAB3  | 111.9 | 119.6  | 113.1  | 121.7  | 109.7  | 98    | 120    | 117.5  |
| TAC1  | 119.9 | 116.4  | 119.5  | 114.8  | 108.7  | 92.5  | 110.1  | 110.4  |
| TAC3  | 111.9 | 112.1  | 120.4  | 119.6  | 107.3  | 97.4  | 123.2  | 111.3  |
| TAC3  | 119.1 | 123.7  | 125.9  | 133.2  | 105.8  | 105.9 | 128.6  | 136.3  |
| TAC3  | 105.2 | 109.2  | 114.2  | 115.1  | 107.6  | 93.1  | 116.1  | 114.8  |
| TAC4  | 102.1 | 116.4  | 119.2  | 118.8  | 107.8  | 100.9 | 115.3  | 113.4  |
| TAC4  | 115.8 | 115.5  | 117.4  | 115.4  | 104.8  | 97.8  | 123.8  | 117.1  |
| TACC1 | 1770  | 1476.9 | 1838.5 | 1696.1 | 1286.1 | 1596  | 1904.6 | 1617.6 |
| TACC2 | 115.2 | 114.3  | 113.6  | 110.7  | 102.4  | 95.8  | 109.7  | 114    |
| TACC2 | 113.9 | 107.9  | 112    | 121.2  | 106.3  | 93.4  | 113.9  | 112.6  |
| TACC2 | 123.2 | 122.8  | 117.3  | 119.2  | 109.1  | 113.6 | 115.6  | 109.7  |
| TACC3 | 178.2 | 166.4  | 188.3  | 162.8  | 127.2  | 161.7 | 173.6  | 174    |
| TACR1 | 113.8 | 125.1  | 116.1  | 122.6  | 102.7  | 99.3  | 119.9  | 115.3  |



|         |        |        |        |        |        |        |       |        |
|---------|--------|--------|--------|--------|--------|--------|-------|--------|
| TACR1   | 116.2  | 119.2  | 123.8  | 117.6  | 111.1  | 103.2  | 129.7 | 124.6  |
| TACR1   | 116.8  | 118.5  | 118.4  | 119.6  | 115    | 98.6   | 113   | 120.9  |
| TACR2   | 115.2  | 111.8  | 105.8  | 113.2  | 99.8   | 101.7  | 122.2 | 112.2  |
| TACR3   | 119.7  | 118.3  | 135.4  | 132.7  | 120.5  | 104.8  | 132.7 | 125.3  |
| TACSTD1 | 118.2  | 131.8  | 137.4  | 130.9  | 115.6  | 107.9  | 126.4 | 123.6  |
| TACSTD2 | 113.6  | 131.3  | 119.6  | 132.9  | 112.3  | 108.1  | 124.6 | 111.9  |
| TADA1L  | 186.6  | 209.4  | 179.5  | 215.2  | 179.9  | 135.7  | 216.5 | 226.7  |
| TADA2L  | 117.1  | 120.9  | 123.5  | 117.4  | 111.1  | 96.9   | 115.4 | 112.7  |
| TADA2L  | 135.7  | 120.9  | 126.6  | 115.8  | 119.3  | 110.2  | 125.9 | 112.4  |
| TADA2L  | 110.3  | 110.5  | 118.8  | 115.1  | 106.2  | 102.8  | 111.7 | 106.8  |
| TADA3L  | 149.1  | 143.8  | 167.9  | 169.1  | 146.7  | 126.5  | 151.1 | 165.8  |
| TADA3L  | 168.8  | 153.4  | 145.5  | 157.6  | 138.1  | 131.6  | 164.8 | 141.2  |
| TADA3L  | 105    | 117.9  | 116.7  | 117    | 113.2  | 104.8  | 124.1 | 116.6  |
| TAF1    | 134.5  | 128.1  | 121.4  | 148.7  | 136.1  | 117.8  | 127.7 | 148.9  |
| TAF1    | 130.6  | 131.8  | 127.5  | 139.8  | 117.8  | 112.6  | 144.6 | 133.8  |
| TAF10   | 478.1  | 670.2  | 601.2  | 500.2  | 430.1  | 471.2  | 448.4 | 402.1  |
| TAF11   | 118.4  | 113.4  | 116.6  | 121.3  | 108.5  | 102.5  | 118   | 124.9  |
| TAF13   | 106.2  | 122.7  | 109.3  | 124.7  | 112.6  | 102.9  | 122.8 | 117.3  |
| TAF15   | 2188.3 | 2281.1 | 1151.3 | 2284.5 | 2167.4 | 1296.8 | 2308  | 2236.7 |
| TAF15   | 200.1  | 216    | 165.8  | 228    | 233.5  | 146    | 187.3 | 206.4  |
| TAF1A   | 133.2  | 118    | 122.4  | 134    | 113.5  | 107    | 130.4 | 122.6  |
| TAF1A   | 113.4  | 109.1  | 118.7  | 118.1  | 107.6  | 99.1   | 117.5 | 111.4  |
| TAF1B   | 159.3  | 175.7  | 152.1  | 145.4  | 151.3  | 122.7  | 156.6 | 163.8  |
| TAF1C   | 111.8  | 105.2  | 123.1  | 123.8  | 116.6  | 100.5  | 119.2 | 113.3  |
| TAF1C   | 174.9  | 153.1  | 193    | 167.7  | 118.5  | 143.4  | 167.1 | 143.1  |
| TAF1C   | 909.1  | 958    | 853.8  | 896.2  | 663.6  | 536.3  | 761.2 | 589.6  |
| TAF1L   | 189.1  | 192.1  | 210.7  | 210.3  | 184.3  | 145.2  | 166.3 | 183.7  |
| TAF2    | 259.1  | 246.3  | 241.2  | 277.9  | 239    | 192.7  | 252.4 | 281.2  |
| TAF4    | 484.8  | 512.7  | 688.3  | 621.1  | 586.5  | 530.7  | 612   | 579.3  |
| TAF5    | 225    | 231.6  | 196.7  | 195.9  | 178.8  | 159.8  | 174   | 169.3  |
| TAF5L   | 117.1  | 115.6  | 112.5  | 120.4  | 112.6  | 97     | 112.9 | 109.2  |
| TAF5L   | 150.2  | 135.5  | 111.9  | 148    | 138.5  | 106.1  | 145.8 | 168.1  |
| TAF6    | 128    | 111    | 123.8  | 126.8  | 128.2  | 109.3  | 132.8 | 123.1  |
| TAF6    | 126    | 133.1  | 122.8  | 125.5  | 110.8  | 108.8  | 133.7 | 129.6  |
| TAF6L   | 372.6  | 424.6  | 351    | 447.1  | 287.2  | 230.8  | 493.2 | 476    |
| TAF7    | 219.5  | 164.7  | 257.9  | 220.8  | 216.1  | 225.9  | 215.2 | 326.2  |
| TAF7L   | 110    | 113.3  | 108.6  | 116.2  | 107    | 99     | 117.3 | 112.6  |
| TAF9    | 142.3  | 136    | 140.2  | 145    | 139.3  | 123.9  | 140.4 | 145.1  |
| TAF9    | 130.6  | 130.6  | 144.9  | 139.3  | 139.6  | 118.4  | 139.4 | 150.5  |
| TAF9B   | 108.2  | 115.9  | 119.4  | 119    | 115.8  | 96.7   | 118.6 | 110.9  |
| TAGAP   | 177.2  | 166.1  | 152    | 171.2  | 161.4  | 113.8  | 167.1 | 159.4  |
| TAGAP   | 192.7  | 190.1  | 183.7  | 201.6  | 189.1  | 137.6  | 182.5 | 199.2  |
| TAGAP   | 187.1  | 157.7  | 185.8  | 180.1  | 152.7  | 125.6  | 159   | 165.1  |
| TAGLN   | 135.1  | 134.6  | 167.8  | 148.2  | 141.5  | 139.6  | 169.2 | 209.7  |
| TAGLN   | 128.3  | 123.2  | 137.6  | 159.7  | 113.8  | 115.4  | 125.2 | 136.8  |
| TAGLN   | 117.6  | 117.8  | 104.7  | 117.9  | 106.8  | 95.2   | 120.9 | 111.1  |
| TAGLN2  | 733.7  | 1033.4 | 773.3  | 801.1  | 551.8  | 689    | 586.4 | 452.9  |
| TAGLN3  | 118.4  | 121.7  | 108.3  | 115.4  | 106.3  | 97.8   | 120.5 | 114.3  |
| TAGLN3  | 117.8  | 118.5  | 112    | 124.5  | 110.3  | 96.6   | 117.5 | 117.8  |
| TAL1    | 132.4  | 120.3  | 128.8  | 124.5  | 116.4  | 116.8  | 133.4 | 128.2  |
| TAL2    | 114    | 114.3  | 113.9  | 119.1  | 99.9   | 100.2  | 115.5 | 105.2  |

|          |        |        |        |        |        |        |        |        |
|----------|--------|--------|--------|--------|--------|--------|--------|--------|
| TALDO1   | 3548.8 | 2418.3 | 2904.1 | 5197.7 | 1932.4 | 5188.6 | 3603.6 | 2455.3 |
| TANC1    | 128.3  | 125.6  | 117.3  | 132.1  | 114.7  | 107.2  | 136.4  | 112.4  |
| TA-NFKBH | 130.1  | 131.2  | 118    | 139.5  | 123.7  | 121    | 156    | 132.1  |
| TANK     | 144.6  | 141.6  | 155.2  | 176.2  | 141.4  | 154.3  | 144.9  | 154    |
| TANK     | 115.7  | 110.7  | 122    | 110.5  | 103.6  | 96.7   | 118.3  | 118.2  |
| TAOK1    | 195.3  | 205.7  | 158.8  | 241.5  | 181.3  | 121    | 240.6  | 258.7  |
| TAOK2    | 187.1  | 193.5  | 167.1  | 168.8  | 139.1  | 120.3  | 194.5  | 185.6  |
| TAOK2    | 134.2  | 106.9  | 121.6  | 128.4  | 116.4  | 107    | 116.5  | 131.7  |
| TAOK2    | 115.5  | 107.5  | 119.9  | 127.4  | 113.6  | 98.8   | 120.2  | 114.3  |
| TAOK3    | 111.1  | 106    | 115.6  | 121.3  | 109.6  | 93.5   | 115.6  | 113.4  |
| TAP1     | 3046.2 | 2627.3 | 2233.2 | 2962.5 | 1570.4 | 1655.3 | 1545.1 | 1103.3 |
| TAP2     | 217.3  | 210.2  | 204.8  | 211.1  | 169.2  | 146.2  | 185.7  | 147.1  |
| TAP2     | 339.7  | 392.3  | 416.2  | 375.7  | 350.7  | 274.7  | 297    | 253.7  |
| TAPBP    | 1593   | 1453.6 | 1326.2 | 1383.5 | 719.9  | 1029   | 1064.2 | 797.3  |
| TAPBP    | 126.7  | 136.7  | 133.8  | 131.6  | 129.5  | 106    | 131.3  | 125.1  |
| TAPBP    | 119.8  | 122.7  | 136.8  | 136    | 121.1  | 110.1  | 118.3  | 117.4  |
| TAPBPL   | 170.4  | 175.9  | 202.4  | 162    | 157.8  | 141.4  | 167.6  | 128.3  |
| TA-PP2C  | 291.3  | 269.7  | 349.3  | 347.8  | 243.5  | 226.3  | 290    | 308.4  |
| TARBP1   | 159.1  | 163.2  | 167.4  | 151.2  | 131.6  | 135.2  | 141.5  | 126.8  |
| TARBP2   | 143.2  | 158.2  | 160    | 158.6  | 144.4  | 123.1  | 151.9  | 142.7  |
| TARBP2   | 160.3  | 156    | 194.5  | 169.5  | 151.6  | 138    | 156.4  | 166.2  |
| TARDBP   | 149.9  | 137.9  | 150.1  | 174.6  | 131.3  | 132.6  | 148.2  | 139    |
| TARP     | 168.4  | 202.8  | 174.8  | 190.5  | 175.2  | 159.5  | 165.2  | 180.8  |
| TARS     | 279    | 317.5  | 272.8  | 295.2  | 255.8  | 255.8  | 369.3  | 592.6  |
| TARSL1   | 125.1  | 141.3  | 134.5  | 133    | 118.7  | 114    | 134.7  | 122.1  |
| TAS1R1   | 119.5  | 109.3  | 114.8  | 116.7  | 106.4  | 94.7   | 118    | 109.4  |
| TAS1R1   | 110.1  | 112.2  | 114.5  | 115.9  | 106.6  | 104.2  | 106.4  | 114.2  |
| TAS1R2   | 120.6  | 112.4  | 129.8  | 120.6  | 114.8  | 97.8   | 119.2  | 123.2  |
| TAS1R3   | 117.5  | 106.8  | 109.9  | 114.1  | 108.3  | 104.2  | 117.5  | 111.9  |
| TAS2R1   | 107    | 111.2  | 110    | 109.2  | 106.3  | 94.3   | 111.7  | 121.9  |
| TAS2R10  | 118.4  | 115.6  | 110.3  | 118    | 110.9  | 96.1   | 122.2  | 115    |
| TAS2R13  | 111.9  | 106.4  | 117.5  | 113.5  | 109.5  | 101.4  | 114.7  | 112.9  |
| TAS2R14  | 110.2  | 127.2  | 121.7  | 125.5  | 107.3  | 106.3  | 114.3  | 122.8  |
| TAS2R16  | 114.2  | 110.9  | 124    | 122.1  | 115.5  | 102.5  | 114.2  | 118.1  |
| TAS2R3   | 121.4  | 121.3  | 121    | 116.8  | 109.8  | 105.7  | 117.4  | 119.4  |
| TAS2R38  | 114.2  | 113.5  | 130.5  | 127.6  | 113.6  | 103.2  | 118.7  | 112.3  |
| TAS2R39  | 119.6  | 113.9  | 115    | 114    | 104.5  | 100.9  | 114.7  | 116.3  |
| TAS2R4   | 113.9  | 112.4  | 114.8  | 123.2  | 116.6  | 96     | 121.4  | 114.7  |
| TAS2R40  | 105.3  | 106.1  | 119.1  | 121.3  | 113.2  | 97.1   | 116.6  | 112.1  |
| TAS2R43  | 118.5  | 125.1  | 126.8  | 127.8  | 114.3  | 97.6   | 123.8  | 120    |
| TAS2R44  | 120.7  | 112.4  | 125.3  | 116.4  | 116.4  | 100.3  | 118.4  | 112.5  |
| TAS2R45  | 113.1  | 119.7  | 119.5  | 128.6  | 113.1  | 94.3   | 110.1  | 108.7  |
| TAS2R46  | 117.2  | 112.3  | 105.9  | 116.6  | 114    | 101.5  | 123.6  | 122.9  |
| TAS2R48  | 108.7  | 114.9  | 117.3  | 116.9  | 105.2  | 95     | 124.1  | 108.3  |
| TAS2R49  | 120.9  | 117.6  | 120.5  | 121.5  | 113    | 101    | 118.3  | 111.5  |
| TAS2R5   | 116.9  | 117.6  | 110.3  | 125.3  | 112.2  | 97.6   | 114.4  | 118.8  |
| TAS2R50  | 114.3  | 116.1  | 114.1  | 118.2  | 105.2  | 96.5   | 117.2  | 116.1  |
| TAS2R60  | 120    | 122.6  | 119.8  | 123    | 115.2  | 112.4  | 113.8  | 121.8  |
| TAS2R7   | 114.9  | 114.6  | 127.3  | 127.9  | 107    | 98.8   | 120.3  | 116.1  |
| TAS2R8   | 116.1  | 111.6  | 119.5  | 127.3  | 110.8  | 94     | 126.6  | 121.8  |
| TAS2R9   | 118.1  | 113    | 126    | 113    | 109.7  | 98.7   | 119.2  | 119.2  |

|          |        |        |        |        |        |        |        |        |
|----------|--------|--------|--------|--------|--------|--------|--------|--------|
| TASP1    | 136.5  | 144.1  | 148.9  | 139.4  | 137.4  | 115.5  | 142.4  | 134.8  |
| TAT      | 119.6  | 113.2  | 117.1  | 117.2  | 112.7  | 96.9   | 111.6  | 112.9  |
| TATDN1   | 164.4  | 145.6  | 187.7  | 179.3  | 136.3  | 170.6  | 158    | 165.1  |
| TATDN2   | 207.1  | 198.8  | 172.8  | 210.8  | 172.2  | 168.2  | 208.7  | 204.9  |
| TATDN3   | 164.3  | 156.2  | 251.9  | 175.8  | 144.3  | 164.1  | 179.8  | 158    |
| TATDN3   | 150.3  | 144.9  | 262.9  | 167.1  | 145.6  | 160.9  | 137.7  | 148.4  |
| TAX1BP1  | 1002.5 | 1164.5 | 907.2  | 1148.5 | 1031.3 | 948.5  | 1309.7 | 1351.6 |
| TAX1BP1  | 1036.5 | 1070.1 | 881    | 1327.8 | 1101   | 1181.4 | 1252.3 | 1721.8 |
| TAX1BP3  | 257.1  | 244.6  | 384.4  | 237.5  | 177.6  | 171.6  | 173.6  | 150    |
| TAZ      | 151.6  | 183.9  | 181.6  | 171.7  | 159.8  | 142    | 173    | 160    |
| TAZ      | 124.2  | 122.5  | 135.2  | 116    | 126.5  | 107.7  | 118.3  | 114.4  |
| TAZ      | 198.3  | 193.4  | 176.3  | 204.9  | 171.8  | 156.5  | 189.7  | 205.4  |
| TBC1D1   | 113.7  | 114.6  | 127.2  | 127.6  | 119.5  | 102.6  | 134.2  | 118    |
| TBC1D10A | 164.7  | 150.9  | 165.4  | 154.5  | 155.8  | 148.4  | 140.1  | 156.4  |
| TBC1D10B | 149.4  | 166.6  | 156.7  | 156.7  | 152.5  | 133.1  | 188.1  | 169.1  |
| TBC1D10C | 2561.9 | 2920.5 | 2573.4 | 2665.8 | 1805.4 | 2211.2 | 2483.8 | 2681   |
| TBC1D13  | 281.3  | 195.1  | 234.2  | 257.2  | 161.8  | 226.3  | 256.9  | 182.5  |
| TBC1D14  | 530.6  | 589.8  | 629.9  | 649.1  | 540.2  | 552.4  | 684.9  | 708.7  |
| TBC1D15  | 510.4  | 517.2  | 359.7  | 596    | 611.7  | 357.6  | 886.9  | 1304.5 |
| TBC1D16  | 127.2  | 136.2  | 157.3  | 138.2  | 134.6  | 122.1  | 135.9  | 144.9  |
| TBC1D17  | 125.2  | 146.7  | 130.8  | 133.4  | 116.1  | 111.1  | 153.4  | 159.6  |
| TBC1D19  | 128.6  | 128.4  | 137.6  | 139.8  | 124.2  | 113.2  | 127.8  | 130    |
| TBC1D2   | 277    | 200.7  | 171.4  | 347.5  | 225.3  | 143.4  | 551.3  | 363    |
| TBC1D20  | 195.5  | 209.5  | 191.7  | 212.7  | 195.2  | 181    | 247.4  | 256.4  |
| TBC1D21  | 107.8  | 107.1  | 128    | 122    | 106.1  | 108.4  | 122.4  | 122.6  |
| TBC1D22A | 125.9  | 113.7  | 121.9  | 122.1  | 104    | 102.1  | 123.1  | 112.2  |
| TBC1D22B | 178.6  | 170.4  | 138    | 157.3  | 144.5  | 122.4  | 186.9  | 182.8  |
| TBC1D23  | 155.1  | 177    | 159.8  | 182.6  | 152.5  | 130.4  | 216.7  | 180.4  |
| TBC1D24  | 126    | 154.4  | 123.1  | 131.2  | 114.8  | 105.9  | 129.4  | 135.7  |
| TBC1D2B  | 603.1  | 695    | 652.2  | 505.6  | 472.8  | 567.3  | 456.2  | 348.4  |
| TBC1D3   | 117    | 110.3  | 109.7  | 130.4  | 114.4  | 91.4   | 112.7  | 110.7  |
| TBC1D3B  | 148.4  | 149.2  | 154.9  | 162.6  | 132.4  | 121.9  | 143.8  | 149.4  |
| TBC1D3C  | 109.9  | 115.7  | 116.5  | 129.3  | 107.7  | 99.4   | 116.1  | 117.5  |
| TBC1D3G  | 138.4  | 146.5  | 138.7  | 165.8  | 124    | 122.4  | 137.2  | 144.8  |
| TBC1D4   | 289.6  | 335.9  | 309.4  | 341.9  | 336.3  | 323.1  | 383.3  | 368.5  |
| TBC1D5   | 121    | 121.6  | 137.9  | 129.9  | 116    | 104    | 137.6  | 120.8  |
| TBC1D7   | 133.6  | 196.5  | 154.7  | 132.7  | 164.2  | 135.5  | 218.5  | 206.2  |
| TBC1D8B  | 114.2  | 105.7  | 112    | 112.8  | 105.4  | 98.8   | 127.1  | 115.9  |
| TBC1D9   | 184.5  | 172.6  | 230.1  | 177.4  | 132.1  | 125    | 131    | 145    |
| TBC1D9B  | 161.7  | 155.7  | 147.6  | 143.5  | 122.3  | 116.5  | 151.4  | 171.3  |
| TBC1D9B  | 138.1  | 148.9  | 146.2  | 153.2  | 130.7  | 130.4  | 156.1  | 131    |
| TBCA     | 2242.3 | 1945.9 | 2489.8 | 2480.3 | 2225.4 | 2611.4 | 2848.9 | 2678.7 |
| TBCC     | 360.6  | 434.4  | 302.8  | 375.7  | 296.5  | 279.8  | 264.9  | 306.8  |
| TBCCD1   | 116    | 121.9  | 127.8  | 117.7  | 109    | 99.3   | 117.8  | 116.1  |
| TBCD     | 144.9  | 131.1  | 185.9  | 142    | 124.4  | 141.7  | 139.4  | 133    |
| TBCD     | 443.4  | 531.4  | 900.5  | 469.1  | 341.4  | 679    | 394.3  | 365.6  |
| TBCE     | 238.7  | 232.7  | 262.5  | 249.1  | 217.5  | 202.9  | 202.3  | 293.7  |
| TBCE     | 132.4  | 122.5  | 131.3  | 130.2  | 121.7  | 103.2  | 137    | 132.7  |
| TBK1     | 395.2  | 490.1  | 374.2  | 617.4  | 475.3  | 433.6  | 711.6  | 610.2  |
| TBKBP1   | 121.8  | 117.6  | 107.3  | 124.5  | 108.4  | 102    | 124.5  | 118.1  |
| TBL1X    | 435.9  | 446.9  | 435.7  | 558.7  | 464.7  | 385.4  | 671    | 638.4  |

|         |       |       |       |       |       |       |       |       |
|---------|-------|-------|-------|-------|-------|-------|-------|-------|
| TBL1XR1 | 128.7 | 136.5 | 138.9 | 139.8 | 121.4 | 116.6 | 141.5 | 145.1 |
| TBL1Y   | 113.4 | 118.5 | 110.9 | 116.7 | 111   | 106.5 | 117.2 | 121.1 |
| TBL1Y   | 112.8 | 115.6 | 112.2 | 118.9 | 110.2 | 94.4  | 123.5 | 113.4 |
| TBL2    | 138   | 147.5 | 159.6 | 163.6 | 148.5 | 135.6 | 132.6 | 153.7 |
| TBL3    | 136.1 | 137.2 | 139   | 138.6 | 121.7 | 106.8 | 141.3 | 119.4 |
| TBN     | 115.1 | 117.4 | 120.6 | 122.3 | 113.3 | 106.7 | 123.4 | 131.9 |
| TBP     | 319.5 | 280.8 | 297.9 | 311.8 | 286   | 235   | 287.8 | 306.9 |
| TBPIP   | 113.8 | 119.7 | 111   | 120.8 | 110.7 | 98.6  | 119.9 | 119.8 |
| TBPL1   | 392.6 | 481   | 501.1 | 417.2 | 403.9 | 285.2 | 424.8 | 459.1 |
| TBPL2   | 112.6 | 123   | 124.4 | 116.5 | 111.3 | 103   | 123.8 | 106.1 |
| TBR1    | 106.1 | 108.1 | 116.4 | 116.2 | 111.9 | 101.5 | 111.6 | 104.3 |
| TBRG1   | 107.3 | 113.1 | 122.5 | 119.3 | 116.7 | 112.6 | 119.3 | 129.1 |
| TBRG4   | 264.1 | 255.5 | 200.2 | 286.8 | 206.5 | 213.2 | 282.6 | 240.7 |
| TBRG4   | 272.4 | 381.6 | 353.5 | 378.1 | 266.9 | 298.1 | 418.5 | 341.7 |
| TBRG4   | 118   | 123.8 | 118.8 | 117.9 | 112.3 | 97.5  | 121.8 | 117.4 |
| TBX1    | 121.1 | 114.3 | 114.3 | 106.3 | 114.3 | 106.6 | 119.1 | 114.6 |
| TBX1    | 118   | 110.4 | 107   | 116.1 | 105   | 102.6 | 114.3 | 111.4 |
| TBX1    | 119.1 | 109.3 | 115.1 | 112.8 | 107.2 | 98    | 109.1 | 100.9 |
| TBX1    | 115.1 | 115   | 111.2 | 119.6 | 98.9  | 104.6 | 110.1 | 114.9 |
| TBX10   | 101.5 | 114.7 | 123.6 | 124   | 105.3 | 97.4  | 111.6 | 112.2 |
| TBX15   | 117   | 121.6 | 132.6 | 128.4 | 117.2 | 103   | 121.8 | 117.8 |
| TBX18   | 118.7 | 122.1 | 134.9 | 123.5 | 114.7 | 108.4 | 118.7 | 116.4 |
| TBX18   | 115.1 | 111.6 | 116.9 | 124.2 | 109.2 | 100.3 | 116.8 | 120.7 |
| TBX19   | 138.4 | 143.2 | 138.8 | 137.7 | 120.4 | 115.6 | 134.7 | 123.6 |
| TBX2    | 112.1 | 117.8 | 121.3 | 121.6 | 109.7 | 100.2 | 123.1 | 122.4 |
| TBX20   | 113.5 | 114.5 | 119.1 | 119.1 | 114.1 | 99.8  | 115.9 | 114.5 |
| TBX20   | 117.2 | 121.1 | 117.7 | 120.9 | 110.1 | 103.1 | 116.3 | 114.3 |
| TBX21   | 130.7 | 130.6 | 132.4 | 143.1 | 114.5 | 103.8 | 126   | 132.4 |
| TBX22   | 118   | 102.9 | 115.7 | 115.8 | 107.3 | 93.8  | 118.2 | 120.3 |
| TBX3    | 111.9 | 131   | 121.9 | 122.5 | 116.5 | 95.5  | 120.6 | 117.3 |
| TBX3    | 119.2 | 123.5 | 121.8 | 122.2 | 116.1 | 97.8  | 121.7 | 122.9 |
| TBX4    | 109.9 | 111.7 | 117.3 | 115.3 | 101.9 | 99.1  | 124.1 | 113.9 |
| TBX5    | 114.2 | 108.4 | 110.4 | 107.4 | 113.1 | 99.3  | 112.9 | 106.5 |
| TBX5    | 111.8 | 114.5 | 115.3 | 117.5 | 104.8 | 99.2  | 116.8 | 116   |
| TBX5    | 116   | 110.6 | 110.8 | 123.1 | 104.6 | 94.4  | 120.9 | 117.6 |
| TBX6    | 122.9 | 111.4 | 134.4 | 122.5 | 117.8 | 99.2  | 121.3 | 120.2 |
| TBX6    | 114   | 125.5 | 120.3 | 128.6 | 103.7 | 99.3  | 115.4 | 116.8 |
| TBX6    | 121.8 | 112.8 | 114.7 | 123.5 | 118.9 | 101   | 120   | 115.8 |
| TBXA2R  | 121.5 | 122.7 | 123.2 | 124   | 114.9 | 95.5  | 110.1 | 113.3 |
| TBXA2R  | 116.2 | 121.8 | 109   | 127.9 | 112.4 | 104.3 | 113.2 | 112.9 |
| TBXA2R  | 116.6 | 120.7 | 131.8 | 128   | 114.9 | 111.3 | 124.8 | 143.2 |
| TBXAS1  | 402.8 | 260.1 | 925   | 558.6 | 261.7 | 716.5 | 392   | 249.5 |
| TCAP    | 109.7 | 119.7 | 122.4 | 112.8 | 115.3 | 115.7 | 122.7 | 122.5 |
| TCBA1   | 111.8 | 116.5 | 123.3 | 107.3 | 106.1 | 94.3  | 122.4 | 109.4 |
| TCEA1   | 282.2 | 311.7 | 309   | 410.4 | 303   | 288.4 | 262.3 | 260.6 |
| TCEA1   | 118.1 | 117.2 | 121.1 | 118.1 | 107.4 | 109.5 | 117.4 | 120.3 |
| TCEA1   | 125.5 | 133.2 | 134.3 | 136.3 | 119   | 118.3 | 125.5 | 119.7 |
| TCEA2   | 199.5 | 183.9 | 231.8 | 194   | 150.9 | 166.7 | 157.6 | 154.4 |
| TCEA2   | 112.9 | 122.9 | 120.9 | 113.9 | 111.4 | 103.7 | 115.4 | 119   |
| TCEA2   | 124.5 | 119.9 | 129.5 | 132.5 | 113.1 | 117.1 | 121.7 | 116.9 |
| TCEA3   | 185.5 | 236   | 185.2 | 175.3 | 161.8 | 131.3 | 138.1 | 153.6 |

|         |        |        |       |        |        |        |        |        |
|---------|--------|--------|-------|--------|--------|--------|--------|--------|
| TCEAL1  | 143.4  | 131.6  | 127.4 | 152.1  | 136.4  | 116    | 127    | 145.6  |
| TCEAL1  | 126.5  | 122.8  | 120.8 | 130    | 114.9  | 103.5  | 126    | 115.2  |
| TCEAL2  | 148.1  | 137.5  | 150   | 163.3  | 124.1  | 118.7  | 142.9  | 127.8  |
| TCEAL3  | 267.7  | 315.9  | 258   | 250.4  | 216.9  | 210.6  | 243    | 215.9  |
| TCEAL3  | 508.8  | 540.3  | 489.8 | 576.9  | 450.9  | 386    | 401.8  | 401.6  |
| TCEAL4  | 125    | 124.5  | 124   | 118.5  | 114.3  | 102    | 122    | 118.3  |
| TCEAL4  | 135.9  | 154.5  | 168.7 | 139.3  | 130    | 116.4  | 129.5  | 148.1  |
| TCEAL4  | 530.1  | 679.7  | 558.2 | 489.8  | 541.4  | 371.3  | 401.7  | 553.7  |
| TCEAL5  | 116.6  | 126.3  | 121.5 | 128.1  | 118.4  | 111    | 136.6  | 123.4  |
| TCEAL6  | 105.5  | 119.8  | 111.8 | 108.8  | 106.5  | 102.1  | 118.8  | 109.2  |
| TCEAL7  | 116.3  | 110.8  | 112.7 | 107.1  | 100.9  | 97.3   | 116.4  | 108.9  |
| TCEAL8  | 342.2  | 324.1  | 384.4 | 400.1  | 292.1  | 232.1  | 220.2  | 247.4  |
| TCEAL8  | 209.4  | 216.4  | 212.8 | 220.4  | 215    | 159.8  | 171.6  | 175.6  |
| TCEAL8  | 359.6  | 414.8  | 307.1 | 351    | 265.4  | 216.4  | 279.9  | 279.3  |
| TCEB1   | 496.8  | 517.3  | 681   | 685.3  | 650.3  | 578.3  | 984.8  | 918.9  |
| TCEB2   | 126.3  | 137.7  | 143.2 | 133.6  | 135.9  | 128.4  | 148.8  | 191.6  |
| TCEB2   | 1429.2 | 1652.7 | 1818  | 1678.2 | 1319.1 | 1594.5 | 1402.7 | 1515.8 |
| TCEB3   | 208.6  | 219.4  | 175.2 | 213.3  | 185    | 161.5  | 238.8  | 206.2  |
| TCEB3B  | 107.5  | 109.1  | 116.8 | 101.6  | 103.2  | 93.2   | 114.1  | 111.7  |
| TCEB3C  | 111.3  | 111.4  | 111.8 | 107    | 104.5  | 97.6   | 121.5  | 114.6  |
| TCERG1  | 157.9  | 160.2  | 177.6 | 165.1  | 174.3  | 146.3  | 193.2  | 179.8  |
| TCERG1  | 116.7  | 125.8  | 111.6 | 121    | 107.4  | 99.7   | 123.9  | 115.8  |
| TCERG1  | 164.7  | 162    | 140.3 | 187.7  | 179.8  | 136.5  | 200.1  | 178    |
| TCERG1L | 119.6  | 110.9  | 113.8 | 119.8  | 113.4  | 101.7  | 110.3  | 113.1  |
| TCF1    | 106.6  | 118.7  | 99.4  | 126.3  | 99.5   | 106.4  | 120.1  | 116.6  |
| TCF12   | 262    | 291.2  | 319   | 331.3  | 303.7  | 221.1  | 320.5  | 363.8  |
| TCF12   | 107.4  | 120.3  | 110.7 | 116.4  | 110.7  | 96.7   | 116    | 115.9  |
| TCF15   | 128.6  | 120.5  | 125.1 | 126.3  | 113.7  | 108.9  | 133.9  | 115.4  |
| TCF19   | 112.5  | 114.6  | 105.8 | 119.8  | 120.9  | 99.5   | 116    | 120.8  |
| TCF19   | 112.2  | 126    | 116.5 | 125.5  | 118.7  | 106.3  | 116.3  | 124.8  |
| TCF2    | 115.6  | 109.8  | 117.1 | 112.6  | 118.4  | 99.8   | 129.3  | 102    |
| TCF2    | 109.7  | 120.3  | 119.2 | 119.6  | 107.6  | 96.2   | 122.5  | 113.2  |
| TCF2    | 109.9  | 117.5  | 109.8 | 116.8  | 111.3  | 104.1  | 118.2  | 116.4  |
| TCF20   | 142.1  | 137.6  | 149.4 | 145    | 125.4  | 116.8  | 149.8  | 147.4  |
| TCF20   | 131.7  | 118.8  | 122.5 | 126.2  | 110.9  | 109    | 131.5  | 118.5  |
| TCF20   | 527.4  | 522.6  | 350.7 | 486.1  | 561.6  | 312.5  | 566.4  | 651.8  |
| TCF21   | 114.3  | 114.9  | 119.4 | 123.8  | 111.5  | 100.4  | 122.8  | 115.4  |
| TCF21   | 113.9  | 106.4  | 113.4 | 111.6  | 102.9  | 92.2   | 116.1  | 107.1  |
| TCF21   | 109.7  | 120.5  | 114.3 | 120.9  | 106.5  | 109.3  | 125.8  | 111.5  |
| TCF23   | 114.4  | 114.1  | 108.1 | 110.8  | 113.1  | 105.7  | 129.6  | 105.5  |
| TCF3    | 185.3  | 190.2  | 154.3 | 233.3  | 186.5  | 151.4  | 218.3  | 251    |
| TCF4    | 181.5  | 139    | 139   | 143.2  | 134.4  | 107.5  | 157.9  | 129.7  |
| TCF7    | 122.1  | 142.2  | 121   | 136.2  | 129.1  | 114.2  | 126    | 136.8  |
| TCF7    | 148.4  | 158.5  | 127.5 | 160.4  | 148.1  | 115    | 153    | 163.6  |
| TCF7    | 114.8  | 111.3  | 114.1 | 122.4  | 122.1  | 101.5  | 126.1  | 117.4  |
| TCF7    | 115.2  | 113.6  | 122.7 | 121.7  | 111.5  | 90.3   | 114.9  | 114.8  |
| TCF7    | 120.1  | 121.1  | 120.7 | 122.8  | 116.3  | 103.9  | 120.1  | 117.1  |
| TCF7    | 111.6  | 110    | 107.3 | 117.7  | 100.6  | 100.2  | 114    | 117.5  |
| TCF7L1  | 109.1  | 120.8  | 116.3 | 114.6  | 110.1  | 105.3  | 116.2  | 118.1  |
| TCF7L2  | 117    | 118.6  | 112.6 | 125.3  | 109.4  | 102.6  | 123.1  | 117.8  |
| TCF8    | 123.7  | 128.3  | 115   | 116.8  | 109.6  | 99.9   | 120.3  | 122.5  |

|          |       |       |       |       |       |       |       |       |
|----------|-------|-------|-------|-------|-------|-------|-------|-------|
| TCFL5    | 264.6 | 260.4 | 261.7 | 319.8 | 239.7 | 225.2 | 250.5 | 277.5 |
| TCHHL1   | 115.3 | 112.5 | 111.7 | 112.8 | 106.7 | 93.3  | 114.4 | 105.6 |
| TCHP     | 147.1 | 141.9 | 148.9 | 141.8 | 126.7 | 132.7 | 136.3 | 125   |
| TCIRG1   | 703.4 | 561.1 | 825.3 | 622.4 | 326.1 | 553.5 | 460   | 353.6 |
| TCIRG1   | 115.2 | 117.5 | 116.4 | 128.6 | 104.9 | 99.7  | 121.7 | 117.7 |
| TCIRG1   | 126.4 | 117.9 | 137.1 | 130.7 | 111.3 | 118.9 | 120.5 | 108.2 |
| TCL1A    | 191   | 145.7 | 176.1 | 186.8 | 124   | 147.4 | 152   | 117.1 |
| TCL1B    | 131   | 125.1 | 138.9 | 154.8 | 128   | 117.8 | 127.6 | 134.2 |
| TCL1B    | 105.4 | 112.6 | 108.4 | 108.2 | 99    | 93.4  | 111.7 | 101.5 |
| TCL6     | 109.1 | 113.7 | 118.1 | 119.9 | 95.5  | 105.8 | 102   | 116.5 |
| TCL6     | 118.4 | 110.2 | 108.1 | 111.3 | 109.4 | 99.8  | 112.8 | 99.9  |
| TCL6     | 112.8 | 120.9 | 120.5 | 125.6 | 111.1 | 97.3  | 122.7 | 109.5 |
| TCN1     | 115.6 | 131.4 | 126.6 | 121.7 | 127.5 | 110   | 118.3 | 134   |
| TCN2     | 113.7 | 114.3 | 119.1 | 114.9 | 107   | 93.6  | 111.8 | 115.3 |
| TCOF1    | 106.6 | 115.6 | 111.7 | 111.8 | 110.8 | 97.3  | 121.1 | 123.6 |
| TCOF1    | 114.5 | 119.9 | 124.5 | 112   | 113.4 | 104.1 | 119.3 | 115.2 |
| TCOF1    | 108.1 | 110.3 | 124.7 | 120.7 | 114.8 | 97.2  | 111.8 | 117.1 |
| TCOF1    | 120.4 | 118.8 | 119.6 | 120.5 | 118.6 | 105.6 | 123.9 | 117.9 |
| TCP1     | 153   | 163.7 | 163.8 | 173.4 | 144.6 | 141.4 | 148.9 | 262   |
| TCP1     | 121.6 | 133.9 | 132.6 | 135.6 | 115.6 | 114.8 | 136.5 | 167.3 |
| TCP10    | 114.5 | 117.9 | 103.5 | 113.9 | 104.6 | 90.5  | 116.3 | 114.4 |
| TCP10L   | 116.1 | 121.7 | 121   | 122   | 107.8 | 106   | 130.8 | 122.1 |
| TCP11    | 112.6 | 122.4 | 110.4 | 116.8 | 109.2 | 104.2 | 112.9 | 116.7 |
| TCP11L1  | 113.9 | 109.6 | 108.1 | 114   | 114.6 | 102   | 111.6 | 108.5 |
| TCP11L2  | 126.9 | 125.5 | 129   | 127   | 124   | 114.7 | 147.8 | 136   |
| TCTA     | 159.9 | 166.3 | 197.6 | 201.5 | 151.2 | 141.7 | 159.9 | 188.3 |
| TCTEX1D1 | 121.5 | 120.5 | 117.3 | 123   | 115.5 | 113.3 | 124   | 137   |
| TDGF1    | 116.8 | 106.5 | 111.2 | 117.9 | 104.1 | 98.2  | 114.2 | 111   |
| TDGF3    | 113.6 | 116.3 | 118.1 | 118.5 | 110.8 | 96.4  | 124.6 | 113.7 |
| TDH      | 114.3 | 105.8 | 117   | 119.7 | 113.3 | 100.3 | 115.6 | 108.3 |
| TDO2     | 114.5 | 113.9 | 111.7 | 117.4 | 104.3 | 105.1 | 113.4 | 113.9 |
| TDP1     | 411.8 | 369.7 | 530.1 | 393.1 | 406.5 | 353.6 | 449.1 | 514.4 |
| TDP1     | 135.9 | 135.1 | 130   | 117   | 125.5 | 112.5 | 137.9 | 129.3 |
| TDP1     | 158.3 | 193.7 | 159   | 183.7 | 152.9 | 127.4 | 172.6 | 164   |
| TDRD1    | 425.3 | 333.4 | 461.8 | 383.5 | 347.7 | 307.3 | 417.7 | 447.8 |
| TDRD10   | 116.7 | 116.8 | 110.3 | 111.8 | 113.9 | 100.6 | 122.7 | 113.4 |
| TDRD3    | 124   | 133.5 | 151.5 | 134.3 | 119.6 | 128   | 141.7 | 131.8 |
| TDRD4    | 112.9 | 119.9 | 115.8 | 114.3 | 103.8 | 97.5  | 114.3 | 115   |
| TDRD5    | 113.7 | 114.7 | 113.9 | 118.6 | 105.7 | 90.9  | 114.5 | 116.5 |
| TDRD6    | 120.9 | 133.4 | 129.1 | 148.3 | 125.8 | 109.9 | 133.5 | 141.9 |
| TDRD7    | 410.8 | 394.2 | 365.3 | 430   | 319.6 | 300.4 | 385.9 | 346.9 |
| TDRD9    | 115.7 | 133.1 | 125.5 | 125.5 | 111   | 105.5 | 128.9 | 116.4 |
| TDRKH    | 125.8 | 124.6 | 126.3 | 125.2 | 125.2 | 106.6 | 126.1 | 132.1 |
| TEAD1    | 117.5 | 120.5 | 120.7 | 121.6 | 103.8 | 104.6 | 122.5 | 120.5 |
| TEAD2    | 174   | 182.5 | 172   | 200.7 | 142.5 | 125.7 | 159.9 | 144   |
| TEAD3    | 117.3 | 118.6 | 125.1 | 137.4 | 119.6 | 112.3 | 136.6 | 120.3 |
| TEAD4    | 120.6 | 114.4 | 137.2 | 122   | 113   | 112.9 | 122.9 | 130.4 |
| TEAD4    | 109.6 | 115.9 | 116.7 | 118.7 | 103.4 | 93.8  | 119.3 | 115.4 |
| TEAD4    | 118.3 | 116.8 | 120.4 | 119.9 | 117.6 | 109.2 | 119.3 | 110.3 |
| TEC      | 124.1 | 123.6 | 120.4 | 123.1 | 116.9 | 104   | 125.1 | 124.8 |
| TECTA    | 117.5 | 130.1 | 119.6 | 132.2 | 111.6 | 104.4 | 128   | 110.5 |

|         |        |        |        |        |        |       |        |        |
|---------|--------|--------|--------|--------|--------|-------|--------|--------|
| TECTB   | 128.7  | 124.4  | 109.8  | 110.2  | 111.4  | 108.4 | 118.4  | 122.3  |
| TEDDM1  | 120.1  | 113.8  | 116.8  | 114.8  | 112.5  | 106.5 | 114.8  | 113.6  |
| TEF     | 162.9  | 156.5  | 181.2  | 168    | 156.3  | 145.3 | 170.7  | 182.6  |
| TEGT    | 2808.5 | 3283.6 | 3929   | 3666.1 | 2280.6 | 3396  | 4062.8 | 4428.2 |
| TEK     | 111.2  | 116.1  | 127.5  | 113.9  | 112.2  | 110.2 | 124.3  | 123.7  |
| TEKT1   | 129.1  | 120.6  | 131    | 141.6  | 117.5  | 104.7 | 130.3  | 123.2  |
| TEKT2   | 121.8  | 122.2  | 118.1  | 125.8  | 119.4  | 107.1 | 122.5  | 117.3  |
| TEKT3   | 118.8  | 108.7  | 120.5  | 110.7  | 110    | 100.3 | 114.9  | 117    |
| TEKT4   | 104.6  | 119.7  | 105.8  | 116.3  | 105.6  | 85.6  | 106.2  | 106.1  |
| TENC1   | 120.5  | 113.7  | 115.6  | 127.8  | 109.1  | 96.1  | 112.5  | 123    |
| TENC1   | 114.4  | 115.2  | 118.2  | 118.4  | 122.4  | 101.4 | 113.2  | 104.2  |
| TENC1   | 111    | 119.8  | 113.8  | 119.4  | 111.4  | 96.5  | 124.3  | 126.9  |
| TENC1   | 109    | 109.6  | 109.8  | 121.3  | 102.2  | 98    | 119.3  | 115.9  |
| TENR    | 107.4  | 113.3  | 116.5  | 116.8  | 110.5  | 102.1 | 114.3  | 121.9  |
| TEP1    | 126.4  | 122.7  | 132.5  | 123.6  | 110.4  | 104.9 | 116.6  | 115    |
| TEPP    | 112    | 114.3  | 124.8  | 116.4  | 112    | 100.5 | 112.8  | 115.2  |
| TEPP    | 114    | 128.6  | 121.3  | 134.5  | 113.2  | 108.7 | 132    | 117.2  |
| TEPP    | 107.4  | 119.9  | 114.8  | 117.1  | 108.4  | 101.3 | 126.6  | 117.2  |
| TERF1   | 128.3  | 135.5  | 134.9  | 147.2  | 128.4  | 113.1 | 159.2  | 173    |
| TERF1   | 109.3  | 110.5  | 112.9  | 113    | 106.3  | 93.6  | 106.9  | 107.1  |
| TERF1   | 120    | 120.9  | 120.5  | 127.3  | 113.8  | 109   | 117.9  | 114.7  |
| TERF2   | 241.9  | 256.2  | 222.3  | 240.2  | 226.2  | 218.4 | 292.5  | 295.1  |
| TERF2IP | 491.2  | 565.1  | 451.6  | 595    | 431.7  | 440.5 | 625.4  | 688.4  |
| TERT    | 118.4  | 108.6  | 112.9  | 119.8  | 114.2  | 99.4  | 122.6  | 110.3  |
| TERT    | 119    | 115    | 120.4  | 123.2  | 108.5  | 108.6 | 125.9  | 113.4  |
| TES     | 148.7  | 165.9  | 150.7  | 143.6  | 126.3  | 130.8 | 172.4  | 171.9  |
| TES     | 136.3  | 154.4  | 136.3  | 151.1  | 146.2  | 126   | 153.6  | 154.9  |
| TESC    | 127.4  | 124.1  | 141.1  | 132.5  | 130.2  | 115.9 | 119.6  | 125.8  |
| TESK1   | 386.5  | 371.2  | 300.7  | 419.2  | 304.2  | 315.8 | 563.5  | 506.3  |
| TESK2   | 166.4  | 165.5  | 143.9  | 163.4  | 148.4  | 138.9 | 185.9  | 198.9  |
| TESSP2  | 111.7  | 124    | 126.8  | 137.4  | 118.4  | 106.5 | 131.6  | 120.4  |
| TESSP5  | 108.3  | 104.6  | 115.3  | 118.6  | 106.5  | 100.8 | 112.8  | 107.8  |
| TETRA   | 1814.5 | 1839.2 | 1394.4 | 2058.1 | 1648.7 | 984   | 1469.8 | 1238   |
| TEX10   | 272.1  | 264.8  | 238.8  | 278.9  | 246.1  | 198.5 | 377    | 393    |
| TEX101  | 105    | 107.4  | 113.9  | 114.2  | 101.2  | 88.9  | 111.8  | 113.7  |
| TEX11   | 114.3  | 123.7  | 125    | 120.3  | 107.5  | 98.1  | 122.2  | 116.1  |
| TEX11   | 106.2  | 118.3  | 113.9  | 120    | 111.1  | 97.3  | 119.9  | 130.8  |
| TEX11   | 111.5  | 106.1  | 105.3  | 112.4  | 106.1  | 98    | 114.2  | 105.6  |
| TEX12   | 118.2  | 123.3  | 118.1  | 108.2  | 99.5   | 104.4 | 115.4  | 112.9  |
| TEX13A  | 108.6  | 117.3  | 129.9  | 124.5  | 112    | 105.5 | 129.2  | 123.4  |
| TEX13B  | 120.3  | 116.5  | 116.8  | 117.5  | 118.2  | 93.1  | 129.5  | 120.7  |
| TEX14   | 106.3  | 117.6  | 110.9  | 119.4  | 110.1  | 96.5  | 129    | 110.1  |
| TEX14   | 104.9  | 109.1  | 119    | 110.8  | 108    | 88.1  | 121.1  | 106.7  |
| TEX15   | 110.6  | 114.8  | 116.2  | 120.2  | 104.7  | 103   | 105    | 109.2  |
| TEX2    | 258.5  | 273.5  | 254.1  | 258.1  | 236.1  | 192.4 | 293.1  | 271.2  |
| TEX261  | 165.8  | 154.5  | 169.9  | 166    | 151.7  | 117.1 | 161.7  | 159    |
| TEX264  | 158    | 207.3  | 159    | 185.1  | 167.3  | 153.7 | 159.5  | 180.4  |
| TEX9    | 114.4  | 112.2  | 115.6  | 115    | 107.1  | 103.3 | 112.6  | 113.8  |
| TF      | 117.6  | 113.1  | 113.6  | 120.4  | 111.8  | 101.8 | 125.6  | 114.3  |
| TFAM    | 376.3  | 322.7  | 346.1  | 373.5  | 276.2  | 277.4 | 361.4  | 364.9  |
| TFAP2A  | 158.1  | 160.6  | 149.1  | 175.1  | 152.2  | 130.1 | 192.8  | 165.7  |

|          |        |        |        |        |        |         |        |        |
|----------|--------|--------|--------|--------|--------|---------|--------|--------|
| TFAP2A   | 122.5  | 109.5  | 100.2  | 115.4  | 100.6  | 98      | 107.4  | 111.2  |
| TFAP2A   | 117.5  | 122.1  | 123.3  | 113.3  | 117.8  | 105.2   | 130.7  | 117    |
| TFAP2A   | 116.6  | 115    | 122    | 124.9  | 102.7  | 98.5    | 117.4  | 115.5  |
| TFAP2B   | 116.5  | 114.4  | 114.9  | 113.1  | 102.5  | 94.3    | 120.6  | 107.9  |
| TFAP2C   | 114.4  | 114.1  | 112.1  | 110.8  | 108    | 97.7    | 115    | 109.1  |
| TFAP2D   | 113.1  | 114.6  | 118.9  | 112.6  | 104.9  | 95.4    | 121.5  | 115.9  |
| TFAP2E   | 122.4  | 118.7  | 120.9  | 123.7  | 116.2  | 102     | 131.8  | 114.1  |
| TFAP4    | 113.3  | 119.4  | 126.3  | 127.3  | 114.1  | 100.2   | 126.9  | 121.4  |
| TFB1M    | 207.5  | 226.3  | 268.6  | 259.9  | 248.7  | 185.1   | 198    | 212.7  |
| TFB2M    | 249.6  | 272.4  | 245.5  | 275.3  | 218.6  | 174.5   | 217.1  | 307.4  |
| TFCP2    | 324.3  | 317.1  | 277.6  | 372.6  | 294.5  | 295.2   | 380.2  | 246.7  |
| TFCP2L1  | 113.4  | 120    | 117    | 110.4  | 108.9  | 93.6    | 115.1  | 117.3  |
| TFDP1    | 312    | 406.4  | 457.3  | 365.5  | 276.9  | 330.8   | 273.3  | 242    |
| TFDP2    | 125.5  | 131.6  | 118.4  | 118.3  | 117.8  | 99.9    | 118.6  | 115.8  |
| TFDP3    | 111.1  | 116.8  | 117.5  | 120.1  | 106.8  | 98      | 117.1  | 118.4  |
| TFE3     | 150.2  | 155.4  | 158.9  | 193.9  | 138.4  | 159.8   | 233.8  | 192    |
| TFEB     | 116.5  | 119.7  | 112.4  | 119.6  | 112.9  | 107.8   | 119.8  | 113    |
| TFEC     | 120.6  | 114.2  | 121    | 123    | 110.1  | 102.8   | 119.5  | 115.8  |
| TFEC     | 120.7  | 116.1  | 115.8  | 125.2  | 102.9  | 101.5   | 115.8  | 118.9  |
| TFF1     | 110.2  | 114    | 121.1  | 126.4  | 121    | 110.4   | 114.1  | 114.8  |
| TFF2     | 120.8  | 115.8  | 118.5  | 108.4  | 115    | 105.6   | 128.2  | 111.9  |
| TFF3     | 112.9  | 121    | 113.5  | 122.6  | 112.2  | 100.6   | 120.4  | 119    |
| TFG      | 124.5  | 119.8  | 131    | 123.4  | 118.9  | 105.2   | 121.8  | 124.1  |
| TFG      | 696.2  | 161.7  | 890    | 833.5  | 157.2  | 717.3   | 729.1  | 188.5  |
| TFIP11   | 280.6  | 251.5  | 247.6  | 339.7  | 238.9  | 239.4   | 344.5  | 297.1  |
| TFIP11   | 233.6  | 244.2  | 219.6  | 243.1  | 181.1  | 208.1   | 279.3  | 237.4  |
| TFIP11   | 144.8  | 137.5  | 149.1  | 169.4  | 144.9  | 111.9   | 162.1  | 161.4  |
| TFPI     | 116.8  | 114.5  | 110.5  | 125.3  | 142.6  | 115.7   | 133.3  | 125    |
| TFPI     | 111.4  | 110.9  | 103.3  | 111    | 107.5  | 104.6   | 113.7  | 111    |
| TFPI     | 116.9  | 122.7  | 119.9  | 147.4  | 148.1  | 146.2   | 154.3  | 141.9  |
| TFPI2    | 113.8  | 120.7  | 122.3  | 116.8  | 107.9  | 97.6    | 114.7  | 108.7  |
| TFPT     | 213.8  | 258    | 205    | 208.3  | 198.9  | 164.9   | 205.9  | 253.1  |
| TFR2     | 114.3  | 110.9  | 122.6  | 119.4  | 113.8  | 103.1   | 114    | 115.8  |
| TFRC     | 714.5  | 717.3  | 579.4  | 815.2  | 531.3  | 312.8   | 906.4  | 913.7  |
| TG       | 112.6  | 116.4  | 116.6  | 110.1  | 105.3  | 107     | 116.5  | 125.6  |
| TGDS     | 240.7  | 228.6  | 254.9  | 238.1  | 217.7  | 210.6   | 205.7  | 231.6  |
| TGFA     | 127.4  | 139.1  | 161.8  | 138    | 110.8  | 121.7   | 132.8  | 122.9  |
| TGFB1    | 106.7  | 102.9  | 112.9  | 119.1  | 102.9  | 97.9    | 108.4  | 107.8  |
| TGFB111  | 122.3  | 111.1  | 117.9  | 122.4  | 111.4  | 102.5   | 122.8  | 122.6  |
| TGFB111  | 117.1  | 115.4  | 117.9  | 117.1  | 102.1  | 102.7   | 117.8  | 118.5  |
| TGFB2    | 108.8  | 115.5  | 126.9  | 122.7  | 105.5  | 104.2   | 119.4  | 109.4  |
| TGFB3    | 129.6  | 130    | 148    | 124.1  | 130.1  | 114.4   | 131.8  | 130    |
| TGFBI    | 1344.3 | 195.8  | 9080.4 | 2097.2 | 396.5  | 10356.9 | 2465.7 | 414.8  |
| TGFBR1   | 121    | 113.2  | 110.3  | 118.3  | 101.5  | 107.8   | 122.5  | 120.8  |
| TGFBR2   | 134    | 122.9  | 145.4  | 132.2  | 127.9  | 112.3   | 138.5  | 136.4  |
| TGFBR2   | 1534.2 | 1339.1 | 1710.3 | 1460.2 | 1201.7 | 1584.6  | 1816.9 | 1547   |
| TGFBR3   | 881.4  | 1132.3 | 562.4  | 1135.3 | 868.3  | 516.2   | 1625.8 | 1437.3 |
| TGFBRAP1 | 214.6  | 236.6  | 186.5  | 219.5  | 181    | 147.9   | 233.7  | 232    |
| TGIF     | 117.2  | 118.8  | 117.9  | 125.6  | 111.9  | 103.2   | 114.3  | 117.3  |
| TGIF     | 111.2  | 120.5  | 129    | 118.8  | 107.3  | 94.6    | 130    | 119.9  |
| TGIF     | 111.7  | 110    | 122.4  | 120    | 108.4  | 108.8   | 123.7  | 115.5  |



|        |        |        |       |        |        |        |        |        |
|--------|--------|--------|-------|--------|--------|--------|--------|--------|
| TGIF1  | 114.6  | 113.2  | 112.7 | 108.6  | 102.7  | 96.6   | 113.4  | 116.8  |
| TGIF1  | 296.8  | 416.1  | 436.8 | 368.2  | 334.7  | 390.5  | 362.4  | 404.4  |
| TGIF1  | 116.2  | 129.1  | 124.3 | 123.9  | 114.3  | 94.8   | 125.5  | 115.8  |
| TGIF2  | 147.4  | 192.1  | 148.3 | 165.3  | 163.3  | 132    | 180.4  | 186.9  |
| TGM1   | 120.5  | 118.6  | 112.4 | 124.5  | 108.6  | 100.2  | 119    | 111.5  |
| TGM2   | 116.7  | 127.2  | 127.5 | 125.9  | 123.1  | 104.6  | 122.8  | 124.7  |
| TGM2   | 117.2  | 120.2  | 110.8 | 116.8  | 107.4  | 101.6  | 118.2  | 120.7  |
| TGM2   | 119.8  | 128.7  | 121   | 130.2  | 117.5  | 106.1  | 130.4  | 118.7  |
| TGM3   | 112.5  | 107.2  | 119.3 | 120    | 108.2  | 105.3  | 117.6  | 117.2  |
| TGM4   | 109.1  | 119.6  | 115.2 | 114.4  | 115.4  | 98.5   | 111.8  | 115.8  |
| TGM5   | 114.9  | 117.2  | 144.2 | 117.9  | 108.7  | 110.4  | 120.9  | 117.6  |
| TGM5   | 113.6  | 108.2  | 126.7 | 118.5  | 100.5  | 108.3  | 118.4  | 110.8  |
| TGM5   | 113.8  | 113    | 115   | 130.7  | 111.8  | 104.8  | 114    | 107.1  |
| TGM6   | 107.4  | 110.5  | 124.5 | 111.6  | 102.3  | 103.2  | 113.1  | 117.6  |
| TGM7   | 124.8  | 113.3  | 119.1 | 122.1  | 108.8  | 103.4  | 111.2  | 123.8  |
| TGOLN2 | 489.4  | 511    | 670.3 | 584.6  | 550.5  | 578    | 611.3  | 469.6  |
| TH     | 114.1  | 122.1  | 122   | 117.1  | 112.5  | 97.6   | 120.5  | 106.8  |
| TH     | 109.9  | 116.4  | 124.5 | 110.5  | 109.2  | 102.7  | 124.4  | 122.4  |
| TH1L   | 573.6  | 451.5  | 391.6 | 500    | 427.7  | 336.4  | 707.5  | 416.4  |
| THADA  | 188    | 179.9  | 171.5 | 184.6  | 152.1  | 148.8  | 174.9  | 166.7  |
| THADA  | 110.2  | 111.4  | 107.4 | 118.3  | 109.1  | 93.7   | 109.9  | 106.1  |
| THAP1  | 149.9  | 149.4  | 170.3 | 174.4  | 156.2  | 152.6  | 164.8  | 149.3  |
| THAP1  | 127.3  | 150    | 145.2 | 146.3  | 146.3  | 144.4  | 154.5  | 174.3  |
| THAP10 | 112.7  | 125.9  | 119.9 | 129.1  | 103.2  | 92.8   | 123.1  | 117.9  |
| THAP11 | 1415.3 | 1358.5 | 1027  | 1228.5 | 1087.8 | 875    | 1186.8 | 1003.6 |
| THAP2  | 117    | 122.4  | 119.8 | 121.8  | 114.7  | 99.5   | 119.1  | 115    |
| THAP3  | 121    | 115.8  | 128.2 | 119.8  | 111.6  | 107.8  | 120.3  | 130.5  |
| THAP4  | 125.3  | 124.3  | 117.9 | 126.1  | 114.7  | 112.8  | 123.9  | 121.1  |
| THAP5  | 117.2  | 120.7  | 131.1 | 125.1  | 107.1  | 105.5  | 132.4  | 119.1  |
| THAP6  | 130.3  | 149.5  | 139.7 | 145.3  | 140.5  | 126    | 138.4  | 140.5  |
| THAP7  | 139.3  | 136.9  | 136.3 | 123.4  | 123.3  | 103.7  | 131.9  | 118.1  |
| THAP7  | 204.7  | 209.4  | 218.1 | 203.2  | 177.2  | 161.6  | 184.1  | 149.9  |
| THAP7  | 121.9  | 113.6  | 121.8 | 117.8  | 117.2  | 95.1   | 127    | 116.8  |
| THAP8  | 115.4  | 115.7  | 120.8 | 123.6  | 103.9  | 111.5  | 122.5  | 115.9  |
| THAP9  | 123    | 126.4  | 121.2 | 122.2  | 120.7  | 97.7   | 125.3  | 121.2  |
| THBD   | 108.9  | 117.7  | 127.3 | 113    | 107.8  | 100.9  | 121.6  | 111    |
| THBS1  | 186.8  | 134.3  | 605   | 341.9  | 165.4  | 1841.4 | 184.9  | 126.1  |
| THBS2  | 113.4  | 114    | 126.1 | 123.3  | 112.2  | 101.3  | 130.1  | 117.1  |
| THBS3  | 119.2  | 121.3  | 127   | 131.8  | 127.2  | 109.3  | 122.2  | 132.7  |
| THBS4  | 109.4  | 115    | 123   | 118.5  | 106    | 94.9   | 119.1  | 117.5  |
| THEDC1 | 124.9  | 120.8  | 113.5 | 121    | 127.6  | 107.9  | 121.7  | 123.7  |
| THEG   | 122.5  | 129.1  | 127.1 | 128.3  | 124.4  | 104.6  | 136.1  | 118.6  |
| THEG   | 122.2  | 125.5  | 121.7 | 124.4  | 110.3  | 100.9  | 131.9  | 119    |
| THEM2  | 302.5  | 255.5  | 324.4 | 411.4  | 287.4  | 377.4  | 292.3  | 240.4  |
| THEM4  | 132.7  | 124.6  | 141.2 | 157.2  | 115.4  | 125.7  | 129.1  | 119.9  |
| THEM5  | 108.5  | 109    | 115.8 | 112.5  | 112    | 92.6   | 122    | 108.2  |
| THEX1  | 112.8  | 124.9  | 120.9 | 115.4  | 109.5  | 100.2  | 116.8  | 115.6  |
| THG1L  | 150.2  | 142.1  | 138.1 | 145.9  | 125.1  | 108.9  | 132.9  | 131.7  |
| THNSL1 | 182.1  | 165.9  | 181.3 | 170.1  | 159.5  | 139.1  | 158.4  | 131.8  |
| THOC1  | 214.8  | 235.5  | 238   | 247.1  | 231.4  | 158.8  | 228.4  | 197.8  |
| THOC2  | 295.5  | 240.3  | 272.3 | 329.1  | 255.2  | 186.9  | 354.2  | 292.2  |

|         |       |       |       |       |       |       |       |       |
|---------|-------|-------|-------|-------|-------|-------|-------|-------|
| THOC2   | 140.6 | 126.1 | 182.8 | 169.4 | 140   | 128.1 | 148.5 | 147   |
| THOC3   | 184.6 | 181.1 | 230.6 | 205.9 | 200.3 | 190.6 | 174.1 | 158   |
| THOC3   | 296   | 248.8 | 263   | 272.9 | 216.5 | 196.8 | 214.3 | 183.9 |
| THOC4   | 139.4 | 136.7 | 150.2 | 149.3 | 142.8 | 138.2 | 133.8 | 132.4 |
| THOC5   | 216.6 | 261.6 | 251.9 | 244.6 | 185.9 | 184.7 | 258.1 | 220.4 |
| THOC5   | 250.1 | 262.9 | 274.4 | 247.7 | 201.4 | 182.9 | 230.4 | 203.7 |
| THOP1   | 231.4 | 243.9 | 200.8 | 221.1 | 175.2 | 165.6 | 254.1 | 203   |
| THPO    | 114.2 | 111.5 | 113.1 | 112.2 | 105.5 | 106.2 | 118.2 | 121.6 |
| THRA    | 115   | 133.6 | 126.6 | 122.3 | 126   | 106.4 | 138.4 | 127.9 |
| THRA    | 120.1 | 132.4 | 124   | 131.4 | 116.7 | 102   | 126.7 | 119.5 |
| THRA    | 108.1 | 119.3 | 126.4 | 119.5 | 113.9 | 102.8 | 118.1 | 113.3 |
| THRAP1  | 117.6 | 125.1 | 127.9 | 129.5 | 120.2 | 99.3  | 124.1 | 121.8 |
| THRAP2  | 145.2 | 139.3 | 154.3 | 163.5 | 163.2 | 130.5 | 157.7 | 176.2 |
| THRAP3  | 111.2 | 117.8 | 125.6 | 137.2 | 119.6 | 109.2 | 120.4 | 136.8 |
| THRAP4  | 162.6 | 225.8 | 162.9 | 189.3 | 148.7 | 131.5 | 164.3 | 168.7 |
| THRAP4  | 233.6 | 264.1 | 235.5 | 272.4 | 185.2 | 181.2 | 235.5 | 226.6 |
| THRAP5  | 287.5 | 326   | 246.2 | 321.7 | 249   | 246.9 | 331.8 | 328.8 |
| THRAP5  | 424.8 | 422.4 | 409.6 | 484.7 | 304.4 | 366.4 | 459   | 446.6 |
| THRAP5  | 158   | 162.6 | 165.6 | 188.1 | 138.4 | 157.8 | 175.4 | 157   |
| THRAP6  | 428.6 | 516.4 | 546.2 | 477.6 | 475.5 | 423.9 | 475.6 | 604.4 |
| THRB    | 108.3 | 114.2 | 132.1 | 128.6 | 114.7 | 108.4 | 124.7 | 132   |
| THRSP   | 105.4 | 111.1 | 108.1 | 104.1 | 104.8 | 95.3  | 116.1 | 113.8 |
| THSD1   | 103.9 | 112.6 | 114.5 | 123.3 | 105.3 | 93.6  | 116.3 | 117.8 |
| THSD1   | 112.3 | 115.8 | 113.6 | 108.2 | 117.3 | 102.6 | 118.2 | 121   |
| THSD1   | 108.4 | 117.7 | 118.4 | 110.4 | 107   | 99.4  | 118.8 | 107.4 |
| THSD1P  | 131.2 | 128.9 | 135.8 | 131.9 | 109.2 | 107.2 | 121   | 117.8 |
| THSD1P  | 115.4 | 114.1 | 111   | 107.5 | 104.7 | 101.9 | 119.4 | 118.4 |
| THSD3   | 106.5 | 114.3 | 129.3 | 112   | 113.5 | 120.6 | 120   | 116.2 |
| THSD3   | 115.8 | 115   | 124.4 | 116.4 | 113.9 | 104   | 114.5 | 114.8 |
| THSD3   | 106.1 | 106.7 | 113   | 115.4 | 105.8 | 104.3 | 123.6 | 111.5 |
| THSD4   | 121.9 | 111.7 | 118.4 | 120.6 | 103.5 | 94.3  | 125.8 | 116.1 |
| THSD7B  | 105.9 | 120.2 | 118.4 | 119   | 104.7 | 103.1 | 117.9 | 108.1 |
| THTPA   | 115.5 | 127.1 | 109.2 | 122.1 | 108.5 | 95.4  | 124   | 129.6 |
| THUMPD1 | 402.5 | 375.7 | 329.5 | 351   | 338.4 | 299.8 | 312.2 | 351.6 |
| THUMPD2 | 130.5 | 141   | 159.4 | 121.4 | 128.9 | 108.2 | 128.6 | 136   |
| THUMPD3 | 119.5 | 134.4 | 127.2 | 130.5 | 123.1 | 116.5 | 125.9 | 131.8 |
| THY1    | 110.6 | 105.2 | 122   | 117   | 100.6 | 105.6 | 115.2 | 113.9 |
| THYN1   | 535.3 | 494.8 | 517.3 | 516.8 | 496.4 | 374.4 | 306.2 | 310.7 |
| THYN1   | 164.9 | 164.4 | 169   | 183.8 | 154.6 | 128.7 | 129.4 | 134.5 |
| THYN1   | 339.2 | 391.1 | 325.7 | 242.2 | 320.3 | 240.1 | 203.9 | 187.1 |
| TIA1    | 577.6 | 593.7 | 561.6 | 602   | 546.2 | 375.1 | 521.6 | 527.2 |
| TIAF1   | 457.1 | 398.6 | 484.5 | 405.1 | 280   | 428   | 293.2 | 276.1 |
| TIAL1   | 274.8 | 312.3 | 361.7 | 315.1 | 248   | 189.9 | 222   | 270.6 |
| TIAL1   | 526.3 | 537.8 | 623.5 | 513.7 | 433.6 | 561   | 677.5 | 537   |
| TIAL1   | 201.8 | 170   | 184.8 | 208.7 | 168.8 | 144.8 | 189.9 | 213.7 |
| TIAM1   | 163.9 | 168.8 | 165.3 | 175.1 | 148   | 113.6 | 130.2 | 147.4 |
| TIAM2   | 113.5 | 118.9 | 118.6 | 121.6 | 109.4 | 96.4  | 113.2 | 111.9 |
| TIAM2   | 113.7 | 112.6 | 118.8 | 111.5 | 107.5 | 97.9  | 121.7 | 110.9 |
| TICAM1  | 126.6 | 135.9 | 127.4 | 142.6 | 116.3 | 112.7 | 146.4 | 157   |
| TICAM1  | 482.1 | 486.7 | 371.2 | 611.7 | 390.5 | 436   | 732.3 | 728.2 |
| TICAM2  | 237.3 | 163   | 344.7 | 206.6 | 157.2 | 209.2 | 230.6 | 255.5 |

|          |        |        |        |        |        |        |        |        |
|----------|--------|--------|--------|--------|--------|--------|--------|--------|
| TIE1     | 118.6  | 113.7  | 115.3  | 120    | 111.8  | 97.4   | 124.8  | 116.9  |
| TIFA     | 135.7  | 125.9  | 131.9  | 129.3  | 121.8  | 112    | 128.1  | 127    |
| TIGD1    | 111.5  | 112.1  | 113.3  | 117.6  | 109.3  | 99.2   | 124.7  | 118.9  |
| TIGD2    | 154.1  | 161.9  | 177.7  | 164    | 163.2  | 150.9  | 163.3  | 158.5  |
| TIGD3    | 136.4  | 135.2  | 127.9  | 118.7  | 129.8  | 107.6  | 128.8  | 138.6  |
| TIGD4    | 109.5  | 101.8  | 107.7  | 114.2  | 104.4  | 92.8   | 107.1  | 107.5  |
| TIGD5    | 233.6  | 299.9  | 180.4  | 247.1  | 243.7  | 158.2  | 247    | 239.3  |
| TIGD6    | 124.8  | 121.9  | 126.2  | 127.8  | 116.9  | 98.7   | 124.8  | 118.6  |
| TIGD7    | 150.9  | 161.4  | 179.1  | 174.2  | 157.9  | 128.8  | 209.4  | 165.6  |
| TIMD4    | 122.5  | 131    | 122.7  | 137.8  | 120    | 102.1  | 135.5  | 135.1  |
| TIMELESS | 249.1  | 241.2  | 192.5  | 247.5  | 198.6  | 147.9  | 196.1  | 177.4  |
| TIMM10   | 303.5  | 516.2  | 376.6  | 306.3  | 427    | 244.8  | 345.3  | 477    |
| TIMM13   | 112.9  | 119.8  | 133.7  | 121.6  | 111.6  | 114.2  | 140.4  | 125.8  |
| TIMM17A  | 123.1  | 126.1  | 134.1  | 129.3  | 117.4  | 114.7  | 129.4  | 122.8  |
| TIMM17B  | 138.2  | 159.6  | 180.8  | 157    | 137.4  | 132.2  | 154.4  | 145.3  |
| TIMM22   | 324.8  | 400    | 340.4  | 393.3  | 284.8  | 234.3  | 330.9  | 274.1  |
| TIMM23   | 194.5  | 288.8  | 232.2  | 265    | 207    | 186.9  | 189.8  | 229.4  |
| TIMM23   | 638.5  | 456.4  | 515.7  | 521.2  | 413.5  | 352.4  | 488.6  | 470.3  |
| TIMM23   | 303    | 312.2  | 390.6  | 349.1  | 258.6  | 307.6  | 304.8  | 289.1  |
| TIMM44   | 148.3  | 146.4  | 151.4  | 159.2  | 141    | 136.4  | 197.7  | 221.5  |
| TIMM50   | 115.2  | 109.4  | 124.9  | 114.7  | 108.7  | 94.7   | 113.8  | 119.7  |
| TIMM8A   | 113.2  | 132.2  | 121.7  | 138.4  | 116.2  | 100.3  | 134.2  | 125    |
| TIMM8B   | 132.7  | 132.7  | 139.7  | 126.9  | 132.2  | 122.3  | 128.4  | 123.7  |
| TIMM9    | 171    | 155.1  | 184.8  | 147.9  | 144.6  | 161.6  | 160.7  | 176.3  |
| TIMP1    | 1949.9 | 2995   | 2305.7 | 2039.3 | 1836.1 | 1733.3 | 1283.1 | 1177.3 |
| TIMP2    | 417.4  | 259.2  | 623.3  | 383.5  | 193.8  | 330    | 295.6  | 202.6  |
| TIMP2    | 168.9  | 121.8  | 152.4  | 140.5  | 124    | 129.4  | 141.5  | 125.1  |
| TIMP3    | 119.9  | 116.5  | 114.1  | 116.1  | 103.7  | 99.9   | 118.7  | 115    |
| TIMP4    | 114.8  | 105    | 112.3  | 115.5  | 114.9  | 100.6  | 111.7  | 115    |
| TINAG    | 118.1  | 122    | 132    | 140.2  | 109.4  | 109.1  | 123.1  | 116.6  |
| TINAGL1  | 124    | 111.1  | 124    | 123.9  | 102.7  | 95.5   | 123.2  | 114.4  |
| TINF2    | 763.9  | 952.8  | 764.8  | 774    | 607.3  | 498    | 668.6  | 695.7  |
| TINP1    | 2163.9 | 2099.5 | 2440.7 | 2666.4 | 2057.7 | 2091.5 | 2251.1 | 2225.1 |
| TIP39    | 108.3  | 119    | 122.4  | 115.6  | 113.2  | 102.4  | 124.4  | 125.2  |
| TIPARP   | 436.4  | 649.3  | 880.6  | 887.2  | 593.7  | 1098   | 831.2  | 986.3  |
| TIPRL    | 253    | 265.9  | 248    | 320.4  | 237.2  | 232.4  | 249.7  | 260.4  |
| TIPRL    | 175.1  | 182.8  | 224.9  | 197.6  | 171    | 170.1  | 215.5  | 206.1  |
| TIRAP    | 117.6  | 136.9  | 129.5  | 133.2  | 114    | 102.8  | 119.6  | 117.8  |
| TIRAP    | 116.1  | 115.2  | 119.2  | 119.6  | 108.5  | 102.6  | 118.7  | 118.5  |
| TIRAP    | 122    | 116.4  | 126    | 116.3  | 116.6  | 107.9  | 133.4  | 118.4  |
| TITF1    | 101.3  | 110.6  | 107.4  | 113.6  | 111.5  | 94.5   | 112    | 115.7  |
| TITF1    | 108.9  | 107.8  | 119.5  | 115.6  | 108.7  | 98.2   | 116.1  | 116.2  |
| TJAP1    | 585.1  | 629.1  | 588.6  | 622.7  | 515.9  | 433.2  | 684.1  | 780.2  |
| TJP1     | 113.6  | 105.4  | 109.9  | 106.9  | 100.3  | 90.8   | 109.3  | 117    |
| TJP1     | 111.5  | 120.4  | 130    | 109.9  | 117    | 101.9  | 119.4  | 117.3  |
| TJP2     | 123    | 118    | 122.6  | 116.7  | 105.5  | 98     | 121    | 119.2  |
| TJP2     | 116    | 109.6  | 117.9  | 121.7  | 114.3  | 98.8   | 110.2  | 125    |
| TJP3     | 222.2  | 237    | 169.1  | 232.2  | 172.3  | 149.2  | 187.4  | 186    |
| TK1      | 116    | 119.7  | 125.9  | 121.5  | 113.6  | 99.7   | 126.9  | 124.6  |
| TK2      | 130.8  | 121.1  | 129.5  | 122    | 114.8  | 113.8  | 119.1  | 114.2  |
| TKT      | 1072.2 | 891.1  | 1167.6 | 1484.1 | 772.1  | 1475.5 | 1691.3 | 913.7  |

|         |       |       |       |       |       |       |       |       |
|---------|-------|-------|-------|-------|-------|-------|-------|-------|
| TKTL1   | 138.6 | 158.7 | 124.3 | 143.9 | 133.5 | 109.4 | 149.9 | 147.5 |
| TKTL2   | 115.8 | 108.9 | 107.7 | 123   | 117   | 103.2 | 113.5 | 103.8 |
| TLCD1   | 115.9 | 136.3 | 121.4 | 119.9 | 114.4 | 110.8 | 118.5 | 114.9 |
| TLE1    | 127.9 | 130.4 | 141.8 | 137.1 | 119.7 | 112.8 | 137.2 | 127.1 |
| TLE2    | 200.3 | 235.2 | 163.9 | 201   | 173.5 | 139.4 | 216.5 | 232.6 |
| TLE3    | 126.8 | 126.3 | 139   | 139.1 | 120   | 114.7 | 141.1 | 143.8 |
| TLE4    | 643.6 | 678.2 | 511   | 749.2 | 647   | 559.7 | 844.4 | 977.1 |
| TLE6    | 107.7 | 118.3 | 116.1 | 118.9 | 113   | 106.2 | 115.4 | 110.7 |
| TLK1    | 403.8 | 426.8 | 307.4 | 417.9 | 342.1 | 354.1 | 451.1 | 355.5 |
| TLK2    | 215.6 | 253.7 | 228.1 | 239.8 | 243.1 | 212.1 | 229.5 | 268.2 |
| TLL1    | 109.1 | 102.6 | 111.5 | 111.1 | 106.7 | 95.2  | 105.9 | 111.9 |
| TLL2    | 107.9 | 117.2 | 110.5 | 114.1 | 98.2  | 100.8 | 110.4 | 114.1 |
| TLN1    | 433   | 389   | 464.6 | 451.6 | 335.2 | 384.1 | 507.8 | 443.4 |
| TLN2    | 113.6 | 121   | 116.6 | 121   | 107.6 | 109.9 | 133.9 | 116.2 |
| TLOC1   | 221.8 | 271.7 | 238.1 | 244.7 | 223   | 200.8 | 216.9 | 242.2 |
| TLR1    | 179.8 | 153.7 | 218.6 | 175.5 | 118.4 | 180.7 | 171.1 | 157.6 |
| TLR10   | 123.1 | 109.3 | 119.8 | 119.9 | 106.2 | 96.2  | 122.9 | 111.9 |
| TLR10   | 156.8 | 147.3 | 157.1 | 147.2 | 123.5 | 144.9 | 146.2 | 152.4 |
| TLR2    | 116   | 117.9 | 125.4 | 116.7 | 109.2 | 97.1  | 121.6 | 113.3 |
| TLR3    | 112.1 | 116.3 | 106.4 | 106.9 | 113.4 | 97.7  | 121.9 | 108.4 |
| TLR4    | 136.7 | 110.3 | 177.2 | 127.3 | 103.2 | 143.4 | 136.5 | 118.7 |
| TLR5    | 123.6 | 126.8 | 171.5 | 124.6 | 106.1 | 93    | 115   | 114.2 |
| TLR6    | 124.9 | 123.5 | 126.5 | 133.7 | 107.7 | 108.3 | 121.5 | 125.5 |
| TLR7    | 188.7 | 145.6 | 358.3 | 156.4 | 135.4 | 130.2 | 135.7 | 125.7 |
| TLR8    | 168.6 | 123.7 | 274.2 | 150   | 110.3 | 122.5 | 134.8 | 111.2 |
| TLR8    | 107   | 117.8 | 118   | 119.2 | 104.7 | 96.3  | 115.8 | 117.5 |
| TLR8    | 220.3 | 130.6 | 440.5 | 188.4 | 113.2 | 145.5 | 153.9 | 112.3 |
| TLR9    | 120.3 | 121.5 | 125.1 | 116   | 106   | 110.9 | 140.4 | 118.5 |
| TLX1    | 116   | 118.2 | 124.4 | 132.1 | 116.8 | 106   | 125.2 | 115.1 |
| TLX2    | 114.4 | 112   | 126.2 | 120.2 | 116.9 | 100.3 | 122.3 | 120.5 |
| TLX2    | 108.8 | 112.6 | 127.6 | 131.2 | 108.3 | 102.1 | 120.7 | 120.2 |
| TLX2    | 110.5 | 105.9 | 107.1 | 106.6 | 103.6 | 93.3  | 110.9 | 107   |
| TLX3    | 110.3 | 127   | 130.2 | 124.8 | 110.2 | 108   | 121.2 | 120.6 |
| TM2D1   | 547.7 | 566.2 | 782.8 | 644.3 | 462   | 426.2 | 673.6 | 747.2 |
| TM2D2   | 170.9 | 163.1 | 183.3 | 174.4 | 150.3 | 153.3 | 152   | 177.6 |
| TM2D3   | 135.8 | 127.7 | 140.6 | 149.1 | 143.5 | 117.1 | 140.8 | 146.5 |
| TM2D3   | 574.7 | 587.1 | 630.5 | 773.2 | 631.3 | 664.9 | 712.9 | 694.6 |
| TM4SF1  | 117.7 | 120.6 | 119   | 128.8 | 148.3 | 102.5 | 145.4 | 137.2 |
| TM4SF11 | 134.7 | 138.1 | 149.8 | 136.2 | 129.3 | 115.7 | 129.3 | 123.6 |
| TM4SF18 | 113.7 | 111.2 | 106.1 | 118.6 | 106.5 | 95.8  | 121.8 | 112.7 |
| TM4SF19 | 165.2 | 151.8 | 111.3 | 211.9 | 175.4 | 107.9 | 296.1 | 189   |
| TM4SF19 | 191.8 | 175.9 | 116.5 | 316.2 | 219.4 | 119.7 | 379.6 | 210.8 |
| TM4SF20 | 117.2 | 103.3 | 115.1 | 114.3 | 107.5 | 95.2  | 111.7 | 107.5 |
| TM4SF4  | 111.8 | 112.6 | 117.8 | 116.3 | 100.8 | 96.8  | 109.5 | 115.4 |
| TM4SF5  | 107.2 | 108.2 | 105.5 | 106.9 | 102.2 | 97.7  | 104.6 | 109   |
| TM6SF1  | 130.2 | 133.5 | 309.5 | 129.4 | 119.5 | 204.3 | 137.7 | 123.3 |
| TM6SF2  | 110.1 | 119   | 113   | 115.3 | 104   | 97.6  | 114.3 | 111.5 |
| TM6SF2  | 112.7 | 117   | 116.6 | 119.6 | 118.1 | 96.5  | 117.4 | 121.2 |
| TM6SF2  | 119   | 117.8 | 110.6 | 116.7 | 113.3 | 95.8  | 110.1 | 118.7 |
| TM7SF2  | 182   | 191.1 | 197.6 | 188.6 | 164.7 | 153.4 | 185.3 | 165.1 |
| TM7SF3  | 164   | 159   | 173.8 | 158.7 | 145.5 | 125.4 | 133.2 | 136.6 |

|         |        |        |        |        |        |        |        |        |
|---------|--------|--------|--------|--------|--------|--------|--------|--------|
| TM7SF4  | 181.1  | 222.6  | 119.6  | 253.2  | 181.9  | 137.2  | 217.2  | 167.9  |
| TM9SF1  | 187.7  | 173.8  | 174.2  | 192.5  | 153.5  | 163.9  | 170.6  | 143.6  |
| TM9SF1  | 130.9  | 145.5  | 143.2  | 147.4  | 120.2  | 106.1  | 138.8  | 119.9  |
| TM9SF1  | 133.7  | 134.4  | 129.8  | 138.8  | 124.1  | 114.9  | 135.9  | 125.5  |
| TM9SF2  | 692.1  | 538.3  | 954.6  | 847.1  | 617.3  | 679.9  | 807.5  | 661.3  |
| TM9SF4  | 209.4  | 225.8  | 196.3  | 201.2  | 180.2  | 185.5  | 239    | 255.2  |
| TMBIM1  | 263.8  | 275.6  | 201.9  | 297.7  | 246    | 220    | 429.9  | 454.8  |
| TMBIM4  | 2506.7 | 2259.1 | 4630.1 | 2741.3 | 2329.1 | 2878.5 | 2361.7 | 1737.8 |
| TMC2    | 118    | 116.8  | 124.3  | 129.6  | 113.7  | 96.9   | 121.6  | 122.1  |
| TMC4    | 130.4  | 113.5  | 122.9  | 115.4  | 107.8  | 102.9  | 104.3  | 111.3  |
| TMC5    | 111.6  | 118.3  | 132    | 124.5  | 108.5  | 106    | 121.2  | 126.9  |
| TMC6    | 537.3  | 463.6  | 406    | 429.5  | 314.6  | 289.2  | 434.1  | 366.5  |
| TMC7    | 112.4  | 116.6  | 121.8  | 122.2  | 117.6  | 107.2  | 119.8  | 124.8  |
| TMC8    | 131    | 125.7  | 113.5  | 133.5  | 123.3  | 98.3   | 125    | 121.7  |
| TMCC1   | 115.6  | 114.3  | 113.3  | 116.3  | 109.2  | 105.9  | 120.7  | 119.2  |
| TMCC1   | 127.9  | 125.1  | 130.5  | 125.8  | 118    | 100    | 126    | 121    |
| TMCC2   | 120.5  | 116.1  | 114.3  | 124    | 114.6  | 97.1   | 120.5  | 116.7  |
| TMCC3   | 130.5  | 122.9  | 116.1  | 132.5  | 123.9  | 109.8  | 123    | 127.5  |
| TMCO1   | 871    | 846.9  | 1065.9 | 979.3  | 700.2  | 975.6  | 911.3  | 797.1  |
| TMCO2   | 115.1  | 114.8  | 128.9  | 126.2  | 125.6  | 112.3  | 144.1  | 126.3  |
| TMCO3   | 244.3  | 240.6  | 208.9  | 336.1  | 230.9  | 246.1  | 318.2  | 288.8  |
| TMCO4   | 144    | 144    | 137.5  | 144.9  | 136.3  | 121.9  | 138.9  | 139.2  |
| TMCO5   | 106.8  | 125.4  | 131.8  | 139.8  | 136.1  | 121.1  | 141    | 118.9  |
| TMCO6   | 137.3  | 138.3  | 136.7  | 131.8  | 114.9  | 115.5  | 128.7  | 127.6  |
| TMDCII  | 112.7  | 120.8  | 120.1  | 121.4  | 114.9  | 98.6   | 125.3  | 113.5  |
| TMED1   | 182.2  | 166    | 175.5  | 162.9  | 136.9  | 158.1  | 203.6  | 174.3  |
| TMED10  | 367.3  | 444.2  | 583.8  | 425.7  | 347.8  | 482.1  | 331.1  | 347.7  |
| TMED10P | 850.2  | 822.8  | 1407.5 | 890.8  | 554    | 888.7  | 670.2  | 750.7  |
| TMED2   | 250.9  | 219.2  | 264.8  | 224.5  | 244.7  | 227.8  | 288.5  | 352.3  |
| TMED3   | 918.8  | 881.2  | 980.2  | 835.8  | 593.4  | 532.5  | 698.6  | 671.9  |
| TMED4   | 772.1  | 704.6  | 568.6  | 695.5  | 710.5  | 363.3  | 510.7  | 489.8  |
| TMED5   | 611.7  | 642.5  | 582.9  | 776.2  | 620.1  | 628.3  | 848.5  | 843    |
| TMED6   | 128.9  | 113.3  | 128.7  | 130.2  | 115.3  | 105.8  | 139.1  | 140.9  |
| TMED7   | 441.1  | 483.8  | 518.5  | 505    | 403.8  | 472.9  | 416.6  | 489.2  |
| TMED8   | 118.8  | 121.1  | 113.9  | 122.1  | 116.4  | 96.4   | 121.8  | 124.3  |
| TMED9   | 587    | 578.4  | 819.7  | 850.6  | 468.7  | 659.3  | 638.3  | 816.4  |
| TMEFF1  | 122.5  | 112.2  | 113.8  | 123.7  | 115.1  | 100.6  | 114.9  | 113.6  |
| TMEFF2  | 114.6  | 107.7  | 110.3  | 106.6  | 105.1  | 93     | 109.2  | 117.6  |
| TMEM1   | 225.9  | 192.6  | 183.9  | 244.1  | 188.6  | 171.2  | 197.1  | 190    |
| TMEM1   | 112.4  | 115.3  | 118    | 124    | 108.4  | 96.8   | 119.5  | 124.4  |
| TMEM1   | 135.6  | 140.9  | 147.4  | 131.4  | 118.6  | 109.8  | 135.7  | 121.8  |
| TMEM10  | 111.1  | 109.7  | 120.5  | 109.1  | 104.9  | 99.1   | 111.3  | 124.3  |
| TMEM10  | 112.5  | 106.2  | 117.8  | 119.9  | 113.2  | 95.9   | 113.3  | 121.9  |
| TMEM100 | 122.4  | 116.4  | 121.5  | 130.7  | 109.7  | 100.8  | 133.9  | 118.6  |
| TMEM101 | 450.6  | 473.5  | 509    | 423.1  | 291.7  | 377.3  | 322.3  | 235    |
| TMEM102 | 106.8  | 114.7  | 117.5  | 123    | 109.7  | 92.8   | 118.9  | 120    |
| TMEM103 | 282    | 267.5  | 270.1  | 277.1  | 220.5  | 203.2  | 298    | 254.4  |
| TMEM103 | 137.4  | 148.8  | 144.2  | 135.2  | 148.5  | 109.9  | 126.3  | 123.7  |
| TMEM104 | 115    | 122.7  | 114.2  | 115.1  | 108.6  | 110.9  | 124.8  | 121.2  |
| TMEM105 | 121.3  | 123    | 130.4  | 136.3  | 123.2  | 101.2  | 125.9  | 123.6  |
| TMEM106 | 150.9  | 189.4  | 152.3  | 157.8  | 162.3  | 116    | 159.3  | 158    |

|          |        |        |        |        |        |        |        |        |
|----------|--------|--------|--------|--------|--------|--------|--------|--------|
| TMEM106C | 203.3  | 177.1  | 223.5  | 197.3  | 243.3  | 175.2  | 205.9  | 188.8  |
| TMEM107  | 111.3  | 137.6  | 125.3  | 111.5  | 123.2  | 101.8  | 118.1  | 122.4  |
| TMEM108  | 114.9  | 118.2  | 125.5  | 122.2  | 110    | 99.4   | 118.7  | 118.7  |
| TMEM109  | 308.4  | 342    | 397.8  | 335.7  | 209.3  | 280.4  | 278.1  | 273.3  |
| TMEM11   | 122.2  | 131.5  | 129.1  | 134.3  | 129    | 111.4  | 136.6  | 127.9  |
| TMEM110  | 121.2  | 120.4  | 114.2  | 121.3  | 113.4  | 92.7   | 131.8  | 110.1  |
| TMEM113  | 859    | 1165.7 | 898.3  | 1472.1 | 1151.7 | 743.7  | 1441.1 | 1408.2 |
| TMEM115  | 343.6  | 365    | 319.4  | 346.5  | 276.9  | 285.8  | 367.3  | 362    |
| TMEM116  | 223.4  | 363.6  | 231.8  | 264.4  | 300.3  | 189    | 251    | 403.6  |
| TMEM117  | 116.8  | 131.8  | 107.9  | 127.9  | 130.7  | 100    | 102.3  | 112.2  |
| TMEM118  | 168.2  | 166.5  | 161.6  | 182.5  | 157.1  | 131.1  | 159.3  | 136.9  |
| TMEM119  | 119.9  | 132.6  | 116.1  | 125.2  | 119.5  | 102.1  | 130.7  | 124.4  |
| TMEM121  | 107.1  | 109.9  | 114.1  | 119.4  | 102.7  | 101.2  | 119.1  | 110.8  |
| TMEM122  | 119.9  | 119.6  | 112.4  | 126.8  | 113.7  | 95     | 116.6  | 116.3  |
| TMEM123  | 1901.6 | 2317.8 | 2411   | 1971   | 1943.5 | 1937.5 | 1632.1 | 1802.6 |
| TMEM125  | 110.2  | 111.6  | 115.7  | 115    | 101.2  | 98.8   | 110.1  | 119.2  |
| TMEM126A | 578.3  | 617.8  | 828.6  | 607.1  | 568.3  | 544.9  | 509.4  | 581.8  |
| TMEM126B | 1131.8 | 993    | 1044.9 | 1226.9 | 912.6  | 573.7  | 1299.2 | 1400.1 |
| TMEM127  | 145.6  | 164.5  | 164    | 170.5  | 154.7  | 157.4  | 185.4  | 151.3  |
| TMEM128  | 173    | 144.2  | 198.6  | 153.6  | 122.8  | 157.2  | 151.8  | 128.8  |
| TMEM129  | 130.6  | 125.4  | 144.4  | 149.1  | 121.3  | 99.8   | 121.7  | 115.7  |
| TMEM130  | 118.8  | 133.7  | 117.7  | 121.3  | 110.4  | 101.3  | 130.8  | 125.8  |
| TMEM132A | 116.1  | 114.9  | 132.2  | 133.4  | 107.7  | 102.7  | 127.6  | 109.3  |
| TMEM134  | 316.2  | 315.2  | 389.3  | 276.4  | 229.8  | 270.7  | 248.5  | 206.9  |
| TMEM14A  | 188.7  | 220.3  | 239.9  | 216.9  | 220.2  | 186.4  | 150.5  | 132.1  |
| TMEM14B  | 461.3  | 443.4  | 801    | 375.9  | 366.7  | 553.7  | 410.9  | 518.9  |
| TMEM14C  | 784.3  | 745.5  | 1419.4 | 735.2  | 554    | 732.6  | 553.4  | 498    |
| TMEM15   | 196.7  | 191    | 197.3  | 204.9  | 171.5  | 194.2  | 201.1  | 158.9  |
| TMEM150  | 328.4  | 275.1  | 239.1  | 224.9  | 219.9  | 176    | 182.8  | 152.1  |
| TMEM151  | 127.4  | 120.1  | 123.8  | 122.6  | 109.7  | 93.8   | 103.9  | 116.3  |
| TMEM151  | 113    | 116.8  | 122.4  | 114    | 107.3  | 98.5   | 119.3  | 120.4  |
| TMEM154  | 221.2  | 215.9  | 213.8  | 194.9  | 193.1  | 140.8  | 165.9  | 163.5  |
| TMEM156  | 215.3  | 162.7  | 239.9  | 250.9  | 193.3  | 188.5  | 332.1  | 223.1  |
| TMEM157  | 114.5  | 125.4  | 123.1  | 123.9  | 121.9  | 106.7  | 129    | 125.5  |
| TMEM159  | 120.1  | 133.1  | 120    | 139.4  | 121.1  | 109.1  | 123.1  | 127.2  |
| TMEM164  | 120.7  | 117.9  | 125.4  | 118.9  | 113.1  | 104.5  | 124    | 111.6  |
| TMEM16A  | 119.7  | 107.4  | 117.9  | 114.2  | 102.2  | 92.8   | 116.9  | 109.6  |
| TMEM16B  | 118.5  | 116.7  | 103.8  | 119.8  | 103.7  | 96.4   | 121.8  | 113.6  |
| TMEM16C  | 110.1  | 113.3  | 114.2  | 111.8  | 104.1  | 95.1   | 114.9  | 105.6  |
| TMEM16D  | 113.7  | 125.3  | 116.7  | 115.5  | 112    | 96.6   | 114.6  | 119.2  |
| TMEM16E  | 118.3  | 112.3  | 122.4  | 117.1  | 112.5  | 113.2  | 126    | 116.5  |
| TMEM16F  | 210.7  | 198    | 217.7  | 215.5  | 176.4  | 211.9  | 200.6  | 226.9  |
| TMEM16G  | 107.4  | 117.9  | 108.2  | 114.7  | 102    | 89.1   | 113.8  | 112.7  |
| TMEM16G  | 121.7  | 117.6  | 123.2  | 118.1  | 122.7  | 105.8  | 132.7  | 132.2  |
| TMEM16G  | 108.2  | 111.3  | 116.3  | 113.9  | 106.6  | 91.4   | 113.4  | 110.5  |
| TMEM16H  | 150    | 139.6  | 156.6  | 161.1  | 130    | 118.3  | 142.9  | 137.5  |
| TMEM16J  | 119.9  | 135.1  | 121.3  | 127.2  | 112.7  | 108.3  | 127.6  | 117.4  |
| TMEM16J  | 119.2  | 129.9  | 132.2  | 115.6  | 118.1  | 108.3  | 118.3  | 113.1  |
| TMEM16K  | 141.5  | 140    | 134.8  | 134.2  | 112.7  | 107    | 148.5  | 132.9  |
| TMEM17   | 3597.8 | 3277.9 | 3871   | 3832.8 | 5005   | 2732.4 | 3949.1 | 3502   |
| TMEM170  | 182.1  | 187.1  | 158.3  | 223.4  | 181.1  | 175.4  | 208.1  | 219.2  |

|          |        |        |        |        |       |        |        |        |
|----------|--------|--------|--------|--------|-------|--------|--------|--------|
| TMEM173  | 360    | 535.4  | 740.8  | 436.3  | 291.1 | 412.8  | 266.8  | 199.5  |
| TMEM176f | 119.9  | 129.6  | 137.5  | 127.6  | 105.2 | 114.6  | 129.4  | 117.2  |
| TMEM178  | 116.4  | 108.1  | 112.8  | 122.8  | 105.8 | 100    | 115.5  | 121    |
| TMEM18   | 160.9  | 172    | 192.7  | 194.8  | 136.7 | 151.6  | 153.9  | 147    |
| TMEM183f | 846.4  | 863.4  | 904.6  | 1062   | 786.3 | 694.9  | 760.5  | 821.4  |
| TMEM185f | 192    | 224.7  | 204.7  | 205.2  | 144.5 | 185.7  | 220.8  | 185.4  |
| TMEM185f | 169.7  | 178.8  | 153.2  | 173    | 139   | 139.8  | 175.8  | 167.9  |
| TMEM186  | 121.2  | 136.4  | 135.7  | 128.4  | 125.5 | 113.9  | 132.1  | 127.6  |
| TMEM19   | 127.9  | 132.8  | 123.5  | 120.6  | 127.5 | 95.3   | 124.2  | 119.6  |
| TMEM2    | 290.7  | 344.3  | 238    | 407    | 302.7 | 241.1  | 372.6  | 366    |
| TMEM20   | 124    | 124.1  | 128.3  | 128    | 117.9 | 96.8   | 116.5  | 121.4  |
| TMEM22   | 117.2  | 115    | 117.7  | 120.2  | 104.9 | 104.3  | 123.5  | 119.2  |
| TMEM23   | 123    | 125.3  | 141.8  | 136.2  | 115.4 | 114.5  | 118.6  | 124    |
| TMEM24   | 142.2  | 131    | 132.7  | 135.2  | 112.5 | 119.6  | 134.2  | 129.6  |
| TMEM25   | 128.2  | 135    | 119.9  | 121.7  | 109.7 | 108.3  | 125.2  | 116    |
| TMEM26   | 115.1  | 122    | 118.5  | 128.9  | 107.8 | 100.4  | 121.6  | 117.8  |
| TMEM27   | 113.9  | 122.2  | 119.7  | 119.5  | 113.5 | 101.6  | 118.4  | 116.6  |
| TMEM28   | 115.1  | 117.5  | 114.8  | 125    | 104.7 | 105.1  | 121.6  | 128.2  |
| TMEM29   | 176.6  | 186.2  | 241.3  | 183.7  | 141.5 | 147.7  | 147.6  | 150.9  |
| TMEM30A  | 255.1  | 265.4  | 234.6  | 216.4  | 217.2 | 199.3  | 269.6  | 272.4  |
| TMEM30B  | 118.1  | 126.9  | 135.2  | 138.5  | 122.8 | 118.3  | 159.1  | 168.7  |
| TMEM31   | 118.3  | 118.8  | 134.6  | 131    | 115.8 | 99.1   | 120.9  | 121.2  |
| TMEM32   | 1296.8 | 1377.3 | 1031.2 | 1365.9 | 848.4 | 1173.1 | 1463.2 | 1367.4 |
| TMEM34   | 135.5  | 127.2  | 136.6  | 139.8  | 125.5 | 113.8  | 133.5  | 122    |
| TMEM35   | 123    | 115.8  | 119.5  | 115    | 109.3 | 95.6   | 121.6  | 116.1  |
| TMEM37   | 118.5  | 114.7  | 115.8  | 122.6  | 118.4 | 104.9  | 116.6  | 113.7  |
| TMEM38A  | 107.1  | 111.4  | 113.1  | 122.8  | 113.3 | 94.8   | 116    | 116.6  |
| TMEM38B  | 121.7  | 127.1  | 121    | 125.7  | 112.7 | 100.4  | 116.1  | 121    |
| TMEM39A  | 143.5  | 157.5  | 161.4  | 161.9  | 147.4 | 140.2  | 164.2  | 170.1  |
| TMEM39B  | 307.5  | 288    | 284.7  | 295.4  | 243.6 | 221.8  | 240.3  | 254.8  |
| TMEM4    | 286    | 238.4  | 229.8  | 343.5  | 252.5 | 221.1  | 222.3  | 203    |
| TMEM40   | 119.8  | 118.9  | 115.7  | 122.8  | 108.9 | 99.3   | 114.2  | 111    |
| TMEM41A  | 158.1  | 171.3  | 163.2  | 163.7  | 154.5 | 135.1  | 154.4  | 166.8  |
| TMEM41B  | 526.9  | 614.3  | 634.9  | 520.8  | 481.2 | 517.5  | 544.9  | 465.2  |
| TMEM42   | 280.2  | 279.5  | 391.5  | 252.7  | 235   | 264.6  | 208.7  | 210.7  |
| TMEM43   | 544.1  | 568.6  | 677.7  | 582.4  | 513.9 | 577.2  | 581.5  | 506.3  |
| TMEM44   | 139.5  | 130    | 123.7  | 135    | 109.5 | 112.6  | 136.1  | 138    |
| TMEM44   | 114.5  | 108.4  | 125.7  | 144.5  | 128.8 | 97.7   | 118.8  | 114.5  |
| TMEM45A  | 112.6  | 110.3  | 118.3  | 123.2  | 98.8  | 105.3  | 112.1  | 114.7  |
| TMEM45B  | 143.8  | 152.8  | 156.8  | 161.9  | 136.3 | 117    | 169.3  | 140.4  |
| TMEM46   | 125.6  | 134.6  | 118.8  | 119.9  | 118.3 | 102.2  | 115.1  | 126.9  |
| TMEM47   | 113    | 117.6  | 120.1  | 118.3  | 112.1 | 102    | 127.2  | 113.5  |
| TMEM48   | 147.1  | 162.6  | 137.2  | 148.5  | 131.4 | 120.1  | 145.9  | 129.1  |
| TMEM49   | 615.3  | 463.9  | 731.1  | 736.7  | 436.2 | 976.1  | 744.1  | 530.7  |
| TMEM5    | 426.6  | 503.1  | 547.9  | 467.6  | 419.8 | 380.2  | 482.6  | 561.2  |
| TMEM50A  | 187.6  | 186.6  | 195.3  | 184.9  | 186.6 | 156    | 231.4  | 231.9  |
| TMEM50B  | 532.7  | 556.6  | 704    | 468.3  | 409.3 | 434.4  | 398.4  | 375.2  |
| TMEM51   | 284.5  | 160.8  | 920.5  | 300.8  | 159.5 | 595.6  | 256.6  | 189.8  |
| TMEM52   | 121.1  | 113.3  | 107.6  | 123.8  | 106.9 | 103.2  | 120.7  | 116.9  |
| TMEM53   | 113.5  | 127.6  | 121.2  | 121.5  | 124   | 105.9  | 125.3  | 118.2  |
| TMEM54   | 114.3  | 110.4  | 108.2  | 111.4  | 99.6  | 95.3   | 104.8  | 113.6  |

|         |        |        |        |        |        |        |        |        |
|---------|--------|--------|--------|--------|--------|--------|--------|--------|
| TMEM55A | 220.5  | 266.7  | 242.8  | 228.8  | 190.3  | 153.9  | 180.4  | 159.1  |
| TMEM55B | 404.3  | 388.8  | 371.8  | 422.4  | 409.3  | 352.9  | 447.2  | 454.6  |
| TMEM56  | 111.7  | 114    | 121.9  | 120.1  | 104    | 103.9  | 117.7  | 116.1  |
| TMEM57  | 145.3  | 168.5  | 158.9  | 155.6  | 152.6  | 144.1  | 200.8  | 189.5  |
| TMEM58  | 113    | 131.1  | 125.1  | 122.9  | 116.7  | 109.5  | 129    | 127    |
| TMEM59  | 1268.6 | 1386.9 | 1519   | 1581.9 | 1233.7 | 1321.2 | 1505.9 | 1272.6 |
| TMEM60  | 794.8  | 775    | 813    | 729.3  | 570.8  | 522.2  | 640.6  | 686.3  |
| TMEM61  | 112.4  | 121.3  | 117.5  | 134.8  | 107.7  | 101.5  | 124.1  | 118.3  |
| TMEM62  | 240.4  | 249.5  | 258.1  | 232.7  | 189.3  | 197.5  | 219.3  | 209.4  |
| TMEM63A | 287.1  | 293.2  | 193.8  | 272.9  | 176.3  | 145.6  | 233.4  | 163.4  |
| TMEM63B | 113.3  | 123.6  | 117.3  | 125    | 108.9  | 99.7   | 124.5  | 123    |
| TMEM63C | 128.5  | 102.4  | 114.6  | 119.5  | 109    | 101.4  | 115.6  | 105.4  |
| TMEM64  | 145.7  | 165.1  | 128.9  | 165.4  | 139.8  | 120.9  | 175.2  | 168.6  |
| TMEM65  | 119    | 117.8  | 105.8  | 122.4  | 113.8  | 100.8  | 120.2  | 121.1  |
| TMEM66  | 7024.2 | 7742.1 | 5624.2 | 6311.3 | 5926.9 | 5978.7 | 7919.9 | 8566.8 |
| TMEM67  | 117.1  | 113.8  | 110.7  | 123    | 109.1  | 97.1   | 121.2  | 111.4  |
| TMEM68  | 122.5  | 117.2  | 132    | 129.9  | 111.7  | 109.4  | 122.6  | 111.8  |
| TMEM69  | 299    | 287.4  | 334.9  | 324.6  | 261.6  | 242.8  | 229.5  | 246.5  |
| TMEM70  | 129.6  | 138.8  | 148.2  | 149.3  | 115    | 136.7  | 151.7  | 140.9  |
| TMEM70  | 182.4  | 195.2  | 182.5  | 193.9  | 160.2  | 131    | 176.9  | 164.7  |
| TMEM71  | 426.7  | 558.1  | 495.3  | 507    | 524.8  | 318.2  | 393.6  | 373.6  |
| TMEM74  | 115.7  | 115.2  | 101.5  | 108.6  | 101.6  | 97.5   | 119.6  | 117    |
| TMEM75  | 107.5  | 116.4  | 108.2  | 125.3  | 104.5  | 100    | 111.6  | 112.1  |
| TMEM77  | 188.6  | 185.4  | 270.6  | 217.4  | 193.1  | 226    | 184.5  | 182.4  |
| TMEM79  | 337.3  | 333.2  | 308.2  | 369.9  | 340.4  | 245.8  | 323.6  | 321.9  |
| TMEM8   | 216.6  | 322.8  | 214.9  | 228.9  | 203.9  | 189.2  | 189.4  | 227.9  |
| TMEM80  | 199.3  | 184.5  | 192.8  | 162.5  | 148.2  | 153.4  | 142.7  | 157.3  |
| TMEM80  | 173.3  | 151.6  | 174.1  | 174.1  | 131.2  | 123.5  | 144    | 141.3  |
| TMEM80  | 125.3  | 113.2  | 136.8  | 119.6  | 117.9  | 102.6  | 114.3  | 115.3  |
| TMEM81  | 114.3  | 117.2  | 134.9  | 135.2  | 133.9  | 103.7  | 126.7  | 137.9  |
| TMEM83  | 114.5  | 113.3  | 111.8  | 122.1  | 115.5  | 97.9   | 114    | 109.3  |
| TMEM85  | 779.4  | 962.2  | 991.6  | 811.8  | 690    | 813.7  | 729.2  | 665.4  |
| TMEM86A | 120.4  | 117.8  | 115.9  | 129.7  | 112.2  | 118.4  | 134.1  | 116.2  |
| TMEM86B | 210.4  | 218.3  | 225.7  | 177    | 167.2  | 185.1  | 190.5  | 183.8  |
| TMEM87A | 1481.4 | 1444.8 | 1669.9 | 1623.3 | 1675.1 | 1288.3 | 2113.9 | 2135.7 |
| TMEM87B | 124    | 118.4  | 131.3  | 126.9  | 108.6  | 105.3  | 135.4  | 117.3  |
| TMEM88  | 115.9  | 113.7  | 118.2  | 118.8  | 113.4  | 105.7  | 120.6  | 117    |
| TMEM89  | 120    | 119.3  | 122.6  | 118    | 109.3  | 108.1  | 121.4  | 133    |
| TMEM9   | 158.4  | 148.4  | 151.7  | 159.4  | 130.7  | 133.4  | 138.3  | 149.6  |
| TMEM91  | 157.8  | 190.4  | 191.2  | 156.9  | 149.2  | 124.8  | 138.7  | 127.4  |
| TMEM92  | 109.4  | 109.8  | 111.6  | 110.6  | 107.4  | 92     | 111.6  | 111.5  |
| TMEM93  | 296.6  | 308.1  | 307    | 340.4  | 249.4  | 192.1  | 272.4  | 248.8  |
| TMEM93  | 139.8  | 132.1  | 149.1  | 145.7  | 131.4  | 121    | 156.3  | 142.9  |
| TMEM93  | 511    | 555.7  | 469.8  | 492.7  | 394    | 447.1  | 474.6  | 506    |
| TMEM95  | 114.6  | 115    | 106.2  | 122.6  | 107.5  | 95.3   | 117.5  | 108.1  |
| TMEM97  | 201.6  | 226.3  | 196.4  | 191.5  | 161.5  | 129.1  | 172.7  | 177.3  |
| TMEM98  | 114    | 125.1  | 120.2  | 121.4  | 118.5  | 98.6   | 112.7  | 109.6  |
| TMEM98  | 113.5  | 132.5  | 114.9  | 122.3  | 108.4  | 103.8  | 117.9  | 117.4  |
| TMEM99  | 219.1  | 241    | 223.7  | 261    | 248    | 223.7  | 298.1  | 311.8  |
| TMEM9B  | 665.2  | 674.3  | 876.4  | 665.2  | 530.6  | 540.3  | 606.9  | 541.2  |
| TMEPAI  | 164.3  | 137.5  | 354.4  | 163.8  | 131.2  | 284.4  | 158    | 153.4  |



|          |        |        |        |        |        |        |       |        |
|----------|--------|--------|--------|--------|--------|--------|-------|--------|
| TMENAI   | 109.9  | 109.7  | 116    | 116    | 99.7   | 93.7   | 107.1 | 114.9  |
| TMENAI   | 141.1  | 135.7  | 236    | 139.7  | 129.8  | 200.9  | 143.8 | 137.9  |
| TMENAI   | 114.6  | 114.9  | 129.8  | 114.2  | 107.8  | 89.9   | 121.2 | 110.6  |
| TMF1     | 203.5  | 216.3  | 239.2  | 174.8  | 200.8  | 153.6  | 204.8 | 181.5  |
| TMIE     | 125.4  | 120.2  | 121.2  | 136.5  | 113.3  | 114.5  | 115.5 | 116.5  |
| TMIGD    | 114.1  | 130.6  | 121.3  | 125.9  | 115.8  | 111.6  | 122.7 | 127.1  |
| TMIGD2   | 117.3  | 117.1  | 121.2  | 113.9  | 110.6  | 97     | 119.7 | 110.7  |
| TMLHE    | 121.9  | 119.5  | 144.5  | 139.7  | 118.1  | 107.1  | 135.5 | 118    |
| TMLHE    | 120    | 125.2  | 116.8  | 121.3  | 107.4  | 104.7  | 124.2 | 121.2  |
| TMOD1    | 117.1  | 129.8  | 113.2  | 136.1  | 120.1  | 106.1  | 132.2 | 133.2  |
| TMOD2    | 110.8  | 115.5  | 109.2  | 115.2  | 113.9  | 99.6   | 119.3 | 113    |
| TMOD3    | 139.3  | 148.9  | 141.1  | 158.5  | 129    | 119.7  | 163.8 | 137.3  |
| TMOD4    | 123.8  | 128.3  | 138.8  | 127    | 115.2  | 115.6  | 135.1 | 120.8  |
| TMPIT    | 147.1  | 139.9  | 151.8  | 140.5  | 117    | 140.2  | 140.1 | 121.2  |
| TMPO     | 118.2  | 123.1  | 130.5  | 124.6  | 117.8  | 95.5   | 117.5 | 118.2  |
| TMPO     | 132.3  | 129.1  | 128.6  | 130.8  | 124    | 114.7  | 124   | 125.3  |
| TMPO     | 116.9  | 113.1  | 112.8  | 121    | 109.7  | 92     | 110.9 | 113.8  |
| TMPRSS11 | 120.4  | 110.4  | 119.3  | 122.2  | 112.2  | 96.7   | 119.5 | 110.9  |
| TMPRSS11 | 110.1  | 113.9  | 118.7  | 117    | 110.9  | 102.5  | 114.4 | 115.6  |
| TMPRSS11 | 117.8  | 108.5  | 118.5  | 123.4  | 110.9  | 102.8  | 129.4 | 114.8  |
| TMPRSS12 | 111.1  | 115.8  | 116.2  | 116.8  | 105.9  | 96.2   | 119.1 | 112    |
| TMPRSS13 | 118.3  | 124.6  | 125.1  | 115.3  | 105.1  | 94     | 131.3 | 114.3  |
| TMPRSS2  | 117.3  | 114.3  | 119.1  | 115    | 122.4  | 99.2   | 121.3 | 119    |
| TMPRSS3  | 122    | 115.8  | 120.3  | 124    | 112.2  | 106.3  | 114.9 | 113.6  |
| TMPRSS3  | 114.6  | 100.9  | 110.4  | 124.1  | 112.6  | 95.2   | 109.9 | 118.5  |
| TMPRSS3  | 126    | 130.4  | 127.4  | 126.4  | 117.9  | 104.6  | 131   | 124.8  |
| TMPRSS3  | 128.2  | 119.1  | 125.9  | 126.4  | 123.1  | 110.1  | 116   | 120.7  |
| TMPRSS3  | 125.8  | 124.9  | 134.1  | 136.6  | 115.7  | 102.4  | 124.8 | 113.3  |
| TMPRSS4  | 108    | 120.3  | 116.9  | 119    | 111.8  | 98.7   | 120   | 119    |
| TMPRSS4  | 120    | 120.7  | 121.6  | 125.6  | 113.5  | 100.1  | 124.8 | 123.6  |
| TMPRSS5  | 119    | 112.6  | 111.1  | 116.1  | 103.2  | 93.9   | 116.6 | 113.4  |
| TMPRSS6  | 116.8  | 115.2  | 118.1  | 123.8  | 111.1  | 106.2  | 123   | 116.2  |
| TMPRSS7  | 112.5  | 105.6  | 115.2  | 117.5  | 105.5  | 114.6  | 110.4 | 109.4  |
| TMPRSS7  | 121.3  | 113.5  | 110.5  | 106.6  | 103.5  | 95.1   | 111.2 | 107.4  |
| TMPRSS9  | 112.7  | 116.4  | 118.7  | 118.3  | 104.3  | 101.8  | 112.4 | 103.1  |
| TMSB10   | 6720.5 | 6894.7 | 6895.2 | 7085.1 | 5630.7 | 7175.3 | 6413  | 5162.6 |
| TMSB4X   | 131.7  | 140.9  | 131.8  | 147.8  | 124.7  | 116.8  | 132.7 | 119.2  |
| TMSB4Y   | 123.9  | 135.4  | 131.4  | 130.9  | 123.5  | 117    | 122.6 | 125.3  |
| TMSL8    | 109.8  | 113    | 112.8  | 121    | 107.9  | 97.1   | 115.8 | 112    |
| TMTC2    | 115.6  | 118.9  | 121.8  | 113.6  | 118.9  | 105    | 126.5 | 121.2  |
| TMTC3    | 120.9  | 133.3  | 130.6  | 152    | 127.6  | 104    | 130.1 | 125.3  |
| TMTC4    | 126.9  | 124.3  | 120    | 121.2  | 123.4  | 104.7  | 114.8 | 120.8  |
| TMTC4    | 123.7  | 109.5  | 119.4  | 121.9  | 114.4  | 103.6  | 124.2 | 120.6  |
| TMTC4    | 127.9  | 141.6  | 128.7  | 136.9  | 125.2  | 112.8  | 146.5 | 123.8  |
| TMUB2    | 213    | 200.5  | 192.6  | 213.6  | 176.1  | 183.6  | 211.4 | 204    |
| TMUB2    | 282.7  | 289.6  | 278.8  | 298.4  | 247.1  | 192.6  | 305   | 288.2  |
| TNC      | 149.7  | 120.2  | 136.1  | 124.6  | 124.6  | 114.8  | 134   | 117.6  |
| TNF      | 352.4  | 256.4  | 299.6  | 404.2  | 251    | 325    | 670.6 | 452.9  |
| TNFAIP1  | 172    | 158.2  | 183    | 174.4  | 151.8  | 136.5  | 163.3 | 155    |
| TNFAIP2  | 210.7  | 137.5  | 171    | 172.9  | 116.8  | 143.8  | 186   | 131.1  |
| TNFAIP3  | 857.4  | 748.2  | 478.8  | 730.7  | 559.2  | 502.2  | 732.4 | 955.7  |

|           |        |        |        |        |        |       |        |        |
|-----------|--------|--------|--------|--------|--------|-------|--------|--------|
| TNFAIP6   | 119    | 121.7  | 126.1  | 120.7  | 124.5  | 104.9 | 116.5  | 127.7  |
| TNFAIP8   | 450.5  | 493.6  | 510.5  | 432.3  | 509.7  | 382.2 | 328.3  | 345.4  |
| TNFAIP8   | 120.9  | 126.7  | 130    | 126.5  | 114.4  | 103   | 116.9  | 129.9  |
| TNFAIP8L1 | 214.3  | 234.6  | 269.7  | 247.6  | 246.6  | 184   | 239.4  | 234    |
| TNFAIP8L2 | 198.3  | 185.7  | 184.6  | 218    | 148.9  | 137.3 | 160.4  | 158.9  |
| TNFAIP8L3 | 115.4  | 121.6  | 121.8  | 119.6  | 116    | 110.4 | 123.5  | 123    |
| TNFRSF10A | 272.1  | 264.9  | 219.2  | 323.6  | 252.9  | 174.6 | 380.9  | 401.7  |
| TNFRSF10E | 115.5  | 113.7  | 126.9  | 122.9  | 107.7  | 104.8 | 123.5  | 127.1  |
| TNFRSF10E | 118.3  | 110.1  | 120.2  | 112.4  | 107.9  | 101.3 | 116.6  | 118.7  |
| TNFRSF10E | 258.2  | 254    | 303.6  | 269.5  | 210.8  | 196   | 357.8  | 302.2  |
| TNFRSF10C | 137.6  | 115.4  | 141    | 134.5  | 114.2  | 110.2 | 142    | 131.5  |
| TNFRSF10C | 116    | 122.7  | 142.9  | 138.5  | 135    | 106.5 | 142.1  | 161.7  |
| TNFRSF11A | 120.7  | 109.8  | 113.2  | 114.8  | 105    | 95.9  | 109.7  | 110.6  |
| TNFRSF11E | 115.5  | 117.4  | 125.4  | 107.8  | 108.5  | 99.7  | 126.6  | 119.4  |
| TNFRSF12A | 115.2  | 113    | 117.3  | 125.7  | 119.4  | 115.9 | 130.1  | 114.4  |
| TNFRSF13E | 160.7  | 163.4  | 155.5  | 166.3  | 138.8  | 137.3 | 143.1  | 135.5  |
| TNFRSF13C | 141.9  | 128.8  | 137.2  | 143.6  | 111.3  | 113.6 | 125.4  | 117.5  |
| TNFRSF14  | 4181.4 | 3413.9 | 3858.2 | 3918.9 | 2771.8 | 2221  | 2915.1 | 2748.8 |
| TNFRSF17  | 134.4  | 139.2  | 117    | 143.2  | 121.6  | 107.4 | 122.5  | 122    |
| TNFRSF18  | 140.4  | 135.3  | 125.1  | 141    | 114.4  | 111.1 | 132.4  | 124.5  |
| TNFRSF18  | 113.9  | 121    | 113.9  | 116.8  | 101.6  | 107.5 | 111.5  | 109.2  |
| TNFRSF19  | 112.2  | 118.9  | 131.4  | 111.4  | 108.8  | 110.2 | 133.7  | 131.2  |
| TNFRSF19  | 132.2  | 126.7  | 127.1  | 125.3  | 111.2  | 103.2 | 123.6  | 120.5  |
| TNFRSF19  | 112.7  | 122.6  | 115.2  | 112.4  | 105.9  | 89.8  | 120.6  | 115    |
| TNFRSF19L | 113.2  | 113.4  | 106.2  | 110.4  | 112.9  | 94.2  | 113.4  | 102.8  |
| TNFRSF19L | 128.8  | 130.2  | 122.4  | 124.5  | 109.1  | 114.7 | 125.2  | 127.3  |
| TNFRSF19L | 119.6  | 111.9  | 122.4  | 118.1  | 104.6  | 97.2  | 123.1  | 113.4  |
| TNFRSF1A  | 568.1  | 583.3  | 693.9  | 618.2  | 410.7  | 613.7 | 679.4  | 573    |
| TNFRSF1B  | 179.8  | 187.5  | 206.3  | 225.2  | 178.7  | 166.5 | 199.3  | 196.9  |
| TNFRSF21  | 119.2  | 120.7  | 122.8  | 130.4  | 112.1  | 105.7 | 120.9  | 122.4  |
| TNFRSF25  | 166.2  | 165.8  | 226    | 151.7  | 183.1  | 172.6 | 161.1  | 164.4  |
| TNFRSF25  | 1410.1 | 2145.1 | 2476.6 | 1515.3 | 1471.7 | 1994  | 1461.6 | 1400.2 |
| TNFRSF4   | 276.8  | 254.2  | 160.7  | 254.8  | 140    | 128   | 171.5  | 119.7  |
| TNFRSF6B  | 114.3  | 111.1  | 123.2  | 117.1  | 105.6  | 102.2 | 124.7  | 112.1  |
| TNFRSF6B  | 130.9  | 138.8  | 123    | 132.3  | 124.3  | 100.5 | 121.5  | 128.2  |
| TNFRSF7   | 221.3  | 257.1  | 221.6  | 211.4  | 215.3  | 244.1 | 188.3  | 163.6  |
| TNFRSF8   | 113.2  | 117.8  | 112.9  | 117.6  | 116.6  | 95.9  | 118.8  | 115.6  |
| TNFRSF8   | 124.3  | 124    | 140.9  | 128.8  | 110.1  | 104.1 | 116.4  | 116.6  |
| TNFRSF9   | 131.1  | 117.7  | 123    | 132.2  | 117.7  | 110.9 | 133.7  | 117.6  |
| TNFSF10   | 292.3  | 302.3  | 442.8  | 248.7  | 238.7  | 215.6 | 196.3  | 191.9  |
| TNFSF11   | 114    | 117.8  | 124.7  | 126.5  | 113.8  | 109.9 | 121.8  | 117.2  |
| TNFSF11   | 117    | 116.2  | 105.8  | 122.5  | 112.6  | 93.6  | 122.2  | 111.3  |
| TNFSF11   | 114.1  | 116.3  | 117.2  | 114.6  | 112    | 97.5  | 117.2  | 111.4  |
| TNFSF12   | 281.5  | 250.7  | 362.5  | 249.2  | 183.9  | 233   | 167.9  | 154.7  |
| TNFSF13   | 117.3  | 122    | 120.6  | 111.4  | 119.2  | 105   | 107.7  | 106.5  |
| TNFSF13   | 119    | 121    | 123.2  | 116.3  | 100.6  | 102.6 | 121.1  | 123.1  |
| TNFSF13B  | 205.1  | 212.2  | 342.7  | 223.4  | 179.3  | 174.1 | 159.5  | 150.1  |
| TNFSF14   | 266.7  | 375.8  | 231.9  | 353.1  | 374.4  | 171.7 | 404.9  | 363.6  |
| TNFSF14   | 132.7  | 160.1  | 122.6  | 158.2  | 174.1  | 100.8 | 152.3  | 161.3  |
| TNFSF14   | 375.2  | 401.1  | 307.8  | 421.2  | 361    | 232.9 | 454.6  | 457.3  |
| TNFSF15   | 252.5  | 253.8  | 270.1  | 241.6  | 255    | 184.7 | 290.7  | 262.8  |

|           |       |        |        |        |        |        |       |       |
|-----------|-------|--------|--------|--------|--------|--------|-------|-------|
| TNFSF18   | 111.8 | 122.2  | 120.6  | 123.7  | 109.2  | 106    | 126.5 | 117.6 |
| TNFSF4    | 123.4 | 115.2  | 148    | 130.6  | 116.9  | 117.6  | 126   | 136.5 |
| TNFSF5IP1 | 967.7 | 1091.7 | 1264.7 | 1267.1 | 1015.7 | 1076.1 | 979.2 | 976.3 |
| TNFSF7    | 130.5 | 125.7  | 129.4  | 136.3  | 115.5  | 112    | 126.6 | 119.3 |
| TNFSF8    | 128.7 | 140.4  | 121.6  | 129.8  | 119.2  | 117.9  | 128.7 | 126.7 |
| TNFSF9    | 122.3 | 119.2  | 122.7  | 129.5  | 127.1  | 115    | 141.9 | 121.6 |
| TNIK      | 153.2 | 196.5  | 170.6  | 159.4  | 166.7  | 127.7  | 152.2 | 152.7 |
| TNIP1     | 281.2 | 352.5  | 196.8  | 294.2  | 198.7  | 292.6  | 366.9 | 304.7 |
| TNIP2     | 144.3 | 138.1  | 125.7  | 163.6  | 131.1  | 132.4  | 137.3 | 147   |
| TNIP3     | 129.3 | 123.9  | 116.5  | 129.9  | 124.1  | 103.2  | 119.9 | 125.4 |
| TNK1      | 114.8 | 117.1  | 117.8  | 113    | 103.5  | 96     | 114.3 | 99.5  |
| TNK2      | 700.6 | 740.2  | 815.4  | 748.8  | 556    | 486.1  | 547.8 | 520.2 |
| TNK2      | 122.4 | 123.8  | 129.9  | 119.4  | 115.7  | 121    | 123.6 | 120.6 |
| TNK2      | 122.3 | 117    | 111.3  | 116.1  | 116.9  | 102.9  | 115.6 | 121.1 |
| TNKS      | 122.7 | 125.8  | 124.6  | 126.8  | 110.5  | 103.7  | 120.4 | 113.4 |
| TNKS1BP1  | 122.5 | 122.9  | 115.6  | 127    | 111.4  | 110.1  | 135.1 | 118.9 |
| TNKS2     | 122.9 | 125.9  | 140.9  | 123    | 110.7  | 117.3  | 133.6 | 118.6 |
| TNMD      | 119.8 | 114.2  | 115.6  | 133.7  | 116.7  | 101.8  | 125.8 | 121.5 |
| TNN       | 119.7 | 115.2  | 116.9  | 118.4  | 111.2  | 101.3  | 124   | 115.2 |
| TNNC1     | 126.9 | 110.6  | 130.1  | 131.2  | 108.9  | 102    | 123.8 | 119.3 |
| TNNC2     | 106.5 | 111.6  | 110.4  | 113.9  | 110.2  | 105.6  | 119   | 104.6 |
| TNNI1     | 108.3 | 111.2  | 115.5  | 118.8  | 108.2  | 97.9   | 112.9 | 108.5 |
| TNNI2     | 115.5 | 120    | 125.7  | 115.1  | 105.6  | 95.7   | 123   | 113.8 |
| TNNI3     | 131.8 | 116.8  | 117.5  | 140.1  | 113.1  | 105.1  | 118.5 | 120.7 |
| TNNI3K    | 112.6 | 116.4  | 120.8  | 113    | 112.4  | 109.9  | 121.6 | 116.2 |
| TNNT1     | 111.2 | 119.8  | 113.3  | 104.5  | 103.9  | 99.5   | 120.5 | 113.4 |
| TNNT2     | 118.8 | 117.2  | 132.6  | 129.1  | 119.4  | 114.5  | 128.6 | 113.5 |
| TNNT2     | 115.6 | 130.1  | 126.7  | 123.3  | 110.4  | 117    | 113.9 | 121.8 |
| TNNT3     | 117.5 | 118.4  | 125.1  | 129.2  | 117.6  | 110.1  | 124.9 | 119.8 |
| TNNT3     | 116.9 | 110    | 122.2  | 118.3  | 106.4  | 96.9   | 117.8 | 109   |
| TNP1      | 110.7 | 117.3  | 116.2  | 111.4  | 106.5  | 97.4   | 113.9 | 120.8 |
| TNP2      | 112.6 | 118.4  | 112    | 116.8  | 111.2  | 100.5  | 125.2 | 114.2 |
| TNPO1     | 111.5 | 125.2  | 133    | 121.7  | 124.6  | 107    | 130.8 | 135.7 |
| TNPO1     | 115.2 | 116.4  | 113.3  | 118.2  | 112.5  | 105.6  | 118.8 | 119   |
| TNPO1     | 386.8 | 458.4  | 271.8  | 561.1  | 379.4  | 227.8  | 611.6 | 510   |
| TNPO2     | 524.8 | 613.7  | 626.1  | 670.2  | 551.9  | 493.1  | 699.6 | 563.7 |
| TNPO3     | 387.4 | 385.2  | 335.5  | 441.8  | 374.8  | 262.6  | 457.7 | 495.1 |
| TNR       | 124.5 | 109.9  | 125.4  | 111.8  | 100.2  | 103    | 114.8 | 118   |
| TNRC15    | 262.5 | 282.4  | 197.6  | 256.2  | 215.3  | 204    | 308.2 | 328.7 |
| TNRC4     | 116.8 | 120.8  | 118.4  | 122.3  | 107    | 96.1   | 113.8 | 111.1 |
| TNRC5     | 226.4 | 224.4  | 190.8  | 219.4  | 215.2  | 167.3  | 203.4 | 177.6 |
| TNRC5     | 230.4 | 240.9  | 224.1  | 203.3  | 197    | 164.8  | 169.4 | 193.8 |
| TNRC6A    | 117.1 | 127.9  | 124.5  | 126.8  | 117.9  | 105.9  | 137.9 | 130.3 |
| TNRC6A    | 319.3 | 310.1  | 282.3  | 296.2  | 298    | 266.7  | 364.7 | 288.4 |
| TNRC6A    | 115.7 | 124.9  | 126    | 122.6  | 115.3  | 101.9  | 123.5 | 117.1 |
| TNRC6B    | 537.9 | 541.3  | 460.3  | 628.4  | 597.2  | 369.5  | 506.8 | 775.2 |
| TNRC6B    | 109.7 | 115.4  | 134.8  | 133.1  | 114.7  | 105.9  | 116.2 | 109.8 |
| TNRC6B    | 118.1 | 111.8  | 110    | 121    | 106.9  | 101.8  | 116   | 108   |
| TNRC6C    | 118.9 | 113.4  | 108.9  | 114.7  | 107.5  | 95.2   | 114.5 | 111.1 |
| TNRC9     | 113.6 | 114.1  | 119    | 123.6  | 110.6  | 99.8   | 114.3 | 118.4 |
| TNS1      | 118.9 | 115    | 133.4  | 129.1  | 107.5  | 117.8  | 137.2 | 113.8 |

|          |        |        |        |        |        |        |        |        |
|----------|--------|--------|--------|--------|--------|--------|--------|--------|
| TNS3     | 291    | 163    | 451.5  | 214.3  | 140.9  | 206.5  | 173.7  | 137.8  |
| TNS4     | 106.6  | 114.6  | 115.9  | 118.6  | 104.5  | 92     | 117.8  | 114.8  |
| TNT      | 118.2  | 111.3  | 112.9  | 122.2  | 108.5  | 95     | 112.3  | 111.6  |
| TNXA     | 110.5  | 116.1  | 111.4  | 118.6  | 103.7  | 95.1   | 114.1  | 114.8  |
| TNXB     | 126.7  | 118.3  | 108.2  | 111.8  | 110.1  | 116.7  | 120.3  | 113.9  |
| TNXB     | 119.4  | 119.2  | 112.2  | 112.6  | 107.1  | 101.2  | 119.9  | 109.8  |
| TOB1     | 374.6  | 499.8  | 243.2  | 398.6  | 373.1  | 194.9  | 394.9  | 404.2  |
| TOB2     | 142.3  | 146.7  | 129.2  | 133.3  | 145.4  | 105.1  | 146    | 143.6  |
| TOE1     | 126.5  | 135.3  | 123.6  | 129.6  | 131    | 123.3  | 129.6  | 148.8  |
| TOLLIP   | 201.3  | 233.9  | 181.5  | 208.9  | 176.3  | 194.4  | 257.5  | 258.4  |
| TOM1     | 356.3  | 311.7  | 334    | 320.5  | 272.9  | 340.6  | 468.4  | 417.6  |
| TOM1L1   | 105.1  | 114    | 107.2  | 125.4  | 99.3   | 93.6   | 108.4  | 115.5  |
| TOM1L2   | 121.5  | 118.7  | 121.7  | 133.8  | 118.3  | 107.1  | 133.8  | 118.4  |
| TOM1L2   | 126.6  | 124.7  | 118.5  | 123.5  | 112.2  | 102.6  | 133    | 129.3  |
| TOM1L2   | 130    | 125.1  | 128.8  | 131.5  | 120.8  | 115.1  | 128.6  | 125.6  |
| TOMM20   | 451    | 531.9  | 484.3  | 518.5  | 506.3  | 403.1  | 427.2  | 394    |
| TOMM22   | 240    | 307.6  | 235.7  | 253.5  | 255.1  | 206.2  | 245.4  | 240.6  |
| TOMM34   | 249.3  | 236.1  | 219.4  | 277.5  | 247.3  | 169.9  | 266.6  | 302.9  |
| TOMM40   | 762.8  | 880.1  | 625.3  | 815.2  | 611.5  | 431.1  | 686.4  | 675.9  |
| TOMM40L  | 146.2  | 139.3  | 144.7  | 150.4  | 125.3  | 115.2  | 138.3  | 127.5  |
| TOMM7    | 4649   | 5471.5 | 7321.4 | 4356.2 | 4617   | 6248.9 | 4529.9 | 5751.8 |
| TOMM70A  | 641    | 629.7  | 635.6  | 615.5  | 508.8  | 509    | 573.1  | 575.5  |
| TOP1     | 126.4  | 134.3  | 129.5  | 124.3  | 114.9  | 101.7  | 134.3  | 137.1  |
| TOP1MT   | 280.4  | 300.5  | 247    | 299.2  | 221.3  | 187.3  | 268.5  | 268.6  |
| TOP1MT   | 155    | 150.1  | 133.9  | 127.2  | 137.6  | 107.4  | 140.8  | 132.3  |
| TOP1MT   | 131    | 140.5  | 128.2  | 126.3  | 119.2  | 106.3  | 119.5  | 111.3  |
| TOP1P1   | 110.7  | 133.1  | 131    | 113.7  | 109.7  | 103.5  | 126.3  | 122.7  |
| TOP1P2   | 175.1  | 174.1  | 186.5  | 184.3  | 159.1  | 176.1  | 225.3  | 253    |
| TOP2A    | 132.7  | 123.7  | 130.1  | 116.6  | 115.8  | 110.2  | 124.7  | 118.3  |
| TOP2B    | 1018.3 | 1218   | 1152.2 | 1105.9 | 1309.5 | 1124.7 | 1483   | 1191.3 |
| TOP3A    | 251.4  | 268.9  | 239.5  | 256.4  | 235.9  | 145.2  | 309.4  | 401.9  |
| TOP3B    | 290.9  | 362.9  | 302    | 342    | 238.2  | 250.9  | 298.4  | 297.5  |
| TOPBP1   | 195.3  | 223.8  | 184.9  | 214.4  | 210.4  | 178.3  | 205.5  | 220.5  |
| TOPORS   | 127.7  | 136.5  | 121.2  | 132.5  | 121.7  | 114.9  | 148.1  | 135.7  |
| TOR1A    | 168.2  | 171.5  | 178.2  | 210.7  | 140.2  | 150.4  | 208.8  | 176.6  |
| TOR1AIP1 | 488.6  | 606.6  | 575    | 631.1  | 347    | 465.3  | 458.9  | 496.9  |
| TOR1AIP2 | 145.7  | 146.1  | 132.9  | 155    | 123.3  | 129    | 160.6  | 179.8  |
| TOR1B    | 186.3  | 236.2  | 196.9  | 244.7  | 226    | 197    | 236.7  | 312.1  |
| TOR2A    | 127.4  | 115.7  | 120.1  | 118.5  | 111.8  | 113.9  | 127.4  | 131.1  |
| TOR3A    | 244.7  | 230.5  | 231.5  | 228.3  | 220.2  | 154.9  | 224.3  | 193.1  |
| TOX      | 130.5  | 136.6  | 149.7  | 120.5  | 117.2  | 107.5  | 129.8  | 118.8  |
| TP53     | 132.9  | 133.6  | 119.1  | 130.1  | 147.6  | 108.8  | 134.5  | 129.4  |
| TP53BP1  | 247.1  | 237.9  | 205.4  | 270.4  | 201.2  | 172.5  | 215.2  | 251.5  |
| TP53BP2  | 327.9  | 329.1  | 271.8  | 368.4  | 299.7  | 251.8  | 450.4  | 409.9  |
| TP53BP2  | 122.4  | 122.1  | 124.2  | 137.6  | 118.3  | 113    | 117.9  | 119.8  |
| TP53I11  | 118.9  | 115.4  | 115.3  | 128.8  | 111.3  | 98.5   | 122.9  | 116    |
| TP53I11  | 125.3  | 128.3  | 125.5  | 129.8  | 115.8  | 97.8   | 120.5  | 121.9  |
| TP53I13  | 237.2  | 257.1  | 365.1  | 262.5  | 204.5  | 255.7  | 238.1  | 192.9  |
| TP53I3   | 115    | 110    | 120.6  | 119    | 114.1  | 92.8   | 117.8  | 111.4  |
| TP53I3   | 127.1  | 115.5  | 110.2  | 113.1  | 105.2  | 99.9   | 114.5  | 115.3  |
| TP53INP1 | 165.8  | 153.8  | 162.1  | 154.6  | 122.9  | 134.5  | 137.1  | 145.7  |

|          |       |         |         |         |         |         |         |         |
|----------|-------|---------|---------|---------|---------|---------|---------|---------|
| TP53INP2 | 178.6 | 169.3   | 171.3   | 210.9   | 170.1   | 200.6   | 281.2   | 256.9   |
| TP53RK   | 386   | 424.4   | 328.3   | 461     | 360.3   | 284.3   | 357.2   | 328     |
| TP53TG3  | 122.1 | 118.3   | 120.8   | 123.9   | 113.5   | 101.7   | 124.1   | 128     |
| TP53TG3  | 124.6 | 116     | 127.6   | 115.4   | 120.9   | 108.2   | 133.1   | 115.4   |
| TP73     | 123   | 118.6   | 121     | 132     | 105     | 103.5   | 123.7   | 105.6   |
| TP73L    | 118.2 | 108     | 121.4   | 117.1   | 103.2   | 96.3    | 111.8   | 104.4   |
| TPARL    | 148.6 | 122.4   | 135.5   | 142.1   | 134     | 133.5   | 149.9   | 135.3   |
| TPCN1    | 114.4 | 117.7   | 142.8   | 121.1   | 114     | 102.4   | 115.9   | 122.6   |
| TPCN2    | 156.8 | 156.2   | 156.5   | 176.7   | 135.5   | 123.4   | 146.6   | 144     |
| TPD52    | 117.7 | 110.9   | 121.2   | 116.3   | 107.2   | 96.6    | 128.2   | 108.5   |
| TPD52L1  | 115.1 | 121.3   | 121.9   | 105.5   | 117.4   | 97      | 126.7   | 123.3   |
| TPD52L1  | 118.1 | 126.8   | 125.4   | 112.1   | 120.7   | 104.1   | 121.4   | 124.8   |
| TPD52L1  | 112.4 | 113.3   | 109.3   | 117.6   | 110.1   | 95.3    | 110.1   | 107.8   |
| TPD52L2  | 184.7 | 185     | 196     | 244.9   | 167.6   | 210.6   | 200.9   | 173.5   |
| TPD52L2  | 914.9 | 829.1   | 846.3   | 1066.4  | 594.1   | 795     | 1240.6  | 849.6   |
| TPD52L3  | 124.5 | 119     | 118.2   | 119.2   | 113.5   | 100.1   | 115.2   | 122.9   |
| TPD52L3  | 119.9 | 117.3   | 118.3   | 122.1   | 107.6   | 105.3   | 120.5   | 107.2   |
| TPD52L3  | 114.1 | 119.4   | 118.6   | 119.5   | 111.4   | 107.8   | 122     | 121.2   |
| TPH1     | 128   | 113.9   | 118.1   | 122.8   | 113.2   | 100.6   | 123.3   | 128.7   |
| TPH2     | 119.3 | 115.4   | 117.7   | 114.3   | 114.6   | 102.2   | 127.6   | 108.8   |
| TPI1     | 1655  | 2200.4  | 1953.2  | 1925.7  | 1756.7  | 1640.9  | 2229.2  | 2027.1  |
| TPK1     | 202.8 | 242.5   | 294.5   | 192.6   | 218.8   | 228.2   | 192.4   | 181.6   |
| TPK1     | 113.2 | 130     | 119.5   | 120.7   | 120.6   | 104.4   | 121.2   | 122.9   |
| TPM1     | 140.1 | 127.5   | 151.9   | 140.3   | 114.9   | 110.4   | 126.8   | 114.9   |
| TPM1     | 117.9 | 120.5   | 134.6   | 128.2   | 120.4   | 104.2   | 124.3   | 111.1   |
| TPM1     | 131   | 136.2   | 171.1   | 141.7   | 118.5   | 119.4   | 131.9   | 117.4   |
| TPM2     | 446.3 | 611.4   | 502.5   | 327.6   | 381.9   | 278.6   | 293.3   | 365.2   |
| TPM2     | 114.5 | 125.1   | 121.3   | 124.9   | 103.4   | 97.9    | 134.9   | 115.7   |
| TPM2     | 227.9 | 323.6   | 251.1   | 232.2   | 237.3   | 197.4   | 199.9   | 201.2   |
| TPM3     | 317.4 | 306.1   | 338.6   | 300.1   | 327     | 263.1   | 333.2   | 385.9   |
| TPM3     | 109.4 | 121.1   | 126.6   | 130     | 121.7   | 104.2   | 120.2   | 118.9   |
| TPM3     | 126.1 | 118.7   | 143.6   | 140.2   | 115.9   | 109.6   | 130.3   | 124.2   |
| TPM4     | 123.3 | 121.8   | 126.6   | 115.4   | 118.5   | 123.4   | 122.5   | 120.5   |
| TPMT     | 297.2 | 290.9   | 391.5   | 347.9   | 282.9   | 263.7   | 328     | 315.5   |
| TPO      | 103.2 | 109.3   | 109.2   | 111.5   | 111.4   | 101.3   | 111.7   | 118.4   |
| TPO      | 127.3 | 114.8   | 114.5   | 121.4   | 109.1   | 98.5    | 115.4   | 125     |
| TPP1     | 759.3 | 676.6   | 847.2   | 744.4   | 545.7   | 673.3   | 669.5   | 683.3   |
| TPP2     | 134.2 | 147.6   | 161.5   | 150.6   | 152.8   | 123.7   | 136.1   | 150.9   |
| TPPP     | 121.1 | 120.5   | 121.1   | 123.7   | 116.5   | 99.4    | 123.3   | 111.8   |
| TPR      | 726.7 | 683.1   | 618.2   | 785.9   | 494.5   | 577.4   | 858.1   | 718.8   |
| TPRKB    | 132.1 | 122.7   | 122.9   | 129.2   | 119.1   | 112.2   | 114.7   | 123.4   |
| TPRX1    | 117.4 | 104.4   | 118.1   | 116.8   | 107.7   | 97      | 117.3   | 116     |
| TPRXL    | 114.1 | 116.3   | 115.4   | 110.5   | 105     | 98.2    | 110.7   | 116.5   |
| TPSAB1   | 116.9 | 120.3   | 118     | 121.3   | 105.8   | 95.1    | 112.4   | 116.8   |
| TPSD1    | 107.4 | 123.2   | 121.1   | 116.1   | 109.7   | 100     | 115.1   | 121.6   |
| TPSG1    | 118.9 | 109.9   | 111.6   | 116.7   | 119.5   | 104.9   | 123.4   | 114.7   |
| TPST1    | 143.2 | 144.9   | 120.9   | 163     | 135.8   | 111     | 164.3   | 145.5   |
| TPST2    | 800.3 | 996.2   | 862.4   | 833.3   | 639.4   | 569.8   | 937.4   | 864.1   |
| TPT1     | 31362 | 33809.7 | 33891.9 | 34564.6 | 32779.3 | 26575.3 | 39105.9 | 36593.7 |
| TPTE     | 107.8 | 113.4   | 108.6   | 113.8   | 106.7   | 95.5    | 117.1   | 115.9   |
| TPTE2    | 118.8 | 108.4   | 110     | 119.4   | 114.3   | 104.2   | 114.1   | 122.4   |

|          |        |        |        |        |        |        |        |       |
|----------|--------|--------|--------|--------|--------|--------|--------|-------|
| TPTE2    | 115.3  | 120.8  | 121.9  | 129.5  | 109.5  | 101.4  | 113.1  | 114   |
| TPTE2    | 110.8  | 114.8  | 112.9  | 120.7  | 104.6  | 93.8   | 122.8  | 113.6 |
| TPX2     | 118.1  | 111.2  | 122.2  | 126.8  | 111    | 101.3  | 128.8  | 115.6 |
| TR2IT1   | 110    | 110.5  | 126.7  | 118.6  | 104.3  | 92.1   | 110.8  | 106.2 |
| TRA16    | 161.7  | 199.4  | 159.8  | 199.4  | 140.2  | 125.1  | 176.4  | 155   |
| TRA1P2   | 178.6  | 181.2  | 223.5  | 188.3  | 179.9  | 207.6  | 156.8  | 191.7 |
| TRA2A    | 240.6  | 240.7  | 209.1  | 250.1  | 261    | 162.3  | 218.9  | 262.6 |
| TRADD    | 176.4  | 196.5  | 178.8  | 173.7  | 163.2  | 151.7  | 157    | 140.7 |
| TRADD    | 262.7  | 236.2  | 229.9  | 234.9  | 200.7  | 188.2  | 218.7  | 191.7 |
| TRAF1    | 119.5  | 123.8  | 113.8  | 127.6  | 111.4  | 108.2  | 125.3  | 111.3 |
| TRAF2    | 164.8  | 158.5  | 147.1  | 184    | 126.8  | 135.3  | 190.9  | 165.9 |
| TRAF3    | 166.8  | 166.3  | 141.8  | 172.9  | 149.3  | 126.9  | 200    | 168.2 |
| TRAF3IP1 | 123.6  | 122.4  | 130.6  | 137.1  | 121.1  | 113.4  | 127.2  | 124.4 |
| TRAF3IP2 | 109.6  | 110.6  | 120.1  | 118.4  | 115.7  | 92.7   | 111.3  | 105.8 |
| TRAF3IP2 | 114.4  | 130.7  | 122.5  | 114.2  | 110.6  | 103.6  | 127    | 129.2 |
| TRAF3IP2 | 184.1  | 276.2  | 210.1  | 219.3  | 194.4  | 159.1  | 190.7  | 200.3 |
| TRAF3IP3 | 947.9  | 1299.8 | 1266.1 | 946.4  | 872.9  | 836    | 571.9  | 570.7 |
| TRAF4    | 113.2  | 114.9  | 128.9  | 122.2  | 114.8  | 98.3   | 133.7  | 121.8 |
| TRAF4    | 106.2  | 129.6  | 120    | 130.4  | 106.3  | 103.9  | 109.3  | 115.2 |
| TRAF5    | 123.2  | 114.2  | 117    | 123.6  | 110.2  | 97.5   | 116.1  | 116.3 |
| TRAF5    | 137.1  | 132.9  | 132.4  | 126.1  | 118.8  | 122    | 124.3  | 132.3 |
| TRAF5    | 112.8  | 112.8  | 128.9  | 128.4  | 119.2  | 102    | 121    | 118.7 |
| TRAF5    | 112.8  | 114.1  | 125    | 116.3  | 114.8  | 101.5  | 122.6  | 116.8 |
| TRAF5    | 274.4  | 293.1  | 383.3  | 290.1  | 244.5  | 221.9  | 192.2  | 219.9 |
| TRAF6    | 112.6  | 130.5  | 117.8  | 114.1  | 114.4  | 112    | 116.5  | 107.3 |
| TRAF6    | 177.8  | 157.9  | 162.1  | 187.6  | 146.9  | 147.1  | 191.7  | 199.1 |
| TRAF6    | 180    | 215.3  | 174.4  | 203.1  | 152.8  | 153.1  | 188.3  | 189.4 |
| TRAF7    | 133.1  | 120    | 124.9  | 139.2  | 111.3  | 113.3  | 128.1  | 128.8 |
| TRAF7    | 116.5  | 118.7  | 126.3  | 115.8  | 105.7  | 101.5  | 115.6  | 115.2 |
| TRAFD1   | 238.6  | 203.4  | 234.8  | 196.2  | 151.4  | 198.6  | 214.1  | 211.9 |
| TRAIP    | 128.8  | 120.6  | 129.8  | 136    | 120.4  | 117.9  | 138.8  | 128.4 |
| TRAK1    | 177    | 189.8  | 183.4  | 189.8  | 140.4  | 169.6  | 178    | 158.6 |
| TRAK1    | 254.6  | 240.7  | 255.8  | 242.6  | 195    | 208    | 220.1  | 198.7 |
| TRAK1    | 152.7  | 142.4  | 181.7  | 148.8  | 131.1  | 122.8  | 156.6  | 152.3 |
| TRAK2    | 325.2  | 334.6  | 304.4  | 375.4  | 313.1  | 277.7  | 342.5  | 324.1 |
| TRAM1    | 2505.5 | 2878.7 | 3547.8 | 3104.9 | 2768.6 | 3066.8 | 3143.5 | 3776  |
| TRAM1L1  | 118.3  | 108.6  | 119.5  | 122.8  | 114.1  | 100.9  | 115.9  | 119.6 |
| TRAM2    | 164.8  | 180.4  | 140.9  | 146.6  | 163.3  | 126.7  | 147.7  | 145.1 |
| TRAP1    | 183    | 194.4  | 182.7  | 188.6  | 163.1  | 130.2  | 182.4  | 218.6 |
| TRAPPC1  | 401.1  | 530.4  | 504.7  | 397.2  | 347.6  | 421.6  | 342.5  | 273.9 |
| TRAPPC2  | 134.7  | 124.6  | 138.5  | 123.8  | 116.5  | 102.1  | 124.9  | 107.4 |
| TRAPPC2  | 332.7  | 405.3  | 432.8  | 346.3  | 345.4  | 364.9  | 288.7  | 304   |
| TRAPPC2  | 109.5  | 117.8  | 126.4  | 127.9  | 109.4  | 101.4  | 124.4  | 122.5 |
| TRAPPC3  | 499.4  | 477.1  | 530    | 553.1  | 484.8  | 454.1  | 594.3  | 654.8 |
| TRAPPC4  | 524.5  | 569.9  | 620.7  | 614    | 529.8  | 527.7  | 566    | 570.5 |
| TRAPPC5  | 345.6  | 302.8  | 403.3  | 358.3  | 323.9  | 253.5  | 367.2  | 320.9 |
| TRAPPC6A | 176.6  | 181.7  | 195.1  | 174.2  | 139.8  | 152.4  | 141.8  | 152.1 |
| TRAPPC6B | 155.6  | 160.9  | 149.7  | 136.8  | 129.5  | 119.8  | 136.3  | 148   |
| TRAPPC6B | 126.7  | 115.7  | 114    | 125.1  | 109.1  | 109.9  | 140.3  | 113   |
| TRAPPC6B | 200.6  | 240    | 185.2  | 184.8  | 156.2  | 135.4  | 187    | 234.6 |
| TRAT1    | 116.8  | 116.3  | 121    | 129.7  | 106.7  | 106.9  | 124.9  | 116.8 |

|         |       |       |       |       |       |       |       |       |
|---------|-------|-------|-------|-------|-------|-------|-------|-------|
| TRDMT1  | 138.5 | 161.1 | 157.4 | 151.1 | 124.5 | 106   | 123.5 | 132.1 |
| TRDN    | 111.1 | 123   | 129.1 | 123.5 | 115.9 | 107.9 | 125.2 | 121.1 |
| TREH    | 110.3 | 126.7 | 113.7 | 125.3 | 108.3 | 107.4 | 117.6 | 112   |
| TREM1   | 119.1 | 125.2 | 123.8 | 128   | 119.3 | 98.2  | 122.5 | 113.9 |
| TREM2   | 113   | 117.3 | 111.3 | 114.1 | 104.6 | 99.4  | 117.8 | 113.5 |
| TREML1  | 109.6 | 123.4 | 117.6 | 113   | 112.3 | 102.3 | 124.2 | 121.1 |
| TREML2  | 128.8 | 133.6 | 135.8 | 129.9 | 128.9 | 100.5 | 128.5 | 132.2 |
| TREML2P | 110.7 | 108.5 | 114.2 | 113.6 | 103.2 | 95.2  | 123.3 | 118.6 |
| TREML4  | 122.1 | 116.4 | 103.6 | 113.2 | 112.9 | 105.9 | 119.3 | 107.7 |
| TRERF1  | 157.4 | 159.8 | 154.8 | 155.6 | 139.8 | 116.7 | 143.2 | 124.9 |
| TRERF1  | 116.4 | 113.3 | 109.8 | 113.2 | 111.5 | 94.2  | 119.9 | 114.6 |
| TREX1   | 104.9 | 123.6 | 124   | 122.7 | 115.6 | 102.5 | 116.4 | 132.7 |
| TREX1   | 176.6 | 197.2 | 195   | 190.5 | 149.7 | 170.2 | 183.1 | 169.9 |
| TREX1   | 143.2 | 170.2 | 160   | 169.4 | 146.3 | 137.2 | 173.9 | 152.4 |
| TREX1   | 121.9 | 114.3 | 118.7 | 119.7 | 111.4 | 106.8 | 119.8 | 115   |
| TREX2   | 120.3 | 118.4 | 124.4 | 117.5 | 107.6 | 97.4  | 121.7 | 104.5 |
| TRFP    | 315.4 | 333.3 | 352   | 405.2 | 338   | 297.4 | 408.6 | 485.7 |
| TRG20   | 441.5 | 534.2 | 459.5 | 621.9 | 456.4 | 431.5 | 660.6 | 805.1 |
| TRH     | 110.9 | 116.7 | 112.6 | 112   | 101.5 | 94    | 109.8 | 112.9 |
| TRHDE   | 114.9 | 112.4 | 109.9 | 122.9 | 103.9 | 96    | 115.7 | 110.3 |
| TRHR    | 121.2 | 114.6 | 119   | 116.9 | 102.3 | 106.8 | 122.5 | 124.3 |
| TRIAD3  | 116.3 | 113.3 | 122.3 | 110.6 | 111.1 | 101.5 | 123.1 | 109.7 |
| TRIAD3  | 611.1 | 577.2 | 597   | 653.7 | 617.8 | 437.8 | 572.8 | 651.8 |
| TRIAP1  | 246.2 | 229.9 | 233   | 239.1 | 183.6 | 182.3 | 182.6 | 197.9 |
| TRIB1   | 347.4 | 316.6 | 291.7 | 483.9 | 300.5 | 447.9 | 517.9 | 270.6 |
| TRIB2   | 410.1 | 406   | 262.8 | 332.9 | 322.5 | 155.1 | 277.6 | 214.8 |
| TRIB3   | 148.7 | 149.7 | 146.6 | 141.7 | 138.6 | 119.1 | 146.6 | 152.9 |
| TRIM10  | 112.8 | 119.2 | 109.4 | 120   | 99.9  | 89.8  | 122.3 | 116.4 |
| TRIM10  | 108.2 | 115   | 123.5 | 121.1 | 109.7 | 102   | 126.1 | 111.4 |
| TRIM10  | 117.3 | 120.8 | 117.9 | 123.2 | 106.3 | 94.5  | 120.5 | 117   |
| TRIM11  | 139   | 166.7 | 141.8 | 144   | 135.9 | 141.4 | 170.2 | 156.4 |
| TRIM13  | 352.8 | 351.8 | 385.1 | 344.5 | 451.7 | 246.2 | 379.7 | 466.5 |
| TRIM13  | 188.7 | 187.7 | 173.4 | 194.4 | 189.6 | 140.6 | 165   | 158   |
| TRIM13  | 219.9 | 223.9 | 225.5 | 253   | 258.8 | 196.8 | 307.4 | 293.2 |
| TRIM14  | 116.3 | 112.2 | 117.6 | 121.8 | 118.3 | 99    | 120.7 | 110   |
| TRIM14  | 124   | 122   | 124.4 | 128.5 | 121   | 105.7 | 127.8 | 134.8 |
| TRIM14  | 126.7 | 120.5 | 141.5 | 128.2 | 111.4 | 100   | 122   | 116.9 |
| TRIM14  | 111.3 | 116.1 | 118.3 | 125.2 | 115.4 | 101.9 | 122.3 | 108.1 |
| TRIM15  | 110.3 | 120.5 | 125.1 | 120.1 | 103.7 | 97.9  | 112.5 | 119.3 |
| TRIM15  | 109.7 | 110.1 | 107.4 | 113.5 | 100.8 | 92.2  | 109.4 | 107.2 |
| TRIM15  | 113.9 | 119.3 | 125.4 | 121.9 | 109.6 | 96    | 116   | 112.7 |
| TRIM16  | 109.9 | 109.2 | 112.3 | 111.9 | 97.4  | 97.4  | 119.6 | 106   |
| TRIM16L | 115.3 | 111   | 115.2 | 117.6 | 107.1 | 98.7  | 115.3 | 123.2 |
| TRIM17  | 120.5 | 105.2 | 120.4 | 124.7 | 116.1 | 102.9 | 123.8 | 118.6 |
| TRIM17  | 119.9 | 122.7 | 122.8 | 117.1 | 107.9 | 104   | 116.3 | 117.2 |
| TRIM2   | 121.7 | 141   | 114   | 127.4 | 128.3 | 103   | 120.7 | 130.3 |
| TRIM21  | 227.5 | 216.1 | 282.3 | 259   | 174.2 | 245.3 | 224.3 | 216.4 |
| TRIM22  | 547.2 | 556.6 | 574.1 | 557.9 | 488.7 | 439.4 | 484.5 | 463.6 |
| TRIM23  | 168.7 | 192   | 190.8 | 210.5 | 199.5 | 146.4 | 183.6 | 219.5 |
| TRIM23  | 112.5 | 119.1 | 121   | 120.8 | 111.4 | 97.8  | 124   | 124.6 |
| TRIM24  | 127.4 | 126.7 | 123.9 | 148.5 | 118.4 | 100.8 | 128.4 | 124.7 |

|         |        |        |       |        |       |       |        |        |
|---------|--------|--------|-------|--------|-------|-------|--------|--------|
| TRIM24  | 117.8  | 110.3  | 116.5 | 112.8  | 101.5 | 105.1 | 109.6  | 104.1  |
| TRIM24  | 251.2  | 221.9  | 243.2 | 291.6  | 241.7 | 175.7 | 306.7  | 328.4  |
| TRIM25  | 258.6  | 280.6  | 225.1 | 348.7  | 255   | 285.1 | 316.7  | 213.3  |
| TRIM26  | 247.5  | 252.7  | 259.2 | 262.5  | 191.6 | 220.1 | 261.2  | 265.7  |
| TRIM28  | 295.5  | 346.2  | 243.9 | 320.9  | 214.7 | 226.4 | 426.6  | 336.7  |
| TRIM29  | 106.6  | 111.7  | 115.4 | 107.3  | 107.7 | 99.3  | 103.7  | 103.7  |
| TRIM29  | 122.3  | 127.8  | 124.2 | 122.4  | 115.2 | 102.7 | 115    | 131.9  |
| TRIM3   | 142.2  | 152.4  | 148.2 | 140.6  | 124   | 130.2 | 138.3  | 143.9  |
| TRIM3   | 104.6  | 106.7  | 115.8 | 112.9  | 114.1 | 97.2  | 116.3  | 115.4  |
| TRIM31  | 116.5  | 110.6  | 139.2 | 115.9  | 110.7 | 93.6  | 121.7  | 113.7  |
| TRIM31  | 115.1  | 118.6  | 120.2 | 123.4  | 114.7 | 109   | 124.8  | 119.7  |
| TRIM32  | 199.1  | 204.2  | 173.8 | 204.7  | 199.6 | 137.3 | 156.1  | 190.5  |
| TRIM33  | 220.1  | 219.1  | 188.7 | 242.6  | 233.7 | 212.4 | 318.5  | 280.5  |
| TRIM33  | 619.4  | 648.2  | 710.5 | 691    | 706.4 | 543.5 | 778.1  | 774.1  |
| TRIM33  | 103.9  | 113.2  | 115.5 | 116.3  | 107.6 | 89.7  | 126.5  | 105.6  |
| TRIM34  | 115.4  | 118.5  | 114   | 118.4  | 106.6 | 96    | 127.5  | 114.9  |
| TRIM34  | 114.9  | 116.3  | 119.5 | 115.1  | 104.4 | 95.4  | 109.9  | 116.2  |
| TRIM34  | 115.5  | 111.7  | 114.3 | 122.7  | 103.4 | 91.7  | 114.5  | 110.6  |
| TRIM34  | 119.3  | 131.9  | 124.2 | 126.3  | 111   | 104.3 | 126.6  | 120.7  |
| TRIM35  | 133.6  | 129.1  | 132.6 | 120.8  | 125.8 | 110.5 | 128.6  | 118.2  |
| TRIM36  | 120.6  | 107.5  | 126.7 | 129    | 115.8 | 105.1 | 127.6  | 125.7  |
| TRIM36  | 106.4  | 109.6  | 132.1 | 117.3  | 111.6 | 101.3 | 115.3  | 110.7  |
| TRIM36  | 127.2  | 112.4  | 117.2 | 116.4  | 108.3 | 102.6 | 117.3  | 112.1  |
| TRIM36  | 112.6  | 113.2  | 120.4 | 120.1  | 111   | 95.4  | 118.3  | 121.4  |
| TRIM37  | 127.6  | 123.6  | 126.4 | 124.1  | 117.8 | 117.6 | 122.9  | 134.2  |
| TRIM37  | 143.7  | 170.1  | 156.3 | 165.9  | 156.1 | 132.7 | 147    | 145.4  |
| TRIM38  | 256.3  | 230.6  | 286.6 | 243.8  | 232.5 | 185.9 | 270.4  | 285.3  |
| TRIM39  | 107.5  | 115.8  | 122.2 | 121.5  | 108.4 | 105.6 | 115.5  | 113.8  |
| TRIM39  | 317.9  | 390.5  | 347.7 | 312.7  | 271.1 | 237.7 | 341.7  | 350.6  |
| TRIM39  | 152.2  | 172.6  | 132.5 | 149.1  | 119.2 | 126.5 | 136.9  | 147.4  |
| TRIM4   | 1016.6 | 1541.7 | 982.4 | 1121.4 | 966.9 | 801.7 | 1074.3 | 1041.7 |
| TRIM4   | 129.5  | 119.4  | 129.9 | 124.9  | 105.2 | 108.7 | 121.4  | 118.8  |
| TRIM40  | 117.8  | 115.7  | 130.1 | 123.4  | 116.4 | 103.6 | 118.7  | 129    |
| TRIM41  | 187    | 197    | 195.9 | 203.3  | 179.9 | 187.6 | 254.3  | 183    |
| TRIM41  | 143.2  | 136    | 129.8 | 144.8  | 112.4 | 111.2 | 146.4  | 126.7  |
| TRIM42  | 117.3  | 106.3  | 114.8 | 118.9  | 111.6 | 107.5 | 120.4  | 121.1  |
| TRIM43  | 113    | 107.3  | 124   | 126.2  | 109.2 | 108   | 113    | 111.5  |
| TRIM44  | 871.9  | 1089.3 | 707.1 | 888.9  | 893.4 | 610.8 | 895    | 976.2  |
| TRIM45  | 117.1  | 124.4  | 118.8 | 128.2  | 113.1 | 117.2 | 124.5  | 120.4  |
| TRIM46  | 136.4  | 140.9  | 123.3 | 144.3  | 121.4 | 101.2 | 125.1  | 117    |
| TRIM47  | 125.6  | 132.3  | 117   | 136.6  | 117.4 | 107.5 | 118.1  | 124.5  |
| TRIM48  | 111.6  | 108.3  | 112.3 | 111.6  | 109.7 | 103.9 | 114.5  | 112.3  |
| TRIM49  | 141.7  | 133.7  | 138.8 | 140.7  | 127.5 | 125.8 | 155.1  | 148.6  |
| TRIM5   | 265.2  | 346.1  | 255.7 | 285.8  | 271   | 178.3 | 210.2  | 254.7  |
| TRIM5   | 123.1  | 124.8  | 129.7 | 128.5  | 115.7 | 105.1 | 117.8  | 118    |
| TRIM5   | 166.7  | 139.9  | 152.1 | 174.4  | 143.5 | 129.8 | 159.6  | 139.2  |
| TRIM50A | 113.6  | 112.8  | 114.8 | 112    | 111.1 | 97.9  | 114.8  | 114    |
| TRIM51  | 115.7  | 115    | 135.5 | 125.6  | 115.6 | 109.3 | 116.7  | 114.3  |
| TRIM52  | 400.8  | 400.4  | 464.4 | 324    | 335.7 | 211.5 | 329.4  | 349.5  |
| TRIM54  | 127.8  | 130.5  | 132.4 | 137.1  | 124.4 | 113.7 | 132.6  | 121.9  |
| TRIM54  | 113.2  | 117.2  | 120.9 | 121.5  | 110.9 | 94.8  | 113.8  | 117.5  |



|            |       |       |       |       |       |       |        |       |
|------------|-------|-------|-------|-------|-------|-------|--------|-------|
| TRIM54     | 111.7 | 119.3 | 119.7 | 121.3 | 106.4 | 105.3 | 124.6  | 116.9 |
| TRIM55     | 113.8 | 117.9 | 118.4 | 125.2 | 112.8 | 109   | 117.3  | 111.2 |
| TRIM55     | 106.4 | 112.7 | 122.7 | 137.8 | 106.9 | 97.4  | 121.8  | 113.6 |
| TRIM55     | 119.6 | 116.2 | 110.5 | 117.5 | 109.3 | 109.1 | 119.5  | 123.2 |
| TRIM56     | 236.2 | 252.7 | 183   | 277.9 | 201.2 | 187.5 | 239.8  | 205.6 |
| TRIM58     | 118.6 | 119.8 | 114.8 | 119.2 | 122.5 | 100   | 116.1  | 114.6 |
| TRIM59     | 106.9 | 120.4 | 114   | 115.4 | 107.1 | 105.5 | 111.1  | 113.2 |
| TRIM6      | 108.9 | 110.3 | 110.3 | 116.5 | 113.8 | 95.1  | 113.6  | 119.2 |
| TRIM6      | 115.3 | 114.4 | 120.2 | 128.5 | 115.6 | 103.8 | 126.2  | 122.7 |
| TRIM60     | 112.6 | 105.7 | 115.8 | 116   | 110.3 | 97.7  | 117.4  | 115.1 |
| TRIM62     | 130.1 | 130.7 | 165.3 | 136   | 115.3 | 105.4 | 115.2  | 122.8 |
| TRIM63     | 113.4 | 118.1 | 128.9 | 114.8 | 108.4 | 105.4 | 129.4  | 126.5 |
| TRIM67     | 120.5 | 124   | 118.8 | 112.9 | 119.7 | 104.1 | 126.5  | 121.9 |
| TRIM68     | 230.9 | 267.4 | 278.3 | 277.5 | 223.2 | 231.4 | 252.4  | 257.6 |
| TRIM69     | 123.9 | 128.3 | 128.9 | 131.6 | 121.5 | 114.1 | 134.4  | 126.3 |
| TRIM6-TRII | 110.7 | 110.6 | 114.6 | 118.7 | 104.9 | 96.6  | 120.2  | 107.3 |
| TRIM7      | 116.9 | 119.7 | 119.3 | 120   | 110.9 | 102.2 | 114.9  | 124.7 |
| TRIM7      | 117.6 | 123.4 | 119   | 128.4 | 115.1 | 113.8 | 119    | 121.4 |
| TRIM7      | 114.6 | 129.1 | 125.9 | 115.5 | 111.9 | 100.9 | 118.8  | 117.9 |
| TRIM71     | 112.5 | 116.1 | 111.3 | 126.5 | 106.8 | 102.5 | 125.1  | 113.9 |
| TRIM74     | 126.3 | 121.8 | 138.3 | 129.2 | 124.3 | 113.1 | 124.4  | 123.1 |
| TRIM8      | 682.7 | 614.1 | 660.8 | 651   | 467.3 | 543.1 | 544.1  | 410.6 |
| TRIM9      | 118.8 | 121   | 125.1 | 130.6 | 107.4 | 107.6 | 126.3  | 105.1 |
| TRIM9      | 121.2 | 120.7 | 126.1 | 129.3 | 117.1 | 103.3 | 127.3  | 133.2 |
| TRIM9      | 140.1 | 129   | 131.9 | 130.6 | 125.3 | 115.1 | 137    | 122.8 |
| TRIO       | 123.3 | 121.8 | 126.1 | 134.5 | 121.1 | 101.4 | 131.2  | 136.7 |
| TRIOBP     | 113.2 | 115.2 | 120.4 | 112.9 | 110.6 | 102.5 | 118.7  | 113.9 |
| TRIP10     | 126.3 | 124.4 | 118.9 | 129.3 | 112   | 102.7 | 121.8  | 133   |
| TRIP11     | 192.3 | 212.5 | 193.6 | 202.6 | 193.9 | 160.9 | 220.3  | 265.1 |
| TRIP12     | 327.5 | 331.1 | 298.9 | 482.4 | 320.8 | 325.8 | 552.4  | 560.4 |
| TRIP13     | 115.1 | 116   | 119.9 | 122.9 | 107.6 | 93.5  | 134.1  | 122.8 |
| TRIP4      | 240.2 | 298.9 | 290.7 | 251.9 | 226   | 234.4 | 282.2  | 247.8 |
| TRIP6      | 171.2 | 169.2 | 183.8 | 187.5 | 156.7 | 166.4 | 183.9  | 154.6 |
| TRIT1      | 189.2 | 176   | 218.5 | 182   | 157.8 | 128.5 | 147.4  | 133.3 |
| TRMT1      | 318   | 335.5 | 352.6 | 317.1 | 244.6 | 205.9 | 283.8  | 229   |
| TRMT12     | 164.6 | 163.9 | 177   | 146.9 | 162.8 | 153.1 | 159.3  | 158.6 |
| TRMT5      | 477.9 | 547.1 | 729.3 | 411.3 | 374.5 | 556.7 | 418.1  | 608.7 |
| TRMU       | 133.4 | 128   | 152   | 136.5 | 126.7 | 106.6 | 128.5  | 137.8 |
| TRNT1      | 107.6 | 113.8 | 125.4 | 112.3 | 108.5 | 110.4 | 111.7  | 111.7 |
| TRNT1      | 284.2 | 327.2 | 220.3 | 250.6 | 266.6 | 174.8 | 214    | 208   |
| TRNT1      | 114.5 | 118.1 | 121.3 | 123.5 | 116.2 | 108.5 | 129.5  | 117   |
| TRO        | 147.2 | 139.4 | 141.2 | 150.3 | 117.2 | 107.7 | 139.9  | 115.8 |
| TRO        | 117.6 | 120.6 | 117.9 | 120.8 | 102.8 | 90.6  | 111.2  | 115   |
| TRO        | 131.4 | 123.1 | 136.3 | 141.3 | 110.2 | 108.4 | 134.3  | 126.3 |
| TROAP      | 122.6 | 123.3 | 121.5 | 120.3 | 108   | 98    | 123.3  | 120.4 |
| TROVE2     | 401.8 | 514.1 | 455.9 | 566.6 | 528.8 | 511.2 | 519    | 582.7 |
| TROVE2     | 117   | 129.4 | 123.6 | 137.7 | 117.4 | 107.8 | 125.9  | 127.1 |
| TROVE2     | 159.4 | 182.6 | 177.8 | 183.1 | 182.4 | 180.8 | 166.9  | 169.9 |
| TROVE2     | 795.9 | 970.8 | 707   | 965.1 | 787.3 | 603.5 | 1103.2 | 999.9 |
| TRPA1      | 114   | 121.1 | 118.3 | 122.6 | 108.8 | 94    | 117.8  | 112.5 |
| TRPC1      | 120.2 | 126.1 | 139.5 | 122.3 | 122.4 | 109   | 142.9  | 144   |

|         |       |       |       |       |       |       |       |       |
|---------|-------|-------|-------|-------|-------|-------|-------|-------|
| TRPC2   | 114.8 | 116.8 | 121.6 | 125.2 | 113.3 | 96.8  | 114.2 | 111   |
| TRPC3   | 110.2 | 108.8 | 107.5 | 120.7 | 106   | 98    | 117.4 | 111.5 |
| TRPC4   | 116   | 120.5 | 120.3 | 127.3 | 109.4 | 95.1  | 132.4 | 121.4 |
| TRPC4AP | 481.1 | 330.8 | 556   | 538   | 279.3 | 363.6 | 611   | 393.8 |
| TRPC4AP | 575   | 512.4 | 545.8 | 632.3 | 505.9 | 530.5 | 836   | 703.2 |
| TRPC5   | 123.7 | 134.6 | 135.9 | 142.1 | 126.4 | 128   | 140.2 | 128.7 |
| TRPC6   | 120   | 122.5 | 114.1 | 124.4 | 108.2 | 99    | 111.7 | 107.5 |
| TRPC7   | 122.3 | 112.9 | 106   | 112.8 | 104.4 | 97.3  | 120   | 117.1 |
| TRPM1   | 113.6 | 110.3 | 115   | 114.6 | 105.5 | 102.6 | 110   | 112.7 |
| TRPM2   | 121.7 | 111.9 | 136   | 126.8 | 117   | 108.2 | 111.6 | 120   |
| TRPM2   | 114.9 | 113.3 | 129.7 | 116.8 | 104   | 102.2 | 112.9 | 116.5 |
| TRPM3   | 121.5 | 124.6 | 112.9 | 125.1 | 116.2 | 97.5  | 122.7 | 114   |
| TRPM3   | 110.8 | 110.4 | 118.4 | 120.9 | 99.4  | 101   | 111.6 | 110.7 |
| TRPM4   | 110.2 | 105.4 | 108.6 | 126.5 | 101.8 | 99.1  | 108.5 | 113.5 |
| TRPM5   | 108   | 112.3 | 118.8 | 116.9 | 110.3 | 95.3  | 128.4 | 108.9 |
| TRPM6   | 109.5 | 111.1 | 111.6 | 129.2 | 109.2 | 98.8  | 122.5 | 110.6 |
| TRPM8   | 107.5 | 108.5 | 114.2 | 113.5 | 103.1 | 102.4 | 119   | 115.5 |
| TRPS1   | 131.1 | 126.8 | 139.9 | 141.3 | 128.9 | 116.3 | 130.8 | 136.8 |
| TRPT1   | 107.4 | 112.9 | 110.3 | 113.2 | 107.3 | 101.5 | 120.7 | 106.3 |
| TRPT1   | 840.5 | 783.3 | 812.6 | 826.6 | 792.1 | 562.3 | 798.3 | 610   |
| TRPV1   | 122   | 128.8 | 123.1 | 127.4 | 116.6 | 107.6 | 132.6 | 120.8 |
| TRPV1   | 127.7 | 123.7 | 119.8 | 114.3 | 115.4 | 112.7 | 134.4 | 114   |
| TRPV1   | 114.2 | 107.2 | 110.9 | 129.7 | 113.1 | 95.4  | 117.2 | 117.7 |
| TRPV1   | 119.5 | 121.4 | 106.5 | 114.8 | 109.8 | 91.4  | 115.8 | 120.8 |
| TRPV1   | 112   | 111.3 | 119.8 | 120.5 | 100.9 | 103.9 | 116.3 | 119.3 |
| TRPV2   | 379.1 | 326.5 | 357.4 | 398.3 | 244.9 | 288.1 | 265.8 | 232.1 |
| TRPV3   | 114.6 | 111.1 | 119.6 | 120.8 | 117.8 | 104.3 | 122.7 | 124.5 |
| TRPV4   | 110.8 | 117   | 109.6 | 120.6 | 103.6 | 94.9  | 109.7 | 111.9 |
| TRPV4   | 105.6 | 117.8 | 120.1 | 110.3 | 103.7 | 96.4  | 111.6 | 110.1 |
| TRPV5   | 108.6 | 112.2 | 131.5 | 125.1 | 114.7 | 93.2  | 112.2 | 119.1 |
| TRPV6   | 113.8 | 119.1 | 108.1 | 118   | 105.5 | 97.5  | 118.6 | 110.3 |
| TRPV6   | 105.7 | 108.2 | 121.1 | 121.3 | 111.6 | 100.7 | 110.8 | 109   |
| TRPV6   | 117.1 | 108.4 | 105.4 | 122.9 | 116.1 | 100.5 | 120.3 | 119.4 |
| TRRAP   | 571.5 | 385.7 | 461.1 | 576.8 | 650.7 | 313.7 | 802.6 | 608.8 |
| TRSPAP1 | 125   | 137.7 | 157.7 | 147.8 | 125.5 | 138   | 142.4 | 148.5 |
| TRSPAP1 | 125.6 | 119.8 | 130.1 | 121.9 | 110.8 | 101.8 | 118.2 | 117.3 |
| TRUB1   | 114.2 | 121   | 118.4 | 130.6 | 107.9 | 101.3 | 117.4 | 123.5 |
| TRUB2   | 124.5 | 131.9 | 135.3 | 136   | 129.9 | 102.8 | 127.9 | 129   |
| TRY1    | 124.6 | 99    | 115.8 | 115.9 | 107.3 | 104.7 | 126.2 | 118.4 |
| TRY6    | 123   | 118.1 | 118.3 | 128.6 | 114.3 | 94.1  | 123   | 123.2 |
| TSC1    | 117.9 | 129.9 | 129.5 | 115.1 | 110.8 | 96.5  | 128.2 | 123   |
| TSC1    | 216.5 | 181.7 | 200.1 | 232.3 | 200.9 | 182.7 | 245   | 386.2 |
| TSC1    | 119.1 | 113.1 | 122.4 | 130.2 | 120.9 | 98.8  | 130.7 | 117.9 |
| TSC2    | 141.7 | 153.9 | 150.7 | 167.9 | 144.1 | 117.7 | 162.8 | 157.1 |
| TSC2    | 109.1 | 118.3 | 115.2 | 113   | 102.7 | 94.3  | 109.5 | 106.9 |
| TSC22D1 | 127.2 | 160.4 | 139.8 | 140.4 | 138.4 | 125.3 | 150.5 | 134.9 |
| TSC22D1 | 116.1 | 139.2 | 129.9 | 141.1 | 117.2 | 101.3 | 113.1 | 118.1 |
| TSC22D1 | 110.5 | 107.8 | 121.7 | 128   | 115.3 | 101.1 | 120.5 | 117.4 |
| TSC22D2 | 244.7 | 335   | 268.8 | 311   | 267.1 | 243.8 | 449.4 | 377.9 |
| TSC22D3 | 140.2 | 136.5 | 136.9 | 138.1 | 133.2 | 120.6 | 121.6 | 148   |
| TSC22D3 | 426.3 | 588   | 508.7 | 515.9 | 547.7 | 409.7 | 456.5 | 650   |

|          |       |        |       |       |       |       |       |       |
|----------|-------|--------|-------|-------|-------|-------|-------|-------|
| TSC22D3  | 406.2 | 344.9  | 363.2 | 406.1 | 356   | 354.6 | 432.5 | 480.9 |
| TSC22D3  | 123   | 120.7  | 118.9 | 120.5 | 102.5 | 96.4  | 122.4 | 127.4 |
| TSC22D3  | 115.5 | 105.5  | 121.1 | 115   | 111.8 | 95.7  | 112.5 | 99.9  |
| TSC22D4  | 164.3 | 173.8  | 151.8 | 132.6 | 131.5 | 139.5 | 189.2 | 156.5 |
| TSCOT    | 125.2 | 141.6  | 141.4 | 144   | 129.2 | 127   | 135.4 | 140.7 |
| TSEN2    | 194.5 | 230    | 206.8 | 202.9 | 208.6 | 161.6 | 179.2 | 161.8 |
| TSEN34   | 399   | 547.2  | 742.6 | 616.5 | 489.6 | 527.8 | 683.8 | 643.4 |
| TSEN34   | 369.2 | 363.3  | 445.5 | 441.5 | 311.4 | 451.6 | 465.2 | 383.5 |
| TSEN54   | 274.6 | 275.1  | 189.3 | 282.9 | 208.5 | 156.4 | 243.5 | 245.4 |
| TSFM     | 158.6 | 141.5  | 140.9 | 159.3 | 148.9 | 118.8 | 144   | 130.5 |
| TSG101   | 627.4 | 713.1  | 650.4 | 687.5 | 594.2 | 683.7 | 768   | 670.7 |
| TSGA10   | 121.4 | 126.1  | 113.4 | 123.6 | 119.2 | 108.1 | 133.2 | 134   |
| TSGA10   | 137   | 141.8  | 134.4 | 149   | 139.6 | 109.2 | 130.7 | 122.7 |
| TSGA10   | 110.7 | 116.1  | 123.6 | 111   | 106.6 | 96.4  | 112.8 | 114.6 |
| TSGA10IP | 121.6 | 111.6  | 118.4 | 123.4 | 108.9 | 93.3  | 115.8 | 116.8 |
| TSGA13   | 126.3 | 123.3  | 119.5 | 122.4 | 114   | 99    | 116   | 115.9 |
| TSGA14   | 146.7 | 167.7  | 180.8 | 153.2 | 150.7 | 143.2 | 136.7 | 155.1 |
| TSGA2    | 107.6 | 116.1  | 120.5 | 121.3 | 106   | 98.1  | 107.9 | 115.4 |
| TSHB     | 108.5 | 114.2  | 117.9 | 124.5 | 110.2 | 96.9  | 113.4 | 109.9 |
| TSHR     | 118.8 | 106.3  | 117.9 | 125   | 114.2 | 97.1  | 116.7 | 112.4 |
| TSHR     | 116.3 | 117.9  | 117.7 | 135.9 | 120.5 | 105.2 | 124.5 | 119.7 |
| TSHR     | 119.3 | 113.9  | 123.6 | 112.9 | 111.2 | 95.7  | 119.8 | 115.1 |
| TSKS     | 110.3 | 120.1  | 131.2 | 116   | 109.1 | 99.7  | 122.4 | 114.6 |
| TSLP     | 116.7 | 122.5  | 118.6 | 126.1 | 107.8 | 100.3 | 125.3 | 124.2 |
| TSLP     | 111.5 | 115.7  | 117   | 118.6 | 100.6 | 103.4 | 122.9 | 116.2 |
| TSN      | 128.6 | 110.9  | 132.2 | 126.8 | 118.5 | 101.3 | 134.5 | 130.7 |
| TSNARE1  | 107.8 | 116.5  | 114.6 | 115.9 | 105.6 | 105.3 | 117.7 | 128.8 |
| TSNAX    | 144.1 | 143.4  | 137.9 | 133.9 | 140.1 | 119.8 | 133.6 | 122.5 |
| TSNAXIP1 | 128.1 | 114.2  | 134.1 | 118.4 | 118.9 | 97.8  | 132.3 | 119.6 |
| TSP50    | 111.4 | 132.6  | 121   | 116.1 | 105.3 | 101.4 | 121.5 | 104.4 |
| TSPAN1   | 118.3 | 132.3  | 134.2 | 122.3 | 121.4 | 104.6 | 116.2 | 124.3 |
| TSPAN10  | 126.1 | 117.3  | 125   | 121.4 | 110.8 | 100.2 | 116.7 | 122.4 |
| TSPAN11  | 111.2 | 110.7  | 114.5 | 113   | 105.9 | 100.3 | 113.9 | 119.9 |
| TSPAN11  | 110.6 | 110.7  | 118.3 | 116.9 | 109.1 | 94    | 111.8 | 109.9 |
| TSPAN12  | 114.5 | 110.1  | 117.8 | 121.4 | 111.9 | 96    | 116.2 | 107.7 |
| TSPAN13  | 140.8 | 137.4  | 136.2 | 139.5 | 121.4 | 112.3 | 146.6 | 124.8 |
| TSPAN14  | 137.3 | 141.1  | 161.2 | 146.6 | 130.6 | 145.2 | 138.1 | 145.9 |
| TSPAN15  | 117.7 | 113.1  | 126.7 | 125.4 | 113.6 | 96.8  | 115.9 | 126.3 |
| TSPAN16  | 118.5 | 116.8  | 121.3 | 119.6 | 109.3 | 100.2 | 124.2 | 124.4 |
| TSPAN17  | 137.3 | 162.1  | 133.3 | 141.5 | 128.3 | 126.5 | 123.9 | 137   |
| TSPAN17  | 836.5 | 1141.6 | 712.5 | 911.3 | 602.5 | 344.5 | 640.7 | 556.3 |
| TSPAN18  | 111.6 | 118    | 125.2 | 125.1 | 107   | 98.5  | 108   | 105   |
| TSPAN18  | 135.4 | 144.9  | 136   | 147   | 130.5 | 120.8 | 129.5 | 127.8 |
| TSPAN18  | 134.7 | 120.3  | 130   | 133.4 | 120.8 | 110.6 | 127.3 | 125.6 |
| TSPAN2   | 116.3 | 117.4  | 122.7 | 118.4 | 104.3 | 98.6  | 123.4 | 118.6 |
| TSPAN3   | 237.3 | 255.8  | 233.5 | 290.5 | 265   | 161.9 | 327   | 282.8 |
| TSPAN3   | 405.1 | 475.3  | 359.5 | 447.1 | 396.2 | 307.7 | 321.1 | 422.4 |
| TSPAN31  | 356.3 | 432    | 438.3 | 352.9 | 302.6 | 304.3 | 332.7 | 334.4 |
| TSPAN32  | 901.4 | 980.3  | 884.5 | 614.1 | 469.9 | 428   | 251.2 | 249.1 |
| TSPAN32  | 286.1 | 280.9  | 243.8 | 199.2 | 157.8 | 172.2 | 141.6 | 138.4 |
| TSPAN32  | 156.9 | 144.2  | 138.5 | 143.5 | 143.9 | 99.3  | 123.8 | 118.9 |

|         |        |        |        |        |        |        |        |        |
|---------|--------|--------|--------|--------|--------|--------|--------|--------|
| TSPAN33 | 192.4  | 243.2  | 204.9  | 195.1  | 154.6  | 152.9  | 160.6  | 144.3  |
| TSPAN4  | 129.8  | 130.3  | 142.9  | 143.2  | 117.9  | 120.8  | 136    | 123.1  |
| TSPAN4  | 109.3  | 110.8  | 121.6  | 117.3  | 110.5  | 97.7   | 122    | 106.4  |
| TSPAN4  | 120.3  | 121.3  | 126.7  | 130    | 111.5  | 101.6  | 117.9  | 118.8  |
| TSPAN4  | 109.8  | 106.9  | 132.3  | 122.2  | 107.1  | 103.8  | 123.3  | 127.1  |
| TSPAN5  | 157    | 171.6  | 147.5  | 166.9  | 141.7  | 111.9  | 140.8  | 147.2  |
| TSPAN6  | 126.6  | 131    | 132.1  | 135.1  | 111.2  | 110.5  | 125.1  | 121    |
| TSPAN7  | 116.4  | 113.3  | 115.9  | 116.6  | 120.5  | 102.5  | 122.7  | 113.4  |
| TSPAN8  | 121.1  | 114.2  | 121.3  | 125.5  | 114.3  | 101.4  | 124.7  | 106.7  |
| TSPAN9  | 145.3  | 155.5  | 155.9  | 184.6  | 146.2  | 132.9  | 178.8  | 180.9  |
| TSPO    | 439.9  | 308.1  | 756.2  | 389.7  | 306.3  | 385.1  | 291.2  | 234.9  |
| TSPO    | 183.3  | 190.7  | 244.5  | 205    | 150.8  | 183.5  | 172.5  | 167    |
| TSPO    | 3489.2 | 2934.4 | 5411.3 | 2785.2 | 1845.8 | 2389.5 | 2024.9 | 1600.8 |
| TSPY1   | 104.8  | 106.1  | 109    | 115.2  | 100.6  | 91     | 109.5  | 102.3  |
| TSPY2   | 117.1  | 120    | 111.6  | 119    | 107.5  | 100.6  | 114.7  | 112    |
| TSPYL1  | 434.8  | 404.5  | 422    | 418.9  | 379.8  | 373    | 454.9  | 413.4  |
| TSPYL2  | 121.1  | 114.1  | 110.8  | 120.3  | 105.7  | 105.2  | 123.8  | 133.9  |
| TSPYL2  | 184.3  | 178.4  | 161.8  | 176.4  | 181.9  | 159.5  | 229.5  | 221.3  |
| TSPYL2  | 127.5  | 117.3  | 116    | 131.6  | 113.9  | 107.3  | 127.7  | 130.9  |
| TSPYL2  | 349.8  | 351.7  | 270.3  | 368.1  | 341.4  | 259.9  | 649.7  | 516.6  |
| TSPYL3  | 108    | 117.9  | 116.9  | 120.4  | 117.2  | 97.7   | 114.7  | 120.8  |
| TSPYL4  | 118.7  | 127.6  | 139.3  | 122.9  | 117.7  | 113.2  | 119.7  | 131.2  |
| TSPYL5  | 133.8  | 132.8  | 144.4  | 120.9  | 104.5  | 116.1  | 132.3  | 114.5  |
| TSPYL6  | 124.1  | 111.1  | 123.5  | 120.8  | 117.9  | 96.7   | 134.9  | 121.1  |
| TSR1    | 116.3  | 119.9  | 135    | 130.8  | 115.6  | 100.8  | 133.7  | 119    |
| TSRC1   | 116.9  | 119    | 139.5  | 116.9  | 103.9  | 104.4  | 111.4  | 113.8  |
| TSRC1   | 102.2  | 108.7  | 118.1  | 117.2  | 103.2  | 97.9   | 120.1  | 114.9  |
| TSRC1   | 112.9  | 123.5  | 121.3  | 118.1  | 105.5  | 97.5   | 115.5  | 109    |
| TSSC1   | 269.9  | 283.5  | 307.5  | 272.7  | 246.4  | 214    | 241.8  | 227.1  |
| TSSC4   | 434.7  | 467.3  | 371.3  | 497.8  | 360.3  | 290.8  | 494.7  | 515.2  |
| TSSK1   | 127.6  | 124.1  | 118.6  | 114.6  | 113.2  | 98.7   | 128.1  | 126.6  |
| TSSK2   | 117.2  | 112.3  | 113.7  | 114.5  | 105.5  | 93.8   | 116.9  | 118.8  |
| TSSK3   | 117.4  | 117.2  | 126.1  | 119.2  | 113.5  | 105.3  | 136.7  | 125.3  |
| TSSK4   | 109.6  | 112.2  | 119.5  | 119.7  | 121.1  | 94.9   | 112.1  | 113.6  |
| TST     | 263.2  | 200.1  | 351    | 245.5  | 161.9  | 201.3  | 168.7  | 165.6  |
| TSTA3   | 141.6  | 132.9  | 135.6  | 138.9  | 116.9  | 112.5  | 149.8  | 141.5  |
| TTBK1   | 112.4  | 110.7  | 116.8  | 113.4  | 102.4  | 93.3   | 125.5  | 116.5  |
| TTBK2   | 119.4  | 118.3  | 109.1  | 118.5  | 108.3  | 99.3   | 124.6  | 108.4  |
| TTC1    | 235.9  | 254.8  | 238.5  | 260    | 211.9  | 244.4  | 262.2  | 230    |
| TTC10   | 121.6  | 119.2  | 125.1  | 119.7  | 112.5  | 103.8  | 117.9  | 110.4  |
| TTC10   | 122.7  | 136.6  | 142    | 132.7  | 119.5  | 120.7  | 147.2  | 123.3  |
| TTC12   | 130.2  | 124.6  | 144.1  | 127.4  | 118.8  | 112    | 125    | 118.7  |
| TTC13   | 417.6  | 444.9  | 384.4  | 418.3  | 437.5  | 247.7  | 367.8  | 290.9  |
| TTC13   | 113.9  | 126.1  | 114.8  | 140.5  | 109.2  | 106.2  | 133.8  | 130.3  |
| TTC13   | 192.6  | 209    | 215.8  | 189    | 168.9  | 145.9  | 177    | 188    |
| TTC14   | 412.2  | 428.2  | 498.9  | 415.4  | 457.8  | 278.7  | 305.4  | 281.1  |
| TTC14   | 334.2  | 322.8  | 399.1  | 347.3  | 296.3  | 251.7  | 222.3  | 188.4  |
| TTC15   | 423.5  | 474.4  | 486    | 388.2  | 386.4  | 307.4  | 426.4  | 311.6  |
| TTC16   | 142.4  | 133.4  | 133.4  | 162.3  | 134.4  | 126.7  | 142.2  | 137.1  |
| TTC17   | 226.7  | 204.1  | 271.6  | 252    | 219.4  | 184.1  | 225.9  | 239    |
| TTC18   | 114.7  | 118.4  | 122.3  | 125.5  | 119.8  | 102.2  | 119.2  | 133.5  |

|        |        |        |        |        |        |       |        |        |
|--------|--------|--------|--------|--------|--------|-------|--------|--------|
| TTC19  | 411.9  | 496.2  | 485.6  | 439.7  | 441    | 371.1 | 400.3  | 311    |
| TTC21A | 115.2  | 112.4  | 123.8  | 116.5  | 116.7  | 111.7 | 135.8  | 125.8  |
| TTC21B | 110.2  | 111.2  | 111.2  | 119.3  | 103.8  | 98.2  | 109.8  | 109    |
| TTC22  | 107.7  | 103.6  | 108.1  | 114.6  | 109.7  | 97.6  | 109.3  | 110.2  |
| TTC23  | 122.4  | 126.7  | 129.4  | 118.4  | 111    | 106.5 | 130.3  | 125.9  |
| TTC23  | 115.2  | 115.7  | 121.5  | 120.6  | 108.3  | 101.3 | 119.9  | 123.2  |
| TTC25  | 111.5  | 110.1  | 117.3  | 126.3  | 110.6  | 96.5  | 114.5  | 117.1  |
| TTC3   | 1447.3 | 1344.8 | 1435.6 | 1111.3 | 1051.6 | 905.3 | 1062.2 | 1166.4 |
| TTC3   | 116.8  | 116.1  | 130.7  | 118    | 110.3  | 103.3 | 112.4  | 117.2  |
| TTC32  | 199.2  | 200.8  | 268    | 191.2  | 233.9  | 195.5 | 257.1  | 305.7  |
| TTC4   | 549.6  | 648.6  | 541.4  | 575.1  | 606.2  | 402.4 | 727.1  | 497.1  |
| TTC5   | 140.8  | 168    | 170.2  | 167.9  | 159.3  | 132.1 | 134.8  | 128.8  |
| TTC6   | 104    | 105.7  | 115.4  | 110.9  | 103.4  | 97.1  | 123.8  | 109.8  |
| TTC7A  | 120    | 111    | 125.2  | 132.5  | 108.4  | 110.6 | 106.1  | 114.1  |
| TTC7B  | 118.2  | 115.7  | 119.7  | 121.2  | 111.4  | 98.9  | 122.2  | 115.7  |
| TTC8   | 126.7  | 121.8  | 122.7  | 119.1  | 115.8  | 97.1  | 116.5  | 124.5  |
| TTC8   | 112.3  | 123.2  | 130.1  | 111.8  | 117.6  | 101.2 | 124.8  | 112.8  |
| TTC9B  | 119.3  | 118.1  | 112    | 133.4  | 109.6  | 101.2 | 110.2  | 112.8  |
| TTC9C  | 183    | 174.8  | 158.7  | 165.5  | 169.9  | 130.7 | 154.9  | 138.2  |
| TTF1   | 110.8  | 122.6  | 121    | 118.9  | 99.9   | 95.9  | 111.3  | 120.8  |
| TTF2   | 216.7  | 215.8  | 232.7  | 251.9  | 198.3  | 183.8 | 211.6  | 194.1  |
| TTK    | 122.5  | 121    | 112.2  | 130.6  | 113.1  | 113.2 | 127.4  | 118.8  |
| TTL    | 184.9  | 193.5  | 169.9  | 234.5  | 176    | 176.5 | 198.5  | 191.3  |
| TTLL1  | 112.5  | 116.3  | 122.4  | 113.4  | 111.5  | 96    | 112.6  | 109.6  |
| TTLL1  | 116.3  | 117.9  | 126.4  | 127.6  | 108.6  | 104.1 | 113.9  | 115.9  |
| TTLL1  | 115    | 120.4  | 133.6  | 137.2  | 131.6  | 102.7 | 128    | 125.8  |
| TTLL10 | 114.7  | 116.1  | 114.7  | 116    | 103.7  | 99.1  | 119.4  | 116    |
| TTLL12 | 183    | 194.8  | 180.9  | 212.9  | 164.1  | 146.6 | 208.6  | 188.1  |
| TTLL13 | 120.4  | 122.1  | 121.6  | 121.2  | 108.6  | 99.9  | 124    | 112.9  |
| TTLL2  | 111.1  | 110.9  | 104.8  | 112.2  | 99.6   | 91.7  | 118.3  | 114.1  |
| TTLL3  | 206.5  | 194.6  | 249    | 209.1  | 169.5  | 178.5 | 202.9  | 177    |
| TTLL3  | 122.1  | 111.7  | 132    | 121.8  | 113.7  | 99.9  | 124.2  | 108.1  |
| TTLL4  | 160.5  | 137.2  | 128.4  | 157    | 129.4  | 121.6 | 160    | 127.2  |
| TTLL5  | 141.9  | 151    | 146.4  | 137.4  | 116.6  | 114   | 136.8  | 128.5  |
| TTLL6  | 116.1  | 114.2  | 111.3  | 116.1  | 106.6  | 98.5  | 119    | 108.8  |
| TTLL7  | 113    | 112.2  | 113.1  | 124.1  | 118.3  | 105.2 | 123.6  | 117.1  |
| TTLL9  | 115.3  | 124.3  | 122.1  | 126.7  | 108.9  | 113.4 | 123.3  | 121.8  |
| TTMA   | 112.5  | 112.2  | 108.7  | 117.9  | 101    | 95.9  | 119.4  | 112    |
| TTMB   | 116.5  | 120.1  | 122.3  | 124.6  | 117.9  | 105.9 | 113    | 115.1  |
| TTN    | 120.8  | 127.6  | 117.6  | 111.8  | 106.8  | 103.5 | 120.1  | 112.4  |
| TTN    | 108.2  | 112.6  | 106.4  | 118.2  | 113.4  | 100.6 | 117.3  | 112.6  |
| TTN    | 109.3  | 108.5  | 122.7  | 118.6  | 106    | 101.8 | 112.9  | 122    |
| TTN    | 115.2  | 111.4  | 120.2  | 109.4  | 107    | 93.2  | 117    | 109.4  |
| TTPA   | 116.3  | 107.9  | 120.1  | 115.3  | 105.4  | 97.3  | 117.5  | 104.5  |
| TTR    | 114.6  | 118    | 121.1  | 122.2  | 114.2  | 96.6  | 129.6  | 121.5  |
| TTRAP  | 141.3  | 150    | 140    | 177.5  | 147.9  | 119.5 | 207.2  | 167.4  |
| TTY1   | 104.9  | 112    | 115.5  | 117.1  | 104.1  | 100.9 | 114.5  | 109.9  |
| TTY10  | 118.1  | 122.4  | 134    | 139.9  | 114.6  | 108.3 | 137    | 129.6  |
| TTY11  | 135.6  | 117.7  | 120.8  | 124.2  | 113.7  | 103.7 | 121.6  | 115.4  |
| TTY12  | 107.6  | 114.6  | 118.4  | 112.2  | 100.6  | 97.3  | 116.5  | 106.6  |
| TTY13  | 115.1  | 112    | 109.9  | 106.7  | 111.3  | 95.3  | 112.2  | 113    |

|         |        |        |        |        |       |        |        |        |
|---------|--------|--------|--------|--------|-------|--------|--------|--------|
| TTY14   | 116.1  | 108.7  | 114.3  | 111.7  | 115.9 | 106    | 117.1  | 113.8  |
| TTY17A  | 113    | 113.3  | 118.4  | 126.3  | 106.2 | 94.1   | 115.3  | 102.3  |
| TTY19   | 132.8  | 129.2  | 128.2  | 137.7  | 120.5 | 104    | 118.9  | 123.2  |
| TTY2    | 117    | 111.9  | 115    | 112.5  | 110.2 | 98.1   | 122.3  | 113.4  |
| TTY21   | 112.5  | 121.1  | 121.9  | 114.9  | 108   | 101    | 125.9  | 114.5  |
| TTY5    | 106.1  | 110.1  | 113.8  | 120.2  | 104.6 | 96.5   | 121.2  | 106.1  |
| TTY6    | 111.4  | 115.7  | 124.3  | 118.5  | 106.1 | 98.6   | 110.2  | 112.8  |
| TTY6B   | 109.1  | 109.3  | 113.1  | 121.7  | 111.6 | 97.2   | 120.2  | 110.7  |
| TTY7    | 116.7  | 116.1  | 113.5  | 128.9  | 106.5 | 93.4   | 121    | 115.3  |
| TTY8    | 125    | 124.1  | 119.2  | 125.2  | 108.1 | 104.7  | 132.6  | 117.6  |
| TTY9B   | 113.9  | 108.8  | 109.8  | 115.9  | 111.6 | 102.7  | 115.1  | 119.3  |
| TYH1    | 110.5  | 116.3  | 116.4  | 123.7  | 111.4 | 91.3   | 126    | 116.2  |
| TYH1    | 121.4  | 114.5  | 115.5  | 119.1  | 111.7 | 102.9  | 114.6  | 114.3  |
| TYH2    | 136.6  | 127.9  | 122.8  | 130.6  | 125.9 | 105.3  | 131.6  | 127.7  |
| TYH2    | 109.7  | 122.8  | 119.8  | 119.3  | 109.7 | 94.6   | 118.1  | 115.3  |
| TYH2    | 111.8  | 117.2  | 108.7  | 111.5  | 99.8  | 100.4  | 117.3  | 109.1  |
| TYH3    | 188.3  | 166    | 235    | 225.2  | 157.8 | 192.2  | 229.5  | 159.2  |
| TUB     | 116    | 115.1  | 114.1  | 115.5  | 110.7 | 89.8   | 115.2  | 111.5  |
| TUB     | 119.2  | 118.7  | 113.1  | 118.5  | 106.9 | 104.8  | 116.2  | 111.4  |
| TUB     | 118.6  | 114.3  | 117.4  | 118.9  | 106.9 | 90.4   | 126.3  | 120.8  |
| TUBA1   | 428.3  | 459.6  | 333.1  | 492.3  | 286.3 | 285    | 372.3  | 360    |
| TUBA1A  | 1053.9 | 908.2  | 1952   | 1261.3 | 734.9 | 1096.4 | 1442.3 | 1312.9 |
| TUBA2   | 114.5  | 120.7  | 110.8  | 112.9  | 107.3 | 102.6  | 112    | 110.4  |
| TUBA3D  | 122.4  | 110.4  | 121.4  | 118.9  | 108.9 | 99.7   | 119.6  | 112.9  |
| TUBA4   | 110.5  | 105.8  | 113.8  | 109.8  | 103.1 | 91.8   | 121.7  | 109.8  |
| TUBA6   | 884.2  | 893    | 2040.7 | 973    | 735.3 | 1178.4 | 1000.2 | 1292.8 |
| TUBA8   | 113.3  | 110    | 113.2  | 115.7  | 106.3 | 99.9   | 114.2  | 124.4  |
| TUBA13  | 113.9  | 107    | 112.3  | 113    | 99.3  | 98.7   | 118.4  | 119.2  |
| TUBB    | 126.8  | 121.6  | 134.5  | 123    | 116.4 | 111.3  | 128.2  | 132.9  |
| TUBB    | 1181.9 | 1277.5 | 1383.7 | 1129.8 | 819.8 | 795.8  | 854.9  | 670.3  |
| TUBB2A  | 114    | 116.8  | 124.8  | 134.5  | 115.7 | 102.5  | 137.6  | 123.2  |
| TUBB2B  | 120.4  | 115.4  | 127.9  | 121.3  | 118.7 | 106.7  | 122.6  | 118.7  |
| TUBB2C  | 252.8  | 286.3  | 271.8  | 261.3  | 206.5 | 210.6  | 332.2  | 259.4  |
| TUBB3   | 107.9  | 113.8  | 120.5  | 122.2  | 107.7 | 97.2   | 121.5  | 124    |
| TUBB4   | 139.5  | 146.1  | 136.8  | 140.7  | 119.8 | 111.3  | 126.2  | 123.7  |
| TUBB4Q  | 125.3  | 127.9  | 132.6  | 132.2  | 115.2 | 108.4  | 132.4  | 139.7  |
| TUBB6   | 122.1  | 125.9  | 125.6  | 137.6  | 119.1 | 114.1  | 135.4  | 120.7  |
| TUBB6   | 152.8  | 138    | 172.8  | 175.5  | 135.9 | 130.7  | 166.7  | 134.5  |
| TUBB8   | 114.5  | 106.9  | 114.5  | 106.5  | 113.6 | 95.2   | 114.1  | 115.2  |
| TUBD1   | 154.5  | 154.1  | 179.2  | 155.2  | 128.6 | 122.6  | 139    | 132    |
| TUBE1   | 132.4  | 126.8  | 136.9  | 137.1  | 123.2 | 117.7  | 121.5  | 131.1  |
| TUBG1   | 120    | 117.8  | 125.3  | 128.6  | 118.8 | 109.7  | 123.7  | 118.2  |
| TUBG1   | 224.4  | 244.4  | 219.7  | 230.7  | 192   | 170.8  | 181.4  | 190    |
| TUBG1   | 183.5  | 169.1  | 190.6  | 172.9  | 145.9 | 161.6  | 165.2  | 150.3  |
| TUBG2   | 183.9  | 229.6  | 184.4  | 184.4  | 208   | 140.2  | 163.4  | 193.8  |
| TUBGCP2 | 329.1  | 324.1  | 344.2  | 341.4  | 221.3 | 281.4  | 276.7  | 224.2  |
| TUBGCP3 | 118.8  | 119    | 115.2  | 123.5  | 107   | 96.6   | 133.1  | 119.3  |
| TUBGCP5 | 111.3  | 100    | 124.4  | 126.6  | 106.8 | 113.7  | 116    | 105.3  |
| TUBGCP6 | 132.1  | 137.9  | 123    | 134    | 121.2 | 112.6  | 123.9  | 125.1  |
| TUBGCP6 | 243.7  | 224.2  | 228.5  | 220    | 179.3 | 149.9  | 192.3  | 180.6  |
| TUBGCP6 | 118.5  | 124.3  | 120.2  | 119.8  | 114.8 | 96.1   | 116.9  | 112.3  |

|         |        |        |        |        |        |        |        |        |
|---------|--------|--------|--------|--------|--------|--------|--------|--------|
| TUFM    | 352.5  | 414.5  | 421.1  | 410.9  | 277.9  | 336.2  | 453.5  | 401.6  |
| TUFT1   | 124.9  | 128.1  | 145.9  | 136.4  | 135.1  | 120.7  | 149.2  | 193.4  |
| TULP1   | 103.4  | 114.2  | 112.5  | 110.5  | 104.8  | 95.9   | 109.2  | 109.4  |
| TULP2   | 106.6  | 114.2  | 112.6  | 114    | 105.9  | 92.3   | 122.9  | 118.5  |
| TULP3   | 136.4  | 132.6  | 119.7  | 135.9  | 121.2  | 112.3  | 137.3  | 145.1  |
| TULP4   | 147.2  | 154.6  | 169    | 158.5  | 172.2  | 133.2  | 161.9  | 171.2  |
| TULP4   | 229    | 236.3  | 229.8  | 221.3  | 241.4  | 194.1  | 238    | 260    |
| TULP4   | 112.4  | 114.4  | 114    | 116.6  | 112.5  | 100.6  | 122.1  | 126.3  |
| TUSC1   | 111.6  | 114.4  | 113.6  | 126    | 109.7  | 104.9  | 117.9  | 119.2  |
| TUSC2   | 173.4  | 184.4  | 155.2  | 172.1  | 151    | 148.5  | 165.8  | 160.1  |
| TUSC3   | 122.8  | 112.1  | 118.6  | 115.1  | 106.2  | 93     | 113.4  | 111.4  |
| TUSC3   | 110    | 116.1  | 110.1  | 116.3  | 102.3  | 90     | 115.3  | 119.7  |
| TUSC4   | 918.8  | 984    | 879.2  | 911.7  | 695    | 482.6  | 618.3  | 613.3  |
| TUSC5   | 114    | 122.3  | 121.1  | 120.4  | 110.8  | 108    | 126.5  | 121    |
| TWIST1  | 138.3  | 132    | 127.4  | 132.6  | 124.3  | 106.7  | 113.1  | 128.6  |
| TWISTNB | 116.5  | 127.4  | 130.9  | 128.1  | 123.9  | 110.6  | 121.1  | 121.8  |
| TWSG1   | 263.3  | 279.8  | 234.1  | 331    | 246.5  | 224.2  | 362.3  | 438.7  |
| TXK     | 181.3  | 207.7  | 229.2  | 198.1  | 171.2  | 170.6  | 218.9  | 224.4  |
| TXLNA   | 608.2  | 629.2  | 478.2  | 659.6  | 450.4  | 321.5  | 704.8  | 488.1  |
| TXLNB   | 112.5  | 109    | 124.6  | 115.7  | 107.9  | 95.8   | 121.9  | 115.7  |
| TXN     | 1033.2 | 839.9  | 758.5  | 1790.5 | 1465.8 | 1989.4 | 2247.2 | 2260   |
| TXN     | 2782.3 | 2559   | 2199.1 | 6171.1 | 4727.9 | 5223.9 | 7803.7 | 6723.9 |
| TXN2    | 138.7  | 133.8  | 138.3  | 164.2  | 117.7  | 118.4  | 131.6  | 122.6  |
| TXNDC   | 1253.6 | 1258.4 | 972.7  | 1269.1 | 822.9  | 679.3  | 1187.4 | 838.9  |
| TXNDC10 | 201.4  | 221.1  | 263.5  | 243.2  | 239.6  | 183    | 213    | 236    |
| TXNDC11 | 148.7  | 189.3  | 146.9  | 178.9  | 145.5  | 133.3  | 173.3  | 183.4  |
| TXNDC12 | 1257.1 | 1371.6 | 1820.9 | 1652.7 | 1129.8 | 1715.7 | 1681   | 1422.4 |
| TXNDC13 | 331.3  | 268.9  | 312.2  | 331.8  | 250.2  | 182.1  | 273.3  | 247.1  |
| TXNDC14 | 380.8  | 540.7  | 633.2  | 511.4  | 355.4  | 437.6  | 525.2  | 410.6  |
| TXNDC3  | 129.4  | 133.7  | 124.2  | 127.5  | 116.3  | 116.1  | 126.6  | 116.4  |
| TXNDC4  | 111.7  | 120.5  | 121.7  | 125.1  | 106.7  | 99     | 114.7  | 123.5  |
| TXNDC5  | 111.3  | 103.7  | 115    | 119.4  | 105.5  | 95.5   | 110.4  | 118.2  |
| TXNDC5  | 120    | 124    | 151.1  | 135.6  | 119.7  | 136.1  | 133.6  | 126.4  |
| TXNDC5  | 113.1  | 118.4  | 122.6  | 126.6  | 114.9  | 95.3   | 111    | 111.2  |
| TXNDC6  | 118.5  | 121.5  | 122.4  | 119.8  | 122.3  | 100.1  | 125.2  | 113    |
| TXNDC8  | 116.3  | 108.6  | 119.4  | 114.4  | 96     | 98.9   | 122.6  | 108    |
| TXNDC9  | 199.6  | 224.4  | 193.2  | 233.1  | 204.1  | 201.5  | 216.4  | 214.6  |
| TXNIP   | 364.1  | 476    | 491.9  | 409.8  | 335.8  | 344.6  | 369.1  | 470.2  |
| TXNL1   | 133.3  | 141.3  | 120.2  | 133.2  | 132.5  | 127.3  | 147    | 165.9  |
| TXNL2   | 310.7  | 320.8  | 349    | 374.7  | 297.3  | 283.9  | 352.7  | 407.3  |
| TXNL4A  | 134.6  | 145.4  | 134.1  | 133.9  | 147.2  | 115.8  | 130.7  | 130.6  |
| TXNL4B  | 115.4  | 124    | 142.5  | 134.5  | 119.9  | 105.1  | 127.5  | 127.8  |
| TXNL5   | 750.8  | 762.9  | 1342.7 | 782.4  | 530.6  | 644.7  | 433.6  | 486.5  |
| TXNL6   | 118.8  | 131.1  | 133.1  | 131.7  | 113    | 98.6   | 119.8  | 128.9  |
| TXNRD1  | 830.3  | 957    | 377.6  | 2000.3 | 1286.2 | 1474.1 | 2496.8 | 2374.6 |
| TXNRD1  | 252    | 332.1  | 215    | 519.8  | 444.2  | 678.2  | 684.4  | 619.1  |
| TXNRD2  | 163.4  | 169.4  | 195.3  | 162.6  | 135.1  | 145.8  | 150    | 149.7  |
| TYK2    | 1140.6 | 1163.6 | 1188.6 | 1040.6 | 1055.8 | 742.8  | 1155.2 | 903.3  |
| TYMS    | 121.8  | 133.4  | 134.3  | 131    | 121    | 104.4  | 128.3  | 133    |
| TYR     | 105.4  | 120.6  | 123.3  | 121.9  | 110.5  | 95     | 116.6  | 123.8  |
| TYRO3   | 124.5  | 113.9  | 118.8  | 121.5  | 115.2  | 109    | 118.9  | 127.9  |

|          |         |         |         |         |         |         |         |         |
|----------|---------|---------|---------|---------|---------|---------|---------|---------|
| TYRO3P   | 117.6   | 114.6   | 114.2   | 120.2   | 106.2   | 103     | 122.8   | 105.3   |
| TYROBP   | 3354.9  | 1756.9  | 8752.4  | 3817.6  | 1212    | 7015.1  | 2377.4  | 978.1   |
| TYRP1    | 113     | 108.6   | 106.2   | 110.4   | 106.3   | 94.2    | 123     | 108.2   |
| TYSND1   | 407.1   | 462.5   | 442.1   | 504.5   | 323.6   | 291     | 321.4   | 281.6   |
| TYSND1   | 130.7   | 144.4   | 121.8   | 138.3   | 120.9   | 109.6   | 121     | 123.3   |
| TYSND1   | 142.3   | 144.6   | 154.6   | 153.4   | 141.4   | 137.6   | 125.9   | 149.2   |
| U1SNRNPB | 269.2   | 268.6   | 291.2   | 332.5   | 293.5   | 263.7   | 255.2   | 233.5   |
| U1SNRNPB | 140.4   | 138.1   | 143.6   | 139.4   | 118.7   | 112.4   | 129.5   | 127.8   |
| U2AF1    | 228.5   | 288.5   | 196.6   | 288.5   | 270.3   | 214.7   | 256.7   | 292.9   |
| U2AF1    | 146     | 169.5   | 154.5   | 158.4   | 153.3   | 156.4   | 141.6   | 165.1   |
| U2AF1L2  | 377.3   | 284.9   | 421.4   | 385.7   | 262.6   | 274.6   | 328.9   | 288.3   |
| U2AF1L3  | 245.7   | 268.6   | 206     | 214.2   | 154.5   | 180.4   | 187.6   | 191.2   |
| U2AF1L3  | 167.4   | 165.6   | 191.7   | 162.4   | 138.2   | 125.6   | 144.3   | 134.5   |
| U2AF1L4  | 664.3   | 572.4   | 1019.7  | 606.7   | 307.1   | 685.4   | 360.2   | 289.6   |
| U2AF2    | 984.8   | 1107.7  | 707.7   | 1128.3  | 1001.8  | 631.9   | 1310.6  | 1198.2  |
| U2AF2    | 134.7   | 123.8   | 128.1   | 135.4   | 115.9   | 110.9   | 121.2   | 127.8   |
| UACA     | 110.5   | 107.1   | 119.1   | 111.4   | 108     | 97.2    | 113.2   | 113.8   |
| UACA     | 120.8   | 118.2   | 128.2   | 125.6   | 112.6   | 102.9   | 121.7   | 116.5   |
| UACA     | 123.1   | 109.4   | 124.2   | 114     | 113.6   | 111.8   | 115.8   | 119.9   |
| UAP1     | 144.2   | 131.9   | 145.2   | 147.1   | 130.6   | 122.1   | 150.6   | 162.4   |
| UAP1L1   | 157.5   | 148.5   | 154.9   | 185.4   | 132.1   | 133.1   | 181.7   | 185     |
| UBA2     | 111.3   | 114.6   | 118.7   | 124.2   | 104.3   | 96.7    | 114.4   | 112.1   |
| UBA52    | 19254.1 | 23825.6 | 23873.2 | 22438.9 | 19535.8 | 18816   | 22758   | 24742.5 |
| UBA52    | 203.2   | 258.2   | 212.5   | 250.3   | 188.4   | 167.8   | 277.7   | 295.4   |
| UBADC1   | 567.9   | 635.6   | 767.5   | 577.5   | 444.8   | 481.9   | 365.9   | 424.6   |
| UBAP1    | 373.9   | 470.9   | 447.6   | 583.9   | 377.1   | 415.9   | 844.4   | 685.7   |
| UBAP2    | 127.1   | 128.5   | 126     | 125.3   | 111.5   | 110.5   | 149.5   | 159.3   |
| UBAP2L   | 235.5   | 216     | 207.9   | 245.9   | 212     | 205.5   | 309.9   | 219.8   |
| UBASH3A  | 304.4   | 333.7   | 258.7   | 351.2   | 257.4   | 209.2   | 234.7   | 213     |
| UBASH3A  | 126.6   | 110     | 122.8   | 119.1   | 116.6   | 98.3    | 112.9   | 109.6   |
| UBB      | 8048.4  | 8492.3  | 7822.9  | 9316.7  | 7061.2  | 6436.2  | 13017.1 | 19339.6 |
| UBC      | 12690.7 | 12491.3 | 13528.6 | 13364.1 | 12618.2 | 11762.5 | 18527.1 | 21957.8 |
| UBC      | 10407.9 | 11352.8 | 12408.5 | 13431.9 | 12302.2 | 13190.6 | 18429.7 | 22553.9 |
| UBC      | 119.4   | 139.8   | 113.1   | 121.1   | 113.2   | 105     | 143.8   | 199.3   |
| UBD      | 124.5   | 121     | 116.7   | 126     | 107.3   | 97      | 109.7   | 108.6   |
| UBE1     | 403.8   | 469.8   | 317.6   | 439.6   | 283     | 290.1   | 523.5   | 507.2   |
| UBE1     | 118.8   | 104     | 120.8   | 113.5   | 112.1   | 104.3   | 119.8   | 114.2   |
| UBE1C    | 182     | 186     | 236.2   | 213.7   | 190.9   | 200.1   | 171     | 198.7   |
| UBE1C    | 130.8   | 134.2   | 152.8   | 151.7   | 117     | 114.3   | 144.9   | 133.2   |
| UBE1DC1  | 147.1   | 144.1   | 160.1   | 168.5   | 154.6   | 132.4   | 149     | 146.1   |
| UBE1DC1  | 113.2   | 109.6   | 123.2   | 117.2   | 114.3   | 102.6   | 114.3   | 105.6   |
| UBE1DC1  | 130.2   | 125.7   | 130.1   | 123.9   | 123.8   | 116.9   | 117.7   | 124.7   |
| UBE1L    | 506.6   | 585.2   | 641.4   | 522.3   | 339.1   | 318.1   | 290.4   | 314.3   |
| UBE1L2   | 188.1   | 182.7   | 195.3   | 227.1   | 162.8   | 166.3   | 246.8   | 262.1   |
| UBE2A    | 114     | 116.7   | 131.8   | 118.7   | 109.8   | 112.5   | 122.5   | 139.5   |
| UBE2A    | 506.3   | 489.1   | 653     | 602.9   | 611.6   | 720.5   | 868.9   | 1046.5  |
| UBE2B    | 139.2   | 134.5   | 139.6   | 150.9   | 140.7   | 105.1   | 147.1   | 189.2   |
| UBE2C    | 114.3   | 107.5   | 120.2   | 122.6   | 108.3   | 102.6   | 123     | 118.7   |
| UBE2C    | 111.9   | 112.8   | 101.6   | 113.2   | 103     | 102.4   | 118.3   | 109.1   |
| UBE2C    | 116.8   | 123.5   | 131.3   | 123.9   | 107.2   | 102     | 127.5   | 120.6   |
| UBE2C    | 108.3   | 114.2   | 111.9   | 105.4   | 101.5   | 95.3    | 106.6   | 113.4   |



|         |        |        |        |        |        |        |        |        |
|---------|--------|--------|--------|--------|--------|--------|--------|--------|
| UBE2D1  | 119.7  | 118.7  | 130.2  | 117.1  | 113.4  | 101.1  | 118.4  | 119.3  |
| UBE2D2  | 188    | 207.5  | 182.7  | 213.4  | 157.3  | 147.1  | 185.8  | 247.3  |
| UBE2D2  | 143.8  | 172.2  | 160.6  | 174.6  | 149.9  | 132.4  | 146.6  | 145.1  |
| UBE2D2  | 159.2  | 139.2  | 132.9  | 145.8  | 132.3  | 123.9  | 144.9  | 159    |
| UBE2D3  | 107.5  | 109.7  | 103.3  | 109.7  | 112.3  | 93     | 121.7  | 117.6  |
| UBE2D3  | 1348.8 | 1598.6 | 1377.6 | 1510.7 | 1327.5 | 1231.1 | 2098   | 2727.6 |
| UBE2D3  | 2211.8 | 2254.6 | 2262.8 | 2418.4 | 2375.6 | 2247.9 | 2674.3 | 3467.9 |
| UBE2D3  | 105.2  | 124.5  | 117    | 118.8  | 104.3  | 93.8   | 121.5  | 111.4  |
| UBE2D4  | 203.4  | 188.2  | 179    | 226.7  | 178.6  | 160.4  | 183.8  | 176.4  |
| UBE2E1  | 956.3  | 917.8  | 1182.4 | 1135.4 | 703.3  | 1221.3 | 709.2  | 781.2  |
| UBE2E1  | 136    | 134.6  | 141    | 148    | 121.6  | 118.4  | 130.9  | 129.3  |
| UBE2E2  | 253.6  | 201.8  | 304.1  | 247.7  | 157.1  | 207.3  | 188.7  | 142.9  |
| UBE2E3  | 155.7  | 162    | 167    | 157.9  | 132.7  | 129    | 165.6  | 134.5  |
| UBE2E3  | 513.8  | 577    | 456.5  | 636.8  | 551    | 615.4  | 508.4  | 580    |
| UBE2F   | 766.3  | 828.7  | 931.2  | 848.9  | 617.6  | 680    | 578.2  | 582.9  |
| UBE2G1  | 213.5  | 269.7  | 242.5  | 287.8  | 278.8  | 208.9  | 304.3  | 346.5  |
| UBE2G1  | 238.7  | 258.2  | 277.7  | 281.5  | 247.7  | 225.8  | 296.9  | 291.6  |
| UBE2G2  | 431.8  | 481.7  | 390.3  | 379.6  | 359.9  | 341.2  | 423.3  | 349.8  |
| UBE2G2  | 117.5  | 115.9  | 109.9  | 122.3  | 105.6  | 95.2   | 119.9  | 117.1  |
| UBE2H   | 125.3  | 155.3  | 129    | 135.6  | 133.1  | 116.3  | 146.2  | 154.6  |
| UBE2H   | 171.1  | 171.7  | 178.9  | 216.5  | 159.6  | 129.5  | 182.1  | 226.3  |
| UBE2I   | 1063.4 | 1123   | 1041.6 | 1081.9 | 860.4  | 913.9  | 882.3  | 1137.6 |
| UBE2I   | 106    | 113.8  | 120.6  | 112.1  | 103.6  | 96.2   | 122.8  | 110.1  |
| UBE2I   | 123.4  | 122    | 121.6  | 125.4  | 120.7  | 99.2   | 118    | 113.9  |
| UBE2I   | 122    | 106.2  | 133.1  | 120.6  | 110.2  | 106.7  | 125.2  | 127    |
| UBE2J1  | 393.6  | 388.2  | 353.7  | 480.5  | 362.8  | 337.9  | 490    | 460.3  |
| UBE2J2  | 132.7  | 122.3  | 123.9  | 133.6  | 120    | 106    | 146.2  | 127.9  |
| UBE2J2  | 139.3  | 161.6  | 138.1  | 157.3  | 147.1  | 118    | 172.7  | 147.7  |
| UBE2J2  | 110.3  | 111.9  | 115.9  | 108.3  | 104.9  | 103.3  | 105    | 112.3  |
| UBE2L3  | 249.2  | 310.1  | 241.5  | 315.1  | 258.4  | 251.2  | 334.7  | 419.6  |
| UBE2L3  | 124.4  | 119.3  | 136.8  | 129.9  | 118.1  | 110.7  | 130.4  | 127.5  |
| UBE2L6  | 113.4  | 132.1  | 120.2  | 111.5  | 109.3  | 95.6   | 121.2  | 114.2  |
| UBE2L6  | 1619.5 | 1350.1 | 1928   | 1692.5 | 767.4  | 1237.3 | 1264.9 | 1155.6 |
| UBE2L6  | 312.4  | 261.9  | 393.3  | 316.2  | 240.7  | 307.6  | 209.4  | 216.9  |
| UBE2M   | 690.4  | 831    | 674.8  | 840.9  | 574.2  | 540.9  | 894.8  | 648.9  |
| UBE2MP1 | 113.4  | 115.4  | 130.3  | 115    | 107.1  | 101.2  | 119.8  | 116.3  |
| UBE2N   | 458.8  | 599.8  | 596.7  | 542.6  | 402.2  | 446.7  | 571.8  | 694.9  |
| UBE2NL  | 121.1  | 106.9  | 124.8  | 121.9  | 107.1  | 96     | 131.7  | 115.8  |
| UBE2O   | 259.3  | 237.8  | 179.9  | 230.3  | 178.7  | 152.8  | 216.1  | 242.2  |
| UBE2Q1  | 266.7  | 364.6  | 229.9  | 301.9  | 283.2  | 196.4  | 336    | 326.1  |
| UBE2Q2  | 507.1  | 540.7  | 517.4  | 523.9  | 554.8  | 490.7  | 524.4  | 667.8  |
| UBE2R2  | 126.8  | 118.7  | 136.2  | 135.8  | 117.2  | 115.1  | 119.1  | 122.1  |
| UBE2S   | 119.3  | 120.1  | 110.7  | 123.8  | 107.8  | 104.1  | 108.2  | 113.9  |
| UBE2T   | 125.8  | 144.2  | 131.4  | 149.9  | 141.6  | 107.8  | 124.9  | 137.9  |
| UBE2U   | 120.2  | 121    | 133.4  | 122.2  | 130.8  | 103.7  | 123.6  | 126.7  |
| UBE2V1  | 121.5  | 120.9  | 118.4  | 123.9  | 128.3  | 111.2  | 136    | 135.8  |
| UBE2V1  | 134    | 124.8  | 131.1  | 121.7  | 122.8  | 105    | 121.9  | 131.7  |
| UBE2V1  | 115.8  | 123.4  | 129    | 113.1  | 104.2  | 106.7  | 121.9  | 107.4  |
| UBE2V2  | 112.6  | 120.3  | 108    | 112.5  | 104.9  | 98.3   | 124.3  | 112.1  |
| UBE2W   | 117.4  | 117.3  | 125.9  | 117.5  | 101.8  | 95.7   | 119.6  | 117.2  |
| UBE2Z   | 195.9  | 188.7  | 166.8  | 223.1  | 195.3  | 133    | 231    | 208    |

|         |       |       |       |        |       |       |        |        |
|---------|-------|-------|-------|--------|-------|-------|--------|--------|
| UBE2Z   | 308.9 | 287.3 | 246   | 386.1  | 373.2 | 286.2 | 421.1  | 370.3  |
| UBE2Z   | 130.5 | 129.6 | 125.4 | 126.3  | 114.1 | 105.1 | 123.4  | 123.9  |
| UBE3A   | 551.1 | 715.9 | 562.5 | 662.2  | 498.7 | 471.3 | 677.1  | 807    |
| UBE3A   | 343.8 | 429.5 | 410.9 | 457.8  | 311.7 | 318.4 | 396.6  | 443    |
| UBE3A   | 128.8 | 114.8 | 135.8 | 130.2  | 113.3 | 108.9 | 126.4  | 118.8  |
| UBE3B   | 120.9 | 132.4 | 147   | 140.6  | 112.3 | 119.5 | 124.7  | 131    |
| UBE3C   | 564.9 | 769.1 | 420.2 | 616.3  | 573.5 | 315.3 | 644.8  | 626.8  |
| UBE4A   | 233.3 | 246.4 | 294.3 | 344.7  | 242.9 | 250.6 | 254.5  | 271.1  |
| UBE4B   | 175.4 | 164.5 | 159.3 | 155.8  | 162.3 | 146.1 | 180.1  | 201.1  |
| UBIAD1  | 141.2 | 210.6 | 165.4 | 192.1  | 174.5 | 151.5 | 153.5  | 190    |
| UBL3    | 403.2 | 544.7 | 575.8 | 592.9  | 445.6 | 435.3 | 452.7  | 556.3  |
| UBL4A   | 311   | 340.4 | 323.4 | 350.2  | 245.1 | 213.6 | 286.1  | 245.2  |
| UBL4B   | 115   | 112.3 | 110.1 | 122.5  | 107.7 | 98.9  | 120.7  | 112.9  |
| UBL5    | 123.4 | 142.6 | 141   | 132.8  | 126.4 | 106.5 | 137    | 139.6  |
| UBL5    | 315.6 | 323.7 | 316.5 | 410    | 325.3 | 265.8 | 286.3  | 270.3  |
| UBL7    | 152.2 | 147.3 | 156.6 | 157.1  | 156.2 | 119.3 | 154.4  | 142.5  |
| UBL7    | 189.8 | 208.5 | 204.5 | 211.6  | 156.5 | 158.3 | 165.6  | 167.5  |
| UBLCP1  | 370.3 | 395.1 | 334.6 | 384.3  | 346.6 | 238.3 | 290.1  | 318.3  |
| UBN1    | 126.3 | 121   | 128.4 | 147.7  | 127.3 | 109   | 131.7  | 133.5  |
| UBN1    | 867.4 | 808.7 | 622.7 | 1012.4 | 696.2 | 570   | 1038.3 | 1217.5 |
| UBOX5   | 115.8 | 120.5 | 130.3 | 117    | 118.1 | 108.4 | 128.5  | 127.1  |
| UBOX5   | 119.3 | 109.4 | 135.7 | 133.3  | 112.4 | 101.8 | 124.7  | 120.2  |
| UBP1    | 584   | 708.4 | 674.1 | 646.3  | 551.1 | 537.7 | 691.5  | 627    |
| UBPH    | 131.7 | 122.5 | 126.7 | 135.7  | 118.2 | 117   | 145.7  | 123    |
| UBQLN1  | 236.3 | 243.2 | 248.8 | 294.1  | 236.4 | 233.3 | 360.7  | 360.3  |
| UBQLN1  | 624.2 | 620.7 | 815.9 | 818.7  | 636.1 | 741.8 | 818.2  | 1008.9 |
| UBQLN2  | 776   | 639.1 | 758.5 | 688.4  | 506.6 | 684.2 | 682.9  | 774.7  |
| UBQLN3  | 121.9 | 125.5 | 140.1 | 130.1  | 129.4 | 117.6 | 131.4  | 130.7  |
| UBQLN4  | 470.4 | 489.4 | 372.8 | 612.6  | 363.9 | 309.7 | 598.2  | 475.5  |
| UBR1    | 142.3 | 148.3 | 139.7 | 148.8  | 141   | 116.4 | 171.7  | 142.2  |
| UBR2    | 233.7 | 186.6 | 236.5 | 276.7  | 264.1 | 215.9 | 315.2  | 288.5  |
| UBTD1   | 189.5 | 201.1 | 164.3 | 213.1  | 155.3 | 140.8 | 267.7  | 196.4  |
| UBTF    | 145.4 | 159.8 | 181.3 | 151.5  | 152.9 | 168.8 | 184.4  | 158.1  |
| UBTF    | 137   | 126.6 | 124.2 | 142.6  | 108.9 | 108.8 | 126.5  | 130.3  |
| UBTF    | 148.1 | 173.8 | 134.4 | 173.1  | 166.3 | 126.8 | 143.5  | 148.3  |
| UBTF    | 114.4 | 120   | 115.9 | 112.6  | 115.7 | 100.6 | 130.1  | 118    |
| UBXD1   | 302.3 | 348.1 | 302.8 | 344.7  | 241.5 | 372.2 | 348.2  | 260.9  |
| UBXD2   | 721.4 | 744.7 | 738.3 | 968.1  | 681.6 | 809.1 | 918.6  | 866    |
| UBXD3   | 137.1 | 126.9 | 141.7 | 139.8  | 132   | 111.1 | 151.1  | 126.7  |
| UBXD4   | 300.6 | 266.9 | 252.9 | 327.6  | 261.8 | 203.7 | 324.6  | 310.1  |
| UBXD5   | 103.5 | 107.1 | 109.9 | 104.6  | 112.2 | 102.3 | 106    | 108.7  |
| UBXD5   | 124.5 | 117   | 115.7 | 116.4  | 111.2 | 98.8  | 119.7  | 118.4  |
| UBXD5   | 119.3 | 123.4 | 127   | 120.3  | 110.9 | 111.8 | 119.6  | 114.4  |
| UBXD5   | 274.9 | 252.1 | 283.3 | 212.3  | 177   | 196.4 | 179.1  | 201.2  |
| UBXD5   | 114.4 | 124.4 | 126.5 | 126.7  | 110   | 114.9 | 118.2  | 113    |
| UBXD6   | 117   | 112.3 | 126.6 | 121.6  | 110.6 | 96.2  | 134.6  | 123.2  |
| UBXD8   | 668.9 | 642.8 | 669.8 | 826.2  | 689.8 | 609.9 | 912    | 809.5  |
| UCHL1   | 121.2 | 140.2 | 116.4 | 116.7  | 105.3 | 107.3 | 109.7  | 116.9  |
| UCHL3   | 220.1 | 262.2 | 301.4 | 235.3  | 211.4 | 178.3 | 222.1  | 195.5  |
| UCHL5   | 201.9 | 236.8 | 253.5 | 266.3  | 215   | 184.5 | 194.5  | 197.1  |
| UCHL5IP | 337.8 | 383.3 | 372   | 369.2  | 285.5 | 257.4 | 310.6  | 320.5  |

|         |       |        |        |        |       |       |        |        |
|---------|-------|--------|--------|--------|-------|-------|--------|--------|
| UCK1    | 121.1 | 120.1  | 123.3  | 126.1  | 117.2 | 104.1 | 126.4  | 124.2  |
| UCK2    | 124   | 118.1  | 152    | 148.4  | 122.9 | 108.5 | 142    | 145    |
| UCKL1   | 640.6 | 593.2  | 549.1  | 673.3  | 467   | 423.3 | 505.8  | 352.9  |
| UCN     | 135.1 | 116.2  | 125.3  | 133.8  | 118.5 | 110   | 124.5  | 128.9  |
| UCN2    | 119.4 | 116.8  | 127.8  | 119.2  | 112.1 | 95.4  | 127.8  | 125.3  |
| UCN3    | 120.7 | 122.5  | 116    | 114    | 109.3 | 100.4 | 118    | 113    |
| UCP2    | 816.3 | 775    | 842.8  | 669.1  | 432.4 | 487.9 | 415.6  | 345.2  |
| UCP3    | 119.8 | 124.7  | 122.2  | 117.1  | 107.6 | 104.5 | 117.7  | 121.3  |
| UCP3    | 114.6 | 117.3  | 113.8  | 123.5  | 114.5 | 99.6  | 139    | 120.1  |
| UCP3    | 132   | 127.6  | 121.6  | 134.5  | 124.1 | 108.6 | 125.6  | 122.2  |
| UCRC    | 224.1 | 222.7  | 228.5  | 226.9  | 209.1 | 171.4 | 216.9  | 245.4  |
| UCRC    | 297   | 348.1  | 341.3  | 295.6  | 251.2 | 255.6 | 243.1  | 258.2  |
| UCRC    | 313.8 | 299.2  | 321.5  | 305.7  | 240.7 | 204.2 | 263.9  | 236    |
| UEV3    | 131.9 | 121.6  | 144.8  | 129.6  | 121.8 | 114   | 123.8  | 119.1  |
| UEVLD   | 114.4 | 127.2  | 122.4  | 130.4  | 110.7 | 112.5 | 118.2  | 124.9  |
| UFC1    | 966   | 1026.8 | 962.6  | 1028.6 | 943.6 | 665.7 | 1214.8 | 1270.8 |
| UFD1L   | 129.2 | 129.4  | 123.3  | 142.6  | 129.4 | 108.5 | 143    | 131.4  |
| UFD1L   | 126.3 | 121.7  | 131.1  | 135.4  | 116.9 | 106.6 | 125    | 122.6  |
| UFM1    | 185.3 | 152.5  | 207.2  | 157.1  | 177.2 | 137.5 | 190.7  | 174.4  |
| UGCG    | 146.9 | 151.2  | 181    | 212.7  | 180   | 132.6 | 248.2  | 235.6  |
| UGCGL1  | 101.8 | 113.6  | 113.2  | 111.6  | 105.3 | 98.7  | 114.9  | 105.5  |
| UGCGL1  | 140.8 | 147.6  | 129.9  | 160.1  | 131.2 | 109.6 | 144.5  | 149.3  |
| UGCGL1  | 208.4 | 242.4  | 196.5  | 275.2  | 228.1 | 137.8 | 229    | 243.8  |
| UGCGL2  | 125.5 | 123.8  | 133.2  | 132.7  | 116.2 | 106.5 | 117.2  | 120.4  |
| UGDH    | 233.4 | 329.2  | 209.4  | 341.5  | 263.1 | 141.5 | 365.6  | 355.1  |
| UGP2    | 355.7 | 346.5  | 443.7  | 424.6  | 310.9 | 352.2 | 326.2  | 313.8  |
| UGP2    | 127.4 | 122    | 121.7  | 122.4  | 114.7 | 96.2  | 119.8  | 115.4  |
| UGP2    | 589.5 | 717.8  | 1050.3 | 826.2  | 681   | 706   | 550.3  | 581.2  |
| UGT1A1  | 123.4 | 117.5  | 120.6  | 113.6  | 106.1 | 101   | 118.8  | 128    |
| UGT1A10 | 102.2 | 109.9  | 105.4  | 111.9  | 111.8 | 96.7  | 113.8  | 107.3  |
| UGT1A3  | 109   | 100.7  | 109.9  | 110.4  | 97.1  | 94    | 111.6  | 110.1  |
| UGT1A4  | 113.9 | 120.4  | 121.7  | 123.1  | 115   | 109.5 | 125.2  | 119.8  |
| UGT1A5  | 113.1 | 120    | 118.6  | 111.1  | 112.8 | 98.2  | 114.3  | 121.3  |
| UGT1A6  | 110.1 | 108.8  | 124.4  | 120.9  | 109.1 | 101.4 | 112.7  | 115.1  |
| UGT1A6  | 113.2 | 112.8  | 116    | 118.4  | 103.1 | 99.4  | 112.8  | 111.7  |
| UGT1A6  | 117.1 | 104.1  | 113.4  | 123.2  | 106.9 | 104.3 | 118.3  | 110.1  |
| UGT1A7  | 110.9 | 122.6  | 115.3  | 115.1  | 103.2 | 98.4  | 113.5  | 114.2  |
| UGT1A8  | 111.4 | 114.3  | 110    | 112.2  | 98.9  | 89.7  | 115.4  | 107.7  |
| UGT1A9  | 112.2 | 112.8  | 113    | 127.5  | 111.5 | 97.8  | 125.3  | 112.2  |
| UGT2A1  | 120.5 | 105.1  | 112.9  | 124.4  | 105.1 | 96    | 104.9  | 114.7  |
| UGT2A3  | 103.9 | 114.1  | 112.7  | 119.1  | 101.1 | 96.6  | 112    | 113.5  |
| UGT2B10 | 112   | 107    | 107    | 114.1  | 100.1 | 93.7  | 112    | 114.1  |
| UGT2B11 | 127.6 | 121.2  | 119.6  | 118.6  | 98.9  | 100.6 | 126.8  | 117.2  |
| UGT2B15 | 121.2 | 122.2  | 110.6  | 115.6  | 118   | 103.4 | 119    | 115    |
| UGT2B17 | 119.7 | 114.3  | 114.3  | 122.7  | 105.8 | 98.4  | 115.3  | 112.5  |
| UGT2B17 | 112.4 | 113.5  | 120    | 121.9  | 110.5 | 102.7 | 113.4  | 115.2  |
| UGT2B28 | 119.1 | 118.9  | 110.7  | 120.9  | 108.7 | 105.5 | 119.8  | 125.2  |
| UGT2B4  | 117.4 | 119.7  | 113.6  | 128.2  | 107.5 | 102.7 | 122.3  | 111.8  |
| UGT2B7  | 114.2 | 110.7  | 116.9  | 119.7  | 111.9 | 98.7  | 126.2  | 113.2  |
| UGT2B7  | 114.2 | 113.8  | 110.8  | 127.1  | 109.8 | 97    | 113.3  | 113.4  |
| UGT3A1  | 123.3 | 106.6  | 110.9  | 117    | 102.7 | 107.6 | 111.6  | 110.9  |

|         |       |        |        |        |        |        |        |        |
|---------|-------|--------|--------|--------|--------|--------|--------|--------|
| UGT3A2  | 113.5 | 113    | 116.8  | 114.2  | 101.3  | 100.8  | 109.3  | 107.7  |
| UGT8    | 124.1 | 107.1  | 123    | 117    | 103.6  | 97.9   | 110.8  | 106.4  |
| UHMK1   | 254.7 | 281    | 179.8  | 303.9  | 216.7  | 121.1  | 244    | 252.2  |
| UHRF1   | 115.4 | 110    | 112.2  | 109.5  | 104.6  | 91.1   | 114.5  | 116.6  |
| UHRF2   | 147.7 | 159.6  | 203.3  | 151.4  | 156.9  | 135.2  | 166.2  | 150.5  |
| UIP1    | 124.9 | 128.6  | 121.8  | 119    | 107.3  | 103.9  | 120.3  | 110.3  |
| ULBP1   | 123.9 | 129.2  | 121.4  | 126.6  | 116.8  | 99.2   | 124.4  | 141.9  |
| ULBP3   | 121.6 | 117.8  | 137.4  | 122.2  | 112.5  | 97.7   | 126.8  | 125.7  |
| ULK1    | 853.1 | 993.7  | 778.4  | 1205.1 | 994.2  | 668.7  | 1382.9 | 1751.8 |
| ULK1    | 815.2 | 842.1  | 739.3  | 901.6  | 721.6  | 574.8  | 1275.1 | 1518   |
| ULK1    | 113.1 | 109.4  | 109.6  | 121.3  | 104    | 90.3   | 110.5  | 110.5  |
| ULK2    | 119.6 | 120.9  | 136.1  | 126.1  | 111.8  | 106.9  | 112.1  | 119.8  |
| ULK3    | 128.7 | 142.2  | 143.4  | 151.5  | 124.1  | 111.3  | 153.1  | 144.3  |
| UMOD    | 110.4 | 103.4  | 112.4  | 116.6  | 106.8  | 98.7   | 108.7  | 107.3  |
| UMOD    | 120.2 | 122.4  | 125.6  | 126    | 125.9  | 107.7  | 120.2  | 115.5  |
| UMODL1  | 112.9 | 115.9  | 125.2  | 119.3  | 111.8  | 99.8   | 118.5  | 118.4  |
| UMODL1  | 108.1 | 130.8  | 119.8  | 111.8  | 115.4  | 100.3  | 116.8  | 117.2  |
| UMPS    | 110.6 | 126.9  | 128.3  | 122.5  | 117.7  | 98.8   | 128.9  | 115.9  |
| UNC119  | 124.6 | 130.6  | 137.4  | 138.3  | 134.7  | 106.1  | 124.5  | 124.4  |
| UNC119  | 175.9 | 161.1  | 168.4  | 167.3  | 130    | 117.8  | 136.1  | 159.8  |
| UNC13A  | 118.8 | 114.9  | 112.2  | 117.6  | 109.3  | 103.9  | 114.8  | 116.4  |
| UNC13A  | 131.1 | 121.8  | 126.1  | 120.8  | 112.5  | 110.3  | 129.7  | 127.3  |
| UNC13A  | 127.4 | 121    | 137.1  | 124    | 117.1  | 110.5  | 124.9  | 120.3  |
| UNC13B  | 117.3 | 115.4  | 118.5  | 119.7  | 108.5  | 100.8  | 130.7  | 114    |
| UNC13C  | 109.3 | 117.8  | 111.3  | 111.5  | 109.3  | 99.6   | 108.1  | 117.2  |
| UNC13D  | 191.7 | 198.7  | 196.5  | 220.1  | 156.3  | 135.9  | 169.9  | 167.9  |
| UNC45A  | 417.9 | 462.6  | 435    | 503.2  | 339    | 367.5  | 487.8  | 494.3  |
| UNC45A  | 128.4 | 138.9  | 152    | 136.9  | 126.6  | 112.2  | 129.6  | 135.9  |
| UNC45A  | 383.8 | 480.1  | 352.7  | 456.7  | 332.2  | 323    | 520.1  | 386.4  |
| UNC45A  | 119   | 110.9  | 121.1  | 118.3  | 108.5  | 104.5  | 129.4  | 117.9  |
| UNC45B  | 111.1 | 117.1  | 114    | 113.5  | 107.7  | 104.4  | 114.5  | 123.6  |
| UNC50   | 797.2 | 940.5  | 1361.2 | 978.3  | 597.5  | 942.8  | 923.7  | 753.2  |
| UNC5A   | 114.2 | 109.4  | 113.2  | 117.7  | 112.5  | 98.9   | 112.5  | 113.9  |
| UNC5B   | 109   | 114.2  | 120    | 112    | 110.3  | 106.2  | 120.8  | 124.6  |
| UNC5C   | 123   | 125.3  | 124.2  | 117.9  | 121    | 102.5  | 127.7  | 123.3  |
| UNC5CL  | 116.2 | 112.2  | 121.6  | 127.3  | 106    | 94.7   | 113.7  | 108.8  |
| UNC5D   | 111.3 | 112    | 110.9  | 106.2  | 104.3  | 94.5   | 113.3  | 107.8  |
| UNC84A  | 283.8 | 312.6  | 361.5  | 371.4  | 307.3  | 324    | 301.6  | 337.7  |
| UNC84B  | 6711  | 6610.2 | 5142.7 | 6954.7 | 5967.2 | 3983.9 | 5558.4 | 5420.2 |
| UNC93A  | 111.8 | 119.1  | 124.4  | 123.1  | 112.3  | 103.7  | 119.3  | 122.8  |
| UNC93B1 | 261.2 | 176.1  | 325.2  | 226.5  | 157.8  | 205.3  | 177.3  | 151.4  |
| UNCX4.1 | 116.7 | 120.4  | 109.8  | 127.5  | 112.1  | 101    | 129.8  | 119.3  |
| UNG     | 119.2 | 109.3  | 126.1  | 119.4  | 116.6  | 97     | 117.4  | 123    |
| UNG     | 238.1 | 256.6  | 199.6  | 245.9  | 213.2  | 201.3  | 201.4  | 230.7  |
| UNG     | 119.8 | 116.9  | 133.2  | 124    | 109    | 109.4  | 112.9  | 129    |
| UNG2    | 116.4 | 128.6  | 130    | 120.7  | 131.9  | 108    | 126.6  | 125.9  |
| UNK     | 107.4 | 117.1  | 116.6  | 112.3  | 113.3  | 92.6   | 117.3  | 106.9  |
| UNKL    | 129.4 | 124.8  | 126.3  | 130.4  | 110.9  | 111.2  | 126.9  | 118.9  |
| UNQ1940 | 112   | 122.6  | 115.7  | 124.3  | 108    | 100.7  | 126.6  | 110.2  |
| UNQ2446 | 114.8 | 113.5  | 121.3  | 115.9  | 116.9  | 94.8   | 122.5  | 118.2  |
| UNQ2541 | 101.9 | 114.4  | 121.8  | 117    | 116.9  | 99.2   | 117.8  | 113.3  |

|         |        |        |        |        |        |        |        |        |
|---------|--------|--------|--------|--------|--------|--------|--------|--------|
| UNQ3033 | 115.5  | 127.6  | 122.1  | 115.5  | 105.5  | 94.9   | 122.3  | 120.5  |
| UNQ3045 | 118.4  | 113.6  | 104.1  | 112.8  | 111    | 96.2   | 109.7  | 114.4  |
| UNQ467  | 113.7  | 116    | 114.4  | 118.5  | 107.5  | 98.5   | 127.4  | 115    |
| UNQ470  | 117.1  | 123.5  | 112    | 118    | 102.7  | 94.6   | 115.6  | 113.6  |
| UNQ473  | 115.3  | 116.6  | 121.8  | 114.6  | 107.6  | 96.3   | 124.7  | 117.7  |
| UNQ501  | 445.9  | 445    | 776.5  | 403.5  | 342.3  | 432.8  | 295.3  | 285.4  |
| UNQ5783 | 129.6  | 135.8  | 133.1  | 130.3  | 114.5  | 98.8   | 118.7  | 118.5  |
| UNQ5810 | 112.6  | 108.7  | 116    | 123.5  | 111    | 98.7   | 119    | 118    |
| UNQ6411 | 119.8  | 115.2  | 113.5  | 113.1  | 111    | 101.4  | 120.7  | 118.1  |
| UNQ689  | 112.1  | 111.4  | 111.6  | 114.1  | 108.5  | 94.7   | 113.2  | 107.5  |
| UNQ739  | 115.6  | 112.6  | 118.4  | 122.8  | 114.2  | 106.9  | 119.5  | 116.6  |
| UNQ830  | 111.7  | 116.2  | 115.2  | 122.4  | 107.5  | 103.9  | 122.3  | 114.6  |
| UNQ846  | 131.3  | 135.7  | 149.6  | 149    | 140.2  | 119    | 148    | 147.6  |
| UNQ9217 | 122.8  | 117.6  | 122.4  | 130.3  | 115    | 104.6  | 120.9  | 117.7  |
| UNQ9356 | 119    | 117.8  | 119.3  | 119.7  | 108.5  | 95.9   | 116.8  | 122    |
| UNQ9391 | 116    | 111.2  | 131.1  | 145.3  | 112.9  | 105.7  | 117.5  | 121.7  |
| UNQ9433 | 105.3  | 113.3  | 125.8  | 117.6  | 114.7  | 101.2  | 117.6  | 117.4  |
| UNQ9438 | 117.1  | 120.1  | 110.7  | 117.2  | 99     | 103.9  | 112.8  | 115.6  |
| UPB1    | 117.8  | 118.5  | 117.1  | 123.5  | 124.2  | 102.7  | 123    | 131.7  |
| UPF2    | 1030.3 | 1086.9 | 872.6  | 1298   | 963.1  | 818.7  | 1519.2 | 1633.7 |
| UPF2    | 123.9  | 122.5  | 119.6  | 120.8  | 125.5  | 102.7  | 143.5  | 138.8  |
| UPF2    | 443.2  | 453.1  | 422.6  | 440.6  | 508.3  | 290    | 444.1  | 465.7  |
| UPF3A   | 471    | 470.9  | 486    | 633.4  | 467.5  | 328.1  | 518.6  | 416.8  |
| UPF3A   | 392.1  | 378.1  | 315.7  | 450.4  | 314.8  | 254.9  | 332.9  | 291    |
| UPF3B   | 265.4  | 337    | 263.8  | 331.5  | 283    | 234.8  | 394.8  | 329.3  |
| UPF3B   | 287.6  | 344.3  | 321.8  | 406.9  | 254.6  | 279.3  | 388.8  | 359.2  |
| UPK1A   | 121.1  | 132.4  | 124.3  | 119.5  | 114.6  | 101.2  | 135.5  | 123    |
| UPK1B   | 105.3  | 115.2  | 119.3  | 125.6  | 117.2  | 100.8  | 121.9  | 117    |
| UPK2    | 108    | 114.9  | 114    | 120.9  | 118.3  | 99     | 124.7  | 126.3  |
| UPK3A   | 114.5  | 127.8  | 126.1  | 117.1  | 125.6  | 111.3  | 110.9  | 124    |
| UPK3B   | 113.7  | 119.6  | 111.5  | 121    | 103.1  | 95.6   | 113    | 117.8  |
| UPK3B   | 108.5  | 115    | 119    | 115.2  | 110.6  | 103    | 119    | 117.2  |
| UPK3B   | 128.8  | 120.2  | 130.5  | 126.6  | 115    | 112    | 142.5  | 132.5  |
| UPP1    | 126.6  | 114.2  | 133.1  | 129.3  | 114.2  | 103.3  | 125.6  | 125.4  |
| UPP1    | 116.7  | 121.6  | 128.3  | 127.8  | 122    | 109.1  | 122.4  | 118.3  |
| UPP1    | 458.3  | 506.7  | 617.8  | 483.6  | 432.6  | 451.8  | 616.4  | 633.6  |
| UPP2    | 110.6  | 116.4  | 120.2  | 131.9  | 113.1  | 107.8  | 119.5  | 109.9  |
| UPRT    | 255.8  | 216.1  | 219.6  | 227.4  | 266.9  | 224.4  | 248.5  | 281.5  |
| UQCR    | 162    | 165.6  | 165    | 150.3  | 130.8  | 141.8  | 193.7  | 154.9  |
| UQCRB   | 125.9  | 137.4  | 135.3  | 139.8  | 113    | 111.3  | 129.6  | 141.6  |
| UQCRC1  | 293.1  | 359.1  | 428.7  | 374.9  | 240.4  | 352.2  | 334.1  | 236.7  |
| UQCRC2  | 228.7  | 231.4  | 205.4  | 221.4  | 178.2  | 211.4  | 222.2  | 216.5  |
| UQCRFS1 | 1445.2 | 1744.6 | 1722.8 | 1818.3 | 1364.8 | 1290.5 | 1585.6 | 1605.2 |
| UQCRH   | 2723.2 | 3365   | 3403.4 | 3574.9 | 2850.9 | 2797.1 | 3667.5 | 3397.6 |
| URB     | 128.4  | 124.7  | 118.3  | 118.5  | 119.4  | 106.1  | 119.8  | 121.3  |
| URB     | 112.4  | 119.7  | 103.8  | 118.4  | 107.3  | 103.9  | 121.2  | 116.7  |
| URG4    | 202.2  | 234.6  | 181.2  | 217.5  | 208.6  | 188.1  | 269.1  | 251.4  |
| URG4    | 221.1  | 252.4  | 192.7  | 239.7  | 192.3  | 165.6  | 242.6  | 245.5  |
| UROC1   | 106.7  | 115.2  | 117    | 121.8  | 107.5  | 96.5   | 116.1  | 117.7  |
| UROD    | 335.7  | 373.1  | 472.6  | 363.6  | 282.7  | 316.7  | 301.1  | 241.7  |
| UROS    | 442.9  | 554    | 523    | 401.5  | 332.6  | 315.8  | 285    | 332.3  |

|        |        |        |        |        |       |        |        |       |
|--------|--------|--------|--------|--------|-------|--------|--------|-------|
| URP2   | 1212.7 | 1023.9 | 1051.8 | 1527.1 | 777.8 | 1125.3 | 1595.5 | 987.8 |
| URP2   | 221.6  | 203.3  | 194.8  | 257.1  | 191.7 | 221.6  | 287.4  | 197.3 |
| USF1   | 143.2  | 132    | 145.9  | 143.6  | 131.9 | 109.6  | 131.4  | 131   |
| USF1   | 176.6  | 215.3  | 170.5  | 204    | 178.4 | 141.4  | 179.6  | 164.2 |
| USF2   | 130.3  | 120.6  | 127    | 127.7  | 116.7 | 112.1  | 132.9  | 127.9 |
| USF2   | 446.1  | 458.8  | 337.7  | 448.9  | 305.5 | 299.9  | 424.7  | 350.7 |
| USF2   | 241.7  | 314.4  | 229.1  | 327.2  | 177.5 | 193.5  | 271    | 212.5 |
| USH1C  | 118.3  | 120    | 123.1  | 114.8  | 115.4 | 98.4   | 117    | 117.1 |
| USH1C  | 108.5  | 112.8  | 118.8  | 128.7  | 107.7 | 107.4  | 130.3  | 123   |
| USH1G  | 123.2  | 123    | 131.2  | 113    | 123.8 | 106.2  | 132.4  | 133.6 |
| USH2A  | 113.4  | 113.4  | 122.9  | 120.9  | 109   | 99.1   | 122.6  | 120.7 |
| USH2A  | 107.4  | 110.4  | 108.3  | 111.7  | 109.2 | 95.7   | 113.9  | 116.4 |
| USH2A  | 107.5  | 118.5  | 122.8  | 109.8  | 111.6 | 95     | 110.3  | 112.6 |
| USH3A  | 128.6  | 126.2  | 129.1  | 118.1  | 117.9 | 114.3  | 123.6  | 125.1 |
| USH3A  | 111.4  | 108.4  | 112.1  | 107.5  | 111.4 | 96.1   | 116.8  | 113.3 |
| USHBP1 | 116.1  | 116    | 115.6  | 120    | 112.9 | 97.4   | 128.1  | 119.3 |
| USMG5  | 174.8  | 119.6  | 209.9  | 171.8  | 116.6 | 154.4  | 177.4  | 122   |
| USP1   | 106.2  | 114.5  | 111.9  | 117.2  | 106.5 | 93.2   | 114.8  | 120   |
| USP1   | 368.8  | 327.2  | 287.8  | 260.3  | 244   | 250.8  | 334.9  | 376.5 |
| USP1   | 174.8  | 215    | 205.2  | 197.5  | 188   | 136.6  | 154.7  | 158.4 |
| USP10  | 168.7  | 230.3  | 182.9  | 218.2  | 199.1 | 154.1  | 165.9  | 219.8 |
| USP11  | 212    | 232.5  | 164.7  | 227.4  | 166.1 | 159.4  | 208.7  | 221.9 |
| USP12  | 111.8  | 113    | 123.3  | 120.1  | 108.9 | 109.2  | 119.4  | 109.1 |
| USP13  | 121.7  | 128.4  | 144.8  | 143    | 117.8 | 109.5  | 155.5  | 126.4 |
| USP14  | 235    | 337.3  | 301.3  | 350.1  | 270.7 | 235.3  | 391.6  | 508.1 |
| USP14  | 162    | 180.1  | 167.7  | 185.9  | 189.8 | 159.9  | 179.8  | 191.8 |
| USP15  | 180.1  | 187.5  | 174.6  | 196.5  | 171.1 | 164.1  | 181.7  | 228   |
| USP16  | 449.1  | 455.8  | 530.2  | 526.9  | 476.8 | 467.3  | 523.4  | 525.6 |
| USP16  | 121.9  | 112.4  | 114.2  | 117.2  | 105.3 | 106    | 115.1  | 127.4 |
| USP19  | 125.3  | 130.6  | 126.1  | 130.7  | 123.4 | 103.2  | 161.5  | 119.6 |
| USP2   | 107.7  | 109.6  | 113.7  | 115.4  | 103   | 94.2   | 113.4  | 107.9 |
| USP2   | 119.4  | 114.9  | 117.6  | 121.8  | 112   | 100.8  | 119.4  | 115.8 |
| USP2   | 114.1  | 114.6  | 122.6  | 119.7  | 113.5 | 98.1   | 119.2  | 112   |
| USP20  | 98.4   | 101.3  | 104.2  | 110.4  | 98.6  | 97.6   | 110.3  | 108.2 |
| USP20  | 126    | 128.8  | 117.3  | 140    | 116.6 | 98.1   | 139.4  | 120.1 |
| USP21  | 173.5  | 189.2  | 171.9  | 212.7  | 162.8 | 155.1  | 182.6  | 171.7 |
| USP21  | 117.9  | 128.5  | 121.6  | 104.9  | 110   | 87.2   | 122.7  | 120.1 |
| USP21  | 205.6  | 214.6  | 175    | 216.1  | 196.2 | 177.1  | 207.1  | 192.9 |
| USP25  | 136    | 134.9  | 145.8  | 126.3  | 121.9 | 110    | 134.1  | 128.7 |
| USP26  | 121.1  | 121.5  | 124.3  | 132.2  | 117.2 | 108    | 127.7  | 118.7 |
| USP28  | 118.9  | 114.5  | 120.9  | 123.8  | 110   | 100.6  | 116.8  | 120.5 |
| USP29  | 113.2  | 114.1  | 117.4  | 110.3  | 111.2 | 96.1   | 117.8  | 106.2 |
| USP3   | 1146.7 | 1040.2 | 1172   | 1291.6 | 971.3 | 984    | 1079   | 783.8 |
| USP30  | 119.9  | 121    | 125.2  | 121.6  | 118.2 | 103.9  | 122.6  | 128.8 |
| USP31  | 108.4  | 113.8  | 116.8  | 121.5  | 109.3 | 98.1   | 122.5  | 125.2 |
| USP32  | 121    | 119.2  | 112.8  | 111.6  | 115   | 100.6  | 121.4  | 105.7 |
| USP32  | 127.9  | 131.1  | 118.7  | 132.6  | 143.2 | 118.5  | 133    | 140.1 |
| USP33  | 143    | 143.8  | 133.5  | 137.3  | 132.1 | 116.3  | 135.1  | 134.9 |
| USP33  | 188    | 222.3  | 214.4  | 260.3  | 199.6 | 151.9  | 235.8  | 205.8 |
| USP34  | 349.2  | 462.8  | 301.6  | 406.2  | 399.9 | 259.1  | 407    | 461.9 |
| USP37  | 131    | 151.1  | 137.5  | 149.7  | 145.6 | 121.7  | 160    | 145.7 |

|        |        |       |        |        |       |       |        |        |
|--------|--------|-------|--------|--------|-------|-------|--------|--------|
| USP38  | 491.3  | 508.7 | 360.5  | 495.5  | 385.5 | 362.2 | 494.9  | 591.7  |
| USP39  | 427.8  | 410.5 | 408.1  | 456.4  | 327.9 | 335.7 | 454.3  | 465    |
| USP4   | 130    | 121.8 | 131.5  | 122.1  | 128.2 | 104.7 | 134    | 134.1  |
| USP4   | 299.8  | 281.1 | 302.8  | 318.3  | 291.5 | 266.7 | 327.1  | 237.4  |
| USP40  | 117.6  | 124.2 | 117.6  | 126.1  | 113.4 | 100.6 | 120.9  | 123.9  |
| USP42  | 140.1  | 134.9 | 147.8  | 155.5  | 133.5 | 113   | 139.7  | 145.6  |
| USP42  | 545.1  | 514.7 | 443.7  | 652.9  | 587.9 | 506.4 | 639.8  | 706.6  |
| USP43  | 103.8  | 112.9 | 110.8  | 117.9  | 110.8 | 97.3  | 116    | 122.1  |
| USP44  | 124.3  | 123.3 | 111.5  | 118.8  | 118.2 | 99.9  | 131.8  | 137    |
| USP44  | 123.4  | 119.5 | 121.2  | 122.8  | 120.7 | 106.9 | 131.1  | 117.1  |
| USP45  | 118    | 131.1 | 115.6  | 121.9  | 129   | 102.5 | 132.2  | 135.8  |
| USP46  | 117    | 120.8 | 133.7  | 122.2  | 110.1 | 95.8  | 108    | 110.9  |
| USP47  | 132.7  | 166   | 145.7  | 163.7  | 144.5 | 143   | 163.6  | 150.7  |
| USP48  | 178.6  | 190.5 | 159.6  | 182.9  | 185.3 | 131.1 | 165.9  | 177.8  |
| USP48  | 145.8  | 133.1 | 140.5  | 147.3  | 115.6 | 124.5 | 137    | 136    |
| USP48  | 192.1  | 157.5 | 158    | 192.3  | 144.8 | 136   | 145.9  | 147.5  |
| USP49  | 1473.6 | 844.6 | 1046.7 | 1374.9 | 1061  | 511.8 | 1160.9 | 1165.5 |
| USP5   | 555.4  | 732   | 664.5  | 711.7  | 422.1 | 571   | 672    | 630.2  |
| USP50  | 113.4  | 115   | 115    | 108.4  | 107.5 | 91.6  | 113.5  | 105    |
| USP51  | 112.3  | 118.2 | 109.7  | 117.3  | 106.1 | 97.5  | 126.5  | 121.8  |
| USP52  | 211.7  | 242.8 | 228.3  | 235.9  | 207.4 | 192.2 | 205.2  | 215    |
| USP53  | 120.5  | 125.2 | 129.2  | 139.5  | 120   | 109   | 125    | 120.6  |
| USP54  | 118    | 117.8 | 116.1  | 112.9  | 107.7 | 101.9 | 115.9  | 114.2  |
| USP6   | 143.1  | 129.3 | 118    | 137.2  | 120.6 | 107   | 127.4  | 144.8  |
| USP6NL | 174.3  | 155.3 | 167.5  | 195.8  | 141.3 | 140.1 | 159.7  | 146.4  |
| USP6NL | 113.3  | 113.3 | 116    | 116.5  | 101.1 | 91.1  | 107.9  | 111.8  |
| USP7   | 307.1  | 341.8 | 268.3  | 325.4  | 293.6 | 241.3 | 354.9  | 405    |
| USP8   | 199.1  | 238.1 | 261    | 244.5  | 178.8 | 213.9 | 194.1  | 273    |
| USP9X  | 122.5  | 131.1 | 119.9  | 120.8  | 115.6 | 107.5 | 115.2  | 130.3  |
| USP9X  | 287.8  | 307.1 | 250.4  | 300.8  | 357.3 | 230.4 | 384.9  | 425.1  |
| USP9Y  | 120.9  | 128.8 | 136.4  | 134    | 129.3 | 102.5 | 133    | 137.3  |
| USPL1  | 203.5  | 187.7 | 217.4  | 171.3  | 184   | 171.1 | 206.1  | 204.8  |
| UST    | 146.7  | 136   | 136.2  | 214.9  | 124.5 | 210.2 | 161.2  | 126.3  |
| UTF1   | 115.4  | 109   | 113.1  | 112.8  | 112.6 | 97.8  | 124.8  | 117.3  |
| UTP11L | 227.8  | 234.6 | 262.4  | 269.7  | 247.2 | 254.2 | 293.7  | 273.2  |
| UTP14A | 272.6  | 294.1 | 286.8  | 267.4  | 284.7 | 247.8 | 323    | 265.6  |
| UTP14C | 257.1  | 239.5 | 298.1  | 290.1  | 280.8 | 227.8 | 234.3  | 339.6  |
| UTP15  | 139.9  | 145.3 | 135.2  | 139.9  | 133.3 | 106.5 | 138.3  | 139.6  |
| UTP20  | 115.9  | 113.7 | 124    | 113.7  | 112.8 | 100.4 | 124.1  | 117.1  |
| UTRN   | 129.7  | 124.2 | 130.9  | 119.9  | 126.5 | 105.2 | 132.7  | 129.6  |
| UTS2   | 112    | 114.5 | 119.7  | 116.2  | 117   | 97.4  | 121.3  | 118.7  |
| UTS2   | 112.7  | 118.3 | 122.6  | 127.4  | 112.2 | 106.2 | 128.5  | 111.9  |
| UTS2   | 124.2  | 114.8 | 120.6  | 112.6  | 112.5 | 91.5  | 114.9  | 115.7  |
| UTS2D  | 122    | 108.9 | 115.5  | 120.1  | 118.3 | 107.3 | 132.4  | 120    |
| UTS2R  | 119.6  | 111.4 | 116.5  | 111.1  | 103   | 104.9 | 123.9  | 119.2  |
| UTX    | 161.5  | 163.8 | 154.6  | 166    | 168   | 160.7 | 182.3  | 198.2  |
| UTY    | 124.4  | 125.7 | 136    | 133.6  | 117.3 | 110.4 | 126.3  | 124.2  |
| UTY    | 144.7  | 152.5 | 148.3  | 157.1  | 130.6 | 110.8 | 161.9  | 177.4  |
| UTY    | 117.5  | 113.3 | 117.1  | 114.2  | 102.2 | 103.5 | 117.1  | 116.7  |
| UVRAG  | 148.7  | 159.1 | 178.1  | 162.7  | 151.7 | 133.7 | 158.8  | 148.1  |
| UXS1   | 132.5  | 146.9 | 169    | 158.4  | 157.4 | 116.3 | 144.9  | 137.7  |

|        |        |        |        |        |        |        |        |        |
|--------|--------|--------|--------|--------|--------|--------|--------|--------|
| UXT    | 1565.3 | 2178.4 | 2081.8 | 1895.1 | 1670.4 | 1884.5 | 1751.6 | 1936.9 |
| UXT    | 111.9  | 126.5  | 120.1  | 123.6  | 116.9  | 102.7  | 144.2  | 132.2  |
| VAC14  | 125.5  | 119.1  | 131.9  | 131.7  | 123.8  | 99.7   | 129.5  | 130.3  |
| VAC14  | 169.9  | 171.3  | 146.6  | 176.9  | 123.5  | 130.5  | 184    | 150.4  |
| VAMP1  | 116.4  | 124    | 115.4  | 125.5  | 115.1  | 107.8  | 115.4  | 116    |
| VAMP1  | 111.2  | 107.9  | 111.2  | 127.4  | 103.1  | 101.6  | 116.9  | 115.5  |
| VAMP1  | 658.4  | 614.2  | 893.8  | 670.9  | 538.2  | 452.9  | 389.7  | 399.3  |
| VAMP2  | 233.9  | 314.2  | 228.8  | 287.2  | 208.8  | 222.6  | 300.2  | 260.3  |
| VAMP3  | 291.4  | 286.7  | 445.3  | 324.3  | 241.2  | 335.7  | 369.7  | 281.4  |
| VAMP4  | 137.9  | 133.5  | 146.9  | 127.4  | 123.9  | 126.8  | 132.6  | 134.5  |
| VAMP4  | 147.4  | 148.8  | 155.6  | 142.1  | 131.8  | 123.3  | 130.1  | 131.1  |
| VAMP5  | 547.7  | 656.8  | 1126.9 | 520.4  | 411.1  | 673.6  | 397.4  | 434.9  |
| VAMP8  | 1379.8 | 1980.3 | 2330.2 | 1252.1 | 1425.3 | 1068.5 | 991.4  | 1346.9 |
| VANGL1 | 113    | 124.7  | 119.1  | 117.3  | 112    | 103.3  | 122.8  | 126.2  |
| VANGL2 | 112    | 120.8  | 111.5  | 110.7  | 110.8  | 100.1  | 122.4  | 115.4  |
| VAPA   | 119    | 115.1  | 126.9  | 137.2  | 122.5  | 107.4  | 130    | 129.1  |
| VAPA   | 121.5  | 116    | 124.4  | 126.1  | 114.1  | 101.8  | 128.6  | 123    |
| VAPA   | 138.1  | 124.1  | 146.3  | 126.7  | 124.4  | 113.5  | 141.6  | 144.2  |
| VAPB   | 108.3  | 121.6  | 121.4  | 116.6  | 99.7   | 94     | 118.2  | 114.5  |
| VARS   | 120.5  | 120.6  | 119.9  | 120.3  | 111.6  | 108.2  | 126.3  | 114.2  |
| VARS   | 233.7  | 193.9  | 184.4  | 191.1  | 140    | 120.4  | 193.3  | 180.1  |
| VARSL  | 245.4  | 330.9  | 280    | 352.5  | 279    | 199.7  | 328.6  | 348.8  |
| VASH1  | 154.2  | 167.3  | 285    | 133.4  | 122.6  | 148    | 129.5  | 123.8  |
| VASP   | 140.8  | 134.4  | 155.8  | 139.8  | 115.2  | 110.1  | 151.4  | 116.7  |
| VASP   | 111.6  | 116.3  | 116.5  | 122.7  | 106.3  | 104.1  | 119.9  | 103.5  |
| VAT1   | 185.3  | 171    | 148.1  | 162.2  | 137.9  | 130.4  | 186    | 157.8  |
| VAV1   | 208    | 194.5  | 165.1  | 204.3  | 147.6  | 153.5  | 187.5  | 173.5  |
| VAV2   | 118.7  | 106.6  | 119.4  | 112    | 103.8  | 98.7   | 109.8  | 125.6  |
| VAV3   | 124    | 110.1  | 120.1  | 118.2  | 117.8  | 98.1   | 120.8  | 110.6  |
| VAV3   | 140.3  | 142.2  | 162.2  | 171    | 145.5  | 166.4  | 185.3  | 154.9  |
| VAV3   | 115.9  | 221.6  | 125.8  | 120    | 230.8  | 99.6   | 128.4  | 282.6  |
| VAX1   | 115    | 118.5  | 115.3  | 122    | 106.9  | 100    | 124.5  | 119.8  |
| VAX2   | 118.4  | 116.2  | 119.4  | 114.1  | 103.8  | 103.7  | 130    | 111.9  |
| VBP1   | 791.2  | 926.9  | 758.2  | 776.9  | 706.2  | 790.8  | 1072.6 | 1060.4 |
| VCAM1  | 123    | 120.7  | 117.6  | 123.8  | 114.1  | 104.5  | 114.1  | 121.9  |
| VCL    | 433.9  | 449.9  | 532.9  | 410.6  | 299    | 240.6  | 354.9  | 330.4  |
| VCL    | 123.1  | 120.9  | 130    | 138.3  | 122.9  | 109.9  | 129.8  | 119.5  |
| VCL    | 106.6  | 114.5  | 107.5  | 109.3  | 105.2  | 89.8   | 105.3  | 110.5  |
| VCP    | 375.5  | 451.8  | 363.9  | 520.7  | 336    | 347.7  | 676.8  | 766.3  |
| VCPIP1 | 307.4  | 309.1  | 271.1  | 348.2  | 284.5  | 247.9  | 360.3  | 418.6  |
| VCX    | 118.5  | 111.6  | 124.4  | 122.4  | 118.5  | 106.5  | 125.9  | 112    |
| VCX2   | 113.8  | 122.9  | 111.9  | 108.9  | 107.6  | 100.3  | 116.2  | 110.5  |
| VCX2   | 111.8  | 112.6  | 115.7  | 109.1  | 113.9  | 98     | 114.7  | 101.7  |
| VCX3A  | 108.3  | 120.4  | 115.7  | 116.3  | 106.6  | 96.3   | 113    | 110.5  |
| VCX3A  | 116.2  | 119.3  | 116.9  | 109.4  | 119.5  | 92.8   | 120.4  | 124.4  |
| VCX-C  | 116    | 109.8  | 114.8  | 127.3  | 109.2  | 92.9   | 102.6  | 110.6  |
| VCY    | 111.7  | 120.6  | 115.8  | 113.6  | 110.6  | 97.8   | 114.5  | 114.9  |
| VCY1B  | 111    | 104.3  | 109    | 108.1  | 97.8   | 91.9   | 113.6  | 114.5  |
| VDAC1  | 971.6  | 951.8  | 1070.4 | 1164.2 | 1011   | 1171.9 | 1256.4 | 1069.9 |
| VDAC2  | 100    | 116.2  | 124.3  | 113.5  | 110    | 102.5  | 124.6  | 110.1  |
| VDAC3  | 1615.5 | 2297.7 | 2563.8 | 2484.1 | 1673.9 | 1880.2 | 1892.8 | 1742.9 |



|          |        |        |        |        |        |        |        |        |
|----------|--------|--------|--------|--------|--------|--------|--------|--------|
| VDP      | 360.7  | 356.7  | 425.6  | 510.9  | 389.4  | 330    | 574.5  | 493.4  |
| VDR      | 106.9  | 109.5  | 105.1  | 120.5  | 107    | 98.7   | 109.8  | 101.5  |
| VDR      | 121.7  | 116.9  | 140.5  | 142.5  | 110.6  | 109.6  | 123.1  | 129.4  |
| VEGF     | 115.8  | 114.3  | 116.1  | 122.9  | 101.3  | 97     | 126.3  | 111.7  |
| VEGF     | 113.7  | 114.1  | 121.8  | 120    | 104    | 94.6   | 121.6  | 110.9  |
| VEGFA    | 126.3  | 132.4  | 130.4  | 141.5  | 120.9  | 113.4  | 151.4  | 141.7  |
| VEGFB    | 1697.7 | 1488.7 | 1490.2 | 2252.9 | 1645.1 | 1112.1 | 1535   | 1636   |
| VEGFB    | 113.5  | 110    | 107.8  | 121.4  | 111    | 101.4  | 118.1  | 118.1  |
| VEGFB    | 173.8  | 179.1  | 173.5  | 204.6  | 165    | 156.2  | 200.2  | 169.5  |
| VEGFC    | 106.8  | 109.6  | 112.8  | 117.7  | 104.4  | 93.5   | 106.9  | 114.8  |
| VENTX    | 135.6  | 130.9  | 140.8  | 137.7  | 109.1  | 119.2  | 122.8  | 123.5  |
| VENTXP7  | 115.2  | 120.5  | 119.9  | 118.5  | 103.2  | 93     | 118.6  | 112.6  |
| VEPH1    | 115.9  | 115.5  | 115.5  | 117.1  | 109    | 99.7   | 127.8  | 113.7  |
| VEZT     | 126.2  | 127.6  | 117.7  | 118.5  | 110.2  | 101.2  | 126.6  | 108.2  |
| VGCNL1   | 113.9  | 111.7  | 129.6  | 124    | 115.6  | 95.7   | 122.3  | 113.3  |
| VGf      | 111    | 109.6  | 126.7  | 131.7  | 109.1  | 100.8  | 120.4  | 122.5  |
| VGLL1    | 119.6  | 111    | 121.7  | 115.9  | 115    | 101.6  | 113.7  | 120.9  |
| VGLL2    | 117.4  | 122.6  | 121    | 116.8  | 112.8  | 108.5  | 113.2  | 116.2  |
| VGLL2    | 126.9  | 125.6  | 129.8  | 125.9  | 111.5  | 114.8  | 124.5  | 121.8  |
| VGLL3    | 112.8  | 125.4  | 115.1  | 124.3  | 107.4  | 111.1  | 115.2  | 118.8  |
| VGLL4    | 352    | 335.3  | 330.8  | 338.4  | 289.6  | 244.2  | 330.3  | 375.4  |
| VHL      | 181.8  | 223.7  | 196.9  | 228.2  | 182.7  | 147.2  | 200.9  | 197.9  |
| VHL      | 660.5  | 664.2  | 689.6  | 654.8  | 721.2  | 533.7  | 651.1  | 577.6  |
| VHL      | 136.8  | 133.1  | 138.5  | 150    | 124.6  | 120    | 139.5  | 140.9  |
| VHLL     | 111.3  | 114    | 117.4  | 113.9  | 107.3  | 99.8   | 111.1  | 108.3  |
| VIL1     | 111.3  | 106.4  | 125.5  | 102.7  | 110.6  | 99     | 114.6  | 119.8  |
| VIL2     | 2386.2 | 2713.7 | 1742.1 | 3441.8 | 2782.4 | 1943.9 | 5546.2 | 4753.1 |
| VILL     | 141.7  | 147    | 150.7  | 155.8  | 129.5  | 126.1  | 136.7  | 124.1  |
| VIM      | 1313.8 | 671.7  | 1201.4 | 815.4  | 502    | 961.7  | 687.8  | 557.5  |
| VIP      | 116.7  | 125.3  | 128.1  | 117    | 105.8  | 95.9   | 115.9  | 115.1  |
| VIP      | 116.2  | 120.3  | 115.9  | 116.6  | 114.4  | 96.7   | 120.7  | 109.8  |
| VIPR1    | 749.5  | 940    | 803    | 596.5  | 618.3  | 451.5  | 511    | 503.3  |
| VIPR2    | 135.4  | 135.5  | 134.6  | 135.5  | 114.1  | 113.5  | 119.4  | 119    |
| VISA     | 123.2  | 129.5  | 128.8  | 124    | 109.9  | 110.7  | 129.9  | 118.1  |
| VIT      | 110.5  | 116    | 111.2  | 124.2  | 107.2  | 96.3   | 115.2  | 112.3  |
| VKORC1   | 1138.2 | 1066.9 | 1165.7 | 1191.6 | 727.7  | 813    | 1035.9 | 833.4  |
| VKORC1   | 155.3  | 174.3  | 169    | 169.5  | 131.9  | 131.3  | 129.5  | 131    |
| VKORC1L1 | 168.7  | 188.5  | 191.9  | 176.4  | 152    | 133.1  | 195.3  | 195.1  |
| VLDLR    | 110.5  | 120.9  | 122.5  | 117.2  | 111    | 103.4  | 124.4  | 119.9  |
| VLDLR    | 106.4  | 102.2  | 107.5  | 111.6  | 108.6  | 96.3   | 110.9  | 104.9  |
| VMAC     | 119.1  | 119.8  | 127.8  | 130.6  | 121.8  | 118.4  | 122    | 127    |
| VMD2     | 140.6  | 126.1  | 194.5  | 137.1  | 117.5  | 127.5  | 124.1  | 114.6  |
| VMD2L1   | 116    | 119.5  | 121.2  | 132.1  | 114.8  | 100.6  | 104.2  | 113.9  |
| VMD2L2   | 113.3  | 128.2  | 128.8  | 123.4  | 109.6  | 105.7  | 123    | 122.4  |
| VMD2L3   | 119.8  | 121.4  | 114.5  | 114.5  | 110.2  | 93.5   | 113.4  | 125.2  |
| VMD2L3   | 125.1  | 116.5  | 114.6  | 120    | 107.7  | 96.1   | 120.5  | 120.6  |
| VMO1     | 148.7  | 119.6  | 431    | 236.5  | 117.9  | 743    | 161.9  | 124.7  |
| VMP      | 117.3  | 115.4  | 116.7  | 114.6  | 106.5  | 91.7   | 114.1  | 108.7  |
| VN1R1    | 106.9  | 115.4  | 119.5  | 121    | 104.2  | 106.6  | 117.3  | 113.3  |
| VN1R2    | 118.3  | 116.9  | 120.2  | 126.3  | 122.8  | 98.8   | 123.9  | 113.6  |
| VN1R4    | 111.9  | 117.8  | 119.6  | 116.5  | 110    | 99.6   | 113.9  | 117.2  |

|        |        |       |        |        |       |        |        |        |
|--------|--------|-------|--------|--------|-------|--------|--------|--------|
| VN1R5  | 119.2  | 108.6 | 107.8  | 118.5  | 100.1 | 98.3   | 129.2  | 116.8  |
| VNN1   | 128.3  | 120.7 | 119.2  | 128.6  | 116.2 | 117.3  | 118.4  | 120.2  |
| VNN2   | 300.6  | 389.5 | 395.4  | 309.7  | 289.9 | 354    | 260.6  | 297.6  |
| VNN2   | 112.7  | 113.7 | 123.5  | 106.7  | 107.4 | 104.3  | 110.5  | 115.8  |
| VNN2   | 135.8  | 129.2 | 147    | 153.7  | 133.5 | 134.4  | 122.3  | 127.5  |
| VNN3   | 111.7  | 116.8 | 113.8  | 120.4  | 110.6 | 100.6  | 111.8  | 122    |
| VNN3   | 110.9  | 121.9 | 118.3  | 117.9  | 104.1 | 94.1   | 124.1  | 113.3  |
| VNN3   | 108.5  | 115.4 | 119.7  | 127.8  | 110.8 | 103.7  | 121.7  | 116.1  |
| VPRBP  | 150    | 150.7 | 140.6  | 180.2  | 142.9 | 111.1  | 162.1  | 144.3  |
| VPREB1 | 108.7  | 111   | 110.4  | 126.1  | 105.1 | 94.3   | 117.1  | 115.8  |
| VPREB3 | 145    | 154.2 | 231.6  | 130.2  | 111.2 | 130.7  | 112.3  | 118.5  |
| VPS11  | 158.2  | 160   | 151.3  | 160.6  | 146.1 | 139.5  | 162.8  | 143.9  |
| VPS13A | 112.4  | 122.2 | 115.3  | 112.3  | 112.6 | 97.4   | 110.8  | 107.5  |
| VPS13A | 169    | 178.1 | 176.1  | 193.1  | 195   | 125    | 156.7  | 175.9  |
| VPS13A | 115    | 115.9 | 119.9  | 119.7  | 111.3 | 96.5   | 120.9  | 116.3  |
| VPS13A | 160.7  | 188.1 | 172.6  | 179.7  | 185.5 | 133.5  | 174.5  | 182.9  |
| VPS13B | 116.3  | 117.6 | 113.2  | 117.4  | 104.6 | 106    | 122    | 114.6  |
| VPS13B | 133.1  | 126.7 | 138.4  | 134.5  | 123.3 | 96.8   | 132.8  | 132.6  |
| VPS13B | 108.6  | 118.4 | 114.1  | 110.5  | 103.6 | 97.5   | 120.9  | 119.2  |
| VPS13B | 123.7  | 124.2 | 116.8  | 118.6  | 114.2 | 98.2   | 127.6  | 124    |
| VPS13B | 117.5  | 113.7 | 119.4  | 121.5  | 109.5 | 104.7  | 124    | 112.4  |
| VPS13B | 124.2  | 143.2 | 139.1  | 140.5  | 126.2 | 108.8  | 147.7  | 132.3  |
| VPS13C | 121.4  | 119   | 133.2  | 129.3  | 125.8 | 102.5  | 131    | 120.2  |
| VPS13C | 175.7  | 159.5 | 131    | 187.6  | 151.2 | 107.1  | 182.9  | 175.9  |
| VPS13D | 120.7  | 114.3 | 119.2  | 118.4  | 106.4 | 100.2  | 119.5  | 114.7  |
| VPS13D | 112.6  | 116.3 | 123.9  | 125.6  | 114.8 | 98.4   | 119.5  | 120.7  |
| VPS13D | 126    | 130.7 | 136    | 128    | 113.3 | 112.4  | 125.6  | 126.1  |
| VPS16  | 138.1  | 123.8 | 137.6  | 139.2  | 114.3 | 118.4  | 128.6  | 128.8  |
| VPS16  | 531.9  | 526.6 | 534.2  | 506.9  | 329   | 322.7  | 411    | 327.2  |
| VPS16  | 114.3  | 118.9 | 111.5  | 120.8  | 118.5 | 110    | 118.8  | 122.8  |
| VPS18  | 199.4  | 210.5 | 185    | 207.3  | 140.8 | 153.3  | 217.5  | 240    |
| VPS24  | 177    | 213.1 | 213.6  | 200.8  | 150.8 | 218.3  | 165.4  | 172.1  |
| VPS24  | 116.7  | 112.9 | 124.1  | 119.4  | 105.1 | 104.4  | 114.6  | 115.2  |
| VPS25  | 157.9  | 155.5 | 169.3  | 162    | 141.2 | 146.7  | 146    | 160.2  |
| VPS26  | 152.7  | 157.4 | 157.2  | 181.4  | 146.5 | 132.5  | 186.6  | 208.5  |
| VPS26A | 641.3  | 653.8 | 602.6  | 807.4  | 557.8 | 661.4  | 1039.3 | 1142.9 |
| VPS26B | 214.7  | 223.9 | 233.1  | 195.8  | 175.5 | 155.8  | 174.2  | 160.2  |
| VPS28  | 567.9  | 546.9 | 639    | 601.5  | 435.5 | 532.1  | 561.8  | 560.9  |
| VPS28  | 295.7  | 285.1 | 294.7  | 272.7  | 206.7 | 213.4  | 266.1  | 225.1  |
| VPS29  | 943.2  | 965   | 1518.1 | 1069.5 | 793.8 | 1022.4 | 781.2  | 932.5  |
| VPS33A | 168.7  | 171.4 | 172.1  | 166.6  | 149.5 | 154.3  | 173.2  | 148.8  |
| VPS33B | 213.9  | 206.9 | 234.1  | 233.8  | 189.5 | 206.6  | 214.6  | 199.3  |
| VPS35  | 615.8  | 610.9 | 731.6  | 631.5  | 584.5 | 492.5  | 493.4  | 593    |
| VPS36  | 309.9  | 295.5 | 390.7  | 302.4  | 262.8 | 214.5  | 227    | 282    |
| VPS37A | 262.3  | 244   | 243    | 264.2  | 213.2 | 200.4  | 284.9  | 272.8  |
| VPS37B | 236.6  | 239.5 | 226.3  | 258.7  | 215.3 | 269.2  | 410.3  | 520.8  |
| VPS37C | 1162.7 | 812.9 | 755    | 1453.1 | 731.3 | 757.9  | 1885.5 | 826.8  |
| VPS37D | 142.5  | 139.1 | 146.3  | 146.5  | 134.3 | 119.4  | 148.3  | 145.3  |
| VPS39  | 175.6  | 185.3 | 174.8  | 185.3  | 156.5 | 161.6  | 184.4  | 177.8  |
| VPS41  | 135.6  | 131.1 | 127    | 151.2  | 122.2 | 103    | 138.6  | 119.8  |
| VPS41  | 344.4  | 292.2 | 272.3  | 328.9  | 353.3 | 185.9  | 281.3  | 324.3  |

|        |        |        |        |        |        |        |        |        |
|--------|--------|--------|--------|--------|--------|--------|--------|--------|
| VPS41  | 672    | 605.4  | 712.2  | 724.3  | 501.6  | 493.2  | 631.5  | 497.4  |
| VPS41  | 124.5  | 115.9  | 122.5  | 131.9  | 115.1  | 112.5  | 118    | 115.6  |
| VPS45A | 228.3  | 240.3  | 272.9  | 239.1  | 219.6  | 202.7  | 184.6  | 188.1  |
| VPS4A  | 184    | 187.4  | 181.8  | 196.7  | 173.9  | 207.5  | 219.2  | 200.7  |
| VPS4B  | 959.7  | 844.7  | 698    | 947.6  | 813.4  | 704    | 1078.8 | 1174   |
| VPS52  | 240.1  | 272    | 260.6  | 264.3  | 191.4  | 208.4  | 203.4  | 216.8  |
| VPS53  | 115.5  | 115.3  | 116.2  | 121.4  | 111.8  | 99.8   | 128    | 118.7  |
| VPS54  | 117.6  | 132.4  | 130.7  | 134    | 128.7  | 116    | 130.2  | 126.4  |
| VPS54  | 154.9  | 142.9  | 147.7  | 146    | 135.9  | 129.5  | 156.4  | 147.4  |
| VPS72  | 172.6  | 203.6  | 188.4  | 190.6  | 174.2  | 192.2  | 173.3  | 169.4  |
| VPS8   | 250.2  | 322    | 285.2  | 312.3  | 223.8  | 189.6  | 312.7  | 330.9  |
| VPS8   | 114.6  | 114.5  | 125    | 117    | 118.5  | 108.1  | 125.6  | 119.9  |
| VRK1   | 148    | 140.4  | 139.2  | 148.6  | 150    | 114.1  | 149.5  | 164.8  |
| VRK2   | 136.4  | 137.6  | 198.1  | 154.2  | 127    | 162.2  | 150.5  | 122.3  |
| VRK3   | 162.7  | 166.9  | 158.8  | 181.8  | 177.3  | 166.9  | 184.6  | 209.5  |
| VRK3   | 148.3  | 156.6  | 168.2  | 153.8  | 144.3  | 125.5  | 140.5  | 153.5  |
| VRK3   | 403.8  | 467.3  | 419.1  | 406.4  | 409.2  | 264.6  | 438.8  | 554.7  |
| VSIG1  | 121    | 120.2  | 108.3  | 129.8  | 127.8  | 102.2  | 127.7  | 109.6  |
| VSIG2  | 126    | 122.7  | 124.8  | 137.8  | 111.4  | 101.1  | 121.4  | 126.2  |
| VSIG4  | 113.4  | 121.3  | 170.3  | 122.8  | 121.5  | 118.3  | 125.4  | 114.8  |
| VSIG8  | 118    | 121.1  | 119.7  | 118.9  | 111.8  | 98.8   | 131.4  | 114    |
| VSIG9  | 191    | 153    | 158.9  | 204.4  | 142.7  | 138.2  | 154.7  | 123.9  |
| VSNL1  | 112.3  | 112.8  | 112.3  | 116.1  | 108.6  | 97.5   | 112.7  | 119.3  |
| VSX1   | 108.2  | 104.8  | 108.2  | 109.8  | 99.1   | 99.2   | 112    | 106.4  |
| VSX1   | 111.7  | 116.9  | 127.6  | 118.1  | 110.1  | 102.1  | 122.3  | 118.9  |
| VSX1   | 114.9  | 106.4  | 117.5  | 116.4  | 105.2  | 96.6   | 109.2  | 108    |
| VTCN1  | 111.4  | 117    | 114.2  | 114.7  | 113.4  | 97.8   | 115.1  | 113.6  |
| VTI1B  | 158.1  | 147.9  | 153.8  | 188.7  | 141.8  | 148.4  | 150.6  | 148.3  |
| VTN    | 111.5  | 115.8  | 115.8  | 117.6  | 106.2  | 95.4   | 108.9  | 107.8  |
| VWA1   | 109.3  | 106.8  | 121.6  | 125.4  | 115.7  | 99.3   | 122.4  | 111.7  |
| VWA1   | 124.2  | 120.7  | 125.4  | 130.3  | 117.8  | 102    | 126    | 122.6  |
| VWA2   | 111.8  | 113.4  | 106.9  | 116.1  | 110.2  | 97.9   | 105.7  | 110.1  |
| VWCE   | 111.5  | 119.7  | 129.3  | 119.1  | 110.7  | 96     | 127    | 119.8  |
| VWF    | 122.9  | 125.9  | 128.9  | 136.8  | 115.5  | 126    | 138.8  | 116.8  |
| WAC    | 670    | 963.2  | 724.8  | 942.6  | 736.9  | 578.1  | 977.8  | 1122.4 |
| WAC    | 127.2  | 147.3  | 123.7  | 138.5  | 127    | 106.6  | 129.8  | 133.3  |
| WAC    | 2054.5 | 827.4  | 1465.5 | 1597.1 | 943.3  | 1118.6 | 2276.8 | 1144.1 |
| WARS   | 830.1  | 256.5  | 422.9  | 716.7  | 183.5  | 383.8  | 467.6  | 201.1  |
| WARS   | 1003.2 | 345.7  | 482    | 848.4  | 200.1  | 531.9  | 593.4  | 253    |
| WARS2  | 117.2  | 113.3  | 122.7  | 129.6  | 116.7  | 101.6  | 128.5  | 115.3  |
| WAS    | 1705.3 | 1692.6 | 2702.4 | 1862.5 | 1067.9 | 2087.1 | 1295.3 | 1086.2 |
| WASF1  | 113    | 115.4  | 119.3  | 114.7  | 105.7  | 98.3   | 122.8  | 116.9  |
| WASF1  | 121.3  | 117.9  | 121.1  | 118.4  | 110    | 101.8  | 120.6  | 111.9  |
| WASF2  | 260.3  | 336.6  | 251.1  | 322.5  | 247.5  | 269.9  | 476.5  | 349.6  |
| WASF3  | 111.9  | 114.3  | 122.1  | 115.3  | 112.6  | 97     | 118.6  | 122.5  |
| WASL   | 279.2  | 311.9  | 244.8  | 311.8  | 278.6  | 223.7  | 367.8  | 295.7  |
| WASPIP | 658.9  | 829.9  | 1053   | 983.2  | 882.1  | 979.4  | 900.2  | 886.5  |
| WBP1   | 146.7  | 131.7  | 171.5  | 154.8  | 143.5  | 146.7  | 138.9  | 133.2  |
| WBP11  | 807.2  | 997.8  | 766    | 955.7  | 791.2  | 857.8  | 1036.3 | 1113.9 |
| WBP2   | 3081.6 | 2888.8 | 3058   | 3604.1 | 1912.3 | 4281.3 | 4251.7 | 3967.1 |
| WBP4   | 228.7  | 255.9  | 232.9  | 242.1  | 207.1  | 241.4  | 273.6  | 297.9  |

|        |        |        |        |        |        |        |        |        |
|--------|--------|--------|--------|--------|--------|--------|--------|--------|
| WBP5   | 113.8  | 122.1  | 128    | 120.6  | 112.5  | 103.6  | 123.1  | 115.5  |
| WBSR14 | 121.1  | 114.8  | 121.2  | 123.8  | 108    | 102.4  | 121.5  | 115.6  |
| WBSR16 | 114.7  | 118.3  | 126.1  | 142.1  | 112    | 106.8  | 120.3  | 120    |
| WBSR17 | 126.5  | 120.7  | 118.9  | 131.2  | 106.1  | 94.5   | 120.5  | 124.2  |
| WBSR18 | 214.3  | 201.6  | 216.7  | 208.2  | 185.1  | 154.6  | 185    | 174.9  |
| WBSR19 | 114.9  | 109.4  | 108.1  | 118.9  | 104.7  | 96.5   | 117.8  | 108.3  |
| WBSR19 | 114.2  | 117.7  | 116.7  | 115.8  | 111.9  | 95.7   | 118.5  | 112.1  |
| WBSR22 | 368    | 454.7  | 399.1  | 389.3  | 356.1  | 423.6  | 399.3  | 501.5  |
| WBSR23 | 109.6  | 111.2  | 108.3  | 109.4  | 106.4  | 91.4   | 111.8  | 113.2  |
| WBSR27 | 110    | 117.2  | 113.8  | 112    | 112.1  | 99.2   | 109.9  | 118.7  |
| WBSR28 | 117.7  | 117.1  | 119.1  | 117.7  | 118.7  | 101.7  | 113.7  | 124.1  |
| WDFY1  | 599.5  | 536.3  | 679.1  | 515.7  | 357.2  | 545.4  | 409.6  | 307.2  |
| WDFY2  | 164.6  | 165.1  | 197.9  | 172    | 196.6  | 144.7  | 210.5  | 165.9  |
| WDFY3  | 117.7  | 118.2  | 116.6  | 117.4  | 112.6  | 102.8  | 120.4  | 109.4  |
| WDFY3  | 122.9  | 122.5  | 124.1  | 124.6  | 115    | 106.7  | 128.5  | 110.2  |
| WDFY3  | 114.4  | 103.4  | 112.2  | 107.5  | 108.1  | 91.9   | 118.3  | 111.6  |
| WDHD1  | 117    | 121.1  | 119.1  | 126.9  | 115.1  | 100.2  | 115.4  | 122.2  |
| WDHD1  | 111.8  | 113.7  | 105.5  | 124.5  | 110.7  | 97     | 115.2  | 114.5  |
| WDHD1  | 110.5  | 117.8  | 120.8  | 122.9  | 110    | 95.4   | 123    | 118.9  |
| WDR1   | 181.8  | 184.5  | 193.7  | 204.4  | 159.2  | 172.2  | 195.6  | 147    |
| WDR1   | 1950.1 | 1878.7 | 2625.3 | 2402.8 | 1759.1 | 2106.8 | 2246.3 | 1870.4 |
| WDR12  | 156.4  | 175.4  | 178.1  | 154.1  | 175    | 129.6  | 168.8  | 161.8  |
| WDR13  | 174.8  | 244.2  | 215.6  | 215    | 167.8  | 164.7  | 178.3  | 191    |
| WDR16  | 104    | 113.4  | 115.6  | 113.4  | 102.3  | 96.1   | 120.7  | 110.1  |
| WDR16  | 113.1  | 131.3  | 136.4  | 127.8  | 124.5  | 103.5  | 141.2  | 133.4  |
| WDR17  | 112    | 111.5  | 115.6  | 112.3  | 109.2  | 95.7   | 112.3  | 118.1  |
| WDR17  | 127.7  | 117.7  | 121.8  | 122.8  | 104.4  | 105.6  | 124.9  | 122.4  |
| WDR18  | 425.7  | 540.5  | 519.4  | 482.7  | 376    | 358.3  | 372.3  | 310.7  |
| WDR19  | 363.5  | 368.1  | 345.4  | 411    | 318.3  | 252.7  | 438.1  | 353.9  |
| WDR20  | 387.1  | 365.7  | 320.9  | 431.9  | 341.7  | 306.9  | 540.7  | 676    |
| WDR20  | 136.5  | 163    | 158.2  | 150.2  | 147.7  | 159.3  | 159.3  | 181.9  |
| WDR20  | 131.3  | 127.1  | 125.3  | 132.6  | 127.7  | 121    | 134.9  | 140.7  |
| WDR21A | 182.2  | 199.3  | 146.8  | 180.2  | 176.3  | 122.6  | 157    | 153.5  |
| WDR21C | 119.6  | 109.6  | 118.8  | 122.5  | 106.9  | 99.3   | 128.8  | 115    |
| WDR22  | 300.2  | 274.9  | 301.9  | 292.3  | 279    | 207.7  | 269.7  | 281.6  |
| WDR23  | 124.7  | 127.1  | 130.8  | 137.9  | 120.4  | 107.1  | 111.8  | 125    |
| WDR23  | 289.7  | 283.7  | 305.7  | 299.9  | 231.7  | 201    | 233.5  | 266.5  |
| WDR24  | 139.1  | 128.3  | 134.1  | 158.2  | 123.8  | 109.2  | 135.8  | 120.6  |
| WDR25  | 130.4  | 133.4  | 118.6  | 127.6  | 122.4  | 107.6  | 124.2  | 122.3  |
| WDR26  | 198    | 235.8  | 233.7  | 216.3  | 197.2  | 191.8  | 354.8  | 293.7  |
| WDR27  | 120.4  | 119.9  | 141.2  | 132.5  | 122.1  | 116.5  | 122.9  | 119.3  |
| WDR3   | 116.2  | 115.8  | 109.8  | 122.6  | 111.3  | 106    | 130.4  | 123.1  |
| WDR31  | 118.4  | 124.7  | 132.7  | 124.1  | 109.6  | 101.8  | 115.2  | 108.7  |
| WDR33  | 210.2  | 195    | 203    | 196.2  | 248.2  | 146.6  | 177.1  | 147.8  |
| WDR33  | 516.4  | 703.9  | 589.6  | 667.6  | 582.8  | 456.8  | 436.2  | 472.1  |
| WDR33  | 142.9  | 142.3  | 136.2  | 136    | 124.8  | 116    | 131.6  | 147.3  |
| WDR33  | 126    | 133    | 121.1  | 135.7  | 117.3  | 98.2   | 123.4  | 129.9  |
| WDR34  | 117.1  | 124.1  | 136.4  | 127.5  | 107.6  | 108.9  | 121.6  | 131.2  |
| WDR35  | 117    | 115.7  | 121.4  | 128.3  | 105.8  | 105.8  | 125.2  | 117.9  |
| WDR36  | 232.8  | 280.6  | 202.5  | 226.3  | 225.6  | 168.3  | 205.5  | 214.5  |
| WDR37  | 463.2  | 505.6  | 468.4  | 544.5  | 406.2  | 406.2  | 488.5  | 481.5  |

|        |        |       |        |       |       |       |        |        |
|--------|--------|-------|--------|-------|-------|-------|--------|--------|
| WDR4   | 289.8  | 295.9 | 269.8  | 319.1 | 280.8 | 192.7 | 247.6  | 191.2  |
| WDR4   | 122    | 125.1 | 131.7  | 123   | 112.6 | 108.1 | 113.9  | 120.5  |
| WDR4   | 122.1  | 134.9 | 122.7  | 130.1 | 125.6 | 109.2 | 138.4  | 122.2  |
| WDR40A | 189.7  | 221.2 | 200.4  | 199.3 | 186.9 | 157.8 | 198.3  | 228.4  |
| WDR40B | 113.9  | 117.6 | 116    | 131   | 115.4 | 100.7 | 123.5  | 110.1  |
| WDR41  | 118.4  | 132.1 | 125.3  | 126.3 | 123.2 | 100.9 | 136.5  | 136.8  |
| WDR42B | 103.9  | 106.5 | 115.5  | 112.6 | 105.3 | 97    | 106.2  | 105    |
| WDR44  | 138.3  | 127.6 | 133.8  | 133.2 | 119.6 | 113.6 | 126.7  | 128.3  |
| WDR45  | 330.7  | 380.6 | 252.9  | 380.1 | 246.4 | 238.5 | 397.5  | 356.6  |
| WDR45  | 118.9  | 125.2 | 124.6  | 120.8 | 104.5 | 109.5 | 129.1  | 111.1  |
| WDR45  | 115.5  | 123   | 125    | 123.4 | 113.8 | 107.3 | 125.8  | 114.6  |
| WDR45L | 213.1  | 219.1 | 281.2  | 234   | 198.2 | 208.6 | 200.8  | 225.2  |
| WDR46  | 391.7  | 365.6 | 291.2  | 363.6 | 303.8 | 220.2 | 367.2  | 307.4  |
| WDR47  | 107.8  | 130.7 | 116.2  | 115.7 | 120.7 | 93.2  | 120.4  | 132.1  |
| WDR48  | 280.1  | 276.8 | 256.5  | 315.4 | 227.1 | 254.2 | 360.6  | 349.6  |
| WDR49  | 110.1  | 113.6 | 116.4  | 111   | 103.3 | 95.7  | 107.6  | 108.8  |
| WDR5   | 113.6  | 110.8 | 119.3  | 126.9 | 114.5 | 104.5 | 114.1  | 119.3  |
| WDR5   | 238.1  | 236.1 | 229.9  | 212   | 198.8 | 199.3 | 298.1  | 256.8  |
| WDR50  | 198.5  | 181.9 | 220.3  | 203.2 | 162.6 | 160.7 | 180.7  | 204.1  |
| WDR51A | 153.3  | 167.1 | 140.9  | 163.1 | 136.8 | 119.2 | 137.5  | 133.1  |
| WDR51B | 132.8  | 151.1 | 151.8  | 168.8 | 125.9 | 138.5 | 148.1  | 157.8  |
| WDR52  | 120.1  | 128.9 | 139.1  | 132.8 | 123.4 | 102.8 | 125.4  | 119.4  |
| WDR53  | 170.1  | 164.4 | 211.8  | 176.3 | 155.9 | 137.3 | 171.9  | 184.8  |
| WDR54  | 770.7  | 904.3 | 820.4  | 790.3 | 463.1 | 471   | 451.7  | 347.7  |
| WDR55  | 157    | 172.5 | 145.1  | 186.2 | 160.8 | 133.5 | 177.6  | 170.1  |
| WDR57  | 322.2  | 375.3 | 357.3  | 399.1 | 398.9 | 295   | 377.6  | 366.8  |
| WDR58  | 173.4  | 180.3 | 192.3  | 187.3 | 157.8 | 131.5 | 154.3  | 137.2  |
| WDR59  | 511.4  | 594   | 481.3  | 589   | 478.5 | 446.6 | 636.5  | 643.4  |
| WDR5B  | 118.9  | 133.2 | 123.2  | 136.7 | 113.5 | 117.5 | 132.9  | 119.9  |
| WDR6   | 1823.8 | 1906  | 1569.5 | 2001  | 1139  | 1128  | 1930.1 | 1544.4 |
| WDR60  | 162.3  | 213.1 | 173.4  | 176.1 | 147.9 | 122.1 | 166.6  | 152.2  |
| WDR61  | 451.3  | 464.3 | 606.1  | 432.6 | 417.4 | 439.7 | 323.2  | 330.5  |
| WDR62  | 123    | 114.2 | 118.2  | 113.9 | 107.6 | 95.8  | 115.1  | 119.9  |
| WDR63  | 117.5  | 110.6 | 121.2  | 122.6 | 110.5 | 94.1  | 114.1  | 120.8  |
| WDR64  | 108.5  | 111   | 113.8  | 102.7 | 101.7 | 107.5 | 113.2  | 117.8  |
| WDR65  | 118.8  | 114.7 | 121.2  | 115.6 | 112.6 | 105.7 | 128    | 118.3  |
| WDR66  | 119.4  | 127.3 | 117.8  | 119.9 | 114.5 | 104.3 | 107.8  | 120.4  |
| WDR67  | 215.1  | 212.8 | 235.6  | 187.9 | 186.9 | 185.8 | 197.4  | 183.4  |
| WDR68  | 712.5  | 868.9 | 751.9  | 822   | 718   | 744.2 | 778.9  | 614.7  |
| WDR69  | 109.6  | 126.2 | 105.1  | 116.5 | 113.9 | 98    | 109.9  | 109.9  |
| WDR7   | 126.9  | 112.6 | 122.4  | 122.4 | 124.8 | 104.2 | 123.7  | 118.4  |
| WDR7   | 227.7  | 242.7 | 212.4  | 245.3 | 206.2 | 177   | 204.3  | 183.8  |
| WDR70  | 193.2  | 222.1 | 239.3  | 205   | 207.3 | 206.1 | 224.9  | 177.9  |
| WDR71  | 243.2  | 199.4 | 280.4  | 251.9 | 193.4 | 223.6 | 243.3  | 227.3  |
| WDR72  | 118.9  | 119.4 | 119    | 125.6 | 108.4 | 102.8 | 113.8  | 114.9  |
| WDR73  | 193.5  | 204.5 | 218.4  | 229.1 | 186.2 | 147   | 173.4  | 154    |
| WDR74  | 425.6  | 460.7 | 323.4  | 442.1 | 296.2 | 214.1 | 347.5  | 362.9  |
| WDR74  | 246.9  | 268.9 | 250.9  | 227.8 | 310.9 | 180.8 | 264.7  | 236.1  |
| WDR74  | 165.4  | 158.1 | 163.6  | 188.1 | 163.7 | 146.5 | 170.9  | 163.2  |
| WDR75  | 606.2  | 778.7 | 663.2  | 580.5 | 639.1 | 394   | 625.8  | 524.5  |
| WDR77  | 179.1  | 192.1 | 154.8  | 163.1 | 161.4 | 139.3 | 155.7  | 139.4  |

|         |       |       |       |       |       |       |       |       |
|---------|-------|-------|-------|-------|-------|-------|-------|-------|
| WDR78   | 113.2 | 112.5 | 120.3 | 111.3 | 102.7 | 96.7  | 121   | 114.5 |
| WDR78   | 114.5 | 118.3 | 119.4 | 125.8 | 113   | 109.7 | 115.7 | 120.3 |
| WDR78   | 114.2 | 117.9 | 107.1 | 110.3 | 109.5 | 99.4  | 123.3 | 121.7 |
| WDR79   | 177.1 | 188.4 | 171.4 | 177.7 | 158.4 | 142.2 | 155.5 | 151.3 |
| WDR8    | 472.3 | 541   | 430.3 | 424.4 | 367.5 | 338.2 | 433.9 | 421   |
| WDR81   | 157.9 | 174.8 | 134.5 | 160.5 | 131   | 160.3 | 121   | 149.4 |
| WDRPUH  | 119.5 | 112.6 | 119.6 | 117   | 112.2 | 92.5  | 112.8 | 119.8 |
| WDSOF1  | 119.6 | 122.5 | 122.5 | 115.2 | 119.8 | 110   | 125.5 | 124.7 |
| WDSUB1  | 252.7 | 253.4 | 269.4 | 295.5 | 256   | 202.8 | 247.3 | 243.1 |
| WDTC1   | 120.6 | 118   | 120.4 | 115.5 | 107.3 | 113   | 124.2 | 124.6 |
| WEE1    | 130   | 131.7 | 125.3 | 140.2 | 121.4 | 112   | 147.2 | 129.9 |
| WFDC1   | 111.6 | 116.1 | 117.8 | 119.6 | 110.4 | 110.6 | 115.7 | 111.9 |
| WFDC10A | 108.1 | 117   | 117.4 | 114.5 | 105   | 105   | 112.8 | 106.9 |
| WFDC10B | 111   | 119.2 | 118.7 | 121.6 | 104.4 | 102.9 | 116.8 | 106.4 |
| WFDC10B | 123.2 | 119.2 | 117.8 | 127.1 | 116.2 | 99.8  | 114.1 | 118   |
| WFDC11  | 110.9 | 118.2 | 113.2 | 118.3 | 102.5 | 107.7 | 119.2 | 124.5 |
| WFDC12  | 105.7 | 121.3 | 120.3 | 125.2 | 108.1 | 94.8  | 109.5 | 111.6 |
| WFDC13  | 116.9 | 117.3 | 128.3 | 106.6 | 112.1 | 106.1 | 124.8 | 113.4 |
| WFDC2   | 126.2 | 111.6 | 133.2 | 117   | 112   | 110.5 | 122   | 119   |
| WFDC2   | 113.2 | 121.5 | 116.1 | 120.7 | 110.1 | 102.8 | 118.4 | 114.6 |
| WFDC3   | 114.1 | 114.6 | 122.6 | 121.9 | 110.3 | 107.6 | 125.4 | 121.9 |
| WFDC3   | 118   | 117.7 | 123.3 | 115.9 | 108   | 99.8  | 119.1 | 116.4 |
| WFDC3   | 108.5 | 127.1 | 121.1 | 124.3 | 109.1 | 108   | 119.4 | 115.5 |
| WFDC5   | 113.6 | 106.1 | 111.5 | 116.5 | 105   | 91.5  | 122.9 | 104.3 |
| WFDC6   | 120.8 | 123.2 | 124.9 | 124   | 114.6 | 110.2 | 121   | 116.1 |
| WFDC8   | 125.2 | 118.6 | 115.4 | 118.5 | 113.7 | 106.1 | 119.3 | 119.4 |
| WFDC8   | 113.4 | 129.1 | 131.5 | 129   | 116.2 | 114.6 | 135.8 | 130   |
| WFDC9   | 112.9 | 112.8 | 128   | 117.6 | 109   | 106.3 | 114.6 | 114.5 |
| WFIKKN1 | 113.5 | 117.2 | 108.3 | 120.5 | 112.8 | 100.3 | 115.3 | 115.8 |
| WFIKKN2 | 111.2 | 114.8 | 117.5 | 119   | 112.5 | 100.6 | 125.2 | 109.3 |
| WFS1    | 156.2 | 185.5 | 153.4 | 164.3 | 147   | 120.9 | 165.1 | 150.1 |
| WHDC1   | 305.2 | 271   | 222.4 | 298.3 | 272.2 | 139.4 | 367.8 | 366.2 |
| WHDC1   | 163.5 | 150.5 | 149.9 | 168.4 | 151.8 | 124.7 | 174.5 | 153.5 |
| WHSC1   | 115.9 | 116.3 | 117.8 | 120.6 | 107.7 | 103.7 | 120   | 110.7 |
| WHSC1   | 117.3 | 111   | 122.7 | 120.5 | 107.4 | 113.5 | 128.8 | 123.8 |
| WHSC1   | 107.7 | 123.2 | 138.5 | 118.6 | 106.3 | 103.1 | 119.2 | 129.8 |
| WHSC1   | 107.9 | 115.6 | 112.2 | 123.7 | 107.4 | 95.6  | 119.6 | 113.9 |
| WHSC1   | 118.3 | 121.4 | 146.6 | 132.3 | 118.2 | 111.2 | 134   | 125.1 |
| WHSC1L1 | 102.6 | 108.1 | 114   | 120.7 | 115.4 | 92.2  | 114.7 | 111.4 |
| WHSC1L1 | 140.1 | 125.3 | 129.3 | 140.1 | 123.2 | 103.3 | 128.2 | 123.8 |
| WHSC1L1 | 153.9 | 167.4 | 137.2 | 165   | 132.2 | 126.6 | 164.8 | 180.7 |
| WHSC2   | 136.3 | 137.8 | 149.3 | 151.9 | 129.3 | 117.3 | 140   | 144.7 |
| WIBG    | 152   | 174.7 | 157.5 | 162   | 148.7 | 145.1 | 172.5 | 157.7 |
| WIF1    | 116.7 | 116.4 | 107.4 | 113.3 | 109.1 | 97.6  | 111.7 | 109   |
| WIPF1   | 122.4 | 114.3 | 115.1 | 119.3 | 102.5 | 100.7 | 116.2 | 110.6 |
| WIPF1   | 238.4 | 183.8 | 220.3 | 270.1 | 263.2 | 220   | 270.9 | 222.8 |
| WIPF3   | 107.3 | 110.7 | 120.5 | 113.8 | 105.8 | 101.3 | 111.5 | 111.5 |
| WIPI1   | 141.4 | 137.2 | 121   | 131.3 | 121.8 | 130.3 | 139.3 | 141.7 |
| WIPI2   | 197.2 | 285.4 | 187.6 | 241.5 | 243.3 | 186.3 | 283.1 | 309.3 |
| WIPI2   | 113   | 120.1 | 120.5 | 124.9 | 109.7 | 101.3 | 117.1 | 109.5 |
| WIRE    | 129.3 | 136.3 | 126.5 | 126.4 | 120.7 | 114.4 | 134.2 | 129.7 |

|        |        |        |       |        |        |       |        |        |
|--------|--------|--------|-------|--------|--------|-------|--------|--------|
| WISP1  | 116.9  | 114.4  | 113.1 | 114.3  | 111.9  | 99.8  | 108.8  | 110    |
| WISP1  | 114.5  | 115.3  | 109.6 | 116.4  | 105.1  | 94.3  | 121.2  | 110.4  |
| WISP2  | 111.4  | 124.1  | 118   | 116.9  | 107.7  | 95.8  | 112.6  | 114    |
| WISP3  | 114.3  | 118.7  | 120.6 | 124.1  | 114.6  | 103.2 | 123.2  | 110.9  |
| WISP3  | 110.8  | 124.2  | 115.4 | 112.9  | 111.4  | 99.8  | 113.5  | 114.3  |
| WISP3  | 113    | 121.3  | 129.4 | 124.6  | 126.7  | 101.7 | 116.8  | 116.2  |
| WIT-1  | 104    | 108.4  | 104.6 | 114.9  | 107    | 94.3  | 109.5  | 107.9  |
| WNK1   | 161.1  | 162.3  | 157.1 | 178.3  | 173.9  | 144.2 | 196.3  | 191.1  |
| WNK2   | 116.3  | 115.7  | 126.4 | 121.1  | 111.4  | 98    | 119.5  | 118.6  |
| WNK3   | 123.8  | 130.4  | 125.4 | 118.6  | 111    | 108.8 | 121    | 118.6  |
| WNK3   | 120.7  | 114.5  | 113.4 | 117.8  | 113.7  | 99.8  | 128    | 116.1  |
| WNK4   | 108.3  | 113.3  | 121.1 | 118.2  | 106.3  | 97.6  | 114.4  | 122.2  |
| WNT1   | 133.2  | 123.7  | 114.8 | 121.7  | 110.4  | 97.7  | 114    | 119.7  |
| WNT10A | 119.7  | 122.6  | 122.6 | 129.7  | 105.5  | 107.9 | 121.9  | 117.2  |
| WNT10B | 121.7  | 119.4  | 127.3 | 121    | 104.2  | 107.2 | 119    | 107.5  |
| WNT11  | 116.7  | 113.9  | 115.6 | 111.7  | 112.8  | 99.5  | 116.4  | 108.3  |
| WNT16  | 126.1  | 131.9  | 127.1 | 130.2  | 114.1  | 106.8 | 127.8  | 127.5  |
| WNT16  | 122.8  | 117.6  | 120.1 | 112.2  | 110.1  | 100.1 | 109.3  | 118.4  |
| WNT2   | 118.9  | 125.3  | 130.3 | 119    | 119.6  | 105.3 | 127.8  | 120.1  |
| WNT2B  | 123.7  | 126.8  | 136.6 | 132.3  | 118.2  | 112.9 | 122    | 124.7  |
| WNT2B  | 115.9  | 116.6  | 118.1 | 128.4  | 112.5  | 97.6  | 114.5  | 123.6  |
| WNT3   | 105.6  | 110.2  | 122.6 | 112.8  | 115    | 103.6 | 110.7  | 115.4  |
| WNT3A  | 116.1  | 116.2  | 115.4 | 118.9  | 106.7  | 98.8  | 113.6  | 111.7  |
| WNT4   | 123.1  | 117    | 113.3 | 111.1  | 108.5  | 99.1  | 121.4  | 116.4  |
| WNT5A  | 105.8  | 108.5  | 108.8 | 116.4  | 100.6  | 99.1  | 122.6  | 115.4  |
| WNT5B  | 122.6  | 134.1  | 122.6 | 136.2  | 117.7  | 113.6 | 139.9  | 124.8  |
| WNT5B  | 109.4  | 111.9  | 114.5 | 113.3  | 108    | 92.6  | 118.2  | 111.8  |
| WNT6   | 122.1  | 123.1  | 120.5 | 115.3  | 108.6  | 102.7 | 124.9  | 134.5  |
| WNT7A  | 157    | 144.8  | 140.3 | 163.8  | 123.6  | 119.8 | 137.7  | 138.4  |
| WNT7B  | 114.6  | 124.5  | 114.4 | 120.8  | 111.7  | 103.9 | 114.5  | 121.5  |
| WNT8A  | 111.7  | 113.1  | 116.3 | 113.7  | 106.3  | 99.2  | 123.4  | 112.7  |
| WNT8A  | 121.4  | 120.8  | 118.2 | 111.7  | 106.8  | 101.4 | 118.4  | 114.2  |
| WNT8B  | 121.9  | 114.6  | 117.8 | 121.9  | 106.3  | 105.4 | 121.6  | 120.6  |
| WNT9A  | 118.7  | 109.3  | 111.2 | 124.8  | 111.7  | 93    | 120.1  | 110.7  |
| WNT9B  | 111.5  | 107    | 129.8 | 119.6  | 112.4  | 106   | 127.9  | 108.8  |
| WRB    | 181.5  | 160.1  | 176.8 | 200.3  | 188.7  | 149   | 181.9  | 177.7  |
| WRN    | 206.2  | 197.9  | 243.8 | 209    | 219.6  | 151.7 | 220.5  | 269.2  |
| WRNIP1 | 149.6  | 172.4  | 167.7 | 176.9  | 160.2  | 135.9 | 158.2  | 167.7  |
| WRNIP1 | 1221.4 | 1294.6 | 965.3 | 1428.2 | 1296.7 | 826.8 | 1351.7 | 1429.2 |
| WSB1   | 311.5  | 275.1  | 319.2 | 292.1  | 284.2  | 252.2 | 336.5  | 291.5  |
| WSB1   | 453.3  | 475.9  | 393.7 | 369.3  | 517.5  | 356.8 | 445    | 539    |
| WSB2   | 141.9  | 148.5  | 152.6 | 143.7  | 140.6  | 146.5 | 155.6  | 143.4  |
| WT1    | 106.8  | 111.8  | 106.8 | 118.1  | 100.6  | 97.8  | 123.1  | 117.8  |
| WT1    | 125.3  | 137.2  | 130.5 | 127.8  | 116    | 108.5 | 120.8  | 126.6  |
| WTAP   | 877.8  | 956.3  | 825.8 | 1056.7 | 799.2  | 443.2 | 1003.8 | 1186.2 |
| WTAP   | 119.9  | 114.9  | 117.2 | 116.9  | 106.8  | 104.3 | 124.4  | 113.9  |
| WTAP   | 126    | 129.6  | 123.3 | 137.8  | 124.8  | 109.5 | 124.6  | 136.6  |
| WTIP   | 112.8  | 117.4  | 109.2 | 119.9  | 104.2  | 103.7 | 117.8  | 109.4  |
| WTIP   | 121.7  | 112.3  | 113   | 136.2  | 112.1  | 103.5 | 126    | 121.2  |
| WWC1   | 123.2  | 111.8  | 114.3 | 119.2  | 106.5  | 102.6 | 114.9  | 114.2  |
| WWC2   | 112.6  | 112.3  | 111.1 | 119.1  | 107.1  | 96.1  | 119.7  | 113    |

|         |        |        |        |        |        |        |        |        |
|---------|--------|--------|--------|--------|--------|--------|--------|--------|
| WWC3    | 246.8  | 247.7  | 252.6  | 258.3  | 254.2  | 213.6  | 226.7  | 226.9  |
| WVOX    | 111.2  | 120.3  | 117.4  | 111    | 112.4  | 96     | 112.2  | 115.3  |
| WVOX    | 120.7  | 126.9  | 118.9  | 124.2  | 118.2  | 105.1  | 121.2  | 132.7  |
| WVOX    | 120.9  | 123.2  | 116.3  | 118.1  | 105.4  | 103.6  | 112.7  | 115.8  |
| WVOX    | 120.1  | 127.5  | 114.7  | 115.7  | 115.1  | 101.7  | 119.6  | 105.4  |
| WWP1    | 118.2  | 117.4  | 121    | 115.8  | 111.7  | 105.4  | 138    | 115.2  |
| WWP2    | 107.3  | 113.3  | 107.1  | 123.2  | 107.2  | 94.5   | 121.3  | 108.5  |
| WWP2    | 120.6  | 112.6  | 130.4  | 136.1  | 118.3  | 106.6  | 117.2  | 121    |
| WWP2    | 183.7  | 177    | 195.3  | 182.7  | 160.7  | 155.3  | 227.4  | 204.3  |
| WWTR1   | 102.9  | 110.2  | 113.3  | 116.7  | 102.7  | 93.7   | 110.8  | 116    |
| XAB1    | 628.4  | 687.4  | 614.3  | 583.2  | 494.8  | 501.7  | 665.4  | 781.7  |
| XAB2    | 478.3  | 472.6  | 506.9  | 494    | 298.6  | 355.1  | 547.7  | 441.1  |
| XAF1    | 256.4  | 214.7  | 307.7  | 253.4  | 209.3  | 177    | 197.7  | 141.8  |
| XAF1    | 170.4  | 145.7  | 164.7  | 151.3  | 127.8  | 126.6  | 144.9  | 128.1  |
| XAGE1   | 119.6  | 112    | 120.5  | 114.2  | 109.1  | 98.4   | 122.7  | 123.7  |
| XAGE1   | 105.1  | 108.5  | 116.9  | 117.4  | 111.8  | 93.3   | 109.6  | 113.6  |
| XAGE2   | 114    | 113    | 119.1  | 117    | 110.8  | 96.9   | 115.5  | 114.9  |
| XAGE3   | 121.5  | 116.4  | 127.2  | 116.1  | 108.6  | 114.3  | 112.6  | 116.1  |
| XAGE3   | 112    | 124.4  | 108.9  | 116.5  | 101.2  | 93.4   | 107.2  | 113.8  |
| XAGE5   | 111.4  | 116.8  | 121.7  | 117.3  | 102.9  | 94.7   | 116.2  | 109.4  |
| XBP1    | 815.6  | 1044.5 | 794.3  | 927.3  | 825.8  | 885    | 1035.4 | 1559.7 |
| XBP1    | 1350.6 | 1445.2 | 1181.7 | 1210.2 | 1482.7 | 1470.9 | 1524.5 | 1946.9 |
| XCL1    | 126    | 130.2  | 130.7  | 127    | 126.3  | 101.7  | 120.8  | 119.7  |
| XCR1    | 108.3  | 115.1  | 113.2  | 119.7  | 102.6  | 95.6   | 123.1  | 115.5  |
| XCR1    | 114.2  | 105.5  | 117.6  | 111.8  | 113.2  | 99.4   | 110.4  | 112.6  |
| XCR1    | 121.4  | 120.5  | 119.3  | 113.8  | 111.3  | 108.9  | 110.6  | 121.3  |
| XDH     | 108.2  | 119.2  | 129.9  | 124.2  | 109.6  | 92     | 119.2  | 119.1  |
| XG      | 107.2  | 113.8  | 111.6  | 110.2  | 103.1  | 95.7   | 111.6  | 109.5  |
| XK      | 124.9  | 116.5  | 116.8  | 118.1  | 101    | 101.4  | 120.9  | 113.5  |
| XKR3    | 111.4  | 113.6  | 115.6  | 114    | 117.9  | 111.7  | 119.1  | 128.9  |
| XKR4    | 105.5  | 118    | 118.9  | 110.8  | 98.7   | 96.7   | 106.5  | 113.2  |
| XKR5    | 110.6  | 117.2  | 110.2  | 117.8  | 108.5  | 99     | 123.8  | 108.9  |
| XKR6    | 108.4  | 124.9  | 109.7  | 112.3  | 104.7  | 91.7   | 116.5  | 114.1  |
| XKR6    | 122.4  | 116.6  | 144.3  | 121.7  | 113.4  | 95.2   | 132    | 119.5  |
| XKR6    | 158.1  | 151    | 157    | 164    | 138.6  | 117.1  | 151.4  | 148.7  |
| XKR7    | 119.1  | 111    | 111.3  | 112.4  | 103.2  | 97.3   | 113.2  | 117.3  |
| XKR8    | 180    | 204.1  | 177.3  | 199.5  | 182.7  | 162.2  | 180.9  | 171.2  |
| XKR9    | 107.7  | 114.9  | 115    | 110.1  | 96.4   | 100.1  | 112    | 117.9  |
| XKRX    | 122.5  | 117.1  | 118.9  | 121.9  | 111.7  | 97.8   | 112.8  | 112.7  |
| XKRY    | 119.3  | 116.5  | 111.1  | 111    | 104    | 88     | 108.4  | 109.1  |
| XLF     | 116.7  | 106.5  | 115    | 124.3  | 108.9  | 100.8  | 118.1  | 110.7  |
| XLKD1   | 105.8  | 118.6  | 116.2  | 122.1  | 109    | 94.6   | 124.1  | 117.4  |
| XPA     | 121.8  | 109.1  | 115.9  | 128.4  | 119.1  | 103.7  | 130.5  | 116.5  |
| XPC     | 948    | 832.6  | 939.5  | 787.7  | 748.3  | 864.1  | 820.9  | 719.8  |
| XPNPEP1 | 578.5  | 606.3  | 679.6  | 625.9  | 451.7  | 441.9  | 512.1  | 506    |
| XPNPEP2 | 113.1  | 117.5  | 116.2  | 117.8  | 105.1  | 106.8  | 128.8  | 116.7  |
| XPNPEP3 | 3704.6 | 4007   | 3612.7 | 3993.3 | 3168.5 | 3188.2 | 3803.3 | 4439.2 |
| XPO1    | 676.7  | 757.6  | 708.3  | 682    | 524.6  | 394.9  | 764.9  | 893.7  |
| XPO4    | 183.9  | 214.7  | 186.5  | 191.7  | 172.3  | 145    | 185.9  | 154.9  |
| XPO5    | 150.3  | 164.4  | 142.1  | 173.1  | 149.8  | 122.3  | 157.8  | 161.7  |
| XPO6    | 430.2  | 475.3  | 419.2  | 473.4  | 380.3  | 279    | 546.8  | 657.9  |



|         |       |        |       |        |       |        |        |        |
|---------|-------|--------|-------|--------|-------|--------|--------|--------|
| XPO7    | 239.7 | 243.1  | 199.2 | 240.6  | 200.4 | 167.5  | 244    | 252.8  |
| XPOT    | 149.8 | 144.7  | 164.4 | 166    | 139.2 | 120.2  | 138.7  | 137.2  |
| XPR1    | 336.5 | 333.2  | 276.5 | 362.7  | 303.9 | 244.2  | 432.4  | 352.8  |
| XRCC1   | 207.8 | 180.7  | 254.1 | 184.3  | 148.4 | 163.5  | 149.3  | 133.4  |
| XRCC2   | 937.8 | 722.1  | 930   | 764.3  | 805.5 | 497.9  | 887.9  | 868.7  |
| XRCC3   | 123.2 | 143.2  | 130.4 | 136.4  | 121.5 | 106.4  | 138.9  | 138.2  |
| XRCC4   | 111.7 | 109.9  | 117.2 | 116.5  | 114.1 | 94.8   | 117.7  | 116    |
| XRCC5   | 152   | 194.1  | 177.9 | 198.2  | 145.3 | 136.4  | 169.7  | 173.6  |
| XRCC6   | 962.3 | 1161.1 | 901.4 | 1133.9 | 932.3 | 794.2  | 1180   | 1258.9 |
| XRN1    | 117.3 | 121    | 129   | 132.4  | 117.2 | 105.9  | 127.4  | 108.3  |
| XRN1    | 564.1 | 524.6  | 488.5 | 544.3  | 506.1 | 403.4  | 547.7  | 553    |
| XRN2    | 107.4 | 170.8  | 109.8 | 116.2  | 167.8 | 102.9  | 116.5  | 182.5  |
| XTP3TPA | 449.6 | 536.3  | 434.1 | 408.2  | 333.9 | 279    | 364.6  | 333    |
| XTP7    | 121.2 | 117.3  | 125.7 | 119.7  | 110.1 | 101.1  | 124.4  | 113.9  |
| XYLT1   | 107.9 | 117.2  | 115.6 | 120    | 114.5 | 104.8  | 118.9  | 118.9  |
| XYLT2   | 355.3 | 366.1  | 291.1 | 313.4  | 295.4 | 227.3  | 318.9  | 254.9  |
| YAF2    | 112.6 | 124.6  | 117.2 | 135.5  | 116   | 106.8  | 127.8  | 135.6  |
| YAF2    | 114.6 | 115.3  | 130.4 | 124.1  | 106.7 | 100.4  | 124.8  | 113.7  |
| YAF2    | 185   | 187.6  | 179.7 | 159    | 165.8 | 127.3  | 184.7  | 195.6  |
| YAP1    | 106.9 | 113.2  | 116.3 | 116.6  | 101.3 | 98.8   | 114.6  | 107.6  |
| YARS    | 473.5 | 625.4  | 709.1 | 698.8  | 588.9 | 649.7  | 731.8  | 872.8  |
| YARS2   | 237.3 | 220    | 227.9 | 235    | 208.1 | 183.3  | 189.8  | 201.1  |
| YBX1    | 630.4 | 688.4  | 423.9 | 516.5  | 438.8 | 498    | 627    | 1037.2 |
| YBX2    | 111.6 | 118.1  | 107.4 | 129.4  | 102.4 | 104.2  | 120.8  | 113.7  |
| YEATS2  | 222.7 | 224.6  | 195.9 | 258.8  | 229.5 | 197.8  | 238.2  | 226.3  |
| YEATS4  | 329.9 | 325.1  | 292.2 | 289.6  | 253.5 | 234.2  | 319.3  | 229.3  |
| YES1    | 147.1 | 168    | 145.5 | 147.9  | 137   | 131.3  | 174    | 255.6  |
| YIF1A   | 178.2 | 165.1  | 250.2 | 186.1  | 157.7 | 156.9  | 172.1  | 166.4  |
| YIF1B   | 109.1 | 112.3  | 118.7 | 118.1  | 111.5 | 93     | 110.4  | 112    |
| YIF1B   | 149.2 | 164.1  | 176.8 | 166.8  | 123.5 | 122.9  | 138.8  | 135.2  |
| YIF1B   | 176.2 | 153    | 167.9 | 165.1  | 135.8 | 125    | 152.7  | 133.8  |
| YIPF1   | 260.2 | 240    | 400   | 258.3  | 193.4 | 244.6  | 272.2  | 249.8  |
| YIPF2   | 129.4 | 126    | 128.8 | 127.4  | 116   | 113.6  | 129.3  | 130    |
| YIPF3   | 407.6 | 463.7  | 415.1 | 443.7  | 293.8 | 384.7  | 368.5  | 401.9  |
| YIPF4   | 110.3 | 124.3  | 120   | 120.6  | 112.3 | 102    | 109.7  | 116.5  |
| YIPF5   | 162.2 | 163.8  | 201.2 | 159.1  | 147.1 | 141.8  | 195.7  | 179.8  |
| YIPF5   | 105.9 | 107.5  | 117.5 | 117.6  | 108.4 | 96.3   | 118.6  | 113    |
| YIPF6   | 300.9 | 317.4  | 309.9 | 395.7  | 280.1 | 277.3  | 337.3  | 344.6  |
| YKT6    | 130.8 | 133.2  | 135.5 | 121.6  | 130.3 | 113.5  | 134.6  | 125.1  |
| YME1L1  | 444.2 | 402.6  | 436.4 | 425.3  | 435   | 357.7  | 429.7  | 420.6  |
| YOD1    | 109.5 | 109.6  | 114.2 | 111.3  | 109.8 | 97.2   | 114.4  | 106.5  |
| YPEL1   | 184.6 | 239    | 210.6 | 239.1  | 196.2 | 153.1  | 187.9  | 171.3  |
| YPEL2   | 290.2 | 282.9  | 328.4 | 271    | 284.7 | 358.1  | 265.9  | 316.9  |
| YPEL3   | 870.9 | 1053.8 | 976.5 | 801.5  | 536   | 799.3  | 784.1  | 691.6  |
| YPEL4   | 137.1 | 128.3  | 125.2 | 128.3  | 104.7 | 103.5  | 111.6  | 109.7  |
| YPEL5   | 928.7 | 994.8  | 997.6 | 1017.5 | 960.5 | 1145.1 | 1591.5 | 1905.8 |
| YRDC    | 315.8 | 357.2  | 321.7 | 348.4  | 244.6 | 248.6  | 392.8  | 412    |
| YSK4    | 102.7 | 109.6  | 116.6 | 116.2  | 115.6 | 101.1  | 108.7  | 108.7  |
| YSK4    | 113.5 | 120.4  | 111.8 | 113.9  | 117.8 | 97.1   | 122    | 115.6  |
| YSK4    | 118.4 | 108.2  | 110.5 | 121.1  | 99.5  | 98.2   | 117.9  | 118.2  |
| YTHDC1  | 120.7 | 117.7  | 133.4 | 127.9  | 119.9 | 109.4  | 122.7  | 126.3  |

|        |        |        |        |        |        |        |        |        |
|--------|--------|--------|--------|--------|--------|--------|--------|--------|
| YTHDC1 | 162.3  | 150.5  | 171.1  | 179.2  | 179.8  | 124    | 188.2  | 282.6  |
| YTHDC1 | 2104.6 | 2273.9 | 2101.8 | 2588.2 | 2170.9 | 1918.1 | 3308.1 | 3064.3 |
| YTHDC2 | 119.6  | 136    | 141.5  | 137    | 140.4  | 133.2  | 141.6  | 129.4  |
| YTHDF1 | 306.4  | 340.1  | 299.7  | 364.3  | 361.2  | 296.2  | 420.6  | 430.2  |
| YTHDF2 | 358.1  | 476.6  | 359.4  | 441.4  | 388.5  | 299    | 470.1  | 542.7  |
| YTHDF3 | 155    | 144.5  | 179.9  | 178.8  | 160.5  | 147.2  | 190.3  | 189.7  |
| YWHAB  | 3427.6 | 3401.4 | 4097.1 | 3201.6 | 3129.8 | 3973.8 | 3894.5 | 3308.1 |
| YWHAB  | 240.7  | 269.5  | 203.3  | 204    | 198.9  | 167.6  | 211.6  | 217.8  |
| YWHAE  | 165.2  | 153.6  | 149.8  | 172    | 134.3  | 181.4  | 156.5  | 157    |
| YWHAG  | 278.9  | 260.9  | 247.9  | 322.6  | 240.4  | 271.9  | 335.2  | 421.6  |
| YWHAH  | 1413   | 1756.6 | 2515.8 | 1564.8 | 1119.5 | 1192.3 | 1480.3 | 1709.4 |
| YWHAQ  | 2442.1 | 2915.2 | 2568.9 | 2396.7 | 2503.8 | 2023   | 2618.6 | 3310.9 |
| YWHAZ  | 3559.8 | 3973   | 4150.7 | 4490.7 | 3552   | 4752.9 | 4825.8 | 5827.4 |
| YWHAZ  | 122.3  | 141.9  | 131.8  | 124.4  | 121.2  | 112.1  | 133.2  | 118.1  |
| YY1    | 500    | 500.4  | 444.1  | 583.1  | 365.5  | 330.8  | 777.6  | 815.3  |
| YY1AP1 | 516.9  | 649.5  | 531    | 647.2  | 570.1  | 453.5  | 666.5  | 789.5  |
| YY2    | 111.1  | 117.1  | 120.5  | 126.7  | 105.7  | 95.1   | 116.2  | 117    |
| ZA20D2 | 1864.6 | 1858.6 | 1867.3 | 2738.6 | 2154.2 | 2258.4 | 2978.9 | 3428.5 |
| ZADH1  | 244.3  | 190.2  | 247.6  | 234.4  | 237.7  | 170.2  | 207.4  | 226    |
| ZADH2  | 239.7  | 280.3  | 266.9  | 227.6  | 255.5  | 154.3  | 223.2  | 225.1  |
| ZAK    | 111.8  | 117.5  | 134.1  | 121.6  | 111    | 101.2  | 125.4  | 113.4  |
| ZAK    | 143.1  | 134.6  | 148.9  | 129.2  | 120.7  | 121    | 132.6  | 122.9  |
| ZAN    | 114.2  | 116.6  | 112.9  | 114.2  | 113.2  | 100.8  | 117.1  | 116.9  |
| ZAN    | 123.8  | 137.8  | 127    | 123.6  | 118.8  | 109.6  | 128.5  | 130.5  |
| ZAN    | 118.6  | 124    | 125.2  | 127.7  | 115.8  | 105.6  | 121    | 124.6  |
| ZAP70  | 120.2  | 120.7  | 124.9  | 126    | 115.1  | 105.4  | 137.9  | 128.7  |
| ZAP70  | 643.3  | 720.8  | 731.5  | 667.6  | 488.5  | 686.7  | 719.1  | 473    |
| ZAP70  | 117.6  | 128.9  | 115.7  | 117.3  | 125.9  | 102.3  | 126.7  | 121.6  |
| ZAR1   | 108.5  | 119.5  | 121.3  | 107.9  | 100.7  | 98.9   | 107    | 111.4  |
| ZBED1  | 490    | 466.7  | 636.1  | 464.2  | 348.2  | 507.5  | 496.9  | 550.5  |
| ZBED2  | 112    | 116.8  | 119.7  | 111.8  | 117.6  | 94.4   | 117    | 119.8  |
| ZBED3  | 114.8  | 114.5  | 136.9  | 116    | 118.3  | 111.3  | 135.9  | 108.7  |
| ZBED4  | 221.1  | 245    | 208.3  | 220    | 200.3  | 183.2  | 245.4  | 309.7  |
| ZBED5  | 466.6  | 258.6  | 337.7  | 390.4  | 278.1  | 260.5  | 277.3  | 282.8  |
| ZBP1   | 288    | 254.7  | 421.4  | 251.1  | 159.2  | 220.6  | 208.7  | 178.6  |
| ZBTB1  | 125.7  | 130.2  | 119.9  | 122.3  | 111.7  | 99.2   | 122.7  | 127.1  |
| ZBTB10 | 111.8  | 126.9  | 127.9  | 128.6  | 108.9  | 104.7  | 125    | 125.6  |
| ZBTB11 | 150.1  | 169.4  | 172    | 164.7  | 130.5  | 125.3  | 178    | 171.8  |
| ZBTB12 | 114.5  | 104.6  | 116.9  | 107.2  | 107    | 96     | 115    | 115.3  |
| ZBTB16 | 127.8  | 143.5  | 126.6  | 147.1  | 121.2  | 98.8   | 144.7  | 133.6  |
| ZBTB16 | 178    | 175    | 150.5  | 178.1  | 147    | 129.6  | 163.4  | 139.7  |
| ZBTB16 | 112.9  | 115.7  | 114.2  | 112.6  | 113.7  | 104.2  | 112.8  | 120.1  |
| ZBTB17 | 311.1  | 332.7  | 260    | 352.7  | 269.9  | 228.1  | 412.5  | 319.5  |
| ZBTB2  | 132.6  | 134.5  | 136.7  | 139.6  | 129.4  | 104.3  | 144.5  | 135.3  |
| ZBTB20 | 201.2  | 179.5  | 202.1  | 185.7  | 171.7  | 161.1  | 186.7  | 199.3  |
| ZBTB24 | 324.1  | 302.1  | 221.6  | 302.3  | 291.8  | 186.9  | 280    | 244.2  |
| ZBTB25 | 208.2  | 256.3  | 225.7  | 205.4  | 220.9  | 160.7  | 189.5  | 187.4  |
| ZBTB26 | 119.1  | 123.3  | 118.4  | 123.9  | 105.9  | 92.7   | 118.9  | 123.3  |
| ZBTB3  | 127.8  | 133.5  | 150.4  | 133.6  | 131    | 123.9  | 126.1  | 135.7  |
| ZBTB32 | 124.2  | 125.7  | 125.1  | 125.3  | 111.4  | 100.7  | 122.4  | 118    |
| ZBTB33 | 905.1  | 944.8  | 879.9  | 1060.5 | 646.8  | 642    | 931    | 913.4  |

|          |        |        |       |        |        |       |        |        |
|----------|--------|--------|-------|--------|--------|-------|--------|--------|
| ZBTB37   | 110.3  | 109.1  | 109.3 | 120.5  | 103.9  | 102   | 119.7  | 113.1  |
| ZBTB38   | 118.2  | 124.6  | 144.3 | 141.2  | 129.2  | 116.9 | 129    | 123.5  |
| ZBTB39   | 123    | 129.2  | 123.9 | 130.9  | 117    | 110.9 | 127.8  | 129.5  |
| ZBTB4    | 1047.1 | 923.6  | 999   | 981.8  | 1193.4 | 739.8 | 928.9  | 877.5  |
| ZBTB40   | 245.7  | 239.8  | 201.1 | 250.5  | 174.1  | 132.1 | 223.5  | 263    |
| ZBTB41   | 118.8  | 127.3  | 114.9 | 115.9  | 117.1  | 98.2  | 113.5  | 126.9  |
| ZBTB44   | 134.5  | 159.7  | 155.2 | 147.5  | 128.1  | 120.8 | 145.2  | 154.6  |
| ZBTB5    | 172.7  | 183.6  | 173.5 | 197.4  | 177.8  | 139.7 | 203.5  | 202.4  |
| ZBTB7A   | 124.8  | 126    | 133.2 | 135.7  | 125    | 111.6 | 133.7  | 131.5  |
| ZBTB7B   | 125.8  | 128.4  | 126.4 | 132.6  | 117.1  | 108   | 140.1  | 129.5  |
| ZBTB8    | 116.7  | 111.1  | 124.4 | 121.5  | 110.8  | 96.5  | 116.6  | 115.6  |
| ZBTB8    | 109    | 110.5  | 111.4 | 114.5  | 104.2  | 102.3 | 121    | 107.7  |
| ZBTB8OS  | 126.6  | 126.8  | 128.2 | 142.9  | 121.3  | 110.4 | 122.6  | 131.9  |
| ZBTB9    | 193.5  | 217.9  | 207.4 | 216.9  | 162    | 179.5 | 219.3  | 205.7  |
| ZC3H10   | 179.6  | 202.1  | 192.8 | 244.9  | 150.9  | 164.4 | 176.7  | 170.1  |
| ZC3H11A  | 123.6  | 108.6  | 119.9 | 124    | 114.4  | 93.7  | 116.5  | 124.2  |
| ZC3H12A  | 324.1  | 355.7  | 256.9 | 320.6  | 274.9  | 239.2 | 414.8  | 369.8  |
| ZC3H12B  | 128.1  | 133    | 149.3 | 128.3  | 117.2  | 111.8 | 115.6  | 124.4  |
| ZC3H14   | 243.8  | 234.2  | 198   | 262.7  | 257.2  | 180.2 | 223.7  | 204.2  |
| ZC3H15   | 237    | 215.1  | 230.6 | 272.6  | 235.4  | 206   | 256.7  | 240.9  |
| ZC3H3    | 443.9  | 443.2  | 478.8 | 473.9  | 325.4  | 450.1 | 417.2  | 349    |
| ZC3H6    | 139.9  | 137.4  | 137.2 | 137.5  | 141.3  | 117.1 | 157.9  | 142.2  |
| ZC3H7A   | 120.3  | 115.3  | 128.9 | 135.1  | 125.4  | 101.3 | 128.1  | 139.2  |
| ZC3H7B   | 114.5  | 117.1  | 118.6 | 120.4  | 102.5  | 100.4 | 117.4  | 120.8  |
| ZC3H8    | 129.4  | 127.9  | 139.4 | 134.8  | 117.9  | 121.2 | 129.4  | 128    |
| ZC3HAV1  | 166.6  | 204.1  | 150.6 | 197.5  | 175.2  | 159.8 | 196.8  | 222.9  |
| ZC3HAV1  | 169.7  | 146.6  | 139.7 | 178.1  | 203    | 134.3 | 182    | 205.9  |
| ZC3HAV1  | 983.6  | 1004.2 | 858.1 | 1214.2 | 1485.2 | 850.8 | 2486.2 | 3804.2 |
| ZC3HAV1L | 114.6  | 116.3  | 113.2 | 113.4  | 109    | 100.1 | 122.1  | 109.8  |
| ZC3HC1   | 473.3  | 507.8  | 498.3 | 534    | 439.6  | 372.5 | 547.4  | 465.3  |
| ZCCHC10  | 118.6  | 116.8  | 115.1 | 117.3  | 106.1  | 97.6  | 118.7  | 117.1  |
| ZCCHC11  | 290.5  | 292.3  | 333.3 | 311.1  | 297.6  | 274   | 329    | 364.3  |
| ZCCHC11  | 196.7  | 204.2  | 193.7 | 214.5  | 178.6  | 143.1 | 185.8  | 196.2  |
| ZCCHC12  | 119    | 120.9  | 125.2 | 124.7  | 113.4  | 102.4 | 125.6  | 129.7  |
| ZCCHC13  | 113.2  | 118.8  | 111   | 107.9  | 107.1  | 107   | 108.7  | 117.8  |
| ZCCHC14  | 232.1  | 258.2  | 210.6 | 224.3  | 222    | 204.2 | 251.2  | 214.6  |
| ZCCHC16  | 111.6  | 113.5  | 106.1 | 119.7  | 107.2  | 95.8  | 120.7  | 106    |
| ZCCHC17  | 336.3  | 331.9  | 311.3 | 329.3  | 272.8  | 318.2 | 336.3  | 297.3  |
| ZCCHC2   | 112.7  | 117.4  | 111.4 | 110.2  | 116.3  | 93.4  | 123.1  | 112.9  |
| ZCCHC3   | 237.2  | 220.7  | 174.5 | 225.8  | 179.1  | 164.8 | 236.9  | 234.5  |
| ZCCHC5   | 117    | 119.8  | 114.9 | 116.9  | 104.7  | 107.5 | 120.7  | 113.2  |
| ZCCHC6   | 139.4  | 165.7  | 131.1 | 164.9  | 169.9  | 123   | 183.3  | 167.5  |
| ZCCHC7   | 425.1  | 402.4  | 418.4 | 435.2  | 359.9  | 324.6 | 394.2  | 351    |
| ZCCHC8   | 234.4  | 223.4  | 222.2 | 289    | 237.7  | 221.3 | 230.9  | 256.3  |
| ZCCHC9   | 318.2  | 408.7  | 469   | 447.3  | 337.5  | 375.6 | 252.7  | 315.4  |
| ZCD1     | 669.4  | 811.6  | 806.6 | 707.2  | 708.5  | 471.8 | 613    | 516.6  |
| ZCRB1    | 133.1  | 137.5  | 143.6 | 141.2  | 137.1  | 130.5 | 146.8  | 154.2  |
| ZCSL2    | 153.3  | 160.3  | 165.4 | 177.5  | 141.2  | 162.1 | 181.9  | 154.9  |
| ZCSL3    | 196    | 226.6  | 225.2 | 209    | 201.1  | 225.6 | 195.3  | 175    |
| ZCWPW1   | 159.2  | 165.8  | 167.9 | 193.6  | 177.9  | 140.4 | 214.4  | 233    |
| ZCWPW2   | 109    | 123.9  | 117.8 | 120.3  | 106.4  | 104.4 | 120    | 122.9  |

|         |        |        |        |        |       |        |       |        |
|---------|--------|--------|--------|--------|-------|--------|-------|--------|
| ZD52F10 | 121.7  | 117.3  | 117.9  | 114.1  | 112.3 | 100.7  | 110.1 | 112.3  |
| ZD52F10 | 108.2  | 121.1  | 118.6  | 107.7  | 109.7 | 93.9   | 115.7 | 112.5  |
| ZD52F10 | 113.4  | 125.7  | 120    | 127.2  | 111.9 | 102    | 119.6 | 116.2  |
| ZDHHC1  | 116.9  | 107.9  | 120.3  | 115.4  | 105.9 | 90.4   | 115.7 | 113.4  |
| ZDHHC11 | 162    | 173.7  | 127.7  | 165    | 143.9 | 111.6  | 176.9 | 179.3  |
| ZDHHC11 | 127.5  | 122.9  | 129.5  | 120    | 118.8 | 110.9  | 130.7 | 111.2  |
| ZDHHC12 | 160.5  | 180.8  | 186.3  | 166.9  | 129.1 | 169.8  | 176.2 | 155.9  |
| ZDHHC13 | 169.1  | 177.8  | 184.7  | 194.6  | 170.7 | 146.4  | 170.4 | 165.1  |
| ZDHHC13 | 127.9  | 149    | 119.6  | 130.3  | 132.7 | 105.9  | 128.5 | 119.5  |
| ZDHHC13 | 105.2  | 108.8  | 116.8  | 116.8  | 114.6 | 106.2  | 112.5 | 121.8  |
| ZDHHC14 | 169.5  | 180    | 140.8  | 188.5  | 159.1 | 120.9  | 216.5 | 196.9  |
| ZDHHC15 | 120.7  | 114.8  | 111.3  | 107.4  | 108.7 | 96.9   | 114.6 | 116.2  |
| ZDHHC16 | 221.3  | 224.2  | 188.1  | 195.2  | 174.9 | 166.6  | 178.7 | 200.4  |
| ZDHHC16 | 122    | 117.6  | 124.4  | 123.4  | 113   | 98.7   | 123.1 | 125.4  |
| ZDHHC16 | 782.3  | 764.5  | 555.6  | 755.8  | 464   | 391.2  | 609.6 | 558.8  |
| ZDHHC17 | 231    | 260.3  | 237.4  | 268    | 241.9 | 224.5  | 266.2 | 267.8  |
| ZDHHC18 | 183    | 197.9  | 162.9  | 176    | 180.7 | 156.7  | 185.4 | 181.8  |
| ZDHHC19 | 117.5  | 111.9  | 115.4  | 120    | 103.9 | 92     | 117   | 114.7  |
| ZDHHC2  | 128.7  | 136    | 137.8  | 146.8  | 138.8 | 113.5  | 144.2 | 160.7  |
| ZDHHC20 | 120.6  | 125.2  | 125.7  | 131.7  | 112.9 | 97.8   | 135.7 | 125.8  |
| ZDHHC21 | 118.4  | 118.8  | 117.5  | 110.2  | 113.2 | 94.3   | 112.8 | 114.7  |
| ZDHHC22 | 124.4  | 139.5  | 149.4  | 133.3  | 116.1 | 104.7  | 138.4 | 122    |
| ZDHHC23 | 115.1  | 118.4  | 125.1  | 115.9  | 128.2 | 109.6  | 127.9 | 120.9  |
| ZDHHC24 | 134.3  | 137.1  | 146.8  | 133    | 117.3 | 117    | 128.2 | 129.1  |
| ZDHHC3  | 147.8  | 154.1  | 159.1  | 166.4  | 132.1 | 126.8  | 141.5 | 148.1  |
| ZDHHC4  | 109.8  | 122.1  | 128.4  | 114.5  | 112.4 | 109.8  | 118.2 | 113.5  |
| ZDHHC5  | 305.2  | 304.5  | 324.7  | 451.4  | 289.5 | 255.1  | 404.1 | 427.9  |
| ZDHHC6  | 537.3  | 540.4  | 755.3  | 629.7  | 484.5 | 477.6  | 471   | 486.7  |
| ZDHHC7  | 522.7  | 578.8  | 865.3  | 527.6  | 396.9 | 564.2  | 553.5 | 416.8  |
| ZDHHC8  | 1269.1 | 1369.9 | 991    | 1120.5 | 803.1 | 721.5  | 861.4 | 744.3  |
| ZDHHC9  | 185.4  | 187.9  | 182.8  | 187.3  | 164.6 | 118.6  | 195.8 | 184.8  |
| ZDHHC9  | 115.9  | 111.2  | 111    | 114.3  | 109.7 | 95.5   | 111.5 | 114.3  |
| ZDHHC9  | 114.5  | 115    | 107.5  | 119    | 109   | 95.7   | 112.9 | 111.7  |
| ZF      | 155.1  | 188    | 190.4  | 184    | 152.7 | 155.2  | 162.2 | 181.9  |
| ZFAND1  | 174.8  | 164.4  | 186.2  | 169.2  | 159.8 | 132    | 170.3 | 168.5  |
| ZFAND2A | 243.6  | 262.2  | 215.5  | 285.6  | 287.1 | 180.2  | 493.5 | 1389.5 |
| ZFAND2B | 508.1  | 493.6  | 389.4  | 547.6  | 376.5 | 454.8  | 507.4 | 456.2  |
| ZFAND3  | 179.9  | 173.8  | 170.7  | 184.1  | 160.3 | 170.6  | 200.9 | 209.9  |
| ZFAND6  | 151    | 166.1  | 177.2  | 185.3  | 152.6 | 163.1  | 177.8 | 170.9  |
| ZFHX1B  | 316.8  | 203.6  | 336.6  | 295.4  | 216.8 | 280.4  | 250.4 | 183.4  |
| ZFHX4   | 117.3  | 113.7  | 115.1  | 111.2  | 103.5 | 92.2   | 115.1 | 115.9  |
| ZFP1    | 146.7  | 131.6  | 114.9  | 116.1  | 116   | 108.7  | 136.4 | 126.9  |
| ZFP106  | 413.6  | 381.9  | 484    | 410.7  | 341   | 313.3  | 346.2 | 324    |
| ZFP161  | 364.3  | 384.1  | 372.9  | 388.8  | 301.9 | 275.1  | 240.5 | 271.6  |
| ZFP2    | 116.2  | 123.2  | 122.8  | 123.7  | 110   | 112.2  | 130.4 | 140.3  |
| ZFP260  | 167.3  | 232.9  | 223.5  | 212.3  | 172.4 | 169.6  | 186.2 | 208.4  |
| ZFP28   | 116.9  | 120.7  | 118.7  | 131.4  | 110.6 | 103.4  | 124.7 | 117    |
| ZFP3    | 171.9  | 162.4  | 222.6  | 188.1  | 160.2 | 146.5  | 136.6 | 141.4  |
| ZFP36   | 839.4  | 981    | 1128.3 | 783.4  | 633.6 | 812.3  | 786.9 | 795.6  |
| ZFP36L1 | 876.6  | 614.9  | 998.4  | 897    | 722.1 | 1017.8 | 801.7 | 556.3  |
| ZFP36L2 | 453.6  | 415.5  | 455.4  | 389.9  | 402.7 | 311    | 280.9 | 307.7  |

|         |        |       |       |       |       |       |        |        |
|---------|--------|-------|-------|-------|-------|-------|--------|--------|
| ZFP37   | 177.1  | 193.7 | 128.7 | 163.7 | 170.9 | 124.4 | 158    | 172.8  |
| ZFP41   | 110.3  | 124.5 | 120.7 | 125.4 | 107.8 | 103.9 | 131.2  | 115.1  |
| ZFP41   | 117.8  | 122.7 | 124.4 | 122.3 | 112.1 | 104.7 | 112.9  | 118.6  |
| ZFP42   | 130.2  | 125   | 122.9 | 128.9 | 113.6 | 108.1 | 125.1  | 120.4  |
| ZFP64   | 112.1  | 117.2 | 123.4 | 121.1 | 113.9 | 93.8  | 112.5  | 115.4  |
| ZFP64   | 114.5  | 121.6 | 124.6 | 117.3 | 106.2 | 97.2  | 122.6  | 123.6  |
| ZFP90   | 321.6  | 317.1 | 354.9 | 333   | 253.5 | 260.2 | 265.5  | 236.9  |
| ZFP91   | 1012.9 | 974.1 | 820.4 | 829.3 | 986.7 | 709   | 1014.3 | 1056.5 |
| ZFP91   | 135.6  | 162.7 | 133.9 | 158.1 | 139   | 107.5 | 168.3  | 172.6  |
| ZFP95   | 109.9  | 120.3 | 115.8 | 124.6 | 108   | 101.5 | 122.6  | 113.6  |
| ZFP95   | 110.5  | 105.6 | 120.6 | 111.1 | 101.6 | 98.8  | 116.2  | 110.7  |
| ZFP95   | 131.5  | 133.1 | 134.2 | 145.6 | 119.5 | 115   | 158.9  | 181.3  |
| ZFPL1   | 131.2  | 125   | 147.5 | 143.8 | 110.2 | 116.2 | 134.9  | 139.8  |
| ZFPM1   | 253.6  | 240.5 | 228.3 | 244.2 | 174.6 | 194.4 | 235.4  | 219.9  |
| ZFPM2   | 114.3  | 111.7 | 118.9 | 117.4 | 102.8 | 101.6 | 118.4  | 116    |
| ZFR     | 220    | 157.7 | 232.2 | 389.8 | 381.8 | 272   | 339    | 378.5  |
| ZFX     | 146.1  | 142.7 | 135   | 157.8 | 142.6 | 114.7 | 158.4  | 164.9  |
| ZFY     | 157.9  | 160.6 | 155.2 | 190.7 | 194   | 145.6 | 179.8  | 184.3  |
| ZFYVE1  | 111.2  | 121.3 | 117.5 | 132.2 | 107.9 | 98    | 115.8  | 116.8  |
| ZFYVE1  | 119.4  | 119.5 | 113   | 126.9 | 112.6 | 112.2 | 121.5  | 117.8  |
| ZFYVE16 | 165.2  | 144   | 156.2 | 173.4 | 158.5 | 146.5 | 195.3  | 176.5  |
| ZFYVE19 | 292.9  | 366.9 | 370.8 | 277.8 | 256.2 | 231.6 | 293.4  | 324.7  |
| ZFYVE20 | 577.1  | 506.6 | 548.7 | 553.9 | 463.3 | 403.8 | 484.8  | 450.3  |
| ZFYVE21 | 306.9  | 267.4 | 364.5 | 272.3 | 266.7 | 321.5 | 361.1  | 311.2  |
| ZFYVE26 | 435.2  | 398.9 | 394.1 | 442.7 | 380.8 | 301.1 | 452.5  | 494    |
| ZFYVE27 | 124.6  | 134.4 | 125.6 | 129.9 | 109.8 | 106.9 | 132.8  | 139.3  |
| ZFYVE27 | 164.2  | 165.4 | 148.4 | 179.3 | 132.4 | 144.6 | 173.9  | 170.9  |
| ZFYVE28 | 111.6  | 112.3 | 117.4 | 118.6 | 108.8 | 107.9 | 122.6  | 122.3  |
| ZFYVE9  | 112.1  | 119.6 | 119.9 | 129.6 | 106.6 | 94.5  | 125.8  | 117.6  |
| ZFYVE9  | 114.9  | 117.9 | 111   | 114.6 | 110.2 | 100.1 | 114.7  | 111.3  |
| ZFYVE9  | 114    | 110.2 | 113.9 | 110.3 | 117.3 | 98.6  | 126.1  | 114.3  |
| ZFYVE9  | 112    | 117   | 125.5 | 122.6 | 116.3 | 101.2 | 122.2  | 112.5  |
| ZGPAT   | 142.6  | 134   | 149.5 | 153   | 144.4 | 124.5 | 130.5  | 132    |
| ZGPAT   | 117.2  | 120.2 | 128.5 | 120.9 | 108.1 | 110.7 | 121.3  | 117.6  |
| ZGPAT   | 537.1  | 662.3 | 586.7 | 636   | 435.1 | 512.1 | 474.1  | 403.9  |
| ZGPAT   | 117.2  | 125   | 129.2 | 125.4 | 118.3 | 108.5 | 137.2  | 124.7  |
| ZHX1    | 135    | 132.3 | 141.8 | 154.2 | 127.5 | 123.8 | 150    | 140.3  |
| ZHX1    | 111.8  | 119.8 | 128.6 | 121.9 | 110.4 | 103.7 | 124.7  | 117.6  |
| ZHX1    | 119.5  | 128.7 | 127.1 | 129.3 | 117.3 | 98.1  | 115.5  | 130.8  |
| ZHX2    | 291.8  | 411.8 | 220.5 | 273.9 | 420   | 182.7 | 293.3  | 446.1  |
| ZHX3    | 153    | 159.9 | 150.6 | 154   | 142.7 | 117.1 | 149.3  | 134.6  |
| ZIC1    | 113.6  | 115.8 | 107.9 | 112.4 | 114.8 | 95    | 126.9  | 110.4  |
| ZIC2    | 112.4  | 108.8 | 121.1 | 119.5 | 111.8 | 100.3 | 119.9  | 118.1  |
| ZIC3    | 111    | 106.7 | 107.9 | 114.4 | 99    | 100.5 | 117.4  | 107.9  |
| ZIC4    | 105.8  | 108.8 | 108.1 | 111.2 | 101.3 | 96.8  | 115.3  | 117.4  |
| ZIC5    | 117.4  | 116.3 | 114.4 | 123.2 | 109.1 | 104.4 | 121.3  | 106.2  |
| ZIK1    | 152.7  | 184.6 | 156.5 | 164.4 | 156.2 | 134   | 151.3  | 157.2  |
| ZIM2    | 116.4  | 109.2 | 117.9 | 117.1 | 114   | 101.2 | 109    | 116.3  |
| ZIM3    | 119    | 125.6 | 117.2 | 130.4 | 112.1 | 102.2 | 119.3  | 127.4  |
| ZKSCAN1 | 122.4  | 134.3 | 151.8 | 122.8 | 129.4 | 104.3 | 123.8  | 132.8  |
| ZMAT1   | 123.3  | 111.7 | 115.3 | 119.1 | 111.4 | 96.8  | 111.1  | 113.6  |

|          |        |        |        |        |        |       |        |        |
|----------|--------|--------|--------|--------|--------|-------|--------|--------|
| ZMAT1    | 106.9  | 117.6  | 119    | 117.7  | 109    | 97.9  | 119.5  | 111.5  |
| ZMAT1    | 109.8  | 117    | 104.3  | 110.6  | 101.7  | 91.6  | 113.3  | 106.8  |
| ZMAT2    | 491.9  | 584.9  | 571    | 658.5  | 527    | 526   | 654.8  | 645.8  |
| ZMAT3    | 1421.5 | 1277   | 1330.5 | 1386.5 | 1313.2 | 1163  | 1528.9 | 1726.9 |
| ZMAT5    | 106    | 108.6  | 117.8  | 117.1  | 105.9  | 100.4 | 112.1  | 108.3  |
| ZMAT5    | 151.2  | 155.2  | 174.4  | 151.9  | 127.9  | 134.1 | 146.1  | 146.7  |
| ZMIZ2    | 129.3  | 147.2  | 144.5  | 135.3  | 125.5  | 110.3 | 150.4  | 128.9  |
| ZMPSTE24 | 723.7  | 828.2  | 850.5  | 945.7  | 567.6  | 572.9 | 1020.7 | 953.7  |
| ZMYM1    | 217.4  | 216.7  | 213.5  | 196.1  | 193.9  | 146.1 | 206.8  | 208.5  |
| ZMYM3    | 115.7  | 115.2  | 119.8  | 113.4  | 104.1  | 99.9  | 121.6  | 111.6  |
| ZMYM3    | 138.5  | 131.5  | 159.9  | 142.1  | 116.6  | 120.4 | 134.2  | 125.1  |
| ZMYM3    | 118    | 119.1  | 116.1  | 119    | 105.2  | 98.5  | 111.8  | 111.5  |
| ZMYM4    | 204    | 242.2  | 230.3  | 260.4  | 208.5  | 209.2 | 265.3  | 277.9  |
| ZMYM5    | 150.5  | 153.8  | 160    | 177.1  | 148.6  | 118.6 | 164.2  | 159.5  |
| ZMYM5    | 147    | 153.6  | 167.1  | 180.9  | 161.8  | 119.1 | 158.4  | 179.9  |
| ZMYM6    | 110.7  | 122.6  | 120    | 120    | 107    | 99.4  | 112.6  | 113    |
| ZMYND10  | 120.1  | 112.4  | 116.1  | 118.1  | 112.7  | 103.7 | 123.3  | 114.7  |
| ZMYND11  | 117.6  | 114.3  | 131.9  | 117.4  | 110.7  | 105.8 | 120.9  | 114.3  |
| ZMYND11  | 122.9  | 115.1  | 114.9  | 117.9  | 112.4  | 100.9 | 129.7  | 121.4  |
| ZMYND12  | 112.8  | 106.4  | 116.5  | 112.6  | 103.5  | 92.6  | 120.3  | 106.3  |
| ZMYND15  | 164.2  | 126.1  | 207.8  | 166.3  | 117    | 299.4 | 118.7  | 114.5  |
| ZMYND17  | 119.2  | 115.6  | 121.5  | 111.1  | 106.7  | 106.1 | 122.3  | 115.1  |
| ZMYND19  | 302.2  | 327.9  | 232.3  | 272.5  | 253.1  | 175.4 | 326.8  | 283.3  |
| ZMYND8   | 172    | 174.5  | 195.3  | 161    | 158.8  | 139.2 | 152.5  | 139.3  |
| ZNF10    | 151.6  | 161    | 155.4  | 164.7  | 149.3  | 133.4 | 166    | 165.4  |
| ZNF100   | 114.9  | 124.1  | 119.7  | 122.7  | 112.2  | 97.5  | 122.5  | 116.2  |
| ZNF101   | 253.8  | 305.2  | 323.6  | 274.2  | 287.2  | 198.7 | 288.7  | 272.3  |
| ZNF114   | 124.9  | 123    | 116.7  | 120    | 109.8  | 96.5  | 128.1  | 117.7  |
| ZNF117   | 110.3  | 103.4  | 115.7  | 116.6  | 104.1  | 96.3  | 117.2  | 112.1  |
| ZNF11B   | 508.7  | 678.6  | 489.1  | 503.7  | 422    | 403.7 | 456    | 386    |
| ZNF12    | 165.4  | 153.4  | 156.5  | 157.3  | 137.6  | 119.3 | 158.5  | 154    |
| ZNF121   | 107.1  | 107.5  | 114.9  | 113.5  | 110    | 92.1  | 112    | 113.5  |
| ZNF124   | 121.8  | 122    | 123.2  | 118.5  | 107.6  | 94.5  | 124.1  | 115.2  |
| ZNF131   | 118    | 128.7  | 113.9  | 123.8  | 117.9  | 97.8  | 131.3  | 114.1  |
| ZNF132   | 113.4  | 125.4  | 119.1  | 124.2  | 106.7  | 111.6 | 128    | 135.9  |
| ZNF133   | 157    | 157    | 144.7  | 156.8  | 133.1  | 114.2 | 139.1  | 146    |
| ZNF134   | 138    | 169.6  | 143.1  | 137.6  | 131.3  | 132.3 | 155.5  | 140.1  |
| ZNF135   | 128.7  | 136.3  | 131.8  | 128.6  | 129.2  | 107.8 | 119.2  | 129.3  |
| ZNF136   | 133.1  | 142.5  | 144.3  | 151.5  | 139.9  | 112.6 | 143.5  | 125.6  |
| ZNF136   | 158.4  | 154.2  | 175.6  | 158.6  | 148.4  | 125.4 | 143.2  | 160.4  |
| ZNF137   | 128.6  | 132.1  | 147.3  | 140.1  | 129.3  | 112.9 | 141.2  | 136.4  |
| ZNF14    | 119.2  | 119.5  | 111.6  | 113.7  | 104.5  | 109.1 | 128.9  | 117.9  |
| ZNF140   | 133    | 131.3  | 163.7  | 154.3  | 136.3  | 120.2 | 142.5  | 148.4  |
| ZNF141   | 109.9  | 114.3  | 128.4  | 121.3  | 105.3  | 100.1 | 125.2  | 137.5  |
| ZNF142   | 172.9  | 188.8  | 189.9  | 194.7  | 149.8  | 165.4 | 208.8  | 206    |
| ZNF143   | 347.2  | 341.8  | 327.5  | 383.8  | 332.3  | 342.8 | 428.4  | 502.2  |
| ZNF146   | 444.5  | 393.5  | 355.7  | 544.8  | 366.8  | 322.2 | 483.1  | 501.8  |
| ZNF148   | 1091.5 | 1136.2 | 823.1  | 1189.5 | 911.5  | 656.6 | 1370.8 | 1311   |
| ZNF155   | 126.2  | 114.5  | 129.4  | 113.1  | 97.9   | 99.7  | 133.3  | 119.7  |
| ZNF155   | 117.9  | 123.7  | 123.9  | 126.5  | 116.4  | 105.6 | 125.1  | 121.4  |
| ZNF155   | 113.2  | 116.2  | 121.7  | 119.2  | 111.1  | 108.2 | 132.1  | 118.7  |

|        |       |        |        |        |        |       |        |        |
|--------|-------|--------|--------|--------|--------|-------|--------|--------|
| ZNF157 | 109.4 | 112    | 120.8  | 124.4  | 113.2  | 100.8 | 127.3  | 109.3  |
| ZNF16  | 145.2 | 149.5  | 133.8  | 146.5  | 157.1  | 121.9 | 155.7  | 163.4  |
| ZNF16  | 116   | 107.7  | 116.1  | 107.1  | 99.5   | 98.5  | 126.8  | 122.5  |
| ZNF16  | 123.2 | 129.3  | 121.2  | 124.4  | 127.4  | 113.3 | 132.9  | 126.9  |
| ZNF160 | 177.3 | 161.6  | 155.8  | 180.3  | 165.5  | 127.9 | 150.8  | 176.7  |
| ZNF160 | 114.7 | 125.6  | 119.1  | 115.7  | 116.9  | 101.6 | 120.4  | 122.6  |
| ZNF160 | 218   | 204.9  | 211.9  | 197.1  | 229.1  | 135.1 | 165.2  | 245.9  |
| ZNF161 | 1245  | 1566.4 | 1018.5 | 1241.4 | 1123.7 | 866   | 1159.7 | 1218.3 |
| ZNF165 | 126.9 | 128.6  | 125.1  | 136.5  | 122.4  | 108.1 | 141.8  | 156    |
| ZNF167 | 128.7 | 125.5  | 133.7  | 127.8  | 110.5  | 108   | 124.7  | 116.1  |
| ZNF167 | 115.8 | 114.9  | 116.6  | 120.1  | 106.1  | 97.8  | 112    | 117.9  |
| ZNF167 | 113.4 | 118.4  | 112.3  | 113.5  | 110.2  | 104.9 | 112.6  | 120.5  |
| ZNF169 | 128.9 | 150.8  | 141.9  | 143    | 132    | 117.9 | 145.4  | 136.3  |
| ZNF17  | 256.8 | 298.5  | 286.2  | 286.7  | 243.1  | 210.1 | 238.5  | 236.7  |
| ZNF174 | 137.7 | 139.3  | 127.5  | 131.7  | 114.6  | 123.8 | 129.9  | 142.4  |
| ZNF174 | 119.3 | 143.2  | 132    | 133.7  | 118.2  | 108.2 | 139.1  | 121.5  |
| ZNF174 | 132   | 125.8  | 126.6  | 126.3  | 117.9  | 111.8 | 119.7  | 123.5  |
| ZNF175 | 152.1 | 142.2  | 145.7  | 149.5  | 139.8  | 125.9 | 150.5  | 140.8  |
| ZNF177 | 127.5 | 115.7  | 125.5  | 129.1  | 121.3  | 113.8 | 142    | 141.7  |
| ZNF179 | 122.3 | 138.8  | 120.3  | 142.5  | 120.8  | 112.2 | 134.3  | 140    |
| ZNF18  | 174.4 | 221.8  | 251.6  | 223.1  | 179.9  | 215   | 207.3  | 208.8  |
| ZNF181 | 124.4 | 137.4  | 127.1  | 132.9  | 120.9  | 114.2 | 127.5  | 128    |
| ZNF182 | 253.5 | 291.9  | 237.9  | 256.4  | 270.5  | 183.7 | 221.3  | 236.1  |
| ZNF184 | 125.1 | 119.6  | 118.6  | 119.1  | 130.2  | 109.7 | 122.5  | 121.2  |
| ZNF187 | 111.9 | 108.4  | 116.3  | 119.6  | 116.2  | 102.5 | 125.8  | 109.9  |
| ZNF187 | 152.9 | 151.9  | 182.2  | 163.1  | 150.5  | 138.4 | 133.9  | 152    |
| ZNF189 | 226.7 | 238.1  | 227.5  | 237.4  | 250.6  | 217   | 260.9  | 254.7  |
| ZNF189 | 103.1 | 110.7  | 108.2  | 114.2  | 109.5  | 94.4  | 120.6  | 119.6  |
| ZNF19  | 112.3 | 120.1  | 113.5  | 126.2  | 101.9  | 95.9  | 110.4  | 111.2  |
| ZNF192 | 120.8 | 125.6  | 121.4  | 137    | 116.9  | 103.4 | 121.4  | 114.7  |
| ZNF193 | 144.6 | 137.3  | 156.4  | 165.4  | 128.6  | 131.7 | 135.6  | 125.4  |
| ZNF195 | 223.5 | 217.1  | 208.9  | 227    | 218.9  | 158.8 | 240.4  | 249.4  |
| ZNF197 | 129.9 | 142.4  | 128.1  | 138.1  | 115.9  | 119.4 | 129.7  | 130.2  |
| ZNF197 | 123.8 | 119.3  | 114.6  | 115.3  | 109.9  | 98.6  | 117.4  | 113.4  |
| ZNF197 | 135.3 | 128.4  | 145.4  | 144.7  | 129.8  | 127.8 | 132.6  | 130.8  |
| ZNF2   | 146   | 134.8  | 144.2  | 137.4  | 139.4  | 129.2 | 145.1  | 128.1  |
| ZNF2   | 104   | 110.4  | 111.5  | 109.2  | 104.1  | 100.3 | 129.4  | 105.5  |
| ZNF20  | 186.1 | 208.1  | 172.2  | 208.6  | 172.4  | 137.2 | 182    | 178.3  |
| ZNF200 | 104.9 | 105.8  | 116.5  | 122.3  | 108.5  | 102   | 115.9  | 112    |
| ZNF200 | 149.4 | 153.6  | 160.9  | 144    | 139.9  | 128.8 | 127.4  | 130    |
| ZNF200 | 217.9 | 237.1  | 196.7  | 223    | 203.7  | 171.5 | 236.7  | 232.9  |
| ZNF202 | 130.5 | 148.9  | 127.6  | 147.7  | 142.6  | 115   | 160.3  | 151.6  |
| ZNF204 | 135.9 | 135.6  | 135.3  | 136.7  | 106    | 107   | 120.3  | 115.8  |
| ZNF205 | 115.2 | 112.8  | 113.8  | 120.8  | 108.4  | 97.9  | 119.6  | 119.6  |
| ZNF205 | 122.2 | 120.9  | 121.9  | 118.7  | 111.9  | 102.1 | 117.9  | 111.2  |
| ZNF206 | 120.6 | 113    | 118.1  | 119.9  | 106.1  | 96.7  | 116.9  | 115.6  |
| ZNF207 | 497.9 | 560.6  | 510.6  | 582.8  | 528.6  | 389.6 | 538.8  | 483.5  |
| ZNF207 | 637.5 | 737.1  | 616    | 860.6  | 596.5  | 591.4 | 843.5  | 672.2  |
| ZNF208 | 109   | 108.4  | 113.7  | 115.4  | 111.6  | 93.4  | 117.1  | 113    |
| ZNF21  | 133.4 | 131.9  | 126.1  | 133.9  | 118.4  | 103.8 | 134.2  | 127.1  |
| ZNF211 | 265.8 | 291    | 235.7  | 286    | 265.1  | 217   | 242.6  | 223.1  |

|        |       |       |       |       |       |       |       |       |
|--------|-------|-------|-------|-------|-------|-------|-------|-------|
| ZNF212 | 294.7 | 316.7 | 288.6 | 333.5 | 260.6 | 233.5 | 359.6 | 342.1 |
| ZNF213 | 159.8 | 186.9 | 187.4 | 197.4 | 149   | 151.6 | 177.1 | 148.7 |
| ZNF214 | 114.5 | 125.5 | 114.5 | 115.7 | 105.5 | 93.3  | 113   | 120   |
| ZNF215 | 123.8 | 110.3 | 113.7 | 117.5 | 112   | 102.1 | 120   | 116.6 |
| ZNF217 | 313.3 | 449.9 | 425.5 | 451.3 | 399.5 | 314.2 | 278.1 | 348.5 |
| ZNF218 | 275.4 | 212.5 | 246.6 | 255.7 | 166.8 | 244   | 291.7 | 207.9 |
| ZNF219 | 228.8 | 212.4 | 149.3 | 216.1 | 164.1 | 136.8 | 201.4 | 157.3 |
| ZNF22  | 496.4 | 624.7 | 633.9 | 560.2 | 572.7 | 391.7 | 524.3 | 527.4 |
| ZNF221 | 108   | 119.3 | 115.7 | 118.7 | 106.3 | 99.6  | 120.3 | 116.2 |
| ZNF222 | 129.2 | 119.8 | 122.9 | 124.5 | 110.7 | 104.8 | 127.3 | 111.5 |
| ZNF223 | 357.6 | 431.8 | 436.7 | 426.5 | 392.5 | 202.7 | 513.5 | 420.6 |
| ZNF224 | 162.6 | 175.7 | 168   | 185.6 | 145.3 | 147.7 | 164.3 | 152.8 |
| ZNF225 | 156.1 | 162.4 | 144.6 | 145.5 | 155.7 | 132.1 | 151.9 | 140.5 |
| ZNF226 | 130.7 | 149.7 | 138.8 | 132.2 | 124.6 | 107   | 121   | 128.2 |
| ZNF226 | 122.1 | 131.8 | 146.7 | 134   | 110.2 | 109.3 | 126.6 | 132.1 |
| ZNF227 | 143.6 | 162.8 | 128.4 | 145.3 | 126.9 | 125.2 | 149.5 | 151.5 |
| ZNF228 | 150.4 | 117.9 | 119.2 | 142.7 | 117.7 | 106.2 | 137.5 | 125.9 |
| ZNF229 | 113.1 | 113.7 | 113.5 | 114.4 | 101.4 | 98.2  | 117   | 112.6 |
| ZNF23  | 140.7 | 124.6 | 159.1 | 133.2 | 128.7 | 110.9 | 127.4 | 127.2 |
| ZNF230 | 128.5 | 131.3 | 131.4 | 143.4 | 132.1 | 121.4 | 130.7 | 126.4 |
| ZNF232 | 173.6 | 166   | 171.4 | 162.7 | 171.8 | 137.2 | 156.6 | 154.8 |
| ZNF233 | 113.9 | 106.6 | 113.9 | 120.8 | 98.1  | 94.2  | 110.4 | 113.5 |
| ZNF234 | 249.4 | 192.1 | 194.6 | 247   | 187.6 | 141.6 | 219.3 | 236.2 |
| ZNF235 | 192.7 | 221.8 | 187.6 | 209   | 192.4 | 161   | 204.4 | 175.7 |
| ZNF236 | 136.2 | 135.9 | 124.5 | 148.5 | 126.4 | 111.4 | 146.2 | 133.4 |
| ZNF238 | 123.8 | 117   | 118.1 | 136.2 | 113.3 | 107.4 | 126.8 | 122.8 |
| ZNF238 | 109.7 | 115.8 | 116.6 | 116.8 | 110   | 101.8 | 111.1 | 111.1 |
| ZNF238 | 123.8 | 126.9 | 118.3 | 122.6 | 120.5 | 98.9  | 122.3 | 124.1 |
| ZNF239 | 160.3 | 158.1 | 177   | 172.7 | 148.5 | 124.2 | 157.9 | 134.7 |
| ZNF24  | 142.2 | 156.6 | 148   | 172.8 | 156.4 | 136.9 | 153.4 | 166.5 |
| ZNF248 | 137.6 | 135.4 | 138.4 | 152.2 | 132.9 | 126.3 | 136.8 | 122.6 |
| ZNF25  | 199.3 | 215.8 | 235.1 | 232.7 | 198.7 | 188   | 183.3 | 201.6 |
| ZNF250 | 151.4 | 138.6 | 141.6 | 152.7 | 153.2 | 123.6 | 148.1 | 146   |
| ZNF253 | 106.7 | 116.2 | 118.2 | 111.7 | 113.5 | 103.4 | 123.6 | 111.5 |
| ZNF254 | 132.1 | 136.6 | 116.6 | 125.4 | 130.7 | 108.8 | 130.9 | 127.7 |
| ZNF256 | 166.7 | 197.9 | 183.7 | 190.2 | 195   | 141   | 188.7 | 228.6 |
| ZNF257 | 113.4 | 111.7 | 116.1 | 122.1 | 106.7 | 99.3  | 122.1 | 109.1 |
| ZNF259 | 155.9 | 180.3 | 168.9 | 162.6 | 136.4 | 148.6 | 153.8 | 154.1 |
| ZNF26  | 187.1 | 210   | 198.6 | 210.2 | 187.3 | 150.5 | 195.2 | 171.2 |
| ZNF263 | 246   | 294.5 | 231.9 | 226.2 | 240.8 | 224.4 | 297.2 | 290   |
| ZNF264 | 230.8 | 237.7 | 272.3 | 235.9 | 253.9 | 216.2 | 265.1 | 287.4 |
| ZNF265 | 164   | 174.6 | 176.8 | 182.9 | 171.6 | 136.4 | 174.6 | 194.3 |
| ZNF265 | 582.1 | 404.3 | 654.4 | 435.8 | 469.6 | 375.4 | 408.2 | 452.2 |
| ZNF266 | 247.1 | 280.3 | 252.8 | 324.7 | 288.3 | 213   | 235.3 | 334.7 |
| ZNF266 | 180.1 | 192.4 | 182.4 | 193.1 | 185.3 | 169.3 | 181.2 | 292.1 |
| ZNF266 | 121.1 | 110.8 | 122.3 | 131.9 | 111.4 | 103.6 | 113.9 | 117.3 |
| ZNF267 | 115.8 | 112.7 | 129   | 124.5 | 107.9 | 95    | 113   | 117.1 |
| ZNF268 | 120.9 | 106.4 | 118.8 | 118.7 | 115.7 | 100.7 | 115.7 | 117.6 |
| ZNF268 | 107.6 | 112.3 | 108.5 | 120.3 | 106   | 90.4  | 111   | 119.5 |
| ZNF271 | 158.7 | 189.4 | 192.6 | 203.7 | 167.9 | 166.8 | 234   | 258.4 |
| ZNF273 | 124.4 | 121.1 | 116.1 | 121.6 | 104.8 | 99.1  | 125.5 | 115.5 |



|         |       |       |       |       |       |       |       |       |
|---------|-------|-------|-------|-------|-------|-------|-------|-------|
| ZNF273  | 107.4 | 116.4 | 110.4 | 116.2 | 114.2 | 101.4 | 119.6 | 113.2 |
| ZNF274  | 465.7 | 408.4 | 537.8 | 457.3 | 438.6 | 454.5 | 471.8 | 515.5 |
| ZNF274  | 116.3 | 123.3 | 123.4 | 132.5 | 112.9 | 107.8 | 132.1 | 118.5 |
| ZNF274  | 198.9 | 192   | 205.8 | 178.4 | 156.4 | 169.4 | 175.3 | 197.1 |
| ZNF275  | 403.6 | 395.2 | 367.2 | 404.8 | 313.8 | 248.9 | 461.8 | 462.2 |
| ZNF275  | 122.3 | 115   | 121.5 | 119   | 111.5 | 98.6  | 117.9 | 113.9 |
| ZNF276  | 121.2 | 153.9 | 150.1 | 146.8 | 124.7 | 134   | 153.8 | 144.4 |
| ZNF277  | 442.2 | 484.5 | 563.9 | 477.1 | 410.9 | 421.9 | 403.7 | 430.2 |
| ZNF278  | 117.8 | 121.8 | 123.2 | 126.2 | 110.5 | 114.5 | 118.2 | 106.9 |
| ZNF278  | 110.6 | 113.6 | 107.4 | 114.8 | 106.4 | 99.4  | 115.8 | 116.1 |
| ZNF28   | 125.7 | 123.9 | 122.6 | 124   | 110.8 | 100.7 | 124.2 | 111.6 |
| ZNF284  | 104.8 | 122.2 | 114.9 | 114.6 | 102.3 | 97.4  | 104.4 | 114.8 |
| ZNF285A | 141.2 | 132.2 | 145.3 | 143   | 133   | 125.8 | 121.9 | 115.8 |
| ZNF286  | 118.6 | 132   | 132.8 | 134.5 | 133.7 | 107.3 | 133.1 | 128.9 |
| ZNF287  | 109.6 | 119.6 | 124.2 | 119   | 108.7 | 107.1 | 108.3 | 118.1 |
| ZNF289  | 205.1 | 245.1 | 253.5 | 199.9 | 159.5 | 196   | 223.7 | 193.8 |
| ZNF291  | 157.6 | 159.1 | 151.7 | 182.2 | 137.3 | 130.4 | 181.3 | 191.6 |
| ZNF294  | 121   | 131.8 | 135.1 | 146.1 | 116.2 | 117.5 | 122.4 | 131.4 |
| ZNF295  | 207.8 | 205.2 | 194   | 242.7 | 215.6 | 167.7 | 348.7 | 412   |
| ZNF297B | 205.9 | 181.9 | 174.5 | 201.6 | 193.2 | 130.9 | 242.9 | 291.7 |
| ZNF3    | 136.5 | 143.2 | 149   | 136   | 144.3 | 115.6 | 141.1 | 134.6 |
| ZNF3    | 131.1 | 132.5 | 142   | 154.3 | 129.8 | 123.4 | 144.1 | 135.2 |
| ZNF3    | 147.2 | 142.4 | 147.4 | 137.3 | 123.9 | 116.4 | 140.1 | 130.5 |
| ZNF3    | 116.2 | 111.3 | 112.6 | 112   | 106.3 | 96.9  | 111.3 | 117.6 |
| ZNF30   | 223.1 | 236.4 | 228.7 | 221.2 | 188.4 | 187   | 170.1 | 178.1 |
| ZNF300  | 105.3 | 105.8 | 116.3 | 116.3 | 107.2 | 103.3 | 124.9 | 115.2 |
| ZNF302  | 107.9 | 114.9 | 118.9 | 120.6 | 124.2 | 100.4 | 120.3 | 115.5 |
| ZNF304  | 127   | 133.1 | 137   | 135.8 | 123.3 | 125   | 129.8 | 132.7 |
| ZNF306  | 128.2 | 139.2 | 154.3 | 136.3 | 125.3 | 112.5 | 136.2 | 121.8 |
| ZNF307  | 175.3 | 183.6 | 190   | 185.6 | 155.1 | 128.9 | 159.6 | 144.3 |
| ZNF31   | 115.4 | 125.9 | 119.1 | 127.9 | 114.4 | 103   | 121.4 | 121.9 |
| ZNF311  | 103.7 | 105.8 | 103.7 | 113.3 | 114.7 | 95.4  | 119.7 | 112.2 |
| ZNF312  | 121.4 | 115.1 | 120.7 | 131.3 | 116   | 100.8 | 113.6 | 123.3 |
| ZNF313  | 550.9 | 512.7 | 780.3 | 726   | 530.6 | 495.8 | 694.1 | 851.3 |
| ZNF317  | 187.3 | 240.8 | 190.7 | 213.6 | 153.7 | 157.5 | 195.9 | 217.6 |
| ZNF318  | 171.9 | 167.7 | 146.3 | 183.8 | 133.3 | 119.7 | 165.2 | 161.6 |
| ZNF319  | 278   | 274.1 | 266.1 | 310.2 | 253.5 | 220   | 345.7 | 282.1 |
| ZNF32   | 117.7 | 114.8 | 126.7 | 123.3 | 118.8 | 107.4 | 129.6 | 116.2 |
| ZNF32   | 232.5 | 218.6 | 200.1 | 200.6 | 193   | 189.1 | 223.1 | 199.8 |
| ZNF32   | 151.4 | 153   | 173.5 | 155.2 | 153.7 | 131   | 141.9 | 129.2 |
| ZNF320  | 139.8 | 137.2 | 131.7 | 137.4 | 123.6 | 104.2 | 126.4 | 137.2 |
| ZNF322A | 124.4 | 124.3 | 143.5 | 120.6 | 129.2 | 113.2 | 139.1 | 132.5 |
| ZNF322B | 127.4 | 109.4 | 117.7 | 118.1 | 126.4 | 105.7 | 125.1 | 115   |
| ZNF323  | 126.6 | 118.7 | 127.2 | 124.5 | 115.2 | 107.3 | 118.6 | 115.8 |
| ZNF323  | 104.4 | 109.9 | 106   | 111.6 | 97    | 94.2  | 115   | 111.7 |
| ZNF324  | 252.7 | 264.6 | 253.2 | 288.3 | 195.7 | 220.5 | 301.6 | 326.8 |
| ZNF326  | 115.6 | 124   | 125.6 | 129   | 119.3 | 106.6 | 137.8 | 138.7 |
| ZNF326  | 116.7 | 126.8 | 121.1 | 115.1 | 110.9 | 103.9 | 131.8 | 119.2 |
| ZNF326  | 134.3 | 133.8 | 141.1 | 143.4 | 140.3 | 108.6 | 155.5 | 167.3 |
| ZNF329  | 232.4 | 256   | 276.8 | 235.7 | 257.8 | 287.3 | 315.7 | 314.4 |
| ZNF330  | 180   | 163.6 | 235.8 | 169.5 | 164.7 | 156.7 | 172.6 | 196.9 |

|         |        |       |       |       |        |       |        |       |
|---------|--------|-------|-------|-------|--------|-------|--------|-------|
| ZNF331  | 143    | 150.7 | 173.2 | 149.9 | 130    | 158.1 | 154.8  | 137.9 |
| ZNF331  | 116.5  | 113.5 | 95.5  | 111.3 | 109.4  | 99.5  | 110.3  | 108.3 |
| ZNF331  | 134.5  | 150.4 | 140.3 | 167.4 | 129.8  | 148.5 | 145.5  | 153.5 |
| ZNF333  | 155.4  | 143.7 | 145.3 | 163.7 | 123.3  | 128.1 | 129.4  | 136.7 |
| ZNF334  | 119.2  | 104.4 | 119.4 | 116.5 | 110.3  | 99.4  | 117.9  | 112   |
| ZNF334  | 111    | 118.9 | 113.6 | 126.3 | 108.7  | 103.7 | 119.9  | 114.7 |
| ZNF335  | 142.2  | 135.8 | 128.3 | 140.4 | 122.5  | 101.7 | 156.2  | 139.7 |
| ZNF336  | 122.6  | 126.8 | 126.2 | 130   | 118.8  | 101.6 | 123.9  | 136.4 |
| ZNF337  | 322.1  | 335.6 | 335.6 | 272.2 | 274    | 310.1 | 327.6  | 300.5 |
| ZNF33A  | 191.9  | 163.1 | 174.9 | 195.9 | 168.9  | 147.2 | 152.6  | 169.8 |
| ZNF33A  | 146.8  | 143.4 | 163.6 | 146.9 | 145.2  | 120.5 | 141.8  | 133.4 |
| ZNF34   | 146.3  | 159.4 | 150.5 | 152.7 | 126.7  | 122   | 149.8  | 120.2 |
| ZNF341  | 172.4  | 154.1 | 138.7 | 171.4 | 145.6  | 143.2 | 175.4  | 143.2 |
| ZNF342  | 221.6  | 212.1 | 213.1 | 211   | 168.5  | 170   | 201    | 186.3 |
| ZNF343  | 127.6  | 118.5 | 125.8 | 117.5 | 117    | 113.6 | 120.9  | 115.2 |
| ZNF345  | 114.2  | 124.8 | 121.8 | 126.2 | 107.9  | 104.6 | 121.4  | 124.1 |
| ZNF346  | 144.5  | 159   | 134.8 | 138.9 | 127.6  | 111.5 | 150.2  | 136.4 |
| ZNF347  | 119.9  | 116.6 | 123.7 | 122.4 | 118.7  | 104.5 | 124    | 126.4 |
| ZNF35   | 148.6  | 163.7 | 150.5 | 162.3 | 134    | 127.5 | 161.2  | 146.1 |
| ZNF350  | 152.9  | 158.8 | 184.7 | 160.1 | 152    | 153.8 | 155.5  | 159   |
| ZNF354A | 150.4  | 170.6 | 142.2 | 152.5 | 136.2  | 120.3 | 163.5  | 169.8 |
| ZNF354B | 127.7  | 120.9 | 121.5 | 118.5 | 111.3  | 99.2  | 123.8  | 117.5 |
| ZNF354C | 112    | 109.7 | 120.4 | 113.5 | 104.8  | 91.9  | 123.5  | 108.5 |
| ZNF358  | 245.6  | 242.9 | 208.5 | 247.9 | 183.5  | 149.4 | 203.4  | 223.1 |
| ZNF364  | 556.7  | 585.2 | 481   | 656   | 504.4  | 321.5 | 664.2  | 686.1 |
| ZNF365  | 113.4  | 112.7 | 114.1 | 125.8 | 106.1  | 97.9  | 113.6  | 118.9 |
| ZNF365  | 119    | 113   | 114.5 | 129.4 | 107.7  | 103.6 | 114.8  | 102.9 |
| ZNF365  | 109    | 119.4 | 115   | 118.7 | 117.6  | 105.1 | 117    | 113.4 |
| ZNF365  | 117.5  | 132.5 | 120.5 | 129.2 | 121.1  | 105.6 | 125.6  | 125   |
| ZNF366  | 120.8  | 133.7 | 134.7 | 128.5 | 128.1  | 109.4 | 130.9  | 123.7 |
| ZNF367  | 112.6  | 105.9 | 113.6 | 121.6 | 118.7  | 94.8  | 119.3  | 110.9 |
| ZNF37A  | 107.1  | 118.3 | 110.1 | 116.9 | 104.2  | 95.6  | 108.7  | 98.1  |
| ZNF37A  | 134.1  | 117.4 | 128.2 | 130.3 | 113.6  | 111.9 | 123.2  | 117.6 |
| ZNF37A  | 138.7  | 146.1 | 129.9 | 165.4 | 130.1  | 112.6 | 137.6  | 140.6 |
| ZNF382  | 112.9  | 115   | 112.1 | 127.7 | 98.6   | 102   | 117.1  | 113.7 |
| ZNF383  | 165.1  | 163.4 | 146.8 | 145.2 | 162.9  | 124.3 | 163.6  | 147.3 |
| ZNF384  | 117.7  | 121.4 | 122.9 | 114.6 | 109.5  | 101.2 | 130.8  | 129   |
| ZNF384  | 177.3  | 186.2 | 176.4 | 194.4 | 156.7  | 144.4 | 179.4  | 182   |
| ZNF385  | 141.3  | 146.9 | 146.5 | 197.9 | 127.5  | 139.2 | 222.3  | 145.3 |
| ZNF394  | 1000.6 | 933.7 | 1057  | 807.4 | 1000.5 | 619.8 | 1101.5 | 1229  |
| ZNF395  | 347.3  | 436.5 | 404.5 | 369.6 | 300.2  | 259.7 | 371.9  | 331.2 |
| ZNF396  | 116.7  | 116.2 | 121.2 | 119.5 | 113.9  | 104.3 | 122    | 112.9 |
| ZNF397  | 127.9  | 136.4 | 147.5 | 137.3 | 127    | 110.1 | 132.1  | 126.1 |
| ZNF398  | 116.3  | 127.3 | 126.1 | 122.9 | 118.6  | 105.3 | 127.3  | 119.6 |
| ZNF398  | 211.9  | 212   | 154.9 | 181   | 173.5  | 148.4 | 207.7  | 176.7 |
| ZNF403  | 806.8  | 934.4 | 880.9 | 920   | 859.6  | 721.4 | 874.3  | 835.2 |
| ZNF404  | 129.7  | 123   | 126.7 | 120.5 | 109.2  | 109.4 | 129.2  | 112.4 |
| ZNF406  | 124.7  | 117.9 | 114.9 | 120.4 | 111.1  | 98.9  | 120    | 124.7 |
| ZNF406  | 109    | 108.9 | 128.2 | 118.4 | 122.5  | 111   | 121.9  | 115.5 |
| ZNF407  | 112.4  | 107.7 | 121.2 | 112   | 106.2  | 96.1  | 110.9  | 110   |
| ZNF408  | 132.4  | 149.3 | 129.6 | 136.9 | 117.5  | 126.5 | 141.9  | 140.2 |

|         |        |        |        |        |        |        |        |        |
|---------|--------|--------|--------|--------|--------|--------|--------|--------|
| ZNF41   | 111.8  | 120.1  | 117    | 127.5  | 116.9  | 102.9  | 121.4  | 117    |
| ZNF41   | 119.2  | 119.6  | 119.1  | 120.9  | 114.5  | 110.1  | 118.7  | 118.7  |
| ZNF41   | 120.2  | 124.8  | 126.3  | 116.8  | 105.5  | 104.9  | 123.5  | 119.7  |
| ZNF410  | 249    | 302.1  | 307.1  | 324.8  | 246.8  | 296.6  | 345.7  | 427.8  |
| ZNF414  | 127.1  | 125    | 126.5  | 121.4  | 115.9  | 97.8   | 127.2  | 111.4  |
| ZNF415  | 124.6  | 125.4  | 133.3  | 141.5  | 136.8  | 116.4  | 132.7  | 127.9  |
| ZNF416  | 139.4  | 146.6  | 144.1  | 154.9  | 130.5  | 122.1  | 143.2  | 153.3  |
| ZNF417  | 119.9  | 127.3  | 124    | 128.5  | 122.5  | 108.8  | 127.8  | 126.3  |
| ZNF418  | 119    | 141.2  | 127.6  | 123.5  | 120.4  | 102.3  | 121.9  | 122.8  |
| ZNF419  | 225.5  | 240.5  | 257.7  | 238.5  | 211    | 184.1  | 196.7  | 208.4  |
| ZNF42   | 525.3  | 501    | 524    | 457    | 362.1  | 260.7  | 407.2  | 342.1  |
| ZNF42   | 102.7  | 118    | 124.7  | 116.6  | 118.6  | 110.7  | 123.7  | 121.5  |
| ZNF420  | 129.3  | 128    | 125.5  | 125    | 116.1  | 99.3   | 136.9  | 131.5  |
| ZNF423  | 118.5  | 125.1  | 115.6  | 113.9  | 104.3  | 104.1  | 121.6  | 114.9  |
| ZNF425  | 130.4  | 128.7  | 122.7  | 145.9  | 129.4  | 101    | 152    | 135.1  |
| ZNF426  | 146    | 171.7  | 190.8  | 166.1  | 136.9  | 146.5  | 161.6  | 192.9  |
| ZNF429  | 114.9  | 119.7  | 128    | 121.7  | 104.8  | 102.2  | 114.2  | 115.7  |
| ZNF43   | 115.2  | 116.8  | 125.6  | 117.3  | 105.5  | 96.9   | 117.1  | 116.5  |
| ZNF430  | 2315.2 | 1585.2 | 1794.6 | 1685.2 | 1600.8 | 1235.1 | 1614.1 | 2336.2 |
| ZNF431  | 139.9  | 128.7  | 151.5  | 135    | 128    | 117.9  | 129.9  | 129.6  |
| ZNF432  | 131.6  | 156.1  | 162.1  | 156    | 122.4  | 135.4  | 146.8  | 154.5  |
| ZNF433  | 115.5  | 122.2  | 122.1  | 126.7  | 108.7  | 98.4   | 128.8  | 125.1  |
| ZNF434  | 190.8  | 242.1  | 232    | 233.2  | 221.9  | 176.3  | 235.1  | 258.8  |
| ZNF435  | 264.8  | 277    | 245.4  | 307.7  | 260.9  | 228.5  | 228.7  | 206.7  |
| ZNF436  | 118.5  | 109.3  | 118.6  | 116.3  | 113.2  | 99.3   | 125.7  | 119.1  |
| ZNF436  | 116.6  | 111.9  | 114.3  | 122.1  | 107.2  | 94.1   | 118.9  | 117.5  |
| ZNF436  | 115.6  | 129.6  | 148.2  | 120.6  | 122.9  | 111.3  | 119.5  | 133.1  |
| ZNF438  | 154.1  | 139.9  | 155.4  | 169.9  | 139.3  | 144.4  | 200.3  | 179.1  |
| ZNF439  | 229.3  | 235.2  | 195.9  | 230.3  | 232.9  | 170.5  | 184.7  | 210.4  |
| ZNF44   | 115.4  | 115.4  | 121.2  | 121.2  | 103.7  | 98.4   | 117.8  | 110.3  |
| ZNF440L | 135.9  | 159.5  | 162.8  | 156    | 153.3  | 125.7  | 150.5  | 164.1  |
| ZNF441  | 117.9  | 112.1  | 123.5  | 122.8  | 114    | 100    | 115.9  | 117.9  |
| ZNF442  | 133.8  | 130.9  | 132.9  | 128.6  | 121.8  | 110.5  | 128.4  | 135.1  |
| ZNF443  | 185.2  | 218.3  | 181.7  | 194.2  | 166.8  | 154.9  | 186.6  | 180.9  |
| ZNF444  | 178.8  | 205.2  | 196.1  | 180.8  | 163.3  | 161.4  | 179.9  | 163.2  |
| ZNF445  | 118.9  | 120.2  | 121.2  | 128.6  | 106.8  | 93.4   | 107.5  | 114.7  |
| ZNF446  | 163.9  | 183.5  | 145.5  | 158    | 136.7  | 146.5  | 153    | 157.8  |
| ZNF447  | 352.9  | 392.5  | 694.6  | 422.2  | 403.6  | 523.9  | 356.9  | 412.6  |
| ZNF449  | 115    | 121.3  | 115.6  | 129.3  | 120.7  | 107.3  | 125.3  | 113.7  |
| ZNF45   | 186.2  | 173.6  | 199.2  | 184.9  | 191.5  | 153.8  | 179.2  | 190.8  |
| ZNF451  | 114.3  | 117.3  | 119.7  | 127.2  | 106.6  | 99.8   | 122.1  | 118.9  |
| ZNF451  | 320.2  | 279.6  | 327    | 312    | 296.9  | 311.7  | 355.6  | 283    |
| ZNF451  | 134.6  | 142.7  | 135.4  | 136.9  | 137.7  | 126.3  | 135.2  | 125.1  |
| ZNF452  | 115.8  | 111.1  | 113.9  | 115.7  | 105.8  | 99.6   | 113.7  | 116.4  |
| ZNF454  | 124.8  | 123.5  | 126.9  | 118.2  | 116.1  | 111.3  | 130.1  | 124.8  |
| ZNF460  | 119.6  | 128.7  | 138.6  | 127.4  | 122.2  | 109.5  | 131.7  | 118.5  |
| ZNF462  | 121.1  | 119.3  | 106.6  | 127.9  | 112.9  | 99.9   | 118.7  | 115.4  |
| ZNF467  | 164.7  | 164.4  | 208.8  | 194.2  | 138.8  | 146    | 169.4  | 163.9  |
| ZNF468  | 109    | 107.7  | 118.8  | 117.3  | 102.8  | 94.9   | 121.7  | 103.2  |
| ZNF471  | 118.9  | 116.6  | 116.5  | 119.8  | 120.5  | 95.1   | 121.6  | 133.4  |
| ZNF473  | 155.6  | 156.4  | 164.4  | 158.5  | 132.5  | 135.2  | 181.9  | 173.5  |

|        |       |       |       |       |       |       |       |       |
|--------|-------|-------|-------|-------|-------|-------|-------|-------|
| ZNF473 | 120.1 | 121.9 | 122.6 | 118.8 | 109.3 | 101.1 | 110.9 | 116.9 |
| ZNF474 | 112.9 | 110.7 | 113.8 | 118.1 | 115.3 | 96.4  | 120.5 | 108.2 |
| ZNF480 | 157.3 | 157.9 | 197.9 | 158.7 | 165.7 | 167.1 | 171.7 | 169.6 |
| ZNF482 | 130.3 | 133   | 155.8 | 150.7 | 124.1 | 120.3 | 146.4 | 135.4 |
| ZNF483 | 111.4 | 113.4 | 133.5 | 120.8 | 112.4 | 104.3 | 118.7 | 116.5 |
| ZNF483 | 376.2 | 325.5 | 414.1 | 337.3 | 316.3 | 241.2 | 427.5 | 336.5 |
| ZNF483 | 129.1 | 131.5 | 123.1 | 127.2 | 126.2 | 107.4 | 135   | 132.8 |
| ZNF484 | 159.9 | 163.9 | 158.8 | 170.1 | 157.3 | 131.5 | 175.4 | 171.7 |
| ZNF485 | 114.9 | 115.9 | 122.5 | 126.9 | 116.4 | 107.7 | 118.4 | 119.4 |
| ZNF490 | 121.6 | 122.6 | 118.8 | 115.6 | 118.5 | 109.4 | 123.6 | 116.6 |
| ZNF491 | 111.5 | 106.8 | 108   | 120.7 | 110.9 | 93.1  | 115.6 | 121.6 |
| ZNF493 | 141.5 | 140   | 135.3 | 128   | 132.6 | 110.8 | 132.3 | 124.2 |
| ZNF493 | 128.2 | 124.9 | 124.1 | 127.6 | 111.4 | 113.4 | 135.2 | 127.1 |
| ZNF496 | 111.8 | 111.8 | 115.2 | 122.2 | 114.1 | 99.1  | 116.4 | 112.4 |
| ZNF497 | 110.4 | 120   | 121.9 | 135.2 | 114.2 | 101   | 108.8 | 115.1 |
| ZNF498 | 127.3 | 134.5 | 139.4 | 139.3 | 135.4 | 118.6 | 146.1 | 133.8 |
| ZNF499 | 166.4 | 141.9 | 154   | 174.1 | 144.3 | 137.3 | 157.9 | 132.4 |
| ZNF500 | 211.3 | 227.3 | 189.5 | 234.2 | 173.1 | 177.4 | 179.3 | 186.6 |
| ZNF501 | 104.3 | 117.9 | 118   | 112.3 | 113.3 | 107.6 | 108.9 | 102.4 |
| ZNF502 | 123.2 | 130.1 | 124   | 125   | 116   | 114   | 128.2 | 130.9 |
| ZNF503 | 118.3 | 120.5 | 142.8 | 113.7 | 105.3 | 102.8 | 118.8 | 112.2 |
| ZNF507 | 124.9 | 121.7 | 126.7 | 127.2 | 116.7 | 104.3 | 118   | 122.8 |
| ZNF508 | 222.9 | 239.3 | 215   | 238   | 236.2 | 173.7 | 273.5 | 317.5 |
| ZNF509 | 183.2 | 202.5 | 159.8 | 194.8 | 181.7 | 140.4 | 241.4 | 219.5 |
| ZNF510 | 116.7 | 121.9 | 123.2 | 118.7 | 109   | 104.9 | 109.8 | 122.5 |
| ZNF511 | 259   | 304.6 | 258.8 | 270.1 | 216.3 | 199.1 | 200.5 | 221.6 |
| ZNF512 | 551.9 | 594.6 | 595.5 | 516   | 574.7 | 450   | 405.4 | 395   |
| ZNF513 | 138.9 | 138   | 151.5 | 145.7 | 134.5 | 116.2 | 146.5 | 127.2 |
| ZNF514 | 182.3 | 179.6 | 213.1 | 195.6 | 149.7 | 134.5 | 194.1 | 180.7 |
| ZNF517 | 107.1 | 110   | 111.4 | 120.5 | 117.6 | 99.7  | 115.2 | 115.9 |
| ZNF518 | 162.1 | 160.9 | 171   | 179.7 | 168.6 | 139.9 | 153.4 | 159.3 |
| ZNF519 | 111   | 115.6 | 116.6 | 116.4 | 106.7 | 101.7 | 118.8 | 118.4 |
| ZNF519 | 120.8 | 125.7 | 122.6 | 125.2 | 109.5 | 104.6 | 119.8 | 113.3 |
| ZNF521 | 117.6 | 119.3 | 111.6 | 113.5 | 109.2 | 97.2  | 118.3 | 114.8 |
| ZNF524 | 451.1 | 415.7 | 422.2 | 412.9 | 305.4 | 334.8 | 396.1 | 356.5 |
| ZNF526 | 152.8 | 135.1 | 144.8 | 143.1 | 138   | 118.2 | 141.1 | 142.9 |
| ZNF528 | 108.2 | 107.6 | 116.8 | 118.5 | 106.2 | 93.5  | 114.9 | 115.8 |
| ZNF529 | 250.3 | 321.8 | 336.5 | 308   | 269.9 | 264.3 | 309   | 255   |
| ZNF530 | 118.6 | 124.9 | 117.4 | 120.6 | 121.7 | 100.8 | 119.7 | 117.7 |
| ZNF532 | 121.3 | 106.4 | 143.6 | 140.5 | 121.6 | 102.8 | 134.2 | 132.4 |
| ZNF533 | 107.3 | 109.9 | 113.2 | 113   | 107.2 | 98.5  | 112.4 | 112.6 |
| ZNF536 | 113.2 | 120.5 | 107.4 | 116.3 | 106.5 | 98.6  | 117.7 | 120.2 |
| ZNF537 | 132.4 | 124.2 | 166.8 | 150.1 | 125.2 | 137.3 | 146.8 | 132.9 |
| ZNF539 | 116.3 | 118.7 | 127.8 | 131.4 | 112.9 | 105.7 | 125.7 | 123.2 |
| ZNF540 | 139.2 | 150.5 | 146.5 | 151.3 | 126.8 | 107.1 | 126.5 | 124.7 |
| ZNF542 | 116.3 | 115.5 | 121.4 | 120.8 | 106.9 | 94.4  | 116.8 | 124.8 |
| ZNF543 | 139.4 | 163.8 | 140.7 | 155.4 | 136.6 | 128.7 | 140.3 | 157.1 |
| ZNF544 | 113.5 | 108.8 | 120.6 | 128.7 | 117.7 | 102   | 116.7 | 112.3 |
| ZNF545 | 183.6 | 193.8 | 164.6 | 222.5 | 170.9 | 155.2 | 190.7 | 176.3 |
| ZNF546 | 109.5 | 109.6 | 111.8 | 114   | 108.7 | 101.3 | 113.4 | 113   |
| ZNF547 | 113.5 | 119.6 | 112.6 | 124.6 | 113.9 | 106.6 | 116.4 | 117.2 |

|         |        |        |        |        |       |        |       |        |
|---------|--------|--------|--------|--------|-------|--------|-------|--------|
| ZNF548  | 257.9  | 248.2  | 277.1  | 263.5  | 240   | 202.9  | 263.8 | 256.5  |
| ZNF549  | 5995.6 | 4764.5 | 5774.1 | 4859.1 | 6031  | 3568.6 | 5647  | 5238.7 |
| ZNF550  | 118.2  | 124.1  | 123.7  | 122.6  | 107   | 106.9  | 126.7 | 114.9  |
| ZNF551  | 147.1  | 156.7  | 134.5  | 159.3  | 130   | 115    | 136.9 | 143.3  |
| ZNF552  | 119.4  | 129.8  | 122.7  | 122.4  | 113.7 | 98.2   | 114.8 | 117    |
| ZNF553  | 108.4  | 110.7  | 121.4  | 122.8  | 108.1 | 101.7  | 130.6 | 122.8  |
| ZNF554  | 116.3  | 116.6  | 119.2  | 117.5  | 105.4 | 93.2   | 122.4 | 124.5  |
| ZNF555  | 121.6  | 117.8  | 121.8  | 123.8  | 113.9 | 111    | 119.1 | 117.4  |
| ZNF556  | 104.3  | 111.9  | 116.3  | 115.3  | 106.7 | 109.2  | 119.8 | 127.5  |
| ZNF557  | 118.1  | 131.2  | 109.3  | 130.5  | 111.3 | 102.4  | 122.5 | 117.7  |
| ZNF557  | 239.4  | 159.4  | 208.1  | 196.8  | 174   | 136    | 178.2 | 231.2  |
| ZNF558  | 147.2  | 146.8  | 146.5  | 155    | 126.7 | 125    | 128.2 | 132.5  |
| ZNF559  | 194.1  | 185.8  | 233.6  | 247    | 193.9 | 199.4  | 257.1 | 259.6  |
| ZNF560  | 109.2  | 116.3  | 118    | 120.7  | 109.3 | 100.5  | 119.9 | 122.3  |
| ZNF561  | 122.6  | 126    | 118.2  | 119.8  | 104   | 106.1  | 129.6 | 120    |
| ZNF562  | 195.9  | 208.5  | 206    | 216.3  | 216.7 | 179.7  | 260.5 | 245.3  |
| ZNF563  | 115.6  | 129.5  | 121.1  | 137.3  | 125.5 | 111.5  | 116.8 | 127.8  |
| ZNF564  | 315.5  | 306.2  | 296    | 297.9  | 275.7 | 224.2  | 279.1 | 229.5  |
| ZNF565  | 140.7  | 133.6  | 136.2  | 157.5  | 127.2 | 117.7  | 170.4 | 152.4  |
| ZNF566  | 136.1  | 160.2  | 123.2  | 129.2  | 132.4 | 106.3  | 125.2 | 145.4  |
| ZNF567  | 123.4  | 121.2  | 115.5  | 121.1  | 120.5 | 95.9   | 114.7 | 133.3  |
| ZNF568  | 126.4  | 128.6  | 119.2  | 126    | 118.4 | 96.8   | 116.3 | 113.7  |
| ZNF569  | 113.9  | 113.2  | 123.7  | 123.2  | 102.3 | 102.5  | 115.9 | 123.8  |
| ZNF570  | 125.1  | 127.5  | 116.1  | 125.4  | 110.2 | 119.3  | 127.5 | 131.2  |
| ZNF571  | 148.7  | 150.9  | 160.6  | 172.6  | 116   | 123.2  | 143   | 145.9  |
| ZNF572  | 111.9  | 117.8  | 118.6  | 128.5  | 103.9 | 95.9   | 121.3 | 110.9  |
| ZNF573  | 232.5  | 281.2  | 282.4  | 281.4  | 295.6 | 170.7  | 232.7 | 228.7  |
| ZNF574  | 140.4  | 138.8  | 121.5  | 136.9  | 126.1 | 110.9  | 136.5 | 135.2  |
| ZNF575  | 116.4  | 119.6  | 123.5  | 128.8  | 114   | 108.8  | 119.9 | 109.9  |
| ZNF576  | 162.2  | 155.4  | 149.8  | 166.2  | 136.8 | 122    | 149.2 | 144.2  |
| ZNF577  | 386.4  | 254.2  | 272.8  | 260.9  | 319.1 | 255.9  | 437.2 | 443.8  |
| ZNF579  | 117.8  | 116.2  | 126    | 123.8  | 117.3 | 102.4  | 130.3 | 131.8  |
| ZNF580  | 117.5  | 126.5  | 147.4  | 125.4  | 109.4 | 106.2  | 138.3 | 123.6  |
| ZNF580  | 171.3  | 157    | 182.3  | 177    | 146.1 | 140.3  | 169.4 | 157.4  |
| ZNF580  | 122.2  | 121.6  | 129.5  | 128.2  | 116.2 | 117.4  | 116.8 | 114.8  |
| ZNF581  | 825.4  | 770.2  | 515.9  | 769.7  | 436.8 | 385.5  | 763.1 | 591.6  |
| ZNF582  | 133.7  | 123.1  | 127.7  | 120.3  | 117.1 | 109.2  | 112.9 | 126.8  |
| ZNF584  | 116.2  | 118    | 119    | 124.7  | 122.8 | 99     | 120.1 | 120.8  |
| ZNF585A | 153.6  | 209    | 262.7  | 212.5  | 225.4 | 183.7  | 182.6 | 193.2  |
| ZNF585A | 162.2  | 165.1  | 173.7  | 184.6  | 163.2 | 130.2  | 164.1 | 169    |
| ZNF585B | 113.3  | 121.4  | 128.2  | 126.7  | 130.3 | 100.6  | 127.1 | 125.7  |
| ZNF586  | 365.6  | 516.3  | 437.5  | 423.5  | 343.6 | 256    | 423.8 | 406.4  |
| ZNF586  | 475.2  | 620.6  | 547.1  | 532.9  | 381.7 | 346.6  | 461.7 | 552.9  |
| ZNF586  | 121    | 115.9  | 121.6  | 126    | 115.7 | 111.3  | 117.6 | 131.5  |
| ZNF587  | 107    | 112.9  | 116.3  | 114.5  | 106.1 | 103.9  | 117.6 | 109.8  |
| ZNF588  | 105.1  | 112.9  | 107.8  | 109.4  | 99.6  | 102.3  | 107.6 | 104.4  |
| ZNF589  | 248.8  | 274.9  | 304.9  | 233.2  | 208.5 | 185.7  | 189.8 | 150.5  |
| ZNF592  | 114.4  | 118.2  | 119    | 128.3  | 109.5 | 102.4  | 122.3 | 113.9  |
| ZNF593  | 176    | 183.6  | 176.9  | 185.7  | 157.9 | 133.1  | 168   | 157.6  |
| ZNF595  | 118    | 105.8  | 104.1  | 104    | 103.8 | 95.5   | 115.2 | 112.7  |
| ZNF596  | 109.5  | 110.6  | 118.2  | 123.5  | 113.1 | 104.5  | 121.2 | 106.2  |

|        |        |       |       |        |       |       |       |        |
|--------|--------|-------|-------|--------|-------|-------|-------|--------|
| ZNF596 | 110.9  | 117.5 | 113.5 | 108.7  | 109.7 | 93    | 117.1 | 120    |
| ZNF597 | 136.7  | 121.1 | 128.7 | 144.6  | 123.5 | 115.5 | 124   | 121    |
| ZNF598 | 428    | 442.1 | 274.5 | 456.5  | 326.3 | 291.9 | 369   | 369.1  |
| ZNF599 | 117.6  | 120.5 | 119.9 | 123.9  | 122.3 | 106   | 125.1 | 131.7  |
| ZNF599 | 118.5  | 115   | 124.9 | 115.4  | 111.4 | 103.5 | 121.2 | 123.6  |
| ZNF6   | 117.1  | 126   | 120.6 | 117    | 106.5 | 106.2 | 108.5 | 117.1  |
| ZNF600 | 131.5  | 137.8 | 143.9 | 138.5  | 122.5 | 112.8 | 140.8 | 129.1  |
| ZNF606 | 125.4  | 128.8 | 121.9 | 125.9  | 109.1 | 101.2 | 125.3 | 119.3  |
| ZNF607 | 115.4  | 123.7 | 107.3 | 120.5  | 107.3 | 92.9  | 114.2 | 109.3  |
| ZNF608 | 108.7  | 119.6 | 111.6 | 114    | 102.6 | 100.8 | 112.5 | 119.1  |
| ZNF609 | 161.4  | 166.7 | 156.2 | 176.9  | 153.4 | 145.1 | 196.3 | 186.6  |
| ZNF610 | 103    | 105.7 | 109.1 | 115.6  | 104.9 | 91.6  | 109   | 109.3  |
| ZNF611 | 128.8  | 116.6 | 143.2 | 135.5  | 111.4 | 110.6 | 125.5 | 129    |
| ZNF613 | 222    | 264.1 | 228.8 | 242.5  | 215.6 | 196.6 | 212   | 236.6  |
| ZNF613 | 117.7  | 120.4 | 119.5 | 122.8  | 110.8 | 99.3  | 115.6 | 114.9  |
| ZNF614 | 171.8  | 204.7 | 211.3 | 184.8  | 167.8 | 150.6 | 188   | 185.7  |
| ZNF615 | 210.4  | 264.8 | 228.4 | 230.8  | 238.7 | 200.7 | 239.9 | 313.1  |
| ZNF616 | 146    | 160.7 | 160.8 | 173.5  | 149   | 135.4 | 174.1 | 187    |
| ZNF618 | 142.2  | 128.9 | 128.8 | 123    | 118.8 | 111.9 | 137.7 | 128.3  |
| ZNF619 | 113.7  | 110.7 | 113.4 | 111.9  | 98.4  | 94.4  | 110.7 | 112.2  |
| ZNF620 | 121.5  | 112.4 | 119.2 | 126.2  | 108.5 | 100.4 | 123.3 | 118    |
| ZNF621 | 214.4  | 234.5 | 221.4 | 260.2  | 198   | 172.2 | 214.7 | 238.3  |
| ZNF622 | 361.7  | 383.7 | 319.7 | 435.7  | 323.7 | 277   | 419.6 | 479.5  |
| ZNF623 | 115.7  | 111.9 | 110   | 113.6  | 103.4 | 98.2  | 126.7 | 118.5  |
| ZNF624 | 117.4  | 137.4 | 138.8 | 139    | 119   | 103.8 | 127.7 | 124.3  |
| ZNF625 | 115.6  | 115.6 | 118.7 | 123.2  | 113.7 | 96.1  | 126.5 | 109    |
| ZNF626 | 133.5  | 137.9 | 171.5 | 157.6  | 140.1 | 129.1 | 137.4 | 151.7  |
| ZNF626 | 139.3  | 123.7 | 156.8 | 148.9  | 135.4 | 111.7 | 132.8 | 129    |
| ZNF626 | 131.7  | 132.9 | 134.7 | 134.3  | 120.5 | 113   | 134.7 | 137.8  |
| ZNF627 | 279.3  | 263.8 | 287.3 | 273.7  | 218.9 | 241.2 | 248.2 | 249.1  |
| ZNF628 | 121.5  | 133.7 | 122.3 | 121.1  | 116.9 | 104.9 | 131.3 | 121.9  |
| ZNF629 | 125    | 116.5 | 124.9 | 119.2  | 110.9 | 98.7  | 122.3 | 122.1  |
| ZNF629 | 123.8  | 123   | 124.1 | 123.9  | 91.9  | 90.8  | 121.8 | 115.4  |
| ZNF630 | 135.4  | 117.3 | 138.5 | 131.5  | 112.4 | 106   | 131.7 | 130.1  |
| ZNF630 | 124.2  | 127.5 | 138.1 | 126.2  | 118.2 | 114.5 | 134.7 | 139.7  |
| ZNF639 | 114.2  | 98    | 113.1 | 108.3  | 102.8 | 86.6  | 123.7 | 107.5  |
| ZNF641 | 237.8  | 219.7 | 224.8 | 214.3  | 166.7 | 139   | 152.8 | 196.7  |
| ZNF642 | 122.9  | 141.3 | 116.2 | 123.7  | 117.9 | 109.9 | 118.6 | 115.5  |
| ZNF643 | 124.1  | 128.8 | 125   | 126.7  | 118.8 | 103.4 | 127.5 | 126.3  |
| ZNF644 | 111.9  | 118.8 | 111.5 | 121.9  | 103.5 | 98.7  | 121   | 127    |
| ZNF644 | 258.6  | 263   | 266.1 | 314.2  | 250.8 | 226.4 | 336.3 | 299.8  |
| ZNF644 | 136.2  | 145.3 | 143.4 | 143.9  | 140.3 | 111.8 | 164.9 | 180.4  |
| ZNF645 | 114.7  | 118.9 | 114.7 | 114.4  | 104.4 | 96.4  | 125.7 | 106.5  |
| ZNF646 | 138.6  | 123.4 | 137.4 | 127.6  | 114.2 | 106.8 | 137.6 | 135.1  |
| ZNF648 | 124.8  | 118.6 | 123.6 | 120.9  | 109.2 | 103.3 | 121.8 | 108.8  |
| ZNF649 | 120.2  | 137.6 | 134.8 | 126.1  | 127.2 | 111.1 | 134.3 | 124    |
| ZNF650 | 223.2  | 249.7 | 265.3 | 250.2  | 232.8 | 168.9 | 227.1 | 191.5  |
| ZNF651 | 117    | 108.4 | 121.9 | 112.3  | 103.1 | 109.2 | 115.4 | 106.8  |
| ZNF652 | 1071.9 | 995.2 | 825.6 | 1031.8 | 810.6 | 456.2 | 967   | 1144.4 |
| ZNF653 | 340.9  | 313.4 | 249.4 | 340.8  | 270.4 | 221.7 | 284.1 | 320.2  |
| ZNF654 | 123    | 137.6 | 141.5 | 149.5  | 128.5 | 113   | 138   | 147.8  |

|         |        |       |       |       |       |       |        |        |
|---------|--------|-------|-------|-------|-------|-------|--------|--------|
| ZNF654  | 159.2  | 177.9 | 174.4 | 230.1 | 178.1 | 129.5 | 234.4  | 236.1  |
| ZNF654  | 164.6  | 177   | 155.5 | 198.7 | 169.6 | 129.9 | 180.6  | 256    |
| ZNF654  | 131    | 136.8 | 133.7 | 142.4 | 136.1 | 106.5 | 130.6  | 136.3  |
| ZNF655  | 129.1  | 108.6 | 125.9 | 129.5 | 123.5 | 109   | 128.9  | 133.3  |
| ZNF655  | 127.5  | 121.9 | 141.9 | 130.1 | 125.8 | 107   | 116.7  | 119.6  |
| ZNF655  | 110.4  | 123.2 | 142.6 | 124.8 | 110.5 | 109.9 | 128.5  | 119.2  |
| ZNF655  | 178.6  | 176   | 189.9 | 185.8 | 165.2 | 126.5 | 167.6  | 172.8  |
| ZNF658  | 118.3  | 130.7 | 119.8 | 115.7 | 113   | 102.4 | 108.9  | 117.1  |
| ZNF658B | 108.2  | 120.7 | 114.3 | 113.4 | 110.2 | 93.2  | 116.1  | 107.5  |
| ZNF659  | 120.5  | 113.9 | 123.1 | 127.4 | 114.9 | 100.9 | 124.4  | 120.6  |
| ZNF660  | 152.2  | 137.4 | 154.9 | 162.5 | 159.7 | 133.7 | 144.9  | 162.2  |
| ZNF662  | 125.1  | 132.5 | 110.6 | 124.7 | 112.2 | 94.5  | 131.2  | 120.5  |
| ZNF664  | 137.3  | 129.1 | 142.4 | 147.1 | 128.6 | 107.9 | 142.9  | 126.2  |
| ZNF665  | 114.9  | 110.5 | 120.6 | 122.8 | 116.7 | 112.8 | 114.5  | 119.2  |
| ZNF667  | 119.2  | 118.3 | 121.5 | 124.9 | 111   | 103   | 122.5  | 123.4  |
| ZNF668  | 245.2  | 230.8 | 172.4 | 257.9 | 198   | 157.1 | 260.5  | 272.6  |
| ZNF669  | 255.8  | 214.1 | 244.3 | 248.3 | 272.4 | 149.2 | 242.2  | 251.5  |
| ZNF670  | 118.7  | 112.1 | 112.3 | 112.4 | 118.2 | 96.8  | 117.8  | 116    |
| ZNF671  | 257.9  | 291.7 | 304.6 | 278.4 | 236.4 | 232.7 | 254.3  | 270.2  |
| ZNF672  | 383    | 403.5 | 337.3 | 461.3 | 321.8 | 278.3 | 537.4  | 498.1  |
| ZNF673  | 121.6  | 129.1 | 115.6 | 121.9 | 113.1 | 97.9  | 113.9  | 131.7  |
| ZNF675  | 114.5  | 119.4 | 109.6 | 122.1 | 113.5 | 101.2 | 113.5  | 115.9  |
| ZNF677  | 114.5  | 121.5 | 113.3 | 119.2 | 110.1 | 101.7 | 122.2  | 118.9  |
| ZNF678  | 104    | 105.6 | 97.5  | 111.5 | 105.6 | 96.7  | 109.9  | 111.6  |
| ZNF680  | 148.4  | 161   | 140.7 | 155.7 | 131.5 | 121.2 | 136.7  | 130.3  |
| ZNF681  | 125.5  | 121.1 | 124.3 | 116.2 | 127.9 | 122.9 | 129.2  | 123.9  |
| ZNF682  | 127.6  | 109.7 | 121.8 | 120.9 | 110.6 | 102   | 121.2  | 115.4  |
| ZNF682  | 130.4  | 137.5 | 131.2 | 137   | 130.2 | 106.1 | 127.1  | 131.7  |
| ZNF682  | 1191.3 | 660.9 | 748.4 | 709.6 | 860.7 | 398.7 | 1000.3 | 1127.4 |
| ZNF683  | 315.6  | 182.2 | 545.7 | 320.9 | 175   | 353.4 | 189.2  | 158.9  |
| ZNF684  | 161.2  | 153.3 | 156.8 | 164   | 164.3 | 119.8 | 184.2  | 163    |
| ZNF687  | 139.8  | 127.4 | 134.1 | 134.3 | 113.7 | 117.2 | 138.2  | 119.9  |
| ZNF688  | 158.5  | 165.3 | 168.2 | 181   | 136.9 | 130   | 165.7  | 151.9  |
| ZNF688  | 122.9  | 116.4 | 111   | 127.7 | 112   | 108.5 | 120.7  | 113.6  |
| ZNF689  | 511.1  | 524.3 | 432.1 | 503.9 | 393.8 | 264.8 | 453.2  | 495.4  |
| ZNF69   | 757.3  | 811.6 | 1002  | 795.3 | 936.6 | 487.4 | 835.2  | 839.5  |
| ZNF690  | 122.5  | 121   | 129.6 | 135.7 | 123.5 | 109.6 | 130.9  | 118.4  |
| ZNF691  | 132.7  | 125.8 | 116.7 | 136.2 | 116.1 | 110.1 | 118.5  | 120.1  |
| ZNF692  | 283.6  | 293.6 | 248.7 | 251.1 | 199   | 192.1 | 257.6  | 208.7  |
| ZNF694  | 165.8  | 175.2 | 171.2 | 165.6 | 149.2 | 134.7 | 162.8  | 168.6  |
| ZNF695  | 107.2  | 113   | 122.6 | 113.3 | 112.2 | 99.5  | 125.4  | 115.5  |
| ZNF696  | 169    | 176   | 154.6 | 164.9 | 157.9 | 134.2 | 145.7  | 154.5  |
| ZNF699  | 127.2  | 115.5 | 122.9 | 130.1 | 108.2 | 108.8 | 128    | 118    |
| ZNF7    | 220.1  | 232.9 | 269.9 | 251.6 | 206.2 | 214   | 233.1  | 203.6  |
| ZNF70   | 108.1  | 109.5 | 112.6 | 120.4 | 100   | 98.6  | 102.2  | 110.6  |
| ZNF700  | 409.9  | 407.6 | 407.5 | 439.4 | 394.9 | 286.2 | 384.6  | 382.3  |
| ZNF701  | 129.1  | 133.4 | 142.6 | 138.1 | 125.7 | 129   | 124.1  | 130.6  |
| ZNF702  | 121.4  | 142.5 | 119.7 | 124.8 | 131.8 | 105   | 138.3  | 136.3  |
| ZNF703  | 118.7  | 119.5 | 125.1 | 122.4 | 109   | 102.4 | 120.4  | 127.7  |
| ZNF703  | 117.5  | 110.3 | 121.5 | 121.3 | 107.6 | 96.9  | 120    | 117.3  |
| ZNF704  | 117.3  | 117.4 | 124.8 | 118.4 | 112.1 | 104.7 | 113.1  | 124.5  |

|         |        |        |        |        |       |        |        |       |
|---------|--------|--------|--------|--------|-------|--------|--------|-------|
| ZNF706  | 141.2  | 151.1  | 146.5  | 150.6  | 144.5 | 130.3  | 150.5  | 158.6 |
| ZNF706  | 112.4  | 113.7  | 116.7  | 117    | 110.7 | 98     | 117.5  | 110.2 |
| ZNF706  | 150    | 142.2  | 167.5  | 177    | 149.1 | 122.9  | 171.6  | 169.6 |
| ZNF707  | 162.5  | 166    | 142.6  | 182.6  | 143.3 | 126.3  | 178.5  | 167.4 |
| ZNF708  | 125.3  | 136.1  | 136.7  | 128.3  | 111.8 | 120.9  | 131.4  | 120.8 |
| ZNF709  | 109    | 115.8  | 123    | 125.7  | 112.4 | 98.7   | 124.8  | 116.7 |
| ZNF71   | 111    | 116.3  | 124.3  | 129.4  | 118.3 | 94.1   | 116.7  | 114.5 |
| ZNF710  | 108.7  | 119.4  | 122.5  | 116.5  | 105   | 97.7   | 110.2  | 109.9 |
| ZNF713  | 111.9  | 120.4  | 119.1  | 116.6  | 103.5 | 98.7   | 119.7  | 118.3 |
| ZNF714  | 119.3  | 121.8  | 118.3  | 126.6  | 106.4 | 105    | 125.6  | 123.8 |
| ZNF718  | 127.6  | 120.5  | 130.2  | 131.6  | 122   | 108.8  | 124.9  | 124.3 |
| ZNF721  | 315.2  | 322.6  | 330.9  | 338.7  | 388.7 | 268.6  | 340.7  | 412.8 |
| ZNF74   | 109.7  | 116.3  | 109.2  | 114.8  | 113.5 | 97.9   | 113.8  | 110.8 |
| ZNF74   | 130.8  | 123.7  | 129.7  | 126.2  | 110.8 | 100.5  | 127.1  | 115   |
| ZNF74   | 154.3  | 173.4  | 144.8  | 177.4  | 146.3 | 114.2  | 149.8  | 150   |
| ZNF740  | 134.2  | 135.9  | 132.1  | 125.1  | 118.1 | 105.8  | 141    | 123.5 |
| ZNF749  | 110.2  | 122.7  | 117.1  | 114.4  | 100.8 | 95.4   | 112    | 115   |
| ZNF75   | 131.8  | 194.7  | 122.1  | 128.2  | 168.9 | 103.4  | 126.1  | 189.5 |
| ZNF75A  | 154.2  | 145.6  | 141.9  | 139.5  | 129.4 | 112.8  | 157.4  | 155.6 |
| ZNF76   | 179.5  | 171.1  | 163.9  | 164.3  | 143.1 | 130.8  | 169.8  | 166.7 |
| ZNF765  | 107.9  | 106.6  | 108.2  | 111.5  | 106.1 | 90.1   | 105.9  | 107.2 |
| ZNF767  | 204.3  | 239.6  | 211.3  | 231    | 193.7 | 171.8  | 212.4  | 193.6 |
| ZNF77   | 133.8  | 134.1  | 140    | 139.1  | 133.8 | 118.2  | 137.4  | 140.9 |
| ZNF781  | 120.7  | 121.8  | 119.2  | 123.7  | 111.5 | 96.9   | 115.9  | 119.4 |
| ZNF79   | 125.2  | 144.8  | 131.2  | 149.3  | 120.2 | 108.7  | 132.5  | 117.5 |
| ZNF8    | 122.8  | 121.9  | 134.8  | 124    | 114.3 | 109.5  | 122.1  | 132.9 |
| ZNF80   | 148    | 153.6  | 146.4  | 147.4  | 135.4 | 114.5  | 134.2  | 141.6 |
| ZNF805  | 147.8  | 141.4  | 145.6  | 161    | 132.3 | 125.5  | 135.1  | 158.4 |
| ZNF808  | 116.2  | 120.9  | 113.9  | 117.9  | 115.1 | 101.9  | 121    | 114.8 |
| ZNF81   | 118.5  | 121.3  | 111.3  | 129.3  | 113.4 | 99.7   | 110    | 113.7 |
| ZNF83   | 176.1  | 238.5  | 228.3  | 200.8  | 201   | 156.4  | 164.3  | 207.5 |
| ZNF85   | 131.3  | 123.8  | 123.5  | 114.8  | 106   | 111.8  | 113.7  | 111.2 |
| ZNF91   | 230.1  | 224.6  | 245.4  | 226.3  | 234.8 | 245.1  | 222.4  | 190.3 |
| ZNF92   | 125.2  | 118.7  | 129.9  | 124.7  | 110.2 | 98.7   | 124.2  | 118   |
| ZNF92   | 121.1  | 111.9  | 115.2  | 127.5  | 110.1 | 108.9  | 113.3  | 110.6 |
| ZNF93   | 161.5  | 170.6  | 198.5  | 153.1  | 137.2 | 133.5  | 178.1  | 166.9 |
| ZNF93   | 128.3  | 128.6  | 115.9  | 114.2  | 105.5 | 105.5  | 132.4  | 116.8 |
| ZNF96   | 117.9  | 124    | 126.1  | 127    | 112.1 | 112.5  | 135.4  | 121   |
| ZNF99   | 127.5  | 108.9  | 115.2  | 113.2  | 106.5 | 97.6   | 118.5  | 119.6 |
| ZNFN1A1 | 583.7  | 851.4  | 512    | 674.7  | 545   | 306.5  | 541.6  | 678.5 |
| ZNFN1A2 | 134.1  | 120.6  | 125.8  | 127.7  | 113.3 | 110.9  | 136.3  | 130.2 |
| ZNFN1A2 | 123.4  | 126.8  | 137.1  | 124.9  | 115.4 | 96.7   | 113.3  | 117.6 |
| ZNFN1A3 | 137.8  | 140.7  | 138    | 140    | 136.1 | 113.3  | 130.8  | 134.6 |
| ZNFN1A4 | 129.2  | 139.5  | 132.6  | 134.1  | 122.8 | 117.8  | 143.8  | 131.5 |
| ZNFN1A5 | 198.4  | 211.2  | 208.2  | 210.8  | 188.1 | 177.7  | 234.3  | 261.4 |
| ZNFX1   | 427    | 396.9  | 382.6  | 448.4  | 380.4 | 333.2  | 510.3  | 611.5 |
| ZNHIT1  | 415.7  | 439.4  | 511.1  | 445.6  | 342.3 | 386.6  | 393.1  | 341   |
| ZNHIT2  | 130    | 141.1  | 136.6  | 154.7  | 127.4 | 115.2  | 132    | 129.3 |
| ZNHIT3  | 1478.3 | 1736.4 | 1588.5 | 1482.7 | 1474  | 1239.2 | 1258.5 | 1790  |
| ZNHIT3  | 110.8  | 122.2  | 126.1  | 116.6  | 110.3 | 96     | 118.1  | 110.1 |
| ZNHIT3  | 215.2  | 254.7  | 282    | 244.4  | 191.8 | 194    | 176    | 201.1 |



|         |       |       |        |       |       |        |       |       |
|---------|-------|-------|--------|-------|-------|--------|-------|-------|
| ZNHIT4  | 180.8 | 174.6 | 149.6  | 175.7 | 152   | 136.8  | 176.4 | 157.8 |
| ZNRD1   | 218.1 | 252   | 206.3  | 213.7 | 203.5 | 152.9  | 188.5 | 242.6 |
| ZNRD1   | 327.5 | 418.6 | 332.8  | 367.7 | 321.4 | 240.2  | 316.4 | 356.9 |
| ZNRD1   | 239.4 | 299.6 | 301.5  | 293.8 | 227.2 | 242.5  | 301.5 | 254.7 |
| ZNRF1   | 116   | 124.7 | 130.8  | 130.3 | 118.2 | 108.4  | 127.8 | 120.1 |
| ZNRF2   | 110.4 | 123.2 | 125.7  | 129.8 | 112.8 | 104.2  | 129.2 | 118.3 |
| ZNRF4   | 119   | 116.3 | 118.5  | 113.8 | 100.6 | 98     | 129.9 | 105   |
| ZP1     | 110.9 | 120.1 | 117.8  | 121.8 | 103.6 | 97.1   | 117.3 | 115   |
| ZP2     | 120   | 118.7 | 115.1  | 127.4 | 109.3 | 114.8  | 120   | 112.6 |
| ZP3     | 111.6 | 116.9 | 125.4  | 119.8 | 105.8 | 102.7  | 120.9 | 116.6 |
| ZP4     | 102.6 | 109.7 | 113.4  | 112.7 | 96.6  | 95.7   | 111.2 | 102.6 |
| ZPBP    | 116   | 116.2 | 114.2  | 107.3 | 105.9 | 100.3  | 115.1 | 111.7 |
| ZPBP2   | 117.1 | 106.7 | 118.3  | 122   | 107.1 | 103.9  | 105.8 | 115.5 |
| ZPBP2   | 109.3 | 122.7 | 115.5  | 114   | 106.1 | 102.2  | 115.7 | 115.6 |
| ZPBP2   | 113.8 | 109.2 | 113.8  | 124.6 | 107.4 | 97     | 117.9 | 111.6 |
| ZPLD1   | 113.4 | 111.3 | 117.9  | 116.5 | 98.6  | 98.1   | 112.5 | 110.9 |
| ZRANB1  | 170.5 | 329   | 152.2  | 217.5 | 287.9 | 127.2  | 259.5 | 471.9 |
| ZRANB3  | 110.7 | 116   | 113.6  | 114.8 | 113   | 95.3   | 116.6 | 116.6 |
| ZRF1    | 118.4 | 111.7 | 126.7  | 128   | 107.5 | 100.7  | 124.4 | 124   |
| ZSCAN1  | 115.8 | 129.8 | 120.9  | 119.5 | 112.1 | 109.1  | 119.8 | 126.7 |
| ZSCAN2  | 126.8 | 128.9 | 125.1  | 125.6 | 115.3 | 109.6  | 134.1 | 129.7 |
| ZSCAN2  | 192.1 | 188.8 | 199.4  | 172.4 | 142.7 | 150.8  | 160.3 | 160.3 |
| ZSCAN2  | 115.3 | 130.1 | 128.4  | 121.3 | 112.8 | 97.6   | 116.9 | 116.5 |
| ZSCAN2  | 120.5 | 111.3 | 113.3  | 123.3 | 111.8 | 94.7   | 132.4 | 107.1 |
| ZSCAN4  | 118.5 | 103   | 116.7  | 132.6 | 114.6 | 100.9  | 119.2 | 107.8 |
| ZSCAN5  | 141.6 | 143.8 | 133.4  | 122.5 | 121   | 111.4  | 136.9 | 153.1 |
| ZSWIM1  | 233.9 | 278.2 | 270.7  | 259.5 | 231.5 | 214.9  | 204.7 | 225.2 |
| ZSWIM2  | 111.1 | 108.9 | 114.7  | 118.7 | 105.4 | 88.8   | 119   | 111.4 |
| ZSWIM3  | 119.7 | 123.4 | 117.9  | 121.9 | 108.5 | 95.3   | 126.5 | 128.8 |
| ZSWIM3  | 161.6 | 179.8 | 153.8  | 178.7 | 163   | 134.9  | 164.8 | 161.7 |
| ZSWIM3  | 114.9 | 134.4 | 111.9  | 127.4 | 115   | 101    | 125   | 122   |
| ZSWIM3  | 117.8 | 120.3 | 120.7  | 130   | 116.3 | 115.4  | 113   | 117.5 |
| ZSWIM4  | 192.4 | 207.3 | 229.1  | 240.3 | 208.3 | 208.7  | 332.1 | 239.6 |
| ZW10    | 271.6 | 310.7 | 220.2  | 297.3 | 294.8 | 194    | 316.5 | 290.4 |
| ZWILCH  | 111.5 | 110.8 | 122.1  | 114.2 | 109.4 | 96.9   | 108.3 | 105.8 |
| ZWILCH  | 115.4 | 117.5 | 118.8  | 125.6 | 115.7 | 95.3   | 125   | 124.8 |
| ZWILCH  | 201.9 | 241.2 | 249.8  | 222.8 | 200.5 | 193.1  | 234.6 | 263.9 |
| ZWINT   | 113.2 | 122.3 | 111    | 121.7 | 109.9 | 104.8  | 113   | 110.9 |
| ZWINT   | 119.6 | 110.5 | 121.6  | 115.4 | 107   | 97.5   | 103.7 | 110.6 |
| ZWINT   | 123.4 | 118.2 | 121.1  | 135.1 | 123.5 | 112    | 132.4 | 115.3 |
| ZXDA    | 125   | 123.3 | 128.7  | 139.4 | 116.9 | 109.6  | 127.1 | 124.9 |
| ZXDA    | 123   | 120.1 | 117.5  | 125.7 | 102.1 | 98.1   | 117.8 | 112.6 |
| ZXDB    | 135.7 | 147.2 | 122.5  | 146.6 | 131.3 | 125.1  | 154.1 | 156.3 |
| ZXDC    | 134.3 | 129.2 | 132.8  | 126.9 | 122.7 | 98     | 143.9 | 141.4 |
| ZXDC    | 191   | 170.1 | 180.4  | 194.4 | 177.5 | 135    | 195.6 | 207.4 |
| ZYG11A  | 104   | 106.7 | 110.4  | 114.7 | 106.2 | 98.2   | 107.8 | 106.2 |
| ZYG11B  | 689   | 721.5 | 538.6  | 641.3 | 601.9 | 398.6  | 508.3 | 481.1 |
| ZYG11BL | 142.7 | 137.4 | 145.3  | 165.4 | 136.5 | 126.7  | 163.7 | 146.8 |
| ZYX     | 382.8 | 329.9 | 518.9  | 439.2 | 220.2 | 320.2  | 408.3 | 232.1 |
| ZYX     | 836   | 835.3 | 1309.7 | 960.4 | 600.7 | 1059.8 | 884.4 | 517.4 |
| ZZEF1   | 265.7 | 276.2 | 257.9  | 310   | 271.4 | 240.7  | 316.9 | 269.8 |

ZZZ3

346.3

421.6

324.5

518.7

338.4

243.8

460.1

569.8

| AVG_Signa | AVG_Signa | AVG_Signa | AVG_Signa | AVG_Signa | AVG_Signa | AVG_Signa | AVG_Signa | AVG_Signa |
|-----------|-----------|-----------|-----------|-----------|-----------|-----------|-----------|-----------|
| 114.3     | 120.9     | 120.3     | 109       | 101.2     | 123.4     | 112       | 139.8     | 110       |
| 147.5     | 182.5     | 164.7     | 161.1     | 187.1     | 197.2     | 163.7     | 260.1     | 226.5     |
| 94        | 109.9     | 104.9     | 98.9      | 89        | 102       | 99.2      | 106.6     | 100.8     |
| 105       | 121       | 109.2     | 111.4     | 95.8      | 114.6     | 101.7     | 121.9     | 125.1     |
| 106       | 99.9      | 93.2      | 91.2      | 93.1      | 104       | 92.3      | 99.4      | 109.2     |
| 98.9      | 107.2     | 95.8      | 97.5      | 98.2      | 109.2     | 105.2     | 107.7     | 103       |
| 109.6     | 111.4     | 106.1     | 107.9     | 97.6      | 109.9     | 96.3      | 107.7     | 107.9     |
| 101.3     | 111.9     | 109.4     | 108       | 101       | 115.3     | 104.8     | 113       | 119.1     |
| 111.1     | 110.3     | 102.3     | 122.8     | 101.6     | 111.7     | 110.2     | 107.7     | 110.5     |
| 101.3     | 104.3     | 94.7      | 95        | 93.6      | 97.6      | 100.8     | 101.9     | 103.4     |
| 104.3     | 104.6     | 95.8      | 98        | 89.5      | 114.8     | 98.6      | 110.5     | 106.5     |
| 102       | 100.5     | 95.3      | 98.8      | 94.6      | 107.9     | 95.2      | 108.4     | 103       |
| 100.9     | 108.8     | 106.8     | 99        | 101       | 109.1     | 109       | 113.5     | 112       |
| 108.3     | 114.3     | 105.5     | 105.5     | 103.4     | 106.1     | 102.4     | 107.4     | 117.9     |
| 104.5     | 116       | 102.6     | 92.3      | 94.5      | 107.2     | 100.8     | 101       | 108.4     |
| 104.9     | 105.9     | 103.9     | 97.1      | 98.6      | 109       | 106.4     | 102.7     | 119.7     |
| 105.4     | 110.8     | 100.7     | 101.2     | 97.3      | 109.5     | 101       | 102.5     | 116.7     |
| 100.4     | 100.7     | 100.6     | 97.8      | 97.5      | 102.2     | 97.6      | 107       | 102.7     |
| 97.3      | 105.4     | 106.2     | 101       | 96.1      | 102.7     | 105.8     | 113.7     | 106.1     |
| 110.8     | 125.2     | 119.4     | 118.2     | 103.1     | 118       | 108.4     | 120.7     | 117.2     |
| 137.5     | 175.7     | 139.5     | 154.9     | 145.1     | 156       | 134.4     | 210.2     | 159.2     |
| 104.3     | 108       | 102.4     | 95.1      | 93.2      | 106.9     | 97.2      | 109.6     | 100.5     |
| 107.3     | 150.9     | 151.1     | 178.5     | 151.7     | 155.1     | 166.5     | 224.7     | 134.3     |
| 105.6     | 108.6     | 103.5     | 101.3     | 93.8      | 106.3     | 103.6     | 109       | 103.1     |
| 106       | 109.4     | 98.6      | 98.5      | 92.8      | 107.5     | 99.6      | 114.3     | 111.3     |
| 103.6     | 108.9     | 97.5      | 98.7      | 95.7      | 106.8     | 101       | 105.7     | 112       |
| 107.7     | 109.1     | 107.1     | 97.7      | 97.2      | 110.8     | 105.8     | 117.3     | 107.6     |
| 106.9     | 106.9     | 96.7      | 94.2      | 104.6     | 116.7     | 103.4     | 111.1     | 114.2     |
| 163.9     | 147.7     | 145.7     | 153.2     | 139.1     | 178.3     | 179.6     | 258.4     | 181.2     |
| 102.7     | 112.4     | 112.8     | 103.9     | 91.5      | 110.2     | 103.8     | 105       | 101.8     |
| 914.2     | 1626.1    | 1631.9    | 983.3     | 1702.4    | 2097.6    | 1441.3    | 3278.6    | 2185.6    |
| 146.8     | 204.5     | 181.5     | 175.8     | 158.3     | 206.9     | 208.7     | 255.1     | 182.1     |
| 127.4     | 134.3     | 132.1     | 123.1     | 127.7     | 150.6     | 128.6     | 200.2     | 148.1     |
| 145.6     | 186.1     | 187.7     | 188.2     | 154.8     | 168.5     | 172.2     | 209.7     | 150.8     |
| 264.6     | 262.1     | 234.6     | 272.2     | 232.5     | 240.1     | 244       | 467.7     | 311.1     |
| 100.5     | 108.9     | 106       | 105.9     | 104.9     | 110.5     | 107.4     | 119.8     | 119       |
| 361       | 373.4     | 366       | 349.6     | 332.4     | 403       | 359.4     | 599.7     | 377.1     |
| 112.5     | 119.9     | 108.6     | 120       | 105       | 120.3     | 118.9     | 110       | 120.8     |
| 105.7     | 107       | 102.8     | 100.1     | 97.6      | 111.1     | 108.9     | 98.1      | 104.8     |
| 105.1     | 108       | 103       | 98.1      | 107.9     | 101.8     | 106.7     | 110.5     | 109       |
| 111.1     | 116       | 114.8     | 111.2     | 103.4     | 115.3     | 119.7     | 126.7     | 117.2     |
| 123.7     | 115.2     | 115.3     | 103.2     | 99.5      | 119.6     | 110       | 106.6     | 106.3     |
| 114.6     | 139       | 121.6     | 125       | 111       | 136.5     | 128.8     | 139.6     | 114.9     |
| 329.2     | 231       | 184.2     | 294       | 308.9     | 246       | 554.3     | 474       | 248       |
| 119.8     | 109.2     | 121.4     | 109.4     | 104.7     | 112.6     | 102.5     | 116.6     | 114.4     |
| 117.5     | 114.5     | 112.3     | 101.8     | 101.2     | 107.6     | 106.9     | 126.9     | 115.2     |
| 103.9     | 104.9     | 94.5      | 101.4     | 98        | 119.9     | 111.1     | 118.6     | 105.4     |
| 112.6     | 115.5     | 98.5      | 107.6     | 94.9      | 108.1     | 100.4     | 128.3     | 112.1     |
| 99        | 108.2     | 101.5     | 102.3     | 87.2      | 106       | 107       | 113.6     | 104.2     |
| 105.7     | 108.4     | 100.3     | 99        | 91        | 107       | 99.7      | 109       | 108.8     |

|       |       |       |       |       |       |       |       |       |
|-------|-------|-------|-------|-------|-------|-------|-------|-------|
| 102   | 115.6 | 116.8 | 110.7 | 107.6 | 112.8 | 112.1 | 106.5 | 108.6 |
| 108.8 | 124   | 113.2 | 113.7 | 103.5 | 109.4 | 116.4 | 116.7 | 107.9 |
| 137.4 | 136   | 132.3 | 113.4 | 117.7 | 140.1 | 127.8 | 143.2 | 145.7 |
| 110.5 | 129.3 | 112.8 | 120.1 | 106.7 | 133.8 | 121.6 | 133.5 | 129.1 |
| 103.5 | 108.3 | 109.6 | 99.7  | 105.8 | 108.6 | 99.5  | 115   | 111.1 |
| 106   | 119.8 | 112.8 | 107.9 | 98.5  | 111.4 | 107   | 115   | 113   |
| 105.8 | 104.6 | 96.5  | 99.8  | 91.1  | 102.4 | 103.7 | 104.7 | 107.3 |
| 106.7 | 118.1 | 107   | 98.5  | 109.2 | 122.4 | 116.5 | 123.3 | 122.8 |
| 103   | 115.3 | 106.8 | 99.8  | 99.7  | 110.2 | 96.4  | 106.4 | 105.5 |
| 145.1 | 311.3 | 353.8 | 353.6 | 231.2 | 252.9 | 271.4 | 220.5 | 178.7 |
| 107.6 | 112.7 | 97.4  | 87.9  | 93.5  | 105.3 | 100.8 | 106.4 | 108.4 |
| 105.4 | 111   | 102.9 | 103.3 | 96.9  | 108   | 101.8 | 112.7 | 107.8 |
| 109.9 | 119   | 119.1 | 99.1  | 98.6  | 112.1 | 106   | 112.5 | 109.9 |
| 105.9 | 106.5 | 113.1 | 108.9 | 99.2  | 109.9 | 106.2 | 126.2 | 104.4 |
| 374.8 | 187.1 | 236.5 | 199.6 | 187.6 | 253.7 | 190.8 | 244.1 | 296.9 |
| 145.5 | 183.5 | 181.8 | 189.8 | 169.4 | 192.8 | 175.3 | 225.4 | 187.1 |
| 101.4 | 109.3 | 109.6 | 92.8  | 99.8  | 107   | 101.5 | 105.7 | 117.2 |
| 111.4 | 104.4 | 113.8 | 96.4  | 100.6 | 102.6 | 104.5 | 103.5 | 108.2 |
| 102.3 | 108   | 107.4 | 96.3  | 94    | 111.1 | 107.6 | 108.7 | 102.5 |
| 175.8 | 145.3 | 140   | 124.3 | 155.7 | 280.5 | 177.5 | 635   | 334.2 |
| 155.8 | 263.4 | 160.5 | 179.2 | 196.9 | 184.4 | 137.3 | 323.8 | 202.3 |
| 106.6 | 113.7 | 104   | 107.7 | 97.4  | 109.2 | 103.6 | 108.7 | 111.1 |
| 100.9 | 108.6 | 99.1  | 102.5 | 100.1 | 104.7 | 100.5 | 108.5 | 106.8 |
| 110.5 | 119   | 110.6 | 108.3 | 115.9 | 122.1 | 114.5 | 117.8 | 111.3 |
| 118.5 | 118.6 | 116.4 | 122.4 | 112.1 | 125.8 | 130.4 | 125.1 | 127.2 |
| 114.2 | 106.5 | 101.8 | 97.6  | 102.5 | 107.1 | 102.5 | 111.9 | 113.3 |
| 114.4 | 125.7 | 115.3 | 107.7 | 128.3 | 120.6 | 134.6 | 151.4 | 141   |
| 130.3 | 134.4 | 141.6 | 152.5 | 131.2 | 133.1 | 140   | 144.1 | 124.9 |
| 101.5 | 101.3 | 102   | 96    | 98.2  | 106   | 101   | 101.6 | 107.6 |
| 109.9 | 105.9 | 102.9 | 106.5 | 100.2 | 109.9 | 105   | 108.7 | 112.6 |
| 109.7 | 106.9 | 98.6  | 94.2  | 101.6 | 120.4 | 108   | 108.1 | 114.5 |
| 111.8 | 113.1 | 105.6 | 103.6 | 93.6  | 115.3 | 111.7 | 127.1 | 117   |
| 107.4 | 103.4 | 107.8 | 119.9 | 103.9 | 117.5 | 112.7 | 124.2 | 116.8 |
| 108.6 | 120.5 | 101.7 | 99.7  | 100.8 | 109.7 | 106.4 | 117.5 | 116.8 |
| 116   | 130.7 | 114.3 | 104.2 | 108.4 | 113.8 | 117.3 | 118.9 | 110.9 |
| 150.8 | 276.6 | 226.9 | 227.3 | 235.9 | 202.3 | 588.2 | 234.6 | 120.2 |
| 126.1 | 131.3 | 117.5 | 138.3 | 112   | 128   | 132.9 | 133.4 | 106.4 |
| 102.7 | 104   | 97.6  | 101.3 | 92.5  | 105.6 | 101.6 | 104.2 | 110.4 |
| 149   | 234.5 | 221.4 | 217   | 235.3 | 220.1 | 264.9 | 314.4 | 190.9 |
| 126.2 | 190.3 | 196.1 | 222.7 | 168.5 | 184.7 | 223.3 | 184.1 | 166.2 |
| 109.8 | 111.6 | 101.1 | 106.7 | 97.9  | 110.4 | 102.1 | 115.3 | 109.1 |
| 108.8 | 105.7 | 103.1 | 130   | 105.7 | 115.9 | 112.5 | 117.6 | 126.5 |
| 101.8 | 111.4 | 107.9 | 92.8  | 86.8  | 105.6 | 99.1  | 96.3  | 98.9  |
| 111.1 | 113.9 | 100   | 103.9 | 99.9  | 105.3 | 100.7 | 109.6 | 105.1 |
| 105.2 | 108.8 | 112.2 | 100.9 | 97.5  | 118.4 | 109.6 | 122.6 | 117.9 |
| 102.8 | 103   | 100.5 | 103   | 94.7  | 105.4 | 101.2 | 106.6 | 105.1 |
| 109.6 | 106.8 | 99.1  | 99.2  | 97.1  | 99.9  | 101.4 | 103.2 | 94    |
| 110.8 | 116.3 | 106.7 | 120.1 | 102   | 114.6 | 104.7 | 114.5 | 112   |
| 115.2 | 123.2 | 110.5 | 120.8 | 105.9 | 116.2 | 124.2 | 138.6 | 111.8 |
| 103.7 | 107.1 | 102.6 | 98.1  | 98.1  | 104.5 | 101.1 | 110.6 | 102   |
| 103.7 | 112.8 | 110.3 | 100.8 | 110.9 | 120.1 | 108.4 | 117.3 | 111.8 |

|       |       |        |       |       |       |       |        |        |
|-------|-------|--------|-------|-------|-------|-------|--------|--------|
| 111.2 | 132.4 | 113.3  | 95.1  | 103.9 | 106.4 | 111   | 115.4  | 113.3  |
| 228.8 | 358.2 | 369.1  | 331.8 | 371   | 311.4 | 315.2 | 416.5  | 368.5  |
| 190.6 | 389.3 | 368    | 297.6 | 342.7 | 345.9 | 300.8 | 504.3  | 310.1  |
| 296   | 363.8 | 419.9  | 297.4 | 312.1 | 388.6 | 403.7 | 719.8  | 471.7  |
| 658.6 | 885.9 | 1019.7 | 649.2 | 865.5 | 1071  | 799.8 | 1471.8 | 935    |
| 126.5 | 121.8 | 112.4  | 112.2 | 103   | 121.9 | 124.4 | 114.4  | 120.7  |
| 122.2 | 154.9 | 142.2  | 126.9 | 135.6 | 169   | 160.4 | 211.1  | 196.8  |
| 116   | 130.9 | 151.1  | 134.9 | 119.4 | 142.7 | 137.3 | 167.7  | 144.5  |
| 113.5 | 125.9 | 152.4  | 117.6 | 114.2 | 130.9 | 130.6 | 190.4  | 143.5  |
| 120.9 | 139.7 | 140.9  | 114.6 | 113.7 | 139.6 | 114.8 | 144.5  | 136.9  |
| 109.6 | 106.5 | 108    | 102.2 | 99    | 109   | 102.7 | 102.6  | 100.3  |
| 105.2 | 113.2 | 100.2  | 101.9 | 99.4  | 107.1 | 100.1 | 111.5  | 95.1   |
| 115.8 | 110.9 | 111.5  | 110.6 | 106   | 126.7 | 119.9 | 131.4  | 110.2  |
| 113.9 | 131.4 | 108.7  | 121.5 | 104.4 | 127   | 130.4 | 119.9  | 110.9  |
| 110.8 | 115.7 | 98.8   | 107.1 | 97.6  | 115   | 109.8 | 112.9  | 111.2  |
| 106.1 | 104.6 | 116.2  | 100.6 | 91    | 104.5 | 97.5  | 113.7  | 103.7  |
| 107.7 | 107   | 103.3  | 98.3  | 94.9  | 106.1 | 101.5 | 109.7  | 116.4  |
| 116.4 | 129.5 | 106.6  | 110.5 | 100.4 | 107.9 | 104.9 | 129.7  | 115.2  |
| 104.1 | 108   | 105    | 92.4  | 89.7  | 115.2 | 98.2  | 111.3  | 111.9  |
| 112.8 | 110.2 | 105.6  | 114.7 | 95    | 108   | 104   | 105    | 111.1  |
| 110.6 | 138.4 | 120.8  | 138.5 | 121.1 | 120.5 | 139.8 | 143.1  | 129    |
| 116.6 | 116.1 | 110.4  | 121.3 | 107   | 122   | 123.2 | 143.4  | 126.7  |
| 105.2 | 116.3 | 99.4   | 100.3 | 102.1 | 111.6 | 110   | 108.5  | 106.2  |
| 129.8 | 128.6 | 111.1  | 130.1 | 106.8 | 132.5 | 132.2 | 145    | 130.2  |
| 115.2 | 149.7 | 125.9  | 167.1 | 117.2 | 137   | 161.3 | 157.5  | 145    |
| 139.2 | 215.9 | 142    | 343.6 | 154.8 | 149.5 | 257.5 | 184.1  | 151.5  |
| 112.2 | 105.8 | 99.1   | 105.9 | 99.6  | 109.7 | 108.3 | 105    | 112.5  |
| 104.8 | 166   | 174.4  | 176.2 | 154   | 165.1 | 169.7 | 137.6  | 120.4  |
| 147.2 | 180.4 | 183    | 178.9 | 161.9 | 164.9 | 164.2 | 147.1  | 121    |
| 111   | 126.5 | 119.8  | 108.7 | 109.6 | 125.7 | 133.6 | 154.9  | 124.5  |
| 96.6  | 104.9 | 104.2  | 99.9  | 93.4  | 102.9 | 95.5  | 107.6  | 104.5  |
| 110.9 | 114   | 110.8  | 120.7 | 115.8 | 121.8 | 108.1 | 125.9  | 113.4  |
| 492.5 | 253.6 | 261.7  | 282.3 | 233.5 | 312.6 | 379.4 | 896.4  | 1060.1 |
| 176.2 | 129.9 | 118.1  | 134.5 | 127   | 155.4 | 116.3 | 241.4  | 228.5  |
| 139.5 | 148.5 | 115.8  | 123.2 | 130   | 133.4 | 125.8 | 302.2  | 153    |
| 130   | 152.5 | 134    | 150.9 | 130.4 | 156.5 | 146.7 | 175.5  | 132.4  |
| 121.7 | 137.5 | 128    | 122.2 | 108   | 132   | 105.8 | 118.7  | 109.8  |
| 164.1 | 250.8 | 200.6  | 264.3 | 246.1 | 226.9 | 248.4 | 342.7  | 197.9  |
| 115.6 | 107.7 | 99.3   | 108.7 | 98.4  | 100.7 | 105.7 | 124.9  | 115.4  |
| 108.4 | 107.3 | 101.7  | 95.4  | 95.2  | 104.7 | 95.6  | 107.2  | 115.5  |
| 269.4 | 235   | 248.8  | 220.9 | 201.7 | 198.9 | 226.1 | 307.2  | 296.6  |
| 107.8 | 113   | 108.5  | 114.6 | 96.5  | 115.8 | 108.9 | 109.7  | 113.1  |
| 123.4 | 147.8 | 143.6  | 127.5 | 124   | 146.3 | 140.7 | 185.7  | 151.2  |
| 113   | 112.5 | 106.3  | 106.7 | 92.5  | 115.2 | 98.8  | 126.8  | 127.5  |
| 124.8 | 186.8 | 151.9  | 196.1 | 145.7 | 143.4 | 207.2 | 171.3  | 149.4  |
| 110.5 | 105   | 104.9  | 110.8 | 106.2 | 122.4 | 106   | 114.8  | 118.1  |
| 187.8 | 215.2 | 185.4  | 203.4 | 178.5 | 213.2 | 227.5 | 205.7  | 174.4  |
| 111.7 | 115.6 | 111.1  | 96.5  | 105.2 | 117.8 | 107.9 | 123    | 124.5  |
| 105.2 | 108.5 | 96     | 99.8  | 101.7 | 102.2 | 99.8  | 107    | 112.4  |
| 109.8 | 111   | 106.4  | 103.1 | 97.7  | 120.2 | 104.9 | 125.9  | 121.7  |
| 109.4 | 113.1 | 101.4  | 104.7 | 91.6  | 113.8 | 103.4 | 120.1  | 114.5  |

|        |        |        |        |        |        |        |        |        |
|--------|--------|--------|--------|--------|--------|--------|--------|--------|
| 109.5  | 106    | 104.2  | 93.3   | 97.1   | 107.6  | 113.2  | 104    | 120.5  |
| 2539.7 | 1866.7 | 2347.4 | 2216.6 | 2367.3 | 3460.9 | 2810.7 | 4185.9 | 2714.9 |
| 207.7  | 203.7  | 192.2  | 165.6  | 171.9  | 247.4  | 145.2  | 342.3  | 244.6  |
| 107.4  | 114.5  | 105.7  | 100    | 105.5  | 108.4  | 104.5  | 116    | 112.1  |
| 671.5  | 669.1  | 613.5  | 450.7  | 583.1  | 864.6  | 750.6  | 1686.2 | 1080.7 |
| 110.7  | 113.4  | 127.5  | 122.4  | 122.7  | 115.8  | 123.9  | 122.5  | 114.4  |
| 120.5  | 113.6  | 107.8  | 102.1  | 96.8   | 118.6  | 112.5  | 113.9  | 127.3  |
| 107.6  | 110.1  | 108.5  | 95.2   | 101.8  | 116.6  | 102.3  | 104.4  | 112.6  |
| 106    | 118.5  | 104.7  | 99     | 91.6   | 113.6  | 104.6  | 106.5  | 108.7  |
| 465.3  | 655.1  | 481.7  | 595.1  | 609.3  | 561.1  | 632.7  | 1328.1 | 496.4  |
| 113    | 114.6  | 103.3  | 103.5  | 97.4   | 116.9  | 112.2  | 127.7  | 132    |
| 98.4   | 106.5  | 99.2   | 101.7  | 95.9   | 110    | 104.8  | 112.3  | 110.7  |
| 109    | 109.6  | 108.4  | 92.9   | 93.7   | 108.8  | 101.9  | 103.4  | 107.5  |
| 118.9  | 136.2  | 119.2  | 121.3  | 107.7  | 124.8  | 125.4  | 151.5  | 156.1  |
| 383.9  | 442.7  | 365.2  | 406.3  | 342.4  | 413.2  | 431.9  | 525.2  | 317.3  |
| 187.6  | 193.5  | 198.2  | 150    | 184.1  | 211.5  | 203.7  | 234.7  | 186    |
| 105.5  | 109.9  | 100.7  | 100.5  | 96.6   | 100    | 104    | 114.6  | 108.9  |
| 220.5  | 364.1  | 398.6  | 349.6  | 302.6  | 362.3  | 328.1  | 505    | 288.2  |
| 132.5  | 143.9  | 136.2  | 166.2  | 134.5  | 147.1  | 130.8  | 172.9  | 166.9  |
| 157.8  | 173.5  | 162.5  | 182    | 163.4  | 183.2  | 175.9  | 187.4  | 174.3  |
| 137.2  | 145.5  | 130.3  | 129.9  | 118.6  | 131.8  | 132.4  | 144    | 128.1  |
| 105.6  | 103.5  | 104.2  | 96     | 99.1   | 106.7  | 103.6  | 116.8  | 106.9  |
| 123.2  | 171.2  | 194.2  | 167.1  | 170.4  | 177.1  | 174.2  | 169.4  | 138.9  |
| 123    | 126.8  | 119.6  | 137    | 115    | 133.8  | 128.5  | 144.3  | 118.6  |
| 205.7  | 267    | 201.4  | 239.7  | 172.1  | 189.9  | 232.1  | 230.1  | 226.4  |
| 194.2  | 300.1  | 281.4  | 261.9  | 293.2  | 311.7  | 276.9  | 398.1  | 250.5  |
| 146.8  | 256.4  | 352.5  | 203.4  | 225.3  | 310.1  | 248.8  | 332.5  | 212.2  |
| 103.1  | 105.3  | 102.1  | 104.1  | 96.8   | 111.8  | 101.8  | 105.5  | 105.5  |
| 496    | 682.1  | 643.9  | 659.5  | 680.1  | 686.7  | 623.7  | 1001.5 | 682.8  |
| 108.1  | 117.7  | 113.5  | 123.8  | 110.4  | 120.5  | 128    | 137.7  | 121.2  |
| 113.6  | 114    | 120.8  | 111.7  | 101.2  | 118.1  | 120    | 132.9  | 120.1  |
| 105.2  | 116.7  | 107.8  | 117.1  | 97.7   | 104.1  | 122.9  | 119.6  | 114.6  |
| 602.6  | 1091.7 | 1101   | 1341.1 | 951.5  | 1155.7 | 1795   | 2378.7 | 1501.1 |
| 202.5  | 347.4  | 377.9  | 347.6  | 328    | 338.2  | 657.6  | 567.6  | 421.8  |
| 233.7  | 329.3  | 269.2  | 356.5  | 263.1  | 288.2  | 340.4  | 526.9  | 356.7  |
| 107.7  | 104.7  | 112.3  | 107.8  | 99.3   | 116.3  | 100.6  | 112.2  | 114.3  |
| 293.5  | 426.2  | 284.9  | 300.3  | 295    | 288.6  | 259.4  | 484.7  | 389.4  |
| 116.9  | 108.2  | 120.2  | 114.5  | 107.3  | 118.7  | 110.5  | 110.4  | 112    |
| 121.8  | 118.5  | 115    | 122    | 106    | 114.7  | 112.6  | 115.9  | 126.7  |
| 107.9  | 106.6  | 102.2  | 102.4  | 93.8   | 103.1  | 100    | 96.7   | 112.3  |
| 101.3  | 108.5  | 102.4  | 104.9  | 94.4   | 110.3  | 97.9   | 104.1  | 105.6  |
| 118.9  | 138.1  | 129.2  | 132.5  | 128.5  | 140.2  | 135.6  | 148    | 138.3  |
| 104.8  | 108.3  | 105.5  | 96     | 94.6   | 103.6  | 99     | 126    | 111.5  |
| 104.6  | 107.7  | 107.1  | 104.4  | 99.3   | 109.9  | 106.4  | 110.5  | 106.6  |
| 103.4  | 99.8   | 102.6  | 95.9   | 90.4   | 107.2  | 100.5  | 112.4  | 110.6  |
| 107.7  | 107.2  | 105.6  | 100.6  | 101.6  | 107.9  | 99     | 115.1  | 111    |
| 99.8   | 106.5  | 105.2  | 102.2  | 92     | 102.5  | 98     | 112    | 107.8  |
| 113.2  | 121.6  | 112.7  | 121.9  | 102.6  | 117    | 112.1  | 138.6  | 118.3  |
| 105.3  | 109.2  | 105.7  | 102.3  | 100.4  | 108.1  | 107    | 114.3  | 98.9   |
| 108.1  | 110.4  | 106    | 110.5  | 100.5  | 118.8  | 106.9  | 116.8  | 118.4  |
| 100    | 104.5  | 101    | 92.5   | 94.2   | 100.3  | 99.1   | 98.3   | 108.7  |

|       |       |       |       |        |       |        |        |        |
|-------|-------|-------|-------|--------|-------|--------|--------|--------|
| 105.1 | 106.3 | 100.7 | 97.8  | 94     | 106.2 | 103.7  | 105.9  | 110.2  |
| 104.5 | 103.6 | 102.3 | 100.6 | 97.4   | 107   | 101.9  | 115.7  | 109.3  |
| 232.2 | 181.2 | 186.7 | 179.8 | 181.4  | 261.3 | 213.6  | 347.1  | 222.7  |
| 103.2 | 109.1 | 104.2 | 101.8 | 93.5   | 105.7 | 107.3  | 118.4  | 120.4  |
| 112   | 112.4 | 102.5 | 101   | 100.4  | 108.1 | 105.9  | 113.4  | 104.6  |
| 111.1 | 105.4 | 103   | 90.8  | 93.1   | 110.1 | 106.4  | 110.2  | 107.5  |
| 103.7 | 112.7 | 98.8  | 109.3 | 96     | 110.2 | 100.7  | 107.4  | 109.6  |
| 102.5 | 101.5 | 103.3 | 103   | 91.7   | 106.8 | 88.2   | 108.2  | 112.2  |
| 111.1 | 118.1 | 108.1 | 104.6 | 97     | 105.7 | 100    | 111.8  | 112.5  |
| 108.4 | 113.6 | 104.5 | 105.8 | 98.4   | 107.2 | 99.8   | 116.2  | 110.7  |
| 102.7 | 99.2  | 98.1  | 108.3 | 92.8   | 105.2 | 99     | 97.6   | 103.2  |
| 96.3  | 104.4 | 103.9 | 89.5  | 93.3   | 103.8 | 97.5   | 110.8  | 102    |
| 338.8 | 407.6 | 364.8 | 313   | 391.7  | 394.7 | 394.5  | 596.9  | 422.3  |
| 542.9 | 767.3 | 617   | 469.2 | 513.3  | 663.1 | 524.3  | 761.8  | 600.7  |
| 122.7 | 123.9 | 124.3 | 124.2 | 118.5  | 136.3 | 119.6  | 148.9  | 127.3  |
| 160.3 | 320.2 | 315.4 | 366.6 | 317.9  | 247.6 | 403.6  | 371    | 227.6  |
| 145.2 | 300.1 | 269.2 | 312.7 | 266.7  | 267.1 | 346.6  | 307.6  | 211.4  |
| 142.8 | 147.4 | 148.9 | 141.3 | 142.5  | 133   | 146.4  | 207.5  | 160.9  |
| 102.6 | 104.2 | 106.5 | 106.1 | 97     | 111.1 | 103.9  | 113.8  | 103.7  |
| 108.5 | 118   | 110.4 | 109.3 | 106.7  | 120.2 | 114.3  | 123.8  | 124    |
| 103.3 | 140.4 | 101.6 | 146.8 | 107.1  | 120   | 153.5  | 119.3  | 106.7  |
| 116.3 | 110.5 | 106.1 | 102.2 | 99.9   | 111.8 | 110.5  | 108    | 119    |
| 106.3 | 115.2 | 105.1 | 102.5 | 98.1   | 107.1 | 101.2  | 116.3  | 117.6  |
| 93.5  | 105.9 | 104.1 | 101.6 | 96.4   | 106.1 | 110.4  | 111.7  | 120.2  |
| 112.3 | 124.4 | 107.6 | 112.2 | 109.1  | 117   | 103    | 119.4  | 132.5  |
| 95.1  | 104.1 | 96.9  | 97.3  | 98.9   | 107.1 | 91     | 101.8  | 107.1  |
| 105.5 | 106.5 | 97.3  | 107.4 | 95     | 105.6 | 99.8   | 105.9  | 108.9  |
| 103.8 | 108.1 | 106.8 | 97    | 96     | 109.4 | 94.9   | 105.5  | 116.7  |
| 345.4 | 151.1 | 156.9 | 157.4 | 141.1  | 168   | 185.3  | 386.9  | 413.2  |
| 105.5 | 115.7 | 109.1 | 106.3 | 101.5  | 118.3 | 108.9  | 118.2  | 108.9  |
| 225.2 | 128.9 | 113.9 | 103.1 | 103.2  | 158.8 | 121.4  | 225.8  | 242.9  |
| 109.9 | 108.3 | 106.4 | 110.7 | 94.8   | 111.6 | 107.2  | 105.9  | 101.5  |
| 106.6 | 124.8 | 114.7 | 111.8 | 108.4  | 113.4 | 124    | 124.1  | 111.7  |
| 142   | 135.7 | 116.9 | 127.9 | 112.6  | 127.1 | 131    | 140.2  | 116.6  |
| 202.6 | 203.7 | 154.1 | 174.8 | 176    | 185.9 | 207.6  | 262.6  | 181.2  |
| 119.7 | 126.4 | 113.7 | 114.3 | 111.3  | 125.3 | 119.2  | 148    | 134.3  |
| 104.8 | 106.9 | 102.5 | 97.7  | 90.4   | 106.4 | 103.9  | 112.5  | 108.4  |
| 113.4 | 111.1 | 98.9  | 86.2  | 93.9   | 105.9 | 100.9  | 105.4  | 97.7   |
| 104.5 | 107.6 | 96.6  | 97.8  | 94.5   | 103.7 | 103.5  | 106.8  | 105.3  |
| 129.6 | 151.3 | 140.2 | 165.6 | 127.3  | 147.7 | 159.5  | 182.5  | 158.2  |
| 100.8 | 108.7 | 101.2 | 88.9  | 97.6   | 108.5 | 98.1   | 95.9   | 111.8  |
| 485.5 | 520.1 | 476.8 | 395.5 | 374.7  | 459.4 | 516.1  | 736.7  | 607    |
| 714.3 | 944.3 | 945.4 | 755.8 | 761.2  | 940.7 | 816.3  | 1365.8 | 1111.4 |
| 114.2 | 134.9 | 144.7 | 149.2 | 135.5  | 140   | 142.8  | 204    | 145.7  |
| 135.6 | 884.7 | 771.1 | 708.4 | 1317.6 | 867.5 | 1030.6 | 1478.6 | 270.9  |
| 104.8 | 127.8 | 129   | 105.9 | 103.7  | 119.1 | 114.6  | 121.8  | 116.4  |
| 136.5 | 146.2 | 157.1 | 132.7 | 118.4  | 154.1 | 132.6  | 132.5  | 128.6  |
| 102.4 | 110.3 | 100.7 | 107.3 | 85.2   | 99    | 109.4  | 106.2  | 104.7  |
| 153   | 161   | 143.5 | 125.6 | 135.3  | 155.3 | 149.7  | 175.2  | 152.8  |
| 102.6 | 104.7 | 105   | 113.9 | 105.5  | 103.4 | 103.5  | 100.8  | 114.7  |
| 109.4 | 116.8 | 105.3 | 105.4 | 103.5  | 117.3 | 105.7  | 118.7  | 120    |

|        |        |        |        |        |        |        |        |        |
|--------|--------|--------|--------|--------|--------|--------|--------|--------|
| 111.4  | 115.2  | 102.3  | 104.9  | 95.3   | 106.9  | 100.7  | 103.3  | 109.3  |
| 145    | 137.3  | 128    | 137.9  | 124.8  | 127.8  | 120.9  | 200.9  | 161.8  |
| 116.1  | 117    | 106.3  | 106.5  | 102.1  | 119.9  | 110.9  | 111.4  | 113.5  |
| 108.7  | 105.6  | 102.3  | 106.8  | 100    | 109.2  | 102.5  | 114    | 110.2  |
| 100.4  | 106.2  | 105.1  | 98.6   | 97.2   | 105.3  | 104    | 111.6  | 114.9  |
| 111    | 113.2  | 100.9  | 102.9  | 99.7   | 104.9  | 106.7  | 105.8  | 106.2  |
| 158.8  | 147.3  | 125.9  | 139.9  | 121.3  | 158.6  | 142.3  | 210.3  | 176    |
| 249.2  | 293.4  | 318.4  | 270.6  | 279.5  | 286.8  | 364.9  | 523.1  | 300.8  |
| 112.9  | 112.5  | 109.9  | 120.2  | 105    | 116.3  | 110.1  | 125.5  | 121.2  |
| 129.4  | 143.2  | 127.4  | 131.7  | 112.8  | 147.1  | 139.1  | 133.5  | 155.1  |
| 108.6  | 111.6  | 110.4  | 120.3  | 103.2  | 115.8  | 109.2  | 120.8  | 116.3  |
| 134.5  | 146    | 129.5  | 157.2  | 131.5  | 128.9  | 126.1  | 159.5  | 143.2  |
| 293.8  | 301    | 222.7  | 317.3  | 263.9  | 249.6  | 350.6  | 377.2  | 306.7  |
| 152.3  | 183.9  | 159.1  | 157.3  | 174.2  | 169.2  | 162.1  | 217.3  | 175.7  |
| 109.9  | 106    | 103.8  | 102    | 94.6   | 104.4  | 109    | 107.9  | 109.3  |
| 107.1  | 103    | 98     | 106    | 99     | 107    | 98     | 101.4  | 97.9   |
| 103.7  | 102.8  | 100.6  | 105.4  | 94.5   | 112    | 100.4  | 118    | 111.7  |
| 378.8  | 596.3  | 527.7  | 514.2  | 620    | 496.2  | 507.2  | 625.7  | 535.5  |
| 103.1  | 112.2  | 104.5  | 97     | 93.8   | 101.4  | 99.1   | 101.6  | 108.5  |
| 99.7   | 113.2  | 107.9  | 111.3  | 100    | 109.8  | 97.1   | 106.7  | 107.8  |
| 112.8  | 103.8  | 104.6  | 95.2   | 95.8   | 115.1  | 106.9  | 109.2  | 112.4  |
| 102.3  | 101.6  | 97.1   | 94     | 92.1   | 109.8  | 96.8   | 101.1  | 102.8  |
| 102    | 106.8  | 99.3   | 95.3   | 90.7   | 108.8  | 103.3  | 113.4  | 104.2  |
| 99.5   | 107.4  | 93.1   | 97     | 99.1   | 106.3  | 99.6   | 103    | 106.5  |
| 105.6  | 114.7  | 107.4  | 108.4  | 100.4  | 118.8  | 104.3  | 117.6  | 107.4  |
| 105.3  | 108.7  | 94.2   | 112    | 108.5  | 106.9  | 106.9  | 109.9  | 113.3  |
| 156.9  | 123.9  | 125.2  | 139.1  | 113.6  | 130.4  | 132    | 122    | 118.2  |
| 151.2  | 273.9  | 326.5  | 182.3  | 242    | 242.6  | 224.3  | 276    | 211.8  |
| 106.5  | 107    | 100    | 109.8  | 100.5  | 116.4  | 98.4   | 107    | 101.6  |
| 109.7  | 111.3  | 108.5  | 104.5  | 90.1   | 109.6  | 106.3  | 107    | 116.7  |
| 229.3  | 388.5  | 298.4  | 452.4  | 373.2  | 359.2  | 445.1  | 385.6  | 217.1  |
| 325.3  | 473.2  | 430    | 581.5  | 417    | 467.7  | 598.8  | 519.7  | 262.1  |
| 118    | 111.3  | 102.7  | 99.6   | 97.1   | 104.4  | 98.1   | 118.9  | 120.8  |
| 206.8  | 299.1  | 172.2  | 280.9  | 209.3  | 156.1  | 230.5  | 206.8  | 216.9  |
| 1819   | 4310.8 | 3692.6 | 7287.6 | 3388   | 4435.9 | 6724   | 5222.8 | 4581.3 |
| 1186.2 | 2908.1 | 2333.6 | 3973.4 | 2551.6 | 2379.1 | 4312.9 | 3574   | 2917.7 |
| 109.3  | 109.4  | 104.8  | 102.4  | 98.2   | 110.1  | 102.2  | 114.1  | 101.9  |
| 110    | 112.1  | 97.7   | 101.1  | 104.7  | 113.7  | 108.4  | 114.4  | 109.5  |
| 3549.4 | 8121.9 | 6708.5 | 8226.7 | 7113   | 8069.9 | 8628.7 | 8968.6 | 6679.2 |
| 101.4  | 104.7  | 97.8   | 108.4  | 100.4  | 104.7  | 106.6  | 124.2  | 104.7  |
| 347.9  | 617    | 603.1  | 445.7  | 546    | 570.3  | 532.7  | 683.2  | 481.8  |
| 140.3  | 232.7  | 211.5  | 212.7  | 166.5  | 229.6  | 250.2  | 375    | 273.4  |
| 107.6  | 107.9  | 105.6  | 106.6  | 96.7   | 109.4  | 102.8  | 104.4  | 105.1  |
| 101.9  | 111.9  | 103.5  | 104    | 89.5   | 100.1  | 100.8  | 121.8  | 102.6  |
| 108.4  | 108.1  | 111.9  | 97.8   | 92.8   | 108.6  | 99.2   | 115.4  | 101.3  |
| 103.4  | 105.9  | 118.5  | 115.5  | 105.3  | 114    | 103    | 112.3  | 106.3  |
| 656.2  | 921.6  | 1005.3 | 733.9  | 857.7  | 975.3  | 569.2  | 840.2  | 547    |
| 117.4  | 109    | 110    | 109.3  | 93.5   | 118    | 106.4  | 129    | 125.9  |
| 107.4  | 108.8  | 100.5  | 102.9  | 101.9  | 104.3  | 103.8  | 120.2  | 113.5  |
| 276.3  | 258.8  | 281.4  | 273.6  | 335.7  | 291.1  | 266.2  | 450.4  | 244.6  |
| 390.3  | 432.8  | 326.8  | 339.3  | 304.3  | 342.9  | 358.3  | 633.5  | 511.1  |



|        |       |        |       |        |        |        |        |       |
|--------|-------|--------|-------|--------|--------|--------|--------|-------|
| 537.6  | 407.9 | 363.5  | 457.9 | 386.5  | 458.1  | 409.6  | 769.6  | 501.5 |
| 165    | 313.7 | 334.8  | 317.8 | 219.2  | 236.8  | 309.8  | 280.9  | 165.5 |
| 2252.8 | 2226  | 2109.2 | 2810  | 2178.8 | 2015.6 | 2453.8 | 3715.1 | 3232  |
| 573.7  | 434   | 353.4  | 483.5 | 336    | 460.1  | 419.1  | 677.1  | 608.2 |
| 107.3  | 121.4 | 107.2  | 106.8 | 105.4  | 113.4  | 106.5  | 114.1  | 107.1 |
| 110    | 112.6 | 101.3  | 104.2 | 96.2   | 107.7  | 109.8  | 104.1  | 105.3 |
| 111.4  | 113.2 | 111.3  | 105.1 | 115.9  | 113.6  | 103.8  | 120.3  | 118.4 |
| 146.5  | 173   | 173.6  | 203.5 | 176.6  | 197.4  | 186.2  | 266.4  | 168.2 |
| 328.3  | 457.7 | 363.4  | 544.7 | 349.8  | 363.2  | 448.9  | 664.3  | 550.8 |
| 113.5  | 174.3 | 138.4  | 124.3 | 131.2  | 143.6  | 136.9  | 163    | 142.3 |
| 116.3  | 107.5 | 111.2  | 111.2 | 106.5  | 111.8  | 114    | 125    | 124.3 |
| 292.7  | 434.3 | 413.9  | 294.1 | 423.3  | 435.8  | 313.2  | 839.7  | 319.6 |
| 108.8  | 113.1 | 106.5  | 98.9  | 103    | 113.4  | 104.5  | 125    | 121.7 |
| 113.6  | 124.9 | 103.4  | 111.6 | 110.8  | 132.4  | 106.7  | 140.1  | 130.8 |
| 171.7  | 255.4 | 197.6  | 169.8 | 179.5  | 235.2  | 223.2  | 260.7  | 210.8 |
| 109    | 111.7 | 98.1   | 111.2 | 97.8   | 112.6  | 103.5  | 116    | 114.5 |
| 104.6  | 107.7 | 103    | 99.7  | 94.7   | 111.4  | 98.7   | 122.2  | 108.4 |
| 153.5  | 170.7 | 159    | 168.3 | 168.9  | 183.5  | 172.2  | 202.6  | 173.5 |
| 109.9  | 103.8 | 105.9  | 109.6 | 101.1  | 105.9  | 102.6  | 103.5  | 107.6 |
| 101.5  | 109   | 98.9   | 100.6 | 94.9   | 106.1  | 105.4  | 98.6   | 106.5 |
| 113.6  | 130.5 | 147.5  | 144.7 | 116.1  | 138    | 155.3  | 134.2  | 137.6 |
| 124.7  | 130.9 | 125.6  | 115.5 | 104.4  | 123    | 119.2  | 139.5  | 119.9 |
| 101.7  | 106.5 | 99.8   | 101.1 | 93.6   | 106.9  | 100.4  | 98.9   | 103.3 |
| 126.8  | 121.6 | 114    | 128.9 | 109.1  | 125.8  | 117.4  | 135.8  | 129.4 |
| 172    | 259.4 | 227.4  | 237.8 | 226.1  | 225.1  | 261.3  | 376.2  | 299.3 |
| 110.5  | 112.8 | 107    | 107.1 | 105.4  | 113    | 111.9  | 134.3  | 129.1 |
| 162.7  | 178.6 | 174.7  | 146.8 | 157.4  | 172.5  | 151.7  | 326.8  | 259.3 |
| 106.2  | 115.1 | 105.2  | 110.9 | 100.4  | 121.4  | 104.6  | 104.8  | 105.8 |
| 273.7  | 396.3 | 384.4  | 580.6 | 288.3  | 329    | 466.8  | 286.5  | 248.8 |
| 109.1  | 125.7 | 111.6  | 107.6 | 108.4  | 134    | 113    | 136.7  | 127.5 |
| 106.6  | 131.2 | 108.4  | 118.8 | 99.2   | 118.5  | 106.4  | 121.5  | 116.2 |
| 114.3  | 100   | 103.4  | 101.8 | 101.3  | 114.1  | 105.4  | 124.6  | 115.7 |
| 103.7  | 112.7 | 102.2  | 110.1 | 94.3   | 113.1  | 112.8  | 114.1  | 114.4 |
| 109.6  | 116.6 | 114.3  | 113.2 | 102.5  | 113.1  | 108    | 124    | 104.9 |
| 100    | 108.1 | 107.1  | 100.7 | 98.2   | 112.2  | 105.1  | 104.9  | 100.8 |
| 105.8  | 112.8 | 114.6  | 121.3 | 107.9  | 122.4  | 127.2  | 133.6  | 115.2 |
| 272.9  | 311   | 243.4  | 550.3 | 293.9  | 324.4  | 374.7  | 558.8  | 437.2 |
| 104.7  | 106.3 | 104.9  | 104.1 | 94.9   | 104.4  | 105.4  | 119.7  | 110.6 |
| 197.6  | 155.7 | 135.9  | 130.4 | 138.3  | 148.7  | 185.5  | 260.2  | 267.1 |
| 106.2  | 106.7 | 105.2  | 103.9 | 92     | 106.2  | 98.2   | 103.4  | 107.2 |
| 107.2  | 117.8 | 106.6  | 114.7 | 103.5  | 121.1  | 114.9  | 122.2  | 110.7 |
| 104.7  | 114.9 | 99     | 101.3 | 91.7   | 112.5  | 96.7   | 113.7  | 109.6 |
| 157.1  | 267.5 | 258.3  | 259.6 | 204.4  | 212.9  | 263.9  | 172.2  | 147.4 |
| 110.8  | 116.3 | 109.7  | 104.4 | 98.1   | 110.8  | 104    | 116.3  | 122.8 |
| 114.8  | 117.3 | 100.9  | 98.8  | 100.9  | 103.6  | 104    | 103.5  | 106.3 |
| 110.6  | 114.8 | 109.3  | 106.1 | 93.8   | 113    | 110.2  | 125    | 109.4 |
| 103.6  | 114.6 | 107.5  | 90.2  | 104.9  | 114.5  | 100.4  | 119.2  | 107.5 |
| 109.4  | 104.4 | 100.8  | 108.7 | 93.3   | 106.8  | 98.3   | 105.1  | 104.2 |
| 130    | 113.2 | 107.7  | 118.4 | 99     | 111    | 103.6  | 127.7  | 116.9 |
| 109.9  | 108.5 | 121.2  | 100.8 | 98.7   | 116.4  | 104.6  | 113.4  | 109.4 |
| 111.7  | 117.9 | 99     | 110.4 | 98.8   | 120.4  | 108.9  | 105.6  | 118   |

|       |       |       |       |       |       |       |        |       |
|-------|-------|-------|-------|-------|-------|-------|--------|-------|
| 109.8 | 115.6 | 107.9 | 106.3 | 103.1 | 117.7 | 111.9 | 118.5  | 110.3 |
| 109.7 | 110.8 | 105.8 | 119.6 | 100.7 | 105.4 | 119.8 | 116    | 112.4 |
| 117   | 106.3 | 102.9 | 101   | 103   | 116.5 | 111.2 | 118.1  | 112.5 |
| 109   | 109.9 | 95.2  | 96.2  | 95.5  | 107.7 | 103.7 | 104.5  | 103.1 |
| 107.9 | 105.2 | 104.9 | 99.4  | 100   | 108.4 | 105.6 | 109.8  | 113.8 |
| 115.4 | 104.8 | 98.8  | 108.2 | 88.9  | 117.9 | 108.3 | 109.7  | 101.8 |
| 116.4 | 115.7 | 106.4 | 110.3 | 101.1 | 115.3 | 109.6 | 116.3  | 126.8 |
| 103.9 | 114.4 | 109.6 | 105.2 | 100.5 | 117.5 | 107.3 | 119.7  | 116.1 |
| 111.4 | 101.2 | 100.2 | 95.3  | 94.5  | 104.3 | 102.9 | 102.1  | 110.9 |
| 110.6 | 113.3 | 106   | 103.6 | 96.7  | 113   | 102.1 | 118.2  | 114.3 |
| 135.3 | 167.2 | 161.4 | 179.2 | 128.2 | 148.3 | 152.8 | 148.3  | 134.4 |
| 146.3 | 200.3 | 237.5 | 215.4 | 174   | 177.5 | 188.4 | 190.5  | 180   |
| 125.5 | 120.1 | 105.9 | 125.6 | 112.5 | 124   | 131   | 160.3  | 133.2 |
| 141.1 | 490.3 | 219.8 | 405.5 | 257.9 | 221.5 | 291.8 | 295.6  | 296.5 |
| 106.1 | 111.7 | 106.5 | 112.7 | 99.1  | 114.2 | 115.4 | 117    | 106.1 |
| 111.1 | 111.3 | 111.3 | 115.8 | 106.2 | 110.5 | 111   | 110.6  | 105.9 |
| 99.9  | 108.4 | 101.5 | 94    | 93.6  | 110.1 | 105.2 | 113.5  | 105.9 |
| 113.5 | 122   | 106.7 | 120.6 | 105.6 | 119.6 | 106.7 | 125.6  | 117.2 |
| 102.6 | 103   | 101.9 | 93.3  | 101   | 102.9 | 102.4 | 99.7   | 99.9  |
| 110.9 | 123   | 109.6 | 119.5 | 100.1 | 124.3 | 111.3 | 116    | 119.2 |
| 105.9 | 119.1 | 102.2 | 101.5 | 95.1  | 104.3 | 102.3 | 101.1  | 113.7 |
| 105   | 106.7 | 104.1 | 122.5 | 101.3 | 117.5 | 99    | 112.9  | 111.6 |
| 116   | 109.6 | 100.1 | 103.7 | 98.1  | 112.5 | 101.2 | 112.4  | 111.2 |
| 102.9 | 107.5 | 100.6 | 107.8 | 101.8 | 102.9 | 106.8 | 114.3  | 105.8 |
| 108.6 | 103.9 | 102.1 | 102   | 95.6  | 114   | 103.8 | 104.7  | 119.6 |
| 107.5 | 104.5 | 99.9  | 111.7 | 97.8  | 118.1 | 107   | 115.4  | 108.5 |
| 106   | 104.3 | 102   | 106.5 | 93.9  | 106   | 96.2  | 109.6  | 108.3 |
| 125   | 138.7 | 128.6 | 115.2 | 110.1 | 122.5 | 124.2 | 132.2  | 132.4 |
| 107.7 | 104   | 109.7 | 90.5  | 94.2  | 106.5 | 102.1 | 111.1  | 111.4 |
| 98.1  | 109.1 | 102.4 | 99.9  | 96.1  | 105.7 | 96    | 114.6  | 101.9 |
| 105.2 | 112.5 | 102   | 108.2 | 100.2 | 102.9 | 101.2 | 112.5  | 111.3 |
| 110.1 | 109   | 98.1  | 102.4 | 89.7  | 108.1 | 94.9  | 102.1  | 102.7 |
| 110.3 | 107.3 | 104.9 | 99.9  | 98.8  | 106.8 | 110.2 | 110.3  | 107.2 |
| 102.6 | 102.2 | 109.3 | 102.7 | 100.7 | 113.7 | 114.5 | 104.6  | 102.6 |
| 108.3 | 101.1 | 98.2  | 99.6  | 102.7 | 106.2 | 98.4  | 100.8  | 108.5 |
| 104.1 | 116.1 | 123.1 | 104   | 109.4 | 114.7 | 113   | 116    | 118.2 |
| 113.8 | 109.4 | 110.6 | 107.9 | 95.4  | 109   | 102.3 | 113.1  | 110.1 |
| 101.4 | 92.2  | 96.7  | 113.6 | 97.4  | 106.4 | 101.6 | 104.6  | 103   |
| 105   | 101.2 | 96.3  | 102.7 | 88.2  | 106.8 | 91.6  | 112.8  | 96.3  |
| 105.1 | 105.7 | 105.7 | 101.6 | 93.4  | 113.5 | 102.4 | 111.3  | 120.9 |
| 108.8 | 103.1 | 101   | 110   | 98.2  | 111.3 | 98.1  | 103.9  | 107.8 |
| 112.7 | 112.6 | 103.6 | 108   | 96.8  | 109.9 | 101   | 118.6  | 103   |
| 107.8 | 106   | 95.8  | 95.8  | 98.3  | 102.5 | 99.1  | 106.5  | 109   |
| 113.3 | 105.1 | 113.1 | 104.2 | 99.5  | 109.9 | 101.4 | 105.6  | 103.9 |
| 113.3 | 105.8 | 105.4 | 109.5 | 100.6 | 120.5 | 111.4 | 114.4  | 97.8  |
| 113.3 | 124.7 | 112.8 | 117.7 | 109.7 | 114.3 | 116.3 | 118.8  | 110.1 |
| 485.7 | 911.5 | 716.5 | 596.5 | 584.7 | 739.4 | 498.7 | 1345.4 | 704.1 |
| 109.3 | 115.1 | 107   | 105.3 | 101   | 106.5 | 101.7 | 123.9  | 111.5 |
| 279.8 | 560.3 | 506.3 | 437.2 | 500.9 | 457.3 | 532.1 | 576.5  | 520.8 |
| 119.7 | 111.5 | 101.7 | 104.5 | 100   | 118.7 | 114.2 | 123.5  | 114.2 |
| 137.4 | 187.4 | 173.9 | 169.7 | 159.4 | 184.8 | 183.9 | 185.4  | 143.5 |

|        |        |        |        |        |        |        |        |        |
|--------|--------|--------|--------|--------|--------|--------|--------|--------|
| 110.2  | 112.8  | 103.9  | 113.1  | 95     | 110    | 103.6  | 125.1  | 108.6  |
| 283.8  | 421.2  | 444.5  | 424.8  | 439.2  | 458.8  | 463.5  | 436.2  | 274.8  |
| 107.5  | 104.6  | 116.1  | 115    | 109.4  | 124    | 109.9  | 120.2  | 116    |
| 173.9  | 240.6  | 254.2  | 195.5  | 246.9  | 233    | 227.7  | 278.8  | 187.5  |
| 113.1  | 114.8  | 108.2  | 107.4  | 105.1  | 113.4  | 116.8  | 115.7  | 117    |
| 117.4  | 162.3  | 144.8  | 157.5  | 125.7  | 147.9  | 128.3  | 150.1  | 117.3  |
| 243.2  | 248.1  | 294.5  | 295.4  | 225.1  | 270.4  | 302.8  | 267.3  | 211.6  |
| 115.8  | 131.6  | 121.1  | 111.8  | 109.8  | 119.3  | 105.9  | 129.4  | 110.6  |
| 117.2  | 157.6  | 134.3  | 129.3  | 121.9  | 145.4  | 134.5  | 142.7  | 131.4  |
| 107    | 118    | 106.8  | 101.5  | 94.7   | 104.8  | 103.1  | 116.3  | 109.3  |
| 114.3  | 122.1  | 105.7  | 109.6  | 101.8  | 113.4  | 107.5  | 125.9  | 121.3  |
| 205.9  | 428.1  | 441.5  | 318.1  | 359.8  | 387.8  | 349.5  | 517.9  | 253.1  |
| 134    | 113.2  | 108.2  | 110.3  | 105.7  | 122.7  | 122    | 136.2  | 122.5  |
| 107.1  | 113    | 98.6   | 109.8  | 92.2   | 104.8  | 103.8  | 107.2  | 107.6  |
| 105.9  | 115    | 105.1  | 103.8  | 94.2   | 108.8  | 98.4   | 110.4  | 101.9  |
| 114.9  | 111.5  | 106.6  | 101.7  | 95.2   | 105.3  | 94.9   | 118.5  | 112.8  |
| 162.6  | 188.3  | 184.6  | 190.6  | 161.7  | 170.6  | 216.8  | 248    | 206.6  |
| 109.4  | 117.1  | 100    | 89.2   | 96.7   | 113.4  | 99.4   | 118.9  | 110.3  |
| 113    | 132.2  | 126.8  | 125.6  | 135.5  | 125.7  | 136.2  | 142.1  | 127.3  |
| 106.9  | 108.3  | 107.3  | 113.4  | 95     | 109.8  | 101.6  | 110.4  | 112.3  |
| 119.1  | 109.1  | 103.8  | 98.6   | 102.2  | 123.4  | 101.3  | 106.8  | 104.8  |
| 119.6  | 124.8  | 109.4  | 113    | 107    | 121.1  | 110.5  | 130.1  | 118.8  |
| 1415.5 | 1711.6 | 1677.8 | 1685.3 | 1776.5 | 1646.8 | 1556.8 | 2541   | 1719.5 |
| 99.6   | 112.1  | 104.8  | 97.9   | 97.3   | 103.2  | 97.1   | 113.3  | 102.3  |
| 108.9  | 113.4  | 105.2  | 110.1  | 94.7   | 106.8  | 106.4  | 108.8  | 109.1  |
| 106.2  | 108.2  | 104.6  | 94.4   | 102.2  | 110.7  | 114.1  | 123    | 111.3  |
| 105.4  | 98.3   | 99     | 103.6  | 93.5   | 111.3  | 94.9   | 112.8  | 109.6  |
| 423.4  | 554    | 613.6  | 589.4  | 561.3  | 560.9  | 316.7  | 875.2  | 908.4  |
| 672.2  | 768.9  | 889.7  | 775.4  | 585.5  | 1072.2 | 841.6  | 1598.2 | 1241.1 |
| 399.8  | 544.7  | 545.8  | 460    | 534.9  | 649    | 316.8  | 865.9  | 798.1  |
| 1044   | 934.1  | 828.5  | 455    | 933.6  | 1457.2 | 805.2  | 2483.2 | 1136.4 |
| 105.8  | 103.8  | 97.4   | 99     | 93     | 108.2  | 100.4  | 102.6  | 106    |
| 107.6  | 102.9  | 99.7   | 99.4   | 95.7   | 104.6  | 96.8   | 102    | 100.5  |
| 109.3  | 111.2  | 101.9  | 98.9   | 91.1   | 105.3  | 99.8   | 103.8  | 103.6  |
| 109.7  | 105.5  | 102.3  | 87.9   | 89.5   | 104.3  | 98.5   | 99.2   | 105.5  |
| 112.1  | 117    | 110    | 119.5  | 116    | 118.6  | 107.5  | 117.4  | 123.5  |
| 111.2  | 117.9  | 102.6  | 105.7  | 98.3   | 111.9  | 108.6  | 115.3  | 125.3  |
| 105.4  | 116.2  | 104.1  | 96.5   | 94.6   | 101.2  | 102.5  | 112    | 102.9  |
| 129.5  | 160    | 146.7  | 164.7  | 128.5  | 130.5  | 171.4  | 136.5  | 149.3  |
| 98.9   | 114.1  | 109.2  | 108    | 95.4   | 106.5  | 106.8  | 114.2  | 117.7  |
| 118.6  | 125.1  | 108.3  | 111.9  | 103.4  | 122.8  | 120    | 124.3  | 120.4  |
| 106.3  | 106.1  | 103.7  | 101.7  | 93.9   | 107.5  | 103.2  | 119.7  | 117.8  |
| 289.3  | 243.2  | 236.6  | 223.3  | 246.7  | 231.4  | 295.1  | 520.6  | 275.1  |
| 356.3  | 466.8  | 382    | 309.8  | 363.8  | 428.9  | 407.6  | 633.1  | 468.4  |
| 107    | 121.6  | 109.1  | 112.3  | 102.9  | 116.7  | 109.9  | 125.1  | 108.2  |
| 108.5  | 113    | 108.4  | 101.8  | 94.7   | 111    | 110.6  | 100    | 113.5  |
| 121    | 144    | 128.3  | 140.9  | 118.7  | 134.9  | 118.5  | 136.3  | 135.8  |
| 2548.4 | 180.2  | 152.1  | 158.6  | 216.9  | 270    | 335.9  | 917.5  | 713.8  |
| 134.3  | 137.9  | 123.6  | 139.6  | 124.2  | 169    | 142.7  | 182.7  | 178.9  |
| 104    | 105.8  | 109.9  | 101.6  | 94.8   | 107.2  | 105.1  | 100.6  | 111    |
| 140    | 178.6  | 179    | 187.4  | 134.1  | 184.8  | 156.5  | 252.3  | 186.1  |

|       |        |        |        |        |        |        |        |        |
|-------|--------|--------|--------|--------|--------|--------|--------|--------|
| 119.6 | 129.6  | 138.8  | 116.9  | 121.1  | 144.9  | 114.8  | 144.9  | 131.2  |
| 106.6 | 109.8  | 103.8  | 109.5  | 98.4   | 103.8  | 97.1   | 103.7  | 107.2  |
| 111   | 110.6  | 109.4  | 109.1  | 97.6   | 108.5  | 108    | 108.6  | 111.9  |
| 136.5 | 262.2  | 291.4  | 182.9  | 241.3  | 269.2  | 209.1  | 235.4  | 174.9  |
| 112.5 | 124.8  | 103    | 115.7  | 112.1  | 111.4  | 117.1  | 144.9  | 103.1  |
| 102.8 | 110.2  | 91.6   | 308    | 92.8   | 98.3   | 148.2  | 107.6  | 105.2  |
| 116.8 | 121    | 120.1  | 221.6  | 111.9  | 129.3  | 176.5  | 151.3  | 124.3  |
| 231.4 | 306.5  | 291.6  | 305.4  | 287.4  | 249.1  | 355.6  | 422.4  | 387.1  |
| 103.4 | 100.4  | 102.8  | 101.4  | 94.9   | 107.4  | 99.7   | 112.6  | 112.6  |
| 120.1 | 134    | 110.6  | 116.9  | 110.2  | 116.2  | 116.5  | 146.8  | 112.9  |
| 109.2 | 107    | 108.4  | 103.5  | 93.8   | 107.5  | 99     | 113.8  | 103.7  |
| 112.5 | 106.5  | 106.6  | 104.5  | 104.9  | 113.8  | 102.5  | 115.9  | 120.2  |
| 115.1 | 103.6  | 106.8  | 116.3  | 99.9   | 106.1  | 108.7  | 114.4  | 115.8  |
| 200.4 | 213.6  | 182.3  | 177.4  | 199.9  | 203.7  | 207.9  | 375.6  | 237.3  |
| 102.8 | 98.5   | 102.1  | 91.4   | 92.6   | 107.1  | 96.4   | 108.6  | 118.5  |
| 103.1 | 101.9  | 97.3   | 94     | 93     | 105.1  | 101.3  | 98.1   | 114.6  |
| 110.3 | 100.7  | 108    | 92.3   | 105.1  | 108.9  | 97.3   | 119.2  | 106.9  |
| 110.1 | 129.3  | 102.8  | 107.6  | 107    | 117.6  | 117.6  | 124.7  | 119.9  |
| 114.2 | 111.1  | 101.4  | 98.8   | 98     | 116.8  | 100.6  | 115.6  | 110.1  |
| 113.8 | 113.5  | 107.3  | 100.5  | 107.8  | 115.6  | 107.6  | 117.7  | 121    |
| 112.2 | 107.5  | 112.9  | 105.1  | 102.4  | 119.3  | 105.5  | 119.2  | 109.7  |
| 113.3 | 107.3  | 97.9   | 104.8  | 101.5  | 101.9  | 112    | 127.6  | 112    |
| 131   | 116.9  | 113.5  | 121.9  | 107.8  | 122.2  | 112.6  | 123.1  | 119.3  |
| 111.1 | 114.7  | 111.2  | 105.9  | 106.2  | 120.5  | 108.2  | 121.5  | 113.6  |
| 108.1 | 106.2  | 98     | 103.5  | 101    | 109    | 101.3  | 107.5  | 111.7  |
| 161.9 | 361.3  | 367.8  | 290    | 360.9  | 380.3  | 248.7  | 540    | 327    |
| 99.7  | 107    | 100.8  | 105.8  | 101.4  | 112.8  | 111.4  | 117.4  | 119    |
| 97.3  | 104.4  | 97.6   | 89.5   | 86.5   | 107.2  | 92.6   | 103.8  | 102.3  |
| 113   | 105.7  | 107.3  | 104.4  | 100.2  | 109.2  | 103    | 109.9  | 99     |
| 212.8 | 195.3  | 194.1  | 164.4  | 185.9  | 249.8  | 227.6  | 536.3  | 491.8  |
| 419.3 | 272.1  | 208.8  | 211.1  | 323.5  | 251    | 310.3  | 1081.6 | 1240.5 |
| 388.2 | 977    | 918.6  | 693.6  | 694.7  | 862.6  | 781.9  | 1042.9 | 657.5  |
| 662.7 | 771    | 809.8  | 590.5  | 741.1  | 833.7  | 910.3  | 1045.6 | 730.3  |
| 102.6 | 109.5  | 98.4   | 102.2  | 100    | 110.8  | 103.6  | 118.3  | 109.3  |
| 119.4 | 109.6  | 114.2  | 112.7  | 92     | 116    | 120.6  | 123.5  | 121.3  |
| 115.7 | 103.4  | 107.7  | 92.7   | 95     | 106.2  | 104.1  | 115.1  | 107.9  |
| 126.8 | 133.4  | 135.4  | 124.8  | 123.2  | 137.9  | 138.2  | 162    | 123.8  |
| 131.3 | 130.3  | 126.5  | 132.9  | 129.8  | 140    | 132.2  | 176.7  | 148.4  |
| 1208  | 1544.7 | 2041.1 | 1751.7 | 1446.1 | 1948.3 | 1217.1 | 2085.8 | 859.3  |
| 314.1 | 523.8  | 552.9  | 441.7  | 553.5  | 419.2  | 459.3  | 822.1  | 479.4  |
| 102.5 | 113.3  | 101.8  | 102    | 99.8   | 113.2  | 98.4   | 119.1  | 114.6  |
| 107.1 | 107.6  | 105.6  | 95.4   | 89.5   | 106.7  | 102.2  | 106.6  | 102.8  |
| 115   | 121    | 113    | 117.1  | 109.8  | 121.2  | 129.7  | 124.5  | 117.3  |
| 111.8 | 118.9  | 98     | 100.7  | 100.7  | 109.2  | 107.5  | 115.4  | 108.5  |
| 118.8 | 118.4  | 109.2  | 113.9  | 105.4  | 114.6  | 121.3  | 116.3  | 128.9  |
| 109.8 | 116.1  | 109.5  | 111    | 114.6  | 122    | 102.3  | 121.2  | 119.5  |
| 107.6 | 105.5  | 112.1  | 97.5   | 107.7  | 106    | 94.3   | 115.2  | 102.4  |
| 100.6 | 104.9  | 100.3  | 93.6   | 92.4   | 114.4  | 101.4  | 102.5  | 113.2  |
| 109.1 | 124.8  | 129.6  | 115.7  | 112.6  | 119.5  | 127.5  | 185.7  | 167.3  |
| 110.3 | 118    | 104.1  | 116.7  | 98.5   | 115    | 105.3  | 116.3  | 108.2  |
| 121.5 | 138.4  | 129    | 132.5  | 107.9  | 118.9  | 123.8  | 116    | 111.3  |

|       |       |       |       |       |       |       |       |       |
|-------|-------|-------|-------|-------|-------|-------|-------|-------|
| 109.5 | 118.7 | 105.9 | 107.5 | 99.6  | 104   | 101.5 | 98.8  | 105.7 |
| 215.1 | 167.9 | 174   | 147.1 | 173.6 | 186.1 | 155.5 | 321.5 | 243.4 |
| 277.1 | 326.4 | 324.7 | 214.4 | 285.3 | 320.9 | 266.8 | 404.9 | 270   |
| 122.8 | 134.6 | 125.8 | 115.7 | 102.3 | 123.3 | 109.5 | 127.1 | 121.2 |
| 104.6 | 110.2 | 108.3 | 103.7 | 96.3  | 109.6 | 99.2  | 115.9 | 111.9 |
| 110.2 | 106.7 | 105.4 | 94.6  | 92.2  | 108.4 | 100.7 | 104.6 | 110.1 |
| 272.7 | 372.7 | 350.2 | 250.8 | 290.3 | 332.2 | 325.9 | 494.9 | 366.1 |
| 97.5  | 104.3 | 99.1  | 96.9  | 83.9  | 106.1 | 95.9  | 100.9 | 104.2 |
| 113.4 | 118   | 107.4 | 142.8 | 105.2 | 111.5 | 116.2 | 105   | 103.2 |
| 104.4 | 114.4 | 107.1 | 108.9 | 99.9  | 118   | 107.5 | 116.2 | 111.2 |
| 159   | 142.2 | 136.8 | 130.4 | 130.9 | 148.2 | 133   | 164.9 | 129.6 |
| 115.4 | 122.6 | 112.9 | 114.5 | 111.4 | 114.8 | 107.7 | 185   | 154.7 |
| 199.9 | 188.7 | 191.6 | 172.7 | 193.5 | 200.8 | 196.2 | 323.5 | 255.5 |
| 111.8 | 215.7 | 183.3 | 206.5 | 175.4 | 169.3 | 170.5 | 178.4 | 155   |
| 100.1 | 103.7 | 107.5 | 103.1 | 91.4  | 100.6 | 96.9  | 101.7 | 106.2 |
| 102.9 | 110.4 | 98.3  | 98.4  | 92.7  | 111.5 | 100.1 | 109.9 | 100.1 |
| 106.2 | 99.5  | 97.7  | 104.2 | 93.2  | 100.4 | 99.9  | 118.2 | 123.2 |
| 107.1 | 105.6 | 111.4 | 93.1  | 94.2  | 112.1 | 105   | 108.8 | 108.1 |
| 107.2 | 107.7 | 99.1  | 96.4  | 89.6  | 102.1 | 92.6  | 110.2 | 106.2 |
| 110.7 | 106.9 | 109.1 | 107.6 | 104.5 | 112.2 | 113.4 | 115.9 | 105.2 |
| 119.4 | 121.9 | 109.7 | 112.9 | 101.2 | 117.2 | 127.6 | 132.5 | 130   |
| 224.6 | 270.3 | 313.9 | 279.6 | 300.9 | 362.5 | 327   | 389.4 | 295.2 |
| 110.4 | 118.3 | 97.3  | 109.1 | 95.1  | 113.8 | 112.4 | 113.7 | 107.1 |
| 110   | 116.1 | 98.6  | 102.5 | 101.8 | 106.3 | 102.7 | 101.2 | 112.9 |
| 177.3 | 293.6 | 314.6 | 282.3 | 284.9 | 276.7 | 265.9 | 305.1 | 197.5 |
| 108.1 | 108.9 | 109   | 104   | 96.9  | 108.4 | 99.8  | 102.2 | 111.7 |
| 106.5 | 109.5 | 100.4 | 105.9 | 98.5  | 107.6 | 101.7 | 110.4 | 105.8 |
| 111.8 | 133.3 | 134.3 | 118.3 | 117.7 | 129.6 | 125.9 | 138.1 | 131.6 |
| 119.1 | 176.6 | 169.4 | 146.2 | 132.6 | 167.9 | 146.2 | 156.9 | 129.8 |
| 101   | 105.2 | 102.6 | 95    | 91.1  | 107.1 | 101.2 | 107.3 | 108   |
| 100   | 103.9 | 98.4  | 99.8  | 94.5  | 108.5 | 98.7  | 98.8  | 103.5 |
| 128.6 | 140.4 | 138.4 | 143.4 | 133.1 | 142.8 | 142.8 | 153.8 | 120.2 |
| 111.7 | 138.3 | 108.8 | 129.4 | 119.8 | 122.4 | 145.3 | 138   | 123.4 |
| 117.1 | 120.9 | 103.1 | 134.4 | 114.5 | 116.9 | 125.2 | 129.3 | 125   |
| 116.8 | 130.9 | 115.8 | 127.2 | 109.4 | 129.7 | 133.2 | 135.8 | 129.3 |
| 116.4 | 109.8 | 102.9 | 100.2 | 101.6 | 112.3 | 102   | 109.5 | 111.9 |
| 116.8 | 137.5 | 118.7 | 121.5 | 109.3 | 121.5 | 124.7 | 135.7 | 118.5 |
| 153   | 167.7 | 158.7 | 157.3 | 143.5 | 145.1 | 177.6 | 160.5 | 139.6 |
| 130.9 | 206.8 | 192.6 | 138.9 | 189.4 | 180   | 142.5 | 195   | 122.9 |
| 106.6 | 108.7 | 113.5 | 114.7 | 97    | 118.3 | 98.6  | 113   | 110.3 |
| 110.3 | 137.4 | 130.3 | 124.8 | 124.5 | 118.4 | 120.7 | 136.1 | 120.2 |
| 165.1 | 243.8 | 179.8 | 208.2 | 199.4 | 201.3 | 207.9 | 354.6 | 249.8 |
| 113.8 | 109.4 | 111.6 | 119.4 | 118.4 | 129.8 | 111.8 | 117.9 | 109.8 |
| 109.1 | 107.7 | 97.9  | 97.2  | 95.4  | 105.1 | 109.1 | 106.4 | 111.7 |
| 104.7 | 112.9 | 106.1 | 101.5 | 94.5  | 114.4 | 107.4 | 103   | 105.3 |
| 104.1 | 111   | 107.4 | 116.2 | 98.1  | 106.4 | 101.1 | 98.5  | 105.6 |
| 111.4 | 98.6  | 107.8 | 101   | 93.5  | 108.9 | 103.4 | 105.8 | 111   |
| 104.9 | 106.4 | 94.3  | 99.5  | 91.1  | 107.2 | 95.2  | 99.1  | 99.3  |
| 112.2 | 126.2 | 113.5 | 143.6 | 117.1 | 127.9 | 121.7 | 153.8 | 122.8 |
| 100.5 | 104.6 | 99.5  | 94    | 93    | 106.2 | 96.7  | 107.2 | 110.6 |
| 105.9 | 112   | 92.6  | 99.3  | 97    | 97.9  | 90.8  | 117.4 | 108.2 |

|        |        |        |        |        |        |        |        |        |
|--------|--------|--------|--------|--------|--------|--------|--------|--------|
| 113    | 118.7  | 113.5  | 116.2  | 104.5  | 117.3  | 110.6  | 114.5  | 115.8  |
| 112.4  | 133.6  | 119.8  | 143.3  | 112.8  | 115.8  | 124    | 122.7  | 117.9  |
| 108.3  | 130.2  | 112.7  | 126.3  | 110.5  | 115.2  | 118.9  | 117.2  | 102.3  |
| 105.2  | 108.5  | 102.8  | 105.4  | 94.1   | 108.5  | 106.2  | 112.4  | 110.5  |
| 107.7  | 111.5  | 108.5  | 109.4  | 94.6   | 114.1  | 104.2  | 124.8  | 116.8  |
| 103    | 108.6  | 99.9   | 103.8  | 93.2   | 106.8  | 101.9  | 114    | 108    |
| 104.3  | 106.3  | 99.9   | 104.8  | 94.9   | 115.9  | 105.9  | 104.1  | 105.9  |
| 240.7  | 245.4  | 233.8  | 191.8  | 207.1  | 255.4  | 219.2  | 307.9  | 236.8  |
| 238    | 241.6  | 257.1  | 183.7  | 256.1  | 228.6  | 237.3  | 357.8  | 305.7  |
| 281.5  | 570.6  | 587.2  | 545.5  | 509.7  | 494.3  | 556.9  | 680.2  | 392.3  |
| 282.2  | 462.6  | 347.2  | 387.8  | 492.2  | 566.1  | 356.7  | 759.3  | 535    |
| 124.1  | 116.7  | 128.4  | 102.6  | 115.1  | 130.7  | 112.8  | 120    | 117.4  |
| 130.5  | 133    | 109.8  | 119.2  | 135.1  | 126.4  | 113.3  | 163.4  | 130.7  |
| 317.2  | 602.5  | 489.5  | 628.7  | 713.1  | 434.3  | 738.2  | 822.5  | 583.8  |
| 123.1  | 109    | 111.3  | 108.9  | 97.1   | 109.7  | 113.2  | 126.7  | 123.3  |
| 112.4  | 108    | 110.8  | 114.7  | 94.5   | 110.3  | 108.4  | 113    | 115.5  |
| 116.4  | 117.7  | 106.4  | 112.5  | 106.1  | 114.3  | 127.5  | 133.1  | 126.5  |
| 101.6  | 117.6  | 105.3  | 108    | 99.7   | 108    | 110.8  | 121.1  | 106.8  |
| 938.5  | 325.7  | 227.9  | 285.4  | 225.7  | 260.3  | 265.1  | 927.2  | 1277.3 |
| 125.6  | 159    | 135.6  | 188.4  | 128.6  | 132.2  | 140.6  | 182.7  | 187.7  |
| 111.5  | 108.9  | 96.5   | 109    | 94.3   | 101.1  | 110.8  | 112.3  | 118.8  |
| 112.3  | 108.3  | 102.4  | 106.8  | 93.5   | 99.2   | 104.3  | 119.3  | 102.4  |
| 259.9  | 328.4  | 129.8  | 1447.6 | 242.8  | 147.3  | 1069.7 | 225.7  | 227.3  |
| 631    | 806.7  | 343.8  | 3472.1 | 565.7  | 330.1  | 2050.8 | 392.9  | 267.7  |
| 102.4  | 110    | 98.3   | 94     | 89.8   | 109.3  | 96.5   | 117.1  | 108.7  |
| 110.2  | 113.6  | 111.6  | 107.1  | 107.6  | 120.5  | 112.4  | 106.7  | 110.5  |
| 197.2  | 290.8  | 267.8  | 253.9  | 225.7  | 274.4  | 303.6  | 393.1  | 247.4  |
| 117.4  | 114.4  | 111.3  | 108.7  | 99.2   | 120    | 111.1  | 113.6  | 113.1  |
| 134    | 138.8  | 119.1  | 135.9  | 103.6  | 130.1  | 115.7  | 142.5  | 142.8  |
| 101.8  | 108    | 106.9  | 110.8  | 98.7   | 111    | 105.8  | 113.4  | 103.3  |
| 120.9  | 117.6  | 114.1  | 113.7  | 101    | 114.9  | 105.4  | 116.4  | 125.3  |
| 426.5  | 835.3  | 908.2  | 652    | 708.7  | 939.7  | 694.3  | 1078   | 679.4  |
| 122.6  | 103.9  | 105.1  | 108    | 99     | 116.3  | 115.1  | 108    | 122.2  |
| 107.1  | 109.2  | 106.5  | 95.8   | 100.4  | 108.1  | 109.2  | 118.4  | 118.8  |
| 108.1  | 108    | 110.4  | 108    | 102.1  | 106.1  | 107.5  | 120.8  | 122.2  |
| 3198.1 | 3239.4 | 2532.2 | 3422.3 | 2392.3 | 3529.6 | 2041.2 | 5915.6 | 7133   |
| 101.9  | 102.3  | 105.4  | 108.6  | 96.4   | 108.8  | 104.9  | 112.2  | 116.9  |
| 102.4  | 110.3  | 102.2  | 115.4  | 100.3  | 108.3  | 98.1   | 104.4  | 112.9  |
| 105.8  | 120.4  | 109.7  | 100.3  | 107.7  | 121.5  | 107.3  | 123.4  | 116.7  |
| 213.4  | 260.7  | 216.9  | 242.6  | 169.9  | 212.2  | 229.3  | 211.2  | 140.1  |
| 119.1  | 139.3  | 135.1  | 120.8  | 108    | 137.6  | 125.3  | 169.1  | 127.3  |
| 135.6  | 156.7  | 127.9  | 125.8  | 131.2  | 151.1  | 131.5  | 143.1  | 121.8  |
| 155.9  | 387.5  | 299.8  | 279.8  | 309.1  | 335.3  | 306.8  | 388.5  | 200.9  |
| 237.3  | 403.7  | 492.3  | 368.4  | 382.1  | 508.2  | 391.7  | 387.6  | 381.5  |
| 115    | 125.9  | 145.5  | 104.1  | 115.4  | 129    | 108.6  | 134    | 122.3  |
| 110.2  | 94.2   | 99.5   | 106.1  | 89.6   | 105.1  | 103    | 106.4  | 112.9  |
| 115.4  | 113.5  | 105.6  | 107.4  | 101    | 109.6  | 99.5   | 110.4  | 105.9  |
| 108    | 112.1  | 106    | 103.4  | 100.5  | 101.3  | 107.4  | 106    | 110.2  |
| 104    | 142.1  | 147.4  | 113    | 134.3  | 140.9  | 111.6  | 109.4  | 107.1  |
| 112.2  | 107.5  | 99.5   | 93.4   | 96.7   | 107.2  | 106.1  | 104.5  | 107    |
| 127.4  | 144.5  | 128.4  | 118.5  | 130.6  | 119.8  | 114.8  | 144.3  | 122.4  |

|        |        |        |        |        |        |        |        |        |
|--------|--------|--------|--------|--------|--------|--------|--------|--------|
| 121.3  | 126.8  | 122.7  | 115.8  | 113.4  | 128.9  | 116    | 158.9  | 154.8  |
| 104    | 104.9  | 100.2  | 102.2  | 95.2   | 105.2  | 101.3  | 104.9  | 99.6   |
| 189.5  | 300.2  | 307.2  | 334.9  | 234.6  | 279.5  | 336    | 353.1  | 242.1  |
| 109.1  | 130.8  | 125.7  | 113.2  | 123.5  | 130.9  | 109.2  | 128.8  | 119.6  |
| 110.4  | 108.2  | 101.3  | 103.3  | 94.6   | 110.1  | 106.4  | 112.7  | 108.7  |
| 115.6  | 113.5  | 109.3  | 116.5  | 102.7  | 121.9  | 100.1  | 113.2  | 108.1  |
| 112.9  | 117    | 108.2  | 110.3  | 98.9   | 109.3  | 114.1  | 123.6  | 108.9  |
| 202.6  | 181.3  | 165.1  | 157.7  | 184.5  | 171.3  | 161.2  | 229.8  | 203.9  |
| 785    | 843.8  | 837.4  | 783.7  | 805    | 1019   | 1012.1 | 1431.5 | 1019.5 |
| 102    | 96.9   | 94     | 97.6   | 97.2   | 99.9   | 101    | 109.5  | 115.1  |
| 100    | 110.6  | 100.3  | 92.4   | 93.4   | 110.1  | 100.7  | 110.7  | 109    |
| 100.1  | 109.9  | 100.8  | 97.3   | 95.2   | 101.6  | 104.8  | 112.6  | 106.8  |
| 105.7  | 103.8  | 99.3   | 105.7  | 102.2  | 103.4  | 103.9  | 108.5  | 106.7  |
| 103    | 112.6  | 109.2  | 106.1  | 111.7  | 113.1  | 117    | 118.4  | 113.8  |
| 104.5  | 104.6  | 101.4  | 96.5   | 101.2  | 105.7  | 100.1  | 110.2  | 108.4  |
| 104.8  | 104.7  | 110.7  | 102.8  | 94     | 106.3  | 103.6  | 110.7  | 109.8  |
| 107.6  | 117.5  | 104    | 111.8  | 105.2  | 117.2  | 112    | 126.9  | 110.4  |
| 101    | 110    | 102    | 96.4   | 100.5  | 119.1  | 101    | 113.6  | 105.3  |
| 100.5  | 104.1  | 96.6   | 98.6   | 88.8   | 104.4  | 102.3  | 97     | 101    |
| 95.9   | 95.4   | 100.5  | 85.8   | 89.7   | 101.7  | 106.8  | 104.5  | 109    |
| 111.7  | 118.6  | 119.1  | 108.9  | 110.1  | 115.9  | 103.6  | 125.5  | 118.1  |
| 136.1  | 275.1  | 271.7  | 328.6  | 218.5  | 266.6  | 262.4  | 188.8  | 176.1  |
| 106.9  | 114.5  | 110.8  | 100    | 97.9   | 122.7  | 115    | 114.6  | 115.9  |
| 322.4  | 336    | 391.7  | 314.4  | 340.1  | 353.6  | 364.7  | 521.9  | 368.1  |
| 195.4  | 227.1  | 183    | 175    | 191.7  | 206.5  | 171.1  | 341.7  | 302.7  |
| 106.8  | 116.3  | 96.2   | 101.9  | 94.2   | 109.3  | 97.4   | 114.6  | 113.2  |
| 111.4  | 115.1  | 104.6  | 106.8  | 98.2   | 103    | 114.8  | 111.3  | 107.4  |
| 404.1  | 947.7  | 880.5  | 729.3  | 730.3  | 714    | 752.9  | 1047.8 | 664    |
| 319.4  | 829.6  | 644.5  | 1297.1 | 690.1  | 580.5  | 1078.1 | 873.4  | 507.1  |
| 103.1  | 108.1  | 102.3  | 99.4   | 95     | 110.9  | 106.3  | 107.5  | 110.2  |
| 240.4  | 497.5  | 496.1  | 804.2  | 467.4  | 421.1  | 761.2  | 906.1  | 483.2  |
| 393.2  | 1314.6 | 1692   | 635.6  | 1181.7 | 1324   | 681.9  | 1901.5 | 674.3  |
| 103.5  | 103.7  | 98.7   | 97.9   | 94.5   | 108.7  | 101.5  | 109.2  | 108.2  |
| 105.9  | 109.3  | 99     | 95.2   | 95.6   | 109.3  | 93.3   | 107.3  | 97.1   |
| 113.6  | 101.9  | 104.9  | 102.9  | 104.6  | 116.4  | 109.5  | 127.5  | 109    |
| 417.3  | 190.9  | 217.8  | 164.6  | 200.9  | 316    | 314.6  | 758.7  | 315.6  |
| 106.8  | 111.8  | 107.8  | 103.5  | 108.1  | 117.1  | 103.7  | 117.9  | 114.7  |
| 113.9  | 104.6  | 114.8  | 106.4  | 110    | 113.7  | 111.5  | 138.6  | 114.8  |
| 105.3  | 110.8  | 95.7   | 103.7  | 96.5   | 108.9  | 102.1  | 102.8  | 101.2  |
| 3246.8 | 3501.3 | 4145.4 | 3086.9 | 2830.3 | 3039.7 | 3242.2 | 7705.4 | 8308.3 |
| 182.7  | 486.9  | 420    | 703.4  | 380.4  | 358.1  | 599.3  | 330.1  | 227.4  |
| 118.2  | 152.1  | 136.1  | 160.2  | 125.8  | 132    | 159.3  | 140.3  | 127.4  |
| 597.1  | 591.5  | 535.5  | 667.3  | 614.4  | 681.1  | 861.8  | 914.6  | 582.3  |
| 430.1  | 404.9  | 394.9  | 491.8  | 318    | 493.2  | 541.4  | 734.9  | 459.5  |
| 119.8  | 118.7  | 111.4  | 103.2  | 112.7  | 123.5  | 105.9  | 130.6  | 113.7  |
| 117.8  | 108.3  | 99.5   | 88     | 92     | 101.6  | 103.8  | 115.4  | 116.2  |
| 101.8  | 110.2  | 105.2  | 100.9  | 99.5   | 108.3  | 105.2  | 109.1  | 109    |
| 111.9  | 108.1  | 104.4  | 96.6   | 95.3   | 106    | 105.9  | 123.2  | 116.1  |
| 110.2  | 110.5  | 102.2  | 108.1  | 99.8   | 119    | 113    | 107.6  | 110.7  |
| 118.1  | 117.5  | 110.7  | 111.5  | 101.8  | 107.5  | 112.1  | 121.8  | 131.3  |
| 322.7  | 764.4  | 786.3  | 522.5  | 612.5  | 956.7  | 649.2  | 1095.7 | 530.1  |

|        |        |        |        |        |        |        |        |        |
|--------|--------|--------|--------|--------|--------|--------|--------|--------|
| 118.1  | 118.6  | 119.7  | 111.1  | 110.1  | 111.4  | 111    | 128.3  | 112.7  |
| 131.5  | 210.6  | 219.1  | 222.8  | 170.4  | 226.6  | 248.7  | 213    | 164.8  |
| 103.7  | 119.6  | 106.9  | 100.9  | 96.6   | 102.2  | 100.3  | 111.1  | 110.7  |
| 121.3  | 113.8  | 107    | 110.6  | 90     | 113.9  | 106.7  | 108.7  | 120.5  |
| 114.5  | 129.2  | 122.6  | 108.7  | 105.1  | 122.7  | 118.4  | 119.1  | 129.2  |
| 112.5  | 115    | 103.5  | 114.6  | 102.3  | 119.2  | 120    | 109.9  | 117.1  |
| 107.6  | 109.1  | 109.7  | 105.8  | 104.6  | 109    | 104.6  | 111.4  | 112.3  |
| 136    | 113    | 102.7  | 107.7  | 100.9  | 114    | 118.6  | 110.2  | 113.8  |
| 115.8  | 114.4  | 109    | 100.2  | 100.7  | 103.7  | 102.4  | 115.8  | 121.1  |
| 108.2  | 104    | 91.7   | 89.9   | 93.2   | 106    | 100    | 100.7  | 102.2  |
| 140.2  | 149.6  | 125.6  | 156.4  | 130.2  | 123.7  | 140.4  | 154.5  | 116.7  |
| 130.5  | 186.7  | 187.7  | 161.3  | 159.9  | 176.7  | 170.3  | 154.7  | 152.2  |
| 120.3  | 160.5  | 129.5  | 118.7  | 118.8  | 129.9  | 135    | 144.6  | 114.4  |
| 109.6  | 463.2  | 249.2  | 424    | 304    | 179.5  | 249.7  | 333.3  | 191.9  |
| 117.3  | 121.4  | 105.1  | 106.2  | 104.5  | 121.5  | 110.1  | 127.3  | 118    |
| 122.6  | 115    | 112.5  | 108    | 104.8  | 109.9  | 107.3  | 112.4  | 125.6  |
| 105.1  | 113.3  | 103.7  | 106.8  | 97.9   | 106.8  | 106.9  | 107.5  | 97.6   |
| 108.4  | 109.7  | 111.1  | 100.9  | 104.8  | 113.4  | 105.1  | 111.6  | 110    |
| 113.6  | 111.2  | 99.5   | 96.4   | 101.6  | 110.9  | 98.2   | 108.2  | 116.1  |
| 128.6  | 110.3  | 110.7  | 105.4  | 101.1  | 123.5  | 111.3  | 120    | 110.6  |
| 121.5  | 173.8  | 121.4  | 692.1  | 106.9  | 119.5  | 182.3  | 104.3  | 115.7  |
| 109    | 103.5  | 100.9  | 104.9  | 96.8   | 114.5  | 102.4  | 100.4  | 108.5  |
| 100.3  | 111    | 104.9  | 94.2   | 96.7   | 115.8  | 111.4  | 115.1  | 108.5  |
| 134.9  | 236.4  | 177.6  | 196.7  | 226.9  | 171.3  | 272.8  | 232.1  | 151.5  |
| 102.8  | 100.7  | 102.9  | 109.4  | 95.5   | 110.4  | 95.5   | 105.8  | 113.6  |
| 113    | 125.3  | 116.1  | 130.8  | 109.1  | 106.4  | 128.2  | 113.5  | 108    |
| 117.5  | 110.1  | 106    | 107.5  | 105.2  | 112    | 107.2  | 111.4  | 118.5  |
| 100.8  | 102.8  | 110.8  | 108.2  | 91.7   | 97.3   | 101.3  | 102.2  | 106.5  |
| 109.3  | 106.3  | 98.2   | 96.8   | 90.2   | 105.3  | 102.3  | 107.7  | 103.7  |
| 104.2  | 108.3  | 105    | 96.2   | 90.5   | 98.6   | 100.5  | 97.2   | 103.7  |
| 111.9  | 115.5  | 115.5  | 109.4  | 105.9  | 115.9  | 105.7  | 121.1  | 113.6  |
| 109.6  | 112.4  | 98.6   | 101.3  | 96     | 110.5  | 113.2  | 111.9  | 124.8  |
| 116.5  | 146.1  | 152.6  | 147.5  | 138.5  | 149.3  | 150.7  | 142.7  | 120.6  |
| 111.7  | 118.6  | 106.8  | 111.2  | 94.7   | 111.1  | 110.8  | 106.5  | 107.8  |
| 110.5  | 128.4  | 115.9  | 120    | 103.7  | 118.1  | 104.6  | 116.4  | 113.6  |
| 105.6  | 105.2  | 103.1  | 98.1   | 94.7   | 119.9  | 105.3  | 111.3  | 130.8  |
| 102.7  | 103.4  | 91.6   | 99.6   | 97.6   | 106.4  | 99.6   | 98.5   | 105.7  |
| 1128.7 | 2209.7 | 2001.7 | 2000.3 | 2066.4 | 2107.5 | 1773.9 | 2900.6 | 1682.3 |
| 117.2  | 118.6  | 110.2  | 100.8  | 98.9   | 118.4  | 105.9  | 119.8  | 114.9  |
| 1213.6 | 1293.8 | 1065.4 | 1061.3 | 1240.6 | 1573.2 | 1315   | 2955.7 | 2880   |
| 106.8  | 121.4  | 101.6  | 107.1  | 97.2   | 113.3  | 104    | 109.3  | 103.4  |
| 712    | 961.9  | 887    | 865.2  | 1040.8 | 906.5  | 1034.5 | 2189.4 | 1906.7 |
| 105.6  | 103.4  | 112.9  | 95.2   | 100.2  | 118.6  | 104.9  | 114.8  | 120.1  |
| 324    | 592.6  | 485.9  | 476.2  | 432.2  | 530.6  | 496.6  | 595.7  | 373.2  |
| 110.2  | 111.5  | 102.7  | 98.1   | 89.7   | 109.6  | 105.9  | 109.1  | 107.5  |
| 97.1   | 111.9  | 111.1  | 90.7   | 95     | 111.9  | 99.3   | 99     | 103.6  |
| 108    | 133.1  | 122    | 123    | 116.9  | 132.4  | 110    | 122.7  | 120.3  |
| 103.5  | 106.6  | 99.8   | 110.2  | 92.4   | 104.2  | 99.5   | 114.8  | 106.6  |
| 107.8  | 116.5  | 96.4   | 101.5  | 95.7   | 120.8  | 98.1   | 117.5  | 113.5  |
| 108.7  | 116.6  | 115    | 108.5  | 110.2  | 115.5  | 114.7  | 123.8  | 117.6  |
| 122.1  | 130.7  | 121.2  | 126.8  | 100.9  | 126.4  | 111.9  | 146.8  | 133.8  |



|        |        |        |        |        |        |        |        |        |
|--------|--------|--------|--------|--------|--------|--------|--------|--------|
| 120    | 118.4  | 110.1  | 110.5  | 94.7   | 117.4  | 112    | 132.3  | 126.5  |
| 118.9  | 108.4  | 105.1  | 98.2   | 93.8   | 111.1  | 108.3  | 120.6  | 105.3  |
| 139.6  | 238.7  | 265.3  | 232.2  | 187.4  | 220.5  | 243.5  | 285.2  | 228.8  |
| 211.5  | 332.4  | 234.4  | 356.3  | 255    | 280.6  | 332.1  | 473.5  | 343    |
| 178.3  | 335.9  | 293.6  | 244.1  | 232.5  | 243.8  | 267.3  | 293.1  | 205    |
| 220    | 246.7  | 194.8  | 223.7  | 202.5  | 229.6  | 217.3  | 244.5  | 178.5  |
| 104.8  | 116    | 96.3   | 97.7   | 96.8   | 104.8  | 103.1  | 103.1  | 111.6  |
| 240.2  | 433.3  | 343.4  | 349.4  | 295.1  | 295.5  | 338.5  | 301.3  | 206.1  |
| 165    | 150.4  | 170.1  | 184.8  | 150.9  | 180.5  | 192.8  | 210.8  | 183    |
| 103.9  | 106.6  | 102.7  | 104.9  | 98.5   | 114.1  | 108.1  | 114.6  | 124.3  |
| 160.3  | 189.9  | 182.3  | 160.4  | 174.8  | 194.5  | 189.2  | 222.7  | 207.3  |
| 105.6  | 110    | 104.6  | 112.5  | 99.7   | 112    | 113.5  | 125    | 116.5  |
| 171.1  | 214    | 172.3  | 166.9  | 188    | 197.8  | 186.2  | 256.9  | 222.6  |
| 114.8  | 177.2  | 187.4  | 153.5  | 144.9  | 165.5  | 164.8  | 202.3  | 155.3  |
| 157.2  | 307.3  | 233.9  | 222.3  | 227.5  | 253.5  | 248.6  | 261.4  | 231.3  |
| 114.6  | 130.8  | 128.2  | 120.7  | 118.2  | 125.3  | 129.3  | 148.5  | 134.5  |
| 1323.3 | 2426.3 | 1950   | 1944.7 | 2066.5 | 2148.7 | 2023.3 | 3280.1 | 2402.6 |
| 224.2  | 233.7  | 203.4  | 200.6  | 179    | 231.2  | 215.3  | 321    | 287    |
| 183.8  | 184.3  | 181.8  | 173.2  | 177.4  | 185.1  | 223    | 290.7  | 226.5  |
| 124.6  | 174.3  | 189    | 156.4  | 164.7  | 181.8  | 127.8  | 194.3  | 170.2  |
| 101.9  | 107    | 100.3  | 94.7   | 91.6   | 102.2  | 99.9   | 111.1  | 110.3  |
| 104.4  | 105.2  | 94.6   | 106.3  | 99     | 108.5  | 98.2   | 112.5  | 109    |
| 105.1  | 108.5  | 111.3  | 99.2   | 93.4   | 107.5  | 106.8  | 114.1  | 107.4  |
| 133.5  | 132.8  | 135.4  | 132.9  | 132.7  | 146    | 132.6  | 144    | 131.5  |
| 102.9  | 111.5  | 105.4  | 107.7  | 92     | 102.5  | 109.8  | 112.1  | 103.6  |
| 103.2  | 104.2  | 101.8  | 105.2  | 100.7  | 105.3  | 105.6  | 103    | 118.5  |
| 106.8  | 104.3  | 103.4  | 109.3  | 96     | 109.3  | 106.1  | 129.9  | 135.2  |
| 110.1  | 114.6  | 116.1  | 104.7  | 96.5   | 114.7  | 112.4  | 115.7  | 114.2  |
| 109.6  | 105.4  | 110.7  | 109.2  | 104.7  | 109.9  | 101.5  | 116.7  | 107.7  |
| 105.5  | 116    | 103.1  | 99.7   | 91.4   | 114.2  | 105.3  | 117.7  | 125.1  |
| 110.9  | 106.6  | 103    | 104    | 101.7  | 107.2  | 104.5  | 101.4  | 104.7  |
| 114.1  | 106    | 107    | 111.9  | 103.4  | 114.9  | 116.2  | 110.1  | 125.6  |
| 144.4  | 564.7  | 325.8  | 1263.3 | 338.5  | 220.8  | 410.2  | 173.6  | 161.8  |
| 106.7  | 109.2  | 98.6   | 104.7  | 97.6   | 122.3  | 99.5   | 111.4  | 103.9  |
| 443.7  | 1290   | 1353.1 | 1242   | 874.1  | 1313.7 | 1478.8 | 1168.4 | 928.8  |
| 103.8  | 115.3  | 106.7  | 92.8   | 98.9   | 113.4  | 100.7  | 118.8  | 117.9  |
| 114.2  | 109.8  | 106.6  | 103.1  | 103.9  | 104    | 105.2  | 130.5  | 105.2  |
| 132.5  | 165.7  | 146.4  | 148.3  | 155.5  | 147.9  | 155.6  | 156.5  | 133    |
| 103.3  | 100.5  | 97.2   | 103.3  | 89.5   | 113.1  | 93.6   | 105.7  | 110.6  |
| 111.9  | 103.7  | 98.6   | 95.5   | 93.2   | 110.5  | 102.1  | 113    | 102.4  |
| 1370.2 | 1415.5 | 1283.2 | 843.5  | 1164.1 | 1203.1 | 732    | 2226.2 | 2996.1 |
| 112.4  | 110.3  | 109.3  | 106.5  | 103.1  | 118.8  | 110.7  | 125.3  | 120.3  |
| 190.9  | 179.2  | 173.7  | 166.1  | 142.5  | 201.2  | 164.4  | 364.2  | 310    |
| 103.5  | 104.1  | 97.8   | 102    | 101.1  | 106.7  | 108.9  | 108.7  | 107.9  |
| 108.7  | 111.6  | 93.8   | 129.2  | 94.2   | 118    | 105.7  | 104.5  | 107.2  |
| 108.3  | 104.1  | 105.2  | 93.6   | 91.8   | 100.6  | 102.8  | 99.7   | 109.6  |
| 107    | 98.4   | 99.7   | 90.8   | 93.8   | 98.5   | 104.1  | 105.5  | 105.4  |
| 103.7  | 107    | 102.4  | 101.5  | 104.5  | 118.6  | 98.2   | 104.5  | 106.5  |
| 519.7  | 848.7  | 1032.4 | 768.1  | 818.4  | 874.6  | 735.5  | 1228.7 | 660.2  |
| 103.8  | 107    | 101.9  | 100.4  | 94.8   | 108.9  | 103.3  | 122.6  | 108.7  |
| 107    | 116    | 111    | 108.2  | 102.9  | 106.2  | 108.8  | 131.2  | 106.8  |

|       |       |       |        |       |       |        |        |       |
|-------|-------|-------|--------|-------|-------|--------|--------|-------|
| 108.4 | 114.9 | 103.1 | 100.7  | 90.9  | 112.2 | 103.7  | 113.9  | 112.9 |
| 146.5 | 187.6 | 152.1 | 164.5  | 141.1 | 167.9 | 179    | 198.1  | 165   |
| 107.3 | 129   | 130.8 | 123    | 106.8 | 141.5 | 124.3  | 125.6  | 129.8 |
| 101.6 | 106.3 | 99.7  | 110.2  | 98.7  | 104.6 | 103.7  | 106.5  | 102.5 |
| 113.1 | 112.3 | 113.1 | 109.1  | 107.5 | 119.8 | 102.6  | 113.5  | 116.3 |
| 104.1 | 105.2 | 99.5  | 94.1   | 89.7  | 101.7 | 101.7  | 103.9  | 107.4 |
| 110.8 | 107.2 | 102.1 | 103.2  | 102.9 | 114.5 | 110.6  | 110.3  | 111   |
| 110.8 | 116.8 | 108   | 105    | 100.5 | 118.5 | 103.4  | 120.1  | 114   |
| 112   | 110.8 | 100.9 | 97.3   | 103.1 | 103.7 | 103.2  | 107.9  | 115.9 |
| 114.9 | 116.1 | 106.5 | 115.1  | 101.5 | 121.6 | 111.8  | 122.6  | 133.2 |
| 105.6 | 116.8 | 124   | 105.7  | 111.7 | 123.8 | 115    | 129.5  | 119.5 |
| 108.8 | 103.3 | 109.2 | 112.4  | 102.2 | 104.6 | 95.6   | 112.1  | 115.1 |
| 106.3 | 102.4 | 100   | 99.6   | 94.4  | 114.8 | 101.8  | 104.7  | 103.7 |
| 109.5 | 113.5 | 101.8 | 101.7  | 100.6 | 117.6 | 111.1  | 127.1  | 111.5 |
| 566.8 | 734.2 | 692.8 | 744.5  | 572.9 | 751.1 | 625.9  | 1305.2 | 918.8 |
| 221.7 | 327.3 | 222.2 | 337.4  | 209.4 | 299.7 | 177    | 352    | 333.1 |
| 106.7 | 113.5 | 112.5 | 113.7  | 106.6 | 113   | 106.2  | 121.9  | 115.2 |
| 108.3 | 199.4 | 163.8 | 180.2  | 132.7 | 142.3 | 145.7  | 169.4  | 118.8 |
| 104.9 | 112   | 103.9 | 93.4   | 90.9  | 100.7 | 99.3   | 103.3  | 103.1 |
| 119.4 | 116.4 | 110.3 | 113.4  | 103.3 | 119.1 | 117.2  | 122.5  | 113.6 |
| 266.1 | 254.9 | 288.6 | 222.3  | 246.5 | 328.5 | 236.7  | 363.3  | 343.5 |
| 111.7 | 119.7 | 115.9 | 114.3  | 112.9 | 113.7 | 119.5  | 147.4  | 132.1 |
| 123.7 | 117.6 | 104.2 | 97.8   | 96.6  | 107.7 | 104.6  | 113.3  | 112.4 |
| 113.1 | 105.6 | 103.5 | 96.8   | 99.5  | 108.4 | 106.3  | 103.3  | 117.8 |
| 291   | 842.9 | 814   | 1067.7 | 551.8 | 732.2 | 1018.2 | 709.9  | 458.7 |
| 115.9 | 110.4 | 126.3 | 103.5  | 111.9 | 123.5 | 114    | 150.1  | 169.3 |
| 109.7 | 112.6 | 109.8 | 112.6  | 102.1 | 121.6 | 106.2  | 125.2  | 117   |
| 104.1 | 101.5 | 112.4 | 102.3  | 108.7 | 116.4 | 109.5  | 130.2  | 116.7 |
| 107.6 | 118.4 | 107.3 | 106.8  | 95.7  | 107.7 | 112.4  | 102.6  | 113.4 |
| 102   | 107.7 | 112.8 | 109.2  | 91.5  | 109.1 | 103.9  | 113.1  | 105.2 |
| 132.1 | 139.7 | 135.9 | 141.3  | 123.9 | 129.7 | 155    | 173    | 138.6 |
| 113.1 | 127.4 | 119   | 124.6  | 110.2 | 126.1 | 129.3  | 166.1  | 126.1 |
| 102.6 | 106   | 104.2 | 95.4   | 99.4  | 111.4 | 100.9  | 105.6  | 106.7 |
| 116.1 | 123.6 | 123.9 | 119.3  | 108.2 | 114.8 | 120.8  | 143    | 140.7 |
| 115.3 | 111.7 | 104.3 | 109.2  | 94.7  | 107.6 | 111.6  | 111.1  | 120.4 |
| 104.1 | 112.9 | 97.6  | 101.2  | 97.9  | 107   | 102    | 104    | 115.5 |
| 106.4 | 109.1 | 109.4 | 105.1  | 103.6 | 108.6 | 98.7   | 112.6  | 113.8 |
| 104.4 | 107.4 | 104.1 | 106.1  | 97.3  | 106.6 | 100.7  | 102.8  | 103.5 |
| 109.1 | 99.9  | 96.5  | 102.7  | 102.3 | 104.2 | 103.1  | 103.1  | 103   |
| 111.1 | 125.5 | 122.5 | 114.1  | 108.3 | 120   | 125.2  | 123.7  | 112.3 |
| 104.7 | 105.2 | 96.8  | 102.5  | 98.4  | 104.9 | 99.9   | 104.1  | 116.7 |
| 110   | 112.5 | 100.7 | 99.1   | 97.3  | 109.4 | 99.7   | 99.9   | 112.3 |
| 107.4 | 110   | 105.3 | 98.5   | 95.2  | 104.7 | 104.4  | 112.3  | 109.3 |
| 114.2 | 115.9 | 105.3 | 109.7  | 97.4  | 118.4 | 113.9  | 129.1  | 113.5 |
| 109.8 | 128.3 | 121.1 | 106.7  | 100.1 | 107.8 | 104.5  | 109.6  | 106   |
| 130   | 169.6 | 152.5 | 182.9  | 137.9 | 140.2 | 168    | 141.5  | 119.7 |
| 103.2 | 103.8 | 94.9  | 103.1  | 93    | 108   | 97.5   | 107.5  | 114.2 |
| 116   | 160   | 155.7 | 200.4  | 137.9 | 148.3 | 159.2  | 186.7  | 177.9 |
| 104.1 | 100   | 100.7 | 96.4   | 101   | 103.6 | 106.5  | 107.5  | 101.6 |
| 116.1 | 121.1 | 115   | 118    | 92.8  | 106.6 | 110.7  | 117.3  | 123.4 |
| 96.4  | 105   | 103.3 | 108    | 98.5  | 107.2 | 103.7  | 102.4  | 107.1 |

|       |        |       |       |       |       |       |        |       |
|-------|--------|-------|-------|-------|-------|-------|--------|-------|
| 148.7 | 129.8  | 130   | 145.1 | 110.2 | 139.7 | 149.9 | 165.7  | 145.7 |
| 105.1 | 117.7  | 98.2  | 108.5 | 100.7 | 110.6 | 101.5 | 103.9  | 105.5 |
| 101.5 | 106.7  | 106.2 | 103.4 | 98.7  | 114.6 | 113.7 | 118.7  | 112.2 |
| 749.3 | 912.2  | 809.3 | 796.4 | 767.5 | 936.9 | 930.1 | 1161.3 | 939.6 |
| 222.8 | 384.5  | 395.8 | 302.5 | 367.6 | 398.6 | 341.3 | 384.3  | 265.2 |
| 155.7 | 236.2  | 189.1 | 224.5 | 192.3 | 203.5 | 200.2 | 335.7  | 288.4 |
| 170.8 | 244.1  | 233.8 | 241.2 | 219.1 | 253.9 | 294.9 | 316.7  | 222.1 |
| 110.5 | 108.3  | 102.1 | 96.2  | 97.3  | 100.6 | 108.7 | 103.5  | 111.4 |
| 175.5 | 226.3  | 165.9 | 204.3 | 192.9 | 230.9 | 242.5 | 373.8  | 289.8 |
| 608.4 | 1015.3 | 844.9 | 706.8 | 617.2 | 676.9 | 661.2 | 1111.8 | 721.3 |
| 106.4 | 108.5  | 102   | 98.8  | 98.9  | 108.9 | 98    | 104    | 102.8 |
| 118.8 | 118.2  | 114.5 | 112.9 | 101   | 109.3 | 122.7 | 112.4  | 117.3 |
| 187.1 | 314    | 380.1 | 263   | 287   | 346.3 | 298.5 | 392    | 261.4 |
| 338.4 | 735.8  | 678.7 | 676.1 | 604.1 | 708   | 640.8 | 996.3  | 645.3 |
| 126.8 | 146.7  | 125.6 | 123.9 | 121.4 | 133.3 | 137.1 | 167.5  | 140.4 |
| 111.5 | 122.1  | 107   | 202.8 | 109.8 | 131.6 | 182.1 | 140.3  | 128   |
| 114.9 | 146.7  | 136.9 | 146.3 | 141.5 | 149.7 | 145.3 | 146.1  | 129.8 |
| 585.8 | 710.7  | 634.9 | 536.5 | 531.5 | 661.9 | 629.3 | 851.9  | 742.5 |
| 107.8 | 118.9  | 107.2 | 105.6 | 102.8 | 116   | 114.7 | 118.6  | 116.3 |
| 113.4 | 111.3  | 99    | 100.9 | 95.4  | 108.2 | 106.1 | 109.2  | 112.9 |
| 110.2 | 114.5  | 101.6 | 106.4 | 98.5  | 110.1 | 107.5 | 107.6  | 104.4 |
| 105.7 | 107.5  | 98    | 96.3  | 95.3  | 109.1 | 106.6 | 108.2  | 102   |
| 112.9 | 110    | 107.3 | 102.5 | 104.1 | 108   | 105.2 | 113.1  | 112.5 |
| 101.9 | 108.8  | 102.6 | 101.1 | 92.9  | 108.8 | 102.7 | 112.8  | 113.5 |
| 110.5 | 113.3  | 103.6 | 101.7 | 100.5 | 115.8 | 94.3  | 115.5  | 110.5 |
| 116.9 | 119    | 99.5  | 108.5 | 102.2 | 131.7 | 101.6 | 121.9  | 104.1 |
| 115.2 | 119.1  | 111.5 | 105.6 | 99.9  | 116.6 | 108   | 111.9  | 120.4 |
| 108.8 | 106.6  | 97.3  | 93.7  | 87    | 97.6  | 109.6 | 102.1  | 105.6 |
| 107.8 | 119.4  | 110.7 | 113.3 | 102.4 | 112.3 | 112.5 | 115.6  | 114.8 |
| 107.6 | 103.1  | 111.1 | 101.5 | 101   | 113.1 | 105.3 | 117.1  | 118   |
| 107.5 | 110.5  | 111.6 | 104.7 | 97.6  | 107.7 | 102.8 | 115.2  | 113.5 |
| 114.2 | 117.3  | 118   | 114.8 | 105.8 | 112.6 | 108.7 | 129.6  | 105.6 |
| 109   | 100.5  | 96.1  | 91.9  | 94.6  | 103.1 | 102.5 | 105.8  | 110.7 |
| 110.6 | 108.8  | 98.3  | 98.7  | 99.7  | 106.3 | 96.8  | 108.2  | 104.4 |
| 116.6 | 120.6  | 110.4 | 104.5 | 99.2  | 125   | 112.2 | 127.2  | 120.3 |
| 124.6 | 122.1  | 120.3 | 121.1 | 120.1 | 110.7 | 139.7 | 144.2  | 129.5 |
| 107.6 | 121.3  | 112.7 | 117.3 | 104.4 | 115.3 | 102.3 | 107.3  | 100.5 |
| 119.4 | 114.4  | 110.9 | 106.4 | 93.7  | 114.3 | 106.1 | 118.3  | 115.2 |
| 169.7 | 150.2  | 153.8 | 128.5 | 169.4 | 151.1 | 130   | 316.6  | 190.4 |
| 109.1 | 115.5  | 106.3 | 99.4  | 88.5  | 110   | 102   | 106.6  | 109.6 |
| 158   | 186.2  | 187.6 | 154.7 | 180.9 | 194.5 | 205.7 | 260.6  | 173.8 |
| 117.8 | 134.7  | 132.5 | 118.1 | 139.4 | 133.6 | 135.3 | 160.6  | 144   |
| 100.1 | 110.2  | 109.3 | 105.5 | 105.1 | 114.6 | 109.7 | 116.4  | 115.6 |
| 121.6 | 122.4  | 108.9 | 116.9 | 95.2  | 124.6 | 96.8  | 105.1  | 104.3 |
| 106.6 | 119.8  | 110   | 107.1 | 100.4 | 118.9 | 111.9 | 137.9  | 117.6 |
| 106.9 | 102.9  | 104.3 | 102.9 | 93.5  | 100.3 | 100.5 | 112.8  | 116.6 |
| 116.4 | 107.5  | 115.4 | 117.8 | 91.8  | 107.5 | 104.9 | 118.7  | 104.6 |
| 147.7 | 213.6  | 238.3 | 185.9 | 186.2 | 225.5 | 198.6 | 183.6  | 164.2 |
| 109.1 | 118.2  | 105   | 101.7 | 109.1 | 106   | 101.4 | 104.9  | 103.7 |
| 101.1 | 103.8  | 102.2 | 94.1  | 92.7  | 107.6 | 101.3 | 108.1  | 110.5 |
| 128.3 | 150.5  | 145.3 | 159.9 | 134.8 | 157.7 | 158.4 | 238.8  | 195.4 |

|       |       |       |       |       |       |       |        |       |
|-------|-------|-------|-------|-------|-------|-------|--------|-------|
| 371.9 | 391   | 385.9 | 388.3 | 348.6 | 404.5 | 399.1 | 457.1  | 355.9 |
| 101.8 | 106.1 | 105.9 | 102.4 | 94.6  | 101.5 | 100.6 | 110.6  | 113   |
| 142.5 | 208.9 | 202.5 | 180.3 | 185   | 194.6 | 185.7 | 282    | 206.5 |
| 504.1 | 587.3 | 605.2 | 315.1 | 465   | 494.1 | 418.1 | 1579.7 | 977.8 |
| 425.1 | 500.6 | 391.1 | 464.4 | 546.8 | 446.4 | 582.3 | 867.9  | 640.1 |
| 326.5 | 541.6 | 403.9 | 505.2 | 408.9 | 469.3 | 554.1 | 791.4  | 510.6 |
| 114.2 | 110.9 | 109.2 | 99.4  | 95    | 121.2 | 102.7 | 128.1  | 110.6 |
| 162.5 | 189.9 | 154.8 | 145.9 | 153.7 | 176.4 | 156.9 | 216.5  | 216.3 |
| 113.4 | 106.8 | 108.3 | 103.2 | 94.9  | 110.3 | 96    | 112.5  | 108.8 |
| 102.3 | 108.7 | 99.8  | 101.1 | 99.2  | 107.7 | 105.1 | 104.5  | 109.8 |
| 105.1 | 109.9 | 99.6  | 98.4  | 97.6  | 108.6 | 96.9  | 108.6  | 98.5  |
| 151.9 | 201.7 | 178.5 | 175.4 | 217.4 | 177.2 | 201   | 259.2  | 125.5 |
| 108.4 | 140.2 | 123.8 | 108.6 | 119.8 | 128.4 | 127.6 | 138.9  | 131.2 |
| 110.4 | 128.4 | 120.4 | 120.3 | 107.4 | 121.1 | 108.8 | 124.7  | 105   |
| 110   | 115   | 118.5 | 113.7 | 101.2 | 122.6 | 122.8 | 130.8  | 119.6 |
| 115   | 112.9 | 121.9 | 109   | 102.9 | 121.8 | 104.8 | 127.1  | 130.2 |
| 162.6 | 171.7 | 159.8 | 167.9 | 150.3 | 170.1 | 176.3 | 281.1  | 191.6 |
| 224.4 | 242   | 272.9 | 189.8 | 238.4 | 283.4 | 273.3 | 391.8  | 250.5 |
| 105.9 | 124.4 | 109   | 105.8 | 112   | 120   | 108.6 | 136.2  | 126.5 |
| 105.2 | 108.5 | 97.9  | 97.8  | 100.6 | 106.9 | 100.1 | 97.5   | 105   |
| 113.6 | 123   | 135   | 116.9 | 128.7 | 159.5 | 122.4 | 136.4  | 140.3 |
| 98.1  | 101.1 | 99.4  | 96.2  | 88.6  | 101.6 | 89    | 104.8  | 99    |
| 106.9 | 116.3 | 98.6  | 109.6 | 101.3 | 109.9 | 119   | 115.4  | 115.1 |
| 97.9  | 107.5 | 100.4 | 99.1  | 95.4  | 98.7  | 105.4 | 115.3  | 112.5 |
| 102   | 103.9 | 104.3 | 101.6 | 95.9  | 104.7 | 104.2 | 110.3  | 104.1 |
| 105.8 | 101.8 | 93.4  | 99.2  | 95.7  | 105.7 | 97.2  | 110    | 102   |
| 105.6 | 130.1 | 108.8 | 130.6 | 95.1  | 111   | 110.2 | 115.1  | 109.5 |
| 118.4 | 106.6 | 109.9 | 114.9 | 101.9 | 120.4 | 116.5 | 132.6  | 125   |
| 102.1 | 111.2 | 104.4 | 101.4 | 95.6  | 107.3 | 95.5  | 106.4  | 105.8 |
| 101.1 | 115.6 | 107   | 98    | 98.6  | 103.3 | 103.1 | 99.7   | 116.5 |
| 129.9 | 142.9 | 138   | 117.7 | 106   | 130.3 | 124   | 139.7  | 124.6 |
| 122.7 | 132.5 | 115.7 | 112.3 | 114.6 | 146   | 122.3 | 147.4  | 130.8 |
| 131.2 | 145.2 | 173.3 | 148   | 133.2 | 171.8 | 153.8 | 225.6  | 208.3 |
| 113.8 | 110   | 109.8 | 98    | 98    | 112.6 | 108.3 | 107.8  | 107.3 |
| 105.3 | 99.7  | 92.2  | 96.4  | 98.1  | 108.7 | 91.1  | 107.3  | 103.8 |
| 99.1  | 108.9 | 100.7 | 94.2  | 94.3  | 109.8 | 107.1 | 100.1  | 99.6  |
| 104.7 | 114.1 | 104.8 | 100.9 | 93.5  | 107.6 | 109.1 | 110.4  | 103   |
| 102   | 113.3 | 111.7 | 130.5 | 111.3 | 122.9 | 109.2 | 133.5  | 115.4 |
| 171.1 | 265.2 | 170.3 | 409.1 | 233.4 | 219.9 | 325.2 | 431.7  | 255.3 |
| 112.5 | 127.4 | 106.4 | 106.3 | 106.4 | 127.7 | 113.2 | 119.1  | 124.2 |
| 112.3 | 119.6 | 108.8 | 113.8 | 98.1  | 107.9 | 112.9 | 111.7  | 113.5 |
| 108.1 | 120.8 | 103.2 | 103.1 | 97.5  | 129.4 | 105.4 | 119.5  | 111.2 |
| 108.2 | 111.8 | 100.2 | 99.6  | 96.2  | 106.5 | 104.7 | 108    | 103.5 |
| 126.5 | 166.3 | 157.3 | 122.5 | 140.1 | 143.6 | 107.6 | 142.7  | 140.5 |
| 205.8 | 166.7 | 154.5 | 132   | 147.1 | 176.1 | 131.3 | 217.7  | 225.2 |
| 109.5 | 118.1 | 110.2 | 106.6 | 106.2 | 111.8 | 111.7 | 117.6  | 118.2 |
| 147.8 | 170.6 | 166.1 | 140.8 | 157.9 | 179.5 | 159.8 | 232.8  | 243   |
| 109.3 | 115.2 | 105.5 | 120.3 | 101.2 | 124.1 | 110.2 | 117.9  | 117.5 |
| 112.5 | 108   | 104.6 | 104.1 | 105.2 | 119.2 | 114.9 | 127    | 109.2 |
| 109.3 | 106   | 107.8 | 95.1  | 94.1  | 115.1 | 99.5  | 110.4  | 107.6 |
| 107.6 | 105.8 | 101.5 | 106.8 | 98.2  | 105.8 | 99.7  | 117.9  | 107.7 |

|        |        |        |        |        |        |        |        |        |
|--------|--------|--------|--------|--------|--------|--------|--------|--------|
| 147.5  | 144.3  | 146.1  | 148.2  | 112.7  | 150.4  | 120    | 193.7  | 221.2  |
| 104.5  | 111.4  | 102    | 96.9   | 96.7   | 115.5  | 98.2   | 119.8  | 111.5  |
| 141.3  | 241    | 246.1  | 202.4  | 218.5  | 189.3  | 223.3  | 241.2  | 193.6  |
| 112.6  | 108.9  | 110.7  | 102    | 105.3  | 111.4  | 113.2  | 117.1  | 109.9  |
| 291    | 526.1  | 459.5  | 374.7  | 400.8  | 415.6  | 443.2  | 551.5  | 436.9  |
| 103.3  | 106.9  | 99.3   | 97.6   | 95.6   | 100.7  | 95.8   | 97.7   | 105.1  |
| 112    | 109.5  | 95.6   | 93.9   | 93.6   | 98.6   | 101.2  | 105.6  | 99.4   |
| 105.1  | 111    | 104    | 106.8  | 100.9  | 108.3  | 99.7   | 110.3  | 115.6  |
| 113.7  | 119.8  | 111.6  | 122.3  | 97.6   | 116.7  | 121.3  | 128.9  | 116.3  |
| 118.8  | 129.5  | 128.2  | 131.2  | 119.9  | 133.9  | 108.1  | 140.5  | 126.3  |
| 102.2  | 110.5  | 105    | 91.8   | 91.3   | 104    | 99.1   | 103.9  | 95.5   |
| 143.6  | 154.7  | 139.1  | 121.5  | 126.4  | 148    | 123.7  | 164.8  | 133.4  |
| 114.7  | 112    | 103.7  | 111.7  | 101.6  | 106.1  | 116    | 120.5  | 125.6  |
| 105.9  | 112.7  | 103.9  | 98     | 98     | 110.1  | 109.1  | 110.6  | 111    |
| 127    | 138.5  | 141.1  | 152.7  | 137.2  | 151.6  | 156.5  | 198.6  | 138.5  |
| 154.7  | 205.4  | 198.6  | 185.3  | 177.2  | 200.5  | 195.9  | 251.6  | 161.1  |
| 109.5  | 118.4  | 101.5  | 108.9  | 95.5   | 106    | 114.2  | 108.6  | 102.4  |
| 105.2  | 97     | 93.7   | 88     | 93.7   | 102.4  | 107.8  | 106.6  | 99.2   |
| 105    | 110.4  | 104.5  | 100    | 98.4   | 106.2  | 96     | 117    | 108.9  |
| 115.7  | 125.8  | 123.7  | 117.3  | 115.7  | 140.3  | 124.9  | 141.4  | 122.3  |
| 105.3  | 102.1  | 100.3  | 93.8   | 91.5   | 98.7   | 107.3  | 95.8   | 96.8   |
| 115.3  | 105.5  | 96.9   | 97.1   | 98.3   | 105.9  | 101.8  | 109.2  | 104.3  |
| 172.2  | 292.7  | 308.5  | 270.5  | 253.8  | 234.6  | 306.1  | 349.7  | 237.6  |
| 111.7  | 110.9  | 101    | 100.6  | 101.8  | 112.2  | 102    | 116    | 114.5  |
| 107.1  | 109.3  | 107.1  | 105.1  | 105.9  | 124.7  | 117.2  | 123.8  | 107.9  |
| 113.1  | 116.5  | 107.2  | 116.1  | 95.2   | 115.5  | 95.4   | 112.5  | 115.3  |
| 107.2  | 111.6  | 109.6  | 109.6  | 106.8  | 112.9  | 121.9  | 104.7  | 110.4  |
| 3017.5 | 3811.9 | 3871   | 3305   | 2899.3 | 3119.7 | 3784.8 | 5362.1 | 4024.1 |
| 109.9  | 106.5  | 103.9  | 94.3   | 92     | 110.6  | 118    | 110.3  | 111.2  |
| 105.4  | 105.5  | 97     | 100.1  | 96.4   | 109.2  | 97.9   | 107.4  | 113.1  |
| 109.9  | 110.4  | 90.1   | 128.8  | 103.8  | 110.1  | 102.6  | 106.5  | 105.7  |
| 227.8  | 194.6  | 159    | 415.4  | 195.5  | 159.2  | 418.4  | 184.3  | 118.5  |
| 119.1  | 123.7  | 114.4  | 107.4  | 103.3  | 115.6  | 108.6  | 126.4  | 128.2  |
| 125.9  | 118.8  | 110.7  | 139.1  | 112.7  | 142.2  | 141.2  | 146    | 135.7  |
| 109.1  | 116.5  | 103.6  | 105.9  | 95.2   | 107    | 105    | 109.9  | 108.6  |
| 199    | 259.4  | 276.1  | 331.2  | 222.3  | 218.2  | 231.7  | 265.9  | 197.9  |
| 109.3  | 109.1  | 108.7  | 100.9  | 103.6  | 113.1  | 110.1  | 107.5  | 100.8  |
| 4280.5 | 2350.3 | 2416   | 1920.2 | 1915.7 | 2918.9 | 1854.8 | 5544.5 | 6108.7 |
| 109    | 105.1  | 105.2  | 100    | 99.3   | 104.8  | 100.1  | 108.7  | 106.7  |
| 173.3  | 173.7  | 189    | 182.5  | 216.4  | 191.4  | 174.4  | 259    | 182.7  |
| 353.7  | 506.2  | 509.5  | 485.5  | 511.9  | 604.2  | 357.1  | 624.9  | 438    |
| 121    | 126.6  | 109.3  | 107.9  | 106.8  | 122.6  | 110.6  | 133.3  | 112.4  |
| 107.9  | 106.6  | 97.4   | 102.1  | 94.2   | 104.3  | 99     | 120.2  | 100.9  |
| 110.9  | 107.3  | 98.3   | 98.5   | 95.7   | 105.6  | 101.4  | 106.1  | 104.5  |
| 105.1  | 105.3  | 102    | 103.5  | 92.4   | 109    | 100.9  | 107.2  | 107    |
| 526    | 661.7  | 353.7  | 528.8  | 442    | 435.5  | 468.9  | 612.1  | 510.9  |
| 183    | 204.9  | 165.2  | 207.8  | 174.7  | 170.5  | 197.1  | 253.3  | 173.1  |
| 2478.9 | 2994.5 | 1808.1 | 3835.6 | 3262.8 | 2621.6 | 3617.6 | 6398.5 | 4234   |
| 675.5  | 571.2  | 456.8  | 1319.6 | 582.3  | 410.4  | 1122.5 | 1211.8 | 716.4  |
| 107.9  | 114    | 100.2  | 106.5  | 99.6   | 105.9  | 102.1  | 114.6  | 103.5  |
| 108.5  | 124.8  | 114.3  | 115.9  | 115.1  | 115.3  | 121.5  | 130    | 122.7  |

|        |        |        |        |        |        |        |        |        |
|--------|--------|--------|--------|--------|--------|--------|--------|--------|
| 1626.1 | 1728.6 | 1467   | 1448.9 | 2302.9 | 2818.8 | 2259.3 | 4680.2 | 1271.4 |
| 106.8  | 131.3  | 138.7  | 131.1  | 116.4  | 135.4  | 124.3  | 149.2  | 145.3  |
| 116.1  | 181.5  | 182.1  | 144.3  | 124    | 186.8  | 139    | 161.5  | 197.4  |
| 109.2  | 110.7  | 98.1   | 96.6   | 100.4  | 112.8  | 103.3  | 115.4  | 108.6  |
| 1000.8 | 1031.5 | 790.9  | 856.1  | 764.5  | 912.2  | 1060.6 | 2265.9 | 2089.4 |
| 109.4  | 114.5  | 111.8  | 103.4  | 103.8  | 111.6  | 109    | 120.9  | 119.5  |
| 112.6  | 105.6  | 97.8   | 99.6   | 102.3  | 112.6  | 104.7  | 108.4  | 97.7   |
| 112.9  | 106.8  | 102.5  | 94.6   | 88.4   | 112    | 103.1  | 98.2   | 100.4  |
| 143.1  | 187    | 184.1  | 190.4  | 158.1  | 138.3  | 193.3  | 206.1  | 185.1  |
| 112.9  | 106.2  | 114.8  | 106.2  | 100.2  | 116.7  | 109.2  | 123.8  | 120.2  |
| 106.6  | 108.1  | 100.3  | 102.7  | 99.7   | 108.5  | 96.4   | 116.9  | 115.1  |
| 105.8  | 111.2  | 105    | 96.8   | 93     | 106.3  | 96.6   | 105.8  | 111    |
| 107.8  | 110.3  | 102.8  | 135.5  | 110.2  | 122.9  | 121.9  | 121.5  | 104.3  |
| 101.9  | 103.9  | 105.9  | 100.2  | 93.2   | 110.4  | 104.2  | 114.1  | 106.9  |
| 164    | 265.5  | 284.7  | 223.8  | 236.8  | 234.5  | 274    | 335.5  | 223.8  |
| 102.4  | 109.3  | 101.9  | 101.5  | 93.9   | 106.3  | 105.4  | 109    | 99.7   |
| 122.4  | 110.3  | 113.7  | 125.5  | 102.6  | 114.2  | 129.6  | 127.6  | 112.9  |
| 197.3  | 255.2  | 257.4  | 350.1  | 228.3  | 217.8  | 295.1  | 305    | 220.9  |
| 238.2  | 255.6  | 217.5  | 209.1  | 247.1  | 266.8  | 229.5  | 349.9  | 462.3  |
| 101.6  | 107.5  | 96.3   | 96.8   | 90.6   | 102.5  | 102.3  | 105.7  | 102.2  |
| 334.4  | 551.8  | 657.4  | 449.1  | 464.7  | 557.7  | 455.8  | 613.8  | 390.8  |
| 117.3  | 118.5  | 126.6  | 109.8  | 118.6  | 136.5  | 108.6  | 127.3  | 134.1  |
| 122.5  | 120.8  | 119.7  | 113.2  | 106.6  | 127.5  | 106.8  | 138.1  | 126.9  |
| 289    | 662.1  | 536.8  | 580.1  | 526.8  | 494.8  | 569.2  | 763    | 494.4  |
| 108.7  | 113.3  | 104.2  | 109.2  | 100.5  | 118.3  | 97.5   | 116.5  | 116.2  |
| 118.5  | 163    | 134.7  | 156.3  | 154    | 166.9  | 148.6  | 210.2  | 150.4  |
| 126.1  | 177.9  | 159.6  | 147.5  | 161.5  | 160.6  | 162    | 217.5  | 173.6  |
| 581.1  | 740.1  | 598.5  | 1296.6 | 662.7  | 538.8  | 838.2  | 1179.1 | 728.6  |
| 105.4  | 102    | 107    | 89.7   | 97.9   | 103.2  | 101.1  | 105.2  | 104.7  |
| 108.5  | 124.4  | 116.8  | 118    | 103.2  | 128    | 113.8  | 131.7  | 122.1  |
| 108.6  | 103.1  | 97.5   | 98.8   | 92.2   | 105    | 99.8   | 107.1  | 100.8  |
| 107.1  | 107.4  | 107.3  | 103.6  | 93.9   | 106.1  | 114.5  | 108    | 103.1  |
| 147.1  | 150.4  | 161    | 172.8  | 139.5  | 161.3  | 170.8  | 170.3  | 140.3  |
| 130.3  | 130.5  | 148.8  | 143.8  | 142.4  | 165.3  | 171.8  | 191.8  | 169.8  |
| 125.2  | 141.5  | 144.1  | 141.3  | 121.7  | 167.1  | 144.3  | 178.7  | 179.6  |
| 233.5  | 285.3  | 349    | 367.4  | 309.3  | 358    | 394.4  | 494.9  | 271.5  |
| 254.3  | 244.2  | 265.6  | 364.7  | 288.7  | 339.1  | 430.9  | 515.5  | 296.2  |
| 352.3  | 580.3  | 500.2  | 763.7  | 438.8  | 502.1  | 663.1  | 877.4  | 614.6  |
| 2020   | 3700.9 | 2612.2 | 5268.3 | 2954.6 | 3034.3 | 4906.9 | 3931.1 | 2586.9 |
| 495.3  | 803.6  | 560.9  | 646.8  | 666.7  | 587.8  | 760.3  | 794.5  | 545.4  |
| 102.8  | 109.7  | 99.8   | 99.1   | 100.4  | 108.8  | 100    | 110.1  | 111.5  |
| 99.3   | 108.3  | 102.1  | 105.6  | 91.8   | 102.2  | 103.2  | 107.4  | 110.5  |
| 228.3  | 299.4  | 286.3  | 271.2  | 298.4  | 327.9  | 327.3  | 448.1  | 248.7  |
| 212.8  | 317    | 249.3  | 238.2  | 277.7  | 272.8  | 307.2  | 418.2  | 292.3  |
| 248.6  | 266.4  | 228.8  | 249.3  | 281.8  | 288.5  | 279.5  | 324.1  | 354.6  |
| 112.6  | 105.6  | 106.7  | 97.9   | 99.7   | 109.7  | 102.8  | 104.9  | 106.4  |
| 282    | 294.3  | 279.9  | 317.6  | 282.8  | 303.5  | 393    | 447.6  | 430.4  |
| 245    | 316    | 276.9  | 249.2  | 251.2  | 285.7  | 333.1  | 334.9  | 235.4  |
| 208.3  | 221.8  | 195.7  | 198.1  | 188.8  | 212.4  | 274.6  | 266    | 272    |
| 125.2  | 111.2  | 114.2  | 120.2  | 107.7  | 124.6  | 121.2  | 142.5  | 118.5  |
| 453.8  | 432.3  | 420.9  | 356.3  | 387.9  | 459.7  | 518.6  | 941.8  | 793.2  |

|       |        |        |        |        |       |        |        |       |
|-------|--------|--------|--------|--------|-------|--------|--------|-------|
| 179.7 | 230    | 211.9  | 158.8  | 185    | 208   | 242.7  | 279.5  | 215.5 |
| 116.1 | 112.4  | 102.9  | 108.7  | 94     | 106.6 | 108.2  | 111.4  | 106.3 |
| 123   | 117.8  | 125.6  | 116.2  | 112.4  | 121.7 | 114.7  | 131.8  | 123   |
| 246.5 | 280.7  | 246.8  | 266.4  | 195.5  | 248   | 341.3  | 384.5  | 332.6 |
| 116.4 | 117.6  | 102.3  | 116.2  | 103.8  | 118.3 | 115.3  | 128.1  | 111.7 |
| 107.5 | 110.1  | 97.5   | 102.4  | 100.5  | 103.2 | 104.9  | 116.9  | 105.2 |
| 110.3 | 112.9  | 125.1  | 113.8  | 109.6  | 130.6 | 116.7  | 125.5  | 120   |
| 103.7 | 119.2  | 110.4  | 103.9  | 106.2  | 110.2 | 114.2  | 112.4  | 112.1 |
| 110.1 | 110.3  | 103.4  | 105.4  | 92.2   | 108   | 98.7   | 99.8   | 103.2 |
| 108.9 | 116.7  | 116    | 125.1  | 106.4  | 113.6 | 112.1  | 112.8  | 116   |
| 194.5 | 290.1  | 428.3  | 271.4  | 246.4  | 378.1 | 318.5  | 395.6  | 296.9 |
| 105.8 | 118.8  | 95.6   | 124.1  | 100.7  | 124.9 | 115.2  | 119.9  | 111   |
| 109.1 | 111.6  | 105.3  | 104.7  | 96.3   | 105.4 | 104    | 111.5  | 102.7 |
| 101.2 | 103.4  | 110.5  | 96.7   | 100.1  | 102.3 | 100.2  | 110.2  | 113.2 |
| 310.1 | 581.8  | 519    | 706.2  | 556.6  | 483.4 | 515    | 614    | 401.5 |
| 95.5  | 106.7  | 97.7   | 93.2   | 91.8   | 104   | 102.8  | 96.2   | 105   |
| 245.5 | 580.4  | 503.3  | 420.4  | 435.1  | 431.8 | 491.2  | 433.3  | 229   |
| 162.3 | 279.4  | 291.8  | 242.1  | 233.6  | 227.2 | 302.2  | 258.3  | 161.8 |
| 104.4 | 106.3  | 99.4   | 97.7   | 100.1  | 112.2 | 101    | 104.6  | 111.5 |
| 102.2 | 106.5  | 97.7   | 97.8   | 92.7   | 108   | 97     | 112.9  | 107.3 |
| 107.6 | 110.1  | 101.9  | 105.6  | 99.8   | 110   | 101.2  | 110.4  | 107.6 |
| 134.6 | 132.8  | 115    | 122.4  | 110    | 135   | 122    | 124.6  | 123.5 |
| 142   | 237.1  | 357.5  | 263.3  | 257.5  | 273   | 380    | 378.2  | 213.1 |
| 235.2 | 816.8  | 811.8  | 643.1  | 548.8  | 652.6 | 548.7  | 669.7  | 358.9 |
| 368.6 | 1463.5 | 1471.5 | 1245.9 | 1016.2 | 1079  | 1101.3 | 1049.8 | 519.1 |
| 166   | 205.9  | 195.7  | 215.8  | 184    | 212.2 | 215.2  | 289.9  | 158.9 |
| 369.7 | 605.7  | 579.9  | 535.4  | 540.1  | 530.8 | 597.9  | 724.2  | 480.4 |
| 136.4 | 165.8  | 123.9  | 156.2  | 127    | 141.4 | 138.6  | 186.5  | 159.3 |
| 159.6 | 274.8  | 189.4  | 302.5  | 193.8  | 182.6 | 298.9  | 231.5  | 148.6 |
| 267.7 | 367.1  | 297.5  | 366.4  | 314.2  | 281.6 | 350.3  | 672.2  | 568.4 |
| 112.3 | 111.3  | 101.4  | 94     | 99.2   | 111.5 | 100.4  | 108.8  | 115.5 |
| 151.3 | 188.7  | 148.5  | 131.6  | 137    | 157.1 | 162.9  | 189    | 161.9 |
| 103.2 | 106.6  | 102.5  | 105.1  | 96.8   | 114   | 102.6  | 112.3  | 118.6 |
| 134.4 | 171.2  | 182.6  | 159    | 140.1  | 178.2 | 139.1  | 205.6  | 160.7 |
| 113.5 | 115.4  | 104.7  | 112.2  | 102.8  | 109.8 | 108.9  | 118.7  | 100.1 |
| 109.4 | 117.9  | 103.4  | 95.8   | 99     | 114.1 | 108.6  | 111.1  | 106.8 |
| 103.6 | 109.3  | 96.3   | 98.2   | 100.8  | 99.6  | 100.3  | 104.5  | 105.8 |
| 106.9 | 111.8  | 101.5  | 95.5   | 92.7   | 106.5 | 106.8  | 105.6  | 105   |
| 103.8 | 108.8  | 102.6  | 92.6   | 99.4   | 112.3 | 110.3  | 120.2  | 112.5 |
| 205.9 | 542.7  | 624.6  | 371    | 530.1  | 535.4 | 503.7  | 663.3  | 400.7 |
| 105.2 | 110.7  | 101    | 103.6  | 102.9  | 112   | 108.7  | 111    | 110.5 |
| 105.3 | 102.2  | 101.8  | 105    | 95.9   | 103.6 | 95.2   | 106.5  | 104.8 |
| 98    | 106.9  | 104.5  | 96.6   | 92     | 106.6 | 95.7   | 113.3  | 103.4 |
| 98.3  | 114.4  | 112    | 110    | 98.4   | 113.4 | 105.3  | 124.6  | 118.6 |
| 134.2 | 155.8  | 171.9  | 179.6  | 176.7  | 164.8 | 199.2  | 176.1  | 142.2 |
| 109   | 105.8  | 96.9   | 94.4   | 96.3   | 111.5 | 104.8  | 108.3  | 107.5 |
| 106.9 | 104.5  | 99.8   | 100.4  | 93.1   | 102.7 | 102.5  | 105.8  | 107.7 |
| 108.5 | 139.2  | 103.2  | 110.5  | 97.8   | 110.1 | 101    | 112.2  | 105.6 |
| 104.4 | 106.3  | 107.2  | 94     | 100.8  | 102.3 | 104.2  | 111.4  | 107.8 |
| 116.3 | 130.8  | 146.6  | 150.7  | 110.7  | 128.4 | 138.7  | 128.6  | 130.6 |
| 106.3 | 116.1  | 110.9  | 112.2  | 97.9   | 113   | 100.1  | 112.5  | 115.9 |

|       |        |        |        |        |        |        |        |        |
|-------|--------|--------|--------|--------|--------|--------|--------|--------|
| 134.3 | 201    | 151.8  | 172.3  | 141.3  | 144.1  | 194.8  | 204.9  | 185.1  |
| 158.9 | 284.1  | 168.5  | 197.9  | 178.7  | 158.7  | 163    | 219.9  | 179.5  |
| 122.3 | 148.3  | 120.3  | 123    | 117.2  | 127.6  | 112.6  | 134.6  | 130.6  |
| 235.1 | 446.1  | 320.9  | 328.5  | 315.1  | 248.2  | 263.5  | 351.3  | 322.8  |
| 103.1 | 115.6  | 103.7  | 104.8  | 103.2  | 101.2  | 101    | 108.9  | 113.6  |
| 100.5 | 135    | 118.8  | 122.7  | 104.3  | 116.2  | 111.6  | 111.5  | 113.2  |
| 109.1 | 109.9  | 115.5  | 98.9   | 106    | 104.6  | 117.9  | 103.6  | 110.2  |
| 107.9 | 111.9  | 97     | 104.7  | 96.7   | 106.1  | 103.9  | 111.6  | 107.1  |
| 113.1 | 99.8   | 99.8   | 105.1  | 97.6   | 109.4  | 107.4  | 105.4  | 105.2  |
| 107   | 101.3  | 101.2  | 97.4   | 90.4   | 100.5  | 99.6   | 109.1  | 116.9  |
| 127.1 | 179.6  | 234.8  | 103.9  | 131.6  | 206.3  | 105.8  | 144.6  | 132    |
| 112.5 | 105.2  | 103.5  | 97.2   | 95.2   | 110.4  | 99.9   | 110.9  | 117.9  |
| 108.9 | 107.3  | 100.6  | 99.4   | 95.3   | 104.4  | 100.5  | 106.7  | 105.1  |
| 115.4 | 108.9  | 110.3  | 115.9  | 104.6  | 116.6  | 103.4  | 121.1  | 111.1  |
| 108.9 | 108.5  | 96.8   | 98.8   | 97.5   | 107.7  | 101.4  | 109.6  | 106.2  |
| 113.4 | 115.5  | 103.3  | 103.1  | 107.2  | 116.7  | 106.1  | 120.4  | 117.3  |
| 109.6 | 99.3   | 101    | 102.9  | 101.8  | 113.6  | 106.4  | 110.1  | 117.6  |
| 159.9 | 130.9  | 128.7  | 136.6  | 115.8  | 128.3  | 162.1  | 218.8  | 262.6  |
| 103   | 104.3  | 98.9   | 95.9   | 92.7   | 102.6  | 103.3  | 102    | 99.5   |
| 910.3 | 1408.3 | 1412.4 | 1024.7 | 1080.5 | 1091.7 | 1035.5 | 1269.5 | 1001.4 |
| 106.4 | 113.3  | 104.3  | 113.8  | 100    | 112.7  | 109.9  | 106.9  | 113.4  |
| 106.1 | 112.1  | 116.7  | 103.2  | 103.9  | 108.9  | 110.9  | 115.2  | 109.2  |
| 106.2 | 112.2  | 104.7  | 108.1  | 94.3   | 101.2  | 105.9  | 112.9  | 107.8  |
| 105.5 | 108.5  | 105.1  | 105.8  | 97.8   | 110.6  | 100.1  | 106.1  | 112.2  |
| 117   | 135.8  | 117.3  | 116.5  | 103.5  | 118.9  | 104.9  | 123.7  | 140.6  |
| 106.8 | 115.2  | 111.2  | 104.7  | 108.3  | 107.7  | 107.5  | 114.6  | 105.9  |
| 120.3 | 112.7  | 113.6  | 116    | 100.8  | 108.6  | 110.6  | 107.7  | 110.1  |
| 222.8 | 275.4  | 231.7  | 203.8  | 201.3  | 200.8  | 203    | 212.6  | 168.7  |
| 104.5 | 116.3  | 113    | 110.6  | 105.9  | 106.5  | 105.3  | 118.6  | 123.3  |
| 150.4 | 168.1  | 147.9  | 155.8  | 132.4  | 151.9  | 150.6  | 176.5  | 158.7  |
| 101.4 | 109.6  | 101.6  | 99.8   | 93.5   | 104.1  | 118.3  | 126.5  | 110.3  |
| 325.1 | 449    | 495.3  | 455.3  | 320.3  | 485.3  | 487.2  | 602    | 486.2  |
| 271.4 | 384.7  | 357.9  | 369.2  | 303.9  | 337.6  | 368.8  | 445.2  | 359.5  |
| 415.3 | 400.8  | 418.4  | 369    | 274.2  | 361.2  | 360.6  | 487.3  | 381.8  |
| 131.3 | 155.1  | 149.3  | 168.8  | 128.4  | 154.3  | 143.2  | 193.3  | 154.5  |
| 158   | 151.7  | 140.4  | 138.2  | 135.4  | 147.6  | 160    | 180.1  | 157.5  |
| 199   | 220    | 184.6  | 155.5  | 167.9  | 235.5  | 172.8  | 286.7  | 229.1  |
| 440.9 | 716.1  | 830.4  | 960    | 714.3  | 724.2  | 817    | 667.4  | 450.8  |
| 194.4 | 348.3  | 307.9  | 336.9  | 244.7  | 304.8  | 362.4  | 312.3  | 229.4  |
| 113.6 | 124.8  | 109.6  | 98.1   | 96     | 115.6  | 104.2  | 112.1  | 109.2  |
| 195.1 | 234.9  | 195.6  | 192.6  | 191.9  | 213.9  | 210.6  | 296.7  | 259.2  |
| 103.1 | 102.2  | 98.6   | 93.7   | 99.6   | 107.5  | 95.7   | 104.7  | 105.9  |
| 155.5 | 141.2  | 148.6  | 153.2  | 136.4  | 149.9  | 158.2  | 183.5  | 165.4  |
| 98.5  | 114.2  | 104    | 91.1   | 97.2   | 105.8  | 102.5  | 109.4  | 104.2  |
| 110.3 | 111.4  | 107.4  | 105.5  | 98     | 114.2  | 113.1  | 105.8  | 110.8  |
| 110.1 | 131.9  | 113.8  | 116.8  | 103.7  | 119.3  | 112    | 112.6  | 116.8  |
| 104.2 | 109.5  | 107.8  | 99.5   | 96.8   | 107.9  | 107.2  | 112.5  | 98.4   |
| 103.1 | 104.7  | 99.8   | 97.3   | 91.9   | 100.8  | 92.3   | 100    | 106.8  |
| 101.6 | 123.4  | 115.2  | 104.7  | 104.4  | 112.4  | 103.4  | 123.8  | 118.4  |
| 104.1 | 110.8  | 102.6  | 98.5   | 95.9   | 107.6  | 110.7  | 104.5  | 113.9  |
| 102.7 | 115.2  | 103    | 97.4   | 96     | 106.4  | 110.7  | 107.7  | 108.6  |



|        |        |        |        |        |        |       |        |        |
|--------|--------|--------|--------|--------|--------|-------|--------|--------|
| 111.6  | 131.2  | 117    | 133.2  | 118.2  | 124.5  | 109.1 | 131.1  | 112.2  |
| 113.1  | 116.8  | 111.4  | 98.9   | 101.2  | 114    | 103.2 | 109.7  | 115.2  |
| 108.1  | 106.4  | 98.8   | 102.4  | 92.9   | 102.9  | 98.9  | 107.5  | 103    |
| 110.6  | 108.9  | 108.2  | 98.9   | 95.1   | 107.8  | 100.5 | 103.1  | 105.6  |
| 112.7  | 118    | 107.6  | 109.4  | 102.8  | 106.3  | 109.7 | 128.8  | 109.2  |
| 105    | 112.6  | 95.8   | 98.4   | 100.4  | 108.2  | 102.4 | 112.5  | 110    |
| 101.6  | 112.7  | 104.4  | 106.5  | 100.7  | 114.1  | 109.1 | 116.6  | 117.7  |
| 115.5  | 110.5  | 102    | 96.8   | 93.8   | 102.9  | 96.2  | 110.8  | 108    |
| 131.9  | 167.4  | 191    | 99.4   | 133    | 149.1  | 103.9 | 144.5  | 113.4  |
| 114.3  | 118.4  | 119.3  | 107    | 104.3  | 117.3  | 107   | 121.8  | 114.5  |
| 112.9  | 108.6  | 106.3  | 111.7  | 99.6   | 123.7  | 110.4 | 115.7  | 104.2  |
| 103.7  | 104.4  | 96.7   | 99     | 92.3   | 104.3  | 96.9  | 104.6  | 103.8  |
| 112.4  | 106.9  | 107.7  | 107.8  | 96     | 109.4  | 102.2 | 103.6  | 105.8  |
| 263.5  | 553.9  | 563.9  | 425.8  | 453.7  | 497.9  | 448   | 530    | 303.8  |
| 111.6  | 110.2  | 105    | 110.5  | 104.3  | 115.3  | 112.3 | 132.2  | 127    |
| 613.9  | 579.4  | 583    | 466.8  | 555.9  | 665.5  | 710.4 | 1150.6 | 984    |
| 163.6  | 195.9  | 195    | 201.7  | 193    | 241.1  | 241.1 | 328.2  | 184.5  |
| 108    | 105.1  | 96.6   | 96.3   | 98.2   | 110.7  | 110.1 | 103.9  | 109.5  |
| 148.9  | 141.5  | 132.4  | 122.3  | 116.4  | 137.3  | 152.4 | 191.8  | 171.3  |
| 1131.4 | 971.4  | 835    | 840.7  | 1003.6 | 1085.4 | 1300  | 1953.4 | 1525.9 |
| 122    | 118.2  | 110.1  | 123.8  | 101.3  | 115.3  | 105.8 | 124.6  | 115.4  |
| 136    | 243.9  | 200.6  | 269    | 218.9  | 238.5  | 265.3 | 267    | 191.4  |
| 197.6  | 196.6  | 141.9  | 151.7  | 149.6  | 197.8  | 161.2 | 339.5  | 402.8  |
| 747    | 553.4  | 538.7  | 640.1  | 647.7  | 562.2  | 477.9 | 1630.9 | 1602.2 |
| 439.6  | 444.6  | 392.9  | 536.9  | 384.3  | 483.7  | 450.3 | 639.4  | 476.7  |
| 109.7  | 112.4  | 106.1  | 117.2  | 106.7  | 120.1  | 102   | 119    | 110.1  |
| 105.2  | 112.3  | 115.7  | 104.3  | 95     | 107.8  | 111.3 | 105.8  | 106.3  |
| 182.3  | 220.8  | 260.1  | 207.3  | 222.8  | 282.7  | 233.9 | 329.4  | 250.1  |
| 106    | 112.9  | 105.4  | 101.5  | 98.9   | 107.4  | 104.4 | 108.2  | 111.3  |
| 134.3  | 140    | 139.2  | 149.7  | 139.2  | 153    | 140.6 | 228.1  | 168.5  |
| 118.7  | 117.7  | 113.2  | 102.3  | 108.9  | 130.6  | 105   | 164.2  | 120.4  |
| 123.5  | 197.2  | 165.5  | 164.3  | 155.4  | 172.9  | 191   | 258.5  | 176.4  |
| 110.3  | 108.1  | 101.4  | 101.5  | 99.3   | 112    | 99.7  | 106.8  | 113.3  |
| 110    | 124.4  | 116.1  | 122    | 106.8  | 118.3  | 100.6 | 121.7  | 111.5  |
| 112.4  | 143.4  | 134.6  | 132.5  | 124.5  | 146.8  | 133.8 | 149    | 125.7  |
| 104.5  | 112    | 106.2  | 116.3  | 94.5   | 112.5  | 99.3  | 113.8  | 121.3  |
| 134.4  | 153.1  | 126.8  | 106.4  | 140.7  | 156    | 119.3 | 452.6  | 220    |
| 113.8  | 109.3  | 102.1  | 108.5  | 94.3   | 101.8  | 105.6 | 114.2  | 116.5  |
| 108.2  | 115.5  | 105.8  | 101.6  | 91.8   | 104.9  | 97.2  | 107.8  | 107.7  |
| 109.1  | 109.6  | 104.4  | 107    | 95.2   | 109.4  | 104.6 | 104.4  | 103.8  |
| 237.6  | 339.3  | 335.2  | 337.4  | 312.5  | 373.2  | 353.6 | 356    | 284.8  |
| 118.7  | 134.2  | 129.4  | 135.9  | 119    | 123.5  | 146   | 186    | 140.1  |
| 124.3  | 138.6  | 120.2  | 123.6  | 105.8  | 152.3  | 120.5 | 167.1  | 133.5  |
| 105.3  | 106.5  | 102.3  | 101.6  | 94     | 107.7  | 100.7 | 106.2  | 102.6  |
| 118    | 117.1  | 106.4  | 107.1  | 102.3  | 116.4  | 106.5 | 119.3  | 119.3  |
| 118.5  | 137    | 125.2  | 106.8  | 110.5  | 121.3  | 118   | 161.1  | 125.5  |
| 809    | 1280.9 | 1457.9 | 1015.9 | 1065.2 | 1315.8 | 889.9 | 1380.6 | 1139.6 |
| 593.1  | 860.7  | 701.8  | 682    | 706.5  | 602.4  | 742.1 | 882.3  | 662.2  |
| 143.4  | 146.3  | 140.7  | 141.2  | 123.1  | 130.2  | 134.3 | 189.1  | 149.1  |
| 107.1  | 116.8  | 99.7   | 97.9   | 98.1   | 109.9  | 105.2 | 111.7  | 113.4  |
| 104.5  | 118.5  | 111.3  | 123.7  | 107.7  | 109.1  | 132.7 | 127.7  | 121.6  |

|        |        |        |        |        |        |        |        |        |
|--------|--------|--------|--------|--------|--------|--------|--------|--------|
| 178.7  | 208.5  | 197.4  | 211.8  | 178.4  | 201.2  | 232.6  | 262.1  | 212.7  |
| 107.1  | 108.5  | 106.3  | 106.7  | 95.5   | 106.3  | 104.8  | 112.5  | 117.9  |
| 240.6  | 224    | 224.2  | 254.9  | 248.2  | 237    | 298.1  | 427.3  | 337    |
| 102.4  | 130.3  | 110.7  | 129.1  | 109.5  | 120.3  | 121.8  | 137.3  | 116    |
| 107.6  | 127.1  | 105.8  | 113.6  | 102.5  | 112.9  | 102.8  | 109.4  | 112.1  |
| 109.4  | 122.4  | 113.3  | 115    | 103.9  | 117.1  | 112.7  | 107.6  | 115.3  |
| 120.6  | 117.8  | 104.1  | 105.9  | 107.8  | 112.3  | 110.5  | 125.1  | 116.5  |
| 125.5  | 164.2  | 129.9  | 143.1  | 137.5  | 148.9  | 126.2  | 127.8  | 140.4  |
| 104.5  | 105.4  | 107.2  | 109.2  | 101.2  | 115.5  | 97.7   | 114    | 109.5  |
| 320.5  | 565.1  | 675.3  | 555.4  | 679.1  | 659.1  | 519.8  | 1222   | 631.8  |
| 111.7  | 113    | 105.7  | 102.6  | 98.5   | 115.2  | 99.8   | 117.4  | 113.5  |
| 110.7  | 114.1  | 103    | 111.4  | 101.5  | 113.9  | 110.4  | 119.9  | 127.1  |
| 104.6  | 109.6  | 103.6  | 102.5  | 105    | 109.2  | 106.2  | 125.7  | 115.3  |
| 101.9  | 101.2  | 95.1   | 92     | 93.1   | 108    | 99.1   | 100    | 106    |
| 113.2  | 105.1  | 101.2  | 107.4  | 102.9  | 116    | 105.2  | 111.2  | 115.7  |
| 106.1  | 100.3  | 100.6  | 115.2  | 95.4   | 103.1  | 99.3   | 105.7  | 104.7  |
| 109.5  | 108.6  | 95.1   | 97.2   | 95.7   | 107.1  | 108.9  | 104.6  | 111.3  |
| 328    | 717.6  | 711.6  | 507.7  | 592.1  | 738.1  | 608.9  | 973.6  | 630.1  |
| 760.3  | 1131.6 | 892.4  | 870.4  | 727.9  | 933.7  | 936.6  | 1295   | 972.4  |
| 179.6  | 332.3  | 275.3  | 227.7  | 221.9  | 317    | 243.5  | 334.2  | 268.5  |
| 369.7  | 649.3  | 732.6  | 649    | 508.8  | 420.2  | 541.8  | 405    | 246.8  |
| 105.9  | 114.7  | 110.6  | 112.4  | 104.6  | 116    | 106    | 121    | 123.4  |
| 102.6  | 104.3  | 107.2  | 99.7   | 92     | 104.1  | 107.3  | 113.5  | 109.3  |
| 106.1  | 102.9  | 99.7   | 104.9  | 95.6   | 115    | 103.4  | 106.2  | 112    |
| 102.9  | 104.6  | 94.5   | 94.4   | 91     | 97.4   | 97     | 107.9  | 108.1  |
| 101.8  | 104.3  | 91.9   | 105.3  | 102.4  | 107.3  | 104.6  | 106.4  | 108.4  |
| 104.6  | 100.9  | 97.6   | 93.8   | 97.6   | 106.7  | 102.4  | 100.2  | 105.1  |
| 101.2  | 109.4  | 103.8  | 113.1  | 104.8  | 108.6  | 92.9   | 106.4  | 112.1  |
| 108.8  | 105.2  | 103    | 105    | 90.6   | 104.5  | 98.6   | 106    | 108.6  |
| 610.8  | 1734.1 | 1292.8 | 1471.7 | 1201.5 | 1258.6 | 1014.3 | 1566.1 | 898.9  |
| 155    | 351.5  | 400.2  | 345.2  | 332.3  | 328.2  | 347.2  | 376.9  | 256    |
| 349.2  | 392.8  | 372    | 365.2  | 331.1  | 463.5  | 402.3  | 749    | 491.8  |
| 5515.1 | 8684.6 | 8973.9 | 9931   | 7100.6 | 9239.5 | 9757.3 | 9877.3 | 6579   |
| 100.8  | 111.5  | 104.8  | 86.9   | 100.9  | 98.5   | 100.5  | 108.5  | 113.9  |
| 161.3  | 182.4  | 147.2  | 157    | 154.3  | 177.5  | 202.4  | 197.9  | 168.5  |
| 107.8  | 109.4  | 103.6  | 101.8  | 103.6  | 108    | 101.1  | 129.2  | 112.1  |
| 119.3  | 135.6  | 133.5  | 118.8  | 114.3  | 130.6  | 134.6  | 140.1  | 131.2  |
| 127.8  | 156.2  | 192.1  | 133.9  | 142    | 163.3  | 139.7  | 138.5  | 115.3  |
| 121.3  | 119.5  | 112.8  | 126.1  | 106    | 124.4  | 110.9  | 125.3  | 109    |
| 114.7  | 116.5  | 112.3  | 107.3  | 105    | 130.3  | 113.8  | 131.6  | 116.5  |
| 107.1  | 118.2  | 108.5  | 113.8  | 106.6  | 110.3  | 108.9  | 108.3  | 106.3  |
| 101.2  | 103    | 96.5   | 101.5  | 97     | 112.4  | 103.3  | 99.8   | 101.3  |
| 111.4  | 121    | 118.4  | 115.7  | 110.5  | 115.8  | 115.9  | 113.9  | 127    |
| 107.5  | 112.7  | 119    | 124.6  | 114.2  | 120.5  | 109.2  | 115.6  | 115.7  |
| 105.6  | 115.1  | 103.1  | 110.2  | 96.2   | 115    | 101.8  | 114    | 110.4  |
| 105.1  | 108.9  | 104.8  | 103.2  | 99.4   | 104.6  | 104.2  | 116.9  | 115.4  |
| 112.7  | 108.6  | 117    | 107    | 107.7  | 112.7  | 105.8  | 125.5  | 121.2  |
| 104.8  | 113.3  | 98.7   | 96.5   | 87.7   | 113.2  | 103.3  | 115.6  | 110.6  |
| 906.1  | 2640.6 | 2799.1 | 2298.8 | 2234.8 | 2448.5 | 2147.8 | 2325.7 | 1031.9 |
| 155    | 158    | 150.2  | 158.1  | 149.4  | 189.1  | 187.4  | 245.9  | 219.4  |
| 755.4  | 1202.6 | 1126.4 | 1232.1 | 915.2  | 1147.6 | 1153.9 | 2041.6 | 928.5  |

|        |        |        |        |        |        |        |        |        |
|--------|--------|--------|--------|--------|--------|--------|--------|--------|
| 1183.9 | 1561.6 | 1413.2 | 1552   | 1342.2 | 1498.5 | 1316.3 | 2074.8 | 1514.2 |
| 98.1   | 108.7  | 98.7   | 100.1  | 96.2   | 107.1  | 103.3  | 106.6  | 105.8  |
| 115.3  | 118.2  | 99.9   | 112.8  | 106.1  | 105.2  | 106.4  | 108.9  | 109.2  |
| 123.1  | 118.2  | 116.2  | 109    | 111.9  | 122.4  | 110    | 129.1  | 116.4  |
| 788.9  | 1450.8 | 1795.5 | 1604.7 | 1274.7 | 1423.9 | 1643.4 | 1092   | 804.6  |
| 445    | 508.4  | 528.1  | 424.8  | 437    | 453.1  | 524    | 878.5  | 508    |
| 104.7  | 106.6  | 99.3   | 99.4   | 90     | 107.7  | 112.5  | 117    | 107    |
| 109.1  | 111.4  | 106.5  | 106.2  | 93.4   | 110.4  | 118.3  | 124.3  | 126.5  |
| 110.6  | 111.4  | 100.5  | 103.5  | 102.5  | 106.8  | 104.2  | 105.3  | 105    |
| 110.2  | 107.4  | 101    | 105.3  | 99.1   | 114.5  | 101.6  | 114.1  | 116.4  |
| 515.1  | 712.3  | 676    | 644.7  | 765.5  | 773.5  | 679.3  | 1080.3 | 695.5  |
| 109.5  | 106.3  | 107.2  | 90.9   | 93.4   | 100.5  | 102.2  | 104.6  | 103.2  |
| 104.9  | 110.4  | 105.9  | 104.6  | 91.2   | 103.1  | 104.3  | 120.3  | 110.1  |
| 137.8  | 154.2  | 116.5  | 130.1  | 129.5  | 146.4  | 141.6  | 196.7  | 153    |
| 231    | 293.3  | 233.2  | 218.4  | 291.4  | 248.8  | 270.7  | 394    | 228.6  |
| 103.9  | 115.4  | 107.6  | 102.8  | 99.9   | 112.1  | 107.1  | 115.8  | 108.7  |
| 137.4  | 154.7  | 134.9  | 136.7  | 138.5  | 143.5  | 133.9  | 197.5  | 159.6  |
| 136.8  | 140.6  | 136.9  | 126.6  | 116.1  | 144.6  | 116.9  | 187.6  | 154.5  |
| 194.5  | 188.2  | 145.2  | 152.7  | 160.9  | 158.9  | 171.7  | 285.1  | 219.5  |
| 120.4  | 134.7  | 135.5  | 109.1  | 115.4  | 128.7  | 131.1  | 174.1  | 173.3  |
| 591.4  | 516.1  | 530.1  | 474.5  | 478    | 415.5  | 194.7  | 836.3  | 660.9  |
| 194    | 200.4  | 179.5  | 153.3  | 176.9  | 192    | 124.2  | 262.6  | 238.9  |
| 127.5  | 111.3  | 112.5  | 97.1   | 104.3  | 116.1  | 112.6  | 116.1  | 119.4  |
| 103.2  | 106.5  | 91.3   | 94.9   | 99.8   | 114.5  | 97.5   | 101    | 109.6  |
| 135.3  | 137.3  | 134.5  | 140.2  | 126.9  | 131.7  | 134.4  | 132.4  | 125.7  |
| 323.1  | 483.9  | 459.8  | 348.8  | 418    | 476.2  | 370.6  | 679.9  | 559.8  |
| 200.3  | 171.6  | 165.2  | 153.7  | 184.1  | 175.9  | 152.8  | 382.8  | 305.2  |
| 834.6  | 870.7  | 886.6  | 553.4  | 661.6  | 972.9  | 761.6  | 1084.4 | 816.5  |
| 193.6  | 256.6  | 252.1  | 281.2  | 223.7  | 282.4  | 275.2  | 328.3  | 246.6  |
| 105.3  | 111.4  | 102.1  | 101    | 100.5  | 109.4  | 104.3  | 109.5  | 110.1  |
| 106.5  | 113.8  | 100.6  | 106.4  | 98     | 108.3  | 104.7  | 105.1  | 102.7  |
| 102.8  | 101.4  | 98.4   | 105.7  | 94.7   | 109.6  | 104.7  | 103.5  | 96.6   |
| 108.5  | 110.5  | 100.3  | 115.1  | 115.4  | 109.8  | 106.2  | 112.1  | 127.8  |
| 108.1  | 111.5  | 99.2   | 99.3   | 95.8   | 116.3  | 101.2  | 110.2  | 113.4  |
| 106    | 102.8  | 106.2  | 97.5   | 92.2   | 106.8  | 99.5   | 107.6  | 112.1  |
| 114.1  | 123.6  | 119.2  | 109.8  | 112.4  | 130.4  | 103.4  | 145.6  | 121.6  |
| 583.6  | 638.3  | 638.9  | 528.5  | 498.7  | 518.9  | 381.3  | 1416.6 | 1230.6 |
| 321.8  | 675.1  | 612    | 627.2  | 507    | 592.9  | 566.2  | 694.8  | 316.9  |
| 348.8  | 436.1  | 534.1  | 510    | 530.9  | 409.6  | 518.1  | 638.2  | 462.3  |
| 111    | 109.3  | 108.8  | 118.3  | 107.3  | 121.2  | 117.5  | 135    | 113.3  |
| 111.5  | 137.6  | 131.3  | 103    | 119    | 126.3  | 117.1  | 150.7  | 131.5  |
| 122.7  | 149.2  | 145.9  | 107.7  | 117.3  | 137.5  | 108    | 144.5  | 127.2  |
| 116.2  | 130    | 120    | 126.5  | 110.6  | 129.5  | 105.5  | 132    | 115.8  |
| 106.5  | 112.9  | 107.7  | 99.8   | 94     | 113.7  | 101.6  | 108.8  | 113.9  |
| 127.8  | 136.3  | 133.3  | 150.2  | 135.9  | 131.2  | 158.4  | 147.9  | 140.7  |
| 113.3  | 105.8  | 106.6  | 98.1   | 98     | 117.2  | 108.4  | 115.1  | 121.8  |
| 113.4  | 139    | 128.5  | 137.9  | 120.2  | 130.1  | 120    | 142.3  | 135.1  |
| 719.9  | 1159   | 1049.2 | 1317.7 | 832.6  | 1020.6 | 842.7  | 1732.4 | 1162.5 |
| 232.6  | 454.1  | 290.8  | 369.3  | 269.5  | 324.3  | 281.5  | 524    | 326.7  |
| 126.5  | 129.2  | 117.6  | 106.5  | 101.4  | 137.2  | 114.9  | 154.4  | 140.7  |
| 101.5  | 115.8  | 96.6   | 96.2   | 99     | 104    | 92.1   | 108.4  | 110.6  |

|        |        |        |        |        |        |        |        |        |
|--------|--------|--------|--------|--------|--------|--------|--------|--------|
| 107.6  | 109.9  | 99.8   | 98.6   | 103.6  | 103.1  | 101.6  | 119.9  | 107    |
| 101.3  | 103    | 100.5  | 96.2   | 90     | 110    | 98.1   | 96.9   | 106.8  |
| 126.3  | 120    | 111.8  | 137.8  | 110.9  | 116.3  | 117.4  | 142.4  | 164.3  |
| 138.5  | 168.5  | 162.7  | 151.4  | 145.7  | 176.4  | 171.3  | 234.8  | 166.4  |
| 128.7  | 149    | 126.5  | 134.5  | 124.3  | 119.3  | 140.9  | 159.1  | 136.3  |
| 112.2  | 125    | 122.2  | 115.5  | 114.9  | 136.8  | 121.7  | 139.5  | 123.9  |
| 133.4  | 194.1  | 157.4  | 164.2  | 169.3  | 144.8  | 174.2  | 157.9  | 146.7  |
| 618.9  | 1139.2 | 1509.3 | 1894.9 | 868.2  | 1672.2 | 1397.6 | 1896.7 | 1055.9 |
| 105.9  | 102.5  | 96.9   | 100.4  | 95.4   | 111.9  | 103.8  | 106    | 106.9  |
| 107.2  | 112.3  | 103.1  | 106.5  | 94.4   | 104.7  | 103.3  | 111.8  | 111.4  |
| 344.7  | 395.1  | 322.1  | 345.1  | 345.6  | 364.7  | 322.9  | 669.2  | 518.6  |
| 110.5  | 112.2  | 102.3  | 104.9  | 97.9   | 116.1  | 105.4  | 112    | 112.9  |
| 142.3  | 191.1  | 177    | 161.7  | 163.9  | 189.6  | 156.9  | 285.8  | 206.4  |
| 257.5  | 408.2  | 358.4  | 398.5  | 357.7  | 408.4  | 365.1  | 519.1  | 360.3  |
| 103.5  | 111.3  | 101.2  | 109.1  | 94.1   | 115.2  | 108    | 112.6  | 104.2  |
| 108    | 103.9  | 98.3   | 101.6  | 100.2  | 105.9  | 99     | 108.7  | 109.5  |
| 121.3  | 112.5  | 107    | 119.3  | 109.5  | 120.5  | 112.8  | 129.2  | 106.7  |
| 119.5  | 134.5  | 122.4  | 127    | 115.7  | 132.4  | 125.6  | 150.7  | 132.8  |
| 168.1  | 260.2  | 302.9  | 255    | 231.9  | 261.1  | 282.2  | 250.8  | 216.6  |
| 110.9  | 115.5  | 112.2  | 101.4  | 99.8   | 114.5  | 105.7  | 112.3  | 114.2  |
| 158.2  | 197.5  | 165.5  | 131.3  | 177.4  | 167.4  | 177.6  | 214.5  | 181.2  |
| 116.9  | 107.8  | 111.3  | 101.5  | 105.8  | 118.1  | 114.1  | 123    | 122.2  |
| 111.2  | 115.1  | 107.2  | 105    | 96.3   | 105.4  | 110.9  | 122.9  | 117.8  |
| 108.9  | 116.6  | 97.4   | 111.7  | 102.1  | 109.2  | 104.6  | 129.2  | 110    |
| 107.9  | 106.7  | 103.2  | 111.1  | 95.9   | 109.9  | 96.5   | 114.6  | 102.4  |
| 189.1  | 214    | 172.1  | 183.5  | 167.7  | 163.2  | 168.7  | 221.3  | 192.8  |
| 184.6  | 202.9  | 181.3  | 203.5  | 150.1  | 180.9  | 200.9  | 295.3  | 323.3  |
| 106.8  | 115.5  | 103.6  | 93.6   | 93.1   | 111.8  | 103.6  | 118.9  | 118    |
| 118.3  | 133.4  | 133.1  | 137.8  | 113.6  | 124.7  | 121.9  | 150.5  | 158.7  |
| 176.4  | 212.4  | 173.8  | 162.4  | 155.3  | 192.4  | 161.8  | 272.9  | 252.3  |
| 154.1  | 192.4  | 138.5  | 162.3  | 131.8  | 149.6  | 129.8  | 190.8  | 200.2  |
| 1133.1 | 1041.4 | 831.6  | 818.2  | 896.6  | 1116.1 | 1179.2 | 1448.8 | 1345.3 |
| 116.1  | 112.6  | 95     | 103.2  | 98.1   | 103.5  | 113    | 111.2  | 114.8  |
| 124.3  | 123.3  | 109    | 134.4  | 105.4  | 122.5  | 125    | 124.7  | 131.2  |
| 116.7  | 117.5  | 99.6   | 96     | 97.2   | 103.5  | 105    | 105.9  | 103.9  |
| 105.7  | 112.2  | 99.9   | 100.8  | 97.1   | 103.3  | 103.9  | 112.2  | 111.3  |
| 115.7  | 116.8  | 111.8  | 127.8  | 110.8  | 116.7  | 114.4  | 120.7  | 121.6  |
| 477.2  | 445    | 441.8  | 392    | 413.8  | 544.2  | 470.4  | 847.7  | 620.7  |
| 103    | 114    | 98.1   | 104.6  | 100.4  | 107    | 104.3  | 115.3  | 109.2  |
| 122.5  | 131.5  | 123.3  | 116.5  | 102.8  | 116.4  | 139.8  | 119.7  | 126.5  |
| 254.9  | 317.9  | 338.1  | 269.4  | 284.4  | 297.3  | 370.8  | 434.8  | 328    |
| 209.3  | 324.4  | 269.2  | 398.1  | 300    | 301.4  | 414.7  | 457.8  | 361.3  |
| 108.1  | 106.8  | 103.2  | 95     | 101.7  | 110.2  | 99.3   | 107.7  | 101.7  |
| 2977.7 | 2959.6 | 2497.7 | 3359.7 | 2955.8 | 2743   | 3267.6 | 4937   | 3705.7 |
| 116.8  | 111.3  | 109.4  | 117.1  | 103.6  | 116.9  | 111.9  | 137.7  | 121.1  |
| 2557   | 3268.6 | 2544.8 | 3124.4 | 2125.9 | 2312.4 | 3191.7 | 3435.6 | 3217.9 |
| 108.6  | 109.7  | 104.4  | 101.8  | 92.1   | 106.4  | 111.8  | 105.8  | 115.7  |
| 564.1  | 566.4  | 431.4  | 605.3  | 511.1  | 510.4  | 814.5  | 950.1  | 914.2  |
| 404.7  | 323.1  | 327.8  | 400.1  | 264.6  | 323    | 422.1  | 659.8  | 511.1  |
| 1093   | 1123.2 | 776.7  | 1214.1 | 1030   | 840.7  | 1108.5 | 1965.7 | 1129.6 |
| 341.4  | 485    | 395.2  | 311.1  | 361.8  | 420.3  | 374    | 707    | 753    |

|        |        |        |        |        |        |        |        |        |
|--------|--------|--------|--------|--------|--------|--------|--------|--------|
| 109.6  | 117    | 109.9  | 107.2  | 102.1  | 119.4  | 106.1  | 119.6  | 111.1  |
| 105.8  | 115.3  | 100.9  | 98.5   | 96.6   | 107    | 102.1  | 106.2  | 103.6  |
| 152.5  | 183.6  | 240.3  | 185.7  | 130.2  | 176.5  | 176.3  | 292.9  | 222.3  |
| 101.1  | 101.6  | 102.7  | 99.3   | 97.9   | 110    | 96.4   | 104.5  | 110.6  |
| 96     | 97.3   | 104.9  | 98.6   | 94.2   | 104.3  | 104.8  | 110.9  | 106.1  |
| 106.6  | 107.8  | 105.9  | 97.5   | 94.2   | 116    | 96.8   | 107.4  | 108.9  |
| 110.1  | 102.1  | 99.4   | 100.1  | 97.1   | 102    | 96.8   | 102.6  | 106.5  |
| 108.6  | 110.1  | 99.9   | 100.7  | 100.6  | 112.9  | 99.9   | 106.4  | 117.2  |
| 119    | 186.6  | 137.7  | 210.1  | 141.3  | 147.6  | 187.2  | 205.2  | 136.4  |
| 110.8  | 160    | 133.7  | 164.9  | 125    | 138.8  | 168.6  | 161    | 118.6  |
| 114.7  | 111.3  | 108.7  | 102.5  | 102    | 124.3  | 107.2  | 121.5  | 116.8  |
| 124.2  | 138.8  | 135.4  | 135    | 146.3  | 147.2  | 145.7  | 181.1  | 153.4  |
| 110.6  | 133.9  | 117.1  | 110.3  | 109.9  | 120.7  | 121.5  | 125.1  | 103.2  |
| 110.4  | 130    | 108.1  | 111.2  | 108    | 120.2  | 100.3  | 108.6  | 104    |
| 128.2  | 131.2  | 119.7  | 114.3  | 108.2  | 134    | 113.9  | 164.3  | 154.6  |
| 334.5  | 278.7  | 245.5  | 233.6  | 249.8  | 235    | 279.5  | 452.6  | 237.5  |
| 189.9  | 143.2  | 140    | 138    | 124.4  | 166.4  | 154    | 278.2  | 431.7  |
| 130.3  | 115.2  | 108.5  | 126.8  | 105.6  | 111.3  | 120.9  | 145.5  | 126.1  |
| 122.7  | 143.9  | 137.8  | 136.2  | 116.5  | 146.5  | 131.1  | 146.7  | 126.3  |
| 1194.2 | 1681.8 | 1580.5 | 1113.9 | 1406.5 | 1559.3 | 1363.7 | 3020.2 | 2179.7 |
| 98.9   | 108.1  | 104.9  | 101    | 94.8   | 107.9  | 106.5  | 120.5  | 111    |
| 115.7  | 138.9  | 147.2  | 150.8  | 140.6  | 154.7  | 140.1  | 148.9  | 118.9  |
| 108.1  | 109.2  | 99.4   | 100.1  | 101.2  | 107.4  | 99     | 102.3  | 98.8   |
| 124.7  | 156.9  | 126    | 162.7  | 141.4  | 132.9  | 148    | 172.5  | 138.9  |
| 116.2  | 110.3  | 117    | 119    | 104.1  | 112.7  | 103.6  | 126.1  | 107.1  |
| 117.4  | 104.8  | 108.1  | 119.5  | 104.1  | 113    | 107    | 107    | 110.2  |
| 115.5  | 118.2  | 106.6  | 114.8  | 100.4  | 113.8  | 105.7  | 121    | 120    |
| 124.5  | 156.6  | 161.7  | 190.4  | 126.2  | 139.3  | 180.1  | 136.6  | 130.5  |
| 112.1  | 102.1  | 103.8  | 99.5   | 95.2   | 113.1  | 104.1  | 112.1  | 104.3  |
| 97     | 100.8  | 103.4  | 92.7   | 96.4   | 106.3  | 101.5  | 108.7  | 98.9   |
| 120.1  | 111.8  | 111.5  | 114.9  | 94.7   | 107.3  | 106.6  | 123    | 108.4  |
| 103.9  | 110.1  | 101.9  | 105.5  | 98.9   | 109.8  | 112.7  | 96.3   | 110.7  |
| 103.1  | 105.1  | 101.3  | 101    | 95.4   | 106.4  | 106    | 113.3  | 104.2  |
| 116.7  | 110    | 95.5   | 98.6   | 99.9   | 105.2  | 110.8  | 109.2  | 111.5  |
| 108.2  | 145.1  | 141.2  | 115.1  | 122.2  | 133.7  | 124.9  | 154.4  | 127    |
| 116.3  | 116.1  | 106.7  | 112    | 104.6  | 116.3  | 107.9  | 124.6  | 112.1  |
| 103    | 108.8  | 104    | 102.1  | 97     | 112.3  | 100.6  | 115.1  | 123.1  |
| 108.4  | 104.6  | 109.6  | 105.9  | 93.8   | 103.3  | 103.4  | 110.5  | 107.1  |
| 109.1  | 107.9  | 98.8   | 96.1   | 90.9   | 104.1  | 101    | 102.2  | 104    |
| 100.3  | 108.7  | 103.6  | 89.9   | 88.2   | 105    | 105    | 112.2  | 111.1  |
| 97.5   | 104.1  | 95.6   | 99.1   | 90.3   | 107    | 95     | 108.7  | 97.2   |
| 104.4  | 110.2  | 103.4  | 99.5   | 96.3   | 110.6  | 95     | 106.2  | 112.5  |
| 99.1   | 95.9   | 101.3  | 96.9   | 98.3   | 104    | 106.2  | 102.6  | 113.4  |
| 110    | 109.6  | 96.7   | 99.6   | 92.2   | 101    | 108.5  | 105.9  | 110.3  |
| 118.7  | 111.6  | 129.3  | 112.9  | 115.8  | 132    | 116.6  | 122.6  | 122.8  |
| 110.2  | 118.4  | 109    | 120.5  | 100.2  | 111.2  | 114    | 119.4  | 107    |
| 142.5  | 186.3  | 189.9  | 167.7  | 175.8  | 181.4  | 242    | 272.8  | 180.9  |
| 106.5  | 105.4  | 106.1  | 101    | 89.4   | 103.5  | 91.1   | 105.7  | 113.5  |
| 108.6  | 113.7  | 107.5  | 100.9  | 107    | 113.1  | 103    | 118.1  | 111.3  |
| 109.3  | 106.7  | 104.5  | 96     | 99.3   | 106.1  | 102.6  | 110.3  | 112.2  |
| 108.5  | 105.4  | 107.3  | 101.6  | 93.9   | 102.4  | 108.8  | 105.4  | 100.5  |

|       |       |       |       |       |       |       |        |        |
|-------|-------|-------|-------|-------|-------|-------|--------|--------|
| 128.6 | 159.4 | 124.3 | 177.4 | 142   | 139.8 | 163.8 | 181.5  | 180.1  |
| 107.2 | 112.9 | 102.9 | 114.1 | 103.5 | 114.3 | 103.8 | 106.2  | 121.5  |
| 106   | 108.1 | 101.7 | 104.8 | 96.7  | 104.1 | 101.7 | 106.7  | 104.7  |
| 104.3 | 108.2 | 100.7 | 101.1 | 95.5  | 105.8 | 99.9  | 115    | 108.3  |
| 99.2  | 105.9 | 104.3 | 100.7 | 90.3  | 105.3 | 100.2 | 97.2   | 106    |
| 139.2 | 204.4 | 187.2 | 265.6 | 153.8 | 183.8 | 210.6 | 206.7  | 185.3  |
| 158.9 | 178   | 201   | 284.5 | 183.6 | 203   | 259   | 214.6  | 188.6  |
| 134   | 180.9 | 126.3 | 224.5 | 149.7 | 169.6 | 181   | 155.6  | 129.6  |
| 105.5 | 106.8 | 97.1  | 102.4 | 96.9  | 109.1 | 99.4  | 103    | 106.7  |
| 163.5 | 192.1 | 188.5 | 156.8 | 184.5 | 203.9 | 211.6 | 312.1  | 203.3  |
| 102.1 | 113.6 | 100.7 | 105.3 | 96.2  | 111.8 | 108.5 | 119.2  | 111.1  |
| 113.1 | 112.8 | 99.7  | 99.4  | 94.1  | 108.9 | 104.9 | 119.3  | 107.8  |
| 123.5 | 108   | 114.5 | 112.1 | 94.9  | 116   | 103.6 | 114.8  | 100.4  |
| 118.5 | 118.6 | 112.1 | 109.5 | 108.8 | 120.4 | 114.2 | 135.9  | 123.8  |
| 105.4 | 104.2 | 104.5 | 99.9  | 95    | 105.8 | 99.7  | 108.5  | 104.2  |
| 109.6 | 191.7 | 142.4 | 191.2 | 151.9 | 129.7 | 151   | 143.3  | 115.2  |
| 105.1 | 104.5 | 106.2 | 96.7  | 97.5  | 106.9 | 103   | 113.6  | 108.8  |
| 102   | 106.7 | 101.1 | 92.7  | 95.5  | 106.3 | 97.4  | 104.5  | 97.6   |
| 104.9 | 109.3 | 102.2 | 98.7  | 98.1  | 104.4 | 107.1 | 112.7  | 112.3  |
| 107.5 | 106.4 | 97.8  | 90.6  | 99.7  | 102   | 102.6 | 105.9  | 107.3  |
| 117.1 | 118.7 | 106.4 | 106.5 | 103.3 | 116.6 | 108.1 | 115.9  | 114.9  |
| 153.7 | 147.2 | 132.8 | 149.1 | 132.3 | 157.5 | 133.3 | 178.3  | 181.5  |
| 133.5 | 150.3 | 138.7 | 122.5 | 125   | 141.9 | 128.5 | 172.7  | 169.1  |
| 105.5 | 109.1 | 104   | 104   | 100.8 | 117.9 | 100.9 | 107.1  | 120.5  |
| 100.6 | 105.6 | 106.5 | 94.1  | 107.1 | 116.1 | 103.9 | 97.8   | 103.2  |
| 105.7 | 107   | 103   | 95.3  | 99.2  | 111.2 | 98.3  | 112    | 105.7  |
| 108.2 | 105.7 | 97    | 111.7 | 100.9 | 112.5 | 105   | 109.6  | 101.9  |
| 99.1  | 113.5 | 111.6 | 102.1 | 95.8  | 102.4 | 101.4 | 127.1  | 102.3  |
| 171.2 | 151.9 | 170.5 | 143.6 | 138.1 | 162.1 | 172.1 | 218.8  | 193.7  |
| 160.3 | 156.1 | 136.4 | 169.6 | 156.9 | 165.5 | 160.1 | 220.9  | 175.5  |
| 112.2 | 107.5 | 105.9 | 112.8 | 97.4  | 114.4 | 99.3  | 127.9  | 103.5  |
| 107.9 | 115.2 | 101.4 | 100.4 | 99.1  | 116.7 | 102.8 | 118.8  | 120.4  |
| 104.4 | 113.4 | 114.1 | 116.5 | 97.2  | 125.9 | 115.2 | 154.4  | 134.2  |
| 147.6 | 192.6 | 241.1 | 226.1 | 152.9 | 174.7 | 145.3 | 329.2  | 181.9  |
| 105.5 | 108   | 102.7 | 102.7 | 90.9  | 108.2 | 101.4 | 111.4  | 106.8  |
| 99.3  | 103.3 | 103.2 | 92.9  | 97.1  | 105.7 | 104.7 | 108.6  | 103.8  |
| 283.1 | 381.5 | 304.6 | 282   | 258.9 | 312.6 | 291.6 | 400.2  | 247.7  |
| 424.5 | 583.8 | 578.2 | 635.7 | 484.9 | 628.6 | 531.2 | 720.6  | 537.2  |
| 108.5 | 110   | 113.3 | 115.1 | 112.4 | 119.3 | 111.9 | 129    | 128.1  |
| 131.5 | 145.2 | 114.6 | 127.4 | 118.7 | 124   | 130.6 | 140.3  | 133.4  |
| 114.5 | 110.3 | 108.8 | 114.5 | 99.7  | 112   | 105.8 | 112.6  | 108.3  |
| 118.9 | 117   | 127.1 | 116.2 | 126.5 | 134.5 | 123.1 | 165.4  | 148.9  |
| 128.4 | 161.6 | 149.8 | 163.6 | 131.3 | 146.5 | 161.3 | 184.3  | 149.3  |
| 111.1 | 104.9 | 101.6 | 104   | 101.5 | 106.8 | 102.2 | 106.9  | 107.8  |
| 140.9 | 406.1 | 184.5 | 249   | 288.4 | 198.6 | 260.8 | 309.6  | 161.2  |
| 105.4 | 105.5 | 106.3 | 105.9 | 91.4  | 106.6 | 99.1  | 114.1  | 110.3  |
| 110.9 | 109.6 | 102.4 | 110.8 | 98.2  | 109.8 | 107.1 | 112.5  | 113.9  |
| 725.5 | 410   | 358.4 | 393.1 | 401.8 | 641.1 | 537.4 | 1362.2 | 1855.4 |
| 111.9 | 109.3 | 103.4 | 107.7 | 101.7 | 106.2 | 109.8 | 116.3  | 120.7  |
| 117.7 | 133.5 | 108.3 | 194.9 | 112.8 | 114.6 | 135.7 | 120.7  | 128.5  |
| 97.3  | 103.1 | 100.1 | 97.5  | 92.5  | 105.6 | 99.3  | 115.7  | 112.4  |

|       |        |        |       |        |        |       |       |       |
|-------|--------|--------|-------|--------|--------|-------|-------|-------|
| 108.3 | 109.3  | 106.7  | 200.7 | 94.9   | 115.9  | 119.8 | 115.6 | 106.7 |
| 110.7 | 109.1  | 100.9  | 127   | 94.2   | 105.5  | 107.6 | 119.7 | 117.4 |
| 113.9 | 119.9  | 112.2  | 114.4 | 95.4   | 113.2  | 108.2 | 118.6 | 116.6 |
| 167.4 | 389    | 321.9  | 357.6 | 348.4  | 330.5  | 346.6 | 368.6 | 241   |
| 103.3 | 114    | 102.6  | 98.1  | 96.5   | 105.2  | 103.8 | 100.2 | 103.4 |
| 107.5 | 111.8  | 103.1  | 100.5 | 99.1   | 113.8  | 96.5  | 116.4 | 104.8 |
| 110.2 | 115.9  | 105.6  | 100.3 | 100.5  | 115.2  | 104.6 | 127   | 103   |
| 118.4 | 122.5  | 122.5  | 121.9 | 110.4  | 115.2  | 104.7 | 155.4 | 128.2 |
| 105.7 | 109.1  | 103.1  | 98.5  | 97.5   | 103.6  | 100.8 | 106   | 103.5 |
| 156.9 | 130.3  | 136.9  | 131.2 | 142.7  | 148.7  | 162.8 | 207.8 | 195.3 |
| 106.1 | 106.7  | 102    | 113.1 | 96.7   | 107    | 105.5 | 109.8 | 100.7 |
| 453.5 | 569.1  | 598.2  | 374.1 | 471.7  | 656.7  | 608.6 | 957.6 | 644.5 |
| 138.2 | 132.5  | 144.3  | 110.1 | 119.6  | 131.1  | 121.7 | 161.1 | 122.5 |
| 737.6 | 1062.5 | 1115.8 | 760.7 | 1064.3 | 1250.8 | 873.6 | 1314  | 738.7 |
| 107.4 | 109.9  | 102.7  | 96.6  | 106.1  | 106.9  | 106.4 | 98.9  | 107.3 |
| 122.7 | 120.4  | 111.6  | 126.6 | 108    | 124.9  | 121.1 | 183.5 | 124.1 |
| 124.9 | 134.1  | 108.5  | 101.8 | 133.2  | 131.8  | 114.5 | 284.2 | 146.1 |
| 115.6 | 109.1  | 106.1  | 106.5 | 95.7   | 105.9  | 108.3 | 121.4 | 110.4 |
| 108.3 | 107.3  | 107.3  | 103.2 | 108.2  | 106.9  | 105.2 | 123.2 | 118.7 |
| 103.8 | 110.4  | 104.7  | 103.3 | 94.9   | 116.9  | 100.2 | 107.8 | 114.3 |
| 112.6 | 132.7  | 121.4  | 109   | 116.6  | 126.6  | 118.2 | 138.4 | 120.5 |
| 113.6 | 104.8  | 99.6   | 102.9 | 98.7   | 118.4  | 107.3 | 115.4 | 116.5 |
| 104.9 | 111.2  | 105.6  | 104.5 | 97.3   | 98.9   | 106.6 | 108.4 | 103.8 |
| 106.7 | 110.7  | 100.9  | 105.2 | 93.7   | 105.5  | 100.2 | 116.5 | 113.3 |
| 426   | 634.9  | 615.1  | 431.1 | 450.9  | 510.5  | 472.6 | 868.2 | 587.9 |
| 103.8 | 128.1  | 107    | 137.6 | 116.4  | 108.3  | 130.6 | 143.6 | 114.5 |
| 108.3 | 114.5  | 101.2  | 103.9 | 100.9  | 101.8  | 99.9  | 109   | 109   |
| 105.1 | 105.1  | 98.9   | 106.4 | 98.1   | 110.4  | 104.9 | 110.7 | 108.3 |
| 126   | 147.4  | 165.1  | 198.2 | 150.3  | 163.2  | 151.4 | 224.8 | 158.4 |
| 105.9 | 111.5  | 103.6  | 105.3 | 100.3  | 122.1  | 109.6 | 118.1 | 123.1 |
| 99    | 106.9  | 100.3  | 95.1  | 98     | 107    | 100.7 | 112.4 | 109.9 |
| 106.1 | 108    | 101.1  | 102.1 | 98.2   | 117.3  | 106.7 | 104.5 | 99.4  |
| 108.4 | 110.4  | 115    | 100.4 | 99.1   | 111.8  | 105.4 | 114.5 | 112.4 |
| 107.2 | 110.5  | 100.7  | 104.4 | 94.8   | 109.9  | 103.3 | 117.5 | 110   |
| 109.4 | 113.4  | 104.2  | 107.5 | 89.4   | 107.2  | 104.7 | 96.6  | 104.6 |
| 182.4 | 219    | 256.8  | 198.5 | 183    | 231.9  | 248.7 | 263.3 | 171.6 |
| 375   | 361.3  | 340.4  | 433   | 459    | 411.8  | 292.4 | 719.1 | 581.1 |
| 112.3 | 100.4  | 102.3  | 100   | 94.9   | 106.8  | 97.8  | 98.6  | 105.3 |
| 116.9 | 134    | 119.6  | 121   | 124.2  | 132.3  | 125   | 158.9 | 165.9 |
| 120   | 133.4  | 121.1  | 124.5 | 121.8  | 127.7  | 141.9 | 149.9 | 142.9 |
| 127   | 124.5  | 134.9  | 107.9 | 115.3  | 132.8  | 135.7 | 172.5 | 120.3 |
| 115   | 121.5  | 114.7  | 95    | 97     | 114.8  | 109.9 | 118   | 120.7 |
| 111.2 | 110.5  | 102.8  | 96.6  | 99.3   | 100.8  | 102.2 | 116.9 | 109   |
| 120.1 | 119.6  | 116.3  | 116.3 | 111.1  | 129.5  | 119.4 | 152.6 | 138.8 |
| 111.8 | 121.4  | 110.5  | 156.1 | 110.7  | 112.4  | 120.6 | 120.5 | 108.4 |
| 114.1 | 112.9  | 104.6  | 102.6 | 98.8   | 112.9  | 105.4 | 118.1 | 114.5 |
| 109.2 | 103.6  | 106.4  | 107.4 | 102.9  | 104.8  | 103.6 | 126.3 | 115.2 |
| 96.8  | 107.8  | 103.8  | 94.2  | 101.9  | 108    | 103   | 118.5 | 118   |
| 120.7 | 121.1  | 110.9  | 103.3 | 108.6  | 125.9  | 110.7 | 142.5 | 126.3 |
| 129.8 | 144.7  | 135.7  | 125.9 | 104.4  | 115.7  | 128.1 | 202.8 | 150.2 |
| 126.6 | 130.2  | 122.2  | 116.5 | 108.8  | 137.6  | 125.1 | 171.1 | 152.1 |

|        |        |        |        |        |        |        |        |        |
|--------|--------|--------|--------|--------|--------|--------|--------|--------|
| 736.2  | 196.1  | 215.3  | 131.4  | 267.2  | 270.9  | 155.4  | 1053.6 | 902    |
| 114.7  | 107.1  | 102.4  | 103.1  | 99.9   | 115.7  | 97.6   | 122.6  | 116.8  |
| 101.8  | 110.6  | 105.5  | 100.6  | 99.3   | 107.8  | 102.4  | 107.8  | 114.3  |
| 4186.4 | 3842.1 | 2837.4 | 2918.2 | 3229.1 | 3596.3 | 2473.4 | 8994.7 | 6807.8 |
| 119.9  | 119.2  | 129.5  | 114    | 125    | 121.9  | 114.9  | 169.1  | 187    |
| 228.7  | 192.5  | 201.2  | 149.3  | 175.5  | 207.9  | 138    | 485    | 418.8  |
| 243.6  | 266.4  | 178.4  | 258.5  | 184.9  | 197.7  | 253.5  | 416.3  | 346.7  |
| 193.3  | 321.5  | 329    | 273.2  | 267.1  | 320.9  | 283.9  | 323.2  | 242.6  |
| 115.4  | 105.9  | 105    | 100.7  | 96.6   | 112.4  | 99.1   | 112    | 111.2  |
| 110.1  | 116.7  | 119.1  | 110.5  | 102    | 117    | 102.9  | 118.7  | 123.3  |
| 131.3  | 180.6  | 220.2  | 154.5  | 168    | 216.3  | 175.9  | 182.3  | 158.9  |
| 117.7  | 117.6  | 117.5  | 99.5   | 107.3  | 123    | 119    | 119    | 108.4  |
| 701.9  | 798.6  | 715.8  | 706.8  | 662.6  | 741.9  | 546.6  | 1076.3 | 826.6  |
| 286.6  | 328.7  | 349    | 240.2  | 315.5  | 381.3  | 333.2  | 589.6  | 352.1  |
| 310.5  | 371.7  | 436.8  | 322.2  | 452    | 497.8  | 446.4  | 622.6  | 390.6  |
| 127.3  | 160.7  | 143.5  | 158    | 149.3  | 159.5  | 161.6  | 202.9  | 144.3  |
| 123.1  | 117.1  | 113.7  | 116.2  | 106.6  | 125    | 114.2  | 124.8  | 138.8  |
| 170    | 157.1  | 155.4  | 135.1  | 146.9  | 159.4  | 152    | 249.1  | 215.3  |
| 96.3   | 107.8  | 108.7  | 109.1  | 97     | 106.7  | 99.6   | 110.5  | 110.6  |
| 104.5  | 111.2  | 106.7  | 95.6   | 93.7   | 107.9  | 96.4   | 106    | 105.9  |
| 258.7  | 287.3  | 234.3  | 251    | 242.7  | 279.5  | 229.8  | 418.8  | 304.5  |
| 105.2  | 110    | 95.7   | 93     | 93.8   | 104.2  | 99.5   | 99.6   | 100.8  |
| 111.5  | 110.8  | 110.3  | 111    | 100.2  | 114.7  | 103.4  | 117.7  | 110.4  |
| 143.2  | 134    | 132.5  | 129.4  | 117.9  | 147.5  | 142.5  | 168.6  | 174.6  |
| 131.5  | 228.7  | 147.8  | 257.3  | 189.9  | 172.9  | 268.7  | 263.7  | 156.8  |
| 107.2  | 100.9  | 99     | 91.6   | 87.8   | 100.5  | 99.7   | 101    | 101.5  |
| 186.2  | 234.5  | 211.9  | 200    | 230.9  | 247.2  | 264.7  | 309.9  | 225.8  |
| 187.5  | 207    | 228.2  | 225.8  | 189.4  | 231.8  | 264.7  | 304.2  | 198.3  |
| 107.4  | 107.2  | 108.3  | 104.5  | 102.5  | 114.4  | 108.9  | 123.7  | 121.2  |
| 695.4  | 553.1  | 803.1  | 416.2  | 556    | 720.9  | 585    | 1054.6 | 682.7  |
| 294    | 883.9  | 750.7  | 696.1  | 711.7  | 803.9  | 668.9  | 871.7  | 548.2  |
| 111.4  | 110    | 100.2  | 108    | 99.8   | 113.7  | 114.8  | 119.1  | 107.7  |
| 1149.1 | 1479.9 | 1652.3 | 1128.4 | 1186.4 | 1565.5 | 1198.8 | 2116.1 | 1255.1 |
| 102.6  | 100.9  | 101.7  | 99.4   | 93.3   | 103.4  | 97.9   | 110    | 109.7  |
| 106.3  | 104.3  | 104.5  | 105.4  | 101.2  | 114.2  | 104.3  | 117.3  | 111    |
| 206.1  | 213.1  | 207.6  | 202.5  | 193.9  | 213.9  | 200    | 321    | 166.3  |
| 105.5  | 108.6  | 105.9  | 97.3   | 99.4   | 111.2  | 97.9   | 111.2  | 101    |
| 111.3  | 109.9  | 103.9  | 112.2  | 94.8   | 111.2  | 103.6  | 101.2  | 117.3  |
| 107.4  | 105.9  | 100.1  | 106.9  | 92.3   | 101.6  | 106.1  | 108.2  | 108.2  |
| 103.6  | 102.3  | 111.7  | 100.8  | 97.8   | 107.9  | 99.6   | 116.8  | 111.8  |
| 296    | 564.3  | 395.6  | 636.7  | 482.2  | 332.2  | 568.8  | 488.3  | 375.8  |
| 108.5  | 123.4  | 113.6  | 103.6  | 109.2  | 126.2  | 105.7  | 133.7  | 122.9  |
| 112.8  | 115.8  | 110.4  | 120.4  | 99.7   | 115.5  | 106.1  | 114    | 106.2  |
| 101.6  | 106    | 102.9  | 98.6   | 87.5   | 106.6  | 104.6  | 105.2  | 103    |
| 105.5  | 104.2  | 99.8   | 96.7   | 87.6   | 105.1  | 100.3  | 103.1  | 103.8  |
| 263.3  | 285    | 250.5  | 276.5  | 200.5  | 223.2  | 257.5  | 450.1  | 308.6  |
| 117.1  | 98.7   | 115    | 117.5  | 100.9  | 108.6  | 110    | 123.7  | 111.9  |
| 189.3  | 181.2  | 193    | 189.1  | 176.9  | 174.8  | 178.7  | 245.2  | 174    |
| 111    | 115.1  | 113.1  | 114.4  | 102.7  | 114.2  | 111.2  | 118.6  | 107.9  |
| 172.5  | 271    | 267.5  | 206.4  | 227.9  | 255.8  | 265.8  | 379.3  | 198.1  |
| 124.7  | 139.1  | 131.9  | 130.8  | 140.8  | 144.8  | 128.3  | 148.4  | 139.8  |



|        |        |        |        |        |        |        |        |        |
|--------|--------|--------|--------|--------|--------|--------|--------|--------|
| 103.1  | 109.8  | 96     | 102.7  | 93.6   | 104.1  | 99.1   | 109.4  | 103.5  |
| 106.6  | 103    | 105    | 97.4   | 98.1   | 107.7  | 100.4  | 106.1  | 109.9  |
| 606.1  | 981.3  | 931.3  | 522.2  | 955.4  | 1006.7 | 863.9  | 1480.2 | 876.7  |
| 812.7  | 1249.4 | 1211.2 | 1161.9 | 1213   | 1316.1 | 898.6  | 2495   | 1105.7 |
| 246.1  | 243.4  | 261.3  | 232.3  | 297.5  | 317.1  | 241.9  | 695.8  | 342.4  |
| 100.1  | 99.3   | 99.4   | 95     | 91     | 103.2  | 99.3   | 106.1  | 101.3  |
| 116.9  | 117.6  | 105.2  | 116    | 111.7  | 115.8  | 106.5  | 119    | 113.5  |
| 106.5  | 103.1  | 104    | 103.1  | 98.8   | 106.1  | 103.9  | 103.9  | 105.1  |
| 111.4  | 112.2  | 110.4  | 108.6  | 97.2   | 108.8  | 107.8  | 114.1  | 118.7  |
| 126.4  | 131.5  | 125.2  | 178.8  | 126.1  | 122.7  | 134.7  | 147.8  | 146.7  |
| 177.9  | 229.6  | 138.7  | 236.8  | 149.4  | 153.2  | 240.4  | 203    | 250.8  |
| 136.6  | 144.7  | 112.5  | 193.1  | 125.1  | 120.2  | 153.2  | 150.6  | 187.7  |
| 126.5  | 159.9  | 139.7  | 138.3  | 140    | 162.6  | 128.9  | 168.7  | 163.3  |
| 543    | 789.8  | 480.1  | 754.5  | 785.1  | 966.2  | 631.3  | 1603.3 | 1094.6 |
| 191.2  | 181.3  | 164.2  | 150.2  | 225    | 181.6  | 154    | 549    | 266.8  |
| 386.9  | 598.9  | 334.5  | 445.2  | 419.3  | 352.7  | 341.6  | 1092.7 | 698.6  |
| 101.1  | 115.6  | 103.6  | 103.1  | 104.2  | 109.6  | 107.5  | 118.5  | 104.1  |
| 106.2  | 105.4  | 102.2  | 93.2   | 90.2   | 107.9  | 97.4   | 104    | 113.1  |
| 239.1  | 201.7  | 159.9  | 156    | 181.8  | 199.9  | 195.2  | 263.8  | 292.8  |
| 374.3  | 289.2  | 280    | 341.2  | 261.2  | 346.6  | 372.3  | 369.6  | 399.1  |
| 328.6  | 213.6  | 222    | 220    | 258.3  | 254.7  | 290.1  | 313.7  | 284.2  |
| 118.8  | 143.3  | 125.6  | 119.3  | 115.7  | 119.1  | 118.3  | 135    | 133.1  |
| 128.1  | 131    | 131.6  | 129.4  | 128.8  | 144.5  | 135.9  | 155.7  | 127.6  |
| 118    | 126.7  | 112.1  | 144.4  | 105.4  | 135.2  | 126.3  | 134.3  | 133.9  |
| 109.2  | 111.9  | 110.6  | 129.4  | 96.6   | 120.5  | 107.3  | 119.2  | 124.1  |
| 99.9   | 116.3  | 106.2  | 113    | 95.6   | 107.4  | 104.3  | 109.7  | 103.2  |
| 104.2  | 107.3  | 103.4  | 98.5   | 94.8   | 110.3  | 100.7  | 117.2  | 113.7  |
| 100.2  | 109.8  | 100.4  | 100.8  | 95.4   | 108.2  | 97.5   | 107.1  | 110.1  |
| 101.3  | 112.8  | 107.8  | 102    | 93.3   | 109    | 102.8  | 127.8  | 111.9  |
| 114.7  | 114.6  | 118.3  | 109.4  | 102.7  | 115.3  | 98.1   | 105.2  | 107.2  |
| 102.7  | 107.5  | 107.7  | 93.4   | 97.8   | 103.4  | 101.8  | 100.4  | 107.9  |
| 115    | 124.4  | 114.9  | 108.5  | 117.1  | 119.5  | 113.2  | 123.7  | 125.4  |
| 233.4  | 304.4  | 303.7  | 325.2  | 358.6  | 350.8  | 386.4  | 372.7  | 404.8  |
| 190.4  | 156.5  | 148.9  | 148.8  | 142.9  | 169    | 149.8  | 231.9  | 223.1  |
| 127.5  | 124    | 116.8  | 97.3   | 109.2  | 123.1  | 113    | 145.9  | 152    |
| 247.9  | 221.3  | 176.7  | 199.8  | 188.1  | 230    | 190.1  | 325.3  | 359.6  |
| 95.9   | 104.3  | 101.5  | 94.8   | 101.4  | 101.8  | 99.9   | 98.2   | 107.3  |
| 109.8  | 109.2  | 108    | 97     | 101.5  | 110.2  | 101.7  | 117.5  | 110.3  |
| 111.1  | 106.8  | 115.6  | 98.6   | 103    | 109.6  | 108.7  | 109.7  | 114.2  |
| 1955.7 | 4169.4 | 3762   | 4284.9 | 3009.9 | 3463.3 | 3893.7 | 4235.9 | 2395.2 |
| 1950.5 | 3912.6 | 3629.1 | 3371.8 | 2854.4 | 3337.9 | 3447.6 | 3812.7 | 2364.3 |
| 3184.3 | 4421.9 | 5688.5 | 5019.4 | 3592.6 | 5045.8 | 4508.8 | 7206   | 5490.9 |
| 330.4  | 624.5  | 568.6  | 525.5  | 521.9  | 545.1  | 357.2  | 848.7  | 605    |
| 146.3  | 173.6  | 187.1  | 160.2  | 182.2  | 228.2  | 217.7  | 231.4  | 164.3  |
| 412.5  | 937.5  | 976.9  | 1014.4 | 804    | 914.8  | 935.3  | 819.3  | 456.7  |
| 187.2  | 249.4  | 250.9  | 301.4  | 192.8  | 247    | 304.7  | 425.9  | 309.9  |
| 888.1  | 1452.8 | 1557.3 | 1422.7 | 1127.3 | 1012.6 | 1363   | 2213   | 1462.1 |
| 113.6  | 124.7  | 106.7  | 110.2  | 104    | 128.2  | 118.5  | 119.5  | 119.4  |
| 418    | 711.2  | 704.2  | 689.5  | 659.2  | 669    | 772.5  | 773.7  | 488.1  |
| 112    | 107.8  | 106.4  | 99.4   | 99     | 104.7  | 106.3  | 104.1  | 104.8  |
| 112.1  | 113    | 104.2  | 104.1  | 97.4   | 111.4  | 109.6  | 130.8  | 113.7  |

|        |        |        |        |        |        |        |        |        |
|--------|--------|--------|--------|--------|--------|--------|--------|--------|
| 1181.4 | 1270.4 | 1106.7 | 1777.3 | 1205.1 | 1320.3 | 1532.8 | 1576.1 | 1396.8 |
| 107    | 120.3  | 119.9  | 122.5  | 119.8  | 135.6  | 121    | 135.9  | 119.2  |
| 1130.8 | 1602.1 | 1322.8 | 1797.8 | 1361.8 | 1207   | 1790.5 | 2027.7 | 1471.9 |
| 1226.5 | 2134.2 | 1761.6 | 2331.3 | 1703.2 | 1548.5 | 2305.6 | 1986   | 1637   |
| 1805.2 | 2273.7 | 2197.4 | 2714   | 2286.1 | 2125   | 2831.5 | 2671.4 | 2404.4 |
| 250    | 308.2  | 254.8  | 269.8  | 257    | 287.5  | 274    | 332.3  | 295.7  |
| 186.7  | 248.8  | 253.8  | 203.2  | 162.6  | 217.1  | 284    | 261.7  | 286.5  |
| 1378.9 | 1740.5 | 1665.6 | 1868.9 | 1667.3 | 1892.1 | 1866.1 | 2508.2 | 1962.5 |
| 1587.1 | 2077.5 | 1832.6 | 1961   | 1800.1 | 2082.2 | 1960.6 | 2985.8 | 2214.1 |
| 412.6  | 615.2  | 502.1  | 721.8  | 517.3  | 644.4  | 753.3  | 806.4  | 642.8  |
| 600.1  | 629.2  | 725.1  | 907.6  | 700.9  | 826.4  | 1032.7 | 1122.9 | 856.3  |
| 214.4  | 152.9  | 149    | 201.7  | 131.7  | 174.3  | 188.4  | 335.1  | 265.2  |
| 1980.2 | 1712.3 | 1358.5 | 2045.9 | 1203.8 | 1652.8 | 1779.1 | 2400.4 | 2202.8 |
| 132    | 188.9  | 155.8  | 158.4  | 120.2  | 158.9  | 131.8  | 217.8  | 170.9  |
| 120    | 111.9  | 112.5  | 124.5  | 96.9   | 111.4  | 103.3  | 122.1  | 119.3  |
| 1165.2 | 2647.4 | 1965   | 2138.4 | 2756.8 | 2526   | 2670.3 | 4785.9 | 1584.3 |
| 1088.2 | 1003.6 | 1016.1 | 1977.6 | 1043.9 | 778    | 1837.2 | 1901.8 | 1078.8 |
| 541.1  | 528.4  | 241.6  | 477    | 426.3  | 293.7  | 526.6  | 697.3  | 360    |
| 168.3  | 195.8  | 229.8  | 161.7  | 199.6  | 212.1  | 173.1  | 300.2  | 194.7  |
| 105    | 113.4  | 105.6  | 120.4  | 97.7   | 106    | 99.2   | 104.4  | 106.9  |
| 108.1  | 107.1  | 106.9  | 104    | 99.9   | 109.9  | 104.7  | 113.1  | 110.1  |
| 105.1  | 101.6  | 97.3   | 108.9  | 99.6   | 109.9  | 105.5  | 125.5  | 109.6  |
| 108.2  | 102.2  | 108.5  | 104    | 93.8   | 94.1   | 98.1   | 113.3  | 117.5  |
| 1820   | 2006.2 | 1542.7 | 1698.3 | 1808.6 | 1641.6 | 2151.1 | 2822.5 | 1530.3 |
| 153.7  | 135.3  | 133.7  | 156.1  | 151.1  | 147.2  | 151.1  | 210.5  | 147.4  |
| 299.4  | 290.8  | 218.4  | 311.6  | 246.8  | 258.7  | 304.8  | 482.1  | 348.6  |
| 421.9  | 537.3  | 415.8  | 521.5  | 538.3  | 464.7  | 594.8  | 878.8  | 471.1  |
| 99.8   | 102.3  | 105    | 105.1  | 94.5   | 106    | 104.2  | 108.1  | 114.1  |
| 2434.5 | 2269.9 | 2159.1 | 2557.5 | 2042.7 | 1914.9 | 2551.8 | 4319.9 | 3120.2 |
| 166    | 1223   | 1524.7 | 933.3  | 824.9  | 1025   | 754.3  | 797.2  | 326.3  |
| 1007   | 1270.3 | 971.6  | 1249.8 | 1285.5 | 979.7  | 1289.7 | 2343.4 | 1357.6 |
| 105    | 113.7  | 101    | 100.2  | 92.3   | 111.3  | 97.6   | 112.7  | 118.1  |
| 2465.5 | 2455.5 | 1538.3 | 2486.3 | 2223.6 | 1593.7 | 3055.3 | 3724.6 | 1602   |
| 186.6  | 197.4  | 167.5  | 193.7  | 201.3  | 177.7  | 194.4  | 323.1  | 194.5  |
| 112.7  | 119.2  | 100.8  | 111.3  | 103.6  | 119.3  | 106    | 140.5  | 128.2  |
| 107.4  | 106.7  | 100.2  | 104    | 99.1   | 106.6  | 108.2  | 109.5  | 109.9  |
| 104.7  | 106.5  | 97.4   | 104.5  | 89.2   | 99.4   | 99     | 104.8  | 101    |
| 438.6  | 644.9  | 498.6  | 641    | 569.1  | 586.7  | 668.6  | 1396.6 | 648    |
| 1184.1 | 1513.5 | 1195   | 1285.7 | 1451.9 | 1409.9 | 1302.2 | 2568.8 | 1277.5 |
| 860.2  | 1187.8 | 988.1  | 940.3  | 1036   | 1121.1 | 1194   | 1815.3 | 1213.5 |
| 179.8  | 156.7  | 151.9  | 141.5  | 143.2  | 172.2  | 167.7  | 170.4  | 166.2  |
| 841.5  | 1222.7 | 1054.5 | 1179   | 1107.5 | 1123.8 | 1139.4 | 2343   | 1011.7 |
| 1267.4 | 1478.3 | 1227.2 | 1504.5 | 1084.2 | 1441.1 | 1483.7 | 3110.2 | 2133.8 |
| 117.7  | 126.8  | 112.3  | 106.3  | 107.4  | 127.5  | 110.8  | 133.1  | 130.2  |
| 104.6  | 103.3  | 110.9  | 105.3  | 99.8   | 112    | 98.2   | 108.4  | 101.4  |
| 103.5  | 104    | 104.3  | 94.1   | 93.3   | 105.1  | 93.8   | 102.8  | 107    |
| 108.7  | 109.3  | 103.8  | 108.8  | 92.9   | 113.3  | 99.9   | 116.1  | 112.4  |
| 188.7  | 199.1  | 217.8  | 155.1  | 195.6  | 242    | 200.3  | 471.9  | 258    |
| 138.3  | 133.4  | 128.6  | 124.6  | 113.9  | 123.7  | 139.6  | 143.2  | 142.5  |
| 114.4  | 114.5  | 112.8  | 106.1  | 103.6  | 117.2  | 105.7  | 129.7  | 116.6  |
| 119.8  | 115.9  | 106.6  | 103.3  | 102.2  | 111.8  | 103.5  | 112.9  | 111.7  |

|       |        |        |        |        |        |        |        |       |
|-------|--------|--------|--------|--------|--------|--------|--------|-------|
| 112.3 | 115.6  | 102.4  | 103.9  | 109.9  | 118.2  | 106.6  | 118.5  | 122.3 |
| 114.8 | 113.7  | 104.6  | 107.8  | 106.9  | 105.5  | 107.6  | 130.6  | 117.9 |
| 103.5 | 111    | 106.8  | 95.9   | 97.9   | 111    | 105.9  | 115.5  | 115.9 |
| 107.7 | 125.5  | 110    | 118.1  | 108.8  | 103.1  | 106.8  | 111.4  | 114   |
| 149   | 247.1  | 305.4  | 203.7  | 200.1  | 217.8  | 236.7  | 322.8  | 227.2 |
| 111   | 105.4  | 103.7  | 99.4   | 97.6   | 113.2  | 100.3  | 113.7  | 114.5 |
| 147.6 | 150.5  | 170.4  | 292.2  | 147.4  | 156.2  | 190.2  | 155.6  | 153.8 |
| 184   | 259.4  | 167.6  | 203.7  | 199.6  | 171.6  | 180.8  | 169.5  | 167.4 |
| 110.2 | 119.1  | 136.7  | 113.1  | 109.9  | 121.6  | 126.3  | 147.6  | 112   |
| 160.9 | 195    | 195.2  | 208.1  | 201.9  | 199.5  | 213.5  | 212.9  | 188   |
| 146.2 | 188.8  | 163.3  | 179.9  | 170.8  | 183.5  | 195.9  | 195.9  | 190.7 |
| 114.1 | 124.1  | 111.9  | 127.6  | 115.8  | 134.8  | 128.5  | 138.7  | 126.5 |
| 200.3 | 314.7  | 234.3  | 266.5  | 266.3  | 249.3  | 251.1  | 444.4  | 259.6 |
| 102.4 | 111.7  | 107.1  | 91.5   | 88.9   | 100.8  | 103.1  | 109.3  | 102.2 |
| 116.3 | 125.9  | 130.9  | 129.8  | 118.4  | 139.1  | 115.4  | 130.5  | 129   |
| 110.3 | 116.1  | 111.4  | 110.7  | 106.5  | 114.9  | 113    | 117.9  | 113.1 |
| 150.9 | 224    | 219.8  | 266.3  | 190    | 234.7  | 259.1  | 301.5  | 237.2 |
| 127.8 | 174.9  | 182.5  | 162.2  | 158.9  | 146.8  | 179.3  | 228.6  | 146.7 |
| 109.1 | 104.1  | 103.6  | 106.6  | 93.5   | 103.6  | 100.2  | 112.4  | 98.9  |
| 102.9 | 112    | 99.4   | 103.1  | 101.3  | 106.3  | 100.9  | 110.3  | 111.6 |
| 117.5 | 139.3  | 124.6  | 121.8  | 109.6  | 134.9  | 110    | 135.3  | 136.8 |
| 115.7 | 119.1  | 104.9  | 117.7  | 99.5   | 108.1  | 113.6  | 113.3  | 109.6 |
| 107.2 | 101.3  | 95.8   | 108.3  | 89.7   | 106.3  | 99.9   | 105.8  | 112.8 |
| 105.3 | 108    | 109.1  | 97.9   | 101.7  | 113.6  | 104.8  | 116.3  | 103.3 |
| 107   | 115.7  | 108.5  | 114.8  | 98.7   | 114.9  | 103.9  | 121.4  | 110.7 |
| 99.9  | 104.6  | 102.4  | 104.3  | 96     | 99.9   | 101.6  | 110.6  | 96.6  |
| 117.1 | 110.3  | 99.2   | 102    | 100.9  | 107.4  | 100.6  | 112.2  | 106   |
| 196.2 | 215.9  | 208.1  | 259.1  | 227.5  | 212.2  | 221.8  | 442.6  | 267.4 |
| 105.8 | 110.1  | 105.4  | 93.6   | 101.8  | 122.1  | 100.6  | 106    | 107.5 |
| 736.5 | 642    | 676.6  | 483.9  | 469.7  | 595.5  | 469.5  | 876    | 634.2 |
| 127.4 | 118.7  | 122.1  | 113.3  | 119.1  | 135.1  | 130.1  | 170.6  | 140.2 |
| 110.8 | 113.8  | 120.3  | 113.2  | 98.8   | 128.9  | 100.5  | 172.4  | 164.1 |
| 247.7 | 230.2  | 256.1  | 195.2  | 209.5  | 283.6  | 181.6  | 477.5  | 359.2 |
| 121   | 124.3  | 119.8  | 110    | 107.3  | 129.6  | 114.2  | 136.3  | 133.2 |
| 98.1  | 104.2  | 102.3  | 104.2  | 95.6   | 102.9  | 96     | 106.3  | 100.1 |
| 124.5 | 141.6  | 165.2  | 123.1  | 143.4  | 155.9  | 122.8  | 211.8  | 172.9 |
| 109.1 | 110.3  | 107.6  | 122.9  | 119    | 119.4  | 106.3  | 110.6  | 111.8 |
| 107.4 | 100.7  | 101    | 99.5   | 100.4  | 102.9  | 99.2   | 105.5  | 112.7 |
| 117.1 | 197.5  | 172.3  | 156.9  | 142    | 180.9  | 170.6  | 180.4  | 149.6 |
| 156.9 | 159    | 162.9  | 182.9  | 123.6  | 168    | 171.3  | 300.3  | 192.3 |
| 137   | 135.3  | 121.1  | 143.1  | 123.1  | 125.6  | 146.3  | 154    | 142   |
| 112.4 | 121.6  | 110.2  | 120.4  | 129.3  | 122.9  | 133.5  | 140    | 136.5 |
| 973.6 | 1644.2 | 1645.6 | 1528.5 | 1571.9 | 1866.2 | 1583.5 | 2465.6 | 1649  |
| 108.1 | 114.5  | 110.9  | 108.7  | 98.1   | 118.1  | 103.8  | 126.5  | 117.1 |
| 101.5 | 99.7   | 99.2   | 98.3   | 96.9   | 106    | 103.1  | 109.1  | 103.1 |
| 96.5  | 104.7  | 108.8  | 99.9   | 92.6   | 102.7  | 99.2   | 111.1  | 99.7  |
| 107.1 | 106    | 96.9   | 106.4  | 100.6  | 113.4  | 111.8  | 111.7  | 109.4 |
| 430.6 | 464.3  | 403.9  | 495.2  | 284.8  | 448.4  | 465.6  | 474.1  | 274.6 |
| 102.8 | 125.4  | 125    | 127.3  | 121.1  | 138    | 120.1  | 155.1  | 152.1 |
| 138.1 | 123.4  | 114.8  | 101.7  | 110.1  | 120.6  | 115    | 134.4  | 140.7 |
| 106   | 112.4  | 102.6  | 105.5  | 94.8   | 107.8  | 107.8  | 115.7  | 105.7 |

|        |        |        |        |        |        |        |        |        |
|--------|--------|--------|--------|--------|--------|--------|--------|--------|
| 569.9  | 352.9  | 303.8  | 210.7  | 409    | 495.2  | 332.4  | 656.9  | 293.3  |
| 109.5  | 109.7  | 98.7   | 92.5   | 95.9   | 108.6  | 99.4   | 115.6  | 112.5  |
| 105.8  | 110.5  | 107.3  | 122.9  | 98.9   | 103.2  | 104.6  | 101.7  | 104.3  |
| 112.8  | 105.1  | 103.9  | 98.7   | 97.4   | 117.8  | 102.9  | 119    | 123.5  |
| 286.8  | 1210.1 | 1228.3 | 1198.5 | 847.5  | 786.5  | 851.2  | 536.8  | 392    |
| 540.3  | 505.4  | 580    | 387.3  | 510.7  | 599.1  | 452.8  | 787.1  | 524.5  |
| 116.3  | 130.1  | 120.1  | 121.1  | 106.5  | 107.7  | 108.9  | 134.4  | 113.5  |
| 221.1  | 375.2  | 339.4  | 205.5  | 254.2  | 315.3  | 238.5  | 319    | 233    |
| 115.4  | 107.4  | 92.8   | 115.7  | 92     | 104.1  | 107.6  | 99.9   | 102.5  |
| 101.7  | 112    | 104.7  | 117    | 97.3   | 101.3  | 101    | 102.5  | 109    |
| 635.5  | 332.6  | 354.7  | 289    | 374.5  | 433.4  | 358.1  | 956.1  | 648.4  |
| 117.7  | 122.2  | 113.7  | 103.8  | 104.2  | 114.5  | 109.8  | 132.9  | 118.4  |
| 110.3  | 109.2  | 115.2  | 104.4  | 100.8  | 117.2  | 100    | 116.3  | 114.6  |
| 193.1  | 256.3  | 247.8  | 252.5  | 227.3  | 306.6  | 251.1  | 319.3  | 207.4  |
| 122.3  | 122.3  | 103.2  | 123.2  | 106    | 124.1  | 109.9  | 126.7  | 118.9  |
| 145.2  | 200.7  | 175.7  | 180    | 167.2  | 203.3  | 235.8  | 231.5  | 179.4  |
| 110.7  | 108.6  | 112.7  | 110.3  | 98.7   | 119.5  | 103.5  | 114.1  | 108.8  |
| 153.4  | 159    | 169.3  | 136.3  | 136.2  | 133.5  | 136.8  | 254.7  | 215.4  |
| 1199.7 | 683.2  | 577.9  | 648.5  | 608.4  | 500.4  | 645    | 1187   | 1415   |
| 134    | 112.9  | 100.6  | 114.3  | 108.2  | 125    | 114.8  | 131.9  | 133.9  |
| 184.9  | 166.2  | 130.7  | 183.6  | 130.4  | 109.3  | 143.5  | 274.1  | 167.8  |
| 100.4  | 97.1   | 112.2  | 101    | 95.8   | 104.6  | 109    | 108.9  | 118.9  |
| 4211.8 | 4418.4 | 4757.6 | 4181.8 | 3261.9 | 4149.1 | 5478.8 | 8102.7 | 5664.2 |
| 109.5  | 113.2  | 113.4  | 107.8  | 97.3   | 106.3  | 97.4   | 112.8  | 112.8  |
| 104    | 115.7  | 105.6  | 100.2  | 104    | 117.5  | 103.2  | 121.7  | 116.4  |
| 112.2  | 118.1  | 105.2  | 110.5  | 106.9  | 117.6  | 112.4  | 125.3  | 115.6  |
| 120.1  | 124.7  | 128.7  | 108.7  | 104.4  | 125.2  | 107.7  | 158.7  | 126.2  |
| 114.8  | 112.8  | 109.7  | 106.5  | 92.4   | 115.5  | 102.5  | 101.7  | 111.5  |
| 105.4  | 104.7  | 100.8  | 102.3  | 90     | 111.4  | 105.7  | 108.8  | 117.2  |
| 104.4  | 120.3  | 112.3  | 115.1  | 98.4   | 115.3  | 111.8  | 129    | 106.6  |
| 149    | 183.5  | 193.5  | 186.9  | 167.7  | 181.1  | 157.1  | 229.7  | 155.1  |
| 107.7  | 108.5  | 102.6  | 101.7  | 101.8  | 103.3  | 101.8  | 104.2  | 109.3  |
| 103.6  | 116.3  | 105.4  | 107.2  | 93     | 121.9  | 114.2  | 134.6  | 108.9  |
| 107.7  | 105.3  | 103    | 102    | 92.1   | 102.9  | 105.2  | 99.9   | 115.9  |
| 144.2  | 236.6  | 233    | 173.5  | 236.3  | 209.8  | 192.4  | 274.4  | 174.1  |
| 113.6  | 119.3  | 115    | 103.1  | 109.3  | 115.7  | 113.5  | 128.6  | 113.7  |
| 117.9  | 117    | 108.9  | 100.2  | 109.9  | 130.1  | 104.7  | 110    | 119.2  |
| 117.6  | 124.9  | 109.3  | 113    | 103.4  | 125.9  | 109.6  | 136.8  | 136.4  |
| 116.2  | 117.8  | 111.1  | 107.5  | 103.7  | 114.7  | 109.3  | 118.2  | 121.6  |
| 104.2  | 106.6  | 101.2  | 96.3   | 90.1   | 108.5  | 97     | 108.4  | 110.8  |
| 124.1  | 157.5  | 178.7  | 153.7  | 153.2  | 171.2  | 168    | 160.4  | 135.8  |
| 131.7  | 136    | 134.6  | 136.2  | 123.4  | 138.1  | 140.5  | 173.2  | 164.4  |
| 107    | 109.8  | 105.2  | 113.4  | 103.3  | 117.5  | 112.7  | 110.1  | 104.1  |
| 106.9  | 120.3  | 102    | 103    | 105.9  | 111.9  | 101.7  | 110.2  | 111.2  |
| 108    | 117.6  | 103.4  | 119.5  | 105    | 104    | 101    | 114.1  | 106.7  |
| 107.7  | 142.6  | 146.8  | 118    | 122    | 134.5  | 120.1  | 108.4  | 109.7  |
| 101.2  | 108.6  | 108    | 103    | 102.8  | 105.4  | 108.2  | 100.9  | 94.5   |
| 110.6  | 106    | 100.6  | 105    | 94.6   | 107.5  | 100.7  | 108.2  | 109.1  |
| 98.7   | 113.2  | 105    | 108.9  | 94.1   | 120.1  | 105.5  | 113.7  | 116.6  |
| 173.2  | 178.3  | 194.9  | 149.1  | 146.4  | 183.2  | 147.4  | 195.1  | 165.9  |
| 103.5  | 103.4  | 100.1  | 103.7  | 108.2  | 111    | 97.7   | 112.4  | 102.2  |

|        |       |       |       |       |       |       |        |        |
|--------|-------|-------|-------|-------|-------|-------|--------|--------|
| 106.2  | 112.9 | 103.7 | 101.4 | 96.6  | 97.6  | 101   | 100.6  | 110.7  |
| 106.1  | 102.3 | 105.5 | 91.8  | 90.8  | 101.7 | 99.8  | 101.1  | 97.6   |
| 140.7  | 140   | 145.8 | 125.9 | 143.4 | 165.9 | 141.9 | 179.8  | 159.5  |
| 108.5  | 113.5 | 104   | 99.4  | 94.6  | 111.9 | 102.8 | 113.8  | 111.8  |
| 107.6  | 116.9 | 109.5 | 114.8 | 103.9 | 117.2 | 107.9 | 126.6  | 113.6  |
| 123.3  | 108.6 | 106.9 | 106.9 | 116.6 | 120.7 | 111.6 | 117.4  | 110.3  |
| 453.5  | 586.7 | 429   | 390.4 | 458.1 | 491   | 518.8 | 950.5  | 537.3  |
| 223.2  | 195.8 | 154.6 | 196.4 | 149.8 | 170.6 | 172.9 | 391.7  | 256.3  |
| 158    | 127.4 | 133.6 | 138.9 | 141.2 | 134.5 | 128.9 | 188.3  | 169.4  |
| 238.6  | 341   | 258.5 | 280   | 347.9 | 278.4 | 281.3 | 586.4  | 357.5  |
| 112.6  | 107.1 | 107.3 | 104.7 | 98.4  | 103.4 | 112.2 | 110    | 99.9   |
| 175.5  | 302.3 | 272.4 | 254.7 | 242.6 | 279.8 | 280.7 | 288.9  | 214.1  |
| 136.1  | 164.5 | 139.5 | 139.4 | 128.1 | 157.7 | 139.8 | 202.9  | 166.8  |
| 107    | 107.3 | 106.9 | 97.4  | 98.8  | 109.2 | 98.6  | 114.4  | 107    |
| 103.7  | 118.9 | 108   | 102.6 | 97.2  | 114.1 | 109.4 | 116.8  | 115.2  |
| 113.3  | 111   | 100.3 | 112.9 | 96.2  | 111.3 | 102.5 | 114    | 112.9  |
| 105.1  | 110.5 | 99    | 100.2 | 93.3  | 107.1 | 103.1 | 100.4  | 105.9  |
| 109.8  | 113.8 | 105.9 | 109.7 | 98    | 109.1 | 95.6  | 104.8  | 102.2  |
| 113.1  | 115.9 | 106.9 | 121.2 | 105.5 | 128.4 | 109.3 | 115.6  | 97.9   |
| 112    | 112.7 | 107.3 | 108.6 | 98.7  | 118.6 | 98.6  | 119.4  | 105.1  |
| 110.1  | 102.8 | 97.1  | 102.9 | 94.7  | 104.9 | 102.1 | 111.1  | 106.3  |
| 110.2  | 117.9 | 105.2 | 96.7  | 96.5  | 112.9 | 104.6 | 144.2  | 142.7  |
| 109.9  | 108.6 | 107.9 | 100.5 | 98.5  | 104.2 | 112.4 | 112.8  | 110.2  |
| 105.6  | 104.7 | 99.9  | 100.7 | 93.6  | 104.9 | 103.7 | 116.8  | 113.4  |
| 271.8  | 271.3 | 292.5 | 266.6 | 245.5 | 301.3 | 276.9 | 564.4  | 402.1  |
| 114.7  | 114.9 | 115.2 | 100.9 | 96.8  | 116.4 | 105.2 | 104.5  | 111.5  |
| 122.4  | 191.3 | 167.4 | 158.6 | 147.9 | 173.9 | 156.7 | 168.9  | 148.7  |
| 114.4  | 107.4 | 105.1 | 105.4 | 97.4  | 103.1 | 98.7  | 109.3  | 107    |
| 113.3  | 117   | 112.2 | 110.9 | 111.3 | 126.1 | 118.4 | 138.4  | 117.7  |
| 2240.9 | 361.2 | 342.5 | 288.7 | 331.4 | 449.7 | 280.9 | 1757.6 | 2705.3 |
| 105.7  | 114.8 | 109.3 | 102.1 | 96.7  | 111.4 | 110.6 | 145.8  | 114.6  |
| 572.7  | 752.3 | 679.4 | 671   | 757.8 | 743   | 762.1 | 1022.2 | 763.9  |
| 98.6   | 109.3 | 96.8  | 92.6  | 96.1  | 107.8 | 98.2  | 101.8  | 110.3  |
| 108    | 112.2 | 99.9  | 103.4 | 101.3 | 97.7  | 103.2 | 114.1  | 106.9  |
| 174.2  | 165   | 178.4 | 157.4 | 137.4 | 155.7 | 172.3 | 193.6  | 154.6  |
| 118    | 119   | 106.3 | 110.4 | 100.7 | 112.4 | 102.7 | 116    | 110    |
| 117    | 106.6 | 104.8 | 97.2  | 101.4 | 103.1 | 99.2  | 114.7  | 117.8  |
| 114.4  | 112.7 | 107.6 | 114.7 | 97.1  | 108.5 | 98.5  | 121.2  | 114.3  |
| 110.2  | 102.8 | 108.9 | 96.9  | 97.7  | 107.3 | 98.4  | 109.7  | 105.8  |
| 135.2  | 123.8 | 111.7 | 114.6 | 123.8 | 130.7 | 103   | 142.7  | 134.8  |
| 109    | 120.2 | 104   | 111.2 | 105.1 | 124.4 | 105.4 | 116.1  | 114.8  |
| 110.1  | 112.6 | 99.1  | 87.5  | 101.8 | 107.6 | 112.5 | 106.9  | 104.7  |
| 102.5  | 115.2 | 98.3  | 93    | 95.3  | 110.9 | 99    | 104.3  | 110.1  |
| 110    | 106.3 | 92.6  | 97.5  | 96.6  | 105.5 | 108.7 | 104.3  | 113.6  |
| 112.5  | 103.7 | 99.1  | 105.8 | 104.5 | 104.3 | 99.6  | 106    | 97     |
| 100.4  | 102.9 | 101.1 | 90.5  | 91    | 105.4 | 97.4  | 102    | 101.8  |
| 118.8  | 130.1 | 120.1 | 118.8 | 108.3 | 128.2 | 121.6 | 145.5  | 124.7  |
| 104.7  | 109.1 | 102   | 95.4  | 92.1  | 107.2 | 113.5 | 136.2  | 116.6  |
| 108.4  | 108.3 | 104.5 | 103   | 98.1  | 107.7 | 97.6  | 106.3  | 102.5  |
| 107    | 105.5 | 102.1 | 104.6 | 100.1 | 105.1 | 102   | 104.5  | 113    |
| 112.8  | 102   | 101.1 | 108   | 89.2  | 107.7 | 102.5 | 99.2   | 110.7  |

|       |        |        |       |       |        |       |        |       |
|-------|--------|--------|-------|-------|--------|-------|--------|-------|
| 187.7 | 151.3  | 154.3  | 138.6 | 141.8 | 161.7  | 173.2 | 194.2  | 196.5 |
| 105   | 110.5  | 105.3  | 98.2  | 96.4  | 106.1  | 100.7 | 102.6  | 103.5 |
| 119.9 | 159.7  | 129.3  | 147   | 125.3 | 129.1  | 119.7 | 159.7  | 140.3 |
| 115.3 | 104.4  | 94.3   | 91.4  | 93.3  | 105    | 113.5 | 149.4  | 129   |
| 582   | 665.1  | 716.4  | 530.1 | 575.1 | 679.3  | 615.8 | 738.5  | 901.6 |
| 171.4 | 565.6  | 360    | 356.7 | 400.9 | 258.7  | 234.6 | 206.2  | 197.4 |
| 156.4 | 152.5  | 122.9  | 115.7 | 114.3 | 141    | 118.6 | 194.7  | 160.3 |
| 167.3 | 137.5  | 147.9  | 159.7 | 140.4 | 184.6  | 151.8 | 231.5  | 192.7 |
| 107.5 | 98.2   | 99.1   | 106.3 | 91.7  | 113.3  | 104.4 | 102.3  | 106.8 |
| 174.7 | 168.1  | 164.1  | 169.8 | 157.2 | 183.9  | 148.6 | 204.4  | 174.7 |
| 109.2 | 104.6  | 100.3  | 97    | 97.5  | 108    | 108.9 | 109.8  | 104.9 |
| 108.6 | 122    | 107.9  | 105.8 | 95.5  | 105.7  | 112.5 | 125.5  | 105.7 |
| 106.3 | 108.4  | 104.6  | 103.9 | 98.6  | 111.5  | 105.5 | 106.3  | 116.2 |
| 108.3 | 101.4  | 100.1  | 103.1 | 94.7  | 110.3  | 107.2 | 106.5  | 112.7 |
| 487.4 | 583.2  | 432.2  | 519   | 559.5 | 474.2  | 394.4 | 1031.8 | 385.2 |
| 722.7 | 1017.7 | 1164.7 | 740.6 | 894.4 | 965.5  | 923.1 | 1275   | 911.2 |
| 107.6 | 110.9  | 107.6  | 108.9 | 95.6  | 113.4  | 98.9  | 117    | 105.8 |
| 117.2 | 106.7  | 99.7   | 103.3 | 102.1 | 120.5  | 117.5 | 111.3  | 108.9 |
| 136.5 | 171.2  | 155.3  | 131.3 | 167   | 177.2  | 152.2 | 218.2  | 157.2 |
| 242.6 | 247.1  | 246.9  | 237.6 | 265.7 | 306.7  | 288.6 | 409.7  | 251.5 |
| 683.7 | 829.9  | 697.5  | 566.5 | 777.9 | 742    | 670.7 | 1231.1 | 909.9 |
| 147.3 | 148.4  | 147.7  | 161.7 | 137.1 | 162.5  | 139   | 200.5  | 138.6 |
| 136.2 | 143.2  | 140.3  | 155.4 | 138.6 | 149.3  | 170.3 | 154.6  | 133.1 |
| 112.5 | 130.1  | 105.1  | 102.3 | 103.7 | 120.1  | 101.5 | 144.3  | 119.5 |
| 265.5 | 262.6  | 245.5  | 269.6 | 250.4 | 294.9  | 294.4 | 341.6  | 296   |
| 128.3 | 196.9  | 202.8  | 205.8 | 161.7 | 169.1  | 191.6 | 188.2  | 224.9 |
| 100   | 120.6  | 107.7  | 109.7 | 109.4 | 108    | 110   | 112.5  | 112.2 |
| 452.8 | 870.2  | 920.1  | 458.7 | 825.2 | 1018.3 | 685.7 | 1241.5 | 739.2 |
| 102.2 | 104    | 108.3  | 100.2 | 99.6  | 105.6  | 99.4  | 113.8  | 109.1 |
| 133.8 | 136.8  | 124.2  | 110.7 | 114.5 | 139.8  | 126.9 | 173.9  | 165   |
| 687.5 | 625.5  | 539.8  | 565.9 | 466.4 | 510.4  | 525.7 | 916.9  | 795.3 |
| 184.7 | 158.9  | 156.1  | 156.2 | 147.6 | 188.4  | 132.2 | 259.2  | 232.6 |
| 298.8 | 344.5  | 300.8  | 244.5 | 323.2 | 357.5  | 276.2 | 412.1  | 368.5 |
| 107   | 127.4  | 118.9  | 99.9  | 107.9 | 122.8  | 110.7 | 119.3  | 120.3 |
| 185.1 | 212.8  | 191.6  | 225   | 208.3 | 208.4  | 217.3 | 211.9  | 197.7 |
| 106.3 | 114.8  | 102.9  | 120.3 | 101.9 | 115    | 102.9 | 120.7  | 115.1 |
| 107.2 | 107.6  | 108.3  | 109.2 | 104.4 | 113.1  | 108.1 | 115.3  | 114.6 |
| 121.9 | 143.8  | 140.9  | 120.9 | 135.9 | 142.3  | 147.6 | 136.9  | 133.6 |
| 111.1 | 113.9  | 108.2  | 113.3 | 96.9  | 112.3  | 112.8 | 115.8  | 117.3 |
| 133.4 | 274.9  | 252    | 238.4 | 230.7 | 202.5  | 262.8 | 227.9  | 160.1 |
| 150.5 | 150.9  | 147.5  | 170.6 | 142.7 | 149.2  | 160.7 | 155.4  | 153.3 |
| 105   | 113.2  | 99     | 95.2  | 100.5 | 113.2  | 102.1 | 107.4  | 105.8 |
| 100.9 | 108.4  | 103.5  | 103.3 | 96.2  | 110.6  | 101.9 | 101.4  | 107.8 |
| 104.4 | 98.8   | 98.9   | 101.1 | 92.7  | 102.6  | 100   | 105.3  | 110.2 |
| 112.1 | 111.6  | 106.2  | 107.7 | 103.3 | 114.9  | 112.4 | 121.9  | 109   |
| 156.4 | 174.2  | 172.9  | 143   | 159.5 | 172.5  | 156.6 | 206.6  | 194.2 |
| 103   | 107.9  | 101.7  | 100.7 | 94.5  | 96.1   | 103.2 | 110.8  | 109.6 |
| 100.9 | 121.6  | 102.5  | 93    | 99.7  | 103.5  | 96.3  | 123.7  | 101.7 |
| 399.6 | 490.8  | 388.4  | 515.6 | 452.7 | 444.5  | 245.4 | 767    | 473   |
| 371.1 | 310.9  | 334.6  | 336.7 | 331.6 | 340.8  | 382.3 | 474.9  | 285.8 |
| 113.7 | 111.4  | 101.7  | 97.3  | 100.5 | 115.1  | 105.2 | 104.8  | 105   |

|        |        |        |        |        |        |        |        |        |
|--------|--------|--------|--------|--------|--------|--------|--------|--------|
| 109.9  | 124.6  | 109.8  | 106.7  | 99.8   | 115.5  | 100.5  | 111.9  | 103.9  |
| 99.6   | 107.3  | 101    | 99.7   | 92.6   | 105.5  | 99.8   | 103.3  | 103.3  |
| 105.9  | 113.6  | 109    | 95.9   | 94.1   | 105.3  | 104.7  | 113.4  | 116    |
| 119.8  | 124.1  | 110    | 133.8  | 104.1  | 141    | 117.1  | 130.1  | 128.9  |
| 105.9  | 101.7  | 100.9  | 94.5   | 96.9   | 109    | 98.1   | 103.9  | 100.4  |
| 109    | 97.1   | 108.6  | 99.4   | 102.6  | 108.1  | 107.8  | 99.2   | 104.1  |
| 168.9  | 160.9  | 144.4  | 155.7  | 146.3  | 156.3  | 158.3  | 192    | 144.6  |
| 108    | 112.8  | 100.3  | 100.6  | 97.4   | 100.4  | 102.9  | 105.8  | 106.2  |
| 167.2  | 165.7  | 137.2  | 184.8  | 136.6  | 150.5  | 145.7  | 183.1  | 152.4  |
| 103.4  | 101.4  | 101.7  | 90.6   | 97.8   | 109.3  | 105.1  | 109.9  | 105.4  |
| 149.3  | 134.6  | 121.4  | 127.1  | 116.3  | 136.4  | 146.1  | 121.9  | 125.6  |
| 1246.4 | 1224.5 | 1206.2 | 1104.8 | 1735.9 | 1713.3 | 1481.6 | 3024.1 | 1760.7 |
| 105.9  | 99.5   | 106.7  | 107.3  | 93.6   | 110.9  | 98.6   | 109.8  | 104.5  |
| 116.7  | 127.2  | 126.4  | 109.7  | 114.8  | 132.2  | 111.1  | 141.3  | 124.7  |
| 109.6  | 108.4  | 101.8  | 102.5  | 98     | 106.7  | 108.8  | 112.3  | 102.5  |
| 117.7  | 122.1  | 106.5  | 111.7  | 107.9  | 115.7  | 105    | 122.3  | 120.6  |
| 106    | 111    | 105.9  | 95.9   | 103.7  | 104.2  | 105.4  | 104.3  | 109.4  |
| 163.1  | 368.9  | 376.1  | 319.1  | 337.9  | 346.2  | 300    | 236.6  | 182    |
| 191.1  | 425.3  | 457    | 346.5  | 350.9  | 417.5  | 370.8  | 306.4  | 187.9  |
| 120.3  | 125.9  | 116.3  | 110.4  | 115    | 116.1  | 108.2  | 149.2  | 142.1  |
| 119.6  | 135.1  | 126.6  | 134.4  | 124.5  | 137.3  | 113.5  | 171.8  | 115    |
| 127.7  | 170.5  | 153.8  | 160.1  | 135.1  | 170.2  | 183.2  | 162.8  | 144.6  |
| 318.4  | 624.8  | 406    | 345.5  | 429.5  | 429.4  | 471.8  | 825    | 583.3  |
| 180.8  | 233.5  | 211.3  | 165.7  | 182.9  | 164.3  | 195.1  | 327.4  | 251.6  |
| 187.7  | 191.5  | 182.5  | 167.2  | 160.4  | 182.8  | 185.3  | 229    | 210    |
| 113.3  | 120.6  | 120.4  | 115.5  | 108.4  | 119.3  | 101.8  | 127.4  | 110    |
| 952.3  | 867.4  | 801.8  | 614.9  | 708.7  | 863.1  | 634.7  | 1609.1 | 1132.6 |
| 96     | 115    | 95.3   | 87.3   | 89.5   | 97.6   | 103.3  | 96.5   | 96.4   |
| 108.8  | 108.3  | 102.7  | 99.9   | 92.9   | 106.2  | 98.5   | 112.2  | 109.3  |
| 188.8  | 392.1  | 355.3  | 360.2  | 317.8  | 396.2  | 415.8  | 449.8  | 295.6  |
| 115    | 113.3  | 117.6  | 122.5  | 109.2  | 108.9  | 117.8  | 131.3  | 127.6  |
| 112.4  | 113    | 107.5  | 108.6  | 95.9   | 116.9  | 114.6  | 122.9  | 115.2  |
| 345.2  | 797    | 650.7  | 835.4  | 684    | 649    | 956.5  | 925.4  | 379.6  |
| 137.6  | 138.7  | 123.3  | 111.6  | 108.7  | 131.3  | 134.6  | 161.2  | 171.5  |
| 112.6  | 150.7  | 124    | 119.6  | 112.5  | 114.5  | 111.3  | 128.9  | 113.6  |
| 105.9  | 122.6  | 95.9   | 108.2  | 98.8   | 112.7  | 107.5  | 107.2  | 104    |
| 121.2  | 157.3  | 124.5  | 122.4  | 116.1  | 127.8  | 119.3  | 121.6  | 113.5  |
| 403.9  | 1468.5 | 1370   | 1130.3 | 1181.1 | 1205.7 | 1168.6 | 1138.7 | 634.5  |
| 104.2  | 106.1  | 103.3  | 94.5   | 95.9   | 105.8  | 100    | 107.7  | 106.4  |
| 106.8  | 106.7  | 95.6   | 96     | 99.9   | 102.2  | 107.9  | 103.5  | 107.2  |
| 111.7  | 109.4  | 104.3  | 115.3  | 100.5  | 117.2  | 109.2  | 114.5  | 111.9  |
| 245.1  | 567.4  | 471.7  | 398.9  | 458.1  | 323.1  | 349.5  | 301.1  | 245.8  |
| 117.8  | 127.8  | 116.4  | 110.6  | 102.3  | 117.4  | 106.2  | 138.2  | 134    |
| 225.5  | 383.7  | 381.9  | 311.6  | 305.9  | 310.1  | 345.7  | 374.1  | 275.1  |
| 111.1  | 106.2  | 108.5  | 109.1  | 94.8   | 110.6  | 110.7  | 111.9  | 111.7  |
| 116.8  | 109.4  | 99.7   | 103.5  | 96.3   | 105.9  | 97.2   | 101.3  | 112.9  |
| 107    | 110.6  | 101.5  | 99.2   | 95.7   | 102.8  | 98.3   | 110.5  | 109    |
| 104.5  | 104.9  | 98.4   | 98.3   | 93.4   | 109.1  | 97.9   | 115.2  | 104.4  |
| 110.7  | 112.7  | 107.8  | 103.6  | 100.7  | 112.9  | 105.1  | 114.1  | 116    |
| 120.5  | 124.5  | 115.3  | 114.2  | 107.8  | 126.2  | 127.3  | 124.7  | 135.2  |
| 204.2  | 265.5  | 226.8  | 232    | 219.9  | 260    | 259    | 403.5  | 366.8  |

|       |        |       |       |       |       |       |       |       |
|-------|--------|-------|-------|-------|-------|-------|-------|-------|
| 176.8 | 212.9  | 199   | 187.7 | 201   | 223.5 | 195.2 | 330.9 | 307.9 |
| 699.1 | 743.6  | 580   | 447.4 | 606.5 | 604   | 580.7 | 916.4 | 699.4 |
| 103.3 | 113.4  | 96.8  | 104.6 | 103.5 | 111.8 | 92.2  | 108.9 | 111.9 |
| 103.2 | 119.2  | 105.2 | 100.1 | 101.5 | 111.7 | 102.3 | 106.5 | 106.2 |
| 109.3 | 108.7  | 108.5 | 101.6 | 99.3  | 109.5 | 105   | 118.5 | 114.2 |
| 105.5 | 104.1  | 97.9  | 92    | 86.6  | 99    | 101.5 | 102.9 | 108.5 |
| 121.2 | 132.9  | 129.1 | 133.8 | 129.2 | 123.1 | 125.7 | 175.1 | 139.3 |
| 187.2 | 179.3  | 183.8 | 153.5 | 172.2 | 171   | 202.6 | 227.2 | 167   |
| 102.9 | 110.3  | 94.7  | 96.6  | 95    | 111.7 | 100.1 | 110.4 | 106   |
| 571   | 466.8  | 488.6 | 365.2 | 322.2 | 346.5 | 413.9 | 902.5 | 692.3 |
| 107.8 | 108.6  | 97.1  | 99.7  | 88.6  | 98.8  | 105.9 | 120.7 | 99.6  |
| 112   | 104.9  | 106.8 | 102.6 | 97.9  | 119.7 | 103.4 | 115   | 101.1 |
| 103.4 | 118.2  | 110.8 | 113.1 | 98.9  | 113.3 | 104.5 | 112.1 | 110.9 |
| 109.8 | 116    | 104.6 | 108.2 | 98.8  | 110   | 108.6 | 110.1 | 105.5 |
| 146   | 151.7  | 172.1 | 131.5 | 122.3 | 160.7 | 150.2 | 257.3 | 200.1 |
| 252.1 | 262.7  | 214.6 | 209.7 | 180.4 | 240.4 | 200.9 | 319   | 247.2 |
| 175.5 | 256.9  | 244.7 | 237.9 | 245.2 | 294.6 | 259.9 | 290.5 | 263.5 |
| 160.4 | 139.3  | 127.2 | 132.8 | 126.4 | 149.1 | 157.1 | 160.9 | 149.3 |
| 120.3 | 148.2  | 143.2 | 154.2 | 137   | 148.2 | 153.1 | 172.5 | 129.5 |
| 545   | 1073.9 | 964.8 | 781.3 | 662.9 | 849.5 | 864.3 | 1291  | 763.3 |
| 190   | 266.5  | 325.8 | 266.9 | 234.4 | 223.2 | 223.7 | 416.3 | 260.3 |
| 103.4 | 105.1  | 98.9  | 99    | 92.5  | 104.2 | 107.3 | 98.7  | 101.6 |
| 108.8 | 129    | 116.3 | 120.3 | 102.2 | 119.8 | 113.1 | 115.1 | 116.4 |
| 204.5 | 282.7  | 264.5 | 245.7 | 211.9 | 220.2 | 281   | 301.6 | 233.6 |
| 106.7 | 114.5  | 107.7 | 115.5 | 99.3  | 115.5 | 100.9 | 114   | 114.9 |
| 121   | 116.6  | 126.1 | 130.7 | 118.1 | 127.3 | 116.3 | 134.1 | 124.3 |
| 121.2 | 111    | 111.5 | 101.6 | 109.6 | 131.1 | 112.4 | 127.6 | 122.8 |
| 119.2 | 129.4  | 119.7 | 103.8 | 101.9 | 116.8 | 116.4 | 127.3 | 117.7 |
| 110   | 123.4  | 146.9 | 107.3 | 107.8 | 157.5 | 116.6 | 135.7 | 116.7 |
| 110.2 | 106.8  | 113.9 | 101.9 | 101.2 | 113.6 | 102.5 | 125.1 | 114.5 |
| 112.7 | 108.6  | 123.4 | 108.6 | 106   | 108.7 | 107.7 | 126.4 | 108.8 |
| 132.9 | 151.1  | 174.7 | 184.5 | 148.8 | 159.3 | 169.3 | 227.6 | 130.2 |
| 112.3 | 103.1  | 111.8 | 105.2 | 113.2 | 129.6 | 110.3 | 111.7 | 112.7 |
| 106.5 | 102.1  | 105.3 | 96.6  | 101.8 | 105.6 | 101.9 | 105.5 | 109.7 |
| 109.6 | 132.7  | 145.3 | 116.1 | 118.3 | 128.1 | 119.9 | 131.6 | 116.6 |
| 108.9 | 113.3  | 105.7 | 116   | 97.9  | 104.3 | 101.7 | 110.8 | 107.8 |
| 108.2 | 113.5  | 107.7 | 95.7  | 97.1  | 117.9 | 109.1 | 114.8 | 124.1 |
| 113.2 | 113.8  | 101.2 | 103.1 | 97.3  | 101.8 | 106.8 | 105   | 109   |
| 100.2 | 110.9  | 98.2  | 101.6 | 99.7  | 108.5 | 106.8 | 107.7 | 105.6 |
| 109.8 | 108.1  | 101   | 109.5 | 103.4 | 114   | 108.9 | 120.3 | 120.2 |
| 115.7 | 132.2  | 118.1 | 138.9 | 98.1  | 119.8 | 106.5 | 123.4 | 120.3 |
| 115.3 | 106.5  | 104.7 | 106.5 | 95.6  | 113.5 | 112.3 | 117.4 | 118.9 |
| 110.8 | 103.9  | 94.7  | 99.2  | 92.4  | 107.1 | 107.2 | 109.3 | 106   |
| 107.6 | 108.9  | 115.1 | 110.5 | 112   | 128.1 | 112.5 | 122.7 | 126.3 |
| 109.1 | 107.1  | 96.9  | 96.8  | 95.7  | 105.1 | 102.6 | 107.1 | 113.8 |
| 115   | 107.7  | 109.4 | 114   | 97.7  | 116.6 | 104.1 | 122   | 122.9 |
| 183   | 206.3  | 177.6 | 194.5 | 140   | 226   | 177.2 | 324.6 | 298.2 |
| 159.2 | 160.4  | 141.2 | 147.5 | 141.2 | 137.8 | 184.6 | 230.9 | 194.2 |
| 119.2 | 126    | 126.5 | 132   | 129.1 | 131.3 | 133.6 | 137.8 | 113.2 |
| 109.3 | 109.7  | 114.2 | 111.4 | 99.2  | 114.9 | 109.6 | 118   | 108.2 |
| 298   | 446.6  | 523.8 | 422.8 | 394.4 | 412   | 442.1 | 516   | 543   |



|       |        |        |        |        |        |        |        |        |
|-------|--------|--------|--------|--------|--------|--------|--------|--------|
| 224.7 | 275.1  | 218.8  | 320.2  | 249.7  | 182.6  | 195.7  | 331.9  | 256.6  |
| 424.1 | 654.7  | 456.7  | 636.8  | 403.3  | 420.2  | 554    | 768.6  | 543.7  |
| 223   | 262.3  | 243.4  | 195.8  | 214.5  | 269.1  | 216.3  | 412.5  | 287.7  |
| 102.7 | 103.5  | 103.8  | 97.4   | 90.4   | 111.4  | 102    | 120    | 112.6  |
| 116.4 | 115.1  | 101    | 107.9  | 99.9   | 110.9  | 107.1  | 116.7  | 120    |
| 104.4 | 104.4  | 115.4  | 113.6  | 94.3   | 122.8  | 118.3  | 125.3  | 123.7  |
| 110.4 | 110.5  | 104.7  | 96.4   | 98.4   | 110    | 108.8  | 107.3  | 116.8  |
| 448.6 | 570.5  | 513.5  | 371.7  | 564.5  | 590.8  | 393.1  | 890    | 533.9  |
| 107.2 | 211.2  | 169    | 106.8  | 144.1  | 116    | 166.7  | 129.5  | 116.3  |
| 114   | 108.5  | 100.8  | 103.2  | 98.6   | 112.1  | 109.3  | 99.3   | 111    |
| 107.4 | 101.8  | 98.1   | 97.8   | 95.9   | 103.8  | 96.9   | 105.8  | 110.6  |
| 111.2 | 115.4  | 101.1  | 98.7   | 100.8  | 105.1  | 105.3  | 104.6  | 104.4  |
| 113.3 | 125.2  | 111.9  | 124.5  | 104.1  | 116.7  | 107.8  | 133.9  | 131.7  |
| 106.5 | 106.1  | 99.7   | 101.1  | 89.6   | 106.9  | 101.5  | 105.3  | 106.9  |
| 101.5 | 107.4  | 101.9  | 91.9   | 96.6   | 101    | 104.2  | 107.7  | 108.4  |
| 108.7 | 103.7  | 103.1  | 97     | 92.2   | 109.7  | 103.2  | 109.7  | 107.1  |
| 108.8 | 111.2  | 108.4  | 95.7   | 99.1   | 104.6  | 100.8  | 112.7  | 118.6  |
| 114.2 | 110.4  | 95.4   | 102.1  | 101.6  | 108.1  | 105.9  | 120.3  | 113.2  |
| 98.6  | 108.6  | 100.7  | 102    | 95.3   | 115.4  | 103.5  | 105.2  | 109.1  |
| 433.7 | 713.6  | 693.5  | 738.9  | 682.2  | 738.2  | 491.9  | 1011.3 | 592    |
| 164.2 | 234.6  | 203.2  | 227    | 193.4  | 180.9  | 259.7  | 256.5  | 189.9  |
| 139.2 | 181.9  | 152.9  | 164.3  | 151.1  | 168    | 181.7  | 221.8  | 167    |
| 103.2 | 97.5   | 90.7   | 92.5   | 91.5   | 104.7  | 94.1   | 103.9  | 104.2  |
| 104.6 | 104.6  | 112.4  | 100.7  | 91.9   | 110    | 111.6  | 108.8  | 104.9  |
| 481.7 | 668.7  | 576.8  | 587.7  | 538.2  | 745.6  | 637.2  | 739.9  | 553.4  |
| 749.4 | 993    | 1170   | 1108.4 | 967    | 1281.9 | 1116.7 | 1267.6 | 968.8  |
| 114.2 | 127.3  | 122.3  | 113.1  | 117.6  | 118.2  | 120.7  | 144.7  | 141.1  |
| 126.9 | 120.9  | 123.9  | 116.1  | 105.2  | 132.6  | 109.9  | 146.7  | 131.8  |
| 107.2 | 115.7  | 96.7   | 103.3  | 96     | 108.1  | 100.2  | 111.2  | 113    |
| 110.2 | 101.2  | 103.6  | 107.8  | 99.9   | 106.8  | 100.9  | 111.2  | 112    |
| 884.4 | 884.2  | 892.7  | 964.4  | 697.6  | 890.2  | 834.2  | 1434.3 | 679.2  |
| 893   | 1315.5 | 1701.7 | 1118.8 | 1165.6 | 1013   | 1033.8 | 1865.5 | 1241.5 |
| 445.8 | 1009.4 | 1574   | 726.7  | 1048.9 | 950.1  | 922.5  | 1177.7 | 614.5  |
| 176.5 | 269    | 278.3  | 154.1  | 193.4  | 215.9  | 122.8  | 263.6  | 114.7  |
| 123.2 | 124.9  | 114.2  | 118.2  | 117.7  | 126.7  | 107.8  | 132.3  | 122.9  |
| 110.4 | 106.7  | 110.9  | 101.7  | 102.1  | 114    | 108.8  | 111.7  | 111.1  |
| 109.2 | 110.8  | 98     | 105.4  | 93.5   | 102.6  | 101.9  | 103.7  | 113.9  |
| 138.5 | 135.6  | 136.6  | 138.1  | 131.1  | 157.4  | 155.2  | 177.5  | 143.5  |
| 99.5  | 112.9  | 97.1   | 103.7  | 90     | 102.7  | 101.4  | 98.9   | 110.7  |
| 103.9 | 115.1  | 104.4  | 100.4  | 96.5   | 110.4  | 96.6   | 110.7  | 108.9  |
| 110.5 | 105.2  | 108.7  | 95     | 94.5   | 107.5  | 99.2   | 103.4  | 114.9  |
| 128.4 | 133.9  | 136.6  | 150.7  | 124.2  | 165.3  | 129.8  | 139.2  | 130.2  |
| 161.3 | 205.4  | 200.5  | 209.3  | 196.1  | 209    | 224.8  | 261.2  | 186.9  |
| 121.1 | 124.6  | 139.5  | 139.5  | 128.5  | 134.2  | 128.2  | 145.1  | 128.8  |
| 128.9 | 172.4  | 142    | 191.9  | 164.4  | 131.1  | 165.1  | 141.3  | 127.6  |
| 107   | 119.7  | 108.8  | 107.6  | 109.8  | 124.5  | 121.9  | 115.6  | 126.8  |
| 157   | 172.7  | 163.5  | 148.2  | 156.7  | 176.4  | 143    | 256.7  | 180.4  |
| 106.3 | 109.4  | 99.7   | 97.4   | 92.8   | 104.5  | 104    | 108.5  | 108    |
| 209.8 | 249.6  | 235.5  | 230.7  | 240.9  | 244.2  | 263.5  | 406.5  | 290.5  |
| 108.8 | 111    | 103.6  | 97.2   | 95.7   | 110.4  | 101.4  | 120.3  | 127.2  |
| 155.6 | 130.8  | 117.5  | 100.4  | 109    | 124.7  | 114.2  | 215.3  | 183.3  |

|       |       |       |       |       |       |       |        |       |
|-------|-------|-------|-------|-------|-------|-------|--------|-------|
| 103.5 | 106.2 | 101   | 94.9  | 92.9  | 108.4 | 98.7  | 106.4  | 106.2 |
| 184.2 | 284.1 | 255.9 | 239.7 | 270   | 247   | 284.5 | 284.3  | 150.9 |
| 129.5 | 143.1 | 137.8 | 149.2 | 131.3 | 148.6 | 131   | 165.1  | 137.2 |
| 101.6 | 118   | 110.2 | 108.6 | 95.7  | 111.4 | 105   | 113.6  | 105.6 |
| 147.4 | 161.3 | 127.1 | 177.5 | 141.9 | 138.9 | 199.6 | 166.6  | 140.7 |
| 152.9 | 130.7 | 123.5 | 209.1 | 119.1 | 138.3 | 163.2 | 175.6  | 185   |
| 201.4 | 177.2 | 182.9 | 144.7 | 149.2 | 187.2 | 159.9 | 232.7  | 314.6 |
| 112.9 | 110.2 | 105.4 | 98.6  | 98.3  | 114.9 | 107.7 | 118.8  | 120.1 |
| 121.6 | 139.1 | 125.9 | 170.3 | 111.7 | 122.2 | 165.2 | 139.3  | 115.6 |
| 104.3 | 99.7  | 106.6 | 96.7  | 101.7 | 102.7 | 98.9  | 107.3  | 113.1 |
| 113.8 | 107.7 | 100.6 | 109.2 | 100.2 | 112.7 | 108   | 118.2  | 102.7 |
| 110.5 | 130   | 126.3 | 140.7 | 132.9 | 120   | 147.4 | 133.1  | 117.2 |
| 101.1 | 107.5 | 101.2 | 95.4  | 98.4  | 101.1 | 105.2 | 115.5  | 108.9 |
| 105.8 | 109.7 | 109.6 | 105.7 | 96.1  | 111.2 | 109.2 | 119.1  | 107.5 |
| 116.5 | 118.3 | 126.6 | 123.4 | 107.4 | 122.9 | 123.6 | 120.6  | 120.8 |
| 102.3 | 108.6 | 96.3  | 98.2  | 97.3  | 106.2 | 106.7 | 99     | 114.2 |
| 110.6 | 112.3 | 98.6  | 108.8 | 96.8  | 105.1 | 107.7 | 110.6  | 111.6 |
| 107.8 | 109.6 | 108.1 | 101.5 | 94.9  | 110.8 | 97.6  | 104.5  | 101.4 |
| 111.5 | 135.7 | 123.7 | 114.4 | 121.5 | 118.9 | 124.5 | 141.4  | 119.2 |
| 110.7 | 123.1 | 129.6 | 117.1 | 108.7 | 126.4 | 115   | 125.3  | 127.1 |
| 109.5 | 117   | 106.3 | 124.3 | 101.8 | 119.6 | 106.1 | 113.9  | 124.3 |
| 110.3 | 105.9 | 105.1 | 106.8 | 91    | 121.7 | 106.5 | 116    | 95.6  |
| 106.9 | 103.9 | 107.9 | 95.9  | 98.3  | 117.3 | 104.1 | 107.4  | 109.1 |
| 103.9 | 98.2  | 104.5 | 103.9 | 100.6 | 102.7 | 100   | 108.1  | 104.1 |
| 115.1 | 100.5 | 96.6  | 106.9 | 95    | 106.6 | 117.1 | 110.9  | 115.4 |
| 111.3 | 115.9 | 110.7 | 105.5 | 96.9  | 111.5 | 103.6 | 103.9  | 108.8 |
| 108.3 | 111.5 | 121.4 | 115   | 110.4 | 117.8 | 117.8 | 126.3  | 107.5 |
| 117.1 | 110.6 | 104.9 | 110.9 | 97.9  | 115.3 | 104.4 | 112.7  | 110.7 |
| 103.8 | 98.4  | 95.8  | 99.1  | 92.7  | 106.9 | 101.6 | 107.2  | 106.8 |
| 121.4 | 114.8 | 113.9 | 104.2 | 102.6 | 119.3 | 115.3 | 118.9  | 125.4 |
| 105.1 | 115.4 | 108.6 | 97.5  | 104.6 | 104   | 108.1 | 117    | 106.9 |
| 109.4 | 113.5 | 101.6 | 95    | 99.3  | 104.5 | 100.2 | 113.3  | 110.2 |
| 101.8 | 107   | 102.7 | 91.8  | 93.4  | 101.8 | 97.2  | 102.8  | 98.1  |
| 144.8 | 135.3 | 150.8 | 145   | 141.8 | 167.2 | 164   | 166.5  | 142.7 |
| 234.5 | 437.7 | 405.1 | 314.5 | 361.2 | 430.6 | 331   | 501.2  | 331.5 |
| 108.8 | 113.9 | 106.6 | 102.2 | 93.9  | 109.1 | 99    | 105.5  | 108.2 |
| 103.9 | 106.1 | 100.7 | 99.6  | 92.8  | 107.9 | 107.7 | 116.2  | 117.3 |
| 112   | 107   | 111.3 | 105.8 | 104.2 | 115   | 107.2 | 116.9  | 109.5 |
| 106.4 | 106.4 | 98.7  | 104.3 | 92.7  | 102.9 | 106.2 | 100.8  | 109   |
| 119.1 | 116.3 | 109.6 | 112.1 | 104.4 | 117.9 | 112   | 121.1  | 120.3 |
| 110.5 | 114.9 | 108.5 | 102.5 | 103.2 | 112.9 | 112.5 | 133    | 137.3 |
| 121.4 | 126.4 | 137.5 | 121.5 | 127.1 | 150.3 | 126.5 | 150.1  | 182.4 |
| 664.6 | 755.7 | 665.1 | 566.1 | 576.4 | 827   | 591.3 | 1200.4 | 866.4 |
| 393.7 | 583.5 | 648   | 497.5 | 582.2 | 642.6 | 484.4 | 1108.3 | 702.5 |
| 147.3 | 129   | 120.7 | 136.3 | 109.2 | 136.1 | 121.4 | 167.6  | 144.1 |
| 114.1 | 116.8 | 113.5 | 115   | 114.8 | 116.7 | 109.2 | 127.4  | 112.3 |
| 151.3 | 143.1 | 145.8 | 133.6 | 135.2 | 153   | 141   | 167.7  | 153.7 |
| 97.7  | 99.6  | 110   | 95.4  | 93.4  | 105.7 | 97.5  | 111.7  | 99.9  |
| 108.5 | 106.8 | 103.5 | 93.5  | 86.9  | 97.8  | 96.3  | 97.9   | 98.7  |
| 119.4 | 136.6 | 108.4 | 137.2 | 112.5 | 118.5 | 126.1 | 155.2  | 127.3 |
| 112.8 | 105.8 | 108.5 | 110.4 | 100.8 | 114.6 | 105.5 | 125.8  | 119.5 |

|        |        |        |        |        |       |        |        |        |
|--------|--------|--------|--------|--------|-------|--------|--------|--------|
| 359.2  | 1125.1 | 942.2  | 662.6  | 854.1  | 946.2 | 742.4  | 1170.7 | 795.3  |
| 129.6  | 231.5  | 239.9  | 199.4  | 205.2  | 208   | 216.2  | 277.4  | 210.3  |
| 333.7  | 323.1  | 322.4  | 419.1  | 279    | 352.9 | 397.7  | 330.1  | 293.8  |
| 384.2  | 378.2  | 398.5  | 412.8  | 294    | 377.9 | 478.8  | 340.8  | 327    |
| 121.5  | 121.1  | 106.5  | 114.7  | 110.5  | 113.3 | 113.4  | 113.7  | 125.5  |
| 97.4   | 104.6  | 93.8   | 96.5   | 85.7   | 99.6  | 95.5   | 103.8  | 108.7  |
| 98.8   | 109.6  | 99.3   | 99.7   | 94.2   | 109.4 | 104.4  | 121.2  | 107.8  |
| 109.3  | 109.7  | 106    | 100.2  | 97     | 114.3 | 107.1  | 106.6  | 104    |
| 161.8  | 373.2  | 467.7  | 316    | 336.4  | 425.8 | 327.8  | 577.5  | 275.5  |
| 123.1  | 155.5  | 132.1  | 151    | 132.6  | 155.5 | 141.7  | 175.5  | 158.9  |
| 164.3  | 210    | 153.4  | 161.7  | 148    | 166.4 | 173.2  | 215.5  | 179.7  |
| 119.1  | 109.1  | 111.9  | 106.7  | 95.7   | 111.8 | 103.5  | 108.9  | 108.6  |
| 152    | 217.6  | 196.2  | 219.8  | 184.5  | 205.6 | 193.4  | 179.4  | 147    |
| 103.2  | 104.9  | 111.5  | 105.6  | 95.8   | 116.3 | 106.1  | 108.8  | 118.6  |
| 107.7  | 110.5  | 104.3  | 103    | 99.2   | 106.7 | 99.6   | 106.3  | 101.8  |
| 109.9  | 114.3  | 102.1  | 93.1   | 95.9   | 110.6 | 103.4  | 113.7  | 105.9  |
| 108.7  | 104.5  | 102.1  | 98.3   | 94.6   | 107.8 | 107.1  | 109.2  | 106.5  |
| 118.1  | 133.6  | 132.3  | 118.5  | 111.4  | 128.9 | 113.9  | 140.9  | 134    |
| 107.6  | 103.8  | 99.9   | 103.1  | 93.4   | 104.5 | 102.6  | 100.8  | 108.8  |
| 107.8  | 101.1  | 100.3  | 96.4   | 91.2   | 100   | 108.4  | 104.2  | 106.7  |
| 238.7  | 219.8  | 206.7  | 226.2  | 208.5  | 228.1 | 239.1  | 323    | 211.1  |
| 115.7  | 113.3  | 122.6  | 106.4  | 103.5  | 129.4 | 109.1  | 146.6  | 123.4  |
| 108    | 113.9  | 108.9  | 106    | 99.6   | 116.4 | 105    | 124.4  | 118.3  |
| 109.9  | 112.5  | 100.6  | 100.8  | 101.1  | 109.5 | 112.1  | 115.5  | 107.6  |
| 113.9  | 108.5  | 99.7   | 105.6  | 101.2  | 110   | 101    | 111.9  | 98.4   |
| 111.7  | 114.9  | 103.7  | 108.4  | 94.5   | 119.9 | 108.3  | 116.2  | 111.7  |
| 98     | 107    | 105.7  | 97     | 92.3   | 115.7 | 95.2   | 113.4  | 103.8  |
| 112.1  | 123.4  | 112.2  | 106.4  | 113.6  | 112.6 | 99.9   | 107.4  | 103.1  |
| 171.2  | 168.5  | 184.2  | 159    | 165.4  | 192.9 | 188.1  | 240.6  | 192.6  |
| 2279.6 | 1778.6 | 1798.6 | 1316.4 | 2028.3 | 2605  | 1906.4 | 3866.2 | 3496.1 |
| 299.9  | 368.3  | 439.1  | 427    | 445.5  | 495.2 | 342.9  | 534.7  | 293.2  |
| 116.2  | 112.5  | 110    | 102.9  | 104.6  | 116.5 | 106.8  | 132.9  | 125.7  |
| 117    | 115.4  | 108.2  | 105.3  | 109.9  | 111.7 | 108.4  | 116.2  | 114.8  |
| 248.3  | 357.5  | 320.7  | 269.8  | 277.7  | 286.1 | 277.5  | 452.2  | 263.7  |
| 216.1  | 259.3  | 252    | 214.8  | 173.9  | 231.2 | 266.1  | 550.3  | 354    |
| 110.9  | 107.9  | 106.3  | 89.3   | 94.9   | 110.9 | 96.4   | 116.1  | 109.1  |
| 433.1  | 562.7  | 496    | 476.3  | 477.8  | 588.6 | 582.7  | 898.2  | 689.4  |
| 106.9  | 108.6  | 112.1  | 107.8  | 100.6  | 111.9 | 106.3  | 128.7  | 116.4  |
| 121.9  | 127    | 111.5  | 107.9  | 108.5  | 110.9 | 112    | 120    | 114.5  |
| 103.8  | 100.6  | 102.8  | 92.9   | 95.1   | 109.5 | 100.3  | 108.9  | 107.8  |
| 102.4  | 106.9  | 101.8  | 96.4   | 94     | 102.6 | 94.7   | 97.3   | 99.4   |
| 99.2   | 98.2   | 95.9   | 97.9   | 92.5   | 105.8 | 95.6   | 102.5  | 100.6  |
| 244.6  | 239.6  | 193.6  | 212.4  | 209    | 213.4 | 241.2  | 276.4  | 245.3  |
| 184.3  | 207.7  | 175.5  | 167.2  | 158.9  | 185.1 | 193.7  | 248.2  | 211.9  |
| 108.5  | 109.7  | 108.4  | 107.1  | 98.6   | 110.8 | 100.6  | 115.6  | 119.3  |
| 113.5  | 103    | 97.7   | 99.1   | 95.8   | 105.4 | 102.3  | 112.3  | 107.4  |
| 116.7  | 118.1  | 112.5  | 106.2  | 120.8  | 121.8 | 118.1  | 149.1  | 123.5  |
| 104.4  | 114.5  | 98.2   | 107.7  | 94.3   | 113.6 | 108.3  | 118.7  | 113    |
| 316.4  | 267.2  | 252.5  | 235.7  | 269.7  | 345.3 | 305.5  | 638.9  | 672.5  |
| 671.4  | 866.2  | 625.3  | 1047.5 | 907.9  | 681.6 | 930.9  | 1182.8 | 703.8  |
| 107.7  | 110.3  | 113.6  | 111.5  | 96.6   | 112.9 | 116.8  | 108.4  | 119.6  |

|        |        |        |        |        |        |        |        |        |
|--------|--------|--------|--------|--------|--------|--------|--------|--------|
| 112.1  | 118.3  | 115.5  | 132.8  | 104.2  | 124.2  | 126.2  | 117.1  | 125.4  |
| 119.9  | 120    | 116.1  | 131.3  | 110.2  | 114    | 113.3  | 122.5  | 120.3  |
| 106.8  | 124.1  | 109.9  | 103.8  | 98.9   | 116.7  | 114.8  | 123.7  | 107.3  |
| 722.6  | 1702.4 | 1398.5 | 1098.7 | 1594   | 1526.1 | 1383.1 | 1924.6 | 1369.9 |
| 154    | 233.2  | 191.9  | 188.5  | 185.8  | 233.4  | 218.5  | 298.2  | 197.1  |
| 101.5  | 106.3  | 106.5  | 100.2  | 101.2  | 110.1  | 109    | 110.4  | 109    |
| 381.6  | 289.5  | 288.1  | 346.3  | 250.6  | 341.6  | 332.1  | 573    | 495    |
| 586.9  | 663.6  | 554.3  | 650.5  | 496.8  | 645.5  | 678.6  | 1039.8 | 650.1  |
| 173.2  | 173.3  | 159    | 149.1  | 154.3  | 194.9  | 168.5  | 313.2  | 203.5  |
| 1642.3 | 1814.3 | 1681.4 | 1372.6 | 1547.8 | 1700.7 | 1378.5 | 2809.9 | 1755.1 |
| 353.2  | 306.4  | 267.8  | 209.8  | 253.2  | 297.7  | 267.8  | 723.5  | 398.9  |
| 111.3  | 107.6  | 105.9  | 108.1  | 105.1  | 114.1  | 109.7  | 117.5  | 113.1  |
| 110.8  | 106.2  | 110.8  | 103.6  | 96     | 116.5  | 115.3  | 113.2  | 104.5  |
| 381.7  | 399.5  | 191.9  | 520.4  | 319.1  | 173.9  | 658.6  | 331.8  | 179.6  |
| 115.7  | 113    | 115.4  | 105.1  | 100.5  | 119.6  | 99     | 119.5  | 119    |
| 112.6  | 110.2  | 98.5   | 103.5  | 102.2  | 105.4  | 104.5  | 118.4  | 111.3  |
| 105    | 107    | 105.8  | 102.6  | 96.8   | 101.8  | 104.3  | 101.7  | 105.6  |
| 106.6  | 105.4  | 99.6   | 103.2  | 94.1   | 116    | 108.3  | 109.3  | 116.3  |
| 122    | 130.5  | 118    | 109.1  | 105.8  | 113.4  | 117.5  | 131.8  | 132.9  |
| 98.1   | 96.7   | 95.3   | 99.9   | 92.9   | 104.4  | 92.8   | 114.8  | 105.7  |
| 121.6  | 114.1  | 115.8  | 113.9  | 112    | 121.9  | 99.7   | 122.5  | 125.6  |
| 187.1  | 168.7  | 177.3  | 172.3  | 150.7  | 178.9  | 204.8  | 206.7  | 195.7  |
| 130.2  | 137.2  | 115.7  | 122.6  | 133.3  | 119.5  | 135.4  | 168.9  | 136.5  |
| 108.7  | 146.5  | 126.1  | 159    | 117.9  | 111.1  | 141.8  | 155.4  | 136.8  |
| 121.3  | 111.8  | 102.2  | 101.4  | 105.2  | 116.9  | 106    | 148.8  | 118.4  |
| 350.9  | 281.6  | 278    | 310.1  | 259.4  | 277.2  | 265.8  | 396.3  | 341.8  |
| 418.1  | 339.3  | 335.6  | 309.8  | 288.7  | 343.2  | 344.8  | 1005.3 | 888.2  |
| 428.9  | 402.6  | 613.1  | 473    | 564.7  | 654    | 549.8  | 759.7  | 433.3  |
| 97.2   | 105.7  | 99.9   | 103    | 96.6   | 106.7  | 104.5  | 116.2  | 112.6  |
| 105    | 105.6  | 110    | 101.7  | 95.8   | 106.6  | 116.4  | 112.7  | 105.5  |
| 114    | 114.1  | 108.1  | 106.4  | 103.5  | 117.9  | 108.2  | 113.8  | 104.9  |
| 109.6  | 111.5  | 112.6  | 117.2  | 99.2   | 110.8  | 102.4  | 104.2  | 112.6  |
| 380.6  | 397    | 321.5  | 587.1  | 342.3  | 278.9  | 615.2  | 558.2  | 698.4  |
| 536    | 492.3  | 460.9  | 477.3  | 476.2  | 534.1  | 692.7  | 771.1  | 589.8  |
| 118.1  | 159.1  | 148.6  | 147.8  | 155.3  | 144.4  | 146.7  | 237    | 165.5  |
| 131.8  | 144.6  | 132.9  | 132.4  | 116.1  | 140.6  | 133.5  | 172.9  | 157.4  |
| 154.2  | 152.3  | 128.6  | 154.2  | 133.4  | 143.2  | 162.6  | 232.6  | 171    |
| 108.7  | 103    | 103.8  | 102.6  | 96.3   | 100.7  | 102    | 108.8  | 114.9  |
| 109.3  | 115.4  | 103.4  | 108    | 96.5   | 111.4  | 109.2  | 110.6  | 101    |
| 98.8   | 108.9  | 102.2  | 106.5  | 90.4   | 109.9  | 100.6  | 107.8  | 103.4  |
| 161    | 227.2  | 248.3  | 193    | 172.3  | 243.3  | 187.4  | 197.4  | 140.3  |
| 145.9  | 142.3  | 139.3  | 128.8  | 143.1  | 148.3  | 172.2  | 209    | 136.7  |
| 124.6  | 151.6  | 132.4  | 111.9  | 132.7  | 146.2  | 120.2  | 169.2  | 132.3  |
| 108.8  | 114.2  | 103.8  | 107.3  | 100    | 117    | 109.9  | 131.1  | 134.4  |
| 108.5  | 111.2  | 103.7  | 100    | 93.5   | 103.7  | 113.4  | 111.7  | 115.3  |
| 117.3  | 124.2  | 121.1  | 115.6  | 117.9  | 125    | 105.1  | 130.7  | 126.6  |
| 111.9  | 117.2  | 98     | 116.1  | 107.4  | 110.4  | 118.3  | 112.4  | 110.9  |
| 301.6  | 239.2  | 254.5  | 224.3  | 255    | 250.3  | 189.4  | 264.4  | 242.6  |
| 243.8  | 408.8  | 397    | 333.8  | 492.6  | 497    | 326.8  | 555.6  | 349.7  |
| 204.3  | 195.2  | 163.3  | 174.4  | 200.7  | 203.3  | 199.7  | 293.2  | 191.2  |
| 108.5  | 106    | 98.9   | 103.1  | 98.4   | 126.7  | 103.1  | 111.5  | 104.2  |

|        |        |        |        |        |        |        |        |        |
|--------|--------|--------|--------|--------|--------|--------|--------|--------|
| 144.1  | 153.2  | 158.8  | 128.9  | 149.2  | 153.9  | 123.5  | 227.8  | 148.9  |
| 106.7  | 106.5  | 97     | 102.4  | 94.8   | 107.1  | 99.5   | 113.4  | 110.3  |
| 112.1  | 107.3  | 118.5  | 100.5  | 103    | 113    | 100.1  | 107.6  | 112.4  |
| 110.2  | 108.5  | 103.6  | 93.2   | 95.5   | 100.7  | 99     | 110.8  | 98.2   |
| 109.4  | 145.8  | 140.6  | 140.6  | 121.6  | 129.6  | 134.6  | 165.7  | 150.2  |
| 4096.3 | 4320.1 | 3572.2 | 4334.7 | 3636.2 | 3579.4 | 4237.3 | 7051.6 | 5876.6 |
| 5570.7 | 5699.4 | 4737.3 | 4588.9 | 4783.7 | 4207.9 | 4843.1 | 7054.4 | 6275.6 |
| 164.9  | 160.9  | 132.3  | 149.3  | 160.9  | 129.2  | 132.8  | 219.8  | 207.8  |
| 126.6  | 152.5  | 147.3  | 159.1  | 130.2  | 153.7  | 173    | 208.5  | 170.5  |
| 2327.6 | 4464.7 | 2922.6 | 3073.6 | 2677.1 | 2359.1 | 3144.2 | 6342.5 | 4161.1 |
| 336.4  | 654.8  | 634.3  | 566.2  | 545.3  | 544.4  | 720.1  | 597.9  | 371.5  |
| 217.6  | 158.6  | 181.1  | 158.6  | 156.8  | 147.4  | 164.5  | 276.4  | 299.4  |
| 104.7  | 110.3  | 107.2  | 107.1  | 93.4   | 110    | 101.3  | 114.4  | 117.8  |
| 132.8  | 177.1  | 145.3  | 246.8  | 167    | 129.5  | 235.8  | 153.3  | 136.4  |
| 103.6  | 184    | 147.6  | 157.1  | 137.1  | 136.9  | 132.5  | 153    | 125.8  |
| 100.4  | 103.4  | 98.9   | 97.6   | 89.4   | 100.5  | 96.8   | 113.8  | 103.4  |
| 115.5  | 120.1  | 108    | 102.9  | 100.2  | 123.4  | 105.5  | 135.1  | 120.9  |
| 324.6  | 426    | 368.6  | 472.3  | 307.2  | 280.1  | 305.8  | 652.7  | 494    |
| 124.8  | 120.5  | 127    | 114.2  | 111.5  | 119.1  | 109.2  | 129.9  | 111.7  |
| 97.3   | 111.3  | 100.7  | 98.6   | 91.8   | 104.9  | 91.8   | 111.4  | 102.2  |
| 100.9  | 107.6  | 107    | 94.1   | 93.1   | 104    | 95.5   | 113.8  | 107.3  |
| 104.8  | 115.6  | 107.9  | 96.8   | 99.4   | 102.4  | 103.6  | 113.5  | 103.4  |
| 145.2  | 247.1  | 220.8  | 260.1  | 187.2  | 184.2  | 254.8  | 183.8  | 156.2  |
| 202.1  | 482.3  | 429.4  | 541.6  | 226.2  | 315.9  | 527.1  | 335.4  | 195.7  |
| 135.7  | 209    | 164.7  | 244    | 171.6  | 161.9  | 208.3  | 168.9  | 142.9  |
| 113.3  | 120    | 109.3  | 100.7  | 102    | 121.9  | 105.2  | 119.7  | 130.7  |
| 110.4  | 109.1  | 99.4   | 93.4   | 95.8   | 104.4  | 98     | 110.7  | 110.9  |
| 101.9  | 110.3  | 98.6   | 105.7  | 89.8   | 108.7  | 103.6  | 116.4  | 108.1  |
| 105.4  | 104.5  | 101.4  | 107.8  | 99.3   | 108.5  | 100.1  | 115.8  | 118.8  |
| 97.2   | 106.1  | 92.9   | 102.2  | 94.8   | 103.5  | 101.9  | 94.5   | 103.6  |
| 110.7  | 119    | 109.8  | 108.1  | 100.5  | 117.6  | 105.6  | 123.2  | 113.2  |
| 109    | 121.2  | 107.8  | 108.6  | 97.3   | 126.3  | 120    | 128.4  | 115    |
| 109.2  | 109.1  | 102.3  | 100.9  | 97.9   | 109.3  | 101.2  | 101.6  | 117    |
| 112.2  | 108.4  | 109.6  | 108.2  | 96.6   | 107    | 99.1   | 99.2   | 114.7  |
| 110.2  | 113.4  | 101.6  | 100.3  | 103.4  | 109.1  | 108    | 110.1  | 107    |
| 1550.1 | 2596.5 | 2385.9 | 1968   | 2034.3 | 2482.7 | 2029   | 3124.3 | 2062.5 |
| 110.5  | 111.5  | 107.1  | 105.2  | 102.4  | 121    | 116.9  | 106.2  | 112.5  |
| 129.6  | 168    | 248.9  | 187.8  | 149.6  | 163.9  | 171.9  | 375.6  | 212    |
| 105.7  | 115.4  | 103.9  | 111.9  | 92.2   | 108.7  | 100.6  | 115.4  | 116.4  |
| 111.9  | 117.5  | 102.7  | 98.3   | 100.8  | 114.3  | 110.9  | 111.4  | 115.4  |
| 107.5  | 109.1  | 106.9  | 100.2  | 100.6  | 107.9  | 103.3  | 109.4  | 112.3  |
| 276.7  | 391.9  | 463.2  | 363.7  | 389.4  | 442.4  | 368.5  | 541.5  | 400.4  |
| 141.2  | 189.6  | 213.4  | 179    | 151.2  | 200.8  | 172    | 304.4  | 222    |
| 185.6  | 276.8  | 202.3  | 186.6  | 197.9  | 241.5  | 228.5  | 380.1  | 324.2  |
| 134.2  | 157.7  | 143.5  | 125.7  | 135.4  | 152    | 154.3  | 206.5  | 165.5  |
| 145.6  | 156    | 139.2  | 143.8  | 132.5  | 128    | 149.8  | 132.7  | 142.4  |
| 104.5  | 110.2  | 97.4   | 96.5   | 89.1   | 100.5  | 104.4  | 109.8  | 111.3  |
| 119.3  | 120.5  | 109.5  | 106.3  | 104.9  | 117.4  | 110.5  | 118.5  | 123.5  |
| 240.2  | 297.7  | 282.8  | 214.1  | 239    | 292.5  | 250.3  | 449.9  | 277.1  |
| 110.8  | 110.7  | 103.2  | 116.1  | 96.6   | 109.6  | 111    | 112.8  | 106.7  |
| 228    | 426    | 295.8  | 405.8  | 332.1  | 359.6  | 276    | 551.3  | 342.5  |

|       |       |       |        |       |       |        |        |        |
|-------|-------|-------|--------|-------|-------|--------|--------|--------|
| 109.2 | 109.8 | 98.2  | 107.5  | 101.7 | 116.1 | 96.7   | 107.6  | 110    |
| 107.9 | 102.7 | 105.7 | 148.9  | 95.6  | 106.6 | 117.5  | 107.2  | 98.8   |
| 108.9 | 109.3 | 105.2 | 102.1  | 93.5  | 105.9 | 100.8  | 120.5  | 116.5  |
| 108.3 | 110.2 | 104   | 102.1  | 100.7 | 107.4 | 102.7  | 113.1  | 109.8  |
| 100.9 | 109.7 | 98.1  | 104.5  | 100.8 | 110.6 | 103.7  | 106.9  | 121.2  |
| 109.4 | 113.5 | 103.7 | 102.3  | 96.8  | 116.4 | 115    | 106.7  | 123.4  |
| 106.9 | 120.6 | 108.8 | 122.5  | 108.6 | 122.8 | 107.1  | 152.8  | 116.3  |
| 126.1 | 158.4 | 127.1 | 145.4  | 138.8 | 140.8 | 140    | 184.8  | 133.7  |
| 107.6 | 109   | 114.3 | 110.5  | 99.3  | 119.2 | 107.7  | 130.2  | 117.4  |
| 97.5  | 99.7  | 107.1 | 100.8  | 92    | 106   | 100    | 103.8  | 108.7  |
| 106.2 | 138.6 | 135.8 | 163.7  | 122   | 126.8 | 149.1  | 120.8  | 114.8  |
| 115.1 | 111.5 | 104.1 | 107.8  | 99.5  | 111.3 | 109.7  | 104.9  | 105.6  |
| 115   | 119.3 | 109.8 | 111.4  | 99.2  | 108.6 | 100.6  | 114.4  | 108.4  |
| 104.7 | 108.3 | 98.6  | 97.1   | 99.8  | 109.6 | 105.2  | 107.5  | 109.4  |
| 103.5 | 114.3 | 109.5 | 102.5  | 99.7  | 102.1 | 113.8  | 111.8  | 118.2  |
| 159.8 | 229   | 181.7 | 166.8  | 163.3 | 179.4 | 170.2  | 381.6  | 211.9  |
| 198.4 | 316.2 | 301.8 | 296    | 293.7 | 245.8 | 360.4  | 498.7  | 306.3  |
| 109   | 102.5 | 100.2 | 99     | 87.4  | 103.4 | 102.6  | 100.5  | 97     |
| 194.8 | 263.5 | 253.9 | 194.5  | 199.4 | 233.1 | 213.1  | 292.5  | 248.3  |
| 109.2 | 110.7 | 109.1 | 100.3  | 109   | 117.9 | 99.9   | 114.5  | 106.8  |
| 175.4 | 137.5 | 140.7 | 130.2  | 124.2 | 149.5 | 131    | 230.1  | 191.4  |
| 104.9 | 105.6 | 98.3  | 101.3  | 90.8  | 110.8 | 107.4  | 102.5  | 105.9  |
| 188.4 | 292.2 | 292.1 | 211.2  | 257.4 | 338.9 | 269.7  | 486.2  | 326.8  |
| 134.1 | 125.2 | 138   | 124.9  | 120.9 | 138.7 | 118.2  | 131.2  | 145.3  |
| 149.7 | 200   | 167.3 | 147.7  | 196.9 | 199   | 166.5  | 491.1  | 257.2  |
| 106.1 | 109.2 | 103.8 | 106.5  | 94.6  | 109.3 | 96     | 111.5  | 104.8  |
| 129.6 | 141.4 | 163.4 | 136.9  | 134.6 | 155.2 | 150.3  | 131.1  | 130.7  |
| 117.1 | 128.2 | 117.5 | 111.4  | 108.9 | 119.7 | 124.8  | 123    | 119.9  |
| 112   | 119.6 | 106.3 | 111.8  | 102   | 108.5 | 108.5  | 117    | 102.1  |
| 112.7 | 112.1 | 109.7 | 105.9  | 100.3 | 115   | 112.7  | 111.3  | 115.9  |
| 104.3 | 101.9 | 100.9 | 101.7  | 87.8  | 111.2 | 103.3  | 101.9  | 107.1  |
| 104.4 | 112.2 | 113.3 | 100.6  | 96.3  | 111.7 | 98.5   | 108    | 110.5  |
| 123.6 | 141.9 | 134.5 | 131.5  | 133.6 | 144.1 | 133.6  | 165.6  | 153    |
| 114.9 | 109.8 | 105   | 101.4  | 89.2  | 114   | 113.4  | 116.4  | 106.8  |
| 111.3 | 110.1 | 101   | 113.8  | 100.2 | 108.6 | 109.3  | 113.4  | 100.6  |
| 113.7 | 115   | 115.8 | 97.3   | 96.2  | 116.8 | 112.1  | 120.8  | 105.8  |
| 111.6 | 115.7 | 103.7 | 115.1  | 96.9  | 104.2 | 99.9   | 122.8  | 113.9  |
| 105.5 | 110.2 | 111.2 | 101.6  | 97.2  | 107.6 | 106    | 111.1  | 102.7  |
| 106.6 | 111.1 | 106.5 | 102.7  | 100.1 | 113.9 | 107.1  | 105.4  | 108.2  |
| 162   | 392   | 361.2 | 495.4  | 349.6 | 333.9 | 487.5  | 283.5  | 280.3  |
| 109.4 | 108.3 | 108.5 | 102.6  | 99.8  | 103.5 | 100.6  | 105.8  | 104.5  |
| 127.2 | 129   | 116.3 | 119.4  | 114.2 | 126.7 | 130.4  | 147.1  | 139.3  |
| 121   | 139.2 | 117.8 | 129.9  | 114.3 | 129.8 | 127.2  | 140.4  | 115.5  |
| 579.4 | 972.4 | 676.5 | 1455.8 | 915.7 | 709.1 | 1010.6 | 1776.5 | 1700.6 |
| 100.3 | 110.8 | 103.4 | 103.7  | 88.6  | 105.1 | 95.3   | 103.6  | 102.6  |
| 111.6 | 148.2 | 112.4 | 121.9  | 119.9 | 143.9 | 121.2  | 137.4  | 128.2  |
| 109.3 | 118.2 | 123.4 | 139    | 114.4 | 128.3 | 120.1  | 146.4  | 121.8  |
| 220   | 351.6 | 270.9 | 269.6  | 256.8 | 288.4 | 311    | 285.3  | 280.4  |
| 121   | 154.8 | 142.6 | 144.3  | 132.5 | 153.8 | 148.8  | 139.3  | 146.7  |
| 104.4 | 109.8 | 101.2 | 99     | 93.2  | 107.3 | 101.3  | 105.8  | 103.8  |
| 112.9 | 126.8 | 127.7 | 108.7  | 99.8  | 130.3 | 128.5  | 130.4  | 120.6  |

|        |        |        |        |        |        |        |        |        |
|--------|--------|--------|--------|--------|--------|--------|--------|--------|
| 104.7  | 105.8  | 110.7  | 102.4  | 94.8   | 107.8  | 104.7  | 104.5  | 99.5   |
| 110.1  | 107.9  | 101    | 98.5   | 92.3   | 107.7  | 102    | 105.6  | 109.7  |
| 109.7  | 106.3  | 101.9  | 104.6  | 100.6  | 108.4  | 103.8  | 105.3  | 111.3  |
| 104    | 103.3  | 97.4   | 101.8  | 100.1  | 110.4  | 98.1   | 114.2  | 109.8  |
| 106.8  | 104.1  | 102.1  | 98     | 92.6   | 111.5  | 99.7   | 104    | 111.8  |
| 292.6  | 434.7  | 332.9  | 329.2  | 341.7  | 381.4  | 402.3  | 517    | 480.4  |
| 106.6  | 103.7  | 98.4   | 100.6  | 89.5   | 104.8  | 99.8   | 111.9  | 106.3  |
| 105.6  | 105.7  | 106.9  | 98.8   | 98.6   | 100.7  | 99.5   | 114.4  | 106.1  |
| 116.8  | 129.7  | 93.1   | 103.5  | 97     | 109.1  | 102.1  | 114.9  | 100    |
| 108.5  | 113.2  | 103.5  | 105.8  | 100.1  | 116    | 108.7  | 111.6  | 111.7  |
| 182.9  | 213    | 187.1  | 195.9  | 170.8  | 228    | 228.4  | 243.4  | 200    |
| 109.9  | 117.1  | 119.8  | 122    | 101.5  | 126.5  | 112.8  | 130    | 119.4  |
| 112.5  | 111.4  | 106.1  | 114.1  | 107.3  | 115.6  | 121.4  | 117.3  | 111.9  |
| 105.4  | 109.3  | 105.3  | 109.7  | 91.6   | 111.3  | 111.5  | 109.9  | 111    |
| 103.7  | 112.9  | 107.2  | 99.2   | 98.2   | 104.9  | 102.2  | 106    | 109.7  |
| 111.3  | 107.6  | 107.9  | 103.5  | 92.3   | 108.6  | 91.8   | 112    | 108.5  |
| 100    | 103.7  | 109.9  | 101.7  | 99.7   | 107    | 110.9  | 110    | 112.1  |
| 105.9  | 111.4  | 103.8  | 107.3  | 97.6   | 106.6  | 109.5  | 121.8  | 111    |
| 117.1  | 128    | 120.9  | 112.4  | 109.4  | 116    | 110.5  | 139.1  | 114.4  |
| 113.7  | 109.7  | 111.6  | 110.5  | 99.5   | 115.1  | 106.1  | 112.5  | 110.8  |
| 262.2  | 512.9  | 527.5  | 646.6  | 403.2  | 490.7  | 623.9  | 664.9  | 485.8  |
| 101.3  | 111.6  | 103.2  | 115.1  | 99.2   | 117.6  | 99     | 111.8  | 109.4  |
| 129.3  | 131.2  | 134.9  | 135.2  | 114.7  | 136    | 133.5  | 160.6  | 134    |
| 115.7  | 120.9  | 112.7  | 118.7  | 107.9  | 116.4  | 117.2  | 125.5  | 128.5  |
| 144.1  | 153.4  | 134.7  | 149.4  | 122.6  | 135.2  | 168.7  | 208.4  | 146.6  |
| 106.4  | 103.1  | 96.4   | 98.1   | 92.5   | 100.8  | 102.4  | 103.8  | 106.9  |
| 106.2  | 116.2  | 107.2  | 97.7   | 96.3   | 105.8  | 99.9   | 111.7  | 107    |
| 106.7  | 99.9   | 104.8  | 91.5   | 92.9   | 98.4   | 92     | 98.4   | 102.2  |
| 114.6  | 117.6  | 108    | 105.7  | 101.1  | 113.3  | 108.2  | 115.4  | 110.7  |
| 103.6  | 104.5  | 96.7   | 98.4   | 98.2   | 112.3  | 97     | 104.8  | 106.2  |
| 97.9   | 101    | 101.6  | 103.2  | 89.9   | 99.9   | 97.3   | 109.1  | 107    |
| 110.7  | 111.7  | 103.7  | 99.4   | 100.2  | 105.8  | 106.6  | 110.6  | 109    |
| 111.8  | 111.9  | 102.3  | 100.9  | 92.3   | 108.3  | 102.2  | 101.1  | 102    |
| 158.1  | 209.2  | 183.2  | 160.9  | 161.3  | 200.2  | 181.3  | 305.8  | 213.1  |
| 112.2  | 109.5  | 105    | 107.1  | 94.9   | 115.9  | 105.7  | 114    | 103.7  |
| 275    | 283.7  | 233.6  | 298.4  | 252.6  | 252.9  | 322.7  | 297.9  | 266.6  |
| 1385.8 | 1897.1 | 1640.4 | 1884.3 | 1565.4 | 1918.1 | 2432.5 | 2490.8 | 2462.2 |
| 108    | 132    | 132.1  | 103.9  | 147.6  | 143.6  | 140.5  | 183.6  | 114.1  |
| 110.2  | 107.2  | 99.9   | 112    | 95.7   | 118.5  | 102.9  | 127.6  | 112    |
| 108.7  | 115.9  | 106.8  | 111.9  | 98.7   | 117.7  | 101.3  | 109.9  | 126.8  |
| 118.7  | 196.6  | 178.3  | 228    | 155.4  | 185.9  | 234.6  | 210    | 172.4  |
| 126.4  | 171.4  | 131.5  | 172    | 129    | 140.9  | 153.4  | 134.7  | 132.3  |
| 100.3  | 108.3  | 100.5  | 107.6  | 93.7   | 114.5  | 100.7  | 109    | 105.4  |
| 150    | 274.4  | 213.4  | 275.9  | 182.7  | 224    | 251.2  | 280.6  | 194    |
| 1177.2 | 2242.4 | 2337.1 | 1258.9 | 2085.6 | 2098.7 | 1581   | 2483.9 | 1004.9 |
| 122.3  | 135.1  | 137.2  | 134.4  | 124.3  | 134.1  | 122.5  | 151.7  | 128.7  |
| 116.1  | 120.4  | 119.6  | 108.4  | 99.8   | 122    | 111.8  | 129.8  | 121.8  |
| 125.5  | 163.3  | 155    | 128.3  | 121.4  | 147.4  | 123.7  | 150.4  | 124    |
| 108.4  | 108.6  | 109.3  | 111.2  | 94.1   | 119.4  | 112.2  | 106.9  | 111.1  |
| 101.5  | 105.4  | 95.1   | 94     | 96.9   | 108.3  | 106.1  | 110.5  | 109    |
| 136.1  | 143.7  | 133.5  | 126.1  | 118.6  | 131.7  | 127.6  | 177.1  | 229.4  |

|       |       |       |       |       |       |       |        |       |
|-------|-------|-------|-------|-------|-------|-------|--------|-------|
| 106.2 | 109.7 | 100   | 95.2  | 102.4 | 103.9 | 103.3 | 104.4  | 107.7 |
| 109.6 | 114.8 | 93.1  | 100.2 | 91.5  | 102.2 | 101.1 | 102    | 117.3 |
| 102.8 | 113.1 | 95.1  | 113.7 | 99.3  | 107.7 | 107.3 | 109    | 112.2 |
| 106.7 | 128.7 | 123.1 | 105.7 | 119.8 | 132.1 | 113.9 | 131.7  | 114.5 |
| 329.1 | 494.6 | 535.6 | 416.2 | 398.1 | 444.7 | 230.9 | 569.6  | 421.9 |
| 128.3 | 126.6 | 108.3 | 119.6 | 109.9 | 126.6 | 116.2 | 150.4  | 134.2 |
| 228.9 | 312.2 | 274.6 | 265   | 228.3 | 261   | 299.4 | 537    | 400.2 |
| 112   | 109.2 | 101.4 | 97.5  | 103.6 | 99.6  | 104.2 | 101    | 108.9 |
| 106.1 | 113.1 | 106.5 | 99.8  | 98.9  | 101.9 | 102.8 | 107.4  | 111.5 |
| 112.7 | 123.6 | 106.4 | 116   | 108.3 | 109.4 | 107.5 | 123.7  | 112.6 |
| 105.5 | 111.4 | 111.8 | 101.5 | 97.5  | 111.2 | 106   | 110.9  | 111.4 |
| 122.7 | 137.5 | 120.9 | 126.7 | 110.7 | 127.7 | 125.6 | 137.8  | 138.7 |
| 99.2  | 106.9 | 103.4 | 99    | 93.6  | 105.8 | 99.8  | 105.6  | 105.6 |
| 105.2 | 107.6 | 101.5 | 103.3 | 94.5  | 116.3 | 101.9 | 109.4  | 107.2 |
| 308.1 | 273.7 | 253   | 277.4 | 265   | 314.9 | 295.1 | 306.5  | 272.9 |
| 100.8 | 119.4 | 98.9  | 105.5 | 97.4  | 107   | 106   | 122.7  | 123.7 |
| 180.6 | 195.9 | 208.2 | 168   | 185.2 | 201   | 195.2 | 264.6  | 199.8 |
| 121.7 | 125.2 | 109.1 | 110.4 | 108.2 | 131.2 | 106.8 | 166.8  | 124   |
| 106.8 | 111.1 | 101.8 | 94.7  | 93.5  | 110.7 | 106.1 | 120.1  | 109.3 |
| 120.3 | 114.6 | 99.1  | 106.7 | 95.7  | 113.4 | 98.8  | 114.5  | 124   |
| 174.5 | 158.4 | 160.9 | 138.8 | 157.4 | 172.9 | 135.6 | 284.8  | 289.9 |
| 104.7 | 105.3 | 99.6  | 99.5  | 97.2  | 104.5 | 99.7  | 120.2  | 104   |
| 100.2 | 107.4 | 103   | 93.3  | 93    | 107.8 | 97.4  | 116.4  | 106.4 |
| 127.4 | 123.5 | 112.1 | 106.3 | 111.5 | 121.1 | 124.6 | 148.2  | 146.4 |
| 104.7 | 104.4 | 101.6 | 100.7 | 94.1  | 108.6 | 101.4 | 103.3  | 104.1 |
| 129.3 | 120.2 | 108.5 | 114.4 | 111.4 | 118.8 | 102.7 | 142.6  | 155.7 |
| 106.5 | 115.5 | 103.8 | 110.3 | 99.5  | 111.5 | 105.3 | 105.9  | 115.1 |
| 258.8 | 357.3 | 345   | 356.8 | 360.6 | 324.7 | 395.5 | 452.2  | 355.9 |
| 106.9 | 105.8 | 106.7 | 108.7 | 100.4 | 113   | 101.5 | 123    | 120   |
| 112.3 | 109.2 | 101.2 | 97.5  | 98.7  | 106.2 | 106.7 | 108.7  | 116.5 |
| 123.8 | 136.7 | 141.9 | 150.2 | 129.9 | 134.2 | 134.8 | 188.6  | 147.9 |
| 122.4 | 203   | 193.9 | 159.6 | 210.9 | 188.4 | 146.8 | 173.3  | 134.6 |
| 104.2 | 111   | 104.9 | 109.3 | 97.3  | 107.9 | 101.8 | 120    | 113.9 |
| 178.3 | 356.2 | 354.6 | 264.6 | 290.8 | 314.5 | 303.2 | 435.7  | 314.8 |
| 118.3 | 108.4 | 108   | 102.4 | 96.5  | 115.5 | 100.6 | 108.8  | 112.3 |
| 150.8 | 242.6 | 242.2 | 186.4 | 200.7 | 274.3 | 192.4 | 334.6  | 258.1 |
| 115.2 | 114   | 118.5 | 98.5  | 101.4 | 118.5 | 104.4 | 124.5  | 124.5 |
| 184.7 | 208.2 | 203.5 | 160.2 | 234.3 | 219.5 | 163   | 319    | 258.1 |
| 146.3 | 212.8 | 195.2 | 189.1 | 164.4 | 156.7 | 189.3 | 167.7  | 158   |
| 113.7 | 109.5 | 105.4 | 103   | 100.3 | 114   | 103   | 131    | 111.7 |
| 167.7 | 205.9 | 168.1 | 191.9 | 244.4 | 232.1 | 201   | 487.9  | 324   |
| 99.8  | 102.1 | 101.6 | 96.6  | 96.6  | 107.9 | 106.3 | 100.3  | 109.8 |
| 115.1 | 115.9 | 101.2 | 105.2 | 93.1  | 107.1 | 98.3  | 109.8  | 109.5 |
| 108.1 | 111.2 | 102.5 | 93    | 93.7  | 110.2 | 101.9 | 114.9  | 99.6  |
| 132.8 | 162.7 | 125.5 | 148.6 | 137.5 | 152.8 | 149.5 | 155    | 155.6 |
| 103.5 | 104.8 | 103.7 | 105.1 | 90.5  | 103.3 | 104.2 | 103.5  | 108.4 |
| 103   | 107.6 | 102.3 | 103.3 | 93.5  | 107.1 | 102.9 | 106.5  | 104   |
| 537   | 704.4 | 719.9 | 541   | 650.3 | 677.9 | 580   | 1153.8 | 781.5 |
| 111.7 | 108.9 | 105.6 | 98.3  | 94.6  | 108.3 | 100   | 105.5  | 103.5 |
| 129.9 | 171.2 | 173   | 174.4 | 178.5 | 158.9 | 160.2 | 243.5  | 176.3 |
| 371.9 | 473.7 | 487.4 | 307.6 | 411.9 | 535.1 | 401.4 | 639.1  | 462.6 |



|        |        |        |        |        |        |       |        |        |
|--------|--------|--------|--------|--------|--------|-------|--------|--------|
| 128.3  | 143.7  | 146.5  | 134.4  | 121.4  | 130.9  | 136.1 | 174.8  | 156.2  |
| 244.1  | 262.8  | 264.8  | 224.8  | 214.9  | 257.1  | 217   | 273.6  | 214.4  |
| 374.2  | 407.4  | 428.2  | 508    | 354.8  | 374.8  | 354.5 | 1035.6 | 656.6  |
| 106.7  | 118.6  | 116.3  | 104.1  | 103.4  | 109.3  | 101.7 | 115.7  | 108.5  |
| 135.7  | 152.5  | 144.9  | 112.1  | 144.5  | 162.5  | 128.5 | 208.8  | 191    |
| 130.7  | 154.2  | 129.1  | 123.1  | 139.6  | 151.8  | 150.7 | 260.6  | 211.2  |
| 110.6  | 109.2  | 105.9  | 100.1  | 102.1  | 110.9  | 102.4 | 110.7  | 115.6  |
| 122.9  | 178.8  | 182.5  | 166.7  | 137.7  | 170.6  | 175   | 215    | 166.8  |
| 103.3  | 120.3  | 100.4  | 92.9   | 88.6   | 105.2  | 96.5  | 112.6  | 98.2   |
| 112.3  | 116.3  | 101.6  | 100.4  | 95.7   | 115.1  | 104.8 | 112.6  | 112.5  |
| 1168.2 | 1869.3 | 1609.4 | 1724.9 | 1083.7 | 1297.8 | 1555  | 1930.9 | 1607.2 |
| 112.6  | 114.9  | 115.8  | 120.1  | 102.1  | 121.8  | 106.4 | 127.2  | 119.8  |
| 108.5  | 105.4  | 103.4  | 93.4   | 98.2   | 109    | 104.8 | 105.6  | 106.4  |
| 110.5  | 106.4  | 101.2  | 108.3  | 92.6   | 108.2  | 100.7 | 109.5  | 120.2  |
| 107.5  | 112.6  | 108.6  | 97.4   | 90.1   | 109.4  | 102.1 | 108.6  | 107.4  |
| 131.3  | 148.1  | 152.9  | 188.4  | 129.8  | 123.5  | 158.9 | 178.1  | 156.2  |
| 102.5  | 119.8  | 99     | 98.3   | 102.7  | 108.6  | 113.6 | 112.3  | 112.3  |
| 107.2  | 114.3  | 102.6  | 112.6  | 91.9   | 114.5  | 114.5 | 125.4  | 113.2  |
| 186    | 217.4  | 262.5  | 229.1  | 167.3  | 212.2  | 186.9 | 315.4  | 259.8  |
| 118.1  | 106.7  | 99.5   | 100.6  | 100.9  | 105.2  | 107   | 112.4  | 108.9  |
| 128.2  | 166.7  | 135.9  | 113.1  | 130.3  | 129.5  | 124.4 | 160.9  | 117.4  |
| 99.8   | 118.2  | 107.7  | 112.1  | 100.8  | 112.4  | 106.5 | 111.3  | 112.2  |
| 184.3  | 300.5  | 310.4  | 267.8  | 244.2  | 274.8  | 266.9 | 376.8  | 324.9  |
| 178.9  | 282    | 264.1  | 236.1  | 229.2  | 272.3  | 249.7 | 305.4  | 253.3  |
| 107.5  | 106.2  | 101.1  | 102.9  | 92.3   | 104.6  | 106.4 | 106.8  | 115.7  |
| 123.7  | 131.4  | 122.5  | 126.8  | 132    | 125    | 130.5 | 161.1  | 130.4  |
| 103.9  | 101    | 91.1   | 100    | 91     | 104    | 101.1 | 101.6  | 112.5  |
| 108    | 111.5  | 99.2   | 96.9   | 104.7  | 114    | 106.7 | 112.1  | 114.1  |
| 135.2  | 168.6  | 162.9  | 137.7  | 144    | 181    | 165.8 | 239.9  | 230    |
| 203.8  | 432    | 428.8  | 373.7  | 402.8  | 335.5  | 351.4 | 525.7  | 277    |
| 110.2  | 118.2  | 108.9  | 120.3  | 111.4  | 120.4  | 101.6 | 127.2  | 118.9  |
| 148.5  | 211.4  | 203.3  | 231.3  | 211.5  | 225.5  | 254.5 | 330.4  | 269.9  |
| 107.3  | 121    | 105    | 104.8  | 98.4   | 120.7  | 108.4 | 124.1  | 117.3  |
| 328.3  | 430.7  | 416.1  | 343.5  | 315.8  | 453.7  | 268   | 768    | 799.8  |
| 133.6  | 168    | 170.8  | 159.4  | 145.5  | 187.4  | 158.8 | 266.1  | 219.5  |
| 132.5  | 144.9  | 144    | 115.8  | 126.2  | 148.5  | 135.7 | 156.4  | 147.9  |
| 112.4  | 148.9  | 129.9  | 129.7  | 120.6  | 128.3  | 140.1 | 155.1  | 135.8  |
| 101.7  | 113    | 107.8  | 100.7  | 99.4   | 111.3  | 110.1 | 110.2  | 110    |
| 227    | 373.6  | 330.3  | 397.3  | 298.9  | 297.9  | 335.8 | 423.1  | 309.8  |
| 206.3  | 240    | 262.8  | 234.9  | 201.2  | 208    | 158.3 | 358.5  | 259.7  |
| 110.4  | 108.7  | 102.7  | 106.1  | 107    | 112.4  | 118.5 | 116.7  | 106.3  |
| 282.1  | 311.7  | 341.5  | 300.7  | 298.9  | 387.1  | 420.1 | 559    | 508    |
| 102.1  | 103    | 102.5  | 96.1   | 92.1   | 101.8  | 103   | 104.3  | 99.7   |
| 110.7  | 112.6  | 113.7  | 101    | 102.3  | 116.4  | 111.4 | 142.2  | 124.4  |
| 124.1  | 121.4  | 109.4  | 104.3  | 111.9  | 123.3  | 131.4 | 187.2  | 186.5  |
| 111    | 124.8  | 121.2  | 131.3  | 97.5   | 130.5  | 108.3 | 109.8  | 111.5  |
| 252.8  | 267.7  | 258.2  | 249.5  | 221    | 273.1  | 259.5 | 492.8  | 390    |
| 117.4  | 127.8  | 121    | 109.5  | 116.5  | 132.8  | 113.9 | 131.7  | 121.4  |
| 123.7  | 158.7  | 119.9  | 122.7  | 135.7  | 133.4  | 133.7 | 195.2  | 132.4  |
| 111.4  | 169.2  | 130.6  | 123.6  | 132.9  | 151.2  | 120.6 | 193    | 131.3  |
| 106.5  | 118    | 101.4  | 97.4   | 88.9   | 112.4  | 100.9 | 111.2  | 115.1  |

|        |        |        |        |        |        |        |        |        |
|--------|--------|--------|--------|--------|--------|--------|--------|--------|
| 178.4  | 167.9  | 158.4  | 153.4  | 152.9  | 149.2  | 155.4  | 224.5  | 182.1  |
| 123.6  | 135.3  | 137.4  | 131.2  | 114.7  | 136.4  | 129.8  | 159.3  | 175.9  |
| 241.9  | 192.7  | 201.7  | 177.2  | 161.2  | 196    | 228.3  | 337    | 260.3  |
| 100    | 110.9  | 102.6  | 105.3  | 96.6   | 105.5  | 106.9  | 110.4  | 102.4  |
| 173.5  | 272.2  | 303.8  | 230.3  | 227.4  | 267.2  | 256.4  | 284.7  | 182.4  |
| 148.7  | 159    | 134.5  | 151.5  | 109.7  | 128.9  | 140.2  | 163.1  | 150.7  |
| 275.1  | 408.3  | 360.8  | 345.3  | 349    | 398.5  | 350.4  | 503.6  | 270.3  |
| 104.1  | 102.6  | 102.2  | 97.9   | 91.8   | 101.5  | 99     | 98.3   | 114.2  |
| 250.7  | 247    | 227.1  | 178.3  | 234.8  | 242.7  | 231.8  | 362.4  | 302.9  |
| 342.7  | 457.2  | 327.3  | 298.9  | 329.5  | 433.9  | 338.1  | 643.3  | 444.2  |
| 115.8  | 128.6  | 111.8  | 131.9  | 112.2  | 130.7  | 120.1  | 124.3  | 120.1  |
| 109.4  | 112.9  | 97.6   | 113.6  | 98.4   | 111.6  | 94.2   | 134.1  | 119.8  |
| 104    | 108.4  | 97.2   | 97.8   | 88.9   | 107.7  | 97.6   | 98.1   | 104    |
| 191.4  | 166    | 160.7  | 154    | 175.3  | 168.5  | 142.3  | 259.2  | 248.8  |
| 110.2  | 114.9  | 103.7  | 107.4  | 97.8   | 113.3  | 107.4  | 113    | 108.3  |
| 105.8  | 124.6  | 114.8  | 108.1  | 102.6  | 113.6  | 118.9  | 125.2  | 112    |
| 135    | 172.8  | 139.6  | 173.4  | 144.2  | 151.3  | 162.3  | 137.9  | 144.1  |
| 105.1  | 99.8   | 106.5  | 95.7   | 93.3   | 102.5  | 101.8  | 97     | 107.8  |
| 110.6  | 118.3  | 114.4  | 113.2  | 99.3   | 116.1  | 106.1  | 127.8  | 123.9  |
| 103.6  | 109    | 104.3  | 105.7  | 91.2   | 107.9  | 107    | 114.5  | 115.1  |
| 102.6  | 118.8  | 115.2  | 116.4  | 113.5  | 118.8  | 112.9  | 125.2  | 112.3  |
| 111    | 124.3  | 110.9  | 109.4  | 101.6  | 117.8  | 111.2  | 119.4  | 120.3  |
| 129.6  | 137.4  | 132.8  | 126.7  | 132.4  | 146.5  | 134    | 192.4  | 152.8  |
| 105.7  | 105.8  | 101.2  | 100    | 96.6   | 108.6  | 98.7   | 114.5  | 109    |
| 1963.6 | 1339.7 | 1866   | 1205.1 | 1301.1 | 1559.7 | 1103.4 | 2192.2 | 2971.8 |
| 106.8  | 118.3  | 102.7  | 98.1   | 91.8   | 107.9  | 105.8  | 107.6  | 112.1  |
| 783.1  | 1620.9 | 1408.5 | 1441.2 | 1423   | 1382.3 | 1367.7 | 1916.2 | 1467.5 |
| 179.2  | 412.8  | 379.9  | 453.6  | 290.1  | 301.4  | 350.4  | 403.6  | 319    |
| 117.2  | 135.9  | 104.1  | 124.5  | 118.1  | 124.9  | 126.8  | 153.7  | 109.7  |
| 114.8  | 116.1  | 101.9  | 108.7  | 98.9   | 109.8  | 102.1  | 110.1  | 107.2  |
| 221.5  | 257.9  | 249.2  | 271.3  | 228.1  | 242.7  | 279.9  | 602.4  | 409.2  |
| 105.4  | 110.1  | 101.8  | 102    | 99.9   | 105.6  | 109.2  | 113.9  | 111.2  |
| 128.4  | 183.1  | 189.2  | 180    | 161    | 220    | 154    | 273.7  | 196.9  |
| 111    | 143.4  | 143.4  | 113.1  | 119.5  | 144.7  | 133    | 155.1  | 120    |
| 596.8  | 855.4  | 919.9  | 862.2  | 811.2  | 889.2  | 911.9  | 1115.7 | 555.9  |
| 143.9  | 152.3  | 163.4  | 167.9  | 146.8  | 153.9  | 176.5  | 185.6  | 140.5  |
| 142.8  | 121.7  | 122.2  | 118.2  | 106.1  | 124.5  | 138.9  | 144.4  | 149.6  |
| 303.7  | 309    | 260    | 309.6  | 240    | 286.9  | 351.6  | 379.6  | 317.7  |
| 110.4  | 117.7  | 106.7  | 101.5  | 106.2  | 114.8  | 122.8  | 135.8  | 116.8  |
| 2670.6 | 2455.5 | 1723.6 | 2291.8 | 2149.1 | 3068   | 1705.5 | 6226.7 | 6154   |
| 121.1  | 136.6  | 112.5  | 101.5  | 118    | 131.6  | 110.2  | 135.8  | 140.1  |
| 131.6  | 127.5  | 113.3  | 113.6  | 113.4  | 124    | 118.5  | 126.7  | 142.2  |
| 146.9  | 207.4  | 178.8  | 160.1  | 164.4  | 199.9  | 147.1  | 233.2  | 214.1  |
| 110.2  | 110.1  | 104.1  | 105.3  | 103.8  | 116.3  | 103.6  | 107.1  | 102.3  |
| 97.2   | 101.6  | 98.3   | 95.3   | 91.1   | 102.8  | 96.5   | 105.2  | 106.5  |
| 523.7  | 417.3  | 378.7  | 331.7  | 357.8  | 398    | 368.2  | 707.4  | 542.6  |
| 103.9  | 102.6  | 102.6  | 100    | 97.8   | 114.1  | 107.3  | 104.2  | 103.4  |
| 107.7  | 106.7  | 95.4   | 96.7   | 98.1   | 111.6  | 96.4   | 103.2  | 108    |
| 224.9  | 302.8  | 201.9  | 260    | 253.5  | 204.5  | 303.1  | 469.7  | 228.3  |
| 104.6  | 100    | 94.5   | 87.7   | 92.2   | 105    | 105.1  | 101.9  | 96     |
| 113    | 161    | 194.2  | 144.6  | 154.8  | 162.4  | 172    | 169    | 147.1  |

|        |        |        |       |       |        |        |        |        |
|--------|--------|--------|-------|-------|--------|--------|--------|--------|
| 127.3  | 256.7  | 239    | 233.1 | 235.2 | 214.7  | 281.8  | 300.9  | 205.5  |
| 102.7  | 109.4  | 97.6   | 95.3  | 97.7  | 109.4  | 112.5  | 110.8  | 105.1  |
| 108.6  | 107.8  | 103    | 96.6  | 99.4  | 106.8  | 108.3  | 111.3  | 102.8  |
| 130.3  | 125.8  | 127    | 117.4 | 115   | 133.2  | 120.8  | 154.2  | 154.9  |
| 111.6  | 111.8  | 104.7  | 103.8 | 103.3 | 114.4  | 110.3  | 117    | 110.8  |
| 104.6  | 110.6  | 105.4  | 104.2 | 100.5 | 113.7  | 111.3  | 110.6  | 111.4  |
| 94.6   | 107    | 101.4  | 89.1  | 93.2  | 107.1  | 104.6  | 106.5  | 103.2  |
| 106    | 102.4  | 98.3   | 101.2 | 105.9 | 112.9  | 101.8  | 108.6  | 112    |
| 121.2  | 156.5  | 124.9  | 159.5 | 145.7 | 127.7  | 271.6  | 132.2  | 121.1  |
| 105.6  | 103.4  | 108.9  | 104.1 | 91.4  | 113.1  | 112    | 113.4  | 101.4  |
| 108    | 114.2  | 104    | 99.8  | 100.4 | 106.9  | 105.9  | 106.1  | 110.5  |
| 115.2  | 116.6  | 112    | 102.7 | 96.6  | 109.5  | 108.8  | 108.5  | 117.7  |
| 115.6  | 114.5  | 116.1  | 105.1 | 100.1 | 110.7  | 103.5  | 118.7  | 110.3  |
| 92.3   | 102.1  | 96.3   | 99.8  | 90.4  | 101.1  | 97.2   | 99.5   | 99.7   |
| 115.5  | 146.1  | 139    | 129.6 | 131.1 | 153.6  | 137.2  | 190.8  | 143.1  |
| 1211.2 | 1223.9 | 1216.8 | 1273  | 927.5 | 1211.9 | 1050.1 | 3826.6 | 3532.7 |
| 133.2  | 135.4  | 131.3  | 128.7 | 109.6 | 134.7  | 132.6  | 142.2  | 164.8  |
| 188.3  | 232.5  | 240.7  | 205.6 | 182.4 | 195.5  | 245    | 223.5  | 186.8  |
| 133.6  | 148.4  | 127.4  | 201.4 | 128.6 | 150.8  | 171.4  | 188.5  | 149.4  |
| 1261.8 | 827.7  | 1248.2 | 966.2 | 843.6 | 1486.7 | 1205.3 | 2891.7 | 2309.9 |
| 168.5  | 250.2  | 240.8  | 211.1 | 238.3 | 245.7  | 245.9  | 319.2  | 228.7  |
| 111.1  | 111.3  | 100.9  | 119.9 | 98.7  | 120.9  | 106.6  | 102.7  | 121.3  |
| 113.6  | 105.7  | 100.9  | 103.7 | 103.5 | 111.3  | 109.4  | 120.5  | 111.7  |
| 108.2  | 110.7  | 104.6  | 103.2 | 103.9 | 120.4  | 100.5  | 118.6  | 112.1  |
| 100.6  | 112.7  | 100.8  | 108.2 | 94.5  | 106.2  | 96.5   | 109    | 110.4  |
| 100.3  | 116.9  | 117.8  | 115.4 | 111.2 | 112.9  | 107.1  | 140.8  | 120.6  |
| 617.5  | 911.4  | 813.3  | 809.5 | 819.4 | 894.4  | 931.8  | 1365.2 | 1118.5 |
| 111.5  | 111.6  | 104.8  | 110.6 | 108.4 | 108.5  | 99.9   | 121    | 117.1  |
| 108.5  | 106.1  | 106.6  | 97.6  | 99.2  | 100.6  | 97.5   | 107    | 99.4   |
| 107.3  | 118.8  | 109.3  | 113.1 | 105   | 117.7  | 111    | 133.2  | 116.6  |
| 110.5  | 106.9  | 104.9  | 100.2 | 106.6 | 108.2  | 112.9  | 112.6  | 103.1  |
| 102.8  | 106.6  | 100.5  | 95.4  | 90.5  | 106.9  | 98.1   | 102.5  | 112    |
| 107.6  | 109.3  | 97.9   | 108.5 | 92.2  | 105.4  | 104    | 107.2  | 111.6  |
| 112.2  | 118    | 108.3  | 138.1 | 100.6 | 110.4  | 130.7  | 122.5  | 107.5  |
| 115.2  | 156.1  | 132.7  | 130.6 | 135   | 153    | 159.5  | 165.2  | 124.5  |
| 142.4  | 156    | 160.4  | 141.7 | 135.5 | 140.9  | 137.1  | 196.3  | 162.7  |
| 115.8  | 132.9  | 127.3  | 104   | 113.7 | 121.2  | 122.2  | 115.7  | 116    |
| 105.9  | 104.4  | 103.2  | 103.1 | 99.8  | 110.6  | 103.8  | 113.5  | 104.9  |
| 103.3  | 99.8   | 100.3  | 97.7  | 95.3  | 107.6  | 103.3  | 106.6  | 108.8  |
| 111.6  | 102.9  | 113.5  | 104.4 | 109.8 | 119    | 104.8  | 125.2  | 122.6  |
| 142.2  | 177.4  | 146.3  | 134.3 | 141.7 | 166.7  | 170.3  | 210.4  | 199.1  |
| 456.6  | 314.9  | 351.7  | 163.3 | 250.1 | 248.6  | 384    | 502.9  | 174.3  |
| 169.8  | 138.1  | 136.5  | 106.1 | 127.7 | 131.9  | 151.6  | 162.7  | 151.2  |
| 107.5  | 116.8  | 107.7  | 119.1 | 112.2 | 104.6  | 103.3  | 123.8  | 110    |
| 113.6  | 114.8  | 104.6  | 111.1 | 104.7 | 109.1  | 113.5  | 119.9  | 111.5  |
| 119    | 207.5  | 293.8  | 223.3 | 171.3 | 229.6  | 190.3  | 198.1  | 137.7  |
| 110.5  | 115.1  | 99.4   | 98.2  | 98.4  | 103.3  | 101.2  | 100.9  | 103.7  |
| 101.1  | 97.2   | 103    | 90.6  | 92.4  | 100.1  | 102.9  | 105.9  | 104.2  |
| 154.7  | 145.9  | 150.2  | 130.4 | 132.4 | 160.3  | 138.3  | 285.3  | 275    |
| 106.1  | 116.5  | 111.1  | 100.5 | 99.9  | 109.1  | 101.7  | 106.3  | 110.3  |
| 233.5  | 510.1  | 486.3  | 420.4 | 433.4 | 382.8  | 400.9  | 416.9  | 190.9  |

|        |        |        |       |        |        |        |        |        |
|--------|--------|--------|-------|--------|--------|--------|--------|--------|
| 182.3  | 305.4  | 349    | 348.1 | 294.9  | 350.8  | 345.4  | 428.3  | 277.5  |
| 145.5  | 128.4  | 118.1  | 113.4 | 125.3  | 134.6  | 117.6  | 155    | 139.2  |
| 106.8  | 111.3  | 108.9  | 100   | 102.2  | 111.9  | 106.2  | 119.7  | 109.7  |
| 189.2  | 334.1  | 358.6  | 245.6 | 289.4  | 341.4  | 259.1  | 410.8  | 259.5  |
| 219.3  | 311.3  | 285.7  | 221   | 208.5  | 264.2  | 213.3  | 362.9  | 243    |
| 110.6  | 119.6  | 107.1  | 102.1 | 102.5  | 112.2  | 101.4  | 114.1  | 115.7  |
| 106.8  | 125.2  | 102.4  | 96.1  | 97.8   | 109.6  | 108.3  | 116.8  | 107.6  |
| 128.7  | 148.4  | 128.8  | 143.5 | 112.5  | 140.4  | 152    | 170.4  | 130.3  |
| 125.1  | 116.9  | 124.7  | 106.7 | 107.1  | 126.9  | 121.9  | 139.5  | 131.3  |
| 114.4  | 111.1  | 111.5  | 114.6 | 105.9  | 111    | 109.3  | 135.4  | 121.6  |
| 127.6  | 203.3  | 163.1  | 175.4 | 138.4  | 175.4  | 143.8  | 315.3  | 144.7  |
| 108.2  | 114.8  | 108.8  | 111.9 | 99     | 113    | 99.7   | 125.7  | 121.4  |
| 106.7  | 111.9  | 97.1   | 108.2 | 98.9   | 102.2  | 110.1  | 117.9  | 106.8  |
| 190.3  | 287.1  | 311.9  | 287.4 | 274.2  | 268.6  | 339.2  | 311.2  | 191.8  |
| 143.8  | 136.6  | 139    | 131.7 | 130.2  | 153.9  | 144.1  | 235    | 214.6  |
| 340.7  | 575    | 552.1  | 543.2 | 395.5  | 487.4  | 549.2  | 518.6  | 281.8  |
| 167.5  | 155.9  | 129.8  | 138.5 | 130.7  | 141.2  | 143.7  | 210    | 174.8  |
| 1179.9 | 853.4  | 728.4  | 848.6 | 730.8  | 852.9  | 846.7  | 1561   | 1154   |
| 531.7  | 540.1  | 500.5  | 446.9 | 431.8  | 474.3  | 487.3  | 879.7  | 703.8  |
| 115.4  | 114.9  | 105.8  | 119.7 | 95.7   | 104    | 106.8  | 111.3  | 116.8  |
| 231.1  | 256.2  | 211.4  | 193.5 | 221.1  | 190.4  | 235.6  | 215.6  | 148.7  |
| 103.2  | 99.1   | 94.6   | 99.3  | 93.2   | 101.7  | 101.5  | 102.7  | 98.7   |
| 172.1  | 278.4  | 261    | 218.8 | 250    | 318.3  | 257.9  | 544    | 438    |
| 153.2  | 225.4  | 221.1  | 215.3 | 186.3  | 184.8  | 220.4  | 205.4  | 151.2  |
| 219.7  | 269.7  | 308.6  | 246.1 | 252.6  | 248    | 251.1  | 381.9  | 309.9  |
| 114.5  | 110.6  | 107.5  | 108.1 | 106.4  | 110.1  | 106.5  | 109.9  | 128.7  |
| 116.1  | 107.2  | 106.5  | 103.2 | 98.6   | 111.3  | 108.5  | 107.9  | 105.5  |
| 142.1  | 161.6  | 162.3  | 126.5 | 122.1  | 153.7  | 152    | 239.4  | 188.2  |
| 117.1  | 135.5  | 116.2  | 113.8 | 111.2  | 120.1  | 121.8  | 148.6  | 129.7  |
| 107    | 113.9  | 108.1  | 93.7  | 89.7   | 109.8  | 107.7  | 109.7  | 112.2  |
| 103.3  | 122.5  | 122    | 129   | 118.1  | 119    | 119.4  | 139.8  | 130.7  |
| 199    | 247    | 282.3  | 280.6 | 220.8  | 270.3  | 248.4  | 595.2  | 341.1  |
| 113.8  | 109.3  | 100.7  | 91.4  | 99.3   | 114.9  | 105.1  | 107.4  | 103    |
| 2959.8 | 2768.9 | 2449.7 | 3104  | 1976.2 | 2874.3 | 2864.1 | 4137.6 | 3732.9 |
| 107.3  | 106.5  | 106.3  | 112.8 | 102.5  | 110.5  | 110.5  | 122.8  | 119.5  |
| 111.8  | 117    | 106.3  | 129   | 105    | 115.7  | 115.7  | 135.6  | 126.9  |
| 114.4  | 115    | 112.7  | 122.5 | 110.5  | 121.6  | 101    | 114.8  | 119.8  |
| 212    | 337.6  | 315.5  | 281.8 | 313.2  | 305.8  | 227.1  | 445.9  | 257    |
| 279.9  | 530.9  | 519.2  | 436.4 | 436.3  | 413.2  | 393.6  | 660.5  | 332.8  |
| 106.8  | 119.6  | 105.7  | 101.4 | 89.9   | 111.3  | 101.1  | 106.3  | 102.8  |
| 110.8  | 118.5  | 116    | 110.3 | 100.9  | 120.4  | 114.6  | 113.5  | 117.9  |
| 106.1  | 113.6  | 112.4  | 111.5 | 101.3  | 107.5  | 107.4  | 117.3  | 120.5  |
| 102.7  | 112.7  | 99.2   | 98    | 98.4   | 112.1  | 101    | 96.9   | 103.1  |
| 124.3  | 136.1  | 139.8  | 130.1 | 121    | 127.6  | 140.9  | 177.1  | 120.8  |
| 102.5  | 110.5  | 107.1  | 95.2  | 92.3   | 109.9  | 100.7  | 114.1  | 108.3  |
| 146.2  | 204.9  | 180    | 176.7 | 141.3  | 163.1  | 191.8  | 184.2  | 202.1  |
| 116.1  | 171.2  | 133.8  | 133.2 | 107.6  | 134.1  | 132.3  | 137.9  | 158.1  |
| 110.6  | 110.6  | 108.4  | 109.5 | 98.1   | 111.4  | 103.8  | 110    | 116    |
| 112.4  | 136.4  | 160.3  | 135.6 | 132.5  | 162.5  | 128.1  | 159    | 142    |
| 312.8  | 519.6  | 519.5  | 664.2 | 401.8  | 400.8  | 734.2  | 397.1  | 359.6  |
| 209    | 298.2  | 347.9  | 381.5 | 268.6  | 326.8  | 401.3  | 291.4  | 230.8  |

|       |       |       |       |       |       |       |       |       |
|-------|-------|-------|-------|-------|-------|-------|-------|-------|
| 168.4 | 206.4 | 182.8 | 175.8 | 160.8 | 193.2 | 147.7 | 225.6 | 220.6 |
| 112.6 | 122.2 | 111.4 | 116.6 | 111.8 | 129.2 | 115.5 | 119.9 | 124.7 |
| 111.8 | 132   | 136.8 | 122.5 | 116.4 | 134.8 | 124.4 | 125.5 | 123.1 |
| 108.6 | 109.2 | 101.7 | 104.2 | 98    | 109.4 | 105.6 | 116.3 | 113.9 |
| 201.8 | 318.6 | 310.7 | 249.8 | 252.9 | 364   | 311.7 | 478.4 | 223   |
| 140.7 | 161.2 | 179.8 | 159.4 | 152.7 | 183.9 | 176   | 240.5 | 155.1 |
| 111.4 | 133.6 | 148.7 | 129.3 | 120.4 | 133.4 | 113.9 | 156.1 | 118.4 |
| 234.4 | 577.8 | 577.1 | 534.2 | 502.9 | 531.3 | 539.9 | 713.6 | 311.1 |
| 121.5 | 112.6 | 128.6 | 113.3 | 118.4 | 121.9 | 104.6 | 140.5 | 137.6 |
| 125.6 | 128   | 115.1 | 115.4 | 103.6 | 131.9 | 113.6 | 148.4 | 121.5 |
| 114.6 | 119.1 | 106.3 | 104.1 | 111.3 | 122.7 | 109.9 | 138.6 | 136   |
| 120   | 139.3 | 141.8 | 110.8 | 114.7 | 130.5 | 112.4 | 131.7 | 127.1 |
| 111.5 | 117.4 | 107.7 | 96.8  | 101.2 | 111.1 | 101.2 | 114.1 | 107.5 |
| 106.4 | 109.1 | 98.1  | 88.5  | 93.2  | 102.6 | 100   | 98.2  | 105.4 |
| 103.7 | 102.1 | 93    | 101.8 | 101.3 | 99.4  | 99.4  | 104.8 | 104.9 |
| 116   | 142.9 | 113.6 | 131.3 | 117.6 | 141.7 | 113.2 | 202   | 137.2 |
| 135.2 | 140.8 | 129.8 | 134.3 | 121.3 | 149   | 140.2 | 166.5 | 141.5 |
| 122.1 | 123.6 | 125.7 | 109.8 | 100   | 135.6 | 115.2 | 159.9 | 147.2 |
| 120.4 | 189   | 153.4 | 154.6 | 150.5 | 157.8 | 170.2 | 186.8 | 145.5 |
| 122.1 | 144.4 | 139.4 | 156.6 | 150.1 | 144.2 | 154.2 | 170.1 | 141.7 |
| 103.4 | 110.8 | 104   | 105.4 | 94.3  | 121.3 | 106.6 | 111   | 108.2 |
| 108.2 | 106.4 | 99.4  | 106.8 | 97.9  | 106.3 | 91.2  | 100.2 | 101.6 |
| 196.3 | 170.1 | 197.8 | 151   | 166.8 | 217.1 | 166.7 | 258.4 | 189.5 |
| 112.1 | 107.7 | 115.1 | 124.9 | 93.4  | 107.8 | 119.4 | 116   | 111.5 |
| 120.1 | 145.2 | 111.5 | 130.5 | 128.6 | 114.6 | 136.1 | 157.7 | 156.9 |
| 106.9 | 111.5 | 100.6 | 99.7  | 96.1  | 112.7 | 98.5  | 113.4 | 115.5 |
| 186.9 | 426.6 | 408.1 | 330.8 | 311   | 312.2 | 336.2 | 444.3 | 230.1 |
| 129.5 | 145.3 | 131.5 | 113.1 | 113.2 | 131.8 | 114.6 | 138   | 154.8 |
| 154.7 | 238.3 | 163.5 | 150.5 | 180.2 | 208.5 | 187   | 274.3 | 207.4 |
| 115.4 | 137.1 | 124.4 | 123.4 | 104.4 | 140.9 | 121.3 | 161.7 | 141.3 |
| 112.4 | 111   | 115.3 | 104.6 | 102.8 | 118   | 116.6 | 115.7 | 112.3 |
| 611.2 | 650.7 | 552   | 483.5 | 536.5 | 668.1 | 571.8 | 793.3 | 770.2 |
| 105   | 100.7 | 104.8 | 106.9 | 96.8  | 107.9 | 105.8 | 107   | 100.9 |
| 110.3 | 111.4 | 108.8 | 105   | 101.3 | 118.3 | 109.1 | 116.5 | 110.6 |
| 108.9 | 105.4 | 106   | 100.9 | 95.9  | 114.8 | 98.9  | 105.3 | 110.4 |
| 149.6 | 262.8 | 215.5 | 190.8 | 181.3 | 233.1 | 190.4 | 280.6 | 232.4 |
| 111.3 | 121.6 | 109.5 | 103.8 | 101.4 | 120.4 | 97.3  | 124.7 | 110.6 |
| 107.4 | 105.1 | 99.5  | 101.9 | 96.9  | 112.4 | 103.6 | 108.3 | 105.9 |
| 109.8 | 118.8 | 116.7 | 113.5 | 109.8 | 113.3 | 105.7 | 111.5 | 107.2 |
| 116.2 | 117   | 108.2 | 118.3 | 107.3 | 124.2 | 112.3 | 120   | 123   |
| 285.9 | 550.3 | 483.5 | 488.7 | 405.6 | 476.8 | 493.7 | 564.3 | 357   |
| 109.3 | 117.7 | 105.6 | 102.8 | 95.9  | 109.6 | 97.6  | 113.2 | 116.2 |
| 369.3 | 481.2 | 431.8 | 315.8 | 384.5 | 393.8 | 351.5 | 917.1 | 820.3 |
| 283.3 | 429.5 | 332.4 | 484.4 | 371.7 | 332.4 | 398   | 527   | 552.8 |
| 105.5 | 109.1 | 101.3 | 102.2 | 90.6  | 107.7 | 100.8 | 103.3 | 112.6 |
| 179.2 | 296.1 | 313.6 | 251.7 | 248.1 | 303.1 | 189.7 | 387   | 243.1 |
| 228.1 | 446.9 | 419.8 | 283.2 | 319.6 | 429.9 | 312.9 | 614.3 | 368.4 |
| 113.8 | 113   | 107.8 | 106.9 | 98.5  | 118.6 | 102.1 | 131.2 | 116.9 |
| 104.7 | 107.6 | 106   | 108.5 | 95.9  | 104.1 | 105.4 | 114.2 | 107.4 |
| 114.1 | 113.8 | 107.8 | 99.8  | 96.6  | 104.4 | 96.2  | 104.2 | 109.5 |
| 107.4 | 111.9 | 97.5  | 98.2  | 105.5 | 107   | 104.7 | 115.5 | 110.2 |

|         |         |         |         |        |         |        |         |         |
|---------|---------|---------|---------|--------|---------|--------|---------|---------|
| 224.8   | 248.3   | 207.7   | 197.2   | 189.5  | 217.5   | 202.6  | 382.2   | 308.2   |
| 819.9   | 1134.6  | 1115    | 1005.3  | 1139.4 | 1308.7  | 1174.2 | 1827.9  | 1186.7  |
| 111.7   | 115.9   | 109.2   | 105     | 102.9  | 114.4   | 106.5  | 114.3   | 112     |
| 121.9   | 122.9   | 122.1   | 106.9   | 109.6  | 120.8   | 112.4  | 131.9   | 122.6   |
| 617.9   | 765.2   | 684.9   | 872.5   | 658.3  | 714.2   | 825.1  | 922.4   | 485.6   |
| 105.8   | 112.5   | 113.1   | 100     | 116.3  | 132.1   | 116.6  | 140.9   | 122.5   |
| 139.3   | 214.3   | 210.3   | 187.6   | 225.2  | 230     | 203.5  | 251.2   | 167.4   |
| 181.1   | 222.3   | 203.2   | 202.3   | 204.5  | 230.5   | 220.8  | 257.1   | 188.5   |
| 116.8   | 110.5   | 112.9   | 167     | 107.8  | 140.3   | 123.9  | 135.8   | 124.6   |
| 104.3   | 132.1   | 112.8   | 105.9   | 103.3  | 109.4   | 112.2  | 132.6   | 115.8   |
| 112.8   | 153.1   | 148.8   | 139     | 155.9  | 156.8   | 132.8  | 190     | 116.3   |
| 133.6   | 134.2   | 148.5   | 127.6   | 126.1  | 132.1   | 129    | 186.8   | 153.9   |
| 116.2   | 116.1   | 121.3   | 104.7   | 106.7  | 109.7   | 116.7  | 147.3   | 122.7   |
| 112.2   | 114.2   | 116.1   | 106     | 102.7  | 111     | 99.7   | 122.5   | 122.3   |
| 10354.8 | 12159.2 | 10098.1 | 11459.8 | 9772.2 | 10214.9 | 9055.8 | 21598.8 | 22101.2 |
| 107.9   | 103.6   | 109.8   | 95.5    | 101    | 107.1   | 98.4   | 96.8    | 112.4   |
| 101.5   | 109.4   | 99.8    | 97.5    | 97.8   | 102.8   | 103.9  | 98.5    | 98      |
| 106     | 107.3   | 106.5   | 105.5   | 102.3  | 113.3   | 115.6  | 111.8   | 115.3   |
| 113.3   | 116     | 104.9   | 109.2   | 92.4   | 119.9   | 110.9  | 116.5   | 122.6   |
| 101     | 104.2   | 97.1    | 97.5    | 99.4   | 101.6   | 107.4  | 102.6   | 103.1   |
| 286.1   | 764.1   | 611.2   | 704.1   | 560.5  | 614.1   | 653.7  | 859.6   | 599.4   |
| 102.6   | 114.2   | 105.6   | 99      | 103.1  | 110.7   | 106.2  | 105.7   | 110.2   |
| 110.7   | 118.6   | 114.4   | 113.7   | 104    | 118.4   | 115.1  | 124.2   | 118.3   |
| 113     | 133.6   | 124     | 121.9   | 113.3  | 123.6   | 118.2  | 171.5   | 152.5   |
| 102     | 104.5   | 100     | 103.3   | 102.7  | 112.7   | 94.5   | 109.8   | 109.6   |
| 134.8   | 137.7   | 136.7   | 140.7   | 132.3  | 141.1   | 144.1  | 163.8   | 149.9   |
| 264.5   | 337.8   | 292.5   | 270.7   | 256.3  | 281.6   | 286.9  | 427.8   | 334.2   |
| 474.9   | 588.2   | 464.2   | 465.9   | 441.9  | 543.6   | 411    | 758.4   | 640.5   |
| 110.4   | 109.7   | 107.1   | 116.7   | 101.5  | 109.6   | 104.6  | 119.3   | 118.1   |
| 111.4   | 103.7   | 102.3   | 100.6   | 92.8   | 104.7   | 96.7   | 102.4   | 112.2   |
| 171.4   | 208.4   | 282.8   | 153.2   | 159.5  | 190.5   | 139.9  | 359.6   | 249.3   |
| 108.8   | 108.8   | 106.9   | 103.3   | 104.8  | 112.4   | 96.8   | 108.3   | 113.6   |
| 127.7   | 158.4   | 143.8   | 153     | 130.8  | 143.7   | 140.6  | 163     | 131     |
| 114.8   | 113.6   | 106.7   | 103.7   | 92.9   | 111.2   | 99.7   | 115.7   | 117     |
| 121.1   | 126.7   | 124.6   | 105.4   | 112.8  | 126.3   | 121.6  | 130.1   | 115     |
| 115.8   | 114.5   | 102.9   | 106     | 100.7  | 118.1   | 106.3  | 103.8   | 119.4   |
| 108.5   | 115.1   | 106.8   | 124.9   | 105.7  | 113.9   | 105    | 115     | 112.4   |
| 110.4   | 108.5   | 104.1   | 100.4   | 90.8   | 110.6   | 105.3  | 106.1   | 108.3   |
| 104     | 109.1   | 96.8    | 105.1   | 92.5   | 97.9    | 101.4  | 107.2   | 102.5   |
| 184.7   | 140.5   | 116.2   | 110.2   | 119.7  | 136.3   | 107.7  | 173.1   | 137.8   |
| 125.6   | 116.8   | 122.2   | 103.2   | 109.5  | 129.8   | 111.5  | 136.3   | 116.8   |
| 106.8   | 106.5   | 102.4   | 102.7   | 88.4   | 101.1   | 103.1  | 107.9   | 111.2   |
| 108.8   | 113.9   | 100.3   | 100.2   | 96     | 113.3   | 103.9  | 111.4   | 121.8   |
| 128.2   | 156.1   | 210.1   | 120.3   | 148.6  | 159.7   | 138    | 154.1   | 149.4   |
| 531.3   | 481.8   | 468.1   | 354.1   | 428    | 558     | 288.3  | 928.1   | 602.9   |
| 120.1   | 111.4   | 115.9   | 118.5   | 97.4   | 128.7   | 105.2  | 121.8   | 114.9   |
| 339.7   | 362.5   | 311.1   | 269.4   | 284    | 337.8   | 215.8  | 560.8   | 433.3   |
| 169.8   | 242.9   | 207.7   | 148.5   | 196.6  | 238.6   | 185.9  | 257.5   | 209.6   |
| 109     | 105.9   | 103     | 102.5   | 92.5   | 108.4   | 103.2  | 107.6   | 120.2   |
| 103.6   | 109.6   | 98.7    | 102.2   | 99.7   | 102.7   | 102.1  | 108.9   | 102.2   |
| 121     | 126     | 118.2   | 119.1   | 121.2  | 141.9   | 115.5  | 154.9   | 132.7   |

|        |        |        |        |        |        |        |       |        |
|--------|--------|--------|--------|--------|--------|--------|-------|--------|
| 108.8  | 114.1  | 113.7  | 114.1  | 106    | 115.2  | 101    | 134.2 | 121.5  |
| 106.9  | 113.5  | 101.1  | 103.8  | 92     | 111.7  | 101.7  | 111.2 | 108    |
| 110.7  | 115.6  | 133.4  | 102.8  | 107.4  | 129.2  | 104.2  | 107.2 | 115.1  |
| 108.2  | 112    | 101.8  | 112.3  | 100    | 105.6  | 105.6  | 104.7 | 104.8  |
| 104.1  | 100    | 102    | 89.4   | 88.5   | 110.6  | 103.1  | 108.2 | 107.2  |
| 112.1  | 106    | 101.3  | 100.4  | 95.3   | 107.4  | 104.9  | 109.8 | 109.9  |
| 457.4  | 336.6  | 276.4  | 298.8  | 281    | 296.3  | 312.7  | 604.2 | 703.8  |
| 184    | 197.6  | 169.3  | 193.7  | 197.1  | 189.9  | 203.1  | 308.7 | 256.3  |
| 182.1  | 188.2  | 191.4  | 170.4  | 186.3  | 193.1  | 201.3  | 299.3 | 191.3  |
| 225.1  | 424.1  | 459.4  | 421.3  | 306.9  | 412.9  | 432.9  | 376.8 | 250    |
| 136    | 177.3  | 179.1  | 145.1  | 147.8  | 166.3  | 142    | 228.4 | 227.8  |
| 107.6  | 128.4  | 107.9  | 107    | 100.2  | 130.4  | 117.8  | 137.6 | 151.8  |
| 109.1  | 112.6  | 104.7  | 100.7  | 100    | 109.6  | 115    | 114.1 | 117.9  |
| 109.8  | 111.2  | 102.5  | 101.3  | 96.9   | 107.8  | 97.7   | 110.1 | 108.5  |
| 96     | 108.8  | 100.8  | 96.2   | 97.1   | 109.8  | 93.8   | 103.8 | 103.1  |
| 113.1  | 118.8  | 107.8  | 113.7  | 106    | 113.3  | 102.5  | 113.8 | 114.6  |
| 1078.7 | 1146.5 | 1163.2 | 1098.4 | 1070.1 | 1265.4 | 1190.5 | 2090  | 1708.2 |
| 100    | 102    | 108.2  | 106.2  | 95.1   | 111    | 111.3  | 108.8 | 109.6  |
| 258.2  | 429.9  | 373.5  | 397.8  | 388.3  | 360.2  | 430.8  | 410.2 | 303.8  |
| 109.2  | 109.7  | 105    | 109.2  | 93     | 109.8  | 101    | 117.6 | 112.4  |
| 101.1  | 107.9  | 98.2   | 92.1   | 94.6   | 102.7  | 103.1  | 102   | 107.9  |
| 106.5  | 112.4  | 109.3  | 99.6   | 95.3   | 109.5  | 96.7   | 125.3 | 110.9  |
| 100.8  | 104.9  | 108.3  | 98.2   | 93.7   | 105.4  | 92.3   | 105.8 | 112.2  |
| 126.9  | 134.8  | 123.7  | 158.2  | 124.6  | 144.6  | 134.4  | 170.2 | 136.3  |
| 330.8  | 409.8  | 506.7  | 394    | 415.8  | 540.3  | 423.2  | 835.1 | 566    |
| 101.7  | 115.9  | 105.5  | 101.2  | 99.2   | 107.1  | 100.1  | 110.8 | 104.5  |
| 142.2  | 158.9  | 169.6  | 164.5  | 150.1  | 183.9  | 157.4  | 161.7 | 140.9  |
| 106.7  | 113.6  | 101.2  | 102.8  | 97.3   | 107    | 115.7  | 108   | 104.6  |
| 101.4  | 110.7  | 97.1   | 115.7  | 94.2   | 102.9  | 105.1  | 107.7 | 109    |
| 101.1  | 110.8  | 102.7  | 100.6  | 92     | 104.6  | 102.8  | 101.2 | 110.1  |
| 139.6  | 172.7  | 164.8  | 154.6  | 144    | 178.4  | 145    | 254.3 | 207.7  |
| 105.5  | 110.9  | 104    | 117.1  | 103.6  | 112.8  | 100.6  | 117.3 | 112.7  |
| 94.4   | 111.3  | 102.2  | 98.4   | 91.5   | 109.8  | 96.9   | 109.8 | 107.1  |
| 109.8  | 109.1  | 101.3  | 101.2  | 94.4   | 111    | 106.6  | 110.9 | 112.3  |
| 134.7  | 136.8  | 121.9  | 128.8  | 114.6  | 132.3  | 129.2  | 147.7 | 118.8  |
| 144.5  | 167.8  | 159.1  | 153.5  | 150.7  | 186.5  | 165.2  | 253.9 | 168.6  |
| 388.1  | 1094.8 | 1009.1 | 2425   | 801.2  | 825.5  | 1770   | 888.1 | 485.5  |
| 110.3  | 129.6  | 120.9  | 117.4  | 118.2  | 126.5  | 104.8  | 164.2 | 129.1  |
| 285.3  | 545.4  | 453.1  | 400.2  | 450    | 506.4  | 445.3  | 649.4 | 435.9  |
| 110.3  | 118    | 112.8  | 111.7  | 119.5  | 117.1  | 110.6  | 123.2 | 111.9  |
| 124    | 141.9  | 135.3  | 128.2  | 140.1  | 152.4  | 134.7  | 180.6 | 129.4  |
| 105.6  | 102.9  | 100.5  | 100.6  | 99     | 108.9  | 99.1   | 112.1 | 112.1  |
| 134.2  | 157.1  | 141.5  | 132.9  | 134.2  | 145.8  | 130.4  | 160.9 | 161.4  |
| 106.8  | 123.9  | 112.8  | 108.3  | 98.4   | 112.3  | 106.6  | 115.6 | 112.4  |
| 114.1  | 113.5  | 102.8  | 96.5   | 99.7   | 105.4  | 102.7  | 108.3 | 110.9  |
| 101.9  | 113.1  | 109    | 107.1  | 97.3   | 107    | 102.6  | 101.5 | 106.7  |
| 477.5  | 475.8  | 571.4  | 385.8  | 390.6  | 537    | 429.7  | 920.9 | 834.9  |
| 114.7  | 110.3  | 102.9  | 99.6   | 94.9   | 109.4  | 102    | 108.4 | 110.1  |
| 98.4   | 110.8  | 103.9  | 95.9   | 85.8   | 108    | 98     | 108.6 | 109.1  |
| 109    | 108.9  | 97     | 100    | 99.7   | 104.1  | 100.1  | 112.3 | 115.3  |
| 101.9  | 103.3  | 97.4   | 102.2  | 90.5   | 111.8  | 104.6  | 107.5 | 106.6  |

|       |       |       |       |       |       |       |        |       |
|-------|-------|-------|-------|-------|-------|-------|--------|-------|
| 218.3 | 357.7 | 325.3 | 295.4 | 308.3 | 395.9 | 306.8 | 362.7  | 267.1 |
| 110.3 | 113.8 | 109.8 | 103.1 | 96.9  | 99.6  | 98.9  | 115    | 115.2 |
| 107.7 | 112.3 | 101.9 | 98.3  | 100.5 | 104.6 | 108.2 | 103.1  | 106.9 |
| 100.1 | 116.4 | 103.6 | 104.7 | 93.4  | 105.3 | 99.3  | 111.1  | 114.2 |
| 107.3 | 116.9 | 107   | 99.8  | 92.3  | 107.6 | 103.5 | 126.4  | 108   |
| 98    | 108.1 | 99.3  | 106.9 | 102.2 | 108.1 | 100.5 | 111.7  | 114.8 |
| 115.8 | 120.1 | 113.3 | 116.6 | 96.5  | 104.9 | 100.6 | 114.1  | 115.8 |
| 105   | 107.2 | 106.2 | 95.3  | 103.9 | 97.8  | 96.8  | 108.4  | 109.4 |
| 102.8 | 103.3 | 99.8  | 105   | 96.8  | 101.5 | 102.2 | 105.2  | 107.2 |
| 301   | 425.1 | 482.1 | 337.5 | 381.8 | 578.2 | 396.3 | 581.8  | 573.9 |
| 105.8 | 102.2 | 102.6 | 109.3 | 97.8  | 104.7 | 101.1 | 118.7  | 104.9 |
| 116.1 | 119.9 | 104.6 | 111.9 | 110.3 | 119.4 | 105.9 | 119.3  | 116.9 |
| 114.7 | 128.3 | 113.7 | 113.8 | 109.8 | 116.2 | 120.6 | 140.1  | 145.3 |
| 146.2 | 320   | 256.1 | 251.2 | 221.5 | 203.1 | 197.7 | 299    | 173.8 |
| 100.9 | 104.4 | 106.6 | 101.5 | 96.1  | 112.3 | 97.9  | 107.9  | 107.5 |
| 104.1 | 115.3 | 106.9 | 103.4 | 103.9 | 112.2 | 102.8 | 112.4  | 108.7 |
| 100.7 | 110   | 100.8 | 97    | 96.8  | 115.5 | 107.5 | 104.9  | 109.6 |
| 168.9 | 144.8 | 143   | 134.2 | 140.8 | 156.1 | 146.2 | 195.9  | 280.1 |
| 109.1 | 112.5 | 106.3 | 102.3 | 93.9  | 112.9 | 104.8 | 117.3  | 103.8 |
| 296.5 | 272.3 | 337.1 | 262.6 | 298.3 | 304.8 | 200.3 | 337    | 423.8 |
| 110.2 | 117.3 | 111.3 | 95.2  | 106   | 106.6 | 123.6 | 130.1  | 124.9 |
| 122   | 118.7 | 123   | 122   | 101.6 | 117.9 | 104.9 | 128.2  | 126   |
| 105.9 | 116   | 101.4 | 102.4 | 91.2  | 113.3 | 111.8 | 106.9  | 120.5 |
| 149   | 144.6 | 139.4 | 135.8 | 127.3 | 138.8 | 151.6 | 218    | 189.8 |
| 105.6 | 108   | 104.5 | 101.6 | 96.4  | 117.6 | 98.9  | 110.9  | 115.8 |
| 110.9 | 175.8 | 180.8 | 142.5 | 150.9 | 163   | 131.9 | 200.6  | 148.8 |
| 111.8 | 105.2 | 108.3 | 106   | 94.2  | 110.4 | 98.6  | 104.9  | 108.7 |
| 175.5 | 224.8 | 211.3 | 184.9 | 191.7 | 238.7 | 216.6 | 266    | 202   |
| 113.2 | 113.5 | 107.7 | 135   | 104.1 | 120.6 | 110.6 | 127.3  | 119.8 |
| 567.9 | 623.2 | 749.4 | 762   | 750   | 745.1 | 684.6 | 1366   | 896.1 |
| 113.9 | 119.2 | 115.7 | 123.1 | 99.7  | 124.5 | 106.1 | 128.2  | 115.7 |
| 399.6 | 312.1 | 285.8 | 261.9 | 289.5 | 317.6 | 355   | 520.5  | 602.9 |
| 114.9 | 106.1 | 101.6 | 96.7  | 102.3 | 107.7 | 106.9 | 103.6  | 108.9 |
| 351.5 | 331.7 | 276.5 | 294.3 | 290.5 | 321.8 | 316   | 562.2  | 371.3 |
| 152.5 | 179.8 | 150.1 | 132.3 | 126.9 | 154.9 | 147.4 | 241.3  | 165.8 |
| 102.7 | 99.3  | 99.4  | 96.4  | 96.5  | 107.3 | 97    | 107.8  | 110.6 |
| 476.7 | 876.6 | 823.6 | 900.8 | 767.4 | 809.2 | 723.9 | 1082.6 | 801.3 |
| 102.3 | 105.2 | 102.9 | 107.7 | 96.3  | 112.9 | 106.3 | 109.5  | 108.6 |
| 242.1 | 365.7 | 283   | 374.3 | 260.9 | 345   | 340.7 | 425.9  | 376.8 |
| 103.8 | 102.7 | 111.3 | 100.2 | 95.7  | 116.1 | 99.2  | 110.4  | 109.5 |
| 555.3 | 580.8 | 600.5 | 438.1 | 471.4 | 625.5 | 502.9 | 825.7  | 588.2 |
| 111.9 | 121.4 | 109.4 | 120.2 | 96.2  | 106.6 | 104.4 | 126.4  | 105.4 |
| 248.8 | 204.6 | 182.9 | 219.6 | 169.4 | 222.5 | 308.3 | 254.8  | 229.3 |
| 308.8 | 264.5 | 291.1 | 238.2 | 258.7 | 302.8 | 263.1 | 429.9  | 410.4 |
| 156   | 157.1 | 140.9 | 136.2 | 127.2 | 144.4 | 117   | 174.2  | 141.1 |
| 140.6 | 188.1 | 178.1 | 217.7 | 154.4 | 205.7 | 223.5 | 201.5  | 168.5 |
| 101.2 | 116   | 97.9  | 97.4  | 91.5  | 107.5 | 100.7 | 101.1  | 108.3 |
| 369.7 | 725.4 | 746   | 496.7 | 573.2 | 635.8 | 641.1 | 771.4  | 493.3 |
| 154.1 | 224.7 | 225.2 | 175   | 184.1 | 215.9 | 242.3 | 246.4  | 235.6 |
| 109.4 | 109.8 | 101.3 | 99.9  | 92.7  | 106.5 | 110.5 | 108.7  | 104   |
| 106   | 109.3 | 108   | 104.5 | 92.8  | 106.4 | 98.9  | 115.9  | 116.7 |



|        |        |        |       |       |        |       |        |        |
|--------|--------|--------|-------|-------|--------|-------|--------|--------|
| 172.7  | 203.3  | 139    | 188.2 | 145.9 | 145.7  | 177.4 | 254.8  | 226.6  |
| 102.9  | 109.4  | 96.7   | 101.1 | 91    | 116.2  | 96.8  | 111.2  | 98.4   |
| 112.6  | 110    | 100.6  | 107.6 | 100.7 | 100.2  | 106.7 | 111.6  | 115    |
| 196    | 254.7  | 240.5  | 181.5 | 229.5 | 255.1  | 180.4 | 263.2  | 178    |
| 128.5  | 151    | 143.5  | 132.8 | 131.1 | 152.5  | 142.9 | 163.1  | 158.3  |
| 1212.7 | 1265.9 | 1248.7 | 844.5 | 951.6 | 1419.9 | 623.8 | 2044.6 | 1281.6 |
| 104.4  | 120.1  | 115.2  | 117.4 | 108.5 | 115.8  | 116.7 | 132.6  | 123.8  |
| 113.6  | 125.9  | 122.2  | 135.3 | 125.6 | 138.9  | 116.1 | 145.7  | 130.9  |
| 100.5  | 117.8  | 113.6  | 104.8 | 93.6  | 115.6  | 103.6 | 109.3  | 110.6  |
| 115.6  | 116    | 114    | 104.6 | 97.3  | 124.3  | 109.2 | 133.8  | 127.3  |
| 286.5  | 359.7  | 374.2  | 252.7 | 366.4 | 499.1  | 326.8 | 665.5  | 448    |
| 117.1  | 134.2  | 123.4  | 122.2 | 119.6 | 127.6  | 127.4 | 161.4  | 130.7  |
| 249.7  | 233.5  | 212.5  | 208.9 | 212.6 | 252.6  | 185.2 | 262.5  | 210.1  |
| 135.6  | 123.5  | 143.2  | 141.5 | 116.1 | 135    | 133.3 | 164.7  | 155.5  |
| 118.2  | 116.2  | 106.4  | 105.3 | 103.3 | 117.1  | 105.5 | 115.4  | 113.8  |
| 102.3  | 105.6  | 104.6  | 104.2 | 100.3 | 113.2  | 107.7 | 122.5  | 108.1  |
| 111.2  | 117.5  | 110.9  | 110   | 101.9 | 122.9  | 110.5 | 124.9  | 140.4  |
| 161.9  | 430.6  | 289    | 725.9 | 356.3 | 250.8  | 403.1 | 530.6  | 294.2  |
| 169.5  | 229    | 221.3  | 238   | 182.4 | 198.3  | 232.8 | 220.9  | 175.5  |
| 109.5  | 103.9  | 101.8  | 110.9 | 107.7 | 111.1  | 104.8 | 106.2  | 117.4  |
| 110.5  | 124    | 130.5  | 127.6 | 118.4 | 126.8  | 107.5 | 125.9  | 125.4  |
| 118.7  | 118.9  | 107.6  | 108   | 99.7  | 120.2  | 115.1 | 114.3  | 110.7  |
| 105.6  | 104.2  | 95.2   | 95.1  | 85.9  | 99.1   | 95.8  | 101.5  | 89     |
| 108.4  | 107.5  | 101.8  | 100.1 | 90.8  | 106.1  | 99.1  | 117    | 118.8  |
| 126.2  | 119.6  | 116.3  | 112.5 | 101.4 | 126.3  | 104.9 | 129.7  | 124.5  |
| 106.2  | 115.5  | 111.2  | 107.3 | 108.9 | 112.9  | 102.5 | 124    | 110.6  |
| 106    | 101.1  | 109.3  | 94    | 99.5  | 107.8  | 109.6 | 107    | 101.9  |
| 109.1  | 109.4  | 102.1  | 104.4 | 97.4  | 104.7  | 105.4 | 108.4  | 114    |
| 104.9  | 110.7  | 108.9  | 96.1  | 97.2  | 106.3  | 106.5 | 120.9  | 118.2  |
| 113.5  | 104.6  | 106.7  | 107.5 | 103.6 | 107.9  | 114.6 | 107.5  | 115    |
| 108    | 109.2  | 99.7   | 102.4 | 95.3  | 108.2  | 106.7 | 115.9  | 107.2  |
| 134    | 129.8  | 111.7  | 121.3 | 127.5 | 119.1  | 124.2 | 121.4  | 123    |
| 109.5  | 107.6  | 102.7  | 105.7 | 96.4  | 113.8  | 97.9  | 117    | 118.3  |
| 105.2  | 110.3  | 110.8  | 114.8 | 95.8  | 114.8  | 106.3 | 107.5  | 99.1   |
| 110.1  | 133.4  | 111.1  | 231.1 | 104.8 | 112.3  | 122.4 | 105.3  | 111    |
| 319.9  | 901.1  | 978.6  | 710.6 | 785.9 | 740    | 661   | 1001.1 | 527.6  |
| 108.5  | 120.4  | 105.2  | 306.5 | 104.6 | 105.8  | 152.6 | 110.9  | 113.7  |
| 145.6  | 202.8  | 203.3  | 150.4 | 162.9 | 185.8  | 194   | 233.5  | 190.6  |
| 174.7  | 181.8  | 197    | 170.8 | 143.6 | 218.2  | 207.4 | 209.1  | 205.4  |
| 110.9  | 110.4  | 114.4  | 97.6  | 96.9  | 107.1  | 105   | 106.8  | 112.7  |
| 100.5  | 101.1  | 105.3  | 100.8 | 112.7 | 105    | 103.6 | 125.1  | 108.2  |
| 105.4  | 98.8   | 102.3  | 99.9  | 98    | 107.2  | 109.9 | 106    | 111.5  |
| 108.5  | 113.7  | 111    | 109.1 | 102.9 | 114.2  | 99.1  | 113.4  | 106    |
| 106.3  | 103.2  | 102.4  | 94.8  | 94.9  | 105.3  | 102.8 | 105.3  | 103.2  |
| 104    | 115.2  | 108.8  | 150.6 | 92.9  | 117.1  | 114.1 | 113.5  | 117.3  |
| 117.2  | 125.6  | 112.3  | 111   | 98.5  | 121.9  | 110.7 | 121.9  | 123.2  |
| 110    | 101.9  | 104    | 97.9  | 93.5  | 106.8  | 99.4  | 104.4  | 101.1  |
| 104.8  | 116.1  | 104.3  | 105.4 | 103.4 | 112.1  | 96.9  | 108.9  | 108.6  |
| 101.1  | 115.1  | 100.8  | 98.5  | 98    | 111.2  | 110.6 | 110.7  | 117.4  |
| 111.2  | 107.9  | 102.6  | 98.1  | 94.7  | 113.2  | 97.4  | 102.3  | 104.9  |
| 102.4  | 104.4  | 106.8  | 101.7 | 96.4  | 109.6  | 103.1 | 103.7  | 105.2  |

|        |       |       |       |       |       |       |        |       |
|--------|-------|-------|-------|-------|-------|-------|--------|-------|
| 101.5  | 102.1 | 101.5 | 105.3 | 94.3  | 108.3 | 93.6  | 111.7  | 108.1 |
| 110.4  | 110   | 108.7 | 110.6 | 104.5 | 118   | 108.3 | 124.7  | 106.7 |
| 110.7  | 117.7 | 114.3 | 101.6 | 100.1 | 108.5 | 99.9  | 125.8  | 118   |
| 132.3  | 124.3 | 136.3 | 145.7 | 110.1 | 132   | 141.2 | 124    | 115.8 |
| 109.5  | 111.1 | 106.4 | 95    | 95    | 116.2 | 101.1 | 105.8  | 107.2 |
| 107.3  | 107.8 | 104.4 | 104.7 | 96.8  | 111.1 | 102.2 | 116    | 113.7 |
| 113.7  | 114.6 | 100.7 | 99.2  | 106.8 | 111.1 | 99.1  | 128.4  | 111.1 |
| 108.8  | 106.2 | 104.1 | 106.7 | 106.3 | 105.5 | 101.9 | 111.8  | 105.5 |
| 112    | 129.8 | 127   | 112.4 | 113.4 | 122.7 | 121.6 | 115.2  | 124.6 |
| 109.2  | 112.8 | 106.7 | 92.7  | 93.8  | 105.3 | 99.7  | 109.5  | 111.8 |
| 104.2  | 128.6 | 109.9 | 108.7 | 98.7  | 105.7 | 98.4  | 118.1  | 116.9 |
| 107.9  | 117.5 | 109.2 | 117.7 | 101.3 | 113.1 | 105.6 | 114.6  | 116.8 |
| 105.2  | 109.1 | 98.6  | 108.2 | 95.1  | 113.7 | 99.2  | 112.2  | 108.1 |
| 237.3  | 144   | 149.5 | 122.9 | 144.4 | 190.1 | 153.1 | 203.9  | 244   |
| 101.9  | 101.9 | 103.2 | 97.2  | 94    | 102.8 | 102.5 | 110    | 106   |
| 108.2  | 117.1 | 102.1 | 96.2  | 90.5  | 105.6 | 107.4 | 117.5  | 108.1 |
| 144.1  | 106.4 | 109.8 | 104.8 | 106.2 | 122.6 | 118.1 | 130.3  | 129   |
| 152.3  | 128.4 | 131.2 | 112.8 | 118.3 | 134.3 | 112.8 | 160.9  | 143.2 |
| 113.9  | 156.6 | 161.8 | 194.8 | 167.6 | 153.4 | 176.2 | 155.7  | 151   |
| 767    | 739.3 | 901.3 | 498.6 | 686.7 | 918.1 | 757.9 | 956.1  | 772.2 |
| 1213.1 | 715.5 | 446.4 | 477.1 | 439.5 | 785.1 | 484.2 | 3558.4 | 4053  |
| 105.8  | 116.8 | 101.1 | 112.2 | 96.9  | 110.2 | 111.9 | 115.3  | 103   |
| 104.2  | 109.2 | 97.4  | 94.2  | 99.4  | 101   | 98.6  | 110.1  | 107.2 |
| 224.2  | 325.4 | 254.8 | 334.2 | 302.4 | 310.2 | 323.4 | 668.2  | 294.3 |
| 138.8  | 120.6 | 111.5 | 119.2 | 123.4 | 133.3 | 126.8 | 158.1  | 106.4 |
| 101.9  | 105.7 | 103.3 | 104.7 | 98.3  | 108.2 | 90.5  | 110.2  | 105.1 |
| 108.5  | 113   | 106.5 | 110.2 | 104.2 | 115   | 99.2  | 121.7  | 128.7 |
| 105.6  | 112.2 | 114   | 114   | 93    | 108.9 | 107.7 | 127.8  | 114   |
| 201.8  | 321.3 | 312.5 | 250.3 | 305.9 | 323.5 | 262.6 | 305.9  | 243.5 |
| 131.8  | 169.9 | 185.8 | 145.3 | 149.8 | 177   | 159.1 | 191    | 177.1 |
| 107.2  | 108.5 | 94.2  | 96.2  | 97.1  | 117.5 | 98.8  | 104.9  | 105.9 |
| 133    | 118.7 | 101.5 | 101.2 | 102.2 | 114   | 105.4 | 130.2  | 120.9 |
| 108.5  | 108   | 102.1 | 105   | 94.2  | 109.5 | 107.4 | 114.6  | 109.4 |
| 120.6  | 112.9 | 105.9 | 105.3 | 101.9 | 110.8 | 103.1 | 121.7  | 113.6 |
| 99.8   | 99.8  | 104.5 | 100.3 | 106.5 | 108   | 101.9 | 114.9  | 98.5  |
| 111.6  | 102.5 | 102.5 | 102.6 | 94.2  | 104.4 | 102.3 | 115.3  | 104.3 |
| 109.1  | 106.2 | 102.8 | 104.6 | 98.2  | 110.4 | 102.9 | 105.1  | 109.7 |
| 107.9  | 116.4 | 115.7 | 111.7 | 107.8 | 125.8 | 110.9 | 121.8  | 118.5 |
| 116.6  | 112.6 | 102.8 | 113.6 | 95.6  | 112.5 | 102.4 | 124.5  | 109.7 |
| 105.6  | 125.7 | 113.2 | 111.4 | 105.4 | 117.5 | 118.2 | 159.4  | 115.4 |
| 109.3  | 112.7 | 108.3 | 98.3  | 94.5  | 104.4 | 105.3 | 108.2  | 110.9 |
| 115.1  | 108.2 | 106.5 | 109.7 | 100.5 | 110.7 | 101.2 | 118.1  | 113.4 |
| 105.9  | 107.8 | 110.3 | 99.7  | 94    | 104.5 | 104   | 110.9  | 106.6 |
| 127.3  | 134.4 | 109.6 | 132   | 121   | 138.6 | 138.6 | 141.8  | 129.1 |
| 111.4  | 113.2 | 105.4 | 105.9 | 99.3  | 111.7 | 105.6 | 113.8  | 114.9 |
| 110    | 103.4 | 101.2 | 93    | 95.4  | 109.1 | 104.5 | 108.4  | 106   |
| 237.2  | 491.7 | 500.7 | 383   | 390.5 | 479.2 | 437.2 | 696.6  | 426.9 |
| 104.3  | 112.5 | 100.4 | 103.9 | 98.1  | 102.5 | 103.7 | 107.4  | 105.5 |
| 109.1  | 100   | 102.5 | 102.7 | 92.1  | 112.3 | 106.1 | 110.9  | 100.7 |
| 109.4  | 123.8 | 112.7 | 121.2 | 103.2 | 113.7 | 110.1 | 112.7  | 112.3 |
| 101.5  | 106.4 | 102.3 | 97.9  | 90.7  | 110.3 | 101.9 | 101.6  | 108   |

|        |        |        |        |        |        |        |        |        |
|--------|--------|--------|--------|--------|--------|--------|--------|--------|
| 101.3  | 106.9  | 102.5  | 109.6  | 98.9   | 108.5  | 100.2  | 100.7  | 104.6  |
| 119.4  | 119.4  | 118    | 140    | 116.3  | 125.4  | 126.5  | 137.2  | 135.8  |
| 117.8  | 127.7  | 127.6  | 117.2  | 111    | 124.5  | 112.1  | 147    | 150.1  |
| 192.8  | 342.5  | 314.3  | 213.3  | 240.8  | 263.6  | 224.8  | 239.1  | 210.5  |
| 214.3  | 648.2  | 669.3  | 552.9  | 543.3  | 606.6  | 390.2  | 460.8  | 447.8  |
| 109.6  | 109.4  | 110    | 107.4  | 98.7   | 107.8  | 98.9   | 105.8  | 100.6  |
| 105.5  | 98     | 104.3  | 111.4  | 99.7   | 98.7   | 104    | 100    | 112    |
| 109.1  | 115.8  | 111.1  | 105.1  | 100.2  | 119.3  | 108.6  | 111.7  | 110.8  |
| 110.4  | 100.1  | 98.6   | 99.8   | 95.3   | 108.1  | 95.7   | 106.2  | 105.6  |
| 117.5  | 114.2  | 112.1  | 129.8  | 97.8   | 122.4  | 110.8  | 131.4  | 125.3  |
| 151.7  | 170.9  | 177.6  | 169    | 163.8  | 170.8  | 197.1  | 308.1  | 218.9  |
| 97.5   | 107.8  | 103.7  | 100.2  | 96.3   | 99.2   | 105.1  | 123.8  | 114.2  |
| 554.2  | 874.6  | 876.9  | 554    | 710.7  | 793.5  | 625.1  | 1028.5 | 580.4  |
| 133.1  | 132.9  | 113.5  | 155.3  | 112.2  | 117.9  | 144.7  | 165.6  | 128.5  |
| 130.6  | 133.9  | 120.4  | 138.1  | 106.4  | 122.6  | 123.7  | 136    | 130.2  |
| 2904.4 | 3023.2 | 2406.1 | 2593.5 | 2640.4 | 3172.4 | 2810.9 | 8006.4 | 6532.8 |
| 3385.7 | 3584.5 | 3000.1 | 2891.5 | 3333.4 | 3995.6 | 3676   | 8724.2 | 7159.8 |
| 809    | 938.8  | 816.3  | 630.9  | 1029.3 | 989.6  | 1156.5 | 3057.9 | 2464.5 |
| 119.4  | 114.1  | 109.4  | 102.3  | 96.8   | 107.3  | 109    | 108.9  | 110.7  |
| 121.5  | 229.2  | 185.8  | 270.9  | 154.8  | 184.5  | 179.8  | 181.7  | 159.3  |
| 106.5  | 108    | 108.7  | 106.2  | 104.7  | 109.9  | 109.5  | 119.6  | 123.6  |
| 110.3  | 176.9  | 144.1  | 130.4  | 133.7  | 152.2  | 139.3  | 161.1  | 140.1  |
| 324.9  | 315    | 359.2  | 406    | 329.5  | 376.8  | 474    | 644.1  | 457.3  |
| 510.7  | 786.9  | 945.3  | 947.7  | 913.2  | 867.1  | 846.2  | 1531.1 | 805.8  |
| 937.4  | 1262   | 1303.6 | 1274.3 | 1219.8 | 1230   | 1565.3 | 1944.7 | 923.4  |
| 137.2  | 174.4  | 179.5  | 154.7  | 146.3  | 149.5  | 136.3  | 220    | 172.1  |
| 103.6  | 102.8  | 99.2   | 98.5   | 91.1   | 103.2  | 106.7  | 121.4  | 115.1  |
| 215.7  | 266.7  | 215.2  | 242.3  | 223.5  | 243.1  | 267.8  | 303.1  | 229.3  |
| 112.5  | 107.1  | 104    | 95.9   | 94.7   | 106    | 103.1  | 101.4  | 100.2  |
| 272.7  | 350.3  | 363.2  | 296.9  | 330.5  | 394.3  | 319    | 480    | 328.7  |
| 100.7  | 104.9  | 103.7  | 96.2   | 96.3   | 103    | 102.9  | 103.6  | 106.2  |
| 843.4  | 1232.1 | 1173.5 | 1180.5 | 1161.4 | 1111.6 | 1534.3 | 1951.7 | 1353.5 |
| 140    | 142.8  | 151.2  | 139    | 119.8  | 144.7  | 137.5  | 164.7  | 156.1  |
| 111.9  | 128.4  | 124.9  | 128.9  | 106.8  | 128.9  | 113.8  | 145.8  | 140    |
| 234.5  | 280.7  | 234.9  | 263.2  | 203.4  | 213.6  | 257.2  | 406.5  | 311    |
| 264.7  | 264.1  | 237.4  | 199.4  | 215.1  | 291    | 254.7  | 374.2  | 376.8  |
| 109.7  | 118.7  | 102.8  | 105.5  | 103.1  | 111.1  | 103.6  | 105.4  | 110.9  |
| 920.1  | 852    | 733.6  | 857    | 781.1  | 727.9  | 840    | 1593.5 | 1113.6 |
| 109    | 106.4  | 102.1  | 101.4  | 91.1   | 107    | 103.5  | 110.1  | 112.6  |
| 157.5  | 162.4  | 149.2  | 179.6  | 166.5  | 149.4  | 148.6  | 204.8  | 166.1  |
| 107.8  | 113.5  | 101.3  | 100.2  | 91.7   | 114.2  | 98.6   | 107.4  | 106.7  |
| 238.3  | 233.7  | 267.6  | 227.2  | 237.8  | 248.5  | 271.3  | 341.3  | 215.6  |
| 100.7  | 103.8  | 96.7   | 107.6  | 94     | 110.8  | 97.1   | 106.2  | 103.2  |
| 112.6  | 109.2  | 104.4  | 110    | 99.6   | 112.1  | 111.1  | 116.9  | 113.8  |
| 100.9  | 109.8  | 97     | 98.9   | 97.3   | 108.9  | 108.7  | 107.3  | 108.8  |
| 119.3  | 129.8  | 143.1  | 122.8  | 113.6  | 136.5  | 127.1  | 161.9  | 143.4  |
| 108.4  | 116    | 104.2  | 111    | 103.5  | 110.1  | 113.9  | 110.3  | 102.3  |
| 193.6  | 177.8  | 212.6  | 207.9  | 157.5  | 211.5  | 191.3  | 370.7  | 277.7  |
| 118    | 136    | 126    | 131.9  | 122.2  | 145.7  | 132.7  | 193.9  | 166.3  |
| 113.3  | 111.4  | 111    | 102.2  | 99     | 107.8  | 105.9  | 114.7  | 105.5  |
| 111    | 104.9  | 108.9  | 91.7   | 101.6  | 105.1  | 103    | 107.3  | 109.2  |

|        |        |        |        |        |        |       |       |        |
|--------|--------|--------|--------|--------|--------|-------|-------|--------|
| 106.4  | 112.6  | 109.3  | 95     | 98.4   | 110.7  | 101.7 | 105.9 | 112.5  |
| 104.8  | 100.7  | 103.6  | 100.5  | 97.1   | 102.6  | 98.7  | 112   | 102.2  |
| 267.5  | 340.5  | 246.5  | 305.7  | 289.5  | 268    | 343   | 361.4 | 313.6  |
| 105.8  | 111.5  | 101.9  | 101.8  | 94.3   | 101.2  | 100.8 | 112.1 | 110.4  |
| 110    | 113.1  | 107.1  | 127.5  | 105.6  | 105    | 116.7 | 109.4 | 115.2  |
| 112.1  | 112.6  | 108.7  | 99     | 96.7   | 112.3  | 105.4 | 107.2 | 102.1  |
| 104.3  | 106    | 96.6   | 102.9  | 91.7   | 105.9  | 102.4 | 104.2 | 106.5  |
| 95.4   | 108.7  | 101.5  | 96.5   | 96.4   | 113.8  | 98.3  | 103.8 | 105.9  |
| 113.2  | 110    | 107.2  | 100.9  | 88.6   | 108.5  | 106.6 | 111.3 | 105.2  |
| 108.1  | 116.8  | 110.9  | 101.6  | 109.4  | 115.7  | 105.5 | 124.9 | 111.8  |
| 129.9  | 135.6  | 129.2  | 122.2  | 117.1  | 136.5  | 129.5 | 145.6 | 127.7  |
| 112.8  | 111.6  | 104.2  | 97.7   | 92.5   | 110.9  | 103.8 | 117.5 | 105.9  |
| 111.8  | 121.3  | 113.4  | 108    | 100.3  | 105.4  | 108.8 | 106.1 | 111.9  |
| 106.5  | 111.3  | 104.8  | 97.9   | 94.7   | 106    | 108.1 | 114.1 | 118.4  |
| 109.3  | 126.9  | 111.2  | 114.1  | 104.6  | 120.2  | 115.4 | 132.9 | 125.8  |
| 111.9  | 100    | 104.3  | 100.4  | 95.7   | 102.3  | 103.7 | 121.3 | 106.8  |
| 110.1  | 139.1  | 131.3  | 124.8  | 128    | 143.4  | 119.8 | 157.3 | 134    |
| 102.6  | 106.3  | 101.8  | 97.9   | 95.6   | 104.9  | 100.9 | 107.2 | 108.9  |
| 111.9  | 106.2  | 109.8  | 100.3  | 101    | 109.1  | 106.2 | 109.4 | 106.7  |
| 275    | 476.5  | 496.8  | 428.3  | 443.3  | 476.1  | 443.3 | 527.6 | 244.5  |
| 2878.8 | 3340.2 | 2953.2 | 2838.9 | 3114.1 | 4040.4 | 2486  | 7035  | 7557.2 |
| 113.2  | 113.9  | 116.1  | 108.9  | 106.6  | 114.5  | 123.8 | 120   | 112.4  |
| 141.9  | 142.4  | 136.3  | 155.2  | 141.2  | 145.4  | 177.5 | 131.9 | 125.4  |
| 105.4  | 110.7  | 98.8   | 109.5  | 100.6  | 107    | 100.2 | 108.5 | 112    |
| 136.5  | 189    | 170.9  | 203.4  | 151.1  | 170.6  | 180.5 | 177   | 161.8  |
| 310.4  | 630.2  | 579.5  | 630.2  | 410.3  | 439.9  | 507.5 | 590   | 317.6  |
| 133.6  | 182.7  | 163.3  | 157    | 123.3  | 141    | 148.8 | 146.5 | 142.5  |
| 112.8  | 118    | 101.1  | 111.2  | 94.2   | 117.5  | 105.8 | 124   | 107.7  |
| 103.5  | 108.6  | 104.6  | 98.7   | 96.2   | 107.4  | 107.6 | 114.2 | 108.2  |
| 101.3  | 106    | 102.5  | 111.5  | 97.2   | 96.4   | 103.1 | 104.6 | 100.8  |
| 113.1  | 108.9  | 101.5  | 106.8  | 97.5   | 109.8  | 105.5 | 107.7 | 125.8  |
| 105    | 109.5  | 106.8  | 102.7  | 97.8   | 107.1  | 107.3 | 110.6 | 102.9  |
| 103.5  | 109.1  | 98.4   | 103.2  | 101.2  | 110.6  | 103.8 | 111.3 | 105.1  |
| 234    | 289.2  | 292.5  | 250.9  | 218    | 282.2  | 197.7 | 315.4 | 245    |
| 141.2  | 137.6  | 132.5  | 131.3  | 123.5  | 128.3  | 128.5 | 158.9 | 162.6  |
| 105.4  | 112.8  | 94.7   | 98.6   | 96.2   | 102.2  | 110.1 | 122.3 | 99.1   |
| 100.7  | 111.1  | 107.4  | 108.8  | 96.2   | 114.7  | 111.4 | 111.7 | 109.2  |
| 109.5  | 118.7  | 108    | 95.9   | 95.8   | 106.1  | 99.6  | 114.9 | 106.5  |
| 111.7  | 114.7  | 106.3  | 120.7  | 111.6  | 107.2  | 126   | 125.9 | 110.1  |
| 207.4  | 235.7  | 196.1  | 280    | 210.9  | 266.1  | 295.3 | 354.3 | 296.5  |
| 139    | 149.5  | 133.5  | 156    | 133.7  | 146.9  | 130.3 | 176.7 | 140.8  |
| 114.1  | 106    | 103.8  | 101.2  | 100.4  | 111.1  | 117.5 | 118.8 | 110.7  |
| 103.3  | 112.6  | 96.4   | 96.5   | 86.5   | 104.4  | 104   | 98.4  | 98.5   |
| 110.5  | 108.8  | 96.8   | 93     | 84.5   | 101.3  | 104.9 | 112.5 | 98.7   |
| 106.2  | 103.5  | 107.8  | 103.5  | 96.9   | 113.3  | 96.1  | 103.3 | 99.6   |
| 106.7  | 105.8  | 99     | 102.4  | 89.7   | 110.3  | 94.6  | 103.2 | 102.9  |
| 144.8  | 300    | 287.2  | 226.8  | 258    | 288    | 246.3 | 407.2 | 294.5  |
| 131.4  | 119.2  | 118.8  | 117.4  | 111.3  | 123.1  | 121   | 128   | 117.4  |
| 107.5  | 117.1  | 111.2  | 101.6  | 95.4   | 103.6  | 110.4 | 108.3 | 101.6  |
| 118.1  | 127.5  | 110.6  | 122.6  | 108.5  | 117.7  | 111.4 | 133.1 | 122.4  |
| 116    | 117.8  | 114.1  | 104.4  | 104.4  | 114.6  | 110.4 | 145.4 | 144    |

|       |        |        |        |       |       |        |        |        |
|-------|--------|--------|--------|-------|-------|--------|--------|--------|
| 118.9 | 132.9  | 124.7  | 128    | 117.7 | 137.3 | 129.3  | 156.5  | 166.2  |
| 115   | 127.1  | 107.3  | 112.8  | 112.3 | 110.9 | 107.6  | 126.3  | 128.3  |
| 272.5 | 448.8  | 415.4  | 336.9  | 325.4 | 423.7 | 417.2  | 589.8  | 423.6  |
| 115.2 | 114.4  | 106.9  | 111.6  | 111.6 | 111.7 | 112.5  | 132.5  | 115.1  |
| 105.8 | 113.8  | 110    | 94.8   | 92.8  | 114.7 | 110.2  | 116.8  | 107.8  |
| 157.7 | 174.5  | 177.3  | 148.7  | 187.4 | 187.1 | 183.6  | 340.8  | 143.7  |
| 114   | 135.8  | 127.9  | 115.5  | 123.8 | 122.6 | 132.3  | 142.7  | 120.5  |
| 100   | 111    | 106.9  | 96.1   | 93.9  | 109.3 | 114.1  | 116    | 109.3  |
| 107.1 | 117.7  | 106.5  | 113.7  | 98.3  | 111.7 | 107.7  | 99.4   | 107.4  |
| 103.2 | 110.1  | 101.8  | 100.4  | 97.7  | 111.8 | 108.6  | 110.3  | 107.8  |
| 111.5 | 112.4  | 111.4  | 105.5  | 105.7 | 119   | 112.9  | 112.6  | 114.7  |
| 147.4 | 184.1  | 182    | 157.2  | 164.9 | 176.8 | 147.5  | 239.2  | 197    |
| 112.2 | 120.1  | 101.3  | 107.9  | 92.3  | 108.2 | 100    | 107.8  | 107.7  |
| 102   | 110    | 104.3  | 96.5   | 91.1  | 106   | 110.4  | 99.7   | 96.8   |
| 515.4 | 454.8  | 490.8  | 469.8  | 559   | 481.5 | 537    | 964.9  | 733.8  |
| 110.2 | 114.9  | 116.5  | 111.6  | 100   | 119   | 114.2  | 119.8  | 119.4  |
| 233.4 | 464.5  | 458.3  | 518.4  | 352.3 | 354.7 | 424.6  | 283.8  | 224.9  |
| 100.6 | 109.5  | 106.5  | 98.4   | 87.5  | 112.9 | 101.1  | 111.1  | 111.7  |
| 110.7 | 119    | 110.5  | 107    | 99.4  | 108.6 | 110    | 127.5  | 124.7  |
| 151.3 | 172.5  | 173.4  | 214.5  | 169.4 | 161.1 | 188.7  | 240.5  | 153.7  |
| 173   | 164.9  | 167.6  | 164    | 171.1 | 174.2 | 185.9  | 210.8  | 153    |
| 189.5 | 211.7  | 116    | 243.4  | 168.4 | 124.9 | 205.1  | 292.4  | 128.8  |
| 105.5 | 108.1  | 106.9  | 110.5  | 94.5  | 105.9 | 99.9   | 106    | 105.2  |
| 112.1 | 130.6  | 124.4  | 139.8  | 116.4 | 137.1 | 145.4  | 177.8  | 119.6  |
| 105.5 | 110.1  | 96.6   | 98.7   | 99.9  | 114.9 | 104.4  | 102.8  | 107.4  |
| 114.2 | 113.8  | 104.9  | 102.4  | 99.5  | 110.9 | 113.9  | 117.8  | 101.1  |
| 102.6 | 112.9  | 101.1  | 102.4  | 103   | 111.6 | 104.4  | 104.6  | 106.8  |
| 111.5 | 112.2  | 107.1  | 96     | 93.1  | 111.3 | 103.9  | 115.2  | 110.1  |
| 102.5 | 101.9  | 98.4   | 94.5   | 95.9  | 104.8 | 103.5  | 96.9   | 109.8  |
| 108.5 | 108.5  | 102.6  | 99     | 102.1 | 109.7 | 94.9   | 104.1  | 107.5  |
| 257.8 | 279.5  | 258.6  | 232.2  | 287.2 | 368.1 | 247.8  | 464.6  | 261.3  |
| 136   | 152.1  | 127.9  | 149.7  | 140.6 | 137.8 | 168.8  | 175.8  | 157.7  |
| 108.8 | 115.5  | 109.4  | 100.6  | 105.4 | 107.6 | 106.1  | 115.5  | 118.6  |
| 280.4 | 207.3  | 192    | 203.9  | 172.1 | 224.8 | 275.3  | 296.8  | 260.2  |
| 917.9 | 854    | 806.4  | 769.8  | 693.8 | 696   | 822.4  | 1375.3 | 1309.4 |
| 239.5 | 254.1  | 152    | 290.2  | 213.5 | 142.2 | 390.9  | 296    | 180.5  |
| 101.9 | 107.9  | 101.1  | 99.3   | 96.6  | 103   | 101.1  | 107.3  | 105.3  |
| 637   | 1257.3 | 1046.2 | 1419.7 | 976.8 | 974   | 1373.8 | 1142.9 | 754.6  |
| 288.8 | 501.7  | 422.5  | 519.8  | 388.5 | 451.2 | 506.9  | 678.5  | 434.9  |
| 447.2 | 780.5  | 753.3  | 590.4  | 648.7 | 715.9 | 803.3  | 1054   | 839.6  |
| 111.4 | 112.1  | 115.9  | 112.2  | 101.6 | 120   | 108.6  | 108.7  | 115.9  |
| 284.3 | 332.2  | 320.4  | 349.2  | 303.4 | 337.5 | 367.1  | 481.2  | 337.1  |
| 109.6 | 116.4  | 104.9  | 103    | 106   | 101.6 | 108.5  | 106.9  | 108.9  |
| 151.7 | 149.2  | 123.1  | 149    | 147.1 | 123.1 | 126.3  | 215.3  | 115.3  |
| 120.3 | 141.4  | 123.1  | 113.9  | 119.6 | 134.5 | 129.1  | 141.3  | 128.1  |
| 141.1 | 183.2  | 184.9  | 161.5  | 173   | 181.3 | 173.8  | 241    | 192.2  |
| 109.6 | 118.3  | 97.7   | 99.8   | 105.5 | 107.6 | 110    | 106.3  | 103.9  |
| 110.1 | 116.4  | 104.5  | 96.4   | 99.4  | 114.2 | 114.4  | 127.8  | 122.5  |
| 106.4 | 109.8  | 102.9  | 108    | 101.2 | 105   | 104.2  | 104.8  | 99.9   |
| 128   | 150.8  | 108.5  | 188.5  | 118.9 | 123.5 | 137.2  | 146.3  | 133.6  |
| 125.6 | 132.3  | 121.6  | 113.6  | 112.7 | 124.6 | 116.2  | 122.1  | 120.9  |

|        |        |        |        |        |        |        |        |        |
|--------|--------|--------|--------|--------|--------|--------|--------|--------|
| 295.6  | 349.9  | 355.1  | 293.3  | 357.1  | 405.9  | 365.2  | 655    | 403.4  |
| 129.1  | 173    | 127.5  | 164.2  | 142    | 148.8  | 170.3  | 190.7  | 151    |
| 115.4  | 113.6  | 104    | 109.5  | 103.2  | 113.6  | 109.6  | 110.9  | 121.6  |
| 161.5  | 185.5  | 155.6  | 180    | 184.6  | 152    | 205.7  | 306.9  | 259.8  |
| 119.3  | 108.2  | 105.9  | 100.7  | 103.5  | 104.7  | 106.8  | 120.2  | 116.3  |
| 137.8  | 147.9  | 140.6  | 127.7  | 122.3  | 132.1  | 136.5  | 159.2  | 160.6  |
| 103.9  | 117.3  | 107.2  | 114.7  | 108    | 110.1  | 108.8  | 119.3  | 109.5  |
| 512.7  | 636.9  | 595.1  | 453    | 516.7  | 643.4  | 537.6  | 851    | 685.4  |
| 109.6  | 116.2  | 112.6  | 110.1  | 101.1  | 118.7  | 95.9   | 102.9  | 102.7  |
| 115.9  | 146.1  | 128.5  | 150.2  | 114.5  | 152.6  | 133.2  | 145.4  | 125.3  |
| 103.3  | 109.8  | 104.3  | 103.1  | 95.5   | 105.9  | 104.4  | 116.7  | 103.6  |
| 118.9  | 122.3  | 104.2  | 124.6  | 108.6  | 112.6  | 108.2  | 132.5  | 119.3  |
| 104.7  | 100.3  | 91.4   | 98.7   | 91.4   | 103.7  | 103.9  | 107.3  | 97.9   |
| 101.2  | 107.5  | 102.3  | 105.6  | 94.3   | 110.2  | 94.7   | 113.9  | 120    |
| 120.9  | 115.2  | 113.5  | 110.7  | 99.5   | 120.4  | 117.4  | 134.4  | 111.6  |
| 106.2  | 111    | 94.9   | 103.1  | 94.1   | 108.2  | 104.9  | 100.2  | 108.4  |
| 110    | 118.1  | 109.1  | 104    | 105.2  | 115.9  | 107.6  | 135.1  | 119.4  |
| 164.2  | 289.4  | 287    | 227.8  | 218.7  | 226.7  | 232.2  | 305    | 219.9  |
| 109    | 116.4  | 99.1   | 113.2  | 90.4   | 116.8  | 105.5  | 114.7  | 109.5  |
| 182.6  | 219.7  | 257.4  | 350.4  | 205.5  | 212.3  | 248.6  | 266.7  | 200.5  |
| 572.3  | 637.4  | 577    | 606.9  | 551.9  | 580    | 653.6  | 1066.4 | 662.4  |
| 200.9  | 176.3  | 173.2  | 185.8  | 156.9  | 187.7  | 165.9  | 242.3  | 212.7  |
| 112.3  | 116.8  | 102.6  | 96.4   | 99.7   | 105    | 105.7  | 108    | 110.1  |
| 179.9  | 286.5  | 230.6  | 271.4  | 234.1  | 261    | 260.2  | 282.9  | 188.6  |
| 115    | 109    | 108.2  | 101.4  | 99.1   | 117    | 114.4  | 111.4  | 120.4  |
| 105.1  | 109.9  | 107.7  | 104.6  | 98.3   | 106.1  | 97.6   | 115.6  | 103.3  |
| 134    | 145.1  | 151.1  | 149.1  | 134.7  | 140.2  | 131.5  | 163.4  | 115.8  |
| 2719.7 | 2132.2 | 2927.6 | 2035.6 | 1848.6 | 2214.1 | 1574.4 | 3980.9 | 4826.9 |
| 116.7  | 108.1  | 107    | 111.8  | 97.7   | 112.7  | 110.5  | 113.1  | 122.2  |
| 107.5  | 111.6  | 94.9   | 101.8  | 97.7   | 108.3  | 106.9  | 108.4  | 112.1  |
| 103.8  | 112.5  | 101.5  | 100.8  | 106.2  | 104.1  | 107.6  | 109.8  | 114.9  |
| 263.1  | 359.4  | 322.6  | 272.8  | 286.6  | 349.5  | 318    | 436.1  | 298.5  |
| 111.3  | 110.5  | 100.3  | 92.5   | 95.5   | 106.4  | 103.6  | 106.9  | 108.4  |
| 219.7  | 316.4  | 265    | 252    | 254.1  | 279.2  | 248.9  | 364.6  | 285.3  |
| 119.4  | 126    | 149.9  | 130    | 131.6  | 159.6  | 129.1  | 145.5  | 123    |
| 159.9  | 166.1  | 156.8  | 151.8  | 151.7  | 184.9  | 175.1  | 238.9  | 161.1  |
| 109.8  | 117.2  | 117.7  | 108.8  | 105.3  | 113.2  | 102.8  | 112.7  | 121.7  |
| 109.9  | 111.2  | 112.2  | 106    | 97.7   | 110.3  | 103.2  | 126.1  | 110.2  |
| 106.8  | 111.3  | 105.2  | 116.1  | 95.9   | 114.3  | 105.1  | 105.6  | 105.6  |
| 105    | 109.4  | 104.7  | 101.4  | 99.9   | 116.4  | 103.1  | 106.3  | 118.3  |
| 102.4  | 108.9  | 107.9  | 100.4  | 92     | 112.3  | 107    | 116.5  | 110.3  |
| 115.9  | 172.2  | 149.3  | 123.7  | 128    | 129.3  | 116.5  | 138.5  | 121.6  |
| 104.1  | 111.2  | 104.4  | 96.4   | 95.3   | 108.4  | 100.3  | 106.3  | 106.3  |
| 98.7   | 114.3  | 97.4   | 99.5   | 92.6   | 116.2  | 105.8  | 112.7  | 107.9  |
| 123.6  | 169.2  | 150    | 213.6  | 153.7  | 151.3  | 158.8  | 205.6  | 223.8  |
| 120.9  | 135.3  | 126.9  | 152    | 115.6  | 124.8  | 148.2  | 159.9  | 134.4  |
| 103.5  | 108.8  | 105    | 107.2  | 97.8   | 111    | 100.5  | 108.7  | 110.3  |
| 115.2  | 113.2  | 109.7  | 103.1  | 104.9  | 113.2  | 110.9  | 118.9  | 123    |
| 109.5  | 111.5  | 102.7  | 106.7  | 95.8   | 106.5  | 100.9  | 117.8  | 110.6  |
| 108.7  | 115.5  | 105.2  | 109.3  | 98.4   | 112.8  | 109.3  | 109    | 114    |
| 387.5  | 1495.1 | 1258   | 1055.1 | 992.9  | 1024.5 | 1112.2 | 1198.8 | 602.5  |

|       |        |        |        |       |        |       |        |        |
|-------|--------|--------|--------|-------|--------|-------|--------|--------|
| 207.3 | 156.6  | 156.7  | 135.7  | 149.3 | 164.1  | 133   | 180.7  | 171.6  |
| 149   | 192.2  | 166.5  | 165.9  | 152.7 | 177.3  | 186   | 191.4  | 176.2  |
| 145.5 | 127.1  | 124.9  | 139.7  | 131   | 149.9  | 116.7 | 188    | 159.3  |
| 98.8  | 104.3  | 100.3  | 95     | 97    | 108.5  | 100.9 | 105.9  | 101.2  |
| 127.7 | 233.7  | 261    | 162    | 207.3 | 219.4  | 183.4 | 243.2  | 189.8  |
| 310.9 | 1029.3 | 1067.7 | 682.2  | 739.4 | 915.1  | 565.2 | 923.1  | 484.7  |
| 112.2 | 115.3  | 109.7  | 136.3  | 109.8 | 114    | 109.9 | 120.4  | 117.4  |
| 104.7 | 110.2  | 100.8  | 98.9   | 92    | 104.3  | 102.2 | 103.9  | 102.2  |
| 106   | 123.6  | 103.2  | 109.5  | 103.3 | 109.2  | 113.7 | 117.1  | 121.5  |
| 108.6 | 109.1  | 106.6  | 109    | 99.3  | 104    | 102   | 107.1  | 109.7  |
| 114.2 | 118.6  | 102.7  | 104.7  | 98.9  | 109.2  | 110.1 | 112.2  | 121.6  |
| 112.6 | 136.4  | 118.6  | 147.7  | 127.1 | 126.6  | 132.7 | 137.5  | 148    |
| 226.5 | 436    | 341.7  | 414.5  | 400.4 | 352.3  | 402.8 | 535    | 301.3  |
| 116.6 | 114.4  | 106    | 103.6  | 108.6 | 117.5  | 110.2 | 110    | 118.2  |
| 113.3 | 115.8  | 103.7  | 113.2  | 104   | 114.8  | 116.4 | 138.2  | 126.4  |
| 106.9 | 101.3  | 97.8   | 88.9   | 89.6  | 105    | 98.5  | 108.9  | 112.3  |
| 109.1 | 129.7  | 108.4  | 168.4  | 127.2 | 135    | 154.8 | 150.2  | 127.7  |
| 130   | 201.6  | 134.8  | 232.6  | 141.4 | 128.4  | 217   | 166.9  | 141.5  |
| 101.3 | 107.2  | 103.8  | 97     | 93    | 105.7  | 99.2  | 104.7  | 96.5   |
| 99.2  | 109.6  | 94.6   | 89.4   | 91.5  | 96.3   | 110.4 | 104.1  | 100.3  |
| 113.2 | 124    | 109    | 106.3  | 99.7  | 108.3  | 106.3 | 120.9  | 110.7  |
| 162.7 | 248.2  | 247.6  | 340.3  | 243.2 | 222.4  | 242.3 | 294.3  | 287.7  |
| 107.6 | 113    | 108.5  | 99.2   | 96.7  | 102.7  | 104   | 101.2  | 111.5  |
| 101.7 | 103.1  | 98.5   | 101.4  | 94.7  | 104.6  | 105.5 | 108.6  | 106.4  |
| 107.4 | 109.3  | 108.1  | 107.4  | 101   | 109.5  | 104   | 111.2  | 109.1  |
| 182.9 | 187.4  | 158.1  | 193.7  | 168.3 | 186.6  | 182.1 | 284.3  | 248.8  |
| 155.7 | 219.3  | 222.4  | 216.5  | 203.1 | 214.9  | 202.7 | 251.7  | 188.2  |
| 123.3 | 137.3  | 131.1  | 140.2  | 108   | 118.2  | 121.6 | 130.6  | 116.3  |
| 487   | 246.4  | 197.6  | 261.6  | 369.6 | 333.3  | 465.8 | 612.5  | 223    |
| 113.6 | 137.7  | 127.2  | 149.6  | 102.5 | 125.7  | 112.4 | 115.4  | 123    |
| 105.8 | 119.1  | 111.4  | 112.4  | 110.9 | 117.9  | 113.2 | 141.3  | 116    |
| 337.5 | 558.7  | 539.2  | 558.4  | 453.5 | 485.6  | 551.1 | 595.6  | 354.5  |
| 125.7 | 193.1  | 164    | 124.7  | 156.3 | 189.2  | 129.7 | 211.5  | 173.9  |
| 106.7 | 124.8  | 111.5  | 218.7  | 106.1 | 104.1  | 114.6 | 118.8  | 114.9  |
| 419.3 | 307.3  | 269.2  | 343.7  | 262.9 | 323.5  | 328.4 | 379.6  | 360.9  |
| 1209  | 1152.3 | 1153.7 | 1032.4 | 859.3 | 1244.1 | 922.8 | 2185.5 | 2451.1 |
| 132.8 | 131    | 120.6  | 117.1  | 118.6 | 120.5  | 115.3 | 123.9  | 123.6  |
| 104.3 | 106.9  | 103.9  | 105.9  | 101   | 115.3  | 107.5 | 124.7  | 114.7  |
| 107.5 | 103    | 97.1   | 102.5  | 93.3  | 103.7  | 99.9  | 101    | 104.9  |
| 127.6 | 191.6  | 186.2  | 177.4  | 167   | 189.5  | 174.7 | 242.7  | 256.6  |
| 102.2 | 114.9  | 107.6  | 98.6   | 96    | 112.4  | 103   | 117.9  | 106.8  |
| 105.7 | 104.9  | 101    | 100.7  | 96.4  | 103.9  | 104.1 | 95.5   | 104.3  |
| 112.3 | 112    | 107.7  | 105.3  | 97.7  | 113.5  | 101.6 | 104    | 110.7  |
| 378   | 443.2  | 632.4  | 423.6  | 391.6 | 412.6  | 416.1 | 865.1  | 579.3  |
| 111   | 105.4  | 111.7  | 97.9   | 93.4  | 101.1  | 105.5 | 112.7  | 111.4  |
| 116.9 | 110.3  | 114.1  | 105.9  | 94.5  | 114.4  | 104.8 | 120    | 118    |
| 111   | 116    | 107    | 108    | 113.5 | 118.7  | 115.9 | 130.7  | 138.7  |
| 115.3 | 114.8  | 106    | 103.5  | 98.6  | 112.7  | 112.2 | 108.9  | 110.9  |
| 115.3 | 110.3  | 105.9  | 100.6  | 94.4  | 108.5  | 103.1 | 112.7  | 119.2  |
| 129.7 | 157.3  | 129.2  | 140    | 118.6 | 118.1  | 158.6 | 120.2  | 113.9  |
| 139   | 146    | 130.4  | 113.6  | 142.1 | 141.2  | 109.4 | 197.3  | 168.9  |

|       |       |       |       |       |       |       |       |        |
|-------|-------|-------|-------|-------|-------|-------|-------|--------|
| 244   | 172.7 | 166.8 | 160.1 | 193.3 | 198.7 | 201.6 | 349.6 | 268.9  |
| 110.9 | 108.4 | 105.2 | 107.2 | 96.3  | 107.5 | 103.4 | 121   | 119.1  |
| 117.4 | 120   | 103.5 | 105.6 | 103.3 | 111.5 | 107.9 | 97.3  | 118    |
| 180.9 | 515.4 | 457.5 | 645.5 | 382.7 | 255.4 | 672.6 | 260.7 | 180.7  |
| 426.8 | 795.8 | 776.3 | 618.4 | 534.1 | 697.6 | 750.8 | 986   | 1020.9 |
| 191.6 | 183.1 | 150.5 | 161.5 | 146.3 | 178.2 | 157.8 | 287.5 | 257.9  |
| 106.7 | 108.1 | 99    | 110.1 | 99.5  | 113.4 | 98.9  | 112.5 | 104.7  |
| 115.1 | 113.5 | 105.3 | 99.7  | 105.2 | 114.7 | 104.7 | 113.6 | 112.9  |
| 110.1 | 113.3 | 101.6 | 106.6 | 94.5  | 105.8 | 110   | 116.3 | 104.6  |
| 137.8 | 178.6 | 144.3 | 157.9 | 130.4 | 141.8 | 127.4 | 186.9 | 140.5  |
| 103.4 | 106.9 | 101.8 | 95.6  | 96.8  | 114.3 | 101.1 | 108.4 | 111.5  |
| 175.7 | 324.9 | 324.3 | 346.9 | 241.4 | 285.9 | 294.6 | 349.5 | 206.4  |
| 103.8 | 109.8 | 111.7 | 103.2 | 107.8 | 109.8 | 111.9 | 123.4 | 108.3  |
| 201.8 | 224.3 | 187.4 | 219.3 | 196.6 | 237.1 | 267   | 332.5 | 343.3  |
| 518.8 | 486.7 | 367.2 | 394   | 383.7 | 401.2 | 372.4 | 597.6 | 543.5  |
| 107.6 | 111.1 | 109.8 | 115.8 | 97.9  | 110.9 | 94.3  | 114   | 108.5  |
| 118.3 | 125.3 | 107.3 | 95.7  | 102.6 | 118.7 | 101.6 | 131.2 | 127.9  |
| 107.3 | 107.9 | 97.1  | 101.3 | 93.3  | 109.3 | 101.5 | 106.8 | 104    |
| 164.5 | 186   | 169.7 | 142.6 | 149.6 | 198.2 | 170.1 | 417.5 | 272.3  |
| 120.2 | 120.8 | 111.9 | 117.5 | 105.3 | 118.7 | 121.6 | 132.6 | 130.6  |
| 103.8 | 103.5 | 103.7 | 115.3 | 102.5 | 112.6 | 102   | 104   | 105.6  |
| 108.2 | 106.4 | 95.3  | 103.2 | 94.9  | 109.7 | 96.4  | 114.9 | 109.3  |
| 107   | 115.4 | 102.3 | 102.1 | 92.6  | 110.6 | 99.6  | 105.3 | 110.6  |
| 104.4 | 110.9 | 94.7  | 95    | 90.5  | 103.8 | 96.7  | 100.7 | 100.5  |
| 113.2 | 114.2 | 104.2 | 98.9  | 100.2 | 114.4 | 105.1 | 109.3 | 114.4  |
| 137.9 | 139.8 | 139.7 | 132.4 | 122.4 | 148.1 | 126.6 | 199.4 | 132.7  |
| 101.8 | 108.5 | 102.6 | 99.5  | 85.8  | 108.6 | 103   | 107.8 | 103.9  |
| 124.3 | 127.9 | 108.7 | 119   | 101.8 | 129.1 | 102.2 | 140.8 | 127.7  |
| 127.8 | 122.8 | 118.8 | 119.8 | 110.6 | 132.1 | 123   | 185.7 | 128    |
| 109.1 | 107.6 | 100.3 | 91.6  | 106.4 | 110.6 | 101.2 | 101.6 | 104.2  |
| 213.2 | 304.6 | 368.6 | 277.9 | 253.8 | 335.8 | 263.2 | 642.6 | 366.8  |
| 109.8 | 108.8 | 103.4 | 97.4  | 97.1  | 112.3 | 94.7  | 125.5 | 118    |
| 105.7 | 120.5 | 118.6 | 108.9 | 106.5 | 117.5 | 115.4 | 113   | 110.3  |
| 108.5 | 112.1 | 112.8 | 111.9 | 108.1 | 118.6 | 111.6 | 110.4 | 111.1  |
| 114   | 117.5 | 105.7 | 108   | 105.1 | 121.2 | 119.6 | 128.5 | 122.6  |
| 111.8 | 116.2 | 110.7 | 121   | 102.5 | 126.8 | 124.8 | 122   | 119.1  |
| 109.5 | 107.2 | 95.8  | 101.7 | 95.8  | 108   | 106.4 | 117.2 | 109.8  |
| 111.5 | 117.6 | 103.1 | 108   | 102   | 107   | 103.3 | 104.4 | 106    |
| 109.1 | 116   | 97.6  | 98    | 102.7 | 106.1 | 96.8  | 116.3 | 114.5  |
| 929.9 | 390.9 | 384   | 348.7 | 509.7 | 455.5 | 404.2 | 883.6 | 923    |
| 112.8 | 114   | 106   | 112.7 | 94.4  | 112.3 | 114.9 | 108.8 | 111.6  |
| 102.1 | 102.6 | 97.5  | 102.9 | 93.6  | 99.1  | 105.2 | 109.7 | 104.2  |
| 227.1 | 205.8 | 226.2 | 167.1 | 197.4 | 217.4 | 185.8 | 322.7 | 378.9  |
| 124.6 | 112.4 | 112.9 | 127.7 | 108.3 | 120.5 | 129.2 | 135   | 129.1  |
| 101.3 | 104.4 | 100.7 | 89.5  | 95.5  | 105.8 | 108.2 | 109.8 | 114.3  |
| 108.9 | 108.8 | 96.7  | 98.9  | 93.9  | 107.2 | 106.3 | 127.8 | 112.8  |
| 95.7  | 104.7 | 101   | 92.6  | 93.5  | 103.1 | 103.8 | 99    | 110.4  |
| 166.6 | 174.9 | 140.9 | 142.7 | 134   | 251.3 | 184.9 | 560.4 | 421.6  |
| 105.1 | 111.4 | 104.1 | 106.3 | 102.1 | 101.9 | 106.9 | 113.9 | 105.9  |
| 137.1 | 211.1 | 217.5 | 217.8 | 179.7 | 200.3 | 238.3 | 201.5 | 157.8  |
| 106.9 | 100.5 | 103.1 | 108.1 | 96.6  | 110.7 | 111.8 | 112.1 | 103.2  |



|        |        |        |       |        |        |        |        |       |
|--------|--------|--------|-------|--------|--------|--------|--------|-------|
| 104.6  | 115.9  | 103.3  | 102   | 89.6   | 107.1  | 95.7   | 116.9  | 106.2 |
| 115.9  | 110.3  | 109.1  | 102.6 | 98.9   | 123.2  | 97.6   | 117.4  | 122.4 |
| 98.5   | 105.2  | 100.2  | 100.5 | 98.4   | 112.7  | 92.3   | 109.7  | 108.7 |
| 115.1  | 118.4  | 116.9  | 119.2 | 115.2  | 132.2  | 114.2  | 136.9  | 121.4 |
| 123.3  | 133.3  | 120.2  | 146.7 | 129.7  | 136.2  | 112.5  | 142.8  | 123.2 |
| 115.1  | 139.4  | 137.5  | 154.5 | 116.7  | 159.4  | 105.3  | 172.6  | 130.9 |
| 106.9  | 114.7  | 113.4  | 124.4 | 105.6  | 117.2  | 115    | 123.5  | 113.9 |
| 106.6  | 118.7  | 102.4  | 106.7 | 96.5   | 113.6  | 108.5  | 114.4  | 116.4 |
| 96.3   | 104.5  | 95.4   | 103   | 90.6   | 99.3   | 99.7   | 95.1   | 107.5 |
| 115.3  | 111.2  | 109.9  | 101.6 | 98.6   | 112    | 98.4   | 121.8  | 115.3 |
| 101.5  | 110.7  | 104    | 107.8 | 94.4   | 106.5  | 97.8   | 117.8  | 110.4 |
| 147.8  | 128.8  | 131.2  | 133.1 | 110.9  | 153.1  | 146    | 186.4  | 169   |
| 110.8  | 105.4  | 99.4   | 99.1  | 97     | 111.2  | 100.9  | 96.9   | 112.5 |
| 108.3  | 117.6  | 110.8  | 100.8 | 101.7  | 111.6  | 116.4  | 134.8  | 113.9 |
| 106    | 117.3  | 109.6  | 97.3  | 102.8  | 113    | 110.4  | 123.3  | 115   |
| 111.6  | 109.9  | 96.9   | 93.7  | 99.8   | 126.6  | 102.1  | 107.6  | 106.8 |
| 106.8  | 105    | 105.8  | 101.6 | 99.3   | 107.4  | 100.6  | 115.4  | 115.3 |
| 103.7  | 113.6  | 100    | 104.1 | 101.3  | 111.3  | 107.2  | 108.6  | 110.6 |
| 118.7  | 113.7  | 105.5  | 102.6 | 99.2   | 115.5  | 107.7  | 111.2  | 112.2 |
| 343.3  | 1275.1 | 1163.1 | 972.9 | 1130.3 | 1120.3 | 872.4  | 1205   | 762.3 |
| 112    | 112    | 102    | 109   | 98.9   | 112    | 98.4   | 127.8  | 103.4 |
| 149    | 243.5  | 196.8  | 219.8 | 180.1  | 236.8  | 182.4  | 333.8  | 229.6 |
| 114.8  | 109.9  | 103    | 108.8 | 97.4   | 107.4  | 104.9  | 105.9  | 104.3 |
| 3146.3 | 2915.8 | 2449.8 | 2697  | 1703.1 | 1997.1 | 2295.1 | 2993.6 | 2400  |
| 411.8  | 665.1  | 637.5  | 586.5 | 421.3  | 543.4  | 795.1  | 939.3  | 737.3 |
| 108.9  | 110.3  | 105.9  | 98.7  | 97.7   | 112.9  | 104.5  | 110.6  | 104.3 |
| 152.7  | 182    | 175    | 148.1 | 154.2  | 189    | 174.9  | 203    | 176.5 |
| 113.2  | 128.5  | 115    | 119.2 | 101.4  | 119.3  | 121.1  | 140.4  | 128.2 |
| 111.3  | 108.5  | 114.5  | 99.5  | 103.9  | 110    | 117.5  | 119    | 117.9 |
| 193.9  | 145.7  | 136.4  | 129.3 | 131.9  | 151.6  | 133.5  | 237.4  | 202.3 |
| 121.6  | 110    | 111.1  | 99.7  | 102.9  | 111.6  | 108.6  | 119.5  | 114.7 |
| 159.4  | 183.4  | 166.9  | 184.3 | 167.9  | 185.5  | 176.9  | 207.2  | 168.9 |
| 105.2  | 115.1  | 104.1  | 98.2  | 96.2   | 107.9  | 99.3   | 107.6  | 106.3 |
| 127.5  | 127.7  | 132.7  | 135.8 | 106.1  | 129.6  | 115.4  | 152.3  | 154.5 |
| 357.3  | 383.5  | 444.5  | 467.2 | 475.2  | 458.9  | 388.8  | 808.8  | 675.4 |
| 160.6  | 184.2  | 182.6  | 162   | 160.9  | 182.9  | 182.9  | 212.6  | 177.7 |
| 105.9  | 110.1  | 99     | 94.8  | 92.5   | 100.8  | 95.8   | 108.9  | 94.7  |
| 132.3  | 123    | 98.4   | 105.2 | 103    | 118.9  | 112.4  | 162.5  | 131.9 |
| 105.6  | 108.4  | 92.7   | 98.4  | 92.7   | 113    | 98.7   | 106.5  | 115.2 |
| 106.8  | 102.9  | 106.5  | 97.4  | 89.9   | 101.5  | 104.5  | 104.2  | 111.7 |
| 146.3  | 185.7  | 193    | 140.4 | 181.4  | 191.8  | 198.7  | 272.7  | 207.6 |
| 104.3  | 110.3  | 99.2   | 101.8 | 95.3   | 111.7  | 100    | 105.1  | 106.7 |
| 198.3  | 197.1  | 175.5  | 185.4 | 190.5  | 182.2  | 164.8  | 293.3  | 207.4 |
| 112.1  | 114.3  | 106.7  | 119.7 | 97.3   | 117.3  | 111.6  | 129    | 115   |
| 111.5  | 124.4  | 127.6  | 115.6 | 121.5  | 137.4  | 121.2  | 134.4  | 121.2 |
| 125.8  | 133.7  | 148.5  | 116.5 | 158.6  | 191.4  | 132.3  | 202    | 157.2 |
| 126    | 144.1  | 125.2  | 114.1 | 118.3  | 144.1  | 127.7  | 154.1  | 129.3 |
| 118.1  | 123.2  | 108.6  | 114   | 105.4  | 121.8  | 109.6  | 143.4  | 129.8 |
| 103.7  | 116.1  | 102.4  | 106.8 | 99.8   | 108.3  | 105.4  | 108.1  | 107.4 |
| 105.9  | 111.2  | 104    | 105.6 | 93.3   | 104.8  | 103.9  | 112.8  | 115.8 |
| 116.4  | 151.1  | 126.4  | 142.7 | 120.3  | 137.9  | 134.2  | 160.4  | 144   |

|        |       |        |       |        |        |       |        |        |
|--------|-------|--------|-------|--------|--------|-------|--------|--------|
| 114.2  | 117.7 | 105.1  | 100.8 | 102.2  | 117    | 102   | 114.9  | 114.7  |
| 201.7  | 192.2 | 159.5  | 184.5 | 156.5  | 175    | 164.9 | 278.3  | 346.6  |
| 141.4  | 129.9 | 121.1  | 116.9 | 111.2  | 135.7  | 117.3 | 161    | 175.2  |
| 340.1  | 458.5 | 532.9  | 379.6 | 474.7  | 501.7  | 490.8 | 784.1  | 374    |
| 133.2  | 194.6 | 198.9  | 211.9 | 166.9  | 168.5  | 223.2 | 202.4  | 175.4  |
| 128.2  | 150.8 | 154.3  | 121.4 | 149.1  | 160.6  | 153.2 | 190.1  | 132.8  |
| 226.9  | 376   | 445.5  | 387.8 | 375.5  | 413.6  | 366.1 | 531.3  | 273.9  |
| 200.4  | 329.6 | 246.3  | 231   | 250.5  | 201.5  | 303.7 | 440.6  | 297.1  |
| 106.5  | 115.8 | 109.1  | 95.4  | 96.5   | 110.4  | 100.2 | 117.6  | 115.2  |
| 264.8  | 263.2 | 400.1  | 332   | 239.5  | 415.1  | 249.7 | 429.1  | 276.8  |
| 114.2  | 124.3 | 113.5  | 113.3 | 109.1  | 120.9  | 121.4 | 132.6  | 130.5  |
| 323.8  | 891.7 | 844.2  | 781.7 | 691.5  | 842.2  | 816   | 942.1  | 643.3  |
| 101.7  | 105.5 | 104    | 98.9  | 98.1   | 105.8  | 109.3 | 110.3  | 104.5  |
| 103.8  | 105.8 | 94.2   | 101.3 | 96.8   | 106.2  | 103.6 | 106    | 104.6  |
| 104.3  | 110.7 | 96.2   | 92.6  | 92.1   | 109.1  | 109.1 | 105.7  | 110.6  |
| 121.6  | 150.1 | 151.1  | 133.1 | 126.6  | 143.7  | 135   | 165.6  | 139.2  |
| 251.6  | 351.2 | 491.4  | 496   | 274.5  | 374.8  | 438.8 | 537.5  | 355    |
| 108.8  | 114.8 | 101.1  | 109.3 | 99.5   | 107    | 112.3 | 107.3  | 117.8  |
| 104.6  | 106.4 | 97.5   | 96.5  | 98     | 107.8  | 100.2 | 98.8   | 115.1  |
| 100.7  | 110.5 | 101.3  | 94.1  | 93.5   | 101.3  | 104.6 | 108.5  | 101.3  |
| 109.3  | 111.9 | 105.7  | 112.6 | 102.6  | 114.2  | 104.9 | 106.1  | 106.7  |
| 145.5  | 164.9 | 123.1  | 128.1 | 129.3  | 146    | 142.9 | 269.3  | 216.8  |
| 113.6  | 109.3 | 111.5  | 95.2  | 101.5  | 116.5  | 98.7  | 119.3  | 117.7  |
| 102.6  | 108.1 | 113.5  | 109   | 102.6  | 110.4  | 105.8 | 108.7  | 109.5  |
| 109.5  | 101.1 | 105.5  | 101.2 | 89.1   | 115.1  | 103.5 | 104.5  | 111.2  |
| 100    | 104.4 | 87     | 92.5  | 97.9   | 106.4  | 99.9  | 99.2   | 97     |
| 108.3  | 114.2 | 97.5   | 106.3 | 98     | 109.3  | 106.6 | 99.2   | 115.8  |
| 116    | 122.9 | 123.6  | 126.9 | 115.7  | 120.5  | 113.4 | 132.4  | 125.8  |
| 174.4  | 243.4 | 196.7  | 204.2 | 185.4  | 212.1  | 212   | 293.4  | 207.2  |
| 116.9  | 125.5 | 114.7  | 117.2 | 116.5  | 137.8  | 121.5 | 139.2  | 138.5  |
| 251.5  | 385.3 | 455.7  | 331   | 433.8  | 430.6  | 330.6 | 668.7  | 345.9  |
| 156.3  | 178.6 | 172.2  | 167.8 | 152.4  | 179.5  | 168.3 | 229.1  | 229.1  |
| 2043.5 | 1458  | 1786.5 | 1369  | 1169.8 | 1602.6 | 1131  | 3770.7 | 4041.8 |
| 122.8  | 120.4 | 150.9  | 135.5 | 126.8  | 151.6  | 127.4 | 175.6  | 145.3  |
| 111    | 104.6 | 97.9   | 92.4  | 97     | 109.6  | 99    | 107.2  | 103.3  |
| 227.3  | 261.2 | 293.5  | 334.3 | 226.9  | 296.2  | 271.9 | 312.7  | 214.5  |
| 139.3  | 166.6 | 149.6  | 158.5 | 148.5  | 156.6  | 153.8 | 226.9  | 163.1  |
| 98.5   | 102   | 111.3  | 96.1  | 92.4   | 102.3  | 102.7 | 101.9  | 97.4   |
| 124.6  | 113.3 | 119.9  | 120.2 | 110.9  | 123    | 110.9 | 127.6  | 122    |
| 717.6  | 624.7 | 479.7  | 662.7 | 359.4  | 525.6  | 333.3 | 1436.1 | 1563.1 |
| 105    | 111.3 | 104.6  | 97    | 87.6   | 107.1  | 100.8 | 115.4  | 104.8  |
| 114.7  | 105.7 | 97.1   | 102.6 | 99.8   | 106.4  | 103   | 99.3   | 106    |
| 111.9  | 114.9 | 110.3  | 119.4 | 93.9   | 107.8  | 100.7 | 115.3  | 111    |
| 102.4  | 107.4 | 99.1   | 95.8  | 93.5   | 108.7  | 101.5 | 112.4  | 105.7  |
| 119    | 136.2 | 153.7  | 166.4 | 130.3  | 172.3  | 129.5 | 212.9  | 163.1  |
| 108    | 118.6 | 118.2  | 113.8 | 106.5  | 129.6  | 104.6 | 131.3  | 148.2  |
| 127.8  | 382.5 | 383.8  | 311.2 | 323.3  | 332.7  | 294.2 | 313.3  | 224.5  |
| 133.5  | 125   | 122.1  | 121.7 | 125.1  | 132.3  | 127.4 | 166.5  | 117.7  |
| 129.6  | 123.9 | 125.5  | 123.5 | 108.3  | 136.1  | 122.2 | 170.8  | 148.7  |
| 122.3  | 133.1 | 126.6  | 122.2 | 118.6  | 127.9  | 117.4 | 164.1  | 167.3  |
| 108    | 107.3 | 100.3  | 99.1  | 101    | 112    | 110.2 | 100.8  | 109.4  |

|       |        |        |        |       |       |        |       |       |
|-------|--------|--------|--------|-------|-------|--------|-------|-------|
| 102.5 | 105.4  | 96.7   | 95.2   | 93.4  | 102.6 | 102.1  | 101.6 | 113.7 |
| 552.3 | 552.3  | 613.6  | 468.7  | 584.2 | 627.9 | 579.2  | 896.8 | 664.5 |
| 110.2 | 116.6  | 113.2  | 100.8  | 100   | 112.8 | 106.5  | 108.4 | 111.4 |
| 108.8 | 109.3  | 105    | 104.3  | 99    | 106.8 | 107.8  | 104.5 | 106.7 |
| 102.8 | 110.1  | 97.7   | 97.2   | 93.4  | 100.5 | 99.9   | 101.4 | 101.8 |
| 106.7 | 106.7  | 103.4  | 98.5   | 98    | 102   | 107.3  | 108.4 | 106.6 |
| 105.2 | 109    | 102.8  | 107.1  | 93.2  | 106.7 | 104.6  | 107.6 | 112.3 |
| 106.2 | 116    | 112.3  | 107.7  | 94.8  | 111.5 | 102    | 110.4 | 104   |
| 127.5 | 179.3  | 167.4  | 132.4  | 154.9 | 182.5 | 158.7  | 186.2 | 154.1 |
| 232.2 | 209    | 175.5  | 181.7  | 163   | 179.2 | 183.1  | 170.9 | 176.9 |
| 107.5 | 112.6  | 114.3  | 104.9  | 95.3  | 109.5 | 104.1  | 116.2 | 117.4 |
| 136.4 | 170.7  | 159.1  | 129.5  | 130.4 | 141.8 | 136.3  | 237.1 | 161.1 |
| 96.7  | 114.1  | 99.7   | 98.4   | 94.1  | 108   | 103.4  | 106.4 | 103.8 |
| 245.6 | 228.3  | 193.8  | 249.2  | 194.3 | 192.4 | 277.1  | 173.7 | 143.7 |
| 106.4 | 124.3  | 122.1  | 109.3  | 104.3 | 124   | 119.1  | 118.3 | 128.4 |
| 283.9 | 715.9  | 674.9  | 414.4  | 612.9 | 834.5 | 554.5  | 875.1 | 442.2 |
| 102.3 | 105.8  | 106.3  | 96.1   | 101.7 | 111   | 109.1  | 107.1 | 111   |
| 112.5 | 104.9  | 97.9   | 106.5  | 100.7 | 108.5 | 107.6  | 109.7 | 118.1 |
| 105.1 | 103.9  | 99.6   | 103.2  | 92.9  | 112   | 106.4  | 106   | 105.7 |
| 112.6 | 102.3  | 100.1  | 97.8   | 90.8  | 104.9 | 99.3   | 107   | 111.6 |
| 142.6 | 183.3  | 190.2  | 172.5  | 173   | 186.4 | 209.8  | 212.9 | 156.9 |
| 105.8 | 102.5  | 102.2  | 99.7   | 94.2  | 99.2  | 99.4   | 104.3 | 110.5 |
| 106.3 | 106.1  | 107.2  | 96.3   | 92.6  | 106.5 | 94.5   | 106.2 | 105.3 |
| 179.2 | 130.8  | 120.5  | 133.8  | 112.9 | 151.5 | 161.9  | 122.7 | 122.6 |
| 112.9 | 107.7  | 114.2  | 117.9  | 106.8 | 116   | 110.2  | 124.4 | 107.7 |
| 101.4 | 113.5  | 106.4  | 96.8   | 88.6  | 100.2 | 101.7  | 107.8 | 111.9 |
| 202.5 | 210    | 204.8  | 178.2  | 164.6 | 202.5 | 287.7  | 252.9 | 179.4 |
| 114   | 105.2  | 101.1  | 102.1  | 97.4  | 111.1 | 105.3  | 107.5 | 114.8 |
| 104.3 | 99.3   | 104.1  | 104.1  | 93.7  | 105.8 | 105.8  | 121.6 | 118.6 |
| 653.4 | 1087.1 | 1062.2 | 1055.8 | 812.2 | 944.8 | 1146.1 | 1006  | 723.3 |
| 101.7 | 109.5  | 98.9   | 99.5   | 92.6  | 112.2 | 100.2  | 109.7 | 109.6 |
| 128.9 | 112.7  | 96.6   | 106.5  | 101.7 | 100.5 | 97.5   | 136.8 | 101   |
| 103.1 | 102    | 99.6   | 98.9   | 95.9  | 107.3 | 107.4  | 109.8 | 109.5 |
| 323.6 | 439.7  | 443.9  | 383.1  | 365.2 | 410.7 | 391.2  | 686.7 | 467.2 |
| 107.3 | 107.1  | 101.8  | 103.2  | 90.6  | 111.9 | 104.6  | 108.8 | 102.4 |
| 121.9 | 128    | 117.3  | 126.3  | 112.8 | 143.8 | 117.7  | 137.7 | 118.6 |
| 110.9 | 110.8  | 104.7  | 110.6  | 103.5 | 113.3 | 105.3  | 121.4 | 110.3 |
| 101   | 97.3   | 102.9  | 94.6   | 96.7  | 96.4  | 92.6   | 100.6 | 104.1 |
| 511   | 1113.1 | 860.8  | 1110   | 821.4 | 735.6 | 1148.6 | 764.1 | 721.4 |
| 134   | 147.6  | 127.7  | 128.3  | 137.6 | 141.5 | 138.2  | 211.6 | 144.4 |
| 124.2 | 133.1  | 129.3  | 141.2  | 127.4 | 149   | 131.6  | 149.1 | 149.8 |
| 127   | 130.9  | 130.2  | 114.3  | 110.5 | 117.4 | 119.6  | 138.1 | 125.7 |
| 156.6 | 257.5  | 244    | 201    | 253.3 | 244.9 | 239.8  | 284.5 | 213.5 |
| 119.5 | 120.6  | 115.4  | 100.3  | 98.9  | 117.5 | 113.5  | 130.1 | 126.2 |
| 109.5 | 105.9  | 105.9  | 95     | 91.2  | 103.8 | 99.3   | 125.1 | 131.7 |
| 113.9 | 106.5  | 109.8  | 95.8   | 98.8  | 108.2 | 97.3   | 100.9 | 124.5 |
| 119.2 | 129.3  | 111.8  | 112.6  | 111.7 | 129   | 131    | 171.8 | 152.2 |
| 124.7 | 139    | 159.1  | 180.2  | 140.6 | 152.1 | 152.8  | 140.6 | 140.7 |
| 103.1 | 105    | 107.4  | 95.9   | 94.7  | 106.4 | 105.6  | 114.2 | 107.1 |
| 118.2 | 143.9  | 149    | 115    | 136.3 | 170.8 | 134    | 307.6 | 129.9 |
| 135.2 | 154.6  | 146.2  | 186.9  | 125.7 | 140.3 | 152.8  | 202.9 | 152.5 |

|        |        |        |        |        |        |        |        |        |
|--------|--------|--------|--------|--------|--------|--------|--------|--------|
| 104.3  | 104.3  | 109    | 104.6  | 100    | 100.8  | 98.3   | 108.1  | 106.3  |
| 117.8  | 143.3  | 127.9  | 138    | 120.8  | 143.8  | 129.1  | 146.9  | 129.1  |
| 108.1  | 108    | 108    | 105.1  | 93.8   | 113.1  | 109.3  | 126.1  | 117.7  |
| 100.2  | 105.3  | 95.6   | 125.1  | 95.9   | 112.2  | 109    | 113.2  | 105.7  |
| 147.8  | 149.8  | 132.4  | 139.7  | 132.5  | 153    | 144.3  | 198.8  | 157.6  |
| 110.8  | 122.7  | 108.6  | 111.5  | 95.8   | 114.1  | 106.6  | 119    | 130.7  |
| 110.4  | 111.9  | 112.4  | 113    | 109.6  | 113.1  | 103.6  | 115.8  | 110.1  |
| 192.2  | 229.1  | 215.5  | 184.6  | 208.6  | 229.4  | 215.8  | 240.3  | 155.9  |
| 235.6  | 453    | 306.7  | 478.6  | 343.5  | 289.6  | 449.4  | 337.2  | 263.8  |
| 111.5  | 100.8  | 109.6  | 104.1  | 102.9  | 108.9  | 96     | 106    | 105.5  |
| 114    | 113.4  | 115.9  | 105.9  | 104    | 105.7  | 108.9  | 117.4  | 112    |
| 319.5  | 243.9  | 316.9  | 255.8  | 228.6  | 377.7  | 281.5  | 716.7  | 471.2  |
| 107    | 110.5  | 98.1   | 105.5  | 98.3   | 108.4  | 106.3  | 111    | 103.3  |
| 103.3  | 103.3  | 99.3   | 96.9   | 96     | 112.8  | 103.9  | 101    | 105.4  |
| 107.4  | 115.9  | 104.8  | 100.2  | 97.4   | 99     | 102    | 105.7  | 103    |
| 110.9  | 107.9  | 101    | 118.1  | 102.7  | 117.3  | 110.5  | 104.5  | 103.1  |
| 138.9  | 160.4  | 171.2  | 148.2  | 165.2  | 189.1  | 182.5  | 190.9  | 151.2  |
| 102.8  | 102.5  | 99.9   | 96.9   | 95.9   | 96     | 100.9  | 100.5  | 101.3  |
| 119.3  | 118.1  | 109.5  | 118.6  | 114.5  | 123.2  | 112.2  | 129    | 106.8  |
| 113.5  | 135.2  | 123.7  | 125.4  | 110.8  | 128.7  | 114.7  | 120.7  | 121.3  |
| 110.1  | 108.4  | 95.3   | 102.8  | 91.2   | 111.7  | 102.3  | 105.8  | 106.8  |
| 117.7  | 122.7  | 123.9  | 118.5  | 125.5  | 120.5  | 127.3  | 162.9  | 143.6  |
| 105.2  | 103.7  | 99.8   | 97.3   | 90.7   | 105.9  | 98.3   | 108.5  | 104.4  |
| 134.5  | 132.6  | 103.8  | 121.5  | 119.7  | 117.1  | 116.9  | 143.6  | 125.5  |
| 105.9  | 116.2  | 96.7   | 101.7  | 104.6  | 106.1  | 106    | 116.4  | 107.4  |
| 114.8  | 118.1  | 107.4  | 116.6  | 104.3  | 118.7  | 115.4  | 129.2  | 125.9  |
| 287.5  | 570.2  | 515.2  | 556.7  | 512.5  | 580.2  | 502.1  | 628    | 408.5  |
| 136.2  | 115.7  | 120.3  | 125.3  | 112.5  | 131.4  | 113.9  | 145.3  | 137.9  |
| 122    | 144.2  | 126.4  | 117.2  | 108.9  | 114.3  | 118.1  | 181    | 171    |
| 114    | 116.4  | 113.5  | 111.4  | 96.8   | 119.3  | 111.8  | 122.1  | 118.5  |
| 194.5  | 181.8  | 167.4  | 211.4  | 160    | 181.5  | 159    | 305.1  | 221.1  |
| 1219.7 | 2137.5 | 1881.7 | 1695.4 | 1660   | 1975.5 | 1810.3 | 2777.7 | 1933.9 |
| 108    | 114.9  | 100.4  | 102.1  | 91.8   | 112.2  | 101.6  | 116.8  | 114.1  |
| 2173.9 | 2725.3 | 2496.1 | 2105.6 | 2239.9 | 2404.8 | 1529   | 4673   | 4474.7 |
| 117.5  | 134.6  | 149    | 127.8  | 125.3  | 139    | 147.3  | 162.4  | 136.3  |
| 113.6  | 114.3  | 113.7  | 105.9  | 105.6  | 119.4  | 112.8  | 108    | 108.6  |
| 105.6  | 112.5  | 103.1  | 97.7   | 96.9   | 100.2  | 98.1   | 112    | 102.7  |
| 119.7  | 120.2  | 111.5  | 120.3  | 102.4  | 114.1  | 107.8  | 126.3  | 118    |
| 104.9  | 109.7  | 99.2   | 119.2  | 103.8  | 110.5  | 105.6  | 117.2  | 111.8  |
| 151.2  | 214.1  | 226.3  | 197.4  | 163.5  | 177.9  | 194.6  | 259.2  | 206.7  |
| 349.4  | 517.7  | 502.3  | 355.4  | 669.8  | 687.9  | 747.3  | 1178.8 | 305.2  |
| 475.6  | 291.7  | 301.4  | 249.1  | 305.6  | 440.5  | 371.3  | 764.8  | 512.6  |
| 104.8  | 110.7  | 105.9  | 100.5  | 98.6   | 112.4  | 111    | 107.6  | 110.3  |
| 273    | 289.3  | 254.5  | 189.6  | 242.7  | 323    | 209.5  | 392.2  | 324.9  |
| 137.5  | 166.3  | 147    | 150    | 137.6  | 164    | 150.4  | 171.4  | 128.9  |
| 102.6  | 107.7  | 103.1  | 100.1  | 97.7   | 109.8  | 113.1  | 107.3  | 111.1  |
| 164.3  | 194.2  | 163.9  | 183.1  | 147.3  | 147.6  | 223.3  | 220    | 153.9  |
| 110.9  | 100.6  | 105.4  | 100.2  | 87.2   | 106.2  | 103.5  | 108    | 99.2   |
| 126.6  | 139.7  | 136.4  | 112.5  | 114.8  | 141.4  | 124.1  | 173.9  | 145.7  |
| 105.8  | 117.4  | 107.8  | 106.5  | 102.3  | 108.9  | 120.5  | 112.6  | 109    |
| 109.1  | 114.5  | 98.4   | 93.8   | 99.6   | 117.6  | 98.7   | 103.1  | 115.9  |

|        |        |        |        |        |        |        |        |        |
|--------|--------|--------|--------|--------|--------|--------|--------|--------|
| 103.4  | 110.3  | 98.4   | 95.5   | 91.9   | 114.3  | 101.7  | 115.3  | 103.3  |
| 111.5  | 173    | 149.3  | 144.3  | 127.3  | 146    | 141.8  | 146.9  | 129.7  |
| 102.1  | 105.2  | 107.7  | 101.6  | 95.2   | 115.4  | 95.6   | 109.8  | 116    |
| 102.1  | 98.3   | 97.2   | 97.5   | 99.1   | 101.5  | 107.6  | 103.3  | 103.4  |
| 103.2  | 122.5  | 111.8  | 116.3  | 103.2  | 116.2  | 121.1  | 136.4  | 119.3  |
| 100.9  | 108.8  | 101.8  | 97.8   | 95.6   | 110.8  | 104.7  | 110.7  | 108.3  |
| 420.4  | 163.9  | 193.2  | 286    | 165.5  | 201.3  | 228.8  | 272.8  | 174.2  |
| 104.5  | 102.1  | 95.2   | 92.5   | 97.7   | 103    | 97.3   | 107.8  | 101.5  |
| 112.3  | 105.6  | 108.3  | 92.2   | 99.8   | 115.9  | 117.8  | 123.2  | 126.9  |
| 100.9  | 103.7  | 102.1  | 94.6   | 90.9   | 104.2  | 95.4   | 105.4  | 105.3  |
| 177.3  | 266.8  | 262.3  | 244    | 220.9  | 257.6  | 243.7  | 359    | 279.6  |
| 108.5  | 114.3  | 117    | 108.8  | 101    | 122.5  | 114.9  | 114.3  | 118.3  |
| 113    | 110.7  | 106.7  | 98.6   | 92.6   | 103.7  | 103.7  | 110    | 106    |
| 102.3  | 106.2  | 101.1  | 100.9  | 98.2   | 106.1  | 92.5   | 106.4  | 109.2  |
| 109.1  | 104.4  | 104.9  | 103.2  | 91.2   | 106.2  | 94.9   | 108.6  | 120.8  |
| 107.9  | 105.5  | 109.1  | 104.3  | 93.7   | 110.5  | 105.5  | 106.9  | 116    |
| 1156.9 | 1180.8 | 1073.3 | 1225.5 | 1099.6 | 1356.9 | 1757.2 | 2495.2 | 1703.4 |
| 166.4  | 120.3  | 112.2  | 115.2  | 112.4  | 126.7  | 133.1  | 206.2  | 184.2  |
| 109.6  | 109.4  | 106.1  | 102.5  | 102.9  | 104.2  | 102.4  | 116.4  | 108.7  |
| 102.4  | 114.8  | 109.4  | 98.5   | 94.2   | 119.2  | 108.9  | 119.9  | 109    |
| 265    | 419.6  | 449.1  | 377.6  | 413.5  | 622.8  | 466.5  | 911.5  | 548.7  |
| 125.8  | 171.7  | 187.1  | 170.1  | 142.5  | 172.5  | 146.7  | 154    | 123.8  |
| 107.4  | 127.2  | 108.1  | 111    | 106.4  | 126.5  | 114.3  | 134    | 113.1  |
| 127.1  | 124    | 120.7  | 123.9  | 105.5  | 143.2  | 115.6  | 164    | 124.2  |
| 104.4  | 112    | 101.6  | 98.9   | 98.5   | 107.2  | 105.6  | 101.8  | 106.4  |
| 107.6  | 107.2  | 96.7   | 95.6   | 92.2   | 104.3  | 101.5  | 103.2  | 107.2  |
| 113.8  | 112.4  | 97.1   | 102.7  | 94.7   | 106.6  | 101.6  | 111.2  | 111.3  |
| 107.4  | 103.2  | 105.9  | 101.6  | 101.6  | 110.7  | 100.6  | 110.8  | 113.5  |
| 107.3  | 112.4  | 103.2  | 110.4  | 100.7  | 106.9  | 105.8  | 106    | 108.5  |
| 118.6  | 109.7  | 116.5  | 117.7  | 100.3  | 114.3  | 109    | 118.4  | 110.9  |
| 115.9  | 110.2  | 105.8  | 105    | 99     | 106.8  | 100.5  | 111    | 109.3  |
| 109.1  | 115.6  | 103.1  | 93.5   | 92.3   | 107.2  | 101.8  | 106.5  | 101.8  |
| 105    | 120.2  | 100    | 115.3  | 100.8  | 115.7  | 111.2  | 129.7  | 119.3  |
| 103.3  | 98.9   | 106.7  | 101.7  | 91     | 103.4  | 99.9   | 108.8  | 107.2  |
| 229.6  | 111.1  | 117.2  | 108.2  | 117.6  | 155.2  | 119.2  | 587.3  | 904.5  |
| 107.5  | 114.1  | 112.5  | 106.8  | 95.4   | 127.4  | 102.1  | 117.5  | 121.9  |
| 97.2   | 110.2  | 107    | 93.9   | 100.2  | 110.9  | 96.6   | 106.8  | 100.8  |
| 107.7  | 105.6  | 104.4  | 105.3  | 95.3   | 118.4  | 102.4  | 119.3  | 110    |
| 109.7  | 126.6  | 110.2  | 120.6  | 106.4  | 122.5  | 108.2  | 126.8  | 130.2  |
| 111.6  | 115.1  | 105.1  | 111.6  | 95.8   | 117.7  | 112.3  | 113.9  | 109.7  |
| 116    | 113.1  | 111.7  | 100.7  | 97.1   | 117.7  | 107.8  | 122.6  | 134    |
| 101.8  | 107.5  | 105.5  | 97.8   | 100.6  | 109.6  | 97.9   | 105.7  | 109.4  |
| 100    | 108.1  | 104.6  | 100.6  | 92     | 103.7  | 97.2   | 108    | 116.8  |
| 102.9  | 105.2  | 100.8  | 89.1   | 90.2   | 97.4   | 97     | 96.6   | 98.6   |
| 111.4  | 102.6  | 100.9  | 95.8   | 90.2   | 100    | 105.4  | 123.7  | 101.9  |
| 101.2  | 109.9  | 99.9   | 102.4  | 97.7   | 108.2  | 99.5   | 100.2  | 106.5  |
| 106.2  | 108.2  | 104.9  | 104    | 97.9   | 111.4  | 97.9   | 103.1  | 109.2  |
| 121.8  | 129.1  | 113.6  | 124.4  | 113.3  | 117.7  | 141.1  | 135.5  | 141    |
| 101.9  | 112.2  | 106.3  | 99.9   | 96.9   | 115.7  | 106.5  | 106.1  | 103.6  |
| 102    | 106.7  | 100.7  | 102.7  | 97.1   | 108.4  | 97.5   | 103.4  | 100    |
| 212.3  | 446.1  | 373.6  | 397.2  | 384.4  | 337    | 405.5  | 338    | 179.2  |

|        |       |       |       |       |       |       |        |       |
|--------|-------|-------|-------|-------|-------|-------|--------|-------|
| 104.3  | 107.2 | 100.7 | 96.3  | 92.4  | 106.2 | 97.7  | 105.3  | 98.3  |
| 102.2  | 109.7 | 100.1 | 101.9 | 95.7  | 107.2 | 104.1 | 111.9  | 110.1 |
| 119.6  | 135.5 | 121.3 | 119.2 | 114.1 | 128.4 | 106.3 | 143.4  | 125.2 |
| 106.7  | 116.9 | 106.6 | 97.6  | 95.5  | 110.6 | 93.6  | 117.8  | 104.8 |
| 105.4  | 110.4 | 97.5  | 114.6 | 98.9  | 109.2 | 107   | 112    | 105.2 |
| 113    | 113.9 | 99.5  | 104.5 | 99.2  | 107.3 | 105.5 | 106.5  | 111.5 |
| 109.6  | 117   | 117.3 | 132.4 | 108.4 | 114   | 120.8 | 114.1  | 111.1 |
| 107.4  | 108.3 | 102.3 | 96.7  | 97.6  | 112.1 | 115.9 | 116.4  | 106.2 |
| 100.7  | 111.1 | 104   | 102.8 | 96    | 115.5 | 104.2 | 102.1  | 116   |
| 105.3  | 102.3 | 102.5 | 103.4 | 90.4  | 102.6 | 95.6  | 105.8  | 106.1 |
| 108.7  | 110.8 | 110   | 93.1  | 102.1 | 112   | 105.7 | 121.8  | 114.4 |
| 113.1  | 108.8 | 100.7 | 89.6  | 108.2 | 108.7 | 101.6 | 115.6  | 101.3 |
| 101    | 105.8 | 103.7 | 103   | 103.1 | 115.3 | 102.1 | 101.5  | 105.8 |
| 101.6  | 106.2 | 104.1 | 102.4 | 95.8  | 115.6 | 101   | 106.3  | 105.6 |
| 102.1  | 111   | 106.8 | 99.7  | 93.6  | 105.4 | 106.1 | 115.1  | 110.1 |
| 99.3   | 110.8 | 99.5  | 96.9  | 98.8  | 111.8 | 94.7  | 103.6  | 99.9  |
| 178.1  | 165   | 146.5 | 123.2 | 152.5 | 189   | 150.7 | 293    | 211.2 |
| 102.1  | 115.2 | 102.2 | 104.1 | 93.9  | 104.4 | 106.2 | 113.4  | 106.9 |
| 102.4  | 104.7 | 94.6  | 95.4  | 99.6  | 104.7 | 96.6  | 101.8  | 102.3 |
| 102.6  | 100.6 | 103   | 97    | 88.8  | 102.9 | 103   | 99.5   | 100.9 |
| 103.1  | 117.3 | 111.7 | 108.3 | 93.7  | 102   | 100.5 | 103.7  | 111.3 |
| 103.9  | 102.8 | 93.5  | 90.6  | 95.1  | 104.5 | 103.6 | 102    | 110.8 |
| 109.9  | 109.9 | 100.8 | 97.7  | 90    | 106   | 99.8  | 109.8  | 105   |
| 103    | 109.6 | 97.2  | 91.6  | 94.1  | 102.5 | 107   | 110.5  | 108.8 |
| 111.9  | 113.3 | 99.5  | 105.6 | 102.5 | 108.4 | 102   | 100.6  | 119.5 |
| 109.5  | 105.3 | 102.6 | 103.5 | 92.3  | 105.5 | 107.8 | 116.9  | 108.9 |
| 97.4   | 109.2 | 107.2 | 102.5 | 99.8  | 103.5 | 108.9 | 101.2  | 112.8 |
| 110    | 106.1 | 101   | 100.9 | 91    | 108.4 | 105   | 119.1  | 103.8 |
| 103    | 105.6 | 97.3  | 96.2  | 93.9  | 108.9 | 108.2 | 106.8  | 107.7 |
| 107.3  | 118.8 | 105   | 112.1 | 93.8  | 114.3 | 102.3 | 113.1  | 117.2 |
| 98.2   | 103.9 | 98.6  | 103.4 | 97    | 110.5 | 95.9  | 107.6  | 106.6 |
| 118.5  | 120   | 115.2 | 105.7 | 104.1 | 111   | 111.8 | 115.3  | 116.4 |
| 1642.3 | 370.3 | 280.1 | 319.8 | 291.8 | 363.8 | 365   | 1266.8 | 2288  |
| 244.8  | 183   | 155.5 | 170.2 | 139.5 | 158.4 | 182.9 | 294.1  | 316.3 |
| 114.5  | 111.7 | 108.3 | 110.9 | 103.9 | 107.5 | 104.9 | 105.1  | 126.6 |
| 141.5  | 146   | 153   | 139.8 | 137.1 | 168.8 | 158.4 | 164.2  | 127.9 |
| 104.6  | 104   | 102.2 | 104.7 | 96.3  | 106.7 | 100.2 | 101.4  | 108.5 |
| 108.9  | 126.2 | 105.4 | 106.6 | 98.6  | 119.2 | 111.6 | 119    | 112.5 |
| 99.3   | 98    | 92.4  | 101.8 | 90.1  | 108.6 | 99.9  | 110.2  | 111.3 |
| 99.4   | 112.3 | 98.2  | 91.1  | 92.6  | 103.6 | 101.2 | 99.9   | 100.2 |
| 105.4  | 111.2 | 108.7 | 105.9 | 99.2  | 107.6 | 106.7 | 112.9  | 122.3 |
| 118.9  | 126   | 109.1 | 110.1 | 104.5 | 117.3 | 115.7 | 128.7  | 125.4 |
| 105.3  | 116.7 | 93.4  | 102.8 | 100.7 | 103.6 | 98.2  | 112.8  | 106.4 |
| 116.7  | 118.3 | 116.8 | 117.5 | 109.9 | 116.7 | 123.7 | 117.9  | 119.1 |
| 105.9  | 105.6 | 112.7 | 106.3 | 90.4  | 109.4 | 100.4 | 100.7  | 112.7 |
| 99.6   | 105.9 | 101.6 | 108.2 | 99.2  | 109.4 | 92.5  | 101.3  | 103.7 |
| 116.2  | 112.8 | 103.1 | 104.1 | 95    | 106   | 111.2 | 113.1  | 113.7 |
| 100    | 106.1 | 95    | 99    | 96    | 106.6 | 101.5 | 107.9  | 101.7 |
| 114.2  | 99.1  | 110.4 | 94.5  | 95.2  | 101.9 | 108.1 | 111.1  | 106.7 |
| 129.6  | 174.9 | 156.2 | 159.7 | 131.7 | 139.2 | 160.4 | 172.4  | 128.1 |
| 166.4  | 137.2 | 121.8 | 145   | 136.9 | 155.7 | 166.1 | 185.3  | 186.3 |

|        |        |        |        |        |        |        |        |        |
|--------|--------|--------|--------|--------|--------|--------|--------|--------|
| 103.8  | 103.5  | 108.1  | 102.2  | 98.6   | 107.1  | 100.5  | 113.8  | 115.5  |
| 99.3   | 116.9  | 100    | 90.5   | 99.8   | 107.1  | 107.1  | 110.9  | 111.5  |
| 102.9  | 105.2  | 98.1   | 96.8   | 96     | 111.4  | 101    | 122.6  | 108.7  |
| 1926.7 | 2443.5 | 2527.6 | 2045.1 | 2332.9 | 2482.5 | 2025.5 | 2620.7 | 1701.3 |
| 1656   | 2216.3 | 1907.1 | 3182.2 | 1555.2 | 1621.4 | 2462.5 | 3320.8 | 2751.7 |
| 852.4  | 1843.1 | 1985.1 | 1612.5 | 1295.3 | 1738.8 | 1586.7 | 2117.9 | 1449.2 |
| 106.7  | 105.1  | 99.1   | 95.3   | 95.7   | 116.8  | 99.7   | 106.9  | 113.7  |
| 108    | 115.1  | 100.8  | 107.9  | 100.5  | 106.1  | 106.3  | 100.8  | 105.3  |
| 110.6  | 123    | 114.1  | 129.8  | 105.2  | 121.9  | 108.7  | 126.9  | 136.4  |
| 521.7  | 545    | 480.4  | 425.9  | 406.1  | 538.8  | 425.3  | 910.5  | 690.6  |
| 114.8  | 143.9  | 124.9  | 156.7  | 133.3  | 129    | 194.1  | 163.2  | 140.8  |
| 103.4  | 114    | 105.7  | 116.4  | 97.6   | 117.9  | 101    | 112.5  | 114.5  |
| 114.5  | 109.5  | 107.9  | 99.1   | 99.5   | 105.2  | 106.4  | 117.8  | 114.8  |
| 104.2  | 113.5  | 103.4  | 108.2  | 100.7  | 108.3  | 105.2  | 118.1  | 113.8  |
| 137.6  | 136.9  | 122.7  | 148.3  | 134.9  | 140.8  | 146    | 188.3  | 150.8  |
| 107.8  | 105.9  | 104    | 104.5  | 100.3  | 109    | 109.4  | 100.6  | 109.5  |
| 285.3  | 257.3  | 210.6  | 295.6  | 245.9  | 237.5  | 327.1  | 341    | 261.1  |
| 104.1  | 107.7  | 107.6  | 97.9   | 96.7   | 101.9  | 98.6   | 112.2  | 111.3  |
| 128.7  | 175.2  | 143.6  | 132.2  | 162.9  | 163.3  | 160.4  | 325.7  | 167.2  |
| 128.9  | 163    | 143.9  | 387.9  | 201.5  | 149.2  | 469.2  | 184.5  | 132.1  |
| 118.6  | 165.7  | 143.6  | 129.7  | 125.4  | 138.7  | 113.1  | 196.6  | 155.2  |
| 98.4   | 100.2  | 106.2  | 98.6   | 90.7   | 106.3  | 107    | 107.4  | 102.7  |
| 112.9  | 106.5  | 120.9  | 104    | 97.3   | 111.1  | 108    | 115.8  | 108    |
| 112.4  | 118.4  | 116    | 105.4  | 97.6   | 111.1  | 105.8  | 120    | 107.3  |
| 105.4  | 107.7  | 97.4   | 106.4  | 92.3   | 112.9  | 102.9  | 117.2  | 108.2  |
| 104.7  | 106.9  | 95.5   | 103.9  | 103.1  | 102.7  | 104.2  | 104.4  | 114.9  |
| 101.2  | 98.8   | 103.7  | 98.3   | 90.8   | 105    | 99.8   | 103    | 118.8  |
| 110.4  | 102.2  | 105.5  | 100.5  | 96     | 103.5  | 102.4  | 114.7  | 106.5  |
| 112.5  | 114.1  | 104.7  | 106.1  | 108.1  | 109.4  | 112.4  | 122.4  | 114.6  |
| 116.7  | 118.8  | 107    | 108.8  | 107.5  | 122.3  | 118    | 136.2  | 121.6  |
| 111.1  | 117    | 99.4   | 103    | 102.9  | 110.2  | 108.1  | 118.4  | 116.3  |
| 104.7  | 109.5  | 93     | 104.5  | 93.3   | 109.8  | 105.4  | 116.9  | 112.1  |
| 104.9  | 103.8  | 96.3   | 105    | 94.5   | 99.7   | 101.2  | 103.8  | 100.9  |
| 116.9  | 219.9  | 204.2  | 188.7  | 172    | 167.2  | 198.6  | 200.8  | 149.1  |
| 103.3  | 143.5  | 141.3  | 119.9  | 118.8  | 150.1  | 140.2  | 131.8  | 120.6  |
| 183.4  | 168.6  | 170.7  | 204.5  | 151.7  | 162.6  | 130.4  | 197.6  | 183.5  |
| 101.4  | 112.6  | 107.7  | 98.3   | 97.5   | 116.4  | 94.7   | 103.4  | 101    |
| 107.2  | 105.1  | 101.5  | 99.4   | 91.2   | 105.5  | 94.8   | 104.4  | 106.3  |
| 110.7  | 113.6  | 101.9  | 110.8  | 99.8   | 112    | 99.9   | 112.2  | 113.6  |
| 110    | 108    | 99.1   | 99.7   | 95.6   | 109.9  | 99.7   | 104.5  | 110.6  |
| 114.7  | 114.6  | 112.6  | 109.4  | 97.7   | 113.9  | 113.2  | 105.9  | 101.8  |
| 120.7  | 115.2  | 103.7  | 111.6  | 110.2  | 107.2  | 102.6  | 121.1  | 109.2  |
| 103.6  | 105.9  | 99.4   | 109.7  | 99.5   | 118.8  | 100    | 111.7  | 115.7  |
| 127.5  | 145.4  | 163.3  | 156.1  | 112.8  | 175.6  | 135.7  | 123.9  | 147.7  |
| 200.6  | 229.2  | 218.1  | 190.5  | 225.4  | 225.8  | 196.2  | 326.6  | 221.6  |
| 189.1  | 168.1  | 159.9  | 182.9  | 160.5  | 177.9  | 195.8  | 201    | 144    |
| 115.9  | 118.7  | 125.8  | 113.2  | 107    | 122.5  | 102.1  | 119.9  | 119.5  |
| 102.3  | 110.3  | 117.4  | 102    | 104.2  | 103    | 103.6  | 117.2  | 112.5  |
| 143    | 142.8  | 156.7  | 145.7  | 134.3  | 131    | 146.6  | 191.1  | 163.3  |
| 108.6  | 110.6  | 104.4  | 96.3   | 98.2   | 110.1  | 100.5  | 96.4   | 107.7  |
| 120.1  | 131.5  | 129.4  | 131    | 114.8  | 123.7  | 131.3  | 150.1  | 128.5  |

|       |        |        |        |        |       |        |        |        |
|-------|--------|--------|--------|--------|-------|--------|--------|--------|
| 299.1 | 240.8  | 247.5  | 259.1  | 272.3  | 289   | 310.6  | 451.3  | 301.6  |
| 928.9 | 738.7  | 568.7  | 931.2  | 727.4  | 801   | 982.2  | 1124.4 | 882.3  |
| 2498  | 3082.8 | 2692.2 | 3927.9 | 2744.8 | 3491  | 3698.7 | 5637.9 | 3717.2 |
| 103   | 106.2  | 106.1  | 93.1   | 87.9   | 104.6 | 98     | 106.4  | 100.8  |
| 116   | 143.2  | 119.1  | 138.3  | 111.8  | 117   | 128.4  | 124.1  | 111.4  |
| 248.5 | 459.4  | 527.1  | 598.1  | 409.7  | 441   | 472.4  | 744    | 395    |
| 136.3 | 128.6  | 127.8  | 143.2  | 108.4  | 123.8 | 129    | 147.6  | 142.6  |
| 111.8 | 107.9  | 114.1  | 99.7   | 94.1   | 112   | 97.2   | 105.9  | 112.8  |
| 111.1 | 110.6  | 101.9  | 124.5  | 99.1   | 110.5 | 107.5  | 112.7  | 106.8  |
| 110.5 | 113.6  | 107.2  | 103.9  | 99.4   | 109.6 | 102.9  | 118.5  | 110.5  |
| 108.9 | 113.1  | 100.8  | 104.9  | 98.3   | 108.4 | 99.1   | 110.3  | 110    |
| 118.1 | 195.7  | 234.5  | 168.6  | 182.9  | 202   | 148.9  | 178.6  | 109.3  |
| 103.5 | 116    | 105.8  | 105.5  | 109.3  | 117.9 | 105.8  | 108.3  | 109.5  |
| 109.4 | 130.3  | 120    | 117.6  | 114.1  | 134.1 | 116.5  | 118.9  | 124.3  |
| 116.7 | 106.9  | 103.2  | 102.5  | 93.5   | 107.2 | 104.3  | 116.2  | 98.4   |
| 98.5  | 105.9  | 104    | 94.4   | 97.7   | 108.5 | 108.5  | 104.7  | 111.5  |
| 170.9 | 167    | 144    | 126.5  | 134.2  | 132.4 | 139.1  | 135.2  | 120.6  |
| 119.9 | 129.1  | 127.7  | 122.7  | 121    | 118.4 | 122.7  | 138    | 120.6  |
| 116.8 | 123.1  | 118.3  | 116.5  | 120    | 131.6 | 117.3  | 127.6  | 116.6  |
| 115.4 | 127.3  | 125.2  | 115.3  | 104.2  | 131.4 | 109.8  | 124.8  | 112.8  |
| 107.8 | 107.5  | 115    | 93.4   | 95.5   | 110.5 | 95.5   | 105.1  | 106.9  |
| 111.5 | 110.8  | 106.9  | 94     | 90.9   | 104.3 | 104.5  | 109.8  | 109.5  |
| 553.8 | 684.6  | 658.4  | 855.9  | 585.7  | 694.3 | 883    | 900.8  | 698.1  |
| 238.4 | 223.3  | 216.6  | 240.7  | 194.2  | 202.7 | 268.4  | 371.7  | 273.4  |
| 105.5 | 112.2  | 104.5  | 107.2  | 97.2   | 111.3 | 104    | 121.6  | 112.9  |
| 109.5 | 105.6  | 105.3  | 103.6  | 98.1   | 115.8 | 104.9  | 120.1  | 106.7  |
| 159.4 | 171    | 189    | 157.3  | 159.8  | 205.7 | 173.8  | 186.3  | 154.6  |
| 103.8 | 109.2  | 102.6  | 97.2   | 91     | 107.4 | 97.5   | 109    | 110.3  |
| 105.3 | 101.3  | 116.1  | 108.3  | 101.4  | 106.6 | 104    | 116.8  | 107.3  |
| 101.3 | 101.7  | 101.7  | 103.9  | 93.8   | 107.9 | 100.5  | 102.5  | 107.6  |
| 101.6 | 104.7  | 101.8  | 99.3   | 100.2  | 107.3 | 104.5  | 117.2  | 124    |
| 838.7 | 950.2  | 746.7  | 1046.3 | 811.2  | 796.3 | 1140   | 1147.4 | 945.7  |
| 97.6  | 110.5  | 102.3  | 91.8   | 100.5  | 106.4 | 101.8  | 96.6   | 100.1  |
| 143   | 163.1  | 158.1  | 203.9  | 157.2  | 158.8 | 184.5  | 221.9  | 172.8  |
| 111.2 | 117.1  | 113.1  | 104.6  | 104.3  | 115.4 | 101.9  | 105.2  | 101.8  |
| 201.9 | 380    | 438.9  | 282.8  | 320.8  | 352.6 | 324.6  | 479.3  | 354.4  |
| 118.8 | 120.3  | 96.5   | 123    | 97.3   | 118.4 | 128    | 116.8  | 111.6  |
| 110.2 | 110.9  | 108.3  | 96.5   | 93.3   | 118.5 | 104.6  | 108.7  | 108.1  |
| 98    | 99.1   | 100.7  | 97     | 88.4   | 112.5 | 99.9   | 103.2  | 98.4   |
| 111.1 | 112.9  | 108.2  | 103.3  | 111.4  | 105.1 | 109.9  | 107.8  | 109.9  |
| 113.5 | 149    | 128.3  | 159.7  | 118.9  | 118.4 | 127.9  | 131.6  | 114.5  |
| 114.2 | 124.1  | 102.1  | 109.8  | 106.1  | 120   | 109.2  | 118.3  | 111.4  |
| 377.4 | 665.5  | 699.6  | 447.6  | 541.6  | 611.8 | 493.7  | 596.3  | 356.3  |
| 146.4 | 184.6  | 147.8  | 401.1  | 170    | 142.6 | 326.1  | 225.8  | 235.5  |
| 248.2 | 359    | 292.2  | 296.9  | 318.1  | 354.8 | 288.7  | 642.2  | 539.2  |
| 297.1 | 414.5  | 446.6  | 346.4  | 310.1  | 456.5 | 344.5  | 682.1  | 436    |
| 125.4 | 197.4  | 190.1  | 221.5  | 184.9  | 174.1 | 221.8  | 228    | 148.6  |
| 503.7 | 528    | 587.8  | 546.3  | 546.6  | 672.8 | 549    | 746.5  | 499.6  |
| 117.4 | 128.8  | 112.5  | 123.7  | 107.3  | 129   | 125    | 162    | 146.8  |
| 362.8 | 427.3  | 572.4  | 243.5  | 402.2  | 587.4 | 291.2  | 938.9  | 811.7  |
| 111.2 | 108.8  | 106.2  | 101    | 103.2  | 114.2 | 109.4  | 124.4  | 103.7  |



|       |        |        |        |        |        |        |        |        |
|-------|--------|--------|--------|--------|--------|--------|--------|--------|
| 107.5 | 101.6  | 99.6   | 96.1   | 90.6   | 106.2  | 103    | 116.8  | 106.5  |
| 107.8 | 117.3  | 109.3  | 97.1   | 102.3  | 119.6  | 106.5  | 105.6  | 104.7  |
| 107.7 | 109.5  | 108.4  | 120    | 106.8  | 116.5  | 116.2  | 126.3  | 127.1  |
| 111.7 | 117.5  | 110.8  | 113.1  | 97.7   | 114.4  | 109.8  | 119.1  | 116.4  |
| 251.1 | 302    | 255.8  | 226.8  | 305.6  | 369    | 333.9  | 638.1  | 374    |
| 106.3 | 117.2  | 101.9  | 101.1  | 101.8  | 111.4  | 110.2  | 122.1  | 121    |
| 161.4 | 252.4  | 204.9  | 192.3  | 239.8  | 235.6  | 238.5  | 296.6  | 245.2  |
| 103.8 | 103.9  | 102.9  | 88.6   | 91.4   | 107.7  | 103.3  | 109.6  | 114.8  |
| 111.6 | 113.2  | 101.5  | 107.2  | 99.6   | 106.3  | 106.8  | 106.2  | 116    |
| 127.6 | 137.7  | 132.9  | 127.4  | 112.5  | 138.9  | 122.1  | 151.7  | 151    |
| 155.8 | 185.8  | 169    | 165.7  | 158.9  | 172.5  | 164.8  | 201.4  | 179.1  |
| 101.9 | 112.8  | 99.4   | 100    | 97.3   | 109.2  | 99.6   | 113.7  | 111.1  |
| 111.9 | 112.6  | 109.6  | 114.5  | 100.9  | 112.6  | 114.7  | 118    | 112.3  |
| 335.1 | 448.5  | 320.1  | 1008.1 | 263.9  | 270.6  | 425.5  | 316.1  | 321.6  |
| 104.3 | 104.6  | 103.3  | 94.7   | 93.2   | 101.4  | 101.2  | 107.1  | 100.8  |
| 246.3 | 261.3  | 252.2  | 510.2  | 176.8  | 207.4  | 311.4  | 254.7  | 247.6  |
| 116.4 | 111.6  | 109.8  | 115    | 98.9   | 119.8  | 111.2  | 122.9  | 125.6  |
| 117.1 | 109.8  | 114.2  | 105.4  | 102.4  | 116.7  | 104.1  | 112.3  | 130.2  |
| 108   | 104.3  | 107    | 99.3   | 92.2   | 109.7  | 105    | 106.9  | 104.5  |
| 108.7 | 117.3  | 107.6  | 101.9  | 100    | 104.9  | 99.4   | 109.1  | 104.9  |
| 109.8 | 116.2  | 103.7  | 106.3  | 110.8  | 114.7  | 101.7  | 109.5  | 108.4  |
| 922.5 | 2033.7 | 1973.8 | 1570.8 | 1813.8 | 1912.6 | 1633.4 | 2321.5 | 1211.9 |
| 161.6 | 222.8  | 232.8  | 175.8  | 215.9  | 238.1  | 233.6  | 280.8  | 213.9  |
| 288   | 273.8  | 251.5  | 266.3  | 229.8  | 266.1  | 268.1  | 499.5  | 383.7  |
| 119.9 | 106.9  | 115.3  | 114.1  | 107.3  | 123.4  | 105.1  | 119.7  | 148.7  |
| 101.7 | 108.8  | 105.7  | 105.8  | 96.4   | 108.6  | 102.3  | 107.8  | 102.3  |
| 257.4 | 385    | 246.9  | 397.9  | 205.9  | 252.4  | 243.3  | 483.4  | 619.2  |
| 128.1 | 110.2  | 102.1  | 105.2  | 92     | 112.7  | 104.9  | 109    | 120.1  |
| 131.1 | 116.6  | 115.7  | 100.7  | 106.5  | 119.6  | 108.6  | 129.5  | 186.5  |
| 106.7 | 107.4  | 91.4   | 100.1  | 94.1   | 104.7  | 109.2  | 104.6  | 110.3  |
| 145.8 | 200.8  | 180.4  | 161.3  | 165.1  | 195.7  | 135.8  | 305.4  | 206.5  |
| 116.1 | 122.5  | 121.7  | 107.2  | 112.7  | 130.2  | 110.3  | 134.5  | 129.1  |
| 115.4 | 131.2  | 120.3  | 116.3  | 114.3  | 139.8  | 114.5  | 174    | 130.5  |
| 127.8 | 168.8  | 134    | 136.7  | 115.2  | 117.3  | 147.7  | 147.2  | 142.4  |
| 110.4 | 108.6  | 99.6   | 99.7   | 101.4  | 108.9  | 103    | 111.5  | 102.6  |
| 107.2 | 115.4  | 94.4   | 101.3  | 96.1   | 110.2  | 111.9  | 110.1  | 103.1  |
| 116.7 | 134.2  | 131.7  | 107.6  | 106.5  | 131.2  | 129.7  | 253.6  | 215.5  |
| 116.8 | 110.5  | 123    | 109.3  | 105.8  | 132    | 108.1  | 139.3  | 121    |
| 128.8 | 139.6  | 118    | 115    | 118.1  | 142.5  | 125.9  | 244.9  | 236.2  |
| 129   | 128.5  | 149.6  | 119.4  | 112.5  | 137.7  | 127    | 191.7  | 243.4  |
| 110.4 | 114.1  | 103.5  | 96.8   | 100.8  | 104.7  | 102.6  | 104    | 98.7   |
| 111.7 | 114.2  | 114.1  | 108.4  | 102.8  | 115.3  | 109.3  | 133.1  | 132.5  |
| 162.7 | 168.1  | 153.1  | 158.3  | 160.4  | 190.4  | 171.5  | 274.1  | 223.4  |
| 111.3 | 105.8  | 105.7  | 102.6  | 95.9   | 114.7  | 103.8  | 109    | 113.6  |
| 104.9 | 107.1  | 109.9  | 100.3  | 95.8   | 105.1  | 110.2  | 105    | 101.6  |
| 105   | 107.8  | 103.5  | 104.7  | 92.1   | 110    | 101.6  | 114.2  | 112    |
| 132.3 | 163.3  | 154.4  | 160.5  | 130.3  | 172.3  | 145.2  | 240.5  | 177.9  |
| 101.5 | 109.4  | 104.6  | 104.3  | 104.6  | 105.9  | 115.7  | 111.8  | 109.8  |
| 104.9 | 107.2  | 101.4  | 96.5   | 96.7   | 111.9  | 99.3   | 105.6  | 107.1  |
| 147.5 | 224.9  | 222.4  | 229.9  | 162    | 244.5  | 242.6  | 280.8  | 228    |
| 101.4 | 107.5  | 97.4   | 103.4  | 96.8   | 113.2  | 102    | 112.2  | 105.3  |

|        |       |       |       |       |       |       |        |        |
|--------|-------|-------|-------|-------|-------|-------|--------|--------|
| 237.9  | 210.1 | 206.8 | 169.6 | 211.2 | 217.5 | 197.7 | 347.8  | 344.3  |
| 100.9  | 104.5 | 101   | 93.7  | 87.4  | 109   | 104.6 | 115.3  | 107.4  |
| 126.7  | 108.3 | 111.4 | 104.8 | 94.6  | 110   | 103.2 | 118.8  | 118.5  |
| 132.9  | 144   | 124.1 | 253.8 | 126.3 | 146.4 | 209   | 187.7  | 143.7  |
| 111.3  | 120.8 | 99.3  | 107.3 | 90.4  | 109.1 | 118.1 | 112.7  | 113.2  |
| 99.8   | 111   | 102.4 | 103.6 | 100.8 | 108.9 | 103.6 | 114    | 104.4  |
| 115.2  | 115.9 | 104.6 | 104.9 | 103.3 | 103.2 | 105.4 | 107.5  | 97     |
| 99.4   | 99    | 100.1 | 96.3  | 86.1  | 99.6  | 100.7 | 106.3  | 99.3   |
| 100.7  | 105.3 | 105.5 | 102.1 | 92.1  | 106.2 | 96.8  | 109.6  | 108.6  |
| 108.2  | 104.3 | 100.8 | 96.4  | 94.5  | 108.4 | 107.8 | 116.8  | 102.5  |
| 122.7  | 116.9 | 113.7 | 117   | 112.9 | 110.9 | 102.8 | 111.3  | 112.2  |
| 102    | 111.7 | 103.1 | 111.5 | 99.1  | 125.6 | 104.1 | 114.7  | 110.1  |
| 118.2  | 112.3 | 108.4 | 112.8 | 107.1 | 120.3 | 98.5  | 112.8  | 114.3  |
| 154.6  | 172.5 | 159   | 176.1 | 153.4 | 175.8 | 166.3 | 223.9  | 186.2  |
| 145    | 142   | 141.6 | 138.7 | 116.9 | 148.2 | 139.9 | 172.5  | 143.7  |
| 103.4  | 109.5 | 109.9 | 111.7 | 95.5  | 106.8 | 109.7 | 109.5  | 115.9  |
| 110    | 115.4 | 105.6 | 122.9 | 101.8 | 119.9 | 105.8 | 135.3  | 139.5  |
| 112    | 119.1 | 109.9 | 97.5  | 92.3  | 108.1 | 106.7 | 109.2  | 119.1  |
| 123.6  | 134.3 | 117.7 | 121   | 110.4 | 119.2 | 109.2 | 141.3  | 126.4  |
| 105.9  | 111   | 105.2 | 112.4 | 103.8 | 111.1 | 110.3 | 101.1  | 117.8  |
| 337    | 349.9 | 297.5 | 344.3 | 270.7 | 357   | 294.3 | 527.3  | 364.2  |
| 104.8  | 108.9 | 98.9  | 100.8 | 95    | 101.6 | 103   | 106.9  | 106.5  |
| 160.5  | 127.9 | 143.1 | 144.2 | 131.8 | 129.1 | 132.9 | 229.4  | 159.8  |
| 1173.2 | 663   | 691   | 550.3 | 861.3 | 964.6 | 485.7 | 2006.2 | 1664.6 |
| 115.2  | 109   | 104.7 | 94.2  | 95.5  | 106.8 | 97.6  | 122.3  | 105.1  |
| 374.4  | 550.8 | 496.4 | 366.6 | 378.1 | 458.7 | 365.5 | 849.2  | 732.8  |
| 104.4  | 101.5 | 100.3 | 107.7 | 100.6 | 107.8 | 101.1 | 106.1  | 101.4  |
| 107.4  | 105.4 | 103.9 | 109.8 | 95.3  | 112.2 | 107.2 | 108.8  | 101.4  |
| 122.6  | 165.8 | 142.9 | 137.4 | 128.2 | 143.2 | 166.4 | 154.1  | 145.6  |
| 113.8  | 100.1 | 106.6 | 102.4 | 100.7 | 117.3 | 104.2 | 116.7  | 106.5  |
| 135.4  | 154.5 | 122.8 | 148.5 | 137.3 | 149.1 | 154.9 | 195.1  | 181.1  |
| 165.9  | 151.1 | 221.4 | 144.4 | 135.4 | 198.1 | 166.5 | 259.1  | 301.8  |
| 142.5  | 206.9 | 169.1 | 188.8 | 161.3 | 206   | 271.7 | 196.8  | 162    |
| 113.5  | 139.5 | 121.5 | 110.8 | 113.7 | 112.4 | 129.4 | 121.6  | 113.4  |
| 107.7  | 105.2 | 110.1 | 109.2 | 94.9  | 107.2 | 104.8 | 108.9  | 114.4  |
| 107    | 114.3 | 99.5  | 101.6 | 95.7  | 115.1 | 102.9 | 105    | 103.2  |
| 138.5  | 195.8 | 157.1 | 149.9 | 152.9 | 179.6 | 154.9 | 236.9  | 182.7  |
| 119.2  | 134.9 | 126.6 | 125   | 116.2 | 131   | 128.9 | 204.1  | 173.6  |
| 114.1  | 117.9 | 104.6 | 122.2 | 107.3 | 120.1 | 104.3 | 130.4  | 113    |
| 103    | 106.3 | 108.7 | 100.3 | 97.6  | 100   | 98.1  | 110.7  | 101.2  |
| 115.9  | 110.2 | 104.1 | 102.5 | 93.1  | 128.5 | 109.9 | 131.1  | 124.5  |
| 153.3  | 140.7 | 124   | 124.2 | 122.3 | 138.2 | 118.1 | 205.5  | 178.1  |
| 344.9  | 490.8 | 454.9 | 471.4 | 385.9 | 380.5 | 337.8 | 538.1  | 424.4  |
| 108.5  | 106.1 | 103.6 | 105.8 | 94.2  | 107.3 | 103.5 | 98.8   | 110.1  |
| 143.6  | 164.3 | 167.4 | 181.4 | 152   | 172.1 | 171.8 | 270.8  | 245.3  |
| 149.3  | 176.8 | 172.3 | 145.6 | 140.8 | 152.1 | 155.3 | 275.5  | 201.9  |
| 292.4  | 417.4 | 396.6 | 362.3 | 386.7 | 422.9 | 313.7 | 852.5  | 478.2  |
| 244.2  | 399.6 | 473.3 | 507.1 | 467.6 | 471.9 | 533.1 | 430.6  | 291.2  |
| 108.6  | 114.9 | 105.1 | 104.3 | 102.8 | 121.2 | 103.5 | 123.4  | 122.1  |
| 102.5  | 110.2 | 99.8  | 97.4  | 95.1  | 114.3 | 102.3 | 110.1  | 107.4  |
| 108.4  | 123.5 | 128.3 | 113.1 | 117   | 130.3 | 115.6 | 145.3  | 136.3  |

|       |       |       |       |       |       |       |        |       |
|-------|-------|-------|-------|-------|-------|-------|--------|-------|
| 187   | 279.4 | 244.2 | 184.1 | 208.1 | 259.5 | 217   | 338.9  | 211   |
| 394.4 | 242.5 | 308.4 | 218.2 | 249.7 | 234.5 | 233.8 | 467.5  | 472.1 |
| 115.8 | 138.8 | 143.8 | 156.9 | 122   | 148.8 | 153   | 134    | 133.7 |
| 153.1 | 313.3 | 274.4 | 228.2 | 205.9 | 231   | 223   | 345.8  | 216.6 |
| 139.4 | 142.8 | 120.1 | 115.8 | 101.7 | 126.3 | 108.2 | 138.7  | 138.6 |
| 109.2 | 105.4 | 96.9  | 93.7  | 100.1 | 109.2 | 108.2 | 114.3  | 109.6 |
| 111.6 | 102.9 | 103.9 | 95.6  | 99.9  | 105.3 | 104.3 | 113.5  | 113.2 |
| 104   | 117.4 | 96.5  | 99.1  | 101.2 | 107.4 | 96.9  | 106.7  | 110.3 |
| 107.5 | 105.5 | 100.5 | 99.9  | 89.8  | 102.1 | 96    | 105    | 107.1 |
| 109.4 | 112.6 | 102.4 | 96.1  | 97    | 108.1 | 95.7  | 102.8  | 110.1 |
| 118.9 | 113.8 | 102.2 | 113.1 | 96.1  | 109.3 | 101.2 | 112.9  | 111.6 |
| 117.2 | 111.1 | 109.2 | 119.4 | 97    | 113.7 | 108.2 | 115.2  | 108.9 |
| 588   | 653.2 | 634.8 | 536.9 | 580.1 | 820.1 | 635.4 | 1131.1 | 998.9 |
| 110.9 | 119.6 | 102.2 | 109.8 | 102.4 | 114.7 | 116.2 | 113.9  | 110.8 |
| 189.8 | 146.4 | 169.6 | 136   | 149.6 | 169.9 | 137.5 | 220.9  | 215.3 |
| 106.3 | 109.4 | 107.1 | 94.1  | 99.5  | 104.7 | 111.3 | 105.5  | 108.4 |
| 107.9 | 110.3 | 107.1 | 103.6 | 102   | 118.4 | 100.5 | 119.9  | 115.6 |
| 199.5 | 245.2 | 288.7 | 256.6 | 182   | 237.8 | 254.4 | 289.2  | 257.7 |
| 363.7 | 442   | 357   | 374.6 | 323.1 | 379.5 | 414   | 867    | 729.1 |
| 109.5 | 128.3 | 121.5 | 115.9 | 107.1 | 113.3 | 105.2 | 115.5  | 111.2 |
| 110.2 | 112.1 | 105.7 | 104.4 | 104.7 | 113.5 | 116.4 | 110.6  | 104.8 |
| 126.8 | 147.6 | 141   | 128   | 125.9 | 151   | 132.7 | 195.4  | 148   |
| 117.3 | 114.4 | 119.1 | 117.8 | 122.4 | 127.8 | 110   | 133.5  | 124.1 |
| 386.7 | 605.8 | 447.6 | 506.2 | 367   | 480.8 | 538.5 | 676.5  | 555.5 |
| 110.2 | 125   | 113.5 | 105.5 | 109.2 | 119.6 | 115.8 | 127.9  | 107.2 |
| 118.4 | 152.8 | 144.9 | 118.6 | 147.1 | 127.3 | 125.7 | 164.7  | 159.1 |
| 203.6 | 406.7 | 431.9 | 380.7 | 376.3 | 405.9 | 407.1 | 373.8  | 262.5 |
| 107.9 | 110   | 110.4 | 112.1 | 105.9 | 111.9 | 109   | 127.6  | 126.1 |
| 389.1 | 421.9 | 453.1 | 489.6 | 434.9 | 477.6 | 495.5 | 650.5  | 703   |
| 123.2 | 121.4 | 122.5 | 116.9 | 106.5 | 126.7 | 104.6 | 128.2  | 118.8 |
| 107.1 | 109.3 | 103   | 103.8 | 102   | 110.5 | 100.9 | 114    | 105.9 |
| 135.2 | 131.5 | 121.1 | 119.2 | 118.1 | 149   | 135.8 | 196.8  | 193   |
| 605   | 583.5 | 472.1 | 588.6 | 591.2 | 566.7 | 707.2 | 1051.4 | 914.1 |
| 111.1 | 104.5 | 109   | 103   | 98.9  | 110.3 | 104.3 | 114.9  | 109.8 |
| 104.4 | 115   | 98    | 91.5  | 91.8  | 107.3 | 106.7 | 103.5  | 107.4 |
| 108.7 | 128   | 117.7 | 120.5 | 109.1 | 116.6 | 116   | 123.9  | 115.5 |
| 143.8 | 212   | 216.1 | 227.7 | 185.8 | 180.2 | 178.4 | 160.5  | 156.7 |
| 117.3 | 111.6 | 110.9 | 120.4 | 110.5 | 120   | 108.2 | 130.3  | 103.4 |
| 104.6 | 111.5 | 95.6  | 102.1 | 96.3  | 108.4 | 102.3 | 120.1  | 106.2 |
| 117.6 | 109.2 | 102.4 | 103.2 | 92.8  | 111   | 103.8 | 104.8  | 103   |
| 113.1 | 101.2 | 93.3  | 97    | 89.5  | 102.1 | 103.4 | 103.7  | 104.6 |
| 114.9 | 120.2 | 131.2 | 109.1 | 107.6 | 127.6 | 111.4 | 125.4  | 150.3 |
| 112.7 | 106.9 | 100.7 | 95.7  | 98.7  | 106.2 | 99.4  | 115    | 107.1 |
| 119.2 | 140.7 | 123.9 | 139.8 | 122.7 | 127.4 | 131.4 | 143.6  | 144   |
| 101.5 | 100   | 97.4  | 99    | 96    | 99.1  | 99.9  | 106.7  | 110.5 |
| 109   | 137.5 | 113   | 119.8 | 103.5 | 119.3 | 109.4 | 131.6  | 128.8 |
| 206   | 304.9 | 293.1 | 226.5 | 221.8 | 278.9 | 327.7 | 401.1  | 299.8 |
| 261.9 | 266.8 | 309.5 | 240.8 | 261.9 | 251.6 | 222.1 | 488.9  | 377.2 |
| 101.1 | 102.5 | 101.8 | 103   | 103.8 | 105.3 | 99.7  | 109.3  | 109.7 |
| 108.9 | 108.2 | 101.3 | 101.6 | 94.4  | 106.9 | 103.6 | 108.1  | 106.5 |
| 193.5 | 171   | 151.3 | 178.2 | 151.7 | 179.4 | 170.9 | 223.5  | 172.3 |

|        |        |        |        |       |        |        |        |        |
|--------|--------|--------|--------|-------|--------|--------|--------|--------|
| 101.7  | 104.4  | 98.5   | 95.6   | 90.1  | 105.4  | 101.1  | 97.4   | 98.8   |
| 301.1  | 284.8  | 307.8  | 228    | 235.4 | 282.6  | 214.6  | 501.8  | 535.8  |
| 124.1  | 158.5  | 138.7  | 120.1  | 127.5 | 160.3  | 167.2  | 184.5  | 151.4  |
| 207    | 354.8  | 326.3  | 413.4  | 265.6 | 289.5  | 246.2  | 309.6  | 272.7  |
| 100.4  | 110.2  | 102.4  | 102.2  | 99    | 111.5  | 99.8   | 110.9  | 101.9  |
| 109    | 119.3  | 118.8  | 112    | 100.4 | 125.3  | 112.4  | 112.8  | 122.2  |
| 107.4  | 103.6  | 100.2  | 94.4   | 94.7  | 115.3  | 102.6  | 109.4  | 100.7  |
| 433.3  | 569.2  | 549.9  | 695.9  | 409.6 | 491.6  | 509.3  | 572.8  | 454.3  |
| 107.7  | 113.5  | 96.5   | 107.7  | 90.8  | 103.4  | 101.1  | 103.9  | 101.3  |
| 126.8  | 143.3  | 118.9  | 132.3  | 119.7 | 137.2  | 126.1  | 177.3  | 159.6  |
| 307.3  | 629.5  | 682    | 665.1  | 586.8 | 640.2  | 644.9  | 690.4  | 354.2  |
| 111.7  | 111.6  | 114.6  | 109.7  | 104.7 | 111.8  | 118.4  | 116.6  | 124.5  |
| 129.8  | 186.7  | 206.9  | 172    | 127.7 | 204.3  | 129.9  | 193.5  | 222.6  |
| 1106.6 | 1211.8 | 887.2  | 844.7  | 832.3 | 1032.7 | 1066.8 | 1656.8 | 1922.3 |
| 253.8  | 530.6  | 457.9  | 402.2  | 438.5 | 395.9  | 486.4  | 464.1  | 321.4  |
| 115    | 100.7  | 100    | 109    | 95.2  | 115.4  | 101.3  | 107.2  | 109.2  |
| 123.1  | 119.1  | 116.2  | 116    | 109.1 | 118.3  | 114.2  | 120.8  | 118.7  |
| 116.9  | 112.4  | 106    | 111.2  | 99.7  | 112.1  | 110.4  | 111.7  | 110.2  |
| 114.5  | 110.1  | 109.9  | 108.9  | 100.2 | 107.3  | 102.2  | 112.9  | 115.9  |
| 102.5  | 103.6  | 104.1  | 94.3   | 95    | 102.6  | 104.1  | 111.6  | 95.2   |
| 107.4  | 123.5  | 96     | 110.1  | 126.4 | 124.4  | 123.2  | 141.9  | 140.5  |
| 172.4  | 139.3  | 175.5  | 162.1  | 130   | 176.6  | 160.2  | 243    | 191.3  |
| 104.2  | 111.5  | 104.5  | 99.4   | 102.9 | 113.3  | 109.3  | 104.9  | 100.9  |
| 104.3  | 107.1  | 102.5  | 99.5   | 98.3  | 109.7  | 109.6  | 112.4  | 112.6  |
| 116.4  | 144.7  | 148.6  | 144.2  | 129.5 | 161    | 121.2  | 168.6  | 135.2  |
| 112.5  | 113.6  | 104.3  | 117.4  | 98.4  | 120.1  | 103.9  | 114.2  | 120.4  |
| 101.2  | 104.4  | 97.6   | 93.1   | 97.2  | 109.2  | 99.4   | 105.8  | 119.8  |
| 111    | 105.6  | 111.2  | 108.8  | 98.9  | 103.4  | 105.9  | 105.9  | 100.8  |
| 108.7  | 114.2  | 104.4  | 117.4  | 96.8  | 118    | 105.6  | 127.1  | 122    |
| 133.7  | 190    | 209.6  | 175.2  | 180.9 | 221.7  | 184.6  | 235.1  | 140.6  |
| 856.4  | 1391.1 | 1443.6 | 1148.8 | 858.9 | 1352.3 | 1324.9 | 2059.1 | 1558.9 |
| 105.2  | 109.9  | 106.4  | 107.9  | 98.4  | 115.7  | 107.4  | 107.4  | 107.5  |
| 105.6  | 111    | 103.4  | 100.1  | 99.9  | 115.1  | 110.8  | 103.7  | 104.5  |
| 112.9  | 113.1  | 109    | 103.2  | 99.4  | 112.8  | 109.1  | 124.3  | 108.1  |
| 195.3  | 234.4  | 268.5  | 220.9  | 231.4 | 266.3  | 234.9  | 332.4  | 256.3  |
| 220.4  | 268.3  | 214    | 222.5  | 227.1 | 261.1  | 258.2  | 333.5  | 259    |
| 108.4  | 113.8  | 97.2   | 103.5  | 95.1  | 103.6  | 110    | 110.6  | 118.3  |
| 105.9  | 101.4  | 93.1   | 102.7  | 96.1  | 103.6  | 103.2  | 110.6  | 100.2  |
| 108    | 106.2  | 102.1  | 100.5  | 97.5  | 114.2  | 109.9  | 119.4  | 127.2  |
| 641.3  | 854.8  | 656    | 714.3  | 656.3 | 755.9  | 835.1  | 983.1  | 681.1  |
| 116.1  | 124.7  | 122.1  | 140.8  | 115.2 | 123.1  | 133    | 149.8  | 128.3  |
| 111.5  | 115.7  | 103.6  | 105.1  | 93.7  | 119.4  | 101.9  | 108.6  | 102.2  |
| 112.5  | 106.5  | 97.5   | 89.8   | 94.5  | 105.9  | 105    | 103.7  | 107.4  |
| 108.5  | 110.7  | 104.9  | 111.5  | 96.1  | 107.5  | 102.1  | 112.2  | 114.4  |
| 103.7  | 118.7  | 98.5   | 106.6  | 97.5  | 108.5  | 103.1  | 117.7  | 115.1  |
| 97.1   | 115.9  | 103.8  | 106    | 98.7  | 110.9  | 106.2  | 112    | 107.7  |
| 98.3   | 95     | 151    | 101.5  | 94.4  | 107    | 188.9  | 104.8  | 114.4  |
| 99.4   | 99.2   | 107.8  | 103.7  | 91.9  | 108.7  | 104.4  | 107.7  | 97.6   |
| 111.3  | 114.3  | 109.1  | 119.1  | 93.1  | 110.9  | 127    | 106.3  | 130    |
| 103.6  | 106.3  | 111.7  | 100.6  | 92.5  | 98.1   | 99.3   | 106.4  | 95.4   |
| 97.5   | 103.9  | 102.1  | 98.1   | 94.2  | 110.3  | 100.4  | 105.3  | 119.7  |

|        |        |        |        |        |        |        |        |         |
|--------|--------|--------|--------|--------|--------|--------|--------|---------|
| 101.2  | 99.9   | 102.9  | 104.4  | 93.8   | 109.6  | 100    | 109    | 103.4   |
| 113.3  | 108    | 106.5  | 109.5  | 94     | 96.5   | 100.9  | 113.9  | 100.5   |
| 114.7  | 110.8  | 93.8   | 115.7  | 94.7   | 113.3  | 101.9  | 115.5  | 114.5   |
| 119.4  | 114.3  | 115.4  | 100.2  | 103.6  | 117.8  | 115.9  | 128.2  | 116.3   |
| 210.1  | 677.4  | 305.3  | 393    | 975.7  | 513.9  | 517.9  | 996    | 479.8   |
| 128.1  | 123.8  | 159    | 119.6  | 112.8  | 139.8  | 114    | 120.1  | 130     |
| 110.9  | 108.9  | 108.3  | 102.7  | 105.5  | 113.4  | 103.2  | 109.2  | 103.5   |
| 127.1  | 186.4  | 201.3  | 160.9  | 123.8  | 135.6  | 235.9  | 126.9  | 134.2   |
| 95.8   | 107.2  | 97     | 98.5   | 90     | 103.1  | 99.6   | 110.6  | 107.9   |
| 113.4  | 118.4  | 110.9  | 124.8  | 105.4  | 115.8  | 115.4  | 119.7  | 114.4   |
| 163.6  | 1209   | 748.4  | 107.7  | 1990.7 | 832.1  | 2744.6 | 1226.1 | 222.3   |
| 107.1  | 106    | 111.3  | 100.4  | 98     | 106.5  | 105.2  | 109.5  | 103.6   |
| 106.6  | 107.7  | 100.4  | 107.9  | 94.8   | 116.6  | 100.4  | 102.2  | 114.4   |
| 106.6  | 110.2  | 98.1   | 94.1   | 100    | 101.2  | 103.8  | 107.8  | 102     |
| 101    | 109.6  | 103.3  | 100.4  | 93.5   | 104.8  | 98     | 112    | 100.9   |
| 117    | 110.1  | 103.3  | 112.9  | 92.3   | 115.7  | 98     | 126.1  | 107.9   |
| 126.3  | 414    | 675.2  | 229.2  | 278.5  | 275.8  | 191.6  | 331.8  | 250.7   |
| 115.2  | 179.6  | 190.6  | 145.2  | 127.4  | 154.9  | 123.1  | 174.5  | 179.6   |
| 161    | 478.6  | 554.5  | 301.5  | 386.7  | 306.9  | 240.8  | 578.9  | 509.6   |
| 136.7  | 358.1  | 160.6  | 244.1  | 190.5  | 162.3  | 174.9  | 374.7  | 264.3   |
| 6862.2 | 7143.2 | 6851.6 | 8314.8 | 5615.4 | 6614.6 | 7517.1 | 9104.7 | 11488.5 |
| 105.1  | 118.5  | 107.8  | 101.8  | 107.1  | 113.3  | 105.3  | 114.6  | 105.4   |
| 117.9  | 617.8  | 126.7  | 314.9  | 234.2  | 120.2  | 174.4  | 128.4  | 145.9   |
| 125.7  | 138.1  | 119.3  | 108.5  | 115.6  | 125    | 113.8  | 152.4  | 121.5   |
| 254.4  | 446.4  | 401.9  | 318.9  | 393.1  | 413.2  | 278.5  | 600.3  | 388.3   |
| 1152.1 | 2082.4 | 2269.8 | 1607.2 | 1704.9 | 2042.1 | 1720.7 | 2550.6 | 1294.9  |
| 110.5  | 134.1  | 111.1  | 104.8  | 101.8  | 124.4  | 108.7  | 116.4  | 106.2   |
| 119.1  | 117    | 109.4  | 115.7  | 99.4   | 115.4  | 117.3  | 123.5  | 120.6   |
| 114    | 113    | 99.3   | 101.2  | 91     | 106.7  | 103.5  | 100.2  | 101.3   |
| 234.1  | 355.5  | 256.7  | 282.7  | 268.1  | 278.2  | 274.9  | 421.8  | 314.6   |
| 107.7  | 112.7  | 105.4  | 104    | 91.2   | 114.1  | 114.9  | 127.8  | 115.3   |
| 107.8  | 107.2  | 102.9  | 98.6   | 92.4   | 106.8  | 106.6  | 103.4  | 114.1   |
| 154.4  | 183.1  | 174.5  | 162.6  | 161.3  | 184.3  | 173.5  | 211.4  | 173.3   |
| 119    | 114.7  | 105.1  | 105.1  | 94.1   | 111.3  | 116.1  | 127.9  | 117.9   |
| 108.1  | 119.9  | 115.1  | 102.4  | 93.3   | 113.3  | 107    | 106.2  | 108     |
| 110.1  | 107.2  | 102.9  | 98.4   | 104.6  | 115.2  | 104.4  | 109.6  | 112.2   |
| 106.4  | 104.8  | 99.5   | 96.2   | 93.9   | 107.8  | 102.1  | 111.1  | 108.5   |
| 173.3  | 196.6  | 149    | 157.3  | 141.8  | 185.1  | 195.3  | 273.8  | 311.8   |
| 208.7  | 256.2  | 212.2  | 181.2  | 171.9  | 253.6  | 243.6  | 462.7  | 503.5   |
| 155.8  | 127.3  | 127.9  | 124.4  | 107.8  | 139.1  | 126.2  | 319.1  | 237     |
| 108.3  | 121.9  | 106.2  | 109.9  | 100.5  | 120    | 110.1  | 105.4  | 117.3   |
| 493.8  | 1040.2 | 1219.6 | 964.7  | 930.3  | 958.3  | 1057   | 987.2  | 880.1   |
| 2079.6 | 2919.8 | 2758   | 3129.9 | 2669.1 | 3490.3 | 2821.3 | 4858.7 | 3252.8  |
| 117.1  | 142.5  | 118.9  | 120    | 103.5  | 141.2  | 126.8  | 148.4  | 146.3   |
| 115.1  | 114.4  | 106    | 111.6  | 106.8  | 112.7  | 108.6  | 130.1  | 125.6   |
| 1571.3 | 2593.2 | 2105.9 | 1832.7 | 1695.5 | 2143.6 | 2115.1 | 2680.7 | 1717.4  |
| 176.2  | 129.2  | 138.5  | 121.5  | 133.3  | 156.2  | 153.5  | 260.1  | 249.5   |
| 116.3  | 112.1  | 98.2   | 105.4  | 98.5   | 110.9  | 100.8  | 112.6  | 112.5   |
| 106.7  | 116.2  | 108.2  | 103.3  | 94.4   | 109    | 100.5  | 115.9  | 97.7    |
| 140    | 108.8  | 107.2  | 111.3  | 104.1  | 114.2  | 114.3  | 120.2  | 140.4   |
| 125.1  | 127.2  | 136.4  | 119.1  | 111.5  | 130.9  | 132    | 163.4  | 144.6   |

|        |        |        |        |        |        |        |         |         |
|--------|--------|--------|--------|--------|--------|--------|---------|---------|
| 257.2  | 362.3  | 393.4  | 378.2  | 239.9  | 274.8  | 362.8  | 764.6   | 507.4   |
| 112.1  | 108    | 115.7  | 112    | 97.9   | 108.1  | 98.4   | 113.2   | 112.4   |
| 159.8  | 170.2  | 147    | 180.2  | 152.8  | 183.8  | 183.6  | 227.5   | 206.1   |
| 158.8  | 147.8  | 150.3  | 157.2  | 156.9  | 165.8  | 182.6  | 310.2   | 198     |
| 6470.1 | 7110.2 | 5971.7 | 7755.8 | 5232.7 | 6114.2 | 5275   | 8242.8  | 5935.6  |
| 100.3  | 111.1  | 97.4   | 91.7   | 97.9   | 106.1  | 94.5   | 106.4   | 106.1   |
| 508.4  | 338.6  | 329.5  | 376.8  | 365.3  | 316.5  | 366.4  | 833.7   | 704.4   |
| 632.6  | 591.6  | 561.1  | 457.1  | 473.3  | 582.5  | 536.4  | 1133.4  | 979     |
| 112.6  | 116.1  | 117.6  | 108.7  | 105.8  | 121.4  | 112.8  | 137.1   | 126.1   |
| 143.7  | 140.5  | 117.9  | 127    | 115.3  | 128.8  | 117.8  | 160.3   | 133.1   |
| 130.7  | 126.1  | 104.5  | 108.9  | 106    | 113.3  | 121.7  | 121.6   | 133.5   |
| 257.1  | 235.2  | 218.8  | 205.1  | 234.5  | 275.4  | 235.1  | 381.6   | 360.5   |
| 106.1  | 110.7  | 104.8  | 106.2  | 100    | 103.5  | 100.1  | 104.1   | 113     |
| 725.9  | 681.5  | 548.6  | 603.9  | 754    | 637.7  | 536.1  | 813.5   | 517.9   |
| 133.5  | 140.6  | 123.1  | 148.2  | 119.1  | 125.3  | 125.4  | 189.1   | 142.4   |
| 112.2  | 116.7  | 116.3  | 100.1  | 107.6  | 113.6  | 105.3  | 123.6   | 124.8   |
| 196.2  | 301.3  | 233    | 219    | 251    | 226.3  | 318.2  | 341.1   | 296.5   |
| 253.1  | 311.8  | 213    | 272.5  | 321.7  | 235.1  | 372.5  | 516     | 175.6   |
| 110.6  | 103.3  | 101.5  | 109    | 98.8   | 115.1  | 114.2  | 117.9   | 114.2   |
| 103.4  | 103.3  | 99.9   | 103.7  | 92.6   | 107.4  | 100.6  | 106.3   | 106.3   |
| 104.7  | 112.5  | 101.1  | 109.7  | 92.9   | 106.8  | 106.7  | 105.8   | 106.7   |
| 106.1  | 115.8  | 106.6  | 102.1  | 94.5   | 104.4  | 107.7  | 107.9   | 101.7   |
| 104.1  | 107.8  | 94.1   | 106.5  | 100.5  | 110.3  | 106.7  | 115.2   | 108.8   |
| 114    | 116.6  | 106.6  | 99.1   | 121.9  | 116    | 106.8  | 118.1   | 116.9   |
| 103.7  | 110.1  | 99.7   | 105.7  | 105.5  | 97.7   | 111.3  | 115.6   | 102.1   |
| 8090.8 | 6492   | 6572.1 | 6023.2 | 5649.2 | 6818.8 | 4301.4 | 15008.3 | 13517.9 |
| 106.9  | 105.2  | 104.6  | 102.9  | 93.8   | 104.8  | 105.3  | 109.2   | 111.7   |
| 2339.9 | 3909.4 | 4092.1 | 2882.6 | 3188   | 3336.2 | 2427.3 | 3761.1  | 1267.6  |
| 98.1   | 101.8  | 99.1   | 102    | 96.3   | 103.2  | 99.1   | 104.8   | 108.3   |
| 106.5  | 121.1  | 108.2  | 106.6  | 106.8  | 122.6  | 113.3  | 116.4   | 117     |
| 105.8  | 112.1  | 107.5  | 107.9  | 103.8  | 109.9  | 105.6  | 114     | 123.7   |
| 135.4  | 159.7  | 157.2  | 132    | 130.9  | 159.4  | 147.7  | 164.5   | 140.5   |
| 114    | 125.4  | 125.6  | 114    | 107.4  | 119.8  | 110.6  | 134.7   | 115.3   |
| 113.1  | 111.5  | 103.1  | 110    | 96.8   | 103.2  | 109.7  | 104.9   | 109.1   |
| 99.4   | 102.4  | 106.9  | 106.4  | 96.1   | 110.1  | 104    | 112.6   | 109.3   |
| 100    | 106.1  | 97.2   | 98.3   | 93.4   | 107.2  | 104.9  | 104.9   | 103.2   |
| 109.1  | 105.7  | 106.9  | 106    | 97.8   | 108.6  | 99.5   | 123.6   | 112.3   |
| 105    | 114.5  | 111.2  | 111.3  | 103.2  | 115    | 115.8  | 129.8   | 106.7   |
| 161.9  | 308    | 296    | 254.6  | 276.2  | 324.8  | 309.9  | 293     | 245.7   |
| 120.5  | 177.1  | 153.1  | 192.6  | 163.3  | 200.5  | 197.9  | 239.3   | 158.3   |
| 927.9  | 789.2  | 876    | 548.5  | 665.6  | 909.1  | 786    | 1507.7  | 1461.6  |
| 142.6  | 133.6  | 135.8  | 125.2  | 111.5  | 133.8  | 127.3  | 188.3   | 187.9   |
| 860.7  | 472.1  | 463.5  | 398.5  | 450.9  | 552.5  | 590.2  | 1099.8  | 1109.4  |
| 230.1  | 151.8  | 177.4  | 165.2  | 160.7  | 171.6  | 170.6  | 262.3   | 213.1   |
| 129.6  | 122    | 122.3  | 109.8  | 107.1  | 129.9  | 106.3  | 147.2   | 132.9   |
| 239.4  | 233.7  | 237.8  | 235    | 192    | 265.9  | 164.4  | 521     | 401.8   |
| 501.2  | 239.2  | 280.8  | 213.6  | 225.8  | 239.4  | 281.5  | 553.7   | 459.9   |
| 428.9  | 350.2  | 350.4  | 338.9  | 275.3  | 380.9  | 253    | 768.3   | 660.9   |
| 123.6  | 116.5  | 108.4  | 123.4  | 106.8  | 114.9  | 102.3  | 130.7   | 126.7   |
| 1206.2 | 1407.5 | 1246.9 | 1025   | 1270.1 | 1398.7 | 1170.7 | 2287    | 1888.8  |
| 242.5  | 235.3  | 185.1  | 190.9  | 233.8  | 242.3  | 221.4  | 457.8   | 337.8   |

|        |        |        |        |        |        |        |        |        |
|--------|--------|--------|--------|--------|--------|--------|--------|--------|
| 394.9  | 462.7  | 386.3  | 335.8  | 343.6  | 384.5  | 379.1  | 836.1  | 680.1  |
| 1278.8 | 1201.9 | 859.7  | 1114   | 1120   | 1131.2 | 1202.4 | 2406.9 | 1623.2 |
| 115.8  | 105.4  | 103.1  | 102    | 106    | 109.4  | 107.6  | 111.2  | 112.6  |
| 874.2  | 3864.5 | 900.8  | 7690.9 | 3126.8 | 788    | 9844.5 | 1952.2 | 1069.9 |
| 177.2  | 541.9  | 205.2  | 1603.1 | 580.5  | 190.2  | 2184.4 | 422.1  | 272.5  |
| 131.8  | 150.9  | 136.2  | 129.1  | 114    | 134.5  | 133.4  | 177.4  | 117.9  |
| 670.8  | 1135.6 | 762.6  | 1192.3 | 1182.7 | 922.8  | 1229   | 1948.5 | 587.3  |
| 106.1  | 117.2  | 113.3  | 117.8  | 108.4  | 121.2  | 124.1  | 133.6  | 114.4  |
| 107    | 119.4  | 117.7  | 105.8  | 104.4  | 115    | 106.3  | 131.5  | 121.2  |
| 189.4  | 145.3  | 109.5  | 1064.8 | 134.1  | 115.3  | 579.4  | 127.3  | 134.1  |
| 133.8  | 113.5  | 110.6  | 279.9  | 92.6   | 117.9  | 202.6  | 120.1  | 106.7  |
| 140.5  | 128.4  | 138.8  | 138.2  | 121    | 144.2  | 154.5  | 192.9  | 163.4  |
| 103.6  | 109.3  | 98.9   | 98.3   | 98     | 103.5  | 101.1  | 103.4  | 107.6  |
| 114.6  | 111.7  | 112.5  | 107.3  | 103    | 110.6  | 107.6  | 109.2  | 103.3  |
| 115.1  | 108.8  | 101    | 98.7   | 103.1  | 108    | 110.1  | 117.6  | 113    |
| 175.3  | 388.2  | 319.7  | 337.4  | 303    | 247.6  | 334.4  | 196.9  | 171.2  |
| 104.1  | 109.4  | 101.4  | 109.1  | 97.7   | 104.4  | 101.9  | 114.6  | 103.1  |
| 105.1  | 106    | 96.9   | 98.3   | 96     | 110.2  | 103    | 100.6  | 104.4  |
| 115.2  | 111.6  | 106.1  | 111.8  | 99.5   | 112.8  | 110.2  | 99     | 112.5  |
| 105.4  | 109.9  | 103.2  | 115.9  | 98.8   | 98.8   | 105.2  | 113.9  | 105    |
| 111.6  | 117.2  | 101.8  | 107    | 93.4   | 108.6  | 103.4  | 109    | 108.7  |
| 108    | 101.8  | 101.7  | 110    | 98     | 119.2  | 110.9  | 110.3  | 116.6  |
| 795.5  | 2160.9 | 2304.9 | 2003.2 | 1664.7 | 1831.4 | 2324.7 | 1571.6 | 983.3  |
| 113.5  | 119.7  | 109.7  | 131.1  | 114.9  | 121.9  | 113.5  | 137.8  | 125.3  |
| 105.9  | 114.1  | 102.1  | 104.9  | 94.2   | 97.9   | 102.6  | 104.4  | 108.3  |
| 106.2  | 118    | 108.8  | 100.8  | 103.1  | 111.3  | 113.8  | 105.6  | 107.1  |
| 102.4  | 108.1  | 95.2   | 95.2   | 89.5   | 106.3  | 98.7   | 108.3  | 96.8   |
| 108.7  | 112.9  | 103.1  | 107.2  | 95.4   | 109.4  | 104.5  | 115.6  | 106.7  |
| 105.1  | 144.8  | 109.6  | 168.5  | 119.9  | 113.3  | 152.9  | 113.2  | 114.7  |
| 112    | 114.7  | 112.6  | 111    | 101.7  | 114.2  | 111.5  | 121.8  | 120.1  |
| 130.8  | 167.4  | 167.5  | 158.5  | 165.2  | 166.5  | 137    | 176.5  | 165.6  |
| 136.8  | 294.9  | 259.8  | 282.7  | 163.6  | 172.6  | 193.3  | 148.3  | 155.8  |
| 129.6  | 155.6  | 147.9  | 142.8  | 135.2  | 130.2  | 131.7  | 208.1  | 294.5  |
| 3805.6 | 5305.7 | 5285.9 | 3881.3 | 3605.2 | 5107.9 | 4496.7 | 6378.8 | 3026.4 |
| 3073.2 | 4981.4 | 4049.6 | 3530.1 | 3420.9 | 3994.4 | 3430.9 | 6594.4 | 3179.5 |
| 110.6  | 137.6  | 162.5  | 115.3  | 118.5  | 161.3  | 131.4  | 124.9  | 123.6  |
| 106.2  | 110.6  | 99     | 99.5   | 97.3   | 111.3  | 110.6  | 108.3  | 104.8  |
| 104.4  | 130.5  | 116.5  | 99.2   | 146.4  | 129.7  | 129.4  | 131.9  | 106.7  |
| 99.1   | 112    | 99.2   | 102    | 89.1   | 103.7  | 106.1  | 111.5  | 115.9  |
| 120.9  | 140.6  | 113.1  | 133.3  | 106.1  | 120.8  | 122.7  | 169.3  | 125.7  |
| 423.5  | 781.3  | 726.4  | 559.5  | 624.2  | 751.8  | 652.2  | 1133.1 | 637.8  |
| 137.2  | 261.2  | 261.3  | 219.8  | 226    | 266    | 200.1  | 314.3  | 304.3  |
| 124.7  | 111.3  | 101.3  | 132.4  | 109.2  | 117.5  | 137.8  | 120.4  | 108    |
| 116    | 114    | 98.5   | 98.1   | 97.8   | 106.6  | 96.8   | 113.2  | 113.7  |
| 109.8  | 99.2   | 118.5  | 107.1  | 98.4   | 122.8  | 110.8  | 125.5  | 107    |
| 100.6  | 180.6  | 105.4  | 174.2  | 114.2  | 115.4  | 145.5  | 124    | 106.5  |
| 122.4  | 105.1  | 108.1  | 103.1  | 99.8   | 117.2  | 109.8  | 129.2  | 108.9  |
| 104.3  | 99.3   | 104.4  | 119.6  | 96.5   | 108.1  | 105.7  | 107.8  | 110.4  |
| 117.1  | 243    | 227.5  | 164.9  | 181.8  | 211.4  | 172.9  | 263.5  | 160    |
| 109.5  | 130.8  | 123.1  | 171.2  | 109.7  | 110.8  | 166.9  | 126.8  | 109.7  |
| 112.5  | 118    | 108.2  | 105.4  | 92.7   | 108.9  | 100.3  | 111.3  | 107.3  |

|        |        |        |        |        |        |        |        |        |
|--------|--------|--------|--------|--------|--------|--------|--------|--------|
| 108.9  | 122.2  | 110.3  | 115.5  | 102.6  | 120.8  | 109.4  | 124.1  | 117.9  |
| 105.8  | 109.5  | 99.2   | 94.4   | 97.1   | 107.9  | 103.2  | 107.1  | 100    |
| 108.3  | 115.7  | 106.6  | 103.9  | 91.7   | 107.7  | 110.3  | 120.6  | 105.8  |
| 109.4  | 105.9  | 108.9  | 105.4  | 98.8   | 112.5  | 104.7  | 117.8  | 104.4  |
| 232.5  | 337.4  | 114.7  | 970.1  | 222.6  | 122.5  | 899.5  | 189.7  | 151.1  |
| 248.6  | 329.3  | 123.4  | 1245.1 | 182.9  | 120.6  | 722.5  | 180.9  | 195.3  |
| 106.1  | 109.1  | 100.2  | 105    | 107.1  | 111.4  | 99.9   | 99.9   | 101.7  |
| 231.8  | 408.5  | 340    | 319.9  | 313.6  | 290.9  | 300.5  | 292.3  | 221.3  |
| 306.6  | 486.1  | 485    | 481.8  | 381.1  | 355.6  | 385.9  | 444.8  | 320.2  |
| 104    | 121.4  | 95.9   | 107.1  | 100.2  | 107.3  | 107.3  | 110.7  | 100.4  |
| 1564.5 | 2837.6 | 2320.2 | 2424.7 | 1944.3 | 2331.4 | 2222.8 | 4027.5 | 2294.7 |
| 831.9  | 1564.3 | 1833.4 | 1719.2 | 1466.5 | 1710.4 | 1592.5 | 2908.5 | 1721.4 |
| 273.9  | 377.9  | 446    | 345.1  | 352.7  | 407.5  | 363.9  | 371    | 257.7  |
| 111.5  | 112.7  | 102.5  | 114.2  | 101    | 108.4  | 111.3  | 118.7  | 118.7  |
| 189.8  | 285.4  | 395.1  | 304.7  | 231    | 499.4  | 205.8  | 359.2  | 236.7  |
| 122.2  | 155.3  | 141.9  | 286.3  | 134.8  | 149.5  | 181.4  | 133.1  | 120.1  |
| 101.6  | 129.2  | 109.2  | 104.7  | 111.4  | 123.5  | 110.9  | 125.3  | 113.3  |
| 117.3  | 162.2  | 138.8  | 125.7  | 123.2  | 130.6  | 141.1  | 144.2  | 115.8  |
| 119.2  | 124.3  | 134.3  | 129.7  | 112.5  | 126.7  | 120.9  | 126.1  | 115.2  |
| 131.1  | 137.6  | 140    | 127.2  | 144.7  | 137.4  | 134.7  | 198.3  | 152.8  |
| 385.3  | 617    | 624.5  | 488.4  | 677.2  | 513.4  | 747.2  | 799    | 475.1  |
| 4055.5 | 5582.2 | 5117.4 | 4622.1 | 4281.8 | 4876.6 | 4323.4 | 6000.5 | 3386.5 |
| 274.1  | 589.9  | 608.5  | 544.4  | 439.2  | 454.3  | 648.6  | 683.1  | 399.9  |
| 495.3  | 1020.6 | 976    | 946.6  | 845.1  | 877.1  | 1018.6 | 876.8  | 518.4  |
| 135.8  | 143.4  | 126.4  | 124.1  | 132.7  | 148.4  | 155.8  | 155.9  | 146.1  |
| 545.3  | 901.3  | 726.5  | 719.3  | 627    | 500    | 746.7  | 1130.2 | 558.1  |
| 285.9  | 339.6  | 297.3  | 287.8  | 276.7  | 303.6  | 309.5  | 388.1  | 218.7  |
| 1439.9 | 3321.4 | 3455.3 | 2290.8 | 3273.5 | 3478.2 | 2538.9 | 3642.7 | 2482.1 |
| 272    | 301.1  | 307.7  | 257    | 242.2  | 288.8  | 299    | 512.4  | 292.3  |
| 283.1  | 301    | 312.1  | 362.6  | 289.5  | 375.3  | 288.2  | 521.4  | 403.7  |
| 494.9  | 343.7  | 308.2  | 263.4  | 233.5  | 302.4  | 269.3  | 978.7  | 785.1  |
| 181.1  | 233.9  | 229.8  | 253.4  | 235.4  | 275.7  | 317.3  | 467.1  | 253.5  |
| 215.1  | 154.4  | 134.7  | 120.2  | 143.9  | 156.7  | 135.6  | 229    | 160.7  |
| 119.2  | 115.7  | 106.5  | 112.8  | 102.7  | 117.6  | 99.4   | 118.5  | 108.1  |
| 110.6  | 112.9  | 103.3  | 109.7  | 97.4   | 114.2  | 101.2  | 102.9  | 103.1  |
| 1898.9 | 1620.5 | 1757.2 | 1876.2 | 1400.1 | 1538.1 | 2132.5 | 2038.3 | 1031.6 |
| 272.9  | 278.6  | 234.6  | 184.7  | 279.9  | 229.7  | 219.7  | 563.2  | 228.1  |
| 613.3  | 998.9  | 596.6  | 1405.8 | 970.7  | 710.7  | 1298   | 1499   | 596    |
| 184.1  | 247.8  | 170.6  | 465.4  | 227.6  | 205.2  | 296.9  | 397.1  | 169.4  |
| 749.6  | 319.3  | 300.9  | 349.6  | 232.1  | 323.6  | 325.2  | 1608.9 | 925.9  |
| 329.1  | 487    | 517    | 389.4  | 352.2  | 345.7  | 342.8  | 424.4  | 243.6  |
| 108.5  | 138.6  | 117.8  | 118.9  | 103.6  | 114.7  | 105    | 126    | 116.2  |
| 1152.6 | 1780.8 | 1191   | 4333.6 | 782.5  | 622    | 1925.3 | 698    | 503.2  |
| 117.6  | 158.8  | 116.9  | 230.7  | 116.6  | 108.8  | 147.4  | 126.5  | 105.9  |
| 682.9  | 759.9  | 550.3  | 1596.1 | 417.9  | 245.6  | 1109.2 | 334    | 241.1  |
| 170.1  | 293    | 202.8  | 172.5  | 212.1  | 171.9  | 174.6  | 187.6  | 145    |
| 935.3  | 1056.3 | 917.8  | 969.9  | 1062.4 | 715.4  | 877.4  | 604.7  | 428.9  |
| 119.1  | 115.2  | 117.3  | 134.5  | 118.1  | 119.1  | 118.5  | 138.9  | 123.1  |
| 251.5  | 1415.5 | 939    | 985.4  | 905.7  | 811.4  | 768.5  | 747.5  | 406.7  |
| 160.8  | 653.3  | 411.2  | 456    | 493    | 344.9  | 307.1  | 297.8  | 181.5  |
| 118.9  | 373.2  | 308.8  | 237.6  | 267.2  | 231.9  | 198    | 180.2  | 168.1  |



|        |        |        |        |        |        |        |        |        |
|--------|--------|--------|--------|--------|--------|--------|--------|--------|
| 97.4   | 110.4  | 106.8  | 105.1  | 102.3  | 104.1  | 113.7  | 115.1  | 116.2  |
| 3071.6 | 5239.6 | 4330.2 | 6502.1 | 3335.3 | 3384.8 | 4617.3 | 5628.7 | 5324.6 |
| 165    | 231.4  | 267.5  | 202.2  | 185.9  | 228.4  | 217.3  | 208.7  | 175.9  |
| 117.5  | 146.9  | 147.8  | 131.3  | 130.5  | 135.7  | 129    | 150.6  | 135.4  |
| 669.4  | 628.5  | 400.9  | 345.4  | 502.8  | 338.5  | 339    | 602.5  | 334.5  |
| 461.5  | 375.4  | 281.9  | 189.9  | 419.9  | 253.2  | 205    | 442.7  | 211.6  |
| 128.2  | 128.3  | 129    | 135.3  | 117.9  | 129.6  | 130.9  | 144    | 144.4  |
| 133.1  | 127    | 101.8  | 211.9  | 102.8  | 106.8  | 142.2  | 122.5  | 126.5  |
| 265.6  | 189.7  | 157.2  | 461.7  | 139.5  | 152.6  | 329.3  | 134.3  | 148.4  |
| 107.5  | 112.1  | 106.1  | 96.5   | 97.6   | 113.2  | 103.3  | 105.2  | 104.8  |
| 321.8  | 639.2  | 974.4  | 984.9  | 582.7  | 648.3  | 1004.6 | 643.7  | 486.9  |
| 137.9  | 258.3  | 256.4  | 240.4  | 165.7  | 209.5  | 304.2  | 178.6  | 170.7  |
| 375.3  | 1233.5 | 1183.9 | 1280.7 | 770    | 785.8  | 1078.8 | 719.2  | 557.3  |
| 123.1  | 200.3  | 236.6  | 152    | 154.5  | 214.5  | 173.3  | 193.7  | 156.5  |
| 120    | 145.9  | 166.1  | 127    | 116.4  | 149.1  | 136.3  | 180.1  | 128.5  |
| 105.1  | 108    | 103.9  | 97.8   | 96.4   | 108    | 97.9   | 113.3  | 106.9  |
| 104.5  | 108.4  | 100.9  | 101.2  | 94.8   | 107.4  | 104.4  | 103.2  | 102.5  |
| 107.5  | 158.7  | 132.9  | 114.3  | 135.3  | 130.3  | 133.8  | 223.2  | 141.1  |
| 794.7  | 597    | 796.9  | 788.1  | 651.6  | 966.9  | 790.7  | 1300.4 | 938.9  |
| 646.4  | 668.3  | 720.3  | 727.9  | 667    | 787.8  | 850.4  | 1375.4 | 923.1  |
| 127.5  | 159.8  | 143.9  | 157.4  | 138.6  | 138.1  | 146.2  | 146.9  | 132.4  |
| 444.2  | 1196.9 | 909.4  | 1071.6 | 852.2  | 774.7  | 974.8  | 1041.2 | 522.4  |
| 154    | 221.8  | 173.1  | 189.9  | 211.8  | 218.7  | 246.9  | 356.3  | 326.5  |
| 141.6  | 147    | 132.2  | 169    | 133    | 128    | 137.7  | 171.1  | 158.1  |
| 504.6  | 506.7  | 426.9  | 707.9  | 424.3  | 457.3  | 514    | 549.8  | 497.4  |
| 110.4  | 169    | 158.1  | 130.5  | 154.4  | 154.8  | 150.3  | 137.9  | 124    |
| 105.9  | 114.2  | 106.4  | 106.4  | 100.6  | 108.2  | 103.8  | 113.9  | 110.5  |
| 142.1  | 154.9  | 159.5  | 158.6  | 160.1  | 170.9  | 189.2  | 225.9  | 178.4  |
| 2405.9 | 2549.2 | 2650.2 | 2160.1 | 2313.3 | 1850.6 | 1896.9 | 5508.4 | 7122.5 |
| 115.8  | 108.6  | 108.5  | 97     | 97.1   | 114.9  | 112.7  | 124.3  | 109.8  |
| 116.6  | 110.2  | 103.4  | 102.7  | 94.8   | 111.2  | 108.6  | 126.3  | 112.5  |
| 95.9   | 106.5  | 95.8   | 99.5   | 91.4   | 107.9  | 97.6   | 106    | 110.4  |
| 131.8  | 148.9  | 140.1  | 120.2  | 133.4  | 144.9  | 107.7  | 169.4  | 123.1  |
| 107.5  | 124.6  | 113.9  | 111.6  | 112.7  | 128.7  | 107.7  | 118.3  | 121.5  |
| 116.6  | 132    | 121.6  | 140    | 126.2  | 130.5  | 139.6  | 135.9  | 133.3  |
| 188.4  | 224.2  | 152.4  | 158.4  | 176.4  | 271.3  | 136.9  | 1163.3 | 908.7  |
| 337.4  | 677.9  | 823.7  | 711.8  | 619.8  | 852.9  | 796.8  | 1502.8 | 590.4  |
| 303.5  | 566.9  | 482.9  | 422.1  | 462.9  | 459.8  | 482.1  | 964.2  | 309.6  |
| 654.3  | 1121.5 | 967.7  | 1022.2 | 892.6  | 958.5  | 1237.9 | 1405.5 | 643.1  |
| 108.3  | 102.3  | 98.7   | 101.2  | 100.7  | 108.3  | 108.8  | 123.9  | 117.3  |
| 102.5  | 104.3  | 103.5  | 105.6  | 94.8   | 99.8   | 103.4  | 112.3  | 108.1  |
| 98.1   | 102.4  | 102.3  | 105.6  | 99.6   | 106.3  | 102.3  | 114.2  | 118.5  |
| 221.7  | 256.6  | 302.2  | 322.2  | 280.4  | 303.8  | 325.5  | 337    | 304    |
| 112.8  | 108.9  | 100.5  | 103.1  | 92.9   | 111.9  | 91.8   | 109.2  | 103    |
| 106.2  | 106.2  | 103.1  | 104.4  | 93     | 112.5  | 96     | 109    | 113.3  |
| 744.8  | 2750.1 | 3090.3 | 1815.9 | 2636.1 | 2810.7 | 2460.7 | 2982.1 | 1146.6 |
| 114.3  | 117.4  | 106.1  | 105.2  | 103.1  | 113.5  | 104.3  | 123.8  | 126.9  |
| 105.6  | 110.7  | 110.3  | 105.4  | 95     | 105.7  | 100    | 109.4  | 112.5  |
| 104.7  | 104.2  | 102.7  | 102.8  | 99.2   | 114.3  | 104.5  | 110.5  | 113.3  |
| 798.4  | 998.4  | 832.7  | 737.9  | 626.7  | 906    | 681.1  | 1710.6 | 1377.8 |
| 117.4  | 122.9  | 103.3  | 101.2  | 103.3  | 111.3  | 108.9  | 114.7  | 110.3  |

|        |        |        |        |       |        |        |        |        |
|--------|--------|--------|--------|-------|--------|--------|--------|--------|
| 103.4  | 104.8  | 107.1  | 100.3  | 99.3  | 103.3  | 100.1  | 108.1  | 111.4  |
| 119.6  | 150.9  | 142.7  | 141.5  | 109.2 | 133.4  | 114.7  | 195.1  | 212.5  |
| 170.5  | 228.9  | 226.2  | 184.9  | 205   | 250.4  | 223.7  | 324.3  | 239.1  |
| 222.4  | 284    | 298.6  | 229.9  | 291   | 240.4  | 252.1  | 365.3  | 243.1  |
| 325.6  | 312    | 331    | 324.6  | 396.2 | 373    | 346.5  | 454.7  | 290.5  |
| 147.6  | 136.3  | 173.2  | 151.5  | 143.7 | 190.9  | 133.9  | 188.7  | 166.6  |
| 4216.6 | 4746.2 | 4753.4 | 3757.3 | 4367  | 5038.1 | 4775.5 | 7035.2 | 5387.8 |
| 121.3  | 116    | 110.8  | 108.6  | 95.4  | 116.2  | 111.6  | 107.5  | 113.5  |
| 263.9  | 509.5  | 416.2  | 478    | 434.7 | 453.9  | 462.1  | 768.4  | 592.6  |
| 121.1  | 111.2  | 109.6  | 120.5  | 101.6 | 119.7  | 103.4  | 126.8  | 115.4  |
| 102.5  | 106.7  | 99.2   | 99.5   | 96.6  | 101.4  | 90.7   | 101    | 110.9  |
| 171.3  | 130.8  | 120.7  | 129.1  | 130.1 | 135.5  | 130.7  | 237    | 169.5  |
| 280.8  | 268.7  | 228.7  | 280    | 228.9 | 285.6  | 284.5  | 514    | 369    |
| 107.6  | 108.3  | 108.5  | 110.3  | 95.7  | 120    | 108    | 109    | 126    |
| 100.5  | 104.4  | 98.8   | 102.2  | 92.7  | 105.4  | 97.9   | 105.4  | 98.8   |
| 112.1  | 126.6  | 116.4  | 111.5  | 115.4 | 113.2  | 111    | 120.1  | 113.4  |
| 103.7  | 100.4  | 102.4  | 93.5   | 89.5  | 101.6  | 94.8   | 100.4  | 113.1  |
| 111.8  | 107.3  | 98.8   | 107.4  | 104.9 | 118    | 107.4  | 122.7  | 111.8  |
| 108.1  | 112.3  | 102.7  | 106    | 97.6  | 124    | 111.9  | 113.5  | 117.7  |
| 115.7  | 110    | 105.1  | 112.9  | 104.1 | 114.4  | 122.7  | 122.6  | 109    |
| 122.2  | 146.7  | 117.6  | 131.1  | 124.6 | 148.2  | 104    | 154.2  | 151.7  |
| 233.4  | 193.7  | 158.4  | 178.5  | 169   | 181.9  | 195.4  | 272.1  | 233    |
| 101.2  | 112.7  | 104.1  | 100.8  | 93.1  | 101.6  | 99.6   | 111.5  | 107.9  |
| 242.1  | 350    | 298.4  | 288.7  | 257.3 | 330.5  | 331    | 451.1  | 273    |
| 130.8  | 159    | 126.8  | 173.5  | 132.2 | 133.4  | 158.7  | 199.3  | 137.7  |
| 178.3  | 200.7  | 195    | 134.9  | 150.6 | 203.8  | 146.9  | 302.1  | 301.4  |
| 984.1  | 1028.4 | 1285.1 | 846.9  | 827.1 | 1289.2 | 1045.5 | 1518.3 | 1606.8 |
| 105.4  | 108.6  | 98     | 96.8   | 96    | 104.7  | 104.1  | 124.5  | 111.7  |
| 173.6  | 171.2  | 172.1  | 180.8  | 163   | 167    | 169.9  | 298    | 214.1  |
| 110.2  | 106.7  | 103.8  | 96.7   | 99.1  | 115.6  | 104.4  | 104    | 112.2  |
| 113.4  | 128.7  | 116.5  | 120    | 114.5 | 137.2  | 131.1  | 165.1  | 134.4  |
| 112.5  | 126.2  | 110.7  | 106.8  | 109.1 | 111.9  | 103    | 126.3  | 116.6  |
| 127.9  | 131    | 130.8  | 137.6  | 126.4 | 145.8  | 143.9  | 177.6  | 145.5  |
| 106.1  | 94     | 95.7   | 96.3   | 96.3  | 103.8  | 101.4  | 109.9  | 101.2  |
| 110.7  | 106.6  | 96     | 103    | 104.8 | 111.9  | 104    | 131.8  | 115    |
| 100.9  | 110.9  | 97.5   | 97.6   | 90.3  | 108    | 105.6  | 109.6  | 113.5  |
| 111.1  | 105.2  | 102.1  | 107.6  | 102.2 | 102.8  | 105.6  | 121.4  | 114    |
| 153.1  | 152.8  | 191.9  | 149.5  | 176.8 | 186.3  | 159    | 208.2  | 182.9  |
| 121.1  | 132.9  | 147.6  | 127.6  | 123   | 132.7  | 128.6  | 157.1  | 140    |
| 118    | 134.1  | 110    | 110.5  | 105.1 | 124.4  | 121    | 158.3  | 136.9  |
| 104.8  | 149.1  | 126    | 133.1  | 115.9 | 120.5  | 127.8  | 120    | 132    |
| 100.9  | 106.2  | 105.3  | 100.8  | 90.5  | 106    | 97.3   | 108.3  | 102.3  |
| 113.6  | 155.4  | 132.8  | 128    | 116.6 | 145.8  | 118.8  | 125.9  | 122.9  |
| 113.7  | 108.4  | 114.2  | 111.4  | 102.7 | 112.4  | 116.5  | 127.1  | 124.4  |
| 114.1  | 123    | 109.7  | 110.9  | 113.9 | 113.6  | 102.6  | 114.7  | 113.6  |
| 109.9  | 104.4  | 110.2  | 102.4  | 92.7  | 117.6  | 114.7  | 102.6  | 113.9  |
| 103    | 109.2  | 106.4  | 105.2  | 96.6  | 112.7  | 112.1  | 112.3  | 102.4  |
| 104.3  | 101.5  | 109.4  | 104.7  | 87.9  | 99.9   | 99     | 97.9   | 101    |
| 112.3  | 114.6  | 102.6  | 98.3   | 100.7 | 111.7  | 109.9  | 116.9  | 108.7  |
| 107.3  | 107.4  | 100.1  | 99.4   | 94.1  | 107.7  | 105    | 105.4  | 103.4  |
| 102.4  | 100.8  | 106.5  | 100.2  | 97.7  | 104.1  | 97     | 111.8  | 104.6  |

|       |       |        |        |       |       |        |        |       |
|-------|-------|--------|--------|-------|-------|--------|--------|-------|
| 116.6 | 113.5 | 104.1  | 106.6  | 103.7 | 117.1 | 109.7  | 127.2  | 127.4 |
| 101.1 | 103.7 | 92.5   | 92.9   | 95.5  | 102.2 | 96.2   | 104.2  | 105.3 |
| 104.5 | 107.3 | 108.1  | 103.6  | 95.4  | 111.4 | 106.5  | 117.8  | 106   |
| 103.2 | 110.6 | 104.5  | 100.6  | 96.5  | 108.1 | 100.5  | 105.4  | 105.3 |
| 100.6 | 108.8 | 99.6   | 97.6   | 90.8  | 107.7 | 99.5   | 110.6  | 104.7 |
| 109.1 | 120.4 | 107.5  | 95.4   | 105.2 | 116.4 | 110.9  | 114.7  | 109.4 |
| 106.2 | 119.1 | 102.9  | 104.2  | 96.1  | 104.8 | 98.8   | 110.5  | 112.9 |
| 100.4 | 103.7 | 99.5   | 100.9  | 94.5  | 106   | 103.9  | 110.2  | 108.1 |
| 108.8 | 112.2 | 96.1   | 103    | 93.3  | 105.4 | 109.3  | 110.2  | 106.8 |
| 119.5 | 121.3 | 116.4  | 113.8  | 114   | 121.2 | 114.9  | 126.3  | 130.6 |
| 109.9 | 115.2 | 112.1  | 106.1  | 95.7  | 119.2 | 102.9  | 108    | 109.3 |
| 106.8 | 110.2 | 105    | 113.2  | 98.2  | 110   | 106.7  | 117.6  | 117.1 |
| 108.1 | 123   | 110.1  | 113.8  | 104.7 | 106.2 | 109.6  | 110.8  | 107.9 |
| 113.5 | 105.9 | 105.2  | 101.8  | 102.3 | 106.2 | 102.6  | 112.9  | 110.9 |
| 152.5 | 240.2 | 254    | 231    | 160.1 | 167.1 | 168    | 124.5  | 110.7 |
| 101.5 | 107.9 | 99.1   | 104    | 98    | 113.1 | 98.5   | 108.3  | 107.4 |
| 115.8 | 116.7 | 110.6  | 110    | 99.8  | 119.4 | 106.1  | 120.5  | 116.5 |
| 106.8 | 103   | 108.9  | 109.2  | 99.9  | 106.8 | 104.4  | 111    | 116.2 |
| 110.3 | 108   | 105    | 92.6   | 94.6  | 117.8 | 104.5  | 113.8  | 110.2 |
| 120.4 | 116.9 | 107.3  | 120.1  | 100   | 108.7 | 101.1  | 111.2  | 111.6 |
| 99.7  | 114.8 | 112.3  | 102.5  | 94.1  | 102.3 | 95.3   | 108    | 106.1 |
| 101.8 | 101.6 | 98     | 102.7  | 99    | 102.2 | 98.9   | 120.2  | 111.8 |
| 106   | 110   | 99.7   | 102.1  | 92.7  | 108.9 | 103.4  | 102.3  | 107.3 |
| 107.1 | 110.9 | 100.4  | 106.2  | 91.6  | 115.7 | 101.2  | 104.1  | 109.1 |
| 110.6 | 111.1 | 103.9  | 112.2  | 102.4 | 112.5 | 110.3  | 107.2  | 109.5 |
| 101.7 | 107   | 95.7   | 96.7   | 101.4 | 111.2 | 100.9  | 103.7  | 108   |
| 109.4 | 106.5 | 105    | 102.1  | 103.9 | 125.5 | 109.9  | 109.5  | 115.9 |
| 94.8  | 108.4 | 95.2   | 97.3   | 91.2  | 103.1 | 100.7  | 105.6  | 104.1 |
| 108.8 | 119.8 | 110.8  | 112.7  | 101.7 | 116.2 | 108.9  | 115.9  | 116.7 |
| 122.1 | 138   | 127.6  | 117.1  | 112.5 | 134.2 | 142    | 140.4  | 138.9 |
| 316   | 669.6 | 768.6  | 565.4  | 662   | 756.4 | 598.5  | 809.5  | 439.8 |
| 109.2 | 112.4 | 108    | 112.9  | 94.9  | 102.4 | 113.2  | 112.9  | 118.7 |
| 125.2 | 135.7 | 124.5  | 119.3  | 113.6 | 131.2 | 124.1  | 149.9  | 156.4 |
| 230   | 279.5 | 215.6  | 209.5  | 217.3 | 256.8 | 263.1  | 453.7  | 386.1 |
| 120.2 | 173   | 177.9  | 161.6  | 142.8 | 171.2 | 196    | 228.3  | 181.6 |
| 110.7 | 109.1 | 117.6  | 103.1  | 103.1 | 117.6 | 110.4  | 128.9  | 122.6 |
| 153.1 | 324.7 | 331    | 279.1  | 271.7 | 289.9 | 243.8  | 500.3  | 304.6 |
| 123   | 119.3 | 112.4  | 118.5  | 116.5 | 108   | 115.4  | 105.5  | 110.5 |
| 105   | 114.1 | 111.8  | 106.5  | 93.1  | 109.2 | 108.9  | 109.6  | 107.4 |
| 112.7 | 113.3 | 100.3  | 105.2  | 97.5  | 110.3 | 103.3  | 106.8  | 113.9 |
| 201.5 | 274   | 311.8  | 267.4  | 189.3 | 274.9 | 252.2  | 376.3  | 253   |
| 106.6 | 119.4 | 112    | 93.3   | 106.5 | 110.9 | 107.2  | 121.9  | 118.6 |
| 164.2 | 211.2 | 161.1  | 114.4  | 213.2 | 278.9 | 276.7  | 891.3  | 372.6 |
| 322.9 | 286.4 | 419.7  | 182.2  | 481.8 | 654.7 | 455.8  | 1333.3 | 851   |
| 111.7 | 118.3 | 110.9  | 111    | 104.4 | 110.8 | 113.1  | 116.5  | 120.6 |
| 594.2 | 992.6 | 1050.8 | 860.2  | 746   | 849.8 | 1087.2 | 793.6  | 614.4 |
| 165.9 | 253.8 | 224.5  | 226.7  | 239.8 | 195.4 | 215.6  | 247    | 219.8 |
| 615.7 | 989.9 | 1288.2 | 1196.7 | 764.5 | 905.3 | 1228.3 | 960.8  | 602.9 |
| 136.8 | 146.2 | 131.3  | 141.1  | 134.5 | 165.1 | 142.1  | 227.6  | 174.9 |
| 176.1 | 177.3 | 160.1  | 165    | 167.3 | 173.4 | 169    | 246.2  | 256.5 |
| 107.8 | 122.9 | 114.2  | 104    | 98.7  | 111.5 | 103.2  | 121.7  | 125   |

|       |       |       |       |       |       |       |        |        |
|-------|-------|-------|-------|-------|-------|-------|--------|--------|
| 145.9 | 256.2 | 212.4 | 182.4 | 216.1 | 258.2 | 220.3 | 328.4  | 207.6  |
| 121.9 | 122.4 | 114   | 115.4 | 91.2  | 122   | 110   | 113.3  | 125.1  |
| 113.1 | 115.8 | 106.1 | 118.1 | 105   | 117.7 | 111.9 | 123.9  | 112.6  |
| 101.6 | 101.6 | 102.1 | 92.4  | 92.5  | 103.1 | 98.7  | 113.1  | 109.9  |
| 182.4 | 120.8 | 106.8 | 116.9 | 114.4 | 124.8 | 124.9 | 153.8  | 168    |
| 108.9 | 110.1 | 112.2 | 98.7  | 99.5  | 112.6 | 110.8 | 111.9  | 109.2  |
| 111.5 | 108.4 | 104.9 | 107.9 | 96.8  | 104.8 | 109.4 | 115.6  | 117.6  |
| 105.5 | 111.2 | 97.7  | 94.4  | 86.4  | 107.4 | 103.6 | 110.5  | 103.4  |
| 109.3 | 111.7 | 104   | 108.3 | 94.4  | 101.3 | 103.3 | 114    | 112    |
| 1401  | 389   | 392.6 | 256.5 | 587.6 | 783.4 | 569.7 | 2274.6 | 1108.9 |
| 156.4 | 117.9 | 114.5 | 106.2 | 116.4 | 121.4 | 115.3 | 194.3  | 256.1  |
| 568.1 | 771.3 | 882.9 | 996.9 | 637.4 | 699.1 | 766.7 | 1173.6 | 670.4  |
| 106   | 112.6 | 113.6 | 104   | 98.9  | 108.8 | 102.8 | 132.9  | 128    |
| 102.2 | 117.4 | 110   | 98.8  | 97    | 112.8 | 107.8 | 117.8  | 120.8  |
| 101.5 | 111.2 | 111.8 | 103.4 | 98.1  | 112.1 | 96.7  | 118.8  | 111.3  |
| 111.7 | 102.4 | 104.5 | 102.6 | 93    | 108.2 | 110.9 | 104.7  | 99.4   |
| 119.9 | 222.1 | 131.2 | 112.6 | 201.6 | 160.8 | 152.3 | 280.6  | 143.4  |
| 106.9 | 114.8 | 102.7 | 106.7 | 93.1  | 120.6 | 102.4 | 113.7  | 108    |
| 148.6 | 148   | 134.5 | 123.3 | 126.4 | 146.6 | 150.4 | 146.6  | 165.2  |
| 105   | 108.1 | 98.1  | 93.6  | 94.2  | 108.7 | 98.4  | 107.3  | 109.2  |
| 110.9 | 117.5 | 107   | 115.3 | 96    | 112.8 | 108.1 | 112.6  | 108.2  |
| 105   | 116.3 | 109.2 | 104.6 | 100.8 | 113.7 | 95    | 126.5  | 123.4  |
| 274.3 | 412.6 | 349.9 | 282.5 | 326.6 | 385.2 | 262.2 | 563.9  | 528.1  |
| 111.8 | 121.3 | 104.1 | 107.5 | 104.9 | 110   | 128.7 | 117    | 123.7  |
| 102.9 | 112.7 | 103.1 | 109   | 95.1  | 117.5 | 102   | 106.6  | 103.6  |
| 107.1 | 104.4 | 100.8 | 103.3 | 95.9  | 109.1 | 106.8 | 119.5  | 105.3  |
| 108.1 | 101.9 | 102   | 112.9 | 100.9 | 107.7 | 105   | 108.7  | 120.4  |
| 105.8 | 98.6  | 99.9  | 93.5  | 88.3  | 109   | 100.6 | 98     | 105    |
| 278.5 | 331.9 | 338.9 | 286.7 | 310.2 | 377.5 | 381.9 | 576    | 374.7  |
| 109.8 | 114.6 | 104.3 | 112   | 96.3  | 108.8 | 114.5 | 117.4  | 110.8  |
| 100.4 | 107.7 | 96    | 92.4  | 96.1  | 104   | 96    | 106.8  | 107.9  |
| 106   | 110.9 | 113.9 | 97.2  | 97.3  | 113.1 | 109.7 | 122.2  | 99.2   |
| 111.1 | 117.2 | 118   | 102.6 | 103.6 | 129.8 | 98.6  | 127.8  | 109.9  |
| 252.1 | 345.7 | 272.5 | 170.2 | 314.2 | 319.2 | 227.5 | 467.5  | 260.8  |
| 108.8 | 110.3 | 107.4 | 100.7 | 91    | 104.2 | 105.2 | 110    | 106.4  |
| 104.9 | 108.7 | 106.3 | 98.8  | 92.9  | 107.4 | 105.7 | 118.4  | 118.3  |
| 648.1 | 595.3 | 456.4 | 559   | 411   | 561.8 | 516.4 | 1272.7 | 928.5  |
| 621.8 | 673.1 | 633.5 | 551.7 | 543.9 | 673   | 516.7 | 1293.1 | 1114.3 |
| 104.5 | 113.6 | 101.6 | 104   | 94.4  | 110.5 | 98.3  | 103.7  | 113.9  |
| 106.7 | 106.2 | 96.8  | 101.6 | 94.3  | 96.8  | 102   | 113.9  | 99.5   |
| 113.3 | 120.3 | 104.1 | 105.1 | 100.3 | 104   | 96.4  | 102.7  | 108.6  |
| 106.8 | 105.9 | 107.4 | 100.1 | 97.7  | 110.6 | 103.6 | 107.6  | 111    |
| 109.4 | 106.3 | 96    | 95.5  | 102.3 | 105.4 | 100.4 | 103.4  | 107.7  |
| 104.6 | 98.4  | 101.7 | 99.7  | 103.9 | 111.3 | 102.9 | 120    | 103.9  |
| 108.9 | 100.4 | 100.8 | 93.8  | 92.2  | 101.9 | 90.5  | 107.8  | 100.5  |
| 94.2  | 103.9 | 98.9  | 91.3  | 97.3  | 97.2  | 97.2  | 99.6   | 100.2  |
| 117.5 | 124.6 | 119.6 | 134.2 | 113.3 | 124.5 | 129.5 | 163.6  | 129.9  |
| 105.7 | 105.6 | 100.3 | 99.5  | 99.5  | 106.5 | 101.4 | 106.8  | 100.5  |
| 112.3 | 113.7 | 109.3 | 105.4 | 96.1  | 111   | 111.1 | 124.7  | 113.1  |
| 124.1 | 126.3 | 111.4 | 107.5 | 111.1 | 121.4 | 113.8 | 153    | 132.3  |
| 118.7 | 118.4 | 104.8 | 105.3 | 99.2  | 120.1 | 110.2 | 139.6  | 135.8  |

|        |        |       |        |        |        |        |        |        |
|--------|--------|-------|--------|--------|--------|--------|--------|--------|
| 116.2  | 112.5  | 117   | 114.6  | 108.5  | 117.6  | 114.8  | 116    | 136.3  |
| 113.8  | 110.6  | 113.6 | 115.9  | 103.2  | 114.2  | 109.3  | 114.4  | 117.9  |
| 99.4   | 104.2  | 106.9 | 99.8   | 91.4   | 110.8  | 103.1  | 105.4  | 113.3  |
| 119.2  | 127.4  | 116.5 | 109.8  | 101.5  | 118.9  | 112.6  | 124.8  | 116.3  |
| 102.8  | 113.3  | 105.1 | 106.4  | 101.4  | 108.5  | 108    | 110.3  | 106.1  |
| 108.3  | 107.5  | 108.1 | 104.3  | 92.6   | 117.5  | 105.7  | 116.9  | 115.2  |
| 105.7  | 111.5  | 105.7 | 100.9  | 94.5   | 108.8  | 98.8   | 110.5  | 109.1  |
| 107.5  | 102.7  | 128.4 | 109.4  | 103    | 124.5  | 105.1  | 112.2  | 150.9  |
| 106    | 106.9  | 107.9 | 95     | 93.2   | 106    | 106.1  | 105.1  | 99.2   |
| 105.9  | 116.4  | 122.7 | 113.1  | 99.9   | 125.3  | 115.9  | 112.4  | 144.3  |
| 139    | 290.4  | 224.2 | 571.6  | 332.9  | 195    | 543.8  | 283.2  | 172.3  |
| 1843.8 | 3027.4 | 2387  | 1082.5 | 3453.4 | 2826.8 | 2309.8 | 5024   | 2837.8 |
| 415.3  | 550.2  | 639.8 | 840.6  | 487.3  | 588.2  | 586.4  | 1057.3 | 448.2  |
| 107.2  | 111.3  | 104   | 106.2  | 103.6  | 112.3  | 104    | 119.2  | 111.5  |
| 342.8  | 299.7  | 270   | 229.2  | 212.3  | 284.5  | 266.9  | 525.9  | 649.6  |
| 684.6  | 892.7  | 878.1 | 738.2  | 792    | 816.6  | 606.6  | 1738.9 | 1215.5 |
| 104.1  | 132.3  | 119.2 | 113.9  | 102.9  | 126.5  | 104    | 114.4  | 103.5  |
| 473.5  | 1267   | 1133  | 2659.8 | 900.5  | 724.8  | 1187.7 | 400.8  | 366.3  |
| 117.1  | 111.7  | 104.5 | 102.9  | 101.6  | 111.3  | 106    | 114.5  | 111    |
| 108.5  | 138.9  | 129.7 | 118.9  | 113.3  | 134    | 129.7  | 133.4  | 116.2  |
| 194.8  | 581.9  | 538.5 | 361.5  | 537.7  | 541.6  | 439.5  | 703    | 342.9  |
| 105.7  | 132.6  | 112.3 | 103.4  | 130.4  | 125    | 134.8  | 157.9  | 114.3  |
| 104.2  | 109.2  | 100.7 | 98.6   | 95.1   | 107.7  | 103.5  | 102    | 105.8  |
| 108.2  | 108.3  | 109.4 | 102.9  | 93     | 110.5  | 95.4   | 112.4  | 118.1  |
| 139.6  | 114.7  | 117.6 | 106.5  | 105.3  | 121.8  | 119.1  | 147.9  | 128.1  |
| 118.6  | 109.9  | 121.6 | 112.5  | 108.5  | 118.1  | 118.9  | 128.1  | 124.7  |
| 106.1  | 110.5  | 105.1 | 103.8  | 96.4   | 109.1  | 106.5  | 115.3  | 108.2  |
| 117.6  | 159    | 183.7 | 125.1  | 138.4  | 194.1  | 126.1  | 168.9  | 126.6  |
| 119.1  | 124.8  | 112.8 | 126.8  | 101.7  | 118.5  | 102.5  | 113.7  | 114.8  |
| 113.4  | 109.5  | 104.3 | 110.3  | 92.9   | 111.3  | 103.1  | 116.7  | 112.5  |
| 106.6  | 120.3  | 101.5 | 103.9  | 103.6  | 112.7  | 96.6   | 121.8  | 118.3  |
| 444.7  | 1131.6 | 1123  | 1069.2 | 928.1  | 1066.4 | 1033.5 | 1305.8 | 589.9  |
| 115.9  | 132.8  | 104.1 | 103.4  | 100.6  | 111.6  | 126.6  | 129.1  | 119.9  |
| 102.2  | 101.4  | 100.8 | 104.4  | 92.7   | 102    | 97.9   | 112.5  | 109.1  |
| 109.3  | 108.9  | 106.3 | 103.7  | 96.9   | 103.6  | 97.5   | 107.3  | 111.8  |
| 107.6  | 106    | 104.6 | 109.3  | 95.6   | 108.9  | 105.2  | 108    | 118.7  |
| 103.8  | 103.3  | 96.6  | 102.5  | 93.7   | 107.7  | 105.4  | 107.7  | 109.7  |
| 118.9  | 120.8  | 111   | 119.5  | 117.3  | 126.8  | 128.5  | 135.2  | 139.9  |
| 124.9  | 119.8  | 110.9 | 105.8  | 104.3  | 105.8  | 109.7  | 120    | 129.2  |
| 104.4  | 102.9  | 96.2  | 102.6  | 94.5   | 101.3  | 102.4  | 106.7  | 100.5  |
| 105.9  | 108.8  | 103.1 | 103.8  | 100.1  | 109.6  | 104    | 114.8  | 112.6  |
| 496.2  | 940.2  | 645.3 | 1258.9 | 694.6  | 556.8  | 1026.2 | 799.2  | 594.2  |
| 162.3  | 303.2  | 159.5 | 668.8  | 236.3  | 187.5  | 525.1  | 350.1  | 192.4  |
| 251    | 915.9  | 850.8 | 644.1  | 506.8  | 599.7  | 641.7  | 554.3  | 413    |
| 145.8  | 160.8  | 144.8 | 143.3  | 123.6  | 152.1  | 161.6  | 245.1  | 231.9  |
| 99.6   | 107.6  | 101.6 | 104.3  | 94     | 112.1  | 104.5  | 120.4  | 108.6  |
| 162.9  | 154.6  | 148   | 145.9  | 136.9  | 137.2  | 114.2  | 180.6  | 177.2  |
| 103.9  | 107.5  | 102.9 | 103.1  | 98.5   | 116.7  | 104.1  | 107.1  | 102.1  |
| 105.8  | 128.7  | 105.5 | 122.2  | 107.1  | 112    | 107.1  | 96.3   | 106.1  |
| 145.2  | 165.9  | 146.2 | 164.5  | 169.1  | 183.6  | 157.6  | 237    | 145.7  |
| 214.6  | 239.9  | 295.5 | 184.4  | 344.6  | 322.7  | 291.2  | 598.8  | 267.4  |

|       |        |       |       |       |       |       |        |       |
|-------|--------|-------|-------|-------|-------|-------|--------|-------|
| 106.2 | 109.9  | 100.6 | 101   | 97.6  | 110.3 | 107.9 | 111.3  | 109.1 |
| 109.2 | 107.3  | 105.8 | 107.3 | 99    | 109   | 105.5 | 117.6  | 108.1 |
| 117.6 | 119.9  | 125.8 | 109.3 | 116.6 | 127.1 | 103.4 | 117    | 120   |
| 97.7  | 105.4  | 107.1 | 101.7 | 96.4  | 103.5 | 97.3  | 110.9  | 104.6 |
| 106.6 | 104.7  | 99.6  | 101.5 | 97.7  | 110   | 113.7 | 126.9  | 115   |
| 123.8 | 146.6  | 132.9 | 129.3 | 155   | 158   | 134.9 | 224.9  | 126.4 |
| 136.7 | 177.8  | 173.4 | 184.2 | 182.8 | 182.6 | 196.7 | 306.1  | 121.1 |
| 203.7 | 268.3  | 205.4 | 189.9 | 227.9 | 253.3 | 272.5 | 271.1  | 218.4 |
| 244.4 | 427.3  | 491   | 304.5 | 376.5 | 371.5 | 387.7 | 462.2  | 287.6 |
| 114.4 | 125.1  | 112   | 109.6 | 108.1 | 111.7 | 119.2 | 130.2  | 106.8 |
| 128.6 | 146.6  | 142.1 | 126   | 135.8 | 149.1 | 152.7 | 151.9  | 134.1 |
| 114   | 116.2  | 109.7 | 100.6 | 112.8 | 120   | 109.2 | 116.1  | 122.3 |
| 106   | 112.4  | 98.9  | 103.3 | 89    | 100.7 | 102.8 | 103.4  | 110.5 |
| 157.8 | 230.8  | 241.4 | 194.7 | 257.4 | 222.5 | 222.5 | 307.4  | 237.4 |
| 103   | 113.8  | 106.3 | 100.5 | 101.7 | 114.4 | 105.1 | 116.5  | 118.6 |
| 114.8 | 122.2  | 128.7 | 118.5 | 98.4  | 123.7 | 111.3 | 120.3  | 112   |
| 343.5 | 223.5  | 280.5 | 252.8 | 247.1 | 299.2 | 191.5 | 464    | 576.8 |
| 142.6 | 161.2  | 159.7 | 142.3 | 140   | 166.1 | 136   | 194.1  | 173.8 |
| 115.5 | 126    | 112.5 | 113.8 | 101   | 115.6 | 116.3 | 137.5  | 133.9 |
| 146.1 | 153.9  | 140.9 | 164.6 | 125.8 | 143.2 | 135.8 | 166.7  | 144.7 |
| 257.6 | 384.8  | 340.4 | 271.5 | 324.8 | 363.7 | 384.3 | 669.7  | 378.3 |
| 103.7 | 111.8  | 106.8 | 113.2 | 99.3  | 111.7 | 102.9 | 119.1  | 111.9 |
| 100.3 | 110.6  | 98.2  | 93.3  | 94.2  | 106.4 | 99    | 110    | 108.5 |
| 112.9 | 120.3  | 117.9 | 105.4 | 100.1 | 108.2 | 106.2 | 115.3  | 120.9 |
| 130.5 | 159.9  | 132.5 | 143.9 | 132.3 | 135.2 | 126.5 | 167.5  | 152.8 |
| 111.2 | 114.3  | 125.7 | 107.3 | 97.1  | 117.6 | 108.6 | 118.9  | 124.4 |
| 111.4 | 111.8  | 120.4 | 106.2 | 103.8 | 117.6 | 109.4 | 126.7  | 118.4 |
| 124.8 | 117.7  | 103.8 | 113   | 101.6 | 119.2 | 114.6 | 123.7  | 137.2 |
| 113.5 | 115.7  | 110.2 | 101.8 | 97.4  | 112.5 | 107.6 | 120.2  | 111.1 |
| 128.6 | 155.2  | 125.4 | 129.4 | 110.9 | 153.6 | 134.2 | 151.4  | 156   |
| 193.9 | 262.9  | 236.4 | 224.4 | 198.3 | 218.6 | 230   | 348.3  | 250.9 |
| 101.6 | 99.1   | 105.5 | 91.8  | 90.4  | 101.5 | 99.9  | 108.2  | 111.8 |
| 654.6 | 1003.3 | 894.2 | 868.3 | 893.9 | 892.9 | 988.4 | 1213.1 | 671   |
| 488.1 | 663.9  | 523.7 | 572.1 | 425.6 | 457.9 | 575.7 | 1021.4 | 563.8 |
| 112.5 | 115    | 114.3 | 112.1 | 110.8 | 126.7 | 108.9 | 138.1  | 125.3 |
| 112.4 | 146.4  | 123.8 | 118.4 | 130.7 | 139.2 | 115.2 | 133.9  | 137.6 |
| 106.5 | 115.2  | 98.7  | 102.1 | 97.3  | 100   | 101.5 | 104.3  | 103.5 |
| 103.5 | 102.5  | 103.9 | 101.9 | 92.7  | 108.9 | 99.2  | 103.7  | 117.1 |
| 106.8 | 106.3  | 103.6 | 102.6 | 97.4  | 105.7 | 99.8  | 112.7  | 115.3 |
| 141   | 475.6  | 204.2 | 106.2 | 344.5 | 145.9 | 199.4 | 491.6  | 242.8 |
| 193.9 | 311.3  | 310   | 302.1 | 283.9 | 306.5 | 272.9 | 360.7  | 240.2 |
| 125.9 | 115.6  | 126.5 | 118.7 | 110   | 125.9 | 108.4 | 130.4  | 145.6 |
| 108.8 | 103.1  | 102.4 | 96.6  | 96.6  | 111.9 | 111.6 | 108.7  | 108   |
| 105.6 | 173.3  | 112.9 | 106.1 | 134.8 | 121.2 | 113.9 | 165    | 121.4 |
| 102   | 100.2  | 99.9  | 109.1 | 95.5  | 110.5 | 99    | 101    | 111.1 |
| 100.5 | 103.1  | 97.3  | 98.7  | 89    | 100.7 | 105.7 | 98.9   | 98.6  |
| 109.6 | 100.8  | 109.8 | 99.1  | 95.2  | 107.5 | 106.4 | 116.5  | 106.3 |
| 227.6 | 399.4  | 385.6 | 483.8 | 343.4 | 408.7 | 479.4 | 411    | 387.2 |
| 106.9 | 106.3  | 97.5  | 103.6 | 94.7  | 109   | 103.7 | 104.1  | 113.9 |
| 116.5 | 111.1  | 109.9 | 113.7 | 100.2 | 111.8 | 107.4 | 129.1  | 127.1 |
| 109.7 | 122.1  | 103.6 | 108.3 | 95.2  | 108.4 | 106.9 | 105.3  | 117.9 |

|        |        |        |        |        |        |       |        |        |
|--------|--------|--------|--------|--------|--------|-------|--------|--------|
| 99.9   | 104    | 104.8  | 107.4  | 99.1   | 104.3  | 102.5 | 106.1  | 109.6  |
| 182.4  | 207.1  | 115.5  | 829.4  | 201.7  | 115.8  | 508.4 | 181.4  | 130.6  |
| 119.1  | 129.3  | 153.3  | 137.2  | 135.5  | 128.2  | 127.4 | 153.3  | 140.8  |
| 106.3  | 104.2  | 100.6  | 102.7  | 99.2   | 109.4  | 96.9  | 104.9  | 107.2  |
| 124.5  | 123.4  | 119.7  | 122.9  | 97.5   | 129.9  | 117.9 | 127.8  | 126.7  |
| 107.6  | 106.2  | 99.6   | 114.3  | 101.7  | 110.4  | 101.5 | 107.7  | 109.8  |
| 106.1  | 121.2  | 104.7  | 108.9  | 106.6  | 111.4  | 116.8 | 128.6  | 115.4  |
| 115.9  | 113    | 106.1  | 106.5  | 109.5  | 116.5  | 111.1 | 125.5  | 107.7  |
| 102.7  | 108.6  | 109.8  | 98.3   | 95.2   | 107.9  | 105.9 | 98.8   | 104.2  |
| 102    | 102.1  | 105.1  | 106.7  | 94.6   | 101.8  | 101.4 | 102.2  | 108.7  |
| 112.2  | 113.6  | 102.5  | 111.4  | 91.9   | 117.4  | 97.7  | 114    | 104.2  |
| 112.4  | 111    | 103.4  | 101.3  | 98.7   | 122    | 100.4 | 115.8  | 111.4  |
| 1261.2 | 1497.8 | 1171.3 | 2024.3 | 1390.2 | 1661.8 | 1891  | 2780.5 | 1687.9 |
| 111.8  | 101.9  | 106.5  | 104.1  | 104.7  | 103.9  | 106.8 | 120.3  | 105    |
| 109.3  | 107.5  | 97.3   | 97.2   | 87.8   | 105.6  | 99.5  | 102.1  | 112.2  |
| 315.8  | 494.3  | 268.4  | 334.1  | 364.3  | 355.7  | 263.2 | 975    | 427.4  |
| 108.5  | 114    | 118    | 113.1  | 109.1  | 126.1  | 113   | 109.8  | 118.3  |
| 129.8  | 135.4  | 138.3  | 151.3  | 106.1  | 123.1  | 152.6 | 159.9  | 142.6  |
| 110.6  | 111.4  | 109.8  | 106.4  | 94.4   | 105.9  | 109.3 | 120.4  | 105.8  |
| 131.7  | 143    | 136    | 137.8  | 119.9  | 132.2  | 156.4 | 150.2  | 138    |
| 111.8  | 115.1  | 105.9  | 114.5  | 110.5  | 125    | 103.3 | 128    | 113.9  |
| 107    | 115.5  | 102.7  | 105.8  | 103.4  | 117.3  | 106.2 | 120.6  | 124.7  |
| 107.2  | 116.8  | 106.7  | 101.2  | 94.5   | 111.9  | 98.6  | 111.4  | 114.9  |
| 96.3   | 100.4  | 94.7   | 92.4   | 95.6   | 102.6  | 101.4 | 96.6   | 101.3  |
| 103.9  | 107.1  | 100.3  | 96.6   | 99.4   | 106.7  | 101.9 | 101.6  | 111.7  |
| 100    | 111.4  | 103.4  | 95.2   | 105.3  | 110.6  | 106.2 | 116.4  | 103.4  |
| 595.9  | 692.7  | 594.5  | 457.2  | 597.2  | 740.5  | 523   | 1342.1 | 900.6  |
| 93.3   | 112.1  | 101.7  | 106.9  | 100.1  | 113.2  | 117.7 | 122.2  | 105.8  |
| 1446.6 | 1434.5 | 1153.8 | 1204   | 1134.8 | 1350.9 | 1204  | 1799.5 | 1171.1 |
| 108.3  | 113    | 122.6  | 111.9  | 108.1  | 118.7  | 106.6 | 112.3  | 112.9  |
| 135.6  | 245.7  | 295.3  | 190.9  | 198.4  | 244.3  | 211.4 | 293.4  | 189    |
| 100.4  | 107.9  | 99.4   | 105.7  | 101    | 106.7  | 105.6 | 104.5  | 108    |
| 108.3  | 105.9  | 99.8   | 102.2  | 99.4   | 109.3  | 101.1 | 108.1  | 104.9  |
| 597.7  | 1079.8 | 1068.8 | 874.8  | 865.3  | 820.5  | 994.1 | 1097.1 | 577.2  |
| 202.5  | 324.6  | 202.9  | 267.4  | 270.7  | 206.3  | 310.4 | 347.4  | 289.8  |
| 120.3  | 125.8  | 108    | 109    | 104.7  | 118.2  | 121   | 144.2  | 139.7  |
| 109.3  | 132.7  | 136.4  | 108.7  | 122.7  | 143    | 119.9 | 162.7  | 137.4  |
| 100    | 106.2  | 107.1  | 106    | 97.4   | 105.3  | 94    | 109.1  | 100.8  |
| 112    | 109.2  | 108.2  | 107    | 91.6   | 114.1  | 103.7 | 107.4  | 124.3  |
| 155.1  | 194.1  | 196.7  | 186.5  | 166.5  | 191.3  | 180.9 | 382.5  | 250.3  |
| 110.5  | 113.2  | 104    | 99.9   | 98.5   | 112.4  | 99.5  | 110.1  | 107.8  |
| 111.5  | 108.3  | 100.9  | 103.1  | 103.2  | 119.9  | 103.5 | 142.9  | 128.5  |
| 108.7  | 107.5  | 100.6  | 98     | 96     | 109.9  | 110.4 | 133.6  | 122.1  |
| 106.9  | 112.3  | 100.2  | 94.9   | 88.1   | 105.8  | 98.7  | 112.1  | 104.4  |
| 110.5  | 114.2  | 103.6  | 99     | 110.8  | 115.5  | 112.7 | 116.3  | 114.9  |
| 130.6  | 121.5  | 111.9  | 116.8  | 97.9   | 116    | 108.3 | 128.6  | 120.4  |
| 113    | 108.7  | 109.9  | 108.7  | 100.7  | 109    | 101.9 | 127.6  | 113.4  |
| 105.5  | 114    | 98.6   | 94.7   | 99.2   | 105.1  | 100.1 | 98.1   | 102    |
| 109.5  | 107.7  | 95.8   | 99.9   | 96.4   | 108.5  | 104.2 | 112.3  | 104.8  |
| 100.8  | 109.8  | 100.2  | 96.4   | 98.2   | 107.4  | 100.8 | 111    | 100.6  |
| 112.4  | 133.4  | 129.8  | 151.7  | 125.3  | 138.5  | 125   | 163.4  | 143.6  |

|        |        |       |        |        |        |        |        |        |
|--------|--------|-------|--------|--------|--------|--------|--------|--------|
| 1150.9 | 1494.6 | 1852  | 1464.4 | 1187.2 | 2313.6 | 2026.3 | 2957.8 | 2162.7 |
| 125.9  | 134.6  | 136.2 | 158    | 145.4  | 156.5  | 135.4  | 228.9  | 164.1  |
| 153.5  | 291.1  | 317.3 | 250.7  | 237.2  | 254.2  | 208.7  | 384.8  | 201.1  |
| 159.5  | 214.8  | 198.5 | 198.1  | 193.9  | 199.9  | 191.5  | 243.9  | 181.6  |
| 119.9  | 138.6  | 126.5 | 122    | 110.4  | 120.2  | 127.5  | 133.8  | 122    |
| 121.5  | 142.7  | 125   | 126.3  | 113.1  | 135.7  | 137.9  | 168.5  | 166    |
| 191.8  | 330.4  | 326.7 | 287.9  | 229.4  | 357.1  | 244.1  | 454.5  | 410    |
| 120.5  | 155.4  | 134.1 | 131.3  | 138.7  | 120.6  | 132.6  | 169.6  | 144.4  |
| 360.3  | 391.1  | 352.6 | 342.2  | 402    | 267.4  | 374.9  | 1011   | 538    |
| 116.9  | 140.8  | 126.8 | 139.3  | 119.3  | 137.5  | 134.3  | 154    | 132.3  |
| 143.6  | 143    | 128.6 | 129.6  | 121.1  | 140.5  | 124.9  | 219    | 202.5  |
| 115.2  | 123.4  | 114.3 | 133.2  | 109.9  | 120.2  | 108    | 113.4  | 116.8  |
| 125.5  | 122.9  | 133.8 | 115    | 120.4  | 125.9  | 123.8  | 130.9  | 129.4  |
| 356.4  | 694.6  | 903.1 | 623.5  | 738.1  | 862.1  | 749.4  | 1134.3 | 655.3  |
| 106.2  | 102.9  | 108.7 | 98     | 94     | 109.3  | 105.3  | 120.5  | 113.3  |
| 118.2  | 134.8  | 141.7 | 133.3  | 114.8  | 121.8  | 128.6  | 162.2  | 128.4  |
| 457    | 297.1  | 280.3 | 270.8  | 331.5  | 406.7  | 392.2  | 587.6  | 425.2  |
| 522.6  | 447.2  | 495.1 | 458    | 611    | 589.7  | 435.8  | 915.1  | 620.2  |
| 509.2  | 445.2  | 418.6 | 446.4  | 457.1  | 381    | 455.2  | 494.8  | 321.9  |
| 105.2  | 106    | 101.3 | 93.2   | 98     | 99.9   | 97.1   | 99.2   | 106.4  |
| 116.9  | 118.2  | 109.3 | 114.6  | 102.8  | 112.1  | 110.5  | 120.6  | 129.9  |
| 113.7  | 127.8  | 110   | 105.5  | 108.2  | 119.8  | 117.1  | 120.7  | 115.6  |
| 108.3  | 111.4  | 104.2 | 101.6  | 92.6   | 104.9  | 106.7  | 103.2  | 109.1  |
| 123.9  | 129.5  | 123   | 112.9  | 116.4  | 137.3  | 129.3  | 159.2  | 152.6  |
| 280.2  | 387.6  | 424.6 | 430.8  | 439.6  | 397.9  | 432.5  | 435.6  | 329.2  |
| 346.9  | 584.6  | 634.5 | 510.1  | 480.4  | 568.9  | 629.8  | 737.6  | 494.2  |
| 100.3  | 104.7  | 100.5 | 96.6   | 95.4   | 110.9  | 103.7  | 118.7  | 112.5  |
| 103.6  | 109.1  | 106.6 | 105.2  | 89.9   | 105.5  | 102    | 107.4  | 105.6  |
| 131.1  | 126.7  | 113.7 | 137.1  | 122.3  | 125.7  | 136.2  | 133.9  | 119.5  |
| 105.2  | 106.8  | 108.6 | 103.6  | 97.1   | 110    | 102.4  | 115.4  | 104.6  |
| 118.7  | 130.1  | 126.8 | 119    | 125.6  | 128.1  | 119.6  | 122.9  | 116.1  |
| 107.9  | 111.5  | 106.3 | 107.7  | 97.2   | 106.1  | 105.4  | 110    | 104.8  |
| 108.4  | 115    | 104.7 | 105.4  | 95.8   | 111.1  | 101.2  | 120    | 100.9  |
| 109.9  | 108.1  | 97.5  | 100    | 97.6   | 115.7  | 112.4  | 118.7  | 109.8  |
| 108.3  | 117.2  | 106.6 | 111.1  | 98.3   | 109.6  | 98.1   | 122.5  | 134.6  |
| 107.1  | 113.1  | 105.7 | 101.4  | 100.8  | 106.3  | 103.3  | 118.1  | 112.9  |
| 1148.3 | 912.1  | 736.7 | 799.4  | 865.1  | 950    | 852.9  | 1443.7 | 1534.3 |
| 102.3  | 102.3  | 103.7 | 99.9   | 93.9   | 105.4  | 113    | 112.1  | 107.6  |
| 167.2  | 159.4  | 156.3 | 132.6  | 165.3  | 171.4  | 158.6  | 209.9  | 140.4  |
| 117.1  | 119.2  | 106.5 | 110.5  | 101    | 118.2  | 108.7  | 125.8  | 112.3  |
| 349.1  | 596.7  | 604.2 | 521.2  | 474.9  | 532.6  | 588.2  | 763.8  | 413.6  |
| 108.8  | 111.5  | 110.8 | 100.6  | 94.6   | 100    | 106.6  | 107.1  | 97.2   |
| 109.2  | 103.8  | 101.3 | 103.8  | 100.5  | 110.1  | 102.9  | 113.1  | 116.8  |
| 106    | 113.5  | 101.1 | 91.4   | 105    | 121.5  | 107.3  | 120.8  | 105.7  |
| 128.3  | 131.2  | 120.7 | 114.2  | 114    | 130.3  | 131.6  | 152    | 140.5  |
| 737    | 563.2  | 528.2 | 505.8  | 523.9  | 469.1  | 585.2  | 981.3  | 940.9  |
| 113    | 119.8  | 111.2 | 104.8  | 98.8   | 111.8  | 114.6  | 115.9  | 121.6  |
| 194.9  | 164.4  | 139.5 | 176.1  | 146.4  | 181.4  | 211.9  | 237.3  | 220.8  |
| 567.7  | 499.7  | 444.2 | 659.9  | 426.9  | 520.5  | 711.2  | 887.7  | 668.7  |
| 277.5  | 266.9  | 223.5 | 235    | 185.7  | 232.6  | 211.4  | 414.9  | 375.2  |
| 253    | 339.6  | 283.1 | 338.3  | 243.7  | 305.5  | 326.4  | 449.6  | 273.7  |



|        |        |        |        |       |        |       |        |        |
|--------|--------|--------|--------|-------|--------|-------|--------|--------|
| 346.9  | 419.4  | 431.9  | 356.4  | 346   | 383    | 379.6 | 462    | 330    |
| 106.2  | 119.4  | 101.7  | 99.4   | 103.5 | 110.2  | 102.6 | 109.9  | 104.7  |
| 197.2  | 226.3  | 211.9  | 201.9  | 180.8 | 175.5  | 206.3 | 306.8  | 311.3  |
| 124.9  | 166.7  | 154.6  | 147    | 122   | 147.4  | 148.3 | 184.8  | 134    |
| 100.8  | 120.5  | 129.9  | 114.6  | 103.4 | 116.6  | 110.8 | 105.4  | 120    |
| 134.2  | 147.1  | 156.9  | 129.8  | 156.7 | 172.2  | 153.4 | 223    | 152.9  |
| 119    | 129.5  | 132    | 111.4  | 112.4 | 128.3  | 115.1 | 128    | 128.1  |
| 109.2  | 112.8  | 95.6   | 101.6  | 106.5 | 107.2  | 94.9  | 105.1  | 103.5  |
| 111.3  | 118.5  | 109.6  | 129.6  | 107.5 | 117.2  | 115.1 | 119.4  | 102.6  |
| 114.8  | 138.5  | 123.2  | 124.8  | 107.9 | 113.1  | 119.3 | 118.3  | 120    |
| 106.1  | 103.1  | 105.3  | 104.3  | 97    | 111.9  | 100.2 | 106.4  | 106.4  |
| 110.2  | 109.1  | 103.9  | 108.8  | 106.3 | 104.1  | 109.5 | 115.7  | 118.7  |
| 115    | 107.9  | 111.1  | 97.9   | 98.2  | 108.6  | 102.5 | 116.4  | 118    |
| 169.5  | 143.6  | 121.7  | 150.9  | 126.6 | 134.7  | 165.1 | 237.6  | 203.4  |
| 113.2  | 115.2  | 115.6  | 122.2  | 105.8 | 109.9  | 110.7 | 118.9  | 117.6  |
| 127.8  | 145.8  | 146.1  | 151.7  | 130.8 | 136.9  | 127.2 | 185.1  | 144.7  |
| 106.3  | 102.9  | 96.6   | 97.8   | 96.3  | 113.2  | 105.9 | 115.2  | 103.8  |
| 159.8  | 159.4  | 143.2  | 140    | 124.8 | 138.5  | 141.6 | 169.1  | 153.5  |
| 110.9  | 102.8  | 105.2  | 112.5  | 95.1  | 109.2  | 106.7 | 107.2  | 104    |
| 103.3  | 105    | 92.3   | 95.9   | 94.3  | 106.9  | 101   | 96.9   | 97.9   |
| 112.6  | 101.4  | 102.2  | 113.4  | 97.6  | 117.8  | 96.3  | 115.4  | 114.5  |
| 102.5  | 109.6  | 97.6   | 97.2   | 97.4  | 104.4  | 104.4 | 103.1  | 107.4  |
| 111.3  | 108.9  | 99.2   | 97     | 96.4  | 110.9  | 102.8 | 104.5  | 105    |
| 99.7   | 104.9  | 96.5   | 99.2   | 89.8  | 106.9  | 99.7  | 102    | 105.7  |
| 111.6  | 101.7  | 98.3   | 106.2  | 98.7  | 119.5  | 106.8 | 110.4  | 111.2  |
| 99.5   | 103.8  | 98.4   | 96.2   | 94.4  | 111.3  | 98.2  | 107.2  | 100.1  |
| 102.9  | 113.1  | 105.9  | 103.7  | 101.1 | 108.5  | 98.1  | 107.1  | 107.3  |
| 115.3  | 97.2   | 104.4  | 98.9   | 93.7  | 109.3  | 111.1 | 114.2  | 103.9  |
| 105.7  | 116.3  | 100.4  | 106.2  | 93.6  | 107.8  | 105   | 110.7  | 108.2  |
| 107.1  | 102    | 100.7  | 100    | 97    | 106.5  | 96.5  | 102    | 105.4  |
| 110.1  | 112.5  | 99.1   | 107.4  | 96.2  | 108.9  | 103.5 | 108    | 108.8  |
| 99.5   | 108.3  | 98.9   | 109.2  | 98.9  | 101.9  | 103.7 | 107.7  | 103.1  |
| 131.5  | 109.2  | 102.2  | 95     | 95.7  | 123.4  | 103.9 | 141.2  | 110    |
| 112.9  | 111.4  | 104.2  | 107.8  | 98.8  | 126.7  | 112.1 | 118.5  | 122.7  |
| 106.5  | 111.6  | 108.5  | 116.2  | 97    | 118.7  | 104.5 | 116.8  | 125    |
| 112.8  | 106.6  | 106.8  | 96.5   | 101.2 | 108    | 101.6 | 116.1  | 110.5  |
| 1206.1 | 1259.8 | 1137.9 | 1168.1 | 955.9 | 1085.1 | 907.2 | 1860.6 | 2135.7 |
| 110.8  | 117.9  | 127.2  | 107.2  | 115.4 | 125.1  | 113.2 | 116.6  | 132.8  |
| 107.5  | 110.1  | 105.3  | 104.7  | 93.7  | 111.2  | 103.6 | 112.8  | 124.6  |
| 104.7  | 108.1  | 97.1   | 106.4  | 104.6 | 112.4  | 103.9 | 115.3  | 105.6  |
| 130    | 177.5  | 174.1  | 181.2  | 155.4 | 187.7  | 168   | 207.8  | 172    |
| 110.7  | 105.9  | 97.5   | 94.3   | 91.2  | 103    | 99.2  | 100.5  | 96.6   |
| 115.3  | 114.7  | 105.1  | 100.4  | 108.1 | 114.4  | 114.3 | 121.9  | 107.7  |
| 114.6  | 110.7  | 102    | 109    | 96    | 107.5  | 103.4 | 101.6  | 102    |
| 105.1  | 115.3  | 105.4  | 110.5  | 100.1 | 117.1  | 104.4 | 126.1  | 120    |
| 106.7  | 108.4  | 103.9  | 103    | 99.6  | 114.6  | 101.2 | 114.6  | 106.1  |
| 100.8  | 111    | 103    | 100    | 92.6  | 107.2  | 102   | 107.3  | 111    |
| 117.2  | 113.1  | 116    | 109    | 108.4 | 119.8  | 114.7 | 130.7  | 123.5  |
| 113    | 110.7  | 103.3  | 107.5  | 104.4 | 108.8  | 106.3 | 115    | 110.4  |
| 299.3  | 378.6  | 329.5  | 290.4  | 352.2 | 336.6  | 310.6 | 498.6  | 394.6  |
| 107.7  | 173.7  | 115.2  | 383.3  | 139.1 | 114.1  | 228.1 | 138.6  | 114.7  |

|        |        |        |        |        |        |        |        |        |
|--------|--------|--------|--------|--------|--------|--------|--------|--------|
| 126    | 126.1  | 118    | 119.9  | 108.1  | 128    | 116.9  | 128.9  | 131.4  |
| 114    | 121.3  | 112.9  | 110.1  | 101.2  | 110.6  | 109.9  | 126.7  | 119.9  |
| 115.7  | 114.8  | 93.8   | 92.1   | 95.4   | 107    | 105.9  | 104.5  | 116.3  |
| 101.6  | 106.9  | 99.1   | 94.8   | 93.5   | 111.9  | 96.9   | 112.3  | 104.9  |
| 102.7  | 103.1  | 103.5  | 94.2   | 99.3   | 107.6  | 99.5   | 102.7  | 108.5  |
| 104.4  | 100    | 100.3  | 100.1  | 95.1   | 107.8  | 100.3  | 106.7  | 105.1  |
| 132.9  | 281.9  | 239.4  | 187.1  | 254.5  | 225.6  | 159    | 284.2  | 139.3  |
| 104.2  | 108.7  | 108.1  | 110.5  | 97.5   | 117.5  | 99.3   | 119.2  | 109.7  |
| 113.8  | 109.1  | 99.9   | 103.3  | 99     | 104.8  | 103.9  | 109.1  | 109.7  |
| 286.4  | 372.8  | 300.1  | 347    | 295.9  | 382.2  | 324    | 527.3  | 396.5  |
| 127.2  | 137.6  | 151.8  | 135.7  | 134.4  | 142.2  | 139.3  | 149.4  | 125.6  |
| 220.2  | 244.7  | 235.1  | 202.6  | 243.4  | 260.2  | 289.2  | 402.7  | 318.3  |
| 743.1  | 941.1  | 474.6  | 874.1  | 826.5  | 401.2  | 1000.2 | 1476.3 | 980.5  |
| 110.6  | 107.6  | 102.9  | 108.5  | 95.6   | 112.8  | 112.7  | 107.4  | 120.6  |
| 328.4  | 601.9  | 566.4  | 517.9  | 538.1  | 702.3  | 514.7  | 961.5  | 584.6  |
| 140    | 158.7  | 127.7  | 117.8  | 141.8  | 156.8  | 147.5  | 203.9  | 162.1  |
| 119.9  | 124.8  | 107    | 156.8  | 101.2  | 111.1  | 144.3  | 116.3  | 115.6  |
| 110.7  | 118.8  | 104.5  | 106.6  | 102.3  | 107.8  | 106.2  | 116.7  | 104.9  |
| 2052.6 | 2983.1 | 2711.3 | 3189.5 | 2361.1 | 2214.2 | 3210.6 | 2848.2 | 1458   |
| 109    | 115.4  | 111.6  | 115.2  | 99.6   | 115.3  | 109.7  | 116.2  | 112.1  |
| 107.3  | 105.2  | 101.3  | 107.1  | 102.6  | 108.9  | 106.5  | 107.3  | 108.8  |
| 102.7  | 96.1   | 98.8   | 98.8   | 93     | 108.4  | 95.6   | 102.8  | 100.7  |
| 174.7  | 186.6  | 192.4  | 156.8  | 179.2  | 207.5  | 190.1  | 273.9  | 207.4  |
| 107.9  | 114.1  | 110.3  | 103.2  | 100.8  | 105.9  | 106    | 134.1  | 107.5  |
| 105.6  | 104.8  | 104.1  | 105.4  | 94     | 106.5  | 108.3  | 112.4  | 116.8  |
| 125.4  | 118.1  | 108.5  | 101.7  | 101.6  | 112.9  | 105.2  | 119    | 112    |
| 112.3  | 111.1  | 103    | 108.5  | 95.2   | 108.8  | 105.1  | 111.5  | 110.5  |
| 105.9  | 153.5  | 155.1  | 142.3  | 120.6  | 144.9  | 130.7  | 115.5  | 115.1  |
| 101.7  | 101.6  | 99.9   | 95.1   | 83.4   | 102.3  | 100.6  | 100.4  | 102.6  |
| 117.2  | 152.9  | 111.8  | 126.1  | 125.2  | 110.3  | 115.4  | 100.7  | 100.3  |
| 104.9  | 110    | 107.8  | 100.3  | 95.5   | 110    | 104.3  | 103.9  | 105.4  |
| 107.3  | 112.2  | 98.4   | 100.3  | 94.3   | 114.6  | 98.2   | 121.4  | 113.7  |
| 106.3  | 109.5  | 106.1  | 106.2  | 90.3   | 111.5  | 117.2  | 113.5  | 109.3  |
| 716.5  | 722.9  | 631.5  | 792.6  | 656.6  | 680.8  | 865    | 1295.3 | 804.9  |
| 125    | 166.9  | 144.3  | 145.9  | 136.5  | 141.3  | 140.3  | 295.5  | 180.8  |
| 645.2  | 861.5  | 752.7  | 723.8  | 640.9  | 730.8  | 668.2  | 1139.6 | 1362.3 |
| 344.6  | 438.6  | 387.5  | 305.4  | 299.2  | 383.2  | 330.6  | 558.7  | 351.8  |
| 110.8  | 110.4  | 105.7  | 119.7  | 98.5   | 100.9  | 117.4  | 107.6  | 107.4  |
| 97.2   | 109.1  | 99.6   | 93.1   | 96.2   | 105.4  | 101.7  | 109.7  | 101.2  |
| 102.6  | 102.5  | 105.8  | 106.8  | 94.7   | 105.1  | 103    | 107.3  | 111.2  |
| 182.8  | 326.4  | 267.9  | 333.5  | 191.2  | 235.8  | 241.1  | 343.4  | 312.3  |
| 111.4  | 140.6  | 124.3  | 128    | 118    | 139.6  | 132.8  | 149.4  | 117    |
| 118.4  | 109    | 107.2  | 101.6  | 108.2  | 116    | 109.3  | 111.9  | 117.6  |
| 205.2  | 329.5  | 340.7  | 321.4  | 270.1  | 296.1  | 336    | 551.5  | 406.5  |
| 134    | 174.4  | 144.2  | 185.6  | 118.6  | 153.4  | 181.8  | 217.1  | 149.1  |
| 242.1  | 203.6  | 204    | 207.2  | 177.9  | 215.8  | 242.6  | 246.7  | 192.8  |
| 208.5  | 348.6  | 316.4  | 291.1  | 296.6  | 308.1  | 393.6  | 319.3  | 239.9  |
| 109.1  | 120.4  | 106.5  | 106.7  | 108.6  | 109.3  | 102.6  | 131.3  | 119.1  |
| 118.3  | 108.3  | 104.8  | 98.6   | 102.2  | 106.6  | 101.6  | 128.6  | 109.6  |
| 419.4  | 1135.1 | 1101.5 | 1070.4 | 976.4  | 1179.9 | 1289.2 | 1709.3 | 1146.9 |
| 227.2  | 553.5  | 457.7  | 426.1  | 359    | 391.2  | 502.9  | 832    | 582.6  |

|        |        |        |        |        |        |        |        |        |
|--------|--------|--------|--------|--------|--------|--------|--------|--------|
| 96.3   | 116.4  | 102.2  | 98     | 102.6  | 113.9  | 108.2  | 118.3  | 113.9  |
| 104.2  | 105.5  | 97.1   | 100.3  | 93     | 103.9  | 97.9   | 103.2  | 105.7  |
| 106.5  | 101.4  | 96.4   | 93.4   | 91.8   | 111.5  | 102.8  | 111.1  | 96.4   |
| 104.1  | 108.1  | 107.6  | 93.8   | 99.9   | 110.2  | 101    | 113.1  | 103.8  |
| 105.4  | 111.9  | 92.2   | 97.8   | 89.7   | 113.1  | 109.7  | 106.2  | 111.1  |
| 108.6  | 108.6  | 102.7  | 104.5  | 99.5   | 112.4  | 100.5  | 107    | 104.2  |
| 134.3  | 222.6  | 214.2  | 172.4  | 165    | 180.1  | 154.5  | 245.5  | 180.4  |
| 692.8  | 292.7  | 216    | 305    | 229    | 245.4  | 300    | 829.2  | 992.3  |
| 237.4  | 299.3  | 293.1  | 256.4  | 228    | 274.8  | 240    | 382.1  | 298.3  |
| 168.1  | 197.9  | 169.6  | 178.3  | 171.1  | 196.4  | 168.1  | 251.6  | 206.6  |
| 154.4  | 122.1  | 127.2  | 426.4  | 111.2  | 117.3  | 307    | 143.3  | 120.7  |
| 102.5  | 102.9  | 97.9   | 112.3  | 99.7   | 102.5  | 96.5   | 104.9  | 105.3  |
| 101.6  | 103.6  | 98.1   | 96     | 89.4   | 101    | 100.7  | 97.8   | 100.2  |
| 113.7  | 110.6  | 100.1  | 100.3  | 93.4   | 104.4  | 103.9  | 101.6  | 107.3  |
| 116.7  | 111.1  | 101.5  | 106.3  | 96.7   | 109.8  | 100.7  | 111.6  | 111    |
| 104.7  | 111.3  | 99.7   | 103.3  | 97.1   | 103.7  | 103.7  | 108.6  | 112.1  |
| 110.6  | 116.1  | 102.7  | 101.8  | 96.9   | 117.5  | 120.6  | 123.6  | 124.7  |
| 139.2  | 151    | 170.6  | 135.7  | 151.3  | 178.4  | 158.6  | 232.9  | 176    |
| 104.2  | 106.2  | 104    | 103.2  | 97.9   | 99.1   | 110.9  | 115.3  | 98.1   |
| 108.3  | 109.9  | 105.2  | 109    | 96.9   | 101.8  | 105.4  | 118.6  | 98.6   |
| 109.9  | 107.3  | 107    | 106.8  | 93.1   | 113.8  | 98.9   | 110.2  | 114.1  |
| 234.1  | 193.8  | 198.7  | 202.9  | 194.9  | 184.3  | 171    | 317.5  | 283.4  |
| 108.4  | 107.5  | 101.3  | 95.3   | 99.6   | 108.5  | 97.8   | 105.2  | 113.5  |
| 106.1  | 104.7  | 99.3   | 106.5  | 100.8  | 104.6  | 103.8  | 116.3  | 109    |
| 110.6  | 113.5  | 112.8  | 105.4  | 109.3  | 120.2  | 108.8  | 128.7  | 114.3  |
| 151.9  | 176.3  | 153.2  | 138.7  | 159.2  | 147.2  | 151.7  | 199.4  | 170.5  |
| 180.8  | 196.5  | 188.5  | 161.9  | 151.4  | 170.6  | 153.7  | 216.5  | 182.7  |
| 1391.9 | 2468.1 | 2288.6 | 1938.4 | 2562.9 | 2798.1 | 2069.2 | 4893.7 | 1792.3 |
| 105.5  | 111.8  | 100.7  | 108.1  | 100.6  | 115.9  | 107.9  | 113.1  | 105.9  |
| 110    | 110.1  | 115.7  | 101.7  | 101.3  | 114    | 105.9  | 107.5  | 111.8  |
| 107    | 106.4  | 111    | 99.8   | 102.3  | 109.9  | 102.2  | 99.5   | 116    |
| 111.9  | 113.5  | 107.5  | 106.9  | 95.3   | 108.1  | 109    | 112.6  | 126.4  |
| 110.3  | 111.4  | 104.2  | 101.4  | 94.5   | 108.2  | 104.6  | 109.9  | 101.1  |
| 105.4  | 97.4   | 99.5   | 95.7   | 95     | 119.5  | 90.6   | 101.6  | 108.7  |
| 103.9  | 110.6  | 110.7  | 100.7  | 101.2  | 108.7  | 101.6  | 99.9   | 119.1  |
| 115    | 110.6  | 117.4  | 125.1  | 116.8  | 143.4  | 117.4  | 150.2  | 120.4  |
| 142    | 196.6  | 145.9  | 173.8  | 148.5  | 171.2  | 179    | 247.3  | 200.1  |
| 100.1  | 107.4  | 97.5   | 95.6   | 96.5   | 107.3  | 98.5   | 119.5  | 102    |
| 103.2  | 104    | 98.9   | 99.3   | 90.2   | 96     | 99.5   | 112.9  | 92.9   |
| 120.9  | 117.3  | 108.4  | 98.2   | 114.2  | 108.2  | 111.9  | 128.4  | 120    |
| 609.5  | 462.2  | 560.7  | 352.7  | 417    | 467.5  | 441    | 679.1  | 413    |
| 125.1  | 109.8  | 120.4  | 107.7  | 117.4  | 131.7  | 123    | 136.7  | 147.2  |
| 99.3   | 105.8  | 99.3   | 103.8  | 97.5   | 110.7  | 100.2  | 107.8  | 118.7  |
| 109.5  | 108.7  | 103.8  | 101.3  | 108.3  | 115.4  | 102.2  | 110.2  | 108.4  |
| 116.5  | 114.5  | 103.7  | 102.5  | 92.7   | 109.2  | 104.2  | 105.2  | 110.9  |
| 115.5  | 122.2  | 112.6  | 107.7  | 105.3  | 117.8  | 106.5  | 151.4  | 119.9  |
| 102    | 102.9  | 104.5  | 101    | 104.4  | 105.4  | 107.6  | 111.3  | 104.9  |
| 107.6  | 111.6  | 102.2  | 106.9  | 97.5   | 117.5  | 106.5  | 114.7  | 123.5  |
| 107.4  | 113.5  | 101.2  | 100.1  | 91.3   | 108.2  | 105.2  | 116.3  | 111.7  |
| 102.9  | 108.4  | 98     | 95.4   | 94.5   | 108.9  | 100.8  | 108.1  | 107    |
| 112.3  | 112.2  | 106.4  | 104.7  | 92.4   | 111.5  | 107.6  | 137.4  | 136.2  |

|       |       |       |        |       |       |       |        |        |
|-------|-------|-------|--------|-------|-------|-------|--------|--------|
| 122.8 | 233.4 | 161.8 | 150.4  | 190.1 | 141.3 | 140.6 | 219.6  | 132.8  |
| 110.4 | 116.5 | 109.3 | 120    | 110.8 | 113.5 | 115.3 | 116.6  | 109.2  |
| 104.3 | 110.8 | 101.3 | 108.4  | 96    | 107.8 | 99.4  | 109    | 108.6  |
| 101   | 104.7 | 106.7 | 96.4   | 97.2  | 115.9 | 97.7  | 101.2  | 103    |
| 106.2 | 104.1 | 103.2 | 103.2  | 105.6 | 122.5 | 105.8 | 100.5  | 110.9  |
| 109.8 | 117   | 103.1 | 97.8   | 102.2 | 115   | 105.2 | 111.1  | 112.3  |
| 104.5 | 105.9 | 101.1 | 101.2  | 93.5  | 110   | 99    | 115.5  | 108.4  |
| 110.2 | 122.7 | 115.9 | 117    | 104.3 | 108.9 | 115.8 | 121    | 131.2  |
| 590.1 | 721.8 | 515.4 | 652.3  | 470.4 | 632.6 | 581.1 | 992.2  | 1206   |
| 757.1 | 759.9 | 603.8 | 659.1  | 583.4 | 612.1 | 650.3 | 1347.8 | 1331.7 |
| 279.4 | 266   | 248.9 | 212.3  | 213.5 | 310.8 | 238.1 | 482.1  | 950.8  |
| 100.6 | 108.6 | 93.5  | 134.6  | 85.9  | 109.2 | 106.4 | 111    | 113    |
| 114.4 | 101.5 | 101.6 | 177.3  | 98.6  | 102.7 | 109.6 | 109.7  | 102.1  |
| 105.5 | 116.4 | 97.1  | 297.4  | 97.6  | 109.4 | 130.4 | 105.7  | 111.3  |
| 106.4 | 131.2 | 127.2 | 138.8  | 104.8 | 130.2 | 121.4 | 110.1  | 117.2  |
| 105.3 | 313.9 | 156.8 | 200.9  | 226   | 136.7 | 140   | 256.6  | 141    |
| 115.4 | 248.4 | 149.7 | 199.9  | 211.8 | 154.2 | 136.8 | 289.3  | 145.7  |
| 98.7  | 148   | 116.2 | 106.4  | 121   | 109.5 | 115.1 | 134.4  | 113.8  |
| 101.6 | 111.9 | 101.4 | 104.2  | 92.2  | 115.2 | 108.3 | 108.5  | 102.7  |
| 106.8 | 105.4 | 101.6 | 98     | 97.4  | 107.7 | 99.4  | 109.7  | 108    |
| 106.8 | 107.5 | 96.8  | 106.4  | 96.6  | 113.2 | 104   | 107.5  | 111.6  |
| 101.2 | 107.8 | 94    | 95.1   | 97.6  | 108.9 | 101.1 | 106.4  | 111.6  |
| 619.1 | 336.9 | 141.6 | 282.6  | 255   | 168   | 304.6 | 762.5  | 575.3  |
| 116.6 | 175.2 | 128.2 | 131.3  | 111   | 123.2 | 113.9 | 183.9  | 155.8  |
| 439.2 | 564   | 686   | 434.4  | 484.8 | 585.4 | 361.5 | 799.8  | 489.1  |
| 108   | 108.5 | 97.8  | 103.8  | 94.8  | 109.5 | 100.1 | 111.6  | 109.6  |
| 113.3 | 109.5 | 99.1  | 104.2  | 98.2  | 101.4 | 104.1 | 115.6  | 108    |
| 150.3 | 206.1 | 127.5 | 372.2  | 161.3 | 126.4 | 487.3 | 184.3  | 140.1  |
| 100.6 | 104.6 | 101.7 | 102    | 92.5  | 108.9 | 106.9 | 104.6  | 110.1  |
| 103.3 | 113.4 | 103.2 | 102    | 99.1  | 102.8 | 94.3  | 122.9  | 113.5  |
| 110.6 | 120.8 | 98.2  | 104.9  | 94.2  | 104.3 | 103.2 | 109.9  | 116.9  |
| 110.6 | 137.9 | 112   | 107.1  | 105.3 | 119.9 | 105.4 | 121.2  | 113    |
| 112.3 | 107.3 | 100.9 | 100.1  | 87.2  | 102   | 98.9  | 104.8  | 109    |
| 104.2 | 111.5 | 97.3  | 100.1  | 101.7 | 107.4 | 102.2 | 107    | 110.7  |
| 115.6 | 102.4 | 93.7  | 99.8   | 95.2  | 100.2 | 105.3 | 102.5  | 106    |
| 513.6 | 140.7 | 134.5 | 167    | 186.4 | 179.6 | 436   | 202.6  | 185.1  |
| 106.7 | 116.6 | 106.6 | 100.9  | 102.1 | 107.4 | 101.8 | 103.3  | 101.4  |
| 127.9 | 136.9 | 104.7 | 140.2  | 112.7 | 114.8 | 138.2 | 147.2  | 109.9  |
| 100.8 | 101.5 | 105.5 | 101.5  | 104.8 | 99.4  | 108.9 | 110.9  | 104.4  |
| 125.3 | 131.7 | 116.8 | 143.3  | 122.4 | 120.4 | 163.8 | 131.3  | 122.2  |
| 109.8 | 109   | 103.5 | 95.5   | 89.3  | 106.4 | 99.7  | 100    | 123.5  |
| 110.6 | 119.5 | 107.9 | 108.8  | 98.6  | 112.1 | 97.7  | 107.5  | 112.4  |
| 588.5 | 627.2 | 519.3 | 1047.1 | 717.3 | 639.9 | 863.5 | 1481.7 | 1283.1 |
| 129.4 | 110.9 | 119.2 | 124.9  | 111.6 | 126.1 | 112.4 | 117.3  | 116.4  |
| 235.4 | 246.8 | 209.7 | 261.5  | 199.5 | 213.1 | 239.5 | 330.8  | 202.5  |
| 216.3 | 298.2 | 200.8 | 240.3  | 202   | 167.9 | 191.1 | 241.8  | 181.5  |
| 119.5 | 129.5 | 116.3 | 132.7  | 103.3 | 131.9 | 113.9 | 133.8  | 114.5  |
| 115.3 | 113.7 | 114   | 111.3  | 108.1 | 128.4 | 103.1 | 119.9  | 121.3  |
| 298.3 | 273.7 | 330.8 | 258.4  | 291.2 | 313.9 | 246.2 | 575.4  | 391    |
| 128.9 | 122.9 | 110.6 | 96.1   | 115.9 | 140.6 | 125.7 | 178.5  | 131.3  |
| 127.9 | 131.4 | 118.6 | 109.7  | 120.8 | 117.9 | 148.8 | 185.4  | 122.4  |

|         |         |         |         |        |       |       |         |         |
|---------|---------|---------|---------|--------|-------|-------|---------|---------|
| 120     | 130.9   | 184.7   | 115     | 109.9  | 181.9 | 124.1 | 154.7   | 145.3   |
| 294.1   | 543.3   | 294.1   | 372.7   | 202.4  | 242.1 | 254.5 | 507.4   | 538.6   |
| 166.5   | 146.2   | 132.7   | 145.2   | 121.1  | 148.1 | 147.3 | 254     | 242.9   |
| 137.3   | 175.1   | 149     | 146.7   | 124    | 147.4 | 152.8 | 176.7   | 133.9   |
| 212.1   | 376.6   | 314.1   | 319.7   | 264.4  | 322.9 | 349.1 | 398.1   | 266     |
| 107.8   | 105.7   | 92.5    | 111.2   | 94.4   | 107.8 | 107.1 | 112.1   | 106.5   |
| 143.7   | 203.8   | 176.4   | 176.2   | 146.5  | 191.4 | 180.2 | 292.1   | 262.5   |
| 408.7   | 525.7   | 546.1   | 391.4   | 444.7  | 557.1 | 523.9 | 861.6   | 755.2   |
| 118.3   | 124.4   | 128     | 112.1   | 103    | 114.9 | 122.8 | 137.7   | 122.6   |
| 206.7   | 244.7   | 244.8   | 191.8   | 215.1  | 287.4 | 291.7 | 375     | 309     |
| 101.8   | 103.1   | 99.4    | 89      | 91.7   | 100.5 | 95.6  | 106.3   | 103.8   |
| 103.5   | 113.7   | 100.7   | 97.8    | 92.4   | 108.5 | 104.8 | 133.7   | 99.6    |
| 107.8   | 111.3   | 106     | 104.6   | 98.6   | 110.5 | 101.1 | 110.9   | 106     |
| 150.6   | 278.7   | 256.2   | 205.6   | 217.2  | 256.2 | 240.2 | 286.3   | 252.7   |
| 168.9   | 242.6   | 218.8   | 182.5   | 219.8  | 225.5 | 214.7 | 287.3   | 194.8   |
| 188.5   | 180.6   | 174.1   | 227.3   | 175.8  | 232.1 | 246.6 | 295.7   | 168.3   |
| 114.4   | 118.7   | 112.4   | 123.1   | 100.9  | 118.5 | 114.8 | 124.8   | 111.2   |
| 150.4   | 134.9   | 136.5   | 106.9   | 126.7  | 144.8 | 115.7 | 202.3   | 189.6   |
| 319.5   | 607.2   | 801.7   | 743     | 606.8  | 671.4 | 693.2 | 749.9   | 568.3   |
| 115     | 114.6   | 115.5   | 113.2   | 109.4  | 118.3 | 121.1 | 118.9   | 118.8   |
| 110.5   | 101.3   | 102.4   | 98.8    | 89     | 110.5 | 102.7 | 115.5   | 125.4   |
| 162.1   | 254.8   | 230.3   | 217.3   | 181.1  | 231.2 | 197.5 | 308.2   | 195.7   |
| 102.6   | 109.5   | 103.2   | 95.3    | 93.5   | 104.8 | 101.2 | 104.2   | 106.1   |
| 398.8   | 404.4   | 382.9   | 358.7   | 368.7  | 444.3 | 453.9 | 589.1   | 365.4   |
| 173.1   | 245.8   | 232.7   | 228.7   | 221.5  | 255.3 | 235.2 | 351.8   | 212.8   |
| 103     | 117.6   | 102.9   | 97      | 93.2   | 104.6 | 105.1 | 110.3   | 111.7   |
| 114.1   | 112.8   | 102.6   | 92.2    | 97.3   | 117   | 101.2 | 116.4   | 113.8   |
| 345.6   | 687     | 718.4   | 692.5   | 619.3  | 624.7 | 748.2 | 883.9   | 425.6   |
| 104     | 111.8   | 96.7    | 104.2   | 103.5  | 116.3 | 112.2 | 115     | 100.9   |
| 116.4   | 105     | 108.7   | 110.1   | 104.9  | 116.1 | 120.3 | 115.9   | 107.7   |
| 108.8   | 112.7   | 112.9   | 104     | 105.3  | 115.8 | 123.8 | 108.3   | 117     |
| 523.2   | 585.3   | 541.9   | 680.7   | 568.9  | 651.7 | 710.8 | 983.6   | 618.4   |
| 111.9   | 102.8   | 101.9   | 100.8   | 94.8   | 110.3 | 98.3  | 104.3   | 119.2   |
| 379.5   | 425.7   | 374.9   | 404.7   | 369.9  | 391.2 | 439.5 | 577.9   | 459.9   |
| 352.5   | 375.9   | 264     | 354     | 297.9  | 364.5 | 414   | 563.5   | 460.6   |
| 115.3   | 114.3   | 107.3   | 107.5   | 100.4  | 109.5 | 101.7 | 113.7   | 100.6   |
| 127.3   | 136.3   | 115.7   | 129.3   | 107.8  | 133.2 | 126   | 165.2   | 138.4   |
| 107.7   | 107.6   | 101.7   | 98      | 99.1   | 109.2 | 100.1 | 116.9   | 102.7   |
| 109.9   | 112.1   | 99.8    | 109     | 103.4  | 112.8 | 111.4 | 127     | 109.5   |
| 95.6    | 99.6    | 102.5   | 99.5    | 91.8   | 101   | 94    | 112.5   | 109.3   |
| 103.7   | 101.5   | 98.7    | 89.9    | 89.9   | 102.1 | 101   | 100.2   | 100.5   |
| 101.1   | 118.2   | 106.9   | 109.2   | 91.7   | 106.3 | 104.1 | 112.1   | 95.7    |
| 119.8   | 149.1   | 152.7   | 138.7   | 110.9  | 134.4 | 132.8 | 132.8   | 139.8   |
| 11290.9 | 10990.5 | 10462.3 | 10003.4 | 8817.9 | 8917  | 9227  | 21472.6 | 23297.8 |
| 114.1   | 154.1   | 212.6   | 149.4   | 145.5  | 162.1 | 148.7 | 149     | 138.8   |
| 102.4   | 105.9   | 102.7   | 98.2    | 93.9   | 106.1 | 100.6 | 104.4   | 103.8   |
| 106.1   | 117.4   | 110.3   | 109.7   | 106.4  | 112   | 107.3 | 122.5   | 121.4   |
| 103.1   | 115.6   | 103.8   | 111     | 107.5  | 108.1 | 107.5 | 115.5   | 111.3   |
| 156     | 150.4   | 188.4   | 167.6   | 154.5  | 173.8 | 163.7 | 178.4   | 143.4   |
| 119.9   | 122.8   | 140.6   | 138.7   | 120.8  | 133.3 | 136.9 | 124.3   | 118.1   |
| 100     | 111.3   | 105.2   | 97.2    | 99.7   | 115.8 | 108.3 | 105     | 103.4   |

|        |        |        |        |        |        |        |        |        |
|--------|--------|--------|--------|--------|--------|--------|--------|--------|
| 128.4  | 142.2  | 123.3  | 129.2  | 122.2  | 149.8  | 131.2  | 143.9  | 122.9  |
| 334.7  | 498    | 383.7  | 309.3  | 388.9  | 412.2  | 417.6  | 858.1  | 514.6  |
| 583.5  | 356.6  | 250.6  | 417    | 288.4  | 303.1  | 537.9  | 507.7  | 466    |
| 104    | 111.9  | 106.1  | 102.6  | 98     | 106.6  | 100.7  | 104.6  | 103.9  |
| 105.1  | 104.3  | 110    | 107.2  | 93.1   | 112    | 100    | 116.7  | 105.9  |
| 110.8  | 117.3  | 109.6  | 137.8  | 115    | 111.6  | 133.6  | 116.7  | 120.2  |
| 117.8  | 173    | 136.5  | 173.2  | 136.4  | 149.7  | 152    | 142.5  | 126.1  |
| 106    | 105    | 108.1  | 104.8  | 97.3   | 110.5  | 99.6   | 120.2  | 116.8  |
| 554.5  | 478.7  | 452.5  | 672    | 383.7  | 481.5  | 501.8  | 584.3  | 449.5  |
| 111.1  | 116.1  | 101.2  | 105.1  | 97.8   | 114.7  | 111.5  | 110.9  | 117.8  |
| 108.1  | 113.7  | 90.5   | 107    | 104.7  | 103.7  | 107.2  | 113.2  | 116.5  |
| 107.6  | 109.5  | 108.2  | 103.9  | 103.4  | 110.6  | 113.1  | 122.2  | 120.2  |
| 107.7  | 99     | 103.4  | 94.9   | 98.2   | 104.9  | 100    | 110.5  | 104    |
| 104.8  | 104.9  | 104.6  | 117.7  | 91.7   | 111.5  | 104.6  | 104.9  | 112.9  |
| 557.8  | 673    | 602.6  | 744.8  | 617.3  | 726.2  | 652.6  | 892.9  | 464.3  |
| 120.1  | 116    | 113.5  | 114.3  | 101.9  | 122.3  | 104.9  | 136.2  | 114.2  |
| 193.9  | 256.2  | 188.7  | 232.2  | 187.6  | 242.5  | 247    | 241.6  | 200.8  |
| 127.2  | 130.3  | 113.4  | 119.2  | 101.7  | 130.3  | 115.6  | 127.3  | 119.2  |
| 116.3  | 116.4  | 106.2  | 112    | 99.8   | 119    | 114.3  | 113.6  | 114.6  |
| 109.6  | 112.7  | 109.7  | 114.1  | 97.8   | 122    | 101.3  | 113.5  | 107.5  |
| 1030.3 | 1634.7 | 1234.2 | 2082.9 | 1330.1 | 1396.9 | 1955.9 | 1741.2 | 1024.1 |
| 136.4  | 166.1  | 142.8  | 200.2  | 136.5  | 153.6  | 198.7  | 188    | 147.2  |
| 154.8  | 194.3  | 152.9  | 223.7  | 165.7  | 163.7  | 252.9  | 235.6  | 148.6  |
| 615.3  | 924.6  | 287    | 662.4  | 937.3  | 328.2  | 681.4  | 1382.7 | 438.7  |
| 99.9   | 108.7  | 105.9  | 101.4  | 90.8   | 100.2  | 104.6  | 100.3  | 100.2  |
| 98.7   | 104.6  | 98.3   | 95.4   | 98.2   | 106.1  | 97.5   | 103.4  | 108.3  |
| 104.2  | 112.8  | 108    | 100.3  | 99.7   | 108.1  | 101    | 107    | 102.8  |
| 118.7  | 113.4  | 102.4  | 108.4  | 96.5   | 108.5  | 109.9  | 131.4  | 109.2  |
| 192.7  | 226.7  | 203.1  | 235.8  | 180    | 180.7  | 203.7  | 287.1  | 218.7  |
| 100.5  | 110.2  | 100.8  | 93.6   | 93.1   | 108.8  | 95.4   | 108    | 103.1  |
| 615.8  | 1127.4 | 944.6  | 1115.4 | 967.8  | 775.8  | 1015.7 | 1768.5 | 1216.2 |
| 107.6  | 113.1  | 104.3  | 97.8   | 85.7   | 111.1  | 105.4  | 110.7  | 113    |
| 847.9  | 1690.9 | 1331.6 | 1537.5 | 1183.1 | 1336.5 | 1423.1 | 1778.1 | 1300.7 |
| 119.1  | 122.8  | 124.9  | 105.1  | 109.2  | 123.3  | 119.8  | 127.6  | 119.1  |
| 105.8  | 106.7  | 105.3  | 98.3   | 89.8   | 114.7  | 101.6  | 106.2  | 100.7  |
| 107.8  | 111.6  | 109.2  | 96.3   | 98.7   | 113.3  | 108.8  | 119    | 111.4  |
| 105    | 105.7  | 100.7  | 104.2  | 91.3   | 109.2  | 111.4  | 105.4  | 109.8  |
| 106.9  | 102.9  | 99     | 98.8   | 99.6   | 101.9  | 99.8   | 109.8  | 106    |
| 110    | 113.7  | 108.2  | 114.8  | 92.3   | 107.5  | 111    | 139.1  | 115    |
| 101.3  | 106.8  | 98     | 101.7  | 98.1   | 106.8  | 110.5  | 107    | 106.5  |
| 119.8  | 129    | 120    | 119    | 112.3  | 125.8  | 113.8  | 136.7  | 123.8  |
| 108.8  | 100    | 100.8  | 101    | 99.5   | 114.1  | 97.5   | 111.3  | 118.2  |
| 331    | 412.1  | 361    | 393.1  | 303.1  | 333    | 428.5  | 676.4  | 422.7  |
| 297.9  | 349.9  | 281.6  | 308.9  | 256.2  | 297.4  | 338.2  | 429.9  | 314.6  |
| 104.5  | 106.1  | 102.2  | 93.5   | 98.1   | 99.6   | 97.1   | 97.9   | 110.7  |
| 109.2  | 109.6  | 102.9  | 105    | 95.2   | 111.8  | 101.1  | 111.4  | 110.2  |
| 112    | 116.2  | 109.4  | 102.3  | 98.2   | 110.1  | 104.7  | 101.4  | 113.3  |
| 313.8  | 414.7  | 280.8  | 299.5  | 240.4  | 384.7  | 227.7  | 587.7  | 358.7  |
| 114.7  | 103    | 107.6  | 100.8  | 101.2  | 104    | 110.6  | 120.1  | 107.7  |
| 100.5  | 111.7  | 112.5  | 101.8  | 99.5   | 104.6  | 105.3  | 124    | 114.1  |
| 112    | 109.1  | 98.9   | 99.4   | 97.5   | 110    | 104.2  | 109.8  | 108.2  |

|        |        |        |        |        |        |        |        |       |
|--------|--------|--------|--------|--------|--------|--------|--------|-------|
| 102.3  | 105.1  | 103.1  | 102.4  | 94.4   | 97.7   | 100.3  | 108.9  | 104.7 |
| 103.2  | 132.3  | 108.9  | 105.1  | 105.6  | 118.5  | 111.1  | 140.5  | 115.6 |
| 480.9  | 975.7  | 803.9  | 942.8  | 757.3  | 703.8  | 688.7  | 689.6  | 429.3 |
| 184    | 228.9  | 236.6  | 188.1  | 190.3  | 187    | 174    | 228.4  | 152.9 |
| 120.1  | 131.2  | 114.5  | 122.1  | 105.1  | 121.6  | 129.2  | 117.2  | 127.9 |
| 106.4  | 104.6  | 103.7  | 95     | 91.7   | 104.8  | 102    | 95.1   | 115.2 |
| 127.4  | 123.4  | 122.1  | 122.4  | 115.5  | 134.6  | 108.8  | 146.2  | 147.8 |
| 112.7  | 115.1  | 103.4  | 122.3  | 101.9  | 111.6  | 106.9  | 123.5  | 126.3 |
| 188.5  | 261.6  | 184.8  | 202.1  | 184.1  | 207.6  | 176.8  | 303.6  | 201.6 |
| 115.5  | 126.4  | 112.1  | 104.3  | 114.6  | 121.8  | 109.6  | 130.6  | 121.1 |
| 145.2  | 327.9  | 310.4  | 327.9  | 279.3  | 358    | 256.2  | 424.4  | 247.8 |
| 104.7  | 110.3  | 104.1  | 100.2  | 97.1   | 112.8  | 96.2   | 110.2  | 117   |
| 1192.1 | 1127.2 | 1275.9 | 1105.7 | 1152.1 | 1383.9 | 1276.6 | 1580.5 | 1106  |
| 159.9  | 194.1  | 182.8  | 182.1  | 192.8  | 195.9  | 198.7  | 241.8  | 183   |
| 369.9  | 574.9  | 529.2  | 424.9  | 451.7  | 486    | 650.2  | 819.9  | 683.8 |
| 146.8  | 151.6  | 133.7  | 119.6  | 119    | 152.7  | 134.1  | 157    | 138.9 |
| 305.9  | 257.7  | 257.9  | 206.8  | 227.4  | 277.8  | 271.4  | 434.8  | 438.1 |
| 119.6  | 120.9  | 107.6  | 100.5  | 98.5   | 111    | 106.8  | 127    | 126.8 |
| 121.7  | 122.4  | 119.1  | 107.8  | 96.3   | 111.6  | 112.3  | 157.2  | 131   |
| 428.3  | 409.8  | 288    | 364.1  | 459.4  | 335.4  | 447.9  | 635.1  | 380.1 |
| 216.1  | 216    | 194.9  | 161.8  | 179.6  | 221.1  | 174.9  | 225.4  | 186.6 |
| 185.8  | 326.8  | 353.1  | 225.5  | 221.6  | 383.7  | 252.3  | 439.5  | 285.6 |
| 254.1  | 561    | 418.9  | 423.6  | 457.7  | 446.1  | 431.9  | 596.3  | 498.7 |
| 108.4  | 110.3  | 110.2  | 101.7  | 107.1  | 119.8  | 106.2  | 103.5  | 109.5 |
| 280.2  | 306.6  | 258.6  | 336.7  | 265.2  | 364.3  | 272.9  | 494.7  | 333   |
| 108    | 113.8  | 106.8  | 114.2  | 101.2  | 104.5  | 108.4  | 117.4  | 105.4 |
| 110    | 106.7  | 113.9  | 105.8  | 99.7   | 113.7  | 105.4  | 110.2  | 113.6 |
| 112.3  | 104.9  | 99.1   | 98.7   | 97.5   | 108.9  | 107.1  | 112.2  | 108.4 |
| 102.3  | 109.9  | 102.9  | 109.2  | 104.7  | 102.4  | 101.2  | 113.6  | 116.9 |
| 105.9  | 111    | 99.9   | 98.8   | 94.2   | 108.9  | 104.8  | 108.1  | 110.9 |
| 112.8  | 110.4  | 105.4  | 108    | 101.2  | 118.2  | 107.2  | 106.7  | 102   |
| 105.3  | 110.7  | 103    | 106.1  | 102.9  | 108.8  | 101.6  | 109.5  | 108.8 |
| 110.2  | 103.4  | 98.9   | 101.7  | 90.1   | 107.4  | 97.5   | 99.6   | 110.9 |
| 113.3  | 106.1  | 111    | 100.4  | 91.4   | 106.2  | 97.3   | 104.7  | 105.7 |
| 106.4  | 109.7  | 99.6   | 99.9   | 88.1   | 111.6  | 96.3   | 99.6   | 115.6 |
| 106.7  | 109.1  | 95.6   | 89.9   | 97.1   | 102.7  | 99.8   | 104.3  | 108.8 |
| 106.7  | 111.4  | 101    | 97.3   | 96.2   | 109.7  | 104.8  | 113.5  | 120   |
| 105    | 113.8  | 108    | 110.4  | 95.6   | 117.7  | 109.5  | 106.6  | 111.3 |
| 104.7  | 108.1  | 102.4  | 96.3   | 93.2   | 108.2  | 105.2  | 109.3  | 109.8 |
| 118    | 106.5  | 108.5  | 100.9  | 91.6   | 107.2  | 99.3   | 101.1  | 109.4 |
| 104.1  | 108.5  | 102.4  | 99.9   | 93.2   | 107.3  | 106.1  | 105.4  | 110.8 |
| 103.1  | 107.5  | 106.4  | 105.1  | 101.4  | 111.2  | 107    | 109.2  | 100.1 |
| 110.1  | 112.5  | 99.5   | 107.5  | 98.9   | 117.5  | 100.4  | 113.9  | 121.2 |
| 115.8  | 112    | 114.5  | 117.6  | 106.3  | 120.4  | 102.2  | 116.6  | 120.9 |
| 108.6  | 542.1  | 333.7  | 211.6  | 305.1  | 177    | 175    | 139    | 118.1 |
| 107.6  | 109    | 103.2  | 102.4  | 104.7  | 112.4  | 103.6  | 106.8  | 110.7 |
| 106    | 103.6  | 104.3  | 104.2  | 98.6   | 107.6  | 105.1  | 110.8  | 116.7 |
| 109.5  | 107.6  | 98.8   | 99.1   | 104.5  | 107.7  | 103.7  | 115.8  | 114.1 |
| 110.2  | 107.5  | 100    | 103.2  | 97.1   | 112.5  | 101.8  | 119.3  | 119.7 |
| 104.1  | 107.2  | 107.4  | 97     | 100.7  | 105.9  | 101.3  | 106.9  | 114.9 |
| 111.3  | 119.4  | 102.5  | 110.5  | 104.6  | 119.1  | 112    | 115.2  | 117.3 |

|       |       |       |       |       |       |       |       |       |
|-------|-------|-------|-------|-------|-------|-------|-------|-------|
| 175.2 | 348.6 | 438.8 | 461.4 | 301.5 | 295.9 | 391.1 | 524.9 | 307.4 |
| 113.8 | 133   | 132.1 | 142.1 | 129.8 | 117.3 | 140.6 | 198.9 | 128.2 |
| 111.8 | 109.8 | 107.3 | 107.1 | 101   | 106.6 | 104.5 | 117   | 122.5 |
| 159.2 | 383.1 | 281.5 | 216.4 | 264.2 | 205.4 | 186.4 | 223.9 | 160.6 |
| 122.4 | 116.9 | 109.5 | 118.9 | 106.2 | 124.5 | 127.1 | 133.3 | 140.6 |
| 247.1 | 285.5 | 272.6 | 259.8 | 294.8 | 286.8 | 300   | 393.3 | 244.3 |
| 303.5 | 419.9 | 447.8 | 385.9 | 423.6 | 417.6 | 424.6 | 653.8 | 386.4 |
| 104.3 | 106.5 | 107.2 | 99.7  | 93.1  | 112.5 | 103.8 | 106.1 | 113.4 |
| 141   | 145.7 | 158   | 144.3 | 130.2 | 166.6 | 176.9 | 181.2 | 155.8 |
| 139   | 331.8 | 279.3 | 230.6 | 293   | 282.9 | 246.7 | 388.3 | 235.7 |
| 170   | 170.7 | 148.8 | 151.6 | 156.8 | 205   | 162.2 | 240   | 212   |
| 123.2 | 126.2 | 130.6 | 116.8 | 109.7 | 127.5 | 129.5 | 151   | 121.4 |
| 116.8 | 126.8 | 105.7 | 102.7 | 103.4 | 111.3 | 124.5 | 138.2 | 122.8 |
| 122.6 | 160.3 | 111.7 | 175.6 | 128.1 | 125.7 | 146.6 | 202.7 | 148.7 |
| 143.4 | 213   | 182.1 | 156   | 160.7 | 214.3 | 191.2 | 245.4 | 187.4 |
| 110.9 | 117   | 117   | 119.4 | 112   | 119.2 | 118   | 146.9 | 123.3 |
| 110.3 | 120.4 | 123.2 | 113.8 | 109.6 | 113.3 | 114.3 | 149.3 | 129.8 |
| 268.9 | 274.8 | 275.8 | 257.5 | 267.9 | 262.3 | 260.7 | 493.9 | 344.5 |
| 104.2 | 108.8 | 109.6 | 99.1  | 99.1  | 106.2 | 106.7 | 109.7 | 110.5 |
| 103.4 | 110.3 | 100.2 | 97.1  | 96.6  | 109.6 | 100   | 112.6 | 112.7 |
| 103.1 | 111.2 | 105.8 | 104.8 | 93.7  | 110.4 | 105.2 | 111.9 | 108.4 |
| 108.7 | 116.2 | 99.1  | 103.8 | 97.3  | 111.5 | 96.5  | 111.8 | 110.3 |
| 109.6 | 111   | 104   | 98.9  | 98.5  | 99.3  | 101.1 | 117.5 | 110.6 |
| 117.5 | 107.9 | 110.7 | 100.9 | 92.8  | 113.5 | 104.9 | 123.9 | 117.8 |
| 109.2 | 116.6 | 114.4 | 121.5 | 100.1 | 122.3 | 111.9 | 121.6 | 118.4 |
| 104.3 | 111.6 | 105.1 | 105.9 | 99.9  | 118.9 | 118.9 | 126.3 | 120.7 |
| 112   | 121.9 | 105.1 | 120.3 | 99.2  | 125.9 | 107.7 | 131.6 | 118.1 |
| 111.2 | 106.5 | 108.7 | 95.6  | 104.4 | 113.8 | 107   | 115.8 | 107.7 |
| 102.1 | 104.3 | 93    | 91.5  | 99.8  | 105.5 | 101.3 | 106.5 | 104.4 |
| 105.7 | 110   | 97    | 99.2  | 91.2  | 112.7 | 103.9 | 109.2 | 102.7 |
| 110.4 | 114.6 | 98.9  | 107.8 | 99.3  | 104.8 | 104.1 | 115.3 | 116.5 |
| 106.5 | 109.1 | 102.7 | 94.1  | 100.1 | 107   | 110.1 | 107.2 | 103.3 |
| 107.9 | 108.9 | 98.9  | 94.7  | 93.7  | 115.8 | 100.5 | 115.4 | 112.8 |
| 114.8 | 118.5 | 120   | 103.8 | 96.2  | 124.5 | 98.2  | 111.8 | 118   |
| 99.7  | 116.4 | 96.6  | 116.6 | 105.6 | 113   | 109.5 | 107.3 | 109.1 |
| 101.1 | 112.7 | 99.9  | 94.1  | 95.8  | 106.6 | 100.4 | 102.4 | 106   |
| 107.5 | 110.5 | 102.1 | 99.2  | 94.6  | 109   | 102.4 | 108.9 | 109.4 |
| 109   | 115.6 | 111.9 | 99.7  | 94.8  | 117.7 | 112.8 | 106.4 | 115.8 |
| 116.5 | 107.6 | 117.1 | 108.1 | 92.7  | 115.3 | 107   | 116.5 | 120.7 |
| 101.1 | 113.5 | 99.4  | 92.9  | 94.9  | 102.7 | 102.6 | 99    | 107.2 |
| 107.5 | 102.2 | 113.1 | 102.6 | 108   | 111   | 101.8 | 110.4 | 110.9 |
| 122.9 | 116.9 | 117   | 144.8 | 97.8  | 113.4 | 133.4 | 119.4 | 124.9 |
| 109   | 123.6 | 105.1 | 103.5 | 103.9 | 103.6 | 105.8 | 109.8 | 114.3 |
| 109.1 | 113.6 | 101.6 | 103.8 | 98.9  | 119.2 | 111.1 | 110.7 | 112   |
| 103.9 | 112.6 | 104.5 | 95.5  | 93.2  | 112.3 | 100.5 | 103.3 | 108.6 |
| 102.4 | 113.5 | 100.1 | 91.2  | 91.6  | 98.9  | 95    | 107.4 | 98    |
| 106.9 | 110.6 | 98.2  | 101.4 | 88.1  | 116.3 | 110.9 | 104.2 | 101.2 |
| 110.1 | 111.9 | 109.9 | 118.8 | 101.7 | 116.9 | 103.6 | 116.5 | 112.9 |
| 111.7 | 114.8 | 106.4 | 103.1 | 99.9  | 106.4 | 103.2 | 107.4 | 113.4 |
| 115.3 | 121.6 | 102.3 | 110.5 | 104.3 | 107.4 | 100.3 | 114   | 112.7 |
| 106.2 | 112.2 | 109.8 | 119.8 | 101.5 | 122.6 | 107.2 | 116.4 | 112.6 |



|        |        |        |        |        |        |        |        |        |
|--------|--------|--------|--------|--------|--------|--------|--------|--------|
| 108.4  | 111.7  | 105.2  | 124.7  | 95.1   | 119.8  | 111.3  | 120.6  | 113.4  |
| 103.4  | 101.4  | 102.4  | 102.1  | 93.5   | 108    | 99     | 110    | 108.3  |
| 108.3  | 108.1  | 110.2  | 105.3  | 97.6   | 110.1  | 102.2  | 121.5  | 118.5  |
| 146.1  | 122.6  | 108.1  | 107.9  | 105.6  | 116.4  | 105    | 127.1  | 138.3  |
| 345.7  | 292    | 277.1  | 291.7  | 280.2  | 350.7  | 165.5  | 508.8  | 374.8  |
| 105.4  | 107.5  | 99.1   | 113.3  | 93.5   | 104.9  | 109.5  | 101.3  | 114.1  |
| 98.3   | 107.6  | 101.1  | 104    | 95.7   | 106.6  | 101.1  | 129.1  | 121.7  |
| 94.6   | 101.2  | 97.3   | 92.6   | 92.6   | 100.7  | 94.3   | 107.7  | 97.5   |
| 102.9  | 96.4   | 98.1   | 96.5   | 94.8   | 99.8   | 103.9  | 101.2  | 104.1  |
| 107.7  | 104.1  | 102.3  | 101.7  | 92.1   | 117    | 92.8   | 119.9  | 108.2  |
| 104.7  | 118.5  | 107.1  | 102.8  | 94.9   | 110.6  | 98.2   | 102.3  | 113.2  |
| 102.2  | 110.4  | 105.1  | 116.7  | 99.6   | 114.1  | 108.9  | 110.1  | 108.2  |
| 114.4  | 104.5  | 108.3  | 93.6   | 94.7   | 105.7  | 103.8  | 107.9  | 135.3  |
| 110    | 109.9  | 97     | 101.7  | 101.6  | 105    | 92.1   | 114.5  | 119.2  |
| 105.6  | 113.9  | 105.5  | 105.5  | 105.8  | 118    | 107.3  | 116.4  | 113.5  |
| 106.8  | 111.9  | 104.9  | 102.6  | 107.1  | 112.9  | 106.5  | 111.8  | 113.1  |
| 108    | 113.2  | 107.2  | 106.6  | 95.7   | 115.8  | 110.5  | 114.6  | 107.8  |
| 108.1  | 112.2  | 106.3  | 110.2  | 99.8   | 119.5  | 112.3  | 131.8  | 114    |
| 101    | 108.8  | 106.1  | 97.5   | 103.7  | 106.3  | 102.3  | 107.2  | 103.2  |
| 109.6  | 140    | 128.1  | 108.1  | 98     | 119.9  | 96.6   | 107.2  | 117.9  |
| 123    | 133    | 109    | 106.2  | 101    | 132.8  | 114.9  | 132.4  | 124.1  |
| 108    | 105    | 109    | 95.7   | 97.6   | 104.8  | 101.8  | 117.8  | 110.8  |
| 104.8  | 109.4  | 90.2   | 105.7  | 93.7   | 106.5  | 97.8   | 101.8  | 102.1  |
| 103.4  | 106.5  | 97.7   | 96.5   | 93.8   | 104.3  | 103.6  | 102.7  | 110    |
| 111.6  | 112.2  | 119.3  | 107    | 109.8  | 120.5  | 113    | 161.8  | 112.7  |
| 103.6  | 107.2  | 103.3  | 95.8   | 93.6   | 108    | 102.1  | 105.7  | 114.9  |
| 115.7  | 117.1  | 103.6  | 113    | 96.6   | 103.2  | 100.2  | 114.8  | 106    |
| 123.3  | 114.5  | 100.7  | 113.5  | 96.9   | 113.4  | 114.7  | 128.6  | 113.6  |
| 106    | 107.4  | 110.7  | 95.2   | 93.7   | 106.2  | 101.5  | 108.4  | 95.6   |
| 106.9  | 109.8  | 109    | 100.8  | 104.2  | 105.5  | 108.7  | 113.8  | 105    |
| 99.8   | 112.5  | 96.7   | 102.3  | 90.3   | 108.2  | 94.5   | 113.9  | 114.4  |
| 108.3  | 106.3  | 104.8  | 103.8  | 92.8   | 105.6  | 106.2  | 104.7  | 109.3  |
| 116.5  | 109    | 99.6   | 105.9  | 97     | 105    | 108.8  | 107    | 102.7  |
| 112    | 111.2  | 93.2   | 101.6  | 91.1   | 108.2  | 108.8  | 105    | 126.2  |
| 123    | 118.3  | 113    | 111.6  | 114.9  | 119    | 115.4  | 113.2  | 129.6  |
| 103.7  | 101.8  | 101.2  | 136.6  | 100.5  | 108.8  | 131.4  | 110.3  | 119.5  |
| 111.1  | 110.4  | 104.6  | 103.8  | 93.5   | 106.1  | 98.7   | 111.8  | 102.4  |
| 112.6  | 120.2  | 131.4  | 121.6  | 108.7  | 128.2  | 124    | 111.1  | 125.2  |
| 100.4  | 109.7  | 98.1   | 102.7  | 95.8   | 111.2  | 103.9  | 110.8  | 102.7  |
| 107.5  | 123    | 127.5  | 107.4  | 105.4  | 113.6  | 111.6  | 125.4  | 114    |
| 114.6  | 109.9  | 109.6  | 107.3  | 106    | 116.2  | 113.8  | 124.7  | 123.2  |
| 177.2  | 339.2  | 294    | 427.7  | 232.7  | 283    | 377.5  | 314.2  | 295.5  |
| 153.5  | 223.7  | 193.7  | 275.9  | 176.3  | 204.3  | 270.7  | 235.7  | 202.9  |
| 160.8  | 281.9  | 217.9  | 210    | 194.2  | 224.3  | 289.3  | 352.5  | 267.5  |
| 394    | 1072.6 | 1182.7 | 1178.5 | 778.7  | 1100.4 | 1256.1 | 998.6  | 737.7  |
| 160.3  | 351.3  | 299.1  | 314.8  | 277.6  | 278.4  | 304.8  | 365.9  | 215.5  |
| 188.8  | 247.8  | 228.6  | 280.9  | 221.8  | 262.8  | 274.1  | 419.7  | 233.3  |
| 107.9  | 127.5  | 118.1  | 118.8  | 108.5  | 132.1  | 113.4  | 143.2  | 122.7  |
| 1758.1 | 2473.1 | 2143.7 | 2523.3 | 1903.8 | 2058.9 | 2145.9 | 3093.9 | 2686.3 |
| 101.2  | 101.9  | 104.3  | 101.3  | 89.3   | 119    | 104.8  | 109.7  | 105.9  |
| 447.3  | 572.6  | 511.9  | 864.8  | 512.7  | 608.8  | 858.7  | 602    | 491.1  |

|       |        |        |        |       |        |        |        |        |
|-------|--------|--------|--------|-------|--------|--------|--------|--------|
| 116.2 | 128.1  | 120.4  | 116.8  | 99.1  | 117.1  | 111.3  | 139.1  | 115.5  |
| 165.4 | 267.7  | 223    | 333.8  | 243.7 | 220    | 285.9  | 321.4  | 259.4  |
| 111.1 | 106.1  | 98.6   | 108.8  | 96.8  | 111.3  | 92.4   | 109.1  | 101    |
| 105.9 | 132.5  | 108.7  | 123.1  | 110.9 | 123.6  | 112.2  | 141.1  | 113.4  |
| 567.5 | 1003.4 | 710.9  | 947.2  | 782   | 738.7  | 1183.1 | 914.5  | 489.8  |
| 123.5 | 144.7  | 141.1  | 151.1  | 129   | 140.7  | 136.3  | 155.7  | 125.7  |
| 110.6 | 116    | 109    | 121.2  | 101.8 | 113.2  | 113.4  | 127.8  | 119.4  |
| 109.9 | 106.5  | 111.7  | 117.7  | 97.8  | 103.1  | 103.9  | 113.3  | 122.4  |
| 851.2 | 1082.9 | 861.4  | 932.1  | 883.3 | 971.9  | 987.5  | 1504.7 | 1113   |
| 610.7 | 508    | 476.2  | 542.7  | 555.1 | 543.1  | 590.2  | 969.8  | 856.9  |
| 313.6 | 496.1  | 411.5  | 404.4  | 456.8 | 467.5  | 488.7  | 711.2  | 461.2  |
| 364.6 | 359.3  | 313.4  | 313.1  | 311.9 | 379.4  | 381.5  | 493    | 429.4  |
| 357.9 | 441.7  | 324.8  | 418.6  | 263.5 | 363.7  | 401.9  | 812.8  | 507.4  |
| 150.5 | 199    | 182.8  | 168.9  | 191.3 | 189    | 197.8  | 211.9  | 199.3  |
| 102.5 | 112    | 111.7  | 106.6  | 116.4 | 118.1  | 114.3  | 124.5  | 106.3  |
| 102.8 | 110.5  | 102.8  | 106.8  | 95.8  | 101.8  | 93.8   | 105.6  | 110.1  |
| 605.6 | 630.3  | 619    | 671.1  | 572.3 | 693.4  | 652    | 1238.6 | 1049.1 |
| 233.5 | 237.2  | 194.2  | 269    | 199.1 | 223.9  | 207.7  | 432.4  | 377.4  |
| 902.9 | 888.3  | 925.9  | 951.7  | 790.7 | 971.2  | 818.3  | 1518.6 | 1236.8 |
| 189.5 | 294.7  | 307.7  | 264.9  | 273.5 | 302.2  | 312.9  | 327.5  | 251.6  |
| 273.4 | 599.6  | 505.2  | 564.2  | 447.2 | 447.8  | 562.5  | 617.5  | 389.8  |
| 191.5 | 332.1  | 318    | 263.6  | 259.6 | 315.9  | 263.9  | 336.2  | 273.9  |
| 105.5 | 110.9  | 99.4   | 94.7   | 90.8  | 105.9  | 99.7   | 101.6  | 99.5   |
| 131.2 | 143.1  | 137.6  | 125.6  | 120.5 | 124.1  | 134.2  | 168.1  | 126.3  |
| 415.2 | 413.5  | 352.4  | 410.9  | 368   | 409    | 475.7  | 517.3  | 598.7  |
| 106.5 | 112.8  | 102.3  | 103.7  | 101.5 | 115.9  | 108.5  | 108.3  | 115    |
| 128.1 | 270.7  | 223.2  | 197.3  | 219.7 | 269.7  | 210.4  | 350.5  | 187.9  |
| 868.7 | 840.5  | 735.6  | 530.2  | 597.8 | 791.3  | 667.2  | 1490   | 1413.2 |
| 123.7 | 201.7  | 166.7  | 293.8  | 166.2 | 154.3  | 207.5  | 221.8  | 147.6  |
| 140.8 | 138.6  | 152.8  | 113.2  | 110   | 134.1  | 121.1  | 211.5  | 197.3  |
| 341.1 | 487.3  | 511.8  | 410.5  | 409.4 | 478    | 496.3  | 562    | 368.7  |
| 120.8 | 139.2  | 125.1  | 122.9  | 114.1 | 122.2  | 121.8  | 142.9  | 143.2  |
| 185.7 | 243.8  | 246    | 213.9  | 204.2 | 241    | 227.7  | 249.4  | 208.4  |
| 120.5 | 128.6  | 122.3  | 102.6  | 104.7 | 126    | 119.8  | 145.6  | 151.3  |
| 165.7 | 328.5  | 295.9  | 297.4  | 288.2 | 298    | 321.5  | 366    | 189.4  |
| 107.3 | 111.1  | 93.1   | 93.1   | 91.4  | 104.5  | 109.1  | 105.4  | 106.2  |
| 506.2 | 1072.6 | 1701.8 | 1349.4 | 959.3 | 1249.8 | 1136.1 | 1541.8 | 935.9  |
| 107.9 | 132.9  | 116.6  | 144.9  | 108.9 | 118.8  | 140    | 131    | 106.9  |
| 178.1 | 332    | 307.8  | 590.9  | 311   | 261.8  | 542.8  | 277.5  | 161    |
| 160   | 197    | 168.2  | 180.7  | 186.6 | 171.4  | 181.2  | 265.2  | 190.3  |
| 160.8 | 203.3  | 197.8  | 226.2  | 150.4 | 212.5  | 186.9  | 228.8  | 185.2  |
| 114.2 | 114.5  | 106.4  | 118    | 105.6 | 111.3  | 116.8  | 124.6  | 109.4  |
| 119.6 | 117.3  | 115.8  | 120.5  | 114.2 | 128.6  | 113.7  | 121.6  | 112.6  |
| 101.7 | 110.3  | 98.9   | 102.7  | 99.7  | 110.5  | 104.2  | 107.3  | 107.2  |
| 98.8  | 103.6  | 96.7   | 103.3  | 97.4  | 105.8  | 98.2   | 109.8  | 110.7  |
| 202.6 | 206.5  | 207.4  | 203.7  | 191.4 | 228.5  | 240.5  | 250.3  | 212.9  |
| 110.8 | 105.7  | 100.1  | 108    | 98.3  | 101.2  | 102.7  | 105.3  | 104    |
| 118.9 | 126.1  | 106.9  | 124.8  | 115.5 | 127.6  | 113.3  | 120.2  | 109.5  |
| 138.8 | 162.2  | 164.6  | 164    | 140.6 | 161.7  | 163.4  | 166.5  | 137.8  |
| 97.1  | 115.1  | 101.6  | 100.6  | 100.2 | 105.1  | 94.1   | 106.8  | 105.4  |
| 107.6 | 113.7  | 108.9  | 110.6  | 104.9 | 118.9  | 127.9  | 125.5  | 109.7  |

|        |        |        |        |        |        |        |        |        |
|--------|--------|--------|--------|--------|--------|--------|--------|--------|
| 156.8  | 297.1  | 264.3  | 239.5  | 235.6  | 277.2  | 209.1  | 252.4  | 197.5  |
| 117.5  | 121.4  | 135.2  | 140.2  | 119    | 135.9  | 129.2  | 147.1  | 117.1  |
| 102.6  | 106.5  | 102.1  | 102.8  | 91.9   | 105.7  | 102.7  | 103.1  | 106    |
| 96.5   | 102.4  | 91.7   | 90.3   | 91.5   | 106.6  | 100.8  | 101.3  | 98     |
| 127.5  | 147.2  | 146.2  | 137.4  | 143.8  | 144.1  | 162.8  | 148.2  | 148.9  |
| 1529.8 | 1773.1 | 1566.8 | 1261.8 | 1489.2 | 1617   | 1551.5 | 2796   | 2397.3 |
| 6405.4 | 6143.8 | 6455.5 | 6144.7 | 5710.2 | 7462   | 5462.3 | 8187   | 6605.7 |
| 107    | 111    | 102    | 106.4  | 100.3  | 109.6  | 102.3  | 110.2  | 107.7  |
| 138    | 139.1  | 131.1  | 126.6  | 128.1  | 148.5  | 126.1  | 174.9  | 152    |
| 979.3  | 1219.4 | 1105   | 1330.5 | 1157.2 | 1182.4 | 1455.7 | 1951.7 | 1156.5 |
| 950.6  | 1523.4 | 1676.6 | 1872.1 | 1376.8 | 1725.3 | 1717.1 | 2450.7 | 1649.1 |
| 552.5  | 445.9  | 527.1  | 557.3  | 403.3  | 537.4  | 501.3  | 947    | 712.2  |
| 98     | 106.2  | 100.9  | 92.6   | 95.6   | 105    | 95.9   | 98.4   | 108.9  |
| 2702.2 | 2643.2 | 2370.7 | 2805.1 | 2590.3 | 2779.2 | 3261.4 | 3693.1 | 3122.6 |
| 120.4  | 103.4  | 98.2   | 104.3  | 102.4  | 113    | 100    | 112    | 123.4  |
| 1242.2 | 2157.7 | 1812.1 | 1800   | 1795   | 2128.2 | 1771.4 | 3499.7 | 2734.5 |
| 104.3  | 112.6  | 110.1  | 107.2  | 102.2  | 109.3  | 111.1  | 119.5  | 110.6  |
| 2783   | 3106.1 | 2458.5 | 3014.6 | 2212.1 | 2362.4 | 2618.4 | 4809   | 4430.4 |
| 386.5  | 503.1  | 466.6  | 507.7  | 519.2  | 427    | 570.7  | 721.7  | 867.1  |
| 108.9  | 103.7  | 99.4   | 111.7  | 96.7   | 101.6  | 104.2  | 107.4  | 114.4  |
| 6034.6 | 6317.2 | 6573.2 | 6101   | 6050.1 | 5887.8 | 6811.2 | 7859.8 | 7038.3 |
| 1363.3 | 1917   | 1504.7 | 2032.8 | 1710.6 | 1654.5 | 1966.6 | 2836.6 | 1797.3 |
| 112.5  | 110.5  | 99.8   | 112.1  | 106.3  | 105.1  | 99.3   | 110.9  | 115.4  |
| 105.1  | 94.6   | 96.5   | 93.2   | 93.7   | 109.5  | 96.6   | 111.1  | 109.5  |
| 202.7  | 218.6  | 242.1  | 199.6  | 186.2  | 242.1  | 159.2  | 318.2  | 200.5  |
| 109.4  | 112.9  | 104.6  | 101.5  | 95.5   | 102.7  | 101.7  | 103.1  | 107.6  |
| 106.8  | 104.9  | 105.7  | 97.7   | 94.4   | 111.9  | 109.5  | 98.6   | 109    |
| 107.1  | 115.5  | 103.7  | 124.1  | 96.4   | 112.8  | 121.1  | 123.2  | 116.5  |
| 106.1  | 113    | 94.9   | 99.6   | 94.8   | 113.1  | 103.8  | 114.4  | 109    |
| 112.9  | 110.6  | 120.1  | 108.8  | 97.6   | 120.3  | 101    | 107.7  | 111.2  |
| 102.4  | 101.8  | 106.8  | 104.7  | 97     | 99.7   | 91     | 101.2  | 97.2   |
| 103.4  | 109.6  | 103.8  | 103.5  | 101    | 106.8  | 103.8  | 118.5  | 103.8  |
| 113.1  | 111.8  | 110    | 105.5  | 101    | 113.9  | 102.8  | 114.6  | 114.8  |
| 105    | 113.8  | 109.5  | 103.7  | 99.4   | 106.5  | 103.5  | 101.2  | 110.9  |
| 107.6  | 110.2  | 96.5   | 102.4  | 91.3   | 102.6  | 99.8   | 97.9   | 107.6  |
| 101.1  | 110.4  | 104.5  | 92.1   | 92.8   | 104.6  | 105.3  | 110.6  | 111    |
| 257.3  | 260.2  | 238.6  | 253.2  | 216.3  | 246.7  | 241.6  | 372.4  | 301.2  |
| 114.9  | 107.9  | 107.9  | 107.3  | 97.8   | 113.6  | 113.4  | 109.8  | 112.8  |
| 104.8  | 110.1  | 104.7  | 112.1  | 103.7  | 105.2  | 99     | 107.4  | 104.4  |
| 108.9  | 104.7  | 99.7   | 90.5   | 100.9  | 104.5  | 97.3   | 110.9  | 111.2  |
| 102.1  | 111.9  | 102.5  | 106.9  | 102.5  | 106.5  | 102.3  | 118    | 116.8  |
| 118.8  | 115    | 110.5  | 110.7  | 110.1  | 128.8  | 115.7  | 125.5  | 126.5  |
| 175.5  | 145.3  | 138.9  | 136.3  | 135.7  | 160.7  | 154.6  | 181.6  | 179.2  |
| 112.1  | 109.6  | 99.5   | 110.3  | 102.4  | 115.8  | 105.9  | 118.2  | 111.6  |
| 146.7  | 131.5  | 118.7  | 124.3  | 110.3  | 162.2  | 102    | 188.6  | 189.4  |
| 114    | 99.6   | 108.1  | 105.7  | 91.6   | 110.9  | 98     | 116.7  | 107.7  |
| 108.8  | 116.9  | 106.7  | 112.6  | 100    | 109    | 110.7  | 117.8  | 99.3   |
| 104.1  | 103.8  | 106.1  | 98.2   | 106.2  | 103.3  | 107.7  | 108.8  | 100.8  |
| 108.6  | 107.9  | 106.6  | 102.8  | 92.2   | 114.5  | 96.3   | 109.4  | 115.4  |
| 106.4  | 102.8  | 103.8  | 101.6  | 101.8  | 112.7  | 103.4  | 103.3  | 108.6  |
| 105.4  | 108.1  | 108    | 107.6  | 107.9  | 109.3  | 106.9  | 107.2  | 111.1  |

|       |       |       |        |       |       |       |       |       |
|-------|-------|-------|--------|-------|-------|-------|-------|-------|
| 98.3  | 98.4  | 102.2 | 103    | 92.8  | 108.7 | 101.5 | 97.6  | 109.1 |
| 114.4 | 114   | 101.2 | 98.8   | 97.8  | 109.1 | 107.3 | 116.8 | 123.2 |
| 116   | 112.6 | 104.7 | 97.7   | 92.2  | 115.4 | 94.7  | 109   | 109   |
| 104.9 | 121.1 | 116.6 | 107.5  | 100.6 | 132.4 | 109.9 | 144   | 121.9 |
| 276.2 | 341   | 351.5 | 298.1  | 327.9 | 400.7 | 346.7 | 573.1 | 371.1 |
| 281   | 445.7 | 402.2 | 295.7  | 352.4 | 388.4 | 352.2 | 514.5 | 400.9 |
| 120.7 | 113.3 | 107.3 | 110.4  | 104.4 | 112.5 | 115.2 | 103.8 | 108   |
| 457.4 | 640.6 | 548.8 | 646.4  | 562.6 | 512.8 | 649.1 | 776.2 | 647.5 |
| 115.7 | 108.5 | 107.3 | 96.2   | 99.4  | 105.2 | 95    | 111   | 111   |
| 108.3 | 106.4 | 103   | 104.4  | 102.5 | 111.9 | 112.8 | 106.4 | 106.5 |
| 114.7 | 101.3 | 101.6 | 103.7  | 100.5 | 112.6 | 95.1  | 110   | 109.4 |
| 101.2 | 103.2 | 98.9  | 96.3   | 96.4  | 107.7 | 98.8  | 110.4 | 98.7  |
| 115   | 152   | 124.4 | 154.9  | 114.3 | 138.5 | 131.5 | 177.3 | 158   |
| 114.9 | 109.6 | 106.2 | 100.9  | 91.4  | 107.2 | 106.3 | 120.8 | 107.7 |
| 101.6 | 115.4 | 101   | 93.3   | 91.9  | 101   | 103.1 | 104.6 | 101.4 |
| 106.3 | 114.4 | 106.9 | 110.9  | 96.5  | 108.6 | 101.3 | 108.3 | 109.9 |
| 224.7 | 323   | 279.7 | 259.7  | 293.3 | 258.4 | 287.3 | 406.1 | 297   |
| 167.3 | 154.2 | 172.7 | 189.6  | 150.6 | 160   | 213.8 | 231   | 157.3 |
| 198.4 | 245.8 | 307.8 | 306.7  | 267.1 | 248.6 | 264.1 | 385.8 | 244.3 |
| 149.7 | 162.2 | 168.8 | 169.6  | 155   | 164.3 | 165.9 | 256.5 | 196.9 |
| 151.2 | 136.9 | 140.5 | 137.7  | 120.5 | 140.7 | 143.2 | 185.7 | 148.1 |
| 734.4 | 894.8 | 819.6 | 671.6  | 775.5 | 856.1 | 835   | 1300  | 850   |
| 105.2 | 114.7 | 109.1 | 98.3   | 100.8 | 111.5 | 112.5 | 132.4 | 123.4 |
| 127.3 | 116.8 | 125.1 | 107.4  | 116.2 | 115.9 | 120.8 | 155.5 | 135.9 |
| 111.1 | 111.3 | 100.8 | 108.3  | 94    | 100.2 | 100.7 | 120.6 | 111.5 |
| 106   | 106.1 | 105.7 | 98.5   | 104.4 | 102.4 | 104.7 | 110.8 | 110.7 |
| 111.3 | 117   | 113.1 | 123.3  | 106   | 125.5 | 119.5 | 156.5 | 144.2 |
| 181.4 | 160.3 | 125.8 | 143.3  | 140.9 | 140   | 175.8 | 204.1 | 161.6 |
| 109   | 118.7 | 115.5 | 115.9  | 99.5  | 117.3 | 97.6  | 123.4 | 120.4 |
| 97.8  | 124.5 | 118.1 | 95.5   | 109.7 | 122.4 | 115.6 | 130   | 109.7 |
| 142.6 | 263.5 | 215.6 | 316.3  | 206.5 | 232.8 | 243   | 258   | 190.6 |
| 175.1 | 326   | 123.4 | 1316.4 | 162.9 | 129.3 | 356.8 | 151.8 | 134.3 |
| 136.3 | 184.3 | 105.4 | 756.8  | 129.3 | 119.6 | 210.6 | 135.4 | 121.9 |
| 116.5 | 104.5 | 96.9  | 112.3  | 102.1 | 118.9 | 102.1 | 123.9 | 115.5 |
| 105.2 | 103.9 | 108.8 | 102.3  | 95.7  | 116.2 | 100.9 | 121.4 | 108.1 |
| 113.2 | 108.7 | 98.5  | 104.1  | 104.5 | 114.1 | 105.4 | 113.4 | 115.9 |
| 102.6 | 109.1 | 100.4 | 92.3   | 93.5  | 113.1 | 101.2 | 109.7 | 103.2 |
| 101.8 | 106.7 | 103   | 108.2  | 94.8  | 110.7 | 98.9  | 111.5 | 106   |
| 105.2 | 110.5 | 105.1 | 100.9  | 92.8  | 105.5 | 101   | 107.6 | 106.9 |
| 101.5 | 100.4 | 108.5 | 97.8   | 97.7  | 111.6 | 104.7 | 120.9 | 103.9 |
| 101.8 | 107.1 | 104.2 | 102.7  | 98    | 110.6 | 98.3  | 102   | 110.7 |
| 110.1 | 112.8 | 106.3 | 100.2  | 96    | 109.9 | 102.2 | 110.1 | 116.5 |
| 103.8 | 100.6 | 99.4  | 105.8  | 95.5  | 108.4 | 101.6 | 102.9 | 110.6 |
| 104   | 120.1 | 119.5 | 101.9  | 108   | 121   | 106.7 | 114.7 | 98.1  |
| 106   | 109.6 | 100.2 | 114.1  | 89.6  | 102.7 | 116.2 | 113.8 | 110.1 |
| 113.5 | 102.7 | 106   | 107.8  | 100.5 | 108.8 | 107.8 | 125.1 | 124   |
| 157.9 | 201.8 | 161.6 | 179    | 160.2 | 198.2 | 195   | 255.7 | 199.5 |
| 147.8 | 191   | 181.9 | 123.3  | 174.2 | 187.5 | 183.9 | 246.7 | 180.2 |
| 108.6 | 114.5 | 107.4 | 110.6  | 100.4 | 111.5 | 103.7 | 119.2 | 110.4 |
| 106.5 | 108.9 | 106.3 | 106    | 92.9  | 106.5 | 101.2 | 110.5 | 115.1 |
| 106.7 | 101.4 | 102.3 | 93.6   | 100.2 | 105.7 | 102.4 | 104   | 110.8 |

|       |        |        |        |        |        |        |        |        |
|-------|--------|--------|--------|--------|--------|--------|--------|--------|
| 114.4 | 118    | 107    | 92.9   | 96.5   | 110.3  | 96.3   | 103.8  | 102.2  |
| 98.5  | 110.8  | 96.7   | 90.4   | 96.9   | 114    | 104.8  | 110.8  | 108.4  |
| 110.4 | 119.1  | 116.5  | 110.2  | 99.7   | 114.9  | 106.2  | 120.6  | 110.7  |
| 120.5 | 143    | 123.2  | 111.7  | 113.3  | 129.6  | 120.9  | 130.7  | 120.9  |
| 290.9 | 680.1  | 735.6  | 572.6  | 683.1  | 618.6  | 648.6  | 1219.6 | 694.2  |
| 984.5 | 1010.7 | 915.4  | 721.1  | 848.7  | 1048.6 | 650.1  | 1746.4 | 1793.2 |
| 116.9 | 122.2  | 117.3  | 133.1  | 115.5  | 128.4  | 107.6  | 137.6  | 115.8  |
| 113   | 100.8  | 102    | 101.1  | 93.9   | 105.8  | 101.5  | 111.3  | 112.4  |
| 187.2 | 274    | 286.1  | 262.3  | 272.5  | 261.7  | 240.7  | 323.8  | 297.7  |
| 105   | 110.2  | 105    | 98.7   | 91.7   | 105.7  | 104.4  | 101.3  | 109    |
| 107.4 | 109.9  | 101.5  | 108.5  | 100.1  | 110.5  | 109.8  | 106.1  | 108.5  |
| 113.6 | 100.6  | 97.3   | 102.8  | 98.6   | 111.7  | 104.2  | 104.5  | 115.6  |
| 99.1  | 110.1  | 103    | 100    | 95.3   | 105.4  | 98.6   | 107.9  | 102.3  |
| 104.1 | 110.5  | 97.4   | 94.6   | 94.2   | 107.3  | 102.3  | 108    | 106.5  |
| 112.5 | 118.6  | 110.2  | 130    | 107.8  | 118.2  | 119.3  | 110.2  | 110    |
| 107.1 | 108.3  | 102.6  | 99.6   | 94.6   | 122.4  | 103.9  | 120.4  | 113.4  |
| 107.4 | 126.8  | 111.7  | 109.9  | 109.4  | 131    | 107.5  | 123    | 131.1  |
| 736.4 | 807.9  | 745.4  | 614.1  | 773.9  | 784.3  | 704.9  | 1310.6 | 965    |
| 121.8 | 118.1  | 109.5  | 110.7  | 110.7  | 122.2  | 107.9  | 125.5  | 115.2  |
| 102   | 114.8  | 103.9  | 120.9  | 103.9  | 108.7  | 107.8  | 117.1  | 120.4  |
| 715.6 | 629.9  | 413.4  | 1082.1 | 735.7  | 754.3  | 1204.5 | 1957   | 608.9  |
| 105.3 | 108.4  | 104.8  | 112.9  | 98.4   | 119.2  | 98.3   | 112.7  | 113    |
| 108.3 | 113.2  | 108.8  | 104.1  | 101.6  | 111.9  | 101.9  | 121.5  | 111.9  |
| 105.6 | 113.5  | 123.9  | 108.7  | 96.5   | 114.2  | 115    | 110.4  | 110.1  |
| 170.6 | 279.9  | 325.2  | 372.2  | 260.1  | 292.5  | 359.6  | 270.1  | 159.6  |
| 105.3 | 99.5   | 103.6  | 93.6   | 93     | 105.5  | 108.3  | 106    | 109.5  |
| 367.1 | 362.2  | 393.6  | 426.4  | 349.2  | 386.4  | 495.3  | 459.3  | 391.4  |
| 126.2 | 108.3  | 100.3  | 120.4  | 102.3  | 108.7  | 102.9  | 123.3  | 118.3  |
| 107.6 | 122    | 104.2  | 99.9   | 97.5   | 112.4  | 107.8  | 105.4  | 127.4  |
| 106.2 | 110.8  | 102.3  | 97.1   | 94.4   | 105.4  | 101.4  | 112.3  | 110.7  |
| 126.8 | 124.9  | 123.3  | 121.6  | 123.2  | 134.6  | 126.7  | 142.1  | 130.9  |
| 117.6 | 106.8  | 99     | 99.2   | 103.4  | 110.6  | 107.7  | 101.6  | 107.3  |
| 107.6 | 100.6  | 100.9  | 103.7  | 90.3   | 103.8  | 99.4   | 102.2  | 104.9  |
| 114.5 | 125    | 113.4  | 114.7  | 113.6  | 108.1  | 119.4  | 118.9  | 131    |
| 142   | 198.1  | 170.5  | 210.8  | 137.7  | 182.3  | 156.8  | 255.8  | 203.5  |
| 110.7 | 132.7  | 105.7  | 107.7  | 109.4  | 110.3  | 117.6  | 143.8  | 128.9  |
| 295.7 | 472.5  | 371.1  | 445.4  | 314.7  | 306.8  | 472.9  | 443.3  | 455.9  |
| 111.3 | 116.6  | 102.7  | 125.9  | 100.7  | 106.6  | 110.8  | 116.2  | 121.7  |
| 111.5 | 110.6  | 98.9   | 117.2  | 104.4  | 106.5  | 107.2  | 121.7  | 111.5  |
| 154.4 | 171.2  | 160.8  | 134    | 159.4  | 158.1  | 187.1  | 191.4  | 131.1  |
| 249.7 | 264.6  | 231.3  | 263.3  | 261.3  | 278.4  | 303.6  | 467.8  | 304.8  |
| 103.3 | 104.9  | 104.3  | 107.3  | 93.4   | 100.4  | 96.4   | 108.8  | 113    |
| 110.8 | 106.7  | 100.3  | 97.5   | 100.8  | 108.3  | 108.9  | 109.6  | 104.4  |
| 112.6 | 114.1  | 112.6  | 100.8  | 93.4   | 113.1  | 104.1  | 119    | 111.4  |
| 102.9 | 105.4  | 99.4   | 102.2  | 92.6   | 103.8  | 102.1  | 107.1  | 111.7  |
| 103.6 | 100.6  | 101.2  | 103.4  | 97.2   | 118.8  | 96.4   | 105.9  | 108.1  |
| 102.4 | 113.3  | 97.1   | 102.2  | 107.4  | 106.6  | 109.2  | 112    | 103.9  |
| 323.8 | 252.1  | 212.6  | 258    | 214.7  | 231    | 232.7  | 422.7  | 285    |
| 142.1 | 133.4  | 122.2  | 129.8  | 113.6  | 132.5  | 130.7  | 168.2  | 165.8  |
| 1170  | 1219.1 | 1215.1 | 964.9  | 1257.8 | 1277.4 | 1114.1 | 1968.4 | 1436.5 |
| 154.7 | 208.8  | 210.5  | 190.6  | 170.1  | 217.6  | 173.9  | 276.3  | 196.4  |

|       |       |       |       |       |       |       |        |       |
|-------|-------|-------|-------|-------|-------|-------|--------|-------|
| 109.5 | 113.8 | 105.3 | 103.1 | 97.5  | 110.8 | 108.7 | 107.7  | 111.7 |
| 106.6 | 111.6 | 101.8 | 99.9  | 97.5  | 104.9 | 108   | 107    | 108.5 |
| 565.5 | 798.6 | 757.3 | 789.9 | 583.1 | 709.1 | 691.3 | 1041.5 | 681   |
| 113   | 107.5 | 104.7 | 105.3 | 93.8  | 122.4 | 111.6 | 120.5  | 114.5 |
| 109.4 | 121.6 | 110.9 | 110.8 | 112.9 | 119.8 | 108.1 | 127.8  | 127   |
| 106   | 100.2 | 104.3 | 103.2 | 95.8  | 100.8 | 106.2 | 111.3  | 106.3 |
| 173.4 | 156.9 | 135.1 | 127.7 | 142.7 | 151.3 | 141   | 170    | 153.7 |
| 119.7 | 131.1 | 104.1 | 114   | 110.7 | 104   | 117.4 | 137.8  | 121.6 |
| 121.9 | 122.6 | 108.1 | 121.7 | 106.8 | 130   | 123.4 | 143.9  | 131   |
| 160.7 | 187.2 | 179.3 | 187.3 | 156   | 175.8 | 159.5 | 287.2  | 238.4 |
| 561.2 | 753.8 | 663.3 | 704.6 | 600.4 | 601.8 | 731.1 | 1216.9 | 837.3 |
| 121.8 | 130.1 | 144.7 | 119.8 | 116.8 | 131.4 | 138.3 | 192.8  | 139.2 |
| 115.4 | 105   | 100   | 97.1  | 96.9  | 108.6 | 103.5 | 106.9  | 111.4 |
| 302.9 | 526.2 | 507.5 | 364.8 | 500   | 435.9 | 445.4 | 602.2  | 373.2 |
| 107.3 | 107.9 | 103.4 | 94.7  | 101.6 | 113.2 | 91.6  | 109.3  | 111.1 |
| 194.8 | 245.9 | 260.1 | 275.7 | 209   | 264.9 | 239.9 | 403.2  | 288.6 |
| 124.1 | 108.7 | 102.6 | 107.8 | 93.9  | 109.5 | 105.7 | 115.8  | 111.7 |
| 132   | 109.1 | 120.9 | 105.6 | 106.8 | 118.7 | 101.5 | 131.7  | 141.4 |
| 142   | 133.2 | 123.1 | 115   | 114.2 | 127.4 | 129.8 | 175    | 185.6 |
| 110.1 | 124.9 | 111.5 | 102.9 | 108.6 | 112   | 105.9 | 125.5  | 129   |
| 109.1 | 108.6 | 101.6 | 103.5 | 97    | 113.9 | 98.9  | 113.9  | 108.1 |
| 102   | 104.3 | 116   | 106   | 99    | 107.2 | 104   | 119.3  | 106.9 |
| 156.5 | 194.4 | 165   | 288.2 | 139.2 | 186.2 | 223.1 | 178.1  | 157.7 |
| 113.4 | 139.1 | 136.6 | 143.1 | 116.8 | 133.5 | 145.3 | 144.5  | 119.9 |
| 108.6 | 125.5 | 110.3 | 96.2  | 92.9  | 104.3 | 117.5 | 110.1  | 110.6 |
| 138.4 | 155.9 | 137.3 | 130.1 | 135.4 | 133.7 | 123.8 | 180.7  | 157.8 |
| 105.8 | 114.4 | 99.1  | 100   | 98.1  | 112   | 99.2  | 124.1  | 108.2 |
| 246.2 | 253.7 | 256.5 | 231.1 | 222.7 | 296   | 215.5 | 642.6  | 554.4 |
| 136.5 | 154.5 | 142.6 | 143.8 | 132.1 | 152.3 | 154   | 216.9  | 155.6 |
| 109.2 | 106.9 | 104.4 | 107.1 | 95.2  | 108.9 | 103.3 | 109.9  | 106.7 |
| 111.4 | 104.1 | 106.8 | 101.3 | 97.1  | 115   | 101.4 | 120.7  | 105.3 |
| 104.9 | 113.3 | 104.5 | 99.5  | 90.3  | 115.7 | 105.8 | 105.9  | 102.9 |
| 103.2 | 108.1 | 94    | 95.9  | 93.1  | 103.6 | 97.3  | 111.1  | 107.3 |
| 106.2 | 112.1 | 104.2 | 93.3  | 98.2  | 111.9 | 100.3 | 108.8  | 104.3 |
| 104.3 | 115.1 | 98.7  | 96.8  | 99.5  | 111.8 | 102.1 | 117.9  | 112.4 |
| 108   | 103.5 | 98.3  | 105.7 | 93.6  | 109.1 | 101.9 | 109.9  | 109.3 |
| 128   | 134.7 | 130.3 | 115   | 115.1 | 127.1 | 124.4 | 173.5  | 139.6 |
| 107.4 | 106.5 | 98.8  | 107.2 | 99.7  | 103.1 | 105.8 | 102.1  | 110.6 |
| 112.6 | 123.1 | 118.9 | 107.2 | 99.9  | 123.7 | 113.3 | 141.4  | 125.4 |
| 112.4 | 117.1 | 101.4 | 115.5 | 102   | 115.7 | 115.2 | 118.7  | 105.3 |
| 105.6 | 108   | 99.8  | 103.4 | 98.2  | 105.9 | 93.7  | 102.4  | 109.6 |
| 99.7  | 102.7 | 99.1  | 91.7  | 92.4  | 100.3 | 98.1  | 101.6  | 103.5 |
| 105.7 | 116.9 | 106.3 | 110.1 | 99.4  | 110.8 | 112.6 | 112    | 114.1 |
| 166   | 169.2 | 195.6 | 149.2 | 143.9 | 152.6 | 171.1 | 191.6  | 192   |
| 125.3 | 130   | 130   | 180.3 | 110.3 | 118.3 | 151.8 | 129    | 121.9 |
| 121.9 | 112.6 | 113.8 | 124.2 | 102.3 | 126.7 | 123.5 | 142    | 128.1 |
| 104.1 | 100.5 | 102.2 | 100.2 | 99.3  | 108   | 102.9 | 101.1  | 106.7 |
| 101.6 | 103.2 | 100.9 | 92.1  | 88.3  | 108.6 | 98.8  | 105.3  | 105.2 |
| 187.6 | 274.1 | 359.2 | 246.9 | 179.7 | 343.3 | 232.7 | 288.4  | 400.1 |
| 157.8 | 228.3 | 227.5 | 242.7 | 180.7 | 224.9 | 245.8 | 315.9  | 222   |
| 106.7 | 108.1 | 101.9 | 109.3 | 101.2 | 111.2 | 106   | 111.8  | 108.4 |

|        |        |        |        |       |        |        |        |       |
|--------|--------|--------|--------|-------|--------|--------|--------|-------|
| 668.7  | 1015.2 | 946.3  | 1088.7 | 687.8 | 1065.3 | 973.3  | 970.3  | 571   |
| 143.6  | 162    | 165.4  | 182.4  | 164.6 | 159.1  | 199.1  | 186.5  | 154.8 |
| 178.8  | 175.6  | 160.7  | 188.3  | 141.2 | 178.1  | 176.6  | 232.6  | 223   |
| 108.8  | 103.2  | 98.7   | 97.7   | 96.8  | 109.3  | 102.2  | 114.2  | 107.2 |
| 104    | 112.8  | 107    | 93.2   | 93.7  | 105.2  | 100.2  | 100.6  | 108.4 |
| 110.2  | 110.4  | 100.8  | 97.6   | 88.1  | 107.1  | 104.7  | 108.5  | 108.5 |
| 107.8  | 110.6  | 105.3  | 109    | 98.3  | 108.4  | 108    | 113.2  | 109.1 |
| 98.6   | 104.2  | 106.4  | 90.8   | 93.6  | 98.9   | 96.7   | 102.9  | 103.9 |
| 102.2  | 117.1  | 96.2   | 100.8  | 101.5 | 109.9  | 104.3  | 111.7  | 117.3 |
| 245.1  | 305    | 243.5  | 448.7  | 329.1 | 259.5  | 301.5  | 472    | 458   |
| 104.5  | 112.1  | 100.4  | 94.9   | 88.1  | 106.3  | 108.8  | 105.7  | 109.6 |
| 156.1  | 169.3  | 138.8  | 137.4  | 129.4 | 141.3  | 154.9  | 153.9  | 140.3 |
| 117.6  | 146.9  | 130.9  | 120.6  | 120.4 | 131.9  | 113.5  | 160.9  | 144.2 |
| 356.7  | 348    | 372.8  | 311.2  | 328.3 | 426.9  | 339.8  | 626.1  | 447.6 |
| 536.2  | 422.8  | 452.3  | 389    | 373.3 | 470    | 505.4  | 862.3  | 523.3 |
| 119.7  | 111.2  | 114.3  | 123.4  | 105.4 | 118.6  | 113.6  | 127    | 106.8 |
| 109.7  | 109.4  | 102.1  | 99.8   | 97.1  | 104.9  | 104.1  | 110.7  | 107.5 |
| 108.9  | 107.8  | 104.9  | 95.9   | 94.8  | 114.7  | 108.6  | 103    | 104.8 |
| 95.5   | 103.1  | 97.6   | 97.1   | 91.8  | 114.8  | 96.4   | 95.8   | 99.4  |
| 747    | 896.3  | 474.8  | 1894.3 | 971.4 | 710.1  | 3103.4 | 1000   | 390   |
| 104.5  | 107.1  | 110.4  | 106.1  | 97.2  | 109.7  | 106.4  | 111.3  | 108.3 |
| 343.2  | 167.5  | 135.8  | 324.7  | 195   | 164.6  | 380.8  | 500.5  | 180.5 |
| 1154.7 | 720.7  | 640.6  | 915    | 811.9 | 603.1  | 1330.7 | 1900.7 | 1483  |
| 563.5  | 209.8  | 184.4  | 431.6  | 256   | 206.9  | 675.9  | 692    | 207   |
| 101.6  | 114    | 104.8  | 104.2  | 93.9  | 106.4  | 110.6  | 109    | 107.8 |
| 106.6  | 110.5  | 99.8   | 101.7  | 100.7 | 107.6  | 99.7   | 102.8  | 109.8 |
| 109.4  | 115.6  | 112.4  | 99.8   | 95.5  | 107.5  | 110.6  | 121.5  | 102.4 |
| 106.5  | 114.6  | 106.1  | 120.5  | 97.2  | 111.3  | 100.5  | 110.9  | 115.3 |
| 104.3  | 109    | 102.1  | 108.9  | 98.5  | 105.8  | 96.7   | 108.5  | 112.4 |
| 123    | 136.5  | 111.2  | 247.8  | 98.9  | 110.4  | 141.1  | 105    | 114.7 |
| 157.8  | 194.3  | 194.9  | 156    | 148.7 | 186.3  | 177.9  | 282.7  | 224.3 |
| 101.8  | 107.4  | 107.6  | 104.4  | 95.1  | 107    | 100.3  | 108.1  | 107.2 |
| 101.2  | 108.4  | 107.3  | 97.9   | 96.3  | 101.2  | 105.2  | 111.2  | 109.3 |
| 106.6  | 123.6  | 108.6  | 104.2  | 97    | 110.2  | 110.8  | 130.2  | 106.3 |
| 107.4  | 100.5  | 102.8  | 104.6  | 107.8 | 102.5  | 107.3  | 106.8  | 111.7 |
| 106.3  | 113.2  | 106.5  | 119.4  | 102.4 | 117.6  | 109.8  | 114.2  | 103.6 |
| 106.4  | 113.5  | 112.5  | 117.3  | 99    | 107.4  | 107.7  | 116    | 115.4 |
| 419.4  | 1066   | 1228.3 | 1020.3 | 1150  | 1119.1 | 1186.9 | 1222.7 | 731.5 |
| 99.8   | 104.2  | 103.1  | 103    | 94.7  | 104.2  | 95.6   | 110    | 105.5 |
| 111.8  | 114.4  | 99.5   | 119.6  | 101.8 | 119.7  | 109    | 107.1  | 111.5 |
| 100.1  | 109.4  | 98.1   | 94.6   | 94.1  | 115.3  | 95.5   | 105.2  | 105.2 |
| 103.4  | 108.4  | 103.5  | 109.5  | 97.9  | 103.4  | 103.5  | 105.3  | 106.1 |
| 101    | 110    | 100    | 106.4  | 97.3  | 109.3  | 95     | 105.3  | 103.6 |
| 106.2  | 108.5  | 107.7  | 99.3   | 99    | 100.2  | 94.7   | 116.7  | 110.5 |
| 104.2  | 109.9  | 98.7   | 99.7   | 107.1 | 105.3  | 102.7  | 111    | 107.4 |
| 101.6  | 100.7  | 99.6   | 100.5  | 89.9  | 107.3  | 106.2  | 107.5  | 105.3 |
| 107.6  | 101.6  | 106.3  | 98.6   | 99.5  | 102.3  | 106.5  | 106.4  | 109.1 |
| 130.6  | 126.5  | 133.1  | 111.9  | 108.4 | 119.3  | 116.2  | 177.8  | 163.5 |
| 117.3  | 112.4  | 122.2  | 120    | 109.7 | 113.6  | 103.3  | 116.6  | 135.5 |
| 256.4  | 323.3  | 232.8  | 182.8  | 253.7 | 284.2  | 242.3  | 409.5  | 374.5 |
| 103    | 108.4  | 99.9   | 104.1  | 92.4  | 113.3  | 113.5  | 101.7  | 104.2 |

|        |        |        |        |        |        |        |        |        |
|--------|--------|--------|--------|--------|--------|--------|--------|--------|
| 506.7  | 374.2  | 356    | 321.1  | 410    | 359.1  | 360.1  | 884.5  | 521.5  |
| 238.3  | 180    | 171.6  | 175.3  | 183.1  | 200.7  | 209.3  | 326.6  | 233.1  |
| 621.7  | 410    | 411.3  | 407.8  | 396.8  | 449.3  | 374.5  | 879.1  | 774.7  |
| 111.9  | 109.8  | 104.9  | 114.4  | 100    | 119.7  | 121.3  | 121.5  | 111.4  |
| 153.5  | 132.7  | 128.6  | 124    | 129.5  | 151.1  | 145.1  | 183.8  | 185.8  |
| 170.2  | 163.4  | 139.3  | 137.8  | 136.6  | 175    | 149.6  | 235.6  | 174.7  |
| 111.3  | 108.8  | 92.7   | 96.7   | 95.9   | 105.3  | 101.7  | 111.6  | 117.4  |
| 162.1  | 177.1  | 149.3  | 212.7  | 181.3  | 193    | 234.3  | 489.3  | 308.7  |
| 105.7  | 109.3  | 105    | 99.8   | 91.1   | 106.5  | 98.8   | 108.6  | 108.4  |
| 164.9  | 193.9  | 199.9  | 162.7  | 197.4  | 179.7  | 201.4  | 190.5  | 207.1  |
| 126.5  | 150.2  | 115.6  | 136.4  | 120.3  | 128    | 124    | 159.8  | 157    |
| 148.2  | 190.8  | 157.7  | 136.2  | 158.1  | 170.6  | 171    | 253.2  | 197.2  |
| 159.9  | 153.7  | 169.3  | 133.6  | 187.5  | 212.1  | 188    | 246.3  | 182.4  |
| 106.4  | 113.9  | 106.9  | 107.5  | 109.4  | 117.2  | 104.8  | 128.2  | 128.7  |
| 123.3  | 123.8  | 117.6  | 119.4  | 125.4  | 135    | 125    | 149.3  | 161    |
| 375.2  | 297.5  | 288.5  | 297.8  | 287.9  | 342.6  | 309.2  | 514.5  | 386.1  |
| 807.1  | 1032.4 | 906    | 978.5  | 854    | 947.3  | 1225.1 | 1405.9 | 923.4  |
| 117.3  | 122.7  | 103.2  | 132.5  | 97.2   | 116.5  | 103.6  | 105.8  | 98.7   |
| 119.7  | 122.6  | 124.2  | 105.4  | 114.3  | 128.9  | 112.6  | 124.9  | 127.8  |
| 108.2  | 119.3  | 106.1  | 120    | 106.8  | 118.3  | 106.9  | 120.7  | 110.1  |
| 109.1  | 109.9  | 100.1  | 97.2   | 96.2   | 106.6  | 102.6  | 104.4  | 111.5  |
| 106.5  | 108.6  | 93.7   | 94.1   | 92     | 104.7  | 103.2  | 109.5  | 121.2  |
| 182.6  | 181.3  | 194    | 148.4  | 189.5  | 221.5  | 183.2  | 305.1  | 254.1  |
| 118    | 119.7  | 116.6  | 108.3  | 103.6  | 113.5  | 119.1  | 140.9  | 131.4  |
| 146.2  | 217.8  | 218.6  | 263.2  | 179    | 254.3  | 276.6  | 218    | 185.4  |
| 106.6  | 107.2  | 102    | 101.4  | 101.6  | 116.1  | 101.2  | 113.7  | 106.5  |
| 119    | 117.4  | 118.1  | 113.3  | 98.2   | 113.4  | 107.6  | 126.6  | 115.9  |
| 124.9  | 234.3  | 214.3  | 196.1  | 190.7  | 214.2  | 246.4  | 282.2  | 201.2  |
| 113.5  | 109.4  | 103.3  | 105.4  | 99.5   | 108.3  | 102.6  | 110.5  | 117.9  |
| 104.6  | 111.4  | 97.5   | 102.4  | 92.5   | 100    | 99.5   | 105    | 109.1  |
| 110.4  | 113.7  | 105.1  | 109.9  | 102.8  | 107.3  | 102.5  | 107.5  | 118.2  |
| 110.2  | 108.4  | 101.2  | 114    | 95     | 113.2  | 105.4  | 107.4  | 107.5  |
| 96.6   | 104.4  | 93.2   | 94.7   | 93.9   | 102.5  | 107.2  | 107.8  | 110.6  |
| 109.6  | 100.7  | 95.4   | 103.2  | 95.2   | 107.8  | 97.9   | 106    | 105.6  |
| 111.5  | 109.7  | 107.4  | 103.9  | 97.1   | 109.6  | 98.2   | 111.3  | 111.2  |
| 1136.1 | 605.2  | 219    | 4518.3 | 464.7  | 243.7  | 2029.2 | 348.2  | 262.5  |
| 110.2  | 112.5  | 105.2  | 102.6  | 91.3   | 115.4  | 103.6  | 115.7  | 118.2  |
| 111    | 101    | 100.3  | 124.1  | 89     | 114.3  | 100.1  | 113.7  | 124.2  |
| 124.8  | 101.3  | 99.7   | 213.5  | 94     | 97.3   | 117.4  | 112.6  | 118.6  |
| 107.8  | 117    | 110.8  | 179.3  | 103.8  | 115.9  | 114.6  | 109    | 103.8  |
| 363.4  | 533.6  | 571.9  | 471.3  | 594.1  | 786.3  | 526.5  | 1043.2 | 1376   |
| 103.8  | 106.8  | 109.1  | 94.5   | 100.7  | 109.4  | 98.7   | 113.5  | 104.1  |
| 116.8  | 115.4  | 117.5  | 125.4  | 110.8  | 111.2  | 115.1  | 124.5  | 113.9  |
| 100.1  | 105.2  | 104.8  | 99.1   | 99     | 107.1  | 107.4  | 109.3  | 107    |
| 109    | 125.1  | 104.3  | 119.9  | 109.7  | 112.8  | 114.1  | 106.5  | 105.8  |
| 2369   | 3775.6 | 2790.4 | 2361.3 | 3186.6 | 2788.3 | 2729.5 | 7036   | 2706.5 |
| 107.6  | 118    | 130.4  | 121.9  | 118.5  | 133.3  | 118.9  | 151.4  | 127.3  |
| 110.9  | 113.5  | 98.3   | 107.9  | 94.8   | 109.6  | 102    | 106    | 123.3  |
| 113.6  | 113.4  | 99.2   | 102.9  | 100.8  | 106.6  | 108.3  | 107.3  | 109.7  |
| 112.4  | 106.8  | 114.8  | 96.4   | 90.8   | 107.4  | 107.6  | 116.5  | 107.7  |
| 154.5  | 237.5  | 177.8  | 203.3  | 205.2  | 211.6  | 235    | 317    | 252.8  |



|       |       |        |        |        |        |        |        |        |
|-------|-------|--------|--------|--------|--------|--------|--------|--------|
| 134.1 | 152.3 | 122.2  | 131.8  | 127.5  | 128    | 142.7  | 157.2  | 158.3  |
| 193.8 | 225.8 | 241    | 268.9  | 193.2  | 232.1  | 263.5  | 294.2  | 304.6  |
| 129   | 162.5 | 147.8  | 164.5  | 130.3  | 142.4  | 207.9  | 185.9  | 201.4  |
| 357.2 | 273.1 | 262.3  | 208.4  | 238.4  | 258.8  | 231.8  | 364.9  | 330.7  |
| 141.7 | 144.1 | 139    | 189.4  | 119    | 143.3  | 157.4  | 193.2  | 236.9  |
| 97.5  | 103.5 | 104.4  | 100.7  | 95.2   | 109    | 102.2  | 117.2  | 113.7  |
| 98.9  | 109.3 | 97.9   | 102.6  | 95.2   | 108.6  | 102.4  | 99.9   | 108.4  |
| 97.7  | 107.4 | 105.5  | 105.7  | 95.9   | 105    | 107.5  | 101.3  | 111.9  |
| 101.6 | 105.8 | 97.4   | 106    | 91.7   | 100.3  | 93.7   | 103.7  | 103.7  |
| 108.7 | 115.8 | 101.1  | 104.2  | 96.3   | 108.6  | 106.5  | 117.5  | 109.2  |
| 108.7 | 108.4 | 101.2  | 104.2  | 97     | 109.3  | 107.5  | 115.1  | 109    |
| 101.4 | 104.6 | 100.5  | 90.4   | 92.4   | 103    | 106.4  | 105.4  | 103.2  |
| 104.4 | 108.7 | 105    | 109.7  | 102.5  | 115.3  | 103.9  | 103.4  | 116.7  |
| 112.9 | 114.8 | 97.6   | 107.2  | 98.2   | 119    | 106.8  | 112.5  | 102.8  |
| 113.2 | 114.4 | 109.2  | 110.1  | 102.8  | 111.9  | 112.5  | 120.3  | 124.1  |
| 109.6 | 106.9 | 104.1  | 93.3   | 96     | 106.7  | 105.2  | 116.1  | 106.1  |
| 100   | 108.8 | 99.6   | 99.9   | 96     | 112.3  | 102.6  | 112.3  | 111.9  |
| 105.5 | 106.7 | 101.8  | 102.9  | 98.6   | 118.1  | 97.7   | 112.3  | 104.2  |
| 105.3 | 108.8 | 103.3  | 96.8   | 93.8   | 114.8  | 102.9  | 108.8  | 105.8  |
| 102.8 | 111.8 | 108.5  | 105.3  | 99.6   | 105.9  | 109.4  | 115.6  | 110.1  |
| 101.8 | 110.9 | 99.3   | 97.7   | 96.2   | 99.3   | 100.5  | 105.7  | 109    |
| 105.1 | 105.5 | 98.3   | 102.9  | 95.9   | 110.6  | 102.6  | 101.8  | 102.4  |
| 111.8 | 130.3 | 124.7  | 109.3  | 123.4  | 125.9  | 114.1  | 117.6  | 117.4  |
| 112   | 122.3 | 114.1  | 103    | 100.9  | 115.3  | 103.6  | 126.5  | 132.7  |
| 108.6 | 124.2 | 113.6  | 109.2  | 113.8  | 120.6  | 124.7  | 126.9  | 124.5  |
| 182.2 | 216.8 | 261.9  | 206.3  | 201.5  | 213.3  | 303    | 404.8  | 225.2  |
| 107.6 | 121.4 | 106.7  | 115.8  | 102.5  | 113.1  | 104.7  | 119.4  | 116.1  |
| 107   | 103.4 | 102.2  | 96.2   | 94.4   | 107.7  | 98.4   | 110.1  | 117.3  |
| 249.8 | 218   | 202.7  | 273.3  | 206.8  | 219.1  | 191.3  | 362.7  | 261.1  |
| 182.1 | 394.3 | 356.8  | 247    | 321    | 349.6  | 316.3  | 417.3  | 274.4  |
| 105.7 | 106.9 | 106.7  | 112.5  | 104.4  | 109.2  | 99.9   | 120.6  | 102.2  |
| 133.5 | 135.2 | 132.5  | 136.4  | 125.2  | 137.8  | 140.2  | 165.4  | 137.5  |
| 113.8 | 113   | 117.8  | 107.7  | 98.1   | 115.5  | 106.8  | 116.1  | 118.5  |
| 123   | 122.5 | 117.4  | 111.8  | 108.7  | 118.4  | 118.9  | 153.9  | 150.1  |
| 143.6 | 287.7 | 274.4  | 336.2  | 253.4  | 226.4  | 260.6  | 246.8  | 177.8  |
| 113.1 | 122.9 | 126.3  | 116.2  | 109.4  | 125.4  | 115    | 119.1  | 117    |
| 860.9 | 1314  | 1468.4 | 1233.8 | 1131.1 | 1466.4 | 1155.7 | 1694.6 | 1064.3 |
| 105.3 | 123.1 | 112    | 112.5  | 110.1  | 117    | 125.3  | 163.6  | 118    |
| 125.6 | 135.6 | 106.5  | 117.6  | 107.3  | 120.8  | 113.5  | 162.2  | 160.6  |
| 103   | 113.4 | 100.4  | 95.3   | 92.2   | 112.5  | 104.3  | 123.7  | 113    |
| 108.5 | 120.2 | 115.4  | 114.7  | 109.5  | 115.4  | 117.8  | 127.5  | 114.2  |
| 108.7 | 137.5 | 111.2  | 110.8  | 115.3  | 108.6  | 108.5  | 120.1  | 118.7  |
| 114.7 | 110.3 | 105.8  | 112.7  | 106.1  | 112.8  | 104.2  | 117.6  | 120.9  |
| 503.1 | 636.1 | 598.9  | 492.3  | 560.2  | 533.8  | 562.2  | 876.4  | 570.3  |
| 139.3 | 139   | 122.2  | 138.4  | 111.4  | 152.5  | 137.6  | 142.2  | 155.8  |
| 124   | 118.6 | 120.1  | 111.4  | 104.8  | 123.6  | 117.7  | 165.8  | 225.5  |
| 115   | 112.1 | 108.6  | 102    | 102    | 112.8  | 100    | 110.1  | 129.6  |
| 105.9 | 104.4 | 98.6   | 104    | 100.7  | 109.2  | 103    | 104.9  | 102.9  |
| 133.9 | 130.5 | 106.7  | 107    | 111.9  | 121.7  | 126    | 143.6  | 120.3  |
| 110.5 | 109.5 | 95.9   | 109.1  | 105.2  | 106.1  | 106.7  | 135.5  | 106.4  |
| 148.8 | 148.5 | 126.5  | 130    | 136.4  | 132.3  | 143.4  | 232.1  | 135.9  |

|        |        |       |        |        |        |        |        |        |
|--------|--------|-------|--------|--------|--------|--------|--------|--------|
| 468.1  | 434.2  | 250.4 | 489.5  | 392.7  | 307.6  | 509.8  | 542.6  | 345.9  |
| 106.1  | 108.1  | 100.2 | 98.7   | 92.4   | 108.9  | 108.2  | 100.6  | 104    |
| 100    | 107.8  | 99.3  | 104.8  | 100.2  | 108.1  | 96     | 110.3  | 105.1  |
| 231    | 137.1  | 134.9 | 109.6  | 130.5  | 157.4  | 124.7  | 407.2  | 421.9  |
| 139.8  | 162.9  | 145.3 | 154.9  | 129.7  | 169.8  | 148.8  | 211.6  | 196.2  |
| 108.6  | 113    | 108.4 | 114.6  | 101.6  | 116.8  | 105.1  | 129    | 123.9  |
| 118.1  | 113.5  | 100.3 | 122.5  | 97.4   | 117.7  | 113.9  | 110.3  | 120.5  |
| 105.8  | 112.4  | 105.8 | 106.3  | 93     | 106.1  | 103.1  | 110.1  | 104.8  |
| 252.4  | 346.5  | 305.5 | 229.6  | 333.6  | 316.5  | 250.9  | 581.1  | 339.1  |
| 103.6  | 112    | 100.1 | 101.1  | 90.1   | 108.6  | 102.8  | 119.7  | 105.1  |
| 103.4  | 108.8  | 108   | 94.3   | 98     | 101.5  | 97.2   | 101    | 108    |
| 113.7  | 111.8  | 104.9 | 102.1  | 101.7  | 111.3  | 103.3  | 107.8  | 111.7  |
| 107.5  | 102.2  | 104.9 | 101    | 93.8   | 106.4  | 98.5   | 102.8  | 106.6  |
| 218.7  | 270.7  | 236   | 237.9  | 257.6  | 210.3  | 307.2  | 448.2  | 270.9  |
| 113.8  | 128.1  | 123   | 115.8  | 116.6  | 118.3  | 106.7  | 145.1  | 126.6  |
| 199.4  | 211.4  | 209.4 | 165    | 197.7  | 246.2  | 205.9  | 510.7  | 266.4  |
| 106.3  | 105.5  | 98.6  | 98.3   | 88.5   | 103.5  | 99.1   | 109.3  | 112.7  |
| 133.8  | 152.6  | 168.5 | 191.2  | 153.2  | 165.2  | 171.3  | 126.3  | 124.7  |
| 113.7  | 111.6  | 108.6 | 115.9  | 104    | 112.9  | 109.8  | 110.1  | 114.7  |
| 104.9  | 106.2  | 113.6 | 106.7  | 97.1   | 106.9  | 104.3  | 106.2  | 122.8  |
| 116.2  | 111.6  | 112.6 | 120.7  | 110.4  | 126.3  | 110.7  | 121.2  | 119.7  |
| 101.8  | 104.6  | 105.5 | 99     | 90.7   | 99.5   | 96.7   | 103.9  | 100.4  |
| 106.5  | 124.6  | 100.1 | 110.7  | 94.2   | 114    | 109.5  | 104.8  | 103.2  |
| 108.3  | 108    | 105.3 | 112.2  | 106.5  | 111.5  | 107.8  | 119.7  | 115.2  |
| 121.2  | 123.8  | 117.1 | 117.2  | 113.5  | 132.5  | 124.3  | 173    | 137.7  |
| 180.7  | 177.2  | 174.6 | 141    | 139.3  | 162.9  | 152.2  | 229    | 181.4  |
| 2340.3 | 1680.4 | 988.7 | 3762.7 | 2351.9 | 1518.5 | 3456.3 | 3727.8 | 1794.1 |
| 109.1  | 110.8  | 107.8 | 102    | 96.9   | 116.6  | 107.2  | 112.8  | 122.7  |
| 125.2  | 251.2  | 182.8 | 277.9  | 152    | 169.8  | 199.3  | 279.7  | 271.5  |
| 175.4  | 406.5  | 283   | 584.2  | 295    | 255    | 458.9  | 427.3  | 348.1  |
| 227.9  | 391.8  | 271.3 | 502    | 309.1  | 313.4  | 383    | 529.6  | 325.6  |
| 105.2  | 112.7  | 103   | 116    | 102.4  | 113.9  | 112.5  | 122.7  | 121.6  |
| 108    | 114.3  | 99.6  | 98.7   | 96.8   | 109.3  | 105.3  | 104.4  | 101.4  |
| 105.5  | 106.4  | 108.1 | 99.3   | 93.9   | 117.3  | 106.6  | 129.4  | 107.9  |
| 107.2  | 167.4  | 188.7 | 139.9  | 148.3  | 162.6  | 142.3  | 139.7  | 105.1  |
| 114.7  | 102    | 107.6 | 103.9  | 98.6   | 122.7  | 107.7  | 113.1  | 111.8  |
| 241.6  | 954.9  | 456.6 | 1219.3 | 583.1  | 370.8  | 716.7  | 733.9  | 438.3  |
| 117.4  | 117.1  | 112.2 | 134.3  | 110.9  | 111.3  | 114.4  | 120    | 131.6  |
| 118.7  | 247.5  | 162.2 | 156.9  | 183.2  | 152.2  | 156.9  | 238.2  | 153.4  |
| 310    | 153.8  | 131.3 | 169.3  | 142.1  | 158.3  | 171.3  | 274.9  | 149.4  |
| 3219   | 885.2  | 565.8 | 1149.3 | 1004.9 | 919.3  | 1350.1 | 3218.6 | 743.4  |
| 2914.2 | 668.7  | 472.4 | 984.7  | 725.9  | 852.5  | 1206.5 | 3448.1 | 725.3  |
| 110.5  | 110.2  | 101.7 | 108.2  | 101    | 115.8  | 105.6  | 127.1  | 126.9  |
| 171.9  | 296.1  | 191.1 | 335.3  | 235.5  | 206.8  | 212.5  | 218.5  | 196.7  |
| 173.5  | 307.5  | 189.3 | 410.7  | 250.3  | 184.5  | 361.9  | 216.7  | 163.6  |
| 146.4  | 245.8  | 345.1 | 215.5  | 180.6  | 228    | 163.1  | 185.8  | 205.3  |
| 306    | 492.9  | 288.6 | 961.5  | 420.5  | 227.2  | 719.2  | 558    | 182.5  |
| 101.6  | 127.1  | 123.6 | 101.7  | 114.3  | 125.4  | 110.9  | 117.5  | 101.4  |
| 113    | 140.4  | 118.6 | 107.3  | 109.3  | 130    | 112.9  | 134.9  | 128.3  |
| 98.4   | 100.2  | 100.2 | 92.1   | 90.8   | 94.6   | 97.7   | 110.2  | 98.6   |
| 99.4   | 102.7  | 101.1 | 98.6   | 92.4   | 103.9  | 99.9   | 113.2  | 106.1  |

|        |        |       |        |        |        |        |        |        |
|--------|--------|-------|--------|--------|--------|--------|--------|--------|
| 105.3  | 119.2  | 103.4 | 115.4  | 94.4   | 114.7  | 107    | 110.8  | 100.9  |
| 111.7  | 106.7  | 112.8 | 106.7  | 97.8   | 110.2  | 111.3  | 115.7  | 125.2  |
| 105.6  | 102.3  | 108.4 | 99.1   | 96.5   | 109.5  | 107.6  | 100.9  | 105.4  |
| 120.1  | 110.4  | 111.8 | 107.9  | 107.5  | 111.8  | 121.4  | 111.7  | 111.6  |
| 174.4  | 190.9  | 133   | 230.1  | 175.5  | 174.9  | 167.8  | 278.1  | 181.1  |
| 175.2  | 270.1  | 217.7 | 276.7  | 207    | 260.5  | 248.1  | 438.7  | 228.4  |
| 106.2  | 127.9  | 115   | 102    | 110.6  | 124.7  | 102.8  | 157.1  | 135.9  |
| 118.6  | 132.1  | 110.3 | 124.5  | 111.2  | 123.8  | 120.8  | 144.7  | 123.7  |
| 109.6  | 110.8  | 105.9 | 97.8   | 93.4   | 114.7  | 106    | 102.1  | 117.2  |
| 200.9  | 245.6  | 238.5 | 283    | 218.3  | 290.2  | 290.5  | 285.4  | 222.2  |
| 137.6  | 174.7  | 169.6 | 180.1  | 176.5  | 179.8  | 149.5  | 218.2  | 160.9  |
| 186.1  | 174.1  | 183   | 176.3  | 188    | 182.1  | 194.5  | 337    | 226.5  |
| 253.7  | 345.3  | 313.4 | 288.3  | 274.2  | 335.4  | 286.6  | 444.2  | 346.4  |
| 122.1  | 108.6  | 114.8 | 107.2  | 93.4   | 116.6  | 106.1  | 100.5  | 106.4  |
| 108.1  | 108.8  | 105.8 | 108.9  | 96.4   | 116.7  | 105.5  | 108.2  | 100.8  |
| 370.4  | 384.7  | 297.3 | 346.1  | 310.4  | 386.3  | 298.5  | 620.3  | 487.5  |
| 126.5  | 142.3  | 132.4 | 118.8  | 133.8  | 126.4  | 133.2  | 159.5  | 158.2  |
| 119.1  | 140.2  | 123.6 | 136.6  | 123.4  | 137    | 117.6  | 148.2  | 136.1  |
| 226.1  | 412.3  | 304.6 | 331    | 304    | 264.7  | 351.8  | 516.8  | 243.6  |
| 109.6  | 117.9  | 104.1 | 102.8  | 101.8  | 116.3  | 111.5  | 110.6  | 112.9  |
| 754.5  | 1139.2 | 1426  | 1357.2 | 1147.5 | 1765.3 | 1238.9 | 1437.8 | 1302.2 |
| 324.7  | 477.8  | 452.5 | 511.5  | 437.9  | 431.5  | 486.3  | 735    | 554.6  |
| 99.4   | 116    | 103.4 | 104.7  | 101.6  | 109.2  | 108.5  | 111.1  | 108.1  |
| 245.2  | 297.9  | 304.9 | 291.5  | 271.5  | 290.7  | 288.6  | 430.8  | 299.1  |
| 104.8  | 110.7  | 104.2 | 106.7  | 95.4   | 107.9  | 103.4  | 98     | 117    |
| 224    | 218.6  | 227.9 | 218.3  | 222.3  | 226.5  | 215.1  | 294.3  | 205.2  |
| 104.6  | 101.5  | 99.8  | 97.7   | 100.1  | 100.6  | 105.1  | 104.4  | 108.8  |
| 104.3  | 104.6  | 105.6 | 99.8   | 96.7   | 108.2  | 97.1   | 96.8   | 117.5  |
| 108.9  | 133.2  | 126.5 | 119.4  | 107.8  | 129.5  | 118.9  | 153.6  | 126.4  |
| 758.9  | 704.2  | 575.9 | 564.7  | 663.1  | 567.8  | 992.8  | 1074.5 | 629.3  |
| 184.9  | 264.4  | 282.7 | 215.9  | 215    | 298.6  | 209.4  | 371.2  | 292.7  |
| 99.3   | 105.2  | 105.7 | 97.9   | 94.6   | 107.9  | 100.8  | 109.9  | 106.5  |
| 112    | 108    | 101.4 | 109.9  | 101.3  | 116.6  | 104.2  | 112.4  | 107.7  |
| 333.3  | 963.5  | 905.2 | 549.4  | 923.1  | 605    | 374.4  | 1573.6 | 1337   |
| 112    | 99.3   | 113.7 | 103    | 91.8   | 108.4  | 98.5   | 107.5  | 110.3  |
| 102.9  | 104.8  | 97.8  | 87.1   | 93.4   | 99.1   | 102.2  | 108.9  | 101.1  |
| 106.2  | 108.2  | 107.4 | 99.4   | 96.2   | 108    | 106.1  | 104    | 99.5   |
| 110.3  | 108.5  | 109.1 | 119.4  | 100.3  | 111.8  | 114.2  | 118.1  | 113.9  |
| 111.6  | 1588.9 | 161.3 | 1583.2 | 293.5  | 110.7  | 179    | 114.1  | 123.9  |
| 107.4  | 108    | 94.5  | 105.6  | 97.4   | 108.5  | 105.7  | 103.2  | 101.5  |
| 103.7  | 112.5  | 97.2  | 99.1   | 101.8  | 101.3  | 104.3  | 102.3  | 106.8  |
| 120.1  | 114.1  | 98.6  | 97.5   | 108.5  | 106.3  | 98.6   | 109.9  | 107.2  |
| 104.7  | 110.3  | 113.8 | 100.2  | 88.4   | 107.5  | 98     | 99.5   | 99.3   |
| 108.9  | 108.3  | 109.5 | 110.2  | 99.7   | 110.1  | 103.9  | 115.1  | 113    |
| 1325.1 | 728.7  | 343   | 336.1  | 813.6  | 427.7  | 1422.5 | 962.4  | 490.8  |
| 243.9  | 125.3  | 148.7 | 142.8  | 119    | 118.2  | 138.8  | 190.4  | 135.8  |
| 121.9  | 120.9  | 124.7 | 108.8  | 103.3  | 129.2  | 107.3  | 122.7  | 114.6  |
| 104.6  | 113.2  | 212.6 | 100.8  | 122.1  | 137.3  | 252.8  | 131.6  | 116.2  |
| 98.2   | 110.6  | 102.1 | 104.6  | 102    | 104.7  | 106.8  | 100.6  | 110.2  |
| 113.7  | 205.5  | 104   | 301.4  | 99.6   | 117.9  | 118.1  | 105.4  | 107.1  |
| 139.8  | 199.3  | 212.2 | 245.1  | 151.6  | 209.3  | 168.1  | 209.3  | 194.9  |

|        |        |        |        |        |        |        |        |        |
|--------|--------|--------|--------|--------|--------|--------|--------|--------|
| 238.3  | 373.8  | 255.2  | 291.8  | 310.8  | 230    | 327.5  | 536.1  | 322.3  |
| 101.8  | 106.5  | 102.7  | 99.1   | 91     | 107.2  | 98.2   | 103.2  | 101.9  |
| 956.7  | 1577.7 | 1284.2 | 996.7  | 1007   | 1570.9 | 1061.5 | 1668.8 | 1281.8 |
| 242.5  | 259.1  | 268.5  | 203    | 247.8  | 287.1  | 283.2  | 371.4  | 201.1  |
| 108.5  | 120.6  | 106    | 113.4  | 104.3  | 112.4  | 108.3  | 116.4  | 119.6  |
| 108.7  | 102.7  | 90.6   | 98.9   | 93.9   | 104    | 102.2  | 105.6  | 109.7  |
| 135.9  | 242.6  | 224.4  | 190.8  | 178.1  | 238.8  | 190.3  | 190.3  | 157.7  |
| 119.5  | 115.2  | 120    | 104.1  | 101.4  | 111.4  | 108.7  | 107.4  | 112    |
| 118    | 108.7  | 95.7   | 105    | 99.8   | 114.3  | 106.2  | 115.6  | 109.1  |
| 103.2  | 104    | 103.5  | 106.4  | 96     | 104.2  | 108.6  | 106.9  | 115.6  |
| 105.6  | 117.2  | 112.3  | 120.9  | 99.5   | 109    | 103.3  | 112.1  | 114.7  |
| 101.8  | 121.5  | 102.8  | 103.9  | 96.4   | 106.8  | 108.5  | 106.8  | 103.1  |
| 106.8  | 119.9  | 107.8  | 105.4  | 103.6  | 118.4  | 112.1  | 127.9  | 111.7  |
| 191.8  | 374.2  | 336.7  | 320    | 340.9  | 307.8  | 279.4  | 720.3  | 465.1  |
| 110.6  | 114.2  | 104.7  | 110.3  | 97.7   | 116.6  | 109.8  | 118.7  | 104.5  |
| 104.2  | 112.7  | 93.9   | 92.2   | 92.8   | 104.3  | 93     | 107.3  | 108.1  |
| 129.3  | 122.3  | 120.1  | 116.9  | 115.3  | 137.6  | 120.7  | 135.5  | 116.5  |
| 162    | 280.3  | 249.5  | 278.8  | 203.4  | 215.8  | 183    | 300.1  | 222.5  |
| 157.2  | 171.3  | 121.3  | 147.9  | 138.4  | 147    | 141.8  | 253.6  | 173.5  |
| 215.2  | 265.5  | 250.9  | 248.4  | 221.7  | 289.4  | 250.3  | 439.8  | 300.2  |
| 160.8  | 199.7  | 214.9  | 197    | 152    | 207.5  | 210.3  | 351.3  | 285.7  |
| 103.7  | 100.2  | 95.5   | 113.9  | 91.3   | 100.5  | 102    | 107.3  | 108.7  |
| 112.7  | 117.9  | 115.5  | 113.4  | 109.6  | 122.3  | 113.2  | 115.4  | 115.5  |
| 134.4  | 142.4  | 134.2  | 131.5  | 118.7  | 144.4  | 148.1  | 135.2  | 154.3  |
| 172.3  | 157.7  | 130.8  | 189.6  | 136.4  | 161.9  | 162.5  | 163.8  | 155.4  |
| 104    | 97.2   | 99.4   | 102.5  | 96.8   | 107.3  | 93     | 105.3  | 107.8  |
| 97.6   | 102.5  | 100.7  | 99.2   | 92.3   | 103.4  | 95.2   | 109.9  | 108.9  |
| 145.2  | 208.1  | 187.1  | 178.6  | 162.6  | 194.4  | 198.4  | 234.8  | 170.5  |
| 106.3  | 114.8  | 100.6  | 109.3  | 94.8   | 102.5  | 100.7  | 114.2  | 111.4  |
| 133.6  | 120.1  | 106.6  | 119.9  | 103.2  | 112.1  | 108.3  | 137.2  | 129.3  |
| 101.4  | 109.6  | 108.5  | 115.6  | 96.1   | 114.2  | 102.6  | 111    | 103.6  |
| 242.7  | 430.6  | 473.2  | 465.1  | 432    | 424.6  | 538.5  | 462.6  | 308.2  |
| 159.5  | 312.3  | 242.1  | 346    | 250.5  | 232.9  | 360.5  | 262.4  | 200.9  |
| 745.9  | 1019.6 | 1030.9 | 689.6  | 904.8  | 1323.4 | 1007.9 | 1590.6 | 1003.7 |
| 113.5  | 122.7  | 105.2  | 122.9  | 103    | 118.3  | 103.1  | 122.4  | 103.5  |
| 181.5  | 533.1  | 369.8  | 316.6  | 426.8  | 347.6  | 323.5  | 504.7  | 188.8  |
| 106.8  | 113.1  | 99.6   | 98.9   | 97.5   | 107.6  | 102.3  | 106.6  | 113.3  |
| 1591.9 | 1643.4 | 1807.8 | 1235.8 | 1353.4 | 1465.7 | 1727.1 | 3210.1 | 1832.3 |
| 117.7  | 141.9  | 168.6  | 144.1  | 135.5  | 151.7  | 149.2  | 161.3  | 138.5  |
| 124.3  | 163.6  | 186.5  | 174.7  | 167.4  | 174.3  | 169.4  | 193.2  | 160.7  |
| 119.7  | 108.4  | 104.4  | 114    | 93.1   | 109.5  | 108.6  | 118.8  | 118.3  |
| 136.5  | 309    | 302.5  | 290.4  | 233.3  | 262.5  | 304.3  | 298.3  | 248.9  |
| 137    | 246.5  | 290.9  | 232.4  | 229.7  | 229.1  | 252.5  | 270.9  | 198.2  |
| 110.9  | 160.3  | 150.3  | 139.8  | 141.1  | 148.4  | 148.7  | 186.8  | 147.7  |
| 141.4  | 160    | 157.5  | 138.4  | 154.4  | 175.7  | 151.7  | 161.8  | 135.3  |
| 154.6  | 162.2  | 182.4  | 152.2  | 163.2  | 150.5  | 172.9  | 201.5  | 159.5  |
| 640    | 862.9  | 764.3  | 804.5  | 771.4  | 873.8  | 717.6  | 1387.9 | 1003.6 |
| 254.1  | 253.6  | 224.6  | 302.2  | 226.4  | 265.5  | 329.1  | 568.5  | 652.4  |
| 112    | 112    | 104.6  | 111    | 103.3  | 111.5  | 105.2  | 125.8  | 118.3  |
| 144.4  | 146.4  | 129.5  | 158.2  | 109.8  | 136.6  | 145    | 183.3  | 132.6  |
| 1287.2 | 1326.9 | 1122.3 | 1369   | 1224.5 | 1257.7 | 1610   | 2163.5 | 1070.2 |

|        |        |        |        |        |        |        |        |        |
|--------|--------|--------|--------|--------|--------|--------|--------|--------|
| 200.7  | 251.4  | 219.8  | 258    | 305.6  | 239.5  | 279.9  | 663.2  | 280.2  |
| 1810.8 | 3147.7 | 1790.3 | 3874.9 | 2108.9 | 1676.1 | 3605.4 | 1863   | 1396.8 |
| 244.4  | 914.6  | 637.9  | 780.4  | 776    | 511.8  | 1050.7 | 654.3  | 336.2  |
| 198.8  | 595.1  | 281.2  | 424.1  | 277.5  | 186.3  | 600.8  | 242.9  | 177.1  |
| 133.9  | 149.1  | 108.7  | 193.9  | 124.2  | 133    | 133.7  | 127.9  | 105.7  |
| 303.4  | 695    | 695.8  | 736.2  | 722.6  | 623.8  | 745.7  | 1007.7 | 514    |
| 197.8  | 208.6  | 217.7  | 189.3  | 194.8  | 194.7  | 217.4  | 242.2  | 256.6  |
| 141.2  | 138.1  | 130.5  | 137.2  | 122.3  | 134.3  | 119    | 164.7  | 218.4  |
| 110.3  | 114.8  | 104.8  | 103.7  | 103.6  | 110    | 106.8  | 123.2  | 116.5  |
| 171.1  | 232.3  | 181.6  | 365.4  | 268.1  | 270.5  | 447.6  | 357.4  | 182.2  |
| 108.7  | 111.5  | 105.5  | 109.4  | 109.9  | 121.2  | 111.6  | 120.7  | 124.1  |
| 112.5  | 108.5  | 105.5  | 116.8  | 103.4  | 117.3  | 102    | 109.5  | 99.9   |
| 462.4  | 424.8  | 408.7  | 467.6  | 364.5  | 479.6  | 517.9  | 538.7  | 446.5  |
| 1033.6 | 1275.7 | 1199.2 | 1087.4 | 1034.9 | 1186.2 | 802.2  | 2084   | 1262.7 |
| 102.8  | 122.6  | 103.6  | 100.9  | 95.6   | 122.5  | 103.8  | 113.4  | 112.4  |
| 110.7  | 117.1  | 105.7  | 114.4  | 97.2   | 124.4  | 123    | 124    | 121.6  |
| 99.7   | 105    | 97     | 98.8   | 93.1   | 107.4  | 93.7   | 105.8  | 93.9   |
| 107.4  | 112.1  | 100.5  | 104.7  | 101.6  | 107.5  | 100.1  | 124.4  | 123    |
| 108.7  | 122    | 110.3  | 105.6  | 101.5  | 109.8  | 112.5  | 111    | 124    |
| 460.3  | 459.5  | 529.5  | 419.3  | 421    | 436.7  | 289    | 443.6  | 373.3  |
| 110.6  | 107.5  | 107.2  | 101.2  | 98.3   | 108    | 114.5  | 107.7  | 99.5   |
| 111.5  | 111    | 105.7  | 106.6  | 97.6   | 119.4  | 104.3  | 122.7  | 126.5  |
| 252    | 380.1  | 323    | 292.1  | 244.1  | 275.7  | 277.6  | 322.7  | 251.3  |
| 118.6  | 141    | 142.2  | 124.2  | 125.6  | 130.3  | 136    | 166.2  | 137.4  |
| 110.8  | 121.1  | 109.3  | 111.9  | 101.8  | 114.2  | 110.4  | 127.1  | 119.3  |
| 103.4  | 98.1   | 101    | 98.3   | 92.8   | 99.1   | 95.6   | 106.2  | 99.3   |
| 111.7  | 111.5  | 116.7  | 105.6  | 106.4  | 111    | 103.7  | 107.1  | 108.3  |
| 106.5  | 104.7  | 106.5  | 109.9  | 87.8   | 106.7  | 106.2  | 107.3  | 104.2  |
| 103.5  | 113    | 102.8  | 96.3   | 102.9  | 109.6  | 103.1  | 103    | 108    |
| 98.8   | 105.3  | 103.5  | 96.2   | 92.3   | 99.9   | 99.5   | 112.8  | 107.5  |
| 122.1  | 111.9  | 110.4  | 116.7  | 109.9  | 111.5  | 108.9  | 113.1  | 110.4  |
| 109.5  | 115.3  | 101.7  | 115    | 102.2  | 115.5  | 105.9  | 113.3  | 112.7  |
| 109.3  | 104.9  | 98.8   | 95.6   | 96.2   | 99.8   | 103.4  | 106.9  | 105.5  |
| 394.8  | 959.2  | 1002.2 | 1204.5 | 1878   | 1119.6 | 1635.8 | 3921   | 923.6  |
| 246.3  | 317.8  | 257.9  | 239    | 249.2  | 333.9  | 249.9  | 452.8  | 353.2  |
| 105    | 115.1  | 101    | 101.9  | 94.1   | 103.5  | 97.9   | 110.3  | 112.4  |
| 105.4  | 109.7  | 106    | 104.1  | 104    | 107.3  | 102.4  | 112.7  | 108.3  |
| 103.7  | 106    | 99.8   | 95     | 97.5   | 103.9  | 94.5   | 102.3  | 102.4  |
| 107.4  | 108.1  | 96.4   | 93.7   | 91.8   | 116.3  | 101.1  | 112.3  | 109.1  |
| 115.2  | 109.9  | 99.7   | 106.6  | 97     | 105    | 98.4   | 125.1  | 112.4  |
| 101.5  | 109.9  | 98.4   | 96.8   | 100.2  | 104.9  | 101.1  | 104.4  | 105.3  |
| 104.3  | 114.7  | 103    | 118.4  | 99.6   | 111.6  | 97.6   | 114.6  | 108.5  |
| 104    | 107    | 111.4  | 96.4   | 104.9  | 105.6  | 101.6  | 104.2  | 104.5  |
| 322.2  | 2073   | 1534.4 | 263.7  | 2478.1 | 1744.5 | 2218.2 | 3418.2 | 870.5  |
| 117.6  | 124.4  | 120.7  | 104.9  | 97.9   | 114.8  | 111.4  | 118.9  | 109.3  |
| 107.3  | 103    | 106    | 101.3  | 90.8   | 103.7  | 100.3  | 104.3  | 107.7  |
| 104.2  | 106.8  | 107    | 97.5   | 93.4   | 108.7  | 116    | 102.9  | 102    |
| 109.8  | 107    | 105.9  | 93     | 98.5   | 113.4  | 107.9  | 108.3  | 110.1  |
| 110.3  | 98.5   | 102.5  | 106    | 96.6   | 110.3  | 94.3   | 108.5  | 109.5  |
| 99.4   | 107.1  | 100.8  | 101.6  | 93.7   | 107.4  | 103.5  | 108.6  | 98.1   |
| 99.4   | 107.1  | 112.4  | 114.6  | 93.7   | 104.3  | 101.6  | 110.1  | 118.2  |

|       |       |       |       |       |       |       |       |       |
|-------|-------|-------|-------|-------|-------|-------|-------|-------|
| 105.7 | 97.5  | 94.3  | 97.3  | 89.3  | 108.6 | 94.8  | 106.6 | 102.9 |
| 119.8 | 105.7 | 101.3 | 109.8 | 100.3 | 107.5 | 113.4 | 121.4 | 112.1 |
| 105   | 103.2 | 102.9 | 92.5  | 90.6  | 95    | 101.4 | 107.9 | 99.1  |
| 110.3 | 106.7 | 107.4 | 94.6  | 95.9  | 102.7 | 107.6 | 114.4 | 106   |
| 107.6 | 123.9 | 110   | 107.6 | 101.5 | 118.3 | 117.5 | 128.6 | 118   |
| 123.1 | 122.6 | 128.4 | 104.4 | 103.1 | 126.5 | 107.9 | 120.4 | 117.1 |
| 113.8 | 106.6 | 102   | 100.5 | 97.8  | 108.6 | 107.8 | 108   | 112.6 |
| 101.1 | 118.9 | 108.8 | 101.7 | 124.4 | 123.1 | 115.5 | 120.9 | 109.6 |
| 184.9 | 250.9 | 182   | 177.7 | 217   | 205.1 | 185.1 | 299.5 | 241.3 |
| 101.1 | 102.1 | 105   | 101.1 | 93.7  | 111.1 | 112.9 | 103.4 | 110.1 |
| 106.1 | 123.7 | 112.5 | 129.2 | 107.3 | 111.6 | 142.2 | 117.5 | 110.8 |
| 100.7 | 117.8 | 117   | 111.4 | 99    | 111.4 | 106.4 | 119.9 | 113.3 |
| 105.1 | 109.3 | 103.8 | 117.4 | 110.3 | 115   | 99.3  | 110.2 | 122.4 |
| 103.3 | 98.8  | 105   | 92.6  | 94.3  | 106   | 99.1  | 98.4  | 108.5 |
| 104   | 104.3 | 104.3 | 102.1 | 90.1  | 96.4  | 96.1  | 105.7 | 113.1 |
| 104.1 | 114.9 | 101   | 109.1 | 94.1  | 110.9 | 114.7 | 109.2 | 126.2 |
| 114.8 | 112.7 | 105.6 | 102.2 | 95.7  | 109   | 102.1 | 105.2 | 104   |
| 106   | 107.9 | 99.1  | 108.7 | 93.1  | 112.1 | 97.9  | 103.2 | 106.6 |
| 101   | 105.3 | 107.3 | 101.6 | 99.4  | 110.6 | 94.5  | 108.3 | 116.9 |
| 104.3 | 113   | 104.3 | 103.7 | 99.8  | 108.2 | 93.8  | 116.2 | 113   |
| 105.3 | 102.2 | 100.5 | 100.1 | 93.4  | 107.8 | 105.2 | 106   | 109.6 |
| 109.6 | 108   | 107   | 109.8 | 100   | 103.4 | 96.3  | 108.3 | 111.7 |
| 99.8  | 104.2 | 102.3 | 99.9  | 99.3  | 108.6 | 101.3 | 109.4 | 117.8 |
| 110.9 | 107.2 | 112.6 | 104.8 | 102.8 | 104.3 | 108.7 | 111.9 | 128   |
| 106   | 110.8 | 102.4 | 106.8 | 95.5  | 114.6 | 102.5 | 110.5 | 100.5 |
| 101.7 | 104.9 | 103   | 94.8  | 96.7  | 103.8 | 100.2 | 113.5 | 103.7 |
| 102.9 | 109.8 | 99.4  | 104.5 | 95.4  | 110.1 | 104.6 | 109.6 | 105.9 |
| 107.9 | 115.8 | 112.3 | 105.7 | 96.9  | 114.4 | 106.7 | 114.6 | 112.5 |
| 173.3 | 369.8 | 321.3 | 279.3 | 271.2 | 258.9 | 275.7 | 249.9 | 183.8 |
| 109.1 | 101.6 | 101.5 | 108.7 | 94.8  | 99.6  | 97.2  | 112.1 | 106.4 |
| 101.9 | 105.4 | 98.1  | 99.9  | 93.3  | 97.3  | 104.2 | 101.7 | 108.7 |
| 109.9 | 106.4 | 110.6 | 102.5 | 92.5  | 104.3 | 94.3  | 104.7 | 106.4 |
| 105   | 106.2 | 94.9  | 94.8  | 93.7  | 109.3 | 97.1  | 107.1 | 101.5 |
| 109.5 | 110.3 | 102.8 | 107.5 | 93.7  | 104.5 | 103.4 | 106.7 | 106.9 |
| 128.4 | 137.3 | 130.6 | 151.5 | 123.7 | 143.9 | 119.9 | 185   | 136.7 |
| 115.3 | 108.3 | 105   | 102.2 | 99.3  | 102.3 | 98.3  | 115   | 108.2 |
| 115.2 | 114.3 | 95.1  | 106.3 | 97.5  | 109.1 | 102.1 | 111.5 | 110.4 |
| 105   | 112.5 | 103.4 | 105.2 | 94.2  | 111.7 | 104.4 | 115.2 | 114.2 |
| 104.7 | 106.2 | 98.4  | 95.4  | 95.7  | 102.9 | 101.1 | 110.5 | 115.2 |
| 102.2 | 96.2  | 105.1 | 106.1 | 95.6  | 110.3 | 103   | 111.3 | 105.6 |
| 107.3 | 104.7 | 101.5 | 99.6  | 99    | 107.9 | 99.4  | 116   | 106.2 |
| 154.7 | 184.7 | 190.7 | 297.8 | 166.3 | 169.9 | 213.9 | 173.8 | 151   |
| 104.9 | 106.8 | 109.3 | 107.4 | 103.9 | 119.7 | 104   | 105.7 | 108.6 |
| 97.6  | 108.3 | 103.3 | 102.4 | 95.2  | 102.9 | 100.2 | 110.4 | 97.4  |
| 99.7  | 103.9 | 100.1 | 96.1  | 98.1  | 102.4 | 97.6  | 102.8 | 108.4 |
| 283.7 | 243.5 | 250.3 | 209.2 | 198.3 | 293.8 | 202.7 | 338.5 | 319.3 |
| 115.7 | 110.1 | 103.1 | 120.5 | 107   | 126.7 | 112.5 | 126.3 | 117.6 |
| 190.4 | 471.1 | 492.8 | 473.4 | 389.7 | 344.7 | 482.1 | 264.4 | 153.8 |
| 204.1 | 366.1 | 367.6 | 294.9 | 344.9 | 389   | 330.4 | 370.9 | 393.9 |
| 122.6 | 148.7 | 144.6 | 145.7 | 135.9 | 146.6 | 142   | 155   | 135.8 |
| 122.9 | 129.1 | 108.9 | 104.5 | 105.8 | 120.9 | 148.9 | 183.5 | 131.4 |

|        |        |        |        |        |        |        |        |        |
|--------|--------|--------|--------|--------|--------|--------|--------|--------|
| 109.5  | 109.6  | 105.8  | 103.1  | 98.4   | 115.1  | 102.6  | 125    | 114.1  |
| 113.5  | 106.3  | 96     | 102.6  | 95.2   | 103.1  | 99.9   | 109.2  | 99.5   |
| 157.1  | 234.2  | 182.1  | 347.1  | 233.3  | 188.7  | 265.2  | 337.9  | 174    |
| 104.2  | 110.2  | 111.5  | 103.3  | 93.4   | 117.3  | 102.5  | 118.3  | 111.2  |
| 99.8   | 110.8  | 102.7  | 98.8   | 96.7   | 110.4  | 101.4  | 99.2   | 113    |
| 103.6  | 102.8  | 100.9  | 102.1  | 101.4  | 108.2  | 103.1  | 105.5  | 101    |
| 101    | 103.9  | 101.8  | 96.2   | 94.4   | 105.3  | 95.4   | 104.5  | 102.3  |
| 102.2  | 115.3  | 108.5  | 98.7   | 95.7   | 113.6  | 97.4   | 109.9  | 106.4  |
| 102.6  | 108.1  | 107.2  | 102    | 97.9   | 108.4  | 104.3  | 113.7  | 106.7  |
| 110.8  | 117    | 108    | 101    | 97.5   | 110.5  | 104.1  | 101.1  | 108.2  |
| 103.9  | 124.2  | 112    | 104.5  | 104.8  | 112    | 112.9  | 107    | 103.9  |
| 108.1  | 116.9  | 104.1  | 115.1  | 103    | 108.7  | 108.1  | 112.1  | 114.5  |
| 106.8  | 111.5  | 104.8  | 112.7  | 99     | 116    | 102.3  | 125.1  | 105.5  |
| 2248.2 | 1955.4 | 1765.9 | 1714.1 | 1579.6 | 2050.6 | 1936.6 | 3274.3 | 2302   |
| 114.9  | 125    | 122.3  | 141.6  | 136.7  | 141.4  | 135.9  | 163.9  | 145.3  |
| 106.8  | 126.8  | 111.6  | 111    | 109.6  | 118.2  | 105.7  | 117.9  | 112.4  |
| 108.6  | 120.3  | 116.7  | 107.3  | 104.8  | 120.8  | 114.9  | 112.7  | 109.6  |
| 101.5  | 107.8  | 101    | 105.2  | 94.4   | 100.3  | 94.8   | 116.1  | 110.4  |
| 106.5  | 107.7  | 101.1  | 101.1  | 97.6   | 106.9  | 108.9  | 108.3  | 123.1  |
| 102.2  | 109.1  | 99.3   | 99.5   | 90.1   | 107.5  | 104.4  | 103    | 101.4  |
| 100.2  | 102.9  | 101.2  | 113.9  | 95.8   | 105.2  | 97.3   | 100.5  | 95.1   |
| 145.9  | 141.1  | 136.2  | 150.5  | 129.2  | 130.1  | 162.1  | 174.4  | 142.2  |
| 472    | 548.6  | 490.3  | 515.7  | 480.3  | 490.3  | 461.4  | 1221   | 905.7  |
| 125.8  | 150.7  | 114.9  | 163.4  | 127.4  | 118.1  | 156.3  | 150.8  | 116.9  |
| 116.5  | 112.8  | 107    | 101    | 103.9  | 105.1  | 112.7  | 112.9  | 127.3  |
| 124.8  | 134.3  | 133.5  | 147.2  | 131.8  | 161.9  | 136.2  | 179.8  | 145.2  |
| 1105.7 | 1337.6 | 1246.3 | 1166.3 | 1300.3 | 1275.7 | 858.2  | 2797.5 | 2879.5 |
| 104.8  | 117    | 96     | 112.2  | 102.5  | 119.4  | 107.5  | 118.1  | 129.4  |
| 981.7  | 1858.2 | 2014.1 | 1633.2 | 1363.7 | 1752.8 | 1499.9 | 1338.9 | 865.7  |
| 115.1  | 142.4  | 157.7  | 156.4  | 124.7  | 151.7  | 131.6  | 176.5  | 136.9  |
| 161.9  | 190.6  | 196.1  | 163.1  | 194.8  | 207.6  | 209.8  | 274    | 182.8  |
| 110.8  | 107.3  | 108    | 100.1  | 95.7   | 107.1  | 104.9  | 101.7  | 111.6  |
| 107.7  | 118.7  | 103    | 106.4  | 97.4   | 113.8  | 109.8  | 115.9  | 108.4  |
| 106.3  | 112.2  | 110.5  | 107.9  | 98.6   | 107    | 104.9  | 122.6  | 117.1  |
| 104.9  | 104.6  | 100.6  | 102.2  | 100.2  | 102.8  | 103.6  | 102.6  | 106.3  |
| 112.1  | 125.4  | 104.7  | 105.5  | 104.1  | 110.1  | 100.5  | 103.8  | 106.4  |
| 282    | 246.7  | 248.1  | 248.3  | 225.1  | 297.9  | 297.2  | 377.1  | 320.5  |
| 3653.8 | 5259.5 | 4852.5 | 4728.7 | 3747.6 | 4704.8 | 5665.8 | 6710.8 | 6068.9 |
| 101.1  | 112.2  | 101.9  | 107.1  | 96.6   | 111.4  | 100.6  | 101.8  | 109.3  |
| 106.8  | 111    | 99.9   | 96.5   | 89.3   | 111    | 96.6   | 105.3  | 105.5  |
| 112.8  | 107.2  | 108.8  | 107.8  | 101.7  | 114    | 104.6  | 108.1  | 117.1  |
| 108.3  | 114.8  | 112.7  | 105.4  | 101.9  | 116    | 102.6  | 123.7  | 102.1  |
| 103.8  | 105.2  | 101.6  | 103.6  | 88.1   | 111.9  | 100.7  | 104.9  | 104    |
| 102.1  | 113.4  | 104.2  | 119.9  | 99.1   | 108.9  | 102.3  | 111.7  | 104.8  |
| 618.9  | 1690.3 | 1583.9 | 1262.4 | 1439.3 | 1290.5 | 1383.7 | 2213.5 | 1255.6 |
| 159.7  | 290.7  | 178.2  | 200.1  | 195.3  | 207.7  | 216.3  | 355.7  | 226    |
| 120.3  | 162.7  | 195.2  | 134.5  | 142.2  | 231.9  | 134    | 234.4  | 173.3  |
| 107.6  | 115.7  | 104.2  | 110.4  | 94.3   | 105.9  | 102.3  | 108.7  | 109.2  |
| 135.5  | 118.6  | 101.8  | 113.6  | 112    | 117.9  | 100    | 193.2  | 195    |
| 105.7  | 107.6  | 105.6  | 89.6   | 94.6   | 106.4  | 97.7   | 96.8   | 103.9  |
| 308.5  | 1335.8 | 1181.8 | 1283.1 | 934.7  | 1083   | 1134.5 | 1023.1 | 552.3  |

|       |        |        |       |        |        |        |        |       |
|-------|--------|--------|-------|--------|--------|--------|--------|-------|
| 128.1 | 216.2  | 218.4  | 220.2 | 189.2  | 216.8  | 261.9  | 210.2  | 149.5 |
| 114.2 | 133    | 123.1  | 149.9 | 107.5  | 124.3  | 127.4  | 138.8  | 121.8 |
| 114.4 | 145    | 154.5  | 144   | 142.7  | 144    | 132.4  | 154.7  | 128.3 |
| 248.5 | 339.5  | 356.7  | 390.5 | 289.2  | 391.2  | 252.8  | 502    | 360.1 |
| 105.4 | 111    | 102.9  | 115.2 | 103.2  | 121.3  | 106    | 108.9  | 106.8 |
| 106.2 | 116.6  | 104.9  | 104.5 | 98     | 108.5  | 105.5  | 120.1  | 105.9 |
| 151.8 | 175.1  | 129.5  | 166.7 | 160.1  | 150    | 182.7  | 238.6  | 204.5 |
| 237.8 | 354.4  | 319.2  | 337.6 | 321.6  | 385.8  | 339.2  | 469.5  | 374   |
| 135.6 | 203.6  | 182.6  | 189.3 | 176.7  | 186.5  | 162    | 174.2  | 169.9 |
| 106.9 | 116.5  | 109    | 109.8 | 99.6   | 116.4  | 104.6  | 127.5  | 114.5 |
| 109.7 | 115    | 93.3   | 85.5  | 94.9   | 103.3  | 103.4  | 114.1  | 112.4 |
| 99.9  | 107.8  | 101    | 99.4  | 92.4   | 105.7  | 100.1  | 109    | 105.5 |
| 122.9 | 134    | 115.9  | 118.3 | 108.5  | 116.3  | 106.2  | 149.3  | 142.8 |
| 134.1 | 154.9  | 157.7  | 124.4 | 124.6  | 145.9  | 124.7  | 142    | 121.7 |
| 108.8 | 108.9  | 107.4  | 105.5 | 99.5   | 112.1  | 111.9  | 116.7  | 104.4 |
| 112.1 | 118.1  | 113.3  | 117.2 | 99.1   | 111.2  | 94.3   | 119.2  | 114.5 |
| 108.3 | 107.3  | 95.8   | 96.9  | 95.8   | 104.6  | 97.7   | 106    | 103.4 |
| 108.4 | 104.6  | 98.8   | 100.8 | 89.4   | 111.3  | 97.7   | 110.2  | 97.2  |
| 105.3 | 112.7  | 99.8   | 93.6  | 89.7   | 109.5  | 113.1  | 106.8  | 106.9 |
| 229.1 | 195.5  | 196.5  | 193.4 | 172.3  | 205.8  | 192.2  | 286.9  | 250.5 |
| 114   | 113    | 116.5  | 111.8 | 107.6  | 125    | 104.5  | 125.1  | 125.9 |
| 111.3 | 103.8  | 96.8   | 97.5  | 100.6  | 108.7  | 91.6   | 110.3  | 108   |
| 113.9 | 130.8  | 120.8  | 110.8 | 123.6  | 139.6  | 156.2  | 150.5  | 127.1 |
| 138.6 | 156.7  | 143.2  | 140.4 | 128.9  | 138.6  | 140.9  | 151.9  | 161.7 |
| 141.3 | 128    | 125    | 115.4 | 111.1  | 144.2  | 114.8  | 157.6  | 144   |
| 107.2 | 108.7  | 102.7  | 106.8 | 97.2   | 105    | 101    | 112    | 109.9 |
| 155.9 | 160.5  | 169.7  | 140.6 | 147.7  | 161    | 153.8  | 165.2  | 159.5 |
| 99.1  | 117.1  | 100.5  | 116.1 | 99.1   | 116.1  | 112.7  | 122.2  | 113.3 |
| 227.7 | 202.8  | 226.5  | 211.8 | 220.7  | 193    | 189.7  | 335.9  | 343   |
| 108   | 105.2  | 100.7  | 97.8  | 96.6   | 104.3  | 100.4  | 108.1  | 107.5 |
| 103.9 | 106.2  | 99.2   | 98.7  | 92.7   | 123.5  | 102.8  | 109.5  | 111.4 |
| 110.9 | 104.1  | 98.7   | 105.2 | 94.4   | 106.3  | 103.2  | 112.6  | 108   |
| 213.5 | 170.3  | 186.1  | 158.7 | 183.3  | 193.8  | 176.9  | 299.6  | 307.4 |
| 114.1 | 132.1  | 113.7  | 112.8 | 108.4  | 121.6  | 113.7  | 118.3  | 126.7 |
| 409.5 | 480.5  | 404.4  | 465.3 | 403.6  | 546.1  | 475.7  | 889.5  | 653.3 |
| 117.7 | 143.5  | 149.6  | 168.8 | 115.9  | 146    | 145.7  | 141.1  | 138   |
| 109.7 | 104.4  | 94.1   | 99.1  | 97.3   | 115.2  | 99.3   | 112.7  | 104.6 |
| 106.1 | 110.2  | 102.8  | 97    | 95.2   | 107.1  | 96.1   | 95.3   | 100.9 |
| 101.9 | 118.5  | 106.1  | 97.4  | 93.3   | 112.2  | 97     | 109.7  | 121   |
| 125.2 | 120.7  | 121    | 122.2 | 116.6  | 131.1  | 126.9  | 131.5  | 129.5 |
| 285.7 | 385.4  | 390.2  | 327.3 | 335    | 427.2  | 433.1  | 403.9  | 311.4 |
| 234.1 | 296.3  | 368.6  | 347.4 | 292.5  | 358.1  | 369.1  | 574.1  | 305.2 |
| 108.3 | 119.1  | 120    | 104.4 | 96.4   | 107.7  | 99     | 116.1  | 109.8 |
| 132.4 | 157.9  | 147.1  | 125.2 | 122.3  | 137.7  | 155.1  | 150.7  | 126.6 |
| 813.3 | 1258.6 | 1023.8 | 981.1 | 1192.5 | 1018.7 | 1088.8 | 1489.1 | 741.3 |
| 109   | 112.8  | 109.6  | 104   | 94.5   | 116.4  | 109.1  | 112    | 108   |
| 351.7 | 455.2  | 570.8  | 466.4 | 425.5  | 523    | 510.9  | 509.9  | 522.7 |
| 151.2 | 178    | 152.4  | 195.7 | 139.3  | 173.4  | 173.7  | 286.4  | 241.4 |
| 395.5 | 338.3  | 357    | 319.4 | 376.2  | 354.1  | 388.9  | 568.9  | 528.3 |
| 112.4 | 110.7  | 108.1  | 114.7 | 94.9   | 117.8  | 109.8  | 147.1  | 119.8 |
| 138.6 | 180.4  | 141.1  | 123.4 | 156.7  | 168.6  | 135.1  | 240.6  | 146   |



|        |        |        |        |        |        |        |        |        |
|--------|--------|--------|--------|--------|--------|--------|--------|--------|
| 111.3  | 103.7  | 97.2   | 101.3  | 92.3   | 102.2  | 98.5   | 108.3  | 108.2  |
| 113.9  | 135.3  | 125.8  | 110.2  | 113.8  | 129.4  | 128.7  | 151    | 140.7  |
| 191.8  | 178.6  | 164.7  | 140.8  | 163.1  | 194.7  | 166.9  | 294.3  | 249.6  |
| 114.7  | 117.1  | 111.9  | 121.6  | 105.2  | 116    | 106.1  | 169.4  | 135.4  |
| 313.3  | 323.3  | 355.2  | 242.6  | 260.4  | 315.3  | 334.8  | 503.4  | 401.3  |
| 271.1  | 341.2  | 272.7  | 237.6  | 254.8  | 312.7  | 335.6  | 495.7  | 506.8  |
| 109    | 113.4  | 105.1  | 99.6   | 96.6   | 113.6  | 108.3  | 113.4  | 115.5  |
| 106.3  | 109.8  | 102.4  | 96.1   | 91.4   | 111.3  | 97.1   | 114.8  | 108.9  |
| 164.7  | 260.1  | 248.5  | 307.7  | 256.9  | 267    | 328.1  | 379.2  | 293.5  |
| 538.5  | 560.8  | 463.2  | 416.6  | 468.3  | 364.4  | 486.4  | 1008   | 628.6  |
| 100    | 110.2  | 103.6  | 100.1  | 93     | 109.2  | 104.9  | 106.4  | 104    |
| 127.6  | 117.6  | 105.5  | 141.1  | 105.5  | 120.9  | 110.2  | 126.2  | 157.4  |
| 1073.6 | 1819.6 | 1850.6 | 1497.8 | 1662.2 | 1765.6 | 1834.9 | 3076.9 | 1720   |
| 122.5  | 128    | 118.9  | 107.5  | 119.8  | 120.6  | 115.7  | 150.9  | 122.2  |
| 122.6  | 114.2  | 106    | 108.8  | 97.9   | 111.2  | 105.7  | 120.2  | 115.4  |
| 106.6  | 110.5  | 103    | 98.9   | 96.8   | 105.9  | 108.2  | 103.2  | 104.7  |
| 140.3  | 178    | 192.2  | 150.6  | 153.1  | 177.3  | 162.3  | 252.9  | 160.9  |
| 108    | 114.7  | 96.3   | 136.8  | 97.5   | 110.9  | 113.8  | 112    | 119.7  |
| 110.8  | 125.2  | 112.4  | 111.8  | 102.3  | 114.8  | 110.3  | 133.8  | 122.1  |
| 107.3  | 106.7  | 110.3  | 97.5   | 93.8   | 106.7  | 105.3  | 111    | 114.9  |
| 125.2  | 121.1  | 121    | 115.7  | 112.2  | 111.8  | 121.1  | 133.3  | 119.7  |
| 105.3  | 109.8  | 97.5   | 107.1  | 106.9  | 115    | 105.3  | 112.2  | 118.3  |
| 100.3  | 107.7  | 105.4  | 105.5  | 98.1   | 112.6  | 110.7  | 117.4  | 103.1  |
| 697.5  | 256.6  | 240.8  | 167.7  | 254.8  | 343.8  | 199.4  | 858.7  | 1312.8 |
| 316.1  | 201.4  | 175.1  | 178.4  | 173    | 192.9  | 213.5  | 418.9  | 527.8  |
| 99.3   | 104.7  | 97.3   | 103.3  | 98.7   | 107    | 100.9  | 107    | 113.1  |
| 108.7  | 97     | 106    | 101.3  | 99.6   | 102.8  | 103.4  | 105.2  | 121.7  |
| 107.8  | 108.8  | 97.6   | 95.4   | 93.6   | 107.4  | 104.2  | 118.9  | 109.2  |
| 109.7  | 105.9  | 107.9  | 106.4  | 96.6   | 113.8  | 97.7   | 110.5  | 108.8  |
| 269.8  | 354.2  | 436.8  | 494.6  | 464.2  | 420.3  | 508.7  | 730.8  | 528.5  |
| 130.4  | 127.7  | 136.2  | 122.8  | 113.2  | 129.7  | 117.2  | 131.1  | 118.7  |
| 117.3  | 111.9  | 105.5  | 130.5  | 101.5  | 120.9  | 106.3  | 121.5  | 116.1  |
| 107.4  | 104.9  | 107.3  | 112.6  | 102.8  | 109.4  | 105.1  | 112.6  | 119.6  |
| 112.3  | 103    | 97.8   | 103    | 101.1  | 114.6  | 106.9  | 109.6  | 104.6  |
| 103.9  | 105.1  | 97.1   | 91.1   | 100.5  | 103.6  | 96.9   | 114.5  | 113.8  |
| 575.6  | 872.6  | 864.7  | 935.2  | 864.5  | 809.5  | 963.1  | 1458.1 | 875.3  |
| 627.4  | 968.7  | 988    | 759.7  | 887    | 937.1  | 929.2  | 1246.9 | 765.2  |
| 163.5  | 252.3  | 247.3  | 213.3  | 237.5  | 255.3  | 222.6  | 335.9  | 190.8  |
| 113.7  | 118.7  | 113.1  | 108.3  | 107.7  | 110.4  | 104.3  | 107    | 117.6  |
| 116.9  | 151.6  | 136.2  | 136.5  | 126.2  | 145.4  | 143.9  | 179.5  | 120.7  |
| 111.9  | 114    | 111.4  | 105.7  | 102.4  | 112.3  | 116    | 110.5  | 117    |
| 534.3  | 541.8  | 444.3  | 656.2  | 545.9  | 540.1  | 631.1  | 1164.9 | 767.4  |
| 112.1  | 133.4  | 113.1  | 126.7  | 109.6  | 123.3  | 116.5  | 131.2  | 138    |
| 166.4  | 229.1  | 239.9  | 193.6  | 244.6  | 209    | 163.1  | 286    | 216.3  |
| 416.5  | 926.4  | 885    | 563.2  | 773.7  | 848.4  | 767.4  | 962.4  | 657.1  |
| 174.2  | 279.9  | 321.6  | 267.6  | 253.3  | 301    | 248.9  | 313.9  | 234.3  |
| 192.7  | 335.2  | 263.7  | 327.6  | 260.2  | 328.2  | 267.6  | 372.3  | 303.5  |
| 113.2  | 119.8  | 115.4  | 107.6  | 99.3   | 119.4  | 118.6  | 137.4  | 123.5  |
| 514.6  | 782.3  | 739.7  | 488.4  | 696.8  | 754.7  | 631.5  | 1318.9 | 938.5  |
| 274.7  | 389.7  | 417.8  | 349.6  | 433.2  | 419.8  | 435.8  | 658.5  | 327.3  |
| 394.6  | 565.3  | 591.7  | 426.4  | 449    | 627.5  | 616.2  | 789.8  | 558.2  |

|        |        |        |        |        |        |        |        |        |
|--------|--------|--------|--------|--------|--------|--------|--------|--------|
| 114.8  | 108.9  | 101.2  | 101.4  | 98.8   | 114.7  | 104.4  | 107    | 110.5  |
| 625.1  | 537.4  | 548.2  | 492    | 456.3  | 528.6  | 402.3  | 819.2  | 824.3  |
| 133.7  | 127.4  | 111.1  | 122.5  | 106.8  | 127.1  | 116.7  | 128.3  | 123.8  |
| 185.4  | 192    | 189.5  | 176.6  | 147.9  | 211.4  | 160    | 367.7  | 264.7  |
| 132.9  | 182    | 158.5  | 153.7  | 147.6  | 174.5  | 138.4  | 181.3  | 151.5  |
| 137.5  | 178.1  | 178.9  | 146    | 156.6  | 180.2  | 173.2  | 179.5  | 141.9  |
| 99.2   | 103    | 100.8  | 98.5   | 92.9   | 110.6  | 108.3  | 115    | 98.4   |
| 110.8  | 121.9  | 107.6  | 105.3  | 100.3  | 116.5  | 117.9  | 118    | 112.9  |
| 1279.3 | 2033.7 | 1616.6 | 945    | 1548.3 | 1979.8 | 1111.3 | 3707.2 | 2070.9 |
| 114.3  | 105.5  | 110    | 96.7   | 101.6  | 110.2  | 112    | 114.7  | 117.9  |
| 969.6  | 1137.8 | 910.5  | 794    | 887.4  | 946.8  | 831.3  | 1713   | 1478.7 |
| 116.6  | 132.7  | 116.5  | 129.7  | 96     | 123.4  | 120.2  | 135.7  | 115.9  |
| 106.5  | 109.7  | 101.3  | 94.7   | 93.1   | 107.4  | 97.4   | 105.2  | 102.3  |
| 139.6  | 168.9  | 176.1  | 140    | 146.7  | 193.9  | 165.2  | 272.5  | 220.9  |
| 110.8  | 115.8  | 104    | 102.5  | 103.8  | 117    | 101.7  | 110.4  | 121    |
| 316.4  | 531.4  | 429.7  | 383.6  | 450.1  | 512.5  | 491.1  | 734.9  | 378.7  |
| 114.1  | 121.7  | 109.3  | 111    | 100.4  | 120.6  | 107.4  | 142.6  | 142.1  |
| 210    | 368.5  | 296.9  | 297.5  | 300.5  | 303.9  | 278.6  | 381.5  | 256.3  |
| 193.5  | 347.1  | 313    | 271.1  | 264.6  | 321.7  | 338    | 376.2  | 282.9  |
| 302.6  | 733.7  | 572.2  | 447.6  | 378.8  | 578.1  | 516    | 896.7  | 615.7  |
| 716.1  | 908.5  | 770.4  | 749.2  | 746.5  | 878.8  | 956.9  | 1678.2 | 1292.6 |
| 112.4  | 114.6  | 107    | 97.4   | 101.8  | 117.9  | 120.4  | 113.2  | 112    |
| 4536.2 | 4241.3 | 3896.1 | 4639.8 | 3125   | 4210.4 | 4339.7 | 7628.9 | 6524.1 |
| 130.3  | 177.3  | 177.5  | 172.6  | 194    | 157.6  | 199.8  | 246.1  | 194.3  |
| 1777.8 | 1559.4 | 2488.9 | 1333.6 | 1679   | 1756.7 | 1119.5 | 3421.6 | 4283.8 |
| 112.7  | 109.2  | 113.9  | 97.7   | 103.6  | 116.3  | 102.9  | 136.1  | 124.9  |
| 109.4  | 109.2  | 106.4  | 103.1  | 95.4   | 105.1  | 106.2  | 110.4  | 107.5  |
| 161.4  | 187.9  | 236.4  | 134.1  | 176    | 194    | 153.4  | 244.3  | 177.4  |
| 205.6  | 364.6  | 320.2  | 294.9  | 351.2  | 385.6  | 327.4  | 640.4  | 359.5  |
| 306.8  | 489.3  | 527.7  | 360.3  | 439.8  | 491.3  | 373.6  | 663.8  | 453    |
| 133.5  | 165.3  | 138.4  | 137.2  | 127.5  | 149.7  | 139.9  | 137.8  | 140.1  |
| 278.5  | 351.7  | 263.2  | 253.6  | 261.7  | 243.8  | 234.5  | 356.4  | 308.5  |
| 111.2  | 117.4  | 108.5  | 108.6  | 92.4   | 104.3  | 103.6  | 107.9  | 110.5  |
| 132.6  | 135.1  | 118.9  | 108.4  | 120.4  | 119.8  | 120.8  | 158    | 144.6  |
| 122.1  | 116.1  | 115    | 128.4  | 111.9  | 126    | 100.5  | 137.2  | 120.2  |
| 112.6  | 113.7  | 103.7  | 105.9  | 95.7   | 109.6  | 114.2  | 113.6  | 109.7  |
| 109.3  | 125.3  | 118.9  | 113.3  | 105.7  | 129    | 116.6  | 121.4  | 114.9  |
| 105.4  | 112.7  | 112.4  | 104.4  | 94.6   | 121.7  | 108.6  | 119.1  | 111.9  |
| 106.8  | 109.5  | 111.9  | 107.5  | 96.5   | 109.3  | 103.8  | 102.2  | 110.5  |
| 214.5  | 268.7  | 226.4  | 333.5  | 202.3  | 185.4  | 219.3  | 337.1  | 262.4  |
| 146.8  | 129.6  | 130.4  | 134.7  | 122.6  | 160.1  | 135.2  | 162.6  | 147.3  |
| 376    | 314.8  | 352.3  | 295.4  | 289.1  | 328.1  | 386    | 509.1  | 384.7  |
| 111.2  | 119.7  | 106.9  | 99.7   | 113.3  | 112.6  | 112    | 131.9  | 124.4  |
| 160.2  | 161.8  | 143    | 135.3  | 152.2  | 161.3  | 171.5  | 217.7  | 166.1  |
| 1111.2 | 400.6  | 342.1  | 433.8  | 415.2  | 394.7  | 495.9  | 1620.4 | 1952.7 |
| 287    | 327.4  | 328.5  | 295.7  | 194.3  | 271.5  | 334.7  | 354.4  | 240.2  |
| 513.9  | 293.5  | 1113.3 | 498.6  | 238.7  | 1119.4 | 512.9  | 380.4  | 1587.5 |
| 227.3  | 204.3  | 586.8  | 263.1  | 150.3  | 606.8  | 296.8  | 231.3  | 899.5  |
| 115.9  | 114.4  | 153.5  | 98.9   | 103.5  | 152.7  | 107.2  | 111.3  | 142.1  |
| 104.8  | 104.9  | 105.6  | 101.9  | 91.6   | 110.5  | 102    | 109.2  | 108.2  |
| 109.4  | 110.3  | 108.2  | 100.8  | 94.1   | 107.9  | 101.9  | 105.1  | 102.8  |

|        |        |       |       |       |       |       |        |        |
|--------|--------|-------|-------|-------|-------|-------|--------|--------|
| 102.5  | 100    | 102.4 | 99.6  | 92.4  | 102.7 | 105.2 | 110.4  | 114    |
| 102.8  | 107.7  | 101.7 | 107.6 | 93.4  | 111.9 | 98.2  | 106.8  | 109.8  |
| 104    | 102.9  | 102.8 | 102   | 94.9  | 111.7 | 96.6  | 107.9  | 109.3  |
| 107.1  | 106.6  | 98.8  | 106.4 | 89.1  | 109.3 | 103.6 | 103.2  | 107    |
| 102.2  | 108.7  | 98.7  | 100.1 | 93.1  | 104.5 | 99.6  | 111.6  | 102.9  |
| 121.3  | 110.5  | 110.1 | 103.1 | 97.6  | 115.8 | 119.7 | 114.8  | 122.1  |
| 105.8  | 120.2  | 109.6 | 107.2 | 96.8  | 117.8 | 103.8 | 110.7  | 117.1  |
| 107.7  | 105    | 101.2 | 104.2 | 98.6  | 113.2 | 107.8 | 116.2  | 113.1  |
| 113.7  | 104.1  | 106.4 | 107.5 | 94.3  | 116.7 | 98.7  | 108.7  | 109.9  |
| 98.7   | 117.8  | 94.5  | 102.7 | 92.2  | 108.6 | 97    | 103.1  | 106.8  |
| 104.2  | 112.3  | 105.4 | 106.1 | 95    | 108.4 | 102.5 | 105.2  | 105.5  |
| 93.6   | 96.6   | 101.9 | 104.4 | 94.8  | 101.1 | 96.8  | 107.4  | 111.9  |
| 112.5  | 103.4  | 97.8  | 106.8 | 96.1  | 106.5 | 103.3 | 108.8  | 105.5  |
| 110.2  | 106.6  | 100.5 | 100.7 | 97.1  | 97.7  | 106.1 | 125.5  | 114.7  |
| 114.7  | 131.5  | 113   | 115   | 110.4 | 129.1 | 109.2 | 140.4  | 131    |
| 97     | 112.3  | 102.7 | 98.2  | 89    | 118.7 | 101.5 | 103.7  | 104.1  |
| 97.9   | 108.6  | 101.3 | 97.7  | 100.8 | 105.6 | 106.6 | 105.4  | 103    |
| 105    | 110.6  | 98.1  | 97    | 96.2  | 108.6 | 99.6  | 101.3  | 111.7  |
| 108    | 111    | 105.2 | 103.4 | 94.6  | 118.9 | 117.2 | 115.5  | 103.8  |
| 107.8  | 110.8  | 108.8 | 99.4  | 99.4  | 109.6 | 102.3 | 128.7  | 106    |
| 118    | 110.2  | 107.2 | 103.8 | 100.3 | 108.5 | 103.5 | 130.4  | 110.7  |
| 99.7   | 105.6  | 102.8 | 99.9  | 94    | 111.9 | 100   | 105.5  | 103    |
| 106    | 107.7  | 107.4 | 98.4  | 96.7  | 106.9 | 100.1 | 103.3  | 100.8  |
| 106.1  | 111.4  | 108.8 | 101   | 94.8  | 107.6 | 108.9 | 114    | 108.1  |
| 104.5  | 103.4  | 98.9  | 92.6  | 90    | 100.7 | 99    | 106.2  | 97.9   |
| 131.6  | 122.7  | 111.4 | 116.2 | 122.2 | 122.7 | 113.6 | 156.2  | 143.1  |
| 107.3  | 101.1  | 103.7 | 100.3 | 98.4  | 99.6  | 95.5  | 107.7  | 109.6  |
| 97.6   | 105.2  | 99    | 97.5  | 93.2  | 105.2 | 101.1 | 104.1  | 102.9  |
| 107.1  | 107.2  | 105.8 | 106.3 | 93.2  | 105.6 | 102.8 | 99.4   | 106.8  |
| 118.2  | 108    | 101.5 | 101.4 | 96.2  | 113.7 | 100.8 | 107    | 100.9  |
| 102    | 118.1  | 99.9  | 101.6 | 96.7  | 114.1 | 102.9 | 112.5  | 106.7  |
| 1021.9 | 740.7  | 833.1 | 935.2 | 607.5 | 944   | 939.4 | 1591.8 | 1094.7 |
| 315.5  | 285.8  | 241.7 | 411.9 | 245.5 | 231   | 278.7 | 472.3  | 422.1  |
| 102    | 116    | 101.3 | 99.1  | 95.7  | 102.1 | 97.2  | 103.2  | 104.4  |
| 896.6  | 1049.5 | 806.3 | 1003  | 983.3 | 864.7 | 884.4 | 1336.2 | 1109.2 |
| 121.7  | 122.1  | 114.6 | 119.5 | 113.5 | 118.3 | 124   | 139.7  | 122.7  |
| 115.3  | 113.9  | 117.3 | 113.9 | 111.2 | 104.2 | 112.9 | 120.4  | 112.2  |
| 111.6  | 109.4  | 116   | 105.3 | 99.7  | 104.3 | 111.3 | 116.1  | 117.5  |
| 107.7  | 101.7  | 102.2 | 109.7 | 92.6  | 108.5 | 103.5 | 114.2  | 104.9  |
| 123.1  | 132.2  | 121.9 | 124.6 | 112.4 | 126.4 | 133.9 | 141.8  | 125.9  |
| 101.9  | 110.6  | 101.7 | 100.6 | 97.6  | 110.8 | 97.6  | 106.9  | 106.8  |
| 116.3  | 115.9  | 115.7 | 107.2 | 102.7 | 116.2 | 104.8 | 108.5  | 105.7  |
| 288.3  | 683.2  | 676.5 | 614.3 | 542.8 | 824.1 | 656.4 | 806.2  | 446.2  |
| 113.7  | 119    | 102.5 | 119.4 | 102.7 | 112.8 | 119.1 | 118.5  | 113.9  |
| 130.4  | 142.3  | 127   | 119.9 | 125.7 | 126.3 | 128.5 | 161.3  | 155.1  |
| 203.1  | 197.9  | 205.2 | 232   | 168.3 | 186.4 | 219.7 | 387.6  | 325.6  |
| 240.5  | 263.5  | 197.4 | 207.6 | 167.8 | 210.6 | 168.1 | 370.4  | 383.1  |
| 108.3  | 104.2  | 103.7 | 94    | 93.7  | 103.2 | 99.5  | 110.2  | 99.6   |
| 102.2  | 108.3  | 105.6 | 103.1 | 104.9 | 110.7 | 100.6 | 107.4  | 109.3  |
| 107.3  | 116.6  | 110.5 | 108.2 | 95.9  | 112.4 | 102.5 | 110    | 101.8  |
| 104.3  | 103.9  | 93.7  | 108.5 | 92.4  | 109.5 | 106.5 | 102.5  | 108.7  |

|       |       |       |       |       |       |       |       |       |
|-------|-------|-------|-------|-------|-------|-------|-------|-------|
| 112.1 | 114.1 | 106.6 | 105.3 | 97.5  | 119.4 | 100.3 | 106.8 | 115.6 |
| 115.8 | 149.1 | 146.8 | 138.6 | 134.2 | 163.3 | 165.9 | 194.5 | 146.3 |
| 108.5 | 111.5 | 100.8 | 100.1 | 91.8  | 106.4 | 99.3  | 118.4 | 102.9 |
| 105.7 | 103.2 | 103.5 | 100.4 | 93.9  | 110.3 | 108.8 | 105.5 | 114.3 |
| 120.3 | 105.9 | 111.8 | 121.3 | 101.8 | 108   | 108.9 | 118.7 | 101.8 |
| 114.1 | 112.5 | 103.2 | 101.7 | 91.3  | 114.2 | 104.9 | 127.6 | 123.1 |
| 105.3 | 105.1 | 98.1  | 104   | 99.1  | 104   | 100.8 | 120.3 | 110.4 |
| 301.8 | 547.3 | 420.7 | 806.7 | 405.8 | 533.7 | 544.9 | 671.9 | 433.5 |
| 499.9 | 502.2 | 529.3 | 402.4 | 457   | 470.4 | 467   | 743.7 | 750.3 |
| 204.9 | 185.9 | 177.7 | 173.2 | 208   | 199.9 | 204.4 | 400.4 | 338   |
| 110.4 | 109.5 | 102.6 | 106.8 | 100.6 | 113.5 | 102   | 111.3 | 110.4 |
| 104   | 115.4 | 107.3 | 121.9 | 96    | 118.1 | 108.7 | 115.8 | 107.7 |
| 105.2 | 116.4 | 98.1  | 113   | 97.5  | 110.8 | 107.4 | 111.6 | 112.8 |
| 118.9 | 133.1 | 123.9 | 124.1 | 108.8 | 121.1 | 122.4 | 137.8 | 129.8 |
| 106.9 | 105.1 | 105.2 | 101.3 | 94.2  | 109.5 | 97.2  | 105.4 | 109.3 |
| 122.9 | 182.4 | 145.5 | 134.4 | 126.6 | 143.5 | 146.6 | 148.5 | 132.7 |
| 292.7 | 557.1 | 575.8 | 466.3 | 442.4 | 552.6 | 401.6 | 789.1 | 442   |
| 229.6 | 305.5 | 265.6 | 252.2 | 224.7 | 277.1 | 157   | 400.2 | 310.3 |
| 117.8 | 115.5 | 106.5 | 110.8 | 101.7 | 115.2 | 110.5 | 138.3 | 135.8 |
| 110.6 | 107.3 | 98.5  | 117.5 | 112   | 110.8 | 105.6 | 112.3 | 110.6 |
| 130.6 | 181.5 | 191   | 207.2 | 176.5 | 201.1 | 164.3 | 224.4 | 173.2 |
| 120.8 | 227.7 | 201.3 | 111.7 | 176.7 | 262.6 | 136.5 | 317.4 | 167   |
| 113   | 125.4 | 115.7 | 103.7 | 105.1 | 114.1 | 97.8  | 121.6 | 116.5 |
| 107.5 | 113.1 | 110   | 111.3 | 96.5  | 107.6 | 99.6  | 110.2 | 107.2 |
| 137.8 | 199.5 | 194.1 | 173.6 | 167.7 | 169.6 | 210.7 | 212.6 | 145.4 |
| 114.9 | 116.6 | 108.9 | 113.3 | 107.7 | 112.3 | 106.4 | 117.4 | 116.4 |
| 113.6 | 109.2 | 103.7 | 111.7 | 92.6  | 115.6 | 107.5 | 111.3 | 111.9 |
| 107.8 | 102   | 100.7 | 97.4  | 95.4  | 109.4 | 98.1  | 105.1 | 101.6 |
| 101.4 | 103.3 | 94.2  | 98.4  | 95.6  | 105.3 | 100.8 | 105.7 | 99.4  |
| 167.1 | 128.3 | 131.6 | 113.1 | 120.6 | 126.9 | 121   | 143.4 | 143.1 |
| 125.1 | 138.2 | 120   | 108.9 | 103.3 | 136.7 | 119.8 | 159.7 | 141.2 |
| 153.6 | 164.8 | 149.7 | 164.9 | 160.3 | 179.4 | 194.3 | 238.9 | 160.8 |
| 110.9 | 101.7 | 97.8  | 103.1 | 91.9  | 109.7 | 105.4 | 105.6 | 110.4 |
| 116.1 | 121.7 | 132.6 | 135   | 117.4 | 144.5 | 130.8 | 135   | 124.9 |
| 175.7 | 220.8 | 212.5 | 157.2 | 202.4 | 207.4 | 193.7 | 250   | 163.1 |
| 120.6 | 138.8 | 121.9 | 104.6 | 109   | 129.9 | 113.4 | 152.8 | 126.4 |
| 102.1 | 110.8 | 109.4 | 103.7 | 97.3  | 108.3 | 105.5 | 108.6 | 110   |
| 178.9 | 339   | 238.2 | 278.1 | 206.6 | 307.1 | 254.6 | 456   | 259.2 |
| 111.3 | 119.7 | 112.8 | 118.7 | 107.1 | 119.3 | 114.9 | 116.8 | 112.1 |
| 276.1 | 442.4 | 643.5 | 374   | 435.2 | 493.2 | 555.2 | 814.4 | 430.9 |
| 103.4 | 109.9 | 104.2 | 96.9  | 95.2  | 108.8 | 96.6  | 107.6 | 114.9 |
| 110.6 | 115.8 | 105.7 | 101.6 | 97.9  | 103.3 | 110.8 | 107.7 | 104   |
| 107.8 | 106.2 | 102.2 | 89.5  | 91.5  | 107.2 | 94.3  | 108.3 | 105.1 |
| 127   | 132.5 | 123   | 141.4 | 114.7 | 129.3 | 131.4 | 156.8 | 124.3 |
| 119.7 | 114.7 | 109.8 | 113.1 | 101.2 | 123.1 | 111.2 | 122.1 | 123.8 |
| 98.5  | 99    | 98.9  | 102   | 96.7  | 103.9 | 100.6 | 104.2 | 101.7 |
| 113.3 | 120.1 | 118.6 | 113   | 101   | 126.3 | 105.3 | 133.1 | 118.5 |
| 104.6 | 102.3 | 104.1 | 105.9 | 92.8  | 108.4 | 104.4 | 108.4 | 102.2 |
| 102.2 | 110.5 | 101.5 | 86.8  | 94.6  | 106.3 | 97.7  | 104.3 | 103.3 |
| 120   | 113.1 | 109.7 | 111.7 | 97.1  | 121.8 | 108.1 | 130.1 | 126   |
| 104.7 | 111.8 | 101.2 | 97.7  | 94.2  | 113.4 | 102.7 | 110   | 108   |

|        |       |       |        |        |        |        |        |        |
|--------|-------|-------|--------|--------|--------|--------|--------|--------|
| 99.6   | 105.3 | 99    | 96.5   | 92.8   | 108    | 104.2  | 103    | 107.4  |
| 222.5  | 403.5 | 395.7 | 333.8  | 389.5  | 418.8  | 408.7  | 537.2  | 288.5  |
| 111.8  | 111.1 | 104.9 | 99.9   | 97.7   | 106    | 108.8  | 101    | 108.5  |
| 107.6  | 109.4 | 99.2  | 104.2  | 104.4  | 115.5  | 104.7  | 112.4  | 108.9  |
| 114.9  | 113   | 114.6 | 104.2  | 99.2   | 110.7  | 105.8  | 117.3  | 109.3  |
| 1178.5 | 875   | 792.9 | 696.8  | 720.1  | 1000.1 | 925.9  | 1442.7 | 1108.9 |
| 1124.2 | 971.4 | 914.2 | 867.2  | 880    | 1067.7 | 961.6  | 1574.5 | 1226.9 |
| 246.2  | 187.9 | 186.8 | 173.9  | 174.4  | 203.9  | 211.3  | 262.2  | 209.3  |
| 106.2  | 128.9 | 148   | 118.6  | 112.8  | 136.4  | 117.3  | 135.7  | 108.1  |
| 120    | 142.6 | 163.7 | 130    | 134.3  | 153.2  | 139.1  | 140.6  | 140.7  |
| 153.3  | 162.8 | 149.7 | 146.3  | 167.8  | 207.4  | 180.9  | 240.8  | 205.7  |
| 118.7  | 125.4 | 114.4 | 113.6  | 119.3  | 128.7  | 115.6  | 153    | 144.7  |
| 138.2  | 115.9 | 126   | 111.4  | 102.1  | 128.4  | 107.4  | 159.4  | 286.2  |
| 100.1  | 109.4 | 99.8  | 107.2  | 96.1   | 102.1  | 104.4  | 102.5  | 110.3  |
| 112.8  | 144.3 | 132.7 | 149.1  | 110.8  | 139.6  | 140.5  | 136.9  | 131.3  |
| 112    | 115.7 | 107.2 | 108.1  | 102.6  | 106.5  | 108.8  | 117    | 119.7  |
| 106.8  | 107.1 | 107.6 | 107.3  | 90.9   | 111.5  | 101.9  | 106.6  | 107.8  |
| 104.6  | 112.1 | 105.6 | 98.3   | 93     | 107.9  | 105.7  | 110.6  | 117.3  |
| 199.7  | 319.5 | 340   | 380.6  | 292.5  | 322.6  | 399.9  | 351.7  | 236    |
| 200.3  | 347.8 | 404.3 | 341    | 322    | 403    | 432.5  | 467.4  | 254.2  |
| 269.8  | 388.7 | 351.8 | 353.8  | 397.4  | 373.4  | 390.2  | 662.8  | 454.8  |
| 148.3  | 447.1 | 407.4 | 409.9  | 340.8  | 334.3  | 361.5  | 375.7  | 252.2  |
| 111.7  | 119.5 | 109.8 | 109.5  | 99.3   | 121    | 113.3  | 121.9  | 103.5  |
| 108    | 115   | 99.1  | 111.3  | 95     | 111.4  | 109.7  | 113.1  | 102.9  |
| 98.1   | 104.2 | 99.5  | 102.5  | 96.4   | 104.9  | 100.1  | 113.8  | 104.2  |
| 186.7  | 250.5 | 203.8 | 251.3  | 203.6  | 228.3  | 248.6  | 320.9  | 223.7  |
| 219.6  | 565.4 | 458.2 | 840.6  | 495.5  | 542.8  | 742.1  | 483.9  | 397.8  |
| 123.2  | 163.2 | 127.9 | 151.6  | 125.3  | 153.9  | 144.2  | 133.2  | 135.7  |
| 404    | 538.5 | 432.1 | 549.8  | 458.4  | 563.3  | 424.8  | 996.8  | 815.6  |
| 120.5  | 137.3 | 121.1 | 123.8  | 115.6  | 121.7  | 119.3  | 143.6  | 123.6  |
| 236.7  | 282   | 182   | 255.5  | 188.4  | 213.5  | 303.6  | 284.1  | 233    |
| 1394.6 | 582.3 | 297.1 | 366.3  | 746.9  | 521.6  | 516.4  | 1228   | 280    |
| 206.3  | 124.2 | 106.2 | 123.1  | 116.5  | 133.4  | 121    | 177.7  | 128.9  |
| 108.5  | 107.1 | 99.1  | 100.4  | 98.7   | 107.3  | 106.3  | 111.2  | 103.7  |
| 367.6  | 213.6 | 149.8 | 146.2  | 206.2  | 169    | 176.3  | 419.6  | 157.4  |
| 107.1  | 131.6 | 107   | 120.8  | 110.6  | 108.4  | 122    | 137.5  | 116.9  |
| 112.8  | 126.6 | 119.9 | 104.1  | 105.3  | 116.4  | 121.4  | 132.3  | 128.2  |
| 1505.3 | 1424  | 1328  | 1193.8 | 1060.8 | 1428.9 | 1241.3 | 2243.3 | 1598.9 |
| 274.4  | 555.2 | 475.5 | 460.6  | 416.7  | 467.8  | 530.9  | 758.3  | 419.4  |
| 329.6  | 354.7 | 346.9 | 333.2  | 369.5  | 393.8  | 369.8  | 426.1  | 399.8  |
| 280.7  | 402.9 | 417   | 304.2  | 350.9  | 406.1  | 333.9  | 583.5  | 368.9  |
| 107.9  | 101.5 | 99.9  | 93.1   | 92.4   | 98.5   | 93.8   | 108.2  | 108.5  |
| 137.4  | 160.9 | 178.2 | 161.1  | 158.8  | 201.5  | 155.9  | 273.9  | 168.5  |
| 124.8  | 172.4 | 190.9 | 171.9  | 166.7  | 173.6  | 166.6  | 196    | 141.5  |
| 179.9  | 224.4 | 206.7 | 186    | 176.3  | 205.4  | 214.6  | 265.2  | 209.2  |
| 182.7  | 195.9 | 151.4 | 151.7  | 160.1  | 186.6  | 156.4  | 320.8  | 177.8  |
| 136.6  | 150.4 | 154.3 | 160    | 146.1  | 159.2  | 148.5  | 192.3  | 175.5  |
| 204.7  | 231.7 | 198.8 | 189.2  | 209.2  | 190.8  | 168.4  | 341    | 215    |
| 173.8  | 300.1 | 331.7 | 251.8  | 316.6  | 330.1  | 255    | 400.7  | 228.8  |
| 170.2  | 144.4 | 141.6 | 147.8  | 135.6  | 194.3  | 169.7  | 263.3  | 226.9  |
| 309.2  | 291.4 | 224.3 | 234.2  | 235    | 318.5  | 269.4  | 422.8  | 396    |

|       |       |       |       |       |        |       |        |        |
|-------|-------|-------|-------|-------|--------|-------|--------|--------|
| 167   | 142.3 | 152.6 | 130.7 | 133.7 | 145.9  | 150.9 | 179.5  | 175.1  |
| 104.7 | 113.5 | 109.9 | 104.5 | 99.1  | 110.7  | 103.9 | 113.2  | 115.8  |
| 105.1 | 110.5 | 99.2  | 109.2 | 87    | 103.6  | 100.5 | 112.6  | 106.9  |
| 122.4 | 141.5 | 119.9 | 115.5 | 119.7 | 128.5  | 135.8 | 167.3  | 138.2  |
| 187.3 | 239.1 | 259.8 | 199.1 | 227.4 | 237.5  | 220   | 387.3  | 252.9  |
| 852.1 | 934.3 | 881.7 | 724.1 | 824.5 | 1034.6 | 961.7 | 1395.6 | 1138.2 |
| 176.2 | 184.3 | 183.1 | 182.5 | 168.3 | 201.2  | 197.4 | 263.1  | 257.1  |
| 150.3 | 150   | 149.5 | 132.3 | 128.8 | 136.1  | 146.8 | 189    | 205.8  |
| 241.4 | 159.4 | 190.5 | 158.7 | 169.3 | 199.7  | 209.1 | 319.9  | 290.7  |
| 680.6 | 593.2 | 542.6 | 466   | 465.5 | 575.2  | 588   | 1081.8 | 1003.9 |
| 116.7 | 140.4 | 138.8 | 151.5 | 141   | 120.1  | 131.8 | 167.9  | 151.3  |
| 110   | 122.5 | 103.7 | 106.2 | 101.3 | 120.9  | 101.6 | 113.2  | 117.8  |
| 107.6 | 114.8 | 98.5  | 94.2  | 91.7  | 113.1  | 105.9 | 113.4  | 95.8   |
| 112   | 110.3 | 100.5 | 106.5 | 96    | 110    | 100.2 | 104.3  | 106.2  |
| 104.5 | 116.2 | 104.8 | 94.6  | 94.9  | 107.9  | 99.6  | 107.5  | 107.1  |
| 106.6 | 105.4 | 106.3 | 107.8 | 100.1 | 113.3  | 108.9 | 116.7  | 111.2  |
| 113.9 | 123   | 141.1 | 140.2 | 117.4 | 113.2  | 144.4 | 145.5  | 127.7  |
| 136.5 | 138.2 | 122.9 | 132   | 123.2 | 156.5  | 139.4 | 173.1  | 174.3  |
| 138   | 205.1 | 199.5 | 158.9 | 146.5 | 198.2  | 216.8 | 368.7  | 231.3  |
| 113.2 | 115.8 | 102.9 | 111.7 | 107.5 | 121.3  | 113.4 | 121.7  | 126.3  |
| 104.2 | 106.6 | 105.8 | 93.8  | 99.9  | 108    | 109.1 | 102.1  | 108.7  |
| 104   | 108.3 | 101   | 105.3 | 95.3  | 112.4  | 96.9  | 113.5  | 108    |
| 99.3  | 107.7 | 98.6  | 104.9 | 94.6  | 103.9  | 103.5 | 111.4  | 106.7  |
| 102   | 120   | 101.6 | 99.7  | 98.3  | 112.2  | 107.9 | 110.7  | 103.4  |
| 111   | 110.4 | 104.5 | 104.3 | 92.7  | 107.3  | 104.6 | 102.7  | 108.4  |
| 103.9 | 111.6 | 102.4 | 98.4  | 95.3  | 106.9  | 101.1 | 105.6  | 108    |
| 135.3 | 213.9 | 143.8 | 241.4 | 161.8 | 148.8  | 246   | 163.7  | 131    |
| 430.4 | 376   | 376.2 | 416.4 | 397   | 387.9  | 525.6 | 416.2  | 255.8  |
| 114.1 | 105   | 106   | 103.7 | 93.4  | 117.9  | 101.9 | 114.7  | 106.8  |
| 106.8 | 110.6 | 99.7  | 101   | 97    | 110.8  | 105   | 108.7  | 113.3  |
| 173   | 134.2 | 137   | 115.1 | 135.6 | 146.4  | 128.9 | 240.1  | 145.2  |
| 136.9 | 131   | 129.2 | 126.5 | 115.3 | 127.4  | 116.6 | 162.7  | 126.3  |
| 149.6 | 158.7 | 234.7 | 150.2 | 130.7 | 219.4  | 165   | 202.7  | 166.1  |
| 454.5 | 485.6 | 495.5 | 508.9 | 441.5 | 542    | 547.9 | 732.4  | 534.7  |
| 114.7 | 117   | 112.3 | 121.9 | 104.5 | 120.1  | 123.5 | 120.8  | 119.2  |
| 100.7 | 109.6 | 106.5 | 108.2 | 102.2 | 117    | 104.6 | 116    | 108.4  |
| 110.4 | 106.7 | 107.5 | 98.8  | 101.6 | 112.9  | 111.6 | 109.7  | 101.3  |
| 108   | 107   | 97.9  | 100.3 | 90.7  | 104.9  | 99.6  | 114.2  | 98.7   |
| 107.5 | 109.3 | 108.6 | 106   | 104.3 | 105.9  | 107.3 | 116.8  | 105.4  |
| 106.1 | 98.9  | 93.9  | 107.2 | 97.8  | 105.8  | 103.1 | 105.9  | 107.5  |
| 288.1 | 418.9 | 292   | 318.7 | 512.3 | 371.9  | 337.6 | 643    | 199.4  |
| 110.5 | 108.5 | 106.8 | 100.1 | 99.3  | 116.4  | 115   | 108.9  | 108.3  |
| 102.1 | 112.2 | 103.9 | 100   | 91.1  | 105    | 104.8 | 110    | 108.8  |
| 106.9 | 112.5 | 100.7 | 105.1 | 102   | 106.5  | 98    | 106.2  | 106.1  |
| 106.7 | 103.2 | 100.6 | 101.3 | 97.4  | 105.3  | 98.1  | 103.9  | 112.3  |
| 116.6 | 122.3 | 118.2 | 120.6 | 106.5 | 115.1  | 113.4 | 136.7  | 126.8  |
| 108.6 | 112.7 | 103.7 | 99    | 86.7  | 101.9  | 102.2 | 117.1  | 105.3  |
| 112.3 | 117.3 | 116.4 | 102.7 | 96.3  | 117.8  | 119.1 | 132    | 124.7  |
| 108.1 | 116.6 | 96.8  | 99.3  | 94.7  | 106.2  | 95.8  | 103.2  | 111.9  |
| 106.2 | 129.8 | 103.1 | 107   | 100.9 | 103.8  | 102.6 | 111.5  | 116.5  |
| 213.5 | 507.6 | 493.9 | 423.7 | 351.5 | 449.7  | 297.3 | 466    | 340.2  |

|       |        |       |       |       |       |       |        |        |
|-------|--------|-------|-------|-------|-------|-------|--------|--------|
| 147.9 | 152    | 141.1 | 116.6 | 128.7 | 139.9 | 113.1 | 146.6  | 166.9  |
| 460.7 | 1014.7 | 930.1 | 805.2 | 815.9 | 962.8 | 760.4 | 1394.1 | 680.2  |
| 105.2 | 110.7  | 101.5 | 98.9  | 97.2  | 97.9  | 101.9 | 106.9  | 104.3  |
| 126.4 | 142.9  | 131.3 | 114.4 | 113.5 | 135.7 | 119.1 | 154.3  | 113.4  |
| 201.1 | 293.4  | 301.3 | 265.9 | 339.2 | 285.7 | 167   | 374.5  | 222.7  |
| 104.2 | 104.3  | 90.7  | 96.4  | 90.9  | 110.2 | 90.3  | 99.6   | 103.3  |
| 126.8 | 109.8  | 110.7 | 103.6 | 93    | 107.8 | 106.8 | 120.6  | 115.3  |
| 170   | 208.9  | 204.4 | 162.6 | 174.6 | 218.9 | 183   | 374.6  | 236.5  |
| 102.9 | 111.1  | 96.9  | 110.5 | 91.6  | 111.3 | 104.2 | 109.7  | 105.6  |
| 114.1 | 113.9  | 113.1 | 119.8 | 98.5  | 126.1 | 111.1 | 117.4  | 110.3  |
| 108   | 123.5  | 131   | 120   | 115.4 | 126.4 | 106.3 | 148.5  | 113.4  |
| 110.7 | 154.1  | 158.5 | 128.9 | 119   | 141.2 | 141.4 | 153    | 125.6  |
| 103.7 | 109.5  | 105   | 95.8  | 92.5  | 104.4 | 98.4  | 102.9  | 106.7  |
| 114.1 | 168.2  | 142   | 145.8 | 151.2 | 145.4 | 155   | 177.5  | 150.6  |
| 219.9 | 201.7  | 165   | 241.4 | 190.6 | 217.7 | 243.8 | 411.4  | 282.4  |
| 116   | 116.3  | 107.2 | 101.8 | 95.8  | 111.4 | 114.3 | 120.9  | 118.3  |
| 106.3 | 112.4  | 101.3 | 94.5  | 90.6  | 103.7 | 112.2 | 112    | 112.6  |
| 909.6 | 852.4  | 944.6 | 774.1 | 600   | 763.5 | 722.6 | 1323.7 | 1482.5 |
| 104.9 | 111.8  | 103.4 | 103.6 | 98.9  | 107.5 | 100.5 | 108.3  | 102.4  |
| 164   | 207.1  | 181.6 | 137.4 | 145.2 | 191.5 | 165.2 | 211.4  | 231.2  |
| 96.6  | 112.9  | 106.3 | 113.3 | 105.7 | 121.6 | 106.4 | 113.3  | 114.9  |
| 113.6 | 111    | 111.9 | 112   | 104.5 | 122.7 | 114   | 125    | 116.4  |
| 109.6 | 174.1  | 167.3 | 156.3 | 149.6 | 171.1 | 143.2 | 173.2  | 137.9  |
| 111.3 | 109.5  | 107.2 | 99.4  | 96.9  | 107.6 | 102.2 | 109.2  | 111.7  |
| 99.9  | 109.6  | 113.5 | 90.6  | 86.2  | 99.7  | 108.2 | 105.6  | 98.6   |
| 110.8 | 111.8  | 100.8 | 102.6 | 92    | 102.3 | 100.5 | 103.2  | 112.8  |
| 202.6 | 146.7  | 145.6 | 179.9 | 162.3 | 191.4 | 153.3 | 278.6  | 252.2  |
| 106.6 | 105.6  | 107.4 | 98.1  | 98.4  | 112.7 | 102.1 | 107.7  | 111.5  |
| 105.6 | 106.5  | 104.6 | 98    | 92.2  | 104.6 | 99.3  | 101.9  | 107.2  |
| 101.8 | 104.9  | 96    | 104.9 | 93.2  | 107.5 | 104.6 | 102.9  | 104.6  |
| 112.6 | 106.7  | 112.3 | 104.9 | 94.8  | 105.5 | 102.9 | 105.5  | 104.4  |
| 121.6 | 116.2  | 114.1 | 129.3 | 105   | 114.6 | 110.8 | 121.1  | 110.1  |
| 99.7  | 99.7   | 92.8  | 88.4  | 99.6  | 109.6 | 96.4  | 100.8  | 105.8  |
| 119.6 | 119.4  | 120.5 | 112   | 105.5 | 116.9 | 111.6 | 120    | 122.9  |
| 105   | 128.5  | 109   | 111.5 | 95.3  | 108.7 | 132.1 | 117.3  | 118.9  |
| 104.7 | 120.4  | 109.5 | 103.1 | 112.7 | 115.2 | 122.1 | 139.1  | 129.6  |
| 272.6 | 391.8  | 377.3 | 302.1 | 269.3 | 318.9 | 151.9 | 533.7  | 286.1  |
| 195.4 | 166.6  | 146.7 | 172.6 | 168.1 | 164.7 | 156.7 | 319.6  | 308.8  |
| 98.3  | 102.8  | 102.5 | 121.3 | 97.2  | 110.2 | 103.4 | 105    | 110.2  |
| 124.5 | 130.7  | 117.5 | 113.2 | 108.9 | 134.3 | 108.7 | 128.5  | 122.9  |
| 114.4 | 108.5  | 104.9 | 116.5 | 103.3 | 110.4 | 102.6 | 117.7  | 118.5  |
| 142   | 226.5  | 257.6 | 172.4 | 180.4 | 249.8 | 235.5 | 308.1  | 180.2  |
| 116.6 | 107.3  | 108.8 | 113.9 | 98.2  | 119.2 | 119.1 | 120.5  | 114.5  |
| 303.8 | 349.1  | 400   | 281.2 | 304.3 | 354.5 | 290.2 | 618.5  | 640    |
| 115.8 | 110.6  | 105.9 | 116   | 100   | 127.7 | 114.5 | 115.9  | 106.5  |
| 123   | 115.3  | 106.2 | 99    | 98.9  | 112.1 | 118.7 | 102.8  | 116.2  |
| 118   | 103.2  | 109   | 103.3 | 102.5 | 104.5 | 105.3 | 118.3  | 119.3  |
| 108.9 | 117.4  | 109.2 | 95.2  | 100.4 | 116.3 | 104   | 116.4  | 116.3  |
| 103.1 | 101.9  | 96.6  | 94.2  | 94.9  | 103.9 | 95.5  | 108.6  | 104.1  |
| 100.9 | 109.6  | 96.8  | 101.8 | 97.4  | 107.5 | 99.4  | 101.2  | 96.2   |
| 111.5 | 118.8  | 106.1 | 102.3 | 96.5  | 114   | 104.4 | 127.7  | 101.1  |

|       |       |       |       |       |       |       |       |       |
|-------|-------|-------|-------|-------|-------|-------|-------|-------|
| 143.8 | 125.7 | 119.6 | 159   | 98.9  | 113.1 | 137.7 | 119.5 | 107.3 |
| 110.8 | 107   | 98.6  | 109   | 90.6  | 106.4 | 109.7 | 101.8 | 104.1 |
| 154.5 | 123.5 | 148.6 | 187.7 | 123.2 | 137.4 | 160.6 | 126.8 | 116   |
| 105.8 | 112.3 | 106.8 | 101.1 | 97    | 112.6 | 108.3 | 116.3 | 117.6 |
| 111.3 | 104.4 | 110.7 | 107.7 | 99.5  | 115.1 | 106.5 | 120.8 | 109.1 |
| 150.5 | 246.8 | 193.5 | 171.1 | 192.1 | 216.8 | 179.9 | 272.9 | 189.7 |
| 108.5 | 114.1 | 102.5 | 100.6 | 94    | 112.9 | 103.8 | 111.6 | 115.1 |
| 107.6 | 114.6 | 124.5 | 121   | 105.6 | 123.8 | 105.3 | 125.8 | 102.8 |
| 159.6 | 196.6 | 172.5 | 175.7 | 161.4 | 161.7 | 166   | 353   | 265   |
| 100.8 | 114.5 | 107.9 | 109   | 96.3  | 108.2 | 116.3 | 118.9 | 109.1 |
| 109.3 | 113.6 | 108.1 | 110.2 | 89.9  | 110.8 | 106.7 | 109.4 | 104.8 |
| 115.6 | 116   | 106.8 | 111   | 101.3 | 124.3 | 111.1 | 116   | 108.4 |
| 123.5 | 208.1 | 169.1 | 159.9 | 159.5 | 203.6 | 150.8 | 260.6 | 173.8 |
| 106.2 | 104.4 | 103.2 | 98.3  | 97.7  | 119   | 101.5 | 106.4 | 107   |
| 106.6 | 113.1 | 103.9 | 116.7 | 96    | 111.4 | 100.7 | 111.2 | 116.7 |
| 115.7 | 110.5 | 105.3 | 122.9 | 97.6  | 113   | 109.8 | 114.8 | 102.9 |
| 103.5 | 105.5 | 108.9 | 103.7 | 96.8  | 104.3 | 100.6 | 111.2 | 103.1 |
| 118.8 | 116.5 | 102.3 | 106   | 109   | 107.9 | 112.2 | 115   | 111.2 |
| 103.5 | 113.5 | 107.8 | 102.8 | 102.5 | 115.9 | 101.8 | 115.7 | 108.1 |
| 104.1 | 107.1 | 101.5 | 102.5 | 100.7 | 106.1 | 107.6 | 112.4 | 104.7 |
| 131.4 | 118.7 | 110.2 | 126.2 | 109.1 | 111.6 | 129.3 | 119.9 | 112.2 |
| 109.6 | 113.3 | 107   | 123.9 | 106.4 | 113   | 100.9 | 122.3 | 119.4 |
| 112.4 | 114.5 | 118   | 112.2 | 90.8  | 114.2 | 106.5 | 125.8 | 119.2 |
| 102.1 | 110.6 | 100.5 | 99.6  | 90.4  | 103.3 | 98.5  | 98.6  | 99.7  |
| 105.4 | 116   | 102.4 | 105.8 | 100.3 | 114.9 | 104.3 | 111.3 | 113.1 |
| 119.5 | 112.2 | 105.6 | 118.1 | 103.2 | 121.9 | 105.3 | 126   | 119.5 |
| 105.2 | 103.2 | 106.6 | 107.8 | 94.3  | 114.6 | 104.7 | 115.2 | 112   |
| 102.5 | 111.1 | 104.6 | 98.3  | 91.4  | 104.4 | 103.5 | 107   | 119   |
| 102.5 | 107   | 101.9 | 102.8 | 91.4  | 104.7 | 100   | 113   | 106.4 |
| 172.7 | 160.1 | 146.9 | 137.6 | 143.4 | 155   | 168.6 | 191.7 | 141.3 |
| 104.4 | 113.3 | 103.4 | 99    | 92.7  | 108   | 93.4  | 103.7 | 104.3 |
| 106.3 | 103.5 | 95.1  | 98.1  | 89.3  | 99.2  | 103.7 | 103.5 | 111.2 |
| 116.5 | 115.9 | 111.8 | 116.4 | 108.9 | 118.2 | 122.9 | 127.5 | 117.6 |
| 106.8 | 106.5 | 102.5 | 96.1  | 90.6  | 105.9 | 103.8 | 95.8  | 108.5 |
| 105.8 | 99.9  | 107.5 | 99.2  | 98.6  | 108.5 | 101   | 105.2 | 107.8 |
| 109   | 118.8 | 102.6 | 99.1  | 100.7 | 112.1 | 108.8 | 113   | 106.5 |
| 249.2 | 319.5 | 344.2 | 221.8 | 278.2 | 294.3 | 316.4 | 452.6 | 287.5 |
| 288.1 | 223   | 274.3 | 238.4 | 228.9 | 319.8 | 266.7 | 448.8 | 306.7 |
| 113.4 | 121.1 | 104.1 | 94.7  | 101.6 | 113   | 103.6 | 109.3 | 119.4 |
| 110.6 | 129   | 104.9 | 108.1 | 102.1 | 119   | 113   | 119.6 | 109.7 |
| 104.3 | 106.8 | 96    | 96.8  | 94.6  | 102.8 | 102.3 | 112.1 | 119.2 |
| 105.7 | 109   | 107.2 | 109.1 | 108.7 | 121.5 | 106   | 122.9 | 106.9 |
| 101.1 | 102.1 | 97.5  | 100.1 | 90.5  | 98.6  | 104.8 | 111.2 | 107.3 |
| 108.9 | 114.5 | 101.3 | 104.6 | 97.1  | 107.1 | 110   | 106.2 | 117.6 |
| 113.9 | 106.5 | 109.7 | 99.2  | 102   | 101.8 | 105.4 | 107.7 | 119.1 |
| 104.3 | 109.7 | 102.6 | 99.7  | 93.3  | 105   | 101.3 | 114   | 106.4 |
| 99    | 103.7 | 100.2 | 99.9  | 96.4  | 106.1 | 100.2 | 112.9 | 103.6 |
| 244.4 | 429.4 | 501.6 | 294.6 | 382   | 455.1 | 423.8 | 666.5 | 460.9 |
| 150.4 | 275.2 | 371.7 | 240.9 | 288.4 | 306.3 | 301.6 | 495.7 | 352.3 |
| 115.5 | 111   | 101.6 | 97.2  | 96.5  | 112.4 | 106.4 | 109.4 | 104.7 |
| 111.7 | 105.2 | 98.9  | 114.1 | 95.4  | 104.3 | 109.1 | 104.3 | 111.9 |



|        |        |        |        |        |        |        |        |        |
|--------|--------|--------|--------|--------|--------|--------|--------|--------|
| 1266.2 | 1045.5 | 1488.6 | 1532.2 | 1212.4 | 1245   | 739.2  | 2804.8 | 3376.3 |
| 101.4  | 112.3  | 108.8  | 114.6  | 105.8  | 114.4  | 102.8  | 117    | 113.6  |
| 108.8  | 110.9  | 99.8   | 92.7   | 91.4   | 101.9  | 104.2  | 101.7  | 116.5  |
| 142.9  | 146.8  | 144    | 135    | 135.9  | 144.1  | 127.3  | 164.1  | 151.5  |
| 105    | 111    | 109.1  | 101.2  | 104.7  | 110.7  | 105.8  | 114.8  | 117.1  |
| 97.4   | 102    | 98.8   | 96.4   | 89.5   | 105.2  | 105    | 101.6  | 109.1  |
| 117.2  | 107.2  | 103.3  | 109.1  | 101.1  | 102    | 108    | 120.6  | 101.9  |
| 117.8  | 110.7  | 109.4  | 106    | 110.6  | 114.8  | 110.2  | 117.6  | 123.3  |
| 111    | 102.3  | 106    | 103.7  | 100.2  | 118.1  | 111.5  | 115.8  | 110.7  |
| 104.6  | 109.8  | 108.7  | 101.6  | 99.4   | 117.2  | 106.6  | 107.6  | 110    |
| 127    | 134.5  | 113.5  | 139.3  | 118.1  | 123.4  | 126.4  | 164.9  | 118.9  |
| 103.4  | 114.9  | 102.2  | 106.2  | 102.2  | 107.5  | 98.1   | 106.2  | 108.4  |
| 110.8  | 107.5  | 96.2   | 91     | 90.2   | 95.5   | 96.1   | 98.2   | 100.9  |
| 105.3  | 104.2  | 98.6   | 90.6   | 94.8   | 104    | 98.7   | 104.2  | 100.9  |
| 106.1  | 108    | 103.6  | 98     | 100.9  | 114.8  | 106.6  | 112.1  | 107.8  |
| 104    | 103.9  | 99.2   | 101.5  | 89.9   | 96.8   | 102.3  | 107.9  | 106.7  |
| 107.6  | 108.9  | 99.6   | 109.8  | 104.8  | 104.3  | 96.7   | 102.9  | 113.7  |
| 107.5  | 107.2  | 98.7   | 104.8  | 97     | 119.9  | 109.5  | 108.3  | 110.9  |
| 101    | 105.3  | 99.5   | 88.2   | 92.6   | 97.6   | 93.7   | 106    | 103    |
| 111.3  | 107.8  | 115.3  | 101.5  | 97.9   | 111.7  | 99     | 114.8  | 109.8  |
| 103.4  | 111.2  | 105.6  | 95.1   | 92.4   | 113    | 99.3   | 110.7  | 115.7  |
| 101.6  | 110.6  | 101.1  | 92.4   | 100.3  | 113.2  | 105.5  | 117.1  | 106.8  |
| 373.9  | 389.3  | 379.4  | 364.4  | 313.2  | 395.7  | 465.9  | 693.8  | 400.8  |
| 123    | 119.9  | 128.7  | 114.3  | 107.6  | 117.7  | 125    | 131.9  | 119.6  |
| 118.3  | 115.7  | 107.1  | 118.3  | 101.3  | 119.3  | 99     | 140.6  | 107.9  |
| 112.9  | 178.1  | 124.8  | 143.1  | 140    | 123.6  | 151.5  | 194.9  | 126.6  |
| 130.8  | 116.8  | 109.3  | 109.6  | 113    | 126.7  | 115.7  | 130.3  | 128.4  |
| 131.3  | 122.4  | 117.4  | 110.2  | 106.3  | 127.9  | 117.3  | 138.3  | 141.7  |
| 175.1  | 175.4  | 178.2  | 182.7  | 159.3  | 174.8  | 196.3  | 184.3  | 139.2  |
| 104.5  | 109.1  | 102.3  | 103.8  | 87.9   | 113.2  | 99.7   | 103.2  | 107.3  |
| 98.6   | 109.4  | 97.1   | 101.1  | 94.4   | 104.6  | 102.7  | 109.8  | 117.6  |
| 110    | 108    | 110.4  | 96.7   | 89.8   | 104.5  | 107.5  | 115.6  | 97.5   |
| 107.1  | 107.8  | 101.7  | 105.5  | 103.8  | 106.2  | 93.6   | 108.4  | 110.6  |
| 107.5  | 110.6  | 106.4  | 107.8  | 91.8   | 118.4  | 100.6  | 113.9  | 105.4  |
| 116.8  | 111.1  | 111.4  | 116.2  | 106.3  | 122.6  | 112.7  | 121.6  | 119.9  |
| 114.4  | 111    | 100.3  | 108.1  | 99.1   | 116.8  | 112    | 119.5  | 114.1  |
| 103.5  | 105.2  | 96.8   | 95.6   | 91.5   | 109.8  | 102.3  | 107.2  | 99.4   |
| 103.6  | 114.8  | 94.7   | 106.8  | 95.4   | 110    | 103.1  | 111.2  | 115.3  |
| 97.7   | 103.5  | 104.5  | 101.7  | 97     | 104    | 104.5  | 108.7  | 111.6  |
| 104.4  | 99.6   | 101.2  | 115.1  | 96.2   | 109.2  | 98.4   | 118.8  | 105.1  |
| 115.3  | 116.7  | 105.6  | 101.6  | 91.8   | 109    | 95.3   | 107.5  | 113.7  |
| 117.7  | 126.8  | 113.5  | 118.9  | 101.9  | 129.7  | 120.6  | 136.8  | 136.2  |
| 8172   | 1979.1 | 1686.7 | 1761.4 | 1412.7 | 2054.6 | 1931.4 | 6968.9 | 8822.2 |
| 581.3  | 628.9  | 633.6  | 585.6  | 477.5  | 582.9  | 597    | 1207.9 | 1194.3 |
| 405.8  | 807.6  | 824    | 620.5  | 683.2  | 707.8  | 624.4  | 1042.6 | 535.7  |
| 2095.4 | 269.6  | 253.5  | 203    | 228.7  | 300.4  | 274.7  | 1702.8 | 4912.3 |
| 114.6  | 122.6  | 120.4  | 114.8  | 104.6  | 115.1  | 114.3  | 135.3  | 122.1  |
| 107.4  | 118.4  | 109.6  | 109.8  | 93.4   | 107.9  | 109.3  | 109.9  | 111.1  |
| 4547.3 | 433.6  | 483.4  | 451.5  | 432.2  | 553.6  | 549.8  | 2788.3 | 4153.2 |
| 1030.6 | 826.9  | 750.2  | 731.2  | 735    | 774.8  | 852.7  | 1212.6 | 1110.8 |
| 113.6  | 127    | 119.7  | 108.8  | 102.1  | 116.1  | 123.4  | 140.4  | 144.4  |

|        |       |        |        |       |        |       |        |        |
|--------|-------|--------|--------|-------|--------|-------|--------|--------|
| 127.9  | 166.5 | 144.4  | 148.7  | 140.5 | 164    | 142.6 | 193.5  | 164.1  |
| 111.8  | 124.1 | 110.2  | 114.5  | 114.1 | 132.1  | 126   | 138.9  | 153.2  |
| 110.8  | 107.1 | 110.2  | 111.1  | 100.6 | 104.9  | 103.2 | 115.7  | 112.7  |
| 121.1  | 114.9 | 117.5  | 116.9  | 106.6 | 114.7  | 103.1 | 143.1  | 134.7  |
| 191.3  | 257.1 | 237.2  | 204.1  | 196.8 | 281.8  | 147.7 | 446.2  | 368.3  |
| 107.8  | 104   | 107.1  | 86.3   | 98.3  | 100    | 105.9 | 104.3  | 104    |
| 117.5  | 112.6 | 112.6  | 104.1  | 108.9 | 114.3  | 104.7 | 123    | 121.7  |
| 768.3  | 762.6 | 664.2  | 688.6  | 688.7 | 830.2  | 735   | 1596.5 | 1062.3 |
| 171.4  | 115.3 | 106.1  | 110.1  | 105.6 | 119.8  | 104.5 | 323.8  | 300    |
| 111    | 115.5 | 106.1  | 106.5  | 98.4  | 110.1  | 112.6 | 107.9  | 112.5  |
| 105.5  | 112.4 | 112.4  | 106.7  | 95.1  | 111.1  | 111.8 | 113.4  | 118.3  |
| 1690   | 547.9 | 354.7  | 553.1  | 399.8 | 498    | 579.5 | 1760.4 | 2611.8 |
| 3046.5 | 730   | 689.2  | 768.2  | 857.9 | 812.2  | 1145  | 1983.7 | 1155   |
| 105    | 116.5 | 106.3  | 96.9   | 98.8  | 107.9  | 108.7 | 106.3  | 107.9  |
| 122.8  | 117.5 | 113.8  | 108.8  | 99.8  | 114.3  | 105.6 | 116.8  | 116.6  |
| 685.5  | 330.8 | 330.8  | 290.4  | 338.7 | 407.1  | 341.9 | 755.5  | 754.8  |
| 110.6  | 116.6 | 108.4  | 108.9  | 102.6 | 101.8  | 109.3 | 111.1  | 111.2  |
| 152.9  | 238.2 | 228.6  | 263.7  | 203   | 205.8  | 239.1 | 303.6  | 206.9  |
| 113.3  | 120.8 | 108.6  | 98.7   | 106.9 | 115.2  | 103.8 | 120.5  | 111.9  |
| 104.7  | 113.3 | 109.6  | 101.3  | 94.6  | 112.2  | 95.4  | 114.6  | 114.9  |
| 100.9  | 108.6 | 98.3   | 88.2   | 89.7  | 102.2  | 106.2 | 101.5  | 96.7   |
| 112.9  | 108.4 | 103.4  | 105.2  | 98.4  | 106.9  | 96.4  | 107.2  | 99.4   |
| 164.9  | 167.4 | 169    | 159.5  | 153.2 | 171.1  | 163.9 | 180.7  | 148.6  |
| 154.1  | 222.2 | 201.2  | 166.8  | 203.6 | 200.2  | 184.5 | 253.3  | 179.2  |
| 201.1  | 213.5 | 193.3  | 215.8  | 165   | 218.9  | 213   | 276.4  | 229    |
| 106.8  | 105.9 | 111.4  | 96.2   | 89.5  | 115.9  | 110.5 | 111.9  | 108.9  |
| 118.7  | 137.9 | 131.6  | 147.2  | 119.4 | 123.1  | 145.9 | 160.9  | 145.4  |
| 112.8  | 123.6 | 137    | 124.4  | 105.2 | 117.9  | 121.3 | 143.9  | 130    |
| 124.8  | 147.8 | 159.6  | 149.6  | 140.3 | 177.8  | 161.9 | 175.4  | 153.1  |
| 110.9  | 113.9 | 110.8  | 113.6  | 104.7 | 116.3  | 107.3 | 150.2  | 124.1  |
| 98.6   | 119.8 | 112.6  | 108.4  | 97.1  | 112.4  | 113.7 | 113.2  | 119.1  |
| 221.4  | 187.6 | 173.8  | 167.1  | 194.1 | 188.3  | 199.4 | 279    | 192.4  |
| 100.7  | 105.7 | 100.3  | 87.4   | 93.8  | 96.8   | 103.1 | 119    | 107.4  |
| 108.8  | 107.5 | 99.1   | 98.5   | 94.9  | 99.5   | 105.7 | 108.4  | 107.8  |
| 104.7  | 111.2 | 99.1   | 100.4  | 94.6  | 102.7  | 103.3 | 102.5  | 105.2  |
| 245.4  | 255.9 | 195.6  | 218.9  | 223.4 | 270.6  | 252.3 | 534.2  | 442.6  |
| 2830.2 | 2643  | 2377.3 | 2321.2 | 2386  | 3040.3 | 2363  | 4371.5 | 3526   |
| 366    | 566.1 | 606.9  | 465.5  | 468.7 | 565.6  | 458.6 | 1060   | 751.4  |
| 100.7  | 115.9 | 109.1  | 107.8  | 88.6  | 114.1  | 106   | 107.6  | 116.9  |
| 248.9  | 211.4 | 250.1  | 233.3  | 204   | 274.5  | 260.9 | 276    | 245.5  |
| 115.1  | 118   | 102.2  | 108.3  | 103.3 | 120    | 109.7 | 124.7  | 119.8  |
| 157.2  | 130.7 | 121.3  | 128.8  | 134.3 | 152.5  | 149.8 | 166.6  | 141.5  |
| 110.6  | 122.1 | 117.2  | 104.1  | 102.1 | 114.6  | 115.8 | 125.7  | 115    |
| 138    | 214.3 | 208.9  | 230.6  | 198.7 | 179.2  | 235.2 | 196.4  | 145.7  |
| 109.6  | 111.1 | 100.2  | 98.5   | 94.1  | 112.3  | 100.8 | 118.1  | 111.3  |
| 106.9  | 122.5 | 115    | 108.2  | 105.2 | 110.1  | 113.6 | 134.1  | 115.2  |
| 106.9  | 118.2 | 103.6  | 101.9  | 96.9  | 113.4  | 103.8 | 113.6  | 111.9  |
| 115.2  | 114.8 | 115.2  | 101.7  | 112.6 | 111.1  | 105.4 | 112.2  | 119.6  |
| 108.7  | 110.7 | 111.8  | 91.3   | 99.3  | 107.5  | 106.7 | 101.9  | 97.7   |
| 284.2  | 879.5 | 508.2  | 1276.9 | 553.6 | 587.5  | 739.3 | 812.8  | 474.1  |
| 105.6  | 116.9 | 106.3  | 98.3   | 97.1  | 113    | 106.6 | 104.4  | 108.6  |

|       |        |        |        |        |        |        |        |        |
|-------|--------|--------|--------|--------|--------|--------|--------|--------|
| 105   | 100.9  | 100    | 96.5   | 95.6   | 94.1   | 89     | 105.1  | 97.6   |
| 108.6 | 112    | 98.6   | 101.5  | 95.2   | 103.5  | 109.9  | 103.3  | 106.5  |
| 226.6 | 231.5  | 266.1  | 217.8  | 198    | 247.5  | 261.8  | 376.4  | 304.8  |
| 170.3 | 180.5  | 159.5  | 207.4  | 181.7  | 181.3  | 172.9  | 248.3  | 237.3  |
| 100.9 | 106.9  | 103.6  | 99     | 90.2   | 113.7  | 102.5  | 101.6  | 99.1   |
| 106.1 | 111.3  | 108.2  | 104.9  | 89.1   | 107.7  | 102    | 111.1  | 108    |
| 111.7 | 146.8  | 155.4  | 132.5  | 128.1  | 133.2  | 107.9  | 132.5  | 123.8  |
| 112.1 | 113.2  | 108    | 99.2   | 99.6   | 106.5  | 105.1  | 113    | 115.3  |
| 109.2 | 104    | 100.3  | 102.7  | 95.9   | 98.6   | 99.4   | 105.9  | 110.3  |
| 96.7  | 105.1  | 104.7  | 97.6   | 96.2   | 101.3  | 107.8  | 121    | 99.5   |
| 377.3 | 331.7  | 272.9  | 277.4  | 256.2  | 291.6  | 232.4  | 463.5  | 333.5  |
| 138.2 | 131.9  | 116.3  | 125.8  | 116.3  | 120.3  | 129.6  | 180    | 137    |
| 184   | 147.8  | 133.9  | 174.4  | 152.4  | 161.8  | 142.8  | 179.9  | 157.8  |
| 210.8 | 171.9  | 181.3  | 199.7  | 151.7  | 197.7  | 198.4  | 272.4  | 194.7  |
| 110.8 | 108.3  | 111.7  | 100.7  | 94.6   | 105    | 111.8  | 104.4  | 98.7   |
| 109.5 | 102.7  | 100.9  | 99     | 94.6   | 106.7  | 106.2  | 108    | 100.3  |
| 816.7 | 1790.4 | 1714.1 | 1672.6 | 1924.1 | 1894.7 | 2353.2 | 2498   | 1388.4 |
| 107.1 | 114.3  | 109.4  | 122.7  | 96.5   | 112.8  | 109    | 113.5  | 115.3  |
| 116.6 | 136.5  | 123.3  | 118.8  | 117.9  | 127.9  | 115.3  | 156.4  | 119.9  |
| 113.8 | 124.5  | 107    | 100.4  | 97.8   | 126.9  | 112.4  | 130.8  | 115.3  |
| 107.7 | 123.2  | 116.9  | 109.5  | 103.6  | 120.3  | 102.6  | 123.3  | 113.3  |
| 117.4 | 113.4  | 100.1  | 106.5  | 101.9  | 125.6  | 104.3  | 124.7  | 114.4  |
| 107.6 | 102.6  | 95.4   | 96     | 91.1   | 105.1  | 100.3  | 103.2  | 101.1  |
| 101.8 | 103.5  | 107    | 95.8   | 95.1   | 108    | 96.7   | 105.5  | 105.5  |
| 103.5 | 107.6  | 103.4  | 99.6   | 99.1   | 115.5  | 109.9  | 108.5  | 111.3  |
| 106.1 | 107.3  | 109.6  | 102.3  | 106.8  | 117.1  | 103.5  | 116.8  | 108.8  |
| 135.5 | 117.8  | 113.2  | 142    | 118.8  | 145.9  | 169.7  | 196.6  | 154.1  |
| 105.2 | 123.5  | 107.7  | 99.8   | 100.8  | 113.6  | 102.7  | 112.2  | 107    |
| 110.8 | 108.8  | 108.3  | 99.7   | 97.1   | 114.3  | 104.1  | 115.2  | 110    |
| 144.3 | 154.2  | 142.4  | 174.3  | 124.6  | 145.4  | 165.5  | 241.3  | 219.8  |
| 117.3 | 118.8  | 107    | 103.3  | 104.4  | 112.1  | 105.6  | 132    | 140.2  |
| 111.5 | 114.4  | 106.1  | 114.3  | 98.3   | 111.1  | 109.6  | 126.4  | 115.6  |
| 117.2 | 120.1  | 103.2  | 103.9  | 111.4  | 116.1  | 111.2  | 121.3  | 108.7  |
| 107.9 | 107    | 107.6  | 104.4  | 100.4  | 112.7  | 105.7  | 106.1  | 103    |
| 103.9 | 105.8  | 105.8  | 104.4  | 93.5   | 114.9  | 102.4  | 118    | 108.6  |
| 111.3 | 106.6  | 99.4   | 108.6  | 94.8   | 107.6  | 100.2  | 120.9  | 113    |
| 104.2 | 105.2  | 111.4  | 116.3  | 106.5  | 112.9  | 113.7  | 112.9  | 110.6  |
| 520.4 | 1078   | 1044.3 | 990.5  | 723.2  | 946.9  | 883.6  | 1214.8 | 746.2  |
| 600.5 | 580.3  | 456.9  | 565.2  | 605.3  | 849.8  | 672.8  | 1100.9 | 711    |
| 390.5 | 898.3  | 921.8  | 1025.6 | 704.9  | 742.1  | 891.4  | 656.1  | 522.4  |
| 109.8 | 111.7  | 96.8   | 96.8   | 94.8   | 110    | 101    | 104.1  | 99.1   |
| 107.5 | 117.3  | 105.9  | 104.7  | 104.3  | 118.3  | 104.4  | 105.4  | 108.9  |
| 107.6 | 113.7  | 102.9  | 108.1  | 111    | 121.5  | 111.2  | 135.3  | 106.2  |
| 113.1 | 105.2  | 103.9  | 100.4  | 96.2   | 111    | 105.5  | 110.4  | 114.1  |
| 98.4  | 108.9  | 99     | 91.9   | 93.1   | 99.2   | 104.7  | 101.9  | 105    |
| 320   | 640.8  | 657.8  | 591    | 530.7  | 447.2  | 566    | 862.3  | 536.1  |
| 158.8 | 161.7  | 159.9  | 140.6  | 156.8  | 170.7  | 175.2  | 216.2  | 159.5  |
| 110.5 | 109.3  | 103.7  | 111    | 101.4  | 115.1  | 107.2  | 106.8  | 109.7  |
| 108.3 | 102.1  | 99.5   | 108.8  | 101.1  | 105    | 108.8  | 112.7  | 109.2  |
| 147.3 | 119.2  | 109.2  | 128.5  | 116    | 127.8  | 122.3  | 154.8  | 175.1  |
| 100.7 | 113.7  | 96.7   | 121.2  | 100.5  | 108.6  | 125.4  | 121.2  | 106.5  |

|       |       |       |       |       |       |       |        |        |
|-------|-------|-------|-------|-------|-------|-------|--------|--------|
| 112.7 | 110.1 | 116.4 | 116.3 | 104.8 | 110.9 | 102.6 | 130.5  | 115.8  |
| 104.5 | 106.3 | 99.1  | 97    | 91.3  | 105.6 | 101.9 | 106.4  | 101.2  |
| 106.3 | 103.7 | 104.6 | 107.4 | 94.8  | 111   | 96.5  | 111    | 107.3  |
| 130.8 | 155.3 | 158   | 156.5 | 145.3 | 169.5 | 159   | 222.2  | 229.9  |
| 143.8 | 262   | 224.6 | 188.9 | 199.4 | 282.6 | 231.5 | 268.2  | 190    |
| 197.5 | 143.4 | 136   | 138.6 | 142.8 | 168.9 | 157.5 | 225    | 251    |
| 112.6 | 108.4 | 102.5 | 99.3  | 97.2  | 123.5 | 103.3 | 129.3  | 129.4  |
| 112.6 | 133.8 | 122.6 | 107.9 | 123.2 | 117.3 | 116.9 | 130    | 134.8  |
| 308.4 | 326.7 | 293.1 | 317   | 332.9 | 321.7 | 260.6 | 513.5  | 325.1  |
| 117.7 | 109.8 | 103   | 100.7 | 97.9  | 105.5 | 113.2 | 120.9  | 122.4  |
| 105.2 | 113.9 | 103.4 | 99.2  | 94.3  | 99.8  | 93    | 103.2  | 106.3  |
| 112.6 | 126.3 | 119.9 | 120.6 | 116   | 122.2 | 139   | 129    | 114    |
| 148.4 | 349.2 | 233   | 259.8 | 230.5 | 266   | 314.1 | 308    | 213.1  |
| 106.4 | 107.9 | 110   | 110.6 | 95    | 113.6 | 103.1 | 105.4  | 111.8  |
| 110.4 | 114.3 | 106.8 | 101.3 | 94.1  | 105.3 | 105.2 | 119.4  | 102.8  |
| 211.2 | 371.2 | 400.4 | 490.8 | 421.9 | 316.3 | 573.3 | 260    | 177.5  |
| 137.5 | 128.8 | 118.8 | 128.1 | 124.5 | 123   | 121   | 114.7  | 121.4  |
| 114   | 114.9 | 106.1 | 104.4 | 99.9  | 117.9 | 108.4 | 121.4  | 109.8  |
| 349.7 | 375.4 | 355.1 | 329   | 328.8 | 421   | 374.2 | 661.6  | 452.4  |
| 101   | 113.6 | 99.6  | 107.7 | 95.8  | 105.9 | 96.2  | 120    | 113.2  |
| 117.8 | 108.5 | 103.8 | 112.8 | 100.6 | 115.9 | 112.9 | 120.1  | 114.4  |
| 116.6 | 119.2 | 126.1 | 113.9 | 113.6 | 118.7 | 105.2 | 131    | 110.3  |
| 104.5 | 111   | 112.8 | 106.7 | 103   | 110.6 | 107.8 | 109.6  | 116    |
| 177.4 | 318.4 | 362.6 | 234.3 | 332.2 | 391   | 299.2 | 484.6  | 266.2  |
| 140.8 | 192.9 | 153.5 | 174.1 | 164.5 | 169.1 | 159.9 | 281.8  | 233.4  |
| 125.2 | 140.6 | 123   | 135.2 | 118.5 | 132.8 | 119.9 | 178.1  | 150    |
| 284.9 | 311.4 | 292.6 | 299.2 | 278.5 | 305.3 | 328.8 | 361    | 259.4  |
| 199.7 | 252.1 | 239.3 | 248.8 | 206.5 | 205.5 | 244.6 | 285.6  | 166.4  |
| 448.6 | 544.9 | 503.1 | 515.5 | 505.9 | 457.1 | 485.6 | 1324.7 | 1038.5 |
| 139.8 | 139.8 | 139.4 | 139.1 | 149   | 168.4 | 147.7 | 161.5  | 146.9  |
| 158.9 | 217.4 | 193.3 | 176.1 | 201.2 | 202.4 | 226.8 | 243.5  | 228.8  |
| 217.1 | 321   | 277.9 | 356.3 | 264.8 | 331   | 340.1 | 310    | 324    |
| 106.1 | 111.8 | 103.4 | 113.2 | 92.7  | 117.2 | 101.7 | 116.1  | 108.9  |
| 100.9 | 109.1 | 100.9 | 101.2 | 93.4  | 109.5 | 104.2 | 109.3  | 107    |
| 122.6 | 118.8 | 114.5 | 115.9 | 118.3 | 133.5 | 130.7 | 149.4  | 118.6  |
| 114.1 | 114   | 109.5 | 118.4 | 98.5  | 125.5 | 114.4 | 113.2  | 129.7  |
| 143.4 | 155.5 | 152.1 | 173.5 | 151.9 | 165.2 | 163.6 | 199.3  | 196.2  |
| 119.5 | 132.4 | 108.7 | 137.1 | 128.9 | 124.7 | 133.3 | 150.6  | 119.4  |
| 107.5 | 106.8 | 109.1 | 106.6 | 105.7 | 114.2 | 105.2 | 119.8  | 116.8  |
| 102.3 | 102.2 | 101.7 | 94.4  | 95.1  | 106.5 | 97.6  | 102.1  | 102    |
| 146.6 | 169.4 | 146.2 | 183.8 | 145.3 | 166   | 198.1 | 176    | 157.4  |
| 205.6 | 261.7 | 249.3 | 302.2 | 254.4 | 217.6 | 305.5 | 374.8  | 290.5  |
| 138   | 142.5 | 149.4 | 157.1 | 143.6 | 154.5 | 129.3 | 189.1  | 167.1  |
| 172.2 | 221.5 | 242.8 | 244.9 | 210.9 | 176   | 216.9 | 339.3  | 255.9  |
| 119.9 | 107.5 | 106.3 | 114.3 | 94.9  | 115.1 | 114.8 | 114.6  | 104.4  |
| 218.8 | 289.2 | 303.6 | 338.6 | 286.2 | 349.5 | 340.5 | 356.4  | 290.1  |
| 108   | 108.9 | 99.8  | 110.9 | 92.6  | 108.2 | 99.3  | 109.1  | 106.8  |
| 108.1 | 105.8 | 107.3 | 104   | 99.7  | 115.9 | 107.1 | 107.3  | 108.2  |
| 110.7 | 107.6 | 102.1 | 105.3 | 95    | 109.2 | 101.3 | 111.1  | 107.8  |
| 107.6 | 106.1 | 101.2 | 103.3 | 98.1  | 111.6 | 102.1 | 114.6  | 109.8  |
| 103.9 | 101.4 | 99.9  | 94    | 94    | 105.2 | 97.1  | 109.1  | 108.9  |

|       |       |       |        |       |       |       |        |       |
|-------|-------|-------|--------|-------|-------|-------|--------|-------|
| 110.8 | 110.3 | 101.4 | 106.4  | 100.8 | 110.1 | 105.6 | 118.3  | 114.9 |
| 104.3 | 100.6 | 98.9  | 96.7   | 100.9 | 109.7 | 102   | 111.2  | 116.6 |
| 109   | 108.2 | 96.8  | 94.3   | 94.4  | 102.2 | 109.8 | 113.1  | 105.5 |
| 110   | 111.7 | 107   | 98.2   | 102.7 | 110.2 | 98.2  | 120.2  | 104.6 |
| 116.4 | 122.5 | 120.6 | 105.2  | 108.3 | 115.6 | 125.4 | 133.7  | 113.4 |
| 142   | 166.5 | 156.2 | 244.4  | 131.5 | 142.7 | 166.2 | 149.9  | 143.1 |
| 113.1 | 110.9 | 105.1 | 100.1  | 95.7  | 104.5 | 107.6 | 102.2  | 98.9  |
| 192.9 | 991.2 | 509.7 | 1149.8 | 616.1 | 441.5 | 721.5 | 633.2  | 303.5 |
| 107.7 | 132.6 | 186.8 | 103    | 168.1 | 158.6 | 112   | 263.8  | 147.3 |
| 111.8 | 101.4 | 158.2 | 103    | 95.2  | 182.6 | 97.3  | 123    | 119.1 |
| 113   | 117.8 | 109.9 | 108.3  | 101.7 | 119.8 | 108.6 | 114.4  | 122.8 |
| 112.4 | 112.8 | 105.5 | 112.1  | 95.8  | 118.6 | 107.4 | 117    | 106.2 |
| 155.6 | 168.1 | 231.9 | 188.4  | 157.5 | 231.8 | 209.9 | 270.8  | 249.8 |
| 755.1 | 744.8 | 765.3 | 859.8  | 662   | 688.7 | 791.6 | 1083.4 | 720.8 |
| 120   | 202.1 | 158.3 | 155.6  | 163.4 | 157.5 | 148.5 | 253.3  | 156   |
| 103   | 117.9 | 109.3 | 112.2  | 102.1 | 113.6 | 102.2 | 108.9  | 102.7 |
| 110.3 | 122.6 | 104.4 | 104.3  | 107.5 | 111.4 | 123.5 | 157.7  | 137.7 |
| 108.1 | 104.8 | 101.8 | 103    | 93.3  | 103.1 | 97.7  | 110.9  | 101.1 |
| 108.5 | 110.2 | 98.4  | 102.2  | 101   | 108.6 | 103.6 | 104.7  | 107.6 |
| 106.3 | 116.4 | 109.8 | 101.6  | 97.4  | 110.6 | 104   | 116.3  | 108.3 |
| 108.2 | 115.3 | 110.8 | 114.4  | 93.6  | 110   | 103.4 | 116.2  | 116.9 |
| 114.7 | 112.2 | 106.2 | 98.3   | 93.1  | 108.9 | 106.1 | 112.7  | 117.9 |
| 101.2 | 108.1 | 96.2  | 97.4   | 103.3 | 106.4 | 106.1 | 105.5  | 106.6 |
| 146.9 | 114.7 | 113.4 | 94.4   | 100.8 | 113.8 | 112.7 | 105.3  | 123.6 |
| 104.3 | 113.9 | 106.9 | 103.2  | 95.8  | 105.6 | 108.3 | 112.4  | 114.8 |
| 140.4 | 130.9 | 144.8 | 141.1  | 135   | 148.8 | 173.3 | 163    | 155.8 |
| 284.7 | 403.9 | 383.2 | 330.2  | 314.2 | 339.5 | 372.5 | 597    | 356.9 |
| 148.7 | 184.5 | 186.4 | 165.6  | 152.4 | 209.2 | 191.3 | 226.8  | 186.9 |
| 103.9 | 100.1 | 111.8 | 92.9   | 101.2 | 112.4 | 109   | 109.9  | 105.9 |
| 107.9 | 136   | 149.2 | 116.7  | 114.1 | 141   | 109.6 | 120.9  | 118.5 |
| 109.2 | 127   | 113.3 | 138.5  | 117.2 | 119.1 | 126   | 117.3  | 109.5 |
| 103.5 | 109.8 | 102.6 | 105.1  | 98    | 108   | 99.2  | 115.5  | 106.6 |
| 100.2 | 107.6 | 97.2  | 98.3   | 89.8  | 96.7  | 98.9  | 106    | 100.5 |
| 128.9 | 133.2 | 130.7 | 113.8  | 113.7 | 137   | 135.1 | 144    | 141.7 |
| 111.3 | 120.1 | 114.4 | 111.8  | 108.4 | 121.2 | 109.7 | 125.3  | 120.1 |
| 107.1 | 116.1 | 108.4 | 115.4  | 97.5  | 113.2 | 109.1 | 117.4  | 122.6 |
| 97.8  | 103.3 | 105.2 | 91.1   | 94.6  | 103.4 | 98.1  | 109    | 99.6  |
| 116.5 | 114.7 | 100.5 | 108.7  | 99.7  | 110.6 | 105.9 | 117.5  | 113.5 |
| 113.3 | 112   | 106   | 97.2   | 95.8  | 103.6 | 100.7 | 105    | 108.7 |
| 150.8 | 174.4 | 157.6 | 181.5  | 159.7 | 165.5 | 179.7 | 180.4  | 178.9 |
| 116.3 | 118.5 | 110.5 | 104.1  | 99.3  | 113.5 | 112.5 | 122.4  | 113.9 |
| 108.7 | 114.3 | 105.4 | 106.2  | 100.2 | 102.6 | 104.1 | 110.9  | 108   |
| 123   | 153.4 | 118.8 | 114.4  | 109.6 | 136.8 | 122.1 | 182.6  | 125.9 |
| 143.5 | 199.3 | 200.8 | 226.5  | 164.1 | 204.8 | 189.5 | 351.6  | 251.1 |
| 158.2 | 255.3 | 214   | 217.4  | 182.3 | 220.3 | 205.1 | 279.9  | 231.2 |
| 292.7 | 438.9 | 415.9 | 354    | 359.6 | 454.2 | 393.3 | 546.9  | 379.9 |
| 112.3 | 111.4 | 106.5 | 119    | 101.4 | 118.9 | 107.8 | 120.6  | 116.9 |
| 142.4 | 154.1 | 196.2 | 178.7  | 141.8 | 182.5 | 163.5 | 156.8  | 150   |
| 278.7 | 354.4 | 429.4 | 373.5  | 317.6 | 391.4 | 310.7 | 406.7  | 272.4 |
| 122   | 118   | 111.9 | 101.2  | 105.8 | 118.1 | 120.3 | 100.8  | 116.1 |
| 113.3 | 119   | 111.7 | 112.3  | 111.5 | 110.6 | 111.3 | 98.8   | 120.9 |

|       |       |       |       |       |       |       |        |        |
|-------|-------|-------|-------|-------|-------|-------|--------|--------|
| 108.8 | 108.9 | 110.7 | 99.9  | 95.1  | 102.2 | 106.6 | 108.7  | 112.7  |
| 106.1 | 112.5 | 106.1 | 104   | 98.3  | 109.9 | 107.3 | 115.2  | 112.1  |
| 104.3 | 105.2 | 98.3  | 100.2 | 98.5  | 108.7 | 96.9  | 103.4  | 100.8  |
| 102.9 | 101.3 | 96.4  | 91.6  | 96.6  | 108.1 | 102.5 | 106    | 105.3  |
| 122.3 | 124   | 113.9 | 108.3 | 108   | 120.4 | 102.3 | 121    | 135.3  |
| 115   | 114   | 108.1 | 117.7 | 108.5 | 118   | 110   | 117.2  | 111.5  |
| 102.6 | 111.3 | 98.2  | 103.3 | 95.9  | 106.4 | 96.4  | 116.4  | 112.3  |
| 101.5 | 108.7 | 97.7  | 99.5  | 95.1  | 106.4 | 99.7  | 115.3  | 111.5  |
| 101.2 | 108.1 | 106.9 | 104.4 | 99.5  | 110.5 | 104.6 | 121.3  | 109.3  |
| 97.7  | 111.4 | 104.8 | 98.6  | 98.3  | 101.6 | 100.3 | 102.1  | 96.6   |
| 107.6 | 106.2 | 101.9 | 99.9  | 99.5  | 107.4 | 101   | 108.4  | 108.9  |
| 107.3 | 107.7 | 98.9  | 100.7 | 100.2 | 111.8 | 107.1 | 99.7   | 108.2  |
| 108.8 | 117.5 | 110.5 | 105.4 | 99.4  | 112.2 | 108.4 | 111.7  | 116.2  |
| 109.7 | 107.2 | 99.6  | 104.9 | 94.9  | 108.2 | 103.3 | 97.3   | 105.1  |
| 105.8 | 108.7 | 100.5 | 108.8 | 94.7  | 107   | 101.8 | 119    | 104.3  |
| 102.8 | 107.9 | 98.3  | 108.6 | 92.1  | 101.3 | 108.8 | 107.6  | 101.8  |
| 106.7 | 110.3 | 97.1  | 97.9  | 97.4  | 103.9 | 106.7 | 108    | 109.6  |
| 250.4 | 266.7 | 216.3 | 307.9 | 281.8 | 259.7 | 323.9 | 490.9  | 309.7  |
| 113.9 | 116.6 | 106   | 100.7 | 102.2 | 113.1 | 115   | 127.1  | 115.9  |
| 196.3 | 258.6 | 247.6 | 263   | 201.8 | 280.8 | 276.6 | 381    | 283    |
| 114.2 | 113.9 | 118.6 | 109.8 | 101.5 | 105.7 | 107.3 | 119.7  | 109.3  |
| 106.6 | 104   | 99.6  | 95.1  | 98.6  | 109.4 | 98.7  | 114.9  | 108    |
| 108.8 | 110.3 | 107.2 | 88.8  | 94.1  | 109.7 | 95.5  | 104    | 113.3  |
| 110.3 | 118.5 | 115   | 114.7 | 109.3 | 124.8 | 99.8  | 130.9  | 106.1  |
| 104.4 | 109.3 | 99.4  | 102.9 | 91.8  | 112.5 | 105.3 | 118.1  | 119.5  |
| 112.7 | 104.6 | 108.9 | 101.3 | 95.5  | 108.5 | 110.5 | 112.9  | 118.2  |
| 114.1 | 124.6 | 107.1 | 107.6 | 103.7 | 117.1 | 107.3 | 124.8  | 119.9  |
| 119.3 | 169.7 | 162.1 | 139.4 | 155.4 | 160.4 | 156   | 243.6  | 175.2  |
| 115.1 | 118.1 | 124.2 | 108.8 | 104.8 | 110   | 111.6 | 130.8  | 122.5  |
| 107.5 | 102.3 | 104.5 | 96.6  | 100.2 | 105.5 | 95.4  | 106    | 106.2  |
| 475.9 | 399.6 | 449   | 502.8 | 518.3 | 312.1 | 417.1 | 977.5  | 937    |
| 112.4 | 110.3 | 112.9 | 117.5 | 97.5  | 114.8 | 97.5  | 120.5  | 117.6  |
| 303.4 | 411.9 | 334   | 355.7 | 325.2 | 409.2 | 455.5 | 544.8  | 384.3  |
| 130.2 | 121.7 | 147.3 | 129   | 119.5 | 158.5 | 147.5 | 145.8  | 131.3  |
| 114.3 | 160.7 | 131.3 | 124.2 | 127.5 | 136.9 | 120.4 | 142.3  | 139.3  |
| 107.6 | 119.5 | 101.4 | 109.9 | 99.9  | 109.3 | 109.5 | 110.7  | 112    |
| 115.3 | 106.2 | 105.6 | 106.6 | 98.7  | 111.3 | 102.1 | 106.9  | 105.8  |
| 157.3 | 166.1 | 146.8 | 128.8 | 147.4 | 164.9 | 166.3 | 218.3  | 143.5  |
| 101.5 | 105.1 | 104   | 101   | 93.4  | 106.2 | 106   | 109.4  | 113.8  |
| 118   | 110.1 | 113.7 | 104.2 | 113   | 111.4 | 111.6 | 135    | 114.6  |
| 101.3 | 104.8 | 96.3  | 92.7  | 103.3 | 101.2 | 93.1  | 108.2  | 105.4  |
| 108.7 | 107.4 | 99.3  | 96.3  | 98.6  | 110.1 | 101.1 | 114.5  | 103.3  |
| 108.4 | 107.3 | 106.1 | 103.2 | 92.3  | 101.1 | 106.3 | 106.3  | 115.6  |
| 130.5 | 145.1 | 134.8 | 136.6 | 114.4 | 131.8 | 148.5 | 171.5  | 139.4  |
| 130.6 | 182.9 | 177.2 | 165.6 | 184.5 | 159.7 | 169.6 | 185.8  | 146.8  |
| 195.8 | 283   | 288.5 | 213.8 | 227.8 | 306.6 | 266.7 | 426.9  | 338.9  |
| 135.3 | 149.1 | 139.5 | 136.3 | 118.7 | 147.6 | 143.9 | 162.4  | 151    |
| 1611  | 270.8 | 222.7 | 226.5 | 271.7 | 336.5 | 283.1 | 1134.2 | 1043.5 |
| 126.6 | 108.1 | 102.7 | 111.9 | 93.4  | 108.2 | 110.4 | 142.9  | 129    |
| 107.7 | 109.7 | 97.2  | 101   | 94.1  | 111.9 | 102.1 | 116.2  | 101.8  |
| 184.4 | 155.5 | 132.1 | 123   | 129.1 | 134.2 | 127.5 | 216    | 225.9  |

|        |        |        |        |        |        |        |        |        |
|--------|--------|--------|--------|--------|--------|--------|--------|--------|
| 127.4  | 118.4  | 116.9  | 118.8  | 101.6  | 130.8  | 125    | 138.2  | 124.7  |
| 297.7  | 552.9  | 544.3  | 588.1  | 387.9  | 489.3  | 422.9  | 836.9  | 583.6  |
| 99     | 107.5  | 97.7   | 104.9  | 106.9  | 106.6  | 106.2  | 104.9  | 100.3  |
| 103.6  | 108.7  | 104.2  | 104.7  | 94.3   | 108.4  | 101.2  | 104.2  | 104.9  |
| 113.2  | 117    | 103.4  | 103.5  | 104.8  | 118.7  | 108.3  | 119.7  | 107.2  |
| 103.9  | 113.8  | 104.7  | 114.4  | 98.6   | 115.8  | 107.3  | 113.5  | 108.2  |
| 169.4  | 203.2  | 181.6  | 159.2  | 198.9  | 179.2  | 149.7  | 335.8  | 209.7  |
| 114.7  | 106.2  | 105.3  | 98.3   | 91.9   | 107.8  | 95.7   | 100.3  | 105.6  |
| 93.4   | 106.9  | 102    | 97.8   | 92.7   | 101.3  | 97.1   | 116.4  | 105.7  |
| 109.4  | 108.9  | 108    | 113.9  | 96.8   | 111.1  | 100.2  | 98.1   | 109    |
| 136.6  | 128    | 121.7  | 118.6  | 111.5  | 118.8  | 140.7  | 168.4  | 131.9  |
| 154.2  | 172.7  | 170    | 183.4  | 141.5  | 173.4  | 189.4  | 227.6  | 178.7  |
| 1853.5 | 2076.1 | 2357.1 | 1341.1 | 1257.7 | 1662.9 | 1292.1 | 2642.7 | 3284.3 |
| 134.1  | 163.4  | 145.3  | 152.7  | 136.1  | 169.2  | 161.7  | 224.9  | 157.8  |
| 107.9  | 107.4  | 104.5  | 98.2   | 96.6   | 115.6  | 103.7  | 104    | 108.4  |
| 131.6  | 139.5  | 120.9  | 158.5  | 116.3  | 121.5  | 138.2  | 129.7  | 130.3  |
| 278.1  | 357.7  | 344.8  | 412.6  | 306.7  | 314.3  | 412.6  | 384.1  | 249.8  |
| 231.3  | 513.1  | 419.1  | 919.7  | 390    | 471.3  | 590.2  | 626.2  | 470.4  |
| 118.5  | 118.1  | 111.6  | 104.8  | 99.9   | 110.1  | 107.5  | 129.5  | 104.3  |
| 112.5  | 120.2  | 102.6  | 128    | 101.7  | 121.9  | 105    | 108.5  | 116.9  |
| 115.9  | 108.4  | 115.3  | 113.9  | 104.1  | 114.4  | 101.6  | 119.6  | 122    |
| 448.4  | 296.3  | 203.1  | 791.8  | 328.2  | 261.5  | 400.6  | 600.3  | 305.4  |
| 97.8   | 104.7  | 98.9   | 97.8   | 99.1   | 104.8  | 95.7   | 102.7  | 110.4  |
| 105.9  | 105.2  | 102.6  | 102.7  | 92.6   | 106.9  | 106.1  | 110.9  | 105.5  |
| 300.2  | 177.4  | 162.6  | 145.1  | 184.2  | 197.6  | 187.6  | 447.8  | 445.5  |
| 105.9  | 111.4  | 106.6  | 100.3  | 105.2  | 116.6  | 105.6  | 114.3  | 100.6  |
| 152.5  | 141.2  | 132.2  | 172.8  | 146.9  | 150.7  | 212.1  | 238.3  | 196.3  |
| 117.5  | 121.7  | 107.8  | 120.3  | 121.6  | 125.1  | 155.8  | 150.7  | 116.9  |
| 100.3  | 108.5  | 109.1  | 100.6  | 95.9   | 106.3  | 105.5  | 111    | 118    |
| 170.5  | 121.4  | 112.9  | 108.1  | 110.5  | 144.7  | 114.2  | 177.2  | 143    |
| 113.5  | 112.2  | 103.3  | 104.9  | 101    | 107.7  | 111.5  | 113.3  | 108    |
| 125.3  | 139.2  | 138.5  | 134.1  | 111.5  | 125.8  | 115.1  | 125.1  | 113.3  |
| 110    | 124    | 114.2  | 133.1  | 121.3  | 133.3  | 121.9  | 125.1  | 118.4  |
| 127    | 130.7  | 121.3  | 120.4  | 120    | 131.3  | 131.2  | 132.9  | 129.4  |
| 101    | 102.8  | 96.2   | 100.2  | 105.5  | 108.4  | 98.7   | 116.9  | 118.3  |
| 106.7  | 111.7  | 116.5  | 110.4  | 106.6  | 115.5  | 106.1  | 103.9  | 103.6  |
| 114.5  | 110.8  | 107.5  | 112    | 104.2  | 113.6  | 103.1  | 116.1  | 122.6  |
| 113.4  | 104.6  | 110.7  | 102.6  | 94.7   | 111    | 108.7  | 115.8  | 110.4  |
| 101.9  | 108.4  | 102.1  | 106.4  | 95.4   | 99.4   | 103.1  | 109.6  | 103.7  |
| 112.7  | 110    | 111.9  | 114.7  | 94.2   | 117.7  | 99     | 109.8  | 108.1  |
| 102.6  | 111.5  | 103.5  | 100.6  | 92.4   | 97.3   | 97.6   | 104.5  | 116.5  |
| 685.4  | 603.6  | 770.6  | 673.6  | 712.3  | 889.5  | 448.9  | 1971.7 | 1727.5 |
| 112.5  | 118    | 116.3  | 94.5   | 95.9   | 120.4  | 103.2  | 113.3  | 112.1  |
| 176.7  | 221.1  | 186    | 209.9  | 192.7  | 189.8  | 184.3  | 277    | 204.3  |
| 238.8  | 199.7  | 203.5  | 180.4  | 179.5  | 211.7  | 227.6  | 306.6  | 262.4  |
| 375.9  | 575.5  | 531.7  | 492.4  | 464.7  | 611.5  | 500.6  | 1041.7 | 535.3  |
| 107.1  | 114.7  | 102.7  | 98.5   | 89.9   | 106.6  | 101.6  | 108.5  | 106.7  |
| 253.2  | 371.2  | 326.3  | 403.4  | 290    | 335.6  | 343.1  | 371.3  | 239.8  |
| 277.3  | 185.3  | 243.6  | 231.1  | 229.3  | 229.6  | 351.8  | 416.3  | 308.4  |
| 104.1  | 101.5  | 99.5   | 101.3  | 97.3   | 110.1  | 102.2  | 106    | 111.5  |
| 240.3  | 361.8  | 374.2  | 394.3  | 376.7  | 362.9  | 410.5  | 486.6  | 310    |

|       |        |       |       |       |       |        |        |        |
|-------|--------|-------|-------|-------|-------|--------|--------|--------|
| 113.4 | 145.4  | 122.5 | 124.9 | 118.4 | 135.6 | 121.2  | 153.2  | 139.7  |
| 833.3 | 1004.4 | 963   | 711   | 773.1 | 955.2 | 813.4  | 1274.3 | 900.6  |
| 108   | 120.1  | 111.8 | 119.5 | 106.9 | 128   | 125.6  | 116.9  | 129.4  |
| 96.4  | 106.5  | 100.4 | 96.2  | 90.7  | 104.7 | 101.2  | 105.1  | 103.1  |
| 103   | 142    | 117.7 | 121.2 | 113.4 | 115   | 115.1  | 129.7  | 122.7  |
| 104.8 | 102.3  | 101.5 | 102.6 | 96.8  | 112   | 107.2  | 111.2  | 108    |
| 985.9 | 1087.5 | 956.5 | 1595  | 972.2 | 911.6 | 1309.1 | 1393.8 | 1376   |
| 157.7 | 199.4  | 188.3 | 156.6 | 151.8 | 189.5 | 185.7  | 292.9  | 250.2  |
| 474.3 | 435.1  | 395.2 | 438.5 | 406.5 | 441.2 | 487.2  | 682.6  | 487.6  |
| 135.7 | 148.5  | 115.8 | 115   | 106.4 | 132.8 | 111.3  | 169.1  | 179.9  |
| 320.8 | 451.3  | 313.6 | 463.5 | 349.9 | 344.4 | 363.6  | 550.9  | 468.3  |
| 110.8 | 107.7  | 102.3 | 101.6 | 94.8  | 105.7 | 95.5   | 114.7  | 113.4  |
| 255   | 255.8  | 306   | 314.5 | 423.8 | 322.3 | 240.6  | 656    | 481.1  |
| 109.7 | 118.6  | 111.4 | 114.2 | 97.9  | 105.8 | 98.6   | 115.9  | 129    |
| 332.7 | 465.1  | 328   | 324.7 | 325.6 | 413.6 | 395.5  | 788.6  | 555.2  |
| 106.6 | 110.9  | 102.5 | 113   | 98    | 109.4 | 101.4  | 122    | 106.5  |
| 117.7 | 115.8  | 132.9 | 117.8 | 109.8 | 131.2 | 121.5  | 129.3  | 124.4  |
| 112.4 | 123.3  | 122.3 | 105.1 | 102.3 | 129.1 | 119.8  | 133.2  | 122.9  |
| 417.5 | 828.8  | 775.2 | 596.2 | 826.4 | 888.3 | 353.6  | 1048.7 | 660.6  |
| 114.7 | 115.1  | 111.9 | 111.1 | 102.3 | 117.2 | 115.2  | 121.9  | 126.2  |
| 104.1 | 101    | 100.8 | 103.3 | 101.3 | 109   | 105.2  | 117.4  | 116.4  |
| 107.9 | 100.3  | 103   | 93.3  | 92.2  | 108.1 | 99.9   | 100.4  | 106.5  |
| 100.6 | 98.4   | 102.3 | 95.6  | 90.6  | 107.2 | 94.8   | 100.2  | 103.2  |
| 121.2 | 179.8  | 165.2 | 172.3 | 160.8 | 174.9 | 147.9  | 149.4  | 124.2  |
| 116.7 | 118.3  | 120.5 | 123.3 | 104.6 | 118.8 | 113.7  | 136.2  | 117.5  |
| 114.6 | 109.1  | 106.6 | 103.9 | 101.9 | 115.6 | 104    | 107.5  | 119.1  |
| 105.8 | 106.2  | 102.2 | 106.4 | 96    | 108.5 | 104.9  | 106    | 105.6  |
| 109.7 | 103.2  | 103.6 | 111.9 | 96.5  | 103   | 97.7   | 105.3  | 104.9  |
| 102.9 | 105.4  | 107.2 | 101.3 | 99.4  | 109.1 | 101.4  | 100.4  | 103.2  |
| 103.6 | 106.3  | 98.1  | 94.9  | 95.6  | 106.2 | 108.4  | 107.5  | 108.8  |
| 112.9 | 109.2  | 106.6 | 110.3 | 103.7 | 111   | 109.4  | 116.2  | 107.7  |
| 112.3 | 108.2  | 116.1 | 101.9 | 99.3  | 106   | 105.6  | 111.2  | 107.2  |
| 106.7 | 120.7  | 107.8 | 104.4 | 100.1 | 118   | 115.6  | 114.8  | 113    |
| 118.7 | 145.9  | 138.1 | 137.2 | 128.9 | 147.2 | 132.7  | 143.5  | 135    |
| 742.1 | 1073.5 | 849.5 | 748.5 | 899.6 | 945.3 | 666.8  | 1687.4 | 1367.8 |
| 237.7 | 401.1  | 460.7 | 405.4 | 353.9 | 406.2 | 371    | 495.5  | 286.3  |
| 146.7 | 310.2  | 211.8 | 182.9 | 188.2 | 200   | 205.2  | 198    | 147.1  |
| 114.5 | 105    | 105.4 | 104.3 | 104.5 | 118.3 | 118.1  | 119.2  | 120.2  |
| 424.6 | 284.6  | 293.5 | 197.9 | 286.3 | 369.3 | 286.6  | 1006.9 | 726.8  |
| 104.5 | 108.6  | 92.4  | 95.2  | 96.9  | 104.3 | 100.6  | 104.5  | 110.5  |
| 109.1 | 113.1  | 110.2 | 97.4  | 95.1  | 100.5 | 103.7  | 103.1  | 100.7  |
| 308.2 | 602.4  | 589.7 | 495.1 | 412.9 | 608.2 | 492.5  | 724.8  | 475    |
| 138.5 | 144.3  | 126.8 | 121.2 | 113.3 | 122   | 124.8  | 168.6  | 185.2  |
| 135.5 | 136.4  | 154.5 | 162.3 | 132.8 | 146.7 | 124.4  | 164.4  | 166.1  |
| 670.2 | 758.7  | 752.8 | 659.5 | 661   | 731.3 | 629.1  | 774.4  | 599.5  |
| 120.2 | 116.4  | 110.7 | 108   | 116.9 | 118   | 103.7  | 118.7  | 122.2  |
| 108.4 | 121.5  | 115   | 111   | 94.1  | 120   | 100.1  | 119.4  | 101.4  |
| 115.5 | 133.1  | 108.5 | 117.8 | 100.9 | 117.6 | 109.9  | 116    | 116.3  |
| 97.4  | 101    | 107   | 101.2 | 99.6  | 97.9  | 96.9   | 102.1  | 105.9  |
| 103.1 | 106.2  | 112.7 | 94.7  | 99.7  | 106.5 | 101.7  | 112.6  | 109.5  |
| 340.6 | 338.1  | 276.6 | 459.8 | 273.4 | 395.1 | 394.6  | 939    | 544.2  |



|        |        |        |        |        |        |        |        |        |
|--------|--------|--------|--------|--------|--------|--------|--------|--------|
| 109.3  | 131.7  | 124.3  | 108.5  | 100    | 123.5  | 127.8  | 114.1  | 112.2  |
| 277.3  | 434.2  | 492.2  | 434.9  | 461.2  | 435.8  | 496.7  | 661.3  | 398.9  |
| 153.1  | 235.1  | 230.4  | 202    | 194.5  | 201.2  | 215.1  | 275    | 184    |
| 95.8   | 101.6  | 95.1   | 87.7   | 88.7   | 105.7  | 97.6   | 112.9  | 103.3  |
| 108.5  | 110.7  | 106.9  | 115.3  | 99.8   | 110.5  | 100.3  | 115.2  | 112.7  |
| 131.1  | 125.6  | 139.1  | 126.1  | 118.9  | 140.9  | 136.3  | 196.3  | 178.3  |
| 108.2  | 111.7  | 110.4  | 93.6   | 91.6   | 109.4  | 101.2  | 118.6  | 118.4  |
| 108.4  | 128.5  | 130.1  | 116    | 110.2  | 126    | 109.4  | 145.7  | 125.5  |
| 111.7  | 109    | 103.8  | 87     | 97     | 100.1  | 101.8  | 113.9  | 102.2  |
| 106.5  | 103.3  | 101.5  | 104.3  | 93.9   | 109.9  | 106.2  | 109.4  | 106.5  |
| 102.7  | 99.6   | 101.5  | 93.4   | 97.7   | 102.9  | 106.2  | 106.7  | 103.2  |
| 752.5  | 1643.6 | 521.3  | 3041.4 | 1011   | 409.3  | 2047.3 | 822    | 425.1  |
| 445.2  | 1160.9 | 1073.9 | 820.1  | 892.9  | 975.3  | 969.4  | 1017.6 | 658.2  |
| 118.9  | 164.1  | 166.4  | 188.3  | 138.9  | 169.5  | 180.1  | 200.8  | 163.1  |
| 295.1  | 464.2  | 504.4  | 514.2  | 480.8  | 537.3  | 453.4  | 487.9  | 315.6  |
| 121.2  | 127.7  | 108.1  | 141.1  | 114.2  | 117    | 123.1  | 120.1  | 114.4  |
| 216.3  | 298.7  | 276.4  | 351.3  | 247.8  | 310.8  | 350    | 285.3  | 247.7  |
| 106.8  | 113.1  | 104.2  | 108.6  | 106.9  | 114.6  | 109.4  | 118.1  | 113.7  |
| 112.9  | 128.8  | 113.2  | 117.4  | 100.3  | 106    | 110.9  | 130.1  | 113    |
| 112.9  | 113.4  | 96.6   | 101.7  | 97.5   | 112.7  | 101.8  | 113    | 109.5  |
| 145.2  | 309.2  | 249.9  | 194.9  | 241.7  | 240.1  | 245.2  | 201.9  | 199.8  |
| 109.1  | 125    | 121.6  | 113.7  | 120.5  | 137.1  | 138.1  | 127.6  | 126    |
| 113    | 134.4  | 107.6  | 103.8  | 110.3  | 111.2  | 119.5  | 150.5  | 116.1  |
| 122.7  | 109.5  | 111.3  | 113.6  | 96.7   | 112.5  | 100.1  | 125    | 124.3  |
| 103.3  | 110.4  | 105.2  | 96.8   | 91.4   | 101.5  | 104.1  | 104.4  | 109    |
| 103.5  | 119.2  | 110.7  | 95.5   | 99.3   | 105.9  | 107.4  | 110.4  | 114.3  |
| 108.8  | 106.2  | 105.3  | 96.1   | 96.5   | 110.8  | 109.2  | 105.2  | 105.7  |
| 106.2  | 112.3  | 104.3  | 102.1  | 96.2   | 111.4  | 106.7  | 111.7  | 108.1  |
| 112.6  | 108.6  | 113.2  | 100.6  | 91.8   | 105.5  | 103.9  | 111    | 107.4  |
| 120.3  | 141.7  | 130.2  | 133.5  | 129.1  | 137.4  | 138.1  | 120.4  | 114.5  |
| 108    | 100    | 98.6   | 95.6   | 90.3   | 113.9  | 98.4   | 111    | 112.4  |
| 116.6  | 134.3  | 124    | 123.6  | 120.8  | 130.2  | 115.8  | 138.4  | 135.2  |
| 105.3  | 109.1  | 99.4   | 103    | 85.4   | 112.8  | 104.9  | 114.8  | 107.7  |
| 206.9  | 172.2  | 186.3  | 176.5  | 213.9  | 177.5  | 182.8  | 292.5  | 292.1  |
| 174.4  | 173.4  | 146.9  | 145.2  | 173    | 246.2  | 233.3  | 375.6  | 308.4  |
| 197.6  | 178.1  | 191.9  | 192.8  | 152    | 186.9  | 221.9  | 269.8  | 208.5  |
| 293.3  | 248.2  | 282.9  | 384.4  | 212.7  | 264.1  | 304.3  | 433    | 312.9  |
| 1514.8 | 2092.4 | 1969.3 | 2007.3 | 1570.2 | 1857.8 | 2114.3 | 2361.2 | 1854.8 |
| 281.8  | 460.8  | 523.2  | 499.4  | 490.7  | 553.6  | 424.4  | 878.4  | 514.7  |
| 126.1  | 137    | 125.2  | 155.4  | 122.8  | 121.4  | 209.2  | 130    | 120.2  |
| 108.8  | 113.7  | 102.7  | 98     | 94.9   | 107    | 104.4  | 106.8  | 106.6  |
| 116.7  | 109.8  | 102.5  | 96.1   | 106.9  | 110    | 102    | 181    | 109.7  |
| 349.3  | 213.6  | 185.4  | 262.4  | 190.3  | 217.8  | 282.2  | 269.8  | 194.1  |
| 99.9   | 112.5  | 102.4  | 101.7  | 94.2   | 115.5  | 111.5  | 104.1  | 117.8  |
| 367.9  | 727.9  | 907.8  | 696.8  | 807.6  | 999.6  | 749.4  | 1069.5 | 633.7  |
| 108.6  | 110.4  | 100.2  | 104.2  | 96.4   | 103.8  | 97.3   | 110.8  | 114.1  |
| 187.2  | 345.8  | 334.4  | 227.3  | 342.9  | 270.3  | 238.4  | 441.9  | 397.2  |
| 105.4  | 112.6  | 105.5  | 109.9  | 96.7   | 114.2  | 96.3   | 114.5  | 99     |
| 108.6  | 118.3  | 105    | 115.6  | 105.8  | 122.4  | 110    | 110.8  | 122    |
| 104.4  | 110.5  | 97.8   | 92.6   | 95.6   | 104.9  | 101    | 106    | 110    |
| 110.2  | 107.8  | 108.4  | 113.4  | 98.8   | 113.8  | 103.6  | 107    | 112.9  |

|         |         |         |         |         |         |         |         |         |
|---------|---------|---------|---------|---------|---------|---------|---------|---------|
| 104.6   | 103.9   | 106.4   | 107.3   | 96.6    | 111.3   | 104.9   | 111.7   | 108.5   |
| 107.5   | 106     | 94.9    | 102.3   | 91.1    | 106.9   | 104.9   | 107.3   | 105.5   |
| 134.6   | 116.6   | 120.5   | 111.2   | 108.6   | 127.5   | 149     | 147.9   | 142.5   |
| 102.1   | 100.9   | 96.3    | 105.5   | 96.4    | 108.7   | 99.3    | 100     | 103.5   |
| 103.8   | 108.5   | 99      | 98.8    | 95.5    | 107.7   | 99.6    | 103.2   | 103.9   |
| 110.4   | 121.3   | 117.8   | 107.6   | 100.7   | 124.3   | 113.5   | 110.9   | 114     |
| 101.4   | 108.6   | 101.7   | 99.3    | 103.6   | 108.9   | 105.5   | 123.2   | 118     |
| 186.3   | 201.5   | 192.8   | 147.2   | 129.7   | 166.6   | 189.9   | 301.5   | 264.8   |
| 120.6   | 111.4   | 125.2   | 116.1   | 106.4   | 121.4   | 115.5   | 147.4   | 125.9   |
| 30102.4 | 33387.2 | 31745.3 | 29541.1 | 29641.3 | 31065.8 | 29986.5 | 37316.8 | 36590.7 |
| 20311.2 | 23820.6 | 22603.8 | 19354.5 | 17629.9 | 20016   | 19021.7 | 31152.8 | 27195.8 |
| 113.5   | 120.7   | 111.9   | 101.6   | 105.1   | 125.7   | 109.3   | 133.6   | 111.3   |
| 126.5   | 152     | 136.1   | 155     | 126.1   | 125.9   | 128.6   | 172.6   | 148     |
| 3540    | 2519.9  | 2886.9  | 3408.4  | 3680.2  | 2983.3  | 2807.1  | 7411.2  | 4758.4  |
| 312.4   | 312     | 296.3   | 302.4   | 245.1   | 372     | 276.1   | 422.9   | 348.9   |
| 7256.1  | 7890.1  | 7099.6  | 6149.6  | 6962.7  | 6532.5  | 6483.3  | 10801.9 | 8133.5  |
| 1320    | 1689.4  | 1439.1  | 1189.5  | 1078.9  | 1262.9  | 1525.1  | 3035.5  | 2720.8  |
| 103.7   | 110.9   | 98.4    | 97.8    | 94.8    | 102.5   | 90.1    | 104     | 104     |
| 99.5    | 102.7   | 96.7    | 94.9    | 97.7    | 99.9    | 97.8    | 98.9    | 111.7   |
| 3413.8  | 5321.8  | 4614.8  | 4133.3  | 4039.7  | 4661.6  | 4331    | 8243.6  | 2589.5  |
| 3258.8  | 4145.3  | 3662.7  | 3476.6  | 3552.2  | 4011.1  | 3609.1  | 6725.3  | 4300    |
| 116.9   | 205.6   | 197.5   | 227.2   | 169.8   | 181.5   | 202.5   | 197.5   | 149.9   |
| 107.4   | 111     | 108     | 113.2   | 96.6    | 112.4   | 111.2   | 116.4   | 114.9   |
| 101.6   | 104.4   | 101.7   | 99.1    | 99.3    | 104.8   | 104.1   | 110.3   | 106.5   |
| 108.3   | 111.8   | 99.8    | 107.3   | 94.4    | 109     | 100.7   | 104.2   | 106.8   |
| 109.7   | 112.5   | 99      | 102.5   | 102.2   | 113.1   | 105.4   | 105     | 105.3   |
| 105.8   | 123.3   | 95.7    | 101     | 101.1   | 105.8   | 104.2   | 131.3   | 128.2   |
| 97.2    | 113     | 99.7    | 103.2   | 95.7    | 113.5   | 110.9   | 105.9   | 116.8   |
| 108.2   | 112     | 105.2   | 110.4   | 98.1    | 112.5   | 100.6   | 114.2   | 106.3   |
| 107.4   | 106.2   | 106.8   | 97.1    | 95      | 108.9   | 106.6   | 115.1   | 110.3   |
| 103.4   | 102.2   | 100     | 103.1   | 95.2    | 103.7   | 106.8   | 119.4   | 107.1   |
| 121.8   | 118.4   | 118     | 119.1   | 106.2   | 121.2   | 129.3   | 117.6   | 151.8   |
| 419.7   | 564.8   | 545.4   | 448     | 572.6   | 543.5   | 530.6   | 980.7   | 601     |
| 116.5   | 119.4   | 107.2   | 102     | 97.5    | 112.1   | 117.8   | 103.7   | 114.4   |
| 109.7   | 106.4   | 106.3   | 95.2    | 94.3    | 109.4   | 101.7   | 111.9   | 107.8   |
| 109.4   | 109.6   | 103.6   | 101.6   | 102.1   | 119     | 111.2   | 113     | 116.4   |
| 106     | 111.1   | 109.5   | 105.2   | 99.5    | 111     | 99.6    | 107.1   | 119.8   |
| 115.8   | 122.7   | 109.1   | 107.2   | 117     | 122.4   | 121     | 113.8   | 116.4   |
| 569.4   | 1384.5  | 1088    | 1077.7  | 1072.4  | 1035.1  | 1166.1  | 1520.7  | 1070.3  |
| 106.8   | 110.1   | 101.6   | 103.2   | 99.1    | 112     | 104.7   | 107.6   | 105.6   |
| 120.6   | 138.1   | 125.8   | 132.1   | 123.2   | 133.2   | 123.1   | 139.2   | 122.1   |
| 104.9   | 105.6   | 97.2    | 103.5   | 91.9    | 106.2   | 98.2    | 107.7   | 106.2   |
| 105.1   | 114.3   | 105.9   | 108.6   | 91.5    | 109.6   | 104.1   | 105.6   | 107.3   |
| 115.3   | 118.9   | 110.9   | 111     | 105.9   | 113.3   | 117.1   | 128.1   | 107.5   |
| 187.5   | 182.6   | 160.7   | 189.3   | 164.7   | 182.6   | 181.6   | 263.9   | 217.3   |
| 115.3   | 109     | 108.1   | 104.4   | 101.3   | 110.9   | 103.8   | 108.2   | 108.5   |
| 114     | 110.7   | 105.9   | 100.9   | 99.4    | 118.2   | 107.8   | 104.9   | 113.4   |
| 144.3   | 128.1   | 112.8   | 111.5   | 109     | 128.9   | 115.1   | 161.3   | 143.5   |
| 110.6   | 108     | 99.3    | 97      | 97.3    | 100.6   | 98.2    | 102.7   | 111.5   |
| 105.8   | 113     | 105     | 99.3    | 97.8    | 114.1   | 105.5   | 115.7   | 121     |
| 103.1   | 107.5   | 101.9   | 102.4   | 93.3    | 107.6   | 101.3   | 110     | 107     |

|        |        |        |        |        |        |        |        |        |
|--------|--------|--------|--------|--------|--------|--------|--------|--------|
| 127.9  | 164.8  | 175.3  | 138.3  | 138    | 155.3  | 159.9  | 195.7  | 135.6  |
| 147.8  | 172.2  | 193.7  | 154.1  | 166.6  | 180.5  | 152.9  | 212.6  | 152.4  |
| 106.8  | 105.4  | 102.7  | 94.6   | 92.6   | 108.1  | 99     | 111.5  | 103.5  |
| 227.6  | 334.5  | 410.9  | 397.9  | 363.1  | 354.5  | 499.6  | 590.9  | 298.7  |
| 103.9  | 108.6  | 104    | 94.5   | 97.5   | 109.1  | 108.2  | 109.6  | 111.9  |
| 106.1  | 110    | 104.7  | 98     | 95.9   | 109.8  | 101    | 114.2  | 115.2  |
| 98.6   | 108.1  | 106.5  | 104.3  | 94.7   | 109.7  | 102.2  | 109.4  | 117.8  |
| 103.2  | 109.4  | 104.1  | 104.8  | 101.7  | 104.7  | 101.6  | 114.4  | 105.3  |
| 106.8  | 106.3  | 103.7  | 103    | 100.1  | 109.3  | 104.8  | 109.3  | 114.3  |
| 113.1  | 108.3  | 110.8  | 104.2  | 104.9  | 109.1  | 113.7  | 107.9  | 113.3  |
| 103.6  | 109.4  | 111.1  | 113.4  | 92.6   | 114.6  | 101.7  | 117.9  | 106.2  |
| 105.8  | 116.4  | 103.4  | 99.8   | 102.7  | 116.6  | 114.1  | 121.2  | 109.7  |
| 103.5  | 106.9  | 105.7  | 103.4  | 89.6   | 101.1  | 107.7  | 118.4  | 104.7  |
| 102.2  | 117.1  | 100.6  | 114.1  | 95.7   | 109    | 117.1  | 114.5  | 111.7  |
| 107.1  | 104.9  | 96.1   | 95.3   | 98.1   | 106.8  | 110    | 108.7  | 108.9  |
| 103.8  | 112.5  | 103.2  | 101.5  | 89.5   | 109.1  | 106.5  | 109.3  | 117.4  |
| 104.6  | 104.7  | 102.3  | 98.5   | 96.6   | 106.6  | 97.2   | 104.3  | 97.9   |
| 98.6   | 116.9  | 108.5  | 119.5  | 94.8   | 117.8  | 106.5  | 111.4  | 111.2  |
| 121    | 123.9  | 105.5  | 116.3  | 105    | 122.9  | 106.2  | 157.3  | 127    |
| 106.3  | 106.1  | 103.1  | 112.3  | 108.5  | 109.9  | 107.9  | 112.3  | 104.4  |
| 1617.2 | 1926.7 | 2006.1 | 1502.3 | 1380.9 | 1975.6 | 1650.6 | 3552.3 | 1855.5 |
| 104.7  | 102.2  | 101    | 103.8  | 95.9   | 106.4  | 99.2   | 100.3  | 111.9  |
| 170.1  | 147.2  | 123.7  | 107.8  | 142.2  | 133.8  | 105.3  | 251.1  | 423.9  |
| 301.6  | 777.1  | 769.8  | 168.7  | 939.7  | 962.2  | 860    | 1526.6 | 426.3  |
| 107.9  | 110.2  | 105.1  | 102.4  | 91.9   | 116.1  | 95.1   | 124.9  | 128.3  |
| 122.5  | 126.2  | 115.1  | 109.7  | 114.7  | 119.6  | 109.7  | 132.1  | 142    |
| 110    | 110    | 101.3  | 114.7  | 91     | 110.3  | 100.2  | 113    | 104.9  |
| 163.8  | 186.1  | 209.9  | 172.5  | 157.4  | 195.3  | 166.4  | 222.8  | 160.9  |
| 449.4  | 1727.6 | 1792.2 | 1288.1 | 1240.9 | 1688.9 | 1404.3 | 1553.1 | 1244.8 |
| 111.2  | 106.9  | 107.3  | 107.6  | 100.6  | 111.8  | 111.4  | 115.6  | 122.9  |
| 107.3  | 105.5  | 115    | 117.1  | 108.4  | 128.7  | 121.2  | 107.6  | 123    |
| 149.8  | 240    | 177.9  | 240.8  | 191.7  | 190    | 249.4  | 223.7  | 172.2  |
| 108.5  | 114    | 104.4  | 107.6  | 100.2  | 110.8  | 114    | 113.2  | 116.6  |
| 107.6  | 103.9  | 107.6  | 107.4  | 98.1   | 109.6  | 105.2  | 108.5  | 110.7  |
| 107.2  | 108.9  | 108.2  | 96.3   | 97.8   | 112.4  | 106.5  | 127.1  | 120.9  |
| 118.9  | 126.1  | 113.5  | 118.7  | 109.9  | 117.1  | 110.4  | 135.6  | 121.6  |
| 112.7  | 105.6  | 115.5  | 121.5  | 91.1   | 106.1  | 106    | 109.8  | 102.9  |
| 314.6  | 307.1  | 348.8  | 369.3  | 292.5  | 402    | 317    | 439.2  | 322    |
| 153.5  | 148.9  | 130.2  | 140    | 119.1  | 162.4  | 148.5  | 170.3  | 156.4  |
| 1324.9 | 1136.2 | 1227.4 | 685.6  | 731.7  | 976.3  | 850    | 2908.1 | 3048.8 |
| 126.9  | 130    | 123.6  | 112.4  | 114.4  | 125.5  | 109.9  | 135.9  | 176.3  |
| 3449.3 | 2285.3 | 1589.5 | 1509.3 | 1475.4 | 1881.7 | 1789.1 | 6189.9 | 8260.5 |
| 103.9  | 118.9  | 113.1  | 104.5  | 90.6   | 115.8  | 101.5  | 116    | 116.6  |
| 290    | 244.6  | 210.9  | 318.9  | 193.8  | 266.7  | 191.6  | 414    | 357.5  |
| 202.2  | 154.5  | 168.3  | 177.5  | 136.2  | 181    | 149.5  | 215.6  | 164.5  |
| 192.2  | 201.6  | 149.5  | 143.5  | 148.2  | 159.3  | 152.9  | 246.1  | 212.1  |
| 405.2  | 403.6  | 370.6  | 331.9  | 306.2  | 533.3  | 350.9  | 987.2  | 692.5  |
| 433.7  | 623.6  | 514.1  | 508.1  | 535.2  | 525.3  | 447    | 814.7  | 635.5  |
| 453.4  | 881.9  | 911.3  | 874.5  | 837.8  | 726.4  | 801.7  | 1286.1 | 630.9  |
| 212.8  | 368.5  | 309.4  | 394.8  | 354.4  | 369    | 240    | 478.8  | 426.7  |
| 206.4  | 220.2  | 206.9  | 197.4  | 221.1  | 231.1  | 189.6  | 363.2  | 310.2  |

|        |        |        |        |        |        |        |         |        |
|--------|--------|--------|--------|--------|--------|--------|---------|--------|
| 173.5  | 370.7  | 341.6  | 306.2  | 280.2  | 298.8  | 337.3  | 379     | 264.7  |
| 186.3  | 335.7  | 320.4  | 240    | 270.9  | 373.5  | 295.9  | 427.4   | 288.9  |
| 647    | 952.7  | 1069.2 | 726.7  | 919.6  | 1137.9 | 970.4  | 1396.3  | 651.6  |
| 462.3  | 683.1  | 750.8  | 529.3  | 650.2  | 690.2  | 736.5  | 1146.5  | 550.4  |
| 111.5  | 110.4  | 106.4  | 94.6   | 106.3  | 113.6  | 102.9  | 120.3   | 120.3  |
| 199.2  | 317.7  | 201.4  | 229.2  | 211.2  | 259.8  | 225    | 452.1   | 295.1  |
| 133    | 220.2  | 192.5  | 179.8  | 182.3  | 166.7  | 152.7  | 192.8   | 131.1  |
| 537.8  | 332.7  | 324.5  | 240.7  | 430.8  | 409.4  | 204.5  | 792.3   | 702.5  |
| 141.6  | 126.1  | 124.3  | 112.8  | 122.6  | 136.7  | 115.4  | 166.3   | 144.4  |
| 116.1  | 113    | 111.2  | 110.3  | 99.7   | 121.7  | 108.7  | 135.8   | 127.9  |
| 127.5  | 125.7  | 121.1  | 128.9  | 117    | 116.5  | 113.6  | 160     | 129.9  |
| 148.7  | 146.9  | 144.5  | 132.6  | 143.7  | 141.8  | 153.5  | 166.4   | 157.6  |
| 164.7  | 139.4  | 139    | 115.5  | 117.6  | 162    | 133.1  | 170.2   | 162.9  |
| 659.8  | 797.6  | 755.9  | 936.3  | 686.4  | 811.3  | 794.5  | 1007.2  | 778.3  |
| 210.6  | 192.3  | 204    | 167.8  | 183.5  | 205.2  | 189.8  | 325.1   | 350.5  |
| 288.1  | 373.2  | 366.7  | 298.2  | 265.1  | 239.2  | 411.7  | 654.1   | 460    |
| 1073.2 | 896.7  | 968.6  | 1152.7 | 710.5  | 933.7  | 1429.8 | 1549.1  | 1173   |
| 487.9  | 687.6  | 527.4  | 627.5  | 515.6  | 769.7  | 508.5  | 1301.3  | 942.9  |
| 1348.3 | 1093   | 943.2  | 1080.1 | 871    | 983.4  | 1267.4 | 1734.8  | 1366.1 |
| 1028.1 | 834.2  | 1230.4 | 1117.3 | 1249.4 | 1234.2 | 1071.8 | 1783.5  | 1336.9 |
| 1722.8 | 1969.3 | 1783.1 | 1859.5 | 1756.4 | 1647   | 1875.8 | 2502.2  | 1652.7 |
| 4920.5 | 4615.1 | 3998.6 | 5924.4 | 3796.8 | 4795.2 | 3507   | 6710.7  | 5571.2 |
| 1439.1 | 1221.7 | 1170.3 | 1558.7 | 802.6  | 1045.9 | 1720.5 | 1876.8  | 1382.9 |
| 1556.4 | 1525.8 | 1504.5 | 1606.5 | 1505   | 1651.9 | 1853.3 | 2664    | 1634.1 |
| 99.1   | 110.6  | 109.2  | 104.1  | 99.3   | 110.8  | 104.1  | 108.6   | 100.7  |
| 1617.5 | 2220.7 | 2062.3 | 1642   | 1952   | 2529.3 | 2170.4 | 3609.7  | 2035.7 |
| 159.1  | 179.6  | 186.3  | 172.8  | 178.6  | 198    | 196.4  | 249.1   | 179.9  |
| 420.7  | 478.7  | 525.1  | 422.9  | 569.4  | 609    | 518    | 878.5   | 490.8  |
| 5412.2 | 5039.8 | 4647.9 | 4493.4 | 4266.6 | 5252.6 | 4549.6 | 10458.2 | 9637.5 |
| 2869.6 | 3487.6 | 3729.4 | 3830.1 | 2499.9 | 3314.2 | 3980.9 | 6675.7  | 4891.8 |
| 2645.7 | 3244.1 | 2810.2 | 2927.6 | 3264.4 | 3465.5 | 3302.6 | 3725.9  | 3317.1 |
| 118.4  | 119.6  | 111.1  | 129.5  | 104.6  | 126.8  | 117    | 130.6   | 122.2  |
| 152.7  | 230.2  | 161.6  | 202.6  | 155.6  | 172.8  | 274.3  | 258.2   | 219.9  |
| 281.2  | 559.3  | 436.5  | 551.6  | 400.9  | 377.2  | 399.9  | 623.2   | 598.4  |
| 108.8  | 108.9  | 105    | 113.2  | 104.1  | 113    | 113.3  | 117     | 117.2  |
| 271.5  | 295.6  | 324    | 324.1  | 332.1  | 391.6  | 356.4  | 390.1   | 310.1  |
| 103.5  | 106.2  | 110.4  | 102.7  | 104.2  | 111.9  | 100.8  | 101.4   | 112.8  |
| 176.3  | 184.8  | 192.6  | 171.2  | 152.5  | 198.4  | 189.8  | 245.6   | 188.3  |
| 248.2  | 250.6  | 232.9  | 193.9  | 258.5  | 283.3  | 219.8  | 525.2   | 368.1  |
| 106.9  | 108.3  | 93.3   | 102.4  | 94.6   | 107    | 103.2  | 107.4   | 110.2  |
| 541.8  | 613.2  | 736.2  | 451.6  | 576.3  | 755.7  | 591.2  | 1038.2  | 848.9  |
| 98.7   | 108.7  | 103.9  | 93.5   | 98.6   | 110.3  | 109    | 115.6   | 110.5  |
| 2158.4 | 1634.7 | 1373.3 | 1390.8 | 1221.5 | 1883.7 | 1816.2 | 4201.9  | 2987.4 |
| 236.9  | 249.6  | 169.3  | 192.2  | 167.1  | 206.8  | 213.2  | 312.8   | 311.2  |
| 3171.2 | 2925.3 | 2827.5 | 2477.5 | 2685   | 3112.8 | 2977.2 | 5413    | 4369.4 |
| 171.7  | 289.1  | 253.8  | 243.2  | 286.1  | 260    | 191    | 370.8   | 208.3  |
| 905.6  | 748.1  | 649.5  | 871    | 692.4  | 930.4  | 776    | 1623.1  | 1144.8 |
| 157.3  | 120.2  | 121.9  | 110.4  | 104.2  | 134    | 109.7  | 190.5   | 198.3  |
| 674.6  | 540.2  | 449.9  | 422.5  | 489.2  | 536.5  | 337.8  | 1070.6  | 1881.9 |
| 113.2  | 112.5  | 104.7  | 107.9  | 94.3   | 113.8  | 110.4  | 127.5   | 145    |
| 447.4  | 493.1  | 377.7  | 442.8  | 550.8  | 486.7  | 593.9  | 902.2   | 559.6  |

|       |       |       |       |       |        |       |        |        |
|-------|-------|-------|-------|-------|--------|-------|--------|--------|
| 116.8 | 119.2 | 104.9 | 107.1 | 100.2 | 116.1  | 102.1 | 132.4  | 130    |
| 201.6 | 215.8 | 220.9 | 188.3 | 211.8 | 233.6  | 203.9 | 295.2  | 218.9  |
| 168.8 | 161.1 | 137   | 235.5 | 154.6 | 176.5  | 185.1 | 256    | 186.5  |
| 114.2 | 110.9 | 126.8 | 131.5 | 102.3 | 131    | 109.7 | 117.2  | 126.7  |
| 108.7 | 102.3 | 105.9 | 98.8  | 95.9  | 100.2  | 100.6 | 108.3  | 106.3  |
| 119.6 | 122.3 | 109   | 109.5 | 98.1  | 113.5  | 106.4 | 126.3  | 117.4  |
| 108.7 | 104.4 | 107.9 | 99.8  | 93.2  | 108.3  | 104.4 | 101.7  | 113.5  |
| 106.6 | 108.9 | 107.4 | 93.2  | 97.9  | 108    | 107.7 | 106    | 109.9  |
| 110.3 | 126.4 | 113.4 | 102.6 | 110.2 | 122.2  | 109   | 119    | 123.9  |
| 133.8 | 171.7 | 167.6 | 152.9 | 161.2 | 163.6  | 170.1 | 209.5  | 148.7  |
| 119.6 | 130.5 | 131.1 | 111.9 | 110   | 121.3  | 125.4 | 134.2  | 133.5  |
| 103.3 | 101.2 | 96.3  | 91.9  | 87.6  | 109.8  | 99.6  | 102.8  | 101.5  |
| 102.6 | 115.3 | 108.2 | 110.2 | 97.3  | 119.7  | 111.6 | 105.6  | 108.3  |
| 112.1 | 111.9 | 101.4 | 103.7 | 96.2  | 112.5  | 104.4 | 117.6  | 113.7  |
| 109.8 | 108   | 91.9  | 99.1  | 94.7  | 112.8  | 102   | 114.6  | 108.1  |
| 742.3 | 883.2 | 913.3 | 790.1 | 837.1 | 1009.5 | 907.3 | 2307.3 | 2142.8 |
| 120.4 | 120   | 105.4 | 106.1 | 95.9  | 112    | 107   | 138.4  | 116.6  |
| 254.7 | 386   | 347.3 | 313.5 | 250.3 | 288.5  | 318.3 | 411.8  | 313    |
| 126.7 | 154.6 | 163.1 | 133.6 | 131.3 | 148.1  | 111.5 | 162.3  | 164.9  |
| 99.3  | 95.4  | 98.4  | 92    | 100.3 | 106.4  | 102.4 | 104.9  | 111.1  |
| 288.3 | 262.3 | 237.6 | 240.3 | 259.9 | 267.5  | 289.7 | 553.4  | 283.7  |
| 98.5  | 104.8 | 98.2  | 99    | 91.9  | 109.2  | 102.6 | 106.1  | 106.2  |
| 107.6 | 104.8 | 99.1  | 94.5  | 97.1  | 104    | 101.9 | 104.9  | 105.5  |
| 174.1 | 194.4 | 210.7 | 194   | 195.9 | 183.7  | 212.4 | 314.6  | 214.1  |
| 112   | 109.8 | 101   | 105.1 | 97.7  | 108.1  | 110.3 | 118.2  | 123.4  |
| 128.8 | 122.3 | 120.1 | 109.5 | 117   | 121.2  | 112.3 | 157.6  | 125.6  |
| 105.8 | 109.2 | 106.2 | 103.1 | 93.1  | 114    | 97.3  | 116.5  | 116.9  |
| 116   | 129.4 | 122.7 | 103.1 | 106.5 | 125.7  | 113.8 | 161.5  | 132.9  |
| 178.1 | 161.8 | 181.8 | 151.3 | 136.6 | 197    | 164.3 | 216.6  | 239.3  |
| 124.3 | 151.2 | 119.3 | 150.5 | 117   | 135.5  | 132   | 141.2  | 118.9  |
| 369.7 | 225.2 | 210.7 | 236.1 | 204.1 | 212.1  | 298.2 | 362.7  | 321.4  |
| 118.3 | 116.3 | 106.2 | 97    | 102.5 | 114.6  | 110.7 | 131.5  | 117.1  |
| 282.9 | 314.9 | 256.7 | 239.3 | 293.1 | 323.4  | 417.3 | 525    | 426.8  |
| 104.8 | 101.9 | 104.8 | 105.5 | 97.8  | 112.8  | 107.6 | 105.9  | 102.1  |
| 115.5 | 116.7 | 113.1 | 113.2 | 103.3 | 123.7  | 113.5 | 142.7  | 128.8  |
| 113.8 | 125.6 | 114.7 | 111.8 | 112.5 | 126.9  | 122.5 | 123.9  | 123.7  |
| 313.1 | 363.1 | 344.5 | 317.7 | 387.2 | 342.2  | 349.2 | 562.4  | 352.9  |
| 107.4 | 122.5 | 103.6 | 97.4  | 93.3  | 108.1  | 102.7 | 114.9  | 118.8  |
| 119.8 | 149.1 | 134.1 | 127.2 | 117.8 | 127.7  | 123.9 | 182.7  | 125.7  |
| 106.6 | 110.7 | 100   | 102.9 | 89    | 100.8  | 100.9 | 111    | 112.1  |
| 142.1 | 142.2 | 122   | 137.7 | 150.5 | 147.2  | 162.3 | 197.3  | 130.4  |
| 103.4 | 113   | 108.9 | 114.7 | 107.8 | 109.1  | 95.6  | 123.6  | 116.8  |
| 109.3 | 106   | 100.7 | 93.4  | 93.7  | 109.9  | 101.2 | 102.9  | 113.1  |
| 128.4 | 150.3 | 134.9 | 139.2 | 134.8 | 151.7  | 125.3 | 184.5  | 157    |
| 146.8 | 173.7 | 151   | 153.2 | 132.3 | 149.9  | 149   | 166    | 136.6  |
| 111.6 | 115.2 | 111   | 99    | 96.2  | 111.7  | 107.1 | 101.1  | 114.4  |
| 101.7 | 110.8 | 108.8 | 104.5 | 92.7  | 102.6  | 99.2  | 107.7  | 105.3  |
| 138.2 | 200.4 | 217.2 | 177.6 | 154.1 | 191.8  | 152.7 | 225.2  | 156.3  |
| 701.5 | 493.3 | 507.5 | 556.7 | 476.9 | 438.4  | 443.2 | 651    | 661.6  |
| 117.4 | 130.4 | 130.6 | 114.9 | 115.8 | 144    | 114.9 | 157.8  | 143.7  |
| 106.6 | 101.1 | 99.6  | 96.2  | 95    | 101.6  | 97.1  | 104.7  | 103.9  |

|        |        |        |        |        |        |        |        |        |
|--------|--------|--------|--------|--------|--------|--------|--------|--------|
| 258.7  | 351.5  | 291.2  | 297.9  | 267.5  | 368.3  | 309.4  | 475.5  | 349.9  |
| 111.7  | 137.9  | 109.3  | 129    | 118.4  | 125.4  | 123.3  | 111.5  | 126.2  |
| 106.3  | 108.4  | 98.7   | 105.7  | 93.7   | 102    | 97.4   | 105.2  | 109.2  |
| 110.2  | 110.7  | 106.9  | 100.8  | 94.2   | 102.8  | 102.9  | 119    | 109.8  |
| 570.4  | 612    | 594.7  | 573.5  | 526.8  | 746.3  | 673.7  | 1087.4 | 828    |
| 112.6  | 119.4  | 116.7  | 107.2  | 100.7  | 123.8  | 102.7  | 119.8  | 109.3  |
| 105.7  | 100.8  | 99.3   | 97     | 98.5   | 107.8  | 101.9  | 120    | 111.4  |
| 282    | 450.4  | 447.8  | 361.5  | 383.9  | 571.4  | 371.5  | 720.7  | 431.4  |
| 109.5  | 103.1  | 105    | 100.3  | 96.7   | 110.2  | 94.6   | 108.1  | 109.3  |
| 104.9  | 109.3  | 104.8  | 98.2   | 103.5  | 114.7  | 109    | 114.8  | 108.7  |
| 336.7  | 391.4  | 266.5  | 624.6  | 562.9  | 429.6  | 612.7  | 685.5  | 264.3  |
| 117.8  | 105.8  | 109.1  | 105.5  | 101    | 106.7  | 98.5   | 109.5  | 104.2  |
| 107.9  | 113.3  | 103.3  | 92.3   | 98.5   | 106.7  | 97.3   | 102    | 95.4   |
| 109.5  | 105.9  | 99     | 95.9   | 92.7   | 107.2  | 106.1  | 100.1  | 100.3  |
| 104.2  | 107.7  | 102.1  | 101.9  | 97.5   | 108    | 105.3  | 118.9  | 110.8  |
| 1058   | 1027   | 1086   | 1129   | 870.2  | 934    | 1374.2 | 1023   | 603.4  |
| 487.1  | 387.3  | 443.2  | 383    | 290.6  | 388.3  | 398.9  | 690.3  | 470.2  |
| 106.1  | 103.8  | 102.4  | 100.4  | 99.1   | 110.2  | 96     | 124.6  | 112.2  |
| 581    | 548.3  | 333.5  | 120.4  | 691.6  | 599.7  | 347.8  | 1846.9 | 384.3  |
| 122.5  | 124.6  | 107.6  | 111.5  | 104.9  | 113.5  | 123.2  | 125.6  | 114.4  |
| 1725.7 | 2492.1 | 2346.3 | 2157.9 | 2452   | 2581.2 | 2550   | 4634.5 | 3323.9 |
| 116.6  | 136.1  | 105.3  | 108.1  | 115.2  | 117.8  | 117.7  | 147.6  | 115.2  |
| 156    | 161.4  | 128.5  | 153.2  | 153.8  | 123.5  | 234.4  | 157.1  | 123.7  |
| 102.1  | 114.2  | 110.4  | 100.4  | 91.5   | 109.2  | 106    | 131.3  | 108    |
| 96.6   | 117.8  | 99.2   | 104.4  | 103.4  | 121.3  | 110.7  | 106.2  | 112.1  |
| 110.8  | 109.4  | 97.1   | 110.5  | 99.1   | 107.7  | 96.7   | 104.3  | 101.3  |
| 100.5  | 118.1  | 100.8  | 99.5   | 91.5   | 108.8  | 112.2  | 107.4  | 103.2  |
| 106.1  | 106    | 96.5   | 100.6  | 94.4   | 109.6  | 100.3  | 112.4  | 109.1  |
| 101.6  | 105.8  | 96.7   | 103.4  | 94.3   | 109.5  | 110    | 108.6  | 102.2  |
| 113.3  | 110.4  | 110.5  | 108.4  | 98.2   | 110.8  | 104.2  | 114.4  | 111    |
| 110.9  | 103.8  | 99.1   | 95.3   | 95.4   | 108.9  | 101.7  | 109.7  | 111.4  |
| 109.5  | 113.3  | 106.3  | 102.2  | 102    | 113.9  | 109.4  | 111.3  | 114.2  |
| 100.7  | 106.3  | 91.3   | 95.2   | 87.4   | 103.9  | 100.9  | 102.7  | 103.5  |
| 100.3  | 108.5  | 102.8  | 106.3  | 89.2   | 107.5  | 99     | 105    | 104.7  |
| 121.8  | 113.8  | 102.6  | 104    | 100.6  | 107.7  | 103.5  | 120.7  | 100.5  |
| 104    | 110.3  | 103.4  | 100.3  | 89.7   | 103.1  | 100    | 105.1  | 107    |
| 107.1  | 112.2  | 116.7  | 120.7  | 98.6   | 115.4  | 118.7  | 113.2  | 124    |
| 115.4  | 164.2  | 132.1  | 151.2  | 126    | 133.5  | 132.7  | 178.5  | 142.3  |
| 111.1  | 136.8  | 113.6  | 106.7  | 103.3  | 112.6  | 109.2  | 122.1  | 121.4  |
| 148.4  | 183.9  | 145    | 243.4  | 152.2  | 162.9  | 312.2  | 206.3  | 115    |
| 3078.9 | 3616.6 | 3494.5 | 3330.1 | 3431.6 | 3658.8 | 3685.2 | 6987.7 | 4293.2 |
| 227.5  | 254.2  | 306    | 274.9  | 276.8  | 314.3  | 358    | 384.2  | 243.9  |
| 182.1  | 192.4  | 223.9  | 164.6  | 154    | 165.3  | 179.2  | 214.3  | 176.6  |
| 119.9  | 116.1  | 124.4  | 117.4  | 108.1  | 120.7  | 118.9  | 127.8  | 114.4  |
| 126    | 171.4  | 183.8  | 184.7  | 155.8  | 168.9  | 183.7  | 228.2  | 160.2  |
| 105.9  | 107.4  | 98.9   | 104.7  | 98.6   | 107.5  | 101.7  | 112.6  | 104.2  |
| 111.5  | 107    | 106.1  | 104.8  | 113.2  | 129.7  | 114.4  | 123.9  | 122.8  |
| 112.4  | 115.5  | 105.1  | 103.3  | 99.5   | 108.5  | 105.6  | 124.5  | 128.1  |
| 105.4  | 110.1  | 102.6  | 103.5  | 97.3   | 108.8  | 110.7  | 124.1  | 128.3  |
| 107.7  | 106.7  | 108.4  | 105.6  | 95.3   | 104.6  | 105.7  | 110.6  | 103.4  |
| 175.2  | 240    | 194.5  | 173.9  | 209.3  | 206.3  | 207.9  | 294.4  | 234.8  |

|       |       |       |       |       |       |       |        |       |
|-------|-------|-------|-------|-------|-------|-------|--------|-------|
| 110.3 | 117.8 | 118.1 | 107.9 | 100.7 | 120   | 108.2 | 121.5  | 111.1 |
| 109.2 | 110.7 | 98.7  | 98.6  | 98    | 107.9 | 113.1 | 108.3  | 115.5 |
| 107.8 | 111.7 | 106.1 | 111   | 95.9  | 113.7 | 107   | 126.3  | 121.9 |
| 108.8 | 112.1 | 106.4 | 108.3 | 100.8 | 108.9 | 105.1 | 107.3  | 106.5 |
| 172   | 189   | 186.2 | 171.1 | 138.2 | 172.6 | 157.1 | 261.4  | 253.2 |
| 557   | 695.7 | 699   | 548.6 | 575   | 668.6 | 647.5 | 887.9  | 670.6 |
| 119.6 | 140.1 | 124.1 | 145.6 | 107.4 | 120.8 | 119.2 | 157    | 138.5 |
| 109.4 | 105.5 | 105.1 | 96.1  | 93.6  | 109.1 | 91.8  | 99.3   | 104.3 |
| 106.6 | 110   | 111   | 104.3 | 94.8  | 111.6 | 99.3  | 116.2  | 106.1 |
| 97.4  | 105.1 | 109.2 | 104.9 | 100.9 | 108.7 | 99.1  | 102.6  | 109.7 |
| 212.1 | 338.9 | 353.1 | 225.5 | 235.2 | 309.7 | 160.1 | 411.4  | 249.4 |
| 103.4 | 113.9 | 109.2 | 101.6 | 100.9 | 113.9 | 102   | 119.8  | 110.8 |
| 188.8 | 220.7 | 234.9 | 250.6 | 227.5 | 254.2 | 240.8 | 278.7  | 205.5 |
| 109.1 | 113.5 | 117.5 | 110.3 | 103.5 | 115.2 | 108.5 | 125.3  | 103.7 |
| 102.3 | 102.8 | 104.1 | 104.7 | 91.1  | 104.3 | 103   | 120.5  | 104.7 |
| 114.3 | 108.3 | 108.4 | 108.1 | 105.2 | 124.8 | 107.8 | 112.5  | 117.3 |
| 108   | 109   | 103.5 | 96.4  | 93.2  | 101.4 | 100.4 | 110.3  | 114.1 |
| 631.4 | 581.2 | 562.4 | 579.4 | 489.2 | 562.7 | 830.3 | 1235.7 | 999.5 |
| 375.9 | 646.4 | 625.6 | 905.5 | 582   | 500.1 | 667.1 | 679.2  | 687   |
| 236.6 | 192.9 | 195.1 | 183.8 | 221.2 | 208.1 | 174.4 | 287.7  | 249.7 |
| 306.8 | 303.5 | 307.6 | 262.6 | 308.9 | 284.8 | 312.5 | 470.7  | 262.8 |
| 101   | 113.3 | 103.7 | 98.3  | 97.1  | 98.1  | 98.4  | 108.2  | 106.2 |
| 106.7 | 97.2  | 101.1 | 101.6 | 92.3  | 105.7 | 99.6  | 106.6  | 112.1 |
| 128.1 | 134   | 110.9 | 108.1 | 118.8 | 119.3 | 129.9 | 147.6  | 148.2 |
| 117.5 | 117.4 | 129.4 | 127.9 | 98.4  | 133.8 | 120.1 | 147.6  | 138.6 |
| 108.5 | 105.8 | 107.4 | 98.6  | 86.7  | 109.8 | 97.1  | 108.5  | 113.7 |
| 146.1 | 145.5 | 166   | 134.9 | 123.5 | 142.7 | 132.3 | 186.4  | 198.1 |
| 109.9 | 110.4 | 105.4 | 106.9 | 90.9  | 101.8 | 96.6  | 110.2  | 120.5 |
| 110.9 | 109   | 103.3 | 107.5 | 103.7 | 108   | 104.4 | 107.3  | 116   |
| 104.6 | 111.3 | 108.5 | 109.2 | 94.5  | 112.7 | 102.9 | 119    | 111.3 |
| 315.1 | 409.3 | 211.1 | 706.7 | 333.8 | 197   | 889.8 | 208.9  | 195.9 |
| 111.7 | 116.4 | 103.5 | 102.1 | 105.2 | 121.9 | 108.4 | 113.2  | 120   |
| 107.6 | 105.6 | 108.1 | 115.8 | 96.2  | 117.7 | 105.6 | 119.1  | 115.7 |
| 113.1 | 120   | 113.3 | 112.4 | 104.3 | 114.6 | 119.7 | 130.1  | 131.8 |
| 107.2 | 104.9 | 103   | 94.9  | 94.8  | 107.9 | 92.8  | 105.5  | 110.1 |
| 121.5 | 121.2 | 118.2 | 109.9 | 99.7  | 113.2 | 104.9 | 113.1  | 111.5 |
| 219.9 | 245.4 | 242.6 | 168   | 186.9 | 232.6 | 163   | 311.8  | 244.2 |
| 116.9 | 128.5 | 114.4 | 118   | 110.5 | 119.4 | 121.8 | 130.5  | 111.7 |
| 129.6 | 121.8 | 108.8 | 129.5 | 114.1 | 130.3 | 113   | 157.2  | 186.5 |
| 122.4 | 116.2 | 117.9 | 115.3 | 111.2 | 124.1 | 107.3 | 155.6  | 131.1 |
| 132.9 | 227.2 | 286.9 | 290.7 | 194.4 | 226.4 | 240.2 | 156.3  | 124.1 |
| 124.8 | 125.9 | 112.2 | 108.7 | 109.5 | 127   | 112.8 | 120.6  | 120.5 |
| 110.5 | 107.2 | 104.1 | 98.8  | 95.1  | 106.2 | 98.8  | 116.3  | 108.4 |
| 109.8 | 112.3 | 107.1 | 101.6 | 90    | 116.1 | 106.4 | 102.6  | 99.3  |
| 111.4 | 115.2 | 101.5 | 101.1 | 97.5  | 101.2 | 104.5 | 110.8  | 103.9 |
| 117.3 | 117.9 | 109.3 | 99.7  | 96.1  | 120   | 100.8 | 111.4  | 116.5 |
| 106.4 | 105.9 | 104.2 | 104.3 | 98    | 111.7 | 104.4 | 114.7  | 113.3 |
| 183.3 | 221.1 | 200.2 | 206.3 | 193.9 | 195.6 | 212.9 | 248.4  | 214.5 |
| 106.5 | 120.7 | 106.7 | 116.2 | 102.2 | 117.2 | 106.3 | 121.6  | 115.2 |
| 104.3 | 104.1 | 98    | 100.8 | 98.9  | 106.4 | 102   | 112.8  | 107.9 |
| 112.3 | 112   | 103.6 | 123.9 | 112   | 114.4 | 103.7 | 116.6  | 110.1 |

|       |       |       |        |       |       |        |        |       |
|-------|-------|-------|--------|-------|-------|--------|--------|-------|
| 108.9 | 103.9 | 102.5 | 101    | 94.3  | 106   | 108.8  | 106.3  | 107.1 |
| 115.4 | 115.5 | 113.3 | 113.8  | 99.7  | 124.9 | 107.6  | 125.3  | 113.4 |
| 101.3 | 107.2 | 104.9 | 98.8   | 96.7  | 106.7 | 102.6  | 112.1  | 98.8  |
| 109.8 | 118.2 | 101.4 | 106.3  | 99.1  | 109.9 | 111    | 110.8  | 111   |
| 103.2 | 111.8 | 104.9 | 94.6   | 92.2  | 105.2 | 103.1  | 107.7  | 107.7 |
| 109.1 | 111.9 | 104.6 | 101.7  | 96.3  | 102.2 | 97.1   | 116.8  | 111.1 |
| 120.7 | 112.7 | 112.4 | 109.4  | 115   | 136.6 | 115.3  | 142.3  | 104.5 |
| 104.5 | 106.8 | 101.5 | 106.2  | 97    | 106.2 | 115.4  | 109.6  | 101.7 |
| 118.5 | 112   | 112.9 | 120.6  | 100.1 | 108.9 | 114.9  | 118.9  | 122.6 |
| 109.4 | 112.6 | 107.3 | 101.1  | 108.9 | 111.9 | 108.3  | 112.9  | 111.6 |
| 162.6 | 211.7 | 180.1 | 165.2  | 198.7 | 175.3 | 229.6  | 266.5  | 159.6 |
| 117.4 | 129.4 | 108.8 | 107.7  | 115.4 | 123.5 | 127.7  | 151.1  | 124.9 |
| 108.9 | 140   | 125.5 | 136.8  | 107.4 | 129.9 | 128.9  | 125.9  | 121.4 |
| 106.1 | 124.6 | 111   | 95.3   | 102.9 | 115.6 | 108.4  | 119.4  | 121.8 |
| 112.4 | 114.1 | 102.2 | 109.4  | 99.3  | 115.4 | 110.4  | 127.3  | 110.8 |
| 97.2  | 108.7 | 109   | 96.9   | 92.3  | 106.3 | 100.2  | 107.6  | 107.3 |
| 181.9 | 273.9 | 280.3 | 243.6  | 219.4 | 279.6 | 275    | 449.7  | 327   |
| 531.4 | 845.7 | 761.9 | 849.8  | 799.6 | 816.3 | 1071.1 | 1186.6 | 639.6 |
| 107.1 | 117.3 | 100.2 | 102.8  | 98.2  | 105.1 | 102.7  | 98     | 100.6 |
| 101.3 | 107   | 104.3 | 99.5   | 93.3  | 110   | 98.7   | 106    | 103.8 |
| 105   | 112.1 | 112.1 | 108.5  | 104.1 | 110.4 | 108.6  | 114.8  | 106.4 |
| 110.9 | 106.4 | 108.7 | 111.3  | 101.3 | 110.8 | 103.1  | 119.7  | 114.5 |
| 108.7 | 112.1 | 103.6 | 98     | 96.6  | 101.5 | 100.2  | 101.8  | 106.7 |
| 123.4 | 111.1 | 102.9 | 101.2  | 90.4  | 102.1 | 102.1  | 110.6  | 104.4 |
| 117.3 | 112.7 | 105.7 | 105.2  | 91.1  | 112.6 | 103.6  | 101.6  | 106.9 |
| 100.8 | 109   | 99.3  | 99.5   | 97.6  | 106.4 | 98.2   | 110.3  | 111.5 |
| 703.2 | 944.9 | 871.1 | 742.5  | 766.1 | 830.6 | 805.5  | 1380.4 | 988.6 |
| 160.4 | 183.7 | 167.6 | 164.7  | 157.1 | 167.3 | 174.6  | 199.8  | 172.5 |
| 121.2 | 122   | 112.3 | 107.5  | 113.2 | 124.8 | 111.6  | 134.9  | 138.1 |
| 113.1 | 104.8 | 100.9 | 101.7  | 91.5  | 106.6 | 105.1  | 106.9  | 105   |
| 112.3 | 110.1 | 106.1 | 102    | 101.6 | 111.5 | 102.2  | 111.7  | 110   |
| 102.6 | 106.7 | 106.4 | 100    | 104.6 | 105.1 | 103.1  | 107.1  | 107.1 |
| 112.7 | 116.3 | 104.7 | 104.7  | 93.4  | 109.9 | 115.9  | 123.1  | 95    |
| 110.2 | 104.7 | 100.5 | 103.1  | 101.9 | 110.9 | 99.6   | 101.7  | 119.7 |
| 106.4 | 107   | 105.6 | 102    | 93.9  | 103.1 | 114.1  | 111.5  | 105.3 |
| 109.2 | 117.7 | 95.5  | 114.3  | 106.3 | 113.5 | 100.9  | 117.4  | 104.7 |
| 329   | 837   | 357.2 | 1001.5 | 476.2 | 243   | 477.9  | 354.1  | 197.3 |
| 118.1 | 109.5 | 105.3 | 108.6  | 101.2 | 114.1 | 107.8  | 110.3  | 99.1  |
| 115.8 | 113   | 97.4  | 99.1   | 104.1 | 112.1 | 111.4  | 115.8  | 116.9 |
| 200.3 | 320.1 | 250.4 | 296.6  | 239.3 | 257.8 | 325.5  | 425.6  | 240.6 |
| 105.5 | 108.4 | 101.9 | 101.2  | 96.8  | 103.1 | 102.7  | 104.8  | 104.6 |
| 100.6 | 108.6 | 100.1 | 101.3  | 102.5 | 104.4 | 97.1   | 101.5  | 106   |
| 114.2 | 119.7 | 110.6 | 109.1  | 91.6  | 109.4 | 104    | 119    | 130.6 |
| 121   | 126.6 | 115.6 | 101.5  | 110.9 | 123   | 120.7  | 128.1  | 107.8 |
| 124.3 | 117.9 | 120.5 | 104.7  | 109   | 127.9 | 116.3  | 135    | 130.3 |
| 115.6 | 120.9 | 107   | 103.3  | 90.9  | 106.9 | 108.3  | 118.2  | 110.8 |
| 111.9 | 116.2 | 110.5 | 108.2  | 97.4  | 113.8 | 113.4  | 137.8  | 134.7 |
| 111.7 | 110.9 | 100   | 107.1  | 86.1  | 107.4 | 99.6   | 103.9  | 105.3 |
| 112   | 109.2 | 102.3 | 110.5  | 102.9 | 107   | 112.1  | 109.1  | 109.4 |
| 120.3 | 132   | 125.7 | 111.9  | 114.2 | 125.3 | 123.8  | 132    | 143.3 |
| 120.2 | 108.6 | 116.8 | 112.4  | 99.9  | 120.8 | 99.2   | 122    | 104.7 |



|        |        |        |        |        |        |        |        |       |
|--------|--------|--------|--------|--------|--------|--------|--------|-------|
| 131.9  | 285.5  | 250.4  | 279.1  | 212.8  | 215.5  | 233.8  | 242    | 175.5 |
| 162.9  | 281.3  | 233.5  | 316.2  | 219.8  | 240.9  | 256.3  | 283.7  | 180.3 |
| 105.5  | 118.7  | 101.2  | 90.3   | 95.6   | 105.1  | 102.6  | 109.5  | 106.5 |
| 117.4  | 135.3  | 121.6  | 118.8  | 106.5  | 121.8  | 116.5  | 120.8  | 110.5 |
| 151    | 244.8  | 237.5  | 189.7  | 210.2  | 244.2  | 233    | 350.7  | 248.3 |
| 107.6  | 127.5  | 106.4  | 104.4  | 106.6  | 116.8  | 105.3  | 127.9  | 117.8 |
| 396.5  | 593.3  | 690.5  | 655.9  | 634.8  | 734.2  | 604.6  | 738.5  | 549.5 |
| 111.3  | 111.1  | 117.6  | 112.1  | 96.7   | 109    | 105.1  | 122.9  | 106.4 |
| 97     | 105.1  | 98.8   | 92.9   | 97.2   | 107.5  | 101.1  | 111.7  | 108.3 |
| 101.7  | 117    | 107.9  | 105.9  | 98.9   | 115.1  | 105    | 113.3  | 109.7 |
| 96     | 95.5   | 98     | 97     | 97.2   | 107.5  | 103.5  | 108.8  | 100.4 |
| 105.7  | 115.4  | 102.7  | 106.3  | 98.4   | 113.6  | 109.1  | 111.2  | 109.9 |
| 121.2  | 114    | 115.6  | 110.3  | 105.4  | 125.6  | 117.2  | 121.5  | 120.5 |
| 171.7  | 130.9  | 138.3  | 131.2  | 142.1  | 166.6  | 141.5  | 188.8  | 181.2 |
| 105.5  | 104.2  | 100.9  | 101.5  | 94.6   | 105.3  | 96.9   | 113.9  | 107   |
| 112.8  | 108.1  | 97.8   | 108.9  | 93.4   | 107.6  | 113.8  | 118    | 104.5 |
| 111.4  | 104.4  | 108.7  | 110.3  | 99     | 109.4  | 109.6  | 123.6  | 111.1 |
| 155.6  | 199    | 152.6  | 189.8  | 172.4  | 175.9  | 170.7  | 205    | 178.4 |
| 112.6  | 112.9  | 106.3  | 115.8  | 101.6  | 115.5  | 105.1  | 110    | 117.4 |
| 118.8  | 123.4  | 113.1  | 109.5  | 105.7  | 116.8  | 105.9  | 126.1  | 145.9 |
| 163.2  | 176.5  | 180.8  | 214    | 167.7  | 181.8  | 153.6  | 293    | 242.6 |
| 198.9  | 240.2  | 276.2  | 252.8  | 208.8  | 293.9  | 266.7  | 370.8  | 272.4 |
| 866.6  | 878.7  | 1102.3 | 1010.9 | 1049.2 | 1110.4 | 1201.2 | 1570   | 908.7 |
| 374.2  | 484.4  | 503.3  | 434.3  | 438    | 459.4  | 468.7  | 920.5  | 689.1 |
| 378.3  | 699.5  | 386.8  | 407.5  | 523.9  | 435.5  | 526.3  | 733.3  | 362.1 |
| 108.4  | 120.2  | 107.7  | 110.5  | 108    | 113.2  | 110.7  | 125.2  | 123.6 |
| 104.9  | 104.9  | 97.9   | 97.5   | 88.6   | 99.7   | 107    | 110.5  | 103.3 |
| 125.9  | 131.3  | 138    | 123.8  | 113.8  | 140.2  | 119.9  | 152    | 129.5 |
| 226.4  | 204.9  | 249.7  | 211.1  | 179    | 254.1  | 192.5  | 351.2  | 411.3 |
| 108.5  | 103.9  | 100.7  | 96.8   | 92.8   | 106.3  | 91.5   | 117.7  | 116.7 |
| 106.9  | 112.4  | 113.5  | 107.1  | 96.2   | 103.5  | 108.8  | 117.3  | 106   |
| 147.2  | 183.1  | 183.3  | 158.5  | 168.2  | 201.4  | 198.5  | 280.6  | 169   |
| 126.1  | 129.1  | 120    | 123.5  | 103.5  | 122.8  | 106.1  | 197.4  | 142.5 |
| 340.4  | 590.5  | 489.8  | 498.3  | 397.8  | 409.9  | 449.8  | 514.8  | 469.1 |
| 1909.8 | 3124.2 | 3127   | 3937.8 | 2534.2 | 3477.4 | 3336.2 | 3829.4 | 2362  |
| 223.7  | 147.3  | 129    | 124.7  | 124.3  | 144    | 114.5  | 254.8  | 234.1 |
| 112.2  | 117.4  | 115.6  | 103.9  | 100.6  | 121.4  | 136.3  | 125.9  | 113.7 |
| 108.2  | 103.7  | 99.4   | 101.9  | 91.1   | 100.5  | 99.8   | 110.9  | 105   |
| 125.2  | 117.9  | 105.2  | 91.4   | 104.3  | 115.8  | 107.9  | 136.3  | 122.4 |
| 110.7  | 133.1  | 124.3  | 132.1  | 101    | 133.4  | 133.1  | 157.8  | 139.4 |
| 112.3  | 105.7  | 100.5  | 103.4  | 99.5   | 109.7  | 97     | 103.8  | 107.3 |
| 139    | 137.9  | 130.6  | 132.2  | 129.5  | 145.4  | 136    | 180.8  | 142.9 |
| 114.2  | 119.2  | 108.1  | 117.2  | 107.7  | 116.3  | 110.8  | 113.4  | 115.6 |
| 123    | 121.1  | 110.5  | 123.1  | 106.5  | 126    | 130.6  | 136.2  | 132.4 |
| 104.4  | 102    | 102.4  | 94.3   | 100.9  | 107.1  | 108.4  | 112.3  | 106.1 |
| 109.4  | 106    | 106.6  | 103    | 87.4   | 106.9  | 103.8  | 104.3  | 117.2 |
| 106.4  | 114.3  | 103.7  | 108.4  | 95.1   | 108.1  | 104.5  | 107.9  | 114.1 |
| 111.6  | 117.8  | 104.6  | 114    | 105.7  | 117.9  | 108.6  | 120.9  | 117.7 |
| 99.4   | 113    | 102.1  | 102.1  | 95.7   | 107.6  | 103    | 101.4  | 104.4 |
| 153.7  | 154.5  | 173.1  | 184.6  | 149.8  | 175.7  | 166.9  | 226    | 155.6 |
| 110.6  | 107.6  | 109.5  | 107.4  | 98     | 112.3  | 107.7  | 109.5  | 110.4 |

|        |        |        |        |        |        |        |        |        |
|--------|--------|--------|--------|--------|--------|--------|--------|--------|
| 113.7  | 115.1  | 106.5  | 117.4  | 100.7  | 115.2  | 102.3  | 110.5  | 120.6  |
| 103.3  | 102.6  | 101.7  | 100.1  | 93.2   | 107.3  | 105.6  | 112.4  | 107.9  |
| 102.6  | 105.4  | 97.4   | 92.5   | 94.1   | 104.4  | 98.1   | 104.5  | 103    |
| 103.8  | 108    | 110.3  | 98.5   | 95.2   | 104.5  | 99     | 110.5  | 106.1  |
| 137.3  | 156.3  | 153.6  | 156.8  | 138.7  | 152.1  | 134.5  | 215    | 146.6  |
| 103.8  | 110.9  | 108.6  | 100    | 96.7   | 117.8  | 110.6  | 109.4  | 94     |
| 366.8  | 320.5  | 342.7  | 312.3  | 294    | 333.2  | 247.9  | 529.8  | 439.4  |
| 110.6  | 111.2  | 103.9  | 108.2  | 102.1  | 112.8  | 112.1  | 123.4  | 115.1  |
| 535.5  | 402.9  | 322.6  | 414    | 405.2  | 494.5  | 444.2  | 905.6  | 731.2  |
| 272.2  | 630.8  | 570.1  | 645    | 472.6  | 584.6  | 649.4  | 564.3  | 401.8  |
| 103.6  | 107    | 105.8  | 90.5   | 91.9   | 105    | 94.9   | 113.5  | 112.1  |
| 192.3  | 275.6  | 219.3  | 314.7  | 221.7  | 238.8  | 314.8  | 265.8  | 185    |
| 299.5  | 361    | 299.2  | 411    | 302    | 296.5  | 548.3  | 410.1  | 374.3  |
| 286.8  | 195.5  | 241.7  | 219.6  | 219.6  | 277.9  | 278.2  | 394.7  | 376.9  |
| 106.7  | 105.7  | 107.4  | 102    | 96.8   | 114.4  | 111.2  | 119.6  | 116.4  |
| 127.2  | 119    | 109.8  | 105.9  | 107.1  | 128.1  | 108.3  | 148.5  | 164.3  |
| 148.2  | 158.6  | 139.1  | 128.9  | 124.8  | 142.5  | 125.7  | 208.1  | 178.5  |
| 167.5  | 177.6  | 141.5  | 145.5  | 142    | 145.3  | 169.6  | 235.8  | 155.2  |
| 109.5  | 108.8  | 99.2   | 105.3  | 94.8   | 117.4  | 108.5  | 112.7  | 121.2  |
| 1082.7 | 1907.8 | 2773.2 | 2306.3 | 1740.1 | 2167.2 | 1917.9 | 2760.5 | 1480.9 |
| 271.5  | 240.1  | 219.3  | 205.5  | 250.2  | 204    | 385.1  | 295.7  | 204.4  |
| 103.6  | 103.2  | 98.9   | 105.2  | 84.7   | 100.3  | 96.2   | 101.1  | 101.6  |
| 115.4  | 113.2  | 111.8  | 126.5  | 115.9  | 124.2  | 125    | 111.6  | 117.1  |
| 120.7  | 130.5  | 118.5  | 117.9  | 110.1  | 127.7  | 109.3  | 172.9  | 145.8  |
| 106.2  | 105.7  | 103.8  | 102    | 90.4   | 102.3  | 98.1   | 103.3  | 106    |
| 106.3  | 108.9  | 102.4  | 100.6  | 96.2   | 106    | 99.2   | 101.6  | 112.3  |
| 110.3  | 108.6  | 101.2  | 111.2  | 95.8   | 111.8  | 135.4  | 120    | 111.8  |
| 104.5  | 111.8  | 103.9  | 109.3  | 97.4   | 114.8  | 107.1  | 116.4  | 122.6  |
| 142.3  | 171.9  | 150.4  | 182.1  | 131.9  | 134.6  | 183.6  | 163.3  | 152    |
| 108.9  | 108.4  | 110    | 104.5  | 101    | 110.3  | 117.1  | 116.4  | 113.3  |
| 122.3  | 193.9  | 175.3  | 164.8  | 162.7  | 201.3  | 175.8  | 244.9  | 126.5  |
| 103.1  | 100.3  | 104.3  | 93.1   | 92.6   | 118.9  | 98.9   | 109.7  | 106.3  |
| 109.5  | 103.1  | 95.2   | 111.5  | 101.2  | 109.3  | 101.9  | 114.2  | 109.3  |
| 104    | 116.7  | 108.9  | 111.1  | 99.8   | 108.6  | 105.7  | 128.3  | 111.1  |
| 106.8  | 103.4  | 105.1  | 105.3  | 102.1  | 111.6  | 97.4   | 123.4  | 111.2  |
| 105.3  | 103.6  | 106.3  | 90.2   | 94.6   | 102.1  | 99.8   | 106.8  | 112.6  |
| 166.2  | 167.9  | 179.1  | 180.4  | 140.9  | 161.8  | 174.7  | 287.5  | 244    |
| 161.6  | 147.2  | 130.2  | 109.3  | 115.9  | 130.7  | 112.2  | 215.5  | 200.8  |
| 106.5  | 112.3  | 107.1  | 99.5   | 98.4   | 104.5  | 106    | 129.2  | 116.4  |
| 169.6  | 164.2  | 148.8  | 165.6  | 163.8  | 189.7  | 189.7  | 199.1  | 180.2  |
| 2560.5 | 4600.7 | 4294.8 | 3679.1 | 4107.3 | 3740.6 | 4106.1 | 5543   | 3274.2 |
| 109.6  | 104.3  | 103.6  | 100.2  | 95.4   | 103.1  | 103.1  | 112.1  | 102.2  |
| 111.3  | 111.7  | 111.9  | 115.5  | 100.7  | 117.3  | 106.2  | 114.8  | 110.5  |
| 110.2  | 113.6  | 106.7  | 117.3  | 104.3  | 119.9  | 108.7  | 114.5  | 118.5  |
| 806.3  | 484.3  | 502.7  | 397.1  | 460.9  | 608.7  | 491.4  | 1518.9 | 1893.7 |
| 123    | 120.7  | 116    | 114    | 108.5  | 131.4  | 117.1  | 171    | 138.2  |
| 1306.4 | 704.1  | 818.3  | 670.4  | 611.5  | 635.3  | 842.4  | 1407.2 | 1936.3 |
| 107.9  | 116.9  | 100    | 108.7  | 94.7   | 99.5   | 102.2  | 109.3  | 102.9  |
| 118.2  | 174.8  | 176.6  | 141.2  | 156    | 154.2  | 144.3  | 144.6  | 132.5  |
| 127.5  | 106.7  | 107.8  | 105.7  | 98.4   | 108.9  | 105.3  | 114.6  | 114.9  |
| 106.6  | 115.8  | 101.1  | 101.7  | 87.7   | 101.9  | 102.5  | 108.1  | 109    |

|       |       |       |       |       |       |       |        |       |
|-------|-------|-------|-------|-------|-------|-------|--------|-------|
| 100.4 | 104.3 | 111.2 | 108.6 | 104.4 | 114.7 | 102.6 | 113.2  | 108.2 |
| 125.2 | 119.9 | 106.6 | 108.1 | 103.9 | 118.3 | 114.7 | 123.2  | 124.1 |
| 119.4 | 164.3 | 129.3 | 107   | 115.5 | 132.6 | 135.3 | 191.7  | 146.3 |
| 221.6 | 267.8 | 247.2 | 256.7 | 252.3 | 228.2 | 273.8 | 336.8  | 288.3 |
| 147.2 | 179   | 192.5 | 160.8 | 146.1 | 183.1 | 165.7 | 220.3  | 156.2 |
| 113.1 | 107   | 110.5 | 104.9 | 99.8  | 111.7 | 108.3 | 119.3  | 113.8 |
| 128.3 | 129.5 | 129.2 | 108   | 111.3 | 120.2 | 111.4 | 133.6  | 139.9 |
| 112.4 | 113.6 | 105.4 | 104.7 | 105.7 | 115.8 | 116.2 | 121.4  | 110.1 |
| 121   | 201.6 | 174.3 | 163.6 | 167.6 | 158.5 | 149.6 | 186    | 150   |
| 109.3 | 115.7 | 110.2 | 98.9  | 99.3  | 110.5 | 106.1 | 113.4  | 104.5 |
| 558.1 | 595.7 | 595.5 | 434.9 | 545.8 | 707.4 | 504.7 | 1305.6 | 800.4 |
| 113.9 | 114.1 | 112   | 115.3 | 118.6 | 121.6 | 109.2 | 121.9  | 129.7 |
| 120.4 | 120.9 | 116.2 | 110.2 | 108.6 | 117.5 | 107.4 | 141.6  | 138   |
| 412.4 | 636.9 | 672.5 | 577.5 | 503.1 | 716   | 659.5 | 917.2  | 701.3 |
| 238.7 | 233.7 | 275.7 | 265.8 | 275.2 | 262.5 | 207.3 | 483    | 332.1 |
| 279.8 | 333.6 | 447.6 | 335.5 | 361.2 | 401.3 | 324.8 | 865.9  | 604.4 |
| 226.9 | 349.8 | 335.8 | 258.8 | 298.7 | 331.9 | 296.1 | 429.9  | 314.4 |
| 157.9 | 269   | 250.8 | 169   | 205.4 | 242.8 | 175.8 | 313.8  | 196.9 |
| 183.3 | 286.3 | 260.6 | 268.7 | 296.8 | 258.8 | 259   | 450    | 338.8 |
| 205.8 | 314.2 | 270.9 | 265.9 | 241.5 | 341.5 | 312.6 | 704.2  | 440.6 |
| 117.5 | 181   | 168   | 139   | 177.1 | 153.4 | 158.1 | 209    | 136   |
| 111.7 | 249.8 | 178.3 | 163   | 187.5 | 175.9 | 167.7 | 195    | 163.7 |
| 325.3 | 416.6 | 417.9 | 350.2 | 351.7 | 365.2 | 327.9 | 684.8  | 435.4 |
| 150.9 | 243.8 | 220.4 | 239   | 188.9 | 215.2 | 231.3 | 285.5  | 244.6 |
| 304.2 | 349.3 | 311   | 372   | 288.1 | 320.2 | 237.4 | 571.9  | 434.6 |
| 142.5 | 153.6 | 123.9 | 149.1 | 139.5 | 159.9 | 132.4 | 181.1  | 170.7 |
| 132.6 | 193.2 | 162.6 | 163.5 | 155.9 | 188.5 | 179.3 | 278.9  | 244.2 |
| 113.6 | 111.8 | 112.2 | 114.3 | 103.4 | 114.2 | 107.5 | 118.3  | 109.4 |
| 117.3 | 120.4 | 126.7 | 114.6 | 109.5 | 122.8 | 110.6 | 136    | 114.4 |
| 109.9 | 98.2  | 96.1  | 99.1  | 93.1  | 121.9 | 98.7  | 98.6   | 101.2 |
| 165.2 | 207.7 | 197.4 | 209.8 | 181.3 | 190.1 | 175.1 | 260.6  | 208   |
| 144.9 | 146   | 149.6 | 141   | 133.9 | 148.6 | 138.5 | 189.7  | 167.7 |
| 113.1 | 116.2 | 112.7 | 105.2 | 93.5  | 111.1 | 105.5 | 110.6  | 112.5 |
| 119.5 | 118.6 | 111.2 | 112.3 | 104.3 | 115.8 | 97.4  | 123.3  | 128   |
| 139.5 | 144.3 | 162.5 | 129.4 | 134.4 | 152.6 | 133.8 | 185.1  | 143.8 |
| 133.1 | 164.8 | 157.3 | 176.4 | 129.9 | 181   | 200.6 | 178    | 147.3 |
| 108.2 | 109.7 | 105.7 | 120.8 | 96.8  | 110.3 | 103.9 | 116.2  | 106   |
| 97.1  | 102.7 | 102.3 | 99.8  | 88.9  | 107.2 | 97.4  | 100.2  | 103.4 |
| 102.8 | 104.8 | 102.5 | 91.3  | 90    | 106.2 | 105.8 | 110.8  | 99.3  |
| 105.7 | 118.7 | 106   | 110.8 | 98.3  | 104.5 | 107.5 | 116.3  | 107.2 |
| 106.5 | 115.5 | 107.4 | 103.3 | 92.4  | 105.8 | 98.9  | 107.7  | 107.7 |
| 106.5 | 105   | 106   | 112.3 | 99.7  | 112.9 | 104.9 | 109.1  | 113.9 |
| 113   | 103   | 101.1 | 96    | 92.3  | 104.2 | 101.5 | 105.4  | 113.3 |
| 103.1 | 109.7 | 94.7  | 97.1  | 94.1  | 112.9 | 103.5 | 118.9  | 102.5 |
| 107.1 | 117   | 110.1 | 100.6 | 91.3  | 114.9 | 113.3 | 119.8  | 130.6 |
| 105.8 | 111.8 | 100.8 | 93.5  | 100.6 | 109.8 | 106.7 | 110.5  | 108.4 |
| 108.8 | 114.3 | 107   | 109.1 | 97.7  | 111.4 | 112.5 | 117.1  | 111.8 |
| 112.6 | 109.3 | 100   | 105.3 | 98.3  | 110.1 | 105.2 | 102.4  | 101.3 |
| 109.2 | 102   | 103.9 | 106.1 | 97.4  | 110.3 | 97.6  | 110.7  | 108   |
| 121.2 | 130.3 | 128.6 | 120   | 111.7 | 134.9 | 127.3 | 152.7  | 124.7 |
| 114.7 | 114.5 | 112.9 | 107.3 | 102.8 | 121.8 | 107.5 | 137.5  | 142.5 |

|       |         |       |         |         |         |       |         |         |
|-------|---------|-------|---------|---------|---------|-------|---------|---------|
| 108.7 | 118.6   | 113.7 | 111.5   | 101.9   | 117.9   | 105.4 | 122.4   | 132.4   |
| 136.5 | 130.9   | 117.5 | 118.5   | 108.3   | 133.8   | 122.7 | 156.2   | 158     |
| 100.5 | 102.1   | 102.5 | 95.3    | 98.8    | 95.1    | 102   | 107.8   | 112.4   |
| 113.1 | 114     | 106   | 103.6   | 104.5   | 113.1   | 105.4 | 117.5   | 120.9   |
| 99.6  | 112.1   | 95.9  | 101.3   | 93.5    | 104.9   | 101.1 | 102.4   | 116.7   |
| 107.3 | 110     | 105.3 | 97.6    | 97      | 108.7   | 112.9 | 111.8   | 114.3   |
| 98.4  | 113.7   | 108.2 | 98.2    | 93.8    | 111.1   | 101.8 | 112.1   | 126.9   |
| 139.6 | 149.8   | 146.8 | 145.7   | 119.5   | 151.1   | 138.4 | 232.6   | 154.4   |
| 108.7 | 107.9   | 99    | 103.3   | 95.9    | 107.4   | 112.6 | 109.8   | 119.3   |
| 115.2 | 107.4   | 92.7  | 154.2   | 99.6    | 103.1   | 102.6 | 106.8   | 108.1   |
| 101.9 | 103.6   | 92.6  | 98.4    | 97.7    | 99.4    | 92.1  | 99.3    | 105.5   |
| 123.3 | 141     | 118.3 | 116.6   | 105.5   | 120.6   | 117.2 | 154.5   | 126.5   |
| 13846 | 14608.5 | 14410 | 10454.2 | 14759.5 | 13591.8 | 11471 | 22699.2 | 26232.2 |
| 114.8 | 124.3   | 110.7 | 122.7   | 121     | 125.5   | 158.4 | 137.9   | 112.7   |
| 97.6  | 109.6   | 109   | 110     | 98.3    | 108.8   | 109.3 | 112.9   | 103.7   |
| 115.5 | 102.9   | 109.7 | 107.8   | 103.8   | 112.7   | 107.3 | 120.7   | 118.1   |
| 109.5 | 107.6   | 107.9 | 105.3   | 94.1    | 111.3   | 111.6 | 106.6   | 110.3   |
| 112.3 | 117.7   | 121.2 | 120.1   | 111.5   | 117.2   | 116.4 | 133.9   | 116.9   |
| 102.6 | 105.2   | 97.2  | 93.4    | 96.5    | 101.3   | 99.8  | 103     | 107.3   |
| 109.7 | 117.5   | 117.6 | 110     | 100.7   | 121.4   | 113.1 | 119.1   | 116.7   |
| 104.8 | 104.9   | 101.5 | 104.7   | 95.3    | 108.4   | 102.8 | 115.2   | 113.9   |
| 108.7 | 110.9   | 101.1 | 97.1    | 99.2    | 105.4   | 108.4 | 114.9   | 106     |
| 103.8 | 113.1   | 96.3  | 102.6   | 91.1    | 102.5   | 102.9 | 114.3   | 108     |
| 98.5  | 111.2   | 108.1 | 103.6   | 103.6   | 110.5   | 105.1 | 106.3   | 110.4   |
| 142.1 | 188.6   | 206.8 | 195.2   | 174.5   | 226.2   | 219.8 | 204.4   | 184.5   |
| 105.6 | 121.2   | 111   | 100.9   | 100.5   | 113.4   | 107.9 | 105.4   | 96.7    |
| 109.8 | 114.3   | 102.8 | 105.2   | 91      | 108.9   | 104.7 | 110.4   | 107.8   |
| 107.4 | 104.6   | 106.1 | 103.6   | 88.7    | 108.4   | 108.3 | 113.1   | 100.8   |
| 116.7 | 131.3   | 122   | 129.2   | 110.3   | 121.6   | 124.7 | 121.7   | 106.5   |
| 113.4 | 111.3   | 106.6 | 94.3    | 95.9    | 104     | 108.7 | 121.6   | 102.8   |
| 112.6 | 116.1   | 109   | 109.7   | 100.1   | 120.4   | 108.1 | 111.6   | 112.7   |
| 107.3 | 104.5   | 97    | 103.1   | 103.2   | 105.6   | 102.8 | 98.2    | 102.4   |
| 112.4 | 113.7   | 101.7 | 113.2   | 98.8    | 117.7   | 112.2 | 116.8   | 109.6   |
| 101.5 | 104.3   | 108.3 | 107     | 90.7    | 113.5   | 105.1 | 111.2   | 105.1   |
| 118.9 | 106.9   | 113.8 | 99.8    | 95.5    | 113.5   | 103.1 | 125.1   | 129.2   |
| 99.1  | 108.6   | 101.2 | 96.9    | 104.1   | 98.4    | 95.3  | 102.4   | 111.8   |
| 106.3 | 106.7   | 97.3  | 106     | 97      | 106.3   | 101.2 | 117.4   | 105.9   |
| 116.4 | 108.7   | 106.3 | 106.5   | 98.2    | 120.5   | 104.7 | 118.5   | 108.8   |
| 195.6 | 382.9   | 408.4 | 378.5   | 355.9   | 340.1   | 349.7 | 599.2   | 341.4   |
| 100.8 | 164.6   | 125.2 | 150.1   | 136.9   | 142.1   | 161   | 139.1   | 120.1   |
| 107.6 | 113.2   | 99.5  | 100.1   | 94.7    | 107.2   | 102.3 | 105.7   | 109.3   |
| 107.4 | 116.1   | 103   | 90      | 87.8    | 112.7   | 96.5  | 121.2   | 104     |
| 118.9 | 114.2   | 125.5 | 122.7   | 96.4    | 120     | 112.7 | 127.1   | 120     |
| 134.5 | 183.6   | 167.4 | 151.6   | 150.8   | 176.4   | 176.9 | 230.8   | 168.4   |
| 123.4 | 141.7   | 135.7 | 136.4   | 123.3   | 147     | 130.1 | 165.9   | 156.8   |
| 120   | 111     | 113.8 | 154.7   | 108.8   | 126.3   | 140.6 | 139.1   | 197.8   |
| 125.3 | 157.8   | 146.9 | 140.9   | 136.2   | 138.8   | 177.7 | 190.1   | 152.1   |
| 113.6 | 146.2   | 129.5 | 130.8   | 120.5   | 121.2   | 113.1 | 152.1   | 143.2   |
| 103.2 | 111.2   | 99.7  | 102.8   | 97.3    | 109.9   | 111.8 | 111.7   | 106.8   |
| 114.8 | 128.2   | 113.8 | 115.7   | 108.6   | 119.3   | 122   | 121.6   | 115.5   |
| 117.3 | 133     | 137.9 | 142.2   | 131.9   | 146.1   | 143.5 | 140     | 122.6   |

|        |        |        |        |        |        |        |        |        |
|--------|--------|--------|--------|--------|--------|--------|--------|--------|
| 101.4  | 113.6  | 114.4  | 103.3  | 105.9  | 122.5  | 102.8  | 125    | 109.5  |
| 107.8  | 98.7   | 94.2   | 93.7   | 96.2   | 101.8  | 108.5  | 111.5  | 110    |
| 116.8  | 114.6  | 103.8  | 113.8  | 109.2  | 118.1  | 98.3   | 103.1  | 117.3  |
| 101.4  | 105.4  | 106.5  | 101.7  | 104.7  | 118.1  | 107.9  | 106.9  | 112.5  |
| 119.3  | 177    | 158.7  | 101.3  | 164.7  | 201.3  | 126.5  | 190.9  | 138.9  |
| 111.2  | 108.5  | 103.7  | 102    | 93.5   | 105.2  | 106    | 104.4  | 105.7  |
| 3692.9 | 4352   | 4667   | 3265.8 | 3938   | 3920.9 | 2649.3 | 4735.1 | 2028.6 |
| 111.5  | 110.2  | 103.9  | 97.4   | 96.8   | 109.5  | 106.4  | 108    | 114    |
| 114    | 131.1  | 106.8  | 113.6  | 108.5  | 120.8  | 120.5  | 170.1  | 117.2  |
| 109    | 111.7  | 112    | 99.2   | 105.9  | 106.5  | 105.5  | 110    | 111.6  |
| 176    | 166    | 148.3  | 146.9  | 159.4  | 176.9  | 167.8  | 226    | 151.4  |
| 289.2  | 205.7  | 200.4  | 189.3  | 184.6  | 222.4  | 190.3  | 291.8  | 234.7  |
| 100.6  | 114.6  | 100.3  | 106.7  | 100.9  | 117.8  | 105.4  | 125.9  | 108    |
| 160.4  | 145    | 135.5  | 132.4  | 117.1  | 155.5  | 114.2  | 177.3  | 175.1  |
| 428.3  | 530.7  | 701.7  | 532.8  | 442.5  | 598.2  | 568.2  | 531.8  | 382.1  |
| 134.6  | 120.5  | 123.6  | 122.5  | 110.1  | 115.5  | 112.8  | 128.8  | 123.1  |
| 117.7  | 138.8  | 126.4  | 145.2  | 119    | 126.5  | 120.5  | 143.4  | 137.8  |
| 181.6  | 273.4  | 255.9  | 273.2  | 212.7  | 256.6  | 258.3  | 410.9  | 268.6  |
| 640.2  | 624.1  | 574.7  | 576.3  | 653.3  | 660.4  | 511.9  | 1165.4 | 1081.3 |
| 122.9  | 127.2  | 125.6  | 120.4  | 123.6  | 124.5  | 117.1  | 132    | 123.9  |
| 301.3  | 313.1  | 278.3  | 200.4  | 271.4  | 340.4  | 255.1  | 530.1  | 404.1  |
| 111.9  | 103.4  | 110.9  | 108.9  | 96.4   | 117.9  | 99.8   | 114    | 108    |
| 1118   | 1581   | 1315.2 | 1326.6 | 1239.9 | 1201.3 | 675.8  | 2580.5 | 1458   |
| 97.2   | 107.3  | 93.8   | 91.2   | 96.6   | 105.9  | 99.9   | 106.1  | 105.6  |
| 137    | 228.4  | 216.5  | 232.5  | 188.7  | 196.8  | 245.1  | 168.4  | 159.1  |
| 112.7  | 123.1  | 113.7  | 127.4  | 109.7  | 119.2  | 131.5  | 120.4  | 122    |
| 113.1  | 118    | 114.7  | 120.7  | 106.7  | 128.6  | 134    | 129.3  | 110.1  |
| 112.1  | 111.9  | 112.5  | 105    | 97.5   | 106.2  | 107.9  | 114.4  | 121.9  |
| 99.9   | 113    | 93     | 87.6   | 96.1   | 110.4  | 93.2   | 102.9  | 108.6  |
| 117.9  | 103.5  | 102.1  | 98.2   | 88.6   | 102.8  | 101.6  | 113.9  | 107.2  |
| 166.6  | 148.4  | 117.2  | 140    | 108.9  | 128.8  | 117.5  | 200.9  | 234.7  |
| 102.6  | 109.2  | 105.1  | 95.4   | 93.2   | 111.5  | 95.2   | 105.1  | 112.3  |
| 198.8  | 371.6  | 384.8  | 378.2  | 298.8  | 380.7  | 343.8  | 463.6  | 297.2  |
| 156.3  | 271.9  | 245.7  | 243.8  | 203.9  | 196.4  | 224.5  | 254.5  | 198.3  |
| 111.1  | 122.4  | 103.8  | 117    | 103.7  | 111.1  | 104.5  | 111.1  | 114.2  |
| 110.4  | 110.6  | 108.5  | 103.5  | 99     | 113.6  | 108.2  | 110.6  | 108.7  |
| 94.8   | 115.1  | 102.9  | 110.9  | 95.4   | 107.3  | 105.2  | 117.2  | 103.8  |
| 128.1  | 125.8  | 119.3  | 106.1  | 109.8  | 114.1  | 118.6  | 149.3  | 120.5  |
| 120    | 165    | 165.9  | 143.4  | 127.6  | 128.4  | 141.7  | 143.6  | 112.7  |
| 428.8  | 1490.1 | 1352.1 | 856.9  | 811.2  | 1000.2 | 809.8  | 1387.5 | 608.2  |
| 1233.7 | 1204.9 | 1575   | 1001.8 | 926    | 1193   | 922.4  | 2812.4 | 2894.5 |
| 595    | 946.7  | 924.6  | 1020.5 | 718.4  | 746.6  | 895.5  | 1357.6 | 1008.8 |
| 98.8   | 110.7  | 100.9  | 98.3   | 86.2   | 111.3  | 100.1  | 107.2  | 104.4  |
| 112.3  | 133.3  | 121.1  | 118.3  | 103.3  | 124.1  | 109.3  | 135.8  | 118.8  |
| 239.4  | 299.4  | 276.3  | 301.2  | 259.1  | 295.5  | 348.1  | 334.1  | 261.7  |
| 108.3  | 104.2  | 100.5  | 102.9  | 92.2   | 104.4  | 101.9  | 114.9  | 110.5  |
| 109    | 101.2  | 101.4  | 95.3   | 96.2   | 105.2  | 100.2  | 106.3  | 102.5  |
| 163    | 292    | 248.4  | 258.7  | 191.8  | 221.1  | 271.9  | 254.2  | 205.3  |
| 111.1  | 113.3  | 102.7  | 99.8   | 96.1   | 111    | 100.8  | 112.8  | 111.4  |
| 102.6  | 105.4  | 99.9   | 96.5   | 93.3   | 101.6  | 102.5  | 98.5   | 101.4  |
| 102.1  | 111.6  | 99.9   | 100.5  | 92.2   | 100    | 105.4  | 113.3  | 125.3  |

|       |       |       |       |       |       |       |       |       |
|-------|-------|-------|-------|-------|-------|-------|-------|-------|
| 106.7 | 104.6 | 98.2  | 111.4 | 95.9  | 116.9 | 100   | 104   | 108.2 |
| 114.2 | 112.4 | 98.7  | 108.6 | 101   | 124.5 | 113.2 | 109.3 | 112.2 |
| 105.2 | 104.4 | 102.5 | 102.4 | 95.3  | 107.7 | 99.2  | 105.2 | 104.6 |
| 106.6 | 109.6 | 109.6 | 109.6 | 99.7  | 114.3 | 108.5 | 122.7 | 111   |
| 130.8 | 123.3 | 129.5 | 118.8 | 150.8 | 164.3 | 156.1 | 203.7 | 130.1 |
| 122.5 | 120   | 120   | 111.8 | 111.9 | 115.1 | 112.3 | 133.8 | 122.9 |
| 113.3 | 116.4 | 107   | 107.5 | 98.9  | 102   | 103.5 | 104.3 | 109.7 |
| 192.6 | 215.7 | 193.7 | 137.6 | 164.7 | 178.7 | 183.5 | 277.9 | 187.5 |
| 95.3  | 109.3 | 103.8 | 98.7  | 90.3  | 108.6 | 102.3 | 98.9  | 100.6 |
| 105.3 | 104   | 100.5 | 103.6 | 91.5  | 115.8 | 99.4  | 110.4 | 108.4 |
| 108.3 | 115.5 | 104   | 103.6 | 98.9  | 108.9 | 104.5 | 115.3 | 115.6 |
| 103.3 | 109.1 | 110.6 | 105   | 93.5  | 114.2 | 99.1  | 106.7 | 104.4 |
| 102.5 | 105.9 | 94.3  | 103.2 | 99.7  | 105.6 | 104.9 | 112.4 | 105.2 |
| 106.8 | 101.7 | 100.9 | 98    | 89.9  | 106.6 | 99.4  | 101.7 | 102.3 |
| 112.1 | 104.4 | 105.3 | 101.4 | 93.4  | 106.6 | 100.3 | 104   | 108.9 |
| 132.2 | 179   | 129.8 | 183.7 | 121   | 152.3 | 145.9 | 229.4 | 186   |
| 104.9 | 119.5 | 111.5 | 113   | 107.2 | 117.8 | 106.4 | 119.7 | 111.1 |
| 148   | 176.8 | 156.7 | 155.5 | 142.4 | 170.1 | 141.1 | 205.3 | 198.8 |
| 300.6 | 381.5 | 371.6 | 257.8 | 268.7 | 355.3 | 330.1 | 479.9 | 467.7 |
| 109.3 | 113.9 | 101.4 | 100.7 | 96.5  | 110.3 | 98.6  | 99.6  | 110   |
| 105.3 | 109   | 103.8 | 102.8 | 100.3 | 104.7 | 102.8 | 102.9 | 103.8 |
| 111   | 113.9 | 105.9 | 100.8 | 97.4  | 112.7 | 108.9 | 111   | 111.5 |
| 109.4 | 112.2 | 100.4 | 100.9 | 97.2  | 103   | 99.2  | 111.5 | 100.1 |
| 110.7 | 121.2 | 103.5 | 90.2  | 103.8 | 94.4  | 100.7 | 115.5 | 98    |
| 95.8  | 103.6 | 101.7 | 81.2  | 91.8  | 101.2 | 97.9  | 97.6  | 100   |
| 116.8 | 116.1 | 109.3 | 112.7 | 112.6 | 115.7 | 114.9 | 129.1 | 127.2 |
| 110.6 | 112.8 | 106.4 | 105.2 | 99.6  | 108.7 | 101.8 | 109.4 | 111.3 |
| 102.6 | 107.8 | 105.8 | 98.2  | 97.6  | 105.8 | 104.7 | 108.2 | 106.4 |
| 113.5 | 106.2 | 98.7  | 102.5 | 96.3  | 121.3 | 106.7 | 110.4 | 111.7 |
| 105.7 | 112.8 | 105.6 | 98.6  | 93.1  | 104.8 | 103.8 | 109.2 | 108.6 |
| 245.9 | 277.5 | 222.3 | 275.8 | 260.7 | 254   | 273.8 | 367.2 | 300.9 |
| 107.9 | 111.1 | 107.1 | 107.1 | 103   | 119.9 | 115.9 | 109.7 | 104.4 |
| 170.7 | 233.8 | 217.8 | 218.9 | 341.4 | 190.1 | 336.6 | 287   | 144.7 |
| 115.3 | 124.7 | 123.9 | 106.6 | 100.9 | 121   | 120.3 | 134.1 | 125.6 |
| 110.1 | 122.4 | 123.8 | 125.1 | 116   | 127.1 | 126   | 158.5 | 171.5 |
| 119.6 | 110.6 | 99.9  | 98.1  | 91.8  | 107.8 | 106.4 | 103.1 | 110.3 |
| 111.3 | 108.5 | 101.6 | 105.3 | 97.4  | 107.7 | 106.1 | 109.5 | 110   |
| 121.1 | 151.7 | 126.9 | 127.4 | 131.8 | 149.8 | 149   | 208.6 | 156.8 |
| 114   | 136.2 | 137.9 | 118.9 | 139.1 | 141.3 | 149.7 | 149.6 | 147.8 |
| 159.4 | 174.5 | 130   | 166.7 | 138.9 | 127.8 | 135.7 | 185.1 | 159.1 |
| 118.4 | 103.2 | 102.6 | 103.8 | 96.5  | 112.8 | 103.6 | 105.6 | 109.8 |
| 102.2 | 113.8 | 101.7 | 107.7 | 97.7  | 103.5 | 101.1 | 115.2 | 104.1 |
| 106.4 | 114.6 | 106.2 | 110.3 | 97.9  | 108.5 | 105.5 | 107.1 | 107.9 |
| 117.6 | 149.6 | 118.6 | 142.4 | 121.7 | 132.4 | 134.7 | 143.9 | 127.7 |
| 124.1 | 149.3 | 135.3 | 127.4 | 114.6 | 124.4 | 127.4 | 154.6 | 133.6 |
| 160.1 | 155.3 | 127.7 | 160.2 | 148.3 | 139.9 | 142.5 | 322   | 187.6 |
| 224.7 | 335.1 | 267.8 | 234.4 | 334.8 | 359.2 | 374.8 | 699.8 | 589.7 |
| 103.4 | 109.6 | 106.6 | 107.2 | 94    | 110.8 | 106.9 | 123.7 | 116.3 |
| 431.9 | 508.3 | 544.3 | 533.2 | 417.9 | 467.3 | 581.4 | 552.6 | 327.1 |
| 101.2 | 106   | 104.9 | 100.6 | 107.1 | 106.7 | 103.1 | 113.6 | 105   |
| 104.4 | 102.5 | 107.6 | 98.1  | 97.1  | 108.6 | 106.9 | 107   | 109   |

|        |        |        |        |        |        |        |        |        |
|--------|--------|--------|--------|--------|--------|--------|--------|--------|
| 133.1  | 178.5  | 161.7  | 124.3  | 129.3  | 142.2  | 139    | 151.1  | 156.1  |
| 128.3  | 181.5  | 133.6  | 135.2  | 127.4  | 162.4  | 138.6  | 183.4  | 159.6  |
| 117.5  | 110.6  | 103.6  | 116.4  | 98.1   | 113.9  | 102    | 107.4  | 112.2  |
| 142.3  | 173.7  | 159.4  | 132    | 144.8  | 170.1  | 173.9  | 254.6  | 186.3  |
| 254.7  | 233.7  | 254.5  | 205.9  | 231.6  | 234.8  | 185.5  | 375.1  | 407.7  |
| 170.5  | 318.5  | 261.6  | 275.5  | 231.7  | 283.1  | 234.8  | 254.2  | 247.7  |
| 98.7   | 105.9  | 100.7  | 98.9   | 99.2   | 110.6  | 106.3  | 103.9  | 104.2  |
| 109.3  | 103.2  | 103.5  | 84.8   | 92.5   | 105.5  | 104.8  | 104.7  | 107.1  |
| 180.4  | 333.3  | 306.5  | 311.1  | 291    | 278.7  | 248.2  | 370.7  | 276.5  |
| 151.4  | 229.6  | 195.2  | 194.9  | 166    | 192.9  | 206.9  | 262.9  | 214.6  |
| 109.9  | 108.4  | 111.3  | 105.2  | 97.7   | 103.8  | 112.3  | 111.4  | 112.8  |
| 507    | 448.2  | 329.6  | 686.7  | 378.6  | 358.8  | 585.8  | 558.6  | 417.5  |
| 102.6  | 101.6  | 99.7   | 100.5  | 87.2   | 108.1  | 97.8   | 100.4  | 108.9  |
| 523.8  | 327.2  | 257.2  | 324.7  | 271.8  | 265.1  | 345.2  | 389.1  | 612    |
| 104.4  | 97.4   | 103    | 97.4   | 87.1   | 102.4  | 100.5  | 107.2  | 107.5  |
| 101    | 100.8  | 98.1   | 98.5   | 90.3   | 114    | 108.2  | 110.6  | 107.1  |
| 109.1  | 114    | 104.1  | 96.6   | 99.4   | 114.2  | 102.1  | 109.6  | 110.3  |
| 103.4  | 103.4  | 104.6  | 102.5  | 93.5   | 104.9  | 105.9  | 111.6  | 101.9  |
| 174.3  | 231.5  | 191.5  | 168.8  | 199.5  | 201.4  | 195.3  | 283.6  | 239.8  |
| 113.7  | 108.9  | 105.3  | 107.1  | 100.6  | 109.5  | 102.2  | 117    | 116.6  |
| 115.7  | 114.7  | 105.6  | 98.5   | 104.2  | 118.4  | 114.4  | 108.9  | 120.5  |
| 242.9  | 175    | 143.9  | 265    | 150.2  | 163.5  | 169.2  | 310.6  | 288.3  |
| 1218.3 | 1631   | 1451.5 | 1276.6 | 1368.4 | 1472.6 | 1491.1 | 2397.4 | 1366.8 |
| 131.4  | 194.2  | 227.3  | 154.3  | 186.2  | 279.7  | 204.8  | 195.8  | 176    |
| 110    | 127.4  | 122.3  | 113.9  | 101.9  | 118.6  | 109.2  | 111.3  | 111.2  |
| 132.7  | 124.2  | 116.8  | 108.2  | 104.7  | 110.5  | 118.1  | 121.2  | 110.2  |
| 110.8  | 122.8  | 117.6  | 126.5  | 107.2  | 119.1  | 114.6  | 124.9  | 132.5  |
| 836.3  | 429.5  | 358.1  | 304.1  | 369.9  | 464.2  | 317.1  | 1409.4 | 1506   |
| 113    | 115.4  | 108.6  | 100    | 100.4  | 119.5  | 104.7  | 104.8  | 112.2  |
| 103    | 103.1  | 102.4  | 98.7   | 96.6   | 105.6  | 101.9  | 103.8  | 104.3  |
| 100.5  | 108.8  | 99.7   | 96.2   | 102.1  | 106.4  | 101.2  | 105.1  | 109.4  |
| 122.3  | 137.2  | 135    | 134.6  | 126.5  | 150.5  | 128.8  | 174.1  | 172.9  |
| 105.4  | 100.7  | 104.3  | 98.5   | 94.7   | 103    | 99.3   | 108    | 108.8  |
| 109.5  | 117.2  | 105.9  | 98.7   | 97.6   | 104.2  | 99.3   | 118.6  | 102.9  |
| 109.6  | 114.1  | 98.6   | 104.5  | 97     | 109.4  | 102.8  | 102.8  | 110.1  |
| 126.7  | 118.8  | 107.5  | 103.6  | 107.8  | 118.3  | 107.9  | 127.4  | 112.1  |
| 196.1  | 333.2  | 304.4  | 317.3  | 271.8  | 306.3  | 310    | 439.9  | 264.7  |
| 110.1  | 101.6  | 103.5  | 101.6  | 102.3  | 113.4  | 106.5  | 108.7  | 107.8  |
| 109.4  | 107.8  | 108.5  | 96.6   | 97.2   | 116.5  | 106.5  | 107.9  | 109.3  |
| 107.2  | 120.4  | 105.3  | 107.3  | 100.6  | 113.4  | 102    | 114    | 107.8  |
| 283    | 579.5  | 682.8  | 554.8  | 540.7  | 558.9  | 598    | 914.7  | 414.4  |
| 2101.5 | 2165.3 | 2703.1 | 1728.2 | 2005.3 | 2744.3 | 1993.9 | 2480.3 | 2986.9 |
| 105.7  | 108.8  | 103    | 101.8  | 94.5   | 111.5  | 103    | 110.9  | 114.9  |
| 292.2  | 359.4  | 378.4  | 374.5  | 268.2  | 288    | 286.5  | 463.2  | 418.3  |
| 107.2  | 107.3  | 109.2  | 101.7  | 100    | 112.9  | 103.6  | 120.6  | 108.9  |
| 112.1  | 105    | 102    | 107.1  | 90.9   | 102    | 98.6   | 108.8  | 110.5  |
| 414.3  | 438.7  | 330.6  | 386.3  | 323.9  | 356.2  | 431.3  | 684.5  | 387.2  |
| 127    | 128.5  | 120.2  | 120.1  | 127.3  | 137.3  | 123.5  | 156.7  | 147.2  |
| 109.2  | 121.3  | 104.6  | 126.1  | 98.9   | 109    | 110.7  | 128.8  | 115.2  |
| 101.1  | 104.5  | 100.5  | 105.9  | 97     | 109.1  | 99.1   | 108.6  | 106.7  |
| 101.4  | 110    | 106.6  | 101.1  | 98.4   | 108    | 104.2  | 119.2  | 104.7  |

|        |        |        |        |       |        |        |        |        |
|--------|--------|--------|--------|-------|--------|--------|--------|--------|
| 100.9  | 103.9  | 101.8  | 103.5  | 95.6  | 107.2  | 104.9  | 109.8  | 106.5  |
| 116.7  | 107.8  | 95.3   | 85.4   | 92.7  | 90.8   | 95.6   | 108.1  | 103.2  |
| 105.4  | 106.5  | 100    | 103.3  | 95.7  | 114.2  | 106    | 113.6  | 115.4  |
| 108.5  | 110    | 96.2   | 104    | 88.5  | 105    | 94.1   | 111.6  | 117.8  |
| 108.8  | 106.1  | 103.9  | 104    | 102.5 | 110.7  | 92.9   | 120.2  | 114.2  |
| 137.7  | 147.8  | 154    | 132.7  | 141.3 | 169    | 159.1  | 205.1  | 151.8  |
| 109    | 133.7  | 128.3  | 125    | 128.9 | 141.4  | 132.8  | 143.2  | 125.7  |
| 181.6  | 231.1  | 191.5  | 211.2  | 173.5 | 213.2  | 209.1  | 248.3  | 199.7  |
| 105.5  | 106.2  | 98.7   | 99     | 95.9  | 100.4  | 102.6  | 118.2  | 107.2  |
| 107.7  | 118.3  | 111.5  | 103.8  | 106.3 | 119.2  | 112.2  | 122.5  | 108.8  |
| 112.6  | 141.1  | 125.3  | 131.6  | 112.3 | 129.4  | 129.4  | 133.3  | 124.2  |
| 111.2  | 112.3  | 112.6  | 107.9  | 98.7  | 115.2  | 112    | 124.5  | 116.8  |
| 1222.4 | 900.4  | 1088.4 | 788.4  | 870.3 | 1071.4 | 890.5  | 1929.6 | 1128.4 |
| 107.1  | 111    | 100.2  | 110.8  | 89.6  | 106.5  | 102.6  | 111.2  | 114    |
| 117.9  | 114.8  | 101.6  | 102.9  | 100.6 | 111.2  | 103.5  | 108.9  | 117.9  |
| 112.9  | 110    | 98.3   | 102.4  | 97.2  | 119.9  | 102.3  | 112.1  | 115.5  |
| 153.7  | 115.3  | 107.6  | 115.5  | 107.5 | 117.8  | 113    | 143.5  | 134.2  |
| 107.6  | 105.6  | 100.7  | 100.6  | 94.1  | 112.2  | 108.8  | 114.4  | 119.2  |
| 104.3  | 111.7  | 105.1  | 97.2   | 105.7 | 118.2  | 112.6  | 110.2  | 108    |
| 102.4  | 106.8  | 104.1  | 98.2   | 90.5  | 104.8  | 98.3   | 102.9  | 115.8  |
| 156.9  | 238    | 205.9  | 234.8  | 211.4 | 229.8  | 266.9  | 291.2  | 232.6  |
| 112    | 111    | 107.4  | 100.3  | 103.2 | 104.2  | 109.8  | 115.3  | 114.8  |
| 103.4  | 106.9  | 99.7   | 88     | 95    | 103.4  | 102.4  | 113.3  | 102.3  |
| 102.2  | 107.6  | 104.4  | 95.5   | 91.4  | 109.7  | 98.6   | 102.7  | 107.7  |
| 108.3  | 102.9  | 110    | 101.4  | 99.6  | 106.3  | 98.1   | 105.5  | 104.3  |
| 111.8  | 111.1  | 105.7  | 109    | 100.2 | 118.3  | 99.5   | 113.2  | 107.3  |
| 115.1  | 107.3  | 100.5  | 103.8  | 99.5  | 105.6  | 99.9   | 102.3  | 111.5  |
| 95.5   | 103.5  | 99.5   | 106.7  | 97.5  | 105.3  | 107.1  | 109.7  | 115    |
| 263.8  | 352.4  | 397.9  | 236.6  | 400.2 | 446.1  | 333.1  | 596.9  | 427.8  |
| 118    | 127.6  | 121.9  | 118.2  | 112.4 | 129    | 106.9  | 145.7  | 135.2  |
| 120.4  | 118.4  | 118.7  | 104.5  | 106.5 | 121    | 112.9  | 111.9  | 121.5  |
| 149.9  | 127.7  | 137.2  | 139.6  | 124.8 | 136.4  | 125.4  | 192.7  | 151.8  |
| 278.9  | 316.2  | 301.9  | 269.5  | 298.3 | 281.9  | 255.6  | 464.6  | 345.6  |
| 255.1  | 356.7  | 459.4  | 389    | 311.1 | 464.8  | 417    | 596.3  | 315.5  |
| 144.4  | 174.5  | 140.5  | 148    | 140.5 | 172.6  | 133.1  | 222.9  | 219    |
| 108.6  | 111.7  | 100.6  | 108.2  | 94    | 114.5  | 103.8  | 120.4  | 111.4  |
| 137.8  | 141.2  | 137.4  | 130.1  | 132.7 | 149.8  | 131.6  | 220.4  | 170.1  |
| 112.5  | 114.8  | 110.6  | 114.4  | 96.6  | 108.3  | 104.1  | 109.1  | 107.9  |
| 901.2  | 1084.2 | 893.8  | 1389.4 | 901.5 | 956.6  | 1439.4 | 1797.8 | 942.8  |
| 137.5  | 193    | 167    | 186.4  | 170.2 | 152.3  | 182.7  | 307.2  | 194.6  |
| 230.5  | 413.9  | 373.2  | 386.2  | 324.7 | 365.3  | 404.1  | 613.3  | 435.6  |
| 157    | 231.1  | 220.1  | 238.8  | 194.3 | 197.1  | 234.1  | 441.3  | 267.3  |
| 112.4  | 113.9  | 105.1  | 121.2  | 95.6  | 119.6  | 107.4  | 109.7  | 108.7  |
| 107.8  | 107.4  | 97.7   | 98.1   | 96.5  | 108.8  | 100.2  | 111.9  | 114.2  |
| 115.9  | 139.1  | 140.7  | 140.5  | 138.7 | 160    | 149    | 157    | 136.9  |
| 103.3  | 103.1  | 101    | 104    | 94.6  | 110.5  | 104.4  | 114.3  | 113.5  |
| 106.8  | 102.3  | 103.2  | 106.4  | 89.3  | 110.9  | 110.7  | 108.1  | 109.5  |
| 107.9  | 111.8  | 98.6   | 102.2  | 96.5  | 109    | 101    | 104    | 103.8  |
| 103.1  | 115.8  | 104.7  | 101.9  | 99.6  | 110.2  | 103.3  | 120.4  | 112.7  |
| 112    | 108.6  | 107.6  | 104.4  | 101   | 112    | 105.5  | 114.5  | 112.1  |
| 101.5  | 108    | 95.8   | 113.7  | 97    | 113.1  | 103.3  | 115.4  | 105.7  |



|        |        |       |        |       |        |        |        |       |
|--------|--------|-------|--------|-------|--------|--------|--------|-------|
| 116    | 114.7  | 108.9 | 108.5  | 101.2 | 107.9  | 115    | 118.9  | 117.3 |
| 116.6  | 110.7  | 119.3 | 115.4  | 109.1 | 113.4  | 118.6  | 141.7  | 129.7 |
| 104.9  | 105.6  | 107.3 | 103.1  | 99.2  | 107.7  | 106.1  | 107    | 106.9 |
| 135.3  | 144.8  | 145   | 154.1  | 129.4 | 155.4  | 145.8  | 152.4  | 142.8 |
| 103.8  | 107.2  | 102.9 | 101.6  | 94.2  | 108.4  | 110.3  | 113    | 107.3 |
| 105.5  | 111.4  | 108.3 | 109.7  | 100.1 | 112.1  | 109.5  | 108.5  | 120.2 |
| 142.1  | 219.1  | 219.5 | 159.4  | 179.3 | 213.8  | 171    | 247.9  | 171.6 |
| 103.8  | 108.6  | 109.6 | 108.9  | 103.2 | 114.6  | 112.4  | 117.1  | 119.5 |
| 144.4  | 150.3  | 175.2 | 133    | 137.9 | 173.1  | 154.3  | 218.6  | 181.8 |
| 109.2  | 100.8  | 101.5 | 91     | 92.4  | 111.5  | 102.6  | 99     | 112   |
| 107.7  | 117.4  | 109.8 | 108.6  | 95.3  | 111.8  | 104.8  | 116.5  | 112.9 |
| 115    | 118.2  | 107.5 | 116.7  | 103.7 | 112.4  | 104.7  | 122.2  | 119.5 |
| 114.9  | 116.5  | 103.7 | 98.6   | 93.1  | 108.9  | 112.7  | 102.7  | 110.3 |
| 108.7  | 112.4  | 106.8 | 98.2   | 108.3 | 110.1  | 101.7  | 114.2  | 115.1 |
| 102    | 102.4  | 102.7 | 98.7   | 100.1 | 110.4  | 104.6  | 108.4  | 95.6  |
| 107.6  | 105.8  | 101.3 | 101.6  | 91.9  | 102.3  | 98.5   | 104.8  | 107.9 |
| 118.6  | 124.6  | 117.4 | 115.5  | 112.1 | 125    | 128.2  | 118.8  | 110.5 |
| 158.9  | 232.9  | 213.7 | 231    | 198.1 | 187.9  | 207.8  | 220.7  | 154.9 |
| 118.4  | 116.9  | 108   | 103.6  | 101.8 | 112    | 105.2  | 115.8  | 102.9 |
| 128.2  | 157.6  | 158.8 | 150.1  | 151   | 172.3  | 139.1  | 181    | 132.3 |
| 109.6  | 119.7  | 113.7 | 105.4  | 99.6  | 111.2  | 111.4  | 116.2  | 114   |
| 113    | 129.5  | 105.3 | 103.3  | 106.6 | 111.7  | 119.9  | 136.1  | 131.8 |
| 119    | 139.8  | 130.1 | 142.4  | 124.3 | 139.9  | 137.4  | 202.9  | 157.2 |
| 205.8  | 266.3  | 247.6 | 268    | 240.7 | 311.2  | 301.7  | 412.8  | 215.7 |
| 295.4  | 471    | 439.2 | 384.7  | 360.3 | 375.7  | 373    | 534.3  | 312.6 |
| 129.3  | 157.8  | 152   | 134.2  | 126.5 | 151.7  | 128.9  | 160.6  | 145.4 |
| 157.6  | 166.7  | 196.8 | 137.2  | 163.8 | 169.3  | 150.6  | 191.8  | 131.1 |
| 119.5  | 144.8  | 126.5 | 127.2  | 118.7 | 127.1  | 128.6  | 158.3  | 127.5 |
| 130.3  | 169.6  | 170.5 | 151.2  | 149.9 | 167.3  | 149.9  | 186.8  | 174.3 |
| 107.5  | 110    | 102.2 | 97.5   | 92.6  | 112.1  | 108.5  | 113.6  | 115.2 |
| 101.7  | 107.7  | 95.9  | 90.8   | 96.5  | 100.7  | 105.4  | 100.7  | 105.7 |
| 107.5  | 112.3  | 100.4 | 109.6  | 97.2  | 107.7  | 107    | 114.7  | 113.7 |
| 112.1  | 106.2  | 108.4 | 111    | 100.8 | 117.6  | 102.6  | 110.8  | 119.9 |
| 7950.7 | 7112.4 | 6496  | 7237.3 | 5807  | 6890.8 | 7439.5 | 9600.3 | 9449  |
| 105.5  | 115.4  | 107.7 | 100.1  | 109.7 | 120    | 111.3  | 117.5  | 112.2 |
| 837.3  | 936.9  | 786.6 | 892.7  | 776   | 927.9  | 812.1  | 1330.8 | 907.7 |
| 100.3  | 101.5  | 98.5  | 97.8   | 96.1  | 116.6  | 106    | 108.2  | 107.6 |
| 107.5  | 105.7  | 99.4  | 102.9  | 101.3 | 116.2  | 101    | 116    | 111.5 |
| 108.8  | 102.5  | 105.8 | 99.2   | 93.2  | 106.7  | 100.5  | 117.5  | 108.8 |
| 113.4  | 110.3  | 103.2 | 97.3   | 100   | 121.9  | 101.5  | 120.6  | 117.6 |
| 115    | 115    | 101.5 | 102.7  | 101.7 | 114.8  | 99     | 118.6  | 111.9 |
| 106.2  | 107.3  | 101.9 | 99.3   | 89.7  | 105.5  | 99     | 111.4  | 108.8 |
| 119.7  | 107.6  | 111   | 102.7  | 103.6 | 109.1  | 107.8  | 111.6  | 98.5  |
| 104.3  | 98     | 98.8  | 104    | 98.1  | 104.1  | 101.6  | 111.3  | 112.5 |
| 109.6  | 105    | 104.3 | 101.1  | 102.1 | 102.4  | 105.7  | 113.1  | 109.5 |
| 109.7  | 132.3  | 114.5 | 118    | 112.5 | 112.4  | 121.7  | 119.3  | 134.8 |
| 183.3  | 145    | 156.4 | 176.2  | 128.4 | 153.4  | 148.1  | 157.4  | 153.5 |
| 109.1  | 116.9  | 104.8 | 107.1  | 100.3 | 120.8  | 108.9  | 116.5  | 106.9 |
| 122.2  | 121.8  | 114.7 | 139.1  | 102.1 | 110.2  | 133.5  | 128.3  | 122.4 |
| 106.5  | 106.3  | 107.9 | 98.5   | 91.9  | 109    | 104.5  | 107.7  | 108.6 |
| 103.1  | 667    | 390   | 156.9  | 337.6 | 328.6  | 222    | 212.5  | 120.5 |

|       |       |        |       |       |       |        |        |       |
|-------|-------|--------|-------|-------|-------|--------|--------|-------|
| 109.6 | 106.6 | 104.1  | 98    | 94.6  | 109.4 | 101.8  | 106.8  | 106.3 |
| 154   | 127.7 | 122.2  | 120   | 124   | 132.6 | 121.2  | 175.2  | 140.5 |
| 112.9 | 112.3 | 99.5   | 119.5 | 102.9 | 116.9 | 96.3   | 125    | 107.7 |
| 749.2 | 1154  | 1046.5 | 1004  | 994.3 | 942.5 | 1033.8 | 1341.3 | 867.1 |
| 105   | 129   | 116.5  | 118.7 | 103.7 | 116   | 116.9  | 128.7  | 118.5 |
| 113.7 | 119.6 | 123.8  | 130.7 | 103.1 | 126.7 | 113.3  | 143.8  | 124.3 |
| 111.1 | 112.3 | 100.5  | 104.3 | 107.3 | 114.7 | 99.7   | 109    | 110.4 |
| 113.6 | 118.5 | 107.3  | 116.1 | 107.6 | 105.8 | 108.2  | 122.5  | 109.7 |
| 126   | 287.1 | 280.8  | 232.6 | 246.7 | 243.2 | 231.6  | 263.4  | 201.6 |
| 103.4 | 154.9 | 129.8  | 142.1 | 121.7 | 123   | 150.8  | 130.5  | 115.4 |
| 118.7 | 124.4 | 132.6  | 106.3 | 108.2 | 114.9 | 116.2  | 115.3  | 128.2 |
| 109.7 | 112.2 | 111.1  | 108.1 | 90.4  | 106.8 | 100.8  | 110.2  | 104.8 |
| 108.9 | 108.1 | 104.4  | 107.4 | 96.9  | 110.4 | 102    | 118.9  | 114.4 |
| 162.6 | 143.7 | 134.7  | 127.4 | 137.5 | 162.8 | 132.1  | 182.4  | 161.3 |
| 104.3 | 109.9 | 106.6  | 100.7 | 96.8  | 108.8 | 110.6  | 116.1  | 103.2 |
| 104.1 | 107.8 | 104.2  | 105.2 | 105.2 | 102.3 | 97.8   | 108.1  | 104.3 |
| 110.6 | 106.7 | 106    | 109.9 | 98.5  | 110.6 | 97.7   | 114.9  | 113.3 |
| 106.4 | 116.7 | 101.1  | 103.1 | 96.9  | 103.7 | 106.8  | 119.8  | 116.1 |
| 98.6  | 107.2 | 104.2  | 105.3 | 99.7  | 109.5 | 97.9   | 106.7  | 101.6 |
| 116.5 | 120.1 | 118.2  | 129.5 | 107.6 | 119   | 109.8  | 129.1  | 122.4 |
| 187.9 | 357   | 284.1  | 366.3 | 297.6 | 324.6 | 406.5  | 334.7  | 258.4 |
| 140.2 | 152.5 | 164.4  | 150.6 | 130.3 | 154.9 | 140.7  | 200    | 157.9 |
| 107   | 117.6 | 108.6  | 120   | 101.9 | 112.8 | 107.3  | 102.2  | 108.2 |
| 100.7 | 115.4 | 112.7  | 102.3 | 99.6  | 114.1 | 105.5  | 120.2  | 113   |
| 106.6 | 106.7 | 98.6   | 99.5  | 95.8  | 104.6 | 97.7   | 105.6  | 101.2 |
| 114.7 | 109.9 | 108.5  | 117.8 | 104.5 | 111.2 | 106.6  | 118    | 113.5 |
| 113.7 | 110.1 | 105.3  | 104.5 | 102.2 | 115   | 107.1  | 124.5  | 113.2 |
| 616.5 | 563.7 | 461.8  | 523.1 | 550.1 | 556.7 | 480.9  | 1255.1 | 926.3 |
| 114.5 | 122.4 | 95.5   | 95.5  | 100.1 | 116.1 | 106.9  | 125.4  | 115.5 |
| 141.5 | 132.3 | 122.9  | 113.5 | 125   | 141.7 | 131.2  | 169.4  | 161.5 |
| 108.7 | 118.5 | 115.6  | 114.7 | 101.3 | 126.5 | 105.5  | 122.2  | 104.9 |
| 106.8 | 106.9 | 95.5   | 97.6  | 97.8  | 107.6 | 103.1  | 108.3  | 113.2 |
| 109.3 | 111.6 | 98.7   | 94.6  | 91.6  | 109.4 | 97.4   | 110.5  | 104.4 |
| 105.4 | 103.6 | 94.3   | 109.2 | 96.7  | 114.2 | 105.7  | 110.7  | 106.8 |
| 107.1 | 116.5 | 108.1  | 96.7  | 92.1  | 117.4 | 103    | 106.9  | 111.8 |
| 111.7 | 105.7 | 104.3  | 102.5 | 103   | 107.9 | 101.1  | 106.1  | 103.5 |
| 382.2 | 366.9 | 344.3  | 353.5 | 340.7 | 341.4 | 331.8  | 573.6  | 335.2 |
| 110.7 | 143.1 | 134    | 120.8 | 118.3 | 136.5 | 122    | 146.5  | 117.3 |
| 138.1 | 149.5 | 152.6  | 137   | 119.7 | 166.9 | 126    | 185.4  | 183.6 |
| 328.9 | 444.4 | 492.5  | 434.6 | 350.1 | 472.5 | 415.1  | 619.3  | 478.3 |
| 114.1 | 136.6 | 121.3  | 120   | 118.3 | 117.2 | 123    | 158.4  | 115.5 |
| 99.5  | 107.8 | 99.1   | 94.6  | 92.8  | 100.1 | 98.9   | 94.9   | 108   |
| 112.6 | 126.4 | 118.8  | 117.9 | 116.6 | 124.6 | 130.7  | 150.8  | 131   |
| 110.8 | 110   | 97.7   | 98.7  | 94.4  | 106.7 | 103.5  | 113.8  | 121.1 |
| 94.2  | 110.6 | 97.3   | 89.7  | 90.5  | 105.1 | 103.6  | 107.5  | 103.8 |
| 109.3 | 109.2 | 102.2  | 97.7  | 92.2  | 99.8  | 100.8  | 118.1  | 98.4  |
| 105.6 | 98.2  | 101.1  | 105.7 | 96.8  | 109.5 | 98.9   | 103.1  | 106.7 |
| 102.8 | 113.9 | 103    | 104.9 | 89.5  | 104.9 | 103.1  | 105.7  | 109.2 |
| 113.8 | 103.1 | 108.7  | 97.4  | 92.4  | 103.1 | 101.5  | 105.3  | 102.4 |
| 273.4 | 248   | 207.3  | 201.4 | 196.1 | 256.1 | 214.9  | 513.9  | 324   |
| 117.2 | 114.6 | 136.2  | 113   | 110.9 | 117.6 | 113    | 134.8  | 123.6 |

|       |       |       |       |       |       |       |       |       |
|-------|-------|-------|-------|-------|-------|-------|-------|-------|
| 149   | 159.6 | 157   | 156.3 | 146.3 | 160.7 | 165.4 | 238.4 | 187.2 |
| 139.3 | 132.8 | 118.6 | 112.3 | 123.3 | 136.4 | 112.8 | 144.2 | 134.1 |
| 291   | 184.4 | 171.4 | 171.1 | 156.3 | 192.7 | 170.5 | 381.4 | 449.5 |
| 316.7 | 382.4 | 424.3 | 344.9 | 314.3 | 392.6 | 359   | 452.1 | 297.2 |
| 135.4 | 145.9 | 118.9 | 143.2 | 130.5 | 153.9 | 119.4 | 187.1 | 205.7 |
| 110.1 | 119.5 | 102.1 | 102.9 | 98.1  | 116.2 | 99.6  | 120.4 | 121.6 |
| 244.5 | 251.8 | 256.9 | 245.9 | 243.1 | 256.7 | 215.8 | 418   | 437.8 |
| 826.3 | 731.1 | 780   | 726.1 | 727.5 | 725.2 | 744.3 | 1094  | 949.9 |
| 247.2 | 281.1 | 264.2 | 258.3 | 243.1 | 247.2 | 258.2 | 365.3 | 348.3 |
| 108.2 | 100.6 | 102.1 | 95    | 106.7 | 108.5 | 98.7  | 115   | 108.8 |
| 106.5 | 120.6 | 121.5 | 99.4  | 105.6 | 118.5 | 112   | 128.2 | 115.5 |
| 150.3 | 152   | 152.1 | 153.9 | 131.5 | 135.6 | 170.4 | 205.2 | 149.6 |
| 105.8 | 109.1 | 102.6 | 104.1 | 93.3  | 101.9 | 101.6 | 106.1 | 109.4 |
| 134.2 | 148.5 | 128.9 | 148.3 | 132.6 | 137.9 | 157.4 | 135.3 | 124.6 |
| 109.8 | 110.9 | 108.5 | 122.7 | 101.2 | 119   | 112.3 | 129.6 | 110.5 |
| 105.1 | 115.2 | 98.7  | 109.5 | 100.6 | 108.5 | 101.1 | 112.7 | 112.5 |
| 117.1 | 111.9 | 114.1 | 139.6 | 110.9 | 122.9 | 129.7 | 126.7 | 131.5 |
| 109.9 | 97.2  | 94.3  | 114   | 92.5  | 107.4 | 108.8 | 108   | 110.3 |
| 113.3 | 106.9 | 101.6 | 105.8 | 97.9  | 105   | 102.9 | 107.7 | 111.7 |
| 111.4 | 131.2 | 119.5 | 131.9 | 108.2 | 112.6 | 128.4 | 111.1 | 115.2 |
| 110.3 | 110.5 | 113.7 | 131.3 | 105.4 | 112   | 106.8 | 135.9 | 125.7 |
| 106.4 | 103   | 101.4 | 98.9  | 93.2  | 102   | 97.8  | 104.6 | 101.4 |
| 117.2 | 125.2 | 134   | 114.6 | 123.2 | 130   | 119.4 | 139.4 | 129.9 |
| 100.3 | 105.2 | 94.3  | 99.1  | 95.3  | 109.2 | 103.4 | 105.5 | 102.8 |
| 117   | 117.7 | 105.7 | 110.7 | 100.4 | 120   | 103.9 | 138.7 | 109.2 |
| 126.1 | 223   | 169.3 | 268.8 | 170.6 | 137.9 | 177.2 | 156.3 | 141.3 |
| 161.3 | 172.5 | 151.8 | 160.5 | 152.3 | 183.2 | 168.4 | 254.2 | 215   |
| 127.7 | 133.4 | 106.6 | 106.6 | 102.3 | 126.3 | 111.8 | 136.1 | 131   |
| 327.2 | 337   | 341.9 | 272.9 | 317   | 326   | 344.6 | 585   | 416.2 |
| 160.2 | 206.2 | 197.2 | 202.6 | 173.2 | 191.8 | 170.8 | 272.1 | 268.6 |
| 109.9 | 106   | 102.4 | 98.9  | 100.9 | 113.9 | 103.2 | 109.9 | 107.3 |
| 113.6 | 127.2 | 105.6 | 128.7 | 110.3 | 116.9 | 112.6 | 126   | 127   |
| 105.3 | 100.3 | 106.7 | 96.9  | 99.3  | 112.3 | 100.5 | 111.3 | 104.4 |
| 109.4 | 107.2 | 102   | 113   | 94    | 110   | 104.2 | 109.7 | 110   |
| 103.8 | 105   | 102.1 | 101.4 | 95.6  | 105.4 | 100.7 | 120.1 | 106.2 |
| 104.3 | 111.6 | 102.8 | 101.6 | 92.9  | 107.4 | 107.2 | 102.2 | 108.5 |
| 118.6 | 110.7 | 102.5 | 100.8 | 95.7  | 109.3 | 105.3 | 105.2 | 114.9 |
| 312.1 | 453.7 | 393.9 | 333.4 | 405.3 | 424.7 | 457.1 | 578.8 | 376.8 |
| 97.2  | 103.8 | 99.7  | 98.4  | 93    | 108   | 90.8  | 102.6 | 108.1 |
| 141.5 | 191.1 | 184.6 | 145.9 | 171.2 | 173   | 145   | 247.7 | 181.2 |
| 166.5 | 177.4 | 184   | 171.1 | 182.3 | 187.1 | 162.4 | 209.2 | 173   |
| 185.3 | 241.2 | 274.8 | 254   | 273.3 | 252.3 | 270.6 | 425.9 | 245.7 |
| 208.7 | 170.9 | 183.4 | 160.3 | 152.7 | 185.4 | 122.3 | 222.2 | 199.3 |
| 114   | 113.7 | 108.9 | 117.8 | 104.5 | 112.9 | 109.6 | 107.3 | 113.3 |
| 230   | 240.4 | 231.2 | 230.5 | 202.4 | 264.6 | 245.2 | 519.2 | 372.9 |
| 112.7 | 112.6 | 103.2 | 101.7 | 94.9  | 105.7 | 100.4 | 113.6 | 103.7 |
| 101.4 | 117.8 | 107.6 | 101.7 | 98.3  | 106   | 111.8 | 108.6 | 110.7 |
| 112.1 | 103.9 | 103.6 | 93    | 102.3 | 118.2 | 105.8 | 100.1 | 103   |
| 151.7 | 148.2 | 156.5 | 167.6 | 137.6 | 166.5 | 132.5 | 238.4 | 195.1 |
| 105.7 | 126.4 | 134   | 132.1 | 109.6 | 130.6 | 123.5 | 131   | 117.2 |
| 110.4 | 103.5 | 109.1 | 99.8  | 96.7  | 104.1 | 107   | 103.6 | 103.8 |

|        |        |        |        |        |        |        |        |        |
|--------|--------|--------|--------|--------|--------|--------|--------|--------|
| 423    | 327.5  | 399.4  | 343.3  | 316.3  | 386.4  | 214.8  | 578.4  | 781    |
| 144.6  | 150.2  | 141.4  | 121.2  | 135.9  | 145.4  | 156.9  | 273.4  | 161.4  |
| 137.6  | 117.1  | 112.4  | 99     | 122.5  | 142.7  | 149.4  | 168.2  | 112.7  |
| 1071.7 | 1176.5 | 598.4  | 2201.9 | 962.9  | 541.2  | 2342.4 | 939.9  | 638.9  |
| 122.9  | 201.2  | 150    | 115.9  | 141.6  | 124.8  | 141.4  | 151.1  | 109.6  |
| 124.1  | 120.6  | 105.7  | 113    | 112.5  | 121.7  | 116.6  | 146.4  | 164.2  |
| 101.6  | 128.5  | 143.1  | 120.8  | 117.2  | 127.4  | 111.2  | 140.9  | 111.7  |
| 248.9  | 799.8  | 1710.2 | 793.7  | 719.1  | 1118   | 539.3  | 701.7  | 310.1  |
| 116.3  | 146.1  | 109.2  | 132.2  | 112.4  | 112.6  | 115.5  | 121.2  | 124.1  |
| 125.6  | 398.7  | 132.7  | 204    | 162.5  | 111.2  | 132.6  | 116.5  | 124.9  |
| 114.5  | 211.7  | 115.4  | 163.9  | 124.2  | 116.4  | 106.7  | 123    | 117.5  |
| 141.7  | 114.8  | 105.1  | 195.7  | 106.5  | 114.8  | 168.8  | 133.1  | 134.4  |
| 122.7  | 146.2  | 111.9  | 124.1  | 111.9  | 111.7  | 184.1  | 135    | 133.6  |
| 114.4  | 124.1  | 113.9  | 177    | 106.2  | 107.7  | 153.6  | 115.3  | 114    |
| 111.9  | 111.6  | 100.3  | 100.2  | 93.4   | 105.7  | 100.4  | 104.1  | 105.8  |
| 105.9  | 109.8  | 94.5   | 91.2   | 97.1   | 103.9  | 109.7  | 105.5  | 99.4   |
| 105.3  | 129.5  | 121.1  | 109.3  | 103    | 123.4  | 114.9  | 155    | 131.1  |
| 340    | 354.7  | 278.7  | 1368.9 | 320.3  | 231.7  | 1164.5 | 303.4  | 184.3  |
| 191.6  | 221    | 195.7  | 190.8  | 164.3  | 224.5  | 222.2  | 237.9  | 168.5  |
| 120    | 121.6  | 106.2  | 107.6  | 105.2  | 113.1  | 113.4  | 116.7  | 115.1  |
| 106.5  | 103.1  | 101.8  | 102.6  | 95.3   | 115.7  | 108.9  | 120.5  | 126.5  |
| 142.9  | 217.9  | 219.3  | 213    | 212.8  | 206.4  | 221.9  | 257.9  | 146.5  |
| 1840.8 | 2295.8 | 2680.5 | 2320.7 | 3080.7 | 3729.5 | 1967.8 | 5456.1 | 5338.1 |
| 112.5  | 106    | 95.8   | 100.3  | 100.4  | 106.4  | 105.9  | 114.4  | 117.4  |
| 1840.5 | 363.3  | 129.7  | 6624.7 | 212    | 137.3  | 1898.5 | 152.1  | 206.6  |
| 109.5  | 115.7  | 100.5  | 100.4  | 97.6   | 109.6  | 107.2  | 105.2  | 104.7  |
| 106.5  | 115.3  | 110.1  | 108.4  | 101.2  | 113.5  | 105.6  | 117.4  | 101    |
| 107.9  | 106    | 95.1   | 101.9  | 92.9   | 106.4  | 105.4  | 107.1  | 104.2  |
| 103.3  | 119.7  | 103    | 117.1  | 88.9   | 100.9  | 105.3  | 106.3  | 110    |
| 108.7  | 112.2  | 97.9   | 95.6   | 89.1   | 108.6  | 106.9  | 109.5  | 116.8  |
| 101.7  | 104    | 98.5   | 99.3   | 91.9   | 102.2  | 101.6  | 105.3  | 108.6  |
| 128.5  | 254.5  | 153.1  | 188.3  | 159.3  | 130.6  | 166.9  | 134.7  | 132.2  |
| 110.9  | 105.5  | 95.9   | 106.3  | 96.4   | 108.6  | 102    | 115    | 110    |
| 111.7  | 135.4  | 139.9  | 124.8  | 115    | 122.1  | 121.3  | 115.1  | 122    |
| 111.6  | 231    | 189.4  | 167.2  | 163.8  | 144.3  | 134.6  | 159.6  | 118.3  |
| 107.4  | 103.6  | 98     | 95.6   | 94.6   | 109.6  | 104.1  | 105.4  | 114.3  |
| 107.4  | 111.4  | 98.9   | 101.7  | 100.8  | 103.7  | 97     | 107.3  | 124.3  |
| 105.2  | 113.6  | 114.8  | 102.1  | 98.9   | 102.8  | 96.8   | 111    | 119.9  |
| 114    | 399.2  | 276.6  | 249.6  | 249.4  | 203.6  | 178.4  | 200.6  | 140.8  |
| 114.3  | 132.4  | 131.2  | 137.6  | 123.1  | 136.8  | 133.6  | 135.4  | 133.3  |
| 589.9  | 1316.8 | 1183.6 | 1197.6 | 1224.3 | 1238.6 | 983.1  | 2252.8 | 1541.3 |
| 115.9  | 118.6  | 110.4  | 105.9  | 99.8   | 123.8  | 108    | 125.8  | 115.1  |
| 101.3  | 106.3  | 98.1   | 94.6   | 98.1   | 108    | 94     | 103.6  | 99.4   |
| 102.6  | 112.9  | 103.8  | 95.8   | 99.2   | 111.5  | 106.1  | 129    | 101.8  |
| 109.6  | 110.6  | 103    | 103.7  | 96.9   | 102.5  | 107.7  | 116.8  | 103.3  |
| 134.1  | 147.1  | 139.6  | 158    | 123.4  | 130.7  | 149.7  | 164.7  | 172.9  |
| 277    | 427.7  | 383.9  | 298.2  | 422.7  | 427.9  | 376.7  | 537.5  | 405.9  |
| 130.7  | 128.2  | 111.6  | 121    | 114.7  | 122.4  | 113.5  | 160.7  | 128    |
| 250.6  | 233.9  | 181.1  | 285.1  | 186.6  | 211.2  | 251.1  | 358.8  | 312.4  |
| 177.1  | 278.9  | 274.6  | 243.4  | 234.9  | 320.2  | 271.5  | 445.4  | 267.4  |
| 107.8  | 119    | 108.5  | 100.6  | 98     | 106.6  | 109.6  | 117.3  | 118.5  |

|        |        |        |        |        |        |        |        |       |
|--------|--------|--------|--------|--------|--------|--------|--------|-------|
| 135    | 304.3  | 242.6  | 229.7  | 284    | 210    | 219.5  | 296.9  | 107.5 |
| 108.5  | 140.1  | 116.1  | 120.3  | 137.1  | 134.6  | 120.7  | 147    | 100.5 |
| 109.7  | 104.7  | 98.9   | 106.6  | 98.5   | 109.4  | 114.7  | 111.1  | 108.1 |
| 102.3  | 113    | 103.8  | 100.6  | 100.2  | 117.7  | 107    | 117    | 101.7 |
| 105.8  | 148.2  | 122.7  | 334.3  | 113.6  | 126.7  | 239.4  | 114.4  | 116.5 |
| 102.2  | 112.6  | 100.7  | 102.1  | 98.9   | 107.4  | 94     | 102.5  | 111.4 |
| 98     | 115.8  | 99.8   | 95.5   | 92     | 113.6  | 104.7  | 114.1  | 102.1 |
| 109.8  | 129.2  | 116.1  | 104    | 102.9  | 113.7  | 111.8  | 122.7  | 120.8 |
| 133.2  | 144.5  | 128.6  | 123.4  | 132.2  | 144.5  | 130.7  | 161.2  | 143.9 |
| 121.9  | 180.8  | 172.1  | 148.6  | 145    | 149.7  | 126.2  | 152.6  | 133.1 |
| 246    | 276.4  | 290.3  | 397.9  | 246.8  | 270    | 327.2  | 331.7  | 314.3 |
| 366.9  | 394.6  | 413.7  | 557.5  | 325.4  | 470.5  | 540.7  | 542.3  | 491.4 |
| 117    | 115.2  | 110.2  | 105.8  | 96.9   | 117.2  | 109    | 126.8  | 123.3 |
| 105.2  | 134.8  | 102.9  | 107.8  | 101.6  | 102.6  | 103.3  | 110.7  | 114.6 |
| 109.5  | 110.6  | 100.7  | 104.3  | 105.4  | 114.7  | 105.9  | 123    | 118.3 |
| 105.7  | 108.3  | 99.1   | 99.2   | 91.7   | 110.3  | 105.7  | 117.6  | 101.2 |
| 157.3  | 161.8  | 152.7  | 151.9  | 157    | 157.5  | 134.3  | 200.2  | 212.4 |
| 101.2  | 104.5  | 105.8  | 94.5   | 99.2   | 113.8  | 106    | 105.7  | 107.7 |
| 108.9  | 110.7  | 113.8  | 101    | 102.8  | 110.7  | 99.4   | 105.5  | 105.6 |
| 103.5  | 109.3  | 101.8  | 92.7   | 91.4   | 107.7  | 101.5  | 99.4   | 105.7 |
| 104.6  | 103    | 97.6   | 110.8  | 89.9   | 111.1  | 107.3  | 112.6  | 106.5 |
| 1873.3 | 2172.1 | 2500.9 | 2122.7 | 1741.6 | 2122.7 | 2202.3 | 3760.5 | 2613  |
| 108    | 116    | 106    | 111.5  | 105.9  | 112.7  | 104.8  | 111    | 110   |
| 104.2  | 107.7  | 100.5  | 94.7   | 100.5  | 113.6  | 104.1  | 95.8   | 104   |
| 100.3  | 109.2  | 109.2  | 112.3  | 100.9  | 114.9  | 115.1  | 126.3  | 103.9 |
| 106.3  | 107.3  | 101.4  | 100.1  | 96     | 107.8  | 98.1   | 107.7  | 116.5 |
| 110    | 125.4  | 100.6  | 115.6  | 91.4   | 120.4  | 106.8  | 115.6  | 107.1 |
| 103.7  | 109.8  | 101.1  | 98.1   | 93.8   | 103    | 93.9   | 101.6  | 100.7 |
| 111.3  | 115.4  | 107.5  | 96.5   | 104.9  | 103    | 107.9  | 124.1  | 111.3 |
| 106.4  | 106.4  | 99     | 104.5  | 92.1   | 106.6  | 106.5  | 110.5  | 113.8 |
| 106.1  | 110.8  | 107.2  | 99.2   | 94.9   | 109.2  | 97.2   | 113.1  | 102.5 |
| 100.7  | 103.7  | 103.9  | 103    | 103.1  | 111.7  | 102.6  | 102.5  | 107.5 |
| 104.8  | 101    | 100    | 108.2  | 95.9   | 107.7  | 106.7  | 110.1  | 103   |
| 96.3   | 110.4  | 107.8  | 100.2  | 93.1   | 108.2  | 96.7   | 103.8  | 104.2 |
| 108    | 110.7  | 101.9  | 89.8   | 94.6   | 108.7  | 104.3  | 116.2  | 112.9 |
| 107.6  | 107.8  | 97.3   | 102.3  | 100.4  | 109.4  | 97     | 107.8  | 105.8 |
| 116.1  | 100.4  | 99     | 101.7  | 92.9   | 102.2  | 96.8   | 102.4  | 113.4 |
| 102    | 105.8  | 98.6   | 101.4  | 98.5   | 101.7  | 93.6   | 106.5  | 106.2 |
| 109.8  | 115.7  | 101.8  | 104.9  | 101.9  | 105.5  | 105.6  | 114.5  | 104.4 |
| 108.9  | 116    | 117.5  | 115.8  | 114.4  | 131.9  | 126.8  | 129.9  | 126.6 |
| 106.3  | 106.6  | 96     | 104.5  | 97.2   | 107.8  | 94.2   | 109.7  | 102.4 |
| 105.3  | 119.4  | 110.6  | 112.7  | 98.9   | 117.4  | 104.5  | 120.3  | 121.3 |
| 107.6  | 124.2  | 112.9  | 115.2  | 104.3  | 109.3  | 114.5  | 144.4  | 100.7 |
| 104    | 104.9  | 101.4  | 93.8   | 89.8   | 97     | 102.4  | 106.2  | 105.9 |
| 100.3  | 107.8  | 102.3  | 102.4  | 105.9  | 103.6  | 95.5   | 119.2  | 110.8 |
| 104.4  | 103    | 97.8   | 100.5  | 90.9   | 101    | 97.9   | 106.3  | 104   |
| 95.8   | 105.1  | 101.6  | 93     | 91.1   | 106.2  | 107.3  | 110.6  | 112.2 |
| 110.5  | 112.4  | 103.3  | 105.5  | 98.3   | 106.4  | 103.8  | 107.5  | 100.2 |
| 98     | 107.3  | 101.3  | 120.2  | 101.8  | 117.8  | 102.1  | 111.5  | 107.6 |
| 100.4  | 111.5  | 107.3  | 99.4   | 95.8   | 113.6  | 100.8  | 122.4  | 99.6  |
| 108    | 116.3  | 100.9  | 96.4   | 96.4   | 114.3  | 95.6   | 107.3  | 107.7 |

|       |       |       |        |       |       |        |        |       |
|-------|-------|-------|--------|-------|-------|--------|--------|-------|
| 103.5 | 109.4 | 102.9 | 115.8  | 102.2 | 117.2 | 100.5  | 108.1  | 104.8 |
| 110.1 | 103.1 | 100.1 | 104.9  | 93.1  | 107.6 | 97.9   | 103.5  | 108.3 |
| 106.8 | 106.9 | 101.3 | 98.2   | 99    | 112.2 | 100.6  | 107    | 107.9 |
| 103.1 | 113.1 | 104.1 | 102.1  | 96.7  | 96    | 100.4  | 109.6  | 105.3 |
| 135.9 | 144.8 | 150.9 | 130.9  | 133.4 | 142.3 | 129.1  | 150.8  | 138.3 |
| 104.6 | 108.3 | 103.8 | 109.8  | 105.4 | 102.2 | 97.6   | 101    | 110   |
| 104.3 | 105.7 | 98.8  | 96.7   | 97.8  | 104.8 | 100.8  | 108.6  | 108.9 |
| 108.9 | 104.6 | 101.1 | 104.5  | 97    | 115.4 | 97.5   | 106.1  | 104.4 |
| 111.4 | 126.7 | 119   | 109.3  | 102.5 | 121.8 | 118    | 137.6  | 118.6 |
| 163.5 | 146   | 148.7 | 149.6  | 132.9 | 161.4 | 143.1  | 268    | 237.8 |
| 111.4 | 111.2 | 106   | 99.8   | 101.4 | 109.8 | 104.8  | 102.4  | 102.1 |
| 108   | 114.6 | 111.3 | 109.5  | 101.9 | 110.4 | 102.4  | 114.2  | 104.1 |
| 106.3 | 103.1 | 101.8 | 110.1  | 96    | 112.6 | 101.9  | 108    | 107.9 |
| 114.1 | 109.6 | 103.8 | 108.7  | 110.4 | 115.3 | 106.1  | 107.3  | 113.4 |
| 103.7 | 113.6 | 102.7 | 96.6   | 96.5  | 102.4 | 105.2  | 106.2  | 102.6 |
| 113.6 | 118.7 | 104.6 | 106.8  | 100.8 | 113.3 | 111.3  | 110.5  | 111.1 |
| 201.1 | 142.3 | 134.5 | 128.1  | 152.6 | 145   | 180.9  | 202.9  | 172.4 |
| 119.3 | 112.1 | 107.6 | 105.2  | 96.7  | 106.4 | 120.6  | 128.2  | 111.6 |
| 100.8 | 105.3 | 106   | 96.5   | 90.6  | 102.6 | 94.1   | 106.2  | 109.4 |
| 111.5 | 104.4 | 97.4  | 101    | 91.9  | 104.2 | 107.3  | 93.5   | 114.1 |
| 108.7 | 108.4 | 104.5 | 97.4   | 92    | 115.6 | 105.7  | 113.1  | 109.8 |
| 110   | 106.5 | 104   | 100.2  | 101.8 | 104.1 | 101.3  | 111.2  | 113.5 |
| 104.7 | 107.1 | 102.5 | 110.6  | 92.4  | 104.5 | 99.6   | 110.2  | 107.2 |
| 201.4 | 523.5 | 195.6 | 3304.5 | 310.7 | 179.1 | 1596.4 | 150.2  | 148.8 |
| 151.1 | 306   | 277.2 | 244.9  | 293.4 | 287   | 211.9  | 387.7  | 223   |
| 109.9 | 110.2 | 106.9 | 107.5  | 96.4  | 127.5 | 107.5  | 108.6  | 106.5 |
| 279.7 | 960.8 | 757   | 476.8  | 830.8 | 777.3 | 544.2  | 1380.7 | 528.9 |
| 212.4 | 392.1 | 285.6 | 401.4  | 277.4 | 349.8 | 282.3  | 596.1  | 406.7 |
| 136.9 | 177.1 | 126.1 | 161    | 138.9 | 132.9 | 183.2  | 146.9  | 119.5 |
| 135.6 | 135.6 | 134.1 | 142.1  | 127.4 | 129.1 | 132.2  | 157.9  | 106.7 |
| 114.9 | 108.6 | 104.7 | 106.4  | 100.7 | 116.7 | 104.8  | 124.7  | 115.8 |
| 104.8 | 114.6 | 109.6 | 108.2  | 98.8  | 116.9 | 105    | 112.4  | 107.6 |
| 106.6 | 115.1 | 99.2  | 108    | 100.7 | 105.6 | 102    | 110.6  | 116.8 |
| 99.3  | 107.3 | 106.7 | 97.5   | 97.1  | 102.9 | 101    | 108.1  | 105.3 |
| 178.8 | 189.8 | 165.9 | 187.4  | 185.8 | 194.6 | 236.4  | 219.6  | 179.9 |
| 104.4 | 104.3 | 100.1 | 102.2  | 94.4  | 105.5 | 101.7  | 97     | 108.8 |
| 222.7 | 230.2 | 245.2 | 268    | 254.1 | 270.9 | 303.1  | 400.8  | 279.6 |
| 105.1 | 110   | 102   | 98.2   | 92.2  | 116.5 | 99.6   | 112.1  | 108.4 |
| 103.3 | 115.7 | 109.8 | 115.9  | 100.4 | 120.9 | 106.5  | 117    | 108.8 |
| 166.8 | 413.3 | 382.1 | 436.6  | 396.4 | 353.1 | 337.6  | 368.7  | 231.4 |
| 108   | 130.2 | 131.3 | 129.6  | 123.3 | 131.6 | 123.3  | 140.4  | 127.6 |
| 108.2 | 108.8 | 113.1 | 110    | 99.5  | 114.5 | 104.7  | 104.7  | 105.9 |
| 102   | 110   | 100   | 95.6   | 101.3 | 103.1 | 101.1  | 114.6  | 112.9 |
| 113   | 107.1 | 106.5 | 101.3  | 97.4  | 107.3 | 103.9  | 104.2  | 104.3 |
| 109.5 | 139.5 | 124.9 | 114    | 127.7 | 130.6 | 118    | 158.4  | 150.8 |
| 121   | 148.5 | 122.5 | 136.3  | 132.8 | 143.9 | 137.3  | 167.3  | 149.8 |
| 111.7 | 113.5 | 106.3 | 110.8  | 98.7  | 113.5 | 103.4  | 109.6  | 114.8 |
| 117.8 | 123.3 | 106.4 | 108    | 114.2 | 112.8 | 103.5  | 126.5  | 108.7 |
| 104.5 | 109.4 | 99.3  | 94.9   | 92.3  | 102.1 | 106.9  | 114.3  | 108.4 |
| 163.6 | 246.6 | 193.6 | 272.4  | 173.7 | 226   | 228.5  | 335.2  | 278.5 |
| 112.4 | 108.7 | 103.2 | 105.2  | 101.6 | 113   | 102.8  | 99.4   | 110.1 |

|        |        |        |        |        |       |        |        |        |
|--------|--------|--------|--------|--------|-------|--------|--------|--------|
| 106    | 110.2  | 104.2  | 103.3  | 108.4  | 114.9 | 111.5  | 109.9  | 115.1  |
| 528.4  | 717.3  | 681.4  | 695.2  | 591.4  | 695   | 808    | 1230   | 873.5  |
| 866.8  | 1019.8 | 1065.8 | 684.1  | 726.3  | 819.6 | 609.9  | 1614.4 | 1792.5 |
| 112.5  | 134.3  | 116.5  | 115.7  | 125.2  | 138.5 | 126    | 147.3  | 128.8  |
| 132.7  | 158.3  | 167.8  | 168.7  | 156.2  | 207.2 | 151    | 201.5  | 148    |
| 196.5  | 459.7  | 467.1  | 422.2  | 399    | 494.8 | 379.9  | 476.7  | 246.2  |
| 105.7  | 107.7  | 105.8  | 105.5  | 99.1   | 107.6 | 105.3  | 115.9  | 109    |
| 205.9  | 209.6  | 252.4  | 244.9  | 257.7  | 236.4 | 238.7  | 398.2  | 336.2  |
| 107.1  | 123.3  | 115    | 112.3  | 102.6  | 121.5 | 110.4  | 121.8  | 123.6  |
| 111.3  | 123.5  | 117.1  | 105    | 106.6  | 130.1 | 128.5  | 128.9  | 145.4  |
| 162    | 163.6  | 152.3  | 189.6  | 148.2  | 166.5 | 185.7  | 244.3  | 208    |
| 782.6  | 161    | 186.3  | 146.6  | 157.3  | 207.8 | 181.7  | 613.9  | 761.2  |
| 266.6  | 377.1  | 413.3  | 327    | 273.3  | 382.8 | 365.6  | 529.3  | 419.3  |
| 107.5  | 106    | 99.5   | 105.3  | 94.6   | 104.2 | 113.7  | 109.6  | 103.1  |
| 104.7  | 105.5  | 102    | 102.7  | 93.8   | 104.9 | 96.1   | 101.2  | 106.6  |
| 118.1  | 133.8  | 114.3  | 121.6  | 105.1  | 126.1 | 119.6  | 132.1  | 120.2  |
| 104.2  | 106.2  | 96.9   | 96.7   | 95.2   | 106.1 | 105.2  | 96.9   | 98.1   |
| 105.3  | 114.1  | 100.8  | 110.7  | 104.4  | 112   | 98.3   | 101.9  | 108.2  |
| 101.9  | 124.5  | 108.5  | 104.7  | 116.4  | 120.7 | 115.9  | 134.9  | 120.2  |
| 101.9  | 103.1  | 95.5   | 100.6  | 95.8   | 104.2 | 104.7  | 105.9  | 111    |
| 173.7  | 185.3  | 181.6  | 157.1  | 154.5  | 170.9 | 156    | 231.4  | 178.7  |
| 133.6  | 136.9  | 117.4  | 122.8  | 120.1  | 134.2 | 127.4  | 151.9  | 130.1  |
| 118.7  | 196.3  | 229.9  | 155    | 142.6  | 230.7 | 146.1  | 180.8  | 209.8  |
| 108.8  | 108.3  | 109.2  | 96.2   | 99.9   | 107.4 | 106.3  | 110.7  | 106.7  |
| 111.8  | 119.3  | 104.4  | 117.6  | 107.2  | 116.1 | 119.2  | 137.4  | 132.8  |
| 100.7  | 103.5  | 100.7  | 90.9   | 93.1   | 103.3 | 101.5  | 107.9  | 103.4  |
| 108.7  | 107.4  | 104    | 101.6  | 95.3   | 106.8 | 100.2  | 109.5  | 103.7  |
| 113.9  | 122.4  | 106.9  | 109.8  | 98.5   | 120.7 | 109.8  | 142.2  | 117.1  |
| 198.2  | 268.8  | 287.3  | 229.5  | 223.8  | 293.2 | 246.8  | 429.7  | 285.6  |
| 128    | 138.5  | 118    | 113    | 100.9  | 131.6 | 107.4  | 158.6  | 142.2  |
| 118.7  | 117.5  | 110.3  | 107.3  | 102.2  | 118   | 110.7  | 151.8  | 152.7  |
| 112.4  | 105.6  | 108.1  | 103    | 109.7  | 113.4 | 102.8  | 124.4  | 116.4  |
| 101.9  | 109.7  | 100.3  | 111.6  | 97.7   | 100.5 | 98.9   | 106    | 98.6   |
| 103    | 111.4  | 100.5  | 100.8  | 105.6  | 117   | 97.3   | 112.3  | 107.3  |
| 113.4  | 116.8  | 111.5  | 120.9  | 109.1  | 108.9 | 119.4  | 128.6  | 118.6  |
| 191.9  | 233.1  | 200.2  | 200.9  | 234.9  | 200.7 | 232    | 311.6  | 236.3  |
| 98.4   | 106.6  | 103.3  | 96.5   | 99.1   | 107.5 | 108    | 104.5  | 109.2  |
| 365.2  | 385.4  | 309.9  | 276.6  | 310.9  | 293.1 | 335.5  | 539.9  | 348.5  |
| 472.9  | 351.2  | 275.2  | 352.1  | 372.2  | 419.3 | 416.8  | 660.7  | 623.3  |
| 212.9  | 253.5  | 214.5  | 202.4  | 207.5  | 200.9 | 232.4  | 370.2  | 274.1  |
| 124.2  | 173.7  | 172.1  | 153.8  | 156.9  | 173.2 | 162.2  | 155.9  | 137.9  |
| 110.5  | 116.6  | 116.5  | 105.8  | 102.8  | 119   | 106.2  | 116.4  | 106.1  |
| 1201.8 | 1911.6 | 2292.6 | 1700.6 | 1617.7 | 1907  | 1992.5 | 2817.1 | 1946.9 |
| 110.5  | 113.3  | 104    | 109.2  | 104.9  | 103.6 | 100.6  | 113.3  | 110.3  |
| 160.6  | 190.9  | 173    | 159.7  | 157.5  | 197.8 | 156.3  | 198.9  | 148.1  |
| 137.1  | 174.6  | 120    | 121.6  | 120.8  | 131.8 | 130.5  | 189.2  | 152.7  |
| 344.4  | 503    | 441.9  | 358.4  | 364.8  | 502.5 | 465    | 600.2  | 442.6  |
| 117.4  | 123    | 117    | 123.4  | 106.8  | 129.2 | 116    | 177.4  | 143.2  |
| 111.2  | 118.5  | 110.8  | 101.4  | 97.3   | 110.9 | 104.2  | 106.4  | 110.8  |
| 98.2   | 107.5  | 93.5   | 92.5   | 93.2   | 104   | 106.4  | 108.6  | 112.6  |
| 107.5  | 111.2  | 105.6  | 107.5  | 98.3   | 120.5 | 105.2  | 110.9  | 125.7  |

|       |        |        |       |       |        |        |        |       |
|-------|--------|--------|-------|-------|--------|--------|--------|-------|
| 121.8 | 148.2  | 125.1  | 121.3 | 121.4 | 134.9  | 120.7  | 146.1  | 134.1 |
| 160.9 | 240.1  | 238.7  | 206.6 | 215.4 | 209.4  | 217.3  | 249.6  | 218.4 |
| 110.9 | 115.1  | 113.3  | 107.4 | 99.8  | 107.9  | 107.7  | 125.4  | 101.9 |
| 110.7 | 115.3  | 120.1  | 105.6 | 101.6 | 121    | 113    | 111.7  | 118.4 |
| 118.7 | 139.5  | 112.5  | 141.3 | 116.6 | 136    | 142.2  | 155.7  | 156.4 |
| 210.5 | 257.6  | 307.2  | 273.4 | 223.7 | 300.4  | 325.5  | 378.3  | 251.5 |
| 114.6 | 119.6  | 107.6  | 106   | 101.5 | 115.8  | 98.9   | 106.7  | 108.4 |
| 102   | 105.2  | 96.6   | 92.1  | 100.3 | 106.2  | 96.8   | 106.6  | 109.5 |
| 108.2 | 116.1  | 106.1  | 122.5 | 104.9 | 119.1  | 110    | 117.2  | 121.1 |
| 103.4 | 124.7  | 108.1  | 112.5 | 97.8  | 112.7  | 111.8  | 120.9  | 116   |
| 115.9 | 126.9  | 115.9  | 107.9 | 104   | 114.6  | 115    | 115.4  | 103.3 |
| 106   | 143.3  | 124.5  | 141.4 | 112.1 | 132.3  | 139.3  | 134.2  | 115.6 |
| 135.9 | 191.6  | 184.5  | 148.1 | 169.2 | 170.5  | 172.1  | 187.6  | 159.5 |
| 107.6 | 111    | 105.2  | 106.1 | 93.9  | 104.3  | 110.3  | 112.5  | 109.3 |
| 115.9 | 161.4  | 127.2  | 183   | 125.7 | 128.1  | 149.1  | 143.1  | 126.1 |
| 112.2 | 118.7  | 117.3  | 106.7 | 109.1 | 113.7  | 102.4  | 179.7  | 116.2 |
| 274.4 | 336.7  | 293.6  | 237.7 | 314.6 | 409.5  | 325.9  | 777.1  | 616.6 |
| 105.8 | 112.4  | 108.2  | 101.8 | 96.9  | 113.2  | 108.4  | 117.7  | 110.9 |
| 108.2 | 116.2  | 114.7  | 111.6 | 92    | 109.3  | 106.7  | 118.7  | 120.5 |
| 104.5 | 119    | 98.2   | 117.6 | 103.2 | 110.4  | 105.2  | 137.2  | 120.7 |
| 161.8 | 220.2  | 220.7  | 231.4 | 193.4 | 192.5  | 183.3  | 309.8  | 227.6 |
| 103.6 | 107    | 107.6  | 101.9 | 105.2 | 106.7  | 104.3  | 129.3  | 105.7 |
| 116.2 | 117.8  | 109.4  | 104.7 | 111   | 121.1  | 120.3  | 129.1  | 133.1 |
| 142.5 | 155.3  | 176.2  | 173.1 | 143.4 | 181    | 168    | 208.5  | 214.7 |
| 149.2 | 288.1  | 214.5  | 305.8 | 229.6 | 172.3  | 210.2  | 229.2  | 126.1 |
| 233.3 | 288.6  | 333.1  | 303.4 | 269.1 | 314    | 278.5  | 455.6  | 249.5 |
| 715.4 | 1322.1 | 1123.7 | 840.6 | 969.5 | 1048.3 | 1197.6 | 1690.6 | 790.1 |
| 103.4 | 106.5  | 91.7   | 98.6  | 97.4  | 102.9  | 103.1  | 109.2  | 106.8 |
| 129.1 | 179.7  | 138.8  | 178.2 | 131   | 133.4  | 138.6  | 217.2  | 150.9 |
| 114.8 | 127    | 115.5  | 100.9 | 118.6 | 120.5  | 108.8  | 128.5  | 119.3 |
| 124.9 | 151.9  | 149.4  | 123.7 | 117.9 | 138.3  | 124.6  | 136.8  | 141.3 |
| 112.7 | 110.1  | 105.1  | 116   | 95.6  | 113.9  | 101.4  | 112.7  | 112.3 |
| 118.9 | 115.5  | 111    | 112.3 | 100.1 | 118.1  | 112.9  | 118.7  | 115.9 |
| 108.4 | 109.2  | 102.6  | 107.8 | 101.5 | 106.1  | 105.4  | 104.9  | 101.4 |
| 111.3 | 120    | 124.5  | 113.5 | 108.5 | 125.6  | 111.5  | 133.4  | 120.8 |
| 110.4 | 101    | 101.7  | 109.2 | 98.6  | 103.7  | 103.2  | 112.4  | 118.3 |
| 104.7 | 128.5  | 132    | 100.3 | 107.5 | 114.4  | 108.3  | 136.1  | 118.2 |
| 105.3 | 112    | 99.8   | 114.3 | 93.9  | 115.9  | 101.9  | 116.8  | 109.9 |
| 97.8  | 103.2  | 98.7   | 98.1  | 100   | 110.6  | 104.8  | 108.7  | 108.7 |
| 107   | 116.2  | 104.2  | 104.9 | 100   | 114.2  | 105.9  | 113.7  | 106.4 |
| 118.6 | 120    | 107.6  | 101.9 | 102   | 112.6  | 106.6  | 110.6  | 116.3 |
| 105.6 | 122.4  | 116.6  | 113   | 96.8  | 120.3  | 107.3  | 111.7  | 105.8 |
| 98    | 105.5  | 89.2   | 94.7  | 91    | 104.1  | 102.9  | 106.2  | 99.5  |
| 141.7 | 176.9  | 152.3  | 154.5 | 137.2 | 173    | 150.4  | 160.8  | 163.5 |
| 143.4 | 155.5  | 147.2  | 186.6 | 166.7 | 157.9  | 159.5  | 210.2  | 165.7 |
| 180.2 | 347.7  | 353.1  | 350.2 | 298.4 | 291.6  | 279.6  | 367.5  | 226.9 |
| 141.4 | 139.8  | 130.2  | 114.1 | 123.7 | 155.6  | 138    | 173.9  | 158.9 |
| 116.5 | 144.7  | 126.2  | 123.9 | 138.1 | 147.8  | 125.7  | 155.9  | 132.9 |
| 147.3 | 317.4  | 256.1  | 184.2 | 217.7 | 252.4  | 249.4  | 359.1  | 216   |
| 120   | 129    | 120.5  | 114.8 | 122.1 | 127.9  | 124.4  | 136.9  | 134.4 |
| 123.3 | 126.5  | 110.6  | 102.2 | 98.8  | 124.4  | 117.5  | 136.4  | 113.1 |



|       |       |       |       |       |       |       |       |       |
|-------|-------|-------|-------|-------|-------|-------|-------|-------|
| 359.5 | 354.7 | 359.1 | 273.5 | 341.6 | 433.7 | 310   | 710.9 | 604.5 |
| 111.6 | 107.5 | 104.9 | 106.2 | 97    | 107.1 | 101.2 | 108.4 | 109.3 |
| 106.8 | 111.1 | 98.2  | 99.1  | 92.8  | 108.7 | 98    | 117.6 | 108.3 |
| 125.6 | 114.4 | 105.3 | 102.7 | 95.5  | 113.6 | 101   | 118.1 | 119.9 |
| 113.6 | 122   | 108.9 | 106.4 | 107.1 | 115.7 | 111.6 | 123.9 | 125.5 |
| 180   | 206.8 | 187.4 | 189.9 | 161.6 | 250.4 | 184.5 | 397.2 | 264.5 |
| 113.5 | 117.9 | 120.1 | 111.3 | 98    | 113.8 | 113   | 115.6 | 109.5 |
| 113.1 | 107   | 105   | 115.1 | 91    | 114.6 | 104.5 | 112.6 | 105.5 |
| 123.7 | 156.1 | 147.8 | 117.6 | 127.9 | 138.1 | 130.8 | 149   | 134   |
| 109.2 | 106.5 | 99.7  | 102.5 | 93.4  | 109.3 | 98    | 109.1 | 110.6 |
| 108.6 | 107.9 | 97.9  | 105.5 | 95    | 110   | 104.8 | 111.5 | 101.2 |
| 114   | 112.5 | 114.5 | 116.6 | 110.4 | 125.4 | 121.2 | 118.6 | 114.9 |
| 121.6 | 128.8 | 114.2 | 114.4 | 105.5 | 122.3 | 109.7 | 118   | 120.6 |
| 123.8 | 123.8 | 128.4 | 111.1 | 111.1 | 121.4 | 125   | 124.8 | 127.4 |
| 103.3 | 109   | 102.5 | 99.3  | 95.8  | 106   | 104.4 | 108.6 | 115.4 |
| 104   | 118.1 | 107.4 | 102.4 | 97.6  | 104.8 | 102.6 | 99    | 117.9 |
| 119.3 | 111.4 | 127.7 | 112   | 103.3 | 132.7 | 107.5 | 142   | 121.7 |
| 127.7 | 147.8 | 141.1 | 136.6 | 123.9 | 145.4 | 143.2 | 166.8 | 165.9 |
| 116.7 | 116.9 | 107.2 | 98.2  | 100.5 | 103.3 | 107.4 | 120.7 | 128.2 |
| 110.6 | 113.3 | 107.7 | 109.6 | 102.4 | 111.3 | 106.2 | 115.4 | 108.3 |
| 104.1 | 113.1 | 96    | 97.8  | 103.7 | 107.3 | 104.3 | 108.8 | 97.7  |
| 114.4 | 113.9 | 104.7 | 102.5 | 104.6 | 122.2 | 108.6 | 118.3 | 130.5 |
| 145.4 | 138.1 | 141   | 128.3 | 131.5 | 143.9 | 125.4 | 177.6 | 135.8 |
| 103.3 | 102.3 | 105.8 | 113.3 | 92.7  | 102.5 | 106.5 | 108.3 | 98.4  |
| 176.4 | 240.1 | 215.4 | 261   | 198.7 | 228.7 | 287.7 | 290.8 | 334.6 |
| 122.6 | 114.9 | 108   | 127.7 | 108.7 | 111.9 | 102.4 | 110.2 | 110.6 |
| 105.9 | 114.4 | 107.2 | 108.9 | 95.8  | 109.5 | 102.4 | 121.9 | 114.8 |
| 152.2 | 246.3 | 227.9 | 245.5 | 236   | 214.3 | 198.3 | 243.5 | 199.9 |
| 110.5 | 112   | 102.8 | 107.5 | 100   | 118   | 100.7 | 128.8 | 112.7 |
| 171.1 | 363   | 315.6 | 271.9 | 277.5 | 280.9 | 306   | 368.5 | 242.6 |
| 138.2 | 144.1 | 136.9 | 135.4 | 134.6 | 146.9 | 131.8 | 181.1 | 131.5 |
| 183.4 | 301.3 | 246.9 | 280.1 | 281.5 | 273.3 | 276.2 | 383.4 | 273.6 |
| 109.4 | 111   | 98.1  | 97.2  | 88.6  | 102.9 | 105.7 | 107.9 | 108.3 |
| 102.8 | 94.2  | 102.6 | 93.8  | 98.1  | 97.7  | 100.7 | 101.6 | 101.1 |
| 116.8 | 107.9 | 109.3 | 106.4 | 98.5  | 113.6 | 105.4 | 105.2 | 126.4 |
| 101.2 | 105.9 | 101.2 | 89.1  | 95.4  | 101.6 | 97.9  | 104   | 105.2 |
| 105   | 106.1 | 97.4  | 102.6 | 95.2  | 106   | 101.3 | 116.5 | 108.8 |
| 108.7 | 121.1 | 113.6 | 118.8 | 108.9 | 124.4 | 125.4 | 136.2 | 128.3 |
| 108.8 | 108.8 | 109.3 | 104.2 | 94.5  | 108.4 | 101.6 | 109.5 | 117.7 |
| 109.2 | 108.7 | 107.6 | 97.3  | 96.3  | 111.2 | 99.6  | 110.8 | 101.4 |
| 105   | 100.3 | 98.7  | 93    | 98.6  | 106.3 | 106.8 | 109.4 | 104.8 |
| 127.8 | 108.5 | 116.8 | 125.5 | 124.9 | 123.8 | 125.6 | 132.1 | 120.8 |
| 105.2 | 110.3 | 100.3 | 108.5 | 97.7  | 107.4 | 105.7 | 121.6 | 112.4 |
| 106.9 | 112.5 | 105.2 | 92.4  | 98    | 113.4 | 107.5 | 115.2 | 116.3 |
| 114.6 | 119.2 | 108.4 | 121.8 | 119.4 | 124.5 | 116.5 | 139.3 | 130.2 |
| 118.6 | 118.3 | 104   | 106.8 | 100.4 | 119.8 | 121.1 | 126.8 | 115   |
| 101.5 | 111.7 | 100.2 | 96.6  | 92.7  | 109.8 | 100.2 | 123.3 | 111.6 |
| 163.4 | 200.3 | 178.3 | 207.5 | 152.2 | 179   | 182.9 | 160.1 | 146.8 |
| 335.3 | 258.4 | 301.4 | 333.8 | 233.8 | 267.6 | 277.1 | 277.1 | 229.5 |
| 171.9 | 166   | 159.2 | 153.1 | 134.1 | 191.1 | 160.5 | 238.7 | 158.4 |
| 111.5 | 132   | 115.4 | 107.5 | 106.8 | 121.8 | 105.7 | 127.7 | 118.6 |

|        |        |       |       |        |        |        |        |        |
|--------|--------|-------|-------|--------|--------|--------|--------|--------|
| 105.7  | 100.8  | 105.6 | 105.6 | 91.8   | 108.5  | 99.6   | 105.3  | 101.9  |
| 107.5  | 109.8  | 105.3 | 92.9  | 93.7   | 107.9  | 100.6  | 101.1  | 102.3  |
| 102.8  | 109.8  | 106   | 91.4  | 98.1   | 105.1  | 111.6  | 109.3  | 105.5  |
| 127.2  | 155.1  | 159.3 | 134.9 | 137.3  | 143    | 157.2  | 174.2  | 161.1  |
| 111    | 110    | 108.8 | 113.3 | 105.4  | 106.8  | 112.7  | 122.1  | 121.2  |
| 142.8  | 141.5  | 149.4 | 131.5 | 129    | 163.6  | 139.7  | 150.3  | 119.2  |
| 201.8  | 190.4  | 200   | 184.2 | 158.3  | 212.6  | 196.1  | 174.4  | 139.8  |
| 357.3  | 480.3  | 447.5 | 370.7 | 284.5  | 306    | 318.8  | 323.4  | 209.9  |
| 191.3  | 272.9  | 275.9 | 201.1 | 278.5  | 272.6  | 290.7  | 373.7  | 219.3  |
| 98.7   | 103.4  | 102.7 | 100.6 | 95.7   | 104.7  | 101.9  | 105    | 105.2  |
| 146    | 143.3  | 130.1 | 108.7 | 126    | 137.9  | 136.7  | 212.9  | 228.3  |
| 139.9  | 135.8  | 120.4 | 122.4 | 121.3  | 153.1  | 129.4  | 209.8  | 206.4  |
| 235    | 285.7  | 319.1 | 338.6 | 286.3  | 321.1  | 378.2  | 284.9  | 213.7  |
| 208.3  | 302.7  | 319.1 | 304.4 | 289.6  | 330.3  | 330.8  | 328.4  | 238.8  |
| 120.1  | 135.4  | 109.3 | 137.4 | 110.3  | 120    | 138.7  | 132.2  | 116.1  |
| 119.2  | 132.2  | 128.1 | 128.9 | 120.2  | 143.7  | 146.2  | 187.9  | 136.3  |
| 130.5  | 221.1  | 184   | 200.3 | 172.8  | 185.2  | 157.8  | 205    | 165.5  |
| 177.4  | 175.5  | 148   | 183.3 | 149    | 142.6  | 225.9  | 191.2  | 126.5  |
| 173    | 221.1  | 218.2 | 192   | 183.5  | 238.2  | 245.2  | 289.8  | 302    |
| 114    | 114.7  | 108.5 | 101.8 | 108    | 121.4  | 106    | 116.5  | 114.7  |
| 126.9  | 129    | 129.9 | 118.9 | 115.7  | 133.7  | 118.8  | 130.7  | 135.9  |
| 112.4  | 113.1  | 102.7 | 116.3 | 92     | 106    | 100.3  | 105.2  | 109.7  |
| 102.3  | 106.1  | 113.8 | 99.4  | 94     | 114.6  | 99.9   | 109    | 104.6  |
| 110    | 109    | 99.4  | 101.8 | 103    | 107.1  | 102.3  | 105.6  | 101.2  |
| 153.2  | 177.5  | 165.9 | 204.8 | 146.9  | 183.2  | 216.5  | 196.7  | 178.6  |
| 136.1  | 162.4  | 154.5 | 141.7 | 143.7  | 142.9  | 155.9  | 186.1  | 148.4  |
| 108.9  | 111.1  | 103.2 | 110.7 | 103    | 116.2  | 109.2  | 114    | 112    |
| 104.4  | 104.1  | 103   | 106.5 | 90.7   | 110.4  | 101.3  | 107.1  | 113.2  |
| 113.5  | 117.5  | 110.2 | 113.9 | 103.3  | 113.7  | 106.8  | 116.3  | 116.2  |
| 108.5  | 111.8  | 104.6 | 101   | 91.9   | 112.3  | 111.3  | 110.1  | 101.3  |
| 170.9  | 111.8  | 105.3 | 136.8 | 112.6  | 124    | 151.4  | 146.6  | 164.3  |
| 224.7  | 821.3  | 654.4 | 645.7 | 625.5  | 672    | 653.5  | 711.7  | 499.9  |
| 98.8   | 107    | 106.8 | 104.1 | 105.6  | 123.8  | 103.8  | 125.1  | 112.2  |
| 130.6  | 187.4  | 196.7 | 197.3 | 161.9  | 170.6  | 179.6  | 197.1  | 159.9  |
| 168.1  | 205.6  | 191.3 | 160.4 | 188.8  | 197    | 195.6  | 277.7  | 238.1  |
| 194.9  | 247.4  | 212   | 208.1 | 196.7  | 249.6  | 235.1  | 476.4  | 340.1  |
| 114.4  | 125.4  | 109.7 | 111.1 | 104    | 120.2  | 111.2  | 125.6  | 117.5  |
| 176.5  | 228    | 204.6 | 152   | 203.7  | 235.1  | 204    | 327.6  | 264.7  |
| 414.1  | 556.3  | 448.5 | 632.6 | 504.4  | 508.2  | 700.8  | 714.1  | 500.6  |
| 116.7  | 128.4  | 130.9 | 134   | 135.4  | 128.4  | 133.2  | 161.6  | 137.4  |
| 125.8  | 225.5  | 219.3 | 191.3 | 179.2  | 214.3  | 236    | 203.6  | 194.8  |
| 1059.2 | 1460.3 | 1124  | 1690  | 1112.2 | 1168.7 | 1355.9 | 2397.7 | 1322.7 |
| 107.7  | 110    | 102.3 | 109.6 | 90.7   | 110.8  | 107.7  | 108.7  | 105.9  |
| 110.4  | 117.1  | 107.1 | 105.8 | 113    | 111.4  | 112.8  | 122.3  | 109.2  |
| 142.3  | 185.1  | 141.1 | 200.5 | 186    | 177.5  | 180.9  | 273.8  | 219.9  |
| 139.5  | 138.2  | 115.4 | 280   | 119    | 112.9  | 201.6  | 125.9  | 108.2  |
| 101.7  | 171.3  | 126.9 | 133.4 | 129.1  | 143.5  | 142.2  | 169    | 138.1  |
| 121.6  | 117.5  | 119.1 | 106.9 | 99.2   | 112.7  | 112.2  | 133    | 123.3  |
| 110.7  | 104.4  | 115.7 | 110.7 | 106.7  | 120.6  | 108.7  | 114.2  | 113.8  |
| 110.1  | 123.2  | 112   | 108.9 | 108.5  | 116.5  | 114.7  | 132.5  | 114.6  |
| 102.7  | 114.2  | 99.9  | 90.4  | 94.8   | 109.8  | 103.8  | 111.7  | 104.7  |

|       |       |       |        |       |       |        |       |       |
|-------|-------|-------|--------|-------|-------|--------|-------|-------|
| 114.8 | 110.7 | 100.2 | 96     | 99.3  | 107.8 | 101.9  | 97.5  | 113   |
| 103   | 107.5 | 96.1  | 107.2  | 97.7  | 109.4 | 98.8   | 107.2 | 104   |
| 109.3 | 117   | 118.4 | 105.2  | 97.1  | 125.5 | 116.5  | 134.6 | 117.5 |
| 130.3 | 177.7 | 186.5 | 133.9  | 156.8 | 184.4 | 143.8  | 219   | 157.7 |
| 115.8 | 217.9 | 211.4 | 202    | 207.9 | 201.4 | 200.2  | 207.3 | 144.8 |
| 105.8 | 136.1 | 108.6 | 123.2  | 112.1 | 122.7 | 128    | 128.6 | 115.9 |
| 107.6 | 111.1 | 104.6 | 107.4  | 105.3 | 105.9 | 101.1  | 113   | 120.1 |
| 108.2 | 111.4 | 92.3  | 95.7   | 97.2  | 106.1 | 100    | 108.9 | 103.9 |
| 119.2 | 115.6 | 115   | 133.1  | 97.6  | 118.9 | 104    | 121.7 | 129.5 |
| 114.6 | 132.5 | 119.3 | 109.6  | 111.1 | 129.1 | 116.7  | 148.3 | 120.6 |
| 186.7 | 318.8 | 230.2 | 293.6  | 215.5 | 292   | 293.5  | 235.2 | 182.4 |
| 122.9 | 151   | 142.9 | 126.9  | 132   | 128.9 | 121.5  | 151.1 | 124   |
| 121.2 | 125.9 | 128.6 | 135.2  | 113.6 | 139.5 | 135.2  | 146.5 | 139.5 |
| 121.1 | 123.3 | 128.6 | 114.2  | 118.9 | 127.8 | 117.5  | 141.1 | 121.9 |
| 116.7 | 131.9 | 134   | 132.7  | 118.7 | 125.6 | 119.7  | 131.4 | 129.3 |
| 131.1 | 134.4 | 142   | 99.4   | 121.4 | 121   | 124.5  | 139   | 118   |
| 207.9 | 211.3 | 243   | 257.2  | 173.5 | 221.9 | 277.3  | 246.8 | 193.2 |
| 146.3 | 149.7 | 156.2 | 149    | 153.3 | 136.1 | 139.9  | 188.3 | 139.8 |
| 107.6 | 113.1 | 101   | 104.8  | 95.4  | 104.1 | 101.6  | 106.2 | 103.8 |
| 154   | 188.9 | 175.7 | 177.1  | 183.7 | 208   | 185.2  | 243.8 | 205.5 |
| 103.5 | 99.8  | 99.2  | 106.9  | 93.2  | 106.9 | 107    | 108.5 | 104.1 |
| 113.7 | 136.3 | 109.3 | 315.4  | 105.1 | 108   | 181.7  | 108.9 | 112.8 |
| 128.4 | 145.7 | 126.2 | 143.8  | 118.1 | 129.7 | 125    | 144   | 131.6 |
| 102.9 | 106.5 | 109.5 | 102.2  | 99.9  | 110.3 | 100.7  | 113.4 | 107.6 |
| 105.1 | 115.2 | 101.8 | 99.8   | 96.2  | 110   | 101.7  | 117.4 | 105.8 |
| 111.7 | 114.6 | 98.9  | 110.6  | 96.5  | 107.4 | 102    | 124.1 | 117.3 |
| 108   | 121.5 | 122.1 | 118.1  | 109.1 | 124   | 114.7  | 129   | 121.4 |
| 114.1 | 126   | 117.3 | 116.7  | 114.1 | 120.9 | 146    | 122.6 | 128.8 |
| 107.4 | 109.1 | 107.9 | 110.5  | 98.4  | 111.6 | 112.1  | 111.6 | 107.1 |
| 104.8 | 158   | 131.1 | 125.5  | 129.7 | 153.3 | 138.2  | 176.3 | 119.5 |
| 102.6 | 119.7 | 103.4 | 112.4  | 103   | 117.6 | 108.5  | 129.3 | 123.9 |
| 108.9 | 111   | 105.1 | 104.4  | 95.2  | 122.5 | 95.8   | 122   | 122.7 |
| 108.4 | 118.5 | 106.5 | 120.1  | 107.3 | 110.7 | 115.6  | 127.9 | 114.9 |
| 494.6 | 581.7 | 487.6 | 471.2  | 433.7 | 507.5 | 541.4  | 718.7 | 551   |
| 110.6 | 144.3 | 136   | 126.5  | 113.4 | 156.2 | 119.3  | 153.3 | 139.6 |
| 299   | 391.7 | 307.7 | 253.8  | 268.6 | 311.9 | 287.6  | 498.7 | 457.6 |
| 135.8 | 168.5 | 166.4 | 141.7  | 162.6 | 165.8 | 176    | 231.9 | 193.7 |
| 118.4 | 130.9 | 123.6 | 113.5  | 106   | 122.9 | 137.5  | 138.5 | 152.7 |
| 274.2 | 367   | 211.8 | 1058.2 | 481.8 | 267.7 | 1505.2 | 549.3 | 228.1 |
| 103.7 | 100.7 | 93.9  | 98.5   | 94    | 104.6 | 101.5  | 110   | 106.7 |
| 120.7 | 123   | 106.7 | 117.5  | 106.8 | 117.2 | 108.5  | 126.4 | 114.7 |
| 148.6 | 338.2 | 305.6 | 328    | 241.9 | 259.2 | 295.8  | 280.4 | 167.3 |
| 103.7 | 108.2 | 105.6 | 101.2  | 100   | 106.7 | 99.2   | 109.7 | 111.4 |
| 128.1 | 118.3 | 123.5 | 134.2  | 118.6 | 128.6 | 120.4  | 161.2 | 153.6 |
| 102.1 | 112.8 | 112   | 110.1  | 102.9 | 123.9 | 113.1  | 146.4 | 122.2 |
| 101   | 102.6 | 100.3 | 100.7  | 87.3  | 101.1 | 104.8  | 105.5 | 107   |
| 110   | 110.2 | 102.2 | 104.6  | 94.3  | 108.1 | 108.6  | 117.6 | 112.5 |
| 104.5 | 107.8 | 109.3 | 102    | 97.8  | 111.8 | 110.2  | 116.5 | 114.3 |
| 112.8 | 117.5 | 103.8 | 103.7  | 91.6  | 116   | 110.2  | 101.7 | 108.2 |
| 108   | 109   | 106.5 | 96.4   | 98.5  | 104.5 | 96.8   | 110.3 | 114.4 |
| 122.2 | 112.7 | 96.8  | 95.9   | 100   | 105   | 99.6   | 101.5 | 112.9 |

|       |       |       |       |       |       |       |       |       |
|-------|-------|-------|-------|-------|-------|-------|-------|-------|
| 101.2 | 104.4 | 100.1 | 105.4 | 94.2  | 104.6 | 107.8 | 106.9 | 113   |
| 111.6 | 127.5 | 99.4  | 123.1 | 107.4 | 120.1 | 113.8 | 114.8 | 113.5 |
| 105.4 | 102.8 | 101.9 | 103.2 | 95.4  | 102   | 102.1 | 105.7 | 102.5 |
| 160.1 | 163.3 | 153.4 | 148.7 | 118.6 | 142.2 | 147.2 | 193.4 | 162.8 |
| 107   | 103.8 | 95    | 98.6  | 91.9  | 103.2 | 99.1  | 106.7 | 104.5 |
| 110.8 | 110.6 | 102.4 | 97.3  | 98.3  | 118.5 | 96.6  | 111.9 | 106.2 |
| 107.2 | 110.3 | 104.9 | 123.1 | 103.5 | 107.2 | 110.2 | 124.4 | 112.3 |
| 110.1 | 106.3 | 104.3 | 96.2  | 95.5  | 111.3 | 99.2  | 111.4 | 113.9 |
| 108.3 | 130   | 114.7 | 119.2 | 110   | 118   | 107.7 | 118.3 | 109.5 |
| 113.4 | 117.8 | 107   | 109.2 | 102.5 | 108.9 | 113.3 | 113.1 | 120.4 |
| 108.9 | 104.5 | 103.5 | 101.3 | 89.5  | 107.5 | 103.3 | 103.4 | 107.3 |
| 114.6 | 111   | 104.5 | 117   | 103.7 | 118.4 | 119.9 | 118.5 | 109.8 |
| 111.8 | 168.6 | 183.8 | 149.3 | 152.6 | 174.3 | 166   | 163.2 | 144.2 |
| 120.6 | 116   | 125.5 | 117.4 | 111.1 | 112.4 | 112.6 | 124.6 | 134.5 |
| 105.3 | 114   | 105.7 | 105.4 | 102.4 | 120.8 | 107.7 | 126.1 | 111   |
| 113   | 109.6 | 107.2 | 112.7 | 105.4 | 119.2 | 113.6 | 122.7 | 120.3 |
| 305.1 | 367.2 | 229.5 | 303.4 | 294.2 | 248.1 | 385.6 | 575.3 | 328.7 |
| 106.7 | 103.9 | 100.6 | 102.9 | 92.4  | 106.1 | 99.1  | 116.6 | 105.1 |
| 105.3 | 103.1 | 100.9 | 93    | 92.9  | 102.9 | 97.4  | 105.8 | 107.8 |
| 106.6 | 109.2 | 104.6 | 98.3  | 102.2 | 106.5 | 100.8 | 110.9 | 112.1 |
| 112.1 | 129.5 | 113.1 | 120.9 | 109.4 | 133.5 | 111.3 | 137.6 | 121.5 |
| 110   | 126.2 | 117.4 | 106.3 | 108.5 | 120.4 | 103.2 | 146.2 | 121.8 |
| 110   | 118.5 | 110.5 | 124.1 | 109.9 | 116.9 | 107.6 | 124.7 | 120.8 |
| 117.8 | 110.3 | 108.7 | 103.2 | 98.7  | 115.3 | 108.3 | 119.4 | 118.2 |
| 107.8 | 101.5 | 96    | 103.2 | 95.7  | 104.9 | 104.6 | 111.9 | 105.4 |
| 163.2 | 218.5 | 195.8 | 239.1 | 167.2 | 170.6 | 242.7 | 173   | 157.2 |
| 110.9 | 115.2 | 110.8 | 109.5 | 103.5 | 109.7 | 96.7  | 108.1 | 107.7 |
| 107.7 | 105.1 | 104.9 | 95.1  | 95.7  | 106.6 | 100.1 | 106.6 | 104.3 |
| 110.9 | 108.8 | 107.6 | 104.5 | 103.2 | 112   | 100.9 | 100.8 | 111.3 |
| 105.9 | 101.9 | 102.7 | 103.3 | 99.2  | 108.7 | 96.4  | 101.2 | 102.8 |
| 104.2 | 101   | 102.8 | 93.6  | 91.4  | 101.5 | 100.5 | 107.3 | 109   |
| 127.4 | 115.7 | 120.2 | 101.5 | 100.6 | 120.8 | 112.1 | 108.7 | 111   |
| 114.8 | 111.7 | 106.7 | 111   | 99.9  | 109   | 105.6 | 105.9 | 107.6 |
| 102.9 | 104.6 | 98.1  | 95.8  | 92.4  | 105.4 | 94.5  | 116.2 | 107.9 |
| 106.9 | 112   | 101.2 | 99.9  | 97.1  | 115.6 | 95    | 112   | 123   |
| 109   | 121.3 | 130   | 134.5 | 117.2 | 143.1 | 127.3 | 156.8 | 122.5 |
| 108.3 | 112.7 | 105.3 | 101.1 | 91.2  | 107.9 | 110.1 | 110.1 | 105   |
| 116.6 | 120.6 | 113   | 114.2 | 115.2 | 133   | 110.7 | 138.7 | 121.7 |
| 115.8 | 115.6 | 109   | 101.8 | 94.8  | 111.2 | 112.1 | 107   | 114.4 |
| 108.3 | 111.4 | 98.7  | 95.4  | 94.8  | 108.2 | 106.4 | 110   | 107.6 |
| 100.3 | 106.1 | 101.2 | 94.7  | 90.4  | 111.2 | 92.9  | 101.8 | 104.2 |
| 105.4 | 114.6 | 111.2 | 123   | 104.7 | 116.3 | 98.5  | 122.7 | 114.9 |
| 159.7 | 214.7 | 217.1 | 206.2 | 247.9 | 202.5 | 195.1 | 332.4 | 220.8 |
| 104.1 | 113.9 | 105.4 | 109.6 | 108.4 | 124.7 | 103.7 | 127.5 | 117.8 |
| 115.3 | 115.2 | 114.4 | 123.8 | 104.9 | 113.9 | 109.2 | 122.7 | 117.6 |
| 101.6 | 115.4 | 107.1 | 112.1 | 103   | 114.5 | 112.7 | 114.6 | 103   |
| 105.5 | 104.6 | 95.2  | 103.3 | 97.5  | 117.9 | 97.4  | 111.1 | 95.8  |
| 108.5 | 106.7 | 95.6  | 99.5  | 89.3  | 112.6 | 101.9 | 112.3 | 110.1 |
| 116.1 | 118.9 | 112.3 | 112.6 | 107.2 | 119.4 | 110.6 | 133.3 | 119.9 |
| 108.4 | 107.2 | 106.2 | 105.4 | 96.4  | 112.2 | 97.6  | 113   | 103.9 |
| 105.7 | 104.9 | 103.6 | 95.1  | 90    | 111.5 | 102.6 | 108   | 114.4 |

|       |       |       |        |       |       |       |       |       |
|-------|-------|-------|--------|-------|-------|-------|-------|-------|
| 108.1 | 102.4 | 109.6 | 122.8  | 97    | 105.5 | 110.9 | 110.9 | 114   |
| 102.3 | 107.6 | 108.4 | 100    | 94    | 101   | 96.3  | 106.7 | 97.6  |
| 106.4 | 108.3 | 99.8  | 94.7   | 97.4  | 114.4 | 116.3 | 126.3 | 111.8 |
| 98.4  | 100.7 | 105.4 | 97.8   | 101.8 | 109.4 | 95.2  | 102.7 | 101.1 |
| 106.8 | 110.2 | 110.7 | 112.7  | 96.4  | 107.3 | 104.6 | 113.7 | 105   |
| 119.4 | 127.3 | 130.6 | 119.6  | 108.3 | 114.5 | 133.2 | 120   | 106.5 |
| 105.7 | 115.7 | 97.9  | 103.3  | 91.9  | 108.7 | 97.9  | 107.1 | 104.1 |
| 598.5 | 352.2 | 323.3 | 339    | 338   | 382.3 | 411   | 796.2 | 638.3 |
| 122.1 | 114.4 | 113.8 | 106.4  | 101.6 | 121.7 | 105.8 | 111.9 | 116   |
| 106.4 | 111.2 | 99.7  | 106.7  | 98.8  | 110.7 | 100.8 | 114.2 | 103.6 |
| 110.4 | 105.3 | 106.7 | 103    | 97.8  | 111.9 | 103.6 | 114.4 | 112.2 |
| 110   | 110   | 105   | 105.6  | 91.8  | 111.6 | 106.9 | 107.6 | 118.8 |
| 110.9 | 106.6 | 110.9 | 110    | 100.9 | 110.4 | 106.7 | 117.2 | 107.8 |
| 101.8 | 107.8 | 97.8  | 102.1  | 99.9  | 114.8 | 97.5  | 111.4 | 96.9  |
| 108.5 | 106.2 | 101   | 102.5  | 94.3  | 100.6 | 97.7  | 111.9 | 111.7 |
| 110.2 | 117.8 | 113.3 | 109.5  | 99.6  | 117.6 | 103.8 | 112.2 | 116.3 |
| 107   | 113.4 | 95.9  | 104.7  | 93.5  | 106.6 | 102.9 | 115   | 108.5 |
| 109.9 | 124.8 | 101.4 | 113.7  | 102.6 | 115.9 | 107.5 | 117.8 | 116.5 |
| 117.6 | 128.7 | 122.3 | 117.1  | 110   | 123.7 | 119.6 | 134.9 | 154.2 |
| 104.4 | 111   | 109.9 | 107.6  | 106.5 | 113.1 | 112.9 | 129.6 | 111.3 |
| 106   | 109.3 | 106.1 | 102.6  | 95.5  | 102.7 | 95.9  | 115.4 | 101.7 |
| 107.5 | 111.2 | 104.4 | 101.6  | 94.7  | 104.7 | 102.8 | 114.2 | 113.8 |
| 122   | 112.4 | 102.3 | 101    | 97.5  | 108.7 | 107.2 | 101.2 | 109.1 |
| 112.3 | 130.3 | 108.9 | 110.1  | 98.4  | 115.9 | 107.6 | 126   | 116.5 |
| 114   | 133.6 | 115.9 | 118.2  | 105.2 | 126.8 | 107.1 | 130.2 | 113.6 |
| 108.2 | 105.7 | 106.4 | 101.7  | 102.8 | 116.5 | 103   | 114.2 | 112.5 |
| 108.6 | 110.5 | 104.7 | 95.3   | 92.5  | 112.8 | 95.9  | 106.5 | 114.3 |
| 104   | 104.3 | 95.2  | 91.8   | 96.9  | 106.1 | 100.8 | 116.2 | 102.1 |
| 98.9  | 104.5 | 99.4  | 97.5   | 100.8 | 101.3 | 103.4 | 106   | 102.7 |
| 99.7  | 105.2 | 102.9 | 106.1  | 95.7  | 106.7 | 104.2 | 113   | 106.9 |
| 111.6 | 114.2 | 118.3 | 102    | 100.5 | 120.6 | 105.5 | 118.7 | 115.8 |
| 105.1 | 103.1 | 98.7  | 101    | 96.6  | 101   | 107.8 | 100.7 | 107.4 |
| 118.6 | 107.2 | 95.5  | 105.1  | 96.7  | 103.5 | 113.1 | 104.6 | 112   |
| 110.5 | 136.2 | 120.6 | 121.6  | 124.8 | 130.5 | 119.9 | 123.7 | 109.6 |
| 157.8 | 243.4 | 142.7 | 1260.9 | 166.5 | 123.9 | 627.8 | 131.2 | 122.1 |
| 110.8 | 111.9 | 117.4 | 120.7  | 107.3 | 111.7 | 108.4 | 127.9 | 118.8 |
| 123.9 | 126.5 | 121.1 | 114.8  | 106.6 | 123.8 | 125.6 | 133.6 | 130.7 |
| 108.7 | 102.2 | 106   | 97.6   | 100.4 | 106.5 | 100.3 | 104.6 | 116.2 |
| 98.2  | 101.4 | 104.2 | 94.3   | 95    | 103.4 | 100.1 | 98    | 99.2  |
| 111.5 | 116.1 | 104   | 103.5  | 92.1  | 105.8 | 107.6 | 109.8 | 111.3 |
| 116.9 | 112.7 | 112   | 111.2  | 100   | 105.1 | 105.2 | 122.3 | 106.2 |
| 193.7 | 224   | 240.1 | 250.9  | 238.2 | 251.4 | 196.2 | 378.5 | 268   |
| 121.1 | 136.5 | 125   | 125.1  | 113.4 | 135.9 | 130.3 | 155.5 | 148.3 |
| 103.3 | 108.3 | 108.5 | 108    | 101.7 | 107.9 | 105.4 | 115.1 | 112.4 |
| 110.4 | 102.3 | 103.9 | 96.5   | 97.4  | 106.7 | 100.9 | 113.6 | 109.6 |
| 99.9  | 105.2 | 106.8 | 102.5  | 100.9 | 107.5 | 97.6  | 110.9 | 110.3 |
| 107.6 | 110.9 | 114   | 126.4  | 100.8 | 110.1 | 106.9 | 129.5 | 119.2 |
| 102.5 | 112.5 | 107.1 | 94.7   | 99.5  | 113   | 107.6 | 108.6 | 118.9 |
| 112.1 | 115.1 | 104.1 | 100.6  | 96.6  | 118.6 | 105.9 | 161   | 162.3 |
| 109.9 | 104.3 | 102.6 | 106.1  | 94.7  | 107.5 | 104.3 | 112.2 | 105   |
| 116.7 | 100.4 | 101.4 | 100.2  | 102   | 110.8 | 106.3 | 112.7 | 113.4 |

|       |       |       |       |       |       |       |       |       |
|-------|-------|-------|-------|-------|-------|-------|-------|-------|
| 109.2 | 123.1 | 103.9 | 103.9 | 97.5  | 108.3 | 114.2 | 104.4 | 107.3 |
| 103.8 | 107.6 | 99.6  | 96.9  | 105.4 | 96.4  | 104.8 | 108.8 | 107.9 |
| 111.5 | 103.1 | 104.4 | 108.8 | 105.9 | 116   | 103.9 | 113.4 | 100.7 |
| 104.1 | 112.7 | 103.8 | 94.5  | 96.2  | 106.6 | 96.1  | 108.1 | 109.4 |
| 106.9 | 107.1 | 107   | 103.4 | 99.5  | 117.5 | 102.9 | 111.5 | 103.5 |
| 98.4  | 99.6  | 99.1  | 95.6  | 91.3  | 105.1 | 108.2 | 104.9 | 97.5  |
| 102.6 | 108.4 | 99.6  | 100.6 | 94.4  | 102.6 | 100.8 | 106.8 | 102.7 |
| 108.3 | 106.6 | 94.5  | 96.5  | 93.4  | 105.5 | 102.1 | 97.1  | 104.5 |
| 101.1 | 104.5 | 105.7 | 101.1 | 94.4  | 107.8 | 97.9  | 109.3 | 114.3 |
| 108.8 | 108.6 | 110.5 | 101.1 | 106.1 | 114.7 | 120   | 121.9 | 110.3 |
| 113.2 | 124.6 | 152   | 118.7 | 113.2 | 128.7 | 124.4 | 141.1 | 133.9 |
| 106.8 | 111.6 | 101.2 | 102.3 | 89.8  | 102.3 | 104.8 | 103.4 | 104.9 |
| 108.3 | 115   | 106.7 | 98.1  | 102.3 | 108.3 | 111.1 | 114.9 | 116.7 |
| 108.7 | 113.8 | 112.5 | 114.1 | 97.9  | 110.9 | 117.5 | 124.3 | 119.4 |
| 105.5 | 108.1 | 99.9  | 97    | 100.2 | 104.2 | 94.4  | 101.8 | 107.6 |
| 118.2 | 107.6 | 102.8 | 100.4 | 97    | 108.8 | 101.7 | 120.3 | 125.4 |
| 102.7 | 104.9 | 104.3 | 100.3 | 94.5  | 107.1 | 106.2 | 116.7 | 106.3 |
| 107.5 | 112.7 | 97    | 102.7 | 91.9  | 104.8 | 99.6  | 108.5 | 106.7 |
| 110.6 | 112.9 | 103.4 | 98.8  | 112.5 | 119.7 | 110   | 117.1 | 117.4 |
| 101.7 | 111.8 | 107.9 | 95.8  | 96.8  | 109.4 | 99.4  | 118.2 | 102.5 |
| 597.7 | 663.3 | 596.7 | 551.1 | 551.5 | 664.4 | 588.2 | 982.3 | 764.6 |
| 111.8 | 121.3 | 115.1 | 97.7  | 100.8 | 114.2 | 111   | 119.3 | 114.8 |
| 115.2 | 108.3 | 103.6 | 113.4 | 102.3 | 109   | 108.2 | 119.2 | 130.5 |
| 109.5 | 119.3 | 110.3 | 108.9 | 96.4  | 115.2 | 111.1 | 112.1 | 109.7 |
| 107.1 | 109.8 | 104.3 | 101.2 | 97.1  | 106.8 | 96    | 113.3 | 106.3 |
| 109.2 | 109.6 | 105.9 | 104.9 | 99.5  | 116.1 | 102.4 | 117.8 | 139.8 |
| 140.5 | 153   | 160.1 | 179.5 | 140.5 | 151.2 | 183.8 | 158.2 | 120.3 |
| 114.5 | 122   | 116.2 | 122.7 | 109.8 | 118.3 | 116.6 | 122.9 | 110   |
| 100.3 | 102.2 | 97.9  | 92.5  | 92.5  | 101.1 | 101.3 | 113   | 100.5 |
| 129.6 | 167.1 | 131.3 | 150.8 | 140.3 | 161.4 | 134.3 | 169.5 | 131.9 |
| 120.1 | 111.4 | 114.6 | 103.9 | 99.1  | 110.5 | 106.9 | 108.9 | 113.5 |
| 111.7 | 114.5 | 105   | 105.7 | 97.3  | 120.4 | 101.2 | 106.6 | 111.8 |
| 124.9 | 125   | 139.9 | 129.1 | 120.7 | 150   | 126.9 | 161.4 | 177.3 |
| 111.7 | 113.8 | 104.1 | 114.2 | 95.4  | 114.3 | 109.4 | 115.5 | 113.1 |
| 115.3 | 133.9 | 125.3 | 135.9 | 115.5 | 127.2 | 118.3 | 139.7 | 121.5 |
| 112.3 | 116.3 | 113.8 | 120.2 | 115.9 | 128.8 | 120.3 | 151.8 | 123.2 |
| 107   | 105.2 | 100.1 | 95.6  | 94.1  | 115.9 | 103.7 | 106.2 | 95.6  |
| 134.1 | 336.4 | 323.2 | 265.5 | 239.6 | 280.6 | 261.6 | 247.6 | 154   |
| 286.8 | 304.7 | 236.5 | 299   | 213.4 | 293   | 226.9 | 401.8 | 300.7 |
| 111.4 | 111   | 106.4 | 108.9 | 93.2  | 107.8 | 101.2 | 97.8  | 104.5 |
| 162.6 | 196   | 194.6 | 166.8 | 190.1 | 183.5 | 165.5 | 273.4 | 201.2 |
| 111.6 | 105.5 | 106   | 96.8  | 94.1  | 115.6 | 108.9 | 109.2 | 106.7 |
| 110.4 | 125.2 | 102.6 | 147.8 | 118.1 | 129.5 | 132.5 | 126   | 119.4 |
| 168   | 122.8 | 122.2 | 110.2 | 97    | 121.3 | 119.2 | 160.7 | 187.3 |
| 105.8 | 115.7 | 105.2 | 107   | 101.8 | 119.3 | 105.7 | 118.8 | 117.5 |
| 138.2 | 150.9 | 126.3 | 126.1 | 127.8 | 149.4 | 154.3 | 186.4 | 230.9 |
| 102.4 | 108.3 | 109.4 | 104.4 | 87    | 112.9 | 99.4  | 113.8 | 110.5 |
| 116   | 115.1 | 110.9 | 109.3 | 112.7 | 122.9 | 103.8 | 122.7 | 124   |
| 106   | 105.2 | 101.1 | 99.3  | 100.7 | 107.9 | 104.4 | 114.4 | 119.3 |
| 102.1 | 106.1 | 96.4  | 102.1 | 93.9  | 106.2 | 101.3 | 112.9 | 113   |
| 109.8 | 103.8 | 97.8  | 94.6  | 108   | 108.4 | 108.7 | 107.4 | 107.2 |

|       |       |       |       |       |       |       |       |       |
|-------|-------|-------|-------|-------|-------|-------|-------|-------|
| 103.6 | 114.4 | 105.1 | 91    | 90.5  | 106.1 | 95.5  | 108.4 | 110.6 |
| 112.4 | 100   | 102.1 | 105.2 | 98.8  | 112.4 | 103.2 | 106.9 | 106.4 |
| 132.7 | 153.3 | 141.8 | 136.3 | 113.5 | 131.3 | 143   | 149.9 | 137.9 |
| 107.6 | 111.1 | 102.2 | 100.1 | 97.5  | 112.8 | 112.1 | 117.2 | 110.3 |
| 93.6  | 111   | 100.9 | 99.2  | 102.1 | 102.3 | 96.9  | 101.8 | 104.9 |
| 108.2 | 110.2 | 116.9 | 110   | 99.2  | 106.1 | 108.2 | 121.2 | 116.6 |
| 161.7 | 124.5 | 123.3 | 112.2 | 112.6 | 132.6 | 113.1 | 211.3 | 206.9 |
| 115.9 | 121.4 | 113.8 | 105.4 | 107.8 | 119.9 | 117   | 130.8 | 117.9 |
| 110.2 | 113.7 | 95.5  | 92.3  | 95.2  | 109.7 | 101.3 | 111.7 | 109.3 |
| 104.6 | 105.6 | 103   | 101.1 | 92.1  | 103   | 107.4 | 109.2 | 107   |
| 115.7 | 120.4 | 110.4 | 110.5 | 107.7 | 115.1 | 115.8 | 120.6 | 110.8 |
| 111.9 | 121.4 | 103.5 | 121.4 | 97.6  | 119.7 | 106.9 | 120.1 | 113.8 |
| 133.9 | 197.9 | 189.1 | 173   | 161.5 | 189.2 | 175.8 | 175.9 | 142.8 |
| 102.4 | 108   | 102.4 | 101.7 | 95    | 100.8 | 93.4  | 112   | 105.4 |
| 99.9  | 131.9 | 107.8 | 104.7 | 108.3 | 123.1 | 101.9 | 123.9 | 120.6 |
| 132.2 | 212.1 | 213.4 | 208.7 | 179.5 | 210.8 | 204.8 | 210   | 146.9 |
| 102   | 108.6 | 93.3  | 99.1  | 95.1  | 102.6 | 99.1  | 108.9 | 96.5  |
| 103.4 | 108.5 | 102.6 | 101.3 | 94.8  | 106.4 | 97.9  | 102.4 | 106.9 |
| 104.4 | 101.5 | 106.3 | 101.4 | 100.7 | 100.8 | 98.8  | 104.8 | 105.7 |
| 99.7  | 102.4 | 102.4 | 93.4  | 94.4  | 100.4 | 101.5 | 101.9 | 100.1 |
| 114.8 | 111.2 | 105.8 | 103.8 | 97.5  | 114.8 | 102.9 | 112.2 | 111.5 |
| 101.8 | 105.8 | 112.5 | 97.2  | 97.9  | 106.1 | 101.6 | 108.9 | 106.6 |
| 106   | 105.3 | 100.6 | 94.7  | 94.6  | 102.7 | 97.1  | 100.9 | 105.8 |
| 101.7 | 108.3 | 98.6  | 96.3  | 89.7  | 111.7 | 101.7 | 110.2 | 108.8 |
| 105.4 | 116.3 | 112.4 | 116.1 | 97.4  | 113.9 | 102.9 | 116.5 | 120.1 |
| 105.2 | 121.2 | 118.3 | 108.4 | 110.5 | 106   | 118.7 | 120.3 | 126.2 |
| 109.1 | 110.3 | 110.6 | 105.2 | 96.6  | 109.1 | 113.4 | 105   | 103   |
| 108.8 | 105.7 | 106.6 | 98.9  | 100.4 | 117.6 | 101.7 | 120.9 | 111.1 |
| 105.8 | 111   | 97.9  | 101.8 | 95.1  | 111.5 | 109.6 | 111.1 | 110.8 |
| 107.7 | 111.8 | 108.9 | 101.8 | 98.3  | 108.3 | 108.4 | 119.7 | 116.5 |
| 120.4 | 115.4 | 117   | 110.7 | 109.2 | 114.5 | 114.3 | 139.2 | 119.2 |
| 108.4 | 110.3 | 95    | 93.4  | 92.6  | 112.3 | 103   | 111.1 | 99    |
| 103.9 | 102.2 | 105.1 | 101.9 | 97.4  | 108.5 | 99.2  | 114.2 | 99.5  |
| 110   | 110.5 | 103.7 | 104.5 | 91.4  | 109.4 | 106.3 | 114.8 | 113.4 |
| 121.8 | 140.1 | 119.8 | 118.9 | 111.3 | 124.1 | 120.2 | 139.7 | 131.9 |
| 105.1 | 112.1 | 98.6  | 96.7  | 100.5 | 105.2 | 109.2 | 105.1 | 112.3 |
| 220.6 | 200.1 | 200.7 | 231.2 | 203.2 | 188.8 | 192.4 | 324.5 | 307.9 |
| 102.8 | 106.8 | 103.2 | 92.5  | 94.6  | 107   | 114.4 | 108.7 | 118.6 |
| 106.5 | 99.2  | 102.9 | 95.5  | 102.8 | 109.9 | 110.4 | 106.9 | 114.1 |
| 110.1 | 118.4 | 105.8 | 106.7 | 106.7 | 113.1 | 109.9 | 108.9 | 105.9 |
| 96.7  | 105.9 | 98.7  | 84.5  | 96    | 100.5 | 100.1 | 107.2 | 109.1 |
| 96.5  | 108.3 | 93.8  | 88.9  | 87.4  | 109.6 | 96.8  | 95    | 100.6 |
| 105.6 | 110.1 | 106.2 | 106.1 | 100.6 | 118.1 | 109.1 | 106.2 | 108.5 |
| 105.5 | 101.2 | 104.3 | 93.2  | 97.4  | 104.8 | 93.5  | 103.1 | 107.3 |
| 102.5 | 108.1 | 104.8 | 106.2 | 97.5  | 115.2 | 104.8 | 121.4 | 116   |
| 114.9 | 113.5 | 104.3 | 98.2  | 94.2  | 102.5 | 94.2  | 104.7 | 109.6 |
| 106.3 | 116.6 | 103.7 | 98.2  | 100.1 | 114.2 | 110.1 | 117.8 | 108   |
| 105.2 | 110.2 | 98.8  | 97.6  | 93.6  | 104.7 | 99.8  | 112.6 | 103.3 |
| 104.7 | 105.8 | 105.8 | 106.4 | 96    | 107.8 | 104.2 | 113.5 | 114.1 |
| 98.8  | 111.2 | 110.2 | 104.8 | 98.6  | 115.3 | 107.8 | 109   | 114.5 |
| 103.9 | 103.4 | 102.3 | 101.2 | 95.1  | 100.6 | 100.2 | 103.5 | 109.4 |

|       |       |        |       |       |       |       |        |        |
|-------|-------|--------|-------|-------|-------|-------|--------|--------|
| 102.8 | 106.3 | 98.5   | 107.2 | 97.2  | 118   | 102.7 | 127.5  | 112.2  |
| 104.8 | 110.1 | 103.4  | 95.6  | 95.9  | 104.1 | 105.2 | 105    | 100.5  |
| 116.9 | 101.4 | 100    | 109.9 | 98.2  | 111.6 | 109.2 | 123.3  | 108.9  |
| 99.2  | 112.8 | 101.6  | 94.7  | 100.7 | 112.5 | 96.9  | 126.3  | 111.2  |
| 106.2 | 110.4 | 110.4  | 104.4 | 88.3  | 105.9 | 104.3 | 100.4  | 111.7  |
| 115   | 108.6 | 106.9  | 95.8  | 97.6  | 106.7 | 102.8 | 103.7  | 108.3  |
| 101.4 | 128.4 | 109.5  | 129.8 | 112.6 | 126.1 | 126.1 | 118.2  | 111.7  |
| 107.2 | 112   | 100.8  | 104.7 | 94.5  | 107.7 | 98.7  | 116.1  | 105.5  |
| 102.5 | 112.3 | 108.9  | 98.7  | 95.2  | 107   | 98.7  | 101.6  | 112.4  |
| 161.9 | 172.1 | 154    | 113.7 | 148.9 | 163.1 | 134.6 | 174.7  | 142.9  |
| 102.9 | 109.6 | 105.6  | 104.6 | 99.5  | 112   | 105.9 | 115.2  | 118.6  |
| 103.9 | 108.7 | 99.3   | 99.1  | 98.1  | 104.8 | 99.2  | 109    | 102.2  |
| 99.5  | 110   | 104.1  | 98.4  | 94    | 114.3 | 106.2 | 105.4  | 105.8  |
| 108.2 | 110.7 | 104.1  | 99.6  | 92.8  | 120.8 | 100.1 | 113.3  | 109    |
| 125   | 116.7 | 109.4  | 122.4 | 114.8 | 124.1 | 116.3 | 154.3  | 117.7  |
| 106.8 | 107.4 | 109.3  | 100.9 | 93.9  | 103.8 | 101.6 | 115.5  | 108.9  |
| 112.3 | 98.9  | 98.6   | 94    | 94.5  | 109.8 | 100.5 | 119.8  | 110.4  |
| 107.4 | 112.6 | 94.5   | 98.8  | 93.5  | 107.7 | 105.3 | 115.3  | 117.4  |
| 110.8 | 104.2 | 101.6  | 98.5  | 95.6  | 105.3 | 107.5 | 105.1  | 106.1  |
| 109.3 | 105.7 | 102.8  | 99.3  | 94.5  | 124   | 108.4 | 108.5  | 124.8  |
| 113   | 110.8 | 103.6  | 95.2  | 93.8  | 107.1 | 103.7 | 110.2  | 113.2  |
| 100.3 | 111.5 | 100.3  | 102.3 | 94.2  | 99.2  | 99.2  | 100.1  | 106.1  |
| 104.8 | 107.1 | 97.5   | 101.3 | 98.3  | 103.9 | 99.1  | 109.2  | 107.3  |
| 99.2  | 102.4 | 100.7  | 99.6  | 86.7  | 101.9 | 100.4 | 107.7  | 105.4  |
| 775.1 | 601.8 | 1028.1 | 653.6 | 749.3 | 864   | 657.3 | 2242.7 | 1903.7 |
| 174   | 185.9 | 183.8  | 152.5 | 146.1 | 191.3 | 180.9 | 228.5  | 172.1  |
| 107.9 | 105   | 104    | 110.4 | 98.4  | 104.9 | 100.3 | 108.7  | 101.1  |
| 109.4 | 113.1 | 99.4   | 103.9 | 90.3  | 102.5 | 104.3 | 105.7  | 109.9  |
| 106.5 | 105.5 | 101.3  | 103.5 | 96.5  | 109.8 | 104.3 | 117.1  | 115    |
| 118.4 | 115.4 | 108    | 113.6 | 100.5 | 109.4 | 104.8 | 118.4  | 115.6  |
| 101   | 108.5 | 101.2  | 105.7 | 98.3  | 104   | 102.8 | 106.3  | 104.6  |
| 112.4 | 110.5 | 110.7  | 98.1  | 104.2 | 118.5 | 104.4 | 114.4  | 115.8  |
| 109.5 | 105.4 | 106.8  | 102.7 | 96.5  | 107.6 | 98    | 104.7  | 101.4  |
| 104.8 | 106.7 | 97.5   | 99.7  | 95.6  | 100.7 | 101.4 | 103.5  | 111.9  |
| 107.5 | 110   | 106.5  | 96.7  | 94.3  | 111.8 | 100.1 | 107.5  | 104.6  |
| 112.9 | 110.9 | 106.8  | 102.6 | 102.4 | 103.7 | 96.7  | 110.7  | 112.3  |
| 110.4 | 108   | 105.4  | 107   | 102.3 | 110.8 | 119.4 | 120.2  | 111.4  |
| 118.1 | 119.5 | 112.5  | 115.7 | 107.7 | 118.7 | 119.6 | 128.4  | 108.2  |
| 107.1 | 113.8 | 111.6  | 103.1 | 103.7 | 107.4 | 109   | 119.3  | 120.4  |
| 106.4 | 117.2 | 98.3   | 109.5 | 97    | 113.6 | 97.1  | 101.6  | 99     |
| 107.2 | 106   | 108.6  | 106.5 | 97.8  | 107.6 | 96.6  | 105.6  | 115    |
| 102.2 | 114.9 | 105.8  | 116.3 | 101.4 | 117.3 | 105.7 | 120.5  | 112.3  |
| 101.5 | 122.7 | 103.1  | 96.6  | 98.8  | 110.8 | 104.8 | 122.1  | 128.2  |
| 116.3 | 120.4 | 122.7  | 112   | 111.4 | 128.7 | 123.8 | 139.3  | 151.6  |
| 109.6 | 119.5 | 107.3  | 107   | 103.8 | 104   | 100.1 | 115.7  | 105.4  |
| 112.4 | 109.8 | 114.8  | 102.7 | 100.9 | 105.5 | 108.1 | 118.3  | 112    |
| 107.6 | 110.5 | 102.9  | 100   | 94.6  | 110   | 107.5 | 116    | 101.9  |
| 110.2 | 103.2 | 99.7   | 97.5  | 93.6  | 103.6 | 97.4  | 103.1  | 102.8  |
| 103.4 | 105.6 | 103.6  | 106.1 | 99.1  | 108.7 | 99.3  | 108.8  | 107.6  |
| 120.7 | 123   | 102.2  | 123.1 | 109.8 | 122.3 | 119   | 162.2  | 133    |
| 107.9 | 104.9 | 103.9  | 105.5 | 93.9  | 110.5 | 96.3  | 113.7  | 107.7  |



|        |        |        |        |        |        |       |        |        |
|--------|--------|--------|--------|--------|--------|-------|--------|--------|
| 105.5  | 110.8  | 99.1   | 91.7   | 94.1   | 102.3  | 97.9  | 106    | 99.9   |
| 100.3  | 108.8  | 102.4  | 101    | 97.9   | 106.7  | 101.7 | 105.1  | 104.6  |
| 110.7  | 111.5  | 98.4   | 109.3  | 95.4   | 101    | 95.9  | 107.3  | 116    |
| 107.4  | 102.3  | 100    | 104.1  | 93.8   | 110.4  | 101.7 | 109.8  | 109.2  |
| 106.5  | 107.5  | 107.5  | 98.6   | 97.2   | 112.4  | 108.9 | 120.8  | 106    |
| 153.4  | 167.4  | 157.9  | 187.9  | 154.2  | 188    | 148.8 | 229.7  | 188.8  |
| 103.1  | 111    | 99.3   | 96.2   | 95.8   | 107.3  | 115.2 | 112.7  | 103.8  |
| 107.8  | 104.3  | 98.2   | 94.4   | 94.7   | 103.2  | 98.2  | 104.3  | 111.6  |
| 108.1  | 116.6  | 111.9  | 110.4  | 99.5   | 123    | 110.8 | 112.9  | 119.3  |
| 109.2  | 103.9  | 111.3  | 105.1  | 98.1   | 107.5  | 107.6 | 113.9  | 102.9  |
| 103    | 109.7  | 103.6  | 111.3  | 103.3  | 125.4  | 100.1 | 117.1  | 114.8  |
| 108.6  | 110.6  | 101.2  | 100.7  | 87.2   | 103.1  | 97.4  | 104.5  | 107.1  |
| 116.4  | 111.1  | 111.1  | 110    | 104.8  | 119.2  | 111.4 | 118.3  | 112.2  |
| 109.2  | 112.7  | 101.3  | 102    | 97.5   | 104.8  | 95.4  | 105.6  | 104.1  |
| 109.4  | 97.7   | 95.2   | 108.6  | 90.7   | 110.7  | 96.6  | 118.2  | 119.2  |
| 157.8  | 140.7  | 158.9  | 139.5  | 124.9  | 147.9  | 121.3 | 180.4  | 227.7  |
| 104.8  | 108.5  | 106.7  | 104.4  | 100.6  | 103    | 102   | 101.9  | 108.8  |
| 107.4  | 104.2  | 101.7  | 99.7   | 95.4   | 109.5  | 103.1 | 99.6   | 107.6  |
| 110.5  | 106.6  | 105.1  | 94.8   | 100    | 107.6  | 109   | 107.7  | 104.3  |
| 105.2  | 108.6  | 99.3   | 99.5   | 95.3   | 112    | 99.6  | 112.3  | 117.9  |
| 96.6   | 104.8  | 100.9  | 97.7   | 90.2   | 106.6  | 99.6  | 106.2  | 104.7  |
| 107.8  | 103.5  | 97.9   | 97.7   | 95.9   | 99.9   | 107.5 | 111.4  | 101.2  |
| 1181.1 | 1028.8 | 879.9  | 1294   | 605.3  | 1097.7 | 724.6 | 2394.5 | 2431.1 |
| 102.5  | 105.4  | 102.2  | 97.4   | 95.5   | 109.6  | 98.8  | 112.1  | 103.5  |
| 116.7  | 102.1  | 99.6   | 92     | 98.1   | 107    | 102.4 | 107.7  | 109.6  |
| 108.3  | 104.8  | 100.5  | 101.4  | 97     | 108.1  | 108.4 | 115.5  | 113.4  |
| 117.9  | 121.8  | 110.6  | 112.2  | 100.9  | 120.7  | 109.4 | 124    | 121.4  |
| 104.9  | 113.2  | 99.5   | 94     | 96.7   | 113.5  | 106.2 | 110.4  | 106.5  |
| 111.3  | 121.9  | 114.2  | 107.8  | 95.4   | 122.7  | 112.2 | 112.9  | 120.7  |
| 101.3  | 116.6  | 112.7  | 97.7   | 95.1   | 108.5  | 104.9 | 111    | 119.4  |
| 118.4  | 107.6  | 123.2  | 114.9  | 118.2  | 133.5  | 111.2 | 118.9  | 114.4  |
| 106    | 117.1  | 114.7  | 99.6   | 108.7  | 106.7  | 107.1 | 112.3  | 115.4  |
| 143    | 116    | 136.2  | 119.8  | 117.3  | 141.1  | 122   | 197.9  | 143.5  |
| 109.5  | 116.9  | 108.7  | 100.2  | 99.9   | 122.1  | 103.7 | 118    | 110.6  |
| 257.8  | 183.9  | 170.6  | 189.3  | 163.3  | 209.5  | 156   | 335.7  | 271.3  |
| 103.4  | 112.9  | 108    | 108.6  | 99.4   | 110.8  | 113.1 | 115.4  | 117.1  |
| 104.7  | 113.9  | 100.8  | 99.2   | 94.3   | 106.4  | 101   | 111.3  | 105.4  |
| 103.3  | 109.9  | 98.9   | 103.4  | 96.2   | 106.5  | 97    | 113.2  | 108.7  |
| 175.7  | 182.6  | 217.2  | 176.3  | 162.6  | 207.6  | 167.2 | 247.5  | 184.2  |
| 133    | 165.2  | 139.5  | 135.5  | 135.2  | 139.1  | 160.7 | 173.6  | 138.7  |
| 102.7  | 108.8  | 105.4  | 127    | 104.8  | 120.2  | 113   | 123.6  | 110.3  |
| 111.4  | 116.9  | 115.3  | 115.4  | 100.4  | 119    | 104.7 | 135    | 129    |
| 109    | 105.7  | 105.4  | 101.8  | 92.1   | 109.5  | 105.5 | 105.6  | 110    |
| 105    | 118.8  | 116.1  | 105.3  | 116.8  | 122.7  | 111.7 | 119.7  | 118.3  |
| 179.4  | 261.6  | 326.8  | 205.1  | 251.6  | 314    | 261.4 | 259.9  | 201.1  |
| 107.6  | 111.1  | 102.5  | 104    | 94.1   | 101.6  | 104.6 | 112.6  | 122    |
| 187.3  | 291.3  | 303.9  | 274    | 237.4  | 267.5  | 306.2 | 401.6  | 256.9  |
| 734.1  | 2300.5 | 2408.2 | 2003.3 | 1762.1 | 1692.8 | 1897  | 1536.9 | 832.5  |
| 99.9   | 103.5  | 100.7  | 99     | 94.6   | 108.7  | 100.7 | 109.6  | 110.4  |
| 104.9  | 120.6  | 114.8  | 99.4   | 103.7  | 109.1  | 100.6 | 115.9  | 116.4  |
| 100.5  | 100.4  | 107.2  | 107.9  | 98.7   | 104.2  | 102.1 | 109.9  | 107.2  |

|        |        |        |        |        |        |        |        |        |
|--------|--------|--------|--------|--------|--------|--------|--------|--------|
| 102.1  | 109.5  | 101.7  | 104.8  | 98.8   | 107    | 96     | 103.2  | 111.3  |
| 102.4  | 118.5  | 98.8   | 100.7  | 99.8   | 108.7  | 107.9  | 103.6  | 105.3  |
| 112.6  | 120.5  | 103.4  | 107.8  | 93.8   | 114.2  | 113    | 114.3  | 110.9  |
| 282.9  | 275.5  | 297.8  | 265.8  | 217.9  | 283.9  | 298.1  | 340.1  | 200.4  |
| 105.1  | 111.6  | 107.2  | 105.7  | 94.3   | 104.7  | 93.1   | 109.9  | 115.3  |
| 110.4  | 115.6  | 95.6   | 97.7   | 90.1   | 109.7  | 101.9  | 96.1   | 107.1  |
| 121.6  | 135.9  | 127.5  | 139.9  | 113.8  | 137    | 124.4  | 139.6  | 125.8  |
| 102.5  | 116.7  | 108.3  | 104.6  | 102.1  | 113    | 105.3  | 124.9  | 112.4  |
| 132.9  | 118.2  | 112.3  | 115.7  | 94.4   | 126.7  | 129.7  | 123.9  | 127.4  |
| 109.2  | 109.5  | 97.9   | 94.5   | 94.4   | 110.6  | 108.6  | 101.9  | 100.1  |
| 114.2  | 135.5  | 121.2  | 109.2  | 116.7  | 133.1  | 126.1  | 142.8  | 136.1  |
| 112.6  | 112.4  | 98.8   | 106.3  | 104    | 107.1  | 96.4   | 106.8  | 103.6  |
| 141    | 142    | 138.2  | 162    | 134.2  | 139.2  | 170.4  | 120.6  | 124.2  |
| 112.5  | 111.2  | 97.9   | 107.3  | 92.3   | 107.9  | 103.7  | 109.7  | 108    |
| 117.6  | 114.9  | 108.7  | 123.5  | 102.2  | 112    | 114.9  | 116.2  | 105.8  |
| 108.1  | 107.1  | 100.8  | 107.8  | 95.9   | 109.6  | 107.9  | 108.7  | 110.1  |
| 109.1  | 115.6  | 111.1  | 101.8  | 105.5  | 113.7  | 101.4  | 103.3  | 109.1  |
| 103.2  | 103.6  | 99.8   | 99.3   | 91     | 110.3  | 102.9  | 102.9  | 104.9  |
| 103.3  | 107.1  | 97.5   | 101    | 93.2   | 107.2  | 101.1  | 112.5  | 109.5  |
| 129.5  | 133.2  | 113.8  | 123.8  | 121.4  | 126    | 126.8  | 132.4  | 117.9  |
| 110.8  | 119.2  | 104.7  | 114.4  | 97.8   | 110.1  | 105.9  | 115.7  | 107.1  |
| 137    | 148.3  | 132.9  | 133.5  | 129.8  | 143.3  | 134.5  | 147.8  | 144.2  |
| 108.9  | 105.3  | 105.6  | 100.4  | 101    | 108.3  | 108.7  | 106.5  | 101.7  |
| 105.8  | 108.5  | 112.9  | 113.1  | 94.6   | 105.9  | 105.9  | 117.1  | 109    |
| 100.6  | 106.9  | 98.6   | 100.1  | 94.2   | 108.7  | 105.1  | 104.8  | 104.7  |
| 102.3  | 106.6  | 96.3   | 100.3  | 100.5  | 111.9  | 109.7  | 105.8  | 109    |
| 109.7  | 112.1  | 101.7  | 108.8  | 96.5   | 112.1  | 104.7  | 123.4  | 107.7  |
| 116.1  | 115.9  | 104.1  | 101.6  | 96.1   | 114.5  | 102.5  | 105.5  | 107.8  |
| 109.7  | 108    | 109.5  | 108.9  | 102.6  | 112.2  | 101.6  | 117.1  | 111.7  |
| 102.6  | 115.4  | 102.3  | 103.7  | 99.6   | 108.9  | 109.6  | 114.8  | 110.5  |
| 237.7  | 274.3  | 289.7  | 330    | 196.6  | 285.9  | 350.9  | 451.7  | 227.1  |
| 119.5  | 157.2  | 130    | 172.1  | 117.6  | 121.5  | 142.4  | 136.9  | 104.3  |
| 1598.9 | 2655.1 | 2210.7 | 3009.7 | 2069.3 | 2368.9 | 2522.9 | 3260.1 | 2309   |
| 102.2  | 106    | 94.6   | 97.2   | 92.5   | 101.8  | 99.7   | 108    | 109.4  |
| 108.3  | 111    | 107.6  | 97.7   | 103    | 109.2  | 114.6  | 108    | 122.3  |
| 1546   | 2209.3 | 2240.4 | 1410.9 | 1927.8 | 2320.2 | 1634.4 | 2688.5 | 1857.3 |
| 104.7  | 106.8  | 104    | 94.8   | 94.9   | 114    | 101.7  | 101.7  | 110.2  |
| 166    | 167.9  | 141.4  | 160    | 154.5  | 173.2  | 146.2  | 235.8  | 189.1  |
| 103.5  | 108.4  | 101.4  | 97.8   | 95.6   | 107.5  | 104.2  | 112.5  | 117    |
| 143.7  | 193.3  | 161.7  | 174.9  | 154.6  | 189.1  | 200.9  | 243.4  | 208.3  |
| 108.9  | 113    | 113.3  | 107.1  | 98.5   | 105.1  | 108.1  | 105.8  | 112.7  |
| 108.2  | 105.8  | 105.1  | 101.8  | 93.5   | 105.8  | 98.2   | 108.8  | 110.2  |
| 128.1  | 119.4  | 113.8  | 111.1  | 102.1  | 111.8  | 105.2  | 118.1  | 122.1  |
| 106.7  | 105.8  | 99.7   | 95.3   | 97     | 107.8  | 95.3   | 110.4  | 108.1  |
| 102.2  | 117.1  | 106.7  | 90.1   | 92.9   | 117.3  | 104    | 110.4  | 108.6  |
| 219.8  | 305.4  | 255.6  | 228.6  | 227.7  | 271.9  | 311.7  | 430.1  | 343.6  |
| 117.3  | 118.5  | 109.4  | 116    | 105.1  | 112.3  | 108    | 121.5  | 114    |
| 925.7  | 851.2  | 940.7  | 956.1  | 858.6  | 1024.5 | 986.5  | 1348.4 | 1132.7 |
| 106    | 140.7  | 145.6  | 142.6  | 133.8  | 151.3  | 130.2  | 138.4  | 123.6  |
| 106.5  | 102.8  | 103.5  | 100.4  | 96.7   | 110.2  | 101.8  | 107.9  | 108.1  |
| 121.6  | 126.5  | 118.3  | 126.5  | 112.6  | 125.4  | 124.4  | 142.4  | 127.9  |

|       |        |        |       |        |        |        |        |        |
|-------|--------|--------|-------|--------|--------|--------|--------|--------|
| 111   | 112.6  | 103.2  | 106.1 | 95.4   | 108.6  | 104.9  | 100.1  | 95.3   |
| 108   | 108.5  | 103    | 103   | 96.4   | 109.6  | 103.8  | 112.1  | 107.1  |
| 101.4 | 109    | 105    | 95.2  | 99     | 106.5  | 101.8  | 120.1  | 115.2  |
| 102.7 | 110.7  | 104.3  | 101.4 | 92.3   | 110.8  | 97.3   | 105.6  | 117.2  |
| 99.6  | 114    | 103.1  | 116.1 | 91.6   | 105.6  | 103.6  | 111.2  | 115.8  |
| 107.9 | 139    | 105.8  | 153.1 | 111.3  | 116.1  | 136.8  | 115.6  | 100.6  |
| 286.3 | 138.2  | 134.9  | 184   | 165    | 174.3  | 265.8  | 319    | 473    |
| 308.3 | 118.7  | 115.4  | 108.3 | 108.6  | 127.1  | 107.2  | 251.1  | 477.8  |
| 111.9 | 111.2  | 107.8  | 96.5  | 91.6   | 103.8  | 111.6  | 133.4  | 161.5  |
| 116.8 | 110.2  | 104    | 107.6 | 95.4   | 109.3  | 106.3  | 126.9  | 113.5  |
| 102.5 | 109.5  | 98.8   | 94.1  | 96.7   | 106.3  | 99.8   | 110    | 109.8  |
| 101.7 | 112.9  | 98.2   | 114.3 | 94.3   | 98.4   | 102.7  | 106    | 109.8  |
| 102.1 | 98.2   | 100.7  | 94.2  | 91.8   | 104.3  | 98     | 105.5  | 107.7  |
| 110.1 | 108.1  | 97.9   | 98.4  | 95.3   | 106.5  | 108.5  | 100.5  | 113.5  |
| 100.4 | 107.2  | 100    | 99    | 94     | 107.3  | 101.1  | 108.2  | 96.2   |
| 106.1 | 103.2  | 111.6  | 112   | 95.9   | 107.3  | 101.9  | 113.2  | 106.6  |
| 113.8 | 114.9  | 103.4  | 96    | 99.5   | 109.8  | 103.1  | 111.2  | 114.8  |
| 120.5 | 113.1  | 112.4  | 108.8 | 106.7  | 115.5  | 127.8  | 141.1  | 129.1  |
| 104.3 | 108    | 106    | 100.4 | 95.3   | 105    | 103.7  | 110.4  | 111.8  |
| 120   | 110.3  | 121.9  | 102.3 | 116.7  | 135.5  | 115    | 149    | 150    |
| 103.2 | 110.9  | 101.6  | 102.1 | 94.8   | 106.4  | 103.6  | 107.7  | 107.3  |
| 171.8 | 118.8  | 114.8  | 110.7 | 114.9  | 120.8  | 115.3  | 136.3  | 141    |
| 128.5 | 127.2  | 107.6  | 114.6 | 108.7  | 115.7  | 113.4  | 123.2  | 127.9  |
| 104   | 101.8  | 98.7   | 98.5  | 95.8   | 110.6  | 103.7  | 103.8  | 99.1   |
| 106.1 | 119.5  | 112    | 115.3 | 99.7   | 106.4  | 105    | 117    | 120.5  |
| 107.6 | 115.4  | 102.9  | 93.3  | 97.7   | 115.3  | 95     | 114.1  | 106    |
| 105.8 | 115.2  | 103.6  | 108.8 | 99.3   | 111.8  | 100.2  | 116.8  | 112.7  |
| 114.8 | 108.2  | 111.2  | 111.8 | 94.9   | 111.2  | 113.7  | 110.2  | 94.9   |
| 108.5 | 113    | 105.4  | 113.3 | 92.4   | 114.5  | 110.2  | 117.7  | 111.4  |
| 107.3 | 106    | 99.1   | 98.3  | 93.6   | 116.1  | 102.3  | 103.9  | 104.7  |
| 119.2 | 107    | 109.3  | 111.9 | 100.1  | 118.1  | 105.9  | 121.8  | 107.2  |
| 116.7 | 114.9  | 108.4  | 106.2 | 99.7   | 118.2  | 108.4  | 113.7  | 126.9  |
| 105.7 | 109.5  | 106.4  | 107.8 | 95.9   | 115.8  | 105.6  | 113.3  | 117    |
| 112.2 | 111.7  | 102.9  | 109.4 | 106.6  | 121.2  | 109.4  | 119.8  | 113.5  |
| 121.9 | 114.1  | 110.7  | 119.7 | 94.2   | 114.7  | 108    | 112    | 117.6  |
| 738   | 589.2  | 618.9  | 628.7 | 514.9  | 637.1  | 678.6  | 763.2  | 634.9  |
| 987.1 | 1112.9 | 1122.3 | 835.4 | 1007.8 | 1265.1 | 1010.6 | 1730.2 | 1192.5 |
| 352.5 | 442.3  | 422.1  | 360   | 445.6  | 444.2  | 464.1  | 551    | 397.1  |
| 96.5  | 106.5  | 103    | 89.6  | 92.6   | 101.7  | 101.3  | 108.2  | 106.3  |
| 122.9 | 121.3  | 113.3  | 121.9 | 104.2  | 132.3  | 107.6  | 142.5  | 111.5  |
| 106.4 | 109.6  | 99.2   | 97.6  | 87     | 113.7  | 104    | 104.1  | 111.4  |
| 106.7 | 109.5  | 98.2   | 102.3 | 93.6   | 107.6  | 100.8  | 100.7  | 110.8  |
| 111.9 | 104.3  | 110.2  | 104.1 | 96.5   | 112.8  | 103.6  | 111.5  | 111.1  |
| 104.4 | 105.3  | 104.5  | 100.1 | 101.4  | 105.9  | 107.5  | 113.8  | 109.4  |
| 102.2 | 107.4  | 101.4  | 108.2 | 102.8  | 109.8  | 103.9  | 107.2  | 108.9  |
| 99.1  | 101.4  | 100.3  | 107.6 | 94.9   | 104.1  | 96.4   | 100.5  | 103.6  |
| 107   | 98.3   | 105.6  | 102.6 | 95.1   | 113.1  | 102.9  | 107.3  | 108.8  |
| 403.5 | 723.9  | 680.9  | 473.8 | 554.1  | 629    | 542.6  | 621.6  | 347.1  |
| 101.9 | 113.9  | 97.4   | 103.3 | 89.7   | 101.4  | 102.5  | 105.4  | 110.6  |
| 519.2 | 558.4  | 533.2  | 481.5 | 561.9  | 568.8  | 449.1  | 821.7  | 513.7  |
| 126.7 | 118.4  | 117.4  | 121   | 117.5  | 123.6  | 109.5  | 146.5  | 125.1  |

|       |       |       |       |       |       |       |       |       |
|-------|-------|-------|-------|-------|-------|-------|-------|-------|
| 121.2 | 125.6 | 117.7 | 117.5 | 109.4 | 108.2 | 110.2 | 129.4 | 106.5 |
| 124.9 | 121.5 | 126   | 128.4 | 117.1 | 126   | 105   | 136.5 | 127.5 |
| 99    | 102.5 | 100.2 | 109.1 | 94.6  | 101.7 | 102.4 | 107.1 | 111.9 |
| 104.1 | 110.9 | 108.1 | 106.4 | 97.9  | 107.7 | 105   | 114.2 | 110.7 |
| 105.6 | 109   | 117   | 99.5  | 111.1 | 106.7 | 103.9 | 97.7  | 106.1 |
| 125.1 | 116.6 | 114.2 | 113.4 | 102.2 | 113.1 | 102.1 | 130.4 | 112.6 |
| 107.2 | 108.4 | 105.6 | 101.1 | 93.6  | 110   | 101.1 | 113.1 | 113.3 |
| 103.6 | 110.5 | 101.7 | 101.6 | 96.2  | 120   | 103.9 | 120.4 | 103.9 |
| 110.6 | 115.7 | 104.1 | 106.7 | 95.7  | 115   | 96    | 111.8 | 104.4 |
| 105.7 | 122.6 | 99    | 103.1 | 100.3 | 105.3 | 103.9 | 108.7 | 111   |
| 106.6 | 101.5 | 103.9 | 96.4  | 101.1 | 111.3 | 95.6  | 110.7 | 113.2 |
| 140.9 | 186.3 | 149.3 | 191   | 163.2 | 167.2 | 172.7 | 172.4 | 147.3 |
| 117.7 | 146.7 | 119.8 | 158.2 | 119.7 | 135.8 | 130.2 | 150.3 | 140.6 |
| 119.3 | 112.7 | 105.3 | 99.7  | 100.4 | 108.5 | 103.3 | 112.7 | 124.9 |
| 110.7 | 124.2 | 111.5 | 118.2 | 114.6 | 122.3 | 113.5 | 130.8 | 121   |
| 105.8 | 110.4 | 113.1 | 98    | 90    | 121.9 | 102.4 | 115.6 | 110.4 |
| 100.2 | 103.6 | 102.4 | 107.2 | 98    | 107.7 | 102   | 107.2 | 109.9 |
| 129.6 | 112.7 | 105.3 | 146.3 | 94.2  | 105.1 | 122   | 107.2 | 106.6 |
| 106.6 | 108.2 | 104.1 | 95.6  | 91.3  | 105.4 | 102.6 | 102.8 | 112.5 |
| 103.4 | 108.9 | 99.2  | 98.7  | 97.1  | 106   | 107.4 | 107.7 | 112.1 |
| 273.4 | 196.5 | 118.1 | 868   | 163.4 | 122.6 | 782.9 | 154.2 | 152.4 |
| 143.2 | 157.8 | 131.1 | 155.4 | 126.7 | 140.1 | 147.5 | 168.7 | 136.9 |
| 296.5 | 345.9 | 341.7 | 266.8 | 327.9 | 301.9 | 343.7 | 448.8 | 341.6 |
| 102.6 | 104.8 | 104.6 | 99.3  | 96.9  | 101.6 | 101.6 | 98.9  | 106.8 |
| 111.2 | 179.2 | 133   | 126.4 | 127.2 | 144.9 | 132.3 | 140.6 | 132.5 |
| 116.1 | 121.6 | 123.4 | 114.8 | 101.4 | 119.2 | 117.8 | 130.3 | 123.1 |
| 271.2 | 585.8 | 585.4 | 551.4 | 445   | 560.4 | 498.8 | 706.6 | 429.6 |
| 102.7 | 109   | 101.9 | 114.5 | 98.9  | 116.6 | 105.8 | 101.9 | 107.6 |
| 103.4 | 102.3 | 106.3 | 97.1  | 94.6  | 102.3 | 97.8  | 111.1 | 112.8 |
| 108.3 | 107.9 | 103.8 | 103.4 | 102.5 | 111.7 | 103.1 | 130.4 | 113.6 |
| 199.8 | 201.5 | 169.6 | 233.4 | 186.2 | 178.2 | 232.1 | 418.1 | 336.7 |
| 102.6 | 103.1 | 101.9 | 97.3  | 94.4  | 102.7 | 99.3  | 100   | 104.7 |
| 102.2 | 106.7 | 101   | 95.9  | 96.3  | 103.7 | 105.7 | 115.6 | 99.4  |
| 108.4 | 109.1 | 97.6  | 102.3 | 97    | 105   | 101   | 103.7 | 112.1 |
| 112.5 | 123   | 108.7 | 120.7 | 117.4 | 119.1 | 116.8 | 126.3 | 110.2 |
| 109.1 | 107.6 | 105   | 100.6 | 98.6  | 106.3 | 109.6 | 110.5 | 101.3 |
| 121.2 | 111.4 | 107.4 | 116.6 | 104.1 | 121.6 | 104.6 | 147.3 | 134.7 |
| 202.2 | 145.8 | 118.1 | 108.4 | 110   | 152.9 | 122.7 | 203.9 | 172.3 |
| 107.7 | 119.1 | 109.3 | 107.9 | 101.3 | 110.2 | 114.4 | 109   | 107.7 |
| 103.5 | 114.8 | 105.5 | 101.9 | 96.8  | 106   | 101.6 | 116.6 | 113.8 |
| 99.9  | 111.7 | 105.2 | 98.3  | 96.6  | 110.9 | 102.7 | 109   | 109.8 |
| 113.7 | 107.2 | 96.5  | 105.4 | 102.7 | 124.4 | 103.1 | 114.2 | 122.9 |
| 109.9 | 102.3 | 110   | 102.6 | 100   | 108.3 | 106.5 | 116.1 | 106.1 |
| 108.5 | 109.8 | 107.2 | 97.4  | 94.1  | 102.2 | 97.7  | 110.6 | 104.8 |
| 110.8 | 113.3 | 108.8 | 93.9  | 93.5  | 104.3 | 106.5 | 106.7 | 116.7 |
| 99.1  | 110.9 | 101.9 | 97.8  | 94.2  | 108.2 | 97.7  | 111.2 | 113.8 |
| 104.3 | 109.3 | 103.1 | 96.5  | 92.8  | 111.9 | 98.8  | 116.1 | 106.6 |
| 111.1 | 107.2 | 110.6 | 101.6 | 102.4 | 121.9 | 103.4 | 121.2 | 115.3 |
| 118.3 | 111.7 | 115.2 | 104.7 | 99.8  | 110.4 | 109.6 | 108.6 | 115.2 |
| 113.8 | 110   | 106.3 | 101.7 | 96.1  | 110.2 | 106.9 | 111.2 | 107.8 |
| 99.8  | 99    | 97.1  | 100   | 86.8  | 103.6 | 97.1  | 98.5  | 111.8 |

|         |         |         |         |         |         |         |         |         |
|---------|---------|---------|---------|---------|---------|---------|---------|---------|
| 110.6   | 156.7   | 144.1   | 134.4   | 129.6   | 161.4   | 125.9   | 151.3   | 127.8   |
| 110.1   | 112.3   | 105.2   | 104.6   | 98.6    | 112.3   | 105.2   | 120.3   | 113.1   |
| 119.3   | 124.5   | 102.4   | 110.8   | 107.7   | 121.6   | 102.5   | 121.7   | 122.2   |
| 109.5   | 105.4   | 106.4   | 102.3   | 95.9    | 111     | 102.6   | 139.2   | 103.3   |
| 123.4   | 147.3   | 160.2   | 154.6   | 133.3   | 142     | 154.9   | 175     | 138.3   |
| 100.8   | 109.7   | 97.4    | 109.4   | 92.6    | 104.6   | 98.7    | 108.5   | 104     |
| 106.7   | 105.2   | 101     | 94.2    | 92.9    | 101     | 98.7    | 102.1   | 107.3   |
| 110.5   | 115.2   | 106.8   | 106.1   | 95.7    | 109.2   | 102.4   | 101.3   | 107.6   |
| 106.6   | 115.8   | 107.8   | 102.3   | 100.9   | 109.3   | 101.9   | 115.3   | 117.2   |
| 112.6   | 108.1   | 98.5    | 101.3   | 95      | 114.2   | 95.2    | 105.2   | 103.5   |
| 110.7   | 135.1   | 115.5   | 108.1   | 112     | 112.3   | 115.3   | 124     | 115.7   |
| 107.2   | 98      | 100     | 102.2   | 101.2   | 110     | 102.5   | 118     | 106.4   |
| 116.7   | 114.2   | 117     | 117.3   | 106.9   | 117.5   | 114.9   | 126.6   | 110.8   |
| 101.8   | 108.7   | 99.2    | 92.1    | 93.2    | 112.3   | 97.1    | 104.3   | 103.9   |
| 107.1   | 107.9   | 99.8    | 100.9   | 95.3    | 111.3   | 96.7    | 105.2   | 107     |
| 128.8   | 118.5   | 115.1   | 119     | 109.9   | 133.2   | 116.2   | 121.3   | 117     |
| 108     | 106.6   | 101.2   | 102.4   | 97.4    | 107     | 97.5    | 105.8   | 109.3   |
| 112.2   | 102.7   | 97.1    | 96.8    | 104.9   | 108.1   | 103.4   | 103.6   | 105.8   |
| 107.7   | 115     | 112.4   | 102.2   | 94.8    | 114.6   | 104.5   | 113.4   | 104.9   |
| 106.2   | 108.5   | 99.1    | 103.7   | 102.2   | 105.4   | 109.6   | 108.9   | 103.8   |
| 124.6   | 108.4   | 109.9   | 109.1   | 99.9    | 107.5   | 114     | 122.5   | 104.9   |
| 162     | 181.7   | 141     | 162.3   | 142.3   | 144.8   | 164     | 199.8   | 138.7   |
| 96.8    | 107.6   | 101.1   | 96.7    | 93.2    | 100.2   | 100.1   | 101.4   | 99.6    |
| 126.2   | 122.3   | 111.4   | 102.4   | 108.6   | 114.7   | 109.4   | 117.7   | 106.7   |
| 100.6   | 103.3   | 100.7   | 99.3    | 98.1    | 103.2   | 96.7    | 104.3   | 104     |
| 105.1   | 105.7   | 99.6    | 104.6   | 97.1    | 101.6   | 97.2    | 102.3   | 108     |
| 104.5   | 118.6   | 102.8   | 99.2    | 101.3   | 114.6   | 110.7   | 113.5   | 109.7   |
| 108.1   | 105.9   | 95.9    | 99.1    | 95.5    | 100.1   | 95.5    | 109.9   | 104.7   |
| 495.3   | 441.3   | 254.4   | 468.9   | 402.7   | 339.8   | 415.7   | 1167    | 667.8   |
| 1919.3  | 2105.1  | 1225.7  | 1497.9  | 1378.8  | 1415.2  | 1571    | 5299.9  | 3494.2  |
| 106.7   | 115.3   | 102.6   | 104.3   | 98.5    | 103.9   | 106.6   | 113.9   | 113.9   |
| 132.5   | 152.4   | 117.7   | 154.3   | 133.8   | 143.8   | 148.8   | 233.1   | 161.9   |
| 713.7   | 536.9   | 394.8   | 492.8   | 553.8   | 739.3   | 692.3   | 1648.5  | 884.7   |
| 10272.5 | 10922   | 7018.6  | 8723.5  | 9460.5  | 9243.7  | 12423.6 | 25326.5 | 21344.3 |
| 104     | 108.2   | 102.4   | 98.9    | 101.3   | 109.8   | 104.2   | 108.2   | 103     |
| 32581   | 23978.4 | 18297.4 | 27970.1 | 24695.1 | 30735.3 | 27071.3 | 35874.1 | 41421.9 |
| 107     | 104.2   | 101.4   | 102.7   | 96.3    | 107.8   | 101.8   | 109.8   | 112.7   |
| 122.7   | 132.1   | 128.6   | 132.8   | 113.5   | 132.4   | 111.6   | 129.2   | 125.1   |
| 128     | 162.1   | 183.8   | 162.6   | 141     | 207.6   | 139     | 291.2   | 167.5   |
| 183.3   | 255.9   | 284.9   | 202     | 179.5   | 220.2   | 213.4   | 339.6   | 248.1   |
| 104.5   | 102     | 99.4    | 96.5    | 95.3    | 101.9   | 114.5   | 107     | 109.6   |
| 122.6   | 132.3   | 118.4   | 133.1   | 111     | 131.8   | 129.9   | 147.3   | 136.9   |
| 120     | 128.9   | 116.1   | 115.1   | 115.2   | 125.1   | 128.3   | 157.1   | 147.1   |
| 132.1   | 144.9   | 127.9   | 117.2   | 126.6   | 144.3   | 130.1   | 164.9   | 166.8   |
| 384.6   | 511.5   | 569.7   | 425.2   | 510.9   | 507.1   | 560.8   | 941.2   | 685     |
| 165.4   | 245.1   | 270.5   | 1019.6  | 275.9   | 515.3   | 1382.9  | 324.8   | 1082.1  |
| 102.6   | 100.9   | 100.2   | 95.1    | 90.1    | 101.9   | 100     | 103.5   | 104     |
| 176.7   | 207.5   | 195.5   | 192.3   | 166.6   | 188.4   | 219.1   | 248.9   | 194.4   |
| 116.4   | 126.7   | 112.5   | 127.5   | 119.2   | 134.8   | 123.5   | 150.3   | 139.3   |
| 111.7   | 112.9   | 110.3   | 109.3   | 107.8   | 107.5   | 110.2   | 128.4   | 112.3   |
| 139.6   | 126.1   | 116     | 117.4   | 130.4   | 130.1   | 147.1   | 152.7   | 115.3   |

|        |        |        |        |        |        |        |        |        |
|--------|--------|--------|--------|--------|--------|--------|--------|--------|
| 132.5  | 129.4  | 122.7  | 105.1  | 120.8  | 121.4  | 123.9  | 164.4  | 130.9  |
| 100.5  | 104.9  | 94     | 105.2  | 88.3   | 111.4  | 103.5  | 97.8   | 106.8  |
| 189.8  | 215.2  | 205.5  | 177.6  | 172.1  | 209.3  | 165.8  | 292.5  | 253.5  |
| 112.1  | 104.4  | 100.5  | 104.2  | 97.9   | 113.1  | 107.5  | 111.2  | 108.7  |
| 104.5  | 99.1   | 107.1  | 93.2   | 97.4   | 109.3  | 100.7  | 104.8  | 105.1  |
| 113.5  | 113.3  | 109.9  | 109.2  | 107.5  | 119.5  | 111.9  | 126.8  | 115.9  |
| 105.7  | 103.3  | 103.2  | 97.3   | 88.4   | 99.1   | 98.9   | 100.3  | 105    |
| 99.1   | 103.7  | 94.4   | 103    | 94.5   | 100    | 99.8   | 105    | 109.6  |
| 135.9  | 193.7  | 185.6  | 137.9  | 169.5  | 189.6  | 158.7  | 244.9  | 189    |
| 110.4  | 108.5  | 107.2  | 104.8  | 99.6   | 105.4  | 99     | 111.2  | 129    |
| 138.6  | 123.6  | 119.8  | 130.3  | 113    | 130.9  | 115.1  | 166    | 145.7  |
| 103.8  | 113.3  | 105.2  | 103.7  | 97     | 106.2  | 104.5  | 114.4  | 121.1  |
| 99.3   | 115.2  | 110.6  | 96.4   | 97.4   | 115.6  | 108.3  | 119.7  | 107    |
| 107.5  | 136    | 132.2  | 121.5  | 116.4  | 114.7  | 111.8  | 143.1  | 104    |
| 109.6  | 107.6  | 100.1  | 96     | 90.6   | 108.1  | 96.1   | 99.7   | 101.2  |
| 103    | 119.8  | 98.9   | 103.8  | 97.1   | 107.3  | 96.7   | 103.8  | 110.7  |
| 202.6  | 248.8  | 208.9  | 218    | 164.2  | 299.8  | 255    | 366    | 293.5  |
| 147.8  | 171.8  | 160.5  | 137.1  | 125    | 177.4  | 147.2  | 229.3  | 187.3  |
| 116.2  | 130.7  | 127.7  | 116.1  | 111.1  | 122.2  | 118.2  | 131.1  | 117.9  |
| 99.2   | 121.2  | 110.2  | 101.4  | 103.3  | 113.1  | 109.9  | 108.3  | 111.6  |
| 738.5  | 382.1  | 293.4  | 309.8  | 301.2  | 389.9  | 323.6  | 850.4  | 1068.7 |
| 134.8  | 116.4  | 110    | 100.2  | 100.3  | 115    | 104.2  | 131    | 168    |
| 374.2  | 244.8  | 191    | 211.9  | 178.7  | 234.3  | 225.7  | 456.2  | 542.2  |
| 197.6  | 226.5  | 203.7  | 154.3  | 182.7  | 205    | 193.8  | 278.2  | 188.7  |
| 114.5  | 119.5  | 106.9  | 111.1  | 101.1  | 114.6  | 110.1  | 110    | 108.3  |
| 109.2  | 119.7  | 101.9  | 104    | 102.1  | 112.9  | 96     | 111.1  | 107.5  |
| 118.6  | 118.5  | 112.7  | 127.7  | 115.6  | 122    | 120.9  | 114.8  | 120.7  |
| 115.8  | 116.8  | 109.6  | 107.5  | 99.8   | 105.1  | 107.2  | 122.1  | 119.7  |
| 106.8  | 114.8  | 104.5  | 99.1   | 96.4   | 113.4  | 103.1  | 103.4  | 105.8  |
| 108.7  | 111.4  | 103.1  | 103.4  | 96.4   | 110.5  | 103.6  | 111.2  | 103.3  |
| 104.2  | 120.7  | 104.1  | 103.7  | 117.8  | 112.8  | 103    | 130.9  | 123.7  |
| 110.4  | 108.7  | 99.5   | 102.6  | 100.2  | 100.8  | 106    | 113.8  | 98.3   |
| 106.4  | 106.5  | 113    | 111.7  | 104.3  | 114.5  | 102.3  | 114.2  | 107.7  |
| 104.1  | 108.9  | 102.5  | 98.9   | 92     | 103.2  | 101.2  | 108.4  | 111.6  |
| 104.9  | 110    | 96.3   | 110.9  | 101    | 111.1  | 97.9   | 112.4  | 106.7  |
| 741.8  | 606.6  | 539.1  | 812.9  | 651.9  | 797.6  | 1026.2 | 1161.6 | 726.9  |
| 131.8  | 133.2  | 135.9  | 112.7  | 126    | 156.3  | 110.7  | 156.2  | 134.6  |
| 3072.9 | 2340.1 | 2577   | 3389.4 | 2241.7 | 2720.9 | 3022.2 | 3235.1 | 1598.8 |
| 100.8  | 131    | 110.9  | 98.8   | 110.1  | 111.3  | 107.5  | 123.5  | 111.6  |
| 111.5  | 109.7  | 101    | 95.7   | 91.4   | 115.7  | 108    | 116.8  | 111.8  |
| 113.9  | 115.8  | 127.2  | 118.7  | 114.2  | 126.6  | 106.4  | 128.2  | 116.9  |
| 932.1  | 2114.1 | 1995.2 | 2392.9 | 1378.4 | 1490.3 | 1728.9 | 2326.2 | 1538.9 |
| 206.1  | 285.8  | 259.1  | 272.1  | 261.9  | 273    | 271.2  | 302.3  | 197.9  |
| 437.6  | 431.2  | 592.7  | 566.5  | 508.6  | 490.3  | 376.9  | 877.6  | 655.9  |
| 262.8  | 374.5  | 391    | 305    | 291.3  | 352.4  | 246.9  | 487.3  | 373.9  |
| 298.2  | 370.1  | 324.2  | 271.9  | 294.5  | 398    | 276.1  | 471.4  | 493.5  |
| 237    | 312.9  | 407    | 332    | 303    | 333    | 399.1  | 376.3  | 281.1  |
| 186.6  | 148.3  | 150.6  | 124.8  | 128.1  | 172.7  | 120.6  | 235.1  | 229    |
| 213.3  | 185.4  | 184    | 207.8  | 183.6  | 180.6  | 226.1  | 376.3  | 297.7  |
| 120.6  | 117.3  | 110.4  | 109.9  | 107.9  | 115.8  | 121.8  | 131.2  | 136.5  |
| 115.9  | 119.1  | 99.7   | 112.3  | 100.5  | 112.2  | 113.3  | 109.7  | 110.7  |

|        |        |       |        |        |        |        |        |        |
|--------|--------|-------|--------|--------|--------|--------|--------|--------|
| 109.8  | 115.1  | 107.1 | 97.3   | 92     | 108.3  | 106.4  | 117.2  | 105.1  |
| 107.5  | 125.1  | 101.4 | 191.5  | 100.8  | 102.4  | 152.3  | 113.3  | 107.5  |
| 99.8   | 115    | 103.4 | 104.1  | 93.7   | 119.7  | 114.8  | 110.6  | 110.1  |
| 115.8  | 106.5  | 105   | 115.7  | 97.3   | 120.1  | 104.2  | 111.5  | 111.7  |
| 109.6  | 105.3  | 99.3  | 101.7  | 97     | 107.1  | 106.7  | 112.5  | 113.4  |
| 110.8  | 113.3  | 118.8 | 97.5   | 93.3   | 108.3  | 109    | 111.1  | 119.5  |
| 134.7  | 149.1  | 156.7 | 136.7  | 127.4  | 150.4  | 142.6  | 177.2  | 168.6  |
| 104    | 112.5  | 104.3 | 111.1  | 97.8   | 109    | 100.6  | 111.6  | 104.1  |
| 130.3  | 110.1  | 115   | 106.5  | 109.8  | 130.7  | 117.6  | 145.7  | 127    |
| 125.1  | 124.2  | 127.2 | 113.7  | 108.8  | 128.4  | 118.8  | 135    | 146.2  |
| 112    | 105.1  | 107.4 | 101    | 97.7   | 114.5  | 100    | 111.9  | 111.2  |
| 854.2  | 491.9  | 496.7 | 420    | 498.5  | 502.3  | 483.5  | 1355.8 | 1429.3 |
| 584.3  | 1125.4 | 695.4 | 1088.7 | 795.8  | 596.5  | 633.5  | 1189.2 | 821.3  |
| 204.2  | 349.8  | 269   | 247    | 227.1  | 238.2  | 231.4  | 443.6  | 334.5  |
| 120.4  | 129.2  | 135.1 | 117.1  | 125.4  | 149.6  | 147.3  | 225.7  | 183.1  |
| 111    | 112.8  | 103.1 | 111.1  | 98.2   | 112.9  | 107.1  | 118.8  | 114.2  |
| 821.6  | 688.3  | 807.9 | 634    | 758.7  | 768.5  | 714.8  | 1254.5 | 1087.2 |
| 102.3  | 108.5  | 105.5 | 110.3  | 100.9  | 107.2  | 101.6  | 108.8  | 120.1  |
| 105.2  | 113.2  | 106.3 | 99.9   | 92.2   | 103.2  | 103.6  | 114.9  | 112.9  |
| 109.6  | 112.1  | 111.2 | 101.7  | 100.4  | 109.2  | 108.7  | 102.6  | 107.5  |
| 105.1  | 104.9  | 102.1 | 97.6   | 92.9   | 103.4  | 100.7  | 100.4  | 110.4  |
| 116.9  | 140.8  | 142.5 | 137.7  | 120.9  | 128.7  | 122.4  | 130.6  | 119.9  |
| 221.1  | 247.3  | 314.1 | 199.2  | 501.5  | 454.4  | 390.3  | 817.2  | 285.9  |
| 594.5  | 862.3  | 940.9 | 455.8  | 1286.6 | 1282.3 | 1483.9 | 2477.9 | 871.7  |
| 106.4  | 108.6  | 103   | 111.5  | 107.5  | 112    | 102.8  | 106    | 113.7  |
| 130.5  | 140.7  | 109.2 | 196.5  | 120.1  | 128.1  | 202.9  | 135.4  | 108.2  |
| 117    | 119.9  | 112.4 | 175.6  | 114.1  | 118.3  | 137    | 115.8  | 110.3  |
| 102.6  | 103    | 102.6 | 98.6   | 95.3   | 107.3  | 101.5  | 108.1  | 104.3  |
| 102.5  | 114    | 104.4 | 99.1   | 101    | 111.4  | 97.1   | 104    | 103.9  |
| 112.2  | 111.2  | 105.7 | 103.7  | 103.3  | 117.6  | 104.7  | 116.8  | 103.7  |
| 169.3  | 138.3  | 119.8 | 161.9  | 144.4  | 135.6  | 151.1  | 231.2  | 137.1  |
| 97     | 110.6  | 100.8 | 100.8  | 100.4  | 102.7  | 106.2  | 99.4   | 112.3  |
| 112.1  | 105.8  | 93.3  | 97.3   | 94     | 107.9  | 107.4  | 114.5  | 100.3  |
| 117.5  | 149.6  | 121.8 | 126.5  | 112.6  | 124.9  | 122.4  | 154    | 149.3  |
| 156.2  | 141.8  | 161.2 | 142    | 129.1  | 139.2  | 153.1  | 241.2  | 163.7  |
| 2267.6 | 460.9  | 485.7 | 347.2  | 625.6  | 1136.9 | 809.7  | 4235.4 | 4618.7 |
| 149.8  | 154.2  | 129.5 | 148    | 130.8  | 139.3  | 129.8  | 166.4  | 158.2  |
| 118.8  | 140.9  | 110.3 | 111.6  | 112.3  | 121    | 119.9  | 124.9  | 124.5  |
| 106.8  | 111.2  | 104.4 | 101.2  | 101.1  | 111.4  | 105    | 111.4  | 105.1  |
| 129.8  | 144.6  | 131.4 | 125.5  | 124.2  | 142.6  | 136.6  | 154.6  | 140.3  |
| 105.2  | 103.1  | 105.4 | 100    | 98.6   | 108.7  | 109.1  | 101    | 114.8  |
| 110.2  | 97.6   | 99    | 103.6  | 93.9   | 104.7  | 106.8  | 104.2  | 99     |
| 110.9  | 101    | 103   | 92.1   | 95.4   | 106.7  | 93.8   | 100.3  | 109.1  |
| 153.7  | 157.6  | 133.6 | 136.2  | 125.1  | 149    | 149.5  | 202.9  | 189.7  |
| 105.3  | 102.3  | 105.6 | 101.4  | 104.6  | 109.8  | 108.2  | 106.4  | 113    |
| 101.3  | 105.4  | 102.1 | 108.2  | 94.7   | 106.2  | 105.8  | 106    | 103.4  |
| 112.2  | 117.3  | 103.5 | 105.9  | 97.1   | 111.3  | 108.7  | 103.2  | 112.4  |
| 105.6  | 115.8  | 99.3  | 95.3   | 92.1   | 105.6  | 95.2   | 106.4  | 110.9  |
| 102.5  | 106.4  | 105   | 106.4  | 92.5   | 101.9  | 98.6   | 112.8  | 109.5  |
| 112.7  | 110.8  | 106   | 122.2  | 102.9  | 116.1  | 111.4  | 124.1  | 108.4  |
| 110.5  | 106.5  | 94.4  | 99.2   | 81.5   | 97.7   | 98.6   | 98.2   | 106.6  |

|        |        |       |        |        |        |        |        |        |
|--------|--------|-------|--------|--------|--------|--------|--------|--------|
| 107.3  | 112.5  | 103.1 | 99.4   | 96.7   | 107.4  | 99.5   | 105.8  | 105    |
| 106.9  | 107.7  | 99.2  | 98.4   | 100.7  | 104    | 107.3  | 118.4  | 106.3  |
| 102.3  | 102.6  | 100.5 | 105.5  | 96.9   | 105.4  | 110    | 102.8  | 107.8  |
| 113    | 113.5  | 110.9 | 104.9  | 101.8  | 109.2  | 107    | 113.1  | 102    |
| 108.4  | 117.9  | 104.2 | 94.6   | 97.2   | 114.9  | 103.4  | 118.4  | 105.8  |
| 116.2  | 106.3  | 104.2 | 104.1  | 101.3  | 111.4  | 104.1  | 112.5  | 109.5  |
| 111.9  | 106.4  | 101.6 | 101.3  | 94.6   | 110.9  | 101.5  | 110.2  | 108.2  |
| 112.7  | 111.3  | 115.8 | 101.2  | 102.9  | 106.3  | 104.9  | 118.2  | 115.3  |
| 102.8  | 104.8  | 102   | 101.5  | 93.9   | 104.7  | 105.8  | 110.7  | 108.4  |
| 124.1  | 120.5  | 113.1 | 112.1  | 108.6  | 117.8  | 116.4  | 121.3  | 117.6  |
| 107.2  | 102.5  | 106.9 | 96.6   | 98.9   | 116.9  | 103.7  | 119.1  | 111.8  |
| 103    | 106.1  | 103.5 | 101    | 95.4   | 109.7  | 99.1   | 114.8  | 106.8  |
| 104.7  | 106.8  | 107.5 | 105.5  | 94.1   | 116    | 104.3  | 108.2  | 105.3  |
| 106    | 105.4  | 107.1 | 103.3  | 100.9  | 106.6  | 101.9  | 116.3  | 110.9  |
| 102.7  | 108.6  | 104   | 97     | 90.6   | 107.9  | 99.5   | 99.9   | 102.5  |
| 102.7  | 107.1  | 110.3 | 96.7   | 96.6   | 109.6  | 102.5  | 107.6  | 105.6  |
| 105.2  | 104    | 100.9 | 101.6  | 96.8   | 106.5  | 100.3  | 118.7  | 108.2  |
| 109.9  | 103.4  | 100.4 | 90.2   | 97.1   | 109.1  | 101.6  | 110.8  | 108.2  |
| 103.9  | 105.4  | 105.3 | 95.5   | 98     | 105.5  | 97.5   | 105.3  | 104.5  |
| 94.4   | 106.8  | 101.5 | 101    | 93.7   | 109.9  | 104.7  | 100.8  | 102.1  |
| 112.5  | 106.6  | 110.8 | 108.3  | 101.1  | 112.7  | 109.1  | 108.9  | 119.8  |
| 176.4  | 150.8  | 150.5 | 148.4  | 129.6  | 149.8  | 147.9  | 448.8  | 602    |
| 150.8  | 127.9  | 143.2 | 135.5  | 120.3  | 120.4  | 129.6  | 176.7  | 236.6  |
| 134    | 121.7  | 117   | 109.5  | 113.8  | 121.7  | 118.9  | 307.5  | 314.1  |
| 107.2  | 110.6  | 96.7  | 98.6   | 101.3  | 112.7  | 107.2  | 105    | 109.1  |
| 100.5  | 103.2  | 104.6 | 109.6  | 94.6   | 107.2  | 96.9   | 101.8  | 102.3  |
| 109.3  | 106.6  | 99.8  | 100    | 100.7  | 115    | 106.4  | 117.4  | 106.8  |
| 106    | 106.9  | 98.9  | 100.4  | 103.4  | 108.6  | 100.7  | 105.2  | 112.6  |
| 114.2  | 108.2  | 105.6 | 98.5   | 106.4  | 117.1  | 112    | 114.8  | 107.1  |
| 120.2  | 105.6  | 106.9 | 107.6  | 102.9  | 110.4  | 99.2   | 103.3  | 123.1  |
| 114.2  | 115.2  | 107.9 | 107.3  | 99.9   | 119.2  | 123    | 112.9  | 113.1  |
| 103.3  | 101    | 98.4  | 94.2   | 95.3   | 101.7  | 95.4   | 99.9   | 92.7   |
| 116.9  | 114.5  | 116   | 111.9  | 104.9  | 109.8  | 112.3  | 122.5  | 123.8  |
| 109.8  | 112.2  | 106.4 | 104.6  | 92.2   | 112.4  | 109.7  | 113.5  | 98.5   |
| 103.4  | 108.6  | 104.1 | 98.7   | 90.7   | 103.3  | 105.1  | 98.8   | 108    |
| 108.5  | 103.8  | 99.6  | 99.5   | 96.1   | 105.8  | 97     | 109.1  | 103.1  |
| 1180.5 | 1516.7 | 1273  | 1126.9 | 1425.3 | 1501.5 | 1531.1 | 2021.1 | 1466.7 |
| 100.1  | 110    | 96.3  | 97.3   | 90.2   | 107.9  | 97.9   | 114    | 107.7  |
| 109.7  | 111    | 104.4 | 111.9  | 97.2   | 116.1  | 103.9  | 118    | 112.4  |
| 114.8  | 114.2  | 105.5 | 103.7  | 105.2  | 113.6  | 107.5  | 120.4  | 109.6  |
| 102.2  | 101.9  | 100.2 | 98.5   | 89.4   | 107.3  | 99.4   | 104.5  | 114.7  |
| 133.9  | 114.8  | 116.1 | 149.3  | 123.6  | 128.2  | 128.1  | 126.6  | 116.1  |
| 112.1  | 117.3  | 108.2 | 129.5  | 107.2  | 134.3  | 127.1  | 140.3  | 130.1  |
| 159    | 290.2  | 313   | 366.6  | 249.8  | 266.5  | 323.7  | 266.5  | 230.5  |
| 103.7  | 100.2  | 94.9  | 110.1  | 97     | 100    | 110.5  | 112    | 100.2  |
| 134.9  | 145.2  | 124.5 | 139.3  | 109.3  | 126    | 128.8  | 165.3  | 142.8  |
| 105.7  | 107.9  | 103.3 | 101.6  | 99.4   | 107.1  | 102.9  | 110.9  | 108.3  |
| 118.7  | 113    | 106.5 | 119.6  | 117    | 119.5  | 110.2  | 126.1  | 108.8  |
| 121.1  | 127    | 118.2 | 101.4  | 113.6  | 125.5  | 116.8  | 168.1  | 110.7  |
| 152    | 500.5  | 431.4 | 672.3  | 374.8  | 365    | 584    | 347.5  | 222.7  |
| 141.1  | 144.2  | 117.9 | 132.1  | 116.4  | 127.8  | 133    | 135.9  | 142.3  |



|        |       |        |        |        |        |        |        |        |
|--------|-------|--------|--------|--------|--------|--------|--------|--------|
| 137.1  | 140.8 | 142.7  | 137.6  | 138.9  | 140.4  | 134.7  | 165.1  | 150.8  |
| 104.8  | 110.3 | 108.8  | 100    | 95.9   | 105.2  | 106.6  | 119    | 116.6  |
| 132.7  | 239.2 | 256.9  | 248.7  | 226.9  | 246.2  | 229.2  | 233.6  | 188.7  |
| 190.7  | 256.9 | 179.3  | 184.8  | 216.6  | 172.7  | 206.2  | 248    | 133.9  |
| 143.7  | 135.6 | 120.1  | 125.7  | 129.9  | 142.6  | 112.7  | 211.1  | 151.2  |
| 118.7  | 117.6 | 107.4  | 104.4  | 111.8  | 130.9  | 113.1  | 128.6  | 114.1  |
| 102.5  | 112.9 | 97.8   | 101.1  | 92.3   | 104    | 107.9  | 97.5   | 107.4  |
| 117.7  | 113.5 | 96.5   | 107.7  | 94.6   | 110.3  | 95.3   | 127.9  | 109.4  |
| 150.9  | 171.9 | 142.4  | 141.8  | 137.8  | 141.6  | 152.8  | 166.6  | 187.5  |
| 104.6  | 106.2 | 103.8  | 101.7  | 98.1   | 113    | 105.9  | 108.6  | 119.2  |
| 183.3  | 201.8 | 244.7  | 185    | 203.6  | 225.2  | 215.7  | 329.5  | 287.6  |
| 107.4  | 119   | 114.4  | 111.5  | 104.2  | 121.7  | 112.5  | 111.4  | 118.8  |
| 105.5  | 108.6 | 104    | 100.1  | 91.6   | 107.5  | 100.4  | 99.3   | 108.6  |
| 107.9  | 120.9 | 104.4  | 103.9  | 104.9  | 120.6  | 113.7  | 134.9  | 114.1  |
| 111.7  | 117.5 | 104.4  | 101.2  | 89.3   | 117.8  | 99.5   | 107.1  | 100.3  |
| 114    | 115.7 | 101.6  | 113.6  | 107.8  | 117.2  | 104.4  | 120.1  | 112.4  |
| 167.2  | 172.5 | 155.4  | 148    | 155.8  | 174    | 146.9  | 220.2  | 215.7  |
| 149.4  | 141.8 | 142    | 143.6  | 125.1  | 139.1  | 128.1  | 173.8  | 159    |
| 104.1  | 106.1 | 98.3   | 104    | 97.4   | 103.4  | 95.5   | 100.5  | 114.7  |
| 108.7  | 114.3 | 103.2  | 103.4  | 104.8  | 114.8  | 106    | 113.8  | 112.2  |
| 98     | 102.9 | 101.4  | 104.6  | 100.2  | 109.1  | 104.6  | 123    | 110.3  |
| 112.7  | 117.1 | 105.2  | 116.1  | 104.1  | 110.6  | 113.4  | 128.2  | 116.7  |
| 112.8  | 108.5 | 123    | 110.1  | 95.1   | 116.2  | 99.3   | 129.1  | 114.2  |
| 101.5  | 112.4 | 104.6  | 104.6  | 96.2   | 108.8  | 94.4   | 101.9  | 114.6  |
| 108.5  | 111.7 | 104.1  | 97.8   | 90.5   | 115.6  | 101.3  | 108.6  | 110.3  |
| 112    | 101.9 | 100.3  | 98.6   | 97.6   | 109.8  | 97.8   | 111.7  | 108.8  |
| 107.4  | 105.7 | 98.1   | 100.5  | 99.2   | 110.1  | 95.7   | 111.4  | 102    |
| 105.6  | 103.9 | 100.8  | 98.7   | 92.7   | 107    | 106.2  | 102.6  | 101.4  |
| 104.4  | 115.5 | 108.4  | 108.1  | 87.8   | 99.9   | 103.7  | 109    | 114.3  |
| 106.3  | 105   | 98.9   | 114.7  | 100.4  | 110.8  | 102.2  | 110.8  | 98     |
| 104.7  | 108.1 | 101.7  | 95     | 95.2   | 104.3  | 94.8   | 112.8  | 110    |
| 104.2  | 113.3 | 98.2   | 102    | 93.7   | 103.4  | 99.1   | 103.7  | 111.6  |
| 142.2  | 380.1 | 352.1  | 332    | 264.3  | 301.5  | 259.2  | 346.6  | 195.7  |
| 121.9  | 212.6 | 175.5  | 183.6  | 172.9  | 190    | 172.4  | 175.9  | 136.9  |
| 133.4  | 234.6 | 241.6  | 222.8  | 209    | 183.6  | 171.6  | 170.7  | 139.5  |
| 107.1  | 116.5 | 111.2  | 126.4  | 107.9  | 115    | 112.7  | 102.6  | 115.3  |
| 111.3  | 156.6 | 137.4  | 107.8  | 112.7  | 125.4  | 112.3  | 120.7  | 114.6  |
| 110    | 109.8 | 103.5  | 104.6  | 99.6   | 108.1  | 107    | 114.4  | 108.6  |
| 191.7  | 180.3 | 183.6  | 183.6  | 176.9  | 188.1  | 198.5  | 210    | 185.5  |
| 108.4  | 103.8 | 103.7  | 100.7  | 91.4   | 102.6  | 95.6   | 106.9  | 111.8  |
| 104.2  | 104.3 | 101    | 96.7   | 92.3   | 104.4  | 103.4  | 105.3  | 106.3  |
| 830.4  | 639.6 | 596.4  | 663.7  | 626.1  | 822.5  | 791.7  | 2185.2 | 1686.3 |
| 284.1  | 222.3 | 198.3  | 301.7  | 201.9  | 228    | 253.5  | 759.5  | 469    |
| 1916.3 | 1534  | 1580.1 | 1619.2 | 1568.9 | 1938.5 | 2079.6 | 5302.1 | 4044.1 |
| 112.9  | 111.5 | 101.7  | 105    | 98.2   | 116.9  | 105.8  | 107.7  | 104.3  |
| 275.3  | 357.5 | 343.7  | 370.7  | 299.2  | 389.5  | 363.4  | 504.9  | 355.2  |
| 409.2  | 284.3 | 261.1  | 332.5  | 218.3  | 304.5  | 310.1  | 537.6  | 450.3  |
| 98.6   | 100   | 97.3   | 95.6   | 87.2   | 111.4  | 111.3  | 95.9   | 108.3  |
| 127.3  | 179.6 | 131.7  | 168.7  | 165.9  | 159.2  | 149.7  | 203.1  | 207.8  |
| 1030   | 735.1 | 674.6  | 443.8  | 793.4  | 1043.7 | 724.1  | 2497.6 | 1877.9 |
| 419.4  | 401.6 | 439.8  | 320.9  | 449.2  | 487.7  | 434.6  | 729    | 454.4  |

|       |        |        |        |        |        |        |       |        |
|-------|--------|--------|--------|--------|--------|--------|-------|--------|
| 129.1 | 149.3  | 131.6  | 129.5  | 127.2  | 138.7  | 137.5  | 216.6 | 171.9  |
| 110.2 | 114.3  | 107.6  | 100.1  | 98.2   | 105.9  | 103.7  | 119.8 | 116.4  |
| 108.3 | 114.3  | 103.6  | 101.2  | 96.9   | 107.4  | 105.6  | 110.3 | 110.8  |
| 114.8 | 109.6  | 110.8  | 106.3  | 93.4   | 111.2  | 101.1  | 109.3 | 113.9  |
| 106.4 | 108.1  | 114    | 101.6  | 93.5   | 106.4  | 109.2  | 107.5 | 102.9  |
| 111   | 115.3  | 101.4  | 104.3  | 100.4  | 109.7  | 101.8  | 121.3 | 120.9  |
| 104   | 117    | 105.4  | 100.2  | 91.6   | 115.7  | 107    | 113.1 | 112.1  |
| 104.1 | 115.6  | 105.2  | 101.6  | 89.9   | 108.3  | 114.1  | 112.6 | 114.7  |
| 118.3 | 112.2  | 108.5  | 120.5  | 100.5  | 114.4  | 110.1  | 130.4 | 124.8  |
| 146.7 | 129.9  | 118    | 115.8  | 135.3  | 131.2  | 130.6  | 157.7 | 122.8  |
| 122.3 | 129.7  | 122.1  | 207.9  | 108.7  | 116    | 145.9  | 106.4 | 114.7  |
| 111.2 | 127.7  | 107    | 208.1  | 111.5  | 115    | 160.7  | 111.6 | 119.1  |
| 105.9 | 104.2  | 97.1   | 99.2   | 94.4   | 102    | 102.9  | 114.8 | 110.3  |
| 109.3 | 111.7  | 108.2  | 104.8  | 97     | 112.5  | 95.4   | 107.8 | 115.8  |
| 144.9 | 164    | 116.8  | 227.3  | 147.2  | 127.7  | 253.6  | 167.1 | 149.7  |
| 107.2 | 115.1  | 97     | 101    | 91.5   | 104.6  | 96     | 105.8 | 100.6  |
| 103.2 | 107.2  | 105.6  | 111.7  | 95.1   | 106.6  | 100.2  | 114   | 106    |
| 117.2 | 117.1  | 107.1  | 110.6  | 103.8  | 109.5  | 117.5  | 128.7 | 130.4  |
| 107.1 | 122.3  | 112    | 111.8  | 106    | 121.5  | 107.7  | 128.7 | 119.4  |
| 106.2 | 109.5  | 96.7   | 100.2  | 95.4   | 114.2  | 106.4  | 111.6 | 113.2  |
| 104.9 | 117.2  | 104.8  | 110.7  | 100.3  | 104.3  | 108.5  | 106.5 | 104.1  |
| 120.9 | 153.3  | 164.6  | 148.1  | 116.7  | 150.3  | 144.5  | 152.8 | 140.9  |
| 103.7 | 113.4  | 99.9   | 102.5  | 94     | 101.6  | 103.3  | 105.1 | 112.1  |
| 112.5 | 116.7  | 100.5  | 100.9  | 98.6   | 102.9  | 102.5  | 111.4 | 116.4  |
| 107.9 | 113.5  | 102.3  | 108.5  | 101.3  | 120.3  | 108.5  | 114.4 | 104.7  |
| 116.9 | 136.9  | 122.5  | 128.3  | 115    | 137.4  | 122.5  | 145.8 | 143.4  |
| 562.9 | 572.5  | 569.2  | 424.8  | 707    | 693.5  | 534.5  | 986.1 | 769.4  |
| 229.1 | 203.9  | 222.4  | 183.8  | 212.4  | 206    | 172.4  | 253   | 256.7  |
| 99.2  | 114.2  | 100.8  | 115.5  | 98.1   | 107.1  | 106.4  | 103   | 109.6  |
| 257.6 | 283.2  | 254.5  | 233.4  | 272.5  | 284.3  | 292.5  | 393.1 | 225    |
| 183.5 | 394    | 369.1  | 398.5  | 364.8  | 297.1  | 417.7  | 402.5 | 268.1  |
| 141.4 | 164.8  | 180.4  | 162.6  | 149.6  | 182.3  | 178.3  | 231.7 | 164.9  |
| 105.1 | 106.3  | 104    | 100.1  | 89.8   | 100.9  | 96.7   | 96.3  | 104    |
| 172.6 | 277.8  | 286.3  | 299.8  | 217.1  | 272.6  | 286    | 233.8 | 186.7  |
| 137.2 | 162.4  | 172.2  | 138.3  | 142.5  | 163.2  | 125.6  | 214.3 | 203.9  |
| 131.5 | 136.2  | 137.7  | 130.8  | 138.5  | 160.3  | 152.1  | 211.9 | 158.2  |
| 112.7 | 158.9  | 129.6  | 152.5  | 136.9  | 133.9  | 169.5  | 134.8 | 104.2  |
| 125.6 | 178.4  | 186    | 170.7  | 165.8  | 165.1  | 171.9  | 212.2 | 149.1  |
| 196.9 | 461.3  | 184.5  | 374    | 218.8  | 166    | 203.4  | 258.9 | 218.2  |
| 956.3 | 2305.8 | 1620.7 | 2191.4 | 1327.1 | 1151.6 | 1462.7 | 2399  | 1527.9 |
| 115.9 | 132.8  | 116    | 125.9  | 114.8  | 130.3  | 103.8  | 142.7 | 137.9  |
| 222.3 | 806.8  | 621.1  | 408.9  | 406.5  | 306.5  | 339.6  | 557.7 | 273.8  |
| 233.5 | 683    | 413.9  | 376.6  | 323.7  | 257.9  | 280.8  | 350.7 | 265.4  |
| 105.3 | 114.1  | 109.7  | 114.1  | 109    | 118.8  | 114.4  | 138.1 | 127.9  |
| 100.2 | 100.4  | 98.7   | 97.1   | 100.9  | 100.8  | 101.8  | 97.3  | 108.7  |
| 114   | 110.3  | 104.2  | 102    | 103.4  | 111.8  | 99.2   | 103.8 | 113.3  |
| 105   | 111.2  | 96.5   | 105.3  | 94.1   | 106.2  | 101.9  | 106.1 | 108.4  |
| 197.7 | 310.7  | 246.3  | 426.3  | 268.1  | 237.3  | 409.3  | 340.9 | 295.1  |
| 106.1 | 110.6  | 111.9  | 104.3  | 101    | 112    | 111.2  | 111.5 | 112    |
| 253.7 | 235.8  | 216.3  | 258.2  | 212.8  | 288.4  | 311.2  | 429.5 | 340.3  |
| 100.7 | 101.6  | 105.9  | 109.1  | 101.1  | 113.4  | 107.3  | 119.1 | 108.9  |

|       |       |       |       |       |       |       |       |       |
|-------|-------|-------|-------|-------|-------|-------|-------|-------|
| 109.7 | 111.7 | 105.6 | 105   | 92.9  | 114.8 | 101.4 | 113.8 | 125.7 |
| 114.4 | 133.1 | 122.5 | 112.1 | 105.5 | 131.8 | 112.3 | 152.1 | 137.3 |
| 106.8 | 132.1 | 137.7 | 129.2 | 127.2 | 133.4 | 124.7 | 138.1 | 115.6 |
| 116.3 | 182.3 | 165.1 | 174.2 | 160.4 | 150.8 | 209.9 | 213.7 | 146.5 |
| 117.1 | 114.8 | 101.1 | 101.8 | 102.6 | 116.4 | 113.6 | 110.8 | 118.1 |
| 108   | 116.5 | 107.9 | 132.7 | 108.4 | 116   | 113.5 | 116.1 | 121.8 |
| 118.2 | 108.3 | 101.1 | 99.5  | 94.6  | 106.1 | 102.4 | 106.5 | 110.9 |
| 107.7 | 114.6 | 102.8 | 101.4 | 101.1 | 106.3 | 103.9 | 105.7 | 119.9 |
| 149.4 | 149.6 | 147.5 | 162.3 | 128.4 | 140.4 | 138.2 | 187.6 | 215.2 |
| 114.5 | 131.2 | 112.5 | 117.5 | 96.7  | 119.5 | 108.3 | 128.5 | 148   |
| 113.9 | 119.1 | 115.1 | 114.2 | 101.6 | 132.1 | 110.9 | 125.2 | 120.1 |
| 156.5 | 307.8 | 301   | 268.4 | 224.3 | 245.2 | 290.6 | 259.3 | 162.7 |
| 112.1 | 111.2 | 99.9  | 106.4 | 106.2 | 109.8 | 101.1 | 125.5 | 103.8 |
| 105.2 | 113.5 | 101.2 | 103.9 | 94.9  | 107.6 | 102.9 | 100.8 | 112.5 |
| 110.6 | 112.1 | 103.1 | 108.8 | 94.5  | 109   | 103.6 | 112.3 | 111.8 |
| 105.4 | 117.9 | 102.5 | 94.7  | 99.1  | 112.3 | 105.9 | 113.9 | 122.8 |
| 121.4 | 116.1 | 123.1 | 102.2 | 107.1 | 124.4 | 111.1 | 122.2 | 116.6 |
| 438   | 133.8 | 144.5 | 116.1 | 139.1 | 186.8 | 124.6 | 547   | 626.8 |
| 124.8 | 115.4 | 108.3 | 102.8 | 98.5  | 114.5 | 108.3 | 125.1 | 136.9 |
| 106.4 | 113.4 | 108.2 | 107.3 | 99.7  | 111.2 | 101.5 | 103.7 | 111.5 |
| 159.2 | 208.7 | 191.9 | 179.1 | 161.5 | 191.4 | 187.4 | 309.9 | 218.6 |
| 212   | 441.6 | 436.5 | 401.1 | 286.8 | 385   | 365.5 | 369.3 | 223.5 |
| 103.6 | 114.3 | 100.1 | 107.6 | 99.7  | 112.3 | 106.4 | 104.5 | 103.2 |
| 102   | 111.2 | 94.2  | 105.7 | 86.7  | 99.1  | 101.6 | 99.6  | 107   |
| 98.3  | 107.9 | 99.8  | 98.2  | 95    | 109.5 | 102.5 | 110   | 109.2 |
| 123   | 126   | 111.4 | 132.8 | 111.1 | 122.5 | 119.7 | 135.3 | 119.9 |
| 109.3 | 108   | 101.9 | 100.9 | 94.9  | 111.9 | 102.1 | 112.1 | 111.1 |
| 105.5 | 100.5 | 102.8 | 103.1 | 91.8  | 108.5 | 107.2 | 109.6 | 103.1 |
| 111.3 | 109.8 | 103.8 | 102.7 | 99.3  | 102.6 | 100.5 | 114.8 | 111.9 |
| 101   | 111.6 | 108.3 | 98.4  | 99    | 111.5 | 104.1 | 107.8 | 115.3 |
| 108.3 | 110.8 | 96.1  | 100.9 | 101.7 | 109.1 | 104.6 | 104.1 | 102.3 |
| 101.4 | 107.2 | 100.5 | 101.3 | 91.2  | 105.1 | 103.8 | 113.7 | 112.3 |
| 115.8 | 175   | 155.8 | 154.5 | 140.2 | 159.7 | 150.2 | 211.2 | 142.9 |
| 110.9 | 122.5 | 111.4 | 111.3 | 109   | 124.5 | 113.4 | 119.2 | 126.5 |
| 98.4  | 110.1 | 103.7 | 108.2 | 95.4  | 101.6 | 97.7  | 98.2  | 107.7 |
| 105.7 | 108.1 | 112.3 | 96.7  | 92.2  | 105.8 | 97.5  | 109.4 | 109.3 |
| 99.6  | 113.2 | 111.1 | 102.3 | 94.3  | 106.7 | 101.6 | 103.1 | 115.5 |
| 109.2 | 109.8 | 106   | 104.7 | 94.5  | 102.5 | 104.9 | 115.1 | 117.5 |
| 140.7 | 146.5 | 133.9 | 128.9 | 143.5 | 153.2 | 133.7 | 173.6 | 149.5 |
| 107.2 | 105.6 | 113.5 | 103   | 95.7  | 118.9 | 99.2  | 117.9 | 107.8 |
| 109.8 | 115.9 | 106.9 | 109.9 | 97    | 115.3 | 110.9 | 111.3 | 117   |
| 106.8 | 110.5 | 104.9 | 106.3 | 98.8  | 112.8 | 109.2 | 119.9 | 101.1 |
| 116.4 | 126.9 | 119.1 | 129.4 | 111.8 | 125.8 | 120.2 | 138.8 | 123.1 |
| 119.7 | 151.8 | 118.3 | 98.6  | 137.8 | 134.1 | 103.5 | 531.1 | 135.5 |
| 103.9 | 105.6 | 96.2  | 85    | 93.7  | 102.8 | 95.8  | 103.6 | 101.5 |
| 107.6 | 107.4 | 98.5  | 92.1  | 98.9  | 102.8 | 103.2 | 98.7  | 107.2 |
| 102.4 | 110.4 | 99.8  | 96.8  | 93.8  | 106   | 97.5  | 108.9 | 115.5 |
| 98.8  | 103.5 | 98.7  | 99.1  | 89.2  | 110.9 | 104.7 | 114.1 | 103.1 |
| 105.4 | 110.9 | 105.4 | 96.9  | 92.3  | 107.4 | 100.4 | 119.3 | 114.2 |
| 109.3 | 112.1 | 109.6 | 104.7 | 92.4  | 103.4 | 102.7 | 104.8 | 116.1 |
| 115.4 | 107.1 | 100.6 | 101.7 | 102   | 118.6 | 108.2 | 111.3 | 110.2 |

|         |        |         |       |        |       |        |         |         |
|---------|--------|---------|-------|--------|-------|--------|---------|---------|
| 243.5   | 254    | 273.8   | 240.3 | 228.7  | 280.8 | 325.7  | 414     | 246.1   |
| 345.9   | 493.3  | 311.8   | 472.6 | 338.9  | 343.5 | 527.2  | 835.2   | 591.8   |
| 107.5   | 109.6  | 107.7   | 99.4  | 96.7   | 106.2 | 102.4  | 117     | 106.5   |
| 111.9   | 115.6  | 109.9   | 98.8  | 95     | 107.5 | 101.4  | 99      | 105.5   |
| 106.8   | 112.4  | 106.2   | 119.5 | 101.8  | 118.2 | 103.5  | 115.6   | 101.8   |
| 159.6   | 160.9  | 176.7   | 169.1 | 145.4  | 163.4 | 140.3  | 201.6   | 230.1   |
| 102.3   | 117    | 95      | 103.3 | 95.3   | 116.9 | 102.4  | 109.2   | 109.3   |
| 180     | 158.9  | 173.1   | 179.5 | 159.3  | 175.8 | 178.3  | 203.2   | 139     |
| 110.2   | 104.6  | 94.7    | 93.4  | 93.1   | 97    | 103.3  | 102     | 102     |
| 118.3   | 121    | 104.2   | 117   | 110.8  | 115.1 | 104.2  | 116.1   | 114.4   |
| 129.2   | 143.1  | 156     | 148.6 | 130    | 147.8 | 166.8  | 171.6   | 140.3   |
| 113.7   | 124.8  | 101.9   | 103.7 | 107.8  | 112.8 | 115.2  | 123.1   | 103.6   |
| 100.4   | 100.6  | 96.8    | 94.4  | 98.7   | 104.3 | 107    | 107.6   | 101.4   |
| 107.7   | 114.1  | 100.4   | 110   | 105.1  | 108.1 | 106.7  | 109.3   | 113.5   |
| 105.4   | 109.7  | 112.6   | 106   | 103    | 112   | 103.2  | 140.5   | 104.4   |
| 109.1   | 100.9  | 97.2    | 102.8 | 90.7   | 110.7 | 100.4  | 128.8   | 108.3   |
| 266     | 478.7  | 530     | 342.5 | 482.6  | 559.4 | 357.8  | 771.5   | 329.9   |
| 121.7   | 133.9  | 127.7   | 128.8 | 130.1  | 140.5 | 142    | 154.8   | 132.9   |
| 136.9   | 245.4  | 249.6   | 234.6 | 193.6  | 223.4 | 227.5  | 276.3   | 196.5   |
| 108.7   | 110.1  | 101.4   | 109.9 | 104.4  | 107.8 | 106.3  | 104.5   | 114.5   |
| 111     | 112.3  | 105.1   | 99.1  | 95.3   | 112.4 | 103.6  | 112.2   | 113.7   |
| 103.1   | 104.5  | 106.6   | 106.7 | 107.9  | 123.1 | 129.4  | 121.2   | 121.7   |
| 102.8   | 117    | 113.8   | 108.7 | 104.2  | 112.5 | 107.7  | 111.5   | 115.7   |
| 103.1   | 108.1  | 103.6   | 103.9 | 100    | 115.6 | 110    | 107.2   | 109.9   |
| 117.1   | 122.2  | 107.2   | 132.4 | 112.6  | 119.7 | 106.1  | 120.6   | 113.3   |
| 163.9   | 308    | 219.4   | 175.4 | 193.8  | 225.1 | 208.6  | 401.4   | 190.6   |
| 105.5   | 96.7   | 104.2   | 101.7 | 93.3   | 109   | 104.8  | 112.1   | 112.9   |
| 197.7   | 284    | 236.2   | 247.3 | 253.8  | 281.5 | 240    | 417.7   | 290     |
| 115.3   | 112.8  | 103.9   | 112.6 | 96.8   | 108.3 | 98.8   | 113.1   | 115.7   |
| 146.6   | 163    | 167.4   | 152.8 | 152.5  | 143.7 | 163.1  | 203     | 182.8   |
| 253.2   | 194.2  | 177.5   | 178.3 | 180.8  | 197.9 | 179.9  | 408.8   | 325.1   |
| 122.7   | 121.9  | 117     | 102   | 105.4  | 111   | 114.7  | 123     | 116.2   |
| 119.3   | 114.9  | 112.4   | 125.5 | 101.7  | 113.9 | 107.6  | 124.5   | 105     |
| 108.1   | 104.6  | 102.3   | 96.3  | 95.4   | 110.5 | 94.8   | 109.8   | 100.5   |
| 119.1   | 113.7  | 108.2   | 107.9 | 107.2  | 113.1 | 106.8  | 122.7   | 108.7   |
| 130     | 140.9  | 133.9   | 134.8 | 116.2  | 120.9 | 134.4  | 157.6   | 153.9   |
| 111     | 109.2  | 102.4   | 98.5  | 92.8   | 103.1 | 100.2  | 108.7   | 109.5   |
| 109.3   | 107.1  | 98.1    | 100.7 | 90.7   | 112.5 | 104.4  | 102.4   | 102.5   |
| 121.5   | 131.9  | 116.8   | 112.7 | 112    | 122.8 | 115.6  | 131.6   | 120.8   |
| 112.9   | 111.8  | 106.2   | 110.1 | 103.8  | 116.3 | 104.8  | 133.4   | 117.2   |
| 10539.3 | 9347.4 | 11621.4 | 8861  | 7224.9 | 10743 | 6606.1 | 18811.2 | 20302.6 |
| 112.4   | 113.6  | 118.6   | 108.6 | 115    | 125.3 | 118.5  | 155.6   | 126.7   |
| 127.6   | 123    | 108     | 118.9 | 117.4  | 115.7 | 105.8  | 139.3   | 126.5   |
| 256.2   | 320.1  | 312.2   | 415.5 | 294.9  | 289.5 | 347.4  | 327.3   | 287.7   |
| 156.5   | 233.7  | 186     | 185   | 213.1  | 209.2 | 176.8  | 299.4   | 201.2   |
| 150.5   | 156.2  | 162.2   | 152.3 | 148.5  | 174.9 | 163.2  | 225.3   | 176.6   |
| 117.5   | 113.8  | 101.8   | 115.9 | 112.1  | 122.4 | 114.2  | 122.2   | 106     |
| 114.8   | 141.6  | 118     | 117.5 | 117.1  | 126.7 | 122.9  | 152.8   | 129.4   |
| 110.3   | 159.8  | 115.9   | 114.8 | 119.8  | 130.3 | 114.4  | 150.4   | 133.4   |
| 110.2   | 110.2  | 97      | 110.5 | 101.7  | 107.2 | 98.4   | 106.8   | 104     |
| 115.1   | 113.6  | 115.8   | 109.8 | 104.8  | 117.3 | 114.5  | 128.6   | 117.1   |

|        |        |        |        |        |        |        |        |        |
|--------|--------|--------|--------|--------|--------|--------|--------|--------|
| 320.3  | 352.3  | 363.7  | 445.1  | 354.1  | 395.5  | 413.9  | 725.1  | 500    |
| 110.4  | 110.6  | 95.9   | 93.5   | 95.5   | 106.6  | 101.9  | 114    | 108.1  |
| 110.2  | 114.4  | 99.1   | 90.7   | 96.5   | 116.6  | 118.5  | 125.1  | 110    |
| 104.5  | 115.1  | 110.2  | 117    | 107.3  | 122.8  | 102    | 115.1  | 112.3  |
| 108.1  | 107.1  | 100.7  | 98.2   | 92.5   | 110.2  | 105.2  | 107.4  | 110.7  |
| 110.8  | 107.9  | 104.9  | 105.1  | 103.2  | 119.1  | 103.9  | 121.5  | 114.9  |
| 121.6  | 138.4  | 111.4  | 121.2  | 112.7  | 124.8  | 108.3  | 163.2  | 124.3  |
| 103.8  | 101    | 99.2   | 106.1  | 85.6   | 108.3  | 107.6  | 115.7  | 109    |
| 108.9  | 108.2  | 101    | 111.6  | 96.4   | 113.4  | 108.6  | 108.1  | 106.5  |
| 108.2  | 105    | 96.5   | 103.2  | 102.8  | 104.7  | 106.6  | 123.2  | 117.1  |
| 111.1  | 117.7  | 111.8  | 114.4  | 102.6  | 113.9  | 112.6  | 119.8  | 109.8  |
| 112.8  | 111.7  | 104.9  | 105.6  | 100.8  | 117    | 100.2  | 111.5  | 114.7  |
| 103.4  | 104.9  | 96     | 101.6  | 91.1   | 103.1  | 114.4  | 108    | 109.6  |
| 103.8  | 106.3  | 100.3  | 104.4  | 98.8   | 109.8  | 99.4   | 102.7  | 103.7  |
| 98.7   | 106.7  | 99.1   | 102    | 93.9   | 96.9   | 107.3  | 102    | 106.8  |
| 110.7  | 110.3  | 103.1  | 106    | 95     | 103.7  | 105.2  | 105.9  | 107.7  |
| 101.3  | 107.2  | 94.6   | 114.2  | 90.9   | 116.6  | 100    | 101    | 111.9  |
| 2791   | 2271.8 | 2292.2 | 2188.4 | 2229.2 | 2692.5 | 2579.1 | 5807.5 | 5821.9 |
| 108.7  | 105.1  | 99.7   | 99.9   | 95.8   | 107.5  | 92.9   | 103    | 103.8  |
| 102.6  | 103.3  | 105.6  | 98.3   | 98.9   | 110.8  | 99.6   | 104.5  | 112    |
| 100.7  | 102.9  | 95.3   | 94.3   | 93.7   | 105.6  | 106.3  | 100.7  | 104.1  |
| 101.6  | 105.1  | 98.4   | 106.2  | 90.7   | 104.9  | 112.7  | 121.6  | 101.5  |
| 112.4  | 114.3  | 103.6  | 111.7  | 99.2   | 103.3  | 101    | 113.7  | 106    |
| 110.1  | 109.5  | 106.1  | 96.2   | 90.7   | 105.1  | 98.7   | 115.8  | 113.6  |
| 106    | 107.4  | 101.7  | 105.9  | 98.6   | 113.1  | 95.5   | 101.2  | 104.2  |
| 109.9  | 109.9  | 105.8  | 101.3  | 96.3   | 114.8  | 102.5  | 107.5  | 114    |
| 109.4  | 107.9  | 104    | 102.1  | 94.2   | 113.5  | 95.9   | 115.2  | 108.8  |
| 175.6  | 212.2  | 173.5  | 223.7  | 157.4  | 185.9  | 199.2  | 264.1  | 175.8  |
| 280.1  | 732.1  | 509.9  | 660    | 383.2  | 497.4  | 490.7  | 705    | 342    |
| 1452.4 | 3353.2 | 3974   | 2837.3 | 2363.5 | 3164   | 2960.7 | 3353.6 | 1561.3 |
| 640.4  | 2983.1 | 3391.6 | 1940.4 | 2039.4 | 2516.9 | 2010.3 | 2134.7 | 911.6  |
| 110.3  | 109.2  | 111.3  | 112.5  | 102.3  | 114.2  | 101.7  | 125.5  | 106.9  |
| 282.2  | 1286.6 | 1488.8 | 714.4  | 833.2  | 1134.1 | 596.7  | 1453.4 | 434.3  |
| 141.7  | 174.6  | 180    | 164.4  | 133.8  | 186.8  | 138    | 235.9  | 154.6  |
| 388.2  | 709.1  | 968.7  | 686.2  | 482.8  | 595.7  | 467.2  | 743.3  | 352.5  |
| 97.9   | 102.6  | 103.4  | 100.3  | 96.7   | 112.9  | 96.3   | 101    | 96.3   |
| 102.7  | 109.1  | 101.7  | 104.9  | 95.3   | 108    | 103.4  | 104    | 100.5  |
| 102.5  | 114.2  | 101.9  | 99.3   | 91.5   | 112.3  | 104.4  | 112.8  | 114.3  |
| 179    | 270    | 282.4  | 319.4  | 251.3  | 298.2  | 309.3  | 250.6  | 192.3  |
| 109.1  | 105.8  | 102.1  | 100.8  | 88.2   | 100.4  | 95.8   | 110.5  | 108.9  |
| 102.5  | 106.1  | 101.4  | 95.8   | 90.3   | 100.7  | 97.1   | 107.3  | 104.3  |
| 103.6  | 105    | 107.5  | 95     | 93.9   | 106.9  | 94.4   | 107.7  | 102.6  |
| 117.2  | 139.7  | 119.8  | 110.3  | 115.8  | 136.9  | 147.6  | 152.2  | 143.2  |
| 142.7  | 166.8  | 155.6  | 183.4  | 143.4  | 167.9  | 185.2  | 200.6  | 184.6  |
| 110.8  | 133.8  | 121.9  | 124.1  | 121.7  | 138.8  | 131.7  | 140    | 137.8  |
| 129.4  | 143.1  | 140.5  | 140.7  | 123.3  | 150    | 136.9  | 137.9  | 130.6  |
| 112.3  | 120.8  | 115.8  | 101.4  | 104.8  | 116.9  | 112.4  | 110.8  | 116.5  |
| 94.5   | 99.5   | 99.2   | 103.1  | 88.4   | 95     | 101.5  | 102    | 100.3  |
| 103.2  | 104.1  | 105.2  | 96.1   | 95.1   | 109.2  | 98.1   | 105    | 108.1  |
| 124.1  | 121.2  | 105    | 105.5  | 118.8  | 108.3  | 108.9  | 135.4  | 115.9  |
| 172.8  | 135.5  | 159.7  | 116.9  | 118.9  | 146.3  | 125.3  | 182.6  | 141.2  |

|        |        |        |       |        |        |        |        |        |
|--------|--------|--------|-------|--------|--------|--------|--------|--------|
| 108    | 108.1  | 100.3  | 105.9 | 95     | 107.6  | 109.9  | 102.7  | 107.7  |
| 102.5  | 104.8  | 102.9  | 93.4  | 102.4  | 106    | 104.1  | 110.2  | 102.5  |
| 112.7  | 115.8  | 107.2  | 104.9 | 94.8   | 108.4  | 111.1  | 104    | 97.8   |
| 103.5  | 118.3  | 108.2  | 102.7 | 94.4   | 106.1  | 111.2  | 119.4  | 121.8  |
| 119.2  | 120.6  | 108.1  | 108.2 | 103.7  | 131.9  | 105.2  | 113.1  | 103.9  |
| 4913   | 4127.5 | 3964   | 3048  | 4322.3 | 3734.3 | 3124.5 | 8373.6 | 9169.2 |
| 107.4  | 111.6  | 106.4  | 102.8 | 94     | 108.2  | 101.3  | 102.5  | 107.2  |
| 108.2  | 106.3  | 106.8  | 105.8 | 98.9   | 109    | 114    | 106.6  | 102    |
| 102.5  | 141.7  | 120.4  | 91.7  | 93.1   | 113.3  | 95.7   | 104.8  | 106.6  |
| 112.2  | 109.8  | 111.3  | 115.3 | 106.7  | 114.7  | 107.1  | 119    | 117.5  |
| 97.6   | 107.3  | 107    | 92.1  | 94.7   | 108.8  | 100.4  | 103    | 107.5  |
| 106.5  | 108.4  | 103.2  | 99.1  | 91.7   | 103.2  | 100.8  | 109.9  | 108    |
| 109.2  | 115.3  | 104.2  | 110.1 | 107.3  | 110.2  | 114.6  | 105.2  | 101.9  |
| 111.1  | 116.6  | 105.4  | 106.2 | 96.8   | 108    | 97.4   | 107.2  | 106.1  |
| 105.2  | 109    | 95.9   | 103.9 | 95.7   | 116.1  | 103.6  | 103.6  | 106.7  |
| 105.9  | 110.4  | 98.3   | 100.5 | 91.6   | 108.2  | 106.5  | 106.1  | 115.6  |
| 100.6  | 109.8  | 101.8  | 114.7 | 97.6   | 117.9  | 107.1  | 119.4  | 109.2  |
| 103.5  | 108.9  | 102.7  | 102.1 | 97.9   | 100.3  | 108    | 107.7  | 99.6   |
| 305.6  | 366.6  | 238    | 158.9 | 318    | 281.5  | 266.5  | 534    | 174.3  |
| 191.4  | 135.7  | 134.1  | 151.3 | 150.5  | 177.5  | 158.9  | 221    | 237.9  |
| 118.1  | 117.8  | 117.1  | 110   | 105.2  | 118.2  | 118.7  | 145.1  | 130.4  |
| 113.2  | 109    | 99.8   | 109.7 | 99.1   | 108.5  | 102    | 109.4  | 102.9  |
| 1843.2 | 1338   | 1278.8 | 549.4 | 1845.3 | 1775.6 | 1269   | 6170.1 | 4675.4 |
| 337.3  | 597.7  | 404.1  | 958.5 | 499    | 455.6  | 813.1  | 825.9  | 382.7  |
| 105.8  | 127.6  | 95.7   | 96.6  | 99.7   | 113.5  | 109.4  | 108    | 116.9  |
| 301.4  | 519.7  | 406.2  | 738.2 | 490.7  | 411.7  | 717    | 648.7  | 304.2  |
| 112.1  | 117.2  | 117.8  | 111.8 | 99     | 114.9  | 123.5  | 122.8  | 133.2  |
| 142.9  | 155.4  | 146.6  | 141.2 | 139.1  | 145.4  | 149.3  | 146.1  | 167.7  |
| 111.6  | 130    | 120.8  | 143.5 | 125.8  | 124.6  | 133    | 125    | 110.9  |
| 107.4  | 107    | 101.6  | 96.4  | 101.6  | 106.6  | 104.5  | 102.1  | 107.6  |
| 107.3  | 109.1  | 104.9  | 98.8  | 92.5   | 109.2  | 100.3  | 106.5  | 102    |
| 330.7  | 434.3  | 371    | 397.8 | 366.2  | 419.3  | 433.9  | 675.7  | 417    |
| 125.7  | 144.7  | 120.2  | 129.8 | 106.7  | 125.5  | 132.4  | 165.9  | 143.1  |
| 486.8  | 714.2  | 824.6  | 751.9 | 757.1  | 924.8  | 732.1  | 1284.4 | 784.9  |
| 109.5  | 121.3  | 116.3  | 101.9 | 98.8   | 112.3  | 109.4  | 121    | 112.8  |
| 111.5  | 114.2  | 105.4  | 101   | 92.6   | 110.9  | 107.9  | 106.6  | 107.6  |
| 105.4  | 111.7  | 103.5  | 96.1  | 95.8   | 110.2  | 105.3  | 115.7  | 112.9  |
| 109.3  | 115.2  | 116.1  | 114.6 | 102.3  | 113.2  | 105.4  | 113    | 105.4  |
| 242.3  | 327.2  | 286.4  | 432.7 | 288.1  | 254.9  | 537.5  | 551.3  | 488.8  |
| 103    | 108.9  | 109.3  | 99.8  | 97.8   | 109.2  | 109.7  | 108.1  | 109.8  |
| 104.7  | 102.6  | 103.6  | 106   | 96     | 103.4  | 100.3  | 112.4  | 107.8  |
| 103.1  | 104.6  | 98.4   | 100.8 | 94.3   | 111.2  | 98     | 111.3  | 113.3  |
| 104.1  | 101.3  | 103.9  | 98.8  | 94.5   | 114.9  | 98     | 117.5  | 108.1  |
| 133.7  | 107.4  | 109    | 106.9 | 107.1  | 113.2  | 117.7  | 143.8  | 122.4  |
| 109.3  | 108.3  | 101.6  | 103.5 | 87.8   | 105.7  | 98     | 112.1  | 106.8  |
| 196.2  | 162.7  | 195.1  | 201.1 | 176    | 220.8  | 223.9  | 405.2  | 251.2  |
| 620.7  | 1024.7 | 887.7  | 933.8 | 739    | 906.5  | 966.1  | 1196.4 | 900.5  |
| 110.2  | 112.6  | 105.7  | 96    | 90     | 114.8  | 105.6  | 103.5  | 105.4  |
| 110.6  | 107.9  | 106.2  | 109.9 | 93.4   | 107.7  | 107.2  | 114.5  | 104.3  |
| 99.7   | 102.7  | 106.9  | 91.2  | 93.8   | 108.1  | 104.2  | 107    | 104.4  |
| 97.8   | 104.2  | 104    | 94.6  | 97.3   | 102.8  | 101.4  | 110.9  | 110.4  |

|        |        |        |        |        |         |        |         |        |
|--------|--------|--------|--------|--------|---------|--------|---------|--------|
| 106.2  | 102.9  | 102.7  | 103    | 99.2   | 107.7   | 93.1   | 106.1   | 99.5   |
| 93.7   | 106.1  | 105.3  | 103.7  | 94.1   | 104     | 101.4  | 117.2   | 112.1  |
| 105.3  | 109.2  | 97     | 99.4   | 96     | 110.5   | 102.5  | 117.8   | 106.4  |
| 100.1  | 107.2  | 108.6  | 98.1   | 94.8   | 99.8    | 105.7  | 111.1   | 105.1  |
| 410.5  | 497.1  | 508.8  | 545.7  | 380.9  | 497.1   | 553.6  | 1302.8  | 659.6  |
| 113.1  | 159.3  | 140    | 127.3  | 135.4  | 146.8   | 156.7  | 167.3   | 153.2  |
| 111.1  | 113.7  | 107.3  | 102.2  | 94.8   | 113.2   | 102.9  | 112.4   | 109.7  |
| 138.5  | 175.2  | 157.5  | 164.4  | 130.9  | 144.1   | 184.4  | 206.6   | 160.5  |
| 569.7  | 1331.9 | 1429.6 | 986    | 979.6  | 1240.5  | 1121.5 | 1916.7  | 1067.3 |
| 237.5  | 246.2  | 307.6  | 247.2  | 220.2  | 215.8   | 245.9  | 398.2   | 281.2  |
| 99.9   | 110.1  | 110.1  | 97.1   | 96     | 111.5   | 107.4  | 106.3   | 103.3  |
| 97.8   | 108.5  | 112.3  | 97.8   | 97.5   | 108.5   | 95.9   | 109.7   | 104.4  |
| 116.1  | 119.9  | 104.8  | 123.1  | 100    | 116.3   | 103.2  | 114.7   | 114.5  |
| 303.4  | 645.7  | 622.2  | 551.3  | 658.2  | 659.5   | 763.7  | 722.4   | 334.9  |
| 119.2  | 128.3  | 107.8  | 108    | 111.1  | 124.8   | 125.5  | 136.4   | 119.3  |
| 104.9  | 113.2  | 103.6  | 105.2  | 94.8   | 108.3   | 104.6  | 106.4   | 101.1  |
| 126.3  | 128.3  | 138.5  | 119.8  | 106.6  | 120.2   | 122.6  | 177.4   | 113.9  |
| 102.2  | 101    | 98     | 96.1   | 98.6   | 108.1   | 104.9  | 101.4   | 112.3  |
| 107.3  | 115.2  | 100.6  | 119.6  | 94.8   | 114.2   | 117.6  | 117.4   | 113.6  |
| 102.8  | 114.8  | 107    | 101.8  | 96     | 112.2   | 105.7  | 115.9   | 110.9  |
| 111    | 109.5  | 109.3  | 111    | 103    | 118.7   | 104.5  | 110.9   | 111.3  |
| 1222.4 | 1304.7 | 1164.3 | 1111.3 | 929.7  | 1204.5  | 1048.4 | 1316.8  | 1090.1 |
| 227.5  | 207.1  | 203.1  | 170.6  | 196.3  | 220.1   | 204.3  | 313.4   | 251.6  |
| 7282.2 | 8057.2 | 9767.9 | 7868.8 | 6959.5 | 10214.9 | 7531.4 | 12165.3 | 7958.4 |
| 337.2  | 446.8  | 427.2  | 409.4  | 465.6  | 484.3   | 515.5  | 754.1   | 656.7  |
| 120.4  | 116.2  | 122.2  | 112.4  | 119.2  | 112.8   | 117.5  | 154.2   | 138.5  |
| 120.1  | 116.9  | 114.9  | 116.9  | 111.7  | 116.9   | 105.9  | 137.4   | 153.2  |
| 95.5   | 110.1  | 95.7   | 92.1   | 88.8   | 105.6   | 95.3   | 100.6   | 103.9  |
| 128    | 120.9  | 95.6   | 118.4  | 106.8  | 116.6   | 125.1  | 120.7   | 106.2  |
| 108.3  | 104.6  | 116.5  | 108.4  | 97.8   | 106.2   | 98.5   | 107     | 104.4  |
| 101.6  | 108.7  | 103.4  | 109.9  | 92.5   | 106.7   | 98.2   | 105.5   | 110.2  |
| 112.5  | 108.8  | 98.9   | 99.6   | 101.9  | 108.5   | 109.9  | 105.2   | 106.2  |
| 109.5  | 113.2  | 108.5  | 128    | 112.7  | 120.8   | 114.9  | 134.5   | 133    |
| 98.9   | 106.7  | 98.3   | 103.9  | 97.7   | 114.1   | 98.2   | 109.1   | 111.6  |
| 98.3   | 105.2  | 102    | 95.4   | 88.6   | 99.6    | 103.8  | 95.2    | 102.3  |
| 100.2  | 108.2  | 108.4  | 109.7  | 96.8   | 102.1   | 100.2  | 112.1   | 108.5  |
| 112.6  | 159.1  | 175.7  | 152.1  | 131.2  | 142.7   | 145.7  | 140.7   | 122.7  |
| 108.8  | 133.2  | 141    | 117    | 137.6  | 150.6   | 117.3  | 186.2   | 118.9  |
| 112.2  | 141.8  | 119.6  | 124.7  | 113.3  | 126.4   | 123.4  | 122.6   | 122.1  |
| 236.1  | 372.2  | 348.2  | 260.1  | 294.8  | 260.7   | 189.8  | 447.7   | 304.5  |
| 96.8   | 106.6  | 100.6  | 102.8  | 89.1   | 98.8    | 104.8  | 105.3   | 105.2  |
| 149.4  | 270.8  | 237.6  | 241.7  | 198.3  | 233.8   | 206.6  | 219.3   | 167    |
| 138    | 158.4  | 134.8  | 128.3  | 138.3  | 147.1   | 127.7  | 229.3   | 187.6  |
| 137.2  | 146.1  | 152.1  | 135.6  | 145.1  | 152.4   | 128.7  | 248.8   | 212.5  |
| 318.7  | 377.6  | 333    | 326.6  | 385.5  | 390.6   | 410    | 508.7   | 352.2  |
| 825.6  | 622.1  | 467.1  | 623.3  | 540.4  | 713     | 703.7  | 1026.8  | 1067.5 |
| 343.3  | 520.4  | 597.2  | 681.4  | 434.2  | 431.2   | 610.4  | 824.7   | 577.8  |
| 191    | 274.8  | 254.8  | 297.8  | 221.7  | 233.6   | 291.5  | 309.4   | 155.3  |
| 109.6  | 117.4  | 107.6  | 118.4  | 97.4   | 110.3   | 97.2   | 113.4   | 112.8  |
| 126.6  | 120.5  | 120    | 140.7  | 114.8  | 129.6   | 119.7  | 206.9   | 168    |
| 199.4  | 284.7  | 232.8  | 266.3  | 279.9  | 271.4   | 318.6  | 296.8   | 229.9  |

|        |        |        |        |        |        |        |         |         |
|--------|--------|--------|--------|--------|--------|--------|---------|---------|
| 110.1  | 106.4  | 114.6  | 113.5  | 104.6  | 117    | 114.4  | 123.5   | 112.5   |
| 121.4  | 210.7  | 180.5  | 183.2  | 193    | 188.1  | 187    | 240.4   | 154.8   |
| 109.1  | 135.9  | 128.4  | 121.2  | 120.8  | 120.5  | 123.2  | 142.7   | 124.2   |
| 110.9  | 108    | 110.9  | 97.3   | 99     | 108.6  | 99.7   | 109.9   | 105.4   |
| 107.5  | 115.9  | 104.5  | 108.9  | 91.7   | 114.5  | 108.7  | 125.9   | 110.1   |
| 144.6  | 203.5  | 154.2  | 180    | 142.8  | 190.5  | 170.4  | 272.9   | 214     |
| 111.7  | 115.9  | 100.6  | 109.9  | 114    | 116.6  | 113.3  | 112.2   | 112.9   |
| 274.9  | 402    | 426.2  | 392.4  | 435.1  | 323.8  | 361.4  | 642.5   | 454.5   |
| 117.9  | 145.2  | 134.2  | 104.5  | 108.4  | 140.6  | 114.7  | 124.4   | 115.1   |
| 167.2  | 238.3  | 170.6  | 198.3  | 183.2  | 211    | 220    | 251.2   | 169     |
| 234    | 256.2  | 165.1  | 225.7  | 238.5  | 165.9  | 186.3  | 387.7   | 297.4   |
| 101.1  | 106.8  | 97.9   | 91.3   | 92.4   | 104.3  | 99.4   | 99.6    | 102     |
| 282.3  | 205.4  | 151.1  | 371.5  | 212.6  | 163.7  | 362.9  | 283.6   | 183.7   |
| 104.6  | 107    | 97     | 102.1  | 100    | 119.1  | 118.3  | 105     | 103.1   |
| 554.2  | 673.2  | 671.1  | 1251.9 | 562.7  | 758.2  | 1665.4 | 1087.9  | 706.2   |
| 210.2  | 179.5  | 142.9  | 213.7  | 173.5  | 196.3  | 206.3  | 345.3   | 201.2   |
| 109    | 122.6  | 109.4  | 109.8  | 107    | 112.1  | 107.2  | 120     | 106.2   |
| 106.7  | 111.4  | 99.1   | 104.1  | 102.5  | 119.3  | 114.2  | 105.4   | 114.2   |
| 114.2  | 107.9  | 112.2  | 102.5  | 98.4   | 112    | 99     | 103.3   | 120     |
| 110.6  | 111.5  | 108.1  | 108.7  | 95.6   | 112.4  | 105.3  | 109     | 111.9   |
| 101.9  | 106.6  | 99.2   | 101.3  | 96.9   | 104    | 107.2  | 114.4   | 104.2   |
| 129.5  | 132    | 137.3  | 131    | 118    | 140.5  | 125.4  | 147.1   | 125.8   |
| 107.9  | 109.9  | 112.9  | 100.7  | 102.6  | 116.3  | 106.7  | 116.3   | 120.9   |
| 99.8   | 106.7  | 92.2   | 101.3  | 93.2   | 108.7  | 104    | 95.5    | 110.4   |
| 4422.4 | 4584.5 | 4065.9 | 4989   | 4161.6 | 3396.8 | 5013.2 | 8254.7  | 4904    |
| 109    | 114.5  | 107.4  | 104.2  | 95.5   | 98.7   | 107.5  | 117.6   | 115.8   |
| 104.1  | 115.9  | 114.8  | 111.1  | 104    | 120.3  | 109.6  | 119.7   | 111.2   |
| 107.5  | 113.4  | 101.6  | 112.9  | 99.5   | 115.8  | 109.9  | 108.1   | 115.8   |
| 106.3  | 117.2  | 108.2  | 119.1  | 96.3   | 112.3  | 121.9  | 104.7   | 110.3   |
| 2068.2 | 1639   | 1751.7 | 2199.7 | 1769.5 | 1566.3 | 1885.9 | 2480.3  | 1659.9  |
| 130    | 156.7  | 121.8  | 166.8  | 130.2  | 116.1  | 145.8  | 225.1   | 117.1   |
| 134.8  | 119.5  | 116.4  | 140.7  | 128.2  | 132.3  | 135.8  | 148.7   | 120.3   |
| 6902.8 | 9569.4 | 7637.7 | 9229.3 | 8972.9 | 9578   | 8821   | 16621.5 | 11309.4 |
| 103.3  | 115.5  | 101.4  | 100.9  | 100    | 109.5  | 97.5   | 98.5    | 98.2    |
| 129    | 130.4  | 124.6  | 130.4  | 102.3  | 121.4  | 119.7  | 125.6   | 123.4   |
| 126.2  | 231.3  | 197.9  | 212.6  | 165.2  | 172.5  | 152    | 246     | 189.4   |
| 112.8  | 107.7  | 108.1  | 96.8   | 95.6   | 115.3  | 103.8  | 103.1   | 109.4   |
| 110.4  | 107.6  | 104.8  | 99.4   | 99.7   | 105.7  | 102.5  | 106.7   | 107.2   |
| 200.5  | 205.2  | 191.5  | 195.7  | 177    | 171.9  | 226.3  | 346.2   | 278.3   |
| 147.6  | 206.6  | 160.2  | 200    | 146.8  | 157.6  | 189.1  | 209.6   | 171.6   |
| 124.1  | 120.6  | 113.5  | 115    | 118.1  | 122.5  | 115.9  | 118.7   | 132.4   |
| 111.2  | 112.9  | 107.7  | 102.5  | 91.3   | 106.6  | 104.4  | 110.4   | 108.4   |
| 105.9  | 103.4  | 104.1  | 101.7  | 90     | 104    | 103.2  | 106.6   | 100.6   |
| 134.3  | 175.8  | 175.9  | 167.4  | 166.9  | 178    | 141.9  | 234.3   | 362.3   |
| 98.7   | 114.6  | 102    | 107    | 100.4  | 113.9  | 109.1  | 121.2   | 104.5   |
| 106.3  | 109.8  | 101.1  | 104.7  | 92     | 108.3  | 104.8  | 108.2   | 105.4   |
| 171.5  | 165.3  | 183.9  | 166    | 174.4  | 203.9  | 223.6  | 273.7   | 201.7   |
| 152.3  | 153.5  | 147.9  | 155.6  | 161.3  | 148.3  | 154    | 137.2   | 138.4   |
| 113    | 119.7  | 120.2  | 112.4  | 109.5  | 114.4  | 110.6  | 126.6   | 115.7   |
| 111.3  | 109.7  | 97.7   | 90.5   | 99.6   | 106.7  | 105.5  | 104     | 104.2   |
| 121.3  | 147    | 132.3  | 142.3  | 122.3  | 129.8  | 149.9  | 134.8   | 121.4   |



|        |        |        |        |        |        |        |        |        |
|--------|--------|--------|--------|--------|--------|--------|--------|--------|
| 235.8  | 349    | 312.4  | 243.1  | 290.4  | 339.2  | 280.7  | 486.8  | 265.3  |
| 352.6  | 401    | 351.5  | 358.8  | 290.6  | 446.4  | 365.6  | 687    | 634.2  |
| 176.7  | 271.1  | 250.1  | 201.9  | 231.7  | 284.4  | 218    | 553    | 254    |
| 290.1  | 538    | 480.5  | 328.9  | 360.1  | 598.6  | 429.2  | 694    | 474.4  |
| 111    | 114.2  | 113.9  | 94.8   | 100.6  | 113.6  | 101.7  | 122.3  | 115.8  |
| 293.1  | 415.4  | 455.8  | 358.2  | 340.5  | 533.6  | 233.3  | 600.8  | 398.4  |
| 110.8  | 132    | 113.1  | 116.6  | 102    | 114.7  | 117.2  | 155.8  | 122.4  |
| 2389.1 | 6124.2 | 3203.6 | 4310.4 | 4244.8 | 2226.5 | 3480   | 6174.2 | 2564   |
| 963.3  | 2525   | 1200.2 | 1334.4 | 1634.2 | 1008.3 | 1180.3 | 2762.7 | 1385.1 |
| 104    | 119.9  | 115.6  | 107.1  | 104.5  | 115.3  | 104.5  | 129.7  | 118.7  |
| 224.8  | 310    | 311.6  | 345.5  | 339.1  | 350.2  | 389.3  | 447.8  | 246.4  |
| 937.3  | 696.4  | 708.7  | 933.4  | 727.8  | 917    | 726.7  | 1649   | 1800.5 |
| 107.5  | 120.8  | 105.1  | 100.4  | 99.8   | 110.6  | 104.4  | 111.8  | 104.8  |
| 108.5  | 103.8  | 92.9   | 92.2   | 97.2   | 102.1  | 96.6   | 117.2  | 105.2  |
| 103.7  | 109.9  | 103.9  | 98.2   | 96     | 110.7  | 104.2  | 100.3  | 116.7  |
| 303.6  | 431.9  | 401.6  | 457.9  | 394.6  | 452.5  | 477.4  | 601    | 417.4  |
| 186.5  | 137.3  | 138.4  | 134.1  | 118.1  | 145.2  | 137.2  | 201    | 200.6  |
| 98.1   | 104.1  | 94.7   | 95.4   | 95.1   | 102.4  | 99.1   | 101.8  | 103.9  |
| 109.9  | 109    | 97.2   | 104.3  | 97.6   | 114.4  | 106    | 115.3  | 115.4  |
| 100.7  | 110.4  | 109.7  | 92.6   | 94.1   | 104.4  | 96.3   | 116.1  | 100.1  |
| 112.8  | 117.8  | 107.5  | 110.6  | 99.8   | 116.9  | 103.7  | 107.3  | 111.3  |
| 1509.8 | 2582.1 | 1455.2 | 2986.5 | 2237.7 | 1828.3 | 2758.3 | 2343.1 | 1700.8 |
| 121    | 139.7  | 133.7  | 132.1  | 114.6  | 130.4  | 134.4  | 149.4  | 143.4  |
| 133.6  | 137.4  | 126.2  | 126.8  | 127    | 152.7  | 155.1  | 165.5  | 147.8  |
| 162.7  | 137.9  | 127.7  | 123.7  | 126.3  | 120.8  | 131.8  | 230.8  | 214.3  |
| 104.6  | 110.1  | 108.2  | 109.6  | 98.4   | 119.8  | 101.6  | 109    | 103.1  |
| 107    | 104.8  | 113.5  | 109.1  | 93.1   | 104.1  | 101.5  | 108.2  | 113.4  |
| 386.2  | 524    | 509.2  | 370.7  | 505.3  | 536.6  | 522.3  | 759.1  | 632    |
| 121.2  | 140.7  | 120.3  | 106.3  | 111.9  | 130.7  | 121.2  | 169.5  | 148.4  |
| 113.7  | 107    | 98     | 102    | 92.5   | 102    | 96.5   | 103.5  | 111.6  |
| 1187.4 | 1685.8 | 1781.6 | 1485.2 | 1541.5 | 1642.5 | 1557.7 | 2059   | 1542.9 |
| 108.7  | 117.4  | 109.8  | 118.8  | 91.7   | 107.7  | 98.4   | 117.9  | 99.1   |
| 118.4  | 115.3  | 115.8  | 120    | 102.1  | 115.2  | 108.6  | 133.3  | 120    |
| 182.4  | 186.6  | 200.9  | 201.7  | 159.1  | 195.8  | 123.6  | 243.2  | 192.5  |
| 1392.5 | 1283.7 | 1503   | 1407.5 | 885.5  | 1139.4 | 1012.7 | 1516.8 | 758.9  |
| 104.4  | 109.4  | 98.4   | 97.8   | 96.6   | 106.9  | 94.4   | 113.6  | 109    |
| 105.8  | 101    | 101.3  | 104.2  | 94.2   | 107.8  | 101.6  | 105.6  | 103.4  |
| 103.4  | 113.7  | 98.7   | 102.7  | 93.4   | 107.1  | 98.6   | 101.3  | 107.3  |
| 149.7  | 139.9  | 132.2  | 147.9  | 144.9  | 137.8  | 153.1  | 287.4  | 216.5  |
| 99.9   | 103.3  | 102.4  | 100.4  | 96.2   | 106.3  | 91.6   | 122.5  | 107.8  |
| 112    | 108.2  | 104.5  | 108.2  | 100.3  | 105    | 108.6  | 116.1  | 113.6  |
| 417.4  | 477.5  | 489.4  | 406.1  | 464.2  | 423.3  | 330.5  | 730.2  | 486.2  |
| 151.1  | 167.3  | 177    | 164.7  | 158.4  | 160.7  | 152.4  | 215.5  | 177.2  |
| 107.4  | 146.2  | 133.2  | 133.2  | 114.6  | 127.1  | 142.6  | 119.6  | 129    |
| 99.5   | 114.3  | 101.2  | 97.9   | 90.8   | 97.2   | 103.4  | 101.1  | 103.4  |
| 124.6  | 135.4  | 123.8  | 128.2  | 116    | 124.2  | 133.7  | 156.1  | 158.2  |
| 102.7  | 109.9  | 104    | 109.1  | 92.6   | 107.4  | 103.7  | 103.7  | 103.1  |
| 133.4  | 145.6  | 136.8  | 148.5  | 127.8  | 153.1  | 129.8  | 171.3  | 146.4  |
| 130.5  | 187.4  | 182.8  | 211.2  | 160.7  | 154    | 213.1  | 185.7  | 132.7  |
| 292.9  | 377.3  | 371.8  | 354.3  | 284    | 368.6  | 345.1  | 670    | 405.6  |
| 147.5  | 140.5  | 136    | 124.9  | 126.1  | 131.7  | 125.4  | 164.5  | 144    |

|       |       |       |       |       |       |       |       |       |
|-------|-------|-------|-------|-------|-------|-------|-------|-------|
| 116.9 | 112   | 129.8 | 112.7 | 102.2 | 117   | 108.8 | 138.9 | 135.5 |
| 110.6 | 117.8 | 112   | 118.5 | 107.7 | 129.2 | 107.4 | 150.8 | 130.5 |
| 138.6 | 133.5 | 140.2 | 121.2 | 159.3 | 129.7 | 142.1 | 229.8 | 180.3 |
| 114.8 | 113.8 | 104.1 | 105.3 | 100.9 | 106.9 | 103.4 | 114.7 | 130.1 |
| 302.2 | 321.6 | 283.5 | 245.9 | 265.5 | 316.7 | 275.8 | 505.9 | 659.4 |
| 101.5 | 113.1 | 101.7 | 100.8 | 98.2  | 108.4 | 101.2 | 114.1 | 101.7 |
| 283   | 428.1 | 527   | 424.5 | 488.1 | 537.3 | 454.7 | 633.8 | 397.9 |
| 132.2 | 120.8 | 114.9 | 116.9 | 103.9 | 130.5 | 121.1 | 147.5 | 145   |
| 107.1 | 111.9 | 114.5 | 117   | 105.6 | 104.6 | 108.5 | 113.2 | 116.3 |
| 110.9 | 108.8 | 100.1 | 108.2 | 102.8 | 121.1 | 99.2  | 109.5 | 115.8 |
| 108.2 | 100.6 | 93.7  | 101.7 | 91.8  | 101.5 | 101.3 | 112.6 | 99.8  |
| 118.5 | 150.2 | 164.1 | 146.7 | 136.8 | 145.1 | 149.6 | 132.6 | 122   |
| 144.3 | 254.9 | 242.3 | 240.9 | 209   | 218.7 | 259.4 | 193.7 | 143.8 |
| 111.4 | 126.1 | 123.7 | 143.1 | 105   | 131.1 | 127.5 | 133.4 | 132.3 |
| 130   | 160   | 134.7 | 142.4 | 133.6 | 164.5 | 162   | 211.7 | 165.3 |
| 118.6 | 110.5 | 115.3 | 119.9 | 104.6 | 111.7 | 122.7 | 120.6 | 137.5 |
| 156.4 | 188.9 | 186.6 | 122   | 128.8 | 178.2 | 145.9 | 350.9 | 271.5 |
| 101.5 | 113.8 | 112.1 | 111.1 | 105.2 | 118.7 | 100.5 | 125.9 | 109.7 |
| 188   | 288.8 | 255.6 | 186   | 213.7 | 289.8 | 245.7 | 381.8 | 236.1 |
| 108.9 | 113.1 | 154.8 | 98    | 91.6  | 159.5 | 102.6 | 119.8 | 107.3 |
| 116.1 | 113   | 108.5 | 114.1 | 98.9  | 112.6 | 113.2 | 120   | 108.1 |
| 122.7 | 123   | 110.2 | 145.8 | 101.8 | 109.9 | 109.2 | 129.6 | 113.1 |
| 150   | 179   | 140.4 | 142   | 148.3 | 171.8 | 174.9 | 281.3 | 227.4 |
| 153.7 | 123.2 | 150   | 132   | 121.5 | 156.2 | 127.9 | 198   | 160.1 |
| 106.8 | 108.4 | 102.6 | 98    | 99.6  | 105.7 | 101.7 | 108.1 | 110.1 |
| 133.6 | 149.8 | 133.6 | 141.6 | 128.7 | 149.6 | 164.8 | 145.5 | 110.3 |
| 101.7 | 109.6 | 102.8 | 94.1  | 91    | 106.2 | 98.2  | 113.7 | 101.6 |
| 108   | 223.8 | 240.1 | 97.9  | 251   | 214.6 | 122.1 | 245.1 | 116.5 |
| 106.9 | 108.9 | 93.1  | 98.7  | 94.1  | 132.2 | 109.1 | 114   | 112.2 |
| 117.6 | 131   | 125.2 | 123.7 | 123.3 | 131.6 | 120.5 | 154.5 | 160.1 |
| 106.4 | 106.2 | 97.3  | 96.8  | 94.2  | 100.5 | 102   | 104.9 | 106.5 |
| 158.9 | 271.2 | 215.8 | 296.7 | 250.6 | 205.8 | 312.4 | 327   | 231.7 |
| 104.5 | 104.8 | 98.9  | 101.3 | 93    | 103.1 | 96.7  | 105.6 | 109.8 |
| 115.4 | 109.4 | 108   | 116.2 | 106.8 | 116   | 104.8 | 120.9 | 122.6 |
| 117.8 | 119.9 | 113.4 | 118.9 | 103   | 120.5 | 119.6 | 128.5 | 117.3 |
| 111.9 | 132.2 | 126.5 | 111.2 | 116.9 | 133.8 | 112.8 | 125.8 | 124.7 |
| 101.5 | 105.3 | 101.4 | 107.8 | 93.2  | 112.8 | 104.8 | 110.5 | 109.5 |
| 228.2 | 362.3 | 377.1 | 388.8 | 359.9 | 436.2 | 429   | 619.4 | 454.3 |
| 123.2 | 115.2 | 119.7 | 113.2 | 105.3 | 114.2 | 105   | 135.4 | 114.1 |
| 155.6 | 176.2 | 158.1 | 157.4 | 161.9 | 186.6 | 185.4 | 234.8 | 184.6 |
| 172.6 | 184.7 | 169.9 | 157   | 154.6 | 161.9 | 183.6 | 225.6 | 194.8 |
| 127.5 | 123.3 | 123.5 | 142.8 | 118.7 | 135.5 | 137.8 | 190.7 | 160.2 |
| 107.5 | 112   | 101.6 | 105.7 | 98.6  | 113.4 | 102.8 | 113.5 | 106.5 |
| 107   | 106.6 | 100.4 | 98    | 91.6  | 101.8 | 103.4 | 112.2 | 112.7 |
| 100.9 | 120.6 | 111.3 | 109.5 | 98.9  | 111   | 101.9 | 113.4 | 117.7 |
| 100.8 | 109.5 | 101.1 | 108.7 | 87    | 107.5 | 100.9 | 104.1 | 109.5 |
| 122.3 | 131.4 | 111.5 | 115.6 | 105.1 | 117.8 | 119.2 | 130.3 | 122.5 |
| 98.7  | 109.7 | 94.5  | 102.4 | 97.9  | 100.3 | 108.1 | 111.5 | 102.7 |
| 106.9 | 106   | 99.1  | 100.6 | 93.7  | 113.7 | 103.3 | 102.7 | 110.2 |
| 108.2 | 115.7 | 114.2 | 105.9 | 112.3 | 120   | 99.7  | 126.2 | 116.3 |
| 132.9 | 747.3 | 264.9 | 644.6 | 524   | 286.9 | 275.7 | 802.8 | 276.5 |

|       |        |       |        |        |       |       |        |       |
|-------|--------|-------|--------|--------|-------|-------|--------|-------|
| 174.2 | 1842.8 | 601.6 | 1365.1 | 1168.1 | 521.3 | 567.8 | 2072.7 | 572.5 |
| 295.2 | 294.3  | 311.8 | 329    | 300.8  | 352.4 | 214.7 | 850.1  | 827   |
| 106.4 | 108.9  | 102.8 | 96.9   | 94.3   | 114.4 | 92.5  | 104.8  | 114   |
| 101.9 | 105.5  | 99.3  | 100.7  | 97.3   | 109.1 | 97.3  | 106    | 110.5 |
| 107.5 | 107.8  | 105.8 | 105.2  | 103.3  | 105.6 | 103.6 | 119.5  | 107.6 |
| 146.4 | 192.7  | 164.5 | 193.2  | 178.7  | 193.5 | 205.2 | 278.7  | 184.6 |
| 111   | 107.1  | 99.1  | 100.2  | 96.6   | 108.1 | 111.3 | 106    | 101.3 |
| 104.8 | 110.6  | 110.5 | 101.2  | 100.3  | 108.6 | 101.6 | 107.2  | 106.5 |
| 104   | 114.2  | 99.1  | 93.9   | 95.3   | 116.1 | 104.5 | 100.2  | 108   |
| 100.5 | 98.8   | 97.3  | 97.7   | 93.6   | 103.5 | 105.7 | 106.8  | 103.3 |
| 104.4 | 102.5  | 98.9  | 103.4  | 97.2   | 105.6 | 105.3 | 105.4  | 112.5 |
| 102.7 | 108.7  | 103.8 | 101.1  | 92.3   | 105.1 | 97    | 118.7  | 119.6 |
| 96.2  | 109.4  | 97.1  | 97.1   | 90.2   | 98.8  | 102.4 | 107.3  | 98.1  |
| 120.3 | 111.9  | 115.1 | 112.8  | 107.3  | 112.7 | 115.4 | 119.5  | 126.7 |
| 133.7 | 225.4  | 225.7 | 160.3  | 172.4  | 225.9 | 166.6 | 216.4  | 174.6 |
| 104.5 | 101.7  | 97.6  | 102    | 93.7   | 105.2 | 103.8 | 108.7  | 109.1 |
| 109.6 | 107.6  | 106.2 | 96.6   | 95.2   | 108.9 | 101.8 | 112.4  | 108.1 |
| 116.6 | 128.8  | 122.5 | 121.3  | 111.7  | 131.7 | 121.9 | 140.4  | 129.1 |
| 104.6 | 108.2  | 98.7  | 101.8  | 92.6   | 103.7 | 94    | 110.5  | 107.8 |
| 105.3 | 112.3  | 104.6 | 103.2  | 94.9   | 109.2 | 112.5 | 101.3  | 113.4 |
| 102.9 | 103.7  | 103   | 104    | 94.3   | 108.8 | 111.6 | 118.5  | 109.2 |
| 109.6 | 106.1  | 105.4 | 100.8  | 99.1   | 105   | 107.9 | 106.3  | 107.9 |
| 122.2 | 117.7  | 111.4 | 111    | 106.6  | 116.6 | 106.8 | 108    | 112.8 |
| 103.2 | 106.3  | 104.1 | 111.4  | 101.1  | 107.9 | 95.4  | 113.5  | 109.9 |
| 109.1 | 110.9  | 99.1  | 101    | 100.7  | 109.7 | 104   | 112.7  | 103   |
| 156.7 | 185.7  | 183.8 | 181.6  | 138.7  | 176.7 | 184.8 | 161.7  | 163.2 |
| 106.9 | 108.3  | 108.3 | 102.9  | 96.2   | 103.6 | 101.5 | 110.9  | 115.7 |
| 104   | 112    | 97.7  | 109.2  | 102    | 112.1 | 107.5 | 116.7  | 105.3 |
| 634.5 | 793.6  | 814.8 | 538.7  | 695.6  | 691.1 | 709.6 | 1028.9 | 632.1 |
| 179.5 | 179.7  | 154.5 | 193.2  | 167.4  | 181.3 | 215.3 | 226.9  | 187.6 |
| 105.7 | 102.8  | 104.6 | 100.5  | 97.1   | 110.6 | 105   | 116.7  | 111.9 |
| 107.5 | 116.9  | 103.3 | 114.1  | 106.8  | 105.1 | 104.8 | 113.7  | 106.5 |
| 102.9 | 104.1  | 106   | 103.4  | 91.8   | 111.1 | 101.4 | 124.3  | 116   |
| 117   | 116.6  | 110.3 | 120.2  | 106.6  | 117.2 | 113.1 | 113.3  | 123.3 |
| 112   | 120    | 112.9 | 103.7  | 107.4  | 123.1 | 115.7 | 122.8  | 117.8 |
| 105   | 112    | 106.6 | 99.7   | 98.8   | 114.9 | 111.9 | 109.7  | 127.6 |
| 104.5 | 104.7  | 110.5 | 99.5   | 91.6   | 102.2 | 90.6  | 100.9  | 111   |
| 102.6 | 110.2  | 108.8 | 101.8  | 101.1  | 110.8 | 102   | 108.1  | 116.8 |
| 110.8 | 113.2  | 114.5 | 105.7  | 102.5  | 112.8 | 103.2 | 109.1  | 104.6 |
| 103.8 | 103.1  | 98    | 99.5   | 95.4   | 107.4 | 106.3 | 110.9  | 105.8 |
| 109.3 | 105.5  | 109.1 | 98.3   | 103.6  | 107.2 | 88.4  | 105.5  | 109.1 |
| 104.5 | 105.4  | 99.1  | 100.3  | 99.3   | 106.5 | 100.3 | 106.6  | 102.9 |
| 104.3 | 108.5  | 111.2 | 101.4  | 98.7   | 109.3 | 110.6 | 113.5  | 119.4 |
| 102.1 | 106.2  | 98.5  | 102.1  | 100.8  | 109.6 | 99.7  | 123.1  | 108.6 |
| 106.8 | 103.5  | 101.8 | 99.2   | 97.3   | 109.1 | 98.4  | 111.5  | 112.1 |
| 161.9 | 172.4  | 142   | 171.6  | 148.5  | 138.4 | 149.3 | 179.6  | 213.7 |
| 104.6 | 110.7  | 109.2 | 107.9  | 89.4   | 120.8 | 101   | 110.9  | 106.2 |
| 113.2 | 118    | 121.3 | 107.5  | 102.6  | 118.3 | 106.9 | 113.7  | 114   |
| 110.2 | 117.3  | 110.6 | 118.8  | 101.9  | 119.3 | 114.4 | 143.9  | 127.7 |
| 109.5 | 106.3  | 103   | 97.3   | 94.7   | 105.7 | 101.2 | 107.5  | 106.5 |
| 105.6 | 115.3  | 108.6 | 96.6   | 99.2   | 106.3 | 109.1 | 118    | 101.2 |

|       |       |       |       |       |       |       |        |       |
|-------|-------|-------|-------|-------|-------|-------|--------|-------|
| 112.4 | 139.5 | 186.4 | 181.5 | 108.3 | 209   | 132.7 | 137.5  | 125.2 |
| 114   | 119.2 | 106   | 111.4 | 106.2 | 114.1 | 112.4 | 116.9  | 117.7 |
| 104.2 | 116.5 | 104.7 | 103.3 | 88.6  | 110.7 | 99.4  | 109.7  | 105   |
| 224.5 | 249.3 | 169   | 287.4 | 356.2 | 257.4 | 721.3 | 673.9  | 228.1 |
| 109   | 103.9 | 102.6 | 101.5 | 97.6  | 113.9 | 108.3 | 99.8   | 103   |
| 104.4 | 99.3  | 100.6 | 103.8 | 97.3  | 109.7 | 96.7  | 110.1  | 106   |
| 112.5 | 115.3 | 103.3 | 100.9 | 92.9  | 105.6 | 104   | 106.6  | 100   |
| 296.3 | 333.5 | 367.8 | 258.1 | 343.3 | 310.3 | 314.1 | 574.4  | 351.9 |
| 107.2 | 103   | 105.4 | 96.2  | 101.3 | 116.5 | 105.4 | 108.3  | 101   |
| 104.3 | 115.7 | 103.6 | 103.5 | 99.2  | 112.2 | 94.4  | 120.4  | 111.1 |
| 107.3 | 109   | 108.5 | 109.5 | 95    | 115.1 | 98.3  | 106.4  | 109.6 |
| 106.9 | 108.6 | 96    | 103.3 | 104.4 | 103.9 | 101.4 | 104.7  | 102.5 |
| 155.8 | 168.6 | 135.3 | 169.9 | 129   | 148   | 165.6 | 215.2  | 186.9 |
| 116.8 | 109.9 | 104.6 | 94.6  | 101   | 108.4 | 111.6 | 106.5  | 114.4 |
| 106.3 | 109.4 | 114.2 | 108.8 | 90.5  | 103.4 | 94.6  | 112.8  | 105.7 |
| 100.4 | 129.9 | 124.3 | 150.9 | 122.4 | 134.1 | 109.6 | 147.2  | 122.3 |
| 108.3 | 127.9 | 109.7 | 109.7 | 101.9 | 111.6 | 110.5 | 119    | 114.7 |
| 108.3 | 116.7 | 111.8 | 106.6 | 106.2 | 117.4 | 105.3 | 118.1  | 111.6 |
| 272.6 | 515.5 | 514.5 | 383.3 | 390.8 | 534.6 | 367   | 651.4  | 400.1 |
| 106.4 | 112.4 | 99.7  | 100.6 | 90.1  | 101   | 100.9 | 109.6  | 112.3 |
| 107.9 | 114   | 100.5 | 105.7 | 97.3  | 103.7 | 97.1  | 108.5  | 106.7 |
| 107.8 | 107.2 | 107.6 | 110.6 | 102.4 | 112.2 | 108.1 | 116    | 117.8 |
| 106.3 | 109.8 | 107.4 | 104.1 | 106.4 | 112   | 105.3 | 108.2  | 119.2 |
| 107.3 | 115.4 | 108.8 | 116.3 | 96.6  | 112.3 | 106.8 | 123.6  | 105.2 |
| 100.7 | 109.2 | 106.2 | 117.1 | 96.6  | 114.3 | 105.4 | 118.5  | 114.5 |
| 108.9 | 110.5 | 99.9  | 102.4 | 97    | 111.7 | 110.9 | 112.9  | 121.9 |
| 116.5 | 112.5 | 106.5 | 115.7 | 98.8  | 111.4 | 114   | 117.3  | 103.2 |
| 122.4 | 132.5 | 121.5 | 126.2 | 121.8 | 121.5 | 128.8 | 131.3  | 128.1 |
| 109.9 | 109   | 106.8 | 107.2 | 99.1  | 104.4 | 112.4 | 113.3  | 128.6 |
| 110.6 | 131.1 | 122.8 | 105.4 | 116.1 | 130.7 | 108.9 | 138.2  | 115.1 |
| 106.6 | 137.4 | 128.3 | 116.8 | 124.1 | 137.1 | 116.4 | 139.5  | 119.4 |
| 110.1 | 111   | 100.8 | 103.2 | 103.3 | 104.7 | 100.9 | 110.7  | 105.3 |
| 106.7 | 106.7 | 101.2 | 105.1 | 98.4  | 109.9 | 107.7 | 110.5  | 117   |
| 104.3 | 108.9 | 100.4 | 111.1 | 92.6  | 102.1 | 103.7 | 107.2  | 103.1 |
| 106.8 | 107.7 | 105.7 | 97.2  | 92.8  | 113.8 | 104.1 | 112.4  | 109.7 |
| 104.4 | 113.3 | 114.5 | 224.8 | 102.1 | 113.9 | 149.5 | 110.2  | 113.4 |
| 112.8 | 112.7 | 112.4 | 102.8 | 93.8  | 112   | 110   | 107    | 107.6 |
| 113.9 | 115.4 | 112.9 | 105.8 | 102.6 | 108.2 | 114.2 | 126.1  | 111.4 |
| 106.1 | 107.1 | 106.2 | 98.2  | 96.1  | 101.4 | 104.2 | 112.7  | 108.5 |
| 111.2 | 104.9 | 97.7  | 103.8 | 92.5  | 111.1 | 99    | 110.7  | 106.9 |
| 104.3 | 103.2 | 109.8 | 100.1 | 93.4  | 111.4 | 102.2 | 116.3  | 111.4 |
| 105.6 | 107.7 | 98.8  | 94.8  | 89.8  | 97.4  | 97.2  | 107.2  | 103.8 |
| 101.6 | 100.5 | 105.2 | 105.9 | 100.4 | 104.6 | 99.4  | 117.7  | 103.8 |
| 110.8 | 100.7 | 103.7 | 98.4  | 90.2  | 106   | 100.6 | 105.4  | 112.5 |
| 107.6 | 106.4 | 104.8 | 98.1  | 98.7  | 106.6 | 92.5  | 101.7  | 115.1 |
| 113.2 | 112   | 111   | 93.4  | 94.9  | 110.9 | 108.3 | 105.8  | 106.3 |
| 110.3 | 102.2 | 90.2  | 92.1  | 95.8  | 114.3 | 99.2  | 114.7  | 109.1 |
| 103.6 | 119.8 | 120   | 127.2 | 96.5  | 129.5 | 113.5 | 121    | 134.4 |
| 111.4 | 116.3 | 98.9  | 105.1 | 98.9  | 108.2 | 105.9 | 109.9  | 115   |
| 459.5 | 982.8 | 518.4 | 639.6 | 736.9 | 524.9 | 593.5 | 1078.9 | 669.1 |
| 417.1 | 906.4 | 491.8 | 723.8 | 806.2 | 499.4 | 602.1 | 978.9  | 600.7 |

|        |        |        |        |        |       |        |        |        |
|--------|--------|--------|--------|--------|-------|--------|--------|--------|
| 103.4  | 110.4  | 99.8   | 90.4   | 97.1   | 108.1 | 103.5  | 112.4  | 113.1  |
| 100.6  | 109    | 103.7  | 104.2  | 104.8  | 115.6 | 100    | 104.3  | 109.8  |
| 103.2  | 107.4  | 97.1   | 92.5   | 94.3   | 100.9 | 101.5  | 104.2  | 103.3  |
| 102.3  | 111.5  | 105.8  | 94.1   | 93.7   | 103.6 | 101.7  | 117.2  | 112.3  |
| 100.7  | 114.6  | 107.3  | 112.7  | 97.5   | 110   | 110.5  | 114.4  | 112.1  |
| 103.6  | 102.6  | 105.2  | 98.4   | 102.5  | 109   | 107.6  | 108.4  | 99.4   |
| 212.9  | 324.1  | 263.6  | 347.5  | 210.2  | 272.7 | 228.5  | 377.1  | 354    |
| 120.5  | 220.5  | 219.3  | 235.8  | 197    | 153.6 | 309.6  | 224.8  | 189.8  |
| 105.9  | 109.5  | 110.2  | 101.8  | 94.5   | 108.5 | 102    | 114.9  | 115.9  |
| 99.3   | 104.5  | 97.1   | 98.3   | 97.5   | 107.4 | 92.9   | 111.8  | 117.8  |
| 113.8  | 112.3  | 104.7  | 104.6  | 100    | 109.8 | 106.6  | 107.9  | 108.4  |
| 99.7   | 106.3  | 102.1  | 113.5  | 93.8   | 101.9 | 102.1  | 108.7  | 120.6  |
| 101.7  | 105    | 93.8   | 98.6   | 89.8   | 99.2  | 127.4  | 99.9   | 112.5  |
| 106.9  | 115.2  | 108.4  | 103.7  | 94.7   | 111   | 103.5  | 111    | 109.1  |
| 116.7  | 118.7  | 100.1  | 138.9  | 108.8  | 109.1 | 104.8  | 125.8  | 119.5  |
| 100.9  | 111.3  | 104.5  | 108.5  | 95.9   | 113   | 101.7  | 112.2  | 107.9  |
| 109.6  | 106.5  | 102.1  | 103.9  | 92.3   | 96.4  | 101.2  | 113.6  | 104.6  |
| 108.9  | 106.4  | 108.1  | 94.1   | 99.2   | 111.2 | 101.2  | 105.8  | 98.3   |
| 137.5  | 142.7  | 136.1  | 121.7  | 124    | 159.6 | 133.4  | 221.2  | 220.3  |
| 172.7  | 358.2  | 396.4  | 276.6  | 269.1  | 321.3 | 259.6  | 283.7  | 179.5  |
| 107.8  | 106.3  | 104    | 98.7   | 97.5   | 105.8 | 107.2  | 102.3  | 106.7  |
| 104.3  | 111.1  | 95.9   | 103.4  | 95.8   | 100.5 | 105.4  | 110.3  | 110.8  |
| 102.2  | 113.4  | 103.8  | 104.4  | 95     | 112.2 | 97.2   | 110.2  | 113.3  |
| 112    | 111.8  | 106.3  | 107.8  | 99.6   | 116.7 | 104.7  | 106    | 118.7  |
| 136.2  | 137.6  | 119.2  | 124    | 109.9  | 128.5 | 122.4  | 142.8  | 151.7  |
| 104.7  | 120.8  | 110.8  | 118.9  | 100.1  | 129.9 | 106.1  | 137.5  | 108.3  |
| 107.3  | 106.9  | 108.3  | 99.8   | 93.8   | 112.6 | 104    | 113.1  | 111.3  |
| 112.9  | 114.5  | 111.6  | 106    | 102.5  | 122.9 | 113    | 118.5  | 120    |
| 99.3   | 109.7  | 102.4  | 101.8  | 95.9   | 117.4 | 102.6  | 108.4  | 104.7  |
| 114.7  | 113.9  | 97.2   | 101.7  | 97.7   | 112.2 | 102.5  | 115.3  | 107.6  |
| 108.8  | 108    | 104.2  | 109.4  | 97.5   | 111.8 | 101.2  | 108.2  | 115.9  |
| 102.9  | 106.2  | 101.7  | 116.3  | 94.3   | 116.5 | 103.8  | 123    | 108    |
| 106.1  | 112.9  | 104.6  | 98     | 93.9   | 113   | 106.5  | 104.6  | 109.7  |
| 117.5  | 119.5  | 113.6  | 103.5  | 107.1  | 117.3 | 108.3  | 128.5  | 122.2  |
| 248.1  | 525.4  | 548    | 508.7  | 481.4  | 558.5 | 489.6  | 626.7  | 371.2  |
| 117.8  | 136.7  | 136.5  | 122.3  | 124.4  | 150.3 | 135.7  | 152.7  | 127.1  |
| 187.8  | 313.8  | 321.7  | 249.6  | 282.9  | 309.4 | 255.6  | 513.1  | 294.6  |
| 102.4  | 101.5  | 98.3   | 99.3   | 93.8   | 110.6 | 98.2   | 114.5  | 100.9  |
| 111.7  | 113.9  | 113.8  | 103.5  | 109.6  | 125.5 | 111.5  | 124.9  | 130.6  |
| 252.5  | 497.8  | 372.6  | 372    | 396.6  | 355.5 | 351.6  | 654.5  | 279.2  |
| 646.2  | 1031.3 | 997.7  | 1164.6 | 828.6  | 898.3 | 1133   | 1282.7 | 859    |
| 119.9  | 107.6  | 108.5  | 99.1   | 97.8   | 118   | 115.1  | 123.4  | 119.5  |
| 133    | 158.6  | 165.7  | 114.4  | 142.8  | 178.2 | 141.5  | 190.8  | 116.9  |
| 294.7  | 1155.2 | 594.2  | 2702.1 | 808.1  | 470.5 | 2637.7 | 605    | 356.4  |
| 100.9  | 106.2  | 104.6  | 101.8  | 101.1  | 112.2 | 109.6  | 109.6  | 110.1  |
| 114    | 117.8  | 111    | 105    | 99.8   | 117.4 | 115.5  | 123.7  | 110.2  |
| 103.3  | 119.9  | 126.1  | 117.6  | 113.1  | 132.4 | 136.1  | 125.7  | 124.9  |
| 434    | 923    | 803.7  | 785.1  | 735.4  | 630.2 | 681.4  | 1537.1 | 790.4  |
| 2227.1 | 3758.2 | 3504.1 | 3797.9 | 3859.3 | 3250  | 4020.7 | 4851.3 | 2557.8 |
| 99.4   | 102.9  | 103.3  | 102.7  | 92.4   | 104.2 | 98.2   | 115.5  | 104.7  |
| 102.2  | 98.3   | 98.1   | 88.5   | 95.9   | 102.2 | 94.8   | 101.8  | 108.1  |

|        |        |       |        |       |       |        |       |       |
|--------|--------|-------|--------|-------|-------|--------|-------|-------|
| 117.8  | 96.5   | 98.6  | 102.2  | 91.4  | 112.9 | 101.8  | 113.3 | 116.9 |
| 128.6  | 193.1  | 186.9 | 234.3  | 177.8 | 156.4 | 194.5  | 200.5 | 168.2 |
| 210.5  | 387.4  | 550.6 | 399.2  | 335.6 | 535   | 419.4  | 337.9 | 230.8 |
| 113.3  | 108.8  | 110.6 | 99     | 98.4  | 108.5 | 105.6  | 110   | 110.2 |
| 106.9  | 108.9  | 105.9 | 97.6   | 88.7  | 102.7 | 101    | 107.4 | 110.9 |
| 129.4  | 130.6  | 132   | 111.2  | 107.9 | 143.7 | 118.5  | 124.2 | 122.6 |
| 118    | 112.4  | 115.3 | 121.3  | 102.5 | 110.3 | 113    | 120.5 | 104.6 |
| 1230.3 | 1021.5 | 955.9 | 1010.7 | 848.6 | 869.5 | 1310.3 | 1446  | 782.4 |
| 120.3  | 121.1  | 118.7 | 108.9  | 111.9 | 138.4 | 122    | 151.9 | 132.6 |
| 121.2  | 114.2  | 107.4 | 107.7  | 114.2 | 119   | 122.4  | 134.7 | 121.6 |
| 113.2  | 118    | 113   | 97.8   | 100   | 111.4 | 101.7  | 117.2 | 103.7 |
| 117.5  | 118.3  | 113.6 | 112.9  | 104.4 | 129.4 | 119.6  | 131.6 | 114.1 |
| 106.4  | 112.8  | 101.6 | 98.2   | 96.8  | 115   | 110.1  | 116.7 | 112.2 |
| 114.9  | 106    | 110.2 | 96.5   | 98.5  | 120.7 | 106.1  | 117.7 | 115.2 |
| 101.8  | 104.9  | 101.5 | 107.4  | 103.4 | 103.8 | 106.2  | 106.5 | 106.8 |
| 106.6  | 108.7  | 102   | 111.9  | 94.8  | 114.7 | 110.3  | 101.8 | 101.9 |
| 165.6  | 261.5  | 207.2 | 264.6  | 218.6 | 208.4 | 336.2  | 270   | 206.6 |
| 273.7  | 505.1  | 288.2 | 525.7  | 366.2 | 322.8 | 305.3  | 597.3 | 365.5 |
| 107.4  | 106.9  | 104.8 | 98.9   | 96.5  | 108.2 | 103.1  | 107.2 | 107.1 |
| 105.9  | 109    | 100.1 | 100    | 96.2  | 111.5 | 101.5  | 101   | 103.3 |
| 109.5  | 112.2  | 107.2 | 102    | 104.3 | 112.5 | 103.9  | 116.6 | 102.4 |
| 105.3  | 108.7  | 102.7 | 105.1  | 99.4  | 108.9 | 105.6  | 106.1 | 108.7 |
| 118.5  | 117.4  | 115.1 | 110.3  | 102.9 | 110.6 | 107.9  | 122.9 | 118   |
| 105.1  | 103.9  | 101.8 | 105    | 97    | 110.1 | 105.9  | 113.1 | 106.9 |
| 112.8  | 117    | 111.5 | 107.3  | 91.8  | 108   | 107.2  | 111.5 | 107.5 |
| 112.4  | 104.6  | 100.1 | 102    | 96.7  | 108.7 | 102.9  | 104.1 | 107.4 |
| 112.6  | 112    | 109.4 | 96.5   | 96.7  | 108.3 | 106.3  | 106.9 | 105.8 |
| 105.8  | 109.1  | 100.8 | 116    | 105.3 | 110.2 | 106.7  | 125.3 | 132.1 |
| 107.4  | 115.1  | 104.3 | 102.6  | 96.9  | 115.3 | 104.6  | 101   | 108.3 |
| 102.2  | 105.9  | 98    | 101.2  | 97.8  | 112.4 | 105.8  | 109.8 | 109.7 |
| 99.4   | 107.9  | 105.1 | 101.4  | 87.1  | 104.6 | 99     | 104.4 | 108.4 |
| 104.5  | 110.8  | 103.5 | 101.8  | 91    | 109.2 | 104.4  | 112.6 | 111.2 |
| 105.4  | 99.9   | 97.5  | 99.3   | 88.9  | 105.2 | 103.4  | 109.5 | 107.5 |
| 113.2  | 113.4  | 112   | 108    | 105.5 | 120.9 | 99.4   | 119.8 | 110.8 |
| 128.6  | 132.5  | 164   | 151.5  | 131.2 | 165.1 | 135.5  | 236.4 | 183.6 |
| 102.2  | 101.4  | 99.8  | 90.4   | 92.1  | 100.7 | 92.8   | 108   | 107.6 |
| 105.9  | 109.9  | 104.2 | 99.6   | 99.1  | 110.5 | 104.6  | 104.4 | 113.4 |
| 108.6  | 123.8  | 105.8 | 111.5  | 102.2 | 110.7 | 104    | 106.6 | 110.9 |
| 112.2  | 112.6  | 98.7  | 101.6  | 104.5 | 110.1 | 104.4  | 111.8 | 107.4 |
| 112.3  | 117.1  | 106.1 | 109.5  | 105.2 | 116.3 | 104.9  | 119.9 | 117.5 |
| 105.4  | 110.5  | 107.5 | 99.7   | 100   | 113.4 | 104.5  | 105.7 | 109.4 |
| 103.7  | 109    | 98.9  | 101.6  | 93    | 108.6 | 99.3   | 107.9 | 101   |
| 102.5  | 105.4  | 109.5 | 97.7   | 98.8  | 110.6 | 110.2  | 106   | 113.2 |
| 99.2   | 110.6  | 94.4  | 103.8  | 99.4  | 107.9 | 103.5  | 104.8 | 105.6 |
| 108.8  | 105.5  | 102   | 114.9  | 110.5 | 110.2 | 105.4  | 125.4 | 106.2 |
| 104.4  | 107.4  | 99.2  | 89.4   | 97    | 103.1 | 103.6  | 107.2 | 105.8 |
| 100.2  | 111    | 95.5  | 98.4   | 93.1  | 108.4 | 95.1   | 101.5 | 109.5 |
| 106.1  | 103.1  | 97.1  | 95.6   | 90.4  | 105.6 | 101.7  | 114.3 | 113.6 |
| 102.2  | 111.8  | 98.8  | 94.9   | 93.2  | 101.2 | 97.2   | 103.7 | 105.4 |
| 109.3  | 99.6   | 97    | 97.5   | 94.6  | 107.2 | 105.3  | 108.7 | 104.3 |
| 104.9  | 109.3  | 98    | 99     | 97.7  | 111.6 | 102.9  | 104.9 | 98.9  |

|        |        |        |        |        |        |       |       |        |
|--------|--------|--------|--------|--------|--------|-------|-------|--------|
| 104.8  | 112.6  | 110.3  | 112.4  | 105.2  | 119.7  | 111.4 | 125.9 | 111.7  |
| 105.8  | 105.3  | 103.6  | 101.4  | 99     | 114.9  | 103.9 | 109.1 | 110.2  |
| 113.1  | 104    | 98.7   | 104.7  | 95.3   | 107.7  | 100.1 | 105.1 | 99.7   |
| 126.5  | 158    | 137.7  | 143    | 128.7  | 153.9  | 129.6 | 185.1 | 156.5  |
| 113.9  | 111.1  | 108.7  | 103.1  | 109.1  | 122.3  | 110   | 122.9 | 114.8  |
| 100.6  | 112.4  | 111.2  | 95.2   | 93.7   | 111.8  | 99.2  | 104.2 | 119.1  |
| 104.9  | 105.3  | 97.9   | 103.3  | 93.6   | 107    | 96.8  | 118.9 | 103.6  |
| 105.1  | 111.9  | 103.4  | 102.8  | 86.3   | 100.6  | 94.9  | 109.9 | 106.7  |
| 104.7  | 102.8  | 95.8   | 99.3   | 94.3   | 103.2  | 90    | 105.3 | 106.4  |
| 114.5  | 113.6  | 105.1  | 110.3  | 101.8  | 111.6  | 110.7 | 123.9 | 117.8  |
| 148.8  | 214.2  | 166.3  | 232.8  | 206.8  | 193.2  | 246.7 | 218.6 | 137.9  |
| 198.1  | 429.5  | 198.3  | 501.7  | 267.6  | 177.8  | 443.2 | 353.7 | 165.9  |
| 102.9  | 106.2  | 100.4  | 114.5  | 98.6   | 105.2  | 105.1 | 105.5 | 112.9  |
| 155    | 139.1  | 124.6  | 143.7  | 113.6  | 144.2  | 147.8 | 216.8 | 186    |
| 105.4  | 116.3  | 105.7  | 108.1  | 107.3  | 118.1  | 100.9 | 134   | 118.5  |
| 100.3  | 100.5  | 96.4   | 89.5   | 93.7   | 101.2  | 103.5 | 100.9 | 98.5   |
| 105.4  | 115    | 100.5  | 98.9   | 92.5   | 100.8  | 101.6 | 112   | 103.9  |
| 156.8  | 166.7  | 186.3  | 151.4  | 141.1  | 157.8  | 174.4 | 247   | 200.4  |
| 117.1  | 124.4  | 118.3  | 122.3  | 111.8  | 133.1  | 116.8 | 140.5 | 146.7  |
| 1441.9 | 1283.5 | 1660.8 | 1224.2 | 1129.2 | 1310.7 | 977.8 | 2408  | 2743.2 |
| 106.3  | 101.9  | 97     | 89.1   | 97.2   | 96.1   | 98.5  | 104.5 | 108.3  |
| 103.9  | 101.2  | 101.2  | 94.4   | 90.4   | 103.5  | 100.7 | 104   | 105.3  |
| 113.6  | 110.3  | 106.2  | 102.6  | 101.2  | 123.8  | 105.8 | 116.3 | 117.7  |
| 101.8  | 112.9  | 101.1  | 94.9   | 98.2   | 106.8  | 110.1 | 117.4 | 124    |
| 147.4  | 187.9  | 159.9  | 179.8  | 147.6  | 170.5  | 148.9 | 240.8 | 171.9  |
| 112.5  | 146.8  | 138.3  | 134.1  | 143.2  | 150.9  | 147.5 | 187.7 | 148.5  |
| 120    | 141.9  | 167.7  | 122.3  | 142.4  | 147.2  | 140.5 | 175.7 | 155    |
| 100.1  | 103.2  | 95.1   | 96.8   | 92.3   | 101.9  | 90.8  | 105.8 | 105.6  |
| 107.9  | 111.5  | 104.4  | 98.1   | 105.9  | 107    | 98.8  | 114.7 | 120.9  |
| 106.8  | 115.9  | 103.4  | 107    | 93.8   | 111    | 105.6 | 102.9 | 106.7  |
| 124.1  | 130.3  | 117    | 122    | 118.6  | 132.1  | 123.8 | 149.2 | 132.4  |
| 111.2  | 103    | 101.3  | 97.2   | 93.4   | 111.5  | 100.6 | 106.1 | 113.4  |
| 108.2  | 110.8  | 108.1  | 105.3  | 97.9   | 108.1  | 102.9 | 121.3 | 106.1  |
| 105.1  | 117.5  | 94.1   | 100.6  | 94.5   | 100.9  | 100.9 | 123.8 | 108.9  |
| 98.3   | 95.7   | 97.2   | 97.6   | 92.4   | 101.7  | 102.8 | 100.9 | 104.9  |
| 104.4  | 107.8  | 101.8  | 105.5  | 101.5  | 100.2  | 98.5  | 99.6  | 108.2  |
| 106    | 111.9  | 105.8  | 96.4   | 96.1   | 106.2  | 103.8 | 103.4 | 109.2  |
| 103.6  | 104.4  | 102.4  | 99.8   | 92.7   | 105.1  | 97.8  | 105.1 | 111.8  |
| 106    | 103.6  | 104.8  | 101.8  | 101    | 114.6  | 101.1 | 118.1 | 105.9  |
| 257.7  | 523.7  | 260.5  | 1080.4 | 488    | 270.3  | 599   | 690.9 | 311.7  |
| 238.4  | 469.1  | 244.3  | 716.2  | 317.4  | 266.4  | 501.8 | 548.4 | 249.9  |
| 106.3  | 104.6  | 105.7  | 103.9  | 96.6   | 114.7  | 110.9 | 105.1 | 111.1  |
| 103.2  | 111.8  | 95.2   | 94     | 92.5   | 107.1  | 104.7 | 116.9 | 98.7   |
| 198.9  | 224    | 216.5  | 236    | 218.4  | 277.9  | 190.7 | 507.7 | 337.7  |
| 549.9  | 742.4  | 723.1  | 662.5  | 655.9  | 772.6  | 613   | 1076  | 737.2  |
| 112.5  | 113.9  | 104.5  | 95     | 98.5   | 109.5  | 98.1  | 107.1 | 106    |
| 111.2  | 114.7  | 104.2  | 100.5  | 92.7   | 105.9  | 98.7  | 101   | 97     |
| 316.9  | 462.4  | 411    | 350.4  | 362    | 529.5  | 358.7 | 661.8 | 416.7  |
| 107.7  | 104.7  | 97.1   | 95.9   | 93.6   | 108.2  | 105.8 | 109.7 | 112.7  |
| 176.3  | 271.4  | 272.8  | 232.2  | 241.3  | 292.4  | 254.5 | 335.5 | 221.5  |
| 121.1  | 121.8  | 110.9  | 118.2  | 96.2   | 123.1  | 121.4 | 129.5 | 114    |

|        |        |        |        |        |        |        |        |        |
|--------|--------|--------|--------|--------|--------|--------|--------|--------|
| 106.1  | 103.8  | 100.6  | 105.5  | 93.9   | 101.4  | 104.2  | 98.4   | 109    |
| 111.2  | 127    | 112.9  | 103.8  | 111.8  | 122.4  | 112.3  | 126.3  | 122.6  |
| 276.4  | 555.8  | 634.3  | 568.6  | 538.1  | 583.5  | 642.6  | 793.5  | 492.9  |
| 203.2  | 259.4  | 278.4  | 214.9  | 237.9  | 292.2  | 214.7  | 348.8  | 243.2  |
| 140.9  | 148.5  | 146.8  | 124.2  | 151.5  | 176.3  | 148.9  | 188.4  | 195    |
| 264.6  | 276.1  | 397.5  | 256.6  | 292.6  | 370.1  | 330.5  | 413.8  | 249.5  |
| 109.1  | 98.9   | 104.2  | 106.4  | 97.3   | 112.1  | 107    | 122.4  | 115    |
| 101.4  | 117.1  | 100.1  | 105.3  | 91.5   | 106.2  | 104.1  | 112    | 110.4  |
| 109.8  | 107.1  | 112.1  | 100.7  | 100.1  | 109.4  | 109.6  | 120.2  | 117.9  |
| 103.6  | 109.2  | 102.9  | 99.5   | 93.4   | 115.2  | 108.5  | 117.3  | 107.6  |
| 106.8  | 109.2  | 96     | 106.8  | 91.7   | 109    | 103.5  | 116.6  | 111.2  |
| 107.3  | 98.8   | 106.4  | 96.8   | 95.2   | 108.5  | 108.9  | 104.8  | 99.9   |
| 107.9  | 106.5  | 110.7  | 120.6  | 110    | 116.1  | 109.8  | 122.3  | 119.4  |
| 234.4  | 284.3  | 226.1  | 240.3  | 241.7  | 250.9  | 199.5  | 436    | 268.4  |
| 106.3  | 146.7  | 116.6  | 131    | 141.1  | 135.3  | 162.6  | 142.4  | 132.7  |
| 94.9   | 109.3  | 103    | 94.5   | 99.8   | 106.9  | 102.6  | 105.8  | 107    |
| 1069.4 | 1249.5 | 1046.8 | 1058.4 | 916.9  | 1290.3 | 966.6  | 1886   | 1105.5 |
| 144.3  | 304    | 326.8  | 254.5  | 311.8  | 348    | 307.5  | 320.4  | 255.4  |
| 109.5  | 113.9  | 98.8   | 102.5  | 104.1  | 124.9  | 113.9  | 124.7  | 116.7  |
| 224.7  | 198.1  | 213.5  | 237.2  | 209.9  | 216.3  | 288.8  | 301    | 197.2  |
| 105.2  | 114    | 100.5  | 91.3   | 92.9   | 109.9  | 98     | 108.7  | 107.4  |
| 106.8  | 111.6  | 102.7  | 100.3  | 97.3   | 111.7  | 103.1  | 111.4  | 113.1  |
| 109.6  | 106.4  | 106.3  | 98.4   | 99.7   | 107.8  | 118.7  | 100.8  | 109.3  |
| 99.2   | 111.3  | 108.9  | 96.4   | 97.9   | 114.2  | 108.3  | 113.3  | 109.7  |
| 101    | 105.3  | 101    | 102.6  | 95.3   | 107.9  | 104.5  | 106.9  | 117.1  |
| 107.2  | 112.1  | 103.6  | 89.6   | 95.4   | 103    | 99     | 108.8  | 111.9  |
| 556.4  | 2248.4 | 1965.7 | 2243.4 | 1292.6 | 1264.9 | 1590.2 | 1334   | 584.1  |
| 116.4  | 164.1  | 119.1  | 153    | 124.6  | 132.8  | 151.3  | 163.6  | 118.7  |
| 425.7  | 743.4  | 371.4  | 1189.2 | 665    | 276.1  | 901.8  | 519.7  | 161    |
| 107.8  | 102.7  | 105.2  | 88.1   | 93.9   | 102.2  | 104.5  | 98     | 97.7   |
| 467.1  | 631.5  | 354.3  | 1090.7 | 569.3  | 279.5  | 808    | 533.4  | 166.5  |
| 126.6  | 124.1  | 140.9  | 104.3  | 97.7   | 161.7  | 124.4  | 153.1  | 236    |
| 111.9  | 119.6  | 111.4  | 105.2  | 100.9  | 114.6  | 110.3  | 109.5  | 107.4  |
| 110.8  | 126.7  | 127.1  | 126.5  | 120.7  | 121.7  | 129.4  | 134.9  | 145.2  |
| 113.2  | 103.9  | 109.5  | 106.9  | 91.8   | 102    | 104.4  | 106.5  | 112.2  |
| 682.8  | 879.3  | 650.4  | 913.4  | 663.5  | 654.7  | 1027.2 | 1697.4 | 1052.9 |
| 113    | 109.5  | 109    | 111.7  | 104.5  | 114    | 115.5  | 115.9  | 107.5  |
| 1307.5 | 1567.8 | 1398   | 2485.6 | 1698.8 | 2107.1 | 2326.3 | 4200.2 | 3474.3 |
| 119.1  | 281    | 187.4  | 184.7  | 225.9  | 161.1  | 191.3  | 245.8  | 139    |
| 102.3  | 114.5  | 103    | 112.4  | 99.9   | 104.1  | 95     | 113.1  | 110.5  |
| 108.2  | 113.1  | 106    | 105.3  | 101.3  | 112.5  | 111.5  | 109.1  | 113.1  |
| 119.4  | 107.1  | 100.7  | 108.2  | 99.5   | 124.3  | 120.5  | 124.7  | 99     |
| 119.5  | 137    | 114.6  | 145.1  | 113.3  | 117.4  | 123.7  | 117.8  | 108.8  |
| 104.2  | 109.8  | 99.2   | 104.1  | 95.6   | 112    | 109    | 110.8  | 109.7  |
| 121.9  | 117.7  | 102.8  | 119.8  | 95.3   | 114.7  | 110.3  | 128.4  | 119.9  |
| 124.6  | 131    | 108.7  | 126.7  | 116.1  | 136.3  | 121.3  | 138.5  | 141.9  |
| 103.3  | 106.8  | 107    | 109.9  | 93.6   | 113.1  | 104.2  | 107    | 112.1  |
| 108    | 110.5  | 104    | 96     | 98.7   | 115.3  | 104.9  | 114.8  | 118.1  |
| 117.4  | 119.9  | 100.4  | 99     | 100.3  | 111.2  | 102.9  | 161.6  | 176.9  |
| 121    | 125.5  | 109.7  | 109.1  | 92.4   | 119    | 104    | 121.6  | 118    |
| 330.7  | 478    | 347.7  | 382.9  | 392.3  | 374.3  | 424    | 813.1  | 649.3  |



|       |        |       |       |       |        |       |        |        |
|-------|--------|-------|-------|-------|--------|-------|--------|--------|
| 502.1 | 409.5  | 298.3 | 324.6 | 323   | 454.5  | 344.3 | 834.6  | 820.7  |
| 198.6 | 307.4  | 244.9 | 218.2 | 265.8 | 235.8  | 243.9 | 315.2  | 228.4  |
| 615.1 | 847.5  | 698.6 | 679.5 | 606.2 | 700.8  | 773.9 | 1189.6 | 764.7  |
| 322.9 | 293.7  | 316.9 | 289.1 | 294.5 | 345.7  | 279.4 | 568    | 380.7  |
| 257.5 | 585.7  | 403.6 | 431.4 | 525.2 | 348.3  | 397.7 | 884.4  | 425    |
| 156.5 | 137.3  | 127.9 | 135.8 | 114.1 | 137.2  | 115   | 203.9  | 141.1  |
| 107.1 | 113.5  | 107.4 | 102.4 | 106.6 | 119.2  | 109.4 | 106.5  | 108.7  |
| 127.5 | 161.1  | 150.5 | 138.1 | 129.3 | 152.3  | 153.5 | 193.1  | 152.9  |
| 129.7 | 270.5  | 272   | 183   | 240.1 | 290.5  | 239.9 | 329.9  | 251    |
| 200.1 | 432.2  | 391.8 | 436   | 307.8 | 340.3  | 388.6 | 375    | 299.1  |
| 133   | 150.9  | 133.8 | 129.2 | 107.8 | 127.7  | 126.3 | 151    | 136    |
| 119.3 | 113.7  | 99.7  | 103   | 108.1 | 116    | 106.9 | 118.5  | 111.9  |
| 107   | 111.4  | 109.1 | 93    | 100.6 | 110    | 110.4 | 127.4  | 138.1  |
| 104.8 | 102.8  | 108.9 | 99.9  | 99    | 118.9  | 110.3 | 117    | 119.1  |
| 119.5 | 109.3  | 97.6  | 105   | 103   | 112.6  | 105.8 | 111.8  | 119.9  |
| 102   | 110.3  | 109.5 | 101.4 | 98.4  | 107.2  | 104.4 | 114.6  | 114.9  |
| 123.6 | 139    | 151.9 | 120.5 | 128.5 | 140.2  | 128   | 173.3  | 145.5  |
| 277.1 | 481.9  | 564.6 | 486   | 480.9 | 464.6  | 413.1 | 735.8  | 386.5  |
| 118.4 | 141.3  | 154.6 | 139.5 | 131.5 | 164.1  | 135.8 | 184.1  | 145.2  |
| 264.2 | 214.5  | 205.2 | 200.7 | 187.7 | 212.6  | 256.7 | 339.2  | 359.7  |
| 101.7 | 117.9  | 110.2 | 108.8 | 101.3 | 113.3  | 115   | 113.1  | 119.9  |
| 195.1 | 242    | 304.8 | 223   | 237.5 | 305.8  | 244.4 | 331.9  | 281.6  |
| 113.5 | 108.2  | 107.3 | 107.9 | 105.1 | 115    | 102.4 | 129.9  | 105.6  |
| 113.7 | 123.2  | 121.9 | 114.8 | 101.9 | 121    | 104.5 | 121.8  | 116.4  |
| 114.9 | 117.7  | 112.7 | 102.5 | 101.4 | 112.7  | 115.1 | 120.2  | 116.3  |
| 122.7 | 151.2  | 128.9 | 124.1 | 120.3 | 137.2  | 133.8 | 150    | 112.2  |
| 109   | 102.1  | 103.7 | 105.6 | 95.3  | 109.3  | 101.5 | 114.8  | 106.9  |
| 218.2 | 567.9  | 588.2 | 450.6 | 423.3 | 411.8  | 476.2 | 501    | 303.7  |
| 336.6 | 692.5  | 561.9 | 445   | 489.1 | 529.2  | 495.3 | 1257   | 768.7  |
| 113.2 | 115.7  | 116.9 | 110.3 | 102.4 | 119.9  | 105.2 | 128.8  | 118.8  |
| 645.9 | 1116.4 | 1191  | 768.1 | 963.9 | 1286.1 | 879.5 | 1729.4 | 1190.4 |
| 241.1 | 355.6  | 290.5 | 252.8 | 254.8 | 342.6  | 219.1 | 554.5  | 404.4  |
| 161.6 | 165.1  | 148.1 | 173.8 | 165.5 | 208.5  | 146.6 | 270.9  | 212.8  |
| 141.3 | 154.2  | 141.8 | 148.7 | 134.4 | 131.3  | 144.1 | 190.6  | 194.7  |
| 102.8 | 106.8  | 99    | 97.4  | 94.9  | 102.2  | 97.1  | 110.6  | 108.5  |
| 107.7 | 105    | 103   | 120.1 | 106.1 | 114.1  | 99.3  | 113.3  | 116.4  |
| 116   | 110.8  | 104.3 | 117.5 | 92.5  | 122.2  | 113   | 120.6  | 116.8  |
| 128   | 124    | 132.7 | 126.7 | 127.9 | 117.9  | 141.8 | 136.5  | 140.9  |
| 112.6 | 131.1  | 119.7 | 113   | 108.3 | 111.6  | 118.4 | 126.4  | 133.3  |
| 109.3 | 111.1  | 109   | 103.3 | 100.3 | 115.1  | 113.1 | 132.5  | 113.8  |
| 116.1 | 107.6  | 96.7  | 95.2  | 101.6 | 108.4  | 105.7 | 113.3  | 106.4  |
| 108.9 | 114.6  | 97.8  | 102   | 96    | 115.5  | 99    | 109.8  | 101.9  |
| 107.5 | 109.3  | 101.9 | 127.2 | 91.4  | 112.6  | 101   | 107.5  | 109.1  |
| 111.6 | 109.9  | 109.4 | 107.7 | 95.6  | 109.9  | 99.8  | 112.1  | 115.1  |
| 109.1 | 101.4  | 94.7  | 102.6 | 88.1  | 103.7  | 102.6 | 95.7   | 108.7  |
| 105.5 | 111.5  | 103.5 | 98.8  | 100.3 | 119.1  | 104.1 | 111    | 104.9  |
| 105.1 | 112.2  | 107.6 | 108.9 | 97.5  | 109.7  | 110.5 | 105.8  | 101    |
| 108.7 | 149.8  | 119.6 | 117.2 | 110.7 | 128.1  | 113.6 | 146.7  | 133.1  |
| 385.1 | 549    | 480.3 | 494.1 | 386.6 | 480.4  | 589.7 | 722.4  | 544.4  |
| 109.5 | 115.4  | 104.2 | 99.4  | 95.4  | 102.6  | 105.6 | 103.6  | 110.4  |
| 108.1 | 120.1  | 108   | 111.2 | 94.2  | 122.7  | 115.3 | 116.1  | 108.7  |

|        |        |        |        |        |        |        |         |        |
|--------|--------|--------|--------|--------|--------|--------|---------|--------|
| 181.1  | 381.8  | 339.8  | 369.6  | 324.8  | 328.2  | 362.4  | 364.1   | 239.6  |
| 134.9  | 146.7  | 137.2  | 144.1  | 124.8  | 151.7  | 126.2  | 169     | 173.3  |
| 282.1  | 413.2  | 337.2  | 518    | 297.7  | 313.2  | 374.7  | 728     | 561.6  |
| 104    | 98.8   | 103.1  | 98.8   | 93.2   | 100.6  | 94.8   | 106.2   | 107.4  |
| 97.6   | 105.7  | 97.9   | 92.4   | 90.4   | 102.4  | 101.5  | 106.9   | 108.6  |
| 106.1  | 106.2  | 102.7  | 96.7   | 95     | 102.3  | 95.9   | 94.6    | 101.9  |
| 108.9  | 113.5  | 102.4  | 100.1  | 100.1  | 107.2  | 102.4  | 99.1    | 102.2  |
| 106.3  | 106.2  | 103    | 100    | 97.3   | 107.4  | 97.3   | 100.5   | 108.5  |
| 103.7  | 108.6  | 96.5   | 99.9   | 93.6   | 98.8   | 100.6  | 99.8    | 102.3  |
| 347.1  | 691.4  | 928.2  | 725.5  | 662.4  | 618.4  | 548.2  | 727.7   | 343.7  |
| 399.9  | 864.1  | 935.3  | 710.7  | 676    | 764.3  | 526.5  | 793.2   | 369.9  |
| 111.1  | 109.1  | 103.3  | 107.2  | 95     | 104.3  | 103.5  | 113.1   | 109.4  |
| 102.2  | 111.1  | 107.4  | 116.8  | 102.9  | 115.4  | 105    | 112.6   | 104.4  |
| 95.1   | 106.2  | 105.9  | 98.3   | 90.4   | 104.5  | 101.4  | 109.6   | 110.6  |
| 125.1  | 140.1  | 141.4  | 117.6  | 115.5  | 127.5  | 143.3  | 140.3   | 102.7  |
| 110.3  | 111    | 103.2  | 98.5   | 95.6   | 113    | 99.2   | 108.9   | 111.4  |
| 330.9  | 737.3  | 888.5  | 788.6  | 692.7  | 719.5  | 581.8  | 874.8   | 939.3  |
| 439.7  | 967.4  | 610.7  | 487.2  | 646.7  | 495.5  | 508.4  | 1111.1  | 817.4  |
| 295.9  | 434.4  | 292.5  | 617.3  | 407.3  | 262.7  | 497.1  | 469.6   | 796.7  |
| 599.1  | 1417.2 | 1762.4 | 1270.3 | 866    | 1176.1 | 1108.6 | 880.2   | 648.8  |
| 158    | 245.5  | 251.1  | 217    | 197.1  | 220.5  | 185.7  | 211.9   | 163.6  |
| 107.3  | 108.6  | 99.5   | 94.6   | 98.3   | 108.7  | 101.1  | 103.5   | 99.9   |
| 109.7  | 358.7  | 233.5  | 212.2  | 211.7  | 237.2  | 278.3  | 294.2   | 118.6  |
| 104.6  | 102.7  | 99.9   | 95.2   | 96.2   | 108    | 102.4  | 113.3   | 103.3  |
| 121.9  | 175.6  | 191.6  | 194.9  | 139.2  | 147.4  | 182.5  | 135.2   | 126    |
| 111.2  | 101.9  | 103.2  | 95     | 99.9   | 104.9  | 104.2  | 104.9   | 110    |
| 108.6  | 112.5  | 105.8  | 105.6  | 102.5  | 112.4  | 107.2  | 110.8   | 122.1  |
| 116.2  | 110    | 101.1  | 94.5   | 94     | 109.7  | 103.2  | 104.8   | 103.7  |
| 104.7  | 103.8  | 106.8  | 97.4   | 95.2   | 104.7  | 92     | 104.1   | 102    |
| 115.4  | 105.9  | 100.7  | 102.8  | 99.8   | 108.5  | 103.4  | 108.8   | 115.8  |
| 134.2  | 146.6  | 151.2  | 147.8  | 148    | 142.7  | 133.3  | 233.5   | 219.7  |
| 122.3  | 119.2  | 114.2  | 103.4  | 112.8  | 132.6  | 111.3  | 146.7   | 128.4  |
| 131.8  | 124.6  | 111.5  | 110.8  | 109.6  | 132.1  | 119.4  | 149.8   | 148.8  |
| 104.9  | 102.3  | 101.5  | 95.1   | 93.8   | 97.4   | 104.4  | 94.1    | 109.3  |
| 162.7  | 351    | 172.9  | 560.5  | 239.4  | 206.4  | 332.4  | 352.2   | 208.4  |
| 2110.7 | 3467.8 | 2537.7 | 4206.4 | 2676.9 | 2362.8 | 3518.8 | 4088.4  | 1782   |
| 134.7  | 204.6  | 212.6  | 223.5  | 159.8  | 191.7  | 210.5  | 166     | 132.8  |
| 2664.2 | 3236.1 | 3326   | 3035.1 | 2623.2 | 3225.3 | 2777.6 | 6988.5  | 5419.3 |
| 218.2  | 297.5  | 270.1  | 146.4  | 312.1  | 350.7  | 214.4  | 765.7   | 577.3  |
| 104    | 99.5   | 93     | 92     | 89.4   | 104.6  | 88.2   | 105.6   | 98.5   |
| 110.8  | 112.7  | 94.6   | 103.6  | 98.5   | 113.4  | 97.5   | 109.3   | 115.1  |
| 7672.2 | 7368.6 | 7522.6 | 7731.7 | 7332   | 7986.4 | 7470.4 | 10090.1 | 8155.9 |
| 890.2  | 388    | 386.2  | 433.6  | 313.8  | 382.5  | 428.7  | 1002.4  | 1346.2 |
| 103.3  | 105.1  | 100.4  | 98.1   | 99.2   | 110.7  | 106.6  | 113.9   | 113.5  |
| 107.4  | 108.8  | 99.7   | 103    | 96.2   | 113.4  | 100.4  | 119     | 120.9  |
| 108    | 106.2  | 109.4  | 106.7  | 98.7   | 105.7  | 101.4  | 103.5   | 101.8  |
| 142.6  | 200.5  | 186.4  | 176.1  | 138.5  | 160.2  | 149.8  | 201.6   | 149    |
| 108.1  | 118.9  | 116.4  | 117.5  | 104.6  | 116.1  | 109.5  | 124.9   | 117.2  |
| 137.9  | 139.2  | 147.5  | 132.7  | 144.1  | 145    | 160.1  | 177.8   | 161    |
| 167.6  | 172.4  | 162.7  | 167.2  | 156.8  | 172.8  | 193.7  | 224.8   | 195.2  |
| 219.2  | 194.7  | 181.9  | 196.5  | 175.3  | 183.8  | 209.7  | 258.7   | 168.5  |

|        |        |        |        |        |        |        |        |        |
|--------|--------|--------|--------|--------|--------|--------|--------|--------|
| 112.3  | 131.6  | 127.1  | 185.2  | 109.3  | 136.6  | 137.6  | 186.8  | 156.4  |
| 184.7  | 349.5  | 322.9  | 398.4  | 311.9  | 350.2  | 366.2  | 322.5  | 242.8  |
| 106.7  | 157.6  | 141.4  | 142.7  | 130.8  | 138.2  | 142.4  | 173.7  | 148.4  |
| 203    | 560.9  | 480.6  | 599.2  | 520.5  | 393.8  | 617.8  | 731.9  | 312.9  |
| 121.9  | 156    | 146.9  | 124.1  | 111.4  | 152.3  | 134.3  | 143.6  | 136.1  |
| 118.1  | 106.7  | 111.3  | 119.9  | 97.5   | 109.9  | 101.5  | 135.7  | 123    |
| 114.5  | 164.9  | 162.6  | 154.3  | 137.8  | 139.4  | 158.5  | 149.5  | 125.3  |
| 116.8  | 116.2  | 114.8  | 103.5  | 105    | 117.5  | 101.3  | 113.7  | 99.8   |
| 107.1  | 112.7  | 106.6  | 102.4  | 98.8   | 114.9  | 99.9   | 115.4  | 104    |
| 111.6  | 132.7  | 116.5  | 104.4  | 163.6  | 153.5  | 125    | 233.3  | 136.2  |
| 106    | 100.7  | 97.2   | 101    | 92.4   | 113.5  | 97.8   | 103.9  | 105.9  |
| 113    | 119.1  | 101.9  | 102.8  | 97.4   | 121.6  | 115.5  | 113.9  | 102.4  |
| 108    | 110.3  | 106.3  | 106.7  | 104    | 112.3  | 104.2  | 119.6  | 113.7  |
| 102.5  | 112.9  | 101.8  | 104.5  | 97.5   | 118.1  | 106.1  | 105.9  | 119.7  |
| 108.1  | 111.2  | 103.6  | 104.7  | 91.2   | 110.2  | 106    | 104.4  | 112    |
| 111.1  | 116.8  | 101.6  | 108.7  | 97.9   | 114.2  | 101.3  | 111.9  | 103.7  |
| 114.7  | 103.1  | 97.4   | 99.5   | 90.8   | 109.6  | 97.6   | 99.3   | 112.6  |
| 104.9  | 109.4  | 108.2  | 102.4  | 101.2  | 111.8  | 107.4  | 108.9  | 105.1  |
| 101.3  | 112    | 96.2   | 91.8   | 91.4   | 108.3  | 97.4   | 101.9  | 110.9  |
| 109.4  | 112.4  | 105.9  | 112.7  | 99.5   | 126.3  | 106.6  | 114.2  | 127.8  |
| 141.5  | 166.4  | 168.1  | 164.5  | 128.1  | 133.9  | 186.5  | 121.2  | 113.8  |
| 110.3  | 113.5  | 106.4  | 99.1   | 99.7   | 109.2  | 107.1  | 113.5  | 112.9  |
| 425.9  | 538.7  | 633.8  | 429.9  | 452.5  | 553.1  | 575.6  | 880.9  | 634.8  |
| 126.3  | 167.8  | 156.4  | 156    | 145.5  | 164.3  | 159.7  | 174.5  | 148.8  |
| 469.9  | 801.9  | 686.7  | 641.3  | 703    | 661.2  | 743.8  | 1134.5 | 829.7  |
| 104.1  | 108.3  | 103.8  | 100.4  | 94.8   | 100.3  | 104.4  | 119    | 110.2  |
| 102.9  | 103.9  | 96.1   | 98.7   | 95.5   | 99.6   | 99.5   | 105.8  | 114.6  |
| 108.8  | 109.9  | 94.2   | 95.8   | 93.2   | 95.7   | 104.6  | 106.1  | 104.3  |
| 105.8  | 101.4  | 106.3  | 96.7   | 98.1   | 116.4  | 102.5  | 107.7  | 105.4  |
| 107.4  | 108.4  | 102.2  | 93.6   | 98.8   | 103.9  | 108.9  | 119.4  | 118.2  |
| 210.5  | 227.9  | 155.3  | 228.2  | 172.1  | 147.9  | 223.5  | 455.7  | 322.3  |
| 126.6  | 127.6  | 112.5  | 122    | 107.4  | 125.6  | 125.6  | 169.3  | 166    |
| 106.1  | 106.2  | 92.9   | 98.2   | 94.5   | 103.5  | 99.2   | 99.9   | 103.4  |
| 471.5  | 401.7  | 257    | 733.3  | 308.4  | 279.5  | 423.7  | 652.6  | 276.1  |
| 253.3  | 364.5  | 229.2  | 280.7  | 297.4  | 328.4  | 276    | 535.2  | 426.1  |
| 124.3  | 158.4  | 151.3  | 144.3  | 129.9  | 160.4  | 143.1  | 167.2  | 159.5  |
| 125.1  | 151.5  | 136.8  | 133.1  | 134.6  | 145    | 148.9  | 191.3  | 167.5  |
| 102.5  | 107.9  | 99.6   | 93.4   | 100.5  | 104.5  | 98.5   | 108.3  | 120.7  |
| 2164.6 | 423.1  | 141.9  | 1846.7 | 493.4  | 154.4  | 1563.6 | 929.1  | 2501.5 |
| 7243.4 | 954.7  | 184.8  | 4191.2 | 1166.8 | 328.1  | 4326.7 | 2314.3 | 8341.4 |
| 137.3  | 115.3  | 115.5  | 115.8  | 123.3  | 125    | 138.9  | 163.7  | 114.3  |
| 103.1  | 98.8   | 105    | 99.8   | 93.7   | 100.3  | 104.2  | 105.9  | 107    |
| 194.4  | 120.4  | 114    | 98.9   | 105.8  | 114.3  | 122.2  | 143.7  | 163.5  |
| 169.8  | 120.9  | 104.8  | 155.8  | 111.3  | 121.9  | 184.9  | 145.5  | 115.2  |
| 200.3  | 118.8  | 100.5  | 133.2  | 110.5  | 108.9  | 185.7  | 138    | 110.5  |
| 108    | 109.6  | 95.9   | 103.1  | 99.6   | 111.8  | 106.2  | 105.5  | 111.7  |
| 511.1  | 353.5  | 353.1  | 341.8  | 283.3  | 351    | 359    | 616.4  | 525.4  |
| 108.5  | 107    | 102.4  | 109.7  | 101    | 102.1  | 101.9  | 109.8  | 103.4  |
| 104.3  | 115.7  | 100.5  | 99.5   | 93.3   | 103.7  | 101.8  | 110.7  | 107.2  |
| 118.6  | 117.5  | 106.9  | 109.3  | 102.9  | 115.5  | 110.4  | 139.5  | 116.9  |
| 1128.8 | 1608.8 | 1407.1 | 1456.4 | 1288.6 | 1653.4 | 1302.1 | 2345.4 | 2120.3 |

|        |        |        |        |        |        |        |        |        |
|--------|--------|--------|--------|--------|--------|--------|--------|--------|
| 105.2  | 106.3  | 106.4  | 99.7   | 93     | 104.6  | 105.8  | 103.4  | 109.3  |
| 103.5  | 157.1  | 99.8   | 209.9  | 125.9  | 106.3  | 163.9  | 113.4  | 110.9  |
| 113.7  | 136.3  | 117.8  | 125.6  | 118.8  | 141.8  | 128.6  | 146.3  | 136.2  |
| 123.7  | 106.2  | 105.5  | 111.2  | 97.6   | 110.3  | 102.6  | 148.5  | 135.8  |
| 122.6  | 131    | 134.7  | 121.1  | 137.2  | 124.4  | 123.2  | 198.2  | 148.5  |
| 103.9  | 105.3  | 100.7  | 102.7  | 101.8  | 95.7   | 106.4  | 113.2  | 104.1  |
| 111.7  | 122.7  | 110.9  | 107.4  | 104.9  | 121.6  | 99     | 128.7  | 113.2  |
| 224.8  | 195.6  | 214.6  | 162.5  | 192    | 204.7  | 173.6  | 302.7  | 235.1  |
| 123.9  | 116.3  | 117.9  | 118.6  | 110.9  | 124.5  | 120.2  | 147.9  | 126.5  |
| 814.3  | 709.3  | 644.6  | 525.6  | 719    | 858.1  | 726.1  | 1115.5 | 1026.2 |
| 114.9  | 152.5  | 147    | 152.4  | 121.7  | 143.8  | 143.7  | 182.3  | 128.5  |
| 146.3  | 296.8  | 316.8  | 290.1  | 262.1  | 321.5  | 256    | 433.6  | 231.9  |
| 137.6  | 135.4  | 138.2  | 129.5  | 126.4  | 134.4  | 132.8  | 179.7  | 139.4  |
| 108.4  | 117.3  | 109.8  | 129.6  | 110.4  | 115.3  | 112.1  | 126.8  | 144.3  |
| 1352.2 | 1160.2 | 1347   | 937.7  | 1027.2 | 1167.7 | 793.9  | 2945.9 | 3182.1 |
| 108.5  | 113.5  | 107.8  | 110.5  | 94.2   | 120    | 105.5  | 103.9  | 120.6  |
| 102.3  | 104.6  | 101.6  | 103.5  | 99.3   | 104.7  | 96.1   | 106.5  | 106.6  |
| 107.2  | 108.8  | 99.9   | 106.3  | 100.2  | 108.3  | 108.2  | 120.8  | 111.6  |
| 163.4  | 348.9  | 203.1  | 493    | 294.1  | 156.9  | 459.6  | 232    | 144    |
| 2084.5 | 2217.2 | 2161.8 | 2645.7 | 1875.9 | 2495.3 | 2692.7 | 3426.6 | 2857   |
| 109.2  | 104.1  | 105.5  | 102.4  | 98.2   | 111.2  | 104    | 108.5  | 107.8  |
| 103.6  | 108.5  | 98.9   | 97.2   | 88.5   | 111.1  | 101.4  | 107.6  | 102.4  |
| 112.9  | 126.5  | 115.9  | 114.2  | 114    | 123    | 118    | 124.7  | 117.2  |
| 107.6  | 110.8  | 112.6  | 101.7  | 96.8   | 112.5  | 109.1  | 107.8  | 107    |
| 102.1  | 110.3  | 105.8  | 118.3  | 98.7   | 111.8  | 119    | 109.1  | 101.6  |
| 616.5  | 2630.5 | 2986.6 | 2659.7 | 1580.2 | 1316.1 | 1698.5 | 769.3  | 553.2  |
| 125.2  | 122.9  | 121.8  | 99.4   | 99.6   | 117.5  | 109.7  | 108.4  | 123.3  |
| 101.8  | 108.4  | 105.9  | 101.9  | 93.6   | 107.2  | 104.7  | 106.8  | 109.5  |
| 121    | 114.3  | 111.4  | 109.8  | 107.1  | 117.4  | 105.1  | 123.4  | 112.2  |
| 923.2  | 2068.8 | 1876.6 | 2474.9 | 1203.1 | 1061.8 | 1584   | 901.8  | 860.4  |
| 178.9  | 226.2  | 182.1  | 282.8  | 155.4  | 176.6  | 238    | 156.5  | 160.2  |
| 109.3  | 109.2  | 105.8  | 95.2   | 93.7   | 117.1  | 105.9  | 110.8  | 105.7  |
| 1104.1 | 2092.3 | 1568.1 | 1259.8 | 1554.6 | 1551.1 | 1487.1 | 3002.1 | 1722.7 |
| 106.5  | 107.6  | 114    | 101.1  | 102.7  | 116.3  | 109.9  | 117.4  | 129.1  |
| 110    | 119.5  | 114.6  | 114.2  | 113    | 116.8  | 116    | 124.4  | 105.1  |
| 346.9  | 529.5  | 472.3  | 443.6  | 543.2  | 400.2  | 395.7  | 746.8  | 512.4  |
| 268.8  | 349.1  | 312.3  | 330.8  | 271.1  | 268.6  | 301.3  | 551.2  | 376.5  |
| 162.9  | 165.3  | 144.1  | 166.2  | 140.8  | 153.5  | 155.8  | 164.7  | 146.9  |
| 112.2  | 115.1  | 102.7  | 105.9  | 101.1  | 111.6  | 112.1  | 121.4  | 114.9  |
| 134.9  | 124.4  | 113.4  | 120.8  | 100.9  | 129.8  | 119.7  | 145.6  | 140.7  |
| 190    | 187.1  | 185.3  | 232.7  | 191.7  | 196.6  | 244.1  | 223.7  | 187.7  |
| 103    | 113.6  | 109.8  | 104.2  | 105.1  | 116.2  | 105.3  | 120.3  | 112.1  |
| 113.6  | 112.8  | 110.3  | 121.4  | 104.9  | 125.2  | 122.6  | 115.2  | 116.7  |
| 112.5  | 114.9  | 116.2  | 106.4  | 106.1  | 111.6  | 111.8  | 112.1  | 117.4  |
| 118.5  | 117.9  | 109.7  | 122.1  | 110.3  | 129.4  | 108.7  | 126    | 113.5  |
| 100.7  | 107.9  | 98.7   | 97.9   | 101.1  | 109.2  | 106.4  | 98.7   | 113.2  |
| 102.2  | 103.2  | 100.3  | 104.5  | 100.5  | 108.4  | 108.8  | 108.4  | 116.2  |
| 107.3  | 105    | 103.1  | 102.1  | 100.6  | 107.7  | 106.2  | 102.6  | 102.9  |
| 109.7  | 114.1  | 102.6  | 99     | 98.5   | 108.1  | 105.3  | 108.9  | 106.8  |
| 117.8  | 111.6  | 101.7  | 135.8  | 96     | 116.8  | 123.2  | 118.6  | 105.2  |
| 190.5  | 263.4  | 222.7  | 238.3  | 215.7  | 246    | 224.6  | 431.6  | 343.9  |

|       |       |       |       |       |       |       |        |        |
|-------|-------|-------|-------|-------|-------|-------|--------|--------|
| 394.6 | 729.4 | 503.4 | 593.5 | 520.9 | 542.7 | 633.9 | 1454   | 1153   |
| 116.7 | 261.6 | 275.6 | 239.6 | 188.8 | 210.8 | 191.1 | 188.1  | 154.3  |
| 265   | 328.5 | 339.9 | 319.7 | 303.6 | 341.3 | 447.4 | 441.6  | 327    |
| 162.8 | 185.3 | 152.4 | 179.6 | 147.9 | 156   | 163.4 | 201.6  | 199.7  |
| 130.2 | 151.2 | 150.5 | 133.2 | 130.8 | 173.5 | 160.9 | 184.8  | 175.5  |
| 106.9 | 111   | 95.7  | 101.7 | 99.5  | 107.9 | 93.5  | 112.8  | 108.5  |
| 110.6 | 118.3 | 105.2 | 103.1 | 93.6  | 117.4 | 107.1 | 127.7  | 120.8  |
| 126   | 156.5 | 135.6 | 123.4 | 120.1 | 148.7 | 161.2 | 161.7  | 131    |
| 112.9 | 139.7 | 146.1 | 139.9 | 114.6 | 142.7 | 140.1 | 161.2  | 118.9  |
| 144.7 | 169.7 | 156.7 | 162.5 | 150.7 | 170.9 | 171.5 | 207.2  | 140.3  |
| 113.5 | 128.2 | 110.9 | 117.7 | 103.6 | 110.8 | 105.9 | 145.1  | 123.8  |
| 111.2 | 103.9 | 104.1 | 96.9  | 101.3 | 106   | 110.2 | 110.3  | 120.4  |
| 111.2 | 115.9 | 118   | 113.4 | 101   | 111.3 | 111.4 | 127.7  | 120.5  |
| 190.7 | 255   | 245   | 219.3 | 217.9 | 255   | 227.7 | 396.5  | 277.6  |
| 199.8 | 410.2 | 357.7 | 309.6 | 419.6 | 435.4 | 318.2 | 558.5  | 573    |
| 218   | 306   | 313.2 | 253.3 | 294   | 391.1 | 299.9 | 410.1  | 284.8  |
| 229.2 | 310.7 | 172.7 | 254.2 | 302.8 | 234.3 | 240.4 | 902.1  | 336.1  |
| 266.8 | 308.3 | 288.6 | 280.4 | 226.5 | 311.5 | 240.7 | 454    | 297.2  |
| 480.5 | 485.3 | 418.7 | 545   | 397.6 | 450.5 | 358.3 | 915.4  | 621.6  |
| 689.2 | 781.4 | 845.7 | 615.2 | 841.4 | 920.2 | 853.6 | 1093.6 | 828.5  |
| 110.3 | 111.4 | 110.2 | 104.5 | 97.9  | 108.7 | 100.9 | 113.3  | 102.8  |
| 107.7 | 110.9 | 101.1 | 105.3 | 94.3  | 110.5 | 101.6 | 108.8  | 116.4  |
| 121.4 | 126.1 | 123.9 | 118.4 | 115.6 | 130.3 | 121.7 | 138.9  | 125.3  |
| 143.1 | 187.4 | 162.2 | 177   | 156.4 | 165.6 | 204.5 | 249.9  | 166.3  |
| 109.4 | 105.5 | 106.1 | 104.8 | 93.9  | 109.9 | 103.7 | 111.7  | 99.9   |
| 109.2 | 109.4 | 98.4  | 105.6 | 87    | 114.3 | 105.7 | 116.6  | 114.7  |
| 200.5 | 308.2 | 247.3 | 201.3 | 248.6 | 264.9 | 218.3 | 290.9  | 247    |
| 119.7 | 131.8 | 137.9 | 121.4 | 116.6 | 155.7 | 116.5 | 164.3  | 150.7  |
| 106.9 | 118.5 | 106.4 | 113.5 | 95.2  | 121.6 | 113.1 | 112.8  | 113    |
| 108.9 | 108.9 | 106.6 | 98.7  | 96.6  | 105.8 | 96.4  | 115.8  | 107.3  |
| 186.8 | 162.6 | 173.1 | 143.8 | 175.4 | 177.5 | 193.6 | 327.9  | 268.5  |
| 137.4 | 157.5 | 132   | 170.4 | 127.9 | 138.4 | 153.3 | 218.4  | 163.2  |
| 105.4 | 120.3 | 108.1 | 102.9 | 95.9  | 111.8 | 111.5 | 115.9  | 115.6  |
| 100.9 | 106.3 | 102.6 | 103.7 | 97.7  | 111.6 | 104.6 | 107.3  | 103.3  |
| 106   | 128.2 | 120.2 | 103.1 | 103.4 | 121.5 | 114.5 | 119.2  | 115.2  |
| 112   | 130.2 | 122.7 | 116   | 109.8 | 128.2 | 113.9 | 118.2  | 116.8  |
| 103.4 | 111.7 | 98.3  | 110.7 | 92.2  | 108   | 100.4 | 110.9  | 100    |
| 104.8 | 114.9 | 101.1 | 96.6  | 94.5  | 101.2 | 96.3  | 102.1  | 117    |
| 105.5 | 104.8 | 104.1 | 94    | 88.1  | 115.8 | 100   | 105    | 95.2   |
| 311.1 | 310.2 | 303.3 | 250.7 | 331   | 327   | 327.4 | 320.6  | 255.8  |
| 193.6 | 195.7 | 198.6 | 181   | 204.2 | 204.1 | 213.3 | 281    | 237.5  |
| 106.9 | 116.2 | 115.1 | 105.3 | 103.5 | 123.9 | 110   | 123.5  | 115    |
| 102.2 | 106.9 | 94.5  | 98    | 93.5  | 107.8 | 99.3  | 102.5  | 106.5  |
| 127.6 | 135.3 | 143.3 | 147.4 | 147.9 | 151   | 160   | 140.1  | 154    |
| 136.6 | 140.3 | 128.3 | 124.9 | 130.2 | 130.9 | 132.7 | 158.4  | 115.6  |
| 108.4 | 114.4 | 125.5 | 103.1 | 94.7  | 117.8 | 121.7 | 134.1  | 117.1  |
| 381   | 397.5 | 415.5 | 343.5 | 331.4 | 340.6 | 371.8 | 522.8  | 337.8  |
| 357.1 | 695.7 | 542.7 | 542.8 | 410.5 | 505.2 | 423.7 | 599.8  | 449.2  |
| 188.2 | 344.6 | 308   | 212.4 | 266   | 284.1 | 246   | 279.7  | 211.6  |
| 497.9 | 361.2 | 388.8 | 373.4 | 315.7 | 482   | 437.2 | 957.8  | 1130.8 |
| 132.5 | 116.5 | 123.2 | 150.7 | 105.3 | 138   | 114.5 | 164.5  | 134.1  |

|        |        |        |        |        |        |        |        |        |
|--------|--------|--------|--------|--------|--------|--------|--------|--------|
| 104.2  | 106.4  | 101    | 106.9  | 97.5   | 105.7  | 99.5   | 102.8  | 115.3  |
| 106.9  | 106.8  | 109.6  | 104.6  | 96.9   | 114    | 108.3  | 111.4  | 101.9  |
| 109.4  | 109    | 104.5  | 108.1  | 99.1   | 110.4  | 111.4  | 109.9  | 108.2  |
| 166.1  | 106.8  | 103.5  | 103.1  | 97.7   | 105.5  | 101.2  | 136    | 133.6  |
| 141.8  | 166.2  | 139.8  | 160.4  | 151.4  | 189.8  | 138.5  | 300.6  | 198.2  |
| 105.4  | 100.1  | 99.9   | 90.6   | 85.2   | 114.7  | 103.8  | 110.6  | 100    |
| 98.8   | 115.8  | 109    | 113    | 102.4  | 104.9  | 100.3  | 104    | 112.3  |
| 113.7  | 109.2  | 109    | 109.2  | 110.6  | 107.4  | 116.5  | 133.1  | 121    |
| 1209.3 | 2055.5 | 1353.3 | 2546.8 | 2130.6 | 1654.5 | 2527.7 | 3073   | 1339.8 |
| 114    | 129.3  | 135.1  | 118.2  | 101.4  | 124.8  | 113.9  | 129.8  | 112.4  |
| 113    | 122.9  | 109.5  | 100.3  | 100.3  | 116.8  | 116    | 123.9  | 124.1  |
| 122.8  | 123.5  | 114.6  | 109.2  | 103.4  | 120.5  | 108.5  | 137.8  | 122.6  |
| 114.5  | 115.9  | 104    | 102.7  | 90.8   | 101.6  | 103.7  | 107.9  | 123.3  |
| 107.5  | 105.7  | 103.4  | 95.8   | 95.4   | 109.5  | 107.9  | 116.8  | 117    |
| 119    | 126.3  | 105.6  | 103.8  | 99.8   | 109.1  | 108.8  | 116.3  | 114.6  |
| 101.6  | 106.1  | 104.4  | 97.8   | 97.6   | 100.7  | 105.9  | 114    | 107.1  |
| 109.1  | 105    | 97.3   | 100.6  | 98.1   | 106.5  | 95.1   | 112.7  | 112    |
| 111.5  | 111.9  | 101.3  | 108.3  | 96.4   | 105.9  | 108.7  | 106    | 111.3  |
| 100.8  | 124    | 110.6  | 106.3  | 99.1   | 107.2  | 103.9  | 104.9  | 103    |
| 107.8  | 105.9  | 101.9  | 102.4  | 101.2  | 102.3  | 108    | 103.1  | 100.1  |
| 108.4  | 107    | 106.5  | 102.6  | 91.6   | 111.4  | 105    | 110.5  | 111.4  |
| 103.2  | 110    | 101.1  | 93.9   | 86.8   | 106.4  | 111.2  | 100.2  | 95.5   |
| 115.2  | 103.4  | 112.7  | 103.7  | 104.2  | 107.4  | 113.1  | 129.1  | 111.8  |
| 104.6  | 116.4  | 115.8  | 118.4  | 94.6   | 112.6  | 109.1  | 123.4  | 118.5  |
| 117    | 106.7  | 107.8  | 92     | 96.9   | 109.8  | 101.9  | 116.2  | 110.4  |
| 106.8  | 111.1  | 101.2  | 108.8  | 102.2  | 108.8  | 106.2  | 103.7  | 119.9  |
| 109    | 99.8   | 101.5  | 99.7   | 97.4   | 110.1  | 107.7  | 106.3  | 105.1  |
| 1146.4 | 1040.5 | 1220.6 | 892.4  | 1089.3 | 1324.1 | 1057.6 | 2506.6 | 1798.9 |
| 101.9  | 113.6  | 112    | 106.5  | 97.4   | 111    | 101.1  | 106.8  | 106    |
| 120.7  | 161.8  | 116.6  | 137.3  | 103    | 121.8  | 146.4  | 140.9  | 125.1  |
| 104.4  | 103.3  | 102.3  | 98.4   | 95.9   | 105.7  | 100.5  | 111.6  | 104    |
| 105.9  | 104.6  | 101.6  | 99.7   | 97     | 105.1  | 106.9  | 116.9  | 114.6  |
| 100.8  | 107.2  | 99     | 102.1  | 102.6  | 105.7  | 106.3  | 98.3   | 106.9  |
| 109.9  | 103.9  | 98.4   | 96.9   | 94.6   | 109.7  | 113.3  | 108.6  | 107.9  |
| 113.1  | 105.3  | 108.6  | 108.2  | 94.1   | 109.9  | 103.3  | 106    | 117.6  |
| 99.3   | 115.4  | 100.8  | 104.3  | 99.8   | 103.4  | 102.7  | 107.6  | 104.4  |
| 134    | 124.7  | 120.4  | 121.2  | 114.1  | 146.2  | 115.8  | 142.2  | 133.1  |
| 254.4  | 332.6  | 312.8  | 277.5  | 291.6  | 324.6  | 293.3  | 395    | 435.3  |
| 173.8  | 270.6  | 298.6  | 285.2  | 283    | 279.4  | 321.1  | 285.1  | 203.9  |
| 183.7  | 225.2  | 207.4  | 204.8  | 168    | 186.2  | 252.7  | 250.8  | 249.8  |
| 111.7  | 110.5  | 108.6  | 106.9  | 103.3  | 115.6  | 112.7  | 109.4  | 113.7  |
| 238.4  | 237.4  | 249.7  | 207.8  | 233.6  | 280    | 248    | 386.1  | 294.4  |
| 275.2  | 239.4  | 210.4  | 240    | 219.9  | 172.2  | 210.7  | 398.9  | 328.7  |
| 168.7  | 180.2  | 194.6  | 132.3  | 184.3  | 151.1  | 159.2  | 326.8  | 293.8  |
| 141.8  | 144.6  | 144.9  | 126.8  | 140.2  | 150.5  | 140.7  | 208.4  | 158.7  |
| 106.7  | 104.3  | 109    | 93.2   | 97.1   | 105.9  | 106.5  | 108.1  | 108    |
| 122.2  | 121.7  | 106.4  | 114.3  | 106.4  | 121.6  | 108.2  | 115.5  | 107.4  |
| 105.2  | 108.8  | 101.3  | 101.5  | 98.6   | 104.1  | 102.2  | 107.9  | 110.4  |
| 108.1  | 107.2  | 100.9  | 107.9  | 105.7  | 105.9  | 105.5  | 114.9  | 110.7  |
| 107.8  | 108.1  | 101.1  | 104.3  | 95.9   | 102.8  | 100.5  | 99.6   | 110    |
| 131.3  | 142.4  | 116.4  | 153.9  | 111.9  | 120.9  | 112.2  | 135.1  | 122.3  |

|        |        |        |        |        |        |        |         |        |
|--------|--------|--------|--------|--------|--------|--------|---------|--------|
| 562.1  | 441.1  | 410.3  | 501.3  | 311.4  | 411.5  | 446.9  | 801.2   | 695.5  |
| 110.9  | 110.5  | 105.7  | 104.6  | 95.2   | 113.9  | 105.3  | 112.9   | 114.7  |
| 472.6  | 662.4  | 678.2  | 618.8  | 589.9  | 665.8  | 887.4  | 1178.9  | 665.1  |
| 103.2  | 107.4  | 103.7  | 91     | 98.1   | 104.7  | 107.4  | 113.7   | 120.5  |
| 108.1  | 105    | 98.9   | 96.5   | 99.7   | 109.3  | 94.7   | 102.1   | 101.3  |
| 106.1  | 109.3  | 110.4  | 102.9  | 106.1  | 106.8  | 103.5  | 109.9   | 121.3  |
| 5352.9 | 5147.3 | 5167.3 | 4498.8 | 4793.6 | 5254.1 | 4866.1 | 11958.6 | 9009.2 |
| 133.2  | 227.3  | 214.3  | 227.3  | 169.7  | 210.2  | 234.8  | 218.9   | 173.7  |
| 101    | 110.4  | 102    | 103.7  | 94.9   | 103.5  | 100.3  | 103.7   | 108.6  |
| 144.3  | 119.1  | 114.7  | 109.1  | 114.1  | 126.7  | 168.9  | 125.1   | 134.7  |
| 131.2  | 128.8  | 145.7  | 118.6  | 106.9  | 118.7  | 139.3  | 134.3   | 154.1  |
| 137.6  | 125.3  | 114.4  | 112    | 111.5  | 120    | 123.2  | 134.9   | 135.6  |
| 114.9  | 110    | 98.6   | 107.9  | 104.5  | 110.6  | 106.9  | 122     | 127.1  |
| 101.5  | 108.7  | 97.4   | 99.4   | 100.2  | 102.7  | 101.8  | 109.3   | 102.1  |
| 106.7  | 106.3  | 103.4  | 100.2  | 96.6   | 106.1  | 94.5   | 105.6   | 102.5  |
| 99.8   | 106.4  | 97.9   | 98     | 90.4   | 109.3  | 96     | 106.3   | 113.9  |
| 102.7  | 104.3  | 102.3  | 99.5   | 107    | 111.4  | 100    | 109.9   | 107.8  |
| 99.1   | 104.5  | 97     | 96.6   | 89.9   | 95.1   | 93.3   | 96.9    | 103.3  |
| 176.2  | 147.4  | 146    | 138.5  | 152.9  | 157.5  | 130    | 186.5   | 158.9  |
| 116.3  | 105.2  | 105.3  | 109.3  | 100.6  | 109.3  | 102    | 120.7   | 123.1  |
| 107.4  | 118.2  | 104.3  | 103.9  | 103.3  | 115.1  | 106.8  | 129.1   | 118.7  |
| 108    | 106.1  | 108    | 102.1  | 101.2  | 115.3  | 99.3   | 109.1   | 102.1  |
| 112.5  | 113.9  | 106.3  | 116.1  | 104.9  | 118.8  | 106.4  | 131.6   | 116.6  |
| 120.5  | 184.4  | 211.4  | 190.5  | 171.2  | 215.4  | 173.3  | 265.3   | 196    |
| 99.2   | 104.8  | 100.6  | 92.9   | 90.7   | 102.2  | 105    | 106     | 103.1  |
| 149.1  | 164.7  | 158    | 157.7  | 155.4  | 181.4  | 172.6  | 188.7   | 161.5  |
| 106    | 102.8  | 96.5   | 90.5   | 94.2   | 99.3   | 111.8  | 100.1   | 110    |
| 114.6  | 106.2  | 95     | 112.2  | 95.1   | 112    | 100.9  | 111.2   | 109.3  |
| 106.3  | 112.5  | 107    | 100.8  | 97.7   | 109.4  | 111.4  | 111.4   | 116.1  |
| 109.9  | 107.9  | 100.9  | 107.1  | 100.9  | 105.1  | 101.8  | 107.5   | 114.7  |
| 137.4  | 128.4  | 134.3  | 114.1  | 137.6  | 182.8  | 123.2  | 294.9   | 136    |
| 102.8  | 112.3  | 101.5  | 105.2  | 98.9   | 107.6  | 102.3  | 112.8   | 106.7  |
| 100.2  | 103.9  | 99.4   | 92.7   | 100.4  | 108.4  | 107.3  | 108.6   | 99.8   |
| 105.9  | 102.7  | 102.6  | 96     | 94.3   | 104.7  | 100.6  | 102.5   | 106.3  |
| 107.2  | 108.3  | 102.5  | 104.1  | 103.2  | 111.2  | 101.5  | 111.9   | 114.5  |
| 103.4  | 110.3  | 108.2  | 103.5  | 97.7   | 109.3  | 102.6  | 107.8   | 111.1  |
| 154.5  | 176.2  | 142.3  | 118.7  | 193.3  | 195.6  | 146.7  | 372.6   | 247.2  |
| 103.5  | 102.9  | 99     | 98.3   | 96.3   | 106.7  | 100.7  | 100.8   | 104.5  |
| 104.1  | 99.6   | 105.4  | 105.4  | 92.9   | 101.7  | 100.5  | 122.2   | 139.3  |
| 107.4  | 106    | 95     | 91.7   | 92.6   | 103.9  | 105.6  | 102.1   | 107.3  |
| 105.8  | 102.5  | 97.4   | 99.8   | 92.6   | 107.5  | 105.6  | 113.3   | 110.5  |
| 108.6  | 113.2  | 105.6  | 100.8  | 93.8   | 104    | 96.9   | 122.1   | 113.5  |
| 105.6  | 107.4  | 94.6   | 101.6  | 96.5   | 105.1  | 102.3  | 106     | 98.9   |
| 108.3  | 111.4  | 100.7  | 108.4  | 104.7  | 120.7  | 104.8  | 118.4   | 127.2  |
| 121    | 112.9  | 109.6  | 98.9   | 99.8   | 110.7  | 108.6  | 164.6   | 253.4  |
| 105.3  | 103.6  | 96.8   | 97.9   | 91.6   | 104.4  | 97     | 107.1   | 107.9  |
| 109.9  | 106.9  | 101.3  | 95.2   | 93.1   | 113.1  | 96.5   | 132.8   | 178.4  |
| 101.5  | 111.1  | 96.4   | 93.5   | 107.2  | 120.1  | 107.2  | 130.9   | 113.6  |
| 186.4  | 255    | 321.2  | 150    | 297.8  | 405.2  | 186.4  | 638.5   | 302.9  |
| 133.7  | 169.1  | 190.9  | 110.1  | 183.6  | 286.4  | 127.3  | 375     | 350.9  |
| 96.8   | 100.6  | 100.9  | 106.9  | 97.7   | 102.3  | 98.8   | 116.1   | 104.4  |

|        |        |        |        |        |        |        |        |        |
|--------|--------|--------|--------|--------|--------|--------|--------|--------|
| 117.2  | 105.1  | 102.3  | 103.4  | 103.6  | 121.7  | 109    | 114.9  | 124.5  |
| 114.2  | 106.7  | 101.1  | 99.2   | 96.8   | 109.5  | 102.6  | 127.1  | 122.8  |
| 119.5  | 111.3  | 111.5  | 99.1   | 112.3  | 113.5  | 112.6  | 183    | 232.1  |
| 107.3  | 104.1  | 108.6  | 96.3   | 92.6   | 101.9  | 104.1  | 109.6  | 121.7  |
| 103.6  | 107.3  | 99.8   | 89.2   | 93.2   | 104.8  | 104.6  | 112.4  | 107.2  |
| 249.2  | 256.4  | 223.1  | 258    | 196.5  | 201.8  | 220.5  | 412.5  | 286.5  |
| 1101.6 | 2208.6 | 1903.8 | 942.3  | 2519.5 | 2310.3 | 1527.7 | 5973.7 | 3412.8 |
| 103.8  | 101.6  | 97.8   | 102.9  | 82     | 106.6  | 94     | 106.7  | 110.9  |
| 98.8   | 106.2  | 104.9  | 101.8  | 100.5  | 106.8  | 103.2  | 107.9  | 102.5  |
| 113.4  | 102.3  | 97.9   | 102.4  | 92.5   | 103.4  | 101.5  | 113.4  | 103    |
| 119.8  | 117.4  | 107    | 115.8  | 104.6  | 121.9  | 109    | 160    | 165.5  |
| 107.6  | 106.7  | 98.6   | 95.8   | 88.4   | 105.6  | 93.9   | 96.8   | 105.6  |
| 111.9  | 105.7  | 102.9  | 101.4  | 88.6   | 107.6  | 105.9  | 109.4  | 127.9  |
| 122.9  | 108.4  | 113.6  | 114.8  | 109    | 123.9  | 112.1  | 169.7  | 139.6  |
| 120.1  | 112.8  | 102.4  | 117.9  | 104.8  | 117.4  | 115.9  | 146.2  | 123.6  |
| 107.8  | 105.7  | 110.7  | 104.2  | 105.6  | 113.5  | 110.2  | 128.2  | 119.1  |
| 113.8  | 112.8  | 108.9  | 108    | 102.2  | 116.8  | 108.6  | 129.4  | 138.3  |
| 120.9  | 112.4  | 102    | 105.1  | 107.7  | 116.5  | 112.3  | 124    | 139    |
| 106.4  | 105.1  | 101.9  | 103.1  | 94.4   | 112.2  | 107.6  | 136.4  | 149.5  |
| 121.6  | 111.7  | 106.7  | 104.3  | 103.4  | 115.2  | 102.3  | 230.3  | 323    |
| 111.5  | 116.3  | 115.3  | 106.3  | 103.3  | 126    | 115.7  | 145    | 164.7  |
| 1611.4 | 2634.1 | 2554.1 | 2282.2 | 2036.3 | 2974.2 | 943.5  | 2855.4 | 2173.8 |
| 102.5  | 106.3  | 95.4   | 93.7   | 94.2   | 104.8  | 105.9  | 110.1  | 104.8  |
| 115.4  | 112.7  | 99.5   | 108.8  | 95     | 120.3  | 97.8   | 125.4  | 125.4  |
| 115.6  | 100.1  | 108.5  | 89     | 95.4   | 111.3  | 104.9  | 113.1  | 124.7  |
| 105.1  | 114.6  | 108.3  | 107    | 95.1   | 109.2  | 103.5  | 102.6  | 114    |
| 144.9  | 157.4  | 140.8  | 99.8   | 152.2  | 189    | 126.5  | 434    | 348.6  |
| 107.2  | 109.8  | 101.5  | 113.3  | 95.8   | 106.6  | 103.7  | 110.1  | 107.1  |
| 103.8  | 102.6  | 99.7   | 100.4  | 95.2   | 116.6  | 99.8   | 112.7  | 110.1  |
| 102.9  | 106.2  | 102.3  | 107    | 94.3   | 106.7  | 94.4   | 106.5  | 101.5  |
| 227    | 261    | 246    | 180.6  | 235.1  | 227.1  | 231.4  | 679.3  | 559.1  |
| 101.8  | 110.2  | 109    | 110.3  | 96.6   | 111    | 113    | 106.9  | 121.3  |
| 182.8  | 179.8  | 169.6  | 161.4  | 181.8  | 220.3  | 182    | 479.4  | 508.6  |
| 134.8  | 122.8  | 122.5  | 118.4  | 107.6  | 119.7  | 125.9  | 158.3  | 152.2  |
| 119.2  | 124.5  | 112.9  | 105    | 105.9  | 123.7  | 108.1  | 133.5  | 142.4  |
| 105.5  | 105.1  | 93.8   | 102.4  | 92.5   | 102.5  | 97.7   | 113.4  | 132.2  |
| 106.4  | 120.6  | 108.7  | 109.7  | 107.9  | 136.4  | 114.2  | 139.7  | 125.3  |
| 138.3  | 167.2  | 123    | 136.4  | 118.8  | 145.9  | 135.5  | 188.6  | 240.4  |
| 103.1  | 112.5  | 98.8   | 111.6  | 98.7   | 104.5  | 104.1  | 108.9  | 109.1  |
| 108.4  | 105.1  | 103.6  | 114    | 98.8   | 109.7  | 106.5  | 111    | 106.2  |
| 99.4   | 115.8  | 96     | 97.1   | 97.9   | 115    | 102.6  | 120.9  | 128.4  |
| 140.2  | 130.3  | 130.2  | 122.4  | 116.7  | 141.3  | 133.6  | 168.2  | 188.5  |
| 132.5  | 130    | 120.7  | 115.2  | 114.6  | 131.8  | 133.8  | 164.7  | 141.9  |
| 102.2  | 107.8  | 97.5   | 101.5  | 95.6   | 104.2  | 96.4   | 112.7  | 104.8  |
| 1045.7 | 1475.9 | 1501.5 | 1875.2 | 1530   | 1597.9 | 2401.3 | 1844.8 | 1113.4 |
| 110    | 108.5  | 101.9  | 108.8  | 105    | 106.8  | 103.1  | 118.5  | 113.4  |
| 106.1  | 107.5  | 102.5  | 107.9  | 97.5   | 110    | 100.8  | 104.5  | 108.3  |
| 102.6  | 104    | 92.8   | 93.5   | 93.5   | 109.4  | 99.2   | 108.2  | 107.3  |
| 145.3  | 171.6  | 150.6  | 138.1  | 157.7  | 164.2  | 163.1  | 276.8  | 124.8  |
| 110.6  | 125.1  | 130    | 168.8  | 112.4  | 138.5  | 122.4  | 125.3  | 116.4  |
| 101.1  | 114.6  | 118.6  | 110.9  | 102.1  | 121.6  | 106    | 120.5  | 112.9  |



|         |         |         |         |         |         |         |        |        |
|---------|---------|---------|---------|---------|---------|---------|--------|--------|
| 119     | 137.2   | 120.4   | 127.5   | 116.8   | 132.6   | 134.9   | 149.5  | 135.8  |
| 107.4   | 112.1   | 114.9   | 97.3    | 114.6   | 111     | 106.1   | 124.9  | 116.8  |
| 356.2   | 289.2   | 296.7   | 335.2   | 253.7   | 292.4   | 354.1   | 368.6  | 246.8  |
| 13298.1 | 19476.5 | 14132.2 | 20128.3 | 14609.6 | 12622.9 | 17871.1 | 18015  | 8708.5 |
| 115.4   | 112.5   | 106.2   | 98.4    | 98.6    | 103.9   | 103.7   | 107.5  | 105.4  |
| 800     | 2077    | 925.3   | 3491.6  | 971.4   | 532.9   | 2071.7  | 542.8  | 392.5  |
| 537.7   | 2440.5  | 1085.7  | 5237.9  | 1471    | 520.4   | 2503    | 595.7  | 432    |
| 138     | 295.7   | 228.9   | 267.7   | 178.5   | 168.2   | 185     | 136.7  | 129.2  |
| 124.3   | 286.5   | 201.9   | 188.6   | 161.4   | 133.9   | 141.1   | 123.8  | 125.5  |
| 2667.1  | 2773.5  | 1214.7  | 7885.3  | 1048.6  | 571     | 2700.5  | 501.8  | 391.9  |
| 150.3   | 193.7   | 137.8   | 293     | 117.7   | 120.1   | 158.8   | 118.4  | 120.8  |
| 108.2   | 118.4   | 107.9   | 110.1   | 100.4   | 105.9   | 96.6    | 103.7  | 114.5  |
| 788.3   | 1015.4  | 368.5   | 2312.5  | 378.5   | 220.2   | 905.7   | 185    | 229.7  |
| 101.2   | 110.2   | 112.1   | 102.9   | 96.6    | 113.7   | 103.7   | 112    | 113.4  |
| 152.2   | 173.5   | 105.7   | 303.3   | 119.2   | 114.2   | 149.8   | 115.5  | 131.3  |
| 107.9   | 111.6   | 104     | 107.8   | 98.7    | 112.2   | 110.3   | 104.7  | 106.5  |
| 4033.9  | 4228.7  | 1586.4  | 9303.6  | 2017.5  | 850.1   | 5504.6  | 1252   | 1500.2 |
| 113.4   | 109.4   | 189.8   | 120.6   | 92.1    | 168.6   | 112.9   | 108.1  | 104.5  |
| 205.5   | 262.9   | 155.4   | 488.7   | 129.5   | 131.2   | 281.8   | 130.1  | 156    |
| 198.5   | 163.8   | 102.7   | 349.9   | 134.7   | 116.3   | 268.5   | 132.3  | 124    |
| 110.1   | 110.9   | 103.6   | 104.7   | 98.3    | 105.4   | 98.4    | 118.3  | 102.5  |
| 395.8   | 329     | 229     | 760.3   | 201.1   | 143.5   | 436.4   | 199.4  | 199.9  |
| 374.7   | 719.1   | 633.7   | 863.3   | 601.9   | 606.8   | 451.4   | 950    | 510.5  |
| 752.1   | 1315.1  | 1609.8  | 1751.2  | 1478    | 971.1   | 1809    | 1206.3 | 688.2  |
| 187.3   | 211     | 240.9   | 296.1   | 187.1   | 175.1   | 227.1   | 302.5  | 156    |
| 2977.2  | 4124.3  | 5117.5  | 5929.2  | 3246    | 3078.3  | 4598.1  | 4142.8 | 1773.3 |
| 102.2   | 100.8   | 107.7   | 108.7   | 98.1    | 111.1   | 101.8   | 113.5  | 97.8   |
| 108.9   | 107.2   | 107.1   | 100.1   | 100.1   | 122.5   | 105.3   | 152.3  | 120    |
| 136.7   | 115.8   | 117.1   | 108.8   | 115     | 125.2   | 113.7   | 127.9  | 120.3  |
| 162.1   | 145.4   | 123.1   | 168.3   | 145.9   | 136.8   | 137     | 190.4  | 144.1  |
| 107     | 114.1   | 106.3   | 103.5   | 102.9   | 119     | 109.8   | 105.5  | 110.8  |
| 104.2   | 107.4   | 99.7    | 102.8   | 99.1    | 101.9   | 102     | 113.7  | 116.1  |
| 200     | 367.4   | 211.7   | 211.6   | 249.6   | 270.7   | 228.3   | 442.3  | 245.8  |
| 121.9   | 145     | 144.3   | 119.8   | 128.1   | 142.2   | 114.8   | 189.9  | 148.6  |
| 113.8   | 140.3   | 126.4   | 125.4   | 120.8   | 123.8   | 138.6   | 174.4  | 131.5  |
| 108.7   | 119.7   | 108.9   | 109.7   | 97.6    | 108.4   | 105.1   | 114.4  | 114.7  |
| 116.4   | 138.5   | 149.6   | 113.7   | 112.6   | 142.9   | 146.7   | 147.7  | 130.4  |
| 119.9   | 173.9   | 189.1   | 166     | 155.2   | 183.4   | 163.5   | 157.2  | 146.5  |
| 101.2   | 102.7   | 104.6   | 104.5   | 97.9    | 106.9   | 103.2   | 109.7  | 115    |
| 418.2   | 353.9   | 310.6   | 200.7   | 435.8   | 552.9   | 224.3   | 857.7  | 463    |
| 157.7   | 155.3   | 186.7   | 196     | 122.5   | 148.5   | 146.7   | 202.3  | 162.7  |
| 119.1   | 128.5   | 125.2   | 126.6   | 114.1   | 118.7   | 138.8   | 120    | 124.8  |
| 246.9   | 451.5   | 487.8   | 410.2   | 454     | 486.8   | 405.7   | 721.4  | 425.8  |
| 126.5   | 131.2   | 111.9   | 126.3   | 103.6   | 118.7   | 112.2   | 129.6  | 133.1  |
| 113     | 107     | 109.7   | 100.5   | 104.9   | 110.1   | 117.7   | 116.6  | 106.7  |
| 103.7   | 101.8   | 104.2   | 102.2   | 99.1    | 105.4   | 99.2    | 106.3  | 105.1  |
| 114.4   | 124.9   | 102.5   | 114.1   | 110.3   | 124.8   | 109.1   | 128.6  | 117.8  |
| 111.7   | 103.5   | 101.7   | 103.4   | 95      | 108.9   | 101.3   | 106.6  | 105.4  |
| 106.6   | 116.1   | 113.8   | 110.3   | 98.1    | 116.4   | 109.2   | 129.6  | 106.2  |
| 273.8   | 290.2   | 292.7   | 279.7   | 279.7   | 340.9   | 360.9   | 513.3  | 271.7  |
| 104.3   | 112.7   | 111.4   | 114.1   | 105.2   | 121.7   | 105.6   | 106.9  | 117.9  |

|        |        |        |        |        |        |        |        |        |
|--------|--------|--------|--------|--------|--------|--------|--------|--------|
| 108.8  | 106    | 101.3  | 104.7  | 97.8   | 116.7  | 100.4  | 115.5  | 110.8  |
| 191.7  | 176.6  | 172.3  | 152.4  | 140.9  | 147    | 152    | 210.4  | 151.3  |
| 289.8  | 252.9  | 252.9  | 343.1  | 192.3  | 271    | 239.3  | 554.9  | 570.4  |
| 122.8  | 115.3  | 103.6  | 106.8  | 95.2   | 112.1  | 104.7  | 117.8  | 128.6  |
| 111.1  | 119    | 108.4  | 102.5  | 98.8   | 106.3  | 106.4  | 116.9  | 115.6  |
| 101.9  | 108.4  | 103.5  | 105.6  | 89.1   | 108.7  | 104.7  | 106.6  | 109.1  |
| 139.9  | 144.4  | 118.9  | 128    | 123.1  | 128.3  | 155    | 151.9  | 146.4  |
| 108.2  | 111.5  | 103.9  | 109.5  | 95.5   | 111    | 101.2  | 116.2  | 99.6   |
| 108.5  | 108    | 108.3  | 95.5   | 99.8   | 107.3  | 99     | 109.6  | 108.7  |
| 102.4  | 100.7  | 97.9   | 93.7   | 93.8   | 104.5  | 107.9  | 105.7  | 105.1  |
| 186.7  | 323.8  | 359    | 276.1  | 280.4  | 343    | 335.9  | 532.3  | 319    |
| 364.3  | 224.4  | 272.9  | 228.6  | 173.4  | 272.5  | 212.4  | 548.7  | 400.2  |
| 103.6  | 111.9  | 104.7  | 102.5  | 101.8  | 110.5  | 101.6  | 117.2  | 108.1  |
| 2722.4 | 3032.4 | 2478   | 2920.5 | 2412.3 | 2028.8 | 2649.8 | 4964.8 | 2771   |
| 256.4  | 230.8  | 159.4  | 272.4  | 334    | 237.3  | 572.3  | 678.8  | 813    |
| 110.6  | 114.8  | 100.8  | 101.7  | 103    | 115.2  | 99.5   | 110.3  | 109.3  |
| 526.1  | 755.2  | 664.9  | 1111   | 621.3  | 645.1  | 822.2  | 1491.2 | 1042.2 |
| 239.4  | 461.9  | 554.9  | 303.8  | 394.8  | 558.2  | 346.3  | 601    | 429.1  |
| 106.5  | 111.7  | 95.6   | 103.5  | 97.4   | 105.7  | 108.3  | 116.3  | 131.2  |
| 116.1  | 107.4  | 111    | 104.2  | 95.1   | 113.3  | 99.6   | 109.8  | 144    |
| 5860.6 | 171    | 153    | 380.1  | 227.7  | 371.6  | 274.8  | 2435.2 | 1960.7 |
| 115.8  | 113.9  | 105.8  | 94.3   | 106.5  | 109.5  | 108.3  | 112.2  | 110    |
| 115.2  | 107    | 109.1  | 104.5  | 98     | 116.1  | 106.6  | 120.3  | 122.6  |
| 110.2  | 109.5  | 104.2  | 97.1   | 95.4   | 113.3  | 108.1  | 106.7  | 104.9  |
| 112.4  | 114.9  | 103.9  | 93.6   | 92.6   | 105.2  | 98.4   | 105.8  | 108.8  |
| 114.3  | 126.7  | 119.4  | 133.3  | 116.4  | 128.1  | 119.7  | 185.4  | 180.2  |
| 115    | 110    | 104.7  | 103.1  | 93.3   | 111.3  | 108.2  | 112    | 100.8  |
| 106.2  | 109.6  | 108.3  | 106.1  | 95.7   | 113    | 105.2  | 107.5  | 120    |
| 110.6  | 107.1  | 101.2  | 97.4   | 98.1   | 102.8  | 104.4  | 105.1  | 106.9  |
| 120.3  | 214    | 124.3  | 361    | 166.3  | 120.2  | 307.3  | 189.5  | 172.4  |
| 143.2  | 198.6  | 131    | 281.4  | 170.8  | 126.6  | 259.8  | 221.3  | 142.8  |
| 110.6  | 140.1  | 112.8  | 183.7  | 120.1  | 110.5  | 161.1  | 113.6  | 103    |
| 107    | 105.9  | 99     | 98.8   | 92.3   | 108.9  | 102.8  | 106.2  | 117.4  |
| 112.6  | 106.9  | 100.8  | 106.6  | 96     | 114.7  | 101.3  | 111.6  | 110.4  |
| 745.4  | 679.5  | 665.8  | 647    | 623.2  | 707.5  | 656.5  | 1007.4 | 753.3  |
| 115.3  | 142.7  | 141.2  | 124.7  | 113.3  | 137.7  | 123.6  | 147.8  | 134.6  |
| 112    | 121.2  | 111.2  | 117.5  | 110.9  | 115.1  | 125.6  | 123.1  | 119.7  |
| 213.2  | 242.3  | 201.4  | 227.3  | 169.1  | 245.5  | 209    | 416.9  | 315    |
| 2659.1 | 1787.1 | 2044.6 | 2034.4 | 1763   | 1725.6 | 2364.8 | 3903.2 | 3250.1 |
| 127.3  | 139.8  | 124.9  | 102.9  | 104    | 125.1  | 121.5  | 138.8  | 130.7  |
| 111.7  | 122.2  | 106.6  | 116.8  | 105.1  | 116.9  | 111.8  | 113.5  | 109.8  |
| 168.1  | 194.5  | 228.7  | 191.5  | 188.5  | 221.5  | 235.9  | 308.6  | 258.8  |
| 350.9  | 419.7  | 439.9  | 319.9  | 325    | 431.5  | 412.1  | 795.1  | 715.6  |
| 1789.2 | 2216   | 1925.9 | 1737.2 | 1882   | 2080.6 | 2029.2 | 3444.4 | 2913.3 |
| 180.6  | 163.7  | 184.2  | 177    | 142.4  | 141.7  | 183.7  | 323.7  | 221.6  |
| 728.2  | 417.2  | 442    | 468.6  | 427.8  | 412.3  | 376.4  | 760.4  | 694    |
| 113    | 113    | 108.9  | 110    | 95.8   | 114.2  | 102    | 108.7  | 106.4  |
| 2147.1 | 1705.2 | 1794.4 | 2987.4 | 1729.9 | 2182.6 | 2283.4 | 4231.2 | 2443.8 |
| 383.4  | 265.9  | 257.2  | 240.7  | 188.8  | 328.8  | 267.2  | 436.5  | 316.2  |
| 380.7  | 808.2  | 781.2  | 559.6  | 560.3  | 570.4  | 532.9  | 715.4  | 625.1  |
| 123.4  | 142.5  | 113.9  | 114.9  | 115.6  | 131.9  | 121.8  | 161    | 123.1  |

|        |        |        |        |        |        |        |        |        |
|--------|--------|--------|--------|--------|--------|--------|--------|--------|
| 124.4  | 114.8  | 111.9  | 111.9  | 109.6  | 116.3  | 110.3  | 117.1  | 116.3  |
| 160.9  | 158.1  | 153.5  | 126.1  | 134.4  | 146    | 131.1  | 258.7  | 296.7  |
| 285.1  | 284.5  | 259.7  | 248.4  | 218.3  | 297.4  | 274.5  | 466.6  | 330    |
| 110.3  | 111.4  | 115.9  | 104.9  | 95.9   | 105.3  | 105.1  | 115.8  | 115.5  |
| 1789.2 | 1864.7 | 1743.8 | 1268.6 | 1559.1 | 1948.1 | 1482.6 | 2348.6 | 2106.1 |
| 269.5  | 316.3  | 237.1  | 260.5  | 270.9  | 290    | 271.8  | 634.2  | 461.7  |
| 129.3  | 112.4  | 117.4  | 129.3  | 136.5  | 128.3  | 110    | 177.2  | 136.4  |
| 124    | 106.8  | 103.7  | 102.5  | 102.3  | 113.7  | 110.4  | 124.6  | 110.9  |
| 1279.5 | 1250.9 | 1085.3 | 1037.3 | 998.8  | 1356.3 | 1129.1 | 2669.9 | 2235.4 |
| 733    | 1156.3 | 1160.1 | 767.4  | 1052   | 1253.2 | 749.8  | 1683.2 | 1144.3 |
| 452.9  | 487.3  | 436.5  | 386.4  | 359.7  | 487.8  | 338.2  | 669.6  | 819.2  |
| 245.5  | 268.2  | 269.7  | 191.9  | 238.5  | 272.3  | 231.5  | 244.7  | 243.3  |
| 402.7  | 641.6  | 521.5  | 605.9  | 410.8  | 645.6  | 616.5  | 801.3  | 628.6  |
| 1221.4 | 1503   | 1673.8 | 1362.4 | 1485.3 | 1445.5 | 1352   | 1731.8 | 1321.8 |
| 221.5  | 334.1  | 355.1  | 340.9  | 286.2  | 439.3  | 336.5  | 606.5  | 376.5  |
| 105.7  | 107.8  | 106.2  | 102.5  | 95.8   | 98.8   | 100.9  | 105.5  | 110.8  |
| 108.2  | 106.9  | 106.9  | 104.6  | 98.8   | 112.3  | 108.6  | 107.3  | 113.8  |
| 107.4  | 107.8  | 107.8  | 99.5   | 101.2  | 100.1  | 101.9  | 109.3  | 97     |
| 105.3  | 112.3  | 107.2  | 98.7   | 104.8  | 113.5  | 110.9  | 123.4  | 126.9  |
| 108    | 113.7  | 96.7   | 95.3   | 94.4   | 106.1  | 99.7   | 108.3  | 107.1  |
| 111.5  | 116.3  | 109.3  | 107.1  | 101.1  | 113.1  | 106.6  | 127.9  | 108.7  |
| 126.6  | 120.4  | 116.4  | 140.7  | 133.1  | 130.5  | 167.7  | 148.6  | 122.3  |
| 110.2  | 112.5  | 102.6  | 107    | 105.4  | 125    | 110    | 108.7  | 107.9  |
| 106.2  | 123.2  | 113.7  | 129.3  | 112.9  | 119.9  | 122.5  | 136.7  | 115    |
| 187.2  | 614.2  | 429.2  | 609.7  | 471.8  | 454.2  | 535.8  | 767.2  | 398    |
| 144.5  | 186.7  | 174.3  | 163.2  | 149.7  | 172.9  | 122    | 182.8  | 147.8  |
| 129.5  | 171.3  | 162.2  | 133.5  | 135    | 142.5  | 135.7  | 173.6  | 128.9  |
| 123.6  | 123.5  | 107.8  | 115.6  | 121.1  | 131.6  | 112.2  | 128.9  | 119.2  |
| 112.3  | 103.9  | 101.3  | 100.9  | 98.4   | 110.7  | 98.6   | 107.3  | 107    |
| 117.9  | 121    | 112.4  | 111.1  | 107.4  | 126.9  | 102.2  | 117.9  | 106.1  |
| 305.3  | 944.9  | 707.3  | 622.3  | 741.6  | 605.6  | 507.3  | 1059.2 | 1091.6 |
| 100.5  | 105.5  | 99.1   | 101.7  | 96.2   | 104.5  | 105.9  | 114.1  | 116.7  |
| 105.8  | 113.7  | 109.9  | 106.5  | 97.6   | 120.9  | 109.1  | 96     | 104.2  |
| 105.4  | 109.2  | 103.4  | 93     | 87.3   | 106.7  | 99.7   | 109.6  | 103    |
| 113.6  | 120.5  | 104.7  | 115.2  | 104    | 121    | 123.7  | 108.3  | 114.1  |
| 112.2  | 121.9  | 102.2  | 103.1  | 98.8   | 110.5  | 102.2  | 118.3  | 111.5  |
| 104.2  | 102.8  | 100.6  | 98.1   | 95.3   | 111.8  | 106.5  | 97.8   | 103    |
| 107.5  | 117.1  | 93.8   | 98.9   | 95.7   | 107.9  | 104.7  | 107.9  | 106    |
| 102.2  | 101.8  | 100.7  | 98.2   | 102.8  | 116.6  | 111.8  | 106.7  | 109.6  |
| 104.3  | 106.6  | 107.2  | 104.1  | 101.6  | 108.8  | 105.6  | 107.1  | 107.5  |
| 102.5  | 106.8  | 96.5   | 95.9   | 94.5   | 108.5  | 104.4  | 109.4  | 105.8  |
| 107.6  | 109.2  | 102.7  | 100.4  | 96.7   | 105.9  | 101.4  | 108.5  | 111.3  |
| 110.6  | 107.6  | 103.9  | 95.3   | 95.3   | 105.5  | 99.2   | 105.3  | 105.4  |
| 105.8  | 110.2  | 101.8  | 100    | 94.6   | 107.2  | 107.1  | 101.8  | 101.2  |
| 101.7  | 114.4  | 102.3  | 100.5  | 94.2   | 104.3  | 106.9  | 102    | 104.6  |
| 108.7  | 107.9  | 102.1  | 94.8   | 100.9  | 100.1  | 104.7  | 109.2  | 107.2  |
| 104    | 111.6  | 102.7  | 108.4  | 106.3  | 113.7  | 113.4  | 120.8  | 120.5  |
| 113.1  | 115.1  | 110.8  | 121.9  | 110    | 113.5  | 103.2  | 124.7  | 117.1  |
| 103.2  | 109.2  | 98.7   | 107.9  | 96.1   | 108.9  | 102.6  | 107.3  | 104.2  |
| 106.6  | 101.6  | 108.6  | 105.9  | 99.6   | 105.9  | 112.9  | 131.8  | 115.9  |
| 102.3  | 110.8  | 98.8   | 102.2  | 96.3   | 110.7  | 105    | 99.4   | 100.6  |

|       |        |        |        |        |        |        |        |       |
|-------|--------|--------|--------|--------|--------|--------|--------|-------|
| 122.4 | 120    | 110.2  | 116.6  | 101.6  | 126.3  | 107.6  | 138.9  | 134.1 |
| 99    | 100.5  | 98.5   | 97.4   | 92.8   | 101.7  | 98.4   | 110.1  | 108.8 |
| 184.4 | 260.1  | 166.9  | 220.4  | 178.7  | 163    | 232.6  | 232.4  | 146.5 |
| 112.9 | 107    | 104    | 107.5  | 100.5  | 116.4  | 109.9  | 105.4  | 108.6 |
| 104.2 | 118.5  | 104.5  | 105.2  | 113.9  | 112.2  | 112.1  | 114    | 109.9 |
| 104   | 117.2  | 103.6  | 101.5  | 108.1  | 110    | 103    | 120.4  | 122.2 |
| 130   | 136.3  | 132.8  | 121.6  | 123.2  | 138.6  | 126.7  | 125.8  | 118.6 |
| 115.9 | 121.1  | 106.2  | 103.7  | 102.6  | 116.9  | 105.9  | 119.6  | 128.1 |
| 104   | 110.1  | 105.6  | 99.4   | 99.7   | 117    | 105    | 114.2  | 112.6 |
| 109.5 | 107.5  | 96.4   | 93.5   | 99.1   | 108.9  | 110.4  | 105.7  | 115.3 |
| 110.3 | 110.3  | 100.1  | 103.1  | 94.1   | 105.2  | 100    | 106.1  | 108.5 |
| 106.6 | 106.8  | 104.1  | 106.2  | 97.3   | 113.2  | 104.6  | 110.9  | 114   |
| 122.4 | 116.1  | 111.6  | 122.6  | 120.6  | 119    | 114.1  | 139.9  | 122.4 |
| 101.2 | 110.3  | 98.8   | 102.6  | 87.2   | 107.4  | 96.6   | 105.5  | 98.4  |
| 110.9 | 110.5  | 105.9  | 114.8  | 94.5   | 111.8  | 115.7  | 114    | 107.5 |
| 104.6 | 104.9  | 102.4  | 105    | 96     | 107.7  | 103.9  | 105.4  | 109.2 |
| 124   | 151.7  | 177.5  | 126    | 133.9  | 166.7  | 134.5  | 150.1  | 139.3 |
| 108.3 | 111.2  | 107    | 106.1  | 93.9   | 119.9  | 108.8  | 114.5  | 108.4 |
| 111.2 | 114.6  | 103.9  | 100.8  | 96.9   | 110    | 112.6  | 112.4  | 108.6 |
| 103.5 | 120.8  | 105    | 100    | 95.8   | 115.3  | 100.1  | 119.5  | 115.8 |
| 114.7 | 109.7  | 100.4  | 99.3   | 99.1   | 120.4  | 114.7  | 119.3  | 109.7 |
| 107.6 | 107.7  | 107    | 108.8  | 96.2   | 109.2  | 107.4  | 110.7  | 111.8 |
| 114.6 | 109    | 102.2  | 98     | 96.6   | 119.1  | 101.5  | 113.1  | 106   |
| 108.8 | 102.3  | 105.5  | 104.5  | 96.7   | 101.2  | 98.6   | 104    | 110.9 |
| 103.2 | 103    | 93.9   | 99.7   | 94.6   | 114.6  | 107.2  | 99.4   | 105.8 |
| 109   | 107.4  | 110    | 110.3  | 113.6  | 122.9  | 109.4  | 119.6  | 118.8 |
| 115.3 | 119.8  | 106.6  | 101.8  | 105.9  | 110.5  | 119    | 127.4  | 125.6 |
| 106.2 | 123.2  | 111.4  | 116.7  | 109.5  | 124.4  | 110.9  | 140.7  | 120.5 |
| 119.2 | 121    | 115.7  | 113.6  | 110.8  | 123.8  | 113.7  | 132.7  | 122.5 |
| 114.1 | 108    | 104.5  | 99.7   | 91.8   | 116.2  | 106.1  | 115.1  | 116.7 |
| 104.7 | 103.4  | 106    | 101.4  | 91     | 117.1  | 105.3  | 101.1  | 105.4 |
| 104.2 | 112.9  | 104.1  | 99.2   | 98.2   | 109.4  | 109    | 101.1  | 105.8 |
| 112   | 107.5  | 108.8  | 90.8   | 103.5  | 112.9  | 106    | 108.1  | 113.1 |
| 138.3 | 133.5  | 118    | 124.6  | 115.7  | 126.3  | 123.9  | 173.3  | 190.9 |
| 103.3 | 107.4  | 99     | 97.1   | 91.2   | 112.5  | 109.4  | 105.9  | 105.6 |
| 105.3 | 107.7  | 95     | 97.6   | 96.7   | 101.4  | 100.3  | 104.6  | 108.4 |
| 913.8 | 1338.5 | 1055.9 | 1048.6 | 1050.3 | 1089.3 | 1105.3 | 1815.9 | 905.3 |
| 116.7 | 113.9  | 107.5  | 117.4  | 101    | 116.1  | 106.2  | 123.4  | 114.8 |
| 118.9 | 134.1  | 159.7  | 130.9  | 119.4  | 165.6  | 143.6  | 172.1  | 149.5 |
| 112.2 | 112.8  | 101.9  | 100.4  | 92.6   | 106.7  | 107.8  | 115.9  | 113.5 |
| 108.7 | 117.1  | 115.2  | 125.8  | 97.6   | 118.6  | 106.5  | 117.2  | 114.3 |
| 102   | 110.6  | 104.5  | 100.7  | 94     | 110.9  | 100.4  | 105.1  | 103.6 |
| 103.3 | 107    | 97.2   | 108.9  | 98.4   | 103.9  | 113.3  | 114.3  | 108.2 |
| 101.6 | 106.8  | 104.2  | 91.6   | 87.7   | 112.4  | 101.7  | 105.8  | 109.8 |
| 114.1 | 109.1  | 99.7   | 98.3   | 99.5   | 105.4  | 100    | 102.3  | 95    |
| 105.8 | 104.2  | 107    | 109.5  | 97.3   | 112.7  | 100.5  | 113.4  | 111.9 |
| 577.2 | 408.8  | 310.7  | 500.2  | 377.4  | 419.5  | 520.7  | 575    | 690.5 |
| 119.7 | 119.8  | 116.8  | 112.7  | 102.2  | 124.6  | 107.8  | 137.3  | 119.5 |
| 128.1 | 142.4  | 125    | 115.4  | 117.8  | 150    | 121.8  | 167.3  | 172.4 |
| 118.1 | 112.2  | 107.3  | 108.2  | 105    | 109.7  | 107.2  | 127.6  | 122.3 |
| 119.5 | 198.8  | 173.5  | 189.9  | 173.8  | 181.1  | 165.5  | 189.5  | 182.2 |

|       |       |       |       |       |       |       |       |       |
|-------|-------|-------|-------|-------|-------|-------|-------|-------|
| 109   | 110.3 | 102.7 | 104.4 | 98    | 115.5 | 99.9  | 114.6 | 104.4 |
| 112.1 | 112.9 | 108.2 | 110.2 | 112.7 | 115.3 | 119.8 | 112.2 | 110.3 |
| 131.3 | 137.2 | 131.5 | 144.8 | 118.1 | 130.4 | 139.3 | 131.5 | 122.2 |
| 111   | 105.6 | 105.5 | 107.3 | 110.3 | 117.5 | 102.4 | 124.8 | 116.9 |
| 295.9 | 225.6 | 158.8 | 180.7 | 193.9 | 200.2 | 199.5 | 288.9 | 265.5 |
| 100.8 | 108.4 | 107.7 | 101.3 | 99.1  | 110.1 | 103.3 | 105.4 | 118.7 |
| 288.1 | 665.5 | 691.6 | 629   | 555.7 | 742.5 | 654.7 | 720.9 | 466.9 |
| 118.7 | 117.3 | 109.7 | 124.6 | 106.7 | 122.7 | 125.5 | 165.6 | 118.2 |
| 108.9 | 106.2 | 95.8  | 98    | 99.2  | 108.3 | 102.5 | 111.4 | 107.5 |
| 113.6 | 107.6 | 107   | 104.5 | 98.5  | 109.7 | 103.1 | 107.9 | 115.6 |
| 101.1 | 103.5 | 99.6  | 93.5  | 92.6  | 108.2 | 97    | 101.8 | 103.3 |
| 102.1 | 103.8 | 102.5 | 91.5  | 90.5  | 107.5 | 100.4 | 105.9 | 106.3 |
| 171.8 | 147.1 | 170.9 | 152.1 | 153.7 | 184.6 | 164.3 | 227.4 | 199.1 |
| 113.2 | 111.7 | 111.1 | 106.8 | 92    | 110.6 | 109.4 | 114.3 | 117.8 |
| 105.7 | 116.4 | 107.2 | 110.6 | 101.7 | 112.4 | 103.1 | 115.4 | 109   |
| 112.8 | 106.8 | 100.2 | 107.2 | 99    | 117   | 94.8  | 107.8 | 117.3 |
| 141.8 | 181.1 | 161.4 | 197.3 | 153.4 | 152.4 | 170   | 183.3 | 218.8 |
| 100.2 | 106.2 | 98.4  | 96    | 93.5  | 111.9 | 108.3 | 106.5 | 98.2  |
| 110.1 | 105.9 | 105.2 | 105   | 104.5 | 111   | 99.1  | 120.8 | 111.3 |
| 125   | 143.4 | 158.8 | 117.9 | 122.7 | 139.5 | 139.6 | 158.9 | 135.2 |
| 109.9 | 125.3 | 118.2 | 116.6 | 119.4 | 130.1 | 128   | 142.3 | 126.5 |
| 101.2 | 109.9 | 103.4 | 97.6  | 95.9  | 100.4 | 101.7 | 105.8 | 107.7 |
| 105.9 | 104.5 | 95    | 93.5  | 92.2  | 107.5 | 101.8 | 94.5  | 104.8 |
| 105.9 | 107.8 | 105.9 | 99.2  | 95    | 109.8 | 100.8 | 106.1 | 114.6 |
| 102.6 | 108.9 | 100.2 | 101.8 | 101.6 | 106.1 | 106.7 | 115.3 | 102.3 |
| 106.4 | 109.8 | 105.2 | 99.6  | 92.9  | 112.2 | 102.7 | 100.9 | 115.9 |
| 102.5 | 103.3 | 103.1 | 100.3 | 95.2  | 101.4 | 99.3  | 109.5 | 104.8 |
| 114.5 | 124.9 | 125.3 | 129.7 | 108.6 | 128.5 | 130.3 | 140.9 | 127.6 |
| 105.1 | 116.5 | 104.8 | 101.3 | 90.2  | 107.2 | 107.6 | 109.3 | 105.1 |
| 147.5 | 175.2 | 170.3 | 237.2 | 156.1 | 147.8 | 204.9 | 180.5 | 143   |
| 101.9 | 108.2 | 95    | 95.5  | 97.4  | 101.4 | 96.3  | 100.2 | 112.2 |
| 111.1 | 104.2 | 95.5  | 94.8  | 99.4  | 107.8 | 108.6 | 105.2 | 105.4 |
| 118.5 | 103.6 | 105.6 | 119.7 | 103.9 | 118.5 | 121.7 | 127.3 | 116.1 |
| 127.7 | 144.4 | 138.6 | 192.4 | 153.2 | 148.9 | 147.1 | 181.9 | 142.6 |
| 113.3 | 126.8 | 113.8 | 112.3 | 102.5 | 119.9 | 112.1 | 127.2 | 122.3 |
| 121   | 113.7 | 100.2 | 146.8 | 100.8 | 111.6 | 171.5 | 107.9 | 104.9 |
| 113.5 | 130.9 | 111.4 | 105.9 | 105.7 | 107.3 | 106.6 | 148.1 | 110   |
| 103.3 | 105   | 102.2 | 95.2  | 87.1  | 106.8 | 99.1  | 110.8 | 106   |
| 106.5 | 106.8 | 101   | 108.5 | 94.3  | 116.9 | 110.8 | 106.9 | 111.9 |
| 118   | 108.9 | 102.8 | 113.1 | 96.2  | 109.8 | 109.7 | 118.6 | 112.9 |
| 104.6 | 119.5 | 105.6 | 111.9 | 101.6 | 105.5 | 101.3 | 105.7 | 107.4 |
| 109.8 | 102.8 | 103.8 | 89.5  | 92.7  | 104.4 | 99.4  | 108.1 | 108.4 |
| 111.7 | 118.3 | 112.2 | 106.4 | 109.3 | 115.3 | 108.9 | 130.9 | 127.9 |
| 104.8 | 102.1 | 96.6  | 93.3  | 94.5  | 104.8 | 98    | 111.5 | 108.7 |
| 97.9  | 108.2 | 105.9 | 116.8 | 98.5  | 115.9 | 109.4 | 116.2 | 109.2 |
| 101   | 105   | 102.1 | 107.4 | 94.1  | 109.9 | 93.9  | 107.5 | 116.6 |
| 102.2 | 109.8 | 108   | 99.8  | 98.4  | 103.8 | 99.2  | 109.1 | 108.6 |
| 108   | 113.8 | 109.1 | 104.4 | 97.4  | 109.6 | 93.8  | 111.5 | 102.5 |
| 345.8 | 502.8 | 441.7 | 417.3 | 382.4 | 431.8 | 372.7 | 786.5 | 608.6 |
| 416.6 | 603.2 | 597   | 616.3 | 545   | 595   | 688.2 | 654.2 | 398.8 |
| 143.5 | 336.3 | 353.4 | 305.3 | 268.6 | 289.2 | 331.6 | 380.4 | 226   |

|        |        |        |        |        |        |        |         |         |
|--------|--------|--------|--------|--------|--------|--------|---------|---------|
| 275.3  | 237.4  | 230.8  | 194.6  | 198.9  | 239.8  | 245.6  | 435.2   | 385.9   |
| 102.7  | 141.2  | 118.8  | 95.4   | 95.1   | 111.9  | 126.9  | 108.8   | 122     |
| 106.6  | 130.5  | 124.7  | 102.9  | 99.1   | 111.1  | 131.1  | 121     | 117.6   |
| 112.8  | 128.4  | 108.6  | 100.5  | 92.6   | 104.2  | 114.5  | 109.3   | 109.3   |
| 117.7  | 125.2  | 119.9  | 111.1  | 119.9  | 127.9  | 124    | 136.1   | 127.1   |
| 102.4  | 115    | 101    | 96.4   | 93.3   | 116    | 96.7   | 113.6   | 114     |
| 105.9  | 113.2  | 115.9  | 109.7  | 100    | 114.6  | 104.9  | 122.9   | 109.6   |
| 675    | 571.5  | 321.6  | 735.8  | 662.8  | 378.1  | 491.3  | 1177.7  | 747.6   |
| 105.3  | 104.1  | 106.9  | 98.9   | 97.8   | 106.2  | 106.7  | 112.4   | 116     |
| 103.5  | 112    | 94.6   | 109.4  | 91     | 99.8   | 106    | 102.1   | 103.6   |
| 101.5  | 105.6  | 103.8  | 99.5   | 95.8   | 105.4  | 103.8  | 108.9   | 103.1   |
| 162.6  | 453    | 318    | 559.7  | 397.9  | 359.3  | 578.5  | 548.7   | 375.6   |
| 104.3  | 118.3  | 113    | 104.5  | 91.7   | 103.9  | 104.1  | 114.9   | 107.5   |
| 122.6  | 154.3  | 148.2  | 196.3  | 128.5  | 144.1  | 170.5  | 117.8   | 116     |
| 99.1   | 106.7  | 102.7  | 97.4   | 94.6   | 107    | 93.3   | 114.7   | 103.8   |
| 104.6  | 110.2  | 102.6  | 107.3  | 91.8   | 108.5  | 102.1  | 108.7   | 102.1   |
| 117.5  | 152.2  | 119    | 107.1  | 132.2  | 150.3  | 116.2  | 151     | 119     |
| 189.3  | 215.3  | 191.3  | 164.3  | 189.6  | 199.9  | 195.3  | 211.9   | 161     |
| 147.1  | 128.6  | 127    | 149.9  | 118.5  | 149.2  | 162    | 154.9   | 129.8   |
| 116.7  | 113.1  | 112.9  | 100.6  | 97.9   | 119.8  | 110.2  | 122.8   | 120.8   |
| 175.1  | 222.3  | 213    | 163.1  | 181.6  | 230.5  | 195    | 361.4   | 229.4   |
| 105.3  | 125.1  | 109    | 95.6   | 101.4  | 117.6  | 110    | 112.9   | 112.3   |
| 104    | 105.9  | 110    | 103.3  | 97.3   | 105.9  | 100.4  | 109.2   | 104.5   |
| 104.6  | 112.4  | 98.7   | 108.4  | 92.8   | 108.2  | 107.4  | 109.5   | 105.9   |
| 103.4  | 140.9  | 131.9  | 127.8  | 114.8  | 128.6  | 118.3  | 153.5   | 113.4   |
| 106    | 106.4  | 97.5   | 102.8  | 94.9   | 113.3  | 93.5   | 104.8   | 117.6   |
| 103.7  | 114.3  | 106.9  | 100.2  | 100.8  | 117    | 109.6  | 111.9   | 106.6   |
| 98.2   | 109.3  | 101.6  | 100.3  | 102.9  | 105.6  | 98.2   | 107.3   | 102.7   |
| 95.9   | 106.8  | 95.9   | 95.7   | 88.7   | 102.9  | 101.8  | 105.9   | 108.6   |
| 117.2  | 113.6  | 106.1  | 95.8   | 105.7  | 108.3  | 100.6  | 106.5   | 111.4   |
| 131    | 202    | 214.1  | 214.4  | 161.5  | 163.7  | 175.1  | 193.5   | 184.3   |
| 261.9  | 448.4  | 372.2  | 321.4  | 358.3  | 365.3  | 374.2  | 491.4   | 335.1   |
| 107.3  | 111.4  | 115.2  | 102.8  | 100.9  | 100.3  | 104    | 111.2   | 106.6   |
| 141.2  | 115.7  | 113.9  | 103.8  | 105.4  | 121.1  | 102.7  | 138.5   | 120     |
| 9044.4 | 4662.8 | 3273.4 | 3001.8 | 1767.4 | 4700.2 | 3678   | 12801.4 | 13910.5 |
| 5243.9 | 919    | 857.3  | 731.8  | 736.4  | 1085.1 | 1287.6 | 3916.2  | 6177.1  |
| 111.9  | 118.2  | 104.9  | 107.8  | 103.9  | 111.8  | 111.8  | 114.3   | 109.1   |
| 103.2  | 97.3   | 100.9  | 101.9  | 91.8   | 104.5  | 94.5   | 103.9   | 110.1   |
| 1777   | 1824.3 | 1568.9 | 2105.7 | 1428.1 | 1781   | 1876.9 | 2117.9  | 1694.2  |
| 109.7  | 109.7  | 97.2   | 107.1  | 100.7  | 110.5  | 104    | 110.6   | 106.3   |
| 108.3  | 106.3  | 103.5  | 102.2  | 97.8   | 105.4  | 108.5  | 106.5   | 111.4   |
| 107.7  | 108.4  | 98.5   | 109.6  | 100.1  | 107    | 110.2  | 110.3   | 115.9   |
| 274.5  | 200.1  | 212.1  | 207.7  | 150.7  | 207.9  | 205.5  | 402.9   | 378.7   |
| 9663   | 621.1  | 505.2  | 938.2  | 496.4  | 1229.8 | 1042.2 | 8840.4  | 13630.4 |
| 9769.1 | 305    | 220.6  | 337.9  | 290.8  | 529.8  | 406.8  | 6475    | 10048.5 |
| 442.1  | 231.2  | 216.2  | 198.8  | 177.3  | 211.7  | 223.5  | 302.5   | 390.4   |
| 127.4  | 109.4  | 106    | 101.2  | 102    | 121.1  | 103    | 185.9   | 194     |
| 177.9  | 146.4  | 117    | 113.7  | 119    | 128.2  | 136.9  | 166.7   | 129.5   |
| 145.2  | 121.4  | 116    | 102.1  | 106.3  | 114.2  | 111.4  | 153.7   | 152.6   |
| 615    | 363.1  | 465    | 400    | 395.1  | 484.5  | 436.2  | 918.1   | 739.5   |
| 115.5  | 120.2  | 104.1  | 111.8  | 91.5   | 115.9  | 112.3  | 117.7   | 111.6   |

|        |        |        |        |        |        |        |        |        |
|--------|--------|--------|--------|--------|--------|--------|--------|--------|
| 418.4  | 265.4  | 261.5  | 295.8  | 258.2  | 311.1  | 322.1  | 313.3  | 371    |
| 7278.9 | 3202.7 | 2700.8 | 3171.5 | 2373   | 2858.2 | 2618.5 | 8564.9 | 7715   |
| 4993.4 | 2169.2 | 1667.5 | 2346.3 | 1932.3 | 2187.1 | 2997.3 | 6526.6 | 6353.9 |
| 775    | 477.1  | 505.8  | 370.7  | 432.6  | 503.7  | 424.9  | 1234.9 | 1882.4 |
| 1563.2 | 414.7  | 445    | 477.2  | 408.6  | 437.8  | 589.8  | 2012.1 | 2753.5 |
| 106.4  | 105.4  | 95     | 103.5  | 94.1   | 110    | 102.8  | 117.6  | 113.8  |
| 104.2  | 109.6  | 104.7  | 100.7  | 102.1  | 104.2  | 105.7  | 114.4  | 110.3  |
| 107.1  | 109.9  | 102.2  | 100.7  | 98.9   | 113.8  | 108.1  | 118.2  | 117    |
| 106    | 105.7  | 102.1  | 96.4   | 95.1   | 109    | 103.9  | 103.3  | 105.5  |
| 109.8  | 105.1  | 96.5   | 91.2   | 95.1   | 106.7  | 101.2  | 108.4  | 103    |
| 103.7  | 104.8  | 105.3  | 105.2  | 93.5   | 112.9  | 110.6  | 117    | 102.4  |
| 200.2  | 229.3  | 227.2  | 202.9  | 177    | 200.4  | 183.7  | 321.8  | 175.4  |
| 105.4  | 120.1  | 114.9  | 100.8  | 102.5  | 118.1  | 110    | 135    | 122.2  |
| 109.2  | 111.6  | 113.2  | 114.1  | 104.8  | 115.6  | 106.3  | 123.5  | 127.5  |
| 353.8  | 707.3  | 664.4  | 675.9  | 663.7  | 573.7  | 692.6  | 802.7  | 482.1  |
| 183.9  | 170.5  | 143.6  | 159.9  | 159.4  | 167.1  | 184.4  | 184.4  | 168.6  |
| 113    | 107.2  | 96.6   | 107    | 100.6  | 106.8  | 106.5  | 111    | 107.7  |
| 104.1  | 105.6  | 96.2   | 106.7  | 97.4   | 99.9   | 106.3  | 109.8  | 110.2  |
| 104.6  | 102.2  | 100.5  | 100.2  | 102.1  | 107.4  | 104.6  | 114    | 117.9  |
| 136.5  | 156.2  | 138    | 147.8  | 149.4  | 162    | 138.9  | 203.8  | 171    |
| 201.8  | 272    | 293.6  | 269.7  | 239.8  | 330.1  | 328    | 404.4  | 239.2  |
| 130.4  | 196.2  | 164.7  | 211.9  | 148.2  | 188.5  | 182.2  | 274.1  | 208.3  |
| 352.3  | 553.3  | 725.3  | 687.9  | 548.7  | 547.6  | 736.7  | 778.3  | 568.4  |
| 318.4  | 463.3  | 448.5  | 431.2  | 433.2  | 378.9  | 435.5  | 756.9  | 550.9  |
| 623    | 839.8  | 738.9  | 818    | 782.1  | 833.2  | 705.7  | 2140.7 | 1771.3 |
| 107.2  | 97.9   | 94.3   | 96.1   | 93.6   | 107.7  | 97.8   | 112    | 106.3  |
| 206.2  | 274.8  | 259.5  | 225.9  | 264.1  | 285.8  | 281.9  | 478.8  | 357.7  |
| 325.5  | 608.5  | 471.8  | 571.7  | 498.1  | 448.1  | 554.6  | 632.8  | 583.6  |
| 143.5  | 342.2  | 242.4  | 246.7  | 258    | 266.6  | 403.8  | 407.1  | 272.9  |
| 521.3  | 391.3  | 513.5  | 393.1  | 380.2  | 495.5  | 319.2  | 823    | 849.4  |
| 1728.8 | 697.9  | 1193.1 | 838.4  | 644.4  | 857.2  | 731.6  | 2098.4 | 2721.5 |
| 111.8  | 114.3  | 99.7   | 101.7  | 94.2   | 112.7  | 105.9  | 115.8  | 119.4  |
| 116.4  | 121    | 104.2  | 113    | 104    | 112.2  | 115.6  | 139.7  | 143.9  |
| 670.6  | 338.1  | 262.3  | 455.3  | 226.3  | 277.5  | 291.3  | 842.4  | 1247   |
| 104.6  | 107.2  | 112.5  | 105.8  | 102.2  | 112.6  | 102.3  | 116.7  | 108.6  |
| 4699.1 | 490.7  | 416.4  | 477.3  | 497.6  | 797.8  | 628.8  | 3471.3 | 5584.2 |
| 141.2  | 248    | 202.8  | 203.1  | 186.4  | 208.2  | 206    | 215.4  | 140.8  |
| 144    | 214.4  | 218.9  | 204.9  | 173.7  | 210.4  | 190.1  | 224.4  | 212.5  |
| 113.7  | 170.5  | 156.7  | 128.4  | 114    | 141.5  | 138.3  | 157.6  | 151    |
| 118.4  | 126.4  | 107.5  | 108.6  | 102.9  | 110.7  | 113.1  | 136.9  | 129    |
| 120.7  | 115.4  | 115.3  | 123.3  | 106.2  | 125.4  | 112.5  | 126    | 122.3  |
| 734.7  | 472.5  | 443    | 521.5  | 521    | 569.2  | 744    | 1558.9 | 1198.4 |
| 104.5  | 104    | 100.1  | 104.6  | 103    | 113.1  | 101.4  | 108.1  | 105.1  |
| 119.4  | 115.6  | 118.2  | 127.6  | 108.6  | 123.7  | 124.9  | 138.2  | 120.8  |
| 102.9  | 108.7  | 100.7  | 100.6  | 97.6   | 110.4  | 98.6   | 111.9  | 108.9  |
| 98.5   | 116.8  | 107.4  | 107.3  | 100.6  | 121.3  | 101.8  | 124.5  | 119.8  |
| 325.3  | 523.7  | 423.7  | 586.5  | 420.4  | 429.9  | 551.8  | 727.7  | 542.2  |
| 91.8   | 96.1   | 104.6  | 97.6   | 83.9   | 108    | 97.9   | 115    | 100.2  |
| 104    | 120.4  | 109.4  | 111.4  | 103.2  | 116.6  | 110.9  | 118    | 118.6  |
| 110.1  | 109    | 104.7  | 105.6  | 97.8   | 109.4  | 102.2  | 107.3  | 102.8  |
| 99.9   | 103.7  | 99.6   | 99.2   | 94.6   | 103.4  | 99.7   | 101.7  | 111.2  |

|        |        |        |        |        |        |       |        |       |
|--------|--------|--------|--------|--------|--------|-------|--------|-------|
| 114.9  | 113.4  | 106.2  | 114.2  | 104.7  | 118.9  | 112.6 | 119.2  | 120.6 |
| 114.7  | 112.3  | 117.8  | 103.4  | 101.1  | 126    | 110.7 | 119.7  | 117.6 |
| 97.3   | 101.1  | 97.8   | 98.5   | 96     | 102.4  | 105.8 | 105.2  | 94.9  |
| 252.7  | 280.1  | 272.2  | 277.9  | 206.7  | 235.3  | 345.7 | 550.4  | 310   |
| 98.2   | 107.8  | 97     | 103.9  | 93.8   | 105.6  | 101.6 | 111.7  | 112.9 |
| 103.4  | 101.3  | 101.9  | 91.3   | 95.2   | 112.2  | 100.1 | 104.1  | 105   |
| 113.5  | 106.6  | 102.1  | 102.1  | 101.6  | 111.8  | 101.8 | 111.9  | 108.9 |
| 108.2  | 120.6  | 113.5  | 112.7  | 98.9   | 119.3  | 108.4 | 113.3  | 117.8 |
| 103.7  | 109    | 103.7  | 98.6   | 102.1  | 104.8  | 98.6  | 114.2  | 108.4 |
| 105.1  | 115.5  | 101.5  | 99.2   | 107.6  | 105.4  | 97.4  | 111.8  | 108   |
| 103    | 105.4  | 109.3  | 95.7   | 96.6   | 109.6  | 98    | 112    | 106.7 |
| 104.3  | 105.7  | 106.9  | 94.3   | 99.2   | 116.6  | 105   | 110.1  | 108.3 |
| 106.9  | 100.5  | 99.8   | 97.5   | 94     | 108.9  | 97.3  | 108.9  | 109.1 |
| 99.4   | 108.4  | 93.3   | 92     | 101.1  | 112.6  | 99.1  | 107.9  | 104.1 |
| 111.8  | 111.3  | 106    | 106.4  | 84.8   | 99.9   | 109.1 | 108.3  | 106.5 |
| 116.6  | 106.9  | 100.8  | 102.2  | 98.8   | 108.2  | 116.3 | 114.2  | 108.8 |
| 101.1  | 115    | 109.7  | 107.7  | 95     | 106.2  | 104   | 110.8  | 107.6 |
| 99.4   | 110.4  | 105.7  | 106.9  | 97.6   | 105.3  | 98.3  | 103.8  | 99.9  |
| 113.4  | 113.1  | 106.8  | 110.3  | 105.4  | 118.9  | 114.1 | 125.4  | 118.6 |
| 97.8   | 107.5  | 103.4  | 105.5  | 98.3   | 116.4  | 100.7 | 110    | 107.3 |
| 106.1  | 108.6  | 102.4  | 105.2  | 96.9   | 112.4  | 109.9 | 107.5  | 114.7 |
| 116.1  | 107.9  | 107.2  | 110    | 98.8   | 113.3  | 111   | 106.9  | 116.9 |
| 110.4  | 162.2  | 201.9  | 139.6  | 213.3  | 263.8  | 143.1 | 279.8  | 111.7 |
| 161.7  | 176.3  | 149.4  | 169.2  | 161    | 202    | 187.5 | 353.7  | 215   |
| 195.7  | 190.2  | 186.5  | 164.5  | 172.4  | 170.8  | 176.7 | 338.1  | 194.1 |
| 105.9  | 116.2  | 96.1   | 101.3  | 91.1   | 109.2  | 115.8 | 110.7  | 104.9 |
| 112.9  | 162.8  | 113.2  | 105.3  | 105.9  | 122.8  | 108.8 | 116.6  | 121.6 |
| 105.6  | 106.6  | 100.1  | 94.1   | 91.7   | 105.5  | 104.9 | 109.7  | 105.4 |
| 107.5  | 113.3  | 109.6  | 100.7  | 97.3   | 108.2  | 107.2 | 118.1  | 106.6 |
| 113.6  | 124.3  | 115.4  | 111.7  | 116.5  | 113.5  | 111.4 | 137.7  | 144.7 |
| 143    | 140.6  | 119.4  | 113.4  | 118.1  | 144.4  | 132.7 | 167.5  | 131.2 |
| 111.5  | 111.5  | 102.8  | 101.2  | 96.9   | 115.5  | 97.9  | 127.5  | 108.7 |
| 107    | 105.7  | 105.8  | 100.2  | 96     | 112.7  | 106.5 | 105.1  | 109.1 |
| 105.6  | 106.5  | 100.2  | 108.5  | 95.6   | 103.2  | 105.6 | 106.4  | 107.4 |
| 106    | 108.6  | 105.3  | 99.3   | 99.2   | 116.4  | 108.8 | 124.3  | 117.3 |
| 109.3  | 110.2  | 98.8   | 114.7  | 99.4   | 124.8  | 98.3  | 107.6  | 104   |
| 109.4  | 134.2  | 134.4  | 119.5  | 110    | 125.1  | 127.6 | 128.6  | 107.1 |
| 109.2  | 101.1  | 110.6  | 96.1   | 101.1  | 107.2  | 109.4 | 108.7  | 104.7 |
| 109.7  | 115.8  | 122.2  | 98.7   | 96.1   | 125.3  | 106.2 | 122.2  | 117.8 |
| 103.9  | 109.6  | 105    | 106.6  | 94.3   | 100.4  | 103.9 | 110    | 122.8 |
| 99.1   | 105.9  | 104    | 102.1  | 95.1   | 104.6  | 103.3 | 110.1  | 108.9 |
| 110.3  | 114.5  | 106.5  | 97.3   | 100.2  | 108.4  | 105.8 | 114.5  | 111.7 |
| 99.9   | 110.7  | 104.5  | 99.4   | 93.7   | 103.7  | 95.1  | 101.4  | 108.1 |
| 108.4  | 105.1  | 97.1   | 106.2  | 97.2   | 106.8  | 102.7 | 121.8  | 104.1 |
| 106.4  | 131.9  | 112.2  | 108.6  | 104.9  | 117.3  | 115.1 | 131.1  | 109.6 |
| 159.9  | 250.9  | 302.6  | 248.8  | 227    | 228.8  | 221.8 | 293.7  | 244.8 |
| 157.7  | 144.9  | 144.1  | 136.5  | 133    | 181.7  | 167.8 | 204    | 170.7 |
| 575.3  | 644.2  | 613    | 386.4  | 626.9  | 708.6  | 599.1 | 1141.5 | 949.9 |
| 174.4  | 147.4  | 156    | 176    | 155.8  | 176.4  | 152.6 | 226.3  | 217.9 |
| 1432.2 | 1380.7 | 1501.8 | 1122.6 | 1347.7 | 1392.1 | 938.1 | 2714.6 | 3095  |
| 208.6  | 424.9  | 321.8  | 404.9  | 401.2  | 377.7  | 480.2 | 477.8  | 373.8 |



|        |        |        |        |        |        |        |        |       |
|--------|--------|--------|--------|--------|--------|--------|--------|-------|
| 103.9  | 108.3  | 112.2  | 95.2   | 102.8  | 105.7  | 103.9  | 118.8  | 109.2 |
| 255.5  | 332.1  | 296.2  | 284.3  | 289.7  | 432    | 402.9  | 785.3  | 730.7 |
| 109.1  | 110.8  | 104.7  | 97     | 97.9   | 107.2  | 97.1   | 121.1  | 123.4 |
| 295    | 443    | 387.9  | 403.4  | 402.9  | 453    | 439.9  | 624.1  | 395.5 |
| 103    | 115.8  | 108.2  | 100.8  | 101.4  | 110.7  | 112.9  | 106.3  | 114.4 |
| 115.4  | 154.8  | 121.1  | 154    | 108    | 121.2  | 148.8  | 107.1  | 117.6 |
| 129.6  | 124    | 122.7  | 118.4  | 114.2  | 120.7  | 126.8  | 139.6  | 148.7 |
| 111.1  | 118.9  | 110.4  | 102.6  | 105.9  | 115.9  | 112.8  | 116    | 123.8 |
| 266.2  | 226.8  | 216.7  | 283.7  | 192    | 243.5  | 257.1  | 335.6  | 244   |
| 106.4  | 102.4  | 109.9  | 101.9  | 98.1   | 116.6  | 108.2  | 119.9  | 110.3 |
| 111.2  | 110.6  | 110.7  | 114.7  | 112.9  | 128.7  | 123.8  | 118.9  | 105.4 |
| 112.8  | 116.9  | 106.4  | 113.7  | 108.4  | 124.8  | 108.1  | 119.2  | 102.1 |
| 106.7  | 118.5  | 100.8  | 108.5  | 95.1   | 113.7  | 106.4  | 110.4  | 113.9 |
| 111.1  | 116.8  | 108.3  | 96.5   | 94.4   | 103.9  | 104.2  | 105.1  | 113.2 |
| 117.3  | 119.1  | 112    | 127.9  | 110.4  | 120.2  | 115.1  | 127.4  | 123.2 |
| 600.8  | 1358.2 | 1518.3 | 1089.3 | 1248.7 | 1324.6 | 887.4  | 1043.2 | 709.1 |
| 1307.1 | 1473.8 | 1574.8 | 1227.3 | 1383.5 | 1569.4 | 1754.6 | 1085.4 | 964.3 |
| 100.4  | 118.9  | 100.9  | 102.8  | 98.5   | 110.4  | 113.9  | 108.9  | 99.6  |
| 117.6  | 124.7  | 100.4  | 104.1  | 100.9  | 110.4  | 110.5  | 121.6  | 116.5 |
| 112.5  | 108.1  | 97     | 97.2   | 94.9   | 105.8  | 89.9   | 93.8   | 108.5 |
| 109.6  | 110    | 104.9  | 109.7  | 102    | 110.6  | 114.3  | 111.3  | 105.5 |
| 100.2  | 101.2  | 96.2   | 103.4  | 94.3   | 106.3  | 94.3   | 103.9  | 103.3 |
| 116.4  | 115.1  | 106.4  | 97.1   | 106    | 121.6  | 101.8  | 125.4  | 119.3 |
| 102.8  | 109.9  | 99.3   | 101.4  | 98.2   | 104    | 95.4   | 108.6  | 109   |
| 128.4  | 187.5  | 192.1  | 197    | 173.8  | 164.2  | 190.2  | 226.9  | 142.4 |
| 626.9  | 542.8  | 606.6  | 336.4  | 662    | 912    | 468.3  | 2225.8 | 936.7 |
| 108.3  | 134.7  | 113.3  | 113.5  | 103.2  | 127.2  | 124.1  | 122.5  | 114.2 |
| 131.9  | 173.3  | 136.3  | 150.6  | 142.9  | 166.6  | 158.8  | 204.2  | 168.3 |
| 101.1  | 107.4  | 103.9  | 96.1   | 101.6  | 113.1  | 102.1  | 115.1  | 131.4 |
| 113.2  | 108.6  | 100.9  | 108.5  | 101.6  | 118.4  | 97.1   | 114.1  | 119.7 |
| 283    | 520.8  | 549.9  | 679.3  | 330.3  | 483.7  | 339.6  | 844.8  | 838.4 |
| 204.6  | 450.8  | 353.8  | 472.3  | 344.1  | 328.7  | 359    | 333    | 412.7 |
| 106.2  | 101.9  | 104.7  | 104.4  | 90.4   | 102.5  | 112.9  | 109.5  | 97.6  |
| 123.6  | 142.4  | 140.3  | 134.1  | 125.3  | 140.6  | 136.1  | 231    | 191.2 |
| 203.1  | 419.6  | 298.3  | 515.1  | 326.7  | 267.6  | 519.4  | 378.3  | 248.8 |
| 154.4  | 194.1  | 184.5  | 406.1  | 181.5  | 171.4  | 425.2  | 212.2  | 195.3 |
| 143.6  | 174.8  | 179.4  | 142.1  | 145.6  | 177.8  | 186.9  | 192.6  | 167.6 |
| 571.9  | 908.2  | 983.1  | 913.8  | 917    | 1056.6 | 893.2  | 1443.5 | 945.2 |
| 116.7  | 105.9  | 108.3  | 106    | 105.4  | 109.3  | 110.2  | 118.9  | 112.6 |
| 336.5  | 787.3  | 613.8  | 542.3  | 561.8  | 586.3  | 560    | 728.5  | 522.7 |
| 109.4  | 120.2  | 120.7  | 111.7  | 108.4  | 129.5  | 122.7  | 146.5  | 129   |
| 198.6  | 394.3  | 347.3  | 427.9  | 300.2  | 327.7  | 441.7  | 310.7  | 202.6 |
| 140.2  | 174.8  | 130.2  | 158.4  | 126.2  | 158.2  | 151.7  | 305.6  | 229.3 |
| 105.8  | 101.4  | 100.7  | 99.7   | 95.3   | 107.1  | 98.5   | 111.2  | 111.9 |
| 614.7  | 391.4  | 414.2  | 326.1  | 435.6  | 576.5  | 501.4  | 1217.1 | 697.8 |
| 124.4  | 147    | 133.4  | 161.6  | 133.5  | 130.8  | 148.2  | 229.1  | 186.4 |
| 280.3  | 241.7  | 203.6  | 284.2  | 283.7  | 287.5  | 325.5  | 648.8  | 550.2 |
| 139.5  | 203.7  | 200    | 194.2  | 176.5  | 178.9  | 211.6  | 165.2  | 141.8 |
| 120.6  | 144.1  | 148.2  | 141.5  | 149    | 134.1  | 124.5  | 164.4  | 163.3 |
| 273.6  | 428.6  | 659    | 326.2  | 717.9  | 587    | 460.8  | 1088.3 | 597.1 |
| 152    | 207.2  | 143    | 180.3  | 130.6  | 190.2  | 159.3  | 230.3  | 189.6 |

|       |        |       |        |        |       |        |        |       |
|-------|--------|-------|--------|--------|-------|--------|--------|-------|
| 400.7 | 243.6  | 320.2 | 192.2  | 223.9  | 236.1 | 217.6  | 527    | 571   |
| 118.6 | 127.7  | 115.2 | 108.2  | 123.4  | 126.4 | 151.2  | 202.8  | 166.4 |
| 342.6 | 570.6  | 596   | 490.3  | 377.3  | 408.3 | 413.2  | 778.2  | 766.8 |
| 115   | 128.4  | 95.6  | 111.7  | 103.4  | 101.9 | 97.5   | 108.5  | 107.2 |
| 478.3 | 419.7  | 252.5 | 930.5  | 387.4  | 296.7 | 778.3  | 624.4  | 244.3 |
| 198.7 | 401.4  | 343.7 | 395.2  | 291.9  | 255.2 | 342.4  | 254.1  | 201.2 |
| 276.3 | 322.3  | 366.8 | 368.8  | 185.5  | 357.1 | 240.9  | 477.3  | 738.4 |
| 113.2 | 209    | 154.2 | 187.7  | 134.9  | 115.9 | 120.9  | 121.2  | 116.1 |
| 131.5 | 226.9  | 142.7 | 193.2  | 158    | 161.4 | 151.5  | 230.6  | 206.4 |
| 177.8 | 277.4  | 286.8 | 315.5  | 224    | 289.3 | 210.8  | 352.7  | 290.9 |
| 106.6 | 250.8  | 131   | 224.7  | 120.3  | 133.1 | 152.4  | 126.6  | 115.1 |
| 104.4 | 106.9  | 104   | 96.5   | 93.5   | 109.1 | 100.7  | 103.2  | 111.4 |
| 174.1 | 424    | 242.5 | 350.5  | 228.5  | 218.1 | 229    | 235.8  | 222.3 |
| 119.5 | 284.5  | 124.6 | 140.6  | 134.1  | 125.7 | 125.2  | 133.4  | 126.4 |
| 150.9 | 454.2  | 177.2 | 221.2  | 168.6  | 149.4 | 146.5  | 188.1  | 177.7 |
| 106   | 125.3  | 104   | 104.2  | 93     | 96.3  | 102.7  | 103    | 107.3 |
| 117.6 | 121.9  | 113.5 | 122.3  | 112.1  | 124.2 | 121.6  | 139    | 131.5 |
| 378.1 | 1969.7 | 1653  | 1440.6 | 1043   | 970.5 | 1200.8 | 693.2  | 602.5 |
| 284.6 | 675.6  | 778   | 667.9  | 493.5  | 516.9 | 498.2  | 571    | 596.1 |
| 119.9 | 161.5  | 180.4 | 257.4  | 117.8  | 168   | 148.2  | 121.3  | 137.2 |
| 101.8 | 103.6  | 104.4 | 95.4   | 99.4   | 104.1 | 104.6  | 96.9   | 106.6 |
| 110.8 | 110    | 103.5 | 96.9   | 101.3  | 112.6 | 105.5  | 107.8  | 115.5 |
| 103.9 | 114.5  | 98.3  | 93.5   | 94     | 106.7 | 110    | 108.5  | 111.5 |
| 113.3 | 120.1  | 116.3 | 112.6  | 109.7  | 119.6 | 112.9  | 135.2  | 103.9 |
| 95.3  | 105.4  | 101.7 | 99.2   | 93.5   | 109.9 | 97.7   | 116.8  | 105.3 |
| 107.3 | 117.8  | 106.6 | 107    | 101.1  | 104.7 | 99.3   | 116.7  | 121.3 |
| 104.2 | 105.4  | 98.5  | 104.3  | 95.1   | 102.3 | 106.6  | 113.7  | 122.1 |
| 102.4 | 110.1  | 102   | 102.2  | 100.5  | 114.9 | 101.1  | 107.2  | 104.7 |
| 106.1 | 105.4  | 102   | 104.7  | 91.5   | 98.8  | 101.2  | 96.8   | 107.5 |
| 114.1 | 115.9  | 105   | 109.5  | 97.4   | 114.3 | 108.7  | 120.8  | 123.8 |
| 99    | 106.3  | 94.7  | 94.8   | 92.8   | 107.1 | 100.2  | 109.4  | 105.3 |
| 108.8 | 108.6  | 101.4 | 106.5  | 95.5   | 104.6 | 97.8   | 101.1  | 103.4 |
| 105.7 | 105.7  | 93.7  | 97.6   | 87.8   | 103.7 | 94     | 107    | 104   |
| 107.7 | 110.4  | 107.6 | 107.8  | 97.6   | 106.5 | 110    | 112    | 102.1 |
| 128.8 | 136.5  | 135.1 | 136.2  | 107.2  | 124.8 | 129.3  | 156.1  | 130.6 |
| 190.3 | 278.3  | 274.7 | 228.4  | 277.3  | 258.3 | 310.4  | 302    | 207.4 |
| 148.4 | 197.7  | 167.9 | 228.6  | 194.2  | 189.5 | 131.9  | 217.9  | 179.4 |
| 139.6 | 202.2  | 166.5 | 278.8  | 172.4  | 172.8 | 245.1  | 187.9  | 164.3 |
| 100.7 | 103.8  | 100.2 | 110    | 103.9  | 107.4 | 98     | 112.6  | 111.2 |
| 104.4 | 112.3  | 97.6  | 98     | 91     | 104.6 | 104.6  | 98.4   | 111.1 |
| 104   | 116.8  | 96.6  | 104    | 100.3  | 110.8 | 109.9  | 116.1  | 113.9 |
| 119.3 | 144.7  | 129.2 | 135.1  | 118.5  | 128.3 | 110    | 159.1  | 244.5 |
| 520.3 | 968.7  | 571.7 | 1447.5 | 1125.3 | 666   | 1863.1 | 1227.7 | 766.9 |
| 407.2 | 831.6  | 659.6 | 1626   | 590.8  | 436.7 | 1301   | 522.2  | 318.1 |
| 111.2 | 105.7  | 107.2 | 107.5  | 96.3   | 115.3 | 117.7  | 113    | 101.5 |
| 103.4 | 105.3  | 95.7  | 103.7  | 99.2   | 103.6 | 96.5   | 112.1  | 100.2 |
| 141.1 | 136.2  | 132.5 | 113.7  | 129.2  | 148.7 | 125    | 241.8  | 299.4 |
| 102.6 | 105.6  | 103.3 | 101.4  | 96.7   | 109.8 | 104.2  | 118    | 114.2 |
| 128.8 | 157.8  | 146.9 | 125.3  | 128.5  | 146.9 | 145.9  | 180.4  | 125.2 |
| 110.6 | 113.1  | 98.9  | 107.7  | 94.8   | 115.3 | 106.5  | 111    | 106.8 |
| 100.9 | 106.1  | 104   | 97.8   | 100.4  | 107.6 | 99.7   | 107.5  | 109.3 |

|       |       |       |       |       |       |       |        |        |
|-------|-------|-------|-------|-------|-------|-------|--------|--------|
| 113.6 | 108   | 100.7 | 107.9 | 113.9 | 122.3 | 122.6 | 123    | 106.6  |
| 153.6 | 146.5 | 139.5 | 166.9 | 138.5 | 162   | 142.8 | 182.8  | 140    |
| 107.8 | 114.5 | 119.5 | 107.4 | 101.7 | 110.4 | 106.7 | 120    | 108.4  |
| 108.6 | 122.8 | 118.4 | 108.6 | 104.6 | 120.4 | 123.6 | 125.7  | 109.5  |
| 106.8 | 126.6 | 121   | 113.3 | 110.4 | 114.5 | 112.3 | 135.7  | 120.7  |
| 157   | 131.3 | 126   | 130   | 127.2 | 140.5 | 134.6 | 147.8  | 142.5  |
| 119.2 | 149.3 | 115.4 | 150   | 130.9 | 139   | 125.7 | 150.7  | 150.9  |
| 99    | 102.1 | 96.1  | 113.9 | 99.4  | 111.4 | 105.4 | 106.6  | 103.3  |
| 101.2 | 103.5 | 95.5  | 98.1  | 90.6  | 106.8 | 98.5  | 111.4  | 104    |
| 97.7  | 107.8 | 106.8 | 103.7 | 94.3  | 102.1 | 110.2 | 98     | 107.4  |
| 112.9 | 117.6 | 104.1 | 107.2 | 102.8 | 110.2 | 100   | 127.7  | 115.1  |
| 114.1 | 109.7 | 116.1 | 98.7  | 97.4  | 116.1 | 109.7 | 113.4  | 113.6  |
| 216.8 | 302.8 | 240.3 | 278.1 | 235.2 | 264.5 | 264.3 | 455.2  | 331.9  |
| 108.7 | 101   | 105.3 | 100.4 | 93.4  | 113.1 | 106.4 | 104.2  | 108.4  |
| 116.1 | 121.3 | 111.5 | 98    | 97.9  | 115.9 | 108   | 105.5  | 108    |
| 103.3 | 98.5  | 95.7  | 93.1  | 94.1  | 101.9 | 99.4  | 108.7  | 100.1  |
| 107.6 | 109.8 | 98.8  | 101.4 | 96.7  | 107   | 105   | 112.8  | 112.4  |
| 100.8 | 107.1 | 103.3 | 108.5 | 100.5 | 107.7 | 108.8 | 108.6  | 103.1  |
| 110.2 | 105.8 | 106.8 | 110.2 | 111.6 | 123.4 | 106.7 | 119.5  | 110.6  |
| 145.2 | 135.3 | 117.8 | 142.8 | 137.9 | 131.8 | 136.9 | 154.7  | 141.5  |
| 114.6 | 111.7 | 110.9 | 110   | 102.4 | 117.9 | 109.9 | 120.4  | 124.8  |
| 644   | 721.7 | 693.5 | 492.2 | 886.1 | 923   | 669.4 | 1848.7 | 1289.9 |
| 113.1 | 114.3 | 98.9  | 95.8  | 95.8  | 106   | 98.5  | 107.4  | 106.9  |
| 105.7 | 104.5 | 104.9 | 101.6 | 95.1  | 112.3 | 103.6 | 118.5  | 119.9  |
| 100.8 | 109.8 | 106.8 | 106.1 | 91.3  | 104.1 | 94.9  | 115.3  | 106.8  |
| 108.6 | 119   | 105.5 | 104.4 | 105.7 | 104.9 | 95.7  | 101.2  | 105.2  |
| 108.6 | 116.7 | 107.3 | 112.6 | 95.2  | 107.8 | 102   | 128.9  | 110.1  |
| 109.5 | 118.4 | 111   | 117.9 | 109.8 | 116.6 | 111.2 | 112.5  | 115.6  |
| 105.3 | 105.4 | 109.9 | 116.3 | 97.8  | 111.8 | 102.3 | 109.9  | 109.4  |
| 114   | 117.7 | 118.3 | 100.7 | 100.4 | 111.2 | 116.1 | 125.7  | 118.2  |
| 113.2 | 119.5 | 105.1 | 145.7 | 104.3 | 115.9 | 112.8 | 138.4  | 117.5  |
| 117.7 | 120.1 | 108.2 | 130.2 | 113.2 | 122.7 | 116.3 | 126.3  | 106.9  |
| 105   | 108.6 | 104.2 | 98.9  | 92    | 105.8 | 102.7 | 111    | 110.7  |
| 93.2  | 104.4 | 96.1  | 90.8  | 94.2  | 110.1 | 99.9  | 105.9  | 100    |
| 108.5 | 120.9 | 109.5 | 104   | 111.7 | 116.2 | 109.6 | 121.3  | 132.3  |
| 106.8 | 102   | 100.6 | 104.9 | 93    | 100.9 | 108.8 | 107.1  | 102.9  |
| 123   | 129.1 | 118.5 | 105.5 | 112.4 | 131.2 | 125.1 | 147.5  | 136    |
| 111   | 138.9 | 130.2 | 106.2 | 99.2  | 133   | 113.1 | 122.8  | 174.6  |
| 155.3 | 591.3 | 658.8 | 379.8 | 459.5 | 363.4 | 384.8 | 547.3  | 589.6  |
| 109.5 | 111.5 | 104.7 | 109.9 | 103.4 | 110   | 106.7 | 113.3  | 111.9  |
| 106.4 | 108.7 | 102.3 | 92.8  | 98    | 106.2 | 106.8 | 111.2  | 106.2  |
| 107.9 | 114.8 | 106.1 | 109.6 | 92.5  | 108.5 | 108.4 | 118.1  | 116.6  |
| 110.4 | 120.7 | 108.1 | 109.4 | 101.9 | 107.3 | 106.7 | 127.2  | 113.3  |
| 100.9 | 109.1 | 97.7  | 95    | 96.2  | 110.5 | 95    | 101.5  | 100.3  |
| 106.2 | 101.6 | 101   | 105.7 | 93.6  | 111.3 | 94.1  | 113.1  | 108.7  |
| 114   | 118.7 | 109.7 | 99.1  | 93.3  | 109.5 | 108.4 | 127.5  | 111.6  |
| 109.4 | 118.3 | 109.5 | 105.8 | 109.3 | 111.2 | 109.8 | 113.1  | 119.8  |
| 111.4 | 112.5 | 106.5 | 109.4 | 98.3  | 107.3 | 110.7 | 112.8  | 114.4  |
| 99.4  | 104.6 | 100.7 | 100.3 | 90.2  | 103.4 | 94.6  | 106.4  | 103.9  |
| 100.8 | 110.6 | 105.5 | 103.9 | 91.9  | 105.9 | 107.2 | 114    | 107.4  |
| 105.9 | 110.2 | 102.3 | 84.2  | 93.8  | 110.4 | 100.8 | 105.6  | 102.8  |

|       |       |       |        |       |       |       |        |        |
|-------|-------|-------|--------|-------|-------|-------|--------|--------|
| 109.4 | 102.3 | 102.7 | 103.5  | 99    | 105.8 | 104.1 | 115.5  | 105    |
| 111.8 | 113.2 | 111.4 | 116.1  | 99.8  | 114   | 106.8 | 127.1  | 132    |
| 113.2 | 111.1 | 106.6 | 93.7   | 92.6  | 105.4 | 100   | 111    | 109.3  |
| 98.2  | 104.8 | 101.9 | 91.4   | 92.3  | 104.7 | 97.5  | 99.2   | 100    |
| 103.7 | 103.8 | 97.4  | 100.3  | 92    | 98.6  | 104   | 109    | 104    |
| 138.2 | 209.7 | 156.9 | 318.8  | 226.5 | 130.1 | 165.3 | 171.8  | 142.5  |
| 105.1 | 117.9 | 118.6 | 112.2  | 102.2 | 121.4 | 109.7 | 118.6  | 102.5  |
| 106.1 | 117.9 | 100.2 | 107.9  | 88.9  | 106.6 | 109.5 | 117.9  | 106.9  |
| 109.2 | 101.1 | 107.1 | 100.7  | 96.1  | 105.9 | 103.4 | 117.5  | 104.3  |
| 116.4 | 117.3 | 106.7 | 123.3  | 101.9 | 122.3 | 110   | 123.3  | 118.7  |
| 418.3 | 243.3 | 248.6 | 259    | 253.6 | 305   | 282.2 | 520.9  | 396.3  |
| 467.7 | 356.4 | 278.5 | 310.2  | 312.3 | 349.2 | 350.9 | 625.2  | 430    |
| 170.2 | 154.8 | 143   | 144.7  | 134.4 | 170.1 | 148.9 | 199    | 211.6  |
| 146.4 | 133.7 | 136   | 127.9  | 113.5 | 148.5 | 134.2 | 169.2  | 164.2  |
| 109.6 | 126.8 | 116.7 | 110.8  | 97.2  | 123.9 | 111.1 | 126.5  | 117.7  |
| 110.3 | 133.2 | 126.8 | 131.1  | 125.5 | 131   | 146.1 | 158.2  | 135.4  |
| 102.8 | 112.2 | 104.6 | 93.5   | 94.9  | 101.5 | 101.4 | 104    | 110.6  |
| 353.5 | 480.3 | 392   | 387.7  | 378.6 | 474.9 | 417.1 | 805.1  | 630.1  |
| 104.9 | 110   | 121   | 113.4  | 109.7 | 117.4 | 113.4 | 120.8  | 115.5  |
| 104.1 | 123.7 | 130.4 | 131.5  | 108.5 | 127.5 | 128.1 | 133.3  | 111.8  |
| 117.5 | 235.6 | 291.6 | 182.7  | 208.4 | 212.4 | 193   | 206    | 134.2  |
| 523.3 | 630.7 | 591.9 | 611.4  | 636.8 | 657   | 671.2 | 1307.1 | 993.2  |
| 117.7 | 136.4 | 112.9 | 120.7  | 110   | 121.9 | 118.4 | 129.5  | 121.5  |
| 117.2 | 114.7 | 100.3 | 112.7  | 101.7 | 114.3 | 114.7 | 132.7  | 108.9  |
| 108.1 | 115.1 | 111.6 | 104.7  | 99.2  | 102.2 | 110.4 | 120.2  | 115.8  |
| 100.9 | 129   | 116.7 | 127.2  | 98.3  | 109.4 | 106.8 | 128.3  | 121.6  |
| 864.6 | 641.9 | 657.1 | 709.7  | 809.2 | 530.2 | 487.3 | 1684.9 | 1713.5 |
| 275.4 | 353.1 | 346.7 | 373.1  | 310.7 | 399   | 404.7 | 507.1  | 400.7  |
| 639.2 | 811.7 | 630.2 | 1042.6 | 651.3 | 618.2 | 876.3 | 1035.1 | 799.5  |
| 105.7 | 105.8 | 101.8 | 107.7  | 101.5 | 104.4 | 106.9 | 117.1  | 111.5  |
| 116.2 | 168.4 | 145.3 | 158    | 136.6 | 126.5 | 165.2 | 138.5  | 124.4  |
| 366.9 | 907.9 | 968.5 | 1120.9 | 656   | 621   | 991.8 | 424.6  | 287.9  |
| 107.1 | 102.6 | 109.8 | 99.9   | 101.5 | 110.9 | 108.2 | 108.4  | 103.5  |
| 106.2 | 129.2 | 124.2 | 107.5  | 115.5 | 118   | 109.7 | 118.8  | 118.4  |
| 102.6 | 103.3 | 90.4  | 100    | 93.6  | 102.9 | 100.3 | 99.6   | 110.3  |
| 102.2 | 115.5 | 108.3 | 110    | 98.4  | 104.7 | 103.9 | 116.6  | 116.4  |
| 117.3 | 201   | 159.9 | 143.6  | 134   | 138.5 | 129.9 | 164.4  | 152.1  |
| 141.3 | 185   | 163.2 | 166.5  | 126.7 | 144.7 | 130.3 | 182.4  | 135.8  |
| 112.6 | 113.7 | 105.5 | 97.1   | 105.8 | 112.9 | 107.3 | 120.6  | 109.8  |
| 100.6 | 104   | 96.7  | 94.6   | 95.4  | 106.6 | 89.5  | 101.2  | 99.7   |
| 265.8 | 348   | 216.1 | 839.3  | 350.7 | 196.8 | 817.4 | 356.7  | 211    |
| 104.1 | 104.8 | 103   | 96.4   | 91.8  | 106.5 | 102.5 | 105.4  | 106    |
| 141.6 | 210.8 | 165   | 205.7  | 167.7 | 155.9 | 189.1 | 178.1  | 173.5  |
| 114.1 | 133.7 | 96.8  | 115    | 107.7 | 116.7 | 110   | 124.9  | 137    |
| 110.6 | 115.1 | 114.8 | 123.8  | 92.8  | 116.6 | 112   | 124.7  | 116.5  |
| 104.3 | 107.4 | 97    | 101.5  | 92.1  | 104   | 108.8 | 122.9  | 127.7  |
| 110   | 110.7 | 107.5 | 106.7  | 101   | 116.8 | 108   | 113.2  | 108.7  |
| 110.2 | 106.9 | 102.7 | 98.7   | 100.9 | 110.9 | 98    | 115.1  | 110.4  |
| 135.1 | 170   | 200.7 | 129.4  | 153.8 | 191.2 | 174.4 | 173.2  | 208.1  |
| 138.9 | 177   | 168.9 | 213    | 152.9 | 188.2 | 217.8 | 152.6  | 163    |
| 99.7  | 102.8 | 101.8 | 101.1  | 92.8  | 105.9 | 101   | 109.3  | 109.5  |

|        |        |        |        |        |        |        |        |        |
|--------|--------|--------|--------|--------|--------|--------|--------|--------|
| 102.3  | 108.5  | 100.6  | 104.8  | 92.4   | 101.6  | 97.1   | 110.1  | 105.3  |
| 108.3  | 116.6  | 113.1  | 107.8  | 101    | 106.1  | 105.9  | 108.1  | 112    |
| 122.1  | 129    | 114.5  | 116.4  | 111.9  | 128.3  | 107.4  | 133.6  | 128.2  |
| 112.9  | 122.1  | 105.4  | 110.7  | 107.5  | 106.4  | 106.5  | 121.2  | 112.2  |
| 106.3  | 104.5  | 93.8   | 88.7   | 90.3   | 98.2   | 93.9   | 103    | 110.4  |
| 149.3  | 184.5  | 140.8  | 186.4  | 169.8  | 197.6  | 171.7  | 270.4  | 161    |
| 101.7  | 105.9  | 101.3  | 104    | 86.9   | 107.9  | 100.5  | 121.9  | 110.7  |
| 102.9  | 102.9  | 99.4   | 96.2   | 94.4   | 105    | 106.8  | 106.8  | 102.8  |
| 112.2  | 119.6  | 110.4  | 106.8  | 98.5   | 113.6  | 105.5  | 117.2  | 109    |
| 110.2  | 116.9  | 96     | 114.9  | 110.5  | 114.3  | 94.3   | 106    | 110.9  |
| 99.4   | 95.6   | 101.8  | 97     | 91.1   | 106.7  | 97.8   | 104.3  | 110.7  |
| 669.1  | 730.1  | 549.8  | 566.4  | 573.2  | 571.1  | 438    | 1123.5 | 1575.4 |
| 102.4  | 102.9  | 93.6   | 102.6  | 93.9   | 103.9  | 100.8  | 104.3  | 103.5  |
| 101.6  | 114.8  | 112.5  | 115.8  | 104.9  | 106.9  | 113    | 114.9  | 107.9  |
| 111.5  | 102.1  | 105.2  | 101.7  | 92.4   | 107.6  | 107.8  | 112.5  | 108.4  |
| 107.6  | 107    | 101.8  | 102    | 93.6   | 110.7  | 103.4  | 111.5  | 108.2  |
| 3229.8 | 3332.8 | 3304.8 | 3513.6 | 2581.9 | 3065.5 | 2562.6 | 7322.3 | 6416.5 |
| 110.2  | 109.3  | 94.3   | 99.5   | 90.1   | 108.7  | 113    | 103.1  | 105.2  |
| 679.3  | 538.9  | 205.1  | 1340.3 | 461.1  | 270.6  | 1852.9 | 751.5  | 823.9  |
| 124    | 186.2  | 217.5  | 144    | 156.1  | 206.5  | 149.3  | 225.5  | 165    |
| 392    | 867    | 493.5  | 508.5  | 579.2  | 452.3  | 554.7  | 901.2  | 369.4  |
| 119.3  | 105.3  | 103.4  | 100.7  | 92.7   | 103.1  | 104.2  | 110.6  | 106.6  |
| 105.5  | 118.7  | 104.5  | 104.4  | 102.7  | 116.8  | 110.5  | 107.9  | 110.4  |
| 101.6  | 104.2  | 147.1  | 112.5  | 108.7  | 109.7  | 141.4  | 112.1  | 113.3  |
| 132.8  | 171.7  | 1052.6 | 177.5  | 194.5  | 201.7  | 383.6  | 186.4  | 134.8  |
| 101.8  | 98.1   | 96.7   | 92.4   | 94.2   | 98.6   | 100.7  | 103    | 101.7  |
| 103.4  | 104.7  | 98.6   | 96.1   | 97.8   | 113.3  | 107.4  | 115    | 111.8  |
| 109.1  | 112.8  | 104.8  | 99.4   | 92.1   | 108.5  | 98.2   | 103.2  | 110.3  |
| 104.6  | 104.7  | 101.6  | 93.3   | 93     | 101.4  | 99.3   | 106.1  | 104.2  |
| 99.7   | 104.3  | 104.6  | 94.7   | 92.8   | 116.3  | 105.3  | 110.5  | 109.3  |
| 106.9  | 103.1  | 108.4  | 94.4   | 97.7   | 105.7  | 98.8   | 104.8  | 104.2  |
| 117.4  | 117.7  | 116.9  | 116.4  | 102.4  | 114.6  | 104    | 123    | 121.1  |
| 109.2  | 108.4  | 101.4  | 102.2  | 93     | 111.1  | 106    | 104.2  | 101.3  |
| 100.3  | 104.9  | 100.4  | 110.2  | 97.8   | 104.3  | 97.6   | 138.2  | 112.7  |
| 106.7  | 107.4  | 106.9  | 100.1  | 95.3   | 108.8  | 107.1  | 106.6  | 104.1  |
| 110.7  | 107.2  | 109.2  | 103.9  | 94.9   | 111.6  | 110.8  | 124.2  | 115.7  |
| 108.3  | 108.6  | 104.8  | 95.2   | 103.8  | 99.5   | 100.7  | 95.3   | 102.5  |
| 108.2  | 103.5  | 104.8  | 101.7  | 97.4   | 128.4  | 116.2  | 117.9  | 121    |
| 105.5  | 115.2  | 109.6  | 111.7  | 122.2  | 118    | 131.9  | 142.2  | 113.2  |
| 145    | 179.3  | 133.8  | 143.9  | 351.5  | 186.5  | 378.2  | 319.7  | 142.4  |
| 102    | 99.2   | 99     | 98.5   | 93.8   | 106.1  | 106.3  | 109.3  | 102.8  |
| 103.7  | 101.2  | 97.2   | 95.9   | 89.7   | 112.7  | 102.3  | 119.4  | 104.4  |
| 110.8  | 108    | 104.2  | 97.5   | 94.2   | 111.6  | 108.2  | 115.8  | 110.5  |
| 111.1  | 117    | 106.5  | 103.6  | 112.7  | 114.5  | 116.6  | 124.3  | 119.3  |
| 101.9  | 105.3  | 97.2   | 92.5   | 97.5   | 104.9  | 95.9   | 110.2  | 103.2  |
| 107.8  | 104.7  | 100.8  | 101.5  | 99.7   | 109.1  | 104.8  | 114.1  | 107.1  |
| 107.4  | 108    | 98.8   | 101    | 100.3  | 111.5  | 101    | 97.5   | 102.1  |
| 108.5  | 114    | 102.8  | 103.5  | 99.6   | 115.2  | 106.6  | 119.7  | 112    |
| 104.3  | 105.6  | 110.9  | 99.3   | 98.9   | 114.3  | 106    | 109.3  | 114.5  |
| 108.5  | 111.3  | 105.1  | 99.3   | 100    | 105.9  | 105.8  | 114.2  | 120.3  |
| 109.5  | 115.2  | 112    | 114.1  | 101.4  | 111    | 102.8  | 115    | 120.8  |

|       |       |       |       |       |       |       |       |       |
|-------|-------|-------|-------|-------|-------|-------|-------|-------|
| 112.7 | 178.4 | 170.6 | 101.8 | 220   | 170   | 125.1 | 249   | 99.8  |
| 132.9 | 243   | 268   | 126.1 | 395.6 | 230.7 | 125.5 | 492.9 | 111.6 |
| 105.9 | 107.2 | 103.5 | 95.6  | 91.9  | 109.3 | 104.8 | 109.9 | 110.8 |
| 105.8 | 106.4 | 108.4 | 120   | 103.6 | 114.3 | 106.3 | 125   | 120.3 |
| 102.5 | 103.6 | 99.5  | 100.4 | 96.9  | 107.5 | 103.4 | 113.4 | 105.4 |
| 133.8 | 135.8 | 138.3 | 143.7 | 126.1 | 144.5 | 138   | 141.3 | 131.5 |
| 106.2 | 113.1 | 109.6 | 102.7 | 94.1  | 108.3 | 106   | 111.3 | 113.8 |
| 105.7 | 113.6 | 101.4 | 120.1 | 106.7 | 116.7 | 106   | 107.7 | 112.7 |
| 106.2 | 103.6 | 96.7  | 111.3 | 102.7 | 105.9 | 100.8 | 125.7 | 111.9 |
| 104.9 | 104.8 | 100.2 | 95.8  | 97.3  | 107.5 | 103.2 | 106.1 | 110.4 |
| 107.6 | 107.2 | 108.2 | 125.5 | 108.6 | 113.2 | 105.1 | 127.7 | 116.7 |
| 101.5 | 121.4 | 107.8 | 136.2 | 116.2 | 116.3 | 107.4 | 115   | 107.9 |
| 107.2 | 107.4 | 105.9 | 93.2  | 97.6  | 110.1 | 102.1 | 97.7  | 109.7 |
| 125.4 | 196.9 | 174.1 | 133.2 | 131.5 | 165.4 | 129.3 | 149.4 | 151.2 |
| 110.2 | 117.1 | 102.3 | 95.6  | 102.2 | 111.4 | 105.5 | 123.5 | 121   |
| 108.1 | 107.4 | 104.3 | 112.5 | 94.3  | 103.5 | 95.4  | 118   | 108.8 |
| 122.1 | 173.8 | 120.8 | 128.5 | 159.6 | 163   | 111.5 | 208.7 | 161.8 |
| 116.8 | 108.5 | 95.9  | 100.6 | 98.2  | 106.4 | 100.6 | 114.1 | 101.9 |
| 107.4 | 115.1 | 101.5 | 101.8 | 95.2  | 107.3 | 101.5 | 106.3 | 107.5 |
| 106.7 | 111.3 | 105.3 | 106.4 | 106.5 | 111.7 | 108.3 | 97.9  | 118.1 |
| 104.3 | 109.3 | 104.3 | 94.7  | 95.6  | 110.2 | 104.8 | 104.8 | 109.9 |
| 103.4 | 109   | 95.9  | 103.5 | 93.6  | 103.9 | 95.9  | 106.8 | 104.6 |
| 267.1 | 610.4 | 660.5 | 490.7 | 585.1 | 573.6 | 532.9 | 764.7 | 366.3 |
| 109.1 | 102.2 | 99.8  | 117.8 | 94.7  | 107.1 | 107.2 | 109.5 | 117.1 |
| 109.5 | 113   | 104.9 | 119.9 | 98.5  | 109.8 | 102.4 | 116.5 | 114.1 |
| 122.8 | 150.1 | 118.4 | 140.2 | 129.2 | 123.9 | 118.9 | 143   | 136.1 |
| 101.1 | 118.2 | 110.2 | 103   | 99.3  | 114   | 110.5 | 111.8 | 111.7 |
| 107.9 | 116.4 | 107.9 | 118.7 | 100.7 | 125.1 | 105.2 | 109.7 | 114.2 |
| 411.2 | 914.8 | 799.1 | 906.2 | 711.3 | 674.9 | 728.8 | 802.3 | 593.6 |
| 127.8 | 153.9 | 179   | 123.3 | 135.7 | 151.2 | 141.2 | 156.7 | 128.1 |
| 111   | 110   | 110.1 | 95.7  | 102.6 | 107   | 96.8  | 116.4 | 109.3 |
| 104.2 | 104   | 102.6 | 93.9  | 100.6 | 104.7 | 100.6 | 106   | 95.1  |
| 100.1 | 112.8 | 104.8 | 106.3 | 98.3  | 117.1 | 118   | 110.1 | 112.3 |
| 181.2 | 382.4 | 414.3 | 270.3 | 273.7 | 302   | 312.3 | 479.3 | 325.1 |
| 170.5 | 390.3 | 413.6 | 280.4 | 375.3 | 362.3 | 328.5 | 377.3 | 273.9 |
| 108.7 | 109.3 | 101.8 | 97.6  | 96.1  | 113.7 | 103.9 | 108.3 | 105.6 |
| 116.7 | 126   | 110.9 | 120.5 | 108.9 | 121.9 | 129.6 | 114.5 | 121.7 |
| 107.7 | 112.5 | 104.5 | 102.7 | 94.8  | 104   | 108.7 | 108.5 | 106.5 |
| 110.7 | 111.5 | 107.5 | 126   | 95.7  | 107.7 | 102.1 | 109.6 | 104.7 |
| 113.1 | 140   | 112.8 | 123.9 | 116.9 | 115.4 | 146.1 | 135.1 | 130   |
| 100.1 | 111.4 | 108.5 | 96.5  | 103.5 | 117.9 | 101.5 | 111.1 | 108.6 |
| 110.3 | 117.1 | 107.5 | 103.2 | 101.7 | 115.4 | 113.4 | 122.5 | 115.8 |
| 137.8 | 228.3 | 188.2 | 171.4 | 181   | 170.1 | 170.7 | 190.2 | 131.7 |
| 98.4  | 104.8 | 99.4  | 101.2 | 94.2  | 104.5 | 95.5  | 104.6 | 104.9 |
| 124.2 | 124.4 | 123   | 116.7 | 101.7 | 137.6 | 127.3 | 142.8 | 134.8 |
| 108.6 | 99.9  | 98.6  | 97.7  | 89.6  | 106.6 | 98.4  | 97.3  | 103.6 |
| 134.4 | 107.3 | 153.3 | 105.4 | 104.9 | 111.3 | 108.2 | 122.5 | 111.8 |
| 117.4 | 118.5 | 114.6 | 119.8 | 122.7 | 126   | 122.6 | 143.1 | 115.4 |
| 147   | 191.4 | 153.1 | 203.8 | 154.5 | 184.5 | 166.5 | 247.2 | 163.8 |
| 111   | 115.5 | 102.6 | 106   | 100   | 117.1 | 97.5  | 119.1 | 109.7 |
| 115.3 | 106.9 | 111.7 | 98.1  | 99.5  | 108.2 | 114.4 | 116.4 | 116   |

|         |         |         |         |        |         |         |         |         |
|---------|---------|---------|---------|--------|---------|---------|---------|---------|
| 106.7   | 104.8   | 101.2   | 106.3   | 96.4   | 112.9   | 107.3   | 110.5   | 113.5   |
| 4723.3  | 6173.9  | 7636.3  | 4265.9  | 5270.7 | 6651.3  | 2709.4  | 5919.3  | 3688.6  |
| 15917.7 | 6900.1  | 10177.6 | 767.8   | 8819.4 | 9231.7  | 7514.8  | 15236.3 | 5993.3  |
| 112.7   | 115.8   | 107.3   | 120.8   | 103.6  | 120.2   | 114     | 119.2   | 118.7   |
| 124.1   | 115.9   | 105.9   | 107     | 105.8  | 117.7   | 108.2   | 113.8   | 126.8   |
| 108.4   | 111.5   | 106.7   | 108.1   | 96     | 109.8   | 109.2   | 114.1   | 118.1   |
| 108.9   | 113.4   | 107.4   | 101.7   | 95.7   | 111.5   | 105.7   | 106.9   | 108.4   |
| 101.7   | 107.6   | 104.8   | 93.1    | 88.9   | 104.4   | 97.9    | 114.2   | 104.3   |
| 930.4   | 1121.8  | 864     | 819.5   | 695.1  | 1075.2  | 865.3   | 1925    | 1578.3  |
| 564.5   | 584.5   | 611     | 456.1   | 510.3  | 515.4   | 481.8   | 881.9   | 457.5   |
| 124.2   | 128     | 115.9   | 117.9   | 110.5  | 125.6   | 109.2   | 137.6   | 139.1   |
| 206.1   | 234.6   | 224.4   | 199.2   | 184.1  | 201.6   | 216     | 280.3   | 297.4   |
| 108     | 107.5   | 104.8   | 108.4   | 98.9   | 108.3   | 96.7    | 95.8    | 108.1   |
| 631.8   | 1089.8  | 1033.6  | 1317.9  | 877.8  | 1081.8  | 989.5   | 1435.1  | 982.1   |
| 113.6   | 139.8   | 139.9   | 143.8   | 126.1  | 123.1   | 129.8   | 146.7   | 141.4   |
| 176.8   | 201.6   | 187.9   | 164.2   | 152.3  | 224.3   | 192     | 327.7   | 226.1   |
| 107     | 110.6   | 107.4   | 99.5    | 92.5   | 106.8   | 111.1   | 109.5   | 112.2   |
| 164.2   | 209.2   | 209.4   | 209.6   | 178.4  | 227.4   | 195.1   | 286.1   | 196.9   |
| 273.3   | 414.6   | 373.8   | 372.6   | 386.7  | 419.9   | 353.8   | 557.9   | 354     |
| 107.5   | 117.7   | 113     | 109.7   | 104.6  | 116.9   | 103.8   | 139.9   | 147.7   |
| 14736.1 | 17268.1 | 16281.2 | 15442.5 | 16518  | 12745.9 | 13164.3 | 26993.7 | 27527.7 |
| 121.9   | 122.3   | 122.2   | 134     | 114.1  | 126     | 138.3   | 125.6   | 113.1   |
| 258.2   | 297.6   | 251.2   | 280.6   | 235    | 269.9   | 295.8   | 621.9   | 456.8   |
| 290     | 1805.4  | 1558.7  | 1245.9  | 1510.2 | 1378.7  | 1210.9  | 1488.6  | 905.7   |
| 304.1   | 959.3   | 893.4   | 793.5   | 698.5  | 870.3   | 783     | 1059.1  | 630.4   |
| 108.1   | 110.2   | 104.8   | 116.8   | 96.2   | 107.8   | 108.9   | 108.6   | 116.4   |
| 199.8   | 214.3   | 158.9   | 182.4   | 169.9  | 180.8   | 176.4   | 450.1   | 305.5   |
| 200.1   | 205.1   | 162.9   | 401     | 213.7  | 196.7   | 322.6   | 316.3   | 176.6   |
| 96.4    | 106.2   | 106.7   | 93      | 97.8   | 107.5   | 102.1   | 109.3   | 110.6   |
| 126.5   | 134.3   | 115.2   | 145.6   | 113.2  | 129.7   | 132.3   | 164     | 161     |
| 153.5   | 281.8   | 235.6   | 350.4   | 234    | 229.1   | 376.5   | 260.8   | 186.7   |
| 105.2   | 110.9   | 105.5   | 112.8   | 99.8   | 119.9   | 106.6   | 123.5   | 108.8   |
| 112.8   | 119.8   | 104.3   | 109.1   | 97.7   | 109.7   | 105.1   | 108.1   | 114.6   |
| 331.4   | 532.7   | 598.5   | 374.3   | 437.7  | 627.1   | 485.4   | 812.3   | 506.6   |
| 109.6   | 107.7   | 102.1   | 103.8   | 92.9   | 103.4   | 95.4    | 109.5   | 102.5   |
| 121.4   | 114.6   | 116.8   | 105.1   | 111.7  | 116     | 118     | 139.2   | 126.2   |
| 108.3   | 110.2   | 109.3   | 102.9   | 97.4   | 115.1   | 103.6   | 109.4   | 111.1   |
| 109.5   | 117.1   | 104.3   | 106.4   | 109.6  | 126.2   | 106     | 121.9   | 113.2   |
| 108.8   | 108.5   | 104.4   | 101.7   | 98.8   | 110.5   | 105.5   | 112.7   | 113     |
| 100.4   | 104.7   | 98.4    | 98.2    | 93.6   | 112.6   | 104.5   | 110.5   | 108.8   |
| 110.6   | 108.5   | 97.3    | 103.3   | 91.6   | 101.6   | 106.7   | 112.8   | 106.4   |
| 101     | 145.9   | 138.6   | 121.5   | 119.6  | 137.7   | 118.7   | 168.2   | 128.7   |
| 111     | 144.7   | 97.2    | 115.7   | 90     | 98.6    | 106.1   | 108.8   | 108.6   |
| 117.8   | 109.3   | 98.6    | 101.6   | 95.9   | 104.6   | 105.2   | 109.6   | 106.1   |
| 160.7   | 228.6   | 195.2   | 195.9   | 180.5  | 199.9   | 199.7   | 265.9   | 210.6   |
| 118.7   | 120.5   | 105.6   | 124.1   | 98.8   | 119.9   | 110.5   | 117.6   | 117.9   |
| 104.2   | 111.6   | 107.8   | 96.9    | 105.1  | 121.6   | 104.7   | 116.2   | 109.2   |
| 174.5   | 198.1   | 158.1   | 152.9   | 169.7  | 163.9   | 176.3   | 298.5   | 254.2   |
| 151.3   | 202.4   | 163.2   | 169     | 150.9  | 172.6   | 145.1   | 226     | 243.7   |
| 107.5   | 107.9   | 105.4   | 112.2   | 102.3  | 117.4   | 111.2   | 116.1   | 109     |
| 439.3   | 642     | 596.5   | 430.6   | 535    | 614.3   | 427.6   | 850.2   | 756.6   |

|       |       |       |       |       |       |       |       |       |
|-------|-------|-------|-------|-------|-------|-------|-------|-------|
| 147.1 | 149.1 | 162   | 173.7 | 136.3 | 156.1 | 157.4 | 196.1 | 187   |
| 110.1 | 112   | 108.9 | 100.3 | 107.7 | 115.6 | 104.9 | 140.8 | 120.8 |
| 114.6 | 113.8 | 102   | 94.3  | 99.2  | 106.5 | 102.3 | 105.7 | 108.1 |
| 105.9 | 119.4 | 104.1 | 121.2 | 97.7  | 112.9 | 109   | 109.5 | 112.5 |
| 103.2 | 104.3 | 101.6 | 99.3  | 97.6  | 108.4 | 114   | 103.2 | 101.1 |
| 103.8 | 110.9 | 105   | 101.4 | 101.5 | 113.7 | 99.7  | 110.9 | 107.9 |
| 104.9 | 114.6 | 105.4 | 108   | 98.6  | 116.9 | 108.5 | 114.4 | 117.5 |
| 104.4 | 111   | 103.7 | 102.4 | 91.5  | 104.7 | 103.3 | 103.9 | 105.2 |
| 113.1 | 118   | 103.8 | 118.2 | 108.4 | 114.3 | 106   | 117.4 | 103   |
| 107.5 | 102.8 | 99.1  | 96.6  | 96.9  | 103.9 | 103.1 | 99.5  | 105.7 |
| 105.4 | 112   | 111.8 | 102.8 | 100.9 | 108.9 | 93.8  | 118.6 | 126.5 |
| 163.3 | 187.5 | 181.1 | 166.1 | 183.9 | 193.1 | 177.8 | 314.8 | 216   |
| 128.5 | 212.3 | 179.8 | 182.7 | 161.9 | 161.3 | 174   | 206.8 | 158.3 |
| 99.7  | 107.9 | 99.3  | 101.6 | 94.6  | 109.8 | 98.5  | 98    | 99.6  |
| 107.6 | 131.2 | 128.9 | 123   | 124.6 | 133.7 | 117.3 | 143.8 | 125.5 |
| 104.1 | 113   | 102.9 | 116   | 101.2 | 116   | 100.3 | 114.3 | 111.4 |
| 113.3 | 158.7 | 157.3 | 139.2 | 141.2 | 142.5 | 147.7 | 235.9 | 135.7 |
| 140.3 | 168.7 | 146.8 | 138.8 | 152   | 160.7 | 166.6 | 191.6 | 126.6 |
| 126.1 | 148.7 | 156.3 | 130.6 | 131.8 | 162.4 | 145.7 | 189.2 | 180.1 |
| 204.6 | 272.6 | 254.8 | 372.3 | 248   | 270.3 | 307.2 | 286.6 | 222.2 |
| 133.5 | 162.4 | 154.1 | 153.8 | 142.4 | 157.7 | 152.1 | 182.1 | 126.1 |
| 105.4 | 113.6 | 106.5 | 107.5 | 94.9  | 116.2 | 97.2  | 112.7 | 106.9 |
| 107.9 | 111.7 | 103.5 | 99.1  | 100.8 | 109.1 | 104.5 | 115.6 | 111.3 |
| 128.1 | 135.4 | 127.6 | 145.4 | 132.8 | 136.7 | 131.7 | 153.1 | 152.3 |
| 526.2 | 475.1 | 469.3 | 472.3 | 461.8 | 496.9 | 594.1 | 678.8 | 587.9 |
| 98.6  | 101.9 | 103.3 | 98    | 96.2  | 99.9  | 109.4 | 105.4 | 115.9 |
| 105   | 110.4 | 100.1 | 93    | 93.9  | 101.5 | 102.9 | 111.5 | 103.1 |
| 156.7 | 146.6 | 132.2 | 131.1 | 112   | 146.5 | 144.2 | 155.3 | 158.7 |
| 220.8 | 364.8 | 322.4 | 250.8 | 306.4 | 304   | 289.1 | 394.7 | 298.6 |
| 110.2 | 118.3 | 102.2 | 99.6  | 91.9  | 110.6 | 104.1 | 100   | 100.4 |
| 101   | 104.2 | 101.5 | 100.9 | 94    | 112   | 97.7  | 113   | 101.9 |
| 141.3 | 139.5 | 150.3 | 108.8 | 117   | 112.6 | 114   | 152.7 | 120.3 |
| 115.8 | 111.8 | 98.7  | 109   | 103.7 | 115.8 | 112   | 116.6 | 113.3 |
| 105.5 | 108.2 | 98.2  | 100.2 | 97.3  | 112.9 | 102.4 | 107.5 | 113.9 |
| 104.9 | 107.3 | 98.1  | 101.6 | 96.7  | 106.3 | 99.6  | 108.7 | 108.1 |
| 113.9 | 111.7 | 104.7 | 111   | 107.2 | 121.3 | 112.8 | 124.8 | 116.4 |
| 105.5 | 109.5 | 106.2 | 97.3  | 97.1  | 105   | 107.2 | 111   | 106.5 |
| 121   | 119.1 | 113.8 | 137.8 | 107.7 | 124.1 | 102   | 129.6 | 111.5 |
| 105.3 | 109.2 | 104.2 | 106.8 | 97.1  | 109.1 | 106.2 | 113.8 | 107   |
| 127.7 | 161.5 | 167.4 | 145   | 171.8 | 174   | 152.4 | 180.7 | 137.4 |
| 212.3 | 266.9 | 203.5 | 249.7 | 217.9 | 265.2 | 252.8 | 381.3 | 307.2 |
| 169.9 | 279   | 252.5 | 235.8 | 232.1 | 288.2 | 225.4 | 390   | 212.2 |
| 107   | 107   | 111.3 | 101.4 | 102.4 | 121.5 | 103.2 | 155.8 | 159.4 |
| 108.5 | 105.8 | 101.4 | 101.6 | 92.1  | 107.8 | 99.1  | 109.9 | 108.8 |
| 107.3 | 106.8 | 108.2 | 115.1 | 99.3  | 111.6 | 103.3 | 110.3 | 115.1 |
| 133.2 | 156.9 | 167   | 155.4 | 135   | 159.6 | 139.8 | 174.8 | 152.4 |
| 109.8 | 109.5 | 101.2 | 103.1 | 97.1  | 117   | 110.7 | 111.4 | 116.7 |
| 104.6 | 110   | 103.9 | 95.4  | 91.9  | 106.5 | 98.3  | 110.3 | 94.6  |
| 118.8 | 113.9 | 113.6 | 108.4 | 105.9 | 122.8 | 102.7 | 120.6 | 124.7 |
| 202.6 | 219.1 | 241.7 | 215.5 | 215.5 | 238.7 | 240.7 | 276.3 | 202.6 |
| 129.4 | 144.4 | 148   | 134.1 | 144.3 | 150.2 | 149.8 | 196.2 | 159   |



|       |        |        |        |       |       |       |        |        |
|-------|--------|--------|--------|-------|-------|-------|--------|--------|
| 122.5 | 140.3  | 155.4  | 124.7  | 131.7 | 141.3 | 126.7 | 158.7  | 130.5  |
| 124   | 127.7  | 120.5  | 107    | 112.9 | 140   | 122.3 | 149.3  | 137.7  |
| 159.2 | 182    | 175.3  | 166.7  | 194.7 | 199.2 | 200.8 | 216.9  | 188.4  |
| 141.1 | 171.9  | 166.7  | 138.2  | 154.4 | 172.4 | 172.5 | 269.6  | 183.2  |
| 125.2 | 121.6  | 117.1  | 115.5  | 112.2 | 116.7 | 137.1 | 136.5  | 131.8  |
| 110.4 | 107.3  | 107.5  | 105.3  | 106.9 | 112.5 | 111.6 | 144.5  | 126.5  |
| 103.3 | 112.7  | 114    | 97.4   | 98.7  | 104.9 | 105.4 | 107.9  | 110.7  |
| 108.1 | 103.9  | 105.2  | 117    | 93.2  | 110.5 | 107.3 | 113.6  | 115.3  |
| 192.4 | 185.6  | 185.7  | 164    | 175.5 | 166.5 | 215.6 | 281.4  | 205.8  |
| 113.6 | 111.2  | 106.8  | 106.2  | 101.5 | 114.8 | 110.1 | 123.7  | 118    |
| 107.6 | 110.8  | 95.4   | 93.2   | 90.5  | 104.5 | 107.5 | 101.7  | 107.9  |
| 109.4 | 111.8  | 104.7  | 95.7   | 95.3  | 106.4 | 97.5  | 106.5  | 107.7  |
| 104.9 | 103.3  | 104.1  | 100.2  | 101.3 | 103.7 | 98.6  | 103.7  | 107.9  |
| 111.3 | 114.6  | 101.2  | 105.7  | 98    | 107.8 | 98.3  | 114.2  | 113.4  |
| 121.1 | 125.2  | 117.7  | 117    | 101   | 117.5 | 118.4 | 137.8  | 116    |
| 99.6  | 106.8  | 99.2   | 107.1  | 98.4  | 103.2 | 100.6 | 107.7  | 110.8  |
| 102.9 | 111.2  | 105.2  | 100    | 97.8  | 113.2 | 101.5 | 110.3  | 109.3  |
| 114   | 131.1  | 115.4  | 122    | 107.7 | 130.6 | 132.9 | 143.4  | 121.2  |
| 245.4 | 233.5  | 200.4  | 294.2  | 228.3 | 227.3 | 294.1 | 403.6  | 330.4  |
| 131.2 | 163    | 175.9  | 252.1  | 159.8 | 160.7 | 212.5 | 190.2  | 169.3  |
| 108.2 | 105.9  | 108    | 101.6  | 97.6  | 119.8 | 113.6 | 127    | 118.2  |
| 247.2 | 229.3  | 259.7  | 278.4  | 226.4 | 235.9 | 283.7 | 330.7  | 233.2  |
| 113.7 | 111.2  | 104.9  | 104.1  | 97.9  | 109.4 | 108.3 | 107.1  | 109.1  |
| 105.5 | 110.9  | 104.1  | 103    | 100.5 | 110.2 | 99.6  | 109.3  | 102.1  |
| 379.5 | 306.1  | 311.4  | 294.5  | 324.9 | 370.2 | 349.2 | 490.5  | 358.2  |
| 121.3 | 118.8  | 120.6  | 102.5  | 105   | 118.1 | 107   | 134.6  | 123.2  |
| 129   | 108.1  | 109.3  | 101.3  | 108.5 | 129.6 | 129.6 | 138.3  | 119.2  |
| 223.4 | 375.3  | 258.8  | 272.1  | 344.8 | 242   | 291   | 641.6  | 305.5  |
| 97.5  | 107.1  | 106.9  | 94.4   | 92.5  | 108.6 | 108.2 | 105    | 104.6  |
| 244.2 | 267.2  | 254.5  | 192    | 273.5 | 266.9 | 215   | 505    | 199.5  |
| 133.6 | 169.6  | 139.6  | 188    | 143.2 | 143   | 166.3 | 198    | 125.9  |
| 158.7 | 164    | 143.3  | 178.2  | 142.9 | 140.5 | 161.6 | 165.5  | 139.5  |
| 159.8 | 244.3  | 189.5  | 178.9  | 196.9 | 214.6 | 168   | 275.3  | 249    |
| 844.3 | 1879.7 | 1219.9 | 1382.6 | 957.4 | 704.3 | 982.2 | 1389.2 | 1015.7 |
| 112.4 | 118.5  | 100    | 98.9   | 99.3  | 117.1 | 98.7  | 114.6  | 95.5   |
| 127.7 | 132.6  | 134.5  | 117    | 126.7 | 133.4 | 128.9 | 148.8  | 121.3  |
| 162.5 | 347.2  | 296    | 278    | 260.3 | 287.2 | 310.5 | 301.4  | 225.2  |
| 118.9 | 184.7  | 155.8  | 154.4  | 168.8 | 171.8 | 169.6 | 216.7  | 168    |
| 206.3 | 302.2  | 259.8  | 314    | 264.7 | 276.9 | 364.1 | 330.9  | 254    |
| 108   | 110    | 105    | 103.9  | 105.5 | 111.7 | 111.3 | 125.9  | 126.1  |
| 121.4 | 118.6  | 109.3  | 122.9  | 101.8 | 113.8 | 122.2 | 114.7  | 120.9  |
| 111.1 | 107.6  | 105.3  | 94.2   | 94.4  | 113.5 | 105.3 | 108.4  | 101.3  |
| 163.9 | 199.6  | 144.4  | 171.5  | 177.9 | 164.6 | 167.6 | 258.5  | 196.6  |
| 106.7 | 108    | 101.2  | 103.4  | 96.3  | 109.5 | 109   | 125.9  | 103.8  |
| 444.3 | 727.9  | 545.5  | 618.2  | 434.5 | 463.1 | 541.8 | 971    | 739.1  |
| 276.4 | 895.4  | 516.9  | 778.2  | 612.8 | 405.7 | 616   | 386.6  | 334.8  |
| 109.6 | 110.9  | 111.8  | 104.9  | 106.8 | 112.5 | 107   | 108.6  | 107.6  |
| 106.8 | 96.5   | 94.8   | 94.7   | 86.3  | 98.5  | 93.2  | 96.2   | 100.4  |
| 100.6 | 112.7  | 113.1  | 100.8  | 108.2 | 106.2 | 106   | 120.1  | 114.2  |
| 363.8 | 194.7  | 194.6  | 183.5  | 207.6 | 228.8 | 172.8 | 458.7  | 365.5  |
| 105.5 | 112.4  | 100    | 111.6  | 100.3 | 124.9 | 105   | 124.4  | 114.4  |

|        |        |        |        |        |        |        |        |        |
|--------|--------|--------|--------|--------|--------|--------|--------|--------|
| 128.7  | 119.7  | 115.1  | 109.5  | 109.7  | 125.2  | 114.6  | 127    | 117.8  |
| 110.4  | 114.8  | 100.8  | 98     | 99.4   | 112.8  | 112.5  | 108.4  | 119.2  |
| 104.5  | 102.4  | 102.3  | 107.6  | 91.4   | 105.5  | 99.8   | 113    | 116.3  |
| 105.7  | 113.8  | 106.6  | 111.8  | 97.2   | 104.7  | 106    | 110.8  | 107.1  |
| 104.8  | 108.6  | 104.5  | 101.9  | 97.2   | 109.2  | 108.2  | 114.7  | 112    |
| 112.4  | 110.3  | 104.9  | 113.7  | 101.9  | 114.3  | 103.8  | 114.3  | 111.6  |
| 98     | 112    | 99.2   | 100.2  | 95     | 100.4  | 104.2  | 114.3  | 101.8  |
| 171.3  | 187.5  | 173.3  | 146.7  | 138.5  | 195.9  | 165.7  | 327.2  | 252.8  |
| 150.9  | 188.8  | 180    | 170.5  | 167.9  | 181.1  | 171.7  | 216.3  | 164.3  |
| 1233.5 | 1808.7 | 1688.6 | 1444.7 | 1568.3 | 1741.3 | 1717.4 | 2467.8 | 1809.4 |
| 244.2  | 282    | 205.7  | 250.6  | 218.1  | 189.3  | 249.4  | 339.9  | 264.3  |
| 764.5  | 1608.4 | 1619.8 | 1263.4 | 1034.4 | 1838.4 | 1303   | 1796.5 | 1541.6 |
| 242.8  | 259.4  | 276.9  | 197.4  | 286.6  | 345.2  | 214.6  | 592.1  | 360.7  |
| 281.2  | 331.7  | 310.2  | 314    | 295.4  | 297    | 258.6  | 767.9  | 399.6  |
| 651.7  | 976.2  | 782.8  | 614.5  | 643.8  | 656    | 765.9  | 1142.2 | 866.8  |
| 112.8  | 110.9  | 115    | 115.1  | 103.5  | 114.8  | 105.4  | 111.8  | 117.3  |
| 102.9  | 108.8  | 95.7   | 96.3   | 93.6   | 103.6  | 97.9   | 97.5   | 96.9   |
| 115.7  | 104.7  | 96.9   | 108.1  | 100.2  | 106.1  | 97.6   | 108.6  | 104.2  |
| 111.8  | 118.8  | 104.7  | 102.4  | 98.1   | 117    | 100.2  | 117.9  | 118.4  |
| 101.6  | 106.8  | 108.7  | 96.6   | 90.1   | 102.7  | 101.1  | 114.5  | 109.2  |
| 134.7  | 178.6  | 143    | 147.3  | 125.6  | 157.8  | 140.3  | 227.7  | 164.1  |
| 107.1  | 125.9  | 126.9  | 124.7  | 111.9  | 126.3  | 126.3  | 133.3  | 134.8  |
| 126.8  | 138.9  | 132.8  | 127    | 130    | 144.1  | 136    | 179.5  | 154.4  |
| 200.9  | 278    | 238.4  | 206.6  | 207.5  | 274.4  | 227.4  | 297.9  | 255.7  |
| 100.7  | 110.1  | 106.6  | 97.1   | 97.6   | 109.2  | 100.9  | 114.7  | 111.8  |
| 113    | 113.1  | 105.6  | 102.2  | 98     | 112.1  | 109.3  | 119.8  | 104.7  |
| 145.6  | 156.9  | 133.2  | 119.8  | 129.1  | 137.4  | 124.2  | 146.4  | 120.8  |
| 106.4  | 108    | 102    | 96.5   | 109.9  | 103.9  | 117.2  | 107.4  | 106.8  |
| 107.8  | 110.7  | 98.9   | 108.4  | 108.4  | 110.5  | 124.5  | 124.3  | 110.2  |
| 101.3  | 107.4  | 101.6  | 97.2   | 97.5   | 107.9  | 107.2  | 110.8  | 110.6  |
| 108.3  | 109.3  | 104.9  | 100.1  | 98.7   | 111    | 101.9  | 114.6  | 93.9   |
| 106.6  | 115.9  | 104    | 105.3  | 96.9   | 113.7  | 106.7  | 112.2  | 106.4  |
| 163.6  | 169.3  | 141.2  | 148.6  | 149.8  | 152.2  | 151.7  | 199.3  | 183    |
| 148    | 268.1  | 252    | 236    | 219.2  | 251.8  | 192.3  | 291.7  | 191.5  |
| 468.8  | 320.2  | 337.1  | 290.7  | 284.3  | 306.3  | 417.1  | 619    | 337.6  |
| 119.6  | 145.4  | 144.6  | 138.3  | 153.9  | 152.1  | 132.6  | 197.8  | 132.5  |
| 108.8  | 120.3  | 101.5  | 100.8  | 99.1   | 111.1  | 103.5  | 118.2  | 119.8  |
| 116.3  | 112.9  | 113.6  | 100.1  | 90     | 113.3  | 108.2  | 116.1  | 116.2  |
| 104.6  | 101.7  | 102.1  | 99.6   | 96.2   | 107.3  | 97.5   | 101.5  | 109.8  |
| 107.4  | 110.1  | 109.7  | 108.9  | 103.8  | 112.6  | 104.6  | 114.6  | 115.3  |
| 200.2  | 278.6  | 202.2  | 259.2  | 196.3  | 186.9  | 257.6  | 378.9  | 256.6  |
| 267.3  | 521    | 551.4  | 556.5  | 460.8  | 511.7  | 745.6  | 513.4  | 408.8  |
| 120.9  | 153.1  | 136.4  | 147.6  | 125.9  | 146.3  | 139    | 184.7  | 147.7  |
| 163.2  | 158.6  | 139.6  | 212.3  | 154.7  | 157.4  | 190.8  | 219.4  | 200.5  |
| 221.2  | 290.5  | 225.7  | 172.2  | 307    | 214.6  | 421.2  | 403.6  | 153.5  |
| 101.8  | 113    | 104.3  | 103.6  | 99.9   | 111.1  | 108.6  | 108.5  | 124.9  |
| 289.5  | 380.3  | 309.8  | 317.7  | 280.9  | 320.7  | 388.7  | 420.1  | 362.6  |
| 1264.7 | 1307.1 | 985    | 1144.2 | 1116.9 | 795.1  | 1241.4 | 2027.1 | 1454.5 |
| 647    | 883.9  | 707.2  | 748.7  | 701.4  | 770.5  | 886.9  | 913.5  | 801    |
| 104.3  | 115.4  | 109.9  | 96.7   | 99.5   | 109.7  | 112.1  | 105.6  | 108.3  |
| 107.6  | 111.3  | 103.3  | 117.2  | 95.9   | 112.6  | 111.6  | 110.7  | 102.6  |

|        |         |         |        |        |        |        |         |         |
|--------|---------|---------|--------|--------|--------|--------|---------|---------|
| 109.5  | 97.8    | 97.6    | 94.4   | 99.1   | 108.6  | 104.8  | 108     | 106.1   |
| 278    | 272.9   | 173.3   | 221.8  | 270.7  | 211.2  | 264.9  | 386.3   | 125.1   |
| 179.5  | 231.5   | 263.3   | 183.4  | 163.7  | 269.4  | 178.7  | 312.7   | 451.7   |
| 108    | 113.5   | 109.8   | 94.8   | 100.6  | 111.4  | 107.1  | 112.2   | 111.5   |
| 112    | 109.6   | 109.2   | 98.8   | 95.9   | 114.4  | 110.1  | 111     | 112.3   |
| 105.3  | 106.8   | 100.5   | 114.2  | 95.5   | 111.6  | 101.1  | 105.2   | 106     |
| 2688.2 | 7597.5  | 6205.1  | 7921.6 | 5606.2 | 4642.2 | 7661.8 | 4097    | 2317.4  |
| 98     | 101.1   | 99.3    | 93.9   | 98.1   | 103.1  | 96.7   | 113.5   | 102.2   |
| 134.5  | 129.9   | 119.1   | 124.7  | 111.1  | 135.9  | 127.4  | 153.3   | 135.7   |
| 110.3  | 99.5    | 97.8    | 96.5   | 91.5   | 114.8  | 107.1  | 107.1   | 106.3   |
| 97.4   | 107     | 99.5    | 96.7   | 95.5   | 101    | 98.3   | 102.6   | 112.9   |
| 109.4  | 106.8   | 111.6   | 103.4  | 98.4   | 108.3  | 101.1  | 113.5   | 108.1   |
| 105.9  | 119.7   | 111.5   | 97.8   | 97.2   | 115.5  | 109.9  | 109.5   | 118.6   |
| 419.8  | 450.9   | 523.7   | 384.4  | 453.2  | 559.1  | 450.5  | 810.3   | 632.4   |
| 105.3  | 118.5   | 106.5   | 105.5  | 112.7  | 114.4  | 107.5  | 125.3   | 117     |
| 653.3  | 1017.2  | 901.2   | 737.2  | 828.1  | 913.3  | 621.1  | 1734.1  | 1078.9  |
| 108.9  | 104.6   | 102.1   | 151.2  | 106.5  | 116.4  | 190.8  | 114.4   | 129.8   |
| 139.6  | 138.4   | 115.1   | 460.3  | 127.6  | 130.4  | 521.8  | 164.4   | 157.1   |
| 111    | 109.8   | 105     | 97.2   | 95.6   | 109.8  | 104.6  | 97.5    | 103.3   |
| 584.3  | 820.1   | 1017.2  | 1035.5 | 1032.6 | 866.4  | 1266   | 1173.5  | 886.6   |
| 111.2  | 105.6   | 112.1   | 107.6  | 96.8   | 111.2  | 111.6  | 115.9   | 106.8   |
| 112    | 113     | 107.4   | 119.3  | 102.3  | 107.4  | 111.6  | 112.2   | 110.5   |
| 112.8  | 122.2   | 115.9   | 96.2   | 94.1   | 112    | 107.4  | 113.3   | 120.1   |
| 107.7  | 100.4   | 104.9   | 106.3  | 97.5   | 111.7  | 107.2  | 110.2   | 104.4   |
| 112.2  | 118.5   | 114.7   | 127.7  | 110.3  | 119.7  | 106.6  | 128.7   | 118     |
| 107.4  | 115.1   | 107.9   | 101.4  | 98.8   | 108.3  | 112.6  | 106.8   | 104.1   |
| 104.5  | 108     | 96      | 93.2   | 92     | 105    | 100.6  | 120.3   | 122.6   |
| 9954   | 10115.9 | 10537.8 | 7529   | 5569.3 | 8528.2 | 6456.3 | 16206.1 | 17601.9 |
| 103    | 110.2   | 104.4   | 97     | 92.8   | 105.7  | 102.7  | 111.8   | 109.3   |
| 111.4  | 108.6   | 101.2   | 104.8  | 97.3   | 111.6  | 107.5  | 107.8   | 114.6   |
| 104.6  | 102.8   | 107.6   | 103.7  | 92.5   | 102.3  | 99     | 104.4   | 103.8   |
| 1134.8 | 1972.5  | 2390    | 1233.6 | 1827.4 | 2257.6 | 1910.7 | 3151.2  | 2101.9  |
| 121    | 109.2   | 103.1   | 96.7   | 100.3  | 109.1  | 101.9  | 105.5   | 109.1   |
| 97.4   | 108.6   | 94.1    | 97.5   | 96.7   | 104.9  | 97.5   | 104.3   | 105.6   |
| 119.6  | 146.3   | 131.7   | 144.1  | 113.4  | 133.7  | 113.2  | 165.2   | 140.9   |
| 109.8  | 110.8   | 108.1   | 115.9  | 106.1  | 115.3  | 106.6  | 118.7   | 111.2   |
| 246.4  | 349.1   | 409.9   | 346.1  | 292.6  | 329.7  | 353.9  | 392.4   | 192.5   |
| 302.9  | 477.4   | 659.1   | 551.5  | 430.5  | 544.3  | 543.7  | 511.7   | 283.7   |
| 136.6  | 195.6   | 184.4   | 163.8  | 153.5  | 212.9  | 143.5  | 205.5   | 169.4   |
| 173.8  | 231.3   | 307.7   | 224.3  | 191.4  | 284.4  | 227.5  | 257.6   | 210.6   |
| 134.6  | 150.5   | 132.5   | 149.6  | 126.7  | 127.4  | 166.2  | 245.2   | 152.8   |
| 105    | 126.2   | 116.7   | 109.5  | 105.5  | 108.1  | 101.6  | 122.4   | 117.7   |
| 246.9  | 419.9   | 382.1   | 299.4  | 391.2  | 407.7  | 307.4  | 519.5   | 261.9   |
| 120.9  | 120.4   | 120     | 109.7  | 112.9  | 130.8  | 116.8  | 137.3   | 121.3   |
| 177.9  | 305.2   | 243.2   | 264    | 263.4  | 230.1  | 235.3  | 265.2   | 203     |
| 128.2  | 157.2   | 131.8   | 161.9  | 133.2  | 136.9  | 142.8  | 137     | 135     |
| 841.8  | 1135.1  | 1186.3  | 983.8  | 1173.7 | 1233.5 | 1271.7 | 1341.9  | 772.1   |
| 126.9  | 177.5   | 148.6   | 143.2  | 150.5  | 169.1  | 155.8  | 181.9   | 145.7   |
| 107.6  | 103.4   | 103.3   | 97.8   | 98.5   | 108.8  | 104.6  | 112.5   | 113.5   |
| 102.6  | 103.7   | 97.8    | 86     | 94.9   | 105.3  | 98.9   | 115.8   | 102.5   |
| 120    | 137.7   | 121     | 146.7  | 108.3  | 133    | 131.5  | 177     | 134.4   |

|       |       |       |       |       |        |       |        |       |
|-------|-------|-------|-------|-------|--------|-------|--------|-------|
| 111.9 | 118.2 | 112.5 | 115.1 | 97.1  | 122.8  | 115.3 | 123.3  | 118.8 |
| 105.6 | 111.1 | 104   | 109.7 | 97.4  | 107.8  | 95.8  | 120    | 115.9 |
| 114   | 156.2 | 134.8 | 130.8 | 115.5 | 140.1  | 109.4 | 131.1  | 121   |
| 110.2 | 108.7 | 102.1 | 98.7  | 100   | 114.2  | 112.9 | 115.7  | 103.1 |
| 258.5 | 407.8 | 448.6 | 362   | 278.8 | 425    | 428.3 | 538.3  | 356.2 |
| 191.1 | 244.8 | 310.5 | 338.6 | 306.7 | 264.5  | 290.2 | 418.4  | 297.8 |
| 126.8 | 119.7 | 117.7 | 105.2 | 112.9 | 113.2  | 114.1 | 140.4  | 121   |
| 183.9 | 277.8 | 258.9 | 219.3 | 260.8 | 240.7  | 215.9 | 403.3  | 313.1 |
| 104.5 | 103   | 101.7 | 106   | 95.3  | 118.6  | 100.2 | 108.2  | 107.2 |
| 137.7 | 112.2 | 110.2 | 110.8 | 101.4 | 103.4  | 104.1 | 109.8  | 110.2 |
| 121.2 | 114.9 | 115.8 | 110.4 | 105.3 | 112.7  | 110   | 137.4  | 128.1 |
| 110   | 114.2 | 106   | 106.7 | 96.7  | 111.7  | 103.7 | 115.5  | 107.4 |
| 112   | 111   | 101.7 | 103.4 | 93.9  | 116    | 106.5 | 122.2  | 114.8 |
| 672.5 | 981.1 | 960.9 | 810.5 | 788.5 | 1154.2 | 925.7 | 1327.2 | 919.9 |
| 121.9 | 162.7 | 135.9 | 191.9 | 139.8 | 128.9  | 156.1 | 139.5  | 136.4 |
| 107.3 | 106.7 | 108.7 | 113   | 90.7  | 110.3  | 101.6 | 112.9  | 110.6 |
| 116.7 | 106.7 | 105.6 | 101.4 | 98.1  | 111.3  | 109.3 | 112.8  | 111.4 |
| 104.1 | 152.5 | 132.6 | 106.3 | 125.4 | 137.9  | 107.2 | 176.2  | 116.7 |
| 105.9 | 110.1 | 108.9 | 104.4 | 101   | 112.4  | 105.5 | 116.4  | 105.6 |
| 161.3 | 226.6 | 273.3 | 168.1 | 173.6 | 239.6  | 151.7 | 226.4  | 201.5 |
| 106.7 | 106.2 | 97.4  | 91.2  | 86.5  | 101.9  | 89.9  | 97     | 105.7 |
| 232   | 216.3 | 198.1 | 209.1 | 194.7 | 208.4  | 239.2 | 298.9  | 234.7 |
| 218.5 | 276.2 | 326   | 229.2 | 252.5 | 282    | 263.2 | 481.6  | 267.4 |
| 149.6 | 174.3 | 146.2 | 185.9 | 163.4 | 143.7  | 160.5 | 197.2  | 184   |
| 116.8 | 126.1 | 129   | 111.7 | 105   | 126.6  | 125.8 | 134.3  | 112.7 |
| 135.4 | 157   | 156.3 | 126.3 | 151.8 | 170.9  | 157.8 | 194    | 144.5 |
| 167   | 156.7 | 174.6 | 142.6 | 151.1 | 179.6  | 147.7 | 328.3  | 250.2 |
| 146.6 | 150.1 | 159.5 | 165.6 | 177.1 | 160.6  | 150.5 | 258.4  | 211.3 |
| 398.4 | 394.5 | 353   | 409.4 | 421.6 | 379.3  | 480.5 | 794.3  | 848.4 |
| 322.1 | 310   | 291.1 | 294.9 | 320.8 | 370.5  | 309.9 | 675.3  | 652.2 |
| 114.2 | 123.1 | 104.2 | 97.3  | 94.7  | 113.2  | 117.4 | 126.5  | 122   |
| 108.4 | 117.6 | 102.3 | 112.3 | 97.7  | 112.7  | 107.2 | 112.4  | 110   |
| 117.5 | 116.8 | 111.9 | 106.7 | 105.6 | 119.5  | 109.8 | 124.4  | 125   |
| 104.2 | 112.3 | 97.8  | 94.8  | 96.2  | 116.7  | 101   | 106.5  | 107.8 |
| 110.4 | 126.8 | 107.5 | 121.5 | 107.7 | 112.7  | 116.1 | 142.1  | 116   |
| 120.5 | 128.5 | 142.8 | 117.8 | 124.9 | 155.2  | 117.1 | 149.2  | 124.4 |
| 98.2  | 121.8 | 109.5 | 111.7 | 98.6  | 110.8  | 107.3 | 108.7  | 112.4 |
| 134.5 | 127.5 | 121.1 | 107.7 | 110.5 | 124.5  | 119.1 | 140.8  | 154.9 |
| 238.2 | 129.2 | 139.1 | 129.1 | 138.5 | 166    | 154.8 | 273.3  | 235.1 |
| 114.7 | 122.1 | 117.1 | 128.5 | 108   | 131.4  | 123.6 | 122.7  | 111.4 |
| 117.3 | 127.7 | 122.2 | 110.2 | 117   | 123.9  | 113.9 | 147.2  | 134.3 |
| 142.8 | 174.7 | 167.7 | 152.9 | 145.2 | 156.5  | 173.8 | 272.8  | 185.6 |
| 108.4 | 103.6 | 104.8 | 103.3 | 96.8  | 105.4  | 102.2 | 109.6  | 109.2 |
| 111.6 | 112.4 | 109.1 | 111.8 | 104.6 | 124.9  | 105.8 | 127.1  | 110.2 |
| 119.1 | 112.1 | 107.7 | 103.4 | 95.2  | 112.7  | 113   | 114.5  | 111.4 |
| 108   | 105   | 98.9  | 97.6  | 94.7  | 104.1  | 101.1 | 100    | 106.3 |
| 108.2 | 116.1 | 101.3 | 107.3 | 101.7 | 115.6  | 102.7 | 115.6  | 105.8 |
| 110.7 | 110.5 | 104.9 | 93.8  | 99.5  | 113.2  | 105.5 | 115.9  | 106.3 |
| 112.5 | 107.9 | 109.5 | 104.6 | 99.7  | 108.1  | 112.4 | 120.2  | 117.9 |
| 115   | 132.2 | 113.7 | 99.8  | 93.1  | 118.5  | 118.7 | 128.5  | 122.6 |
| 123   | 115   | 117.5 | 111.2 | 97.9  | 123    | 97.3  | 114.6  | 125.3 |

|        |        |        |        |        |        |        |        |        |
|--------|--------|--------|--------|--------|--------|--------|--------|--------|
| 2658.4 | 5037.1 | 4482.3 | 3883.1 | 4160.2 | 4203.5 | 4333.3 | 5600.5 | 3378.2 |
| 179.6  | 336.3  | 326.5  | 298.6  | 292.8  | 343.4  | 298.4  | 443.2  | 237.1  |
| 105.8  | 119.5  | 109.4  | 108.3  | 112.1  | 113.3  | 102.7  | 117.6  | 110.4  |
| 108.8  | 109    | 104.6  | 89.6   | 95     | 106.8  | 102    | 107.1  | 109.2  |
| 103.3  | 106.9  | 100.6  | 99.1   | 94.4   | 108.2  | 102.4  | 109.8  | 109.6  |
| 933.6  | 401    | 402.9  | 414.5  | 447.7  | 401.5  | 547.9  | 1033.5 | 937.5  |
| 141.9  | 153.5  | 168.8  | 130    | 133.9  | 150.3  | 157.5  | 184    | 161.8  |
| 4426.5 | 3874.6 | 2891.9 | 2901   | 3549.7 | 3928.3 | 3275.5 | 5073.1 | 4483.5 |
| 114.5  | 110.2  | 104    | 106    | 97.1   | 109.2  | 114.4  | 104.6  | 104.3  |
| 105.1  | 106.5  | 105.9  | 115.8  | 99.9   | 113.6  | 112.6  | 114    | 111.3  |
| 116    | 144.2  | 126    | 146.5  | 114.3  | 124.7  | 146.2  | 103.7  | 109.7  |
| 112.3  | 109.2  | 94.9   | 107    | 98.2   | 114.9  | 104.2  | 112.6  | 117.7  |
| 102.6  | 112.5  | 105.9  | 110.8  | 96.5   | 102.8  | 102    | 121.6  | 117.3  |
| 172.9  | 416.1  | 966.8  | 235.8  | 313.4  | 681.3  | 268    | 256.7  | 165.9  |
| 122.8  | 190.9  | 215.2  | 139.5  | 166.7  | 214.6  | 136.7  | 128.7  | 114.1  |
| 96.5   | 104.8  | 101.8  | 105.8  | 92.6   | 110.6  | 105.3  | 101.5  | 99.7   |
| 103    | 106.2  | 99     | 108.4  | 89.5   | 120.2  | 100.5  | 115.2  | 107.4  |
| 103    | 110.9  | 107.1  | 96.6   | 102.5  | 105.4  | 100.6  | 106    | 107.2  |
| 108.5  | 107.2  | 98     | 107.6  | 93.7   | 106.9  | 93.1   | 106.2  | 102.7  |
| 3404.1 | 3496   | 3476.7 | 6741.6 | 3156.3 | 3540.3 | 5676.9 | 8097.2 | 7229.6 |
| 109.4  | 112.2  | 113.5  | 128.3  | 103.9  | 113.4  | 112.6  | 132.8  | 112.3  |
| 104.6  | 110.9  | 99.8   | 99.3   | 96.7   | 104.5  | 94.3   | 108.8  | 105.4  |
| 101.1  | 98.6   | 91.6   | 108.4  | 97.9   | 99.4   | 98.9   | 120.7  | 102.6  |
| 105.3  | 114    | 106.9  | 101    | 95     | 109.2  | 107.9  | 101    | 115.2  |
| 105.6  | 111.3  | 103    | 101.9  | 95     | 109.7  | 96.7   | 112.4  | 104.6  |
| 242.1  | 322.4  | 235.6  | 298.5  | 265.1  | 282.4  | 279.6  | 384.5  | 307    |
| 393.2  | 338.2  | 314.1  | 287.4  | 299.7  | 420.8  | 361.3  | 487.8  | 474.1  |
| 109.4  | 114.9  | 122.6  | 121.3  | 109.2  | 113.5  | 108.9  | 111.2  | 114.4  |
| 127.4  | 139.3  | 112.6  | 116.7  | 117.3  | 118.2  | 108.4  | 138.5  | 118.8  |
| 102.9  | 102.3  | 96.6   | 102.5  | 91.9   | 107.5  | 98.5   | 109.9  | 116.3  |
| 107.5  | 109.1  | 107.2  | 101.1  | 103.5  | 109.3  | 108    | 116    | 121.4  |
| 113.8  | 107.5  | 102.7  | 108.9  | 102    | 112.6  | 100.1  | 109.8  | 116.9  |
| 174.3  | 220.5  | 196.4  | 235.7  | 184.1  | 250.5  | 238    | 320.1  | 260.1  |
| 102.5  | 109.9  | 103.2  | 105    | 93     | 111.1  | 98.6   | 107    | 103.7  |
| 107.7  | 122.1  | 113.6  | 119.3  | 99.3   | 122.5  | 109.9  | 117.4  | 111.7  |
| 106.6  | 108.7  | 96.7   | 104.7  | 92.2   | 104.3  | 104.1  | 96.8   | 105.1  |
| 248.6  | 281.6  | 289.9  | 284.6  | 244.2  | 318.2  | 262    | 321.2  | 211.2  |
| 673    | 482.4  | 490.5  | 356.9  | 382.7  | 573.3  | 399.4  | 1007.7 | 661.4  |
| 107.5  | 113.5  | 121.6  | 107.7  | 95.5   | 113.1  | 117.5  | 113.7  | 104.8  |
| 132.6  | 122.1  | 124.2  | 155.4  | 110    | 129.9  | 139.6  | 145.8  | 156.8  |
| 110.8  | 104.6  | 103    | 127.4  | 97     | 105.7  | 105.7  | 103.3  | 111.4  |
| 117.3  | 122.6  | 122    | 111.7  | 106.6  | 118.5  | 117.6  | 141.5  | 129    |
| 101.3  | 97.3   | 105.4  | 89.6   | 88.3   | 104.8  | 99     | 105.6  | 110.6  |
| 106.6  | 104.1  | 105.4  | 104.6  | 96.2   | 111.6  | 105.5  | 116    | 113.3  |
| 112.6  | 172.9  | 150.6  | 156.4  | 156.9  | 166.1  | 140.2  | 224.9  | 149.8  |
| 181.9  | 194.6  | 180.6  | 150.7  | 168.3  | 176.6  | 159.6  | 309.3  | 240.2  |
| 116.7  | 119.8  | 107.7  | 105.1  | 103.1  | 117.2  | 125    | 115.4  | 110.9  |
| 116.6  | 113.4  | 111    | 117.6  | 103.7  | 112    | 100.5  | 124.6  | 130.6  |
| 156.5  | 143.9  | 126.2  | 114.6  | 120.5  | 148.4  | 127.3  | 185.5  | 172.4  |
| 103.6  | 112.9  | 101    | 95.4   | 92.4   | 100.7  | 106.3  | 104.9  | 111.7  |
| 102.3  | 100.9  | 93.1   | 100.1  | 90.3   | 102.5  | 94.7   | 103.5  | 100.1  |

|       |       |       |       |       |       |       |       |       |
|-------|-------|-------|-------|-------|-------|-------|-------|-------|
| 98    | 103.7 | 98.1  | 101.4 | 95.6  | 104   | 100.9 | 102.3 | 98.7  |
| 102.6 | 133.7 | 128   | 109.2 | 100.9 | 126.2 | 109.8 | 129.2 | 125.5 |
| 99    | 107.6 | 106.9 | 87.4  | 97.9  | 103.2 | 99.7  | 107.4 | 106.3 |
| 104.9 | 107.5 | 101.7 | 103.7 | 94.9  | 109.9 | 101   | 113.4 | 109.5 |
| 116.1 | 111.1 | 111.2 | 123.7 | 103.7 | 125.5 | 105.3 | 118.1 | 123   |
| 107.8 | 108.8 | 110.8 | 109.2 | 100.4 | 112.6 | 104.9 | 116.7 | 107.7 |
| 116.9 | 130.2 | 109.9 | 112.4 | 108.8 | 125.4 | 102.4 | 153.7 | 150   |
| 100.7 | 102.9 | 97.5  | 102.6 | 95.9  | 112.1 | 108.3 | 100   | 111.5 |
| 107.2 | 111.7 | 98.9  | 102   | 88.6  | 108.9 | 103.8 | 104.3 | 112.3 |
| 105.1 | 106.9 | 100.4 | 99    | 99.4  | 105.9 | 97.4  | 109.6 | 118   |
| 114.9 | 121.2 | 109.4 | 102.1 | 105.5 | 116.1 | 122.8 | 129.1 | 123   |
| 102.8 | 108.3 | 102.6 | 100.7 | 96.5  | 112.3 | 98.6  | 115.7 | 118.6 |
| 109.2 | 109.2 | 105.6 | 102.7 | 110   | 113.6 | 106.4 | 110.2 | 105   |
| 109.9 | 109.8 | 104.6 | 116.2 | 99.1  | 112.9 | 108.8 | 115.5 | 116.7 |
| 97.9  | 107.4 | 97.1  | 92.5  | 97.8  | 109.8 | 108.3 | 104.8 | 113.2 |
| 105.4 | 109.6 | 95.8  | 93    | 100   | 105.1 | 105.3 | 107.8 | 107.9 |
| 99.3  | 111.6 | 89.3  | 99.6  | 89.3  | 99.5  | 95.8  | 93.1  | 108.9 |
| 100.9 | 108.6 | 103.4 | 95    | 97.5  | 111.5 | 101.9 | 104.5 | 107.5 |
| 101.4 | 109.7 | 97.7  | 101.5 | 93.9  | 104.3 | 107.4 | 101.8 | 105.6 |
| 99.6  | 106.1 | 100.9 | 101   | 94.6  | 103   | 100.5 | 107.2 | 116.2 |
| 105.1 | 110.4 | 97.3  | 98.7  | 98.5  | 106.3 | 96.8  | 110.4 | 106.9 |
| 109.9 | 104.7 | 105.4 | 96.2  | 93.8  | 108.4 | 96.1  | 111.5 | 105.2 |
| 108.3 | 108   | 100   | 102.1 | 95    | 114.4 | 98.7  | 112.4 | 121.7 |
| 115.2 | 116   | 103.3 | 97.7  | 104.6 | 113.9 | 109.9 | 114.9 | 131.8 |
| 106.6 | 106   | 97.4  | 101   | 93.7  | 109.8 | 94.2  | 102.1 | 108.5 |
| 106.9 | 107.5 | 106.9 | 97.2  | 105.4 | 110.2 | 103.2 | 104.8 | 107.4 |
| 108.3 | 114.5 | 116.2 | 106   | 103.1 | 120.4 | 114.8 | 124.5 | 113   |
| 112.9 | 108.7 | 100.2 | 105.3 | 99.6  | 106   | 104.1 | 117.6 | 105.7 |
| 107.5 | 109.2 | 102.8 | 95.9  | 83.8  | 105.2 | 95.2  | 99.2  | 92.3  |
| 105.2 | 109.4 | 104.6 | 99.1  | 96.2  | 107.3 | 102.8 | 110.4 | 107.1 |
| 111.8 | 108.3 | 98.7  | 97.8  | 94    | 106.5 | 101.5 | 109.4 | 113.5 |
| 99.4  | 116.5 | 104.2 | 96.7  | 91.8  | 101.1 | 105.1 | 100.3 | 109.1 |
| 105.1 | 106.9 | 102.8 | 102.8 | 89.8  | 105.7 | 97.1  | 111.8 | 117.3 |
| 105.4 | 109.3 | 98.7  | 105.3 | 92.8  | 115.2 | 98.2  | 104.2 | 109.2 |
| 109.2 | 199.1 | 132.7 | 145.1 | 118   | 113.1 | 113.5 | 122.2 | 117   |
| 105.4 | 109.8 | 107.4 | 112.3 | 91.8  | 99.3  | 106.6 | 117.7 | 119.2 |
| 112.8 | 111.1 | 105.5 | 101.3 | 104.8 | 110.3 | 105.3 | 109.6 | 111.9 |
| 130.4 | 123.1 | 117   | 117.9 | 105.1 | 126.9 | 119.9 | 130.2 | 121.9 |
| 103.9 | 106.9 | 97.6  | 93.9  | 95.9  | 107.9 | 103.5 | 109.4 | 104.4 |
| 102   | 107.8 | 108.2 | 95.3  | 93.2  | 106.2 | 101.9 | 103.8 | 106.7 |
| 104   | 101.1 | 100.2 | 94.6  | 97.9  | 102.1 | 103.4 | 102.9 | 99.5  |
| 106.4 | 107.2 | 107.6 | 100.2 | 102.1 | 102.5 | 102.9 | 104.8 | 115.9 |
| 111.7 | 108.7 | 105.4 | 114.1 | 103   | 104.4 | 102.5 | 111.1 | 110.5 |
| 100.4 | 107   | 98.6  | 92    | 102.3 | 110.2 | 98.9  | 102.3 | 101.1 |
| 110.7 | 108.6 | 110.9 | 98.6  | 99    | 113.7 | 109   | 115.3 | 115.1 |
| 102.1 | 117.7 | 106.6 | 115   | 105.1 | 113.7 | 105.7 | 108.7 | 116.8 |
| 121.6 | 121.6 | 117.6 | 117.9 | 103.9 | 123.3 | 117.9 | 125.5 | 121.7 |
| 106.2 | 107.4 | 102.7 | 98.7  | 102.7 | 109.4 | 102.4 | 106.1 | 105.4 |
| 108.8 | 141.7 | 118.3 | 123.6 | 128   | 128.7 | 134.9 | 139.3 | 124   |
| 113   | 112.2 | 104.8 | 98.6  | 96.9  | 115   | 103   | 116.2 | 109.9 |
| 106   | 107.3 | 106.9 | 97.2  | 96.2  | 111.5 | 110   | 117.6 | 111.6 |

|        |       |        |        |        |        |        |        |        |
|--------|-------|--------|--------|--------|--------|--------|--------|--------|
| 103    | 108.3 | 102.6  | 100.6  | 99.9   | 115.2  | 99.8   | 104.2  | 102.4  |
| 107.5  | 104.5 | 96.6   | 102.9  | 93.8   | 100.6  | 110.9  | 108.4  | 106    |
| 2559.7 | 2077  | 1462.1 | 1941.9 | 1825.6 | 2566.6 | 1322.2 | 4843.6 | 5614.1 |
| 107.5  | 110.9 | 100.8  | 104.6  | 94.9   | 108.2  | 108.7  | 106.7  | 104.8  |
| 108.8  | 114.9 | 105.3  | 108.4  | 96.6   | 116    | 103.3  | 117.5  | 115.1  |
| 100    | 104.4 | 97.6   | 111    | 97.5   | 106    | 102.7  | 100.6  | 108.8  |
| 114.9  | 110.1 | 100.7  | 102.6  | 103    | 112.1  | 112.7  | 123    | 113.1  |
| 111.5  | 102.8 | 98.8   | 103.6  | 95.6   | 109.8  | 96.3   | 102.7  | 111.6  |
| 102.1  | 104   | 96     | 93.3   | 89.4   | 104.8  | 107.3  | 108.5  | 100.8  |
| 105.5  | 103.1 | 101.1  | 99     | 94.6   | 101.2  | 97.6   | 118.9  | 103.3  |
| 106.7  | 111.9 | 99.7   | 107.1  | 93.5   | 112.1  | 100.7  | 103.1  | 115.7  |
| 109.1  | 111.2 | 99.7   | 108.4  | 97     | 113.7  | 105.4  | 107.1  | 115.7  |
| 116.2  | 106.8 | 103.5  | 106.5  | 99.1   | 112.9  | 106.6  | 118    | 116.9  |
| 116.3  | 119.1 | 102.7  | 106.1  | 100.3  | 103.8  | 118.4  | 124.6  | 109.2  |
| 100.5  | 113.2 | 107.8  | 102.9  | 91.8   | 110.3  | 96.7   | 113.2  | 109.9  |
| 103.7  | 108   | 103.6  | 104.8  | 98     | 108.7  | 98.3   | 118.6  | 100.4  |
| 110.5  | 108.5 | 102.4  | 98.2   | 91.6   | 109.8  | 104.7  | 105.2  | 107.1  |
| 104.9  | 103.9 | 99.7   | 101.9  | 91.6   | 107.1  | 101.9  | 105    | 99.8   |
| 105.8  | 102.6 | 101.8  | 100.1  | 94.7   | 107.8  | 99.8   | 100.8  | 100.3  |
| 107.4  | 104.9 | 97.9   | 92.8   | 97.1   | 107    | 100.2  | 121.1  | 114.7  |
| 99.5   | 111.4 | 102    | 98     | 92.7   | 105    | 97.8   | 118.2  | 108.6  |
| 108.2  | 109.8 | 104.7  | 106.1  | 98.9   | 104.4  | 97     | 111.3  | 109.6  |
| 107.4  | 106.3 | 100.7  | 103.8  | 95.8   | 102.7  | 102.4  | 115.4  | 102.3  |
| 104.1  | 103.2 | 102.1  | 103.9  | 97.4   | 113.3  | 101.9  | 117.3  | 110.9  |
| 100.8  | 96.9  | 98.8   | 99     | 96.3   | 113.1  | 97     | 99.9   | 101.1  |
| 104.8  | 101.2 | 105.2  | 95.5   | 91.4   | 104    | 98     | 108.5  | 109.5  |
| 107    | 114.2 | 97.8   | 107    | 94.7   | 113.2  | 103.3  | 113.2  | 109.5  |
| 109.3  | 113.8 | 105.7  | 110.7  | 93.7   | 108.5  | 99.5   | 119.9  | 125.1  |
| 112.2  | 116.7 | 102.4  | 98.8   | 99.2   | 109.3  | 111.1  | 110.3  | 105.3  |
| 117.1  | 120.9 | 111.6  | 113.4  | 104.1  | 116.7  | 109.7  | 115    | 116.6  |
| 108.5  | 121.6 | 101.3  | 111    | 131.4  | 129.2  | 106    | 179.8  | 124.6  |
| 109.7  | 113.4 | 109.3  | 103.1  | 108.4  | 112.1  | 107    | 122.1  | 111.8  |
| 107.3  | 109.6 | 98.5   | 100.5  | 105.4  | 114.4  | 99.8   | 96.1   | 107.9  |
| 115    | 111.8 | 108.2  | 93.6   | 103    | 113.1  | 112.2  | 115.7  | 113.4  |
| 109.6  | 114.7 | 106.1  | 121.8  | 97.7   | 108.2  | 115.7  | 115    | 110.9  |
| 100.5  | 102.8 | 99.5   | 102.5  | 92.7   | 105.3  | 101.5  | 101.6  | 102.5  |
| 115.9  | 110.1 | 99.2   | 117.7  | 100.4  | 115.2  | 100.3  | 119    | 108.8  |
| 98.9   | 108.2 | 104.5  | 99.9   | 96.2   | 103.8  | 101.9  | 106.6  | 108.4  |
| 104.7  | 108.3 | 103.3  | 97.3   | 94.6   | 102.9  | 102    | 110    | 109.3  |
| 111.2  | 112.8 | 104.8  | 102.1  | 99.7   | 113.7  | 113    | 118.5  | 111.6  |
| 100.2  | 100.7 | 101.8  | 109    | 99.4   | 109.8  | 100.9  | 107.6  | 109.2  |
| 113.6  | 119   | 108.2  | 111.1  | 100.1  | 112.2  | 110.6  | 115.2  | 113.4  |
| 108.9  | 107.4 | 96.3   | 100.8  | 95.6   | 107.6  | 109.5  | 109.2  | 109.8  |
| 111.6  | 102.1 | 107    | 104    | 101.6  | 109.4  | 100.3  | 117.9  | 105.8  |
| 104.8  | 111.6 | 100.2  | 108.2  | 96.2   | 110.2  | 106.9  | 115.3  | 110.6  |
| 113.3  | 117.4 | 110.1  | 105.6  | 109.4  | 117.7  | 111.5  | 122.6  | 111.5  |
| 106.5  | 119.4 | 105.7  | 102.5  | 94.9   | 104.3  | 97.8   | 98     | 112.6  |
| 108    | 107.9 | 98.8   | 95.7   | 100.3  | 106.9  | 102.4  | 117.5  | 115.1  |
| 120.8  | 116   | 117.3  | 123.5  | 103.9  | 127.4  | 113.1  | 158.2  | 160.7  |
| 103.2  | 114.4 | 104.2  | 117.8  | 105.7  | 112.3  | 109.5  | 112.8  | 111.5  |
| 107.3  | 117.5 | 117    | 112.5  | 106    | 122.5  | 103.2  | 119    | 106.1  |

|       |       |       |       |       |       |       |       |       |
|-------|-------|-------|-------|-------|-------|-------|-------|-------|
| 102.1 | 107.6 | 98.7  | 95.9  | 94.4  | 112   | 104.3 | 120.9 | 115.5 |
| 115.1 | 113.6 | 102.3 | 120   | 99.8  | 111.9 | 103.4 | 122.9 | 110   |
| 106.2 | 104.3 | 106.1 | 102.2 | 97.1  | 109.6 | 105.2 | 117.9 | 106.6 |
| 107.6 | 112.8 | 101.9 | 99.8  | 101.3 | 108.7 | 101.7 | 113.7 | 109.9 |
| 105.1 | 103.7 | 101.5 | 100.3 | 91.3  | 109.8 | 98.9  | 106.6 | 103   |
| 100.4 | 101.6 | 99.4  | 96.7  | 90.1  | 100.4 | 97.1  | 103.9 | 105.4 |
| 106.8 | 104.7 | 105.2 | 101.9 | 99    | 118.2 | 100   | 115.4 | 110   |
| 111.8 | 108.1 | 107.1 | 112   | 95.8  | 126.4 | 110.7 | 122.9 | 109   |
| 108.1 | 108.2 | 104.7 | 102.1 | 93.8  | 110.9 | 99    | 106.8 | 99.6  |
| 113.2 | 114.6 | 107.3 | 102.1 | 95.6  | 106.9 | 104.9 | 111.9 | 108.6 |
| 109.9 | 110.5 | 107.9 | 109.2 | 100.6 | 109.8 | 103.7 | 118.4 | 119.1 |
| 116.5 | 126.9 | 110.2 | 115.7 | 110.5 | 119.7 | 111.5 | 130.5 | 131.1 |
| 116   | 110.3 | 107.9 | 113   | 96.4  | 109.8 | 100.4 | 116.1 | 111.1 |
| 112.9 | 102.2 | 99.8  | 99.9  | 98.6  | 103.5 | 94.8  | 108.3 | 112.2 |
| 110.8 | 101   | 108.6 | 105.1 | 104.1 | 113.1 | 100.6 | 118.4 | 115   |
| 104.4 | 103.4 | 103   | 99.7  | 97.5  | 110.1 | 100.8 | 109.5 | 101.8 |
| 107.9 | 116.6 | 116.1 | 126.9 | 106.8 | 121.8 | 115.6 | 119.9 | 112.5 |
| 103   | 104   | 102   | 101.5 | 94.2  | 101.2 | 105.4 | 106.4 | 115.1 |
| 111.2 | 128   | 110.3 | 134.5 | 97.7  | 102.6 | 107.4 | 106.5 | 107.3 |
| 113.2 | 121.6 | 106.5 | 109.4 | 98    | 107.7 | 106.6 | 113   | 104.5 |
| 107.2 | 114.5 | 99.6  | 92.8  | 92.3  | 105.7 | 99    | 98.4  | 104.2 |
| 107.3 | 104.4 | 102.2 | 106.8 | 95.7  | 110.5 | 104.9 | 112.3 | 105.8 |
| 101.4 | 107.6 | 94.1  | 99.7  | 91.3  | 102.4 | 109.8 | 104.7 | 107.1 |
| 103.6 | 106.5 | 98.8  | 102.1 | 101.9 | 101.5 | 106.6 | 114.6 | 118   |
| 119.9 | 145.1 | 121.4 | 119.8 | 115.3 | 154.4 | 121.1 | 158.8 | 127.9 |
| 106.1 | 108.1 | 120.7 | 132.3 | 100.5 | 118.8 | 121.5 | 134.6 | 116.5 |
| 117.3 | 114.8 | 101.8 | 104.7 | 106.9 | 114.4 | 108.2 | 111.3 | 104.6 |
| 111.1 | 104.4 | 109   | 107.2 | 102.2 | 107.7 | 104.3 | 105.5 | 118.7 |
| 107.6 | 106.6 | 101.9 | 99.4  | 100.4 | 107.3 | 101.9 | 110.3 | 111.2 |
| 103.1 | 108.6 | 96.3  | 106.7 | 93.9  | 104   | 96.3  | 121.2 | 111.7 |
| 106   | 111.6 | 102.6 | 108.4 | 105.4 | 108.1 | 102.2 | 116.6 | 124.5 |
| 108.6 | 116.8 | 147.8 | 124.8 | 103.1 | 127.9 | 119   | 132.4 | 109.6 |
| 110.4 | 116.7 | 111.8 | 107.4 | 111.3 | 107.4 | 103.4 | 101.9 | 106   |
| 126.8 | 133.8 | 136.3 | 135.7 | 112.2 | 139.1 | 130.9 | 152.9 | 148.3 |
| 102.8 | 107.8 | 106.4 | 108.5 | 103.5 | 112.4 | 101.5 | 112.1 | 99.6  |
| 99.6  | 101.4 | 99.9  | 98    | 91.1  | 102.9 | 100.1 | 110.8 | 103.6 |
| 94.8  | 106.9 | 100.4 | 102.5 | 94    | 103.5 | 98.4  | 103.8 | 102.9 |
| 106.7 | 116   | 105.2 | 111.9 | 99.6  | 112.6 | 112.2 | 117.6 | 110.5 |
| 115.2 | 110.9 | 104.4 | 106.8 | 98.8  | 117   | 111.4 | 104.1 | 108.2 |
| 111.4 | 114.7 | 101.7 | 102.3 | 103   | 110.8 | 111.8 | 141.7 | 109.2 |
| 101   | 114.7 | 105.9 | 96.4  | 96.5  | 104   | 108.9 | 104.3 | 103.5 |
| 105.5 | 112.4 | 99.9  | 94.3  | 89.6  | 96.8  | 98.8  | 102.4 | 105.9 |
| 105   | 111   | 98.9  | 106.4 | 94.3  | 120.3 | 102.3 | 104.1 | 115.6 |
| 107.2 | 109.1 | 99.9  | 95.9  | 96.1  | 110.2 | 103.3 | 110   | 100.7 |
| 107.1 | 120.3 | 100.4 | 100.4 | 94.9  | 118.3 | 113.6 | 115.6 | 103.1 |
| 112.7 | 129.7 | 113.1 | 118.3 | 111.2 | 124.9 | 104   | 140.3 | 123.8 |
| 111   | 107.8 | 98    | 106.9 | 100.5 | 114.8 | 104.6 | 115.7 | 111.2 |
| 103   | 105.8 | 104.8 | 91.1  | 92.7  | 109.5 | 104.7 | 112.7 | 112.6 |
| 105.5 | 106.1 | 110.1 | 99.7  | 91    | 102.5 | 94.1  | 108   | 111.6 |
| 98.9  | 103.1 | 100.4 | 95.7  | 95    | 108.9 | 104.5 | 102.1 | 106.4 |
| 105.5 | 110   | 94.3  | 104.9 | 95.7  | 103.3 | 97.4  | 105   | 107.6 |



|        |        |        |        |        |        |        |         |         |
|--------|--------|--------|--------|--------|--------|--------|---------|---------|
| 105.5  | 108    | 102.3  | 94.9   | 98     | 102.4  | 101.9  | 106.6   | 109.9   |
| 109.8  | 127    | 107.2  | 111.7  | 105.5  | 112    | 114.5  | 127.9   | 117.5   |
| 113.4  | 117    | 110.9  | 97.5   | 98.7   | 117.4  | 102.5  | 121.1   | 107.8   |
| 189.8  | 173.5  | 123.5  | 154.2  | 142.3  | 128.1  | 168.7  | 242.1   | 208.1   |
| 117.7  | 122.5  | 126    | 119.7  | 112.4  | 126.7  | 125.4  | 136     | 123.2   |
| 100.5  | 109.9  | 96.6   | 101.3  | 96.8   | 109.9  | 94.2   | 105.1   | 109.8   |
| 187.3  | 236.5  | 230.7  | 200.3  | 226.1  | 226.4  | 253.9  | 281.6   | 203.7   |
| 98.3   | 110    | 103.1  | 106.5  | 95.3   | 104.8  | 98.4   | 111.8   | 109     |
| 112.7  | 112.1  | 113.6  | 107.4  | 101.7  | 121.4  | 110.2  | 120.1   | 114.9   |
| 100.1  | 109.9  | 102.9  | 98.5   | 95.2   | 104.9  | 102.2  | 113.6   | 119.2   |
| 113    | 109.6  | 100.2  | 102.4  | 94.6   | 111.1  | 108.1  | 113.7   | 108.8   |
| 122.9  | 143.2  | 123.4  | 116.3  | 117    | 131.2  | 143    | 132.8   | 148.2   |
| 115.7  | 113.6  | 95.8   | 98.7   | 97.3   | 105.3  | 105    | 110.6   | 117     |
| 151    | 177.8  | 202.6  | 154.1  | 165.7  | 200.4  | 168.2  | 226.3   | 182     |
| 110.8  | 118.5  | 103.3  | 114.1  | 102.3  | 116.2  | 116.7  | 111.6   | 121.5   |
| 105.3  | 109    | 108.4  | 103.1  | 92.4   | 100.9  | 100    | 112     | 104.5   |
| 765.7  | 478.2  | 388.8  | 519.6  | 429.2  | 470.7  | 499.1  | 787.1   | 725.5   |
| 361.4  | 362.7  | 434.9  | 402.6  | 326.1  | 394.9  | 413.5  | 767.1   | 501.1   |
| 114.9  | 111    | 112    | 105.1  | 104.2  | 114.5  | 105.8  | 134.4   | 135.4   |
| 106.2  | 109    | 98.1   | 103.2  | 98     | 115.2  | 107.4  | 114.1   | 117.3   |
| 223.8  | 197.9  | 172.7  | 168.7  | 177.4  | 201.3  | 147.6  | 320.7   | 335.9   |
| 104.5  | 105    | 102.2  | 100    | 93.3   | 103.7  | 103.1  | 108.9   | 118     |
| 130.3  | 119    | 109    | 177.9  | 105.3  | 126.7  | 152    | 157     | 147.3   |
| 257.1  | 283.4  | 257.2  | 337.1  | 224.5  | 274.7  | 347.8  | 402     | 302.5   |
| 181    | 164.3  | 143.9  | 217.1  | 153.3  | 189.7  | 177.9  | 257.3   | 268.4   |
| 108.9  | 101.7  | 103.1  | 106.2  | 93.5   | 109.8  | 105.6  | 123.4   | 118.9   |
| 109.5  | 103.3  | 104.5  | 102    | 91     | 106.8  | 108.7  | 107.2   | 110.6   |
| 103.2  | 100.8  | 97     | 92.9   | 88.8   | 109    | 99.6   | 101.4   | 99.6    |
| 113.7  | 106.2  | 104.7  | 99.1   | 94.6   | 110.7  | 102.9  | 118.4   | 111     |
| 248.2  | 178    | 183.5  | 163.8  | 167.3  | 229.9  | 230.1  | 698.6   | 582.7   |
| 109    | 110.8  | 94.4   | 106    | 89.4   | 106.9  | 101.6  | 105.9   | 108.3   |
| 326.7  | 219.6  | 214.4  | 158.6  | 208    | 271.9  | 246    | 745.2   | 696     |
| 107.6  | 107.4  | 100.7  | 102    | 91     | 113.8  | 98.4   | 114.7   | 108.8   |
| 107.3  | 114.5  | 98.5   | 101.7  | 101.4  | 118    | 102.9  | 115.1   | 113.8   |
| 107.7  | 109.3  | 100    | 108.1  | 98.3   | 107.8  | 108.1  | 108.9   | 118.8   |
| 100.3  | 103.9  | 95.5   | 95.4   | 95.5   | 100.9  | 97.1   | 104.8   | 111     |
| 1277.3 | 1344.7 | 1040.6 | 1281.2 | 1102.7 | 1389.5 | 1108.1 | 2150.8  | 2037.1  |
| 101    | 106.6  | 101.8  | 114    | 96.5   | 108.1  | 97.7   | 113.1   | 104     |
| 108.1  | 103.2  | 96.3   | 99.5   | 87.8   | 103.7  | 98.9   | 108.1   | 109.3   |
| 114    | 126.1  | 116.5  | 112.2  | 106.9  | 114.9  | 116.7  | 112.2   | 117.6   |
| 117.8  | 115.8  | 106.9  | 102.3  | 95.9   | 114.1  | 104.5  | 114.5   | 109.8   |
| 102.3  | 117    | 114.4  | 109.4  | 97.3   | 115.9  | 110.6  | 101.9   | 112.2   |
| 203.5  | 251.9  | 214.3  | 204.9  | 211.7  | 238.8  | 228.8  | 330.9   | 195.9   |
| 229.7  | 436.9  | 387.7  | 264.1  | 343.8  | 347.9  | 305.7  | 507.4   | 396.4   |
| 118.8  | 122.6  | 116.1  | 104.2  | 103.9  | 112.2  | 111.4  | 107.6   | 116.7   |
| 144.9  | 175.9  | 169.7  | 176    | 158.7  | 178.7  | 168.2  | 240.2   | 178.4   |
| 110.1  | 108    | 109.7  | 101.6  | 99.6   | 114.2  | 98.4   | 118     | 119.4   |
| 112.9  | 104.1  | 104    | 98.2   | 89.5   | 103.9  | 101.1  | 113.9   | 108     |
| 104.8  | 110.4  | 101.6  | 96.5   | 94.6   | 113.8  | 103.9  | 108.8   | 106.7   |
| 6688.9 | 6605.7 | 4787.5 | 5604.1 | 5043.3 | 6582   | 5512.9 | 14211.2 | 16307.1 |
| 125    | 124.3  | 125    | 113    | 109    | 115.6  | 113.5  | 135.2   | 127     |

|        |        |        |        |        |       |       |        |        |
|--------|--------|--------|--------|--------|-------|-------|--------|--------|
| 119.3  | 145.2  | 121.1  | 120.5  | 112.7  | 125.3 | 115.9 | 155.5  | 130.7  |
| 172.2  | 257.5  | 238.5  | 268.1  | 236.1  | 223.4 | 296.5 | 316.4  | 188.3  |
| 455.6  | 891.3  | 623    | 682.5  | 675.3  | 686.2 | 643.4 | 1015.5 | 761.6  |
| 226.7  | 290.7  | 288.5  | 403.1  | 304.2  | 296.5 | 472.5 | 457.2  | 327.1  |
| 268.1  | 383.9  | 322.4  | 291.7  | 303.5  | 366.2 | 283.7 | 464    | 348.8  |
| 1246.9 | 1164.1 | 1188.5 | 1092.8 | 1102.2 | 1243  | 1182  | 2161.2 | 1403.1 |
| 117.8  | 158.7  | 170.7  | 146.9  | 148.8  | 152.6 | 144.3 | 175.2  | 147.8  |
| 175.4  | 252.9  | 256.1  | 205.1  | 192.3  | 223.3 | 221.6 | 234    | 197.1  |
| 130.9  | 170.4  | 179.7  | 141.5  | 149.4  | 169.3 | 180.4 | 173.1  | 151.4  |
| 314    | 487    | 401.5  | 495    | 352.9  | 401.9 | 419.3 | 484.8  | 407.9  |
| 166.9  | 125.9  | 129.6  | 125.2  | 112.9  | 122.7 | 124.2 | 161.2  | 181.9  |
| 532.6  | 715.6  | 645.7  | 506    | 574.3  | 494.5 | 475.5 | 959.4  | 614.2  |
| 103    | 113.5  | 124.5  | 118.8  | 114    | 133.5 | 114.2 | 156.4  | 131.9  |
| 241.9  | 245.2  | 217.5  | 215.8  | 257.1  | 205.4 | 257.2 | 382.7  | 174.7  |
| 123    | 133.2  | 119.1  | 113.8  | 118.6  | 119.7 | 122.5 | 165.6  | 137.7  |
| 235.4  | 294.4  | 244.2  | 235.6  | 270    | 270   | 279.7 | 384.9  | 327.3  |
| 106    | 109.6  | 105    | 101.2  | 98.5   | 110.4 | 107.8 | 103    | 111.2  |
| 270.5  | 290.1  | 254.5  | 244.4  | 211.8  | 274   | 225   | 410.2  | 382.2  |
| 108.6  | 111.7  | 101.8  | 112.2  | 102    | 106.4 | 107.3 | 130.3  | 119.7  |
| 145.5  | 166.8  | 168.5  | 183.3  | 175    | 163.6 | 164.1 | 183.4  | 146.1  |
| 109.7  | 112    | 102.4  | 106.9  | 100    | 115.8 | 104.8 | 115.1  | 107.8  |
| 106.5  | 104.8  | 103.4  | 102.3  | 96.9   | 102.3 | 97.6  | 114.2  | 103.6  |
| 193.3  | 230.6  | 188.5  | 139.5  | 154.3  | 213.2 | 158.3 | 298.7  | 230.2  |
| 700.3  | 503.4  | 462.8  | 457.6  | 533.5  | 519   | 606.1 | 875.3  | 593.4  |
| 105.6  | 109.5  | 114.1  | 102.5  | 100.8  | 111   | 100.8 | 109.6  | 105.6  |
| 125    | 134.4  | 130.3  | 108.3  | 117.4  | 131.2 | 125.3 | 149.9  | 128.9  |
| 125.5  | 145.8  | 144.4  | 138.6  | 122.2  | 131.9 | 129.4 | 148.2  | 135.8  |
| 105.5  | 115.8  | 107.8  | 105.8  | 94.1   | 113.2 | 109   | 123.7  | 113.4  |
| 381.6  | 267.8  | 291.8  | 283.6  | 300.8  | 285.4 | 383.5 | 433.2  | 370.8  |
| 108.1  | 114    | 105.3  | 97.6   | 92     | 104.5 | 107.9 | 107.4  | 97.4   |
| 289.8  | 314.2  | 320.1  | 242.8  | 325    | 360.1 | 286.1 | 416.6  | 329.5  |
| 674.7  | 574.3  | 636.2  | 475.9  | 519.5  | 629   | 444.5 | 792.7  | 585    |
| 102.9  | 110.6  | 96.8   | 106.1  | 105    | 110.6 | 101.3 | 114.6  | 101    |
| 163    | 124.7  | 117.2  | 120.4  | 114.9  | 145.1 | 118.9 | 180    | 224    |
| 198.9  | 279.7  | 228.2  | 239.7  | 235    | 268.4 | 196.9 | 412.6  | 265.4  |
| 466.1  | 895.8  | 1066.1 | 602.4  | 815.6  | 864.3 | 819.7 | 1183.1 | 598.9  |
| 207.5  | 364.2  | 363.8  | 362    | 329.3  | 378.4 | 302.6 | 425.3  | 270    |
| 245.2  | 201.1  | 221.8  | 199.6  | 204.4  | 228.5 | 178   | 381.8  | 326.6  |
| 111.5  | 122.2  | 116.4  | 112    | 113.5  | 127.7 | 124.2 | 147.8  | 127.6  |
| 138.6  | 141.1  | 137.6  | 129    | 128.5  | 136.7 | 121.1 | 170.6  | 155.5  |
| 132.5  | 150.9  | 147.3  | 142.8  | 127.4  | 145.3 | 147.4 | 204.1  | 167.1  |
| 146.2  | 123    | 144.4  | 121.7  | 126.5  | 159.9 | 120.3 | 273.3  | 192.9  |
| 120.7  | 174.3  | 125.2  | 120    | 146.2  | 147.3 | 135   | 177.4  | 134.9  |
| 123.8  | 134.2  | 121    | 118.7  | 111.5  | 121   | 125.4 | 124.6  | 117.1  |
| 196.3  | 223.6  | 230.5  | 261.4  | 182.4  | 206.4 | 210.9 | 489.3  | 322.1  |
| 116.5  | 133.2  | 121.6  | 127.4  | 119.5  | 117.1 | 133.5 | 134.2  | 124.2  |
| 112.7  | 106.2  | 101.5  | 96.9   | 99.7   | 103.9 | 104.7 | 109.2  | 118.3  |
| 259.4  | 438.4  | 428.8  | 378.6  | 324    | 404.6 | 442.3 | 401.2  | 347    |
| 118.1  | 144.8  | 128.8  | 134    | 137.6  | 138   | 141   | 156.2  | 113.1  |
| 162.8  | 202.7  | 193.3  | 223.5  | 177.4  | 197.2 | 246.3 | 185.3  | 138.7  |
| 99     | 104.8  | 101.4  | 92.2   | 90.1   | 101.7 | 95.6  | 99.6   | 105.2  |

|        |        |        |        |        |       |        |        |        |
|--------|--------|--------|--------|--------|-------|--------|--------|--------|
| 109    | 103.1  | 111.4  | 126.7  | 94.9   | 110.6 | 107.4  | 112.2  | 109.1  |
| 164.4  | 360.9  | 316    | 272.5  | 227    | 246   | 290.3  | 443.1  | 239.2  |
| 115    | 114.6  | 123.9  | 109.6  | 112.8  | 119.4 | 106    | 129.7  | 112.2  |
| 125.3  | 148.9  | 138.3  | 146.9  | 124.7  | 150.2 | 150.6  | 180.7  | 133.2  |
| 143.7  | 145.1  | 149.6  | 135.4  | 134.7  | 174.2 | 147.2  | 180.6  | 165.3  |
| 108.7  | 130    | 111.2  | 100.9  | 115.8  | 111.1 | 115.8  | 111.4  | 118.7  |
| 110.6  | 120.8  | 122.8  | 114.1  | 108.6  | 124.5 | 131    | 133.6  | 137    |
| 110.5  | 137    | 131.8  | 134.1  | 115.4  | 137.2 | 124.5  | 129.9  | 134    |
| 101.3  | 110.3  | 107.6  | 102.5  | 99.3   | 103.5 | 106.5  | 106.3  | 106.4  |
| 107.6  | 113.1  | 101.9  | 110    | 95.6   | 110.6 | 104.5  | 119.2  | 109.8  |
| 107.5  | 108.8  | 108.7  | 101    | 97.4   | 111.8 | 103.3  | 110.6  | 113.2  |
| 125.7  | 163.5  | 149.5  | 147.3  | 157.2  | 154.4 | 146    | 189.3  | 142.6  |
| 107    | 114.4  | 100.2  | 94.4   | 98.4   | 106.1 | 104.3  | 102.2  | 104.5  |
| 138.2  | 165.3  | 151.2  | 145.1  | 153.7  | 165.5 | 159.6  | 181.5  | 147.7  |
| 123    | 162.6  | 152.7  | 163.3  | 131.4  | 146   | 144.6  | 174.7  | 160.9  |
| 118.8  | 104.5  | 108.8  | 108.3  | 94.7   | 124.4 | 105.5  | 112.5  | 121.2  |
| 102.7  | 107.9  | 95.1   | 111.7  | 97.2   | 99.3  | 107.6  | 102.7  | 106.5  |
| 1105.2 | 1409.4 | 1858.1 | 1808.8 | 1605.9 | 983.8 | 1008.1 | 4138   | 3448.8 |
| 221.1  | 311.4  | 277.8  | 253.5  | 212.7  | 331.3 | 295.3  | 747.7  | 637.1  |
| 107.6  | 111.6  | 117.4  | 107.9  | 107.7  | 114.8 | 103.4  | 109.3  | 117.8  |
| 115.7  | 117.4  | 108.3  | 112.1  | 101.3  | 108.7 | 98.1   | 125.8  | 107.4  |
| 115.2  | 120.3  | 103.9  | 99.8   | 101.4  | 110.3 | 105.7  | 110.8  | 106.2  |
| 108.6  | 103.9  | 98.3   | 96.3   | 98.2   | 100.1 | 100.9  | 105.7  | 107.5  |
| 104.7  | 109.6  | 101.7  | 100.4  | 96.1   | 106.9 | 106.2  | 107    | 108.9  |
| 106    | 107.6  | 104.4  | 101.4  | 94.9   | 107.4 | 100    | 111.4  | 105.4  |
| 102.1  | 104.7  | 105.1  | 92.1   | 89     | 102.9 | 94.4   | 111.1  | 103.3  |
| 126.3  | 118    | 120.2  | 109.3  | 106.1  | 120.6 | 110.3  | 121.8  | 131.6  |
| 111    | 108    | 100.4  | 101    | 95.4   | 107.5 | 112    | 108.3  | 120.5  |
| 104    | 107.3  | 105.7  | 97.8   | 96.2   | 110.1 | 110.2  | 97     | 108.2  |
| 125.3  | 140.1  | 148.5  | 146.4  | 132.6  | 150   | 161.3  | 185.9  | 155.7  |
| 182.4  | 206.8  | 213    | 212.7  | 147.7  | 159.8 | 157.9  | 345.8  | 246.3  |
| 106.9  | 106.7  | 106.5  | 95.9   | 96     | 106.2 | 104.9  | 110.9  | 102    |
| 181.6  | 237.8  | 212.9  | 187.2  | 174.5  | 230.5 | 221.9  | 255.7  | 191.5  |
| 269.8  | 538.2  | 550.7  | 452.9  | 447.7  | 616.7 | 464.8  | 615.6  | 407.9  |
| 265.4  | 293.7  | 288.6  | 243.5  | 248.4  | 280.2 | 262.8  | 336.6  | 221.2  |
| 100.2  | 107    | 110.3  | 105.3  | 106.8  | 114.1 | 113.5  | 113    | 111.7  |
| 260.2  | 335.9  | 203    | 344.8  | 297.2  | 315.1 | 312    | 619.7  | 477.5  |
| 273.5  | 361    | 341.5  | 271.3  | 425.7  | 346.8 | 420.4  | 761.4  | 461.3  |
| 157    | 214    | 212.2  | 175.3  | 189.7  | 203.6 | 227.3  | 229    | 180.4  |
| 116    | 118.8  | 115.3  | 115.6  | 100.3  | 133.8 | 116.5  | 134.1  | 119.9  |
| 130.3  | 130.7  | 132.2  | 137.8  | 105.3  | 123.8 | 150.9  | 147    | 130.6  |
| 107    | 107.4  | 103.8  | 102.3  | 98.5   | 103   | 98.6   | 121.6  | 105.2  |
| 283.9  | 257.9  | 188    | 245.4  | 194.6  | 291.2 | 195.8  | 549.7  | 302.6  |
| 111.6  | 108.1  | 107.1  | 93.3   | 97.6   | 106.2 | 98.9   | 100.7  | 116.2  |
| 116    | 121.7  | 120.3  | 114.8  | 111.9  | 134.7 | 121    | 143.7  | 115.3  |
| 588.6  | 810.4  | 658.1  | 720.2  | 721.6  | 655.1 | 501    | 1238.5 | 772.1  |
| 115.1  | 109.8  | 116.5  | 105.5  | 99.6   | 113.4 | 109    | 115    | 112.7  |
| 118.5  | 111.5  | 113.6  | 101.3  | 110.8  | 107   | 109.2  | 127.2  | 114.5  |
| 110.2  | 111.8  | 102.8  | 95.5   | 93.8   | 111.3 | 98.1   | 106.6  | 109.4  |
| 102.7  | 108.3  | 99.2   | 103.5  | 94.9   | 109.2 | 100.9  | 110.1  | 104.7  |
| 103.6  | 117.9  | 110    | 112.2  | 102.4  | 114.7 | 103.8  | 117.9  | 108.5  |

|       |       |       |        |       |       |        |        |       |
|-------|-------|-------|--------|-------|-------|--------|--------|-------|
| 105.4 | 111.9 | 102.4 | 101.6  | 96.3  | 111.6 | 107.1  | 107.2  | 104.1 |
| 116.7 | 122.8 | 111.9 | 138.4  | 110.4 | 113.8 | 125    | 148.6  | 131.6 |
| 414.7 | 491   | 571.8 | 398    | 406.8 | 606.1 | 421.4  | 567.7  | 585.6 |
| 97.7  | 106.2 | 101.7 | 92.8   | 92.4  | 109.3 | 95.4   | 106.3  | 105.2 |
| 657.6 | 947.7 | 970.5 | 1011.1 | 710.1 | 810.7 | 1243.2 | 777.6  | 472.3 |
| 177.1 | 204.4 | 201.2 | 183.8  | 178.9 | 208.6 | 156.6  | 357.6  | 293.6 |
| 108.5 | 109.7 | 109.5 | 107    | 93.7  | 113.5 | 99.9   | 123.5  | 106.4 |
| 109   | 122.1 | 110   | 123.5  | 107.4 | 121.4 | 115.7  | 118.1  | 119.3 |
| 101.6 | 113.1 | 99.9  | 102    | 92.8  | 102.5 | 99.6   | 112.4  | 97.4  |
| 107.3 | 111.6 | 107.1 | 94.1   | 96.7  | 105   | 105.1  | 120.3  | 102.3 |
| 98.5  | 103.5 | 98.1  | 104.5  | 93.3  | 104.5 | 96     | 106.7  | 106.6 |
| 101.4 | 111   | 99.9  | 109    | 102.4 | 101.3 | 110.8  | 105.7  | 107.2 |
| 320.6 | 431   | 431.4 | 357.1  | 400.1 | 422.6 | 454.7  | 591    | 396   |
| 206.7 | 287   | 296   | 286.1  | 256.4 | 244.9 | 290.6  | 485.9  | 355.5 |
| 107.2 | 110.3 | 116.4 | 120.8  | 106.7 | 124.5 | 113.5  | 123.9  | 116.7 |
| 108.7 | 106.3 | 101.7 | 99.9   | 104   | 112.5 | 110.4  | 109.2  | 101.9 |
| 120   | 132.6 | 122.7 | 127.6  | 107.9 | 132.1 | 139.2  | 167.2  | 126.4 |
| 112.8 | 108.4 | 105   | 110.4  | 97.3  | 106.7 | 108.5  | 107.4  | 108.7 |
| 196.5 | 195   | 188.4 | 169.8  | 159.6 | 209.6 | 196.1  | 323.7  | 220.1 |
| 106.9 | 118.6 | 100.6 | 111.3  | 101   | 113.6 | 111.1  | 106.5  | 115.6 |
| 816.3 | 606.6 | 640.7 | 654.3  | 590.8 | 938.7 | 644.6  | 1340.3 | 910.5 |
| 110   | 109.3 | 101   | 100    | 106.4 | 117.5 | 107.3  | 118    | 101.6 |
| 108.5 | 117.7 | 119.6 | 106.2  | 111.3 | 117.4 | 110.6  | 128.1  | 110.6 |
| 109.4 | 109.5 | 117.7 | 102.5  | 108.8 | 107.5 | 104.7  | 123.4  | 112.3 |
| 190.3 | 179.9 | 156.7 | 155.6  | 160   | 163.5 | 160.3  | 223.3  | 189.3 |
| 109.4 | 126.2 | 115.9 | 109.7  | 119.7 | 123.1 | 118.8  | 126.4  | 117.2 |
| 127.6 | 152.6 | 131.3 | 125.8  | 111.3 | 132.8 | 130.6  | 127.4  | 116.4 |
| 118   | 110.7 | 112.6 | 119.8  | 103.3 | 110.6 | 104.3  | 117.1  | 117.6 |
| 114.3 | 123.7 | 136   | 128.5  | 103.8 | 115.7 | 115.6  | 160    | 139.2 |
| 114.1 | 120   | 122.2 | 118.3  | 106.1 | 125.2 | 114.2  | 111.4  | 117.3 |
| 102.8 | 107.3 | 103.8 | 96.5   | 95.9  | 105.6 | 101.7  | 103.8  | 104.3 |
| 336.2 | 196   | 256.7 | 221.5  | 167.6 | 241.8 | 257.2  | 351    | 272.5 |
| 106.6 | 105.7 | 110   | 97.7   | 89.4  | 107.9 | 98.9   | 112.7  | 105   |
| 104   | 122.7 | 113.7 | 111.8  | 109.9 | 112   | 116.8  | 114.6  | 118   |
| 99.3  | 104.2 | 103.2 | 101.5  | 93.2  | 114.2 | 94.9   | 114.6  | 114.1 |
| 117.1 | 135.1 | 127.2 | 119.5  | 123.9 | 134.6 | 126.1  | 120.6  | 119.9 |
| 113.7 | 130.7 | 126.1 | 116    | 119.3 | 131   | 135.4  | 150.9  | 137.2 |
| 102.8 | 111.6 | 103.3 | 93.8   | 99.6  | 115.2 | 101.1  | 114.7  | 118.2 |
| 262.3 | 192.6 | 196.3 | 176.1  | 150.9 | 181   | 198.3  | 314.8  | 239.7 |
| 108.6 | 103.2 | 103.4 | 106.7  | 100.2 | 105.6 | 105.6  | 107.4  | 101   |
| 109.2 | 129.5 | 111.9 | 107.2  | 107.4 | 113.8 | 107.4  | 112.8  | 118.6 |
| 104.2 | 105.9 | 104.2 | 95     | 96    | 109.7 | 101.4  | 108.4  | 102.7 |
| 104.7 | 113.6 | 116.2 | 118.2  | 116.7 | 116   | 117.9  | 125.5  | 112.9 |
| 133.2 | 153.7 | 135.2 | 129.6  | 125.7 | 154.3 | 139.1  | 199.9  | 178.1 |
| 134.4 | 130   | 143.7 | 117    | 117.2 | 131.7 | 133.2  | 146    | 138.2 |
| 115.1 | 111.4 | 101.1 | 108.8  | 99    | 113.6 | 108.3  | 123.9  | 117.7 |
| 102.5 | 112.2 | 102   | 99.4   | 97.8  | 100.4 | 97.9   | 108.5  | 113.6 |
| 102.2 | 113   | 99.6  | 96.5   | 90.5  | 108.5 | 97.1   | 108.2  | 99.3  |
| 187.8 | 232.5 | 193.2 | 193.9  | 217.3 | 232.4 | 215.7  | 323.8  | 207.3 |
| 109.3 | 104.2 | 109   | 100.1  | 99.8  | 111.6 | 110.7  | 118.9  | 118.8 |
| 188.7 | 155.4 | 137.3 | 155.5  | 150   | 149.9 | 149.6  | 201.9  | 161.2 |

|       |       |       |       |       |       |       |       |       |
|-------|-------|-------|-------|-------|-------|-------|-------|-------|
| 110.6 | 113.9 | 101.4 | 96.3  | 92.7  | 103.7 | 99    | 135.8 | 117.4 |
| 106.4 | 109.8 | 105.8 | 100.7 | 96.4  | 109.3 | 112.3 | 112.8 | 114.2 |
| 102.7 | 104.9 | 104.9 | 97    | 91.4  | 109.2 | 100.3 | 114   | 104.1 |
| 113.4 | 114.9 | 107.4 | 108.6 | 102.3 | 119   | 110.8 | 107.3 | 111.7 |
| 110.9 | 110.4 | 114.8 | 96.3  | 105.9 | 110.4 | 108.6 | 118.1 | 114.5 |
| 105.2 | 113.3 | 111.9 | 112.7 | 107.5 | 125.7 | 114.7 | 115.6 | 118   |
| 110.2 | 110.2 | 103.4 | 105.7 | 105.1 | 117.3 | 108.3 | 123.6 | 111.5 |
| 105.5 | 116.4 | 106.1 | 102.8 | 95.3  | 109.8 | 113   | 126   | 116.6 |
| 156.4 | 244.1 | 166.6 | 347.7 | 215.2 | 164.8 | 307.9 | 281.9 | 157.8 |
| 334.9 | 270.5 | 318.6 | 341.4 | 261.3 | 335.3 | 399.5 | 484.3 | 431.4 |
| 139.4 | 114.4 | 114.8 | 105.8 | 102.9 | 132.8 | 120.3 | 171.8 | 135.8 |
| 112.6 | 118   | 111   | 101.3 | 96.1  | 113.5 | 101.1 | 104.6 | 117.3 |
| 219.3 | 306.5 | 286.2 | 201.5 | 235.8 | 320.5 | 254.9 | 358.8 | 329.5 |
| 108.4 | 111.5 | 104.5 | 111.9 | 93.5  | 112.8 | 100.8 | 118.9 | 107.8 |
| 102.5 | 105.2 | 95.1  | 93.4  | 94.2  | 107.5 | 103.5 | 107.7 | 105.4 |
| 102   | 111.3 | 95.9  | 90    | 90.4  | 100.5 | 106.8 | 109.2 | 102.6 |
| 110.7 | 130.9 | 110.1 | 116.1 | 95.7  | 122   | 97.2  | 124.1 | 120.6 |
| 112.3 | 122.2 | 114.5 | 113   | 104.6 | 124.5 | 116.5 | 131.5 | 132.7 |
| 109.3 | 122.8 | 106.9 | 103.9 | 103.1 | 117.9 | 111.1 | 120.9 | 121.1 |
| 175.8 | 141.8 | 125.6 | 105.4 | 111.3 | 133   | 115.3 | 140.2 | 119.3 |
| 102.7 | 113.8 | 107.5 | 104.1 | 97    | 103.7 | 100.4 | 111.5 | 107.8 |
| 161.1 | 171.5 | 178.4 | 148.5 | 158.1 | 192   | 187.7 | 208.6 | 178.5 |
| 104.9 | 103.5 | 101.5 | 96.1  | 92.3  | 108.7 | 104.6 | 111.2 | 101.8 |
| 131.1 | 129.4 | 119.5 | 146.4 | 126.7 | 116.7 | 138   | 139.4 | 123.1 |
| 255.9 | 340.7 | 300.9 | 303.9 | 293   | 313.7 | 403.1 | 377.6 | 336.9 |
| 187.2 | 222.1 | 207.3 | 194.6 | 199.2 | 273.8 | 207.8 | 263.5 | 264.4 |
| 112.2 | 110.8 | 98.7  | 99.3  | 102.3 | 106.1 | 108.1 | 120.5 | 114.3 |
| 294.8 | 422.6 | 427.1 | 291.6 | 363.4 | 404.4 | 396.5 | 491.9 | 240.4 |
| 157   | 212.8 | 190.7 | 207.5 | 201.7 | 213.8 | 199.1 | 384.8 | 204.2 |
| 393.3 | 539.8 | 455.8 | 391.2 | 375.8 | 479.5 | 333.3 | 874   | 1315  |
| 196.1 | 302.3 | 255.8 | 221.9 | 215.1 | 264.2 | 233.1 | 429.1 | 264.3 |
| 110.2 | 111.9 | 121.1 | 105.5 | 102.1 | 124.9 | 112.5 | 132.7 | 121.2 |
| 113.8 | 109.9 | 111   | 118.6 | 99.4  | 126.5 | 117.5 | 120.4 | 115.3 |
| 105.4 | 110.7 | 102.2 | 101   | 93.1  | 108.2 | 101.2 | 111.1 | 107.4 |
| 106.6 | 121.8 | 104.6 | 110.7 | 95.4  | 118.1 | 109.6 | 119.2 | 110.1 |
| 106.2 | 105.1 | 99.8  | 93.6  | 95.7  | 102.9 | 101.3 | 107.6 | 106.7 |
| 139.8 | 154.9 | 141.3 | 123.3 | 136.9 | 173.1 | 160.1 | 188.2 | 150.8 |
| 109.5 | 116.1 | 110.9 | 106.4 | 100.5 | 114.2 | 111.4 | 128.7 | 108.8 |
| 118.9 | 123.8 | 113.9 | 115.7 | 111.4 | 130.7 | 121.9 | 140.5 | 121.3 |
| 109.8 | 101.2 | 99.4  | 91.8  | 95.4  | 110.6 | 106   | 111.4 | 111.2 |
| 108.3 | 110.7 | 104.9 | 101.6 | 102.1 | 109.3 | 103.5 | 125.6 | 112.9 |
| 126.1 | 144.9 | 141.2 | 140.1 | 125.1 | 142.6 | 134.3 | 145.2 | 132.2 |
| 107   | 103.1 | 99    | 100   | 96    | 107.8 | 102.7 | 115.4 | 112   |
| 108.9 | 113.5 | 106.4 | 111.1 | 98.3  | 110.9 | 107.7 | 114.9 | 105.1 |
| 210.8 | 307.1 | 297.7 | 256.5 | 269.9 | 304.4 | 252.6 | 383.1 | 293.5 |
| 299.8 | 530.5 | 503.8 | 477.7 | 465   | 484.9 | 553.1 | 439.5 | 286.9 |
| 318.4 | 429.7 | 478.5 | 584.6 | 408   | 402.5 | 495.2 | 547.5 | 390.9 |
| 102.6 | 104.3 | 99    | 92.9  | 91.7  | 102.5 | 96.1  | 106.9 | 110.6 |
| 107.7 | 107.5 | 102.1 | 97.9  | 94.9  | 109.4 | 105.8 | 103.1 | 113.2 |
| 115.8 | 141   | 134.4 | 117.5 | 119   | 141.1 | 117.3 | 156.1 | 137   |
| 121.1 | 153   | 145.1 | 139.9 | 122   | 123.7 | 134   | 136.9 | 118   |

|       |       |       |       |       |       |       |        |       |
|-------|-------|-------|-------|-------|-------|-------|--------|-------|
| 112.1 | 101   | 95.2  | 99.1  | 94.8  | 106.1 | 107.2 | 113    | 105.9 |
| 107.7 | 114.2 | 106   | 102.4 | 98.9  | 105.3 | 106.4 | 114.4  | 102.4 |
| 122   | 110.3 | 114.6 | 111.7 | 104   | 116.2 | 119.1 | 113.4  | 114.9 |
| 103.5 | 103.8 | 98.4  | 100.7 | 93.7  | 107.4 | 100.8 | 108.1  | 104.3 |
| 107.7 | 105.3 | 110.5 | 92.4  | 95.5  | 108.8 | 101.7 | 105.1  | 107.1 |
| 109.8 | 107.3 | 106.7 | 107   | 100.9 | 112.9 | 111.3 | 103.6  | 103.7 |
| 109.1 | 137.5 | 115.3 | 117.8 | 123.2 | 128.5 | 122.5 | 109.9  | 132.2 |
| 102.5 | 110.1 | 101.4 | 94.8  | 104   | 115   | 100.4 | 107.3  | 105.1 |
| 111.2 | 104.3 | 101.5 | 111   | 99.2  | 107.4 | 107   | 105.5  | 106.8 |
| 117.6 | 110.5 | 106   | 105.6 | 108.7 | 115.6 | 108.8 | 117    | 115.4 |
| 105.1 | 112.2 | 99.2  | 101.3 | 96.9  | 114.7 | 103.1 | 102.4  | 108.7 |
| 116.9 | 108.1 | 107.9 | 114.9 | 98.6  | 118.6 | 109.1 | 115.1  | 111.6 |
| 116.8 | 124.6 | 111.2 | 105.2 | 107.6 | 123.9 | 108.5 | 114.3  | 114.7 |
| 99.1  | 102.5 | 102.3 | 94.8  | 92.1  | 106.6 | 94.8  | 103.1  | 100.1 |
| 341.7 | 394   | 281.8 | 224.8 | 321.7 | 411.2 | 299.7 | 667    | 681.8 |
| 131.1 | 157.5 | 166.4 | 135.3 | 155.6 | 182.1 | 164.3 | 233.2  | 194.5 |
| 104.3 | 108.6 | 106.8 | 115.4 | 97.9  | 98.2  | 114   | 107.1  | 115.4 |
| 113.5 | 120.4 | 109.9 | 114.9 | 106.5 | 115.4 | 112.8 | 129.8  | 108.9 |
| 133.9 | 158.5 | 136.7 | 155.9 | 141.3 | 137.6 | 128.6 | 157.7  | 151.9 |
| 111.2 | 104.5 | 103.6 | 103.8 | 101.2 | 115   | 103.9 | 110.8  | 104.1 |
| 106.4 | 98.4  | 103.7 | 99.6  | 91.9  | 107.1 | 100.6 | 110.3  | 100.1 |
| 602.9 | 611.4 | 469.9 | 396.7 | 540.1 | 624.6 | 477.4 | 1100.8 | 859   |
| 152.3 | 198.4 | 209.5 | 198.6 | 191.5 | 199.6 | 218.5 | 314.9  | 200.6 |
| 110.4 | 108.2 | 101   | 97    | 95.8  | 108.1 | 105.1 | 108.5  | 109.8 |
| 109.4 | 117.8 | 102.3 | 104.7 | 91.6  | 111.9 | 100.2 | 99.7   | 101.1 |
| 211.3 | 259.2 | 256.7 | 207   | 232.5 | 303.5 | 214.9 | 339.1  | 321   |
| 423.9 | 326.1 | 323.2 | 338.5 | 376.2 | 381.7 | 410.2 | 646.3  | 468.6 |
| 111.5 | 112.7 | 102.8 | 97.8  | 100.4 | 118   | 109.2 | 112    | 114.1 |
| 101.9 | 105.4 | 101.5 | 99.4  | 95.6  | 109.8 | 99.5  | 107.7  | 114.2 |
| 116.2 | 107.4 | 98    | 110.6 | 94.4  | 109   | 102.6 | 105.2  | 105.6 |
| 226.8 | 207.5 | 205.8 | 237.2 | 196.5 | 228.8 | 236.6 | 277.7  | 213.3 |
| 109.3 | 107.4 | 108.6 | 102.7 | 99.3  | 115.4 | 105.4 | 123.9  | 122.4 |
| 105.4 | 105.1 | 98.6  | 94.7  | 98.9  | 99.8  | 105.8 | 99.3   | 114.9 |
| 105.2 | 104.3 | 103.1 | 105.4 | 92.5  | 107.7 | 98.1  | 105.4  | 105.1 |
| 111.6 | 103.4 | 100.1 | 97.4  | 93.4  | 112.1 | 94.3  | 112.1  | 108.8 |
| 106.8 | 112.4 | 103.7 | 108.9 | 104.1 | 119   | 96.7  | 121.7  | 115   |
| 99.8  | 101   | 103.2 | 104.8 | 92.7  | 103.2 | 97.3  | 114.1  | 100.6 |
| 113.5 | 121   | 106.6 | 104.5 | 107.5 | 122.6 | 109.1 | 135.3  | 111   |
| 142   | 115   | 114   | 112.2 | 111.1 | 130.1 | 116   | 148.5  | 112.1 |
| 212.2 | 334.8 | 383.6 | 269.4 | 435.8 | 491.3 | 382.2 | 701.1  | 285.6 |
| 105.8 | 118.5 | 106.1 | 128.6 | 115.4 | 112.8 | 111.9 | 136    | 109.3 |
| 331.7 | 538.6 | 503   | 328.8 | 448.2 | 480.5 | 333.7 | 753.4  | 398.7 |
| 100.5 | 105.8 | 95.3  | 93.7  | 95    | 108.9 | 101.1 | 113.8  | 116.2 |
| 123.3 | 123.7 | 127.3 | 121.6 | 112.6 | 132.4 | 128.2 | 151.5  | 154.7 |
| 100.2 | 105.5 | 96.1  | 100.9 | 89.7  | 109   | 100.4 | 105.3  | 120.7 |
| 154.8 | 135.4 | 124.7 | 128.4 | 124.3 | 177.9 | 138.4 | 305.8  | 196.3 |
| 101.3 | 112.4 | 99.5  | 95    | 98    | 104.5 | 103.5 | 109    | 107.3 |
| 116.5 | 110.8 | 94.8  | 99.8  | 93.1  | 97.7  | 104.1 | 108.5  | 113.2 |
| 103.8 | 110.1 | 99.2  | 95.3  | 92.5  | 101.8 | 97.3  | 103.4  | 104.2 |
| 111.9 | 119.1 | 107.2 | 113.2 | 95    | 119.8 | 106.7 | 109.9  | 116.1 |
| 100.3 | 104.5 | 99.5  | 93.5  | 91.1  | 96.5  | 96.3  | 99.8   | 97.4  |

|       |       |       |       |       |       |       |       |       |
|-------|-------|-------|-------|-------|-------|-------|-------|-------|
| 115.1 | 112.9 | 110.8 | 100.9 | 94.8  | 117.1 | 117.8 | 137.9 | 129.8 |
| 108.6 | 107.2 | 109.2 | 102.1 | 90.8  | 118.1 | 103.3 | 111.1 | 108.1 |
| 107.9 | 105.6 | 103.1 | 107.3 | 94.9  | 111.8 | 98.3  | 109.4 | 105.7 |
| 106.2 | 110   | 103.9 | 105.1 | 109.7 | 103.2 | 97.9  | 121.9 | 116.5 |
| 105.5 | 108.2 | 102.9 | 100.1 | 95.9  | 107.6 | 99.2  | 112.5 | 105.3 |
| 130.4 | 165.6 | 162.2 | 146.6 | 154.6 | 159.9 | 153.7 | 180.9 | 161.4 |
| 123.9 | 106.7 | 108.9 | 113.9 | 102.3 | 110.9 | 108.3 | 109.8 | 107.1 |
| 105.2 | 107.4 | 100.9 | 109.3 | 93.6  | 110.6 | 104.9 | 103.6 | 106.1 |
| 107.1 | 111.4 | 98.2  | 99.6  | 94.2  | 104.9 | 102.5 | 113.1 | 103.3 |
| 157.7 | 193   | 179.8 | 157.1 | 153.1 | 178   | 166.6 | 257.2 | 221.7 |
| 146   | 197.3 | 180.2 | 153.8 | 183.3 | 175.2 | 193.7 | 228.7 | 149.5 |
| 119.5 | 121.5 | 111.9 | 118.7 | 104.1 | 126.7 | 114.7 | 124.3 | 128.8 |
| 106   | 111.7 | 100.5 | 98.1  | 100.9 | 106.8 | 105.9 | 101.2 | 109.5 |
| 98.7  | 112.6 | 105   | 95.2  | 95.9  | 105.7 | 97.8  | 108.8 | 108.5 |
| 202.1 | 256.9 | 213.6 | 205.8 | 214.2 | 215.9 | 228.8 | 275.8 | 225   |
| 101.8 | 115.2 | 100.8 | 94.8  | 95    | 114.2 | 106.8 | 109.2 | 109.6 |
| 149.5 | 173.7 | 153.4 | 160.9 | 149.9 | 172.8 | 178.1 | 226.1 | 181.3 |
| 117.6 | 111.4 | 99.2  | 108.7 | 97.8  | 119   | 108.5 | 111   | 101.9 |
| 108.8 | 109.1 | 101.5 | 99.8  | 98    | 109.6 | 106.3 | 117.4 | 112.1 |
| 121.5 | 111.7 | 175.4 | 113.9 | 100.2 | 168.9 | 113.9 | 120.7 | 124.1 |
| 116   | 116   | 120.9 | 99.7  | 94.8  | 125.2 | 107.8 | 117.8 | 131.9 |
| 250.3 | 199.4 | 244.2 | 194   | 160.1 | 220.6 | 326.6 | 250.7 | 360   |
| 116.7 | 116.9 | 107.6 | 99.1  | 95.3  | 111.4 | 112.4 | 116.8 | 109   |
| 109.2 | 111.1 | 103.2 | 103.2 | 106.9 | 105.8 | 108.5 | 114.1 | 111.2 |
| 117.6 | 104.7 | 101.8 | 111.6 | 99.8  | 110.3 | 111.4 | 124.2 | 139   |
| 111.4 | 104.9 | 103.9 | 106.6 | 99.5  | 109.5 | 104   | 107.9 | 97.9  |
| 113.9 | 111.9 | 104.2 | 106.1 | 95.1  | 105.7 | 104.9 | 113.8 | 109   |
| 107.6 | 114.6 | 103.8 | 97.7  | 96.4  | 107.8 | 106.3 | 102.1 | 128.8 |
| 110.5 | 115   | 99.8  | 109.8 | 95    | 112.1 | 101.7 | 102.1 | 120.3 |
| 112.3 | 119.6 | 96.7  | 97    | 97.1  | 120   | 109.1 | 109.8 | 105.6 |
| 116.4 | 121.2 | 114.5 | 101.7 | 106.9 | 127.2 | 115.4 | 120   | 138.2 |
| 148.7 | 133.1 | 130.8 | 117.6 | 110   | 144.3 | 131.1 | 149.3 | 159.3 |
| 127.3 | 119.4 | 119.6 | 105.3 | 102.7 | 136.2 | 125.3 | 129   | 172   |
| 122.9 | 111.4 | 115.3 | 113.2 | 98.5  | 123.2 | 125.2 | 116.5 | 135.4 |
| 111.3 | 113.7 | 103.5 | 109.4 | 105.5 | 112.1 | 103.6 | 128   | 107.9 |
| 104.1 | 103.6 | 103.3 | 97.7  | 95.9  | 118.5 | 107   | 111.1 | 117.7 |
| 100.9 | 108.6 | 105.1 | 103.8 | 96.3  | 102.7 | 100.7 | 103.9 | 108.7 |
| 105.9 | 110.2 | 110.2 | 111.6 | 100.9 | 109   | 108.9 | 105.1 | 109.8 |
| 106.8 | 99.8  | 98.6  | 95.8  | 93.1  | 103.4 | 104.8 | 110.3 | 108.7 |
| 110   | 115.2 | 107.2 | 106.8 | 101.1 | 108.3 | 108.4 | 105.4 | 108.6 |
| 113.2 | 108.2 | 97    | 99.7  | 103.2 | 113.6 | 106.4 | 115.2 | 115.8 |
| 110.6 | 110.1 | 106.6 | 112.7 | 107.1 | 119.5 | 107.6 | 109.1 | 108.2 |
| 111.3 | 140.3 | 141.9 | 139.3 | 123.3 | 148.5 | 150.4 | 155.1 | 117.4 |
| 122.6 | 102.4 | 104   | 106.8 | 98.9  | 104.5 | 119   | 115.9 | 120.9 |
| 108.9 | 108.3 | 104.7 | 106.8 | 99.5  | 107   | 104.8 | 121   | 108.2 |
| 104.9 | 107.4 | 106.7 | 92.4  | 90.2  | 108.4 | 100.1 | 108.1 | 103.3 |
| 110.6 | 120.3 | 109.9 | 107.8 | 103.6 | 113.1 | 105.2 | 116.9 | 113.7 |
| 110.2 | 111.1 | 107.5 | 99.8  | 93.7  | 111.4 | 106.1 | 115.1 | 116.2 |
| 108.8 | 113.9 | 102.3 | 110.1 | 107.3 | 105.2 | 109   | 122.3 | 108.2 |
| 101   | 112.7 | 110.2 | 97.3  | 93.9  | 103.6 | 99.1  | 107.9 | 101   |
| 106.5 | 113.5 | 103.8 | 103.3 | 89.2  | 106.2 | 104   | 119.7 | 102.4 |

|        |        |        |        |        |        |        |        |        |
|--------|--------|--------|--------|--------|--------|--------|--------|--------|
| 116    | 116.1  | 113.6  | 105.3  | 99.8   | 113    | 104.4  | 119.9  | 110.1  |
| 108.6  | 107.7  | 99.5   | 95.5   | 96.8   | 107.6  | 104.3  | 108.8  | 98.3   |
| 110.5  | 111.8  | 116.8  | 106.8  | 96.8   | 118.8  | 102    | 110.7  | 114.2  |
| 104.4  | 106.9  | 109.9  | 108.6  | 103.9  | 109.8  | 107.5  | 112.3  | 104.8  |
| 132.5  | 111.9  | 108.1  | 95.1   | 102.2  | 112.7  | 107    | 120.8  | 116.5  |
| 111    | 121.3  | 108.6  | 116.7  | 104.8  | 113    | 111.8  | 111.7  | 117.7  |
| 119.3  | 119.1  | 97.2   | 112.6  | 102.4  | 111.4  | 102.9  | 134.6  | 120.5  |
| 115.5  | 117.4  | 112    | 119.3  | 99.1   | 107.2  | 111    | 126.3  | 119.7  |
| 232    | 240.8  | 175.2  | 285.1  | 183.9  | 209.8  | 225.9  | 258.2  | 202.6  |
| 141.8  | 177.7  | 171.4  | 166.8  | 186.7  | 154.1  | 166.2  | 210.2  | 200.6  |
| 116.5  | 126.3  | 108    | 116    | 101.6  | 126.1  | 116.7  | 116.8  | 115.9  |
| 871.1  | 1021.5 | 1153.9 | 1204.6 | 1089.5 | 1403.1 | 1389.5 | 1349.4 | 860.7  |
| 102.9  | 103.3  | 102.1  | 93.4   | 93     | 105.8  | 95.6   | 108    | 108.9  |
| 108.8  | 111.7  | 114.4  | 105.9  | 94.2   | 118.8  | 114.1  | 116.2  | 121.7  |
| 106.5  | 109    | 97.8   | 101.9  | 92.1   | 98.9   | 111.6  | 109.1  | 110.1  |
| 116.3  | 114    | 103.7  | 98.1   | 89.8   | 121.6  | 105.2  | 110.9  | 116.6  |
| 1844.9 | 3204.5 | 3134.8 | 2425   | 2923.1 | 2515.8 | 2019.2 | 4845   | 3852.8 |
| 109.4  | 128.1  | 109.5  | 115.3  | 103    | 114.4  | 108.8  | 146.3  | 127.3  |
| 157.2  | 145    | 105.4  | 120.3  | 117.7  | 118    | 126.1  | 187.5  | 135.4  |
| 100.1  | 105.7  | 103.6  | 106.5  | 93.3   | 112.4  | 101.2  | 116.9  | 109    |
| 518.1  | 423.9  | 400.8  | 374.7  | 346.6  | 411.4  | 343.4  | 956.7  | 658    |
| 1822.8 | 1144.8 | 948.7  | 888.1  | 1140.9 | 993.4  | 951.2  | 2479.4 | 1501.1 |
| 113    | 109.6  | 100.5  | 119.8  | 96.7   | 119.6  | 115.5  | 100.5  | 114.6  |
| 112.1  | 113.8  | 116    | 112.4  | 103.7  | 120.6  | 114.2  | 129.7  | 112.6  |
| 409    | 448.7  | 524.6  | 669.7  | 392.1  | 493.1  | 770.1  | 542.7  | 395.6  |
| 99.7   | 111.8  | 100    | 96.6   | 88.5   | 105.4  | 102.5  | 108.9  | 98.4   |
| 272.1  | 365.2  | 381    | 338.8  | 363.3  | 519.7  | 382.4  | 666.4  | 464.5  |
| 315.5  | 513    | 530.5  | 529.3  | 399.7  | 466.5  | 497.7  | 821.3  | 472.3  |
| 186.3  | 182.4  | 168.7  | 190.7  | 195.5  | 191.7  | 203.1  | 319.9  | 249    |
| 162.4  | 156.8  | 165.7  | 183.4  | 160.1  | 195.8  | 147.3  | 268    | 221.6  |
| 103    | 111.4  | 98.9   | 96.4   | 95.5   | 105.1  | 109.4  | 105.5  | 108.9  |
| 113.6  | 111    | 107.6  | 106.9  | 104    | 113.1  | 112.8  | 121.4  | 111.5  |
| 101.9  | 112.9  | 106.3  | 103.6  | 103.1  | 113.2  | 95.5   | 111.2  | 112.5  |
| 111.7  | 118.1  | 121    | 115.9  | 92.9   | 112.6  | 107.6  | 133    | 124.7  |
| 174.8  | 199.7  | 148.3  | 161.5  | 161.6  | 167.9  | 159.8  | 171.4  | 157.4  |
| 105.3  | 104    | 108.2  | 105.8  | 98.8   | 106.9  | 102.6  | 117    | 117.6  |
| 105.8  | 121.5  | 97.7   | 100.7  | 91.3   | 111.7  | 102.4  | 102.4  | 107.9  |
| 106    | 110.3  | 104.2  | 119.3  | 95.8   | 121.4  | 106.1  | 126.8  | 117.7  |
| 431.8  | 443.3  | 420.6  | 362.6  | 360.2  | 370.6  | 470.6  | 700.3  | 555.5  |
| 103    | 101.2  | 100.1  | 99.1   | 100.7  | 111.1  | 97.4   | 109.9  | 107.5  |
| 105.1  | 113.9  | 106.2  | 103    | 101.5  | 105.3  | 99.7   | 102.6  | 105.7  |
| 108.3  | 113.6  | 113    | 100.4  | 97.7   | 106.5  | 106.9  | 114.6  | 114    |
| 105.2  | 114.1  | 101.6  | 96.2   | 104.9  | 107.4  | 96.2   | 92.8   | 105.3  |
| 115    | 135.5  | 143.5  | 119.1  | 128.9  | 136.2  | 157.7  | 167.6  | 146.8  |
| 123.8  | 127.7  | 124.7  | 127.7  | 102    | 122.7  | 113.8  | 142.1  | 128    |
| 122    | 152.6  | 136.4  | 137.3  | 144.3  | 151.2  | 145.9  | 205.7  | 154.8  |
| 136.4  | 167.1  | 160.1  | 150.8  | 134.4  | 165.8  | 159.6  | 263.2  | 205    |
| 280.6  | 163.5  | 162.3  | 143.9  | 202.5  | 224.8  | 187.5  | 508.9  | 455.4  |
| 339    | 713.5  | 611.5  | 535    | 561.5  | 648.1  | 525.1  | 578.8  | 276.9  |
| 116.1  | 117.9  | 102.2  | 104.3  | 94.2   | 110.1  | 98.9   | 110.8  | 112.1  |
| 105.9  | 113.1  | 109.9  | 103.7  | 102.3  | 119.6  | 114.3  | 109.9  | 113.8  |



|        |        |        |        |        |        |       |       |        |
|--------|--------|--------|--------|--------|--------|-------|-------|--------|
| 113.3  | 119.3  | 119.6  | 117.2  | 100.5  | 123.8  | 116.5 | 134.1 | 125.5  |
| 187.9  | 236.4  | 285.4  | 209.6  | 227.8  | 276.5  | 228.7 | 213.8 | 178.9  |
| 106.7  | 101    | 105.8  | 105.7  | 94.9   | 100.2  | 103.9 | 112.4 | 108.8  |
| 95.6   | 97.4   | 100.7  | 99.7   | 88.6   | 97.3   | 90.5  | 98.7  | 109.2  |
| 108.6  | 107.1  | 102.3  | 99.6   | 95.5   | 108.9  | 103.8 | 105.2 | 111.5  |
| 261.6  | 366.5  | 305.6  | 397.9  | 337.1  | 292.8  | 429.7 | 509.2 | 287.9  |
| 145.6  | 182.3  | 131.9  | 169.8  | 149.1  | 145.9  | 176.9 | 221.8 | 171.6  |
| 170.7  | 183.2  | 162.5  | 169.7  | 177.7  | 174.5  | 151.4 | 216.3 | 189    |
| 104.2  | 106.4  | 104    | 103.6  | 97.8   | 106.8  | 100.6 | 109.1 | 117.3  |
| 237.6  | 330.7  | 319.4  | 344.2  | 282.7  | 306.3  | 307.7 | 352   | 288.1  |
| 215    | 243.2  | 248.3  | 282.2  | 213.1  | 209.4  | 293.4 | 366.5 | 278.8  |
| 108.2  | 116.7  | 102.4  | 103.9  | 98.7   | 106.5  | 100.8 | 107   | 117.1  |
| 99.3   | 102.3  | 103.7  | 89.4   | 92.9   | 100.5  | 101.6 | 103.9 | 109.3  |
| 117.3  | 112.5  | 111.2  | 115.2  | 112.8  | 118.7  | 110.4 | 125.3 | 113.1  |
| 105.7  | 112.3  | 110.5  | 104.8  | 98.5   | 112.8  | 109.5 | 110.1 | 114.4  |
| 105.5  | 109.3  | 110.2  | 101.5  | 98     | 105.9  | 109.6 | 115.8 | 105.4  |
| 115    | 112.6  | 104.4  | 101    | 93.9   | 109.1  | 103.6 | 122.4 | 107.5  |
| 110.1  | 110.7  | 109.1  | 106.2  | 99.1   | 115.7  | 100.3 | 115.5 | 115.7  |
| 101    | 95.3   | 98.3   | 105.3  | 100.3  | 106.2  | 97    | 103.1 | 98.1   |
| 112.3  | 104.4  | 96.6   | 100    | 94.2   | 100.8  | 95.1  | 99.8  | 103.7  |
| 108.1  | 112.5  | 101.2  | 105.7  | 106.9  | 109.3  | 101.6 | 108.8 | 107.9  |
| 97.8   | 101.5  | 99.6   | 99.3   | 92.9   | 118.7  | 100.7 | 109.5 | 114.1  |
| 108    | 109.4  | 106.4  | 102.1  | 97.7   | 108.4  | 103   | 124   | 111.9  |
| 107.5  | 106.6  | 99.4   | 96.5   | 94.4   | 113    | 102.8 | 106.5 | 104.3  |
| 105.2  | 116.1  | 105.2  | 113.3  | 104.2  | 135.6  | 109.6 | 126.5 | 110.2  |
| 108.3  | 109.9  | 105.7  | 104.3  | 90.1   | 107.7  | 101.4 | 109   | 106.3  |
| 104.6  | 110.5  | 101.3  | 102.7  | 89.3   | 108.6  | 101.1 | 106   | 105.2  |
| 111.1  | 113.6  | 107.8  | 100.6  | 94.3   | 113.5  | 106.4 | 114.3 | 105.5  |
| 105.7  | 111.8  | 101.5  | 101.5  | 100.2  | 110.3  | 101.2 | 112.4 | 111.9  |
| 106.3  | 109.4  | 106.8  | 93.5   | 95.3   | 99.6   | 96.1  | 104   | 108.7  |
| 108.7  | 106.1  | 104.1  | 106.3  | 90     | 109.5  | 113   | 134.3 | 110    |
| 102.9  | 98.7   | 93     | 97.9   | 97.8   | 104.9  | 101.7 | 105.2 | 118.8  |
| 101.7  | 102.2  | 100.6  | 92.1   | 94.9   | 112.4  | 103.2 | 107.7 | 104.9  |
| 111.2  | 107.4  | 101.5  | 101.4  | 92.5   | 108.9  | 102.7 | 115.8 | 104.4  |
| 111    | 109.3  | 103.8  | 106.6  | 92     | 115.6  | 114.2 | 109.6 | 109.7  |
| 113    | 114.5  | 109.4  | 101.2  | 112    | 117.8  | 111.3 | 130.8 | 130    |
| 113.5  | 108.9  | 102.9  | 112.7  | 102.3  | 116.2  | 107.5 | 107.2 | 104    |
| 113.9  | 107.9  | 104.9  | 103.8  | 95.2   | 112.8  | 100.4 | 104.9 | 104.9  |
| 97.8   | 98.3   | 99.5   | 90.2   | 95.7   | 102    | 96.8  | 100.3 | 101.1  |
| 143.8  | 119.6  | 115.1  | 115.1  | 119.4  | 125.3  | 111.6 | 141.8 | 137.7  |
| 96.7   | 101.4  | 95.6   | 85     | 93     | 99.8   | 100.4 | 102.7 | 110.9  |
| 105.3  | 111.3  | 97.4   | 100.3  | 100    | 106.4  | 102.6 | 106.8 | 104.7  |
| 113.4  | 135    | 115.8  | 125.5  | 110.1  | 109    | 131.3 | 150.7 | 127.5  |
| 108.4  | 115.6  | 111.2  | 116.6  | 104.2  | 112.5  | 113.9 | 133.9 | 138.6  |
| 3546.4 | 4759.6 | 3456.8 | 3660.2 | 3854.2 | 2914.2 | 4061  | 5496  | 3071.4 |
| 116.1  | 157.7  | 143.5  | 119    | 126.2  | 152.1  | 131.9 | 164.7 | 119.3  |
| 126.5  | 155.3  | 123.5  | 159.9  | 125.4  | 137    | 162   | 180.6 | 328.9  |
| 106.8  | 103.3  | 99.4   | 97     | 94.5   | 112.7  | 100.7 | 111.7 | 103.9  |
| 192    | 238.5  | 249.4  | 205.8  | 177.4  | 215.8  | 198.5 | 175.8 | 348.8  |
| 106.6  | 106.2  | 104.3  | 98.7   | 95     | 110.6  | 101.1 | 109.5 | 104.4  |
| 109.3  | 120.7  | 111.1  | 109.5  | 104.4  | 111.2  | 113   | 124.6 | 116.9  |

|        |        |        |        |        |        |        |        |        |
|--------|--------|--------|--------|--------|--------|--------|--------|--------|
| 226.1  | 271    | 252.8  | 250    | 248.3  | 245.1  | 221.4  | 419.8  | 574.8  |
| 111.1  | 114.7  | 105.1  | 104.7  | 98.1   | 108.4  | 100.9  | 104.3  | 117.9  |
| 234.4  | 332.8  | 278.5  | 564    | 266.1  | 227.1  | 454.6  | 496.2  | 439.5  |
| 99.6   | 104.9  | 103.4  | 100.3  | 91.3   | 109.5  | 96     | 110.3  | 109.8  |
| 102.9  | 120.7  | 106    | 102.2  | 105.2  | 111.9  | 108.4  | 125    | 115.9  |
| 125.5  | 142.3  | 118.3  | 102.7  | 101.5  | 123.8  | 116.5  | 116.9  | 122.8  |
| 122.1  | 135.4  | 114.4  | 112.2  | 98     | 106    | 116.1  | 121.7  | 107.2  |
| 106.4  | 119.1  | 106.9  | 106.5  | 99.1   | 108.9  | 96.3   | 107.4  | 106.4  |
| 110.7  | 110    | 100.1  | 96.1   | 86.9   | 101.5  | 99.8   | 108.2  | 111.2  |
| 110.5  | 105.2  | 104.9  | 97.1   | 101.3  | 107.5  | 104.3  | 116.3  | 99.7   |
| 130.9  | 126.8  | 110    | 114.2  | 109    | 122.6  | 127.2  | 140    | 151.4  |
| 154.7  | 153.7  | 141.8  | 140    | 166.2  | 164.1  | 165.4  | 245.4  | 212.8  |
| 206.5  | 180.4  | 170.8  | 159.2  | 176.1  | 155.7  | 173.8  | 225.6  | 215.1  |
| 151.8  | 137    | 123.6  | 118.1  | 116.1  | 181    | 118.9  | 291.3  | 367.4  |
| 117.7  | 131.4  | 111.8  | 123.7  | 109.1  | 121.6  | 115    | 135.4  | 128    |
| 208.2  | 282.1  | 225.9  | 242.2  | 237.3  | 305.1  | 238.3  | 528.4  | 388.4  |
| 667.9  | 547.5  | 405.4  | 489.9  | 464.2  | 650    | 466.6  | 1521.3 | 1139.9 |
| 130.6  | 162.3  | 151.9  | 119.7  | 106.9  | 149.7  | 120.6  | 165.6  | 133.8  |
| 364.6  | 344.3  | 359    | 338.3  | 407.2  | 451.3  | 446.1  | 552.5  | 388.4  |
| 1743.9 | 1873.7 | 1625.3 | 1652.8 | 1465.2 | 2127.5 | 1593.8 | 3085.7 | 2304.4 |
| 100    | 101.8  | 107.3  | 96.9   | 99.2   | 109.2  | 100.9  | 106.7  | 108.9  |
| 362.3  | 211.7  | 200    | 242.6  | 211.9  | 214.7  | 266.2  | 314.4  | 284.1  |
| 97.5   | 107.1  | 99     | 95.3   | 84.8   | 109.2  | 105.3  | 108.5  | 104.6  |
| 267.2  | 172.6  | 170.6  | 179.6  | 170.7  | 195.4  | 218.5  | 283    | 216.7  |
| 108.6  | 107.4  | 105.7  | 107.1  | 107.5  | 115.3  | 103.8  | 118.7  | 112.9  |
| 118.3  | 138.9  | 122.8  | 118.7  | 109.8  | 121.4  | 123.1  | 154.8  | 149.9  |
| 110.3  | 108.6  | 104.9  | 98.6   | 95.6   | 106.6  | 105    | 117.8  | 128    |
| 103.7  | 115.2  | 108.7  | 101.6  | 100.9  | 108.8  | 113.1  | 109.3  | 112.3  |
| 112.3  | 108.6  | 112.4  | 94.9   | 96.6   | 111    | 102.4  | 106.3  | 106.1  |
| 107    | 110    | 115    | 101.4  | 93.3   | 105.8  | 100.2  | 110.2  | 105.6  |
| 420    | 607.6  | 600.8  | 415    | 593.9  | 607.3  | 593.4  | 956.4  | 621.8  |
| 108.6  | 107.3  | 97.6   | 97.6   | 91.9   | 104.3  | 96.9   | 107.9  | 101.5  |
| 107.6  | 116.9  | 104.9  | 91.9   | 101.9  | 100.1  | 93.1   | 110.1  | 104.6  |
| 108.4  | 108.1  | 102.2  | 90.7   | 90.4   | 103.7  | 108.7  | 102.3  | 105.4  |
| 105.2  | 111    | 101.4  | 93.6   | 99.7   | 103.3  | 99.8   | 109    | 107.7  |
| 103.3  | 115.7  | 110.5  | 103.9  | 97.7   | 115.9  | 92.5   | 113.8  | 111.3  |
| 107.1  | 112.8  | 105    | 111.9  | 100.9  | 108.3  | 95.2   | 105.6  | 100.7  |
| 111.7  | 98.8   | 98.4   | 97.8   | 92.5   | 106.5  | 106.3  | 109.6  | 109.9  |
| 113.5  | 114.8  | 107.3  | 106.6  | 103.9  | 114.7  | 122.1  | 122.3  | 116.7  |
| 97.2   | 105.7  | 104.4  | 92.5   | 90.4   | 105.4  | 101.8  | 109.3  | 97.9   |
| 100.2  | 103.1  | 96.3   | 98.5   | 87.7   | 110.7  | 99.8   | 105.4  | 108.6  |
| 107.9  | 109.4  | 102.5  | 106.5  | 96.7   | 114.3  | 103.1  | 106.3  | 108.1  |
| 115    | 107.4  | 109.1  | 110.5  | 109    | 110.1  | 101.8  | 115.4  | 115.4  |
| 106.1  | 104.6  | 105.5  | 104    | 102.1  | 105.8  | 110.3  | 124.2  | 110.4  |
| 103.9  | 113.1  | 99.2   | 93.5   | 92     | 106.8  | 102.1  | 110.1  | 114.2  |
| 108.6  | 109.5  | 98     | 96.3   | 102    | 108.6  | 100.9  | 102.5  | 99.4   |
| 105.9  | 103    | 102.9  | 99.4   | 87.2   | 104.2  | 100.1  | 102.8  | 102.5  |
| 111.1  | 109    | 107.4  | 105.5  | 103.2  | 117.8  | 106.1  | 109.5  | 119.5  |
| 104.2  | 132    | 127.7  | 106.5  | 109.7  | 130.6  | 104.9  | 113.5  | 111    |
| 106.3  | 107.8  | 103.2  | 97     | 95     | 102.3  | 102    | 114.2  | 109.8  |
| 102.4  | 107.6  | 104.3  | 99.6   | 94     | 115.3  | 108.4  | 110.1  | 99.8   |

|       |       |       |       |       |       |       |       |       |
|-------|-------|-------|-------|-------|-------|-------|-------|-------|
| 106.3 | 111.7 | 107.3 | 110.9 | 95.6  | 113.9 | 106.1 | 121.3 | 113.6 |
| 102.2 | 112.3 | 107.5 | 105.8 | 104.3 | 110.5 | 105.4 | 103.5 | 114   |
| 106.7 | 117   | 99.9  | 100.9 | 94.4  | 113.7 | 103.7 | 109.9 | 112.5 |
| 97.4  | 102.7 | 100.3 | 89.6  | 88.4  | 103.1 | 102.7 | 97.5  | 100.2 |
| 107.3 | 108.7 | 101.1 | 100.8 | 98.7  | 109.2 | 101.6 | 102   | 107   |
| 105.5 | 104.9 | 110.3 | 100   | 90.2  | 108.3 | 103.3 | 104.4 | 114.6 |
| 107   | 102.8 | 100.8 | 99.8  | 101.5 | 102.7 | 107.4 | 109.7 | 112.5 |
| 100.3 | 104.1 | 109.6 | 97.3  | 100.6 | 105.8 | 100.1 | 107.4 | 104.3 |
| 105.1 | 109.9 | 105   | 112.9 | 92.2  | 117.3 | 100.2 | 106   | 110.1 |
| 108.9 | 103.3 | 105.4 | 98.7  | 92.7  | 105.8 | 96    | 105.6 | 107.4 |
| 106.8 | 106.2 | 117.7 | 101.7 | 98.1  | 109.6 | 108   | 103.7 | 113.6 |
| 116   | 118.3 | 104.5 | 109.8 | 99.4  | 105.3 | 104.5 | 104.4 | 106.3 |
| 107.5 | 111.4 | 106.2 | 119   | 95.8  | 114.9 | 123.1 | 110.1 | 105.2 |
| 116.8 | 118.2 | 117   | 105.4 | 100.2 | 121   | 114.1 | 132.1 | 126.4 |
| 109.2 | 114   | 103.7 | 99.9  | 104.6 | 115   | 96.7  | 98.9  | 108.8 |
| 119.3 | 114.4 | 106.5 | 105.7 | 93.6  | 110.2 | 111.7 | 126.5 | 125.5 |
| 101   | 101.3 | 104.8 | 112.4 | 99.6  | 109.2 | 102.6 | 110.5 | 113.3 |
| 100.4 | 102.8 | 95.4  | 100.4 | 96.4  | 105.7 | 98.8  | 108.3 | 103.7 |
| 117.6 | 109.9 | 108.3 | 110.5 | 99.4  | 114.2 | 115.2 | 118.9 | 118.4 |
| 95.7  | 101.6 | 104.2 | 92.7  | 92.7  | 103   | 99.2  | 104.4 | 113.4 |
| 96.7  | 113   | 108.5 | 96.6  | 97.5  | 108.4 | 102.1 | 111.4 | 113.5 |
| 113.5 | 106.4 | 95.2  | 107   | 98.2  | 119.4 | 104.1 | 113.8 | 101.4 |
| 112.7 | 117.4 | 114.9 | 114.8 | 104.2 | 111   | 106.5 | 106.3 | 112.9 |
| 99.4  | 105   | 100.4 | 99.7  | 96.8  | 105.3 | 105.1 | 103.8 | 100.2 |
| 109.6 | 97.9  | 102   | 99.4  | 93.9  | 106.7 | 100.3 | 106   | 107.7 |
| 116.9 | 117.7 | 103.2 | 99.7  | 92.8  | 115.4 | 109.4 | 122.1 | 121.5 |
| 106.5 | 104   | 99.1  | 98.5  | 97.9  | 105.7 | 101.6 | 104   | 105.6 |
| 107   | 104.6 | 107.2 | 100   | 97.9  | 106   | 107.2 | 111.4 | 105.8 |
| 108.1 | 108.3 | 101.6 | 96.9  | 97.3  | 110   | 112.1 | 114.8 | 109.5 |
| 109.2 | 107.2 | 100.6 | 98.5  | 92.5  | 104   | 99.5  | 112.8 | 114.5 |
| 109   | 112.2 | 103.9 | 111.5 | 98.9  | 105   | 100.2 | 111.5 | 106.8 |
| 116.5 | 106.8 | 111   | 102.9 | 97.4  | 116.1 | 111.9 | 115.2 | 101.8 |
| 110.2 | 103.7 | 97    | 103.8 | 94    | 106.2 | 108.9 | 112.8 | 111.2 |
| 103.5 | 105.8 | 108.3 | 104.5 | 90.2  | 110.6 | 104.9 | 105   | 108.4 |
| 114.2 | 109.7 | 105.3 | 93.2  | 95.2  | 110.7 | 100.7 | 105.5 | 107.8 |
| 108.3 | 103.8 | 102.2 | 104.8 | 97.2  | 105.5 | 105.5 | 108.6 | 106.9 |
| 108.1 | 110.8 | 108.6 | 108.1 | 97.4  | 108.2 | 108.6 | 125.6 | 110.5 |
| 108.7 | 113.8 | 111.2 | 95.7  | 101.8 | 101.1 | 108.4 | 121.3 | 106.9 |
| 121   | 117.3 | 98.1  | 111.4 | 91.2  | 110.3 | 106.8 | 104.7 | 107.7 |
| 107.7 | 115.2 | 100.3 | 98.4  | 95.2  | 100.3 | 104.9 | 104.2 | 111   |
| 102.1 | 107.8 | 100.7 | 94.1  | 92.2  | 108.7 | 97.5  | 104.5 | 103.3 |
| 106.4 | 108.5 | 99.4  | 99.1  | 93    | 108.1 | 101.7 | 108.1 | 112.3 |
| 105.3 | 106.4 | 108.6 | 105   | 94.4  | 105.4 | 116.8 | 124   | 99.8  |
| 107.4 | 105.5 | 110.3 | 118.6 | 98.8  | 114.4 | 105.6 | 114.8 | 101.3 |
| 112.3 | 112.3 | 116.1 | 106.8 | 104.3 | 127.2 | 112.8 | 122.8 | 119   |
| 112.4 | 116.3 | 109.6 | 108.4 | 96.2  | 109.2 | 99.5  | 119.6 | 111   |
| 106.9 | 105.1 | 92.2  | 97.9  | 92.5  | 110.5 | 95.4  | 113.4 | 110.9 |
| 114.6 | 111.9 | 117   | 116.4 | 111.6 | 119.7 | 110.9 | 113.5 | 127   |
| 111   | 106.7 | 107   | 102.5 | 99.9  | 116.5 | 103.6 | 107.2 | 110.7 |
| 113.3 | 112.1 | 104.5 | 96.3  | 89.1  | 103.7 | 108.3 | 105.7 | 102.9 |
| 111.7 | 105.5 | 110.1 | 99.7  | 94.4  | 108.5 | 107.8 | 106.8 | 106.8 |

|        |        |        |        |        |        |        |        |        |
|--------|--------|--------|--------|--------|--------|--------|--------|--------|
| 107    | 110.6  | 106.1  | 100.9  | 102.5  | 107.9  | 107.4  | 105.4  | 116    |
| 117.1  | 115    | 110.8  | 119.3  | 109.3  | 121    | 107.7  | 118.7  | 122.7  |
| 111.7  | 110    | 102.8  | 97.9   | 92.4   | 110    | 98     | 113.1  | 116.6  |
| 105.8  | 107.3  | 99.1   | 94.1   | 92.4   | 106.7  | 95.9   | 96     | 100.2  |
| 101.6  | 111.4  | 101.3  | 97     | 92.2   | 108.2  | 102.6  | 110.3  | 105.6  |
| 112.9  | 101.6  | 103.9  | 101.8  | 97.4   | 110.2  | 96.2   | 106.1  | 103.9  |
| 109    | 110.1  | 107.4  | 111.7  | 94.1   | 115.7  | 105.8  | 111.3  | 111    |
| 113.5  | 106.8  | 106.9  | 106.8  | 95.2   | 106.3  | 107.9  | 102.5  | 105.3  |
| 105.6  | 104.1  | 101.1  | 92.6   | 90.7   | 94.6   | 97.9   | 113.8  | 99.9   |
| 107.7  | 105.5  | 104.9  | 107.9  | 102.6  | 108    | 101.6  | 99.3   | 111.5  |
| 98.5   | 104.1  | 103.9  | 98.5   | 91.2   | 103.8  | 104.7  | 109    | 106.5  |
| 106.4  | 109.2  | 105.9  | 106.8  | 96.7   | 112    | 102.4  | 110.7  | 108    |
| 116.3  | 107.9  | 100.7  | 96.3   | 97.4   | 110.4  | 102.3  | 107.7  | 112.4  |
| 106.7  | 105.9  | 100.1  | 100.5  | 99.1   | 105.5  | 100.9  | 110.4  | 105.9  |
| 110.5  | 106    | 107    | 109    | 103.8  | 113.2  | 93.2   | 107.3  | 110.6  |
| 112    | 105.4  | 97.2   | 97.7   | 97.2   | 109.3  | 107.3  | 106.6  | 102.4  |
| 110.1  | 114.9  | 103.3  | 101.6  | 102.3  | 110.7  | 98.4   | 109.8  | 109.9  |
| 115.1  | 108    | 100.6  | 97.2   | 95.4   | 108.4  | 107.5  | 109.8  | 104.7  |
| 105.1  | 101.2  | 102    | 100.9  | 94.1   | 104.1  | 104    | 107.2  | 103.2  |
| 108.9  | 106.5  | 96.5   | 89.4   | 98.1   | 92.2   | 98.1   | 102.9  | 104.7  |
| 107.6  | 101.2  | 98.8   | 100.8  | 97.7   | 111.5  | 104.7  | 109.1  | 109.7  |
| 104    | 104.4  | 100.6  | 108.4  | 99.7   | 110.4  | 94.2   | 113.6  | 111.1  |
| 101.9  | 113.1  | 102.5  | 106.2  | 100.6  | 114.8  | 105.6  | 108.3  | 106.7  |
| 99.9   | 105.3  | 108.9  | 96.6   | 96.6   | 105.2  | 107.4  | 108    | 108.2  |
| 107.7  | 107    | 104.6  | 101.9  | 95.5   | 108.8  | 108.2  | 113    | 115.8  |
| 108.6  | 104    | 99.9   | 106.5  | 96.1   | 106.8  | 94.2   | 103.9  | 107.4  |
| 105.4  | 108.1  | 100.5  | 101.5  | 92.7   | 109.2  | 103.1  | 105.5  | 111.1  |
| 104.1  | 101.9  | 103.1  | 115.3  | 93.7   | 107.8  | 96     | 96.2   | 107    |
| 114    | 114    | 109.8  | 108.8  | 96.6   | 105.1  | 109.2  | 110.4  | 108.6  |
| 962.5  | 1392   | 1321.5 | 1228.3 | 895.1  | 1192.5 | 1426.5 | 1748.7 | 1136.6 |
| 111.8  | 116.1  | 107.3  | 110.6  | 104    | 124.2  | 115.2  | 124.4  | 116.6  |
| 110.7  | 109.1  | 108    | 116.9  | 102.6  | 109.5  | 99.7   | 104.4  | 106.4  |
| 105.7  | 104.6  | 96.8   | 105.2  | 99.6   | 110.4  | 107.2  | 105.9  | 105.1  |
| 108.6  | 103    | 100.4  | 97.8   | 96.1   | 109.8  | 105.7  | 112.6  | 108.2  |
| 107    | 109    | 107.5  | 98.9   | 90.6   | 109.2  | 105.6  | 97.1   | 103.4  |
| 113.2  | 109.9  | 109.2  | 111.4  | 93.3   | 113    | 107.2  | 107.3  | 112.2  |
| 109.3  | 108.1  | 106.5  | 115.4  | 97.9   | 107.6  | 109.8  | 121.4  | 102.4  |
| 101.7  | 101.8  | 106.4  | 102.9  | 91.7   | 106.6  | 102.3  | 104.6  | 107.8  |
| 108.1  | 108.1  | 105.9  | 106.1  | 103.4  | 116.7  | 107    | 118.4  | 111.3  |
| 109.7  | 106.8  | 103.2  | 105.6  | 99.1   | 112.7  | 104.6  | 115.9  | 110.4  |
| 111.5  | 114.1  | 113.2  | 103    | 102.6  | 116.9  | 114.2  | 113.8  | 114.6  |
| 102.3  | 102.1  | 103.4  | 92.5   | 97.5   | 103.9  | 99.2   | 113.6  | 115.5  |
| 109.9  | 103.5  | 101.3  | 99.6   | 94.8   | 105.1  | 100.8  | 107.1  | 109.8  |
| 1235.5 | 1334.1 | 930.6  | 1644.6 | 1370.3 | 1053.8 | 1492.3 | 1916.2 | 1957.1 |
| 114.2  | 119.1  | 116.1  | 108.6  | 99.1   | 117.9  | 109.9  | 117.8  | 117.1  |
| 102.6  | 105.1  | 101.1  | 98.8   | 99.1   | 108.1  | 104.1  | 109.2  | 104.8  |
| 132.2  | 176.7  | 163.6  | 139.7  | 139.3  | 198.7  | 137.4  | 232.9  | 157.9  |
| 265.3  | 291    | 241.2  | 250.7  | 196.4  | 229.8  | 194.7  | 520    | 486.6  |
| 231.1  | 150.2  | 154.3  | 130.9  | 159    | 176.2  | 130.3  | 224.6  | 201.3  |
| 194.1  | 278.2  | 241.7  | 229.3  | 231.9  | 273.9  | 221.7  | 470.5  | 212.1  |
| 119.6  | 117.9  | 108.7  | 118.5  | 113.8  | 119.7  | 115.1  | 178.3  | 126.2  |

|         |         |         |         |         |         |         |         |         |
|---------|---------|---------|---------|---------|---------|---------|---------|---------|
| 114.5   | 123.4   | 125.7   | 108.7   | 106.2   | 118.8   | 108.1   | 134.3   | 126.2   |
| 1066    | 1621.3  | 1668.4  | 631.7   | 1838.6  | 1152.1  | 1072.2  | 2651.7  | 651.7   |
| 455.5   | 842.3   | 713.8   | 236.9   | 777.8   | 739.8   | 536.8   | 1361.9  | 332.8   |
| 112.3   | 111.3   | 112.7   | 110.8   | 105.2   | 115.6   | 111.4   | 110.5   | 120     |
| 120     | 125.5   | 113.7   | 125     | 105.6   | 131.4   | 113.4   | 136.4   | 130.4   |
| 108.5   | 103.6   | 108.6   | 101.1   | 94.7    | 108.1   | 106     | 118.2   | 101.3   |
| 111.8   | 103.3   | 97.7    | 97.3    | 94.7    | 105.2   | 97.4    | 103.4   | 111.2   |
| 105.4   | 108.8   | 95.4    | 99.9    | 96.8    | 113.5   | 104.9   | 110.2   | 114.2   |
| 109     | 114.2   | 110.4   | 116.8   | 100.7   | 110.8   | 109.7   | 126.7   | 112.9   |
| 108.7   | 105.6   | 112.4   | 101.1   | 98      | 109.2   | 95.5    | 106.7   | 114.9   |
| 277.7   | 410     | 367     | 341.7   | 351.4   | 405     | 449.8   | 449.1   | 290.3   |
| 206.8   | 197     | 156.2   | 187.8   | 141.3   | 178.7   | 178.3   | 165.9   | 200.5   |
| 109.9   | 117.6   | 105.7   | 104.6   | 98.1    | 116.6   | 107.6   | 103.3   | 110.1   |
| 103.7   | 107     | 98      | 93.6    | 90.3    | 107.3   | 96.2    | 102.9   | 111.2   |
| 101.5   | 120.5   | 102.5   | 95.4    | 93.9    | 102.7   | 94.4    | 105.6   | 116.1   |
| 123.2   | 112.7   | 97.4    | 101.5   | 93.9    | 119     | 105.9   | 99.3    | 113.6   |
| 102.6   | 112.8   | 103.3   | 92.1    | 93.7    | 115.1   | 99.6    | 95.2    | 101.5   |
| 144.6   | 183.9   | 137.4   | 169.3   | 130.7   | 148.9   | 150.9   | 203     | 161.9   |
| 700.9   | 990.3   | 484.6   | 719.6   | 586.7   | 492.8   | 751.6   | 801.4   | 517.6   |
| 130.7   | 159.2   | 132.3   | 141.8   | 138.5   | 129     | 140.1   | 182.1   | 156.9   |
| 135.6   | 186     | 181.1   | 170.9   | 161.9   | 186.7   | 148.3   | 209.8   | 175     |
| 103.7   | 115.3   | 110     | 109.2   | 100.7   | 120.8   | 121.7   | 106.7   | 100.4   |
| 95.9    | 108.6   | 98.7    | 106.2   | 101.4   | 108.6   | 95.7    | 102.4   | 105.6   |
| 124.6   | 300.7   | 204.6   | 179     | 222.9   | 163.5   | 156.5   | 296.2   | 175.8   |
| 110.8   | 139.9   | 117.5   | 147.5   | 116.5   | 121.1   | 143.7   | 121.6   | 121.2   |
| 15788.3 | 15876.2 | 17342.4 | 14108.7 | 14163.7 | 13665.8 | 16082.5 | 27508.1 | 29534.7 |
| 110.3   | 123.3   | 114.6   | 124.7   | 105     | 121.1   | 114.6   | 122.4   | 114.1   |
| 117.2   | 133.5   | 117     | 154.9   | 101.6   | 123.4   | 116.7   | 144.5   | 110.9   |
| 95.8    | 110.3   | 99.9    | 102.8   | 92.7    | 104.7   | 100.3   | 109.3   | 111.2   |
| 106.7   | 103.4   | 99.3    | 95.4    | 98.5    | 107.5   | 103     | 111.6   | 104.6   |
| 107.1   | 103.2   | 102.9   | 97.7    | 88.5    | 98.9    | 98.3    | 107.9   | 109.9   |
| 109.6   | 108     | 112.6   | 94.2    | 95.1    | 101.4   | 109.5   | 114.7   | 114.1   |
| 101.2   | 117.5   | 99.3    | 100     | 97.3    | 104.8   | 100.2   | 116.3   | 112.4   |
| 111.3   | 105     | 98.3    | 93.2    | 94.9    | 106.3   | 96.5    | 111.7   | 108.6   |
| 103.3   | 106.1   | 102.9   | 101.8   | 98.3    | 108.7   | 103.2   | 105.3   | 108     |
| 107     | 113.8   | 100.5   | 100.8   | 102.2   | 113     | 108.8   | 109.5   | 121.3   |
| 104.7   | 112.5   | 104     | 90.8    | 93.8    | 104.8   | 101.8   | 108.6   | 104.4   |
| 109.1   | 102.9   | 106.3   | 105.1   | 94.3    | 103.6   | 103.3   | 110.9   | 118.1   |
| 144.5   | 168.1   | 137.2   | 137     | 128.9   | 154.8   | 141     | 179.8   | 154.1   |
| 103.9   | 102.6   | 98.4    | 98.5    | 91.5    | 105.5   | 106.3   | 105.5   | 101.7   |
| 97.8    | 99.9    | 101.5   | 103.3   | 101.7   | 113.3   | 106.6   | 119.2   | 101.1   |
| 118.1   | 109.4   | 110.4   | 111.4   | 106.7   | 110.8   | 107.7   | 117.6   | 109.2   |
| 111     | 107.9   | 110.5   | 102.6   | 100.6   | 109.6   | 108.9   | 112.5   | 105.5   |
| 108.8   | 109.8   | 98.9    | 106.8   | 92.4    | 106.4   | 104.2   | 104.5   | 110.8   |
| 119.7   | 102.8   | 106.3   | 106     | 99.2    | 121.4   | 102.9   | 118.3   | 108.3   |
| 144.7   | 136.6   | 113.2   | 120     | 126.7   | 135.9   | 127.6   | 144     | 116.9   |
| 108.6   | 104.4   | 99.8    | 112.7   | 98.3    | 112     | 114.2   | 114.5   | 114.2   |
| 99.7    | 107.2   | 105.4   | 98.4    | 94.7    | 105.5   | 100.2   | 106     | 101.6   |
| 101.9   | 109.5   | 100.8   | 102.6   | 92.4    | 103.8   | 101.6   | 112.8   | 106.6   |
| 116.1   | 119.2   | 107.4   | 104.2   | 100.9   | 110.6   | 111.8   | 116.8   | 105     |
| 1081.4  | 1364.2  | 1557.9  | 1153.2  | 1301.2  | 1965    | 1654.9  | 2799.8  | 2059    |

|        |        |        |        |        |        |        |        |        |
|--------|--------|--------|--------|--------|--------|--------|--------|--------|
| 830.3  | 756.8  | 595.2  | 886.6  | 617.6  | 679.3  | 811.1  | 1170.1 | 1215.2 |
| 177.6  | 290.5  | 207.7  | 352.5  | 263.9  | 233.3  | 281.1  | 401.7  | 227.9  |
| 229.7  | 423    | 230.6  | 532.8  | 260.3  | 307.8  | 336    | 619.3  | 252.7  |
| 132.2  | 147.7  | 126.5  | 133.3  | 118.9  | 132.1  | 161.7  | 120.7  | 121.5  |
| 183.8  | 260.4  | 257.4  | 287.1  | 215.9  | 249.4  | 248.3  | 330    | 256.4  |
| 123.4  | 148.1  | 136.2  | 122.5  | 116.2  | 128.9  | 122.2  | 139.3  | 141.4  |
| 100.5  | 104.3  | 102.1  | 102.9  | 96.6   | 109.2  | 104.2  | 101.8  | 98.8   |
| 394.9  | 374.5  | 192.1  | 495.9  | 300.8  | 187.4  | 365.5  | 330.7  | 230.1  |
| 141.3  | 134.3  | 137.3  | 163    | 144    | 140.2  | 135.8  | 169.2  | 128.6  |
| 155.1  | 151    | 140.3  | 119.2  | 138.4  | 166.2  | 159    | 266.9  | 242.7  |
| 1486.3 | 1141.3 | 1431.5 | 1622.3 | 1273.7 | 1073.9 | 1696.6 | 1592.8 | 834.9  |
| 136.7  | 153.4  | 134.1  | 143.3  | 122.2  | 130    | 147.6  | 123.9  | 114.8  |
| 102.2  | 103.3  | 92.8   | 93.5   | 90.3   | 116.8  | 97.4   | 101.7  | 102.4  |
| 115.1  | 118.3  | 109.5  | 110    | 88.3   | 106.9  | 115.6  | 114.5  | 117    |
| 100.3  | 111    | 103.5  | 101    | 96.4   | 111    | 103    | 109.5  | 108.3  |
| 160.1  | 223    | 196.6  | 164.4  | 207    | 230.8  | 228.5  | 366.1  | 255.3  |
| 117.8  | 120.6  | 107    | 112.1  | 94.1   | 128.1  | 114    | 137.8  | 148.5  |
| 120.5  | 114.2  | 110.7  | 102.5  | 106.9  | 118.5  | 115.9  | 130.3  | 119.2  |
| 114.2  | 113.2  | 109    | 108.5  | 108.8  | 122.8  | 108.6  | 125.5  | 124.9  |
| 299.9  | 193.8  | 156.8  | 219.1  | 189.6  | 246.1  | 199.5  | 439.6  | 492.5  |
| 116.6  | 129.9  | 118.7  | 118.7  | 113.1  | 116.8  | 118.7  | 130.8  | 141.3  |
| 167.3  | 209.2  | 188    | 243.2  | 171.3  | 249.8  | 218.7  | 445.6  | 360.3  |
| 357.3  | 446.2  | 382.7  | 367.4  | 401.4  | 446.5  | 399.9  | 593.2  | 449.4  |
| 104.4  | 104.5  | 102.7  | 96.6   | 94.1   | 105.2  | 99.7   | 107    | 111.5  |
| 105.3  | 101.8  | 101.5  | 101.9  | 96.9   | 108.2  | 96.1   | 112.4  | 102.3  |
| 411.7  | 672.6  | 589.7  | 494.7  | 550.7  | 589.6  | 505.3  | 798    | 554.7  |
| 185.2  | 274    | 280.7  | 184.2  | 194    | 317.1  | 243.3  | 413.3  | 274.2  |
| 133.8  | 122.8  | 123    | 129.8  | 130.8  | 136.3  | 135.8  | 140.1  | 141.2  |
| 125.8  | 142.9  | 131.3  | 145.4  | 114.3  | 153    | 128.2  | 154.8  | 134.7  |
| 1819.6 | 2917.8 | 2505.6 | 2231.4 | 2576.5 | 2517.7 | 2892.7 | 4025   | 2431.7 |
| 108    | 109.7  | 102.9  | 108.3  | 96.3   | 118.7  | 95.6   | 112.5  | 110.1  |
| 108.4  | 107.5  | 100.5  | 106.4  | 98.9   | 110.3  | 111.2  | 109.1  | 113.2  |
| 109.8  | 109.2  | 100.7  | 101.1  | 103.3  | 103.5  | 98     | 99.5   | 101.3  |
| 191.2  | 198    | 203.8  | 214.9  | 209.2  | 263.4  | 260.7  | 427.7  | 270.5  |
| 269    | 254.8  | 307.9  | 275    | 258.2  | 340.2  | 409.3  | 570.8  | 391.3  |
| 102.4  | 102.8  | 98.6   | 101.1  | 92     | 111.1  | 108.8  | 108.4  | 107    |
| 119    | 130.9  | 115.3  | 110.5  | 108.5  | 126.4  | 105    | 129.8  | 117.8  |
| 196.6  | 177    | 197    | 153.9  | 146.3  | 182.8  | 196.6  | 272.6  | 269.1  |
| 456.5  | 478.1  | 415    | 441.5  | 389.8  | 488    | 413.6  | 585.7  | 461.9  |
| 423.5  | 856.9  | 841.5  | 649.8  | 554.4  | 751.1  | 617.2  | 871.7  | 465    |
| 292.8  | 510.2  | 528.1  | 343.7  | 431.2  | 486.9  | 402.4  | 538.2  | 294.9  |
| 110    | 91.4   | 104.2  | 97.1   | 86.8   | 97.4   | 99.9   | 100    | 97.8   |
| 103.7  | 117.6  | 106.2  | 109.8  | 101.6  | 120.3  | 106    | 116.8  | 119    |
| 279.5  | 266.8  | 298.4  | 290.5  | 234.5  | 285.5  | 262.1  | 579.9  | 357.2  |
| 109.9  | 113.4  | 104.5  | 100.6  | 102.2  | 115.7  | 103    | 117.1  | 118.1  |
| 114.3  | 115.1  | 100.4  | 114.1  | 97.3   | 104.7  | 104    | 117.2  | 131.5  |
| 207.4  | 197.6  | 159.9  | 286.2  | 155.1  | 146.8  | 320.4  | 167.9  | 180.9  |
| 201.7  | 184.4  | 133.1  | 249.6  | 142.4  | 134.1  | 292.9  | 158    | 172    |
| 114.1  | 111.8  | 102.8  | 122.8  | 100.1  | 107.1  | 101.2  | 108    | 103.6  |
| 113.3  | 119.9  | 112.8  | 114.3  | 105.7  | 111.3  | 111.7  | 118.5  | 106.1  |
| 130.1  | 130.9  | 111.4  | 115.6  | 115.8  | 119.7  | 106.4  | 128.2  | 122.7  |

|        |       |        |        |        |        |        |        |        |
|--------|-------|--------|--------|--------|--------|--------|--------|--------|
| 298.1  | 314.9 | 301.9  | 234.1  | 264.8  | 341.5  | 288.3  | 418.8  | 447.2  |
| 114.1  | 108.5 | 101.7  | 95.4   | 93.6   | 106.6  | 99.7   | 119.6  | 111.1  |
| 107.7  | 130.3 | 113    | 112.2  | 107    | 118.2  | 103.7  | 156.7  | 156.8  |
| 228.4  | 890.3 | 788.9  | 844.4  | 558.4  | 711.9  | 586.9  | 737.3  | 522    |
| 113.1  | 107.5 | 109.6  | 103.9  | 101.5  | 122    | 105.4  | 112.6  | 117.2  |
| 156.9  | 133.9 | 127.2  | 117.6  | 114.9  | 136.5  | 109    | 173.3  | 173.3  |
| 350.8  | 225.8 | 237    | 202.9  | 236.5  | 315.2  | 215.2  | 530.8  | 541.5  |
| 108.3  | 104.9 | 106.6  | 90.5   | 98     | 100.7  | 103.7  | 129    | 132.9  |
| 108.5  | 108.6 | 101.2  | 100.2  | 95.6   | 108.7  | 99.2   | 107.1  | 115.4  |
| 108.5  | 112.6 | 106.1  | 104.2  | 93.8   | 104.2  | 106.4  | 110.7  | 114.7  |
| 112.5  | 108.3 | 106.1  | 104.5  | 94.9   | 104.8  | 106.8  | 109.5  | 108.4  |
| 116.9  | 126.3 | 113.9  | 102.3  | 103.4  | 114.6  | 112.9  | 120.6  | 115.1  |
| 107    | 113.8 | 108.5  | 117.3  | 107.8  | 113.7  | 105.2  | 111.3  | 112.9  |
| 104.2  | 108.2 | 99.9   | 105.6  | 99     | 104.9  | 103.5  | 115.1  | 109.1  |
| 109.3  | 117   | 107.5  | 107.1  | 95.4   | 114.2  | 101.3  | 115.1  | 105.2  |
| 105.3  | 116.4 | 101.5  | 99.5   | 93.3   | 113.4  | 98     | 106.9  | 107.4  |
| 105.2  | 113.5 | 98.7   | 111.5  | 98.3   | 117.4  | 111.1  | 103.6  | 107.3  |
| 106.7  | 107.4 | 100.8  | 99.3   | 91.2   | 101.1  | 98     | 104.5  | 125.3  |
| 108.9  | 112.5 | 112.2  | 105.5  | 98.9   | 113.1  | 102.8  | 106.3  | 109.1  |
| 103.1  | 112.2 | 98.3   | 98     | 97.9   | 100.2  | 99.5   | 109.4  | 102    |
| 106.9  | 112.6 | 109.3  | 114.5  | 100.4  | 117.4  | 97.2   | 122    | 104.2  |
| 111.4  | 108.6 | 95.7   | 100.9  | 98.1   | 105    | 101.4  | 113.4  | 110.6  |
| 105.5  | 105.5 | 101.4  | 101.4  | 91.4   | 97     | 99.8   | 107.1  | 104.1  |
| 109.7  | 111.1 | 102.1  | 108.1  | 95.1   | 114.8  | 109.8  | 109    | 103.1  |
| 103.9  | 109.5 | 97.9   | 108.4  | 92.3   | 108.4  | 102    | 108    | 117.2  |
| 100.9  | 101.8 | 104.5  | 97.4   | 100.2  | 105.6  | 101.8  | 99.5   | 97.1   |
| 107.1  | 105.1 | 102.9  | 99.1   | 96.5   | 112.7  | 101.7  | 107.5  | 111.8  |
| 102.9  | 108.8 | 101.3  | 103.5  | 95.5   | 100.8  | 106.8  | 101.5  | 115.2  |
| 107.3  | 109.4 | 99.9   | 101.8  | 102.2  | 110.3  | 111    | 126.1  | 101.3  |
| 142.1  | 166.1 | 204.8  | 181    | 160.1  | 193.4  | 170.1  | 268.7  | 178.7  |
| 130.9  | 226.6 | 219.2  | 154.7  | 148.7  | 217.6  | 137.9  | 273.9  | 203.6  |
| 112.1  | 164.9 | 150.5  | 97.8   | 123.9  | 178.9  | 106.2  | 221.1  | 120.3  |
| 227.1  | 508.8 | 431.4  | 412    | 399.3  | 404.3  | 452    | 543.7  | 310.6  |
| 163.7  | 321.3 | 309.3  | 301.2  | 286.4  | 300.4  | 311.5  | 322.9  | 221    |
| 145.4  | 273.1 | 217.9  | 221    | 210.9  | 227.6  | 242.1  | 267.8  | 155.5  |
| 153.5  | 329.8 | 317.8  | 188.7  | 262.2  | 253.2  | 223.6  | 308    | 199.8  |
| 112.2  | 115   | 101.5  | 103.1  | 95.4   | 106.6  | 100.2  | 101.4  | 117.9  |
| 102.3  | 118.5 | 106.9  | 106.7  | 95.3   | 109.2  | 104.5  | 118.8  | 117.6  |
| 95.6   | 101.2 | 99.9   | 99.9   | 90.9   | 102.3  | 96.1   | 109.2  | 103.4  |
| 121.3  | 116.2 | 140.6  | 111.8  | 101.3  | 148.7  | 126.6  | 121.3  | 135.3  |
| 104.8  | 107.8 | 107.3  | 107.5  | 89.3   | 105.7  | 101.9  | 106.4  | 108.4  |
| 103.5  | 107.4 | 100.2  | 96.1   | 99.8   | 101.1  | 98.4   | 113.9  | 104    |
| 107.7  | 108.4 | 99.8   | 98.3   | 98.3   | 111.5  | 101.2  | 112.8  | 109.4  |
| 321.6  | 281.7 | 300.8  | 224.3  | 272.9  | 303.9  | 208.5  | 463    | 334.1  |
| 108.1  | 105.4 | 94.2   | 99.1   | 92.5   | 97.5   | 87.5   | 98.9   | 98.5   |
| 3774.3 | 4669  | 3824.2 | 4755.3 | 3475.4 | 3690.2 | 4560.5 | 8402.3 | 6249.2 |
| 128.9  | 128.3 | 139.7  | 139.5  | 135.7  | 137    | 133.5  | 150    | 150.5  |
| 107.4  | 104.5 | 103.3  | 98     | 98.1   | 108    | 105.8  | 114.6  | 117.2  |
| 105.2  | 113.1 | 108.7  | 110.8  | 101.5  | 110.4  | 108.4  | 132.1  | 111.5  |
| 116.9  | 118   | 107.9  | 115    | 97.4   | 129.3  | 103.1  | 117.9  | 110.6  |
| 120.5  | 134.7 | 121.2  | 130.4  | 102.6  | 118.7  | 145.3  | 119.6  | 114.2  |

|        |        |        |        |        |        |        |        |        |
|--------|--------|--------|--------|--------|--------|--------|--------|--------|
| 117.3  | 102.8  | 109.1  | 106.7  | 103.9  | 125.8  | 111.1  | 112.6  | 114.7  |
| 101    | 104.2  | 103.3  | 105.1  | 93.3   | 107.4  | 101.4  | 100.8  | 107.6  |
| 103.3  | 108.4  | 99.1   | 98.2   | 95.6   | 108.9  | 98.2   | 104.6  | 103.6  |
| 1333.5 | 1468   | 1657.8 | 1491.7 | 1097.9 | 1607.4 | 1778   | 2076.7 | 1551.9 |
| 114.6  | 115.6  | 104.8  | 114.5  | 100.2  | 118.5  | 114.8  | 122.1  | 117.3  |
| 121.5  | 103.7  | 99.6   | 100.4  | 90.3   | 111.7  | 112.4  | 104.6  | 114.8  |
| 637.8  | 936.2  | 1107.6 | 834.7  | 623.3  | 856    | 707.5  | 1532.1 | 699.7  |
| 109.1  | 121.7  | 106.3  | 100.6  | 95     | 109.3  | 112.3  | 128.4  | 127.3  |
| 104.5  | 103.8  | 101.7  | 103.6  | 93.3   | 102.5  | 104.8  | 105    | 103.7  |
| 106.8  | 118.1  | 100.6  | 106.2  | 100    | 114.3  | 102    | 102.5  | 107.8  |
| 100.7  | 105.1  | 102.8  | 101.4  | 92.9   | 103.7  | 102.5  | 103    | 95.2   |
| 232.5  | 603.1  | 630.1  | 423    | 402.9  | 449.5  | 464    | 837.3  | 460.7  |
| 102.5  | 102.8  | 102.6  | 96.8   | 102.3  | 109.7  | 100.1  | 112.5  | 110.4  |
| 108.2  | 110.8  | 108.1  | 96.2   | 91.8   | 112.6  | 96.8   | 110.1  | 108.6  |
| 97.1   | 113.3  | 94.9   | 99.5   | 94.5   | 98.1   | 104.8  | 92.9   | 100.7  |
| 165.2  | 272.2  | 307.9  | 285.8  | 283.2  | 270.7  | 308    | 270.4  | 144.8  |
| 117.4  | 136.7  | 138.2  | 157.5  | 111.9  | 148.7  | 119.7  | 123.8  | 116.9  |
| 157    | 205    | 221    | 185.2  | 185.8  | 259.5  | 196.2  | 292.1  | 278.2  |
| 141.4  | 128.6  | 131.3  | 127    | 119.1  | 140.5  | 122.9  | 165.7  | 134.4  |
| 118.9  | 116.6  | 105.5  | 95.7   | 102    | 110.3  | 113    | 113.9  | 117.2  |
| 106    | 104.1  | 99.2   | 88.2   | 96.3   | 95.6   | 99.6   | 104.5  | 99.4   |
| 802.7  | 1691.7 | 2092.3 | 1134.8 | 1518   | 1863.6 | 1388.3 | 2238.5 | 1196.9 |
| 103    | 105.2  | 103.8  | 98.3   | 100.8  | 115    | 99.7   | 115.1  | 105.4  |
| 103.8  | 107.5  | 105.8  | 103    | 99     | 111.2  | 103.5  | 102.1  | 115.5  |
| 109.9  | 108.1  | 100    | 112.6  | 97.6   | 109.7  | 108.6  | 112.3  | 107.2  |
| 98.7   | 107.8  | 106.3  | 108.1  | 91.7   | 108.4  | 100    | 110.5  | 114.6  |
| 194.9  | 269.8  | 288.7  | 230.3  | 242    | 256.7  | 250.2  | 376.1  | 235.6  |
| 556.3  | 494    | 434.9  | 439    | 490.7  | 514    | 421.6  | 774.7  | 815.5  |
| 104.3  | 105.2  | 98.5   | 96.7   | 96.4   | 102.4  | 97.2   | 104.4  | 102.7  |
| 114.4  | 120.5  | 114.7  | 118    | 105.5  | 112.9  | 112.9  | 125.1  | 121.4  |
| 276    | 206.9  | 197.9  | 225.8  | 217.8  | 254.9  | 366.5  | 394.4  | 280.8  |
| 110.9  | 119.5  | 118.8  | 109.1  | 120.8  | 123.8  | 121.9  | 119.9  | 141.2  |
| 109.7  | 115.6  | 95.8   | 98.1   | 94.3   | 105    | 106    | 110.2  | 106.5  |
| 108    | 111.8  | 105.6  | 100.7  | 105.3  | 106.6  | 105.2  | 110.7  | 109.7  |
| 164.1  | 169.3  | 161.2  | 128.9  | 143.4  | 134.9  | 139.2  | 255.7  | 252.9  |
| 104.2  | 104.5  | 101.6  | 114.2  | 96.6   | 112.9  | 103.3  | 106.3  | 106.7  |
| 119.6  | 117.7  | 102.9  | 108.6  | 103.6  | 108.5  | 115.9  | 115.2  | 111.5  |
| 104    | 105.4  | 101    | 103.2  | 95.9   | 113.8  | 101.9  | 104.2  | 113.7  |
| 146.3  | 170.8  | 166.6  | 142.7  | 137.4  | 179    | 159.8  | 216.6  | 159.2  |
| 118.8  | 112    | 101.8  | 111.5  | 95.3   | 113.4  | 108.3  | 109.4  | 107    |
| 100.7  | 114    | 95.2   | 109.6  | 100.2  | 100.5  | 104.3  | 117.1  | 106.2  |
| 310.1  | 363.1  | 375.2  | 309.6  | 312.3  | 302.4  | 195.8  | 600.9  | 448.4  |
| 614    | 1140.7 | 1040.3 | 1001.8 | 933.2  | 941.8  | 908.3  | 2097.8 | 854.5  |
| 125.6  | 124.9  | 114.8  | 113.9  | 107.2  | 130.3  | 110.7  | 132.9  | 136.8  |
| 104.6  | 106.4  | 104.4  | 102.1  | 92.7   | 112.1  | 106    | 106.8  | 105.8  |
| 119.5  | 131.4  | 124.8  | 121.1  | 115.2  | 123.4  | 116.7  | 158.7  | 140.4  |
| 234.6  | 383.6  | 300.4  | 317.1  | 302.3  | 296.5  | 322.3  | 407.6  | 250.5  |
| 105.1  | 111.9  | 103.5  | 106.2  | 108.1  | 118.2  | 110.4  | 105.3  | 110    |
| 120.9  | 115.2  | 111.9  | 108.7  | 103.8  | 115.6  | 107.1  | 114.9  | 116.4  |
| 215.4  | 800.6  | 840.2  | 903.5  | 699.8  | 854.3  | 849.9  | 696.6  | 356.3  |
| 1004.2 | 684.4  | 388.9  | 1415.9 | 586.5  | 507    | 919.9  | 889.1  | 1050.2 |



|       |       |       |       |       |       |       |        |       |
|-------|-------|-------|-------|-------|-------|-------|--------|-------|
| 111.9 | 119.7 | 102.8 | 100.2 | 102.1 | 112.2 | 107.4 | 118    | 107.4 |
| 116   | 137.8 | 124.7 | 106   | 106.4 | 111.6 | 112.5 | 119.3  | 122.5 |
| 115.1 | 121.7 | 119   | 117.7 | 100.4 | 116.1 | 114.3 | 120.4  | 116   |
| 107.2 | 111.3 | 100.2 | 101.6 | 104.5 | 114   | 103.3 | 92.8   | 115.3 |
| 113.1 | 115   | 117.8 | 102.3 | 114.1 | 111.1 | 108.3 | 107.7  | 120.2 |
| 354.6 | 368.9 | 321.1 | 545   | 341.1 | 349.8 | 278.8 | 610.5  | 210.7 |
| 112.3 | 152.7 | 156.4 | 164.4 | 134.1 | 133   | 144.3 | 138.4  | 107.4 |
| 121.5 | 109.3 | 117.7 | 113.3 | 106.3 | 123   | 110.6 | 113    | 123.3 |
| 103.7 | 110.7 | 112.6 | 112.4 | 97.6  | 122   | 101.9 | 129.5  | 107.3 |
| 106.6 | 114.1 | 101.6 | 107.4 | 95.9  | 103.2 | 105.7 | 106.6  | 110.1 |
| 163.9 | 170.2 | 172   | 179.9 | 165.9 | 153.8 | 154.6 | 442.2  | 375.9 |
| 103.6 | 109.5 | 109.6 | 113.5 | 94.5  | 103.4 | 106.3 | 112    | 111.9 |
| 221   | 226.5 | 244.1 | 223.2 | 232.9 | 176.8 | 232.7 | 547.9  | 535.5 |
| 107.8 | 128.8 | 115.9 | 121.5 | 128.2 | 120.4 | 144.4 | 122    | 122.8 |
| 107.2 | 126.4 | 110.2 | 129.9 | 106.9 | 120.7 | 116.4 | 122.5  | 120   |
| 102   | 101.5 | 94.2  | 98    | 91.3  | 107.7 | 98.7  | 107    | 109.6 |
| 115.9 | 104.5 | 106.1 | 115   | 108.8 | 124.4 | 100.4 | 114.1  | 111.9 |
| 112.2 | 103   | 101   | 99.3  | 98.7  | 116.1 | 99.5  | 108.4  | 108.8 |
| 106.7 | 112.6 | 109   | 101.7 | 99.8  | 113.2 | 98.7  | 130.4  | 105.2 |
| 112.1 | 117   | 99.7  | 111.9 | 102.4 | 107.9 | 105.4 | 106.8  | 111.2 |
| 141.5 | 266.6 | 154.6 | 424.3 | 353.9 | 197.2 | 617.6 | 537.1  | 314.5 |
| 110   | 107.3 | 100.9 | 102.1 | 102.7 | 109.3 | 108.6 | 113.9  | 114.5 |
| 174.7 | 376.6 | 176.8 | 858.3 | 565.8 | 267.6 | 908.1 | 989.6  | 416.4 |
| 121.7 | 195.5 | 171.9 | 198.1 | 144.5 | 154.1 | 173.1 | 167.5  | 134.3 |
| 123.8 | 147   | 138.7 | 157.8 | 120.8 | 143   | 167.1 | 155.9  | 130.8 |
| 106.2 | 104.3 | 101   | 98.1  | 93    | 102.4 | 96.7  | 95.4   | 99.9  |
| 102.3 | 106.9 | 101.8 | 100.9 | 95.1  | 106.3 | 106.2 | 111.6  | 109.7 |
| 107.6 | 108.2 | 104   | 116.9 | 101.1 | 106   | 102.9 | 111.3  | 95.5  |
| 121.6 | 120.5 | 109.6 | 107.6 | 105.8 | 118.2 | 118.1 | 113    | 108.5 |
| 113.5 | 112   | 111.8 | 115.4 | 101.5 | 107   | 106.2 | 115.5  | 106.7 |
| 103.2 | 102.7 | 98.5  | 105.9 | 94.1  | 101   | 98.4  | 104.3  | 107.4 |
| 103.1 | 105.1 | 96.7  | 99.2  | 95.1  | 101.1 | 101.8 | 112.6  | 108.3 |
| 103.1 | 111.6 | 96.5  | 101.2 | 92.6  | 107.7 | 103.8 | 97.8   | 103.8 |
| 201.7 | 264.3 | 219.3 | 272.2 | 209   | 234.5 | 270.9 | 221.7  | 213.4 |
| 102.7 | 107.1 | 100.8 | 94.2  | 98.3  | 106.8 | 103.2 | 102.3  | 101.3 |
| 106.2 | 106.8 | 105.8 | 102.8 | 96.3  | 102.8 | 104.3 | 106.7  | 113.4 |
| 100.8 | 104.5 | 101.9 | 96.3  | 91.5  | 105.1 | 103.6 | 112.8  | 99.9  |
| 112   | 116.9 | 119   | 127   | 113.3 | 131.6 | 114.4 | 117.8  | 115.4 |
| 549   | 460.8 | 255.4 | 275   | 610.5 | 491.6 | 393.2 | 1196.4 | 336.5 |
| 122.9 | 112.4 | 106.9 | 103.9 | 102.1 | 124.2 | 113.8 | 124.3  | 123   |
| 105.3 | 100.6 | 96    | 99.2  | 94.7  | 104   | 99.7  | 106    | 109.1 |
| 141.4 | 208.7 | 162.2 | 302.9 | 165.6 | 151.3 | 201.6 | 216.8  | 176   |
| 102.5 | 115   | 105.8 | 111.1 | 101.3 | 115.9 | 107.3 | 122.3  | 115.5 |
| 112.4 | 113   | 108.3 | 111.2 | 100.5 | 112.3 | 113   | 104.1  | 119.1 |
| 96.1  | 101.4 | 101.6 | 100   | 95.2  | 113.8 | 99.5  | 105.2  | 107.3 |
| 112.7 | 108.6 | 106.7 | 86.3  | 106.9 | 105.1 | 102.1 | 112.6  | 107.5 |
| 109   | 104.3 | 96.5  | 107.5 | 98.4  | 103.5 | 101.8 | 105.4  | 102.1 |
| 101.6 | 106.8 | 103.5 | 97.6  | 93.5  | 101.6 | 94.1  | 99.3   | 97.7  |
| 103.3 | 104.4 | 107.4 | 98.1  | 96.1  | 103.6 | 105.7 | 103.3  | 114.8 |
| 105.4 | 109.9 | 108.2 | 94.2  | 94.7  | 114.6 | 111.3 | 110.7  | 114.2 |
| 105.1 | 104.8 | 95.6  | 98.5  | 99.7  | 108   | 101.6 | 109.2  | 106.1 |

|        |        |        |        |        |        |        |         |         |
|--------|--------|--------|--------|--------|--------|--------|---------|---------|
| 137    | 132.8  | 123.6  | 135.9  | 116    | 133.6  | 115.3  | 159     | 160     |
| 100.4  | 110.1  | 106.4  | 103.5  | 91.4   | 105.7  | 103.3  | 110.4   | 110.1   |
| 107.6  | 110.1  | 98     | 107.9  | 95.3   | 101.1  | 100.5  | 105.2   | 111.2   |
| 100.1  | 104.5  | 101.4  | 99.8   | 94.7   | 104    | 93.8   | 106.8   | 108.4   |
| 101.3  | 103.7  | 100.5  | 96.2   | 101.7  | 112.5  | 102.4  | 106.5   | 110.5   |
| 127.8  | 137    | 123.3  | 135.1  | 116.2  | 125.8  | 119.7  | 127.4   | 123.5   |
| 207.8  | 250.2  | 199.2  | 278.7  | 209    | 201.2  | 201    | 269.3   | 217.2   |
| 108.6  | 113.2  | 107.6  | 94.5   | 95.2   | 101.8  | 100.5  | 106.6   | 109.7   |
| 109.2  | 98.6   | 96.7   | 107.4  | 95.2   | 119.4  | 100.5  | 102     | 118.3   |
| 169.9  | 202.4  | 223.1  | 250.6  | 193.5  | 227.8  | 295    | 235     | 199.4   |
| 108.4  | 105    | 100.8  | 102.2  | 95.3   | 109.1  | 101.5  | 105.3   | 106.5   |
| 112.7  | 121.8  | 116.2  | 101.2  | 107.7  | 125.9  | 106.5  | 123.8   | 113.2   |
| 116    | 153.6  | 170.5  | 148.1  | 138.6  | 145.9  | 138.5  | 187     | 140.6   |
| 131.3  | 131.4  | 120.3  | 105.9  | 121.5  | 134.1  | 126.3  | 133.1   | 129.6   |
| 108.9  | 112.2  | 104.8  | 116.7  | 98.9   | 118.5  | 108    | 106.2   | 108.7   |
| 98     | 112.9  | 112.2  | 99.2   | 94.8   | 109.7  | 103.5  | 109.9   | 105.4   |
| 109.1  | 240.9  | 149.3  | 173    | 174.8  | 160.7  | 189.8  | 301.3   | 112.7   |
| 145.4  | 169.2  | 108.9  | 226.6  | 132    | 137.9  | 167.3  | 153.4   | 121.7   |
| 114.2  | 112.7  | 97.9   | 121    | 88.8   | 105    | 99.4   | 111.3   | 99      |
| 109.9  | 124.4  | 120    | 115.5  | 99.6   | 114.4  | 103.1  | 109.8   | 102.7   |
| 101.5  | 113.2  | 100.9  | 108.6  | 97     | 102.5  | 111.4  | 106.9   | 106.1   |
| 104    | 221.2  | 104.9  | 175.7  | 131.4  | 108.8  | 148.6  | 133.3   | 121.4   |
| 99.4   | 109.3  | 103.4  | 91.7   | 96.6   | 109.2  | 103    | 106.3   | 103.7   |
| 111.1  | 116.3  | 103.3  | 100.7  | 98.3   | 112.1  | 103.9  | 112.8   | 113.2   |
| 109.4  | 125.5  | 112.4  | 114.2  | 112.5  | 118.6  | 144.9  | 123.5   | 119.1   |
| 1759.4 | 2614.8 | 1932.1 | 2399.3 | 1869.1 | 1930.6 | 1724.1 | 4294.9  | 4313.7  |
| 229.9  | 387.2  | 170.7  | 505.6  | 294.4  | 188.7  | 702    | 373.9   | 191     |
| 306.1  | 654.6  | 494.5  | 575.8  | 686.7  | 665.7  | 616.5  | 1231.7  | 263.4   |
| 9357.3 | 9496.1 | 8890.7 | 7499.3 | 8540   | 9301.7 | 6857   | 15844.5 | 16105.8 |
| 132.8  | 192.3  | 125.5  | 159.2  | 136.9  | 135.7  | 166.1  | 181.4   | 121.6   |
| 108.5  | 137    | 96.4   | 245.1  | 97.4   | 111.6  | 137.6  | 114.8   | 102.7   |
| 121.7  | 120.1  | 109.1  | 121.1  | 108.8  | 124.4  | 109.3  | 117.5   | 121     |
| 109.2  | 121.4  | 104.6  | 92.1   | 104.6  | 113.7  | 103.7  | 112.9   | 116.4   |
| 113    | 151.3  | 143.8  | 132.4  | 130.1  | 157.3  | 131.3  | 149.7   | 122.4   |
| 105.1  | 108.8  | 99.2   | 94.8   | 92.7   | 99.7   | 100.6  | 100.2   | 93.9    |
| 112.4  | 114.9  | 116.1  | 106.9  | 100.8  | 118.1  | 116.4  | 113.3   | 123.7   |
| 513.4  | 773.8  | 667.9  | 1192   | 803.1  | 891.6  | 1023.2 | 1226.2  | 908.4   |
| 113.2  | 129.5  | 100    | 105.6  | 108.1  | 109.8  | 110    | 119.1   | 112.4   |
| 100.6  | 110.3  | 102.5  | 98.8   | 96     | 108.4  | 102.3  | 103.8   | 112.4   |
| 118.3  | 107.8  | 101.3  | 96.6   | 101.2  | 110.4  | 105.2  | 117.7   | 111.1   |
| 102.2  | 107.5  | 103.1  | 89.8   | 93.2   | 106.4  | 100.4  | 127.3   | 103.9   |
| 126.9  | 128.5  | 113.6  | 101.8  | 102.5  | 104.3  | 119.1  | 127.4   | 108.1   |
| 102.7  | 107.5  | 97.1   | 103.4  | 95.9   | 105.4  | 97.5   | 112.2   | 111.5   |
| 269.8  | 306.3  | 175.4  | 206.3  | 212.2  | 202.8  | 132.4  | 426.1   | 236.5   |
| 108.3  | 122.9  | 114.7  | 111.5  | 109.7  | 112.6  | 104.9  | 130.7   | 114.9   |
| 108.6  | 114.8  | 113    | 105.4  | 98.4   | 110.9  | 96.2   | 108.5   | 123.3   |
| 113.5  | 101.7  | 110.4  | 98.3   | 98.8   | 106.3  | 101.2  | 110.4   | 106     |
| 119.2  | 152.3  | 135.4  | 115.6  | 142.3  | 140.4  | 144.9  | 173.2   | 126.2   |
| 106.4  | 104.4  | 97.7   | 95.2   | 101.1  | 110    | 94.2   | 106.2   | 114.5   |
| 113    | 116    | 112.3  | 106.8  | 104.2  | 111.3  | 115.1  | 113     | 110.8   |
| 107.2  | 100.8  | 104.8  | 102    | 95.8   | 110.1  | 103.9  | 122.6   | 109.1   |

|        |        |        |        |        |        |        |        |        |
|--------|--------|--------|--------|--------|--------|--------|--------|--------|
| 117.6  | 148.3  | 132    | 158    | 126.9  | 152.5  | 167.1  | 170.5  | 173.1  |
| 118.9  | 128.5  | 117.4  | 132.9  | 117.7  | 129.5  | 116.6  | 131.8  | 116.8  |
| 127.1  | 133    | 130.8  | 118.2  | 117.2  | 128.6  | 134.6  | 154.4  | 130.2  |
| 100.5  | 115.8  | 103.1  | 104.3  | 98.7   | 114.9  | 111    | 114.1  | 107.5  |
| 114.5  | 118.6  | 101.8  | 95.1   | 109.7  | 107.4  | 102.1  | 130.3  | 101.6  |
| 113.2  | 124.6  | 130.8  | 114.9  | 119.8  | 118.1  | 115.7  | 144    | 153.8  |
| 114.8  | 115.9  | 122.1  | 98.6   | 106.3  | 120.8  | 106.4  | 116.6  | 120    |
| 434.2  | 1533.6 | 977.4  | 1120.7 | 1068.3 | 1054   | 1205.6 | 781.6  | 967.4  |
| 106.7  | 114.1  | 114.3  | 98.9   | 95.5   | 107.3  | 108.3  | 101.9  | 100.6  |
| 115.7  | 109.7  | 109.4  | 116.4  | 110.9  | 118.7  | 123.7  | 137.1  | 124.3  |
| 108    | 123.5  | 105.1  | 100.2  | 104    | 109    | 109.1  | 118.2  | 114.8  |
| 106.4  | 109.1  | 103.6  | 108.1  | 94.3   | 107.1  | 102.5  | 104.1  | 98.3   |
| 108.3  | 105.9  | 119    | 98.5   | 97.4   | 107.8  | 105.6  | 117.1  | 114.6  |
| 101.6  | 112.4  | 102.3  | 105.8  | 99.2   | 103.6  | 108.3  | 107.1  | 107.4  |
| 119.9  | 108.9  | 112.4  | 104.6  | 101.9  | 114.5  | 108.6  | 130.6  | 127.3  |
| 100.6  | 116.2  | 114    | 112.5  | 112.6  | 120.5  | 109.7  | 113.4  | 115.8  |
| 190.3  | 229.6  | 277.2  | 243.7  | 195.9  | 250.9  | 237.5  | 253.9  | 257.6  |
| 114.5  | 128.7  | 120.8  | 111.4  | 109.7  | 138.8  | 116.5  | 119.9  | 124    |
| 1840.7 | 2162.5 | 1736.6 | 1801.8 | 2013.4 | 1889.3 | 1778.5 | 3502.5 | 2688.8 |
| 114.2  | 104.4  | 100.7  | 101.8  | 95.8   | 112.1  | 99.1   | 108.3  | 113.5  |
| 131.7  | 173.9  | 162.9  | 178.8  | 154.6  | 168    | 160.1  | 207.2  | 137.8  |
| 1075.3 | 1486.1 | 1332.5 | 1087.2 | 1385.1 | 1591.7 | 1350.7 | 1898.7 | 1247   |
| 188.1  | 276.6  | 276.2  | 208.3  | 272.4  | 273.2  | 268.5  | 322.8  | 256.2  |
| 110.8  | 116.2  | 104.2  | 104.6  | 98.1   | 115.5  | 107.1  | 113.3  | 112.9  |
| 114.8  | 121.4  | 110.1  | 119.3  | 98.6   | 126.1  | 107.1  | 127.5  | 119.5  |
| 104.4  | 114.2  | 107.5  | 112.8  | 107.2  | 124.2  | 106.1  | 123.8  | 108.9  |
| 123.6  | 131.4  | 132.4  | 140.8  | 125.4  | 128.1  | 133.2  | 157.2  | 139.1  |
| 170.3  | 138.8  | 136.9  | 136.9  | 126.7  | 144.6  | 154.8  | 191.9  | 180.6  |
| 198.8  | 199.2  | 179.5  | 167.4  | 196.9  | 220.4  | 201.3  | 404.5  | 254.7  |
| 123.9  | 106.4  | 113.3  | 114.1  | 110.6  | 118.3  | 110    | 134    | 125.8  |
| 471.4  | 585.8  | 627.8  | 557.1  | 519.6  | 432    | 600.8  | 802.6  | 516    |
| 105.4  | 112    | 114    | 108.5  | 106.5  | 110.5  | 102.3  | 114.6  | 105    |
| 117.9  | 105.7  | 109.3  | 101.1  | 96.1   | 111.6  | 109.3  | 109.7  | 105.5  |
| 112.1  | 108.8  | 97.8   | 109.8  | 95.2   | 110.8  | 101.7  | 115.7  | 119.1  |
| 197.4  | 145.1  | 128.7  | 237.5  | 204.9  | 195.4  | 212.4  | 361.1  | 199.6  |
| 388.2  | 263.8  | 179.6  | 495.3  | 370.3  | 330    | 553.9  | 775.3  | 330.8  |
| 112.9  | 133.3  | 137.1  | 125.9  | 114.1  | 113.4  | 149    | 131.6  | 128.4  |
| 188.8  | 220.9  | 212.1  | 169    | 195.3  | 236.6  | 226.1  | 289.6  | 224.8  |
| 107    | 101.6  | 100.9  | 104    | 99     | 109.5  | 104.8  | 107    | 104.7  |
| 123.3  | 139.9  | 114.4  | 437.2  | 109.5  | 127.4  | 164.8  | 128.2  | 124.9  |
| 104    | 111    | 102.4  | 102.9  | 94.8   | 117.7  | 106.5  | 115.5  | 116.2  |
| 103.6  | 118.4  | 107.1  | 108.5  | 99.1   | 111.6  | 99.5   | 116.5  | 110    |
| 98.2   | 115.7  | 96.4   | 95.1   | 98.2   | 105.6  | 96.9   | 107.2  | 106    |
| 506    | 669.6  | 383.1  | 553.3  | 424.1  | 402.2  | 474    | 710.3  | 601.4  |
| 106.1  | 110.7  | 107.6  | 102.2  | 91.7   | 109.7  | 99.7   | 101    | 111.1  |
| 105.5  | 115.3  | 111.7  | 101.1  | 107.9  | 118.2  | 108.8  | 131.7  | 121.2  |
| 111.2  | 107.8  | 102.3  | 101.7  | 99.2   | 111.1  | 104    | 106.2  | 112.1  |
| 369.7  | 381.7  | 492.3  | 342.8  | 346.9  | 433.1  | 266.2  | 752.4  | 962.4  |
| 117.7  | 113.2  | 104.2  | 109.4  | 111.1  | 134.5  | 116.7  | 127.8  | 122.3  |
| 144.7  | 163.9  | 151.6  | 158.9  | 150.8  | 160.2  | 166.7  | 212.8  | 138.5  |
| 100.9  | 104.2  | 103.1  | 100.1  | 103.9  | 110.3  | 111.7  | 97.5   | 107.6  |

|       |       |       |       |       |       |       |       |       |
|-------|-------|-------|-------|-------|-------|-------|-------|-------|
| 102.8 | 108.9 | 98.3  | 93.4  | 90.3  | 104.6 | 93.6  | 105.2 | 103.1 |
| 100.3 | 106.4 | 104.8 | 109.4 | 95    | 108.1 | 104.8 | 101.2 | 109.6 |
| 109.3 | 109.7 | 104.1 | 104.8 | 97.9  | 109.4 | 109.3 | 105.6 | 106.8 |
| 102.2 | 110.3 | 109.5 | 105.4 | 93.4  | 104.2 | 106.8 | 112.6 | 109.3 |
| 532.9 | 665   | 539.5 | 808.7 | 603.8 | 536.8 | 660.7 | 926.5 | 781.2 |
| 111.6 | 107   | 106.8 | 101.5 | 97.3  | 104.7 | 98.7  | 109.3 | 109   |
| 169.7 | 178.2 | 157.3 | 151.1 | 174.7 | 159.3 | 150.7 | 270.6 | 176.2 |
| 106.3 | 107.9 | 105.2 | 104.5 | 102   | 108.9 | 99.1  | 115   | 113.1 |
| 147.9 | 142.4 | 139.8 | 114.7 | 132.5 | 127.8 | 135.7 | 197.1 | 157   |
| 103.3 | 118.3 | 109.2 | 105   | 109.4 | 124.8 | 120.9 | 129.4 | 124.2 |
| 107.4 | 112.9 | 102.7 | 105.3 | 94.5  | 116   | 99.2  | 118.6 | 111.1 |
| 122.4 | 154.1 | 154.1 | 138.8 | 139   | 146.1 | 145.3 | 168.1 | 136.4 |
| 186.5 | 318.9 | 313.2 | 300   | 292.4 | 303.4 | 254.4 | 434.9 | 248.2 |
| 117.4 | 163.2 | 128.6 | 122   | 130.2 | 143.3 | 136.1 | 230.9 | 134.2 |
| 216.4 | 282.3 | 347.9 | 227.6 | 232.5 | 374.5 | 267.9 | 337.8 | 300   |
| 159.9 | 188.8 | 180.9 | 154.7 | 148.1 | 190   | 178.5 | 260.9 | 236.6 |
| 130.7 | 139.3 | 136.3 | 133.9 | 132.5 | 137.7 | 158.4 | 150.6 | 131.4 |
| 125.8 | 127.6 | 110   | 109   | 114.5 | 124.7 | 137.1 | 146   | 133.2 |
| 115.9 | 172   | 141   | 149.5 | 135.9 | 152.8 | 141.7 | 170.7 | 147.4 |
| 122   | 138.5 | 119.2 | 125.2 | 109.8 | 129.8 | 139.3 | 136.4 | 138.2 |
| 127.3 | 138.7 | 113.3 | 155.6 | 117.6 | 133.9 | 138.8 | 140   | 118.6 |
| 97.9  | 109.3 | 100.4 | 101.9 | 92.9  | 110   | 96.4  | 103.9 | 101   |
| 102.4 | 105.7 | 97.4  | 95    | 99.6  | 101.8 | 99.8  | 105.6 | 108.8 |
| 181   | 173.7 | 158.8 | 137.5 | 150   | 163.7 | 151.1 | 189.3 | 249.5 |
| 97.1  | 106.1 | 103.2 | 105.3 | 94.9  | 109.1 | 98.6  | 105.8 | 113.5 |
| 96    | 97.7  | 99.6  | 94.1  | 94.2  | 99.5  | 103.4 | 99.3  | 97    |
| 219.7 | 379.2 | 354.7 | 530.6 | 314.9 | 322.7 | 437.3 | 353.4 | 214.9 |
| 133.9 | 195   | 167.6 | 155.1 | 147.7 | 154   | 146.2 | 167.6 | 134.6 |
| 119.8 | 168.6 | 201.4 | 165.2 | 166.2 | 159.7 | 156   | 208.8 | 155.3 |
| 116.2 | 179.2 | 172.7 | 138.6 | 126.2 | 158.7 | 152.7 | 149.3 | 135.9 |
| 107.5 | 115.4 | 108.2 | 115.2 | 99.1  | 111.6 | 108.6 | 115.5 | 112.2 |
| 108.6 | 105.4 | 105.3 | 93.4  | 96.4  | 109.7 | 98.8  | 111.2 | 106.7 |
| 169.2 | 331   | 338.9 | 286.5 | 275.5 | 340.6 | 311.7 | 306.8 | 239.2 |
| 104.2 | 115.4 | 105.4 | 98.8  | 91    | 111.1 | 102.3 | 110   | 110.4 |
| 108.6 | 103.6 | 111.8 | 102.7 | 101.8 | 99.3  | 103.3 | 114.1 | 115.8 |
| 578.8 | 648.8 | 651.5 | 552.5 | 566.5 | 617.2 | 573.9 | 813.3 | 519.4 |
| 113.8 | 112.8 | 111.5 | 110.5 | 108.8 | 117.7 | 110.2 | 134.5 | 115.5 |
| 111.7 | 107.7 | 99.9  | 104.6 | 93.2  | 117.2 | 134   | 117.5 | 122.2 |
| 107.6 | 108.8 | 102.6 | 100.2 | 100.9 | 108.5 | 106.5 | 122.8 | 109.2 |
| 104.6 | 100.7 | 95.8  | 108.4 | 95.8  | 116.6 | 98.2  | 110.9 | 105   |
| 124.4 | 135.9 | 130.5 | 117   | 118.1 | 124.4 | 122.5 | 131.6 | 119.6 |
| 107.9 | 146.4 | 146   | 143.1 | 127.5 | 127.8 | 135.6 | 155.7 | 123.8 |
| 139.2 | 153.5 | 199.2 | 138.9 | 160.1 | 189.3 | 143.2 | 268.9 | 197.6 |
| 155.8 | 201.2 | 179.5 | 155.2 | 170.4 | 172.7 | 194.3 | 218.2 | 150.2 |
| 125.1 | 174.9 | 145.5 | 127.5 | 140.4 | 156.6 | 119.9 | 162.3 | 143.8 |
| 492.3 | 719.9 | 533.3 | 430.4 | 466   | 509.8 | 504.4 | 844.2 | 747.5 |
| 104.1 | 122.5 | 102.5 | 114.5 | 104.4 | 110.9 | 106.5 | 114.2 | 101.8 |
| 150.7 | 157.5 | 143.7 | 136.2 | 134.8 | 141.9 | 156.5 | 204.1 | 179.6 |
| 128.3 | 132   | 124.1 | 127.1 | 111.7 | 137.2 | 123.9 | 164.6 | 136.7 |
| 109.7 | 107.4 | 104.5 | 105   | 96.8  | 107.8 | 107.6 | 111.2 | 102.1 |
| 106.4 | 109.6 | 96.2  | 102.9 | 90.1  | 101.8 | 112.2 | 104.4 | 101   |

|        |       |        |        |       |       |        |        |        |
|--------|-------|--------|--------|-------|-------|--------|--------|--------|
| 118.8  | 118.8 | 102    | 105.1  | 98.5  | 114   | 102.2  | 133.3  | 131.2  |
| 113.2  | 111.5 | 98.4   | 95.9   | 95.1  | 111.1 | 115.3  | 104.2  | 104.4  |
| 109.4  | 106.6 | 103    | 96.7   | 93.8  | 106.5 | 102.9  | 115.1  | 110.9  |
| 112    | 114.9 | 109.3  | 96     | 108.7 | 119.8 | 102.1  | 127.8  | 131    |
| 112.1  | 129.5 | 109.9  | 126.3  | 105.1 | 130   | 112.2  | 136.3  | 139.3  |
| 111.9  | 114.5 | 120.5  | 104.4  | 110.2 | 121.2 | 114    | 127.9  | 124.6  |
| 152.8  | 181.3 | 200.2  | 187.1  | 223.7 | 183.5 | 188.7  | 267    | 196.8  |
| 111.6  | 98.6  | 96.6   | 99.1   | 106.5 | 108   | 108.2  | 113.4  | 109.5  |
| 102.4  | 106   | 100.8  | 99.8   | 89.7  | 111.5 | 115.2  | 108.3  | 108.4  |
| 1039.8 | 1587  | 1404.6 | 1163.1 | 1038  | 1167  | 1048.6 | 2001.7 | 1327.5 |
| 104.1  | 107   | 99.6   | 100.3  | 98.1  | 105.9 | 107.9  | 111.2  | 104.7  |
| 118.7  | 118.2 | 101.1  | 102.8  | 101   | 112.2 | 112.4  | 115.2  | 115.8  |
| 108.9  | 105.3 | 104.4  | 103.4  | 101.8 | 99.9  | 95.5   | 103.6  | 106.5  |
| 98.3   | 95.9  | 89.1   | 104.6  | 97.4  | 101.2 | 98.4   | 115    | 99.1   |
| 109.7  | 114.1 | 113.2  | 107.5  | 92.8  | 108.4 | 98.5   | 107.1  | 142.3  |
| 122.6  | 196.5 | 166.2  | 211    | 161.4 | 163.7 | 188.6  | 186.7  | 157.8  |
| 108.8  | 116.4 | 106.7  | 108.3  | 97.9  | 113.7 | 107.2  | 106.1  | 113.9  |
| 150.7  | 143   | 143.7  | 158    | 120.1 | 136.8 | 127.1  | 161.7  | 139.2  |
| 113.4  | 113.4 | 104.2  | 92.7   | 102.7 | 104.4 | 114.6  | 97.9   | 109.9  |
| 112.8  | 106.7 | 115.6  | 117.8  | 112.2 | 125.6 | 105.1  | 115.1  | 111.9  |
| 236.9  | 379.4 | 343.2  | 231.3  | 302.4 | 358.1 | 308.3  | 406.1  | 270.5  |
| 246.9  | 395.4 | 338.4  | 522.1  | 306.2 | 309.4 | 398.6  | 477.9  | 214    |
| 101.7  | 100.1 | 97.1   | 95     | 96.9  | 106.6 | 103.9  | 112.9  | 122.6  |
| 104.9  | 115.8 | 99.7   | 104.4  | 95.6  | 105.9 | 100.1  | 108.5  | 101.5  |
| 108.8  | 110.1 | 102.4  | 88.6   | 96.7  | 103   | 100.6  | 98.8   | 100    |
| 111.3  | 115.7 | 97.1   | 101.5  | 96.9  | 105.6 | 100.1  | 111.3  | 104.3  |
| 116.6  | 112.1 | 108.7  | 102.3  | 106.1 | 112.8 | 105.9  | 109.9  | 113    |
| 108    | 109.9 | 93.8   | 97.5   | 98.3  | 95.5  | 104.3  | 111.8  | 106    |
| 113.2  | 106.1 | 99.5   | 101    | 100.9 | 100.6 | 109.1  | 106.2  | 110.5  |
| 96.9   | 104.2 | 97.8   | 90.7   | 90.6  | 111.9 | 97.5   | 111.3  | 104.9  |
| 98.5   | 102.1 | 95.9   | 93.4   | 91.5  | 109.9 | 94.2   | 101.3  | 95     |
| 97.3   | 108.7 | 96.8   | 97.9   | 95.7  | 105.4 | 103.3  | 95.4   | 97.8   |
| 101.8  | 108.5 | 106.1  | 96.6   | 91.8  | 108   | 104.5  | 107.9  | 103.5  |
| 104.6  | 107.9 | 105.7  | 94.8   | 88.4  | 102.9 | 104.2  | 110.2  | 101    |
| 122.6  | 132.7 | 134    | 123.8  | 127.7 | 137.5 | 124.4  | 170.5  | 156.4  |
| 116.5  | 117.9 | 99.7   | 104.7  | 103.5 | 107.1 | 107.8  | 122    | 119.1  |
| 102.6  | 114.6 | 108.1  | 105.2  | 92.6  | 110.5 | 101    | 106.8  | 113.5  |
| 105.7  | 113.3 | 105.3  | 104.9  | 98.3  | 113.5 | 105.9  | 118.7  | 115.5  |
| 100.4  | 108.6 | 101.7  | 100.4  | 99.5  | 107.3 | 104    | 116.5  | 113.9  |
| 132.2  | 154.1 | 146.8  | 139.8  | 129.4 | 152.9 | 141.4  | 168.8  | 133.3  |
| 108.7  | 163.2 | 118.5  | 100.8  | 197   | 116.2 | 125.2  | 383.4  | 107.6  |
| 113.5  | 109.5 | 103.9  | 102.7  | 109.8 | 108.8 | 102.8  | 108.8  | 109.4  |
| 120.4  | 133.6 | 128.9  | 133.5  | 111.1 | 125.8 | 125.2  | 146.3  | 141.6  |
| 114.9  | 110.7 | 109.3  | 107    | 99.6  | 110.5 | 102.2  | 119.8  | 117.1  |
| 115.5  | 127.2 | 120.5  | 109.3  | 102.1 | 122   | 121.1  | 124.6  | 127.1  |
| 111.7  | 116.6 | 98.6   | 107.7  | 95.6  | 118.7 | 102.3  | 116.1  | 106.2  |
| 107.9  | 105.7 | 103.2  | 112.7  | 98.1  | 108.4 | 101.4  | 115.3  | 107.2  |
| 100.3  | 112.8 | 94.1   | 110.5  | 95.5  | 98.2  | 105.8  | 110.8  | 103.2  |
| 186.2  | 194.6 | 198.9  | 156.5  | 172.3 | 181.9 | 159.7  | 165.3  | 163.9  |
| 107.9  | 100.7 | 100.6  | 90.7   | 93.9  | 108.2 | 105.5  | 118.3  | 96.6   |
| 105.7  | 102   | 99.4   | 102.9  | 96.2  | 108.7 | 100.9  | 104.8  | 106    |

|        |       |       |       |       |       |       |        |       |
|--------|-------|-------|-------|-------|-------|-------|--------|-------|
| 1111.8 | 737.9 | 735.5 | 545   | 667.1 | 998   | 428.7 | 1651.5 | 1575  |
| 102.6  | 120.2 | 111.7 | 113.7 | 109.9 | 115   | 116.5 | 116.1  | 113.1 |
| 113.3  | 154.6 | 157.2 | 142.7 | 126.2 | 161.5 | 138.6 | 133    | 126.5 |
| 101.5  | 101.6 | 97.3  | 95.7  | 92.8  | 95.3  | 98.9  | 107.2  | 110.3 |
| 100.3  | 111.2 | 98.9  | 100.3 | 98    | 113.5 | 101.6 | 104.1  | 104.2 |
| 164.2  | 151.6 | 194.1 | 138.8 | 152.9 | 173.4 | 164.2 | 278.3  | 196.1 |
| 106.9  | 110.7 | 118   | 102.3 | 100.7 | 109.8 | 106.5 | 114.4  | 108.6 |
| 112.1  | 131.8 | 115.9 | 132.8 | 112.8 | 132   | 121.2 | 152.3  | 125.4 |
| 107.3  | 116.1 | 103.3 | 108   | 102.6 | 108   | 111.7 | 111.3  | 114   |
| 109.3  | 130.9 | 136.2 | 121.4 | 104.2 | 131.4 | 111.9 | 123.5  | 134.6 |
| 126.8  | 137.4 | 123.2 | 112.1 | 107.1 | 129.7 | 116.1 | 128.9  | 118.9 |
| 104    | 107.1 | 101.2 | 116.3 | 101.3 | 110   | 105.1 | 119    | 106.5 |
| 107.3  | 110   | 104.8 | 104.2 | 102.9 | 110   | 96.3  | 114    | 103.8 |
| 128.4  | 125.3 | 129.8 | 125.2 | 108.1 | 127.9 | 120.9 | 154.2  | 133.4 |
| 104.2  | 124.9 | 105.9 | 108.5 | 90.2  | 115.1 | 105.8 | 109    | 107.8 |
| 104    | 101.7 | 107   | 101.8 | 91.1  | 109   | 99.3  | 112.7  | 108.4 |
| 102    | 105.3 | 101   | 104.3 | 96.8  | 104.3 | 102.6 | 104.3  | 115.2 |
| 108.9  | 111.2 | 101.2 | 108.9 | 101.6 | 102.5 | 108.3 | 111.4  | 107.4 |
| 108.4  | 115.7 | 100.9 | 110.1 | 97.2  | 109.4 | 103.4 | 129.6  | 117   |
| 376.7  | 781.9 | 555.3 | 411.4 | 540.3 | 607.3 | 515.9 | 747.9  | 550.5 |
| 107.6  | 116.1 | 109.6 | 104.4 | 98.1  | 114.6 | 111.9 | 122.9  | 121.1 |
| 115.1  | 120.4 | 110.6 | 117.7 | 110.1 | 120.3 | 117.3 | 142.5  | 117.4 |
| 135.3  | 135.9 | 115.4 | 160.9 | 117.8 | 123.7 | 164.9 | 136.3  | 113.4 |
| 105.7  | 100   | 103.7 | 98.6  | 93.6  | 102.8 | 97.5  | 95.8   | 105.3 |
| 107.3  | 114.9 | 98.9  | 111   | 94    | 109.2 | 112.4 | 118.2  | 103.7 |
| 104.5  | 117.4 | 110.7 | 100.5 | 97.8  | 117.7 | 97.3  | 111.5  | 122.5 |
| 114.3  | 125.6 | 130.8 | 97.7  | 101.3 | 122.8 | 112.1 | 137.7  | 120.4 |
| 103.9  | 110.5 | 97.6  | 93.6  | 91    | 104.6 | 94.7  | 103.7  | 109.9 |
| 105.5  | 107.5 | 103.7 | 102.2 | 98.1  | 110.2 | 111.2 | 102.6  | 104   |
| 114.8  | 112   | 108.5 | 102.8 | 98    | 111.9 | 108.5 | 117.2  | 117.8 |
| 116.2  | 105.7 | 97.8  | 104.9 | 104.5 | 121.1 | 104.8 | 119.9  | 107   |
| 111.5  | 136.3 | 129.5 | 110.9 | 118.8 | 128.6 | 119.9 | 120.4  | 125.6 |
| 113.8  | 120.1 | 106.8 | 121.9 | 117.5 | 117.3 | 121.5 | 121.5  | 128.8 |
| 110.6  | 105.8 | 105.5 | 107.1 | 100.6 | 118.1 | 98.8  | 100.9  | 109.3 |
| 106.3  | 112   | 102.5 | 105.1 | 98.8  | 109.3 | 101.6 | 110.1  | 94.6  |
| 106.6  | 123   | 108.2 | 112.8 | 100.5 | 115.4 | 116.4 | 106.5  | 122.6 |
| 117.1  | 118.6 | 105.7 | 105.5 | 105.4 | 118.6 | 107.2 | 124.9  | 126.4 |
| 191.8  | 253.3 | 224.8 | 182.2 | 206.9 | 197.4 | 168.7 | 337.6  | 200.4 |
| 110.9  | 108.7 | 112   | 98.8  | 90.1  | 113.8 | 105   | 124.4  | 117.6 |
| 103.5  | 101.9 | 101.3 | 98.8  | 98    | 109   | 108.6 | 108.5  | 113.9 |
| 101.8  | 115.5 | 100.1 | 100.2 | 99.2  | 115.5 | 99.1  | 104.7  | 111.3 |
| 397.2  | 616.3 | 593.2 | 563.6 | 540.2 | 556.4 | 494.7 | 709.6  | 428.6 |
| 112.2  | 122.1 | 126   | 121.2 | 107.8 | 135.8 | 110.7 | 143.8  | 117.5 |
| 161    | 242.2 | 264.2 | 275   | 262.3 | 249.3 | 296.4 | 380.9  | 226.6 |
| 103.3  | 109   | 96.6  | 101.8 | 91.3  | 109.8 | 93.9  | 109.6  | 107.9 |
| 107.6  | 113.2 | 99.9  | 90.9  | 91.9  | 105.6 | 97.2  | 100.1  | 101.9 |
| 104.1  | 110.6 | 101.6 | 116.1 | 92.9  | 110   | 96.8  | 109.4  | 111.7 |
| 103    | 112.2 | 95.1  | 93.4  | 94.7  | 93.1  | 101.4 | 100.5  | 108.1 |
| 109.7  | 113.8 | 105   | 96    | 99.7  | 100.9 | 104.9 | 108.7  | 106.7 |
| 136    | 152.3 | 146   | 142.5 | 130.9 | 167.2 | 145.5 | 181.5  | 153.1 |
| 111.5  | 114.9 | 108.7 | 106.3 | 102.2 | 113.2 | 99.4  | 109.9  | 107.2 |

|       |       |       |       |       |       |       |       |       |
|-------|-------|-------|-------|-------|-------|-------|-------|-------|
| 250.1 | 298.4 | 343.7 | 362.2 | 247.6 | 287   | 319.5 | 435.6 | 362.7 |
| 111.6 | 102.6 | 98    | 104.7 | 95.7  | 115.7 | 106.3 | 109   | 112.2 |
| 106.2 | 109.2 | 106.1 | 105.2 | 98.9  | 116.5 | 104   | 115.7 | 125.5 |
| 112.3 | 109.3 | 107.6 | 109.8 | 93.1  | 116.2 | 105.6 | 116.1 | 115.9 |
| 100.9 | 106.1 | 102.4 | 89.6  | 92.6  | 102.7 | 102   | 107.5 | 113.6 |
| 110.9 | 95.8  | 105.5 | 97.3  | 102.7 | 106.2 | 115   | 100.5 | 102.3 |
| 108.8 | 112.5 | 100.9 | 108.1 | 105.8 | 117.4 | 104.7 | 124.3 | 109.9 |
| 108.4 | 107.2 | 106.5 | 101.4 | 98    | 114.4 | 105.1 | 106   | 104.9 |
| 104.3 | 101.6 | 97.9  | 95.4  | 91.6  | 103.4 | 99.5  | 104.9 | 109.2 |
| 104   | 106   | 100.9 | 101.9 | 98.5  | 107.1 | 101.7 | 107.5 | 116.1 |
| 105.5 | 104.6 | 104.7 | 100.9 | 96.6  | 104.3 | 95.7  | 107.3 | 106.7 |
| 105.5 | 103.6 | 102.9 | 91.5  | 92.3  | 99    | 96.5  | 104.4 | 108.1 |
| 110.5 | 110.6 | 105.6 | 118.4 | 98.1  | 114.1 | 107   | 117.1 | 111.9 |
| 108   | 112.1 | 110   | 104.6 | 98    | 111.1 | 104.5 | 102.2 | 114.2 |
| 100.8 | 115   | 92.4  | 99    | 94.5  | 102.9 | 101.7 | 101   | 97.7  |
| 109.4 | 120.9 | 117.5 | 102.3 | 109.4 | 119.3 | 111.4 | 117.4 | 122.7 |
| 229.5 | 179.1 | 257.4 | 230.7 | 229.7 | 228.4 | 250.2 | 344.1 | 286.1 |
| 510.1 | 479.8 | 335.6 | 449.4 | 281.4 | 394.5 | 505   | 626.7 | 411.6 |
| 116.9 | 133.9 | 123.3 | 122.9 | 109.1 | 114.3 | 134.4 | 136.2 | 124.1 |
| 105.1 | 103.2 | 103.6 | 98.7  | 92.2  | 110.1 | 106.2 | 110.1 | 107.4 |
| 118.1 | 118.2 | 111.6 | 114.9 | 103.7 | 122.5 | 109   | 114   | 104.6 |
| 148.7 | 264.2 | 254.6 | 324.1 | 198.6 | 244.1 | 352.4 | 235.4 | 247.7 |
| 111.1 | 114.2 | 103   | 108.7 | 95.1  | 106.7 | 99.9  | 106.4 | 104.4 |
| 110.2 | 108.3 | 98    | 104.7 | 97.4  | 104.7 | 95.5  | 104.7 | 113.8 |
| 103.3 | 105.4 | 107.2 | 95.7  | 97.6  | 107.7 | 101.1 | 113.5 | 101.4 |
| 113.5 | 163.7 | 148.9 | 151.5 | 158.4 | 155.6 | 147.4 | 160   | 119.8 |
| 117.1 | 132   | 125.9 | 118.4 | 111.2 | 126.2 | 128.2 | 157.5 | 130.5 |
| 183.5 | 221.9 | 207.6 | 203.8 | 194.9 | 252.5 | 223.9 | 320.7 | 278.9 |
| 100.3 | 100   | 103.9 | 95.9  | 93.2  | 110.2 | 98.7  | 102.4 | 105.5 |
| 114.1 | 119.8 | 106.9 | 112.6 | 104   | 112.4 | 115.9 | 118.9 | 120   |
| 103.8 | 112.1 | 102.5 | 98.9  | 91.1  | 95.7  | 102.2 | 102.7 | 108.3 |
| 104.2 | 105.9 | 107.4 | 100.2 | 98.9  | 110   | 104.5 | 116   | 112.4 |
| 110.7 | 111.4 | 99.7  | 97.1  | 98.5  | 117.4 | 108.8 | 105.5 | 109   |
| 109.5 | 112.8 | 107.4 | 108.9 | 97.5  | 109.2 | 110.1 | 119.3 | 109.9 |
| 102.9 | 110.1 | 102.9 | 101.2 | 99.9  | 112.5 | 101.5 | 112.7 | 104.4 |
| 104.5 | 114.4 | 101.4 | 103.9 | 92.4  | 105.3 | 100.9 | 108.5 | 99.8  |
| 101.5 | 108.5 | 100   | 96.8  | 92.7  | 110.2 | 99.9  | 111.1 | 102.8 |
| 113.9 | 112.9 | 106   | 102.5 | 97.9  | 118.5 | 111.2 | 116.5 | 114.9 |
| 105.2 | 110.3 | 102.6 | 96    | 99.2  | 110.6 | 104.2 | 114.4 | 105.5 |
| 104.3 | 107.1 | 103.6 | 104.6 | 95.4  | 105.7 | 103   | 107.2 | 107.1 |
| 108.8 | 109.7 | 113.5 | 102.5 | 100.9 | 100.3 | 108.6 | 111.1 | 117.7 |
| 111   | 114.6 | 104.6 | 98.9  | 101.5 | 115.3 | 109   | 113.2 | 109.1 |
| 110.8 | 106.1 | 105.3 | 97.6  | 95.7  | 115.7 | 103.3 | 114.4 | 121.4 |
| 108   | 120.9 | 113.9 | 99.4  | 104.3 | 111.4 | 109.8 | 128   | 114.5 |
| 112.5 | 117.8 | 106.9 | 118.9 | 97.9  | 106.6 | 109   | 116.5 | 106.6 |
| 293.5 | 318.4 | 311.5 | 283.4 | 280.5 | 362.9 | 355   | 594.5 | 575   |
| 220.2 | 344.9 | 332.7 | 254.4 | 257.2 | 285.9 | 271.8 | 346.9 | 227   |
| 106.9 | 108.2 | 111.2 | 111   | 101.8 | 107.2 | 108.4 | 129.6 | 116.1 |
| 109.7 | 112   | 112.4 | 97.3  | 103.2 | 115.9 | 103.2 | 114.1 | 126.3 |
| 117.4 | 119.1 | 118.5 | 110.9 | 107.5 | 112   | 116.3 | 123.5 | 125.1 |
| 115.3 | 129.9 | 121.2 | 101.7 | 107.3 | 123.5 | 103   | 128.6 | 127.8 |

|       |        |        |        |        |        |        |        |       |
|-------|--------|--------|--------|--------|--------|--------|--------|-------|
| 111.8 | 114.2  | 99.1   | 102    | 92.3   | 109.8  | 106.6  | 114.5  | 110   |
| 111   | 135.9  | 120.5  | 113.1  | 114.9  | 119.9  | 106.8  | 140.2  | 131.7 |
| 110.4 | 111.2  | 106.1  | 102.4  | 97.7   | 110    | 99.7   | 115.9  | 109.5 |
| 320.7 | 407    | 314.9  | 339.1  | 342.5  | 384.3  | 417.5  | 559.7  | 539.2 |
| 111.5 | 101.5  | 101.4  | 102    | 93.5   | 103.3  | 98.2   | 120.6  | 107.9 |
| 117.3 | 123    | 122.4  | 111.6  | 109.5  | 121.1  | 122.5  | 127.1  | 124.4 |
| 150.2 | 162.1  | 135.7  | 157.6  | 135.3  | 152.6  | 146.1  | 178.9  | 148.5 |
| 101   | 109.8  | 102.1  | 100.1  | 91.3   | 109.8  | 99.8   | 117.7  | 111   |
| 130.2 | 162.4  | 155.5  | 123.8  | 124.3  | 149.2  | 151.4  | 171.3  | 154.6 |
| 104.5 | 111.1  | 98     | 102.9  | 88.9   | 115.3  | 115.4  | 110.1  | 100.6 |
| 99.3  | 99.4   | 102.4  | 96.1   | 92.2   | 109.8  | 103.8  | 100.5  | 107.4 |
| 107.5 | 108.7  | 101    | 96.2   | 97.3   | 103    | 101.9  | 101.5  | 106.1 |
| 105.9 | 100    | 100.1  | 101.7  | 101.6  | 105.4  | 100.7  | 110.7  | 104.2 |
| 102.4 | 106.2  | 101.6  | 96.7   | 105    | 117.2  | 111.1  | 103.5  | 107.6 |
| 186   | 301.4  | 286    | 261.3  | 199.5  | 252.4  | 297.9  | 293.7  | 280   |
| 533.7 | 1736.8 | 1711.7 | 1421.7 | 1374.2 | 1545.3 | 1467.1 | 1546.1 | 680.5 |
| 276.5 | 690.7  | 751.8  | 651.4  | 509.5  | 620.1  | 618.1  | 670.6  | 341.6 |
| 118   | 144.7  | 138    | 139.3  | 129.9  | 149.3  | 141.6  | 155.4  | 133   |
| 98.9  | 117.3  | 101.1  | 106.4  | 95.9   | 118.1  | 101.5  | 104.3  | 107.9 |
| 219.7 | 416.6  | 377.1  | 329    | 341.6  | 380.5  | 394.8  | 707.5  | 341.5 |
| 114.9 | 106.1  | 104    | 100.5  | 94.3   | 112.7  | 108.2  | 109.8  | 107.9 |
| 113.8 | 115.9  | 112.3  | 116.9  | 104.2  | 115.1  | 117.3  | 125.7  | 122   |
| 111.2 | 113.9  | 99.2   | 95.4   | 101.2  | 115    | 111.3  | 112.8  | 102.7 |
| 98.7  | 100.1  | 94.7   | 92.3   | 89.8   | 103    | 94.5   | 99     | 101.5 |
| 112.7 | 116.4  | 115.6  | 105.5  | 90     | 114    | 104.3  | 117.1  | 110.4 |
| 106.1 | 105.5  | 101.1  | 98.6   | 96     | 98.7   | 116.1  | 103.1  | 100.6 |
| 103.7 | 111.5  | 103.3  | 110.5  | 95     | 106.4  | 100.3  | 114.4  | 107.8 |
| 118.2 | 114.3  | 110.6  | 108.9  | 102.6  | 116.9  | 108.9  | 113.9  | 114.8 |
| 103.6 | 97.6   | 105.4  | 97     | 95.8   | 101    | 100.2  | 100.4  | 106.5 |
| 113.5 | 115.5  | 106.4  | 100    | 99.5   | 108    | 95.4   | 107.2  | 113.1 |
| 105.5 | 109    | 99.4   | 101.1  | 109.6  | 108.8  | 101.3  | 113.9  | 108.7 |
| 110.8 | 103.2  | 101.5  | 98.2   | 93.6   | 108.6  | 99.1   | 96.6   | 105.9 |
| 111   | 122.2  | 119.5  | 120.3  | 123.5  | 123.9  | 132.6  | 143.4  | 122.7 |
| 110.3 | 109.2  | 99.4   | 97.7   | 105.6  | 103    | 102.6  | 115.6  | 111.3 |
| 114.6 | 108.4  | 106.1  | 103.8  | 91.5   | 111    | 112.9  | 107    | 107.5 |
| 103.4 | 109.4  | 106.5  | 105    | 100.8  | 109.1  | 101.1  | 99.9   | 104   |
| 114.9 | 120.5  | 127.2  | 124.3  | 110.9  | 119.4  | 116.1  | 130.6  | 133.2 |
| 121.6 | 112.5  | 118.4  | 117.5  | 106.7  | 126    | 117.1  | 146.7  | 123.6 |
| 110   | 104.3  | 100.4  | 92     | 97     | 110.7  | 105.6  | 115.7  | 106.7 |
| 104.7 | 101.6  | 105.3  | 99.9   | 103.8  | 107.9  | 98.6   | 116.9  | 113.5 |
| 105.4 | 107    | 105.8  | 102.6  | 88.7   | 108.3  | 100.9  | 109.9  | 113.4 |
| 105.6 | 105.5  | 96.7   | 94.1   | 86.1   | 105.1  | 101.2  | 104    | 110.3 |
| 106.2 | 104.5  | 100.8  | 99.3   | 92.5   | 106.3  | 105.8  | 100.9  | 103.2 |
| 105.2 | 113.5  | 102.9  | 97.2   | 100.9  | 112    | 98.6   | 112.1  | 111.3 |
| 112.7 | 122.9  | 109.4  | 117.6  | 109.8  | 130.3  | 111.1  | 137    | 130.7 |
| 109.6 | 106.3  | 98.3   | 101.7  | 92.7   | 106.5  | 102.1  | 104    | 108.5 |
| 106.9 | 115.2  | 100.3  | 102.8  | 101.1  | 110.9  | 106.4  | 105.2  | 115.5 |
| 110.4 | 111.2  | 106.8  | 104.1  | 101.8  | 114.7  | 106.5  | 121.3  | 109.8 |
| 111   | 114    | 113.2  | 108.6  | 105    | 114.2  | 109.5  | 131.8  | 115.9 |
| 109.3 | 115.7  | 106.9  | 101.1  | 110.3  | 120.4  | 100.6  | 140.5  | 119.2 |
| 139.9 | 175.3  | 189.5  | 137.9  | 172.9  | 173.9  | 174    | 217.9  | 141   |



|        |         |       |         |         |        |        |         |         |
|--------|---------|-------|---------|---------|--------|--------|---------|---------|
| 103.1  | 123     | 128   | 109.7   | 103.2   | 122.8  | 104.4  | 115.1   | 119.9   |
| 112.2  | 116.7   | 117.2 | 107.6   | 100.1   | 118.6  | 109.3  | 115     | 108.3   |
| 148    | 136.6   | 116.6 | 113.9   | 114.8   | 124.4  | 143.7  | 181.6   | 140.3   |
| 106.1  | 127.7   | 119.1 | 120.9   | 108.7   | 116.3  | 118.7  | 119.8   | 111.8   |
| 168.3  | 163.2   | 170.8 | 155.6   | 152.6   | 178.3  | 158.2  | 161.5   | 140.9   |
| 175    | 158.9   | 156.8 | 167.1   | 143.6   | 160.8  | 205.7  | 241.6   | 219.8   |
| 109    | 107.2   | 103   | 97.5    | 99      | 108.5  | 103.9  | 110.2   | 107.8   |
| 340.3  | 1014.8  | 991.9 | 1134    | 778     | 808.5  | 1341.4 | 1188.1  | 654.4   |
| 102    | 104.6   | 94    | 98.5    | 90.4    | 103.8  | 91.7   | 115.8   | 106     |
| 111.2  | 119.8   | 109.2 | 104.6   | 100.9   | 116.3  | 112.3  | 112.9   | 115     |
| 113    | 116.9   | 115   | 102.2   | 103.9   | 118.1  | 110.6  | 117.5   | 129.5   |
| 107.8  | 109.3   | 111.1 | 98.7    | 102.7   | 114.8  | 98.7   | 106.9   | 105.8   |
| 112.9  | 111.4   | 116.9 | 107     | 97.4    | 114    | 106.5  | 103.9   | 113.1   |
| 106.8  | 112.9   | 109.3 | 95      | 104.1   | 122    | 107.6  | 106.4   | 108.6   |
| 103.8  | 111     | 118.8 | 103.2   | 90.9    | 104.3  | 108.5  | 107.8   | 108.8   |
| 101.8  | 107.7   | 105.2 | 112.2   | 93.5    | 100.3  | 98.7   | 111.5   | 106.2   |
| 123.8  | 130.8   | 121.1 | 108.9   | 110.8   | 126.1  | 110.8  | 156.6   | 163.7   |
| 105.3  | 105.1   | 99.4  | 98.8    | 88.5    | 109.4  | 106.3  | 123.5   | 107.5   |
| 112.1  | 111.2   | 105.9 | 100.8   | 96.1    | 106.6  | 101.6  | 114.8   | 103.8   |
| 103.6  | 107.3   | 105.9 | 106.3   | 99.7    | 115    | 100.8  | 110.9   | 111.2   |
| 111.4  | 105.5   | 99.7  | 105.3   | 97      | 109.2  | 96.1   | 106.4   | 109.4   |
| 111.8  | 110.2   | 104.9 | 103.6   | 97      | 113.1  | 99.9   | 118.1   | 122.4   |
| 100.8  | 110.6   | 110.3 | 106.6   | 97.2    | 100.7  | 101.2  | 110.1   | 110.1   |
| 107.3  | 109.4   | 108.4 | 102.8   | 94.8    | 112.5  | 106.6  | 106.5   | 101.9   |
| 109.5  | 106.4   | 106.4 | 113.7   | 94.4    | 113    | 104    | 116.3   | 103.3   |
| 106.8  | 111.4   | 103.2 | 106.1   | 98.7    | 122.5  | 99.2   | 108.9   | 105.2   |
| 111    | 115.8   | 118.8 | 111.3   | 103.1   | 102.7  | 113.3  | 122     | 114.7   |
| 136.7  | 245.2   | 201.6 | 187.2   | 171.9   | 225.2  | 206.9  | 160.3   | 171.2   |
| 106.5  | 107     | 107.5 | 114.4   | 104.3   | 105    | 105.9  | 110.8   | 111.3   |
| 107.3  | 106.3   | 105.3 | 107     | 90.9    | 107.6  | 107.8  | 115.8   | 103.9   |
| 107.2  | 127.2   | 110.9 | 103.8   | 96.8    | 114    | 112.5  | 114     | 114.7   |
| 100    | 106.7   | 100.2 | 104.5   | 95.6    | 108.6  | 104.5  | 108.3   | 104     |
| 128.4  | 151.6   | 140.5 | 109.2   | 136.1   | 168.3  | 113.3  | 167.1   | 127.2   |
| 109.7  | 110.2   | 105.6 | 99.2    | 96.4    | 118.3  | 107.6  | 126.8   | 108.1   |
| 107.6  | 111     | 108   | 98.6    | 100.4   | 113.4  | 104.8  | 110.2   | 115     |
| 110.4  | 106.2   | 102   | 85.6    | 91.8    | 112.4  | 96.4   | 113.1   | 109.3   |
| 115.3  | 108.6   | 106.2 | 104.5   | 102.8   | 114.4  | 110    | 119.1   | 118.2   |
| 8905.4 | 11805.3 | 10521 | 10594.5 | 11273.7 | 9679.3 | 9717.7 | 17956.7 | 11822.7 |
| 105.9  | 107.1   | 104.3 | 96.2    | 93.4    | 102.6  | 93.5   | 107.1   | 113     |
| 103.5  | 106.1   | 107.9 | 98.2    | 98      | 107.2  | 102.5  | 113.6   | 116.4   |
| 234.8  | 291.3   | 316.2 | 220.8   | 270.4   | 323.2  | 275.4  | 270.3   | 186.3   |
| 102.1  | 104.8   | 99.7  | 98.6    | 96.7    | 102.8  | 97.1   | 106.6   | 103.7   |
| 101.4  | 107     | 104   | 94.4    | 91.8    | 109.4  | 99.9   | 110.5   | 108.3   |
| 105    | 98.5    | 100.3 | 98.6    | 95.7    | 102.8  | 94.6   | 106.2   | 98.5    |
| 108.5  | 98.3    | 98.4  | 98.9    | 90.2    | 106.6  | 100.2  | 111.2   | 109.7   |
| 106.5  | 109     | 100.3 | 104.7   | 98.6    | 108.8  | 100.7  | 110     | 106.9   |
| 100    | 100.6   | 106.5 | 92.5    | 96      | 104.4  | 101.8  | 124.8   | 111.1   |
| 104.7  | 109.1   | 104   | 104.6   | 100.1   | 106.5  | 107    | 110.7   | 103.4   |
| 114.5  | 128.7   | 101.4 | 110.6   | 103.8   | 119.8  | 107.9  | 116.9   | 103.4   |
| 101.1  | 103.5   | 100.5 | 98.8    | 96.3    | 108.5  | 100.3  | 123.1   | 112.8   |
| 104    | 110.8   | 106.1 | 113.5   | 101.3   | 129.1  | 105.8  | 125     | 119.9   |

|        |        |        |        |        |        |        |        |        |
|--------|--------|--------|--------|--------|--------|--------|--------|--------|
| 108.3  | 108.5  | 94.7   | 104.6  | 94.1   | 107.6  | 102.9  | 107.6  | 113.5  |
| 95.3   | 109.8  | 104.1  | 103.5  | 92.8   | 107.9  | 97.2   | 101.4  | 104    |
| 114.1  | 114    | 102.3  | 99.7   | 105.2  | 115.3  | 97.9   | 112    | 110.2  |
| 168.3  | 245.1  | 189    | 200.7  | 201.6  | 220.8  | 168.1  | 349    | 324.7  |
| 97     | 100    | 98.3   | 95.9   | 98.8   | 105    | 101.1  | 103    | 99.5   |
| 99     | 104.2  | 99.5   | 96.7   | 91.1   | 109.8  | 101    | 100.7  | 106    |
| 109.3  | 104.4  | 99.5   | 96.5   | 97.5   | 114.8  | 108    | 103.6  | 102.9  |
| 100.9  | 102.4  | 95.6   | 95.1   | 97     | 100.8  | 110.4  | 106.8  | 95.5   |
| 107    | 102.5  | 97.2   | 106.8  | 94.4   | 104    | 101.3  | 98     | 106.8  |
| 226.1  | 353.4  | 327.1  | 430.1  | 380    | 355    | 457.7  | 575.4  | 490.2  |
| 106.9  | 105.1  | 97.5   | 98     | 96     | 106.5  | 104    | 111.5  | 108.7  |
| 103.4  | 106.1  | 107.4  | 95.8   | 91.2   | 104    | 103.8  | 108.5  | 113.3  |
| 113.9  | 103.6  | 100.2  | 98.4   | 93.9   | 106.9  | 103.6  | 110.2  | 111.6  |
| 104.8  | 116.4  | 104.9  | 111.3  | 96.9   | 112.9  | 106.4  | 106.9  | 109.9  |
| 103.2  | 120.9  | 107.4  | 98.7   | 96.7   | 112.2  | 106.8  | 109.9  | 104.6  |
| 103.6  | 104.1  | 96.8   | 108.6  | 90.8   | 118    | 100.5  | 105.7  | 118.4  |
| 102.4  | 112.5  | 102.8  | 94     | 91.9   | 108.5  | 86.9   | 119.7  | 108.8  |
| 106.9  | 117.6  | 101.1  | 105.6  | 99     | 106.2  | 101.4  | 111.7  | 112.4  |
| 104.3  | 113.3  | 127.1  | 109.1  | 97.5   | 128.3  | 91.9   | 105    | 107.9  |
| 92.7   | 102.2  | 96.7   | 105.6  | 92.8   | 102.9  | 105.5  | 106.3  | 103.7  |
| 109.7  | 109.3  | 98.7   | 97.3   | 99     | 114    | 100.1  | 114.1  | 112.9  |
| 108.7  | 105.9  | 96.8   | 95.6   | 93.7   | 112.4  | 99.9   | 109.9  | 108.8  |
| 112    | 109.8  | 103.1  | 101.1  | 95.2   | 110.1  | 99.4   | 105.8  | 115.9  |
| 109.1  | 111.6  | 107.3  | 101.9  | 100.6  | 109.2  | 105.6  | 117.1  | 114.4  |
| 123.4  | 116    | 107.1  | 116.7  | 109.5  | 119.5  | 111    | 128.5  | 115.3  |
| 110.1  | 107.2  | 102.4  | 104.6  | 103.6  | 98.6   | 104.4  | 125    | 113.5  |
| 113.9  | 103.9  | 108.7  | 98.9   | 94.9   | 111.6  | 99.8   | 113.1  | 108.8  |
| 109.9  | 114.7  | 107.4  | 113.9  | 101.5  | 114.8  | 102.9  | 114.3  | 114.1  |
| 104.6  | 112.1  | 102.1  | 103.1  | 97.3   | 109    | 94.2   | 101.7  | 119.1  |
| 108.9  | 109.7  | 105.1  | 97.4   | 97.4   | 105.6  | 101    | 96.9   | 108.1  |
| 125.9  | 141.7  | 131.4  | 139.5  | 115.4  | 134.2  | 125.9  | 147.8  | 149.5  |
| 94.5   | 106.9  | 98.1   | 80.7   | 88.3   | 101.2  | 101.4  | 97.2   | 101.4  |
| 103.8  | 105.3  | 98.4   | 99     | 96     | 104.2  | 103.4  | 105.3  | 105.1  |
| 115.7  | 124.1  | 110.8  | 129.2  | 114.8  | 115.5  | 103.5  | 116.4  | 111    |
| 105    | 109.3  | 101    | 101    | 93     | 118.3  | 103.7  | 104.8  | 106.4  |
| 114.2  | 117.4  | 109.6  | 102.4  | 99.3   | 108    | 110.8  | 136    | 120.7  |
| 111.7  | 113.8  | 112.1  | 108    | 99.5   | 120.6  | 106.1  | 113.2  | 110.3  |
| 105.8  | 106.2  | 104.3  | 95.2   | 91.8   | 106.8  | 106    | 108    | 114    |
| 4950.2 | 4494.8 | 5718.3 | 3982.7 | 3558.1 | 4805.4 | 3355.9 | 9298.9 | 8282.1 |
| 109.7  | 112.9  | 102.7  | 108.9  | 95.3   | 106.8  | 95.8   | 104.3  | 101.7  |
| 117.8  | 126.1  | 127.9  | 113.8  | 113.9  | 121.6  | 113.6  | 129.2  | 136    |
| 106.6  | 115.9  | 104.3  | 101.1  | 99.9   | 117.1  | 99.2   | 114.6  | 115.7  |
| 104.1  | 113.7  | 107.1  | 111.9  | 101.8  | 111.6  | 117.9  | 119.9  | 115.1  |
| 140.1  | 146.1  | 134.7  | 169    | 123.2  | 131.1  | 139.8  | 178    | 160.9  |
| 125.4  | 128.3  | 125.2  | 116.6  | 129.1  | 133.2  | 129.6  | 127.2  | 157    |
| 105.1  | 106.3  | 100.4  | 107.5  | 89.3   | 111    | 100.9  | 103.7  | 111    |
| 100.6  | 127.4  | 107.3  | 101.7  | 104.2  | 114.7  | 104.2  | 119    | 107.5  |
| 107.4  | 114.6  | 112    | 110.9  | 94.4   | 112    | 100.2  | 120.9  | 110.1  |
| 115.6  | 109.1  | 118.6  | 104.8  | 96     | 119.8  | 108    | 117.6  | 108.9  |
| 283.3  | 323.8  | 309    | 289.7  | 293.2  | 311.9  | 288.4  | 420    | 338.4  |
| 108.9  | 107.8  | 105.9  | 97.8   | 94.4   | 103.1  | 97.9   | 112.5  | 107.1  |

|        |        |        |        |        |       |        |         |        |
|--------|--------|--------|--------|--------|-------|--------|---------|--------|
| 105.6  | 110.4  | 107.9  | 102.6  | 92     | 101.5 | 111.9  | 102.1   | 111.1  |
| 113.8  | 115.7  | 114.1  | 113.5  | 107.1  | 131.3 | 122.5  | 147.7   | 121.8  |
| 110.1  | 115.9  | 97.7   | 108.8  | 93.5   | 107.2 | 102.3  | 110.1   | 105.5  |
| 104.5  | 113.3  | 98.6   | 109.7  | 92.1   | 113.3 | 102    | 99.7    | 98.6   |
| 134.2  | 142    | 120.2  | 134.8  | 122.2  | 123.3 | 101.9  | 135.9   | 136    |
| 106.2  | 114.4  | 102.8  | 106.1  | 105.9  | 116.1 | 102    | 116.3   | 112    |
| 3511.7 | 1835.7 | 2721.5 | 3465.2 | 1923.7 | 3058  | 3452.6 | 7105.8  | 5820.9 |
| 122    | 146.3  | 121.7  | 146.4  | 119.9  | 129.9 | 140.8  | 140.9   | 125.4  |
| 100.6  | 104.5  | 104.3  | 101.4  | 99.1   | 106.3 | 105.2  | 109.8   | 107    |
| 110.1  | 110.3  | 102.4  | 108.2  | 110.3  | 115.8 | 103.4  | 110.8   | 108.4  |
| 316.5  | 544.7  | 398.7  | 522.9  | 526.6  | 383.2 | 320.6  | 486.1   | 394.1  |
| 141.2  | 150.3  | 126.6  | 167.5  | 131.2  | 136.3 | 180.5  | 218.4   | 195.4  |
| 107.6  | 106.2  | 100.5  | 100.5  | 97.4   | 108.2 | 96     | 105.3   | 107.9  |
| 108.6  | 100.4  | 101.6  | 98.1   | 94.2   | 102.6 | 100.7  | 109.9   | 104.1  |
| 112.8  | 110.1  | 104.3  | 107    | 90.2   | 110.9 | 102    | 108.4   | 117.6  |
| 163.2  | 189    | 139.6  | 167.9  | 158    | 150.3 | 164.7  | 258.6   | 161.3  |
| 104.1  | 112.3  | 99.2   | 104.4  | 92.3   | 112.8 | 95.2   | 109.1   | 104.5  |
| 106.5  | 107.6  | 103.1  | 99.3   | 90.6   | 99.8  | 95.8   | 108.4   | 92.6   |
| 105.9  | 110.7  | 104    | 99.3   | 94.8   | 111.1 | 105    | 110.8   | 111.5  |
| 124.2  | 179.9  | 173    | 121.6  | 137    | 152.9 | 123.9  | 152.1   | 117.1  |
| 102.4  | 108.3  | 102.5  | 103.4  | 93.6   | 104.1 | 100.5  | 109.2   | 116.2  |
| 111    | 119    | 110.5  | 108.2  | 97.5   | 112.1 | 108.3  | 111.5   | 118.9  |
| 107.3  | 113.2  | 111.2  | 100.8  | 93.8   | 106.8 | 103.5  | 109.2   | 103.4  |
| 108.4  | 108.6  | 102.8  | 108.3  | 106.4  | 113.6 | 103.8  | 122.5   | 115.3  |
| 108.9  | 113.8  | 103.3  | 106.5  | 105.6  | 116.6 | 111.7  | 117.1   | 107.2  |
| 108.5  | 132.5  | 122.3  | 119    | 115.7  | 115.3 | 115.9  | 138     | 114.1  |
| 138.5  | 135.2  | 130.8  | 158.4  | 127.7  | 139.6 | 144.7  | 162.8   | 141.8  |
| 105.7  | 113.9  | 105.3  | 101.7  | 97.6   | 106.2 | 100.7  | 114.7   | 113.6  |
| 102.5  | 109.8  | 97.9   | 102.5  | 92.8   | 107.8 | 102    | 106.2   | 100.8  |
| 156.5  | 122.7  | 125.5  | 121.1  | 118.6  | 139.6 | 127.5  | 150.6   | 164    |
| 124.7  | 107.4  | 106.1  | 95.7   | 96.8   | 107.5 | 101.8  | 118.4   | 153.4  |
| 110.4  | 111.4  | 106.9  | 120.9  | 110.1  | 141.4 | 115.4  | 148.3   | 116.9  |
| 107.7  | 112.9  | 104.5  | 96     | 94.3   | 112.5 | 112.8  | 112     | 116.2  |
| 189.9  | 282.5  | 226.2  | 265.6  | 227.7  | 243.4 | 285.8  | 285.2   | 248.4  |
| 6248.1 | 6909.4 | 5969.6 | 7573.7 | 6629.4 | 6552  | 8217.2 | 11377.3 | 7452.2 |
| 109.5  | 105.6  | 102    | 101    | 92.6   | 102.8 | 99.4   | 106.8   | 110.8  |
| 98.3   | 104.3  | 94.2   | 88.2   | 91.6   | 108.3 | 93.7   | 104.8   | 101.9  |
| 98.4   | 100.6  | 96.2   | 93.8   | 91.8   | 107.8 | 99.3   | 102.5   | 101.6  |
| 111.4  | 109.2  | 107.7  | 104    | 102.6  | 108.9 | 108.5  | 99.2    | 106.3  |
| 138.4  | 152    | 128.6  | 141.2  | 131.7  | 133.4 | 153.2  | 193.4   | 156.9  |
| 113.6  | 124.4  | 121.4  | 105.1  | 113.1  | 116.7 | 112.6  | 145.7   | 124.6  |
| 115.7  | 119.7  | 126.7  | 102.8  | 109.8  | 116   | 115    | 155.8   | 167.5  |
| 109.7  | 114.6  | 110.6  | 104.5  | 97.7   | 110.1 | 110.5  | 108.1   | 112.6  |
| 106.3  | 105.6  | 102.9  | 105.9  | 95.1   | 104.8 | 110.9  | 105.5   | 108.4  |
| 106.1  | 109.4  | 109.2  | 108.1  | 97.1   | 111.1 | 104.1  | 120.8   | 103.2  |
| 391.4  | 326.4  | 399    | 236.8  | 242.3  | 240   | 295.1  | 573.5   | 329.4  |
| 122.7  | 121.1  | 138.2  | 107.8  | 115.1  | 117.2 | 121.6  | 136.6   | 120.4  |
| 121.1  | 124.3  | 109.5  | 115.8  | 113.8  | 128.8 | 108    | 135.3   | 140.9  |
| 115.5  | 114.4  | 111.3  | 109.8  | 106.7  | 109   | 108.7  | 119.5   | 109.1  |
| 102.4  | 102.7  | 97.5   | 97     | 91.1   | 102.9 | 105.1  | 106.3   | 99.1   |
| 105.5  | 108.4  | 99.9   | 100.3  | 91.2   | 97.9  | 99.5   | 101.3   | 110.6  |

|       |       |       |       |       |       |       |        |       |
|-------|-------|-------|-------|-------|-------|-------|--------|-------|
| 103.8 | 105.3 | 99.3  | 94.6  | 100.5 | 102.2 | 103.5 | 104    | 103.1 |
| 103.9 | 107.2 | 98.8  | 103.4 | 96.6  | 113.8 | 101.8 | 118.4  | 112   |
| 120.5 | 114.4 | 102.8 | 112.4 | 99.5  | 123.5 | 101.5 | 133.9  | 143   |
| 107.1 | 106.9 | 99.6  | 105.9 | 91.3  | 105.5 | 103.8 | 116.5  | 110.9 |
| 114.8 | 110.6 | 100.5 | 92.1  | 96.5  | 111.2 | 110   | 105.1  | 108.3 |
| 110.8 | 107.9 | 100.7 | 105.7 | 99.9  | 100.7 | 109.5 | 110.8  | 108.9 |
| 112.8 | 117.4 | 99.9  | 98.2  | 93.8  | 108.2 | 102.9 | 104.1  | 101.2 |
| 209.2 | 217.2 | 198.5 | 211.9 | 168.2 | 171.4 | 203.3 | 292.9  | 186.9 |
| 101.1 | 115.4 | 107.7 | 106.5 | 99.5  | 108.5 | 105.4 | 116.2  | 127.9 |
| 105.3 | 107.5 | 105.1 | 105.1 | 101.6 | 113.6 | 106.5 | 119.8  | 130   |
| 118.8 | 113.6 | 107.6 | 121.3 | 101.7 | 111.6 | 105.6 | 108.4  | 112.2 |
| 111.4 | 111.1 | 108.1 | 113.7 | 98.5  | 111.9 | 103.6 | 114.8  | 119.3 |
| 103.2 | 108.7 | 106.6 | 101.8 | 97.4  | 110.4 | 100.1 | 116.8  | 115.7 |
| 122.3 | 143.7 | 152.3 | 154.4 | 123.9 | 148.9 | 145.2 | 145.7  | 134.8 |
| 101.6 | 106.8 | 107.7 | 104.9 | 96.4  | 99.8  | 102.4 | 100.1  | 112.7 |
| 115.4 | 158.2 | 123.3 | 169   | 115.6 | 111.8 | 122.7 | 129.5  | 124.2 |
| 94.4  | 112.6 | 98.4  | 89.5  | 92.8  | 100.9 | 99.5  | 94.5   | 104.7 |
| 100.2 | 107.9 | 105.1 | 98.3  | 90    | 107.9 | 102.6 | 109.2  | 106.9 |
| 107.1 | 108.8 | 102.5 | 100.1 | 98.6  | 106.7 | 104.2 | 104.4  | 108.7 |
| 111.6 | 104.8 | 101.9 | 98.4  | 97    | 103   | 107.5 | 107.8  | 107.4 |
| 109.7 | 120.9 | 104.1 | 98.7  | 100.2 | 112   | 110.1 | 115.2  | 106.7 |
| 122.2 | 108.2 | 106   | 114.6 | 104   | 119.7 | 104.7 | 138.7  | 128.3 |
| 106.5 | 111.6 | 111.8 | 101.3 | 100   | 115   | 99    | 121.9  | 108.3 |
| 105.8 | 104.9 | 100.3 | 90.3  | 92.2  | 104.1 | 102.5 | 101.3  | 107.5 |
| 124.4 | 162.6 | 165.8 | 137.9 | 152.5 | 152.1 | 158   | 151    | 143.2 |
| 103.7 | 112   | 103.8 | 111.3 | 97.4  | 105.5 | 96.1  | 107.2  | 107.2 |
| 121.1 | 108.2 | 107.9 | 108.8 | 101.8 | 114   | 114.3 | 117.1  | 124.6 |
| 100.5 | 111.5 | 98.8  | 94.9  | 88.7  | 100.3 | 100.9 | 107.3  | 107.2 |
| 112.8 | 95.9  | 105.4 | 106.1 | 91.6  | 104.9 | 99.8  | 111.9  | 114.2 |
| 103.7 | 110.4 | 109.2 | 98.3  | 100.6 | 115.9 | 102.6 | 111.8  | 108.5 |
| 100.7 | 107.6 | 101.8 | 105   | 102.9 | 106.1 | 101   | 119.7  | 113.5 |
| 102.6 | 104.9 | 100.3 | 98.6  | 101.8 | 115.7 | 101.4 | 112.4  | 104.4 |
| 98.2  | 101.8 | 106.4 | 90.8  | 91.9  | 103.1 | 104.3 | 104.3  | 106.7 |
| 110.2 | 106.3 | 101   | 100.3 | 89.9  | 112.8 | 101.5 | 107.3  | 105.8 |
| 159.3 | 155.9 | 130.5 | 151   | 135.8 | 146.1 | 122.8 | 187.7  | 168.3 |
| 110.5 | 109.6 | 98.7  | 97.3  | 104.8 | 118.3 | 103.2 | 110.7  | 112.9 |
| 110.8 | 111.4 | 104.3 | 95.7  | 89.6  | 111.6 | 98.6  | 106.9  | 107.2 |
| 116.8 | 105.9 | 102.8 | 101.8 | 96.2  | 96.8  | 104.2 | 103.5  | 112   |
| 113   | 115.9 | 105   | 106.5 | 96.2  | 115   | 119.2 | 118.4  | 122.8 |
| 104   | 118.9 | 110.8 | 112.7 | 100.5 | 115.9 | 101.6 | 119.1  | 115.8 |
| 101.9 | 106.1 | 97.8  | 99.8  | 90.1  | 100.5 | 113.4 | 102.1  | 99.3  |
| 113.1 | 116.6 | 98.4  | 95.9  | 101.8 | 110.4 | 107.8 | 118.1  | 105.2 |
| 425   | 743.8 | 763   | 485.2 | 623   | 631.2 | 589.3 | 1053.6 | 575.5 |
| 114.2 | 125.2 | 115.2 | 119.6 | 103.8 | 112.4 | 113.2 | 122.3  | 118.7 |
| 108.5 | 109.6 | 104   | 98.1  | 105.4 | 103.5 | 97.6  | 108    | 114.7 |
| 100   | 113.6 | 94.9  | 95.6  | 92.2  | 107.2 | 94.5  | 106.9  | 105.5 |
| 132.4 | 164.8 | 177.6 | 154.2 | 137.6 | 190.7 | 189.2 | 187.9  | 159.7 |
| 96    | 105.6 | 102.8 | 106.1 | 93.6  | 106.2 | 106.4 | 113.3  | 107.4 |
| 132.2 | 141.6 | 156.4 | 133.7 | 118.4 | 140.4 | 149.9 | 170.6  | 167.9 |
| 100.6 | 99.4  | 99.8  | 91.5  | 91.2  | 102.3 | 95.8  | 107.1  | 105.1 |
| 97.7  | 109.6 | 104.1 | 101.5 | 97.8  | 107.9 | 106.7 | 112.5  | 104.9 |

|        |        |        |        |        |        |        |        |        |
|--------|--------|--------|--------|--------|--------|--------|--------|--------|
| 110.5  | 106.1  | 107.8  | 103.6  | 99.5   | 116.1  | 103.9  | 121.8  | 112.5  |
| 118    | 151.3  | 120.2  | 126.2  | 100.3  | 124.7  | 157.9  | 156.9  | 126.6  |
| 1073.3 | 1445.8 | 1114.3 | 1173.7 | 1086.8 | 1253.2 | 1142.9 | 2453.1 | 1869.6 |
| 99.3   | 108.9  | 106.4  | 108.2  | 103    | 113.6  | 103.3  | 124.6  | 102.1  |
| 118.5  | 119.8  | 109.4  | 100.3  | 91     | 108.3  | 101.3  | 127    | 103.2  |
| 129.3  | 181.7  | 142.3  | 136.3  | 140.8  | 156.8  | 174.9  | 187.7  | 161.8  |
| 112.3  | 118.1  | 120    | 106.2  | 102.9  | 105    | 102.8  | 131.7  | 114    |
| 101.2  | 94.7   | 103.6  | 101.2  | 88.7   | 110.2  | 96     | 103.1  | 100.1  |
| 107.9  | 109.9  | 103.7  | 102.2  | 91.8   | 123.4  | 97.2   | 110.5  | 109.3  |
| 108.6  | 113.2  | 103.5  | 104.7  | 98     | 107.5  | 113    | 110.9  | 108.7  |
| 452    | 689.7  | 534.5  | 643.8  | 569.7  | 640.5  | 745.5  | 1219.8 | 977.9  |
| 131.7  | 118.4  | 124.6  | 100.3  | 99.9   | 119.4  | 107.4  | 172.1  | 151.2  |
| 105.5  | 113.1  | 113.5  | 107.8  | 108.4  | 121.4  | 105.5  | 120.4  | 119.5  |
| 122.3  | 130.3  | 106.5  | 109    | 103.5  | 119.9  | 118.5  | 111.1  | 121.3  |
| 120.3  | 104.9  | 114.3  | 106.1  | 103.6  | 120.9  | 98.8   | 114.6  | 108.2  |
| 106.3  | 105.8  | 104    | 98.3   | 100.5  | 117.3  | 105.6  | 106.8  | 105    |
| 115.1  | 109.7  | 114.4  | 104.3  | 95.6   | 104.7  | 103    | 116.4  | 123.4  |
| 103    | 109.4  | 101.9  | 104.8  | 95.8   | 107.9  | 101.2  | 113.2  | 110    |
| 108.1  | 112.2  | 108.7  | 96.5   | 96.4   | 108.7  | 97.5   | 106.8  | 111.3  |
| 103.5  | 110.5  | 104.7  | 109.4  | 101.8  | 108.2  | 101.6  | 111.1  | 116.3  |
| 108    | 107.4  | 104    | 108.9  | 97.9   | 104.5  | 105.2  | 114.3  | 107.8  |
| 128.6  | 174.5  | 134    | 139.2  | 120    | 122.5  | 137.3  | 135.6  | 125.6  |
| 108.3  | 114.4  | 111.5  | 119.5  | 101.9  | 118.7  | 112.8  | 132.4  | 115    |
| 96.2   | 109.5  | 100.5  | 101.2  | 98.4   | 112.7  | 104.8  | 109.4  | 106.1  |
| 126.7  | 143    | 122.1  | 127.4  | 114    | 130.6  | 128.3  | 182.1  | 148.3  |
| 110.5  | 104.6  | 96.8   | 99.2   | 93.6   | 108.6  | 101.3  | 110.7  | 104.7  |
| 545.4  | 471.1  | 376.3  | 461.3  | 417.4  | 407.8  | 500.3  | 922    | 930.3  |
| 136.1  | 138.1  | 111.8  | 115.8  | 111.7  | 135.2  | 112.6  | 164.2  | 125.7  |
| 179.1  | 171.9  | 176    | 132.8  | 175.2  | 214.7  | 158.3  | 349.4  | 155.9  |
| 103.4  | 109.7  | 96.4   | 101.6  | 94.4   | 105.4  | 102.9  | 106.1  | 110.6  |
| 114    | 108    | 112.7  | 89.6   | 100.8  | 113.3  | 103.4  | 116.9  | 119.2  |
| 104.4  | 102.3  | 101.8  | 92.2   | 91.4   | 98.5   | 102.8  | 99     | 110.4  |
| 103.8  | 110.3  | 94.8   | 98.9   | 96.7   | 108.6  | 104.2  | 105.1  | 116    |
| 100.4  | 99     | 106.7  | 99.4   | 92.1   | 116.7  | 101.4  | 108.9  | 102.9  |
| 108    | 112.4  | 126.9  | 110.5  | 106.2  | 121.8  | 110.9  | 125.6  | 117.3  |
| 107.2  | 106.5  | 109    | 106.2  | 94.9   | 110.3  | 99.5   | 100.1  | 106.5  |
| 458.5  | 697.4  | 966.7  | 720.1  | 561.9  | 670.7  | 1031.9 | 1319.9 | 596.9  |
| 2172.8 | 1253.9 | 1256.6 | 1111   | 1474   | 1548.5 | 1286.5 | 2790.6 | 2237.4 |
| 103.3  | 111.3  | 113.5  | 106.9  | 99.8   | 111.6  | 102.4  | 107.8  | 112    |
| 113.1  | 109.4  | 111    | 101.9  | 95.1   | 107.5  | 101    | 108.9  | 115.8  |
| 106.1  | 106.5  | 108.6  | 94.2   | 93.2   | 105.9  | 106.7  | 123.1  | 115    |
| 110.8  | 124.9  | 116.5  | 116.5  | 118.7  | 123.6  | 110.6  | 119.9  | 114    |
| 108.5  | 108.1  | 97.3   | 113.6  | 107.2  | 112.2  | 107.6  | 103.8  | 104.7  |
| 113.3  | 107.8  | 108.5  | 107.1  | 101.6  | 111    | 103.9  | 114.8  | 113.7  |
| 103.9  | 100.7  | 108.3  | 103.7  | 103.8  | 109.7  | 99.7   | 101.2  | 106.7  |
| 108.4  | 116.3  | 103.4  | 103.9  | 105.2  | 114.6  | 103.4  | 108.9  | 111.2  |
| 319.3  | 349.9  | 307    | 308    | 314.8  | 371.6  | 268.9  | 514.3  | 340.1  |
| 104.6  | 110.6  | 102    | 90     | 97.2   | 100.6  | 101.9  | 108.2  | 109    |
| 100.8  | 101.1  | 98.7   | 101.9  | 91.4   | 107.7  | 96.8   | 104.2  | 109.9  |
| 103.9  | 101    | 99     | 103.6  | 95.7   | 105.8  | 107.9  | 97.7   | 105.3  |
| 101.6  | 103.6  | 102.2  | 89.9   | 89.7   | 102.9  | 96.5   | 98.2   | 101.1  |

|         |         |         |         |         |         |         |         |         |
|---------|---------|---------|---------|---------|---------|---------|---------|---------|
| 100.3   | 111.3   | 98.9    | 90.6    | 93.4    | 108.5   | 104.6   | 112.3   | 107.7   |
| 131.8   | 143.6   | 130.2   | 137.5   | 123.1   | 135.7   | 128.7   | 169     | 158.2   |
| 104.2   | 111.1   | 109.2   | 106.6   | 96.4    | 108.4   | 106.4   | 108.8   | 107.4   |
| 102.8   | 108.6   | 93.3    | 91.2    | 91.2    | 111.3   | 96.1    | 109.3   | 104     |
| 5332.1  | 4251.1  | 4411.9  | 3849.5  | 3570.1  | 4315.5  | 2888.1  | 8609.6  | 8909.9  |
| 110     | 119.9   | 107.3   | 109.9   | 103.8   | 113     | 107.4   | 111.2   | 116.1   |
| 105     | 109.3   | 107.8   | 112.6   | 96.4    | 112.5   | 103.4   | 114.7   | 105.6   |
| 105.7   | 113.7   | 110.9   | 97.7    | 100     | 109.2   | 100.7   | 118     | 115.8   |
| 18866.7 | 19472.7 | 16498.7 | 18948.7 | 17678.8 | 14382.5 | 13065.8 | 30429.7 | 28574.6 |
| 109.7   | 107.5   | 112.2   | 98.6    | 102.3   | 112.7   | 104     | 118.1   | 115.6   |
| 105     | 107.9   | 108.7   | 103.1   | 97.4    | 116.4   | 108.8   | 106.7   | 115.1   |
| 111.6   | 110.5   | 102.6   | 95.9    | 98      | 110.3   | 100.4   | 104.1   | 104.6   |
| 109.8   | 100.8   | 104     | 101.8   | 96.7    | 108.5   | 98.6    | 113.3   | 106.9   |
| 104     | 108.2   | 100.6   | 106.2   | 96.2    | 105.3   | 101.5   | 114.5   | 110.2   |
| 112.3   | 110.8   | 114.1   | 107     | 99.3    | 106.6   | 115.2   | 132.6   | 123.3   |
| 116.1   | 108.8   | 104.3   | 105.5   | 96.6    | 109.3   | 108.6   | 130.2   | 116.9   |
| 101.6   | 100.9   | 98.2    | 100.6   | 96.2    | 109     | 97.9    | 116.6   | 107.5   |
| 101.4   | 110.9   | 94.7    | 91.8    | 94.8    | 110.9   | 105.2   | 112.7   | 106.5   |
| 106     | 113.2   | 99.1    | 101.7   | 93.8    | 107     | 103.8   | 101.9   | 106.6   |
| 778.5   | 744.3   | 2866.7  | 1093.9  | 741.9   | 3045.9  | 878.8   | 1350.1  | 5989    |
| 99.2    | 100.9   | 100.5   | 103.8   | 89.9    | 113.7   | 93.2    | 107     | 111.3   |
| 143.5   | 194     | 162.6   | 128.5   | 145.9   | 160.1   | 127.4   | 188.2   | 148.7   |
| 1403.9  | 1235.2  | 1092.9  | 1024.2  | 972.1   | 1430.3  | 993.3   | 3064.2  | 3959.6  |
| 102.9   | 107.8   | 104.4   | 110     | 97.3    | 110.8   | 100.6   | 118.4   | 107.6   |
| 114     | 109.9   | 109.2   | 110.3   | 100.3   | 114.9   | 115.9   | 119.9   | 113.2   |
| 109.6   | 116.5   | 107.1   | 96.8    | 99.8    | 109.4   | 105.1   | 113.8   | 107.9   |
| 103.8   | 107.1   | 100.3   | 98.3    | 93.7    | 103     | 101.2   | 97.6    | 108.2   |
| 102.8   | 112.7   | 114.3   | 97.3    | 101.6   | 121.3   | 112.2   | 123.7   | 112.4   |
| 105.4   | 103.1   | 107.5   | 97.1    | 96.9    | 103.4   | 100.9   | 107.7   | 107.2   |
| 94.4    | 102.4   | 90.5    | 91.1    | 97.8    | 103.4   | 102.6   | 103.4   | 94.8    |
| 109.1   | 107.4   | 97.9    | 92.3    | 92.1    | 106.1   | 102.7   | 108     | 104.6   |
| 110.7   | 99.7    | 103.7   | 99.9    | 99.2    | 102.9   | 101.7   | 104.3   | 106.7   |
| 479.5   | 463.4   | 395.6   | 407.1   | 300     | 475.2   | 423.3   | 768.1   | 675.9   |
| 130.8   | 133     | 130     | 162.5   | 123.8   | 145.1   | 127.4   | 243.6   | 187.6   |
| 103.2   | 106.1   | 100.9   | 102.1   | 94.7    | 111.1   | 98.6    | 98      | 104.2   |
| 175.4   | 401.3   | 348.3   | 346.1   | 286.4   | 376.3   | 274.1   | 428.5   | 315.8   |
| 107.3   | 108.1   | 100.1   | 100.3   | 94.7    | 99.6    | 98.1    | 111.9   | 119.6   |
| 104.4   | 105.4   | 102.7   | 98.6    | 96.2    | 104.1   | 96      | 110.9   | 102.3   |
| 109.9   | 106.7   | 111.2   | 99.6    | 103.8   | 120.5   | 111.1   | 124.2   | 114     |
| 112.5   | 118     | 101.7   | 105.8   | 100.3   | 105.6   | 100.4   | 110.9   | 103.5   |
| 111     | 115     | 100     | 107.2   | 95.9    | 114.7   | 99.3    | 114.5   | 112.4   |
| 108.7   | 115.9   | 103.4   | 104.8   | 95.1    | 115.6   | 103.7   | 119.5   | 109.8   |
| 110.9   | 171.2   | 119.9   | 134.8   | 131.1   | 121.3   | 129.7   | 135.5   | 110.7   |
| 127.9   | 112.9   | 109.2   | 109.8   | 99.6    | 115.5   | 100.4   | 128.8   | 128     |
| 111.3   | 109.8   | 104.6   | 96      | 100     | 108.7   | 106.5   | 104.9   | 120.1   |
| 105.7   | 109.3   | 105.6   | 104.5   | 94.3    | 105.1   | 102.4   | 113.1   | 99.4    |
| 103.9   | 103.6   | 97.3    | 101.6   | 97.1    | 112.2   | 110.7   | 115.9   | 109     |
| 106.7   | 112.4   | 101.5   | 104.6   | 96.4    | 104.6   | 99.6    | 105.5   | 108.1   |
| 114.9   | 103.3   | 97.2    | 99.7    | 89.7    | 102.3   | 101.9   | 108.1   | 106.4   |
| 111.3   | 122.3   | 101.3   | 130.8   | 104.6   | 115.2   | 110.8   | 127.2   | 124.6   |
| 112.1   | 119.1   | 99.4    | 102     | 91.2    | 103.7   | 98.5    | 115.3   | 100.7   |

|        |        |        |        |        |        |        |        |        |
|--------|--------|--------|--------|--------|--------|--------|--------|--------|
| 108.9  | 110.9  | 109.9  | 111.9  | 99.7   | 114.3  | 113.1  | 107.9  | 115.4  |
| 114    | 103.9  | 103.8  | 97.6   | 92.8   | 108    | 99.1   | 105.6  | 104.1  |
| 114.3  | 102.9  | 99.8   | 98.1   | 100.4  | 103.8  | 100.5  | 117.3  | 106    |
| 105.2  | 111.6  | 106.7  | 101    | 96     | 104    | 103.3  | 105.9  | 103.6  |
| 105.9  | 109.4  | 102    | 104.3  | 96.9   | 106.9  | 102    | 108    | 105.6  |
| 109.4  | 101.2  | 98.8   | 98.2   | 92.7   | 105.1  | 94     | 104.2  | 103.2  |
| 106    | 99.2   | 98.7   | 105.4  | 94.4   | 109.4  | 97     | 110.1  | 112.2  |
| 4166.2 | 5347.1 | 3559.3 | 5468.5 | 3386.2 | 3350.1 | 3996.4 | 6098.3 | 4759.9 |
| 100    | 101.1  | 96.3   | 97.8   | 90.9   | 103.2  | 97.4   | 112.9  | 108.8  |
| 103.8  | 107    | 96.8   | 91.5   | 93.4   | 104.2  | 102.6  | 105.5  | 108.2  |
| 102.9  | 106.3  | 96.6   | 94.8   | 88.9   | 103.2  | 100.3  | 107.5  | 114.1  |
| 100.4  | 109.8  | 99.8   | 89     | 97.2   | 118.6  | 93.9   | 104.1  | 104.4  |
| 101.4  | 110.7  | 101.9  | 114.4  | 96.7   | 108.6  | 94.2   | 111.7  | 101.5  |
| 109.1  | 101.1  | 98.6   | 90.1   | 100.5  | 96.9   | 100    | 111.3  | 106.7  |
| 97.5   | 107.3  | 100.3  | 106.1  | 97.2   | 109.8  | 98     | 105.1  | 110.9  |
| 109.7  | 115.2  | 109.1  | 101.4  | 91.6   | 114.3  | 112.7  | 129.9  | 116.8  |
| 119.7  | 106.9  | 108.5  | 101.4  | 98.7   | 109.3  | 113.1  | 114    | 113.2  |
| 100.8  | 114.1  | 101.1  | 101.2  | 91.4   | 101.2  | 106.9  | 107.6  | 107.3  |
| 429.3  | 440.3  | 470.6  | 423    | 397.2  | 470.5  | 434.5  | 587.3  | 576.1  |
| 109.1  | 109.9  | 98.3   | 102.6  | 103    | 105.1  | 99.7   | 111    | 103    |
| 109.2  | 108.2  | 108    | 98.8   | 100.6  | 117.8  | 104.6  | 116.9  | 108.4  |
| 105.3  | 109.9  | 103.4  | 96.6   | 91.9   | 105.7  | 99.8   | 115    | 109.2  |
| 102.2  | 114.5  | 100.2  | 102.8  | 100.9  | 107.5  | 109.9  | 122    | 105.9  |
| 105.4  | 106.8  | 97.6   | 91.2   | 94.9   | 96.5   | 96.8   | 106.1  | 111.1  |
| 114.7  | 116.2  | 101.5  | 105.2  | 94.4   | 105.9  | 107.3  | 103.7  | 101.7  |
| 111.3  | 118.8  | 99.3   | 102.4  | 97.6   | 107.1  | 101    | 117    | 101.3  |
| 112.4  | 107.5  | 108.3  | 108.9  | 100.4  | 114.1  | 107.8  | 107.6  | 109    |
| 103.2  | 116.6  | 121.2  | 121.4  | 107.4  | 123.7  | 110.5  | 117.2  | 108.1  |
| 98.5   | 104.2  | 94.1   | 100.2  | 98.3   | 101.8  | 98.9   | 109    | 108.7  |
| 106.1  | 112    | 108.5  | 96.9   | 99.6   | 114.2  | 102    | 114.3  | 117.3  |
| 115.6  | 112.3  | 110    | 106.4  | 92.7   | 109.4  | 96.9   | 105.9  | 104    |
| 114    | 116.2  | 97.8   | 108.1  | 95.3   | 108.1  | 105.2  | 106.4  | 113.7  |
| 114.7  | 113    | 111    | 101.1  | 107.4  | 112.2  | 105.7  | 106.9  | 110.9  |
| 109.5  | 108.2  | 108    | 103.3  | 100    | 109    | 103.5  | 115    | 109.3  |
| 112.4  | 108.4  | 108.6  | 106.7  | 99.7   | 117.4  | 107.3  | 108.2  | 112.1  |
| 888.5  | 1993   | 1416.8 | 1945.8 | 1218.8 | 932.1  | 1861.8 | 1338.7 | 791.7  |
| 742.1  | 1184.9 | 770.7  | 1164.5 | 552.8  | 757.5  | 659.4  | 1617.7 | 864    |
| 109.9  | 102.1  | 99.9   | 102.9  | 90.8   | 102.9  | 98.1   | 99.8   | 109.8  |
| 108.9  | 116.2  | 103.7  | 119    | 97.4   | 118.3  | 109.4  | 117.2  | 108.5  |
| 112.9  | 111.9  | 99.1   | 108.1  | 98.1   | 111.3  | 105.7  | 109.9  | 106.1  |
| 108.7  | 107.6  | 106.2  | 110.3  | 91.9   | 103.9  | 104.3  | 107.7  | 109.2  |
| 112.6  | 108.3  | 107.1  | 108.4  | 97.6   | 110.2  | 110    | 115.8  | 113.5  |
| 100.9  | 118.5  | 103.6  | 102    | 93.8   | 117.3  | 107.7  | 97.8   | 107.7  |
| 105.1  | 108.6  | 96     | 94.3   | 90.5   | 102.5  | 104.4  | 109.6  | 109.1  |
| 109.6  | 111.4  | 105.9  | 120.7  | 101.4  | 112.9  | 106.3  | 109.6  | 106    |
| 105.3  | 105.9  | 105.6  | 105.4  | 98.9   | 112.7  | 101.3  | 109.9  | 110.5  |
| 102.2  | 104.6  | 98.5   | 97.8   | 92.7   | 99.8   | 101.7  | 109.7  | 100.8  |
| 109.9  | 122.8  | 98.1   | 106.9  | 106.1  | 109    | 99     | 123.5  | 116.7  |
| 115.4  | 134.4  | 138.8  | 106.6  | 114.6  | 137.7  | 138.9  | 155.4  | 133.7  |
| 106.8  | 105.7  | 101.8  | 101.9  | 92.7   | 99.8   | 98.6   | 115.5  | 106.5  |
| 124.6  | 114.5  | 113.5  | 111.6  | 101.9  | 103.9  | 110.5  | 128.1  | 119.6  |

|        |        |        |        |        |        |        |        |        |
|--------|--------|--------|--------|--------|--------|--------|--------|--------|
| 168.3  | 155    | 166.5  | 168.3  | 146.7  | 165.5  | 199.3  | 283.6  | 252.9  |
| 113.5  | 115.7  | 98.9   | 105.7  | 104.5  | 109.3  | 112.3  | 133    | 129.3  |
| 99.7   | 108.2  | 100.3  | 114.7  | 98.3   | 112.5  | 99.8   | 110.6  | 118.1  |
| 106.1  | 109.5  | 100.3  | 103.2  | 93.9   | 107.7  | 104.2  | 98.8   | 100.2  |
| 105.8  | 116.5  | 96.6   | 122.3  | 103.4  | 120.6  | 96.7   | 116.5  | 119.3  |
| 100.7  | 108.1  | 99     | 109.9  | 100.3  | 105.3  | 104.4  | 113.7  | 114.4  |
| 106.1  | 101.2  | 101.6  | 114.3  | 94.3   | 112.4  | 114.5  | 107.7  | 103.3  |
| 109    | 105.2  | 108.1  | 112.9  | 95.5   | 110    | 101.8  | 106.6  | 111.1  |
| 106.3  | 105.5  | 99.5   | 101.5  | 101.2  | 111    | 100    | 101.3  | 108.4  |
| 104.3  | 110.1  | 106.3  | 94.3   | 97.6   | 102.7  | 98.9   | 102.8  | 109.1  |
| 120.1  | 120.5  | 123.3  | 109.9  | 122.1  | 147.7  | 108.3  | 154.3  | 122.9  |
| 137.3  | 135.3  | 133.8  | 140.7  | 123    | 150.6  | 131.7  | 144.7  | 132.1  |
| 97.2   | 109.9  | 102    | 102.5  | 94.4   | 107.2  | 101.8  | 106.4  | 107.6  |
| 109.1  | 111.6  | 98.4   | 98.7   | 96.1   | 102.3  | 104.2  | 107.2  | 109.2  |
| 109.7  | 106.8  | 99.8   | 99.7   | 98.5   | 107.9  | 105.3  | 107.1  | 107.2  |
| 110.4  | 111.8  | 106.3  | 99.4   | 94.3   | 110    | 107.8  | 109.3  | 109.1  |
| 112.4  | 115.4  | 118.2  | 110.3  | 117.7  | 115.3  | 125.7  | 151.5  | 113.9  |
| 116.9  | 115.9  | 117.7  | 133.1  | 95.4   | 126.1  | 102    | 118.5  | 101.2  |
| 104.1  | 107    | 106.8  | 96.7   | 98.2   | 110.6  | 109.4  | 105.5  | 98.6   |
| 108.1  | 118.2  | 98.9   | 104.5  | 98.2   | 112.4  | 106.5  | 118    | 111.1  |
| 132.5  | 126.7  | 119.5  | 124.5  | 132.2  | 143.5  | 131.3  | 158.7  | 136.4  |
| 102.6  | 105.7  | 99.2   | 99.5   | 93     | 99.7   | 102.4  | 104.4  | 102.7  |
| 121.9  | 118.8  | 122.4  | 133.5  | 115.8  | 130    | 121.3  | 122.2  | 127    |
| 116.3  | 113    | 114    | 110.8  | 101.3  | 118.4  | 107.7  | 116    | 110.5  |
| 106.6  | 104.4  | 99.9   | 112.5  | 91     | 116.9  | 113.2  | 112.5  | 113.5  |
| 115    | 113    | 112.9  | 108.2  | 96.9   | 115.5  | 110    | 127.3  | 111.4  |
| 109.3  | 110.3  | 101.9  | 106.1  | 94.8   | 104.8  | 102.5  | 111    | 114.1  |
| 111.8  | 116.4  | 110.7  | 97.1   | 102.4  | 115.3  | 103.1  | 116.9  | 108.5  |
| 107.6  | 108    | 97.6   | 94.8   | 109    | 101.4  | 107.1  | 109.2  | 110.8  |
| 105.1  | 114.5  | 104.8  | 98.9   | 94.7   | 119.6  | 104.2  | 101.3  | 108.6  |
| 105    | 113    | 95     | 110.6  | 99.5   | 113.1  | 105.2  | 111.1  | 116.1  |
| 112.7  | 111.5  | 101.6  | 102.3  | 102    | 103.9  | 105.8  | 113.9  | 117.2  |
| 1477.6 | 1129.5 | 860.8  | 1211.8 | 1399.1 | 1070.8 | 1189.9 | 2870.1 | 1944.6 |
| 105.4  | 103.7  | 98.6   | 94.4   | 96.6   | 105.6  | 97.4   | 106.5  | 104    |
| 107.8  | 110.6  | 88.7   | 97.5   | 96.5   | 103.6  | 99.1   | 100.7  | 101.3  |
| 3403.3 | 2858.3 | 2727.8 | 3124.2 | 2175.4 | 2760.8 | 2771.9 | 5808.1 | 4648.2 |
| 107.9  | 125.4  | 113.1  | 115.6  | 115    | 120    | 119.9  | 129.7  | 120.1  |
| 114.4  | 108.2  | 106.4  | 108.4  | 96     | 118    | 100.8  | 109.7  | 105.5  |
| 109.3  | 113.2  | 110.1  | 125.3  | 97.7   | 122.3  | 108.2  | 118.1  | 106.1  |
| 115.2  | 103.2  | 99.9   | 105.1  | 95.5   | 119.5  | 102    | 114.2  | 104.9  |
| 107.8  | 115.1  | 110    | 118.8  | 95.9   | 111.1  | 102.4  | 119.7  | 110.2  |
| 108.3  | 110.2  | 101.2  | 96.9   | 95.7   | 107    | 110.8  | 118.6  | 99.3   |
| 114.2  | 125    | 121.6  | 111.6  | 101.8  | 123.6  | 107.6  | 125    | 117.2  |
| 115.1  | 128.2  | 109.5  | 103.5  | 100.5  | 126    | 108.6  | 121.3  | 127.6  |
| 107    | 111.6  | 106.3  | 98.3   | 97.2   | 99.8   | 103.7  | 110.7  | 109.2  |
| 114.2  | 105.5  | 106.2  | 104.3  | 97     | 106.3  | 105    | 113.2  | 108.1  |
| 109.6  | 111.7  | 104    | 98.4   | 95.9   | 107.5  | 96.6   | 106.1  | 105.2  |
| 141.8  | 216.9  | 154.1  | 166.8  | 133.7  | 159.4  | 162.8  | 289.2  | 276.1  |
| 99.2   | 110.6  | 106.1  | 98.9   | 98.4   | 107.4  | 102.6  | 117.7  | 109.7  |
| 97.6   | 106.2  | 103    | 102.9  | 90.2   | 105.5  | 98.8   | 105.5  | 104.2  |
| 286.4  | 313.7  | 248.6  | 269.1  | 195.2  | 260.8  | 268.1  | 490.4  | 478.6  |



|       |       |       |       |       |       |       |       |       |
|-------|-------|-------|-------|-------|-------|-------|-------|-------|
| 104.7 | 105.8 | 97.7  | 92.4  | 91.9  | 113.6 | 99.4  | 107.9 | 111.1 |
| 271.1 | 185.2 | 660.9 | 290.1 | 143.7 | 599.5 | 292.3 | 242.6 | 689.5 |
| 105.8 | 108.5 | 105.4 | 95.6  | 94.9  | 106.2 | 107.4 | 104.2 | 102.1 |
| 103.7 | 104.7 | 95    | 101.9 | 89.5  | 106.7 | 104.8 | 107.2 | 113.5 |
| 109.7 | 103.3 | 102.2 | 105.4 | 92.4  | 113.7 | 101.4 | 108.4 | 104.6 |
| 100.5 | 110.9 | 96.8  | 104.6 | 91.7  | 103.5 | 99.5  | 105.5 | 102.1 |
| 109.7 | 108.2 | 109.8 | 100.4 | 93.2  | 103.9 | 111.2 | 111.4 | 117.2 |
| 108.6 | 106.5 | 104.6 | 101.3 | 101.7 | 113.9 | 98.1  | 116.8 | 106.9 |
| 101.9 | 115.6 | 100.8 | 116.2 | 103.6 | 112.2 | 96.7  | 118.8 | 111   |
| 109.1 | 102.1 | 104.3 | 105.2 | 96.8  | 117.3 | 105.8 | 108.8 | 106.8 |
| 98    | 102.7 | 101.5 | 89.8  | 98    | 104.5 | 94.1  | 102   | 105.4 |
| 111.1 | 110.8 | 100.6 | 106.7 | 97.3  | 110.9 | 108.4 | 108.3 | 110.3 |
| 106.2 | 109.4 | 101.3 | 91.4  | 87.3  | 110.4 | 102.7 | 106.1 | 105.3 |
| 109.3 | 120.1 | 101.3 | 98.7  | 93.5  | 110.8 | 99.7  | 112.3 | 110.2 |
| 116.6 | 109.8 | 102   | 96    | 93.1  | 113.6 | 100.8 | 115.1 | 101.9 |
| 132.2 | 120.9 | 113.4 | 112.6 | 106.7 | 120.7 | 119   | 134.5 | 158.6 |
| 112.5 | 104   | 98.9  | 98.4  | 91.8  | 110.4 | 103.1 | 113.6 | 111.7 |
| 104.3 | 107   | 104.7 | 104.1 | 101.5 | 121   | 103.1 | 119.4 | 115.5 |
| 121.3 | 127   | 119.2 | 110.2 | 113.1 | 113.9 | 113.9 | 119.9 | 116.5 |
| 105   | 110.5 | 112.5 | 107.4 | 98.3  | 106.8 | 94.2  | 117.8 | 111.4 |
| 122.2 | 140.5 | 132.9 | 133.3 | 120.7 | 143.4 | 109.4 | 147.5 | 131.3 |
| 105.4 | 105.8 | 99.2  | 89.1  | 89.7  | 93.2  | 94.5  | 100.6 | 95.8  |
| 115   | 107   | 106.3 | 102.2 | 100.4 | 110.2 | 106.9 | 105.8 | 106.7 |
| 141.1 | 120.8 | 123.6 | 126.8 | 117.9 | 132.4 | 127.7 | 141.3 | 142   |
| 105.5 | 103.5 | 101   | 90    | 92.5  | 108   | 97.4  | 103   | 106   |
| 108.8 | 105.3 | 100.4 | 104.1 | 96.8  | 108   | 103.8 | 113.4 | 114.4 |
| 107.2 | 107.2 | 97.1  | 102.8 | 97.6  | 108.2 | 105   | 109.5 | 112.7 |
| 107.4 | 107.2 | 111.1 | 99.2  | 95.2  | 108.4 | 100.6 | 102.3 | 104.9 |
| 104.3 | 100.3 | 92.8  | 92.4  | 90.3  | 94.6  | 101   | 104   | 103.9 |
| 111   | 107.4 | 101.5 | 104.1 | 92    | 108.5 | 104   | 108.5 | 102.6 |
| 108.9 | 110.9 | 101.9 | 109.2 | 91.4  | 108.3 | 105.8 | 112.3 | 114.6 |
| 110.3 | 110.7 | 104.6 | 105.4 | 96.9  | 104.3 | 98    | 118.6 | 120   |
| 110.2 | 100.9 | 98    | 88.5  | 98.3  | 112.3 | 106.5 | 104.5 | 105.4 |
| 102.3 | 110.4 | 96.8  | 96.7  | 91.1  | 108.2 | 105.2 | 99.1  | 99.2  |
| 98.3  | 96.6  | 94.5  | 97.9  | 96.6  | 103.3 | 93.5  | 101.2 | 110.3 |
| 103.4 | 105.1 | 97.9  | 105.6 | 94.6  | 100.3 | 103.8 | 107.6 | 106.5 |
| 102   | 108.4 | 105   | 98.6  | 101.3 | 104   | 104.9 | 105.3 | 104.6 |
| 99.8  | 104.4 | 103.9 | 105.9 | 99.3  | 101.1 | 104.6 | 106.6 | 110.9 |
| 110.5 | 109.2 | 110.1 | 99    | 87.8  | 108.5 | 97.1  | 119.2 | 127.8 |
| 108.4 | 112.7 | 114.8 | 108.9 | 100   | 112.9 | 101.6 | 124.8 | 115.6 |
| 144.6 | 202.8 | 190.8 | 165.3 | 179.7 | 188.4 | 192.7 | 309.8 | 224.5 |
| 138.8 | 138.1 | 122.5 | 118.1 | 119.3 | 141.8 | 116.9 | 198   | 143   |
| 108.3 | 110.2 | 113.1 | 105.4 | 101.7 | 112.4 | 108.6 | 115.2 | 116   |
| 110.9 | 104   | 106.7 | 95.4  | 96.7  | 107.2 | 103.4 | 104.4 | 101.6 |
| 122.6 | 136.7 | 130.4 | 127.2 | 118.6 | 130.1 | 123.8 | 132.3 | 138   |
| 105.5 | 110.5 | 106.6 | 104.2 | 92.8  | 105.1 | 102.1 | 100.7 | 113   |
| 105.9 | 116.7 | 104.9 | 101   | 94.8  | 111.2 | 106.3 | 122.1 | 107.7 |
| 104.1 | 107.8 | 105.5 | 105.6 | 96.3  | 112.1 | 107.6 | 109.3 | 110.3 |
| 107.4 | 108.5 | 104.1 | 104.7 | 96.9  | 110.3 | 99    | 110.1 | 112.4 |
| 104.7 | 108.1 | 102.8 | 103   | 99.7  | 110.4 | 100   | 110.5 | 102.1 |
| 113.7 | 109.9 | 106.7 | 109.9 | 99.4  | 114.5 | 106.6 | 118.8 | 114.9 |

|         |         |         |         |         |         |         |         |         |
|---------|---------|---------|---------|---------|---------|---------|---------|---------|
| 108     | 117.1   | 102.6   | 114.2   | 99.2    | 109.4   | 96      | 104.4   | 111.2   |
| 105.7   | 123.8   | 119.6   | 117     | 102.5   | 114.3   | 121.5   | 141.1   | 131.7   |
| 99.2    | 105     | 100.4   | 94.3    | 99.3    | 103.4   | 99.6    | 112     | 98.6    |
| 107.7   | 123.7   | 104.4   | 108.9   | 102.6   | 114.5   | 116.2   | 116.5   | 115     |
| 102.4   | 105.4   | 104     | 95      | 95      | 107.3   | 105.2   | 110.4   | 105.2   |
| 106.3   | 113.1   | 104.5   | 106.8   | 102.6   | 110.4   | 106.3   | 108.2   | 108.4   |
| 257.3   | 445.1   | 512.1   | 378.4   | 418.2   | 574.4   | 439.1   | 870.6   | 562.4   |
| 105.4   | 112.4   | 96      | 92.5    | 92.9    | 107.8   | 97.9    | 111.7   | 109.7   |
| 113.7   | 106.6   | 116.9   | 110.7   | 105     | 102.3   | 110.1   | 121.5   | 112.4   |
| 216.2   | 210.9   | 209     | 210.4   | 163     | 205.1   | 198.7   | 330.6   | 323.6   |
| 173.6   | 169.1   | 173.3   | 137.6   | 150.8   | 178.5   | 149.1   | 231     | 201.8   |
| 113     | 102     | 106.1   | 101.7   | 97.1    | 105.3   | 105.4   | 114     | 111.9   |
| 101.9   | 116.8   | 104.5   | 105.7   | 107.9   | 116.8   | 107.4   | 126.5   | 114.7   |
| 2866.9  | 2076    | 4565.3  | 2522.6  | 2782.8  | 3192.8  | 2718.4  | 7655.4  | 7791.1  |
| 109.1   | 120.8   | 114.6   | 108.8   | 119.9   | 115.5   | 114     | 137.9   | 125.5   |
| 142.5   | 139.6   | 127.5   | 127.1   | 122.5   | 145.7   | 119.7   | 142.7   | 139.4   |
| 488.8   | 952.5   | 786.1   | 735.1   | 742.2   | 852.8   | 810.4   | 1032    | 886.1   |
| 105.4   | 106.7   | 105.8   | 100.6   | 99.8    | 110.1   | 105     | 114.4   | 119.5   |
| 102.8   | 100.4   | 100.6   | 103.5   | 97.2    | 105.1   | 101.6   | 106.6   | 104.5   |
| 106.1   | 117.3   | 114.2   | 123.9   | 105.7   | 133.2   | 120.8   | 139.3   | 120.6   |
| 130.4   | 131.6   | 124.4   | 118.9   | 103.6   | 126.3   | 122     | 141.9   | 128.5   |
| 107.2   | 106.8   | 102     | 95.5    | 94.7    | 112.8   | 101.1   | 116.8   | 114.7   |
| 146.8   | 177.9   | 166.4   | 142     | 165.3   | 195.9   | 168.4   | 268.8   | 207.5   |
| 156     | 240.3   | 242.4   | 222.4   | 188.8   | 227.1   | 199.7   | 291.1   | 194.8   |
| 1257.7  | 1177    | 1345.4  | 1155.5  | 1607.1  | 1364.8  | 949.4   | 2713.8  | 2488.9  |
| 307.9   | 299.1   | 296.8   | 299.1   | 278.9   | 372.9   | 331     | 554.8   | 360.1   |
| 119.9   | 136.7   | 127.1   | 118.6   | 117.3   | 119.2   | 123.5   | 155.6   | 148.4   |
| 120.9   | 123.6   | 129     | 150.1   | 117.1   | 138.6   | 122.1   | 159     | 139.5   |
| 122.1   | 132.8   | 130.9   | 125.6   | 113.7   | 125     | 130.7   | 149.4   | 132.3   |
| 110.1   | 216.1   | 157.5   | 175.3   | 158     | 128     | 180.3   | 117.1   | 103     |
| 165.2   | 256.9   | 212.7   | 253.8   | 221.6   | 267.6   | 251.7   | 402.2   | 277     |
| 111.2   | 122.5   | 117     | 121.1   | 98.2    | 128.3   | 111.6   | 114.4   | 123.8   |
| 107.2   | 131.7   | 122.3   | 107     | 112.4   | 121.3   | 109.7   | 146.1   | 120.4   |
| 111.1   | 109.6   | 117     | 101.4   | 101     | 118     | 106.7   | 114.7   | 117.8   |
| 20622.8 | 21532.9 | 23233.6 | 19842.4 | 19457.5 | 22931.4 | 21078.4 | 30151.9 | 18528.9 |
| 106.2   | 116.9   | 107.6   | 112.3   | 96.8    | 115.7   | 102.4   | 116.4   | 124     |
| 147.8   | 199.7   | 148.6   | 161.4   | 155.9   | 158.1   | 165     | 221.5   | 204.4   |
| 114.7   | 130.1   | 107.3   | 110.6   | 114.7   | 108.3   | 103.6   | 117     | 122.2   |
| 104.1   | 109.9   | 107.7   | 112.8   | 94      | 112.1   | 103     | 112.2   | 106.1   |
| 142     | 129.6   | 112.5   | 116.8   | 112     | 119.2   | 129     | 140.2   | 119.9   |
| 116.8   | 133.8   | 121.3   | 110.3   | 104.4   | 120.8   | 115.3   | 123.8   | 118.9   |
| 101.3   | 110.9   | 98.9    | 91      | 93.9    | 116.8   | 102.7   | 115.2   | 109.5   |
| 108.3   | 126.1   | 116.3   | 115     | 108.6   | 131.4   | 116.9   | 128.3   | 121.4   |
| 680.7   | 530     | 708.2   | 622.2   | 708     | 630     | 603.8   | 1275.5  | 981.4   |
| 119.6   | 124.5   | 107.7   | 104.6   | 106.1   | 107.2   | 114.3   | 130.4   | 120.1   |
| 173.9   | 268.8   | 260.5   | 225.7   | 233.7   | 254.8   | 280.7   | 354.9   | 234.2   |
| 110.5   | 126     | 110.1   | 112.9   | 111     | 111.9   | 121.2   | 122.3   | 136     |
| 113.1   | 120.8   | 113.8   | 113.2   | 103.9   | 119.1   | 102.1   | 124.9   | 112.6   |
| 107.6   | 105.9   | 106.7   | 103.9   | 103.3   | 108.7   | 106.1   | 121.8   | 118.8   |
| 113.1   | 106.4   | 93.2    | 91.9    | 95.1    | 100.2   | 103.8   | 99.9    | 100.1   |
| 118.8   | 134     | 120.1   | 115.9   | 122.9   | 130.2   | 118.5   | 125     | 120.5   |

|        |        |        |        |        |        |        |        |        |
|--------|--------|--------|--------|--------|--------|--------|--------|--------|
| 139.4  | 142.5  | 126.5  | 110.1  | 126.6  | 139.2  | 139    | 170.4  | 150.8  |
| 103.8  | 106.9  | 97.2   | 94.5   | 93.1   | 107.6  | 98     | 118.3  | 103.2  |
| 131.8  | 126.3  | 132.8  | 114.8  | 135.8  | 142.6  | 117.1  | 208.6  | 123.2  |
| 107.2  | 102.4  | 98.7   | 95.1   | 101.1  | 120.3  | 109.1  | 107.2  | 112.8  |
| 105.4  | 114.6  | 105    | 94.6   | 92.2   | 105.4  | 103.5  | 100.8  | 103    |
| 102.3  | 97.3   | 100.2  | 109.9  | 97.3   | 112.2  | 99.8   | 111.6  | 105.5  |
| 106.4  | 113.8  | 109.6  | 114    | 109.8  | 120.2  | 103.9  | 118.7  | 115.5  |
| 100.1  | 104.3  | 102.8  | 101.9  | 90.8   | 104.9  | 100.2  | 106.6  | 103.5  |
| 103.5  | 112.8  | 102.9  | 102.4  | 87.9   | 100.2  | 101.9  | 102    | 111.4  |
| 102.9  | 107.8  | 98.1   | 99.3   | 97.6   | 106    | 103.3  | 110.9  | 109.5  |
| 114.9  | 109.9  | 105    | 123.1  | 99.7   | 111    | 118.1  | 114.6  | 109.6  |
| 97.8   | 114.9  | 104.4  | 93.6   | 95.8   | 100.5  | 102.2  | 108    | 112.3  |
| 110.1  | 113.6  | 103.9  | 102.7  | 93.8   | 112.7  | 107.5  | 110.8  | 107.4  |
| 104.2  | 112.1  | 102.6  | 103.1  | 93     | 113.9  | 100    | 101.2  | 109.3  |
| 102    | 105.8  | 99.6   | 92.3   | 100.8  | 110.3  | 104.9  | 106.6  | 111.4  |
| 106    | 115.5  | 103.6  | 95.6   | 100.9  | 108.7  | 97.5   | 122.6  | 116.8  |
| 113.1  | 118.4  | 104.6  | 98.6   | 101.3  | 107.9  | 98.6   | 114.1  | 111.4  |
| 107.4  | 106    | 102.9  | 95.8   | 101.3  | 106.2  | 105.5  | 106.3  | 107.2  |
| 228.3  | 221.4  | 190.4  | 179    | 179.5  | 173.9  | 172.3  | 158.9  | 143.7  |
| 105.4  | 113.6  | 116.3  | 96.9   | 102.8  | 111.9  | 114.7  | 122.1  | 122.4  |
| 117.6  | 112.7  | 104.3  | 102.7  | 107.8  | 112.7  | 108.8  | 116.1  | 109.4  |
| 101.3  | 107.5  | 105.1  | 101.3  | 95.9   | 105.9  | 102.4  | 103.6  | 104.1  |
| 1353.5 | 1266.4 | 1117.1 | 1177.3 | 1023.2 | 1154.3 | 1219.5 | 2007.7 | 1331.6 |
| 123.4  | 129.6  | 117.6  | 113    | 103.3  | 123.7  | 119.6  | 155.7  | 172.3  |
| 106.4  | 104.6  | 103.6  | 94     | 95.1   | 103.7  | 104.4  | 106.2  | 112    |
| 111.4  | 115.5  | 123.8  | 103.2  | 116.4  | 118    | 129.6  | 132.2  | 112.5  |
| 108.8  | 104.7  | 106.5  | 95.8   | 99.8   | 117.9  | 102    | 105.7  | 106.4  |
| 173.9  | 180.5  | 220.5  | 247.2  | 198.8  | 197.4  | 166.4  | 194.1  | 172.9  |
| 114    | 112.3  | 101.9  | 121    | 110.3  | 114.5  | 139    | 120.7  | 105    |
| 99.6   | 110.2  | 106.1  | 112.9  | 91.6   | 106.4  | 102.3  | 100.3  | 110.1  |
| 2153.5 | 1972.3 | 2076.4 | 2709.6 | 1688.4 | 2532.2 | 2315.5 | 5095.1 | 4661.5 |
| 3138   | 3214   | 3207.7 | 2392.6 | 2587.6 | 3020   | 1754.6 | 5764.7 | 6859   |
| 111.9  | 103.9  | 103.5  | 104.1  | 93     | 102.8  | 99.1   | 106.9  | 109.6  |
| 312    | 321    | 326.7  | 312.3  | 277.6  | 307.3  | 315.8  | 303.8  | 247.6  |
| 98.6   | 112.8  | 100.7  | 97.3   | 96.5   | 104.5  | 95.9   | 111.6  | 105.2  |
| 105.8  | 106.1  | 104.7  | 98.4   | 96.4   | 104.2  | 103.3  | 109.3  | 108.2  |
| 166.3  | 155.1  | 170.7  | 125.9  | 155.2  | 159.1  | 134.7  | 166.5  | 159.8  |
| 224.4  | 681.4  | 656.2  | 441.8  | 540.9  | 670.1  | 432.2  | 987.1  | 555.2  |
| 144.6  | 148.1  | 170.7  | 153.5  | 150.2  | 175    | 182.6  | 207.1  | 161.6  |
| 148.2  | 151.9  | 154.3  | 142    | 137.4  | 150.4  | 157.7  | 184.9  | 161.1  |
| 105.8  | 111.3  | 103.7  | 94.8   | 93     | 108.9  | 99.6   | 109.2  | 110.7  |
| 104.5  | 100.7  | 107.1  | 101.8  | 103.7  | 107.8  | 98.8   | 107.7  | 111.1  |
| 132.7  | 310.6  | 336.8  | 182.1  | 237.8  | 297.7  | 209.9  | 282.5  | 183.5  |
| 111.4  | 116.4  | 103.6  | 104.8  | 108.6  | 111    | 113.5  | 116.9  | 101.7  |
| 116.2  | 102.1  | 100.1  | 98.3   | 91.4   | 106.7  | 104.7  | 103.8  | 112    |
| 125    | 122.8  | 109.7  | 111.5  | 99.9   | 122.2  | 114.7  | 122.4  | 118.4  |
| 346.3  | 400.6  | 347.6  | 343.4  | 339.3  | 369.4  | 402.4  | 792.3  | 417.6  |
| 128    | 131.9  | 132.1  | 115.2  | 147.7  | 153.4  | 138.7  | 163.9  | 139.2  |
| 102.9  | 99.4   | 105.4  | 98     | 102    | 97     | 101.5  | 95.9   | 100.3  |
| 187.7  | 308.8  | 300.8  | 256.2  | 249.3  | 247    | 236.6  | 303.2  | 228.6  |
| 106.7  | 105.1  | 105.3  | 109.4  | 99.6   | 112.8  | 114.5  | 119.7  | 110.6  |

|       |       |       |       |       |       |       |       |       |
|-------|-------|-------|-------|-------|-------|-------|-------|-------|
| 157.4 | 182.2 | 194   | 187.7 | 153.8 | 160.3 | 143.3 | 346.6 | 206.6 |
| 115   | 118.4 | 112.1 | 106   | 98.7  | 117   | 101.2 | 129   | 118.4 |
| 104.5 | 118.8 | 104.7 | 92.3  | 95.9  | 110.3 | 102.8 | 114.7 | 106.9 |
| 106.7 | 115.8 | 127.2 | 118.8 | 97.1  | 109.3 | 106.7 | 107.7 | 106.3 |
| 109.2 | 104.4 | 105.8 | 105.4 | 96.3  | 102.9 | 104.5 | 110.3 | 112.7 |
| 106.3 | 102.9 | 104.7 | 96.1  | 97.9  | 103.8 | 97.3  | 105.2 | 105.3 |
| 110.2 | 106.9 | 107.5 | 104.7 | 95.4  | 114.8 | 105.3 | 116.1 | 113.8 |
| 101.5 | 136.9 | 136.7 | 148.4 | 118.7 | 118.4 | 135.6 | 118.4 | 109.4 |
| 104.7 | 101.6 | 92.1  | 98.5  | 99.1  | 111.6 | 100   | 100.6 | 100.7 |
| 109.1 | 111   | 103.3 | 104.1 | 94.1  | 105.6 | 108.7 | 101   | 102.7 |
| 189.4 | 200.6 | 213.4 | 212.6 | 205.6 | 212.6 | 212.7 | 249.6 | 171.8 |
| 125.6 | 123.6 | 122.5 | 109   | 108.1 | 126.8 | 114.6 | 121.9 | 118   |
| 107.6 | 113.2 | 111.6 | 102.2 | 100.4 | 105.7 | 108   | 115.8 | 119.7 |
| 127.5 | 129.7 | 122.7 | 124.8 | 115.7 | 137.9 | 145   | 181.6 | 196.6 |
| 180.4 | 206.4 | 205.6 | 248.9 | 244.7 | 231.3 | 282.1 | 320.2 | 232.2 |
| 157.8 | 239   | 220.7 | 177.8 | 213.8 | 223.5 | 212.3 | 236.3 | 177.5 |
| 117.6 | 110.8 | 109.1 | 97.8  | 96.5  | 127.1 | 108.2 | 109.7 | 109.3 |
| 120.1 | 153.9 | 158.7 | 131.8 | 134.6 | 162.1 | 133.3 | 178.1 | 139.8 |
| 102.9 | 106.8 | 106.5 | 103.8 | 88.9  | 110.9 | 104.6 | 106.5 | 106.9 |
| 123.8 | 151.4 | 142.9 | 161.3 | 147.6 | 136.3 | 127.9 | 149.2 | 137.4 |
| 113   | 117.4 | 107.2 | 102.8 | 109.2 | 112.2 | 114.8 | 125   | 114   |
| 116.6 | 116.3 | 108   | 100   | 106.8 | 133.3 | 109.6 | 110.7 | 106.5 |
| 111   | 108.7 | 104.4 | 100.6 | 92    | 112.2 | 102   | 108.4 | 114.7 |
| 101   | 104.4 | 108.2 | 101.1 | 91    | 100.8 | 103.8 | 116.3 | 114   |
| 103   | 103.1 | 99.8  | 100.7 | 93.9  | 113.6 | 96.2  | 102.8 | 100.3 |
| 103.8 | 111.1 | 115   | 98.8  | 103.8 | 111.7 | 93.4  | 113.8 | 108.4 |
| 115   | 113.9 | 104.5 | 102.1 | 98    | 107.8 | 102.4 | 117.9 | 114   |
| 105.9 | 105.2 | 109.6 | 102   | 98.5  | 114.5 | 108.8 | 122.1 | 108.4 |
| 97.8  | 101.8 | 92.6  | 98    | 87.4  | 98.8  | 106.1 | 104.2 | 103.7 |
| 112   | 147.3 | 148.5 | 144.6 | 124   | 134.7 | 125   | 122.4 | 113.6 |
| 103.7 | 112.1 | 105.5 | 105.9 | 95.8  | 114.9 | 102.3 | 114.4 | 107.2 |
| 108.8 | 104   | 102.7 | 102.3 | 95.3  | 109   | 106.1 | 113.6 | 106.1 |
| 108.5 | 111   | 101.4 | 100.1 | 101.5 | 106.4 | 101.5 | 102.6 | 116.7 |
| 109.6 | 108.9 | 104   | 110.7 | 101.7 | 109.5 | 116.2 | 118.6 | 108.6 |
| 108.6 | 117.8 | 101.9 | 104.9 | 96.6  | 114.6 | 98.3  | 128.2 | 126.2 |
| 110.1 | 112.7 | 101.5 | 115.2 | 96    | 107.6 | 104.7 | 108.7 | 107.3 |
| 105   | 149.9 | 111.3 | 253.9 | 162   | 129.9 | 234.3 | 177.5 | 119.9 |
| 116.1 | 112.7 | 102.6 | 107.6 | 96    | 102.6 | 114.2 | 108.1 | 110.6 |
| 114.6 | 142   | 118.8 | 126.2 | 123.3 | 134.5 | 145.6 | 151   | 124.6 |
| 106.2 | 112.1 | 109.1 | 105.6 | 99.1  | 102.2 | 95.7  | 108.2 | 114.4 |
| 113.6 | 118.7 | 111.8 | 122.9 | 105.3 | 120.9 | 119.3 | 123.9 | 106.1 |
| 105.8 | 105.4 | 102   | 110.4 | 102.3 | 106.7 | 111.2 | 108.1 | 110.6 |
| 109.6 | 120.2 | 103.1 | 93.7  | 103.2 | 108   | 105.9 | 123.6 | 107.3 |
| 105.3 | 112.5 | 108.4 | 90.3  | 93.8  | 107.4 | 107.2 | 104.7 | 102.3 |
| 119.5 | 237.9 | 208.3 | 282.7 | 191   | 182.7 | 216.9 | 204.5 | 134.3 |
| 106.4 | 103   | 101.4 | 95.1  | 99.6  | 98.3  | 101.6 | 105.9 | 108.4 |
| 118.8 | 120   | 102.5 | 125   | 99.8  | 113.6 | 106.4 | 123.6 | 108.8 |
| 102.8 | 116.2 | 103.3 | 106.6 | 97.9  | 107.3 | 94.9  | 110.3 | 113.9 |
| 108.2 | 114.5 | 102.1 | 101.6 | 95.7  | 110.9 | 99.9  | 110.4 | 108.7 |
| 455.6 | 353.5 | 399.4 | 324.9 | 358.8 | 358.2 | 402.8 | 562   | 457.9 |
| 105   | 106.5 | 101.2 | 97.8  | 100.4 | 104.9 | 104.7 | 110.7 | 102   |

|        |       |        |       |       |       |       |        |        |
|--------|-------|--------|-------|-------|-------|-------|--------|--------|
| 111.5  | 102   | 94.8   | 91.7  | 93.8  | 103.3 | 102.1 | 108.3  | 102.2  |
| 104.3  | 110.3 | 98.8   | 102.7 | 89.4  | 113.6 | 107   | 106.4  | 98.1   |
| 117.3  | 106.7 | 112.5  | 119.6 | 106.2 | 109.9 | 109.6 | 137.1  | 126    |
| 119.3  | 129.3 | 106.5  | 103.8 | 117.6 | 127.8 | 126.6 | 187.1  | 143.4  |
| 345.3  | 303.2 | 243.2  | 234.9 | 253.5 | 334.7 | 244   | 557.8  | 499.1  |
| 109.3  | 108.8 | 100.6  | 96.2  | 95.1  | 108   | 94.4  | 103.2  | 104.4  |
| 108.3  | 143.7 | 148.7  | 119.8 | 114.3 | 133.5 | 133.4 | 121.6  | 107.8  |
| 102.2  | 110.8 | 99.1   | 113.8 | 98.6  | 110.2 | 110.1 | 104.5  | 107.9  |
| 114    | 107.8 | 110.4  | 98.9  | 99.2  | 118.2 | 105.7 | 115.6  | 111.9  |
| 152.4  | 204   | 221    | 194.4 | 187.1 | 224.8 | 218.3 | 319.5  | 212.3  |
| 107.8  | 105.2 | 99.8   | 98.3  | 94.5  | 108.1 | 104.4 | 111.1  | 108.6  |
| 103.4  | 107.7 | 102.6  | 104.6 | 94    | 108.9 | 103.4 | 109.6  | 108.2  |
| 107.7  | 113   | 107    | 94    | 93.1  | 110   | 102.1 | 127.1  | 106.7  |
| 106.9  | 107.8 | 100.8  | 107.8 | 94.5  | 106.2 | 94.8  | 107.3  | 110.3  |
| 114.4  | 113.4 | 104    | 103.1 | 108.9 | 106   | 100.1 | 111.5  | 114.6  |
| 103.6  | 106.6 | 102.1  | 122   | 94.5  | 113.1 | 111.1 | 108.5  | 106.3  |
| 109.7  | 107.6 | 109.5  | 103.8 | 105.7 | 113.6 | 111.3 | 117.6  | 123.3  |
| 98.8   | 108.9 | 102.6  | 101.7 | 98.6  | 103.7 | 104.2 | 104    | 106.5  |
| 104.4  | 110.7 | 107.3  | 98.9  | 99.8  | 107   | 102.8 | 102.3  | 108.3  |
| 106    | 111.5 | 101.3  | 95.3  | 98.5  | 105.9 | 99.5  | 110    | 102.2  |
| 110.8  | 121.3 | 118.4  | 109.7 | 110.1 | 133.5 | 117.1 | 126.2  | 104.6  |
| 126.4  | 117.8 | 126.4  | 132.6 | 120.3 | 123.7 | 123.2 | 149.4  | 132    |
| 116    | 113.2 | 105.6  | 112.8 | 93.4  | 116.7 | 108.2 | 113.6  | 108.1  |
| 112.9  | 113.5 | 99.5   | 97.5  | 95.7  | 107.3 | 108.4 | 109.3  | 108.1  |
| 108.5  | 101   | 111.6  | 100.7 | 98.9  | 108.1 | 106.4 | 115.8  | 102.6  |
| 103.2  | 104.5 | 104.4  | 92.5  | 96.5  | 114.3 | 97.5  | 96.3   | 107.2  |
| 184.6  | 153.3 | 157    | 147.8 | 155.7 | 145.9 | 140.7 | 200.4  | 169.1  |
| 102.3  | 114.7 | 101.7  | 103.7 | 95    | 104.6 | 101.9 | 113.7  | 102.2  |
| 162.3  | 161.5 | 233.7  | 135.9 | 149.7 | 220.3 | 145.4 | 261.8  | 236.8  |
| 151.7  | 181.9 | 176.5  | 173.3 | 147.8 | 141.2 | 178.4 | 257.8  | 160.3  |
| 101.7  | 115.2 | 108.6  | 102.9 | 101.5 | 108.3 | 109   | 114    | 110    |
| 97.5   | 102.5 | 103.3  | 98.3  | 97.2  | 104.4 | 94.4  | 113.3  | 108.7  |
| 123.7  | 137.7 | 140.8  | 126.2 | 126.1 | 154.1 | 125.2 | 157    | 148.8  |
| 103.3  | 106   | 107.6  | 103.9 | 96.7  | 101.1 | 98.2  | 114.4  | 113.6  |
| 1160.3 | 974.9 | 1043.9 | 850.6 | 844.5 | 767   | 670   | 1373.5 | 1564.8 |
| 104.2  | 106.4 | 96     | 99.4  | 101.8 | 98    | 98.1  | 113.2  | 123    |
| 255.9  | 300.7 | 242.4  | 214.2 | 235.3 | 265.3 | 239.3 | 400.4  | 378.4  |
| 180    | 168.1 | 164.6  | 173.5 | 139.9 | 196.2 | 170.8 | 311.6  | 254.4  |
| 101.1  | 106.3 | 99.7   | 97.6  | 95.3  | 111   | 103.7 | 107.8  | 98.3   |
| 103.5  | 110.9 | 99.8   | 94.7  | 97.7  | 101.6 | 100.4 | 107.4  | 113.2  |
| 113.1  | 116.4 | 105.1  | 117.3 | 95.7  | 111.9 | 111.3 | 109.9  | 106.5  |
| 104.3  | 103   | 107.2  | 99.1  | 95.2  | 101.5 | 109.2 | 108.9  | 106.4  |
| 112.7  | 130.9 | 111.3  | 118.7 | 106.4 | 110.4 | 119.6 | 113.2  | 116.3  |
| 97.1   | 115.6 | 109.7  | 103.6 | 103   | 106.6 | 106.1 | 109.5  | 112.7  |
| 183.7  | 496.2 | 774.4  | 430   | 506.3 | 442.8 | 397.7 | 942.5  | 371    |
| 103.4  | 105   | 102.3  | 104.4 | 100.2 | 108.5 | 106.8 | 113.9  | 110.8  |
| 100.1  | 124.6 | 109.2  | 109.5 | 100.9 | 115.5 | 107   | 107.3  | 117.1  |
| 103.8  | 109.4 | 100.2  | 93.2  | 95.4  | 112.8 | 103.9 | 110.9  | 106.8  |
| 104.5  | 109.7 | 100.2  | 109.3 | 103.9 | 111.4 | 99.7  | 105.7  | 108.8  |
| 118.1  | 121.9 | 105.6  | 112.6 | 105.4 | 105.6 | 115.2 | 116.5  | 108.8  |
| 113.9  | 96.9  | 102.2  | 107.3 | 95.6  | 110.8 | 99.7  | 104.5  | 111.6  |

|        |        |        |        |        |        |        |        |        |
|--------|--------|--------|--------|--------|--------|--------|--------|--------|
| 107.3  | 109.8  | 104.4  | 102.9  | 100.5  | 110    | 104.2  | 113.8  | 116.2  |
| 113.6  | 106.3  | 98.4   | 93.3   | 92.5   | 110.5  | 103    | 102.5  | 109.2  |
| 111.1  | 109.9  | 113    | 110.6  | 102.6  | 113.6  | 108    | 120.5  | 127.4  |
| 108.1  | 109.8  | 99.8   | 104.5  | 96     | 113.2  | 101.8  | 113    | 118.7  |
| 196.6  | 235.4  | 245.5  | 266.2  | 197.4  | 217.2  | 234.8  | 254    | 197.3  |
| 104.2  | 127    | 98.2   | 104.3  | 105    | 108.1  | 107.3  | 102.2  | 114.9  |
| 103.5  | 116.3  | 105.3  | 109.7  | 102.2  | 119.2  | 106.6  | 118.4  | 109    |
| 114.3  | 110.3  | 107.3  | 111.2  | 100    | 119.5  | 110.8  | 122.9  | 114.3  |
| 106.4  | 115.1  | 110.2  | 102.8  | 104.5  | 126.9  | 109.2  | 119.4  | 121.1  |
| 146.7  | 161.6  | 151    | 155.5  | 132.1  | 140    | 134    | 223.7  | 199.5  |
| 123.1  | 148.9  | 159.6  | 142.7  | 118.1  | 184.1  | 159.6  | 176.3  | 188.1  |
| 1158.3 | 1789.8 | 1627.8 | 1337.2 | 1575.1 | 1735.9 | 1851.8 | 2626.6 | 2085.3 |
| 140    | 272.6  | 225    | 284.3  | 251.5  | 276.7  | 241.3  | 414.1  | 304.3  |
| 105    | 113.2  | 109.1  | 102.7  | 96.7   | 111    | 99.5   | 109    | 115.5  |
| 121.1  | 160.4  | 120.2  | 121.5  | 133.3  | 151.1  | 146.1  | 223.7  | 199.4  |
| 1246.2 | 1202.5 | 1268.4 | 1029   | 1137.2 | 1230.2 | 1189   | 1608.8 | 1181.7 |
| 112.2  | 120.6  | 114.1  | 107.8  | 111.7  | 114    | 109.6  | 129.4  | 122.4  |
| 143.2  | 166.3  | 162.9  | 146.7  | 138    | 163.8  | 157.5  | 171.7  | 150.3  |
| 384.6  | 508.1  | 443.2  | 460.9  | 405.3  | 425.2  | 509.4  | 602    | 534.8  |
| 487.2  | 513.4  | 556.2  | 733.4  | 390.2  | 603.9  | 532    | 861    | 820.9  |
| 274    | 401.9  | 362.7  | 427.4  | 416    | 414.1  | 518.9  | 577.1  | 336.6  |
| 125.9  | 138.7  | 153.1  | 171.9  | 114.8  | 147.5  | 130.5  | 188.7  | 152    |
| 122.7  | 119.3  | 116.1  | 116.7  | 101.8  | 119.7  | 123.9  | 138    | 136.1  |
| 500.9  | 700.5  | 612    | 612.6  | 489.4  | 581.7  | 719.5  | 1056.5 | 769.3  |
| 127.1  | 182.3  | 171.4  | 140.2  | 134.7  | 170.9  | 146.1  | 164.3  | 153.6  |
| 116.5  | 161.8  | 159.6  | 131.6  | 127.8  | 134.7  | 169.3  | 181.9  | 151.9  |
| 123.5  | 170.6  | 135.1  | 134.4  | 138.6  | 156.7  | 162.6  | 200.9  | 121.5  |
| 110.8  | 107.7  | 100    | 100.7  | 94.4   | 110.6  | 106.4  | 112.6  | 112.9  |
| 140.5  | 192.7  | 157.9  | 211    | 223.1  | 204.5  | 186.5  | 214.7  | 137.5  |
| 112.6  | 112.6  | 97.3   | 97.4   | 89.7   | 108.9  | 106.7  | 105.4  | 103.7  |
| 104.9  | 125.7  | 110.2  | 107.3  | 107.2  | 109.4  | 116.7  | 110.9  | 115.5  |
| 116.8  | 112.4  | 111    | 111.2  | 97     | 122    | 101.2  | 116.6  | 105.9  |
| 118.1  | 125.3  | 106    | 128.8  | 108.2  | 118.4  | 114.3  | 133.7  | 101.2  |
| 110.7  | 121.7  | 114.1  | 108.3  | 104.5  | 113.4  | 118.3  | 114.3  | 119.5  |
| 110.7  | 112.9  | 102.3  | 109.3  | 103.1  | 104.1  | 108.1  | 102.5  | 118.1  |
| 174.3  | 217.7  | 267.9  | 189.7  | 202.2  | 202.4  | 219.5  | 252.7  | 180.8  |
| 233.4  | 455.5  | 225.6  | 771.9  | 249.4  | 157.7  | 634.4  | 160.6  | 131.5  |
| 108.7  | 102.3  | 104.8  | 102.2  | 93.7   | 103.7  | 97.9   | 112.5  | 101.8  |
| 141.2  | 163.4  | 141.2  | 272.9  | 153.5  | 127.8  | 275.2  | 154.2  | 123.5  |
| 136.9  | 198.9  | 124    | 298.8  | 174.8  | 135.1  | 256    | 178.8  | 131.3  |
| 104.7  | 105.7  | 99.9   | 100.8  | 91.1   | 111.6  | 106.8  | 110.4  | 109    |
| 293.2  | 347.8  | 368    | 307.7  | 289.2  | 340.6  | 420.5  | 523.2  | 315.6  |
| 449.6  | 1631.1 | 833.3  | 1122   | 1189.4 | 672.7  | 1144.2 | 2002.1 | 658.9  |
| 1645.7 | 5583.3 | 6605.7 | 4094.7 | 4166.1 | 4430.7 | 2887.6 | 6052.4 | 2352.8 |
| 511.6  | 1917.2 | 2179.9 | 1082.7 | 1428   | 1582.9 | 1206.7 | 2062.4 | 783.1  |
| 151.4  | 163.6  | 177.7  | 103.2  | 235.5  | 196.6  | 161.4  | 689.7  | 191.2  |
| 113.5  | 112.3  | 119.7  | 111.4  | 102.9  | 116.7  | 121.4  | 109.1  | 103.9  |
| 100.8  | 111    | 101.7  | 91.5   | 101.1  | 112.1  | 107.3  | 114.7  | 109.6  |
| 102.6  | 101.4  | 96.1   | 102.9  | 96.9   | 110    | 111.5  | 117.3  | 112.6  |
| 108.6  | 105.6  | 99.8   | 106.4  | 101.9  | 111    | 98.8   | 120.1  | 115.7  |
| 108.2  | 108.1  | 105.3  | 100.9  | 97.7   | 110.2  | 98.5   | 112.7  | 113.5  |

|       |        |       |        |        |       |        |        |        |
|-------|--------|-------|--------|--------|-------|--------|--------|--------|
| 105.4 | 102    | 106.9 | 111.9  | 96.9   | 100.7 | 99.7   | 104.3  | 117.2  |
| 199.6 | 337.4  | 277.9 | 245.3  | 285    | 239.4 | 302.1  | 335.6  | 184.9  |
| 119.7 | 104.5  | 109.4 | 98.7   | 94.9   | 119.5 | 112    | 108.3  | 125.9  |
| 142   | 133.4  | 132.5 | 123.1  | 136.4  | 123.4 | 159.9  | 193.4  | 158.1  |
| 177.2 | 224.7  | 151.2 | 357.7  | 214    | 166.7 | 264.7  | 258.5  | 126.8  |
| 107.9 | 112.5  | 107.5 | 107.6  | 96.6   | 105.2 | 103.4  | 115.3  | 109.2  |
| 107.9 | 113.9  | 113.4 | 117    | 102.4  | 129.9 | 113.5  | 116.9  | 112.1  |
| 120.8 | 117.6  | 109.7 | 121.5  | 108.5  | 114.9 | 102.8  | 111.7  | 104.9  |
| 103.7 | 110.2  | 98    | 101.4  | 94.4   | 106.6 | 110.3  | 108.1  | 112    |
| 136.6 | 210    | 231.2 | 183.3  | 206.9  | 225.7 | 215.2  | 376    | 238.5  |
| 114.6 | 114.3  | 117.2 | 101.7  | 103.4  | 114.3 | 105.2  | 117.6  | 116.5  |
| 233.8 | 300.9  | 332.2 | 312.6  | 253.1  | 289.6 | 292.3  | 452.4  | 276.9  |
| 135.6 | 138    | 139.6 | 124.7  | 130.4  | 155.7 | 124.2  | 152.6  | 133.7  |
| 110.1 | 108.4  | 108.8 | 107.1  | 97.4   | 113.6 | 109.5  | 101.4  | 109    |
| 538.6 | 321.4  | 361.3 | 296.9  | 315.9  | 377   | 362.4  | 599.9  | 524.2  |
| 109.6 | 113.4  | 107.4 | 100.9  | 101.6  | 112.7 | 107.9  | 116.1  | 111.4  |
| 106.8 | 101.4  | 103.6 | 96.1   | 94.6   | 101.2 | 101.7  | 103.9  | 109.9  |
| 148.1 | 185.7  | 159.7 | 175.2  | 156.9  | 217.6 | 170.3  | 257.7  | 211.7  |
| 111   | 106.7  | 97.2  | 99.9   | 100.8  | 111.3 | 102.4  | 107.6  | 105.1  |
| 177.2 | 385.1  | 347.9 | 320.3  | 336.2  | 332.4 | 346.1  | 367.4  | 259.4  |
| 118.8 | 111.7  | 109.6 | 107.7  | 101    | 111.2 | 101.2  | 123.4  | 129.6  |
| 126.1 | 136.8  | 128.2 | 121    | 130.1  | 125.1 | 125.2  | 132.4  | 133.7  |
| 118.7 | 112.3  | 109.6 | 106.4  | 108.9  | 109.4 | 107.4  | 110.6  | 103.9  |
| 106.6 | 108.8  | 102.7 | 103.3  | 95.7   | 102.8 | 105.1  | 109.1  | 110.3  |
| 114.8 | 119.1  | 94.5  | 108.7  | 101    | 128.2 | 103.7  | 121.2  | 123.6  |
| 109.5 | 105.9  | 99.7  | 101.2  | 89.1   | 112.3 | 103.4  | 113.2  | 106.8  |
| 128   | 151.4  | 126   | 131    | 141.7  | 139.3 | 127.8  | 166    | 137.5  |
| 99.9  | 114.9  | 104.5 | 110.8  | 97.4   | 109   | 103.2  | 109    | 114.9  |
| 105.3 | 107.7  | 100   | 97.6   | 93.7   | 110.6 | 103.3  | 113.3  | 110.6  |
| 110.8 | 113    | 112.6 | 104.4  | 95.7   | 103.4 | 98     | 107.7  | 110.2  |
| 134.2 | 345.5  | 197.8 | 631    | 182.5  | 144.2 | 359.2  | 133.1  | 148.4  |
| 162.8 | 326.4  | 378.3 | 235.2  | 233.9  | 356.3 | 241.1  | 479.1  | 293    |
| 243.9 | 235    | 268.2 | 239.1  | 241.4  | 354.5 | 229.5  | 395    | 261.9  |
| 103.2 | 121    | 103.6 | 104.5  | 101.5  | 116   | 102.9  | 129.9  | 116.6  |
| 783.7 | 794.1  | 505.4 | 1089.3 | 798.1  | 577.3 | 1195.4 | 1719.9 | 1345.3 |
| 522.2 | 847.9  | 750.3 | 605.6  | 649.6  | 612.9 | 687.6  | 1185.6 | 1139   |
| 108.9 | 106.2  | 104.9 | 95.4   | 96     | 107.7 | 106.2  | 104.3  | 100.1  |
| 121.7 | 187.6  | 315.2 | 153.7  | 147.2  | 292.1 | 172    | 171.1  | 158.4  |
| 101.3 | 104.2  | 93.4  | 101.2  | 88.7   | 109.7 | 97.1   | 109.9  | 108.9  |
| 96.6  | 105.2  | 104.7 | 107.5  | 100.4  | 111.5 | 104.3  | 108.7  | 102.4  |
| 287.4 | 361.6  | 323.7 | 332.1  | 349    | 298.2 | 361.1  | 482.4  | 235.9  |
| 123.5 | 122.7  | 113   | 122.8  | 105.8  | 120.7 | 125.7  | 111.1  | 119.7  |
| 166.3 | 469.8  | 328.5 | 633.2  | 334.6  | 288.3 | 492.3  | 395.4  | 181.2  |
| 774.6 | 1596.4 | 924.7 | 1581.7 | 1470.2 | 880.7 | 1104.9 | 1409.1 | 648.3  |
| 101.3 | 99     | 107.2 | 108.9  | 92.6   | 107.8 | 96.7   | 105.7  | 100.2  |
| 108.9 | 112.2  | 105.5 | 113.2  | 90.9   | 108.3 | 96.6   | 103.5  | 106.8  |
| 102.5 | 112.7  | 108.2 | 115.9  | 94.5   | 111.6 | 104.5  | 111.7  | 106.6  |
| 117.6 | 113.5  | 106.5 | 93.1   | 101.4  | 110.7 | 103.6  | 113.6  | 105.6  |
| 106.7 | 122.5  | 122.4 | 109.3  | 107    | 120.1 | 113.4  | 124.3  | 113.9  |
| 109.4 | 114.6  | 109.2 | 103.4  | 92.4   | 109   | 107.7  | 119    | 133.9  |
| 110.6 | 112.2  | 106.5 | 109.1  | 99.9   | 125.3 | 116.8  | 122.5  | 120.6  |

|       |        |        |        |       |       |        |        |       |
|-------|--------|--------|--------|-------|-------|--------|--------|-------|
| 99.9  | 112.8  | 99.3   | 102.1  | 90.4  | 113.7 | 106.1  | 112.2  | 94.8  |
| 102.5 | 105.6  | 100.6  | 96.5   | 93.1  | 105.7 | 101.9  | 110.5  | 106.2 |
| 105.3 | 106.1  | 105.2  | 104.8  | 94.1  | 109.3 | 107.8  | 126.4  | 108.6 |
| 109.7 | 107.6  | 100.6  | 95.2   | 96.8  | 104.8 | 96.3   | 116.1  | 103.1 |
| 105.9 | 109.9  | 101.7  | 103.2  | 96.5  | 107.2 | 109.5  | 116    | 113.6 |
| 118.6 | 152.5  | 149.2  | 140.3  | 144   | 156.1 | 141.9  | 174.6  | 148.7 |
| 113.6 | 123.2  | 113.8  | 112.4  | 109.3 | 125.6 | 110.4  | 123.4  | 117.1 |
| 112.6 | 125.3  | 115.3  | 136.6  | 118   | 128.8 | 130.7  | 176    | 129   |
| 194.7 | 309.4  | 224.9  | 273.4  | 221.1 | 221   | 226.5  | 365.9  | 318   |
| 115.1 | 106.6  | 118.1  | 99.6   | 103.3 | 110   | 105.4  | 132.4  | 108   |
| 529.3 | 1066.3 | 1117.2 | 895.6  | 725.6 | 842.3 | 1177.3 | 1012.6 | 601   |
| 115.6 | 110.5  | 108.1  | 100.5  | 106.8 | 114   | 111.2  | 137.8  | 125.1 |
| 111.6 | 105.7  | 94     | 95     | 97.7  | 96.8  | 98.2   | 101.6  | 101.1 |
| 197.6 | 227.3  | 216.8  | 201.7  | 213.9 | 251.3 | 235.3  | 308.6  | 259   |
| 154.3 | 193.3  | 134.4  | 178.7  | 149.5 | 142.4 | 145.2  | 253.7  | 179.1 |
| 105.1 | 102.8  | 94     | 104    | 99.9  | 101.6 | 106.1  | 100.7  | 105.4 |
| 113.6 | 113.5  | 103.1  | 102.3  | 94.4  | 115.5 | 99     | 108.6  | 110.1 |
| 202.4 | 512.5  | 214.3  | 1021.8 | 433.5 | 233.9 | 613.3  | 284.5  | 165   |
| 110   | 104.9  | 97.3   | 104.1  | 94.8  | 106.5 | 99.8   | 92.9   | 98.1  |
| 103.6 | 111.9  | 97.4   | 96.1   | 102.1 | 104.7 | 101    | 102.6  | 109.9 |
| 110.3 | 107.7  | 103.5  | 96.1   | 95.8  | 110.8 | 105.1  | 100.5  | 108.4 |
| 114.5 | 119.1  | 112.8  | 108.9  | 106   | 118.8 | 108.7  | 125.9  | 127.8 |
| 121.1 | 137.8  | 123.9  | 120.8  | 126   | 142.4 | 129.9  | 179.2  | 143.2 |
| 132.5 | 130.1  | 129.9  | 140.4  | 131.1 | 154   | 123.7  | 158.8  | 158.4 |
| 466.4 | 673.9  | 830.7  | 607.4  | 645.6 | 715.7 | 617.9  | 922.2  | 437.1 |
| 113.8 | 110.3  | 101    | 118.2  | 95.1  | 110.8 | 101.5  | 107    | 103.8 |
| 102.5 | 111.9  | 98.7   | 99     | 101   | 104.7 | 100    | 114.6  | 110.7 |
| 111   | 116.2  | 110.9  | 105.9  | 98    | 117.3 | 109.2  | 120.8  | 114.7 |
| 121.4 | 112.8  | 95.6   | 317.8  | 103.2 | 104.9 | 260.9  | 111.6  | 114.6 |
| 524   | 798.8  | 514.1  | 626.2  | 579.4 | 501.6 | 509.2  | 924.6  | 727.7 |
| 523.4 | 574    | 436.9  | 593.1  | 473.9 | 453.6 | 729.3  | 1406.8 | 588.5 |
| 104.2 | 102.9  | 105.3  | 104    | 99.1  | 113.3 | 101.8  | 108.6  | 110.5 |
| 106.6 | 111.4  | 96.9   | 102.1  | 97.6  | 107   | 105.5  | 111.9  | 108.3 |
| 105   | 107    | 107.9  | 105.7  | 100.4 | 114.2 | 103.5  | 110.9  | 113.2 |
| 109.6 | 125.9  | 106.1  | 126    | 106   | 128.7 | 110.5  | 134.3  | 123.9 |
| 105.4 | 107.4  | 106.4  | 102.5  | 95.3  | 107.6 | 99.5   | 105.2  | 107.8 |
| 241.2 | 302.8  | 370.3  | 280.6  | 337.1 | 302.7 | 345.7  | 398.4  | 304.8 |
| 189.3 | 231.1  | 192.8  | 212    | 251.2 | 266   | 261.4  | 290.3  | 209.3 |
| 98.9  | 114.5  | 107.2  | 107    | 102.4 | 108.9 | 102.5  | 114.5  | 110.1 |
| 101   | 112.8  | 103.6  | 97.1   | 96.9  | 107.9 | 105.5  | 107.7  | 114.3 |
| 181.4 | 189.3  | 186.4  | 165.1  | 169.4 | 205.9 | 170.2  | 288.9  | 247.1 |
| 275.9 | 301.1  | 373.5  | 292.3  | 269.1 | 381.5 | 233.3  | 489.7  | 362.8 |
| 321.5 | 551.7  | 492.2  | 498.7  | 467.2 | 578.9 | 494.4  | 668.8  | 438.5 |
| 108.9 | 98.3   | 97.8   | 99.2   | 96.2  | 112   | 98.8   | 112.2  | 106.3 |
| 102.9 | 103.9  | 101.1  | 101.9  | 93    | 108.3 | 99     | 106    | 107.9 |
| 108.3 | 96.2   | 102.5  | 102.4  | 94.5  | 104   | 101    | 106.8  | 102.3 |
| 182.5 | 227    | 186.8  | 188.7  | 186.6 | 223   | 173.3  | 257    | 205.5 |
| 166.6 | 197.6  | 168.7  | 188.5  | 173.2 | 231.4 | 158.5  | 272.4  | 212.1 |
| 344.8 | 405.1  | 363.5  | 306.7  | 329.8 | 395   | 361.9  | 503.3  | 316.9 |
| 140.3 | 132.1  | 151    | 139.9  | 129.5 | 150.6 | 150.7  | 197.2  | 165.7 |
| 105.7 | 106.9  | 97.1   | 102.1  | 89.3  | 102   | 98.1   | 106.5  | 110   |



|       |       |       |        |       |       |        |        |       |
|-------|-------|-------|--------|-------|-------|--------|--------|-------|
| 108.2 | 121.4 | 106.7 | 102.8  | 108   | 117.3 | 107.5  | 108.8  | 112.7 |
| 173.5 | 263.1 | 221.3 | 332.9  | 174.8 | 173.9 | 271.2  | 236.2  | 200.7 |
| 141.6 | 176.6 | 176.9 | 180.5  | 167.6 | 181.8 | 171.2  | 235.9  | 159.1 |
| 123.2 | 124.9 | 117.2 | 125.7  | 111.5 | 126.7 | 114.5  | 140.9  | 126.5 |
| 815.3 | 789.5 | 188.4 | 1437.5 | 684.1 | 324.8 | 1223.8 | 1238.2 | 654.3 |
| 105.7 | 102.9 | 99.7  | 100.7  | 90.5  | 100.3 | 104.1  | 113.5  | 110.6 |
| 138.9 | 238.2 | 243   | 192.8  | 186.9 | 207.6 | 217.1  | 268.1  | 169.8 |
| 128.3 | 117.5 | 115.7 | 98.8   | 102.8 | 111.2 | 107.3  | 137.6  | 197.9 |
| 247.7 | 132.4 | 125.3 | 124    | 130.6 | 176.4 | 134.6  | 428.7  | 394.5 |
| 115.1 | 107.1 | 103.6 | 112.6  | 96.5  | 118   | 98.8   | 132.9  | 125.7 |
| 110   | 129   | 120.7 | 104.8  | 104.5 | 126.4 | 110.2  | 127.3  | 103.8 |
| 108.9 | 107.4 | 99    | 102    | 95    | 113.5 | 109.7  | 110    | 112.5 |
| 105.4 | 102.7 | 101.3 | 97.7   | 96.3  | 99.7  | 100.9  | 109.7  | 103.8 |
| 106   | 105.3 | 104.9 | 98.7   | 101.3 | 108.3 | 108.4  | 118.6  | 112.9 |
| 102.5 | 107.5 | 95.5  | 107.2  | 91.7  | 106.1 | 111.6  | 98.3   | 106.7 |
| 110.8 | 111   | 102.8 | 109.8  | 98.9  | 103.7 | 106.9  | 112.9  | 106.1 |
| 110.6 | 118.7 | 104.1 | 102.3  | 106.8 | 107.8 | 105    | 131.1  | 116.6 |
| 111.9 | 111.2 | 102.3 | 98.4   | 96.6  | 97.9  | 95.8   | 105.6  | 108.5 |
| 106   | 119.3 | 107.2 | 101.9  | 100.1 | 105.5 | 109.7  | 111.3  | 114.7 |
| 118.2 | 106.9 | 101   | 94.2   | 103.9 | 117.3 | 102.2  | 108    | 106.9 |
| 112.9 | 104.2 | 108   | 99.5   | 94.7  | 107.2 | 109.7  | 112.1  | 113.2 |
| 96.9  | 103.2 | 98.9  | 98.2   | 91.5  | 101.9 | 101.7  | 109.2  | 103.8 |
| 99.8  | 108.9 | 91.7  | 91.1   | 93.5  | 114.4 | 107.7  | 106    | 109.6 |
| 102.8 | 116   | 98.2  | 102.2  | 90.1  | 102.8 | 103.2  | 104.8  | 107.2 |
| 100.1 | 115.1 | 105.3 | 92.5   | 90.8  | 104.3 | 101.1  | 116.5  | 107.9 |
| 103.4 | 97.1  | 98.9  | 98     | 97.8  | 105.9 | 99.8   | 104.5  | 106.9 |
| 112   | 108.3 | 106.4 | 106.7  | 101.7 | 106.3 | 104.6  | 128.6  | 115.4 |
| 106.3 | 116.1 | 110.5 | 111.4  | 118.4 | 112.8 | 106.4  | 136.7  | 110.8 |
| 121.2 | 112   | 98.6  | 94.6   | 94.9  | 108   | 97.8   | 98.7   | 101.4 |
| 111.7 | 102.7 | 103.7 | 94.9   | 92.6  | 111   | 99.9   | 111.3  | 107.7 |
| 102   | 104.4 | 100.2 | 94.3   | 94.5  | 106.7 | 103    | 101.5  | 92.1  |
| 105   | 102.2 | 107.6 | 93.6   | 97.6  | 105.3 | 101.5  | 102.3  | 111.6 |
| 100.6 | 109.3 | 100.4 | 109.1  | 95    | 103.8 | 107.3  | 102.1  | 112.3 |
| 106.6 | 113.8 | 98.1  | 113    | 99.8  | 114.7 | 102.3  | 108.4  | 106.2 |
| 110.6 | 105.2 | 112.3 | 107.3  | 99.2  | 111.5 | 113.8  | 117.2  | 110.8 |
| 103.4 | 101.1 | 105.6 | 100    | 99.7  | 110.1 | 101.7  | 105.2  | 108.1 |
| 104.2 | 122.7 | 97.1  | 108.8  | 101.2 | 108.4 | 104.9  | 105.1  | 105   |
| 102.9 | 111.5 | 99.3  | 103.4  | 100.2 | 110.7 | 99.2   | 99.9   | 109.3 |
| 101.9 | 102.1 | 103.9 | 95.8   | 99.1  | 106.1 | 105.4  | 107.9  | 109.1 |
| 104.7 | 103.2 | 102.5 | 103.8  | 98.9  | 107.5 | 106.1  | 109    | 110   |
| 107.1 | 108.4 | 98.6  | 85.8   | 93.5  | 113.9 | 101.5  | 106.5  | 98.9  |
| 108.8 | 100   | 97.3  | 99.5   | 93.1  | 100.5 | 107.8  | 103.1  | 111.4 |
| 107.3 | 121.5 | 99.9  | 97.8   | 94.9  | 108.2 | 103.1  | 117.6  | 104.8 |
| 197.6 | 427.5 | 426.2 | 373.3  | 320.9 | 396.8 | 348.6  | 373.1  | 305.2 |
| 126.2 | 159.3 | 144.9 | 138.8  | 139.7 | 168.5 | 156.9  | 181.7  | 152.4 |
| 100.6 | 123   | 103.7 | 101.9  | 100.9 | 110.9 | 107.1  | 114.6  | 112.8 |
| 101.6 | 105.7 | 103.8 | 103.2  | 98.6  | 106.7 | 105.2  | 113.1  | 106.7 |
| 120.6 | 155.9 | 126.8 | 115.7  | 122.1 | 128.2 | 117.3  | 155.2  | 156.2 |
| 116   | 124.7 | 115.9 | 107.4  | 99.5  | 114.7 | 116.8  | 133.8  | 119.7 |
| 128.2 | 131.9 | 127.5 | 134.3  | 115.7 | 121.2 | 149.4  | 160.4  | 139.9 |
| 124.6 | 114.3 | 108   | 120.1  | 112   | 121.9 | 117.9  | 119.2  | 107.2 |

|       |        |       |        |       |       |       |        |       |
|-------|--------|-------|--------|-------|-------|-------|--------|-------|
| 116.7 | 118.4  | 121.4 | 131.3  | 120.4 | 135.7 | 119.2 | 137.1  | 137.5 |
| 176   | 260.3  | 269.3 | 278.4  | 228.5 | 251.6 | 289   | 259.7  | 211.8 |
| 104.8 | 106.7  | 98.3  | 97.5   | 93.2  | 110.7 | 98.8  | 105.1  | 99.7  |
| 103.6 | 135.5  | 119.7 | 114    | 102   | 119.4 | 104.9 | 127.1  | 118.5 |
| 132   | 139.7  | 123.6 | 130.8  | 118.6 | 135.8 | 130.2 | 146.5  | 139   |
| 106.5 | 102.8  | 95.3  | 105.3  | 106.6 | 102.8 | 99.4  | 98.9   | 102.7 |
| 111.9 | 108.2  | 102.2 | 101.6  | 95.7  | 110.5 | 107.2 | 116.9  | 111.7 |
| 114.6 | 111.1  | 112.6 | 125.8  | 124.1 | 118.3 | 104.4 | 116.5  | 103.7 |
| 107.3 | 119.1  | 97.2  | 95.2   | 98    | 102   | 105.5 | 114.4  | 97.7  |
| 104.7 | 101.6  | 105.4 | 95.6   | 93.7  | 112.2 | 106.5 | 108.3  | 115.6 |
| 110   | 109.8  | 103.2 | 103.3  | 91.2  | 111.8 | 104.2 | 107.3  | 110.4 |
| 164.4 | 237.5  | 297.4 | 210.3  | 203.4 | 255.3 | 298.4 | 278.3  | 186.4 |
| 181.9 | 223.5  | 194   | 177.5  | 139.7 | 180.1 | 164.2 | 326.8  | 254   |
| 108.1 | 112.4  | 112.7 | 108.6  | 99    | 109.7 | 103.9 | 102.8  | 108.6 |
| 107.3 | 107.4  | 100.5 | 98     | 93.8  | 118.2 | 106.6 | 124    | 98    |
| 584.6 | 1079.8 | 949.4 | 1071.5 | 822.1 | 929.2 | 662   | 1097.4 | 577.7 |
| 247.5 | 410.9  | 524.7 | 373    | 346.8 | 434.1 | 396.3 | 308.5  | 197.3 |
| 104.3 | 115.8  | 95.1  | 110.3  | 93.5  | 105.5 | 108   | 112.2  | 102   |
| 103.2 | 105.5  | 100.6 | 100.1  | 95.5  | 106.4 | 97.2  | 112.8  | 111.6 |
| 107.6 | 104.7  | 98    | 96     | 99.9  | 106.7 | 99.2  | 95.4   | 103.3 |
| 212.1 | 215    | 161.2 | 225.2  | 174   | 233.3 | 204.9 | 392.3  | 240.6 |
| 109   | 112.6  | 98.8  | 100.5  | 101.8 | 104.5 | 104.5 | 109.6  | 103.2 |
| 105.4 | 103.3  | 96.3  | 102.2  | 92    | 105   | 97.7  | 109.5  | 103.4 |
| 115.4 | 109.1  | 102.2 | 97.6   | 98.2  | 106.9 | 101.1 | 105.7  | 110.3 |
| 111.7 | 113.5  | 118.6 | 119    | 93.2  | 114.4 | 108.8 | 105.8  | 106.1 |
| 103.2 | 113.9  | 98.8  | 103    | 86.1  | 116.5 | 103.5 | 117.1  | 110.6 |
| 139.5 | 138.4  | 132.5 | 152.7  | 136.7 | 145.1 | 173   | 171    | 184.3 |
| 125.7 | 126.4  | 141.9 | 118.6  | 112.7 | 122.8 | 121.1 | 130.9  | 126   |
| 104.2 | 102    | 92.8  | 102.2  | 99    | 98.3  | 101.3 | 102.5  | 101   |
| 127.1 | 134.9  | 120.2 | 136.8  | 120.5 | 136.4 | 136.8 | 164.1  | 166.9 |
| 108.3 | 116.5  | 110.5 | 107.8  | 98.8  | 115.3 | 105   | 112.8  | 114.5 |
| 232.2 | 351.2  | 331.8 | 374.2  | 341.5 | 392.6 | 422.5 | 472.9  | 277.5 |
| 135.8 | 230.5  | 234.5 | 266.1  | 175   | 223.2 | 254.9 | 170.2  | 134.7 |
| 110.1 | 106.4  | 103   | 108.3  | 99.6  | 110.5 | 112.4 | 106.9  | 108.8 |
| 150.3 | 205.9  | 184.7 | 187    | 172.8 | 193.2 | 209.8 | 198    | 174.1 |
| 162.6 | 191    | 170.6 | 349    | 173.9 | 152.7 | 271.4 | 169.7  | 134.4 |
| 139.8 | 166.4  | 194.3 | 224.9  | 141.7 | 184.5 | 235.9 | 245    | 179.5 |
| 173.5 | 229.8  | 272.5 | 239.1  | 229   | 224   | 270.2 | 207.7  | 149.2 |
| 127.5 | 228    | 219.2 | 237.3  | 191.4 | 191.8 | 221.2 | 253.3  | 153.5 |
| 231.2 | 321.1  | 329.9 | 320.5  | 310.6 | 325.7 | 375   | 398.9  | 287.3 |
| 109.1 | 105.2  | 104.5 | 98.1   | 95.9  | 104   | 103.1 | 97.9   | 109.7 |
| 130.5 | 130.9  | 120.2 | 116.8  | 116.9 | 123.1 | 129.7 | 149.2  | 124.4 |
| 104.9 | 104.6  | 100.3 | 101.2  | 98    | 111.1 | 113.3 | 112    | 115.5 |
| 120.7 | 133.4  | 117.7 | 121.3  | 120.2 | 124.9 | 117.5 | 135.3  | 140.1 |
| 100.9 | 106.1  | 100.1 | 98.9   | 97.8  | 113.3 | 96.9  | 108.6  | 106.6 |
| 110.6 | 112.2  | 103.6 | 97.3   | 97.5  | 109.3 | 98.4  | 113    | 104.4 |
| 104   | 112.6  | 101.5 | 106    | 95.7  | 104   | 103   | 106.2  | 111.3 |
| 107.9 | 106.5  | 102.3 | 104.1  | 95.8  | 110.4 | 99.8  | 112.9  | 112.4 |
| 109.7 | 110.5  | 102.4 | 109.2  | 93.5  | 107.3 | 104.4 | 117.1  | 102   |
| 113   | 107    | 103.1 | 96.5   | 95.8  | 109.1 | 106.3 | 102.9  | 104.8 |
| 131.1 | 135    | 127.9 | 111.5  | 114.1 | 141.5 | 121   | 139.7  | 127.7 |

|       |        |        |        |        |        |        |        |        |
|-------|--------|--------|--------|--------|--------|--------|--------|--------|
| 106.5 | 106.7  | 102    | 93     | 95.1   | 104    | 99.8   | 108.3  | 107.4  |
| 131.6 | 134.2  | 126.6  | 122.3  | 126.4  | 138    | 124.8  | 137.6  | 139.9  |
| 107.1 | 107.4  | 98.7   | 105.4  | 98.2   | 104.7  | 100    | 104.4  | 105.2  |
| 115.3 | 113.9  | 112.6  | 104.6  | 107.2  | 115.4  | 107.2  | 114    | 105    |
| 102.9 | 109.2  | 98.6   | 103.5  | 93.6   | 109    | 97.4   | 103.5  | 108.9  |
| 103.1 | 105.7  | 102.4  | 97.1   | 96.9   | 107.2  | 115    | 103.7  | 112.2  |
| 339.3 | 207.3  | 205.6  | 166.7  | 199.9  | 244.5  | 238.8  | 372.6  | 312.5  |
| 669.4 | 415.1  | 422.4  | 447.7  | 454.1  | 477.2  | 392.9  | 1206.3 | 1424.3 |
| 112.4 | 114    | 109.7  | 110.2  | 105.2  | 115.4  | 115.6  | 122.4  | 110.9  |
| 103.9 | 106.5  | 103.6  | 119.1  | 96     | 109.3  | 97     | 109.8  | 107    |
| 107.7 | 107.2  | 103.5  | 101.6  | 92.3   | 107.8  | 102    | 101.7  | 112.8  |
| 114   | 109.6  | 103.2  | 108.8  | 92.8   | 113.4  | 98.2   | 101.4  | 103.2  |
| 111.2 | 114    | 103.6  | 106    | 103.5  | 110    | 100.2  | 108.1  | 115.8  |
| 333.5 | 487.2  | 381.4  | 408.8  | 388.1  | 455.4  | 518.2  | 741.8  | 601.6  |
| 531   | 463.7  | 484.9  | 436    | 404.2  | 468.7  | 583.8  | 1084.3 | 747.1  |
| 106.3 | 97.8   | 98.5   | 99.7   | 92.9   | 105.1  | 95.9   | 102.7  | 107.6  |
| 110.1 | 117.1  | 116.9  | 102.3  | 103.4  | 129    | 110.1  | 126.2  | 117.7  |
| 105.9 | 106.8  | 104.8  | 100.2  | 93     | 103    | 100.8  | 106.4  | 112    |
| 126.4 | 110.1  | 108.1  | 114.1  | 109    | 114.9  | 113.4  | 139.1  | 129.2  |
| 196.1 | 229.6  | 205.8  | 173.9  | 229.3  | 195.2  | 238    | 362.4  | 250.3  |
| 127.1 | 141.5  | 130.8  | 141.4  | 119.8  | 126.9  | 139.7  | 150.8  | 140.7  |
| 112.1 | 116.9  | 112.9  | 112.1  | 110.1  | 115.6  | 122.7  | 122.9  | 115.2  |
| 100.5 | 107.1  | 101.6  | 108.3  | 97     | 104.8  | 105.1  | 101.5  | 109.9  |
| 115.2 | 124.7  | 118.9  | 115.1  | 104.4  | 113.6  | 112.9  | 141.1  | 134.9  |
| 106.5 | 113.2  | 110.6  | 94.1   | 105.2  | 117.5  | 109.5  | 121    | 118.6  |
| 178.1 | 210    | 250.4  | 248.3  | 200.1  | 218.4  | 219    | 352.3  | 183.6  |
| 115.6 | 125    | 111.7  | 112.8  | 103.4  | 127    | 123.2  | 139    | 118.6  |
| 107.2 | 101.8  | 101.7  | 98.3   | 94.2   | 103.3  | 109.8  | 108.3  | 99.4   |
| 151.9 | 137    | 155.8  | 139.9  | 126.5  | 150.5  | 153.3  | 207.1  | 151.2  |
| 109.7 | 113.5  | 109.1  | 105.1  | 104.2  | 106.3  | 120.2  | 118.5  | 112.1  |
| 114.3 | 126.4  | 129.5  | 112.8  | 132.1  | 180.6  | 128.6  | 176.7  | 152.7  |
| 105.8 | 109.6  | 100.1  | 95     | 97.9   | 107.7  | 105.3  | 108.2  | 109.8  |
| 110.5 | 108.5  | 107.7  | 107    | 99     | 104.1  | 107.3  | 117.2  | 106    |
| 285   | 398.6  | 416.4  | 263.2  | 326.3  | 409.8  | 383.4  | 419.4  | 278.9  |
| 107.8 | 125.7  | 108.4  | 126.7  | 114.8  | 119.6  | 127.8  | 134.9  | 128.7  |
| 134.7 | 147.6  | 132.5  | 124.9  | 133.3  | 127    | 115.9  | 148.3  | 178.1  |
| 313.7 | 365.8  | 424.9  | 369.1  | 430.7  | 362.1  | 355.2  | 641.6  | 613.7  |
| 116.5 | 106.8  | 106.9  | 108.1  | 97.4   | 103.5  | 103.9  | 116.2  | 110.2  |
| 111.4 | 154.7  | 150.9  | 159.8  | 142.9  | 158.6  | 156.1  | 159.5  | 131.7  |
| 112.9 | 110.1  | 112.9  | 118    | 106.7  | 114.5  | 105.6  | 111.9  | 111.6  |
| 120.9 | 130.1  | 129.7  | 129.2  | 118.2  | 133.3  | 126.8  | 142.2  | 127.7  |
| 222.2 | 199.6  | 185.7  | 206.2  | 202.1  | 145.8  | 222.6  | 304.3  | 295.7  |
| 103.3 | 113.5  | 105.5  | 106.3  | 93.4   | 107.7  | 101.6  | 109.5  | 113.3  |
| 116.8 | 131.8  | 121.3  | 113.9  | 115.3  | 126    | 110.1  | 135.9  | 130    |
| 112.5 | 108    | 106.1  | 103.1  | 93.8   | 110.1  | 103.3  | 111.2  | 100.5  |
| 109.1 | 104.3  | 100    | 100.8  | 89.2   | 106.5  | 101.2  | 109.7  | 104    |
| 305.7 | 538.3  | 510.9  | 460.2  | 405.8  | 451.7  | 489.8  | 577    | 337.7  |
| 263.8 | 359.1  | 440.8  | 321.9  | 325.8  | 364.3  | 431.4  | 345.6  | 250.8  |
| 993.4 | 1776.7 | 1675.3 | 1498.2 | 1195.9 | 1446.4 | 1555.8 | 1708.8 | 749.9  |
| 126.7 | 151.2  | 126.9  | 125.3  | 129.6  | 129.9  | 132.1  | 169.2  | 156.2  |
| 111   | 106.8  | 112.2  | 100.5  | 94.4   | 105    | 97.9   | 103.4  | 105.9  |

|       |       |       |       |       |       |       |        |        |
|-------|-------|-------|-------|-------|-------|-------|--------|--------|
| 203.5 | 206.5 | 195.3 | 192.4 | 179.2 | 215.5 | 191.4 | 276.3  | 261.1  |
| 120.2 | 129.3 | 106.6 | 121.1 | 105.2 | 123.7 | 114.1 | 131.1  | 136.9  |
| 192.2 | 195   | 202.4 | 174.9 | 165.3 | 193.4 | 172.4 | 317.8  | 201.2  |
| 98.9  | 103.5 | 105.9 | 99.3  | 97    | 99.8  | 96.5  | 109.2  | 102.2  |
| 101.8 | 105.6 | 101.4 | 101.5 | 92.2  | 105.2 | 93.9  | 104.2  | 100.5  |
| 97.5  | 108.5 | 107   | 99.1  | 100.5 | 110.6 | 105   | 124.1  | 113.1  |
| 130.3 | 156.9 | 146.2 | 138.9 | 125.7 | 141.9 | 134.7 | 154.5  | 141.9  |
| 109.9 | 111.9 | 99.5  | 109.2 | 103.3 | 116.3 | 105.9 | 124.8  | 116.2  |
| 99.3  | 112.5 | 99.6  | 99.9  | 90.4  | 105.4 | 102.3 | 107    | 108.3  |
| 172.4 | 345.3 | 245.3 | 372.6 | 246.9 | 245.1 | 309.1 | 378.5  | 253.7  |
| 134.9 | 127.9 | 116.8 | 123.4 | 108.9 | 130.6 | 133.3 | 139.8  | 149.7  |
| 428.3 | 418.9 | 382.7 | 459.6 | 442.5 | 486.3 | 442.2 | 912.5  | 674.7  |
| 216.3 | 246.9 | 246.3 | 219.6 | 213.9 | 260.4 | 278   | 493.1  | 388.3  |
| 102.5 | 105.6 | 99.1  | 109.3 | 93.2  | 110.3 | 104.4 | 101.9  | 105.3  |
| 109.3 | 108.2 | 107.1 | 106.4 | 101.8 | 113.5 | 108.1 | 113.3  | 108.6  |
| 105.9 | 112.1 | 96.8  | 104.8 | 101.3 | 110.9 | 101.5 | 119.4  | 126.9  |
| 98.2  | 114.2 | 97.6  | 97.5  | 98.4  | 111.8 | 105.4 | 109.6  | 115.3  |
| 103.9 | 103   | 101.2 | 103.8 | 94.8  | 110.4 | 99.5  | 111.9  | 109.1  |
| 103.8 | 108.7 | 107.1 | 103.8 | 102.3 | 118.3 | 110.3 | 111.2  | 118.8  |
| 105.4 | 105.5 | 103.1 | 100.9 | 103.8 | 118.4 | 103.1 | 109.8  | 109    |
| 97    | 105.3 | 100.7 | 119.8 | 98.3  | 108.2 | 106   | 107.7  | 114.7  |
| 138   | 255.3 | 230   | 215.3 | 203.1 | 244.2 | 247.5 | 278.8  | 188.5  |
| 106.5 | 110.4 | 106.1 | 111.4 | 104.3 | 116.3 | 108   | 110.5  | 111    |
| 107.4 | 113.8 | 111.1 | 118   | 108.4 | 112.5 | 116.2 | 128.3  | 117.6  |
| 113.2 | 115.1 | 128   | 96.9  | 101.4 | 115.5 | 109.1 | 111.1  | 107.3  |
| 100.1 | 107.2 | 100.9 | 105.9 | 94.3  | 112.6 | 103.1 | 107    | 107.6  |
| 309.3 | 437.2 | 408.1 | 488.8 | 462.5 | 428.1 | 527.1 | 507.3  | 288.6  |
| 170.6 | 228.2 | 233.7 | 246.7 | 186.3 | 244.3 | 268.4 | 273.7  | 146.7  |
| 102   | 107.4 | 103.5 | 102.1 | 95.6  | 112.1 | 99.5  | 108.3  | 105.3  |
| 463.6 | 297.4 | 257.2 | 328.6 | 311.2 | 384.5 | 361   | 900.5  | 875.8  |
| 108.2 | 105.6 | 108.2 | 119.4 | 108.4 | 125.2 | 109   | 117.2  | 113    |
| 148.8 | 151.7 | 136.6 | 135.4 | 132.7 | 149.4 | 154.6 | 198.4  | 149.2  |
| 105.1 | 124.8 | 105   | 102.9 | 96.2  | 103.8 | 110   | 117.5  | 118.6  |
| 109.2 | 114.2 | 97.2  | 102.2 | 101.4 | 113.8 | 100.1 | 112.3  | 115.3  |
| 101.2 | 104.7 | 96    | 93.6  | 94.4  | 106.9 | 103.3 | 108.3  | 112.1  |
| 108.1 | 109.9 | 100.4 | 94.5  | 95.1  | 112.4 | 101.3 | 107.9  | 100.8  |
| 106.1 | 113.7 | 111.1 | 113.5 | 103.2 | 111.2 | 106.2 | 118.2  | 110.9  |
| 100.5 | 97.6  | 101.3 | 100.1 | 97.2  | 111.5 | 98.1  | 106.4  | 104.9  |
| 107.9 | 102.4 | 100.5 | 98.2  | 89.9  | 113.7 | 99.9  | 107.4  | 103.2  |
| 108.2 | 104.7 | 111   | 92    | 91.6  | 103.8 | 107.4 | 111.6  | 103.8  |
| 113.3 | 110.9 | 111.6 | 100.9 | 95.7  | 105.5 | 110.5 | 107.9  | 113.1  |
| 471.8 | 464.9 | 572.1 | 444.5 | 498.7 | 583.5 | 554.2 | 832.9  | 400.9  |
| 211.9 | 311.1 | 300.5 | 324.7 | 264.4 | 274.6 | 303.4 | 371.2  | 227.5  |
| 133.5 | 125.6 | 124.2 | 120.8 | 117   | 122.4 | 135.4 | 162.1  | 132.5  |
| 173.2 | 211.9 | 170.6 | 172   | 194.5 | 190.6 | 186.1 | 226.4  | 177.7  |
| 117.5 | 114.5 | 109.7 | 105   | 101.2 | 110.3 | 108.6 | 122.1  | 110.8  |
| 161.6 | 122.1 | 123.2 | 131   | 124.7 | 137.9 | 150.3 | 207.8  | 157.4  |
| 212.9 | 399.5 | 421.4 | 636.6 | 453.1 | 407   | 551   | 525.8  | 309.2  |
| 135.7 | 169.2 | 179.9 | 171.9 | 158.2 | 181.5 | 169.6 | 283.1  | 252.6  |
| 126   | 116.5 | 120.4 | 109.8 | 110.5 | 119.4 | 116   | 141.4  | 124.8  |
| 893.9 | 728.6 | 779.8 | 818   | 691.2 | 951.3 | 991.5 | 1794.7 | 1730.3 |

|        |        |       |        |        |        |        |        |        |
|--------|--------|-------|--------|--------|--------|--------|--------|--------|
| 412.8  | 530.5  | 494.5 | 472.8  | 415.5  | 439.2  | 456.3  | 860    | 741.7  |
| 124.9  | 137.7  | 129   | 118.9  | 113    | 148.4  | 132.8  | 174.3  | 141.8  |
| 104.9  | 102.9  | 99.9  | 96.4   | 99.7   | 111.7  | 96.9   | 103.4  | 108.2  |
| 106.7  | 106.4  | 107.6 | 103.8  | 95.1   | 99.8   | 108.1  | 110    | 113.5  |
| 102.8  | 107.7  | 107   | 108.5  | 92.2   | 108.3  | 103.7  | 109    | 107.9  |
| 103    | 127.6  | 111.9 | 124.6  | 104.1  | 109    | 142.2  | 113.7  | 112.8  |
| 128.5  | 145.2  | 126.7 | 149.3  | 140.8  | 141.5  | 150.8  | 148.7  | 141.4  |
| 113.7  | 117.7  | 106.4 | 123    | 100.3  | 119.1  | 109.4  | 115    | 124    |
| 106.4  | 116.1  | 109.1 | 102.2  | 101.7  | 107.4  | 108.8  | 115    | 112.9  |
| 103.8  | 110.1  | 93    | 100.6  | 96.3   | 103.4  | 104.8  | 118.7  | 116.3  |
| 128.5  | 134.9  | 145.6 | 127.9  | 115.3  | 135.6  | 135.6  | 144.8  | 119.2  |
| 209.5  | 267.4  | 281.8 | 203.1  | 221.8  | 245.6  | 218.7  | 223.3  | 167.8  |
| 211.6  | 256.9  | 259.4 | 174.4  | 206.8  | 210.9  | 191.1  | 233.8  | 170.2  |
| 106.4  | 113.4  | 101.9 | 102.7  | 101.9  | 109.7  | 103.4  | 104.4  | 98.5   |
| 110.9  | 132.4  | 111.2 | 111.8  | 106.6  | 124.7  | 111.7  | 158    | 148.6  |
| 269    | 180    | 219.3 | 199    | 269.4  | 203    | 218.8  | 265.2  | 251.1  |
| 1044.4 | 1257.1 | 1204  | 1048.8 | 1119.7 | 1183.3 | 1457.1 | 2280.1 | 1716.1 |
| 100.4  | 102.3  | 96.3  | 87.9   | 89.8   | 107.3  | 99.8   | 122.5  | 100.5  |
| 111.1  | 128.4  | 121.1 | 109.2  | 103.9  | 113.2  | 107.2  | 136    | 114.1  |
| 105.2  | 114.3  | 95.2  | 94.4   | 94.5   | 110.5  | 99.5   | 126    | 106.7  |
| 119.4  | 118.7  | 122.2 | 106.9  | 107.2  | 132.9  | 110.4  | 121.8  | 114.2  |
| 227.5  | 682.6  | 311.2 | 2650.8 | 298.4  | 184.8  | 1122   | 270.2  | 334.7  |
| 318    | 444.4  | 471.3 | 303.1  | 521.4  | 535    | 416.5  | 1010.5 | 609    |
| 110.5  | 112    | 101.6 | 115.6  | 97.9   | 98.1   | 103.6  | 117    | 111.7  |
| 108.8  | 109.8  | 104.1 | 106.6  | 97.4   | 109.3  | 98.7   | 100.5  | 114.4  |
| 100.5  | 121.8  | 109.7 | 112.7  | 103.8  | 112.2  | 106.6  | 124    | 114.9  |
| 104.9  | 116.5  | 97.5  | 98.3   | 97.8   | 111.2  | 98     | 104.6  | 109.8  |
| 125.7  | 146.2  | 126.5 | 131.2  | 110    | 142    | 115.5  | 166    | 159.5  |
| 158.1  | 154.7  | 149.1 | 117.4  | 124.5  | 155.9  | 134.2  | 180.5  | 167    |
| 118.1  | 131.6  | 114.3 | 113.9  | 111.2  | 129.3  | 121.9  | 126.1  | 116.3  |
| 222.4  | 265.1  | 243.2 | 161.7  | 231    | 257.2  | 245.1  | 543.8  | 367.2  |
| 107.2  | 117.4  | 115.7 | 120.2  | 99.7   | 119.2  | 101.7  | 125.9  | 117.7  |
| 115.9  | 106    | 106.6 | 111.1  | 103.9  | 108    | 106.1  | 119.7  | 110.8  |
| 111.7  | 109.7  | 106.6 | 107.8  | 93.7   | 109.4  | 98.7   | 102.5  | 104.5  |
| 96.8   | 106.8  | 94.9  | 95.3   | 85     | 95.7   | 102.8  | 108.1  | 103.8  |
| 111    | 115.5  | 103.3 | 103.3  | 94.9   | 108.1  | 102.2  | 110.3  | 109.3  |
| 105.8  | 106.6  | 102.9 | 99.5   | 90.9   | 108    | 104.2  | 106.4  | 115.2  |
| 114.1  | 103.9  | 97    | 98.9   | 90.6   | 101.4  | 101.7  | 108    | 105    |
| 108.4  | 106.2  | 101.3 | 100.8  | 95     | 110.7  | 109    | 115    | 108.2  |
| 111.3  | 116.7  | 102.1 | 96.2   | 95.1   | 112.2  | 108.4  | 102    | 114.2  |
| 314.9  | 407.8  | 445.7 | 421.4  | 378.5  | 472.6  | 400.9  | 619.6  | 442.1  |
| 370.3  | 414.4  | 444.6 | 368.6  | 290    | 360.5  | 435.3  | 952.5  | 738.7  |
| 123.6  | 120.9  | 106.6 | 99.1   | 105    | 125.8  | 115.2  | 144    | 131.2  |
| 106.1  | 113.8  | 102.5 | 94.6   | 101    | 106.6  | 101.2  | 105.3  | 108    |
| 110    | 107.3  | 105.4 | 115.6  | 98.6   | 108.4  | 108.1  | 110.6  | 105.4  |
| 110.1  | 118.8  | 107.4 | 107.2  | 106.9  | 111.6  | 106.6  | 121.8  | 114.5  |
| 107.6  | 108.3  | 103   | 105.5  | 101.1  | 107    | 109.6  | 113.6  | 113.1  |
| 99.4   | 106    | 104.2 | 101.7  | 94     | 108.1  | 99.1   | 111.8  | 109    |
| 99.4   | 107    | 96.4  | 96.6   | 95.8   | 107.4  | 107.7  | 106.8  | 106    |
| 109.6  | 111.7  | 99.3  | 109.8  | 93.1   | 105.8  | 102.6  | 122.3  | 108.8  |
| 105.4  | 115.8  | 98.8  | 100.6  | 95.4   | 107.6  | 102.8  | 106.6  | 105.8  |

|        |        |        |        |        |        |        |        |        |
|--------|--------|--------|--------|--------|--------|--------|--------|--------|
| 105.9  | 109.2  | 102.4  | 107.8  | 96.2   | 110.9  | 101.1  | 108.8  | 105.3  |
| 118.2  | 120.1  | 114    | 132.4  | 104.5  | 115.5  | 105.2  | 130.6  | 111.1  |
| 130.2  | 126.9  | 112.1  | 112.8  | 110.7  | 116.4  | 111.7  | 129.8  | 122    |
| 101.9  | 108    | 97.8   | 104.9  | 95.9   | 114.5  | 104    | 104.4  | 111.6  |
| 1909.9 | 1950.8 | 2008   | 1306.6 | 1644.5 | 1845   | 1792   | 3060.3 | 3195.1 |
| 1730.3 | 1702.2 | 1729   | 2293.1 | 1456.1 | 1645.5 | 1616.6 | 2833.9 | 2192.7 |
| 121.9  | 150.6  | 146.1  | 141.2  | 139.8  | 150.3  | 168.7  | 206.5  | 179.4  |
| 110.3  | 119.7  | 120.8  | 112.1  | 92.2   | 122.1  | 107.4  | 141.5  | 118    |
| 103.7  | 107.9  | 100.4  | 103    | 100.7  | 118.7  | 115.3  | 113    | 103.3  |
| 354.1  | 619.9  | 467.2  | 419.1  | 426.4  | 324.3  | 336.3  | 377.4  | 383    |
| 120.1  | 138.5  | 140.5  | 127.2  | 108.2  | 120.7  | 111.5  | 114.6  | 120.1  |
| 109.5  | 110.4  | 101.3  | 88.7   | 98.8   | 95.3   | 96.7   | 107    | 106.2  |
| 102.6  | 107.9  | 105    | 100.1  | 98.4   | 102    | 101.5  | 111.4  | 104.1  |
| 105.4  | 113.5  | 100.8  | 101.5  | 97.9   | 110.6  | 109.4  | 112.1  | 120    |
| 103.8  | 110.1  | 99.9   | 108    | 97.6   | 111.7  | 108    | 118.6  | 122.2  |
| 99.4   | 108.7  | 101.3  | 97.4   | 94.7   | 105    | 94.9   | 105.3  | 111.4  |
| 95.4   | 111.8  | 100    | 102.5  | 94.9   | 106.4  | 100.4  | 102.9  | 103.4  |
| 106.7  | 100.5  | 95.7   | 104.7  | 101.4  | 106.2  | 100.1  | 106.5  | 110.1  |
| 106.8  | 115.2  | 109.3  | 105.6  | 105.4  | 111.9  | 99.2   | 117.6  | 127.8  |
| 113.4  | 118.8  | 106    | 121.3  | 104.9  | 105.3  | 107.6  | 124.3  | 128.5  |
| 942.1  | 779.5  | 758.7  | 562.5  | 727.5  | 488.6  | 585    | 1564.8 | 1054.3 |
| 225.2  | 242.1  | 238.2  | 197.9  | 196.7  | 221.8  | 197.5  | 359.4  | 285    |
| 100.4  | 101.1  | 105.7  | 93.1   | 95.8   | 107.3  | 92.2   | 101.2  | 102.6  |
| 112.8  | 110.8  | 112.8  | 101    | 100    | 110.8  | 108.8  | 116.8  | 107    |
| 108.6  | 102.2  | 103.7  | 91.4   | 93     | 108.6  | 107.1  | 106.2  | 103.6  |
| 188.8  | 139.2  | 144.2  | 129.9  | 136.2  | 156.3  | 135.6  | 171.7  | 173.7  |
| 117.2  | 120.4  | 116    | 126    | 107    | 121.6  | 131.4  | 165    | 148.6  |
| 143.3  | 132.1  | 125.7  | 128.3  | 123.4  | 140.9  | 117.8  | 162.3  | 150.4  |
| 127.1  | 132.4  | 106.3  | 137.6  | 111.4  | 109.2  | 115    | 116.4  | 128.3  |
| 99.6   | 101.7  | 101    | 101.8  | 94.3   | 103.6  | 101    | 108.7  | 104.3  |
| 117.9  | 113.9  | 121.5  | 101.9  | 100.7  | 116.4  | 101.9  | 128.4  | 113.8  |
| 107.8  | 106.7  | 95.1   | 107.4  | 91.1   | 106.8  | 103.9  | 111.2  | 103    |
| 115.1  | 135.2  | 110.8  | 111.3  | 109.5  | 128.1  | 114.9  | 135.9  | 120.2  |
| 118.4  | 116.8  | 102.1  | 105.4  | 99.8   | 114.9  | 103.8  | 117.1  | 114.9  |
| 102.6  | 107.2  | 106.1  | 101.7  | 100.1  | 106.2  | 98.7   | 109    | 107.9  |
| 104.9  | 105.1  | 106.4  | 107.4  | 100.2  | 109.4  | 110.4  | 114.5  | 115.4  |
| 97.4   | 106.5  | 100.4  | 102.7  | 87.3   | 103    | 103.3  | 105    | 107    |
| 158.2  | 153.7  | 171.5  | 143.6  | 166.5  | 163.7  | 147.1  | 262.7  | 250.9  |
| 213.8  | 193.1  | 189.5  | 145    | 178.9  | 203.4  | 184.4  | 295.6  | 265.7  |
| 108.8  | 113.6  | 98.1   | 102.4  | 95.1   | 106.5  | 97.2   | 105.6  | 104.7  |
| 104.7  | 108.6  | 103.3  | 98.1   | 91.1   | 110.4  | 98.7   | 107.3  | 107.4  |
| 107.8  | 109.9  | 104.7  | 101.8  | 99.7   | 109.9  | 105.3  | 115.6  | 101.4  |
| 166.3  | 178.8  | 169.8  | 149.9  | 136.6  | 145.4  | 163.1  | 256.7  | 149.9  |
| 101.1  | 112.2  | 105    | 100.9  | 93.4   | 103    | 105.4  | 108.5  | 110.8  |
| 100    | 108.1  | 108    | 107.1  | 99.1   | 109.3  | 99.4   | 119.1  | 107.5  |
| 1073.7 | 1159   | 1210.5 | 1072.5 | 985.5  | 1180.1 | 806.6  | 1526.4 | 1798.8 |
| 101.3  | 111.4  | 107.6  | 101.5  | 95.2   | 111.6  | 105.8  | 116.8  | 105.1  |
| 314.3  | 361.7  | 434.7  | 306.8  | 347    | 407.2  | 379.4  | 746.1  | 388.2  |
| 126.8  | 160.6  | 162.5  | 168    | 127.4  | 163.4  | 179.4  | 204.9  | 185.4  |
| 104.5  | 105.2  | 99.6   | 102.3  | 96.6   | 111.4  | 103.2  | 114.8  | 103.9  |
| 241.8  | 216.2  | 305.6  | 332.5  | 231.8  | 366.3  | 202.3  | 405.1  | 451.5  |

|        |        |        |        |        |        |        |        |        |
|--------|--------|--------|--------|--------|--------|--------|--------|--------|
| 355.1  | 479.3  | 461.8  | 670.5  | 462.2  | 362.8  | 607.9  | 1131   | 754.4  |
| 105.6  | 110    | 101    | 98     | 94.6   | 108.2  | 100.1  | 108.7  | 113.1  |
| 104.8  | 103.8  | 104.6  | 91.2   | 97.5   | 103.4  | 100.1  | 102.2  | 106.6  |
| 287.7  | 236.3  | 296.5  | 285.3  | 197.7  | 243.4  | 265.1  | 354.7  | 273.5  |
| 168.5  | 182.7  | 186.8  | 183.2  | 144.2  | 175.7  | 175.8  | 199.2  | 175.9  |
| 106.5  | 100.4  | 101.7  | 113.4  | 96     | 105.4  | 95.4   | 103.5  | 109.3  |
| 104    | 104.2  | 94.5   | 108.7  | 97.3   | 105.2  | 97.1   | 107.8  | 117.9  |
| 101.4  | 117.4  | 100.1  | 117.1  | 92.8   | 109.8  | 108.8  | 123.9  | 115    |
| 126    | 139.3  | 125.8  | 115.5  | 103.1  | 134.3  | 110.7  | 141.6  | 145.4  |
| 538.1  | 438.4  | 360.4  | 413.1  | 443.8  | 385.4  | 280.3  | 681.3  | 402.9  |
| 1943.1 | 2116.5 | 1831.6 | 1767.3 | 1854.9 | 1981   | 2219.3 | 2478.7 | 1594.7 |
| 469.5  | 356.9  | 302.4  | 343.8  | 401.7  | 319    | 229.6  | 468.3  | 348.3  |
| 120.2  | 117.7  | 130.5  | 114.7  | 110    | 128.4  | 112    | 142.5  | 137.2  |
| 343    | 522.5  | 559    | 411.4  | 445.6  | 508.4  | 521.7  | 526.4  | 347.8  |
| 138.4  | 166.7  | 151.3  | 137.3  | 134.3  | 146.8  | 169.2  | 201.3  | 140.8  |
| 109.3  | 118.1  | 109.8  | 112.3  | 113.6  | 114.3  | 107.5  | 108.7  | 118.9  |
| 259    | 118.3  | 116.3  | 132.5  | 125.7  | 137.8  | 131.7  | 220.5  | 327.9  |
| 107.5  | 110.8  | 93.7   | 111.1  | 91     | 107    | 100.3  | 104.8  | 103.8  |
| 102.6  | 103.9  | 98.7   | 97     | 87.8   | 102.8  | 99.4   | 99.4   | 104    |
| 103.9  | 105    | 105.8  | 93.6   | 90.8   | 108.4  | 104.3  | 119.6  | 106.9  |
| 113.3  | 100    | 100.2  | 102    | 103    | 105.9  | 106.9  | 113.8  | 106.7  |
| 105.9  | 105.8  | 102    | 99.8   | 108.2  | 113.1  | 104.4  | 105.8  | 107.8  |
| 114.7  | 117.3  | 102.9  | 102.9  | 104.8  | 129.2  | 105.3  | 137.8  | 120.9  |
| 101.7  | 96     | 103.1  | 102.5  | 96.3   | 115.2  | 103    | 115.7  | 113.6  |
| 115    | 120.3  | 111.3  | 137.1  | 111.2  | 124.3  | 124.9  | 105.4  | 116.7  |
| 116.2  | 115.5  | 102.3  | 99     | 98.8   | 110.7  | 107.2  | 112.9  | 116.7  |
| 164.1  | 348.7  | 254.8  | 249.7  | 216.9  | 242.9  | 280    | 301.5  | 241.7  |
| 105.7  | 126.6  | 117    | 108.4  | 102.1  | 128.6  | 113.2  | 113.8  | 121.9  |
| 110.4  | 109.6  | 101.9  | 97     | 98.8   | 122.4  | 102.4  | 118.3  | 117    |
| 207    | 319.4  | 282    | 355.5  | 263.5  | 281.9  | 330.3  | 295.6  | 252.7  |
| 118.2  | 334    | 352.6  | 129.3  | 323.9  | 241.6  | 324.1  | 261.1  | 140.8  |
| 103.5  | 109.3  | 99.8   | 105.4  | 98     | 109.8  | 100.6  | 108.9  | 111.1  |
| 111.7  | 107.9  | 101.2  | 96.9   | 91.6   | 104.1  | 103.9  | 96.3   | 108    |
| 103.1  | 108.5  | 100.9  | 107.3  | 93.3   | 115.6  | 107.6  | 116.6  | 111.7  |
| 124.1  | 130    | 121.3  | 119.9  | 115.8  | 135    | 121.5  | 156    | 132.4  |
| 115.2  | 103.6  | 100.1  | 106.9  | 93.9   | 106.7  | 101.3  | 108.5  | 102.2  |
| 122.7  | 114.8  | 100.1  | 99     | 97.7   | 119    | 106.7  | 135.1  | 113.5  |
| 178.9  | 258.3  | 213.6  | 281.7  | 205.9  | 198.9  | 287.5  | 432    | 489.7  |
| 138.6  | 173.7  | 161    | 120.9  | 125.4  | 144.5  | 135.3  | 213.3  | 190.9  |
| 104.5  | 108.4  | 101.5  | 95.7   | 87.4   | 106.9  | 101.1  | 101.4  | 106    |
| 114.4  | 110.7  | 112.1  | 99.8   | 92.9   | 114.6  | 103.2  | 119.2  | 104.4  |
| 112.1  | 132.1  | 127.8  | 118.1  | 126.3  | 135.8  | 138.4  | 133.4  | 127.1  |
| 445.1  | 1259.4 | 1375   | 1013.6 | 964.5  | 1082.8 | 1085.9 | 1387.1 | 677    |
| 231    | 307.5  | 331.4  | 312    | 287.1  | 314.7  | 350.2  | 444.1  | 299    |
| 120.4  | 138.4  | 121    | 115.9  | 121.7  | 125.8  | 106.8  | 147.6  | 127.8  |
| 107.5  | 111.7  | 111.5  | 103.3  | 103.2  | 124.4  | 110.7  | 125.8  | 122.7  |
| 117.1  | 163.6  | 150.3  | 117.8  | 126.8  | 156.9  | 126.3  | 197.5  | 145.7  |
| 313.6  | 229.2  | 239.9  | 244.9  | 256.6  | 265.3  | 340.5  | 355.7  | 319    |
| 203.5  | 563.2  | 680.5  | 477    | 414.5  | 612.5  | 511.3  | 442.6  | 354.5  |
| 111.4  | 123.3  | 118.9  | 102.9  | 104.6  | 119.2  | 117.4  | 145.6  | 122.5  |
| 566.7  | 969.5  | 925.5  | 608.1  | 646.6  | 588    | 610.7  | 1541.7 | 933.8  |

|       |        |        |        |        |        |        |        |        |
|-------|--------|--------|--------|--------|--------|--------|--------|--------|
| 117.3 | 142.8  | 114.2  | 112.5  | 110.2  | 122    | 111.9  | 127.9  | 121.6  |
| 108.1 | 122    | 111.6  | 103.1  | 115.5  | 112.9  | 110.1  | 147.2  | 132.9  |
| 107   | 109.6  | 100.9  | 101.3  | 97.1   | 108.3  | 106.4  | 104.8  | 96.2   |
| 724.5 | 874.8  | 988.7  | 947.5  | 553.8  | 801.5  | 628.9  | 2241.4 | 2282.8 |
| 111   | 117.1  | 116.7  | 98.1   | 99.8   | 119.9  | 110.3  | 137.8  | 126.7  |
| 250   | 272.3  | 184.3  | 303    | 288.4  | 250.2  | 385.7  | 507.4  | 264.2  |
| 163.9 | 272.5  | 233.4  | 248.4  | 180.4  | 181.8  | 220.1  | 204    | 219.2  |
| 109.6 | 116.9  | 109    | 103.9  | 98.1   | 112.3  | 103.3  | 112.8  | 115.5  |
| 121.1 | 151.9  | 141.7  | 127.7  | 120.6  | 147    | 142    | 155.1  | 129.5  |
| 410.1 | 712    | 597.2  | 529.2  | 605.5  | 634.3  | 568.4  | 762.6  | 574.2  |
| 133.1 | 160.7  | 153.3  | 129    | 136.5  | 163.7  | 142.2  | 193.9  | 182.4  |
| 103.9 | 106.4  | 102.3  | 98.8   | 93.5   | 107.1  | 105.9  | 109.1  | 102.8  |
| 115.7 | 122.2  | 106.8  | 128.5  | 95.2   | 108.9  | 111.2  | 105.4  | 121.6  |
| 101.1 | 107.5  | 94.9   | 99.7   | 94.1   | 108.5  | 102.1  | 108.9  | 104.6  |
| 116   | 108.6  | 106.6  | 105.6  | 106.6  | 108.8  | 116.3  | 135.9  | 114.7  |
| 137.3 | 145.3  | 125.2  | 159.4  | 128    | 148.3  | 157.3  | 172    | 147    |
| 106.1 | 104.4  | 104.8  | 109.5  | 98.8   | 105.8  | 98.1   | 108.9  | 97.7   |
| 196.3 | 231.6  | 212.2  | 206.7  | 228.7  | 215.5  | 232.4  | 420.8  | 310.2  |
| 117.8 | 112.1  | 125.8  | 123.7  | 109.3  | 111.2  | 105.7  | 141.6  | 112.4  |
| 138.4 | 176.9  | 161.8  | 179.1  | 138.2  | 177.5  | 166.6  | 196.2  | 186    |
| 114.8 | 107.1  | 103    | 100.7  | 94.5   | 106.1  | 104.8  | 119.1  | 107.5  |
| 804   | 1533.8 | 1431.4 | 1714.1 | 1317.9 | 1577.9 | 1517.5 | 1767.4 | 1210.4 |
| 101   | 106.4  | 100.7  | 99.8   | 99.3   | 108.8  | 104.5  | 107.7  | 108.6  |
| 945.8 | 2501.7 | 2001   | 2632.1 | 2112   | 1910.9 | 2339.5 | 2391.1 | 1504.5 |
| 106.6 | 103    | 107.7  | 99.4   | 90.5   | 107.7  | 99.8   | 111.4  | 91.6   |
| 108.7 | 109.8  | 101.4  | 108.3  | 102    | 112    | 105.7  | 109    | 110    |
| 122.7 | 126.6  | 110.3  | 99.4   | 92.6   | 113.1  | 106.6  | 110.6  | 112.7  |
| 106.8 | 105.9  | 109.9  | 117.6  | 105.3  | 121.5  | 105.9  | 106.9  | 108.1  |
| 99.9  | 107.2  | 104.9  | 105.9  | 95.6   | 106.5  | 99     | 104.7  | 109.3  |
| 106.9 | 112.9  | 104.4  | 101.8  | 92.4   | 109.8  | 107.7  | 110.2  | 102.1  |
| 103.6 | 117.6  | 105.9  | 108.7  | 110.3  | 108.5  | 106.6  | 107.8  | 130.6  |
| 105.8 | 131.1  | 121.1  | 107    | 108.1  | 119.9  | 119.6  | 126.1  | 115.7  |
| 114.4 | 109.2  | 99.3   | 110.2  | 99.7   | 108.1  | 100.9  | 107.8  | 108.9  |
| 105.9 | 110.9  | 104.6  | 99.8   | 95.8   | 110.9  | 110.9  | 115.6  | 120.6  |
| 114   | 133.5  | 110.1  | 114.5  | 101.5  | 124.1  | 109.6  | 141.4  | 147.3  |
| 117.9 | 128.5  | 129.2  | 115.1  | 116    | 132.1  | 110    | 125.3  | 99.3   |
| 116   | 142.6  | 133.5  | 127.6  | 108.5  | 131    | 121.5  | 144.2  | 121.4  |
| 197.7 | 545.4  | 558.2  | 402.9  | 406.3  | 490    | 399.4  | 519.2  | 304.7  |
| 119.5 | 131    | 152.7  | 107.3  | 123.2  | 142.7  | 119.5  | 175.4  | 147.5  |
| 110.9 | 122.7  | 99.6   | 99.4   | 101    | 112.3  | 96.5   | 111    | 115.6  |
| 236.6 | 237.7  | 169.2  | 225.1  | 242    | 248.3  | 271.6  | 643.8  | 215.7  |
| 356   | 284.5  | 242.6  | 254.3  | 190.6  | 269.8  | 263.6  | 491.1  | 367.4  |
| 113.8 | 112.3  | 106.9  | 100.8  | 94.1   | 106.8  | 99     | 114.6  | 112.8  |
| 104.1 | 117.7  | 105.5  | 108    | 99.3   | 108.5  | 109.7  | 109.3  | 112    |
| 107.1 | 103.6  | 98.8   | 98     | 94.5   | 106.7  | 95.3   | 105.8  | 102.5  |
| 155.4 | 205.6  | 186.5  | 158.2  | 184.2  | 216.6  | 181.3  | 245.8  | 198    |
| 116   | 128.6  | 114.1  | 120.1  | 106.9  | 124.7  | 129.5  | 148.5  | 150.4  |
| 105.5 | 109.6  | 105.6  | 100.2  | 95     | 110.5  | 99.3   | 106.9  | 114.3  |
| 111.7 | 116.3  | 112.9  | 106    | 92.5   | 115.9  | 104.8  | 116.6  | 108.3  |
| 134.1 | 167.6  | 162    | 144.2  | 162    | 162.3  | 146.7  | 234.3  | 155.3  |
| 109   | 109.3  | 100.8  | 99.2   | 103.7  | 106.9  | 101.9  | 103.8  | 109    |



|       |       |       |       |       |       |       |        |        |
|-------|-------|-------|-------|-------|-------|-------|--------|--------|
| 108   | 104.2 | 93.5  | 104.1 | 92.2  | 108.7 | 99.3  | 111.3  | 114.7  |
| 222.5 | 298.4 | 281   | 217.9 | 208   | 287.4 | 241.6 | 445.8  | 317.2  |
| 129.6 | 159.4 | 148.7 | 170.1 | 144.7 | 163   | 167.1 | 177.5  | 128.3  |
| 252.9 | 367.1 | 360.2 | 349.5 | 382.5 | 429   | 336.8 | 669.3  | 465.1  |
| 112.9 | 105.6 | 113.2 | 110.6 | 93.6  | 108.9 | 103.2 | 113.6  | 112.5  |
| 310.5 | 307.5 | 531.8 | 272.5 | 272.1 | 585.4 | 289.8 | 444.4  | 348.1  |
| 733.7 | 874.9 | 803.3 | 721   | 812   | 870.6 | 715.2 | 1412.8 | 1153.7 |
| 126.5 | 149.9 | 141   | 137   | 137.8 | 178.5 | 153.4 | 215.8  | 189.6  |
| 126.5 | 177.8 | 161.6 | 141.9 | 150.9 | 178.3 | 155.5 | 286.6  | 203.7  |
| 128.7 | 131.5 | 137.6 | 131.1 | 134.1 | 169.3 | 132.8 | 200.4  | 182.3  |
| 125.8 | 119.2 | 121.7 | 111.3 | 118.9 | 124   | 122.5 | 156.8  | 126.8  |
| 125.2 | 145.8 | 129.7 | 125.6 | 128.5 | 117.1 | 116   | 155.3  | 149.2  |
| 116.8 | 119.8 | 107.9 | 106.3 | 100.8 | 106.2 | 113.1 | 111.7  | 115.6  |
| 111.5 | 171   | 133.2 | 167   | 139   | 126.8 | 121.2 | 109.7  | 115.1  |
| 945.3 | 405.2 | 396.1 | 383.2 | 391.5 | 461   | 447.1 | 666.1  | 845.6  |
| 106.3 | 112.1 | 100.3 | 104.9 | 96.4  | 103.2 | 103.8 | 110.8  | 113.6  |
| 105.4 | 109.9 | 106.1 | 104.5 | 95.6  | 102.4 | 97.1  | 110.2  | 110.3  |
| 109.7 | 101.7 | 100.3 | 91.8  | 91.2  | 107.2 | 91.8  | 103.1  | 104.2  |
| 93.6  | 103   | 96.1  | 103.4 | 94.4  | 105.9 | 92.1  | 113.8  | 104.9  |
| 109   | 112.4 | 101.7 | 101.4 | 94.8  | 108.2 | 100.4 | 99.7   | 108.5  |
| 108.6 | 117.3 | 106.6 | 107.4 | 94    | 111.6 | 94.3  | 105.3  | 99.2   |
| 114.9 | 113.5 | 115.4 | 137.1 | 97    | 123.9 | 99.5  | 121.2  | 119.3  |
| 121.5 | 124.6 | 130.8 | 130   | 116.1 | 133.8 | 132.1 | 140.2  | 134.9  |
| 101.8 | 102.2 | 96.9  | 101.6 | 93    | 111.8 | 104.6 | 101.7  | 106.8  |
| 119.1 | 111.5 | 113   | 104.7 | 105.2 | 122.4 | 111.1 | 125    | 122.7  |
| 111.2 | 104   | 99.8  | 118.5 | 98.6  | 105.5 | 108   | 123.6  | 111.6  |
| 106.4 | 103.6 | 99.9  | 105.8 | 99.9  | 109.8 | 100   | 113.2  | 105.7  |
| 104.3 | 114   | 106.3 | 116.8 | 101.3 | 118.5 | 99.8  | 117.6  | 102.1  |
| 103.3 | 109.1 | 100.5 | 108.4 | 105.4 | 104.8 | 102.3 | 108.3  | 105.2  |
| 123.1 | 115.3 | 119.5 | 128.5 | 105.6 | 120.7 | 104.7 | 139.2  | 113.3  |
| 104.1 | 109.7 | 101   | 100.3 | 95.8  | 103   | 104.3 | 117.8  | 107.4  |
| 111.8 | 134.9 | 121.5 | 111.8 | 101.8 | 128.8 | 112.3 | 116.8  | 111.9  |
| 104.3 | 110.8 | 102.3 | 103.4 | 98.6  | 109.3 | 105.2 | 116.5  | 108.8  |
| 117.1 | 121.7 | 107.8 | 128.5 | 107.5 | 116.7 | 114   | 121.5  | 114.9  |
| 125.9 | 173.8 | 167.8 | 124.6 | 144.2 | 145.4 | 139.7 | 155.7  | 140.3  |
| 109.7 | 112.9 | 108.5 | 113.9 | 97.6  | 114.3 | 114   | 114.7  | 114.9  |
| 109   | 107.4 | 102.5 | 105   | 92.4  | 105.6 | 98.8  | 105.1  | 106.5  |
| 103.5 | 106.1 | 108.1 | 107.4 | 105.3 | 126   | 110.1 | 118.2  | 111.1  |
| 100.9 | 104.3 | 103.8 | 93.1  | 88.9  | 103.7 | 98.9  | 109.1  | 108.7  |
| 124.6 | 121   | 118.6 | 102.6 | 117   | 132.5 | 144.9 | 151.6  | 129.2  |
| 100   | 106.8 | 104.1 | 110.9 | 100.7 | 112.4 | 105.5 | 109.7  | 107.5  |
| 106   | 104.8 | 103.5 | 103.5 | 98.8  | 105.3 | 103.7 | 105.7  | 108.9  |
| 112.2 | 115.8 | 99.2  | 138.3 | 102.1 | 118.8 | 205.8 | 139.8  | 124.3  |
| 134.5 | 134.2 | 118   | 104.9 | 118.8 | 119.9 | 128.7 | 139.6  | 126.7  |
| 101.3 | 104.5 | 100.9 | 104.5 | 97.4  | 113.7 | 108.3 | 116.8  | 112.9  |
| 106.7 | 107.7 | 105.9 | 98.3  | 100.2 | 107   | 101.2 | 111.2  | 103.1  |
| 104   | 108.7 | 98.2  | 97.9  | 88.9  | 107.8 | 101   | 109.5  | 92.9   |
| 109.2 | 105.9 | 103.8 | 101.1 | 94.5  | 114.9 | 102.3 | 104.6  | 110.6  |
| 106.6 | 115.6 | 98.4  | 103.4 | 96.1  | 106.6 | 108.8 | 108.1  | 105    |
| 101.2 | 110.5 | 102.5 | 102.7 | 102.9 | 122   | 108.6 | 127.5  | 114.3  |
| 441.9 | 734.5 | 691.3 | 530.6 | 654.4 | 640.2 | 710.2 | 961.3  | 531.5  |

|       |       |       |        |       |       |       |        |        |
|-------|-------|-------|--------|-------|-------|-------|--------|--------|
| 672   | 938.1 | 646.2 | 773.7  | 634.8 | 901.2 | 681.1 | 1614.9 | 1282.5 |
| 105.5 | 112.8 | 116.5 | 103.1  | 101.9 | 114.1 | 109.8 | 114.4  | 110.6  |
| 173.7 | 127.6 | 150.2 | 139    | 131.3 | 148.8 | 152.2 | 185.2  | 195.6  |
| 107.7 | 107.6 | 103.4 | 93.4   | 92.5  | 115.6 | 97.7  | 106.5  | 106    |
| 123.8 | 117.2 | 108.7 | 104.8  | 102.2 | 115.3 | 116.5 | 121    | 128.7  |
| 124.2 | 124.6 | 112.1 | 112.1  | 130.1 | 135.7 | 123.5 | 149.9  | 153.2  |
| 105.4 | 107.2 | 100.7 | 101.5  | 91.2  | 102.9 | 99.4  | 105.7  | 107.2  |
| 110.5 | 159.2 | 151.8 | 131.5  | 149.6 | 135   | 134.5 | 169.6  | 141.5  |
| 116.3 | 133.1 | 120.8 | 118.6  | 115.6 | 126.7 | 128.2 | 141.1  | 131.6  |
| 110.9 | 154.2 | 168.7 | 139.1  | 143.9 | 159.5 | 138.6 | 162.8  | 121.7  |
| 116.3 | 113   | 111.6 | 121.9  | 107.1 | 115.6 | 107   | 114.5  | 108.7  |
| 140.3 | 138.5 | 137.4 | 120.6  | 123   | 144.8 | 113.7 | 173    | 136.2  |
| 111.3 | 112.5 | 111.1 | 118.2  | 96.8  | 112.5 | 101.7 | 120    | 122    |
| 110.9 | 106   | 103.9 | 103.5  | 90    | 109.7 | 97.8  | 117.5  | 108.5  |
| 196   | 433.5 | 459.1 | 411.5  | 324   | 378.7 | 359   | 574.6  | 355.6  |
| 221.3 | 213.2 | 205.9 | 158.6  | 197.3 | 219.4 | 212.6 | 261.6  | 205.3  |
| 314.4 | 457.5 | 426.4 | 499.7  | 432.9 | 400.6 | 471.5 | 646.9  | 505.9  |
| 101.5 | 116.7 | 108.2 | 107.2  | 101.3 | 115.9 | 107.5 | 127.5  | 109.7  |
| 114.6 | 147.3 | 130.2 | 195.4  | 119.3 | 140.9 | 165.2 | 150.5  | 149.2  |
| 103.4 | 135.2 | 133.9 | 90.5   | 148.5 | 145.5 | 107   | 141.9  | 105.2  |
| 107.9 | 106.1 | 112.2 | 108.2  | 94.6  | 106.8 | 111.7 | 128.6  | 118    |
| 186.4 | 184.3 | 173.6 | 178.4  | 148.2 | 172   | 170.9 | 411    | 291.1  |
| 115.7 | 115.4 | 101.6 | 108.4  | 107.2 | 109.4 | 99.8  | 107.2  | 97.8   |
| 109.4 | 106.7 | 99.5  | 110.6  | 99.1  | 100.9 | 100.1 | 105.4  | 102.2  |
| 105.7 | 106.9 | 105.5 | 106.3  | 95.6  | 111.1 | 103.1 | 104.1  | 107.6  |
| 136   | 147.4 | 144.1 | 124.2  | 135.6 | 154.4 | 147.1 | 180.7  | 161.7  |
| 113.1 | 106.7 | 100.9 | 105.6  | 90.4  | 112.6 | 103.1 | 111.9  | 113.8  |
| 108.1 | 99.1  | 101.3 | 108.6  | 92.9  | 112.6 | 98.5  | 106.8  | 101.4  |
| 103.4 | 108   | 101.5 | 100.6  | 90.1  | 108.3 | 104.2 | 100.7  | 106.6  |
| 112.8 | 117.2 | 111.9 | 113.6  | 100.9 | 114.2 | 100.4 | 117.7  | 105.4  |
| 109.4 | 110.3 | 102   | 105.5  | 97.4  | 109.2 | 109.7 | 115.2  | 108.6  |
| 299.2 | 586.7 | 523.9 | 526.3  | 395.3 | 578.1 | 479.8 | 584.3  | 447.5  |
| 120.7 | 142.9 | 143.2 | 112.4  | 130.1 | 138.1 | 115.9 | 157.6  | 114.7  |
| 113.3 | 120.2 | 113.7 | 113.3  | 105.3 | 117   | 107.8 | 119.7  | 108.9  |
| 108.3 | 110.8 | 105.3 | 108.6  | 103.8 | 110.7 | 110.2 | 116.6  | 113.9  |
| 106.8 | 111.4 | 102.5 | 101.8  | 96.5  | 108.5 | 102.2 | 114.9  | 107.7  |
| 116   | 111.2 | 105.6 | 96.6   | 95.9  | 109.6 | 104   | 109.8  | 107.9  |
| 115.8 | 137.1 | 120.7 | 108.5  | 117.3 | 121.2 | 127.7 | 140.2  | 116.2  |
| 176.6 | 158.3 | 171.3 | 171.3  | 154.9 | 185   | 175.3 | 255.2  | 194.5  |
| 605.6 | 744.3 | 795.8 | 926    | 710.5 | 911.2 | 806.3 | 1420.8 | 701.5  |
| 103.7 | 111.1 | 99.7  | 96.5   | 96.3  | 101.5 | 97.1  | 96.7   | 94.1   |
| 459   | 633.9 | 460.7 | 1062.4 | 424.8 | 374.3 | 701.7 | 752.7  | 675.9  |
| 103   | 112.5 | 109   | 98.1   | 100   | 118   | 111   | 110.6  | 113.6  |
| 124.2 | 288.5 | 291.3 | 221.9  | 213.7 | 224.5 | 246.9 | 270.9  | 172.2  |
| 108.8 | 112.4 | 96.7  | 101.2  | 99.6  | 102.9 | 102.8 | 106.2  | 104.2  |
| 197.6 | 341.7 | 288.8 | 249.9  | 308.6 | 312.7 | 283.4 | 540    | 263.5  |
| 107.1 | 122.2 | 101.7 | 111.1  | 94.1  | 110.8 | 114.1 | 110.9  | 106.3  |
| 170.1 | 345.2 | 270.9 | 237.9  | 238.8 | 213.4 | 239.2 | 291.7  | 196.1  |
| 130.7 | 132.4 | 142.8 | 135.8  | 159.2 | 148.3 | 141   | 220.8  | 160    |
| 116.2 | 111.7 | 110.8 | 111.5  | 98.7  | 107.4 | 106.3 | 116.5  | 109.1  |
| 114.3 | 111.3 | 103.2 | 103.1  | 101.1 | 115.8 | 103.8 | 112.4  | 97.9   |

|        |        |        |        |        |        |        |         |         |
|--------|--------|--------|--------|--------|--------|--------|---------|---------|
| 1007.3 | 714.7  | 627.2  | 932.5  | 664.8  | 646.6  | 771.5  | 1396.8  | 567.1   |
| 302.3  | 439    | 362.5  | 334.8  | 354.5  | 336.9  | 438.6  | 748.6   | 546.1   |
| 116.8  | 113.4  | 101.5  | 103.8  | 97.6   | 108.3  | 109.7  | 110.4   | 119.2   |
| 96.7   | 99.6   | 97.9   | 100.2  | 90     | 107.7  | 98.5   | 101.1   | 106     |
| 244.9  | 398.8  | 437.3  | 350.3  | 316.7  | 411.6  | 295.5  | 774.1   | 511.5   |
| 119.3  | 122.9  | 108.3  | 112.8  | 110.4  | 121.6  | 110.5  | 123.5   | 120.6   |
| 102.7  | 107.1  | 95.1   | 98.7   | 98.2   | 111.4  | 104.5  | 104.5   | 107     |
| 149.7  | 149.2  | 151.9  | 133.3  | 136.6  | 177.3  | 156.3  | 196.1   | 187.9   |
| 105.5  | 110.8  | 101    | 100.8  | 94.1   | 110.8  | 103.7  | 106.7   | 104.7   |
| 111.5  | 108.1  | 104.8  | 97.7   | 102.5  | 118    | 107.5  | 125.1   | 118.6   |
| 101.5  | 113.1  | 105.3  | 105.8  | 95.2   | 110.8  | 103.2  | 126.3   | 115.2   |
| 105    | 111.6  | 95.6   | 85.9   | 91.5   | 97.6   | 105.4  | 99.5    | 98.7    |
| 140.6  | 142.4  | 120.8  | 131    | 132.5  | 135.3  | 136.2  | 168.4   | 135.9   |
| 285.1  | 278.6  | 277.1  | 271    | 240.6  | 315.7  | 284.8  | 501.5   | 375.7   |
| 1414.1 | 2146.5 | 2013.6 | 1777.7 | 1661.1 | 2038.4 | 1995   | 2786.9  | 1772.9  |
| 112.9  | 142.5  | 137.3  | 143.3  | 127.6  | 149.5  | 143.1  | 165.4   | 133.8   |
| 181.4  | 272.6  | 287.4  | 230.3  | 217.3  | 203.6  | 211.6  | 249.4   | 233.1   |
| 120.1  | 174.1  | 197.9  | 147.7  | 151.1  | 188.6  | 178.9  | 186.8   | 156.2   |
| 766.5  | 1011.7 | 1089.3 | 792.3  | 855.4  | 836.8  | 910    | 1421.4  | 1169.8  |
| 115.6  | 121.5  | 106.7  | 109.4  | 109.5  | 119.1  | 109.7  | 126.3   | 123.7   |
| 269.6  | 363    | 305.8  | 451.2  | 299.6  | 335.7  | 440.5  | 499.2   | 379.2   |
| 106.1  | 105.9  | 102.8  | 99.8   | 99     | 105.4  | 110    | 98.6    | 102.4   |
| 103.1  | 116    | 101.2  | 109.3  | 106.3  | 110.8  | 100.2  | 116.2   | 116.3   |
| 133.8  | 169    | 148.8  | 138.1  | 132    | 147.8  | 149.4  | 213.8   | 149.5   |
| 112.4  | 119.2  | 114.2  | 119.8  | 96.3   | 115    | 107.2  | 112.5   | 110.9   |
| 106.3  | 130    | 119.1  | 132.3  | 117.8  | 122.2  | 112.3  | 134.8   | 113.2   |
| 109.5  | 110.6  | 100.7  | 104.8  | 100.1  | 112.4  | 101.3  | 110.6   | 108.9   |
| 206    | 378.3  | 364.9  | 362.2  | 319.2  | 433.2  | 377.7  | 462.3   | 330.5   |
| 162.6  | 348.4  | 282.9  | 301.4  | 251    | 413.6  | 334.1  | 414.8   | 315.1   |
| 4317.3 | 4660.5 | 5214.6 | 3855.8 | 3806.2 | 4364.7 | 3174.1 | 10608.1 | 11057.6 |
| 111.9  | 121.4  | 111.8  | 120    | 114.7  | 125.7  | 119.3  | 117.7   | 108.9   |
| 113    | 113.1  | 108.4  | 112.5  | 99.9   | 111.7  | 110    | 123.6   | 115.4   |
| 107.9  | 110.5  | 106.5  | 91.7   | 98.2   | 116.2  | 97.3   | 101.3   | 106.3   |
| 108.9  | 111.7  | 104.6  | 96.2   | 96.6   | 107.1  | 101.2  | 112     | 114.4   |
| 115.6  | 227.6  | 215.2  | 148.2  | 166.4  | 182.1  | 181.8  | 243.6   | 160.9   |
| 141.9  | 234.6  | 290.7  | 233.9  | 224.1  | 280.5  | 245    | 238.8   | 159     |
| 116.6  | 120.1  | 118.7  | 106.1  | 104.9  | 112.1  | 113.4  | 117.9   | 115.2   |
| 141.2  | 163.2  | 149.4  | 141.1  | 130.6  | 142.2  | 153.3  | 193.6   | 158.3   |
| 117.7  | 107.1  | 102.9  | 113    | 98.9   | 113.9  | 109.6  | 119.9   | 117.3   |
| 109.5  | 119.9  | 94.4   | 102.3  | 96.3   | 109.2  | 112.8  | 114.5   | 114.6   |
| 146.3  | 211.2  | 207.3  | 182.1  | 179    | 224.2  | 172.8  | 279.9   | 197.9   |
| 156.4  | 327.5  | 308.4  | 279.2  | 281.5  | 330.2  | 210.1  | 419.7   | 221.3   |
| 133.2  | 158.6  | 136.1  | 144.2  | 138.9  | 150.6  | 156    | 157.9   | 122.9   |
| 324.3  | 668.4  | 651.7  | 562.1  | 569.4  | 526.9  | 560.6  | 783.3   | 463.3   |
| 823.2  | 216.5  | 184    | 136.2  | 229.1  | 267.4  | 230.1  | 1701.2  | 1474.8  |
| 108.6  | 145.8  | 138    | 146.8  | 143.7  | 151.9  | 148.2  | 144.5   | 132.6   |
| 127.5  | 122.5  | 122.3  | 109.4  | 115.2  | 131.4  | 120.6  | 135.9   | 130.2   |
| 126.9  | 137.4  | 138.3  | 123.2  | 120.6  | 139.8  | 152.7  | 148.2   | 129.9   |
| 107.6  | 108    | 98.5   | 101.8  | 97     | 105.1  | 99     | 107.6   | 98.1    |
| 114.3  | 144.5  | 129.5  | 121.1  | 130.9  | 130.7  | 128.5  | 155.6   | 144.1   |
| 137.1  | 201.2  | 141.8  | 221.9  | 159.6  | 143.1  | 162.8  | 157.4   | 125.9   |

|        |        |        |        |        |        |        |         |         |
|--------|--------|--------|--------|--------|--------|--------|---------|---------|
| 122.2  | 203.6  | 158.5  | 249.3  | 155.2  | 143.3  | 168.5  | 149.5   | 130.7   |
| 153.3  | 213.2  | 229.2  | 187.9  | 159.7  | 200.2  | 192.8  | 195.3   | 186.2   |
| 200.2  | 318.8  | 304.4  | 263.1  | 213.3  | 270.5  | 298.5  | 307     | 171.6   |
| 125.3  | 143.7  | 145.8  | 128.5  | 114.1  | 128.9  | 126.8  | 148.9   | 133.7   |
| 128.9  | 158.2  | 177.7  | 142.4  | 144.7  | 168.7  | 125.7  | 252.6   | 192.3   |
| 151.2  | 147.9  | 142.3  | 154.7  | 126    | 163    | 156.8  | 187.8   | 169.4   |
| 119.7  | 160.4  | 144.6  | 155.3  | 137.5  | 134.1  | 135.3  | 146.2   | 127.8   |
| 116.3  | 112.4  | 105    | 102.6  | 98.8   | 110.9  | 105.1  | 118.1   | 111.3   |
| 102.5  | 109.9  | 98.9   | 97.5   | 94.7   | 98.1   | 98.9   | 98.9    | 110.5   |
| 112.9  | 110.3  | 92.9   | 105.2  | 95.2   | 106.9  | 104.5  | 111.4   | 105.5   |
| 7572.5 | 6817.8 | 6309.7 | 5184.4 | 4482   | 6156.7 | 5851.7 | 12559.1 | 15233.9 |
| 112.3  | 126.8  | 118.8  | 109.8  | 111.9  | 127.3  | 120.7  | 142     | 113.9   |
| 111.7  | 126.7  | 108.1  | 106.8  | 103.4  | 109.3  | 109.1  | 113.9   | 113.4   |
| 1036.8 | 1407.5 | 1920.7 | 1858.6 | 1374.7 | 1463.6 | 1898.2 | 2037.5  | 710.8   |
| 109.4  | 135.4  | 119.8  | 132.5  | 117.3  | 117    | 107.7  | 114     | 118     |
| 111.3  | 101.8  | 104.1  | 113.8  | 96.4   | 100.7  | 103.8  | 106     | 111     |
| 243.1  | 224.2  | 185.6  | 258.3  | 258.8  | 281    | 225.3  | 370.6   | 367.2   |
| 142.9  | 126    | 123.9  | 115.8  | 108.7  | 129.4  | 127.2  | 135.2   | 114.2   |
| 129.9  | 164.4  | 149.7  | 132.5  | 136.7  | 165.4  | 154.8  | 172.2   | 128.6   |
| 150.4  | 190.7  | 224.4  | 160    | 138.2  | 197.4  | 134.5  | 172.2   | 147.7   |
| 192.9  | 281.2  | 324.7  | 228.4  | 215.9  | 275    | 239.2  | 429.2   | 257     |
| 109.5  | 104.6  | 103.6  | 105.9  | 98.3   | 115.1  | 105.6  | 117.7   | 105     |
| 110.4  | 107.6  | 99.2   | 101.6  | 97.1   | 107.4  | 107.6  | 110.7   | 105.7   |
| 105.6  | 103.8  | 100.9  | 99     | 94.6   | 109.7  | 103.7  | 109.8   | 106.7   |
| 109.6  | 104.1  | 110.9  | 101    | 96.7   | 106.9  | 107.1  | 108     | 110.3   |
| 128.4  | 170    | 148    | 149.2  | 135.4  | 144.7  | 157.3  | 163.3   | 134.5   |
| 103.1  | 106.8  | 102.7  | 98     | 92.3   | 105    | 99.8   | 109.2   | 101.1   |
| 142.9  | 351.1  | 385.7  | 321    | 351    | 374.5  | 388.7  | 432.7   | 260.8   |
| 128.6  | 126.4  | 141.7  | 127.2  | 117.6  | 139.9  | 123.4  | 148.9   | 113     |
| 135.9  | 143    | 120.2  | 170.5  | 125.8  | 145.8  | 143.9  | 249.3   | 178.8   |
| 106.6  | 101.8  | 104.1  | 107.3  | 93.8   | 105.4  | 100.6  | 102.5   | 101.2   |
| 115.1  | 125.9  | 130.4  | 112.6  | 118.2  | 117.8  | 104.3  | 116.9   | 119.8   |
| 124.8  | 128.5  | 147.7  | 139.4  | 152.9  | 138.6  | 131.4  | 180.4   | 128.6   |
| 123.6  | 155.2  | 129    | 152.2  | 122.8  | 132    | 128    | 179.8   | 138.3   |
| 210.2  | 906.4  | 786.2  | 852.6  | 779.3  | 883.1  | 795.6  | 668.7   | 328.7   |
| 117.8  | 127.5  | 125.8  | 132.8  | 118.4  | 125.9  | 120.2  | 136.3   | 126.6   |
| 106.9  | 122.7  | 110.2  | 100.4  | 104.7  | 114.5  | 109.8  | 120.4   | 110.1   |
| 117    | 114.4  | 118.1  | 107.1  | 106.9  | 116.3  | 110.5  | 120.3   | 111.5   |
| 177.8  | 198.8  | 186.7  | 167.7  | 163.2  | 199.3  | 177    | 264     | 224.5   |
| 106.6  | 116    | 98.3   | 108.2  | 92.5   | 113    | 101.3  | 111.9   | 107.6   |
| 111.9  | 108.7  | 107.1  | 112.4  | 109.3  | 111.6  | 114.9  | 116.3   | 119.9   |
| 109.4  | 117.9  | 113.9  | 104.1  | 105.9  | 120.6  | 111.7  | 121.2   | 117.1   |
| 99.5   | 102.4  | 97.8   | 96.1   | 87.8   | 104.3  | 96.2   | 104.5   | 102.1   |
| 102.8  | 107.9  | 102.8  | 94.7   | 102.3  | 116    | 105.4  | 112.5   | 115.7   |
| 150.7  | 139.1  | 136    | 125.7  | 138    | 136.1  | 151.1  | 231.6   | 203.6   |
| 104.2  | 107.4  | 105    | 102.7  | 100.5  | 109    | 106.8  | 109.4   | 110.4   |
| 98.6   | 102.9  | 95.5   | 97.4   | 91.9   | 100.2  | 100.6  | 106.2   | 108     |
| 107.6  | 108.9  | 107    | 95.8   | 95.3   | 96.6   | 102.2  | 112.5   | 105.3   |
| 148.2  | 169    | 142.5  | 149.8  | 141    | 142.1  | 157.5  | 240.9   | 189.4   |
| 169    | 196.5  | 178.9  | 227.9  | 160.8  | 196.7  | 199.8  | 264.1   | 164.7   |
| 107.1  | 116.2  | 122.6  | 120.8  | 113.1  | 122.8  | 112.4  | 136.4   | 128.2   |

|        |        |        |        |        |       |        |        |        |
|--------|--------|--------|--------|--------|-------|--------|--------|--------|
| 273.7  | 201.8  | 233.4  | 276.9  | 344.8  | 231.7 | 212    | 627.4  | 372.7  |
| 110.9  | 137.8  | 116.3  | 115    | 103.1  | 129.5 | 117.5  | 133.5  | 145.7  |
| 106.8  | 103.6  | 113.4  | 118.7  | 102.7  | 111.6 | 113.6  | 112.7  | 117.4  |
| 3891.4 | 3039.5 | 2736.2 | 2709.7 | 1985.6 | 3272  | 1795.5 | 8040.1 | 6875.5 |
| 115.9  | 114.9  | 102    | 97.1   | 95.5   | 103.5 | 106    | 135    | 146    |
| 653.2  | 956.3  | 691.5  | 556.5  | 666.7  | 784   | 715.1  | 1618.1 | 1178.5 |
| 108.8  | 112.8  | 110.7  | 112.6  | 109.1  | 120.6 | 108.1  | 153.2  | 145    |
| 140.2  | 181.4  | 171.1  | 183.7  | 163.9  | 154.8 | 164.9  | 206.3  | 157.7  |
| 114.6  | 144.6  | 126.3  | 124.1  | 126.6  | 131.1 | 126.4  | 162.5  | 134.9  |
| 119.4  | 132.3  | 134.6  | 131.7  | 129.5  | 140.1 | 117.7  | 160.7  | 123.5  |
| 164.9  | 471.8  | 490.7  | 439.1  | 454.3  | 504.3 | 477    | 512.9  | 256.9  |
| 109.1  | 109    | 108.5  | 112.3  | 98.3   | 114.5 | 99.8   | 106.7  | 109.7  |
| 121.3  | 211.9  | 178.2  | 181.8  | 164.9  | 190.7 | 142.7  | 194.9  | 150.4  |
| 235.3  | 761.1  | 917.9  | 823.2  | 605.5  | 678.4 | 808.5  | 972.1  | 431.4  |
| 103.2  | 113.9  | 109.1  | 105.9  | 97.2   | 108.4 | 103.6  | 114.6  | 107.4  |
| 133.8  | 116.5  | 117.4  | 119    | 105    | 125.4 | 116.1  | 133.6  | 152.8  |
| 383.4  | 237.1  | 272.9  | 193.1  | 216.7  | 336.9 | 264    | 379.9  | 295.2  |
| 112.8  | 123.3  | 113.4  | 128.6  | 110.1  | 124.6 | 111.8  | 117.4  | 111.9  |
| 111.7  | 113.1  | 110.2  | 110.7  | 105.1  | 109.6 | 109.8  | 102.7  | 102.6  |
| 102.7  | 107.8  | 98     | 97.7   | 95     | 103.6 | 95.9   | 105    | 106.1  |
| 104.5  | 109.1  | 111.3  | 106.4  | 94.6   | 108.4 | 103.2  | 113.5  | 112.5  |
| 137.3  | 197.7  | 254.5  | 207.5  | 170.2  | 179.5 | 174.8  | 156.2  | 130.1  |
| 125.9  | 128.8  | 131.1  | 134.7  | 111.5  | 136.7 | 139.8  | 135.7  | 122.6  |
| 98.2   | 106.6  | 101.6  | 97.4   | 90.9   | 107   | 102.5  | 105.4  | 113    |
| 200.1  | 162.7  | 175.6  | 150.8  | 149.4  | 183.5 | 140.6  | 239.1  | 210.7  |
| 110.4  | 108.4  | 102.8  | 109    | 98.2   | 117.9 | 107.7  | 115.2  | 113.2  |
| 111.5  | 138.2  | 145.2  | 147.2  | 108.3  | 130.6 | 134.2  | 129.2  | 113.8  |
| 110.3  | 98.4   | 103.4  | 94.8   | 94.9   | 105.8 | 106.1  | 108.7  | 107.8  |
| 104.2  | 116.2  | 106    | 99.2   | 92.5   | 117.8 | 110.4  | 118.9  | 115.5  |
| 105.5  | 109.3  | 99.6   | 103.5  | 93.1   | 109.8 | 96.9   | 104.1  | 102.9  |
| 105.5  | 110.5  | 102.6  | 98.4   | 92.1   | 109.2 | 99     | 97     | 110.3  |
| 109.8  | 114.6  | 106.1  | 100.3  | 95.5   | 103.2 | 96.2   | 102.7  | 111    |
| 108    | 107.2  | 98.8   | 94.3   | 93.9   | 108.3 | 100.2  | 106.4  | 102.4  |
| 115.4  | 114.9  | 97.1   | 102.2  | 96.4   | 113.2 | 99.7   | 116.3  | 102.9  |
| 112.2  | 107    | 101.5  | 122.7  | 97.1   | 118.2 | 101.6  | 125.9  | 108.6  |
| 103.6  | 113.7  | 96.2   | 107.3  | 94     | 104.5 | 99.5   | 104.3  | 106.2  |
| 107.7  | 105.9  | 104.9  | 102.7  | 94.8   | 106.4 | 95.2   | 100.2  | 107.2  |
| 112.7  | 115.7  | 115.1  | 116.3  | 104.3  | 125   | 107.1  | 125.3  | 112.6  |
| 104.1  | 107.1  | 107.9  | 104.7  | 95.6   | 108.8 | 102.3  | 98     | 114.7  |
| 110.1  | 104.5  | 105.4  | 104    | 98.1   | 110   | 108.4  | 114.5  | 111.1  |
| 109.9  | 114.1  | 105.6  | 104.9  | 96.3   | 107.6 | 102.5  | 110.5  | 111.3  |
| 102.7  | 120.9  | 100.4  | 112.2  | 106.6  | 107.5 | 103.6  | 116.4  | 122.6  |
| 108.9  | 108.8  | 103.9  | 103.4  | 95.6   | 112.6 | 103.1  | 107.3  | 99     |
| 104.5  | 101.8  | 99.2   | 94.5   | 92.9   | 110.8 | 102.6  | 107.4  | 108.4  |
| 113.3  | 118.6  | 106.1  | 106    | 98.6   | 116.4 | 106.6  | 123.6  | 118.1  |
| 112.4  | 121.1  | 107.7  | 104.6  | 99.7   | 118.4 | 115    | 117.9  | 102.7  |
| 110.7  | 107.6  | 109.1  | 107.8  | 97.2   | 111   | 90.8   | 109.3  | 106.2  |
| 104.1  | 112.8  | 109.2  | 123.6  | 101.9  | 114.9 | 107.9  | 131.4  | 108.7  |
| 109.9  | 108.9  | 110.2  | 104.3  | 97.8   | 105.7 | 102    | 109.8  | 115.2  |
| 105.6  | 106.1  | 99.9   | 110.3  | 103.5  | 109.2 | 96.6   | 107    | 111    |
| 104.4  | 109.7  | 98.5   | 105.7  | 93.9   | 104.6 | 99.1   | 108.1  | 109    |

|       |       |       |       |       |       |       |        |        |
|-------|-------|-------|-------|-------|-------|-------|--------|--------|
| 122.6 | 167.8 | 131.8 | 179.4 | 134.4 | 151.8 | 153.6 | 143.7  | 134.1  |
| 106.7 | 101.9 | 105.7 | 93.5  | 96.3  | 111.5 | 100.2 | 112.3  | 115    |
| 110.3 | 108.8 | 109.4 | 96.5  | 106.1 | 115.3 | 102.4 | 127.9  | 115.2  |
| 109.9 | 111.4 | 101.3 | 104.2 | 93    | 114.9 | 102.8 | 118.8  | 104.3  |
| 116.7 | 133.4 | 119.8 | 124.5 | 109.1 | 131   | 133.8 | 138.6  | 138.2  |
| 109.5 | 110.5 | 107.3 | 111.2 | 96.7  | 118.6 | 113   | 125.7  | 114.8  |
| 142.6 | 125.8 | 122   | 125.1 | 114.1 | 123.3 | 131   | 142.9  | 133.9  |
| 115.4 | 145.4 | 137.7 | 136.1 | 114.4 | 131.8 | 132.6 | 124.1  | 113.3  |
| 102.6 | 106.2 | 102.8 | 112.6 | 93    | 109.4 | 105.7 | 103    | 113    |
| 190.7 | 209.6 | 278.8 | 208.2 | 222.9 | 206.7 | 205.6 | 389.6  | 331    |
| 166.8 | 292.8 | 249.4 | 231.2 | 224.2 | 272.1 | 245.6 | 418.2  | 253    |
| 110.5 | 139.9 | 110.2 | 116.6 | 103.4 | 119.4 | 124.8 | 137.2  | 127.7  |
| 117.5 | 128.8 | 115.5 | 132.4 | 121.9 | 144.8 | 142.2 | 168.5  | 126.4  |
| 126.7 | 146.3 | 137.5 | 135.2 | 155.5 | 140.5 | 127.7 | 162.1  | 163.4  |
| 142.9 | 167.9 | 161.6 | 137.3 | 148.8 | 183.5 | 187   | 245.2  | 209.1  |
| 119.6 | 127.8 | 122.9 | 130.7 | 110.9 | 134.2 | 131.3 | 143.3  | 124.6  |
| 117.4 | 125   | 108.6 | 120.4 | 102.5 | 119.4 | 118.8 | 122    | 116.5  |
| 104.7 | 106.7 | 95.4  | 97.3  | 93.9  | 108.5 | 109.7 | 106.1  | 109.8  |
| 103.3 | 109.6 | 103.6 | 97.8  | 95.3  | 110.7 | 105.8 | 102.1  | 115.1  |
| 104.5 | 107.6 | 99.8  | 101.6 | 98.6  | 110   | 106.3 | 109.1  | 103.5  |
| 130.7 | 158.5 | 151.6 | 144.1 | 145.3 | 136.8 | 143.9 | 153.5  | 142.7  |
| 178.9 | 168.7 | 142.8 | 158   | 143.6 | 159.8 | 145.9 | 185.9  | 138.3  |
| 104.2 | 107.6 | 111.1 | 100.6 | 94.9  | 119.2 | 98.2  | 113.4  | 116.7  |
| 178.2 | 140.1 | 150.3 | 130.3 | 139.2 | 151.3 | 151.7 | 249.3  | 179.6  |
| 115.6 | 105.9 | 97.5  | 104.2 | 96.1  | 97.7  | 105.9 | 111.4  | 118.6  |
| 107.3 | 111.3 | 104.4 | 103.2 | 97.7  | 111   | 107   | 114.4  | 108.7  |
| 112   | 119.9 | 111.5 | 103   | 98.5  | 109.2 | 108.2 | 121.9  | 113.8  |
| 115.7 | 115.2 | 108.2 | 108   | 98.8  | 117   | 117.5 | 120.5  | 101.4  |
| 105.3 | 107.5 | 100.6 | 103.4 | 95.8  | 111.4 | 100.2 | 113.3  | 106.3  |
| 216.8 | 388.4 | 430.8 | 421.1 | 326.2 | 471   | 381.6 | 414.8  | 277.1  |
| 106   | 112.4 | 100   | 101.1 | 99.2  | 104.3 | 102.7 | 116.7  | 105.7  |
| 125.2 | 142.6 | 128.9 | 139.9 | 110.1 | 129   | 131.8 | 141.9  | 137.4  |
| 172.2 | 264.9 | 263.1 | 267   | 195.2 | 216.9 | 297.6 | 260.4  | 166.4  |
| 109.7 | 102.7 | 105.6 | 106.7 | 97.1  | 104.6 | 100.5 | 107.5  | 114.8  |
| 109.1 | 112.2 | 98.2  | 105.9 | 94.1  | 102.2 | 101.1 | 120    | 99.6   |
| 101.3 | 104.2 | 101.3 | 96.6  | 95    | 101.4 | 101.8 | 125    | 127.8  |
| 909.7 | 471.7 | 503   | 447.1 | 522.2 | 709.8 | 748.2 | 2450.9 | 3666.7 |
| 214.5 | 243.1 | 240.8 | 219.6 | 191.4 | 209.9 | 199.5 | 317.3  | 262.6  |
| 125.1 | 132.2 | 142.1 | 130.3 | 136.9 | 134.2 | 137.7 | 187.8  | 141    |
| 104.8 | 108   | 103.8 | 98.8  | 95.9  | 108.2 | 109.5 | 110.6  | 109.5  |
| 105.7 | 102.8 | 100.2 | 99.9  | 95.4  | 104.4 | 103.4 | 113    | 107.4  |
| 106.6 | 104.2 | 97.5  | 92.1  | 94.7  | 110.1 | 97    | 106    | 112.4  |
| 97.4  | 108.9 | 110.4 | 97.4  | 89.8  | 100.9 | 98.1  | 100.5  | 109    |
| 98.4  | 105.4 | 101.9 | 97.6  | 91.9  | 104   | 106.7 | 101.5  | 104.9  |
| 110   | 110.4 | 105.8 | 95.9  | 97.6  | 104.1 | 106.3 | 120.6  | 114.3  |
| 106.2 | 113.8 | 98.8  | 100.6 | 93    | 106.9 | 97.1  | 107.9  | 104.6  |
| 104.2 | 107.4 | 105.5 | 100.6 | 96.2  | 115   | 108.7 | 121.1  | 117.9  |
| 100.4 | 105.1 | 99.9  | 90    | 92.6  | 97.3  | 102.3 | 102    | 110    |
| 99.1  | 102.2 | 100.7 | 100.2 | 94.5  | 105.8 | 97.2  | 99.9   | 111.5  |
| 112.8 | 116.2 | 104.7 | 106.1 | 98.1  | 103.9 | 105.3 | 117.4  | 114.2  |
| 111.7 | 113   | 103.8 | 99    | 89.4  | 110.3 | 106.7 | 107.4  | 112.7  |

|       |        |        |        |        |        |        |        |        |
|-------|--------|--------|--------|--------|--------|--------|--------|--------|
| 186.8 | 288.2  | 300.3  | 346.1  | 244.2  | 227.9  | 326    | 359.2  | 249.7  |
| 114.4 | 151    | 138    | 124.5  | 124.4  | 141.5  | 140.3  | 180.6  | 122.6  |
| 152.3 | 199.2  | 199.9  | 195.2  | 205    | 211.8  | 204.4  | 205.7  | 135.7  |
| 124   | 138.7  | 124.8  | 116.4  | 120.6  | 152.2  | 133.4  | 267.8  | 176.4  |
| 103.8 | 111.9  | 106    | 104.5  | 107.1  | 108.2  | 105.9  | 113.3  | 110.3  |
| 108.2 | 107.9  | 103.7  | 110.3  | 102.2  | 116.7  | 104.9  | 113.9  | 102.7  |
| 106.9 | 112.4  | 103.4  | 97.9   | 94.4   | 112    | 97.8   | 117.8  | 116.8  |
| 131.8 | 156.9  | 138.4  | 136.7  | 134.5  | 141.5  | 140.4  | 175.5  | 173.6  |
| 95.9  | 110.1  | 96.7   | 98.9   | 93.7   | 106    | 104.9  | 102.9  | 115.8  |
| 108.6 | 105.6  | 111.3  | 97.3   | 98.8   | 105.8  | 113.5  | 109.4  | 109.7  |
| 174.3 | 297.7  | 285.9  | 207.1  | 218.2  | 219.9  | 205.6  | 380    | 250.4  |
| 123.1 | 156.2  | 157.6  | 135.8  | 152.7  | 166.1  | 162.8  | 195.2  | 146.7  |
| 108.8 | 117.6  | 104.2  | 99     | 98.5   | 117    | 105.7  | 115.1  | 112.3  |
| 119.7 | 127.7  | 114.9  | 105.7  | 115.6  | 120.4  | 109    | 132.5  | 132.7  |
| 101.6 | 111.6  | 100.9  | 94.2   | 92.5   | 103.1  | 97.4   | 105    | 108.6  |
| 98.5  | 108.5  | 99.1   | 107.4  | 102.2  | 113.6  | 96.5   | 109.6  | 120.3  |
| 833.7 | 1368.5 | 951.1  | 1281.6 | 1122.3 | 1070   | 1236.7 | 1734.2 | 1003.5 |
| 122.1 | 113.6  | 107.6  | 111.5  | 104.6  | 118.6  | 112.6  | 129.6  | 129.9  |
| 106   | 114.3  | 108.6  | 119.9  | 99.7   | 122.4  | 115    | 136.6  | 109.4  |
| 107   | 109.7  | 101    | 105    | 99.7   | 112.1  | 104.5  | 100    | 102.7  |
| 106.5 | 111    | 100    | 105.3  | 102.7  | 117    | 107.4  | 114.6  | 125.4  |
| 105.4 | 108.6  | 103.5  | 93.4   | 98     | 104.1  | 93.5   | 105.6  | 106.5  |
| 106.1 | 116.9  | 118.2  | 105.2  | 108.6  | 115.7  | 101.8  | 127    | 112.7  |
| 107.5 | 106.8  | 100.3  | 104    | 88.1   | 104.7  | 99.3   | 106.4  | 110.5  |
| 179.7 | 208.4  | 208.7  | 199.3  | 170.5  | 197.4  | 202.3  | 251.1  | 190.4  |
| 110.6 | 116.5  | 121.7  | 102.8  | 91.3   | 100.4  | 107.2  | 118.7  | 117.5  |
| 2303  | 1215.1 | 1301.3 | 1212.1 | 1236.6 | 1451.1 | 1693.8 | 2301.7 | 2112.1 |
| 104.7 | 133.2  | 117.8  | 109.4  | 106.3  | 113.1  | 104.7  | 131.8  | 107.1  |
| 106.7 | 115.2  | 104.3  | 101    | 103.2  | 110.7  | 100.6  | 102.8  | 112.4  |
| 112.6 | 162.6  | 142.4  | 168.8  | 139.2  | 133.5  | 148    | 145.4  | 121.6  |
| 144.7 | 184.1  | 151.3  | 213.5  | 147.3  | 163.4  | 206.9  | 182.6  | 152.6  |
| 120.2 | 109.5  | 110.7  | 97.6   | 93.8   | 115    | 104.7  | 111.2  | 115.4  |
| 149.9 | 169.3  | 148.7  | 164.8  | 151.7  | 167.3  | 183.3  | 210.6  | 144.5  |
| 101.3 | 114.2  | 105.7  | 99.9   | 99.9   | 109.7  | 98.1   | 103.9  | 109.9  |
| 155.5 | 149.3  | 153.7  | 130.7  | 201.7  | 223.5  | 131.9  | 340.6  | 136.2  |
| 107.5 | 112.9  | 109.8  | 110.4  | 100.5  | 114.9  | 110.6  | 143.3  | 117.6  |
| 294.7 | 250.3  | 282.8  | 188.8  | 443.9  | 579.6  | 292.6  | 914.4  | 213.7  |
| 126.6 | 203.9  | 148.8  | 424.4  | 133.6  | 135.3  | 234.1  | 145.4  | 128.5  |
| 470.5 | 1088   | 729.3  | 1211.9 | 926.4  | 740.5  | 1276.2 | 1214.6 | 825.9  |
| 98.1  | 105.3  | 111.9  | 114    | 106.5  | 115.7  | 109.3  | 108.5  | 113.2  |
| 110.8 | 104.2  | 106.2  | 101.3  | 94.6   | 99.2   | 99.7   | 112    | 102.4  |
| 110.2 | 127.2  | 112    | 117.6  | 116.8  | 125.4  | 116.3  | 155.4  | 141.6  |
| 133.9 | 132.7  | 119.7  | 131.9  | 110.8  | 128.8  | 132.9  | 136.4  | 132.2  |
| 213.9 | 276.6  | 305.8  | 247.1  | 295.7  | 335.3  | 335.5  | 421.1  | 326.6  |
| 200.4 | 261.2  | 231.1  | 201.4  | 208.1  | 223.1  | 212.4  | 330.8  | 205.4  |
| 116.8 | 126.1  | 115.8  | 111.3  | 100.8  | 115.9  | 133.4  | 141.5  | 120.6  |
| 213.2 | 205.5  | 175.1  | 278.8  | 172.6  | 145    | 199.4  | 199.2  | 165    |
| 113.5 | 107.2  | 104.8  | 108.8  | 97.8   | 110.9  | 106.7  | 112.4  | 106.6  |
| 107.9 | 107.1  | 112.7  | 100.4  | 97.7   | 119.8  | 113.4  | 119.5  | 107.1  |
| 137.4 | 164.5  | 154.2  | 122.1  | 158.1  | 147.9  | 136.6  | 178.4  | 124.9  |
| 110.3 | 121    | 114.5  | 108.5  | 102.5  | 107.9  | 103.3  | 110.6  | 122.7  |

|        |        |       |        |        |        |        |        |        |
|--------|--------|-------|--------|--------|--------|--------|--------|--------|
| 108.9  | 106.9  | 102.3 | 100.2  | 104.1  | 103.1  | 106.7  | 109.7  | 105.6  |
| 267.6  | 259.3  | 290   | 246    | 233.1  | 286.4  | 267.7  | 317.9  | 311.6  |
| 116.8  | 128    | 123.5 | 121.7  | 116.3  | 125.4  | 121.5  | 123.3  | 124.1  |
| 107.2  | 108.6  | 96.1  | 103    | 101.4  | 107.4  | 97.7   | 103.3  | 108.7  |
| 102.8  | 102.6  | 101.6 | 87.3   | 94     | 105.5  | 106.2  | 106.8  | 109.8  |
| 124.9  | 175.1  | 167.3 | 204.7  | 202.6  | 206.7  | 213.7  | 288.9  | 172.3  |
| 109.7  | 118.4  | 102.5 | 112.3  | 108.2  | 113.4  | 110.1  | 141.6  | 122.6  |
| 108.1  | 111.2  | 104.5 | 102.5  | 97     | 113.8  | 110.2  | 107.4  | 114.5  |
| 123    | 131.5  | 132.4 | 118.5  | 123.9  | 136.7  | 120.8  | 150.5  | 131.6  |
| 343.6  | 213.9  | 171.3 | 196.3  | 197    | 221    | 249.5  | 564.8  | 536.6  |
| 118.3  | 110.8  | 112.1 | 100.3  | 101.3  | 114.6  | 108.8  | 105.2  | 110.6  |
| 386.8  | 271.3  | 266.6 | 287.8  | 243.2  | 329    | 256.9  | 352.4  | 389.8  |
| 364.3  | 829.8  | 800   | 670.3  | 840.7  | 654.8  | 733.1  | 1718   | 873.4  |
| 140.5  | 170.8  | 128.8 | 186.2  | 129.9  | 133.5  | 149    | 156.9  | 132.4  |
| 252.5  | 213    | 219.2 | 262.4  | 189.4  | 228.6  | 240.6  | 328.1  | 241.2  |
| 112.1  | 122.8  | 114.7 | 115.7  | 114.6  | 126.1  | 116.6  | 135    | 117.5  |
| 113.4  | 110.8  | 102.3 | 103.1  | 101    | 114.5  | 110    | 113.8  | 95.5   |
| 111.8  | 113.4  | 105.1 | 116.1  | 100.8  | 109.4  | 112.7  | 125.3  | 107.6  |
| 116.3  | 105.9  | 107.2 | 110.9  | 101.7  | 112.5  | 107.4  | 117.6  | 110.8  |
| 115.5  | 121.1  | 117.2 | 115.8  | 105.8  | 118.3  | 118.7  | 120.2  | 111.5  |
| 108.8  | 105.6  | 99.5  | 100.7  | 95.6   | 115.3  | 102.3  | 107    | 104.5  |
| 93     | 100    | 106.2 | 99.3   | 92.7   | 90.6   | 97.5   | 106.2  | 103.6  |
| 106.9  | 119.7  | 121.1 | 118.2  | 109.2  | 117.4  | 128.6  | 126.3  | 117.6  |
| 104.6  | 99.4   | 97    | 106.7  | 94.8   | 104.3  | 100.1  | 107.7  | 103.5  |
| 146.7  | 176.9  | 165.1 | 195.9  | 169    | 165.5  | 196.3  | 194.2  | 156.8  |
| 589.5  | 710.1  | 616.2 | 532.5  | 599.5  | 598.6  | 534.3  | 1275.4 | 924    |
| 105.2  | 109.9  | 106   | 103    | 97.1   | 105.6  | 109.1  | 118.5  | 105.2  |
| 112    | 144.5  | 120.8 | 118.8  | 130.8  | 126.6  | 145.9  | 173.2  | 115.4  |
| 103.9  | 110.4  | 103.8 | 99.4   | 95.6   | 99.1   | 101.3  | 109.3  | 107.8  |
| 107.4  | 128    | 97.5  | 112.9  | 98.8   | 112.6  | 109.2  | 125.5  | 117    |
| 102.8  | 111.4  | 99.6  | 104.7  | 99.3   | 107.3  | 101.8  | 104.6  | 104.4  |
| 116.5  | 110.3  | 102.1 | 96.7   | 96.9   | 112.9  | 96.5   | 125.5  | 130.1  |
| 194.8  | 233.5  | 287.1 | 183.2  | 242.3  | 285.4  | 240.9  | 302.6  | 215.8  |
| 170.7  | 229.7  | 240.4 | 185.7  | 177    | 233.9  | 161.6  | 353.3  | 216.2  |
| 107.3  | 105.2  | 104.5 | 103    | 97.7   | 106.4  | 107    | 106.2  | 110.9  |
| 326.2  | 392.4  | 485.5 | 325.4  | 358.5  | 426.6  | 317.2  | 626.9  | 470.4  |
| 104.2  | 116.3  | 111.7 | 110.1  | 107.7  | 110.4  | 118.5  | 122.9  | 127.3  |
| 276    | 325    | 368.7 | 345.2  | 314    | 374.8  | 362.2  | 524.7  | 312.9  |
| 101.5  | 112.7  | 105.8 | 102.7  | 98.1   | 104.5  | 101.1  | 116    | 103.9  |
| 181.8  | 188.5  | 195.7 | 213.1  | 197.3  | 224.2  | 222.8  | 239.3  | 163.3  |
| 107.9  | 125.7  | 118.6 | 117.7  | 112.4  | 116.4  | 119.3  | 136    | 113.9  |
| 579.7  | 527.4  | 526.2 | 403    | 508.8  | 505.3  | 493.9  | 779.1  | 565.6  |
| 106.1  | 107.4  | 102.7 | 103.4  | 91.8   | 112.8  | 104.8  | 106.9  | 112.7  |
| 332    | 409.3  | 380.2 | 397.5  | 415.6  | 347.8  | 699.8  | 490.7  | 274.6  |
| 496.2  | 722.6  | 490.4 | 505.4  | 588.5  | 418    | 433.2  | 1427.9 | 832.5  |
| 150.4  | 157.9  | 153.5 | 165    | 147.2  | 170.5  | 170.9  | 194    | 198.2  |
| 1362.8 | 1812.5 | 1756  | 1750.8 | 1508.8 | 1853.7 | 1504.2 | 2293.3 | 1505.6 |
| 299.1  | 339.3  | 299   | 330.6  | 312.9  | 396.8  | 410.8  | 480.5  | 490    |
| 120.1  | 116    | 114.6 | 107.3  | 108.4  | 118.8  | 106.3  | 134.8  | 123.3  |
| 111    | 110.8  | 118.9 | 99.4   | 105.5  | 109.8  | 99.5   | 117    | 104.1  |
| 106.7  | 109    | 101.9 | 93.3   | 88.4   | 110.7  | 99.6   | 113.2  | 105.7  |



|       |       |       |       |       |       |       |       |       |
|-------|-------|-------|-------|-------|-------|-------|-------|-------|
| 110.2 | 114.3 | 102.4 | 111.1 | 93.6  | 105.1 | 101.3 | 118.1 | 111.4 |
| 103.1 | 111   | 106.3 | 104.4 | 101.9 | 113.3 | 106   | 115.4 | 116.8 |
| 109.3 | 106.8 | 106.9 | 105.8 | 99.5  | 115.7 | 109.1 | 114.1 | 114.1 |
| 123.9 | 292.7 | 223.5 | 220.6 | 197.5 | 184.7 | 189.2 | 221.2 | 161.2 |
| 103.7 | 108.8 | 103.2 | 100.7 | 100   | 108.1 | 102.3 | 104.3 | 105.4 |
| 107.6 | 98.9  | 98.5  | 104.7 | 91.5  | 101.4 | 99.8  | 106.9 | 114.3 |
| 109.2 | 118.6 | 101.1 | 114.7 | 100.2 | 109.4 | 106.8 | 99.3  | 107.4 |
| 262   | 255.9 | 261.9 | 248.9 | 253.3 | 299.4 | 309.1 | 445.5 | 330.4 |
| 151.2 | 174.8 | 149.2 | 169.3 | 144.9 | 159.3 | 174.6 | 234.7 | 198.3 |
| 135.7 | 143.2 | 136.1 | 120.3 | 116.7 | 130.5 | 119.6 | 170.8 | 155   |
| 108.7 | 121.1 | 112.2 | 104.2 | 95.1  | 113.5 | 113.3 | 112.9 | 119.9 |
| 134.5 | 247   | 165.4 | 196.6 | 133.8 | 143.1 | 183.6 | 213.3 | 164.4 |
| 123.4 | 133.2 | 118.3 | 122.4 | 112.9 | 121.4 | 130.6 | 132.8 | 127.4 |
| 152.3 | 160.3 | 145   | 140.3 | 151.5 | 142.4 | 144   | 169.3 | 140.2 |
| 116.2 | 122.3 | 110.8 | 121.4 | 99.8  | 106.5 | 110.8 | 118.6 | 118.1 |
| 128.4 | 117   | 115.1 | 129   | 112.4 | 139   | 120.4 | 171.5 | 140.4 |
| 136.9 | 133.3 | 121.7 | 125   | 112.4 | 127.6 | 112.5 | 159.4 | 169.7 |
| 109.1 | 112.5 | 104   | 120.9 | 97.1  | 111.6 | 105   | 106.9 | 108.3 |
| 200.3 | 168.3 | 178.3 | 164.1 | 163   | 207.5 | 162.8 | 233.6 | 255.2 |
| 241.9 | 202   | 204.7 | 169.2 | 206.1 | 206.4 | 234   | 312.9 | 282.5 |
| 140.9 | 138.8 | 123   | 117.6 | 141.7 | 146.1 | 136   | 166.5 | 149.6 |
| 127.8 | 120.1 | 115.9 | 110.1 | 97.3  | 114   | 102.8 | 138.1 | 129.5 |
| 342.8 | 329.6 | 347.8 | 275.1 | 297   | 296   | 181.5 | 561   | 402.5 |
| 102.3 | 110.2 | 101.3 | 94.6  | 96    | 106.3 | 96.8  | 108.1 | 110.6 |
| 114.5 | 111.5 | 109   | 104.6 | 92.4  | 105.9 | 104.4 | 99.5  | 106.5 |
| 188.5 | 271.2 | 248.5 | 270.1 | 213.7 | 209.3 | 202.4 | 274.6 | 218.3 |
| 408.6 | 231.2 | 257   | 163.9 | 179.2 | 272.2 | 229.4 | 576.4 | 464.8 |
| 107.1 | 107.3 | 100.1 | 109.7 | 105.8 | 110.7 | 99.6  | 116.7 | 113   |
| 296.9 | 722.6 | 733.8 | 511.2 | 679.6 | 672   | 548.1 | 783.1 | 474.2 |
| 163   | 182.3 | 183.7 | 156.6 | 168.3 | 151.2 | 188.1 | 261.4 | 216.1 |
| 106.3 | 111.7 | 101.1 | 109.4 | 97.1  | 113.8 | 112.4 | 113.7 | 101.8 |
| 109.9 | 115.7 | 114.6 | 106.3 | 107.5 | 112.4 | 106.9 | 112.3 | 108.9 |
| 101.6 | 110   | 104.3 | 88.4  | 97.8  | 105.3 | 97.8  | 113.2 | 114.5 |
| 98.8  | 112.7 | 105.2 | 107.9 | 93.4  | 112.2 | 105.8 | 108.5 | 108.7 |
| 112.2 | 148.1 | 126.2 | 121.7 | 118.6 | 112   | 120.2 | 138.4 | 119.5 |
| 180.7 | 208.9 | 212.3 | 223   | 168.1 | 202.3 | 233.8 | 210.5 | 201.5 |
| 104.9 | 103.8 | 103   | 95.8  | 96.3  | 115.9 | 110.6 | 113   | 114.7 |
| 129.2 | 157   | 142.6 | 141.3 | 113.5 | 151.8 | 142.8 | 183.8 | 145.9 |
| 113   | 107.3 | 100.8 | 94.7  | 101.4 | 105   | 97.5  | 105.1 | 101.2 |
| 107   | 107.3 | 112.8 | 101.7 | 97.6  | 109.9 | 104.5 | 108.1 | 109.5 |
| 110.7 | 148.7 | 139.9 | 149.6 | 124   | 126.7 | 139.5 | 149.7 | 130.6 |
| 107.6 | 108.1 | 103.6 | 102.4 | 97    | 101.6 | 103.4 | 103.2 | 107.6 |
| 107.2 | 108.6 | 109.9 | 117.5 | 98.6  | 110.3 | 108.7 | 116.7 | 108.5 |
| 117.7 | 126.6 | 123   | 130   | 109.2 | 126.5 | 108.6 | 137.2 | 124.2 |
| 109.7 | 137.8 | 131.8 | 108   | 112.2 | 130.5 | 125.6 | 133.1 | 129.7 |
| 155   | 157.4 | 143   | 236   | 134.6 | 154.2 | 200.5 | 197.9 | 155.1 |
| 97    | 99.7  | 98.8  | 102.3 | 93.5  | 99.5  | 99.7  | 105.7 | 108.2 |
| 105   | 103.3 | 107.4 | 97.4  | 91.4  | 105.7 | 104.5 | 107.8 | 105.3 |
| 104.3 | 106.6 | 98.7  | 89    | 89.1  | 105.5 | 98    | 114.5 | 103.1 |
| 108   | 111.7 | 110.6 | 110.6 | 99    | 107   | 108.2 | 116   | 99.8  |
| 97.6  | 111   | 105.9 | 97.2  | 92.3  | 105.7 | 96.2  | 101.8 | 104.5 |

|       |        |       |        |        |        |        |        |       |
|-------|--------|-------|--------|--------|--------|--------|--------|-------|
| 97.8  | 102.6  | 98    | 100.1  | 90.6   | 103.8  | 113.8  | 110.9  | 102.5 |
| 110.6 | 110.9  | 100.9 | 105.2  | 95.8   | 106.6  | 105.5  | 115.5  | 105.7 |
| 109.6 | 107.6  | 99.9  | 105.2  | 101    | 118.9  | 104.5  | 126.5  | 110.6 |
| 101.7 | 116.9  | 108.5 | 100    | 93.6   | 112.2  | 109.2  | 108.8  | 110.3 |
| 106.7 | 104.3  | 99.4  | 98.1   | 90.9   | 103.1  | 102.3  | 108    | 108   |
| 102.8 | 104.8  | 92.9  | 93.8   | 88.9   | 106.9  | 97.6   | 110.1  | 102   |
| 109.8 | 112.6  | 108.4 | 98     | 94.8   | 110.7  | 108.2  | 118.1  | 111.3 |
| 127.3 | 120.7  | 112   | 104    | 105.2  | 124.8  | 117.3  | 129    | 123.3 |
| 97.9  | 98.2   | 97.8  | 98     | 89.8   | 105.1  | 97.3   | 108.1  | 102   |
| 102.2 | 109.7  | 101.9 | 95.4   | 94.9   | 105.6  | 107.5  | 100.9  | 103.3 |
| 107.5 | 116.1  | 111.3 | 117.9  | 103.2  | 112.1  | 107.8  | 108.8  | 111.2 |
| 104.2 | 111.8  | 102.4 | 97.1   | 96.5   | 111.3  | 104.3  | 116.9  | 108.5 |
| 113.5 | 108.8  | 103.3 | 100.6  | 91.8   | 114.1  | 100.1  | 128.2  | 108.1 |
| 108.6 | 109.9  | 102   | 104.4  | 98.3   | 112.3  | 97.2   | 106.8  | 106   |
| 126.6 | 123.8  | 113.2 | 110.2  | 103.4  | 119.5  | 115    | 135.1  | 130.9 |
| 109   | 114.9  | 106.2 | 104.2  | 98.8   | 103.8  | 107.8  | 105.5  | 104.3 |
| 105.7 | 100.8  | 108.1 | 94.9   | 90     | 105.3  | 96     | 107.6  | 107.8 |
| 107.1 | 115.4  | 109.3 | 116.7  | 104.4  | 112.3  | 105.5  | 113.8  | 117.4 |
| 122.2 | 169.3  | 206.9 | 161.3  | 146.1  | 169.1  | 156.1  | 164.7  | 148.8 |
| 106.4 | 110    | 105.5 | 107.9  | 96.4   | 114.9  | 109.3  | 128.1  | 109.5 |
| 105.9 | 106.3  | 103.5 | 102.1  | 96.6   | 110.5  | 99.1   | 107.7  | 105   |
| 120.8 | 131.2  | 115.9 | 128.4  | 108.6  | 127.4  | 123.8  | 120    | 119   |
| 110   | 103.9  | 100.6 | 93.4   | 92.6   | 103.1  | 100    | 102.1  | 107.1 |
| 105.3 | 110.1  | 101.4 | 104.1  | 90.9   | 106.1  | 107.4  | 106.2  | 112.1 |
| 112.1 | 109.1  | 103.9 | 105.8  | 99.4   | 109.1  | 105.9  | 105.4  | 106.5 |
| 123.7 | 177.5  | 164.5 | 150.3  | 129.1  | 151.2  | 134.8  | 125.9  | 113.2 |
| 107.6 | 107.6  | 115.5 | 108.9  | 95.3   | 127.2  | 96.8   | 113    | 115.8 |
| 127.2 | 122    | 130   | 100.6  | 99.3   | 114.8  | 194.5  | 114.1  | 138.7 |
| 94.6  | 107.1  | 99.7  | 93.9   | 94.2   | 106.6  | 97.9   | 110.7  | 113   |
| 574.3 | 1000.5 | 530.3 | 2024.4 | 1976.6 | 1082.8 | 3995.3 | 2253.8 | 550.1 |
| 106.9 | 100.9  | 103.1 | 102.3  | 92.7   | 102.7  | 110.1  | 110.6  | 103.2 |
| 114   | 118.9  | 110.5 | 120    | 98.3   | 124.3  | 99.2   | 112    | 115.2 |
| 408.9 | 610    | 612.3 | 467.5  | 545.2  | 680.8  | 622.2  | 791.6  | 503.8 |
| 109.9 | 113.6  | 109.7 | 128.9  | 89.3   | 101.9  | 128.5  | 110.4  | 111.2 |
| 148.2 | 151.7  | 140.1 | 133.3  | 145.8  | 138.6  | 127    | 207.2  | 202.4 |
| 106.3 | 110.3  | 105.8 | 104.2  | 95.4   | 111    | 106.5  | 125.8  | 139.2 |
| 102.4 | 101.5  | 97.7  | 96.5   | 93.2   | 102    | 104.9  | 111.8  | 106.2 |
| 108.8 | 136.6  | 124.4 | 294.8  | 105.6  | 119.3  | 202.1  | 105.7  | 123.8 |
| 106   | 113.5  | 108.6 | 103.7  | 93.9   | 118.1  | 100    | 105.9  | 114.7 |
| 199.1 | 213    | 241   | 228.5  | 236.2  | 289.4  | 216.6  | 390.6  | 246.5 |
| 484.6 | 315.6  | 435.4 | 385.4  | 400.8  | 519.8  | 502.5  | 771.3  | 584.7 |
| 108.2 | 113.3  | 104.3 | 103.8  | 106.9  | 112.2  | 114.5  | 114.1  | 115.8 |
| 115.9 | 112.4  | 113.2 | 120.8  | 97.1   | 122.8  | 115.8  | 114.4  | 109   |
| 221.8 | 206.4  | 249.9 | 232.9  | 220.4  | 221.3  | 297.5  | 308.2  | 244.2 |
| 109.8 | 115.6  | 99.3  | 100.6  | 96.9   | 108.1  | 114.4  | 103.2  | 107.8 |
| 116.7 | 110.4  | 102   | 110.2  | 103.2  | 104.7  | 105.7  | 125.6  | 122.6 |
| 319   | 377.3  | 286.3 | 369.2  | 352    | 375.9  | 456    | 610.4  | 393.7 |
| 103.9 | 102.2  | 108.5 | 93.5   | 93.7   | 106.2  | 99     | 99.9   | 108.8 |
| 103.5 | 107.4  | 103.9 | 106.1  | 98.5   | 105.9  | 97.2   | 98.6   | 105.2 |
| 97.2  | 111.4  | 104.9 | 103    | 94.4   | 109.5  | 104.6  | 102.1  | 110   |
| 111.1 | 111.8  | 101.5 | 100.7  | 97.3   | 117.2  | 108.3  | 112.6  | 111.1 |

|       |       |       |       |       |       |       |       |        |
|-------|-------|-------|-------|-------|-------|-------|-------|--------|
| 114   | 106.8 | 102.6 | 95.4  | 96.7  | 104.2 | 100.3 | 105.2 | 104.5  |
| 114   | 113.5 | 113.9 | 112   | 98.2  | 112.4 | 112.1 | 113.9 | 107.2  |
| 123.3 | 116   | 127.1 | 119.7 | 118.6 | 116.3 | 111.2 | 143.2 | 124.9  |
| 108.6 | 109.2 | 102.7 | 105.4 | 96.1  | 114.2 | 108.5 | 113.2 | 114.8  |
| 112.7 | 109.5 | 120.3 | 115.4 | 101.8 | 121.4 | 100.3 | 122.3 | 127.2  |
| 104.8 | 106.7 | 113.6 | 102.2 | 98.1  | 108   | 109.9 | 113   | 110.5  |
| 107.2 | 117.3 | 103   | 109.2 | 98    | 117.6 | 111.8 | 111.3 | 112.6  |
| 130.3 | 145.7 | 138.3 | 141.9 | 137.7 | 139.7 | 141.2 | 150.5 | 139.8  |
| 111.3 | 114.1 | 119.2 | 108.3 | 104.9 | 122.2 | 119.8 | 119   | 114.6  |
| 98.3  | 112.4 | 112.6 | 96.1  | 99.4  | 108.3 | 99.3  | 111.4 | 114.2  |
| 108.2 | 102.4 | 109.5 | 106.7 | 96.9  | 102.2 | 108.9 | 117.2 | 117.7  |
| 98.5  | 111.1 | 111.5 | 101.6 | 94.4  | 110.9 | 97.2  | 118.5 | 106.8  |
| 105.2 | 103.6 | 98.6  | 93.9  | 90.7  | 106.7 | 99.7  | 104.4 | 113.4  |
| 119.1 | 119   | 107.2 | 108.4 | 99.2  | 120.4 | 113.4 | 136.1 | 117.8  |
| 191.4 | 181.9 | 197.4 | 170.2 | 155.6 | 180.4 | 180   | 280.8 | 217.1  |
| 221.1 | 345.4 | 322.1 | 282.1 | 356.6 | 307.2 | 307.9 | 477.2 | 354.1  |
| 109.7 | 108.5 | 102   | 109.4 | 97.8  | 108   | 101.3 | 111   | 108.9  |
| 123.9 | 189.6 | 174.2 | 130.2 | 167.6 | 154.8 | 173.2 | 229.3 | 147.4  |
| 177.1 | 267.1 | 191.7 | 168   | 173.2 | 217.5 | 209.2 | 334.9 | 328    |
| 112.8 | 101.9 | 109.5 | 91.9  | 103.2 | 115.7 | 114   | 129.7 | 117.9  |
| 107   | 111.5 | 96.6  | 107.9 | 104.8 | 111.9 | 108   | 107.3 | 103.3  |
| 626.1 | 554.8 | 798.6 | 711.9 | 590.8 | 427.2 | 592.8 | 1527  | 1507.4 |
| 108   | 100   | 94.8  | 92.3  | 93.9  | 104.2 | 92.9  | 99.8  | 99     |
| 137.1 | 122.2 | 131.7 | 106.5 | 115.8 | 143.3 | 153   | 197.2 | 161.8  |
| 114.6 | 107   | 104.8 | 104.6 | 94.4  | 112.5 | 99.9  | 104.7 | 104.9  |
| 123.9 | 120.4 | 110.4 | 119.3 | 108.9 | 131.7 | 97    | 114.5 | 127.8  |
| 111.9 | 107.7 | 98.3  | 91.6  | 95.2  | 108.5 | 101.2 | 99.3  | 107.4  |
| 98.7  | 107.7 | 97.8  | 101.6 | 94.3  | 115   | 103.4 | 110   | 105.4  |
| 114.1 | 113.7 | 97.1  | 113.6 | 95.1  | 114.4 | 105.5 | 111.1 | 111    |
| 106.5 | 119.2 | 105.5 | 111.7 | 102.2 | 109.1 | 109.8 | 126.5 | 135    |
| 122.7 | 132.6 | 133.4 | 130.4 | 113.6 | 136.8 | 131.1 | 145.1 | 133.1  |
| 111.1 | 127   | 114.3 | 106.3 | 104.3 | 117.9 | 122.2 | 131.8 | 118.8  |
| 171.1 | 195.3 | 185.3 | 187.3 | 157.9 | 176.7 | 226.6 | 200.6 | 158.2  |
| 109   | 107   | 101.1 | 105.4 | 99.7  | 108.9 | 108.6 | 109.7 | 115.2  |
| 104.1 | 107.5 | 107.5 | 106.8 | 102.5 | 110.4 | 103.6 | 119.7 | 97.4   |
| 106.9 | 103.5 | 108   | 98.7  | 93.1  | 107.3 | 103.5 | 109.7 | 107.3  |
| 123.3 | 160.1 | 123.5 | 132.6 | 128.8 | 130.1 | 140.1 | 185.5 | 156.4  |
| 104.6 | 110.2 | 97.9  | 106.8 | 100.3 | 96.9  | 104.2 | 96.3  | 102.7  |
| 108.3 | 115.5 | 112.8 | 98.4  | 98.6  | 116.9 | 109.8 | 117.2 | 111    |
| 99.1  | 114.6 | 94.6  | 90.8  | 100.2 | 108.8 | 101.6 | 108.6 | 106.8  |
| 108.5 | 110.8 | 96.6  | 91.6  | 89.2  | 102   | 104.3 | 107.7 | 110.9  |
| 109.3 | 106.2 | 103.6 | 98.8  | 95.8  | 110   | 97.7  | 113.6 | 107.4  |
| 132   | 206.7 | 189.5 | 172.5 | 166.6 | 176.3 | 205.4 | 232.4 | 219.2  |
| 106.3 | 107.7 | 101.8 | 100   | 98.3  | 112.6 | 105.4 | 116.5 | 118.3  |
| 118.5 | 125.1 | 113.9 | 119.4 | 105.6 | 116.7 | 138.1 | 141.9 | 126.2  |
| 104.6 | 131.8 | 132.5 | 111.5 | 113   | 133.6 | 109.9 | 130.1 | 116.7  |
| 106   | 111   | 100.9 | 106.2 | 104   | 113   | 113.3 | 120.8 | 113.2  |
| 110.8 | 105.8 | 99.3  | 94.3  | 92.4  | 105.1 | 95.5  | 102.5 | 109.9  |
| 109.8 | 118.9 | 115.1 | 113.6 | 104.6 | 106.1 | 120.4 | 109   | 109.9  |
| 110.8 | 121.1 | 139.5 | 108.1 | 114   | 134.5 | 101.9 | 115   | 117.7  |
| 286.2 | 356.3 | 217.4 | 458.3 | 448.1 | 261.5 | 432.1 | 783.1 | 232.7  |

|        |        |        |        |        |        |        |        |        |
|--------|--------|--------|--------|--------|--------|--------|--------|--------|
| 105.5  | 109.5  | 96.1   | 94.5   | 93.8   | 102.6  | 106    | 100.6  | 112.9  |
| 110.3  | 100.9  | 104.2  | 107.8  | 99.6   | 113.7  | 108.6  | 112.4  | 106.8  |
| 107.1  | 95.3   | 94.3   | 95.3   | 93.8   | 101    | 95.8   | 104.9  | 112.4  |
| 123.9  | 166.7  | 163.6  | 150.5  | 152.7  | 162.9  | 145.9  | 171.8  | 161.9  |
| 144.9  | 166    | 167    | 151.4  | 142.9  | 145.8  | 146.4  | 171.1  | 149.6  |
| 110    | 115.8  | 112.9  | 102.9  | 96.4   | 111    | 101.3  | 110.8  | 119.8  |
| 313.9  | 403.4  | 444.2  | 407.3  | 363.6  | 454    | 515.1  | 527.6  | 361.3  |
| 104.3  | 114.9  | 102.9  | 95.8   | 96.6   | 111.1  | 105.2  | 100.1  | 108.4  |
| 106.1  | 111.5  | 97.4   | 99.7   | 98.9   | 106.1  | 94     | 102.9  | 106.4  |
| 115.5  | 113.9  | 115.9  | 117.9  | 108.7  | 118.5  | 108.1  | 131.3  | 111.3  |
| 119.2  | 123.6  | 113.7  | 114.9  | 110.5  | 117.7  | 113.9  | 123.2  | 119    |
| 123.8  | 121.4  | 105.2  | 114.8  | 105.9  | 118.6  | 113.4  | 133    | 106.7  |
| 215    | 328.6  | 272.2  | 334.3  | 258.1  | 242.8  | 312.5  | 283.4  | 227.2  |
| 114.4  | 116    | 107.8  | 97.1   | 105    | 112.8  | 101.8  | 99.9   | 108.7  |
| 100.7  | 109.4  | 101.5  | 96.2   | 93.7   | 110.4  | 99.3   | 109.7  | 110.4  |
| 111.2  | 142.8  | 127.7  | 120.4  | 111    | 130.2  | 137.7  | 131.3  | 122.4  |
| 140.3  | 163.7  | 139.3  | 144.1  | 127.9  | 140.6  | 165.6  | 190    | 162.1  |
| 102.7  | 103.7  | 98.3   | 109.2  | 98.7   | 113.7  | 107.9  | 110.5  | 107.7  |
| 103.5  | 106.7  | 105.1  | 102.3  | 98.9   | 106.9  | 103.1  | 105.8  | 106.9  |
| 110.2  | 122.4  | 113.1  | 105.2  | 111.6  | 133.6  | 105.8  | 125.3  | 107.5  |
| 102.2  | 114    | 99.2   | 97.8   | 87.9   | 106.4  | 101    | 101.8  | 99.2   |
| 113.3  | 97.6   | 103.7  | 108.2  | 96.7   | 102.7  | 98.1   | 106.7  | 104.3  |
| 100.7  | 104.3  | 105.4  | 96.3   | 88.6   | 108.2  | 101.3  | 106    | 105.4  |
| 2110.2 | 3623.2 | 3562.5 | 3375.4 | 2372.6 | 2796.8 | 2763.8 | 3644.8 | 3032.2 |
| 118.7  | 123.1  | 117.1  | 107.1  | 103.5  | 119.3  | 109.4  | 110.1  | 129.7  |
| 119.7  | 122.3  | 115.2  | 122.2  | 111.9  | 130.1  | 114.7  | 130.2  | 148.2  |
| 137.9  | 138.8  | 135.3  | 124.4  | 123.3  | 134.4  | 130.1  | 160.5  | 127.7  |
| 832    | 1132.8 | 1035.6 | 1091.5 | 891.3  | 1004.4 | 1131.1 | 1647.2 | 1271.9 |
| 826.7  | 1520.9 | 1523   | 1199   | 1179.7 | 1322.7 | 1221.8 | 2156.7 | 1327.2 |
| 169.2  | 203.5  | 191.4  | 158.8  | 179.3  | 186.5  | 157.2  | 233.4  | 189.3  |
| 111.6  | 127.7  | 117.3  | 115.7  | 124.6  | 135.4  | 124.6  | 155.4  | 126.6  |
| 107.3  | 106.1  | 110.1  | 111.9  | 103.1  | 119.9  | 109.2  | 119.6  | 131.5  |
| 102.6  | 114.4  | 112.9  | 111.5  | 95.7   | 116.5  | 110.4  | 115.3  | 110.3  |
| 98.1   | 108.6  | 103    | 98.5   | 91.6   | 105.3  | 102.9  | 108.2  | 105.5  |
| 101.6  | 110.1  | 91.9   | 90.1   | 92     | 106.3  | 103.9  | 105.9  | 97.9   |
| 105.8  | 103.7  | 101.6  | 109.2  | 98.9   | 108.3  | 108.7  | 107.2  | 94     |
| 97.7   | 105.1  | 101.4  | 104.8  | 100.2  | 118.2  | 108.7  | 114.4  | 126.7  |
| 103.7  | 107.1  | 98.4   | 97.3   | 95.9   | 104.2  | 102.1  | 97.3   | 116.7  |
| 113.2  | 117.6  | 112.1  | 108.5  | 98.5   | 108    | 101.6  | 110.8  | 107.4  |
| 171.9  | 278.7  | 263.1  | 232.1  | 240.5  | 239.8  | 219.9  | 327.1  | 171.4  |
| 3083.3 | 2786.4 | 2736.9 | 3360.1 | 2535.7 | 2924.5 | 3348.5 | 4963.1 | 3975.5 |
| 100.6  | 107.7  | 109.8  | 99.4   | 95.7   | 110.7  | 108.8  | 103.5  | 107.2  |
| 101.7  | 99     | 99.5   | 99.9   | 92.5   | 115.4  | 107    | 106.5  | 101.1  |
| 159.8  | 217.9  | 188.9  | 196    | 209.3  | 207.2  | 174.6  | 244.6  | 245    |
| 121.2  | 184.5  | 116.7  | 140.3  | 117.2  | 133.3  | 147.5  | 165.2  | 142.8  |
| 113.4  | 114.9  | 123.8  | 125.1  | 128.5  | 146.3  | 133.3  | 174    | 145    |
| 105.3  | 114.5  | 112.4  | 113.1  | 96.6   | 118.3  | 101.4  | 110.3  | 108.7  |
| 153.6  | 197.5  | 217.2  | 190.4  | 155.8  | 192.2  | 180.1  | 253    | 210.9  |
| 103.2  | 114.5  | 100.6  | 94.3   | 105.8  | 106.5  | 101.1  | 99.3   | 103.1  |
| 294.2  | 442.6  | 443    | 483.8  | 384.2  | 417    | 389.1  | 395.9  | 321.1  |
| 137.5  | 247.2  | 259    | 201    | 193.2  | 204.1  | 208.6  | 242.9  | 164.7  |

|        |        |        |       |       |        |        |        |        |
|--------|--------|--------|-------|-------|--------|--------|--------|--------|
| 199.1  | 213.7  | 209.9  | 230.3 | 165   | 176.2  | 166    | 324.1  | 265.4  |
| 377.8  | 578    | 474.4  | 520.4 | 476.2 | 508.6  | 480.8  | 618.3  | 451.6  |
| 155.6  | 262.3  | 212.9  | 262.2 | 232.6 | 239    | 270.2  | 297.3  | 203.2  |
| 116.8  | 154.7  | 135.4  | 142.2 | 120.7 | 136.3  | 147.6  | 194.5  | 139.6  |
| 166.3  | 353.1  | 268.2  | 221.7 | 223.5 | 296    | 282.7  | 446.8  | 262.6  |
| 1319.2 | 347.7  | 376.7  | 388.7 | 273.3 | 429.8  | 387.7  | 1297.5 | 1458.9 |
| 107.7  | 113.4  | 116.5  | 98.5  | 99.6  | 116.2  | 111.1  | 126.9  | 117.7  |
| 133.9  | 152.5  | 166.5  | 134.2 | 145.4 | 182.4  | 156.2  | 195.5  | 157    |
| 161.9  | 277.7  | 326.9  | 210   | 212   | 303.4  | 242.9  | 362.2  | 233.1  |
| 172.9  | 300.6  | 256.8  | 207   | 213.6 | 248.9  | 276.5  | 333.3  | 275    |
| 238.1  | 394.1  | 358.3  | 377.9 | 351.6 | 345.5  | 319.3  | 412.9  | 375.6  |
| 180.2  | 227.6  | 248    | 227.4 | 219.6 | 284.8  | 246.3  | 433.1  | 415.1  |
| 338    | 390.2  | 413.7  | 393.6 | 379.2 | 319.4  | 410.4  | 956.5  | 749    |
| 324.9  | 396.3  | 414.1  | 488   | 330.9 | 294    | 472.5  | 537.5  | 398.3  |
| 128.7  | 177.6  | 152.8  | 150.1 | 141.2 | 156    | 171.9  | 165    | 139    |
| 271.3  | 535.6  | 526.5  | 570.9 | 444.6 | 406.7  | 501    | 539.7  | 370.7  |
| 135.9  | 234.5  | 237.1  | 203.4 | 197.1 | 250.7  | 240.5  | 366.6  | 287.8  |
| 104.8  | 108.3  | 110.2  | 96.3  | 95.7  | 108.7  | 100.9  | 114    | 103.3  |
| 119    | 120.6  | 123.2  | 106.6 | 109.6 | 128.2  | 109    | 162.2  | 121.2  |
| 117.9  | 129.1  | 120.8  | 108.6 | 115.9 | 141.3  | 132.3  | 185.1  | 154    |
| 101.3  | 119    | 111.9  | 111.6 | 100   | 115.8  | 105    | 120.1  | 117.9  |
| 115.8  | 108    | 107.7  | 121.6 | 99    | 107    | 109.4  | 128.3  | 112.9  |
| 125.6  | 142.2  | 128    | 127.3 | 114.3 | 124    | 156.1  | 158.6  | 139.4  |
| 262.1  | 315.3  | 229.3  | 253.7 | 305.5 | 241.8  | 261.3  | 552.6  | 317.1  |
| 261.7  | 343.4  | 378.1  | 375.5 | 332.7 | 263.9  | 316.6  | 640.3  | 509.1  |
| 1231.3 | 1826.8 | 1843.3 | 1853  | 1466  | 1583.3 | 1861.9 | 2195.7 | 2107.4 |
| 164.2  | 362.2  | 421.5  | 392   | 369.3 | 391.2  | 375.9  | 529.9  | 294.3  |
| 207.7  | 296.2  | 290.6  | 367.9 | 272.3 | 275.1  | 309    | 429.1  | 284.1  |
| 124.7  | 172.4  | 152.7  | 122.4 | 131.2 | 138.4  | 139.6  | 184.7  | 175.5  |
| 134.6  | 169.1  | 137.7  | 153.8 | 117.7 | 158    | 142.6  | 176.7  | 152.1  |
| 377.6  | 475.4  | 551.5  | 395.3 | 418.9 | 478.7  | 393.5  | 740.3  | 528.1  |
| 335.8  | 485.5  | 525.3  | 520.5 | 487.4 | 608.1  | 488.4  | 943.7  | 544.1  |
| 126.4  | 150.8  | 123.7  | 142.1 | 149   | 142.7  | 139    | 197    | 185    |
| 113.5  | 119.8  | 107.2  | 102.7 | 96.7  | 106.5  | 101.8  | 117.1  | 118    |
| 269.2  | 350.8  | 271.9  | 320.1 | 273.6 | 282.5  | 306    | 501.5  | 447.4  |
| 101.2  | 109.6  | 105    | 108.6 | 97.5  | 119.1  | 104    | 117.5  | 119.8  |
| 112.7  | 114.7  | 125.8  | 130.2 | 106   | 123.2  | 126.9  | 148.7  | 140.5  |
| 114.5  | 118.3  | 111.9  | 109.6 | 108   | 116.3  | 110.7  | 128.9  | 122.2  |
| 181.4  | 259.5  | 222.8  | 257.9 | 253   | 254.8  | 278.7  | 278.1  | 209.3  |
| 224.6  | 415.2  | 428    | 408   | 348.7 | 378.3  | 396.8  | 461.8  | 336.6  |
| 105.9  | 125.9  | 123.2  | 114.4 | 111.6 | 115.2  | 119    | 153.5  | 126.7  |
| 110.2  | 109.3  | 98.4   | 104   | 99.9  | 105.7  | 103.3  | 117.9  | 123.8  |
| 257.2  | 635.6  | 533.5  | 596.5 | 475   | 470.3  | 607.8  | 688.4  | 468.5  |
| 115.6  | 128.4  | 139.8  | 116.5 | 110.4 | 142    | 121.6  | 129.1  | 131.5  |
| 121.9  | 205.4  | 198.9  | 160.1 | 142.2 | 207.5  | 187    | 276.7  | 230.8  |
| 103    | 109.4  | 99.8   | 98.7  | 98.5  | 112.8  | 109.9  | 108.2  | 106    |
| 200.8  | 204    | 231.6  | 202.3 | 159.2 | 201.4  | 211.3  | 421    | 294.4  |
| 175.5  | 201.2  | 165.8  | 180.2 | 169.2 | 181.2  | 194.3  | 319.1  | 185.6  |
| 180.4  | 308.1  | 348.6  | 271.4 | 274.7 | 282.6  | 283.8  | 416.9  | 292.9  |
| 135.8  | 120.1  | 130.3  | 104.6 | 104.4 | 127.7  | 121.6  | 177.9  | 168.6  |
| 160.7  | 146.6  | 148.2  | 145.8 | 133.3 | 150.7  | 143.6  | 217.3  | 197.3  |

|        |        |        |        |        |        |        |         |       |
|--------|--------|--------|--------|--------|--------|--------|---------|-------|
| 158.1  | 171.3  | 196.4  | 208.8  | 127.3  | 218.5  | 171.3  | 229.7   | 182.8 |
| 192.6  | 229.6  | 195.6  | 180.5  | 201.9  | 218.4  | 219.2  | 272.2   | 224.9 |
| 303.4  | 336.2  | 311.9  | 364.9  | 279.7  | 322.1  | 301.1  | 741.5   | 502.1 |
| 471.3  | 634.4  | 739.8  | 609.6  | 604.6  | 711.7  | 589    | 1034.3  | 705   |
| 244.9  | 278.4  | 222.4  | 201.4  | 224.8  | 278.3  | 240.2  | 407.3   | 333.3 |
| 163.1  | 165.8  | 165.5  | 140.4  | 143.8  | 187.9  | 166.2  | 264.9   | 221.5 |
| 159    | 209.1  | 214.4  | 208.9  | 172.8  | 213.2  | 199.2  | 317.1   | 188.8 |
| 176.4  | 402.3  | 386.7  | 328.1  | 299.1  | 347.9  | 303.2  | 362.8   | 302.5 |
| 252.4  | 225    | 205.8  | 298.2  | 214.1  | 218    | 227.4  | 351.8   | 258.3 |
| 145.8  | 204.9  | 225.4  | 225.6  | 174.4  | 183    | 242.4  | 250.4   | 172.2 |
| 144.5  | 303.5  | 306.1  | 246.8  | 262.1  | 327.4  | 277.1  | 294.7   | 229.4 |
| 131.7  | 187.9  | 181.5  | 170    | 182.3  | 178    | 192.8  | 232.4   | 210   |
| 389.6  | 515.8  | 518.6  | 369.4  | 434.8  | 504.3  | 470.5  | 926.3   | 613   |
| 303.1  | 425.1  | 465.2  | 404.3  | 392.8  | 416.5  | 528    | 530.6   | 376.4 |
| 177.3  | 259.5  | 239.3  | 205.1  | 218.5  | 256.9  | 279.2  | 312.5   | 262.8 |
| 247    | 473.9  | 389.1  | 388.5  | 398.2  | 409    | 442.1  | 769.5   | 482.6 |
| 106.9  | 110.4  | 104    | 113.2  | 96.3   | 109.1  | 112.3  | 109.6   | 113.4 |
| 142.3  | 219    | 241.7  | 204.3  | 209.4  | 243.2  | 210.3  | 288.1   | 185.6 |
| 125.6  | 145.3  | 124.1  | 116.8  | 118.5  | 130.5  | 117    | 169.2   | 139.1 |
| 118.7  | 132.1  | 125.3  | 114.9  | 114.1  | 143.5  | 117.7  | 138.2   | 133.7 |
| 307.7  | 382.3  | 347    | 426.4  | 303.2  | 433.1  | 414.3  | 473.7   | 333.9 |
| 183.2  | 233.1  | 263.7  | 191.3  | 213.9  | 240.9  | 204.7  | 350.7   | 245.1 |
| 167.5  | 221.4  | 232.4  | 216.1  | 168.3  | 195.1  | 209.7  | 303.3   | 259   |
| 154.2  | 163.7  | 165.9  | 159.5  | 140    | 171.8  | 157.4  | 211     | 179.9 |
| 309.3  | 443.4  | 407.6  | 405.7  | 337.1  | 344.6  | 360.2  | 438.7   | 308.5 |
| 111.3  | 117.5  | 109.7  | 103.1  | 103.8  | 111.5  | 111.5  | 122.3   | 107.3 |
| 155.9  | 204.5  | 188    | 175.5  | 164.8  | 227.8  | 208.2  | 233.3   | 184.3 |
| 200.3  | 439.8  | 310.4  | 460.4  | 316.6  | 401.1  | 454.2  | 620.5   | 321.3 |
| 216.2  | 421.1  | 363.5  | 295.1  | 291.6  | 370.3  | 353.1  | 423.6   | 295.6 |
| 378.1  | 515.8  | 544.7  | 474.9  | 497.2  | 601.4  | 576.8  | 797.2   | 648.9 |
| 147.1  | 186.1  | 171.4  | 148.6  | 140.9  | 166.6  | 162.3  | 233.4   | 169   |
| 306.5  | 612.9  | 683.1  | 695.3  | 584.2  | 606.6  | 594.8  | 790.4   | 551.8 |
| 126.8  | 223.8  | 217.4  | 166.3  | 168.5  | 178.3  | 167.4  | 277.7   | 176.1 |
| 207.6  | 246.4  | 250.3  | 260.5  | 252.1  | 255.4  | 222.6  | 347.8   | 328.7 |
| 159.3  | 228.9  | 193.3  | 178.3  | 161.7  | 192.6  | 182.9  | 219.5   | 189.6 |
| 359.4  | 595.1  | 515    | 417.8  | 492.3  | 565.4  | 423.5  | 849.7   | 642.2 |
| 321.5  | 519.4  | 549.2  | 452.4  | 443    | 514.5  | 470    | 602.7   | 476.7 |
| 273.7  | 418.3  | 525.2  | 409    | 442.4  | 516    | 419.7  | 598.3   | 460.2 |
| 142.4  | 154.1  | 140    | 153.7  | 144.7  | 154.9  | 131.9  | 167.5   | 141.7 |
| 119.6  | 143.4  | 145    | 131.2  | 132    | 147.7  | 137.9  | 161.6   | 151.3 |
| 171.1  | 178.9  | 205.1  | 188.4  | 176    | 195.5  | 178.8  | 292.9   | 205.9 |
| 168    | 145.1  | 147.5  | 138.6  | 141.7  | 171    | 148.1  | 223.2   | 168   |
| 181.6  | 341.2  | 292.2  | 299.7  | 319.6  | 315    | 363    | 472.8   | 282.2 |
| 4071.1 | 5209.8 | 4897.8 | 2480.7 | 5691.7 | 6142.2 | 3270.6 | 13016.2 | 5143  |
| 165.5  | 202    | 206.8  | 262.1  | 159.9  | 205.1  | 255.7  | 364     | 216   |
| 377.6  | 449.9  | 419.1  | 339.4  | 387.3  | 459.7  | 427.9  | 542.9   | 433.8 |
| 214.7  | 224.1  | 202.3  | 166.5  | 184.9  | 210.3  | 208.5  | 244.8   | 179.1 |
| 204.6  | 224.1  | 216.9  | 217.1  | 195.3  | 219.6  | 242.1  | 285.1   | 207.5 |
| 108.1  | 110.2  | 115.9  | 111.2  | 104.1  | 113.7  | 102.2  | 119.7   | 112.3 |
| 117.3  | 153.1  | 138.6  | 151.5  | 119.2  | 143.2  | 133    | 191.4   | 131.8 |
| 106.7  | 108.6  | 98.5   | 94.4   | 94.1   | 109.5  | 110.7  | 97.4    | 101.8 |

|        |        |        |        |        |        |        |         |         |
|--------|--------|--------|--------|--------|--------|--------|---------|---------|
| 110.6  | 115.2  | 108.9  | 96.7   | 99     | 112.3  | 104.1  | 111.9   | 116.2   |
| 129.3  | 151.8  | 132.9  | 140.9  | 129.3  | 128.8  | 123.6  | 144.5   | 133.9   |
| 101.2  | 99.7   | 101.1  | 101.2  | 97.5   | 97.6   | 98.8   | 103.2   | 101.8   |
| 139.3  | 133.9  | 120.7  | 123.7  | 106.2  | 114.8  | 119.4  | 126.2   | 110.5   |
| 107.1  | 107.2  | 102.3  | 94.2   | 90.3   | 103.4  | 101.8  | 103.8   | 98.6    |
| 99     | 109.9  | 99.9   | 103.7  | 93.9   | 104.8  | 109.9  | 123.7   | 108.7   |
| 106.1  | 103.7  | 109.6  | 100.9  | 101.2  | 116.2  | 104.2  | 119.4   | 114.3   |
| 115.4  | 117    | 101.4  | 117.2  | 95.7   | 108.2  | 107.2  | 111.3   | 112.5   |
| 100.7  | 116.3  | 104.3  | 111.2  | 93.2   | 111.3  | 102.3  | 105.7   | 107.6   |
| 108    | 106.4  | 94.4   | 101.1  | 92.8   | 105.1  | 98.2   | 107.2   | 102     |
| 110.1  | 115.1  | 135    | 157.5  | 100.8  | 120.3  | 113    | 102.9   | 124.5   |
| 102.9  | 109.3  | 104.4  | 108.9  | 99.1   | 106.1  | 106.1  | 109.9   | 110.5   |
| 104.3  | 107.2  | 102    | 97.5   | 94.6   | 104.1  | 105.9  | 102.3   | 108.8   |
| 109.6  | 114.7  | 107.6  | 116.1  | 95.1   | 112.3  | 106.2  | 109.4   | 110.8   |
| 98.4   | 106.3  | 92.9   | 103.4  | 93.1   | 111.7  | 101.4  | 104.4   | 105     |
| 126.2  | 129.8  | 113.4  | 2245.9 | 102.8  | 108    | 275.2  | 106.8   | 130.1   |
| 114.9  | 130.5  | 106.6  | 944.4  | 108.3  | 118.5  | 207.1  | 116.1   | 119.7   |
| 108    | 129.5  | 103.8  | 1331.6 | 96.2   | 109.8  | 268.1  | 105.9   | 108.7   |
| 102.1  | 110.9  | 103.5  | 105.7  | 95.7   | 114.7  | 107.8  | 108.3   | 111.3   |
| 709.9  | 562.7  | 134    | 1616.4 | 198.8  | 109.7  | 768.2  | 182.2   | 149     |
| 107.7  | 109.1  | 102.8  | 100.2  | 95.5   | 110    | 100.4  | 114.7   | 113     |
| 135.2  | 158.9  | 310.1  | 100.1  | 138.9  | 176.9  | 131.7  | 188.6   | 160.5   |
| 107.5  | 119.2  | 131.3  | 103.3  | 99.8   | 117.8  | 106.8  | 106.9   | 110.8   |
| 5025.7 | 5791.2 | 6617.6 | 5620   | 5189.5 | 4719.4 | 5663.8 | 12379.8 | 16335.7 |
| 110    | 108.7  | 107.9  | 102.7  | 94.3   | 114.1  | 107.9  | 114.5   | 115.1   |
| 109.2  | 111.5  | 106.9  | 101.4  | 99.2   | 118.3  | 117    | 130.4   | 122.9   |
| 108.3  | 109.8  | 104.4  | 102.7  | 95.9   | 113    | 105.1  | 105.1   | 106     |
| 103.7  | 107.5  | 100.3  | 96.5   | 97.5   | 112.3  | 109.5  | 105.3   | 108.9   |
| 110.8  | 104.4  | 104    | 102.4  | 94.1   | 115    | 105.2  | 119.7   | 112.7   |
| 108.8  | 108.1  | 123.1  | 112.2  | 106.3  | 105.1  | 103.2  | 115.2   | 115.9   |
| 380.4  | 467.4  | 619.6  | 441.1  | 485.7  | 560.9  | 484.5  | 953.2   | 664     |
| 106.6  | 105.1  | 95.4   | 96.7   | 97.9   | 106.7  | 104.9  | 110.7   | 116.3   |
| 108.1  | 106.4  | 106.1  | 95.5   | 101    | 115.7  | 103.6  | 106.8   | 103.5   |
| 114.4  | 131.1  | 124.5  | 108.4  | 118.4  | 116.9  | 109.4  | 142.1   | 114.3   |
| 131.9  | 152.7  | 142.2  | 139.5  | 141.1  | 157.4  | 143.3  | 188.8   | 164.7   |
| 103.5  | 117.4  | 120.8  | 112.4  | 97.6   | 120.9  | 105.1  | 134     | 113.7   |
| 418    | 314.9  | 309.6  | 326.2  | 275.6  | 291.3  | 172.7  | 571.2   | 668.7   |
| 102.3  | 112.5  | 94.4   | 102.9  | 91.7   | 100.9  | 103    | 111.1   | 102.1   |
| 174.9  | 176.8  | 144.3  | 151.8  | 134.6  | 168.7  | 178.5  | 245.2   | 279.5   |
| 159.9  | 187.6  | 177.2  | 191.4  | 152.6  | 181.8  | 194.5  | 218.5   | 229     |
| 99.5   | 110.9  | 97.1   | 94.7   | 92.3   | 104.9  | 93.6   | 97.8    | 107.5   |
| 111.7  | 105.2  | 103.8  | 98.6   | 98.9   | 109.4  | 97.1   | 106.7   | 104.9   |
| 109.6  | 104.6  | 100.6  | 104.4  | 91.6   | 104.8  | 103.8  | 103.8   | 104.4   |
| 108.7  | 108.7  | 108    | 100.6  | 94.5   | 109.1  | 103.8  | 112.1   | 114.9   |
| 2396.7 | 1443.9 | 1496.6 | 1463.6 | 1527.5 | 1919.7 | 1883.9 | 2818.8  | 3232.7  |
| 108.7  | 100.5  | 97.9   | 95.8   | 96.5   | 113.7  | 104.1  | 108.8   | 101.4   |
| 102.1  | 104.6  | 110.7  | 110.4  | 102.2  | 118.4  | 99.3   | 121.3   | 113.5   |
| 102.7  | 103.5  | 95.7   | 101.9  | 90.6   | 107    | 100.8  | 108     | 108.3   |
| 164.9  | 232.6  | 192.8  | 213.9  | 184.6  | 224.8  | 212.6  | 209     | 133.4   |
| 151.1  | 229.8  | 199.9  | 383.3  | 157.4  | 182.7  | 229    | 210.4   | 150.2   |
| 102.2  | 110.5  | 103.1  | 100.7  | 96.7   | 107.8  | 104.2  | 107.7   | 109.6   |

|        |        |        |       |        |        |        |        |        |
|--------|--------|--------|-------|--------|--------|--------|--------|--------|
| 108.6  | 108.2  | 98.9   | 99.3  | 94.8   | 110.1  | 101.8  | 107.7  | 108.9  |
| 99.8   | 102.7  | 104.2  | 102.6 | 96.4   | 107.4  | 100.1  | 109.2  | 118.4  |
| 117.2  | 124.1  | 110.8  | 104.5 | 110    | 124    | 114.9  | 140.8  | 116.8  |
| 100.9  | 113.3  | 110.1  | 101.3 | 97.8   | 111.5  | 103.9  | 110.6  | 111.5  |
| 401.7  | 349.2  | 258.4  | 253.5 | 323    | 287.2  | 271.3  | 530.9  | 587.9  |
| 112.9  | 113.6  | 105.2  | 112   | 110.2  | 113.4  | 103.4  | 131.6  | 115.5  |
| 107.3  | 107.1  | 96.5   | 93.7  | 96.9   | 96.2   | 95.8   | 116.7  | 120.2  |
| 104.3  | 107    | 106.9  | 99.2  | 108.8  | 115.7  | 100.4  | 105.3  | 121    |
| 102.3  | 110.4  | 111.5  | 109.6 | 94.2   | 114    | 111    | 110.9  | 113.8  |
| 105.2  | 125.6  | 117.1  | 113.1 | 113    | 121.1  | 118.9  | 132.9  | 122.9  |
| 106    | 109.6  | 107.5  | 105.5 | 107.2  | 104.7  | 107.1  | 108.3  | 116.3  |
| 190.9  | 563.1  | 491.9  | 419.8 | 316.5  | 328.7  | 464.8  | 441.5  | 232.1  |
| 102.8  | 107.3  | 104.5  | 100.2 | 90.6   | 109.7  | 106.4  | 117.5  | 111.1  |
| 106.5  | 150.2  | 114.4  | 115.8 | 113.8  | 125.8  | 145.8  | 162.5  | 118.7  |
| 138.8  | 375    | 445.3  | 254.5 | 245.6  | 318.2  | 369.1  | 284.6  | 192.9  |
| 106.8  | 123.5  | 111.6  | 111   | 111.5  | 118.3  | 237    | 137.5  | 105.1  |
| 104.5  | 122    | 119.7  | 112.1 | 113.9  | 116    | 161.2  | 119.5  | 105.5  |
| 108.1  | 107.7  | 106.6  | 107.3 | 100.4  | 108.2  | 109.2  | 118.4  | 106.8  |
| 111.9  | 110.2  | 110.4  | 103.8 | 89.3   | 101.2  | 104.8  | 103.4  | 95.4   |
| 168.7  | 498.8  | 555.4  | 298.7 | 335.6  | 436    | 385.2  | 468    | 310.7  |
| 194.4  | 603.5  | 355.8  | 399.7 | 386.8  | 296.8  | 371    | 423.7  | 203.7  |
| 105.8  | 103    | 96.3   | 102.3 | 94.5   | 103.7  | 106    | 104.4  | 112.3  |
| 92.2   | 102.9  | 98.8   | 93.2  | 98.8   | 108.7  | 91.7   | 100.2  | 94.8   |
| 198.6  | 227.2  | 246.7  | 190.9 | 196.3  | 226.2  | 232.9  | 279.2  | 183.9  |
| 194.4  | 267.4  | 208.3  | 226.1 | 192    | 244.9  | 208.2  | 359.2  | 239.5  |
| 108.9  | 124.7  | 123.4  | 103.6 | 103.3  | 126.1  | 112.5  | 138.3  | 129.6  |
| 141.5  | 269.1  | 247.6  | 246.7 | 193.3  | 248.2  | 284.3  | 248.9  | 161.8  |
| 120.3  | 224.7  | 202.2  | 208   | 193.4  | 210    | 203.3  | 189.7  | 176.2  |
| 120.3  | 116.2  | 115.4  | 106.1 | 94.6   | 113.7  | 107.9  | 128.8  | 126.3  |
| 2822.8 | 2484.8 | 2500.1 | 2506  | 2021.9 | 2314.5 | 2603.3 | 3495.1 | 3334.3 |
| 112.7  | 114    | 104.2  | 108.6 | 102.4  | 124.1  | 113.7  | 110.5  | 108.5  |
| 332.7  | 387.3  | 380.3  | 484.3 | 312.3  | 411.6  | 367.9  | 383.1  | 338.3  |
| 252.9  | 241.5  | 192.6  | 242.3 | 171.8  | 265.8  | 265.6  | 453.6  | 315.2  |
| 101.7  | 124.9  | 113    | 106.5 | 106.3  | 120.7  | 109.7  | 123.2  | 117.6  |
| 104.8  | 104.1  | 105    | 98.6  | 93.5   | 107.1  | 104.1  | 108.1  | 104.5  |
| 190.7  | 260.6  | 279.8  | 220.8 | 198    | 229    | 200.4  | 277.5  | 210.4  |
| 120.2  | 120.2  | 117.7  | 112.6 | 103.2  | 123.7  | 113.1  | 122    | 128.2  |
| 99.8   | 101.1  | 106.5  | 99.6  | 97.8   | 106.8  | 109.3  | 109.1  | 106.9  |
| 115.6  | 112.7  | 108.3  | 101.6 | 93.9   | 117.8  | 102.2  | 114.5  | 108.4  |
| 285.4  | 233.2  | 243.5  | 218.5 | 232.7  | 237.5  | 220.2  | 346.4  | 245.8  |
| 158.9  | 166.4  | 181.7  | 154.3 | 147    | 191.3  | 135.9  | 341.4  | 235.5  |
| 105    | 111.3  | 104.6  | 104.8 | 90.6   | 105.1  | 105.4  | 102    | 105.2  |
| 160.1  | 162.8  | 155.7  | 138.2 | 153.3  | 164.2  | 156.9  | 210.7  | 179.1  |
| 117.9  | 149.7  | 153.2  | 113.3 | 129.7  | 157.4  | 134.6  | 139.8  | 120.9  |
| 110.5  | 121.2  | 134.3  | 112.1 | 100.7  | 105.7  | 112.1  | 114.7  | 109.3  |
| 129.2  | 148.3  | 153.3  | 101.8 | 153.8  | 205.1  | 148.4  | 258.3  | 159    |
| 303.2  | 188.7  | 142.4  | 147.4 | 135.4  | 161.1  | 180.1  | 526.4  | 480.8  |
| 105.2  | 106.1  | 94.2   | 106.2 | 87.6   | 105.2  | 106.1  | 110.5  | 102.3  |
| 622.5  | 507.9  | 355.2  | 296.8 | 357.5  | 473.1  | 458.3  | 1096   | 1423.1 |
| 203.1  | 152.3  | 153.7  | 131.2 | 136.2  | 170.4  | 143.4  | 225.1  | 192.4  |
| 195    | 187.5  | 195.1  | 217.9 | 189    | 196.1  | 193.9  | 304.1  | 181.7  |



|        |        |        |        |        |        |        |        |        |
|--------|--------|--------|--------|--------|--------|--------|--------|--------|
| 231.8  | 369.4  | 304.5  | 253.6  | 267    | 291.7  | 253.9  | 431.1  | 248    |
| 199.8  | 338.4  | 253.4  | 321    | 264.6  | 273.9  | 275.7  | 358.8  | 291.3  |
| 103.9  | 107.5  | 102.2  | 96.5   | 94.4   | 105.4  | 96.3   | 108.4  | 108.2  |
| 205.2  | 213.1  | 205.5  | 226.9  | 229.2  | 231.5  | 251.2  | 375.5  | 292.7  |
| 108.8  | 111.7  | 108.2  | 103.3  | 88.2   | 110.6  | 104.3  | 120.7  | 103.4  |
| 117.4  | 109.1  | 105.9  | 101.3  | 98.3   | 112    | 100.8  | 122.6  | 92.8   |
| 149.9  | 189.1  | 184.1  | 178.3  | 176.3  | 186    | 176.5  | 203.1  | 175.9  |
| 104.9  | 112.9  | 98.2   | 102.7  | 96.5   | 110.8  | 102.1  | 113.1  | 114.9  |
| 115.9  | 118.7  | 110.3  | 106.1  | 104.7  | 116.9  | 97     | 114.2  | 117    |
| 127.2  | 137.6  | 123.6  | 117    | 114    | 138.5  | 138.9  | 132.4  | 132.2  |
| 151.7  | 136.1  | 122    | 114.8  | 118.9  | 146.3  | 129    | 195.7  | 150.6  |
| 140    | 143    | 135.5  | 150.1  | 131    | 143.6  | 143    | 147.6  | 154    |
| 102.8  | 106.8  | 104.3  | 112.5  | 97     | 103.4  | 101    | 108.3  | 105.8  |
| 115    | 116.7  | 115.4  | 114.9  | 108.2  | 119.5  | 111.4  | 123.7  | 126.4  |
| 447.8  | 430.8  | 445.2  | 351    | 385.3  | 468.9  | 391.7  | 805.9  | 453.4  |
| 103    | 103.6  | 105.9  | 105.1  | 100.1  | 108.8  | 105.5  | 117.5  | 113.2  |
| 131.4  | 130.1  | 135.3  | 115.2  | 117.6  | 140.2  | 128.1  | 210.7  | 143.1  |
| 217.3  | 223.4  | 238    | 340.9  | 261.1  | 246.4  | 257.9  | 429.8  | 231.2  |
| 189.7  | 187.2  | 219    | 227.6  | 220.3  | 213.3  | 223.1  | 386.8  | 271.1  |
| 105.8  | 108.3  | 103.3  | 92.2   | 103.4  | 105    | 101.2  | 114.3  | 109.8  |
| 108.9  | 111    | 118.4  | 103.8  | 96.8   | 110.2  | 112.7  | 108.2  | 99.9   |
| 379.3  | 346    | 343.1  | 295.9  | 284.4  | 370.8  | 322.2  | 493.5  | 350.8  |
| 113.4  | 99.6   | 106.5  | 96.3   | 90.9   | 105.4  | 106.4  | 110    | 112.8  |
| 103.3  | 105.7  | 105.8  | 96.1   | 86.8   | 107    | 96     | 112.8  | 102    |
| 109.5  | 112.9  | 107.7  | 110.7  | 100.7  | 112.4  | 114.2  | 121    | 111.6  |
| 297.8  | 488.5  | 447.3  | 439.4  | 411.8  | 463.3  | 401.3  | 531.1  | 308.4  |
| 120.7  | 166.4  | 152    | 146.4  | 123.3  | 158.6  | 146    | 169.8  | 141.5  |
| 109.7  | 131.5  | 110    | 119.5  | 111.1  | 133.5  | 119.6  | 149    | 122.8  |
| 164.8  | 302.1  | 306.5  | 236.4  | 247.8  | 285.2  | 235.7  | 421.6  | 303.2  |
| 1624.1 | 1641.6 | 1149.8 | 1518.9 | 1153.1 | 1099.5 | 1405.9 | 2176.2 | 1817.4 |
| 128.9  | 138.7  | 138.2  | 142    | 157.6  | 160.8  | 129.1  | 216.8  | 146.8  |
| 133.4  | 136.6  | 143.2  | 124.5  | 129.7  | 144.3  | 122.3  | 175.3  | 144.4  |
| 195.3  | 262.7  | 258.2  | 254.5  | 227.4  | 248.2  | 231.5  | 551.3  | 389.1  |
| 110.8  | 113.9  | 108.8  | 102.8  | 98     | 116.5  | 110.5  | 110.9  | 113    |
| 107.7  | 119.1  | 118.6  | 118    | 107.8  | 114.6  | 112.5  | 143.4  | 128.1  |
| 211.7  | 314.7  | 492    | 292.6  | 290.6  | 485.1  | 286.2  | 537.4  | 381.8  |
| 193.4  | 539.5  | 513.1  | 477.9  | 512.8  | 424.5  | 554.2  | 715    | 390.2  |
| 107.4  | 108.1  | 107.6  | 99.9   | 97.6   | 112.7  | 104.5  | 93.2   | 100.6  |
| 101.5  | 107.1  | 104.2  | 96.1   | 89.2   | 103.8  | 103.9  | 109.7  | 104.4  |
| 106.3  | 107.7  | 103.3  | 110.5  | 99     | 113.9  | 102.6  | 110.7  | 105.8  |
| 106.9  | 113.7  | 103    | 106.3  | 100.5  | 108.8  | 112.9  | 114.9  | 117.6  |
| 106.7  | 105.1  | 104.4  | 101.1  | 98.7   | 100.3  | 97.5   | 103.3  | 108.1  |
| 106.7  | 121    | 125.5  | 111.3  | 106.8  | 136.4  | 111.3  | 122    | 137.6  |
| 122.4  | 164.4  | 135.7  | 141.7  | 131.5  | 158.2  | 156    | 160    | 158.3  |
| 159.8  | 202.9  | 192.5  | 194.2  | 177.9  | 217.5  | 190.5  | 251    | 196    |
| 186.6  | 195.1  | 234.3  | 232.1  | 175    | 267.5  | 249.9  | 272.2  | 216.4  |
| 96.4   | 109.9  | 102.6  | 98.2   | 93.4   | 114.4  | 109.6  | 113.2  | 95.5   |
| 129.5  | 197.9  | 221.7  | 211.3  | 171.6  | 217.1  | 208.6  | 272.5  | 191.3  |
| 110.8  | 106.5  | 107.9  | 110.2  | 102.4  | 102.3  | 110.4  | 112    | 105.6  |
| 115.8  | 117.7  | 103.8  | 112.3  | 91.9   | 111.1  | 102.5  | 107.8  | 100.9  |
| 113.4  | 128    | 117    | 109.2  | 106.9  | 119.1  | 108.6  | 119.8  | 121.6  |

|        |        |        |        |       |        |        |        |        |
|--------|--------|--------|--------|-------|--------|--------|--------|--------|
| 101.9  | 121.7  | 100.1  | 106    | 98.9  | 105.7  | 105.7  | 110.8  | 101.9  |
| 103.4  | 110.2  | 98.5   | 96.2   | 106.8 | 110    | 102.7  | 105.7  | 106.4  |
| 107.3  | 116.1  | 111.5  | 102.9  | 97.1  | 113.2  | 102.3  | 112.7  | 107.1  |
| 108.6  | 113.7  | 108.3  | 110.5  | 93.7  | 112.1  | 104.7  | 105.1  | 108    |
| 108.5  | 125.3  | 108.3  | 108.8  | 112   | 114.2  | 116.6  | 116.8  | 109.5  |
| 125.9  | 130.6  | 113.8  | 129.7  | 124.7 | 120.4  | 117.9  | 143.4  | 113    |
| 103.2  | 106.3  | 107.2  | 108.5  | 96.8  | 108.4  | 103.6  | 109.3  | 108.5  |
| 107.7  | 114.8  | 110.2  | 96.9   | 106   | 101.4  | 105.4  | 110.7  | 116.8  |
| 99     | 109    | 107.2  | 97.8   | 90    | 103.7  | 93.7   | 105.5  | 105    |
| 117.7  | 112.5  | 106.7  | 109.7  | 97.2  | 109.5  | 105.6  | 102.4  | 107.9  |
| 100.9  | 108    | 101.7  | 97.1   | 96.2  | 102.7  | 101.2  | 107    | 105.3  |
| 101.6  | 108.5  | 103.3  | 104.5  | 96.5  | 103.3  | 102.7  | 105.4  | 106    |
| 102    | 112.5  | 101.6  | 103.1  | 106.7 | 109.5  | 101.7  | 111.8  | 103.7  |
| 160.9  | 225    | 198    | 185.1  | 191.4 | 210.4  | 189.8  | 238.5  | 223.8  |
| 625.9  | 331.8  | 363.7  | 239.4  | 320   | 312.8  | 325.6  | 522.4  | 342    |
| 106.5  | 101.9  | 99.5   | 101.6  | 98.3  | 107.3  | 105.4  | 109.6  | 108.3  |
| 158.7  | 228.4  | 242.6  | 251.2  | 239.3 | 226.8  | 213.8  | 305.1  | 211.6  |
| 128.5  | 122.5  | 112.5  | 136.3  | 120.2 | 123.1  | 113.7  | 169.9  | 135.8  |
| 105.5  | 121.9  | 107.2  | 101.7  | 102.2 | 113.8  | 119.4  | 124.1  | 110.4  |
| 107.5  | 104.2  | 106    | 99.9   | 93.7  | 104.8  | 99.3   | 117.7  | 111.1  |
| 157.4  | 253.9  | 230.5  | 262.9  | 228.6 | 218.8  | 229.1  | 315    | 244.5  |
| 115.7  | 120.2  | 110.5  | 108.5  | 98.9  | 118.3  | 107.1  | 130.2  | 113.1  |
| 194.6  | 304.6  | 275.3  | 198.8  | 175.6 | 254.2  | 247.7  | 413.6  | 253.2  |
| 111.3  | 124    | 105.1  | 102.7  | 106.8 | 119.8  | 109.8  | 122.6  | 102.6  |
| 133.2  | 145.5  | 146.4  | 127.7  | 155.1 | 140    | 146.8  | 165    | 148.9  |
| 111    | 118.8  | 112.3  | 111.5  | 109.1 | 121.6  | 110.4  | 132.3  | 129.5  |
| 142.3  | 164.1  | 172.5  | 176.1  | 171.4 | 170.6  | 187.4  | 215.1  | 167.6  |
| 323.3  | 422.2  | 486.3  | 547.6  | 395.6 | 379.5  | 473.6  | 483    | 331.1  |
| 370.9  | 1787.4 | 1266.7 | 1370.1 | 866.6 | 1070.6 | 862.9  | 1049.5 | 803.4  |
| 160    | 340.5  | 285.1  | 258    | 249   | 281.9  | 268.2  | 210.1  | 188.7  |
| 446.5  | 175.1  | 164.4  | 179.5  | 180.8 | 184.6  | 273.3  | 486.2  | 510.5  |
| 115.1  | 118.9  | 115.3  | 104.7  | 111   | 114.4  | 119.8  | 128.6  | 110.9  |
| 1664.6 | 1169.5 | 1161.8 | 1433.6 | 947   | 1160.6 | 1409.8 | 1633.8 | 1475.7 |
| 107.6  | 120.3  | 100.9  | 108.2  | 102   | 114.8  | 113.7  | 121.6  | 120.2  |
| 111.2  | 106.8  | 99.5   | 103.5  | 98.6  | 102.8  | 96.9   | 105.3  | 103.7  |
| 120.2  | 141.8  | 127.3  | 125    | 125.8 | 135.7  | 113.6  | 134.8  | 119.3  |
| 106.5  | 101.8  | 101.1  | 105.1  | 94    | 108.7  | 106.6  | 129.7  | 113.9  |
| 122.1  | 117.7  | 100.7  | 101.5  | 104.1 | 109.6  | 100.6  | 115.9  | 110.8  |
| 108.9  | 113.8  | 103    | 115.6  | 106.3 | 114.8  | 101    | 122    | 131.4  |
| 117.2  | 125.7  | 126.6  | 120.3  | 126.8 | 150.1  | 132.6  | 176.7  | 167.3  |
| 106.7  | 116.5  | 104.1  | 102.2  | 98    | 110    | 99.9   | 114.5  | 115.4  |
| 101.4  | 102.5  | 93.2   | 105.8  | 99.5  | 104.9  | 102.3  | 106.5  | 114.1  |
| 106.4  | 122    | 102.1  | 108.4  | 92    | 105.7  | 95.2   | 109.6  | 114.4  |
| 122.6  | 120.2  | 107.6  | 106.3  | 106.8 | 114.7  | 106.1  | 129    | 114.9  |
| 481.2  | 616.3  | 522.4  | 434.6  | 448.8 | 504.9  | 331.9  | 491.8  | 462.1  |
| 106.1  | 108    | 101.3  | 109.8  | 105.6 | 114.8  | 97.3   | 110.4  | 113.8  |
| 136.6  | 202.8  | 179.1  | 154.6  | 179.9 | 190.4  | 175.1  | 301.4  | 196.9  |
| 107.7  | 119.7  | 111.7  | 122.6  | 103.3 | 127.8  | 110.4  | 115.7  | 114.9  |
| 103.6  | 114.4  | 108.8  | 101.1  | 98.9  | 117.6  | 97.9   | 115.6  | 105.6  |
| 101.2  | 113.4  | 100.6  | 98.2   | 100.4 | 108.8  | 98.7   | 106.1  | 117.8  |
| 112.7  | 100.1  | 99.5   | 111.9  | 96.7  | 110.8  | 103.1  | 102.6  | 108.4  |

|        |        |        |        |        |        |        |        |        |
|--------|--------|--------|--------|--------|--------|--------|--------|--------|
| 112.4  | 104.8  | 108.7  | 101.5  | 89.5   | 117.3  | 98.8   | 121.3  | 118.1  |
| 107.1  | 106.9  | 98.7   | 104.2  | 101.4  | 101.7  | 99     | 107.6  | 112.6  |
| 111.2  | 98.4   | 99     | 95.1   | 94.6   | 105.1  | 108    | 112.4  | 104.7  |
| 106.2  | 115.8  | 97.3   | 100.3  | 97.6   | 106    | 113.6  | 111.7  | 111.4  |
| 110.2  | 121.4  | 122.1  | 96.7   | 115.9  | 115    | 103.3  | 120.8  | 113    |
| 107.8  | 108.6  | 97.6   | 95.1   | 90.4   | 103.2  | 106    | 110    | 107    |
| 161.2  | 346.9  | 370.5  | 224.2  | 207    | 258.9  | 204.7  | 553.8  | 292.5  |
| 128.2  | 124.6  | 122.3  | 113.5  | 107    | 112.3  | 108.5  | 114.6  | 118.6  |
| 581.2  | 746.2  | 767.2  | 704.7  | 785.1  | 803.9  | 663.9  | 1006   | 483.3  |
| 112    | 106.3  | 106.6  | 106.6  | 101.3  | 108.4  | 100.8  | 112    | 104.3  |
| 112.3  | 110.5  | 107.2  | 104.2  | 96.6   | 104.1  | 107.4  | 110.3  | 100.3  |
| 116.5  | 121.3  | 115.4  | 122.1  | 102.5  | 117    | 118.3  | 126.6  | 109.4  |
| 111.4  | 116    | 118.8  | 110.9  | 103.2  | 107.8  | 111.9  | 116.4  | 116.3  |
| 107.4  | 113.6  | 103.7  | 122.8  | 102.7  | 119.3  | 99.6   | 112.4  | 109.5  |
| 112.8  | 109.8  | 107.3  | 109.5  | 95.1   | 112.7  | 106.2  | 134.7  | 111.5  |
| 168.3  | 353.1  | 325.6  | 336    | 283.2  | 278.1  | 353.8  | 403.6  | 214.1  |
| 105.8  | 113.9  | 100    | 113.8  | 107.5  | 113.9  | 104.2  | 125.6  | 105.9  |
| 109.7  | 105.5  | 101    | 86.5   | 94.2   | 97.5   | 107.5  | 108    | 105.4  |
| 116.1  | 116.2  | 111.2  | 127.7  | 96.2   | 112.9  | 118.9  | 129.7  | 116.6  |
| 107.2  | 108.7  | 106.9  | 106.8  | 101.6  | 109.3  | 109.6  | 119.5  | 114.8  |
| 107.7  | 114.8  | 100.3  | 93.9   | 95.2   | 105.1  | 108    | 116.4  | 98.5   |
| 109.7  | 116.2  | 105.3  | 101    | 93.3   | 105.4  | 99.8   | 110.9  | 112.8  |
| 116    | 117.5  | 117.6  | 112.6  | 113.8  | 121.2  | 113.9  | 124.1  | 121    |
| 107.7  | 110.1  | 95.1   | 102.9  | 95.4   | 103.8  | 102.4  | 104.5  | 108.1  |
| 105.5  | 111    | 100.8  | 96.4   | 99.8   | 109.1  | 96.6   | 112.6  | 100.9  |
| 105.7  | 100.7  | 111.6  | 96.3   | 96.1   | 113.2  | 108    | 106.5  | 106.3  |
| 108.8  | 108.8  | 93.7   | 101.2  | 94.3   | 112.8  | 105.8  | 110.1  | 105.1  |
| 108.1  | 105.5  | 96     | 93.4   | 96.2   | 105.1  | 97.6   | 106.5  | 103.4  |
| 109.2  | 108.3  | 103.4  | 110.5  | 95.9   | 110.8  | 101.7  | 118.4  | 106    |
| 106.3  | 103.9  | 107    | 96.3   | 93.5   | 106.5  | 96     | 96.4   | 94.7   |
| 140.3  | 152.4  | 170.1  | 128.1  | 139.9  | 167.4  | 144    | 169.2  | 158.1  |
| 111.4  | 131    | 130.9  | 145.4  | 120.3  | 117.4  | 112.4  | 139.5  | 116.8  |
| 112.9  | 111.6  | 106.3  | 103.6  | 97.1   | 110.8  | 111.5  | 120.7  | 114.9  |
| 113.7  | 109.6  | 99.4   | 112.5  | 94.9   | 105.5  | 110.2  | 121.8  | 112.4  |
| 113.2  | 113.1  | 109.9  | 105.3  | 95.7   | 106.2  | 105.2  | 105.9  | 109.6  |
| 112.5  | 112.6  | 98.2   | 102.3  | 97.1   | 102.8  | 99.5   | 109.7  | 111.7  |
| 1823.4 | 2614.9 | 2952.9 | 2736.6 | 2397.3 | 3281.2 | 3113.5 | 3462.3 | 2502.2 |
| 107.4  | 111.7  | 99.6   | 108.2  | 96.9   | 102.3  | 103.3  | 111.6  | 112.1  |
| 106.3  | 104.7  | 99.1   | 102.9  | 94.2   | 105.6  | 102    | 106.2  | 107.5  |
| 108.8  | 103.8  | 98     | 100.7  | 97.8   | 104.5  | 101.8  | 112.3  | 110.2  |
| 109.6  | 103.7  | 98.8   | 101.9  | 96     | 106.6  | 103.3  | 105.1  | 102.1  |
| 108.8  | 104.4  | 105    | 100.5  | 100    | 108.6  | 102.3  | 108.4  | 107.1  |
| 160.7  | 153.1  | 137.8  | 123.2  | 132.1  | 128.4  | 130.3  | 148.2  | 113.9  |
| 5918.5 | 6223.7 | 4797.1 | 6742.7 | 5026.7 | 5399.7 | 5884.5 | 8046   | 7453.3 |
| 5515.4 | 5338   | 5426.3 | 6286   | 4723.7 | 5559.5 | 6180.9 | 6950.1 | 7497.6 |
| 113.2  | 112.3  | 107.9  | 113    | 100.4  | 112.3  | 111.5  | 115.5  | 127.8  |
| 114.2  | 115.1  | 108.7  | 115.3  | 99.3   | 114.9  | 103.4  | 120.2  | 106.4  |
| 110.3  | 105.6  | 99.3   | 97.8   | 99.4   | 115.9  | 98.5   | 116.5  | 118.2  |
| 101.7  | 105.4  | 96.6   | 104    | 95.2   | 111.8  | 102    | 109.1  | 102.9  |
| 458    | 276.4  | 282.3  | 276.6  | 342.1  | 321.2  | 248.3  | 741.7  | 804.1  |
| 103.5  | 112.4  | 111.8  | 101.9  | 109.6  | 119.1  | 112.5  | 124.8  | 116.6  |

|        |       |       |       |       |        |        |        |       |
|--------|-------|-------|-------|-------|--------|--------|--------|-------|
| 101    | 105.4 | 103.1 | 100.2 | 91.8  | 105.3  | 99.6   | 101    | 103.5 |
| 100.3  | 111.3 | 96.9  | 95.7  | 102.8 | 106.3  | 107.2  | 110.3  | 113.6 |
| 109.6  | 115.4 | 107.7 | 108.9 | 105.3 | 113.5  | 105.1  | 99.6   | 108.9 |
| 95.5   | 111.1 | 104.7 | 105.1 | 99.6  | 111.9  | 102.8  | 111.2  | 121.7 |
| 112.2  | 110   | 104.2 | 107.8 | 103.2 | 120.9  | 108.2  | 109.3  | 115.2 |
| 101.8  | 112.1 | 101.7 | 102.9 | 96.3  | 113    | 104.7  | 111    | 103.3 |
| 116.5  | 129.5 | 128.2 | 165.1 | 120.2 | 129.7  | 132.4  | 139.5  | 139.1 |
| 101.5  | 109.2 | 100.4 | 107.7 | 88.2  | 107    | 110    | 108    | 116.5 |
| 103.4  | 105.5 | 108.2 | 104.2 | 93    | 116.2  | 97.3   | 109.2  | 104.3 |
| 117.2  | 123.7 | 106.5 | 107.6 | 96.3  | 122    | 107.6  | 118.9  | 123   |
| 111.2  | 109.6 | 104.7 | 97    | 95.8  | 111.7  | 108.5  | 119.3  | 113.5 |
| 107.2  | 107.4 | 104.5 | 102.6 | 102.8 | 107.9  | 106.2  | 116.1  | 114.2 |
| 106.3  | 99.3  | 102.1 | 91.6  | 90.4  | 104.8  | 99.1   | 97.9   | 90.7  |
| 127.6  | 121   | 120.8 | 113.6 | 102.4 | 133.1  | 120.7  | 148.7  | 130.1 |
| 113.6  | 120.7 | 118.7 | 118.9 | 111.3 | 130.7  | 102.4  | 134.6  | 114   |
| 108.4  | 114.1 | 105.1 | 103.8 | 98.1  | 108.3  | 103.2  | 113.8  | 106.5 |
| 158    | 215.5 | 215.9 | 222   | 228.6 | 218.4  | 217.8  | 340.5  | 222.2 |
| 162.3  | 282.3 | 255.4 | 313.8 | 252.4 | 260.6  | 259.7  | 287.7  | 264.1 |
| 103.1  | 107.1 | 97.6  | 93.1  | 91.3  | 110.7  | 102    | 104    | 105.9 |
| 157.1  | 142.3 | 150   | 149   | 122.9 | 153    | 134.7  | 237.9  | 220.8 |
| 177.7  | 200.3 | 168.1 | 201.9 | 182.5 | 156.4  | 193.3  | 303.9  | 232.5 |
| 106.6  | 103   | 103.6 | 102.2 | 92.1  | 110.7  | 105.1  | 113.4  | 106.4 |
| 115.2  | 115.3 | 111.2 | 104.7 | 95.5  | 112.7  | 114.5  | 110.8  | 113.3 |
| 110.4  | 116.5 | 102.7 | 104.9 | 102.8 | 107.2  | 110.4  | 119.7  | 125.5 |
| 105.2  | 108   | 103.9 | 113.7 | 91.9  | 112.4  | 108.8  | 112.7  | 113.1 |
| 104.3  | 107.3 | 103.3 | 99.5  | 93.3  | 106.8  | 104.6  | 106.6  | 106.7 |
| 259.3  | 211   | 204.5 | 176.3 | 259.2 | 242.2  | 200.9  | 247.4  | 218.6 |
| 249.1  | 296.7 | 278.7 | 273.4 | 285.5 | 276    | 280.8  | 441.2  | 238.7 |
| 110.7  | 113.4 | 98.5  | 100.4 | 93.7  | 110    | 106.2  | 111.8  | 111.8 |
| 101.9  | 105.4 | 97.5  | 98.5  | 103.1 | 109.9  | 103.9  | 110.1  | 113   |
| 98.8   | 108   | 104.9 | 102.6 | 97.2  | 102.1  | 94.6   | 105.5  | 106.8 |
| 102.8  | 109.4 | 104.8 | 107.5 | 102   | 114.2  | 115.7  | 120.9  | 116.9 |
| 102.2  | 105.8 | 110.6 | 96.8  | 98.1  | 109    | 104.5  | 104.5  | 110.8 |
| 109.2  | 116.6 | 113.4 | 112.4 | 104.5 | 123.2  | 110.8  | 120    | 116.6 |
| 111.6  | 124.9 | 126.4 | 127.5 | 119.2 | 134.1  | 125.1  | 154.8  | 126.9 |
| 156.9  | 166.1 | 159.5 | 132.1 | 133.8 | 148.2  | 143.6  | 141.6  | 116   |
| 271.1  | 232.2 | 185.2 | 153   | 216.2 | 219.2  | 187.3  | 375.1  | 318.9 |
| 108.4  | 112.3 | 112   | 108.7 | 104.6 | 115.4  | 103.5  | 115.6  | 115.2 |
| 105.8  | 107.7 | 108.7 | 95.8  | 103   | 112.7  | 100.2  | 115    | 118.7 |
| 114.9  | 108   | 103.3 | 102.4 | 98.3  | 109    | 105.7  | 115.1  | 107.3 |
| 103.1  | 103.3 | 106.5 | 103   | 93.5  | 111.9  | 104.6  | 102.7  | 123   |
| 105.6  | 109.5 | 97.5  | 98.8  | 89.4  | 105.9  | 97.9   | 105.9  | 111.2 |
| 104.4  | 104.3 | 100.7 | 111.6 | 90.9  | 110.8  | 100.3  | 121    | 104.8 |
| 105    | 114.6 | 116.4 | 105.2 | 98.7  | 112.9  | 102.8  | 113.6  | 106.4 |
| 103.7  | 105   | 94.5  | 113.1 | 105.4 | 101.8  | 98     | 105.7  | 109.7 |
| 154.3  | 235.6 | 232.6 | 223   | 189.7 | 223.9  | 277.9  | 273.8  | 174.5 |
| 117.3  | 119.8 | 114.1 | 111.8 | 107.4 | 119.5  | 111.7  | 130.2  | 117   |
| 1043.5 | 771.7 | 845   | 760.5 | 925.4 | 1019.7 | 1085.7 | 1090.5 | 755.5 |
| 131.7  | 126.7 | 131.5 | 134.4 | 138.1 | 133    | 127.1  | 163    | 162.6 |
| 98.6   | 108.1 | 102.2 | 121.2 | 98.6  | 108.2  | 106.2  | 110.7  | 101.6 |
| 108.6  | 100.8 | 102.6 | 106.3 | 91.3  | 101.7  | 102    | 103.3  | 101.7 |

|        |        |        |        |        |        |        |         |         |
|--------|--------|--------|--------|--------|--------|--------|---------|---------|
| 245.1  | 193.9  | 200.6  | 183.3  | 203.2  | 202    | 227.6  | 274.4   | 210.3   |
| 416.8  | 411.8  | 383.6  | 299.8  | 277    | 295.4  | 259.3  | 638.9   | 917.7   |
| 114.1  | 107.1  | 108.9  | 107.2  | 100.7  | 114.8  | 115.5  | 105.2   | 105.5   |
| 124.4  | 166.9  | 152.6  | 160.8  | 149    | 180.7  | 186    | 182.8   | 162.1   |
| 111.4  | 104.5  | 109.5  | 115.4  | 99.4   | 109.9  | 102    | 141.8   | 108.7   |
| 117.1  | 142.7  | 121.8  | 136.8  | 108.1  | 125.9  | 127.5  | 128.1   | 125.3   |
| 104    | 104.8  | 106.4  | 111.6  | 92     | 101.8  | 100.4  | 109.4   | 109.8   |
| 161.4  | 189.8  | 155.8  | 189.9  | 156.3  | 154.1  | 175    | 199.1   | 154.5   |
| 102.3  | 120.5  | 102.3  | 93.9   | 95.5   | 112.5  | 104.8  | 130.9   | 105.4   |
| 3524.2 | 4017.4 | 3032.8 | 3563.5 | 2606.1 | 3014.9 | 3456.7 | 5677.8  | 3993.3  |
| 108    | 105.3  | 99.2   | 93.7   | 81.7   | 105.7  | 101.4  | 98.3    | 101.3   |
| 182    | 177.6  | 162.2  | 164.8  | 167.5  | 166    | 193.2  | 250     | 215.2   |
| 145.3  | 209.4  | 168.1  | 196.1  | 143.3  | 164.2  | 200.5  | 235.1   | 175.4   |
| 124.5  | 136.8  | 123.3  | 115.1  | 114.9  | 134.5  | 120.2  | 133.7   | 121.1   |
| 6783.9 | 6343.2 | 6840.2 | 4721.8 | 4604.5 | 5043.5 | 4941.7 | 13154.2 | 13664.3 |
| 119.4  | 220.6  | 210.9  | 146.9  | 168.2  | 204.6  | 160.2  | 250.7   | 150.5   |
| 149.9  | 148.3  | 129.8  | 127.8  | 155.5  | 158.1  | 158.1  | 183.3   | 151.1   |
| 101.1  | 114.6  | 103.2  | 135.7  | 98     | 112.5  | 133.2  | 115.6   | 113.6   |
| 316.1  | 889.5  | 624.2  | 1275.4 | 628.4  | 474.9  | 859.6  | 926.1   | 557.1   |
| 124.1  | 131.1  | 128.2  | 133    | 115.7  | 132.1  | 128.9  | 157.3   | 123     |
| 197.1  | 322.5  | 344.8  | 367.7  | 350.7  | 314.7  | 406.3  | 438.1   | 267.3   |
| 109.1  | 110.9  | 107.8  | 114.5  | 99.9   | 114.5  | 99     | 122.7   | 109.8   |
| 105.7  | 116.2  | 105.1  | 108.6  | 101.5  | 112.7  | 102.4  | 124.3   | 108.3   |
| 110.9  | 117.1  | 105.8  | 108.2  | 98.1   | 109.4  | 103.3  | 104.1   | 100.5   |
| 109    | 111.9  | 109.8  | 99.7   | 104.7  | 112.6  | 109.3  | 118.8   | 119.2   |
| 110.4  | 110.3  | 97.4   | 96.1   | 98.9   | 107.1  | 101.5  | 122.1   | 108.6   |
| 101.1  | 106.9  | 98.3   | 101.8  | 93.2   | 106    | 101.4  | 105.7   | 104     |
| 104.1  | 109.9  | 99.4   | 121.5  | 100.7  | 113    | 104.8  | 110.5   | 109.3   |
| 107.3  | 122.3  | 107.6  | 152.3  | 100.8  | 113.8  | 109.8  | 104.7   | 106.8   |
| 103.9  | 111.5  | 104.7  | 102.8  | 95.7   | 109.4  | 100.1  | 111.1   | 108.1   |
| 104.9  | 109.2  | 100.7  | 95.1   | 92.3   | 105.8  | 100.2  | 104.5   | 104.7   |
| 108.8  | 110.9  | 100.3  | 96.8   | 95.6   | 112.5  | 103.9  | 107.5   | 110.1   |
| 114.8  | 139.6  | 115.7  | 115.7  | 118.4  | 106.4  | 122.6  | 139.2   | 116.4   |
| 106.1  | 100.3  | 100    | 102.4  | 91.1   | 104.6  | 104.9  | 113.5   | 110.6   |
| 109.1  | 105.9  | 101.3  | 92.2   | 93.2   | 111.4  | 101.7  | 110.3   | 105.9   |
| 107.8  | 106.1  | 101.4  | 98.8   | 96.5   | 106.6  | 103    | 105.9   | 116.1   |
| 111.8  | 118    | 106.5  | 107.4  | 94.3   | 102.8  | 98.7   | 112.1   | 105.4   |
| 103.4  | 113.9  | 102.3  | 103.7  | 102.1  | 111.5  | 107.4  | 103.4   | 112     |
| 102.1  | 101.5  | 105.9  | 98.7   | 97.7   | 113.7  | 99.5   | 108.9   | 104.5   |
| 104.4  | 107.1  | 100    | 97.4   | 93.1   | 112.2  | 94.2   | 103.9   | 103.6   |
| 98.2   | 106.3  | 104.9  | 107.9  | 93.3   | 106.4  | 103.8  | 108.7   | 111.1   |
| 116.9  | 119.2  | 112.2  | 119.6  | 108.2  | 135.6  | 120.4  | 129.1   | 135.5   |
| 105.7  | 100    | 102.7  | 89.9   | 92.2   | 100.7  | 99.1   | 93.1    | 100.2   |
| 108    | 101.7  | 97.8   | 104.7  | 91     | 105.2  | 101.3  | 102.4   | 105.5   |
| 106.8  | 115.9  | 108.3  | 113.9  | 95.4   | 112.9  | 100.5  | 113     | 101.1   |
| 101.2  | 105    | 101.8  | 113.4  | 98.6   | 112    | 103.4  | 113.2   | 99      |
| 109.8  | 138.8  | 113.2  | 138    | 112.9  | 121    | 149    | 190.5   | 141.2   |
| 173.1  | 257.2  | 254.6  | 177.1  | 235.4  | 212.8  | 194.3  | 335.8   | 284.2   |
| 108.9  | 104.7  | 98.5   | 102.9  | 99.6   | 117.4  | 98.1   | 117.6   | 118.4   |
| 107.2  | 105    | 98.3   | 97.8   | 96.8   | 106.8  | 100.5  | 108     | 102.9   |
| 112.7  | 112.8  | 108.7  | 118.8  | 103.9  | 112    | 98.8   | 122.9   | 115     |

|        |        |        |        |        |        |        |        |        |
|--------|--------|--------|--------|--------|--------|--------|--------|--------|
| 1464.5 | 974.5  | 1159.7 | 1017.9 | 1132.3 | 1368.8 | 1344.3 | 2677.2 | 2577.5 |
| 132.2  | 132.7  | 140.1  | 110.2  | 113.8  | 153.6  | 125.2  | 159.5  | 167.7  |
| 106.5  | 106.2  | 102.2  | 96.4   | 95.1   | 109.9  | 97     | 102.9  | 102.9  |
| 105.7  | 109.3  | 99     | 106.1  | 98     | 109.6  | 107.1  | 118    | 109.5  |
| 104.7  | 105.7  | 106.6  | 97.9   | 96.7   | 106.1  | 102.3  | 109.5  | 103.1  |
| 122.6  | 121.7  | 129.9  | 124.2  | 106.3  | 122.2  | 116.7  | 113.4  | 123.5  |
| 200.8  | 235.6  | 213.8  | 213.2  | 197.3  | 220.4  | 236.6  | 339.9  | 428.5  |
| 124.7  | 122.1  | 121.1  | 128.9  | 126.9  | 130    | 122.4  | 151.3  | 135.2  |
| 114.6  | 114.4  | 111.1  | 115.5  | 108.9  | 127.5  | 102.5  | 184.9  | 133.3  |
| 207.7  | 225.4  | 219.8  | 465.7  | 230.9  | 249.8  | 325.4  | 242.3  | 325.8  |
| 110    | 121    | 122.4  | 104.8  | 115.4  | 129.1  | 127.5  | 121    | 114.7  |
| 138.6  | 229.7  | 213.9  | 220.8  | 178    | 171.9  | 183.3  | 140.3  | 148.1  |
| 320.2  | 324.6  | 386.1  | 284.3  | 283.4  | 381.8  | 417.4  | 566.3  | 335.3  |
| 164.1  | 149.2  | 163.1  | 145.4  | 151.9  | 163.4  | 141.1  | 188.6  | 155.1  |
| 131.9  | 137.4  | 131.3  | 125.3  | 126.6  | 135.4  | 132.4  | 170.3  | 171.4  |
| 239.2  | 161.7  | 175.8  | 184.3  | 152.8  | 188.4  | 154.6  | 301.5  | 226.9  |
| 200    | 170.9  | 173.2  | 137.9  | 152    | 179.3  | 141.6  | 200.5  | 189.2  |
| 117    | 113.5  | 101    | 102.9  | 103.8  | 110.6  | 116.2  | 125.4  | 119.3  |
| 119.7  | 107.4  | 119.9  | 120.3  | 108.1  | 123.2  | 120    | 117.2  | 114    |
| 109.5  | 110.8  | 108    | 113.8  | 101    | 117.6  | 110    | 133.9  | 122.3  |
| 127.6  | 107.9  | 106.6  | 105.5  | 102.8  | 118.6  | 108.2  | 120.4  | 130.4  |
| 742.8  | 1030.2 | 774    | 897.8  | 728.2  | 1272.5 | 589.9  | 1711.9 | 1026   |
| 122.8  | 157.5  | 152.5  | 147.7  | 144.4  | 169.2  | 145.7  | 197.6  | 145.7  |
| 112.4  | 117.1  | 108.9  | 105    | 97.7   | 110.8  | 105.4  | 121.9  | 123.9  |
| 202.9  | 178.1  | 165.1  | 140.2  | 160.1  | 192.8  | 163.5  | 243    | 195.5  |
| 106.2  | 107    | 104.8  | 103.6  | 93.8   | 110.9  | 103.9  | 122.5  | 107.3  |
| 130.6  | 140.9  | 152.2  | 160.8  | 131.1  | 175.9  | 155.9  | 181.6  | 185.7  |
| 267.1  | 470.4  | 408    | 360.9  | 370.9  | 436.4  | 382.4  | 617.2  | 373.4  |
| 121.2  | 126.8  | 127.4  | 108.8  | 111.5  | 125.6  | 110.5  | 117.2  | 123.4  |
| 118.7  | 118.1  | 121.1  | 103.3  | 120.1  | 117.9  | 110.2  | 170.9  | 157.2  |
| 140.5  | 130.1  | 137.5  | 118.8  | 127.1  | 139.7  | 138.4  | 240.5  | 183.5  |
| 106.4  | 111.8  | 100.4  | 103.4  | 101    | 104.9  | 102.5  | 101.6  | 100.3  |
| 736.3  | 1302   | 1106.7 | 1436.4 | 1217.5 | 1112.4 | 1454.4 | 1460.3 | 833.4  |
| 104    | 106    | 103.1  | 102.9  | 95.2   | 113.1  | 102.1  | 114.1  | 111.3  |
| 335    | 671.7  | 587.1  | 616    | 527.7  | 646.5  | 709.7  | 787    | 567.2  |
| 114.9  | 158.6  | 181    | 173.7  | 140.8  | 149.6  | 172.4  | 134.1  | 120.5  |
| 106.9  | 104.5  | 98.2   | 98.6   | 92.7   | 99     | 102.5  | 104.8  | 108.5  |
| 263.9  | 315.6  | 283.7  | 203.7  | 299.1  | 343.6  | 335.2  | 640.3  | 335.8  |
| 103.9  | 104.2  | 99.8   | 94.3   | 103.9  | 111.6  | 104.4  | 108.8  | 102.2  |
| 105.5  | 109.2  | 101.5  | 99.4   | 96.2   | 109    | 109.4  | 107.8  | 110.8  |
| 112    | 123.6  | 140.1  | 130    | 99.8   | 122.4  | 110.5  | 112    | 111.8  |
| 111.8  | 113.9  | 107.4  | 109.4  | 104.6  | 125.4  | 113    | 113.1  | 120.3  |
| 112.5  | 100.9  | 95.4   | 85.3   | 91.5   | 98.5   | 95.2   | 123.9  | 119.5  |
| 101.1  | 99.7   | 101    | 99.4   | 87.7   | 107.5  | 99.6   | 110.6  | 103.2  |
| 294.4  | 218.4  | 178.9  | 228.2  | 166    | 183.7  | 256.4  | 226    | 141.3  |
| 186.6  | 138.3  | 129.2  | 139.5  | 133.7  | 140.4  | 165.3  | 171.4  | 126.1  |
| 135.9  | 131.3  | 120.1  | 129.5  | 135    | 142.5  | 136    | 131.2  | 132.2  |
| 111.3  | 106.6  | 99.8   | 102.6  | 95.9   | 108.8  | 97     | 117.6  | 108.4  |
| 115.3  | 123.6  | 123.9  | 117.4  | 105.6  | 119.3  | 116.9  | 130.3  | 110.6  |
| 124.6  | 160.4  | 145.7  | 136.5  | 137.5  | 166.7  | 122.7  | 171    | 120.3  |
| 111.2  | 115.3  | 113.2  | 113.7  | 111.1  | 118.3  | 112.7  | 129.4  | 106.7  |

|        |        |        |        |        |        |        |        |        |
|--------|--------|--------|--------|--------|--------|--------|--------|--------|
| 2952.4 | 2987.5 | 4441   | 3739.6 | 4717.6 | 4329.1 | 1609.1 | 5721.9 | 4081.4 |
| 543.3  | 715.2  | 635.3  | 604    | 536.2  | 594.2  | 880    | 1152.2 | 614    |
| 164.7  | 206.4  | 171.2  | 180.7  | 159.9  | 219    | 223.3  | 271.1  | 190.3  |
| 104.8  | 104.4  | 102.5  | 97.9   | 94.3   | 104.5  | 94.4   | 106    | 108.3  |
| 5389.1 | 5276.2 | 6056.4 | 4951.5 | 7893.6 | 7721.4 | 2331.1 | 7022.1 | 4877.2 |
| 269.8  | 271.1  | 310.7  | 292.9  | 260.2  | 327.6  | 390.6  | 360.3  | 253.9  |
| 105.8  | 109    | 100.6  | 100.8  | 98.7   | 107.1  | 103.4  | 104.7  | 109.3  |
| 112.5  | 113.1  | 110.9  | 103.7  | 104.2  | 112.7  | 105.6  | 112.5  | 109.8  |
| 115.5  | 126.5  | 109.5  | 113.8  | 108.4  | 112.8  | 109.9  | 124.5  | 120    |
| 110.6  | 112.5  | 108    | 102.7  | 104.4  | 114.6  | 108.3  | 125.9  | 123.1  |
| 103.3  | 108.7  | 97.2   | 96.9   | 102.3  | 104.6  | 98.8   | 111.3  | 113.6  |
| 104.3  | 110.3  | 98     | 105.5  | 91.9   | 107.7  | 110.1  | 111.9  | 101.8  |
| 141.1  | 293.1  | 304.4  | 225    | 295.6  | 342.1  | 218.6  | 259.3  | 290.2  |
| 118.7  | 244.4  | 268    | 160.7  | 189.7  | 300.6  | 210.5  | 212.9  | 208.9  |
| 106.3  | 100.7  | 98     | 90.9   | 98.7   | 103.8  | 101.9  | 106.2  | 96.7   |
| 103.4  | 103.9  | 102.5  | 101    | 99.5   | 110.7  | 103.9  | 109.3  | 107.5  |
| 94.2   | 102.2  | 101.1  | 100.2  | 91.3   | 98.4   | 101.2  | 111.3  | 105    |
| 120    | 143    | 120.4  | 122.7  | 122.4  | 129.8  | 137.5  | 140.5  | 124.1  |
| 102.6  | 103.7  | 101.7  | 102.4  | 93.9   | 102.4  | 103    | 115.7  | 109.9  |
| 119.3  | 131.2  | 138.5  | 108.4  | 115.5  | 136.1  | 119    | 147.4  | 130.8  |
| 142    | 185.7  | 196.4  | 160.8  | 183.2  | 194.1  | 167.7  | 363.7  | 217.4  |
| 188.4  | 324.6  | 268.2  | 255.6  | 293    | 302.6  | 273.1  | 467.1  | 388.9  |
| 113.3  | 111.6  | 117.2  | 119.1  | 104.4  | 115.3  | 110.6  | 115.3  | 118.5  |
| 128.9  | 168.1  | 128.9  | 159.6  | 127    | 164.5  | 151.5  | 199.7  | 180.6  |
| 128.8  | 129.9  | 120.2  | 120.2  | 108.9  | 125.8  | 117    | 140.6  | 128    |
| 113.8  | 123.1  | 114.6  | 113.5  | 112.8  | 127.4  | 118.8  | 125.9  | 119.5  |
| 108.7  | 136.7  | 129.5  | 122.4  | 123.4  | 140.1  | 134.3  | 146    | 132.5  |
| 198.7  | 684.3  | 394.1  | 888    | 395.7  | 235.3  | 758.4  | 254.6  | 195.3  |
| 109.5  | 125.5  | 118.7  | 124.8  | 107.2  | 114.4  | 131    | 120.5  | 108.8  |
| 147.4  | 258.1  | 195.5  | 328.9  | 183.2  | 137.7  | 277.1  | 152.3  | 140.5  |
| 155.9  | 173.2  | 125.2  | 160.3  | 162.5  | 141.9  | 160.3  | 360.8  | 171.9  |
| 106    | 124.3  | 125.4  | 156.4  | 113.1  | 121.2  | 160    | 123.9  | 133.9  |
| 116.4  | 144.8  | 125.9  | 147.3  | 113.3  | 125.5  | 152.1  | 122    | 123.3  |
| 214.9  | 265.2  | 147.6  | 690    | 190.9  | 159.3  | 580.1  | 175.7  | 185.7  |
| 434.3  | 694.6  | 584.6  | 472.3  | 500    | 550.5  | 499.9  | 847.6  | 614.2  |
| 106.2  | 116.8  | 112    | 111.7  | 97.4   | 117.2  | 103.7  | 127.2  | 118.8  |
| 109.9  | 101.2  | 93.1   | 98     | 96.2   | 103    | 101    | 107    | 111.3  |
| 113.5  | 110.2  | 115.8  | 99.8   | 93.9   | 111.7  | 98     | 128.3  | 127.7  |
| 108.3  | 114.3  | 114.6  | 111    | 106.3  | 111.2  | 105.9  | 125.3  | 121.9  |
| 115.9  | 163.5  | 151.9  | 146.5  | 139.8  | 143.6  | 153.5  | 181.8  | 128.2  |
| 685.6  | 969.9  | 892.3  | 871.1  | 832    | 774.2  | 903.2  | 1477.4 | 1060.3 |
| 494.4  | 413.8  | 397.5  | 351.2  | 432.3  | 409.6  | 411.5  | 657.3  | 478.8  |
| 128.8  | 122.4  | 130.6  | 143.6  | 140.3  | 136.1  | 127.9  | 185.6  | 148.4  |
| 111.9  | 123.8  | 107.9  | 105.7  | 110.9  | 114.4  | 106.2  | 130.2  | 121.2  |
| 108.9  | 108.5  | 95.6   | 108.5  | 96.3   | 105    | 104.8  | 111.7  | 109.3  |
| 118.9  | 113.1  | 104.1  | 121    | 103.3  | 129.6  | 102.8  | 116.9  | 117.9  |
| 674.3  | 740.5  | 729.8  | 626.8  | 563.5  | 647.6  | 704.4  | 1288.9 | 710.5  |
| 2756.5 | 6296.8 | 5641.5 | 4696.5 | 4617.7 | 4136.2 | 5341.4 | 5028   | 2946.3 |
| 282.8  | 356.5  | 373    | 264    | 378.4  | 381.7  | 349.2  | 484.2  | 356.1  |
| 456    | 488.4  | 515.5  | 439.5  | 451.9  | 640.7  | 397.5  | 831    | 536.1  |
| 117.2  | 129.1  | 135    | 120.7  | 116.5  | 146.4  | 136.8  | 172.9  | 165.4  |

|        |        |        |        |        |        |        |        |        |
|--------|--------|--------|--------|--------|--------|--------|--------|--------|
| 559.6  | 484.1  | 477.1  | 400.2  | 504.9  | 634.8  | 439.6  | 978.9  | 957.3  |
| 146.9  | 163.5  | 157.6  | 131.1  | 149.4  | 172.9  | 167.9  | 185    | 168.9  |
| 196.2  | 260.6  | 240.9  | 294.7  | 256    | 232    | 274.6  | 359.3  | 213.2  |
| 403.9  | 569.1  | 504.6  | 599.2  | 601.1  | 598.1  | 609    | 869.5  | 414.8  |
| 105    | 115.6  | 98.3   | 98.7   | 100.6  | 105.7  | 104.5  | 110.8  | 101.1  |
| 104.1  | 117.2  | 109.7  | 127.9  | 103.6  | 119    | 107    | 119.9  | 112    |
| 106.7  | 110.7  | 106    | 101.8  | 99.1   | 109.9  | 106.8  | 106.9  | 108.4  |
| 108.1  | 310.2  | 256.1  | 129.3  | 240.3  | 217.3  | 155.7  | 317.7  | 165.9  |
| 523.9  | 657.9  | 626.4  | 685.7  | 611.4  | 682    | 821.9  | 800.7  | 645    |
| 233.9  | 353.5  | 468.8  | 374.2  | 337.4  | 350    | 273.1  | 627.7  | 320.9  |
| 1591.7 | 1285.3 | 1408.8 | 944.6  | 1329.7 | 1280.2 | 1079.3 | 2026.7 | 1735.5 |
| 156.2  | 167.5  | 161.4  | 124.8  | 135.3  | 158.8  | 152.9  | 197.6  | 207.7  |
| 179.1  | 160.9  | 205.6  | 185.5  | 174.3  | 219.6  | 165.5  | 256.1  | 264.3  |
| 224.4  | 210    | 187.7  | 128.8  | 194    | 206.4  | 145.7  | 240.4  | 205.1  |
| 106.6  | 109.8  | 101.2  | 128.6  | 107.4  | 109.1  | 107.7  | 107.1  | 109.5  |
| 116.7  | 120.6  | 110.4  | 134.8  | 107.2  | 127.2  | 109.3  | 153.4  | 125.8  |
| 109.6  | 110.8  | 108.4  | 106.7  | 104.3  | 111.8  | 108.3  | 115    | 103.8  |
| 109.6  | 113.7  | 109.5  | 98.2   | 101.2  | 103.4  | 108.9  | 107.4  | 107.6  |
| 168.6  | 159.4  | 158    | 173.4  | 155.4  | 180.2  | 190.6  | 287.4  | 271    |
| 117.3  | 126.9  | 104.5  | 118.7  | 111.3  | 120.6  | 118.2  | 140.3  | 116.9  |
| 112.7  | 148.1  | 143.2  | 156    | 125.7  | 159.4  | 222.6  | 173.3  | 138.3  |
| 159.3  | 181.1  | 215.4  | 230.1  | 172.2  | 218.2  | 195.2  | 264.9  | 197.8  |
| 128.7  | 203.1  | 172.5  | 179.1  | 172.5  | 218.5  | 174.4  | 173.6  | 161.1  |
| 117.6  | 118.2  | 116.1  | 120.4  | 105.4  | 127.6  | 110.6  | 124.7  | 108.4  |
| 114.3  | 113.8  | 103.6  | 97.3   | 103.7  | 111.7  | 102.4  | 115.3  | 113.4  |
| 110.6  | 121    | 106.1  | 107.4  | 107.4  | 109.1  | 113.3  | 151.7  | 116.9  |
| 114.4  | 111.6  | 104.6  | 114    | 112.9  | 111.9  | 120    | 123    | 115.6  |
| 335.7  | 480.9  | 443.7  | 367.8  | 428.1  | 481.7  | 459.6  | 538    | 323.2  |
| 103.7  | 109.3  | 105.2  | 102.9  | 94.4   | 108    | 94.2   | 106.6  | 108.6  |
| 108    | 111.7  | 103.9  | 99.7   | 96.1   | 108.6  | 97.1   | 107.7  | 104    |
| 4219.9 | 4518.1 | 4468.2 | 4529   | 3775.7 | 4839.7 | 4404.6 | 7120.2 | 6247.5 |
| 128.5  | 140.6  | 131.4  | 132.5  | 119.9  | 138.6  | 138.6  | 156.1  | 155.8  |
| 357.7  | 705.9  | 694.3  | 861.7  | 727.2  | 645.4  | 832.8  | 798.1  | 481.5  |
| 746.9  | 1257.9 | 1592.9 | 1109.1 | 1111.3 | 1841.1 | 1109.5 | 1979.2 | 2563.5 |
| 413.8  | 560.6  | 512.1  | 780.1  | 564.8  | 674    | 568.4  | 894.6  | 524.8  |
| 629.4  | 1292.8 | 1458.4 | 1477.4 | 1074.7 | 1526.8 | 1578.4 | 1176.9 | 1050.7 |
| 1506.9 | 1657.2 | 1611.8 | 2722.2 | 1305   | 1741.2 | 1923   | 2917.6 | 2633.6 |
| 104    | 101    | 108.6  | 112.6  | 97.1   | 106.7  | 101.2  | 110.6  | 111.9  |
| 149.6  | 210.8  | 200.6  | 232.5  | 186.2  | 191.7  | 200.6  | 216.7  | 188.1  |
| 415    | 606.8  | 679    | 678.2  | 478.6  | 693.3  | 723.6  | 904.2  | 571.2  |
| 192.5  | 344.5  | 270.6  | 288.9  | 259.1  | 309.5  | 261.8  | 429.8  | 325.2  |
| 371    | 737.1  | 578.8  | 733.3  | 392.5  | 575.9  | 598.6  | 1294.7 | 851.3  |
| 164.2  | 156.2  | 149.9  | 152.3  | 173.3  | 157    | 172.3  | 221    | 179.5  |
| 109.1  | 123.8  | 108.5  | 105.5  | 106.4  | 117.1  | 106.6  | 122.1  | 112.7  |
| 191.5  | 254    | 265.5  | 218.1  | 218.1  | 165.2  | 316    | 648.7  | 303.8  |
| 744.2  | 1026.2 | 689.2  | 887.7  | 797.6  | 850.6  | 1164.5 | 1643.8 | 1101   |
| 894.4  | 1331.7 | 1229.1 | 1595.5 | 1292.2 | 1030.7 | 1162.8 | 1807.5 | 1634   |
| 779.5  | 848.4  | 862.9  | 971    | 851.6  | 967.5  | 1082.7 | 1532.3 | 1153.7 |
| 104.2  | 111.7  | 98.3   | 90.9   | 92.8   | 106.6  | 98.5   | 109.6  | 104.5  |
| 1433   | 1504.1 | 1311.3 | 1684   | 1150.3 | 1561.2 | 1629.2 | 1501.5 | 1298.7 |
| 186.9  | 246.9  | 246    | 293.9  | 210.2  | 277.7  | 277.1  | 372.7  | 277.7  |



|        |        |        |        |        |        |        |        |        |
|--------|--------|--------|--------|--------|--------|--------|--------|--------|
| 256.9  | 888.1  | 674.3  | 723.3  | 619.6  | 607.4  | 721    | 885.1  | 588.5  |
| 2682.4 | 3184.9 | 2971.3 | 2881.2 | 2584.1 | 2682   | 2825.5 | 4263.6 | 3130.9 |
| 201.6  | 237.8  | 199.4  | 232.6  | 210.3  | 241.9  | 212    | 294    | 239    |
| 102.2  | 109.8  | 105.2  | 105.9  | 97.4   | 115.5  | 105.8  | 128.6  | 117.6  |
| 131    | 133.4  | 129.7  | 131.5  | 120.9  | 122.3  | 120.4  | 138.7  | 145    |
| 116.1  | 102.6  | 124.9  | 112.4  | 102.8  | 105.2  | 123.8  | 155.6  | 119.6  |
| 291    | 725.9  | 488.7  | 588.7  | 493.4  | 632.9  | 592.3  | 954    | 502.7  |
| 299.6  | 381.8  | 307.5  | 541.2  | 403.9  | 282.2  | 386.1  | 504.2  | 356.3  |
| 1469.4 | 1345   | 1320.2 | 1784.1 | 1189.9 | 1243.9 | 1673.2 | 2617   | 1555.2 |
| 110.2  | 113.4  | 107.7  | 99.8   | 95.6   | 106.2  | 106.7  | 110.2  | 107.5  |
| 295.7  | 756.7  | 652.2  | 899.9  | 543.2  | 677.7  | 784    | 576.7  | 379.8  |
| 422.3  | 837.7  | 900.1  | 815.9  | 801.2  | 1014.3 | 811.1  | 1212.8 | 775.2  |
| 262.1  | 582.8  | 657.9  | 787.4  | 487.3  | 456.2  | 658.9  | 436.5  | 312.9  |
| 646.5  | 912.4  | 579.5  | 617.8  | 704.1  | 726.1  | 753.7  | 1310.7 | 1217.7 |
| 102.7  | 116.9  | 110    | 111.8  | 95.6   | 107.6  | 103.7  | 108.9  | 111.8  |
| 115    | 119.3  | 127.8  | 123    | 110.5  | 122.8  | 125.8  | 135.7  | 124.1  |
| 109.4  | 110.8  | 109.1  | 115.2  | 104.5  | 102.9  | 105    | 112.2  | 114.6  |
| 109.1  | 106    | 109.4  | 106.4  | 98.4   | 120.5  | 106.2  | 116.6  | 105.1  |
| 99.1   | 101.5  | 104.1  | 90.8   | 92.8   | 107    | 100.5  | 102.8  | 97.1   |
| 114.5  | 109.4  | 118.6  | 111.4  | 102.1  | 120.4  | 98     | 104.3  | 106.8  |
| 417.8  | 421.6  | 363.7  | 424.1  | 447.5  | 485.7  | 436.9  | 734.8  | 474.7  |
| 796.4  | 1079.1 | 972.7  | 824.8  | 882.2  | 960.2  | 895.7  | 1528.6 | 934.1  |
| 109.6  | 111.3  | 104.7  | 116.5  | 98.7   | 114.1  | 107.7  | 119.8  | 112.8  |
| 109.3  | 114.7  | 103.9  | 101.7  | 93.2   | 112.3  | 102.3  | 116.3  | 112.5  |
| 101.4  | 109.7  | 97.3   | 104.8  | 99.1   | 108.3  | 94.2   | 108.3  | 115.4  |
| 117.5  | 111    | 105.6  | 110.4  | 102.9  | 110.6  | 113.4  | 114.6  | 120.6  |
| 116.8  | 117.5  | 105.2  | 107.1  | 101.1  | 105.2  | 97.8   | 125.2  | 123    |
| 2614.6 | 4051.6 | 3461.9 | 4046.3 | 3517.8 | 4215.8 | 4221.9 | 5026   | 3531   |
| 112.6  | 111.6  | 110.6  | 98.3   | 99.9   | 123.1  | 112.4  | 120.1  | 96.1   |
| 111.6  | 158    | 132.6  | 130.8  | 122.2  | 126.4  | 121.7  | 160.7  | 162.9  |
| 119.9  | 117.4  | 121.4  | 138.6  | 109.5  | 141.9  | 117    | 129.5  | 110.8  |
| 108.4  | 123.1  | 112.5  | 120.3  | 103.3  | 115.4  | 112.1  | 101.9  | 113.5  |
| 111.6  | 115.2  | 105.2  | 108.8  | 97.9   | 107.6  | 99.7   | 113.2  | 105.3  |
| 106.4  | 101.3  | 99.4   | 97.4   | 96.3   | 107.2  | 106.8  | 119.3  | 118.1  |
| 105.6  | 110.5  | 97.9   | 98.8   | 90.8   | 98.7   | 92.2   | 107.3  | 108.1  |
| 111.5  | 116    | 112.8  | 106.7  | 110.1  | 111.1  | 104.5  | 112.3  | 114.4  |
| 113    | 110.5  | 107.8  | 111.6  | 105.9  | 121.8  | 100.7  | 129.6  | 125.7  |
| 108.1  | 105.8  | 105    | 101.6  | 93.6   | 109.2  | 97.9   | 115.7  | 115.8  |
| 176.6  | 174.9  | 192.1  | 170.3  | 143.7  | 190.7  | 147.6  | 195.8  | 200    |
| 118.9  | 117.4  | 109.1  | 112.6  | 104.5  | 114.7  | 112.6  | 135.4  | 110.8  |
| 108.5  | 113.2  | 108.4  | 120.8  | 103.4  | 107.1  | 101.6  | 109.9  | 102.9  |
| 113.4  | 110.2  | 104.3  | 97.5   | 98     | 117.7  | 107.5  | 109    | 127.1  |
| 115.7  | 116    | 107.1  | 108.7  | 100.2  | 111.4  | 106.4  | 127.7  | 129.2  |
| 110    | 95     | 104.6  | 113.4  | 92.4   | 110.9  | 108.2  | 104    | 110.7  |
| 111    | 114.7  | 103.2  | 97.8   | 95.1   | 108.4  | 107.3  | 97.3   | 104.9  |
| 112.4  | 117.4  | 104.8  | 124.6  | 98     | 115.2  | 107.8  | 121.4  | 125.1  |
| 110.3  | 111.5  | 110.4  | 101.5  | 98.3   | 104.9  | 104.4  | 115.8  | 106.9  |
| 106.7  | 117.1  | 103    | 105.5  | 98.5   | 108.3  | 107.4  | 114.1  | 117.6  |
| 108.1  | 105.9  | 98.4   | 97.6   | 93.4   | 102.6  | 99.7   | 107.8  | 104.6  |
| 126    | 130.4  | 123.2  | 141    | 119.8  | 127.3  | 154.4  | 158.5  | 122.6  |
| 106    | 108.8  | 104    | 98.3   | 92.6   | 109.2  | 101    | 128    | 120.8  |

|       |        |        |        |        |        |        |        |       |
|-------|--------|--------|--------|--------|--------|--------|--------|-------|
| 131.4 | 159.3  | 144.8  | 128.1  | 141    | 153.9  | 130.7  | 164.6  | 135.2 |
| 107.5 | 102.3  | 105.9  | 106.6  | 91.3   | 104.7  | 106    | 117.9  | 112.9 |
| 172.7 | 153.9  | 130.8  | 141.5  | 133    | 154.1  | 151    | 266.4  | 288.7 |
| 112.1 | 109.1  | 106.6  | 108.8  | 103.3  | 108.5  | 105    | 114.4  | 116.3 |
| 793   | 1812.2 | 2150.3 | 1085.2 | 1328.8 | 1741.5 | 1068.2 | 1923.5 | 933.5 |
| 554.8 | 479.9  | 351.2  | 522.3  | 477.3  | 449.5  | 604.9  | 999.1  | 518.6 |
| 126.8 | 138.9  | 130.7  | 129.6  | 108.3  | 120.2  | 120.9  | 151.9  | 155.1 |
| 100.5 | 108.3  | 106    | 111.4  | 96.4   | 110.3  | 97.9   | 113.3  | 109.1 |
| 223.3 | 233    | 235.4  | 234.8  | 237.1  | 253.9  | 258.5  | 459.7  | 272.1 |
| 122.6 | 114.2  | 111.3  | 107.3  | 104.3  | 116    | 110.9  | 128.4  | 115.5 |
| 117.7 | 114.5  | 108.1  | 108    | 109.9  | 121.3  | 99.1   | 138    | 127.9 |
| 102.5 | 107.5  | 98.2   | 101.2  | 99.7   | 95.7   | 101.2  | 107.9  | 111.8 |
| 110.8 | 110.6  | 104    | 97.2   | 94     | 111.8  | 104.2  | 107.1  | 108.1 |
| 104.6 | 102.1  | 103.4  | 98.3   | 91.7   | 115.1  | 103.3  | 107.6  | 115.4 |
| 100.3 | 105.4  | 105.1  | 101.3  | 92.4   | 102.6  | 108.9  | 101.3  | 105.7 |
| 144.6 | 165.3  | 136.7  | 130.2  | 131.8  | 164.9  | 158.6  | 180.6  | 153   |
| 249.4 | 242.3  | 209.4  | 304.6  | 271.5  | 253.2  | 320.4  | 569.1  | 413.3 |
| 102.2 | 97.7   | 102.4  | 98.8   | 102.3  | 106.2  | 109.2  | 111    | 112.6 |
| 113.8 | 112.7  | 106.6  | 98.1   | 102.7  | 108.3  | 104.8  | 107.2  | 105.9 |
| 106.1 | 103.8  | 98     | 97.2   | 92.2   | 102.2  | 98.9   | 95.2   | 94.7  |
| 117.5 | 111.2  | 108.9  | 111.6  | 102.7  | 118.1  | 108.7  | 116    | 110.3 |
| 112.7 | 125.9  | 108.8  | 123.2  | 105.1  | 120.7  | 118.4  | 134.5  | 119.2 |
| 113   | 107.7  | 99.3   | 98.9   | 90.6   | 108.9  | 105.5  | 112    | 110.4 |
| 116.9 | 108.8  | 101.8  | 96.6   | 92.6   | 107.5  | 102.9  | 114.7  | 107.9 |
| 103.5 | 101    | 100.1  | 95.5   | 97.7   | 109.9  | 100.4  | 107.2  | 115.5 |
| 108.3 | 113.4  | 109.4  | 96.5   | 97.6   | 110.2  | 112.8  | 106.9  | 105.1 |
| 107.9 | 109.5  | 99.8   | 105    | 100.3  | 102.2  | 101.4  | 111.4  | 103.1 |
| 113.1 | 104.9  | 96.1   | 102.9  | 95.5   | 103.6  | 101.8  | 118.4  | 110.5 |
| 104.9 | 102    | 108.3  | 97.1   | 96.6   | 111.3  | 109.8  | 112.8  | 108.9 |
| 115.1 | 114.2  | 107.5  | 108.7  | 112.1  | 122.6  | 116.4  | 124    | 121.9 |
| 116.5 | 110.6  | 105    | 115.2  | 97.7   | 118.2  | 110.3  | 125.9  | 125   |
| 105.4 | 109.4  | 103.5  | 90.6   | 98.5   | 103.7  | 102.7  | 108.2  | 102.2 |
| 108   | 106    | 100.5  | 100.1  | 95.8   | 105.3  | 99.9   | 110    | 114.8 |
| 117   | 121.7  | 104.8  | 106.7  | 111.8  | 117.6  | 102    | 121.6  | 128.7 |
| 115.4 | 112.1  | 111.5  | 130.7  | 106.1  | 120.9  | 110.2  | 117.6  | 117.2 |
| 106   | 106.5  | 105.6  | 111.3  | 98.8   | 105.8  | 108.8  | 107.4  | 111.7 |
| 115.3 | 115    | 111.8  | 101.2  | 98.7   | 120.1  | 106.9  | 115.2  | 114.9 |
| 124.7 | 129.4  | 117.4  | 114.8  | 109.6  | 126.2  | 110.3  | 161.3  | 140.8 |
| 104.8 | 107.8  | 101.9  | 92.9   | 94.4   | 114.8  | 96.9   | 109.9  | 102.4 |
| 136.1 | 132.4  | 137.5  | 126.8  | 165.5  | 146.8  | 121    | 261.5  | 161.2 |
| 120.8 | 110.6  | 115.1  | 112.1  | 107.7  | 113.3  | 110    | 138.7  | 112.6 |
| 112.9 | 110.9  | 106.3  | 103.6  | 104.1  | 111.3  | 103    | 110.3  | 101.2 |
| 104.2 | 118.4  | 99.1   | 90.3   | 91.8   | 106.6  | 103.5  | 116.3  | 115.1 |
| 104.9 | 108    | 96.6   | 102.5  | 98.3   | 106.8  | 101.9  | 104.4  | 110.9 |
| 101.6 | 108.3  | 101.2  | 101.6  | 94.3   | 108.6  | 109    | 110.8  | 110.3 |
| 142   | 136.5  | 122.2  | 119.8  | 124.1  | 129.9  | 141.4  | 168.9  | 153.5 |
| 114.7 | 114.7  | 104.4  | 111.1  | 96.4   | 117.6  | 108.3  | 127.1  | 120   |
| 173.2 | 200    | 195.8  | 194.5  | 206.4  | 243.7  | 239.4  | 274    | 259.2 |
| 111   | 113.7  | 105.3  | 105.4  | 99.9   | 113.4  | 108.6  | 113.9  | 108.3 |
| 156.4 | 195.4  | 180.4  | 174.4  | 173.3  | 206.7  | 181.2  | 259.1  | 167.3 |
| 159.6 | 150.6  | 148.7  | 132.4  | 133.6  | 166.8  | 139.2  | 166.5  | 163.6 |

|        |        |        |        |        |        |        |        |        |
|--------|--------|--------|--------|--------|--------|--------|--------|--------|
| 111.8  | 124.6  | 130.9  | 110.8  | 117.7  | 121.3  | 109.7  | 139.7  | 130.8  |
| 102.2  | 106.4  | 96     | 93.3   | 95.7   | 105.6  | 108.3  | 101.3  | 113.8  |
| 110.7  | 130.8  | 136.5  | 139.3  | 114.6  | 132    | 132.3  | 155    | 116.7  |
| 354.7  | 322.5  | 263.6  | 226.4  | 254.7  | 293.3  | 395.7  | 438.3  | 395.2  |
| 1059.2 | 802.7  | 650.3  | 605.2  | 649    | 695.4  | 537.8  | 1489.8 | 1455.8 |
| 106.8  | 138.9  | 145.1  | 188.5  | 113.7  | 133    | 170.1  | 155.8  | 130.7  |
| 99.3   | 106.6  | 102.1  | 110.8  | 102    | 106.5  | 118.2  | 97.7   | 105.1  |
| 117.1  | 110.6  | 109.3  | 106.2  | 98.1   | 110.7  | 112.8  | 114.6  | 108.1  |
| 113.3  | 114.3  | 98.4   | 102.6  | 102.9  | 114.9  | 102    | 113.8  | 106.8  |
| 109.7  | 106    | 105.2  | 94.9   | 96.5   | 106.8  | 105.9  | 106.9  | 98.7   |
| 114.7  | 111.7  | 103    | 106.6  | 98.5   | 109.3  | 107.1  | 110.1  | 110.6  |
| 133.1  | 131.3  | 110.4  | 117.3  | 104.3  | 116.6  | 108.9  | 147.9  | 134.3  |
| 123.1  | 140.7  | 160.3  | 143    | 121.2  | 135.1  | 128.9  | 116.1  | 109.9  |
| 1370.1 | 1982.1 | 2217   | 1517.3 | 1551.5 | 1465   | 1479.7 | 1888.4 | 1120.4 |
| 131.7  | 141.8  | 136.5  | 120.2  | 139.9  | 127.5  | 134    | 191    | 162.2  |
| 124    | 130.6  | 134.4  | 121    | 123.5  | 139.6  | 129.6  | 182.3  | 152.8  |
| 106    | 116.6  | 105.8  | 107.3  | 97     | 101.8  | 99     | 103.1  | 104.6  |
| 123.3  | 123.4  | 103.1  | 113.2  | 110.6  | 122.5  | 123.9  | 138.6  | 128.4  |
| 121.5  | 125.1  | 117.5  | 118.3  | 102.5  | 125.1  | 116    | 153.5  | 124.6  |
| 138.1  | 132.8  | 121.9  | 103.7  | 104.6  | 126    | 118.3  | 162    | 144.7  |
| 173.2  | 213.1  | 157.5  | 178.2  | 169.5  | 165.4  | 201.8  | 247.9  | 195.2  |
| 108.8  | 114.4  | 110.1  | 96.8   | 103.5  | 108.4  | 100.4  | 116.3  | 113.8  |
| 109.6  | 105.5  | 107.4  | 112.8  | 98.3   | 109.4  | 107.1  | 117    | 106.9  |
| 120.3  | 112.7  | 119.7  | 111.3  | 106.8  | 108.6  | 103    | 128.6  | 149.1  |
| 983.9  | 662.7  | 728.8  | 585.7  | 421.6  | 495.8  | 553.4  | 1180.9 | 1496.2 |
| 109.8  | 128    | 133    | 110    | 125.4  | 128.8  | 128.1  | 151.4  | 131.4  |
| 111.9  | 120.1  | 115.1  | 107.5  | 101.7  | 105.6  | 105    | 116.4  | 121.4  |
| 582.4  | 548.6  | 534.5  | 608.2  | 522.7  | 408.7  | 625.1  | 850.1  | 948.8  |
| 282.1  | 410.7  | 321.8  | 338.4  | 292.6  | 320.2  | 299.5  | 433.4  | 322.8  |
| 144.9  | 158.9  | 129.9  | 128.7  | 133.7  | 169.8  | 124.6  | 173.9  | 138.4  |
| 149.7  | 163.9  | 150.9  | 152    | 135.4  | 166.2  | 142.6  | 205.2  | 220.3  |
| 159.4  | 165.4  | 159.5  | 127.4  | 137    | 161.9  | 119.2  | 209.4  | 170.1  |
| 316.8  | 334.1  | 290.8  | 290    | 235.5  | 342.6  | 327.8  | 598.8  | 539.9  |
| 138.5  | 173.1  | 170.7  | 347.7  | 131.8  | 195    | 276    | 292.9  | 195.9  |
| 114.5  | 154.1  | 135.1  | 116.9  | 131.2  | 156.5  | 144.4  | 163.7  | 172.1  |
| 116.1  | 112.2  | 108.2  | 112.1  | 91.2   | 100.1  | 102.5  | 111.2  | 110    |
| 119.5  | 120.2  | 111    | 95.7   | 106.8  | 120.7  | 115.2  | 127    | 134.6  |
| 179    | 214.1  | 227.7  | 199    | 192.6  | 218.3  | 262.5  | 250.1  | 182.1  |
| 107.9  | 107.8  | 101.7  | 101.7  | 106.1  | 119.6  | 107.3  | 114    | 108.1  |
| 121.3  | 143.1  | 135.7  | 127    | 127.4  | 135.1  | 126.6  | 172.4  | 154    |
| 501.6  | 541    | 620.5  | 512.7  | 430.1  | 502.5  | 552    | 1163.5 | 848.6  |
| 104.5  | 100    | 94.5   | 88.3   | 94.5   | 101.3  | 102.2  | 100.9  | 105.1  |
| 121.1  | 130.2  | 121.3  | 110.6  | 104.7  | 121.1  | 111.1  | 123.7  | 115.5  |
| 105.4  | 122.3  | 104.6  | 123.4  | 103.6  | 117.9  | 106.3  | 123.4  | 108.9  |
| 107    | 157.3  | 130    | 146.4  | 148.9  | 150.9  | 109.5  | 156.5  | 128.3  |
| 112.9  | 152.6  | 136.9  | 121.5  | 136.4  | 170.5  | 126.4  | 132.1  | 121.1  |
| 152.2  | 454.1  | 314.6  | 321.7  | 302.5  | 322    | 366.4  | 308.4  | 193    |
| 149.2  | 125.3  | 116.8  | 120.1  | 107.3  | 147.8  | 138.1  | 167.5  | 137.4  |
| 191.1  | 240.8  | 232.2  | 201.4  | 149.2  | 224.1  | 179.2  | 498.7  | 363.2  |
| 1349.4 | 1418   | 1356.6 | 1161.3 | 1182.4 | 1323.4 | 1273.6 | 1760.3 | 1359.6 |
| 223.3  | 265.2  | 224.9  | 194    | 187.4  | 231    | 232.8  | 336.1  | 296.6  |

|        |        |       |        |        |        |        |        |        |
|--------|--------|-------|--------|--------|--------|--------|--------|--------|
| 108.3  | 107.2  | 99.1  | 97.3   | 86.4   | 111.1  | 98.8   | 109.8  | 115.9  |
| 112.8  | 104.2  | 100.2 | 108.9  | 99.3   | 117.7  | 103    | 113.5  | 111.3  |
| 102.5  | 117.6  | 101.2 | 97.4   | 90.6   | 111.3  | 107.6  | 107    | 111.2  |
| 112.6  | 148.4  | 128.7 | 124.4  | 118.2  | 139.4  | 120.6  | 141.1  | 116    |
| 140.3  | 144.4  | 129.9 | 143.5  | 128.8  | 163.2  | 147.9  | 177.1  | 152    |
| 530.3  | 745    | 715.9 | 795.9  | 620.7  | 782.9  | 708    | 1251.4 | 758.9  |
| 443    | 378.3  | 256.3 | 237.5  | 256.1  | 310.5  | 281    | 595.3  | 521.6  |
| 117.1  | 142.8  | 136.2 | 138.3  | 143.3  | 137.1  | 142.5  | 158.6  | 160    |
| 110.5  | 104.2  | 102.2 | 105.6  | 100    | 104.1  | 106.2  | 105.2  | 106.2  |
| 123.1  | 129.6  | 122.3 | 137.5  | 115.4  | 123.5  | 132.1  | 119.8  | 118.9  |
| 153.2  | 354.2  | 324.3 | 289.1  | 238    | 251.8  | 283.7  | 298.6  | 168.2  |
| 110.2  | 108.2  | 98.7  | 99.8   | 97.3   | 104.4  | 101.8  | 107.2  | 116.4  |
| 109.7  | 110.5  | 113.5 | 119.1  | 103.1  | 116.4  | 108.6  | 109.5  | 108.3  |
| 277.2  | 604.1  | 701.4 | 574.2  | 540    | 577.2  | 571    | 756.7  | 496.3  |
| 935.8  | 772.9  | 708.4 | 1010.7 | 569.9  | 717.5  | 780.2  | 1051.2 | 913.4  |
| 304.2  | 859    | 721.2 | 856    | 688.3  | 713.1  | 756.7  | 723.8  | 408.3  |
| 197.2  | 240.8  | 240.2 | 225.1  | 176    | 235.4  | 266.3  | 492.4  | 293.9  |
| 142.5  | 149.7  | 143.3 | 141.2  | 160.6  | 145.5  | 153.9  | 203.7  | 157    |
| 123.5  | 173.2  | 140.1 | 144    | 144.2  | 136.1  | 154.3  | 141.3  | 132.9  |
| 105.2  | 109.9  | 104.9 | 90.9   | 90.4   | 105.6  | 103.5  | 107.6  | 109.2  |
| 378.7  | 539.1  | 658.2 | 576.1  | 440.3  | 593.8  | 507    | 636.4  | 407.5  |
| 543    | 1098.4 | 787.1 | 896.1  | 1033.5 | 805.2  | 1055.1 | 1175.2 | 444.7  |
| 170    | 305.7  | 217.7 | 206.5  | 184.5  | 221.5  | 201.1  | 252.9  | 244.1  |
| 103.6  | 106.4  | 98    | 102.6  | 94.9   | 112.9  | 109.1  | 113.2  | 103    |
| 130.8  | 147.5  | 142.5 | 133    | 138.1  | 161.8  | 160.8  | 151.6  | 147    |
| 397    | 450.3  | 483.2 | 336.7  | 412.5  | 501.3  | 396.6  | 650.5  | 569.3  |
| 137.7  | 155.5  | 140.9 | 145.6  | 128.2  | 140.5  | 162.8  | 225.7  | 155.1  |
| 116    | 120.6  | 102.3 | 121.5  | 103.8  | 130.7  | 104.9  | 127.4  | 113.8  |
| 626.7  | 722.4  | 675.8 | 556.9  | 695.6  | 756.6  | 530.7  | 1442.5 | 1036.2 |
| 105.2  | 106.4  | 102.3 | 94.5   | 99.9   | 106.9  | 99.6   | 113.5  | 104.5  |
| 142.4  | 134.7  | 135   | 123.6  | 133.2  | 145    | 126.3  | 237.4  | 179.2  |
| 632.8  | 445.8  | 581.5 | 448.2  | 508.3  | 627    | 408.3  | 795.2  | 609.7  |
| 115.6  | 148.3  | 150.6 | 130.4  | 130.1  | 161.7  | 145.2  | 143.3  | 143.3  |
| 107.9  | 107.7  | 98.8  | 97.6   | 89.8   | 104.7  | 116.4  | 102.5  | 101.7  |
| 114.6  | 110.7  | 106.8 | 105.7  | 97.3   | 108.3  | 110.4  | 110.4  | 112    |
| 377.8  | 461.9  | 510.4 | 775.2  | 589.4  | 467.5  | 1050.3 | 880.3  | 569.5  |
| 121    | 122.9  | 122   | 139.1  | 123.5  | 127.2  | 123.2  | 144.9  | 120.6  |
| 123.3  | 176.7  | 146.5 | 165.8  | 152.2  | 192.5  | 184.3  | 218.5  | 204    |
| 114.9  | 111.8  | 107.8 | 111.7  | 99.7   | 111.6  | 104.8  | 136.5  | 101.4  |
| 137.9  | 108.7  | 112.5 | 104.2  | 100.1  | 118.4  | 107.3  | 110.5  | 114.9  |
| 110.1  | 98.5   | 99.1  | 94.3   | 101.8  | 107.9  | 98.4   | 106.2  | 104    |
| 1137.7 | 2422   | 3001  | 1470.1 | 1889.5 | 2577.7 | 1243.3 | 2556.8 | 6076.8 |
| 148.7  | 183.4  | 165.2 | 142.7  | 151.2  | 175.7  | 149.9  | 217.8  | 176.2  |
| 106.5  | 113.9  | 100   | 103    | 92.4   | 101.6  | 98.1   | 120.3  | 113.2  |
| 111.4  | 106.7  | 99.9  | 101.5  | 90.9   | 105.4  | 104.9  | 104.4  | 114.2  |
| 117.1  | 120.8  | 119.5 | 112.2  | 120.2  | 127.6  | 114.8  | 159.4  | 122    |
| 109    | 112.5  | 109.9 | 100.6  | 93.2   | 109.9  | 95.5   | 101.3  | 105.2  |
| 164.5  | 194.1  | 211.3 | 174.3  | 178.3  | 158.3  | 148.8  | 208.8  | 185.5  |
| 172.5  | 196.7  | 216.3 | 176.2  | 173.3  | 212.2  | 249.5  | 283.4  | 235.8  |
| 824.9  | 957    | 994   | 858.5  | 1026.4 | 967.4  | 1112.6 | 1504.9 | 956.6  |
| 106.2  | 103.8  | 95.3  | 95.6   | 91     | 105.7  | 104.9  | 98.5   | 113.1  |

|       |        |        |       |        |        |       |        |        |
|-------|--------|--------|-------|--------|--------|-------|--------|--------|
| 102.5 | 113    | 110.1  | 107.9 | 100.2  | 106.9  | 113.2 | 117.5  | 115.8  |
| 95    | 107.4  | 100.3  | 97.9  | 99.5   | 105.1  | 96.2  | 99.2   | 103.9  |
| 100.1 | 110.3  | 109.8  | 106.5 | 110.9  | 115    | 117.3 | 125.5  | 105.1  |
| 111.3 | 125.3  | 119.4  | 112.5 | 98.2   | 114.9  | 105.8 | 141    | 135.6  |
| 100.8 | 106.8  | 95.2   | 98.5  | 89.1   | 102.9  | 104.7 | 110.9  | 100.2  |
| 103.2 | 106.6  | 97.6   | 104.3 | 91.1   | 107.4  | 95.3  | 104    | 103.4  |
| 118.7 | 119.2  | 114.9  | 122   | 100.7  | 121.6  | 112.7 | 127.4  | 130.1  |
| 105.6 | 106    | 110    | 108.7 | 99.4   | 112.9  | 102.2 | 120.6  | 105.4  |
| 109.1 | 127.3  | 112.4  | 106.8 | 105.4  | 110.3  | 113   | 125    | 117.5  |
| 103.4 | 99.7   | 98.8   | 98.6  | 90.4   | 107.7  | 101.3 | 105.6  | 104.5  |
| 104.8 | 113.3  | 102.1  | 104.6 | 91.5   | 100    | 104.3 | 112.6  | 117.7  |
| 107.3 | 110.8  | 109.8  | 105.3 | 96.9   | 115.6  | 111   | 114    | 105.6  |
| 104.5 | 106.5  | 106.1  | 103.1 | 97.3   | 112.4  | 105.9 | 103.1  | 105.3  |
| 128   | 128.1  | 120.8  | 121.9 | 114    | 133.1  | 129.6 | 138.7  | 127.5  |
| 106.6 | 107    | 100.5  | 103.2 | 93.4   | 115.8  | 104.8 | 110.7  | 111.1  |
| 109.8 | 101.4  | 100.1  | 90.5  | 98.1   | 104.3  | 108.1 | 100.7  | 107.3  |
| 117.1 | 107.2  | 102.2  | 102.9 | 103.9  | 112.4  | 106.7 | 103.9  | 106.5  |
| 104.9 | 107.7  | 94.5   | 91.4  | 92.6   | 101.6  | 100.4 | 105.7  | 99.3   |
| 122.2 | 125.3  | 123.4  | 121.8 | 121.5  | 134.7  | 123.3 | 148.2  | 127    |
| 113.9 | 116.9  | 116.4  | 128   | 126.5  | 129    | 121.4 | 140.6  | 122    |
| 118.6 | 132.6  | 139.7  | 119.9 | 117.2  | 132.2  | 134.9 | 133.9  | 117.9  |
| 121.9 | 135.4  | 113.8  | 169.1 | 100.9  | 119.9  | 142.9 | 135.2  | 125.9  |
| 1734  | 1706.3 | 1774.6 | 1322  | 1050.8 | 1741.2 | 958.7 | 3057.4 | 3442.3 |
| 127.4 | 137.1  | 153.1  | 112.4 | 142.3  | 190.3  | 119.8 | 232.1  | 172.7  |
| 110.6 | 114.1  | 104.5  | 99.3  | 90.4   | 113.7  | 116.4 | 113.3  | 103.9  |
| 132.9 | 182.3  | 169.6  | 192.7 | 163.7  | 171.4  | 172.2 | 279.3  | 194.8  |
| 217.4 | 576    | 466.1  | 458.8 | 426.7  | 478.1  | 434.3 | 807.1  | 504    |
| 105.8 | 117.2  | 104.8  | 105.5 | 94.8   | 103.7  | 104.4 | 112.1  | 124.5  |
| 109.8 | 121.3  | 121.8  | 111.9 | 111.5  | 122    | 115.7 | 126    | 124.3  |
| 104.3 | 111.3  | 116.6  | 112.1 | 92.6   | 116.7  | 102.7 | 123.8  | 105.7  |
| 103.3 | 106.3  | 100.7  | 107   | 100    | 104    | 108.1 | 117.8  | 110.4  |
| 120.5 | 144.5  | 146.4  | 107.4 | 138.3  | 165.6  | 127.5 | 164    | 146.4  |
| 107.9 | 111.7  | 97.5   | 105.5 | 95.8   | 104.1  | 108.3 | 120.4  | 115.7  |
| 129.8 | 152.8  | 120    | 172.3 | 120.6  | 144.1  | 147.7 | 180.9  | 158.2  |
| 108.2 | 111.1  | 97.9   | 96.3  | 92.4   | 99.2   | 104.6 | 101.1  | 104.7  |
| 190.1 | 522    | 536.4  | 619.2 | 480.7  | 463    | 643.8 | 453.5  | 300    |
| 184.2 | 252.4  | 242.6  | 345.7 | 236.5  | 200.4  | 348.9 | 226.8  | 158.4  |
| 101.9 | 111    | 100.7  | 100.4 | 95.6   | 104.7  | 96.7  | 105    | 115.4  |
| 156.3 | 189.1  | 159.3  | 163.7 | 175.1  | 194.8  | 153.1 | 213.1  | 185.7  |
| 104   | 120.9  | 103.6  | 103.4 | 106    | 106.3  | 121.7 | 120.1  | 111    |
| 124.6 | 168.5  | 149.2  | 141.2 | 130.7  | 144.8  | 146   | 154.4  | 164.3  |
| 233.5 | 360.9  | 261.4  | 381.6 | 256.5  | 294    | 311.5 | 570.7  | 442.6  |
| 122.5 | 116.2  | 104.3  | 104.8 | 97.7   | 115.2  | 106.1 | 124.2  | 112.5  |
| 101.5 | 111.6  | 102.7  | 112.3 | 95.3   | 117.8  | 101.6 | 107    | 116    |
| 103.2 | 106    | 104.1  | 101.7 | 93.4   | 109.9  | 101   | 112    | 104.8  |
| 99.9  | 106.4  | 105.9  | 96.5  | 93.9   | 110.4  | 102.8 | 106.1  | 108.8  |
| 128.6 | 136.1  | 113.3  | 140.5 | 110.6  | 125.8  | 130.1 | 129.9  | 125.4  |
| 98.7  | 105.2  | 100.1  | 99.7  | 100.4  | 107.4  | 94.8  | 114.7  | 104.4  |
| 168.5 | 180.6  | 187    | 172.8 | 177.4  | 210    | 180.9 | 287    | 231.7  |
| 150.2 | 195.4  | 147.1  | 155.4 | 185.5  | 172.5  | 155.4 | 261.6  | 151.6  |
| 104   | 109.6  | 100.6  | 97.2  | 93.8   | 105.3  | 100.1 | 96.6   | 106.6  |

|        |        |        |        |        |        |        |        |        |
|--------|--------|--------|--------|--------|--------|--------|--------|--------|
| 108.8  | 113.9  | 108.6  | 100.7  | 104.6  | 107.7  | 104.2  | 111.3  | 109.9  |
| 99.3   | 107.3  | 107    | 99.7   | 96.3   | 104.1  | 102.1  | 106.2  | 106.6  |
| 106.4  | 105.5  | 100.2  | 100.5  | 98     | 105.7  | 102.9  | 109.2  | 103.6  |
| 117.8  | 115.4  | 107.6  | 122.6  | 114    | 127.4  | 124    | 130.9  | 126.5  |
| 129.9  | 135.8  | 117.5  | 129.8  | 115.7  | 130.9  | 128.6  | 197    | 160.4  |
| 107.8  | 103    | 97.4   | 98.4   | 93     | 102.7  | 105    | 105.3  | 106.3  |
| 146.6  | 239.5  | 197.9  | 231.5  | 185.3  | 200    | 203.2  | 307.4  | 203.1  |
| 152.5  | 134    | 143.7  | 162    | 122.1  | 131.6  | 152.1  | 164.1  | 163.8  |
| 118.5  | 140    | 136.2  | 115.1  | 128.6  | 156.9  | 145    | 176.9  | 133    |
| 97.3   | 105.5  | 100    | 102.3  | 96.2   | 108.9  | 93.7   | 111.5  | 109.9  |
| 106.5  | 108.2  | 108.2  | 105.1  | 99.3   | 118.5  | 115.7  | 114.1  | 113.4  |
| 95.8   | 107    | 101.5  | 101.8  | 102.7  | 113.9  | 102.7  | 122.6  | 113.4  |
| 145.9  | 243.6  | 283.9  | 216.7  | 232.3  | 254.5  | 224.9  | 304.1  | 207.9  |
| 109.1  | 116.4  | 120.4  | 102.6  | 104.3  | 122.2  | 106.7  | 131.7  | 123.3  |
| 122.5  | 139.4  | 136.3  | 126.9  | 116.6  | 125    | 110.8  | 163.6  | 157    |
| 125.5  | 143.5  | 128.3  | 139.2  | 124.4  | 125.2  | 163.8  | 134.3  | 120    |
| 164.3  | 236.7  | 216.5  | 219.6  | 205.9  | 219.7  | 213    | 171.6  | 171.7  |
| 114.3  | 117.2  | 112.7  | 103.9  | 99.2   | 111.7  | 114.5  | 109.9  | 113.2  |
| 126    | 163.6  | 165.2  | 174.8  | 142.4  | 159.4  | 149.9  | 152.1  | 131.4  |
| 120.8  | 131.2  | 109.8  | 106.6  | 105.7  | 133    | 116.5  | 113.8  | 122.6  |
| 102.5  | 102.2  | 102.3  | 94.6   | 91.1   | 109.9  | 107.7  | 107.8  | 111.4  |
| 112    | 157.1  | 136.8  | 125.7  | 122.8  | 141.6  | 123.4  | 117.1  | 113.6  |
| 488.9  | 1030.7 | 975.9  | 661.7  | 861.1  | 1046.2 | 834.2  | 1797.4 | 993.6  |
| 106.9  | 122    | 103.4  | 104.4  | 94.2   | 118.9  | 110.9  | 110    | 105.4  |
| 119.9  | 129.3  | 128.1  | 137.1  | 121.2  | 149.2  | 133.2  | 201.7  | 130.3  |
| 110.4  | 118.9  | 104.4  | 107.9  | 108.9  | 108.1  | 117.7  | 135.3  | 151.6  |
| 271.3  | 322.6  | 446.4  | 287.3  | 276.1  | 457.8  | 331.2  | 650.7  | 434.3  |
| 193.6  | 221.1  | 213.6  | 263.6  | 208.3  | 261.6  | 340.8  | 358.9  | 279.6  |
| 113.3  | 111.5  | 108.6  | 117.8  | 103.5  | 113.5  | 104.2  | 118.2  | 112.4  |
| 114.5  | 114.9  | 106.1  | 115.2  | 109    | 120.1  | 107.8  | 131.9  | 115.4  |
| 300.3  | 425.6  | 468    | 353.5  | 380.2  | 477.9  | 532.6  | 1437.7 | 1046.8 |
| 182.2  | 362    | 286.4  | 234.9  | 328.3  | 341    | 245.5  | 550.8  | 287.4  |
| 106.6  | 106.7  | 107.1  | 102.9  | 99.5   | 111.3  | 112.8  | 123.1  | 121.2  |
| 879.7  | 1565.7 | 1464.2 | 1201.2 | 1091.6 | 1385.4 | 1458.7 | 3039.9 | 2065.9 |
| 188.7  | 203.5  | 220.8  | 156.5  | 214.4  | 194    | 211.5  | 267.7  | 237.5  |
| 119.3  | 135.8  | 115.6  | 118.5  | 117.4  | 135.9  | 115    | 126.5  | 120.7  |
| 139.3  | 162.2  | 151.8  | 131.8  | 141.3  | 167.7  | 128.8  | 178.2  | 161    |
| 507.8  | 747.8  | 733.2  | 398.1  | 566.9  | 730.9  | 483.8  | 955.2  | 690.9  |
| 133.8  | 172.4  | 153.7  | 134.1  | 154.1  | 156.3  | 141.1  | 208.4  | 165.7  |
| 145.1  | 232    | 221.4  | 207.8  | 159.7  | 230.7  | 182.7  | 364.3  | 206.6  |
| 127.9  | 169.9  | 163.7  | 175.6  | 160.6  | 185    | 155.1  | 317.8  | 178.5  |
| 1723.1 | 1992   | 1937.3 | 1678.6 | 1870.8 | 2140.8 | 1814.3 | 3910.4 | 2767.4 |
| 155.2  | 190.9  | 177.7  | 134.2  | 170.9  | 215.2  | 170.6  | 261.3  | 189.4  |
| 112.1  | 110.2  | 102.3  | 99.6   | 93.3   | 115.3  | 103.3  | 111.5  | 114.6  |
| 152.1  | 130.8  | 118.1  | 112.4  | 121.8  | 123.1  | 144.5  | 193.1  | 148.7  |
| 101.9  | 104.5  | 103.3  | 107.7  | 102.4  | 103.5  | 99.6   | 109.6  | 111.2  |
| 106.8  | 126.8  | 115.6  | 113.3  | 94.2   | 112.5  | 104.2  | 119.4  | 122.3  |
| 1003.7 | 1136.8 | 1142.2 | 877.5  | 1129.8 | 1053.1 | 1333.6 | 2164.4 | 1781.7 |
| 228.1  | 170.8  | 172.1  | 168.8  | 153.6  | 172    | 168.4  | 367.1  | 314.7  |
| 105.7  | 106.7  | 109.8  | 100.3  | 97.2   | 119.6  | 103.9  | 121.6  | 116    |
| 106.5  | 102.5  | 97.5   | 96.6   | 93.2   | 101.3  | 104.9  | 105.8  | 106.9  |

|        |        |        |         |        |        |         |        |        |
|--------|--------|--------|---------|--------|--------|---------|--------|--------|
| 101.7  | 107.6  | 103.5  | 95.6    | 94.3   | 102    | 98      | 104.8  | 105.2  |
| 103.2  | 113.3  | 106.6  | 106.3   | 96.8   | 112.5  | 101.3   | 109.8  | 113.4  |
| 104.5  | 106.2  | 110.6  | 102.9   | 91.4   | 102.7  | 99.4    | 123    | 107    |
| 104.3  | 119.2  | 101.7  | 104.3   | 99.2   | 110.1  | 102.9   | 110.2  | 104.3  |
| 635.1  | 1223.2 | 1302.6 | 1027.6  | 899.9  | 926.1  | 656.5   | 1581.6 | 1162.2 |
| 113.1  | 107.7  | 107.3  | 99.5    | 97.9   | 105.8  | 97.6    | 101.3  | 115.5  |
| 834.6  | 526.9  | 472.8  | 545.8   | 508.8  | 549.9  | 526.3   | 942.5  | 678.3  |
| 138.5  | 164.4  | 147    | 151.4   | 156.7  | 152.2  | 167.4   | 203.7  | 148.7  |
| 108.2  | 108.5  | 101    | 94      | 99.6   | 109.1  | 96.4    | 107.1  | 107.1  |
| 139.9  | 131.7  | 118.9  | 99.5    | 148.6  | 144.7  | 147.7   | 190.4  | 120.7  |
| 108.1  | 108    | 100.9  | 105.4   | 96.4   | 109.5  | 105.5   | 112.6  | 103.4  |
| 111.7  | 109.3  | 106.2  | 108.1   | 99.5   | 114.5  | 111.6   | 110.5  | 117.5  |
| 112.2  | 105.1  | 102.1  | 97.9    | 97.7   | 104.6  | 105.1   | 112.3  | 107.3  |
| 105.9  | 114.8  | 105.9  | 104.3   | 100.8  | 106.6  | 103.9   | 115.9  | 108.5  |
| 105.1  | 107.6  | 96.3   | 96.2    | 91.5   | 104.8  | 99      | 106.6  | 111.7  |
| 111.2  | 109.9  | 104.6  | 103.9   | 97.8   | 104.5  | 102.9   | 113.9  | 106.5  |
| 101.5  | 123.7  | 112    | 97.5    | 96.8   | 108.8  | 103.5   | 106.7  | 103.1  |
| 108.5  | 109.5  | 103.8  | 101.8   | 95     | 106.6  | 109.8   | 105.6  | 112.3  |
| 111.5  | 104.6  | 102.6  | 110.6   | 88.5   | 104.8  | 103     | 112.8  | 108.8  |
| 103.3  | 108.8  | 100.2  | 102.6   | 91.2   | 107.6  | 101.9   | 108.9  | 109.7  |
| 106.4  | 114    | 106.8  | 109     | 95.9   | 109.3  | 106.9   | 114.5  | 108.8  |
| 103.2  | 108.1  | 96.4   | 100.6   | 98.7   | 103.8  | 102.7   | 120.3  | 109.4  |
| 116.4  | 125    | 115.8  | 133.9   | 105.3  | 119.3  | 125.7   | 122.5  | 107.8  |
| 121.1  | 111    | 107.9  | 110     | 105.2  | 118.6  | 106     | 117.9  | 109.2  |
| 113.8  | 99.6   | 111.9  | 108.2   | 101.1  | 104    | 104.8   | 112.5  | 107.5  |
| 107.9  | 118.4  | 106.6  | 116.1   | 100.8  | 113.2  | 117.1   | 127.3  | 116.9  |
| 263.5  | 309.1  | 486.4  | 312.7   | 365.2  | 475    | 366.4   | 623.4  | 505.9  |
| 238.5  | 242.1  | 213.6  | 196.4   | 228.6  | 265    | 304.4   | 364.5  | 322.4  |
| 112.8  | 107.7  | 106.8  | 100.6   | 87.2   | 102.8  | 103.6   | 108.7  | 109.2  |
| 95.9   | 102.1  | 107.1  | 106.6   | 92.7   | 102.7  | 101.8   | 102.8  | 108    |
| 201.2  | 299    | 282.5  | 226.8   | 275.1  | 296.9  | 227.8   | 344.7  | 235.4  |
| 104.2  | 122.7  | 104.7  | 103.1   | 105.6  | 117.3  | 98.6    | 117.1  | 110.1  |
| 107.6  | 105.7  | 108.7  | 106.9   | 94.4   | 113.6  | 116.2   | 116    | 115.1  |
| 102.7  | 105.5  | 104.3  | 96.7    | 97.9   | 110    | 109     | 123.3  | 109.8  |
| 105.5  | 103.6  | 104.5  | 92.6    | 101.1  | 99.4   | 100.4   | 108.4  | 93.9   |
| 104.9  | 101.9  | 104.6  | 100.7   | 91.8   | 108.8  | 106.6   | 105.9  | 109.8  |
| 102.3  | 107.8  | 102    | 95.1    | 93.3   | 103.4  | 101     | 110.5  | 110.4  |
| 194.6  | 208.5  | 230.8  | 158.7   | 216.5  | 183.2  | 122.9   | 329.5  | 211.7  |
| 101.2  | 110    | 103    | 104.7   | 102.1  | 112.4  | 106.9   | 110.9  | 107.3  |
| 104.4  | 105.7  | 97.2   | 98.4    | 94.8   | 103.3  | 90.7    | 97.8   | 105.6  |
| 119    | 115.7  | 104.8  | 107.4   | 102.8  | 108.5  | 106     | 114    | 118.2  |
| 306.7  | 483.8  | 504.1  | 302     | 527.6  | 541.5  | 360.8   | 1130.3 | 1164.3 |
| 115.4  | 114.5  | 101.5  | 96.6    | 92.5   | 117.8  | 106.6   | 115.9  | 125.3  |
| 6756.8 | 5228.5 | 2754.5 | 11696.6 | 5655.7 | 3524.9 | 10008.2 | 7469.3 | 4503.9 |
| 106.4  | 109.4  | 114.9  | 95.4    | 91.3   | 112.8  | 101.7   | 103.9  | 99.9   |
| 167.1  | 253.7  | 271.1  | 295.1   | 202.3  | 188.5  | 286.8   | 226.1  | 182.3  |
| 219    | 280.1  | 236.8  | 252.5   | 277.2  | 273.1  | 255.9   | 424.5  | 344    |
| 115    | 115.1  | 105.5  | 105.3   | 97.8   | 105.5  | 105.9   | 133.4  | 107.6  |
| 109.9  | 105.7  | 109.8  | 106.8   | 94.8   | 114.6  | 98.9    | 118.2  | 111.7  |
| 107.4  | 116.5  | 99.4   | 97.9    | 92     | 113    | 98.5    | 111.3  | 114.7  |
| 111.7  | 109.2  | 116.1  | 112.3   | 101.1  | 116.4  | 108.3   | 111.9  | 118.7  |

|        |        |        |        |        |        |        |        |        |
|--------|--------|--------|--------|--------|--------|--------|--------|--------|
| 113.1  | 112.7  | 102.4  | 98     | 89.8   | 110.6  | 99.5   | 105.8  | 113.5  |
| 109.3  | 108    | 109.3  | 105.4  | 95.6   | 98.7   | 112.1  | 116    | 104.2  |
| 107.1  | 108.6  | 100.9  | 95.8   | 100.8  | 116.9  | 93.9   | 106.1  | 119.9  |
| 269.3  | 247.7  | 305.6  | 267.6  | 203    | 293    | 299.2  | 356.8  | 285.9  |
| 122    | 110.9  | 116    | 101.7  | 108.5  | 127.3  | 118    | 144.1  | 123.8  |
| 111.3  | 110.2  | 102.9  | 96.4   | 101.4  | 100.9  | 103.2  | 101.9  | 101    |
| 110.6  | 106.7  | 102.3  | 108.2  | 99.4   | 104.1  | 107.1  | 112.9  | 102.4  |
| 223.1  | 206    | 226.6  | 219.8  | 232.4  | 256.3  | 247.6  | 399.7  | 267.1  |
| 533.2  | 661.2  | 220.4  | 821    | 493    | 380.9  | 837.9  | 1095.1 | 405.7  |
| 200.2  | 158.4  | 141.1  | 154.3  | 166.1  | 185.2  | 173    | 355.4  | 388.5  |
| 108.5  | 103.6  | 102.6  | 95.7   | 97     | 105.6  | 110    | 111.5  | 115.3  |
| 100.8  | 104    | 106.7  | 102.3  | 98     | 105.4  | 103.8  | 108.8  | 112.4  |
| 204.5  | 228.2  | 238.2  | 214.6  | 183.4  | 229.9  | 231.8  | 216.4  | 172.2  |
| 102.5  | 108.3  | 104.5  | 97.8   | 89.2   | 106.2  | 97.1   | 102.2  | 101.3  |
| 104.5  | 111.7  | 100.7  | 98.3   | 94.5   | 109.5  | 98.7   | 104.4  | 106    |
| 104.8  | 105.1  | 101.3  | 100.9  | 95.9   | 106.5  | 98.3   | 106.2  | 110.7  |
| 108.6  | 109.4  | 104.7  | 101.4  | 103.7  | 109.2  | 106.3  | 110.4  | 103.7  |
| 104.4  | 117.2  | 100.3  | 114.7  | 103.2  | 115.6  | 99.7   | 116.5  | 114.4  |
| 149    | 146.9  | 135.4  | 117.9  | 120.3  | 143.2  | 127    | 168.5  | 148.4  |
| 102.7  | 104.9  | 100.6  | 104.4  | 91.5   | 109.7  | 105.6  | 124.7  | 107.7  |
| 1300.4 | 1719.7 | 1295.6 | 1634.3 | 1281.5 | 1441.8 | 1968.2 | 2158.2 | 1362.5 |
| 106.5  | 100.1  | 105    | 96.3   | 106.4  | 109.9  | 94.3   | 106.3  | 100.1  |
| 113    | 109.8  | 104.7  | 103    | 102.6  | 105.4  | 95.6   | 110.5  | 107.1  |
| 105.3  | 107.2  | 100.8  | 96.1   | 103.7  | 108.4  | 102.9  | 106.3  | 113.6  |
| 108.8  | 114.6  | 106.1  | 107.4  | 103    | 115.5  | 105.6  | 118.4  | 116.5  |
| 102.2  | 104.4  | 103.8  | 94.1   | 96     | 96.9   | 111    | 100    | 105.2  |
| 108.8  | 105.8  | 103.5  | 102.2  | 96.2   | 112.7  | 99.6   | 103.3  | 116.9  |
| 107.1  | 115.6  | 103.2  | 96.4   | 94.2   | 111.5  | 103.8  | 114.9  | 102    |
| 108.6  | 111.6  | 98.7   | 105    | 98.1   | 107.9  | 105.7  | 118.2  | 109.2  |
| 107.9  | 106.2  | 99.8   | 96.6   | 98.2   | 113.9  | 98.4   | 115.2  | 122.4  |
| 600    | 243.3  | 236.8  | 209.2  | 406.1  | 566.9  | 499.7  | 1235.1 | 1012.7 |
| 217    | 127.1  | 137.4  | 153.5  | 135.7  | 137.1  | 152.4  | 372.4  | 311.7  |
| 100.8  | 102.9  | 108.4  | 100.8  | 94.6   | 108    | 101.5  | 112.6  | 108.4  |
| 103.5  | 106    | 101    | 95.9   | 90.3   | 94.8   | 104.3  | 95.9   | 96.1   |
| 104.8  | 113.9  | 105    | 99.4   | 94.1   | 108.3  | 106.7  | 104.3  | 105.7  |
| 144.2  | 159    | 192.4  | 126.8  | 161.7  | 187.5  | 122.6  | 181.8  | 167.4  |
| 178.1  | 211.7  | 209.1  | 180.8  | 184.7  | 238.5  | 218.8  | 294.3  | 198.2  |
| 113.1  | 152.3  | 129.6  | 128.2  | 119.2  | 140.7  | 128.3  | 189.2  | 136.6  |
| 106.8  | 109.2  | 97.6   | 95.3   | 93.2   | 106.9  | 107.6  | 108.7  | 113    |
| 103.4  | 103.6  | 99.2   | 102.4  | 103.8  | 101.8  | 102.1  | 107.7  | 100.1  |
| 114.8  | 118.9  | 98.9   | 103.3  | 105.2  | 104.8  | 103.2  | 109.9  | 112.8  |
| 113.3  | 111.3  | 101.3  | 99.4   | 97     | 103.8  | 102.6  | 113.3  | 113.9  |
| 97.4   | 112.8  | 97.7   | 99.8   | 96     | 107.3  | 101.9  | 110    | 102.2  |
| 126.4  | 136.3  | 132.7  | 151.2  | 114.4  | 130.6  | 123.1  | 142.7  | 138.2  |
| 114.2  | 123.4  | 117.1  | 118.2  | 113.9  | 113.2  | 123.6  | 131.2  | 127.4  |
| 133    | 163.5  | 147.4  | 132.3  | 139.5  | 130.2  | 130.8  | 155.2  | 132.7  |
| 177.6  | 158.3  | 140.5  | 116.4  | 144.4  | 143.6  | 129.7  | 273.8  | 196.2  |
| 110.1  | 116.8  | 104.4  | 105.2  | 96     | 109    | 94.7   | 99     | 106.7  |
| 106.3  | 109.5  | 107    | 103.5  | 94.3   | 109.5  | 104.2  | 110.3  | 102    |
| 103.5  | 97.7   | 104.1  | 96.9   | 92.6   | 104.1  | 101.5  | 118.2  | 104    |
| 108.8  | 102.5  | 107.9  | 104.2  | 98     | 105.1  | 107.4  | 112.2  | 113.4  |



|       |       |       |       |       |       |       |        |       |
|-------|-------|-------|-------|-------|-------|-------|--------|-------|
| 98.6  | 105   | 102.8 | 91.5  | 94.1  | 101.6 | 100.1 | 109    | 105.5 |
| 105.3 | 113.6 | 101.7 | 100.5 | 102.8 | 117.3 | 102.7 | 114.3  | 111.1 |
| 117.8 | 119.9 | 138.1 | 132.3 | 124.2 | 119.3 | 116.4 | 139.8  | 117.1 |
| 143.5 | 150.5 | 130.9 | 140.2 | 115   | 152.5 | 136.6 | 150.4  | 141.5 |
| 107   | 119.7 | 107.4 | 116.5 | 100.5 | 110.5 | 113.4 | 116.9  | 119.1 |
| 113.1 | 112.5 | 103   | 113.8 | 107.5 | 133.1 | 115.5 | 128    | 104.9 |
| 124.9 | 201.8 | 177.4 | 196.2 | 151.9 | 178.8 | 172.5 | 198.3  | 136.8 |
| 106.9 | 112.3 | 103.4 | 112.7 | 102.2 | 110.5 | 102.3 | 108.6  | 123.4 |
| 105   | 107.7 | 103.2 | 96.6  | 94.8  | 106.1 | 110   | 104.8  | 109.1 |
| 108.2 | 111.3 | 99.5  | 104.8 | 97.6  | 100.5 | 103   | 101.1  | 101.7 |
| 159.7 | 111.7 | 110.9 | 103.6 | 102.4 | 108.5 | 105.5 | 139.4  | 141.2 |
| 102   | 114.3 | 110.1 | 102.4 | 93.1  | 103.9 | 99.2  | 104.8  | 114   |
| 105.7 | 101.9 | 100.9 | 106.2 | 96.4  | 105.4 | 99.6  | 96.4   | 104.4 |
| 100.4 | 108.4 | 100.3 | 92.5  | 93.9  | 104.7 | 99.2  | 93.2   | 102.4 |
| 109.3 | 107.3 | 103.6 | 99.5  | 88    | 106   | 100.2 | 110.3  | 108.2 |
| 106.4 | 110.2 | 101.3 | 99.3  | 99.8  | 103.7 | 108.6 | 109    | 116.2 |
| 105.3 | 106.4 | 100.6 | 96    | 88.8  | 108   | 101.4 | 103.6  | 101.4 |
| 111.3 | 105.5 | 101.3 | 97.8  | 91.7  | 113.4 | 97.2  | 109    | 104.5 |
| 102.9 | 99.8  | 97.3  | 97.9  | 95    | 98.4  | 92.7  | 110.1  | 103.8 |
| 115.3 | 127.9 | 116.6 | 112.6 | 107.6 | 121.7 | 101.8 | 120.7  | 117.7 |
| 106.8 | 106.7 | 110.7 | 107.9 | 99.8  | 112.3 | 101.5 | 115.7  | 138.2 |
| 98    | 103.5 | 100.4 | 98.4  | 91.5  | 96.5  | 109.7 | 105.7  | 112.8 |
| 103   | 98.4  | 98.2  | 101.8 | 88.9  | 102.4 | 103.4 | 112.1  | 111.2 |
| 104.6 | 106.7 | 102.7 | 97.7  | 102.1 | 111.4 | 99.4  | 105.9  | 105.3 |
| 174.6 | 217   | 184.8 | 181.9 | 176.4 | 199.3 | 187.5 | 339.8  | 283.3 |
| 133   | 127.7 | 134.9 | 135.2 | 131.6 | 150.9 | 141.3 | 181.1  | 141.3 |
| 180.9 | 216   | 193.8 | 244.5 | 195   | 209.9 | 268.1 | 241.6  | 195.5 |
| 116.1 | 118.6 | 106.2 | 118.2 | 91.1  | 101.1 | 115.1 | 110.5  | 112.5 |
| 108   | 110.5 | 107.1 | 126.3 | 96.8  | 113.9 | 122.4 | 107.6  | 111.9 |
| 877.9 | 975.8 | 823.6 | 743.4 | 812.4 | 814.4 | 923.7 | 1687.4 | 1119  |
| 106.4 | 107.2 | 110.8 | 108.9 | 97.2  | 115.3 | 112.1 | 111.5  | 110.5 |
| 116.5 | 130.1 | 109.1 | 112.5 | 101   | 118.7 | 110.1 | 123.2  | 120.8 |
| 113.5 | 105.7 | 99.4  | 100   | 95.8  | 111.1 | 113   | 118.8  | 111.4 |
| 110   | 109.6 | 97.2  | 94.5  | 93.6  | 109.6 | 109.5 | 106.9  | 106.4 |
| 114.9 | 111.8 | 100.9 | 147   | 104.7 | 107.6 | 126.8 | 102    | 108.7 |
| 103.6 | 107.3 | 98.9  | 103.9 | 99.9  | 106.3 | 114.4 | 106.4  | 109.3 |
| 104.3 | 104.6 | 105.1 | 117   | 101.1 | 112.7 | 104   | 112    | 117.4 |
| 107.8 | 114.9 | 104.9 | 103.8 | 98.4  | 118.7 | 108.6 | 117.5  | 112.7 |
| 102.4 | 109.4 | 103.1 | 100.8 | 90.8  | 103.2 | 106.4 | 99.2   | 99    |
| 108.9 | 108   | 103.3 | 96.1  | 95.7  | 108.4 | 105.5 | 106.4  | 111.6 |
| 110.2 | 107.4 | 101.5 | 98.2  | 93.2  | 112.6 | 96.7  | 112.3  | 107   |
| 110.5 | 108.9 | 114   | 104   | 97    | 115.8 | 106.1 | 108.8  | 119.5 |
| 248.2 | 298.1 | 248.2 | 287.5 | 235.7 | 282.5 | 265.5 | 272.5  | 217.1 |
| 119.8 | 111.6 | 114.2 | 117.3 | 103.8 | 126.1 | 113.5 | 128    | 115.2 |
| 227.3 | 127.3 | 130.3 | 100.7 | 159.6 | 195   | 104.8 | 647.5  | 342.3 |
| 129.7 | 126.5 | 108.2 | 126.8 | 113   | 120.7 | 118.5 | 137    | 120.2 |
| 105.4 | 105   | 98.8  | 103.4 | 95.4  | 106.2 | 108   | 102.9  | 106.4 |
| 105   | 134.4 | 122.1 | 117.6 | 116.9 | 124.2 | 125.1 | 144.8  | 123   |
| 109.9 | 99.4  | 100.2 | 92.4  | 101.7 | 103.9 | 101.8 | 108.7  | 112.2 |
| 112   | 112.5 | 115.8 | 123.4 | 105.2 | 126.4 | 111.6 | 136.6  | 124.1 |
| 142.4 | 158   | 170.4 | 174.8 | 171   | 198.6 | 144.4 | 266.6  | 125.5 |

|       |        |       |       |       |       |       |        |        |
|-------|--------|-------|-------|-------|-------|-------|--------|--------|
| 103.7 | 112.5  | 106.4 | 96.1  | 104.2 | 108.5 | 107   | 119.1  | 114.4  |
| 102.9 | 96.2   | 101.6 | 95.8  | 93.6  | 101.9 | 102.5 | 115.5  | 104.7  |
| 106.8 | 106.8  | 101.8 | 104.5 | 102.9 | 105.6 | 102.7 | 109.3  | 104.5  |
| 98.7  | 102.3  | 106.2 | 100.9 | 100.1 | 111.7 | 99.2  | 118.2  | 111.6  |
| 109.5 | 103.2  | 104.5 | 107.5 | 93.1  | 106.4 | 96.9  | 110.9  | 111.2  |
| 103.6 | 105.9  | 105.5 | 102.7 | 94.9  | 107.6 | 94.4  | 111.1  | 104.9  |
| 104   | 106.5  | 107.5 | 100.2 | 97.3  | 102.8 | 104.7 | 108.5  | 102.8  |
| 107.5 | 103.2  | 109.9 | 106.1 | 97.9  | 107.6 | 111.7 | 110.8  | 100.2  |
| 115.4 | 116    | 105   | 104.5 | 94.6  | 109.5 | 96.3  | 116.5  | 108.3  |
| 106.2 | 102.7  | 98.3  | 90.7  | 98.1  | 105.7 | 96.2  | 106.3  | 101.4  |
| 98.1  | 98.5   | 96.2  | 100.1 | 94.7  | 106.9 | 102.6 | 102    | 105.1  |
| 109.8 | 115.9  | 105.1 | 105.7 | 94.2  | 108.6 | 110.7 | 120.8  | 120.6  |
| 155.5 | 151.1  | 147.1 | 212.8 | 149.4 | 148.3 | 159.8 | 282    | 202.6  |
| 106.8 | 100.8  | 99.6  | 94.7  | 94.2  | 113.8 | 104.7 | 102    | 98.9   |
| 110.7 | 109.9  | 118.3 | 105.5 | 100.2 | 123.6 | 112.4 | 121.5  | 121    |
| 107.4 | 132.3  | 120.2 | 98.1  | 108.4 | 128.9 | 109.3 | 124.5  | 118.1  |
| 131.1 | 192.1  | 168.1 | 172.8 | 150.8 | 186.3 | 171.1 | 218.2  | 154.4  |
| 109.3 | 102.7  | 98.2  | 103.6 | 97.9  | 111.3 | 102.9 | 116.9  | 114.8  |
| 138.3 | 173.8  | 137.7 | 176.7 | 154.2 | 150.6 | 171.2 | 220.5  | 134.4  |
| 350.1 | 669.3  | 675.5 | 685.9 | 681.2 | 655.3 | 695.4 | 774.7  | 428.3  |
| 169.3 | 192    | 174.5 | 188.9 | 155.5 | 221.5 | 189.2 | 283.5  | 334.8  |
| 213.5 | 240.6  | 224   | 211.9 | 197.3 | 278.7 | 229.2 | 349.3  | 362.4  |
| 108.9 | 115.7  | 118.7 | 121.6 | 99.1  | 119.4 | 115.4 | 128.1  | 112    |
| 111.1 | 114.8  | 106.1 | 106.5 | 101.2 | 116.9 | 108.8 | 118.4  | 101.1  |
| 713.8 | 1024.9 | 811.5 | 690.1 | 734.4 | 814.2 | 663.5 | 1205.8 | 799    |
| 213.3 | 242.6  | 237.2 | 223.3 | 196   | 254.8 | 223.3 | 264.2  | 196.2  |
| 347.4 | 493.1  | 601.6 | 462.3 | 488.4 | 583.6 | 508.1 | 1015.3 | 666.3  |
| 133.1 | 140.1  | 123   | 126.6 | 114.4 | 134.9 | 144.6 | 203.6  | 154.1  |
| 181.6 | 244.2  | 254.9 | 218.4 | 184.6 | 237.8 | 250.9 | 319.2  | 231.1  |
| 139.6 | 262.8  | 260.2 | 242   | 215.7 | 172.9 | 274.5 | 323.4  | 204    |
| 136.2 | 175.8  | 166.1 | 150.9 | 150.6 | 154.5 | 152.5 | 185.6  | 144.1  |
| 123.2 | 173.7  | 189.4 | 146.9 | 140.8 | 162   | 149.8 | 193.9  | 163.6  |
| 130.4 | 338.1  | 302.6 | 285.3 | 258.9 | 285.3 | 267.9 | 316    | 213.2  |
| 128.6 | 129.9  | 131.3 | 133   | 130.5 | 137.4 | 110.8 | 138.9  | 136.5  |
| 107.4 | 124.2  | 112.8 | 114.6 | 103   | 125.4 | 110.3 | 129.2  | 125.7  |
| 113.2 | 130.7  | 110.7 | 107.5 | 106.9 | 123.5 | 105.4 | 135    | 115.2  |
| 105.9 | 108.2  | 100.3 | 99.9  | 95.5  | 106.4 | 102.2 | 113.3  | 116.1  |
| 202.2 | 631.8  | 545.4 | 460.7 | 442.9 | 518.7 | 457   | 817    | 387    |
| 108.6 | 93.9   | 93.8  | 100.5 | 93.7  | 109.3 | 102.1 | 111.4  | 103.4  |
| 101.3 | 105.5  | 102.7 | 95.3  | 96.1  | 104.9 | 92.9  | 107.2  | 107.5  |
| 103.2 | 107.1  | 97.2  | 100.7 | 91.7  | 110.2 | 95.6  | 114.5  | 108.8  |
| 300.1 | 374.8  | 268.9 | 308.4 | 298.8 | 297.5 | 271.5 | 567.8  | 358    |
| 675.5 | 638.8  | 791.3 | 530.6 | 509.8 | 847.3 | 450.3 | 1120.4 | 1315.1 |
| 147.5 | 168.6  | 174.4 | 131.5 | 152.6 | 153   | 144.8 | 215    | 169.8  |
| 109.8 | 107.9  | 108.8 | 110.7 | 98.9  | 119.1 | 110.5 | 112.4  | 117.1  |
| 132.1 | 141.2  | 120.5 | 132.7 | 136.3 | 135.1 | 188   | 181    | 119.4  |
| 112.2 | 103.5  | 102.8 | 96.1  | 99    | 115.2 | 101.4 | 119.6  | 116.1  |
| 123   | 152.9  | 141.5 | 145.1 | 130.1 | 135.9 | 144.3 | 146.5  | 143    |
| 119.8 | 137.5  | 151.3 | 124.9 | 109.9 | 140.8 | 110.7 | 122.5  | 112.9  |
| 98    | 101.2  | 95.9  | 97    | 94.3  | 107.5 | 102.1 | 105.2  | 106.5  |
| 417.4 | 517.2  | 409   | 520.3 | 522   | 392.1 | 343.2 | 1249.9 | 613.1  |

|        |       |        |        |        |       |        |        |        |
|--------|-------|--------|--------|--------|-------|--------|--------|--------|
| 441.6  | 540   | 617.2  | 585.1  | 666.5  | 596.6 | 901.3  | 762.4  | 358.5  |
| 101.9  | 112.6 | 101.6  | 104    | 93.8   | 104.9 | 100.2  | 110.2  | 110    |
| 104.9  | 109.2 | 103.3  | 109.4  | 103.8  | 105.7 | 107.2  | 115.3  | 118    |
| 114.2  | 179.9 | 168.5  | 130    | 134.4  | 137   | 136.9  | 163.7  | 98.9   |
| 104.9  | 110.1 | 107.7  | 102.7  | 97     | 106.3 | 101.3  | 106.8  | 111.6  |
| 102.8  | 106.4 | 100.6  | 92.7   | 95.5   | 109.3 | 100.5  | 117.9  | 101.8  |
| 113.2  | 105.4 | 100.4  | 101.2  | 98.9   | 109   | 111.1  | 110.2  | 102.8  |
| 99.6   | 104   | 100.3  | 90.2   | 90.2   | 103.7 | 97.3   | 104.2  | 106.8  |
| 101.7  | 111.5 | 105    | 95.2   | 93.5   | 116   | 106.1  | 107.9  | 109.1  |
| 115.4  | 109.6 | 101.1  | 105.8  | 97.4   | 114.3 | 100.2  | 120.4  | 111    |
| 116.2  | 113.1 | 106.3  | 112.3  | 105.9  | 104.6 | 112.7  | 118.6  | 125.5  |
| 111.5  | 104.2 | 95.9   | 105.9  | 102.7  | 119.6 | 104    | 116.4  | 111    |
| 111    | 112.3 | 105.5  | 96.6   | 100.8  | 104.8 | 94.4   | 105.3  | 111.3  |
| 113.3  | 109.8 | 106.1  | 104.9  | 100.7  | 105.4 | 109.6  | 111.3  | 112.4  |
| 101.1  | 104.4 | 98.3   | 95.2   | 93.1   | 104.8 | 107.7  | 108.9  | 106.7  |
| 113.2  | 120.9 | 112.3  | 111.1  | 98     | 113   | 114.5  | 115.9  | 122.5  |
| 104.1  | 115.8 | 94.7   | 99.1   | 100.5  | 113.2 | 98.7   | 109.1  | 110.2  |
| 104.6  | 106.1 | 104.3  | 105.6  | 94.8   | 101.9 | 106.7  | 109.2  | 108.3  |
| 106.3  | 101.3 | 100.9  | 102.8  | 98.1   | 111.2 | 101.6  | 106    | 113.5  |
| 111.5  | 108.5 | 98.8   | 103.4  | 95.6   | 111.1 | 107    | 109.1  | 118.5  |
| 109.3  | 107   | 105.1  | 96.3   | 94.6   | 107.5 | 101.3  | 105.3  | 102.6  |
| 108.7  | 117.3 | 99.8   | 104.2  | 100.6  | 108.7 | 107.4  | 113.4  | 113.6  |
| 140    | 214.4 | 174.5  | 204.5  | 169.9  | 171.8 | 209.8  | 176.9  | 145.2  |
| 112.5  | 114.7 | 107.9  | 100.1  | 91.4   | 101.6 | 102.9  | 116    | 113.3  |
| 181.2  | 275.2 | 216.9  | 227.6  | 213.4  | 258.6 | 237.9  | 276.4  | 212.7  |
| 121.1  | 137.1 | 134.5  | 137.6  | 120.7  | 131.5 | 129.6  | 140.4  | 136.5  |
| 688.3  | 618.2 | 618.5  | 518.4  | 484.6  | 579.8 | 416.5  | 948.7  | 994.8  |
| 2330.7 | 2629  | 2297.2 | 3295.9 | 2183.3 | 2303  | 3240.2 | 2448.1 | 2339.9 |
| 227.5  | 409.4 | 312.9  | 324.5  | 254    | 308.7 | 279.5  | 566.1  | 330.2  |
| 125    | 126.7 | 114.9  | 111.8  | 113.9  | 115.4 | 109.3  | 138.1  | 124.5  |
| 1094.6 | 882.8 | 742.5  | 733.8  | 701.8  | 852.1 | 843.4  | 1652.8 | 1555   |
| 107    | 115.5 | 104.9  | 103.8  | 102.2  | 115.9 | 108.3  | 111.8  | 106.6  |
| 117.5  | 127   | 127.8  | 139.4  | 107.9  | 129.1 | 124.1  | 152.7  | 134.7  |
| 137.8  | 195.2 | 189.3  | 194.1  | 166.3  | 200.7 | 215.9  | 217.8  | 145.1  |
| 117.3  | 110.9 | 122.2  | 120.1  | 108    | 114.5 | 112.9  | 126.8  | 111.4  |
| 145.9  | 269.8 | 246.5  | 372.7  | 222    | 245.2 | 282.4  | 257.3  | 229.3  |
| 102.6  | 103.2 | 95.5   | 99.2   | 96.2   | 111.2 | 104.7  | 108.4  | 112.7  |
| 114.8  | 114.8 | 117.3  | 118.6  | 108.6  | 112   | 117.4  | 130.6  | 128.3  |
| 104.4  | 103.1 | 105.2  | 97.5   | 94     | 109.9 | 97.3   | 108.1  | 100.3  |
| 117.9  | 121.6 | 108.7  | 101.3  | 119.9  | 117.1 | 115.1  | 117    | 115    |
| 173.6  | 325.4 | 264.2  | 350.5  | 271.8  | 276.1 | 309.3  | 392    | 191.4  |
| 103.4  | 133   | 107.5  | 110.9  | 103.3  | 110.1 | 108.3  | 121.9  | 107.4  |
| 110.6  | 128.3 | 116.8  | 124.5  | 111.2  | 124.6 | 131    | 116.3  | 108    |
| 251.6  | 292.6 | 328.8  | 288.6  | 278.6  | 341.7 | 360.1  | 516.1  | 334.4  |
| 112    | 116.5 | 110    | 104    | 99     | 113.7 | 97.4   | 110.3  | 116.6  |
| 118.1  | 219.6 | 187.8  | 200.1  | 201.5  | 162   | 171.4  | 183.5  | 136.2  |
| 160.2  | 151.3 | 142.8  | 147.9  | 149.7  | 137.3 | 156.1  | 182.2  | 158.6  |
| 232.8  | 205.7 | 188.9  | 246.2  | 185    | 204.3 | 252.3  | 280.3  | 184.2  |
| 106.2  | 103.5 | 106    | 103.6  | 98.1   | 112.8 | 108.4  | 117.9  | 111.3  |
| 124.2  | 172.7 | 150.9  | 170.7  | 137.9  | 161.9 | 167.7  | 185.1  | 159.3  |
| 255.7  | 309.5 | 249.9  | 286.3  | 232.1  | 287   | 305.8  | 400.7  | 247.6  |

|       |        |        |        |        |        |        |        |        |
|-------|--------|--------|--------|--------|--------|--------|--------|--------|
| 105.6 | 108.9  | 96.4   | 96.9   | 91.5   | 106.4  | 102.8  | 103    | 114.5  |
| 106.5 | 105.1  | 106.6  | 96     | 95.7   | 103.6  | 101.7  | 109.1  | 102    |
| 212.5 | 330.8  | 334.9  | 328.6  | 321.2  | 312.1  | 438.7  | 581.5  | 417.9  |
| 110.9 | 116.8  | 106.3  | 102.9  | 98.2   | 103.9  | 107.1  | 108.6  | 103.2  |
| 99.8  | 97.8   | 102.7  | 108.9  | 90.5   | 112.4  | 104.8  | 106.7  | 113.2  |
| 108.5 | 112.6  | 107.6  | 108.9  | 96.9   | 108.3  | 113.2  | 104.5  | 122.3  |
| 113.2 | 106    | 103    | 104.5  | 102.7  | 104.8  | 100.9  | 116.5  | 109.5  |
| 123.7 | 122.7  | 119.3  | 116.1  | 113.5  | 128.5  | 112.9  | 142    | 140.5  |
| 503.9 | 325.2  | 298.6  | 327.4  | 343    | 342.8  | 367.3  | 621.1  | 518.9  |
| 113.4 | 121.4  | 116.9  | 101.3  | 100.3  | 107.1  | 103.1  | 111.8  | 110.8  |
| 115.5 | 111.4  | 104.5  | 101.8  | 94.5   | 114.1  | 110.3  | 119.1  | 106.4  |
| 110.6 | 112    | 115.7  | 111.7  | 103.7  | 117.6  | 103.9  | 119.3  | 116.6  |
| 104.3 | 101.7  | 99.2   | 103.1  | 96.4   | 102.4  | 97.4   | 108.7  | 111.8  |
| 118.8 | 117.2  | 117.3  | 103.9  | 106.7  | 112.2  | 107.5  | 104.1  | 119.1  |
| 430.8 | 304    | 479.7  | 321.7  | 330.3  | 426.1  | 271.3  | 851.9  | 469.7  |
| 929.4 | 825.5  | 1028.1 | 814.2  | 915.2  | 1147.7 | 945.9  | 2494.6 | 1724.3 |
| 257.6 | 224    | 263.9  | 237.9  | 203.5  | 279.6  | 257.6  | 275    | 221.7  |
| 429.3 | 541.5  | 456.6  | 425.8  | 481.5  | 449.7  | 542.8  | 864.5  | 359.1  |
| 127.6 | 119.7  | 103.4  | 115.9  | 106.4  | 120.1  | 115.7  | 133.8  | 131.5  |
| 163.8 | 218.7  | 174.3  | 220.1  | 158    | 180.9  | 191.2  | 409.3  | 272.4  |
| 207.5 | 299.9  | 294.5  | 272.4  | 252.7  | 275.9  | 319.3  | 337.5  | 267    |
| 397.1 | 306.5  | 354.7  | 284.1  | 358.4  | 350.5  | 334.7  | 681.9  | 684.2  |
| 101.7 | 108.4  | 104.9  | 99.2   | 94.9   | 103.9  | 100.3  | 110.5  | 105    |
| 200.8 | 264.5  | 224.9  | 246.9  | 223.8  | 257.3  | 231.8  | 333.1  | 244.4  |
| 411.1 | 518.8  | 473.1  | 366.7  | 433.9  | 502.6  | 468.5  | 686.2  | 479.9  |
| 163.1 | 181.8  | 209.5  | 156.6  | 189.6  | 194.4  | 191.1  | 266.7  | 168.3  |
| 287.3 | 331.6  | 320.8  | 311    | 303.5  | 322.9  | 374.1  | 568.3  | 368.5  |
| 137.5 | 177.2  | 189.2  | 165.2  | 153.7  | 167.2  | 171.4  | 204.9  | 139    |
| 111.1 | 108.5  | 97.3   | 94.4   | 98.5   | 110    | 101.3  | 108.7  | 116.1  |
| 285.2 | 286.7  | 276.1  | 527.6  | 316.5  | 270.5  | 519.6  | 441.3  | 283.8  |
| 115.8 | 147.5  | 140.8  | 135.6  | 121.4  | 157.6  | 142.6  | 153.7  | 175.7  |
| 115.3 | 129    | 117.6  | 127.6  | 110.9  | 128.6  | 114.1  | 135.9  | 127.1  |
| 205.6 | 348.6  | 315.1  | 378.1  | 277.4  | 292.5  | 387.1  | 284.6  | 281.6  |
| 110.7 | 120.6  | 111.5  | 125.7  | 105.5  | 116.1  | 117.7  | 125.2  | 118.1  |
| 166.7 | 156.6  | 145.6  | 167.3  | 167.8  | 171.8  | 163.1  | 339.9  | 195.1  |
| 103.1 | 107    | 101.7  | 101.9  | 97.4   | 103.1  | 98.9   | 100.8  | 99.4   |
| 112.6 | 106.2  | 101.3  | 109.6  | 100.9  | 111.1  | 116.2  | 112.7  | 114.7  |
| 408.1 | 433    | 383.8  | 440.3  | 337.8  | 470.2  | 398.8  | 841.2  | 640    |
| 129.2 | 147.8  | 138.2  | 137.3  | 109.6  | 129.5  | 122.1  | 158.9  | 145    |
| 1093  | 2068.4 | 1619.2 | 1527.7 | 1272.7 | 1565.1 | 1525.2 | 2185.4 | 1225.6 |
| 258.8 | 393.9  | 353.1  | 370.4  | 341.8  | 368.5  | 432.6  | 522.9  | 345.2  |
| 419.7 | 686.7  | 447.7  | 605.4  | 500.9  | 574.2  | 510.7  | 1281.3 | 756.5  |
| 142.7 | 308.1  | 259    | 221.4  | 217.1  | 259.3  | 260.7  | 287.3  | 217.4  |
| 116.7 | 128.2  | 112.6  | 106.8  | 107.4  | 129.1  | 116.5  | 146.2  | 122.1  |
| 150.5 | 145.4  | 143.5  | 123.2  | 134.8  | 155    | 126.5  | 208.8  | 182.8  |
| 112.3 | 122.5  | 110.3  | 99.3   | 103.2  | 105.1  | 105    | 116.8  | 110.2  |
| 107.2 | 109.8  | 104.2  | 97.9   | 96.8   | 102.2  | 96     | 111.2  | 106.2  |
| 118.8 | 106.3  | 106.2  | 107.3  | 109.2  | 118.4  | 109.3  | 153.7  | 121.3  |
| 131.8 | 135.1  | 123.2  | 121.4  | 126.8  | 128.1  | 125.9  | 165    | 136.3  |
| 178.6 | 223.3  | 221.8  | 251.9  | 181.6  | 233.1  | 216.3  | 362.8  | 218.5  |
| 103.8 | 144.1  | 104.8  | 118.2  | 101.1  | 112.1  | 108.7  | 140.7  | 110.9  |

|         |         |         |         |         |       |         |         |         |
|---------|---------|---------|---------|---------|-------|---------|---------|---------|
| 117.3   | 121.7   | 125.3   | 122.2   | 113     | 126.4 | 121.9   | 125.3   | 128.1   |
| 145.8   | 117.8   | 120.6   | 154.4   | 112.6   | 137   | 159.1   | 198.1   | 262.5   |
| 114     | 113.1   | 119.6   | 114.2   | 103.5   | 118.3 | 117.5   | 143.4   | 148.2   |
| 101.5   | 105.6   | 101.5   | 101.5   | 97.6    | 111.5 | 99.3    | 108.1   | 108.2   |
| 98.6    | 114.3   | 105.5   | 103.8   | 108.1   | 115.3 | 118.2   | 143     | 119.4   |
| 102.9   | 106.2   | 99.9    | 99.5    | 91      | 113.7 | 104.6   | 104.5   | 120.3   |
| 146.7   | 167.6   | 182.7   | 152.3   | 155.9   | 190.2 | 161.2   | 219.8   | 165.7   |
| 918.5   | 667.7   | 695.8   | 549.4   | 722.8   | 898.8 | 546     | 2108.9  | 2365.2  |
| 1121.9  | 650.9   | 636.1   | 419.1   | 581.5   | 722   | 628.6   | 2066.3  | 2567.9  |
| 112.6   | 109.8   | 108.6   | 110.8   | 101.9   | 116.1 | 107.3   | 112     | 117.9   |
| 102.4   | 110.8   | 105.2   | 95.9    | 93.6    | 116   | 96.3    | 95.2    | 108.2   |
| 116.5   | 114.7   | 104     | 105.3   | 103.5   | 120.3 | 108.3   | 117     | 111.3   |
| 111.8   | 113.2   | 109.3   | 103.8   | 99.4    | 104.5 | 102.3   | 115     | 101.9   |
| 108.7   | 105.2   | 104.3   | 100.7   | 96.8    | 112   | 101.6   | 111.9   | 114.6   |
| 103     | 109.7   | 109.1   | 105.8   | 91.2    | 111.9 | 112.3   | 123.3   | 120.9   |
| 107.6   | 106.2   | 112.8   | 103     | 101.1   | 115.4 | 108.5   | 118.1   | 116.6   |
| 107.7   | 102.9   | 98      | 96.7    | 95.2    | 108.2 | 103.1   | 109.6   | 100.8   |
| 99.5    | 111.1   | 100.8   | 103.7   | 92.3    | 112.1 | 99.2    | 110     | 108.7   |
| 102.8   | 105.6   | 100.3   | 104.9   | 97.2    | 108   | 105.6   | 104.6   | 104.8   |
| 105.6   | 103.7   | 99.6    | 93.5    | 93.8    | 105.3 | 99.3    | 99      | 101.7   |
| 303.5   | 719.5   | 653.3   | 473.1   | 555.6   | 522.6 | 461.5   | 823.1   | 444.7   |
| 141.5   | 143.9   | 123.7   | 129.6   | 111.4   | 132.3 | 123.1   | 207.4   | 205     |
| 110.1   | 101     | 102.6   | 105.4   | 93.6    | 111.8 | 100.9   | 115.6   | 107.6   |
| 108.3   | 100.2   | 94      | 98.8    | 88.8    | 109.1 | 97.4    | 114.4   | 105.8   |
| 167.6   | 125.7   | 106.9   | 157.6   | 98.8    | 107.3 | 155     | 128.2   | 116.2   |
| 139.7   | 118.5   | 104.7   | 128.5   | 94.5    | 119.3 | 118.1   | 114.9   | 108.4   |
| 103.1   | 104.4   | 98.3    | 100.3   | 95.8    | 102.6 | 94.3    | 114     | 107.3   |
| 108.5   | 109     | 100     | 100.9   | 93.8    | 110.9 | 101.2   | 113.2   | 114.2   |
| 116.2   | 119.3   | 107.1   | 116.2   | 106.2   | 125   | 109.9   | 156.5   | 128.2   |
| 129.6   | 139.5   | 129.1   | 120.4   | 129.1   | 144.7 | 145.4   | 209.7   | 181.9   |
| 109.8   | 108.9   | 99.9    | 97.2    | 100.7   | 104.1 | 100.3   | 97.5    | 112.1   |
| 102.7   | 109.3   | 102     | 104.4   | 98.8    | 109.6 | 93.9    | 111.8   | 102.3   |
| 130.7   | 146.2   | 131.2   | 123.8   | 110.6   | 135.4 | 131.6   | 178.7   | 143.1   |
| 128.6   | 142.6   | 147.8   | 131.8   | 159.7   | 142.8 | 162.7   | 161.1   | 108     |
| 107.3   | 103.9   | 100.1   | 100.6   | 94.9    | 104   | 101.2   | 101.4   | 100.9   |
| 109.4   | 164.2   | 121.5   | 126.6   | 112.1   | 116.8 | 126.1   | 120.7   | 114.8   |
| 120.7   | 170.5   | 116.9   | 158.6   | 128.3   | 123.7 | 119.3   | 120.4   | 120.7   |
| 114.5   | 129.2   | 128.1   | 137.9   | 122     | 131.3 | 110.5   | 122.2   | 119.2   |
| 123.4   | 170.9   | 139.2   | 126.8   | 131.5   | 141.2 | 129.6   | 129.6   | 127.2   |
| 112.8   | 136     | 132.4   | 123.6   | 109     | 133.8 | 117.5   | 135.8   | 115.9   |
| 105.7   | 123.2   | 117.2   | 104     | 98.7    | 109.6 | 105.3   | 114.8   | 104.6   |
| 402.7   | 1211.8  | 963.3   | 924.7   | 735.9   | 788.2 | 773.4   | 671.4   | 417.7   |
| 110.7   | 106.3   | 99.5    | 104.3   | 90.2    | 108   | 109.2   | 113.2   | 102.5   |
| 121.3   | 124.6   | 113.4   | 113.8   | 97.4    | 106.5 | 116.8   | 118.5   | 125.3   |
| 176.1   | 169.2   | 135     | 193.9   | 137.4   | 134.8 | 163.4   | 240.6   | 267.1   |
| 293.5   | 347.8   | 314.5   | 259.9   | 281.9   | 368.9 | 340.9   | 585.9   | 558.1   |
| 112.4   | 127.4   | 115.1   | 101.8   | 102.3   | 119.6 | 110.5   | 119.7   | 121.3   |
| 144.5   | 133.1   | 118     | 115.3   | 115.9   | 138.3 | 123.4   | 181.3   | 140.9   |
| 16520.1 | 15366.3 | 12482.8 | 15346.4 | 14777.8 | 12407 | 15541.4 | 25684.7 | 20687.1 |
| 105.1   | 107.9   | 112     | 115.2   | 114     | 117   | 122     | 128.3   | 125.7   |
| 127.3   | 281     | 262.3   | 248.3   | 221     | 226.5 | 268.1   | 256.4   | 207.3   |

|        |        |        |        |        |        |        |        |        |
|--------|--------|--------|--------|--------|--------|--------|--------|--------|
| 267.7  | 302.2  | 288.2  | 281.7  | 232.3  | 335.6  | 264.8  | 724.7  | 461    |
| 166.2  | 196    | 219.3  | 168.2  | 200.3  | 192.4  | 185.5  | 222.5  | 159.7  |
| 107.3  | 111.3  | 102.7  | 106.6  | 107    | 116.7  | 106    | 117.5  | 120.5  |
| 113.5  | 123.9  | 109.9  | 116.7  | 112    | 123.3  | 112.4  | 113.1  | 109.9  |
| 108.6  | 109.7  | 104.5  | 95.3   | 94.4   | 111.4  | 105.6  | 104.9  | 114.5  |
| 107.9  | 106.9  | 99.4   | 97.7   | 96.7   | 114.6  | 106.7  | 104.7  | 109.9  |
| 1267.9 | 1091.9 | 1401.1 | 970.6  | 1180.4 | 1440   | 878.3  | 2508.7 | 2851.5 |
| 876    | 773.2  | 912.8  | 652.3  | 693.7  | 804.9  | 1085.4 | 1410   | 1054.9 |
| 484.8  | 328.4  | 314.8  | 385.3  | 308    | 338.5  | 338.9  | 448.7  | 251.9  |
| 2821.1 | 1512.8 | 1603.4 | 2007.2 | 1527.2 | 1621.2 | 2221.3 | 1821.1 | 1246.4 |
| 112    | 101.6  | 107.9  | 111.4  | 103.2  | 111.4  | 101.8  | 127.4  | 100.9  |
| 105.6  | 107.6  | 102.3  | 106    | 96.8   | 107.2  | 98.9   | 108.3  | 110.4  |
| 110    | 109    | 98.2   | 118.2  | 96.1   | 114.2  | 97.1   | 111.5  | 111.3  |
| 108.3  | 102.5  | 100.7  | 95.9   | 93.4   | 102.6  | 101.2  | 108.1  | 105.8  |
| 109.2  | 121.6  | 107.4  | 113.3  | 104.3  | 109    | 112    | 118.9  | 113    |
| 107.3  | 115    | 110.9  | 103.4  | 103.1  | 110.7  | 112.5  | 121.3  | 113.5  |
| 638.3  | 284.2  | 256.7  | 220.7  | 254.6  | 358.6  | 298    | 687.5  | 983.3  |
| 112.7  | 104.1  | 105.1  | 95.4   | 90.7   | 102.8  | 104.7  | 102.4  | 105.6  |
| 117.9  | 135.6  | 120.1  | 119    | 109.6  | 125.4  | 119.7  | 147.1  | 147.1  |
| 107.2  | 113.1  | 112.1  | 105.7  | 95.4   | 115    | 108.3  | 113.8  | 111    |
| 173.2  | 182.6  | 168.7  | 167.5  | 150.5  | 183.9  | 171.8  | 185.3  | 196.6  |
| 120.6  | 150.5  | 152.7  | 127.1  | 108.2  | 132.6  | 121.9  | 139.6  | 128.8  |
| 106.3  | 103.5  | 100.8  | 99.5   | 103.5  | 108.7  | 105.2  | 94.6   | 102.7  |
| 114.3  | 108.2  | 103.1  | 109.1  | 97.9   | 116.3  | 107.3  | 129.6  | 115.4  |
| 106.2  | 110.2  | 100.3  | 98.7   | 101.6  | 106    | 101.2  | 114.8  | 106.6  |
| 103.8  | 98.8   | 98.2   | 91.1   | 91.1   | 101.8  | 97.9   | 99     | 106.4  |
| 113.5  | 114    | 111.2  | 107.7  | 100.2  | 113.5  | 116.8  | 126.6  | 124.7  |
| 109.3  | 109.3  | 106    | 104.3  | 95     | 106.6  | 98.9   | 112.7  | 110.4  |
| 116.6  | 104.5  | 99     | 96.5   | 90.9   | 107.1  | 97.6   | 106.2  | 101.6  |
| 203.2  | 188    | 167.2  | 199.7  | 148.3  | 183.4  | 188.2  | 262.4  | 210.5  |
| 111.7  | 117.9  | 111.6  | 111    | 107.5  | 119.1  | 106.9  | 124.6  | 134.4  |
| 104.1  | 119.9  | 102.3  | 95.6   | 96.3   | 115.6  | 104.9  | 113.9  | 113.8  |
| 156.3  | 179.1  | 193.3  | 171    | 187.3  | 176.1  | 179.7  | 211.6  | 158.5  |
| 111.5  | 103.1  | 103.8  | 101.9  | 95.4   | 106.2  | 102.5  | 112.8  | 107    |
| 100.2  | 109.8  | 98.2   | 107.4  | 96.2   | 101.5  | 98.7   | 117.3  | 112.4  |
| 159.7  | 188    | 193.1  | 207.4  | 157.2  | 155.1  | 195.9  | 281.2  | 212.8  |
| 263.2  | 303.8  | 317.4  | 307.7  | 280.1  | 351.2  | 323.3  | 507.3  | 322    |
| 116.1  | 115    | 100.6  | 113.3  | 109    | 114.6  | 109    | 117.3  | 113.1  |
| 260.7  | 329.4  | 367.5  | 301.9  | 289.9  | 326.2  | 350.9  | 389.5  | 232.4  |
| 123    | 141    | 115.8  | 145    | 101.8  | 116.5  | 125.4  | 146.3  | 131.1  |
| 112.5  | 122.9  | 115.8  | 109.1  | 102.7  | 122.4  | 115.1  | 143.6  | 118.9  |
| 117.5  | 162.7  | 142.4  | 129    | 141.8  | 162    | 148.4  | 181.9  | 139    |
| 102.5  | 105    | 106.6  | 107.6  | 95.5   | 109.7  | 101.1  | 119.5  | 107.4  |
| 104    | 108.6  | 102.9  | 97.4   | 91.2   | 104.1  | 98.8   | 110.5  | 103.6  |
| 105.3  | 108.8  | 101.1  | 93.8   | 91.4   | 99.7   | 98.5   | 106.2  | 100.5  |
| 823.5  | 1394.1 | 2153.9 | 1657.3 | 1368.6 | 1896.6 | 1786.2 | 2500.1 | 1502.6 |
| 317.9  | 720.5  | 856    | 631.3  | 600.1  | 732.5  | 717.5  | 956.1  | 740.2  |
| 113.9  | 117.3  | 118.5  | 125.8  | 109.8  | 129.8  | 116.2  | 136.1  | 125.3  |
| 109.2  | 112.3  | 115.2  | 108.3  | 97.1   | 108.3  | 110.5  | 117    | 114.6  |
| 110.2  | 111    | 95.9   | 105    | 100.4  | 111.5  | 98.8   | 102.7  | 114.1  |
| 106    | 107.6  | 101.7  | 130.1  | 91     | 114.2  | 121.2  | 105.6  | 104.7  |

|       |       |       |       |       |       |       |       |       |
|-------|-------|-------|-------|-------|-------|-------|-------|-------|
| 106.7 | 113   | 106.3 | 117.5 | 97.9  | 115.2 | 112.3 | 128.2 | 108.1 |
| 96.7  | 103.7 | 104   | 98.6  | 100.2 | 109.4 | 103.5 | 117.7 | 114.4 |
| 101.5 | 100.7 | 94.7  | 96.6  | 90.8  | 102.3 | 97.3  | 110.9 | 101.6 |
| 113.6 | 120.5 | 124.7 | 123.4 | 109.2 | 124.8 | 120.8 | 122.6 | 116.3 |
| 106.4 | 114.1 | 104.6 | 97.3  | 98.3  | 104   | 99.6  | 100.6 | 108.3 |
| 103.7 | 105   | 111.1 | 100   | 99.9  | 106.2 | 97    | 106.3 | 111.3 |
| 115.4 | 116.2 | 106.7 | 135.8 | 96.4  | 107.3 | 142.2 | 112.6 | 108.7 |
| 112.5 | 103.3 | 102.4 | 97.7  | 95.7  | 109.6 | 99    | 110.7 | 101.7 |
| 109.2 | 114.3 | 106.7 | 95.6  | 103.4 | 111.9 | 112.9 | 105   | 105.7 |
| 102.4 | 111.1 | 105.9 | 97.6  | 101.7 | 117   | 117.8 | 118   | 109.5 |
| 193.4 | 116.6 | 105.4 | 353.4 | 97.1  | 125.3 | 124.3 | 111.7 | 139.3 |
| 109.7 | 141.8 | 109.6 | 120.5 | 109.4 | 112.8 | 114.1 | 123.8 | 124.1 |
| 107.4 | 102.5 | 94.9  | 104.7 | 92.5  | 112   | 106.4 | 110.4 | 112.7 |
| 129.3 | 104.4 | 105.6 | 107.5 | 98.3  | 110.3 | 108.4 | 130   | 125.6 |
| 110   | 103.4 | 99.6  | 90.6  | 88.2  | 102.9 | 100.1 | 93.8  | 97.3  |
| 111.4 | 108   | 103.1 | 96    | 95.2  | 109.8 | 96.4  | 111.5 | 109.7 |
| 109.7 | 101   | 107.4 | 101.2 | 89.1  | 106.1 | 103.9 | 117   | 108.9 |
| 99.1  | 105.4 | 93.5  | 100.8 | 92.7  | 103.9 | 101.9 | 115.6 | 113.3 |
| 138.3 | 182.9 | 180.2 | 164.9 | 151.2 | 176   | 166.7 | 208.6 | 176.7 |
| 105.7 | 100.5 | 108.4 | 92    | 105.2 | 100.4 | 104.2 | 105.3 | 99.3  |
| 103.9 | 110.8 | 113.7 | 102.5 | 96.6  | 116.6 | 108   | 108.9 | 111.5 |
| 148.4 | 171.5 | 182.3 | 169.8 | 172.3 | 194.8 | 121.2 | 298.6 | 182.1 |
| 105.1 | 113.7 | 96.6  | 94.9  | 93.5  | 98.9  | 102.5 | 99.9  | 101.8 |
| 105.9 | 109.6 | 106.9 | 105.5 | 100.5 | 110   | 104.8 | 107.3 | 116   |
| 107.5 | 101.1 | 106.1 | 98    | 94.6  | 97    | 104.2 | 106.9 | 102.9 |
| 105.8 | 103.9 | 101.4 | 100.5 | 98.5  | 107.6 | 103.5 | 106.9 | 107.9 |
| 119   | 144.7 | 123.1 | 134.2 | 126   | 123.6 | 130.5 | 132.7 | 104.6 |
| 107.7 | 102.2 | 106   | 98.2  | 97.3  | 103.5 | 105.9 | 113.7 | 111.8 |
| 102.7 | 108.6 | 107.6 | 105.1 | 94.3  | 106.6 | 104.9 | 109.9 | 101.9 |
| 112.7 | 107.5 | 106.7 | 109.3 | 94.2  | 109.3 | 103.5 | 108   | 104.6 |
| 164.3 | 229.6 | 180.8 | 202.1 | 164.4 | 180.1 | 188.5 | 176.4 | 156.1 |
| 118.7 | 111.6 | 110.2 | 124.2 | 105.2 | 124.5 | 118.7 | 110.4 | 116.7 |
| 104.9 | 120.7 | 106.2 | 116.7 | 99.2  | 115.6 | 114.6 | 117.3 | 119.4 |
| 99.1  | 107.8 | 102.7 | 99    | 95.8  | 99.9  | 105.4 | 110.4 | 105   |
| 104.8 | 107.8 | 103.4 | 106.1 | 99.7  | 107.8 | 99.3  | 107.2 | 109.3 |
| 103.5 | 108.1 | 111.3 | 103.7 | 97.5  | 104.1 | 103.4 | 99.3  | 106   |
| 109.1 | 104.9 | 105.3 | 99.4  | 93.4  | 110.2 | 103.7 | 105.1 | 106.6 |
| 111.6 | 110.7 | 106.8 | 95.6  | 93.1  | 111.8 | 103.7 | 123.7 | 117.6 |
| 110.3 | 105.1 | 102.1 | 99.7  | 100.2 | 108.3 | 105   | 123.7 | 115.8 |
| 117.1 | 119.3 | 126   | 124.4 | 126.8 | 118.5 | 125.4 | 113.5 | 114.6 |
| 113.6 | 111.9 | 98.9  | 121.3 | 101.1 | 115.2 | 115.6 | 116.8 | 110   |
| 97.2  | 114   | 101.6 | 107.9 | 92.7  | 111.8 | 102.2 | 101   | 103.4 |
| 111.5 | 105.6 | 108.7 | 103.6 | 96.3  | 114.1 | 105   | 109.3 | 110.3 |
| 102.8 | 106.7 | 100.2 | 93.1  | 92.5  | 100.1 | 96.7  | 103.2 | 105.5 |
| 107.3 | 103.7 | 103.1 | 111.5 | 104.8 | 112.6 | 110.5 | 132.2 | 123   |
| 99.5  | 108.8 | 93.6  | 92.5  | 93.8  | 100   | 93.9  | 103.4 | 96.5  |
| 104.6 | 100.2 | 93.9  | 93.3  | 88.8  | 97.5  | 98.1  | 103.7 | 107.2 |
| 111.9 | 104.3 | 97.5  | 107.9 | 97.6  | 111.2 | 107.7 | 103.8 | 115.6 |
| 113.5 | 117.2 | 134   | 122.7 | 107.6 | 129.3 | 129.1 | 132.4 | 120.6 |
| 119.3 | 169.6 | 193.3 | 178.8 | 158.3 | 182.2 | 173.3 | 213.1 | 131.3 |
| 117.7 | 107.5 | 112.1 | 101.7 | 99.9  | 111.4 | 103   | 111.8 | 121.6 |

|       |       |       |       |       |       |       |       |       |
|-------|-------|-------|-------|-------|-------|-------|-------|-------|
| 559   | 621   | 690.9 | 385.1 | 552.9 | 583   | 353.4 | 670   | 654.4 |
| 111.6 | 110.4 | 97.8  | 103.9 | 97.5  | 104.2 | 106.1 | 106.9 | 105.6 |
| 105.6 | 101.5 | 105.1 | 110.6 | 96    | 107.2 | 102.4 | 102.7 | 117.3 |
| 99.4  | 106.2 | 110.5 | 94.2  | 92.4  | 112.5 | 102.5 | 104.3 | 113.1 |
| 100.4 | 109.7 | 99.4  | 108.2 | 92.2  | 109.1 | 99    | 106.8 | 110   |
| 107.9 | 109.5 | 100.6 | 104.3 | 97.9  | 109.1 | 100.8 | 116.7 | 105.8 |
| 108.1 | 110.5 | 108.2 | 101.5 | 91.9  | 109.2 | 109   | 110.3 | 102.1 |
| 112.6 | 111   | 101.2 | 102.8 | 100   | 108.6 | 96.5  | 104.6 | 115.9 |
| 108.1 | 106.3 | 104.3 | 104.4 | 93.3  | 101.8 | 103   | 110   | 108.9 |
| 96.9  | 109.1 | 109.5 | 96.4  | 89.9  | 114.8 | 101.8 | 104   | 102.8 |
| 109.3 | 107.1 | 92.7  | 93.3  | 96.6  | 109.3 | 104.5 | 116.7 | 108.9 |
| 112.9 | 110.3 | 104.3 | 100.8 | 98.9  | 111.2 | 104.1 | 115.5 | 112.5 |
| 105.9 | 107.4 | 98.7  | 106.2 | 97    | 106.2 | 105.3 | 103.7 | 106.4 |
| 108.5 | 104.2 | 119.1 | 103.8 | 96.7  | 110.8 | 103.6 | 112.5 | 109.4 |
| 103.9 | 103.5 | 96.4  | 104.5 | 91.2  | 98.2  | 102   | 114.2 | 120.1 |
| 103.5 | 103.7 | 99.8  | 98.3  | 98.2  | 102.6 | 103.4 | 106.7 | 115.9 |
| 104.6 | 107.7 | 97.9  | 103.9 | 92.2  | 106.7 | 97.1  | 106.3 | 111.9 |
| 109.7 | 106.2 | 100.1 | 97.5  | 87.4  | 104.1 | 95.5  | 111.8 | 109.2 |
| 104.1 | 106.3 | 104.4 | 101.8 | 93.4  | 103.6 | 109.4 | 106.3 | 112.2 |
| 97.1  | 103.7 | 100.3 | 91    | 89.6  | 107.4 | 106   | 111   | 109.8 |
| 107.6 | 100.6 | 102.1 | 91.8  | 94.4  | 107.6 | 98    | 106.7 | 103.6 |
| 112   | 114.2 | 103.3 | 115.7 | 100.9 | 108.9 | 116.5 | 125.1 | 111.5 |
| 112   | 109.1 | 102.6 | 100.7 | 92.6  | 100.5 | 98.5  | 113.8 | 107.9 |
| 104   | 110.5 | 105.4 | 104.8 | 104.9 | 109.5 | 107.6 | 112.9 | 106.4 |
| 109   | 109.7 | 105.9 | 101.4 | 99.7  | 109.8 | 101.5 | 102.2 | 114.2 |
| 103.6 | 107.9 | 102.3 | 97.3  | 96    | 102.7 | 103   | 103.4 | 105.9 |
| 104.9 | 115.2 | 99.6  | 102.4 | 104.2 | 104.8 | 112.3 | 108.1 | 110.9 |
| 104.1 | 104.6 | 105.9 | 94.4  | 96.1  | 106.3 | 103.3 | 104.3 | 108.3 |
| 105.8 | 105.9 | 100.5 | 107.9 | 99.9  | 111.5 | 95.3  | 110.5 | 109.4 |
| 111.9 | 114.6 | 108.8 | 110.5 | 108.1 | 107.2 | 100.5 | 121.2 | 118.2 |
| 103.1 | 112.3 | 103.3 | 101.1 | 100.9 | 110.7 | 100.3 | 116   | 110.4 |
| 105.3 | 118.1 | 94.1  | 103.3 | 98.4  | 117.6 | 97.6  | 111   | 114.6 |
| 104   | 108.2 | 102.6 | 91.3  | 101.9 | 107.8 | 108.7 | 105.7 | 101.1 |
| 107.6 | 116.1 | 101.8 | 106.9 | 101.7 | 100.6 | 109.1 | 112.6 | 115.6 |
| 106.5 | 101.5 | 104   | 104.6 | 98.5  | 111.3 | 99    | 100.7 | 101.6 |
| 100.9 | 103.2 | 100.3 | 94.8  | 98.9  | 111.2 | 97.8  | 112.7 | 103.8 |
| 106.1 | 102   | 102.1 | 99.2  | 95.3  | 111.8 | 100.6 | 107.9 | 116.6 |
| 107.5 | 106   | 104.6 | 97.7  | 93.4  | 106.3 | 107.5 | 100.2 | 100.2 |
| 108.1 | 111.6 | 108.8 | 107.3 | 96.7  | 118.1 | 95.9  | 111.6 | 121.3 |
| 118.4 | 111.6 | 111   | 102.6 | 109.1 | 114.9 | 104.9 | 120.9 | 123.2 |
| 108.1 | 114.5 | 101.3 | 107.5 | 97.2  | 113.9 | 106.8 | 102.8 | 111   |
| 105.7 | 112.8 | 104.5 | 100.9 | 95.4  | 110.2 | 97.1  | 103.4 | 106.6 |
| 117.3 | 125.9 | 111.2 | 126.1 | 108.9 | 127.1 | 121   | 151.3 | 122.8 |
| 113.2 | 117.2 | 106.5 | 108.3 | 103.1 | 117   | 102.7 | 121.2 | 103.9 |
| 103.5 | 107.7 | 99.2  | 98.8  | 89    | 105.3 | 105.8 | 103.2 | 106   |
| 99.4  | 115.6 | 106.9 | 102.3 | 98.6  | 105.1 | 102.1 | 103.4 | 106.9 |
| 100.3 | 100.4 | 98    | 92.2  | 90.7  | 100.8 | 104.7 | 108.5 | 102.3 |
| 109.4 | 110.2 | 103.7 | 94.8  | 98.9  | 110.1 | 98.3  | 111.9 | 110.8 |
| 103.5 | 101   | 98    | 97.7  | 93.2  | 107.5 | 104   | 111.6 | 105.1 |
| 107   | 116.9 | 108.7 | 97.8  | 97.1  | 104.9 | 103.5 | 100.9 | 100.7 |
| 110.9 | 102.7 | 98.4  | 104.5 | 96.1  | 116   | 104.8 | 106.2 | 109.4 |



|       |       |       |       |       |       |       |       |       |
|-------|-------|-------|-------|-------|-------|-------|-------|-------|
| 109.9 | 107.8 | 97.5  | 100.9 | 95    | 109.6 | 109   | 115.5 | 116   |
| 106.3 | 109.1 | 109.6 | 101.4 | 97.2  | 108.3 | 101   | 96.6  | 104.9 |
| 104.9 | 107   | 105.4 | 91    | 94.9  | 102   | 106   | 91.7  | 105.9 |
| 105.4 | 106.5 | 106.7 | 98.9  | 99.9  | 106.5 | 101.3 | 110.5 | 120.2 |
| 103.7 | 104   | 105.1 | 112.7 | 100.9 | 108.1 | 102.6 | 108.8 | 111.3 |
| 100   | 105.7 | 105   | 102.3 | 91    | 103   | 99.4  | 105.3 | 105.9 |
| 108.3 | 107.8 | 105.8 | 98.9  | 102.1 | 110.2 | 108.8 | 108.4 | 121.5 |
| 110   | 114.3 | 104.7 | 97.7  | 106.1 | 112.1 | 104.2 | 109.4 | 120.1 |
| 100.9 | 105.3 | 102.1 | 98.1  | 91.7  | 108   | 106.7 | 109.4 | 107   |
| 112   | 105.6 | 107.9 | 103.5 | 97.4  | 106.8 | 98.5  | 108.7 | 108.2 |
| 104.2 | 110.2 | 107.1 | 97.9  | 96.4  | 116.6 | 104.6 | 113.6 | 105.1 |
| 106.1 | 109.4 | 105.6 | 100.6 | 103.1 | 113.5 | 99.4  | 112.5 | 106.3 |
| 106.5 | 107.9 | 99.4  | 113.3 | 98.7  | 110.8 | 100.8 | 110.5 | 107.7 |
| 98.8  | 107.9 | 99.8  | 99.3  | 96.3  | 101.7 | 93    | 95.2  | 107.6 |
| 102.5 | 100.6 | 101.1 | 108.4 | 98.2  | 105.8 | 104   | 103.3 | 102   |
| 104.3 | 104.3 | 98.2  | 93.1  | 93.5  | 104.1 | 98.6  | 105.5 | 110.7 |
| 110.9 | 106   | 105.7 | 101.7 | 99.3  | 108.2 | 99.3  | 116   | 100.2 |
| 106.8 | 108.6 | 98.9  | 101.8 | 100.4 | 107   | 97.6  | 111.5 | 106.8 |
| 119   | 112.6 | 112.2 | 107.6 | 92.6  | 108   | 103.2 | 114   | 129.2 |
| 104.6 | 108.6 | 109.9 | 107.1 | 104.7 | 117.3 | 111.7 | 124.2 | 123.1 |
| 111.5 | 118   | 106.4 | 100.6 | 101.9 | 112.3 | 108.1 | 115.5 | 112.1 |
| 101.6 | 113.4 | 100.2 | 102.9 | 88.6  | 109.3 | 103.2 | 98.4  | 102.1 |
| 103.7 | 109.5 | 104.8 | 106.5 | 102.5 | 112.2 | 99.5  | 116.1 | 112.1 |
| 108.3 | 100.4 | 99.4  | 101.5 | 90.6  | 109.2 | 105.4 | 109.4 | 96.8  |
| 115.9 | 112.6 | 102.7 | 101.4 | 96.2  | 116.9 | 100.5 | 107   | 105   |
| 106.1 | 116.7 | 101.4 | 97.8  | 101.7 | 111   | 104.3 | 117.9 | 109.5 |
| 108.2 | 107.4 | 105.5 | 97.4  | 100.7 | 115.6 | 102   | 116.1 | 116.1 |
| 95.8  | 102.1 | 103.6 | 94.8  | 94.1  | 102.2 | 106   | 101.8 | 98.6  |
| 110.1 | 109.5 | 107.7 | 108.5 | 104.5 | 108.6 | 107.1 | 116.6 | 115   |
| 112.9 | 119.2 | 109.9 | 99.8  | 101.8 | 106.2 | 101.6 | 106.9 | 105.1 |
| 99.8  | 102.6 | 98.1  | 94.2  | 92.4  | 102.7 | 94.6  | 107.6 | 96.7  |
| 105.2 | 113.1 | 100.1 | 91.6  | 92.4  | 105   | 100.3 | 101.8 | 105.8 |
| 107.4 | 104.9 | 101.3 | 99.1  | 98.3  | 116.3 | 107.1 | 106   | 108.2 |
| 117   | 126.9 | 112.3 | 105.1 | 105.3 | 130   | 117.5 | 134.1 | 122.9 |
| 103.3 | 108.5 | 103.8 | 96.2  | 98    | 106.1 | 102.3 | 101.7 | 109.8 |
| 109   | 107.8 | 103.2 | 102.3 | 99.1  | 112.5 | 105.4 | 115.2 | 124.8 |
| 104.3 | 101.8 | 103   | 104.6 | 98.7  | 107.8 | 106.5 | 115.1 | 93.5  |
| 111.6 | 113.7 | 105.6 | 108.2 | 102.9 | 104.7 | 113.5 | 117.5 | 110.2 |
| 102.3 | 111.6 | 103.3 | 103.2 | 96    | 110   | 101.8 | 118.4 | 116.1 |
| 100.9 | 116.8 | 108.6 | 101.3 | 96.6  | 107   | 101.5 | 117.5 | 104.8 |
| 112.1 | 114.3 | 102.8 | 101.1 | 101.3 | 113.2 | 103.9 | 123.2 | 125.3 |
| 101.9 | 110   | 101.4 | 102.6 | 96.8  | 105.6 | 104.8 | 115.8 | 108.1 |
| 143.2 | 173.4 | 170.4 | 142.4 | 154.4 | 162.2 | 158.1 | 160.2 | 126.3 |
| 106.8 | 115.3 | 98.7  | 104.3 | 96.1  | 106.7 | 98.3  | 116.2 | 102.8 |
| 113   | 112.2 | 105.2 | 99.8  | 106.6 | 118   | 112.5 | 119.1 | 115.4 |
| 105   | 111.6 | 107   | 101.8 | 93.5  | 115.4 | 102.6 | 111.7 | 116.7 |
| 113.6 | 120.8 | 101.2 | 104.4 | 101.4 | 109.1 | 106.1 | 113.6 | 108   |
| 104.5 | 112.9 | 101   | 112.8 | 87.5  | 121.1 | 102.5 | 105.3 | 111.6 |
| 100.6 | 108.5 | 102.7 | 104.1 | 91.7  | 106   | 98.3  | 107.5 | 112   |
| 112.2 | 111.4 | 102   | 109.5 | 94    | 110.1 | 106   | 109.4 | 111.6 |
| 98.3  | 106.5 | 100.1 | 104.1 | 93.8  | 105.9 | 103.6 | 106.4 | 113.2 |

|       |       |       |       |       |       |       |       |       |
|-------|-------|-------|-------|-------|-------|-------|-------|-------|
| 106.5 | 108.8 | 97.7  | 93.3  | 90.9  | 104.9 | 109   | 115.9 | 105.3 |
| 107.1 | 108.9 | 98.4  | 95.5  | 96.3  | 115.4 | 108.6 | 100.9 | 103.6 |
| 101.4 | 104.6 | 96.4  | 92.7  | 90.2  | 103.8 | 98.1  | 110.3 | 100   |
| 103.7 | 103.3 | 105.1 | 98.9  | 100.3 | 106.8 | 108   | 107.5 | 108.3 |
| 104.6 | 111.5 | 98.1  | 101.8 | 94.9  | 106.8 | 99.8  | 106.7 | 113.9 |
| 104   | 108.1 | 104.9 | 100.5 | 98.2  | 100.7 | 97.2  | 106.8 | 103   |
| 108.2 | 104.1 | 106.1 | 102   | 91.8  | 108.5 | 111.1 | 102.6 | 106.9 |
| 104.8 | 110.4 | 104.2 | 106.3 | 91.6  | 112.6 | 94.3  | 115.6 | 116.4 |
| 121.6 | 114.7 | 110.5 | 99.1  | 105.4 | 117.3 | 115.3 | 121.4 | 116.9 |
| 100.6 | 109.2 | 93    | 98.7  | 99.3  | 110.1 | 100.6 | 103   | 105.5 |
| 102.8 | 106.3 | 107   | 100.5 | 96    | 110.8 | 102.5 | 107.5 | 101.2 |
| 114.6 | 104.7 | 114.8 | 123.1 | 103.2 | 122.4 | 112.3 | 132.5 | 118.9 |
| 96.3  | 108.6 | 104.3 | 97    | 98.9  | 100.9 | 100.8 | 104.5 | 99.7  |
| 105.6 | 105.7 | 99.8  | 106.6 | 101.2 | 108.2 | 103   | 112.5 | 107.7 |
| 100.1 | 104.3 | 102.5 | 88.8  | 90.1  | 100.3 | 103.5 | 102.2 | 105.7 |
| 105.8 | 116.7 | 103.2 | 101.2 | 102   | 102.3 | 108.2 | 111.3 | 104.3 |
| 104.7 | 103.6 | 98.9  | 95.1  | 86.6  | 104.2 | 99.7  | 108.1 | 104.4 |
| 101.3 | 106.9 | 100.4 | 95.1  | 93.3  | 105   | 94.7  | 105.2 | 100.8 |
| 111.5 | 124.2 | 106.6 | 120.5 | 98.1  | 113.1 | 108.6 | 117.9 | 112.9 |
| 107.4 | 115.4 | 103.2 | 104.3 | 104.6 | 111.2 | 99    | 113.3 | 111.6 |
| 98.2  | 108.1 | 104   | 108.6 | 91.8  | 110.9 | 100   | 112.7 | 107.9 |
| 104   | 107.2 | 99.8  | 99.7  | 101.5 | 108   | 101.5 | 111.3 | 111.2 |
| 108.1 | 108.5 | 105.5 | 97.4  | 97.6  | 108.9 | 110.1 | 107   | 104.9 |
| 103.1 | 112.9 | 104.9 | 96.5  | 91.8  | 104.3 | 104.8 | 100.8 | 96.8  |
| 108.6 | 112.5 | 107.1 | 104.9 | 104   | 110.9 | 101.9 | 111.8 | 111.2 |
| 109.9 | 106   | 99.2  | 97    | 91.6  | 102.8 | 97.3  | 110.1 | 101.9 |
| 102.1 | 106.7 | 102.8 | 99.6  | 101.6 | 110.6 | 100.5 | 104.7 | 114.4 |
| 119.2 | 116.1 | 103.6 | 119.9 | 97.5  | 129.8 | 109.7 | 119.2 | 121.5 |
| 106.5 | 101.4 | 103   | 102.1 | 106.4 | 113.7 | 96.9  | 111.4 | 109.9 |
| 109.2 | 121.5 | 103.5 | 116   | 101   | 120.5 | 100.6 | 121.4 | 121.2 |
| 110.1 | 115.2 | 109.8 | 99.5  | 93.5  | 122   | 99.2  | 99.4  | 104.4 |
| 97.3  | 108.2 | 98.8  | 99.6  | 95.4  | 112.2 | 102.8 | 103.7 | 99.3  |
| 102.9 | 103.9 | 100.4 | 94.1  | 90.2  | 108.7 | 97.5  | 98.8  | 107.1 |
| 106.6 | 111.8 | 101   | 99.4  | 94.1  | 111.7 | 102.8 | 118   | 110.5 |
| 113.5 | 107.7 | 101   | 95.8  | 98    | 104.7 | 99.3  | 101.3 | 102.7 |
| 103.6 | 104   | 96.4  | 92.3  | 93.3  | 109.6 | 99.9  | 99.9  | 102   |
| 109.7 | 103.1 | 102   | 102.1 | 101.4 | 109.9 | 98.3  | 104.5 | 98    |
| 105.5 | 106.7 | 107.7 | 108.4 | 100.4 | 112.9 | 105   | 120.6 | 99.4  |
| 106.1 | 110   | 99.5  | 118.7 | 98.7  | 116.8 | 102.7 | 112.3 | 112.7 |
| 106.4 | 106   | 99.3  | 94.6  | 99.5  | 105.4 | 100.9 | 112.7 | 110.7 |
| 109.4 | 104.3 | 106.5 | 104.1 | 96.5  | 115.4 | 98.3  | 119.9 | 116   |
| 106   | 111.4 | 99    | 104.9 | 95.7  | 106.1 | 105.5 | 117.4 | 126.6 |
| 114.3 | 124.4 | 115.6 | 108.7 | 103.8 | 118.4 | 114.1 | 123.5 | 120.3 |
| 108.3 | 103.2 | 100.5 | 98.9  | 90.1  | 102.5 | 97.8  | 104   | 98.5  |
| 103.6 | 112.4 | 107.1 | 111.8 | 92.6  | 108.2 | 109.7 | 117   | 114.2 |
| 106.5 | 110.7 | 95.7  | 98.1  | 96    | 115.4 | 94.1  | 109.2 | 112.7 |
| 108.8 | 108.9 | 97.2  | 101   | 95.5  | 113.5 | 105.9 | 115.6 | 109.1 |
| 95.4  | 113.4 | 101.1 | 94.5  | 90.2  | 108.7 | 100.1 | 102.2 | 106.8 |
| 113.8 | 122.5 | 113.1 | 109.5 | 106.2 | 120.7 | 112.4 | 130.8 | 111   |
| 104   | 114.9 | 114   | 96.3  | 99.1  | 104.9 | 107.4 | 116.6 | 114.8 |
| 103.6 | 106.8 | 100.8 | 95.2  | 92.9  | 111.3 | 97.5  | 112.6 | 109.5 |

|       |       |       |       |       |       |       |       |       |
|-------|-------|-------|-------|-------|-------|-------|-------|-------|
| 104.5 | 104.3 | 100.7 | 92.8  | 96.2  | 109.3 | 99.5  | 99    | 101.9 |
| 104.5 | 104.2 | 103.6 | 101.3 | 91.7  | 107.3 | 95.6  | 115.9 | 108.6 |
| 109   | 107.6 | 102.4 | 104.2 | 101.6 | 109.8 | 104.1 | 120   | 119.2 |
| 104.3 | 109   | 103   | 100.9 | 97.5  | 113.1 | 96.2  | 106.1 | 105.3 |
| 107.7 | 104.5 | 105.7 | 100.5 | 89    | 110.4 | 96.9  | 108.7 | 102   |
| 105.1 | 116.1 | 100.3 | 95.3  | 99.6  | 106.9 | 101.9 | 112.9 | 114.4 |
| 107.4 | 103.6 | 104.7 | 99.1  | 96.5  | 107.7 | 103.5 | 118.3 | 105.3 |
| 99    | 109.9 | 108.6 | 108.2 | 97.4  | 109.6 | 101.4 | 117.3 | 119.1 |
| 101.3 | 114.5 | 94    | 95.4  | 90.1  | 107.4 | 105.4 | 98.5  | 108.8 |
| 108   | 117.7 | 116.1 | 103.1 | 100.3 | 119.3 | 103.7 | 122   | 108.8 |
| 116.2 | 105.6 | 105.5 | 100.7 | 98.7  | 111.6 | 99.2  | 113.7 | 104.1 |
| 108   | 103.2 | 102.8 | 102.5 | 96.8  | 117.9 | 100   | 106.9 | 108.5 |
| 95.8  | 104.2 | 103.9 | 115.5 | 96.3  | 114.9 | 110.2 | 124.6 | 105   |
| 105.5 | 111.2 | 98.2  | 104.9 | 95.6  | 106.2 | 93.3  | 114.8 | 107.4 |
| 106.5 | 109.7 | 110.5 | 108.1 | 96    | 107.2 | 98.9  | 119.8 | 103.9 |
| 109.3 | 104.6 | 97.6  | 108.9 | 95    | 108.6 | 103.1 | 110   | 105.8 |
| 108.4 | 106.2 | 108   | 105.9 | 97.2  | 109.2 | 95.9  | 114.5 | 113.3 |
| 104.7 | 113.5 | 99.7  | 97.2  | 99.5  | 105.7 | 99.5  | 108.7 | 109.9 |
| 102.1 | 117.4 | 103.9 | 104.5 | 92.6  | 105.2 | 105.1 | 103.3 | 105.5 |
| 108.6 | 107.7 | 105.2 | 97.9  | 94.3  | 109.7 | 101   | 114.7 | 107.8 |
| 100.9 | 106.3 | 102.8 | 98.2  | 98.1  | 101.9 | 105.8 | 109.8 | 105.6 |
| 108.9 | 105.6 | 116.2 | 111.5 | 100.4 | 114.7 | 102.9 | 111.5 | 109   |
| 118.7 | 117.5 | 110.1 | 102.5 | 109.2 | 109.9 | 114.8 | 121.8 | 122.7 |
| 108.3 | 105.6 | 104.5 | 114.8 | 102.9 | 107.7 | 109.4 | 110.4 | 116.1 |
| 100.8 | 106   | 106.8 | 106.2 | 97.2  | 101.6 | 100.2 | 102.2 | 113.3 |
| 103.5 | 109.1 | 102.3 | 102.9 | 94.9  | 116.5 | 102.5 | 112.2 | 105.8 |
| 110.8 | 111.3 | 104.2 | 97.5  | 96.1  | 107.7 | 103   | 112.5 | 112.8 |
| 106   | 102.3 | 106.3 | 104.3 | 92.6  | 115.4 | 96.2  | 106.6 | 103.7 |
| 104.8 | 105.8 | 100.8 | 101.9 | 95.2  | 105.2 | 102.9 | 102.2 | 107.9 |
| 100.4 | 110.5 | 96.4  | 93.3  | 95.3  | 112.4 | 108   | 97.4  | 106.8 |
| 109.1 | 109.9 | 98.7  | 97.7  | 94.9  | 114.2 | 100.7 | 105.8 | 104   |
| 105.7 | 101.6 | 94.2  | 110.8 | 101.2 | 116.5 | 100.3 | 111.3 | 106.6 |
| 109.9 | 111.4 | 101   | 102   | 96.3  | 114.2 | 107.1 | 101.7 | 103.9 |
| 109.7 | 103   | 106.9 | 105.8 | 100.1 | 117.9 | 104.9 | 109.7 | 117   |
| 106.2 | 109.3 | 99.4  | 97.9  | 98.5  | 109.3 | 105   | 101   | 106.8 |
| 110   | 105.8 | 103.6 | 97.9  | 95.5  | 107.8 | 97.4  | 108.7 | 104.6 |
| 101.5 | 116.2 | 104.3 | 108.9 | 95.4  | 108.6 | 95.5  | 110.5 | 102.4 |
| 104.9 | 104.2 | 95.3  | 101.6 | 99.1  | 109.7 | 97    | 104.6 | 101.5 |
| 105   | 105.6 | 94.6  | 102.7 | 94.3  | 104.7 | 98.7  | 109   | 119.4 |
| 99.2  | 104.3 | 97.1  | 96.7  | 97.7  | 109.5 | 98.1  | 118.6 | 104.5 |
| 105.8 | 104.1 | 102   | 95.8  | 92.8  | 109.1 | 95.4  | 105.1 | 108.8 |
| 104.1 | 118.4 | 105.1 | 109   | 95.6  | 115.2 | 103.5 | 103.7 | 110   |
| 103.5 | 107.3 | 105.1 | 105.2 | 96.8  | 101.7 | 98.6  | 107.3 | 107.5 |
| 106.1 | 114.9 | 105.9 | 108.1 | 104.7 | 112.9 | 112.4 | 107.5 | 111.6 |
| 97.3  | 98.5  | 95.8  | 109.8 | 85.7  | 106   | 106   | 97.8  | 98.4  |
| 106.1 | 103.3 | 96.8  | 106.2 | 93.5  | 101.6 | 98.1  | 104.4 | 103.4 |
| 106   | 105.3 | 98.6  | 101.1 | 93.8  | 110.4 | 100.5 | 105.8 | 104.4 |
| 108.4 | 107.9 | 105.1 | 99.6  | 91.3  | 108.7 | 104.2 | 107.5 | 102.3 |
| 107.4 | 106.5 | 101.2 | 100.2 | 100.4 | 107.8 | 104.9 | 108.4 | 114.5 |
| 110.8 | 112.9 | 99.5  | 103.4 | 90.4  | 106.8 | 105.4 | 107.7 | 109.2 |
| 113.6 | 103.5 | 98.3  | 104.8 | 101.6 | 114.8 | 102   | 110.8 | 105.6 |

|       |       |       |       |       |       |       |       |       |
|-------|-------|-------|-------|-------|-------|-------|-------|-------|
| 108.7 | 109.2 | 106.2 | 96.8  | 92.1  | 106.9 | 101   | 108.3 | 106.5 |
| 106.6 | 107.9 | 110.7 | 100.7 | 99.1  | 111   | 104.2 | 110.7 | 113.5 |
| 102.8 | 102.9 | 99.4  | 96.4  | 98    | 107.8 | 97.5  | 102.6 | 111.5 |
| 109.2 | 108.1 | 106.8 | 100   | 107.8 | 109.4 | 111.6 | 114.7 | 119.2 |
| 104.9 | 105.3 | 96.7  | 97.4  | 90.3  | 97.8  | 98    | 96.9  | 105.3 |
| 109   | 106.6 | 96.8  | 93.7  | 98.8  | 107   | 99.3  | 102.4 | 110.8 |
| 113.9 | 111.5 | 103.3 | 104.4 | 97.7  | 109.9 | 101.9 | 110.3 | 109.7 |
| 103   | 111.5 | 100.4 | 92.2  | 94.1  | 105.8 | 97.3  | 108.8 | 104.6 |
| 107.4 | 111   | 104.1 | 94    | 92.6  | 106.3 | 101.4 | 102.8 | 114.7 |
| 102.3 | 103.2 | 98.5  | 106.9 | 92.9  | 114.4 | 102.9 | 106.2 | 107.6 |
| 105.9 | 100.6 | 99.6  | 100.7 | 95.6  | 106.8 | 97.4  | 104.4 | 112.3 |
| 104   | 106.5 | 103.2 | 106.3 | 94.3  | 107.6 | 110.9 | 112.8 | 114.7 |
| 101.1 | 102.4 | 109.4 | 106.6 | 96.1  | 109.7 | 112.8 | 117.3 | 113.6 |
| 101.6 | 110.1 | 103.3 | 94.1  | 95.5  | 100.6 | 112.2 | 107.5 | 107.7 |
| 130.2 | 125.2 | 105.9 | 106.1 | 107.1 | 116.5 | 111.1 | 111.8 | 111.9 |
| 103.9 | 103.9 | 98.3  | 88.9  | 91    | 102   | 99.8  | 102.9 | 109.1 |
| 108.8 | 107.3 | 100.6 | 102.6 | 95.7  | 103.5 | 97.5  | 103.3 | 103.5 |
| 102.4 | 106.5 | 100.2 | 99.2  | 92.5  | 110.3 | 96.9  | 104.8 | 107.4 |
| 114   | 114.3 | 112.4 | 110.5 | 102.3 | 115.1 | 113.7 | 121.1 | 116.4 |
| 103.6 | 113.9 | 103.8 | 102.7 | 96.5  | 106.9 | 108.3 | 110.8 | 113.8 |
| 106.8 | 107   | 103.8 | 98.3  | 93.9  | 104.5 | 103.9 | 107.2 | 101.9 |
| 111.1 | 108.7 | 102.9 | 102.9 | 99    | 110.1 | 104.2 | 115.7 | 115.9 |
| 114.3 | 110.6 | 107.1 | 122.5 | 99    | 113.7 | 108.2 | 125.6 | 121.8 |
| 103.6 | 108.3 | 104.5 | 110.8 | 94.3  | 115.5 | 110.4 | 103.8 | 114.5 |
| 98.5  | 111.1 | 106.4 | 117.6 | 96.8  | 106.2 | 103.3 | 107.5 | 110.5 |
| 105.8 | 117.8 | 103.3 | 100.1 | 95.6  | 113.5 | 109.8 | 113   | 115.4 |
| 97.9  | 105.8 | 99.9  | 96.2  | 95.6  | 105.1 | 97.4  | 104.2 | 102.9 |
| 102.5 | 105.4 | 106.1 | 105.2 | 96.7  | 104.5 | 105   | 107.9 | 111.2 |
| 106.2 | 109.7 | 109.1 | 99.4  | 97.1  | 108   | 100.8 | 105.3 | 108.3 |
| 102.7 | 106.5 | 95.8  | 116.4 | 102.5 | 111   | 113.4 | 103.8 | 110.3 |
| 116.7 | 108.4 | 103.8 | 94.2  | 96.5  | 110   | 100.9 | 100.6 | 114.1 |
| 113.3 | 114.4 | 109.4 | 102   | 106.6 | 124.2 | 116.3 | 118.8 | 114.5 |
| 108.9 | 106.3 | 108.9 | 108.9 | 97.9  | 102.8 | 97.8  | 108.3 | 119.4 |
| 102.1 | 104.6 | 109.8 | 100.4 | 94.8  | 103.5 | 98.9  | 104.9 | 111.6 |
| 104.1 | 107.3 | 95    | 104   | 99.6  | 110.3 | 107.9 | 103.6 | 111.1 |
| 111.6 | 116.6 | 102.5 | 112.5 | 100.2 | 110.1 | 106.9 | 108.8 | 107.4 |
| 116.6 | 116.4 | 109.1 | 108.5 | 105.2 | 116.1 | 111.4 | 108.8 | 111.9 |
| 104.7 | 102.4 | 101.9 | 93.5  | 87.6  | 105.8 | 103.8 | 101.1 | 116.7 |
| 110.9 | 110.1 | 104.4 | 108.3 | 94.2  | 103.4 | 107.7 | 114   | 110.7 |
| 102.6 | 110.6 | 103.3 | 110.2 | 94.7  | 104.2 | 101.5 | 110.8 | 104.6 |
| 109.4 | 109.8 | 111.7 | 99.4  | 95.6  | 112.9 | 103.3 | 106.9 | 112.3 |
| 108.2 | 100.7 | 107.2 | 103.8 | 100.9 | 103.5 | 96.8  | 103.7 | 108.5 |
| 104.2 | 107.4 | 101.2 | 99.8  | 89.5  | 104.5 | 97.8  | 102.1 | 99.3  |
| 111.7 | 103.9 | 100.8 | 99.3  | 92.2  | 101.6 | 105.8 | 115.8 | 110.6 |
| 115.1 | 108.5 | 111.8 | 105.4 | 102.9 | 110.7 | 109.4 | 103.9 | 110.8 |
| 107.8 | 105.7 | 109.3 | 106.6 | 98.7  | 112.8 | 109.4 | 118.7 | 112.6 |
| 103.4 | 104.4 | 105.5 | 92.1  | 95.3  | 111.8 | 103.7 | 109.9 | 106.4 |
| 96.9  | 113.9 | 101   | 111.2 | 101.7 | 108.1 | 94.8  | 106.9 | 100.3 |
| 104.1 | 106.9 | 104   | 97.5  | 104   | 116.9 | 115.4 | 109.3 | 108.6 |
| 110   | 105   | 101.4 | 100.1 | 94.8  | 111   | 101.5 | 108.9 | 110.4 |
| 103.3 | 111.9 | 102.6 | 93.3  | 90.9  | 102.7 | 98.2  | 110.6 | 116.9 |

|       |       |       |       |       |       |       |       |       |
|-------|-------|-------|-------|-------|-------|-------|-------|-------|
| 106.9 | 99.5  | 95.8  | 106.4 | 96.7  | 105.8 | 99.5  | 112.9 | 106.2 |
| 106.6 | 110.5 | 100.6 | 111.2 | 98    | 113.6 | 104.4 | 112.5 | 114.7 |
| 107.8 | 111.3 | 107.3 | 104.2 | 89.5  | 104.8 | 102.6 | 108.1 | 116.2 |
| 101.7 | 111.6 | 110.6 | 98.7  | 102.3 | 106.7 | 102.9 | 105   | 117.7 |
| 106.3 | 109.2 | 97    | 103.5 | 94    | 109.6 | 105.7 | 114.9 | 116.8 |
| 101.6 | 106.9 | 102.6 | 95.9  | 99.4  | 104.3 | 98.5  | 110   | 107.5 |
| 107.1 | 113   | 108.5 | 101.5 | 94.7  | 109   | 104.7 | 114.7 | 109.4 |
| 106.5 | 107.3 | 96.2  | 103.9 | 96.6  | 106.6 | 99.6  | 113   | 112.2 |
| 105.9 | 107   | 104.3 | 102.8 | 98.5  | 107.5 | 100.1 | 109.9 | 113   |
| 107.2 | 109.4 | 108.9 | 104.1 | 97.2  | 108.9 | 102.6 | 104.7 | 103.7 |
| 109.5 | 107.9 | 100.1 | 103.1 | 98.3  | 114.9 | 101.3 | 100   | 105.4 |
| 110.5 | 107.1 | 102.5 | 106.5 | 96.1  | 110.1 | 103.6 | 108.4 | 110.2 |
| 109.8 | 114.4 | 101.5 | 98.7  | 91.1  | 111.7 | 95.6  | 105.8 | 107.1 |
| 103.7 | 109.8 | 107.6 | 100.3 | 102.2 | 110.9 | 105.4 | 109.4 | 108.6 |
| 97.1  | 106.4 | 93.1  | 94.1  | 91.8  | 101.5 | 102.5 | 99.2  | 108.3 |
| 103.5 | 115.9 | 104.4 | 107.5 | 97.7  | 111.5 | 107.8 | 109.8 | 110.9 |
| 107.1 | 108.4 | 104.3 | 105   | 104.3 | 109.5 | 102.9 | 121.3 | 115.7 |
| 105.1 | 106.5 | 100   | 97.8  | 87.3  | 100   | 99.2  | 102.7 | 106   |
| 109.1 | 104.9 | 99.6  | 99.2  | 94.1  | 104   | 111.7 | 115.3 | 110.7 |
| 100.7 | 105   | 102.8 | 94.3  | 94.5  | 101.7 | 107.9 | 107.7 | 104.9 |
| 96.2  | 99.7  | 94.2  | 88.9  | 90.9  | 97.2  | 95.2  | 95.8  | 99.1  |
| 107.6 | 106.2 | 99.2  | 98.6  | 101.8 | 107.4 | 100.7 | 108.6 | 106   |
| 99.4  | 104.3 | 103   | 100.9 | 94.8  | 102.2 | 107.4 | 110.6 | 112.7 |
| 104.9 | 107.6 | 96.8  | 105.8 | 96    | 108.7 | 103.1 | 106.6 | 104.7 |
| 101.2 | 102.8 | 94.9  | 100.6 | 98.8  | 108.6 | 101.4 | 108.3 | 104.7 |
| 101.7 | 102.4 | 98.9  | 101.5 | 89.8  | 102.5 | 101.9 | 104.4 | 105.9 |
| 105.7 | 100.9 | 106.4 | 96.5  | 94.3  | 107.4 | 104.6 | 103.7 | 106.1 |
| 107.9 | 108.2 | 102.9 | 106.7 | 98.2  | 108.1 | 108.5 | 120.8 | 110.4 |
| 110.3 | 107.9 | 102.6 | 104.1 | 97.8  | 108.5 | 97.7  | 108.9 | 106.7 |
| 105   | 112.3 | 105.9 | 100.3 | 95    | 111.7 | 113.2 | 107.5 | 108.1 |
| 112.9 | 109.2 | 99    | 94.6  | 101.6 | 107.2 | 105.2 | 106.1 | 102.4 |
| 116.1 | 100.9 | 101.5 | 99.3  | 90.3  | 106.2 | 105.4 | 102.9 | 101   |
| 102.5 | 105.4 | 105.3 | 116.9 | 90.4  | 113.6 | 109.8 | 109.1 | 109.1 |
| 109.5 | 108.8 | 104.1 | 105   | 95.4  | 113.9 | 103.6 | 107.2 | 112.7 |
| 106.8 | 104.3 | 107.5 | 96.8  | 105   | 109.4 | 102.8 | 118.3 | 109   |
| 108.3 | 109   | 99.9  | 98.3  | 88.6  | 108.6 | 100.6 | 102.6 | 106.5 |
| 117.3 | 108   | 108.7 | 96.6  | 102   | 107.3 | 94.2  | 109.5 | 100.6 |
| 96.8  | 103.2 | 102   | 101.3 | 85.9  | 105.3 | 103.1 | 112.6 | 103.3 |
| 107.9 | 108.2 | 101.5 | 109.1 | 98    | 106.9 | 98.8  | 110.2 | 110.6 |
| 104   | 116.6 | 105.2 | 105.6 | 92.1  | 112.7 | 105   | 101.9 | 113.5 |
| 103.6 | 114   | 100.2 | 99.1  | 96    | 104.2 | 100.6 | 103.8 | 102.1 |
| 100.4 | 108   | 96.8  | 97.7  | 93.1  | 107.9 | 104.1 | 105.7 | 101.4 |
| 107.9 | 110.2 | 101.4 | 101.3 | 91.8  | 110.6 | 96.2  | 110.4 | 105.6 |
| 103   | 104.5 | 97.3  | 101.7 | 97.8  | 113.3 | 98.1  | 105.5 | 116.4 |
| 99.5  | 119.1 | 101.8 | 103   | 94.2  | 114.7 | 107.5 | 103.8 | 111   |
| 107.2 | 111.9 | 104   | 109.3 | 92.6  | 109.2 | 100.9 | 112.8 | 103.9 |
| 104.3 | 107.4 | 107.8 | 99.3  | 92.1  | 106.1 | 98.1  | 103.2 | 111.7 |
| 101.2 | 101   | 98.8  | 105.1 | 94.1  | 102   | 109.9 | 113.3 | 107.4 |
| 103.6 | 113.5 | 99.7  | 110.1 | 99.1  | 108.1 | 105.1 | 109.8 | 111   |
| 106.6 | 117   | 102.9 | 105   | 98.7  | 110.8 | 109.1 | 112.4 | 104.1 |
| 104.5 | 106.8 | 99.7  | 102.7 | 96.7  | 106.2 | 103.3 | 98.1  | 99.1  |

|       |       |       |       |       |       |       |       |       |
|-------|-------|-------|-------|-------|-------|-------|-------|-------|
| 108.1 | 104.6 | 100.8 | 93.8  | 98.2  | 112.3 | 107.1 | 96.2  | 105.4 |
| 106.5 | 106.9 | 107.2 | 95.1  | 91.2  | 101.7 | 106.8 | 119.5 | 108.3 |
| 106.2 | 111.6 | 102.4 | 97.3  | 96.3  | 103.9 | 105.5 | 97.8  | 101.3 |
| 105.3 | 99.5  | 102.4 | 101.5 | 94.8  | 107.1 | 103.2 | 108.8 | 106.6 |
| 105.8 | 101.2 | 102.4 | 92.7  | 95.2  | 105   | 96.1  | 112.9 | 106   |
| 100.1 | 101.2 | 99.3  | 95.9  | 91.3  | 105.1 | 84.9  | 102.8 | 104.9 |
| 103.6 | 107.3 | 101.2 | 98    | 96.1  | 102.7 | 102.8 | 111.9 | 98.2  |
| 97.1  | 108   | 93.6  | 96    | 96.2  | 103.3 | 102.1 | 106.1 | 101   |
| 97.3  | 108.3 | 107   | 96.2  | 96.6  | 107.6 | 106.3 | 104.6 | 108.2 |
| 99.8  | 110.5 | 91.2  | 104.3 | 89.8  | 103.1 | 100.3 | 105   | 110.1 |
| 108.7 | 107.1 | 104.4 | 101.4 | 93.5  | 109.2 | 101.1 | 120.2 | 108.9 |
| 112.6 | 109.1 | 98.7  | 98.2  | 96.1  | 110.7 | 101.5 | 116.5 | 114.1 |
| 106.4 | 104   | 101.2 | 96.1  | 96.2  | 99.4  | 107.6 | 108.1 | 110.9 |
| 101.4 | 110.5 | 99    | 89    | 92.6  | 105.4 | 97    | 98.2  | 108.5 |
| 112   | 117   | 105.7 | 97.8  | 95.4  | 108.6 | 102.6 | 104.3 | 106   |
| 104.1 | 117.7 | 101.3 | 99.2  | 95.5  | 109.1 | 102.9 | 124.7 | 112.1 |
| 114.5 | 112.7 | 97.1  | 102.8 | 98.6  | 111   | 97.7  | 119.2 | 109.5 |
| 105.6 | 118.2 | 105.6 | 99.5  | 96.2  | 110.4 | 98.3  | 106.8 | 108.7 |
| 99.3  | 112.5 | 103.6 | 104.8 | 88.2  | 103.5 | 100.3 | 109   | 110.5 |
| 106.5 | 104.7 | 98.6  | 93.2  | 95.2  | 103.2 | 98.5  | 98.6  | 98.4  |
| 108.2 | 108   | 106.9 | 108.6 | 97.3  | 107.5 | 109.4 | 117.3 | 121.7 |
| 103.3 | 112.1 | 107.3 | 104.2 | 93.7  | 107.3 | 107.9 | 116.6 | 113.5 |
| 110.1 | 105.2 | 103   | 106.3 | 96    | 112.7 | 102   | 101   | 110.2 |
| 105.1 | 105.7 | 103.1 | 109.1 | 98.8  | 108   | 104.1 | 105.4 | 113.6 |
| 104.9 | 103.8 | 108   | 107.1 | 93.9  | 105.4 | 103.2 | 100.8 | 109.2 |
| 113   | 121.4 | 102.6 | 113.6 | 112.6 | 123.8 | 113.1 | 116.7 | 121   |
| 107.8 | 106.1 | 103.6 | 97.7  | 94.2  | 111.1 | 103.5 | 105   | 108.2 |
| 102.3 | 106.7 | 106.6 | 107.8 | 100.5 | 114.4 | 109.6 | 115.5 | 110.1 |
| 107.7 | 107.9 | 100.8 | 99.8  | 92.6  | 105.1 | 96.9  | 117.4 | 117   |
| 108.8 | 128.7 | 98.4  | 102.1 | 101.5 | 107.5 | 118   | 132.7 | 106.6 |
| 104.2 | 110.1 | 103.2 | 99.2  | 92.8  | 104.6 | 102.7 | 107.9 | 105.3 |
| 127   | 136.4 | 119.6 | 108.1 | 119.9 | 128.8 | 124.2 | 160.3 | 182.4 |
| 114.5 | 106.4 | 100.1 | 104.6 | 96.6  | 111.4 | 103.4 | 111.2 | 111.8 |
| 103.3 | 103.1 | 102.1 | 111.1 | 93.4  | 110.5 | 103.3 | 108.8 | 108.5 |
| 109.6 | 106.3 | 102.2 | 104.7 | 97.5  | 105   | 95.3  | 104.9 | 110.2 |
| 109.7 | 122.5 | 103.9 | 108.7 | 105.5 | 116.7 | 105.3 | 119   | 116.8 |
| 121.3 | 114.5 | 104.2 | 122.4 | 110.4 | 118.4 | 112.2 | 118.2 | 109.2 |
| 114.7 | 116.9 | 112.3 | 123   | 104.7 | 115.4 | 112.1 | 118   | 106.2 |
| 108.9 | 111.5 | 106.7 | 103.7 | 94.3  | 110.7 | 99.9  | 114.3 | 100.8 |
| 115.8 | 109   | 106.6 | 106.1 | 105   | 110.8 | 115.1 | 119.7 | 113.8 |
| 108.1 | 102.2 | 102.2 | 98.3  | 101   | 114.1 | 99    | 110   | 102.3 |
| 107.8 | 108.7 | 109.8 | 108.5 | 94.9  | 115.7 | 104.8 | 103.7 | 111   |
| 104.2 | 106.5 | 103.1 | 107.7 | 95.3  | 100.1 | 106   | 109.9 | 106.8 |
| 108.6 | 108.9 | 105   | 114.6 | 98.9  | 114.9 | 104   | 105.2 | 96.2  |
| 101.4 | 101.9 | 101.9 | 101.5 | 99.3  | 103.8 | 104.6 | 116.5 | 108.1 |
| 111.5 | 109.1 | 105.3 | 102   | 90.3  | 109.3 | 99.8  | 113.2 | 116.2 |
| 104.2 | 105.4 | 112.9 | 91    | 96.3  | 106.6 | 101   | 102.4 | 101.9 |
| 107.9 | 108.3 | 100.6 | 108.2 | 99.6  | 108.2 | 104.2 | 108.7 | 102.6 |
| 113.3 | 103.9 | 102.9 | 109.8 | 100.8 | 109.5 | 116.6 | 110.8 | 107.9 |
| 103.9 | 102.5 | 97.4  | 98.1  | 96.6  | 98    | 100.9 | 114.1 | 110.6 |
| 109.3 | 106.5 | 99.8  | 110.1 | 96.6  | 107.9 | 104.9 | 121.2 | 111.7 |

|        |        |        |        |        |        |        |         |         |
|--------|--------|--------|--------|--------|--------|--------|---------|---------|
| 104.6  | 108.9  | 103.1  | 89.1   | 90.6   | 109.2  | 107.1  | 101     | 108.8   |
| 112.8  | 121.4  | 109    | 108.3  | 101.4  | 106.2  | 108.6  | 126.9   | 111     |
| 105.5  | 107.5  | 98.3   | 94.6   | 86     | 112.3  | 96.5   | 103.1   | 100.6   |
| 103.5  | 109    | 100.8  | 94     | 92.3   | 108.2  | 94.9   | 106.6   | 104.1   |
| 106.3  | 118.6  | 104    | 103.3  | 106.9  | 111.9  | 109.3  | 119.8   | 113.1   |
| 105.6  | 111.7  | 98     | 99.8   | 95.9   | 109.4  | 100.5  | 110.7   | 114.6   |
| 102.8  | 108.1  | 96.6   | 110.3  | 100.3  | 115.5  | 103.9  | 112     | 111     |
| 107.8  | 104.4  | 101.9  | 92.8   | 96.7   | 109.6  | 104.1  | 110.6   | 116.5   |
| 99.7   | 98.2   | 107.2  | 96.8   | 93.6   | 102    | 99.4   | 102.6   | 109.4   |
| 104.5  | 109.8  | 98.9   | 97.4   | 97.4   | 106.8  | 105.1  | 107.7   | 113.9   |
| 106.1  | 103.6  | 104.9  | 100.5  | 92.2   | 103.5  | 99.1   | 105.4   | 109.7   |
| 100.7  | 106.3  | 97.8   | 100.6  | 95.9   | 105.3  | 98.3   | 104.8   | 109.2   |
| 101.3  | 117.3  | 101.3  | 97.6   | 97.7   | 102.6  | 103.9  | 113.7   | 113.7   |
| 108.7  | 103.5  | 104    | 107    | 93.4   | 114.2  | 105.6  | 117.8   | 116.8   |
| 110.1  | 107.2  | 100.3  | 99.2   | 96.3   | 102.8  | 109.5  | 97.9    | 106.4   |
| 106.3  | 106.6  | 109.8  | 100.9  | 104.2  | 102.6  | 100.5  | 109     | 109     |
| 110.1  | 102.3  | 101.5  | 100.3  | 92     | 106.1  | 101.6  | 109     | 106.9   |
| 109    | 107.3  | 103.7  | 95.2   | 95.3   | 106.9  | 108    | 111.3   | 107.4   |
| 102.6  | 105.9  | 96.1   | 99.3   | 98.7   | 107.9  | 100.7  | 111.2   | 101.6   |
| 100.2  | 89.9   | 98.2   | 97.4   | 93.1   | 103.3  | 102.4  | 106.8   | 114.3   |
| 109.9  | 105.7  | 97.1   | 98.3   | 96.4   | 103.1  | 103.6  | 113.3   | 108.3   |
| 274.6  | 374    | 353.7  | 208.1  | 309.6  | 418.8  | 274.7  | 453.3   | 328.7   |
| 117.1  | 109.4  | 102.4  | 97.1   | 102.2  | 114.3  | 111.4  | 117.3   | 120.2   |
| 224.8  | 334.1  | 287.5  | 240.9  | 315.5  | 344    | 284    | 577.9   | 425.2   |
| 166.3  | 198.5  | 168.5  | 170.1  | 161.3  | 166.9  | 212.6  | 233.8   | 247     |
| 115.4  | 132.5  | 124.6  | 122.9  | 121.5  | 132.1  | 117.4  | 140.1   | 126.2   |
| 233.5  | 346.5  | 291.9  | 248.4  | 277.6  | 290.9  | 278.6  | 335.8   | 249.9   |
| 113.7  | 107.9  | 109.8  | 113.7  | 95.4   | 114.8  | 110.6  | 115.7   | 123.6   |
| 108.8  | 105.3  | 99.6   | 103.6  | 94.2   | 104.9  | 105    | 109.2   | 102.9   |
| 6209.1 | 7132.2 | 7895.2 | 6035.3 | 5067.1 | 7482.2 | 6222.4 | 15434.6 | 14493.1 |
| 175.8  | 152.4  | 135.2  | 168.6  | 150    | 134.9  | 183.7  | 256     | 185.6   |
| 107.2  | 119.5  | 115.5  | 100    | 92.9   | 126.8  | 108.6  | 113.1   | 119.1   |
| 110.2  | 111.9  | 99.3   | 103.9  | 94.5   | 107.3  | 102.9  | 117     | 104.7   |
| 106    | 149.6  | 127.1  | 114.1  | 111.6  | 123.9  | 117.6  | 141.7   | 151.9   |
| 115.8  | 125.2  | 120.9  | 108    | 99.2   | 115.4  | 110.8  | 115.8   | 116.2   |
| 119.7  | 200.7  | 181.3  | 141.2  | 148.9  | 198.8  | 141.5  | 240.6   | 200.8   |
| 142.3  | 157.1  | 143.4  | 144.2  | 117.4  | 137.3  | 154.9  | 139     | 145.9   |
| 107.6  | 117.7  | 102.4  | 99.3   | 95.3   | 112    | 104.2  | 116.6   | 110.6   |
| 746.1  | 726.5  | 660.5  | 649.8  | 581.8  | 744.8  | 665.9  | 1270.5  | 1188    |
| 109.3  | 103.9  | 103.2  | 101.7  | 103.7  | 104.8  | 108.3  | 101.1   | 117.6   |
| 112.9  | 175.3  | 169.8  | 144.9  | 146.3  | 135.1  | 126.6  | 143.2   | 133.2   |
| 133.1  | 132.2  | 134.1  | 139    | 136.8  | 142.5  | 138.3  | 190.7   | 155.8   |
| 112.7  | 124.9  | 103.5  | 113.6  | 100.1  | 109.4  | 114.2  | 126.4   | 111.3   |
| 105.8  | 110.4  | 106.2  | 113.2  | 97     | 110.4  | 117.5  | 110     | 111.8   |
| 105.4  | 172    | 124.6  | 203.8  | 124.5  | 126.7  | 131.9  | 131.2   | 121.5   |
| 113.5  | 126.5  | 111.2  | 107.4  | 103.5  | 115.9  | 108.8  | 123.1   | 126     |
| 207.6  | 199.1  | 197.5  | 170.4  | 156.6  | 172.9  | 170.1  | 282.9   | 216.7   |
| 108.6  | 115.2  | 119.2  | 119.5  | 97.2   | 125.3  | 112.1  | 130.3   | 120.9   |
| 140.3  | 158.4  | 146.3  | 133.5  | 136.8  | 172.4  | 169    | 231.5   | 227.6   |
| 154.9  | 217.7  | 180.7  | 200.6  | 181.4  | 192.2  | 211.3  | 224.7   | 183     |
| 154.1  | 227.8  | 184.7  | 235.1  | 206.1  | 197.8  | 209.4  | 231.2   | 188.5   |

|       |        |       |       |       |       |       |        |       |
|-------|--------|-------|-------|-------|-------|-------|--------|-------|
| 128.5 | 115.7  | 120.9 | 118   | 121.9 | 126.8 | 136.3 | 152    | 131.3 |
| 105.2 | 107.8  | 97.2  | 101.2 | 97.5  | 111.5 | 102.3 | 112.8  | 111.8 |
| 208.4 | 219.5  | 216.5 | 206.2 | 177.4 | 214   | 273.9 | 324.7  | 240.7 |
| 114.3 | 118.9  | 112.3 | 116.7 | 112.5 | 123.9 | 119.4 | 131    | 109.6 |
| 220.3 | 217    | 199.4 | 240.5 | 211.4 | 213.2 | 162.7 | 358.6  | 285.2 |
| 198.6 | 239    | 160.9 | 217.4 | 160.4 | 248.5 | 199.5 | 335    | 275.7 |
| 103.9 | 114.4  | 97.7  | 98.4  | 96.3  | 101.4 | 98.6  | 113.8  | 111   |
| 400.2 | 398.9  | 425.1 | 317.1 | 357.9 | 417.7 | 356.6 | 592.8  | 619.9 |
| 110.8 | 121    | 120.5 | 140   | 105.5 | 119.1 | 145.5 | 126    | 120.8 |
| 136.6 | 228.9  | 179.7 | 352.6 | 142.1 | 137.5 | 197.1 | 148.4  | 121.7 |
| 121.1 | 154.8  | 158.8 | 150.5 | 131.5 | 156.8 | 138.6 | 189.5  | 164.6 |
| 114.4 | 158.7  | 173.6 | 139.7 | 157.5 | 166.4 | 151.1 | 150.3  | 145.1 |
| 151.9 | 110.6  | 100.1 | 105.5 | 98.7  | 108   | 106.4 | 207.8  | 147.7 |
| 102.6 | 103.8  | 98    | 93.2  | 95.8  | 104.3 | 94.9  | 101.8  | 115.4 |
| 132.5 | 116.8  | 108.7 | 112   | 93    | 116.6 | 112.7 | 118.6  | 111.8 |
| 103.5 | 101.4  | 100.5 | 99.8  | 88.9  | 106.8 | 100.2 | 100.4  | 106.7 |
| 106.4 | 106.1  | 107.1 | 95.4  | 98.2  | 98.8  | 96.7  | 103.5  | 98.9  |
| 109.8 | 111.3  | 107.6 | 105.9 | 93    | 107.3 | 100.2 | 119.7  | 109.6 |
| 100.2 | 116.4  | 109   | 114.5 | 98.2  | 109.4 | 96    | 119.6  | 121   |
| 155.3 | 146.4  | 129.9 | 129.1 | 137   | 155.4 | 113.7 | 224.8  | 183.3 |
| 106.9 | 115.7  | 102.3 | 98.5  | 94.2  | 99.7  | 97    | 112.4  | 115.6 |
| 109.2 | 104.6  | 103.7 | 97.6  | 94.2  | 104.3 | 97.5  | 107.5  | 107.3 |
| 515   | 1052.6 | 919.5 | 1015  | 870.5 | 907.8 | 908.9 | 1170.4 | 833.6 |
| 176.1 | 196.1  | 173.2 | 182.3 | 191.4 | 174.8 | 203.1 | 269.8  | 177   |
| 101.9 | 101.1  | 99.2  | 105   | 102.3 | 112.8 | 102.2 | 101.2  | 111.2 |
| 104.2 | 101.5  | 101.4 | 102.5 | 95    | 98.2  | 95.7  | 113.2  | 106.6 |
| 107.1 | 105.4  | 103.8 | 102.3 | 94.8  | 106.1 | 107.7 | 114.5  | 105.7 |
| 102.7 | 110    | 92.8  | 90.1  | 97.2  | 109.3 | 101.1 | 104.9  | 111.2 |
| 112.3 | 105.3  | 106.2 | 104   | 99.8  | 114.9 | 97.3  | 104.7  | 110   |
| 112.1 | 112    | 96.5  | 105.4 | 94.6  | 111.7 | 108.4 | 111.6  | 108.8 |
| 102.7 | 107.7  | 99.3  | 88.1  | 100.9 | 110.9 | 100.5 | 100.8  | 106.9 |
| 111.4 | 123.2  | 108.6 | 102.3 | 103.3 | 117.5 | 103.1 | 117.3  | 114.1 |
| 100.2 | 108    | 107.3 | 93.8  | 99.9  | 108.7 | 104.6 | 107    | 103.9 |
| 108   | 105.8  | 105.3 | 112   | 95.5  | 114.9 | 108.3 | 116.6  | 107.2 |
| 111.5 | 105.2  | 99.4  | 101.1 | 90.7  | 105.9 | 102   | 107.7  | 105.2 |
| 105.5 | 115.1  | 102.9 | 122.2 | 99.5  | 112   | 112.5 | 112.5  | 115.2 |
| 102.1 | 100    | 110.8 | 100.2 | 93.9  | 102.3 | 96.2  | 105.5  | 98.1  |
| 105.4 | 111.2  | 100.1 | 96.8  | 90    | 101.7 | 99.5  | 102.1  | 104.5 |
| 112.9 | 125.1  | 105   | 108.4 | 96.5  | 121.9 | 115.6 | 118.8  | 117.3 |
| 115.3 | 116.6  | 130.5 | 96.7  | 107.3 | 122.6 | 115.3 | 143.6  | 125   |
| 116.1 | 127.9  | 121.3 | 112.8 | 120.8 | 144.9 | 134.6 | 154.4  | 128   |
| 147.8 | 152.9  | 147.6 | 147.9 | 139.4 | 152.1 | 137.9 | 170.4  | 153.6 |
| 108.6 | 111.5  | 106.9 | 96.2  | 105.6 | 112   | 103.8 | 124    | 118   |
| 198.2 | 250    | 228   | 203.2 | 229.8 | 298.5 | 249.9 | 263    | 259.2 |
| 106.9 | 101.5  | 108.9 | 106.9 | 92.2  | 110.7 | 105.6 | 110.8  | 109.4 |
| 111.6 | 116    | 98.2  | 107   | 97.4  | 113   | 101.1 | 117    | 111.6 |
| 144.7 | 110.6  | 127.4 | 124   | 121   | 123.6 | 127.8 | 162.7  | 142.1 |
| 114.5 | 103    | 106.6 | 98.9  | 92.7  | 101.8 | 102.5 | 110.1  | 102.3 |
| 130.7 | 149.5  | 127.7 | 171.2 | 136.6 | 145.6 | 146.7 | 189.8  | 178   |
| 109.2 | 109.3  | 109.4 | 99.2  | 96.8  | 107.2 | 98.8  | 100.3  | 105.7 |
| 106.4 | 116.9  | 104.2 | 104.3 | 96.1  | 106.1 | 101.6 | 120.2  | 102.2 |



|       |       |       |       |       |       |       |       |       |
|-------|-------|-------|-------|-------|-------|-------|-------|-------|
| 109.5 | 99.5  | 111   | 93.8  | 95.8  | 102.1 | 104.5 | 107.5 | 107.7 |
| 107.5 | 107.9 | 97.7  | 106.4 | 95.2  | 109.4 | 100.1 | 112   | 105   |
| 113.6 | 116.2 | 106   | 113.8 | 92.2  | 105.9 | 102.6 | 122.1 | 108.7 |
| 113.5 | 116.2 | 103.2 | 105.1 | 100.1 | 108.6 | 105.4 | 114   | 107.8 |
| 107.9 | 116.7 | 105.2 | 104.6 | 101.5 | 121.9 | 99.7  | 114.7 | 117.5 |
| 105.3 | 105.6 | 103.6 | 95.1  | 92.2  | 110.3 | 104.2 | 105.7 | 107   |
| 108   | 110.1 | 101.7 | 104.5 | 98.4  | 107.8 | 102.7 | 116   | 107.4 |
| 161.7 | 170.9 | 147.2 | 161.8 | 132.3 | 181.6 | 157.6 | 219.8 | 173.7 |
| 102.8 | 105.4 | 99.2  | 93.2  | 92.1  | 104.5 | 96.8  | 105.5 | 113.3 |
| 104.4 | 107.1 | 97.1  | 106.7 | 90.7  | 111.9 | 100   | 103.4 | 112.6 |
| 103.5 | 104.1 | 102.4 | 88.9  | 93.6  | 106.9 | 92.1  | 107.2 | 98.6  |
| 112.5 | 130.1 | 102.6 | 112.1 | 104.1 | 127.8 | 111.1 | 140.4 | 138   |
| 214.9 | 424.7 | 466.1 | 542.2 | 434.4 | 413.7 | 462.8 | 530.2 | 325.6 |
| 149   | 136.4 | 135.5 | 131.9 | 122.1 | 133.6 | 129.4 | 149.8 | 135.4 |
| 112.5 | 106.8 | 108   | 100.4 | 99.1  | 120.6 | 116.5 | 107.3 | 116.7 |
| 102.9 | 113.3 | 104   | 99.6  | 94.9  | 117.1 | 104.5 | 100.9 | 113.2 |
| 102.1 | 100.6 | 98.6  | 96.3  | 97.2  | 107.5 | 96.1  | 115.2 | 111.7 |
| 566.9 | 659.6 | 563.1 | 623.9 | 576   | 531.8 | 679.5 | 590.7 | 421   |
| 109.2 | 118.4 | 123.9 | 107.6 | 101.6 | 112.6 | 114.5 | 139.8 | 125.2 |
| 554.7 | 526.1 | 549.1 | 434.4 | 514.6 | 497.4 | 490.4 | 746.7 | 539.4 |
| 120.8 | 113   | 107   | 103.3 | 96    | 110.2 | 112.9 | 123.3 | 106.5 |
| 113.8 | 114.6 | 112.4 | 128.5 | 93.1  | 113.1 | 109.6 | 107.3 | 115.5 |
| 115.3 | 109.5 | 109.3 | 94.6  | 97.3  | 103.9 | 114   | 115.1 | 122.7 |
| 227.2 | 392.3 | 336.9 | 318.7 | 382.2 | 339.4 | 331.1 | 341.3 | 208.6 |
| 101.3 | 110.5 | 103.6 | 99.9  | 97.1  | 117.8 | 105   | 114.8 | 117.7 |
| 109.5 | 135   | 111   | 107.2 | 108.2 | 112.4 | 117.7 | 130.5 | 116.9 |
| 103.6 | 105.9 | 105.8 | 94.8  | 101.1 | 110.6 | 99.4  | 113.8 | 108.1 |
| 112.9 | 104.1 | 90.7  | 96.8  | 91.9  | 107.6 | 98.4  | 108.8 | 107.1 |
| 109.5 | 107.2 | 103.5 | 99.2  | 104.4 | 112   | 99.5  | 107.6 | 105.4 |
| 114.1 | 121.7 | 117.5 | 115.8 | 109.6 | 122.5 | 109.7 | 136.6 | 126.7 |
| 111   | 123.3 | 105.5 | 104.7 | 96.3  | 109.2 | 105.4 | 109.7 | 101.9 |
| 100.5 | 105.9 | 95.3  | 90.1  | 95.2  | 106.2 | 104   | 103.4 | 114.3 |
| 213.9 | 297.5 | 218.5 | 238.1 | 292.4 | 234.6 | 249   | 345.8 | 173   |
| 107.7 | 122.4 | 122.4 | 110.6 | 109.6 | 116.7 | 114.1 | 122.7 | 112.5 |
| 102.5 | 107.2 | 100   | 94.6  | 98.7  | 111.9 | 113.7 | 99.2  | 100.4 |
| 164.5 | 417   | 179.5 | 140.7 | 276   | 212.6 | 160.3 | 364.2 | 159.8 |
| 118.5 | 113.4 | 103.1 | 102   | 96.7  | 117.7 | 101.8 | 106.3 | 106   |
| 100.8 | 107.1 | 97.6  | 91.7  | 93.2  | 104.9 | 107.3 | 105.9 | 109.9 |
| 450.3 | 487.4 | 411.5 | 297.2 | 370.5 | 429.6 | 263.5 | 728.3 | 444.1 |
| 167.1 | 151.5 | 176.5 | 159   | 141   | 152.1 | 148.1 | 340.5 | 169.2 |
| 152.9 | 226.2 | 188   | 226.5 | 179.6 | 181.9 | 277.1 | 200.3 | 155.1 |
| 108.2 | 113.6 | 109.3 | 124.5 | 103   | 117.9 | 111.9 | 108.6 | 113.1 |
| 105.6 | 108.9 | 103.2 | 104.6 | 94.2  | 106.6 | 104.8 | 114.3 | 113.4 |
| 103.5 | 99.2  | 95    | 96.9  | 85.6  | 102.4 | 106.9 | 101.6 | 104.8 |
| 106.7 | 104.4 | 106.4 | 100.6 | 94.7  | 108.1 | 101.1 | 109   | 104.1 |
| 102   | 111   | 102.6 | 106.2 | 100.7 | 109.2 | 98.6  | 106.5 | 96.8  |
| 102.6 | 107.6 | 103   | 99    | 90.5  | 110.8 | 105.4 | 101.9 | 104.7 |
| 111.2 | 102.9 | 96.9  | 101.2 | 94.6  | 106.6 | 113.7 | 111.1 | 114.9 |
| 103.2 | 112.6 | 111.3 | 107.3 | 103.1 | 120   | 101.5 | 123   | 112.8 |
| 109.8 | 104.6 | 102   | 96.3  | 100.2 | 107.8 | 100.3 | 110.3 | 104.9 |
| 110.3 | 107.6 | 108.8 | 94.6  | 86.6  | 105.2 | 102.5 | 107.8 | 106.3 |

|        |        |        |        |        |        |       |        |       |
|--------|--------|--------|--------|--------|--------|-------|--------|-------|
| 101.5  | 105.7  | 105.3  | 93.7   | 96.1   | 107.5  | 108.3 | 106    | 101.1 |
| 350.4  | 320.6  | 304    | 727.4  | 316.7  | 284.2  | 636.6 | 480.1  | 419.3 |
| 110.5  | 116.8  | 119    | 111.3  | 96.6   | 121.3  | 108.4 | 118.5  | 117.7 |
| 115.4  | 122.1  | 101.2  | 168.9  | 107.9  | 112.9  | 133.5 | 113.4  | 115.9 |
| 109    | 119.2  | 110.7  | 118.8  | 105.6  | 113.7  | 113.3 | 105.3  | 108.6 |
| 276.1  | 1764.7 | 1884.4 | 1089.2 | 1495.1 | 1427   | 950.4 | 1542.6 | 722.5 |
| 106.3  | 104.2  | 111    | 90.2   | 91.1   | 105.4  | 101.7 | 104.6  | 105.7 |
| 133.5  | 145.6  | 129.6  | 125.2  | 113.7  | 131.3  | 134.7 | 189.5  | 167   |
| 109.1  | 114.1  | 96.6   | 101.4  | 100.4  | 101.8  | 108.6 | 115.8  | 108.5 |
| 104.4  | 103.4  | 105.1  | 116.6  | 103.7  | 103.6  | 98.9  | 104.6  | 98.8  |
| 101    | 112.4  | 109.8  | 103.9  | 94.5   | 106.2  | 102.7 | 110.8  | 117.5 |
| 103.2  | 109    | 98.8   | 113.8  | 100.9  | 108.5  | 98.3  | 122.8  | 114.4 |
| 102.9  | 109.9  | 99.7   | 96.1   | 90.7   | 107.3  | 97.5  | 109.7  | 105   |
| 112.1  | 116.9  | 107.7  | 104.7  | 104.4  | 116.2  | 111.3 | 111.4  | 109.1 |
| 258.1  | 224.8  | 241.7  | 247.9  | 262.2  | 228.9  | 225.4 | 446.3  | 264.4 |
| 114.4  | 123.8  | 101.3  | 101.4  | 107.7  | 116.7  | 102.6 | 109.2  | 105.4 |
| 378.1  | 295.3  | 251.9  | 525.2  | 226.7  | 259.1  | 254.6 | 436.6  | 369.8 |
| 105.6  | 109    | 99.4   | 102.4  | 89     | 103.5  | 103.8 | 101.6  | 105.8 |
| 1087.7 | 975.4  | 884.9  | 929.4  | 916    | 1051.6 | 989.3 | 1445.9 | 938.6 |
| 101.1  | 105    | 102.2  | 91.6   | 94.5   | 97.5   | 91.7  | 102.6  | 99.6  |
| 103    | 108    | 100.4  | 95.7   | 99.3   | 113.2  | 99.5  | 110.2  | 103.8 |
| 107.1  | 107.7  | 97.8   | 106.5  | 89.2   | 103    | 101.6 | 112.2  | 113   |
| 419.5  | 655.6  | 613.7  | 432.5  | 498.8  | 587.1  | 541.4 | 887.5  | 720.3 |
| 100.2  | 108.2  | 103.7  | 95.4   | 92.7   | 110.9  | 99.9  | 111.1  | 106.2 |
| 106    | 106.6  | 101.5  | 106.3  | 97     | 109.2  | 106.1 | 106.6  | 119.6 |
| 105.8  | 112.1  | 101    | 108.6  | 88.6   | 110.4  | 100.2 | 111.6  | 104.2 |
| 104.4  | 104    | 93.6   | 93.2   | 89.7   | 102.4  | 98    | 110.2  | 108.3 |
| 177.5  | 194.9  | 241.5  | 203.9  | 203.5  | 242.1  | 231.7 | 209.1  | 151.1 |
| 127.1  | 144.4  | 132.9  | 128.9  | 129.9  | 145.4  | 127.7 | 156.5  | 128.3 |
| 125    | 143.2  | 130.7  | 130.3  | 116.3  | 143.4  | 125.4 | 142.3  | 136.9 |
| 378    | 560.3  | 418.4  | 522.4  | 498.5  | 537.1  | 707.5 | 764.7  | 401.9 |
| 102.3  | 114.3  | 114.9  | 103.9  | 98.8   | 112.4  | 104.9 | 117.8  | 118   |
| 108.4  | 110.1  | 102.2  | 103.9  | 101.5  | 111.5  | 101   | 115.7  | 112.8 |
| 111.4  | 117.1  | 101.4  | 116.5  | 98.6   | 117.5  | 105.9 | 123.8  | 99.9  |
| 106.6  | 107    | 101.9  | 100.9  | 94.2   | 102.9  | 102.4 | 106.7  | 113.6 |
| 115.7  | 162.9  | 173.4  | 124.3  | 125.2  | 160.2  | 136.3 | 134.8  | 151   |
| 107.8  | 105.4  | 109.7  | 111.3  | 100.3  | 108.4  | 103.5 | 115.3  | 130.9 |
| 102.3  | 104.5  | 96.3   | 97.8   | 90.8   | 105.1  | 96.2  | 102.4  | 111.2 |
| 104.1  | 111.4  | 104.5  | 95.8   | 92.3   | 106.4  | 108.4 | 96.9   | 102.4 |
| 165.1  | 225    | 259.8  | 167.9  | 202.8  | 247.8  | 274.1 | 445.4  | 364.4 |
| 403.7  | 384.2  | 323    | 279.6  | 322.9  | 449.8  | 333.5 | 682.2  | 597   |
| 104    | 116.2  | 106.1  | 101.5  | 90.7   | 113.7  | 113.4 | 111.6  | 116   |
| 162.1  | 416.8  | 487.3  | 318.7  | 415.6  | 436.3  | 374.3 | 400.5  | 214.3 |
| 203.2  | 190.5  | 227.5  | 245.5  | 199.9  | 212.6  | 208   | 296.9  | 202.4 |
| 215.6  | 608.2  | 422.7  | 482.2  | 352.3  | 519.2  | 419.3 | 567    | 412.1 |
| 106.5  | 106.6  | 101.9  | 107.5  | 94.3   | 108.6  | 99.8  | 101.2  | 114.8 |
| 113.3  | 108.2  | 101.5  | 109.6  | 101.6  | 114.8  | 105.9 | 105.6  | 108.7 |
| 112.2  | 107.2  | 99.8   | 103.3  | 94.7   | 108.8  | 103.1 | 106.1  | 107.1 |
| 103.6  | 113.7  | 99.7   | 107.1  | 93.2   | 108.9  | 104.8 | 113.2  | 106.2 |
| 104.9  | 103.7  | 107    | 105.6  | 94     | 103.6  | 106.7 | 110.5  | 109.8 |
| 110.8  | 108.5  | 101    | 98     | 97.7   | 108.9  | 100   | 105.7  | 112.8 |

|        |       |        |       |        |        |       |        |        |
|--------|-------|--------|-------|--------|--------|-------|--------|--------|
| 103.9  | 109.7 | 98.7   | 96.6  | 93.1   | 111.9  | 100.3 | 102.5  | 112.9  |
| 101.7  | 105.5 | 96.5   | 96.1  | 87.7   | 106.1  | 102.7 | 99.9   | 109.4  |
| 272.9  | 436.2 | 485.2  | 281.7 | 344    | 469.6  | 452   | 621.7  | 438.3  |
| 93.4   | 109.4 | 95.9   | 99.4  | 94.4   | 112.8  | 103.9 | 107.4  | 101.7  |
| 318.8  | 535.3 | 483.1  | 362.2 | 529.2  | 617.7  | 484.9 | 774.2  | 504.3  |
| 133.4  | 128.3 | 119.3  | 107.8 | 113.3  | 135    | 123.7 | 146.4  | 132.9  |
| 110.2  | 110.3 | 112.5  | 94.1  | 90.5   | 104.4  | 99.8  | 108.7  | 106.3  |
| 2109.6 | 1569  | 1605.7 | 1559  | 1326.1 | 1780.7 | 1872  | 2327.4 | 2128.3 |
| 103.4  | 103.2 | 103.7  | 92.9  | 87.9   | 104.3  | 102.7 | 112    | 110.5  |
| 120.7  | 125.1 | 106.8  | 111.7 | 113.3  | 129.3  | 111.1 | 127.4  | 136.1  |
| 138.2  | 131.6 | 119.1  | 170.4 | 117.2  | 137.5  | 180.1 | 148    | 145.2  |
| 108.4  | 123   | 107.6  | 113.3 | 109.9  | 125.2  | 110.9 | 131    | 131.9  |
| 245.8  | 233.3 | 231.3  | 256.2 | 235.7  | 221.1  | 284.9 | 392.2  | 296.8  |
| 253.7  | 235.6 | 208    | 209   | 227.8  | 224.2  | 139.6 | 287.6  | 203.4  |
| 106    | 114.9 | 111.2  | 103.3 | 97.2   | 113.5  | 98.9  | 103.1  | 108.9  |
| 114.5  | 104.9 | 98.3   | 107.3 | 95.1   | 113    | 103.5 | 115.1  | 106.5  |
| 99.5   | 110.6 | 102.6  | 97.6  | 92.7   | 111.3  | 97.4  | 116.2  | 105    |
| 119.6  | 126.9 | 121.6  | 116.9 | 122    | 121.3  | 128.1 | 140.6  | 120.5  |
| 112    | 108.4 | 103.3  | 100.1 | 98     | 111.2  | 103.2 | 113.3  | 105.9  |
| 112.7  | 110.5 | 104.9  | 102.3 | 90.6   | 112.4  | 101.5 | 109.3  | 104.2  |
| 104.5  | 111.1 | 102.7  | 104   | 96.4   | 106.9  | 106.4 | 115.8  | 112.5  |
| 132    | 143.1 | 113.4  | 124.4 | 112.1  | 129.9  | 119.7 | 166.4  | 180.8  |
| 105.8  | 108.2 | 92.7   | 100.1 | 96.5   | 100.6  | 92.8  | 120.8  | 114.6  |
| 107.8  | 113.5 | 103.9  | 105.9 | 96.9   | 108.1  | 101.8 | 113.1  | 109.5  |
| 103.4  | 110.2 | 103.4  | 104.2 | 98.1   | 106.2  | 114.2 | 110.1  | 109.9  |
| 99.1   | 113.8 | 101.2  | 106.4 | 101.2  | 108    | 96.5  | 100.8  | 109.7  |
| 106.1  | 105.7 | 104.5  | 102.3 | 94.4   | 105.1  | 99.7  | 109.7  | 107.2  |
| 95.7   | 106.2 | 103.4  | 103.5 | 97.6   | 103.3  | 93.2  | 103.7  | 105.3  |
| 109.8  | 104.5 | 101.8  | 104.4 | 102.6  | 105.3  | 103   | 103.2  | 107.4  |
| 106.2  | 112.2 | 99.2   | 101.7 | 100.5  | 118    | 114.7 | 124.5  | 116.1  |
| 316    | 396.5 | 397.6  | 327   | 294.5  | 428.1  | 352.6 | 358.7  | 363.3  |
| 112.9  | 107.8 | 101.7  | 106.7 | 97.5   | 115.4  | 107.1 | 103.6  | 113.7  |
| 646    | 699.4 | 642.5  | 465   | 651.3  | 537.8  | 574.1 | 832.7  | 784.3  |
| 106.9  | 109.3 | 100.7  | 101.1 | 97.7   | 113.8  | 99.6  | 117.6  | 101.4  |
| 108.7  | 120.3 | 118.3  | 106   | 99.3   | 113.5  | 101.9 | 121.8  | 117.9  |
| 572.7  | 615.2 | 532    | 594.8 | 486    | 607.9  | 524.1 | 908.6  | 814.6  |
| 383.2  | 316.2 | 310.9  | 353.7 | 370.5  | 361.1  | 402.5 | 615.8  | 503.5  |
| 95.9   | 112.8 | 105.5  | 88.4  | 89.4   | 107.6  | 105.7 | 99.7   | 101.2  |
| 118.7  | 128.2 | 100.9  | 110.8 | 98.7   | 131.2  | 115.5 | 133.6  | 125.8  |
| 164.5  | 201.1 | 191.9  | 191.5 | 179.9  | 234.1  | 194.4 | 328.1  | 183.5  |
| 111.4  | 130.7 | 125.7  | 108.4 | 111.2  | 127.5  | 119.3 | 151.1  | 114.5  |
| 141    | 102.9 | 104.3  | 95.3  | 97.6   | 123.5  | 122.3 | 162.2  | 135.8  |
| 109.6  | 109.9 | 104.3  | 103.7 | 102.2  | 114.7  | 108.3 | 121    | 114.5  |
| 108.1  | 137.1 | 118.1  | 123.7 | 108.9  | 120.2  | 122.5 | 128    | 111.3  |
| 123.6  | 178.5 | 157.5  | 192.8 | 163.1  | 158.8  | 186.8 | 162.8  | 129.5  |
| 117.6  | 123.6 | 108.1  | 130.8 | 113    | 131.2  | 111.7 | 107.5  | 108.7  |
| 102.8  | 107.1 | 96     | 94.9  | 91.7   | 106.8  | 104.4 | 103.2  | 108.6  |
| 99.7   | 101.7 | 94.2   | 96.2  | 91.1   | 95.6   | 100   | 104.4  | 99.9   |
| 194.9  | 383.7 | 269.2  | 265.5 | 236.7  | 310.6  | 227.7 | 378.7  | 256.3  |
| 415.6  | 638.3 | 496.1  | 589.8 | 493.4  | 507.9  | 575.1 | 692.5  | 604.3  |
| 190.9  | 167.2 | 175.8  | 143.5 | 181.3  | 230.1  | 151.1 | 339.3  | 263.3  |

|        |        |        |       |       |       |        |        |        |
|--------|--------|--------|-------|-------|-------|--------|--------|--------|
| 98.4   | 115.9  | 102.5  | 96.5  | 99.4  | 112.3 | 97.3   | 123.3  | 115.7  |
| 1599.7 | 1088.1 | 1014.4 | 785.5 | 870.7 | 1105  | 906.5  | 2054.1 | 1780.6 |
| 101.7  | 107.6  | 104.2  | 100.7 | 96.7  | 102   | 99.9   | 109    | 102.4  |
| 131.4  | 129.3  | 122.1  | 115.7 | 104.6 | 129.4 | 117    | 125.1  | 127.8  |
| 108.1  | 105.6  | 99.6   | 97.8  | 91.7  | 108.6 | 99.7   | 109.3  | 102.8  |
| 104.5  | 113.9  | 105.7  | 102.8 | 95.9  | 107.7 | 104.1  | 110.1  | 98.9   |
| 107.8  | 105.9  | 103.1  | 101.5 | 100.8 | 115.9 | 105    | 108    | 110.1  |
| 123.6  | 156.4  | 172.3  | 149.9 | 152.7 | 166.2 | 144.6  | 238.1  | 137.4  |
| 109.3  | 110.7  | 102.5  | 124.4 | 92.8  | 107.3 | 102.7  | 108.5  | 112.8  |
| 141    | 154.9  | 155.1  | 148.2 | 127.7 | 158.5 | 159.4  | 167.4  | 166.9  |
| 126.2  | 153.2  | 117.1  | 169.5 | 118.1 | 130.8 | 170.3  | 143.7  | 141.2  |
| 104.2  | 108.7  | 102.6  | 99    | 103.3 | 118.1 | 101.8  | 105.4  | 95.2   |
| 116.1  | 118.7  | 113.6  | 127.7 | 99.1  | 108.6 | 114.4  | 112    | 113.5  |
| 101.5  | 107.2  | 106    | 101.9 | 95.5  | 107.4 | 101    | 107.7  | 112.1  |
| 105.3  | 110    | 100.6  | 102.8 | 101.1 | 110.1 | 100.6  | 107.8  | 110.6  |
| 99.8   | 135.8  | 125.8  | 113.1 | 114.6 | 123.4 | 115.6  | 129.3  | 117.4  |
| 159.1  | 301.6  | 282.2  | 264.4 | 256   | 229.1 | 232.7  | 267.7  | 163.4  |
| 111.5  | 109.9  | 104.1  | 99.8  | 97.8  | 106.7 | 95.6   | 106.9  | 106.1  |
| 128.3  | 131.2  | 153.4  | 121.8 | 127.5 | 132.5 | 131.4  | 158.3  | 132.1  |
| 107.5  | 113    | 106.2  | 111.4 | 104   | 109.4 | 103.5  | 108.2  | 108.3  |
| 107.6  | 118.3  | 110.4  | 109   | 91.4  | 110.4 | 116.1  | 114.7  | 109.6  |
| 127.7  | 152.7  | 160.9  | 129.9 | 139.1 | 160.2 | 128.3  | 167.7  | 131    |
| 118.6  | 152    | 145    | 129.3 | 127.1 | 148   | 130.1  | 154.3  | 126.4  |
| 111.3  | 112.7  | 103.2  | 99.1  | 92.3  | 104.7 | 99.5   | 109    | 114.3  |
| 107.2  | 103.2  | 104.5  | 100.4 | 91.4  | 115.2 | 101.9  | 110.7  | 107.1  |
| 101.3  | 108.8  | 107.6  | 100.1 | 100   | 106.7 | 104.2  | 104.1  | 112.4  |
| 110.5  | 124.9  | 126.2  | 112.9 | 107.4 | 127.7 | 121.6  | 140.1  | 126.7  |
| 100.1  | 112.9  | 107.1  | 101   | 98.1  | 100.5 | 97.5   | 108.1  | 103.2  |
| 102.7  | 106.9  | 102.5  | 93.7  | 96.7  | 106.6 | 112.9  | 106.2  | 104.7  |
| 750.2  | 1013.4 | 822.5  | 792   | 766.7 | 763.9 | 1279.7 | 1456.7 | 1269.4 |
| 389.4  | 518.6  | 492.5  | 673.5 | 438   | 469.2 | 844    | 671.1  | 516.9  |
| 174    | 225.2  | 217.5  | 219   | 189.2 | 175.9 | 250.3  | 307.5  | 227.3  |
| 127.3  | 169.6  | 155.1  | 159.1 | 139.7 | 150.3 | 132.7  | 188.6  | 151.8  |
| 440.5  | 850.3  | 848.7  | 670.9 | 815.3 | 993.4 | 689.6  | 1137.3 | 911.7  |
| 115.3  | 137.7  | 124.6  | 122.8 | 120.8 | 121.5 | 133.6  | 120.2  | 126.2  |
| 130.8  | 300.3  | 213.2  | 237.1 | 216.1 | 183.9 | 233.8  | 323    | 174.2  |
| 140.4  | 156.9  | 154.5  | 140.5 | 123.3 | 155.2 | 156.9  | 196.1  | 199.9  |
| 189.5  | 448.6  | 400.9  | 351   | 355.3 | 300.5 | 397.8  | 434.6  | 263.3  |
| 179.5  | 283.3  | 199.2  | 222   | 205.5 | 200.4 | 213.6  | 258.5  | 208.6  |
| 117.9  | 137.8  | 116.6  | 128.7 | 112   | 121.4 | 120.5  | 136.4  | 120    |
| 126.4  | 127.7  | 122.8  | 125.4 | 102.4 | 128.3 | 114.4  | 128.7  | 104.4  |
| 141.9  | 161.4  | 154.6  | 152.5 | 140.9 | 157.2 | 171.5  | 225    | 226.5  |
| 118.9  | 132.4  | 110.7  | 123.4 | 116.1 | 128.1 | 122.1  | 158.7  | 157.2  |
| 104.4  | 107.2  | 103.5  | 115.1 | 100.3 | 116.8 | 103.8  | 117.4  | 120.2  |
| 169    | 207.4  | 196.6  | 204.4 | 153.9 | 192.1 | 234.2  | 154.8  | 141.9  |
| 127.8  | 134.5  | 126.8  | 120.7 | 109.2 | 128.7 | 119.4  | 122.8  | 116.6  |
| 367.1  | 652.1  | 704    | 712.6 | 547.7 | 684.5 | 730.1  | 793.9  | 541.1  |
| 129.6  | 133.2  | 131.2  | 101.3 | 113.6 | 131.4 | 109.3  | 147    | 128.2  |
| 172.1  | 176    | 158.7  | 152.5 | 131.6 | 167   | 169    | 257.1  | 206.3  |
| 112.7  | 110    | 111.4  | 119.5 | 98.3  | 127.4 | 110.1  | 125.7  | 113.8  |
| 251.8  | 259.2  | 202.4  | 257.1 | 200.2 | 288.3 | 217.2  | 644.3  | 618.6  |

|        |        |        |        |        |        |        |        |        |
|--------|--------|--------|--------|--------|--------|--------|--------|--------|
| 112.7  | 140.2  | 123.6  | 125    | 117.4  | 133    | 121.9  | 138.3  | 134.9  |
| 102.5  | 111.6  | 100.3  | 107    | 106.5  | 107.1  | 107.6  | 124.5  | 118.6  |
| 113    | 111.8  | 103.2  | 92.2   | 100.9  | 111    | 100.6  | 101.5  | 106.1  |
| 109.6  | 107.5  | 97.1   | 97.4   | 103.1  | 107.7  | 102.3  | 110.7  | 110.7  |
| 119.9  | 147.5  | 129.8  | 152.5  | 125.7  | 133.3  | 145.7  | 138.8  | 122.6  |
| 113.8  | 124.8  | 127.8  | 102.7  | 107.6  | 133.2  | 114.7  | 117.5  | 130.2  |
| 101    | 116.3  | 103.5  | 113.7  | 99.3   | 110.8  | 103.2  | 108    | 105.9  |
| 371.6  | 832.5  | 743.9  | 852.9  | 670.7  | 546.2  | 955.2  | 699.9  | 310    |
| 106.5  | 106.7  | 105.8  | 100.3  | 94.8   | 107.3  | 105.8  | 105.7  | 101.8  |
| 885.3  | 1509.5 | 2190.1 | 910.1  | 1165.5 | 1913.1 | 916.7  | 1718.5 | 754.2  |
| 105.4  | 115.8  | 106    | 102.5  | 97.7   | 108    | 103.7  | 118.3  | 119.7  |
| 124.3  | 116.6  | 129.4  | 121.4  | 104.9  | 118.4  | 108.7  | 126.8  | 110.2  |
| 114.8  | 113.2  | 113.7  | 117.4  | 96.6   | 117.7  | 115.1  | 122.5  | 109.6  |
| 105.8  | 109.9  | 111.3  | 102.9  | 94.3   | 107.8  | 103.5  | 114.4  | 114.5  |
| 102    | 105.5  | 95.8   | 104    | 96.3   | 106.1  | 105.6  | 105.7  | 104.5  |
| 109.7  | 106.5  | 100.5  | 98.1   | 91.1   | 104    | 92.6   | 110.6  | 108.7  |
| 108.8  | 107.1  | 96.8   | 103.1  | 95.8   | 107.2  | 103.2  | 115.3  | 103.8  |
| 101.5  | 110.1  | 102.3  | 115.2  | 98.7   | 122.4  | 103    | 117.3  | 104.4  |
| 100.3  | 110.1  | 102.7  | 97.2   | 93.6   | 111.1  | 105    | 105.9  | 105.4  |
| 99.7   | 104.1  | 103.6  | 99.1   | 94.6   | 98.7   | 107.1  | 111.6  | 101.6  |
| 109.1  | 115.3  | 107.5  | 113.6  | 100.6  | 106.9  | 106.7  | 114.7  | 108.4  |
| 107.6  | 97.6   | 99.2   | 100.8  | 100.5  | 105.6  | 104.1  | 115.7  | 103.9  |
| 107.9  | 108.2  | 97.1   | 100.8  | 89.1   | 109.5  | 96.1   | 110.9  | 105.6  |
| 107.8  | 108.5  | 108.2  | 119.7  | 108.1  | 114.1  | 109.9  | 131.5  | 102.1  |
| 211.2  | 198.3  | 171.5  | 185.9  | 163.5  | 162.9  | 174.6  | 235.5  | 216.8  |
| 116.6  | 112.4  | 107.9  | 106.2  | 104.6  | 110.4  | 112    | 120.3  | 112.8  |
| 110.2  | 109.5  | 96.3   | 106.2  | 94.6   | 113.1  | 114.5  | 113.9  | 115.3  |
| 111.1  | 109.6  | 104.4  | 104.8  | 97.7   | 106.7  | 105.7  | 106.4  | 118    |
| 105.1  | 110.1  | 102.9  | 99     | 101.4  | 104    | 110.9  | 109.5  | 114.2  |
| 187.8  | 220.8  | 223.4  | 176.4  | 187.8  | 264    | 215.6  | 320.1  | 224.3  |
| 126.3  | 117.3  | 114.6  | 112.5  | 109.5  | 128.4  | 108.9  | 119    | 119.4  |
| 120.7  | 139.7  | 120.2  | 116.2  | 125.3  | 124.9  | 112.1  | 142.9  | 127.1  |
| 137.6  | 161.6  | 120    | 120.6  | 133.9  | 138.8  | 142.6  | 163.4  | 135.3  |
| 218    | 123.6  | 114.7  | 107.4  | 128.3  | 135.4  | 141.2  | 293    | 173.5  |
| 249.5  | 158    | 137.4  | 122.9  | 144.7  | 170.7  | 181.1  | 282.7  | 234.2  |
| 110.2  | 104.7  | 101.7  | 105    | 92.7   | 116.2  | 95.9   | 106.9  | 111.2  |
| 108.1  | 120.8  | 109.6  | 104.9  | 91.5   | 107.6  | 106.1  | 109.2  | 110.2  |
| 106.3  | 113.8  | 101.4  | 96     | 95.8   | 120.4  | 101.8  | 110.8  | 112.7  |
| 206.1  | 334.5  | 279.2  | 262.3  | 249.5  | 265.1  | 294.5  | 350.6  | 285    |
| 347.9  | 400.1  | 325.8  | 395.7  | 290.8  | 295.7  | 357.1  | 296.4  | 226    |
| 156.3  | 173.9  | 180.9  | 153.6  | 181    | 181.2  | 218.1  | 217.2  | 208    |
| 162.1  | 235    | 244.2  | 228.7  | 217.8  | 240.5  | 242    | 265.7  | 182.5  |
| 108.4  | 108    | 107.4  | 104.6  | 95.7   | 114.8  | 103.2  | 107.2  | 106.6  |
| 105    | 112.6  | 104.5  | 108.8  | 109.4  | 120.6  | 115.7  | 124.8  | 107    |
| 109.8  | 134.2  | 124    | 116.4  | 155    | 139.7  | 149.7  | 156.4  | 111.7  |
| 112.1  | 113.1  | 109.1  | 111.9  | 94.8   | 113.5  | 114.6  | 126.5  | 114.9  |
| 107.2  | 113.5  | 102.2  | 101.1  | 103.9  | 108.4  | 107.6  | 120.4  | 113.6  |
| 166.8  | 137.3  | 125.5  | 161.4  | 121.6  | 119.7  | 149.9  | 158.4  | 138.1  |
| 214.7  | 152.1  | 156    | 181.1  | 148.4  | 162.1  | 205.6  | 204.5  | 274.1  |
| 117.8  | 137.8  | 118.9  | 132.1  | 117.3  | 136.6  | 131.7  | 138.9  | 119.8  |
| 2280.9 | 4011.6 | 3174.5 | 2636.2 | 3009.6 | 3467.6 | 3035.1 | 5235.4 | 3751.7 |

|        |        |        |        |        |        |        |        |        |
|--------|--------|--------|--------|--------|--------|--------|--------|--------|
| 2249.6 | 2226.2 | 2967.5 | 2572.8 | 2379.8 | 2112.1 | 1787.7 | 4419.8 | 3475.8 |
| 817.6  | 836.7  | 748.5  | 956.1  | 555.7  | 791.3  | 968.7  | 1554   | 1305.1 |
| 102.9  | 101    | 98.3   | 96.2   | 94.4   | 102.2  | 99.7   | 111.1  | 101.9  |
| 143.8  | 153.3  | 145.5  | 138.6  | 122.5  | 138.7  | 137.5  | 179.5  | 177.9  |
| 104.3  | 105.8  | 99     | 102.3  | 96.5   | 107.7  | 107    | 106    | 110.4  |
| 113.4  | 116.9  | 109.3  | 115.7  | 101.3  | 115    | 106.6  | 110.1  | 112.8  |
| 124.5  | 147.7  | 131.2  | 168.7  | 139.7  | 142.5  | 144.9  | 172.7  | 137.3  |
| 118.4  | 141.3  | 134.8  | 136.3  | 111    | 133.3  | 125.4  | 142.8  | 130.7  |
| 156.8  | 377    | 300.4  | 366.4  | 281.2  | 298    | 347.4  | 342.3  | 264.2  |
| 114    | 105    | 101.4  | 100.4  | 98.9   | 105.9  | 112.2  | 107.7  | 112.3  |
| 106.2  | 109.7  | 99.3   | 101.5  | 98.8   | 110.4  | 106.6  | 117.7  | 108.8  |
| 107.7  | 109.5  | 101.5  | 95.8   | 88     | 106.9  | 101.4  | 112    | 109.6  |
| 107.8  | 121.2  | 96.8   | 97.8   | 90.3   | 103.9  | 105.5  | 102.3  | 100    |
| 110.5  | 105    | 104.1  | 104.9  | 97.6   | 105.5  | 112.3  | 113.1  | 107.1  |
| 109.8  | 111.8  | 104.6  | 103.3  | 105.5  | 112.4  | 109.5  | 110.7  | 112.7  |
| 104.2  | 109.1  | 103.6  | 94.4   | 94.7   | 106.2  | 103.6  | 106.9  | 115    |
| 114.1  | 103.4  | 100.8  | 102.8  | 101.9  | 113.8  | 105.9  | 117.8  | 109.1  |
| 97.4   | 106.5  | 95.5   | 97.1   | 92.2   | 100.7  | 101.4  | 114.1  | 112.6  |
| 107.6  | 107.9  | 100.7  | 96.4   | 95.1   | 107.2  | 96.6   | 113.1  | 104.8  |
| 103.8  | 108.8  | 100.3  | 95.9   | 98     | 104.6  | 105.4  | 105.2  | 107.2  |
| 107.4  | 113.9  | 115.5  | 121.3  | 98.4   | 122.8  | 110.4  | 121.8  | 120.2  |
| 102.6  | 105.2  | 102.8  | 96.5   | 91.1   | 99.9   | 106.8  | 101.4  | 104.1  |
| 100.5  | 116.2  | 96.9   | 92.8   | 96     | 106.3  | 103.6  | 108.5  | 111    |
| 122.5  | 121.7  | 106.8  | 103.1  | 97.6   | 120.2  | 101    | 108.5  | 108.1  |
| 109.5  | 113.7  | 109.8  | 104.5  | 99.8   | 115.7  | 105.1  | 112.7  | 115.2  |
| 107.1  | 109.4  | 103    | 106.7  | 98.7   | 109.4  | 98.5   | 112.6  | 105.8  |
| 107.2  | 114.8  | 109.5  | 111.8  | 110.8  | 109.1  | 110.7  | 113    | 104.8  |
| 114.7  | 111.8  | 102.4  | 100.7  | 98.5   | 103    | 103.8  | 116.6  | 107.9  |
| 114.5  | 106.7  | 92.6   | 101.3  | 100.5  | 110.5  | 103.2  | 107.5  | 111.8  |
| 110.2  | 109.1  | 111.2  | 104.6  | 106.2  | 109.8  | 110.1  | 115.6  | 109.2  |
| 99.6   | 108.6  | 101.7  | 95.5   | 99     | 106.8  | 101.2  | 111.1  | 104.1  |
| 102.8  | 109    | 99.8   | 100.9  | 90.3   | 107.1  | 109.9  | 102.6  | 99.2   |
| 104    | 101.6  | 97.5   | 95.3   | 87.6   | 106.4  | 100.6  | 103.3  | 110.5  |
| 106    | 102.2  | 99.3   | 100.3  | 91.9   | 104.1  | 104.9  | 103.9  | 119.5  |
| 109.5  | 108.8  | 104.5  | 108.5  | 99.4   | 109.6  | 99.4   | 110.1  | 110.5  |
| 113.5  | 124    | 110.6  | 121.2  | 101.7  | 128.3  | 106.3  | 115.3  | 108.6  |
| 105.8  | 109.1  | 104.6  | 106.3  | 105.9  | 115.7  | 112.3  | 109.6  | 104.7  |
| 106.9  | 115.7  | 101.7  | 103.5  | 98.3   | 110.8  | 102.3  | 107.9  | 99.9   |
| 111.6  | 107.9  | 107.8  | 99.3   | 98.1   | 107.1  | 96.9   | 106.4  | 114.8  |
| 102.4  | 108.1  | 105.1  | 101.9  | 93.6   | 102.4  | 98.7   | 116.5  | 101.4  |
| 103.6  | 109.7  | 101.4  | 107.8  | 91.9   | 114.5  | 100.1  | 104.6  | 100.8  |
| 108    | 105.2  | 99.1   | 106    | 102    | 112.3  | 103.2  | 112.9  | 106.6  |
| 110.6  | 100.4  | 102    | 97.9   | 93.8   | 106.8  | 108.9  | 107.2  | 100.9  |
| 107.2  | 109.6  | 102.8  | 108    | 98.4   | 107.1  | 101.2  | 108.7  | 110.4  |
| 100.6  | 107.5  | 100    | 98.1   | 90.8   | 104.3  | 103.3  | 105.1  | 102.8  |
| 103.1  | 113.9  | 92.5   | 111.8  | 95.2   | 118.4  | 98.5   | 101.6  | 102.5  |
| 105.4  | 110.5  | 108.3  | 106.3  | 97.8   | 106.8  | 105.7  | 117.4  | 108.8  |
| 105.7  | 113.5  | 106.5  | 99.5   | 90.8   | 101    | 97.8   | 104.8  | 117.6  |
| 110.2  | 108.9  | 100.2  | 113.7  | 91.2   | 118.2  | 102.9  | 103.2  | 113.3  |
| 121.2  | 124.1  | 120    | 110.4  | 110.7  | 123.5  | 121.2  | 114.9  | 124.8  |
| 109    | 109.6  | 119    | 106.2  | 100.7  | 108.6  | 101.5  | 116.9  | 114.7  |

|       |       |       |       |       |       |       |       |       |
|-------|-------|-------|-------|-------|-------|-------|-------|-------|
| 99.9  | 101.6 | 105.2 | 105.7 | 96    | 105.5 | 97.3  | 108.9 | 108   |
| 102.3 | 98.2  | 99.3  | 103.1 | 91.7  | 110   | 108   | 102.9 | 97.5  |
| 105.6 | 104.7 | 94.8  | 99.8  | 99.3  | 105.2 | 100.3 | 113.8 | 108.3 |
| 122.3 | 120.3 | 115.4 | 101   | 103.6 | 117   | 113.8 | 125.4 | 114.5 |
| 109.2 | 113.4 | 97.2  | 97.7  | 98.6  | 103.5 | 103.1 | 107.4 | 102.1 |
| 108   | 100.7 | 100.7 | 102   | 98.6  | 101.8 | 98.1  | 109.1 | 110.6 |
| 103.1 | 104.2 | 103.4 | 104.8 | 95    | 94.8  | 100.5 | 110.9 | 113.5 |
| 109.1 | 101   | 100.2 | 93.8  | 88.3  | 102.3 | 98.8  | 100.6 | 108.7 |
| 99.3  | 112.4 | 96.9  | 102.9 | 96.5  | 103.4 | 113.2 | 108   | 97.7  |
| 105.8 | 102.9 | 98.7  | 98.3  | 90.5  | 106.4 | 106.5 | 102.7 | 102.8 |
| 116   | 109.1 | 100.4 | 120.6 | 105   | 115.9 | 109   | 108.3 | 108.9 |
| 111   | 107.4 | 100.7 | 110.4 | 94.5  | 108.4 | 104.8 | 108.3 | 106.3 |
| 104.9 | 106.3 | 102.2 | 95.6  | 89.8  | 108.3 | 100.3 | 97.1  | 106.6 |
| 102.2 | 102.8 | 107.7 | 95    | 91.7  | 102.5 | 97.9  | 114   | 107.2 |
| 100.8 | 99.3  | 99.3  | 107.6 | 93.7  | 102.1 | 104.5 | 105.1 | 105.5 |
| 104.3 | 99.7  | 103.8 | 104.1 | 91.5  | 107   | 101.5 | 105.3 | 107.9 |
| 106.1 | 104.7 | 99.3  | 96.9  | 88.2  | 104.7 | 95.9  | 103.5 | 106.5 |
| 102.7 | 109.1 | 103.9 | 98.8  | 94.3  | 108.1 | 99.5  | 111.3 | 105.6 |
| 107.4 | 111.7 | 106.2 | 109.3 | 99.4  | 110.5 | 101.9 | 126.3 | 117.8 |
| 106.1 | 104.9 | 106.8 | 105.2 | 91.3  | 103.6 | 102.2 | 102.5 | 97.7  |
| 104.8 | 104   | 102.3 | 101.6 | 95.4  | 107.3 | 106.7 | 107.2 | 102.9 |
| 104.3 | 107   | 96.9  | 101.3 | 95    | 112.3 | 103.2 | 115.6 | 110.7 |
| 113.1 | 109   | 102.1 | 94.6  | 97.7  | 104.6 | 97    | 110.8 | 110.8 |
| 101.8 | 109.4 | 105.6 | 101.6 | 92.4  | 110.1 | 99.9  | 106.4 | 121.4 |
| 94.2  | 101.4 | 101.2 | 105.6 | 90.9  | 106.6 | 100.4 | 108.7 | 106.8 |
| 105.1 | 108.4 | 105.6 | 94.7  | 94.5  | 102.9 | 98.4  | 111.2 | 109.6 |
| 100.5 | 113.6 | 101.5 | 102.4 | 89.5  | 105.8 | 101.8 | 101.6 | 110.3 |
| 103.4 | 105.2 | 99.8  | 104.8 | 93.1  | 104   | 92.9  | 97.9  | 105.1 |
| 99.8  | 106.1 | 91.5  | 98.1  | 96.3  | 102.6 | 99.8  | 106.2 | 106.2 |
| 105.3 | 104.2 | 100.5 | 99.6  | 99.8  | 103.4 | 98.8  | 105.3 | 105.3 |
| 227.1 | 182.7 | 197.3 | 167.8 | 156   | 218.2 | 148.2 | 351.6 | 378.6 |
| 110.2 | 112   | 101.8 | 108.2 | 100.9 | 114.5 | 110.1 | 105.2 | 105.3 |
| 110.2 | 106.6 | 105.1 | 103.9 | 94.4  | 106.2 | 99.8  | 115.2 | 105.3 |
| 101.5 | 105.7 | 99.4  | 98.9  | 93.9  | 113.1 | 97.9  | 101.5 | 103.4 |
| 115   | 118.6 | 98.4  | 103.9 | 115.3 | 113.8 | 99.1  | 114.9 | 108.2 |
| 107.4 | 107.4 | 101.8 | 95.7  | 88    | 107.7 | 101.7 | 108.3 | 96.8  |
| 110.1 | 105.4 | 94.9  | 93.4  | 94.2  | 94.9  | 105.4 | 110.5 | 103.1 |
| 103.2 | 102.2 | 100.1 | 107.1 | 96.6  | 100.8 | 107.6 | 97.4  | 111.4 |
| 103.6 | 105.8 | 102   | 100.4 | 96.9  | 106.6 | 99.6  | 100.7 | 107   |
| 109.7 | 105   | 99.9  | 101.3 | 93.9  | 112.5 | 100.7 | 105   | 101.2 |
| 112.1 | 110.2 | 109.7 | 101.9 | 94.1  | 107.6 | 100.2 | 104.9 | 107.7 |
| 102.7 | 103.7 | 100.3 | 101.2 | 89.8  | 105.5 | 99.9  | 107.6 | 111.9 |
| 103.1 | 108.5 | 97.4  | 109.1 | 94.8  | 117.1 | 97.7  | 100.8 | 97.6  |
| 100.8 | 100.2 | 104.9 | 96.6  | 96.7  | 108.6 | 109.4 | 105.5 | 107.4 |
| 99.3  | 108.3 | 93.9  | 105   | 100.9 | 103.8 | 105.2 | 102.3 | 112.1 |
| 101.9 | 115   | 101.4 | 96    | 94.2  | 110.3 | 109.4 | 107.4 | 109.7 |
| 109.1 | 103.8 | 104.5 | 91.8  | 95.2  | 107.5 | 99.2  | 107.5 | 113.4 |
| 104.9 | 107.7 | 98.2  | 102.8 | 92.4  | 103.3 | 100.8 | 104.8 | 96    |
| 106.9 | 105.6 | 102.7 | 103   | 100.4 | 106.4 | 97.1  | 109.7 | 111.7 |
| 113.9 | 120.7 | 102   | 112.2 | 101.1 | 115.9 | 105.8 | 125.3 | 114.8 |
| 105.3 | 112.8 | 107.9 | 105   | 99.6  | 107.1 | 98.6  | 126.9 | 119.8 |

|        |        |        |        |        |        |        |        |        |
|--------|--------|--------|--------|--------|--------|--------|--------|--------|
| 112.3  | 105.2  | 100.7  | 102.6  | 90.6   | 105    | 106.3  | 108.5  | 108.2  |
| 100.1  | 101    | 103.5  | 97.9   | 91.5   | 113.1  | 100.2  | 104.3  | 102    |
| 116.8  | 104.6  | 99.5   | 113.8  | 94.7   | 105.7  | 105.1  | 112.1  | 114.5  |
| 112.2  | 110.7  | 107.3  | 115.7  | 100.1  | 121    | 122.7  | 128    | 114.1  |
| 101.4  | 108.7  | 101.7  | 99.3   | 95.2   | 112.6  | 103.6  | 117.6  | 107.4  |
| 104.7  | 107.9  | 103.4  | 102.3  | 96.1   | 108    | 94.3   | 103.1  | 106.5  |
| 125.6  | 129.5  | 121.4  | 119.7  | 112.1  | 139.3  | 126.5  | 162    | 158.1  |
| 110.5  | 110.2  | 101.1  | 97.7   | 92.7   | 112.7  | 101.5  | 103.7  | 98.1   |
| 99.1   | 107    | 102.9  | 91.2   | 93.6   | 107    | 97.9   | 103.2  | 105.4  |
| 97.2   | 107.8  | 104.2  | 100.9  | 99.1   | 107    | 100.4  | 111.7  | 104.5  |
| 108.9  | 105.5  | 103.2  | 100    | 91.9   | 104.7  | 97.2   | 106.1  | 119.1  |
| 111.1  | 115.1  | 110    | 100.8  | 104    | 117.9  | 112.5  | 129.6  | 117.4  |
| 108.4  | 108.2  | 100.5  | 98.5   | 96.3   | 111.6  | 107.2  | 126    | 105.3  |
| 106.4  | 101    | 105.3  | 105.6  | 91.2   | 107.5  | 95.8   | 104.9  | 114.3  |
| 99.7   | 97.8   | 100.7  | 96     | 90.4   | 107.4  | 98.4   | 114.6  | 104.7  |
| 118.6  | 108.3  | 100.5  | 106.7  | 94.2   | 110.4  | 100.9  | 120.7  | 104.5  |
| 460.9  | 245.2  | 253    | 179.3  | 238.2  | 310.3  | 272.3  | 392.7  | 452.4  |
| 132.9  | 158.5  | 170.6  | 152.7  | 145.2  | 148.3  | 154.6  | 199.4  | 157.9  |
| 109.4  | 103.4  | 100.5  | 100.4  | 89.2   | 105.2  | 96.2   | 109    | 95.9   |
| 109.9  | 120    | 111.7  | 103.6  | 99.1   | 111.3  | 99     | 117.2  | 109.3  |
| 313.8  | 584.6  | 538.9  | 587    | 408    | 564.1  | 593.2  | 857.5  | 513.9  |
| 129.6  | 121.4  | 115.5  | 118.9  | 111.7  | 136.4  | 135.7  | 147.5  | 136.5  |
| 128.5  | 159    | 134.9  | 146.7  | 125.5  | 130    | 136.1  | 189.8  | 136.4  |
| 128    | 129    | 118    | 112.6  | 110.7  | 118.1  | 116.9  | 134.4  | 129.6  |
| 387.5  | 276.3  | 251.9  | 339.3  | 200.3  | 311.5  | 320.7  | 563.8  | 446.8  |
| 101.1  | 111.1  | 97.9   | 98     | 96.4   | 106.6  | 99.8   | 109.8  | 105.4  |
| 111    | 126.7  | 110.1  | 111.7  | 104    | 115.1  | 111.3  | 130    | 113.5  |
| 207.1  | 296.1  | 261.4  | 246.5  | 219    | 294.8  | 225.5  | 394.7  | 267    |
| 105.7  | 107.9  | 104.4  | 108    | 95.7   | 118.7  | 104.3  | 118.1  | 111.1  |
| 127    | 113.2  | 110.5  | 109.9  | 108    | 120.1  | 108.3  | 137.9  | 146.3  |
| 378.2  | 425.5  | 362.5  | 431.1  | 486.7  | 427.1  | 426.5  | 627.4  | 456.3  |
| 971.2  | 1741.4 | 1385.2 | 1450.5 | 1251.1 | 1476.7 | 1406.4 | 2314.6 | 1412.8 |
| 276    | 270.2  | 259.5  | 253.5  | 162.1  | 220.7  | 301.2  | 524.4  | 374.9  |
| 355.6  | 706    | 719    | 483    | 532.8  | 740.4  | 548.8  | 528.6  | 400.3  |
| 108.3  | 110.3  | 112.1  | 113.2  | 103.7  | 122.4  | 110.8  | 120.2  | 113.9  |
| 108.8  | 121.2  | 118.7  | 101    | 103    | 129.4  | 106.7  | 113.9  | 114.7  |
| 278.7  | 336.7  | 262.1  | 348.2  | 292    | 316    | 260.7  | 795.6  | 457.6  |
| 2059.6 | 1519.7 | 1518.6 | 1574.8 | 1373.8 | 1648   | 1636.8 | 2628   | 1940.9 |
| 316    | 397.8  | 428.9  | 275.4  | 375.1  | 445.8  | 394.4  | 587.8  | 428.1  |
| 488.8  | 493.3  | 473    | 298.6  | 449.1  | 502.9  | 460.8  | 729.7  | 424.1  |
| 118.4  | 122.7  | 104.1  | 118.1  | 116.4  | 123.7  | 129.1  | 135.2  | 116.5  |
| 110.1  | 110.2  | 111.3  | 108.7  | 114.3  | 117    | 108.9  | 114.6  | 103.4  |
| 113.8  | 125.3  | 117.7  | 120.3  | 119.3  | 130.6  | 118    | 135.2  | 109.8  |
| 116.5  | 119.2  | 119.2  | 102.3  | 104.6  | 119.4  | 112.5  | 121.7  | 110.3  |
| 109.1  | 106.9  | 102.5  | 108.1  | 98.6   | 107.1  | 107.5  | 106.8  | 106    |
| 253.1  | 227.7  | 298.1  | 247.2  | 285.7  | 296.8  | 280.7  | 413    | 299.5  |
| 108.4  | 104.9  | 110.4  | 102.6  | 98.7   | 110    | 105.5  | 116.8  | 114.6  |
| 117.8  | 114.9  | 101.8  | 101.8  | 102.2  | 108.3  | 110.6  | 123.7  | 111.9  |
| 126.6  | 141.5  | 139.7  | 127.9  | 102    | 146.7  | 135.2  | 153.4  | 156.6  |
| 144.4  | 126.8  | 135.8  | 110.8  | 123.1  | 135.4  | 115.4  | 157.5  | 158.5  |
| 109.5  | 99.9   | 99.9   | 98.1   | 102.7  | 105.8  | 101.8  | 111.8  | 105.5  |



|        |        |        |        |        |        |        |        |        |
|--------|--------|--------|--------|--------|--------|--------|--------|--------|
| 103.1  | 115.4  | 102.9  | 110.7  | 98.3   | 114.6  | 107.7  | 108.5  | 107.9  |
| 104.6  | 119    | 110.6  | 108.9  | 98     | 102.4  | 103.3  | 122.9  | 111    |
| 113.3  | 108.4  | 99.4   | 104.4  | 95.7   | 112.2  | 101.9  | 98.9   | 105.8  |
| 104.6  | 108.7  | 103.8  | 100.2  | 99.4   | 104.7  | 102.7  | 105.4  | 97.2   |
| 109.2  | 109.9  | 108.1  | 103.3  | 96.4   | 115.9  | 97.5   | 116.2  | 106.9  |
| 105    | 105.9  | 103    | 104.1  | 99     | 107.2  | 106.2  | 112.6  | 110.8  |
| 104.4  | 99.9   | 102.3  | 98     | 90.3   | 105.4  | 97.3   | 108.3  | 103.2  |
| 110.5  | 114.8  | 101    | 106.1  | 95.9   | 112.4  | 99.3   | 102.4  | 113.8  |
| 191.3  | 312.9  | 273.2  | 296    | 297.7  | 268.9  | 306.8  | 338.6  | 240.8  |
| 109.8  | 106.5  | 93.2   | 102.4  | 101.1  | 119.3  | 99.7   | 117.1  | 112.5  |
| 106.8  | 108.1  | 107.2  | 98.8   | 99.1   | 108.7  | 107.9  | 116.3  | 112.1  |
| 99.6   | 114.9  | 91.2   | 94.5   | 96.1   | 109.6  | 104.8  | 107.4  | 104.4  |
| 125.1  | 118.1  | 112.5  | 109.5  | 102.8  | 115    | 112.3  | 113.7  | 128.8  |
| 103.7  | 126.2  | 116.2  | 99.9   | 112    | 127.7  | 103.7  | 122.3  | 117.3  |
| 114.6  | 119.4  | 101.4  | 106.3  | 99.3   | 104.8  | 97.7   | 114.9  | 104.6  |
| 103.6  | 104    | 96.9   | 108.2  | 92.8   | 111.7  | 106.2  | 104.5  | 102.2  |
| 101    | 92.6   | 100.7  | 97.5   | 90.9   | 103.9  | 95.3   | 107.4  | 111    |
| 114.2  | 114.3  | 113    | 116.5  | 105.1  | 114.4  | 111.1  | 128.6  | 116.9  |
| 168.1  | 320.4  | 254.5  | 412.8  | 263.5  | 245.7  | 185.5  | 341.8  | 224.2  |
| 115.3  | 114.1  | 110.5  | 97.8   | 94.1   | 111.4  | 108.3  | 110.8  | 109.6  |
| 110.9  | 108.2  | 103.8  | 109.2  | 102.5  | 104.4  | 102.3  | 103.3  | 111.6  |
| 116.6  | 121.1  | 114.8  | 118.9  | 115.1  | 110.8  | 106.2  | 127    | 121.5  |
| 110.7  | 111.2  | 109.5  | 121.6  | 106.2  | 134.7  | 111.7  | 131    | 112.5  |
| 112.1  | 109.3  | 100.1  | 103.4  | 86.4   | 98.1   | 102.1  | 108.4  | 118.9  |
| 102    | 103.9  | 101.1  | 101.3  | 88.2   | 103.7  | 95     | 107.2  | 108.5  |
| 122.8  | 108.5  | 107.1  | 103.2  | 98.6   | 115    | 105.4  | 113.6  | 110.5  |
| 134.9  | 154.9  | 139.1  | 169.5  | 132.5  | 143.1  | 138    | 196.2  | 169.6  |
| 106.8  | 105.3  | 107.2  | 95     | 95.2   | 106.1  | 104    | 118.1  | 113.2  |
| 253.5  | 363.8  | 298    | 441.5  | 312.8  | 449.3  | 433.2  | 940.6  | 481.9  |
| 132    | 130.6  | 140.2  | 123.8  | 124.8  | 145.1  | 132.5  | 199.7  | 163.7  |
| 98.5   | 103.7  | 99     | 99     | 91.8   | 94.1   | 98.4   | 103.3  | 102.5  |
| 176.9  | 342.9  | 319.3  | 286.3  | 279.2  | 309.5  | 296.4  | 506.7  | 356.7  |
| 442    | 649.7  | 684.9  | 496.5  | 575.6  | 654.3  | 588.8  | 739.5  | 504.9  |
| 2503.1 | 2095.2 | 1950.1 | 1923.6 | 1733.8 | 1790.2 | 1701.8 | 3020.5 | 2502.7 |
| 241.7  | 285.4  | 260.1  | 249.8  | 255    | 281.6  | 273.1  | 437.2  | 333.1  |
| 443.9  | 1002.2 | 976.7  | 908.2  | 696.6  | 758.5  | 829.7  | 1052   | 693.3  |
| 101    | 102    | 98.3   | 92.4   | 95.6   | 117.8  | 97.8   | 113.5  | 117.6  |
| 4564.4 | 4271.1 | 2976.6 | 3370.2 | 3168.8 | 2648.1 | 2354.4 | 7857.2 | 7268.7 |
| 119.5  | 134.5  | 126.1  | 120.3  | 114.7  | 116.4  | 118.6  | 140    | 126.5  |
| 139.8  | 175    | 169.8  | 171.9  | 160.6  | 175.3  | 141.3  | 207.7  | 157.7  |
| 110.9  | 110.7  | 98.5   | 99.6   | 104.5  | 114.1  | 104.7  | 111.2  | 108.8  |
| 131.7  | 148.1  | 126.1  | 126    | 109.1  | 134.4  | 123    | 177.5  | 186.2  |
| 98.8   | 105.3  | 109.8  | 103.2  | 93.1   | 104.7  | 106.9  | 112.3  | 110.9  |
| 184.4  | 273.2  | 228.9  | 176.4  | 190.3  | 194.2  | 215.6  | 341.9  | 286.8  |
| 111.3  | 109    | 108.1  | 99.4   | 98.6   | 108.5  | 110.5  | 109.6  | 102    |
| 141.6  | 223.4  | 189.2  | 157.2  | 185.7  | 171    | 179.9  | 257.4  | 172.2  |
| 106.6  | 105.6  | 103.8  | 99.1   | 97.1   | 107.8  | 98.8   | 103.7  | 109.3  |
| 104.6  | 108.3  | 102.5  | 99.8   | 94.6   | 108.1  | 102.7  | 108.5  | 102.5  |
| 106.9  | 108.6  | 106.7  | 104.6  | 95.6   | 112.1  | 105.3  | 113.9  | 116.7  |
| 109.9  | 108.9  | 95.5   | 105.9  | 98.2   | 109.6  | 97.2   | 104.7  | 110    |
| 104.1  | 104.3  | 96.7   | 94.6   | 94.2   | 105    | 97     | 108.5  | 110.7  |

|       |       |       |       |       |       |       |       |       |
|-------|-------|-------|-------|-------|-------|-------|-------|-------|
| 109.1 | 103.8 | 101.6 | 97.5  | 95.6  | 95.2  | 99.1  | 102.4 | 110.5 |
| 108.9 | 112.4 | 105.3 | 102.8 | 96.4  | 110   | 106   | 102.8 | 104.8 |
| 122.9 | 112.6 | 109.8 | 102.9 | 98    | 111.7 | 108   | 124.2 | 115.3 |
| 105.9 | 106.7 | 102.9 | 104.8 | 94.5  | 109.5 | 98    | 110   | 100.9 |
| 105.4 | 102.7 | 104.6 | 103   | 87.6  | 105.8 | 99.8  | 103.4 | 101.7 |
| 105.7 | 102.1 | 101   | 100.9 | 95.5  | 112   | 103.6 | 106.2 | 109.9 |
| 340   | 568.1 | 629.4 | 354.3 | 487.3 | 670.1 | 414.1 | 668   | 304.1 |
| 111.4 | 110.3 | 105.5 | 102   | 105   | 107.4 | 106.2 | 108.7 | 121.9 |
| 201.5 | 393.3 | 332.2 | 337.3 | 354.7 | 298.2 | 349.5 | 290.3 | 236.9 |
| 116.4 | 160   | 153.7 | 126.4 | 127.6 | 148.2 | 154.3 | 154.8 | 139.2 |
| 102.5 | 109.1 | 100   | 107.5 | 93.7  | 106.2 | 108.1 | 119.7 | 101.7 |
| 98.6  | 108.3 | 101.8 | 99.1  | 96.1  | 110.8 | 99.8  | 106.1 | 112   |
| 108.2 | 105.5 | 102   | 116.3 | 96.1  | 108.9 | 106.6 | 104.9 | 110   |
| 206.1 | 210   | 190.6 | 155.4 | 173.9 | 221.1 | 182.6 | 242.7 | 232.6 |
| 116.3 | 118.8 | 111.6 | 105.1 | 96.9  | 109.2 | 104.7 | 122.7 | 113.2 |
| 100.2 | 109   | 100.3 | 93.3  | 92.9  | 110.8 | 92.3  | 113.2 | 103   |
| 104.4 | 113.7 | 106.4 | 98.3  | 91.4  | 110.8 | 102.6 | 105.8 | 105.3 |
| 109.4 | 105.6 | 102   | 96.9  | 91.3  | 109.2 | 111.2 | 110.3 | 102.2 |
| 125.5 | 136.2 | 121.4 | 113.6 | 116.4 | 125.5 | 108.1 | 145.4 | 139.3 |
| 110.9 | 109.4 | 99.5  | 96    | 102.7 | 107.6 | 110.5 | 107.2 | 109   |
| 102.7 | 108.3 | 104.3 | 105.7 | 105.9 | 108   | 114.1 | 98.2  | 104   |
| 98    | 102.6 | 99.7  | 109.8 | 94.2  | 109.6 | 108   | 110.3 | 113.2 |
| 103   | 107.8 | 105.1 | 100.3 | 91.1  | 99.4  | 106.2 | 101.3 | 112.7 |
| 100.3 | 109.2 | 126.8 | 106.7 | 97.7  | 119.2 | 111.4 | 116.8 | 109.9 |
| 102.8 | 114.1 | 107.4 | 106.1 | 100.5 | 114.5 | 99    | 113.6 | 110.8 |
| 141.7 | 136.7 | 137   | 149.7 | 127.4 | 142.4 | 146.2 | 180.5 | 140.1 |
| 120.1 | 125.8 | 105.3 | 105.8 | 105.6 | 129.7 | 111.6 | 128.6 | 120.5 |
| 110.1 | 115.9 | 106.2 | 118.5 | 105   | 123.4 | 104.8 | 126.1 | 117.4 |
| 154.3 | 192.8 | 181   | 135.2 | 147.5 | 169.3 | 155.3 | 197.1 | 160.2 |
| 204.5 | 334.3 | 364.9 | 309.8 | 307.7 | 358.9 | 375.8 | 409.6 | 238.9 |
| 104.6 | 111.3 | 107.3 | 103.3 | 95.7  | 125.1 | 102.9 | 106.5 | 115.9 |
| 109.8 | 115.4 | 106.9 | 109.5 | 107.6 | 116.3 | 113.4 | 110.2 | 117.7 |
| 118.1 | 129.1 | 130.9 | 108.4 | 109.4 | 136.7 | 131.1 | 153.8 | 131.4 |
| 116.7 | 115.7 | 104.3 | 100   | 102.8 | 120.7 | 112.7 | 127.2 | 113.6 |
| 110.6 | 105.5 | 99.2  | 99.3  | 89.7  | 112   | 104.1 | 113.7 | 103.7 |
| 118.6 | 118.4 | 103.1 | 109.7 | 103.1 | 118.3 | 109.8 | 117.5 | 124   |
| 110   | 107.1 | 95    | 95.2  | 93.4  | 101.7 | 95.4  | 109   | 116.1 |
| 115.3 | 109.9 | 105.8 | 105.4 | 91.4  | 112.7 | 106.6 | 119.4 | 112.5 |
| 120   | 156.3 | 153.2 | 138   | 112.1 | 145.6 | 115.8 | 130.3 | 117.9 |
| 106.2 | 106.2 | 110.4 | 114.6 | 98.9  | 110.8 | 103.1 | 104.2 | 106.3 |
| 109.7 | 110.2 | 93.4  | 103.4 | 102.3 | 112.3 | 103   | 108.2 | 102.9 |
| 106.2 | 111.5 | 104   | 105.1 | 93.3  | 112   | 110.1 | 114.4 | 111.3 |
| 101.6 | 109.8 | 103.5 | 101.8 | 93.2  | 101.1 | 98.3  | 102.9 | 103.3 |
| 106.8 | 109.8 | 109.2 | 96.9  | 93.6  | 111.5 | 107.7 | 117.9 | 99.4  |
| 111.2 | 105.2 | 101.8 | 92.6  | 95    | 108.4 | 108.5 | 109.4 | 106.6 |
| 110.7 | 114.1 | 109.1 | 110.5 | 96.4  | 114.8 | 116.7 | 112.8 | 120.4 |
| 112.3 | 109.3 | 111.5 | 105.9 | 95.9  | 120.5 | 120.2 | 118.6 | 120.5 |
| 113.4 | 117.9 | 107.9 | 130.2 | 99.8  | 117   | 129   | 122   | 109.8 |
| 104.8 | 119   | 94.9  | 101.7 | 102   | 114.1 | 95.5  | 115.6 | 107.9 |
| 104.1 | 125   | 109.5 | 101.1 | 113.1 | 114   | 115.7 | 131.9 | 112.6 |
| 107.2 | 114.9 | 103.2 | 108.3 | 103   | 113.1 | 118.9 | 128.9 | 122.8 |

|       |        |        |        |       |        |        |        |       |
|-------|--------|--------|--------|-------|--------|--------|--------|-------|
| 110.9 | 110.3  | 118.1  | 100.1  | 109.8 | 129.2  | 113.6  | 112.4  | 117.5 |
| 106.5 | 108.4  | 108.1  | 100.1  | 94.8  | 104    | 101    | 119.6  | 112.7 |
| 180.2 | 219.2  | 211.1  | 219.8  | 179.3 | 210.6  | 210.3  | 329.3  | 261.9 |
| 106.1 | 106.7  | 100.5  | 95.4   | 102.6 | 99.6   | 101.1  | 112.5  | 97    |
| 502.9 | 1519.2 | 1450.9 | 1500.1 | 1315  | 1462.8 | 1297.3 | 2028.5 | 929.7 |
| 172   | 280.2  | 157    | 171.4  | 162.7 | 206    | 188.5  | 309    | 201.7 |
| 102.5 | 103.9  | 97.9   | 91.6   | 90.1  | 102.9  | 99.8   | 105.4  | 110.1 |
| 112.6 | 117.6  | 102.3  | 117.5  | 116.1 | 109    | 111    | 107.4  | 116.4 |
| 125.7 | 136.5  | 125.8  | 145.5  | 124.8 | 137.8  | 133.6  | 174.1  | 158.7 |
| 113.8 | 124    | 112.5  | 116.9  | 109.4 | 120    | 120.3  | 121.4  | 119   |
| 107.4 | 130.4  | 121    | 125.6  | 100.4 | 124.2  | 122.9  | 119.4  | 111.4 |
| 150.3 | 211.8  | 194.2  | 213.8  | 162.4 | 203    | 210.1  | 241    | 208.5 |
| 146   | 199.4  | 204.6  | 174.6  | 196.4 | 198.6  | 209.8  | 261    | 191.9 |
| 110.3 | 106.2  | 110.4  | 98.3   | 94.9  | 108.1  | 101.5  | 99.5   | 109.8 |
| 127.3 | 128.4  | 122.5  | 132.3  | 113.7 | 112.6  | 113.8  | 129.5  | 120   |
| 113.1 | 129.6  | 113.6  | 111.6  | 104.9 | 117.7  | 107.4  | 126.4  | 112.6 |
| 118.8 | 133.4  | 125.1  | 132.5  | 135.4 | 123.6  | 129.6  | 163.2  | 143.6 |
| 127.7 | 117.5  | 100.6  | 342.9  | 108.7 | 111.2  | 250.7  | 119.5  | 116.4 |
| 115.4 | 149.5  | 130.5  | 122.9  | 131.3 | 131.9  | 123.3  | 130.3  | 129.5 |
| 110.3 | 106.3  | 103.9  | 110.2  | 96.3  | 112.5  | 104.3  | 110.2  | 103.8 |
| 105.4 | 111    | 103.4  | 98.4   | 94.3  | 109.3  | 99.8   | 111.1  | 106.8 |
| 105.7 | 109.1  | 101    | 96.6   | 94.9  | 109.6  | 96.7   | 115.1  | 101.9 |
| 95.7  | 104.3  | 105.7  | 95.7   | 93.9  | 103.1  | 103.8  | 103    | 108.7 |
| 113.1 | 116.9  | 115.6  | 104.6  | 112.6 | 118.1  | 110    | 134.6  | 132.1 |
| 108.8 | 111.6  | 106.5  | 107.2  | 98.2  | 108.5  | 100.3  | 109.5  | 113.2 |
| 114.9 | 113.5  | 101.7  | 93.8   | 100.8 | 113    | 103    | 120    | 109.5 |
| 104.4 | 104.8  | 97.9   | 102.6  | 92.5  | 108.6  | 108.2  | 117.2  | 110.8 |
| 128   | 138.5  | 114.9  | 139.3  | 121.1 | 131.8  | 132.1  | 156.2  | 131   |
| 118.5 | 124.6  | 124.6  | 115.1  | 128.8 | 145.1  | 166.2  | 171.3  | 132.8 |
| 115.6 | 123.9  | 113.8  | 105.4  | 111.3 | 124.2  | 113.1  | 147.5  | 132.4 |
| 106.4 | 109.4  | 106.4  | 98.8   | 93.9  | 115.1  | 99.7   | 104.8  | 104.5 |
| 196.2 | 204    | 185.8  | 178.2  | 193.6 | 189.7  | 137    | 325.3  | 240.8 |
| 592.1 | 675.5  | 526.8  | 486.7  | 656.2 | 668.2  | 604.6  | 1037.6 | 654.6 |
| 113.9 | 115.2  | 101.4  | 107.3  | 103.3 | 120.7  | 117    | 115.9  | 113.9 |
| 103.4 | 108.3  | 100.1  | 100.4  | 98.7  | 103.4  | 98.2   | 117.2  | 109.6 |
| 233.7 | 254.6  | 173.8  | 220.7  | 198   | 184    | 173.3  | 356.6  | 263.8 |
| 385.5 | 388.1  | 314.7  | 516.5  | 369.7 | 291.6  | 323.4  | 741.3  | 492.8 |
| 100.5 | 111    | 105.5  | 110.2  | 106.5 | 105.6  | 109.7  | 122.2  | 111.9 |
| 229.2 | 224.6  | 226.8  | 204    | 201.5 | 211.8  | 235.8  | 364.9  | 398.9 |
| 121   | 132.4  | 112.6  | 119.6  | 124.3 | 136.8  | 140.2  | 148.1  | 135.2 |
| 398.4 | 397.4  | 346.9  | 322.1  | 359.3 | 361    | 262.2  | 577.3  | 646.8 |
| 618.9 | 587.6  | 536.5  | 596.7  | 622.4 | 761.6  | 757.7  | 782.2  | 515.9 |
| 134.2 | 378.6  | 387.5  | 309.7  | 287   | 311.5  | 253.3  | 346.6  | 198.4 |
| 107.8 | 108    | 105.7  | 99.9   | 106.5 | 109.6  | 108.4  | 116.8  | 104.2 |
| 103.5 | 102.1  | 103.5  | 94.7   | 95.3  | 108.9  | 112.2  | 111.8  | 109.4 |
| 107   | 119    | 97.8   | 100.6  | 95.7  | 106.7  | 104.4  | 109.5  | 100.9 |
| 114.3 | 120.2  | 110.7  | 116.3  | 101.4 | 112    | 104.8  | 121.1  | 127.5 |
| 106.7 | 109.6  | 100.1  | 100.9  | 95.8  | 100.9  | 105.8  | 102.4  | 111   |
| 138.5 | 146.2  | 129.2  | 141.7  | 126.8 | 145.7  | 145.9  | 184    | 163.5 |
| 106.9 | 113.8  | 108.3  | 97.3   | 95.4  | 106.6  | 98.7   | 107.5  | 113.3 |
| 104   | 106.3  | 98.9   | 101.6  | 99.6  | 112.3  | 96.6   | 110.9  | 101.2 |

|       |       |       |       |       |       |       |        |        |
|-------|-------|-------|-------|-------|-------|-------|--------|--------|
| 104.6 | 108.3 | 99.2  | 98.6  | 96    | 106.5 | 103.1 | 109    | 109.3  |
| 104.2 | 104.6 | 94.3  | 102   | 92.9  | 103.1 | 101.9 | 107.8  | 106.1  |
| 100.9 | 107.1 | 105.5 | 94.8  | 98.9  | 120.8 | 102.4 | 106.2  | 103    |
| 101.1 | 105.4 | 95.6  | 90.3  | 91.7  | 114.2 | 93.6  | 99.7   | 110.1  |
| 104.3 | 106.4 | 105.6 | 102.3 | 102.4 | 104   | 106.7 | 117.5  | 115.1  |
| 107.3 | 103.8 | 101.8 | 121.2 | 100   | 104.1 | 106.7 | 106    | 109.3  |
| 101.9 | 107.8 | 101.2 | 96.4  | 93.9  | 106.3 | 97.9  | 103.2  | 108    |
| 101.4 | 104.4 | 91.6  | 104.2 | 100.8 | 111.2 | 98.7  | 111.8  | 109    |
| 103.4 | 102.6 | 99.7  | 100.8 | 88.8  | 100.2 | 95.7  | 114.4  | 99.1   |
| 751.6 | 603.2 | 501.6 | 1147  | 498.4 | 545.6 | 719.6 | 719.1  | 505.9  |
| 110.7 | 103.3 | 103.8 | 119.2 | 99.7  | 109.8 | 106.5 | 119.1  | 111.8  |
| 149.9 | 247.1 | 218.6 | 186.1 | 190.9 | 150.7 | 174.4 | 265.5  | 176.3  |
| 121.6 | 112.4 | 111.9 | 104.7 | 106.8 | 121.2 | 106.5 | 120.8  | 115    |
| 142.7 | 211.5 | 177.9 | 321.8 | 153.2 | 188.8 | 285.9 | 178.4  | 181.7  |
| 195.2 | 225.8 | 188.9 | 322.3 | 191.7 | 209.4 | 242.9 | 452.7  | 295.5  |
| 161.2 | 247.4 | 210.2 | 264.7 | 209.1 | 254.3 | 273.1 | 331.2  | 292.9  |
| 113.5 | 174.7 | 159.3 | 166.3 | 142.9 | 162   | 162   | 142.6  | 132.4  |
| 248.9 | 197.5 | 243.2 | 202.7 | 167.6 | 224.6 | 190.8 | 336.5  | 356.8  |
| 109.6 | 114.1 | 99.5  | 108.8 | 94.6  | 111.3 | 101.7 | 107.7  | 111.2  |
| 111.2 | 107.7 | 105.3 | 106.1 | 94.9  | 114.9 | 100   | 110.4  | 102.9  |
| 267.7 | 216.9 | 181.3 | 236.5 | 202.5 | 207.7 | 237.4 | 397    | 329.8  |
| 233.9 | 197   | 179.3 | 155.6 | 170.6 | 162.1 | 178.2 | 250.4  | 260.3  |
| 112   | 124.1 | 101.9 | 109.6 | 95.4  | 113.9 | 105.1 | 125.5  | 114.2  |
| 469.6 | 486.3 | 425.1 | 389.8 | 459.9 | 525.4 | 412.4 | 1446.3 | 1325.3 |
| 126   | 160.8 | 161.3 | 149.1 | 154.8 | 138.4 | 160.6 | 207    | 153.2  |
| 131.5 | 203.2 | 180.1 | 193.7 | 165   | 177.3 | 184.3 | 174.8  | 154    |
| 101.6 | 112.5 | 100.9 | 96.5  | 91.4  | 109.1 | 97.1  | 111.5  | 108    |
| 108.1 | 111.4 | 105.8 | 101   | 94    | 106.2 | 109.4 | 103.4  | 109.6  |
| 117.9 | 118.4 | 117.4 | 110.3 | 105.7 | 130.8 | 111.5 | 114.9  | 117.7  |
| 114.1 | 109.6 | 95.2  | 107.3 | 95.6  | 103.1 | 102.2 | 114.6  | 114.9  |
| 111.6 | 142   | 147.6 | 131.5 | 120.5 | 143.3 | 112.1 | 187.8  | 141.4  |
| 323.8 | 594.8 | 422.8 | 774.5 | 510.6 | 417.6 | 601.8 | 811.5  | 484.5  |
| 124.8 | 123.2 | 118.3 | 130.1 | 102   | 117   | 110.2 | 127.2  | 125.8  |
| 104.9 | 104.8 | 94.1  | 90.7  | 87    | 100.4 | 98.9  | 100.9  | 93.5   |
| 179.9 | 239.9 | 205.5 | 199.2 | 189.1 | 194.1 | 217.9 | 217.2  | 157.5  |
| 110   | 101   | 106.3 | 106.4 | 93.9  | 105.7 | 102.1 | 111.1  | 111.6  |
| 145.1 | 234.8 | 257.7 | 236.7 | 186.2 | 202.6 | 221.7 | 199.6  | 186.1  |
| 101.7 | 108.9 | 97.3  | 102   | 98.9  | 104.6 | 94.3  | 115.6  | 108    |
| 126.9 | 123.9 | 130.1 | 116.6 | 113.5 | 119.9 | 118.5 | 124.6  | 126.9  |
| 114.6 | 120.8 | 111   | 137.1 | 113.2 | 118.5 | 116.5 | 144.3  | 120.5  |
| 139.8 | 145   | 133.1 | 147.1 | 129   | 152.8 | 143.2 | 186.7  | 131.3  |
| 167   | 163.1 | 148.3 | 143.4 | 144.8 | 147.1 | 173.6 | 220.8  | 191.5  |
| 111.9 | 110.9 | 99.5  | 119.2 | 111.4 | 111.6 | 110   | 118.5  | 111.3  |
| 111.4 | 113.5 | 97.8  | 98.9  | 93.7  | 119   | 101.8 | 114.1  | 112.8  |
| 119.5 | 115.5 | 123.9 | 111.2 | 110.9 | 114.5 | 116.9 | 133.2  | 132.2  |
| 289.6 | 496.8 | 456.3 | 463.6 | 434   | 479.1 | 472.3 | 533    | 390.4  |
| 109.7 | 110.1 | 113   | 106.9 | 97.9  | 118   | 111.7 | 110.2  | 106.8  |
| 113.2 | 118.2 | 106.2 | 109.4 | 99.6  | 109.7 | 114.2 | 109.4  | 111.2  |
| 102.6 | 111.1 | 110.2 | 102.2 | 93.1  | 105.3 | 96.1  | 98.4   | 109.2  |
| 118.8 | 134.2 | 147.6 | 130.7 | 123.2 | 143.8 | 125.3 | 150    | 136.2  |
| 274.4 | 496.6 | 346.5 | 390.7 | 328.4 | 366.9 | 363.8 | 582.6  | 416    |

|        |        |        |        |        |        |        |         |        |
|--------|--------|--------|--------|--------|--------|--------|---------|--------|
| 104.8  | 115.6  | 114.8  | 103.5  | 98.9   | 120.5  | 108.9  | 114.3   | 121.7  |
| 258.9  | 408.1  | 468.6  | 447    | 402.4  | 509    | 419.8  | 655.3   | 395.1  |
| 172.1  | 205.5  | 236.8  | 199.9  | 191.8  | 220.3  | 239.8  | 273.6   | 240.2  |
| 100.7  | 111.7  | 107.9  | 101.5  | 90.9   | 110.1  | 99.4   | 117.2   | 104.7  |
| 118    | 112.7  | 102.9  | 107.9  | 96.1   | 116.8  | 107.8  | 119.8   | 114.4  |
| 263.3  | 347.4  | 386.7  | 362    | 303.2  | 387.9  | 404.2  | 566.9   | 384.1  |
| 114.9  | 107.7  | 103.2  | 103.6  | 98.3   | 118.6  | 99     | 114     | 108.7  |
| 126.8  | 123.7  | 130.9  | 125.4  | 107.6  | 134.5  | 135.2  | 144.3   | 125.9  |
| 108.7  | 141    | 136.5  | 136    | 112.2  | 153.4  | 141.1  | 141.5   | 118.1  |
| 96.3   | 97.9   | 101.2  | 101    | 93.1   | 113.2  | 101.3  | 110     | 116.1  |
| 114.6  | 111.2  | 108.3  | 112.7  | 100.6  | 118.5  | 107.7  | 117.8   | 122    |
| 230.4  | 346.2  | 312.7  | 334.9  | 303.1  | 271.7  | 307.5  | 354.2   | 242.5  |
| 118    | 173.8  | 154.3  | 142.2  | 154.6  | 141.5  | 153.3  | 162.3   | 130.2  |
| 124.2  | 119.4  | 124.5  | 163.5  | 118.8  | 117.6  | 127    | 123.2   | 116.3  |
| 401.8  | 463.2  | 470.9  | 447.7  | 419.3  | 488.5  | 404.8  | 532.8   | 444.7  |
| 116.5  | 114.5  | 109.4  | 136.9  | 108.6  | 125.1  | 113.7  | 110.9   | 112.2  |
| 124.5  | 122.1  | 110    | 107.2  | 99.8   | 110.4  | 117.1  | 134.7   | 126.7  |
| 2671.8 | 1485.2 | 1158.3 | 2315   | 1596.6 | 1742.5 | 2620.8 | 3388.3  | 2934.2 |
| 1459.4 | 1471.1 | 1629.8 | 2456.6 | 1336.6 | 1316   | 1861.2 | 2779.6  | 2172.9 |
| 155.5  | 162.2  | 175    | 154.8  | 174.7  | 181.1  | 182.1  | 209.3   | 204.5  |
| 105.2  | 107.9  | 105.6  | 111.2  | 92.8   | 106.7  | 102    | 116     | 110.1  |
| 108.7  | 118.6  | 103.7  | 104.4  | 93.3   | 106.5  | 112    | 114.5   | 116.8  |
| 110.9  | 116.4  | 107.1  | 98     | 96.1   | 104.2  | 104.7  | 108.7   | 108.3  |
| 101.2  | 103.5  | 104.4  | 110.9  | 90.7   | 106.1  | 113.2  | 114.5   | 118    |
| 735.8  | 525.9  | 592.6  | 735.1  | 500.5  | 494.9  | 1123.7 | 1063.8  | 356    |
| 137.1  | 180.8  | 151.8  | 194.8  | 146.4  | 173.6  | 185.1  | 238.8   | 140    |
| 100.3  | 99.8   | 106.8  | 96.7   | 99.1   | 103.6  | 95.7   | 111.5   | 100    |
| 162.5  | 215.1  | 172.9  | 242.5  | 168.2  | 205.7  | 276.8  | 249.2   | 150.2  |
| 119.7  | 157.6  | 133.1  | 128    | 133.2  | 146.7  | 137.1  | 161     | 133    |
| 261.4  | 278.7  | 218.1  | 195.5  | 217.1  | 206.8  | 248.2  | 348.5   | 340.9  |
| 4417.6 | 9221.5 | 7075.6 | 7721   | 6197.2 | 6379.6 | 7426.1 | 10285.1 | 7071.9 |
| 106.6  | 110.6  | 107.1  | 101.9  | 97.4   | 105.3  | 100.2  | 104.6   | 106.5  |
| 120.2  | 113.3  | 119.3  | 108.8  | 106.6  | 130.7  | 113.5  | 133.8   | 120.8  |
| 108.9  | 122.1  | 100.7  | 110.5  | 95.3   | 109.1  | 108.2  | 106.3   | 108.1  |
| 101.4  | 107.2  | 97     | 105.3  | 98.6   | 105.1  | 103.5  | 104.5   | 115.6  |
| 115.1  | 125.8  | 111.1  | 116.2  | 104.6  | 119.6  | 108.6  | 139.5   | 136    |
| 104.5  | 131.9  | 137.1  | 94.7   | 122    | 130.4  | 98     | 111.8   | 115.9  |
| 107.7  | 106.2  | 97.1   | 106.7  | 99.9   | 109.5  | 100.9  | 103.2   | 109.9  |
| 105.4  | 102    | 105.9  | 103.5  | 95.3   | 105.6  | 104    | 102     | 99.4   |
| 101.4  | 105.3  | 102    | 95.5   | 94.1   | 105.3  | 105.8  | 110.4   | 95.8   |
| 266.8  | 573.1  | 512.9  | 415.4  | 459    | 532.2  | 533.2  | 822.1   | 654.1  |
| 100.5  | 110.5  | 98.6   | 96.5   | 93.9   | 102.5  | 103.6  | 106.9   | 105.2  |
| 109.9  | 106.6  | 102.6  | 103    | 105.3  | 114    | 104.8  | 109.5   | 107.9  |
| 101.6  | 107.1  | 101    | 94.3   | 92.3   | 113.9  | 100.5  | 106.7   | 104.4  |
| 116.2  | 106.2  | 111.7  | 98.5   | 98.8   | 112.9  | 109.1  | 128     | 106    |
| 118.4  | 120.6  | 113.1  | 106.2  | 104.3  | 126.3  | 109.6  | 113.3   | 129    |
| 128.1  | 183.6  | 178.7  | 143.2  | 177.6  | 190    | 164    | 264.3   | 175.7  |
| 106.7  | 114.9  | 115    | 113.9  | 107.7  | 128.8  | 110.9  | 123.2   | 116.3  |
| 104.5  | 111.6  | 107    | 113.4  | 101.9  | 109.9  | 104.4  | 111.8   | 117    |
| 119.2  | 114.1  | 105.5  | 106.1  | 102.9  | 115.8  | 111    | 113.3   | 117.9  |
| 105.2  | 102.6  | 96.4   | 104.6  | 98.2   | 113.6  | 103.6  | 108.4   | 108.7  |

|        |        |       |       |        |        |        |        |        |
|--------|--------|-------|-------|--------|--------|--------|--------|--------|
| 102.8  | 100.8  | 102.2 | 97.7  | 94.7   | 102.6  | 96.6   | 109.6  | 106    |
| 239.3  | 202.4  | 148.7 | 404   | 185.5  | 154.5  | 414.8  | 252.6  | 178.7  |
| 1157.3 | 1467.1 | 893.7 | 784.7 | 1197.4 | 1026.9 | 1786.6 | 3777.2 | 1981.2 |
| 102.3  | 106.2  | 101.9 | 96.7  | 92.2   | 102.8  | 99.5   | 101.8  | 103.7  |
| 146.8  | 159.9  | 159.8 | 173.6 | 125.9  | 172.7  | 181.6  | 168.7  | 156.5  |
| 107.6  | 113.1  | 108.2 | 100.3 | 102.5  | 111.7  | 110.3  | 111    | 106.6  |
| 109    | 111.6  | 100.3 | 96    | 100.4  | 104.9  | 99.8   | 101.6  | 109.4  |
| 130.1  | 150.4  | 131.2 | 119.9 | 116.8  | 146.5  | 142.2  | 151.4  | 153.8  |
| 420.3  | 406.2  | 263.1 | 347.3 | 266.2  | 394.1  | 313.4  | 661.8  | 685.3  |
| 100.7  | 109.7  | 100.8 | 97.7  | 102    | 110.1  | 93.9   | 118.3  | 104.2  |
| 375    | 456.3  | 447.5 | 488.8 | 414    | 451.9  | 469.9  | 470    | 260.8  |
| 108.3  | 110.1  | 125.7 | 105.2 | 103.1  | 131    | 113.5  | 131.5  | 147.4  |
| 105    | 118    | 106.5 | 100.4 | 100.8  | 108.4  | 113.9  | 110.8  | 115.8  |
| 105.8  | 99.2   | 103.3 | 103.6 | 93.8   | 104.6  | 97.3   | 105.9  | 100.7  |
| 109.9  | 113.3  | 102.9 | 99.7  | 95.1   | 113    | 109.3  | 120.8  | 115.7  |
| 225.4  | 383.2  | 450.7 | 438.4 | 349.3  | 481.1  | 364.8  | 391.4  | 217.1  |
| 122    | 135.4  | 134.8 | 145.5 | 133.8  | 144.3  | 140.9  | 154.7  | 150.2  |
| 307.5  | 232.9  | 210.4 | 195.9 | 178.2  | 232.1  | 207.7  | 296.1  | 235.8  |
| 122    | 132.1  | 109.9 | 119.8 | 113.1  | 124.7  | 119.4  | 139.1  | 118.1  |
| 105.8  | 107.5  | 93    | 91.1  | 93.6   | 109.7  | 102    | 102.4  | 101.3  |
| 100    | 105.2  | 90.6  | 96.6  | 93     | 103.8  | 97.3   | 103.1  | 103.8  |
| 110.6  | 101    | 102.4 | 97.7  | 102.9  | 101.1  | 103    | 109.4  | 105.1  |
| 98.8   | 108.6  | 113   | 103.5 | 95.1   | 113    | 101.3  | 113.9  | 106    |
| 104.8  | 104.4  | 105.6 | 108.3 | 94.6   | 105.8  | 99.3   | 110    | 107.5  |
| 104.6  | 117.1  | 92    | 104.9 | 93     | 113.2  | 105.4  | 98.7   | 96.5   |
| 104.6  | 105.8  | 102.7 | 95.6  | 96.1   | 106.5  | 99.8   | 108.5  | 110.4  |
| 329.8  | 326.9  | 232.9 | 280.8 | 306.2  | 324.7  | 354.7  | 610.2  | 399.8  |
| 596.7  | 819.2  | 692.9 | 784.7 | 699.4  | 809.5  | 704.9  | 974.5  | 674.4  |
| 185.5  | 339.8  | 361.7 | 287.5 | 274.4  | 305.2  | 289.7  | 435.3  | 199.8  |
| 118.1  | 122.1  | 116.9 | 108.7 | 117    | 128    | 118.4  | 121.1  | 108.6  |
| 122    | 128.6  | 120.9 | 129.9 | 111.6  | 126    | 133    | 130.3  | 128    |
| 138.7  | 184.9  | 214.8 | 208.2 | 146.6  | 200.6  | 223.9  | 165.9  | 164.2  |
| 119.2  | 111    | 122.4 | 120.2 | 102.5  | 124.7  | 115.4  | 120.8  | 111.2  |
| 150.4  | 125.5  | 113.5 | 117.5 | 128.9  | 124.1  | 106.7  | 182.5  | 127.5  |
| 177.3  | 307.8  | 301.4 | 238.1 | 290.8  | 306.6  | 161.9  | 276.5  | 264.6  |
| 107.5  | 110.4  | 103.8 | 112.7 | 97.3   | 108    | 103.9  | 110.8  | 117    |
| 106    | 106.5  | 102.7 | 106.7 | 88.8   | 116.6  | 108.1  | 108.8  | 114.1  |
| 99.9   | 108.3  | 96.3  | 103.3 | 95.1   | 101.8  | 95.7   | 103.9  | 100.2  |
| 301    | 669.7  | 716.1 | 487.9 | 549.6  | 661.9  | 453.3  | 801.9  | 414.5  |
| 108.6  | 115.1  | 99.3  | 117.7 | 94.1   | 106.3  | 103.7  | 120.6  | 113.9  |
| 103.9  | 105.8  | 97.1  | 92.5  | 97.6   | 103    | 102.5  | 103.6  | 99.2   |
| 189.6  | 370.6  | 353.8 | 301.3 | 291.5  | 303    | 300    | 432    | 240.6  |
| 152    | 195.4  | 203.5 | 179.3 | 184.2  | 209.8  | 251.9  | 298.4  | 220.7  |
| 123.5  | 171.8  | 175.6 | 123.8 | 139.1  | 144.5  | 151.2  | 172.5  | 132    |
| 109.1  | 105.2  | 97    | 98.9  | 98.5   | 107.3  | 107.1  | 111.9  | 106.3  |
| 128.6  | 134.7  | 129   | 123.4 | 133    | 135    | 137.3  | 181.4  | 141.7  |
| 110.2  | 117.2  | 112.7 | 102.3 | 102.4  | 115.5  | 102.5  | 129.8  | 101.1  |
| 182.9  | 150.3  | 145.8 | 127.9 | 146.2  | 157.7  | 116.6  | 231.6  | 201.2  |
| 161    | 157.8  | 150.7 | 191.6 | 183.6  | 166.6  | 149.7  | 227.3  | 180.8  |
| 104.3  | 110.3  | 108.8 | 97.3  | 93.9   | 107.4  | 102.1  | 114.3  | 115.3  |
| 125.1  | 127.2  | 124.1 | 112.2 | 115.1  | 131.9  | 118.2  | 154.8  | 161.7  |

|        |        |        |        |        |        |        |        |        |
|--------|--------|--------|--------|--------|--------|--------|--------|--------|
| 204    | 158.7  | 146.1  | 173.2  | 140.7  | 166.5  | 199.6  | 333.3  | 238.9  |
| 247    | 224.9  | 187.1  | 207.1  | 199.8  | 269.2  | 256.1  | 459.3  | 308.6  |
| 208.7  | 181.7  | 164.7  | 175.1  | 166.7  | 208.4  | 202.1  | 306.3  | 228.4  |
| 890.7  | 1084.1 | 1100.7 | 1222.6 | 976.7  | 997.6  | 1061.5 | 1599.5 | 1266.7 |
| 1032.6 | 1434.9 | 1412   | 1407.1 | 1110.4 | 1446.4 | 1484.8 | 2013.1 | 1865   |
| 110.3  | 122    | 116.8  | 105.7  | 99.4   | 126.8  | 115.9  | 144.3  | 132.1  |
| 107.4  | 112.3  | 106    | 105.6  | 101.1  | 108.7  | 108.6  | 113.2  | 114.6  |
| 127.1  | 138.6  | 160.3  | 124.1  | 130.7  | 150.7  | 155.7  | 188.6  | 157.5  |
| 100.5  | 101.1  | 97.2   | 101.9  | 96.5   | 107.9  | 102.6  | 104.6  | 100.1  |
| 494.4  | 284    | 296.1  | 239.3  | 220.6  | 291.8  | 275.7  | 542.6  | 404.9  |
| 113    | 105    | 108.5  | 98.3   | 89.6   | 106.3  | 102.8  | 117.1  | 108.4  |
| 110.7  | 114.2  | 108.2  | 96     | 104.2  | 112.3  | 105.2  | 111.6  | 106.2  |
| 126.4  | 141.1  | 146.5  | 143.2  | 125.3  | 139.5  | 120.8  | 159.2  | 136.2  |
| 374.3  | 881.5  | 886.7  | 565.9  | 719    | 752.4  | 702.9  | 812.6  | 457.2  |
| 142.9  | 130.2  | 113.1  | 127.1  | 121.8  | 120.6  | 136.7  | 154.3  | 146.2  |
| 116.9  | 112    | 111.5  | 117.9  | 103.3  | 115.7  | 110.8  | 104.5  | 108.2  |
| 113.3  | 109.8  | 105.7  | 104.9  | 98.1   | 118.5  | 106.1  | 111.9  | 114.7  |
| 191.1  | 243.1  | 234.4  | 241.8  | 230.8  | 251.8  | 211.7  | 252.2  | 215.1  |
| 137.7  | 127.2  | 127.9  | 125.8  | 120.3  | 128.6  | 131.8  | 148.4  | 156.4  |
| 150.7  | 195.5  | 204.3  | 170.1  | 176.9  | 169    | 192.8  | 253.1  | 145    |
| 132.6  | 190.4  | 185.6  | 128.2  | 147.2  | 165.9  | 150.3  | 216    | 143.9  |
| 116.3  | 160.3  | 166.7  | 121.4  | 138.1  | 157.6  | 135    | 183.9  | 132.6  |
| 116.1  | 108    | 102.7  | 109.5  | 105.8  | 115.5  | 108.6  | 134.4  | 124.9  |
| 246    | 244.5  | 242.4  | 219.9  | 238.7  | 223.7  | 284.2  | 272.6  | 224.8  |
| 175.9  | 200.4  | 183.5  | 173.4  | 182.1  | 172.5  | 146.4  | 228.9  | 167.2  |
| 160.6  | 138.9  | 111.7  | 124.8  | 113.4  | 143.9  | 103.9  | 158.7  | 161.2  |
| 403.5  | 418.9  | 364.8  | 296    | 376.3  | 468.5  | 357.8  | 614.9  | 394.4  |
| 111.7  | 121.5  | 111.1  | 101.7  | 96.8   | 116    | 112.6  | 115.7  | 122.5  |
| 122.4  | 110.2  | 107.1  | 110.5  | 107.2  | 117.4  | 117.3  | 130.8  | 119.6  |
| 155.5  | 198.3  | 154.1  | 135.8  | 131.8  | 165.5  | 153.6  | 236.7  | 188.4  |
| 573    | 924.3  | 645.4  | 611.3  | 617.6  | 731    | 518.4  | 924.5  | 667.1  |
| 106.6  | 110.7  | 101.7  | 102.6  | 103.4  | 106.5  | 108.8  | 108.8  | 107.6  |
| 359.6  | 394.2  | 374.7  | 344.1  | 352.1  | 400.7  | 422.2  | 575.7  | 466.5  |
| 150.4  | 175.7  | 132.4  | 127.5  | 141.6  | 160.2  | 146.8  | 255.8  | 177.3  |
| 121.2  | 146.4  | 134.7  | 132.4  | 120.1  | 129.9  | 120    | 160.9  | 128.6  |
| 441.4  | 554.9  | 597    | 424.6  | 514.4  | 588.8  | 517.4  | 983.1  | 722.2  |
| 110    | 116.6  | 97     | 92.5   | 98.7   | 105.7  | 100.9  | 115.3  | 104.4  |
| 105.1  | 104.1  | 102.6  | 100.6  | 95.2   | 105.2  | 100.9  | 104.7  | 98.8   |
| 111.7  | 122.3  | 107    | 97.2   | 96.9   | 117.3  | 103.6  | 111.2  | 108.3  |
| 103.7  | 111.2  | 105.9  | 94.4   | 90.7   | 103.6  | 96.3   | 101.4  | 106    |
| 107.9  | 120.7  | 101    | 102.3  | 89.6   | 106    | 108.2  | 105.7  | 108.6  |
| 105.9  | 107.9  | 101.8  | 92.2   | 98.4   | 111.6  | 103.4  | 106.7  | 113.7  |
| 166.8  | 328.8  | 677.5  | 150.8  | 443.3  | 988.4  | 400    | 1171.8 | 750.9  |
| 208.4  | 300.3  | 236.8  | 231.3  | 214    | 275.9  | 244.3  | 329.7  | 218.7  |
| 243.4  | 256.1  | 229.5  | 301.9  | 248.5  | 240    | 284.9  | 468.6  | 349.5  |
| 108.9  | 119.6  | 102.4  | 103.2  | 103    | 116.4  | 105.8  | 118.6  | 109    |
| 272    | 279    | 295.8  | 304.9  | 285.9  | 323.6  | 302    | 390.3  | 319.9  |
| 184.9  | 154.1  | 144    | 164.8  | 143.6  | 159.3  | 157.4  | 195.5  | 184.6  |
| 105.4  | 119.9  | 108.4  | 116.2  | 104.6  | 126    | 117.2  | 122.5  | 126.9  |
| 334.8  | 358.5  | 297.7  | 319.4  | 306.8  | 314.9  | 364.7  | 356.3  | 323    |
| 110    | 123.1  | 115.7  | 114.3  | 104.5  | 117    | 114.8  | 130.7  | 124.1  |

|       |       |       |       |       |       |       |        |       |
|-------|-------|-------|-------|-------|-------|-------|--------|-------|
| 118.2 | 116   | 136.6 | 139.7 | 122.1 | 137.4 | 132.2 | 171.6  | 144.5 |
| 199.6 | 139.5 | 132.5 | 108.1 | 131.1 | 202.6 | 187   | 206.6  | 167.6 |
| 115.8 | 114.5 | 115.7 | 110.8 | 109.7 | 111.5 | 113.6 | 111.9  | 122.1 |
| 101.6 | 112.2 | 112.1 | 104.6 | 97.3  | 103.6 | 106.8 | 119.9  | 106.9 |
| 119.3 | 116.6 | 115.3 | 100.8 | 108   | 117.3 | 113.9 | 122.6  | 112   |
| 115.5 | 125.9 | 111.4 | 119.5 | 109.9 | 115.8 | 107.1 | 122.4  | 119.2 |
| 108.4 | 107.4 | 107.1 | 111.2 | 98.2  | 117.5 | 112.6 | 112.9  | 110.6 |
| 112.5 | 110.4 | 99.3  | 113.2 | 97.2  | 113.2 | 108.6 | 112.1  | 119.8 |
| 187.5 | 135.3 | 139.7 | 113   | 150.3 | 153.8 | 135.5 | 224.7  | 189.1 |
| 106.2 | 103.1 | 100.9 | 92.8  | 94.5  | 105.7 | 104   | 114.5  | 115.3 |
| 96.4  | 104.2 | 101.8 | 97.5  | 93    | 105   | 100.8 | 99.2   | 99.2  |
| 107.6 | 104.1 | 96.7  | 93.9  | 93.3  | 108.9 | 107.2 | 108.4  | 104.1 |
| 107.5 | 108.3 | 99.5  | 95.9  | 98.1  | 101.7 | 98.3  | 115.2  | 107.4 |
| 146.7 | 225.5 | 206.9 | 296.8 | 210.5 | 175.5 | 239   | 443.8  | 253   |
| 189.3 | 136.8 | 140.9 | 147   | 149.4 | 173   | 158   | 328.6  | 430.4 |
| 113.7 | 123   | 112.5 | 106   | 102.4 | 119.3 | 109.3 | 110.7  | 107.7 |
| 112.1 | 123.5 | 103.7 | 106.9 | 99.4  | 115.8 | 104.2 | 110.4  | 111.4 |
| 115.8 | 120.3 | 114.7 | 134.3 | 109.5 | 132.2 | 119.4 | 135    | 137.7 |
| 188.3 | 168.4 | 151.3 | 221.1 | 130.2 | 154.4 | 182.5 | 185.2  | 177.9 |
| 544   | 425.9 | 350.7 | 367.5 | 378.2 | 552.3 | 440.7 | 813.3  | 811.8 |
| 108.5 | 97.5  | 93.2  | 89.4  | 92.6  | 101.2 | 100.4 | 98.8   | 100.9 |
| 108   | 112.3 | 100   | 106.8 | 101.2 | 108.1 | 103.4 | 115.2  | 109.9 |
| 100.6 | 107   | 98    | 97.9  | 91.8  | 103.1 | 100.2 | 105.1  | 109.4 |
| 123.5 | 124.9 | 108.9 | 124.5 | 105   | 124.1 | 109   | 139.8  | 116   |
| 106.6 | 123.5 | 141.8 | 110.9 | 98.2  | 133.4 | 110.3 | 123.5  | 113.4 |
| 103.5 | 98.5  | 109.1 | 93.3  | 94.8  | 104.7 | 106.6 | 108    | 109.1 |
| 113   | 115.1 | 113   | 113.6 | 99.9  | 120.7 | 111.6 | 128.4  | 114.6 |
| 160.2 | 154.8 | 158.7 | 140.6 | 173.1 | 172.5 | 163.6 | 224.5  | 201.1 |
| 217.5 | 285.3 | 231.4 | 283.7 | 264.8 | 276.9 | 198.6 | 521.5  | 327.8 |
| 108.9 | 98.7  | 90.9  | 97.8  | 92.1  | 113.1 | 97.8  | 100.1  | 98.9  |
| 146.8 | 150.2 | 150.9 | 129.6 | 139.9 | 160.1 | 159.1 | 207.5  | 204.1 |
| 105.2 | 115   | 102.6 | 96    | 105.1 | 106.5 | 105.1 | 123.6  | 110.6 |
| 119.6 | 132.8 | 116.1 | 107.6 | 117.5 | 126.9 | 136.1 | 150.9  | 129.8 |
| 623.9 | 657.2 | 601.6 | 469.9 | 544.3 | 712.2 | 353.3 | 993.1  | 832.2 |
| 114.4 | 107.3 | 108.4 | 105.9 | 92.3  | 106.9 | 100.6 | 110.3  | 110.9 |
| 104.4 | 106.3 | 101   | 99.8  | 96.4  | 106.7 | 102.4 | 109.8  | 107.6 |
| 130.4 | 131.1 | 107.9 | 113.8 | 116.8 | 106.2 | 110.1 | 121.9  | 116.6 |
| 447.9 | 415.8 | 278.1 | 436.5 | 346.6 | 392.6 | 650.2 | 1101.9 | 768   |
| 158.2 | 191.5 | 191.9 | 181.3 | 164.5 | 194.2 | 197   | 258.2  | 185.3 |
| 106.7 | 109.6 | 101.2 | 102.8 | 100.7 | 111.9 | 101.1 | 109.5  | 113.1 |
| 105.9 | 103.9 | 99.9  | 123.3 | 102   | 117.1 | 104.8 | 104.9  | 113   |
| 309.6 | 371.9 | 275.5 | 303.3 | 302.2 | 389.4 | 290.8 | 449.2  | 399.7 |
| 116.7 | 110.6 | 108.2 | 107.8 | 107.8 | 116.1 | 102.4 | 108.9  | 111.3 |
| 107.8 | 130.1 | 110   | 126.7 | 112   | 115.1 | 122.8 | 145.2  | 131.1 |
| 173.4 | 197.3 | 194.6 | 169.6 | 166.5 | 179.6 | 219.9 | 209.3  | 183.9 |
| 243.1 | 555   | 446.5 | 588.7 | 513.5 | 463.2 | 611.9 | 536    | 363.7 |
| 137.7 | 221.8 | 212.2 | 220.6 | 178.8 | 194.6 | 207.5 | 180.9  | 157   |
| 186.8 | 227.5 | 195.3 | 283.3 | 208.7 | 165.2 | 250.3 | 234.4  | 166.8 |
| 112.6 | 128.7 | 113.9 | 100.9 | 113.6 | 115.7 | 115.5 | 127.6  | 114.3 |
| 126.6 | 132.3 | 127.5 | 131   | 129.1 | 136.2 | 123.4 | 149.2  | 127.7 |
| 126.7 | 178.5 | 184.2 | 149.5 | 144.7 | 185.9 | 166.6 | 285.6  | 197.5 |



|       |        |       |       |       |       |       |        |       |
|-------|--------|-------|-------|-------|-------|-------|--------|-------|
| 140.3 | 165.7  | 151.7 | 152.1 | 142.4 | 168.1 | 133.7 | 196.1  | 162.7 |
| 109.2 | 111.6  | 109.5 | 114.8 | 108.8 | 123.6 | 111.9 | 122.1  | 120.9 |
| 118.6 | 146.4  | 140.4 | 143.9 | 143.8 | 159.8 | 154.3 | 195.4  | 142.3 |
| 106.8 | 110.9  | 104.7 | 100.4 | 100   | 107.8 | 96.5  | 108.2  | 110.3 |
| 124.7 | 151.9  | 137.4 | 158.2 | 132.9 | 159.2 | 181.8 | 160.5  | 145.3 |
| 179   | 194.4  | 177.7 | 191.4 | 169.5 | 204   | 215.4 | 201.2  | 182.1 |
| 118.6 | 134.4  | 126.9 | 126.5 | 123.7 | 133.5 | 135.6 | 147.2  | 120.8 |
| 130.3 | 195.5  | 174.5 | 160.2 | 156.3 | 185.9 | 182.7 | 163.3  | 154.4 |
| 109.1 | 121    | 108.4 | 113.6 | 102.5 | 113.4 | 106.8 | 118.1  | 120.5 |
| 140.1 | 157.6  | 183.3 | 156.3 | 162.2 | 178.2 | 172.6 | 199.8  | 139.4 |
| 102.8 | 102.9  | 98.7  | 96.3  | 96.4  | 106.3 | 97.8  | 106.5  | 100.8 |
| 172.4 | 179.2  | 185.4 | 203.1 | 161.9 | 173.2 | 227.9 | 217.1  | 175.3 |
| 146.4 | 231    | 224.8 | 243.6 | 173.8 | 216.9 | 236.2 | 293.9  | 201.6 |
| 171.5 | 303.9  | 244.7 | 207.3 | 187   | 192.2 | 165.3 | 304    | 216.7 |
| 111.4 | 109.7  | 106   | 105.9 | 97.1  | 107.2 | 107.1 | 110.3  | 112.4 |
| 136.7 | 132.1  | 118.9 | 143.5 | 115.7 | 128.3 | 125   | 157.5  | 134.7 |
| 528.2 | 846    | 826.5 | 866.4 | 690.8 | 755.5 | 920.5 | 1188.1 | 932.8 |
| 109.7 | 108.6  | 101.9 | 113.4 | 101.3 | 111.4 | 111.5 | 113.2  | 120   |
| 150.1 | 137.2  | 146.7 | 163.7 | 125.6 | 134.1 | 142.9 | 202.7  | 148.9 |
| 111.4 | 134.8  | 114.5 | 114.3 | 107.9 | 117   | 104.8 | 137.4  | 139.7 |
| 107.3 | 142    | 138.5 | 109.1 | 116.1 | 132.9 | 132.3 | 134.9  | 118.7 |
| 98.2  | 100.4  | 98.9  | 95    | 91.8  | 97.8  | 95.1  | 110.4  | 110.2 |
| 112.7 | 116.8  | 99.2  | 111.4 | 101.7 | 118.5 | 114.3 | 135.8  | 125.6 |
| 139.8 | 146.1  | 126.8 | 126.6 | 123.9 | 131.9 | 113.3 | 179.6  | 159.9 |
| 116.4 | 134.7  | 135.9 | 138.6 | 127.2 | 127.9 | 139.1 | 148.7  | 132.4 |
| 286   | 453.8  | 491.8 | 413.1 | 397   | 605.1 | 519.2 | 713    | 409.4 |
| 136   | 182.3  | 179.1 | 185.4 | 128.5 | 156.6 | 136.5 | 187.6  | 178   |
| 248.7 | 411.5  | 410.5 | 429   | 310.2 | 489.6 | 315.1 | 481.4  | 343.5 |
| 103.4 | 98.3   | 100.6 | 97    | 92    | 101.2 | 96.8  | 109.4  | 104.8 |
| 116.1 | 112.6  | 114.5 | 117.4 | 95.9  | 107.9 | 106.7 | 116.3  | 110.4 |
| 106.8 | 109.6  | 112.4 | 106.5 | 98.4  | 113.9 | 105.7 | 106    | 102.6 |
| 106.3 | 128.3  | 121.6 | 146.1 | 116.8 | 121.9 | 117.7 | 155.3  | 131.9 |
| 180.2 | 594.8  | 510.7 | 514.1 | 450.9 | 474   | 514.9 | 482.9  | 251.4 |
| 110.1 | 115.2  | 111.6 | 101.3 | 110.5 | 127.3 | 109.4 | 106.4  | 110.9 |
| 114.1 | 121.4  | 124.2 | 99.5  | 119.5 | 124.8 | 122.7 | 140.1  | 132.2 |
| 115.8 | 111.2  | 115.2 | 134.4 | 118.2 | 134.4 | 137.5 | 139.1  | 114.9 |
| 626.2 | 1221.6 | 1012  | 936.3 | 993.5 | 980.4 | 916.4 | 2223.4 | 915.5 |
| 196.6 | 235.5  | 213.5 | 237   | 228.2 | 254.2 | 219.7 | 295.5  | 241.8 |
| 482.2 | 381.5  | 246.7 | 675.4 | 440   | 267.3 | 858.6 | 762.6  | 318.5 |
| 176.2 | 201.2  | 166.7 | 267.2 | 184.9 | 139.9 | 278.9 | 293    | 154.7 |
| 248.3 | 253.8  | 168.9 | 311   | 289.3 | 188.6 | 471.7 | 365    | 163.8 |
| 116.1 | 124.2  | 118.7 | 105.8 | 104.1 | 133.2 | 129.9 | 127.3  | 140.7 |
| 227.4 | 269    | 320.2 | 260.8 | 262.8 | 373.1 | 308   | 545.1  | 347.8 |
| 111   | 109.4  | 113   | 102.5 | 98.5  | 113.4 | 107.6 | 118.2  | 138.6 |
| 106.1 | 117.2  | 108.6 | 105   | 99.6  | 119.2 | 105   | 104.2  | 111.8 |
| 327.5 | 736.1  | 902.7 | 491.7 | 686.5 | 723.3 | 642.1 | 1322.5 | 598.3 |
| 264.3 | 600.2  | 662.3 | 372.9 | 407.7 | 424.5 | 561.8 | 798.9  | 862.8 |
| 172.8 | 192.4  | 186.2 | 146.6 | 157.5 | 185.3 | 176.3 | 358.6  | 216.2 |
| 106   | 106.9  | 103.3 | 97.2  | 100   | 108.9 | 100.7 | 119.7  | 114   |
| 551.6 | 734.9  | 705.6 | 768.4 | 654.6 | 732.4 | 749.3 | 1164.5 | 695.5 |
| 149.1 | 154.2  | 146   | 143.3 | 155.8 | 175.7 | 168.3 | 246.9  | 164.1 |

|       |       |       |        |       |       |        |        |       |
|-------|-------|-------|--------|-------|-------|--------|--------|-------|
| 134.2 | 123.6 | 124.4 | 117    | 119.8 | 128.9 | 125.9  | 156.6  | 139.8 |
| 106.8 | 106.5 | 100.6 | 97.2   | 97.6  | 105.4 | 100.4  | 109.3  | 105.1 |
| 208.8 | 253   | 291.6 | 206    | 189.9 | 242   | 184.2  | 390.4  | 252   |
| 110.9 | 118   | 120.8 | 115.1  | 110.5 | 119.1 | 109.6  | 127.4  | 108.2 |
| 104.1 | 112   | 98.6  | 104    | 100.4 | 107.9 | 93.5   | 106.4  | 102.4 |
| 228.1 | 278.1 | 266.5 | 258.4  | 221.8 | 244.3 | 260.3  | 322.9  | 239.6 |
| 140.8 | 151.5 | 173   | 125    | 149.2 | 193.8 | 151.4  | 232.6  | 195   |
| 109.6 | 106   | 113.8 | 108.3  | 107.8 | 113.1 | 107.7  | 113.8  | 107.7 |
| 117.4 | 112.2 | 114.5 | 114.5  | 112.4 | 114   | 109.5  | 129.6  | 117.9 |
| 117.9 | 130.6 | 128.9 | 121.8  | 134.8 | 129.7 | 123    | 166.7  | 153.1 |
| 107.7 | 121   | 106.4 | 104.8  | 106.7 | 115   | 114.2  | 107    | 109.4 |
| 92.8  | 104.3 | 104.3 | 91.4   | 98.3  | 103.4 | 102.5  | 109.4  | 110.1 |
| 108.5 | 106.6 | 108.1 | 102.3  | 95.1  | 111.4 | 108    | 117.3  | 112.3 |
| 114.5 | 113.8 | 110.2 | 100.7  | 102.8 | 114.3 | 103.1  | 108.7  | 106.4 |
| 103.1 | 108.1 | 95.9  | 99.8   | 96.4  | 108.4 | 106.6  | 117.1  | 107.8 |
| 136.1 | 137.7 | 131.3 | 123.7  | 125.6 | 145.6 | 168.4  | 267.9  | 175.7 |
| 123.8 | 135.5 | 118.2 | 121.7  | 120   | 131.9 | 139.4  | 227.7  | 138.5 |
| 134.6 | 196.9 | 172.3 | 159.4  | 169.9 | 170.2 | 174.3  | 257    | 207.7 |
| 136.8 | 139.6 | 123.6 | 121.7  | 117.5 | 139.6 | 150.8  | 158.6  | 137.8 |
| 236   | 246.9 | 210.9 | 187.8  | 188.8 | 235.7 | 222.8  | 305.4  | 216   |
| 267.8 | 344.5 | 388.3 | 303.7  | 356.6 | 321.9 | 334.7  | 426.4  | 318.1 |
| 133.6 | 148.3 | 147   | 120.8  | 129.8 | 152.2 | 120.8  | 174.1  | 138.3 |
| 746.9 | 681   | 792   | 778.3  | 750.8 | 775.4 | 1063.2 | 1017.4 | 535.4 |
| 136.9 | 202.4 | 135   | 176.5  | 158.7 | 135.5 | 154.7  | 142.7  | 128.6 |
| 103.5 | 97.4  | 101.5 | 96.5   | 94    | 110.2 | 96.2   | 102.9  | 103.2 |
| 213.8 | 207.5 | 191   | 194.5  | 181.7 | 218.5 | 187.1  | 406.5  | 340.5 |
| 101.5 | 101.1 | 95.7  | 97     | 91.2  | 108.4 | 102    | 105.8  | 104.2 |
| 115.9 | 108.3 | 101.3 | 104.6  | 100.2 | 109.9 | 105.4  | 117.7  | 119   |
| 104.6 | 118.1 | 108.5 | 113.2  | 104.4 | 102.6 | 114.8  | 130.7  | 120.4 |
| 104.8 | 112.2 | 97    | 98.9   | 98.9  | 105.2 | 107.5  | 110.8  | 121.7 |
| 106.6 | 103.8 | 95.2  | 96.2   | 91.4  | 105.6 | 103.3  | 100.8  | 104.8 |
| 108.7 | 106   | 99.4  | 99.4   | 98.8  | 106.2 | 105.2  | 106.6  | 109.9 |
| 116.6 | 105.3 | 104.2 | 103.4  | 98.3  | 113.6 | 101.5  | 111.4  | 114   |
| 105.4 | 104.6 | 104.9 | 93.3   | 101.2 | 110.9 | 97.8   | 106.6  | 103.4 |
| 104.6 | 107.6 | 105.8 | 109.2  | 93.4  | 112.4 | 99.8   | 109.2  | 108.7 |
| 115.2 | 107.7 | 99    | 100.7  | 105.3 | 108   | 104.6  | 120.5  | 119.8 |
| 110.4 | 122.1 | 102.5 | 116.8  | 101.7 | 116.9 | 114.5  | 118.6  | 116.5 |
| 191.6 | 279.2 | 277.8 | 201    | 219.6 | 239.6 | 238.5  | 312.8  | 193.2 |
| 110.2 | 112.5 | 100.1 | 102.8  | 103.5 | 117.2 | 105.1  | 110.9  | 111.7 |
| 609.3 | 913.2 | 753.3 | 1222.9 | 503.8 | 845.9 | 828.9  | 1473.2 | 918.4 |
| 111.6 | 113.5 | 105.3 | 92.6   | 96.1  | 107   | 103.1  | 114.6  | 122.3 |
| 171.1 | 159   | 166.7 | 140.3  | 163.6 | 179.7 | 181.9  | 202.7  | 157.3 |
| 140.7 | 135.7 | 125.4 | 114.4  | 131.2 | 151   | 141.2  | 139.5  | 124.7 |
| 114.4 | 119.9 | 105.7 | 106.7  | 101.3 | 117.9 | 110.9  | 117    | 105.2 |
| 107.3 | 102.6 | 98.3  | 96.5   | 92    | 108.6 | 96.6   | 96.3   | 102.8 |
| 104.3 | 111   | 105.9 | 99.6   | 99.2  | 113.1 | 99.1   | 106.7  | 101.6 |
| 110.6 | 111.6 | 107.4 | 97     | 90.5  | 113.2 | 104.6  | 109.8  | 103.1 |
| 90.7  | 103.5 | 101.3 | 101    | 100.7 | 107.2 | 102.8  | 105.7  | 111.7 |
| 107.6 | 116.7 | 105   | 107.2  | 104.7 | 108.5 | 101.3  | 108.9  | 104.4 |
| 119.9 | 132.1 | 166.7 | 147.1  | 126.1 | 123.9 | 123.7  | 165.6  | 133.7 |
| 114.9 | 108.5 | 103.1 | 109.4  | 100.9 | 103   | 127.7  | 126.5  | 119.3 |

|       |       |       |       |        |        |       |       |       |
|-------|-------|-------|-------|--------|--------|-------|-------|-------|
| 102.8 | 115.3 | 98.7  | 92.5  | 97.9   | 103.3  | 101.6 | 103.9 | 106.5 |
| 107.1 | 108.5 | 99.3  | 104.1 | 93.5   | 116.9  | 103.3 | 107.8 | 110.7 |
| 108   | 107.5 | 104.9 | 108.7 | 94.1   | 110.4  | 101.9 | 106.2 | 105.8 |
| 99.5  | 103.8 | 100.4 | 106.5 | 95.4   | 107.9  | 109.6 | 105.6 | 110.9 |
| 112.7 | 120.8 | 112.2 | 105.2 | 103.9  | 120.4  | 112.3 | 149.1 | 124.1 |
| 102   | 112.8 | 111   | 106.9 | 99.8   | 116.3  | 105.5 | 107.7 | 107.4 |
| 274.4 | 340.9 | 374.9 | 355.6 | 312.3  | 420.8  | 337.3 | 424.8 | 355.8 |
| 105.6 | 106.1 | 109.4 | 108   | 95.6   | 108.7  | 109.4 | 118.7 | 115   |
| 146.2 | 183.8 | 140.3 | 159.5 | 124.7  | 163.3  | 138.1 | 206.9 | 167.1 |
| 109.3 | 109.9 | 100.2 | 106.7 | 94.4   | 112.4  | 109.9 | 110   | 116.8 |
| 115.8 | 108.3 | 105.2 | 104.6 | 94.1   | 109.1  | 99.9  | 108.9 | 106.7 |
| 103.4 | 114.6 | 112.3 | 109.4 | 97.9   | 102    | 113.3 | 113.9 | 106.9 |
| 112.2 | 116.6 | 109.9 | 115.4 | 98.2   | 113.6  | 106.9 | 119.8 | 108.5 |
| 112.8 | 116.6 | 108.7 | 104.8 | 100.1  | 112.5  | 115   | 111.9 | 116.2 |
| 111.4 | 106.3 | 101.8 | 103.3 | 98.3   | 111.8  | 106.1 | 111.4 | 107.2 |
| 100   | 104.5 | 100.2 | 103.2 | 94.5   | 109.1  | 99.2  | 112.4 | 110.2 |
| 109.9 | 108.3 | 107.4 | 95.3  | 99     | 102.4  | 105.6 | 119   | 118.6 |
| 105.5 | 105   | 107   | 104.1 | 97.3   | 108.6  | 100.8 | 110.5 | 110   |
| 530   | 834.7 | 858.1 | 743.7 | 1099.9 | 1146.6 | 906.6 | 1981  | 873.2 |
| 137.7 | 168.7 | 166   | 154.1 | 193.2  | 191.7  | 153.1 | 396   | 220.6 |
| 133   | 159.4 | 144.4 | 134   | 157    | 178.2  | 143.7 | 251.9 | 194   |
| 112   | 107.4 | 101.9 | 98.3  | 93.4   | 111.6  | 95.2  | 106.2 | 112.1 |
| 104.3 | 107.2 | 97.3  | 94.1  | 95.5   | 102.2  | 113.4 | 114.6 | 107   |
| 115   | 120.2 | 121.5 | 120.8 | 136.1  | 123.7  | 119.6 | 133   | 124.3 |
| 114.6 | 150   | 139.7 | 118.3 | 121.3  | 152.2  | 143.5 | 187.9 | 141.1 |
| 119.7 | 123.6 | 115.7 | 119   | 101.3  | 125.8  | 109.5 | 120.1 | 113.7 |
| 119.3 | 128.1 | 106.7 | 97.1  | 106.9  | 118.7  | 103.2 | 124.8 | 121.9 |
| 110.9 | 113.5 | 109.3 | 97.6  | 107.1  | 115.7  | 122.1 | 116   | 115.5 |
| 170.1 | 128.8 | 116.4 | 126   | 104.9  | 151.5  | 152.4 | 216.5 | 254.6 |
| 116.5 | 114.3 | 107.8 | 113.2 | 108.6  | 118.9  | 110.3 | 141.4 | 136.1 |
| 102.5 | 110.7 | 103.2 | 94.1  | 97.4   | 109.5  | 97.2  | 114.7 | 106.9 |
| 111.9 | 111.4 | 108.7 | 110.1 | 97.5   | 112.3  | 105.2 | 124.5 | 109.7 |
| 108.2 | 118.9 | 104.4 | 102.9 | 99.4   | 111.5  | 107.4 | 105.2 | 101.5 |
| 100.8 | 105.5 | 103   | 95.8  | 91.1   | 101.3  | 100   | 106.6 | 103.3 |
| 102.6 | 108.1 | 103.8 | 106.2 | 91     | 119.1  | 102.3 | 122.9 | 108.2 |
| 101.8 | 107.7 | 106   | 104.6 | 101.6  | 107.4  | 108.7 | 105.9 | 111.5 |
| 176.5 | 178.4 | 150   | 182.7 | 145.6  | 156    | 211.2 | 202   | 135.3 |
| 102   | 104.8 | 100.2 | 104.3 | 96.7   | 105.1  | 98.9  | 103.3 | 115.8 |
| 113.1 | 107.8 | 105.8 | 100.8 | 92.7   | 106.3  | 102.1 | 112.3 | 109.6 |
| 107   | 110.3 | 111.8 | 97.8  | 106.8  | 116.7  | 103.6 | 109.2 | 104.5 |
| 112.2 | 108.8 | 99.1  | 102.6 | 93.9   | 111.9  | 104.2 | 108.6 | 111.8 |
| 101.8 | 100   | 104.5 | 100.2 | 92     | 107    | 105.2 | 104.5 | 101.7 |
| 106.2 | 109.4 | 111.5 | 102.1 | 92.5   | 110.5  | 104.2 | 104.9 | 112.8 |
| 183.2 | 151.6 | 163.9 | 164.6 | 146    | 195.7  | 148.7 | 264   | 263.9 |
| 103.6 | 109.6 | 102.5 | 100.5 | 95.8   | 113.4  | 100.7 | 107.1 | 109   |
| 104.8 | 103.2 | 96.8  | 101.3 | 100.8  | 106.9  | 102   | 109.8 | 106.4 |
| 105.1 | 107.1 | 101   | 101.7 | 92.1   | 108.2  | 98.5  | 111.6 | 103.1 |
| 114.5 | 118.6 | 101.1 | 119.8 | 102.7  | 104.2  | 121.5 | 108.6 | 108.3 |
| 506.9 | 764.5 | 742.4 | 866.2 | 696.3  | 727.4  | 862.4 | 979.5 | 471.1 |
| 128.3 | 165.7 | 145.8 | 124.4 | 144.6  | 176.4  | 158.4 | 173.2 | 170.8 |
| 111.6 | 104.6 | 95.1  | 104.9 | 94.5   | 108    | 95.6  | 113.9 | 105.5 |

|        |        |       |        |        |        |        |        |        |
|--------|--------|-------|--------|--------|--------|--------|--------|--------|
| 104.3  | 105.3  | 108.3 | 100.5  | 95.5   | 104.3  | 109    | 108.6  | 112.6  |
| 99.6   | 106.6  | 102.6 | 100.1  | 99.5   | 105.1  | 104.7  | 107.5  | 106.1  |
| 99.1   | 102.7  | 97.7  | 96.3   | 96.1   | 100.8  | 95     | 101.8  | 107    |
| 122.7  | 127.5  | 115.8 | 113.2  | 119.9  | 139.3  | 125.4  | 127.4  | 116.6  |
| 107.8  | 110.7  | 99.8  | 100.6  | 90     | 110.2  | 102.9  | 104.8  | 108    |
| 1382.3 | 2102.2 | 850.2 | 1599.7 | 1926.4 | 1125.5 | 3302.1 | 2731.1 | 1121.2 |
| 108.5  | 105.8  | 103.8 | 102.8  | 96.2   | 106.5  | 104.4  | 109.5  | 108.7  |
| 102.2  | 97.4   | 107.4 | 97.2   | 101.4  | 106.9  | 97.1   | 111.2  | 107    |
| 120.3  | 128.2  | 109.1 | 109.4  | 104.3  | 116.9  | 112.6  | 126.1  | 137.5  |
| 114.3  | 123.6  | 107.7 | 111.3  | 101.1  | 109.5  | 104.1  | 142    | 128.5  |
| 126.8  | 125.1  | 109.1 | 135.9  | 112.3  | 132.1  | 123.3  | 168.5  | 167.6  |
| 104.5  | 113.1  | 107.9 | 98.4   | 99.6   | 116.8  | 98.9   | 111.2  | 119.7  |
| 116.6  | 105    | 107.3 | 99.9   | 100.4  | 124.7  | 113.4  | 133.2  | 122.9  |
| 109    | 118.6  | 105.2 | 105.8  | 96.8   | 109.2  | 103.2  | 123.4  | 109.9  |
| 528.5  | 868.6  | 749.1 | 775.4  | 567.1  | 599.8  | 675.6  | 1406.7 | 926.7  |
| 121.6  | 125.5  | 124   | 106.3  | 109    | 124    | 117.4  | 146.2  | 152.3  |
| 105.2  | 110.9  | 101.4 | 99.1   | 92.8   | 101.3  | 100.7  | 105.1  | 105.7  |
| 115.4  | 116.7  | 107.9 | 109.5  | 99.5   | 115.3  | 107.9  | 117.3  | 120.7  |
| 130.6  | 133.5  | 116.8 | 137.2  | 113    | 157.2  | 122.5  | 140.6  | 126.8  |
| 115.4  | 118.5  | 114.2 | 114    | 119.9  | 112.1  | 111.4  | 129.5  | 118.6  |
| 106.7  | 118.3  | 106.4 | 106    | 100.7  | 103.2  | 106.7  | 114.5  | 105.2  |
| 236.1  | 248.4  | 228.2 | 180.3  | 216.1  | 232.3  | 213.1  | 396.6  | 319.5  |
| 103.5  | 99.8   | 104.5 | 90     | 88.4   | 108.1  | 98     | 106.1  | 102.7  |
| 111.9  | 137.7  | 104.4 | 138.5  | 109.6  | 128.1  | 121.2  | 143.7  | 125.6  |
| 242.1  | 137.5  | 138.7 | 125.8  | 135.2  | 150.1  | 177.8  | 326.6  | 145.8  |
| 274.1  | 134.6  | 119.7 | 115.6  | 118    | 136.1  | 156.8  | 263.3  | 141.4  |
| 883.5  | 183.1  | 199.3 | 140.7  | 242.9  | 207.5  | 257.6  | 456    | 221    |
| 99.3   | 114.3  | 108.9 | 106.2  | 94.7   | 117.3  | 100.8  | 119.2  | 111.5  |
| 125.8  | 124.2  | 121.8 | 116.6  | 107.2  | 118.2  | 126.2  | 140.7  | 134.2  |
| 107.3  | 101.5  | 100.3 | 97.5   | 94     | 110.7  | 99     | 101.7  | 109.1  |
| 145.7  | 220.7  | 224.6 | 287.6  | 199.4  | 195.7  | 232.4  | 197.9  | 139.8  |
| 105.2  | 113.8  | 105.3 | 101.8  | 97     | 110.4  | 112.2  | 111.8  | 110.5  |
| 119.7  | 122.2  | 116.6 | 109    | 108.7  | 112.6  | 117.4  | 132.4  | 125.4  |
| 106.8  | 107.6  | 100.9 | 96.3   | 89.8   | 102.2  | 95.5   | 108.9  | 111    |
| 121.7  | 145    | 137.9 | 126.6  | 122.9  | 161.2  | 149.9  | 155.3  | 148    |
| 108    | 104.6  | 105   | 109.5  | 105.1  | 112.4  | 109.5  | 129.1  | 109.6  |
| 108.4  | 97.8   | 106.1 | 90     | 95.1   | 104    | 108.5  | 104.5  | 102.2  |
| 103.9  | 117.1  | 105.2 | 110.8  | 100.9  | 109.9  | 108.9  | 111.1  | 112.5  |
| 121.7  | 156.9  | 133   | 133.4  | 121.6  | 169.8  | 141.1  | 180    | 144.5  |
| 161    | 212.3  | 295.1 | 195.9  | 201.4  | 244.3  | 251.9  | 369.3  | 205    |
| 332.1  | 563.7  | 392.7 | 555.8  | 412.1  | 337    | 522.4  | 534.3  | 369.6  |
| 114.7  | 106.5  | 101.6 | 102.9  | 99.7   | 108.7  | 103    | 110.7  | 117.8  |
| 159.2  | 216.5  | 180.3 | 236.2  | 177.4  | 155.9  | 193.7  | 182.5  | 150.6  |
| 125.5  | 121.1  | 123.8 | 117.3  | 117.1  | 128.1  | 112.4  | 147    | 116.9  |
| 376.3  | 717.9  | 883.9 | 670    | 707.2  | 660.7  | 586.9  | 876.7  | 463.6  |
| 135.4  | 205.9  | 164.4 | 196.7  | 196.2  | 154.4  | 197.1  | 206.9  | 122.6  |
| 105.7  | 113    | 107.2 | 101.7  | 89.8   | 107.5  | 102.5  | 109.5  | 97.9   |
| 106    | 108.9  | 91.2  | 99.9   | 95.3   | 104    | 100.3  | 111.3  | 109.2  |
| 101.1  | 106.2  | 97.8  | 102.4  | 97.8   | 109.9  | 102    | 114.9  | 109.9  |
| 114.5  | 117.6  | 126.1 | 124.4  | 119    | 129.5  | 111.1  | 154.4  | 112.2  |
| 123.9  | 118.2  | 105.7 | 124.4  | 111.1  | 110.5  | 121.5  | 122.4  | 121.2  |

|       |        |       |        |        |        |        |        |        |
|-------|--------|-------|--------|--------|--------|--------|--------|--------|
| 110   | 114.6  | 103.6 | 114.8  | 95.3   | 111.4  | 109.3  | 114.7  | 122.8  |
| 340.1 | 1347.8 | 814.1 | 1237.7 | 1435.1 | 1020.9 | 1267.8 | 1469   | 302    |
| 101.2 | 110.6  | 107.4 | 100.1  | 100.3  | 108.3  | 111.7  | 113.8  | 111.7  |
| 103.3 | 117.4  | 109.9 | 101.4  | 101.9  | 114.7  | 99.2   | 122.4  | 112.2  |
| 106.6 | 101.1  | 100.1 | 97     | 103    | 105.3  | 107.5  | 103.6  | 102.5  |
| 525.6 | 504.6  | 561.3 | 450.5  | 604.3  | 499.2  | 388.3  | 1008.3 | 976    |
| 144.3 | 152.9  | 141.7 | 177    | 139.4  | 160.4  | 205.3  | 164.3  | 156    |
| 106.5 | 113.1  | 103.1 | 102.2  | 101.2  | 109.4  | 97.9   | 106.6  | 119.7  |
| 109.1 | 113    | 98.1  | 107.7  | 99.6   | 114.3  | 102.6  | 106.1  | 114.3  |
| 104.5 | 111    | 109.1 | 103.7  | 94.4   | 110    | 103.9  | 109.5  | 113.4  |
| 108.7 | 106    | 100.8 | 95.1   | 96.1   | 108.6  | 98.7   | 103.4  | 103.7  |
| 102.1 | 102    | 97.9  | 98.8   | 94.1   | 106.1  | 98.9   | 104.2  | 103.9  |
| 110.9 | 111.6  | 108.6 | 98.1   | 102.8  | 106.2  | 99.4   | 110.6  | 109    |
| 106.7 | 107.4  | 113.7 | 105.8  | 100.5  | 116.8  | 107.5  | 111.3  | 107.1  |
| 507.9 | 806.9  | 537.5 | 720.1  | 664.3  | 533.6  | 433.3  | 1216.3 | 1289.3 |
| 116.8 | 116.4  | 112.3 | 116.9  | 101.9  | 107.7  | 119.7  | 131.8  | 127.3  |
| 517.8 | 755.5  | 624.6 | 609.7  | 697.5  | 849.9  | 385.4  | 1126.5 | 743.4  |
| 506.5 | 679.5  | 605.4 | 633.4  | 571.3  | 663.1  | 541.6  | 1098.6 | 756.9  |
| 152.6 | 171.3  | 149.6 | 142.9  | 142.4  | 158.6  | 158.2  | 223.3  | 194.6  |
| 127.9 | 113.1  | 108.1 | 91.5   | 110.8  | 109.2  | 107.1  | 125.2  | 122.3  |
| 110   | 130    | 117.6 | 106.3  | 108.5  | 120.6  | 114.4  | 126.8  | 114.9  |
| 108.2 | 103.2  | 105.5 | 105.9  | 99.3   | 111.2  | 100.5  | 106.4  | 110.2  |
| 108.9 | 110.9  | 103.1 | 109.4  | 102.1  | 112.9  | 107.4  | 111.8  | 114.9  |
| 99.4  | 106.9  | 101.4 | 106.2  | 93.2   | 111    | 106.6  | 95.7   | 110.2  |
| 122.4 | 177.8  | 159.4 | 166.9  | 130.7  | 168.3  | 171.3  | 180.6  | 147.1  |
| 138.1 | 220.4  | 240.5 | 194.3  | 188.6  | 181    | 216.7  | 168.2  | 128.9  |
| 228.9 | 192.9  | 155.5 | 227.4  | 182.6  | 207.9  | 169.9  | 363.7  | 318.8  |
| 389.8 | 284.8  | 203.4 | 328.9  | 239.3  | 219.9  | 187    | 611    | 411.4  |
| 106.9 | 112.7  | 99.2  | 101.2  | 95.9   | 103.8  | 107.3  | 111.9  | 109.9  |
| 107.8 | 106.9  | 101.9 | 99.7   | 100.2  | 113.1  | 102.6  | 128.4  | 110.3  |
| 463.9 | 762.4  | 678.8 | 547.5  | 851.8  | 1188.6 | 754    | 1839.7 | 982.3  |
| 120.7 | 130.9  | 125.9 | 131.5  | 124    | 128.5  | 127.6  | 160.8  | 136.5  |
| 120.2 | 107.7  | 104.1 | 101.9  | 103.3  | 107.1  | 107    | 116    | 105.4  |
| 109.1 | 117.7  | 117.5 | 113.4  | 105    | 113.2  | 103.9  | 114.7  | 116.5  |
| 125   | 216.8  | 237.4 | 179.6  | 173.2  | 203.8  | 164.4  | 276.7  | 224.4  |
| 118.5 | 173.7  | 169.3 | 146.8  | 139.6  | 146.3  | 141.9  | 138.6  | 122.4  |
| 103.4 | 108.2  | 97.3  | 100.3  | 96.2   | 104.5  | 100.5  | 107.5  | 100.7  |
| 106.9 | 115.4  | 114.2 | 98.7   | 97.8   | 111.9  | 107.5  | 117.4  | 98.2   |
| 99.7  | 104.1  | 96.9  | 98.9   | 90.7   | 106.1  | 98     | 107.5  | 113.3  |
| 111.5 | 100    | 101.1 | 98.8   | 95.5   | 109.7  | 100.3  | 110.9  | 110.1  |
| 113.7 | 108.6  | 106.5 | 102.9  | 96.4   | 110    | 109.7  | 121.8  | 111.1  |
| 101.2 | 113.4  | 103.6 | 106.3  | 101.9  | 106.3  | 109    | 103.4  | 104.3  |
| 102.4 | 108.8  | 106.7 | 100.5  | 98     | 102.6  | 105.9  | 113.2  | 110.2  |
| 103.2 | 103.2  | 101   | 105.3  | 94.4   | 111.8  | 104.6  | 113    | 115    |
| 108.9 | 111    | 105.5 | 110.3  | 97.5   | 113.9  | 110.2  | 118    | 106.9  |
| 120.2 | 143.5  | 145.6 | 122.3  | 130.7  | 144    | 143.6  | 148.1  | 131.7  |
| 166.5 | 182.6  | 176.5 | 159.7  | 147.2  | 194.9  | 225    | 277    | 198.5  |
| 117   | 124.1  | 108.7 | 120.4  | 114.1  | 132.5  | 117.4  | 128.4  | 137.2  |
| 247.2 | 390.2  | 315.8 | 377.2  | 327.1  | 300.9  | 354    | 591.1  | 213.9  |
| 182.3 | 157.4  | 135.6 | 190.4  | 153.5  | 176.1  | 226.2  | 334.8  | 192.9  |
| 103.3 | 101.8  | 104.6 | 98.2   | 93.1   | 114.3  | 108    | 114.8  | 105.9  |

|        |        |        |        |        |        |       |        |        |
|--------|--------|--------|--------|--------|--------|-------|--------|--------|
| 144.2  | 177.8  | 175.9  | 137.3  | 161.8  | 184.4  | 140.9 | 211.4  | 169.8  |
| 109.5  | 104.2  | 103.8  | 102.8  | 99     | 114.7  | 101.4 | 114.9  | 104.2  |
| 124.2  | 132.5  | 122.4  | 113    | 112.7  | 118.7  | 120.2 | 133.1  | 132.7  |
| 110.4  | 105.4  | 109.5  | 108.5  | 94.2   | 120.7  | 101.3 | 121.3  | 112.8  |
| 123.6  | 112.4  | 130.8  | 115.9  | 118.2  | 143.2  | 121.6 | 134.1  | 128.3  |
| 115.3  | 117.7  | 112.6  | 112.6  | 101.4  | 119.1  | 114   | 139.2  | 120.8  |
| 109.5  | 100.9  | 108.3  | 107.7  | 100.3  | 112.2  | 106.9 | 117.8  | 115.8  |
| 190.9  | 236    | 155    | 360    | 211.3  | 198.7  | 351.2 | 350.2  | 280.5  |
| 105.9  | 107.5  | 106.1  | 113.4  | 96.7   | 109.2  | 105.1 | 115.4  | 106.7  |
| 104.1  | 107.8  | 92.3   | 99.4   | 91.2   | 111.4  | 108.3 | 110.1  | 110.5  |
| 131.8  | 121.3  | 104.1  | 126.8  | 112.9  | 115.1  | 116.9 | 118.3  | 111.2  |
| 551.5  | 348.7  | 280.6  | 410.3  | 326.9  | 291.2  | 408.7 | 498.4  | 396.4  |
| 103.1  | 106.1  | 95     | 106.7  | 98.2   | 106.2  | 109.8 | 106.5  | 109.2  |
| 108.7  | 101.6  | 107.6  | 100.4  | 92.3   | 109.9  | 98.9  | 108.7  | 112.8  |
| 119.8  | 116.9  | 110.7  | 118    | 106    | 116.7  | 108.7 | 117.6  | 108.7  |
| 121.7  | 117.4  | 115.5  | 141    | 116.2  | 116.9  | 131.8 | 144.5  | 141.4  |
| 401.1  | 510.3  | 414.7  | 445.9  | 422.2  | 396.2  | 423.7 | 1046.3 | 779.5  |
| 117.4  | 137    | 128.7  | 121.4  | 113.1  | 144.6  | 118.3 | 144.1  | 132.8  |
| 104.7  | 105.9  | 104.5  | 101.9  | 95.6   | 118.3  | 102.4 | 117.4  | 108.7  |
| 113.2  | 123.5  | 103.5  | 111.8  | 98.9   | 107    | 111.1 | 116.9  | 106.2  |
| 105    | 110.2  | 101    | 99.6   | 86.4   | 111.9  | 108.2 | 112.4  | 100.2  |
| 1478.5 | 2916.2 | 2702.1 | 1935.5 | 2281.2 | 3122.9 | 2220  | 2690.5 | 1212.3 |
| 103.8  | 118.9  | 106.7  | 100.4  | 95.6   | 117.3  | 104.6 | 115.3  | 109.7  |
| 115    | 116.3  | 109.1  | 113.9  | 97.6   | 111.1  | 105.1 | 122.3  | 102.5  |
| 111    | 113.3  | 97.2   | 115    | 101.9  | 110.4  | 108.8 | 115.7  | 103.9  |
| 102.7  | 103.7  | 98.3   | 103.3  | 90.7   | 109.6  | 99.3  | 103.8  | 97.2   |
| 103.1  | 109.1  | 105.9  | 95.1   | 90.2   | 104.6  | 97.2  | 113.2  | 115.1  |
| 108    | 113.6  | 119.6  | 119    | 92.5   | 111.1  | 113   | 115    | 112.3  |
| 129.8  | 172.3  | 135.6  | 225.5  | 131.1  | 120.7  | 149.1 | 170.6  | 122.7  |
| 118.9  | 139.5  | 132.8  | 116.7  | 113.4  | 130.9  | 131.1 | 159.1  | 119.1  |
| 113.7  | 109    | 109.5  | 112.5  | 103.5  | 115.1  | 106.9 | 114.1  | 113.8  |
| 131.7  | 131.7  | 146.3  | 118.8  | 122.6  | 146    | 135   | 196.9  | 130.3  |
| 99.3   | 103.2  | 103.6  | 102.4  | 91.5   | 108.7  | 106.8 | 107.5  | 106.3  |
| 109.4  | 108    | 108.5  | 95.8   | 104.1  | 105.9  | 120.7 | 129.4  | 109.1  |
| 109.7  | 108.2  | 98.3   | 101.3  | 92.6   | 103.6  | 99    | 105.8  | 104.9  |
| 122.4  | 120.1  | 109.5  | 123.9  | 96.4   | 114.4  | 111.3 | 132.4  | 129    |
| 112.1  | 122.6  | 111.1  | 130.6  | 116.1  | 136    | 106.6 | 134.2  | 120.5  |
| 194.3  | 131.7  | 154.4  | 147.2  | 139.8  | 172.7  | 149.5 | 454.2  | 493.4  |
| 111.3  | 102    | 101.2  | 102.7  | 91.2   | 104.4  | 105.3 | 107    | 102.1  |
| 103.7  | 111.9  | 112.2  | 109.3  | 103.2  | 119.9  | 99.3  | 118.2  | 113.2  |
| 124.1  | 131.1  | 112.4  | 148.8  | 114.6  | 116.6  | 137.2 | 120.6  | 111.4  |
| 105.9  | 108.8  | 100.5  | 107.5  | 98.9   | 111.1  | 112.2 | 117.9  | 108    |
| 103.3  | 113    | 109.1  | 99     | 97     | 118.9  | 108.2 | 103.4  | 112    |
| 112.5  | 113.9  | 109.7  | 106.2  | 97.7   | 115.4  | 106.9 | 127.7  | 123.9  |
| 109.1  | 103.7  | 106.6  | 103.3  | 93.9   | 109.9  | 103.8 | 126.1  | 112    |
| 108.8  | 106.8  | 106.2  | 101.7  | 100.7  | 108    | 107.8 | 111.3  | 105.4  |
| 359.4  | 285.3  | 265.5  | 326.1  | 264.4  | 332    | 374.9 | 456.7  | 395.5  |
| 120.8  | 135.3  | 165.9  | 128.2  | 134.9  | 159.4  | 145.9 | 166.3  | 161    |
| 104.8  | 103.5  | 103.1  | 92.8   | 88.7   | 104.9  | 98.7  | 112.1  | 107.6  |
| 107.9  | 108.3  | 100.1  | 110.8  | 98.1   | 106    | 115.4 | 106.4  | 111.4  |
| 106.1  | 117.3  | 104.3  | 102.5  | 97.6   | 113.4  | 106.6 | 108.5  | 113.1  |

|        |        |        |        |        |        |        |        |        |
|--------|--------|--------|--------|--------|--------|--------|--------|--------|
| 123.5  | 143.7  | 111.2  | 392.6  | 115.4  | 117.8  | 281.4  | 119    | 120.3  |
| 105.2  | 109.1  | 110.3  | 109.5  | 95     | 105.6  | 105    | 98.8   | 111.6  |
| 177.5  | 281.5  | 354.2  | 218    | 242.9  | 273.4  | 262.4  | 406.4  | 290.3  |
| 443.8  | 595.5  | 491.6  | 626.3  | 414.4  | 507.5  | 559.5  | 792.2  | 728.5  |
| 121.7  | 117.8  | 129.9  | 129.2  | 127    | 135.4  | 141.8  | 150.7  | 131.8  |
| 116.8  | 120.6  | 126.2  | 113.7  | 117.4  | 125.4  | 119.7  | 154    | 133.1  |
| 117.7  | 115.5  | 105.8  | 111.1  | 103    | 116.4  | 99.6   | 115.6  | 117    |
| 112.9  | 123.7  | 117.3  | 112.2  | 109.7  | 127.4  | 117.3  | 141.4  | 136.3  |
| 102.3  | 103.9  | 97.9   | 98.5   | 99     | 104.1  | 96.2   | 102.7  | 98.4   |
| 102.8  | 110.8  | 102.1  | 107.4  | 105.1  | 107.1  | 97.4   | 118    | 106    |
| 120.3  | 148.4  | 138.2  | 133.3  | 112.9  | 127.6  | 127.4  | 173.9  | 149.6  |
| 126.5  | 139.2  | 124.5  | 123.3  | 124.1  | 143.3  | 122.7  | 158.5  | 146.7  |
| 161.3  | 142.3  | 142.2  | 149    | 136.4  | 165    | 140.5  | 164.8  | 182.1  |
| 114.9  | 114.3  | 107.9  | 100.5  | 95     | 117.7  | 100    | 120.5  | 118.5  |
| 227.7  | 189.4  | 170.5  | 194.2  | 209.2  | 253.4  | 288.8  | 328    | 164.4  |
| 132.4  | 128.8  | 122.1  | 106.4  | 113.4  | 122.3  | 121.4  | 136.4  | 123.8  |
| 107.4  | 130    | 117.9  | 127.9  | 122.2  | 151.1  | 133.8  | 141.3  | 127.4  |
| 173.9  | 294    | 251.5  | 256.7  | 241.2  | 254.6  | 299.3  | 451.2  | 269.4  |
| 119.8  | 115.5  | 100.3  | 105    | 101.2  | 105    | 100    | 140.6  | 145.3  |
| 113.4  | 109.9  | 103.6  | 102.7  | 95.7   | 110.6  | 101.2  | 108.1  | 110.7  |
| 108.8  | 102.6  | 104.3  | 98.9   | 93.5   | 112.8  | 97.3   | 109.1  | 107.1  |
| 96.9   | 109.2  | 98.9   | 90.5   | 93.7   | 100.4  | 98.5   | 97.2   | 103.8  |
| 102.1  | 109.1  | 100.1  | 100.8  | 97.5   | 104.1  | 99.1   | 107.1  | 101.3  |
| 141.3  | 159.8  | 146.7  | 148.8  | 147.3  | 146.2  | 154.6  | 149.1  | 142.9  |
| 120.2  | 129.3  | 114.1  | 106.7  | 96.6   | 109.3  | 111.5  | 114.8  | 109.7  |
| 114.7  | 160.2  | 223    | 162.6  | 158.7  | 184.6  | 163    | 154.5  | 134.1  |
| 106.5  | 102.9  | 118.5  | 114.5  | 93.1   | 121    | 105.9  | 111.2  | 111.4  |
| 101.1  | 101.6  | 103.3  | 102.8  | 96.9   | 115.3  | 108.9  | 105.1  | 104.2  |
| 111.5  | 116.4  | 97.5   | 100.8  | 97.1   | 109.3  | 103.9  | 102.9  | 105.9  |
| 558    | 712.3  | 739.7  | 632.5  | 452.3  | 576.3  | 499.6  | 1315.5 | 919.6  |
| 108    | 100.2  | 109.7  | 104.5  | 99.2   | 110.8  | 106.4  | 119.7  | 114.6  |
| 100.1  | 107.9  | 100.1  | 97.5   | 93     | 107.6  | 101    | 102.9  | 108.9  |
| 109    | 114    | 112.4  | 104    | 102.4  | 112.3  | 108    | 115.5  | 112.6  |
| 209    | 169.8  | 184.1  | 177.5  | 185.5  | 248.7  | 222.3  | 323.8  | 259.5  |
| 105.8  | 102.6  | 103.4  | 106    | 94.2   | 101.8  | 101.6  | 104.2  | 104    |
| 100.2  | 106.3  | 99.3   | 96.8   | 90.6   | 101.2  | 96.7   | 100.6  | 105.7  |
| 140.9  | 136.8  | 114    | 134.1  | 122    | 141.4  | 134.8  | 204.3  | 155.7  |
| 160    | 232    | 267.3  | 355.5  | 230.4  | 265.6  | 274.6  | 341.3  | 231.6  |
| 3488.4 | 3255.1 | 2696.7 | 2557.1 | 2305.6 | 3021.9 | 2277.5 | 6027.6 | 7281.3 |
| 108.5  | 133    | 120.5  | 111.5  | 106.9  | 117.2  | 109.5  | 127.2  | 131.8  |
| 792.8  | 713.2  | 633.3  | 673.3  | 650.6  | 756.4  | 693.7  | 1397.1 | 1426.5 |
| 109.8  | 118.1  | 117.9  | 104.4  | 105.1  | 113.5  | 98.9   | 125.2  | 109.4  |
| 108    | 113.5  | 100.5  | 102.8  | 101.8  | 101    | 106.4  | 102.7  | 118.2  |
| 102.7  | 111.2  | 100.5  | 101.2  | 99.4   | 109.9  | 96.2   | 103.3  | 109.7  |
| 119.8  | 112.7  | 105.1  | 112.4  | 97.8   | 129    | 107    | 107.7  | 116.8  |
| 104.7  | 105.4  | 111.1  | 116.8  | 105    | 118.5  | 116.7  | 112.9  | 112.2  |
| 117.9  | 123.8  | 108.1  | 110.9  | 105.1  | 111.1  | 105.5  | 125.7  | 118.5  |
| 542.3  | 612.3  | 812.7  | 558.9  | 1151.6 | 978.7  | 471.3  | 1793.7 | 1739.4 |
| 106.3  | 102.6  | 101.4  | 106.2  | 92.6   | 106.5  | 95.4   | 107.3  | 105.7  |
| 104.1  | 110.2  | 96.8   | 88     | 95.6   | 104.8  | 95     | 110.2  | 104.6  |
| 219    | 209    | 204.5  | 178.1  | 170.3  | 202.5  | 212.4  | 307.1  | 245.9  |

|        |        |        |        |        |        |        |        |        |
|--------|--------|--------|--------|--------|--------|--------|--------|--------|
| 118.2  | 125.2  | 114.8  | 132.8  | 110.1  | 129    | 122.1  | 143.5  | 125.4  |
| 205.8  | 181.8  | 209.9  | 192.7  | 184.8  | 205.8  | 224.3  | 292.8  | 208.5  |
| 506.2  | 868    | 887    | 636.9  | 819.5  | 947.5  | 756.7  | 1004.2 | 473.3  |
| 121.7  | 131.7  | 127.7  | 116.4  | 117.1  | 118.9  | 134.8  | 149.8  | 139.7  |
| 113.3  | 116.3  | 119.7  | 107    | 99.4   | 124.1  | 117.1  | 133.2  | 122.5  |
| 104.6  | 107.6  | 115.4  | 105.3  | 104.3  | 114.8  | 100.3  | 120.7  | 116.3  |
| 110.1  | 131.7  | 135.1  | 122.8  | 132.6  | 128.1  | 129.3  | 149.4  | 134.5  |
| 114.1  | 119.8  | 118.3  | 118.3  | 93.1   | 125    | 112.8  | 119.1  | 112.2  |
| 127.6  | 213.1  | 173.2  | 217.6  | 171.7  | 169.7  | 180.7  | 247    | 177.2  |
| 300.6  | 337.8  | 268.9  | 390    | 259.2  | 323.2  | 404.1  | 399.3  | 393.9  |
| 119.1  | 172.9  | 164.8  | 152.7  | 141.9  | 158.8  | 140    | 220.2  | 140.5  |
| 109.8  | 115    | 106.3  | 101.3  | 97.3   | 116.8  | 112.1  | 119.1  | 113.5  |
| 118.4  | 143.5  | 140.2  | 139.3  | 124.4  | 137.4  | 132.1  | 156    | 129.2  |
| 138.5  | 142.3  | 127.1  | 139.3  | 137.9  | 144    | 140.5  | 198.9  | 155.5  |
| 279.9  | 324.2  | 325.5  | 306.6  | 301.9  | 342.8  | 336.9  | 600.5  | 413.5  |
| 114.6  | 112.2  | 114.2  | 103.9  | 106.2  | 120.4  | 101.5  | 131.8  | 125.4  |
| 174.4  | 157.3  | 135.8  | 107.4  | 119.5  | 152    | 154.3  | 194.3  | 150.9  |
| 114.3  | 114.7  | 118.3  | 108.1  | 104.9  | 114.8  | 110.6  | 122.7  | 117    |
| 940.5  | 1625.5 | 1404.6 | 1121.2 | 1256.2 | 1418.2 | 1078.4 | 2260.5 | 1805.8 |
| 582.2  | 1080.4 | 1202.5 | 1109.2 | 957.7  | 1105   | 1156.8 | 1532.9 | 984.8  |
| 246.4  | 302.3  | 290.4  | 276.8  | 277.6  | 309.5  | 333.9  | 573.3  | 364.9  |
| 115    | 128.1  | 127.8  | 127.4  | 112.3  | 131.5  | 133.2  | 147    | 122.4  |
| 103.8  | 107.6  | 103.5  | 97.9   | 98.8   | 114.3  | 99.9   | 104.3  | 113.1  |
| 94.1   | 108.2  | 97.7   | 108.2  | 94     | 103.8  | 102.5  | 102.7  | 107    |
| 105.5  | 109.3  | 100.6  | 108.5  | 97.9   | 109.8  | 103    | 110.9  | 110.2  |
| 113.4  | 114.3  | 111.9  | 120.4  | 110.8  | 122.8  | 116.5  | 117.3  | 107.7  |
| 163.9  | 177.6  | 206.7  | 184.5  | 171.2  | 177.9  | 171.9  | 226.8  | 147.2  |
| 111.1  | 109.5  | 114.7  | 102.8  | 102.3  | 115.5  | 98.1   | 116    | 108.3  |
| 112.9  | 107.7  | 112.5  | 109.1  | 101.8  | 107.1  | 110.4  | 110.1  | 112    |
| 110.5  | 101.4  | 105.8  | 113    | 103.3  | 122.1  | 109.7  | 121.3  | 117    |
| 110.8  | 122.1  | 112.3  | 105.8  | 101.1  | 114.3  | 106.2  | 121.7  | 111.1  |
| 165.1  | 367.2  | 396.2  | 232.2  | 239.3  | 341.5  | 300.9  | 439.8  | 283.2  |
| 179.9  | 282.1  | 246.1  | 227    | 318.8  | 307.3  | 252.2  | 416.6  | 270.4  |
| 1614.5 | 1774.8 | 1792.1 | 1603.9 | 1524.2 | 1769.4 | 2117   | 2518.6 | 2076   |
| 217.9  | 202.4  | 195.9  | 251.9  | 189.4  | 228.7  | 266.1  | 419.1  | 269.9  |
| 667.1  | 598.7  | 726.6  | 593.8  | 671.7  | 816.9  | 735    | 1574   | 862.8  |
| 212.8  | 332.7  | 341.6  | 280.3  | 291.7  | 308.3  | 332.9  | 570.9  | 387.8  |
| 144.8  | 132.9  | 146    | 136.6  | 130.2  | 153.2  | 147.2  | 234.6  | 157.8  |
| 460.7  | 574.4  | 507.5  | 485.5  | 487    | 498    | 492.6  | 920.1  | 817.3  |
| 166.5  | 169.8  | 177.1  | 158    | 165.4  | 217    | 184.5  | 264.4  | 197.2  |
| 381    | 708.8  | 774.1  | 749.4  | 584.5  | 689.4  | 659    | 1086.8 | 686.7  |
| 361.4  | 504.2  | 529.5  | 536.8  | 422.5  | 585.7  | 581.9  | 841.6  | 588.3  |
| 223.3  | 343.2  | 215.4  | 301.1  | 276.4  | 248.5  | 290.9  | 717.7  | 358.7  |
| 184.9  | 339.8  | 278    | 329.6  | 288.2  | 294.2  | 303.8  | 434.4  | 285.3  |
| 125.8  | 189.3  | 153.8  | 170.8  | 173.3  | 152.4  | 134.7  | 226.9  | 196.9  |
| 113    | 119.9  | 109.8  | 108.3  | 106.4  | 113.1  | 109.6  | 132    | 116.6  |
| 107.9  | 109.3  | 113.3  | 116.2  | 96.5   | 130.2  | 107.3  | 119.3  | 115.4  |
| 174    | 279.8  | 195.4  | 238.7  | 219.6  | 191    | 201.6  | 537.2  | 262.2  |
| 114.1  | 129.8  | 111    | 115.4  | 108.5  | 124.7  | 120.9  | 131.3  | 122.3  |
| 156.6  | 186.8  | 159.3  | 152.7  | 169.8  | 170.8  | 159.4  | 238.5  | 162.8  |
| 170.2  | 194.8  | 229.3  | 205.8  | 221.3  | 216.9  | 187.2  | 260.9  | 206.7  |



|       |       |       |       |       |       |       |        |       |
|-------|-------|-------|-------|-------|-------|-------|--------|-------|
| 147.8 | 245.2 | 242.4 | 203.3 | 217   | 262.7 | 213.5 | 243.9  | 166.5 |
| 289   | 403.5 | 494.5 | 443.3 | 365.5 | 440.5 | 398.5 | 656.9  | 431.8 |
| 112   | 121.3 | 112.1 | 111.3 | 103.3 | 127.3 | 110.1 | 120.4  | 104.3 |
| 121.2 | 119.5 | 97.6  | 127.8 | 115.6 | 112.9 | 114.4 | 144.6  | 126.9 |
| 108   | 114.3 | 107.8 | 96.1  | 99    | 109.4 | 93.8  | 110.9  | 108.2 |
| 523.5 | 527   | 531.2 | 824.3 | 543.7 | 665.7 | 800.6 | 1003.5 | 822.4 |
| 172.5 | 373.4 | 333.7 | 210   | 323.1 | 344.7 | 278.4 | 388.7  | 206.3 |
| 102.4 | 109.3 | 113.1 | 96    | 100.3 | 117   | 110.4 | 113.4  | 105.1 |
| 110.4 | 109.1 | 105.5 | 93    | 90.6  | 107.8 | 98.5  | 102.7  | 100.1 |
| 153.9 | 212.3 | 182.5 | 212.1 | 172.1 | 232.8 | 207.5 | 284.6  | 194   |
| 164.3 | 319.9 | 328.5 | 268.4 | 255.1 | 323.4 | 268.9 | 336.5  | 207.6 |
| 270.9 | 266.2 | 271.3 | 220.7 | 207.6 | 269.8 | 253.2 | 421.1  | 292.3 |
| 102.8 | 109.4 | 100.8 | 103.5 | 101   | 103.9 | 107   | 121.3  | 104.8 |
| 116   | 139.9 | 118.7 | 121.5 | 116.8 | 120.2 | 129.6 | 158.1  | 129.2 |
| 104.5 | 103.7 | 101.7 | 98.7  | 98.4  | 107.3 | 94.4  | 116.5  | 102.8 |
| 149.4 | 179.6 | 173   | 198.2 | 183.8 | 176.1 | 208   | 268.5  | 181.3 |
| 107.2 | 104.7 | 102.8 | 108   | 92.7  | 103.5 | 104.6 | 104.5  | 100   |
| 101.7 | 117.5 | 115.1 | 109.3 | 103.3 | 109.4 | 110.4 | 119.1  | 115.5 |
| 126.1 | 185.8 | 198.7 | 149.2 | 162.9 | 168.3 | 165.9 | 180.6  | 143.2 |
| 130.1 | 136.3 | 114.5 | 141.2 | 123.8 | 134   | 135.8 | 159.2  | 137.2 |
| 105.3 | 115.1 | 110.7 | 103   | 102.7 | 114.1 | 107   | 121.7  | 127.5 |
| 104.3 | 112.9 | 105.8 | 115.2 | 96.7  | 110.5 | 106   | 102.8  | 106.3 |
| 130   | 156.5 | 158.7 | 194.6 | 134.8 | 148.7 | 162.1 | 160.5  | 162.5 |
| 98.7  | 103.7 | 97.8  | 96.4  | 91.9  | 107   | 105.8 | 98.3   | 103.2 |
| 112.4 | 127.1 | 118.6 | 116.6 | 108.3 | 132.2 | 107.6 | 159    | 124.9 |
| 126.5 | 148.4 | 134.4 | 117.7 | 110.6 | 125.6 | 124.4 | 183.4  | 172.2 |
| 123.7 | 225.1 | 232   | 203.3 | 159.3 | 224.5 | 164.9 | 271.2  | 191.1 |
| 145.8 | 162   | 197.5 | 145.8 | 170.8 | 208.8 | 181.5 | 238.7  | 208.5 |
| 111   | 115.2 | 107.2 | 109.8 | 97    | 112.3 | 101.7 | 117    | 103.9 |
| 101   | 104.3 | 107.9 | 100.9 | 106.1 | 112.3 | 103.8 | 102.7  | 102.4 |
| 223.6 | 159   | 135.8 | 147.6 | 145.8 | 163   | 159.7 | 241.4  | 173.2 |
| 107.6 | 121.3 | 120.4 | 114.5 | 110.8 | 125.5 | 114.1 | 124    | 116.5 |
| 109.5 | 122   | 116.6 | 115.8 | 102.3 | 121.8 | 113.4 | 125.2  | 135.6 |
| 108.2 | 106.1 | 92.9  | 108.8 | 97.7  | 109.5 | 101.2 | 124    | 122.5 |
| 111.7 | 111.7 | 104.5 | 112.3 | 96.1  | 107.5 | 104.3 | 108.2  | 110.3 |
| 135.4 | 119.5 | 129.3 | 114.5 | 108.2 | 137.8 | 128.4 | 138.9  | 130.3 |
| 106.8 | 107.6 | 106.7 | 109.8 | 96.5  | 104.9 | 103.5 | 110.7  | 115.6 |
| 116.4 | 101.6 | 103.1 | 105.1 | 99.7  | 110.7 | 107.3 | 105    | 109.9 |
| 101.8 | 95.5  | 99.7  | 92.1  | 93.3  | 109.4 | 97.8  | 105.1  | 100.6 |
| 97.8  | 108.6 | 91.7  | 95.8  | 95.6  | 107.4 | 100.4 | 107.5  | 101.5 |
| 106.6 | 101.9 | 91.8  | 96    | 94.4  | 108.8 | 95.7  | 104.9  | 107.8 |
| 105   | 123.6 | 120.1 | 121.8 | 114.1 | 120.1 | 122.5 | 114.6  | 116.6 |
| 139.7 | 128.1 | 144.4 | 142.4 | 123.9 | 144.2 | 130.8 | 161.1  | 140.6 |
| 106   | 107.4 | 102   | 100.9 | 106.7 | 107.8 | 101.3 | 114.7  | 100.6 |
| 106.2 | 115.5 | 106.4 | 100.5 | 98.3  | 103.8 | 106.6 | 119    | 114.5 |
| 108.7 | 101.6 | 97.7  | 100.2 | 91.2  | 104.2 | 99.3  | 113.1  | 102.9 |
| 106.1 | 112   | 98.1  | 106.2 | 93.5  | 108.1 | 111.4 | 105.5  | 110.7 |
| 103.5 | 117.9 | 98    | 107.3 | 96    | 118.8 | 100.4 | 100.6  | 101.6 |
| 103.9 | 114.7 | 101   | 92.1  | 92.4  | 108.4 | 104.7 | 107.4  | 111.7 |
| 103   | 100.7 | 104.7 | 103.4 | 94.6  | 111.6 | 100.2 | 107.6  | 107.3 |
| 104.9 | 109.4 | 101.5 | 96.8  | 89.5  | 102.8 | 100.4 | 100.3  | 108.6 |

|        |        |        |        |        |        |        |        |        |
|--------|--------|--------|--------|--------|--------|--------|--------|--------|
| 117.6  | 112.4  | 106.5  | 107.5  | 102    | 109.8  | 102.1  | 110.7  | 123.1  |
| 98.1   | 103.9  | 106.4  | 94.4   | 93     | 100.6  | 101.5  | 105.5  | 108.1  |
| 102.8  | 111.7  | 105.5  | 96     | 89.8   | 111.4  | 101.3  | 116.3  | 109.2  |
| 110.9  | 116.9  | 110.8  | 126.1  | 113.6  | 113.3  | 115    | 144.7  | 124    |
| 99.6   | 108.9  | 95.4   | 89     | 91.2   | 104.2  | 100.7  | 101.7  | 109.8  |
| 666.9  | 1705   | 1486.3 | 1829.8 | 1084.2 | 1375.4 | 1760   | 1497.8 | 975.8  |
| 104.2  | 109.3  | 100    | 100    | 89.4   | 103.6  | 103.4  | 115    | 107    |
| 1111.9 | 1348.4 | 1167   | 1344.2 | 1045.1 | 1175.4 | 1128   | 1881.3 | 1060.4 |
| 197.2  | 299.7  | 199.1  | 312.1  | 213.2  | 181.5  | 305.8  | 313    | 251.5  |
| 1501.4 | 1700.9 | 1801.1 | 1285.1 | 1978.9 | 1446.7 | 1159.7 | 2968   | 3738.8 |
| 104.3  | 108.2  | 101.7  | 99     | 96     | 106    | 106.2  | 101.6  | 104.5  |
| 113    | 195.5  | 231.5  | 161.4  | 192.9  | 207.6  | 163.4  | 250    | 162.8  |
| 105.1  | 114.7  | 114.5  | 102.8  | 101    | 124.7  | 102.2  | 122.3  | 107.6  |
| 101.8  | 121.9  | 115.2  | 104.4  | 104.8  | 120.2  | 107    | 139.1  | 120.2  |
| 120.8  | 118.7  | 102.3  | 117.8  | 106.6  | 118.4  | 121.8  | 118.1  | 131.1  |
| 115.9  | 151.9  | 140.4  | 132.1  | 122.9  | 128.8  | 116.2  | 153.5  | 153.7  |
| 110    | 109.8  | 97.5   | 115.5  | 96.6   | 109.8  | 109.1  | 125.2  | 112.3  |
| 121.1  | 133    | 118.3  | 108.8  | 122.6  | 139.7  | 98.8   | 202    | 114.3  |
| 101.4  | 116.3  | 109.3  | 122.4  | 104.9  | 126.2  | 108.2  | 133.4  | 106    |
| 118.4  | 112.1  | 100.2  | 106.1  | 94.9   | 109    | 102.1  | 99     | 106.9  |
| 100    | 110.9  | 104.5  | 99.5   | 104.3  | 103    | 104.9  | 110.4  | 111.3  |
| 103.7  | 110    | 104.1  | 100.8  | 92.4   | 107.7  | 109.3  | 98.3   | 94.1   |
| 152.2  | 134.6  | 124.3  | 137.4  | 118.3  | 138.8  | 118.7  | 210.8  | 160.7  |
| 114.4  | 188.4  | 135.5  | 182.8  | 168.7  | 166.2  | 142.3  | 191.7  | 166.2  |
| 104    | 105.1  | 101.9  | 107.2  | 98.4   | 105.6  | 107.6  | 101.1  | 110.6  |
| 106.1  | 110.5  | 106.7  | 99.1   | 97     | 120.3  | 96.8   | 118.4  | 107.8  |
| 108.6  | 111.3  | 104.9  | 110.7  | 97     | 114.8  | 112.9  | 108.1  | 109.7  |
| 128.7  | 177.9  | 159.3  | 161.5  | 159.7  | 172.3  | 138.1  | 234.4  | 181.4  |
| 107.5  | 105.1  | 104.6  | 104.7  | 100.3  | 111.8  | 107.3  | 110.4  | 114.7  |
| 146.6  | 133.2  | 145.6  | 121    | 126.5  | 143.1  | 137.2  | 145.2  | 144.4  |
| 109    | 104.9  | 106.3  | 101.7  | 100    | 107.4  | 101.9  | 107.1  | 111.9  |
| 117.1  | 114    | 119.7  | 105.2  | 99.2   | 122.9  | 103.3  | 137.9  | 115.8  |
| 110.5  | 102.8  | 102.6  | 107.8  | 97.7   | 105.5  | 104.4  | 111.6  | 110.1  |
| 105.4  | 114.6  | 101.3  | 113.8  | 92.6   | 109.9  | 100.4  | 106.1  | 110.7  |
| 105.1  | 108.5  | 106.4  | 97.4   | 99.1   | 112.5  | 96.6   | 105.5  | 117    |
| 103.5  | 114    | 113.6  | 98     | 99.1   | 113.8  | 109.7  | 116.9  | 103.7  |
| 119.8  | 155.6  | 135.5  | 131.3  | 132.9  | 139    | 125.8  | 200.3  | 158.4  |
| 124.2  | 109.4  | 104.7  | 102    | 96.3   | 107    | 110.9  | 107.2  | 115    |
| 110.8  | 112.4  | 102.6  | 103.5  | 96.8   | 109    | 100.2  | 106    | 108.7  |
| 161.2  | 322.7  | 251.6  | 369.7  | 262.6  | 342.3  | 418.7  | 468.9  | 297.3  |
| 229    | 542.1  | 555.9  | 681.2  | 453.6  | 476.9  | 546.7  | 787.7  | 448    |
| 113.4  | 104.5  | 105.9  | 113.6  | 97.4   | 103.2  | 105.2  | 119.9  | 111.6  |
| 104.8  | 109.3  | 102.5  | 94.3   | 95.7   | 108.4  | 106.8  | 115.2  | 119.4  |
| 111    | 103.9  | 96.4   | 107.6  | 95.2   | 105.8  | 103.8  | 95.4   | 101.9  |
| 422.8  | 397.4  | 357.1  | 340    | 402.6  | 297.1  | 354.7  | 669.7  | 390.8  |
| 125.7  | 143.1  | 136.7  | 121.1  | 110.3  | 145.5  | 113.3  | 169.7  | 128.7  |
| 150.1  | 161.7  | 145.4  | 155.4  | 144.4  | 164.5  | 139.7  | 217.8  | 175.2  |
| 103    | 113.7  | 113.2  | 103.1  | 94.3   | 104.6  | 105.2  | 108.7  | 114.4  |
| 111    | 103.8  | 103.5  | 94.3   | 94.1   | 104.4  | 100.5  | 108.5  | 107.9  |
| 103.5  | 112.5  | 100.1  | 94.2   | 95.9   | 108.4  | 107.6  | 107.8  | 111.6  |
| 106.4  | 104    | 93.7   | 100.3  | 89.3   | 106.2  | 100.9  | 103.5  | 104.9  |

|       |        |        |       |        |        |        |        |       |
|-------|--------|--------|-------|--------|--------|--------|--------|-------|
| 109.7 | 110.3  | 102    | 103.1 | 97.6   | 117    | 98.5   | 103.9  | 108.3 |
| 108   | 111.1  | 108.3  | 94.6  | 99     | 103.5  | 104.5  | 108.7  | 120.2 |
| 209.9 | 303.2  | 214.8  | 299.9 | 234.7  | 220.9  | 288.6  | 325.1  | 199.8 |
| 152.8 | 210.8  | 183.5  | 318.6 | 179.8  | 193.3  | 219.5  | 230.5  | 217.8 |
| 293.9 | 414.7  | 312.5  | 329.3 | 281    | 415.9  | 290.6  | 623.1  | 633.3 |
| 119.3 | 129    | 111    | 107.4 | 111.4  | 134.1  | 112.4  | 137.6  | 131   |
| 126.5 | 128.6  | 118.7  | 130.3 | 110.4  | 126.7  | 122    | 124.5  | 131.8 |
| 317.9 | 462.1  | 368.4  | 399.7 | 327.4  | 431.3  | 346.9  | 720.2  | 562.8 |
| 120.4 | 141.9  | 121.4  | 120.3 | 113.7  | 124.7  | 117.2  | 166    | 138.4 |
| 117.9 | 129.9  | 118    | 151.1 | 98.2   | 120.4  | 141.7  | 120.8  | 127.8 |
| 107.5 | 105.5  | 101.5  | 93.6  | 89.2   | 101.6  | 98.6   | 108.3  | 105.1 |
| 99.8  | 110.9  | 97.4   | 100.7 | 102.9  | 101    | 104    | 107.9  | 116.5 |
| 147.2 | 202    | 226.1  | 210.6 | 226    | 230.2  | 257.2  | 338.4  | 293.5 |
| 109.3 | 115.8  | 105.6  | 109.4 | 105.6  | 112.3  | 116.3  | 115.9  | 114.8 |
| 126.6 | 111.5  | 104.5  | 118.3 | 106.7  | 129.7  | 122.7  | 145.1  | 129.4 |
| 107.9 | 112.6  | 106.2  | 113.8 | 102.1  | 118.1  | 104.2  | 127.6  | 126   |
| 145.2 | 191.1  | 231.3  | 189.5 | 164.7  | 221.2  | 293.5  | 336.6  | 246.8 |
| 142.9 | 176.7  | 182.8  | 145.3 | 170.9  | 202.6  | 156.3  | 235.6  | 188.1 |
| 107.6 | 112.1  | 101.3  | 111.5 | 101.7  | 109    | 109.9  | 107.1  | 113.6 |
| 108.8 | 111.5  | 108    | 111.9 | 101.2  | 123.5  | 120.7  | 119.5  | 109.6 |
| 112.9 | 110.5  | 102.4  | 97.7  | 98.1   | 112.9  | 102.1  | 110.3  | 103.6 |
| 111.7 | 125.1  | 128.8  | 127.7 | 121.8  | 125.8  | 105.5  | 143.6  | 131.2 |
| 101.1 | 109.3  | 101.6  | 105.3 | 104    | 113.3  | 100.3  | 113.3  | 118.7 |
| 391.2 | 792.3  | 719.2  | 754.8 | 568    | 626.7  | 753.3  | 945.5  | 632.4 |
| 120.6 | 124.1  | 115.4  | 117.5 | 122.4  | 121    | 113.6  | 134.5  | 128   |
| 104.2 | 110.1  | 113.2  | 100.2 | 96.2   | 108    | 101.7  | 110.8  | 100.3 |
| 197.4 | 278.5  | 218.9  | 258   | 232.6  | 228.8  | 275.7  | 423.6  | 283.3 |
| 101.7 | 106.7  | 101.1  | 97.8  | 92.2   | 105.8  | 93.3   | 107.7  | 113.9 |
| 104.9 | 111.4  | 97.5   | 100.7 | 98.2   | 109    | 100.4  | 118.7  | 111.6 |
| 110.8 | 107.4  | 117    | 98.7  | 97.7   | 105.8  | 98.3   | 111.4  | 105.4 |
| 108.2 | 102.6  | 104.1  | 94.4  | 97.1   | 105.8  | 98.8   | 106.7  | 105   |
| 111.3 | 101.4  | 103.8  | 98.6  | 98.3   | 110.1  | 100    | 118.1  | 110.6 |
| 180.2 | 173.4  | 167.2  | 130.2 | 153.2  | 171.7  | 157.9  | 236.6  | 223.2 |
| 111.4 | 120.7  | 108.3  | 106.8 | 105.8  | 120.1  | 115.7  | 124.5  | 122.2 |
| 125.9 | 116.8  | 118.1  | 113.7 | 115.1  | 131.5  | 119.5  | 128.7  | 140.8 |
| 112.1 | 110.5  | 111.5  | 100.5 | 100.4  | 108.5  | 96.8   | 121.5  | 125.1 |
| 759.3 | 837.7  | 875.6  | 820.8 | 763.5  | 791.4  | 760.6  | 1242.7 | 873.4 |
| 140.2 | 145.1  | 147    | 131.1 | 129.5  | 151.1  | 110.4  | 160.7  | 148.1 |
| 116.2 | 135.5  | 123.5  | 112.7 | 102.2  | 140.2  | 128.8  | 159.1  | 129   |
| 111.4 | 120.4  | 110.3  | 109.6 | 102.8  | 110.6  | 111.4  | 121.7  | 117.3 |
| 184.5 | 171.8  | 152.8  | 202   | 159.9  | 189.5  | 162.2  | 353.5  | 310   |
| 113.8 | 125.1  | 104.6  | 115   | 101.2  | 116.2  | 114.3  | 117.5  | 119.6 |
| 328.5 | 441.2  | 385.1  | 419.1 | 422.9  | 404.4  | 580.7  | 465.5  | 255.3 |
| 105.2 | 115.3  | 109.7  | 101.5 | 95     | 118.4  | 100.2  | 120.5  | 113.6 |
| 641.9 | 1285.8 | 848.4  | 914.2 | 1003.5 | 1249.7 | 1084.3 | 1751.2 | 915.3 |
| 115.7 | 104.6  | 110.6  | 99.4  | 92.7   | 113.5  | 102.6  | 112.8  | 113.1 |
| 171.2 | 164.9  | 145.3  | 151.1 | 143.1  | 198.2  | 142.1  | 221.2  | 258.4 |
| 103.4 | 113.7  | 104.3  | 109.7 | 89.9   | 112    | 102.5  | 111.1  | 113.1 |
| 317.1 | 976.4  | 1035.9 | 859.7 | 897.4  | 934.3  | 1041.5 | 801.9  | 280.3 |
| 126.4 | 135.3  | 115.9  | 130.2 | 135.7  | 134.2  | 130    | 146.8  | 131.5 |
| 134.9 | 154.2  | 135    | 128.2 | 127.5  | 165.4  | 147.7  | 196.4  | 147.6 |

|        |        |        |        |        |        |        |        |        |
|--------|--------|--------|--------|--------|--------|--------|--------|--------|
| 120.9  | 185.9  | 167.9  | 191.9  | 152.5  | 137.2  | 159.1  | 127.7  | 123.9  |
| 147.4  | 212.6  | 201.7  | 210.8  | 189.3  | 226.2  | 202.1  | 264.3  | 198.5  |
| 383.3  | 298.7  | 276.6  | 363.8  | 361.6  | 313.4  | 319.1  | 734.4  | 831    |
| 817    | 1405.8 | 1084.4 | 1490.6 | 1194.6 | 1084.7 | 1337.4 | 2207.7 | 1225.9 |
| 209.4  | 159.1  | 139.3  | 147.1  | 130.8  | 155.3  | 157.9  | 229.1  | 234.4  |
| 1295.4 | 1480.5 | 1265.6 | 1366.4 | 1289   | 1489.1 | 1508.2 | 2255.4 | 1746   |
| 142.4  | 175.4  | 196.7  | 158.8  | 174    | 217.8  | 158.1  | 569.5  | 273    |
| 127.5  | 132.6  | 117.9  | 126.3  | 106.9  | 117.8  | 107.9  | 139.3  | 136.1  |
| 124    | 130.1  | 125.8  | 128.4  | 110.8  | 147.2  | 121.2  | 162.1  | 143    |
| 195.6  | 176.3  | 174.1  | 185.2  | 149    | 204.9  | 200.5  | 259.3  | 203.5  |
| 108.2  | 115.1  | 110.4  | 106.3  | 103.4  | 115.1  | 113.2  | 108.3  | 117.2  |
| 117.4  | 144.6  | 120.1  | 113.4  | 116.9  | 116.9  | 115.9  | 133.8  | 136.8  |
| 528.9  | 470    | 549    | 524.4  | 384.6  | 462.4  | 735.5  | 463.6  | 240.3  |
| 100.3  | 110.9  | 106.3  | 105.6  | 92.6   | 101.6  | 110.1  | 119.2  | 108    |
| 116.6  | 121.1  | 98.7   | 111.8  | 104.8  | 116.6  | 112.6  | 118.1  | 111.1  |
| 3104   | 649    | 521    | 410.1  | 691.8  | 763.3  | 539    | 3737.6 | 7163.1 |
| 109.8  | 130.3  | 113.5  | 110.5  | 102.3  | 138.5  | 109    | 133.5  | 119.7  |
| 108.9  | 117.3  | 109.5  | 108.8  | 106.8  | 121.2  | 114.1  | 152.2  | 112.5  |
| 374.5  | 308.2  | 400.4  | 250.5  | 307.5  | 276.7  | 377.5  | 499.9  | 378.6  |
| 99.7   | 104.3  | 101    | 98.6   | 95.6   | 103.1  | 95.8   | 115.1  | 97.5   |
| 110.2  | 109.3  | 95.7   | 102.6  | 99.5   | 111.8  | 103.9  | 114.8  | 118.7  |
| 96.8   | 102.9  | 97.6   | 100.2  | 93.5   | 104.7  | 95.6   | 100.6  | 103.7  |
| 112.5  | 126.1  | 118.3  | 112    | 99.4   | 119.4  | 114.6  | 122.6  | 111.3  |
| 102.4  | 105.1  | 99.5   | 101.4  | 96.9   | 108.9  | 105.6  | 105.5  | 106.9  |
| 592.6  | 233.6  | 272    | 272.5  | 200.2  | 296.3  | 308.7  | 549.1  | 551.2  |
| 102.2  | 115.6  | 98.6   | 94.6   | 88.7   | 103.9  | 103.5  | 107.6  | 115    |
| 106.1  | 108.4  | 106.2  | 102.5  | 95.8   | 108.2  | 99.7   | 110.6  | 116.7  |
| 110.9  | 113.2  | 100.5  | 96.2   | 97     | 109.3  | 100.7  | 108.2  | 103.3  |
| 108.7  | 108.3  | 103.9  | 97.1   | 102.8  | 103.2  | 99.1   | 106.4  | 103.4  |
| 104.6  | 106.1  | 107.4  | 91.9   | 93.3   | 108.5  | 103    | 100.7  | 101.4  |
| 120.5  | 150.3  | 144.4  | 138.3  | 138.9  | 166.5  | 144.2  | 187    | 132.1  |
| 182.1  | 194.9  | 207.6  | 190.6  | 201    | 189.9  | 188.4  | 213.8  | 140.8  |
| 203.2  | 260.8  | 252.4  | 264.5  | 201.2  | 243.9  | 233.8  | 301.7  | 233.6  |
| 147.4  | 194.7  | 173.6  | 154.8  | 168    | 201    | 213.7  | 298.3  | 251.3  |
| 115.7  | 134    | 140.2  | 123.3  | 121.6  | 134.7  | 127.8  | 147    | 127.1  |
| 110.6  | 119.8  | 100.3  | 106.5  | 91.4   | 106.8  | 101.9  | 115.2  | 108.1  |
| 105.1  | 114.8  | 107.6  | 96.7   | 94     | 105.7  | 102.6  | 104    | 100.7  |
| 106.5  | 108.9  | 107.3  | 110.1  | 102.1  | 107.9  | 105.9  | 103.9  | 105.3  |
| 691.8  | 620.1  | 525.3  | 411.5  | 472.7  | 732.5  | 501.8  | 862.1  | 778.2  |
| 115.8  | 114.7  | 108.6  | 103.2  | 106.9  | 121.8  | 109    | 131    | 126.1  |
| 146.5  | 137.7  | 147.8  | 146.1  | 124.8  | 132.5  | 148.4  | 179.6  | 161.9  |
| 437.3  | 500.7  | 406.8  | 416.5  | 462.4  | 560.6  | 565    | 932    | 640.4  |
| 102.4  | 113    | 96.3   | 98.7   | 103.5  | 108.7  | 99.9   | 117.6  | 114.5  |
| 112.5  | 121.6  | 101.2  | 116.5  | 107.6  | 115.8  | 113.5  | 115.7  | 118.4  |
| 122.1  | 121.6  | 111.9  | 114.1  | 106.3  | 130.4  | 102.8  | 151.9  | 150    |
| 769.6  | 559.4  | 649.5  | 515.4  | 534.7  | 671.6  | 503    | 980.7  | 769.4  |
| 149    | 165.8  | 137.1  | 151.6  | 142.6  | 177.3  | 155.3  | 289.3  | 181.4  |
| 105.5  | 130.9  | 111.1  | 121.3  | 100.3  | 122.3  | 102.1  | 121.6  | 111.6  |
| 112.2  | 108.6  | 102.2  | 98.8   | 95.2   | 107    | 102    | 103.7  | 107.7  |
| 117.6  | 115    | 112.3  | 105.3  | 98.5   | 115.6  | 116.1  | 108.6  | 114.6  |
| 163.1  | 375.8  | 341.1  | 295.2  | 304.6  | 312.3  | 295.3  | 325.7  | 333    |

|       |        |       |        |        |        |        |        |        |
|-------|--------|-------|--------|--------|--------|--------|--------|--------|
| 101.7 | 108.4  | 98.8  | 102.3  | 95.4   | 111.4  | 108.2  | 102.6  | 111.4  |
| 99    | 106.2  | 100   | 99.5   | 95.5   | 104.7  | 103.8  | 115.7  | 104.7  |
| 100.6 | 119.5  | 108.9 | 100.7  | 94.7   | 103.6  | 116.8  | 116.9  | 117.4  |
| 112.5 | 112.6  | 105.5 | 100.5  | 99.6   | 113.2  | 103.6  | 97.8   | 109.2  |
| 102.6 | 107.5  | 95.2  | 102.4  | 92.7   | 100.2  | 105.3  | 110.8  | 108.6  |
| 130.6 | 136.5  | 132.8 | 133.3  | 118    | 142.1  | 126.7  | 178.5  | 152.4  |
| 114.6 | 118.9  | 106.2 | 101.7  | 99     | 115.2  | 109.1  | 117.3  | 109.8  |
| 345.4 | 313.8  | 297.2 | 231.3  | 282.3  | 351.8  | 256.1  | 542.5  | 358.5  |
| 105.9 | 106.8  | 108.5 | 100.9  | 92.1   | 112.1  | 104.5  | 111    | 120.5  |
| 115.7 | 108.5  | 103.9 | 103.4  | 100.2  | 107.1  | 101.3  | 114.4  | 102.1  |
| 114   | 125.2  | 116.1 | 113.2  | 104    | 126.7  | 124.2  | 126.1  | 115.1  |
| 122.4 | 118.3  | 109.2 | 115.3  | 100.8  | 123.3  | 104.1  | 117.9  | 118.2  |
| 109.7 | 127.6  | 133.3 | 121.5  | 103.8  | 125.1  | 129.9  | 129.9  | 119.1  |
| 112.4 | 118.3  | 107.1 | 113.5  | 100    | 110    | 123    | 113.4  | 109.6  |
| 273.9 | 325.7  | 299   | 396.5  | 332.1  | 334.4  | 339    | 780    | 475.7  |
| 104.3 | 108.9  | 101   | 100.4  | 103.8  | 117.5  | 106.2  | 111.8  | 105.3  |
| 120.9 | 118.1  | 107.7 | 114.6  | 108.8  | 113.7  | 104.3  | 113.7  | 113.4  |
| 120.5 | 118.2  | 109.2 | 115.6  | 98.6   | 112.3  | 105.8  | 127    | 127.3  |
| 218.2 | 277.7  | 254.3 | 377.6  | 279.2  | 281    | 289.2  | 319.4  | 251.2  |
| 313.6 | 286.2  | 279.3 | 308.1  | 310    | 345.1  | 337.8  | 406.1  | 342.3  |
| 129   | 148.6  | 135   | 135.2  | 139.1  | 157.7  | 142.5  | 182.9  | 121.9  |
| 982.1 | 915.9  | 783.2 | 736.9  | 754    | 826.7  | 874.7  | 1280.1 | 1046.3 |
| 128.6 | 128    | 117.6 | 116.3  | 110.9  | 133.1  | 112.6  | 128.1  | 127.3  |
| 124.5 | 119    | 119.9 | 113.8  | 97.5   | 122.3  | 106.1  | 127.3  | 113.6  |
| 109.7 | 114.7  | 109.8 | 112.7  | 97.6   | 124.8  | 109.4  | 119.8  | 114    |
| 135.9 | 117.4  | 139.6 | 125.9  | 119.6  | 141.1  | 144.8  | 138.1  | 134.5  |
| 154.1 | 161.1  | 179.2 | 168.2  | 135.1  | 175.4  | 211.5  | 257.3  | 186.7  |
| 792.6 | 671.7  | 742.6 | 635.1  | 771.1  | 664.8  | 461.1  | 1024.9 | 889.6  |
| 124.2 | 124.4  | 122.5 | 123    | 101.1  | 124.3  | 116.1  | 143.1  | 133.1  |
| 614.1 | 853.6  | 846.4 | 687.1  | 695.9  | 776.2  | 782.9  | 799.5  | 494.1  |
| 258.9 | 335.5  | 317.8 | 227.7  | 249.6  | 259.9  | 294.6  | 537    | 462    |
| 403.6 | 462.5  | 450.5 | 397    | 521.5  | 456.6  | 449    | 675.4  | 618.8  |
| 104.7 | 106.9  | 97.6  | 103.6  | 91.3   | 105.5  | 111.8  | 102.9  | 104.2  |
| 208.2 | 244.8  | 202.2 | 217.6  | 233.1  | 248.2  | 242.5  | 422.6  | 240    |
| 230.9 | 173.8  | 171.1 | 161.4  | 181.2  | 196.6  | 171.7  | 286.6  | 203.2  |
| 108   | 109.4  | 107.9 | 105.1  | 96.5   | 112.9  | 103.8  | 137.9  | 112.1  |
| 103.2 | 108.8  | 105.8 | 96.1   | 97.7   | 113.3  | 101.3  | 130.6  | 112.3  |
| 120.7 | 115.7  | 121.5 | 127.7  | 105.9  | 118.4  | 101.8  | 119.4  | 126.1  |
| 854.7 | 997.4  | 835.8 | 753.3  | 779    | 885.4  | 982.7  | 1581.9 | 1199.6 |
| 249.9 | 297.5  | 316.9 | 207.8  | 268.5  | 362.7  | 249.2  | 497.1  | 265.7  |
| 687.4 | 1522.4 | 974.8 | 2132.2 | 1682.1 | 1295.9 | 1786.8 | 3052.1 | 1315.5 |
| 104.4 | 107    | 102.1 | 97.2   | 94.9   | 114    | 99.7   | 99.8   | 101.1  |
| 107.2 | 125    | 121.7 | 104.7  | 115.2  | 115.6  | 106.3  | 122.6  | 108.5  |
| 263.6 | 395.1  | 382.1 | 255.5  | 315.5  | 352.3  | 340.8  | 452.2  | 472.7  |
| 102.2 | 110.6  | 101.7 | 102.4  | 95.7   | 102.8  | 105.4  | 107.1  | 112    |
| 101.2 | 109.2  | 103.4 | 116.9  | 108.4  | 110.6  | 107.8  | 107.8  | 100.5  |
| 109.2 | 108.4  | 102.8 | 99.6   | 95.1   | 112.6  | 100.3  | 105.3  | 98     |
| 119.2 | 131    | 127.3 | 123.4  | 112.3  | 135.3  | 115.3  | 184.7  | 132.2  |
| 234   | 367.4  | 246.5 | 227.5  | 284.5  | 311.9  | 274.8  | 567.8  | 429.2  |
| 111.3 | 123    | 118.5 | 109.2  | 111.1  | 120    | 113.8  | 130.5  | 113.1  |
| 602   | 674.1  | 577.8 | 666.2  | 609.7  | 697.3  | 702.9  | 863.1  | 482.7  |

|       |        |       |        |       |       |        |        |       |
|-------|--------|-------|--------|-------|-------|--------|--------|-------|
| 108.5 | 116.1  | 101.4 | 111.5  | 101.4 | 105.2 | 96     | 124.5  | 112.7 |
| 109.4 | 106.2  | 101.9 | 105.4  | 97.3  | 109.6 | 100.6  | 106.6  | 105.1 |
| 252.9 | 447.2  | 344   | 789.3  | 387.7 | 380.9 | 753.6  | 556.7  | 448.4 |
| 108.2 | 104.2  | 103.1 | 103.7  | 99.2  | 109.8 | 106.9  | 103.9  | 110.3 |
| 107.5 | 117.2  | 112   | 118.2  | 103.9 | 125.3 | 115.2  | 126.1  | 110.7 |
| 110.9 | 133.5  | 119.3 | 133.2  | 108.9 | 120.8 | 124    | 127.2  | 118   |
| 102.9 | 108.6  | 100.5 | 96.3   | 95.2  | 114.8 | 107.9  | 108.6  | 127.4 |
| 133.9 | 133.3  | 128.3 | 130.2  | 113.7 | 132.2 | 135.7  | 145.4  | 137.3 |
| 107.8 | 110.5  | 103.1 | 97.5   | 103.3 | 114.6 | 108.4  | 116.8  | 116.2 |
| 101.8 | 107.4  | 98    | 99.5   | 93.7  | 103   | 101.3  | 98.8   | 106.9 |
| 114.1 | 105.4  | 109.4 | 102.3  | 97.4  | 112.3 | 107.5  | 121.6  | 110.1 |
| 98.8  | 99.9   | 99.4  | 91.8   | 88.5  | 108   | 95.3   | 99.7   | 102.9 |
| 108.4 | 102    | 101.5 | 88.4   | 93.9  | 108.3 | 99.8   | 107.8  | 105.2 |
| 115.4 | 103.5  | 104.4 | 95.9   | 92.2  | 100.2 | 96.2   | 104.8  | 104.6 |
| 100.4 | 115.7  | 117.9 | 101    | 102.9 | 111.6 | 106.1  | 114.1  | 101.2 |
| 134.5 | 140.4  | 136.1 | 147.9  | 119.7 | 139.9 | 136.9  | 162.5  | 152   |
| 106.2 | 106.9  | 98.9  | 96.6   | 91.3  | 108.9 | 102.1  | 111    | 113   |
| 107.4 | 114.1  | 105.9 | 105.2  | 95    | 110.3 | 103.9  | 109.6  | 101.1 |
| 106.7 | 111.1  | 104.8 | 114.7  | 99.5  | 117.6 | 108.6  | 122.6  | 113.3 |
| 101.6 | 113.6  | 102.5 | 115.5  | 103.9 | 119.5 | 98.1   | 120.8  | 111.6 |
| 113.7 | 109.5  | 103.9 | 101    | 97.9  | 107.3 | 103.2  | 111.4  | 122.2 |
| 111.6 | 112    | 101.5 | 101.3  | 101   | 116.2 | 100.9  | 116.9  | 107.8 |
| 111.8 | 111.2  | 96    | 98.4   | 95.9  | 107.8 | 102.8  | 109    | 110.4 |
| 112   | 110.7  | 99.3  | 103.2  | 95.2  | 109.1 | 104.6  | 105.9  | 114.6 |
| 106.5 | 109.1  | 97.7  | 93.1   | 96.8  | 111.6 | 98.1   | 108.9  | 107.7 |
| 108.4 | 105    | 101.3 | 94.6   | 90    | 104.7 | 101.4  | 103.8  | 109.2 |
| 138   | 129.2  | 127.7 | 129.1  | 120.5 | 132.5 | 138.6  | 148.9  | 150.1 |
| 116.1 | 106.8  | 115.6 | 130.9  | 104.2 | 128.3 | 115.4  | 141.1  | 125.2 |
| 150.3 | 172.4  | 171   | 134.2  | 160.7 | 172.7 | 163    | 205.1  | 183.8 |
| 640.3 | 1304.6 | 779.8 | 1587.7 | 936.3 | 988.3 | 1206.6 | 1224.9 | 584.8 |
| 189.3 | 317.6  | 251.1 | 431.2  | 243.8 | 256.5 | 267.2  | 374.8  | 187.2 |
| 109.6 | 113.8  | 110.8 | 104.2  | 100.8 | 107.2 | 103.9  | 117.9  | 140.8 |
| 110   | 121.9  | 111   | 95.3   | 103.9 | 114.8 | 103.5  | 122.7  | 109.8 |
| 105.9 | 106.6  | 115.8 | 107.3  | 101.9 | 110.5 | 101.1  | 112.7  | 111   |
| 342   | 479.4  | 338.9 | 402.4  | 386.5 | 366.1 | 447.5  | 552.5  | 507.7 |
| 253   | 299.3  | 236.8 | 203.1  | 237.5 | 251.4 | 261.2  | 389.5  | 284.8 |
| 112.7 | 106.1  | 99.5  | 95.7   | 95.3  | 108.6 | 99.4   | 120.1  | 112.7 |
| 105.2 | 98.4   | 100   | 100.7  | 101   | 104.7 | 98.5   | 106.7  | 97.6  |
| 100.7 | 106    | 101.4 | 109.6  | 103.3 | 119   | 104.8  | 117.4  | 117   |
| 105.4 | 107.1  | 100.5 | 95.2   | 91    | 105.7 | 101.7  | 102.8  | 105.3 |
| 108.9 | 103.3  | 101.5 | 97.2   | 96.8  | 114.2 | 108.6  | 112.1  | 109   |
| 106.5 | 107.9  | 101.5 | 106    | 96.8  | 110.1 | 107    | 116.9  | 109.2 |
| 106.3 | 110.2  | 99.9  | 98     | 89    | 113.9 | 96.1   | 113.2  | 109.6 |
| 103.2 | 112.6  | 105.8 | 102.1  | 95.9  | 112.2 | 103.7  | 103.9  | 109.2 |
| 114.3 | 119.8  | 117.4 | 104.7  | 109   | 143.9 | 127.3  | 156.1  | 133.2 |
| 101.6 | 99.5   | 99.4  | 104.8  | 92.1  | 102.6 | 88.1   | 111.1  | 108.8 |
| 282.5 | 280.8  | 245.9 | 213.3  | 235.2 | 227.8 | 193.2  | 475.9  | 326   |
| 106.1 | 107.3  | 102.7 | 96.3   | 100.8 | 108.7 | 107    | 106.8  | 111.7 |
| 105   | 106.4  | 107.5 | 102    | 100.9 | 114.8 | 106.3  | 116.4  | 116.3 |
| 166   | 203.8  | 233.1 | 190    | 197.9 | 223   | 199.3  | 278.9  | 185.7 |
| 122.4 | 122.5  | 111.7 | 119.5  | 101.5 | 119.7 | 108.8  | 130    | 112.5 |

|        |        |        |        |        |        |        |        |        |
|--------|--------|--------|--------|--------|--------|--------|--------|--------|
| 4366.4 | 3238   | 2039   | 2970.9 | 2543.8 | 3369.2 | 4369.2 | 8694.4 | 7855.6 |
| 2267.8 | 1521   | 920.7  | 1147.5 | 1079.4 | 1342.7 | 1725.5 | 5025.7 | 4071.6 |
| 97.6   | 104.3  | 98.6   | 94.9   | 92.4   | 104.7  | 105.8  | 121.2  | 107.5  |
| 131.3  | 238.7  | 307.9  | 233.5  | 267.8  | 282.4  | 263.6  | 398.1  | 205.7  |
| 482.9  | 636.1  | 534.8  | 902.7  | 549.4  | 560.9  | 731.6  | 912.8  | 665.7  |
| 163.9  | 310.7  | 264.9  | 280.8  | 197.1  | 246.3  | 282.9  | 349.3  | 206.1  |
| 408    | 694.8  | 654.2  | 721.9  | 541    | 648.3  | 511.1  | 749.3  | 636.8  |
| 1128.8 | 1733.8 | 1675.7 | 1966.8 | 1422.5 | 1583.4 | 1614.7 | 1782.7 | 1356.6 |
| 1041.8 | 2037.9 | 1648.3 | 1686.8 | 1298.7 | 1658.7 | 1459   | 1967.7 | 1448.4 |
| 872.6  | 988.7  | 1012.8 | 978    | 968.4  | 1156   | 948.1  | 2261.7 | 1901.9 |
| 171.4  | 192.7  | 178.1  | 194.2  | 178.7  | 209.5  | 198    | 283.6  | 205.6  |
| 103.9  | 107.1  | 110.7  | 99.7   | 97.9   | 114.4  | 101.9  | 111.2  | 120.7  |
| 251    | 205.1  | 206.1  | 199.9  | 181.5  | 232.6  | 236.7  | 296.6  | 254.9  |
| 146.9  | 169.8  | 128.6  | 121.4  | 131.5  | 149.2  | 127.9  | 189.5  | 180.2  |
| 103.4  | 106.1  | 97.9   | 97.5   | 85.5   | 104.8  | 101.8  | 97     | 104.6  |
| 293.7  | 443    | 414.7  | 411.5  | 416.5  | 406.1  | 446    | 620.4  | 419.6  |
| 103.7  | 95     | 100.7  | 94.4   | 100.9  | 103.8  | 94.1   | 102.7  | 105.3  |
| 114.9  | 109    | 107.6  | 101    | 101.6  | 110.1  | 101    | 112.1  | 107.9  |
| 128.7  | 145.4  | 151.1  | 139.4  | 137.5  | 149.6  | 138.7  | 201.3  | 140.9  |
| 145.7  | 175.8  | 188.2  | 167.7  | 151.7  | 187.7  | 199.9  | 165    | 179.6  |
| 125.4  | 172.1  | 153.9  | 149.3  | 141.9  | 150.4  | 156.2  | 159.8  | 162.1  |
| 286.8  | 689.7  | 475.4  | 374.2  | 653.4  | 503.1  | 380.6  | 1230.6 | 723.8  |
| 103.3  | 109.5  | 102.2  | 91.8   | 92.6   | 105.4  | 96.1   | 106.1  | 107.6  |
| 107    | 106.6  | 106    | 109.5  | 97.9   | 113.9  | 109.8  | 111.2  | 111.2  |
| 97.9   | 102.9  | 111.7  | 99.5   | 92.2   | 102.2  | 100.7  | 109    | 109.9  |
| 117.6  | 116.1  | 118.9  | 108    | 92.9   | 116.9  | 111.5  | 125.2  | 106.3  |
| 108.9  | 104.5  | 99.6   | 105.1  | 94.2   | 106.9  | 101.5  | 109.4  | 105.6  |
| 98.8   | 103.2  | 98.4   | 110.4  | 95.2   | 108.7  | 101.6  | 112.9  | 102.2  |
| 109.1  | 109.5  | 104.8  | 103.6  | 103.5  | 115.1  | 118.7  | 127.9  | 120.6  |
| 106.8  | 101    | 106    | 98.8   | 96     | 104.9  | 101.6  | 111.9  | 105.7  |
| 331.8  | 412.4  | 317.9  | 371.5  | 311    | 282.3  | 338.3  | 364.9  | 219    |
| 125.1  | 148.4  | 139.8  | 132.5  | 133.8  | 127.7  | 111.6  | 117    | 125.5  |
| 103.5  | 111.1  | 107.9  | 104.2  | 92.4   | 107.5  | 101.8  | 116.3  | 99     |
| 154.9  | 270.3  | 247.6  | 200.7  | 188.3  | 194.5  | 176.3  | 264    | 184.7  |
| 102.5  | 106.4  | 100.6  | 106.1  | 94.9   | 113.8  | 108.8  | 129.5  | 111    |
| 103.4  | 110.7  | 102.1  | 105.2  | 96.3   | 105.5  | 109.1  | 111.7  | 107.1  |
| 162.2  | 191.5  | 237.4  | 179.6  | 197.6  | 221.2  | 190.2  | 254.7  | 185.1  |
| 258.5  | 438.2  | 298.4  | 351.4  | 240.4  | 316.6  | 343.1  | 490.5  | 336.9  |
| 104.4  | 107.6  | 108.3  | 98.7   | 94.6   | 111.2  | 94.9   | 107.3  | 110.2  |
| 151    | 162    | 166.6  | 129.3  | 125.1  | 161.4  | 162    | 217.9  | 178.6  |
| 128.3  | 148    | 141.7  | 151.3  | 140.7  | 180    | 146.9  | 164.7  | 153.3  |
| 113    | 103.1  | 109.4  | 100    | 106.9  | 112.2  | 111.7  | 120.1  | 105.1  |
| 112    | 115.7  | 104.4  | 107.4  | 104.5  | 115.5  | 110    | 108    | 118.6  |
| 106    | 104.2  | 103.5  | 107.5  | 103.3  | 102.5  | 104.4  | 103.8  | 109.3  |
| 134.9  | 129    | 121.1  | 132.2  | 107.6  | 124.6  | 123.1  | 141.6  | 191    |
| 108.6  | 110.6  | 108.5  | 115.5  | 96.8   | 114.1  | 108.8  | 105.4  | 113.7  |
| 106.8  | 116.1  | 101.6  | 106.2  | 90.8   | 102.7  | 108.1  | 105    | 112.7  |
| 112.3  | 109    | 111.2  | 107.1  | 103    | 113    | 106.3  | 112.3  | 113.2  |
| 157.8  | 185.6  | 163.9  | 169    | 156.6  | 171.8  | 162.9  | 237    | 224.7  |
| 235.9  | 257.2  | 228.2  | 240.5  | 221.7  | 250.9  | 226.5  | 264.7  | 228.8  |
| 261.1  | 330.8  | 262.5  | 228.4  | 326.4  | 275.8  | 291.2  | 519    | 351.3  |

|        |        |        |       |        |        |        |        |        |
|--------|--------|--------|-------|--------|--------|--------|--------|--------|
| 137.6  | 143.6  | 126.7  | 121.7 | 126.8  | 122.8  | 139    | 202.2  | 160.3  |
| 95.7   | 109.6  | 108.1  | 108.1 | 95.3   | 107.6  | 95.5   | 114.2  | 115.6  |
| 104.6  | 102    | 103.9  | 109.9 | 106.6  | 110.4  | 99.9   | 103.2  | 109.4  |
| 99.4   | 112.6  | 99     | 93.8  | 97     | 103.7  | 97.5   | 107.9  | 99.5   |
| 661.4  | 572.4  | 266.2  | 622.7 | 458    | 412.7  | 545.5  | 1047.6 | 466.7  |
| 110    | 136.3  | 125.1  | 111.3 | 115.6  | 124.4  | 115.4  | 124.2  | 121.4  |
| 115.1  | 132.9  | 113.8  | 116.1 | 105.4  | 116.4  | 119.8  | 123.4  | 122    |
| 109.4  | 115.5  | 94.3   | 98.7  | 97.2   | 111.1  | 102.9  | 108.9  | 116.5  |
| 298.3  | 384.6  | 415.7  | 374.7 | 330.7  | 396.5  | 325    | 487.6  | 259.9  |
| 117.4  | 129.9  | 125.5  | 112.6 | 107.3  | 117.5  | 125    | 131    | 113.8  |
| 125.1  | 133    | 118.3  | 121   | 116.1  | 176.3  | 120.3  | 322.1  | 227.1  |
| 189.7  | 216.6  | 232.9  | 175   | 275.6  | 292    | 195.8  | 602    | 597.3  |
| 1174.9 | 1144   | 1137.4 | 816.3 | 1659.8 | 2764.5 | 1275.3 | 4511.2 | 2689.6 |
| 143.3  | 205.2  | 216.1  | 175.4 | 169.4  | 210    | 176.2  | 230.9  | 171    |
| 107.1  | 103.6  | 107.3  | 98.6  | 94.3   | 105.7  | 113    | 116    | 114.9  |
| 374.9  | 593.3  | 396.8  | 672.2 | 516.7  | 425.3  | 603.2  | 619.3  | 348.2  |
| 107.1  | 113.1  | 105.5  | 114   | 98.2   | 108.3  | 101.7  | 122.4  | 103.4  |
| 106.5  | 124.1  | 101.8  | 108.7 | 101.3  | 114.9  | 115.1  | 114.6  | 120    |
| 121.9  | 123.8  | 120    | 107   | 109.2  | 109.1  | 111.9  | 114.8  | 117.1  |
| 108    | 112.8  | 108.8  | 94.6  | 98.3   | 104.4  | 100.7  | 116.9  | 111.7  |
| 1229.4 | 1722.4 | 1467.4 | 1043  | 1523.6 | 1364.1 | 1015.5 | 2582.4 | 1643.9 |
| 127.1  | 134.5  | 116.7  | 110.9 | 131.9  | 136.3  | 130.2  | 147.6  | 134.6  |
| 279    | 422.1  | 493.8  | 357.6 | 453.1  | 542.8  | 434.2  | 680.2  | 412.8  |
| 216.1  | 283.1  | 262.6  | 298.8 | 204.8  | 242    | 289.2  | 279.3  | 195.8  |
| 107.1  | 104.9  | 114.1  | 103.3 | 96.5   | 103.5  | 109    | 113    | 104.8  |
| 107.6  | 111.5  | 105.3  | 107.5 | 106.3  | 114.8  | 107.5  | 123.3  | 108.7  |
| 108.3  | 106.6  | 98.6   | 107.4 | 90.3   | 104.7  | 106.2  | 113.8  | 107.4  |
| 163.7  | 159.9  | 169.1  | 145.4 | 128.3  | 174    | 141.6  | 185.9  | 179.8  |
| 99.3   | 105.2  | 101.7  | 100.2 | 97.7   | 103.7  | 99.3   | 104.1  | 109.6  |
| 102.3  | 104.1  | 96.3   | 103.1 | 94.8   | 108.8  | 97.7   | 113.5  | 105    |
| 136    | 157.6  | 143.8  | 145.2 | 142.2  | 138.1  | 137.1  | 197.8  | 142.5  |
| 123.5  | 122.7  | 113.8  | 122.3 | 108.2  | 120.2  | 105.1  | 132.7  | 123.8  |
| 115    | 117.9  | 110.9  | 117.6 | 102.6  | 111.2  | 114.1  | 125.6  | 119    |
| 157.4  | 200.6  | 192.9  | 161.1 | 159.5  | 204.3  | 188.9  | 217.6  | 160.9  |
| 100.9  | 120.9  | 114.5  | 114   | 112.2  | 119.5  | 107.3  | 113.9  | 119.6  |
| 104    | 114.8  | 104.9  | 103   | 106.6  | 104.4  | 103.3  | 114.1  | 114.2  |
| 108.1  | 105.5  | 99.2   | 92    | 92.6   | 104.5  | 101.3  | 109.5  | 105    |
| 105.5  | 109.7  | 111.7  | 90.6  | 92.4   | 110.5  | 94.1   | 106.5  | 104.6  |
| 214.5  | 248.3  | 211.3  | 245.5 | 198.7  | 244.5  | 248.1  | 312.4  | 216.1  |
| 689.4  | 1088.6 | 1007.3 | 859.4 | 850.7  | 1022.4 | 837    | 1300.7 | 980.1  |
| 208.5  | 226.6  | 219.3  | 192.1 | 188.4  | 186    | 226.4  | 266.2  | 193.4  |
| 149.8  | 205.8  | 205.2  | 148.6 | 193.9  | 176.2  | 176.7  | 254.9  | 170    |
| 107.7  | 101.5  | 102.5  | 98.9  | 99     | 108.3  | 104.1  | 104.2  | 113.1  |
| 106.4  | 102.3  | 98.3   | 98.8  | 99     | 100.6  | 101    | 106.4  | 111.9  |
| 105.8  | 102.4  | 99.4   | 94.6  | 94     | 110.5  | 101.2  | 102.9  | 111.3  |
| 101.7  | 97.9   | 105.8  | 100.2 | 95.2   | 101.2  | 99.9   | 91.4   | 103.1  |
| 103.9  | 104.8  | 105    | 95    | 90.9   | 106    | 94.8   | 108.2  | 112.1  |
| 98.7   | 105.8  | 100.3  | 103.3 | 95.3   | 101.5  | 102.5  | 102    | 105.2  |
| 105.4  | 100.3  | 99.8   | 97.3  | 98.5   | 107.6  | 97.7   | 115.2  | 113    |
| 110.4  | 114.7  | 111.6  | 114.4 | 102.4  | 117.6  | 113.6  | 118.2  | 111.3  |
| 111.9  | 114.5  | 121.7  | 102.6 | 100.6  | 118.5  | 106.7  | 123.4  | 103.6  |



|        |       |       |        |        |        |        |        |        |
|--------|-------|-------|--------|--------|--------|--------|--------|--------|
| 184    | 410.5 | 350.8 | 255.3  | 326.2  | 349.2  | 312.8  | 495.4  | 295.8  |
| 289.9  | 880   | 874.9 | 553.4  | 575.3  | 538.7  | 679.4  | 1347.3 | 607.5  |
| 290.3  | 439.4 | 385.6 | 369.2  | 278    | 388.4  | 377.3  | 434.8  | 261.3  |
| 137.7  | 147.8 | 160   | 144.4  | 135.7  | 141.4  | 135.6  | 180    | 131.1  |
| 351.2  | 434.9 | 445.4 | 478.5  | 329.4  | 451.9  | 440.1  | 521.2  | 282    |
| 142.9  | 152.2 | 145.4 | 140.9  | 139.3  | 155.5  | 143.8  | 299.5  | 155    |
| 153.8  | 158.7 | 160.2 | 146.1  | 145.2  | 174.3  | 185.7  | 298.4  | 166.7  |
| 117.1  | 192.9 | 242.2 | 170.2  | 153.7  | 212.2  | 163.7  | 178.2  | 186.7  |
| 109.2  | 136.3 | 136.5 | 126    | 114.2  | 133.1  | 126.3  | 125.4  | 118.2  |
| 107    | 114.7 | 103.1 | 108.7  | 94.1   | 109.4  | 100.8  | 109.1  | 105.7  |
| 108.3  | 111   | 107.6 | 100.7  | 92.8   | 112.1  | 111    | 101.1  | 102.3  |
| 568.8  | 362.4 | 277.9 | 463.7  | 271    | 383.7  | 357.5  | 706.7  | 1000.4 |
| 2127.2 | 1411  | 1152  | 1914.1 | 1127.4 | 1467.4 | 1495.4 | 2744.6 | 3638.7 |
| 107.5  | 106.8 | 110   | 102.2  | 103.4  | 111.1  | 107.1  | 105.3  | 102.5  |
| 106.2  | 102.8 | 101.5 | 105.4  | 89.8   | 101.6  | 99.1   | 104.8  | 112.7  |
| 451.4  | 333.7 | 339.9 | 322.1  | 319    | 371.9  | 349.9  | 617.8  | 544.3  |
| 108.1  | 119.7 | 101.7 | 103.9  | 96.6   | 110.5  | 108    | 109.8  | 114.8  |
| 195.1  | 150.1 | 153.4 | 126.8  | 132    | 138.4  | 127.7  | 168.3  | 187.3  |
| 131.4  | 155   | 148.4 | 146.5  | 136    | 148.8  | 130.8  | 203.9  | 198.3  |
| 114.8  | 131.9 | 115.4 | 135.4  | 110.1  | 136    | 130.3  | 158.4  | 144.5  |
| 107.8  | 118.5 | 110   | 98.5   | 124.9  | 133.1  | 104.3  | 159.8  | 105.6  |
| 102.9  | 108.2 | 99.5  | 101.4  | 103.3  | 97.6   | 105.2  | 112.2  | 101.6  |
| 115.1  | 112.4 | 113.7 | 107.5  | 109.5  | 119.8  | 104.7  | 113.8  | 122.9  |
| 104.5  | 103.1 | 97.6  | 95.3   | 96.8   | 104.6  | 99.4   | 100.1  | 107.3  |
| 120.6  | 112.4 | 104.4 | 111.6  | 103.3  | 117.3  | 107.5  | 115    | 115.4  |
| 109.6  | 113   | 111.3 | 100.2  | 100.4  | 110.1  | 105.8  | 115.7  | 101.7  |
| 180.8  | 168   | 128.9 | 224.3  | 162    | 153.7  | 211    | 279.4  | 249    |
| 108.5  | 106.2 | 101.3 | 103.2  | 93.8   | 104.1  | 103.4  | 103    | 112.9  |
| 102    | 105.7 | 100.1 | 90.9   | 97     | 105.1  | 99.4   | 102.2  | 106.9  |
| 104.4  | 108.5 | 104.2 | 100.3  | 94     | 103.5  | 97     | 111.1  | 114.4  |
| 111.2  | 119.5 | 103.3 | 103.9  | 98.8   | 114.5  | 106    | 130.1  | 119.3  |
| 106.4  | 118.3 | 102.3 | 113.1  | 98.2   | 110.7  | 105.1  | 114.6  | 101.8  |
| 112.8  | 103.3 | 104.2 | 106.2  | 98.4   | 120.7  | 107.3  | 107.9  | 109    |
| 99.2   | 121.1 | 103.8 | 97.6   | 89     | 110.2  | 103.7  | 107.8  | 111    |
| 127.3  | 130.9 | 130.6 | 135.1  | 113    | 132    | 139.2  | 136.2  | 118.8  |
| 584.6  | 696.7 | 644.5 | 618.7  | 614.7  | 690.3  | 712.7  | 905.6  | 554.3  |
| 99.8   | 105.7 | 96.8  | 104.9  | 95.6   | 104.4  | 103.8  | 108.1  | 116.1  |
| 103.7  | 109.7 | 99    | 102.5  | 94.9   | 107.4  | 97.5   | 104.4  | 104.6  |
| 115    | 109.1 | 104.2 | 95     | 96.1   | 116    | 99.2   | 111    | 112.3  |
| 138    | 183.5 | 152.2 | 161    | 150.1  | 160.2  | 138.9  | 243.3  | 189    |
| 134.2  | 211.4 | 253.2 | 164.9  | 179.3  | 216.1  | 175.5  | 348.8  | 216.2  |
| 264.2  | 292.2 | 249.9 | 297.5  | 306.2  | 335.3  | 392.9  | 596.9  | 390.5  |
| 217.3  | 292.5 | 286.3 | 301.7  | 345.8  | 308.4  | 311.2  | 582.7  | 312.3  |
| 202.2  | 174.2 | 188.2 | 185.8  | 169.1  | 199.4  | 207.6  | 335.6  | 286.8  |
| 116.8  | 113.3 | 100.4 | 107.6  | 106.9  | 117.4  | 112.8  | 145    | 132.9  |
| 163.6  | 199.6 | 240.2 | 183.8  | 176    | 240.2  | 196.2  | 291.3  | 210.1  |
| 122.1  | 112.4 | 104.2 | 110.4  | 103.1  | 110.7  | 105.7  | 126.8  | 130.4  |
| 425.6  | 373.1 | 487.8 | 312.7  | 370.9  | 386.4  | 377.2  | 619.3  | 503.2  |
| 109.1  | 108.4 | 98.7  | 100.8  | 91.3   | 112.8  | 101.4  | 107.6  | 109.6  |
| 104.7  | 102.9 | 105.4 | 105.8  | 98.8   | 105.7  | 98.9   | 107.3  | 107.9  |
| 153.1  | 136.4 | 130.7 | 123.8  | 139.8  | 126.9  | 142.3  | 210.6  | 218.1  |

|        |       |        |        |        |        |        |        |        |
|--------|-------|--------|--------|--------|--------|--------|--------|--------|
| 101.3  | 102.2 | 98.3   | 102.2  | 90.2   | 104.1  | 97.6   | 112.2  | 103.3  |
| 223    | 376   | 333.1  | 210.9  | 292.7  | 385.6  | 344.3  | 473.8  | 405    |
| 500.6  | 627.6 | 632.9  | 602.2  | 458.5  | 699.9  | 728.5  | 1033.1 | 497.8  |
| 118.8  | 117.5 | 108.3  | 110.4  | 115.9  | 113.8  | 106.8  | 119.4  | 118.5  |
| 437.3  | 376.7 | 449.4  | 341.8  | 382.2  | 461.3  | 425    | 713.3  | 528.4  |
| 112.1  | 108   | 101.5  | 96.1   | 90.5   | 108.8  | 106.1  | 107.6  | 101.1  |
| 127.4  | 143.5 | 128.4  | 167.3  | 135.2  | 137    | 142.6  | 165.4  | 154.9  |
| 169.1  | 160.6 | 161.3  | 170.1  | 132.6  | 151.9  | 169.3  | 229.2  | 174.3  |
| 277.9  | 634.8 | 581.5  | 441.6  | 582.2  | 582.2  | 559.1  | 638.1  | 403.2  |
| 235.2  | 307   | 259.5  | 325.2  | 249.9  | 304.9  | 311.3  | 431.9  | 331.2  |
| 106.2  | 112.9 | 107.9  | 102.5  | 93.1   | 112.2  | 112.3  | 116.2  | 112.6  |
| 3728.2 | 4231  | 3628.9 | 4788.3 | 3650.1 | 4393.9 | 4658.5 | 6213.8 | 4376.8 |
| 113.5  | 110.4 | 113.8  | 119.1  | 95.9   | 137.6  | 102.3  | 122.4  | 113.4  |
| 111.3  | 118.1 | 113.7  | 127.7  | 108.7  | 115.4  | 111.1  | 141.7  | 124.9  |
| 103.9  | 120.2 | 124.6  | 112.7  | 111.9  | 118.6  | 126.4  | 121.7  | 129.8  |
| 110.5  | 109.8 | 102.2  | 93.5   | 100.9  | 108.5  | 108.8  | 116.2  | 106.9  |
| 106.4  | 111.8 | 101.3  | 93.7   | 94     | 112.1  | 103.4  | 108.4  | 105.6  |
| 212.7  | 295   | 317.4  | 255.5  | 272.1  | 390.8  | 255.8  | 373.4  | 342.2  |
| 165.2  | 193.5 | 226.4  | 171.6  | 188.5  | 202.6  | 212.7  | 260.6  | 188.4  |
| 178.4  | 213.4 | 210    | 199.7  | 169.9  | 212.6  | 221.4  | 251.5  | 209.1  |
| 123.3  | 125.1 | 112.8  | 110.4  | 107.2  | 117.5  | 113.2  | 131.7  | 124.5  |
| 106.9  | 102.6 | 99.8   | 110.4  | 104.2  | 114.6  | 109.3  | 114.6  | 108    |
| 104.7  | 99.8  | 105.5  | 111.3  | 95.2   | 105.1  | 105.9  | 113.7  | 101.5  |
| 111.9  | 127   | 119    | 104.3  | 113.3  | 114.3  | 108.3  | 142.2  | 126.1  |
| 99.3   | 102.8 | 104.2  | 100.7  | 95.6   | 104.3  | 97.9   | 115.8  | 107.1  |
| 148.8  | 139.5 | 132.1  | 136.7  | 116.5  | 142.9  | 114.7  | 168.9  | 182.8  |
| 104.6  | 112.8 | 105.4  | 104.6  | 96.8   | 113.6  | 99.1   | 113    | 107.2  |
| 102.3  | 142.1 | 120.6  | 119.5  | 109.3  | 129.4  | 118.2  | 126.9  | 114.6  |
| 116.7  | 113.4 | 125.9  | 117.4  | 108.2  | 141.7  | 123.8  | 145.9  | 116.5  |
| 112.5  | 104.7 | 102.4  | 100.1  | 98.3   | 112.8  | 110    | 115.1  | 112.9  |
| 109.1  | 112.1 | 99.6   | 106.3  | 99.4   | 106.5  | 100.8  | 106.4  | 109.3  |
| 108.9  | 107.3 | 98.7   | 103.1  | 95.5   | 106.3  | 101    | 121.5  | 118.2  |
| 102.9  | 118.5 | 103    | 99.6   | 93     | 112.5  | 105.5  | 112.6  | 110.1  |
| 103.3  | 104.6 | 107.2  | 105.1  | 92.7   | 115.8  | 104.8  | 110.3  | 99.3   |
| 322.7  | 319.2 | 348.7  | 279.5  | 330.5  | 347.8  | 312.7  | 596.9  | 563.4  |
| 108.5  | 105.6 | 103.2  | 99.7   | 95.1   | 107.6  | 104.4  | 98.1   | 103.6  |
| 107.9  | 111.7 | 106    | 109.4  | 91.5   | 111.9  | 109.7  | 112.8  | 101.7  |
| 113.3  | 122.3 | 114.1  | 120.1  | 102.3  | 117.8  | 113.6  | 139    | 114.9  |
| 107.1  | 114.9 | 99.5   | 104.7  | 100.5  | 102    | 102.5  | 107    | 109.8  |
| 107.9  | 120.9 | 109.3  | 108.7  | 109.4  | 125.7  | 102.3  | 108.6  | 106.2  |
| 113.8  | 116.8 | 110.3  | 107.4  | 123.4  | 119.9  | 109.7  | 125.9  | 134.9  |
| 110.1  | 106.3 | 111.8  | 98.1   | 96     | 114.8  | 112.5  | 100.3  | 106.4  |
| 103.4  | 111.7 | 101.3  | 100.4  | 91.2   | 115.8  | 95     | 112.4  | 110.9  |
| 111.4  | 111.3 | 97.5   | 99.3   | 95.8   | 110.5  | 101.4  | 109    | 105.9  |
| 116.8  | 144.1 | 159    | 140.3  | 115.1  | 137.4  | 126.2  | 121.8  | 115.3  |
| 124.3  | 122.4 | 111.8  | 124.5  | 112.8  | 128.4  | 123.9  | 146.2  | 131.3  |
| 103.8  | 116.7 | 113    | 110    | 106    | 117    | 112.8  | 107    | 111    |
| 110.3  | 107.6 | 105.1  | 112.5  | 97.3   | 117.5  | 113.1  | 125.6  | 111.7  |
| 103.1  | 110.1 | 106.5  | 106.6  | 92.5   | 119.7  | 95.6   | 107.8  | 101.4  |
| 108.4  | 110.3 | 104.4  | 97.3   | 99.5   | 107.8  | 109.3  | 106.4  | 106.4  |
| 111.7  | 109.3 | 108.5  | 98.5   | 99.1   | 103.9  | 99.5   | 105.2  | 105.6  |

|        |        |        |        |        |        |        |        |        |
|--------|--------|--------|--------|--------|--------|--------|--------|--------|
| 103.6  | 111.5  | 108.6  | 105.4  | 95     | 110.5  | 107.7  | 115.3  | 109    |
| 167.2  | 192.2  | 198    | 135.6  | 175.5  | 188.5  | 179.8  | 246    | 179.3  |
| 101.6  | 105.4  | 102.9  | 109.9  | 95.6   | 109.9  | 103.2  | 105.1  | 110.5  |
| 107.7  | 108.8  | 112.4  | 101    | 98.4   | 116.2  | 106    | 116.8  | 114.3  |
| 110.1  | 112.7  | 105    | 107.1  | 96.9   | 103.5  | 121.3  | 126.6  | 123.6  |
| 112    | 111.3  | 108.9  | 103.8  | 101.2  | 113.8  | 105.8  | 115    | 109.7  |
| 110    | 110.7  | 105.2  | 103    | 102.8  | 102.2  | 106    | 106.7  | 104.2  |
| 2708.6 | 2490.1 | 1558.3 | 3944.7 | 1782.9 | 1588.8 | 3794.1 | 4383.4 | 2831.5 |
| 2505.4 | 2709.7 | 1282.9 | 4183.7 | 2034.6 | 1690.1 | 2679   | 4716   | 2736.3 |
| 381.6  | 509.8  | 538.1  | 763.1  | 476.5  | 559.6  | 771.9  | 683.9  | 504.4  |
| 272.9  | 200.3  | 272.5  | 133.9  | 282.4  | 518.2  | 247.2  | 690.1  | 724    |
| 105.1  | 101.2  | 102.7  | 98.8   | 93.6   | 110.2  | 95.1   | 106.2  | 100.5  |
| 104.7  | 108.3  | 104.4  | 102.3  | 99.3   | 113.8  | 104.7  | 109.7  | 102.8  |
| 210.9  | 257.8  | 254.3  | 249.9  | 261.1  | 305.3  | 250.9  | 491.3  | 291.3  |
| 1993.1 | 3030.2 | 2931.8 | 1883.8 | 2510.5 | 2777.2 | 2295.7 | 4339.4 | 2462.2 |
| 153.4  | 156.5  | 135    | 130.9  | 122.2  | 143.4  | 142.4  | 226.1  | 180.6  |
| 121.3  | 115.2  | 115.7  | 111.2  | 106    | 141    | 114.5  | 135.5  | 131.3  |
| 123.8  | 133.4  | 111.6  | 113.3  | 121.3  | 133.9  | 125    | 161.4  | 139.9  |
| 339    | 870.2  | 838.5  | 982.4  | 858.6  | 864.6  | 1242.3 | 854.8  | 423.8  |
| 127.8  | 123.6  | 124.8  | 105.6  | 106.6  | 131.5  | 114.3  | 173.5  | 160    |
| 115    | 108.2  | 99.4   | 99.3   | 91.1   | 106    | 114.8  | 108.1  | 106.1  |
| 109.9  | 108.4  | 106.2  | 102.9  | 95.3   | 111.3  | 113.5  | 109.1  | 111.8  |
| 107.5  | 118.9  | 102.4  | 99.9   | 96.6   | 107.1  | 104.4  | 125.8  | 114.4  |
| 122.4  | 123.2  | 114.7  | 115.6  | 104.1  | 125    | 119.4  | 138.6  | 121.4  |
| 109.3  | 110.6  | 112.6  | 98     | 101.3  | 118    | 103.2  | 109.6  | 114.2  |
| 163.9  | 330.7  | 332.7  | 339.9  | 314.8  | 329.5  | 331.7  | 294.1  | 177.4  |
| 119.1  | 109.9  | 106.8  | 101.7  | 97.2   | 110    | 106.7  | 121.8  | 120.5  |
| 110.4  | 116.2  | 109.6  | 111.2  | 96.4   | 111    | 99.6   | 111.7  | 111.9  |
| 102.3  | 132.6  | 120.6  | 127.7  | 109.2  | 121.7  | 136.6  | 120.9  | 118    |
| 112.4  | 159.7  | 126.1  | 150.8  | 136.1  | 119.5  | 159.9  | 141.2  | 115.8  |
| 124    | 133.4  | 125.2  | 129.1  | 115.4  | 126.7  | 146.1  | 152.4  | 128.5  |
| 110.8  | 115.5  | 112.8  | 130.2  | 108.8  | 120.9  | 103.6  | 120.5  | 117.1  |
| 104.6  | 107.7  | 97     | 98.6   | 92.6   | 107.2  | 98.8   | 105.8  | 113.6  |
| 101.7  | 105.6  | 100.3  | 106.9  | 94.9   | 111.7  | 105.2  | 108.2  | 104    |
| 100.4  | 98.2   | 95.9   | 94.8   | 95.7   | 101.3  | 99     | 101.9  | 111.5  |
| 109.6  | 106.8  | 102.6  | 108.2  | 98.1   | 117.7  | 102.6  | 104.7  | 103.7  |
| 108.2  | 108.3  | 105.3  | 95.4   | 96.1   | 109.2  | 97.1   | 114.2  | 106.1  |
| 119.3  | 121.8  | 97.2   | 120.4  | 104.5  | 124.5  | 106.3  | 114    | 128.2  |
| 99     | 104.5  | 99.7   | 93.7   | 91.3   | 101.6  | 98.6   | 94.3   | 106.3  |
| 104    | 107.3  | 96.1   | 100.9  | 85     | 105.2  | 106.2  | 109.5  | 101.5  |
| 105.1  | 109.3  | 103.5  | 102    | 93.9   | 114.2  | 96.6   | 109.4  | 113.5  |
| 109.8  | 107.5  | 97.5   | 104.3  | 100.4  | 110.9  | 98.6   | 119.3  | 114.4  |
| 106.3  | 106.5  | 97.9   | 93.5   | 94     | 111.4  | 100.7  | 103.9  | 105.8  |
| 107.3  | 108    | 98.1   | 98.3   | 97.2   | 109.8  | 105.8  | 98.3   | 101.5  |
| 102.9  | 109.8  | 106.2  | 107    | 98.4   | 112.6  | 109.9  | 109.5  | 112.5  |
| 106.2  | 115.8  | 101.4  | 98.7   | 101.4  | 109.4  | 107.7  | 107.3  | 112.1  |
| 104.8  | 99.2   | 101.5  | 93.9   | 97.3   | 105    | 101.8  | 102.8  | 104.4  |
| 241.8  | 432.6  | 529.4  | 406.2  | 314.4  | 385.3  | 421.7  | 500.6  | 325.2  |
| 101.7  | 111.5  | 106    | 92.3   | 91.4   | 102.7  | 106.6  | 105    | 95.5   |
| 105.6  | 112.5  | 107.8  | 98.3   | 90.8   | 107.3  | 104.2  | 113.7  | 106.2  |
| 101.7  | 104.2  | 89.8   | 105.5  | 95.7   | 106.2  | 95.2   | 112.2  | 106.5  |

|        |        |        |        |        |        |        |        |        |
|--------|--------|--------|--------|--------|--------|--------|--------|--------|
| 102.8  | 109.2  | 107.9  | 107.2  | 102.2  | 111.6  | 105.8  | 119.9  | 131.2  |
| 232.9  | 203.5  | 200.4  | 149.1  | 195.6  | 252.3  | 206.8  | 742.1  | 786.1  |
| 1399.7 | 903.4  | 821.4  | 816.2  | 761.4  | 1189.5 | 1050.3 | 3928.9 | 4161.2 |
| 215.6  | 239.7  | 228.9  | 209.9  | 181.6  | 215.3  | 223.5  | 503.4  | 314.7  |
| 629.8  | 447.6  | 409.4  | 490.5  | 341.8  | 570.4  | 456.4  | 1290.7 | 1631.2 |
| 251.3  | 151.4  | 121.9  | 172.1  | 150.3  | 169.9  | 171.7  | 457    | 442.9  |
| 423.3  | 467.9  | 364.8  | 403.2  | 358.4  | 480.5  | 395.8  | 1133.2 | 827.5  |
| 995.4  | 1154.5 | 1098   | 1332.7 | 789.8  | 973.5  | 1154.4 | 2309.4 | 2488   |
| 2952.1 | 3215.4 | 2750.3 | 3454   | 2464.4 | 2749.6 | 2990.4 | 5713.8 | 5743.2 |
| 109.4  | 108.4  | 112.7  | 101.6  | 99.1   | 115.9  | 109.5  | 116.9  | 102.9  |
| 107.8  | 106.2  | 102.8  | 94.1   | 93     | 107.3  | 100.6  | 108.4  | 105    |
| 1633.5 | 1692.5 | 1711.6 | 1539.2 | 1227.7 | 1400.1 | 1678.5 | 4177.7 | 4125.7 |
| 568.5  | 1654.3 | 1581.9 | 2053.5 | 1371.2 | 1412.6 | 1732.8 | 2218.3 | 1675.5 |
| 563    | 493.3  | 329    | 459    | 404.1  | 422.4  | 472.6  | 1404.8 | 1974.9 |
| 1096.1 | 1766.6 | 1436.6 | 1541.9 | 1424.6 | 1420.5 | 1691   | 3255.6 | 3180.4 |
| 909.5  | 1017.1 | 831.8  | 924.3  | 855.7  | 910.4  | 1099.5 | 2234.9 | 1952.5 |
| 302.8  | 334.6  | 252.7  | 256.7  | 286.6  | 334.7  | 288.4  | 1016.7 | 759.1  |
| 2193   | 1797.5 | 1406.5 | 1148.9 | 1419.2 | 1926.8 | 1588.9 | 5003   | 4912.3 |
| 985.8  | 949.2  | 1009.3 | 867.5  | 869.4  | 1077.2 | 1045.5 | 3224.5 | 3174.6 |
| 127.8  | 275.6  | 282.6  | 295    | 190.4  | 228.9  | 192    | 245.7  | 188.7  |
| 120.9  | 169.3  | 144.5  | 160.1  | 127.5  | 137.7  | 138.2  | 181    | 136.5  |
| 118.9  | 127.1  | 120    | 115.4  | 107    | 135.1  | 111.2  | 120.3  | 119.9  |
| 370.2  | 1170.3 | 1119.7 | 1082.8 | 863.7  | 814.5  | 859.3  | 824.8  | 496.7  |
| 136.2  | 473.6  | 422.3  | 416.2  | 277.4  | 259    | 297.4  | 207.8  | 184.2  |
| 112.5  | 145    | 140.4  | 143.5  | 119.3  | 143.3  | 125.8  | 129.1  | 117.8  |
| 2160.7 | 1894.1 | 1501.9 | 1787   | 1549.1 | 2188.4 | 2078.2 | 5397.3 | 5877.7 |
| 1041.5 | 739.7  | 665.4  | 995.4  | 752.5  | 971.7  | 920.5  | 3172.9 | 3049.5 |
| 399    | 385    | 265.6  | 312.8  | 301.1  | 358.1  | 299.4  | 1071.7 | 1254.1 |
| 118.9  | 102.9  | 97.9   | 96.2   | 92.8   | 107    | 101    | 122.7  | 113.7  |
| 133.2  | 120.5  | 109.4  | 97.3   | 97.3   | 119.1  | 108.7  | 127.2  | 113.9  |
| 349.5  | 331.8  | 281.1  | 292.4  | 274.7  | 334.4  | 317.4  | 802.8  | 899.7  |
| 187.2  | 194.6  | 192.8  | 234.5  | 177.5  | 218.2  | 188.6  | 626.3  | 651.7  |
| 412.2  | 401.6  | 638.6  | 386.1  | 416.7  | 356.6  | 381.8  | 1507.2 | 1024.8 |
| 117.5  | 127.3  | 112.4  | 121.8  | 100    | 116.7  | 122.7  | 142    | 131.3  |
| 631.7  | 369.8  | 332.7  | 357.4  | 356    | 458.1  | 422.3  | 1246.6 | 1463.5 |
| 571.6  | 494    | 453.8  | 488.8  | 382.5  | 447    | 493.5  | 610.6  | 576.5  |
| 112.6  | 112.1  | 109.7  | 96.3   | 104.6  | 115.2  | 108    | 121.3  | 125.8  |
| 229.4  | 190.2  | 178.7  | 183.6  | 160.2  | 187.1  | 196.4  | 222.5  | 229.1  |
| 152    | 140    | 119.2  | 129.6  | 120.4  | 147    | 118.5  | 198.4  | 216    |
| 430.4  | 381.2  | 333.5  | 327.2  | 345.8  | 399.1  | 383.4  | 1289.5 | 1364.6 |
| 123.7  | 120.2  | 108.8  | 104.4  | 101.6  | 122.5  | 103.3  | 129.3  | 133.8  |
| 145.8  | 151.3  | 139.8  | 135.1  | 131.3  | 147.5  | 144.8  | 227.2  | 191.9  |
| 401.8  | 231    | 205.2  | 319.1  | 194.2  | 290.2  | 221.7  | 941.2  | 1222.8 |
| 366.8  | 274.9  | 252.4  | 266    | 292.5  | 342.3  | 352.4  | 913.1  | 855.3  |
| 133.8  | 125.4  | 130.7  | 119.8  | 108.7  | 135    | 122.8  | 176.2  | 209.7  |
| 107.6  | 105.9  | 100.9  | 93.3   | 92.1   | 100.5  | 105    | 125.5  | 106    |
| 375.6  | 520.9  | 485.8  | 392    | 438.8  | 616.7  | 567    | 1085.7 | 1196.2 |
| 915    | 850.3  | 859.1  | 743.3  | 664.6  | 949.2  | 998.1  | 1591.6 | 1747.2 |
| 127    | 158.6  | 164.1  | 144.3  | 127    | 148    | 140.6  | 157    | 132.5  |
| 1034.5 | 1022.5 | 845.4  | 670.5  | 728.3  | 846.2  | 816.3  | 2619.8 | 2431.1 |
| 804    | 719.3  | 677.2  | 528.8  | 585.8  | 727.9  | 784.7  | 1450.2 | 1297.2 |

|        |        |        |        |        |        |        |        |        |
|--------|--------|--------|--------|--------|--------|--------|--------|--------|
| 329.4  | 248.7  | 320.1  | 233.9  | 269.6  | 295    | 306.1  | 754.8  | 614.4  |
| 120.4  | 134.8  | 115.8  | 117.3  | 105.9  | 125.7  | 139.6  | 152.1  | 146.7  |
| 2043.1 | 3597.4 | 2654.8 | 2930.4 | 2135.6 | 2099.3 | 3280.3 | 3653.8 | 2536.2 |
| 123.3  | 137.6  | 129.1  | 113    | 119.6  | 124    | 125.2  | 186.3  | 142.3  |
| 442.4  | 954.9  | 542.6  | 782    | 715    | 634.2  | 799    | 982.9  | 723.1  |
| 269.6  | 271.6  | 298.9  | 274    | 289.5  | 330.2  | 306.8  | 419.6  | 312.9  |
| 239.1  | 243.1  | 296.9  | 249    | 229    | 314.1  | 302.1  | 389.4  | 287.2  |
| 370.2  | 339.8  | 342.3  | 303.2  | 298.9  | 414.4  | 283.4  | 1186.4 | 1200.1 |
| 105.7  | 107.4  | 101.1  | 113.7  | 99.5   | 105.3  | 109.6  | 105.4  | 103    |
| 606.4  | 732.1  | 625.3  | 639.1  | 503.5  | 720.7  | 677.9  | 880.1  | 656.5  |
| 120.4  | 130.6  | 127    | 114.9  | 119.6  | 123.2  | 116.1  | 131    | 130.3  |
| 112.9  | 111.3  | 105.7  | 98.4   | 95.9   | 105    | 104.8  | 114.5  | 111.6  |
| 156.3  | 134.2  | 144.4  | 130.1  | 121.3  | 133.2  | 126.9  | 197.2  | 175.1  |
| 107.8  | 111.9  | 109    | 95     | 93     | 112.3  | 99.8   | 108.9  | 105.6  |
| 107.8  | 104.3  | 98.2   | 103    | 99.2   | 110.4  | 107.9  | 96.7   | 125.9  |
| 112.5  | 111.1  | 106.2  | 113.9  | 99.7   | 112.1  | 100.4  | 111.7  | 117.3  |
| 98.8   | 115.4  | 99.6   | 98     | 99.9   | 111.3  | 104    | 108.4  | 112.4  |
| 106.8  | 113.6  | 106.3  | 114    | 103.8  | 107.3  | 104.6  | 111.1  | 105.3  |
| 141.6  | 191.2  | 153.4  | 151.8  | 137.8  | 150.3  | 169.1  | 222.1  | 209.8  |
| 135.2  | 204.4  | 215.7  | 214.5  | 178.1  | 213.3  | 210.8  | 243.5  | 178.3  |
| 113.1  | 156.6  | 120.9  | 171.1  | 123.7  | 113.9  | 148.3  | 121.2  | 114    |
| 126.3  | 153.5  | 106.7  | 142.2  | 119.9  | 120.8  | 211.3  | 174.5  | 131.6  |
| 2477.4 | 2232.8 | 2256.6 | 1901.6 | 2067.2 | 2288.1 | 2212.5 | 3546.6 | 2527.4 |
| 4112.4 | 4035   | 4422   | 3318.9 | 3884.8 | 4557.8 | 4071.1 | 7061.7 | 4672.9 |
| 179    | 201.5  | 169.8  | 152.8  | 165.6  | 205.2  | 151.9  | 278.6  | 208.9  |
| 245.4  | 316.7  | 313.2  | 267.4  | 285.7  | 304.5  | 306.9  | 483.4  | 355.2  |
| 105.6  | 133.5  | 120.4  | 118.1  | 112.5  | 133.3  | 116.6  | 146.5  | 130.8  |
| 117.5  | 118.4  | 108.3  | 107    | 104.3  | 119.2  | 117.6  | 134.1  | 123.5  |
| 116.5  | 112.3  | 106.9  | 105.1  | 103.3  | 123.3  | 116.7  | 112.7  | 107.7  |
| 108.8  | 107.6  | 104.1  | 100.5  | 93.1   | 100.2  | 100.2  | 98.7   | 121.2  |
| 107.2  | 111.7  | 108.3  | 104.2  | 93.6   | 107.5  | 107.1  | 111.6  | 114.5  |
| 102.8  | 100.9  | 103.3  | 95.2   | 95     | 101.4  | 98.5   | 106.1  | 100.1  |
| 107.9  | 115.2  | 101    | 100.1  | 97.7   | 111.2  | 104.8  | 108.9  | 108.4  |
| 108.1  | 108    | 107.4  | 102.9  | 96.2   | 108.8  | 99.1   | 111.2  | 108    |
| 658.2  | 697.9  | 586.1  | 689.3  | 655    | 577.5  | 689    | 1256.9 | 1004.8 |
| 136    | 142.9  | 122.3  | 145.7  | 126    | 144.7  | 167.2  | 198.3  | 211.9  |
| 105.8  | 107.6  | 102.4  | 106.4  | 105.4  | 107.2  | 104.5  | 116.5  | 104.9  |
| 164.2  | 125.1  | 120.4  | 110.4  | 106.5  | 133    | 128.8  | 187    | 207.4  |
| 630    | 986.7  | 839.3  | 682.3  | 778.8  | 921    | 903.7  | 1329.2 | 707.7  |
| 127.6  | 127.8  | 123.2  | 130.8  | 110.5  | 135.3  | 133.8  | 149.6  | 132.9  |
| 273    | 404    | 354.9  | 287.3  | 341.2  | 409.7  | 291.6  | 432    | 301.4  |
| 105.2  | 106    | 107.3  | 97.3   | 103.1  | 107.9  | 105.5  | 103.7  | 111    |
| 100.9  | 105.5  | 101.2  | 106.9  | 97.3   | 110.2  | 102.1  | 117.6  | 109.4  |
| 127.2  | 180.8  | 169.1  | 196.3  | 170.1  | 169.1  | 151.8  | 219.6  | 112.9  |
| 106    | 109.8  | 101    | 106    | 94.5   | 108    | 102.8  | 104    | 106.2  |
| 107.9  | 156.2  | 133.3  | 142.9  | 146.3  | 138.5  | 147.2  | 133    | 141.6  |
| 104.3  | 116    | 105.3  | 115.8  | 95.5   | 107.2  | 109.1  | 106.9  | 104.5  |
| 108.8  | 104.4  | 100    | 100.8  | 95.8   | 106    | 104    | 108.4  | 106.4  |
| 143.7  | 417.5  | 271.8  | 391.7  | 295.8  | 274.1  | 319.8  | 313.9  | 208.2  |
| 106.6  | 102.8  | 99.3   | 98.1   | 104.5  | 99     | 112.6  | 116.9  | 109.4  |
| 105.7  | 109.6  | 104.8  | 101.8  | 100.5  | 109.8  | 108.7  | 112.8  | 114.6  |

|        |        |        |        |       |        |        |        |        |
|--------|--------|--------|--------|-------|--------|--------|--------|--------|
| 112.4  | 111.9  | 104.8  | 95     | 100   | 107.3  | 97.6   | 103    | 108.5  |
| 100.3  | 104.2  | 105.5  | 97.8   | 95.4  | 104.1  | 98.6   | 104.6  | 100.8  |
| 103.4  | 108    | 105.7  | 109.3  | 98.5  | 116.2  | 100.8  | 114.5  | 107.4  |
| 107.2  | 107.9  | 102.3  | 99.6   | 103.7 | 113.5  | 110.3  | 110.1  | 116.6  |
| 268.8  | 351    | 279.9  | 408.7  | 229.7 | 305.6  | 292.2  | 517    | 366.7  |
| 105    | 110.7  | 103.2  | 104.8  | 93.9  | 108.8  | 102.5  | 102.6  | 107.8  |
| 132.4  | 260.8  | 252.3  | 222.3  | 243.5 | 278.7  | 289.7  | 284.1  | 238.4  |
| 170    | 402.7  | 391.8  | 348    | 368.1 | 399    | 426.8  | 544    | 263.7  |
| 1270.8 | 526.6  | 548    | 705.6  | 531   | 689.2  | 627.5  | 1361.1 | 1767.5 |
| 102.5  | 117    | 102.8  | 114.4  | 100   | 119.3  | 114.2  | 126.9  | 111.5  |
| 104.4  | 129.4  | 102.5  | 111.4  | 113.6 | 111.6  | 118.2  | 115.8  | 122.8  |
| 97.7   | 112.5  | 108.9  | 109.2  | 95    | 111.6  | 110.8  | 103.2  | 105.5  |
| 110    | 123    | 106.2  | 105.2  | 96.5  | 111.9  | 110.8  | 99.5   | 104    |
| 99.9   | 109.6  | 104    | 101.1  | 92.2  | 103.9  | 111    | 103.7  | 104.5  |
| 102.2  | 122.4  | 105.8  | 142    | 109.4 | 102.4  | 146.7  | 109    | 102.8  |
| 114.9  | 113.7  | 107.7  | 118.4  | 108.3 | 123.2  | 118.3  | 114.9  | 121.9  |
| 185.1  | 126.9  | 154.4  | 147.1  | 115.6 | 123.9  | 130.4  | 134    | 118.1  |
| 100.2  | 99.3   | 98.4   | 100.4  | 96    | 105.5  | 101.4  | 105.3  | 107.8  |
| 107.7  | 107.1  | 103.3  | 100.8  | 100.6 | 106.4  | 107.9  | 119.6  | 99.4   |
| 106    | 111.6  | 103.2  | 105.3  | 95    | 106.1  | 103    | 111.3  | 114.2  |
| 118.9  | 125    | 117.5  | 115.3  | 115.7 | 120.4  | 115.4  | 125.9  | 116.5  |
| 107.8  | 116.3  | 103.7  | 111.6  | 94.2  | 108.5  | 106.7  | 108.8  | 117.6  |
| 363.8  | 251.1  | 226    | 209.6  | 212.2 | 200.4  | 273.3  | 373.1  | 207.3  |
| 99.8   | 102.9  | 98.8   | 95.6   | 93.2  | 111.2  | 104.4  | 106    | 111.1  |
| 113    | 113.1  | 103    | 108.7  | 104.4 | 118    | 102.3  | 114.8  | 114.1  |
| 116.8  | 123.3  | 143.3  | 112.4  | 102.4 | 133    | 135.1  | 137.4  | 139.9  |
| 116.9  | 114.7  | 112.4  | 106.1  | 99.8  | 114.8  | 106.8  | 114.3  | 110.4  |
| 119.6  | 129.8  | 115.8  | 131.7  | 107.5 | 131    | 115    | 128    | 135.3  |
| 99.7   | 109.6  | 103.6  | 99.7   | 94    | 107.5  | 100.5  | 107.3  | 109.1  |
| 111.6  | 122.7  | 102.7  | 95.5   | 99.6  | 113.3  | 111.9  | 121.6  | 102.9  |
| 104.7  | 110.1  | 104    | 105.2  | 95.4  | 109.6  | 103.4  | 117.1  | 103.8  |
| 106.9  | 109.5  | 111.7  | 112.3  | 96.9  | 109    | 103.5  | 122.9  | 127    |
| 327.2  | 584.5  | 604.7  | 479.9  | 625.2 | 659.5  | 642.5  | 781.6  | 414.7  |
| 223.2  | 344.6  | 421.5  | 746.4  | 260.8 | 292.5  | 628.7  | 617.7  | 409.5  |
| 111.5  | 153.3  | 122.6  | 145.1  | 135.7 | 138.3  | 141.8  | 170.3  | 125.6  |
| 126    | 136.6  | 153.2  | 147    | 141.5 | 166.3  | 136.7  | 146.3  | 152.9  |
| 759.2  | 595.3  | 547.6  | 601.7  | 577.8 | 665.4  | 686.4  | 1166   | 908.6  |
| 107.7  | 117.9  | 112.7  | 105.6  | 98.7  | 113.3  | 111.2  | 120.6  | 117.3  |
| 2251.8 | 3162.9 | 2655.6 | 2444.3 | 2710  | 2623.4 | 2388.6 | 4114.5 | 4109.9 |
| 112.1  | 107.7  | 106.5  | 109    | 97.5  | 111.5  | 102.2  | 116.2  | 112.2  |
| 108.4  | 106.4  | 101.9  | 105.4  | 94.3  | 115.9  | 99.3   | 102.4  | 116.9  |
| 110.9  | 105.1  | 102.4  | 98.5   | 93.9  | 102.1  | 100.2  | 94.8   | 103.4  |
| 133.6  | 130.2  | 136.3  | 118.4  | 127.2 | 128.1  | 138.7  | 127.4  | 125.5  |
| 100.5  | 101.4  | 94     | 92.3   | 89.1  | 106.6  | 99.4   | 100.2  | 105.6  |
| 117.7  | 133.2  | 120.9  | 113.1  | 113.3 | 118.1  | 119.5  | 130.5  | 113.6  |
| 201.3  | 411.9  | 402.1  | 302.1  | 353.1 | 412.9  | 227.7  | 435.1  | 286.4  |
| 294.4  | 299.3  | 299.7  | 288.3  | 246   | 219.3  | 186.7  | 604.4  | 567.8  |
| 626.5  | 685.9  | 553.3  | 783.7  | 714.1 | 702.3  | 728.1  | 1074.4 | 811.6  |
| 346    | 509.9  | 577.5  | 402.7  | 486.9 | 570.4  | 481.7  | 893.2  | 693.1  |
| 359.2  | 350.3  | 409.1  | 306.5  | 304.9 | 307.5  | 376.6  | 863    | 534.5  |
| 329.6  | 474.9  | 366.3  | 371.7  | 435.3 | 377.4  | 473.7  | 828.6  | 360.9  |

|       |        |       |       |        |       |        |        |       |
|-------|--------|-------|-------|--------|-------|--------|--------|-------|
| 97    | 110.1  | 103.2 | 97.2  | 100.5  | 104.5 | 106.8  | 110.5  | 104.8 |
| 106.4 | 104    | 101.4 | 98.4  | 90     | 104.9 | 102.6  | 109.3  | 99.9  |
| 111.5 | 109    | 106.7 | 104.3 | 92.2   | 109.3 | 108.5  | 121.2  | 114.1 |
| 103.4 | 108.9  | 109.8 | 94.5  | 97.7   | 106.7 | 106.4  | 124.1  | 109.2 |
| 184.7 | 292.9  | 261.7 | 204.4 | 222.7  | 247.3 | 221.4  | 306.7  | 207.3 |
| 107   | 102.6  | 103.3 | 96.5  | 98     | 105.5 | 103.1  | 106    | 104   |
| 103.9 | 109    | 102.5 | 89.9  | 93.4   | 101.6 | 98.5   | 102.8  | 100.3 |
| 109.5 | 109.4  | 98.3  | 102.5 | 93.3   | 101.2 | 108.6  | 103    | 101.3 |
| 120.4 | 135.8  | 115.9 | 129.6 | 115.7  | 127.2 | 125.5  | 157.8  | 157.3 |
| 106.1 | 110    | 105.2 | 106.4 | 97.1   | 108.8 | 99.1   | 100.6  | 99.4  |
| 186.6 | 223.8  | 209.1 | 204.9 | 255.6  | 247.7 | 228.1  | 454.1  | 313.3 |
| 124.7 | 142.3  | 154.2 | 119.4 | 140.5  | 137.3 | 138.8  | 175.3  | 134.2 |
| 112.8 | 109.2  | 106.5 | 100.5 | 91.8   | 115.3 | 104    | 112.9  | 122.4 |
| 444.6 | 617.5  | 495.9 | 490.9 | 492.2  | 498.2 | 496    | 730.5  | 615.3 |
| 117.3 | 113.9  | 117.9 | 109   | 102.6  | 125.1 | 113.2  | 123.2  | 119.5 |
| 119.4 | 120.1  | 110.5 | 125.3 | 106.7  | 118.7 | 110.9  | 117.4  | 119.5 |
| 114.4 | 111    | 102.3 | 98.2  | 99.9   | 114.7 | 105.3  | 113.4  | 113.4 |
| 218   | 600.7  | 724.4 | 621.5 | 671.3  | 530.9 | 650.4  | 547.9  | 281.9 |
| 110.4 | 105.7  | 102.5 | 101.9 | 97     | 104.6 | 99.7   | 118.9  | 119.7 |
| 254.3 | 198.7  | 185.6 | 173.8 | 173.4  | 204.6 | 233    | 258.6  | 207.5 |
| 119.1 | 109.8  | 119   | 110.6 | 104.8  | 121   | 114    | 125.4  | 119.7 |
| 100.3 | 106.5  | 110.1 | 97.4  | 98.4   | 117.1 | 103.5  | 106.9  | 105.3 |
| 432.6 | 539.7  | 273.1 | 509.1 | 459    | 384.3 | 710.2  | 1170.5 | 295.8 |
| 167.3 | 223.2  | 159.2 | 181.8 | 209    | 155.7 | 305.7  | 333.4  | 138.4 |
| 103.7 | 108.4  | 109.9 | 102.5 | 101.6  | 110.3 | 108.1  | 110.1  | 111.2 |
| 163.2 | 214    | 247.3 | 184.3 | 189.5  | 188.6 | 179.9  | 231.2  | 195.2 |
| 129.9 | 166.6  | 163.2 | 185.5 | 152.9  | 166.3 | 162.7  | 195.7  | 167.3 |
| 122.4 | 138.2  | 133.9 | 133.4 | 122.1  | 130.6 | 116    | 140.3  | 130.1 |
| 105.5 | 106.6  | 107.1 | 97.4  | 94.1   | 112   | 105.6  | 106.8  | 110   |
| 99    | 99.1   | 90.4  | 92.9  | 88     | 100.9 | 100.1  | 106.1  | 102.1 |
| 133.1 | 152.8  | 128.4 | 139.1 | 113.8  | 141.3 | 120.3  | 186.2  | 153.3 |
| 135.5 | 205.7  | 194.5 | 201.7 | 150.9  | 184   | 122.8  | 215.8  | 191.7 |
| 114.6 | 135.4  | 117.7 | 109.6 | 119.7  | 121.4 | 107    | 131.7  | 145.5 |
| 244   | 686.7  | 684.9 | 503.6 | 485.2  | 645.3 | 525.5  | 644.9  | 288.2 |
| 99.5  | 99.9   | 109.9 | 107.3 | 96.5   | 108.9 | 111.6  | 111.1  | 111.3 |
| 111.7 | 99.5   | 97.7  | 104.5 | 90     | 104.6 | 103    | 113.2  | 108.9 |
| 742.5 | 1212.8 | 964.1 | 489   | 1307.6 | 1007  | 1022.3 | 1715.8 | 720.3 |
| 99.1  | 106.4  | 99.5  | 101.5 | 90.4   | 109.6 | 104.3  | 109.9  | 100.7 |
| 124.9 | 131.5  | 127.4 | 125.7 | 116.5  | 120.5 | 122.1  | 147.1  | 142.6 |
| 120.5 | 105.5  | 110.7 | 108.7 | 96.1   | 112.7 | 97.9   | 123.4  | 115.2 |
| 99.4  | 116.2  | 101.1 | 97.4  | 95.7   | 101.1 | 101.9  | 109.8  | 115.9 |
| 114.9 | 112.2  | 113.8 | 105.2 | 102.3  | 120.6 | 114.8  | 123.5  | 123.6 |
| 105.2 | 108.5  | 101.5 | 113.1 | 94.2   | 119.2 | 110    | 111.2  | 109.9 |
| 122.8 | 118.7  | 107.8 | 112.5 | 100.4  | 133.9 | 106.5  | 162.7  | 191.8 |
| 113.9 | 130.5  | 142.6 | 109.9 | 120    | 142.4 | 117.8  | 118.8  | 149.7 |
| 101.4 | 107.9  | 96.6  | 103.8 | 96.6   | 111.2 | 107    | 110    | 109.8 |
| 109.8 | 116.7  | 118.7 | 104.5 | 104.6  | 118.5 | 104.8  | 116    | 113.1 |
| 132.3 | 142.4  | 135.7 | 169.4 | 129.8  | 131.6 | 154.5  | 129.8  | 112.6 |
| 124.7 | 149.5  | 129.9 | 182.8 | 135.3  | 137.9 | 166.3  | 132.8  | 121.4 |
| 108.3 | 107.3  | 103.4 | 103.3 | 94.2   | 116.1 | 101    | 112.7  | 116   |
| 114.5 | 118.6  | 115   | 108.5 | 112.6  | 115.5 | 106.8  | 128.2  | 121.3 |

|       |       |        |       |       |        |       |        |        |
|-------|-------|--------|-------|-------|--------|-------|--------|--------|
| 108.7 | 112.5 | 107.7  | 114.7 | 92.1  | 105.3  | 108.9 | 118.8  | 121.6  |
| 108.4 | 111.3 | 99     | 100.1 | 94.2  | 100.2  | 110.2 | 106.5  | 105.2  |
| 104.9 | 106.6 | 97.8   | 101.4 | 90.8  | 115    | 102.5 | 100.5  | 103.4  |
| 111.8 | 104.9 | 102.6  | 98.1  | 97.5  | 111.9  | 98.1  | 112.8  | 111.6  |
| 98.7  | 100.7 | 99.1   | 102.6 | 93.4  | 111.9  | 98.1  | 111.2  | 101.2  |
| 112   | 111.4 | 97.4   | 103.7 | 95.5  | 107.2  | 105.8 | 109.8  | 108.8  |
| 108.4 | 112.7 | 106    | 116.3 | 104.8 | 122.3  | 105.3 | 111.2  | 110.4  |
| 102   | 106.2 | 106.2  | 110.7 | 95.7  | 113.4  | 100.7 | 119.6  | 110.7  |
| 104.3 | 128.7 | 114.1  | 104.5 | 103.9 | 125.5  | 126.1 | 122.4  | 121.9  |
| 116.2 | 153.5 | 136.9  | 134.3 | 128.3 | 149    | 156.1 | 146.3  | 146    |
| 249   | 475.5 | 401.3  | 320.7 | 340.8 | 420.2  | 400.1 | 686    | 391.3  |
| 115.9 | 123.5 | 103.8  | 106.4 | 111.9 | 133.2  | 119.7 | 143.6  | 132.6  |
| 228.3 | 208.2 | 187.4  | 198.8 | 208.2 | 173    | 175.9 | 458.6  | 431.2  |
| 184.8 | 160.5 | 141.9  | 154   | 119.9 | 151.3  | 170.9 | 295.6  | 347.7  |
| 668.8 | 730.6 | 556.5  | 908.3 | 785.9 | 657.8  | 971.5 | 1532.6 | 712.9  |
| 102.3 | 123.2 | 116.1  | 125.7 | 103.8 | 115.4  | 113.4 | 144.8  | 139.9  |
| 139.6 | 141.2 | 120.6  | 133.2 | 109.1 | 118.5  | 138.9 | 186.1  | 224.5  |
| 102   | 109.3 | 104.3  | 105.5 | 93.6  | 105.8  | 102.6 | 100.2  | 102.8  |
| 998.2 | 957   | 1067.8 | 896.2 | 936.4 | 1113.9 | 725   | 1726.7 | 1171.7 |
| 752.4 | 909   | 834.3  | 734.3 | 677.4 | 974    | 641.1 | 1075   | 812.9  |
| 687.3 | 784.1 | 755.6  | 613.8 | 778.7 | 753.5  | 720.7 | 914    | 687.7  |
| 100.2 | 110.1 | 103.1  | 96.2  | 93.1  | 110.7  | 96.8  | 99.7   | 107.9  |
| 170.7 | 268.9 | 263.1  | 242.1 | 185.7 | 243.2  | 278.4 | 336.8  | 244.3  |
| 884.6 | 623.9 | 521.5  | 506.4 | 681.3 | 735.3  | 705.2 | 1064.1 | 779.8  |
| 127.3 | 128.8 | 124.5  | 127.4 | 115.9 | 134.6  | 117.5 | 133.6  | 122    |
| 102.3 | 101.8 | 96.7   | 96.8  | 91.7  | 104.9  | 99.5  | 105    | 112.6  |
| 253.6 | 726.8 | 737.6  | 487.5 | 545.7 | 695.9  | 547.1 | 805.1  | 353.3  |
| 102.9 | 108.7 | 104.2  | 103.3 | 102.2 | 110.2  | 104.1 | 125.2  | 117.6  |
| 122.6 | 164.7 | 190    | 160.5 | 159.1 | 187.4  | 165.1 | 179.9  | 150.5  |
| 140.4 | 134.6 | 129.5  | 135.5 | 128.2 | 175.2  | 130.6 | 221.3  | 134.6  |
| 154   | 232.8 | 162.8  | 171.2 | 194.2 | 203.1  | 174.2 | 267.8  | 200.1  |
| 133.4 | 142.2 | 137.5  | 122.2 | 115   | 144    | 131.4 | 177.1  | 154.6  |
| 112.7 | 123.8 | 114.6  | 113.3 | 126.1 | 124.2  | 129   | 156.4  | 122    |
| 108   | 114.5 | 93.2   | 100.8 | 95.1  | 99.1   | 98.8  | 99.1   | 117.1  |
| 111.7 | 107.4 | 110.7  | 106.9 | 103   | 118.3  | 105.9 | 125.4  | 119.4  |
| 104.5 | 101.5 | 104.3  | 93.3  | 98.1  | 111.9  | 101.6 | 119.4  | 104.4  |
| 98.5  | 105.7 | 102.1  | 100.7 | 95.5  | 111.6  | 101.6 | 108.8  | 110.8  |
| 105   | 103.6 | 103.1  | 102.4 | 97.4  | 102.3  | 88.7  | 109.7  | 105.7  |
| 106.4 | 104.7 | 105.2  | 98.3  | 97.1  | 102.1  | 101.9 | 107.2  | 114.6  |
| 113.3 | 117.8 | 104.6  | 103.8 | 104.8 | 106.9  | 117.3 | 118.7  | 116.6  |
| 135.9 | 120.2 | 115.7  | 126.1 | 108.4 | 126.7  | 154.3 | 150.8  | 107    |
| 111.2 | 114.5 | 103    | 107.1 | 96.5  | 107.4  | 106.6 | 104.1  | 105.8  |
| 138.8 | 135.9 | 125    | 136.1 | 137.5 | 133.3  | 128.3 | 181.5  | 171.3  |
| 101.5 | 109.5 | 110.9  | 107.5 | 90.9  | 110.2  | 99.7  | 119.3  | 110.9  |
| 286.3 | 451.9 | 432.4  | 330   | 394.4 | 417.3  | 369.6 | 760.1  | 590.8  |
| 116.8 | 121.1 | 111.5  | 110.3 | 109.4 | 136.1  | 107.1 | 113.6  | 109.3  |
| 178.8 | 174.8 | 166.8  | 183   | 163.5 | 158.6  | 146.3 | 218.5  | 168.7  |
| 113.9 | 114.9 | 117.5  | 121.4 | 103.7 | 127.1  | 123.7 | 126.1  | 126.2  |
| 115.5 | 113.5 | 103    | 108.2 | 105.3 | 107.4  | 93.5  | 113.4  | 105.9  |
| 117.2 | 106.4 | 109.2  | 98    | 90.1  | 111.9  | 102.8 | 108.3  | 109.9  |
| 117.4 | 128.1 | 116.1  | 125.3 | 124.1 | 130.3  | 150.4 | 124.7  | 119.4  |



|        |        |        |        |        |        |        |        |        |
|--------|--------|--------|--------|--------|--------|--------|--------|--------|
| 140.6  | 166.3  | 189    | 190    | 137.5  | 164.3  | 175.8  | 166.3  | 147.2  |
| 119.1  | 128.4  | 140    | 123.9  | 109.9  | 134.8  | 121    | 119.7  | 120.9  |
| 181.5  | 260    | 249.9  | 321.3  | 244    | 269.8  | 356.1  | 361.6  | 277.1  |
| 106.2  | 124.5  | 118.1  | 120.2  | 102.5  | 111.4  | 114.6  | 131.4  | 110.3  |
| 110    | 131.4  | 117    | 119    | 113.9  | 125.7  | 111.5  | 121.8  | 125.4  |
| 120.6  | 125.2  | 114    | 107.5  | 114.2  | 137.3  | 128.3  | 146.3  | 140    |
| 104.6  | 100.6  | 93.7   | 92.8   | 92.3   | 102.9  | 98.1   | 105.8  | 104.9  |
| 107.8  | 128.2  | 118    | 144.3  | 101.3  | 120.8  | 139.6  | 121.7  | 116.5  |
| 158.1  | 719.3  | 595.4  | 1490.4 | 497.3  | 529.6  | 983.2  | 421.4  | 347.5  |
| 107    | 103.4  | 98.8   | 101.8  | 88.2   | 114.9  | 100.1  | 114.1  | 108    |
| 227.6  | 363.7  | 382.4  | 318.2  | 280.7  | 354.2  | 328.6  | 434.7  | 287    |
| 117.2  | 108.6  | 100.2  | 104.9  | 94     | 106.6  | 106.1  | 110.3  | 109.1  |
| 110.9  | 110    | 101    | 102.3  | 98.9   | 106.8  | 103.9  | 114.5  | 121.4  |
| 141    | 196.2  | 158.3  | 189    | 172.6  | 175.9  | 209.2  | 225    | 182.8  |
| 114.1  | 128.2  | 118.1  | 151.5  | 112.6  | 134.4  | 158.2  | 159.2  | 127.4  |
| 124.8  | 107.7  | 102.1  | 100.4  | 92     | 114.2  | 116.1  | 112.8  | 115.2  |
| 111.3  | 99.7   | 97.4   | 97     | 92.6   | 108.6  | 105.6  | 106.1  | 113.6  |
| 112.2  | 136.2  | 123.3  | 114.5  | 138.7  | 149.3  | 143.3  | 166.2  | 122.3  |
| 156.6  | 201.5  | 179.5  | 172.9  | 179.2  | 198.8  | 171.7  | 297.7  | 287.4  |
| 408.3  | 551.6  | 478.2  | 546    | 458.7  | 527.3  | 465.3  | 740.9  | 660    |
| 405.9  | 577.4  | 507.9  | 377.9  | 504.1  | 541.6  | 526.3  | 718.8  | 671.3  |
| 111.5  | 102    | 103.8  | 97.2   | 101.4  | 108.4  | 97.5   | 109.8  | 111.7  |
| 102.1  | 91.7   | 94.6   | 100.6  | 91.5   | 100.5  | 100.4  | 103.4  | 98.8   |
| 114.9  | 111.4  | 102.4  | 99.2   | 90.1   | 103.7  | 98     | 111.4  | 104.3  |
| 767.7  | 1430.1 | 1495.7 | 1418.9 | 1078.6 | 1108.3 | 1132   | 1559.6 | 674    |
| 158.2  | 297.8  | 240.1  | 342    | 211.9  | 252.5  | 265.9  | 257.7  | 189.6  |
| 309.6  | 624    | 595.3  | 675.1  | 427    | 512.8  | 506.6  | 667.1  | 398    |
| 116.4  | 118.8  | 98.9   | 136.5  | 103.7  | 117.8  | 119.6  | 128    | 113.7  |
| 109.7  | 122.1  | 113.4  | 118.7  | 116.8  | 120.7  | 110.7  | 126.2  | 115.7  |
| 111    | 115.8  | 107.6  | 104.7  | 95.2   | 112.7  | 107.8  | 118.3  | 110.7  |
| 632.4  | 1373.5 | 1214   | 1749.7 | 1102.7 | 1310   | 1738.5 | 1785.6 | 1130.1 |
| 130.3  | 134.5  | 118.7  | 108.7  | 112.2  | 124.2  | 124.3  | 162.4  | 155.9  |
| 105.4  | 103.1  | 99.5   | 99.6   | 101.1  | 114.4  | 105.4  | 107.3  | 111    |
| 117.3  | 121.7  | 97     | 134.2  | 111    | 113.9  | 114.2  | 144.3  | 141.9  |
| 117.2  | 127.4  | 99.4   | 103.5  | 99.5   | 115.8  | 112.7  | 114.7  | 110.9  |
| 104.7  | 98.4   | 112.4  | 95.5   | 101    | 96.4   | 103.7  | 103.7  | 90.3   |
| 809.4  | 961.2  | 820    | 598.9  | 820.5  | 876.8  | 855.3  | 1272.2 | 1144.2 |
| 111.2  | 111    | 101.9  | 99.2   | 95.4   | 105.1  | 115.9  | 120.9  | 110.6  |
| 107.2  | 114.5  | 111.9  | 103.1  | 100.5  | 128.1  | 105.5  | 125    | 110.7  |
| 129.5  | 116.1  | 121.7  | 143.2  | 102    | 134.4  | 117.8  | 134.3  | 122    |
| 108.2  | 104.5  | 108.5  | 101.6  | 91.8   | 110.8  | 110.5  | 106.8  | 106.5  |
| 140.8  | 163.6  | 175.3  | 148    | 162.8  | 207.4  | 183.1  | 194.2  | 155.6  |
| 118.1  | 122.8  | 112    | 125.7  | 103    | 125.1  | 108.1  | 135    | 122.9  |
| 114.5  | 133.5  | 128.6  | 115.3  | 100.8  | 123.2  | 118.6  | 124.3  | 115.5  |
| 122.6  | 130.8  | 105.6  | 125.5  | 109.7  | 123.2  | 120.9  | 133.7  | 127.7  |
| 130.5  | 129.6  | 135.2  | 132.1  | 117.7  | 133    | 123.4  | 133    | 120.6  |
| 117.2  | 124.3  | 112.7  | 118.3  | 102.4  | 120.4  | 122.3  | 122.1  | 111.2  |
| 96.6   | 108.2  | 103.5  | 108    | 104.8  | 104.5  | 98.4   | 107.8  | 112.9  |
| 1603.5 | 1579.3 | 1253.8 | 1240.1 | 1747.4 | 1796.6 | 1290.5 | 2886.7 | 1940.4 |
| 587.6  | 721.1  | 480.7  | 626.8  | 568.3  | 600.8  | 556.8  | 772.8  | 599.9  |
| 105    | 118.8  | 111.9  | 98.5   | 97.2   | 110.2  | 109.3  | 118.2  | 106.8  |

|       |       |       |        |       |       |        |        |        |
|-------|-------|-------|--------|-------|-------|--------|--------|--------|
| 101.6 | 101.9 | 108.9 | 97.1   | 100.8 | 118.8 | 102.8  | 106.6  | 115.3  |
| 108.1 | 118.8 | 113.4 | 111.8  | 106.3 | 108.5 | 113    | 141.3  | 117.2  |
| 223.8 | 482.2 | 416   | 622.4  | 450.1 | 365.6 | 565.9  | 516.6  | 398.6  |
| 166.5 | 306   | 327.9 | 272.3  | 241.2 | 318.8 | 251.5  | 339.1  | 221.8  |
| 279.9 | 283.9 | 270.9 | 258.1  | 253.7 | 311.6 | 298.6  | 458.1  | 279.1  |
| 121.7 | 141.2 | 136.8 | 132.2  | 121.7 | 133.8 | 133.4  | 126.7  | 116.8  |
| 185.1 | 199   | 215.3 | 178    | 194.4 | 271.5 | 200    | 298    | 224.3  |
| 109.6 | 121.6 | 106.5 | 113.2  | 95.8  | 110.1 | 111.4  | 124    | 109    |
| 108.4 | 120.2 | 108.8 | 119.3  | 108.3 | 118.1 | 114.1  | 120.1  | 117.7  |
| 110.5 | 110   | 109.2 | 107.1  | 93.1  | 105.3 | 111.5  | 111.3  | 112.2  |
| 108.4 | 105.9 | 111.5 | 106.7  | 99.7  | 121.4 | 109.5  | 119.4  | 111.8  |
| 104   | 91.1  | 90    | 100.9  | 91.9  | 101.7 | 94.3   | 105.1  | 106.4  |
| 136.7 | 162.5 | 135.7 | 136.3  | 132.6 | 158.3 | 147.1  | 196.4  | 157.7  |
| 107.7 | 105.9 | 100.9 | 95.6   | 95.4  | 106.9 | 99.2   | 110.7  | 109.3  |
| 203.5 | 194.9 | 169.1 | 190.3  | 166.8 | 196.4 | 188.1  | 222.4  | 210.5  |
| 120.9 | 137.8 | 114.8 | 124.6  | 109.1 | 136.8 | 136.6  | 158.1  | 138.3  |
| 269.4 | 177.6 | 179.8 | 199    | 162.3 | 178.8 | 202.5  | 328.4  | 221.7  |
| 112.9 | 158.9 | 117.4 | 115.9  | 118.4 | 124.4 | 117.6  | 150.5  | 113.3  |
| 268.3 | 225.4 | 192.6 | 215.6  | 199.1 | 256.6 | 235.3  | 503.1  | 467.7  |
| 480.8 | 494.8 | 479.8 | 441.7  | 504.6 | 462.6 | 473.9  | 626    | 612.9  |
| 107.6 | 103   | 102.3 | 98.2   | 88.6  | 103.4 | 97.5   | 102.5  | 116.1  |
| 106.9 | 106.7 | 106.4 | 113.3  | 104   | 106.4 | 109.1  | 104.1  | 104.3  |
| 148   | 214.7 | 214.4 | 169.4  | 176.2 | 244.5 | 157.7  | 213.6  | 151.2  |
| 113.4 | 143.4 | 124.7 | 129.3  | 120.5 | 128.8 | 138.8  | 142    | 118.9  |
| 173.3 | 428.9 | 435.4 | 420.8  | 291.8 | 287.5 | 365.2  | 349.1  | 247    |
| 122.3 | 208.6 | 180   | 169.4  | 163.9 | 145.8 | 171.2  | 220.1  | 142.9  |
| 110.9 | 128.3 | 128.4 | 132.1  | 123.4 | 130.1 | 121.4  | 149.5  | 123.5  |
| 107.1 | 111.9 | 104.2 | 110.6  | 111.5 | 109.6 | 105.9  | 111.9  | 114.3  |
| 112.7 | 105.5 | 106.9 | 99.3   | 94    | 110.8 | 107.8  | 121.8  | 111    |
| 155.7 | 166.8 | 155.8 | 140.1  | 124.4 | 151.7 | 133.7  | 154.4  | 198.2  |
| 107   | 111.3 | 102.8 | 94.2   | 95.5  | 107.7 | 101.2  | 116.3  | 110.3  |
| 102.3 | 103.5 | 100.4 | 100.7  | 96.7  | 103.2 | 103.2  | 108.8  | 112.9  |
| 103.3 | 100.8 | 99.4  | 104.5  | 89.3  | 111.7 | 97.2   | 109.2  | 108.3  |
| 127.2 | 150.8 | 132.2 | 129.8  | 118.4 | 127.9 | 141.8  | 155.4  | 143    |
| 139.5 | 165.1 | 151   | 129.5  | 133.4 | 154.6 | 146    | 153.9  | 139.8  |
| 806.8 | 964.1 | 851.3 | 597.9  | 692.8 | 885.4 | 693.2  | 1380.8 | 1007.3 |
| 121.2 | 126.5 | 113.8 | 104.7  | 111.5 | 107.4 | 114.7  | 125    | 112.9  |
| 624.9 | 532.5 | 358.6 | 1559.7 | 550.6 | 364.9 | 1641.1 | 456.8  | 298.8  |
| 348.9 | 323.1 | 169   | 809.7  | 295.3 | 165.4 | 677    | 306.1  | 167.9  |
| 146.9 | 137.4 | 133.4 | 165.5  | 110.2 | 126.9 | 200.3  | 124.3  | 119.8  |
| 144.1 | 202.1 | 156.1 | 225.8  | 136.1 | 156   | 209.7  | 186    | 152.8  |
| 109.1 | 125.1 | 112.5 | 130.6  | 113.2 | 129.2 | 142.8  | 144.7  | 106.5  |
| 463.4 | 317.7 | 342.4 | 311.5  | 296.6 | 354.9 | 346.5  | 661.9  | 508.8  |
| 111.3 | 116.8 | 104.3 | 106.3  | 110.5 | 117   | 97.9   | 119.1  | 102.4  |
| 110   | 219.7 | 187.5 | 172.9  | 164.5 | 188.7 | 145    | 162.6  | 149.1  |
| 111.8 | 155.2 | 130.3 | 115.6  | 121.1 | 125.3 | 110.7  | 132.4  | 121.6  |
| 105.8 | 114.5 | 109.9 | 117.5  | 101.5 | 114.9 | 106.1  | 129.1  | 117.5  |
| 104.4 | 120.5 | 107.9 | 108.7  | 109.1 | 110.4 | 115.5  | 107.4  | 111.3  |
| 105.3 | 105.9 | 100.7 | 102.5  | 98    | 113.8 | 104.4  | 109    | 113.3  |
| 99.9  | 114.4 | 108.1 | 107.5  | 95.8  | 105   | 109.9  | 118.3  | 114.1  |
| 101.9 | 101.6 | 107.8 | 106.1  | 102.1 | 114.2 | 102.8  | 114.2  | 115.5  |

|        |        |        |        |        |        |        |        |        |
|--------|--------|--------|--------|--------|--------|--------|--------|--------|
| 106.7  | 109.2  | 109.7  | 109.3  | 97.8   | 107.5  | 112.9  | 116.7  | 117    |
| 113.8  | 113.5  | 96     | 109.7  | 97.4   | 113.3  | 106.1  | 101    | 116.5  |
| 104.4  | 109.2  | 99.4   | 101.9  | 97.5   | 110.9  | 113.3  | 119.5  | 114.2  |
| 809.7  | 944.5  | 774.2  | 743.3  | 800    | 963.2  | 676.8  | 1322   | 1029   |
| 105.7  | 118.3  | 105.2  | 155.3  | 96     | 112.8  | 124.8  | 105.6  | 112.4  |
| 217.1  | 321    | 278.8  | 265.1  | 245.3  | 303.5  | 288.6  | 470.5  | 371.4  |
| 346.3  | 424.8  | 352.9  | 275.2  | 365.3  | 364.4  | 306.1  | 578.2  | 345    |
| 106    | 107.7  | 101    | 97.7   | 94.3   | 101.5  | 98.4   | 96     | 104.8  |
| 119.5  | 136.5  | 136.3  | 141.9  | 129.2  | 145.8  | 159.5  | 143.3  | 134.2  |
| 349.1  | 652.5  | 658.4  | 463.7  | 575.3  | 624    | 664.5  | 928.6  | 500.4  |
| 103.1  | 111.2  | 102.5  | 101.5  | 96.3   | 113.9  | 102.2  | 112.8  | 105.6  |
| 113.3  | 135.6  | 115.2  | 108.1  | 103.3  | 115.7  | 121.5  | 126.6  | 123.7  |
| 320.1  | 364.4  | 353.3  | 272.6  | 356.7  | 392.8  | 362.4  | 519    | 251.5  |
| 114.5  | 143.7  | 132.6  | 148.1  | 142.6  | 134.2  | 151.5  | 173.1  | 126.6  |
| 171.3  | 171.5  | 189.5  | 194.8  | 178.1  | 170.6  | 199.6  | 258.4  | 182.3  |
| 388.6  | 309.7  | 272.5  | 265.4  | 244.2  | 251.3  | 286.7  | 495.4  | 439.5  |
| 741.1  | 983.8  | 969    | 886.7  | 876.2  | 907.4  | 968.9  | 1298.6 | 915.6  |
| 273.8  | 240.6  | 249.9  | 306.8  | 213.4  | 257.2  | 322.5  | 418.7  | 289    |
| 142.2  | 194    | 162.8  | 152.8  | 157.4  | 197.9  | 180.2  | 263.2  | 212.1  |
| 132.6  | 125.9  | 133.6  | 116.5  | 105.8  | 123.2  | 111    | 159.7  | 131.6  |
| 119.5  | 111.1  | 117.3  | 104.7  | 98.5   | 112.6  | 110.5  | 133.6  | 127.1  |
| 109.7  | 107.8  | 103.1  | 104.3  | 93.3   | 114.2  | 100    | 111.9  | 102.3  |
| 733.7  | 632.3  | 585.9  | 540.8  | 493.4  | 625.4  | 513.8  | 1394.8 | 1084.2 |
| 107.8  | 107.3  | 108.1  | 108.5  | 95.8   | 110.9  | 106.9  | 118.9  | 109.3  |
| 1990.8 | 1484.3 | 1448.6 | 1792.5 | 1396.5 | 1543.9 | 1528.4 | 2426.7 | 2029.3 |
| 165.5  | 146.5  | 135    | 148.4  | 214.1  | 188.4  | 266.1  | 335.7  | 169    |
| 253.1  | 535.3  | 436.9  | 313.9  | 402.5  | 483.8  | 313.7  | 586    | 414.3  |
| 545.3  | 730    | 733.8  | 686.6  | 633.4  | 615.3  | 707.1  | 957.4  | 850.5  |
| 810.6  | 507    | 439.5  | 508.8  | 411.9  | 521.8  | 475.2  | 1476.6 | 1854.3 |
| 500.7  | 490.7  | 426.4  | 529.5  | 383.9  | 436.6  | 664.9  | 922.6  | 545.4  |
| 108.6  | 116.1  | 105.7  | 112.6  | 102.7  | 112.5  | 101.6  | 121.9  | 126.2  |
| 335.3  | 553.3  | 439.5  | 523    | 433.6  | 397.7  | 561    | 680.5  | 340.4  |
| 346.6  | 418.1  | 516.1  | 393    | 363.6  | 563.2  | 421.8  | 506.6  | 355.6  |
| 101.5  | 106.1  | 100.6  | 103.7  | 96.1   | 103.2  | 99.5   | 110.3  | 106.7  |
| 109    | 108.3  | 107.6  | 100.2  | 100.3  | 116.4  | 93.5   | 116.3  | 121.9  |
| 216.6  | 242.8  | 259.9  | 338.3  | 229.4  | 323.2  | 336    | 442.9  | 301.7  |
| 466    | 471.7  | 480.5  | 390    | 388.8  | 375.9  | 409.1  | 653.2  | 572.5  |
| 128.1  | 121.4  | 123.7  | 136.7  | 107.1  | 118.6  | 120.4  | 142.3  | 125.8  |
| 110.8  | 114.3  | 105.3  | 112.8  | 97.7   | 108.8  | 107.3  | 126.8  | 113.8  |
| 110.6  | 120.4  | 120.9  | 122    | 109.7  | 117    | 112.2  | 134.4  | 117.5  |
| 197.7  | 290.8  | 308.4  | 239    | 249.8  | 255.6  | 211.7  | 577.2  | 358.9  |
| 101.3  | 113.7  | 114.1  | 101.1  | 100.7  | 111    | 110.1  | 124.8  | 117.4  |
| 114.8  | 128    | 119.9  | 117.6  | 106.2  | 120.6  | 112.7  | 129.7  | 111.7  |
| 117.8  | 188.7  | 157.5  | 172.8  | 137.3  | 144.9  | 142.8  | 141.8  | 120.7  |
| 134.9  | 286.2  | 208.2  | 224.9  | 191    | 209.2  | 218.6  | 242.3  | 140.2  |
| 136.9  | 177.9  | 176.8  | 160.3  | 165.7  | 173.5  | 164.6  | 223.9  | 184    |
| 134.5  | 155.4  | 138.8  | 131.7  | 127.7  | 137.5  | 154.2  | 192.9  | 154.3  |
| 106    | 115.3  | 109.1  | 107.5  | 103.6  | 107.7  | 105.8  | 123.2  | 113.7  |
| 730.1  | 1028.7 | 833.5  | 1326   | 792.1  | 776.4  | 1204.3 | 1366.3 | 819.9  |
| 111.8  | 108.4  | 102.1  | 111.2  | 96.8   | 105.6  | 102.7  | 109.8  | 107    |
| 104.1  | 110.9  | 102.5  | 103.1  | 92.8   | 104.1  | 95.6   | 110.8  | 110.6  |

|       |        |       |        |        |        |        |        |        |
|-------|--------|-------|--------|--------|--------|--------|--------|--------|
| 668.9 | 2469.5 | 2742  | 1875.5 | 2453.9 | 2619.5 | 1932.1 | 2655.4 | 1803.7 |
| 111.4 | 109.7  | 113.3 | 104.2  | 103    | 123.8  | 113.8  | 124.7  | 114.2  |
| 133.8 | 131.4  | 125.5 | 127.7  | 124.2  | 126.9  | 132.7  | 170    | 133.8  |
| 131.1 | 128.3  | 116.6 | 141    | 109    | 135    | 115.5  | 160    | 128.9  |
| 111.3 | 100    | 103.1 | 96.8   | 94.8   | 106.5  | 102    | 105.7  | 110.7  |
| 113.3 | 112.7  | 99.5  | 103.1  | 95.5   | 108.4  | 105.8  | 103.8  | 105    |
| 126   | 145.3  | 151   | 122    | 127.9  | 145.5  | 140.2  | 144.5  | 154.9  |
| 108.2 | 124.1  | 107.7 | 105.3  | 99.3   | 116.6  | 116.9  | 96.6   | 103.8  |
| 105.6 | 105.1  | 97.9  | 96.7   | 92     | 106    | 95.8   | 109.9  | 99.5   |
| 361.8 | 520.9  | 539.9 | 511.9  | 387.3  | 338.7  | 397.7  | 875    | 527.1  |
| 280.8 | 419.7  | 338.3 | 335.5  | 348.6  | 365.2  | 363.6  | 758.2  | 429.9  |
| 258.2 | 282.7  | 244.2 | 206.5  | 226.4  | 337.9  | 251.6  | 393.3  | 373.6  |
| 132.5 | 206.1  | 181.8 | 139.9  | 181.6  | 159.6  | 170.6  | 186.6  | 135.3  |
| 106.9 | 111.4  | 102.8 | 97.4   | 88     | 107.6  | 97.2   | 106.4  | 109.7  |
| 134.8 | 132.5  | 129.6 | 117.3  | 117.5  | 140.8  | 118.4  | 161.7  | 197.3  |
| 108.2 | 113.5  | 117.7 | 122.8  | 110.5  | 122.6  | 115.6  | 139.5  | 116.8  |
| 106   | 114.4  | 100.1 | 96.2   | 95     | 113.7  | 95.8   | 107.7  | 106.5  |
| 113.7 | 116.2  | 113.5 | 144.8  | 104.4  | 124.5  | 117.4  | 132.3  | 134.1  |
| 134.8 | 208.3  | 190.4 | 179.9  | 161.6  | 204.2  | 170.4  | 242.7  | 178.6  |
| 105   | 103.3  | 110.1 | 103.5  | 84.7   | 110.5  | 101    | 112.9  | 108    |
| 137   | 225.9  | 198.6 | 194.9  | 185.5  | 198.3  | 187.8  | 252.4  | 235.7  |
| 98.2  | 105.4  | 105.2 | 104    | 89.6   | 106.3  | 95.3   | 104.6  | 105.7  |
| 100.2 | 113.9  | 103.5 | 103.7  | 103.2  | 116.7  | 106.3  | 111.1  | 118.9  |
| 104.2 | 115.3  | 104.5 | 106.9  | 99.9   | 109.2  | 104.8  | 127.9  | 101.1  |
| 108.1 | 115    | 114.9 | 107.4  | 108    | 120.5  | 119.5  | 125.1  | 109.5  |
| 107.2 | 114    | 99.9  | 93     | 96.9   | 103.4  | 106.5  | 110.6  | 118.9  |
| 104   | 116.9  | 116.6 | 104.4  | 94     | 113.6  | 103.5  | 121.2  | 115.3  |
| 103.2 | 112    | 104.1 | 106.1  | 98.3   | 107.8  | 96.7   | 115.9  | 121.6  |
| 107.4 | 115.4  | 102.4 | 115.4  | 104.4  | 107.5  | 102.6  | 114.1  | 111    |
| 104.6 | 106.8  | 98.2  | 95     | 92.2   | 105.5  | 97.8   | 97     | 103.1  |
| 118.8 | 131.3  | 122.5 | 97.4   | 108.3  | 121.6  | 116    | 135.7  | 113    |
| 103.1 | 103.3  | 101.7 | 106.2  | 96.2   | 116.3  | 106.2  | 104.5  | 113    |
| 247.5 | 208.1  | 206.7 | 202    | 201.2  | 268.5  | 268.3  | 351.6  | 261.9  |
| 106   | 111.2  | 104.8 | 108.5  | 96.1   | 112.1  | 112.7  | 107.4  | 108    |
| 141.7 | 118.7  | 116.1 | 127.2  | 111.7  | 146.3  | 123.4  | 170.6  | 172.7  |
| 101.2 | 115    | 102.9 | 94.2   | 87.6   | 105.6  | 102.7  | 96.6   | 107.8  |
| 435.2 | 429.1  | 447.6 | 294    | 363.8  | 522.8  | 415.8  | 715.2  | 551.2  |
| 105.9 | 98.4   | 96.6  | 97.3   | 101.6  | 105.2  | 103    | 108.8  | 112.4  |
| 99.1  | 105.9  | 101.4 | 97.6   | 91.5   | 101.4  | 99.1   | 106    | 112.6  |
| 104.2 | 104.4  | 105.8 | 102.9  | 98     | 106.8  | 105.6  | 103.3  | 115.3  |
| 252.8 | 257.8  | 224.4 | 237.8  | 230.5  | 235.4  | 271.9  | 408.6  | 300.7  |
| 355.5 | 505.2  | 342.3 | 660.3  | 353.9  | 403.8  | 517.8  | 645.3  | 461.2  |
| 105.6 | 108.5  | 99.4  | 95.1   | 91.7   | 101.7  | 97.7   | 106.8  | 106.3  |
| 119.5 | 129.2  | 114.1 | 121    | 111.4  | 120.9  | 124.6  | 144.1  | 132    |
| 104   | 109.3  | 105.9 | 103.2  | 92.8   | 103    | 102.5  | 120.4  | 110.5  |
| 129.7 | 162.1  | 125.1 | 132.3  | 126    | 139    | 121.4  | 152.7  | 126.6  |
| 156.3 | 172.2  | 165.6 | 156.5  | 135.3  | 177.7  | 158.1  | 195.9  | 141.4  |
| 112   | 118.4  | 121.2 | 102.5  | 116.7  | 143    | 109    | 134    | 116.9  |
| 130.4 | 142    | 114.3 | 117    | 98.8   | 120.3  | 123    | 139.7  | 124.6  |
| 321   | 405.8  | 360.6 | 377.5  | 369.9  | 431    | 554.5  | 946.7  | 321.6  |
| 728.5 | 917.4  | 898.2 | 710.1  | 850.2  | 813.9  | 836.8  | 1044.7 | 722.1  |

|        |        |        |        |        |        |        |        |        |
|--------|--------|--------|--------|--------|--------|--------|--------|--------|
| 291.8  | 456    | 374.8  | 575.9  | 421.9  | 361.9  | 674.7  | 549.5  | 376.6  |
| 203.2  | 236.7  | 210.4  | 204.3  | 198.4  | 201.7  | 184.6  | 328.8  | 232.4  |
| 103.6  | 105.4  | 102.1  | 103.5  | 95.8   | 103.4  | 97.6   | 109.5  | 106.5  |
| 1231.3 | 1616.3 | 1637.6 | 1700.3 | 1260.8 | 1650.7 | 1468   | 2393.4 | 1867.2 |
| 126.1  | 144    | 136.4  | 140.1  | 130.3  | 157.4  | 138    | 143.3  | 128.2  |
| 110.3  | 125.6  | 104.5  | 108.7  | 104.4  | 108.1  | 109.1  | 104.1  | 111.5  |
| 96.7   | 114.4  | 98.6   | 100.3  | 98.8   | 111.1  | 108.9  | 113.3  | 101.4  |
| 113.4  | 110.7  | 101.1  | 100.6  | 93.5   | 112.8  | 107.1  | 108.8  | 109.6  |
| 405.5  | 396    | 302.6  | 282.6  | 270.6  | 330.2  | 302.1  | 716.1  | 593    |
| 834.7  | 542.5  | 575    | 629.8  | 594.8  | 660.8  | 679    | 1125.1 | 896.4  |
| 110.3  | 113.9  | 117.8  | 103.4  | 103.4  | 115.4  | 115.2  | 110.5  | 119    |
| 114    | 121.2  | 104.7  | 115.7  | 112.3  | 109.5  | 118.9  | 128.1  | 129.6  |
| 110.8  | 113    | 104.2  | 99.5   | 96     | 110.9  | 110.3  | 106    | 106.7  |
| 231    | 257.1  | 229    | 187.1  | 211.1  | 241.3  | 196.1  | 350.7  | 273.1  |
| 211.3  | 325.9  | 255.9  | 358.5  | 249.5  | 223    | 256.5  | 586.7  | 364.3  |
| 152.5  | 177.3  | 159.2  | 187.6  | 144.1  | 175.6  | 179.1  | 227.6  | 203.4  |
| 105.8  | 108.3  | 107.3  | 97.9   | 90.6   | 115.7  | 100.1  | 107.6  | 109.1  |
| 106    | 111.4  | 125.9  | 101.5  | 112.7  | 120.9  | 106.2  | 134.5  | 122.9  |
| 228    | 250.7  | 262.7  | 250.1  | 258.8  | 257.6  | 291    | 405.7  | 279.8  |
| 160.4  | 122    | 156.7  | 116.2  | 127.1  | 147.8  | 145.5  | 255.8  | 190.3  |
| 108.9  | 103.5  | 103.5  | 96     | 94.6   | 103.3  | 104.8  | 111.8  | 104.8  |
| 133.3  | 132.4  | 137    | 131.1  | 114.1  | 137.1  | 121.3  | 150.4  | 121.6  |
| 117    | 114.1  | 106.5  | 110    | 97.7   | 114.5  | 108.4  | 122.5  | 116.1  |
| 120.8  | 118.5  | 113.9  | 108.7  | 109.1  | 128    | 116.3  | 149.3  | 133.7  |
| 546.2  | 690.3  | 664.7  | 507.1  | 522.4  | 631.7  | 557.2  | 1076.4 | 718.3  |
| 110    | 113.7  | 102.3  | 104.2  | 103.2  | 105.5  | 110.2  | 122.1  | 107.5  |
| 126.7  | 136    | 126.6  | 123.8  | 107.3  | 136.2  | 124.2  | 157.7  | 136.9  |
| 118.3  | 128.3  | 117.3  | 104.9  | 113.9  | 131.3  | 109    | 132.9  | 134.8  |
| 112.8  | 116.3  | 130    | 109.9  | 97.6   | 128.6  | 114.7  | 126.1  | 115.9  |
| 226.6  | 211.9  | 220.9  | 244.6  | 222.9  | 198.1  | 205.4  | 317    | 272.8  |
| 105.2  | 109.9  | 104.7  | 100.6  | 111.4  | 122.1  | 111.6  | 109.1  | 119.8  |
| 143.4  | 165    | 126.8  | 150.8  | 128.9  | 145    | 171.5  | 198.9  | 126.1  |
| 351.7  | 322.9  | 239.5  | 429.3  | 270.4  | 303    | 477.2  | 587.5  | 488.3  |
| 102.1  | 111    | 111.5  | 109.7  | 101.4  | 110.4  | 108.1  | 115.3  | 103.5  |
| 153.3  | 179.8  | 139.3  | 151.2  | 128.4  | 149.9  | 142.9  | 215.1  | 224.9  |
| 619    | 784.7  | 778.5  | 491.7  | 684.3  | 782.1  | 583.6  | 1261.8 | 771.5  |
| 120.8  | 122    | 111.7  | 124.2  | 100.9  | 113.4  | 115.7  | 113.1  | 117.4  |
| 951.1  | 1068.8 | 1053.6 | 920.9  | 1218.8 | 1066.3 | 1133.4 | 1704.8 | 1040.2 |
| 104.7  | 108.6  | 108.8  | 96.8   | 110.1  | 125.2  | 104.4  | 124.7  | 111.7  |
| 104.2  | 112.5  | 97     | 92.4   | 94.7   | 95.8   | 104    | 102.7  | 109.9  |
| 120.7  | 111.3  | 108.3  | 119.9  | 100.4  | 109.7  | 109.6  | 118.3  | 114.6  |
| 544.8  | 499.4  | 582    | 392.5  | 510.3  | 547.3  | 667.1  | 772.3  | 527.4  |
| 112.6  | 120.2  | 113.5  | 111.4  | 110.5  | 134.6  | 113.8  | 141.8  | 117.2  |
| 105.7  | 106    | 94.6   | 99.4   | 94.1   | 104.1  | 97.3   | 104.9  | 107    |
| 104.9  | 102.9  | 107.7  | 102.1  | 93.9   | 108.7  | 106.8  | 105.4  | 116.4  |
| 108.1  | 102.5  | 102.9  | 101.6  | 95.3   | 102.6  | 109.3  | 110    | 100.8  |
| 113.2  | 113.7  | 99.8   | 116.6  | 96.3   | 107.1  | 112    | 116    | 112.5  |
| 124.7  | 122.4  | 126.9  | 114.3  | 125.5  | 127.9  | 109.2  | 152.2  | 126.5  |
| 109.2  | 122.3  | 98.5   | 103.7  | 104.7  | 109.9  | 106.9  | 108.4  | 118.8  |
| 99.3   | 107.1  | 99.1   | 99.8   | 93     | 101.9  | 101.6  | 100.2  | 105.6  |
| 112.8  | 116.6  | 111.4  | 116.5  | 106.4  | 132.5  | 110    | 121.9  | 115.4  |

|        |        |        |        |        |        |        |        |        |
|--------|--------|--------|--------|--------|--------|--------|--------|--------|
| 590    | 403.7  | 482.8  | 552.8  | 412.5  | 448.3  | 575.4  | 512    | 346.1  |
| 98.3   | 103.1  | 98.1   | 104.3  | 95.8   | 111.6  | 100.2  | 109.3  | 113.1  |
| 119    | 117.3  | 130.1  | 101.1  | 103.8  | 113.4  | 116.7  | 124.1  | 122.5  |
| 106.9  | 111.2  | 98.7   | 99.2   | 91.3   | 106.9  | 99.6   | 107.8  | 100.4  |
| 102.7  | 102.1  | 106.6  | 102.4  | 95.6   | 109.4  | 109.8  | 105.4  | 104.1  |
| 107.8  | 116.9  | 106.3  | 99.7   | 98.6   | 107.4  | 105.5  | 118.3  | 118.1  |
| 103.9  | 103.8  | 97     | 102    | 92.8   | 97     | 91.7   | 108.8  | 99.7   |
| 115.4  | 117.2  | 102.3  | 110.6  | 91.2   | 112.1  | 104.9  | 113.2  | 110.4  |
| 105.4  | 117.1  | 106    | 103.3  | 98.5   | 106.1  | 110.1  | 116    | 114.4  |
| 106.7  | 108.2  | 103.1  | 101.5  | 91.5   | 104.9  | 103.7  | 106.1  | 102.6  |
| 1298.4 | 2011.2 | 1568.7 | 1933.4 | 1222.6 | 1317.9 | 1531.9 | 1209.8 | 1526.4 |
| 399.2  | 684.8  | 661.4  | 561.9  | 515.1  | 563.9  | 635    | 1052.2 | 608.1  |
| 270.8  | 313.2  | 293.7  | 266    | 269.9  | 316.7  | 271    | 372.8  | 346.6  |
| 106.9  | 110.6  | 102.1  | 101.6  | 100.6  | 109.7  | 110.7  | 106.8  | 116.5  |
| 320.4  | 552.1  | 515.1  | 433.5  | 470.6  | 476.4  | 444.6  | 545.3  | 366.4  |
| 110    | 98.5   | 100.3  | 95.1   | 89.5   | 105    | 96.7   | 105.2  | 104.2  |
| 200    | 159.6  | 167.6  | 177.4  | 167.5  | 267    | 126.1  | 305.8  | 258.7  |
| 146.1  | 185.8  | 170.8  | 167.4  | 159.6  | 181    | 170.6  | 210.6  | 170.5  |
| 103    | 101.3  | 102.4  | 98.2   | 104.8  | 110.2  | 111.1  | 111    | 110.5  |
| 126.3  | 119.4  | 108.8  | 128.2  | 126.7  | 121.6  | 165.5  | 154.2  | 115.8  |
| 109.9  | 115.7  | 110.6  | 95.4   | 102.8  | 104.6  | 111.9  | 127.2  | 116.6  |
| 100.9  | 104.7  | 100.6  | 104    | 92.8   | 111.2  | 100.7  | 113    | 95.8   |
| 101.2  | 107.7  | 96.2   | 96.5   | 95.2   | 101.2  | 107    | 107.1  | 110.1  |
| 154.6  | 116    | 101.4  | 109.9  | 102.1  | 113.9  | 113.5  | 259.8  | 346.4  |
| 108.2  | 104.5  | 101.1  | 103.1  | 91.7   | 107.1  | 101.8  | 114.7  | 125.2  |
| 108.7  | 108.6  | 102.8  | 98.2   | 96.8   | 100.1  | 116.4  | 104.8  | 114.6  |
| 100.9  | 102.3  | 98.9   | 107.2  | 88.1   | 99     | 92.6   | 100.7  | 105.8  |
| 108.2  | 99.5   | 99.4   | 105.9  | 99.6   | 104.3  | 102.6  | 112.7  | 109.5  |
| 112.1  | 106.3  | 106.6  | 115.1  | 97.3   | 104.7  | 103.7  | 112.3  | 107.2  |
| 104.3  | 106.6  | 110.9  | 101.2  | 90     | 103.1  | 102.1  | 109.8  | 106.6  |
| 108.4  | 103.7  | 101.5  | 103.3  | 98     | 119.2  | 97.8   | 109.6  | 108.2  |
| 116    | 121.8  | 104.1  | 96.6   | 99.3   | 106    | 98.4   | 105.8  | 105.1  |
| 107.7  | 114.9  | 96.3   | 103.8  | 103.7  | 112.2  | 97.1   | 116.6  | 112.7  |
| 102    | 108.7  | 99.1   | 102.9  | 100.2  | 109.3  | 103.9  | 116.4  | 105.1  |
| 291.1  | 294.7  | 574.8  | 371.6  | 277.6  | 384    | 242.4  | 688.9  | 427.8  |
| 763.2  | 1341.4 | 1421.8 | 1051.1 | 1210.3 | 1287.3 | 921.2  | 1157.4 | 588.4  |
| 374.1  | 524    | 681.4  | 561.4  | 484    | 397.3  | 456.8  | 737.6  | 406.6  |
| 112.9  | 153.3  | 144    | 111.9  | 128.5  | 147.8  | 113.3  | 142.1  | 115.2  |
| 134.9  | 369    | 232.6  | 232    | 289.8  | 200.9  | 173    | 400.1  | 151.2  |
| 105.6  | 103    | 106.6  | 102.3  | 93.9   | 104.5  | 102.8  | 111.6  | 104    |
| 101.9  | 106.6  | 105.7  | 105.1  | 95.2   | 105.6  | 107    | 107    | 105.9  |
| 103.9  | 106.7  | 106.3  | 105.4  | 97.3   | 107.7  | 108.1  | 116.8  | 110.2  |
| 95.5   | 106.4  | 101.9  | 95.5   | 92.1   | 103.1  | 94     | 104.5  | 108.2  |
| 108.7  | 107.7  | 96.6   | 104.2  | 98.2   | 106.3  | 103    | 106.5  | 110.4  |
| 110.2  | 103.2  | 105.4  | 103.9  | 96.1   | 106.3  | 105.1  | 108.1  | 117.1  |
| 109.2  | 102.6  | 99     | 97.5   | 96.8   | 112.4  | 104.8  | 115.1  | 117    |
| 108.5  | 104.4  | 95.7   | 105.8  | 93.3   | 106.9  | 103.6  | 110    | 124.7  |
| 200.9  | 382    | 322.1  | 274.7  | 262.6  | 295.9  | 269.9  | 442.1  | 321.3  |
| 294.7  | 525.8  | 449.1  | 386.2  | 479.3  | 456.6  | 437.2  | 778.4  | 475.6  |
| 109.8  | 112.5  | 101.9  | 102.3  | 106.8  | 110.1  | 104.4  | 117.1  | 109.6  |
| 132.2  | 144.4  | 120.5  | 121.4  | 123.7  | 159.1  | 148.1  | 217.6  | 159.9  |

|        |        |        |        |        |        |        |        |        |
|--------|--------|--------|--------|--------|--------|--------|--------|--------|
| 285.8  | 215    | 242.3  | 338.6  | 279.5  | 218.2  | 295.3  | 351.1  | 265.4  |
| 110.7  | 120.8  | 102.8  | 104    | 105.3  | 105.5  | 107.1  | 110.9  | 107.6  |
| 581.4  | 571.9  | 618.7  | 781.4  | 461.7  | 629.8  | 691.1  | 749.8  | 561.1  |
| 110.9  | 121    | 100.5  | 95.7   | 94.1   | 113    | 98.4   | 122.7  | 104.5  |
| 105.1  | 137.7  | 108.2  | 161.8  | 103.7  | 109.5  | 132    | 118.6  | 116.4  |
| 108.4  | 111.5  | 102.6  | 108.1  | 97     | 110.7  | 101.2  | 114.2  | 118.8  |
| 112.7  | 139.5  | 144.2  | 138.2  | 124    | 169.9  | 126.8  | 162.3  | 161.5  |
| 110.7  | 120.6  | 104.8  | 103.6  | 101.7  | 113.2  | 98.8   | 122.9  | 111.3  |
| 732.2  | 1158.5 | 1496.1 | 1144.9 | 1210.6 | 1249.6 | 1301.8 | 1405.2 | 817.2  |
| 135.4  | 140.4  | 127.7  | 143.6  | 138.2  | 161    | 139.3  | 179    | 190.2  |
| 103.9  | 103.6  | 102.3  | 87.8   | 90.6   | 101.9  | 105.3  | 104.4  | 103.4  |
| 116    | 109    | 99.9   | 103    | 98.1   | 111.6  | 105.9  | 116.3  | 105.6  |
| 446.4  | 503.4  | 493.2  | 575.6  | 497.7  | 569.6  | 682.8  | 797.5  | 522.5  |
| 108.3  | 105.8  | 98.5   | 103.2  | 95.3   | 114.2  | 104.2  | 116.8  | 128.6  |
| 173.9  | 214.3  | 220.4  | 191.1  | 244.4  | 215.6  | 247.9  | 389.6  | 214.1  |
| 102.7  | 113    | 114    | 107.3  | 102.4  | 120.8  | 107.9  | 114.1  | 151.9  |
| 102.5  | 106.6  | 104.6  | 93.3   | 91.6   | 104.7  | 109.9  | 109.1  | 118.1  |
| 203.6  | 204.9  | 210.1  | 176.2  | 179.7  | 199.3  | 153.7  | 346.7  | 360.3  |
| 107.1  | 105.5  | 110.4  | 88.7   | 93.7   | 113.2  | 96.8   | 98.3   | 105    |
| 160.5  | 185.8  | 144.1  | 155.2  | 140.3  | 137    | 139.6  | 194    | 169    |
| 565.3  | 315    | 341.5  | 349.1  | 258.6  | 383    | 291.1  | 784.5  | 612.5  |
| 604.8  | 401.8  | 462.2  | 322.1  | 433.7  | 482.8  | 468.3  | 1002.6 | 803    |
| 114.3  | 117.8  | 118.6  | 114.2  | 122.9  | 117.9  | 114.7  | 139    | 134.7  |
| 115.8  | 121.2  | 127.4  | 107.9  | 115.3  | 124.7  | 113.2  | 135.4  | 128.9  |
| 153.6  | 191.3  | 162.9  | 161.7  | 152.5  | 186.9  | 154.6  | 278.9  | 230.5  |
| 99     | 106.8  | 101.1  | 102.8  | 96.6   | 99.9   | 93.7   | 106.6  | 108.7  |
| 115.4  | 125.7  | 128.9  | 106.7  | 107.5  | 118.9  | 114.7  | 151.6  | 145.6  |
| 98.6   | 105.8  | 104.9  | 105.5  | 97.8   | 105.1  | 102    | 104.5  | 105.5  |
| 144.5  | 154    | 149.8  | 155.8  | 146.6  | 161.7  | 121.3  | 274.4  | 222.4  |
| 101.6  | 109.1  | 104.7  | 102    | 97.8   | 112.4  | 102.5  | 114.4  | 110    |
| 109.7  | 115    | 110    | 103.8  | 104    | 108.9  | 101.4  | 106.4  | 109.4  |
| 229.6  | 219.4  | 199.6  | 182    | 215.1  | 221.2  | 166.2  | 406.1  | 268.7  |
| 103.8  | 116.9  | 110.4  | 108.9  | 101.9  | 114.7  | 110.7  | 119.1  | 112.3  |
| 138.4  | 218.7  | 192.3  | 185.3  | 155.4  | 200.1  | 195.6  | 230.7  | 188.7  |
| 190.6  | 206.8  | 153.4  | 191.6  | 162    | 138.9  | 227.7  | 275.8  | 195.6  |
| 174.5  | 198.9  | 212.1  | 201.9  | 175.6  | 199.3  | 210.5  | 222.5  | 182.2  |
| 118.7  | 128.6  | 121.2  | 133.9  | 128    | 145.7  | 153    | 144.6  | 128.4  |
| 191.7  | 188.7  | 197.9  | 183.6  | 177.1  | 191.8  | 174.9  | 236.8  | 190.4  |
| 121.8  | 119.7  | 122.5  | 127.8  | 113.4  | 126.9  | 115.7  | 132.2  | 117.1  |
| 108.7  | 103    | 100    | 100.9  | 97.5   | 104.2  | 99.2   | 113.3  | 115.8  |
| 112.7  | 130.7  | 124.3  | 120.3  | 116.7  | 120.6  | 118.3  | 157.7  | 134.8  |
| 573.1  | 1521.5 | 1600.5 | 1121.7 | 1347.4 | 1735.5 | 1192.7 | 1426.1 | 676.5  |
| 204.9  | 168.6  | 167.2  | 172.1  | 151.9  | 158.8  | 164    | 278.9  | 255.3  |
| 1578.2 | 1577.2 | 1266.1 | 994.4  | 1058.4 | 1299.7 | 1023.7 | 2493.7 | 2228   |
| 104.6  | 107.3  | 106.1  | 98     | 90     | 98     | 98.2   | 107.1  | 108.1  |
| 122.6  | 133.6  | 104.9  | 116    | 104.9  | 108.2  | 111.2  | 142.8  | 137.3  |
| 154.7  | 142.1  | 139.2  | 137.2  | 142.1  | 156.8  | 136.9  | 194.5  | 172.6  |
| 386    | 320    | 304.8  | 254.8  | 311    | 322.8  | 304.4  | 520.1  | 521.9  |
| 159    | 133.3  | 143.4  | 154.9  | 127.5  | 154.3  | 126.8  | 206.8  | 212.3  |
| 136.9  | 215.9  | 184.3  | 190.6  | 211.4  | 178.7  | 184.9  | 242.2  | 190.8  |
| 608.6  | 533    | 529    | 465.4  | 519.6  | 707.1  | 606.7  | 1252.7 | 1147.9 |

|        |        |        |        |        |        |        |        |        |
|--------|--------|--------|--------|--------|--------|--------|--------|--------|
| 249.9  | 403.4  | 375.9  | 321.6  | 322.3  | 396.8  | 399.5  | 877.6  | 583    |
| 124.3  | 129.8  | 134.1  | 103.3  | 121.7  | 129.8  | 127.8  | 177    | 141.5  |
| 390.7  | 606.8  | 700.5  | 528    | 527    | 679.4  | 651.6  | 787.7  | 458.4  |
| 151.2  | 198.5  | 168.7  | 160.8  | 163.7  | 169.4  | 166.4  | 206.8  | 159.3  |
| 109.4  | 111.5  | 110.4  | 108.1  | 106.1  | 113.8  | 112.9  | 109.8  | 114.5  |
| 155    | 131    | 134.4  | 135.5  | 128    | 147.8  | 148.3  | 179.4  | 164.1  |
| 2184.1 | 2114.5 | 1818.9 | 1403.5 | 1736.9 | 2386.2 | 1638.5 | 3366.6 | 2477.4 |
| 464.8  | 377.9  | 297.1  | 411.7  | 298.4  | 342.8  | 491.7  | 911.5  | 548.5  |
| 1276.8 | 848.8  | 775.6  | 722.1  | 815.1  | 876    | 877.4  | 1443.2 | 1114.1 |
| 100.6  | 105.9  | 103.3  | 95.7   | 94.9   | 105.2  | 99.2   | 106.1  | 99.3   |
| 224.9  | 317.5  | 392.7  | 343.2  | 241.5  | 350.4  | 379.5  | 731.4  | 528.9  |
| 137    | 151.3  | 153.4  | 128.4  | 155.4  | 156.9  | 134.3  | 200    | 164.6  |
| 119.8  | 114.1  | 142    | 126.1  | 112.8  | 129.6  | 127.9  | 188.9  | 135.7  |
| 129.7  | 150.4  | 122.4  | 123.1  | 124.1  | 136.7  | 129.5  | 188.6  | 191.1  |
| 555.2  | 623.7  | 636.4  | 503.2  | 516.3  | 651.9  | 616.5  | 846.7  | 703.4  |
| 176.8  | 221.2  | 202.6  | 177.8  | 186.5  | 196.5  | 181.2  | 319.9  | 358.7  |
| 110.5  | 121.9  | 113.1  | 104.9  | 113.9  | 120.1  | 114.6  | 145.7  | 141.3  |
| 407.8  | 281.5  | 240.3  | 287.8  | 328.8  | 315.7  | 340    | 508.3  | 354.1  |
| 407.1  | 500    | 482.1  | 317.7  | 414.3  | 508.7  | 236.8  | 958.2  | 782.3  |
| 221.1  | 230    | 202.3  | 206.6  | 185.5  | 195.5  | 199.8  | 386.5  | 391.2  |
| 603.3  | 515.8  | 489.2  | 388.5  | 396    | 583.5  | 415.3  | 1057.3 | 902.7  |
| 193.9  | 182.8  | 162.4  | 141.4  | 158.9  | 183.9  | 167.5  | 322.5  | 243.3  |
| 105.6  | 111.1  | 95.7   | 106.2  | 90.4   | 107.1  | 103.4  | 106.8  | 105.5  |
| 146.3  | 213.2  | 225.7  | 210    | 193.9  | 218.7  | 209.8  | 294.6  | 247.6  |
| 1397.7 | 1156.8 | 1321.1 | 1019.8 | 998.9  | 1301.6 | 1322.3 | 2385   | 1651.5 |
| 263.9  | 390    | 395.9  | 312.9  | 325.9  | 320.7  | 295.8  | 543.6  | 321.8  |
| 178.9  | 188    | 169.9  | 168.4  | 142.5  | 156.9  | 151.7  | 278.6  | 281.3  |
| 110.8  | 124.9  | 109.6  | 110.6  | 112.1  | 121.5  | 110.7  | 140.9  | 127.5  |
| 118.4  | 123.5  | 117    | 105.6  | 116.3  | 137.9  | 120    | 160    | 117    |
| 106    | 107.5  | 107    | 102.6  | 93.5   | 116.3  | 108.6  | 119.5  | 110    |
| 321    | 397.1  | 288.6  | 359.8  | 297.2  | 316.3  | 255.4  | 385.6  | 404.5  |
| 104.9  | 104.6  | 99.1   | 100    | 95     | 106.9  | 106.1  | 111.4  | 116.5  |
| 105    | 110.3  | 117    | 112.6  | 96.4   | 107.3  | 102.1  | 113.7  | 107.1  |
| 103.4  | 105    | 102.7  | 91.4   | 94.9   | 104.9  | 100.4  | 111.3  | 110.6  |
| 111.3  | 106.9  | 105.6  | 106.9  | 104.4  | 114.7  | 103.4  | 104.2  | 111    |
| 105    | 110.3  | 98     | 91.6   | 94.3   | 106.9  | 104.1  | 104.9  | 111.5  |
| 330.7  | 390.5  | 350.3  | 380    | 331.4  | 345.3  | 351.2  | 522.1  | 398.2  |
| 131    | 138.7  | 122.9  | 112.3  | 110.7  | 122.5  | 136.1  | 195.1  | 144.8  |
| 107    | 112.3  | 110.3  | 101.2  | 93.2   | 108    | 102.8  | 126.3  | 119.4  |
| 105.4  | 103.8  | 95.8   | 97.3   | 94.2   | 106.1  | 99.5   | 110.9  | 116.9  |
| 105.2  | 110.9  | 101.2  | 94.7   | 93.5   | 101.9  | 98.2   | 104    | 106.7  |
| 108.3  | 103.9  | 97.4   | 112    | 104.7  | 114.1  | 103.5  | 105.7  | 107.7  |
| 109.1  | 103.5  | 99.4   | 104.9  | 98.8   | 111.1  | 101.7  | 98.1   | 102.6  |
| 109.1  | 105.3  | 102.9  | 101    | 93.4   | 109.6  | 106    | 107.6  | 108.9  |
| 109.4  | 104.6  | 103.2  | 103    | 95.8   | 111.6  | 102.8  | 104.3  | 106.7  |
| 101.7  | 103.2  | 101.2  | 100.6  | 93.1   | 113    | 104.9  | 112.4  | 107.5  |
| 110.5  | 110.9  | 100.8  | 97.4   | 94.8   | 112.7  | 99.3   | 109    | 109.1  |
| 107.1  | 107.5  | 107.5  | 105.8  | 94.6   | 108.3  | 106.7  | 115    | 114.8  |
| 102.1  | 109.6  | 99     | 141.3  | 99.1   | 110.2  | 126    | 107    | 110.7  |
| 106.8  | 110.7  | 109.8  | 101.8  | 94     | 102.8  | 99.2   | 114.5  | 116.1  |
| 100.2  | 108.3  | 106.4  | 103.7  | 98.1   | 109.4  | 106    | 111.5  | 101    |



|       |       |       |       |        |        |        |        |        |
|-------|-------|-------|-------|--------|--------|--------|--------|--------|
| 101.2 | 109.4 | 104.7 | 104.7 | 94.3   | 114.1  | 103.1  | 105.1  | 106.8  |
| 108   | 107.2 | 113.4 | 106.7 | 99.8   | 112.4  | 99.5   | 115.6  | 126.1  |
| 102.3 | 119   | 104.8 | 143.9 | 91.9   | 109.3  | 114.8  | 107    | 108.4  |
| 106.9 | 115.9 | 102.9 | 107.7 | 99.5   | 104.3  | 105.5  | 104.7  | 101.2  |
| 106.4 | 111.2 | 104.8 | 104.7 | 98.2   | 109    | 108    | 120.5  | 99.1   |
| 107.2 | 109.9 | 100.1 | 108.9 | 92.6   | 112.5  | 106.2  | 130.3  | 103.2  |
| 106.6 | 106.2 | 102.3 | 107.1 | 96.4   | 108.3  | 101.3  | 100    | 106.9  |
| 124.6 | 120   | 134.7 | 112.4 | 107.5  | 148.5  | 123.5  | 146.9  | 144.8  |
| 115.8 | 105.3 | 109.1 | 112   | 100.7  | 108.7  | 105.7  | 108.8  | 112.7  |
| 325.1 | 409.9 | 340.2 | 367.4 | 358.1  | 385.2  | 309.6  | 415.9  | 291.2  |
| 106.7 | 114.5 | 106.4 | 112.4 | 100.6  | 110.6  | 111.4  | 105.3  | 104.7  |
| 651.1 | 729.6 | 498.4 | 767.7 | 551.5  | 583    | 738.4  | 1211.7 | 1109.1 |
| 109.7 | 115   | 102.4 | 104.5 | 100.9  | 109.4  | 114    | 114.8  | 105.2  |
| 210.4 | 306.1 | 260.3 | 323.4 | 249.8  | 269.1  | 265.4  | 345.6  | 261.7  |
| 114.5 | 128.3 | 113.3 | 121   | 113.3  | 122.2  | 115.1  | 126.8  | 140.2  |
| 313.9 | 604.9 | 517.5 | 677.2 | 704    | 555.8  | 1026.8 | 1089.6 | 679.7  |
| 105.9 | 112   | 103.2 | 101.2 | 90.7   | 121.2  | 105.7  | 129.1  | 111.5  |
| 702.9 | 906.9 | 917.1 | 825.9 | 776.9  | 900.8  | 893.5  | 1159.1 | 869.7  |
| 108.3 | 109.7 | 108   | 98.6  | 90.9   | 100.5  | 105.8  | 97.7   | 104.8  |
| 108.6 | 116.1 | 99.1  | 107.2 | 101.1  | 108.1  | 107.7  | 106    | 110.6  |
| 111.7 | 134.8 | 132.1 | 117.9 | 122.9  | 124.8  | 114.2  | 124.9  | 124.9  |
| 521.9 | 535.7 | 610.7 | 414   | 585.5  | 625.5  | 606.7  | 930.4  | 545.2  |
| 229.3 | 252.8 | 240.6 | 223.3 | 250.1  | 270.7  | 250.5  | 358.6  | 244.1  |
| 124.1 | 144.3 | 130.9 | 114.3 | 118.8  | 129.2  | 115.6  | 146.8  | 153.1  |
| 157.3 | 137.8 | 123.5 | 130.7 | 128.8  | 139.5  | 119.1  | 164.5  | 151.1  |
| 114.3 | 113.5 | 117.2 | 110.4 | 102.5  | 113.5  | 115.7  | 124.1  | 103.6  |
| 122.8 | 161.7 | 150   | 127.8 | 139.7  | 157.7  | 137.6  | 169    | 135.7  |
| 110.9 | 105.2 | 110.1 | 100.4 | 96.8   | 104.1  | 104.6  | 111    | 105.1  |
| 105.2 | 107.7 | 102.4 | 108.4 | 97.8   | 102.6  | 105    | 111.8  | 116.7  |
| 113.4 | 120.7 | 108.7 | 127.4 | 113.4  | 117.9  | 124.8  | 121.2  | 120.3  |
| 102.5 | 100   | 100.9 | 97.6  | 89.5   | 105.3  | 94.6   | 107.1  | 113.2  |
| 106.4 | 111.5 | 104.2 | 85.7  | 89.1   | 100.6  | 99.7   | 103.6  | 105.6  |
| 243   | 428.8 | 386.5 | 326.1 | 374.1  | 376.7  | 321.5  | 390    | 268.2  |
| 527.4 | 565.4 | 644   | 470.8 | 640.3  | 468.3  | 546.6  | 1417   | 1392.7 |
| 102.9 | 110.8 | 106.9 | 100.4 | 95.2   | 108.4  | 102.7  | 112.4  | 117.9  |
| 104.3 | 101.6 | 101   | 103.5 | 93.8   | 99.8   | 99.7   | 102.7  | 103.3  |
| 149.2 | 269   | 319.5 | 261.6 | 231.3  | 233.1  | 241    | 245.7  | 205    |
| 113.9 | 114.5 | 112.9 | 106.2 | 100.6  | 108.3  | 112.4  | 114.2  | 101.4  |
| 144.8 | 205.4 | 176.7 | 154.8 | 168.5  | 186.2  | 174.7  | 205.6  | 145.6  |
| 166.5 | 172.4 | 155.9 | 140.1 | 166.1  | 219.9  | 146.6  | 343.3  | 410.7  |
| 155.5 | 240.9 | 175.8 | 212.8 | 182    | 168.2  | 180.4  | 294    | 217.1  |
| 110.7 | 105.1 | 103.4 | 104   | 92.4   | 114    | 99.5   | 107.6  | 102.1  |
| 121.9 | 141.6 | 162.3 | 152.6 | 119    | 178.2  | 128.5  | 151    | 147.2  |
| 597.3 | 1749  | 1353  | 1018  | 1061.9 | 1244.8 | 961.6  | 1395.3 | 813.7  |
| 114.6 | 113.3 | 110   | 108   | 104.2  | 112.6  | 102.7  | 116.1  | 109.5  |
| 171.4 | 184.2 | 194.5 | 170.3 | 152.4  | 198.3  | 178.1  | 227    | 202.7  |
| 106.8 | 106.8 | 105.4 | 99.8  | 91.3   | 115.6  | 102.7  | 111.2  | 111    |
| 103.3 | 112.3 | 105.3 | 107.5 | 91.1   | 101.6  | 94.2   | 103.2  | 114.6  |
| 102.9 | 115.8 | 117.3 | 96    | 102.3  | 110.5  | 104    | 104.9  | 107.6  |
| 118.1 | 118.3 | 108.6 | 108.9 | 116.4  | 119.2  | 111.7  | 125.5  | 117    |
| 295.3 | 288.8 | 262.5 | 215.7 | 201.3  | 239.8  | 273.9  | 312.9  | 279.6  |

|       |       |       |       |       |       |       |       |       |
|-------|-------|-------|-------|-------|-------|-------|-------|-------|
| 140   | 154.5 | 144.5 | 142.8 | 132.4 | 149   | 128   | 177   | 140.4 |
| 149.5 | 183.4 | 187.9 | 170.2 | 136.7 | 157.9 | 188.7 | 201.6 | 177.2 |
| 185.1 | 245.7 | 224.4 | 227.7 | 209.8 | 237.3 | 179.2 | 337.5 | 264.8 |
| 237.8 | 325.6 | 308.4 | 261.6 | 341.9 | 278.6 | 247.6 | 524.8 | 442.5 |
| 107.6 | 119.4 | 105.4 | 110   | 99    | 116.2 | 104.2 | 126.4 | 110.8 |
| 115.5 | 111.9 | 112   | 99.2  | 93.4  | 103.7 | 107.4 | 114.9 | 110.9 |
| 125.8 | 133.1 | 131   | 118.5 | 120.5 | 120.7 | 122.9 | 157.7 | 140.8 |
| 107   | 110.8 | 103.8 | 103.8 | 99.3  | 116.9 | 111.7 | 123.9 | 106.9 |
| 108.8 | 105.4 | 107.4 | 107.5 | 92.8  | 106.3 | 99.8  | 107.2 | 102.6 |
| 99.4  | 106.2 | 103   | 101.5 | 91.4  | 106.6 | 98.4  | 113   | 104.8 |
| 117.6 | 111.4 | 110.9 | 105.1 | 97.7  | 107.3 | 103   | 120.7 | 111.8 |
| 119.5 | 142.2 | 126   | 147.1 | 117.1 | 140.7 | 141.6 | 140   | 122.6 |
| 554.5 | 667.9 | 449.3 | 731.4 | 562.5 | 583.2 | 737.1 | 942.8 | 567.3 |
| 108.2 | 113.8 | 114.7 | 111.4 | 103.2 | 116.4 | 130.6 | 118.9 | 115.5 |
| 103.8 | 104.8 | 102.9 | 95    | 94.3  | 104   | 98.1  | 106.5 | 108   |
| 108.1 | 116.4 | 102.7 | 110.3 | 97.3  | 105.8 | 106.5 | 108.4 | 107.7 |
| 115.6 | 106.3 | 111.7 | 94.3  | 95    | 120.1 | 106.1 | 103   | 120.6 |
| 108.6 | 109.1 | 108.3 | 104.6 | 97.5  | 118   | 103.6 | 105.1 | 107.4 |
| 104.6 | 105.9 | 93.6  | 92.4  | 98.8  | 109.6 | 100.6 | 112.1 | 107.8 |
| 108.5 | 105   | 110.1 | 105.7 | 93.6  | 104.1 | 106.9 | 120   | 113.8 |
| 111   | 117.6 | 127.2 | 104.9 | 106.9 | 132.2 | 119.4 | 113.1 | 114.8 |
| 122.5 | 130.4 | 104.9 | 117   | 111.8 | 109.7 | 110.3 | 129.3 | 116.9 |
| 146.6 | 165.5 | 142.7 | 122.7 | 145.9 | 154.9 | 152   | 189.2 | 175.7 |
| 252.1 | 187.4 | 190   | 136.2 | 192.4 | 178.1 | 193.4 | 256.2 | 250.9 |
| 109.2 | 107.5 | 100.4 | 105.7 | 89.6  | 119.8 | 110.8 | 108   | 103.7 |
| 109   | 109.9 | 111.1 | 107.6 | 101.8 | 113.3 | 108.1 | 109   | 111.4 |
| 110.6 | 101.6 | 98.9  | 107.3 | 95.7  | 107.7 | 94.6  | 106.8 | 111.7 |
| 108.8 | 115.4 | 110.7 | 102.3 | 100   | 121.1 | 101.1 | 113.4 | 120.6 |
| 171.4 | 304.4 | 225.1 | 472.3 | 272.6 | 238.2 | 386.7 | 412.9 | 201.4 |
| 223.8 | 178.5 | 195   | 144.9 | 192.6 | 239.1 | 185.7 | 314.3 | 236.6 |
| 100.6 | 115.6 | 97.4  | 94    | 91.1  | 103.1 | 100.6 | 104.6 | 104.7 |
| 108.5 | 111.5 | 102.3 | 104.5 | 100.9 | 109.4 | 108.3 | 126.9 | 122.9 |
| 103.4 | 115.6 | 102.6 | 100.7 | 104   | 104.1 | 112.6 | 115.4 | 114.1 |
| 226.7 | 624.6 | 485.5 | 510.8 | 395.4 | 427.7 | 473.9 | 523.7 | 294   |
| 121.2 | 128.7 | 114.2 | 110.1 | 118.5 | 125.8 | 125.3 | 136   | 139   |
| 108.8 | 117.7 | 107.7 | 112.4 | 106.3 | 110.4 | 98.4  | 126.5 | 116.2 |
| 115.3 | 112   | 109   | 109.8 | 92.1  | 114.4 | 97.1  | 113.5 | 109.1 |
| 103.6 | 109   | 103.4 | 100.9 | 95.9  | 105.8 | 114.3 | 104.4 | 107.1 |
| 118.3 | 113   | 108.8 | 145.7 | 109.4 | 105   | 123.7 | 121.5 | 113.7 |
| 103.3 | 106.4 | 105.3 | 105.3 | 93.1  | 112.5 | 104.3 | 107.4 | 106.6 |
| 120.6 | 121.6 | 119.3 | 118.3 | 106.7 | 123.9 | 120.1 | 130.6 | 134.1 |
| 266.4 | 350.6 | 324.8 | 291.5 | 297.1 | 333.7 | 351   | 428.4 | 258.9 |
| 100.8 | 112.8 | 105.6 | 101.2 | 99.2  | 102.5 | 102   | 109.1 | 109.3 |
| 150.6 | 164.6 | 171.1 | 157.3 | 141   | 165.8 | 157.3 | 194.4 | 156.8 |
| 103.2 | 99.5  | 95.3  | 96.4  | 99.7  | 99.3  | 89.6  | 100.4 | 110.6 |
| 107.3 | 103.1 | 109.9 | 104.3 | 95.1  | 93.2  | 104.9 | 107.4 | 110   |
| 112.6 | 113.9 | 104.3 | 107.3 | 100.2 | 115.6 | 106   | 119.5 | 125.4 |
| 117.6 | 115.9 | 111.7 | 108.2 | 101.6 | 112.9 | 108.1 | 118.4 | 114.2 |
| 107   | 109.6 | 104.6 | 103.7 | 95.4  | 102.2 | 105   | 110.5 | 107.6 |
| 110.2 | 111.2 | 102.1 | 104.8 | 97.3  | 112.6 | 108.6 | 117.3 | 110.5 |
| 103.1 | 112.1 | 95.2  | 108.3 | 87.9  | 104.7 | 105.9 | 102   | 105.5 |

|       |        |       |       |       |        |       |        |        |
|-------|--------|-------|-------|-------|--------|-------|--------|--------|
| 108.3 | 106.7  | 108.9 | 104.4 | 99.1  | 109    | 93    | 120.5  | 113.1  |
| 127.8 | 150.8  | 128.1 | 133.7 | 143.8 | 148.7  | 143.1 | 146.3  | 127.7  |
| 238.2 | 272.6  | 272.1 | 210.9 | 212.1 | 274.2  | 210   | 407.1  | 269    |
| 306.2 | 271.1  | 272.9 | 254.9 | 188.5 | 292.7  | 217.6 | 487.9  | 351.9  |
| 116.6 | 120.9  | 116.3 | 111.8 | 107.9 | 128.5  | 113.7 | 118.7  | 139.5  |
| 153.2 | 132    | 157.6 | 137   | 153.5 | 158.2  | 147.3 | 206.6  | 148.7  |
| 103.9 | 109    | 108.8 | 103.6 | 99.8  | 103.3  | 109.3 | 106    | 104.2  |
| 903.8 | 1055.7 | 942.9 | 729.6 | 785.8 | 1043.4 | 776.1 | 2140.1 | 1909.3 |
| 162.9 | 272.4  | 266.5 | 196.6 | 227.8 | 244.5  | 187.7 | 348.1  | 229.5  |
| 184.3 | 237.4  | 179.5 | 222.4 | 243.7 | 260.2  | 236.9 | 412.5  | 224.5  |
| 114.7 | 113.9  | 110.2 | 107.7 | 102.6 | 113    | 115.2 | 133.9  | 138.7  |
| 117.6 | 124.6  | 109.6 | 122.1 | 114.9 | 128    | 118.7 | 144.5  | 146.9  |
| 103   | 115.6  | 106.3 | 101.2 | 98.1  | 111.5  | 109.8 | 114.6  | 109.4  |
| 116.9 | 119.2  | 109.8 | 111.4 | 106.8 | 114.9  | 104.3 | 117.4  | 118.1  |
| 101.5 | 110    | 101.6 | 105.5 | 98.6  | 104.3  | 115.5 | 110    | 114.8  |
| 144.9 | 216.2  | 218.7 | 199.3 | 207.3 | 214.6  | 188.3 | 361.7  | 226.7  |
| 156.3 | 266.7  | 203.5 | 217.6 | 220.6 | 269.2  | 236.7 | 279.7  | 230.7  |
| 129.4 | 190.7  | 163   | 205.3 | 156.3 | 177.3  | 204.8 | 236.6  | 184.1  |
| 105   | 100.7  | 108.1 | 97.3  | 98    | 106.7  | 100.2 | 107.6  | 107.8  |
| 121.4 | 129.8  | 138.4 | 140.5 | 117   | 145.9  | 132.4 | 151.8  | 138.6  |
| 106.4 | 105.6  | 99    | 90.9  | 92.4  | 106.2  | 107.2 | 102.5  | 104.5  |
| 107.8 | 114.4  | 100.6 | 93.3  | 91.4  | 104.6  | 102.7 | 115.6  | 116.4  |
| 108   | 106.9  | 106.5 | 103.5 | 97.9  | 111.9  | 115.1 | 121.8  | 97.7   |
| 113.5 | 112.4  | 116.9 | 114.1 | 102.3 | 115.2  | 100.4 | 116.6  | 107.6  |
| 240.9 | 386.4  | 364.3 | 406.8 | 393.6 | 376.4  | 380.7 | 448.8  | 240.6  |
| 108.3 | 112.2  | 108.4 | 108.8 | 101.7 | 122.2  | 107.7 | 117    | 117.2  |
| 119.1 | 135    | 134.9 | 134.6 | 127.9 | 134.2  | 144.8 | 189.4  | 148.9  |
| 106.6 | 117.9  | 110.1 | 100.5 | 99.9  | 108.5  | 113.7 | 121.1  | 117.1  |
| 110.1 | 109.9  | 108.6 | 110.1 | 104.7 | 112.9  | 107.5 | 113    | 120.7  |
| 126.1 | 110.3  | 106.3 | 105.5 | 99.1  | 118.1  | 97.2  | 116.8  | 118.5  |
| 110.2 | 110.1  | 101   | 101.2 | 103.1 | 109.8  | 105.1 | 112.4  | 111.1  |
| 104   | 107.9  | 96.3  | 98.4  | 92.6  | 104.5  | 100.9 | 107.7  | 106.7  |
| 121   | 111.1  | 106.7 | 115.3 | 100.5 | 110.8  | 105.8 | 98.8   | 111.6  |
| 511   | 603.1  | 554.7 | 568   | 527.4 | 478.2  | 580.2 | 781.6  | 530.7  |
| 108.6 | 108.4  | 106   | 96.9  | 96.4  | 113.5  | 104.2 | 100.2  | 111.2  |
| 426.7 | 500.1  | 473.8 | 552.4 | 458.4 | 418.7  | 480.9 | 718.7  | 531.6  |
| 175.8 | 273.4  | 238   | 204.5 | 233.6 | 276.8  | 232.2 | 279.6  | 245    |
| 178.1 | 199.4  | 189.1 | 163.5 | 141.9 | 187.4  | 169.6 | 239.4  | 211.2  |
| 109   | 112.4  | 105.8 | 100.7 | 102   | 107.4  | 104.9 | 114.2  | 102.6  |
| 114.3 | 112    | 103.3 | 95    | 99.6  | 107.7  | 111.1 | 107.7  | 117.9  |
| 115.6 | 110.6  | 105   | 101.6 | 95.1  | 105.5  | 115.4 | 109    | 112.6  |
| 114.5 | 119    | 113   | 114.6 | 115.8 | 118.8  | 124.9 | 131.8  | 130.7  |
| 105   | 106.5  | 95.3  | 104.8 | 101.6 | 105.9  | 113.4 | 113.8  | 105.1  |
| 105.1 | 106.6  | 105.4 | 99    | 89.3  | 107.6  | 100.1 | 104.9  | 101.2  |
| 106.5 | 117.6  | 106.2 | 103.7 | 103.7 | 111.8  | 106.9 | 104.8  | 115.1  |
| 105.9 | 107.9  | 102.7 | 113   | 96.4  | 113.6  | 103.3 | 111.8  | 107.2  |
| 109.5 | 115.2  | 109.9 | 101.1 | 99.6  | 108.1  | 109.3 | 117    | 113.9  |
| 103   | 113.2  | 104.6 | 118.2 | 108   | 119.6  | 109.3 | 120.6  | 111.1  |
| 250.5 | 667.1  | 566.3 | 527.6 | 506.7 | 510.9  | 487.6 | 652.3  | 403.1  |
| 130.6 | 182.2  | 141.5 | 160.4 | 139.1 | 160.7  | 145.4 | 184.5  | 158.7  |
| 134.3 | 139.6  | 127.4 | 127.3 | 107.4 | 116.7  | 123.5 | 129.9  | 128.5  |

|        |        |        |        |        |        |        |        |        |
|--------|--------|--------|--------|--------|--------|--------|--------|--------|
| 232.8  | 317.1  | 336.2  | 278.7  | 286.4  | 345.4  | 415    | 484.2  | 269.7  |
| 102.9  | 117.9  | 109.3  | 104.3  | 96.8   | 103.9  | 113.6  | 103.1  | 107.6  |
| 101.1  | 115.8  | 107.2  | 103.5  | 106.7  | 109.5  | 106.6  | 110.5  | 102.6  |
| 120.4  | 147.1  | 126.1  | 142.9  | 131.8  | 124.5  | 131.7  | 140.3  | 138.8  |
| 164.5  | 140.1  | 183.7  | 207.7  | 164.7  | 150.7  | 202.1  | 302.5  | 252.3  |
| 120    | 120.2  | 119.2  | 116.9  | 108    | 123.9  | 121.1  | 143.2  | 148.6  |
| 125.9  | 156.1  | 140.8  | 122.9  | 117.3  | 147.8  | 130.4  | 182.1  | 154.5  |
| 108.8  | 109.9  | 97.8   | 102.9  | 98.3   | 110.1  | 103.8  | 111.3  | 104.4  |
| 107.9  | 113    | 98.4   | 98.1   | 103.9  | 110.4  | 100.7  | 112.4  | 107.5  |
| 112    | 120.9  | 114    | 113.8  | 114.8  | 116.3  | 99.4   | 132.8  | 130.3  |
| 1747.6 | 3856.5 | 3154.1 | 2466.8 | 3407.3 | 3358.9 | 2930.5 | 5812.6 | 2171.2 |
| 281.9  | 633.2  | 178.7  | 1450.4 | 630.3  | 261.9  | 1357.6 | 782.1  | 418.9  |
| 143.7  | 156.3  | 143.4  | 131.8  | 122.1  | 129.1  | 134.7  | 180.2  | 150.7  |
| 116.6  | 117.6  | 108.9  | 113.9  | 107.7  | 117    | 100.1  | 111.6  | 113.8  |
| 123.4  | 136.1  | 118.6  | 127.2  | 138.6  | 128    | 127    | 155    | 122.9  |
| 107.1  | 109.1  | 99.4   | 93.4   | 95.1   | 109.2  | 100.5  | 105.5  | 108.3  |
| 132.2  | 123.9  | 127    | 127.6  | 111    | 133.4  | 118.6  | 127.4  | 118.2  |
| 110.7  | 111.8  | 102.4  | 98.4   | 103.8  | 117.9  | 103.2  | 118.1  | 109.6  |
| 114.7  | 108.8  | 107.7  | 111    | 108.9  | 107.3  | 100.6  | 114.4  | 117.9  |
| 105.5  | 107.8  | 98.6   | 96.1   | 102.6  | 105.6  | 100.9  | 111.9  | 111.3  |
| 111    | 118.9  | 111.8  | 102.9  | 95.5   | 117    | 103.5  | 122.6  | 119.6  |
| 101.9  | 101.1  | 96.9   | 94     | 97.9   | 104.4  | 97.4   | 106.7  | 100.3  |
| 177.6  | 171.4  | 249.5  | 170    | 126.8  | 199.9  | 202.4  | 150    | 150.1  |
| 111.9  | 123.9  | 115.7  | 104.6  | 113.1  | 118.4  | 108.6  | 123.7  | 133.5  |
| 102.8  | 107.6  | 101.1  | 96.6   | 97.3   | 112.8  | 104.5  | 101.2  | 102.3  |
| 103    | 108.8  | 99.5   | 92.3   | 95.4   | 107.5  | 111.3  | 114.8  | 112.9  |
| 104.3  | 106    | 100.6  | 96.5   | 92.4   | 107.1  | 102.8  | 109.9  | 105.9  |
| 109.7  | 121.8  | 107.6  | 115.4  | 98.1   | 116.8  | 102.7  | 112.2  | 124.6  |
| 106.7  | 105.7  | 96.1   | 97.1   | 95.3   | 111.3  | 96.1   | 114.3  | 110.1  |
| 123.6  | 120.1  | 109.3  | 114    | 110.6  | 122.3  | 112.9  | 126.1  | 135.7  |
| 123.7  | 123.2  | 134.7  | 146    | 104.9  | 136.5  | 155.6  | 122.3  | 123.4  |
| 372.3  | 125    | 122.9  | 120.6  | 118.5  | 172    | 127.8  | 274.9  | 209.5  |
| 324.6  | 356.4  | 349.1  | 408.7  | 304.8  | 332.8  | 503.2  | 467.5  | 311.7  |
| 422.6  | 529.5  | 521.1  | 893.2  | 496.5  | 711.5  | 559.2  | 1161.3 | 678.6  |
| 110.4  | 106.1  | 101    | 107.1  | 93.1   | 111    | 102.3  | 98.8   | 108.1  |
| 107.1  | 110.1  | 103.6  | 104.5  | 96.3   | 102.6  | 114.6  | 117.9  | 116.4  |
| 111.5  | 115.4  | 102.5  | 110.2  | 101.2  | 111.9  | 110.3  | 109    | 111.5  |
| 106    | 110.6  | 106.7  | 99.3   | 96.8   | 105.1  | 101.1  | 101.5  | 106    |
| 154.3  | 190.8  | 180.9  | 299.6  | 188.7  | 183.5  | 256.5  | 243.9  | 144.4  |
| 100.7  | 101.8  | 96.8   | 99.9   | 94.6   | 106.8  | 96.6   | 114.6  | 98.9   |
| 105    | 107.9  | 99.5   | 103.8  | 96.5   | 111.7  | 102.3  | 110.1  | 109.8  |
| 110.5  | 155.3  | 140.7  | 134.3  | 128.2  | 151.8  | 138.6  | 148    | 119.5  |
| 110    | 110.4  | 107    | 91.9   | 91.6   | 104.1  | 105    | 117.3  | 113.6  |
| 108.5  | 127.1  | 104.4  | 92.8   | 105.8  | 117.7  | 107.9  | 116.4  | 126    |
| 159.9  | 130.1  | 126    | 273.5  | 112.3  | 130.9  | 154    | 124.6  | 219.2  |
| 237.1  | 414.8  | 383.1  | 507.4  | 378.9  | 324.3  | 510.6  | 402.7  | 222.3  |
| 922.4  | 410.9  | 346.3  | 404.2  | 310    | 368.7  | 456.5  | 834.3  | 1065.6 |
| 110.1  | 110.2  | 108.2  | 97.8   | 93.5   | 105.1  | 107.2  | 112.2  | 109.5  |
| 101.2  | 101.8  | 103.1  | 100.9  | 103.6  | 104.1  | 101.6  | 115.7  | 108.7  |
| 96.7   | 108.1  | 97.4   | 102.7  | 99.6   | 108.3  | 102    | 103.7  | 110.8  |
| 113.4  | 108.9  | 101.2  | 101.6  | 99.1   | 105.6  | 96.2   | 112.4  | 114.4  |

|        |        |        |        |        |        |        |        |        |
|--------|--------|--------|--------|--------|--------|--------|--------|--------|
| 101.9  | 108    | 100.1  | 97.1   | 97.1   | 104.4  | 98.8   | 110.4  | 109.3  |
| 104.3  | 108.9  | 104.3  | 104.2  | 94     | 104.6  | 106.6  | 106.4  | 100.4  |
| 98.3   | 101.6  | 97.8   | 96.9   | 95.9   | 97.6   | 102.1  | 107.6  | 96.5   |
| 104.4  | 102.7  | 100    | 102.6  | 97.1   | 106.7  | 99.9   | 110.8  | 106.2  |
| 110.6  | 114.8  | 112.3  | 121.6  | 109.7  | 118    | 109.8  | 120.9  | 121.3  |
| 106.5  | 106.5  | 103.9  | 104.4  | 101    | 104    | 99     | 109.6  | 112    |
| 112.4  | 112.9  | 102.2  | 105.1  | 97.5   | 107.6  | 99.4   | 107.5  | 105    |
| 111    | 111.9  | 113.4  | 99.2   | 99.3   | 117.9  | 110.6  | 120    | 118.9  |
| 98.2   | 110    | 98.6   | 98.5   | 96.6   | 106.1  | 98.1   | 98.3   | 110.8  |
| 101.3  | 106.7  | 94.7   | 102.2  | 94.3   | 105.5  | 110.4  | 116    | 105.2  |
| 107.7  | 105.4  | 95.7   | 98.7   | 105.5  | 114.7  | 108    | 115.7  | 109.7  |
| 103.8  | 106.9  | 92.6   | 96.4   | 97.1   | 109.3  | 97.9   | 97.9   | 106.3  |
| 106.6  | 111.2  | 104.6  | 98     | 98.2   | 110.2  | 105    | 108.6  | 111.8  |
| 105.2  | 107.7  | 100.4  | 104.7  | 94.6   | 107    | 105.1  | 107.6  | 110.8  |
| 151.7  | 165.5  | 135.4  | 159.2  | 144.5  | 141.2  | 154.9  | 150.4  | 147    |
| 821    | 601.1  | 583.7  | 445.5  | 859.2  | 688    | 1352.6 | 1157.2 | 697.4  |
| 907.3  | 628.4  | 511.3  | 525.5  | 768.2  | 720    | 1223.9 | 1185.6 | 738    |
| 137.3  | 123.9  | 115.1  | 118.7  | 114.5  | 127.1  | 129.6  | 222.9  | 239.9  |
| 125.5  | 113.2  | 106.2  | 102.2  | 108    | 103.5  | 104.6  | 128.7  | 126.6  |
| 375.2  | 534.3  | 453.8  | 358    | 412.4  | 433.2  | 422.1  | 389.3  | 316.2  |
| 117.8  | 115.5  | 120    | 106.8  | 102.2  | 122.4  | 117.6  | 113.6  | 124.1  |
| 260    | 385.1  | 278.4  | 330    | 283.4  | 330.7  | 273.6  | 442.1  | 293.2  |
| 97.4   | 104.6  | 104    | 99     | 92.6   | 101.3  | 100    | 111.8  | 110    |
| 127.8  | 112.7  | 107.1  | 104.2  | 97.4   | 115.5  | 99.4   | 116.8  | 125    |
| 119    | 112.4  | 107.6  | 108.7  | 109.7  | 121.1  | 106.4  | 129.3  | 140.2  |
| 102.7  | 106.3  | 101    | 99.6   | 97.3   | 119.2  | 102.8  | 120.2  | 112.3  |
| 105.9  | 107.5  | 103.6  | 98.9   | 90.8   | 106.5  | 106.3  | 102.9  | 106.6  |
| 115.8  | 118.2  | 108.7  | 102    | 96.1   | 107.4  | 101.1  | 110.1  | 106.5  |
| 109.5  | 107.7  | 103.5  | 103.9  | 89.8   | 109.4  | 106.6  | 111.8  | 116.3  |
| 108.4  | 110.7  | 96.7   | 101.6  | 93.4   | 109.9  | 98.2   | 102.9  | 106    |
| 108    | 101.3  | 106.1  | 106.3  | 93.5   | 105.3  | 97     | 97.4   | 115.4  |
| 1026   | 631.8  | 421.9  | 452.5  | 609.9  | 579.7  | 545    | 1835.8 | 1254.6 |
| 120.5  | 121    | 107.1  | 117.3  | 108.6  | 117.4  | 111.4  | 120.2  | 116.3  |
| 105.6  | 110.4  | 100.4  | 105.3  | 92.5   | 104.9  | 107.6  | 113.5  | 108.3  |
| 1487.5 | 1371.7 | 1089.9 | 1383.5 | 879.2  | 940.2  | 1234.5 | 2693.4 | 1686.4 |
| 128.3  | 108.2  | 104.3  | 104.6  | 100.7  | 114.8  | 108.2  | 123.1  | 116.4  |
| 102    | 100.5  | 84     | 82.5   | 95.9   | 87.6   | 92.1   | 94.3   | 103.2  |
| 100.3  | 106.1  | 99.1   | 96     | 94     | 103.3  | 94.4   | 103.1  | 99.9   |
| 103.6  | 100.6  | 99.4   | 93.2   | 104    | 103.6  | 92.6   | 120.1  | 102.1  |
| 106.2  | 115.3  | 106.5  | 115.2  | 100.2  | 110.5  | 98.3   | 107.7  | 110.5  |
| 110.6  | 126.7  | 107.3  | 114.3  | 108.2  | 113.6  | 113.9  | 118.3  | 114    |
| 150.2  | 168.3  | 141.9  | 149.4  | 126.3  | 149.5  | 124    | 174.7  | 145.7  |
| 176.2  | 195.9  | 193.5  | 148.1  | 204.5  | 283.4  | 194.2  | 500.4  | 264.4  |
| 136.2  | 149.4  | 130    | 135.1  | 149.3  | 176.4  | 145.6  | 278.8  | 170.3  |
| 102.7  | 112.5  | 112.4  | 103.5  | 97.4   | 114.3  | 102.1  | 105.8  | 112.4  |
| 117.5  | 132.9  | 110.1  | 97.5   | 108.9  | 117.6  | 122.9  | 123.7  | 112    |
| 1115   | 1102.6 | 956.8  | 1536.3 | 1177.5 | 1080.7 | 1381.3 | 1594.8 | 738.2  |
| 105.9  | 105.7  | 107.4  | 106.2  | 110    | 106.8  | 109.2  | 117.7  | 111.9  |
| 111.6  | 111.1  | 106.9  | 107.2  | 97.7   | 106.7  | 100.1  | 106.1  | 106.8  |
| 551.4  | 1097.9 | 798.5  | 1028.3 | 1093.3 | 859    | 556.9  | 1700.1 | 954.4  |
| 168.9  | 246.5  | 216.2  | 203    | 206.4  | 234.7  | 198.6  | 245.8  | 178.7  |

|       |        |        |       |        |        |        |        |       |
|-------|--------|--------|-------|--------|--------|--------|--------|-------|
| 200.7 | 328.2  | 354.3  | 333.9 | 289.3  | 286    | 260.6  | 469.8  | 271.9 |
| 114.4 | 111.2  | 109    | 122   | 105.7  | 115    | 117.1  | 122.3  | 102.4 |
| 356.3 | 393.7  | 429.3  | 396.5 | 371.4  | 412.1  | 484.3  | 533.9  | 318.3 |
| 104.4 | 109    | 105.2  | 113.4 | 94     | 112.7  | 91.7   | 114.8  | 100.1 |
| 120.1 | 113.5  | 115.2  | 106.4 | 106.7  | 120.9  | 120.3  | 129    | 116.8 |
| 121.6 | 135.3  | 114.9  | 140.9 | 116.4  | 127.4  | 125.9  | 140.7  | 125   |
| 116.1 | 110.5  | 111.9  | 130.7 | 108.4  | 121.5  | 117    | 129.5  | 122.4 |
| 112.3 | 105.1  | 104.7  | 107.8 | 95     | 109.8  | 103.4  | 105.5  | 110.5 |
| 107   | 105.9  | 104.1  | 98.7  | 97.1   | 108.8  | 98.5   | 117.7  | 102.5 |
| 97.8  | 111.8  | 113.6  | 104.7 | 101.1  | 114    | 115    | 115.9  | 112.6 |
| 366.7 | 526.5  | 527.4  | 395.7 | 482.3  | 636.4  | 575.4  | 1052.4 | 534.9 |
| 111.5 | 114.6  | 120.3  | 119.2 | 109.2  | 125.3  | 122.4  | 140.6  | 124.7 |
| 129   | 120.5  | 125.8  | 108   | 124.4  | 146.3  | 139.2  | 149.5  | 142.8 |
| 113.5 | 109.6  | 115.3  | 95.7  | 105.3  | 112.1  | 104.7  | 114.5  | 119.5 |
| 174.8 | 193.5  | 178.5  | 169.2 | 167.3  | 190.3  | 158.7  | 268.9  | 207.8 |
| 118.9 | 121.2  | 129.3  | 142.6 | 116.3  | 112.9  | 125.8  | 143.5  | 138.7 |
| 107   | 105.4  | 99.4   | 99    | 94.7   | 106.4  | 104.3  | 107.2  | 103.7 |
| 102.5 | 109.1  | 106.3  | 105.5 | 99.3   | 109.5  | 101    | 101.7  | 105.7 |
| 111   | 103.2  | 100.5  | 107.7 | 100.3  | 118.6  | 108.3  | 121.1  | 114.1 |
| 123.7 | 141    | 147.2  | 147.1 | 121.4  | 145.7  | 126.7  | 164.4  | 165.6 |
| 114.5 | 117.5  | 107.2  | 108.1 | 101.7  | 112    | 106.9  | 121    | 113.1 |
| 112   | 122.6  | 114    | 105.2 | 104.2  | 117.7  | 111.7  | 131.5  | 124.5 |
| 143.1 | 284.2  | 143.6  | 354.8 | 211.3  | 168.3  | 300    | 231.6  | 154.9 |
| 108.3 | 120.7  | 139.6  | 137.1 | 132.1  | 135.3  | 129.9  | 131.2  | 108.6 |
| 701.3 | 1091.6 | 1090.6 | 796.6 | 1112.8 | 1036.7 | 1014.2 | 1827.1 | 985.1 |
| 115.9 | 141    | 135.5  | 120.3 | 130.2  | 130.1  | 127.4  | 173    | 148.7 |
| 202.8 | 329.2  | 317.2  | 210.2 | 234.4  | 322.4  | 233.4  | 383.1  | 282.5 |
| 105.1 | 106.5  | 97.9   | 96.1  | 90.1   | 110.7  | 104.1  | 107.6  | 99.5  |
| 130.2 | 135.9  | 142    | 123.2 | 120.6  | 147    | 111.8  | 165.8  | 142.5 |
| 209.2 | 280.2  | 268.4  | 232.8 | 203.4  | 301.6  | 227.7  | 384.4  | 284.2 |
| 374.9 | 242    | 234.1  | 250.9 | 235    | 226.2  | 249.3  | 534.5  | 448.7 |
| 740.8 | 516.6  | 408.6  | 462.3 | 381.2  | 557.8  | 414.6  | 835.3  | 905   |
| 102.3 | 113.8  | 101.4  | 100.8 | 101.6  | 110.5  | 110.2  | 110.9  | 106.3 |
| 473.2 | 898    | 819.4  | 719.7 | 711.7  | 853.5  | 798.7  | 955.5  | 676   |
| 294.3 | 274.3  | 295.8  | 233.6 | 272.5  | 330.3  | 309.9  | 367.6  | 289.4 |
| 188.9 | 372.6  | 276.5  | 209.3 | 277    | 255.1  | 212.1  | 343.5  | 243.7 |
| 127.6 | 150.1  | 145.4  | 159.7 | 139.9  | 161.1  | 185.1  | 194.5  | 137.4 |
| 119.3 | 132.7  | 111.5  | 120.1 | 107    | 131.6  | 114.5  | 129.5  | 125   |
| 125.9 | 144.4  | 144.1  | 131.5 | 130.9  | 153.3  | 118.6  | 154    | 152.3 |
| 172.9 | 214.5  | 238.6  | 297.2 | 248.7  | 238.9  | 284.8  | 342.4  | 217.9 |
| 201.4 | 200.9  | 142.9  | 115.8 | 199.5  | 180.9  | 317.1  | 300.7  | 185.9 |
| 309.9 | 157.7  | 169.8  | 174.6 | 162.7  | 170.2  | 163.2  | 398.2  | 334.6 |
| 104.1 | 104.2  | 97.8   | 102   | 92.3   | 101.2  | 102.9  | 96.3   | 103   |
| 108.2 | 105.1  | 97.4   | 102.6 | 97.3   | 104.5  | 102    | 102.6  | 101.2 |
| 373.8 | 304.5  | 344.3  | 352.3 | 312.5  | 388.2  | 328.8  | 538.6  | 522.6 |
| 111.8 | 117.2  | 106.8  | 105.5 | 102.1  | 108.4  | 108.5  | 114.7  | 110.7 |
| 109.9 | 113.2  | 101.5  | 99.3  | 91.3   | 108.4  | 93.6   | 110    | 115   |
| 133.5 | 143    | 146.4  | 122.6 | 123.9  | 141.1  | 123.4  | 220.5  | 162.6 |
| 122.2 | 113.2  | 112.3  | 110.5 | 102.7  | 112.8  | 103    | 115    | 119.8 |
| 108.6 | 113.1  | 99.6   | 102.8 | 100.8  | 113.6  | 108.3  | 118    | 114.4 |
| 119.8 | 116    | 130.9  | 123.6 | 107.9  | 120.2  | 120.4  | 121.8  | 125.4 |

|        |        |        |        |        |        |        |         |         |
|--------|--------|--------|--------|--------|--------|--------|---------|---------|
| 104.2  | 106.5  | 100.7  | 96.4   | 99.1   | 107.8  | 101.8  | 103.4   | 111     |
| 111.3  | 105.6  | 102.3  | 100.4  | 101.5  | 117.4  | 97.4   | 123.2   | 110.7   |
| 102.9  | 109.4  | 101.1  | 106.5  | 93.2   | 103.6  | 103.4  | 103.2   | 116.2   |
| 143.5  | 148.1  | 169.8  | 155.8  | 149.3  | 176.1  | 165.9  | 170.7   | 129.8   |
| 200    | 207.3  | 170.5  | 155    | 168.4  | 170    | 193.5  | 249.2   | 279.8   |
| 1585.4 | 789.8  | 463    | 514.8  | 881.3  | 1300.8 | 582.5  | 6558.8  | 8360.9  |
| 7929.4 | 8831   | 6788.2 | 7069.4 | 6886.5 | 7136.8 | 7275.3 | 17517.8 | 18194.3 |
| 134.2  | 108.6  | 98.8   | 475.2  | 113.4  | 119.8  | 668.3  | 129.8   | 111.7   |
| 220.1  | 117.4  | 112    | 1569.5 | 166.8  | 126.7  | 1587   | 194.3   | 121     |
| 114.1  | 133.5  | 121.7  | 119.3  | 112.4  | 128.6  | 109.1  | 142     | 133.7   |
| 104.2  | 114.9  | 104.6  | 113    | 93.9   | 109.9  | 107.6  | 107.8   | 112.6   |
| 103.7  | 113.3  | 101    | 99.9   | 95.8   | 106    | 100.9  | 107.6   | 107.9   |
| 104.4  | 106    | 111.7  | 109    | 98.9   | 104.9  | 104.9  | 108.2   | 105.8   |
| 126.3  | 112.9  | 117.1  | 116.9  | 98.3   | 123.2  | 107.7  | 114.9   | 122.4   |
| 108.7  | 114.4  | 123.4  | 96.8   | 96.3   | 120    | 106.3  | 100.4   | 103.3   |
| 102.8  | 103.2  | 99     | 97.4   | 103    | 102.7  | 99.1   | 104     | 108.9   |
| 106.8  | 113.4  | 100.7  | 113.2  | 103    | 119.7  | 134.9  | 109.4   | 106.6   |
| 119.3  | 137    | 115.1  | 202.4  | 116.3  | 115.7  | 189.9  | 151.6   | 128.1   |
| 123.9  | 114.9  | 108.4  | 151.3  | 103.7  | 110.8  | 127.5  | 118.8   | 114.5   |
| 143.7  | 123.1  | 116.3  | 643.7  | 125.8  | 134.1  | 645    | 161.4   | 122.3   |
| 109.5  | 109    | 102.4  | 97.7   | 95     | 102.8  | 101.7  | 100.2   | 117.1   |
| 100.1  | 104.6  | 100    | 102.5  | 89.5   | 100    | 103.6  | 103.4   | 101     |
| 103.1  | 107.2  | 101.7  | 93.9   | 88.7   | 107.8  | 98.9   | 111.5   | 100.8   |
| 354.5  | 442    | 433.3  | 322.2  | 378.8  | 484.3  | 338.4  | 592.2   | 449.9   |
| 110.6  | 140.5  | 135.3  | 136.8  | 132.5  | 134.7  | 135.2  | 162.9   | 120.2   |
| 150.9  | 230.5  | 218.2  | 231.4  | 185.6  | 180.5  | 282.3  | 242.6   | 205.7   |
| 107.3  | 108.7  | 102.5  | 118.3  | 110.5  | 127.3  | 107.7  | 123.5   | 109     |
| 741.9  | 2166.6 | 2266.1 | 2827.2 | 1603.7 | 2377.6 | 2489.4 | 1920.3  | 691.6   |
| 111.9  | 111.7  | 111.5  | 105.4  | 101.4  | 115.5  | 104    | 124     | 137.9   |
| 108.6  | 115    | 110.7  | 116.7  | 102.9  | 121.1  | 114.6  | 113.7   | 112.5   |
| 103.3  | 106.8  | 100.6  | 100.2  | 98.4   | 99.8   | 103    | 111.8   | 108.2   |
| 153.2  | 161.3  | 152.4  | 127.5  | 129.7  | 161.3  | 145.6  | 206.4   | 187.8   |
| 108.4  | 116.6  | 107    | 99.7   | 101    | 111.7  | 109.5  | 122.5   | 118.2   |
| 114.1  | 109.2  | 102.4  | 105.2  | 97.4   | 110.4  | 106.2  | 123.3   | 113.2   |
| 157.5  | 237.9  | 256.9  | 210.2  | 208.4  | 244.2  | 211.5  | 335.9   | 235.7   |
| 106.6  | 114.9  | 108.9  | 105.8  | 99.4   | 112.1  | 106.1  | 109.5   | 105.6   |
| 99     | 103.8  | 109    | 104.6  | 92.2   | 104.8  | 107.7  | 101.4   | 103.1   |
| 108.3  | 112.6  | 93.9   | 99.3   | 96.6   | 117.3  | 101.8  | 103.6   | 103.4   |
| 102.6  | 108.2  | 110.2  | 103.3  | 105.7  | 111    | 104.7  | 112.1   | 115.5   |
| 130.1  | 138.3  | 138.7  | 126.4  | 131.1  | 141.6  | 128.6  | 158.5   | 133.7   |
| 177.1  | 293.6  | 215.9  | 214.5  | 257    | 310.4  | 297    | 414.2   | 272.2   |
| 111.9  | 116.1  | 104.7  | 127.8  | 115.5  | 118.3  | 115.2  | 119.9   | 125     |
| 140.6  | 175.3  | 169.9  | 146.3  | 154    | 167.6  | 168.6  | 189     | 148.6   |
| 174.2  | 198.5  | 215.6  | 196.6  | 155.2  | 229.8  | 149.4  | 221.9   | 184.5   |
| 230.3  | 380.4  | 287.8  | 250.7  | 296.3  | 315    | 297.6  | 545.7   | 320.3   |
| 132.1  | 189    | 152.9  | 164.8  | 153.9  | 165.4  | 138    | 199.7   | 165.5   |
| 110.2  | 117.5  | 109.8  | 105.6  | 106.2  | 118.6  | 110.4  | 125.5   | 120.6   |
| 108.6  | 103.4  | 103.6  | 102    | 91.8   | 111.8  | 90.7   | 104.5   | 108.5   |
| 106.5  | 112.3  | 109.1  | 100    | 100.5  | 111.4  | 104.3  | 126.6   | 111.2   |
| 126.4  | 114.2  | 114.8  | 108.4  | 105.3  | 120.5  | 115.4  | 127     | 120.4   |
| 113.6  | 126.3  | 119.8  | 130.8  | 108.5  | 120.7  | 107.1  | 122.1   | 118.7   |

|       |       |       |       |       |       |       |        |       |
|-------|-------|-------|-------|-------|-------|-------|--------|-------|
| 301   | 405.2 | 258.5 | 290.5 | 316.5 | 257.7 | 371.9 | 559.5  | 271.4 |
| 112.3 | 128.7 | 103.8 | 106.3 | 102.9 | 113.8 | 101.1 | 138    | 120.3 |
| 173.3 | 324.7 | 216.5 | 464.4 | 290.3 | 297.8 | 360.1 | 432.2  | 175.5 |
| 100.1 | 114.6 | 106.5 | 106.9 | 99.1  | 109.6 | 100.5 | 99.8   | 117.7 |
| 144.2 | 170.9 | 144.2 | 244.3 | 150.5 | 155.4 | 281.3 | 213.4  | 132.6 |
| 131.5 | 146.4 | 111.4 | 131.5 | 106.8 | 115   | 147.9 | 141.9  | 114.8 |
| 109.5 | 109.9 | 103.5 | 106.6 | 92    | 112.1 | 119.9 | 119.6  | 114   |
| 224.4 | 154.4 | 146.6 | 182.3 | 125.2 | 185.2 | 155.3 | 207.4  | 195.7 |
| 115.3 | 117.1 | 108.1 | 102.8 | 97.1  | 123.5 | 107.5 | 113.9  | 108.1 |
| 114   | 116.5 | 96.7  | 105.1 | 105.8 | 105.4 | 104.9 | 108.5  | 107.9 |
| 289   | 217.6 | 191.6 | 259   | 210.9 | 293.6 | 247.8 | 450.5  | 347.3 |
| 261.5 | 215.6 | 168.4 | 206.5 | 183.7 | 197.9 | 239.9 | 326.3  | 225.7 |
| 110.4 | 119.5 | 110.4 | 139.1 | 107.5 | 124.2 | 112.8 | 131.1  | 126.7 |
| 190.7 | 254.5 | 316.9 | 274.6 | 248.6 | 266.8 | 349.4 | 242.3  | 172.6 |
| 196.2 | 224.3 | 221.9 | 178.8 | 196   | 201.4 | 204.9 | 296.3  | 231.6 |
| 106.1 | 116   | 109   | 97    | 98.1  | 108.7 | 104.5 | 104.1  | 104.9 |
| 141.6 | 141.7 | 145.3 | 133.5 | 127.7 | 134.3 | 153.2 | 199.4  | 206.3 |
| 109.2 | 112.6 | 109.7 | 104.2 | 98.7  | 111.1 | 102.4 | 110.6  | 117   |
| 100.9 | 117.5 | 104.6 | 91.1  | 90    | 108.1 | 100.7 | 101.9  | 99.4  |
| 113.4 | 102.9 | 106.7 | 100.8 | 95.8  | 105   | 102.6 | 102.8  | 105.4 |
| 100.1 | 110.7 | 102.1 | 96.9  | 92.4  | 107.1 | 101.8 | 112.5  | 107   |
| 132.8 | 143   | 155.8 | 149.7 | 142   | 148   | 126.2 | 169    | 141.1 |
| 118.8 | 124.5 | 111.3 | 110.6 | 103.6 | 116.6 | 107.4 | 128.5  | 138.1 |
| 106.3 | 122.8 | 114.8 | 123.2 | 107.5 | 121.5 | 135.7 | 137.8  | 122.7 |
| 130.9 | 156   | 176.7 | 179.4 | 137   | 212   | 166.2 | 256.5  | 168.6 |
| 105.2 | 111.3 | 100.2 | 108.1 | 94.8  | 108.5 | 112.3 | 114.6  | 112.7 |
| 100.6 | 103.5 | 98.6  | 92    | 98.6  | 114.3 | 95.4  | 108.7  | 105.9 |
| 104   | 107.9 | 106.8 | 100.5 | 100.6 | 103.4 | 103.1 | 102.2  | 106.8 |
| 135.5 | 172.4 | 139.3 | 145.4 | 112.3 | 145.2 | 148.1 | 174.1  | 123   |
| 118.3 | 180.9 | 132.2 | 111.9 | 116.6 | 130.6 | 126   | 130.2  | 124.4 |
| 103.5 | 103.6 | 104   | 102.7 | 95.6  | 108   | 112.8 | 117.9  | 114.4 |
| 113.8 | 113.2 | 108   | 110.2 | 105.8 | 112.2 | 113.2 | 116.2  | 108.2 |
| 136.2 | 160.2 | 128.1 | 125   | 129.9 | 145.1 | 141.4 | 189.9  | 176   |
| 113.5 | 108.9 | 106.3 | 116.8 | 91.9  | 111.4 | 99    | 109.8  | 111.1 |
| 130.6 | 137.9 | 135   | 124.9 | 129.5 | 139.6 | 116.7 | 148.1  | 134.7 |
| 104.8 | 106.7 | 97.1  | 107.5 | 97.1  | 106.7 | 97.6  | 117.4  | 106.5 |
| 254   | 355.6 | 301.5 | 339.5 | 309.3 | 294.3 | 372.4 | 402.4  | 308.8 |
| 97.3  | 111.8 | 111.7 | 103.8 | 94.4  | 113.2 | 105.2 | 108    | 106.6 |
| 110.8 | 117.8 | 112.9 | 99.6  | 95.9  | 113.2 | 102.4 | 112.9  | 108.9 |
| 248.8 | 427.7 | 393.5 | 348.5 | 232.6 | 327.2 | 332   | 476.5  | 394.8 |
| 230.2 | 166.5 | 149.6 | 161.2 | 200.2 | 154.9 | 206.8 | 304    | 223.6 |
| 112   | 113.9 | 114.3 | 105.1 | 113.2 | 117.2 | 119.7 | 132.8  | 114.4 |
| 136   | 139.2 | 129.6 | 158.7 | 119.8 | 142.6 | 151.9 | 140.8  | 124.9 |
| 194.8 | 192.3 | 200.5 | 215.7 | 204.4 | 219.3 | 218.6 | 434.3  | 273   |
| 101.3 | 106.5 | 111.5 | 98.8  | 92.4  | 108.6 | 108.6 | 104.3  | 107.7 |
| 671.7 | 935.2 | 787.1 | 807.1 | 798.6 | 882.1 | 767   | 1236.2 | 903.7 |
| 108.6 | 130   | 106.4 | 113   | 104.7 | 117.8 | 127.1 | 125.5  | 132.2 |
| 108.6 | 100.5 | 102.3 | 107.3 | 96.8  | 113.7 | 101.4 | 108.6  | 105.2 |
| 170.9 | 141.2 | 147.7 | 122.3 | 125   | 147.1 | 119.6 | 150    | 150.8 |
| 117.9 | 112.8 | 123.2 | 108.5 | 107.2 | 117.8 | 108.8 | 131.1  | 125.4 |
| 120.3 | 126.7 | 104.3 | 151   | 111.2 | 128.5 | 112.7 | 148.3  | 119.1 |



|        |        |       |        |        |        |        |         |         |
|--------|--------|-------|--------|--------|--------|--------|---------|---------|
| 152.5  | 157.1  | 136.1 | 154    | 129.9  | 160.1  | 145    | 167.4   | 176.5   |
| 554.4  | 508.3  | 542.6 | 448.8  | 521.6  | 550.1  | 529.9  | 682.2   | 614.3   |
| 101.9  | 107.7  | 104   | 94.6   | 95.7   | 108.3  | 104.6  | 106.8   | 110.1   |
| 100.6  | 115.2  | 108.9 | 112.5  | 96.4   | 106.9  | 103    | 110     | 105     |
| 165.6  | 169.7  | 166   | 144.6  | 145.8  | 189.2  | 190.6  | 246.3   | 207.3   |
| 146.5  | 176.6  | 194.5 | 213    | 176    | 190.5  | 213.2  | 281.9   | 193.4   |
| 131.8  | 150.2  | 138.2 | 132.4  | 126.6  | 142.1  | 152.1  | 171.9   | 137.9   |
| 106.9  | 111.7  | 109   | 99.3   | 94.5   | 109.5  | 96.4   | 114.9   | 114.8   |
| 111.8  | 109.7  | 111.5 | 113.8  | 90.8   | 113.5  | 109.6  | 118.2   | 131.9   |
| 347.4  | 428.1  | 479.4 | 399.8  | 348.5  | 372.2  | 352.6  | 630.2   | 428.1   |
| 136.2  | 193    | 149.6 | 164.8  | 150.6  | 170    | 158.3  | 242.6   | 182.7   |
| 229.4  | 442    | 428.8 | 337    | 379.6  | 372.2  | 369    | 640.8   | 431.7   |
| 123.5  | 171.9  | 157   | 169.7  | 155.3  | 154.9  | 157.1  | 216.6   | 167.9   |
| 113.2  | 109.9  | 105.6 | 116.8  | 100.5  | 120.6  | 107.6  | 121.3   | 114.5   |
| 98.2   | 98.7   | 100   | 87.7   | 93.7   | 100.3  | 105.4  | 102.9   | 104.6   |
| 110.7  | 119.3  | 112.3 | 110.2  | 112.9  | 106.5  | 115.3  | 149.4   | 131.9   |
| 103.5  | 119.3  | 96.1  | 111.2  | 99.2   | 109    | 98.6   | 109.2   | 111.7   |
| 106.2  | 115.9  | 97.4  | 100.6  | 107.1  | 116.3  | 111.7  | 114.3   | 118.1   |
| 119.3  | 137    | 132.9 | 112.9  | 114.2  | 147    | 127.8  | 171.5   | 139.1   |
| 236.8  | 308.3  | 316.4 | 319.9  | 240.6  | 351.4  | 261.5  | 399.3   | 320.3   |
| 325.5  | 459.5  | 320.5 | 418.5  | 355    | 386.5  | 471.9  | 464.8   | 354.5   |
| 140.3  | 148.5  | 129   | 163.1  | 148.9  | 144    | 159.8  | 235.2   | 170.3   |
| 364.7  | 344    | 324.9 | 327.8  | 281.2  | 324.3  | 345.6  | 406.9   | 353.5   |
| 219.6  | 304.3  | 252.2 | 231.4  | 225.7  | 234.2  | 229.7  | 368.9   | 298.4   |
| 235.1  | 196    | 197.9 | 166.6  | 208    | 227.6  | 237.4  | 266     | 214.7   |
| 105    | 118    | 109.1 | 96.3   | 93.4   | 110.8  | 99.4   | 113.7   | 115.3   |
| 153.7  | 155.4  | 143   | 147.5  | 133.6  | 158.9  | 151.5  | 214.8   | 164.3   |
| 121.2  | 168.4  | 131.8 | 160.6  | 138.7  | 139.9  | 155.9  | 185.1   | 144     |
| 128.2  | 139.3  | 146.1 | 156    | 131.1  | 133.9  | 144.1  | 156.4   | 126.2   |
| 362.8  | 444.8  | 423.7 | 361.7  | 479.7  | 446.2  | 450.6  | 806.1   | 572     |
| 115.5  | 117    | 110.7 | 105.2  | 106.9  | 133.3  | 110.1  | 134.4   | 132.5   |
| 112    | 114.5  | 100   | 97.8   | 97.7   | 109.9  | 102.5  | 138.3   | 137.7   |
| 105.3  | 113.9  | 115   | 111.8  | 109.3  | 124.3  | 103.5  | 123.1   | 109.6   |
| 221.6  | 293.8  | 309   | 237.9  | 274.2  | 293.6  | 256.4  | 405     | 286.3   |
| 220.3  | 190.6  | 197.5 | 175.9  | 175.7  | 242.5  | 166.9  | 274.2   | 305     |
| 104.6  | 105.2  | 99.4  | 95.2   | 92.8   | 113.3  | 98.5   | 104.5   | 111     |
| 106    | 109.9  | 100.1 | 102.1  | 88.5   | 101    | 95.7   | 115.4   | 109.4   |
| 107    | 107.1  | 106.1 | 95.8   | 99.2   | 108.6  | 102.6  | 107.7   | 107.9   |
| 106.3  | 110.7  | 100.3 | 101    | 87.2   | 106    | 104.3  | 108.6   | 109.7   |
| 119.3  | 116.7  | 116.3 | 121    | 106.5  | 127.3  | 103    | 133.4   | 120.3   |
| 107.3  | 108.7  | 109.3 | 106.5  | 95.5   | 95.7   | 104.6  | 119.3   | 108.4   |
| 141.6  | 151.6  | 134.1 | 138.8  | 138.7  | 123.6  | 115.6  | 216.6   | 163.1   |
| 6573.6 | 7161.7 | 6022  | 5714.9 | 4659.6 | 6181.2 | 4516.6 | 13923.8 | 12662.6 |
| 830    | 547.6  | 759.3 | 950.8  | 503.7  | 569.2  | 600    | 1025.9  | 671.2   |
| 123.6  | 121.5  | 127.6 | 117.8  | 106.8  | 118.6  | 126.5  | 130.9   | 138.5   |
| 110.3  | 110.3  | 110.8 | 108.6  | 97.4   | 102.8  | 98.8   | 111.5   | 110     |
| 115.3  | 111    | 106.6 | 101.1  | 100.6  | 110.6  | 104.8  | 107.7   | 113     |
| 103.6  | 110.2  | 112.1 | 114.2  | 92.4   | 120.5  | 99.7   | 125.9   | 112.7   |
| 114.8  | 107.1  | 102.9 | 96     | 100.6  | 111.6  | 108.3  | 135.3   | 121.1   |
| 107.5  | 98.5   | 103.9 | 108.2  | 98.7   | 109.8  | 106    | 112.7   | 110.6   |
| 104.3  | 105    | 103.1 | 99.9   | 88.9   | 105.3  | 104    | 109.6   | 102.4   |

|        |         |         |        |        |         |        |         |         |
|--------|---------|---------|--------|--------|---------|--------|---------|---------|
| 239.4  | 250.4   | 268.2   | 163.6  | 233.6  | 236.6   | 153.8  | 297.6   | 298.6   |
| 122.1  | 114.9   | 108.8   | 108.6  | 106.6  | 114.3   | 102.5  | 156     | 161.3   |
| 115.5  | 114.2   | 107.7   | 103.3  | 104.8  | 113.9   | 107.8  | 124.9   | 121.8   |
| 110.2  | 111.7   | 103.6   | 105.1  | 100.4  | 102.7   | 109.4  | 114.1   | 121.2   |
| 107.2  | 109.1   | 92      | 108.3  | 89.7   | 104.6   | 93.9   | 108.4   | 105.8   |
| 103.9  | 118.2   | 93.4    | 97.7   | 97.1   | 105.5   | 100.6  | 105.4   | 116.5   |
| 103.9  | 105.7   | 101.1   | 107.2  | 99.1   | 102     | 100.7  | 118.5   | 116.8   |
| 101.2  | 117     | 108     | 105.4  | 95.4   | 122.1   | 121.2  | 132     | 121.6   |
| 101.8  | 103.9   | 96      | 97.5   | 94.3   | 107.4   | 106.5  | 102.7   | 101.5   |
| 116.8  | 133.9   | 127.8   | 109.7  | 116.9  | 153.6   | 117.2  | 134.6   | 125.6   |
| 115.6  | 110.6   | 107.3   | 108.8  | 93.1   | 106.8   | 103.2  | 115.4   | 101.4   |
| 113.5  | 110.6   | 95.4    | 108.6  | 100.9  | 111.2   | 103.2  | 107.5   | 106.6   |
| 113.3  | 110.1   | 107.3   | 107.1  | 96.2   | 109.1   | 100.5  | 114.9   | 100.7   |
| 174    | 242.3   | 271.5   | 305.8  | 244.8  | 269.2   | 253.4  | 481.3   | 328.4   |
| 104    | 110.5   | 107.7   | 108.4  | 100.4  | 117     | 107.6  | 117     | 111.4   |
| 101.4  | 123     | 112     | 103.6  | 103.3  | 121.7   | 118.2  | 109.5   | 118.3   |
| 109.9  | 109     | 101.7   | 115.7  | 94.4   | 109     | 111.6  | 107.1   | 110.4   |
| 114.3  | 112.1   | 111.3   | 116.1  | 110.1  | 109.9   | 111.9  | 116.1   | 123.9   |
| 112.2  | 117.4   | 100.6   | 124.1  | 107.6  | 112.2   | 105.5  | 116.7   | 113.3   |
| 108.9  | 108.7   | 104.4   | 100    | 94     | 111.4   | 101.5  | 101     | 106.6   |
| 114.6  | 110.1   | 100.3   | 96.3   | 99.3   | 105.9   | 103.4  | 117.3   | 123.2   |
| 108.8  | 109.9   | 104.6   | 101.6  | 98.4   | 109.7   | 99.7   | 112.2   | 117.8   |
| 103.2  | 106     | 97.3    | 99.8   | 94.7   | 106.8   | 100.8  | 106.2   | 117.4   |
| 206.3  | 218.8   | 174.3   | 163.3  | 175.7  | 198.3   | 219.8  | 222.8   | 221.5   |
| 223    | 327.8   | 283.5   | 282.3  | 249.5  | 279.5   | 242.5  | 425.2   | 283.5   |
| 424.7  | 630.7   | 353.5   | 628.4  | 578.4  | 360.9   | 625.9  | 801.1   | 548.9   |
| 1168.1 | 1285.2  | 1294.4  | 1147.6 | 1253.6 | 1522.2  | 1211.3 | 2402.1  | 1215.9  |
| 439.6  | 657.1   | 491.1   | 492.7  | 464.4  | 498     | 563.6  | 719.7   | 655.2   |
| 107.6  | 107.2   | 103.9   | 99.2   | 92.3   | 114.5   | 99.9   | 118.2   | 112.2   |
| 859    | 1219.4  | 1303.7  | 1045.4 | 1036.9 | 1212.6  | 1184.3 | 1578.6  | 1205.5  |
| 115.1  | 120.4   | 119.1   | 111.6  | 105    | 114.7   | 127.2  | 135.4   | 126.9   |
| 107.3  | 110.5   | 107.9   | 101.9  | 97.6   | 105.5   | 109.1  | 103.6   | 117.2   |
| 113.1  | 176.9   | 151.6   | 182.1  | 154.5  | 165.6   | 161.8  | 198.2   | 156.2   |
| 101.9  | 106.1   | 104.6   | 101.5  | 100.3  | 103.3   | 109.6  | 112.3   | 107.8   |
| 115.4  | 108.8   | 102.1   | 110.6  | 98.1   | 111.5   | 95.2   | 105.4   | 103.9   |
| 110.7  | 118.9   | 106.4   | 107.2  | 105.7  | 116.7   | 101.4  | 116.4   | 107     |
| 101.2  | 110.6   | 110.7   | 113.5  | 97.2   | 110     | 95.6   | 108.8   | 104.6   |
| 116.5  | 138.1   | 115.6   | 111.4  | 113.4  | 111.7   | 117    | 134.7   | 138.4   |
| 112    | 113.3   | 106.3   | 114.7  | 103.3  | 123.1   | 104.9  | 134.3   | 115.1   |
| 106    | 109.1   | 103.5   | 105.4  | 92.7   | 111.5   | 106.3  | 110.1   | 116.1   |
| 102.9  | 111.6   | 107.6   | 111.4  | 98.1   | 106     | 103.3  | 114.9   | 116.1   |
| 112.7  | 109.2   | 109.6   | 105.6  | 92.5   | 111.8   | 106.6  | 109.6   | 104.6   |
| 151.6  | 229.4   | 238     | 181    | 200.3  | 198.3   | 177.8  | 331.8   | 250.6   |
| 107.1  | 117.2   | 100.3   | 104.6  | 94.3   | 110     | 97.4   | 120.4   | 116.9   |
| 101.3  | 99      | 98.8    | 90.5   | 88.5   | 109.7   | 98.3   | 111     | 113.4   |
| 101.6  | 104.9   | 105.1   | 102.7  | 100.7  | 114     | 97.3   | 113.2   | 102     |
| 6732.4 | 6046.8  | 6279.3  | 7150.4 | 4411.7 | 6349.8  | 6885.3 | 11638.7 | 8384.7  |
| 124.1  | 119.7   | 110.7   | 125.5  | 111.6  | 121.5   | 122.3  | 138.3   | 140.1   |
| 7339.3 | 9221.9  | 8763.8  | 7616   | 6961.7 | 7068.2  | 7971.9 | 13703.3 | 10360.5 |
| 9240.1 | 10615.9 | 10998.4 | 8667.6 | 8242.4 | 10364.5 | 7718.4 | 11022.2 | 7495.2  |
| 118.7  | 125.7   | 114.8   | 110.2  | 98.7   | 118.5   | 111.4  | 127.5   | 124.9   |

|         |         |         |         |         |         |         |         |         |
|---------|---------|---------|---------|---------|---------|---------|---------|---------|
| 430.9   | 672.2   | 442.8   | 519.7   | 401.3   | 403.9   | 479.7   | 923.6   | 524.9   |
| 1808.6  | 1639.3  | 1352.7  | 1630.9  | 818.7   | 1464.7  | 1916.8  | 3296.5  | 2191.2  |
| 329.2   | 289.7   | 288.3   | 352.4   | 185.6   | 314.9   | 393.7   | 537.2   | 363.7   |
| 182.8   | 264.2   | 506.8   | 287.7   | 206.8   | 530.7   | 274.4   | 408.9   | 244.9   |
| 8081.9  | 8042.8  | 8144.4  | 7938.4  | 7798    | 7138.1  | 8530.5  | 12546.3 | 10595.7 |
| 1511.3  | 1357.8  | 1474.9  | 1796.5  | 1182.5  | 1499    | 1805.8  | 1787.1  | 1501.3  |
| 10241.2 | 9266.4  | 10287.8 | 9554.2  | 8459.1  | 8439.2  | 9260.4  | 18180   | 14110   |
| 12908.3 | 16565.6 | 13382.8 | 12051.9 | 11302.4 | 12916.9 | 13722.1 | 19982.5 | 14238.1 |
| 9144.7  | 12953   | 10835.3 | 10885.2 | 9538.3  | 10997.3 | 12044.8 | 16877.2 | 13507.7 |
| 3163.1  | 3939.5  | 2221.1  | 2853.5  | 2543.9  | 3065.5  | 2977.3  | 6016.4  | 4128.2  |
| 1733.5  | 2097.4  | 2187.5  | 1474.5  | 1475.5  | 1825.4  | 1830    | 1679.1  | 1191.5  |
| 1012    | 945.3   | 709.5   | 1673.1  | 887.1   | 662     | 801.5   | 1740.5  | 1391.7  |
| 195.4   | 333.7   | 236.5   | 323.1   | 168.6   | 227.8   | 216.7   | 340.2   | 174     |
| 138.8   | 133.2   | 128.5   | 108.5   | 118.2   | 123.8   | 120.9   | 147     | 147.1   |
| 142.2   | 192.2   | 158     | 198.1   | 137.2   | 182.1   | 213.3   | 281.8   | 193.6   |
| 9722.6  | 9064.1  | 7550.2  | 8299.7  | 6859.9  | 7689.3  | 10218.6 | 13014.1 | 11863.8 |
| 2341.4  | 2960.1  | 2743.5  | 2508.8  | 2939.6  | 2843.3  | 3122.7  | 4743.1  | 3476.7  |
| 221.2   | 307.9   | 246.8   | 305.4   | 211.8   | 272.7   | 271.9   | 305.1   | 266.1   |
| 11394.1 | 9715.5  | 10474.4 | 11807   | 9535.7  | 10289.2 | 12312.4 | 15311.2 | 14461.9 |
| 7588.3  | 6690.1  | 5564.8  | 5973.6  | 5263.8  | 5288.8  | 6077    | 11006.5 | 10982   |
| 162.3   | 200.4   | 177.5   | 167.9   | 211.6   | 169.4   | 194.7   | 361.1   | 220.4   |
| 169.3   | 149.4   | 142.8   | 132.2   | 122.3   | 156.8   | 137.3   | 227.8   | 215.4   |
| 110.6   | 115.2   | 129.2   | 104.6   | 107.9   | 115.6   | 120.8   | 131     | 120.3   |
| 4897    | 4602    | 4706.7  | 5259.2  | 2896.1  | 4210.8  | 5254.8  | 9372.7  | 6490.8  |
| 5349.7  | 5516.2  | 6380.2  | 5038.5  | 5195    | 4561.3  | 4882.8  | 11065.8 | 8829.9  |
| 9267.2  | 9917.7  | 8939.9  | 10139.3 | 7408.7  | 10504.6 | 9146.3  | 15520.8 | 15121.6 |
| 2176.7  | 2533.1  | 1685.4  | 2182.8  | 1796    | 2531.4  | 2080.6  | 4530.4  | 3738.2  |
| 176.1   | 189.1   | 227.1   | 159.9   | 188.8   | 237.8   | 185.8   | 210.3   | 207.2   |
| 118.2   | 127.2   | 125.8   | 114.1   | 115     | 152.4   | 108.6   | 130.1   | 123.8   |
| 359.9   | 662.1   | 617.9   | 405.2   | 504.4   | 581.1   | 482.9   | 877.3   | 437.1   |
| 174.4   | 195.1   | 195.1   | 167.9   | 163     | 221     | 185.9   | 324.1   | 270.8   |
| 3988.2  | 4445.7  | 3098.5  | 3417.1  | 2792.2  | 2370.6  | 3602.5  | 7375.6  | 5207.3  |
| 16202.9 | 16368.4 | 15447   | 12547.8 | 13379   | 15220   | 14971.4 | 16914.4 | 18004.6 |
| 2228.8  | 2433.3  | 1542.7  | 2070.4  | 1457.5  | 1827    | 2819.8  | 3471.6  | 2889.1  |
| 122.3   | 128.3   | 123.3   | 108.4   | 125.8   | 130.8   | 125.5   | 143.4   | 145.7   |
| 121.6   | 132.1   | 113     | 114.8   | 106.1   | 119     | 109.8   | 136.5   | 122.2   |
| 2666    | 2155.5  | 2172.1  | 2943.8  | 1609.4  | 1479.4  | 2386.9  | 5522.5  | 4238.5  |
| 121.8   | 123.6   | 110.8   | 111.8   | 102.4   | 117.8   | 122.6   | 119.8   | 121.1   |
| 2463.3  | 3960.5  | 2348.3  | 2855.2  | 1549.7  | 1577.6  | 3664.1  | 5471.9  | 4564.1  |
| 20542.8 | 18548.8 | 17342.9 | 18340.9 | 16649   | 17553.1 | 17311.4 | 21664.7 | 21886.4 |
| 11494.9 | 13746.8 | 11420   | 12294.2 | 9140    | 12063.2 | 12413.5 | 18825.5 | 16768.9 |
| 14841.2 | 13315.8 | 12740.6 | 13991   | 10405.2 | 13619   | 13374.7 | 18667.4 | 18611   |
| 155.1   | 246.5   | 175.3   | 186.3   | 175     | 191.7   | 179.4   | 285.8   | 273.2   |
| 101.8   | 112.8   | 97.9    | 95      | 91.1    | 101     | 98.9    | 106.2   | 109.6   |
| 2935.4  | 2950.4  | 3362.8  | 3073.5  | 2772    | 3274.1  | 3450.1  | 5395.7  | 4156.4  |
| 138.1   | 130.6   | 115.8   | 108.2   | 104.3   | 127.9   | 128.4   | 150.9   | 153.9   |
| 17141.4 | 20656.9 | 16736.2 | 19852.2 | 14251.6 | 18071.4 | 17701.5 | 27351.6 | 27571.6 |
| 3264.3  | 3134.7  | 2711.8  | 3956    | 2534.4  | 3149.4  | 2918.2  | 4403.7  | 2921.3  |
| 170.9   | 218.7   | 204.3   | 160.8   | 182.3   | 222.6   | 166     | 296.6   | 246.6   |
| 316.3   | 388.3   | 347.9   | 438.7   | 347.5   | 421.2   | 396.4   | 513.9   | 442.7   |
| 160     | 197.9   | 179.5   | 161.9   | 162.5   | 210.9   | 213.1   | 422.1   | 232.2   |

|         |         |         |         |         |         |         |         |         |
|---------|---------|---------|---------|---------|---------|---------|---------|---------|
| 2808.2  | 2776.9  | 3097.2  | 2061.5  | 2529.3  | 2844.4  | 1821.5  | 6466.9  | 5672.8  |
| 148.9   | 150.9   | 163.7   | 140.2   | 136.1   | 167.7   | 146.1   | 199.9   | 159.4   |
| 7885.8  | 8814.2  | 9903.3  | 8101.2  | 7463.7  | 9753.8  | 8131.1  | 14563.6 | 11962.4 |
| 316.2   | 380.4   | 283     | 285.3   | 254.2   | 324.4   | 292.6   | 489.7   | 447.3   |
| 1830.4  | 1119.6  | 1725.4  | 1975    | 994.3   | 974.5   | 1257    | 2414.1  | 1501.8  |
| 101.9   | 112.2   | 96      | 93.1    | 95      | 100.7   | 107     | 95.7    | 102.7   |
| 511.9   | 952.1   | 898.3   | 480.3   | 728.3   | 855     | 570.7   | 1032.3  | 576.4   |
| 103.3   | 113.1   | 110     | 110.5   | 96.3    | 110.7   | 94.5    | 93.1    | 108.8   |
| 7110.9  | 6841.6  | 7129.6  | 8298.4  | 5570.8  | 5013.6  | 5744.3  | 15161   | 12761.4 |
| 3258.6  | 3489.9  | 2241.3  | 3078.7  | 2492.9  | 4222.5  | 3208    | 8116.5  | 5143.7  |
| 12527.3 | 12683.5 | 10789.8 | 13409.4 | 11916.3 | 11391.5 | 11387.9 | 21709.6 | 20388.1 |
| 997.1   | 1246    | 959.7   | 1216.6  | 1326.4  | 1053.4  | 1592.1  | 1577.6  | 1407.4  |
| 149.8   | 209.9   | 194.2   | 214.7   | 179.3   | 215     | 183.9   | 444.9   | 236.2   |
| 104.5   | 105.2   | 101.6   | 111.3   | 102.1   | 113.8   | 109.2   | 126.4   | 118.4   |
| 865.7   | 1317.7  | 1291.7  | 960.4   | 1087.7  | 1373    | 1026.9  | 2334.9  | 1518    |
| 101.7   | 115.9   | 122.9   | 114.9   | 112.5   | 120.6   | 107.3   | 134.6   | 109.2   |
| 111.4   | 112.5   | 98.3    | 110.1   | 98.9    | 104.7   | 103.3   | 108.6   | 117.7   |
| 118.5   | 176.2   | 167.8   | 154.8   | 140.7   | 212.9   | 152.6   | 162.4   | 142.4   |
| 110     | 119.8   | 103.5   | 106.5   | 103.3   | 111.4   | 105.4   | 117.7   | 112.8   |
| 147.5   | 281.8   | 271.7   | 216     | 218.4   | 290.9   | 250.1   | 398.3   | 334.3   |
| 2157.1  | 2327.5  | 2033.3  | 1713.4  | 1968.4  | 1698.5  | 1958.1  | 4817    | 2737.1  |
| 109.6   | 112.4   | 108.3   | 103.5   | 103.1   | 112.5   | 109.4   | 113.3   | 105.6   |
| 104.5   | 114.7   | 100.4   | 98.6    | 101     | 107.9   | 100     | 111.4   | 104.4   |
| 13147.7 | 13459.9 | 13571.7 | 11792.1 | 11441.2 | 12204.3 | 14209.8 | 22016.1 | 17973.9 |
| 10069.1 | 11459.3 | 8909.4  | 9294.3  | 9104.5  | 10211.6 | 8743.4  | 17609   | 13993.8 |
| 19724   | 19061.8 | 18032.4 | 17677.4 | 15883.3 | 17919.6 | 17284.4 | 29086.5 | 25051.5 |
| 3249.9  | 4768.2  | 3690.3  | 4726.5  | 3111.3  | 3551.4  | 4001.4  | 8606.4  | 7196.2  |
| 9746.6  | 8138.9  | 8018    | 9107.7  | 6769.9  | 8082.3  | 7598.9  | 15211.8 | 12212.7 |
| 5177.4  | 4415.9  | 4075.5  | 4612.1  | 2907.2  | 4260.3  | 4758.2  | 6881.4  | 5831    |
| 3057.6  | 3104.7  | 4104.7  | 3758.2  | 2585.7  | 3464.8  | 3784.6  | 7605.3  | 5659.6  |
| 2016.1  | 1653.9  | 1506.3  | 2731.4  | 902.5   | 1373.4  | 1860.4  | 3571.3  | 3502.5  |
| 12148.4 | 13320   | 11855.2 | 14070.7 | 10348.1 | 12869.6 | 12980.2 | 22156.2 | 18791.2 |
| 1358.2  | 1225.1  | 1385.4  | 1521.7  | 1263.3  | 1546.9  | 1358.3  | 2547.7  | 1966    |
| 8268.3  | 11828.8 | 11290.5 | 12259.5 | 7542.6  | 9385.3  | 9420.4  | 20990.5 | 16182.8 |
| 9983.8  | 9556.7  | 9467.9  | 10585.4 | 9256.8  | 10587.1 | 11308.2 | 16961.9 | 15196.3 |
| 4960.5  | 3622.3  | 2208.9  | 3190.5  | 3314.7  | 3958.5  | 3473.5  | 9262    | 6891.4  |
| 238.5   | 289.7   | 294.9   | 230.5   | 295.2   | 291.3   | 279.7   | 567.3   | 392.8   |
| 4511.1  | 5945.4  | 5649    | 4936.9  | 5377.6  | 4167.4  | 4869    | 8765.9  | 5131.2  |
| 4997.3  | 5489.1  | 4594.9  | 6134.9  | 2626.9  | 5005.8  | 4705    | 11293.6 | 8326.9  |
| 313.3   | 384.5   | 339.4   | 339.4   | 303     | 364.3   | 359.4   | 452.8   | 400.7   |
| 276.5   | 362.9   | 1761.7  | 351.9   | 298.1   | 1967.4  | 316.9   | 414.3   | 1009.9  |
| 224.8   | 190.4   | 174.5   | 156.1   | 144.2   | 221.9   | 183     | 285.9   | 270.4   |
| 1369.7  | 1267.1  | 1049.1  | 1134.9  | 987.1   | 1608    | 1690.8  | 2037.7  | 2078    |
| 25092.1 | 24782.7 | 23064.7 | 21925.2 | 21752.7 | 22728.2 | 21894.6 | 29857.6 | 32148.2 |
| 650.1   | 670.1   | 2005.8  | 600.3   | 520.6   | 1991.2  | 741.8   | 1121.1  | 3814.8  |
| 348.7   | 475.1   | 1388    | 350.9   | 281.1   | 1071.9  | 305.5   | 686.2   | 2108.7  |
| 111.7   | 115.4   | 104.7   | 114.4   | 94.2    | 110.8   | 102.5   | 104.9   | 105.4   |
| 30183.8 | 30640.8 | 28575.8 | 26285.4 | 26791.8 | 29272.5 | 29062.5 | 39218.1 | 37990   |
| 16889.6 | 17895.3 | 16513.9 | 16588.6 | 14374.4 | 19345.8 | 18021.3 | 28617.1 | 23810.2 |
| 96.9    | 102.9   | 102.9   | 98.8    | 94.6    | 104.2   | 103.9   | 104     | 109.1   |
| 1472.3  | 2424.5  | 2590.3  | 2158.4  | 1227    | 2114.7  | 1718.9  | 3133.1  | 2669.1  |

|         |         |         |         |         |         |         |         |         |
|---------|---------|---------|---------|---------|---------|---------|---------|---------|
| 5219.5  | 5964.8  | 4122.1  | 6511.2  | 4392.2  | 5317.6  | 5663.5  | 9859.1  | 9312.2  |
| 530.2   | 596.7   | 568.8   | 593.8   | 548.2   | 455.4   | 537.9   | 949.5   | 552.6   |
| 22923.8 | 26564.2 | 26331.3 | 20876.9 | 20732.4 | 20238.1 | 22707.6 | 30665.5 | 31826.4 |
| 14866.9 | 14092.7 | 12536.3 | 17840.9 | 10602.3 | 12357.5 | 10705.1 | 24236.7 | 22906   |
| 19528.5 | 16081.4 | 17171.5 | 15837.6 | 13826.3 | 18427.4 | 17473.1 | 25351.8 | 24284.9 |
| 3390.8  | 3415.8  | 4469.9  | 4948.6  | 2950.9  | 3439.7  | 2971.9  | 8866.5  | 6488.1  |
| 3649.8  | 4144.9  | 3412.4  | 3755.9  | 3446.9  | 4190.3  | 3835.5  | 5675    | 3888.9  |
| 1354.9  | 1444    | 1562.3  | 1555.7  | 1183.4  | 1282    | 1902    | 2241.7  | 1695.6  |
| 209.2   | 212.5   | 204.5   | 232.9   | 158.3   | 198.3   | 227.8   | 242.4   | 199     |
| 6200.5  | 5396.5  | 4712.1  | 4762.9  | 4234.1  | 3975.9  | 5453.1  | 9302.2  | 6261.7  |
| 5558.8  | 5765.4  | 3597.3  | 3878.5  | 2743.1  | 3569.1  | 4902.4  | 6937.7  | 5673.6  |
| 107.2   | 111.1   | 105.5   | 95      | 97.8    | 105.3   | 103.7   | 98.4    | 103.6   |
| 175.3   | 374.3   | 355.5   | 261.8   | 432.8   | 394.6   | 355.9   | 552.7   | 239.5   |
| 109.4   | 108.6   | 103.6   | 96.5    | 98.9    | 111.5   | 96.2    | 122.3   | 101.8   |
| 184.1   | 260.9   | 195.1   | 184.6   | 250.3   | 224.7   | 197.7   | 249.4   | 145.8   |
| 104.8   | 114.9   | 103.6   | 106.8   | 98.1    | 108.1   | 105.1   | 114     | 115.3   |
| 175.4   | 211     | 276.7   | 195.9   | 222.1   | 212.3   | 152.2   | 234.2   | 167.8   |
| 119.3   | 131.4   | 133.4   | 107.4   | 109.4   | 133.6   | 114.5   | 164.3   | 133.6   |
| 120.7   | 125.1   | 133.8   | 125.3   | 104.8   | 140.4   | 122.4   | 201.2   | 165.1   |
| 136.1   | 146.7   | 123     | 167.3   | 118.6   | 152.7   | 153.6   | 155.9   | 139.4   |
| 250.1   | 304.5   | 333.9   | 242     | 282.5   | 326.3   | 295     | 435.8   | 247     |
| 104.1   | 109.1   | 96.9    | 98      | 92      | 110.4   | 103.6   | 105.8   | 101.9   |
| 103.7   | 104.8   | 106.9   | 107.3   | 92.8    | 108.9   | 112.8   | 117.9   | 110.6   |
| 405.9   | 490.6   | 455.8   | 402     | 438.4   | 500.4   | 434.3   | 923     | 482.1   |
| 454.4   | 905.7   | 796.1   | 746.7   | 679.9   | 823.5   | 813.5   | 1380    | 719.2   |
| 113.8   | 132.5   | 134.1   | 129.5   | 114.6   | 136     | 140.9   | 159     | 165.9   |
| 124     | 118.5   | 114.7   | 109.1   | 109     | 122.2   | 111     | 127     | 129.5   |
| 407.2   | 127.5   | 134.3   | 111.3   | 121.6   | 196.5   | 146.6   | 416.7   | 444.8   |
| 4209.8  | 4909.7  | 3698.8  | 3332.1  | 3896.3  | 3945.8  | 4247.8  | 7564.8  | 4395    |
| 5722.3  | 6209    | 6096.1  | 4746    | 5864.3  | 5424.7  | 6148.1  | 9847.4  | 5891    |
| 12810.8 | 16737.7 | 16992.7 | 13978.7 | 15713.9 | 16606.8 | 13400.5 | 22289.7 | 14351.3 |
| 119.7   | 124     | 119.7   | 124.5   | 109.1   | 127.5   | 114.2   | 137.9   | 119.2   |
| 149.1   | 271     | 213     | 159.9   | 212.6   | 257     | 207.4   | 358     | 181.6   |
| 184.2   | 450.1   | 497.4   | 307.6   | 341.7   | 382.9   | 330     | 434.7   | 258.2   |
| 193.4   | 315.2   | 329     | 346     | 291     | 279.2   | 311.5   | 370.8   | 229.3   |
| 431.2   | 667.8   | 805.8   | 580.3   | 602     | 744.1   | 556.6   | 1157.5  | 660.2   |
| 253.7   | 218.8   | 190.4   | 171.4   | 212.9   | 211.2   | 223.1   | 270.9   | 235.9   |
| 106     | 115.9   | 106.6   | 103.8   | 106.2   | 114.3   | 106.8   | 123.4   | 109.2   |
| 512.4   | 1029.7  | 1093.6  | 1063.4  | 998.9   | 1174.6  | 1027.2  | 1275.8  | 759.1   |
| 120.7   | 126.2   | 128     | 138.5   | 119.4   | 127.9   | 116.3   | 133.4   | 127.2   |
| 113.8   | 102.1   | 105.2   | 95.8    | 95.8    | 105.9   | 107.6   | 97.6    | 102.3   |
| 190.5   | 244     | 263.2   | 228.5   | 201.7   | 239     | 219.5   | 283.7   | 236.3   |
| 440.1   | 288.9   | 240.6   | 236     | 260     | 331.2   | 196.6   | 620     | 482.6   |
| 214     | 255     | 159.6   | 256.8   | 249.5   | 194.3   | 184.3   | 472.9   | 205.2   |
| 170.4   | 260.2   | 205.9   | 307.6   | 224.3   | 196.6   | 397.5   | 240.2   | 134.1   |
| 165.9   | 201.5   | 183.9   | 225.1   | 202.5   | 210.9   | 183.6   | 327.2   | 305.5   |
| 119.1   | 138.7   | 104.1   | 117     | 99.3    | 121.3   | 120.2   | 145.1   | 129.5   |
| 337.9   | 295.1   | 275.8   | 285.7   | 268.2   | 297.9   | 356     | 488     | 387.6   |
| 133.8   | 128.8   | 110.7   | 118.2   | 100.5   | 119.6   | 115.5   | 146.1   | 163.1   |
| 114.4   | 107.6   | 106.2   | 97.2    | 104.8   | 104.1   | 105.4   | 108     | 105.5   |
| 116.8   | 120.5   | 110.3   | 105.7   | 106.8   | 121.7   | 113.9   | 121.1   | 124.3   |

|       |       |       |       |       |       |       |       |       |
|-------|-------|-------|-------|-------|-------|-------|-------|-------|
| 101.3 | 100.9 | 104.5 | 93.6  | 96.8  | 101.2 | 105.7 | 113.4 | 115.8 |
| 111.1 | 116.7 | 100.4 | 102.5 | 102.3 | 103.4 | 102.4 | 107   | 107.1 |
| 104.5 | 103.3 | 104.8 | 102.7 | 94.6  | 109.4 | 105.8 | 98.2  | 111.4 |
| 559.4 | 673.6 | 545.4 | 726.4 | 647.9 | 638.3 | 700.3 | 755.6 | 698.4 |
| 110.9 | 106.6 | 111.7 | 106.1 | 96    | 107.4 | 107.7 | 112.5 | 113.3 |
| 136.1 | 138.9 | 120.9 | 126   | 116.2 | 127.2 | 137.3 | 153.6 | 138.4 |
| 135.5 | 143   | 131.1 | 137.8 | 132.6 | 147.9 | 153.7 | 177.1 | 161.7 |
| 112.6 | 113.7 | 113   | 99.3  | 96.7  | 115.2 | 119.7 | 118.4 | 108.6 |
| 115.9 | 109.7 | 108   | 101.2 | 100.3 | 110.1 | 109.6 | 119.1 | 104.7 |
| 124.4 | 244.4 | 263.4 | 177.2 | 219.8 | 284.3 | 210.7 | 246.7 | 167.7 |
| 106.2 | 102.2 | 103.4 | 94.4  | 96.5  | 103.9 | 100.7 | 105   | 104.2 |
| 112.4 | 128.4 | 142   | 130.3 | 117.9 | 131.1 | 152.3 | 146.9 | 124   |
| 106   | 127.2 | 108.3 | 119.3 | 96.1  | 106   | 107.9 | 110.1 | 112.5 |
| 144.6 | 173   | 155   | 152.1 | 159.5 | 149.6 | 147.2 | 189.3 | 177.2 |
| 473.2 | 774.8 | 664.9 | 636   | 600.5 | 601.4 | 610.6 | 776   | 569   |
| 143.5 | 206.9 | 196.1 | 180.8 | 134.1 | 194.3 | 165.7 | 308.8 | 205.6 |
| 120.9 | 121.8 | 140.6 | 108.5 | 114.7 | 131.5 | 119.1 | 161.2 | 126.2 |
| 100.7 | 106.1 | 97.9  | 96.5  | 91.5  | 102.7 | 99.3  | 113.8 | 106.3 |
| 111.7 | 121.9 | 116.1 | 127.7 | 108.9 | 128.2 | 120.5 | 144.1 | 129.4 |
| 117.1 | 109.8 | 102.3 | 91.2  | 99.3  | 107.1 | 103   | 112.8 | 112.4 |
| 451.5 | 665.2 | 595   | 558.1 | 561.2 | 726.6 | 679   | 992   | 590.9 |
| 127.2 | 110.6 | 98.8  | 102.8 | 92.6  | 115   | 106.1 | 127.7 | 115.5 |
| 180.7 | 238.3 | 241.2 | 191   | 215.4 | 246.1 | 203.2 | 293.2 | 297   |
| 108.7 | 116.8 | 102.2 | 103.3 | 98    | 106.9 | 100.8 | 114.4 | 107.5 |
| 130.8 | 134.4 | 132.6 | 131.8 | 134.9 | 136.9 | 126   | 159.2 | 125.9 |
| 113.9 | 113.5 | 111.5 | 107.1 | 105.3 | 112.9 | 113.8 | 130.8 | 121.7 |
| 99.2  | 109.3 | 101.2 | 96.5  | 92.8  | 103.5 | 100.9 | 109.3 | 104.7 |
| 111   | 109.1 | 103.9 | 103.1 | 97.1  | 110.8 | 99.9  | 105.5 | 105   |
| 573.4 | 418.9 | 503.4 | 367.5 | 441.9 | 552.9 | 267.5 | 683.6 | 632.7 |
| 133.6 | 184.4 | 158.2 | 129   | 162.5 | 169.2 | 152.7 | 203.6 | 159.3 |
| 332.9 | 269.9 | 189.2 | 283.9 | 210.5 | 219.7 | 268.6 | 706   | 731.7 |
| 200.6 | 359.3 | 401.9 | 424.2 | 253.5 | 393.2 | 296.8 | 382.4 | 271.8 |
| 122.3 | 120.3 | 111   | 109.4 | 99.8  | 116.2 | 114.5 | 137.4 | 121.6 |
| 107.6 | 109.9 | 95.3  | 106.7 | 97.2  | 99.3  | 99.3  | 104.7 | 104.6 |
| 108.3 | 107.9 | 100.8 | 103   | 95.5  | 111.9 | 100.2 | 119.4 | 114   |
| 109.3 | 109.3 | 98.7  | 99.7  | 92.4  | 108.8 | 104.7 | 99.6  | 106.7 |
| 146.6 | 140.8 | 139.8 | 141.9 | 158.7 | 148.1 | 145.1 | 267.1 | 230.9 |
| 105.9 | 107   | 99.1  | 98    | 88.4  | 105.9 | 94.6  | 103   | 106   |
| 110   | 119.4 | 103   | 115.2 | 100.6 | 112.4 | 111.9 | 117.6 | 107.2 |
| 104.1 | 115.1 | 100.9 | 109   | 99    | 106.3 | 108.3 | 110.4 | 107.5 |
| 116.9 | 122.8 | 116.2 | 116.7 | 101.9 | 134.8 | 114.6 | 126.5 | 134.8 |
| 123.8 | 112   | 114   | 103.7 | 105.8 | 114.8 | 111   | 128.5 | 128.1 |
| 109.6 | 128.4 | 114.2 | 114.3 | 109   | 124.2 | 114.4 | 110.3 | 118.7 |
| 113.4 | 111.6 | 109.1 | 103.7 | 94.9  | 114.2 | 106.2 | 122   | 103.8 |
| 105.5 | 102.4 | 95.4  | 100.8 | 100.4 | 106.6 | 98.9  | 106.1 | 104.2 |
| 109.3 | 105.9 | 92.8  | 87    | 91    | 104.7 | 94.4  | 111.1 | 105.3 |
| 102.9 | 116.2 | 102   | 97.6  | 98.3  | 108.4 | 107.5 | 114.8 | 120.7 |
| 116.9 | 189.4 | 120.1 | 344.3 | 167   | 135   | 303.1 | 148.2 | 123.5 |
| 109.9 | 115.7 | 105.6 | 108.8 | 97.2  | 111   | 111.8 | 117.2 | 116.5 |
| 242.8 | 278.5 | 248.3 | 251.4 | 200.6 | 276.5 | 239.4 | 363.1 | 339.4 |
| 110.9 | 106.3 | 103.9 | 105.9 | 101.2 | 112.8 | 101.5 | 102.5 | 107.5 |

|        |        |        |        |        |        |        |        |        |
|--------|--------|--------|--------|--------|--------|--------|--------|--------|
| 129.9  | 167.2  | 133.3  | 144.2  | 150.1  | 159.1  | 165.8  | 249.5  | 243.1  |
| 111.5  | 121.8  | 102.5  | 89.9   | 103.3  | 107.5  | 117.3  | 116.7  | 110.4  |
| 105.5  | 103.3  | 102.2  | 96.8   | 95.6   | 107.6  | 98.9   | 113.5  | 101.9  |
| 356.3  | 354.7  | 297.8  | 316.7  | 376.3  | 364.4  | 409.5  | 564.6  | 484.2  |
| 457.1  | 337.8  | 283.2  | 389.2  | 260.3  | 386.1  | 433.2  | 884.1  | 736.2  |
| 109.1  | 106.7  | 102.6  | 93.5   | 87.7   | 106.2  | 100.2  | 109.1  | 108.3  |
| 1899   | 1946.9 | 1314.1 | 1540.7 | 1502.4 | 1361.5 | 1772.7 | 3768.8 | 3063.9 |
| 111.3  | 108.5  | 111.5  | 106.1  | 98.2   | 107.4  | 100.6  | 113.8  | 107.7  |
| 118.6  | 134.8  | 112.2  | 135.4  | 110.3  | 126.8  | 123.7  | 145    | 117.1  |
| 103.1  | 120.3  | 110.4  | 107.7  | 102.8  | 117.6  | 109.8  | 120.6  | 108.6  |
| 111.9  | 113.8  | 111.6  | 104.3  | 102.3  | 115.8  | 120.4  | 116.4  | 117.6  |
| 98.8   | 107.7  | 100    | 102.8  | 93.9   | 111.1  | 96.7   | 110.8  | 115.9  |
| 107.8  | 104.9  | 105.9  | 104.8  | 103.3  | 121.4  | 104.6  | 117.8  | 115.7  |
| 106.4  | 107.9  | 94.8   | 99.4   | 92     | 103.6  | 106.5  | 108    | 115    |
| 102.9  | 105    | 94.4   | 91.5   | 93.4   | 104.4  | 100.5  | 111.2  | 98.5   |
| 114.8  | 136.1  | 125.6  | 128.4  | 122.2  | 124.3  | 125.6  | 121.1  | 128.8  |
| 101.1  | 109.8  | 105.8  | 101.6  | 102.7  | 110.5  | 99     | 112.3  | 108.4  |
| 129.2  | 174.1  | 166.4  | 154.2  | 151.9  | 158.8  | 144    | 216.9  | 146.8  |
| 116    | 116.9  | 117.4  | 109.4  | 103.8  | 118.2  | 110.3  | 130.1  | 137.2  |
| 109.5  | 121.2  | 122.9  | 111.5  | 107.9  | 127.5  | 105.4  | 130    | 136.1  |
| 105.1  | 102    | 97     | 94     | 90.6   | 105.5  | 111.4  | 111.4  | 108.1  |
| 124.1  | 133.1  | 127.5  | 124.3  | 121.7  | 132.1  | 119    | 153.7  | 143.8  |
| 115.5  | 121.7  | 116.1  | 128.9  | 111.5  | 123.5  | 112.4  | 135.3  | 131.8  |
| 109.2  | 106.6  | 101.6  | 104.8  | 92.2   | 108.9  | 105.2  | 110.1  | 115.4  |
| 132.2  | 370.6  | 350.1  | 241.4  | 277.6  | 291.7  | 253.9  | 388.6  | 209.3  |
| 112.4  | 113.1  | 109.8  | 113.5  | 105.4  | 119.6  | 115.2  | 118.8  | 119.4  |
| 103.4  | 113.2  | 100.3  | 104.1  | 104    | 108.4  | 99     | 115.6  | 112.2  |
| 112.2  | 113.5  | 109.9  | 99.8   | 108.8  | 123.7  | 112.6  | 125.9  | 111.6  |
| 208.8  | 218.8  | 276    | 193.2  | 228.7  | 252.7  | 234.5  | 310.7  | 231.7  |
| 111.3  | 110.6  | 104.8  | 100.7  | 92     | 112.7  | 102    | 108.5  | 102    |
| 102.1  | 110.3  | 102.1  | 98.3   | 93.3   | 107.1  | 104.3  | 105.1  | 108.5  |
| 106.6  | 109.1  | 104    | 93.4   | 95.1   | 103.3  | 100.3  | 105.1  | 108.8  |
| 112.4  | 121.7  | 118    | 108.9  | 102.8  | 108.1  | 112    | 116.5  | 106.8  |
| 100.9  | 101.6  | 107.7  | 104.3  | 97.9   | 110.1  | 101    | 109.2  | 106.6  |
| 110.8  | 110.4  | 102.3  | 120.1  | 108.9  | 121.2  | 111.6  | 120.1  | 106.3  |
| 112.3  | 117.7  | 129.1  | 114.6  | 101.7  | 127    | 117    | 130.3  | 135.8  |
| 105.2  | 106.2  | 104.9  | 94.5   | 101.3  | 103    | 99.7   | 102.4  | 109.3  |
| 1388.2 | 2230.8 | 1739   | 1747.7 | 1565.5 | 2027.4 | 1511.3 | 3709.3 | 2829.8 |
| 123.8  | 108.7  | 103.2  | 107    | 93.1   | 109.2  | 104.4  | 109.5  | 111.8  |
| 439.7  | 413.6  | 480.2  | 429.7  | 382.9  | 600    | 511.8  | 811.3  | 486.6  |
| 121.4  | 113.5  | 112.3  | 90.2   | 104.8  | 111.2  | 109.6  | 122    | 105.3  |
| 1610   | 1363   | 1508.7 | 1299.9 | 1059.5 | 1269.5 | 1522.2 | 1310.6 | 884.7  |
| 110.9  | 104.1  | 100.6  | 96.3   | 90.7   | 110.4  | 103.8  | 107.2  | 105.2  |
| 120.1  | 149.7  | 130.1  | 159.3  | 132.5  | 167.1  | 150.4  | 165.6  | 130.2  |
| 114    | 160.7  | 139.7  | 127.4  | 117.5  | 131.3  | 128.9  | 143.6  | 122    |
| 141.9  | 158.9  | 171.7  | 147.6  | 153.6  | 169.9  | 169.3  | 244.5  | 194.5  |
| 127.7  | 123.9  | 110.9  | 105.5  | 100.6  | 113.6  | 111.5  | 132.3  | 135.5  |
| 771.9  | 1140.8 | 1120.7 | 1163.9 | 913.2  | 1070.6 | 1184.2 | 1614.3 | 841.1  |
| 158.2  | 186.1  | 178    | 191.1  | 165.2  | 164.9  | 198    | 167.6  | 146    |
| 220.7  | 281.8  | 245.6  | 243.5  | 264.8  | 285.2  | 253.9  | 362.5  | 254.9  |
| 583.9  | 486.4  | 348.2  | 922.4  | 563.1  | 507.2  | 1067.9 | 896.3  | 399.3  |

|        |        |        |        |        |        |        |        |        |
|--------|--------|--------|--------|--------|--------|--------|--------|--------|
| 195.1  | 203    | 203.8  | 182.8  | 182.9  | 209.5  | 222.9  | 368.1  | 263.8  |
| 105.7  | 100.3  | 99.1   | 97.3   | 97.1   | 113.5  | 102.4  | 105.6  | 102.7  |
| 98.9   | 101.4  | 100.5  | 94.9   | 90.3   | 101.6  | 106.9  | 101    | 101.7  |
| 105.1  | 110.1  | 100.3  | 112.1  | 97     | 115.2  | 101.2  | 108.3  | 114.5  |
| 233.2  | 355.7  | 319.1  | 400.1  | 345.4  | 288.4  | 320.4  | 728.2  | 379.7  |
| 665.1  | 381.6  | 527.4  | 287.8  | 349.2  | 542.9  | 193.3  | 909.3  | 907.1  |
| 124    | 150.9  | 143.7  | 135.6  | 139.5  | 154.7  | 138    | 170.6  | 157.6  |
| 157.7  | 200.9  | 191.8  | 152    | 186.3  | 174.7  | 156.2  | 239.5  | 221.4  |
| 299.6  | 422.3  | 471.6  | 272.4  | 359    | 424.7  | 344    | 595.1  | 397.3  |
| 102.5  | 111.2  | 115.1  | 102.9  | 97.2   | 108.8  | 106.3  | 113.9  | 107.3  |
| 111.3  | 112.1  | 105.6  | 109.6  | 95.6   | 119.2  | 112.3  | 102.2  | 103.3  |
| 104    | 107.5  | 105.6  | 104.8  | 94.1   | 107.7  | 103    | 111.7  | 111.2  |
| 102.9  | 111.3  | 106.4  | 92.4   | 100.2  | 109.5  | 96.7   | 103.8  | 100.5  |
| 122.4  | 115.8  | 109.1  | 100.9  | 103.7  | 128.8  | 105.2  | 117.6  | 111.7  |
| 2470   | 2767.6 | 2079.2 | 3216.7 | 2032.7 | 2709.9 | 3140   | 4889.1 | 2942.9 |
| 306.8  | 382.5  | 299.9  | 468.9  | 326.7  | 303.2  | 412.1  | 588.1  | 227.1  |
| 160.1  | 122.9  | 124.2  | 212.8  | 142.4  | 126.2  | 252.5  | 146.2  | 140    |
| 119.2  | 107.6  | 105.9  | 99.6   | 98.2   | 107.9  | 97.1   | 115.5  | 108.6  |
| 107    | 112.4  | 102.4  | 116.6  | 100.9  | 108.1  | 97.5   | 117.1  | 111.7  |
| 110.4  | 120.7  | 104.5  | 108.8  | 103.8  | 112.2  | 104.7  | 117.8  | 102.1  |
| 119.7  | 126.7  | 123.9  | 127    | 133.7  | 122.9  | 122.2  | 138.7  | 131.1  |
| 104.7  | 101.5  | 103.8  | 106.3  | 98.1   | 109.1  | 104.5  | 104.6  | 113    |
| 111.5  | 114.9  | 106.3  | 103.5  | 97     | 114    | 114.2  | 126    | 107.3  |
| 100.6  | 106.7  | 103.2  | 100.8  | 105.7  | 114.1  | 99.7   | 127.5  | 112.1  |
| 112    | 115.4  | 106.8  | 100.4  | 96.7   | 116.7  | 104.3  | 109.2  | 112.7  |
| 122.2  | 124.6  | 125.6  | 114.6  | 108.8  | 116.7  | 115.6  | 139.6  | 125.8  |
| 106    | 104.6  | 106.1  | 102.3  | 97.6   | 101.6  | 101.9  | 103.5  | 102.7  |
| 2280.7 | 6744.9 | 5126   | 7895   | 4331.9 | 4016.1 | 6770.4 | 7683.7 | 2782   |
| 3182   | 8056.3 | 5554   | 9490.1 | 6667.6 | 4987   | 7870.8 | 7142.6 | 2935.5 |
| 120.1  | 108.7  | 107.1  | 112.1  | 108.4  | 120.9  | 110.6  | 128.1  | 115.4  |
| 627.5  | 1316.2 | 863.6  | 1699.1 | 886.8  | 891.7  | 1621.1 | 1737.1 | 811.9  |
| 101.7  | 110.4  | 96.1   | 101.3  | 95.7   | 105.2  | 98.3   | 112    | 104.7  |
| 110.8  | 112.7  | 98     | 96.6   | 89     | 100.9  | 109.3  | 107.2  | 107.2  |
| 108.1  | 113.7  | 100.1  | 109.2  | 98.9   | 106    | 105.5  | 113.3  | 111.4  |
| 812.7  | 434.6  | 421.9  | 2061.7 | 519.6  | 387.3  | 2588.8 | 757.4  | 1223.9 |
| 1357.4 | 516.2  | 389.6  | 1697.4 | 467.1  | 419.6  | 1665.8 | 525.8  | 904.4  |
| 97     | 102.2  | 101.4  | 96.1   | 95.6   | 106.6  | 93.7   | 100    | 108    |
| 108.6  | 111.2  | 102.3  | 100.9  | 101.4  | 108.3  | 102    | 108.7  | 103.2  |
| 126.5  | 112    | 119.4  | 120    | 91.3   | 124.6  | 120    | 128    | 150.6  |
| 108.7  | 113.7  | 104.3  | 108.5  | 101.3  | 104.6  | 106.9  | 131.4  | 122.4  |
| 118.1  | 142.4  | 123.3  | 141.7  | 118.5  | 127.1  | 143.9  | 144    | 134.2  |
| 98.9   | 102.4  | 96.9   | 94     | 95.7   | 102.7  | 97.2   | 111.5  | 106    |
| 112.8  | 107.2  | 106.7  | 113.5  | 99.7   | 116.8  | 109.2  | 112.2  | 113    |
| 106.8  | 109.1  | 110.7  | 106.5  | 106.5  | 111.7  | 110.1  | 114    | 109.3  |
| 110.7  | 111.1  | 104.7  | 111.2  | 101.8  | 115    | 109.7  | 102.3  | 116.9  |
| 108.9  | 106    | 108.1  | 112    | 97.4   | 114.7  | 108.2  | 112.3  | 110.4  |
| 99     | 107.8  | 100.5  | 103.2  | 91.6   | 103.3  | 100.9  | 111    | 106.3  |
| 134.8  | 210    | 221.3  | 174.4  | 167.5  | 196.7  | 194.3  | 249.1  | 240.3  |
| 98.8   | 104.8  | 105.3  | 105.9  | 94.8   | 103.7  | 105    | 114.9  | 108    |
| 325.3  | 389.7  | 353.1  | 386.7  | 348.9  | 527.6  | 425.7  | 672.5  | 421.1  |
| 131.3  | 137    | 140.6  | 135.1  | 136.3  | 154.4  | 160.2  | 197.4  | 134.8  |



|        |        |        |        |       |       |        |        |        |
|--------|--------|--------|--------|-------|-------|--------|--------|--------|
| 1318.3 | 1266.4 | 1355.3 | 1211.3 | 1240  | 1654  | 1434.3 | 3255.2 | 1882.5 |
| 436.8  | 438    | 419.7  | 304.7  | 465   | 482.4 | 472.9  | 862    | 669.3  |
| 297.2  | 326.4  | 360.4  | 322.4  | 294.5 | 360.7 | 329.2  | 553.7  | 404.9  |
| 105.4  | 111.7  | 108.9  | 108.9  | 96.4  | 110.1 | 101.2  | 106.1  | 102.8  |
| 98.8   | 105    | 97.4   | 96.7   | 95.8  | 107.8 | 100.2  | 100.5  | 111.5  |
| 105.1  | 109.9  | 102.4  | 99.2   | 90    | 117.2 | 103.3  | 101.1  | 114.6  |
| 111.7  | 113.8  | 104.2  | 105    | 98.9  | 109.2 | 99.6   | 103.5  | 117    |
| 118.7  | 174.5  | 156.9  | 151.6  | 129.7 | 149.8 | 142.3  | 133.2  | 122.2  |
| 150.8  | 158    | 142.9  | 148.5  | 130.6 | 146.6 | 147.4  | 208.7  | 204.1  |
| 108.7  | 107    | 99.4   | 102.9  | 101   | 112.2 | 101.5  | 110.6  | 101    |
| 120.8  | 131.7  | 126.9  | 119.2  | 116   | 123.8 | 113.7  | 152.9  | 131.2  |
| 112.9  | 114.7  | 104    | 109.5  | 97.9  | 113.5 | 101.9  | 102.3  | 107.9  |
| 116.5  | 128.2  | 111.9  | 100.4  | 105.8 | 126.8 | 108.4  | 126.2  | 126.1  |
| 105.3  | 108.9  | 99.7   | 96.3   | 96.8  | 106.1 | 106.2  | 109.8  | 112.6  |
| 104.9  | 104.2  | 101    | 97.9   | 93.7  | 105.7 | 100.5  | 111.7  | 105.4  |
| 120.1  | 127    | 120.7  | 110.4  | 105.9 | 121.8 | 108    | 119.2  | 128.4  |
| 343.7  | 665.6  | 640.6  | 565.5  | 535.5 | 637.8 | 517.9  | 728    | 520.1  |
| 138.3  | 168.4  | 171.4  | 146    | 158.6 | 168.9 | 164.9  | 183.7  | 186.6  |
| 141.3  | 178.9  | 147.5  | 144.4  | 145.2 | 179.1 | 141.1  | 191.9  | 203.9  |
| 103.3  | 104.4  | 103    | 109.8  | 85.8  | 99.7  | 97.4   | 106.5  | 106.9  |
| 201.5  | 128.8  | 129.1  | 133.5  | 131.2 | 146.5 | 134.5  | 242.5  | 193.1  |
| 108    | 114.1  | 100.1  | 107.7  | 95.6  | 109   | 108.6  | 128.1  | 112.6  |
| 106.2  | 110.4  | 96.1   | 89.7   | 99.6  | 103   | 104.2  | 115.8  | 109.5  |
| 437.2  | 617.5  | 597    | 482.7  | 524.8 | 508   | 529.7  | 626.5  | 469.4  |
| 187.1  | 255.3  | 173.3  | 273.8  | 163.8 | 137   | 220    | 138.3  | 147.1  |
| 106.5  | 110.7  | 112.4  | 105.1  | 110   | 117.2 | 113.8  | 137    | 116.8  |
| 302.4  | 604.7  | 586.6  | 499.8  | 458.6 | 561.9 | 590.9  | 742.8  | 472.4  |
| 115.2  | 116.8  | 103.8  | 126.7  | 100.3 | 112.1 | 133.8  | 137.8  | 138.8  |
| 241.8  | 232.4  | 230.4  | 215.8  | 210   | 240.6 | 250.8  | 373.5  | 310.3  |
| 238.9  | 233.5  | 211.4  | 247.4  | 205.6 | 258.2 | 231.5  | 368.3  | 319.7  |
| 156    | 212    | 171.2  | 254.7  | 147.6 | 193.7 | 169.2  | 293.5  | 221.3  |
| 152.3  | 139.9  | 136.5  | 133.7  | 120.9 | 164.9 | 167.9  | 205.9  | 173.4  |
| 193.1  | 195.5  | 224.3  | 210.6  | 206.7 | 232.9 | 239.2  | 337.9  | 231.7  |
| 103.5  | 108.4  | 101.6  | 106    | 95.4  | 120.6 | 102.2  | 113.7  | 106.1  |
| 537.7  | 360.7  | 333.8  | 300.8  | 355.3 | 354.6 | 401.1  | 547.9  | 472.4  |
| 198.3  | 173    | 126.9  | 153.4  | 144.3 | 159.5 | 161.7  | 305    | 351.8  |
| 111.9  | 111    | 106.7  | 103    | 103.7 | 116.7 | 109.7  | 116.5  | 117    |
| 363.2  | 364.6  | 323.4  | 368.4  | 316.3 | 431.7 | 434.7  | 842.2  | 679.4  |
| 169.8  | 174.9  | 154    | 142.8  | 140   | 178.2 | 164.1  | 282.8  | 249.1  |
| 108.2  | 105.5  | 105.9  | 110.9  | 98.9  | 107.7 | 111.3  | 104.7  | 106.1  |
| 117.1  | 152.3  | 156.2  | 134.3  | 145.9 | 174.6 | 133.1  | 155.1  | 123.4  |
| 144.4  | 174.1  | 150.5  | 159.6  | 162.7 | 191.8 | 167.6  | 285.4  | 241.2  |
| 122.6  | 160.5  | 170.1  | 188.2  | 143.3 | 165.5 | 170.7  | 189.2  | 130.8  |
| 122.2  | 111.8  | 116.4  | 111.9  | 110.3 | 132.2 | 107.7  | 143.6  | 130.8  |
| 108.6  | 102.5  | 94.8   | 97     | 94.3  | 102.1 | 103.3  | 102.2  | 104.7  |
| 103    | 105.4  | 108    | 106.4  | 94.4  | 110.5 | 100.1  | 108.8  | 109.6  |
| 370.2  | 388.5  | 240.7  | 702.9  | 327.5 | 304.6 | 462.4  | 576.6  | 216.4  |
| 119.3  | 149.3  | 148.1  | 139.7  | 111.8 | 140.1 | 138.6  | 167    | 129.7  |
| 102.7  | 109.3  | 95.9   | 100.2  | 93.2  | 98.2  | 103.2  | 106.3  | 121.1  |
| 113    | 123.4  | 108.5  | 148.7  | 103.9 | 111   | 122.7  | 117.1  | 118.4  |
| 114.2  | 130    | 107.5  | 122.7  | 110.3 | 127   | 120.8  | 141.2  | 126.3  |

|        |        |       |        |       |       |        |        |        |
|--------|--------|-------|--------|-------|-------|--------|--------|--------|
| 100.9  | 108.4  | 110   | 96.4   | 95.1  | 112   | 102.2  | 111.3  | 109.2  |
| 1047.1 | 1551.2 | 485.5 | 1754.8 | 683.2 | 627.8 | 1455   | 2626.6 | 1594.5 |
| 207.2  | 262.6  | 241.8 | 258.9  | 196.4 | 238.7 | 238    | 494.4  | 358.3  |
| 111.4  | 138.7  | 127   | 128.3  | 116   | 124.7 | 111.1  | 152.6  | 162.6  |
| 100.5  | 119.5  | 102.5 | 97.5   | 99.7  | 105.7 | 104.2  | 98.7   | 112.3  |
| 108.8  | 113.4  | 108.8 | 103.9  | 104.8 | 126.4 | 114.4  | 121.1  | 115.1  |
| 129.6  | 152.8  | 136.8 | 134.7  | 125.8 | 146.9 | 129.3  | 150.6  | 146.5  |
| 243.6  | 320.6  | 316.6 | 340.7  | 248.2 | 323.2 | 295.9  | 591.3  | 401.1  |
| 140.2  | 159.7  | 147.4 | 132.1  | 132.6 | 154   | 135    | 226    | 185.6  |
| 107.6  | 106.3  | 98.3  | 95.7   | 91.1  | 113.1 | 99     | 126.4  | 111    |
| 437.8  | 674.5  | 609.1 | 621.1  | 614.3 | 637.2 | 601.8  | 846.4  | 528.8  |
| 116    | 111.6  | 115.9 | 116.1  | 96    | 116   | 111.5  | 122    | 119.6  |
| 99.1   | 110.8  | 103.9 | 92.9   | 92.8  | 103.3 | 102.9  | 106.2  | 93     |
| 269.6  | 720.4  | 576.5 | 501.8  | 463.8 | 593.5 | 384.9  | 632.7  | 460.8  |
| 109.8  | 113.7  | 112.3 | 104.4  | 95    | 112.3 | 104    | 126.4  | 125.6  |
| 116.6  | 109.5  | 117.5 | 125.7  | 109.9 | 120.5 | 104.1  | 122    | 118.7  |
| 107.3  | 101.6  | 101.4 | 103.1  | 90.6  | 101.4 | 103.1  | 108.3  | 119.3  |
| 126.6  | 161.2  | 146.2 | 135.7  | 117.4 | 136.6 | 125.2  | 192.8  | 163.2  |
| 131    | 227.1  | 250.9 | 199.9  | 214.3 | 198.4 | 159.3  | 427.8  | 255.7  |
| 112.6  | 114.9  | 104.7 | 93.8   | 101.7 | 110.7 | 102.7  | 103.7  | 123    |
| 224.4  | 273.7  | 268.4 | 217    | 211   | 213.6 | 202.5  | 312.7  | 214.8  |
| 114.6  | 131.4  | 127.3 | 119.2  | 119.3 | 139.7 | 118    | 133.2  | 126.9  |
| 507.5  | 715.8  | 590.3 | 534    | 563.4 | 596   | 582.5  | 728    | 394.6  |
| 118.5  | 134.9  | 116.8 | 121.5  | 110.8 | 129.6 | 116.5  | 154.8  | 140.9  |
| 133.9  | 172.2  | 157.8 | 154.9  | 161.8 | 183.7 | 155.8  | 192    | 173.2  |
| 112.7  | 131.4  | 117.4 | 123.4  | 112.4 | 132.4 | 130.4  | 142.6  | 118.6  |
| 387.6  | 633.2  | 566.5 | 508.2  | 522   | 625.6 | 602.8  | 982.2  | 494.7  |
| 109.7  | 106.1  | 105.8 | 106.2  | 112.7 | 118.6 | 119.7  | 126.8  | 117.8  |
| 108.8  | 111.5  | 119.6 | 107.3  | 97.1  | 118.8 | 111.5  | 112.4  | 112    |
| 171.2  | 267.3  | 293   | 182.6  | 237.1 | 290.8 | 213.1  | 424.6  | 304.9  |
| 140.9  | 133.3  | 135.2 | 140.1  | 124.9 | 142.6 | 127.4  | 185.4  | 197.3  |
| 266.1  | 504.5  | 418.5 | 366.3  | 388.3 | 443.1 | 378.5  | 598.6  | 444.1  |
| 257.8  | 376.6  | 339   | 296.6  | 328.1 | 352.2 | 380.4  | 554.3  | 365.4  |
| 301.1  | 393.3  | 336.4 | 396.1  | 400.8 | 348   | 419.5  | 586.7  | 351.3  |
| 108.1  | 112.2  | 96    | 101.7  | 94.9  | 105.5 | 98.9   | 108    | 109.7  |
| 100.1  | 106.5  | 100.6 | 93.1   | 93.7  | 102.6 | 104.6  | 112.9  | 110.7  |
| 97     | 101.6  | 101.7 | 99.7   | 89.8  | 106.2 | 101.5  | 108.1  | 113.2  |
| 108.5  | 105.8  | 98    | 96.8   | 92.9  | 106.1 | 93.2   | 113.1  | 109.3  |
| 106.9  | 112.8  | 102.8 | 112.6  | 106.9 | 110.8 | 124.7  | 152.8  | 109.2  |
| 635.4  | 851.7  | 452.9 | 905.9  | 731.4 | 472.6 | 1059.4 | 704    | 411.5  |
| 110.8  | 111.6  | 103.2 | 99.4   | 92.6  | 113   | 106.6  | 111.7  | 107    |
| 107.1  | 105.4  | 105.7 | 110.7  | 102   | 115.1 | 112.6  | 116.7  | 112.6  |
| 115.3  | 119.4  | 110.7 | 110    | 97.4  | 112.1 | 106.5  | 118.3  | 110.8  |
| 106.7  | 107.1  | 106.8 | 108.3  | 95.3  | 104.7 | 96.7   | 97.3   | 109    |
| 98     | 105.2  | 103.1 | 99.3   | 94.3  | 105.1 | 97.1   | 104.2  | 105.4  |
| 305.7  | 289    | 238.4 | 189.8  | 176.8 | 290.6 | 204.9  | 320.2  | 283.7  |
| 105.1  | 104.5  | 103.2 | 99.7   | 99.6  | 111.6 | 109.5  | 102.7  | 105.2  |
| 152.7  | 247.3  | 221.3 | 248.5  | 167.3 | 207.5 | 179.7  | 250.6  | 172.1  |
| 120.9  | 128.4  | 113.9 | 111.7  | 107   | 119.4 | 117.1  | 118.7  | 120.8  |
| 103.8  | 105.4  | 97.7  | 98.9   | 93    | 102.2 | 94.4   | 109.9  | 98.1   |
| 112    | 117.2  | 110.6 | 103.9  | 108.4 | 121.8 | 118.8  | 118.6  | 122.2  |

|       |       |       |       |       |       |       |        |       |
|-------|-------|-------|-------|-------|-------|-------|--------|-------|
| 114.1 | 118.4 | 111.8 | 105.7 | 108.1 | 117.3 | 125.5 | 137.2  | 117.7 |
| 104.3 | 108.9 | 107.2 | 108.5 | 93    | 105.4 | 105.1 | 118.8  | 117.9 |
| 480.2 | 643.5 | 552.2 | 635.6 | 592.5 | 497.1 | 505.9 | 1004.2 | 759   |
| 104.9 | 107.5 | 108.1 | 102   | 94.4  | 109.2 | 99.1  | 104.4  | 106.2 |
| 120.9 | 105   | 109.7 | 119.8 | 115   | 116   | 105.9 | 121.5  | 117.3 |
| 106.7 | 106   | 96.3  | 101.4 | 98.7  | 103.8 | 102.1 | 112.2  | 104.6 |
| 107.9 | 108.8 | 112.2 | 92.5  | 104.7 | 105   | 97.1  | 116.2  | 102.4 |
| 104.8 | 114   | 111.6 | 101.4 | 93    | 110.4 | 109.2 | 112.7  | 122.1 |
| 105.2 | 108.6 | 95.5  | 109.6 | 98.7  | 106.7 | 101.6 | 102.7  | 115.1 |
| 99.7  | 109.1 | 97.4  | 102.7 | 98.7  | 103   | 107.3 | 109.3  | 104.1 |
| 104.5 | 109.7 | 104.3 | 104.3 | 86.8  | 105.1 | 104.1 | 103.4  | 105.9 |
| 104.8 | 106.3 | 101.7 | 99.6  | 94.1  | 107.5 | 108.3 | 104.2  | 110.9 |
| 117   | 105.3 | 111.9 | 96.3  | 96.8  | 103.4 | 102.9 | 114    | 104.6 |
| 106.1 | 109.1 | 106.7 | 100.2 | 99.5  | 104.4 | 101.6 | 112.7  | 114.9 |
| 111.4 | 109.1 | 104.5 | 105   | 104.6 | 104.3 | 106.4 | 108    | 103.3 |
| 124.9 | 165.2 | 98.3  | 172   | 128.9 | 107   | 156.5 | 139.3  | 107.7 |
| 106   | 109.9 | 100.4 | 107.3 | 108.3 | 115   | 104   | 106.2  | 104   |
| 111.4 | 116.6 | 106.2 | 102.7 | 96.3  | 104.5 | 112.8 | 109.6  | 101.8 |
| 111.6 | 106.7 | 112.6 | 107.3 | 101.8 | 114.1 | 105.1 | 120    | 116.5 |
| 104   | 108.2 | 101.9 | 100.6 | 104.6 | 113.4 | 98.8  | 119    | 109.6 |
| 117.7 | 124.9 | 127.5 | 130.9 | 122.4 | 125.9 | 128.5 | 145.8  | 126.3 |
| 103.7 | 101.8 | 104.9 | 98.3  | 104.8 | 116.1 | 98.1  | 117.3  | 114.7 |
| 138.8 | 139.1 | 140.2 | 123.2 | 126.2 | 141.5 | 132   | 148.7  | 128.3 |
| 114.9 | 119   | 100.4 | 102.2 | 98.7  | 120   | 112.1 | 108.8  | 109.8 |
| 117.2 | 113   | 107.7 | 104   | 96.3  | 116.8 | 106   | 113.9  | 108.2 |
| 413.2 | 230   | 119.1 | 236.8 | 159.2 | 114.7 | 213.5 | 340.4  | 345.1 |
| 266.1 | 152.7 | 148   | 144.7 | 125.1 | 153.4 | 140.1 | 207.6  | 248.6 |
| 96.8  | 103.7 | 99.8  | 95.4  | 92.2  | 103.9 | 102   | 99.6   | 105.7 |
| 129.7 | 127.4 | 130.9 | 132.1 | 125.6 | 135.8 | 119.9 | 139    | 139   |
| 105.2 | 138.8 | 122.5 | 116.5 | 103.3 | 125   | 131.9 | 118.5  | 110.5 |
| 104.8 | 104.4 | 108.2 | 111.6 | 93.7  | 111.6 | 99.5  | 106.1  | 103.3 |
| 101.8 | 108.9 | 100.5 | 97.8  | 96.2  | 104   | 101.3 | 105.1  | 102.4 |
| 107   | 107.3 | 99.8  | 104.7 | 98.9  | 100.6 | 110.7 | 105.8  | 104   |
| 103.6 | 113.9 | 99.4  | 97    | 89.3  | 101.7 | 100.6 | 118.9  | 111.4 |
| 104.5 | 110.4 | 105.6 | 98.8  | 91.9  | 109.6 | 104.9 | 105.2  | 110.9 |
| 106.4 | 102.9 | 93.4  | 100.5 | 99.2  | 104.7 | 104.7 | 107.7  | 100.3 |
| 112.6 | 106.8 | 111.6 | 99.2  | 89.5  | 109.8 | 102.8 | 108.2  | 111.3 |
| 113.5 | 114.1 | 105.7 | 97.4  | 95.8  | 107.1 | 106.9 | 112    | 111   |
| 100.2 | 108.2 | 105.5 | 108.4 | 93    | 106.6 | 90.5  | 101.7  | 105.5 |
| 106.5 | 106.4 | 98.8  | 105.5 | 87.1  | 107.2 | 99    | 117.7  | 106.9 |
| 143.8 | 148.9 | 160.9 | 144.1 | 128   | 151.6 | 139.4 | 220.7  | 143.4 |
| 104.3 | 115.5 | 112.1 | 107   | 97.9  | 107   | 107.9 | 117.1  | 112.8 |
| 109.6 | 109   | 98.8  | 93    | 85.8  | 105.9 | 102   | 108    | 110.8 |
| 101.9 | 104.1 | 98.5  | 98.5  | 96.8  | 103.9 | 104.4 | 106.8  | 106.6 |
| 105   | 105.6 | 98.3  | 99.6  | 98.3  | 109.6 | 99.9  | 112.3  | 105.1 |
| 119.2 | 114   | 105.4 | 109.9 | 99.5  | 109.4 | 106.7 | 111.3  | 118.3 |
| 100.7 | 107.5 | 99.9  | 102.5 | 95.7  | 105.5 | 100.4 | 109.6  | 104.6 |
| 106.3 | 117.5 | 101.1 | 107.8 | 93.7  | 111.2 | 98.5  | 112.5  | 108.1 |
| 106.8 | 105.6 | 105.6 | 103.2 | 98.6  | 111.3 | 106.5 | 111.5  | 117.9 |
| 91.8  | 111.9 | 100.3 | 98.3  | 83.7  | 106.1 | 104.3 | 99.9   | 98.8  |
| 107.2 | 102.5 | 100.4 | 102.8 | 107.3 | 113.8 | 100.7 | 118.5  | 111.9 |

|        |       |       |        |       |       |       |        |        |
|--------|-------|-------|--------|-------|-------|-------|--------|--------|
| 183    | 197.4 | 213.3 | 183.8  | 190.2 | 251.4 | 232   | 312.1  | 278    |
| 193.5  | 224.9 | 233.5 | 257.9  | 228.8 | 267.4 | 257.9 | 386.7  | 333.2  |
| 117.4  | 113.3 | 117.5 | 122.2  | 105   | 115.2 | 116.9 | 116.9  | 113.1  |
| 111.9  | 110.3 | 102   | 107.5  | 98.6  | 117.1 | 103.6 | 115.7  | 113.8  |
| 118.2  | 148.6 | 140.5 | 154.4  | 119.7 | 137.8 | 156.8 | 154.3  | 125.8  |
| 107.6  | 108.7 | 106.7 | 101.4  | 96.5  | 110.8 | 105.6 | 107.3  | 104.3  |
| 223.6  | 335.9 | 358.2 | 332.9  | 265.3 | 330   | 371.2 | 482.3  | 283.8  |
| 223.6  | 383.6 | 314.9 | 386.7  | 284.9 | 292.4 | 298.4 | 305.5  | 203.6  |
| 147    | 237.8 | 191.9 | 238.9  | 201.6 | 193.8 | 237.3 | 345.2  | 267.3  |
| 638.9  | 890.4 | 716.7 | 855.7  | 730.9 | 894.3 | 828.8 | 980.9  | 550.7  |
| 108.9  | 112.5 | 110   | 116.5  | 99    | 114.8 | 111.9 | 107.7  | 109.4  |
| 116.7  | 111.5 | 111.2 | 108.7  | 107.6 | 117.4 | 111.1 | 127.8  | 109.8  |
| 272.7  | 503.7 | 252.1 | 420.3  | 250.7 | 199.6 | 380.4 | 482.7  | 555.5  |
| 116.7  | 107.4 | 106.2 | 105.2  | 89.1  | 116.9 | 102.3 | 104    | 102.2  |
| 120    | 123.3 | 119   | 115    | 98.1  | 116.5 | 108   | 134.3  | 129.4  |
| 192.6  | 245.9 | 261.2 | 207.8  | 185   | 248.2 | 206.4 | 369.6  | 250.5  |
| 110    | 114.1 | 114.5 | 108.1  | 102.3 | 117.6 | 101.7 | 119.1  | 118.1  |
| 105    | 106.3 | 105.6 | 103.5  | 95.6  | 108.1 | 98.8  | 104.3  | 103    |
| 140.9  | 200.3 | 171.3 | 169    | 177.6 | 168.9 | 136.2 | 166.2  | 132.6  |
| 110.5  | 127.2 | 113.9 | 112.2  | 108.6 | 122.4 | 115   | 129    | 118    |
| 99.5   | 105.8 | 114.9 | 102.2  | 106.2 | 111.3 | 97.7  | 113.3  | 109.7  |
| 101.4  | 112.6 | 103.5 | 101.6  | 95.5  | 106.6 | 105.3 | 101    | 102.5  |
| 113.3  | 122   | 101.3 | 102.7  | 94.3  | 118.1 | 106   | 104.6  | 101    |
| 113.8  | 118.9 | 104.8 | 95.9   | 99.3  | 113.2 | 109.5 | 118.2  | 123.1  |
| 105.2  | 113.8 | 107.7 | 119.1  | 100.8 | 114.4 | 119.2 | 113.5  | 127.8  |
| 102.2  | 105.5 | 100   | 109.5  | 101.3 | 107.9 | 111.1 | 114.2  | 103.2  |
| 104.7  | 101.3 | 107.2 | 99.5   | 91.7  | 108.2 | 93.9  | 110.2  | 106.4  |
| 108.1  | 104.5 | 103.5 | 98.8   | 100.4 | 104.9 | 101.1 | 113.6  | 110.3  |
| 108.3  | 111.9 | 106   | 101    | 88.3  | 106.7 | 98.4  | 115.5  | 115.5  |
| 207.1  | 163.7 | 150.5 | 146.8  | 149.1 | 159.6 | 175.1 | 261.3  | 214.2  |
| 272.3  | 363.4 | 346.9 | 415.2  | 371.5 | 450.1 | 467   | 987.7  | 628.2  |
| 120.8  | 143.9 | 137   | 143.1  | 119.2 | 147.3 | 140.6 | 167.7  | 146.4  |
| 508.2  | 271.6 | 329.6 | 290.5  | 305.3 | 435.7 | 362.2 | 957.2  | 730.1  |
| 143    | 162.5 | 154.3 | 197.4  | 156.5 | 177.8 | 151   | 319.5  | 197    |
| 131.1  | 170.4 | 141.3 | 126.9  | 134.4 | 144.9 | 149.1 | 195.2  | 166.9  |
| 105.3  | 112.6 | 104.6 | 100.2  | 99.4  | 114.4 | 103.3 | 112.1  | 104.3  |
| 415.5  | 856.1 | 976.4 | 737.7  | 752.3 | 882.9 | 698.2 | 964.2  | 627.8  |
| 109.3  | 106.6 | 110.1 | 105.6  | 92.3  | 110.1 | 119.2 | 114.1  | 111.9  |
| 116    | 124.2 | 104.9 | 108.4  | 103.8 | 115.1 | 107.6 | 117.4  | 123.4  |
| 110.9  | 101.2 | 94.4  | 97.4   | 98.8  | 105.2 | 105.6 | 107.8  | 103.8  |
| 116.5  | 113.1 | 109.9 | 120.3  | 105   | 120.2 | 120.8 | 111.7  | 116    |
| 101    | 107.9 | 102.7 | 101.1  | 95    | 104.9 | 103.3 | 114.8  | 134.6  |
| 103.7  | 111.1 | 96.2  | 95.2   | 96.3  | 105.9 | 98.8  | 104.6  | 107.7  |
| 111.1  | 123.7 | 115.6 | 95.2   | 109.6 | 109   | 105.5 | 115.2  | 103.4  |
| 1192.6 | 856.9 | 707.7 | 1079.2 | 945.4 | 787.3 | 850.5 | 1963.7 | 1388.3 |
| 106.6  | 113.1 | 105   | 99.2   | 103.2 | 115.3 | 102.8 | 118.1  | 102.1  |
| 102.3  | 105.5 | 103.4 | 99.9   | 94.3  | 104.4 | 102.7 | 104.7  | 105.2  |
| 107.4  | 118.7 | 108.5 | 105    | 102   | 111.6 | 103.5 | 112.6  | 112.1  |
| 104.7  | 118.2 | 107.1 | 102.1  | 90.1  | 111.9 | 104.4 | 98.6   | 108.2  |
| 177.9  | 282.3 | 253.9 | 214.6  | 220.6 | 235.8 | 176.7 | 285.8  | 229.5  |
| 193.6  | 261   | 237.5 | 301.7  | 163   | 217.7 | 227.4 | 357.3  | 275.1  |

|        |        |        |        |        |        |        |        |        |
|--------|--------|--------|--------|--------|--------|--------|--------|--------|
| 127.1  | 224.5  | 217.7  | 182.9  | 184.3  | 191.5  | 195.5  | 207    | 140.4  |
| 113.8  | 125    | 118.5  | 124.4  | 109    | 120.1  | 111.3  | 124.8  | 121.9  |
| 183.3  | 435    | 543.1  | 325.2  | 366.1  | 391.8  | 390.2  | 472    | 278    |
| 292.2  | 323.6  | 285.1  | 260.2  | 239.3  | 339.3  | 257.1  | 298.5  | 302.3  |
| 115.1  | 130.4  | 129.1  | 120.4  | 105.1  | 125.4  | 118.2  | 126.7  | 117.7  |
| 495.4  | 505.9  | 510.6  | 522.2  | 471.9  | 528.8  | 508.1  | 975.6  | 822.6  |
| 657.4  | 669.8  | 702.7  | 1016.6 | 788.2  | 754.3  | 1228   | 1225   | 942.4  |
| 312.9  | 332.3  | 447    | 350.3  | 382    | 338.2  | 377.9  | 570.3  | 413.9  |
| 100.2  | 96.9   | 120.1  | 104.9  | 93     | 102.6  | 109.7  | 108    | 103.7  |
| 220.7  | 231.5  | 201.2  | 173.6  | 211.5  | 194.4  | 248.5  | 396.4  | 315.3  |
| 187    | 271.6  | 230.9  | 189.1  | 228.4  | 169.7  | 212.6  | 408    | 329.3  |
| 101.4  | 108.6  | 107    | 101.6  | 95.5   | 109.8  | 105.7  | 108.5  | 111    |
| 294.8  | 420.9  | 353.4  | 427.9  | 373.6  | 349.1  | 443.8  | 592.7  | 290.1  |
| 117.1  | 139.1  | 119.8  | 104.5  | 116.9  | 134    | 112.8  | 143.5  | 140.5  |
| 786.4  | 1061.3 | 958.4  | 998.4  | 921.5  | 1178.1 | 956.9  | 1783.8 | 1098.3 |
| 190.6  | 176.6  | 153.8  | 173.9  | 142.9  | 174.9  | 174    | 173.2  | 173.3  |
| 239.3  | 315.5  | 290    | 366.5  | 270.4  | 311.4  | 396.7  | 653    | 523.1  |
| 104.4  | 109.1  | 101.8  | 102.2  | 93.4   | 102.6  | 105.8  | 106.6  | 108.8  |
| 100.4  | 107.7  | 99.2   | 104.9  | 96.3   | 108.8  | 109.3  | 109.3  | 110.6  |
| 116.7  | 106    | 108.7  | 120.3  | 99.8   | 114.4  | 108.7  | 116    | 111.2  |
| 117.9  | 109.9  | 107.4  | 111.6  | 106.4  | 117.9  | 109.1  | 121    | 132.5  |
| 102.7  | 115    | 114.1  | 110    | 102.1  | 106.1  | 107.4  | 102.3  | 112.5  |
| 122.7  | 119.7  | 109.9  | 125.1  | 98.6   | 105.1  | 102.3  | 117.7  | 103.3  |
| 109.9  | 130.7  | 109.9  | 138.4  | 110.5  | 118.5  | 117.9  | 124.7  | 105.2  |
| 104.9  | 106.6  | 99.3   | 95.1   | 94     | 110.8  | 103.8  | 106.4  | 105.4  |
| 132.5  | 137.2  | 124.4  | 124    | 114.6  | 132.6  | 114.2  | 145.6  | 121.9  |
| 1269.3 | 1152.8 | 858.9  | 1262.1 | 967.1  | 1054.9 | 1132.4 | 1717.4 | 1295.1 |
| 191.8  | 177.1  | 181.2  | 203    | 144.8  | 209.1  | 206.5  | 385.4  | 332.2  |
| 144.5  | 155.6  | 136.8  | 118.9  | 139    | 148.5  | 141.3  | 203.4  | 130.4  |
| 147.4  | 176.2  | 140.6  | 139.6  | 146.3  | 179.1  | 151.9  | 302.1  | 161.4  |
| 107.7  | 104.1  | 101.6  | 101.2  | 97.2   | 113.3  | 94.1   | 102    | 104.2  |
| 109.7  | 107.6  | 93.3   | 89.9   | 97.4   | 105.2  | 102    | 101    | 105.6  |
| 112.5  | 113.7  | 108.6  | 109.3  | 93.8   | 102.4  | 101    | 122    | 111.4  |
| 301.6  | 364.6  | 377.7  | 372.4  | 361.2  | 336.5  | 387.3  | 438.7  | 329.9  |
| 154.7  | 175.4  | 156.9  | 173.6  | 153.6  | 168.3  | 188.5  | 204.9  | 183.7  |
| 250.8  | 334.4  | 319.9  | 335.3  | 288.1  | 260.2  | 260.2  | 513.5  | 324.7  |
| 212.8  | 223.3  | 206.1  | 221.2  | 212.6  | 219.7  | 197.1  | 291.1  | 237.8  |
| 115.8  | 131.2  | 124.2  | 105.3  | 112.5  | 127    | 118    | 163.2  | 144.2  |
| 112.9  | 107.6  | 100.8  | 103.9  | 90.7   | 110.3  | 104.5  | 105.6  | 110.8  |
| 210.5  | 244.9  | 171.3  | 280.2  | 248.3  | 179.5  | 291.6  | 470.4  | 324.3  |
| 332.3  | 346.6  | 358.8  | 362.2  | 349.9  | 368.3  | 446.4  | 623.6  | 464.4  |
| 170.2  | 206.4  | 180.6  | 170.9  | 174.6  | 211.7  | 212.3  | 276    | 203.5  |
| 120.2  | 135.2  | 114.3  | 122.3  | 100.5  | 121    | 113.1  | 184.3  | 142.5  |
| 206.4  | 208.8  | 234.5  | 212.6  | 206.6  | 229.3  | 223    | 442.5  | 356.5  |
| 103.8  | 110.6  | 95.9   | 96.2   | 95.8   | 113    | 99.2   | 106.6  | 109    |
| 157.2  | 141.6  | 150.2  | 132.5  | 129.2  | 139.5  | 146    | 218    | 179.6  |
| 129.1  | 135.9  | 134.8  | 116.2  | 124.3  | 140.9  | 124    | 193.6  | 169    |
| 957.1  | 1034.1 | 1029.5 | 932.2  | 1082.1 | 1318.5 | 1083.3 | 1684.3 | 1270.6 |
| 122.9  | 137.7  | 117.4  | 122.1  | 130    | 128.6  | 123.7  | 138.5  | 127.6  |
| 154.7  | 114.7  | 128.9  | 181.7  | 117.2  | 127.1  | 120.6  | 198.6  | 195    |
| 114.3  | 111.8  | 106.4  | 103.7  | 110.5  | 115.6  | 105    | 128.8  | 127.9  |

|        |        |        |        |        |        |        |        |        |
|--------|--------|--------|--------|--------|--------|--------|--------|--------|
| 421.7  | 397    | 330.5  | 437.9  | 442.2  | 394.4  | 301.1  | 737.4  | 502.4  |
| 106.8  | 111.2  | 95.9   | 98     | 101.2  | 106.1  | 100.4  | 101    | 101.7  |
| 113.2  | 120    | 117.2  | 121.6  | 110.5  | 119.6  | 108.7  | 131.4  | 117.7  |
| 984.8  | 950.1  | 878.1  | 877.6  | 1170.8 | 1230.9 | 1103   | 2255.5 | 1788.3 |
| 120.7  | 131.7  | 124    | 106.8  | 103.1  | 127.1  | 110.7  | 151    | 121.7  |
| 946.4  | 839.2  | 787.5  | 1044.8 | 618.3  | 791.4  | 868.3  | 1761.3 | 1321.8 |
| 1563.7 | 1435.4 | 1260.2 | 1198.7 | 1198.5 | 1390.3 | 1663.5 | 2592.1 | 2462   |
| 1403.7 | 1764.5 | 1386.1 | 1593.5 | 1483.4 | 1539.5 | 1712.4 | 3219.4 | 2884.4 |
| 116.3  | 106.5  | 106    | 101.5  | 98.6   | 114.4  | 102.8  | 121.6  | 115.5  |
| 160.8  | 319.7  | 278    | 300.2  | 282.4  | 266.8  | 370.9  | 352.6  | 210.5  |
| 108.7  | 121.3  | 117    | 119.6  | 102.3  | 125.6  | 108.8  | 118.9  | 110.2  |
| 181.5  | 270.8  | 270.8  | 218.3  | 224.7  | 265.8  | 273.4  | 348.2  | 260.9  |
| 116.7  | 114.3  | 106.5  | 115.3  | 101.8  | 118.3  | 110.1  | 125.8  | 109.2  |
| 142.5  | 165    | 176.4  | 125.7  | 133    | 162.8  | 142.5  | 244.1  | 200.2  |
| 131.2  | 170.5  | 157.3  | 145.3  | 136    | 193.2  | 173.5  | 172.2  | 160.9  |
| 125.8  | 155    | 133.3  | 113.1  | 124.5  | 136.1  | 141.6  | 176    | 151.7  |
| 134.2  | 162.8  | 149.5  | 132.1  | 141    | 188.3  | 190.6  | 198    | 178.6  |
| 126    | 127.8  | 118.9  | 128.5  | 108.1  | 121.8  | 118.8  | 123.5  | 128.5  |
| 104.8  | 107.2  | 102.8  | 119.3  | 106.3  | 109.1  | 102    | 123.6  | 114.6  |
| 107.4  | 118    | 110.5  | 101.2  | 104.8  | 114.4  | 91     | 117.7  | 102.5  |
| 144.6  | 145.5  | 130    | 110.1  | 126.6  | 131.2  | 128.8  | 165.6  | 153    |
| 613.1  | 373.9  | 369    | 285.7  | 323.7  | 369.1  | 351.4  | 1334.1 | 1701.3 |
| 752.3  | 1132.5 | 1145.9 | 905.4  | 1173.3 | 1191   | 1334.1 | 1827.3 | 929.8  |
| 153.6  | 158.1  | 138.4  | 197.5  | 146.2  | 138.1  | 207.7  | 165.6  | 167    |
| 202    | 188    | 218.7  | 199.7  | 178.1  | 198.7  | 242.8  | 300.8  | 207.3  |
| 108    | 111.5  | 103.8  | 105.8  | 88.7   | 106    | 103.2  | 114.5  | 107.3  |
| 151.2  | 223.8  | 348.7  | 187.7  | 215.5  | 343.6  | 128.9  | 278.3  | 199.2  |
| 108.5  | 103.9  | 103.8  | 104.1  | 107.9  | 107.5  | 109.6  | 117.5  | 115.4  |
| 1199.6 | 1146.3 | 773    | 778.6  | 811    | 1038.9 | 929.2  | 1917.8 | 1419.5 |
| 384    | 412.4  | 297.7  | 256.3  | 339.3  | 307.6  | 311.2  | 545.1  | 587.5  |
| 105.6  | 106.4  | 104.4  | 108.3  | 97.9   | 109.9  | 101    | 109    | 107.9  |
| 102.8  | 95.6   | 99.6   | 108.2  | 96.2   | 109.3  | 98.4   | 106.8  | 111.6  |
| 107.3  | 114.1  | 106    | 105.5  | 92.5   | 108.3  | 107.2  | 115.2  | 125.3  |
| 108.2  | 120.3  | 107.5  | 110    | 110.4  | 110.6  | 106.5  | 108.6  | 109.8  |
| 107.6  | 109.3  | 100.1  | 101    | 99.9   | 109.4  | 100.7  | 102.6  | 108.5  |
| 106.9  | 101.1  | 103.2  | 100.6  | 100.1  | 113.7  | 111.3  | 105.1  | 110.3  |
| 101.3  | 101.6  | 99.9   | 91.7   | 93.3   | 105.4  | 100.7  | 102.9  | 107.8  |
| 711.5  | 518.1  | 715.8  | 534.7  | 517.5  | 524.3  | 464.1  | 1001.4 | 1278.4 |
| 101.4  | 112.6  | 100.3  | 105    | 96.2   | 110.6  | 102.1  | 111.5  | 112.9  |
| 110.8  | 110.8  | 102    | 111.6  | 93.6   | 107.9  | 116.2  | 108.6  | 107.9  |
| 105    | 157.2  | 132.3  | 180.3  | 121.6  | 119.7  | 142.4  | 109.3  | 121.7  |
| 128.6  | 185.3  | 173.3  | 168    | 167.8  | 175.8  | 188.4  | 190.7  | 151.4  |
| 98.2   | 117.8  | 102.4  | 96.5   | 91.4   | 104.3  | 101.7  | 108.9  | 101.8  |
| 118.8  | 114.4  | 108.6  | 108.2  | 107.3  | 109.4  | 111.4  | 117    | 111.3  |
| 744.5  | 1390.9 | 1620.2 | 1242.6 | 1423.8 | 1428.1 | 1454.6 | 1690.3 | 1235.1 |
| 150.1  | 162.7  | 153.4  | 152.2  | 140    | 170.2  | 157.5  | 182.6  | 158.1  |
| 103.3  | 107    | 106.2  | 101.8  | 90.5   | 107.9  | 102.3  | 115.5  | 98.2   |
| 103.5  | 108.7  | 99.4   | 100.9  | 98.4   | 112.4  | 104.7  | 108.4  | 109    |
| 105.5  | 102    | 100.1  | 101    | 96.8   | 105.1  | 102.6  | 115    | 104.2  |
| 168.1  | 119.3  | 111.6  | 120.7  | 112.9  | 127.7  | 186.2  | 139.3  | 121.8  |
| 105    | 106.7  | 97.4   | 106.7  | 94.7   | 104    | 101.3  | 117    | 110.4  |

|        |        |        |        |        |        |        |        |        |
|--------|--------|--------|--------|--------|--------|--------|--------|--------|
| 105.4  | 112.6  | 104    | 100.2  | 98.8   | 104.2  | 104.3  | 104.5  | 106.6  |
| 117.2  | 110    | 106.1  | 106.8  | 97.4   | 116.3  | 106.7  | 130    | 109.4  |
| 112.1  | 108.7  | 104.7  | 101.5  | 95     | 97     | 108.5  | 99.4   | 111.5  |
| 103    | 107.1  | 102.4  | 104.2  | 93.4   | 112.6  | 98     | 98.9   | 111.6  |
| 118.3  | 109.1  | 121.4  | 122.5  | 105.2  | 115.3  | 113.1  | 119.5  | 116    |
| 109.4  | 107.4  | 104.3  | 104.9  | 101.4  | 109.3  | 99.2   | 114.8  | 106    |
| 117.1  | 103.3  | 99.2   | 101.3  | 98     | 104.3  | 98.8   | 129.5  | 114.6  |
| 118.8  | 114    | 113.5  | 101.5  | 92.7   | 113.9  | 106.8  | 121.2  | 108    |
| 102.5  | 110.8  | 91.6   | 93.8   | 88.4   | 104.2  | 99.2   | 102.8  | 98.8   |
| 127.2  | 168.3  | 149.7  | 144.8  | 134.7  | 153    | 132.1  | 229.3  | 169.5  |
| 111.4  | 113    | 100.8  | 107.5  | 104.6  | 116    | 102.5  | 107.9  | 104.7  |
| 120.5  | 119.7  | 117.8  | 113.8  | 109.6  | 117.2  | 120.1  | 136.7  | 124.7  |
| 116.8  | 112.1  | 96.9   | 107.3  | 98.3   | 117.2  | 106.5  | 125.1  | 114.3  |
| 117.8  | 121.4  | 110.6  | 117.9  | 115.4  | 129.7  | 122.8  | 128    | 120.7  |
| 254.7  | 316.2  | 334.1  | 324.6  | 241.1  | 286.6  | 212.2  | 351.1  | 245.9  |
| 103.4  | 107.8  | 95.6   | 102.4  | 95.3   | 107    | 104.4  | 104.5  | 116.5  |
| 1202.8 | 1325.3 | 1229.4 | 1321.9 | 988.7  | 1087.3 | 1312.2 | 2229.7 | 1522.5 |
| 203    | 276.4  | 269.3  | 260.4  | 242    | 291.6  | 221.5  | 354.8  | 247.9  |
| 129.4  | 190    | 165.8  | 144    | 140.4  | 154.1  | 138.2  | 228.6  | 162.2  |
| 106.5  | 111.9  | 101.1  | 99.6   | 89.7   | 106.8  | 99.2   | 103.3  | 104    |
| 140.3  | 138.1  | 130.2  | 147.1  | 124.3  | 130.1  | 140.3  | 139.8  | 110.4  |
| 183.7  | 218.9  | 259.5  | 270.2  | 216.9  | 204.1  | 260.8  | 210.8  | 134.3  |
| 107.3  | 114.5  | 100.7  | 101.2  | 102.9  | 104.7  | 104.2  | 110.7  | 108.6  |
| 117.7  | 122.8  | 124.1  | 98.5   | 103.2  | 103.8  | 113.1  | 116.1  | 125.6  |
| 104    | 108.2  | 98     | 95.4   | 92.8   | 101    | 110.7  | 110.7  | 105.2  |
| 109.1  | 98.8   | 103    | 96.3   | 93.7   | 103.5  | 97.1   | 101.8  | 101.6  |
| 141.2  | 185.1  | 209.6  | 167.2  | 193.7  | 234.2  | 182.1  | 251.5  | 255    |
| 2746.9 | 2004.1 | 1958.5 | 1887.2 | 1959.2 | 2416.3 | 2088.3 | 3065.9 | 2369.2 |
| 2044   | 1464.4 | 1483.2 | 1785.7 | 1437.7 | 1725.9 | 1906.2 | 2261.1 | 1825   |
| 106.2  | 121.3  | 113.3  | 112.3  | 111.7  | 124.1  | 103    | 128.2  | 119.3  |
| 115.2  | 116.4  | 106.4  | 107.7  | 102.1  | 114    | 104.2  | 138.8  | 128.3  |
| 103.6  | 103.5  | 93.6   | 105.6  | 93.8   | 108.9  | 105.1  | 116.3  | 104.2  |
| 107    | 114.1  | 104.4  | 119.8  | 95.8   | 119.3  | 106.9  | 105.6  | 106    |
| 115.1  | 110.6  | 106.5  | 100.4  | 94.7   | 116.7  | 103.7  | 122.1  | 117.5  |
| 116.6  | 138    | 122.8  | 115.4  | 106.4  | 115    | 116.2  | 116.8  | 118.3  |
| 108.7  | 100.9  | 98.5   | 96     | 94.6   | 105.2  | 115.2  | 108.8  | 99.9   |
| 102.2  | 109.9  | 98.3   | 96.9   | 94.5   | 103.1  | 102.6  | 93.2   | 99.5   |
| 112.2  | 105.9  | 96.5   | 100.3  | 97.2   | 105.5  | 103.6  | 104.7  | 114.8  |
| 106.1  | 114    | 104.3  | 111.6  | 103.4  | 121.6  | 106.8  | 133.3  | 115.6  |
| 174.2  | 201.1  | 224.7  | 188.4  | 197.7  | 238.5  | 237.1  | 207.7  | 214.3  |
| 174.1  | 339.1  | 303.9  | 280.3  | 248.1  | 257.7  | 183.4  | 300.7  | 241    |
| 156    | 131.8  | 167.2  | 143.9  | 113.9  | 158.6  | 116.9  | 213.3  | 178.6  |
| 3303.9 | 7172.7 | 7620.2 | 7193.3 | 6043   | 7160.1 | 6170.1 | 6855.4 | 3910.6 |
| 261.3  | 198.1  | 183    | 268.3  | 187.2  | 159.9  | 216.4  | 207.4  | 225.5  |
| 459.6  | 463.5  | 460.9  | 591.4  | 518.9  | 520.2  | 737.5  | 1039.8 | 700.5  |
| 110.6  | 103.1  | 105.6  | 107.8  | 94.3   | 110.5  | 106.2  | 110.4  | 107.5  |
| 104.6  | 115.7  | 105.4  | 96.9   | 99.9   | 107.1  | 109.4  | 108    | 113.4  |
| 108.3  | 111.6  | 109.2  | 116.1  | 112.1  | 114.9  | 111.3  | 116.9  | 111.2  |
| 104.2  | 108.5  | 107.2  | 89.9   | 95.9   | 106.4  | 100.6  | 111.7  | 105.6  |
| 1268.2 | 1665.4 | 1252.9 | 1821.3 | 1284.3 | 1056.3 | 1912.4 | 2232   | 1539.5 |
| 168.9  | 194.3  | 221.3  | 186.3  | 166    | 199.7  | 225    | 257.4  | 180.1  |

|       |       |       |       |       |        |       |        |        |
|-------|-------|-------|-------|-------|--------|-------|--------|--------|
| 110   | 109.1 | 107.7 | 102.3 | 109   | 115.4  | 111.1 | 108.6  | 120.8  |
| 108.9 | 107.1 | 91.1  | 100.9 | 90.1  | 106.2  | 116.3 | 102.8  | 103.5  |
| 298.7 | 279.6 | 196.5 | 271.1 | 187.4 | 265.2  | 311.7 | 540.6  | 401.8  |
| 107.4 | 109.4 | 101.3 | 100.7 | 93    | 107.6  | 99.4  | 101.1  | 110.5  |
| 123   | 105.6 | 101.8 | 108.8 | 104   | 124.6  | 117.3 | 141    | 148.3  |
| 115.5 | 119.7 | 116.2 | 123.3 | 97.3  | 123.1  | 113.9 | 146.5  | 138.5  |
| 946.1 | 970.6 | 924.4 | 691   | 951.4 | 1040.9 | 624.5 | 1414.1 | 1154.9 |
| 113.3 | 117.1 | 105.6 | 103.8 | 103   | 109.4  | 110.7 | 100.1  | 106.9  |
| 131.6 | 137.6 | 113.7 | 108.6 | 118.2 | 131.9  | 134.5 | 123.7  | 108.2  |
| 154.1 | 173.1 | 149.3 | 163.7 | 148.6 | 165.2  | 171.2 | 224.8  | 194.8  |
| 178.2 | 220.4 | 131.3 | 343.6 | 107.5 | 111.8  | 170.2 | 130    | 127.2  |
| 102   | 105   | 104.4 | 101.7 | 90.1  | 110.8  | 98.1  | 104.6  | 108.9  |
| 187.3 | 198.7 | 124.7 | 399.9 | 113   | 115.6  | 192.4 | 109.9  | 107.5  |
| 106.3 | 111.5 | 105   | 105.7 | 98.5  | 108.9  | 101.5 | 107.9  | 105.5  |
| 105   | 106.5 | 100.7 | 110   | 95.6  | 108    | 102.8 | 115.5  | 114.7  |
| 113.3 | 114.1 | 103.2 | 111.7 | 109.5 | 124.7  | 113.2 | 121.7  | 101.6  |
| 104.1 | 110.4 | 99.9  | 104.7 | 96.3  | 106.9  | 99.2  | 109.6  | 102.3  |
| 109   | 107.8 | 106.7 | 95.8  | 95.6  | 108.2  | 98.4  | 109.3  | 110    |
| 102.3 | 107.5 | 102.1 | 102.2 | 88.2  | 109.2  | 102.5 | 101.6  | 105.4  |
| 100.9 | 110.6 | 99.6  | 113.9 | 98.4  | 102.4  | 101   | 107.6  | 107.5  |
| 112.6 | 110.2 | 103.4 | 123.5 | 100.6 | 118.6  | 98.4  | 111.4  | 112.1  |
| 98    | 104   | 96.9  | 110.1 | 91.2  | 114.3  | 103.5 | 106.6  | 102.8  |
| 102.6 | 112.7 | 104.2 | 105.3 | 96.9  | 109.1  | 101.7 | 103.2  | 101.6  |
| 112.2 | 115.7 | 108.2 | 105.7 | 93.7  | 111.3  | 107.4 | 110.7  | 105.2  |
| 104   | 116.1 | 102.3 | 110   | 104.5 | 114    | 106   | 118.2  | 106.7  |
| 104.5 | 101.5 | 98    | 103.9 | 84.1  | 101.6  | 100.4 | 102.4  | 107.9  |
| 184.9 | 351.2 | 244.7 | 295   | 214.4 | 259.9  | 338.5 | 372.1  | 255.1  |
| 112.1 | 111.4 | 102.2 | 102   | 98.6  | 106.2  | 103.6 | 110.8  | 115.8  |
| 105.4 | 105.8 | 103.2 | 101.9 | 97.1  | 105.8  | 105.2 | 114.6  | 108.1  |
| 98.7  | 100.5 | 98.5  | 88.8  | 94.2  | 102.5  | 95.8  | 102.3  | 100.2  |
| 108.8 | 103.1 | 102.9 | 109.5 | 92.8  | 113.7  | 98.1  | 105.2  | 106.6  |
| 204.4 | 115.7 | 232.4 | 124.7 | 129.9 | 159    | 332   | 271.5  | 228.2  |
| 113.3 | 110   | 111.1 | 93    | 102.7 | 104.4  | 104   | 103.4  | 101.2  |
| 105   | 108.5 | 94.9  | 100.5 | 91.6  | 106.4  | 103.7 | 100.3  | 107.3  |
| 110.9 | 112.4 | 102.3 | 108   | 99.4  | 113.9  | 112   | 114.5  | 117.9  |
| 356.6 | 647.6 | 416.6 | 798.7 | 523.4 | 405.2  | 546.1 | 659.8  | 403.6  |
| 107   | 116.8 | 101.3 | 105.6 | 96.2  | 107.2  | 102.6 | 104    | 111.6  |
| 104   | 103.1 | 99.7  | 109.3 | 97.3  | 111.5  | 119.4 | 110.3  | 111    |
| 158.8 | 156.2 | 140.8 | 182.1 | 155   | 153.2  | 172.1 | 258    | 185.9  |
| 167.4 | 185   | 144.6 | 175.6 | 162.5 | 154.5  | 187.4 | 264.7  | 182.8  |
| 105.1 | 105.2 | 106.1 | 106.9 | 97.3  | 106.4  | 103.9 | 105.3  | 101.5  |
| 106.5 | 112.2 | 105.5 | 95    | 90.6  | 101.3  | 108.1 | 115.8  | 110    |
| 118   | 107.3 | 109   | 98.9  | 97.7  | 107.2  | 104   | 118.2  | 107.3  |
| 116.1 | 112.7 | 119   | 103.3 | 122.7 | 137.7  | 128.6 | 156.5  | 120.7  |
| 247.3 | 256.1 | 256.1 | 200.2 | 232.9 | 380.6  | 259.3 | 580    | 306.2  |
| 103.5 | 106.9 | 95    | 113.8 | 90.5  | 108.2  | 106.4 | 103.8  | 100.1  |
| 107   | 103.7 | 100.5 | 103.9 | 88.9  | 105.7  | 104.7 | 106.1  | 112.1  |
| 121.7 | 123.1 | 106   | 120.7 | 107.2 | 117    | 103.3 | 114.3  | 107.8  |
| 112.1 | 112.4 | 107.7 | 111.9 | 97    | 123.5  | 106.9 | 122.7  | 111.3  |
| 127.2 | 122   | 116.1 | 120.9 | 104.5 | 127.5  | 118.9 | 167.8  | 210.8  |
| 105.7 | 117.8 | 115.4 | 104.2 | 94.2  | 107.1  | 106.2 | 115.9  | 111.7  |



|       |        |       |        |        |        |        |        |        |
|-------|--------|-------|--------|--------|--------|--------|--------|--------|
| 102.8 | 106.5  | 99.3  | 100.3  | 91.3   | 110.4  | 106.3  | 110.8  | 108.8  |
| 548   | 263.5  | 214.2 | 222.8  | 244.7  | 326.2  | 305.1  | 763.7  | 864    |
| 712   | 1042.8 | 793.2 | 782.1  | 756.1  | 971.9  | 676.8  | 1347.6 | 1046.8 |
| 222   | 159.4  | 150.9 | 188.9  | 136.5  | 165.9  | 204.8  | 260.2  | 258.1  |
| 114.6 | 105.1  | 106.2 | 106.5  | 95.5   | 112.8  | 111    | 113    | 110.8  |
| 139.7 | 121.1  | 122.7 | 112.9  | 105.2  | 119.1  | 118.5  | 134    | 154.5  |
| 106.1 | 110.1  | 114.6 | 105.1  | 97     | 113.1  | 111.3  | 113.6  | 122    |
| 287.5 | 299.2  | 360.5 | 305.6  | 248.8  | 318.1  | 352.6  | 344.4  | 271.1  |
| 128.6 | 113    | 109.8 | 99     | 100.7  | 114.6  | 101.6  | 158.9  | 139.6  |
| 126.6 | 144.1  | 113.7 | 114.3  | 119.3  | 141    | 125.1  | 210.1  | 146.7  |
| 194.7 | 166.2  | 137.8 | 150.4  | 155.3  | 156.4  | 153.7  | 180.6  | 140.6  |
| 573.3 | 516.4  | 576.1 | 461.4  | 653.4  | 478.8  | 599.5  | 999.5  | 864.6  |
| 104   | 106.7  | 108.3 | 105.7  | 97.6   | 107.7  | 98.8   | 120.8  | 111.9  |
| 119.6 | 120.8  | 129.8 | 112    | 143.1  | 131.2  | 108.8  | 134.1  | 138.5  |
| 242.8 | 319.4  | 354.4 | 223.2  | 348.1  | 303.5  | 279.4  | 554.2  | 302    |
| 114   | 111.9  | 109.8 | 110.6  | 93.7   | 114    | 112.8  | 123    | 119.6  |
| 113   | 108.5  | 103.1 | 107.4  | 100.5  | 109.4  | 104.7  | 104.8  | 105.6  |
| 995.1 | 821.3  | 822.6 | 897.3  | 974.2  | 1074.2 | 1126.5 | 1333.1 | 751    |
| 115   | 127    | 133.7 | 128.5  | 115.9  | 124.6  | 122.4  | 140.2  | 143.8  |
| 108.2 | 102.1  | 109   | 113.5  | 92.4   | 115.9  | 101.1  | 110.5  | 111.1  |
| 155.8 | 142.1  | 131.3 | 134.8  | 129.4  | 161.8  | 157.8  | 207    | 187.3  |
| 155.9 | 219.4  | 221.4 | 176.1  | 207.9  | 225.7  | 186.7  | 252.4  | 171.2  |
| 174.3 | 238.1  | 163.9 | 223.9  | 157.7  | 186.6  | 223.3  | 372.1  | 205.6  |
| 138.9 | 209    | 221.8 | 162.1  | 195.5  | 209.5  | 171.2  | 235.6  | 186.9  |
| 164.1 | 166    | 148.2 | 130.1  | 156.8  | 149.9  | 144.7  | 407.9  | 485.5  |
| 100.6 | 108    | 101.7 | 104.9  | 96.4   | 107.7  | 98.7   | 102.7  | 106.7  |
| 99.4  | 106.6  | 95.7  | 94.2   | 91.9   | 100.1  | 103.5  | 104.5  | 104.5  |
| 119.6 | 106.8  | 106.6 | 101.2  | 101.5  | 113    | 109.4  | 109.7  | 115.4  |
| 105.7 | 110.9  | 99.5  | 95.7   | 88.7   | 116.5  | 95.4   | 101.8  | 99.7   |
| 109   | 105.1  | 103.9 | 103.4  | 99     | 110.8  | 106.4  | 106    | 107.1  |
| 102.5 | 116.7  | 116.8 | 112.5  | 98.6   | 112.8  | 96.8   | 129.6  | 113.9  |
| 116   | 135.8  | 136.5 | 125.8  | 145.8  | 154.9  | 107.6  | 174.1  | 146.4  |
| 122.4 | 152.1  | 133.5 | 129.3  | 110.8  | 133.7  | 120.4  | 147.1  | 136.3  |
| 107.9 | 107.7  | 98.8  | 98.6   | 95.1   | 109.7  | 106.1  | 113.2  | 113.4  |
| 164   | 221    | 287.2 | 193.8  | 228.3  | 250.9  | 233.1  | 303.8  | 198.7  |
| 494   | 499.5  | 521.3 | 625.9  | 471.5  | 610.7  | 577.4  | 834.2  | 519.6  |
| 480   | 606.6  | 548.6 | 521.1  | 420.9  | 567.2  | 516.1  | 988.5  | 861.7  |
| 119.9 | 115    | 123.1 | 110.7  | 106    | 121.9  | 113    | 136.9  | 116.6  |
| 950.9 | 1027.1 | 1039  | 1055.1 | 1170.4 | 1224.1 | 1435.2 | 1742.8 | 1216   |
| 226.6 | 246.8  | 212.6 | 162.7  | 180.7  | 221.8  | 141.8  | 366.9  | 261.6  |
| 184.4 | 185    | 203.7 | 220.7  | 195.3  | 180.9  | 257.5  | 308.4  | 303.6  |
| 349.6 | 505    | 524   | 376.5  | 478.5  | 527.5  | 479.2  | 986.8  | 657.5  |
| 337.1 | 326.6  | 401.2 | 281.1  | 372.3  | 451.9  | 355.9  | 588.6  | 450.2  |
| 707.1 | 602.9  | 600.3 | 530    | 640    | 568.9  | 615.9  | 1228.1 | 949.5  |
| 592.9 | 924.4  | 840.5 | 794.4  | 754.1  | 692.2  | 880.1  | 864.6  | 882.5  |
| 223.1 | 266.3  | 290.8 | 232.9  | 257.3  | 282.2  | 295.6  | 429.1  | 356    |
| 111   | 115.3  | 101.4 | 98.9   | 99.7   | 119    | 106    | 120.7  | 103.4  |
| 109.9 | 116.1  | 131.1 | 105.4  | 109    | 136.9  | 145.6  | 139.5  | 134.1  |
| 118.3 | 120.1  | 113.7 | 108.5  | 117.9  | 120.5  | 111.7  | 143    | 118.9  |
| 196.9 | 154.1  | 147.6 | 133.4  | 129.8  | 179.9  | 135.2  | 242.1  | 219.4  |
| 232.4 | 165.2  | 170.1 | 150.3  | 161.4  | 206.6  | 157.5  | 321.4  | 305.6  |

|        |        |        |        |        |        |        |        |        |
|--------|--------|--------|--------|--------|--------|--------|--------|--------|
| 100.8  | 101.4  | 107.5  | 99.2   | 93.8   | 108.4  | 104.4  | 107.4  | 107.1  |
| 107.5  | 116.4  | 112    | 109.3  | 118.9  | 128.4  | 112.2  | 118.3  | 116.4  |
| 99.4   | 113.4  | 100    | 95.8   | 94.4   | 106.2  | 103.2  | 107.5  | 108.3  |
| 144.7  | 131.7  | 116.7  | 126.4  | 108.6  | 133    | 126.1  | 159.7  | 134.6  |
| 106.1  | 108.3  | 105.4  | 90.4   | 91.7   | 102.1  | 102.2  | 97.8   | 106.2  |
| 97.8   | 108.9  | 97.7   | 100.7  | 98.4   | 108.6  | 102.5  | 109.9  | 104.1  |
| 99     | 108.1  | 105.8  | 103.9  | 94.8   | 102.4  | 97     | 111.9  | 111.5  |
| 103.6  | 104.7  | 99.4   | 97.9   | 101    | 110.4  | 110.1  | 105.7  | 106.1  |
| 331.1  | 686.5  | 515.7  | 561.7  | 268    | 336.7  | 526    | 1259.2 | 803.6  |
| 874.9  | 702.9  | 630    | 710.9  | 679.1  | 850.3  | 754.7  | 1616.1 | 1636.4 |
| 180.4  | 215.6  | 190.2  | 194.9  | 183    | 204.9  | 166.6  | 310.9  | 249.3  |
| 152.9  | 181.1  | 145.7  | 137.1  | 138.3  | 170.4  | 151.8  | 210.5  | 171.4  |
| 225.7  | 208.5  | 203.3  | 160.9  | 196.9  | 192.3  | 177.7  | 472.5  | 270.8  |
| 115    | 118.6  | 122.7  | 104.6  | 93.1   | 124.4  | 100.9  | 121.8  | 108.7  |
| 367.2  | 538.9  | 555.1  | 484.7  | 385    | 507.5  | 535.9  | 805.8  | 419.8  |
| 229.1  | 220    | 250.6  | 186.7  | 228.9  | 236.7  | 204.2  | 338.6  | 213.3  |
| 137.7  | 160    | 170.6  | 125.6  | 137.1  | 159.6  | 121.6  | 206.4  | 153.5  |
| 291.3  | 259.6  | 241.7  | 211.3  | 281.7  | 278    | 175.8  | 471.7  | 365.4  |
| 162    | 156.2  | 133.8  | 126.4  | 137.7  | 159.2  | 134.2  | 224.1  | 166.5  |
| 3173.4 | 2590.8 | 2677.8 | 2120.8 | 2152.1 | 3304.2 | 2754   | 5222.6 | 4882.9 |
| 273    | 268    | 225.7  | 249.3  | 234.1  | 275.9  | 240.4  | 423.3  | 325.8  |
| 108.9  | 109.1  | 109    | 108.7  | 97.1   | 114.1  | 99.2   | 119.9  | 112.8  |
| 868.4  | 1554.4 | 1425.2 | 1036.9 | 1216.7 | 1435.9 | 1195.8 | 2356.5 | 1626.8 |
| 1490.6 | 3354.1 | 2937.5 | 2182.9 | 2488.9 | 2442.2 | 2523.6 | 4186.3 | 4334.3 |
| 1582.9 | 2790.4 | 3160.4 | 2698   | 2419.2 | 2146.9 | 2659   | 5460.1 | 4097.6 |
| 2379.4 | 2198.3 | 2252   | 2090.8 | 2104.7 | 2133.4 | 2398.8 | 3398.3 | 2977.1 |
| 450.4  | 434.5  | 424.8  | 468.9  | 397.9  | 411.9  | 424.1  | 561.6  | 549.3  |
| 138.2  | 135.2  | 124    | 131.4  | 113.2  | 133.5  | 149.6  | 183.1  | 177.4  |
| 1045.5 | 1410.4 | 1276.7 | 1468.5 | 1267.3 | 1781.1 | 1353.6 | 2320.5 | 1637.8 |
| 734.4  | 1388.6 | 894    | 1584.8 | 998    | 910.1  | 1526   | 1418   | 611.3  |
| 111.5  | 111.4  | 108.7  | 100.6  | 96.3   | 119.9  | 110.4  | 117.3  | 106.4  |
| 109    | 126.8  | 129.4  | 113.8  | 104.2  | 145    | 114.9  | 134.1  | 127.6  |
| 104.4  | 104.2  | 103.3  | 107.6  | 100.7  | 104.9  | 103.1  | 107    | 112.2  |
| 104.3  | 112.6  | 103.7  | 99.5   | 92.4   | 111.4  | 108.1  | 110.7  | 111.8  |
| 100    | 105    | 103.2  | 97.3   | 95.2   | 114.5  | 100    | 107.3  | 102    |
| 109.6  | 111.3  | 101.3  | 97.8   | 111.5  | 96.8   | 103.7  | 105.2  | 104.9  |
| 106.2  | 109.4  | 100.5  | 98     | 96.1   | 103.4  | 99.9   | 104.9  | 106.6  |
| 100.9  | 104.6  | 106.9  | 104.3  | 96     | 105.1  | 102.1  | 110    | 115.7  |
| 104.5  | 115.6  | 102.8  | 107.1  | 106.5  | 117.7  | 109.6  | 116.2  | 120.5  |
| 120.7  | 170.5  | 136.5  | 143.4  | 139    | 154.9  | 143.4  | 165.2  | 151    |
| 114.5  | 126    | 113.7  | 101.7  | 106.8  | 121.4  | 102.9  | 121.5  | 109.6  |
| 112.3  | 110.9  | 111.9  | 100.2  | 101    | 113.4  | 112.2  | 108.9  | 106.6  |
| 134.9  | 235.9  | 238.2  | 202.8  | 189.1  | 223.1  | 219.1  | 226.6  | 167.1  |
| 243.2  | 506.7  | 409.7  | 480    | 360    | 304.1  | 359.4  | 429.4  | 309.6  |
| 120.9  | 125.9  | 122.7  | 110.1  | 117.2  | 115.7  | 111.2  | 146.7  | 134.4  |
| 126.9  | 118.3  | 144    | 122.8  | 110.8  | 137.5  | 128.7  | 166.7  | 164    |
| 112.1  | 111.5  | 107.8  | 108.9  | 101.2  | 111.4  | 108.9  | 109.7  | 115.7  |
| 106.5  | 115.7  | 110    | 107.4  | 104    | 113.8  | 116.6  | 108.8  | 110.7  |
| 109.8  | 115.9  | 99.8   | 104.5  | 95.5   | 113.1  | 102    | 108.2  | 109.2  |
| 105.9  | 109.8  | 102.6  | 99.5   | 99.6   | 108.8  | 108.6  | 110.7  | 102.2  |
| 114.9  | 109.3  | 98.6   | 100.4  | 94.7   | 110.2  | 106.4  | 111.1  | 112.4  |

|        |        |        |        |        |        |        |        |        |
|--------|--------|--------|--------|--------|--------|--------|--------|--------|
| 114.3  | 137.4  | 127.7  | 114.6  | 114.8  | 134    | 114    | 128.4  | 130.6  |
| 106.5  | 112.3  | 99.7   | 106.5  | 96     | 109.2  | 102.7  | 101.6  | 108.1  |
| 107.5  | 108    | 100.6  | 92.6   | 89.5   | 109.1  | 99.7   | 105.4  | 110    |
| 97.4   | 108.2  | 100.4  | 96     | 94.8   | 108.1  | 104.1  | 106.4  | 106.1  |
| 110    | 108.6  | 98.9   | 98.6   | 95.2   | 105.8  | 100.8  | 106.4  | 112.1  |
| 1382.9 | 1742.7 | 1050.7 | 964.3  | 1858.7 | 1484.3 | 1319.3 | 3678.4 | 1214   |
| 107.4  | 106.3  | 95.7   | 93.4   | 91.9   | 112.9  | 96     | 110.3  | 105.9  |
| 103.1  | 109.1  | 102.2  | 99     | 95     | 102.5  | 94.8   | 106.6  | 96.4   |
| 108.4  | 111.1  | 104.7  | 124.3  | 109.8  | 121.8  | 107.2  | 135.1  | 122.6  |
| 102.1  | 103.5  | 111.6  | 99.8   | 96.9   | 110.5  | 105.6  | 98.2   | 108.9  |
| 325.7  | 381.4  | 255.7  | 435.6  | 312    | 306    | 347.8  | 457.4  | 275.6  |
| 246.4  | 354.9  | 226.7  | 306.3  | 312.6  | 258    | 189.1  | 436.2  | 294.6  |
| 103.6  | 112.3  | 101.9  | 99.6   | 95.7   | 104.1  | 99     | 114.6  | 119.4  |
| 108.5  | 102.4  | 99     | 92.4   | 105    | 106.5  | 97.6   | 106.3  | 99.7   |
| 163.8  | 137.7  | 152.7  | 169.5  | 145.2  | 145.2  | 173.1  | 190.2  | 153.8  |
| 114.2  | 123.3  | 109    | 95.2   | 107.4  | 112.9  | 100.6  | 119.9  | 119.7  |
| 113.8  | 113.6  | 111.2  | 97.4   | 101.4  | 110.4  | 112.6  | 122.2  | 115.7  |
| 105.9  | 106.5  | 101.5  | 106.7  | 98.3   | 101.4  | 103.8  | 110.2  | 106.6  |
| 274.2  | 547.1  | 390.5  | 464.1  | 503.5  | 437.9  | 620.8  | 728    | 364.1  |
| 117.9  | 107.9  | 123    | 114.6  | 103.9  | 123.9  | 112.5  | 140.9  | 135.8  |
| 116    | 108.3  | 107.7  | 110.1  | 94.3   | 117.6  | 102.6  | 119.4  | 120.8  |
| 143.6  | 203.9  | 199.1  | 168.8  | 155.9  | 180.8  | 192.8  | 208.3  | 154.8  |
| 329.5  | 334.6  | 334.2  | 325.5  | 251.2  | 336.4  | 277.9  | 674.9  | 653.8  |
| 274.1  | 250    | 236.1  | 299.3  | 224.5  | 202.5  | 262.5  | 299.3  | 336.3  |
| 115.1  | 110.4  | 111.1  | 92.2   | 108.6  | 113.6  | 116.9  | 119.5  | 128.8  |
| 111    | 124.8  | 116.6  | 122.1  | 110.8  | 122.9  | 117.7  | 136.1  | 122.4  |
| 180.9  | 284.3  | 325.4  | 294.3  | 264.8  | 274.1  | 397.5  | 250.6  | 159.4  |
| 112.8  | 126.4  | 116    | 102    | 109.9  | 127.4  | 121.6  | 120.8  | 110.9  |
| 109.6  | 113.8  | 107.6  | 119    | 106    | 116.3  | 112.6  | 115.8  | 118.9  |
| 107.2  | 110    | 103.5  | 101.9  | 99.2   | 107.4  | 105.2  | 124.8  | 105.8  |
| 107    | 106.7  | 99.7   | 100.9  | 100.6  | 104.5  | 96.4   | 111.1  | 109.7  |
| 114.5  | 113.8  | 103.7  | 100.7  | 104.9  | 110.1  | 108.6  | 129    | 113.7  |
| 104.6  | 112.7  | 114.2  | 116    | 98.5   | 118.2  | 105.7  | 111.4  | 127.8  |
| 110.3  | 105.3  | 95.6   | 97.8   | 97.4   | 104.4  | 106.4  | 104.2  | 103.2  |
| 123.3  | 124    | 140.9  | 115.9  | 98.6   | 167.9  | 118.9  | 147.5  | 148.3  |
| 874.6  | 1420.6 | 1191.1 | 1176.3 | 1592.6 | 1396.2 | 1714.5 | 2215.6 | 979.4  |
| 154.5  | 231.2  | 188.5  | 246    | 217.8  | 190.3  | 235.3  | 236.3  | 144.5  |
| 109    | 106.4  | 105.9  | 103    | 100.5  | 105.6  | 114.8  | 120.6  | 111.2  |
| 139.1  | 115.6  | 104.5  | 122.2  | 108.7  | 108.1  | 120.8  | 128.5  | 106.6  |
| 110.3  | 105.1  | 92.8   | 97.4   | 103.4  | 103.7  | 101.5  | 114.5  | 111.9  |
| 99.9   | 109.3  | 111.8  | 99.5   | 98.5   | 103.5  | 97.9   | 118.3  | 112.3  |
| 197.6  | 189.4  | 187.5  | 179.6  | 218.2  | 209.2  | 233    | 244.1  | 222.5  |
| 100.4  | 108.9  | 94.5   | 95.8   | 99.4   | 106.8  | 94.7   | 100.1  | 108.2  |
| 130.4  | 123.2  | 133.8  | 133    | 120.4  | 131.9  | 124.5  | 160.5  | 139.3  |
| 110.1  | 106.1  | 107    | 113.5  | 93.1   | 109.2  | 104.8  | 103    | 110.8  |
| 109.4  | 102.9  | 100.6  | 93.1   | 95.9   | 113.6  | 102.4  | 112.2  | 112.1  |
| 679.7  | 719    | 552.5  | 430.8  | 626.6  | 829.4  | 585.2  | 1326.4 | 825.7  |
| 434.9  | 963.5  | 990.7  | 755.2  | 780.1  | 965.5  | 973.1  | 788.3  | 396.7  |
| 938.4  | 1483.7 | 1278.9 | 1520.8 | 1237.2 | 1776.8 | 1336.9 | 2657.4 | 1434.5 |
| 146.3  | 188.5  | 166.4  | 164.8  | 154.2  | 186    | 115.3  | 214.8  | 164    |
| 851.8  | 1370.2 | 1293.1 | 1358.1 | 1227.9 | 1410.7 | 1024.2 | 1917.6 | 1128   |

|        |        |        |        |        |        |        |        |        |
|--------|--------|--------|--------|--------|--------|--------|--------|--------|
| 108.4  | 109    | 108.5  | 108.6  | 99.2   | 109.8  | 97.8   | 105.6  | 115.4  |
| 107.5  | 106.4  | 107.9  | 110.5  | 106.5  | 115    | 104.6  | 114.3  | 107.3  |
| 172.1  | 273.9  | 272.7  | 306.2  | 248.9  | 230.4  | 332.8  | 274.5  | 175.7  |
| 98.5   | 115.5  | 103.3  | 112.4  | 105.5  | 104.4  | 112.3  | 107    | 102.7  |
| 104.6  | 114.2  | 108    | 117.6  | 98.5   | 114.7  | 111.6  | 104.7  | 108.7  |
| 114.3  | 144.8  | 127.7  | 121.8  | 131.4  | 172.2  | 168.7  | 185.6  | 147.8  |
| 110.5  | 114.5  | 102    | 101.3  | 100.3  | 112.7  | 106.5  | 123.1  | 118.6  |
| 188.1  | 142.5  | 127.1  | 152.2  | 135.8  | 149.2  | 139.2  | 178.3  | 149.5  |
| 106    | 105.2  | 100.6  | 96.4   | 101.8  | 111    | 100.9  | 117.2  | 112.4  |
| 110.2  | 103.7  | 104.8  | 103.7  | 100.5  | 112.4  | 98.6   | 110    | 113.1  |
| 107.5  | 104.8  | 103.9  | 109.4  | 98.1   | 110    | 102.6  | 109.5  | 110.3  |
| 105.5  | 114.8  | 101.2  | 101.6  | 97.3   | 110.9  | 103.3  | 116    | 109    |
| 114.7  | 146.2  | 127    | 119    | 107.4  | 125.9  | 146.2  | 143.6  | 119.4  |
| 122.7  | 122.6  | 118.1  | 115.3  | 113.1  | 133.6  | 120.6  | 146.6  | 112.1  |
| 111.7  | 107.1  | 106.3  | 101.6  | 92.9   | 111.5  | 104.6  | 118.4  | 109.3  |
| 118.3  | 106.1  | 103.9  | 106    | 96.4   | 119.2  | 108.3  | 121.8  | 122.5  |
| 112.9  | 107.4  | 102.4  | 97.3   | 91.3   | 110.5  | 104.8  | 107.7  | 103.8  |
| 406.7  | 420.6  | 407.5  | 497.6  | 371.5  | 462    | 554.4  | 856.3  | 657.3  |
| 106.7  | 110.6  | 114.4  | 101.3  | 110.7  | 115.1  | 106.8  | 122.8  | 116.4  |
| 110.4  | 108    | 100.8  | 104.9  | 94.2   | 116.8  | 102.7  | 115.1  | 102.8  |
| 2825.2 | 3905.5 | 3302.4 | 3678.6 | 2838.4 | 3058.7 | 2335.7 | 5586.5 | 6658.4 |
| 107.2  | 112.6  | 100    | 100.3  | 95.8   | 111    | 104.2  | 104.1  | 105.6  |
| 108.7  | 108.8  | 104.5  | 103.1  | 102.1  | 106.7  | 113.1  | 114.4  | 116.7  |
| 113.2  | 111.3  | 113    | 104.5  | 106.2  | 117.6  | 108.5  | 131.4  | 108.1  |
| 1549.8 | 1634.1 | 1659.9 | 1808.7 | 1473.1 | 1810.9 | 1963.9 | 3380.8 | 3686.1 |
| 109.6  | 106.8  | 107.2  | 110.7  | 98.3   | 105.6  | 104.8  | 119.4  | 119.1  |
| 147.9  | 169.7  | 161.6  | 171.9  | 146.9  | 183.7  | 174.4  | 244.9  | 156.3  |
| 112.4  | 194.6  | 158.5  | 154.5  | 143.5  | 188.1  | 174.3  | 194.4  | 142.4  |
| 123.1  | 117.1  | 112.2  | 121.9  | 108.1  | 124.2  | 115.9  | 139.1  | 134.6  |
| 110.8  | 107.3  | 108.6  | 92.8   | 101.5  | 115.5  | 108.9  | 124.4  | 129.1  |
| 297.8  | 1041   | 866.4  | 750    | 810.4  | 817.9  | 632.6  | 922.7  | 401    |
| 151    | 142.2  | 139.2  | 144.7  | 115.1  | 152.1  | 130.5  | 218.8  | 184.7  |
| 104    | 107    | 100.4  | 104.9  | 93.3   | 103.4  | 106.3  | 112.9  | 112.4  |
| 118.1  | 108    | 103.8  | 105.6  | 93.4   | 103.5  | 94.9   | 110.1  | 105.8  |
| 118.3  | 123    | 108.9  | 109.3  | 114.1  | 118    | 110.5  | 127.9  | 130.5  |
| 107.3  | 112.4  | 103.5  | 103.4  | 104    | 105.6  | 105.4  | 112.6  | 103.5  |
| 108.1  | 124.8  | 121.4  | 115.6  | 105.4  | 117.5  | 114.1  | 124.8  | 111.7  |
| 111.9  | 123.7  | 117.6  | 113.1  | 121.9  | 137.7  | 130.6  | 140.9  | 122    |
| 116.7  | 138.8  | 139.1  | 116.1  | 137.7  | 132.1  | 139.7  | 157.1  | 147.1  |
| 104.3  | 104    | 101.7  | 102.6  | 93.8   | 108    | 99.2   | 103.3  | 105.4  |
| 767.2  | 793.9  | 791    | 829.2  | 575.2  | 780    | 549.4  | 1284.1 | 1457.2 |
| 105.7  | 111.2  | 102.1  | 102    | 96.2   | 106.6  | 93.7   | 105.1  | 112.4  |
| 113.4  | 113.5  | 102.9  | 101    | 101.6  | 108.1  | 106.1  | 99.6   | 111.1  |
| 108.7  | 112.5  | 107.9  | 101.8  | 88.7   | 108.9  | 101.3  | 111.8  | 98.6   |
| 108.3  | 102.8  | 102.5  | 110    | 101.8  | 104.5  | 100.5  | 109.5  | 108.2  |
| 277.3  | 357.1  | 269    | 248    | 283.9  | 317    | 285.3  | 452.6  | 353.3  |
| 148.8  | 133.7  | 122.4  | 135.1  | 134.8  | 151.3  | 135.8  | 160.4  | 157.1  |
| 956.6  | 1512   | 1481.3 | 1045.2 | 1378.9 | 1570.6 | 1294.3 | 2742.1 | 1541.1 |
| 129.8  | 162.7  | 166.5  | 155.4  | 116.4  | 155    | 143.1  | 144.5  | 133.5  |
| 303    | 288.7  | 244.1  | 456.3  | 235.5  | 234.8  | 362.2  | 243.1  | 174.5  |
| 117.3  | 131.2  | 157.2  | 141.4  | 125.3  | 143.9  | 119.9  | 140.9  | 140.4  |

|       |       |       |       |       |       |       |       |       |
|-------|-------|-------|-------|-------|-------|-------|-------|-------|
| 115   | 164.3 | 140.5 | 165.4 | 133.2 | 141.7 | 137.5 | 142   | 136.8 |
| 102   | 121.3 | 113.4 | 108   | 95.1  | 101.7 | 126.1 | 106.2 | 105.2 |
| 103.1 | 106.8 | 96.9  | 106.1 | 92.4  | 105   | 98.9  | 103.6 | 101.5 |
| 121.6 | 117.8 | 108.3 | 110.1 | 100.8 | 114.9 | 102.6 | 114.8 | 118.8 |
| 105.1 | 101.2 | 104.1 | 103.2 | 91.8  | 111.8 | 100.7 | 104.8 | 109.4 |
| 104.1 | 108.8 | 110.6 | 105.4 | 96.3  | 109.8 | 105.8 | 118.9 | 109.4 |
| 106.9 | 108.7 | 108.5 | 104.2 | 100.8 | 111.2 | 112.8 | 113.5 | 111.5 |
| 111   | 110.5 | 102.6 | 102.9 | 99.6  | 108   | 103.8 | 113.1 | 107.6 |
| 114.7 | 114.2 | 108   | 110.9 | 99.9  | 114.4 | 123.1 | 117.3 | 114.9 |
| 104.1 | 103   | 105.4 | 101.2 | 97.5  | 111.8 | 100.7 | 104.1 | 111.9 |
| 110.1 | 112.7 | 108.6 | 115.3 | 110.8 | 129.9 | 123.7 | 125.6 | 126.7 |
| 102.3 | 106.7 | 100.3 | 91.1  | 92.8  | 104.8 | 99    | 112.5 | 108.4 |
| 118.6 | 131.1 | 115.8 | 128.6 | 114.8 | 137.2 | 133.5 | 149.6 | 107.4 |
| 114.6 | 113.6 | 109.3 | 144.2 | 108.9 | 109.9 | 133.2 | 109.5 | 114.2 |
| 109.9 | 128.8 | 105.7 | 101.8 | 113.3 | 120.4 | 107.4 | 130.2 | 111.6 |
| 117.9 | 119.1 | 121.5 | 90.9  | 125.1 | 128.2 | 103.8 | 150.5 | 108.2 |
| 110.8 | 126.8 | 105   | 109.5 | 100.1 | 117.1 | 103.4 | 117.6 | 108.6 |
| 128.2 | 121.9 | 128.1 | 121.8 | 111.6 | 119.8 | 141.8 | 132   | 129.7 |
| 113.5 | 113.5 | 101.1 | 102.9 | 100.4 | 98.8  | 97.9  | 104.9 | 101.2 |
| 205.4 | 221.4 | 159.7 | 274.3 | 158.9 | 163.4 | 264.5 | 197.9 | 174.4 |
| 114   | 108.3 | 100.8 | 107.4 | 97.6  | 111.8 | 104.4 | 111.3 | 105.6 |
| 109.2 | 110.1 | 97.9  | 98.3  | 94.3  | 112   | 94.6  | 108.6 | 101.8 |
| 101.6 | 104.7 | 94.7  | 104.3 | 93.4  | 107.9 | 106.1 | 108.6 | 101.7 |
| 109.7 | 113.1 | 108.8 | 107   | 99.6  | 101.4 | 96.8  | 106.5 | 111.2 |
| 589.5 | 526.7 | 505.5 | 349.8 | 403.9 | 493.6 | 432.9 | 886.4 | 717.6 |
| 122.3 | 127.5 | 122.8 | 126.1 | 120.9 | 135   | 119.5 | 152.3 | 124.4 |
| 173.3 | 230.2 | 202.7 | 212.2 | 182.9 | 199.9 | 226.1 | 269.5 | 255.2 |
| 120   | 151.3 | 130.8 | 150.8 | 117.6 | 132.5 | 119.6 | 131.8 | 121.9 |
| 313.9 | 537   | 529.8 | 571.3 | 437.8 | 481.5 | 624.7 | 499.5 | 379.3 |
| 116.8 | 115.4 | 101.4 | 117.2 | 102.6 | 110.9 | 102.6 | 107.3 | 123.3 |
| 238.1 | 170.1 | 148.3 | 152.7 | 204.6 | 164.4 | 215.6 | 356.8 | 154.9 |
| 124.6 | 126.1 | 117.9 | 121.2 | 114   | 124.2 | 117.9 | 122.1 | 124.7 |
| 106.9 | 127.2 | 111.4 | 105   | 97.3  | 105.1 | 106.8 | 101.8 | 114.8 |
| 108   | 136.4 | 133.4 | 117.1 | 111.8 | 139.4 | 107.8 | 160.7 | 126.6 |
| 103.8 | 106.7 | 104.2 | 103.4 | 93.1  | 112.5 | 126   | 116.3 | 116.5 |
| 178.7 | 242.3 | 180.5 | 184.1 | 199.3 | 231.8 | 222.1 | 318.3 | 236.1 |
| 111.3 | 154.1 | 155.4 | 150.3 | 133   | 145.3 | 124.2 | 208.4 | 135.7 |
| 299.8 | 370.4 | 317.8 | 270.9 | 299.7 | 359   | 343.4 | 628.8 | 510.3 |
| 113.2 | 124.4 | 119   | 119.2 | 111.8 | 124.2 | 119.9 | 141.4 | 130.2 |
| 110.5 | 107.8 | 110.7 | 107.2 | 98.4  | 106.7 | 106.5 | 120   | 119.4 |
| 112.5 | 111   | 109.3 | 117.1 | 96.9  | 125.3 | 105.9 | 113.1 | 110.2 |
| 101.8 | 107.7 | 109.6 | 112.4 | 106   | 110.5 | 94.9  | 116.6 | 106.4 |
| 126.5 | 150.1 | 162.7 | 130.9 | 126.8 | 159.9 | 152.4 | 179.1 | 150.6 |
| 127.8 | 124.7 | 126   | 127.6 | 111.6 | 118   | 115.3 | 137.9 | 133.6 |
| 113.2 | 125.6 | 109.4 | 104.1 | 107.6 | 116.7 | 112.9 | 120.4 | 117.4 |
| 150   | 196.9 | 184   | 173.7 | 163.8 | 171.5 | 169.8 | 189.2 | 159.6 |
| 107.5 | 117.4 | 107.5 | 103.8 | 103.3 | 109.1 | 116.8 | 127.2 | 126.1 |
| 112.9 | 120.6 | 117.4 | 113.4 | 111.4 | 125.4 | 120   | 123.3 | 110.9 |
| 285.2 | 456.8 | 590.7 | 470.4 | 401.1 | 386.1 | 453.1 | 517.3 | 307.7 |
| 161.1 | 321.2 | 291   | 269.3 | 242.8 | 255.3 | 306.6 | 352.8 | 249.3 |
| 109.1 | 106.9 | 99.2  | 102.6 | 90.7  | 108.6 | 103.3 | 100.2 | 107.8 |

|       |        |        |       |        |        |       |        |       |
|-------|--------|--------|-------|--------|--------|-------|--------|-------|
| 98.2  | 102.5  | 100.3  | 97.8  | 95.8   | 108.6  | 101.7 | 98.4   | 111.8 |
| 106.4 | 111.5  | 105.1  | 99.2  | 95.6   | 110.5  | 104.9 | 110.4  | 108.1 |
| 106.3 | 113.9  | 117.9  | 107.9 | 103.1  | 115.4  | 115.5 | 122.6  | 117.9 |
| 109   | 111.9  | 107.7  | 113.7 | 97     | 117.8  | 107.8 | 119.6  | 110.7 |
| 105.7 | 106.3  | 95.5   | 95.4  | 88.7   | 99.2   | 106.5 | 112.7  | 106   |
| 144.4 | 249.2  | 166.7  | 236.1 | 204    | 235.2  | 231   | 289.1  | 218.3 |
| 126   | 140.8  | 135    | 162.1 | 113.8  | 131.7  | 176.5 | 215.7  | 144.3 |
| 136.6 | 148.8  | 130.7  | 129.7 | 134.6  | 145.8  | 140   | 145.3  | 146.5 |
| 105.9 | 107.6  | 93.2   | 94.3  | 87.4   | 106.5  | 100.3 | 104.3  | 117.1 |
| 122.1 | 130.8  | 108.8  | 113.2 | 99.2   | 126.9  | 111.6 | 130.2  | 123.8 |
| 101.5 | 106.2  | 101.1  | 104.9 | 96.4   | 114.7  | 95.2  | 106.4  | 109.4 |
| 211.2 | 499.4  | 521.9  | 419.5 | 463.5  | 453.7  | 392.8 | 611.4  | 373.5 |
| 218.6 | 201.7  | 208    | 270.3 | 203.9  | 246.9  | 206.3 | 395.6  | 297.1 |
| 363.5 | 494.9  | 417.5  | 409.3 | 384.1  | 440.7  | 480.6 | 664.9  | 592.7 |
| 110.6 | 105.5  | 100.6  | 104.5 | 90     | 102.8  | 98.3  | 111.5  | 103.5 |
| 163.8 | 239    | 217.1  | 286.2 | 220.6  | 243.5  | 267.1 | 227.8  | 250.1 |
| 106.9 | 122.2  | 117.3  | 112.9 | 115.8  | 118.1  | 127.8 | 127.8  | 114.9 |
| 112.4 | 109.1  | 106.6  | 108.9 | 96.8   | 117.3  | 104.9 | 113.6  | 118.6 |
| 113.6 | 132.2  | 129    | 126.6 | 103.4  | 123.1  | 122.9 | 127.2  | 128.8 |
| 169.4 | 337.8  | 217.4  | 279.2 | 199.2  | 220.2  | 189.5 | 390.9  | 257.4 |
| 118.2 | 127.2  | 115.9  | 115.9 | 116.8  | 124.9  | 114   | 160.1  | 117.4 |
| 103.4 | 111.8  | 107.7  | 105.7 | 100.2  | 118.7  | 107.9 | 112.5  | 127.6 |
| 103.7 | 112.6  | 102.4  | 99.3  | 101.6  | 110.5  | 109.2 | 121.8  | 114.9 |
| 181.6 | 150.2  | 153.1  | 171.8 | 168.4  | 153.7  | 175.5 | 189.2  | 177.6 |
| 181.2 | 366.1  | 330.6  | 193.7 | 278.6  | 326.1  | 204   | 551    | 245.2 |
| 451.4 | 1442.3 | 1298.2 | 979.1 | 1066.3 | 1043.6 | 853.4 | 1698.9 | 815.5 |
| 126.7 | 178.9  | 138.4  | 118.6 | 140.4  | 124.3  | 137   | 208.2  | 165.2 |
| 132.9 | 258.7  | 162.6  | 235.7 | 227.3  | 183.3  | 387.3 | 298.1  | 170.7 |
| 115.4 | 105.6  | 98.2   | 101.2 | 98.1   | 103.6  | 96.1  | 124.5  | 107.8 |
| 216.6 | 192.7  | 188.5  | 233.2 | 149.7  | 172.1  | 184.2 | 328.3  | 263.8 |
| 100.2 | 98.7   | 105.8  | 97.2  | 97.4   | 102.6  | 101.4 | 104.2  | 108.2 |
| 107.9 | 109.4  | 98.9   | 99.1  | 100.4  | 109.4  | 101.3 | 108.7  | 113.2 |
| 252.8 | 243.4  | 265.9  | 233   | 222.1  | 269.6  | 246.2 | 368.9  | 321.8 |
| 102.7 | 98.3   | 98.1   | 100.1 | 91.8   | 101.3  | 98.7  | 100.2  | 103.2 |
| 101   | 108    | 98.8   | 94.3  | 93.9   | 110.8  | 95.8  | 103.1  | 106.4 |
| 106.9 | 100.9  | 105.2  | 99.3  | 99     | 109.5  | 100.3 | 100.4  | 100.5 |
| 103.7 | 106.8  | 103.4  | 111.4 | 103.1  | 113.4  | 97.5  | 99.4   | 96.8  |
| 179   | 220.5  | 151.5  | 186.5 | 385.7  | 202.9  | 471.2 | 445.6  | 132.1 |
| 102.4 | 100.3  | 97.7   | 101.8 | 93.1   | 97.5   | 92.1  | 100.5  | 102   |
| 184.6 | 381.9  | 260.8  | 301.1 | 295.3  | 326.3  | 345.6 | 441.6  | 308.1 |
| 99.8  | 109.5  | 101.9  | 96.8  | 98.7   | 103.3  | 99.7  | 104.2  | 113.4 |
| 125   | 126.7  | 143.4  | 122.5 | 127.2  | 134.5  | 139.1 | 175.8  | 128.4 |
| 106.6 | 105.7  | 104    | 91.7  | 97.9   | 101.5  | 101.1 | 112.7  | 101.5 |
| 109.8 | 117.1  | 99.4   | 117.3 | 113.9  | 117.2  | 116.5 | 136.9  | 108.7 |
| 113.2 | 113.3  | 104.3  | 99.8  | 97.3   | 108.6  | 110.2 | 108.2  | 109.6 |
| 132.7 | 126.2  | 115    | 109   | 111    | 120.3  | 119.7 | 223.7  | 149.9 |
| 99.6  | 104.2  | 96.2   | 95.6  | 89.1   | 99.8   | 98.1  | 102.4  | 100.3 |
| 109.5 | 109.6  | 108.3  | 98.1  | 101.3  | 107.6  | 101.4 | 103.5  | 103.7 |
| 113.1 | 125.1  | 153.1  | 96.1  | 176.2  | 147.4  | 117.7 | 255.1  | 148.6 |
| 241.2 | 735.5  | 738.6  | 640.6 | 542.1  | 680.5  | 740.9 | 729.5  | 384.1 |
| 107.4 | 104.2  | 102.1  | 108.2 | 100.5  | 107.7  | 102.4 | 112.5  | 107.6 |

|       |        |        |        |        |        |        |        |        |
|-------|--------|--------|--------|--------|--------|--------|--------|--------|
| 103   | 102.4  | 105.7  | 107.3  | 96.1   | 105.6  | 94.1   | 105.7  | 108    |
| 171.5 | 166.9  | 174.4  | 172.4  | 154.7  | 196.9  | 152.1  | 205.9  | 175.7  |
| 101.8 | 107.7  | 105.1  | 111.7  | 96.6   | 107.2  | 98.8   | 108.1  | 106.6  |
| 114.9 | 110.1  | 105.7  | 95.6   | 92.7   | 103.1  | 103.5  | 104.8  | 98.5   |
| 102.1 | 102.7  | 111.7  | 94.5   | 95.4   | 103.4  | 104.7  | 108.3  | 111    |
| 125.5 | 113.4  | 106    | 106.8  | 96.6   | 111.1  | 106.7  | 113.5  | 111.4  |
| 112.8 | 116.4  | 105.5  | 103.5  | 100.7  | 107    | 102.3  | 115.4  | 118.8  |
| 121.4 | 111.2  | 108    | 100.7  | 96.6   | 114.4  | 104.9  | 112.7  | 112.8  |
| 103.9 | 109.1  | 99.6   | 101.6  | 98.6   | 111.8  | 98.9   | 99.7   | 109.1  |
| 105   | 121.1  | 116.1  | 99.3   | 107.1  | 110.5  | 103    | 110.3  | 115.1  |
| 306.7 | 1058.1 | 459.3  | 785.5  | 521.3  | 368.9  | 750.9  | 570.5  | 209.4  |
| 298.5 | 406.6  | 358.2  | 490.1  | 404.2  | 316.1  | 375.5  | 535    | 686    |
| 103.7 | 107.1  | 103.3  | 109.2  | 98.8   | 110.7  | 102.1  | 119.3  | 102.4  |
| 172.9 | 154.3  | 194.6  | 174.3  | 134.2  | 215.6  | 158.9  | 282.5  | 220.9  |
| 106.4 | 107.6  | 105    | 96.4   | 97.6   | 106.4  | 105.6  | 107.2  | 105    |
| 2739  | 3180.4 | 2389   | 2955.5 | 2754.9 | 3178.4 | 2831.1 | 6311.9 | 7060.4 |
| 104.3 | 113.9  | 95.1   | 98.1   | 97.5   | 110.2  | 104.9  | 120.6  | 112.3  |
| 101.7 | 107.9  | 97.3   | 99.9   | 87.6   | 105.9  | 101.7  | 103.7  | 106.4  |
| 115.3 | 111.5  | 105.7  | 114.5  | 100.3  | 117.2  | 109.7  | 113.5  | 110.6  |
| 398.5 | 524.7  | 368.7  | 689    | 532.4  | 397.5  | 685.2  | 743.4  | 387.9  |
| 102.8 | 110.4  | 104    | 97.6   | 103.2  | 112.1  | 94.6   | 98.1   | 110.7  |
| 128.9 | 194.3  | 141.8  | 220.2  | 147.2  | 141.1  | 202.2  | 183.6  | 123.1  |
| 146.6 | 140.6  | 145.1  | 121.4  | 193.8  | 184.9  | 206    | 269.4  | 155.6  |
| 110.7 | 118.2  | 113.5  | 118.5  | 101.3  | 123.3  | 109.2  | 124.9  | 110.3  |
| 106.2 | 109.8  | 102.3  | 111.8  | 94.9   | 103.3  | 102.1  | 115.7  | 114.6  |
| 98.2  | 106    | 99.3   | 100    | 99.2   | 108.3  | 109.3  | 114.5  | 115.3  |
| 113   | 111.1  | 106.5  | 118.4  | 110.1  | 107.4  | 100.4  | 112.9  | 107.8  |
| 103.9 | 113.2  | 103.9  | 108.7  | 91.8   | 101.7  | 103.9  | 116.6  | 104.9  |
| 114.8 | 114.2  | 114.5  | 109.8  | 104.3  | 121.6  | 110.4  | 128.3  | 118.2  |
| 107.1 | 111.3  | 105.8  | 102.1  | 98.8   | 104.1  | 111    | 109.6  | 102.9  |
| 109.6 | 115.1  | 99.2   | 107.6  | 100.4  | 99.6   | 103.5  | 118.5  | 116.5  |
| 104.9 | 101.7  | 103.6  | 100.7  | 93.7   | 108    | 101.9  | 107.2  | 111.1  |
| 109.9 | 109.2  | 109.3  | 104.7  | 103    | 116.3  | 108.6  | 115    | 115.3  |
| 103.4 | 104.9  | 100.2  | 101.7  | 93.8   | 109.2  | 108.5  | 108.3  | 106.4  |
| 102.4 | 110.1  | 109.3  | 97.2   | 103.6  | 107.7  | 115.4  | 116.6  | 113.6  |
| 108   | 105.6  | 103    | 94.6   | 105.4  | 107.3  | 96.8   | 94.4   | 102.2  |
| 104.8 | 96.7   | 93.4   | 97.7   | 94.5   | 108.7  | 95.7   | 106.9  | 104.9  |
| 105.5 | 121.1  | 116.2  | 107.2  | 106.3  | 117.7  | 111.2  | 128.4  | 109.5  |
| 102.8 | 102.7  | 95.3   | 102.6  | 103.7  | 120.9  | 97.4   | 109.8  | 111.8  |
| 106.5 | 104.1  | 106.4  | 104.3  | 95.7   | 105    | 98.3   | 110.6  | 113    |
| 99.5  | 107    | 106.4  | 106.6  | 104.8  | 103.2  | 95.1   | 103.1  | 108.8  |
| 116.4 | 105.2  | 96.4   | 121.3  | 100.7  | 119.6  | 108.3  | 116.7  | 101.5  |
| 111.6 | 243.5  | 197.1  | 128.4  | 244.3  | 184.1  | 153.7  | 364.5  | 133.8  |
| 131.1 | 127.2  | 112.7  | 117.8  | 106.1  | 128.8  | 120.5  | 137.3  | 130.4  |
| 155.5 | 171    | 134.8  | 147.7  | 144.2  | 132    | 177.1  | 298    | 272.2  |
| 109.1 | 102.6  | 97.5   | 102    | 93     | 105.2  | 97.4   | 103    | 98.9   |
| 115.6 | 133.4  | 117.3  | 104.8  | 100.9  | 119.1  | 116.3  | 123.6  | 124.4  |
| 754.3 | 1165.2 | 1076.4 | 646.5  | 998.9  | 1063   | 914.1  | 1620.2 | 1102.7 |
| 126.2 | 134    | 138.8  | 124.7  | 112.5  | 133.7  | 126.6  | 144    | 114.7  |
| 111.5 | 123.1  | 105.2  | 112.2  | 101.1  | 122.7  | 113.2  | 121.5  | 118.8  |
| 104.5 | 119.7  | 108.1  | 101.2  | 101.4  | 106    | 108.6  | 121.1  | 110    |

|       |       |       |       |       |       |       |       |       |
|-------|-------|-------|-------|-------|-------|-------|-------|-------|
| 101   | 107.8 | 101.3 | 99.6  | 97.2  | 110.7 | 96.1  | 102.3 | 100.3 |
| 99.4  | 106.9 | 102.8 | 97.8  | 99.1  | 111   | 104   | 110   | 108.7 |
| 107.6 | 102.5 | 98.2  | 107.2 | 94.8  | 98.7  | 97.6  | 107.9 | 113.4 |
| 104.7 | 113.6 | 105.8 | 105.6 | 95.2  | 110.4 | 108.7 | 110.3 | 110.4 |
| 98.2  | 102.9 | 101.1 | 104.6 | 99    | 94.9  | 106.1 | 97.4  | 111.7 |
| 113.3 | 108.4 | 102.1 | 106   | 96.5  | 111.7 | 108.2 | 97.2  | 106.8 |
| 109.9 | 105.2 | 107.8 | 105.7 | 100.3 | 106.8 | 107.2 | 116.9 | 114.4 |
| 108.2 | 107.6 | 115.2 | 100.7 | 102.3 | 105.1 | 107.3 | 115   | 115.8 |
| 101.5 | 111.5 | 100.8 | 94.6  | 89.7  | 117   | 100.6 | 105.4 | 106   |
| 110.4 | 106   | 103.5 | 103.9 | 95    | 105.2 | 106.5 | 113.9 | 103.3 |
| 134.6 | 180.2 | 142.6 | 184   | 150.5 | 145.1 | 201.8 | 158.9 | 121.5 |
| 102.8 | 109.4 | 101.8 | 105.8 | 94.5  | 113   | 112.2 | 116.4 | 103.8 |
| 122.5 | 162.1 | 132.9 | 197.8 | 125.3 | 141.4 | 181.6 | 120.3 | 123.3 |
| 120.1 | 136.7 | 110.3 | 122.1 | 121.1 | 128.9 | 145.8 | 127.3 | 128.3 |
| 110.1 | 108.1 | 102   | 106.9 | 100.2 | 118.9 | 106.1 | 108.4 | 118.1 |
| 108.8 | 100.9 | 98.3  | 112.6 | 92.5  | 107   | 113.7 | 106.5 | 114.6 |
| 101.2 | 101.1 | 101.3 | 107.6 | 95.2  | 120.3 | 103.5 | 108.2 | 113.8 |
| 111.5 | 110.2 | 95    | 113.8 | 96    | 106.1 | 101.3 | 104.2 | 101.2 |
| 111.8 | 119.1 | 126.3 | 140.8 | 121.6 | 126.1 | 120.8 | 115.5 | 137.8 |
| 118.2 | 113.2 | 108.1 | 98.4  | 98.6  | 107.7 | 107.6 | 113.4 | 109.2 |
| 102   | 107   | 95.7  | 97    | 95.6  | 108.8 | 103.7 | 101.8 | 114   |
| 111   | 108.3 | 95    | 100.8 | 89.6  | 108.8 | 103   | 109.1 | 98.3  |
| 111.6 | 104.7 | 102.3 | 106.8 | 87.2  | 110.2 | 99.2  | 100.8 | 104.7 |
| 100.1 | 107.2 | 99.2  | 97.6  | 92    | 116.9 | 95.4  | 110.4 | 114.5 |
| 106.3 | 108.6 | 104.2 | 97.8  | 90.9  | 99.2  | 96.2  | 108.3 | 116.2 |
| 112.6 | 118.4 | 104.6 | 100.2 | 104.8 | 114   | 101.6 | 106.8 | 111.8 |
| 115.9 | 127.4 | 116.2 | 115.1 | 102.8 | 121.5 | 113   | 128.7 | 134.3 |
| 108.3 | 107.1 | 98.3  | 100.6 | 97.6  | 113.5 | 102.5 | 108.6 | 107.9 |
| 206.3 | 143.3 | 138.4 | 181.9 | 154.1 | 153.9 | 193.6 | 193.6 | 145   |
| 104.7 | 102.8 | 100.6 | 111.4 | 98.2  | 110.1 | 100   | 110.4 | 104.3 |
| 122.4 | 125.9 | 141.3 | 106   | 110.2 | 132   | 102.2 | 130.4 | 111.8 |
| 107.7 | 111.6 | 105.5 | 108   | 94.6  | 119.8 | 105.9 | 115.2 | 122.6 |
| 109.4 | 107   | 106.5 | 104.2 | 100.9 | 104.5 | 103.3 | 96.9  | 109.2 |
| 109.1 | 112.5 | 100   | 110.4 | 97.5  | 111.4 | 104.5 | 117   | 110.6 |
| 104.2 | 104.8 | 101.4 | 96.3  | 94.2  | 109.9 | 105.8 | 107.8 | 115.6 |
| 108.1 | 118.4 | 110   | 114.1 | 95.6  | 103.2 | 103   | 117.6 | 111.8 |
| 113   | 118.9 | 120.7 | 100.6 | 107.3 | 117.6 | 113.4 | 118.8 | 118.7 |
| 109   | 104.1 | 107.9 | 103   | 92.2  | 105.5 | 105.1 | 105.4 | 112.7 |
| 625.9 | 381.9 | 447.9 | 471.4 | 419.6 | 486.1 | 531.1 | 870.8 | 639   |
| 176.3 | 251.1 | 231.6 | 262.8 | 248.3 | 264.3 | 270.2 | 303.2 | 221.1 |
| 114.7 | 119.8 | 109.9 | 107   | 109   | 119.3 | 127.6 | 127.8 | 108.4 |
| 125.1 | 142.1 | 134.3 | 123.1 | 126.9 | 134.5 | 139.8 | 175.7 | 134   |
| 124.6 | 160.2 | 142.9 | 143.6 | 133.2 | 139.9 | 146.6 | 152.6 | 130.2 |
| 124.7 | 175.7 | 146.2 | 144.8 | 120.8 | 143.9 | 137.2 | 190   | 112   |
| 120.9 | 140.2 | 148.1 | 120.4 | 114.3 | 124.1 | 137.6 | 152   | 146.2 |
| 115.9 | 135.1 | 118.1 | 118.2 | 120.4 | 126.8 | 124.1 | 139.7 | 128   |
| 108.4 | 123.5 | 107.2 | 99    | 107.8 | 108.5 | 105.2 | 109.1 | 104.1 |
| 97.2  | 112.7 | 106.1 | 102.1 | 90.4  | 116.2 | 105.7 | 112.4 | 108.3 |
| 131.9 | 140   | 121.4 | 124.7 | 117.3 | 134.7 | 126.1 | 154.8 | 139.9 |
| 102.2 | 107   | 101.8 | 101.8 | 98.6  | 103.8 | 100.7 | 105   | 116.3 |
| 155.2 | 201.6 | 177   | 205.9 | 172.9 | 166.2 | 194.6 | 230.4 | 163.1 |



|        |        |        |        |        |        |        |        |        |
|--------|--------|--------|--------|--------|--------|--------|--------|--------|
| 106.8  | 109.6  | 102.3  | 101.6  | 92.6   | 104    | 100.4  | 104.3  | 104.8  |
| 113.1  | 126.1  | 112.2  | 128.3  | 110.6  | 125.9  | 116.3  | 171.1  | 165.8  |
| 101.5  | 104.3  | 95.8   | 95.9   | 91.7   | 106.2  | 99.7   | 102.8  | 111.5  |
| 162.3  | 217.5  | 198.3  | 155.6  | 148.3  | 199.4  | 190.9  | 211.3  | 165.2  |
| 165.7  | 365.8  | 367.6  | 382.1  | 296    | 315.7  | 350.4  | 287    | 180.8  |
| 113.2  | 114.4  | 98.4   | 98     | 97.8   | 108.9  | 96.5   | 120.9  | 112.8  |
| 123.4  | 112.9  | 102.4  | 108.9  | 101.7  | 112.9  | 97.7   | 113.8  | 119.9  |
| 121.3  | 129.4  | 120.3  | 133.5  | 111.3  | 138    | 125.8  | 143.8  | 132.3  |
| 239.3  | 294.6  | 287.4  | 236.4  | 245.8  | 269.8  | 286.6  | 398.1  | 256.7  |
| 105    | 113.6  | 112.6  | 103.6  | 95.9   | 101.7  | 101.1  | 115.3  | 116.2  |
| 106.8  | 117.2  | 96.9   | 96     | 100.3  | 108.9  | 106.5  | 115.5  | 100.4  |
| 119.5  | 125.2  | 110.4  | 114    | 99.8   | 119.5  | 110.4  | 121    | 113.4  |
| 137.8  | 171.2  | 153.7  | 156.3  | 137.5  | 151.9  | 171.6  | 200.2  | 178.9  |
| 113.4  | 137.2  | 128.5  | 129.9  | 110.6  | 131    | 116.1  | 139.2  | 140.5  |
| 122.8  | 125.1  | 130.9  | 125    | 111    | 132    | 119.2  | 143.2  | 155.1  |
| 113    | 107.8  | 109.6  | 103.6  | 91.5   | 115.3  | 103.6  | 123.1  | 111.2  |
| 406.1  | 460.7  | 474    | 504.1  | 391.4  | 402.6  | 536.6  | 738.3  | 536.6  |
| 111.8  | 107.7  | 115.8  | 115.2  | 97.6   | 118    | 116.7  | 120.6  | 117    |
| 117.8  | 123.2  | 118.7  | 103.4  | 111.1  | 125.3  | 128.9  | 125.1  | 158.4  |
| 1350.6 | 1606.6 | 1520.4 | 1524   | 1065.2 | 1321.7 | 1541.5 | 2503.5 | 1802.5 |
| 112.2  | 127.3  | 111.8  | 104.8  | 100.1  | 118.1  | 105.5  | 145.9  | 134.8  |
| 106.1  | 107.9  | 102.8  | 110.5  | 110.2  | 112.9  | 113.8  | 114.7  | 116.6  |
| 109    | 111.7  | 96.4   | 113.6  | 100.3  | 114.2  | 106    | 115.6  | 113.2  |
| 106.5  | 114.8  | 103.4  | 100.6  | 97.8   | 107.4  | 98.4   | 114.8  | 109.7  |
| 127.1  | 119.4  | 110    | 104.8  | 107.3  | 114.7  | 113.8  | 113.3  | 106    |
| 110.2  | 114    | 108.8  | 107.2  | 104.8  | 109.3  | 117.6  | 107.9  | 106.1  |
| 168.9  | 187    | 175.1  | 184.7  | 174.4  | 187.9  | 146.7  | 189.5  | 204.6  |
| 137.8  | 152.6  | 151.8  | 134.2  | 126.5  | 160.8  | 148.4  | 147.7  | 140.5  |
| 147.7  | 380.4  | 398.6  | 237.1  | 327.1  | 350.4  | 288    | 433.9  | 274    |
| 123.6  | 187.4  | 149.7  | 154.5  | 143.2  | 156.1  | 190.1  | 182.7  | 153.4  |
| 306.8  | 585.9  | 572.1  | 451.3  | 473.9  | 486.7  | 472.5  | 477.9  | 337.3  |
| 145.1  | 214.7  | 166.4  | 215.4  | 149.2  | 164.8  | 201.2  | 174.5  | 183.9  |
| 101.1  | 112.7  | 106.1  | 102    | 101.3  | 110.7  | 104.1  | 109.7  | 106.7  |
| 2563.9 | 3842.4 | 3170.3 | 3451.4 | 2936.6 | 3072.2 | 2810.3 | 5478.2 | 3739.4 |
| 96.1   | 107    | 106.4  | 103.6  | 96.1   | 111.9  | 108.7  | 113.6  | 115    |
| 97.8   | 107.2  | 105.4  | 109    | 107.1  | 105.3  | 98.8   | 116.2  | 108.2  |
| 100    | 108.3  | 99.1   | 104.6  | 96     | 113.3  | 99     | 116.5  | 99.3   |
| 105.1  | 125.4  | 104.9  | 103.4  | 108.8  | 110.5  | 106.7  | 120.9  | 120.8  |
| 109.3  | 114.2  | 100.1  | 95.7   | 99.6   | 102.3  | 101.6  | 112    | 110.2  |
| 177.5  | 215.1  | 200.7  | 164.3  | 226.4  | 278.3  | 181.6  | 471.7  | 266.1  |
| 113.4  | 108.3  | 104.2  | 107.6  | 113.7  | 117.7  | 105.1  | 136.9  | 119.6  |
| 103.3  | 116.8  | 100.3  | 100.4  | 93.6   | 108.5  | 103.7  | 114.1  | 117.2  |
| 102.8  | 117.4  | 103    | 104.9  | 98.6   | 120.5  | 100.6  | 103.4  | 110.2  |
| 102.5  | 108.5  | 103    | 94.7   | 90.9   | 105.4  | 112.7  | 105.8  | 104    |
| 108.5  | 110.1  | 105.3  | 110.3  | 97.9   | 111.4  | 100.8  | 105.4  | 110.4  |
| 105.3  | 111.1  | 105.2  | 109.4  | 97.3   | 119.4  | 96.2   | 107.2  | 114.2  |
| 148    | 201.2  | 208.8  | 215.2  | 184.2  | 208.3  | 229    | 282    | 195.7  |
| 106.4  | 100.9  | 95.9   | 106.2  | 88.9   | 100.8  | 104.1  | 104.8  | 109.1  |
| 100.1  | 111.8  | 104.1  | 111.1  | 94.6   | 109.5  | 110.1  | 111.7  | 106.8  |
| 103.8  | 114    | 102    | 96.2   | 96.9   | 113.3  | 97.2   | 105.4  | 105.5  |
| 107.7  | 108.7  | 105.2  | 102.6  | 96.8   | 110.6  | 104.7  | 109.3  | 123.7  |

|        |        |        |        |       |        |        |        |        |
|--------|--------|--------|--------|-------|--------|--------|--------|--------|
| 112.4  | 116.9  | 107.6  | 109.9  | 102.9 | 102.9  | 106.2  | 107.1  | 102.8  |
| 105    | 100.5  | 96.5   | 96.2   | 95.4  | 102.8  | 101.2  | 107    | 108.6  |
| 109.2  | 110.2  | 108.5  | 105.9  | 101.4 | 116.6  | 99.1   | 116.8  | 114.1  |
| 113.9  | 124    | 110.9  | 111.7  | 98.9  | 111.2  | 109.9  | 107.8  | 104.4  |
| 103.4  | 103.4  | 100.3  | 104.9  | 99.1  | 105.5  | 95.7   | 112    | 108.4  |
| 126.4  | 182    | 149.8  | 224.5  | 184.3 | 162.4  | 193.7  | 196.5  | 127.1  |
| 110.5  | 114.7  | 98.9   | 102.5  | 103.3 | 127.2  | 125.7  | 129.5  | 104.1  |
| 129.8  | 265.2  | 193.3  | 216    | 206.4 | 200    | 214.9  | 235.6  | 187    |
| 120.3  | 111.6  | 119.2  | 128.5  | 110.8 | 119.1  | 107.4  | 110.4  | 117.2  |
| 119.4  | 129.6  | 131.4  | 119.7  | 122.4 | 121.9  | 115.2  | 136.2  | 122.3  |
| 109.1  | 114.2  | 105.6  | 97.7   | 102.9 | 112.7  | 109.9  | 126.5  | 112.8  |
| 97.7   | 110.6  | 104.3  | 109.9  | 93.1  | 107.2  | 102.7  | 109.3  | 109.4  |
| 98.7   | 106.9  | 100.6  | 103.1  | 88.6  | 115.5  | 90.5   | 96.7   | 103.3  |
| 106.3  | 106.2  | 121.6  | 130.4  | 103.1 | 124.8  | 112.3  | 116.4  | 123.7  |
| 110.3  | 115.3  | 99     | 104.2  | 100.9 | 116.5  | 103.7  | 113    | 116.9  |
| 104.9  | 108.8  | 104.6  | 97.1   | 96.4  | 108.1  | 98.6   | 98.5   | 98.3   |
| 114.9  | 114.6  | 102.5  | 109.4  | 106.2 | 117    | 109.1  | 121.3  | 112.9  |
| 105.7  | 128.3  | 97.5   | 124.3  | 113.1 | 111.1  | 109.8  | 111.9  | 116.7  |
| 112.5  | 112    | 104.9  | 116.6  | 106   | 110.1  | 119.9  | 132.1  | 113.8  |
| 117.8  | 146.7  | 147    | 134.3  | 136.8 | 137.9  | 138.4  | 136.7  | 121    |
| 113.3  | 145.1  | 135.4  | 126.4  | 126.9 | 138.9  | 129.2  | 156.9  | 117.8  |
| 109.7  | 106.8  | 103    | 97.9   | 96.8  | 111.9  | 95.9   | 104.7  | 115.8  |
| 173.1  | 268.3  | 240.1  | 227.5  | 222.6 | 273.9  | 210.4  | 408.2  | 316    |
| 98.9   | 100.2  | 107.9  | 96.6   | 92.7  | 99.8   | 101    | 107.2  | 114.5  |
| 101.2  | 115    | 113.2  | 104.4  | 105.5 | 99.5   | 108.4  | 111    | 109.5  |
| 109.9  | 125.5  | 113.4  | 116.9  | 99.8  | 125.6  | 114.6  | 106.9  | 110.3  |
| 112.3  | 129    | 110.7  | 115.3  | 104.1 | 127.6  | 119.6  | 135.8  | 129.5  |
| 98.3   | 108.2  | 104.7  | 95.2   | 95.8  | 107.2  | 97.5   | 100.1  | 98.6   |
| 99.2   | 111.4  | 104.4  | 96.7   | 100.2 | 109    | 100.7  | 105.4  | 102.1  |
| 106.8  | 118.8  | 128.2  | 107.5  | 114.9 | 117    | 110.3  | 138.3  | 124.5  |
| 109.7  | 106.7  | 105.9  | 98.3   | 92.2  | 106.2  | 97.8   | 115.9  | 103.6  |
| 1524.5 | 1139.2 | 1160.6 | 1030.7 | 967.8 | 1234.9 | 1220.9 | 2535.8 | 2571.6 |
| 113.1  | 107.2  | 105.7  | 113.2  | 97.1  | 112.1  | 102.6  | 106.5  | 117.3  |
| 157.3  | 156.6  | 159.6  | 140    | 126.8 | 161.8  | 130.4  | 178.4  | 170.5  |
| 127    | 156.6  | 140.7  | 128    | 136.2 | 133.2  | 149.4  | 126.9  | 108.3  |
| 117.5  | 397.5  | 271.9  | 231.1  | 199.9 | 184.2  | 259.7  | 195.9  | 140.8  |
| 102.5  | 98.7   | 92.5   | 95     | 94.6  | 99.8   | 94.9   | 101.9  | 112.2  |
| 163.6  | 187.7  | 139.8  | 259.6  | 159.1 | 145.1  | 232.1  | 216.2  | 191.3  |
| 123.4  | 114.4  | 106.7  | 124.8  | 103.7 | 122.9  | 114.5  | 108.5  | 110    |
| 109.2  | 108.5  | 104.3  | 111.1  | 94.2  | 105.3  | 105.1  | 122.9  | 117.9  |
| 112.1  | 127    | 105.2  | 154.7  | 105.3 | 109.1  | 116.9  | 111.9  | 104.6  |
| 171.3  | 157.5  | 131.1  | 116.6  | 139   | 135.2  | 133.2  | 229.9  | 130.8  |
| 102.3  | 108    | 107.1  | 96.2   | 107.8 | 111.1  | 113.4  | 102.5  | 115.5  |
| 103.8  | 108.4  | 106.4  | 100.6  | 90.5  | 104    | 104.4  | 106.6  | 105.4  |
| 106    | 106.4  | 106.3  | 101.7  | 99.2  | 105.2  | 105.5  | 106.2  | 114.2  |
| 115.1  | 117.6  | 107.9  | 115    | 116.1 | 114.1  | 105.4  | 119.1  | 117    |
| 108.8  | 109.3  | 98.9   | 97.3   | 96.2  | 112.8  | 101.4  | 110.2  | 110.5  |
| 201.2  | 291    | 272.7  | 231.6  | 229.7 | 281.7  | 239.9  | 474.2  | 307.3  |
| 104.8  | 124.1  | 118.9  | 112.6  | 115.4 | 125.3  | 110.9  | 145.3  | 136.9  |
| 110.6  | 107.4  | 102.3  | 98     | 97.8  | 113.3  | 101.5  | 112.9  | 108.9  |
| 110    | 116.1  | 114.5  | 99.3   | 98.7  | 115.8  | 106.1  | 114.5  | 116.8  |

|       |       |       |       |       |        |       |        |        |
|-------|-------|-------|-------|-------|--------|-------|--------|--------|
| 350.9 | 265.6 | 366.7 | 368.8 | 321.1 | 361.5  | 321.7 | 571.4  | 451.9  |
| 111.3 | 102.8 | 102   | 108.6 | 100.1 | 100.5  | 101.7 | 114.9  | 104.9  |
| 157.4 | 196.1 | 240.2 | 199.3 | 209.4 | 248    | 236.4 | 292.3  | 218.8  |
| 378.1 | 472.8 | 280.6 | 367   | 542.9 | 432.7  | 480.2 | 874.3  | 264.5  |
| 104.8 | 103.9 | 98.2  | 101.5 | 91    | 96.1   | 100.5 | 105.8  | 102.5  |
| 114.3 | 136.9 | 134.7 | 118.8 | 124   | 132.5  | 118.9 | 159.7  | 136.3  |
| 104.2 | 106.4 | 109.3 | 100.2 | 98.5  | 114.8  | 98.6  | 105.7  | 109.2  |
| 104.9 | 102.1 | 98.4  | 93.6  | 96.5  | 105.2  | 108.5 | 103.2  | 97     |
| 111.4 | 109.5 | 104.1 | 97    | 99.2  | 112.4  | 101.8 | 116.1  | 105.8  |
| 370.8 | 534.9 | 560.1 | 592.2 | 491.6 | 636.1  | 598.9 | 751.7  | 568.7  |
| 236.2 | 217.3 | 212   | 228.8 | 215.9 | 233.4  | 243.5 | 348.2  | 257    |
| 113   | 109.5 | 99.2  | 92.5  | 101.1 | 115.7  | 114.8 | 118.1  | 106.4  |
| 113.7 | 119.1 | 105   | 113.6 | 101   | 122.4  | 119.1 | 112.6  | 107    |
| 112.3 | 107.1 | 110.8 | 108.7 | 100.7 | 115.9  | 102.3 | 119.7  | 117.3  |
| 133.8 | 185.8 | 178.4 | 184.1 | 183.6 | 190.7  | 186.6 | 262.9  | 197.8  |
| 288.5 | 246.9 | 265.5 | 307.2 | 247   | 299.7  | 315.4 | 392.1  | 249.5  |
| 248.6 | 488.8 | 292.7 | 449.2 | 359.7 | 318.9  | 381.1 | 662.3  | 362.9  |
| 410.8 | 544.4 | 521   | 567.6 | 476.2 | 510.5  | 580.3 | 784    | 651.3  |
| 199.4 | 382.5 | 398.3 | 255   | 296.6 | 378.6  | 295.4 | 454.7  | 276.4  |
| 302.6 | 324   | 270.1 | 269.5 | 288.8 | 320.8  | 308.9 | 413.7  | 247.4  |
| 125.7 | 142.7 | 130.3 | 136.9 | 109.1 | 132.2  | 133.8 | 125.4  | 124.6  |
| 127   | 155.6 | 182.8 | 177.5 | 148.1 | 161.6  | 168.1 | 197    | 150.9  |
| 148.8 | 189.6 | 153.8 | 178.2 | 173.3 | 158.2  | 174.5 | 192.8  | 147.4  |
| 166.7 | 248   | 222.7 | 219.6 | 212   | 233.5  | 216.3 | 251.8  | 172.7  |
| 104.5 | 105.3 | 107.2 | 91.5  | 94.9  | 104.2  | 101.8 | 118    | 115.4  |
| 107   | 107.1 | 104.8 | 103.9 | 96.2  | 107.7  | 101.4 | 106    | 112.1  |
| 152   | 170.4 | 191.5 | 224   | 184.4 | 196.2  | 209.5 | 180.6  | 161.1  |
| 107.3 | 114.5 | 98.7  | 97.4  | 102.5 | 99.7   | 100.9 | 100.5  | 102.9  |
| 763.8 | 748.1 | 628.6 | 575.3 | 463.4 | 688    | 485.4 | 1333.3 | 1305.4 |
| 117.5 | 121.2 | 112.9 | 109.6 | 106.4 | 117.2  | 105.7 | 124.7  | 120.8  |
| 179.6 | 449.6 | 296.9 | 297.2 | 311.5 | 310.6  | 301.4 | 376.7  | 200.4  |
| 113   | 115.4 | 110.6 | 98.2  | 116.6 | 110.6  | 106.2 | 108.3  | 110.4  |
| 100.3 | 113.4 | 107.4 | 100.6 | 97.6  | 109.4  | 99.1  | 116.8  | 115.8  |
| 126.7 | 136.1 | 150.5 | 136.9 | 118.6 | 146.5  | 151.6 | 180.3  | 161.3  |
| 107   | 109.5 | 103.3 | 102.6 | 88.3  | 112.3  | 105.6 | 103.3  | 104    |
| 103.1 | 113   | 95.5  | 100.1 | 95.9  | 105.6  | 106.8 | 96.7   | 104    |
| 111.6 | 110.4 | 107.2 | 95.1  | 105.5 | 108    | 98.8  | 114.6  | 113.6  |
| 126.6 | 127.7 | 116.2 | 114.9 | 109.2 | 122.6  | 120.1 | 163.6  | 132.8  |
| 118.3 | 120   | 105.2 | 133.8 | 113.9 | 132.7  | 135.3 | 170.7  | 137.4  |
| 102.3 | 104.7 | 106.5 | 96.8  | 92.1  | 106.6  | 105   | 105.4  | 109.4  |
| 100.7 | 102.5 | 93.7  | 101.9 | 94.4  | 103.2  | 99.1  | 106.8  | 109    |
| 209.9 | 234.8 | 237.6 | 231.8 | 219.3 | 251.3  | 165.8 | 424.9  | 261.7  |
| 126.8 | 133.7 | 119.3 | 124.9 | 116.7 | 124.6  | 126.2 | 142.5  | 125.7  |
| 107   | 109.4 | 95.5  | 97.5  | 95.1  | 110.5  | 95.9  | 110.3  | 99.4   |
| 169.8 | 183.6 | 171.2 | 165.1 | 186.2 | 191.9  | 203.4 | 238.4  | 194.4  |
| 112   | 111.6 | 109.1 | 102.8 | 103.8 | 122.9  | 111.7 | 117.8  | 125.3  |
| 144.7 | 206.4 | 225.1 | 237.6 | 174.9 | 205.6  | 225.2 | 274.8  | 205.5  |
| 114.8 | 133.6 | 111.2 | 108.8 | 97    | 112.4  | 101.4 | 141.2  | 128.7  |
| 762.4 | 793.1 | 991   | 638.7 | 762.4 | 1099.5 | 362.2 | 1699.6 | 1637.4 |
| 790.1 | 825.6 | 759.1 | 732.2 | 765.3 | 968.6  | 655.2 | 2236.5 | 1128.7 |
| 111.9 | 113.4 | 102.3 | 95.2  | 97.5  | 93.5   | 99.7  | 103.2  | 108.1  |

|        |        |        |       |        |        |        |        |        |
|--------|--------|--------|-------|--------|--------|--------|--------|--------|
| 118    | 118.2  | 124.2  | 134.1 | 121.6  | 113.7  | 113.8  | 122.1  | 129.9  |
| 158.8  | 187.7  | 184.9  | 309.1 | 215.6  | 201    | 328.2  | 560.2  | 211    |
| 238.7  | 476    | 440.8  | 443.6 | 405.5  | 335.4  | 449.7  | 548    | 360.2  |
| 134.1  | 159.1  | 156.8  | 151.9 | 142.6  | 147.9  | 130.6  | 165.3  | 140.7  |
| 114.8  | 170    | 121.4  | 165.3 | 110.1  | 125.3  | 148.6  | 146.3  | 121    |
| 106.5  | 107.8  | 96.5   | 95.1  | 97.8   | 112.1  | 97.1   | 108.8  | 105.5  |
| 110.3  | 118    | 118.2  | 109.7 | 113    | 126.8  | 112.7  | 118.9  | 124    |
| 115.9  | 129    | 123.6  | 118.9 | 108.5  | 131.2  | 115.6  | 148    | 128.1  |
| 111.8  | 106.5  | 108.1  | 109.7 | 99.8   | 109    | 103.7  | 111.2  | 101.1  |
| 116    | 141.1  | 115.3  | 119.5 | 113.3  | 141.2  | 109    | 149.1  | 114.6  |
| 174    | 410    | 352.8  | 421.3 | 350    | 391.8  | 412.5  | 401.7  | 234    |
| 120.2  | 121.5  | 130.1  | 116   | 105.3  | 129.2  | 129.2  | 156.4  | 142    |
| 105.8  | 103.8  | 100.8  | 97.8  | 93.6   | 102.1  | 97     | 98.6   | 102.6  |
| 109.9  | 111    | 103.8  | 125.3 | 97.1   | 111.5  | 115.3  | 125.6  | 101.2  |
| 106.7  | 110.2  | 108.8  | 99.6  | 96.9   | 110.9  | 97.4   | 108.9  | 113    |
| 148.7  | 160.2  | 153.2  | 135.3 | 132.2  | 162.5  | 133.5  | 200.5  | 167.9  |
| 114.7  | 125.2  | 113.9  | 116.1 | 108.9  | 119.2  | 115.4  | 134    | 140.3  |
| 121.2  | 116.1  | 103    | 113.9 | 117.8  | 111.8  | 119    | 128.6  | 128.9  |
| 136.1  | 142.5  | 126    | 142.4 | 117.7  | 112.9  | 111.9  | 136.3  | 113    |
| 116.1  | 132.4  | 108.9  | 108.4 | 102.1  | 114.3  | 110    | 136.6  | 143.4  |
| 107.8  | 108.1  | 98.5   | 98.1  | 89.3   | 111.1  | 99.9   | 113.3  | 108.3  |
| 716.7  | 286.5  | 236.7  | 181.3 | 245.5  | 345.3  | 276.2  | 1293.7 | 1612.4 |
| 177.6  | 121.7  | 113.3  | 128.1 | 116.1  | 130.1  | 125.1  | 277.7  | 244.8  |
| 885.9  | 335.4  | 294    | 209.3 | 311.6  | 381.3  | 411.6  | 2166.5 | 2359.7 |
| 149.7  | 262.4  | 224.6  | 260.9 | 265.4  | 213.4  | 221.8  | 290.5  | 172.2  |
| 146.7  | 123.8  | 132.9  | 120.6 | 124    | 149    | 139.4  | 172.7  | 170.9  |
| 119.5  | 121.2  | 102.2  | 97.2  | 113.8  | 111.2  | 109.4  | 136.3  | 112.8  |
| 295.8  | 384.8  | 360.3  | 309.8 | 388.6  | 370.9  | 384    | 488.5  | 358.1  |
| 106.5  | 99.8   | 98     | 98.9  | 93     | 106.2  | 105.3  | 105.1  | 105.6  |
| 187.4  | 284.8  | 262    | 227.4 | 190.2  | 189.4  | 184.9  | 385.8  | 260.2  |
| 103.4  | 113.4  | 108    | 100.3 | 96.4   | 114.5  | 106.3  | 106.6  | 104.6  |
| 198.5  | 176.1  | 161    | 227.7 | 192.6  | 149.4  | 313.1  | 223.3  | 150.1  |
| 124.1  | 186.8  | 174.9  | 128.4 | 190.6  | 183.7  | 153.2  | 253.9  | 141.4  |
| 100.4  | 107.2  | 110.6  | 101   | 95.9   | 111.2  | 110.8  | 116.2  | 111.9  |
| 103.9  | 125.8  | 117.3  | 111.5 | 109.2  | 120.2  | 111.5  | 127.1  | 109.8  |
| 103.4  | 107.7  | 104.3  | 113.9 | 102.9  | 108.3  | 109.8  | 121.6  | 112.7  |
| 444.7  | 1039.3 | 842.8  | 420.3 | 1137.5 | 972.1  | 566.8  | 1821.9 | 365.4  |
| 226.1  | 571.1  | 406    | 251   | 800.2  | 533.3  | 338.9  | 1224.9 | 199.1  |
| 620.8  | 1040.4 | 923.2  | 743.2 | 762.8  | 820.7  | 551.4  | 1053   | 692.8  |
| 109.8  | 104.5  | 108    | 104.5 | 99.1   | 117.4  | 112.9  | 116.7  | 113.7  |
| 114    | 107.1  | 105.9  | 103.8 | 99.2   | 109.1  | 107.3  | 120.6  | 117.4  |
| 2632.6 | 2765.1 | 2732.9 | 2894  | 2024.8 | 1873.8 | 2011.7 | 5194.3 | 6239.6 |
| 109.8  | 105.1  | 102.9  | 98.3  | 96.1   | 106.4  | 99.6   | 113.4  | 109.9  |
| 109.5  | 107.1  | 104.5  | 100.4 | 93.5   | 106.6  | 107    | 102.9  | 114.1  |
| 105.7  | 127.6  | 117.7  | 124.4 | 107.8  | 122.7  | 113.7  | 124    | 122    |
| 124.8  | 119.5  | 101.1  | 120.2 | 105.4  | 137.5  | 110.5  | 123.3  | 119.2  |
| 101.3  | 110.2  | 99.5   | 93.1  | 94.6   | 102.3  | 100.3  | 102.4  | 105.2  |
| 113.2  | 112.6  | 111.5  | 115.6 | 93.6   | 109.1  | 110.5  | 116.1  | 110.6  |
| 115.7  | 120.8  | 110.3  | 120.3 | 106.3  | 112.5  | 115.9  | 112.8  | 107.1  |
| 145    | 173.1  | 154.6  | 163.1 | 153.5  | 159.4  | 185.2  | 197.1  | 191.2  |
| 105.8  | 108.9  | 104.4  | 102.1 | 106.9  | 116    | 105.6  | 121.4  | 108.4  |

|       |       |       |       |       |       |       |       |       |
|-------|-------|-------|-------|-------|-------|-------|-------|-------|
| 108.7 | 102.8 | 105   | 100.2 | 92.9  | 101.8 | 107.5 | 99.9  | 109.9 |
| 113.7 | 119.7 | 113.4 | 102.3 | 104.1 | 104.8 | 111.6 | 114.5 | 109.2 |
| 129.5 | 124.1 | 112.6 | 127.3 | 107.4 | 130.3 | 137.8 | 146.6 | 121   |
| 126   | 137.2 | 127.5 | 107.2 | 120.3 | 142.7 | 137.4 | 171.7 | 122.8 |
| 105   | 104.2 | 106.7 | 103.3 | 99.8  | 108   | 101.9 | 110   | 96.2  |
| 118.4 | 114.6 | 105   | 109.2 | 109.7 | 114.4 | 109.4 | 118.5 | 118.3 |
| 108.3 | 117   | 108.5 | 100.2 | 95.7  | 107.8 | 111.9 | 111.9 | 106.7 |
| 329.7 | 357.1 | 396.9 | 271.9 | 231.3 | 362.2 | 253.4 | 547.8 | 625   |
| 109.1 | 107   | 107.8 | 96.5  | 91.6  | 112.1 | 99.5  | 122.4 | 108.3 |
| 109.2 | 111   | 106.3 | 98.2  | 93    | 112.8 | 97.7  | 113.7 | 102.1 |
| 315.6 | 405   | 388.6 | 453.2 | 348.3 | 360.6 | 539.7 | 474.3 | 411   |
| 109.4 | 103.6 | 99.6  | 107.7 | 97.5  | 106.9 | 107.5 | 123.8 | 115.2 |
| 108.6 | 113.3 | 104.8 | 104.6 | 98.2  | 105.1 | 98    | 111.9 | 111.6 |
| 99.4  | 99.3  | 105.3 | 93.6  | 92.5  | 103.8 | 107.5 | 107.7 | 104.5 |
| 95.6  | 113.1 | 112   | 91.9  | 96.4  | 108.6 | 96.9  | 99.9  | 103.5 |
| 100.9 | 101.7 | 100.9 | 99    | 92.5  | 104.8 | 99.5  | 115.8 | 111.6 |
| 98.9  | 103.7 | 94.1  | 100.1 | 98.6  | 109   | 99.9  | 110.7 | 110.4 |
| 112.7 | 99    | 98.2  | 101.2 | 94.1  | 98.4  | 97.3  | 102   | 105.6 |
| 112.6 | 114.2 | 102.7 | 115.9 | 95    | 120.1 | 114.9 | 112.8 | 113.7 |
| 100.8 | 109.3 | 102.9 | 93.6  | 95.9  | 106.2 | 106.7 | 116.1 | 111.2 |
| 100.1 | 98.5  | 103.9 | 102.3 | 93.2  | 103.7 | 95.3  | 109.1 | 111.3 |
| 111.6 | 112.9 | 102.8 | 106.6 | 93.5  | 109.5 | 97.9  | 102.7 | 98.5  |
| 101.9 | 104.2 | 99.6  | 106.9 | 96.9  | 105.5 | 97.2  | 114.2 | 115.6 |
| 101.1 | 106.8 | 105.3 | 97    | 89.8  | 107.3 | 101.3 | 103   | 108.3 |
| 185.5 | 174.8 | 136.2 | 120.1 | 191   | 182.8 | 123.8 | 306.3 | 203.5 |
| 102.6 | 107.2 | 103.7 | 109.8 | 97.2  | 107   | 102.8 | 110.1 | 106.1 |
| 107.9 | 106.1 | 103.2 | 103   | 92.9  | 102   | 101.6 | 103.8 | 102.7 |
| 170.4 | 233.6 | 221.1 | 179.1 | 229.5 | 254.8 | 270   | 290   | 207.6 |
| 101.2 | 109.9 | 110.1 | 101.9 | 102.3 | 109.7 | 96.6  | 94    | 102.5 |
| 154.8 | 159.4 | 154.1 | 140.5 | 136.6 | 147.8 | 133.6 | 210.6 | 242.8 |
| 99.8  | 104.6 | 107.3 | 110.4 | 99    | 104.8 | 104.3 | 110.6 | 109   |
| 101   | 104.5 | 97    | 109.2 | 95.8  | 102.2 | 96    | 110.9 | 115.5 |
| 106.9 | 106.4 | 99.1  | 106.1 | 95.4  | 109.1 | 107.6 | 106.5 | 102.6 |
| 120.4 | 181.8 | 137.2 | 109.2 | 139.1 | 124.9 | 124.7 | 141.4 | 119.7 |
| 118.4 | 121.9 | 109.3 | 109.9 | 108.5 | 117   | 107.6 | 134.5 | 117   |
| 107   | 95.4  | 97.3  | 100.3 | 89.5  | 98.7  | 99.7  | 103.6 | 102.1 |
| 101.3 | 114.2 | 102.3 | 111.4 | 97    | 107.9 | 107.3 | 112.6 | 109.3 |
| 105.1 | 105.3 | 102.4 | 108   | 97.5  | 105.1 | 105.5 | 114.9 | 109.4 |
| 107.3 | 104.7 | 104.6 | 95.4  | 91.9  | 107.5 | 94.6  | 106.3 | 106.5 |
| 149.1 | 142.9 | 150.2 | 127.8 | 134.4 | 137.5 | 142.7 | 136.1 | 127   |
| 100.7 | 110.8 | 110.2 | 109.1 | 91.5  | 106.8 | 106.2 | 104   | 111.1 |
| 104.6 | 110.6 | 101.2 | 95.5  | 93.6  | 111.6 | 105.3 | 108.2 | 117.9 |
| 105   | 97    | 99.6  | 100.7 | 97.7  | 104.7 | 97.9  | 117.4 | 105.1 |
| 110.1 | 112.2 | 103.8 | 97.1  | 101.8 | 105.6 | 108.6 | 123.6 | 115.7 |
| 103.1 | 109.7 | 105.3 | 102.2 | 95.9  | 112.1 | 105.7 | 109.4 | 109.4 |
| 102.6 | 104.7 | 101.7 | 107.3 | 93.1  | 111.2 | 99.7  | 105.1 | 110.4 |
| 104.4 | 107.1 | 105.9 | 110.4 | 99    | 109   | 107.9 | 114   | 106.2 |
| 104.8 | 110   | 107.2 | 96.6  | 99.1  | 104.2 | 97.7  | 116.4 | 113   |
| 109   | 113.4 | 98    | 102.3 | 97.7  | 107.6 | 99.1  | 103.7 | 112.4 |
| 102.3 | 103.1 | 102.1 | 92.5  | 93.2  | 100.8 | 100.9 | 103.5 | 103.7 |
| 143.8 | 127.8 | 119.9 | 103.6 | 125.5 | 127.3 | 120.2 | 198.2 | 130.2 |

|       |       |       |        |       |       |       |        |       |
|-------|-------|-------|--------|-------|-------|-------|--------|-------|
| 107   | 109.1 | 111.6 | 112.9  | 97.1  | 109.7 | 111.8 | 117.7  | 109   |
| 121   | 112.9 | 110.5 | 104.7  | 109   | 124.2 | 108.9 | 140.7  | 128.8 |
| 106.7 | 107.1 | 105.6 | 98.8   | 99.6  | 107.9 | 113.2 | 110    | 107.3 |
| 105.5 | 111.9 | 114.9 | 112.8  | 103   | 119.3 | 111.7 | 126.1  | 110.9 |
| 96.7  | 103.6 | 106.5 | 114.9  | 96.9  | 109.6 | 105.1 | 107.9  | 103.4 |
| 286.4 | 255   | 336.3 | 161.1  | 297.2 | 421.7 | 314.1 | 429.9  | 401.4 |
| 101.5 | 107.9 | 97.5  | 89.3   | 96.1  | 106.4 | 93.7  | 111.7  | 113.9 |
| 261   | 164.2 | 155.6 | 98.1   | 227.8 | 191.4 | 249.4 | 463.8  | 201.9 |
| 121.3 | 113.4 | 103.3 | 96.2   | 89.9  | 118.3 | 98.4  | 101    | 109.5 |
| 108   | 114.7 | 107.7 | 98.3   | 97.7  | 106.1 | 102.8 | 113.8  | 115.5 |
| 107.1 | 107   | 100.1 | 114.7  | 96.5  | 112.4 | 101.6 | 107.4  | 99.8  |
| 100.6 | 112   | 107.2 | 101    | 110.9 | 100.8 | 99.4  | 113.9  | 109.4 |
| 104.4 | 100.6 | 99.7  | 93.6   | 93.7  | 104.5 | 103.1 | 99.1   | 101.9 |
| 112.8 | 114.1 | 98.8  | 108.4  | 97    | 110.6 | 106.9 | 113.2  | 115.1 |
| 109.2 | 115.1 | 107.4 | 97.4   | 100.2 | 111.3 | 99    | 116.9  | 113.5 |
| 100.7 | 109.7 | 103.9 | 96     | 93.9  | 109.8 | 101.4 | 105.9  | 113.7 |
| 835.2 | 298.3 | 274.1 | 163.6  | 353.2 | 465.6 | 399.2 | 969.2  | 1155  |
| 169.8 | 207.2 | 221.5 | 201.5  | 232.7 | 244.8 | 214.1 | 362.8  | 196.1 |
| 158.3 | 208.1 | 230.6 | 170.1  | 201.2 | 210.7 | 177.2 | 249.8  | 175.6 |
| 133.9 | 162.8 | 159.8 | 134.2  | 127.2 | 155   | 119.7 | 190    | 165.6 |
| 152   | 566.1 | 176.2 | 1125.4 | 218.3 | 127.9 | 593.8 | 164.2  | 133.4 |
| 107.9 | 115.3 | 104.6 | 104.8  | 98.5  | 107.9 | 109.1 | 113.9  | 105.9 |
| 103.7 | 110.9 | 99.9  | 105.7  | 96.6  | 109.9 | 106.2 | 108.9  | 111.7 |
| 113.6 | 115.8 | 112   | 138    | 106.8 | 123.6 | 162.3 | 130    | 131.3 |
| 113.7 | 116.1 | 115.8 | 105.9  | 96.7  | 117.7 | 110.8 | 121.7  | 123.4 |
| 109.6 | 111.8 | 104.4 | 99.9   | 88.7  | 104.8 | 99.9  | 114.7  | 112.2 |
| 106.3 | 126.2 | 96.6  | 98.3   | 102.1 | 102.5 | 97.1  | 107.9  | 101.5 |
| 105.9 | 103.2 | 101.4 | 101    | 98.3  | 113.2 | 98.6  | 109.6  | 118.7 |
| 104.1 | 109.7 | 103.3 | 97.9   | 93.5  | 112   | 104.1 | 115.9  | 104.2 |
| 99.3  | 98.1  | 102.6 | 99.8   | 93.5  | 109.2 | 108.7 | 103.9  | 104.4 |
| 193.1 | 296.5 | 313.1 | 248.1  | 321   | 339.7 | 320.3 | 427.9  | 343.4 |
| 107.2 | 107.6 | 102.2 | 103.3  | 93.7  | 115.7 | 100.6 | 104.2  | 110.8 |
| 102.6 | 111.7 | 94.5  | 93.2   | 93.8  | 109.6 | 96.4  | 100.5  | 103.7 |
| 110.6 | 112.9 | 104.1 | 102    | 97.1  | 115.1 | 107.2 | 109.9  | 107.6 |
| 120.7 | 116.7 | 112.6 | 124.7  | 98.1  | 105.7 | 109.3 | 115.9  | 113.9 |
| 357.9 | 646.3 | 585   | 647.6  | 523.2 | 666.8 | 557.2 | 1186.3 | 837.5 |
| 111.6 | 105.1 | 101.4 | 98.2   | 97    | 105   | 104   | 114.5  | 111.9 |
| 135   | 141.5 | 115   | 132.3  | 119   | 124.9 | 133.5 | 156.3  | 146.6 |
| 103.9 | 107   | 102.5 | 96.3   | 94.9  | 105.1 | 99.9  | 103.3  | 112.9 |
| 99.7  | 109.5 | 102.6 | 100.4  | 98    | 110.1 | 107.7 | 109.4  | 107.4 |
| 103.9 | 113.1 | 102.4 | 97.5   | 98.6  | 113.1 | 92.2  | 102.1  | 96.8  |
| 226.5 | 244.4 | 232.1 | 215.8  | 253.3 | 302.9 | 296.3 | 321.3  | 241.7 |
| 111.3 | 115.3 | 108.2 | 94.8   | 110.6 | 112.7 | 117.5 | 118.2  | 112.3 |
| 142.3 | 133   | 136.5 | 137    | 135.2 | 132.7 | 144.4 | 175.7  | 151.9 |
| 110.8 | 121.8 | 123.9 | 160.4  | 106.1 | 116.2 | 127.5 | 114.6  | 119.7 |
| 101.1 | 99.3  | 92.7  | 95.6   | 95    | 106.1 | 103   | 97.7   | 102.5 |
| 109.3 | 113.4 | 108.7 | 99.6   | 96.2  | 109.4 | 104.7 | 110.7  | 108.4 |
| 105.5 | 100.4 | 107.1 | 94.6   | 90.1  | 110.1 | 94.4  | 103.6  | 104.2 |
| 112.5 | 109.1 | 103.4 | 100    | 94.2  | 105.6 | 102.6 | 111.9  | 106.7 |
| 102.3 | 107.7 | 102.2 | 112.1  | 96.8  | 106.7 | 107.3 | 119.7  | 107.7 |
| 101.1 | 104.9 | 98    | 95.2   | 92.8  | 104.6 | 103.4 | 109    | 102.4 |

|       |       |       |       |       |       |       |        |       |
|-------|-------|-------|-------|-------|-------|-------|--------|-------|
| 105.1 | 101.1 | 104.7 | 99    | 96.8  | 110   | 96.4  | 109.9  | 101.9 |
| 108.4 | 115   | 102.7 | 98.6  | 89.7  | 111.1 | 103.8 | 116.5  | 99.2  |
| 107.5 | 101.8 | 103.8 | 98.8  | 97.6  | 114.2 | 107.9 | 106.6  | 99    |
| 123.9 | 163.4 | 109.9 | 471.8 | 145.4 | 120.6 | 518.3 | 221.8  | 160   |
| 119.6 | 119.8 | 104.3 | 105.6 | 106.7 | 114.1 | 106.9 | 121.6  | 120.2 |
| 125.4 | 115.8 | 111.7 | 114.8 | 109.2 | 124.6 | 119   | 170.1  | 172.8 |
| 136.5 | 137.6 | 128.1 | 105.3 | 127.6 | 147.3 | 117.9 | 157.5  | 137.3 |
| 114.4 | 113.3 | 108.3 | 122.1 | 106   | 116.6 | 105.2 | 128.3  | 120.7 |
| 108.3 | 104.1 | 103.1 | 94    | 97.8  | 108.8 | 114.9 | 111.2  | 108.4 |
| 106.7 | 106.7 | 103   | 109.4 | 96.5  | 116.7 | 99.2  | 94.3   | 97.1  |
| 113.8 | 133.4 | 110.5 | 115.9 | 104.4 | 120.5 | 113.2 | 144.1  | 140.8 |
| 123.5 | 157.5 | 160.1 | 260.4 | 143.6 | 149.1 | 140.7 | 181.9  | 172   |
| 114.5 | 136.5 | 129.3 | 124.8 | 121.5 | 118.8 | 118   | 141.3  | 121.4 |
| 117.3 | 113.2 | 108.9 | 108.4 | 95    | 115.5 | 107.4 | 119.6  | 112.4 |
| 105.1 | 115.3 | 110.2 | 107.7 | 100.5 | 118   | 116.5 | 123.5  | 112.9 |
| 100.9 | 106.6 | 101.8 | 108   | 93.9  | 106.7 | 110.2 | 106    | 114.3 |
| 109.4 | 102.7 | 102.3 | 100.2 | 99.1  | 104.3 | 107   | 111.8  | 109.7 |
| 95.7  | 98.6  | 97.4  | 88.4  | 90.7  | 101.2 | 100.6 | 104.5  | 104.4 |
| 115.3 | 109   | 110.1 | 111.7 | 101.3 | 116.2 | 109.4 | 135.3  | 136   |
| 116.8 | 107.2 | 101   | 107.1 | 96.1  | 103.8 | 98.4  | 103.1  | 106.5 |
| 106.2 | 111.8 | 109.5 | 113.1 | 100.5 | 114.6 | 105.6 | 123.3  | 115.4 |
| 110.8 | 106.7 | 104.1 | 98.2  | 100.9 | 103.2 | 107.7 | 112.4  | 115.9 |
| 120.8 | 121.5 | 121   | 106.3 | 109.2 | 116.7 | 107.8 | 128.9  | 122   |
| 102.3 | 104.8 | 101.2 | 101   | 97.4  | 104.6 | 99.7  | 103.5  | 104.9 |
| 105.7 | 107.8 | 102.4 | 100.8 | 95.1  | 106   | 94.1  | 108.7  | 104.3 |
| 172.6 | 235.9 | 190.9 | 215   | 237.1 | 223   | 211.5 | 339.4  | 233.8 |
| 420.5 | 352.8 | 343.8 | 340.5 | 321.9 | 383.7 | 410.6 | 942.5  | 691.1 |
| 115   | 115.3 | 107.2 | 122.8 | 92.5  | 105.1 | 118.5 | 136    | 112.3 |
| 107.7 | 104.6 | 106.7 | 103.2 | 94.6  | 103.1 | 104.9 | 123.3  | 98.4  |
| 98.3  | 106.5 | 104.4 | 95.8  | 89.7  | 112.7 | 103   | 102.5  | 101.7 |
| 734.7 | 835   | 693.3 | 694.9 | 609.6 | 845.9 | 778.2 | 1246.7 | 906.2 |
| 399   | 398.2 | 397.9 | 376.8 | 303.3 | 402.3 | 325.4 | 971.4  | 572.8 |
| 193   | 183   | 194   | 174   | 189.5 | 208.3 | 144.2 | 385.6  | 281.3 |
| 275.1 | 243.3 | 216.7 | 259.3 | 214.6 | 271.7 | 281.9 | 422.1  | 395.6 |
| 111   | 107.2 | 104.7 | 99    | 101.3 | 106.9 | 101.8 | 100.6  | 107.6 |
| 110.3 | 163.2 | 170.4 | 123.9 | 120.3 | 150.9 | 118.1 | 156.5  | 140.3 |
| 108.1 | 103.8 | 101.8 | 97    | 93.7  | 113.1 | 97    | 106    | 104   |
| 112.8 | 108.4 | 101.4 | 103.9 | 97.4  | 112.9 | 100.5 | 108.6  | 105.6 |
| 110.8 | 100.5 | 107.4 | 103.9 | 92.1  | 105.7 | 102.2 | 107    | 108.9 |
| 135.6 | 140.9 | 133.1 | 121.1 | 143.3 | 132.8 | 137.6 | 161.3  | 137.3 |
| 107   | 106.3 | 102.3 | 112.8 | 97.2  | 104   | 105.1 | 106.1  | 93.9  |
| 316.8 | 373.4 | 380.4 | 329.9 | 414.8 | 404.1 | 433.4 | 598.4  | 374.8 |
| 431.3 | 455.9 | 461.8 | 490.3 | 357.2 | 482.4 | 459.3 | 801.8  | 585.1 |
| 112.8 | 107.2 | 112.2 | 106.4 | 95.7  | 110.6 | 105.4 | 109.1  | 112.3 |
| 109.8 | 112.1 | 114.4 | 110.1 | 101.2 | 111.8 | 110.6 | 119.8  | 107   |
| 123.2 | 238.6 | 259.2 | 223.5 | 253.2 | 216.5 | 221.7 | 292.3  | 237.4 |
| 112.3 | 108.6 | 103.5 | 118   | 101.2 | 101.5 | 107.4 | 109.1  | 110.2 |
| 161.8 | 133.1 | 130.7 | 141.5 | 124.2 | 129.7 | 143.2 | 176    | 156.9 |
| 105.2 | 109.4 | 99.5  | 106.8 | 99.1  | 119.4 | 100.4 | 111.1  | 110.8 |
| 115.2 | 112.9 | 102.9 | 90.7  | 99.1  | 101.1 | 106.6 | 112.1  | 110.1 |
| 113.5 | 114.4 | 114.4 | 122.9 | 100.6 | 116.9 | 109.3 | 134.4  | 129.4 |

|        |        |        |        |        |        |        |        |        |
|--------|--------|--------|--------|--------|--------|--------|--------|--------|
| 326.9  | 292.3  | 319.2  | 266.8  | 273    | 361.5  | 303.8  | 338.8  | 305.9  |
| 122.6  | 122.3  | 117.6  | 108.4  | 107.4  | 129.7  | 120.6  | 133.6  | 125.1  |
| 1146.5 | 2004.7 | 1795.9 | 1850.7 | 1468.8 | 1718.3 | 2069.7 | 2244.7 | 1435.5 |
| 100.8  | 106.4  | 102.7  | 107.3  | 96.9   | 110.5  | 110.8  | 108.7  | 107.8  |
| 112.1  | 118.4  | 97.3   | 96.7   | 92.2   | 108.2  | 100.1  | 102.8  | 110    |
| 464.1  | 762.5  | 911.7  | 907    | 615.4  | 700.3  | 767.8  | 882.3  | 666    |
| 106.8  | 130.4  | 117.1  | 109.5  | 105.1  | 113.7  | 123.3  | 129.2  | 120.5  |
| 128    | 201.3  | 203    | 212    | 203.1  | 229.6  | 255.9  | 248.6  | 186.7  |
| 268.3  | 377.6  | 366.4  | 370.2  | 310.5  | 402    | 361    | 757.3  | 354.6  |
| 124.9  | 168.4  | 157.8  | 142.4  | 152.5  | 187.7  | 165.9  | 211    | 185.5  |
| 117.1  | 155.1  | 171.2  | 164.6  | 145.4  | 140.5  | 159.5  | 188.3  | 135.9  |
| 159.5  | 235.5  | 224.4  | 167.3  | 182.7  | 209.6  | 205.2  | 258    | 184.7  |
| 134.1  | 159.4  | 147.3  | 155    | 139.3  | 155.1  | 139.5  | 180    | 143.7  |
| 162    | 185.3  | 196.8  | 230.4  | 169.8  | 178.4  | 173.3  | 224.4  | 157.3  |
| 323.3  | 333    | 430.5  | 333.2  | 361.5  | 412.1  | 347.6  | 615.7  | 452.7  |
| 114.5  | 109.9  | 100.7  | 105.8  | 93.8   | 114    | 108.6  | 120.3  | 112.1  |
| 357.1  | 438.3  | 490.8  | 449.7  | 481.6  | 499.8  | 352    | 588.1  | 307.4  |
| 134.7  | 144.5  | 138    | 110.7  | 126.9  | 150.6  | 118.9  | 163.5  | 121.8  |
| 107.7  | 111    | 106.4  | 105.4  | 96.9   | 108.3  | 111.8  | 129.4  | 106.9  |
| 315.3  | 456.7  | 426    | 291    | 431    | 439.9  | 387.2  | 718.9  | 602.9  |
| 159.6  | 235.7  | 209.5  | 192.1  | 186.7  | 207    | 264.9  | 280.2  | 284    |
| 113.3  | 105.9  | 112.3  | 111.2  | 99.9   | 111.8  | 115.8  | 112.4  | 105    |
| 113    | 114.1  | 102.9  | 105    | 99.2   | 119.6  | 102.9  | 108.1  | 106.4  |
| 129.5  | 127.4  | 124.6  | 152.9  | 107.6  | 119.4  | 138.9  | 135.3  | 127.8  |
| 164    | 209.2  | 218.2  | 160.6  | 150    | 184.3  | 161.7  | 272.8  | 230.5  |
| 160.5  | 196.3  | 177    | 180.3  | 197.8  | 200    | 192.1  | 306.7  | 216.3  |
| 128.2  | 136.4  | 137.9  | 130.3  | 117.5  | 126.8  | 132.6  | 132.6  | 119.8  |
| 112    | 114.9  | 107    | 102.7  | 101.7  | 107.6  | 108    | 108.4  | 121.4  |
| 108    | 111.4  | 102.9  | 113.6  | 99     | 107.2  | 110.8  | 115.3  | 117.4  |
| 138    | 154.9  | 158.4  | 159.6  | 144    | 159.8  | 147.1  | 195.2  | 148.4  |
| 119    | 125.1  | 116.3  | 119.1  | 109.2  | 128.4  | 118.8  | 151.1  | 135.8  |
| 114.7  | 119.2  | 110.6  | 130.9  | 108    | 124.9  | 121.7  | 136.3  | 131.2  |
| 272.8  | 289.7  | 246.1  | 240    | 241.2  | 242.5  | 270.6  | 530.7  | 418.2  |
| 106.1  | 112.1  | 104.5  | 110.6  | 98.3   | 127.8  | 106.8  | 135.8  | 144.9  |
| 109.4  | 111.3  | 107.5  | 98.3   | 97.2   | 111.4  | 103.5  | 121.5  | 122.9  |
| 97.5   | 109.5  | 101.4  | 96     | 92.3   | 107.4  | 117    | 109.6  | 105.9  |
| 135.3  | 163.2  | 151.9  | 131.1  | 136.6  | 146.2  | 133.5  | 172.3  | 120.6  |
| 104    | 114.9  | 118.9  | 108.3  | 96.9   | 106.6  | 108.2  | 112.7  | 104.3  |
| 111.8  | 103.4  | 105    | 109.3  | 95.6   | 115.6  | 96.6   | 106.7  | 98.3   |
| 104.8  | 115    | 112.6  | 106.7  | 96.4   | 107.5  | 104.3  | 113.7  | 113.4  |
| 105.6  | 112.1  | 98.9   | 100.2  | 94.7   | 103.7  | 109.2  | 113.2  | 109.4  |
| 103    | 116.2  | 102.1  | 95.8   | 92.3   | 112    | 98     | 121.3  | 107.4  |
| 216.9  | 261.3  | 257.3  | 209.8  | 199.5  | 246.5  | 268.8  | 286.7  | 265.9  |
| 364.3  | 356    | 267.5  | 331.3  | 291.5  | 366.8  | 300.5  | 703.4  | 484.1  |
| 97.5   | 103.7  | 99.4   | 98.4   | 96.9   | 104    | 95.9   | 105.5  | 108.8  |
| 642.2  | 525.4  | 511    | 491.8  | 531.2  | 559.4  | 624.9  | 1084.1 | 1023.4 |
| 151    | 186.9  | 196.6  | 156.4  | 206.8  | 224.6  | 170.2  | 389.1  | 207.1  |
| 116.7  | 114.7  | 111    | 100.1  | 104.5  | 121.8  | 103.1  | 124.6  | 112.6  |
| 135.1  | 144    | 139.8  | 139.8  | 131.4  | 140.2  | 148.4  | 171.7  | 190.3  |
| 112.7  | 114.9  | 107    | 111.5  | 99.8   | 120.9  | 116.7  | 120.1  | 111.7  |
| 211.7  | 230    | 195.5  | 176.1  | 216.5  | 181.3  | 227.5  | 282.8  | 303.8  |



|       |       |       |       |       |       |       |       |       |
|-------|-------|-------|-------|-------|-------|-------|-------|-------|
| 107.4 | 107.4 | 97.8  | 105.4 | 102.7 | 107.2 | 101.5 | 107.7 | 105.6 |
| 121.7 | 128.1 | 105.6 | 119.7 | 103.3 | 116.2 | 111.2 | 134.3 | 138.1 |
| 335   | 344.1 | 311.2 | 437.4 | 294.1 | 322.8 | 376.2 | 675.6 | 441.8 |
| 112.7 | 117.6 | 109.1 | 106.9 | 105.8 | 125.1 | 111.6 | 120.8 | 112.8 |
| 101.9 | 98.5  | 103   | 105.5 | 95.5  | 112   | 98.3  | 109.5 | 107.8 |
| 107   | 109.8 | 106   | 101.8 | 108.1 | 110.4 | 109.6 | 106.2 | 109.6 |
| 104.2 | 108.9 | 102   | 98.1  | 92.7  | 105.4 | 98.4  | 111.4 | 106.6 |
| 113.4 | 113.7 | 105   | 104.5 | 93.3  | 110   | 114.5 | 119   | 114.4 |
| 105.4 | 101.3 | 102.2 | 103.2 | 94.9  | 102.5 | 107   | 97.5  | 98.9  |
| 106.2 | 107.6 | 103   | 100.5 | 96.5  | 111.1 | 96.6  | 108.6 | 110.7 |
| 124.9 | 131.6 | 106.6 | 126.4 | 107.1 | 119.6 | 114.3 | 138.1 | 132.9 |
| 108.6 | 104.2 | 103.7 | 112.4 | 107.5 | 126.5 | 114.9 | 134.3 | 113.6 |
| 113.1 | 146.1 | 144.2 | 108.1 | 125.2 | 128.3 | 129.1 | 148   | 124.3 |
| 112.4 | 124.2 | 105.4 | 98.3  | 106.8 | 112.8 | 102.7 | 118.5 | 111.8 |
| 105.6 | 106.2 | 104.3 | 95.2  | 91.7  | 112.1 | 105.2 | 104.5 | 115.8 |
| 106   | 118.2 | 108.5 | 106   | 103.1 | 118.8 | 106.4 | 106   | 111.8 |
| 105.6 | 107.3 | 107.7 | 98.5  | 94.4  | 111.4 | 95.1  | 109.9 | 100.1 |
| 112.1 | 111.3 | 98.3  | 104.3 | 100.1 | 109.3 | 107.7 | 106.5 | 104.7 |
| 106.8 | 109.3 | 93.8  | 101.5 | 88.1  | 105.8 | 101.5 | 101.4 | 107.7 |
| 104.1 | 107.1 | 108.7 | 102.9 | 92.1  | 111.4 | 101.2 | 105.7 | 109.7 |
| 113.2 | 105.6 | 97.4  | 99.2  | 102.4 | 109   | 103   | 108.1 | 106.2 |
| 152.3 | 248.8 | 241.2 | 290   | 220   | 188   | 247.1 | 322.5 | 212.8 |
| 110.4 | 104.8 | 111.8 | 92.7  | 100.4 | 109   | 99    | 112.4 | 106.3 |
| 106.6 | 107.3 | 105.1 | 97.8  | 102   | 108.9 | 107.1 | 112.9 | 110.2 |
| 120.2 | 125.3 | 117.9 | 113.6 | 105.3 | 125.3 | 129.1 | 141.3 | 143   |
| 133   | 134.4 | 134.7 | 127.9 | 121.2 | 143.3 | 125.8 | 162.9 | 166.2 |
| 126.2 | 256.1 | 232.8 | 257.7 | 199.9 | 212.8 | 210.2 | 277.5 | 163.4 |
| 123.5 | 108.1 | 106.8 | 101.7 | 97.6  | 108.1 | 108.3 | 121.3 | 123.2 |
| 105.2 | 107.4 | 107.7 | 96.1  | 94.9  | 110.3 | 101.5 | 106.7 | 105.9 |
| 123.6 | 120.5 | 117.9 | 113.5 | 113.8 | 118.5 | 104.2 | 128.1 | 115.7 |
| 96.1  | 105   | 98.5  | 93.1  | 96.5  | 111.7 | 96.4  | 110.7 | 106.2 |
| 121.7 | 189.6 | 165.6 | 175   | 145.8 | 163.1 | 155.4 | 175.8 | 130.8 |
| 123   | 149.7 | 138.1 | 144.9 | 141.3 | 141.4 | 147.4 | 164.6 | 139.4 |
| 147   | 190.7 | 182.4 | 204.9 | 182.4 | 175   | 207.1 | 215.7 | 168   |
| 116.6 | 109.7 | 120.3 | 107.8 | 98    | 107.1 | 102.6 | 121.8 | 117.2 |
| 105.1 | 102.9 | 105.7 | 104.8 | 99.6  | 103.9 | 103.6 | 111.4 | 109   |
| 114.2 | 103.2 | 106.3 | 110.3 | 96.4  | 113.8 | 110.6 | 113.9 | 110.8 |
| 106.8 | 104.5 | 90.7  | 97.8  | 97.5  | 105.5 | 95    | 104.4 | 107.7 |
| 100.8 | 100.1 | 100.8 | 97.1  | 91.5  | 98.8  | 95.6  | 107.1 | 108.5 |
| 116.9 | 128.3 | 123.2 | 122.7 | 116.3 | 124.2 | 128.9 | 119.4 | 112.4 |
| 182.2 | 170.8 | 127.1 | 160.9 | 124.2 | 163.6 | 154.4 | 209.4 | 304   |
| 253.1 | 181.6 | 157.7 | 241   | 143.4 | 162   | 165.8 | 317.6 | 291.8 |
| 116.2 | 108.2 | 110.1 | 109.1 | 106.3 | 114.7 | 104.9 | 118.2 | 125.5 |
| 103.7 | 117   | 110.8 | 101.6 | 98.2  | 109.8 | 97    | 101.2 | 116.9 |
| 150   | 143.3 | 159.8 | 146.2 | 161.9 | 151.1 | 149.5 | 213   | 184.5 |
| 107.3 | 110   | 101.9 | 98.8  | 93.2  | 102.5 | 102.4 | 108.3 | 100.1 |
| 110.8 | 116.8 | 108.9 | 115.4 | 112.3 | 142.7 | 114   | 141.4 | 133.4 |
| 186   | 180.7 | 171.7 | 174.8 | 162.8 | 168.7 | 143   | 271   | 303.1 |
| 192.2 | 184.9 | 181.9 | 193.5 | 190.1 | 225.5 | 239.8 | 337.9 | 244.5 |
| 109.1 | 107   | 99    | 109.8 | 97.4  | 113.5 | 104.7 | 105.6 | 105.6 |
| 223.3 | 396.6 | 446   | 360   | 346.4 | 476   | 388.6 | 641.4 | 338.2 |

|        |        |        |        |        |        |        |        |        |
|--------|--------|--------|--------|--------|--------|--------|--------|--------|
| 116.7  | 144.6  | 136.2  | 147.1  | 110.6  | 135.3  | 143.8  | 176.8  | 169.1  |
| 155.3  | 250.9  | 155.5  | 302.7  | 195.1  | 151.5  | 172.2  | 301.4  | 139.5  |
| 111.5  | 144.8  | 105.2  | 131.7  | 120.8  | 114.8  | 110.2  | 171.8  | 108    |
| 105.2  | 110    | 99.8   | 107.2  | 99.5   | 104.2  | 99.3   | 102.3  | 107.5  |
| 95.9   | 101.7  | 102.1  | 103.1  | 96.7   | 107.7  | 102    | 100    | 101.1  |
| 102.2  | 101.2  | 99.2   | 97.2   | 97.8   | 99.5   | 100.5  | 113.3  | 110.7  |
| 104.3  | 110.1  | 109.8  | 99.2   | 101.8  | 110.7  | 106.5  | 110.9  | 110    |
| 225.2  | 380.8  | 333.1  | 367.1  | 384.7  | 391.6  | 410.4  | 485.6  | 367.5  |
| 133.8  | 124.3  | 107.8  | 124.9  | 105.6  | 110.7  | 106.7  | 134.5  | 127.2  |
| 120.6  | 99.8   | 102.9  | 99.3   | 98     | 103.6  | 98.5   | 110.9  | 101.8  |
| 149.4  | 172.1  | 158.8  | 145.1  | 134.7  | 160    | 140.1  | 207.4  | 171.6  |
| 112    | 133.7  | 123    | 101.5  | 104.8  | 121.1  | 117.4  | 127    | 124.1  |
| 103.7  | 112.6  | 103.7  | 101.8  | 102.9  | 111.1  | 103.8  | 123.4  | 121.9  |
| 105.2  | 111.3  | 97.5   | 104    | 99     | 114.6  | 101    | 113.8  | 106.8  |
| 109    | 108.3  | 100.4  | 102.5  | 99.2   | 106.1  | 92.9   | 99.8   | 109.5  |
| 1061.1 | 1005.6 | 2089.5 | 1004   | 1034.8 | 2037.3 | 974.8  | 1576.4 | 2503.3 |
| 105.1  | 112.9  | 101.3  | 102.2  | 91     | 106.9  | 106.8  | 103.3  | 107.8  |
| 107.6  | 108.8  | 101.2  | 90     | 96.9   | 96.6   | 98.1   | 102.5  | 113.8  |
| 229.9  | 192.6  | 174.8  | 180.2  | 209    | 216    | 160.3  | 350.3  | 380.3  |
| 126.9  | 142    | 133.1  | 117.6  | 133.6  | 145.3  | 135.1  | 150.7  | 125    |
| 136.5  | 180.1  | 169    | 149.8  | 140.1  | 162.7  | 160.7  | 215.5  | 189.7  |
| 106    | 101    | 109.3  | 98     | 92.1   | 104.9  | 95.7   | 104.2  | 101.8  |
| 105.8  | 113.6  | 93.3   | 98.3   | 97.1   | 112.1  | 104.2  | 120.6  | 115    |
| 104.3  | 110.4  | 92.5   | 93.9   | 98.9   | 104    | 99.4   | 106    | 107.1  |
| 129.4  | 126.8  | 137.7  | 117.1  | 110.1  | 138.3  | 118.2  | 157.7  | 124.4  |
| 128.7  | 145.3  | 159.1  | 113.8  | 140.6  | 160.2  | 133.9  | 237.4  | 200.3  |
| 109.1  | 148.2  | 127.4  | 105.9  | 102.2  | 130.3  | 111.3  | 128    | 123.1  |
| 284.4  | 246.6  | 284.3  | 161.9  | 270.8  | 340.7  | 193.7  | 656.4  | 637.7  |
| 111.4  | 135.1  | 132.2  | 130.9  | 120.6  | 135.5  | 126.8  | 120.1  | 117.9  |
| 816.9  | 1104.9 | 1663.6 | 1183.3 | 933.7  | 1595.3 | 984.6  | 1761.3 | 1445.3 |
| 147.1  | 208.1  | 150.8  | 206.4  | 157.9  | 174    | 192    | 259.5  | 225.6  |
| 1033.4 | 1581.1 | 1557.3 | 1919.8 | 1210.1 | 1301   | 1669.4 | 2058.5 | 1341.4 |
| 113.6  | 110.9  | 106.6  | 102.9  | 93.5   | 108.6  | 106.6  | 110    | 106.8  |
| 147    | 219.1  | 187.6  | 222.3  | 176.3  | 212.2  | 232.1  | 248.5  | 261.7  |
| 551.6  | 884.9  | 1029.6 | 975.4  | 844.2  | 890    | 921.6  | 1624.7 | 1212   |
| 728.9  | 627.8  | 619.3  | 525.8  | 621.6  | 659.9  | 631.3  | 1383.7 | 959.1  |
| 1512.3 | 1265.1 | 1277   | 912.3  | 1117.9 | 1448.6 | 1186.9 | 2146.3 | 1989   |
| 899.9  | 981.3  | 898.7  | 945    | 912.1  | 993    | 1074.1 | 1616.5 | 1364.6 |
| 554.5  | 679.1  | 612.8  | 487    | 551    | 635.7  | 473.1  | 944.7  | 739.2  |
| 185.3  | 274.4  | 251.7  | 277.4  | 202    | 209.5  | 289.3  | 339.6  | 293.1  |
| 111.5  | 122    | 126.8  | 125.2  | 121.6  | 122    | 122.3  | 157.5  | 123.7  |
| 108.6  | 114.1  | 110.5  | 99.8   | 101.7  | 108.8  | 108.3  | 129.1  | 112    |
| 5316   | 5403.8 | 5187.9 | 5993.3 | 4310.5 | 5090.9 | 5682   | 7099.1 | 6424.4 |
| 164.3  | 226.9  | 180    | 167.6  | 152.5  | 243.5  | 133.3  | 279.5  | 284.8  |
| 109.9  | 121.5  | 100.3  | 97.7   | 91.3   | 99.2   | 96.1   | 101.2  | 99.2   |
| 951.4  | 1127.7 | 1132.8 | 1129.7 | 871.7  | 909.6  | 1098   | 1393.7 | 1299.3 |
| 2566.9 | 2370.4 | 2477.7 | 2877.7 | 2187.9 | 2567.2 | 2837.9 | 4852.5 | 4433.4 |
| 422.3  | 771.5  | 697.9  | 699.2  | 580.8  | 623.3  | 571.1  | 726.7  | 408.2  |
| 104.8  | 109.7  | 99.9   | 102.3  | 98.5   | 105.4  | 102.4  | 109.9  | 111    |
| 141.7  | 144.7  | 135.3  | 140.2  | 105.8  | 133.3  | 148    | 163.1  | 140.8  |
| 159.2  | 305.9  | 238.8  | 243.3  | 219.5  | 233.7  | 248.1  | 233.1  | 151.9  |

|        |       |        |        |        |        |        |        |        |
|--------|-------|--------|--------|--------|--------|--------|--------|--------|
| 109.9  | 120.9 | 110.2  | 110    | 99.7   | 119.9  | 114.9  | 146.1  | 136.9  |
| 214.8  | 275.7 | 279.9  | 290.7  | 273.2  | 297.9  | 238.3  | 412.2  | 303.1  |
| 109    | 102.6 | 101.1  | 93.6   | 94.2   | 103.2  | 103    | 103.3  | 105.3  |
| 111    | 106.4 | 102.2  | 102.7  | 95.5   | 111.7  | 109.8  | 102.5  | 117    |
| 155.3  | 220.9 | 197.1  | 175.4  | 193.9  | 258.4  | 222.3  | 345.1  | 224.4  |
| 418.1  | 676.5 | 621.4  | 653.6  | 499.1  | 700    | 705.1  | 617.9  | 485.9  |
| 117.2  | 118.4 | 114.8  | 119.4  | 93.8   | 119.6  | 117.1  | 120.4  | 118.8  |
| 134.2  | 122.3 | 130.5  | 107.5  | 123.4  | 146.2  | 128.6  | 190.4  | 165.1  |
| 158    | 188.9 | 163.6  | 170    | 159.8  | 179.9  | 192.2  | 209.8  | 200.7  |
| 163.2  | 424.5 | 239    | 362.3  | 195    | 144.2  | 196    | 219.2  | 192    |
| 267.8  | 289.5 | 244.6  | 355.5  | 257.3  | 305.7  | 321.3  | 490.3  | 351    |
| 105.4  | 107.1 | 107.1  | 98.9   | 92.7   | 108.6  | 107.7  | 112.2  | 109.7  |
| 111    | 117.9 | 112.2  | 106.5  | 97     | 117.7  | 114.8  | 118    | 122.6  |
| 140.8  | 139.9 | 127.8  | 128.6  | 116.6  | 133.5  | 132.8  | 215.5  | 162    |
| 104.1  | 110.7 | 100.2  | 93.8   | 92.5   | 104.3  | 94.8   | 99.4   | 100.9  |
| 183.2  | 252.2 | 248.1  | 208.5  | 211    | 249.6  | 196.6  | 348.1  | 218.7  |
| 106.4  | 123.7 | 124.4  | 117.8  | 104.9  | 118.8  | 130.2  | 123    | 122    |
| 110.6  | 117   | 106.8  | 110.4  | 104.6  | 110.2  | 113.4  | 127.9  | 113.2  |
| 170.2  | 164.9 | 183.3  | 133.4  | 146.7  | 188.4  | 129.4  | 214.8  | 233    |
| 110    | 105.4 | 104.6  | 101.9  | 98.3   | 104.9  | 98     | 109.2  | 106.6  |
| 374.8  | 856.6 | 775.3  | 735.5  | 750.4  | 696.2  | 876.5  | 827.8  | 445.4  |
| 143.4  | 175.5 | 156.4  | 156.4  | 149.3  | 183.7  | 198.7  | 192.4  | 158.8  |
| 413.5  | 779.4 | 567.1  | 826.8  | 774.4  | 619.3  | 784    | 1034.4 | 656.3  |
| 105.1  | 103.9 | 101.7  | 95.9   | 96.7   | 98.4   | 101.5  | 105.4  | 104.6  |
| 102.8  | 109.6 | 99.7   | 99.8   | 92.1   | 105.2  | 103.1  | 99.5   | 104.8  |
| 111.2  | 127.2 | 107.2  | 110.9  | 98.9   | 112.6  | 115.3  | 114.2  | 111.9  |
| 248.4  | 283.6 | 197.8  | 202.2  | 199.5  | 203.2  | 221.2  | 303.6  | 205.4  |
| 165.5  | 156.9 | 140.9  | 156.3  | 142.4  | 167.7  | 176.3  | 196.5  | 175.2  |
| 288.1  | 739.3 | 556.6  | 558    | 606.2  | 567.2  | 630.2  | 687.7  | 362.4  |
| 1678.7 | 1513  | 1396.7 | 1827.3 | 1389.1 | 1206.6 | 2031.4 | 2827.5 | 2241.7 |
| 195.1  | 228.5 | 209.4  | 220    | 196    | 225.8  | 207.3  | 279.5  | 259.7  |
| 117.4  | 162.9 | 127.7  | 127.5  | 121.1  | 136.5  | 139.7  | 176.7  | 163.5  |
| 154.3  | 216.4 | 220.8  | 211.8  | 177.5  | 189.9  | 225    | 211.8  | 170.4  |
| 367    | 306.8 | 261.1  | 327.2  | 263.2  | 339.5  | 300.5  | 533    | 342.8  |
| 120    | 115.5 | 114.3  | 101.6  | 102.4  | 115.5  | 96.6   | 124.6  | 114.4  |
| 100.3  | 98.7  | 99.1   | 93.3   | 92.1   | 108    | 98.4   | 107    | 101.1  |
| 109    | 107.3 | 105.4  | 101    | 96.7   | 112.3  | 104.2  | 104.9  | 115.2  |
| 108    | 104.6 | 100.6  | 95.9   | 93.1   | 109.6  | 99.3   | 112.8  | 113.2  |
| 155    | 177.4 | 121.3  | 165.9  | 142.6  | 134.8  | 173    | 179.2  | 140.1  |
| 104.7  | 110   | 100.4  | 94.9   | 95.3   | 104.5  | 102.4  | 98.5   | 106.2  |
| 112.6  | 145.3 | 129.1  | 147.2  | 131.1  | 139.5  | 114.7  | 210.4  | 156.7  |
| 103.1  | 103.4 | 99.4   | 94.6   | 95.6   | 112.1  | 98.8   | 111.3  | 104.8  |
| 122.2  | 133.6 | 131.9  | 117.7  | 101.5  | 121.5  | 110.2  | 133.5  | 134.3  |
| 110.5  | 142.8 | 137    | 127.3  | 104.9  | 142.4  | 121.5  | 143.3  | 132.7  |
| 108.5  | 107.7 | 104.1  | 99.4   | 97.2   | 101.7  | 91.5   | 104.6  | 101    |
| 137.1  | 124.7 | 122.9  | 111    | 120.1  | 124.4  | 110    | 130.4  | 126.1  |
| 193.1  | 300   | 246.1  | 231.4  | 235.4  | 231.6  | 254.4  | 381.5  | 311.4  |
| 98.7   | 116.6 | 94.6   | 102.8  | 98     | 101.9  | 99.4   | 105.1  | 104.5  |
| 106.6  | 111.8 | 100.1  | 104.2  | 98     | 107    | 103.5  | 106.1  | 103.2  |
| 122.4  | 128.4 | 123.3  | 110.9  | 104.1  | 117.4  | 122.1  | 153.3  | 119.7  |
| 105.7  | 117.4 | 97.1   | 116.5  | 102.3  | 115.4  | 99.9   | 113.8  | 117.4  |

|        |        |        |        |        |        |        |        |         |
|--------|--------|--------|--------|--------|--------|--------|--------|---------|
| 112.9  | 116.1  | 101.3  | 109    | 94.1   | 111.4  | 98.6   | 117    | 112.7   |
| 105.7  | 120.7  | 103.6  | 108    | 108.8  | 111.6  | 105.5  | 122.7  | 112.4   |
| 4665.8 | 1773.3 | 1378.6 | 1989.9 | 1488.9 | 1628.4 | 2298.8 | 7331.3 | 10070.2 |
| 239    | 535.9  | 525.5  | 281.3  | 427.9  | 234.7  | 303.2  | 667.4  | 442.1   |
| 1527.9 | 4019.2 | 3513.8 | 1777.8 | 2703.6 | 1290.5 | 2195.6 | 3139.7 | 2141.9  |
| 115.5  | 107.1  | 98.2   | 104    | 91     | 111.2  | 102.8  | 117.8  | 118.1   |
| 109.1  | 108.2  | 103.6  | 95.6   | 93.3   | 102.9  | 100.3  | 106.6  | 117.4   |
| 99.9   | 105    | 101.7  | 97.3   | 95.1   | 104.4  | 100.4  | 110.9  | 100.1   |
| 111.2  | 120.4  | 123.1  | 119.7  | 112.1  | 116.7  | 111.6  | 135.8  | 125.2   |
| 180.5  | 230.9  | 203.8  | 215.1  | 220    | 195.3  | 213.3  | 332.3  | 256.6   |
| 129.5  | 154.1  | 125.8  | 115.4  | 130.8  | 146.2  | 119.8  | 210.4  | 175.9   |
| 187.2  | 204.7  | 203.4  | 179.6  | 173    | 190.7  | 175.1  | 310.6  | 264.9   |
| 1094.4 | 966.1  | 912.1  | 946.2  | 1030.6 | 978.9  | 1290.5 | 2958   | 1943.8  |
| 110.9  | 108.5  | 109.9  | 97.1   | 93     | 107    | 104.1  | 116.5  | 125.6   |
| 110.9  | 111.5  | 105.8  | 101.6  | 99.5   | 108.3  | 92.2   | 111    | 116.4   |
| 99.4   | 114.5  | 100.2  | 105.7  | 96.6   | 107.7  | 98.2   | 110.9  | 112.8   |
| 111.4  | 110.6  | 107.9  | 98.2   | 95     | 106.9  | 92.1   | 102.9  | 106     |
| 105.5  | 107.2  | 100.2  | 102    | 93.8   | 114.2  | 102.4  | 104.1  | 112.5   |
| 106.3  | 112.9  | 104.2  | 106.5  | 98.1   | 105.9  | 102.3  | 107.9  | 110.3   |
| 97.1   | 102.8  | 97.8   | 95     | 89.3   | 108.9  | 108    | 106.7  | 109.9   |
| 110.1  | 107.3  | 105.9  | 99.4   | 91.1   | 113    | 96.1   | 118.2  | 106.2   |
| 102.7  | 103.1  | 98.5   | 99.4   | 98.1   | 110.5  | 101.9  | 104.9  | 104     |
| 114    | 120    | 100.9  | 95.4   | 100.8  | 109.9  | 105.5  | 112.1  | 116.8   |
| 134.1  | 230.5  | 216.8  | 183.4  | 165.1  | 161.7  | 148.3  | 180.4  | 133.9   |
| 101.6  | 103.7  | 101.8  | 109.4  | 92.4   | 101.5  | 98.1   | 111.1  | 104.7   |
| 100.9  | 120.2  | 101.8  | 109    | 97.4   | 117.5  | 109.1  | 124    | 120.1   |
| 103.9  | 109.5  | 105.7  | 100.5  | 91.9   | 102.8  | 98.4   | 112.2  | 107     |
| 97.2   | 104    | 97.3   | 95.8   | 90     | 100    | 100.7  | 98.9   | 101.6   |
| 110.9  | 106.6  | 100.8  | 99.7   | 93.5   | 107.1  | 101.3  | 105.9  | 111.7   |
| 106.6  | 104.6  | 105.3  | 102.9  | 97.8   | 112.9  | 105.1  | 112.1  | 114.3   |
| 109.3  | 108.1  | 98.5   | 118    | 105.7  | 112.3  | 121.8  | 128.1  | 106.1   |
| 341.1  | 482.7  | 507.1  | 535.4  | 452.9  | 495.8  | 469.4  | 402.7  | 244.6   |
| 115.7  | 167.7  | 122.5  | 127.4  | 113    | 125.5  | 159.7  | 116.5  | 120     |
| 153.5  | 142.3  | 137.5  | 124    | 122.9  | 132.6  | 129.4  | 158.5  | 155.4   |
| 123.5  | 124.6  | 115.2  | 127.2  | 110.9  | 132.6  | 135.3  | 136.7  | 138.2   |
| 104.5  | 110.2  | 101    | 94.2   | 103.2  | 107.8  | 104.7  | 105.3  | 104.9   |
| 105.7  | 102.5  | 105.7  | 110.9  | 92.8   | 109.3  | 104.5  | 125.4  | 120.3   |
| 98.6   | 113.5  | 98.8   | 102.6  | 100.8  | 108.5  | 107.4  | 105.8  | 100     |
| 100.7  | 109.4  | 98.5   | 105.3  | 93.8   | 101.8  | 102.8  | 100.3  | 114.9   |
| 112.9  | 105.1  | 102.1  | 103.6  | 93.8   | 110.7  | 103.9  | 101.1  | 104.9   |
| 106.2  | 121.4  | 112.7  | 108.8  | 106.6  | 121    | 112.1  | 130.6  | 131.6   |
| 120.9  | 119.4  | 119.5  | 117.7  | 112    | 122    | 120    | 141.5  | 135.8   |
| 111.4  | 113.6  | 106.3  | 114.2  | 97     | 120.6  | 96.8   | 128.6  | 112     |
| 111.2  | 110.8  | 101.8  | 106.7  | 101.4  | 111.2  | 105.6  | 115    | 114.6   |
| 106.6  | 107.2  | 102.2  | 103.6  | 98     | 98.2   | 102.7  | 100.4  | 108.8   |
| 102.2  | 105.2  | 109.5  | 109.2  | 101.1  | 99.4   | 108.5  | 109    | 108.1   |
| 100.4  | 103.1  | 97.1   | 99     | 100.8  | 108.3  | 100.3  | 99.4   | 105.9   |
| 109    | 108.9  | 109.3  | 103.4  | 88     | 114.4  | 119.4  | 117.9  | 104.2   |
| 104    | 108    | 102    | 109.8  | 90     | 109    | 92.5   | 108.3  | 116.4   |
| 108.2  | 104.5  | 106    | 108    | 99.2   | 110.9  | 102.7  | 103.7  | 104.9   |
| 109.2  | 120.1  | 103.2  | 106.4  | 95.7   | 116.8  | 110.8  | 112.2  | 112.2   |

|       |       |       |       |       |       |       |       |       |
|-------|-------|-------|-------|-------|-------|-------|-------|-------|
| 114   | 117.5 | 116.7 | 116.1 | 110.4 | 115.6 | 108.7 | 138.8 | 118.7 |
| 109   | 110.9 | 96.9  | 106.5 | 96.3  | 108   | 98.4  | 112.6 | 114.3 |
| 103.1 | 105.2 | 107.6 | 104.5 | 105   | 107.2 | 103.7 | 110.2 | 101.7 |
| 114.5 | 101   | 97.6  | 109.9 | 94.5  | 107.3 | 95.5  | 104.3 | 106.6 |
| 106.4 | 111.2 | 104.3 | 97.8  | 100.3 | 105.8 | 105.6 | 101.6 | 108.1 |
| 94.4  | 113   | 99.3  | 93.3  | 95.2  | 102.9 | 100.1 | 100.1 | 109.7 |
| 102.5 | 114.7 | 100.7 | 102.4 | 89.9  | 109.8 | 104.9 | 105.5 | 108   |
| 101.2 | 112.3 | 101.2 | 97.8  | 93.3  | 102.7 | 110.6 | 105.5 | 106.9 |
| 105.8 | 106.9 | 97.7  | 97.6  | 90    | 107.6 | 101.7 | 105.1 | 110.5 |
| 169.5 | 307.5 | 266.7 | 181.4 | 216.1 | 253.7 | 202.4 | 239   | 159.9 |
| 103.5 | 112.8 | 104.5 | 98.4  | 95.7  | 107.2 | 104.8 | 105.4 | 108.1 |
| 183.1 | 206   | 174.8 | 216.9 | 163.9 | 183.3 | 186   | 292.3 | 240   |
| 166.1 | 192   | 172.3 | 160.2 | 173.6 | 178.3 | 155.1 | 210.4 | 162.6 |
| 148.3 | 163.8 | 139.7 | 138.9 | 140.3 | 178.1 | 145.6 | 245.6 | 200.5 |
| 159.2 | 179   | 164   | 165.5 | 163.9 | 168.2 | 140.6 | 289.1 | 257.2 |
| 636.7 | 696.1 | 670.9 | 585.9 | 598.3 | 641.1 | 559.5 | 740.7 | 619.4 |
| 432.6 | 660.3 | 460   | 514.1 | 408.4 | 511.4 | 413   | 600.5 | 523.9 |
| 126.1 | 170.2 | 176.1 | 123   | 152.5 | 154.6 | 134.6 | 141.3 | 126.6 |
| 130.4 | 136.9 | 134.3 | 132.1 | 120   | 128.1 | 122.8 | 169.6 | 170.8 |
| 156.8 | 202.2 | 188.7 | 187.6 | 175.2 | 183.1 | 183.7 | 205.8 | 190.1 |
| 173   | 166.8 | 168.4 | 167.1 | 144.5 | 140.3 | 153.6 | 194.4 | 238.7 |
| 272.8 | 286.2 | 252.6 | 214.2 | 247.6 | 246.8 | 268.9 | 383.9 | 266.5 |
| 141.2 | 162   | 203.9 | 181.6 | 171.1 | 147.2 | 139   | 238.3 | 186   |
| 114.6 | 108.6 | 97.6  | 114.9 | 98.5  | 109.5 | 103.5 | 108.8 | 104.6 |
| 107.5 | 112.2 | 95.7  | 98.5  | 100.6 | 105.5 | 106.3 | 111.3 | 112   |
| 199.9 | 196.9 | 221   | 175.6 | 171.9 | 161   | 192.6 | 282.8 | 225.9 |
| 119.9 | 115.3 | 104.5 | 101.7 | 102.9 | 106.3 | 106.3 | 121.8 | 113.3 |
| 103.8 | 110.7 | 100.5 | 102.7 | 100.4 | 107   | 105.7 | 117.6 | 105   |
| 114.1 | 112.1 | 106.2 | 107.8 | 100.6 | 112   | 100.5 | 109.3 | 110.3 |
| 96.2  | 106   | 98.1  | 101.5 | 92.7  | 110.1 | 100.2 | 105.1 | 108.2 |
| 104   | 106.9 | 105.5 | 98.6  | 92.7  | 109.1 | 106.1 | 108.5 | 106.5 |
| 105.5 | 124.3 | 106.9 | 120   | 103.6 | 126.9 | 113.8 | 131.3 | 113.9 |
| 108.3 | 108.4 | 105.4 | 103.9 | 97.4  | 120.9 | 103.1 | 118   | 117.9 |
| 120.2 | 108.9 | 109.6 | 100.6 | 112.3 | 113.1 | 111.6 | 130.5 | 117   |
| 111.1 | 110.6 | 106.9 | 111.8 | 103.2 | 103.7 | 103.3 | 103.7 | 100.7 |
| 105.2 | 107.1 | 104.3 | 90.6  | 89.6  | 114.1 | 104   | 111.1 | 111   |
| 104.6 | 118.9 | 91.9  | 100.3 | 91.5  | 112.2 | 99.5  | 106.2 | 101.4 |
| 108   | 116.2 | 110.5 | 108.9 | 104.9 | 109.8 | 113.1 | 119.9 | 121.4 |
| 115.3 | 106.3 | 100.5 | 97.8  | 100   | 115.7 | 102.2 | 116.4 | 108   |
| 103.3 | 105.2 | 97.3  | 100.9 | 91.9  | 117.1 | 106.2 | 118.1 | 99.7  |
| 108.4 | 105.2 | 97.3  | 108.1 | 91.5  | 98.5  | 96.4  | 100   | 113.4 |
| 104.2 | 109.3 | 102.1 | 105.3 | 96.3  | 117.7 | 107.5 | 114.2 | 119.6 |
| 105.9 | 110.7 | 105.3 | 96    | 94.9  | 95.9  | 95.8  | 103.3 | 101.3 |
| 108.7 | 126.5 | 120.9 | 116.5 | 100.6 | 113.8 | 114.2 | 123   | 118   |
| 109.5 | 116.4 | 102   | 100.9 | 108.2 | 104.1 | 105.7 | 103.2 | 101.1 |
| 98.8  | 103.9 | 105.5 | 109.2 | 89.6  | 111.1 | 93.3  | 109.2 | 112.2 |
| 102.3 | 115.1 | 104.1 | 106.5 | 98    | 114.7 | 102.3 | 105.4 | 105.7 |
| 115.9 | 111.5 | 113.3 | 106.8 | 99.6  | 117.1 | 100   | 109.6 | 130.2 |
| 119.8 | 113.6 | 112   | 106.6 | 96.7  | 115.9 | 105.9 | 128.6 | 118.5 |
| 107.3 | 101.2 | 96.8  | 109.4 | 97.4  | 105.5 | 102.7 | 107.1 | 101.6 |
| 101   | 106.4 | 101.9 | 102.6 | 94.8  | 106.1 | 102.2 | 107.6 | 107.8 |

|        |        |       |        |        |        |        |        |        |
|--------|--------|-------|--------|--------|--------|--------|--------|--------|
| 155.7  | 230.3  | 209   | 195.5  | 191.5  | 214.5  | 199.2  | 270.5  | 178.3  |
| 104.2  | 109.7  | 97.6  | 92.7   | 85.2   | 108.2  | 105    | 105.8  | 111.6  |
| 106.4  | 101.7  | 101.9 | 100.5  | 90.6   | 106.8  | 100.5  | 102.2  | 111.8  |
| 175.5  | 162.6  | 131.8 | 131    | 157.6  | 194.1  | 139.2  | 373.2  | 203.8  |
| 120.1  | 115.9  | 108.3 | 125.4  | 125.9  | 123.6  | 109.5  | 156.2  | 142.5  |
| 411.9  | 332.1  | 300.3 | 262.2  | 298.5  | 397.5  | 280.9  | 1345   | 505.1  |
| 109.5  | 114.6  | 107.7 | 100.6  | 103    | 111.3  | 114.1  | 110.7  | 115.3  |
| 105.2  | 108.1  | 105.3 | 102.2  | 97.7   | 108.6  | 112.5  | 115.5  | 109.4  |
| 101    | 101.2  | 102.3 | 91.8   | 90     | 101.8  | 97.5   | 100.2  | 100.5  |
| 100.3  | 110.5  | 99.7  | 96.2   | 86.7   | 102.6  | 105.9  | 100.8  | 109    |
| 107.5  | 108.5  | 102.9 | 94     | 84.9   | 102    | 103.6  | 101.7  | 104.7  |
| 102.4  | 107.4  | 114.1 | 99.4   | 94.3   | 106.9  | 102.7  | 108.7  | 111.1  |
| 106.2  | 100.8  | 99.9  | 105.3  | 95.6   | 105.3  | 97.3   | 110.5  | 105.9  |
| 106.9  | 114.4  | 104.6 | 96.8   | 88.6   | 108.3  | 106.3  | 108.9  | 112.1  |
| 108.2  | 108.9  | 104.5 | 108.4  | 99.9   | 113.8  | 104.7  | 104.4  | 100.3  |
| 99.3   | 104.7  | 107.9 | 100.7  | 96.9   | 104.6  | 100.1  | 108.9  | 110.9  |
| 97.3   | 101.5  | 100.2 | 98.2   | 92.3   | 102.6  | 100.2  | 104.9  | 96.3   |
| 106.2  | 115.5  | 97.9  | 94     | 95.1   | 111.2  | 126    | 106.3  | 99.5   |
| 109.1  | 111.4  | 105.9 | 107.8  | 99.3   | 116.4  | 101.3  | 112.2  | 107.7  |
| 148.8  | 122.4  | 127.3 | 160.2  | 129.3  | 125.5  | 140.3  | 160.3  | 144.6  |
| 109.5  | 112    | 104.9 | 103.6  | 92.1   | 105.5  | 100.3  | 106.2  | 107.4  |
| 103    | 109.3  | 109.5 | 99.9   | 96.7   | 110.8  | 103.9  | 106.5  | 96.6   |
| 108    | 111.3  | 96.6  | 102    | 97.2   | 106.4  | 95.3   | 110.4  | 103.7  |
| 161.8  | 174.3  | 155.1 | 176.9  | 166    | 183.1  | 117    | 241.3  | 170.5  |
| 103.5  | 107.5  | 97.9  | 98.5   | 98     | 102    | 103.7  | 105.6  | 106.6  |
| 104.8  | 104.7  | 102.7 | 96.1   | 95.7   | 103.2  | 109.4  | 102.4  | 112.6  |
| 108    | 111.4  | 102   | 98.6   | 99.1   | 111.3  | 109.6  | 114.9  | 102.7  |
| 149.7  | 129.7  | 117.7 | 119.1  | 119.6  | 130    | 131.3  | 136    | 159.7  |
| 124.9  | 181.8  | 182.3 | 186.6  | 139.9  | 176.4  | 157.1  | 151.2  | 126.3  |
| 109.2  | 109.6  | 100.9 | 100.3  | 93.7   | 105.2  | 98.2   | 101    | 112.1  |
| 117.9  | 103    | 96.5  | 95     | 88     | 98.1   | 100.9  | 102.3  | 101.3  |
| 103.6  | 108.4  | 100.8 | 96.7   | 94.9   | 104.1  | 107.7  | 124.8  | 118    |
| 107.1  | 106.3  | 104.7 | 96.6   | 100.6  | 106.3  | 106.6  | 116    | 106.7  |
| 104.3  | 105.3  | 99.8  | 100.9  | 91.8   | 103.4  | 97.7   | 101.1  | 108.2  |
| 191.5  | 252.3  | 224   | 237.5  | 219.8  | 263.2  | 251.8  | 327.6  | 252.5  |
| 109.3  | 111.1  | 102.5 | 104.3  | 103.8  | 105.1  | 102.5  | 114.4  | 114.7  |
| 105.9  | 110.2  | 140.5 | 115.4  | 114.9  | 129.2  | 108.3  | 118.9  | 114    |
| 102.2  | 110.9  | 106.1 | 100.3  | 96.4   | 112.7  | 94.2   | 119    | 108.7  |
| 104.9  | 109.3  | 102.1 | 106.4  | 95.5   | 108.9  | 102.4  | 111.7  | 109.2  |
| 111.9  | 111.3  | 103.9 | 98.7   | 99.1   | 105.6  | 103.5  | 107    | 105.1  |
| 110.5  | 110.5  | 105.7 | 107.5  | 96.6   | 110    | 116.8  | 113.5  | 107.4  |
| 103.3  | 109.1  | 104.4 | 109.7  | 93.9   | 113.7  | 99     | 109.9  | 106.5  |
| 105.4  | 107.8  | 102.8 | 98.9   | 95.1   | 108.7  | 103.4  | 106.9  | 106.8  |
| 97     | 105.2  | 95.8  | 90.3   | 98.5   | 97.1   | 97.8   | 112.2  | 109    |
| 126.7  | 120.6  | 113.6 | 114.6  | 95.5   | 133.1  | 128.5  | 169.4  | 158.7  |
| 107.5  | 115.9  | 112.5 | 117.9  | 118.7  | 110.2  | 115.7  | 130    | 142.9  |
| 103.9  | 106.5  | 98.4  | 101.2  | 98.5   | 115.1  | 106.1  | 106.3  | 107    |
| 1349.1 | 2030.8 | 1979  | 1895.1 | 1987.3 | 1929.4 | 2334.1 | 2197.3 | 1607.4 |
| 96.3   | 109.4  | 105   | 102.4  | 100.3  | 106    | 97.2   | 124.6  | 109.2  |
| 124.6  | 149.5  | 132.9 | 160.5  | 124.7  | 142.9  | 160.9  | 176.6  | 136.1  |
| 110.6  | 110.6  | 99.8  | 96.4   | 94.9   | 105.9  | 100.6  | 105.6  | 109.3  |

|       |       |       |       |       |       |       |        |       |
|-------|-------|-------|-------|-------|-------|-------|--------|-------|
| 114.9 | 107   | 112.1 | 103.6 | 99.7  | 110.5 | 112.8 | 121.8  | 126.4 |
| 125.5 | 108.2 | 110   | 100.2 | 93.7  | 114.5 | 106.9 | 126.7  | 150.8 |
| 103.2 | 106.9 | 97.4  | 97.8  | 97.9  | 106.2 | 100.1 | 100.9  | 109   |
| 104.3 | 110.3 | 107.3 | 106.4 | 96.1  | 112.1 | 103.7 | 110.8  | 114.4 |
| 110.4 | 113.5 | 109.5 | 103   | 103.2 | 112.8 | 106.9 | 109.2  | 111.4 |
| 612   | 603.3 | 516.1 | 429.9 | 560.1 | 550.9 | 596.5 | 1095.5 | 657.1 |
| 103.7 | 108.5 | 108.6 | 95.2  | 86.6  | 108.8 | 103.9 | 108.6  | 110.2 |
| 114.4 | 112.1 | 101.5 | 103.6 | 94.2  | 110.1 | 101.8 | 111.2  | 103.6 |
| 118.1 | 124.4 | 107.9 | 116.8 | 114   | 114.7 | 105.3 | 135.1  | 113.8 |
| 105.9 | 115.5 | 105.7 | 105.8 | 103.1 | 116.7 | 104.5 | 117.2  | 106   |
| 122.6 | 167.2 | 150.9 | 151.7 | 131.8 | 150.7 | 165.9 | 160.7  | 141.6 |
| 156.5 | 147.8 | 120.9 | 118.6 | 116.1 | 131   | 125.1 | 194.5  | 170.3 |
| 118.1 | 148   | 121.7 | 132.2 | 118.7 | 139.5 | 135.7 | 163.1  | 134.3 |
| 189.9 | 358.5 | 264.1 | 293.3 | 274.7 | 318.5 | 332.3 | 424.3  | 291.5 |
| 112.9 | 131.2 | 112.6 | 108.9 | 113.9 | 138.9 | 110.7 | 138.8  | 112.6 |
| 124.1 | 139.7 | 130   | 107.7 | 114.8 | 118.8 | 119.6 | 139    | 126   |
| 116.2 | 114.7 | 110.1 | 100.2 | 96    | 116.8 | 107.1 | 123.5  | 107.2 |
| 501.8 | 767.3 | 880.8 | 641.1 | 760.1 | 740.9 | 791.7 | 834.5  | 475.2 |
| 114.6 | 113   | 112.8 | 116.2 | 100.7 | 113.6 | 109.8 | 113.8  | 109.4 |
| 170.9 | 155.9 | 198.3 | 106.6 | 218.6 | 209.1 | 153.1 | 238.4  | 143.8 |
| 104.9 | 102.1 | 96.8  | 99.9  | 91.9  | 106.3 | 97.6  | 101    | 107.7 |
| 503.4 | 681.5 | 658.7 | 487.4 | 627.4 | 665.4 | 574.1 | 1022.6 | 618.7 |
| 127.6 | 159.2 | 137.4 | 216.7 | 146.1 | 143.4 | 251.1 | 216    | 123.2 |
| 154.8 | 240.7 | 208.3 | 409.6 | 265.9 | 219.6 | 459.3 | 350.4  | 141.5 |
| 102.7 | 142.7 | 136.9 | 124.8 | 113.6 | 119   | 118.5 | 117.7  | 113.2 |
| 101.4 | 115.7 | 100.6 | 91.7  | 91.6  | 100.6 | 100   | 103.7  | 106.6 |
| 148.6 | 198   | 173   | 149.2 | 186.5 | 189.7 | 119   | 211.5  | 151   |
| 264.4 | 420.3 | 361.8 | 413.8 | 351.2 | 332   | 401.9 | 688.5  | 403.1 |
| 112.2 | 100.4 | 97.4  | 102.5 | 94.1  | 105   | 108   | 111.8  | 111.7 |
| 116.9 | 116.5 | 106.8 | 118.2 | 97.9  | 115.2 | 103.7 | 126.2  | 107.1 |
| 105.2 | 114.7 | 102.4 | 103.3 | 106.2 | 114.4 | 107.7 | 118.5  | 118.4 |
| 166.9 | 376.7 | 392.7 | 102.9 | 439.1 | 545.3 | 109.9 | 1425.7 | 170.6 |
| 108.6 | 124.2 | 124.2 | 118.7 | 104.4 | 117.6 | 117   | 121    | 129.1 |
| 102.7 | 98.7  | 103.2 | 100.2 | 95.5  | 101.2 | 93.4  | 107.6  | 108   |
| 107.1 | 112.8 | 99.9  | 103   | 87.4  | 107.7 | 101.2 | 114.5  | 117.7 |
| 105.6 | 104.9 | 110.5 | 97.1  | 93.2  | 111.2 | 95    | 110.4  | 104.4 |
| 107.3 | 119.3 | 115.3 | 106.3 | 98.2  | 120.5 | 105.1 | 121.6  | 120.3 |
| 105   | 107.3 | 104.8 | 103.7 | 97.8  | 102.6 | 98.3  | 107.9  | 103.5 |
| 109.4 | 123.2 | 105.6 | 107.6 | 105.4 | 112   | 106.5 | 113.9  | 115.1 |
| 98.4  | 112.4 | 91.7  | 101.4 | 91.9  | 105   | 106.8 | 107.1  | 108.1 |
| 121   | 117.9 | 113.1 | 102.1 | 109.2 | 120.7 | 117.7 | 135.3  | 130   |
| 116.6 | 113.9 | 96.7  | 108.6 | 96.8  | 104.1 | 105.7 | 106.1  | 113.4 |
| 104   | 109.1 | 115.7 | 103.6 | 97.7  | 107   | 106.5 | 114.4  | 103.1 |
| 105.1 | 111.9 | 97.7  | 105.6 | 104.9 | 116.5 | 114   | 115.7  | 105.5 |
| 163.3 | 227.4 | 234.3 | 297.6 | 189.1 | 182.7 | 283   | 243.8  | 169.3 |
| 101.1 | 112   | 103.1 | 104.3 | 92.6  | 108.7 | 102   | 114.2  | 105.8 |
| 252.4 | 280.2 | 165.2 | 245.3 | 275.4 | 200.2 | 242.8 | 330.6  | 176.8 |
| 114   | 113.3 | 109   | 106.3 | 96.4  | 108.2 | 113.8 | 107.2  | 118.3 |
| 311   | 910.4 | 732.2 | 768.7 | 556.7 | 739.1 | 437.8 | 791.5  | 545.8 |
| 100.8 | 108.5 | 100.8 | 110   | 95.7  | 114.5 | 105.6 | 111.7  | 116.1 |
| 119.4 | 111.9 | 118.6 | 115.1 | 110.1 | 122.9 | 109.2 | 122.1  | 121.7 |

|        |        |        |        |        |        |        |        |        |
|--------|--------|--------|--------|--------|--------|--------|--------|--------|
| 106.9  | 105.3  | 100.6  | 105.2  | 94.6   | 109.7  | 103.3  | 107.1  | 113.7  |
| 118.8  | 128.8  | 115.9  | 113.1  | 113.5  | 132.8  | 106.9  | 120    | 122.3  |
| 111.6  | 113.6  | 116.1  | 106.2  | 108.5  | 112.2  | 105.5  | 129.3  | 127.6  |
| 102.5  | 110.4  | 97.8   | 101.1  | 96.9   | 107.2  | 108.2  | 112.1  | 108.3  |
| 3173.1 | 3821.2 | 4122.6 | 4373.9 | 3157.9 | 3869.7 | 4250.7 | 3639.1 | 1756.4 |
| 101.5  | 104.1  | 98.5   | 101.9  | 97.8   | 101.7  | 103    | 98.4   | 99     |
| 179.7  | 155.1  | 152.6  | 209.2  | 139.1  | 162.5  | 186.5  | 156    | 131.3  |
| 107.2  | 110.4  | 120.4  | 120.7  | 104.8  | 123.8  | 103.7  | 111.7  | 112.1  |
| 1038.3 | 1249.1 | 1113.5 | 992.5  | 1116.3 | 1174.8 | 713    | 2172.1 | 1266.9 |
| 115.5  | 106.9  | 108.9  | 108.7  | 94.8   | 117.3  | 110.1  | 114.1  | 114.7  |
| 113.9  | 209.6  | 281    | 176.9  | 202.9  | 241.4  | 119.5  | 361.7  | 125.3  |
| 114.5  | 141.3  | 180.1  | 148.7  | 144.9  | 170.4  | 116.6  | 243.4  | 120.5  |
| 109.7  | 106.6  | 97.1   | 98.4   | 108.7  | 113.2  | 111.2  | 105.9  | 125.5  |
| 444.4  | 741.4  | 592.3  | 574    | 529    | 478.1  | 646.2  | 960.7  | 527.3  |
| 103.8  | 109    | 103.6  | 103.7  | 94.5   | 108.7  | 107.4  | 107.7  | 107.6  |
| 102    | 107.5  | 92.6   | 101.4  | 89.7   | 102.7  | 103.2  | 110.6  | 106.8  |
| 118.8  | 124    | 108.6  | 132.2  | 108.8  | 110.6  | 124.5  | 126.4  | 112.3  |
| 111.4  | 108.3  | 111.4  | 118.2  | 99.5   | 122.1  | 111.9  | 132.2  | 112.2  |
| 113    | 118.8  | 108.3  | 123.6  | 113.1  | 115.3  | 110.2  | 132.9  | 113.4  |
| 124.5  | 173.9  | 130.7  | 470.5  | 174.7  | 138.3  | 522.1  | 153.1  | 149.6  |
| 111.5  | 113.4  | 106.3  | 110.1  | 111.7  | 122    | 111.2  | 115    | 115    |
| 116.2  | 116.3  | 105.1  | 107.5  | 101.5  | 110.9  | 107.5  | 115.2  | 111.4  |
| 109.3  | 108.6  | 105    | 100.7  | 99.6   | 112.7  | 107.2  | 104.6  | 108.5  |
| 108    | 103.2  | 97.9   | 98.4   | 94.1   | 104.9  | 95.5   | 110.1  | 110.8  |
| 108    | 115.2  | 100    | 113.2  | 93.6   | 107.5  | 104.1  | 114.9  | 112.8  |
| 114.8  | 118.9  | 115    | 118.4  | 109.6  | 128.8  | 112.8  | 121.2  | 118.1  |
| 117.4  | 117.1  | 112.9  | 110.4  | 106.1  | 113.7  | 112.2  | 139.5  | 121.4  |
| 109    | 108.3  | 104.9  | 102.2  | 95.6   | 115.2  | 98.6   | 108.6  | 98.7   |
| 105.3  | 109    | 111.9  | 102.2  | 104.5  | 111.3  | 106.6  | 110.2  | 112    |
| 110.8  | 101.8  | 104.1  | 99.6   | 102    | 97.8   | 103    | 107.2  | 105.2  |
| 102.1  | 107    | 99.4   | 99.1   | 94.6   | 107.6  | 93     | 103    | 102.8  |
| 106.4  | 101.6  | 97.6   | 106.4  | 94.5   | 99.4   | 90.5   | 100.4  | 100.4  |
| 101.7  | 109.3  | 100.9  | 87.4   | 92.9   | 108.1  | 100.4  | 105    | 105.4  |
| 110.4  | 116.6  | 111.6  | 106.7  | 99.7   | 110.1  | 109.5  | 127.2  | 112.1  |
| 109.9  | 115.4  | 100.2  | 102.3  | 98.8   | 112.3  | 112.5  | 114.9  | 122.4  |
| 103.7  | 112.6  | 104.4  | 99.8   | 99.7   | 103.4  | 98.4   | 106.6  | 105.1  |
| 106.8  | 100.6  | 104.8  | 92.6   | 91     | 101.9  | 98.2   | 103.8  | 117.9  |
| 119    | 147.8  | 118.2  | 150.6  | 101.6  | 120.6  | 135.8  | 128.7  | 125.7  |
| 107.4  | 128    | 105.9  | 109.9  | 119.6  | 119.5  | 106.2  | 124    | 117.9  |
| 105.8  | 111.3  | 104.7  | 100.7  | 100.2  | 113.7  | 103    | 114    | 110.2  |
| 107    | 105.4  | 102.7  | 101.3  | 97.5   | 104.7  | 108.3  | 114.9  | 111.7  |
| 164.9  | 327.5  | 316.2  | 244.4  | 231.5  | 311.7  | 279    | 332.5  | 218.8  |
| 136.1  | 121    | 125.5  | 113.1  | 127.5  | 124.6  | 129.6  | 171.9  | 123.4  |
| 129.8  | 137.8  | 138.1  | 135.2  | 150.7  | 137.6  | 136.4  | 191.5  | 200.9  |
| 1476   | 1745.7 | 1710.2 | 1457.5 | 1471   | 2198.4 | 1880.7 | 2880.2 | 2257.4 |
| 114.8  | 112    | 103.5  | 128.4  | 101.2  | 112.2  | 107.1  | 105.8  | 112.5  |
| 110.3  | 122.7  | 106.9  | 100    | 107.7  | 123.6  | 101.4  | 110.4  | 113.3  |
| 299.8  | 449.7  | 468.9  | 342.7  | 455.5  | 492    | 417    | 620.1  | 306.8  |
| 108.9  | 115.7  | 107.3  | 106.2  | 102.6  | 113    | 102.7  | 120    | 114.9  |
| 104    | 105.1  | 104.6  | 112.7  | 97.8   | 111    | 109.6  | 114.2  | 108.7  |
| 111.3  | 106.9  | 105.1  | 106.8  | 96.9   | 119.3  | 101.6  | 109.1  | 108.3  |



|        |       |        |        |        |        |        |         |         |
|--------|-------|--------|--------|--------|--------|--------|---------|---------|
| 106    | 113.5 | 109.6  | 99.5   | 104.7  | 117.1  | 103    | 109.9   | 109.3   |
| 124.5  | 208.7 | 193.1  | 138.3  | 169.3  | 186.5  | 137.5  | 179.4   | 168.2   |
| 115.5  | 114.4 | 101.4  | 103.4  | 100.5  | 106.2  | 103.5  | 120.5   | 111.3   |
| 112.3  | 111.8 | 106.6  | 102.3  | 92.4   | 111.4  | 102    | 111.1   | 113     |
| 111    | 113.1 | 105.3  | 107    | 100.4  | 109.2  | 112    | 113.5   | 113.7   |
| 113.8  | 115.5 | 114    | 122.6  | 102.6  | 114.5  | 103.7  | 109.1   | 115.4   |
| 1510.5 | 1473  | 1647.6 | 1432   | 1211.3 | 1129.9 | 1186.7 | 2507.2  | 3306.3  |
| 139.4  | 127.5 | 133    | 134.9  | 118.1  | 139.4  | 126.1  | 178.7   | 184.6   |
| 152    | 153.9 | 138.4  | 146.8  | 121.1  | 161.9  | 157.4  | 200.9   | 163.9   |
| 143.3  | 173.6 | 148.6  | 170.2  | 160.6  | 174.8  | 172.5  | 189     | 177.2   |
| 105.7  | 102   | 96.3   | 96.2   | 90     | 101.7  | 102.4  | 113.1   | 103.3   |
| 209.4  | 193.2 | 157.8  | 182.5  | 169.4  | 204.1  | 176    | 321.7   | 354.8   |
| 114.3  | 123.1 | 102.8  | 103.3  | 104.5  | 108.5  | 116.3  | 109.5   | 104.1   |
| 161.3  | 352.8 | 293.6  | 258.6  | 278.4  | 289.5  | 304.4  | 523.5   | 193.1   |
| 202.1  | 239.3 | 206.7  | 260.5  | 201.5  | 220.4  | 256.3  | 333.3   | 236.4   |
| 2271.4 | 904.3 | 819.3  | 655.5  | 1242   | 1416.7 | 1317.6 | 4251.3  | 5857.6  |
| 223.9  | 331   | 297.4  | 230.6  | 257.5  | 338.5  | 237.5  | 393.2   | 354.5   |
| 150.2  | 138.1 | 143.4  | 147.1  | 150.6  | 146    | 184    | 183.3   | 167.8   |
| 113.1  | 110.7 | 102.6  | 110.5  | 99.3   | 115.3  | 105.4  | 122.3   | 110.6   |
| 100.6  | 105.6 | 98.9   | 102.9  | 96.5   | 107.9  | 100.2  | 113.5   | 113.5   |
| 111.9  | 109.7 | 107.1  | 101.2  | 100.9  | 99.1   | 111.5  | 111.3   | 119.6   |
| 205.7  | 291.3 | 235.8  | 222.9  | 356.5  | 314.2  | 513.8  | 560.7   | 195.1   |
| 116.2  | 114.3 | 108.1  | 114.9  | 107.4  | 119.3  | 113.2  | 121.3   | 117.4   |
| 102.6  | 99.4  | 106.2  | 114    | 101.7  | 107    | 104.6  | 103.9   | 106.8   |
| 107.5  | 111.6 | 108.5  | 107    | 102.2  | 117.2  | 104    | 114.4   | 118.1   |
| 114.3  | 121.2 | 119.9  | 112.8  | 101.5  | 114.3  | 102.7  | 104.7   | 106.4   |
| 108.1  | 113.9 | 95.3   | 103.9  | 104.4  | 107.3  | 105.6  | 108.5   | 120     |
| 112.9  | 99.9  | 95.9   | 104.9  | 93.6   | 101    | 97.3   | 113.9   | 111     |
| 120.6  | 125.1 | 141.1  | 128.6  | 121.2  | 125    | 131.4  | 156     | 132.9   |
| 109    | 107.5 | 100.7  | 115.7  | 94.3   | 114.7  | 113.7  | 114.4   | 108.5   |
| 126.8  | 127.8 | 126.5  | 138.8  | 116.7  | 121.8  | 112    | 133.7   | 150     |
| 110.7  | 112.9 | 105.7  | 105.4  | 95.4   | 120.3  | 106.6  | 124.9   | 142.9   |
| 488.6  | 481.3 | 498.7  | 384.4  | 401.9  | 490.8  | 521.4  | 604.3   | 576.5   |
| 124.9  | 183.1 | 161.1  | 157.6  | 156.7  | 179.8  | 126.8  | 199.5   | 146.6   |
| 103.1  | 106.6 | 100.6  | 108.8  | 98.9   | 105.7  | 103.8  | 108.7   | 112.2   |
| 118.8  | 118.6 | 124.4  | 117.6  | 101.7  | 125.3  | 125.3  | 149.8   | 128.1   |
| 104.5  | 103.9 | 102.5  | 99.4   | 92.6   | 106.9  | 100.6  | 111.1   | 102.5   |
| 115.9  | 116.4 | 107.5  | 117.7  | 104.3  | 121.8  | 114.3  | 129.5   | 117.8   |
| 120.7  | 106.2 | 103.7  | 105.6  | 96     | 108.2  | 101.5  | 109.8   | 107.6   |
| 106.2  | 119.2 | 107.3  | 104.6  | 100    | 106.9  | 110.7  | 110.8   | 108     |
| 122.7  | 127.9 | 124    | 106.1  | 118.3  | 127.4  | 118.9  | 135.1   | 129     |
| 3577.1 | 1054  | 829.2  | 1375.6 | 1172.8 | 1845.4 | 1976.2 | 10661.3 | 12300.6 |
| 103.8  | 108.9 | 92.7   | 94     | 95.7   | 101.7  | 95.2   | 106.6   | 102.2   |
| 116.2  | 155.1 | 139.8  | 138.3  | 133.8  | 155.4  | 123.9  | 144.7   | 148.7   |
| 166.5  | 170.7 | 169.2  | 165    | 149.5  | 214.7  | 200.6  | 165.4   | 149     |
| 132    | 199.8 | 228.6  | 195.9  | 186.5  | 203.1  | 234.5  | 212.7   | 160.4   |
| 105.5  | 119.7 | 99.5   | 101.1  | 110.9  | 103.2  | 101.1  | 110.2   | 107.3   |
| 1269   | 1526  | 1274.5 | 1402.1 | 1173.7 | 1297.1 | 1519.4 | 2858.4  | 2545.2  |
| 461.9  | 349.9 | 372.2  | 509.1  | 383    | 427    | 400.8  | 1093.2  | 778.9   |
| 284.8  | 306.7 | 236.1  | 284.2  | 284.5  | 297.1  | 242.4  | 469.3   | 440     |
| 321.3  | 479.7 | 506.2  | 403.4  | 412.8  | 450    | 438.8  | 476.4   | 434.9   |

|        |        |        |        |        |        |        |        |        |
|--------|--------|--------|--------|--------|--------|--------|--------|--------|
| 792.1  | 761.4  | 726.8  | 672.2  | 668.4  | 662.4  | 691.1  | 1287.9 | 1230.5 |
| 415.4  | 356.1  | 426.9  | 405.3  | 412.3  | 480.4  | 575.1  | 682.4  | 535.8  |
| 173.3  | 213.6  | 205.1  | 201.7  | 165.2  | 163.9  | 203.5  | 281.8  | 202.6  |
| 1178.7 | 1518.9 | 1434.1 | 1458.8 | 1133.3 | 1216.2 | 1833.5 | 2568.7 | 1603   |
| 267.5  | 376.6  | 354.5  | 342.3  | 288.2  | 343.9  | 291.2  | 667.9  | 481.9  |
| 141.8  | 160.4  | 160.7  | 139.9  | 133.6  | 172.5  | 124.8  | 235.8  | 303.2  |
| 129.7  | 123.3  | 117    | 113.8  | 111.1  | 120.7  | 106.9  | 150.6  | 138.4  |
| 113.3  | 129.2  | 111.5  | 113.5  | 99.2   | 108.8  | 118    | 152.9  | 122.7  |
| 233.8  | 243.5  | 247.1  | 282.7  | 259    | 271.3  | 314.8  | 369.2  | 273.1  |
| 255.2  | 530.5  | 640.1  | 434.5  | 454.3  | 755.2  | 489.1  | 847.7  | 580.3  |
| 103.5  | 114.1  | 96     | 110.7  | 92     | 106.9  | 113.8  | 113    | 103.2  |
| 102.9  | 105    | 96.6   | 100.8  | 91.1   | 108    | 106.2  | 98.4   | 115.7  |
| 116.8  | 122.8  | 116    | 116.2  | 104.6  | 121    | 116.7  | 129.1  | 113    |
| 899    | 944.1  | 759.5  | 851.2  | 964.9  | 910.6  | 789.7  | 1578.5 | 1226.1 |
| 1463.5 | 1936.2 | 2148.8 | 1742   | 1527.5 | 1809.4 | 2091.8 | 2272.1 | 1455.3 |
| 102    | 114.2  | 101.1  | 108.6  | 97.6   | 112.3  | 103.9  | 113.1  | 110.4  |
| 1052.3 | 392.8  | 428.1  | 166.1  | 571.1  | 540.6  | 465.1  | 1787.4 | 1961.5 |
| 105.2  | 100.5  | 98.7   | 101.5  | 104.7  | 104.2  | 103.9  | 111.1  | 113.5  |
| 111.1  | 119.3  | 113.1  | 116.3  | 105.2  | 122.2  | 107.2  | 120.5  | 131.9  |
| 108.3  | 116.5  | 110.4  | 114.8  | 96.5   | 111.5  | 103.6  | 116.4  | 111.6  |
| 147.4  | 151    | 135.3  | 162.3  | 117.6  | 148.4  | 156.8  | 200.1  | 186.1  |
| 117.1  | 120.1  | 98.7   | 118.3  | 99.3   | 107.3  | 103.7  | 125.3  | 107.2  |
| 2124.4 | 3230.4 | 3077.5 | 2348   | 2509.9 | 3155.5 | 2562.8 | 4120.9 | 3153.8 |
| 108.9  | 106    | 101.7  | 103.8  | 101.6  | 115.9  | 104.8  | 116.3  | 110.1  |
| 489.7  | 557.8  | 546.4  | 635.6  | 616.5  | 534.6  | 535.8  | 1359.1 | 1090.3 |
| 176.5  | 230.6  | 236.6  | 221.3  | 192.1  | 219.3  | 228.7  | 222.4  | 172.4  |
| 114.5  | 141.7  | 132.5  | 117.3  | 126.3  | 137.3  | 123.8  | 156.5  | 126.6  |
| 113    | 138.8  | 128.4  | 112.4  | 115.5  | 119    | 117.5  | 130.4  | 127.4  |
| 113.1  | 159.3  | 171.2  | 182.6  | 139.8  | 144.3  | 167.3  | 142.8  | 129.6  |
| 114.7  | 118.5  | 109.3  | 109    | 101.7  | 120.2  | 115.4  | 125.8  | 125.3  |
| 124.9  | 147.7  | 143    | 134.5  | 166.1  | 141.5  | 116.2  | 155.8  | 155.4  |
| 195.2  | 278.2  | 294.4  | 241.2  | 256.1  | 215    | 273.2  | 293    | 246    |
| 132.7  | 136    | 140.3  | 130.7  | 116.1  | 142.6  | 145.8  | 158.8  | 132.2  |
| 97.8   | 104.2  | 104.7  | 101.1  | 95.8   | 108.1  | 97.4   | 108.9  | 100.7  |
| 220.8  | 291.2  | 290.1  | 309.6  | 299.3  | 319.3  | 281.4  | 539.9  | 463    |
| 105.1  | 110    | 105    | 106.4  | 103.6  | 108.3  | 114.2  | 120.9  | 105.3  |
| 429.1  | 621.8  | 689.5  | 835.9  | 672.9  | 845.6  | 785.2  | 995.5  | 706    |
| 508.4  | 636.1  | 590.8  | 626    | 510.3  | 667.4  | 673.1  | 923.1  | 668.4  |
| 112.6  | 131.8  | 114.7  | 105.5  | 110.4  | 112    | 109.8  | 123    | 128.2  |
| 988    | 1048.9 | 1169.8 | 1219   | 1013.9 | 1098.5 | 1310.3 | 1691.2 | 1177   |
| 128.1  | 151.8  | 156.4  | 130.8  | 132.6  | 163.8  | 134.9  | 183.6  | 136.8  |
| 109.2  | 128.1  | 114    | 114.9  | 114.9  | 120.2  | 120.9  | 146.1  | 120.5  |
| 103.6  | 105    | 98.5   | 95.3   | 97.6   | 103.4  | 102.7  | 103.2  | 103.3  |
| 107.9  | 104.2  | 104.7  | 100.4  | 101.1  | 104.9  | 103.2  | 110.6  | 107.5  |
| 187.9  | 209.2  | 233.1  | 184.4  | 179.8  | 236.8  | 160.5  | 401.2  | 402.9  |
| 102.5  | 106.7  | 102.9  | 109.2  | 101.1  | 102.8  | 100.6  | 114    | 107.4  |
| 112.7  | 113.7  | 103.3  | 101.2  | 96.3   | 111.3  | 104.5  | 110.3  | 108.4  |
| 100    | 107.9  | 99.9   | 100.3  | 99.4   | 106.3  | 98.6   | 108.8  | 110.8  |
| 2439.6 | 3870   | 3233.8 | 2526.1 | 2747.3 | 2769.3 | 2934.9 | 3391.2 | 1371.5 |
| 97.6   | 106.4  | 100.7  | 107.7  | 95.4   | 99.4   | 103.2  | 111.6  | 107.7  |
| 102.4  | 107.9  | 105.6  | 98.9   | 100.1  | 112.7  | 105.7  | 110.3  | 105.9  |

|       |       |       |       |       |       |       |        |        |
|-------|-------|-------|-------|-------|-------|-------|--------|--------|
| 105.5 | 113.7 | 100.4 | 96.2  | 92.6  | 103.1 | 101.5 | 109.8  | 114.8  |
| 110.6 | 111   | 107   | 102.8 | 100.5 | 110.3 | 110.8 | 104.9  | 110.2  |
| 110.1 | 106.4 | 101.4 | 114   | 96.1  | 110.7 | 111.5 | 113.5  | 110.3  |
| 111.8 | 118.1 | 111.8 | 110.9 | 109   | 115.8 | 113.5 | 117.8  | 132    |
| 105.1 | 101.9 | 100.7 | 104.5 | 97.9  | 111.6 | 100.7 | 111.2  | 109.8  |
| 104.6 | 110.4 | 102.8 | 102.4 | 101.9 | 109   | 104.6 | 94.9   | 98.6   |
| 103.5 | 109   | 95.5  | 107.6 | 100   | 97    | 93.9  | 118    | 103.6  |
| 108.2 | 116   | 97.3  | 103.1 | 94    | 103   | 103.1 | 105.6  | 104    |
| 101.2 | 105.7 | 97.5  | 99.8  | 97    | 107.5 | 103.5 | 103.7  | 107.4  |
| 104.6 | 117.3 | 105.2 | 114.4 | 99.1  | 105   | 101.6 | 114.1  | 103.7  |
| 111.2 | 104.5 | 105.3 | 97.4  | 94    | 108   | 93.2  | 111.1  | 104.7  |
| 106.6 | 107.2 | 107.4 | 110.3 | 101   | 106.3 | 100.3 | 98.5   | 100.2  |
| 103   | 102.4 | 99    | 99.1  | 99.2  | 102.1 | 99    | 106.4  | 102.9  |
| 102.2 | 116.4 | 105.1 | 97.4  | 92.9  | 108.9 | 101.9 | 115.2  | 113.7  |
| 106.8 | 113   | 98.2  | 95.8  | 96.4  | 109   | 102.7 | 102.2  | 96.4   |
| 892.7 | 298.4 | 275.8 | 268   | 198.7 | 363.5 | 353   | 956.3  | 1018.3 |
| 107.3 | 121.4 | 111.8 | 104.6 | 111.2 | 116.5 | 113.5 | 103.4  | 97.4   |
| 110.9 | 104   | 102.4 | 104.3 | 93    | 113.5 | 99.3  | 104.1  | 112.2  |
| 437.9 | 745.2 | 752   | 636.9 | 828.8 | 690.8 | 621   | 1017.8 | 423.2  |
| 115.6 | 127.4 | 130.9 | 123.5 | 118   | 132.6 | 127.5 | 144    | 124.8  |
| 117.8 | 154.2 | 142.1 | 135.3 | 148.7 | 157.7 | 146.9 | 184.7  | 120.4  |
| 103.3 | 107.2 | 102.7 | 102.3 | 101.1 | 110.9 | 107.2 | 122.2  | 110.7  |
| 116.5 | 119.9 | 114.3 | 120.3 | 100.7 | 117.4 | 107.8 | 130.9  | 122.8  |
| 107.4 | 121.1 | 106   | 106.2 | 105   | 109.5 | 107.9 | 119.4  | 119.2  |
| 126.9 | 160   | 143.7 | 161.7 | 146.8 | 145.1 | 166.5 | 169    | 130.7  |
| 189.8 | 311.8 | 246.3 | 302.1 | 278.5 | 231.2 | 285.9 | 275.7  | 191.6  |
| 122.9 | 146.6 | 135.4 | 169.8 | 142.9 | 136   | 143.4 | 264.6  | 119.5  |
| 104.6 | 107.4 | 106.4 | 108.3 | 95.5  | 104.6 | 99.8  | 104.5  | 104.6  |
| 114   | 119.6 | 109.7 | 98.6  | 102.3 | 115.2 | 109.9 | 121.4  | 112.8  |
| 107.6 | 100.5 | 97.3  | 98.8  | 93.6  | 106.9 | 96.3  | 103.7  | 117.3  |
| 103   | 113.6 | 104.2 | 107.7 | 92.7  | 105.2 | 102.6 | 105.8  | 115.9  |
| 110.8 | 106.6 | 101.9 | 117.6 | 97.1  | 123.4 | 111.5 | 125.7  | 124.7  |
| 358.4 | 611.9 | 620.5 | 612   | 556.5 | 649.1 | 593.2 | 862.2  | 575.3  |
| 106.6 | 123   | 112.3 | 100.1 | 104.4 | 131.7 | 106.1 | 119    | 108.1  |
| 104.2 | 106.2 | 96.9  | 95    | 93.8  | 98.4  | 100.9 | 111.5  | 110.9  |
| 100.9 | 118.8 | 109.4 | 92.6  | 102.3 | 121   | 110.5 | 111.6  | 110.4  |
| 110.4 | 105.2 | 106.2 | 105   | 98.7  | 116.4 | 115   | 111.2  | 108    |
| 112.1 | 115.6 | 113.8 | 107.9 | 97.3  | 106.9 | 109.3 | 115.5  | 116.4  |
| 120.5 | 138.1 | 139.2 | 159.2 | 165.2 | 159.6 | 156.9 | 215    | 124.7  |
| 109.4 | 105.6 | 104.2 | 102.6 | 92.6  | 105.4 | 97.6  | 107.2  | 114.6  |
| 117.8 | 136.6 | 139.5 | 140.9 | 131   | 145.9 | 134.2 | 156.7  | 130.9  |
| 106.5 | 103.1 | 101.1 | 99.8  | 95.5  | 108.3 | 104.5 | 108.4  | 107.6  |
| 341.8 | 260.1 | 308.7 | 298.8 | 297.6 | 303.8 | 331.4 | 370    | 211.1  |
| 123.9 | 115.4 | 109.8 | 97.8  | 113.8 | 125.9 | 111.3 | 140.7  | 122.5  |
| 107.9 | 114.7 | 108.1 | 120.4 | 94.9  | 108.1 | 103.7 | 127.4  | 134    |
| 117.9 | 128.8 | 110.7 | 128.3 | 109.8 | 126.5 | 123.4 | 135.3  | 133.3  |
| 103.2 | 103.3 | 103.3 | 101.7 | 92.2  | 100.8 | 107.5 | 118.6  | 112.9  |
| 108.6 | 115.3 | 98.7  | 108   | 102.9 | 113.4 | 102.2 | 106.5  | 107.3  |
| 105.8 | 109.9 | 104.2 | 98.5  | 91.7  | 111.2 | 107.3 | 108.3  | 119.4  |
| 101.5 | 119.9 | 106.6 | 100.2 | 104.6 | 109.1 | 100.5 | 104.4  | 116    |
| 100.6 | 105.6 | 98.9  | 96.1  | 92.7  | 102.7 | 97.6  | 100.4  | 105.4  |

|       |        |        |        |        |        |        |        |        |
|-------|--------|--------|--------|--------|--------|--------|--------|--------|
| 110.3 | 114.8  | 107.7  | 118.7  | 101.9  | 113.3  | 112.7  | 109.9  | 113    |
| 134.7 | 121.2  | 112.6  | 120.3  | 106    | 125.8  | 118.7  | 121    | 118.4  |
| 103.6 | 110.5  | 98.7   | 104    | 98.8   | 100.4  | 105.3  | 109.3  | 104.8  |
| 127.5 | 158    | 126.5  | 258.2  | 137.4  | 124.4  | 202.4  | 137.4  | 145.1  |
| 106.8 | 106.8  | 97.4   | 91.9   | 91.9   | 107.9  | 101.1  | 117.3  | 116.5  |
| 105.2 | 103.8  | 100.3  | 100.9  | 95.4   | 113    | 105.9  | 107.3  | 114.8  |
| 191.9 | 129.8  | 107.2  | 450.5  | 142.6  | 120.7  | 441.7  | 131.9  | 135.8  |
| 106.7 | 100.4  | 96.6   | 98.8   | 92.8   | 107.3  | 97.1   | 108.7  | 107.6  |
| 107.3 | 107.1  | 102.9  | 103.4  | 98.4   | 109.4  | 105.6  | 107.7  | 108.3  |
| 108.8 | 111.3  | 110.3  | 110.9  | 101.7  | 110.6  | 101.6  | 116.4  | 119.3  |
| 112.6 | 115    | 112.1  | 121.1  | 106.1  | 110.2  | 107.8  | 119.3  | 118.9  |
| 285.4 | 313.5  | 363    | 259.3  | 254.4  | 287.6  | 268    | 544.3  | 371.6  |
| 116.9 | 127.3  | 119.8  | 113.7  | 96.8   | 115.9  | 113.5  | 128.8  | 129.7  |
| 481   | 391.4  | 405    | 494.9  | 296.8  | 389.9  | 408.9  | 880.5  | 786.6  |
| 121.8 | 117.8  | 112.3  | 119.5  | 111.9  | 127.2  | 120.8  | 127.2  | 124    |
| 109.9 | 126.1  | 112.3  | 109    | 96.2   | 122.1  | 109.6  | 118.9  | 118.9  |
| 188.5 | 279.7  | 229.6  | 205.2  | 223    | 221.9  | 221.8  | 387.6  | 325.6  |
| 109.8 | 126.2  | 122.2  | 124.9  | 110.8  | 123.5  | 124    | 160.4  | 145.2  |
| 218.4 | 375.4  | 286    | 423    | 332.7  | 358.6  | 414.2  | 565.8  | 371.2  |
| 105   | 108.8  | 107.2  | 93.9   | 97.8   | 110.8  | 110.6  | 108.9  | 105.9  |
| 159.8 | 222.4  | 190.7  | 185.8  | 195.8  | 177.9  | 241.3  | 254.5  | 227.1  |
| 149.5 | 377.5  | 327.1  | 269.3  | 253.6  | 244.7  | 338.2  | 241.3  | 232.3  |
| 93.9  | 108.6  | 93.5   | 105    | 97.4   | 111.9  | 107.1  | 109.1  | 113.3  |
| 106   | 110.5  | 105.7  | 101.4  | 89.5   | 110.1  | 108.3  | 103.9  | 111.3  |
| 119.5 | 120.4  | 118.3  | 114.7  | 100    | 118    | 117.7  | 136.1  | 123.9  |
| 105   | 110.1  | 100.1  | 106.6  | 98.6   | 110.8  | 108.6  | 115.6  | 104.9  |
| 112   | 108.2  | 106.6  | 100.9  | 110.4  | 109.8  | 95.4   | 106.7  | 105.1  |
| 104.4 | 104.8  | 107.3  | 102    | 96.3   | 104.4  | 100.5  | 105.7  | 113.8  |
| 112.8 | 127.5  | 124.4  | 104    | 109.5  | 121.6  | 123.6  | 132.4  | 115.7  |
| 121.6 | 206    | 166.8  | 197.4  | 179.5  | 164.7  | 172    | 242.9  | 131.5  |
| 102.1 | 105    | 94.2   | 102.2  | 91.7   | 108.1  | 94     | 113.6  | 108    |
| 104.8 | 103.2  | 104.5  | 101.8  | 101.5  | 104.8  | 102    | 118.5  | 106.1  |
| 105.6 | 113.2  | 108.5  | 113.5  | 99.8   | 106.3  | 110.1  | 120.5  | 105.9  |
| 112.7 | 112.3  | 112.9  | 113.9  | 98.5   | 134.7  | 108    | 119.8  | 123.3  |
| 163.8 | 130.1  | 160.2  | 130.9  | 121.1  | 149    | 126.9  | 182    | 153.8  |
| 216.8 | 222.6  | 185.1  | 166.1  | 179.2  | 207.9  | 195.5  | 326.6  | 304.8  |
| 102.8 | 104    | 104.9  | 104.4  | 95.3   | 102.6  | 101.6  | 109.5  | 110.1  |
| 101.8 | 112.2  | 109.1  | 98.3   | 98.9   | 110.1  | 108.2  | 112.5  | 116.3  |
| 119.4 | 140.8  | 139.6  | 132.3  | 128.3  | 136.1  | 141.2  | 165.3  | 123    |
| 103.4 | 106.4  | 101.6  | 105    | 90.9   | 112.6  | 92.5   | 104    | 107.5  |
| 721.2 | 1634.7 | 1133   | 1289.1 | 1282.5 | 1305.9 | 1542.6 | 1564.2 | 1336.3 |
| 249.8 | 421.7  | 356.8  | 389.5  | 375.4  | 301    | 372.4  | 553.8  | 497.7  |
| 107.8 | 103.6  | 101    | 105.7  | 99.5   | 108.4  | 102.1  | 109.3  | 122.8  |
| 110.6 | 118.8  | 124.3  | 106.1  | 98.9   | 110.6  | 109.6  | 122.4  | 109.9  |
| 165.8 | 694.3  | 292.2  | 854.4  | 411.5  | 182.9  | 560.4  | 331.1  | 240.9  |
| 698.2 | 3098   | 1167.6 | 3248.2 | 1691.1 | 519.5  | 2015.1 | 1057.6 | 736.7  |
| 687.6 | 3849.4 | 2110   | 4240.3 | 2565.4 | 999.6  | 2426.5 | 1334.4 | 969    |
| 702.3 | 1952.7 | 1328.3 | 1628.6 | 1229.4 | 1005.4 | 1384.2 | 1290.8 | 960.9  |
| 395.1 | 434.5  | 339.8  | 314    | 394.7  | 317.4  | 390.4  | 488.3  | 408.6  |
| 804.5 | 1118.7 | 1107.9 | 996.9  | 831.4  | 1070.5 | 1087.1 | 1379.6 | 1060.7 |
| 231.6 | 605.7  | 537    | 509.2  | 501.7  | 401.7  | 620    | 497    | 312.2  |

|        |        |        |        |        |        |        |        |        |
|--------|--------|--------|--------|--------|--------|--------|--------|--------|
| 333.2  | 458.3  | 528.3  | 345    | 484.4  | 440.6  | 435    | 438.8  | 364.8  |
| 335.5  | 389.5  | 527.9  | 372.2  | 375.5  | 450.1  | 308    | 411    | 299.6  |
| 115.2  | 111.9  | 109.7  | 106.3  | 95.9   | 112.3  | 107.3  | 117.2  | 112.3  |
| 235.2  | 215.7  | 199.6  | 234.2  | 244    | 256.2  | 276.7  | 304.3  | 237.3  |
| 107.3  | 109.8  | 108.9  | 101.5  | 100.8  | 109.9  | 104.9  | 119    | 112.1  |
| 328.4  | 337.3  | 317.7  | 313.7  | 255.1  | 365    | 307.1  | 667.7  | 470    |
| 1383.8 | 1497.8 | 1390.5 | 1291.1 | 1427   | 1632.2 | 1161.8 | 1994.8 | 1335.2 |
| 131.3  | 152.4  | 144.6  | 174    | 129.1  | 138.2  | 164.4  | 161.8  | 134.9  |
| 108.4  | 109.8  | 107.7  | 102.1  | 97     | 115    | 94.9   | 109.1  | 112.6  |
| 99     | 101.6  | 102.5  | 98     | 89.1   | 100.9  | 99.7   | 104.9  | 100    |
| 211.1  | 163.1  | 134.2  | 150.4  | 161.8  | 162.2  | 173.9  | 245.5  | 242.1  |
| 100.6  | 103.7  | 101.9  | 100.3  | 92.8   | 110.7  | 93.5   | 106.1  | 102.8  |
| 102.7  | 103    | 93.4   | 93     | 94.3   | 97.4   | 90.2   | 102.7  | 101.2  |
| 103.7  | 101.2  | 96.4   | 97.4   | 91.3   | 102.5  | 100.3  | 108.4  | 99.6   |
| 107.9  | 111.3  | 105    | 104.8  | 94.7   | 120    | 92.5   | 102    | 102.8  |
| 103.3  | 103    | 105.6  | 95     | 95.1   | 108.7  | 99.8   | 105.1  | 101.8  |
| 107.5  | 117.7  | 104.9  | 104.4  | 92.5   | 109.4  | 102.7  | 105.8  | 117.2  |
| 99     | 108.1  | 94.6   | 102.8  | 92.5   | 105.3  | 96.8   | 110.6  | 104.5  |
| 106.7  | 104.4  | 105.1  | 98.4   | 100.5  | 102.4  | 102    | 113.3  | 103    |
| 102.5  | 112    | 96.9   | 103.8  | 92.4   | 99.9   | 97     | 105.3  | 104.5  |
| 112    | 115.8  | 107.5  | 112    | 100.1  | 108.7  | 115.3  | 129.1  | 121.8  |
| 148.2  | 143.5  | 144.3  | 114.8  | 129.9  | 139.6  | 135.2  | 169.9  | 147.8  |
| 133.6  | 146    | 138.2  | 148.3  | 134.7  | 162.5  | 163.8  | 198.2  | 176.1  |
| 122.6  | 132.6  | 124.4  | 129.5  | 112.4  | 149.5  | 114.4  | 154.5  | 141.5  |
| 1500.5 | 369.7  | 326.6  | 279.9  | 411.4  | 484    | 431.3  | 1461.7 | 2589.4 |
| 246.5  | 338.2  | 348.6  | 294.9  | 329.1  | 409.4  | 312.9  | 450.3  | 264.3  |
| 114.4  | 135.3  | 141.4  | 144.8  | 119.6  | 143.3  | 129.5  | 152.1  | 126    |
| 208.6  | 178.1  | 202.2  | 184.5  | 187.5  | 233.8  | 222.7  | 283.8  | 237.6  |
| 106    | 112    | 111.5  | 100.8  | 100.5  | 115.9  | 103.8  | 126.2  | 111.6  |
| 113.7  | 129.5  | 133.4  | 120.8  | 103.8  | 133.1  | 114.3  | 130.7  | 110.4  |
| 102.2  | 118.2  | 104.8  | 113    | 105.1  | 122    | 105.4  | 108.8  | 107.4  |
| 119.9  | 120.3  | 107.2  | 110.2  | 102.7  | 121.1  | 118    | 123.3  | 119.8  |
| 106.2  | 103    | 104.7  | 106.6  | 92     | 109.2  | 106.6  | 106.9  | 103.2  |
| 204.5  | 294.1  | 282.4  | 227.8  | 209.1  | 270    | 263.2  | 508    | 345.6  |
| 188.1  | 229.5  | 214.6  | 191.5  | 177.7  | 203.7  | 214.8  | 298.5  | 238    |
| 109.1  | 106.2  | 104.6  | 98     | 91.3   | 103.9  | 104.1  | 112.4  | 118.1  |
| 114.3  | 102    | 103.4  | 109.2  | 94.1   | 109.7  | 111    | 115.3  | 110.5  |
| 102.5  | 113.4  | 115    | 106.2  | 96.1   | 109.2  | 112.7  | 113.2  | 117.7  |
| 1166.6 | 2269.9 | 2204.5 | 2156.1 | 1846.9 | 2377.9 | 1770.1 | 2527.2 | 1524.4 |
| 176.4  | 315.9  | 306.1  | 355.3  | 271.6  | 301.1  | 302.9  | 371    | 215.6  |
| 205.2  | 244.5  | 165.3  | 199.2  | 165.9  | 207.3  | 184.9  | 399.4  | 271.9  |
| 111.7  | 113.1  | 104.8  | 102.2  | 92.7   | 103.8  | 99.7   | 113.8  | 117.7  |
| 112.5  | 111.9  | 103.1  | 105    | 95.7   | 103.4  | 109.7  | 108.6  | 115.2  |
| 102.6  | 109.6  | 101    | 96.9   | 92.6   | 106.1  | 99.9   | 107.1  | 108.9  |
| 102.6  | 114.9  | 102.1  | 108.4  | 94.2   | 113.3  | 110.2  | 109.3  | 108    |
| 99.9   | 103.2  | 100.6  | 105.5  | 89.9   | 109.3  | 97.5   | 109.3  | 106    |
| 99.4   | 121.5  | 107.2  | 120.1  | 104.4  | 130.9  | 115.1  | 121    | 129.4  |
| 107.7  | 116.5  | 104.1  | 114.7  | 103.2  | 112    | 103.8  | 121.7  | 119.4  |
| 131.8  | 117.5  | 118.4  | 106.2  | 122    | 144.2  | 129.9  | 159.7  | 163.9  |
| 154.4  | 253.8  | 238.9  | 212.5  | 177.1  | 196.2  | 215.5  | 201.1  | 146.7  |
| 1075.1 | 1751.2 | 1854.7 | 949.8  | 1582.4 | 2039.2 | 1214.9 | 1953.1 | 1136.9 |

|        |        |        |        |        |        |        |        |        |
|--------|--------|--------|--------|--------|--------|--------|--------|--------|
| 114.9  | 113.6  | 115.4  | 116.1  | 103.4  | 128.2  | 110.3  | 119    | 130    |
| 244.8  | 459.5  | 438.2  | 412.1  | 397.7  | 440.4  | 305.3  | 360.1  | 286.3  |
| 2216.4 | 2267.3 | 2331.2 | 2090.4 | 2226.4 | 2350.8 | 2516.6 | 3623.2 | 2965.3 |
| 1051.6 | 525.7  | 524.9  | 629.1  | 593.4  | 633.3  | 696.2  | 1652.1 | 1223.4 |
| 116.8  | 113.3  | 104.2  | 104.7  | 102.8  | 122.9  | 114.1  | 147.9  | 133.5  |
| 104.6  | 106.6  | 99.5   | 95.5   | 99.3   | 95.9   | 98.7   | 100.4  | 102.2  |
| 268.8  | 249.1  | 217.5  | 255.1  | 214.1  | 237.8  | 242    | 336.4  | 231.8  |
| 119.3  | 121.9  | 112.5  | 112.8  | 110.8  | 146.1  | 137.2  | 135.1  | 133.9  |
| 121.2  | 107.9  | 105.9  | 105.9  | 100.1  | 115.1  | 104.5  | 114.1  | 106    |
| 108.1  | 116.4  | 98.2   | 104.5  | 100.1  | 122.9  | 104.4  | 116.4  | 121.7  |
| 112.6  | 104.3  | 102.9  | 96.6   | 97.3   | 103.8  | 98.2   | 104.6  | 110.3  |
| 327.7  | 414.8  | 513.8  | 435.5  | 304.3  | 433.1  | 379.7  | 834.6  | 735.4  |
| 133.3  | 189.4  | 168.2  | 159.1  | 149.3  | 191.9  | 186.7  | 243.1  | 310.7  |
| 113.5  | 119.1  | 112.2  | 125    | 104.4  | 118.8  | 116.1  | 114.4  | 113.5  |
| 299.6  | 605.2  | 568    | 483.9  | 404.5  | 524.7  | 510.7  | 722.5  | 513.6  |
| 105.7  | 108.7  | 105.6  | 95     | 94.2   | 115.1  | 102.5  | 108.9  | 107.3  |
| 106.1  | 107.6  | 107.2  | 108.7  | 97.7   | 110.4  | 104.3  | 107.6  | 115.9  |
| 110.4  | 109.9  | 107.2  | 95.3   | 94.9   | 106.7  | 108    | 113    | 109.3  |
| 110.2  | 112.5  | 105.8  | 100.6  | 101.2  | 106.7  | 99.1   | 117.2  | 114.7  |
| 102.8  | 102.8  | 103.4  | 94.2   | 96.1   | 112.9  | 114.6  | 110.2  | 123.6  |
| 308.1  | 367.3  | 354.4  | 467.9  | 369.3  | 414    | 567.9  | 584.5  | 374    |
| 104    | 105.2  | 101.7  | 100    | 94.1   | 112.4  | 104.9  | 102.7  | 99.9   |
| 259.2  | 247.8  | 209.1  | 189.2  | 199.2  | 235    | 202.6  | 522.8  | 391    |
| 168.5  | 262.1  | 228.8  | 214.6  | 214.1  | 227.2  | 214    | 244.2  | 190.6  |
| 128.8  | 117.8  | 126.4  | 125.3  | 102.3  | 131.3  | 126.3  | 115.6  | 117    |
| 111.7  | 112.1  | 107.4  | 107.5  | 106.7  | 113.1  | 110.2  | 165.9  | 123.6  |
| 374.3  | 471.9  | 303.3  | 246.8  | 317.1  | 344.4  | 287.7  | 695.6  | 604.6  |
| 158.6  | 144.5  | 136.3  | 144.8  | 134.5  | 146.9  | 141.2  | 177.6  | 150.4  |
| 111    | 111.4  | 103.8  | 109.1  | 99.9   | 111.3  | 100    | 118.5  | 113.7  |
| 110.3  | 106.9  | 106.2  | 113.5  | 95.2   | 105    | 98.9   | 111.7  | 115.6  |
| 188.7  | 370.3  | 349.3  | 291.2  | 283.1  | 301.4  | 387    | 230.9  | 176    |
| 247.3  | 290.7  | 279.5  | 305.5  | 290.5  | 276.7  | 365.2  | 442.4  | 430.2  |
| 160.2  | 155.5  | 164.1  | 186    | 172.4  | 172.6  | 172.5  | 285.5  | 230    |
| 169.6  | 360    | 354.2  | 260.5  | 306.8  | 316.8  | 271.4  | 536.4  | 319.8  |
| 199.8  | 671    | 516.8  | 514    | 500.9  | 440.6  | 592.9  | 433.8  | 313.2  |
| 389.6  | 355.6  | 250.5  | 287.7  | 258.2  | 178.6  | 296.3  | 267.5  | 262.3  |
| 151.6  | 147.4  | 158.7  | 161    | 148.8  | 168.1  | 142.5  | 232.8  | 180.9  |
| 100.6  | 103.7  | 111    | 107.6  | 94.9   | 108.5  | 92.5   | 109.9  | 110.6  |
| 742.9  | 1311.8 | 1065.3 | 965.4  | 951.1  | 1042.7 | 975.3  | 1379.9 | 835.3  |
| 108.6  | 119.4  | 111.2  | 106.6  | 101.9  | 123    | 114.7  | 126.2  | 121.2  |
| 108.7  | 118.9  | 107.6  | 111.9  | 94.8   | 116.2  | 104.1  | 121.2  | 110.4  |
| 107.7  | 107    | 102.9  | 105.4  | 98.1   | 118.6  | 106.4  | 120.2  | 117.1  |
| 129.3  | 120.7  | 116.6  | 101.2  | 105.7  | 137.1  | 108.1  | 129    | 132.8  |
| 107.7  | 111.1  | 104.2  | 99.7   | 92.3   | 111.6  | 104.5  | 107.9  | 105.7  |
| 233.8  | 330.9  | 325.5  | 209.3  | 269.5  | 250.6  | 269.8  | 340.9  | 245.6  |
| 247    | 382.9  | 315    | 269.9  | 283.4  | 323.4  | 313.9  | 441    | 282.7  |
| 171.4  | 151.6  | 162.3  | 154    | 156.1  | 165    | 177.4  | 386.3  | 225.6  |
| 395.2  | 650.5  | 537.2  | 406.9  | 455    | 604.2  | 381.3  | 1165.9 | 557.6  |
| 1009.9 | 878.4  | 858.3  | 841.8  | 819    | 957.9  | 995.5  | 1718.6 | 1313.3 |
| 126.6  | 109.4  | 101.6  | 101.8  | 100.9  | 108.8  | 104.8  | 131.6  | 119.7  |
| 225.2  | 233.6  | 206.7  | 193.6  | 206.2  | 253.8  | 216.7  | 353.1  | 299.3  |

|       |        |        |        |       |        |        |        |        |
|-------|--------|--------|--------|-------|--------|--------|--------|--------|
| 233.3 | 367.9  | 337.4  | 324.5  | 315.3 | 323.2  | 357.7  | 513.4  | 338.5  |
| 116.8 | 113    | 106.9  | 99.2   | 92.3  | 109.9  | 97.4   | 105.4  | 102.9  |
| 122.2 | 168.3  | 149.8  | 176.2  | 140   | 148.1  | 176.8  | 165.1  | 139    |
| 109.4 | 109.8  | 114.8  | 108.2  | 101.1 | 116    | 110.9  | 116.2  | 116.6  |
| 120.2 | 130.9  | 115.9  | 107.4  | 106.5 | 121    | 119.3  | 154.8  | 123.6  |
| 114.2 | 113.8  | 102.3  | 101.3  | 95.6  | 113.7  | 101.6  | 104.6  | 111.8  |
| 220.6 | 348    | 327.9  | 358.5  | 316   | 321.3  | 443.1  | 401.9  | 246    |
| 276.9 | 283.9  | 251.7  | 243.9  | 238.4 | 256.6  | 236.4  | 379.1  | 364.8  |
| 321.8 | 276.5  | 225.3  | 199.2  | 222.8 | 277.1  | 232.7  | 399.6  | 236    |
| 100.4 | 107.4  | 107.7  | 101.5  | 97.3  | 100.4  | 108.4  | 108.5  | 113    |
| 99.1  | 104.2  | 100.4  | 102.4  | 90    | 117.5  | 110.8  | 107    | 107.1  |
| 100   | 112.8  | 94.8   | 103.3  | 94.2  | 107.5  | 97.2   | 112    | 107    |
| 215.5 | 224.1  | 214.5  | 248.4  | 227.2 | 223.7  | 337.4  | 225.4  | 165.5  |
| 296   | 248.4  | 298.6  | 288.7  | 205.2 | 315.5  | 260.9  | 374.5  | 378.3  |
| 170.3 | 287.6  | 228.7  | 270.8  | 228.2 | 249.1  | 282.7  | 335.7  | 245    |
| 261   | 461.6  | 392.1  | 418.2  | 350.3 | 378.1  | 410.3  | 646    | 392.3  |
| 130.8 | 192.8  | 140.8  | 203.6  | 145.8 | 121.1  | 161.9  | 161.9  | 168.2  |
| 118   | 119.6  | 112    | 113.6  | 100.5 | 110.3  | 106.3  | 120.3  | 110    |
| 106.4 | 114.2  | 113.4  | 96.4   | 94    | 102.5  | 98.9   | 106.3  | 99.6   |
| 233   | 211.6  | 204    | 164.7  | 189.7 | 199.6  | 180.7  | 312.4  | 213.2  |
| 105.5 | 103.5  | 97.2   | 97.2   | 90.9  | 105.9  | 96.2   | 100.5  | 108.8  |
| 106   | 117.1  | 107.9  | 101.5  | 92.8  | 114.2  | 101.2  | 99.8   | 106    |
| 153.7 | 149.6  | 143.8  | 138.6  | 138.5 | 171.3  | 124.1  | 258.5  | 286.2  |
| 105.2 | 140.5  | 131.6  | 141    | 119   | 146.8  | 138.9  | 156.5  | 128.1  |
| 118.2 | 126.4  | 107    | 125    | 113.3 | 117.1  | 122.5  | 129.5  | 111.8  |
| 109.2 | 112.5  | 106.3  | 125.6  | 100.9 | 112.4  | 105.4  | 135.5  | 119.2  |
| 105.2 | 103.3  | 101.4  | 94     | 96.2  | 113.9  | 103.6  | 108.4  | 115.9  |
| 112.2 | 124.8  | 114.9  | 117.7  | 105.5 | 116.7  | 118.6  | 130    | 128.5  |
| 101.3 | 107.6  | 107.4  | 107.2  | 97.2  | 108.6  | 98.3   | 105.8  | 113.9  |
| 116.9 | 116.2  | 115.3  | 112.3  | 102.1 | 123.4  | 106.8  | 126.3  | 125.5  |
| 108.4 | 110.5  | 107.9  | 98.4   | 102.4 | 117    | 100.9  | 107    | 111.8  |
| 847.7 | 1160.7 | 1036.1 | 1280.8 | 974.7 | 1930.5 | 1083.9 | 2306.5 | 2455.2 |
| 106.1 | 111.3  | 102.3  | 114.4  | 98.2  | 116.2  | 107.4  | 113.1  | 99.2   |
| 104   | 105.9  | 108.2  | 100.2  | 95.8  | 107.7  | 110.2  | 112.4  | 115.9  |
| 127.8 | 135.6  | 125.6  | 125.8  | 106.6 | 134.7  | 143.9  | 168.3  | 149.9  |
| 117.1 | 124.4  | 116.9  | 117.3  | 109.3 | 120.3  | 109    | 123.8  | 119.1  |
| 196.3 | 221.5  | 263.3  | 219.2  | 174   | 245.1  | 256.4  | 282.2  | 298.4  |
| 102.9 | 109.6  | 102    | 108.4  | 94.7  | 102.2  | 102.4  | 104.1  | 109.2  |
| 102.2 | 102.9  | 99.2   | 89.8   | 94.3  | 109.5  | 92.8   | 108.7  | 105.9  |
| 106.8 | 108.3  | 105.2  | 90.5   | 96.3  | 118.2  | 100.8  | 111.7  | 103.8  |
| 100.1 | 106.8  | 103.7  | 117.6  | 97.6  | 101.2  | 101    | 107.7  | 104.1  |
| 108.1 | 109.9  | 100.9  | 118.6  | 96.2  | 112.9  | 110.6  | 108.2  | 111.7  |
| 105.3 | 110.3  | 97.5   | 99.1   | 94.2  | 111.7  | 94.8   | 101.4  | 106.5  |
| 106.7 | 107.6  | 108.4  | 109.8  | 92.4  | 107.2  | 101.9  | 110.7  | 103.8  |
| 136.5 | 135.3  | 127.2  | 143.1  | 123.7 | 129.7  | 132.5  | 185.7  | 165.3  |
| 111.5 | 103.1  | 107.4  | 101.9  | 94.2  | 102.7  | 97.1   | 116.5  | 119.6  |
| 108.3 | 109.4  | 97.9   | 99     | 108.5 | 107.4  | 104.4  | 115.7  | 110.1  |
| 112.3 | 113.7  | 115.7  | 100.9  | 103.2 | 119.4  | 118.4  | 123.7  | 131.8  |
| 163.2 | 199.9  | 141.3  | 200.4  | 160.7 | 154.3  | 203.1  | 159.7  | 157.9  |
| 118   | 124.1  | 128.8  | 134.7  | 111.4 | 125.2  | 135.1  | 131.5  | 142.7  |
| 573.6 | 993.4  | 861.5  | 916.7  | 662.1 | 748.1  | 1003.3 | 804.8  | 670.8  |

|       |        |        |        |        |        |        |        |        |
|-------|--------|--------|--------|--------|--------|--------|--------|--------|
| 122.9 | 121    | 108    | 116.8  | 111.7  | 133.5  | 107.8  | 138.6  | 117.7  |
| 106.6 | 103    | 100    | 101.1  | 96.4   | 113.1  | 99.7   | 116    | 107.2  |
| 106.7 | 108.2  | 99.7   | 104.8  | 95.6   | 110    | 101.1  | 108.2  | 104.1  |
| 112.5 | 100.4  | 97.5   | 103.3  | 97.5   | 103.2  | 105.3  | 105.3  | 102.5  |
| 227.4 | 346.9  | 302.4  | 360.5  | 186.8  | 302.1  | 269    | 407.1  | 379.5  |
| 835.8 | 1345.2 | 1186.5 | 983    | 1034.8 | 888.9  | 1045.7 | 1891.3 | 1521.6 |
| 872.6 | 1903.8 | 1659.1 | 1708.5 | 1269.4 | 1419.7 | 1746.2 | 1646.2 | 1506.9 |
| 106.5 | 100.5  | 99.3   | 105.5  | 99.5   | 110.1  | 103.6  | 105.4  | 109.3  |
| 110.4 | 112.5  | 106.1  | 110.1  | 103    | 115.1  | 103.1  | 120.7  | 119    |
| 110.5 | 109.6  | 107.1  | 102.4  | 101.7  | 112.1  | 105.2  | 103.7  | 117.9  |
| 178.3 | 163.8  | 151.6  | 195.1  | 133.3  | 135.8  | 185.6  | 162.9  | 134.6  |
| 113.5 | 116.4  | 104.2  | 102    | 98.3   | 100    | 98.6   | 111.3  | 113.7  |
| 122.3 | 107.7  | 102.2  | 115.5  | 98.7   | 110.4  | 119.9  | 123.1  | 111.4  |
| 406.2 | 585.7  | 668.5  | 443.1  | 518.5  | 621.4  | 572.3  | 762.9  | 639.5  |
| 118   | 121.3  | 113.9  | 106    | 90     | 107.2  | 109.6  | 121    | 122.5  |
| 115.4 | 118.6  | 126    | 140.2  | 104.3  | 133.4  | 131.2  | 148.9  | 127.4  |
| 385.3 | 377.2  | 325.9  | 310.9  | 343.7  | 344.8  | 413    | 546.4  | 430.8  |
| 412.4 | 387.2  | 453    | 323.9  | 433    | 418    | 448.9  | 689.2  | 459.6  |
| 132.5 | 123.8  | 122.1  | 104.9  | 116.3  | 127.8  | 114.6  | 152.3  | 143.9  |
| 105.3 | 111.7  | 106.8  | 104    | 102.8  | 116.4  | 108.9  | 114.3  | 127.7  |
| 163   | 195.5  | 177    | 135.9  | 161.3  | 192.9  | 153.8  | 229.7  | 203.3  |
| 115.6 | 111.2  | 116.9  | 113.4  | 109.1  | 119.8  | 113.4  | 126    | 120.1  |
| 139.8 | 215.1  | 215.7  | 247.7  | 170.1  | 193.9  | 262.2  | 224.5  | 155.8  |
| 123.7 | 132.1  | 141.7  | 121.4  | 124.3  | 127    | 126    | 149.8  | 129.8  |
| 438.1 | 333.4  | 378.8  | 350.8  | 422.6  | 438    | 485.7  | 850.1  | 739.3  |
| 120.9 | 142.4  | 134.7  | 113.3  | 132.5  | 141.1  | 141.8  | 168.4  | 140.7  |
| 224.5 | 483.6  | 430.6  | 386.8  | 356.6  | 438.3  | 378.3  | 789.4  | 378.2  |
| 230.8 | 302.9  | 406.6  | 264.3  | 283.8  | 413.7  | 299.4  | 510.4  | 373.4  |
| 174.4 | 241.1  | 171    | 247.6  | 186.7  | 173    | 200.3  | 273.7  | 183.5  |
| 122.3 | 119.2  | 111.3  | 101.5  | 102.4  | 126.5  | 111.9  | 118.5  | 110.7  |
| 259.9 | 470.8  | 519.4  | 495.1  | 329.4  | 420    | 590.6  | 398.9  | 229.3  |
| 98.1  | 101.6  | 92.2   | 102.7  | 92     | 102.6  | 94     | 97.6   | 96.5   |
| 103   | 107    | 103.8  | 99.8   | 96.9   | 104.1  | 107.5  | 101.9  | 95.5   |
| 171.9 | 270.4  | 271    | 217.7  | 252.2  | 240.3  | 224.6  | 297.7  | 219.4  |
| 133.2 | 126.9  | 119.9  | 124.8  | 118.6  | 126.6  | 120    | 138.9  | 147.8  |
| 110.4 | 116.5  | 105.1  | 107.6  | 103.7  | 123.7  | 113.3  | 126.4  | 129.5  |
| 162.9 | 163    | 159.8  | 167.1  | 147.3  | 175    | 157.1  | 216.5  | 189.8  |
| 129.3 | 135    | 125.4  | 141.6  | 130.3  | 137.2  | 154.8  | 193.6  | 196.9  |
| 108.6 | 108.3  | 105.6  | 113.2  | 100.9  | 109.7  | 116.8  | 103.7  | 112    |
| 1775  | 1868.9 | 1785   | 1663.9 | 1781.3 | 1813.6 | 1422.9 | 2666.5 | 2007.9 |
| 106.8 | 130.3  | 118.6  | 107.4  | 106.9  | 116.4  | 109.2  | 129.1  | 122.8  |
| 105.5 | 116.2  | 102.4  | 106.6  | 100.2  | 109.7  | 105.6  | 110.4  | 102.9  |
| 108.5 | 102.6  | 103.8  | 94.6   | 98.8   | 107.1  | 97.5   | 112.6  | 99.6   |
| 107.8 | 111.6  | 101.8  | 100.2  | 90.2   | 108.5  | 98.8   | 106.2  | 108.1  |
| 105.9 | 115.8  | 107.1  | 89.5   | 95.2   | 104.9  | 108.5  | 128    | 109.8  |
| 116.9 | 136.2  | 127.7  | 105.1  | 119    | 114    | 105.7  | 146.9  | 135.8  |
| 228.9 | 324.9  | 244.5  | 209.7  | 311    | 242.4  | 247.6  | 390.3  | 292.5  |
| 101.7 | 108.9  | 94.7   | 95.9   | 91.3   | 102.1  | 97.5   | 100.2  | 116.8  |
| 402   | 496.9  | 284.4  | 547.3  | 408.8  | 320.1  | 516.8  | 563.2  | 328.9  |
| 144.4 | 189.5  | 170.1  | 145.3  | 185.3  | 165.5  | 148.5  | 263.5  | 279.2  |
| 383.1 | 465.7  | 454.7  | 465.1  | 383.6  | 359.9  | 459.1  | 778.1  | 573.7  |



|        |        |        |        |        |        |        |        |        |
|--------|--------|--------|--------|--------|--------|--------|--------|--------|
| 112    | 116.9  | 111.7  | 104.2  | 101.8  | 108.9  | 110.4  | 116.4  | 111    |
| 106.5  | 105.5  | 103.5  | 100    | 95.1   | 108    | 97.5   | 109.4  | 106.6  |
| 99.5   | 107    | 98.3   | 96.1   | 90.2   | 109.6  | 102.8  | 118.1  | 108.5  |
| 108.4  | 110.7  | 97.1   | 101.4  | 92.8   | 101.8  | 90.2   | 99.4   | 114.4  |
| 120.6  | 118.6  | 119.8  | 107.9  | 108.9  | 105.5  | 105.9  | 120.6  | 121.9  |
| 100    | 107    | 103.8  | 113.4  | 106.8  | 114.8  | 109.4  | 108.9  | 110.4  |
| 101.9  | 106.6  | 103.3  | 111.5  | 95.9   | 107.1  | 97.4   | 109.4  | 106.3  |
| 515.8  | 527.2  | 568.3  | 499.6  | 539.2  | 606.4  | 465.5  | 1005.9 | 670.9  |
| 104.2  | 104.9  | 98.2   | 99.9   | 95.3   | 107.1  | 104.9  | 112.7  | 109.1  |
| 1006.3 | 1228.3 | 1242.5 | 1024.3 | 1057.3 | 1473.9 | 1216.1 | 2037.1 | 1791.8 |
| 205.1  | 437    | 312    | 544.2  | 374.5  | 286.1  | 367.6  | 354.9  | 208.2  |
| 122.6  | 123    | 127.4  | 120.5  | 108.7  | 124.7  | 140.4  | 142.3  | 124    |
| 111.6  | 103.5  | 104.3  | 96     | 89.2   | 110.7  | 103.9  | 103.1  | 111.4  |
| 110.4  | 124    | 127.2  | 97.9   | 103    | 120.7  | 113.7  | 109.9  | 101.4  |
| 105    | 107.5  | 101.8  | 99.7   | 93.4   | 105.2  | 98.5   | 105.1  | 101.1  |
| 105.4  | 109.2  | 112.6  | 103.6  | 101.6  | 109.1  | 110.7  | 120.7  | 110    |
| 110.8  | 108.4  | 104.8  | 97.5   | 92.1   | 108.8  | 98.1   | 107.1  | 111.1  |
| 103.7  | 103.9  | 104.5  | 108.1  | 97.6   | 110.3  | 114.3  | 111.7  | 110.5  |
| 107.4  | 111.6  | 104.6  | 112.3  | 96.6   | 112.6  | 101.1  | 105.5  | 112.1  |
| 115.2  | 110.2  | 101.1  | 108.1  | 95.4   | 101.6  | 111.4  | 126.6  | 115.7  |
| 168    | 344    | 311.4  | 256.9  | 269.2  | 318.9  | 249.9  | 558.2  | 299.7  |
| 107.4  | 114.5  | 98.3   | 102.5  | 96.1   | 111.9  | 106.2  | 103.8  | 113.3  |
| 102.5  | 104    | 117.1  | 109.6  | 94.9   | 104.1  | 92.6   | 105.2  | 101.1  |
| 115.7  | 119.4  | 109.2  | 108    | 104.8  | 111.5  | 108.3  | 136.1  | 114.6  |
| 110.3  | 111    | 106.4  | 104.5  | 103    | 114.8  | 106.7  | 115.4  | 110.6  |
| 120.2  | 122.9  | 129.1  | 108.6  | 129.6  | 143.8  | 138.9  | 156.2  | 159.3  |
| 164.9  | 160    | 166.3  | 141.2  | 170.2  | 179.1  | 162.6  | 222.4  | 183.4  |
| 111.3  | 107.4  | 109.1  | 113    | 99.2   | 119.4  | 98.8   | 124.7  | 126.8  |
| 110.9  | 111.8  | 101.2  | 105.4  | 95.7   | 110.2  | 103.9  | 103.1  | 105.7  |
| 108.3  | 102.3  | 105.7  | 104.5  | 99.4   | 104.6  | 107.7  | 100.8  | 106.4  |
| 104.7  | 116.5  | 114.1  | 112.5  | 99.3   | 112.8  | 103.6  | 120.5  | 110.2  |
| 106.6  | 104.9  | 103    | 107.9  | 103.2  | 111    | 103    | 104.4  | 104.3  |
| 108.9  | 117.2  | 106.4  | 109.8  | 102.2  | 108.5  | 124.3  | 104.6  | 125.8  |
| 106.2  | 134.5  | 114.8  | 126.7  | 113.4  | 129.8  | 119.8  | 140.3  | 111.4  |
| 111.1  | 99.6   | 102.1  | 104.6  | 95.9   | 105.3  | 111.2  | 115.4  | 114.9  |
| 95.6   | 104.4  | 99.7   | 105    | 97.4   | 94.6   | 102.1  | 104.1  | 110.4  |
| 105.3  | 110.1  | 106.4  | 110    | 92.9   | 114.6  | 102.2  | 111.2  | 111.3  |
| 185.6  | 182.5  | 184.5  | 266.1  | 187.8  | 183.8  | 185.9  | 353.5  | 258.5  |
| 103.9  | 113.7  | 105.4  | 109.8  | 103.4  | 112.5  | 102    | 117.1  | 114.3  |
| 103.7  | 107.2  | 93     | 99.9   | 92.5   | 105.6  | 98.7   | 100.8  | 101.3  |
| 150.1  | 140.2  | 138.8  | 125.7  | 124    | 151.7  | 126.6  | 209.9  | 173.7  |
| 145.9  | 233.6  | 242.4  | 264.8  | 203    | 261.5  | 176.6  | 284.8  | 220.8  |
| 101.1  | 111.3  | 97.2   | 117.3  | 103.2  | 110.3  | 107.2  | 120.1  | 101.4  |
| 107.6  | 110.3  | 105    | 108.8  | 95.4   | 106.9  | 102.8  | 111.4  | 111.9  |
| 108.5  | 114.5  | 103.1  | 102.6  | 92.1   | 114.1  | 104    | 111    | 103.4  |
| 101.1  | 109.6  | 97.9   | 98.2   | 100.6  | 106.9  | 100.2  | 115.1  | 107.2  |
| 101.2  | 114    | 106.8  | 91     | 96.7   | 111.4  | 100    | 116.6  | 109.6  |
| 112.5  | 110.7  | 101.5  | 112.1  | 99.6   | 105.9  | 101    | 114.2  | 102.8  |
| 618.9  | 762.4  | 694.5  | 755.9  | 699.3  | 645.2  | 693.1  | 914.7  | 571.6  |
| 151.9  | 187.1  | 149.3  | 153.6  | 137.9  | 164.1  | 173    | 215.1  | 174.7  |
| 107.1  | 106.2  | 105.8  | 98.4   | 93     | 113.7  | 101.3  | 106.7  | 107.2  |

|        |        |        |        |        |        |        |        |        |
|--------|--------|--------|--------|--------|--------|--------|--------|--------|
| 104.8  | 110.4  | 105.1  | 112.5  | 99     | 102.6  | 106.8  | 110.8  | 106.2  |
| 106.9  | 111.2  | 100.5  | 99.5   | 92.9   | 103.3  | 112.5  | 112.1  | 108.5  |
| 103.5  | 97.9   | 96.2   | 102    | 92.9   | 110.3  | 102.2  | 101.2  | 104.7  |
| 422    | 665.4  | 541.5  | 468.1  | 523.8  | 537.1  | 467.8  | 841.9  | 888.7  |
| 107    | 108.3  | 105.2  | 105.6  | 99.5   | 113    | 100.9  | 112.1  | 108.1  |
| 107    | 105.2  | 96.3   | 96.8   | 95.3   | 111.2  | 98.1   | 106    | 113.6  |
| 111.3  | 103.3  | 107.9  | 95.6   | 95.1   | 106.3  | 104.5  | 106.3  | 101.8  |
| 141.8  | 132.8  | 154.5  | 114.7  | 113.7  | 139.7  | 130.1  | 147.7  | 136.2  |
| 118.3  | 112.5  | 106.4  | 106.9  | 106    | 118    | 104.5  | 119.4  | 116.2  |
| 106.8  | 105.8  | 102.1  | 105.7  | 99.5   | 115.1  | 97.8   | 111.1  | 106.4  |
| 111.9  | 108.5  | 112.5  | 107    | 98.4   | 108.5  | 103.9  | 112.7  | 101.6  |
| 99.5   | 107.1  | 99.4   | 96.6   | 95.6   | 108.7  | 104.4  | 109.7  | 104.8  |
| 118.2  | 123.4  | 128.6  | 102.9  | 99.9   | 115.6  | 137    | 122.5  | 123.3  |
| 102.3  | 112.6  | 108    | 96.9   | 99.2   | 106.8  | 101.2  | 110.3  | 110    |
| 108.6  | 104.3  | 102.5  | 103.6  | 97.7   | 111.6  | 102    | 110.9  | 107.3  |
| 112.2  | 104.1  | 104.6  | 102.7  | 94.9   | 110    | 102.7  | 106.8  | 106.2  |
| 110.9  | 119.9  | 113.5  | 117.7  | 105.2  | 121.1  | 104.4  | 118.6  | 113.4  |
| 115.5  | 108.5  | 110.7  | 107.3  | 106.9  | 114    | 121.4  | 121.7  | 104.4  |
| 109.3  | 109.9  | 103.7  | 95.9   | 93.9   | 99.7   | 99.9   | 117.9  | 105    |
| 104.7  | 103.7  | 104.3  | 98.9   | 97.4   | 105.6  | 107.7  | 109.3  | 102.7  |
| 117.7  | 171.7  | 178.6  | 162.3  | 160.1  | 147.8  | 151.1  | 175.3  | 123.8  |
| 116.5  | 116.5  | 106.1  | 103.9  | 103.6  | 114.8  | 112.4  | 148.4  | 152.9  |
| 115.6  | 105.6  | 104.6  | 111.1  | 98.9   | 112.2  | 109.9  | 126.1  | 113.2  |
| 110.6  | 106.7  | 105.2  | 106.2  | 95.1   | 108.3  | 105.5  | 106.6  | 117.3  |
| 624    | 539.5  | 371.2  | 404.7  | 612.2  | 416.7  | 293.4  | 1181   | 1437.5 |
| 143.3  | 137.8  | 132.2  | 146.9  | 120.6  | 134.3  | 127.4  | 158.9  | 166.9  |
| 99.1   | 115.5  | 94.4   | 101.8  | 116.1  | 110.1  | 95.6   | 113.2  | 106.5  |
| 115.6  | 113    | 110.8  | 98.8   | 97     | 111.2  | 107.3  | 117.4  | 114.9  |
| 194.3  | 311.4  | 245.1  | 252.7  | 222.1  | 226.9  | 247    | 459.8  | 280.8  |
| 115.1  | 107.5  | 114.3  | 120.1  | 102.1  | 122.1  | 113.1  | 123.5  | 116.5  |
| 98.5   | 106    | 95.1   | 99.8   | 93.6   | 103.3  | 101.5  | 101.5  | 109.9  |
| 108    | 108.9  | 103.9  | 102.7  | 92.2   | 113    | 97.9   | 107.5  | 111.6  |
| 106    | 119.4  | 107.4  | 106.8  | 93.4   | 108.4  | 104.9  | 109.3  | 108.8  |
| 116.6  | 114.6  | 102.2  | 101.1  | 94.5   | 111.5  | 106.5  | 116.4  | 120.8  |
| 103.3  | 110.1  | 101.8  | 94.6   | 97.2   | 99.8   | 98.4   | 106.6  | 108.7  |
| 115    | 113.9  | 100.4  | 118    | 109.4  | 114.2  | 108.9  | 115.7  | 110.6  |
| 115.5  | 108.2  | 103.9  | 97.9   | 94.9   | 104.5  | 104.2  | 109.9  | 111.5  |
| 105.9  | 107.6  | 104.3  | 97.7   | 97.5   | 112.8  | 99.8   | 115.1  | 112.4  |
| 108.9  | 120.5  | 115.3  | 105.2  | 101.7  | 108.1  | 104    | 106.1  | 109.5  |
| 101.9  | 112.1  | 100.7  | 101.8  | 95.6   | 112.7  | 104.4  | 111.2  | 117    |
| 112.7  | 106.3  | 106.1  | 108.2  | 95.6   | 110.5  | 101.4  | 97.6   | 100.9  |
| 115.5  | 110.4  | 110.7  | 107.2  | 96.8   | 122.3  | 109    | 124.8  | 142.6  |
| 109.3  | 99.6   | 100.9  | 93.8   | 94     | 109.4  | 97.5   | 102.9  | 116.9  |
| 106.9  | 101    | 105.8  | 100    | 96     | 109.9  | 102.3  | 112.5  | 110.3  |
| 105.1  | 107.9  | 108.7  | 100.2  | 102.9  | 108.1  | 106.6  | 112.6  | 110.6  |
| 1994.8 | 1426.7 | 1159.5 | 1339.1 | 1630.2 | 1425.2 | 1582.1 | 2308.9 | 1521.6 |
| 103.7  | 106.3  | 100.6  | 103.7  | 95.5   | 104    | 90.6   | 96.4   | 96.8   |
| 106.7  | 110.1  | 94.1   | 99.6   | 90.8   | 107.5  | 96.5   | 105.9  | 111.2  |
| 109    | 110.5  | 104.3  | 114.1  | 91.6   | 117.5  | 105.3  | 105.2  | 103.4  |
| 139.2  | 151.4  | 155.6  | 169.2  | 159.5  | 170.6  | 189.2  | 196.5  | 150.6  |
| 105.7  | 109.8  | 95.8   | 105.2  | 93.3   | 104.7  | 99.6   | 96.1   | 112.9  |

|       |        |        |        |        |        |        |        |        |
|-------|--------|--------|--------|--------|--------|--------|--------|--------|
| 107.7 | 105    | 108.4  | 105.3  | 101.7  | 106.7  | 97     | 105    | 102.4  |
| 110   | 110.1  | 103.8  | 105    | 95.8   | 115.8  | 108    | 113.7  | 114.3  |
| 120.9 | 113.7  | 105.6  | 92.6   | 91.8   | 107.3  | 103.3  | 107.7  | 99.7   |
| 113.7 | 118.6  | 109.4  | 111.9  | 99.2   | 115.6  | 107.7  | 130.2  | 140    |
| 111.8 | 123.5  | 125.4  | 110.1  | 113.6  | 123.2  | 118.9  | 120.9  | 111.2  |
| 104.6 | 110.5  | 110.7  | 115.9  | 101.7  | 116.2  | 108.5  | 105.1  | 101.5  |
| 182.6 | 174.8  | 197.5  | 186.2  | 152.4  | 178.3  | 145.2  | 293.1  | 264.4  |
| 101.3 | 113.9  | 106.8  | 111.3  | 104.8  | 114.5  | 109.3  | 130.5  | 120.8  |
| 105.5 | 111.1  | 109.9  | 98.5   | 108.5  | 112.2  | 103.5  | 126.5  | 113.5  |
| 100.7 | 112.8  | 105.5  | 109.7  | 94.5   | 114.6  | 105.9  | 106.2  | 107.1  |
| 130.5 | 163    | 152.3  | 140    | 137.7  | 146    | 178.1  | 194.7  | 140.7  |
| 120.7 | 141.2  | 147.5  | 139.6  | 121.9  | 153.8  | 144    | 179.8  | 152.1  |
| 106.4 | 115    | 104.9  | 104    | 92.4   | 116.1  | 100.8  | 124.3  | 106.3  |
| 119.4 | 131.3  | 111.6  | 140.1  | 114.5  | 129    | 114    | 154.1  | 146    |
| 108.8 | 114.4  | 112.9  | 109.2  | 112.2  | 121    | 111.6  | 126    | 129.1  |
| 329.5 | 483.3  | 496.5  | 506.3  | 360.7  | 438.9  | 498.9  | 587.5  | 338.9  |
| 103.8 | 114.3  | 99.7   | 103.1  | 97.5   | 109.9  | 100.3  | 123.8  | 107.5  |
| 111   | 111.4  | 97.3   | 94.7   | 98.2   | 111.4  | 99.3   | 127.5  | 119.7  |
| 1416  | 2011.5 | 1861.7 | 1188.4 | 1641.8 | 1707.1 | 1169.6 | 2290.4 | 1562.6 |
| 178.4 | 214.7  | 188.1  | 160.5  | 179.8  | 207.2  | 147.9  | 309.5  | 279.2  |
| 120.6 | 119    | 113.7  | 95.8   | 108.9  | 127.4  | 114.3  | 149.3  | 121.6  |
| 102.6 | 104.2  | 101    | 98.6   | 94.1   | 106.7  | 98     | 111.7  | 106.4  |
| 133.8 | 145.5  | 129.7  | 137.9  | 132    | 182.4  | 134.8  | 215.6  | 147.1  |
| 109.7 | 111.9  | 100.1  | 108.9  | 96.9   | 105.8  | 106.8  | 102.6  | 113.4  |
| 139   | 168.3  | 143.6  | 147.7  | 137.2  | 156.5  | 176.9  | 200.1  | 156.8  |
| 460.4 | 662.2  | 832.1  | 621.8  | 676.5  | 886.5  | 787.9  | 1193.7 | 688.8  |
| 159.1 | 165.4  | 202    | 180.9  | 149.2  | 180.8  | 188.6  | 201.8  | 170.6  |
| 208.6 | 242.2  | 193.1  | 166.3  | 219.9  | 219    | 239.3  | 275.3  | 275.3  |
| 496   | 463.7  | 481    | 452    | 431.9  | 582.8  | 568.9  | 653    | 447.6  |
| 147.2 | 192.5  | 172.8  | 189.5  | 163.5  | 171.1  | 167.3  | 274.8  | 202.3  |
| 115.2 | 110    | 106.1  | 99.5   | 102.3  | 106.5  | 104.6  | 117.3  | 105.9  |
| 108.6 | 115.2  | 120.8  | 94.9   | 111.7  | 107.2  | 100.5  | 111.1  | 102.7  |
| 107.6 | 120.2  | 117.8  | 106.2  | 122.2  | 117    | 109.2  | 126.4  | 114.8  |
| 108.7 | 128.3  | 117.1  | 118.9  | 109.1  | 113.2  | 121.2  | 125.4  | 110.3  |
| 296.3 | 356.9  | 329.4  | 321.2  | 332.6  | 369.5  | 312.5  | 632.1  | 422.4  |
| 278.3 | 204.5  | 203.4  | 230.5  | 199.6  | 188.3  | 268.8  | 726.6  | 769.9  |
| 105.8 | 105.1  | 97.2   | 101.7  | 92     | 103.9  | 94.5   | 107    | 112.4  |
| 135.2 | 160.5  | 128.7  | 134.9  | 130.4  | 141.4  | 125.2  | 169.7  | 171.7  |
| 114.4 | 138.7  | 125.5  | 120.6  | 112.4  | 130.7  | 147.8  | 190.7  | 157.7  |
| 109.7 | 113.1  | 97.2   | 97.2   | 97     | 99.2   | 100.8  | 106.2  | 103.3  |
| 143.2 | 191    | 177.1  | 124.7  | 153.9  | 162.7  | 135.8  | 180.9  | 168.3  |
| 167.9 | 232.6  | 193.5  | 153.6  | 157.5  | 180.8  | 154.5  | 281    | 198.8  |
| 149.4 | 207.6  | 163.5  | 132.4  | 146.8  | 172.5  | 159.5  | 280.9  | 224.3  |
| 216.6 | 138.3  | 127.5  | 124    | 126.6  | 132.6  | 133    | 147.2  | 142.9  |
| 115.4 | 114.5  | 111.6  | 133.5  | 110.2  | 124.1  | 105.4  | 123    | 114.2  |
| 103.6 | 110.3  | 100.7  | 106.2  | 88.3   | 102.6  | 100.9  | 111.8  | 104.9  |
| 335.5 | 739.7  | 674.6  | 571.9  | 645.5  | 602.3  | 741.7  | 638.9  | 459.9  |
| 100.8 | 108    | 102.2  | 103.8  | 103.5  | 113.4  | 110    | 124.8  | 110.3  |
| 108.2 | 111    | 102.5  | 94.1   | 95.1   | 104.9  | 101.7  | 104.3  | 106.1  |
| 109.7 | 110.3  | 103.2  | 117.2  | 100    | 112.2  | 117.1  | 106    | 113.5  |
| 100.6 | 99.5   | 105.1  | 95     | 94.2   | 102.7  | 101.3  | 103.4  | 102.7  |

|        |        |        |        |        |        |        |        |        |
|--------|--------|--------|--------|--------|--------|--------|--------|--------|
| 2910.6 | 3233   | 2459.7 | 2722.2 | 3263.5 | 3805.7 | 5074.4 | 9931.3 | 6429.9 |
| 105.8  | 110.3  | 104    | 117.5  | 101.2  | 120.9  | 112.3  | 135.6  | 120.6  |
| 117.7  | 116.2  | 116.1  | 122.6  | 106.4  | 115    | 113.5  | 131.9  | 128.6  |
| 121.3  | 121.8  | 129.3  | 109.3  | 115.2  | 111.9  | 134.2  | 161.4  | 147.9  |
| 105.3  | 104.9  | 103.6  | 111.7  | 93.9   | 108.3  | 111.5  | 107.8  | 109.2  |
| 141.8  | 153.8  | 157.2  | 158.3  | 141.8  | 160.9  | 115.1  | 184.7  | 158.2  |
| 127.3  | 146    | 145.8  | 128.1  | 145.7  | 152.9  | 140.9  | 189.9  | 148.9  |
| 105.3  | 111.9  | 115.4  | 106.8  | 108.9  | 113.2  | 102    | 115.9  | 111.2  |
| 101.8  | 92.7   | 102.2  | 102.9  | 90.6   | 108.4  | 106.1  | 105.5  | 109.6  |
| 104.6  | 111.2  | 101.4  | 100.5  | 90.7   | 103.1  | 106.8  | 107.7  | 104.9  |
| 810.3  | 2743.9 | 2164.2 | 2049.2 | 1728.5 | 1248.7 | 1572.1 | 1283.8 | 777.9  |
| 141.8  | 195    | 162.7  | 137    | 167.7  | 167    | 152.4  | 168.8  | 160.8  |
| 196.5  | 394.4  | 412    | 317.6  | 288    | 274    | 292.9  | 267.5  | 271.6  |
| 515    | 1102.9 | 1144.8 | 1284.6 | 1132.8 | 849.7  | 1183.6 | 937.2  | 512.2  |
| 105.7  | 127.8  | 115.4  | 104.2  | 103.3  | 125.1  | 118.4  | 118.2  | 116.3  |
| 107.4  | 121.7  | 118.9  | 123.7  | 104    | 108.1  | 113.8  | 115.7  | 111.4  |
| 123.5  | 193.5  | 159.3  | 173.3  | 163.7  | 149.4  | 189.2  | 178.4  | 136.3  |
| 264.5  | 376.3  | 289.4  | 300.1  | 303.1  | 305.3  | 243.5  | 480    | 439.2  |
| 139.3  | 144.3  | 132.9  | 125.4  | 133.1  | 117.9  | 142    | 173.1  | 133.5  |
| 131.3  | 152.4  | 151.1  | 135.6  | 127.9  | 150.2  | 163.5  | 174.5  | 151.9  |
| 138.1  | 189.5  | 161.8  | 167.9  | 137.7  | 184.2  | 173.5  | 239.1  | 191    |
| 124.6  | 135.9  | 146.4  | 122.8  | 132.5  | 127.2  | 138    | 171.7  | 168.7  |
| 136    | 179.4  | 210.1  | 167.3  | 167.4  | 214.8  | 141.1  | 257    | 270.4  |
| 415.7  | 230.4  | 375.4  | 250.1  | 257    | 471.3  | 350.9  | 1217.9 | 858.8  |
| 111.2  | 119.8  | 111.9  | 112.1  | 102.2  | 114.1  | 128.3  | 113.5  | 118.3  |
| 110.5  | 106.5  | 94.5   | 95.1   | 95.5   | 109.8  | 101.6  | 105.8  | 107.8  |
| 105.3  | 103.9  | 105.9  | 95     | 91.4   | 105.5  | 104.4  | 105.9  | 111.4  |
| 105.9  | 111.4  | 101.1  | 99.2   | 93.3   | 117.9  | 96     | 110.2  | 117.6  |
| 104.9  | 107.7  | 92.6   | 101.2  | 90.2   | 108    | 101.7  | 102    | 100.8  |
| 103.6  | 107.6  | 101.3  | 99.4   | 100.9  | 106.3  | 100.2  | 119.4  | 107.3  |
| 105    | 105.2  | 99.7   | 105.1  | 96.7   | 112.1  | 97.7   | 99.5   | 113.4  |
| 103.6  | 110.3  | 103.4  | 101.4  | 92     | 110.6  | 98.8   | 100.3  | 105.4  |
| 107.7  | 112.3  | 106    | 109.7  | 94.2   | 112.4  | 115.7  | 105.4  | 106.1  |
| 105.8  | 103.5  | 104.5  | 93.8   | 96.6   | 100.8  | 97.7   | 110.4  | 108.3  |
| 114.5  | 112.5  | 106.9  | 104.3  | 100.3  | 110.9  | 104.2  | 109.9  | 118.3  |
| 100.2  | 107.3  | 115.6  | 105.2  | 95.8   | 114.9  | 106.9  | 111.8  | 108.9  |
| 109.1  | 107.3  | 102    | 101.4  | 95.1   | 107.8  | 100.7  | 114.3  | 114.2  |
| 116.1  | 105.8  | 104.6  | 98.9   | 93.6   | 104.4  | 101.1  | 108.5  | 105.3  |
| 104    | 101.3  | 96.5   | 106    | 99.3   | 107.4  | 105.3  | 106.1  | 104.3  |
| 110.7  | 120.4  | 114.7  | 101.4  | 95.3   | 116.6  | 106.9  | 112.5  | 118.2  |
| 106.5  | 116.4  | 105    | 108.4  | 102.7  | 109.3  | 107.2  | 120.6  | 108.1  |
| 107.1  | 112.6  | 108.4  | 104.6  | 92.3   | 109.7  | 102.5  | 120.7  | 107.9  |
| 110.8  | 105.3  | 107.3  | 102.5  | 97.1   | 107.1  | 102.4  | 108.6  | 110    |
| 104.9  | 109.7  | 100.5  | 106.3  | 97.6   | 104.7  | 102    | 104.2  | 110.3  |
| 105.1  | 113.5  | 109.7  | 106.5  | 93.6   | 111    | 112.5  | 111.3  | 117.1  |
| 105.1  | 116.2  | 103.8  | 91.9   | 95.1   | 116.8  | 99.3   | 107.2  | 107.4  |
| 109.5  | 106.8  | 105.4  | 100.2  | 97.6   | 108.5  | 93.7   | 110.3  | 108    |
| 111.4  | 109    | 105.3  | 109.2  | 107.4  | 114.1  | 103.1  | 116.3  | 111.3  |
| 105.8  | 105.9  | 101.3  | 104.4  | 91.2   | 104.5  | 105.7  | 112.8  | 104.2  |
| 107.4  | 116.9  | 112.3  | 102.4  | 104.3  | 106.7  | 102.4  | 108.7  | 94.7   |
| 110.6  | 108.8  | 96.7   | 103.4  | 95.3   | 105.5  | 104.4  | 109.1  | 103.5  |

|        |        |        |        |        |        |        |        |        |
|--------|--------|--------|--------|--------|--------|--------|--------|--------|
| 113.5  | 134    | 138.5  | 113.6  | 114.8  | 137.7  | 128.8  | 145.3  | 135.9  |
| 110.6  | 105.3  | 105.4  | 106.4  | 101.2  | 110.4  | 100.9  | 109.7  | 110.9  |
| 199.5  | 158.5  | 124.6  | 175.4  | 134    | 154.5  | 137.2  | 203.5  | 163.5  |
| 151.4  | 215.4  | 178.3  | 192.3  | 158.7  | 201.2  | 183.3  | 341.2  | 193.7  |
| 161.7  | 196.9  | 153.7  | 191.4  | 154.2  | 168.8  | 200.5  | 191.9  | 178.6  |
| 136.2  | 173    | 149.5  | 222.2  | 128.6  | 175.3  | 193.8  | 166.5  | 154.3  |
| 988.9  | 802.1  | 1005.1 | 746.7  | 867.3  | 1088.5 | 746.4  | 1823.5 | 1930.1 |
| 1157.1 | 990.1  | 917    | 860.1  | 845.1  | 1145.3 | 850.5  | 2391.5 | 2168.5 |
| 124.8  | 239.5  | 223    | 323.5  | 216.6  | 201    | 400.5  | 262.1  | 149.9  |
| 128.2  | 161.2  | 168.4  | 142.8  | 148.5  | 136.4  | 171.4  | 178.5  | 155.8  |
| 107.8  | 111.1  | 100.6  | 104.2  | 95.4   | 112.7  | 113.9  | 116    | 110    |
| 146.2  | 181.5  | 187.2  | 157.8  | 150.4  | 167.1  | 207.2  | 182.7  | 147.8  |
| 104.3  | 111.6  | 106    | 100.7  | 103    | 117.1  | 107    | 108.7  | 111.4  |
| 131.1  | 146.8  | 141.7  | 142    | 109.2  | 135.3  | 127.2  | 162.7  | 117.7  |
| 145.3  | 136.1  | 139.2  | 146.6  | 133.2  | 148.8  | 146.8  | 193.2  | 141.7  |
| 1946.8 | 1972.1 | 2232.1 | 1800.8 | 1845.6 | 2295.7 | 1910.8 | 2365.2 | 1311.4 |
| 168.1  | 239.1  | 174.9  | 192.9  | 183.8  | 173.4  | 214.4  | 268    | 153.9  |
| 391.2  | 480.9  | 492.7  | 568.7  | 557.2  | 569.8  | 740    | 735.7  | 546.4  |
| 966.6  | 435.7  | 430.5  | 342.5  | 448.4  | 542    | 371.2  | 1372.2 | 1342.6 |
| 129    | 126    | 122.3  | 115.6  | 118.3  | 126.8  | 112.3  | 140.4  | 128.1  |
| 121.9  | 127.8  | 110.7  | 106.2  | 100.8  | 122.9  | 108    | 154.3  | 124.4  |
| 101.3  | 122.8  | 118.6  | 112    | 108.2  | 127.4  | 101.4  | 124    | 138.3  |
| 180.8  | 312.3  | 224.2  | 190.5  | 356.6  | 321.6  | 168.9  | 781.1  | 149.5  |
| 175.6  | 178.9  | 199.4  | 162.5  | 180.2  | 187.7  | 211.7  | 304.8  | 253.6  |
| 105    | 107.6  | 110.6  | 98.1   | 96.1   | 118    | 108.2  | 111.9  | 113    |
| 109.4  | 105.2  | 102.4  | 96.5   | 94.4   | 112    | 108.3  | 114.8  | 114.2  |
| 136.5  | 144.2  | 130.1  | 121.4  | 142.9  | 149.2  | 134.5  | 166.6  | 153.5  |
| 144.9  | 195.4  | 139.7  | 138.7  | 155.1  | 169.5  | 147.5  | 242.3  | 200.3  |
| 106.7  | 114.8  | 110.9  | 104.9  | 109.1  | 125.8  | 105.8  | 121.3  | 126.1  |
| 309    | 526.1  | 412.2  | 506.9  | 450.9  | 407.2  | 507.3  | 570.4  | 289.8  |
| 104    | 114.2  | 100.6  | 95.9   | 90.1   | 108.4  | 105.2  | 105.9  | 107.3  |
| 144.9  | 149.7  | 134.2  | 109.7  | 137.6  | 144.3  | 142.4  | 150.2  | 134.3  |
| 103.7  | 103.5  | 105.1  | 97     | 99.7   | 110.6  | 96.7   | 106.8  | 103    |
| 127.1  | 134.5  | 121.3  | 122.8  | 105.1  | 124.9  | 128.9  | 141.1  | 128.7  |
| 306.3  | 304.8  | 263.4  | 260.7  | 267.1  | 275.3  | 328.9  | 443.1  | 382.6  |
| 106.6  | 127.8  | 110.8  | 120.3  | 107.4  | 115.8  | 119.1  | 130.5  | 116.1  |
| 139.9  | 132.6  | 160.7  | 132.4  | 123.8  | 178.6  | 123.7  | 182.6  | 160.8  |
| 114.4  | 104.8  | 98.1   | 97.9   | 88.5   | 101.7  | 102.8  | 111.8  | 109.2  |
| 115    | 237.3  | 169.6  | 191    | 134.7  | 151.2  | 174.7  | 141.3  | 135    |
| 127    | 148.3  | 148.9  | 138.1  | 145.3  | 146.6  | 148.1  | 154.7  | 129.3  |
| 118.9  | 135.3  | 130.7  | 145.1  | 103.3  | 137.1  | 119.1  | 173.5  | 127.3  |
| 2216.2 | 1907.3 | 1745.9 | 2257.1 | 1730.3 | 1791.5 | 2306.4 | 3801.2 | 3510.3 |
| 175.4  | 351.3  | 358.5  | 297    | 288.1  | 313.2  | 321.5  | 491.1  | 292.5  |
| 103.7  | 113.6  | 105.2  | 100.5  | 95.8   | 115.5  | 94.5   | 120    | 114.1  |
| 123    | 132.8  | 128.2  | 137.8  | 119.8  | 125    | 148.6  | 118.1  | 119.6  |
| 356.8  | 423.9  | 431.4  | 591.9  | 385.1  | 439.2  | 651.9  | 424.8  | 329.8  |
| 232.4  | 251.5  | 216.6  | 225.4  | 213.2  | 252.3  | 240.8  | 500.8  | 442.8  |
| 126.9  | 131.1  | 110.8  | 118.5  | 122.3  | 130.6  | 118.5  | 165.7  | 158.1  |
| 524.5  | 423.8  | 423.6  | 379.4  | 431.5  | 455.7  | 416.8  | 1102.5 | 957.9  |
| 114.5  | 108.6  | 101.9  | 110.9  | 97.1   | 106.2  | 108.7  | 113.7  | 121.8  |
| 429.3  | 433.9  | 364.2  | 437.3  | 452.4  | 527.9  | 508.8  | 747.7  | 472.5  |

|       |       |       |       |       |       |       |       |       |
|-------|-------|-------|-------|-------|-------|-------|-------|-------|
| 129.3 | 140.7 | 117.9 | 147.4 | 106.9 | 135.5 | 130.3 | 168.1 | 165.7 |
| 105.3 | 106.4 | 102.1 | 102.6 | 109.6 | 116.7 | 104.9 | 108.9 | 110.1 |
| 98.3  | 115.5 | 102.7 | 97.1  | 95.3  | 107.1 | 105.9 | 103.9 | 103.1 |
| 137.4 | 140.3 | 128.3 | 133.7 | 108.9 | 141.2 | 165.4 | 150   | 137.1 |
| 100.3 | 127.2 | 124.4 | 106.2 | 109.5 | 123.4 | 124.4 | 125.2 | 108.1 |
| 107.9 | 123.4 | 107.9 | 118.9 | 98.7  | 119.9 | 105.1 | 107.1 | 111.8 |
| 244.6 | 307.5 | 293.9 | 250.7 | 247   | 299   | 274.1 | 398.3 | 381.7 |
| 119.4 | 100.9 | 100.2 | 102.1 | 99    | 105   | 103.3 | 103.1 | 112.8 |
| 365.7 | 367.9 | 370.4 | 357.8 | 361.4 | 375.3 | 405.1 | 647.3 | 536.3 |
| 107.1 | 105.2 | 104.8 | 101.6 | 92.6  | 111.2 | 109.3 | 115.9 | 109.1 |
| 107   | 108.3 | 99.4  | 102.4 | 90.3  | 106.7 | 101.4 | 107   | 110.2 |
| 110.8 | 108.6 | 111.8 | 100.7 | 102.7 | 112.8 | 117.1 | 115   | 111.1 |
| 181   | 217.5 | 219.8 | 206.8 | 206.3 | 245.8 | 234.5 | 272.5 | 202.9 |
| 209.1 | 327.4 | 312.4 | 312.3 | 244.8 | 278.6 | 330.5 | 532.7 | 271.6 |
| 104.1 | 116.3 | 105.8 | 109.7 | 105.8 | 104.6 | 106   | 110.6 | 104.6 |
| 106.6 | 106.7 | 110.8 | 114.3 | 97.9  | 114.8 | 101.6 | 114.8 | 112.9 |
| 108.8 | 107.8 | 101.3 | 98.9  | 90.3  | 110   | 101.6 | 107.5 | 99.6  |
| 104   | 101.6 | 97    | 93.2  | 93.3  | 96.4  | 102.9 | 108.2 | 104   |
| 110.2 | 107.5 | 106.1 | 100   | 96.6  | 101.6 | 101.3 | 104.3 | 105   |
| 102.6 | 110.9 | 105.1 | 92.7  | 93.2  | 112.8 | 100.4 | 110.1 | 124.9 |
| 108.7 | 107.3 | 106.5 | 106.6 | 97.6  | 105.5 | 106   | 112.4 | 117.8 |
| 113.9 | 110.9 | 111   | 106   | 105.7 | 117.9 | 112.5 | 115.1 | 116.2 |
| 111   | 114.9 | 104.6 | 107.4 | 105.1 | 119.2 | 97.7  | 110.7 | 113.8 |
| 117.9 | 120.6 | 113.7 | 111.5 | 109.4 | 123   | 115.7 | 147.4 | 136.9 |
| 107.7 | 111   | 113   | 115.6 | 99.4  | 111.6 | 101.4 | 109   | 109.2 |
| 110.2 | 112.3 | 96.8  | 105.3 | 95.9  | 110   | 101.9 | 108.1 | 105.4 |
| 111.7 | 108   | 101   | 104.3 | 95.8  | 107.9 | 103.9 | 104.6 | 111.2 |
| 110.8 | 123.4 | 112.1 | 114.4 | 101.5 | 121.9 | 110.5 | 126.6 | 110.7 |
| 107.7 | 104.3 | 106.7 | 101.4 | 94.3  | 101.6 | 106.6 | 110.9 | 101.4 |
| 100.8 | 104.6 | 92.5  | 101.6 | 95.7  | 98.2  | 104.9 | 122.1 | 115.7 |
| 113.2 | 110.1 | 112.4 | 105.9 | 95.2  | 115   | 109.4 | 115.9 | 122.8 |
| 107.7 | 102   | 106.8 | 104.1 | 90.7  | 106.1 | 103.1 | 114.6 | 105.3 |
| 103.8 | 108.7 | 101.1 | 90.9  | 99.8  | 102.5 | 98.8  | 104.6 | 102.7 |
| 105   | 105.7 | 104   | 105.9 | 93.3  | 111.6 | 100.9 | 100.5 | 109.6 |
| 103.7 | 107.4 | 105.6 | 98.4  | 91.4  | 113.3 | 101.8 | 103.7 | 102.8 |
| 116   | 123.3 | 99.9  | 105.4 | 98.6  | 114.4 | 108.4 | 128.6 | 121.4 |
| 106.5 | 106.2 | 100.8 | 99.4  | 98.2  | 114.2 | 103.8 | 106.6 | 112.3 |
| 105.2 | 109   | 99    | 97.7  | 94.7  | 106.8 | 101.2 | 106.4 | 112.2 |
| 113.2 | 118.4 | 120.1 | 105.8 | 98.3  | 114.2 | 105.9 | 104.2 | 108.8 |
| 111   | 111   | 100.4 | 106.9 | 98.5  | 107   | 108   | 108.3 | 102.5 |
| 113   | 107.9 | 102.9 | 108.5 | 101   | 117.3 | 107.5 | 115.5 | 113.2 |
| 339   | 288.5 | 221.8 | 666.8 | 380.3 | 279.8 | 787.4 | 307.3 | 220.4 |
| 125.8 | 107.6 | 103.4 | 105.7 | 102   | 114.8 | 104.2 | 133.7 | 118   |
| 101.7 | 111.9 | 101.2 | 99.7  | 90.7  | 101.1 | 101.8 | 106.8 | 98.4  |
| 235.4 | 381.2 | 253.5 | 287.2 | 244.2 | 324.2 | 340.7 | 424.5 | 419   |
| 111.6 | 126.6 | 115.8 | 113.2 | 95.2  | 119.2 | 109   | 124.2 | 135.9 |
| 116.8 | 124.4 | 131.8 | 116.9 | 110.3 | 121.2 | 119.6 | 149.4 | 129.2 |
| 141.7 | 186.8 | 140.1 | 184.3 | 135.8 | 144.1 | 183   | 160.5 | 138.6 |
| 95.2  | 116.8 | 109.1 | 109.6 | 97.8  | 106.9 | 103.9 | 98.6  | 109.8 |
| 124.3 | 121   | 109.4 | 116.2 | 102.1 | 107   | 112.7 | 119.1 | 111.8 |
| 128.9 | 205.2 | 174.3 | 186.1 | 147.6 | 150   | 165   | 156.1 | 124.9 |

|        |        |        |        |        |        |        |        |        |
|--------|--------|--------|--------|--------|--------|--------|--------|--------|
| 118.3  | 147.7  | 129.5  | 121.2  | 111.6  | 137.2  | 134.7  | 141.5  | 144    |
| 111.1  | 110.5  | 105.3  | 120    | 102.4  | 113.6  | 114.2  | 105.4  | 118.7  |
| 127.3  | 158.2  | 115.1  | 121.6  | 125.1  | 120.2  | 127.4  | 140.2  | 107.4  |
| 172.1  | 314.3  | 282.2  | 268.1  | 214.6  | 246    | 209.6  | 247    | 205.3  |
| 311.4  | 590.8  | 468.5  | 495.4  | 433.2  | 479.8  | 416.5  | 450.1  | 309.9  |
| 110.6  | 112.8  | 98     | 95.3   | 95.1   | 107.3  | 102.9  | 104.5  | 111.2  |
| 112.4  | 127.9  | 120.6  | 140.4  | 125.9  | 139    | 132.7  | 146.2  | 145.4  |
| 388.7  | 628.6  | 660.1  | 607.3  | 463    | 613    | 470.8  | 563.9  | 493.3  |
| 111.1  | 117.7  | 109.1  | 119.6  | 101.9  | 117.7  | 100.8  | 121.2  | 120.4  |
| 104.8  | 107.5  | 102.7  | 101.1  | 94     | 101.8  | 96.7   | 108.3  | 108.7  |
| 96.9   | 99.4   | 99.4   | 96.8   | 93.6   | 98.1   | 96.7   | 100.8  | 110.9  |
| 181.8  | 419.8  | 267.7  | 343.3  | 210.6  | 272.4  | 206.5  | 272.9  | 205.5  |
| 142.7  | 195.2  | 210.3  | 202.4  | 154.4  | 186.9  | 170.5  | 212.4  | 170.9  |
| 149.7  | 238.1  | 255.1  | 305.7  | 226.1  | 253.3  | 309.4  | 306.5  | 244.4  |
| 707    | 474.3  | 502.5  | 493.7  | 482.5  | 592.2  | 546.2  | 1875.9 | 1331.7 |
| 167.8  | 109    | 128.2  | 123.1  | 108.1  | 159    | 119.7  | 172.5  | 180.8  |
| 1194.9 | 1770.7 | 1571.7 | 1624.9 | 1559.5 | 1679.2 | 1723.4 | 2390.7 | 1548.9 |
| 157.9  | 192.1  | 173.7  | 164.6  | 167.6  | 193.8  | 169.6  | 256.8  | 184.8  |
| 105.5  | 107.8  | 99.9   | 99.4   | 94.2   | 114.7  | 102.4  | 107.1  | 105    |
| 105.2  | 102.8  | 96.5   | 92     | 95     | 103.3  | 96.7   | 106.3  | 99.8   |
| 172.7  | 184    | 169.8  | 136.8  | 160.3  | 181    | 153    | 242.5  | 196.6  |
| 105.4  | 104    | 108.7  | 94.3   | 95.5   | 111.8  | 109    | 108.2  | 112.7  |
| 158.8  | 161.6  | 165.8  | 147.8  | 132.8  | 156.8  | 154.5  | 279.6  | 213.7  |
| 101.4  | 103.7  | 114    | 105    | 95.9   | 100.8  | 110    | 108.4  | 105.7  |
| 102.5  | 103.7  | 99.7   | 96.1   | 94.3   | 99.2   | 101.6  | 100.6  | 101.1  |
| 281.4  | 281.8  | 245.5  | 229.1  | 231.8  | 285    | 221.9  | 372.4  | 285.4  |
| 104.5  | 105.2  | 106.9  | 98.8   | 95.1   | 107.4  | 109.2  | 111.1  | 108.8  |
| 106.9  | 111.8  | 104    | 115    | 103.4  | 118.3  | 108.2  | 103    | 106.5  |
| 106    | 116.4  | 108.6  | 104.9  | 94.4   | 105.3  | 100.3  | 111.6  | 98.8   |
| 109.6  | 113.4  | 110.6  | 108.9  | 93.8   | 109.9  | 110.5  | 114.6  | 111.6  |
| 102.2  | 112.2  | 102.8  | 105.5  | 99.4   | 111    | 103.3  | 114.4  | 107.2  |
| 100.5  | 106.1  | 110.4  | 102.7  | 90.6   | 114.6  | 96.6   | 114.7  | 107    |
| 104.3  | 102.3  | 95.5   | 98.7   | 94.9   | 101.6  | 103.6  | 114    | 107.4  |
| 126.3  | 158.4  | 133.6  | 122.6  | 133.4  | 144    | 127    | 188.7  | 142.1  |
| 104.7  | 108.9  | 112.4  | 109.4  | 103    | 118.1  | 107.8  | 117    | 112.1  |
| 480.2  | 583.7  | 569.5  | 356.6  | 465    | 612.6  | 424.7  | 1015.8 | 599.4  |
| 99.5   | 107.1  | 105.2  | 102.7  | 92.9   | 110    | 99.1   | 111.7  | 109.5  |
| 102    | 104.8  | 97.8   | 106.1  | 93.2   | 110.1  | 98.9   | 109.4  | 99.2   |
| 106.8  | 106.1  | 95.5   | 105    | 102.6  | 113.1  | 98.7   | 106.2  | 100.8  |
| 108.4  | 101.3  | 102.7  | 100.7  | 95.9   | 106.4  | 102.9  | 129.9  | 121.2  |
| 184.4  | 177.3  | 178.3  | 148.1  | 157.7  | 172.1  | 173.4  | 268.3  | 201.2  |
| 120.8  | 140.1  | 143.9  | 121.4  | 134.1  | 130.1  | 107.4  | 136.4  | 111.3  |
| 109.2  | 126.7  | 117.5  | 107.4  | 113.3  | 139.1  | 126.7  | 165.5  | 117.3  |
| 116.1  | 147.5  | 142.3  | 116.9  | 135.2  | 137.1  | 119.8  | 172    | 150    |
| 113.4  | 114.3  | 110.9  | 98.3   | 92.3   | 110.1  | 106    | 117    | 113.1  |
| 106.5  | 108.6  | 106.9  | 98.7   | 93     | 106.2  | 102.5  | 106.6  | 118.2  |
| 100.1  | 110.1  | 104.3  | 102.4  | 101.1  | 120    | 100.5  | 120.4  | 108.6  |
| 109.8  | 117.8  | 103.6  | 95.3   | 98     | 119.5  | 108.4  | 111.3  | 106.5  |
| 100.4  | 112.5  | 101.9  | 104.4  | 99     | 106.6  | 98     | 103.6  | 108.3  |
| 112.7  | 110.8  | 109.2  | 108    | 95.2   | 103.5  | 107.6  | 105.5  | 115.3  |
| 122.7  | 113    | 107.8  | 107.8  | 102.8  | 122.9  | 109.1  | 129.3  | 152.7  |

|       |       |       |       |       |       |       |       |       |
|-------|-------|-------|-------|-------|-------|-------|-------|-------|
| 190.8 | 251   | 247.6 | 217.4 | 212.3 | 276   | 253.5 | 250.3 | 183.1 |
| 108.4 | 101.2 | 99.6  | 93.8  | 95.5  | 102.2 | 97.5  | 104.3 | 106.8 |
| 113.3 | 148.4 | 139.6 | 126.8 | 132.5 | 140.4 | 128.7 | 138.5 | 135.3 |
| 340.7 | 547.8 | 456.6 | 589.9 | 511.8 | 403   | 752.1 | 564.5 | 308.7 |
| 107.5 | 108.1 | 104   | 96    | 92.6  | 111.1 | 104.7 | 107.9 | 109.4 |
| 102.9 | 120.1 | 112.4 | 114.2 | 108.3 | 107.4 | 115.7 | 122.3 | 119.5 |
| 109.1 | 164.5 | 125.5 | 130.8 | 134.4 | 120.1 | 151.4 | 152.1 | 104.4 |
| 118.2 | 131.8 | 107.7 | 119.2 | 110.5 | 120.6 | 111.1 | 127.2 | 119   |
| 99.9  | 100.6 | 97.2  | 92.3  | 90.3  | 104.5 | 94.7  | 103.2 | 107.1 |
| 102.8 | 96.5  | 103.6 | 100.4 | 97.6  | 105.3 | 97.8  | 105.3 | 106.7 |
| 103.1 | 108.3 | 97.6  | 95.9  | 97    | 106.7 | 100.1 | 117.3 | 112.1 |
| 115   | 110.8 | 109.3 | 107.9 | 94.8  | 108   | 109   | 108   | 114.5 |
| 107.9 | 113.2 | 111.4 | 120.6 | 97.4  | 116   | 105.5 | 109.5 | 137.9 |
| 108.8 | 111.7 | 109.2 | 122.8 | 105.7 | 106.8 | 111.6 | 106.7 | 109.1 |
| 104.1 | 112.4 | 108.8 | 101.8 | 95.9  | 109.3 | 96.6  | 111.6 | 107.1 |
| 104.9 | 111.1 | 104.1 | 101.7 | 95.1  | 107.2 | 99.9  | 113.5 | 106.5 |
| 111.1 | 114.2 | 102.2 | 108.2 | 99.9  | 108.8 | 113.2 | 113.2 | 120.5 |
| 115.7 | 99    | 98.2  | 101.5 | 98.4  | 115.7 | 106.2 | 124.3 | 121.5 |
| 256.8 | 148.3 | 133.2 | 141   | 123.6 | 187.1 | 195.8 | 429.2 | 509.9 |
| 124.7 | 118.4 | 112.1 | 113.4 | 113.2 | 127.8 | 115.8 | 154.7 | 129.9 |
| 112.2 | 112.1 | 95.7  | 94.4  | 93.9  | 107.9 | 103   | 104.1 | 102.8 |
| 102.4 | 115.1 | 103   | 107   | 103.3 | 108.1 | 112.4 | 115.7 | 125.9 |
| 103.4 | 113.4 | 102.5 | 106.5 | 100.5 | 112.8 | 106   | 114.9 | 116.1 |
| 101.2 | 103.8 | 99.2  | 96.1  | 95.7  | 105.4 | 101.9 | 107.4 | 109.5 |
| 116.4 | 133.5 | 104.8 | 117.6 | 115.4 | 125.3 | 111.9 | 157.4 | 124.2 |
| 154.2 | 189.1 | 166.4 | 162.5 | 158.4 | 188.2 | 189   | 209.3 | 162   |
| 105.7 | 115   | 111.1 | 127.5 | 95.8  | 111   | 117.9 | 118   | 133.6 |
| 100.5 | 101.7 | 100   | 93.3  | 97.7  | 105.8 | 106.1 | 107.3 | 116.3 |
| 104.9 | 107.6 | 99.3  | 103   | 98.3  | 110   | 104.6 | 108.8 | 105.9 |
| 112.1 | 107.9 | 101   | 104.1 | 93.9  | 103.7 | 100.2 | 111.3 | 107.1 |
| 120.6 | 101.7 | 103.2 | 113.6 | 90.1  | 100.7 | 99.7  | 101   | 104.6 |
| 431.3 | 364.1 | 361.3 | 342.1 | 286.7 | 344.8 | 291.9 | 694.9 | 921.5 |
| 119.1 | 117.1 | 117.3 | 121.3 | 112.8 | 124.5 | 143.6 | 116.9 | 111.8 |
| 130.4 | 158.4 | 142.1 | 132.8 | 129.4 | 155.1 | 143.7 | 155.3 | 146.1 |
| 364.4 | 312.8 | 369.5 | 349.9 | 311.5 | 354.1 | 236.5 | 478.5 | 525.7 |
| 107.6 | 106.5 | 101.7 | 93.6  | 101.5 | 110.5 | 105.9 | 100.2 | 108.3 |
| 111.8 | 122.6 | 129.8 | 111.7 | 116.9 | 131.5 | 133.5 | 150.2 | 126.1 |
| 103.1 | 109.7 | 97.7  | 104.1 | 93    | 108.1 | 99.5  | 107.3 | 110.8 |
| 106.5 | 103.4 | 100.5 | 99.2  | 91.6  | 105.8 | 102.9 | 98.7  | 105.2 |
| 117   | 133.6 | 119.9 | 119.1 | 120.7 | 134.9 | 120.2 | 143.3 | 121.9 |
| 261   | 414   | 324.3 | 297.8 | 278   | 362.1 | 307   | 467.4 | 337.2 |
| 110.2 | 112.5 | 118.7 | 105.9 | 108.1 | 123.3 | 111.7 | 131.8 | 115   |
| 107.4 | 113.2 | 121.9 | 102.6 | 104.4 | 120.2 | 118.3 | 113.4 | 119.1 |
| 109.4 | 111.6 | 111.3 | 108.4 | 102.5 | 115.7 | 109.2 | 126.8 | 118   |
| 127   | 176   | 129.2 | 129.4 | 142.9 | 152.2 | 123.3 | 156.4 | 127.5 |
| 102.2 | 110.9 | 108   | 102.2 | 103.1 | 115.2 | 106.9 | 115.1 | 107.1 |
| 106.2 | 117.1 | 107.5 | 95.4  | 92.7  | 111.8 | 97.9  | 107.4 | 104.3 |
| 109.6 | 101.4 | 97.1  | 106.2 | 93.7  | 111.1 | 106.2 | 100.3 | 108.1 |
| 109   | 117.6 | 104.9 | 111   | 101.2 | 102.2 | 96.4  | 113.4 | 113.9 |
| 113.2 | 110.1 | 104.4 | 106.3 | 103.3 | 113.6 | 104.3 | 128   | 101.5 |
| 116.2 | 107.3 | 107.7 | 112.8 | 98.5  | 121.5 | 114   | 122.9 | 111   |



|        |        |        |        |        |        |        |        |        |
|--------|--------|--------|--------|--------|--------|--------|--------|--------|
| 103.4  | 116.3  | 109.9  | 115.2  | 100.8  | 110.5  | 111.8  | 104.7  | 101.1  |
| 108.5  | 105.6  | 98.9   | 111.6  | 90.9   | 108.4  | 102.4  | 106    | 114.8  |
| 144.6  | 159.3  | 140.8  | 142.8  | 145.7  | 156    | 167.4  | 165.4  | 144.3  |
| 3654.6 | 2974.7 | 2995.3 | 3405.6 | 2976.9 | 3238.3 | 4567.1 | 5801.1 | 4161   |
| 108.4  | 118.5  | 104.6  | 102    | 98.2   | 109.8  | 96.4   | 112.2  | 111.7  |
| 111.1  | 110.8  | 105.2  | 120.6  | 99.6   | 115.6  | 110.1  | 128.7  | 118.8  |
| 117.8  | 119.1  | 111.2  | 101.2  | 105.6  | 113.6  | 104.7  | 115.7  | 120.5  |
| 107.7  | 111.4  | 112.7  | 101.8  | 97.1   | 107.7  | 109.5  | 104.2  | 105.2  |
| 107    | 106.7  | 95.9   | 101    | 85.5   | 105.7  | 96.3   | 106.1  | 106.7  |
| 113    | 108.2  | 103.9  | 103.7  | 94.5   | 109.1  | 103.8  | 117.3  | 114.3  |
| 104.6  | 107.3  | 101.8  | 109.2  | 95.6   | 108.4  | 97.8   | 117.4  | 106    |
| 107.1  | 111.9  | 109.5  | 109.4  | 97.5   | 108.9  | 109    | 107    | 117.5  |
| 102.5  | 104.2  | 101.1  | 90.9   | 83.7   | 100.5  | 103    | 104.1  | 97.9   |
| 112.1  | 105.2  | 99.3   | 103.1  | 101.6  | 114.4  | 96.7   | 109.1  | 106.4  |
| 110.8  | 101.8  | 108.2  | 108.9  | 94.5   | 109.6  | 107.1  | 114.9  | 111.8  |
| 100.2  | 114.1  | 114.3  | 95.2   | 101.2  | 111.8  | 105.6  | 110.9  | 115.4  |
| 114.9  | 107.7  | 102.9  | 112.8  | 100.4  | 106    | 113.5  | 112    | 110.7  |
| 105.3  | 105.5  | 102    | 106    | 98.9   | 108.2  | 99.9   | 111.4  | 113.7  |
| 155.7  | 144.1  | 119.3  | 126.1  | 110.4  | 129.7  | 111.6  | 171.6  | 181.5  |
| 96.8   | 94.8   | 92.5   | 93.5   | 89     | 103.7  | 96.4   | 103.7  | 99.1   |
| 109.5  | 115.9  | 109.3  | 107.7  | 93.3   | 111    | 113.2  | 129.2  | 112.9  |
| 206.2  | 214.1  | 230    | 173.2  | 194    | 247.9  | 202.3  | 264.2  | 188.5  |
| 476    | 473.6  | 439.6  | 389.3  | 403.9  | 528.5  | 523.3  | 704.5  | 558.2  |
| 104.2  | 110.6  | 107.4  | 108.6  | 91.9   | 108    | 92.4   | 112.2  | 111.7  |
| 108.8  | 113.7  | 107.3  | 97.3   | 98.9   | 99.8   | 105.8  | 105.8  | 103    |
| 144.6  | 140.7  | 131.9  | 124.6  | 132.9  | 129    | 129.1  | 182.2  | 121.8  |
| 166.9  | 154.7  | 129    | 133.1  | 132.8  | 138.6  | 129.3  | 239.6  | 162.2  |
| 110    | 114    | 128.1  | 139    | 111.8  | 124.8  | 123.6  | 131.7  | 123.1  |
| 356.1  | 316.1  | 311.6  | 282.8  | 308.3  | 324.6  | 319.8  | 574.9  | 372.7  |
| 138.4  | 136.4  | 154.5  | 134.2  | 128.4  | 149.1  | 147.1  | 201.4  | 172.8  |
| 106.9  | 116.4  | 106.3  | 104.7  | 104.8  | 114.7  | 108.6  | 111.1  | 110.3  |
| 105.7  | 106.7  | 103.4  | 99.5   | 97.4   | 108.3  | 99.3   | 106.4  | 109.1  |
| 806.4  | 1840.9 | 1661.1 | 1157.1 | 1453.5 | 1643.1 | 1357.2 | 1904   | 1204.6 |
| 305.1  | 218.8  | 231.1  | 210.4  | 213    | 275.3  | 195.5  | 356.4  | 323.9  |
| 103    | 108    | 97.7   | 100.8  | 91.7   | 100    | 101.1  | 95.5   | 99.6   |
| 111    | 105.9  | 108.6  | 98     | 101.9  | 105.9  | 102.9  | 120.1  | 114.3  |
| 101.9  | 110.1  | 98.1   | 104.6  | 95     | 113.3  | 107.9  | 112.2  | 114    |
| 98.6   | 105.7  | 94.4   | 100.2  | 89.5   | 98.9   | 97.2   | 100.7  | 107.1  |
| 101.7  | 109.8  | 103.3  | 102.5  | 92.9   | 108.3  | 104    | 105.7  | 114.4  |
| 119    | 109    | 105.3  | 105.8  | 104.3  | 109.7  | 107.9  | 110.1  | 112.9  |
| 106    | 114.2  | 97.9   | 99     | 98.7   | 105.7  | 96.6   | 115.3  | 111.5  |
| 103.6  | 103.3  | 105.7  | 101.1  | 98.8   | 111.7  | 105.3  | 111    | 110.3  |
| 111.9  | 109.6  | 104.1  | 101.3  | 96.3   | 101.3  | 102.1  | 125.6  | 117.1  |
| 108.4  | 110.3  | 96     | 109    | 96.3   | 102    | 98.6   | 107.5  | 103.3  |
| 196.4  | 272.2  | 240.3  | 246    | 236.2  | 302.5  | 253.6  | 315.9  | 192.2  |
| 128.6  | 176.9  | 163.4  | 136.8  | 143.3  | 174.8  | 146.7  | 179.7  | 135.4  |
| 133.8  | 205.7  | 150.4  | 186.8  | 146.2  | 166.9  | 136.1  | 170.2  | 141.1  |
| 98.9   | 106.2  | 105.7  | 94.1   | 95.8   | 112.5  | 102.5  | 114.3  | 112.7  |
| 113.3  | 106.2  | 97.5   | 106.8  | 98.1   | 104    | 98     | 104.2  | 103.9  |
| 227.4  | 373.5  | 328.8  | 286.7  | 342.3  | 297.5  | 314    | 450.7  | 332.7  |
| 151.5  | 142.5  | 151.2  | 151.3  | 138.3  | 136.4  | 118.1  | 201.3  | 204.7  |

|        |        |       |        |        |       |        |        |        |
|--------|--------|-------|--------|--------|-------|--------|--------|--------|
| 105.1  | 107.8  | 98.1  | 104.8  | 94.2   | 106.8 | 106    | 99.7   | 104.6  |
| 103.8  | 105.5  | 99.4  | 104.6  | 100.9  | 109.6 | 97.4   | 112.1  | 114.4  |
| 109.6  | 114    | 105.1 | 100.5  | 92.6   | 103.7 | 99.9   | 112    | 114    |
| 108.8  | 108.3  | 107.6 | 107.6  | 97.3   | 102.9 | 103    | 107.6  | 107.5  |
| 108.2  | 105.4  | 101.7 | 102    | 93.3   | 101.9 | 99.4   | 110.4  | 105.5  |
| 100.3  | 105.1  | 99    | 103.3  | 103.3  | 108.9 | 99.5   | 110    | 105.5  |
| 112.7  | 111.1  | 101.6 | 112.3  | 90.5   | 113.5 | 110.7  | 108.1  | 109.5  |
| 105.3  | 113.4  | 115.7 | 107.1  | 114.4  | 111.3 | 110.4  | 114.3  | 115.9  |
| 156.5  | 224.8  | 244   | 206.6  | 192.5  | 223.4 | 181.4  | 208.9  | 162.6  |
| 172    | 216    | 281.5 | 187.8  | 227.7  | 190.3 | 182.4  | 364.7  | 236.4  |
| 257.9  | 289.6  | 281.6 | 268.5  | 259.4  | 251.8 | 306.5  | 338.5  | 254.5  |
| 105.3  | 103.2  | 113.5 | 102.2  | 97.5   | 113.8 | 100    | 118.1  | 107.4  |
| 189.6  | 352.6  | 313.7 | 373.1  | 288.6  | 280.1 | 331.2  | 267.6  | 180.9  |
| 104.2  | 114.4  | 108.2 | 109.9  | 98.8   | 112.4 | 117.1  | 133.4  | 131.4  |
| 109    | 113.6  | 106.8 | 102.4  | 101.1  | 104.8 | 104.6  | 105.7  | 112.1  |
| 184    | 119.1  | 138.7 | 138    | 138.2  | 157.5 | 151.9  | 253    | 175.8  |
| 109.2  | 103.7  | 109.1 | 100.8  | 96.5   | 117.4 | 114.3  | 113.4  | 115    |
| 109    | 120.1  | 104.6 | 103.8  | 94.9   | 116.1 | 104.9  | 116.8  | 114.6  |
| 113.1  | 112    | 97.9  | 103.6  | 90.6   | 122   | 112.7  | 104.4  | 104.4  |
| 108.4  | 105    | 104.7 | 104    | 95.9   | 111.6 | 103.6  | 107.3  | 113    |
| 108.7  | 111.8  | 102.9 | 100.9  | 93.2   | 98.9  | 105.5  | 113.9  | 110.2  |
| 115.5  | 106.1  | 109.1 | 102.3  | 96.2   | 109   | 102.7  | 110.6  | 114.2  |
| 116.9  | 137.5  | 113.5 | 119    | 112.3  | 128.6 | 124.2  | 137.1  | 132.7  |
| 708    | 765.7  | 136.7 | 781.1  | 597.6  | 164.3 | 583.4  | 1544.6 | 705.5  |
| 198.9  | 255.8  | 246   | 203.3  | 228.3  | 223.7 | 212.2  | 419.2  | 301.6  |
| 208.2  | 247.6  | 239.8 | 216.4  | 234.7  | 232   | 224.6  | 465    | 312.4  |
| 121.2  | 147.7  | 127.7 | 125.1  | 145.5  | 128.6 | 129.9  | 163.6  | 219.1  |
| 142.9  | 103.8  | 108.6 | 94.1   | 97.3   | 129.6 | 103.1  | 156.4  | 127.3  |
| 110.5  | 101.9  | 96.6  | 97.2   | 93.4   | 107.9 | 98.1   | 111.3  | 106.4  |
| 160.1  | 106.6  | 105.6 | 97.7   | 114.1  | 138.3 | 109.7  | 188    | 128.7  |
| 105.1  | 106.1  | 98.2  | 91.8   | 97.4   | 110.4 | 101.8  | 103.6  | 106.7  |
| 160.8  | 195    | 196.5 | 188.4  | 171.1  | 216.5 | 193.2  | 294.7  | 229.5  |
| 103.2  | 107.1  | 98.5  | 104.7  | 95.7   | 116   | 94.9   | 110.4  | 98.3   |
| 317.3  | 1177.3 | 730.9 | 665.7  | 974.2  | 954.1 | 805.2  | 1577.8 | 768    |
| 107.7  | 116.3  | 106.5 | 92.9   | 95.6   | 104.7 | 101.1  | 103.2  | 111.5  |
| 151.2  | 240.5  | 208.1 | 208.7  | 192.6  | 234.9 | 214.8  | 269.3  | 228.4  |
| 144.4  | 121.7  | 111.4 | 126.5  | 104.9  | 116.4 | 113.6  | 128.1  | 113.1  |
| 99.2   | 108.2  | 95.4  | 99.5   | 90.8   | 105.6 | 96.5   | 110.7  | 114.5  |
| 109.5  | 115.5  | 102.1 | 93.4   | 97     | 108.2 | 104.9  | 110.3  | 102.2  |
| 107.2  | 110.7  | 103.3 | 94.1   | 96.4   | 100.1 | 106.4  | 110.6  | 97.5   |
| 108.9  | 105.3  | 101.8 | 104.9  | 95.4   | 112   | 93.6   | 108.2  | 115.7  |
| 111.7  | 121.4  | 116.3 | 114.2  | 99.9   | 123.4 | 118    | 126.3  | 115.5  |
| 6068.4 | 1135.3 | 274.4 | 4709.5 | 1470.7 | 521.3 | 6938.5 | 1764.8 | 950.4  |
| 107.2  | 102.7  | 100.5 | 105.3  | 102.3  | 114   | 107.9  | 106.2  | 111.8  |
| 130.4  | 151.7  | 127.9 | 121.8  | 117.5  | 134   | 126.2  | 141.9  | 127.7  |
| 786.5  | 1068.1 | 980   | 1304.5 | 1005.8 | 594   | 1034.7 | 2181.5 | 884.2  |
| 515.6  | 851.8  | 793.9 | 541.7  | 694.2  | 963.8 | 674.4  | 1651.7 | 1245.9 |
| 153.7  | 213.4  | 186.5 | 162.6  | 191.3  | 205.9 | 118.1  | 240.3  | 190.1  |
| 105.6  | 99.9   | 106.9 | 98.5   | 98.1   | 107.3 | 106.6  | 113.1  | 108.4  |
| 110.8  | 114.6  | 105.6 | 107.4  | 96.9   | 103.4 | 112.3  | 117.8  | 123.9  |
| 106.9  | 106.5  | 97.6  | 99.1   | 99.1   | 113.7 | 109.3  | 110.4  | 107.4  |

|       |        |       |        |        |        |       |        |       |
|-------|--------|-------|--------|--------|--------|-------|--------|-------|
| 96.7  | 106.1  | 97.9  | 90     | 98.4   | 101.2  | 93.1  | 97.2   | 107.6 |
| 336.8 | 355.1  | 326   | 274.5  | 237.6  | 354.9  | 315.5 | 534.6  | 434.5 |
| 113.5 | 114.5  | 107.9 | 103    | 100.2  | 114.4  | 106.4 | 114.3  | 109.7 |
| 143.2 | 160.1  | 132.1 | 152.1  | 133.4  | 149.6  | 139.6 | 164    | 152.7 |
| 103   | 110.2  | 106.6 | 101.6  | 96.8   | 108.7  | 102.3 | 114.2  | 118.4 |
| 101.9 | 115.1  | 108.9 | 108.8  | 100.4  | 113.4  | 103.1 | 114.5  | 110.3 |
| 104.5 | 109.7  | 105.3 | 97.5   | 91     | 112.9  | 105.8 | 108.6  | 104.2 |
| 107.9 | 109.2  | 101.8 | 108.4  | 95.6   | 111.1  | 99.9  | 104    | 107.1 |
| 102.1 | 107.4  | 99.8  | 95.3   | 98.4   | 108.2  | 109.2 | 110.9  | 106.6 |
| 104.7 | 102.9  | 108.2 | 108.4  | 94.3   | 111.7  | 106.9 | 101.9  | 103.5 |
| 101.3 | 103.7  | 105.8 | 101.7  | 94.1   | 105    | 107.7 | 109.4  | 107.5 |
| 103.9 | 101.4  | 105.9 | 100.6  | 95.6   | 104.1  | 104.7 | 108.1  | 104.4 |
| 102.9 | 109.6  | 106.8 | 107.6  | 100.1  | 111.7  | 109.4 | 119.1  | 119.5 |
| 102.1 | 104.4  | 104   | 95.8   | 93.2   | 111.3  | 106.5 | 109.9  | 104.7 |
| 107   | 111.2  | 100.7 | 99.5   | 101    | 106    | 94.6  | 110.9  | 103.9 |
| 403.7 | 577.5  | 541   | 600.6  | 484.6  | 537.9  | 550.9 | 753.4  | 478.3 |
| 107.5 | 104.9  | 101.2 | 96.3   | 95.8   | 111.5  | 103.5 | 123.6  | 113.3 |
| 104.4 | 104.1  | 98    | 101.4  | 87.7   | 107.4  | 101.6 | 106.8  | 105.1 |
| 358.8 | 421.8  | 431.6 | 298.3  | 352.1  | 332.8  | 368.4 | 759.2  | 408.5 |
| 130.1 | 163.5  | 154.6 | 166.8  | 161.9  | 169.6  | 163.8 | 175    | 129.5 |
| 100.6 | 104.8  | 99.2  | 97.3   | 98.2   | 111.9  | 98.2  | 102.4  | 104.4 |
| 153.9 | 182.1  | 152   | 147.4  | 149.2  | 163.8  | 153.4 | 212.8  | 204.2 |
| 150.9 | 139    | 135.4 | 138.4  | 138.1  | 136    | 144.6 | 191    | 155.2 |
| 105.6 | 105.6  | 102.5 | 110.3  | 104.5  | 102.7  | 104.3 | 110.2  | 104.6 |
| 381.8 | 1163.5 | 1229  | 1102.9 | 1011.5 | 1104.5 | 877.4 | 1598.7 | 769.1 |
| 110.1 | 109    | 96.9  | 101    | 98.4   | 106    | 99.8  | 95.7   | 105.9 |
| 106.9 | 117.2  | 103.7 | 111    | 101.8  | 116.6  | 112.5 | 114.3  | 122.2 |
| 117.8 | 108.9  | 100.1 | 105.7  | 107.2  | 126.8  | 115.4 | 125.1  | 112.7 |
| 111.5 | 112.6  | 103.4 | 95.1   | 91.6   | 111.5  | 100.8 | 104.6  | 105.9 |
| 125.1 | 126.5  | 134.2 | 108.7  | 105.8  | 143.8  | 133.3 | 145.6  | 132.7 |
| 109.9 | 118.2  | 122.9 | 128.6  | 109    | 138.3  | 110.3 | 144.3  | 117.8 |
| 124.7 | 199.5  | 228.8 | 159.5  | 170.1  | 195.6  | 169.6 | 226.4  | 170.6 |
| 103.6 | 111.1  | 101.5 | 109.9  | 101.3  | 116    | 106.8 | 121.9  | 118.7 |
| 107.6 | 106.9  | 95.4  | 110.4  | 99.8   | 115.9  | 106.2 | 112.5  | 105.9 |
| 113   | 116    | 110   | 108    | 100.5  | 105.4  | 105.8 | 123    | 114.6 |
| 105.9 | 113    | 103.4 | 101.6  | 101.5  | 118.2  | 103.5 | 126    | 113.8 |
| 183.6 | 119    | 102.9 | 137.9  | 128.5  | 118.4  | 453.5 | 118.3  | 183.7 |
| 109.1 | 108.1  | 104.3 | 106.6  | 99.7   | 114.1  | 106.4 | 104.3  | 110.4 |
| 117.9 | 127.3  | 104.8 | 120.7  | 105.1  | 122.1  | 115.5 | 118.2  | 114.7 |
| 112.3 | 106.1  | 102.5 | 98.5   | 89.5   | 102.8  | 99.2  | 116.2  | 105.3 |
| 105.3 | 111.7  | 103.8 | 105.7  | 113    | 109.3  | 104.2 | 117.5  | 107.2 |
| 107.1 | 119.2  | 107   | 102.1  | 104.7  | 112.1  | 117.6 | 132.6  | 136.4 |
| 112.4 | 124.3  | 105.2 | 104.9  | 99.2   | 111.1  | 106.4 | 106.6  | 114.4 |
| 233.2 | 342    | 305.4 | 295.9  | 394.9  | 370.4  | 460.4 | 659.9  | 398.3 |
| 121.7 | 118.8  | 115.6 | 118.6  | 124.2  | 117    | 112.2 | 159.5  | 125.7 |
| 99.7  | 101.3  | 98.7  | 98.2   | 98     | 112.4  | 99.7  | 104.2  | 109.1 |
| 104.2 | 113.3  | 111.5 | 101.5  | 97.2   | 106.8  | 106.4 | 118.3  | 115.4 |
| 112.3 | 138.3  | 122.7 | 138.7  | 123.4  | 128.9  | 128   | 136.5  | 124.9 |
| 115.6 | 141    | 147   | 142    | 133.5  | 152.9  | 149.5 | 151.4  | 125.1 |
| 149   | 215.1  | 201.7 | 187.7  | 195    | 196.3  | 227.1 | 336.2  | 251.3 |
| 202.5 | 188.9  | 226.2 | 219.5  | 223.8  | 274.9  | 143.3 | 458.4  | 310   |

|       |       |       |       |       |       |       |       |       |
|-------|-------|-------|-------|-------|-------|-------|-------|-------|
| 131.2 | 127.7 | 126.4 | 131.3 | 120.5 | 142.3 | 139.7 | 193.3 | 161.6 |
| 144.8 | 186.2 | 157.3 | 214.7 | 219   | 169   | 180.1 | 338.8 | 195.6 |
| 154.2 | 325.1 | 224.8 | 219.4 | 248.7 | 250.3 | 302.5 | 433.6 | 238.5 |
| 139.9 | 128.1 | 119   | 140   | 137.4 | 171.7 | 132.6 | 268.6 | 202.9 |
| 152.6 | 253.1 | 215.6 | 242.6 | 193.7 | 243.7 | 241.9 | 321   | 225.2 |
| 163   | 250.6 | 202.8 | 193.1 | 197.9 | 244   | 250.3 | 334.5 | 223.6 |
| 166.9 | 218.8 | 199.9 | 217   | 192.7 | 213.5 | 221.9 | 229.1 | 170   |
| 108.2 | 104.8 | 104.4 | 100.4 | 95.7  | 111.2 | 102.9 | 105.7 | 106.8 |
| 105.7 | 140.3 | 126.1 | 101.2 | 101.7 | 117.8 | 117.6 | 115.5 | 119   |
| 110.7 | 118.3 | 105.3 | 119.7 | 112.5 | 113.2 | 104.7 | 119.3 | 127.2 |
| 111.4 | 116.2 | 110.3 | 106   | 103.7 | 114.7 | 106.6 | 120.6 | 108.1 |
| 116   | 118   | 106   | 114.4 | 108.6 | 115   | 109.7 | 126.8 | 116.5 |
| 124.5 | 131.6 | 132.8 | 139.8 | 123.7 | 154.9 | 124   | 175.8 | 157.2 |
| 108   | 115.2 | 111.3 | 114.6 | 108.1 | 134   | 111.9 | 146.8 | 135.6 |
| 139.9 | 162   | 157.8 | 138.9 | 147.8 | 164.7 | 141.5 | 197.2 | 151.6 |
| 184.7 | 250.4 | 254.1 | 210.9 | 224.7 | 258.1 | 286.4 | 290.9 | 172.9 |
| 281.8 | 310   | 329.9 | 218.2 | 285.2 | 296.9 | 287.1 | 725.5 | 424.1 |
| 399.8 | 396   | 350.7 | 384.6 | 382.9 | 393.7 | 402.3 | 665.8 | 387.2 |
| 142.8 | 168.2 | 147.6 | 128.9 | 139.9 | 137.2 | 137.1 | 224.7 | 156.4 |
| 524.5 | 471.1 | 406.6 | 427.2 | 379.8 | 411.4 | 447.6 | 818.6 | 744.8 |
| 106.3 | 104.3 | 113.7 | 108   | 99.6  | 116.1 | 105.4 | 118   | 108.4 |
| 97.9  | 106.6 | 99.9  | 103.7 | 96.6  | 108.9 | 99.8  | 102.1 | 107.3 |
| 105.7 | 119.6 | 104   | 95.5  | 93.5  | 107.3 | 106.8 | 102.1 | 113.7 |
| 106.5 | 108.3 | 102.2 | 97.7  | 92.2  | 116.3 | 103.5 | 104.9 | 104.5 |
| 107.7 | 108.3 | 98.5  | 99.2  | 90.9  | 106.8 | 100.6 | 117.3 | 109.1 |
| 113.4 | 118.2 | 107.2 | 117.9 | 94.3  | 109.5 | 106.8 | 125.4 | 108.9 |
| 108.4 | 109.2 | 99.9  | 108.6 | 101.9 | 110.5 | 101.3 | 104   | 111.1 |
| 112.3 | 111.6 | 104   | 105.5 | 95.5  | 120.8 | 117.9 | 116.9 | 122   |
| 106.8 | 108.4 | 105.6 | 101.1 | 100.2 | 109.8 | 102.9 | 110.2 | 108.4 |
| 113.1 | 104.7 | 102.3 | 96.5  | 93.6  | 104.5 | 102.5 | 104.8 | 108.8 |
| 112   | 107.7 | 111   | 98.6  | 92.9  | 107.4 | 109.5 | 106.6 | 110.6 |
| 97.7  | 115.7 | 97.5  | 111.1 | 94.1  | 95.9  | 98.1  | 108   | 110.9 |
| 116.9 | 111   | 104.4 | 105.3 | 92.6  | 118.5 | 114.5 | 113.4 | 110.8 |
| 255.7 | 406.1 | 302.2 | 480.6 | 258.1 | 414.5 | 296.7 | 578.8 | 447.4 |
| 109.6 | 127   | 135.5 | 140.5 | 114.4 | 126.7 | 130.4 | 165.4 | 145.2 |
| 110.6 | 122.7 | 124.2 | 113.3 | 101.1 | 111.8 | 123.8 | 127.7 | 121.4 |
| 99.7  | 110.7 | 101.5 | 97.6  | 98.9  | 112.5 | 105.2 | 111.1 | 106   |
| 176.2 | 574.2 | 564.1 | 379.4 | 456.3 | 484.5 | 437.5 | 539.9 | 354.6 |
| 111.1 | 169   | 150.9 | 128.3 | 121.2 | 151.8 | 125.4 | 157.9 | 129.1 |
| 149.2 | 330.4 | 369.1 | 219.2 | 253.6 | 318   | 297.1 | 398.4 | 271.5 |
| 337.8 | 466.3 | 513.2 | 433.3 | 444.7 | 550.9 | 483.1 | 638   | 448.2 |
| 189.9 | 351.3 | 321.8 | 450.2 | 327   | 364.6 | 367.1 | 416   | 277.8 |
| 181.7 | 217   | 243.4 | 268.4 | 196.3 | 280.6 | 298.7 | 345.2 | 302.3 |
| 375.7 | 570.9 | 518.6 | 514.1 | 382.1 | 528.4 | 589.8 | 863.5 | 679.6 |
| 141.7 | 205.4 | 179.2 | 162.1 | 151.6 | 157.5 | 157.3 | 288.3 | 199.5 |
| 121.6 | 173   | 147.4 | 136.9 | 136.8 | 148.9 | 130.4 | 208.1 | 167.5 |
| 100.8 | 115.1 | 95.5  | 102.3 | 96.4  | 106.6 | 105.7 | 110.5 | 102.4 |
| 105.4 | 107.5 | 105   | 92.6  | 97.9  | 110.9 | 97.2  | 105.5 | 108.9 |
| 126.3 | 107.3 | 114.1 | 103.5 | 103.9 | 117   | 110.4 | 139.5 | 112.2 |
| 703.6 | 396.4 | 438.4 | 364.6 | 427   | 414.4 | 410.4 | 844.1 | 403.2 |
| 265.7 | 198.4 | 158.7 | 272.4 | 171.1 | 162.3 | 276.4 | 216.2 | 195.5 |

|        |        |        |        |        |        |        |        |        |
|--------|--------|--------|--------|--------|--------|--------|--------|--------|
| 107.1  | 112.3  | 111.2  | 101.6  | 94.9   | 119.7  | 110.2  | 115.7  | 112.6  |
| 108.8  | 125.8  | 116.8  | 106.9  | 102.6  | 129.3  | 102.4  | 119    | 121.6  |
| 108.9  | 108.7  | 100.6  | 110    | 97.8   | 107.9  | 103.6  | 118.4  | 115.2  |
| 138.5  | 165.8  | 144    | 137.9  | 171.6  | 171    | 144.1  | 165.2  | 165.6  |
| 109.4  | 116.1  | 106.7  | 111    | 107.4  | 114.4  | 106.5  | 113.3  | 107.7  |
| 97.7   | 98     | 93.7   | 91.6   | 89     | 101    | 99.3   | 106.3  | 101.5  |
| 148.8  | 216.4  | 253.2  | 158.6  | 222    | 269.7  | 170.8  | 320.8  | 193.8  |
| 113.5  | 119.6  | 107.6  | 121.5  | 105.2  | 114.3  | 111.6  | 138.5  | 117.3  |
| 150.1  | 143.3  | 151.2  | 153.9  | 129.2  | 149.8  | 139.5  | 224.9  | 151.8  |
| 113.7  | 111.9  | 107.7  | 110    | 102.7  | 111.3  | 109.6  | 122.3  | 117    |
| 144.4  | 244.8  | 242    | 194.2  | 221.2  | 214.1  | 204    | 267.3  | 184.8  |
| 228.1  | 335.9  | 481    | 250.8  | 332.3  | 480.7  | 315.1  | 360.7  | 436.7  |
| 120.7  | 125.6  | 112    | 119.5  | 106.8  | 119.5  | 104.3  | 127.1  | 112    |
| 109.7  | 122.1  | 126.3  | 120.2  | 110.4  | 135.6  | 115.5  | 137.3  | 128.6  |
| 126.2  | 147.3  | 134.6  | 136.5  | 121.9  | 132.5  | 148.6  | 171.9  | 145.7  |
| 201.9  | 349.1  | 309.6  | 280.9  | 281.3  | 304.4  | 250.8  | 424.2  | 325.8  |
| 184.1  | 214.3  | 214.7  | 221.9  | 214.5  | 280.9  | 233.1  | 510.1  | 316.1  |
| 314.5  | 534.6  | 614.8  | 540.5  | 594.3  | 447.5  | 582.3  | 1203.5 | 740.9  |
| 256.7  | 357.5  | 320.7  | 311.5  | 319.8  | 415.2  | 339    | 553.6  | 453.7  |
| 184.8  | 169.8  | 140.8  | 142.7  | 164.7  | 186.2  | 159.6  | 318.3  | 264.8  |
| 100.7  | 101.5  | 100.4  | 98.1   | 91.8   | 113.7  | 99.6   | 105.5  | 105.8  |
| 104.5  | 113.8  | 106.9  | 100.7  | 102.6  | 112.6  | 105.4  | 132.7  | 108.2  |
| 123.5  | 122.8  | 113.3  | 115.8  | 106.8  | 120.9  | 134.7  | 138.6  | 127.9  |
| 131.5  | 170.4  | 138.8  | 160.2  | 134.5  | 131.4  | 129.5  | 167.1  | 133.3  |
| 847.5  | 1560.8 | 1919.7 | 1781.9 | 1011.3 | 1328.5 | 2117.8 | 1098.2 | 338.1  |
| 272.4  | 480.1  | 352    | 622.8  | 651.8  | 401.5  | 745.8  | 854.6  | 335    |
| 113.5  | 166.5  | 121.2  | 158.2  | 157.9  | 141.5  | 157.6  | 229.7  | 128    |
| 108.8  | 110.3  | 97.8   | 102.3  | 101.4  | 105.2  | 104.7  | 104.7  | 104.8  |
| 104.9  | 115.3  | 106.1  | 101.8  | 93.4   | 108.4  | 100.6  | 103.5  | 102.7  |
| 119.9  | 114.3  | 106.5  | 113.3  | 96.1   | 120.4  | 104.7  | 116.9  | 110.9  |
| 101.5  | 104.8  | 103.5  | 105.1  | 100.3  | 104.2  | 102.4  | 110.1  | 106.6  |
| 533.6  | 654.9  | 669.1  | 746.6  | 519.6  | 791.8  | 838    | 1081   | 800.7  |
| 1948.6 | 1895.4 | 1650   | 2420.9 | 1512.5 | 1596.7 | 1977.3 | 2535.2 | 1970.8 |
| 113.8  | 119    | 112.5  | 103.8  | 96.8   | 117.5  | 103.8  | 122.9  | 127.6  |
| 936.6  | 476    | 603.2  | 806.8  | 604.8  | 789.5  | 1109.3 | 1707.8 | 1578.3 |
| 203.6  | 238.2  | 206.6  | 222.6  | 225.2  | 218.9  | 248.7  | 439.8  | 403    |
| 173.9  | 186.1  | 161.3  | 159.8  | 160.2  | 185.5  | 177.7  | 199.5  | 228.6  |
| 110.1  | 109.1  | 104.3  | 103.3  | 98.9   | 116.2  | 102.3  | 131.1  | 109.3  |
| 98.2   | 114    | 102.6  | 105.5  | 95.1   | 115.5  | 110    | 105.9  | 111.5  |
| 109.7  | 118.9  | 114.8  | 103.7  | 103.6  | 112.7  | 109.6  | 127.2  | 111.7  |
| 101.3  | 95.8   | 97.1   | 91.1   | 93.4   | 103.5  | 98.1   | 103.3  | 97.5   |
| 98.7   | 107.8  | 100.4  | 98.6   | 91.3   | 112    | 100.2  | 105.5  | 107.2  |
| 585.5  | 678.3  | 602.7  | 488.7  | 489.9  | 640.3  | 501.6  | 965.5  | 804    |
| 98     | 100.4  | 100.4  | 95.8   | 97.4   | 102.5  | 97.8   | 111.5  | 112.6  |
| 115.4  | 112.6  | 105.1  | 106.3  | 104.4  | 107    | 109.7  | 125    | 119.1  |
| 107.4  | 114.5  | 102.4  | 99.5   | 102.1  | 108.2  | 108.5  | 108.8  | 102.4  |
| 107.2  | 109.2  | 104.4  | 100.9  | 106.9  | 110.1  | 104.3  | 106.6  | 106.7  |
| 120.3  | 200.4  | 191.1  | 152.9  | 159    | 199.1  | 184.4  | 176.9  | 142.1  |
| 114.6  | 101.5  | 103.5  | 112.3  | 101.9  | 109.7  | 108.7  | 113.5  | 110.2  |
| 104.1  | 126.8  | 110    | 120.2  | 99.8   | 115.4  | 128.8  | 127.6  | 116.5  |
| 788.8  | 1177.6 | 920.2  | 1420.5 | 1253.7 | 1046.2 | 1810   | 2299.9 | 1086.4 |

|       |       |       |       |       |       |       |        |       |
|-------|-------|-------|-------|-------|-------|-------|--------|-------|
| 110.8 | 140   | 116.6 | 112   | 121.1 | 133.8 | 112.1 | 167.7  | 133.5 |
| 103.5 | 99.5  | 107   | 93.8  | 89    | 106.1 | 98.2  | 100.1  | 100.1 |
| 109.6 | 116.2 | 112.4 | 104.2 | 99.3  | 120.5 | 114.1 | 116.4  | 117.4 |
| 114.9 | 123.2 | 108   | 106.7 | 105.5 | 112   | 108   | 121.5  | 108.9 |
| 188.1 | 181.9 | 190.8 | 163.1 | 161.2 | 181   | 188.1 | 171.6  | 145   |
| 124.6 | 128.6 | 111.5 | 113.8 | 104.5 | 123.5 | 113.1 | 138    | 138.2 |
| 678.8 | 583.7 | 573.1 | 483.1 | 505.7 | 536.8 | 555.5 | 729.6  | 573.7 |
| 104.1 | 103.4 | 114.5 | 102.9 | 102.8 | 112.9 | 108.8 | 109.5  | 113.6 |
| 220.5 | 265.4 | 284.5 | 228.8 | 268.7 | 314.7 | 241.2 | 465.7  | 371.1 |
| 193.7 | 251.1 | 209.3 | 208.1 | 219.2 | 223.5 | 219.4 | 348.3  | 281   |
| 105.9 | 103   | 97.9  | 95.3  | 97.4  | 106.4 | 104.1 | 111.5  | 115.1 |
| 101.2 | 104.9 | 103.4 | 97.4  | 93.6  | 106.7 | 98.6  | 110.8  | 105.9 |
| 324.8 | 326.2 | 337.7 | 404.3 | 388.8 | 400.9 | 453.9 | 432.7  | 272.7 |
| 102.6 | 114   | 109   | 104.8 | 98.1  | 124   | 109.2 | 118.8  | 116.3 |
| 145.6 | 198.8 | 204.4 | 196   | 166.2 | 197.6 | 201.2 | 210.1  | 172.9 |
| 140.3 | 147.9 | 116.2 | 190.2 | 130.4 | 141.6 | 183.8 | 292.2  | 188.4 |
| 105.3 | 105   | 104.1 | 116.6 | 102.8 | 105.3 | 105.4 | 109.2  | 108.1 |
| 121   | 169.4 | 139.2 | 156.3 | 133.5 | 143.8 | 151.4 | 125.2  | 118.5 |
| 97.3  | 102.6 | 96.1  | 106.5 | 94.2  | 114.8 | 104   | 111.1  | 106.3 |
| 103.9 | 104.2 | 99.7  | 100.5 | 99.7  | 107.3 | 97.7  | 108.6  | 115.4 |
| 119.4 | 122.9 | 102.4 | 217.6 | 107.2 | 107.7 | 189.5 | 116.8  | 114.3 |
| 105.8 | 131.4 | 113.8 | 209.9 | 111.9 | 113   | 155.2 | 111.4  | 114.4 |
| 112.5 | 108.1 | 108.6 | 116.9 | 105.8 | 121   | 113.8 | 134.7  | 136.4 |
| 111.1 | 218.8 | 152.1 | 449.9 | 134.3 | 129.7 | 181.2 | 125    | 107.7 |
| 110.9 | 185   | 133.7 | 295.3 | 154.3 | 119.7 | 263.5 | 118.9  | 112.2 |
| 98.8  | 103.2 | 100.8 | 107.7 | 93.7  | 105.8 | 113.7 | 106.3  | 106.3 |
| 119.1 | 247.3 | 161.7 | 500.1 | 182.6 | 131.5 | 377.7 | 131.6  | 106.2 |
| 117.7 | 117.7 | 106.9 | 95.4  | 101.1 | 107.5 | 106.8 | 113.7  | 110.9 |
| 110.9 | 109.3 | 109   | 108.5 | 101   | 121.5 | 104.1 | 111    | 101.4 |
| 119.4 | 112.1 | 106.1 | 105.8 | 86.9  | 106.2 | 103.7 | 117.4  | 112.8 |
| 114.6 | 109.1 | 102.4 | 110.1 | 95.8  | 106.5 | 106.6 | 106.7  | 102.9 |
| 101.9 | 97.7  | 92.8  | 94.6  | 95.4  | 109.2 | 96.6  | 96.9   | 100.9 |
| 102.7 | 110.5 | 103   | 111.7 | 96.5  | 107.1 | 110.3 | 113.5  | 107.4 |
| 386.1 | 555.9 | 514.1 | 542.1 | 405.1 | 402.3 | 422.9 | 722.8  | 630.5 |
| 145.5 | 154.6 | 158.1 | 152.8 | 133   | 154.7 | 199.6 | 198.1  | 192.2 |
| 142.7 | 138.1 | 112.6 | 115.2 | 112.7 | 132.1 | 120.6 | 180.6  | 150.3 |
| 458   | 603.5 | 497.2 | 671.5 | 510.4 | 534.4 | 541.9 | 1138.3 | 772.6 |
| 108.7 | 112.3 | 115.6 | 106.5 | 106.8 | 144.8 | 99.8  | 177    | 110.9 |
| 106.5 | 133.9 | 123.4 | 118.4 | 104.2 | 114.6 | 111.7 | 119.8  | 111.8 |
| 105.6 | 106.4 | 103.2 | 97.1  | 97.6  | 101.1 | 110.1 | 107.8  | 105.6 |
| 124.4 | 182.7 | 171.1 | 108   | 255   | 307.7 | 110.3 | 518.3  | 136.3 |
| 124.8 | 262.9 | 191.3 | 97.4  | 341.9 | 391   | 106.4 | 939.6  | 149.8 |
| 106.6 | 104.3 | 103   | 96.6  | 89.3  | 96.6  | 101.5 | 105.2  | 101.6 |
| 100.3 | 105.4 | 98.1  | 93.9  | 94.4  | 108.9 | 96.5  | 101.9  | 101.3 |
| 99    | 106   | 97.9  | 95.6  | 87.4  | 100.3 | 103.2 | 100    | 97.5  |
| 140.1 | 170   | 126.4 | 243   | 125.1 | 134.7 | 206   | 136.3  | 147.1 |
| 109.2 | 109.4 | 106.9 | 99.6  | 97.8  | 111.4 | 101.6 | 112    | 108.8 |
| 109.1 | 100.4 | 109.3 | 101.1 | 90.9  | 112   | 108.2 | 110.7  | 108.1 |
| 98.9  | 107.2 | 103.3 | 102.4 | 92    | 112.3 | 105.4 | 107.3  | 106.1 |
| 137.5 | 174.8 | 173.9 | 163.5 | 130.8 | 191.9 | 158.3 | 169.5  | 161.5 |
| 121.4 | 163.2 | 147.1 | 150.4 | 131.2 | 161.5 | 129   | 176.3  | 130.9 |

|        |        |        |        |       |        |        |        |        |
|--------|--------|--------|--------|-------|--------|--------|--------|--------|
| 150.4  | 193.3  | 200.1  | 105    | 195   | 158.7  | 147.4  | 208.1  | 107.4  |
| 130.4  | 192.4  | 170.8  | 146.1  | 148.9 | 182    | 197.2  | 216.1  | 145.7  |
| 105.7  | 122.1  | 121.1  | 112.9  | 102.1 | 121.1  | 120.3  | 138.1  | 124    |
| 122.7  | 127.8  | 117.5  | 103.2  | 110.8 | 125.7  | 120.7  | 140.3  | 126.2  |
| 714.3  | 702.4  | 655.6  | 886.6  | 610.9 | 670.8  | 953.6  | 1061.3 | 739.9  |
| 157.5  | 212.5  | 199.6  | 164.7  | 149.3 | 164.5  | 209.9  | 298.7  | 216.7  |
| 353.6  | 259.1  | 254.7  | 212    | 289   | 313.3  | 244    | 680.8  | 385.8  |
| 1797.1 | 2863.7 | 2188.4 | 3352.7 | 2549  | 2420.1 | 3357.8 | 3369.7 | 1659.6 |
| 107    | 111.8  | 101.6  | 125.6  | 91    | 113.6  | 108    | 116.3  | 108.1  |
| 108.8  | 113.5  | 110.8  | 109    | 94.5  | 116.6  | 106.9  | 115.1  | 105.7  |
| 107.1  | 120.6  | 107.8  | 103.8  | 102.9 | 114.1  | 91     | 107.9  | 105    |
| 288    | 443.7  | 421.6  | 357.4  | 421.7 | 437.7  | 449.2  | 763.5  | 474.1  |
| 110.2  | 111.5  | 107    | 107.4  | 101   | 112.5  | 96.6   | 127    | 114.5  |
| 107.1  | 116.8  | 108.5  | 100.1  | 106.7 | 142    | 110.6  | 134.8  | 122.2  |
| 110.7  | 110.7  | 103.9  | 104.4  | 94.9  | 116.6  | 103.2  | 102.5  | 113.2  |
| 109    | 111.8  | 108.3  | 98.4   | 101   | 112.2  | 110.2  | 119.5  | 110.5  |
| 110.8  | 112    | 97.9   | 104    | 99.1  | 100.7  | 108.2  | 110.3  | 104.7  |
| 116.5  | 116.8  | 109.9  | 120    | 99.3  | 110.5  | 101.9  | 117.3  | 110.4  |
| 646.7  | 809.1  | 953.4  | 778.4  | 699   | 857.5  | 959.4  | 1851.1 | 1206.2 |
| 109.2  | 114    | 115.1  | 107.1  | 97.8  | 117.1  | 107.8  | 113.4  | 107.6  |
| 251.9  | 244.1  | 227.3  | 167.4  | 301.2 | 254.5  | 246.4  | 398.1  | 236.4  |
| 142.3  | 137.6  | 121    | 123.3  | 125.7 | 134.9  | 132.4  | 131.1  | 119.8  |
| 116.3  | 104.6  | 106.5  | 127.3  | 112.7 | 120.7  | 105    | 127.2  | 126.6  |
| 103.2  | 118.4  | 108.2  | 126    | 104.4 | 122.4  | 124.5  | 110.7  | 110.1  |
| 108.3  | 114.3  | 105.6  | 102.9  | 96.6  | 111.7  | 99.9   | 114.2  | 111.1  |
| 129.8  | 168.8  | 158.7  | 162.9  | 138.1 | 145.7  | 156.7  | 303.8  | 241.9  |
| 296.4  | 372    | 292    | 443.3  | 365.8 | 345.2  | 452    | 418.7  | 474.3  |
| 501.9  | 851.3  | 610.9  | 1016.8 | 769.9 | 708.6  | 917.2  | 1407.5 | 795    |
| 209    | 227.8  | 222    | 233.3  | 224.8 | 254.9  | 278.8  | 493.9  | 372.1  |
| 345.7  | 1015.3 | 801    | 904.2  | 754.8 | 822.9  | 745.6  | 1019.1 | 443.8  |
| 277.5  | 689.7  | 653.9  | 447.7  | 570.5 | 579.7  | 340.3  | 566.3  | 508.2  |
| 695.6  | 603    | 580.5  | 647.1  | 461.9 | 551.6  | 642.2  | 1241.1 | 931.6  |
| 136    | 124.9  | 102    | 101.5  | 105.6 | 113.4  | 104.1  | 136    | 115.6  |
| 276.1  | 468.6  | 405.6  | 422.7  | 357.1 | 332    | 377.5  | 680.1  | 450.4  |
| 103    | 106.4  | 100.1  | 108.7  | 109.5 | 113.6  | 109.2  | 113.5  | 106.1  |
| 495.1  | 527.1  | 627.5  | 547    | 619.4 | 646.9  | 766.6  | 1488.5 | 910.7  |
| 112.1  | 105.8  | 105    | 98.5   | 96.9  | 112.2  | 102.2  | 113.4  | 106.1  |
| 106.2  | 97.4   | 98.9   | 92.4   | 94.3  | 101.5  | 100    | 110.5  | 112.5  |
| 162.8  | 205.2  | 165.2  | 182.3  | 165.3 | 165.8  | 199.4  | 247    | 204.4  |
| 116.3  | 112.6  | 98.9   | 106.5  | 94    | 106.3  | 102.5  | 125.8  | 107.8  |
| 116    | 125.2  | 122.5  | 102.3  | 124.8 | 112.4  | 122.2  | 146.7  | 125.6  |
| 108    | 107.6  | 97.6   | 103.2  | 93.6  | 118.9  | 103.4  | 114.9  | 107.8  |
| 110.4  | 98.8   | 103.2  | 101.3  | 98.6  | 108.2  | 106.7  | 109.7  | 101.4  |
| 112.6  | 115.1  | 104.9  | 108.6  | 103.3 | 111.8  | 105.2  | 114.6  | 105.9  |
| 175.6  | 390.1  | 371.9  | 459.2  | 413.2 | 321.8  | 388    | 411.1  | 260.7  |
| 104.1  | 118.5  | 101.7  | 103.1  | 99.9  | 110.3  | 97.7   | 125    | 113.9  |
| 185.5  | 295.7  | 271.9  | 214.7  | 249.1 | 263.1  | 229.6  | 357.2  | 269.5  |
| 132.3  | 138.6  | 120.8  | 126    | 121.5 | 147    | 120.9  | 161.1  | 140.9  |
| 103.8  | 119.8  | 108.6  | 110    | 108.6 | 122.5  | 113    | 127.8  | 117.3  |
| 102.3  | 122.5  | 104.3  | 105.7  | 100.9 | 112.6  | 106.8  | 122.8  | 118.7  |
| 126.4  | 143.4  | 136.9  | 141.6  | 123.8 | 140.4  | 128.5  | 169.4  | 140.6  |

|        |        |        |        |        |        |        |        |        |
|--------|--------|--------|--------|--------|--------|--------|--------|--------|
| 146.9  | 163.7  | 180.1  | 211    | 174.1  | 178.8  | 203.5  | 250.7  | 192.3  |
| 108.5  | 114.1  | 111.8  | 99.3   | 102    | 121.3  | 103.3  | 109.9  | 114.1  |
| 106.1  | 105.8  | 105.6  | 97.5   | 95.1   | 113.7  | 108.6  | 109.1  | 112.7  |
| 168.2  | 298.2  | 325.9  | 351.5  | 307.2  | 262.9  | 412.5  | 332.9  | 209.9  |
| 130.6  | 120.3  | 115.8  | 97.4   | 122.6  | 113.3  | 123.2  | 179.4  | 155.9  |
| 103.1  | 113.3  | 111.2  | 104.9  | 108.7  | 110.4  | 107.8  | 109.8  | 111.1  |
| 988    | 966.2  | 1188.2 | 829.8  | 768.5  | 1111.5 | 592.4  | 1538.5 | 1105.7 |
| 280.7  | 357.4  | 344.4  | 270.3  | 339.3  | 345.9  | 324.3  | 581.4  | 367    |
| 192.6  | 214.3  | 296.9  | 171.2  | 182.7  | 349.1  | 207.8  | 305.1  | 507.2  |
| 102.5  | 97.3   | 110.1  | 89.4   | 98     | 107.3  | 102    | 110.3  | 123.6  |
| 126.3  | 149    | 147.7  | 156.3  | 145    | 154.8  | 139.3  | 178.8  | 163.6  |
| 102.7  | 104.1  | 125.7  | 108.7  | 106.3  | 119.2  | 105.4  | 117.8  | 118.6  |
| 101    | 105.4  | 101.5  | 104.4  | 91     | 109.1  | 99.3   | 104.5  | 99.7   |
| 109.1  | 108.7  | 107.4  | 97.5   | 97.4   | 109    | 96.7   | 107.7  | 109.1  |
| 1271.8 | 1987.7 | 2215.5 | 1763   | 1513.7 | 2189.1 | 2373.9 | 2358.7 | 1510.7 |
| 103.3  | 109.9  | 105.8  | 102.2  | 99.7   | 110.1  | 103.2  | 117    | 103.3  |
| 433.3  | 667.9  | 563.2  | 588.5  | 652.3  | 660.6  | 575.3  | 797.2  | 717.9  |
| 648.5  | 881.2  | 958.3  | 863.7  | 971.6  | 1064.5 | 1012.2 | 2102.2 | 1384   |
| 143    | 141.2  | 131    | 121.6  | 143.4  | 180.8  | 173.9  | 222.8  | 148.8  |
| 123.2  | 146.9  | 117.6  | 133.1  | 122.2  | 123.6  | 170.2  | 139    | 134    |
| 118.1  | 117.6  | 123.9  | 119.1  | 107.7  | 118.5  | 112.3  | 116.1  | 110    |
| 109.5  | 106.4  | 109    | 112.7  | 107.8  | 117.9  | 104.6  | 114.6  | 118.9  |
| 109.9  | 118    | 108.8  | 103.1  | 107.8  | 108.5  | 119.8  | 118.6  | 108    |
| 150.9  | 266.6  | 256.2  | 244    | 238.7  | 227.6  | 260.7  | 252.3  | 155.2  |
| 110.3  | 197    | 178.1  | 164.1  | 162.9  | 180.9  | 180.4  | 175.9  | 150.4  |
| 439.5  | 409.5  | 350.2  | 664.1  | 267.8  | 441.7  | 555.5  | 956.4  | 736.4  |
| 383.2  | 662.5  | 758.5  | 1197   | 917.9  | 658.1  | 1312.3 | 1232.5 | 685.5  |
| 129.5  | 175    | 182.7  | 179.9  | 181.7  | 187.2  | 199.5  | 223.4  | 174.4  |
| 124.7  | 320.6  | 251    | 256.3  | 196.8  | 202.4  | 231.2  | 226.1  | 151.4  |
| 107.5  | 111.9  | 102.1  | 107.2  | 95.7   | 103    | 104.7  | 107.5  | 105.3  |
| 109.5  | 104.6  | 104.8  | 104.6  | 100.3  | 109.4  | 105.8  | 106.7  | 105.8  |
| 138.2  | 195.8  | 216    | 182    | 167.7  | 206    | 141    | 250.5  | 194.7  |
| 242.4  | 202.2  | 158.3  | 200.4  | 179.9  | 162.8  | 226.2  | 426.6  | 294.8  |
| 102.6  | 107.4  | 102.5  | 114.4  | 106.6  | 127    | 104.7  | 109.2  | 115.1  |
| 111.1  | 120.3  | 102.8  | 111.1  | 106.2  | 128.6  | 113.1  | 133.3  | 129.5  |
| 117.7  | 114.4  | 105.2  | 96.9   | 91.3   | 119.1  | 99.6   | 118.7  | 115.6  |
| 106.4  | 103.6  | 100.5  | 101.2  | 93.2   | 101.8  | 99.3   | 107.3  | 100.9  |
| 112.1  | 110.1  | 100.4  | 108.2  | 96.3   | 102.4  | 99.6   | 106.2  | 114.3  |
| 99.4   | 112.4  | 96.1   | 98.5   | 88.8   | 108.4  | 101.7  | 105.6  | 106.4  |
| 105.8  | 111.9  | 101.6  | 99.6   | 94.8   | 116.9  | 101.8  | 112.3  | 107.3  |
| 113.3  | 109.2  | 101.1  | 105.8  | 95.5   | 111.7  | 106.7  | 110.5  | 105.5  |
| 196.1  | 185.9  | 163.4  | 246.1  | 185.6  | 188    | 234.7  | 267.5  | 204.6  |
| 105.9  | 110.3  | 96     | 93.6   | 96.1   | 106.7  | 103.1  | 106.3  | 102.3  |
| 110.5  | 122.1  | 121    | 102.4  | 106.2  | 123    | 112    | 129.2  | 118.7  |
| 104.1  | 106.6  | 99     | 99.8   | 93.1   | 103.3  | 103.2  | 100.7  | 101    |
| 119.8  | 127.3  | 136    | 118.3  | 115.5  | 132.9  | 146.8  | 148.6  | 119.8  |
| 108.7  | 115.6  | 117.3  | 112.6  | 106.4  | 114.7  | 105.2  | 130.6  | 130.5  |
| 110.5  | 116.4  | 109.6  | 105.6  | 100.5  | 113.1  | 109.9  | 110.1  | 109.5  |
| 122.8  | 125.7  | 119.2  | 127    | 115.8  | 126.1  | 128.3  | 144.1  | 122.5  |
| 3806.4 | 3280.7 | 3998.9 | 3019.9 | 2466.5 | 4055.9 | 1850.9 | 5101   | 6400.5 |
| 158.7  | 171    | 178.9  | 162.7  | 156.7  | 182.8  | 164.2  | 258.4  | 193.1  |



|       |        |       |       |        |       |       |        |        |
|-------|--------|-------|-------|--------|-------|-------|--------|--------|
| 202.1 | 525.6  | 450.2 | 350.7 | 322.6  | 331.7 | 423.1 | 303    | 207.4  |
| 114.8 | 117.7  | 114.3 | 111.9 | 100.4  | 118.5 | 121.5 | 113.4  | 119    |
| 103   | 107.2  | 100.5 | 94.3  | 91.8   | 108.1 | 100.9 | 104.9  | 104.8  |
| 135   | 179.4  | 145.3 | 160.7 | 157.4  | 154.1 | 179.4 | 176.1  | 140.6  |
| 568.7 | 708.6  | 757.9 | 793.8 | 649.9  | 752.6 | 776.4 | 1283.9 | 772.4  |
| 154.3 | 176.4  | 168.1 | 147.5 | 168.5  | 186   | 189.3 | 222.2  | 150.7  |
| 132.3 | 172.4  | 154.5 | 159.1 | 172.6  | 151.1 | 140.8 | 238.3  | 158.4  |
| 119.2 | 122.1  | 122.8 | 105.5 | 112.7  | 119.7 | 120   | 142.4  | 125.5  |
| 109.5 | 111.9  | 111.4 | 121   | 101.6  | 107.9 | 103.5 | 116.4  | 123.1  |
| 219   | 235.2  | 205.8 | 201.9 | 227.7  | 236.4 | 293.5 | 341.6  | 357.9  |
| 107.2 | 124.5  | 113.9 | 108.3 | 104.9  | 122.7 | 103.6 | 112.7  | 124.9  |
| 105.8 | 111.3  | 112.8 | 102   | 102    | 113.8 | 106.4 | 114    | 121.7  |
| 120.7 | 114    | 114.3 | 113.9 | 114.3  | 117.9 | 109.9 | 123.9  | 112.4  |
| 115.4 | 132.7  | 116.5 | 116.4 | 106.1  | 113.7 | 121.6 | 126.4  | 124.7  |
| 101.4 | 114.6  | 117.5 | 111.8 | 101.7  | 121.4 | 107.4 | 118.4  | 113.2  |
| 110.8 | 106.8  | 102.9 | 102.8 | 105.2  | 110.4 | 98.8  | 117.2  | 112.3  |
| 110.9 | 108    | 106.9 | 98.3  | 93.5   | 115.5 | 101.6 | 107.3  | 116    |
| 107.3 | 105.9  | 110.5 | 99.6  | 96.3   | 113.7 | 112.9 | 107.6  | 113.5  |
| 139.6 | 172.8  | 163.4 | 160.8 | 153.1  | 147.4 | 189.1 | 164.9  | 146.3  |
| 190.1 | 223.4  | 216.7 | 199.4 | 264.6  | 267.4 | 239.3 | 265.6  | 200.5  |
| 131   | 119.5  | 115.7 | 120.2 | 105.6  | 126.1 | 109.5 | 130    | 132.8  |
| 108.3 | 117.3  | 111.8 | 107.4 | 98.3   | 117.1 | 104.1 | 123    | 124.8  |
| 898.1 | 1059.4 | 925.4 | 963.1 | 1037.4 | 889.3 | 976.1 | 1090.1 | 678    |
| 125.9 | 129.5  | 122.8 | 108   | 108    | 117.8 | 112.5 | 137.7  | 137.1  |
| 110.2 | 110.1  | 102.1 | 96.8  | 92.6   | 107.4 | 103.9 | 107    | 110.4  |
| 108.2 | 111.8  | 108.8 | 105.6 | 100.4  | 102.5 | 106.2 | 109.4  | 117.3  |
| 110.7 | 112.8  | 104.9 | 98    | 97.8   | 113.3 | 101.5 | 103.6  | 111.7  |
| 114.1 | 103.8  | 106.7 | 122.1 | 97.6   | 125.6 | 105.5 | 107.3  | 114.2  |
| 164   | 145.9  | 140.9 | 133.3 | 141.1  | 176.7 | 145.6 | 176.7  | 189.6  |
| 156.1 | 226.4  | 230.2 | 244.7 | 227    | 239.9 | 262   | 270.7  | 190    |
| 160   | 223.8  | 241.5 | 266.9 | 234    | 263.4 | 236.4 | 341.8  | 241    |
| 108.2 | 111.1  | 101.4 | 99.6  | 98.2   | 109.2 | 107.1 | 106.5  | 119.8  |
| 130.8 | 146.8  | 157.3 | 147.2 | 135.6  | 159.5 | 139.8 | 227.8  | 190.6  |
| 394.6 | 504.3  | 578.5 | 510.7 | 407    | 519.4 | 490.6 | 898.9  | 540.6  |
| 159.5 | 277.7  | 256.2 | 250.4 | 179.3  | 230.9 | 247.8 | 216.7  | 195    |
| 364.1 | 625.7  | 547.8 | 463.5 | 615    | 505.2 | 606.5 | 783.1  | 442.5  |
| 107.7 | 114.8  | 115.4 | 109.5 | 116.3  | 120.4 | 112.1 | 134.8  | 120.5  |
| 97.9  | 106.3  | 117.1 | 121.4 | 102.7  | 112   | 106.3 | 119.7  | 98.6   |
| 107.6 | 113.3  | 101.7 | 94.3  | 95.4   | 101.7 | 98.1  | 102.3  | 104.5  |
| 126.7 | 139.8  | 121.1 | 120.5 | 109.7  | 132.4 | 113   | 142.8  | 112.9  |
| 102.2 | 114.6  | 112.6 | 107.8 | 96.4   | 120.1 | 107.3 | 111.1  | 108.9  |
| 106.6 | 113.5  | 106.2 | 94.7  | 95.4   | 107.1 | 105.8 | 118.2  | 116.6  |
| 121.6 | 149    | 147.2 | 132.5 | 128.7  | 150.3 | 129.7 | 155.1  | 129.2  |
| 598   | 678.3  | 428.2 | 600.1 | 552.4  | 443.7 | 665.7 | 1340.1 | 1120.1 |
| 435.9 | 540.9  | 516.7 | 455.6 | 411.9  | 486.5 | 376.5 | 590.8  | 455.9  |
| 188.7 | 189.5  | 174.2 | 158.4 | 144.3  | 162.2 | 168.1 | 240.6  | 164.8  |
| 330.3 | 500.6  | 484.4 | 554.9 | 461.5  | 545.3 | 619.2 | 551.7  | 445.4  |
| 384.7 | 393.2  | 201.2 | 694.1 | 349.4  | 281.4 | 629.6 | 519.1  | 183.8  |
| 112   | 105.6  | 108.8 | 109   | 97.3   | 111.2 | 98.5  | 105.7  | 108.2  |
| 111.8 | 115.8  | 108.1 | 105.1 | 97     | 116.6 | 116.2 | 121.2  | 116.6  |
| 102.4 | 105.2  | 103.1 | 99.3  | 93.1   | 99.7  | 102.2 | 104.2  | 107.3  |

|        |        |        |        |        |        |        |        |        |
|--------|--------|--------|--------|--------|--------|--------|--------|--------|
| 141.9  | 194.9  | 190.3  | 214.1  | 192.7  | 174.6  | 194.6  | 299.6  | 215.7  |
| 334.4  | 380    | 376.3  | 297.1  | 360.4  | 408.6  | 347.7  | 598    | 422.6  |
| 109.5  | 107.3  | 94.1   | 109.7  | 95.5   | 106.6  | 100.1  | 102.4  | 105.5  |
| 161.2  | 137.8  | 130    | 136.2  | 121.9  | 155.5  | 140    | 225.6  | 201.7  |
| 118.6  | 110    | 114.9  | 114.6  | 99.5   | 112.3  | 110.7  | 116.9  | 106.2  |
| 1076   | 1565.9 | 1195.8 | 1383.8 | 1153.1 | 1260.6 | 1731.1 | 1730.4 | 1263.1 |
| 466.2  | 818.1  | 660.2  | 764    | 554.1  | 595.3  | 597    | 956.6  | 709.6  |
| 105.3  | 111.1  | 105.9  | 100.2  | 93.7   | 109.2  | 94.2   | 105.6  | 106.5  |
| 169.2  | 255.5  | 231.8  | 223.5  | 212.2  | 240.9  | 231.9  | 243.3  | 183.2  |
| 123.8  | 239.9  | 259    | 227.9  | 263.8  | 270.5  | 221.1  | 244.9  | 148.2  |
| 107.5  | 113.4  | 107.5  | 116.4  | 101.7  | 118.9  | 106.7  | 123.3  | 119.6  |
| 109.7  | 106    | 106.7  | 105.6  | 101.1  | 109.2  | 106.2  | 110.3  | 119.3  |
| 127    | 138.4  | 143.2  | 115.9  | 116.4  | 153.1  | 132.7  | 187.4  | 172    |
| 111.6  | 110.5  | 105.6  | 96.5   | 96     | 109.4  | 103.4  | 118.7  | 115.9  |
| 6947.2 | 4889.6 | 4742.7 | 5426.6 | 4643.7 | 5429.1 | 5054.2 | 8873.4 | 7464.7 |
| 106    | 105.9  | 107.8  | 98.9   | 93.2   | 107.9  | 99.9   | 104.6  | 111    |
| 106.1  | 116.8  | 111.3  | 119.6  | 99.1   | 115.8  | 116.8  | 127.3  | 120.2  |
| 196.4  | 362.9  | 316.4  | 267.9  | 292.9  | 307.1  | 308.1  | 378.4  | 298    |
| 126.4  | 121.9  | 117.6  | 132.1  | 117.8  | 127    | 121    | 139.8  | 119.6  |
| 142.8  | 209.5  | 176.4  | 136.4  | 154.9  | 176.1  | 164.4  | 196.1  | 130.2  |
| 293.1  | 389.4  | 476.4  | 400.2  | 360.9  | 443.2  | 357.2  | 424.2  | 283    |
| 104.1  | 109.1  | 92.4   | 88     | 98.6   | 103.7  | 98.1   | 99.2   | 107.7  |
| 102.9  | 108.2  | 101.6  | 102.8  | 94.5   | 107.7  | 103.5  | 121.8  | 108.1  |
| 163.2  | 195.7  | 184    | 211.1  | 195.7  | 196.1  | 231.8  | 212.2  | 174.2  |
| 303.6  | 314.6  | 347.3  | 239.8  | 273.2  | 370.9  | 297.3  | 414.2  | 300.6  |
| 159.9  | 184.6  | 264.8  | 173.9  | 172.2  | 256.1  | 191.5  | 204.4  | 207    |
| 149.5  | 218.4  | 163.5  | 179    | 162.3  | 202.7  | 171.8  | 173.4  | 146.5  |
| 128.1  | 154.2  | 149.7  | 142.3  | 152.1  | 134.2  | 147.4  | 171.7  | 152.2  |
| 104.3  | 108.1  | 101.9  | 105.5  | 100.4  | 115    | 114.7  | 112.5  | 109.1  |
| 106.6  | 120.9  | 105.2  | 113.1  | 109.3  | 109.4  | 113.4  | 124.5  | 108.2  |
| 102.5  | 105.3  | 102.2  | 112.9  | 95.6   | 106.3  | 117.5  | 110    | 108.9  |
| 586.8  | 880.2  | 783.4  | 781    | 889.4  | 778.3  | 833.3  | 1388.8 | 978.2  |
| 115.6  | 120.5  | 104.9  | 111.1  | 95.9   | 108.1  | 112.8  | 124    | 109.2  |
| 163.1  | 153.4  | 177.2  | 164.7  | 154    | 164.1  | 201    | 201.9  | 173.6  |
| 1790.9 | 1799.3 | 1630.8 | 1202.9 | 1346.1 | 1753.3 | 1205.4 | 2535.1 | 1720.9 |
| 115.7  | 113.9  | 110.7  | 111.2  | 96.7   | 115.6  | 116.7  | 128.4  | 120.6  |
| 112.1  | 108.2  | 108.4  | 117.8  | 96     | 103.6  | 107.9  | 109.2  | 114.3  |
| 116.6  | 115.4  | 106.5  | 94.6   | 104.4  | 113.6  | 108.7  | 117.9  | 110.5  |
| 117.9  | 134.6  | 130.1  | 129.4  | 120    | 142.1  | 133.2  | 134.5  | 130.4  |
| 113.5  | 163.4  | 148.2  | 155.3  | 138.1  | 168.5  | 164.1  | 192.3  | 156.1  |
| 108.4  | 96.9   | 98.4   | 92.7   | 94.9   | 103.7  | 99.1   | 105.8  | 99.4   |
| 206.4  | 311.6  | 248.8  | 251.5  | 226.5  | 293.2  | 237    | 495.9  | 333.6  |
| 127.4  | 142.5  | 127.7  | 114.6  | 132.7  | 139.4  | 119.6  | 190.7  | 144.4  |
| 394    | 544.9  | 563.7  | 403.9  | 395.8  | 504.6  | 348.7  | 1049.4 | 830    |
| 103.7  | 108    | 98.9   | 105.4  | 94.1   | 98.8   | 98     | 104.9  | 104    |
| 125.4  | 209.9  | 189.1  | 199.7  | 139    | 186.8  | 157.3  | 229.4  | 164.9  |
| 101.2  | 112.4  | 101    | 108    | 100.1  | 104.1  | 99.9   | 112.7  | 113.1  |
| 105.4  | 110.1  | 103    | 100.9  | 106.2  | 117.7  | 109    | 113.8  | 101.9  |
| 234.9  | 243.7  | 253.7  | 192.5  | 231    | 304.8  | 223    | 397.2  | 279.4  |
| 472.7  | 734.3  | 602.4  | 681.7  | 494.8  | 630    | 752    | 732.9  | 571.8  |
| 300.7  | 135.2  | 134.3  | 167    | 116.3  | 129.2  | 210.7  | 135.6  | 122.8  |

|        |        |        |        |        |        |        |         |        |
|--------|--------|--------|--------|--------|--------|--------|---------|--------|
| 101.3  | 110.4  | 96.5   | 97.4   | 94.9   | 100.3  | 99.1   | 100.5   | 106.9  |
| 236.6  | 138.5  | 117.8  | 160.4  | 113.2  | 126.9  | 178.8  | 115.5   | 115.3  |
| 107.8  | 104.8  | 101.2  | 104.4  | 97.3   | 103.6  | 98.3   | 107.9   | 105.6  |
| 150.2  | 193.6  | 184.1  | 172.8  | 165.3  | 187.8  | 174.3  | 248.5   | 243.3  |
| 112.8  | 113.5  | 112.3  | 111.6  | 96.7   | 125.7  | 110.7  | 129.3   | 111.8  |
| 110.8  | 116    | 114.3  | 109.8  | 110.4  | 112    | 103.9  | 127.6   | 130.9  |
| 113.7  | 132.6  | 106.2  | 103.3  | 92.2   | 111.3  | 100.1  | 115.6   | 104.6  |
| 108.8  | 112.6  | 119.7  | 123    | 112.7  | 105.1  | 108.1  | 137.7   | 128.2  |
| 109.7  | 106.2  | 110    | 105.7  | 99.2   | 108.5  | 108    | 122.5   | 117.6  |
| 111.2  | 116.5  | 101.9  | 101    | 97.3   | 113.8  | 103.2  | 126.2   | 121.4  |
| 104.7  | 105.7  | 98.9   | 101.4  | 95.9   | 105.2  | 96.3   | 102.6   | 112.5  |
| 124    | 129.8  | 118.8  | 120.9  | 119.6  | 124.5  | 126.3  | 145.1   | 124.2  |
| 118.9  | 115.8  | 115.9  | 115.4  | 102.8  | 123.2  | 117.2  | 123.4   | 115.8  |
| 117.5  | 130.2  | 123.9  | 119.9  | 109.8  | 122.8  | 146    | 170.5   | 133.3  |
| 110.4  | 119.4  | 109.2  | 109.3  | 107.6  | 115.1  | 99.8   | 117.4   | 121.8  |
| 120.1  | 137.3  | 117.1  | 117    | 108.2  | 127.7  | 121.9  | 140.4   | 133.3  |
| 103.4  | 98.4   | 100    | 88.3   | 93.5   | 96.1   | 102.7  | 109     | 102.9  |
| 108    | 111.1  | 100.1  | 106.8  | 95.8   | 104.1  | 104.9  | 105.8   | 112.8  |
| 108.1  | 98.5   | 100.5  | 91.8   | 95     | 112.7  | 102.3  | 112.4   | 109.7  |
| 113.3  | 106.2  | 105.1  | 105.8  | 95.2   | 110.1  | 101.7  | 105.1   | 112.3  |
| 103.2  | 106.2  | 97.3   | 94.3   | 102.5  | 103.6  | 100.9  | 103.2   | 103    |
| 113.4  | 110.8  | 106.9  | 97     | 95.9   | 103.5  | 119.2  | 110.8   | 104.7  |
| 107.4  | 109.9  | 108.9  | 100.8  | 102.4  | 115.8  | 103.3  | 109.6   | 108.7  |
| 95.1   | 108.8  | 104.1  | 102.2  | 96.5   | 108.8  | 95.8   | 107.9   | 104.3  |
| 107    | 103    | 97.4   | 98.6   | 89.4   | 103.3  | 107    | 112.2   | 112.9  |
| 108.3  | 114.4  | 114.4  | 114    | 98.3   | 113.4  | 107.2  | 126.2   | 113.1  |
| 113.5  | 124.6  | 112.9  | 110.9  | 101.5  | 103    | 111.7  | 128.6   | 116.5  |
| 108.3  | 114.2  | 106.7  | 111.1  | 100.4  | 125.9  | 117.8  | 139.6   | 110.7  |
| 104.8  | 116.5  | 98.9   | 103.5  | 99.9   | 108.2  | 106.3  | 119.2   | 125.1  |
| 99.5   | 100.3  | 103    | 101.6  | 92.1   | 105.9  | 105.8  | 102.9   | 98.6   |
| 106.2  | 111.3  | 112.8  | 100.8  | 92.6   | 110.5  | 108.3  | 115.4   | 108.7  |
| 120    | 113.7  | 100.3  | 104.5  | 94     | 110    | 96     | 104.6   | 112.6  |
| 116.3  | 115.5  | 100.3  | 108.8  | 93.4   | 114    | 102    | 110.8   | 102    |
| 101.4  | 103.8  | 98.2   | 96.2   | 98     | 99.2   | 96.2   | 110.1   | 106.8  |
| 105    | 105    | 98.2   | 95.9   | 89     | 102.4  | 102.9  | 111.4   | 104.1  |
| 4965.2 | 7787.3 | 5944.6 | 7784.5 | 4454.8 | 6293.4 | 6587.6 | 10016.2 | 7399.5 |
| 120.1  | 127.9  | 119    | 113.9  | 112.2  | 121.9  | 123.5  | 117.2   | 113.9  |
| 113.8  | 120.8  | 108.4  | 107.3  | 102.3  | 111.3  | 109.9  | 123.1   | 118.2  |
| 109.7  | 109.9  | 100.8  | 105.4  | 95.8   | 106.1  | 99.3   | 116     | 104.6  |
| 115.7  | 113.6  | 110.1  | 107.9  | 96.5   | 123.1  | 109.9  | 115.7   | 126.7  |
| 119.6  | 136.9  | 114.2  | 118.2  | 106.6  | 131.8  | 126.8  | 169.9   | 138.2  |
| 112.6  | 116.3  | 111.4  | 111.2  | 102.9  | 122.2  | 113.8  | 112.8   | 109.8  |
| 111.6  | 124.1  | 104.7  | 109.1  | 99     | 119.6  | 114.1  | 121.1   | 111.9  |
| 118.7  | 133.8  | 117.4  | 115.8  | 105.9  | 124.3  | 129.2  | 134.2   | 119.2  |
| 173.8  | 169.9  | 161.9  | 175.2  | 143.8  | 184.5  | 174.4  | 249.3   | 226.3  |
| 253.9  | 265.5  | 243.3  | 221.1  | 255.1  | 285.3  | 257.6  | 409.4   | 373.5  |
| 114.4  | 111.9  | 114.7  | 113.3  | 117.3  | 123.9  | 114.9  | 127.7   | 115    |
| 418    | 258.9  | 286.9  | 224.4  | 260.1  | 309.9  | 337.9  | 953.3   | 597.2  |
| 130.8  | 149.9  | 144    | 125.8  | 152.9  | 138.3  | 176.4  | 212.4   | 143.8  |
| 132.3  | 181.2  | 134.2  | 157.1  | 174.6  | 123.1  | 186.4  | 216.6   | 119.3  |
| 574.4  | 432    | 492.2  | 446.2  | 402    | 394.7  | 544.6  | 633.8   | 436.6  |

|        |        |        |        |        |        |        |        |       |
|--------|--------|--------|--------|--------|--------|--------|--------|-------|
| 112.3  | 117.9  | 107.4  | 109    | 106.4  | 112.2  | 104.2  | 129.8  | 119.1 |
| 314.9  | 528.8  | 482.1  | 432.2  | 408.7  | 432.5  | 446.2  | 712.7  | 465   |
| 113.9  | 117.1  | 122.7  | 127.2  | 112.6  | 123.7  | 103.9  | 106.5  | 113.4 |
| 200.2  | 226.8  | 214.5  | 257.6  | 199.5  | 218    | 145    | 262.5  | 231.7 |
| 120.5  | 206.2  | 170.2  | 179.4  | 145    | 192.7  | 132.7  | 190.4  | 133.7 |
| 108.6  | 114.8  | 110.2  | 104.8  | 107.1  | 106.8  | 111.3  | 118.4  | 107.6 |
| 280.6  | 297.2  | 270.4  | 191.2  | 287.4  | 315.9  | 171.5  | 560.6  | 494.9 |
| 119.2  | 114.5  | 108.2  | 101.6  | 97.6   | 100.9  | 107.3  | 128.2  | 108.9 |
| 105.8  | 107.3  | 108    | 92.6   | 100.8  | 108.1  | 103.7  | 114.2  | 111.6 |
| 224.2  | 255.6  | 221.5  | 262.1  | 318.6  | 241.8  | 254.2  | 593    | 333.5 |
| 124.2  | 131.1  | 125    | 108    | 110.6  | 125.9  | 114.6  | 139.3  | 118.6 |
| 129    | 124.1  | 112.2  | 101.2  | 106.7  | 134.7  | 112.2  | 157.5  | 154.4 |
| 100.7  | 106    | 98.9   | 96.1   | 101.6  | 104.1  | 102.4  | 106.8  | 101.7 |
| 105.5  | 110.3  | 104.5  | 104.3  | 96.7   | 105.6  | 106.6  | 102.3  | 107.4 |
| 108.5  | 112.2  | 102.1  | 99.1   | 107.8  | 108.7  | 114    | 126.5  | 114.6 |
| 114.5  | 153.9  | 137.7  | 131.2  | 126.3  | 148.1  | 133.4  | 140.1  | 166.3 |
| 113.7  | 123.5  | 121.5  | 121.1  | 100.8  | 115    | 105.2  | 126.6  | 115.4 |
| 2024.5 | 4481.6 | 3518.3 | 3057.5 | 3061.9 | 2983   | 3304.4 | 2681   | 1140  |
| 113    | 124.8  | 113.8  | 105.7  | 105.3  | 125.3  | 111.9  | 127.4  | 121.3 |
| 115.9  | 125.1  | 110.7  | 104.1  | 105.2  | 108.6  | 112.8  | 108.5  | 104.8 |
| 102.3  | 110.2  | 103.3  | 99.8   | 94.1   | 102.5  | 107.9  | 107.4  | 115.5 |
| 107.8  | 109.1  | 103.1  | 101.9  | 96.7   | 107.9  | 105.4  | 103.6  | 107.2 |
| 109.7  | 118.7  | 120.7  | 99.6   | 103.9  | 111.2  | 108.4  | 131    | 111.7 |
| 100.2  | 104.1  | 99.4   | 101.1  | 101.9  | 104.4  | 105.4  | 105.1  | 108.3 |
| 102.1  | 112.6  | 102.7  | 102    | 90.8   | 106.6  | 98.6   | 107.8  | 104.3 |
| 106    | 112.3  | 107    | 118.2  | 104    | 121.5  | 105.9  | 111.4  | 109.4 |
| 103.7  | 104.2  | 101.5  | 108.1  | 97.3   | 104.8  | 105.9  | 110.1  | 112   |
| 485.5  | 446.4  | 496.8  | 665.2  | 521    | 575.5  | 731.5  | 788.1  | 544.8 |
| 148.8  | 209    | 158.5  | 170.8  | 170.3  | 175.7  | 174.4  | 297.5  | 176.9 |
| 105.4  | 123.2  | 104.8  | 127    | 99     | 108.3  | 118.2  | 116.7  | 98.7  |
| 179.9  | 163.8  | 183.1  | 147.5  | 123    | 180.8  | 156.2  | 178.9  | 131.1 |
| 1136.8 | 1219.4 | 2042   | 1506.1 | 1162.9 | 1351.5 | 1738   | 1093.2 | 464.4 |
| 114.7  | 227.9  | 219.5  | 145.9  | 151.2  | 137.7  | 244.2  | 142.6  | 122   |
| 109.7  | 103.7  | 98.4   | 104.1  | 97.1   | 106.5  | 108.2  | 107.6  | 108.9 |
| 112.2  | 119.9  | 123.6  | 114.9  | 104.1  | 115    | 106.1  | 109.9  | 103.6 |
| 115    | 228.8  | 175.1  | 213.4  | 157.3  | 211.4  | 182.3  | 190.5  | 158.4 |
| 103.1  | 113.5  | 103.8  | 97.6   | 99.6   | 111.8  | 94.6   | 108.4  | 110.2 |
| 113.8  | 120.8  | 105.1  | 122.5  | 102.5  | 116.5  | 111    | 111.2  | 106   |
| 107    | 128.5  | 113.5  | 120.5  | 110.4  | 111.5  | 114.8  | 116.6  | 110.4 |
| 156.2  | 241.4  | 295.4  | 415.4  | 214.7  | 221.6  | 255    | 218.9  | 181.8 |
| 104.6  | 115.1  | 99.9   | 95.9   | 103.8  | 113.1  | 108.4  | 111.9  | 105.8 |
| 109.9  | 113.2  | 103.3  | 107.7  | 100.7  | 115.6  | 110.2  | 108.2  | 113.1 |
| 113.8  | 104.3  | 99.7   | 92.1   | 97.5   | 107.1  | 99.1   | 111.7  | 112.7 |
| 126.9  | 229.2  | 215.3  | 249.6  | 164.4  | 180    | 184.3  | 192.4  | 127.2 |
| 104.5  | 112.9  | 103.2  | 93.9   | 95.4   | 119.4  | 110.5  | 120    | 106.8 |
| 106.4  | 109.9  | 98     | 115.9  | 92.1   | 105.9  | 107.9  | 106.1  | 103.1 |
| 137.3  | 360.3  | 219.4  | 381.3  | 179.2  | 152.7  | 258.5  | 182.6  | 137.2 |
| 165    | 254.7  | 306    | 166.3  | 315.1  | 340.5  | 175.3  | 536.3  | 319.9 |
| 115.5  | 149.8  | 145.9  | 105.1  | 154.2  | 176.8  | 115.4  | 180.3  | 134.1 |
| 295.2  | 381.3  | 420.6  | 289.7  | 349.4  | 294.9  | 199.6  | 556.6  | 561.7 |
| 276.9  | 213.9  | 254.1  | 213.8  | 186.1  | 240.3  | 192.8  | 302.1  | 446.5 |

|       |       |       |       |       |        |        |        |       |
|-------|-------|-------|-------|-------|--------|--------|--------|-------|
| 104.8 | 104.4 | 98.3  | 100.6 | 98    | 112.3  | 103.9  | 118.5  | 129.6 |
| 120.3 | 130.7 | 127.8 | 110.5 | 102.7 | 119.8  | 124.4  | 135.4  | 118.9 |
| 740.2 | 1240  | 979.7 | 991.1 | 918.9 | 1009.2 | 1196.4 | 1286.1 | 928   |
| 117.2 | 125.4 | 113.8 | 105.3 | 108.9 | 118.1  | 111.4  | 121.6  | 131.8 |
| 110.8 | 112.5 | 116.9 | 119.1 | 115.1 | 123.9  | 115    | 122.1  | 115   |
| 117   | 116.8 | 119.1 | 126.6 | 104.7 | 123.6  | 106.6  | 150.6  | 161.7 |
| 132.2 | 189.2 | 153.9 | 142.3 | 152.5 | 151.4  | 138.2  | 198.9  | 144.9 |
| 218.4 | 232.4 | 229.8 | 229   | 223.1 | 245.2  | 276.3  | 419.2  | 267.5 |
| 133.6 | 169.9 | 129.1 | 120.8 | 136.2 | 136.1  | 143.2  | 245.7  | 151.5 |
| 101.6 | 110.3 | 103.9 | 109.6 | 97.8  | 109.4  | 103.6  | 109.8  | 120.7 |
| 99.3  | 108.1 | 103.9 | 101.1 | 97.5  | 105.6  | 99.5   | 102.6  | 104.7 |
| 459.1 | 642.5 | 664   | 521.4 | 506.9 | 550.9  | 605.3  | 540.6  | 293.2 |
| 118.1 | 124.3 | 114.6 | 123.5 | 99.8  | 119.4  | 106.5  | 107.3  | 124.5 |
| 103.7 | 115   | 109.6 | 96.6  | 101.4 | 111.9  | 98.9   | 107.1  | 108.4 |
| 105.2 | 111.9 | 104.2 | 104.5 | 99.3  | 117.6  | 100.9  | 123.7  | 127.2 |
| 109.9 | 113.7 | 111.1 | 109.4 | 114.1 | 124.7  | 113.4  | 126.3  | 116.6 |
| 104   | 119.5 | 108.8 | 110   | 114.3 | 125.3  | 105.6  | 116.4  | 115.9 |
| 107.9 | 116.8 | 104.1 | 109.5 | 93.4  | 118.5  | 107.8  | 105.1  | 110.3 |
| 104.5 | 106.6 | 98.7  | 106.5 | 95.8  | 108    | 107    | 108.1  | 120.2 |
| 104.9 | 113   | 107.1 | 112.6 | 102.9 | 106.1  | 104.9  | 116.9  | 108.5 |
| 110.2 | 109.6 | 99.5  | 101.4 | 97.4  | 102.3  | 100.5  | 110.5  | 107.1 |
| 100.6 | 105.6 | 103.9 | 95.3  | 95    | 105.3  | 104.9  | 102.8  | 108.8 |
| 107.4 | 114.9 | 101.6 | 94.2  | 100.6 | 112.8  | 107.2  | 122.5  | 110.2 |
| 116   | 112.5 | 101.8 | 101.6 | 96.5  | 109.1  | 110.6  | 112.2  | 114.7 |
| 110.6 | 112.7 | 104.8 | 107.2 | 103.2 | 103    | 111.7  | 112.8  | 114   |
| 102.9 | 112.8 | 97.1  | 95.4  | 99.9  | 106    | 102.8  | 107.9  | 103.2 |
| 108.5 | 109.6 | 107   | 97.5  | 102.7 | 113.5  | 116    | 131.4  | 119.8 |
| 105   | 110.3 | 104.6 | 109.5 | 98.7  | 119.4  | 108.9  | 108.5  | 120.4 |
| 118.2 | 116   | 102.5 | 107.1 | 114.2 | 110.2  | 116.2  | 114    | 109.9 |
| 104.9 | 110.6 | 98.2  | 97.5  | 95.1  | 98.5   | 102.6  | 106.3  | 104.4 |
| 107.8 | 109   | 105.1 | 97    | 99    | 106.5  | 106.3  | 107.4  | 107   |
| 106.8 | 116.3 | 102.4 | 101   | 95.2  | 102.2  | 105    | 101    | 108.9 |
| 124.9 | 122.6 | 128.5 | 121.8 | 109   | 116.8  | 105.4  | 181.4  | 157.8 |
| 103.9 | 108.2 | 105.5 | 105.2 | 90.9  | 110.2  | 98.9   | 117    | 118   |
| 336.8 | 312.2 | 279   | 238.7 | 337.9 | 346.8  | 192.5  | 886.5  | 600.8 |
| 438.6 | 550   | 492.2 | 481.7 | 473.2 | 488.7  | 520    | 810.2  | 449.5 |
| 337.8 | 303.6 | 344.6 | 299.5 | 332.9 | 365.3  | 235.3  | 444.2  | 393.3 |
| 107.4 | 111.9 | 102.2 | 99.3  | 96.4  | 111.4  | 101.5  | 106.5  | 110.6 |
| 207.4 | 221.9 | 229.2 | 200.5 | 225.6 | 230.2  | 207.5  | 370.7  | 238.7 |
| 107.6 | 104.5 | 104.6 | 101.4 | 92.5  | 107.2  | 100.2  | 110.8  | 118   |
| 129.6 | 243.4 | 211.8 | 225.4 | 200.1 | 230.7  | 193.2  | 255.6  | 212.8 |
| 139.9 | 174.3 | 214.8 | 241.2 | 186.8 | 194.4  | 206.2  | 191.2  | 138   |
| 111.1 | 120.1 | 114   | 112.4 | 100.5 | 110.7  | 116.1  | 118    | 132.3 |
| 197.4 | 256.2 | 247.2 | 193.2 | 233.5 | 279.2  | 232.1  | 308.3  | 244.9 |
| 113.2 | 111.3 | 109.2 | 107   | 99.4  | 129.8  | 98.1   | 111.3  | 116.8 |
| 476.8 | 568.6 | 429.3 | 351.1 | 435.8 | 461.2  | 439.1  | 733.2  | 609.8 |
| 115.7 | 116.5 | 109.8 | 112.2 | 102.1 | 104.2  | 104.8  | 107    | 115.1 |
| 104.8 | 106   | 98.5  | 94.8  | 94.5  | 107.8  | 101.3  | 111.1  | 110.7 |
| 101.8 | 104.8 | 101.1 | 94.2  | 96.9  | 101.2  | 102.8  | 103.3  | 111.6 |
| 106.8 | 106.7 | 106.7 | 113.3 | 95.2  | 112.2  | 107.9  | 107.4  | 111   |
| 111.5 | 111.1 | 113.2 | 114.4 | 118.5 | 124.7  | 129.6  | 152.2  | 117   |

|        |        |        |        |        |        |        |        |        |
|--------|--------|--------|--------|--------|--------|--------|--------|--------|
| 134.5  | 321.2  | 189.2  | 355.3  | 230.3  | 158.2  | 438.1  | 187.4  | 162.6  |
| 109.9  | 101.7  | 99.3   | 92.9   | 93.5   | 104.4  | 105.9  | 116.8  | 117.2  |
| 108.2  | 109.3  | 107.9  | 101.1  | 98.8   | 106.4  | 101.5  | 110.4  | 100    |
| 102.5  | 103.5  | 96.3   | 101.3  | 91.9   | 111.7  | 101.7  | 111.8  | 106.8  |
| 105    | 110.7  | 103.6  | 100.7  | 99     | 107.3  | 99.6   | 106    | 109    |
| 102.6  | 103.6  | 98     | 99.4   | 96.7   | 98.8   | 99.1   | 104.8  | 117.3  |
| 269.3  | 283.1  | 350.7  | 234    | 309.1  | 357.3  | 229.3  | 424.1  | 470    |
| 133.7  | 124.8  | 141.7  | 122.3  | 117.7  | 138.6  | 114.6  | 144.3  | 149.8  |
| 130.5  | 136.4  | 123.1  | 115.5  | 110.8  | 127.5  | 116.3  | 150.7  | 131    |
| 193.7  | 202.6  | 187.9  | 139.9  | 180.4  | 202.1  | 206.3  | 273.6  | 232.9  |
| 378    | 321    | 269.2  | 304.5  | 278.8  | 335.8  | 282.3  | 788.6  | 494.9  |
| 111.3  | 107    | 100.2  | 94.4   | 93.3   | 102.5  | 110.1  | 105.2  | 104.7  |
| 108.7  | 110.7  | 108.7  | 96.5   | 104    | 115.5  | 97.3   | 120.6  | 106.4  |
| 108.4  | 107.7  | 109.7  | 105.9  | 106.2  | 120.9  | 112.1  | 121.2  | 115.3  |
| 115.1  | 119.7  | 111.2  | 98.2   | 109.2  | 122.8  | 114    | 150.4  | 132.7  |
| 272    | 544.2  | 415.3  | 465.3  | 439.2  | 513.8  | 413.4  | 699    | 424    |
| 178.2  | 231.8  | 226.7  | 230.6  | 216.7  | 276.5  | 220    | 389    | 311.5  |
| 293.3  | 251.3  | 251.7  | 204.8  | 184.8  | 330.8  | 254.5  | 440.6  | 320.5  |
| 435.8  | 817.7  | 739.1  | 617.2  | 730.2  | 801    | 502.7  | 1175.9 | 665.5  |
| 123.3  | 140.2  | 128.1  | 132.3  | 112.9  | 137    | 137.6  | 156.4  | 121.4  |
| 4688.3 | 4531.2 | 4406.8 | 4599.1 | 4075.7 | 3860.1 | 4455.4 | 6664.3 | 5902.6 |
| 456.5  | 549.7  | 564    | 542.6  | 554.2  | 605    | 586.2  | 774.2  | 596.4  |
| 124.4  | 112.4  | 104.5  | 113.7  | 102.8  | 129.1  | 115.4  | 154    | 138.3  |
| 165.2  | 260    | 243.5  | 227.6  | 208.6  | 232.5  | 221.1  | 285.4  | 144    |
| 119.7  | 155.3  | 140.5  | 121.5  | 119.1  | 147.2  | 117.2  | 151.5  | 130.5  |
| 106.9  | 127.8  | 122.9  | 98     | 104    | 119.5  | 112.7  | 122.7  | 99.6   |
| 111.1  | 114.8  | 113.7  | 106.6  | 104.9  | 117.8  | 99.6   | 130.5  | 125.5  |
| 254.9  | 166.1  | 160.2  | 172.9  | 166.8  | 171.8  | 148.5  | 313.8  | 244    |
| 116.9  | 116.5  | 104.1  | 109.8  | 104.2  | 109.4  | 105.2  | 114.5  | 112.2  |
| 1134.1 | 965.2  | 1107.5 | 956.1  | 988.5  | 970.9  | 1136.6 | 1233.8 | 941.1  |
| 259.3  | 216.1  | 244.7  | 174.3  | 216.7  | 264.4  | 150.9  | 406.1  | 347.2  |
| 167.5  | 279.3  | 306.5  | 243.4  | 248    | 269.1  | 240.3  | 280.9  | 184.8  |
| 169.2  | 184.9  | 205.8  | 170.1  | 154.8  | 202.4  | 155.3  | 361.8  | 294.3  |
| 128.1  | 114.1  | 113.5  | 100.2  | 105.4  | 114.3  | 112.6  | 139.3  | 138.7  |
| 145.4  | 169.1  | 194.5  | 147    | 128.9  | 188.2  | 149.1  | 255.3  | 156.1  |
| 293.7  | 447    | 468.1  | 514.1  | 347.8  | 334    | 438.4  | 650.5  | 521.9  |
| 139.9  | 119.6  | 122    | 113    | 119.8  | 127    | 118.7  | 179.3  | 149.7  |
| 242.2  | 178.7  | 203.8  | 177.6  | 191.7  | 239.4  | 218.1  | 315    | 233.6  |
| 113.3  | 108.1  | 109.5  | 101.1  | 103.8  | 110.1  | 107.6  | 133.8  | 121.6  |
| 146.8  | 267.3  | 241.8  | 202.9  | 201.4  | 203    | 203.2  | 264.7  | 229.8  |
| 102.8  | 115.3  | 117.2  | 106.8  | 106    | 121.6  | 110.2  | 112.1  | 120    |
| 114    | 119.3  | 117.8  | 118.4  | 103.2  | 124.9  | 114.4  | 145.9  | 119.6  |
| 180.2  | 194.7  | 191.7  | 141    | 194.5  | 223.1  | 207.9  | 268.4  | 238.1  |
| 344.4  | 260    | 282.8  | 240.2  | 296.6  | 289.4  | 252.3  | 490.5  | 370.4  |
| 104    | 120.5  | 107.7  | 112.6  | 92.6   | 116.2  | 106.3  | 129.7  | 106.6  |
| 101.6  | 109.5  | 102.3  | 98.1   | 95.8   | 95     | 111.3  | 109.8  | 114.4  |
| 112.9  | 109    | 114.7  | 117    | 97.2   | 115.2  | 108.4  | 116.8  | 111.7  |
| 183.6  | 251.4  | 251.6  | 245    | 188.6  | 238.8  | 261.5  | 293.5  | 230.6  |
| 110.2  | 130    | 117.4  | 122.4  | 108.8  | 109    | 100    | 115.6  | 108    |
| 110.9  | 110.5  | 106.7  | 101.3  | 102.9  | 106.4  | 110.8  | 115.4  | 120.3  |
| 132.9  | 144    | 147.6  | 139.4  | 120    | 132.2  | 173.2  | 189.8  | 168.8  |

|         |         |         |         |         |         |         |         |         |
|---------|---------|---------|---------|---------|---------|---------|---------|---------|
| 315.7   | 192.4   | 154.7   | 152.1   | 157.2   | 157     | 162.8   | 273.6   | 271.6   |
| 216.5   | 363.4   | 386.8   | 294.1   | 365.3   | 394     | 339.2   | 420.9   | 306.3   |
| 109.1   | 119.8   | 102.3   | 109.5   | 106.8   | 115.9   | 103.5   | 118.2   | 114.4   |
| 103.8   | 115.1   | 116.7   | 105     | 100.9   | 123.6   | 98.9    | 117     | 122.7   |
| 104     | 108.7   | 104.8   | 104.2   | 101.8   | 111.3   | 105.6   | 106.2   | 107.3   |
| 108.4   | 100     | 96.9    | 98      | 88.4    | 107.2   | 103.4   | 104     | 102.6   |
| 121.4   | 130.6   | 130.5   | 122.4   | 115     | 131.5   | 119.9   | 142.7   | 139.2   |
| 110.7   | 110.2   | 104.5   | 120     | 97.3    | 106.9   | 117.7   | 112     | 106.3   |
| 122.9   | 181.2   | 152.7   | 159.6   | 143.1   | 170.3   | 148.7   | 170.3   | 151.6   |
| 99.3    | 104.7   | 98.7    | 95.6    | 97      | 115.6   | 97.5    | 108.8   | 94.3    |
| 111.5   | 108.5   | 109.5   | 107     | 96.1    | 103.7   | 105.1   | 113.7   | 110.9   |
| 110.4   | 109.9   | 116.7   | 110.5   | 91.1    | 119     | 106.2   | 112.5   | 101.6   |
| 98.8    | 107     | 100.4   | 101.2   | 91.5    | 98.2    | 99.4    | 112.6   | 107.1   |
| 171.2   | 153.4   | 156.3   | 164.6   | 156.4   | 159.9   | 182.5   | 286.7   | 178.7   |
| 909.2   | 674     | 563.3   | 882.8   | 780.7   | 794.3   | 994.5   | 1727.4  | 772.3   |
| 121.4   | 110.2   | 104.3   | 115.5   | 96.1    | 114.8   | 107.9   | 118.4   | 112.1   |
| 105.8   | 108.5   | 98.7    | 101.8   | 99.6    | 107.4   | 97.2    | 104.9   | 104.2   |
| 110.9   | 109.6   | 106.9   | 102.8   | 97.9    | 116.6   | 108.9   | 108.9   | 114.8   |
| 107.3   | 104.6   | 103.1   | 114.1   | 99.7    | 118.3   | 111.7   | 124.9   | 111.8   |
| 99.1    | 110.1   | 101.7   | 106.7   | 101.2   | 114.4   | 104.9   | 104.6   | 116.6   |
| 1427.2  | 1487.7  | 1689.9  | 1902.9  | 1655.8  | 2596.9  | 1682.6  | 4327.9  | 2631.1  |
| 173.7   | 239.2   | 254.5   | 283.1   | 175.5   | 215.5   | 252.5   | 154.5   | 142.8   |
| 115.4   | 112.8   | 113.7   | 112.6   | 96.7    | 108.3   | 111.4   | 113.7   | 120.2   |
| 111.4   | 134.7   | 102.6   | 121.9   | 102.4   | 114.5   | 116.1   | 131.4   | 120.5   |
| 107.8   | 114.1   | 114.1   | 107     | 106.7   | 112.2   | 113.8   | 115.2   | 98.8    |
| 118.8   | 149.3   | 113.5   | 125.5   | 121     | 134.7   | 128.6   | 128.9   | 106.1   |
| 298.7   | 490     | 609.3   | 425     | 342     | 419.9   | 356.8   | 391.8   | 316.7   |
| 102.5   | 109.3   | 105.2   | 104.9   | 93.6    | 105.9   | 99.4    | 106     | 117.3   |
| 165.8   | 249     | 298.6   | 223.4   | 172.4   | 252.8   | 229.3   | 250.8   | 214.8   |
| 359.4   | 347.9   | 250.2   | 263.7   | 292.1   | 270.4   | 294.7   | 546.5   | 464.7   |
| 115     | 112     | 105.3   | 100.8   | 93      | 112.1   | 110.8   | 127.7   | 116.2   |
| 109.4   | 114.2   | 101.4   | 128.1   | 105.7   | 118.5   | 103.3   | 110.9   | 113.9   |
| 117.1   | 117.7   | 108.8   | 124.3   | 101.2   | 125.2   | 107.7   | 123.9   | 111.3   |
| 336.6   | 282.8   | 255.9   | 248.3   | 248.3   | 323.8   | 294     | 388     | 265.3   |
| 104.4   | 112.9   | 106.2   | 110.6   | 98.4    | 110.9   | 100     | 109.9   | 110.9   |
| 104.6   | 116     | 104.4   | 102.4   | 95.7    | 104.3   | 106.2   | 102.3   | 101.9   |
| 651.5   | 784.3   | 602.1   | 1018.7  | 602.7   | 608.2   | 802.8   | 854.4   | 649     |
| 128.8   | 150.1   | 127.7   | 126.1   | 125.5   | 144.5   | 128.9   | 157.2   | 152.9   |
| 109.9   | 113.7   | 99.1    | 116.7   | 98.5    | 106.6   | 105.7   | 122.4   | 110.7   |
| 572.7   | 682     | 618     | 568.8   | 666.1   | 681.7   | 832.6   | 905.9   | 540.1   |
| 103.8   | 104.5   | 101     | 112.4   | 103.6   | 114.1   | 101.3   | 119.7   | 123.6   |
| 109.2   | 116.3   | 111.7   | 97.7    | 97.2    | 114.1   | 102     | 99.5    | 105.8   |
| 104.7   | 112     | 97.7    | 103.7   | 91.7    | 106.7   | 107.8   | 113.9   | 102.5   |
| 105.1   | 107.3   | 97.9    | 100.5   | 101.6   | 108.3   | 101.9   | 115     | 113     |
| 102.9   | 100.9   | 96.2    | 105.5   | 100.5   | 108     | 103.5   | 107.3   | 103.3   |
| 111.6   | 114.5   | 103.3   | 104.9   | 95.9    | 108.1   | 104.9   | 114     | 106.2   |
| 122.1   | 129.8   | 127.1   | 102.7   | 111.9   | 131.1   | 107.6   | 173.1   | 129.8   |
| 533.2   | 736     | 627.6   | 715.7   | 705.5   | 684.9   | 724.4   | 1025.2  | 662.7   |
| 30858.2 | 29037.4 | 28008.7 | 26846.8 | 23226.9 | 28227.4 | 27406.9 | 36771.2 | 36172.1 |
| 102.4   | 105.1   | 100.3   | 103.9   | 92.2    | 110.1   | 99.4    | 104.5   | 112.7   |
| 110.3   | 113.7   | 97.9    | 103     | 97.2    | 110.7   | 106     | 106     | 109.6   |

|        |        |        |        |        |        |        |        |        |
|--------|--------|--------|--------|--------|--------|--------|--------|--------|
| 115.7  | 123.9  | 104.1  | 102.5  | 97.6   | 106.5  | 100.5  | 106    | 111    |
| 108.9  | 106.1  | 105.1  | 100.9  | 100.5  | 108.6  | 97.6   | 107.1  | 107.6  |
| 106.8  | 113.9  | 115.1  | 101.7  | 101.6  | 115.3  | 110.2  | 108.7  | 101.8  |
| 109.1  | 106.3  | 96.1   | 98.4   | 93.8   | 102    | 102.9  | 106.6  | 110.5  |
| 129.3  | 161.9  | 208    | 152.6  | 128.4  | 187.1  | 173.5  | 271    | 158.7  |
| 156.2  | 179    | 165.4  | 181.5  | 181.7  | 188.3  | 185.1  | 186.8  | 165    |
| 241.2  | 227.9  | 276.3  | 162.6  | 180.6  | 219.1  | 168.1  | 293    | 285.6  |
| 128.4  | 181.2  | 185.7  | 167.8  | 151.6  | 204.4  | 164.5  | 168.6  | 147.7  |
| 151.3  | 202.5  | 197.4  | 211.6  | 216    | 215.1  | 233.7  | 271.2  | 198.6  |
| 110.4  | 119.3  | 102.4  | 104.7  | 106.4  | 118.6  | 116.7  | 111.6  | 103.5  |
| 153.3  | 137.4  | 157.7  | 137.8  | 140.7  | 159.3  | 145.3  | 170.1  | 153.4  |
| 157.3  | 149.3  | 145    | 118    | 143.2  | 137.9  | 144.5  | 213.6  | 134.3  |
| 118.1  | 118.4  | 115.9  | 115    | 104.1  | 125.4  | 119    | 130.8  | 131.9  |
| 112.4  | 111    | 106.5  | 97.7   | 98.8   | 106.4  | 98     | 120.4  | 113    |
| 113.2  | 115.2  | 109.6  | 95.2   | 100.1  | 118.4  | 110    | 113.1  | 110    |
| 151.5  | 206.7  | 212.4  | 194.9  | 187.3  | 264.4  | 190.9  | 193.7  | 163.2  |
| 366.1  | 1439.4 | 1280.1 | 1119   | 998.4  | 1043.3 | 1078.4 | 1006   | 658.2  |
| 116.7  | 111.3  | 105    | 99.2   | 98.5   | 113.6  | 108    | 109.5  | 109.2  |
| 105.5  | 104.8  | 94.6   | 100.3  | 99.4   | 117.7  | 105.5  | 124.4  | 107.6  |
| 101.7  | 103.2  | 109.3  | 108.5  | 95.9   | 113.4  | 100.3  | 112.7  | 105.5  |
| 108    | 109.4  | 118.6  | 115.6  | 111.2  | 116.1  | 108.5  | 116.2  | 117.9  |
| 112    | 105.8  | 104.5  | 114.5  | 95.3   | 119.8  | 119.7  | 108    | 111.4  |
| 111.5  | 109    | 99     | 100.8  | 97.9   | 119.2  | 107.5  | 121    | 113.8  |
| 129    | 204    | 257.7  | 262.6  | 235.9  | 216.9  | 292.4  | 218.4  | 188.6  |
| 112.6  | 111.3  | 111.3  | 107.2  | 90.4   | 120.9  | 110.6  | 110.5  | 110    |
| 166.3  | 169.3  | 155.3  | 156.1  | 170.7  | 172.9  | 144.7  | 211.2  | 161.9  |
| 175.5  | 166    | 168.4  | 184.5  | 147.6  | 184.8  | 173.6  | 230.9  | 181.8  |
| 108.5  | 122.7  | 105.5  | 110.8  | 101.2  | 119.2  | 120.5  | 127.2  | 122.2  |
| 110.9  | 112    | 112.8  | 92.2   | 92.2   | 108.6  | 106.5  | 104    | 102    |
| 174.6  | 235.2  | 190    | 194    | 180.9  | 183.3  | 222.5  | 278.8  | 261.5  |
| 123.1  | 114.8  | 118.3  | 118    | 114.2  | 120.2  | 120.2  | 152.6  | 132.1  |
| 132.8  | 224.7  | 161.3  | 149.6  | 171.5  | 189.7  | 177.4  | 211.5  | 149.6  |
| 157.6  | 208.5  | 233.2  | 254.2  | 198.3  | 194.2  | 226.6  | 200.6  | 169.1  |
| 125.4  | 140.5  | 129.9  | 118.6  | 122.4  | 142.1  | 123    | 150.5  | 132.7  |
| 237.2  | 283.6  | 300.1  | 263.9  | 315.1  | 285.2  | 356.6  | 431.3  | 307.5  |
| 2331.4 | 2895.5 | 2729.8 | 2729.5 | 2591.3 | 3128.4 | 3166.1 | 3939.6 | 3985.7 |
| 100.8  | 111.7  | 105.5  | 94.2   | 94.7   | 117.7  | 94.9   | 112    | 108.3  |
| 128.4  | 151.6  | 149.9  | 160.2  | 137.4  | 160.7  | 155.2  | 177.8  | 151.2  |
| 115.2  | 178.4  | 210.5  | 132    | 188.7  | 180.1  | 201.1  | 213.6  | 147.9  |
| 205.9  | 442.4  | 453.3  | 487.6  | 321.7  | 410.4  | 454.6  | 409.5  | 251.6  |
| 115    | 124.8  | 121.4  | 98.7   | 115.9  | 115.1  | 110.8  | 139.8  | 121.6  |
| 238.8  | 355.9  | 363.4  | 330.6  | 338.1  | 341.2  | 381.9  | 505    | 364.4  |
| 111.6  | 116.8  | 108.6  | 97.3   | 104.1  | 112.3  | 109.2  | 116.7  | 106    |
| 489.4  | 539.1  | 454.3  | 425.4  | 397    | 490.3  | 459.3  | 863.9  | 631.3  |
| 433.6  | 551.1  | 548.2  | 566.3  | 509.9  | 611.8  | 620.1  | 1062   | 631.8  |
| 215.7  | 388.2  | 290.1  | 349.7  | 266.9  | 376.8  | 361.4  | 513.3  | 374.2  |
| 125    | 161.9  | 156.9  | 202.5  | 140.6  | 145    | 163.8  | 147.2  | 149.7  |
| 131    | 121.2  | 131.6  | 120.7  | 117.9  | 123.5  | 120.5  | 147.8  | 124.3  |
| 112.7  | 116.8  | 99.6   | 101.9  | 100.1  | 114    | 103.2  | 124.6  | 115    |
| 136.7  | 144    | 167.3  | 180    | 140.3  | 171.3  | 167.3  | 238    | 177.2  |
| 103.4  | 108.7  | 107.5  | 100.2  | 96.1   | 114.1  | 103.3  | 112.9  | 105    |



|       |       |       |       |       |       |       |       |       |
|-------|-------|-------|-------|-------|-------|-------|-------|-------|
| 113.9 | 127.1 | 137.9 | 113.4 | 105.1 | 134.3 | 125.7 | 126.9 | 131.3 |
| 115.5 | 108.5 | 110.5 | 107.7 | 100.3 | 121.5 | 106   | 119   | 113.8 |
| 115.3 | 112.6 | 102   | 97.7  | 103.4 | 107.9 | 98.3  | 122.2 | 119.3 |
| 108.9 | 118.3 | 110.7 | 116.3 | 97.8  | 109   | 107   | 109.6 | 111.2 |
| 108.1 | 111.7 | 104   | 107.8 | 102.2 | 108.1 | 111.6 | 115.8 | 105.7 |
| 106.7 | 119.4 | 100.3 | 110   | 97.7  | 107.3 | 104.6 | 114.2 | 106.7 |
| 120.1 | 121   | 105.2 | 106   | 115.9 | 117.7 | 114.4 | 153.4 | 121.5 |
| 110.8 | 110.3 | 98.6  | 103.3 | 99.9  | 111   | 99.9  | 114.7 | 110.1 |
| 109.4 | 117.7 | 105.9 | 95.8  | 105.5 | 106.6 | 111.7 | 114.2 | 106.4 |
| 119.3 | 133.5 | 133.4 | 129.7 | 137.6 | 142.6 | 123.3 | 162.1 | 139.9 |
| 98.2  | 106.8 | 104.6 | 101.1 | 100.9 | 102.7 | 101.1 | 109.2 | 109.4 |
| 102.5 | 113.9 | 102.1 | 97.3  | 97.1  | 113.4 | 109.5 | 113.5 | 102.7 |
| 141.9 | 173.9 | 182.4 | 137.7 | 143.4 | 175.5 | 161.2 | 175.9 | 138.3 |
| 149.1 | 148.8 | 143.7 | 139.2 | 126   | 139.4 | 145.4 | 155.3 | 129.5 |
| 106.4 | 106.7 | 106.9 | 101.7 | 93.9  | 106.6 | 106.3 | 112.6 | 113.9 |
| 115.7 | 116.2 | 109.3 | 102.1 | 102.4 | 102.5 | 106.3 | 112.6 | 106.4 |
| 327.6 | 312.2 | 285.9 | 300.2 | 296.4 | 366.3 | 321.6 | 543.5 | 562.1 |
| 541.3 | 481.3 | 400.3 | 417.9 | 445.2 | 529.2 | 451   | 859.4 | 780.8 |
| 100.7 | 108.5 | 95    | 106.3 | 94.5  | 104.7 | 90.4  | 103.9 | 109.3 |
| 110   | 102.7 | 99.2  | 101.8 | 83    | 101.3 | 101.6 | 100.8 | 103.5 |
| 106.2 | 115.3 | 105.4 | 102.4 | 98.9  | 118.3 | 111.3 | 109.3 | 100.9 |
| 110.6 | 113.4 | 109.1 | 100.3 | 93.5  | 106   | 92.6  | 114.4 | 108   |
| 468.1 | 562.6 | 531.9 | 498.4 | 436.3 | 532.2 | 414.8 | 812.7 | 502.4 |
| 179   | 208.4 | 196.7 | 168.2 | 176.8 | 200.9 | 216.9 | 248.2 | 202.8 |
| 317   | 256.3 | 194.2 | 203.5 | 298.1 | 272   | 369.7 | 333.8 | 184.9 |
| 134.1 | 363.5 | 411.3 | 253.4 | 297   | 292.1 | 262.2 | 263.5 | 165   |
| 204.5 | 183.6 | 146.1 | 124.9 | 139   | 170.5 | 129.1 | 244.2 | 370.7 |
| 107.3 | 109.8 | 101.9 | 107.1 | 96.4  | 104.7 | 101.7 | 105.8 | 109.7 |
| 106.2 | 111.6 | 104   | 108.2 | 92    | 116.4 | 97    | 105.5 | 109   |
| 110.7 | 106.3 | 103.7 | 101.4 | 94.2  | 112.3 | 100.7 | 112.1 | 101.7 |
| 128.4 | 151.1 | 139.9 | 143.3 | 125.7 | 140.9 | 140.2 | 193.6 | 157.1 |
| 324   | 413.2 | 448.5 | 274.6 | 268.4 | 344.3 | 244.8 | 561.5 | 556.7 |
| 144.8 | 185.5 | 143.1 | 148.8 | 174.3 | 157.9 | 150.2 | 215.6 | 175.9 |
| 214.2 | 207.7 | 231.5 | 188   | 180.3 | 220.3 | 219.9 | 241.6 | 205.9 |
| 104.1 | 116.3 | 99.5  | 102.9 | 99.7  | 119   | 107.7 | 115   | 110.2 |
| 111.6 | 120.8 | 114.6 | 100.8 | 97.2  | 111.6 | 109.5 | 122.6 | 114.8 |
| 108.1 | 116.4 | 116.8 | 114.3 | 103.9 | 115.5 | 112.1 | 119.2 | 108   |
| 107.3 | 109.5 | 99.5  | 104.7 | 97.9  | 111.7 | 97.7  | 114.9 | 116.9 |
| 110.8 | 106.8 | 117.3 | 102.4 | 96.4  | 108.2 | 103.6 | 104.8 | 110.4 |
| 96.7  | 108.7 | 96.7  | 93.1  | 92.5  | 103.5 | 98.2  | 101.5 | 98.6  |
| 107.4 | 116.5 | 105.9 | 104.6 | 99.5  | 115.8 | 104   | 113.8 | 105.3 |
| 102.1 | 99.5  | 95.9  | 96.4  | 88.1  | 105.7 | 99.2  | 101.2 | 98.1  |
| 112.1 | 110.5 | 96.7  | 103.2 | 93.1  | 104.9 | 97.2  | 109.5 | 108.2 |
| 107   | 105.3 | 109.4 | 121   | 108.4 | 121   | 109.7 | 117.6 | 116.9 |
| 103.7 | 114   | 107.6 | 103   | 93.2  | 111.3 | 99.5  | 106.6 | 112.3 |
| 112.2 | 114.1 | 116.7 | 106.3 | 100.6 | 117.3 | 101.5 | 129.4 | 120.1 |
| 177.6 | 265.2 | 226   | 231   | 197.2 | 185.2 | 242.9 | 246.5 | 183   |
| 418.5 | 827.6 | 740.6 | 551.4 | 574   | 581.3 | 660.3 | 740   | 574.3 |
| 197.1 | 189.9 | 178.5 | 158.3 | 147.5 | 184.7 | 146.9 | 261   | 249   |
| 104.3 | 104.6 | 105.4 | 109.5 | 92.7  | 105.7 | 96.8  | 108   | 107.7 |
| 112.5 | 116.3 | 109.5 | 105.2 | 109   | 124.7 | 109.8 | 154.2 | 131.8 |

|       |        |       |       |       |        |       |        |       |
|-------|--------|-------|-------|-------|--------|-------|--------|-------|
| 106.3 | 107.8  | 100.4 | 109.6 | 95.1  | 98.5   | 103.8 | 111    | 101.7 |
| 230.9 | 238.3  | 222   | 229.6 | 210.8 | 215.2  | 190.3 | 321    | 247.5 |
| 283.3 | 271.8  | 225.7 | 213.2 | 227.2 | 248.2  | 249.6 | 309.6  | 187.1 |
| 236.1 | 229.3  | 234.9 | 228.8 | 230   | 243.1  | 238.9 | 331.3  | 328.4 |
| 204   | 241.1  | 278.1 | 275.4 | 223   | 282.9  | 318.1 | 462.8  | 263.9 |
| 98.7  | 104.5  | 106.3 | 96.3  | 96.9  | 118.6  | 100.1 | 113.6  | 99.8  |
| 116.4 | 118.2  | 111.6 | 119.5 | 101.4 | 121.2  | 107.8 | 134.2  | 122.7 |
| 125.6 | 136    | 123.3 | 126.7 | 125   | 144.3  | 131.5 | 152.5  | 130.8 |
| 98    | 103    | 102.1 | 105.1 | 91    | 100    | 95.5  | 115.7  | 119   |
| 120.4 | 112.7  | 102.5 | 110   | 95.7  | 116    | 107.5 | 102    | 98.7  |
| 112.6 | 122.4  | 105   | 112.6 | 107.8 | 117.6  | 107.9 | 126    | 120.5 |
| 128.8 | 186.8  | 214.2 | 132.8 | 147   | 173.1  | 148.9 | 167.5  | 149.5 |
| 222.6 | 232.9  | 216.1 | 154   | 242.2 | 221.7  | 170.3 | 441.6  | 233.9 |
| 548.7 | 624    | 602.3 | 471.4 | 479.3 | 626.5  | 623.4 | 852.4  | 649.2 |
| 105.1 | 103.8  | 99.3  | 95.5  | 92.5  | 108.8  | 97.4  | 105.7  | 101.9 |
| 108.3 | 104.6  | 102.5 | 97    | 98.7  | 109.5  | 104.9 | 111.3  | 105.7 |
| 98.7  | 111.6  | 97.6  | 106.9 | 94    | 113.5  | 99.3  | 115.3  | 108.7 |
| 103.5 | 104.8  | 102.7 | 97    | 90.8  | 103.7  | 100.9 | 104.7  | 105   |
| 109.4 | 113.9  | 106.2 | 99    | 99.2  | 113.6  | 106.8 | 100.5  | 107.4 |
| 105.3 | 117.3  | 102.9 | 112.8 | 107.6 | 119.4  | 112.8 | 137.4  | 122.2 |
| 119.8 | 110.1  | 106.4 | 131.8 | 102.3 | 105.5  | 114.9 | 124.4  | 123.6 |
| 109.9 | 108.6  | 106.1 | 103.6 | 98.6  | 107    | 111   | 103.5  | 109.4 |
| 104.1 | 109.4  | 112.4 | 93.3  | 96.1  | 108.1  | 108.9 | 107.9  | 110.8 |
| 104.3 | 106.4  | 111   | 114.1 | 90.8  | 112.3  | 99.8  | 108.1  | 111.5 |
| 106.3 | 119.5  | 113.5 | 108.1 | 112.8 | 109.4  | 128.9 | 137.8  | 118.3 |
| 126.9 | 185.4  | 163.5 | 157.4 | 156.6 | 177.1  | 158.2 | 186.2  | 178.1 |
| 272.1 | 219    | 208.9 | 228.1 | 198.1 | 210.4  | 167.1 | 290.4  | 252.6 |
| 107.3 | 117.3  | 103.2 | 111.9 | 98.6  | 110.4  | 109   | 115.2  | 124.8 |
| 210.8 | 280.2  | 288.3 | 238.5 | 214.2 | 302.2  | 293.7 | 390.1  | 310.5 |
| 124.4 | 147    | 132.6 | 128.4 | 123   | 140.7  | 130.9 | 154.8  | 133.2 |
| 618.9 | 1106.3 | 945.1 | 878.5 | 800.8 | 1132.7 | 735.7 | 1330.3 | 766.8 |
| 106.6 | 108.2  | 106.4 | 104.4 | 102.3 | 109.8  | 108.3 | 121.6  | 118.5 |
| 107.2 | 107.4  | 109.5 | 115   | 94.9  | 115.5  | 105.5 | 120    | 109.4 |
| 156.2 | 166.3  | 168.9 | 170.1 | 146.1 | 177.3  | 155.6 | 246.1  | 191.3 |
| 115   | 120.3  | 110.9 | 122.3 | 106.3 | 117    | 117.9 | 119.9  | 120.6 |
| 109.1 | 105.2  | 106.3 | 97.6  | 95.4  | 108.2  | 102.9 | 107.4  | 106.9 |
| 105.7 | 103.1  | 108.4 | 110.7 | 91.5  | 108.3  | 102.8 | 107.7  | 111   |
| 504.5 | 859.3  | 898.9 | 701.2 | 850.6 | 912.1  | 827.9 | 877.6  | 574.4 |
| 108   | 118.8  | 100.4 | 113.3 | 108   | 111.1  | 108.1 | 115    | 121.4 |
| 109   | 132.9  | 119.8 | 112.1 | 125.3 | 122.8  | 109.9 | 129.7  | 110.5 |
| 106.2 | 119.2  | 115   | 119.3 | 109.2 | 110.2  | 120.7 | 129.8  | 107.6 |
| 99.9  | 110.4  | 102.2 | 103.6 | 92.9  | 102.7  | 103.7 | 112.9  | 107.2 |
| 114.4 | 116.8  | 114.9 | 116.4 | 108   | 118.1  | 124.3 | 142.4  | 135.2 |
| 169   | 282.6  | 263.7 | 238.3 | 233.8 | 249.8  | 260.8 | 378.8  | 369.3 |
| 108.3 | 114.8  | 113.9 | 105.6 | 99.9  | 118.5  | 99.9  | 122.9  | 123.2 |
| 114.7 | 154.4  | 130.7 | 154.7 | 128.4 | 174.9  | 134.8 | 161.6  | 175.2 |
| 108.9 | 105.8  | 97.3  | 98.8  | 93.4  | 107.7  | 102.6 | 112    | 106.9 |
| 113.8 | 117.4  | 104.5 | 115.2 | 109.7 | 112.9  | 111   | 106.2  | 123.2 |
| 301.6 | 378.2  | 358.7 | 292   | 290.2 | 318.1  | 197.4 | 495.3  | 336.9 |
| 116.6 | 114.7  | 106.2 | 116.2 | 104.1 | 127.1  | 114.5 | 123.7  | 116.1 |
| 97.4  | 114.7  | 100.8 | 107.3 | 91.7  | 107.2  | 99.6  | 102.7  | 109.1 |

|       |       |       |       |       |       |       |        |        |
|-------|-------|-------|-------|-------|-------|-------|--------|--------|
| 112   | 114.7 | 110.2 | 97.6  | 97.7  | 108   | 104.6 | 109.8  | 105.9  |
| 110   | 106.1 | 114.6 | 100.4 | 95.5  | 103.9 | 96.8  | 99.6   | 110.7  |
| 100.6 | 105.5 | 100.9 | 96.4  | 93.4  | 101.7 | 98.5  | 101.2  | 102.7  |
| 104.5 | 105.6 | 99.9  | 107   | 104   | 109.7 | 104.4 | 99.1   | 112.2  |
| 171.4 | 206   | 172.5 | 180.1 | 211.6 | 219.3 | 189.9 | 379    | 304.2  |
| 109.9 | 107.7 | 106.3 | 114.2 | 98.2  | 117.7 | 112.1 | 123    | 106.4  |
| 102.7 | 110.6 | 103.8 | 100.8 | 94.9  | 108.4 | 107.1 | 106.2  | 112.2  |
| 103.2 | 101.7 | 104.8 | 98.2  | 98.8  | 105.6 | 99.9  | 102.5  | 101    |
| 109.6 | 109.2 | 104.4 | 111.3 | 102.3 | 109.8 | 112.7 | 108.3  | 109.7  |
| 101.3 | 106   | 107.6 | 109.6 | 88.1  | 102.3 | 101.2 | 116.2  | 106.1  |
| 114.6 | 112.5 | 111.9 | 123.7 | 109.5 | 125.4 | 133.7 | 129.5  | 110    |
| 113   | 115.7 | 98.9  | 99.1  | 101.1 | 108.2 | 108.7 | 115.8  | 108.9  |
| 108.8 | 108.7 | 108.5 | 103.9 | 100.1 | 112   | 102.1 | 107    | 113.1  |
| 192.2 | 284   | 202.2 | 222   | 209.8 | 243.5 | 238.9 | 341.1  | 291    |
| 118.8 | 117.5 | 108.3 | 111.8 | 100.1 | 111.7 | 108.8 | 127.9  | 116.6  |
| 108.1 | 107.6 | 95.7  | 85    | 97.7  | 98.1  | 96.3  | 103.8  | 95.2   |
| 114.6 | 107   | 110.3 | 104.4 | 93.6  | 107.4 | 104.8 | 117.6  | 117    |
| 115.4 | 106.6 | 100.9 | 98.8  | 96.5  | 111.5 | 106.4 | 116.2  | 116    |
| 113.7 | 111.5 | 108.6 | 108.3 | 99.7  | 111.2 | 111.8 | 108.8  | 110.8  |
| 105.6 | 116.1 | 105.5 | 107.6 | 94.3  | 99.6  | 102.1 | 118.6  | 103.9  |
| 121.1 | 117.2 | 115.5 | 124.7 | 102.6 | 123.4 | 113.5 | 120.4  | 114.2  |
| 311.3 | 583   | 571.2 | 545.7 | 495.9 | 477.8 | 519.4 | 623    | 459.3  |
| 113.4 | 108.9 | 103.3 | 100.2 | 103   | 103.2 | 99.1  | 112.7  | 107.6  |
| 109.5 | 124   | 113.4 | 103.7 | 99.5  | 108.3 | 111.9 | 107.3  | 116.7  |
| 103.5 | 112.1 | 112   | 116.5 | 109.6 | 115   | 101   | 132.2  | 122    |
| 107.9 | 123.5 | 108.5 | 107.7 | 106.1 | 111.1 | 99.7  | 122.4  | 115.9  |
| 107.7 | 108.7 | 100.5 | 105.9 | 97.2  | 104.8 | 108.2 | 110.6  | 106.3  |
| 115.3 | 116.5 | 108.5 | 111.2 | 100.9 | 110   | 116.7 | 141.9  | 126    |
| 185.7 | 195.8 | 198.4 | 191.2 | 161.9 | 216.3 | 184   | 341.1  | 288.9  |
| 373.7 | 332.3 | 266.7 | 295.1 | 318.4 | 304.8 | 330.3 | 672.7  | 493.1  |
| 104.2 | 105.1 | 105.7 | 98.8  | 93.9  | 109.6 | 104.8 | 116.2  | 106.5  |
| 216.5 | 297.7 | 253.4 | 246.4 | 239.4 | 287.4 | 255.7 | 357.5  | 298.5  |
| 134.7 | 189.4 | 173   | 176.9 | 162.1 | 189.7 | 171.1 | 282.8  | 202.4  |
| 126   | 174.1 | 168.8 | 186.3 | 140.1 | 163.4 | 179.7 | 219.9  | 166.1  |
| 226.4 | 313.1 | 291.6 | 333.2 | 306.2 | 286.1 | 260.2 | 355.1  | 219    |
| 119.1 | 157.4 | 148.1 | 149   | 136.2 | 154.4 | 145.1 | 181    | 175.4  |
| 761.1 | 475.7 | 379.5 | 529.1 | 381.4 | 455   | 661   | 1323.9 | 1236.1 |
| 120.4 | 128.5 | 137   | 113   | 116.3 | 122.8 | 134.1 | 149.4  | 142.6  |
| 108.5 | 104.9 | 102.7 | 117.3 | 96    | 112.3 | 99    | 117.1  | 103.8  |
| 139.8 | 244.6 | 260   | 213.5 | 195.8 | 258   | 227.3 | 358.4  | 205.1  |
| 106.8 | 102.2 | 114.3 | 109.8 | 92.9  | 114.4 | 108.7 | 118.9  | 108.3  |
| 106.9 | 136.9 | 124   | 104.4 | 119.8 | 121.3 | 109.2 | 138.1  | 113.4  |
| 103   | 109.9 | 108.5 | 97.3  | 98.7  | 107.6 | 100   | 105.4  | 107.5  |
| 116.9 | 131.2 | 119.4 | 102   | 115   | 118.6 | 111.1 | 128.3  | 104.4  |
| 107.4 | 113.9 | 105.7 | 100.4 | 94.4  | 110.3 | 112.1 | 112.9  | 112.4  |
| 386.1 | 431.1 | 377.1 | 476.9 | 387.6 | 422   | 601.1 | 705.8  | 539.6  |
| 111.3 | 121.4 | 109.4 | 105.2 | 92.5  | 120.2 | 107.9 | 134.2  | 120.4  |
| 175.3 | 182.1 | 184.5 | 179   | 128.4 | 168   | 131.9 | 250.6  | 213.3  |
| 642.8 | 589.3 | 560   | 600.2 | 707.2 | 641.2 | 457.5 | 1008.6 | 685.1  |
| 103.9 | 108.1 | 101.9 | 96.1  | 92.1  | 109.2 | 103.1 | 110.9  | 112.2  |
| 120.8 | 123.4 | 109.2 | 111.2 | 108.4 | 120.3 | 112   | 128.8  | 114.4  |

|       |       |       |       |       |       |       |       |       |
|-------|-------|-------|-------|-------|-------|-------|-------|-------|
| 105.8 | 112.7 | 100.3 | 106.3 | 99.9  | 107.8 | 103.8 | 104.1 | 113.5 |
| 98.6  | 103.5 | 93.1  | 100.6 | 88.8  | 99    | 106.3 | 100.8 | 104.6 |
| 113.5 | 111.2 | 111.9 | 109.9 | 99    | 109.6 | 108.7 | 120.2 | 106.9 |
| 446.8 | 357.9 | 303   | 479.9 | 398.9 | 229.6 | 447.9 | 869.4 | 430.6 |
| 580.3 | 469.4 | 487.7 | 388   | 486.9 | 429.7 | 536.4 | 777.3 | 615.9 |
| 118.8 | 109.2 | 115.2 | 135.1 | 96.1  | 123.7 | 111.7 | 129.7 | 130.7 |
| 113   | 113.2 | 102.6 | 99.3  | 93.8  | 105.8 | 103.6 | 108.6 | 107   |
| 109.5 | 113.3 | 91.2  | 90.5  | 91    | 99.9  | 101.2 | 109.9 | 104.8 |
| 107.4 | 103.5 | 99.8  | 102.9 | 94.7  | 110.6 | 100   | 114.2 | 112   |
| 106.9 | 116.3 | 98    | 134.1 | 104   | 110.4 | 109.3 | 107.9 | 107   |
| 113.7 | 111   | 101.2 | 95.3  | 97    | 110.7 | 102.7 | 107.9 | 110.2 |
| 98.9  | 108.3 | 107.1 | 103.8 | 96.8  | 100.8 | 113.3 | 116.1 | 106.2 |
| 104.2 | 102.3 | 99.1  | 104.7 | 95.7  | 106.9 | 103   | 108.2 | 108   |
| 110.1 | 111.5 | 94.5  | 96.5  | 94.8  | 109.7 | 110.5 | 106.2 | 115.1 |
| 102.6 | 105   | 103.2 | 97.6  | 91    | 103.6 | 106.8 | 107.6 | 105.8 |
| 108.8 | 110.7 | 104.1 | 98.2  | 95.5  | 104.8 | 97.6  | 105.3 | 110.7 |
| 109.3 | 98.7  | 100.7 | 96.4  | 93.7  | 107.1 | 96.1  | 98.8  | 105   |
| 113.7 | 124.3 | 107.1 | 129.5 | 110.1 | 117.5 | 111.3 | 149   | 127.3 |
| 100.8 | 101   | 98.7  | 98    | 91    | 99    | 97.4  | 110   | 107   |
| 428.1 | 928.6 | 836.9 | 614.7 | 681.9 | 815.2 | 544.1 | 769   | 428.8 |
| 106.8 | 120.6 | 114.5 | 113.2 | 104.6 | 113   | 103.2 | 122.4 | 112.8 |
| 114.2 | 114.1 | 96    | 111.4 | 105.4 | 117   | 111.6 | 118.8 | 100.9 |
| 98.9  | 108.6 | 103.2 | 102.4 | 94.9  | 112.8 | 98.2  | 109.7 | 114.9 |
| 103.8 | 114   | 102.6 | 104.4 | 93.2  | 107.6 | 100.9 | 115.7 | 107.6 |
| 111.1 | 111.1 | 101.5 | 95.6  | 98.8  | 112   | 99.1  | 109.9 | 101   |
| 226   | 355.2 | 340.1 | 325.2 | 359   | 288.2 | 390.8 | 317.6 | 237.5 |
| 106.3 | 113.4 | 103.4 | 105.5 | 97.5  | 109   | 103.6 | 114.1 | 112.1 |
| 106.2 | 118.2 | 104.4 | 104   | 91.9  | 109.1 | 105   | 115.4 | 109.4 |
| 111.2 | 108.1 | 97.1  | 102.1 | 94.5  | 104.7 | 97.1  | 102.7 | 105.1 |
| 99.8  | 107   | 97.4  | 100.2 | 95.6  | 106.1 | 98.2  | 114.3 | 106.4 |
| 110.7 | 111.5 | 99.4  | 100.9 | 94.6  | 103.8 | 100.5 | 117.2 | 108.1 |
| 105.6 | 106.9 | 108.2 | 97.4  | 95.4  | 108.6 | 101.5 | 110.9 | 109.3 |
| 107.5 | 110.3 | 102.8 | 101.7 | 90.1  | 110.1 | 101.8 | 106.6 | 108.1 |
| 404.4 | 478.9 | 396.4 | 393.1 | 474.6 | 439.8 | 559.1 | 736.2 | 546.1 |
| 128.6 | 144   | 126.5 | 127.1 | 124.3 | 134   | 142.5 | 166.2 | 139.1 |
| 110.1 | 118.7 | 103.4 | 111.1 | 105.5 | 116.7 | 110.2 | 128.2 | 114.8 |
| 111.7 | 117.5 | 106   | 105.4 | 94.8  | 115.8 | 107   | 120.1 | 106.7 |
| 114.1 | 126.3 | 126.5 | 109.6 | 105.8 | 118   | 117   | 128.9 | 116.4 |
| 106.6 | 107   | 106.2 | 96.4  | 102.4 | 116.1 | 99.8  | 112.9 | 110.7 |
| 112.4 | 119.7 | 113.3 | 105.4 | 96.2  | 118.1 | 103.8 | 105.8 | 108.3 |
| 110   | 107.7 | 107.6 | 106.2 | 94.9  | 104.8 | 110.7 | 112.4 | 109.3 |
| 169.8 | 162.4 | 193   | 216.9 | 217.6 | 196.2 | 181.7 | 436.3 | 331.5 |
| 114.4 | 106.8 | 107.1 | 97.8  | 104.1 | 116.9 | 106.5 | 103   | 112.2 |
| 128.1 | 130.1 | 132.6 | 132.5 | 121.6 | 153.9 | 137.2 | 150.5 | 135.1 |
| 96.6  | 103.6 | 98.5  | 104   | 100.3 | 106.2 | 99.4  | 106.6 | 104.5 |
| 121.8 | 136.1 | 125.3 | 121   | 117.2 | 131.1 | 122.3 | 140.3 | 125.2 |
| 122.1 | 125.7 | 109.8 | 105.9 | 99.5  | 110.9 | 119.8 | 136.2 | 143   |
| 114.8 | 117.4 | 106.1 | 101.1 | 98.7  | 113.5 | 112.4 | 128   | 109.4 |
| 472.9 | 242.3 | 243.7 | 267.7 | 180.9 | 330   | 182.6 | 532.5 | 486.3 |
| 130.5 | 122.3 | 123.2 | 121.2 | 100.5 | 108.6 | 118.5 | 146   | 143.3 |
| 545.9 | 397.8 | 315.2 | 407.9 | 346.2 | 370.2 | 369.3 | 596.5 | 462.1 |

|       |        |       |       |       |       |       |       |       |
|-------|--------|-------|-------|-------|-------|-------|-------|-------|
| 401.8 | 228.3  | 250.5 | 232.2 | 240.8 | 248.7 | 274   | 540.9 | 401.1 |
| 111.1 | 100.1  | 103.6 | 100.3 | 97.5  | 109.6 | 106.7 | 106.1 | 110.6 |
| 109.2 | 108.2  | 97    | 105.3 | 91.8  | 99.7  | 106.7 | 114.2 | 109.2 |
| 133.1 | 155.6  | 131.1 | 128.1 | 144.7 | 144.5 | 142.7 | 183.5 | 132.4 |
| 141.7 | 131    | 116.9 | 120   | 109.6 | 123.1 | 117.9 | 154.8 | 172.1 |
| 121.5 | 181.7  | 215.8 | 167.1 | 160.1 | 206.5 | 169.3 | 185.2 | 133.4 |
| 501   | 456.5  | 451.2 | 563   | 457   | 492.7 | 549.2 | 980.2 | 705.6 |
| 348.9 | 325    | 323.1 | 332.5 | 315.7 | 397.4 | 394.3 | 542.7 | 448.7 |
| 173   | 202.5  | 208.7 | 171.6 | 183.6 | 206.9 | 224.6 | 252.2 | 220.6 |
| 124   | 157.1  | 135.3 | 121.3 | 129.1 | 156.8 | 129.3 | 160.9 | 134.2 |
| 675.6 | 650.8  | 627.9 | 551.1 | 581.6 | 634.9 | 684   | 871.9 | 655   |
| 113.4 | 114.1  | 119   | 108.4 | 117.4 | 122.4 | 106.3 | 124   | 123.9 |
| 113.8 | 141    | 141.8 | 118.1 | 115.8 | 129.1 | 113.9 | 140.6 | 119.9 |
| 111.5 | 111.6  | 105.1 | 102.5 | 97.7  | 115.7 | 102   | 104.1 | 102.8 |
| 110.1 | 111.1  | 103.2 | 97.8  | 94.6  | 108   | 99.9  | 120.7 | 103.3 |
| 108.6 | 108.6  | 100.6 | 119.2 | 105.4 | 111.4 | 104.7 | 115.6 | 107.2 |
| 130.2 | 151.9  | 170.5 | 148.1 | 132.5 | 174.1 | 134.9 | 128.5 | 124   |
| 101.8 | 117.4  | 106.5 | 97.2  | 99.5  | 105.3 | 102.3 | 116.2 | 109.4 |
| 97.1  | 103.9  | 97.3  | 100.4 | 98    | 104.2 | 99.9  | 99.2  | 109.8 |
| 106.6 | 112.6  | 104.9 | 102.2 | 97.8  | 113   | 97.6  | 111.3 | 108.6 |
| 106.4 | 107.1  | 108.5 | 103   | 101.8 | 110.6 | 108.7 | 104.2 | 113.8 |
| 110.7 | 99.8   | 99.6  | 102.4 | 95.7  | 105.4 | 109.2 | 112.3 | 99    |
| 106   | 110    | 106.1 | 104.6 | 102   | 95.6  | 106.2 | 111.6 | 119.5 |
| 110   | 107.8  | 96.3  | 104.4 | 101.1 | 112.3 | 103.4 | 120.7 | 110.6 |
| 112.5 | 101.7  | 102.2 | 106   | 99.5  | 103.6 | 106.1 | 110.2 | 103.9 |
| 105.3 | 111    | 116.2 | 119.6 | 107.8 | 117.7 | 114.8 | 130.3 | 114   |
| 104.3 | 107.5  | 104.8 | 105.6 | 94.7  | 109.3 | 105.1 | 122.8 | 113.2 |
| 126.7 | 135.2  | 120.6 | 135   | 113.6 | 138.7 | 119.2 | 140.4 | 127.2 |
| 112.4 | 115.1  | 108.8 | 116.1 | 100.6 | 110.6 | 101.6 | 115.9 | 116.1 |
| 108.8 | 108.1  | 111.6 | 101   | 97.1  | 113   | 104.9 | 109   | 110.8 |
| 111   | 117.5  | 103   | 107.3 | 108.4 | 122.7 | 110.1 | 134.8 | 128.8 |
| 107.6 | 112.3  | 118.6 | 98    | 106.9 | 114   | 108.5 | 111.7 | 110   |
| 108.2 | 99     | 104.8 | 102.4 | 98.9  | 108.5 | 101.4 | 113.6 | 106.2 |
| 107   | 104.5  | 102.4 | 95    | 92.5  | 111.5 | 100.7 | 108.6 | 100.9 |
| 105.4 | 106.8  | 100.7 | 109.3 | 90.1  | 103.3 | 101.6 | 106.9 | 104.9 |
| 116.2 | 148.4  | 122.6 | 123.3 | 101.7 | 114.9 | 115.3 | 126   | 118   |
| 116.6 | 143.9  | 140.7 | 124.7 | 125.8 | 130.1 | 122.8 | 118.6 | 142.6 |
| 110.3 | 115.1  | 103.7 | 102.3 | 99.8  | 112.1 | 111.8 | 122.9 | 107.9 |
| 109.2 | 110.4  | 103.8 | 104.1 | 93.4  | 115.7 | 109   | 109.8 | 104.8 |
| 121.8 | 166    | 136.8 | 128.4 | 118.9 | 133.8 | 142.3 | 151.4 | 130.1 |
| 321.9 | 1004.4 | 891.2 | 576   | 712.3 | 716.6 | 593.8 | 922.4 | 554.9 |
| 104.9 | 111    | 100.9 | 102.4 | 96    | 110.2 | 101.9 | 117.9 | 112.4 |
| 119.7 | 127.1  | 127.2 | 122.3 | 102.8 | 134.1 | 112   | 143.8 | 130.6 |
| 110.9 | 113.3  | 110   | 101.9 | 93.4  | 118.7 | 112.1 | 113.9 | 110.2 |
| 108.2 | 101.6  | 105.5 | 98.5  | 94.6  | 110.8 | 112   | 107.9 | 117.5 |
| 167.3 | 361.3  | 227.8 | 240.9 | 237.8 | 255.3 | 201.2 | 476.5 | 188.1 |
| 184.6 | 462.4  | 427.5 | 415.6 | 349.3 | 400.4 | 318.2 | 611.1 | 306.2 |
| 281.7 | 379.2  | 317.1 | 427.3 | 335.6 | 388   | 420.5 | 532.3 | 634.7 |
| 226.1 | 989.7  | 935.7 | 732.5 | 618.7 | 576.7 | 441.9 | 299.7 | 185.6 |
| 121.4 | 220    | 260.5 | 216.3 | 177.3 | 203.9 | 177.6 | 153.7 | 114.2 |
| 112   | 152.3  | 142   | 120.9 | 129.7 | 141.8 | 115.5 | 123.8 | 122.4 |

|        |        |        |        |        |       |        |       |        |
|--------|--------|--------|--------|--------|-------|--------|-------|--------|
| 120.2  | 226    | 199.5  | 193.1  | 149.4  | 170.9 | 160.6  | 171.6 | 158.4  |
| 115.5  | 145    | 125.6  | 242.3  | 105    | 122.6 | 146    | 130.4 | 118.8  |
| 104.7  | 104.7  | 102.7  | 97.8   | 102.2  | 108.1 | 99.1   | 107.9 | 96.9   |
| 105.9  | 123.2  | 107.8  | 149.6  | 96.7   | 115.8 | 135.7  | 115.9 | 106.8  |
| 103.2  | 112    | 102.9  | 102.9  | 100.4  | 112.1 | 103.9  | 98.7  | 95.9   |
| 132    | 145.4  | 130.7  | 158    | 134.9  | 155.1 | 123.4  | 153.7 | 148.1  |
| 114.1  | 125.3  | 121.7  | 111.5  | 107    | 118.1 | 102.1  | 120.7 | 120.1  |
| 109.3  | 106    | 105.8  | 109.9  | 90.1   | 114.1 | 101.4  | 103.5 | 106.8  |
| 105.5  | 109.4  | 109.5  | 99     | 97.5   | 113.7 | 106.1  | 110.3 | 92.3   |
| 156.8  | 144.9  | 144.3  | 132.3  | 121    | 166.6 | 151.5  | 224.9 | 210.4  |
| 235.8  | 615.5  | 418.7  | 804.1  | 497.3  | 409.7 | 613.3  | 420.2 | 281    |
| 157.3  | 219.8  | 173.7  | 259    | 136.2  | 174.8 | 233.6  | 225.5 | 218.8  |
| 1643.3 | 3929.3 | 2762.2 | 5356.4 | 3063.4 | 2834  | 5034.7 | 2897  | 1745.4 |
| 102.7  | 107    | 95.4   | 92.3   | 97.7   | 106   | 93.9   | 109.5 | 103.7  |
| 112.6  | 102.5  | 107.4  | 96.8   | 95.3   | 108.9 | 98.7   | 109.3 | 110.8  |
| 308.9  | 349.2  | 323.3  | 291.8  | 326.1  | 345.8 | 347.4  | 602.9 | 498.1  |
| 107    | 120.3  | 100.5  | 94.2   | 102.7  | 108.3 | 101.6  | 148.8 | 161.8  |
| 202.4  | 176.7  | 154.6  | 134.2  | 140.4  | 171.3 | 153.7  | 461.9 | 655.5  |
| 110.5  | 97.2   | 113.5  | 106.2  | 103.1  | 105.8 | 98.5   | 122.2 | 124.7  |
| 548.5  | 279.1  | 257.5  | 190.7  | 266.1  | 324.9 | 257.6  | 952   | 1302.7 |
| 106.2  | 109.4  | 107.8  | 104.7  | 93.9   | 112.5 | 105.3  | 103.8 | 113.5  |
| 121.8  | 120.3  | 110.3  | 101.8  | 106.9  | 114.5 | 115.5  | 126.5 | 142    |
| 103.7  | 124.9  | 102.6  | 118.7  | 100.9  | 112.1 | 119    | 113.7 | 110.4  |
| 110.4  | 111.7  | 102.4  | 122.7  | 98.8   | 119   | 103.3  | 115.7 | 110.6  |
| 109    | 108.9  | 113.5  | 113    | 99.1   | 128.3 | 111.9  | 120.3 | 109.5  |
| 107.4  | 113.5  | 102.4  | 107.2  | 99.7   | 115.9 | 117.7  | 106   | 107.4  |
| 106.8  | 104.7  | 102    | 98.9   | 95.1   | 109.1 | 100    | 107.1 | 113.5  |
| 110.2  | 104.2  | 96.1   | 108.9  | 88.4   | 105   | 109.1  | 99.5  | 104.6  |
| 225.3  | 289.2  | 296.4  | 255.3  | 252.8  | 301.8 | 300.9  | 351.9 | 253.4  |
| 317.3  | 420.8  | 424.7  | 312.7  | 341.1  | 466.1 | 328.4  | 732.3 | 549.6  |
| 109.6  | 116.3  | 111.2  | 110.7  | 104.6  | 110.5 | 105.2  | 118.7 | 103.7  |
| 104.1  | 106    | 105.2  | 105.5  | 99.3   | 108.8 | 96.1   | 109.7 | 121.7  |
| 114.1  | 114.5  | 107.1  | 110.6  | 106.2  | 121.3 | 112.6  | 120.7 | 119.7  |
| 109.5  | 111    | 103.1  | 94.7   | 94.2   | 111.9 | 101.6  | 111   | 115.6  |
| 137.8  | 274.1  | 204.8  | 382    | 207    | 165   | 320.6  | 183.3 | 123.1  |
| 121.2  | 133.5  | 119.3  | 109.9  | 109.7  | 146.4 | 120.7  | 129.1 | 119.3  |
| 102.9  | 104.3  | 107.5  | 98.4   | 93.5   | 111.5 | 102.8  | 103.8 | 98.8   |
| 107    | 109.6  | 101.3  | 98.6   | 94.4   | 108.8 | 101.4  | 112.6 | 115.1  |
| 216.4  | 222.8  | 238.6  | 208.5  | 210.2  | 295   | 283.8  | 461.4 | 388.8  |
| 107.6  | 111.2  | 109.3  | 112.6  | 101.8  | 116.1 | 104.8  | 104.2 | 111.7  |
| 122.3  | 137.7  | 114.8  | 104    | 114.2  | 126   | 125.5  | 119   | 113    |
| 110.6  | 119.3  | 111.3  | 105.8  | 95.8   | 114.4 | 108.6  | 116.6 | 113.3  |
| 201    | 433.5  | 405    | 269.9  | 358.5  | 371.1 | 304.1  | 388.1 | 258    |
| 113    | 123.8  | 107.5  | 102    | 99.9   | 124.4 | 101.6  | 118.4 | 122.5  |
| 139.7  | 190.2  | 179.9  | 149.6  | 158.2  | 166.2 | 185.8  | 211.5 | 159.4  |
| 177.9  | 397.4  | 376.4  | 343.4  | 363    | 389.8 | 263.1  | 517.8 | 393.3  |
| 148.3  | 296.3  | 254.7  | 262    | 277.3  | 285.7 | 223.5  | 417.9 | 324.4  |
| 238.7  | 422.4  | 363.3  | 362.3  | 363.9  | 429.2 | 451.8  | 465.5 | 300.3  |
| 117.9  | 148.1  | 129.3  | 125.6  | 118.6  | 127.6 | 124.8  | 154.8 | 136.7  |
| 175.1  | 209.9  | 212    | 206.3  | 199.5  | 218.8 | 181.6  | 243.1 | 187.8  |
| 129    | 114.1  | 100.9  | 108.1  | 97.5   | 110.6 | 110.8  | 144.6 | 158.5  |

|       |        |        |       |       |       |       |        |       |
|-------|--------|--------|-------|-------|-------|-------|--------|-------|
| 247.4 | 403.6  | 357.5  | 317.9 | 381.3 | 437.2 | 433   | 420.9  | 277.2 |
| 112.5 | 107.1  | 108.1  | 119.2 | 104.1 | 106.4 | 109.4 | 108.3  | 114.8 |
| 107.4 | 105.3  | 96.9   | 94.5  | 87.7  | 114.1 | 101.5 | 104.3  | 109.3 |
| 106.7 | 107.3  | 103.6  | 100.5 | 93.7  | 106.2 | 101.1 | 110    | 107.3 |
| 108   | 111.5  | 109.7  | 118.5 | 100.8 | 117.4 | 104.9 | 123.3  | 114.2 |
| 102.5 | 107.9  | 106.9  | 116.7 | 106.1 | 113.9 | 99.9  | 109.9  | 111   |
| 112.7 | 105.9  | 102.9  | 105.4 | 100.3 | 116.4 | 100.4 | 102.7  | 113.8 |
| 586.6 | 1134.9 | 1127.8 | 1062  | 1051  | 891.9 | 937.3 | 1005.7 | 468.6 |
| 108.1 | 110.9  | 100.1  | 119.3 | 101.2 | 113.4 | 111   | 112.4  | 108   |
| 277.3 | 192.6  | 183.5  | 218.2 | 163.6 | 197.1 | 162.9 | 327.9  | 387   |
| 385.6 | 536.5  | 556.3  | 491.7 | 510.4 | 679.8 | 489.3 | 935.1  | 702   |
| 119.4 | 163.9  | 148.4  | 136.7 | 145.8 | 148   | 143.1 | 166.5  | 136.4 |
| 104.1 | 96.1   | 95.7   | 89.7  | 90.4  | 103.3 | 105.1 | 99.5   | 100.4 |
| 111.8 | 114.4  | 107.7  | 108.3 | 96.5  | 103.4 | 114.3 | 112.1  | 118.4 |
| 110.2 | 105.4  | 106.7  | 106.5 | 92.7  | 102.6 | 104.1 | 117.7  | 108.5 |
| 115.1 | 119.2  | 104    | 106.6 | 106.8 | 113.2 | 106.4 | 113.2  | 113.9 |
| 106.7 | 114    | 110.3  | 107.3 | 99.8  | 125.8 | 108.6 | 111.4  | 111.3 |
| 109.5 | 104.6  | 99.9   | 102.2 | 93.2  | 112.8 | 100   | 104.9  | 118.1 |
| 133.6 | 150.5  | 146.1  | 128.3 | 122.8 | 160.2 | 157.8 | 191.2  | 139.4 |
| 113.1 | 104.7  | 107    | 104.2 | 94    | 109.8 | 104.4 | 113    | 108.8 |
| 162.9 | 198.5  | 179.2  | 208   | 177.8 | 175.4 | 201   | 216.8  | 162   |
| 109.7 | 108.9  | 109.5  | 99.8  | 93.3  | 112.9 | 106.2 | 112.4  | 120.3 |
| 165.5 | 185.6  | 164.2  | 181.4 | 197   | 212.1 | 192.3 | 262.1  | 167   |
| 98    | 104.8  | 97.4   | 100.7 | 90.2  | 111.4 | 98    | 102.7  | 110.3 |
| 109.7 | 122.7  | 106.1  | 105.8 | 96.5  | 117   | 115.2 | 105    | 116.3 |
| 111.6 | 127.5  | 118.5  | 136.9 | 104.3 | 123.7 | 120.4 | 128.1  | 122.4 |
| 98.3  | 110.3  | 99.4   | 97.8  | 94.8  | 103.3 | 104.1 | 111    | 102.3 |
| 129.7 | 201.5  | 171.9  | 178.2 | 182.6 | 208.9 | 234.2 | 251.1  | 163.5 |
| 102.5 | 109.8  | 106.7  | 111.7 | 94.2  | 106   | 104.9 | 106.3  | 114.1 |
| 106.8 | 104    | 105.5  | 96    | 91.5  | 111.1 | 99.4  | 110.9  | 108.5 |
| 171.7 | 169.5  | 161.5  | 206.4 | 140   | 155.1 | 164.4 | 168.1  | 135.7 |
| 115.5 | 108.4  | 104    | 112.9 | 103.3 | 108.1 | 105.1 | 115.7  | 104.8 |
| 114.1 | 143.5  | 131.5  | 104.3 | 133.4 | 132.7 | 153.3 | 216.8  | 129.3 |
| 108.7 | 126.1  | 132    | 124   | 127.3 | 133.9 | 121.8 | 121.9  | 115.8 |
| 98.8  | 100.3  | 105.9  | 99.9  | 93.2  | 96    | 96    | 108    | 104.1 |
| 113.6 | 116.4  | 100.5  | 100.3 | 101   | 107.9 | 106.2 | 111.6  | 129.1 |
| 100.7 | 120.8  | 106.4  | 110.4 | 93.6  | 116.2 | 110.8 | 121.3  | 108.4 |
| 101.1 | 112.6  | 100.8  | 104   | 90.3  | 104.6 | 97.5  | 101.9  | 100.9 |
| 107.7 | 109.5  | 106.8  | 112.7 | 99.2  | 110.5 | 103.4 | 111.9  | 105.7 |
| 110.5 | 106.8  | 104.5  | 105.2 | 108   | 107.7 | 102.9 | 113.3  | 109.5 |
| 104.9 | 109.3  | 108    | 101.8 | 88.5  | 111.5 | 101.2 | 103.4  | 112.3 |
| 109.3 | 106.9  | 94     | 106.7 | 97.1  | 111.9 | 103.6 | 114.9  | 111.9 |
| 103.1 | 105.1  | 103.6  | 95.4  | 92.4  | 105.2 | 98.9  | 106.9  | 131.1 |
| 103.9 | 103.4  | 97.5   | 98.4  | 91.8  | 107.2 | 96.9  | 102.4  | 98.7  |
| 103.2 | 119.5  | 113.7  | 106.8 | 93.9  | 109.3 | 104.7 | 108.3  | 113.8 |
| 138.5 | 122.8  | 142.2  | 128.7 | 111.9 | 162.9 | 115.5 | 176.9  | 138.7 |
| 108.1 | 103.3  | 92.2   | 86    | 97.1  | 107.9 | 112.1 | 112.2  | 102.6 |
| 121.6 | 114    | 104.2  | 128.5 | 98.1  | 116.5 | 107.1 | 130.9  | 121.3 |
| 122   | 113.5  | 100.3  | 105.2 | 104.4 | 117.7 | 111.5 | 122.5  | 118.6 |
| 101.2 | 99     | 89     | 103.1 | 91.4  | 112.3 | 100.5 | 104.2  | 108.2 |
| 106.5 | 104.7  | 105    | 102.6 | 95.4  | 105.7 | 98.4  | 101.6  | 108.8 |

|        |        |        |        |        |        |        |        |        |
|--------|--------|--------|--------|--------|--------|--------|--------|--------|
| 107.5  | 108.7  | 99.4   | 100.1  | 97.6   | 107.1  | 111.2  | 115.6  | 108.2  |
| 107    | 107.9  | 98.7   | 99.5   | 93.5   | 110.9  | 99     | 106.9  | 104.4  |
| 114.5  | 116.9  | 109.5  | 121.6  | 112.1  | 112.2  | 109.8  | 113.1  | 117.7  |
| 112.3  | 101.3  | 92     | 97.2   | 97     | 109.7  | 103.1  | 105.2  | 98.6   |
| 99.6   | 111.6  | 100.1  | 104.2  | 95.3   | 114.2  | 107.9  | 111.6  | 108.4  |
| 105.2  | 106.3  | 97.3   | 99.5   | 87.9   | 107    | 98.1   | 104.1  | 98.6   |
| 101.6  | 107.6  | 101.8  | 98.4   | 98.4   | 108.1  | 107    | 108.2  | 111.9  |
| 103.5  | 108.1  | 95.4   | 96.2   | 96     | 110.6  | 101    | 110.4  | 110.1  |
| 109.7  | 113.6  | 101.4  | 104.7  | 99.4   | 111.6  | 104    | 104.4  | 105.7  |
| 105.6  | 100.8  | 98.8   | 103.6  | 95.9   | 110    | 110.1  | 116.4  | 111.6  |
| 109.1  | 111.8  | 100    | 100    | 90.6   | 105.8  | 102.1  | 103.5  | 104.2  |
| 107.2  | 111.5  | 104    | 98.9   | 92.6   | 108.4  | 99.7   | 104.9  | 105.1  |
| 100.8  | 110    | 104.8  | 103.9  | 98.3   | 115.5  | 101.5  | 112.7  | 116.6  |
| 119.7  | 126.1  | 120.2  | 121    | 117.6  | 136.7  | 115.4  | 138.3  | 121.3  |
| 114.4  | 111    | 98.5   | 102.7  | 102.7  | 110.4  | 103.1  | 106.4  | 113    |
| 94.8   | 103.6  | 95.7   | 94.6   | 96.8   | 105.6  | 111.7  | 109.5  | 108.8  |
| 136.4  | 175.4  | 145.4  | 252.7  | 180.4  | 155.8  | 242.8  | 192.8  | 128    |
| 102.1  | 107    | 94.5   | 93.8   | 95.7   | 105.3  | 104.3  | 109.2  | 107.7  |
| 107.3  | 105.8  | 108.8  | 101.9  | 96.5   | 104.1  | 102    | 115.8  | 108.5  |
| 105.2  | 101    | 100    | 94.8   | 95.3   | 108.9  | 103    | 104.3  | 98.4   |
| 255.7  | 365.3  | 352.3  | 308.3  | 252.4  | 403    | 313.5  | 762.9  | 609.3  |
| 1346.6 | 1145.2 | 801.1  | 1819.4 | 1361.9 | 1268.8 | 2176.3 | 4321.6 | 3806.2 |
| 104.2  | 103.4  | 101.7  | 96.1   | 92.1   | 103.8  | 110.3  | 107.8  | 106.3  |
| 102    | 105.9  | 110.2  | 101.2  | 97.1   | 104    | 101.7  | 114.6  | 102.6  |
| 103    | 94.9   | 99.7   | 82.4   | 90.6   | 93.8   | 95.2   | 103.4  | 100.8  |
| 1391.2 | 1286.9 | 904.4  | 1696.6 | 1222.6 | 1162.6 | 1645.6 | 3566.7 | 3889.7 |
| 110.7  | 106.6  | 101.5  | 99.4   | 90.9   | 117.3  | 105    | 113.4  | 116.2  |
| 112.3  | 105.9  | 100.1  | 99.1   | 96.8   | 101.6  | 108.5  | 118    | 111.9  |
| 129    | 113.2  | 113.9  | 112.9  | 97.3   | 118.4  | 112.5  | 149.2  | 154.3  |
| 388.7  | 1394   | 1152.6 | 1556.5 | 943.7  | 1044.2 | 1167.8 | 1219   | 744.3  |
| 122.5  | 120.4  | 108.1  | 117.4  | 100    | 113.8  | 109.5  | 149.4  | 145.9  |
| 105.5  | 105.5  | 109.7  | 109.3  | 99.4   | 120.6  | 103.8  | 124.7  | 109.5  |
| 265.6  | 219.1  | 205.3  | 226.7  | 252.6  | 260.7  | 239.2  | 933.2  | 967.9  |
| 115    | 107.3  | 104.1  | 108.6  | 97.1   | 117.5  | 105.6  | 127.1  | 148    |
| 107    | 117.1  | 117.9  | 112.4  | 102.2  | 120.7  | 109.1  | 123    | 118    |
| 115.5  | 115.4  | 109.6  | 101.2  | 110.6  | 126.4  | 103.1  | 158.9  | 136    |
| 108.4  | 131.6  | 119.9  | 124.6  | 114.4  | 128    | 133.5  | 126.5  | 123.2  |
| 121.2  | 135    | 135.6  | 112.2  | 125.1  | 135.5  | 146.1  | 144.2  | 110.1  |
| 105.4  | 104.7  | 91.3   | 95.1   | 95.1   | 105.5  | 105.2  | 100.9  | 107.3  |
| 131.7  | 126    | 138.1  | 158.6  | 117.8  | 143.3  | 140.8  | 196.8  | 143    |
| 113.1  | 124.1  | 127.4  | 119.8  | 99.3   | 125    | 122.8  | 142.7  | 125.5  |
| 105.5  | 103.8  | 107.2  | 108.9  | 103.2  | 115.9  | 103.3  | 120.9  | 107.1  |
| 177.7  | 213    | 195.6  | 234.3  | 198.9  | 217.1  | 230    | 265.4  | 183.7  |
| 137.5  | 184.2  | 166.3  | 156.2  | 138.8  | 151.6  | 145.6  | 199.7  | 147.8  |
| 128.4  | 179.2  | 226.7  | 141.3  | 150.2  | 211.1  | 181.6  | 189.1  | 140.9  |
| 180.5  | 300.1  | 249.4  | 255.1  | 267.5  | 259.3  | 328.9  | 309.4  | 207    |
| 104.5  | 122.8  | 102.3  | 105.5  | 99.2   | 108.9  | 108.6  | 113.3  | 112.5  |
| 104.9  | 113.9  | 119.4  | 123    | 93.8   | 117.1  | 118.2  | 108    | 103.6  |
| 108.3  | 131.2  | 111.7  | 109.1  | 105.2  | 126.4  | 130.9  | 120.7  | 111.3  |
| 133.5  | 177.6  | 172.2  | 196    | 158.2  | 156.3  | 235.9  | 264.4  | 161    |
| 105.6  | 112.2  | 112.3  | 110.2  | 102.5  | 112.9  | 110.2  | 110.8  | 109.3  |



|        |        |        |        |        |        |        |         |         |
|--------|--------|--------|--------|--------|--------|--------|---------|---------|
| 283.2  | 418.7  | 329.1  | 376.3  | 365.8  | 397.1  | 404.5  | 569.6   | 314.5   |
| 123.1  | 108.7  | 119.4  | 115.3  | 104    | 138.8  | 119.6  | 234.3   | 235.6   |
| 107.2  | 107.6  | 93.7   | 89.1   | 88.6   | 102.8  | 101.9  | 108.4   | 105.5   |
| 100.8  | 109.9  | 101.1  | 97.5   | 95.3   | 98.8   | 102    | 103.6   | 104.5   |
| 122.9  | 116.8  | 117.5  | 108.7  | 106.3  | 128.6  | 125.8  | 139.9   | 126.3   |
| 144.2  | 152.8  | 152.6  | 125.2  | 135.2  | 152.9  | 149.2  | 142.4   | 153.9   |
| 167.8  | 202.2  | 202    | 158.9  | 181.8  | 188.4  | 209.8  | 214.7   | 182.5   |
| 102.9  | 108.8  | 100    | 104.7  | 104.4  | 107.3  | 102    | 111     | 102.2   |
| 109.5  | 105.2  | 111.8  | 101.6  | 100.9  | 104.3  | 109.3  | 117.1   | 112.5   |
| 119.3  | 146.8  | 146.9  | 129.4  | 124.3  | 149    | 149.6  | 191.6   | 164.9   |
| 103.9  | 104.9  | 96.6   | 99.9   | 93.1   | 102.1  | 98.7   | 106.3   | 98.4    |
| 103.8  | 108.9  | 101.5  | 90.8   | 86     | 98.3   | 104.3  | 101.3   | 104.8   |
| 287.1  | 943.6  | 904.6  | 547    | 656.1  | 785.3  | 756.4  | 1181.2  | 756.3   |
| 106.7  | 109.7  | 108.3  | 101.3  | 99     | 112.4  | 101.6  | 124.9   | 104.9   |
| 100.8  | 121.6  | 124.5  | 120.8  | 106.9  | 121.2  | 109.4  | 137.1   | 122.4   |
| 110.7  | 126.5  | 120.1  | 128    | 104    | 123.6  | 116.2  | 143.7   | 121.2   |
| 266.9  | 178.8  | 236.2  | 240.2  | 206    | 223.2  | 210    | 342.6   | 311     |
| 172.6  | 188.7  | 180.4  | 167.4  | 217.2  | 200.1  | 176.4  | 209.1   | 151.9   |
| 490.5  | 508.8  | 455.9  | 489.4  | 461.4  | 578.8  | 490.5  | 1042.3  | 747.3   |
| 102.6  | 105.4  | 100.5  | 103.1  | 91.1   | 104.2  | 109.9  | 117.8   | 104.4   |
| 2090.3 | 1210.7 | 933.4  | 800.4  | 1260.5 | 1150.2 | 1656.9 | 4940.6  | 4592.4  |
| 7836.1 | 4322.2 | 3012.2 | 2468.7 | 4326.9 | 4632.6 | 5325.3 | 13501.1 | 13573.8 |
| 117.9  | 123.1  | 108.3  | 137.6  | 116.2  | 114.8  | 121    | 133.4   | 120     |
| 420.3  | 1043   | 785.6  | 821.3  | 744.9  | 867    | 894    | 1572.5  | 830.3   |
| 192.5  | 235.8  | 204    | 218.4  | 219.4  | 229.3  | 245.5  | 274.4   | 285     |
| 147.9  | 167.3  | 156.9  | 150.8  | 154.7  | 153.5  | 151.3  | 178.3   | 146.3   |
| 1502.6 | 1359.4 | 1239.6 | 1305.2 | 1215.6 | 1287.4 | 1592.3 | 1973.7  | 1297.5  |
| 204    | 221.5  | 195    | 214.8  | 274.3  | 235.2  | 182    | 392.8   | 273.4   |
| 488    | 555.7  | 441.5  | 473.5  | 437.5  | 460.3  | 471.7  | 931     | 540     |
| 116.5  | 130.6  | 107.8  | 124.2  | 104.8  | 118.5  | 109.7  | 112.8   | 102.9   |
| 113.9  | 106.4  | 101.8  | 97.9   | 102.6  | 105.9  | 105.4  | 118.9   | 117.8   |
| 99.2   | 100.5  | 99.8   | 96.2   | 94.4   | 102.4  | 96     | 109.2   | 102.4   |
| 130.9  | 124.9  | 116.5  | 129.3  | 109.3  | 119.6  | 131.1  | 149     | 132.1   |
| 102.7  | 99.7   | 107.7  | 99.2   | 97.2   | 111.8  | 110.6  | 126.6   | 110.7   |
| 112    | 111.6  | 105.6  | 102.6  | 85.3   | 109.9  | 112.4  | 104.4   | 106.9   |
| 106.5  | 111.1  | 102.1  | 96.2   | 98.5   | 108.4  | 107    | 109.8   | 107.2   |
| 155.1  | 204.1  | 176.3  | 179.4  | 164.2  | 199.7  | 176.4  | 357.8   | 255.2   |
| 283    | 352.8  | 296.1  | 460    | 333.3  | 391.2  | 341.7  | 670.8   | 462.6   |
| 124.4  | 120.7  | 134.8  | 112.4  | 112.1  | 138.3  | 108.9  | 205.7   | 227.4   |
| 315.7  | 320.8  | 296    | 283.1  | 237.4  | 340.1  | 259.3  | 737     | 769.8   |
| 121.5  | 139.6  | 133.2  | 116.8  | 119    | 139.8  | 113.6  | 137.9   | 121.2   |
| 121.1  | 117.2  | 119.3  | 106.9  | 100.7  | 123    | 116.3  | 141.7   | 141.7   |
| 310.2  | 679.1  | 654.1  | 1019.8 | 537.1  | 577.6  | 1052.2 | 1193.9  | 722.4   |
| 115.7  | 112.8  | 107.2  | 109.7  | 99.3   | 112.8  | 103    | 128.6   | 112.3   |
| 2022.4 | 594    | 677.8  | 422.1  | 1015.7 | 1457.3 | 919.7  | 4738.1  | 4097.1  |
| 934.4  | 319.3  | 319.8  | 197.2  | 497.5  | 536.3  | 436.6  | 1937.1  | 2059.9  |
| 123.1  | 169.1  | 136.1  | 168.3  | 126    | 151.3  | 155.1  | 164     | 155.1   |
| 643.8  | 933.4  | 1018.1 | 1120.3 | 841.9  | 999.4  | 1002.7 | 1393.1  | 754.2   |
| 106.5  | 122.6  | 109.9  | 106.5  | 116    | 117.5  | 110.1  | 114.8   | 115.3   |
| 108.5  | 102.6  | 103.7  | 104.1  | 95.9   | 112.8  | 103.9  | 101.7   | 109.5   |
| 117.3  | 110.5  | 96.2   | 98     | 98.5   | 101.3  | 102    | 107     | 120     |

|         |         |         |         |         |         |         |         |         |
|---------|---------|---------|---------|---------|---------|---------|---------|---------|
| 106.4   | 106.2   | 102.4   | 97.8    | 95.9    | 102.2   | 97.7    | 112.3   | 99.8    |
| 3049.7  | 3189.3  | 1170.8  | 8014.8  | 2850.4  | 1524.3  | 8575.9  | 2911.9  | 1630.6  |
| 108.5   | 106.7   | 96.6    | 93.1    | 95.9    | 102.3   | 101.3   | 101.6   | 97.3    |
| 191.1   | 382.9   | 405.3   | 394.7   | 333.9   | 420.8   | 402.8   | 379.6   | 237.9   |
| 108     | 121.8   | 122.8   | 108.5   | 105     | 115.8   | 120.5   | 112.2   | 116.5   |
| 116.3   | 138     | 129.1   | 138.1   | 132.2   | 141     | 140.7   | 124.5   | 116.7   |
| 212.8   | 371.3   | 343.9   | 289.1   | 284.8   | 276     | 277     | 390.3   | 314     |
| 114.8   | 131.1   | 129.7   | 118.9   | 124.7   | 120     | 131.5   | 164.3   | 140.4   |
| 265.8   | 234.4   | 206.1   | 206.3   | 193.3   | 241.1   | 217.5   | 471.1   | 341.1   |
| 163.8   | 150.7   | 145.2   | 129     | 127.4   | 143.1   | 127.6   | 220.3   | 221.5   |
| 293.6   | 426.6   | 269.2   | 286.8   | 310.4   | 306.3   | 352.9   | 546.9   | 374.4   |
| 160.1   | 205.9   | 207.1   | 249.6   | 156.5   | 186.9   | 221.2   | 230.5   | 191.2   |
| 134.8   | 142.5   | 131.3   | 146.4   | 123.2   | 131.2   | 149     | 158.7   | 140.6   |
| 299.7   | 532.7   | 397.2   | 769     | 509.4   | 368     | 882.8   | 350.2   | 315.4   |
| 771.4   | 988.4   | 845.9   | 733.2   | 847     | 818.4   | 723.3   | 1556.5  | 1039.5  |
| 110.4   | 125.9   | 109.6   | 108.3   | 104.2   | 115.9   | 106.2   | 124.2   | 120.8   |
| 99.9    | 110.9   | 101     | 104     | 88.8    | 104.6   | 97.1    | 111.6   | 103.2   |
| 114.1   | 108.9   | 112     | 94.1    | 103.3   | 108.2   | 107.2   | 125     | 127.6   |
| 105.9   | 108.5   | 107     | 100     | 96.7    | 108.9   | 110.5   | 104.6   | 107.9   |
| 136.5   | 118.2   | 119.8   | 115.3   | 117     | 133.5   | 129.6   | 174.7   | 169.3   |
| 165.7   | 159     | 145.7   | 155.1   | 142.5   | 148.6   | 153.2   | 171.4   | 153.4   |
| 106.8   | 113.7   | 107.9   | 94.3    | 94.7    | 109.4   | 108.3   | 124.4   | 98.3    |
| 19032.3 | 19598   | 17159.9 | 19772.6 | 16667.8 | 20496.7 | 19745.2 | 25789.6 | 20201.9 |
| 250.2   | 246.6   | 201.1   | 204.2   | 193.8   | 230.4   | 239.8   | 333.6   | 280.4   |
| 220.2   | 578.9   | 625.8   | 594.1   | 462.2   | 641.9   | 661     | 602.4   | 351.4   |
| 601.5   | 364.9   | 364.9   | 329.1   | 385.9   | 419.6   | 461     | 823.8   | 561.5   |
| 129.6   | 134.9   | 121.8   | 103.6   | 100.3   | 119.2   | 128.1   | 168.6   | 131.9   |
| 205.4   | 218.7   | 190.3   | 183     | 178.6   | 176.8   | 214.7   | 248.2   | 171.7   |
| 126.4   | 279.3   | 339.4   | 241.6   | 251.8   | 255.3   | 233.6   | 286.1   | 170.3   |
| 102.8   | 103.7   | 108.7   | 112.9   | 97.7    | 109.5   | 106     | 102.6   | 109.3   |
| 19577.5 | 7781.8  | 7419.9  | 7593.9  | 6308.7  | 8475.7  | 7828.1  | 22046.8 | 24024.7 |
| 19264   | 12323.3 | 12587.9 | 11829.7 | 10135.5 | 14583.9 | 11589.1 | 27179.6 | 29804.1 |
| 23938.6 | 12210.4 | 11957.3 | 9571.5  | 10458.7 | 13626.5 | 12637.7 | 27085   | 32824.2 |
| 158.6   | 112.2   | 117.3   | 97.8    | 104.6   | 115.8   | 104.1   | 210.1   | 308.4   |
| 103.1   | 108.2   | 103.8   | 104     | 92.4    | 109.6   | 100.9   | 104.1   | 107.4   |
| 348.4   | 351.7   | 357.9   | 365.6   | 304.4   | 327     | 360.2   | 529.5   | 422.9   |
| 105.7   | 107.2   | 100.2   | 97.5    | 95.3    | 114.8   | 110.5   | 107.3   | 107     |
| 179.7   | 214.5   | 169.5   | 187.5   | 176.1   | 203.2   | 213.4   | 293.4   | 224.4   |
| 122.8   | 134.2   | 118.9   | 118.2   | 110.5   | 119.7   | 128.5   | 151.8   | 127     |
| 117.9   | 154.4   | 134.6   | 136     | 132     | 149.5   | 145.1   | 175     | 144     |
| 103.3   | 105.4   | 98.4    | 102.6   | 87.4    | 113.2   | 100.1   | 108.2   | 114.7   |
| 109.9   | 133.1   | 124.2   | 127     | 106     | 123.3   | 117.6   | 135.8   | 134.4   |
| 241.1   | 565.6   | 564.8   | 546.8   | 384.4   | 401.4   | 521.2   | 352.3   | 228.9   |
| 238.4   | 170.3   | 176.6   | 208.5   | 176.7   | 190.6   | 156.1   | 334.1   | 231.9   |
| 105.6   | 119.3   | 117     | 118     | 102.2   | 139     | 117.1   | 149.5   | 127.5   |
| 1222    | 663     | 515.7   | 465.1   | 623.3   | 698.4   | 713.2   | 1390.5  | 1487.6  |
| 145.7   | 129.2   | 129.7   | 126.2   | 113.2   | 133.8   | 113.4   | 152.5   | 145.7   |
| 108.9   | 109.4   | 103.6   | 103.5   | 97.3    | 115.7   | 98.9    | 121     | 119.3   |
| 106.1   | 107.8   | 102.8   | 94.6    | 94.6    | 106.2   | 97.8    | 118.6   | 114.3   |
| 116.9   | 115.9   | 107.5   | 102.7   | 102.4   | 111.9   | 109.9   | 116.7   | 119.5   |
| 100.7   | 106.2   | 93.5    | 91.9    | 94.9    | 105.7   | 97      | 104.8   | 109     |

|        |        |        |        |        |        |        |        |        |
|--------|--------|--------|--------|--------|--------|--------|--------|--------|
| 111.4  | 120.1  | 101.3  | 104.8  | 94.2   | 106.1  | 105.5  | 118    | 106.8  |
| 193.4  | 188.4  | 175.4  | 180    | 170.6  | 177.3  | 169.7  | 218.5  | 171.8  |
| 131.8  | 155.2  | 144.8  | 149.7  | 121.2  | 144    | 137.4  | 174.6  | 128.5  |
| 112.4  | 134.4  | 119.6  | 123.9  | 129    | 133    | 107.6  | 156.9  | 137.3  |
| 122.9  | 99.6   | 101    | 94.9   | 89.9   | 110.2  | 107.4  | 186.9  | 178.8  |
| 1845.6 | 1382.7 | 1208.9 | 1050.1 | 1077.2 | 1428.9 | 1256   | 2881   | 2640.3 |
| 3005.3 | 1921.5 | 2021.9 | 1659.3 | 1935.4 | 2403.3 | 1940.5 | 4068.4 | 4368.9 |
| 106.2  | 107.3  | 111.7  | 100.5  | 99     | 110.8  | 105.2  | 109.9  | 118.6  |
| 130.9  | 216.6  | 160.9  | 206.6  | 173.9  | 180.8  | 171.7  | 245.5  | 153.8  |
| 691.9  | 1159.4 | 715.4  | 1053.1 | 930.5  | 488.8  | 928.3  | 1306.5 | 862    |
| 109.4  | 145    | 108.5  | 127.4  | 120.5  | 124.1  | 124.2  | 130.3  | 141.3  |
| 137.1  | 271.6  | 188.2  | 308.7  | 224    | 168.3  | 237.4  | 214.7  | 149.3  |
| 130    | 145.5  | 151.9  | 136.5  | 143.5  | 145.2  | 147.3  | 187.8  | 168.2  |
| 367.9  | 487    | 467.3  | 462.2  | 436.2  | 489.2  | 549.9  | 605.4  | 448.9  |
| 732.2  | 851.6  | 786.9  | 822.9  | 590    | 638.8  | 754.9  | 867.5  | 552.9  |
| 253.6  | 236.4  | 219.7  | 201.8  | 219.2  | 226.6  | 191.4  | 327.9  | 298.6  |
| 272.8  | 259.5  | 220.2  | 235.2  | 207.5  | 280.7  | 236.1  | 456.7  | 398.2  |
| 252.7  | 476.6  | 439.8  | 347.9  | 335.8  | 435    | 396.2  | 652.8  | 320.1  |
| 104.1  | 109.1  | 107.2  | 91.1   | 96     | 109.8  | 106    | 113.4  | 112.6  |
| 128.7  | 124    | 110.3  | 112.6  | 107.7  | 118.2  | 118.3  | 171.2  | 162.7  |
| 153.8  | 141.1  | 156.5  | 132    | 126.7  | 159.4  | 122.7  | 228.5  | 222.5  |
| 882.3  | 1146.4 | 1030.7 | 800.8  | 925.4  | 1137.7 | 1110.7 | 2055.8 | 1436.5 |
| 104.4  | 107.2  | 95.4   | 94.6   | 97.4   | 106.2  | 97.4   | 108.1  | 109.1  |
| 102.2  | 120    | 109.7  | 110.8  | 103.5  | 116.4  | 100.4  | 118.3  | 114.1  |
| 107.6  | 116.9  | 110.7  | 122.5  | 108.9  | 117.9  | 101    | 129.3  | 121.1  |
| 315.4  | 466.2  | 426.2  | 284.1  | 355.9  | 414.5  | 330    | 393.8  | 359.3  |
| 118.1  | 123.6  | 122.7  | 111.9  | 105.1  | 123.4  | 120.6  | 129.1  | 128.9  |
| 126.9  | 148.2  | 130.8  | 107.6  | 120.8  | 134.4  | 125.6  | 160.6  | 135.4  |
| 99.6   | 108.9  | 102.2  | 96.4   | 97.7   | 103.9  | 98.5   | 102.4  | 110.9  |
| 325.9  | 221.1  | 236.4  | 272.3  | 227.5  | 262    | 296.6  | 408.6  | 364.8  |
| 125.4  | 121.4  | 114.4  | 112.1  | 108.9  | 138.7  | 107.9  | 135.5  | 131.7  |
| 109.4  | 110.3  | 102.3  | 98     | 101    | 102.9  | 97.1   | 109.8  | 96.2   |
| 834.8  | 2277   | 1393.5 | 2296.7 | 1349.7 | 1068.3 | 1549.2 | 1863.8 | 960.6  |
| 226.5  | 391.7  | 315.5  | 426.1  | 328.9  | 303.4  | 354.2  | 351.3  | 267.4  |
| 463    | 794.4  | 594.1  | 659    | 599.5  | 719.6  | 728    | 1592.2 | 1035.6 |
| 105.2  | 114.5  | 108.3  | 100.2  | 100.5  | 108.3  | 110.2  | 110.4  | 113.4  |
| 565.5  | 487.1  | 470.6  | 457.4  | 342    | 512.3  | 534.2  | 743.7  | 613.4  |
| 102    | 103.7  | 104.2  | 109.9  | 101.7  | 110.1  | 105.1  | 114.7  | 100.3  |
| 183.5  | 171.3  | 183.5  | 189.9  | 172.5  | 218    | 155.9  | 269.7  | 194.5  |
| 219.4  | 335.8  | 321.2  | 211.4  | 254.3  | 338.7  | 208.2  | 359    | 266.4  |
| 424.8  | 569.2  | 602.8  | 475.1  | 483.8  | 426.2  | 407    | 790.3  | 481.1  |
| 111.8  | 115.1  | 110.3  | 98.4   | 103.5  | 117.2  | 110.7  | 127.2  | 109.1  |
| 104    | 109    | 100.7  | 108.7  | 95.4   | 105.5  | 116.2  | 106.1  | 109.9  |
| 106.9  | 122.1  | 113.2  | 118.3  | 108.3  | 123.5  | 121.8  | 144.8  | 134.1  |
| 117.4  | 114.7  | 109.3  | 104.1  | 106.9  | 115.6  | 117.3  | 125.2  | 117.5  |
| 112.9  | 128.4  | 110.6  | 108.9  | 105    | 111.4  | 110.4  | 146.2  | 130.9  |
| 122.4  | 114    | 102.2  | 107.8  | 99     | 111.5  | 109.7  | 115.2  | 109.1  |
| 108.7  | 113.3  | 104.7  | 105.1  | 96.3   | 111.7  | 103.9  | 113.2  | 116.8  |
| 103.4  | 105.4  | 100.7  | 97.3   | 94.9   | 110    | 103.7  | 110.6  | 103.7  |
| 105    | 106.7  | 105.9  | 107.8  | 105.9  | 109.3  | 104    | 113.7  | 100.3  |
| 189.3  | 185.6  | 159.5  | 165.8  | 160.3  | 178.8  | 147.1  | 268.1  | 194.9  |

|        |       |       |       |       |       |       |        |        |
|--------|-------|-------|-------|-------|-------|-------|--------|--------|
| 287    | 287.9 | 256.6 | 195.9 | 244.8 | 249.2 | 246.6 | 475.2  | 327.1  |
| 106.8  | 116.8 | 115.9 | 110.9 | 90.8  | 113.3 | 110.7 | 133.9  | 116.2  |
| 489.8  | 444.2 | 511.2 | 545.3 | 462.3 | 500.5 | 518   | 759.2  | 555.5  |
| 299.3  | 349.3 | 334.8 | 316.4 | 338.4 | 286.4 | 364.5 | 603.5  | 443.1  |
| 109    | 106.9 | 121.8 | 116.4 | 107.5 | 119   | 115.1 | 111.7  | 108.2  |
| 104.9  | 112.1 | 115.8 | 114.2 | 100.5 | 124.1 | 112.5 | 142.4  | 120.9  |
| 307.9  | 479.6 | 639.5 | 413.5 | 493.2 | 607   | 354.6 | 804.2  | 519.4  |
| 217.8  | 288.9 | 216.6 | 240.4 | 217   | 234.2 | 236.8 | 432.1  | 293.7  |
| 150.4  | 166.1 | 136.7 | 145.4 | 151.2 | 155.4 | 136.1 | 235.6  | 230.2  |
| 134.3  | 169.7 | 145.8 | 147.8 | 140   | 168.9 | 162.8 | 245.8  | 186.6  |
| 371.9  | 455.2 | 410.6 | 455.1 | 349.8 | 352.3 | 427.7 | 446.1  | 350.7  |
| 173.6  | 270.6 | 253.1 | 248.9 | 282.2 | 297.4 | 312.9 | 335    | 199.4  |
| 98     | 104.9 | 112.1 | 106.2 | 94.9  | 105.4 | 94.8  | 109.2  | 118.4  |
| 123.6  | 130.3 | 133.3 | 119.5 | 112.1 | 117.8 | 125.2 | 151.2  | 135.5  |
| 271.2  | 287.9 | 372.4 | 263.5 | 254   | 346.2 | 353.2 | 769.7  | 531.3  |
| 132.8  | 149   | 141.1 | 141.8 | 148.1 | 161.2 | 140.4 | 168.7  | 152.2  |
| 153.9  | 197.3 | 161.3 | 180.6 | 164.6 | 193.9 | 174.8 | 254.9  | 172.4  |
| 220.2  | 426.5 | 333.7 | 352.9 | 284.3 | 419.4 | 375.4 | 453.5  | 339.9  |
| 113.8  | 114.5 | 113.5 | 116.1 | 93.3  | 117.2 | 103.2 | 110.6  | 115.2  |
| 875.6  | 688.4 | 729.5 | 534   | 737.5 | 825.1 | 699   | 1030.1 | 857    |
| 110.9  | 111.4 | 107.7 | 105.2 | 103.4 | 119.8 | 111.5 | 126.9  | 128    |
| 111.6  | 114.8 | 105.9 | 110.5 | 101.3 | 118.1 | 112.6 | 128    | 133.7  |
| 384    | 561.2 | 527.4 | 414   | 562.4 | 569.9 | 479.5 | 710.5  | 603.7  |
| 112.4  | 126.7 | 114.1 | 130.3 | 109   | 127.5 | 122.5 | 178.3  | 149.6  |
| 331.3  | 283.1 | 202.7 | 189.7 | 225.8 | 270.7 | 218.2 | 752.4  | 649.3  |
| 1003.3 | 600.6 | 594.9 | 576.2 | 643.8 | 631.4 | 756.6 | 1323.9 | 1331.4 |
| 447.5  | 519.2 | 582.9 | 696.2 | 456.3 | 540.2 | 714.3 | 1076.7 | 825.2  |
| 123.2  | 128   | 112.6 | 122.1 | 115.5 | 127.2 | 113.4 | 145.7  | 143.2  |
| 333.8  | 518.9 | 445.1 | 393.2 | 329   | 469.2 | 450   | 700.2  | 430.4  |
| 133.2  | 136.1 | 135.2 | 111.7 | 127.3 | 138.1 | 127.1 | 170.1  | 156.7  |
| 264.1  | 183.8 | 186.3 | 198.8 | 190.9 | 206.4 | 208   | 410.2  | 428.3  |
| 154    | 165.7 | 155.8 | 121.9 | 195.9 | 206.7 | 157   | 275.2  | 139.5  |
| 194.8  | 153.7 | 163   | 124.8 | 138.3 | 177.9 | 143.8 | 172.4  | 128    |
| 109.4  | 118.4 | 110.4 | 109.3 | 101.4 | 125.8 | 111.6 | 128.4  | 104.2  |
| 122.6  | 162.1 | 143.2 | 125.5 | 133.8 | 149.3 | 125.6 | 163.6  | 138.4  |
| 106.1  | 108.3 | 106.3 | 103.9 | 94.6  | 117.1 | 101.3 | 113.6  | 105.5  |
| 180.4  | 257.5 | 243.5 | 236.7 | 229.8 | 254.3 | 297.8 | 396.2  | 277.3  |
| 764.4  | 618.3 | 774.8 | 556.2 | 612.2 | 666.3 | 712.8 | 1301.6 | 1403.9 |
| 116    | 128.4 | 127.6 | 129.2 | 116.8 | 126.7 | 119.5 | 138.5  | 131.6  |
| 243.7  | 303.5 | 262.3 | 175.1 | 220.6 | 246.6 | 198.5 | 328.8  | 266.3  |
| 106.5  | 108.2 | 96.3  | 98.4  | 90.1  | 100.9 | 108.2 | 98.6   | 120.7  |
| 100.9  | 113.3 | 95.5  | 103.5 | 101.5 | 101.5 | 98.6  | 112.6  | 107.5  |
| 109.2  | 109.5 | 102.5 | 105.8 | 101.8 | 109.5 | 106.6 | 108.1  | 113.6  |
| 152.4  | 207.2 | 199.3 | 223.8 | 171.9 | 205.1 | 268.2 | 219.3  | 163.9  |
| 101.1  | 107.6 | 104.4 | 100.1 | 91.8  | 106.1 | 99.9  | 109.9  | 112    |
| 100.1  | 117.2 | 101.8 | 116.9 | 94.3  | 110.6 | 103.8 | 125.1  | 121    |
| 552.3  | 764.1 | 595.2 | 518.3 | 655.1 | 645.8 | 563   | 994.2  | 748.1  |
| 109.9  | 130.9 | 117.5 | 94.7  | 103.8 | 113   | 102   | 136    | 126.8  |
| 141.8  | 246.8 | 228.1 | 237.7 | 205.6 | 250.1 | 225.4 | 319.1  | 228.1  |
| 156.9  | 220.9 | 209.7 | 208.1 | 202.1 | 218.6 | 207.1 | 308.9  | 256.5  |
| 250.7  | 310.1 | 325.3 | 320   | 288.7 | 397   | 358.7 | 444.5  | 344    |

|       |        |        |       |       |        |        |        |        |
|-------|--------|--------|-------|-------|--------|--------|--------|--------|
| 108.2 | 122.1  | 105.8  | 101.2 | 99.8  | 122.3  | 109    | 133    | 113.5  |
| 122.7 | 139.2  | 133    | 127.2 | 124.7 | 152.5  | 128.3  | 154.7  | 135.4  |
| 197.9 | 491.8  | 559.1  | 462.5 | 528.8 | 540.8  | 536.2  | 695.8  | 379.4  |
| 104.5 | 110.1  | 106.9  | 106   | 100.7 | 110    | 107.6  | 114.6  | 108.1  |
| 106.8 | 103.3  | 102.4  | 105.4 | 91    | 106    | 107.6  | 99.2   | 99.7   |
| 111.9 | 100.5  | 107.2  | 113.3 | 96.2  | 113.8  | 104.5  | 108.4  | 118.4  |
| 158.1 | 743.1  | 724.1  | 604.4 | 626.4 | 512.6  | 464.9  | 465.8  | 175.4  |
| 106.5 | 111.7  | 103.6  | 102.9 | 98.2  | 114.7  | 100.2  | 104.6  | 108.4  |
| 122.5 | 114.9  | 117.9  | 99.4  | 106.7 | 114.4  | 102.1  | 131.9  | 128.5  |
| 119.7 | 112.1  | 112.8  | 103.8 | 107.1 | 112    | 105.8  | 119.8  | 121    |
| 208.2 | 206.6  | 192.9  | 209.7 | 177.2 | 252    | 191    | 294.6  | 246.2  |
| 179.8 | 361.8  | 297.3  | 297.7 | 286.1 | 282.7  | 236.5  | 323.2  | 209.4  |
| 197.9 | 296.1  | 274.9  | 270   | 231.7 | 235.4  | 214.5  | 285.9  | 197.9  |
| 111.8 | 123.3  | 112.5  | 118.5 | 105.9 | 117.3  | 113.3  | 133.3  | 123    |
| 113.2 | 114.6  | 116.1  | 112.6 | 103.6 | 112.4  | 109.3  | 117.1  | 116    |
| 781.6 | 1064.9 | 1063.8 | 766.7 | 850.3 | 1141.7 | 1013.7 | 1529.2 | 1092.8 |
| 131.9 | 126.9  | 121.2  | 107.4 | 109.4 | 145.7  | 118.9  | 176.7  | 188.5  |
| 114   | 117.8  | 118.1  | 111.2 | 109   | 118.6  | 110.9  | 159.9  | 166.2  |
| 144.1 | 141.2  | 135.4  | 169   | 124.1 | 135.5  | 144.9  | 193.4  | 225.7  |
| 207.9 | 198.3  | 157    | 138.7 | 148.9 | 157.8  | 139.6  | 328.8  | 234.8  |
| 106.8 | 105.2  | 95.2   | 96.2  | 97.1  | 112.5  | 99.2   | 98.7   | 106.7  |
| 127.7 | 146.4  | 123.5  | 118   | 124.2 | 135.9  | 111.2  | 140.2  | 126.1  |
| 148   | 192.6  | 187.9  | 197   | 203   | 202.1  | 133.9  | 236.2  | 200.1  |
| 108.8 | 114.3  | 106.7  | 104.2 | 105.1 | 117.9  | 117.3  | 111.5  | 109    |
| 186.2 | 195.2  | 229.6  | 166.1 | 185   | 274.5  | 161.2  | 384.5  | 366.9  |
| 283   | 301.8  | 310.4  | 351.2 | 247.6 | 264    | 401    | 374.3  | 279.4  |
| 106.8 | 117.6  | 108.3  | 109.2 | 107.7 | 113.1  | 109.4  | 123.7  | 121.1  |
| 599.1 | 663.1  | 584.9  | 726.9 | 567.9 | 592.4  | 855.9  | 892.1  | 690.9  |
| 110.7 | 105.2  | 104.3  | 94.6  | 97.1  | 109.4  | 103.8  | 111.7  | 105.1  |
| 102.4 | 99.6   | 97.1   | 99.4  | 92.4  | 105.3  | 99.3   | 106.7  | 107.9  |
| 102.1 | 102.6  | 107    | 96.8  | 91.7  | 98.4   | 93.8   | 108    | 99.8   |
| 103.9 | 113.7  | 102.5  | 102.8 | 100.6 | 108.7  | 100.7  | 97.6   | 104.5  |
| 106.7 | 104    | 96.4   | 105.1 | 99.4  | 109.1  | 102.9  | 106.7  | 107.6  |
| 110.7 | 101.4  | 104.3  | 110.5 | 96.9  | 107.3  | 101    | 107.4  | 109.6  |
| 104   | 105.1  | 99.9   | 94.9  | 91.6  | 109.2  | 101.5  | 117.5  | 111.5  |
| 103.8 | 103.6  | 104.1  | 104   | 95.8  | 108.8  | 103.6  | 114.5  | 108.9  |
| 103.6 | 107.1  | 103.3  | 103.9 | 93.6  | 106.6  | 102.7  | 107.4  | 103.1  |
| 100.3 | 113.3  | 96     | 87.8  | 93.4  | 101.1  | 98.1   | 96.6   | 103    |
| 105.7 | 107.1  | 103.4  | 102.4 | 90.1  | 106.3  | 110.5  | 105.9  | 112.3  |
| 109.9 | 110.9  | 103.5  | 103.9 | 99.5  | 111.4  | 100.9  | 109.9  | 117.1  |
| 103.4 | 109.4  | 100.8  | 94.3  | 91.3  | 110    | 103.3  | 109.6  | 112.9  |
| 95.1  | 95.3   | 99.5   | 97.4  | 96.8  | 106.1  | 100.1  | 102.2  | 109.8  |
| 105.1 | 104.1  | 107.6  | 96.7  | 93.2  | 106.7  | 103.5  | 105.3  | 117.4  |
| 107.8 | 109.6  | 102.4  | 103.3 | 91.3  | 103.2  | 104.5  | 112.6  | 111.3  |
| 115   | 113.2  | 111.5  | 109.5 | 94.8  | 105.8  | 101.8  | 102.1  | 108.5  |
| 103.6 | 105.3  | 106.4  | 103.5 | 91.1  | 101.8  | 104.5  | 118    | 106.3  |
| 106.2 | 106.8  | 105    | 98    | 96.7  | 111.3  | 104.4  | 109.7  | 114.6  |
| 104.6 | 109.2  | 114.3  | 106.3 | 97    | 110.2  | 100.8  | 103.5  | 113.4  |
| 109.4 | 103.5  | 97.5   | 103.4 | 94    | 103.3  | 103.4  | 105    | 114.9  |
| 111.1 | 108.3  | 106    | 107.5 | 94.8  | 108.5  | 101.4  | 107.5  | 123.4  |
| 104   | 116    | 97.7   | 93    | 102.3 | 105.1  | 97.9   | 102.5  | 106.6  |

|        |        |        |        |        |        |        |        |        |
|--------|--------|--------|--------|--------|--------|--------|--------|--------|
| 104.5  | 100.6  | 98.7   | 110    | 99.1   | 104.6  | 102.2  | 99.4   | 102.6  |
| 103.4  | 110.5  | 98.7   | 100.4  | 97.2   | 100.4  | 101    | 106.2  | 101.6  |
| 194    | 192.6  | 195.1  | 165.5  | 194.6  | 204.6  | 120.3  | 248.5  | 183.6  |
| 103.6  | 106.4  | 96.1   | 90     | 95.7   | 110.5  | 92.5   | 101.2  | 98     |
| 156.1  | 138.1  | 128.8  | 139.7  | 138.3  | 156.4  | 146.4  | 215.7  | 186.8  |
| 108.4  | 118.5  | 113.7  | 98.5   | 108.1  | 111    | 113.6  | 122    | 122.8  |
| 130.4  | 114.2  | 112.3  | 111.7  | 97.3   | 118.1  | 108.1  | 156.1  | 154.4  |
| 111.7  | 127    | 116.9  | 101.1  | 101.3  | 121.3  | 98.5   | 125.7  | 113.6  |
| 1449.2 | 822.3  | 793    | 674.8  | 796.4  | 1282.2 | 911.1  | 2627.5 | 2503.5 |
| 1180.7 | 659.3  | 687.5  | 537.1  | 679.5  | 910.4  | 727    | 2695.9 | 2181.3 |
| 103.1  | 101.9  | 105.3  | 96.4   | 95.2   | 106.4  | 103.3  | 111.9  | 112.7  |
| 116.6  | 119.9  | 101.4  | 128.2  | 104.9  | 115.4  | 110.4  | 117    | 106.5  |
| 120.8  | 129.1  | 134.5  | 112.9  | 116.6  | 136.5  | 140.6  | 154.1  | 123.9  |
| 106.6  | 103.9  | 104.8  | 95.7   | 92.2   | 105.1  | 97     | 104.6  | 94.3   |
| 110    | 112.9  | 103.7  | 106    | 107.5  | 124.2  | 101.5  | 119.8  | 115.3  |
| 106.2  | 107.6  | 103.3  | 101    | 98.3   | 106.5  | 98.8   | 107.8  | 105    |
| 99.6   | 111.4  | 108.4  | 109.7  | 105.9  | 108.5  | 108.7  | 115.6  | 114.2  |
| 108.7  | 115.7  | 118.3  | 120.9  | 104.6  | 115.5  | 117.9  | 117.9  | 107.6  |
| 109.6  | 131.4  | 106.8  | 115.1  | 111.8  | 120.8  | 106.2  | 139.5  | 127.4  |
| 114.3  | 160.4  | 153.3  | 178.5  | 144.4  | 151.4  | 148.5  | 177.4  | 145.6  |
| 106.5  | 106.4  | 99     | 105.6  | 99.3   | 106.3  | 97.6   | 105.3  | 103.5  |
| 135.2  | 121.9  | 106.7  | 112.4  | 99.9   | 113.6  | 115.7  | 146.1  | 141.4  |
| 116.8  | 109    | 105.4  | 107.3  | 99.6   | 117    | 115.7  | 108.1  | 104.3  |
| 117    | 117.3  | 112.6  | 115.9  | 100.9  | 112.7  | 109    | 122.6  | 105.7  |
| 105.6  | 105.4  | 97.8   | 102.2  | 92.4   | 104.3  | 100.5  | 101.9  | 110.7  |
| 110.2  | 146.9  | 200.6  | 166.4  | 145.2  | 177    | 160.1  | 176.5  | 137.9  |
| 284.4  | 377.1  | 350.9  | 451.4  | 410    | 443    | 383.3  | 826.8  | 396.4  |
| 128.5  | 128.3  | 124.1  | 121.3  | 112.8  | 132.2  | 113.7  | 127.6  | 134    |
| 267.4  | 349.5  | 325.5  | 344.7  | 335.3  | 396.1  | 425.9  | 662.3  | 372.2  |
| 104.4  | 115.6  | 107.8  | 105.7  | 95.4   | 112.4  | 102.6  | 111.3  | 106.9  |
| 117.3  | 111.6  | 107.5  | 111.4  | 99.2   | 116.4  | 102.2  | 108.5  | 114.8  |
| 784.6  | 1074.7 | 728.2  | 800.1  | 814.4  | 801.7  | 977.1  | 1477.6 | 1088.6 |
| 103.7  | 106.1  | 104.9  | 98.2   | 90.1   | 102.1  | 102.3  | 106.3  | 102.4  |
| 111.3  | 119.5  | 114.5  | 105.6  | 101.1  | 109    | 104    | 117.9  | 108.3  |
| 117.7  | 125    | 108.5  | 117.7  | 113.8  | 112.3  | 107.9  | 116.4  | 119.7  |
| 114.6  | 111.1  | 109.6  | 103.9  | 97.9   | 104.3  | 98.1   | 101.2  | 116    |
| 99.9   | 108    | 98.4   | 98.3   | 94.5   | 101.7  | 97.9   | 108.2  | 122.2  |
| 290.6  | 293    | 282.7  | 274.6  | 265.1  | 295.2  | 331.9  | 404.6  | 295.9  |
| 3032.5 | 4965.3 | 6494.4 | 4551.6 | 5350.8 | 5709.4 | 4167.5 | 8199.8 | 4977.1 |
| 98.9   | 113.8  | 109.6  | 110.9  | 98.9   | 114    | 100.4  | 113.6  | 105.8  |
| 143.6  | 233.9  | 154.5  | 340    | 200.5  | 156.9  | 305.1  | 172.4  | 121.7  |
| 113.4  | 113.1  | 113.1  | 94.6   | 95.9   | 102.2  | 99.4   | 108.2  | 104.3  |
| 118.6  | 109.5  | 117.5  | 99.8   | 96.8   | 111.6  | 104.7  | 105    | 109.5  |
| 135.8  | 213.3  | 228.7  | 195    | 198.9  | 225.3  | 153.2  | 263.3  | 199.3  |
| 109    | 109.7  | 101.3  | 104.1  | 101.3  | 101    | 119.9  | 108.5  | 103    |
| 118    | 119.9  | 102.4  | 98.4   | 109.1  | 114.6  | 109.3  | 114.4  | 123.4  |
| 103    | 102.1  | 100.5  | 96     | 99.4   | 112.4  | 96.1   | 107.9  | 102.1  |
| 112.1  | 112.4  | 111.1  | 108    | 101.6  | 119.3  | 110.7  | 119.8  | 116.9  |
| 106.3  | 114.6  | 97.7   | 96.5   | 102.7  | 110    | 99.7   | 115.4  | 111.9  |
| 108.4  | 108.1  | 103.9  | 99.5   | 94.9   | 107.3  | 105.2  | 111.4  | 112    |
| 111.6  | 104.2  | 95.6   | 104.3  | 88.2   | 106    | 101.1  | 108.2  | 107.4  |

|        |        |        |        |        |        |        |        |        |
|--------|--------|--------|--------|--------|--------|--------|--------|--------|
| 106.6  | 103.1  | 96.7   | 106.9  | 91.1   | 108.4  | 100.5  | 113.3  | 108.9  |
| 115.3  | 103.6  | 94.9   | 97.2   | 92.8   | 101.6  | 107.7  | 105.7  | 107.3  |
| 110.7  | 103.4  | 101.3  | 106.5  | 103.3  | 109.1  | 115.4  | 104.5  | 112.5  |
| 105.8  | 101.4  | 99.5   | 105.7  | 88.9   | 109.5  | 105    | 106.4  | 102.5  |
| 109.7  | 113.8  | 104    | 97.4   | 97.8   | 118    | 102.8  | 111    | 111.5  |
| 371.8  | 638.2  | 449.9  | 802.8  | 464.1  | 438.3  | 854.6  | 534.4  | 568.2  |
| 106.5  | 141.4  | 124.3  | 129.2  | 102.9  | 112.9  | 113.6  | 108.2  | 121.3  |
| 105    | 115.3  | 98.3   | 98.3   | 99.1   | 113.3  | 107.2  | 116.2  | 109.8  |
| 105.9  | 104.2  | 97.9   | 102.6  | 96.7   | 116.3  | 101.6  | 107.9  | 113.1  |
| 105    | 101.2  | 98.3   | 102.2  | 94.5   | 108.1  | 98.9   | 109.3  | 118.1  |
| 111    | 111.3  | 107.3  | 104.9  | 100.4  | 105.3  | 104.4  | 112.3  | 116.4  |
| 111.2  | 110.6  | 100.9  | 107.2  | 98.5   | 114    | 101.9  | 107.4  | 118.1  |
| 115.8  | 129.6  | 123    | 127.7  | 111.5  | 123.8  | 126.7  | 133.5  | 141    |
| 114.7  | 112.3  | 112.8  | 106    | 101    | 115.2  | 102.9  | 107.7  | 115.6  |
| 108.4  | 114.5  | 103    | 97.2   | 98.7   | 110.4  | 103.3  | 111    | 108.9  |
| 109.4  | 118.8  | 104.1  | 92.2   | 94.4   | 113.3  | 105.3  | 104.5  | 104.1  |
| 104.1  | 105.9  | 106.6  | 96.3   | 95.8   | 104.9  | 108.6  | 112.4  | 110.2  |
| 108.4  | 110.4  | 100.1  | 98.6   | 96.7   | 109.3  | 94.8   | 103    | 109.6  |
| 110.4  | 120.1  | 111.5  | 101.1  | 103.6  | 113.1  | 103.8  | 107.9  | 112.1  |
| 762.2  | 893.8  | 707.8  | 656.2  | 731.2  | 971.5  | 733.7  | 1489.4 | 1033.9 |
| 119    | 118    | 102.1  | 102.2  | 101.8  | 112.7  | 100.7  | 124.1  | 137.4  |
| 423.9  | 423.4  | 421.4  | 331.1  | 350.7  | 440.4  | 246.6  | 750.7  | 584.7  |
| 360.1  | 502.1  | 509.3  | 410.4  | 412.5  | 454.4  | 339.1  | 602.8  | 369.7  |
| 247.8  | 359.7  | 315.2  | 279.2  | 319.9  | 309.6  | 352.5  | 623.3  | 316.8  |
| 285.4  | 248.9  | 249.7  | 248.6  | 238.1  | 317.9  | 249.9  | 511.6  | 424.4  |
| 326    | 301.3  | 263    | 277.5  | 299.2  | 312.4  | 260.8  | 659.4  | 468    |
| 110.5  | 116.7  | 109.9  | 105.5  | 100.2  | 122.6  | 109    | 116.7  | 110.6  |
| 108    | 111.1  | 102.8  | 94     | 98.7   | 105.6  | 101    | 103.9  | 103.9  |
| 110.1  | 109.4  | 102    | 100.4  | 96.7   | 114.2  | 103.1  | 108    | 108    |
| 108.2  | 112.3  | 107.9  | 115.4  | 104.3  | 107.2  | 108.3  | 115.1  | 124.2  |
| 109.1  | 116.2  | 105.3  | 90.6   | 100.5  | 109    | 104.6  | 111.9  | 103.2  |
| 94.5   | 115.1  | 109.9  | 101.9  | 98.1   | 111    | 97.9   | 106.5  | 114.2  |
| 117.5  | 120.9  | 111.8  | 99.9   | 92.7   | 116.2  | 108.2  | 115.5  | 115.9  |
| 115.3  | 114.3  | 98.1   | 109.6  | 97.3   | 106.5  | 97     | 115.6  | 115.7  |
| 109.4  | 119.1  | 103.6  | 109.3  | 94.7   | 113.3  | 100    | 115.4  | 117.1  |
| 585.9  | 473.1  | 442.1  | 366.6  | 454.4  | 457.5  | 545.5  | 808.9  | 685.5  |
| 104.8  | 113.4  | 105.6  | 103    | 97.2   | 106.9  | 107.3  | 107.1  | 113.8  |
| 201.9  | 257.3  | 222.5  | 246.2  | 224.2  | 224.3  | 259.5  | 350.1  | 224.2  |
| 122.4  | 176.4  | 137.9  | 163.3  | 146.9  | 155.1  | 128.8  | 176.1  | 156.9  |
| 117.1  | 118.8  | 115.7  | 112.7  | 115.4  | 113.2  | 110.9  | 134.8  | 124.2  |
| 179.3  | 410.2  | 335.3  | 385.5  | 363.2  | 379    | 365.8  | 473.1  | 279.8  |
| 174.6  | 199.4  | 201.9  | 256.4  | 169.4  | 239.1  | 238.8  | 394.3  | 239.6  |
| 1058.6 | 1447   | 1452.6 | 1463.8 | 1188.1 | 1650.6 | 1409.9 | 2698.6 | 1734.2 |
| 2882.5 | 3667.2 | 2721.9 | 2788.8 | 2984.4 | 3401.1 | 3233.6 | 4673   | 3863.2 |
| 110.6  | 114.1  | 105.5  | 98.5   | 96.9   | 112.7  | 100.3  | 118.1  | 114.4  |
| 105.1  | 108.3  | 103.2  | 99.8   | 96.1   | 107.6  | 98.4   | 109.5  | 107.3  |
| 200.4  | 182    | 195.5  | 189.7  | 173    | 212.7  | 192.2  | 239.8  | 169.4  |
| 198.5  | 198.3  | 194.5  | 150.7  | 170.4  | 217.2  | 201.3  | 247.4  | 187.9  |
| 113.7  | 115.8  | 100    | 100.8  | 97.9   | 114.1  | 101.7  | 113.1  | 104.4  |
| 176.2  | 431.6  | 354.8  | 399.5  | 357.3  | 332.8  | 372.9  | 591.4  | 421.6  |
| 212    | 440.8  | 451.2  | 448.8  | 367.9  | 450.2  | 397.3  | 394.5  | 257.5  |

|       |        |       |       |       |        |        |        |        |
|-------|--------|-------|-------|-------|--------|--------|--------|--------|
| 696.9 | 1045.3 | 967.7 | 926.7 | 1089  | 1196.5 | 1261.1 | 2314.6 | 1617.4 |
| 145.6 | 216.2  | 163.9 | 170.3 | 183.5 | 220.3  | 247.8  | 448.1  | 391.5  |
| 118.5 | 130.4  | 118.7 | 123.4 | 119.6 | 122.8  | 140.1  | 137.9  | 127.2  |
| 146.9 | 178.4  | 161   | 156.3 | 140.3 | 171.5  | 163.7  | 208.4  | 168.3  |
| 112.7 | 129    | 122.1 | 108.1 | 100   | 115.5  | 116.7  | 122.6  | 115.8  |
| 186.6 | 395.9  | 317.8 | 274   | 374.4 | 329.8  | 281.3  | 471.6  | 255.4  |
| 167   | 185.8  | 209.9 | 202.5 | 222.7 | 224.9  | 198    | 343.9  | 152.3  |
| 104.3 | 103.4  | 103   | 107.1 | 95.2  | 107.4  | 111.6  | 105.5  | 105.4  |
| 102.8 | 118.7  | 98.9  | 99.5  | 95.5  | 113.5  | 105.1  | 111.7  | 107.1  |
| 114.5 | 108.6  | 110.4 | 111.5 | 105.1 | 117.2  | 111.8  | 122.1  | 113.8  |
| 111.3 | 117.4  | 102.6 | 108.3 | 95.7  | 117.3  | 105.1  | 117.6  | 114.8  |
| 109.3 | 101.4  | 94.3  | 100.1 | 92.2  | 105.8  | 99.2   | 98.6   | 102.6  |
| 104.7 | 110.8  | 100.6 | 99.2  | 99.5  | 111.6  | 101.5  | 107.4  | 107    |
| 111.6 | 110    | 122.6 | 100.8 | 101.8 | 121.1  | 109.4  | 129.3  | 130.5  |
| 108.2 | 103.3  | 104   | 98.5  | 96.4  | 98.6   | 103.7  | 103.4  | 108.6  |
| 111.3 | 105.7  | 104.2 | 103.1 | 96.6  | 116.1  | 108.2  | 108.3  | 102.4  |
| 165.2 | 146.3  | 113.2 | 168.1 | 133.2 | 110.2  | 156.8  | 265.9  | 127.5  |
| 108   | 104.7  | 96.2  | 100.9 | 96.8  | 107.2  | 97.7   | 109.7  | 112.6  |
| 251.2 | 232.1  | 193.4 | 271.2 | 264.7 | 193.2  | 256.9  | 557.3  | 353.1  |
| 155.2 | 189    | 187   | 153.4 | 159.9 | 200    | 120.8  | 206.7  | 205.5  |
| 141.2 | 183.2  | 192.6 | 177   | 165.1 | 149.3  | 153.8  | 234.9  | 200.2  |
| 177.6 | 201.5  | 167.8 | 160.9 | 170.2 | 163.2  | 173.3  | 253.5  | 205.9  |
| 106.4 | 113.6  | 100   | 106.1 | 93.2  | 121.2  | 107.9  | 114.1  | 109.9  |
| 112   | 124.3  | 116.4 | 113.3 | 128.7 | 121.7  | 106.2  | 125.2  | 121.1  |
| 351.4 | 256.8  | 252.2 | 269.4 | 232.1 | 330.6  | 223.5  | 596.3  | 777.5  |
| 185.8 | 159.6  | 158.5 | 152.4 | 151.2 | 184.9  | 162.7  | 314.3  | 350.9  |
| 157.3 | 161.5  | 149.2 | 150.8 | 151.3 | 152.5  | 163.2  | 204.2  | 191.9  |
| 362   | 560.9  | 551.8 | 399.3 | 518.5 | 463.4  | 483    | 658    | 557.6  |
| 103.4 | 109.5  | 107.7 | 93.6  | 102.8 | 107.5  | 104.7  | 105.8  | 95.4   |
| 112.8 | 128.7  | 105.5 | 104.9 | 117.1 | 120.7  | 119.5  | 129.3  | 114.3  |
| 105.7 | 103.8  | 108.7 | 99.8  | 100.5 | 101.2  | 104.7  | 101.9  | 98.8   |
| 107.9 | 117.7  | 105.9 | 104.1 | 99.7  | 107    | 107.2  | 125.1  | 123    |
| 105.6 | 110.3  | 108   | 114.3 | 101   | 114    | 102.8  | 106.3  | 111.1  |
| 100.1 | 104.5  | 99.2  | 92.2  | 92.3  | 103.8  | 98.5   | 105.5  | 105.1  |
| 107.2 | 117.2  | 108.5 | 118.9 | 103.2 | 119.1  | 107.4  | 125.4  | 123    |
| 128.1 | 185.3  | 193.8 | 136.9 | 155.7 | 185.9  | 185.3  | 192.3  | 156.3  |
| 97.8  | 122.5  | 98.3  | 98.4  | 97.3  | 104.6  | 108.1  | 107.1  | 110.9  |
| 155.3 | 185.9  | 200.1 | 158.6 | 156   | 188.6  | 178.8  | 233.2  | 175.6  |
| 128.4 | 134.9  | 116.2 | 131.9 | 103.5 | 120.9  | 127    | 153    | 127.5  |
| 110.6 | 114.3  | 102.5 | 114.3 | 96.9  | 120.7  | 104.4  | 115    | 112.4  |
| 105.7 | 104.5  | 99.6  | 106.2 | 90.4  | 109.7  | 101.2  | 116.1  | 117.4  |
| 101   | 109.3  | 104.3 | 100.4 | 97.5  | 101.5  | 98.7   | 101.5  | 100.6  |
| 616.2 | 931.4  | 750.7 | 884.1 | 854.2 | 882.3  | 1006.6 | 1552   | 669.7  |
| 111.6 | 113.6  | 102.6 | 103.9 | 110.3 | 106.9  | 105.7  | 121.7  | 119.4  |
| 100.1 | 110.7  | 98.3  | 100.2 | 83.4  | 114.4  | 97.9   | 110.9  | 106.4  |
| 106.5 | 105.4  | 101.8 | 107.3 | 100.7 | 107.9  | 104.8  | 106.1  | 108.5  |
| 122.7 | 114.1  | 117   | 109.2 | 107.4 | 122.7  | 115    | 136.1  | 124.1  |
| 127   | 133.9  | 124.6 | 130.1 | 108.3 | 135.1  | 117    | 149.1  | 136.5  |
| 158.1 | 182.7  | 162.1 | 161.9 | 154.2 | 175.9  | 138.4  | 222.2  | 181.4  |
| 254.2 | 317.1  | 309.2 | 262.9 | 323.4 | 355.2  | 282.5  | 466.1  | 313.2  |
| 137   | 130.9  | 136.9 | 137   | 117.1 | 139.9  | 132.4  | 172.6  | 155.9  |



|       |       |       |       |       |       |       |        |       |
|-------|-------|-------|-------|-------|-------|-------|--------|-------|
| 339.3 | 362.9 | 318.9 | 358   | 351.4 | 332.7 | 439.6 | 798.3  | 601.9 |
| 332.7 | 405.9 | 330.4 | 315   | 362   | 391.4 | 395.3 | 698.4  | 532.9 |
| 117.3 | 117.2 | 120.9 | 111.7 | 105.7 | 117.1 | 114.2 | 139.1  | 124.6 |
| 197.6 | 296.4 | 308.2 | 268.9 | 237.4 | 291.1 | 275   | 402.4  | 266.9 |
| 113.8 | 105.8 | 108.9 | 101.9 | 102.7 | 112   | 106.5 | 113.4  | 111.3 |
| 125.7 | 123.9 | 115.6 | 110.4 | 116.5 | 115.3 | 111   | 158.4  | 138.3 |
| 577.4 | 589.7 | 446.2 | 355.2 | 442.1 | 530.4 | 447.8 | 668.7  | 506.3 |
| 112.6 | 103.9 | 98.4  | 101.1 | 95.1  | 107.9 | 101.3 | 109    | 112.6 |
| 111.7 | 106.6 | 104.3 | 106.3 | 91.3  | 114.2 | 107.8 | 117    | 110.8 |
| 113.7 | 108.5 | 113.2 | 112.7 | 105.3 | 110.7 | 117   | 130    | 111.5 |
| 99.7  | 109.4 | 122.7 | 99.4  | 108.8 | 128   | 111.5 | 113.2  | 121.5 |
| 114.8 | 113.4 | 122.3 | 109.2 | 107.1 | 113.2 | 106   | 133.4  | 108.4 |
| 140.6 | 133.5 | 144   | 131.1 | 123.4 | 137.2 | 139.7 | 149.1  | 152.7 |
| 129.8 | 147.3 | 152.8 | 138.9 | 149   | 165.8 | 149.3 | 203.7  | 159.8 |
| 111.3 | 132.7 | 129.3 | 120   | 113.7 | 122.6 | 110   | 145.2  | 128.8 |
| 115.7 | 186.6 | 159.2 | 147.4 | 161.7 | 146.5 | 167   | 242.4  | 143.7 |
| 788   | 838.9 | 712.5 | 774.6 | 854   | 990   | 518   | 1335.4 | 1510  |
| 436.7 | 518.9 | 575.8 | 603.7 | 503.2 | 590.8 | 597.6 | 929.7  | 761.5 |
| 96.6  | 96.4  | 97    | 101.8 | 93.8  | 110.1 | 98.1  | 99.4   | 101.1 |
| 111.6 | 104.7 | 106.7 | 96.3  | 100.6 | 111.3 | 98    | 104.8  | 103.7 |
| 175.5 | 233.6 | 202.1 | 209.6 | 216.1 | 219.7 | 235.5 | 260.3  | 211.4 |
| 112.8 | 118.4 | 111.8 | 120   | 105.5 | 118.1 | 111   | 134.4  | 160.2 |
| 106.1 | 111.5 | 106.5 | 97.9  | 95.9  | 111   | 97.4  | 108.6  | 103.7 |
| 117.2 | 126.1 | 121.2 | 105.1 | 111.8 | 113.5 | 109.1 | 149.1  | 128.9 |
| 132.6 | 189.4 | 151.1 | 168.3 | 131   | 144.5 | 146.3 | 161.8  | 128   |
| 109.5 | 103.6 | 94.7  | 93.4  | 92.8  | 103.6 | 104.3 | 106.2  | 107.3 |
| 321.2 | 247.2 | 266.4 | 250.4 | 291.7 | 297.2 | 250.2 | 473.5  | 366.9 |
| 181.7 | 199.6 | 174.2 | 207.6 | 142.4 | 191.3 | 181.6 | 331.7  | 251.4 |
| 113.2 | 119.2 | 101.1 | 104.9 | 100.5 | 114.8 | 113.5 | 116.8  | 117.6 |
| 313.7 | 269.2 | 269.1 | 234.4 | 247.1 | 290.9 | 266.8 | 498.6  | 380.6 |
| 117.6 | 133.2 | 119.4 | 93.6  | 107.1 | 123   | 124.8 | 132.8  | 141.9 |
| 211.5 | 154.3 | 148.5 | 182.8 | 148.8 | 177   | 192.6 | 293.3  | 218.6 |
| 156.7 | 139   | 131.3 | 109.3 | 123.8 | 133.3 | 127.3 | 137.3  | 141.8 |
| 104.1 | 101.3 | 100.7 | 95.4  | 95.5  | 99.6  | 103.3 | 110.1  | 106.1 |
| 258.7 | 255.3 | 210.2 | 230.1 | 171.3 | 251.7 | 265.4 | 518.8  | 592.4 |
| 232.4 | 301.4 | 267.1 | 215.7 | 244.6 | 289.4 | 260.9 | 399.9  | 322.7 |
| 269.5 | 318.1 | 272.6 | 257.1 | 229.8 | 295.3 | 255   | 427.8  | 330.9 |
| 113.6 | 133.2 | 121.9 | 122   | 125.3 | 124.6 | 135.3 | 155.1  | 138.7 |
| 103.8 | 106.6 | 104.5 | 105.1 | 97.3  | 102.5 | 101.4 | 106.6  | 109.9 |
| 117.2 | 131.6 | 115.7 | 113   | 118.7 | 126.5 | 121.3 | 170.8  | 162.7 |
| 96.9  | 109   | 99.1  | 99.9  | 94.7  | 106.9 | 107.1 | 117.1  | 114.6 |
| 104.3 | 113.2 | 103.5 | 104.3 | 107.3 | 122.5 | 113.7 | 110.7  | 111   |
| 103.7 | 106.5 | 104.6 | 94.2  | 94.5  | 106.3 | 101.3 | 110.6  | 111.1 |
| 105.2 | 107.5 | 95.3  | 119.4 | 98.4  | 104.5 | 106.2 | 117.2  | 113   |
| 101.2 | 112.4 | 102.6 | 96.4  | 101.2 | 104   | 100.9 | 108    | 108.5 |
| 177.6 | 166.1 | 141.1 | 142.3 | 137.7 | 158.9 | 135.7 | 253.4  | 232.1 |
| 119.3 | 117.7 | 108   | 123.7 | 93.4  | 112.6 | 115.7 | 157.1  | 151.6 |
| 132.9 | 136   | 120.3 | 134.5 | 121   | 140.1 | 124.2 | 161.4  | 129.9 |
| 102.3 | 99.6  | 97.2  | 92.2  | 94    | 106.1 | 91.9  | 120    | 111.1 |
| 120.5 | 161   | 143.9 | 155.1 | 149.5 | 151   | 147.2 | 173.9  | 142.6 |
| 138.2 | 126.7 | 134.8 | 136.7 | 129   | 134.6 | 127.4 | 125.3  | 136.5 |

|        |        |        |        |        |        |        |        |        |
|--------|--------|--------|--------|--------|--------|--------|--------|--------|
| 1648   | 1920.4 | 1749.8 | 1782   | 1267.7 | 1491.2 | 2129.5 | 2256.8 | 1883.6 |
| 130.1  | 126.8  | 127.6  | 105.4  | 111.5  | 131    | 103    | 175.5  | 148.8  |
| 121.1  | 119.2  | 102.9  | 109.4  | 110.9  | 110    | 97     | 123.8  | 113.5  |
| 137.3  | 157.3  | 152.2  | 142.3  | 138.7  | 157.1  | 162.1  | 186    | 135.4  |
| 107.7  | 121.1  | 111.9  | 116.6  | 105.7  | 118.1  | 110.8  | 140.6  | 127.4  |
| 108    | 104    | 101.1  | 89.5   | 95.8   | 102.2  | 98.4   | 100.9  | 105    |
| 257.2  | 604.7  | 683.5  | 602.8  | 484.3  | 636    | 593.6  | 935.5  | 633.1  |
| 196.5  | 269.1  | 302.9  | 264.5  | 201.6  | 277.1  | 274.4  | 343.7  | 289.4  |
| 361.7  | 257.3  | 233.9  | 445.2  | 271.5  | 288.8  | 353.8  | 531.7  | 326.3  |
| 131.5  | 122.1  | 116.1  | 119.5  | 116.7  | 129.3  | 119.4  | 128.1  | 128.5  |
| 115.8  | 130.4  | 123.4  | 122.9  | 108    | 128.5  | 147.2  | 144.5  | 156.4  |
| 376.2  | 646.1  | 559.3  | 782.4  | 520.7  | 418.9  | 679.6  | 408.7  | 284    |
| 892.6  | 1620.5 | 1638.3 | 1950.5 | 1332.9 | 1645.7 | 1668.1 | 1584.6 | 1339.9 |
| 112.7  | 116.2  | 103.8  | 99.6   | 99.2   | 111.2  | 105.1  | 112.7  | 118.7  |
| 104.5  | 105    | 104.7  | 104    | 95.2   | 103.3  | 106.6  | 113.5  | 109.4  |
| 117.6  | 117.3  | 120.4  | 104.1  | 116.5  | 124.7  | 119    | 135.2  | 116.8  |
| 109.3  | 101.9  | 105    | 102.2  | 96.4   | 113.1  | 98.8   | 108.7  | 120.9  |
| 130.9  | 145.2  | 124.5  | 121.8  | 121.9  | 137.6  | 142.1  | 163.6  | 137.9  |
| 96.9   | 105.7  | 98.4   | 104.6  | 99.5   | 107    | 102.4  | 99.5   | 102.7  |
| 108    | 115.1  | 106.2  | 98.2   | 94.3   | 104.5  | 101    | 110.4  | 106.3  |
| 126.6  | 177.4  | 150.6  | 167.9  | 152.7  | 183.7  | 165.6  | 224.3  | 158.2  |
| 198.6  | 248.8  | 248.3  | 226.4  | 228.9  | 337.6  | 268.4  | 334.5  | 279.4  |
| 124.1  | 153.8  | 137.9  | 168.7  | 128.6  | 142.8  | 198.8  | 138    | 122.7  |
| 117.2  | 143.5  | 123    | 110.9  | 107.1  | 122    | 135.8  | 136.3  | 127.5  |
| 111    | 114.6  | 101.6  | 92.1   | 97.4   | 96.7   | 106.2  | 105.1  | 111.4  |
| 128.5  | 195.7  | 142.9  | 157.5  | 193.8  | 161.3  | 156.7  | 274.6  | 142.2  |
| 133.8  | 187.2  | 147.3  | 188    | 182.1  | 148.7  | 211.3  | 197.6  | 171.1  |
| 102.8  | 111.3  | 104.8  | 95.3   | 97.9   | 113.9  | 104.4  | 103.1  | 113    |
| 105.2  | 109.3  | 100.7  | 105.7  | 100.7  | 110.5  | 100.8  | 104.2  | 110.9  |
| 136.7  | 151.7  | 132.5  | 149.8  | 148    | 155.2  | 141.4  | 173.3  | 150.1  |
| 104.3  | 115.4  | 220.5  | 103.1  | 101.5  | 244.7  | 105.4  | 114.2  | 108.5  |
| 101.5  | 108.6  | 98.5   | 108.9  | 99.5   | 115.2  | 95.8   | 125.7  | 110.9  |
| 113.2  | 113.6  | 101.9  | 105.5  | 103.9  | 105.8  | 104.1  | 106.4  | 112.9  |
| 902.2  | 694.3  | 693.9  | 745    | 721.6  | 776.5  | 705.3  | 1526.2 | 1414   |
| 111.9  | 105.9  | 103.2  | 106.2  | 98.3   | 112    | 112.8  | 116.5  | 106.4  |
| 234.9  | 556.6  | 445.8  | 578.2  | 570    | 557.2  | 402.5  | 798.4  | 544.2  |
| 115.7  | 121    | 109.6  | 134.7  | 106.1  | 123.9  | 113.2  | 153.1  | 129.8  |
| 106.1  | 113    | 96.7   | 89.4   | 89.4   | 102.2  | 98.8   | 104.3  | 107.9  |
| 605.3  | 321.5  | 294    | 299    | 309.5  | 439.8  | 337.2  | 1578.7 | 1571.5 |
| 272.1  | 227.6  | 267.7  | 299.4  | 262.7  | 297.8  | 257.2  | 567.1  | 438.6  |
| 104.5  | 103    | 103.2  | 110    | 99.6   | 114.4  | 102.8  | 103.3  | 101.8  |
| 103    | 103.9  | 105.1  | 97.2   | 95.2   | 108.3  | 101.8  | 103.5  | 104.2  |
| 101.1  | 103.5  | 96.2   | 97.6   | 91.3   | 108.2  | 97     | 100.8  | 108.3  |
| 105.2  | 107.1  | 100.1  | 97.3   | 95.6   | 111    | 103.9  | 109.4  | 108.3  |
| 105    | 114.1  | 110.2  | 110.1  | 95.9   | 109.3  | 109.5  | 121.6  | 111.9  |
| 110.1  | 105.8  | 103.2  | 97.6   | 99.6   | 106.8  | 103.1  | 106.2  | 106.3  |
| 102.6  | 115.6  | 102    | 102.1  | 97.1   | 102.9  | 109.7  | 107.5  | 110.7  |
| 96.7   | 107.3  | 104.5  | 99.4   | 103.7  | 108.6  | 101.4  | 110.3  | 96.8   |
| 1062.1 | 1147.9 | 956.4  | 951.2  | 936.3  | 1124.2 | 1023.2 | 1498.8 | 1019   |
| 101.6  | 111.1  | 106.5  | 99.3   | 94.2   | 106.1  | 103.7  | 98     | 106.7  |
| 1166.9 | 1868.5 | 1795.9 | 1937.4 | 1497.6 | 2113.1 | 2104.5 | 3412.5 | 3025.6 |

|        |        |        |        |        |        |        |        |        |
|--------|--------|--------|--------|--------|--------|--------|--------|--------|
| 411.8  | 433.6  | 273.8  | 293.6  | 230.3  | 317.1  | 335.8  | 562    | 430.2  |
| 103.2  | 102.2  | 94.5   | 102    | 92.5   | 96.3   | 99     | 104.9  | 99.4   |
| 109.1  | 104.1  | 102.2  | 105.8  | 96.8   | 120.1  | 117.9  | 112.9  | 111.8  |
| 108.9  | 106.7  | 102.6  | 114.5  | 93.8   | 112    | 102.6  | 111.1  | 112.3  |
| 104    | 99.5   | 96.7   | 99.9   | 97.1   | 111.3  | 103.3  | 104.5  | 107.6  |
| 125.9  | 124.9  | 115    | 106.1  | 112.3  | 120.2  | 112.9  | 137.6  | 129.3  |
| 797.6  | 2182.4 | 1721.8 | 1654.5 | 1593.1 | 1896.8 | 1779.4 | 2559.6 | 1371.9 |
| 109.4  | 110.2  | 99.6   | 104.7  | 100.7  | 113.9  | 100    | 116.9  | 103.6  |
| 137.4  | 154    | 158.9  | 158    | 168.4  | 168.5  | 160.2  | 220.4  | 147.2  |
| 104.5  | 107.8  | 98.3   | 94.6   | 94.6   | 101.4  | 97     | 111.9  | 102.6  |
| 107.6  | 121.4  | 112.3  | 121.3  | 109.3  | 124.8  | 115    | 114.4  | 110.2  |
| 104.7  | 105.7  | 105.7  | 101.3  | 98.6   | 95.9   | 97.7   | 103.2  | 111.1  |
| 109.2  | 103.1  | 101.5  | 96     | 92.1   | 100.6  | 104.2  | 118.6  | 107.8  |
| 101.3  | 107.3  | 102.9  | 108.1  | 94.5   | 113.7  | 101    | 108.5  | 111.7  |
| 115    | 108.1  | 103.6  | 102.9  | 101.7  | 114    | 106.6  | 112.1  | 106.6  |
| 123    | 116.1  | 102.7  | 100    | 103.7  | 111.6  | 101.5  | 122.6  | 109.6  |
| 106.8  | 106.8  | 96.8   | 99.6   | 101.7  | 106.3  | 101.9  | 104.4  | 110.5  |
| 100.4  | 118.1  | 111    | 102    | 94.9   | 98.2   | 99.4   | 113.2  | 115.6  |
| 111.3  | 117.3  | 106.5  | 110.3  | 102    | 108    | 103.4  | 112.1  | 113.4  |
| 109.7  | 101.1  | 113    | 95.1   | 96.8   | 105.2  | 106.5  | 101.9  | 111    |
| 242.9  | 321.1  | 318.2  | 259.7  | 280.8  | 342.5  | 297.4  | 310.3  | 251.9  |
| 201    | 218.8  | 183.1  | 176.8  | 160.7  | 174    | 184.6  | 357.7  | 319    |
| 584.2  | 767.2  | 718.1  | 569.3  | 532.7  | 729.8  | 537.7  | 903.7  | 652.6  |
| 123.5  | 137    | 115.1  | 116.9  | 110.9  | 135.6  | 127.9  | 145.3  | 131.4  |
| 111.4  | 109.6  | 98.9   | 96     | 95.2   | 103.8  | 106.7  | 103.6  | 109.2  |
| 105.4  | 106.5  | 103.1  | 102.3  | 95     | 106.1  | 101.9  | 116.8  | 103.6  |
| 3671.3 | 2146   | 2134.4 | 1493.7 | 2178.1 | 2721.2 | 1798.8 | 4207.5 | 3776.8 |
| 114.5  | 147.8  | 138.7  | 117.7  | 124.4  | 145.6  | 130.2  | 134.2  | 112.7  |
| 358.7  | 1625.5 | 661.6  | 1477.5 | 810.8  | 476.2  | 1089.8 | 1884.5 | 834.4  |
| 112    | 106.9  | 105.5  | 102.1  | 103.1  | 105.2  | 105.3  | 114    | 109.5  |
| 109.3  | 110    | 107.5  | 103.6  | 92.4   | 109.8  | 101.3  | 103.7  | 106.4  |
| 328.6  | 573.6  | 688.6  | 570.9  | 498.6  | 645.2  | 547.4  | 435.7  | 191.9  |
| 114.3  | 120    | 116.8  | 121.1  | 101.9  | 109.3  | 114    | 108    | 111.3  |
| 106.7  | 113.5  | 109.1  | 124.5  | 100.6  | 117.5  | 114.1  | 118.1  | 109    |
| 99.9   | 105.2  | 111    | 101.3  | 102    | 106    | 98.1   | 121.7  | 111.2  |
| 468.8  | 1055.4 | 1179.8 | 1342.4 | 1154.5 | 1170.7 | 1413.2 | 1674.9 | 687.8  |
| 118.3  | 166.1  | 164.1  | 179.8  | 161.2  | 196.1  | 149.6  | 222.1  | 136.6  |
| 172.5  | 157.6  | 167.8  | 144.4  | 147    | 175.7  | 154.3  | 216.5  | 154.4  |
| 106    | 111.3  | 108.5  | 107.2  | 96.4   | 106.7  | 101.8  | 116    | 118.7  |
| 103.3  | 99.9   | 101.1  | 93.3   | 93.4   | 102.1  | 102.6  | 99.2   | 104.7  |
| 120    | 115.1  | 101.9  | 116.3  | 115.3  | 114.5  | 106.6  | 116.6  | 113.1  |
| 119.4  | 130    | 117.7  | 146.1  | 133.8  | 116.5  | 132    | 135    | 117.1  |
| 102.6  | 108.7  | 108.9  | 114.6  | 94.2   | 118.9  | 105.3  | 117    | 99     |
| 99.9   | 111.1  | 116.7  | 103.3  | 96.9   | 113.9  | 102.9  | 112.5  | 110.9  |
| 102.2  | 107.7  | 100.7  | 104.9  | 103.4  | 107.8  | 98.1   | 110.2  | 109.5  |
| 109.1  | 113.4  | 105.9  | 110.6  | 98.3   | 111.3  | 102.6  | 106    | 104.4  |
| 284.9  | 120.8  | 109.2  | 203.4  | 150.8  | 119.4  | 479.8  | 173.6  | 213.3  |
| 103.4  | 106.3  | 100    | 106.7  | 92.5   | 99.5   | 103.1  | 108.1  | 111.2  |
| 106.2  | 103.9  | 105.5  | 99.4   | 93.6   | 102    | 100.1  | 118.4  | 121.3  |
| 113.9  | 106.9  | 103    | 101.7  | 102.9  | 113.1  | 100.6  | 117.8  | 109.3  |
| 114.5  | 109.7  | 111.3  | 113.7  | 95.2   | 115.9  | 104.8  | 109.4  | 114.2  |

|        |       |       |        |       |       |       |        |        |
|--------|-------|-------|--------|-------|-------|-------|--------|--------|
| 112.3  | 109.6 | 100.5 | 94.4   | 100.9 | 102.6 | 99.1  | 112.1  | 108.7  |
| 120.5  | 124.9 | 115.6 | 105.6  | 111.8 | 124.3 | 124.7 | 127.6  | 111.6  |
| 252.2  | 294.1 | 319.1 | 292.5  | 358.1 | 362.9 | 412   | 569.2  | 318.6  |
| 106.2  | 103.2 | 112.5 | 105.4  | 98    | 115.8 | 109.4 | 113.7  | 109.8  |
| 138    | 132.1 | 134.4 | 126.8  | 141.7 | 184.5 | 177.8 | 218.3  | 142.7  |
| 109.5  | 98.8  | 103   | 101.5  | 93.5  | 102   | 99.3  | 112.3  | 114.2  |
| 101.9  | 107   | 100.8 | 105.2  | 95.9  | 112.3 | 105.1 | 109.2  | 104    |
| 112.6  | 111.5 | 107.8 | 104    | 106.5 | 120.6 | 109   | 130.9  | 109.2  |
| 153.7  | 142.6 | 139.7 | 110.2  | 147.5 | 159.3 | 134.1 | 194.2  | 164.8  |
| 104    | 101.1 | 101.4 | 98.7   | 90.7  | 106.7 | 96.6  | 111.7  | 107    |
| 103.3  | 119.9 | 119.8 | 129.2  | 96.9  | 116.2 | 130.1 | 108.9  | 107.4  |
| 135    | 145.3 | 158.2 | 127.9  | 126.2 | 144.3 | 125   | 182.9  | 121.4  |
| 97.7   | 103.1 | 107.2 | 93     | 93.4  | 104   | 99.7  | 105    | 102.7  |
| 139.4  | 174.7 | 173.9 | 130    | 146.8 | 184.6 | 134.8 | 188.9  | 186.5  |
| 110    | 118.5 | 104.7 | 103.3  | 95.5  | 106.4 | 108.2 | 116.2  | 117    |
| 142.4  | 148.4 | 156   | 152.9  | 139.9 | 164.7 | 140.5 | 199.3  | 173.5  |
| 104.8  | 108.9 | 102.3 | 106.5  | 100.3 | 111.1 | 99.5  | 116    | 105.8  |
| 116.4  | 126   | 116.6 | 114.9  | 113.7 | 121.1 | 108.5 | 123.5  | 132.1  |
| 105.6  | 109.6 | 108.9 | 93.5   | 99.7  | 101.6 | 118.8 | 112.4  | 111.2  |
| 106.4  | 106.6 | 104.7 | 107.6  | 99.4  | 113.9 | 107.7 | 114.3  | 114.8  |
| 101.2  | 110.1 | 106.8 | 101.4  | 89.9  | 120.4 | 105.4 | 115.6  | 113.8  |
| 105.8  | 128.1 | 114.1 | 126.2  | 110.6 | 135.7 | 113.1 | 118.9  | 117.4  |
| 114.6  | 121   | 111.1 | 107.2  | 105.3 | 116.8 | 104.4 | 117.2  | 115.6  |
| 123.8  | 138.1 | 140.9 | 124.6  | 147   | 126.5 | 120.7 | 147.3  | 134.4  |
| 110.1  | 100.2 | 109.1 | 103.6  | 93.8  | 101.3 | 99.9  | 119.4  | 107.4  |
| 111.8  | 117.9 | 105.8 | 104.4  | 90.3  | 113.9 | 111.2 | 118.9  | 109.3  |
| 117.4  | 123.1 | 110.7 | 121.2  | 120.9 | 125.3 | 115.8 | 127.2  | 120.7  |
| 124.3  | 127   | 123.8 | 114.9  | 117.8 | 127.8 | 126.5 | 140.3  | 137.4  |
| 265.2  | 508.3 | 429.1 | 406.2  | 457.7 | 467.7 | 523.4 | 764.5  | 502.9  |
| 113    | 109.4 | 107.3 | 103.9  | 98.3  | 112.9 | 108.4 | 119.7  | 114.4  |
| 171.4  | 178.7 | 169.7 | 178.9  | 173.2 | 190.7 | 185.7 | 249.8  | 181.6  |
| 193.1  | 209.1 | 179.1 | 208.6  | 182.3 | 190   | 206   | 239.1  | 148.5  |
| 102.5  | 104.8 | 102.7 | 98.4   | 96.2  | 111.7 | 99.1  | 105.9  | 108.5  |
| 123.6  | 187.3 | 129.9 | 157.6  | 136.3 | 168.4 | 161.9 | 176.2  | 156.2  |
| 156.6  | 141.1 | 131.6 | 139.5  | 146.9 | 154.5 | 130.1 | 210.2  | 166.5  |
| 1095.4 | 683.5 | 585.9 | 631.7  | 584.6 | 769.3 | 611   | 1335.1 | 969.1  |
| 137.8  | 171.9 | 148.3 | 204.9  | 162.3 | 181.8 | 175.7 | 208    | 135.3  |
| 412    | 564   | 569.7 | 480.8  | 479.4 | 500.7 | 618.1 | 612.8  | 338.8  |
| 186.1  | 276.4 | 253.1 | 246.9  | 218.5 | 216.7 | 275.5 | 317.6  | 230.7  |
| 818.7  | 791   | 806.7 | 1081.9 | 707.2 | 648.2 | 639.4 | 1680.5 | 1192.3 |
| 125    | 175   | 152.5 | 162.7  | 147.6 | 184   | 158.9 | 198.9  | 171.4  |
| 155.8  | 223.8 | 207.2 | 234.7  | 197   | 217.9 | 247.8 | 291.9  | 219.3  |
| 559.2  | 589.2 | 527.6 | 753.1  | 496.9 | 640.9 | 620.8 | 1216.2 | 788.5  |
| 207    | 306.1 | 310.9 | 256.6  | 285.2 | 240.5 | 312.5 | 385    | 304.6  |
| 218.6  | 220   | 185.4 | 170.5  | 205.9 | 222   | 159.6 | 348    | 262.6  |
| 382.4  | 201.7 | 180.5 | 196.7  | 203.6 | 222.2 | 196.4 | 455.5  | 452.7  |
| 520.4  | 956.5 | 654.1 | 592.2  | 843.4 | 797.2 | 939.9 | 1512.1 | 477.1  |
| 123.9  | 125.6 | 113   | 121.2  | 122.2 | 126.9 | 123.7 | 149.4  | 135.6  |
| 147    | 187.2 | 167.9 | 148    | 165.6 | 169.4 | 186   | 192.9  | 164.5  |
| 115.7  | 134.6 | 114.6 | 117.1  | 118.2 | 127.9 | 114.7 | 145.9  | 133    |
| 275.9  | 252.5 | 265.5 | 220.4  | 207.9 | 239.4 | 195.9 | 371.1  | 403    |

|        |        |        |        |        |        |        |        |        |
|--------|--------|--------|--------|--------|--------|--------|--------|--------|
| 429    | 883.4  | 552    | 643.1  | 674.5  | 538.8  | 565    | 838.8  | 445.8  |
| 117.1  | 118.3  | 105.8  | 107.3  | 106.3  | 118.7  | 107.7  | 113.4  | 101.3  |
| 163.4  | 241.4  | 220.5  | 253.6  | 195.7  | 198.1  | 257.2  | 266.5  | 245.7  |
| 184.8  | 149.2  | 153.4  | 179.1  | 144.7  | 167.6  | 163.4  | 202.8  | 164.1  |
| 716.1  | 934.4  | 764.7  | 655.9  | 693.5  | 828.3  | 686.7  | 1245.8 | 997.6  |
| 167.7  | 233.3  | 251.5  | 227.1  | 199.9  | 222.9  | 249.4  | 256.7  | 175.9  |
| 107.4  | 118.2  | 110.1  | 101    | 101.4  | 110.5  | 111.7  | 109.3  | 117.4  |
| 107.2  | 134.6  | 120.4  | 113.2  | 103.1  | 114.5  | 114.8  | 135.4  | 128.8  |
| 139.3  | 117.7  | 127.9  | 129.6  | 138.5  | 138.6  | 134    | 165.6  | 139.5  |
| 153.5  | 192.1  | 186.9  | 161.4  | 162.4  | 207.9  | 186.2  | 213    | 180    |
| 223.8  | 290.9  | 272.4  | 225.6  | 266.1  | 252    | 238.1  | 343.3  | 185.4  |
| 105    | 109.2  | 109.2  | 114.6  | 97.9   | 114.3  | 107.8  | 110.3  | 102.8  |
| 120.8  | 165.8  | 172.8  | 145.4  | 129.5  | 138.1  | 142.9  | 203.7  | 157.1  |
| 123.5  | 131.4  | 116.4  | 150.8  | 119.6  | 125.5  | 144.1  | 158.1  | 123    |
| 194.6  | 166.5  | 174    | 152    | 160.4  | 203.6  | 142.4  | 227.6  | 188    |
| 138.9  | 146.5  | 151.9  | 127.7  | 147.3  | 147.2  | 133    | 166.6  | 172.9  |
| 361.9  | 349.7  | 448.1  | 356.7  | 345.1  | 472.2  | 293.7  | 594.8  | 555.5  |
| 103.4  | 121.7  | 101    | 117.2  | 98.2   | 120.8  | 108.1  | 118    | 129.8  |
| 108.2  | 122.1  | 115.6  | 95.7   | 104.8  | 120.5  | 104.4  | 116.3  | 105    |
| 112.3  | 123.5  | 106.8  | 130.3  | 104    | 120.9  | 146.8  | 111.6  | 116.6  |
| 103.9  | 111.6  | 105.5  | 105.9  | 95.9   | 116.2  | 107.9  | 114.5  | 116.6  |
| 120.8  | 164.9  | 145    | 132.6  | 138.1  | 129.4  | 146.8  | 146.3  | 135.3  |
| 106.1  | 91.5   | 101.2  | 99.2   | 96.1   | 108.1  | 98.6   | 102.3  | 103    |
| 103.2  | 104    | 95.4   | 95.9   | 91.2   | 106.1  | 99.3   | 100.6  | 107.2  |
| 107.2  | 112.1  | 103.1  | 104.7  | 99     | 111.3  | 103.7  | 116.2  | 112.6  |
| 99.8   | 104.1  | 104.5  | 100.4  | 91.8   | 108.2  | 96.3   | 102.3  | 100.8  |
| 102.6  | 100.8  | 103.9  | 99.2   | 93.1   | 100.8  | 97.9   | 109.8  | 106.4  |
| 140.2  | 137.6  | 134.4  | 139.6  | 116.3  | 133.6  | 133.2  | 144.2  | 142    |
| 102.2  | 105    | 97.8   | 94.9   | 96.8   | 104.6  | 98.3   | 103.6  | 104.3  |
| 108.2  | 118.4  | 103.5  | 105.5  | 90.6   | 110.4  | 108.2  | 106.4  | 113.4  |
| 107.9  | 117.3  | 111.2  | 110.5  | 101.8  | 115.7  | 108    | 114.6  | 112.6  |
| 108.4  | 103.5  | 103.8  | 99.1   | 99.6   | 99.2   | 100.8  | 99.1   | 102.5  |
| 115    | 114.1  | 102.5  | 102    | 100.6  | 106.4  | 106.2  | 117.5  | 111    |
| 112.4  | 118.2  | 109.9  | 117.6  | 124.7  | 135.9  | 123.2  | 150.4  | 110.5  |
| 645.2  | 682.2  | 765.8  | 658    | 606.1  | 635.2  | 619    | 1715.3 | 1077.1 |
| 122    | 128.6  | 114.3  | 101.5  | 109.7  | 134.9  | 112    | 141.5  | 137.8  |
| 1154.1 | 1467.6 | 822.2  | 1318.3 | 1194.9 | 738.7  | 953.3  | 2836.7 | 2011.7 |
| 424.1  | 887.1  | 374.2  | 353    | 572.1  | 236.9  | 397.7  | 360.9  | 208.5  |
| 476.9  | 1235   | 460.5  | 551.1  | 624.7  | 268.9  | 490.5  | 497.2  | 251.9  |
| 113.8  | 114.1  | 102.3  | 105.7  | 101    | 117    | 107.5  | 116    | 125.6  |
| 1047   | 1727   | 1736.6 | 2160.3 | 1296.7 | 1579.4 | 2178.6 | 1556.1 | 924.3  |
| 99.5   | 108.8  | 102.4  | 92.8   | 92.1   | 111.4  | 103.2  | 110.2  | 109    |
| 103.9  | 105.2  | 111.2  | 102.8  | 99.4   | 116    | 97.3   | 126.8  | 113.4  |
| 225.5  | 238.2  | 236.3  | 299.2  | 249.6  | 292.1  | 277.7  | 445.7  | 260.4  |
| 104.2  | 111.1  | 103.1  | 96.5   | 98.3   | 110.5  | 97     | 113.8  | 103.2  |
| 193.8  | 281    | 251.9  | 227.2  | 279.2  | 275.2  | 229.1  | 341.1  | 283.6  |
| 762.9  | 617.7  | 597.9  | 871.5  | 545.7  | 613.2  | 710.7  | 1105.6 | 1192.4 |
| 128.3  | 140.9  | 122.4  | 143    | 113.8  | 129.2  | 141.6  | 151.4  | 141.7  |
| 682.6  | 758.2  | 798.1  | 672.9  | 777.3  | 817.3  | 914.7  | 1196.7 | 1044.8 |
| 3643.6 | 2107.3 | 2280.7 | 2823.9 | 2348.8 | 2412.3 | 2803.6 | 4355.4 | 2919.4 |
| 245.5  | 229.1  | 203.5  | 191.1  | 185.2  | 233.6  | 209.6  | 318.9  | 278.7  |

|        |        |        |        |        |        |        |        |        |
|--------|--------|--------|--------|--------|--------|--------|--------|--------|
| 113    | 113    | 122.8  | 105.9  | 103.9  | 114.1  | 105.7  | 119.7  | 127.1  |
| 104.1  | 103.3  | 106.9  | 103.2  | 94     | 113.9  | 113.7  | 116.9  | 113.1  |
| 115.5  | 118.6  | 111.9  | 104    | 112.5  | 110    | 107.1  | 123    | 123    |
| 108.3  | 109.7  | 100.4  | 105.4  | 100.2  | 112.8  | 97.7   | 114.9  | 115.2  |
| 149.5  | 177.3  | 188.3  | 153.6  | 169    | 197.7  | 150.5  | 200.4  | 157.9  |
| 104.4  | 109.2  | 103.1  | 112.8  | 95.1   | 107.1  | 103.7  | 112    | 110    |
| 104.2  | 108.8  | 99.6   | 99.3   | 103.5  | 102    | 104.1  | 112.2  | 106.5  |
| 426.8  | 422    | 490.9  | 365.7  | 378    | 425.7  | 492.6  | 658.5  | 633.8  |
| 101.3  | 99.7   | 95.5   | 96     | 93.8   | 103.1  | 98.1   | 100.3  | 100.7  |
| 107.7  | 105.2  | 107.2  | 102.5  | 99.8   | 110    | 107.3  | 112.9  | 106.2  |
| 105.4  | 103.3  | 107    | 94.8   | 94.8   | 114.3  | 106.8  | 116.6  | 109.5  |
| 347.6  | 620.1  | 507.6  | 551.4  | 376.9  | 316.9  | 557.6  | 510.4  | 465.4  |
| 147.1  | 171.9  | 160    | 153.6  | 154.9  | 174.9  | 144.8  | 205.2  | 172.4  |
| 106.8  | 112.8  | 106.5  | 105    | 92.6   | 103.2  | 104.3  | 106    | 111.2  |
| 110.6  | 112    | 107.1  | 112.2  | 99.9   | 111    | 102.1  | 120.6  | 111.2  |
| 112    | 104.1  | 95     | 90.7   | 91.3   | 105.4  | 102.6  | 108.7  | 108.2  |
| 101.1  | 109.9  | 99.5   | 100.3  | 99.6   | 101.6  | 106.1  | 100.4  | 114.5  |
| 104.9  | 98.9   | 107.1  | 106.1  | 95.2   | 110.5  | 100.3  | 113.3  | 109.7  |
| 105.8  | 110    | 98.7   | 94.2   | 100.5  | 104.9  | 103.4  | 114.9  | 116.3  |
| 170.3  | 215.9  | 192.6  | 182.1  | 175    | 210.7  | 160.4  | 243.5  | 205.8  |
| 1495.3 | 2129.6 | 1690.4 | 2119.2 | 1698.7 | 1965.5 | 2304.3 | 3078.8 | 2100.4 |
| 130.7  | 190.4  | 158.7  | 177.8  | 153.7  | 175.2  | 161.9  | 254.8  | 171    |
| 141.4  | 214.7  | 185.7  | 198.6  | 166.9  | 205.9  | 247    | 226.7  | 154.5  |
| 103.9  | 111.4  | 101.7  | 104.6  | 94.3   | 107.5  | 101    | 122.5  | 110.9  |
| 101.8  | 107.6  | 112    | 103.7  | 101.4  | 115.1  | 115.6  | 120.4  | 112.9  |
| 106    | 110.8  | 104.8  | 96.9   | 98.8   | 108.2  | 105.6  | 102.7  | 100.5  |
| 98.9   | 107    | 101    | 103.9  | 92.1   | 117.2  | 107.1  | 120.8  | 102.8  |
| 232.3  | 527.8  | 503.1  | 425.9  | 385.3  | 538.5  | 439.8  | 641.7  | 302.3  |
| 263.7  | 305.9  | 286.9  | 249.8  | 279.8  | 294    | 301.6  | 421.8  | 310.1  |
| 364.6  | 302.7  | 260.2  | 315    | 244.5  | 342    | 321.6  | 573.8  | 392.1  |
| 167.8  | 155.9  | 140.8  | 138    | 151.7  | 154.3  | 145.1  | 206.1  | 160.3  |
| 130    | 120.7  | 124.2  | 114.1  | 107.7  | 127.6  | 124    | 154.1  | 138.8  |
| 108.7  | 195.1  | 165.7  | 143.3  | 128.2  | 165.6  | 157.9  | 183.3  | 140.8  |
| 107.5  | 101.7  | 110.5  | 97     | 100.2  | 107.2  | 100.9  | 111.2  | 109.2  |
| 209.1  | 247.4  | 248.4  | 220.9  | 204.1  | 239.1  | 245.5  | 266.8  | 209.1  |
| 117.4  | 121.3  | 110.5  | 117    | 116.7  | 118.5  | 128.8  | 133.2  | 129.6  |
| 284.2  | 216    | 276.2  | 258.7  | 213    | 250.7  | 247.7  | 368.7  | 331.6  |
| 116.7  | 119.8  | 132.8  | 123.8  | 120.8  | 129.1  | 127.7  | 142    | 127    |
| 106.5  | 114.5  | 104.5  | 102.8  | 105    | 109.3  | 115.2  | 104.1  | 110.8  |
| 251.5  | 199.3  | 184.4  | 182.9  | 157.9  | 188.5  | 211.4  | 542.1  | 668.4  |
| 114.9  | 108    | 110    | 114    | 100    | 113.5  | 109.9  | 112.9  | 110.5  |
| 109.7  | 107.3  | 100.4  | 104.7  | 90.3   | 109    | 103.3  | 113.3  | 111.1  |
| 107.1  | 117.6  | 105.4  | 106.4  | 100.3  | 109.5  | 108.6  | 131.1  | 115.3  |
| 121.9  | 195.1  | 178.9  | 151.6  | 168.7  | 169.1  | 180.4  | 203    | 155.4  |
| 259.6  | 471.1  | 493.2  | 542    | 413.6  | 662.4  | 579.3  | 832.5  | 669    |
| 121.1  | 127.4  | 112.2  | 129.9  | 116.8  | 145.5  | 116    | 185.6  | 133.8  |
| 126.6  | 121.8  | 114.1  | 105    | 98.8   | 123.7  | 114.4  | 125.8  | 125.1  |
| 108.1  | 113.7  | 109.9  | 107.9  | 97.9   | 120    | 108.8  | 119.6  | 110.6  |
| 114.6  | 115.2  | 110    | 95     | 102.8  | 109.4  | 124.1  | 120.5  | 122.9  |
| 122.8  | 213.6  | 208    | 180.8  | 212.5  | 190.1  | 216.2  | 187    | 193.5  |
| 299.1  | 375    | 373.4  | 421.7  | 323.8  | 397.4  | 440.6  | 554.2  | 382.6  |

|       |       |        |        |        |       |        |        |        |
|-------|-------|--------|--------|--------|-------|--------|--------|--------|
| 160.3 | 358.8 | 338.9  | 222.5  | 246.2  | 327.3 | 212    | 397.5  | 223.2  |
| 116.3 | 119   | 113.1  | 107.5  | 102.5  | 119.6 | 109.1  | 122.2  | 118.6  |
| 108.2 | 120.7 | 111.8  | 113    | 116.6  | 131.8 | 110.6  | 127.3  | 110.7  |
| 152.7 | 188.6 | 195.2  | 189.9  | 162.9  | 189.5 | 194    | 280.8  | 201.5  |
| 109   | 119.3 | 108    | 108.4  | 113.4  | 112.5 | 110    | 111.4  | 108.2  |
| 115.5 | 117.2 | 122.1  | 109.8  | 107    | 131.5 | 110.2  | 124    | 169.5  |
| 102.2 | 102.7 | 103.3  | 96.1   | 91.4   | 108.4 | 96.9   | 111.5  | 97.2   |
| 110   | 122.4 | 115.2  | 110.9  | 99.1   | 121   | 107.5  | 125.8  | 124.4  |
| 238.2 | 275   | 307.6  | 219.3  | 268.5  | 297.4 | 282.4  | 395.3  | 308.1  |
| 121   | 116.4 | 101.6  | 101.2  | 101.8  | 112.6 | 115.2  | 120    | 108    |
| 110.2 | 114.6 | 121.1  | 105.4  | 108.2  | 116.5 | 111.2  | 153.4  | 119.9  |
| 183.9 | 234.9 | 195.5  | 222.2  | 193.7  | 232.5 | 278.9  | 268.8  | 256.6  |
| 200.7 | 363.9 | 336.1  | 262.8  | 319.4  | 391.6 | 307.2  | 463.7  | 287.9  |
| 107   | 108.5 | 104.6  | 101.7  | 94.7   | 125.1 | 105.7  | 111.2  | 102.7  |
| 295.9 | 269.4 | 218.3  | 199.6  | 204.5  | 248.7 | 226.7  | 365.1  | 324.6  |
| 101.4 | 104.1 | 104.4  | 100.8  | 89.2   | 101.3 | 98.8   | 101.5  | 105.4  |
| 96.9  | 110.8 | 102.7  | 105.3  | 104.4  | 111   | 117.1  | 110.8  | 113.8  |
| 182.9 | 237.5 | 217.5  | 200.9  | 209.8  | 229.1 | 226.9  | 275.8  | 223.5  |
| 192.3 | 227.8 | 182.6  | 211.3  | 172    | 194.8 | 201.4  | 290.5  | 225.3  |
| 116.5 | 145.5 | 129.4  | 127.3  | 121.5  | 123.8 | 138.8  | 141.6  | 115.5  |
| 123.5 | 128.6 | 108.4  | 135.9  | 126.1  | 146.7 | 143.8  | 162.3  | 137.3  |
| 127.5 | 115.7 | 109    | 113.2  | 105.6  | 118.4 | 119.2  | 131.8  | 128.9  |
| 168.3 | 168   | 149.6  | 164.5  | 157.2  | 165.9 | 160.9  | 263.9  | 263.7  |
| 226.3 | 700.2 | 656.5  | 579.2  | 458.5  | 512.9 | 594.6  | 406.8  | 300.6  |
| 125.6 | 159.3 | 144    | 121.6  | 142.6  | 147.8 | 148.2  | 209.4  | 165.1  |
| 303.4 | 368   | 350.2  | 281    | 291.6  | 327.6 | 399.2  | 474.5  | 399.9  |
| 121.7 | 205.7 | 176.2  | 149.9  | 154.5  | 169.1 | 164    | 193    | 175.9  |
| 413.4 | 454.1 | 492.4  | 418    | 496.9  | 495.6 | 444.3  | 741.5  | 510.5  |
| 117.2 | 132.9 | 124.4  | 102.8  | 110.9  | 141.4 | 117.5  | 140.7  | 128.2  |
| 985.3 | 1525  | 1516.7 | 1308.7 | 1340.2 | 1554  | 1313.3 | 2345.2 | 1037.7 |
| 132.7 | 165.8 | 162.5  | 155.4  | 127.6  | 171.9 | 155.4  | 172.9  | 185.3  |
| 285   | 495.8 | 446.1  | 458.9  | 394.4  | 491.1 | 570.7  | 502.7  | 423.9  |
| 106.1 | 103.1 | 102.6  | 96.4   | 97.7   | 107.9 | 98     | 116    | 109.4  |
| 108   | 109.1 | 108.9  | 106.1  | 97.8   | 111.7 | 105.7  | 102.6  | 113.7  |
| 105.2 | 105.9 | 103.8  | 103.9  | 89.6   | 102.4 | 104.3  | 110.5  | 114.4  |
| 113.2 | 115.4 | 102.7  | 105.7  | 104.6  | 112.5 | 106.4  | 115.5  | 105.9  |
| 110.1 | 104   | 105.6  | 101.6  | 99.3   | 104.6 | 93     | 110.4  | 113.5  |
| 147.9 | 176   | 186.1  | 143.1  | 162    | 176.2 | 179.3  | 231.1  | 163.7  |
| 401   | 774.8 | 759.4  | 731.2  | 571.5  | 777.9 | 734.6  | 956.7  | 566    |
| 109   | 103.4 | 99.2   | 97.6   | 94.1   | 109.8 | 105.2  | 105    | 113.7  |
| 106.6 | 111.9 | 105.4  | 109.6  | 93.9   | 117.6 | 106.3  | 115.6  | 104.3  |
| 140.5 | 224.1 | 219.6  | 202.6  | 191.9  | 220   | 194.3  | 223.8  | 166.9  |
| 175.5 | 202.9 | 207.2  | 235.3  | 182.5  | 200.3 | 222.9  | 229.8  | 206.9  |
| 230.1 | 237.6 | 184.4  | 232.7  | 199.7  | 197.6 | 234    | 291.7  | 268.9  |
| 102.8 | 108.6 | 99.3   | 97.9   | 96.7   | 115.4 | 99.2   | 108.4  | 104.3  |
| 135.9 | 188.8 | 201.6  | 154.3  | 146    | 188.3 | 162.8  | 216.9  | 171.9  |
| 210.9 | 458.8 | 445.1  | 300.6  | 352.2  | 417.5 | 311.5  | 511.9  | 365.1  |
| 215.7 | 241.8 | 214.4  | 188    | 196.9  | 236.8 | 170.4  | 349.5  | 304.1  |
| 122.2 | 184   | 220.6  | 159.5  | 163.2  | 192.2 | 146.3  | 208    | 196.5  |
| 383.9 | 592.1 | 547.1  | 467.1  | 444.9  | 673.5 | 497.9  | 786.3  | 579.2  |
| 109.4 | 184.4 | 164.9  | 149.4  | 149.4  | 182.4 | 161.1  | 157.7  | 131.9  |

|       |       |       |       |       |       |       |       |       |
|-------|-------|-------|-------|-------|-------|-------|-------|-------|
| 103.8 | 112.5 | 98.2  | 93.9  | 90    | 110.2 | 99    | 97.3  | 103   |
| 107.7 | 111.2 | 104.9 | 111.1 | 95.7  | 114.2 | 103.8 | 104.8 | 107.3 |
| 108.6 | 113.2 | 103.3 | 99.4  | 97.5  | 111.9 | 101   | 105.9 | 105.3 |
| 128.7 | 172.8 | 152.4 | 150.2 | 150.5 | 171.1 | 143.1 | 192.9 | 155.3 |
| 244.3 | 405   | 418.6 | 379.7 | 377.1 | 413.4 | 374.2 | 539.5 | 289.4 |
| 119   | 169.2 | 148   | 152.5 | 133.1 | 162.8 | 130.4 | 141.7 | 129.1 |
| 106.9 | 108.2 | 94.6  | 103.7 | 93    | 109.4 | 92.4  | 123.1 | 108   |
| 112   | 112.9 | 115.2 | 102.3 | 95.2  | 112.8 | 108   | 140.1 | 132.7 |
| 205.8 | 301.9 | 242.5 | 227.8 | 244.3 | 261.6 | 236.5 | 443.3 | 213.6 |
| 110.1 | 115.2 | 104.8 | 104.7 | 96.6  | 123.4 | 103.5 | 121.7 | 107.2 |
| 119   | 119   | 114.6 | 110.1 | 106.6 | 124.2 | 124.1 | 130.8 | 131.2 |
| 108.2 | 108   | 105.7 | 98.9  | 94    | 105.9 | 114.8 | 105.3 | 108   |
| 109.3 | 110.8 | 97.6  | 100.8 | 92.4  | 103   | 102   | 108.6 | 102.7 |
| 100.4 | 107.7 | 100.9 | 97.9  | 90.3  | 107.6 | 103.2 | 106.2 | 102.8 |
| 107.5 | 103.7 | 108.1 | 118.2 | 101.2 | 125.4 | 109.9 | 147.2 | 129.8 |
| 110.2 | 109.6 | 110.2 | 106.1 | 100.3 | 115.1 | 103.1 | 112.8 | 109.7 |
| 105.3 | 111   | 107.4 | 101.4 | 95.1  | 108.3 | 99.6  | 107.7 | 101.1 |
| 109   | 102.3 | 106.2 | 106.6 | 99.2  | 111.6 | 99.1  | 116.4 | 102.5 |
| 109   | 102.1 | 100.1 | 102.7 | 100.4 | 109.9 | 104.6 | 107.5 | 103.9 |
| 99.5  | 103.1 | 100.2 | 108.9 | 100.2 | 104.7 | 109   | 114.8 | 111.1 |
| 111.4 | 112.5 | 105.1 | 99    | 94.6  | 107.8 | 106.9 | 120.6 | 106.9 |
| 106.3 | 110   | 103.5 | 100.7 | 95.9  | 111   | 108.8 | 112.4 | 115.8 |
| 114.2 | 115.6 | 99.8  | 100.2 | 89.5  | 112   | 106.7 | 114.5 | 110.9 |
| 102.8 | 104.7 | 93.6  | 101   | 94.1  | 105.8 | 90.7  | 102.3 | 106.3 |
| 107.8 | 116.7 | 112   | 103.9 | 93.1  | 111.6 | 99    | 98.3  | 109.6 |
| 104.7 | 107.9 | 120.1 | 105.3 | 92.9  | 109   | 95    | 106.9 | 106.5 |
| 127.1 | 126.3 | 113   | 125.2 | 109   | 119.6 | 111.8 | 126.6 | 126.3 |
| 112.1 | 109.3 | 96.2  | 102.7 | 90.8  | 111.3 | 105.3 | 106.2 | 109.9 |
| 109.5 | 109.7 | 106.1 | 103.8 | 103   | 110.1 | 105.8 | 108.6 | 107.8 |
| 107.6 | 106.1 | 104.3 | 102   | 94.7  | 106.3 | 94.3  | 103.8 | 114.8 |
| 122.6 | 167.5 | 149.7 | 131   | 148.8 | 169.6 | 146.3 | 174.1 | 166.1 |
| 220.4 | 218.9 | 205.2 | 180.7 | 191.5 | 198.9 | 129.8 | 315.2 | 251.5 |
| 118.4 | 153.4 | 132.5 | 153.3 | 122.8 | 144.9 | 141.2 | 190.7 | 149.2 |
| 105.9 | 107.2 | 105.8 | 102.7 | 95.3  | 107.5 | 109.7 | 113.3 | 113.4 |
| 105.3 | 115.4 | 104.3 | 105   | 96.6  | 104.5 | 115.4 | 113.8 | 107.5 |
| 110.4 | 111.5 | 112.6 | 122.9 | 95    | 107   | 107.2 | 107.1 | 105.5 |
| 111   | 104.9 | 108.6 | 97.9  | 98.8  | 111.9 | 102.4 | 113.8 | 113   |
| 117.3 | 127.1 | 101.5 | 122.5 | 98.4  | 116.9 | 106.9 | 115.1 | 102.5 |
| 117.9 | 109.9 | 107.7 | 100   | 100.3 | 104.9 | 103.5 | 114.7 | 111.5 |
| 118.8 | 134.8 | 106.4 | 110.1 | 120.6 | 122.8 | 109.5 | 162.2 | 127.9 |
| 129.8 | 141.2 | 144.3 | 138.7 | 127.8 | 156.7 | 129.6 | 162.2 | 137   |
| 129   | 132.2 | 124.6 | 120.6 | 113   | 120.8 | 123.3 | 151.2 | 132.1 |
| 135.2 | 164.4 | 150.1 | 118.1 | 138.6 | 144.3 | 142.4 | 188.4 | 156   |
| 106   | 108.5 | 105.5 | 90.3  | 92.4  | 111.2 | 100.7 | 117   | 106.8 |
| 101   | 117.8 | 107.1 | 107.1 | 101.9 | 106.8 | 109.4 | 106   | 111.4 |
| 202.7 | 235.8 | 207.5 | 225.8 | 152   | 172.1 | 215.8 | 339.4 | 339.4 |
| 98.7  | 106.6 | 109   | 97    | 92.3  | 103.5 | 101.3 | 107.9 | 106.5 |
| 129.4 | 128.5 | 121.9 | 121.5 | 120.5 | 122.8 | 112.1 | 158.7 | 158.1 |
| 235.2 | 222.1 | 269.6 | 141.8 | 178.2 | 236   | 175.2 | 272.9 | 177.6 |
| 113   | 107.5 | 104.2 | 97.8  | 99.3  | 112   | 101   | 105.6 | 119.8 |
| 117   | 127.1 | 117.4 | 105.2 | 108.3 | 118.7 | 126.5 | 131.7 | 119.2 |



|       |        |        |       |        |        |        |        |        |
|-------|--------|--------|-------|--------|--------|--------|--------|--------|
| 102.7 | 109.9  | 100.4  | 99.1  | 88.7   | 106.7  | 103    | 105.2  | 107.7  |
| 106.4 | 108.9  | 104.3  | 96.9  | 94.8   | 108.8  | 96     | 106.3  | 104    |
| 103.1 | 103.4  | 96.9   | 98.3  | 98.3   | 110    | 100    | 108.7  | 102.5  |
| 109.6 | 102.6  | 104.4  | 110.5 | 96.9   | 115.4  | 107.1  | 103.3  | 112.9  |
| 110.1 | 110    | 96.2   | 101.6 | 95     | 109.1  | 103.4  | 104.1  | 100.9  |
| 110.3 | 106.2  | 108.2  | 117.7 | 102.4  | 114.1  | 104.6  | 120.2  | 115.7  |
| 101.4 | 100.6  | 95.8   | 95.1  | 90.2   | 104    | 97.2   | 91.9   | 102.4  |
| 161.9 | 150.3  | 133.9  | 126.5 | 140.5  | 170.9  | 129    | 209.9  | 176.3  |
| 102.6 | 109.2  | 106.5  | 101.7 | 100.8  | 101.9  | 103.6  | 108.8  | 112.6  |
| 112.8 | 108.9  | 104    | 103.7 | 100    | 118.9  | 100.4  | 101.2  | 105.4  |
| 112.1 | 108.8  | 106    | 103.5 | 99.4   | 107.8  | 98.4   | 120.8  | 111    |
| 106.1 | 105.7  | 97.2   | 92.8  | 98.6   | 102.2  | 105.6  | 108.1  | 107.3  |
| 111.5 | 109.7  | 108.7  | 101.6 | 96.7   | 105.5  | 105    | 110.6  | 114.1  |
| 109.1 | 109.1  | 104.1  | 102.8 | 97.8   | 109.3  | 109.7  | 117.8  | 109.1  |
| 102.3 | 110    | 106.8  | 109.3 | 104.7  | 109.8  | 103    | 100.9  | 105.4  |
| 112.4 | 112.1  | 103.4  | 103.7 | 94.4   | 108.2  | 105.2  | 106.4  | 115.1  |
| 110.9 | 109.6  | 111.8  | 104.8 | 109.6  | 124.5  | 113.1  | 119.3  | 119.1  |
| 104.8 | 118.5  | 108.2  | 99.6  | 91.3   | 107.2  | 102.5  | 111.5  | 104    |
| 107   | 111.8  | 111.5  | 116.8 | 99.4   | 123.5  | 117.7  | 138.3  | 126.2  |
| 116.4 | 119.3  | 103.2  | 112.1 | 103.9  | 112.6  | 113    | 119.5  | 112    |
| 106   | 116.6  | 96.6   | 97.9  | 97.8   | 113.1  | 109.5  | 105.3  | 111.8  |
| 101.4 | 105.9  | 107.6  | 96.9  | 100.7  | 101.4  | 104    | 106.8  | 106.9  |
| 108.8 | 112.6  | 112.9  | 101.7 | 94.3   | 99.2   | 99.2   | 105.9  | 108.1  |
| 108.8 | 109    | 107.1  | 104.9 | 92     | 109.7  | 100.7  | 106.3  | 117.8  |
| 106.1 | 104    | 105.9  | 99.5  | 91.4   | 109.4  | 100.6  | 102.5  | 111.1  |
| 117.3 | 123.4  | 102.4  | 103.8 | 104.2  | 118.8  | 125.1  | 127.7  | 112    |
| 100.2 | 104.3  | 96.2   | 98.6  | 90.5   | 109.2  | 100.6  | 101.9  | 97     |
| 103.8 | 114    | 114.8  | 107.6 | 99.3   | 116.8  | 107.8  | 122.4  | 111.3  |
| 109.6 | 152.5  | 140.8  | 134   | 131.6  | 135.3  | 128.6  | 141.7  | 111.3  |
| 105.8 | 112.6  | 109.2  | 103.8 | 108.2  | 116.8  | 106.2  | 112.1  | 114.7  |
| 97.8  | 105.7  | 101.4  | 101.8 | 96.4   | 102.6  | 103.4  | 116.8  | 108.8  |
| 106.8 | 114.9  | 112.4  | 99.9  | 96.2   | 110.5  | 107.6  | 118.3  | 110    |
| 103.2 | 107.3  | 97     | 98.9  | 94.6   | 102.3  | 102.9  | 102.1  | 100.4  |
| 105.8 | 112.4  | 103.1  | 95.8  | 97.1   | 108.5  | 97.3   | 114.5  | 114.9  |
| 112.3 | 119.8  | 106.7  | 103.3 | 100    | 110    | 107.8  | 114.9  | 111.3  |
| 145   | 176.5  | 132.6  | 166.2 | 145.7  | 159.5  | 134.3  | 205.1  | 149.2  |
| 211.1 | 188.7  | 181.3  | 182.2 | 187.8  | 224.3  | 203.3  | 320.8  | 249.2  |
| 130.9 | 164.3  | 164.5  | 140.5 | 141    | 153.7  | 136    | 235.4  | 159.4  |
| 798.6 | 1195.1 | 1183.1 | 836.5 | 1173.5 | 1304.1 | 1116.9 | 1660.6 | 1018.2 |
| 346.5 | 220.5  | 252.1  | 296.6 | 261.7  | 198.3  | 200    | 571.8  | 475.2  |
| 399.8 | 430.6  | 327.7  | 314.9 | 298.7  | 283.5  | 288.1  | 671.8  | 447.3  |
| 130.8 | 135.4  | 134.4  | 161.9 | 127.1  | 160.2  | 139.3  | 246.8  | 138.2  |
| 116.3 | 104.9  | 101.4  | 90.9  | 96.6   | 106.9  | 108.1  | 99.5   | 100.6  |
| 104.7 | 114.6  | 111.5  | 112.9 | 101.9  | 122.6  | 105.2  | 119.1  | 115.3  |
| 934.7 | 869.5  | 644.5  | 719.6 | 593    | 682.7  | 695.1  | 1581.9 | 1401.1 |
| 117.7 | 117.1  | 106    | 94.3  | 94.7   | 105.3  | 106.3  | 119.3  | 122.9  |
| 126.8 | 128.2  | 112.1  | 111.3 | 108.5  | 130    | 118.5  | 149.2  | 130.5  |
| 111.8 | 107.4  | 101.6  | 102.4 | 98.6   | 107.7  | 105.1  | 105    | 110.7  |
| 112.3 | 118.6  | 108.6  | 99.1  | 100.9  | 112.4  | 107.2  | 124    | 116    |
| 105   | 103.6  | 93.8   | 106   | 94.4   | 102.9  | 109.9  | 106.1  | 101.2  |
| 104.9 | 101.8  | 104.9  | 101.7 | 88.5   | 111.5  | 101.7  | 104.4  | 105.5  |

|        |        |        |        |        |        |        |        |        |
|--------|--------|--------|--------|--------|--------|--------|--------|--------|
| 197.6  | 269.1  | 238.7  | 213.6  | 222.8  | 231.8  | 231.8  | 206.1  | 193.1  |
| 110    | 103.1  | 98.9   | 100.9  | 95.7   | 107.9  | 101    | 115    | 117.5  |
| 107.5  | 111.9  | 105.6  | 104.3  | 103.1  | 115.1  | 107.6  | 114    | 108.1  |
| 107.6  | 116.2  | 108.6  | 105.4  | 94.3   | 102.7  | 105.4  | 111.7  | 108.7  |
| 104.6  | 133.4  | 114.4  | 98.3   | 100.4  | 105.1  | 96.8   | 108.8  | 104.4  |
| 105.2  | 114.7  | 101.2  | 104.3  | 93     | 111.9  | 111.9  | 108.9  | 119.3  |
| 105.4  | 105.3  | 103.2  | 94.6   | 90.5   | 97.1   | 98.1   | 107    | 107.2  |
| 118.5  | 123.6  | 108.7  | 112.7  | 105.4  | 117.5  | 123.6  | 124.6  | 125.8  |
| 163.2  | 164.1  | 161.3  | 162.6  | 133.6  | 196.5  | 153.3  | 278.2  | 221.9  |
| 105    | 106.1  | 101.1  | 98.8   | 97.4   | 111.8  | 105    | 105.8  | 106.2  |
| 573.5  | 569.7  | 574.5  | 459    | 508.4  | 623.1  | 579.1  | 826.2  | 694.9  |
| 335.3  | 421.3  | 336.2  | 328.4  | 335.2  | 314.6  | 428.5  | 623.9  | 437.5  |
| 171.9  | 362.5  | 251.2  | 299.7  | 228.8  | 177.6  | 261.9  | 204    | 171.9  |
| 119.6  | 143    | 155.3  | 152.5  | 125.2  | 131.8  | 118.9  | 131.4  | 127.1  |
| 102.2  | 111.3  | 103.2  | 111.4  | 97.9   | 102.5  | 110.9  | 108.2  | 113.6  |
| 112.7  | 106.8  | 101.1  | 105.2  | 99.3   | 104.6  | 98.9   | 103.6  | 105.8  |
| 100    | 104.8  | 98.8   | 98.5   | 99.7   | 109.3  | 100.7  | 105    | 106    |
| 107.8  | 104.6  | 106.7  | 107.8  | 94.4   | 114.1  | 103.2  | 110.2  | 113.1  |
| 99.9   | 110.7  | 99.2   | 101.9  | 95.3   | 98.7   | 101.4  | 106.3  | 104.6  |
| 109.1  | 106.8  | 96.7   | 113.7  | 93.9   | 96.5   | 103.8  | 99.9   | 103.9  |
| 1001.8 | 943.3  | 787    | 741.4  | 848.9  | 1131.5 | 826    | 1656.5 | 2065.2 |
| 1641.4 | 1500.3 | 1335.9 | 1097.1 | 1264.8 | 1978.2 | 1374.7 | 2193.6 | 2521.9 |
| 106.1  | 118.2  | 109.6  | 102.8  | 107.4  | 111.4  | 113.4  | 124.7  | 97.3   |
| 107.2  | 100.9  | 108.6  | 103.3  | 97.6   | 112.6  | 106.3  | 108.1  | 101.3  |
| 103.6  | 107.3  | 102.5  | 97.8   | 95.7   | 104.6  | 96.8   | 101    | 106.5  |
| 114.5  | 104.2  | 100.6  | 102.4  | 111.2  | 111.8  | 106.6  | 114.1  | 118.7  |
| 108.7  | 109.4  | 110.8  | 101.1  | 91.6   | 111.1  | 104    | 96.5   | 110.6  |
| 106.3  | 97.8   | 94     | 95.7   | 94.3   | 107.7  | 97.5   | 105.7  | 109.1  |
| 107.7  | 110.8  | 101    | 99.8   | 95.4   | 114.1  | 111.1  | 116.4  | 101.8  |
| 103.2  | 114.9  | 104.9  | 109.2  | 93.4   | 112.9  | 99     | 108.6  | 110.9  |
| 101.1  | 105.6  | 102    | 91     | 91.9   | 104.6  | 100.4  | 107.7  | 100.3  |
| 104.7  | 102.6  | 98.1   | 97.3   | 96.8   | 110.5  | 99.6   | 121.1  | 112.2  |
| 101.5  | 115.3  | 109    | 87.4   | 91     | 105.6  | 101.9  | 112.3  | 110.7  |
| 107.9  | 111.7  | 102.8  | 109.6  | 98.1   | 112.1  | 109.4  | 118    | 116.2  |
| 125.9  | 136.8  | 136.7  | 121.5  | 116.6  | 154.7  | 130.4  | 156.1  | 132.6  |
| 105.3  | 103.8  | 109.2  | 93.2   | 93.2   | 107.4  | 103.2  | 103.7  | 106.7  |
| 125.8  | 178.7  | 170.6  | 148    | 147.4  | 191.8  | 161.6  | 194.5  | 154.3  |
| 104.4  | 102.5  | 98.5   | 102.4  | 97.4   | 104.7  | 103.3  | 101.2  | 112.1  |
| 105.7  | 105.4  | 110.8  | 98.1   | 94.6   | 113.7  | 97.9   | 110.6  | 105.2  |
| 101.2  | 102.5  | 100.9  | 100.7  | 90.3   | 106    | 98.2   | 108.9  | 107.2  |
| 107.4  | 108.9  | 98.4   | 98.8   | 101.6  | 105.7  | 104.3  | 110.4  | 102.7  |
| 108.9  | 108.8  | 102    | 95.4   | 93.6   | 103.3  | 105.3  | 103.7  | 107.8  |
| 107.8  | 121.2  | 105.7  | 107.2  | 98.2   | 117.1  | 102.3  | 114.3  | 106.6  |
| 609.9  | 753.9  | 735.7  | 685.4  | 697    | 637.3  | 662.8  | 897.4  | 492.2  |
| 364.7  | 528.5  | 460.8  | 575.5  | 474.1  | 432.3  | 516.2  | 618.5  | 413.7  |
| 103.6  | 109.3  | 110.7  | 103.9  | 94.5   | 113.1  | 102    | 112.7  | 117.1  |
| 3452.4 | 2668.6 | 4435.1 | 2239.1 | 2268.8 | 3316.6 | 2462.8 | 7763.7 | 9555.6 |
| 761.5  | 563.1  | 614.3  | 648.2  | 527.5  | 518.6  | 642.9  | 1283.9 | 1156.1 |
| 144.6  | 178.3  | 166.1  | 168    | 121.4  | 139.2  | 180.3  | 184.4  | 167.3  |
| 130.4  | 157.4  | 157.8  | 131.8  | 131.7  | 134.1  | 137.5  | 187.7  | 148.5  |
| 299.4  | 388.7  | 456.3  | 363    | 393.3  | 458.5  | 414.9  | 709    | 431.3  |

|       |       |        |       |       |        |       |        |        |
|-------|-------|--------|-------|-------|--------|-------|--------|--------|
| 176.2 | 218.4 | 200.4  | 175.6 | 192.4 | 208.9  | 227.6 | 273    | 189.5  |
| 138.8 | 168.8 | 143.2  | 119.7 | 144   | 182.7  | 154.6 | 247.2  | 236    |
| 304.5 | 283.6 | 230.4  | 302.8 | 259.3 | 317.4  | 282.5 | 493.1  | 370.2  |
| 134.4 | 186.3 | 178.2  | 199.3 | 171.3 | 172.1  | 200.1 | 203.9  | 150.1  |
| 747.6 | 601.3 | 586.8  | 518.2 | 451   | 659.5  | 401.4 | 1167   | 1294.1 |
| 110.2 | 122.7 | 118.8  | 108.6 | 109.9 | 116.8  | 118.7 | 120.6  | 117.9  |
| 98.9  | 103.5 | 100.8  | 107.3 | 92.9  | 100.1  | 99.3  | 120.4  | 115.3  |
| 141.4 | 161.2 | 174.9  | 141.7 | 151.8 | 191.2  | 201.5 | 250.2  | 236.1  |
| 852.3 | 835.3 | 1036.8 | 697.8 | 946   | 1030.8 | 984.3 | 1792.6 | 1445   |
| 117.8 | 115.2 | 106.7  | 105.7 | 93.5  | 119.1  | 113   | 121.9  | 110.4  |
| 496.5 | 384.6 | 417.1  | 424.9 | 348.5 | 467.1  | 387.5 | 496    | 463.7  |
| 94    | 108   | 157.2  | 107.8 | 97.8  | 162.9  | 98.9  | 108.6  | 144.8  |
| 179.8 | 451.7 | 454.6  | 400.7 | 346.2 | 489.3  | 379.3 | 623.5  | 308.4  |
| 102.2 | 107.5 | 103.5  | 106.1 | 96.2  | 111.4  | 104.6 | 102.1  | 112.7  |
| 113.4 | 114   | 103.1  | 98.6  | 99    | 107.2  | 103.2 | 115.4  | 110.7  |
| 177.4 | 284.9 | 276.8  | 253.9 | 273   | 246.2  | 269.5 | 349.5  | 192.2  |
| 122.8 | 113.2 | 115.2  | 102.2 | 103.5 | 117.8  | 111.3 | 137.4  | 130.5  |
| 102.1 | 105.2 | 107.2  | 105.7 | 97.9  | 109.4  | 101.7 | 114.1  | 109.3  |
| 156.6 | 156.7 | 152.3  | 139.1 | 135.1 | 164.8  | 146   | 165.2  | 146.6  |
| 104.8 | 100.5 | 99.2   | 94.3  | 94    | 116.1  | 101.3 | 103.5  | 104.5  |
| 567.7 | 707.6 | 712.8  | 596.4 | 578.7 | 800.1  | 682.5 | 1545.5 | 1395.6 |
| 129.7 | 228.6 | 208    | 211.6 | 155.5 | 230.7  | 175   | 288    | 209.1  |
| 512.6 | 556   | 462.1  | 501.9 | 465.6 | 559.8  | 491   | 1097.7 | 755.7  |
| 107.4 | 120.6 | 102.7  | 106   | 107   | 104.9  | 104.2 | 108.8  | 109.6  |
| 158.7 | 188.6 | 195.8  | 169.1 | 173.7 | 174.9  | 202.3 | 279.7  | 223.7  |
| 191.5 | 327.2 | 249.4  | 254.1 | 251   | 282.2  | 258   | 349.3  | 243    |
| 153   | 140.7 | 137.3  | 138.3 | 111.7 | 136.6  | 131.5 | 259.2  | 217.5  |
| 146.1 | 179.1 | 179.1  | 209.5 | 169.8 | 175.2  | 192.6 | 275.4  | 187    |
| 105.6 | 106.8 | 102.8  | 97.7  | 93.7  | 104.6  | 102   | 98.8   | 105    |
| 124.4 | 140.5 | 133.9  | 166.9 | 149.1 | 120.7  | 162.9 | 138.4  | 122.8  |
| 129.3 | 155.4 | 138    | 175   | 125.5 | 139.7  | 161.1 | 186.3  | 149.4  |
| 248.7 | 254.5 | 256    | 268.7 | 270.9 | 272.2  | 266.8 | 422    | 276.6  |
| 113.2 | 112.9 | 109.4  | 112.7 | 108.6 | 119.5  | 109.7 | 124.2  | 124.9  |
| 287.7 | 390.1 | 431.3  | 423.5 | 404.6 | 415.9  | 388.7 | 614.1  | 388.4  |
| 101.9 | 111.5 | 98.5   | 102   | 99.7  | 101.5  | 108.1 | 112.9  | 115    |
| 146.7 | 158.9 | 130.3  | 160.9 | 130.7 | 140.8  | 168.1 | 194.2  | 152.4  |
| 108.1 | 113.4 | 103.8  | 114.3 | 98.5  | 103.2  | 102.2 | 112.2  | 110.7  |
| 288.6 | 293.7 | 269.4  | 251.4 | 251.7 | 312.2  | 247.8 | 402.9  | 311.5  |
| 128   | 117.1 | 111.7  | 126.3 | 109.6 | 125.8  | 109.4 | 126.7  | 109.7  |
| 435   | 465.4 | 389.6  | 343.8 | 324.1 | 406.1  | 417.9 | 657    | 559.2  |
| 96.6  | 107.6 | 103.3  | 96.4  | 94.1  | 117.9  | 100.1 | 98     | 103.3  |
| 155.8 | 205.9 | 187.1  | 185.2 | 171.2 | 181.3  | 184.5 | 217.2  | 214.9  |
| 316.6 | 246   | 260.5  | 246.5 | 249.3 | 262.9  | 331.5 | 248.7  | 196.4  |
| 478.9 | 710.8 | 732.9  | 870.3 | 651.2 | 775.8  | 799.7 | 854    | 526.4  |
| 103.5 | 120.2 | 107.6  | 100.4 | 111.6 | 114.7  | 113.4 | 129.9  | 120.7  |
| 1865  | 940.3 | 866.1  | 750   | 672   | 1044.1 | 849.9 | 2107.6 | 3127.1 |
| 296.3 | 300.3 | 296.8  | 251.5 | 306.2 | 323.1  | 239.3 | 605.3  | 407.4  |
| 101.2 | 98.6  | 104.1  | 101.4 | 94.4  | 107.5  | 105.6 | 105.2  | 100.6  |
| 105.7 | 111   | 112.2  | 96.6  | 99.2  | 102.6  | 98.7  | 110.6  | 109.6  |
| 104.7 | 107.5 | 97.2   | 97.6  | 101   | 101.3  | 103   | 103.4  | 108.8  |
| 131.3 | 135.7 | 100    | 113.5 | 103.1 | 111.3  | 108.3 | 130.6  | 134.2  |

|        |        |        |        |        |        |        |        |        |
|--------|--------|--------|--------|--------|--------|--------|--------|--------|
| 218.1  | 160.4  | 153.6  | 161.1  | 130.3  | 163.5  | 120.9  | 261.9  | 220.1  |
| 2657.9 | 1947.8 | 2002.2 | 1696.1 | 1826.5 | 2372.5 | 1725.3 | 2820.2 | 2872.4 |
| 131.2  | 126.5  | 132.4  | 113.6  | 128.2  | 139.4  | 135.3  | 146.6  | 149.2  |
| 292.8  | 298.4  | 256    | 295.3  | 260    | 342.2  | 362.2  | 563.9  | 423.2  |
| 330.4  | 302.2  | 361.5  | 291.5  | 313.3  | 379.6  | 264.9  | 808.2  | 584.9  |
| 167.9  | 160.3  | 162.4  | 138    | 146.6  | 157.4  | 168.9  | 209.2  | 184    |
| 2431.6 | 3187.7 | 2811.3 | 3835.2 | 2224.6 | 2878   | 2833.5 | 4478.4 | 3192.8 |
| 198.8  | 230.6  | 222.8  | 221.2  | 207.9  | 243.3  | 192.1  | 277.9  | 242.1  |
| 136.1  | 127.3  | 146.4  | 147.6  | 148    | 146.2  | 180.4  | 251.5  | 150.4  |
| 338    | 274.4  | 256.5  | 339.9  | 189.8  | 260    | 303.3  | 706.5  | 526    |
| 1096.4 | 1714.7 | 1479.4 | 1917.8 | 1127.8 | 1560.2 | 1488.3 | 1870.6 | 1367.3 |
| 1863   | 1792.7 | 1773.7 | 2527.8 | 1735.6 | 2161.3 | 2192.1 | 4211.2 | 3557.1 |
| 4347.2 | 3665.1 | 3574.1 | 3350.9 | 3525.7 | 4635.8 | 4002.2 | 5774   | 5427.1 |
| 123    | 128.7  | 122.3  | 121.7  | 113    | 133.9  | 114.5  | 156.2  | 152.4  |
| 379.9  | 285.7  | 311.7  | 369.4  | 338.4  | 385.4  | 307.6  | 917.6  | 475.1  |
| 629.8  | 496.4  | 495.9  | 457.1  | 413.6  | 663.3  | 493.9  | 1021.6 | 642.8  |
| 105.2  | 105.2  | 104.8  | 97.7   | 100.8  | 111.9  | 100.8  | 113.8  | 104.1  |
| 2835.4 | 1836.6 | 1788.5 | 1923.5 | 1918.2 | 2226.2 | 2118.1 | 5098.1 | 4974.4 |
| 222.3  | 190.8  | 174.5  | 157.7  | 161.8  | 185.8  | 161.6  | 258.1  | 352.6  |
| 180    | 230.4  | 215.2  | 194.5  | 214    | 233.2  | 153.9  | 231.3  | 207.3  |
| 105.5  | 121.5  | 111.2  | 112.1  | 95.9   | 109.4  | 107.7  | 107.4  | 119.1  |
| 132    | 130.2  | 115.4  | 143.8  | 116.6  | 119.7  | 133.4  | 123.5  | 138.9  |
| 104.6  | 108.3  | 99.9   | 100    | 100.5  | 107.2  | 95     | 105.9  | 103.5  |
| 111    | 112.4  | 104.4  | 106.8  | 103.7  | 116    | 104.2  | 118.5  | 113.6  |
| 116.9  | 117.4  | 102.6  | 108.2  | 97.3   | 109.3  | 102    | 110.1  | 105.5  |
| 108.1  | 109.6  | 106.5  | 110.9  | 103.6  | 118.3  | 99.4   | 106.1  | 117.2  |
| 337.5  | 551.3  | 579.8  | 531.6  | 500    | 711.5  | 805.5  | 745.8  | 400.9  |
| 110.3  | 110.1  | 104.7  | 100.5  | 100.8  | 115.2  | 114.2  | 118.4  | 106.5  |
| 109    | 105.6  | 96.9   | 104.9  | 104.3  | 105.9  | 99.3   | 107.6  | 107.5  |
| 501.5  | 405.4  | 366.2  | 824.9  | 392.6  | 396.8  | 606.2  | 473.4  | 404.1  |
| 107    | 111.6  | 111.7  | 104.4  | 96.6   | 109.3  | 108.1  | 103.5  | 115.5  |
| 109.2  | 115.8  | 113.5  | 114.5  | 94.2   | 116.7  | 103.2  | 112.2  | 105.8  |
| 182.4  | 194    | 198.9  | 185.1  | 185.3  | 210.3  | 175.8  | 237.7  | 192.7  |
| 211.8  | 339.9  | 456.6  | 274.3  | 295.8  | 242.2  | 267.4  | 550.9  | 279.1  |
| 192    | 312.4  | 210.5  | 316.8  | 216.5  | 203.6  | 239.3  | 244.9  | 242.2  |
| 119.7  | 125.8  | 102    | 102.8  | 90.8   | 104.4  | 107.5  | 124.3  | 113.8  |
| 110.6  | 117.5  | 105.3  | 100.9  | 97.9   | 114.2  | 107.1  | 123.8  | 115.1  |
| 151.5  | 143.5  | 133.8  | 160.9  | 104.4  | 134    | 152.4  | 202    | 156.1  |
| 101.2  | 104.8  | 105.2  | 93     | 94.4   | 100.4  | 106.3  | 106    | 98     |
| 112.8  | 115.5  | 109.9  | 102.8  | 111.1  | 136.2  | 117.6  | 122.8  | 112.6  |
| 120.5  | 169.8  | 151.4  | 129.9  | 138    | 144.1  | 118.2  | 150.3  | 122.9  |
| 104.3  | 119.5  | 108.3  | 107.2  | 96.9   | 111.9  | 106.1  | 113.2  | 114.6  |
| 198.5  | 224.5  | 299.8  | 222.3  | 244.9  | 284.2  | 264.4  | 468.9  | 310.6  |
| 117.2  | 125.4  | 115.8  | 110.7  | 115.2  | 127.4  | 118.4  | 144.6  | 131.5  |
| 202.7  | 150.3  | 153.8  | 166    | 141.2  | 153.9  | 157.5  | 146.3  | 142.8  |
| 173.2  | 335.9  | 372.5  | 244.7  | 278.1  | 338.3  | 267.7  | 411.8  | 224.6  |
| 158.1  | 197    | 181    | 168.6  | 159.6  | 178.1  | 151.4  | 225.3  | 166.6  |
| 107.9  | 115.2  | 97.7   | 107.8  | 103.7  | 111.4  | 109    | 119.9  | 109.7  |
| 123.7  | 127.9  | 116.6  | 142.5  | 107.7  | 128.2  | 120.6  | 146.1  | 129.3  |
| 108.2  | 115.6  | 112.3  | 90.2   | 106.3  | 110.3  | 104.4  | 117.7  | 110.2  |
| 694.7  | 794.4  | 831    | 751.1  | 609.1  | 706.1  | 680.2  | 1107.3 | 793.1  |

|        |        |       |       |       |        |       |        |       |
|--------|--------|-------|-------|-------|--------|-------|--------|-------|
| 108.2  | 104.7  | 104.2 | 91.8  | 99.4  | 106    | 105.2 | 92.9   | 100.7 |
| 111.9  | 125.7  | 118.4 | 134.5 | 110.5 | 133.2  | 117.5 | 135.2  | 133.1 |
| 109.7  | 126    | 113.9 | 110.3 | 98.7  | 125.3  | 115   | 118.3  | 113.5 |
| 730.6  | 1045.6 | 982.4 | 887   | 799.4 | 799.6  | 901.1 | 1199.4 | 766.1 |
| 186.9  | 189.9  | 193.1 | 183.4 | 175.2 | 215.3  | 154.8 | 309.7  | 207.6 |
| 102.6  | 117.4  | 107.9 | 117.9 | 97.3  | 111.8  | 113.7 | 105.1  | 117.5 |
| 124.4  | 137    | 123.4 | 130.2 | 119   | 131.9  | 113.2 | 215.3  | 140.7 |
| 175.9  | 169.4  | 171.1 | 147.6 | 163.1 | 172.7  | 160.4 | 236.8  | 223.7 |
| 113.1  | 112.3  | 108.3 | 127.3 | 110.8 | 122.5  | 107.8 | 117.7  | 132.7 |
| 104.2  | 133.9  | 120.3 | 94.4  | 109.2 | 132.8  | 112.6 | 140.1  | 116   |
| 107    | 107.5  | 108.1 | 109.9 | 90    | 100.2  | 109.7 | 111.1  | 110.8 |
| 102.9  | 108.4  | 101.5 | 104.3 | 92.1  | 108.3  | 107.1 | 103.6  | 111.5 |
| 105.2  | 129.2  | 123.2 | 124.5 | 118.8 | 128.1  | 124.1 | 148.2  | 137.6 |
| 169.8  | 207.2  | 227.6 | 176.1 | 187.7 | 208.8  | 214.9 | 296.7  | 188.5 |
| 130.5  | 209.9  | 194   | 173.3 | 165.7 | 191.4  | 185.5 | 191.2  | 143.9 |
| 108.7  | 108.6  | 104.7 | 104.9 | 97.4  | 104.9  | 102.5 | 117.2  | 119.7 |
| 260.8  | 262.3  | 311.7 | 227   | 249.7 | 274.4  | 322.3 | 373.8  | 289.8 |
| 119.6  | 130.6  | 114.3 | 115.2 | 106.6 | 116    | 118.2 | 117    | 108.4 |
| 150.8  | 210.3  | 217.4 | 178.3 | 204.4 | 242.5  | 188.9 | 284.5  | 187.3 |
| 173    | 271.7  | 197.3 | 207.4 | 205.7 | 227.2  | 184.6 | 461.5  | 268.9 |
| 370.8  | 375.4  | 367.9 | 382.4 | 319.6 | 352    | 424.5 | 480.6  | 298.5 |
| 119.6  | 132.7  | 119   | 115.8 | 115.4 | 143.1  | 121.6 | 132.7  | 119   |
| 115.6  | 116.5  | 103.1 | 111.4 | 97.2  | 120    | 107.4 | 125.2  | 113.1 |
| 106.1  | 118    | 103.9 | 113.1 | 95.6  | 106.4  | 107   | 110.8  | 125.5 |
| 122.3  | 124.4  | 122.1 | 113.3 | 99.4  | 123.1  | 110.1 | 186.6  | 127.6 |
| 196.6  | 178.5  | 188.9 | 160   | 171.8 | 185.7  | 171.2 | 317.6  | 324.6 |
| 185.5  | 169.5  | 145.8 | 117.8 | 145.4 | 192.4  | 145.7 | 225.8  | 304.2 |
| 3271.7 | 1006.5 | 939.7 | 744.5 | 878.1 | 1221.1 | 951.8 | 2034.7 | 1818  |
| 107    | 113.4  | 105.1 | 105.7 | 94.8  | 108.6  | 102.6 | 111.5  | 111.3 |
| 397.9  | 571.3  | 530.1 | 417   | 511.4 | 589.8  | 404.9 | 645.6  | 447.6 |
| 105.9  | 106.1  | 108.7 | 98.9  | 98.7  | 106    | 98.1  | 111.6  | 103.7 |
| 242.7  | 288    | 266.3 | 240.1 | 270   | 286.7  | 276.3 | 417.5  | 289.9 |
| 167    | 173    | 169.7 | 165   | 184.7 | 165    | 173   | 267.5  | 181   |
| 106.9  | 107.7  | 103.7 | 106.2 | 100.8 | 111    | 103.2 | 126.8  | 116.8 |
| 105.7  | 112.5  | 99.1  | 91.7  | 100.3 | 105.2  | 97.3  | 105.6  | 113.9 |
| 191.6  | 211.7  | 196.5 | 194.8 | 188.9 | 198.4  | 191.7 | 234.4  | 160.2 |
| 97.7   | 98.7   | 95.6  | 93.3  | 87.4  | 109.1  | 97.1  | 111.3  | 106.2 |
| 259.4  | 295.2  | 287.8 | 313.4 | 255.5 | 310.3  | 309.2 | 401.1  | 307.2 |
| 115.2  | 108.8  | 102.4 | 102.1 | 94.1  | 113.3  | 106.2 | 113.8  | 111.3 |
| 171.7  | 194.8  | 186.8 | 181.1 | 164.9 | 190.8  | 173.5 | 218.1  | 184.9 |
| 113.1  | 106    | 107.4 | 99.6  | 99.8  | 112    | 105.1 | 105.6  | 106.6 |
| 154.3  | 141.2  | 134.9 | 115.6 | 148.2 | 151.6  | 132.7 | 232.1  | 218.9 |
| 246.4  | 381.8  | 329.6 | 330.4 | 310.6 | 325.5  | 323.1 | 369.9  | 297.3 |
| 246.9  | 217.9  | 231.9 | 159.7 | 212   | 247.6  | 227.3 | 364.2  | 303.1 |
| 254.2  | 311    | 313.8 | 358.7 | 287.9 | 344.1  | 349.8 | 415    | 305.4 |
| 303    | 705    | 758.4 | 626.4 | 691.1 | 714.2  | 582   | 1181.3 | 798.5 |
| 135.1  | 124.2  | 125.4 | 134.3 | 121.3 | 131.8  | 132.3 | 131.5  | 136.1 |
| 142.9  | 198.6  | 157.3 | 143.8 | 130.9 | 168.9  | 163.2 | 260.2  | 217.6 |
| 144.6  | 215.6  | 215.8 | 191.4 | 185.3 | 210.8  | 202.7 | 208.1  | 204.9 |
| 214.9  | 158.1  | 157.2 | 158.2 | 157.8 | 171.7  | 140.1 | 214.5  | 179.6 |
| 104.3  | 115.3  | 101.6 | 105.7 | 92.5  | 110.9  | 110   | 112.1  | 111   |

|        |        |       |       |       |       |        |        |        |
|--------|--------|-------|-------|-------|-------|--------|--------|--------|
| 106.6  | 97.9   | 113.9 | 103.3 | 99.9  | 111.7 | 99.7   | 112.2  | 115.1  |
| 101.2  | 107.4  | 103.3 | 97    | 95.8  | 114.2 | 101.1  | 117.5  | 115.8  |
| 110.1  | 116.3  | 102.6 | 103.7 | 94.9  | 110.2 | 107.2  | 108    | 107.6  |
| 102.5  | 101.5  | 102.3 | 93.9  | 94.1  | 110.4 | 112.5  | 99.6   | 112.6  |
| 135.8  | 130.6  | 145.2 | 121.4 | 115.5 | 131.7 | 114.8  | 132    | 134    |
| 112.2  | 115.4  | 110.5 | 109.6 | 98.2  | 104.3 | 113.7  | 125.2  | 118.9  |
| 122.9  | 139    | 144.3 | 169.1 | 121.2 | 159.5 | 182.3  | 153.7  | 130.7  |
| 158.6  | 163.8  | 155.4 | 154.8 | 172.9 | 159   | 150.7  | 178.2  | 167    |
| 115.3  | 121.7  | 115.6 | 104.4 | 114.3 | 123.2 | 131.5  | 128.2  | 123.1  |
| 109    | 113.2  | 105.9 | 90.6  | 97.3  | 107.5 | 98.5   | 111.1  | 116    |
| 153.7  | 152.4  | 157.2 | 128.7 | 148.2 | 148   | 126.3  | 172.3  | 146.8  |
| 104.9  | 101.3  | 97.4  | 97.5  | 103.5 | 109.7 | 91.8   | 102    | 104.1  |
| 144.2  | 205.5  | 189.5 | 169   | 159.6 | 198   | 161.6  | 307.7  | 178.4  |
| 112.1  | 119.2  | 109.3 | 99.7  | 104.9 | 113.6 | 109.6  | 108.4  | 111    |
| 308.6  | 801.4  | 677.4 | 565   | 587.2 | 676.7 | 509.4  | 962.1  | 442.6  |
| 194.1  | 257.8  | 235.4 | 177.4 | 227   | 266.1 | 239.8  | 405.6  | 286.3  |
| 134.1  | 168.3  | 178.7 | 156.5 | 167.9 | 167.2 | 164.4  | 221.2  | 168.6  |
| 106.6  | 108.1  | 106.6 | 118.4 | 102.4 | 100.6 | 104.9  | 112.9  | 110.4  |
| 124.4  | 130.4  | 119.8 | 119.4 | 113.8 | 127.9 | 124.4  | 141    | 146.1  |
| 114.8  | 113.3  | 112.4 | 98.2  | 98.2  | 106.1 | 112.4  | 142.2  | 118.2  |
| 105.9  | 108.5  | 103.6 | 107   | 89.4  | 115.6 | 98.7   | 107.8  | 103.2  |
| 123.2  | 115.1  | 115.1 | 124.7 | 108.8 | 126.3 | 118.8  | 117.4  | 121.4  |
| 106    | 107.1  | 113.3 | 106.5 | 98.3  | 119.2 | 104.9  | 114.8  | 115.2  |
| 114.1  | 122.8  | 117.6 | 119.5 | 113.2 | 127.4 | 124.3  | 119.2  | 111.6  |
| 125.4  | 148.2  | 125.9 | 125.2 | 121.7 | 136.4 | 155.9  | 137.1  | 138.7  |
| 104.8  | 104.9  | 107   | 104.2 | 102.2 | 120.5 | 109.1  | 107.1  | 110.9  |
| 289.3  | 280.4  | 257.9 | 278.1 | 301.5 | 296.3 | 314.4  | 488.5  | 378.7  |
| 398.2  | 607.2  | 583.5 | 386.3 | 425.8 | 543.8 | 580.5  | 758.8  | 685.4  |
| 395.6  | 594.4  | 540   | 642.7 | 491.3 | 475.9 | 640.7  | 623    | 558.3  |
| 416.2  | 1077.8 | 1002  | 849.9 | 813.6 | 904.4 | 1023.5 | 1284.6 | 724.8  |
| 140.8  | 194.1  | 162.1 | 150.9 | 157.4 | 172.7 | 140.3  | 217.8  | 154.6  |
| 109.1  | 110.6  | 102.9 | 101   | 96.7  | 108   | 103.4  | 116.2  | 107    |
| 112.2  | 104.5  | 99    | 96.4  | 92.9  | 100.4 | 101.5  | 109.4  | 108.1  |
| 128.3  | 185.2  | 159.7 | 163.5 | 142.7 | 156.8 | 155.6  | 240.2  | 221.6  |
| 151.8  | 177.1  | 153.3 | 160   | 146.6 | 162.7 | 151.9  | 202.7  | 158.7  |
| 1585.1 | 231.8  | 220.6 | 161.1 | 219.1 | 285.5 | 200.5  | 2191.3 | 4355.1 |
| 345.2  | 510.7  | 477.3 | 419.1 | 412.5 | 421.9 | 489    | 714.5  | 399.3  |
| 168.3  | 170.1  | 158.5 | 138.5 | 154.6 | 172.6 | 160.8  | 214    | 171.2  |
| 178.2  | 141.3  | 136.3 | 142.7 | 140.5 | 156.2 | 145.7  | 246.6  | 195.9  |
| 183.6  | 284    | 212.9 | 295.2 | 280.2 | 196   | 243.9  | 323    | 266.7  |
| 109.5  | 104.8  | 100.5 | 106.9 | 92.6  | 103.4 | 104.8  | 99.6   | 97.9   |
| 117    | 115.4  | 105.8 | 107.6 | 99.2  | 109.8 | 108.3  | 145.6  | 119    |
| 241.5  | 369.5  | 316.2 | 440.5 | 362.7 | 294.7 | 426.6  | 467.9  | 322.3  |
| 174.4  | 346.5  | 367   | 324.3 | 285.9 | 298.9 | 314.5  | 293    | 217.5  |
| 116.2  | 127.1  | 120.7 | 105.6 | 108.8 | 126.7 | 109.9  | 125.7  | 111.7  |
| 166.7  | 174.3  | 190.9 | 182.7 | 164.3 | 180.9 | 199.5  | 210    | 178    |
| 110.3  | 109.8  | 112.5 | 107.3 | 111.6 | 108.2 | 107.7  | 129.1  | 112.9  |
| 131.8  | 176.6  | 186   | 143.9 | 145.6 | 159.2 | 169.1  | 174    | 166.7  |
| 723.4  | 843.8  | 982.2 | 810.3 | 675   | 744.7 | 783.6  | 1262.6 | 1288.2 |
| 590.9  | 688.6  | 696   | 779   | 481   | 585.8 | 667    | 1023   | 691.3  |
| 224.1  | 533.6  | 525.3 | 456.7 | 378.7 | 439.2 | 272.2  | 674.2  | 510.8  |

|       |       |       |       |       |       |       |        |        |
|-------|-------|-------|-------|-------|-------|-------|--------|--------|
| 137.8 | 148.4 | 172.1 | 132.7 | 121.5 | 158.2 | 143.6 | 179.7  | 174.5  |
| 116.2 | 108.1 | 113.9 | 97.9  | 101.8 | 120.1 | 105.2 | 110.4  | 114.2  |
| 102.2 | 110.5 | 104.1 | 104.9 | 96.7  | 114.7 | 104   | 111.5  | 102.7  |
| 107.5 | 117.5 | 101.5 | 104.8 | 102.3 | 116.4 | 110.6 | 110.5  | 104.5  |
| 103.2 | 117.6 | 105.5 | 103.2 | 103.3 | 106.5 | 109.2 | 124.6  | 113.8  |
| 111.7 | 113   | 109.8 | 101.5 | 95.4  | 111.4 | 108.8 | 111.9  | 115.1  |
| 223.8 | 270.2 | 313.7 | 305.9 | 215.2 | 272.4 | 294   | 335.3  | 274.4  |
| 633.4 | 857.2 | 927.3 | 878.1 | 662.6 | 744.5 | 805.1 | 1534.3 | 1051.3 |
| 121.9 | 128   | 125   | 119   | 132.3 | 155.1 | 112.8 | 195.3  | 165.2  |
| 108.3 | 107.4 | 106.5 | 106.6 | 94.3  | 111.5 | 99.5  | 114.1  | 115    |
| 103.8 | 104.7 | 105.3 | 93.3  | 96.1  | 103.3 | 106.2 | 103.7  | 99.4   |
| 134.2 | 126.3 | 128.1 | 118   | 114.4 | 133   | 122.9 | 162.8  | 149.9  |
| 121   | 123.6 | 135   | 124.5 | 118.5 | 122   | 127.2 | 157.6  | 124    |
| 162.7 | 252   | 219.5 | 204.7 | 208.3 | 191.5 | 200.9 | 223.8  | 200.2  |
| 106.2 | 109.8 | 108.4 | 101.3 | 99.6  | 100.5 | 103.6 | 110.3  | 113    |
| 359.5 | 211.4 | 228.6 | 227.7 | 216.7 | 255.1 | 225   | 545.9  | 438.9  |
| 123.5 | 138.3 | 126.3 | 115   | 115.1 | 141.7 | 123.7 | 162.5  | 153    |
| 143   | 190.6 | 171.8 | 141.4 | 140.4 | 179.3 | 144.7 | 240.8  | 177.4  |
| 101.4 | 105.4 | 104.5 | 90.2  | 96.4  | 108.5 | 106.1 | 126.4  | 146.9  |
| 121   | 112.1 | 111.8 | 103.3 | 105.1 | 117.7 | 105.3 | 122.1  | 111.7  |
| 150.8 | 171.9 | 162.1 | 145.9 | 146.9 | 155.1 | 148.8 | 191.1  | 145.7  |
| 204.3 | 258.4 | 272.7 | 284.5 | 264.9 | 306.4 | 305.5 | 302.1  | 181.8  |
| 295.6 | 472.6 | 465.9 | 425.4 | 431.7 | 490.7 | 532.7 | 586    | 465.1  |
| 270.3 | 298.8 | 246.6 | 342.9 | 227.6 | 269.1 | 341.9 | 327.2  | 238.1  |
| 351.9 | 436.1 | 379.7 | 412.7 | 376.4 | 418.6 | 428.6 | 485.2  | 330.8  |
| 120.1 | 114.1 | 106.6 | 99.1  | 97.4  | 115.6 | 113   | 106.4  | 103.7  |
| 137.1 | 139.6 | 138.9 | 126.5 | 131.2 | 140.7 | 136.2 | 179.7  | 137.9  |
| 110.1 | 112.7 | 102.4 | 110.4 | 103.6 | 107   | 102.1 | 106.5  | 104.8  |
| 105   | 110.6 | 102.9 | 101.9 | 100.2 | 108.8 | 104.2 | 114.2  | 113.1  |
| 109.6 | 106.8 | 112.8 | 101.1 | 92.8  | 110.2 | 101.2 | 104.4  | 110.2  |
| 100.1 | 108   | 109.2 | 103.4 | 97.1  | 100.8 | 95.8  | 115.8  | 109.9  |
| 109.4 | 111.9 | 100.4 | 99.3  | 98.3  | 108.1 | 108.8 | 114.2  | 104.8  |
| 116.4 | 128.5 | 129.4 | 121.1 | 110   | 148.7 | 137   | 157    | 154.3  |
| 107.9 | 110.5 | 102.7 | 99.2  | 98.1  | 109.7 | 107.2 | 106.4  | 103.7  |
| 265.2 | 604.9 | 673.6 | 449.1 | 534.9 | 590.4 | 563.8 | 920.4  | 546.7  |
| 115.7 | 121.1 | 108.5 | 114.6 | 101.8 | 113.7 | 114.4 | 119.3  | 123.9  |
| 138.1 | 130.5 | 124.5 | 126.4 | 119.3 | 130.5 | 124.8 | 152.1  | 125.7  |
| 112.8 | 118.4 | 107   | 95.9  | 103.6 | 108.5 | 104.7 | 110.9  | 110.6  |
| 117.9 | 107.7 | 123.5 | 103.9 | 116.1 | 117.3 | 111.5 | 128.2  | 116.6  |
| 212.9 | 229.5 | 270.7 | 205.1 | 180.8 | 248.3 | 222.8 | 353.3  | 256.9  |
| 135.6 | 141.1 | 130   | 143.2 | 135.5 | 142.5 | 122.4 | 150.5  | 129.1  |
| 104.3 | 109.8 | 101.9 | 105.6 | 88.8  | 111.9 | 106.2 | 117.6  | 98.8   |
| 109.8 | 112.1 | 95.3  | 110.2 | 96.4  | 119.3 | 103.7 | 116.5  | 111.8  |
| 102.6 | 108.9 | 101.8 | 91.1  | 93.1  | 106.6 | 97.8  | 111    | 98.5   |
| 102.4 | 104.8 | 97.7  | 96.5  | 94.1  | 105.1 | 93.1  | 107.7  | 107    |
| 111.5 | 105.3 | 100.5 | 104.7 | 99.2  | 106.6 | 100.8 | 111    | 107.9  |
| 123.8 | 149.8 | 161.1 | 132.9 | 139   | 178.8 | 143.6 | 192.7  | 144.1  |
| 100.5 | 106.5 | 98.3  | 102.4 | 94.5  | 105.3 | 105   | 104.8  | 107.2  |
| 107   | 111.2 | 106.7 | 106.3 | 101.1 | 107.1 | 102.7 | 123.2  | 112.8  |
| 143.3 | 129.7 | 119.3 | 110   | 103.7 | 129.4 | 99.6  | 129.1  | 124    |
| 107.7 | 112   | 99.4  | 98.4  | 103.6 | 110.1 | 96.8  | 118.8  | 114.6  |

|        |        |        |        |        |        |       |        |        |
|--------|--------|--------|--------|--------|--------|-------|--------|--------|
| 111.9  | 106.5  | 105.7  | 98.2   | 96.5   | 112.2  | 108   | 106.3  | 103.3  |
| 100.3  | 99.6   | 98     | 105.6  | 91.7   | 99.2   | 100.2 | 110.7  | 107.9  |
| 487.4  | 521.5  | 542.4  | 495.1  | 518.1  | 628    | 615.1 | 966.8  | 796.4  |
| 1415.5 | 1066.9 | 1492.3 | 1155.8 | 1082.7 | 1273.7 | 817.8 | 2517.1 | 3181.7 |
| 104.1  | 120.1  | 102.3  | 96.1   | 95.5   | 103.6  | 103.3 | 119.5  | 104.6  |
| 138.9  | 122.6  | 122.9  | 141.9  | 123    | 140.8  | 151   | 170.6  | 162.8  |
| 117.2  | 133.5  | 107.1  | 115.3  | 118.2  | 140.3  | 125.8 | 141.5  | 124.9  |
| 640.2  | 709.9  | 637.8  | 713.6  | 679.6  | 799.1  | 591.3 | 1444   | 926.2  |
| 159.2  | 181.5  | 172.8  | 167.6  | 160.8  | 159    | 175.9 | 265.6  | 167.2  |
| 104.6  | 121.3  | 96.9   | 101.1  | 90.4   | 109.9  | 102.6 | 113.3  | 98     |
| 110.3  | 128.7  | 120.8  | 132.9  | 109.3  | 131.6  | 122.9 | 124.9  | 119.2  |
| 102.5  | 108.1  | 102    | 104.4  | 95.6   | 109.1  | 104.6 | 115.8  | 104.5  |
| 202.1  | 209.7  | 217.4  | 205.2  | 170.9  | 232.1  | 201.7 | 251    | 226.4  |
| 136.8  | 151.8  | 141.7  | 127.3  | 122.8  | 146.2  | 117.3 | 187.9  | 170.5  |
| 162.8  | 145.7  | 114.1  | 119.1  | 127.5  | 156.9  | 118.8 | 221.6  | 203.4  |
| 95.5   | 109.9  | 101.5  | 93.1   | 93.2   | 112.9  | 107.3 | 111.3  | 115.2  |
| 109.5  | 108.6  | 107.5  | 95.6   | 89     | 109.2  | 107.5 | 114.8  | 110.1  |
| 113.6  | 108    | 103.4  | 110.3  | 95.1   | 101.7  | 103.7 | 125.4  | 124    |
| 100.3  | 107.2  | 112.7  | 105.9  | 97.8   | 108.9  | 100   | 119.5  | 116.5  |
| 106.3  | 99.8   | 101.8  | 105.2  | 103.2  | 98.8   | 98.5  | 98.7   | 112.2  |
| 121.3  | 189.3  | 121.3  | 114.8  | 165.9  | 120.2  | 234.5 | 145.4  | 135.3  |
| 111.1  | 108.8  | 104.6  | 101.9  | 100.5  | 109.6  | 96.9  | 107.1  | 107.6  |
| 175.6  | 283.5  | 264.4  | 206.4  | 237.7  | 262.7  | 236.2 | 372.8  | 241.3  |
| 118.8  | 188.2  | 148.8  | 127.5  | 133.9  | 156.9  | 153.9 | 205.5  | 158.2  |
| 151.4  | 157.7  | 146.6  | 136.3  | 145.4  | 168.5  | 154.4 | 200.5  | 164    |
| 115.1  | 112.3  | 107.4  | 108.1  | 95.5   | 108.2  | 104.8 | 108.9  | 114.3  |
| 245.9  | 258.6  | 317.2  | 231.6  | 249.4  | 294.4  | 257.5 | 339.1  | 248.5  |
| 115.3  | 115.2  | 107.4  | 107.2  | 99.4   | 108.9  | 97.5  | 109.4  | 116.1  |
| 106.4  | 107.8  | 93.6   | 99.7   | 91.1   | 102.6  | 104.4 | 102.8  | 106.4  |
| 224.9  | 480.7  | 493.1  | 487    | 413.9  | 433.1  | 533.5 | 595.8  | 397    |
| 118.3  | 137.5  | 120.7  | 127    | 139.6  | 135.5  | 105.6 | 152.2  | 149.7  |
| 102.7  | 108.3  | 102.1  | 97.6   | 95.5   | 102.9  | 104.1 | 102.7  | 106.6  |
| 110.1  | 112.1  | 101.9  | 104.2  | 101.8  | 119.3  | 116.8 | 133.9  | 113.2  |
| 111.6  | 111    | 111.9  | 105    | 97.1   | 114    | 104   | 127.3  | 109.3  |
| 106.4  | 121.1  | 101.8  | 98.7   | 104.9  | 120.1  | 103.2 | 105.2  | 108.3  |
| 118.1  | 139.8  | 135.7  | 116.7  | 132.5  | 136.6  | 130.4 | 134.8  | 123.4  |
| 118.7  | 139.5  | 143.6  | 121.7  | 126.4  | 152.6  | 121.9 | 162.9  | 134.3  |
| 110.8  | 123.7  | 130.9  | 106.2  | 105    | 130.1  | 112.9 | 124.5  | 103.4  |
| 109.3  | 126.7  | 129.8  | 118.2  | 115    | 115.4  | 115.4 | 138.9  | 129.1  |
| 110.2  | 142.9  | 142.4  | 148.7  | 144.2  | 145.5  | 122   | 175.2  | 139.2  |
| 140.4  | 129.7  | 127.5  | 121    | 110.3  | 145.2  | 139.4 | 132.7  | 118.2  |
| 112.8  | 105.4  | 105.4  | 110.2  | 107.8  | 116.5  | 110.7 | 124.7  | 115.3  |
| 133.1  | 118.5  | 110.5  | 130.2  | 106.9  | 121.9  | 125.8 | 167.4  | 147.5  |
| 106.1  | 105.8  | 102.7  | 103.4  | 100.2  | 105.3  | 97.6  | 100.6  | 108    |
| 162.9  | 152.9  | 147.7  | 150.6  | 143.9  | 191.6  | 165.7 | 319.7  | 225.6  |
| 309.9  | 353.5  | 327.6  | 265    | 291.5  | 304    | 315.8 | 566.3  | 408.9  |
| 256.1  | 465.7  | 290.4  | 332.6  | 263.2  | 314.6  | 322.3 | 634.7  | 466.3  |
| 892.7  | 1081.3 | 1008.3 | 834.4  | 841    | 962    | 508.4 | 1382.3 | 995.9  |
| 106.2  | 107    | 104.8  | 101.2  | 103.2  | 118.9  | 103   | 117.5  | 117.3  |
| 110    | 117.8  | 103.2  | 114.2  | 104.1  | 117.4  | 113.9 | 115.4  | 109.3  |
| 108.6  | 114.2  | 112.1  | 99.2   | 101    | 110.4  | 100.7 | 115.5  | 112.7  |



|       |        |        |       |        |        |       |        |       |
|-------|--------|--------|-------|--------|--------|-------|--------|-------|
| 98.1  | 111.6  | 108.2  | 108.8 | 104.8  | 109.2  | 110.7 | 113.1  | 102.7 |
| 127.8 | 152.7  | 135.3  | 125.4 | 116.4  | 161.3  | 141.2 | 176.8  | 156.1 |
| 104.2 | 109.7  | 106.1  | 98.8  | 95.8   | 107.3  | 100.2 | 103.2  | 107   |
| 119.6 | 114.6  | 110    | 120.4 | 105.9  | 119.6  | 123.1 | 139    | 121.3 |
| 146.9 | 163.6  | 175.9  | 135.3 | 142.8  | 167.5  | 147   | 184.6  | 177.7 |
| 113.8 | 113.1  | 112.3  | 101.9 | 101.3  | 113.8  | 104.2 | 113.6  | 122.7 |
| 175.9 | 187.7  | 206.3  | 183   | 167.3  | 222.7  | 130   | 223.3  | 217.3 |
| 803   | 1315.3 | 1363.5 | 974.6 | 1157.6 | 1299.1 | 939.2 | 1383.2 | 919.9 |
| 118.3 | 110.2  | 110.6  | 109.5 | 96     | 117.6  | 108.1 | 136.7  | 135.2 |
| 103.9 | 115.8  | 111.2  | 118.4 | 105.8  | 128.1  | 106.8 | 118.7  | 119.6 |
| 108.2 | 102.7  | 96.1   | 110.8 | 98     | 107.2  | 98.4  | 119    | 105.8 |
| 110   | 110.8  | 102.9  | 100.9 | 95.4   | 115.1  | 111.9 | 103.6  | 123.5 |
| 123.3 | 125.6  | 121.6  | 118.7 | 115    | 120.8  | 109.4 | 127.9  | 107.4 |
| 168.5 | 280.6  | 286.3  | 238.5 | 237.4  | 290.3  | 234.7 | 300.8  | 201.6 |
| 124.5 | 132.5  | 123.6  | 125.7 | 121.2  | 127.7  | 125.8 | 136.6  | 130.4 |
| 102.2 | 124.4  | 124.8  | 117.8 | 104.6  | 122    | 114.6 | 137.6  | 126.6 |
| 107.1 | 119.1  | 109.9  | 115.3 | 109.2  | 118.8  | 117   | 132.4  | 119.7 |
| 118.6 | 138.2  | 148.2  | 125.5 | 115.6  | 150.2  | 125.3 | 190.3  | 130.8 |
| 146.1 | 123.6  | 105.8  | 103.1 | 111.5  | 127.9  | 131.8 | 130.2  | 129   |
| 117   | 123.6  | 112.6  | 120.9 | 110.4  | 117.5  | 107.9 | 130.5  | 117   |
| 160.6 | 174.1  | 199.9  | 176.9 | 183.6  | 192    | 180.1 | 190    | 205.9 |
| 113.8 | 138.1  | 128.2  | 112.2 | 113.5  | 121.8  | 125.4 | 155.6  | 124.1 |
| 166.4 | 247.5  | 222.2  | 195.5 | 206.5  | 253.1  | 211.6 | 268.1  | 188.2 |
| 103.1 | 114.5  | 103.4  | 105.6 | 104.3  | 116.4  | 111.9 | 135.1  | 122.6 |
| 109.1 | 105.8  | 108.6  | 100.9 | 98.1   | 121.8  | 116.8 | 115.8  | 118.5 |
| 135.5 | 155    | 152.9  | 144.9 | 133.4  | 157.2  | 148.2 | 156    | 164.1 |
| 212.7 | 199.4  | 211.4  | 193.2 | 181.7  | 231.1  | 219.9 | 353.3  | 260.1 |
| 110.8 | 100.5  | 98.9   | 101.6 | 95.2   | 103.5  | 106.8 | 100.5  | 105.9 |
| 106.2 | 105.9  | 100.4  | 104.8 | 95.7   | 109.2  | 103.1 | 104    | 106.4 |
| 113.1 | 111    | 105.2  | 98.8  | 100.5  | 113.9  | 119.4 | 122.6  | 111.7 |
| 123.8 | 147.8  | 135.3  | 139.3 | 129.9  | 132.2  | 149   | 169.7  | 179.2 |
| 165.8 | 174.7  | 197.3  | 192.9 | 185.3  | 201.6  | 215.3 | 365.6  | 256.6 |
| 120   | 127.5  | 116.9  | 115   | 109.5  | 126.5  | 106.2 | 155.4  | 119.5 |
| 109.6 | 112.1  | 104.2  | 104.6 | 96     | 104.3  | 105.1 | 106    | 110.6 |
| 124.3 | 140.1  | 130.3  | 107.3 | 125.4  | 141.5  | 124.6 | 171.4  | 135.2 |
| 109.3 | 136.5  | 115.2  | 130.4 | 104.3  | 125.9  | 123.6 | 127.6  | 133   |
| 93.1  | 101.9  | 101.9  | 101.3 | 93.2   | 107.9  | 100.5 | 118.4  | 102.5 |
| 145.6 | 169.2  | 181.1  | 164.8 | 164.2  | 177.5  | 166   | 219.6  | 194.4 |
| 106.3 | 104    | 105    | 100.2 | 86.8   | 107.6  | 105.9 | 110.3  | 100.5 |
| 132.7 | 158    | 135.1  | 132.2 | 147.9  | 152.6  | 129.2 | 173    | 133.9 |
| 166.3 | 217.3  | 218.5  | 180.6 | 187.9  | 255.2  | 175.8 | 273.6  | 181.3 |
| 115.4 | 141.8  | 130.3  | 136.4 | 110.6  | 144.1  | 121.2 | 141.7  | 126.2 |
| 102.1 | 116.8  | 114.8  | 114   | 104.6  | 117    | 106.6 | 118.2  | 103.6 |
| 105.1 | 107.8  | 105.9  | 99.1  | 91.1   | 108.2  | 100.3 | 105.4  | 104.7 |
| 106.3 | 107.3  | 107.1  | 104.3 | 90.9   | 102.6  | 95.6  | 119.1  | 111.7 |
| 103.3 | 100.5  | 94.4   | 91.5  | 91.4   | 111.9  | 98.1  | 106.7  | 106.2 |
| 347.2 | 435.1  | 405.5  | 431.3 | 380    | 474    | 510.5 | 940.3  | 704.6 |
| 424.5 | 665.4  | 662.9  | 529.8 | 460.2  | 615.1  | 589.3 | 1569.5 | 813.5 |
| 106.7 | 109.9  | 98.6   | 107.9 | 96.8   | 99.4   | 101.7 | 117.1  | 101.9 |
| 117.2 | 124.6  | 116.1  | 120   | 106.2  | 123.5  | 126   | 118.9  | 118.3 |
| 182.2 | 261.5  | 263.6  | 221.9 | 200.7  | 231.8  | 235.3 | 355.7  | 237   |

|       |       |       |       |       |       |       |        |       |
|-------|-------|-------|-------|-------|-------|-------|--------|-------|
| 246.1 | 270.6 | 284.3 | 245   | 287.4 | 317.7 | 246.1 | 484.5  | 310   |
| 143.9 | 163.7 | 151.4 | 159.8 | 159.2 | 178.3 | 185.2 | 195.1  | 155.2 |
| 97.2  | 99    | 104.9 | 106   | 88.1  | 103.3 | 106.9 | 100.5  | 100.5 |
| 107.6 | 101.8 | 106.2 | 96.4  | 98.6  | 104.4 | 96.8  | 108.8  | 106.5 |
| 247.6 | 352   | 373.3 | 335.6 | 301.4 | 365.2 | 356.2 | 505.5  | 509.4 |
| 202.3 | 196   | 157.1 | 199.5 | 189.6 | 154.8 | 224.1 | 163.2  | 114.2 |
| 137.7 | 187.8 | 179.1 | 144.8 | 167.2 | 188.3 | 176.2 | 226.5  | 150.7 |
| 280   | 633   | 658   | 593.5 | 429.7 | 626.2 | 588.3 | 857.5  | 526.5 |
| 106.3 | 109.7 | 109.5 | 94.7  | 104.5 | 103.7 | 105   | 117    | 113.3 |
| 115.9 | 104.3 | 108.1 | 111.1 | 100.7 | 125.5 | 108   | 117.1  | 133.8 |
| 297.7 | 297   | 330.5 | 274.2 | 326   | 357.4 | 255.8 | 700.7  | 657.1 |
| 129.7 | 171   | 176.6 | 137.6 | 132.7 | 150.8 | 153.3 | 213.3  | 152.6 |
| 118.9 | 147.3 | 142.9 | 118.7 | 134.5 | 154.3 | 120.9 | 164.3  | 138.9 |
| 118.8 | 136.6 | 117.9 | 124.5 | 106.9 | 116.2 | 118.4 | 166.2  | 134.7 |
| 113.6 | 144.2 | 132.2 | 111.8 | 97.8  | 112   | 115.4 | 140.9  | 149.8 |
| 130   | 133.1 | 120.9 | 136   | 118.7 | 135.1 | 137.9 | 187.6  | 152.5 |
| 112.2 | 119.3 | 114   | 132   | 105.2 | 125.2 | 122.8 | 121.5  | 114.8 |
| 102.8 | 108.1 | 97.8  | 99.3  | 98    | 102.3 | 97.8  | 104.6  | 109.8 |
| 112.2 | 114.9 | 115.5 | 129.2 | 115.7 | 119.6 | 109.7 | 134.7  | 117.1 |
| 118.5 | 134.9 | 122.9 | 115.9 | 120   | 135.9 | 132.9 | 136.1  | 123.3 |
| 130   | 193.2 | 192.7 | 139.6 | 136.9 | 160.5 | 132.4 | 230.7  | 142.5 |
| 104.8 | 106.4 | 104.2 | 94.9  | 104.3 | 104.9 | 105   | 112.9  | 115.2 |
| 144.2 | 252   | 230.3 | 168.9 | 192.6 | 183.8 | 149.9 | 254.2  | 175   |
| 144.7 | 196.2 | 188.2 | 148.9 | 163.5 | 188.9 | 165.8 | 233.1  | 187.7 |
| 126.4 | 133.4 | 129   | 118.7 | 121.2 | 126.5 | 128.6 | 136.9  | 131   |
| 107.7 | 108.3 | 102.9 | 109.3 | 101.8 | 118.7 | 115.4 | 106.2  | 109.5 |
| 105.7 | 108.1 | 101.9 | 95.8  | 100.4 | 108.3 | 101.4 | 110.6  | 105.2 |
| 117.2 | 115.6 | 115.4 | 109.8 | 104   | 110.6 | 100.4 | 116.1  | 123.9 |
| 122.2 | 197.3 | 145.9 | 148.2 | 162.7 | 147.7 | 134.5 | 171.9  | 127.6 |
| 141   | 142.5 | 135.2 | 142.3 | 143.7 | 158.6 | 130.5 | 215    | 204   |
| 122.4 | 127.5 | 126.6 | 131.1 | 122.7 | 125   | 119.4 | 131.1  | 139.5 |
| 180   | 205.3 | 191.2 | 218.3 | 179   | 208.7 | 164.6 | 260    | 211.1 |
| 124.9 | 127.7 | 124.8 | 137.1 | 117.7 | 123.3 | 135.2 | 149.3  | 127.3 |
| 99.1  | 104.5 | 101.3 | 99    | 88.2  | 98.2  | 99.3  | 101.5  | 103.8 |
| 117.1 | 118.6 | 127.1 | 126.6 | 97.7  | 122.8 | 125.3 | 131.6  | 126.1 |
| 167.4 | 197.1 | 182.1 | 159.2 | 165.5 | 194.2 | 161.9 | 373.5  | 236.1 |
| 99    | 104.3 | 107.2 | 101   | 97.1  | 113   | 106.7 | 104.2  | 105.5 |
| 124.8 | 151   | 144.1 | 139.3 | 123.1 | 155.9 | 136.5 | 242.3  | 177.3 |
| 146.6 | 167   | 157.2 | 126   | 140.7 | 174.3 | 165.1 | 191.2  | 149.9 |
| 210.1 | 224.5 | 236.3 | 192.3 | 217.9 | 270.4 | 191.4 | 518.5  | 261.3 |
| 248.2 | 238.5 | 269.9 | 260.7 | 256.5 | 285.6 | 220   | 401.2  | 270.4 |
| 150.9 | 171.4 | 165.4 | 149.5 | 151.6 | 157.5 | 156.1 | 217.7  | 196.4 |
| 437.7 | 425   | 532.1 | 550.1 | 284.4 | 390.3 | 455.5 | 1069.5 | 1076  |
| 291.5 | 212.9 | 222.1 | 197.4 | 207.8 | 237.5 | 261.1 | 351.6  | 238.1 |
| 167.5 | 163.2 | 195.5 | 157.8 | 132.9 | 178.5 | 190.3 | 252.6  | 194.1 |
| 107.5 | 111.4 | 106.5 | 106.1 | 97.3  | 114.8 | 99.8  | 116.9  | 115.4 |
| 106.2 | 106.3 | 99.1  | 101.7 | 95.6  | 110.7 | 104.4 | 105    | 99.2  |
| 104.4 | 105.3 | 96.8  | 96    | 97.8  | 112.5 | 107.4 | 112.3  | 116.2 |
| 111.1 | 113   | 101   | 98.1  | 94.5  | 99.3  | 93.2  | 111.6  | 113.6 |
| 202.6 | 181.2 | 171.9 | 166.1 | 147.6 | 162.8 | 165.5 | 319.8  | 241.7 |
| 114.5 | 105.6 | 104.6 | 102.7 | 98.1  | 111.1 | 107.7 | 110.2  | 108.6 |

|       |       |       |       |       |       |       |       |       |
|-------|-------|-------|-------|-------|-------|-------|-------|-------|
| 112.2 | 103.8 | 106.4 | 93.9  | 101.7 | 99    | 100.7 | 113.5 | 119.4 |
| 410.3 | 521.3 | 506.8 | 441.4 | 481.2 | 612   | 581.1 | 810.8 | 514.2 |
| 116.2 | 123   | 113.7 | 122.4 | 99.5  | 124.9 | 118.5 | 145.3 | 126.1 |
| 169.9 | 177   | 181.3 | 176.2 | 175.3 | 205.4 | 191.9 | 273.3 | 188   |
| 329   | 298.9 | 275.5 | 295   | 310.5 | 325.6 | 232.6 | 369.9 | 271.9 |
| 106.7 | 104.4 | 98.6  | 95.3  | 94.9  | 110.5 | 114.3 | 106.6 | 104.7 |
| 125.7 | 116.6 | 135.9 | 112.4 | 114.4 | 149.2 | 132.9 | 158.8 | 119.2 |
| 402   | 371.2 | 300.7 | 391.9 | 327.2 | 336.7 | 307.7 | 515.6 | 442.7 |
| 99.1  | 118.9 | 113.7 | 112   | 102.5 | 113.7 | 112.6 | 108.7 | 104.3 |
| 110.1 | 99.4  | 101.4 | 100.7 | 94.5  | 105.7 | 97.8  | 100.9 | 105.5 |
| 103.6 | 110.3 | 104.4 | 103.6 | 97.1  | 109.1 | 103.6 | 106.6 | 112   |
| 107.9 | 111.9 | 104.5 | 102.3 | 98.9  | 104.5 | 94.5  | 110.8 | 108.2 |
| 119.1 | 138.3 | 144   | 117.3 | 124.1 | 148.9 | 136.7 | 125.1 | 113.6 |
| 121.1 | 118.2 | 115   | 109.4 | 114.3 | 133.4 | 112.5 | 128.9 | 136.7 |
| 97.5  | 112.6 | 97.6  | 104.3 | 90.3  | 109.5 | 103.1 | 100.9 | 104.1 |
| 188.9 | 192.5 | 210.7 | 224.1 | 185.2 | 184.3 | 197   | 204.9 | 181.6 |
| 133.9 | 152.2 | 130.5 | 148.7 | 132.3 | 142.9 | 140.1 | 175.6 | 133.1 |
| 119.7 | 119.9 | 106.1 | 118.2 | 115.9 | 120.4 | 114.1 | 131.7 | 123.9 |
| 316   | 209.1 | 206.3 | 152.7 | 195.5 | 220.8 | 206.6 | 341.5 | 323.7 |
| 202.3 | 159.5 | 140.8 | 139.1 | 152.9 | 185.8 | 128.6 | 309.2 | 273.5 |
| 125.9 | 129.1 | 126.7 | 118.3 | 107.6 | 123.8 | 109.5 | 161   | 142.6 |
| 131.8 | 124   | 118.6 | 117.5 | 115.6 | 119.3 | 118   | 160.3 | 144.7 |
| 113.6 | 123.4 | 124.6 | 133.2 | 110.4 | 125.4 | 118.3 | 162.3 | 127.3 |
| 104.4 | 109   | 102.4 | 101.7 | 98.7  | 108.4 | 105.6 | 119.4 | 106.5 |
| 125.1 | 191   | 195.3 | 198.7 | 166.1 | 215.4 | 213.6 | 214   | 146.7 |
| 100.6 | 104.9 | 105.4 | 96.6  | 92.9  | 112   | 101.1 | 107   | 104.5 |
| 109.7 | 108.1 | 115.1 | 100   | 90    | 105.9 | 104.3 | 106.6 | 114.4 |
| 122.5 | 130.9 | 113.1 | 105.4 | 118.3 | 134.8 | 120.2 | 124.4 | 107.9 |
| 110   | 132.6 | 122.8 | 124.5 | 120.4 | 134.5 | 122.3 | 142   | 149.4 |
| 116.2 | 180.1 | 161.3 | 167.1 | 158.5 | 176.3 | 165.7 | 195.4 | 165.5 |
| 99.5  | 105.8 | 99.7  | 97.4  | 95.8  | 106   | 103.8 | 107.3 | 111.6 |
| 104.2 | 107.1 | 99.6  | 101.7 | 91    | 110.3 | 93.7  | 113.9 | 107.4 |
| 111   | 119.8 | 105.6 | 111.1 | 100.4 | 113.5 | 96.2  | 116.6 | 114.8 |
| 719.2 | 422.8 | 505.4 | 526.6 | 453.5 | 424.9 | 753.3 | 866.1 | 742.8 |
| 164.7 | 189.1 | 186.9 | 189.7 | 177   | 205.2 | 163.3 | 325.6 | 192.4 |
| 124.3 | 182.5 | 161.3 | 127.3 | 141.7 | 155.9 | 168.7 | 159.5 | 150.2 |
| 196.9 | 249.2 | 231.5 | 264.9 | 253.5 | 282.5 | 243.6 | 386.2 | 311   |
| 106.7 | 105.9 | 103.3 | 129   | 90.1  | 111.3 | 102.8 | 120   | 114.5 |
| 163.3 | 203.6 | 222.7 | 180.1 | 170.9 | 213.2 | 202.2 | 270.5 | 218.7 |
| 121.2 | 173.2 | 157.7 | 128.8 | 132.6 | 161.2 | 155.1 | 173.4 | 145.5 |
| 115.3 | 128.2 | 116.1 | 115.2 | 109.8 | 137.2 | 112.7 | 121.2 | 127.1 |
| 113.2 | 118.3 | 114.2 | 130.2 | 111.8 | 120.2 | 113.8 | 119.9 | 127.1 |
| 102.2 | 113.9 | 106   | 102.2 | 87    | 111.5 | 105.7 | 111.8 | 106.1 |
| 113.1 | 117   | 101.8 | 100.4 | 110.6 | 119.7 | 106.5 | 128.7 | 116.8 |
| 95.5  | 108.1 | 87    | 96.4  | 92.7  | 105   | 102.1 | 105.3 | 107.1 |
| 229.1 | 204.9 | 183.2 | 198.6 | 175.9 | 241.6 | 223.2 | 306.9 | 245.4 |
| 120.8 | 113.3 | 115.9 | 102.3 | 108.4 | 117.4 | 109.6 | 143.8 | 122   |
| 101.6 | 105.1 | 104.7 | 103.2 | 98.3  | 115.8 | 101.4 | 106.7 | 115.3 |
| 159.9 | 135.3 | 124.2 | 117.7 | 127.1 | 140.1 | 105.1 | 213.3 | 226.8 |
| 292.8 | 268.3 | 241.9 | 231.4 | 246.2 | 322.6 | 224.3 | 445.1 | 387.2 |
| 150.1 | 198.5 | 170.9 | 175.6 | 153   | 173.2 | 161.6 | 264.3 | 216.6 |

|       |       |        |       |       |       |       |        |        |
|-------|-------|--------|-------|-------|-------|-------|--------|--------|
| 145   | 144.8 | 116    | 156.4 | 146.9 | 157.6 | 149.2 | 203.1  | 130.9  |
| 98.2  | 107.9 | 100.5  | 96.2  | 93.6  | 102.8 | 105.8 | 112.3  | 103    |
| 128.5 | 133.6 | 133.1  | 132.6 | 119.9 | 120.5 | 136   | 165.6  | 141    |
| 124.7 | 138.9 | 133.2  | 121   | 133.3 | 135.5 | 137.9 | 159.7  | 139    |
| 106.9 | 107.4 | 101.9  | 103   | 93.4  | 104.5 | 101.6 | 110.8  | 108.1  |
| 111.3 | 106.2 | 100.9  | 101.1 | 100.2 | 114.4 | 101.3 | 112    | 112    |
| 115.3 | 123.3 | 119.9  | 97.4  | 108.2 | 119.9 | 113.1 | 138.9  | 125.8  |
| 114.5 | 120.9 | 104.7  | 103.7 | 93    | 123.8 | 103   | 128.1  | 107.9  |
| 324.5 | 283.2 | 316.5  | 263.3 | 267.2 | 289.7 | 347.4 | 328.1  | 228.2  |
| 123.5 | 174.2 | 197.2  | 158.9 | 123.1 | 171   | 157   | 224.2  | 180.7  |
| 115.4 | 130.6 | 134.1  | 131.4 | 130.8 | 148.3 | 109.5 | 146.9  | 125.9  |
| 110.5 | 135.6 | 123    | 126.4 | 125.8 | 120.8 | 124.3 | 131.8  | 115.1  |
| 114.7 | 132.9 | 148.6  | 134.3 | 131.8 | 142.7 | 158   | 165.2  | 132.8  |
| 143.7 | 214.6 | 181.5  | 160.6 | 183.1 | 181.8 | 166.2 | 192.4  | 170.7  |
| 118.8 | 123.4 | 102.7  | 104.3 | 92.7  | 122   | 113.7 | 113    | 112.2  |
| 109.3 | 112.7 | 97.6   | 105.7 | 96.3  | 106.8 | 102.9 | 109.5  | 112.5  |
| 121   | 124.1 | 115.5  | 102.7 | 122.7 | 123.9 | 108.7 | 139.4  | 118.1  |
| 107.2 | 115.8 | 110    | 109.9 | 111.9 | 128.8 | 115   | 123.3  | 113.4  |
| 119.8 | 153   | 135.5  | 125   | 136.1 | 153.7 | 130.5 | 175.9  | 143.4  |
| 152.6 | 182.2 | 164.9  | 147.6 | 143.7 | 177.1 | 151   | 185.4  | 163.2  |
| 118.4 | 136   | 140.3  | 143.7 | 134.1 | 139.8 | 113.4 | 148.3  | 114.7  |
| 115.2 | 108   | 104.7  | 106.5 | 96    | 109.9 | 97.1  | 107.4  | 114.1  |
| 102.8 | 108.9 | 96.1   | 101.4 | 92.3  | 103.6 | 97.3  | 113.2  | 98.1   |
| 152.5 | 239.4 | 202.4  | 197.6 | 207.7 | 194.9 | 171.9 | 252.1  | 146.9  |
| 481.8 | 517.3 | 438.7  | 411.9 | 436.6 | 556.1 | 324.8 | 645.2  | 516.2  |
| 103   | 114.7 | 105.6  | 97.2  | 97.1  | 108.1 | 105.7 | 108.6  | 103.3  |
| 112.8 | 114.1 | 112.2  | 120.8 | 96.4  | 108.6 | 103.2 | 116.4  | 104.4  |
| 106.9 | 105.8 | 106.3  | 113.6 | 90.7  | 118.8 | 97.1  | 138.5  | 108.4  |
| 107.8 | 111.6 | 123.4  | 104.6 | 110   | 142.5 | 104.9 | 162.3  | 155.1  |
| 112.1 | 117.8 | 121.2  | 118.4 | 102   | 132.1 | 123.2 | 132.9  | 124    |
| 104.4 | 108.5 | 106.2  | 98.3  | 97.2  | 115.1 | 105.6 | 116.6  | 108.3  |
| 110.5 | 111.5 | 97     | 98.4  | 94    | 105.7 | 95.3  | 114.3  | 106.3  |
| 120   | 125.8 | 118.1  | 104.8 | 103.5 | 114.4 | 108.1 | 140.2  | 122.5  |
| 130.7 | 140.2 | 130.2  | 112.2 | 128.6 | 118.1 | 121   | 153.6  | 124.5  |
| 100.8 | 107.9 | 108.8  | 102.1 | 91.9  | 103.9 | 103.8 | 100.6  | 111.4  |
| 130.5 | 147.3 | 125.4  | 142.6 | 117.9 | 159.1 | 159.2 | 190.4  | 158.8  |
| 112   | 128   | 108.1  | 106.3 | 107.7 | 115.6 | 103.8 | 153.6  | 119.3  |
| 161.9 | 175.3 | 158.4  | 131.5 | 148.9 | 184   | 155.7 | 254.1  | 156.9  |
| 145.7 | 154   | 145.3  | 116.3 | 160.4 | 174.7 | 151.5 | 207.7  | 128.4  |
| 970.5 | 805   | 1042.4 | 723.8 | 761.2 | 762   | 574.7 | 1598.7 | 1942.2 |
| 283.4 | 322.9 | 311.3  | 294.1 | 354.7 | 344.2 | 276.4 | 364.5  | 203.8  |
| 105.4 | 115.1 | 98     | 105.6 | 99.2  | 106.9 | 104   | 114.3  | 116.4  |
| 141.4 | 124.8 | 118.5  | 129.2 | 109.8 | 128.7 | 137   | 135.8  | 143.3  |
| 108.1 | 122.7 | 102.2  | 113.5 | 97.8  | 121.9 | 105.5 | 121.1  | 124.7  |
| 153.7 | 161.1 | 188.7  | 187.1 | 161.3 | 157   | 169   | 238.3  | 162.1  |
| 530.2 | 874.4 | 892.9  | 771.6 | 733.1 | 905.6 | 668.6 | 1039.4 | 694.8  |
| 111.8 | 113   | 99.3   | 107.8 | 102.9 | 109.8 | 109.7 | 113    | 115.3  |
| 105.1 | 111.1 | 103.4  | 105.4 | 92.5  | 115   | 99.6  | 114.8  | 110    |
| 117.4 | 110.5 | 104.5  | 110.5 | 98.1  | 118.8 | 106.5 | 108.4  | 106.2  |
| 108.3 | 98.6  | 101.1  | 103.2 | 105.4 | 112.4 | 99.8  | 116.9  | 112.1  |
| 128   | 122.3 | 131.4  | 111.8 | 125.3 | 129.7 | 123.4 | 168.9  | 139.5  |

|        |        |        |        |        |       |        |       |        |
|--------|--------|--------|--------|--------|-------|--------|-------|--------|
| 100.5  | 107.5  | 104.9  | 93.6   | 89.8   | 108.6 | 107    | 112.8 | 110.7  |
| 101.2  | 109.4  | 109.1  | 114    | 98.5   | 109.5 | 102    | 111.7 | 109.9  |
| 117.1  | 113    | 111.1  | 104.9  | 97.1   | 123.9 | 109.9  | 113.4 | 119.1  |
| 382.5  | 316.7  | 290.5  | 287.1  | 254.4  | 306.9 | 262.8  | 539.5 | 398.5  |
| 111.1  | 117.4  | 110.4  | 106.1  | 104.3  | 116.8 | 114.9  | 110   | 110.5  |
| 124    | 118    | 123.9  | 107    | 111.5  | 132.9 | 121.5  | 124.7 | 130.1  |
| 118.9  | 138.4  | 155.8  | 121.7  | 136.3  | 175.6 | 120.3  | 155.7 | 135.9  |
| 110    | 115.1  | 105.6  | 103.5  | 111.4  | 116.2 | 112.1  | 123.3 | 124    |
| 108.1  | 114.6  | 115.4  | 102.8  | 96.5   | 119.3 | 102.7  | 111.3 | 101.7  |
| 168.7  | 221.3  | 208.8  | 226.8  | 211    | 238.2 | 211.6  | 306   | 192.8  |
| 274.8  | 471.1  | 475.8  | 344.3  | 338.6  | 437.5 | 410.6  | 543.7 | 274.5  |
| 98.2   | 118.3  | 103.9  | 105.4  | 97.4   | 111.7 | 101.3  | 121.8 | 111.4  |
| 115    | 115.5  | 112.7  | 115.6  | 111.5  | 114   | 112.5  | 122.7 | 122.9  |
| 101.7  | 106.1  | 102.2  | 95.4   | 95.5   | 104.5 | 101.2  | 108.1 | 106.8  |
| 125.5  | 111.7  | 116.7  | 108.7  | 103.9  | 114.3 | 115.5  | 134.2 | 118    |
| 186.6  | 134.7  | 170.8  | 159.9  | 130.8  | 186.2 | 170.6  | 222.9 | 235.3  |
| 120.1  | 112.8  | 104.1  | 106.3  | 98.5   | 113.9 | 104.3  | 109.9 | 109.1  |
| 102.4  | 125.4  | 102    | 104.6  | 96.1   | 106.2 | 103.2  | 111.3 | 110.2  |
| 1617.6 | 1805.7 | 1732.5 | 1407.7 | 1346.8 | 1090  | 1131.8 | 3780  | 4125.6 |
| 118.5  | 136.4  | 120.9  | 110.1  | 103.6  | 122   | 112.9  | 152.3 | 145.2  |
| 130.3  | 112.7  | 146.7  | 132.3  | 118.6  | 132.4 | 121.7  | 149.5 | 145.5  |
| 118.6  | 112.5  | 102.2  | 100.2  | 103.5  | 116.9 | 109.1  | 131.8 | 116.8  |
| 206    | 189.5  | 201.1  | 186.8  | 202.3  | 253.5 | 192.8  | 336.8 | 235.1  |
| 153.1  | 288    | 285.6  | 205.1  | 236.2  | 235.9 | 227.4  | 319.1 | 195.4  |
| 108.9  | 108.2  | 110.4  | 93.9   | 96.5   | 113.9 | 108.1  | 121.9 | 114.3  |
| 99.7   | 106.6  | 99.5   | 101.3  | 97     | 103   | 102.1  | 101.5 | 109.5  |
| 128.3  | 121.9  | 112.2  | 121.4  | 108.5  | 121.1 | 110.1  | 136.8 | 142    |
| 159.4  | 143.9  | 126.8  | 127.2  | 148.1  | 134.2 | 123.1  | 189.2 | 145.7  |
| 155.6  | 202.7  | 196.7  | 190.3  | 178.3  | 159   | 146.1  | 244.2 | 152.1  |
| 104    | 108.6  | 102.9  | 104    | 92.3   | 103.7 | 99.3   | 102.7 | 109.6  |
| 154.8  | 140.1  | 137.1  | 121.5  | 126.6  | 149.4 | 140.9  | 150.9 | 162.5  |
| 107.9  | 100.8  | 116.2  | 115.1  | 99.6   | 116.5 | 110.2  | 121.7 | 123.5  |
| 128.4  | 118.7  | 119.4  | 118    | 110.1  | 131.9 | 111.1  | 144.9 | 129.8  |
| 131    | 175.9  | 168.7  | 178.1  | 142    | 156.9 | 160.4  | 191.7 | 172    |
| 131    | 168.2  | 147.1  | 138.8  | 168.4  | 160.4 | 165.4  | 193.9 | 143.8  |
| 111.1  | 114.4  | 100.3  | 109.3  | 90.6   | 114.1 | 102.7  | 111.3 | 117.7  |
| 138.2  | 140.4  | 143.2  | 132.4  | 121.7  | 141.4 | 138.4  | 167   | 140.3  |
| 485.7  | 297.9  | 385.5  | 495    | 302.4  | 406.5 | 436.7  | 388.2 | 278.4  |
| 112.6  | 108.4  | 106.2  | 107.4  | 100.5  | 114.1 | 104    | 117.1 | 111.8  |
| 128.7  | 175.5  | 185.9  | 173.3  | 185.1  | 174.8 | 159.4  | 254.4 | 184.7  |
| 108.3  | 114.9  | 106.9  | 103.1  | 96.2   | 110.2 | 96.8   | 109.6 | 109.4  |
| 194.7  | 220.5  | 212.8  | 250.6  | 219    | 237.9 | 248.8  | 396.6 | 239.7  |
| 107.3  | 136.5  | 112.9  | 114.6  | 119.9  | 119.9 | 141    | 159.4 | 136.2  |
| 100.9  | 103.3  | 99.6   | 92     | 95.4   | 102.7 | 106.2  | 100.4 | 104.8  |
| 113.1  | 117.6  | 101.5  | 106.1  | 104.2  | 116   | 100.6  | 108.1 | 110    |
| 105    | 110.4  | 104.8  | 106.4  | 92.3   | 120.2 | 111    | 110.1 | 112.5  |
| 109    | 107.7  | 107.1  | 95.6   | 95.1   | 109.9 | 99.6   | 110.3 | 108.1  |
| 139.2  | 168.5  | 126.7  | 226.7  | 135.7  | 153.7 | 176.2  | 222.5 | 134.8  |
| 106.3  | 106.7  | 100.5  | 99     | 93.5   | 102.4 | 98.4   | 112.3 | 109.6  |
| 115.1  | 113.5  | 122.4  | 111.7  | 100    | 119.5 | 110.5  | 108   | 116.9  |
| 159    | 146.5  | 154    | 134.9  | 148.7  | 145.5 | 145.2  | 227.1 | 185.5  |

|       |       |       |       |       |       |       |       |       |
|-------|-------|-------|-------|-------|-------|-------|-------|-------|
| 108.2 | 124   | 101   | 112.2 | 100.2 | 111.3 | 109.3 | 100.8 | 108.7 |
| 110.6 | 103.2 | 100.9 | 94    | 92.7  | 108.2 | 105.8 | 111.5 | 108   |
| 164.6 | 155.5 | 160.8 | 178.7 | 157.9 | 193.4 | 146.9 | 180.7 | 135.4 |
| 117   | 123.1 | 122.4 | 120   | 114.9 | 153.7 | 118.5 | 127.5 | 127.2 |
| 107.6 | 108.4 | 98.5  | 105.3 | 100   | 109.4 | 102.9 | 122.4 | 120.3 |
| 278.3 | 277.8 | 313.2 | 231.7 | 259.3 | 250.8 | 221.7 | 405.1 | 477.3 |
| 112.4 | 123.3 | 102.9 | 108.7 | 92.6  | 109.5 | 106.5 | 107.6 | 116   |
| 139.9 | 152.7 | 140.7 | 131   | 126.5 | 147.2 | 140.2 | 200.5 | 207.8 |
| 107.8 | 120.9 | 104.1 | 105.2 | 98.9  | 116.1 | 110.2 | 111.2 | 105.8 |
| 102.8 | 108.6 | 108.5 | 105.8 | 99.1  | 104.4 | 120.1 | 103.9 | 106.4 |
| 100.5 | 119.7 | 98.7  | 96.3  | 97.1  | 114.7 | 109.3 | 105.1 | 103.9 |
| 117.9 | 129   | 107.9 | 116.8 | 104   | 125.4 | 116.5 | 166.4 | 131.2 |
| 113.9 | 114.4 | 110.2 | 115.7 | 106.8 | 112.8 | 115.7 | 127.5 | 112.8 |
| 106.3 | 104.6 | 98.2  | 95.7  | 90    | 108.1 | 104.6 | 110   | 114.1 |
| 114.1 | 107.8 | 111.6 | 114.7 | 98.1  | 109   | 104.1 | 117.3 | 116.5 |
| 105.5 | 116.4 | 115.1 | 133.3 | 118.1 | 133.4 | 113.9 | 148.9 | 122.8 |
| 123.5 | 150.5 | 153.1 | 139.5 | 140.9 | 144.2 | 139.2 | 181.8 | 148.8 |
| 156.1 | 177.6 | 197.9 | 161.6 | 170.2 | 182.1 | 154.2 | 240   | 161   |
| 107.3 | 111   | 102   | 100.3 | 90.2  | 104.1 | 92.4  | 99    | 112.5 |
| 109.5 | 129.5 | 121.8 | 108.2 | 101.9 | 133   | 114.8 | 123.8 | 116.1 |
| 110.9 | 108.2 | 103.9 | 110.3 | 95.8  | 109.3 | 104.6 | 109   | 121.9 |
| 106.3 | 113.3 | 116.6 | 108.9 | 110.7 | 115.2 | 112.3 | 123.4 | 114.8 |
| 233.2 | 234.9 | 265.1 | 172.3 | 206   | 281   | 233.4 | 553.3 | 592   |
| 155.2 | 168.6 | 169.3 | 131.7 | 154   | 184.4 | 145.6 | 211.8 | 205   |
| 108.4 | 123.5 | 117.7 | 100.4 | 101.5 | 114.2 | 101.8 | 112.1 | 115.5 |
| 145.2 | 275.6 | 265.7 | 263.9 | 242.7 | 243.8 | 304.1 | 426.6 | 292.2 |
| 280.2 | 645.5 | 655.5 | 494.4 | 501.2 | 628.7 | 546.9 | 617.3 | 444.6 |
| 111.9 | 125.6 | 127.9 | 119.6 | 117.5 | 125.7 | 128   | 139   | 130.8 |
| 149.1 | 187   | 205.1 | 210.3 | 160.4 | 174   | 161.5 | 234.1 | 165.6 |
| 103.1 | 108.3 | 104.3 | 100.8 | 96.2  | 106.1 | 104.9 | 103.5 | 105.4 |
| 136.3 | 164.5 | 147.8 | 169   | 162.2 | 173.3 | 157.8 | 206.5 | 169.2 |
| 101.6 | 109.3 | 101.7 | 102.8 | 91.2  | 113.5 | 102.5 | 99.3  | 109   |
| 109.4 | 122   | 102.8 | 105.7 | 100   | 112.8 | 105.2 | 108.1 | 113.2 |
| 105.6 | 106.2 | 102.4 | 95.9  | 99.2  | 108.8 | 106.2 | 116.5 | 106.9 |
| 234.1 | 336.6 | 390.3 | 334.2 | 344.8 | 344.2 | 324.5 | 383.5 | 198.8 |
| 109.7 | 114.1 | 115.2 | 132.5 | 114   | 137.9 | 121.2 | 164   | 143   |
| 104.4 | 102.2 | 103.6 | 103.8 | 95.9  | 106.3 | 107.4 | 111.2 | 112.6 |
| 267   | 268.7 | 299.7 | 283.7 | 235.2 | 310.7 | 349.1 | 428.9 | 337.2 |
| 114.7 | 116.8 | 108.4 | 108.7 | 97.5  | 111.5 | 105.4 | 123.4 | 121.1 |
| 117.7 | 116.2 | 121.1 | 121.4 | 103.2 | 115.9 | 107.3 | 125.3 | 124.9 |
| 108.6 | 112.1 | 106.5 | 104.5 | 89.3  | 107.9 | 101   | 103.8 | 102.7 |
| 106.5 | 113.6 | 93.3  | 106.8 | 91    | 105.8 | 103.3 | 102.2 | 107.1 |
| 141.5 | 141.9 | 119.7 | 143.2 | 122.8 | 143.9 | 150.9 | 153.6 | 136.2 |
| 109.4 | 98    | 105.5 | 94.5  | 102.4 | 123.4 | 108.9 | 119.1 | 125   |
| 121.9 | 144   | 140.5 | 142.1 | 114.5 | 140.8 | 128.6 | 146   | 113.7 |
| 120.8 | 109   | 103.2 | 106.9 | 94.4  | 112.8 | 100.7 | 112.6 | 112.6 |
| 119.9 | 121.2 | 131.6 | 118.6 | 118.4 | 142.4 | 127.2 | 151.4 | 133.5 |
| 105.9 | 106   | 107   | 105.1 | 103.4 | 104.2 | 100   | 99.6  | 102.3 |
| 163.5 | 185.5 | 186.4 | 164.9 | 173.1 | 195.4 | 184   | 251   | 195.2 |
| 102.1 | 105.4 | 105   | 98.3  | 97.1  | 108.1 | 111.6 | 108.2 | 111.8 |
| 109.1 | 106.9 | 100.4 | 99.9  | 97.5  | 107   | 107.4 | 100   | 108.5 |

|       |        |        |        |        |        |        |        |       |
|-------|--------|--------|--------|--------|--------|--------|--------|-------|
| 221.7 | 257.5  | 225.3  | 206.8  | 190.1  | 245.2  | 240.2  | 315.3  | 265.2 |
| 3989  | 3759.7 | 4385.6 | 4248.6 | 3514.6 | 4027.3 | 2988.5 | 7233.4 | 7649  |
| 105.4 | 107    | 111.1  | 98.4   | 98.5   | 126.2  | 103.5  | 116.1  | 107.4 |
| 113.2 | 146.4  | 132.2  | 107.9  | 108.5  | 146.2  | 121.1  | 153.2  | 120.7 |
| 105.6 | 116.1  | 102.7  | 103.2  | 99.1   | 119    | 111.1  | 119.4  | 116.1 |
| 110.5 | 108.4  | 104.4  | 112.7  | 96.9   | 113    | 104.2  | 123.3  | 110.4 |
| 105.4 | 105    | 98.6   | 98.3   | 99.5   | 117.1  | 101.9  | 108.9  | 111.3 |
| 107.7 | 116.1  | 113.1  | 103.2  | 97.4   | 114    | 111.1  | 114.4  | 106.9 |
| 125.8 | 112.2  | 101.6  | 97.7   | 102    | 113.9  | 112.7  | 112.5  | 112.3 |
| 108.7 | 104.6  | 100.8  | 118.8  | 95.9   | 113.1  | 102.3  | 111.1  | 104.8 |
| 177.2 | 175.1  | 154.6  | 167.4  | 145.6  | 179.4  | 155.8  | 270.3  | 280.6 |
| 126   | 127.3  | 125.6  | 127.5  | 123.6  | 158.8  | 142.9  | 180.3  | 176.5 |
| 168.7 | 212.1  | 174.6  | 195.1  | 196.5  | 199.6  | 218.3  | 364.8  | 246.4 |
| 101.8 | 107.1  | 99.3   | 103.1  | 97.1   | 105.8  | 101.8  | 107.9  | 111.2 |
| 108.9 | 106.1  | 102.5  | 103.3  | 91.5   | 120.7  | 116.9  | 118.9  | 112.5 |
| 206.5 | 203.1  | 244.5  | 196.9  | 216.1  | 218.8  | 170.8  | 308.3  | 291.3 |
| 108.9 | 110.5  | 116.1  | 110.4  | 102.6  | 121.5  | 108.2  | 124.6  | 114.4 |
| 181.1 | 289.3  | 256.4  | 244.2  | 259.3  | 295.1  | 301    | 323.9  | 223.9 |
| 125.4 | 126.4  | 131    | 119.6  | 123.9  | 140.2  | 126    | 217.7  | 161.3 |
| 124.2 | 135.9  | 125.3  | 124.8  | 115.1  | 137    | 116.2  | 142.7  | 124.5 |
| 105.5 | 115.7  | 116.8  | 110.2  | 91.8   | 114.2  | 113.1  | 117.2  | 104.7 |
| 104   | 111.7  | 108.5  | 111.3  | 94.6   | 111.3  | 96.2   | 120.9  | 110.5 |
| 103.9 | 108.6  | 105.5  | 101.3  | 97.3   | 119.2  | 103    | 108.1  | 105.1 |
| 110.8 | 131.3  | 116.2  | 110.3  | 104.9  | 141    | 106.6  | 122.4  | 120.9 |
| 139.3 | 136.7  | 122.8  | 151.4  | 123.5  | 150.4  | 128    | 157.2  | 139.6 |
| 112.2 | 111.6  | 99     | 97.2   | 98.2   | 108    | 100.7  | 115.7  | 112.3 |
| 159.1 | 217.5  | 242.2  | 249.9  | 206.7  | 235    | 176.7  | 268    | 202   |
| 125.7 | 124.3  | 118.2  | 118.5  | 113.9  | 119    | 118.1  | 131.9  | 125.8 |
| 105.2 | 105    | 105.8  | 102.2  | 102.6  | 112    | 113.6  | 103.8  | 109.5 |
| 126.9 | 150.8  | 140    | 128.9  | 142.3  | 163.7  | 128.9  | 193.4  | 158.8 |
| 370.6 | 264.7  | 290.9  | 251.7  | 212.8  | 297.7  | 245.3  | 411.9  | 606.2 |
| 106.3 | 116.3  | 108.7  | 122.7  | 103.3  | 125.4  | 108.2  | 127    | 121.8 |
| 116.9 | 113.7  | 103.3  | 108    | 112    | 105.3  | 108.3  | 111.8  | 114.4 |
| 118   | 169.3  | 165.8  | 153.6  | 162.8  | 149.1  | 140.4  | 191.5  | 140.8 |
| 125.3 | 122.1  | 99.1   | 101.3  | 100.5  | 121.5  | 118.6  | 111.7  | 118.4 |
| 308.9 | 578    | 527.6  | 469.2  | 422.8  | 534.2  | 475.4  | 746.6  | 343.5 |
| 127.6 | 114.9  | 107.1  | 113.8  | 96.6   | 108.6  | 99.7   | 107    | 104.2 |
| 112.1 | 113.3  | 98.7   | 103    | 94.8   | 113.9  | 109    | 115.1  | 111.6 |
| 181   | 166    | 208    | 197.4  | 148.6  | 194.8  | 231.2  | 215.7  | 235.7 |
| 138.5 | 141.4  | 146.1  | 122.4  | 142.2  | 146.1  | 128.2  | 141.2  | 133.2 |
| 114.3 | 117.9  | 111.3  | 116.8  | 99.9   | 105.6  | 116    | 135.9  | 116.6 |
| 314.9 | 364.2  | 401.6  | 320.6  | 290.2  | 453.1  | 333.7  | 416.9  | 287.5 |
| 373.4 | 476.1  | 471    | 404.9  | 409.4  | 547.6  | 438.4  | 577.6  | 376.1 |
| 113.2 | 125.4  | 117    | 127.6  | 107.9  | 111.7  | 111.8  | 142    | 128.6 |
| 101.6 | 109.6  | 102.6  | 98.4   | 94.1   | 111.6  | 102.3  | 114.2  | 106.8 |
| 99.1  | 111.5  | 99.8   | 91.8   | 86.2   | 105.1  | 99.1   | 102.3  | 102.1 |
| 130.1 | 221.3  | 213.2  | 228.1  | 203.8  | 219.8  | 224.8  | 223.1  | 137.2 |
| 104.5 | 115.8  | 103.1  | 103.3  | 95.7   | 109.3  | 112.2  | 120.1  | 115.9 |
| 131.1 | 204.3  | 180.4  | 173.2  | 173.9  | 187    | 161.4  | 280.2  | 156.3 |
| 98.3  | 100.5  | 88.5   | 98.7   | 92.3   | 98.3   | 90.7   | 98     | 97.8  |
| 111.7 | 109.9  | 97     | 112.5  | 92.3   | 101.6  | 108    | 110.4  | 105.7 |

|       |       |       |       |       |       |       |        |        |
|-------|-------|-------|-------|-------|-------|-------|--------|--------|
| 100   | 110.6 | 106.6 | 101.8 | 95.2  | 113.1 | 104.8 | 107.9  | 102.9  |
| 118.1 | 131.2 | 115.1 | 110.3 | 105.4 | 125.1 | 111.9 | 139.4  | 118.8  |
| 236.9 | 326.3 | 353.8 | 265.9 | 341.3 | 423.5 | 313   | 601.2  | 379.7  |
| 107.1 | 103.9 | 106.6 | 108.3 | 105.5 | 107.5 | 105.9 | 108.3  | 106.8  |
| 116.2 | 106.4 | 105   | 100.8 | 94.7  | 108.8 | 105.3 | 109.3  | 106.8  |
| 107.8 | 106.1 | 100.2 | 102.4 | 99.9  | 103.8 | 110.5 | 106.3  | 110.8  |
| 115.8 | 121.2 | 124.9 | 116.6 | 116.3 | 119.4 | 109.6 | 143.9  | 138.3  |
| 107.3 | 112   | 107   | 110   | 100.7 | 119.8 | 118.4 | 112.6  | 121.3  |
| 102.1 | 103.6 | 113.6 | 94.5  | 101   | 107.4 | 106.8 | 109.1  | 112.4  |
| 101.6 | 110.5 | 107.1 | 102.3 | 95.7  | 107.4 | 101.3 | 101.6  | 105.8  |
| 139.2 | 153.1 | 147.7 | 141.4 | 147.5 | 159.9 | 146.9 | 193.2  | 144.6  |
| 108.3 | 107.5 | 99    | 90.8  | 86.3  | 107.3 | 105.3 | 101.6  | 112.9  |
| 113.3 | 121.4 | 104.7 | 109.8 | 115.4 | 119.7 | 126   | 147.3  | 115.4  |
| 172.4 | 255.8 | 225.7 | 207   | 207   | 220.3 | 201.9 | 292.9  | 210.4  |
| 106.7 | 109.8 | 100.6 | 100.2 | 93.1  | 114.7 | 102.1 | 108.7  | 113.9  |
| 152.2 | 174.6 | 163.2 | 163.1 | 155.3 | 165.7 | 159.7 | 176.8  | 153.3  |
| 201.5 | 202.2 | 227.5 | 185.1 | 187   | 242.2 | 233.4 | 263.8  | 220.4  |
| 154.4 | 142   | 146.5 | 137.2 | 136   | 147.2 | 143.2 | 151.9  | 151.1  |
| 120.8 | 124.1 | 113.4 | 112.2 | 111.6 | 116.3 | 113.7 | 126.5  | 119.3  |
| 94.3  | 99.2  | 101.4 | 99.4  | 94.3  | 109.7 | 97.9  | 107.6  | 108.1  |
| 104.8 | 112.3 | 104   | 103.3 | 98.1  | 109.3 | 96.9  | 114.7  | 113.8  |
| 213   | 184.1 | 218.8 | 209.2 | 189.6 | 204.9 | 236.7 | 314.6  | 255.4  |
| 318.9 | 357.8 | 371.4 | 308.5 | 331.5 | 358.5 | 321.6 | 905.2  | 519.5  |
| 107.2 | 115.1 | 96.6  | 101.3 | 96.6  | 110.5 | 102.4 | 106    | 100.2  |
| 111.7 | 123.4 | 114.9 | 106   | 100.2 | 119.9 | 111.4 | 126.6  | 119.4  |
| 113.2 | 117.2 | 108.4 | 100.5 | 97.2  | 109.3 | 107.9 | 105.6  | 111.9  |
| 124.5 | 131.2 | 134.4 | 114   | 122.2 | 141   | 139.2 | 140.3  | 147.8  |
| 117.7 | 137   | 127.2 | 115.7 | 110.4 | 139.4 | 114   | 138.5  | 148.6  |
| 141.6 | 127.4 | 116.8 | 119.9 | 109.7 | 117.5 | 108.6 | 159.7  | 145.7  |
| 219.6 | 236.2 | 204.2 | 234.5 | 197.8 | 233.8 | 255.9 | 275.9  | 232.5  |
| 105.8 | 115.4 | 112.9 | 106.7 | 103.9 | 120.7 | 109.7 | 125.4  | 114.6  |
| 110.3 | 105.5 | 119.4 | 115.4 | 111   | 118.5 | 123.3 | 121.8  | 112.4  |
| 117.4 | 116   | 103.8 | 92.3  | 101.5 | 106.2 | 113.2 | 114.6  | 94     |
| 109.6 | 115   | 119   | 121.1 | 112.5 | 125   | 111.8 | 123    | 117.1  |
| 120   | 119.4 | 109.3 | 108.6 | 106.4 | 122.2 | 115.4 | 124.6  | 117.9  |
| 100.3 | 100.4 | 101.4 | 95.8  | 94.7  | 102.7 | 100.7 | 109.1  | 109.7  |
| 150.3 | 215   | 178.8 | 197.3 | 156.1 | 175.5 | 127.8 | 168.5  | 154.9  |
| 111   | 126.3 | 116.9 | 106.6 | 103.9 | 115.3 | 115.4 | 117.6  | 114.1  |
| 113.2 | 116.7 | 111.1 | 104.4 | 102.1 | 126.9 | 110.5 | 138.8  | 138.5  |
| 111.1 | 106.3 | 110.5 | 98.6  | 98.6  | 111   | 104.2 | 129.6  | 121.9  |
| 226.7 | 259.2 | 228.5 | 231.1 | 220.7 | 231.8 | 229.6 | 471.5  | 358.4  |
| 129.6 | 138.6 | 122.5 | 125.7 | 112.7 | 139.4 | 118.7 | 201.7  | 178.6  |
| 103.3 | 110.4 | 102.1 | 103.2 | 101.3 | 114.7 | 105   | 104.6  | 108.2  |
| 119   | 125.3 | 115.3 | 106   | 111.4 | 115.6 | 122.8 | 123.9  | 119.6  |
| 108.7 | 105.6 | 100.7 | 109   | 98.4  | 108   | 111.2 | 106    | 104.6  |
| 108.9 | 125.5 | 130.4 | 113.8 | 106.1 | 131.4 | 125.3 | 135.2  | 127.3  |
| 151.6 | 222.3 | 215.2 | 199.1 | 173.6 | 218.8 | 190.4 | 276.1  | 205.5  |
| 108   | 110.4 | 98.1  | 102   | 98.6  | 102.8 | 100.9 | 111.5  | 105.7  |
| 818.9 | 725.9 | 760.7 | 658.7 | 774.5 | 658.8 | 486.8 | 1752.1 | 2000.5 |
| 226.4 | 275.7 | 285.8 | 185.4 | 311.7 | 301.3 | 269.1 | 392.5  | 240.8  |
| 131   | 121.5 | 118.5 | 125.6 | 120   | 130.1 | 114.2 | 143.4  | 161    |



|        |       |       |       |       |       |       |        |        |
|--------|-------|-------|-------|-------|-------|-------|--------|--------|
| 201.2  | 168   | 160.1 | 162.6 | 155.3 | 172   | 120.5 | 274.1  | 219.7  |
| 195.6  | 144.5 | 144   | 142.6 | 135.6 | 158.7 | 133.6 | 261.2  | 206.8  |
| 139.6  | 137.1 | 112.2 | 104.6 | 113.1 | 120.4 | 120.4 | 170.4  | 134.5  |
| 109.9  | 120.4 | 112   | 107.2 | 105.7 | 116.3 | 117   | 126.9  | 125    |
| 114.7  | 115.3 | 111.3 | 105.8 | 106.4 | 109.9 | 113.1 | 117.3  | 120.2  |
| 114.4  | 116.9 | 127.3 | 103.1 | 98.9  | 114.5 | 108   | 137.1  | 120.7  |
| 149    | 169.7 | 152.5 | 152.1 | 133.9 | 161   | 138.8 | 202.7  | 225.3  |
| 108.4  | 110.9 | 100.6 | 107.1 | 99.2  | 105.9 | 105   | 107.5  | 107.5  |
| 95.6   | 106.5 | 96.2  | 101.7 | 91.1  | 105.9 | 98.3  | 97.1   | 106.3  |
| 107.7  | 113.5 | 107.1 | 104.3 | 103.8 | 112.9 | 104.9 | 120.1  | 119.8  |
| 149.7  | 146.7 | 149.7 | 146.7 | 130.7 | 155.2 | 143   | 172.1  | 171    |
| 110.6  | 110.9 | 102.5 | 112.5 | 97.8  | 123.1 | 100.8 | 125.1  | 115.4  |
| 130.6  | 141.1 | 146.6 | 122.1 | 122.1 | 142.4 | 122.8 | 158.1  | 136.7  |
| 104.1  | 103.2 | 108.6 | 99.7  | 100.2 | 112.9 | 111   | 102    | 109.7  |
| 108.4  | 110.9 | 101.3 | 100.2 | 92.3  | 109.8 | 98.1  | 123    | 109.9  |
| 178.7  | 200   | 212.9 | 188   | 181.8 | 226.9 | 160.8 | 306.5  | 207    |
| 194.4  | 215.5 | 222.6 | 193.3 | 164.5 | 228.9 | 163.4 | 296.8  | 269.1  |
| 105.1  | 111.8 | 105.8 | 99.2  | 99.3  | 102.8 | 107.6 | 127.3  | 111.3  |
| 233.6  | 282.5 | 349   | 242.1 | 235.1 | 305.8 | 318.3 | 308.1  | 196.1  |
| 357.8  | 344.6 | 344.1 | 354.2 | 319.5 | 392.2 | 339.4 | 527.2  | 364.7  |
| 110.8  | 110   | 118.8 | 112.1 | 112.5 | 116.9 | 104.4 | 134.5  | 107.6  |
| 103.4  | 106.7 | 106.6 | 97.7  | 93.8  | 104.2 | 100.1 | 111.9  | 103.9  |
| 110    | 105   | 101.8 | 104.9 | 98.6  | 113.7 | 108.1 | 109.6  | 105.1  |
| 99.9   | 101.5 | 98.2  | 95.5  | 97.9  | 103.4 | 102.1 | 99.5   | 94.4   |
| 116    | 130.1 | 128   | 142   | 106.2 | 135.4 | 125.2 | 145.1  | 134.3  |
| 120.2  | 119.4 | 111   | 101.2 | 94    | 107.3 | 113.2 | 123.9  | 110.6  |
| 107.4  | 112.3 | 102.9 | 104.9 | 98.4  | 107.1 | 98.7  | 107.4  | 104.3  |
| 123    | 135.9 | 129.3 | 123   | 114.4 | 125.6 | 122.9 | 148.5  | 151.7  |
| 1068.5 | 502.8 | 637   | 764.7 | 690   | 553.3 | 441.8 | 1621.4 | 2134.6 |
| 185    | 382.4 | 247.2 | 324.7 | 256   | 179.3 | 331.8 | 312.8  | 174.2  |
| 128.4  | 159.1 | 134.7 | 129.3 | 131.5 | 158.7 | 161.5 | 194    | 174.2  |
| 118.1  | 115   | 119.1 | 130.9 | 98.1  | 124.7 | 125.1 | 139    | 111.8  |
| 135.7  | 156.8 | 151.9 | 144.6 | 128.4 | 163   | 147.1 | 138.8  | 133.8  |
| 106.3  | 119.5 | 110.4 | 118.9 | 103.8 | 111.5 | 103.7 | 108.2  | 114.5  |
| 238.6  | 501.7 | 477.3 | 398.3 | 375.7 | 409.4 | 275.2 | 526    | 358.1  |
| 802.1  | 638.8 | 718.6 | 643.5 | 642.1 | 970.9 | 571.9 | 1307.8 | 1414.3 |
| 117.6  | 121.2 | 108   | 110.4 | 108.2 | 117.8 | 113.9 | 159.5  | 119.4  |
| 118.9  | 119.3 | 110.6 | 117.6 | 104.5 | 113.3 | 116.3 | 120.7  | 106.2  |
| 183.2  | 232.7 | 256.2 | 194.7 | 204   | 237.6 | 237.5 | 310.7  | 213.3  |
| 134.2  | 156.4 | 172.1 | 163.9 | 126   | 156.3 | 144   | 169.3  | 174.2  |
| 106.8  | 108   | 103   | 98.6  | 92    | 106.6 | 103.7 | 113.2  | 104.7  |
| 116.5  | 168.2 | 182.1 | 131   | 133.8 | 174.5 | 136.5 | 160.2  | 146.5  |
| 120.7  | 118   | 115   | 105.7 | 108.3 | 110.7 | 116.6 | 122.5  | 111.7  |
| 213    | 245.3 | 268.7 | 229.2 | 212.3 | 295   | 235.8 | 286.1  | 185.6  |
| 105    | 100.7 | 107.1 | 85.8  | 91.6  | 104.6 | 104.8 | 107.1  | 99.1   |
| 255    | 333.6 | 365.5 | 314.8 | 317   | 324.2 | 334.5 | 424.8  | 300.5  |
| 108.4  | 129.2 | 120.9 | 119.6 | 110.2 | 127.1 | 125   | 156.2  | 174.1  |
| 117.5  | 116.8 | 112.5 | 112.3 | 105.5 | 131.5 | 116.9 | 114.9  | 140    |
| 103.9  | 106.8 | 98.5  | 110   | 97.4  | 112.6 | 100.1 | 117.5  | 119.6  |
| 109.2  | 105.2 | 106.9 | 102.1 | 100.6 | 107.5 | 101.8 | 120.7  | 114.6  |
| 100.1  | 107.1 | 100.2 | 100.7 | 98.8  | 109   | 111.1 | 109.2  | 109.8  |

|       |        |        |        |       |        |        |        |        |
|-------|--------|--------|--------|-------|--------|--------|--------|--------|
| 138.5 | 150.1  | 131.3  | 140.5  | 135.3 | 145.1  | 141.3  | 165.8  | 145.9  |
| 108.6 | 113.1  | 102.7  | 101.6  | 90.5  | 104.4  | 103.8  | 110.5  | 114.1  |
| 144.7 | 157.3  | 131.4  | 145.6  | 138.5 | 168.7  | 143    | 169.8  | 141.7  |
| 136.5 | 174.6  | 153.6  | 125.9  | 148.4 | 159.3  | 141.9  | 224.1  | 139    |
| 101   | 107.1  | 127.3  | 111.4  | 93.5  | 119.6  | 109    | 107.8  | 110.8  |
| 104.2 | 106.5  | 94.6   | 103.6  | 101.8 | 105.9  | 106    | 101.3  | 109.1  |
| 102.5 | 113.7  | 106.6  | 109.8  | 97.8  | 120.8  | 104    | 123.8  | 109.5  |
| 101.9 | 101.2  | 107.2  | 97.3   | 95.5  | 104.5  | 93.2   | 113.2  | 107.8  |
| 105.1 | 112.5  | 106    | 103.7  | 97.4  | 105.7  | 115.9  | 114.2  | 99.6   |
| 105.4 | 109.4  | 111.3  | 110.9  | 99.2  | 113    | 101.7  | 112.1  | 112.7  |
| 111.5 | 121.1  | 110.9  | 110.8  | 102.2 | 117.4  | 105.9  | 125    | 115.4  |
| 225.5 | 326    | 302.9  | 270    | 242.2 | 334.3  | 256.3  | 620.6  | 449.6  |
| 101.1 | 110.8  | 102.7  | 110.8  | 100.3 | 110.6  | 99.5   | 119.5  | 106.4  |
| 110.4 | 125.5  | 119.2  | 94.6   | 103   | 110.9  | 111.4  | 127.9  | 111.1  |
| 110.3 | 142.2  | 141.1  | 126.5  | 108.3 | 162.5  | 113.8  | 137.1  | 107.6  |
| 109.9 | 115.7  | 116.2  | 101    | 123.1 | 122    | 111    | 136    | 125.6  |
| 102.9 | 109    | 102.7  | 102.2  | 94.7  | 110.6  | 98.1   | 104.1  | 89.3   |
| 104.5 | 121.4  | 173.2  | 112.5  | 96.6  | 151.4  | 108.2  | 116.3  | 114.6  |
| 139.4 | 146.6  | 158.8  | 127.8  | 121.4 | 149.7  | 143.7  | 177.3  | 151.8  |
| 129.6 | 151.8  | 154.4  | 146.1  | 134.8 | 146.9  | 151.3  | 153.6  | 128.6  |
| 101.6 | 113.5  | 103.7  | 93.9   | 100.1 | 98.7   | 101.2  | 113.4  | 103.6  |
| 152.3 | 240.9  | 206.8  | 168.8  | 199.8 | 230.3  | 197.6  | 303    | 191.3  |
| 128.7 | 130.5  | 127.4  | 120.2  | 115.3 | 128.2  | 131.1  | 135.3  | 147.3  |
| 112.2 | 118.3  | 118.9  | 102.1  | 101.8 | 117.2  | 105.4  | 108.6  | 101.2  |
| 112.3 | 114.7  | 116    | 119.9  | 106.9 | 108.3  | 110.4  | 123.3  | 111.5  |
| 117.3 | 110.4  | 110.1  | 107.8  | 100.1 | 118.3  | 111    | 127.5  | 109.7  |
| 109.5 | 126.4  | 129.7  | 118.5  | 111   | 132.2  | 113.1  | 132.3  | 128.3  |
| 120.6 | 144.8  | 138.3  | 129.9  | 119.2 | 130.9  | 138.9  | 162.7  | 157.8  |
| 100   | 106.3  | 104    | 100.9  | 94    | 109.2  | 105.2  | 108.2  | 108    |
| 104.9 | 109.5  | 102.5  | 99.1   | 101.1 | 107    | 93.2   | 113.8  | 110.5  |
| 186.1 | 169    | 216.3  | 228.1  | 143.3 | 166.4  | 184    | 163.6  | 206    |
| 110.6 | 106.3  | 102.6  | 103.4  | 98.7  | 116.3  | 107.6  | 121.9  | 103.2  |
| 177.1 | 191.7  | 218.7  | 221.9  | 150.9 | 168.1  | 162.6  | 212.1  | 176.7  |
| 107.4 | 105.2  | 103.1  | 97.4   | 99    | 112.5  | 105.7  | 110.2  | 113    |
| 105.8 | 108    | 100    | 100.3  | 89.1  | 105.3  | 102.6  | 111.6  | 114.3  |
| 144.1 | 157.4  | 140.6  | 164.1  | 133.7 | 135    | 154.4  | 208.7  | 205.8  |
| 106.8 | 118.7  | 108    | 110    | 109.6 | 112.3  | 109.1  | 113.3  | 111.9  |
| 108   | 129.1  | 119.6  | 112    | 106.5 | 117.2  | 121.5  | 133.6  | 132    |
| 100.8 | 105.8  | 96.6   | 107.2  | 98    | 111.7  | 106.8  | 116    | 113    |
| 262.3 | 720.6  | 644.9  | 600.5  | 436.5 | 666.3  | 334.8  | 683.7  | 546.8  |
| 119.4 | 115.4  | 119.4  | 114.5  | 100.4 | 121.5  | 112.7  | 122.2  | 113.3  |
| 105.4 | 100.5  | 104.7  | 109.1  | 96.5  | 110.7  | 100.7  | 112.7  | 110.1  |
| 119.1 | 135.3  | 138.1  | 124.5  | 115   | 119.3  | 119.3  | 148.9  | 129.7  |
| 111.5 | 132.5  | 116    | 124.3  | 113.2 | 122.5  | 116.8  | 125.3  | 132.6  |
| 224.3 | 199.7  | 182.7  | 175.6  | 181.1 | 212.9  | 183.3  | 298.4  | 290.6  |
| 477.6 | 389.3  | 322.5  | 332.3  | 336.9 | 350.7  | 365.8  | 671.3  | 553.4  |
| 297.4 | 405.2  | 380.4  | 486    | 332.8 | 317.3  | 502.9  | 572.6  | 383    |
| 121.7 | 137.9  | 124.6  | 118.3  | 106.8 | 125.1  | 123.8  | 155.7  | 122.1  |
| 1206  | 1401.9 | 1324.8 | 1173.7 | 1188  | 1231.7 | 1373.2 | 2366.6 | 1576.4 |
| 111.9 | 108.7  | 96.1   | 106.2  | 94.7  | 111.7  | 105.1  | 122.5  | 114    |
| 187.6 | 210.6  | 207.8  | 180.6  | 185.1 | 192    | 219.3  | 303.6  | 265.8  |

|       |       |       |        |       |       |       |        |       |
|-------|-------|-------|--------|-------|-------|-------|--------|-------|
| 125.2 | 151.2 | 148.4 | 120.5  | 134.6 | 147.8 | 116.8 | 171    | 127.9 |
| 191.1 | 212.1 | 168.8 | 187.9  | 199.4 | 178.5 | 158.4 | 288.5  | 225.9 |
| 269   | 281.9 | 303.4 | 240.6  | 277   | 351.4 | 266.9 | 503    | 327.9 |
| 216   | 257.7 | 267.7 | 229.3  | 214.1 | 260.7 | 250.2 | 353.5  | 273.1 |
| 110.5 | 118.3 | 110.1 | 130.6  | 105.8 | 120.8 | 113.2 | 112.9  | 114.1 |
| 115.5 | 112.9 | 110.4 | 113.5  | 97    | 107.1 | 113.1 | 125    | 114.9 |
| 102.5 | 112.4 | 103.7 | 97.5   | 92.2  | 106.8 | 101.5 | 108.6  | 110.7 |
| 107.6 | 107.8 | 107   | 101.8  | 98.2  | 105   | 105   | 118.8  | 109   |
| 110.3 | 110.4 | 95.2  | 101.7  | 97.8  | 104.4 | 101.9 | 113.6  | 112.9 |
| 106.4 | 109.5 | 98.7  | 97.7   | 100.4 | 109.5 | 99.9  | 106.9  | 105.1 |
| 99.6  | 106.3 | 94.3  | 97.5   | 93.5  | 99.2  | 99.1  | 108.4  | 106.3 |
| 108.4 | 109.9 | 101.7 | 105.7  | 97.4  | 110.4 | 92.2  | 107.5  | 102.8 |
| 97.7  | 107.7 | 104.4 | 101.2  | 89.6  | 104.3 | 104.2 | 100.3  | 111.8 |
| 102.5 | 110.8 | 105   | 102.7  | 96.7  | 104.1 | 104.5 | 110.2  | 109.1 |
| 105.4 | 107.8 | 100.3 | 95.4   | 91.3  | 110.6 | 107.9 | 104.8  | 102.3 |
| 99.9  | 110.5 | 97.4  | 91     | 95.2  | 105.1 | 101.5 | 103.1  | 110.6 |
| 155.2 | 180.5 | 218.1 | 136.8  | 147.4 | 258   | 136.3 | 228    | 183   |
| 103   | 103.4 | 103.4 | 101.6  | 97.5  | 101.3 | 100.9 | 109.2  | 103.2 |
| 121.1 | 114.8 | 101.5 | 110.8  | 104.8 | 110.3 | 107.6 | 121.1  | 133.4 |
| 109.7 | 108.5 | 98    | 99.7   | 96.7  | 100.6 | 99.9  | 122.4  | 107.9 |
| 108.4 | 113.2 | 111.7 | 101.2  | 105.8 | 122.8 | 105.4 | 121.2  | 120.5 |
| 112.2 | 185.3 | 170   | 154.6  | 148.6 | 160.3 | 161   | 196.4  | 148.9 |
| 106.6 | 105.1 | 101.8 | 101.9  | 105.7 | 105.8 | 104.6 | 111.5  | 110.2 |
| 117.9 | 110.3 | 100.5 | 100    | 101.4 | 110.9 | 104.3 | 109.8  | 107.5 |
| 105.9 | 111.8 | 106.7 | 106.1  | 96.8  | 109.3 | 106.3 | 101.4  | 108.2 |
| 115.6 | 116.5 | 122.6 | 131.1  | 109.3 | 136.6 | 124.4 | 155.8  | 132.5 |
| 186   | 239   | 219.6 | 210.8  | 209.4 | 221.8 | 224.6 | 358.6  | 267.8 |
| 109.3 | 103.5 | 103.8 | 100.4  | 93.9  | 104   | 100.3 | 104.6  | 106.5 |
| 106   | 116.3 | 109.3 | 101.1  | 102.4 | 109.9 | 104.3 | 124.2  | 139.1 |
| 125.1 | 149.6 | 145.3 | 130.4  | 125.7 | 151.7 | 128   | 167.5  | 151   |
| 102.3 | 114.5 | 111.8 | 106.5  | 97.7  | 114.6 | 109.8 | 115.7  | 115.7 |
| 108.5 | 108.8 | 112.4 | 113.9  | 97.3  | 113.5 | 102.5 | 122.6  | 113.3 |
| 206.8 | 176.3 | 167.7 | 156    | 173.5 | 155.2 | 192.1 | 285.9  | 248.6 |
| 257.5 | 237.4 | 267.4 | 240.9  | 286   | 293.4 | 270.3 | 513.9  | 337.2 |
| 109.4 | 111.1 | 101.4 | 96.2   | 94.4  | 103.4 | 102.4 | 107.6  | 107.7 |
| 105.5 | 110.5 | 111.9 | 104.6  | 100.1 | 113.9 | 96.7  | 124.8  | 114.3 |
| 236.1 | 190.9 | 203.1 | 202    | 196.2 | 215.1 | 190.8 | 314.8  | 229.1 |
| 106   | 109.3 | 108.1 | 99     | 95.8  | 112.8 | 105.4 | 109    | 120.9 |
| 105.7 | 117.5 | 97.4  | 91.3   | 95.1  | 106   | 102.5 | 101.9  | 103.5 |
| 115.2 | 123.5 | 115.8 | 113.8  | 112.2 | 126.8 | 107.1 | 123.3  | 114.5 |
| 116.4 | 122.1 | 104.3 | 115.4  | 105.5 | 113.4 | 107.5 | 123.7  | 120.1 |
| 117.2 | 110.2 | 102   | 98.5   | 98.9  | 112.1 | 103.7 | 128.2  | 107.8 |
| 127.6 | 138.5 | 118.9 | 130    | 127.9 | 128   | 130.6 | 138.1  | 159.1 |
| 112.1 | 133.3 | 117.1 | 116.8  | 112.9 | 123.8 | 111.5 | 133    | 131.6 |
| 156.3 | 160.3 | 149.7 | 133.2  | 144.9 | 171.4 | 162.2 | 186.3  | 153.2 |
| 102.1 | 101.7 | 93.7  | 97.8   | 97.1  | 104.7 | 93.5  | 102    | 105.3 |
| 281.8 | 549.1 | 561.3 | 571.3  | 501.4 | 609.2 | 463.5 | 526.3  | 317   |
| 128.7 | 127.8 | 137.3 | 127.8  | 124.5 | 143.3 | 125.4 | 168.2  | 141.4 |
| 254.7 | 282.1 | 271.8 | 472.6  | 272.2 | 242.7 | 383.8 | 506.9  | 199.5 |
| 531.6 | 831.6 | 567.4 | 1289.7 | 826.8 | 639   | 947.2 | 1137.8 | 510.8 |
| 227   | 265.3 | 239.4 | 240.1  | 267.8 | 280.1 | 295.5 | 404.7  | 265.8 |

315.2

425.5

353.8

344.3

291

376.2

343.4

557.8

322.1

AVG\_Signa ACCESSION

131.5 NM\_176818.1  
181 NM\_177966.4  
108.7 NM\_182762.2  
153 NM\_130786.2  
103.6 NM\_018723.2  
119.9 NM\_145891.1  
114.1 NM\_145893.1  
116.4 NM\_018723.2  
113 NM\_000014.4  
106.5 NM\_144670.2  
107.5 XM\_940724.1  
121.7 NM\_001080438.1  
116.2 NM\_017436.4  
115.3 NM\_016161.1  
113.1 NM\_207284.1  
118.8 NM\_207290.1  
117.9 NM\_207285.1  
104.9 NM\_207289.1  
117.4 NM\_207283.1  
119.1 NM\_015665.3  
163.9 NM\_023928.2  
112.4 NM\_001086.2  
125.8 NM\_020792.3  
114.6 NM\_207365.1  
117.1 NM\_016228.3  
105.5 NM\_182662.1  
117.8 NM\_182662.1  
122.8 NM\_014911.2  
182.3 NM\_001087.2  
111.6 NM\_001088.1  
1057.7 NM\_001605.1  
130.1 NM\_025267.2  
133.9 NM\_020745.1  
143.5 NM\_181806.2  
180.4 NM\_015423.2  
119 NM\_005763.2  
266.6 NM\_012138.3  
134.3 XM\_927215.1  
120.8 NM\_001080395.1  
115.7 NM\_020686.3  
121.8 NM\_020686.3  
123.7 NM\_000663.3  
122.8 NM\_022070.3  
343.2 NM\_005502.2  
120 NM\_080282.2  
120.6 NR\_002451.1  
117.7 NM\_173076.2  
121 NM\_015657.3  
117.3 NM\_152701.2  
124.9 NM\_212533.1

121.3 NM\_001606.3  
122.4 NM\_001089.1  
140.8 NM\_000350.1  
132.9 NM\_172232.1  
112.3 NM\_018672.2  
116.6 NM\_018672.2  
    121 NM\_172346.1  
119.1 NM\_080284.2  
108.4 NM\_019112.2  
149.9 NM\_019112.2  
106.5 NM\_033308.1  
118.2 NM\_007168.2  
122.1 NM\_080283.2  
121.1 NM\_080283.2  
345.4 NM\_000927.3  
132.8 NM\_012089.1  
115.4 NM\_003742.2  
116.6 NM\_000443.2  
114.3 NM\_178559.3  
329.2 NM\_005689.1  
148.6 NM\_004299.3  
115.6 NM\_007188.2  
122.9 NM\_203444.1  
115.1 NM\_019624.2  
110.4 NM\_019624.2  
119.4 NM\_019901.1  
132.4 NM\_019900.1  
125.6 NM\_033450.2  
112.4 NM\_145186.2  
120.8 NM\_033151.2  
121.9 NM\_145186.1  
125.3 NM\_145188.1  
    113 NM\_172025.1  
119.9 NM\_172024.1  
127.4 NM\_000392.1  
131.1 NM\_020037.1  
135.6 NM\_005845.2  
    112 NM\_001023587.1  
170.7 NM\_005688.2  
123.2 NM\_001023587.1  
113.5 NM\_001171.2  
139.2 XM\_936351.1  
119.6 NM\_001079528.1  
122.2 NM\_001171.2  
135.3 NM\_001079528.1  
111.1 NM\_000352.2  
117.4 NM\_020297.1  
133.2 NM\_020298.2  
126.7 NM\_000033.2  
111.7 NM\_005164.2  
120.3 NR\_003256.1

131.6 NM\_020323.1  
165.2 NM\_001040876.1  
164.5 NM\_002940.1  
309.8 NM\_001025091.1  
671.9 NM\_001090.2  
126.1 NM\_005692.3  
143.2 NM\_005692.3  
151.9 NM\_007189.1  
150.8 NM\_018358.1  
141.6 NM\_207629.1  
118.7 NM\_207627.1  
109.6 NM\_207630.1  
118.7 NM\_016818.2  
127.2 NM\_004915.3  
115.4 NM\_207174.1  
    109 NM\_004827.2  
120.3 NM\_022169.3  
121.4 NM\_022436.2  
118.2 NM\_022437.2  
117.5 NM\_152870.1  
115.3 NM\_018394.1  
118.8 NM\_148916.2  
115.1 NM\_031295.3  
132.4 NM\_148914.2  
    137 NM\_001042472.1  
130.9 NM\_001042472.1  
115.3 NM\_032859.2  
117.8 NM\_015407.3  
135.1 NM\_032750.1  
134.4 NM\_152924.3  
    120 NM\_007011.4  
129.2 NM\_007011.4  
1072.7 NM\_138340.3  
316.8 NM\_022060.2  
    177 NM\_016006.3  
130.4 NM\_020676.4  
128.5 NM\_173567.2  
190.1 NM\_024527.3  
    125 NM\_024794.1  
117.1 NM\_005470.2  
190.5 NM\_001012751.1  
113.9 XM\_938458.1  
125.5 NM\_005759.3  
125.2 NM\_005759.3  
133.6 NM\_016428.2  
    126 NM\_015429.2  
149.8 NM\_007313.2  
143.7 NM\_007313.2  
116.1 NM\_005157.3  
122.1 NM\_005158.2  
120.3 NM\_005158.2

110.3 NM\_007314.1  
1951.8 NM\_006720.3  
201.5 NM\_006720.3  
118.3 NM\_002313.5  
519.1 NM\_001003407.1  
121.8 NM\_032432.2  
123.9 NM\_014945.1  
118.4 NM\_020469.2  
113.7 NM\_001091.2  
344.9 NM\_021962.2  
124.3 NM\_001092.3  
123.2 NM\_021962.2  
118.4 NM\_139166.2  
119.4 NM\_013375.2  
252.1 NM\_172027.1  
142.1 NM\_172028.1  
120.9 NM\_145804.1  
211.4 NM\_001607.2  
147.7 NM\_006111.1  
156.5 NM\_198836.1  
135.2 NM\_000664.3  
113 NM\_198839.1  
132.1 NM\_001093.2  
120.3 NM\_025247.3  
176.5 NM\_032169.3  
152.8 NM\_014384.2  
179.9 NM\_014049.3  
128.4 NM\_001608.2  
451.2 NM\_000016.2  
116.1 NM\_000017.1  
132.8 NM\_001609.2  
116.9 NM\_000018.2  
824.4 NM\_000018.2  
252.9 NM\_000018.2  
219 NM\_000019.2  
123.8 NM\_005891.1  
215.4 NM\_022735.3  
126.4 NM\_024722.1  
135.2 NM\_145698.1  
108.1 NM\_145698.1  
122.9 NM\_145698.1  
124.3 NM\_032360.2  
116.4 XM\_928013.1  
121.7 NM\_001039844.2  
111.1 NM\_183377.1  
118 NM\_020039.2  
127.6 NM\_020039.2  
123.6 NM\_020322.1  
121.2 NM\_020321.1  
112.9 NM\_018674.3  
119 NM\_018674.3



113.6 NM\_018674.3  
109 NM\_017419.1  
172.9 NM\_022914.1  
123.7 NM\_152831.1  
119.3 NM\_152830.1  
117.8 NM\_000789.2  
119.5 NM\_021804.1  
109.1 NM\_138932.1  
112.6 NM\_138933.1  
114.9 NM\_138933.1  
108.7 NM\_000665.3  
119.2 NM\_015831.1  
380.1 NM\_014977.1  
416.4 NM\_198830.1  
134.1 NM\_138326.1  
145.8 NM\_020186.1  
154 NM\_002197.1  
156.4 NM\_001098.2  
119.4 NM\_001037161.1  
119.4 XM\_929560.1  
125.2 NM\_147161.2  
124.4 NM\_015547.2  
120.9 NM\_130767.1  
120.5 NM\_006821.3  
114.5 NM\_152331.2  
112.1 NM\_001037162.1  
115.8 NM\_181865.2  
115.8 NM\_181866.2  
585.8 NM\_181866.2  
123.9 NM\_007274.3  
324.5 NM\_007274.3  
116.9 NM\_181864.2  
116.4 NM\_183386.1  
121.3 NM\_001037171.1  
172.5 NM\_001033583.1  
126.5 NM\_004035.4  
119.3 NM\_007292.3  
115.8 NM\_004035.4  
105.6 NM\_003500.2  
138.9 NM\_003501.1  
113.3 NM\_018308.1  
252.5 NM\_007099.2  
401.5 NM\_001040649.1  
119 NM\_001610.1  
201.7 NM\_001611.2  
122.2 NM\_016361.2  
124.1 NM\_152282.3  
110.1 NM\_001099.2  
159 NM\_033068.2  
119.2 NM\_033068.2  
129.4 NM\_001097.1

119.4 NM\_032489.2  
205 NM\_052957.2  
125.9 NM\_001612.4  
113.9 NM\_020109.3  
104.5 NM\_015162.3  
117.4 NM\_030924.2  
139.9 NM\_001995.2  
272.9 NM\_203372.1  
122.8 NM\_004457.3  
140.5 NM\_004457.3  
116.4 NM\_022977.1  
141.8 NM\_022977.1  
232.5 NM\_004458.1  
151.4 NM\_203379.1  
118.2 NM\_203379.1  
118.7 NM\_203380.1  
117.7 NM\_016234.3  
302.5 NM\_203379.1  
113.5 NM\_015256.2  
118.2 NM\_001009185.1  
113.8 NM\_015256.2  
116.3 NM\_052956.1  
105 XM\_936876.1  
110.8 NM\_182617.2  
115.1 NM\_202000.2  
117.9 NM\_202000.2  
149 NM\_005622.3  
145.9 NM\_032501.2  
128.1 NM\_018677.2  
119.6 NM\_001076552.1  
297.8 NM\_001076552.1  
333.1 NM\_139274.1  
178.8 NM\_001100.3  
147.8 NM\_001613.1  
2459.7 NM\_001101.2  
1618 NM\_001101.2  
117.7 NM\_001004053.1  
118.9 NM\_005159.3  
4043.7 NM\_001614.2  
117.4 NM\_001615.3  
223.3 NM\_177989.1  
139.5 NM\_004301.3  
118.1 NM\_016188.3  
118.6 NM\_006687.2  
112 NM\_006686.2  
129.6 NM\_030812.1  
243.4 NM\_001102.2  
138.5 NM\_001103.1  
116.1 NM\_001104.1  
259.9 NM\_004924.3  
338.5 NM\_018477.1

454.9 NM\_005736.2  
140.5 NM\_005735.2  
1387.7 NM\_001005386.1  
537.4 NM\_005721.3  
105.2 NM\_020445.4  
109.8 NM\_020445.4  
129.6 NM\_020445.4  
148.4 NM\_024855.2  
317.5 NM\_022496.2  
149.3 NM\_022899.3  
139.4 NM\_138289.1  
201.2 NM\_001105.2  
124.6 NM\_020327.2  
133.1 NM\_020328.2  
148.4 NM\_004302.3  
121.1 NM\_020327.2  
118.6 NM\_145259.1  
173.7 NM\_001616.3  
123.6 NM\_001106.2  
109.8 NM\_000020.1  
121.8 NM\_000666.1  
136.1 NM\_001010853.1  
117.7 NM\_080658.1  
138.1 NM\_001107.3  
220 NM\_203488.1  
131.5 NM\_203488.1  
209.6 NM\_138448.2  
121.8 NM\_032021.2  
209.6 NM\_000022.2  
132.6 NM\_001012969.1  
111.1 NM\_001110.2  
119.5 NM\_002390.3  
112.6 NM\_021641.2  
122.1 NM\_003474.3  
121.7 NM\_021641.2  
129.3 NM\_003815.3  
345.2 NM\_207195.1  
117 XM\_937888.1  
209.1 NM\_003183.4  
104.3 NM\_014237.1  
123.6 NM\_023038.3  
111.2 NM\_023038.3  
137.6 NM\_033274.2  
121.4 NM\_001464.3  
118.8 NM\_003814.4  
130.2 NM\_003813.2  
126.4 NM\_004194.2  
113.6 NM\_021722.2  
124.9 NM\_021721.2  
116.7 NM\_003812.2  
119.4 NM\_021777.2

123.3 NM\_021777.2  
118.7 NM\_014265.3  
120.6 NM\_014269.3  
117.3 NM\_021794.2  
120.4 XM\_940500.1  
125.5 NM\_145004.4  
117.3 NM\_025220.2  
117.9 NM\_153202.1  
111 NR\_001569.1  
120.4 NR\_002224.1  
132 NM\_003817.1  
149.3 NM\_001109.2  
138.9 NM\_003816.2  
186.1 NM\_014479.2  
117.8 NM\_006988.3  
111.7 NM\_030957.2  
116 NM\_030955.2  
122.8 NM\_139028.2  
108.7 NM\_139025.2  
136.3 NM\_139027.2  
116 NM\_139155.1  
130.2 NM\_139155.2  
123 NM\_139055.1  
116.5 NM\_139056.1  
115.9 NM\_139057.1  
114.5 NM\_139054.2  
115.9 NM\_199355.1  
140 NM\_133638.2  
115.7 NM\_014244.1  
114.4 NM\_021599.1  
117.9 NM\_175851.1  
111.2 NM\_025003.2  
118 NM\_014243.1  
119 NM\_005099.3  
111.5 NM\_007038.2  
115.5 NM\_197941.2  
123.1 NM\_014272.2  
108.3 NM\_007037.3  
111.8 NM\_182920.1  
126 NM\_139264.1  
113 NM\_139238.1  
118.9 NM\_052866.2  
116.7 NM\_052866.2  
116.9 NM\_014694.2  
120.1 NM\_207517.1  
128.5 NM\_213604.1  
294.3 NM\_015840.2  
127.9 NM\_001025107.1  
236.5 NM\_015840.2  
129.2 NM\_001112.2  
133 NM\_015833.2

118 NM\_001033049.1  
199.5 NM\_001033049.1  
114 NM\_018702.1  
192.2 NM\_012091.2  
116.5 NM\_052998.2  
124.6 NM\_020421.2  
137.5 NM\_052853.3  
129.5 NM\_024876.2  
135.8 NM\_174922.3  
116.8 NM\_021116.1  
137 NM\_020546.1  
175.4 NM\_004036.2  
130.7 NM\_139247.2  
110.9 NM\_183357.1  
125.1 NM\_020983.2  
128.1 NM\_015270.2  
152.7 NM\_001114.2  
124.7 NM\_001115.1  
127.5 NM\_001116.2  
119.7 NM\_001117.2  
116.4 NM\_001118.3  
121 NM\_001119.3  
964.3 NM\_001119.3  
115.4 NM\_017483.2  
119 NM\_017488.2  
119.3 NM\_001617.1  
115.8 NM\_019903.3  
399.2 NM\_016824.3  
523.9 NM\_016824.3  
393.4 NM\_001121.2  
679.8 NM\_001122.2  
106.8 NM\_000667.2  
104.6 NM\_000668.3  
112 NM\_000669.3  
114.2 NM\_000670.3  
119.5 NM\_000671.3  
126.9 NM\_000672.2  
122.6 NM\_000673.3  
136.6 NM\_144650.1  
106.7 NM\_001077593.1  
120.5 NM\_018269.1  
124.7 NM\_004797.2  
349 NM\_015999.2  
403.6 NM\_024551.2  
138.2 NM\_006721.2  
119.9 NM\_001123.2  
126.1 NM\_001123.2  
1071.1 NM\_001124.1  
179.1 NM\_024866.3  
117.9 NM\_007264.3  
146.8 NM\_181442.1

149.9 NM\_015339.2  
121.4 NM\_000674.2  
125.1 NM\_000674.2  
129.8 NM\_000675.3  
124.8 NM\_000676.2  
110.1 NM\_020683.5  
131.6 NM\_000677.2  
202.8 NM\_031284.3  
119.7 NM\_025225.2  
129.4 NM\_001125.2  
120.7 NM\_138430.3  
113.5 NM\_199162.1  
123.1 NM\_138430.3  
171.2 NM\_017825.1  
108.9 NM\_000680.1  
108.1 NM\_033302.1  
    113 NM\_000680.1  
128.5 NM\_033304.1  
125.9 NM\_033303.2  
128.6 NM\_000679.3  
125.6 NM\_000678.2  
125.5 NM\_000681.2  
    128 NM\_000682.4  
    124 NM\_000683.3  
118.1 NM\_000684.1  
201.9 NM\_000024.3  
116.4 NM\_000025.1  
108.7 NM\_001619.2  
118.1 NM\_005160.2  
310.7 NM\_175573.1  
918.4 NM\_007002.2  
302.5 NM\_000026.1  
494.8 NM\_001126.2  
119.7 NM\_199165.1  
    140 NM\_199165.1  
113.4 NM\_152328.3  
136.4 NM\_001129.3  
132.3 NM\_153207.3  
522.5 NM\_198969.1  
170.8 NM\_198970.1  
115.4 NM\_198969.1  
117.7 NM\_021638.3  
    123 NM\_198595.1  
119.8 NM\_198595.1  
119.2 NM\_032550.2  
112.6 NM\_201252.1  
120.6 NR\_002796.1  
    122 XR\_000989.1  
138.1 NM\_005935.1  
119.6 NM\_002025.1  
117.7 NM\_002285.2

115.2 NM\_001025108.1  
225.5 NM\_014423.2  
243.3 NM\_001031805.1  
126.7 NM\_001031805.1  
117.6 NR\_003228.1  
117.1 NR\_003228.1  
221.7 NM\_006796.1  
111.7 NM\_001133.2  
124.3 NM\_001010982.1  
117.3 NM\_001134.1  
143.1 NM\_203437.2  
138.9 NM\_203437.2  
212.1 NM\_017657.3  
123 NM\_000027.2  
107.6 NM\_152336.2  
118.3 NM\_024783.2  
110.4 NM\_032785.1  
117.7 NM\_001135.1  
116.5 NM\_013227.1  
139 NM\_001136.3  
127 NM\_001136.3  
157.2 NM\_018046.3  
113.8 NM\_000642.1  
113.1 NM\_000646.2  
133.1 NM\_000645.2  
115.4 NM\_000028.1  
116.8 NM\_000645.2  
124 NM\_000645.2  
117.8 NM\_024758.3  
115 NM\_032741.3  
116.1 NM\_006411.2  
122.1 NM\_006411.2  
124.8 NM\_006412.3  
116.8 NM\_006412.3  
127.4 NM\_001012727.1  
128.5 NM\_020132.4  
124.7 NM\_020132.3  
136.4 NM\_001012734.1  
128.1 NM\_018361.2  
121.3 NM\_178819.2  
115.5 NM\_153613.1  
174.5 NM\_003659.1  
129 NM\_006408.2  
116.9 NM\_176813.3  
128.4 NM\_198576.2  
121.4 NM\_001138.1  
108.6 NM\_007316.1  
111.9 NM\_000029.2  
129.7 NM\_015239.1  
113.4 NM\_032049.1  
106.3 NM\_004835.3

135.1 NM\_000686.3  
123.2 NM\_020350.3  
117.2 NM\_001040194.1  
112.5 NM\_005161.2  
    113 NM\_000030.1  
119.5 NM\_031900.1  
115.7 NM\_031279.2  
182.3 NM\_015446.3  
331.2 XM\_942402.1  
267.3 NM\_000687.1  
578.8 NM\_006621.3  
128.5 NM\_001029882.1  
139.5 NM\_017651.3  
244.9 NM\_001620.1  
118.9 NM\_024060.2  
116.8 NM\_024060.2  
133.2 NM\_001621.3  
126.2 NM\_020731.2  
1809.9 NM\_012111.1  
165.4 NM\_152392.1  
126.9 NM\_001622.1  
117.2 NM\_020661.1  
143.8 NM\_001623.3  
285.3 NM\_001623.3  
    110 NM\_004847.2  
132.8 NM\_144704.1  
146.4 NM\_145813.1  
    123 NM\_016108.2  
139.9 NM\_001624.1  
119.3 NM\_017977.1  
128.2 NM\_004833.1  
398.7 NM\_003977.1  
116.8 NM\_014336.3  
122.6 NM\_001033054.1  
125.2 NM\_000659.1  
4480.8 NM\_000383.1  
114.2 NM\_018836.2  
122.6 NM\_001042478.1  
120.5 NM\_001042478.1  
170.4 NM\_000476.1  
121.4 NM\_001625.2  
126.8 NM\_013411.3  
151.1 NM\_001625.2  
173.4 NM\_016282.2  
115.6 NM\_013410.2  
121.3 NM\_203464.1  
118.9 NM\_174858.1  
118.4 NM\_012093.2  
108.9 NM\_012093.2  
117.7 NM\_152327.1  
121.8 NM\_003488.2



128.8 NM\_007202.2  
103.7 NM\_144490.1  
124 NM\_016248.2  
107.4 NM\_144490.1  
120.6 NM\_005100.2  
129.3 NM\_144497.1  
120 NM\_005100.2  
219.1 NM\_006738.4  
780.3 NM\_007200.3  
111.5 NM\_178813.5  
115.7 NM\_001008535.1  
111 NM\_001008535.1  
114.9 NM\_001004065.2  
121.6 NM\_006422.2  
107.8 NM\_003886.2  
115.1 NM\_139289.1  
113.6 NM\_139289.1  
120.4 NM\_004857.2  
115.7 NM\_004274.3  
119.2 NM\_138633.1  
131.7 NM\_016377.2  
128.8 NM\_016377.2  
116.4 NM\_004842.2  
380.6 NM\_005858.2  
256.5 NM\_014371.2  
111.3 NM\_147185.1  
125.1 NM\_147166.1  
279.2 NM\_030767.2  
260.2 NM\_006066.2  
108.5 NM\_006066.2  
248.2 NM\_153326.1  
432.9 NM\_001628.2  
113.7 NM\_020299.3  
107.4 NM\_001353.5  
117.7 NM\_001354.4  
378.3 NM\_003739.4  
113.4 NM\_001818.2  
150 NM\_001007536.1  
116.7 NM\_031436.2  
5908.6 NM\_005989.2  
159.8 NM\_003689.2  
125.2 NM\_012067.2  
416.8 NM\_001014432.1  
338.6 NM\_001014431.1  
134.8 NM\_005163.2  
169.2 NM\_032375.2  
125.7 NM\_001626.2  
118.6 NM\_181690.1  
127.7 NM\_005465.3  
145.6 NM\_181690.1  
205.5 NM\_001012398.1

127 NM\_000031.4  
127.1 NM\_001003945.1  
119.7 NM\_001003945.1  
129.2 NM\_000688.4  
130.6 NM\_199166.1  
128.3 NM\_000688.4  
125.8 NM\_000032.1  
164 NM\_001037968.1  
124.6 NM\_001037968.1  
118 NM\_000477.3  
116.3 NM\_001627.2  
148.9 NM\_153329.2  
114.6 NM\_002860.3  
156.1 NM\_000689.3  
123.2 NM\_170696.1  
120.6 NM\_170696.1  
113.8 NM\_000693.1  
120.9 NM\_000692.3  
118.7 NM\_012190.2  
127.3 NM\_001034173.1  
125.9 NM\_000690.2  
115.3 NM\_000691.3  
108.9 NM\_001031806.1  
142 NM\_001031806.1  
112.5 NM\_000694.2  
108.1 NM\_001030010.1  
119.2 NM\_001031615.1  
126.9 NM\_000695.3  
110.9 NM\_000695.3  
112 NM\_003748.2  
120.7 NM\_170726.1  
118.1 NM\_170726.1  
118.6 NM\_001080.3  
127.5 NM\_005589.2  
115.6 NM\_001182.2  
138.1 NM\_022568.2  
120.1 NM\_022568.2  
851.6 NM\_000696.2  
132.3 NM\_000034.2  
1662.4 NM\_184041.1  
125.5 NM\_184043.1  
1602.6 NM\_184041.1  
132.8 NM\_000035.2  
352.8 NM\_005165.2  
114.2 NM\_172196.1  
114.2 NM\_006872.2  
125.6 NM\_019109.3  
110.4 NM\_032834.2  
118.9 NM\_001004127.1  
121.2 NM\_024105.3  
123 NM\_018466.2

117.3 NM\_144988.2  
118.9 NM\_033087.2  
158.2 NM\_001006940.1  
210.7 NM\_013338.3  
139.7 NM\_013339.2  
132.8 NM\_001007027.2  
115.8 NM\_001007027.2  
145.6 NM\_001007027.1  
144.5 NM\_024740.1  
122.1 NM\_004304.3  
176.2 NM\_006020.1  
113.7 NM\_006020.2  
164.8 NM\_006020.2  
129.1 NM\_001001655.1  
156.5 NM\_139178.1  
122.9 NM\_017621.2  
1347 NM\_017758.2  
229.8 NM\_198867.1  
158.9 NM\_032306.2  
120.1 NM\_138775.1  
116.5 NM\_199232.1  
111.3 NM\_018436.2  
121.7 NM\_018436.2  
123.5 NM\_015120.2  
122.9 NM\_000697.1  
119.6 NM\_001139.1  
135.8 NR\_002710.2  
133 XM\_937556.1  
117.7 NM\_001140.3  
124.6 NM\_001141.2  
115.8 NM\_001141.1  
124.5 NM\_001039131.1  
133.2 NM\_000698.2  
128.1 NM\_000698.2  
407.2 NM\_001629.2  
122.1 NM\_021628.1  
123 NM\_001631.2  
148.7 NM\_025144.2  
110.8 NM\_020778.1  
109.9 NM\_000478.2  
2131.5 NM\_001632.2  
113.7 NM\_031313.1  
377.9 NM\_020919.2  
118.4 NM\_147129.2  
120.5 NM\_147129.2  
115.8 NM\_182775.1  
107.6 NM\_152525.3  
101.6 NM\_139163.1  
291.5 NM\_173511.2  
109.5 NM\_138468.3  
117.6 NM\_205543.1

125.1 NM\_152526.3  
129.2 NM\_018571.4  
125.7 NM\_152388.1  
117.6 NM\_139158.1  
126.2 NM\_024744.12  
114.8 NM\_006492.2  
112.8 NM\_021926.2  
125.6 NM\_152462.1  
115.2 NM\_054028.1  
120.9 NM\_014324.4  
125.8 NM\_203382.1  
112.6 NM\_016519.4  
105.3 NM\_016519.4  
    120 NM\_001633.2  
1260.7 NM\_001033059.1  
377.6 NM\_001634.4  
114.7 NM\_152435.1  
110.1 NM\_015944.2  
109.8 NM\_001142.2  
134.4 NM\_001143.1  
205.3 NM\_138958.1  
140.6 NM\_001144.3  
133.5 NM\_000479.2  
124.3 NM\_020547.1  
191.2 NM\_153206.1  
177.7 NM\_032797.4  
    135 NM\_020703.1  
133.3 NM\_181847.2  
117.8 NM\_198722.1  
115.8 NM\_015365.2  
125.6 NM\_001025580.1  
123.6 NM\_001025580.1  
117.1 NM\_030943.1  
138.5 NM\_133265.2  
122.3 NM\_016201.2  
134.4 NM\_000036.1  
116.2 NM\_004037.6  
119.6 NM\_203404.1  
116.7 NM\_139156.2  
127.2 NM\_001025389.1  
107.3 NM\_000480.2  
117.9 NM\_001025389.1  
118.8 NM\_001025390.1  
133.1 NM\_001635.2  
118.3 NM\_001635.2  
140.5 NM\_000481.2  
116.4 NM\_001008221.1  
149.2 NM\_004038.3  
115.6 NM\_004038.3  
134.8 NM\_001008218.1  
117.2 NM\_000699.2

163.4 NM\_020978.3  
116.7 NM\_133463.1  
105.3 NM\_001033574.1  
533.2 NM\_016627.4  
    171 NM\_022662.2  
208.9 NM\_014885.1  
172.4 NM\_001002246.1  
116.5 NM\_001002244.1  
165.6 NM\_001002247.1  
    380 NM\_015391.1  
123.2 NM\_013366.3  
115.9 NM\_013366.3  
153.8 NM\_013367.2  
269.1 NM\_016237.3  
127.6 NM\_016238.1  
138.5 NM\_001145.2  
131.6 NM\_015305.2  
457.2 NM\_144567.3  
119.7 NM\_001146.3  
118.8 NM\_001147.1  
117.7 NM\_015985.2  
112.6 NM\_004673.3  
123.3 NM\_012098.2  
113.4 NM\_014495.2  
    129 NM\_139314.1  
125.9 NM\_001039667.1  
139.1 NM\_139314.1  
107.8 NM\_178127.2  
122.6 NM\_031917.2  
114.7 NM\_021146.2  
123.2 NM\_020475.2  
128.6 NM\_020480.2  
113.7 NM\_020977.2  
115.3 NM\_001148.3  
128.5 NM\_001149.2  
123.9 NM\_001149.2  
130.6 NM\_020987.2  
115.1 NM\_144708.2  
182.8 NM\_182703.2  
119.5 NM\_153228.1  
138.3 NM\_016376.2  
137.6 NM\_020740.1  
107.6 NM\_020740.1  
121.8 NM\_054027.3  
123.3 NM\_024668.2  
118.8 NM\_017978.1  
    118 NM\_178510.1  
131.2 NM\_016552.2  
114.8 NM\_017844.2  
    114 NM\_016552.2  
150.8 NM\_020319.1

247.3 NM\_023039.2  
110 NM\_014391.2  
148 NM\_017664.2  
1101.3 NM\_013275.4  
384 NM\_015208.2  
222.8 NM\_033121.1  
119.2 NM\_152345.3  
194.1 NM\_030816.2  
115.8 NM\_207354.1  
117 NM\_015158.2  
114.9 NM\_153186.3  
152.8 NM\_153186.3  
112.8 NM\_001009941.1  
118.8 NM\_019046.1  
123.1 NM\_001009941.1  
119.8 NM\_032217.3  
157.5 NM\_198889.1  
187.5 NM\_198889.1  
121 NM\_001010925.1  
110 NM\_020349.2  
139.1 NM\_032250.1  
115.5 NM\_001012419.1  
123.3 NM\_001012419.1  
115.3 NR\_003366.1  
114.8 XM\_934275.1  
116.2 NM\_174981.2  
124.2 NM\_144590.1  
131.2 NM\_144994.7  
112 NM\_133475.1  
114.2 NM\_015493.4  
124.1 NM\_014915.1  
125 NM\_032139.1  
185.2 NM\_015199.2  
106.1 NM\_173505.2  
107 NM\_052997.1  
122.5 XM\_940707.1  
111.8 NM\_001029862.1  
127.7 NM\_032290.2  
189.1 NM\_182608.2  
122.2 NM\_001039888.2  
131.2 NM\_144698.3  
119.4 NM\_198555.3  
110.1 NM\_198555.3  
130 NM\_198555.3  
447.5 NM\_181726.1  
130.4 NM\_181712.2  
153.1 NM\_016466.4  
126.5 NM\_052855.2  
130.8 NM\_152363.2  
122.1 NM\_182603.1  
114.7 NM\_175873.3

190.8 NM\_153697.1  
109.5 NM\_198493.1  
129.8 NM\_198401.2  
126.5 NM\_198471.1  
248.3 NM\_017704.2  
108.2 NM\_022096.4  
109.9 NM\_022096.4  
120.4 NM\_198798.1  
116.3 NM\_020337.1  
123.2 NM\_001039935.1  
120.2 NM\_001029870.1  
154.1 NM\_014942.2  
121.7 NM\_001077708.1  
123.3 NM\_019644.1  
141.6 NM\_152326.2  
167.7 NM\_015245.1  
117.8 NM\_181670.2  
111.1 NM\_152788.3  
127.8 NM\_020140.2  
129 NM\_133450.1  
107.9 NM\_145865.1  
115.5 NM\_173551.3  
141.4 NM\_018089.1  
115.9 NM\_018089.1  
113.7 NM\_018089.1  
117.9 NM\_018685.2  
105 NM\_006305.2  
2137.7 NM\_006401.1  
118.5 NM\_012403.1  
110 NM\_012404.2  
107.5 NM\_030920.2  
134.7 NM\_001150.1  
123.1 NM\_032208.1  
142.5 NM\_018153.2  
116.2 NM\_053034.1  
181.9 NM\_058172.3  
120.5 NM\_174890.1  
6853.4 NM\_000700.1  
114.4 NM\_007193.3  
145.2 NM\_001157.2  
346.4 NM\_145868.1  
112.1 NM\_145869.1  
109.5 NM\_004306.2  
115.3 NM\_001003954.1  
114 NM\_001003954.1  
466.9 NM\_001002857.1  
159.1 NM\_001002857.1  
3206.8 NM\_001002858.1  
746.5 NR\_001562.1  
114.7 NM\_005139.1  
113.2 NM\_001153.2

1480.3 NM\_001154.2  
123.6 NM\_004033.2  
128.8 NM\_001155.3  
110.3 NM\_004034.1  
740.3 NM\_004034.1  
119.4 NM\_001630.2  
123.9 NM\_001040084.1  
110.5 NM\_003568.1  
138.1 NM\_001637.1  
135.7 NM\_009590.2  
120.6 NM\_001158.3  
113.7 NM\_001158.3  
133.8 NM\_003734.2  
108.8 NM\_153042.2  
149.7 NM\_015013.2  
125.3 NM\_001159.3  
116.6 NM\_145730.1  
196.6 NM\_001127.2  
254.1 NM\_001128.5  
106.1 NM\_080545.1  
321.5 NM\_003917.2  
125.6 NM\_007247.3  
129.4 NM\_007247.3  
234.2 NM\_032493.2  
125.8 NM\_005498.3  
124.8 NM\_057089.1  
138.5 NM\_001283.2  
536.5 NM\_003916.3  
112.1 NM\_178814.2  
128.8 NM\_130787.2  
115.1 NM\_130787.2  
113.6 NM\_014203.2  
147.6 NM\_012305.2  
202.2 NM\_001282.2  
172.4 NM\_001282.2  
266 NM\_004068.3  
217.3 NM\_004068.3  
266.7 NM\_004069.3  
1767.6 NM\_004069.3  
323.5 NM\_003664.3  
121 NM\_004644.3  
124.3 NM\_001077523.1  
241.1 NM\_003938.4  
245.3 NM\_001077523.1  
203.3 NM\_012095.4  
116.4 NM\_207012.1  
218.5 NM\_207012.1  
190.1 NM\_006803.2  
168.2 NM\_001002924.1  
123.6 NM\_005829.3  
1002.2 NM\_006594.1



193 NM\_007347.3  
106.5 NM\_004722.2  
126.1 NM\_007077.2  
180.3 NM\_181869.1  
132.6 NM\_181869.1  
120.9 NM\_001163.2  
115.1 NM\_005503.2  
113 NM\_031232.2  
112 NM\_031232.2  
126.8 NM\_031232.2  
169.7 NM\_004886.3  
120.2 NM\_001164.2  
108.3 NM\_145689.1  
111.1 NM\_001164.2  
256.5 NM\_019043.3  
110.1 NM\_173075.2  
141.5 NM\_006051.2  
122.7 NM\_133173.2  
123.7 NM\_000038.3  
113.4 NM\_005883.2  
114.2 NM\_153000.3  
143.2 NM\_001639.2  
139 NM\_001640.3  
128.2 NM\_001641.2  
171.6 NM\_080649.1  
143.9 NM\_014481.2  
252.2 NM\_016022.1  
140.7 NM\_001077628.1  
180.6 NM\_031301.2  
243.8 NM\_006595.2  
116.7 NM\_017855.2  
131.8 NM\_015957.1  
114.4 NM\_199295.1  
146.1 NM\_198544.2  
117.2 NM\_017413.3  
128.8 NM\_005166.3  
114.9 NM\_005166.3  
122.6 NM\_001642.1  
120.2 NM\_000039.1  
163.6 NM\_144772.1  
120 NM\_001643.1  
113.9 NM\_000482.3  
113.7 NM\_052968.3  
112.3 NM\_000384.1  
141.5 NM\_018690.1  
116.8 NM\_005889.2  
116.7 NM\_006789.2  
114 NM\_145699.2  
119.8 NM\_004900.3  
122.2 NM\_014508.2  
121.3 NM\_152426.2

142.6 NM\_001006666.1  
162.1 NM\_001006666.1  
133.1 NM\_145298.4  
143.2 NM\_021822.1  
    124 NM\_203454.1  
116.6 NM\_001645.3  
129.1 NM\_000483.3  
115.8 NM\_000040.1  
111.8 NM\_001646.1  
104.3 NM\_001647.2  
166.7 NM\_000041.2  
    118 NM\_001638.2  
    116 NM\_000042.1  
125.5 NM\_145344.1  
110.1 NM\_145343.1  
122.4 NM\_030882.2  
    116 NM\_145637.1  
290.8 NM\_145637.1  
    101 NM\_014349.2  
560.3 NM\_030644.1  
122.6 NM\_145641.1  
119.7 NM\_030643.3  
121.4 NM\_030643.3  
115.2 NM\_030642.1  
128.6 NM\_030641.2  
119.4 NM\_030817.1  
126.8 NM\_019101.2  
161.6 NM\_201414.1  
    119 NM\_000484.2  
135.6 NM\_201414.1  
109.7 NM\_001018159.1  
184.4 NM\_003905.3  
181.1 NM\_001018160.1  
302.9 NM\_006380.2  
155.5 NM\_012096.1  
    141 NM\_015032.1  
180.1 NM\_015928.1  
285.4 NM\_000485.2  
163.3 NM\_001030018.1  
119.5 NM\_020979.1  
221.8 NM\_175069.1  
115.4 NM\_017692.2  
164.7 NM\_175073.1  
109.2 NM\_001649.2  
117.3 NM\_133456.1  
138.1 NM\_000385.3  
129.3 NM\_198098.1  
117.5 NM\_080429.2  
110.5 NM\_173039.1  
128.9 NM\_198998.1  
120.6 NM\_000486.3

126 NM\_004925.3  
115.4 NM\_001650.4  
108.8 NM\_004028.3  
115.9 NM\_001651.1  
122.5 NM\_001652.2  
115.5 NM\_001170.1  
117.8 NR\_002823.1  
110.5 NM\_001169.2  
116.3 NM\_020980.2  
126.2 NM\_014691.2  
124 NM\_000044.2  
114.9 NM\_000044.2  
115.4 NM\_001011645.1  
239.1 NM\_001654.1  
144.3 NM\_015193.3  
471.9 NM\_001655.3  
146.8 NM\_003491.2  
116.4 NM\_001657.2  
148.7 NM\_001024228.1  
1112.6 NM\_001658.3  
131.7 NM\_001024226.1  
143.9 NM\_001659.1  
281.8 NM\_001660.2  
1615.2 NM\_001660.2  
292.7 NM\_001662.2  
123.8 NM\_001663.2  
123.2 NM\_175609.1  
201.6 NM\_175609.1  
127.3 NM\_014570.3  
151.2 NM\_006421.3  
125.1 NM\_006420.1  
126 NM\_001025593.1  
116.7 NM\_001025595.1  
118.5 NM\_012402.2  
114.2 NM\_003224.2  
121.3 NM\_000045.2  
319.2 NM\_001172.3  
113.2 NM\_175861.1  
103.6 NM\_001012659.1  
116.2 NR\_002222.1  
151.2 NM\_004308.2  
137.7 NM\_024605.3  
138 NM\_199357.1  
111.8 NM\_014783.2  
117.9 NM\_199357.1  
127.4 NM\_018287.4  
625.2 NM\_018460.2  
515.6 NM\_018054.4  
170 NM\_018054.4  
117.6 NM\_001006634.1  
125.3 NM\_033515.2

182 NM\_032900.4  
111.2 NM\_020809.2  
315.2 NM\_020824.2  
122.8 NM\_021226.2  
117.2 NM\_031305.1  
119 NM\_001042669.1  
114.8 NM\_001025616.1  
116 NM\_001025616.1  
117.6 NM\_001007231.1  
330.1 NM\_014882.2  
110.3 NM\_014882.2  
124.1 NM\_015071.2  
112.3 NM\_199282.1  
117.2 NM\_030672.2  
123.7 NM\_001010000.1  
110.7 NM\_030672.2  
118.8 NM\_004815.2  
234 NM\_181720.2  
355.5 NM\_181720.2  
135.5 NM\_001025598.1  
241.9 NM\_001666.2  
131.7 NM\_001173.2  
109.9 NM\_013422.2  
116.1 NM\_013423.1  
116.3 NM\_001174.2  
116.4 NM\_006125.1  
110.3 NM\_181335.2  
123.9 NM\_001017526.1  
117.1 NM\_001017526.1  
350.2 NM\_032496.1  
154.9 NM\_001080156.1  
397.7 NM\_004309.3  
3571.2 NM\_001175.4  
117.7 NM\_001176.2  
149.7 NM\_199002.1  
135.3 NM\_199002.1  
143.3 NM\_199002.1  
123.5 NM\_014629.2  
142.2 NM\_001011722.2  
132.5 NM\_018125.3  
125.5 NM\_001011722.2  
111.3 NM\_198236.1  
119.6 NM\_014784.2  
128 NM\_014784.2  
116.4 NM\_015313.1  
111.2 NM\_173728.2  
139.4 NM\_014448.2  
113 NM\_014786.2  
573.4 NM\_015318.2  
141.2 NM\_153213.2  
837 NM\_004723.2

943.6 NM\_019555.1  
117.9 NM\_032995.1  
137.7 NM\_032995.1  
124.7 NM\_001002861.1  
426.5 NM\_004840.2  
396.1 NM\_003899.2  
124.6 NM\_145735.1  
123.8 NM\_003899.2  
116.5 NM\_015185.1  
117.6 NM\_006015.3  
321.3 NM\_139135.1  
111.1 NM\_175863.2  
115 NM\_020732.2  
154.2 NM\_152641.2  
220.5 NM\_005224.1  
119.1 NM\_001017363.1  
169.2 NM\_023000.2  
168.9 NM\_002892.2  
198.4 NM\_002892.2  
145.1 NM\_016374.4  
1157 NM\_016374.5  
269.3 NM\_016374.5  
131.7 NM\_212481.1  
110.5 NM\_212481.1  
162.2 NM\_212481.1  
305.9 NM\_032199.1  
289 NM\_005744.2  
765.2 NM\_006321.1  
153.2 NM\_001177.3  
113.2 NM\_173664.3  
109.6 NM\_138450.3  
121.5 NM\_001012990.1  
117.3 NM\_144996.2  
111.7 NM\_182896.1  
109.3 NM\_025047.1  
120.2 NM\_019087.1  
955.6 NM\_001040025.1  
185.9 NM\_001667.1  
252.9 NM\_012106.3  
128.7 NM\_004311.2  
114.5 NM\_212460.1  
127.6 NM\_005738.2  
118.3 NM\_005738.2  
122.1 NM\_001037164.1  
134.2 NM\_005737.3  
129.6 NM\_001661.2  
137.3 NM\_012097.2  
631.7 NM\_012097.2  
174.9 NM\_001037174.1  
161.2 NM\_178815.3  
110 NM\_032146.3

111.4 NM\_032146.3  
116.2 NM\_177976.1  
145.3 NM\_015161.1  
135.4 NM\_022374.1  
130.8 NM\_018694.2  
135.5 NM\_001002252.1  
131.4 NM\_001002251.1  
541.4 NM\_006407.3  
110.9 NM\_152522.2  
135.2 NM\_138795.2  
322.5 NM\_018184.2  
171.1 NM\_206919.1  
134.4 NM\_018120.3  
217.7 NM\_031905.2  
114.8 NM\_032131.3  
    110 NM\_018076.2  
132.3 NM\_024742.1  
131.2 NM\_033415.2  
169.5 NM\_024585.2  
    118 NM\_015396.3  
146.5 NM\_014154.2  
    126 NM\_213654.1  
115.7 NM\_014154.2  
129.6 NM\_025139.2  
113.5 NM\_016608.1  
217.1 NM\_177949.1  
251.1 NM\_177947.2  
    118 NM\_177948.2  
141.3 NM\_022838.2  
208.9 NM\_019007.3  
165.3 NM\_019007.3  
805.1 NM\_006010.2  
129.9 NM\_001029954.1  
122.9 NM\_178426.1  
115.7 NM\_001668.2  
117.9 NM\_014862.3  
125.5 NM\_001030273.1  
486.4 NM\_001030272.1  
    114 NM\_020183.3  
122.7 NM\_181773.2  
194.8 NM\_006409.2  
185.5 NM\_005720.2  
110.7 NM\_152862.1  
2386.2 NM\_005731.2  
    127.6 NM\_005731.2  
1678.1 NM\_005719.2  
    119.9 NM\_005718.3  
452.7 NM\_001024960.1  
279.8 NM\_001024959.1  
571.7 NM\_005717.2  
461.3 NM\_030978.1

127.4 NM\_032487.2  
114.2 NM\_080431.3  
151.9 NM\_006628.4  
116.4 NM\_016300.4  
111.4 NM\_198399.1  
117.8 NM\_001025068.1  
115.7 NM\_001025068.1  
115.3 NM\_004312.1  
132.7 NM\_020251.2  
126.3 NM\_004041.3  
123.9 NM\_004313.3  
124.3 NM\_199004.1  
118.2 NM\_152285.2  
124.5 NM\_001025604.1  
153.9 NM\_015683.1  
245.4 NM\_015683.1  
368.2 NM\_020801.1  
120.2 NM\_183376.1  
124.1 NM\_001080523.1  
1828.9 NM\_015908.4  
119.8 NM\_182800.2  
112.9 NM\_000487.3  
113.4 NM\_198709.1  
136.3 NM\_000046.2  
126.1 NM\_198709.1  
120.3 NM\_009589.2  
122.3 NM\_009589.2  
119.6 NM\_001669.2  
111.4 NM\_000047.1  
112.8 NM\_004042.3  
117 NM\_014960.2  
111.2 NM\_001011719.1  
114.2 NM\_001012301.1  
120.2 NM\_024590.2  
126.1 NM\_198150.1  
124.5 NM\_004314.1  
115.8 NM\_001179.2  
115.7 NM\_021071.2  
110.7 NM\_053017.2  
122.6 NM\_053017.3  
115.4 NM\_057091.1  
116.2 NM\_003976.2  
115.2 NM\_057160.1  
123.9 NM\_003976.2  
122.7 NM\_001040458.1  
121.3 NM\_016442.2  
144.5 NM\_022786.1  
116.5 NM\_001670.1  
129.3 NM\_001030078.1  
117.7 NM\_139058.1  
119.1 NM\_020682.2

135.7 NM\_177924.1  
113.9 NM\_004315.2  
117.1 NM\_019893.1  
111.2 NM\_133492.1  
107.2 NM\_001010887.2  
140.7 NM\_014435.2  
136.2 NM\_014435.2  
127.2 NM\_014435.2  
117.9 NM\_024769.2  
156.3 NM\_016114.3  
115.4 NM\_080871.2  
116.4 NM\_001012428.1  
125.2 NM\_001012428.1  
    119 NM\_080873.1  
117.9 NM\_130388.2  
109.7 NM\_024701.2  
123.8 NM\_130387.4  
111.3 NM\_080928.2  
126.2 NM\_080863.4  
108.9 NM\_080868.1  
118.7 NM\_016150.3  
197.9 NM\_145863.1  
173.8 NM\_016115.3  
114.7 NM\_145872.1  
    115 NM\_145872.1  
117.1 NM\_016116.1  
128.9 NM\_080874.2  
110.2 NM\_017873.2  
203.5 NM\_177999.1  
222.7 NM\_177999.1  
123.1 NM\_024708.2  
119.8 NM\_198243.1  
123.6 NM\_024708.2  
145.5 NM\_024095.3  
124.8 NM\_024087.1  
118.2 NM\_024087.1  
220.2 NM\_015947.2  
    324 NM\_032204.3  
122.2 NM\_022091.3  
124.8 NM\_006828.2  
124.1 NM\_022091.3  
135.4 NM\_014014.2  
136.5 NM\_015251.2  
    109 NM\_004316.2  
    147 NM\_005170.2  
115.3 NM\_020646.1  
109.3 NM\_203436.1  
1087.6 NM\_014034.1  
    114 NM\_018154.2  
144.8 NM\_001671.2  
115.1 NM\_080912.1



108 NM\_080914.1  
127.8 NM\_080914.1  
123.1 NM\_018489.1  
149.9 NM\_004674.1  
117.1 NM\_001672.2  
110.6 NM\_000048.3  
116.6 NM\_001024943.1  
130.9 NM\_001024943.1  
115.4 NM\_004043.1  
165.7 NM\_004192.1  
107.9 NM\_004317.2  
791.4 NM\_133436.1  
171.4 NM\_133436.1  
599.8 NM\_019048.1  
113.1 NM\_000049.2  
143.7 NM\_032468.2  
157.7 NM\_020164.2  
116.8 NM\_004318.2  
114.1 NM\_181718.3  
128.7 NM\_181718.3  
117.5 NM\_020437.3  
120.6 NM\_018136.2  
113.4 NM\_017680.3  
116.1 NM\_024083.2  
390.4 NM\_024083.2  
123.9 NM\_025080.2  
124.9 NM\_000050.3  
117.1 NM\_054012.3  
121.1 NM\_014065.2  
127.5 NM\_001002036.2  
110.3 NM\_004319.1  
125.3 NM\_207108.1  
113.8 NM\_014010.3  
113.1 NM\_198188.1  
121.6 NM\_198187.2  
132.9 NM\_015338.3  
376.5 NM\_018263.3  
112.9 NM\_130768.1  
134.8 NM\_032810.2  
132.8 NM\_014109.2  
135.2 NM\_018188.2  
110.5 NM\_031921.4  
110 NM\_001039211.1  
138.2 NM\_024320.2  
111 NM\_006885.2  
122.4 NM\_033064.2  
122.2 NM\_001001976.1  
116.2 NM\_007041.2  
127.8 NM\_007041.2  
125.3 NM\_005171.2  
169.6 NM\_001880.2

1788 NM\_001040619.1  
120.8 NM\_001030287.1  
120.3 NM\_004024.3  
6617.3 NM\_001675.2  
166.3 NM\_001675.2  
364.7 NM\_182810.1  
331.2 NM\_012068.2  
220 NM\_007348.2  
120.5 NM\_006856.1  
126.1 NM\_018179.3  
194.8 NM\_024997.2  
114 NM\_031482.3  
544.5 NM\_004707.2  
220.2 NM\_030803.5  
232.6 NM\_017974.3  
122 NM\_033388.1  
128.5 NM\_022488.3  
189 NM\_178270.1  
124.2 NM\_178271.1  
113 NM\_013325.4  
205.9 NM\_178326.2  
124.1 NM\_032852.2  
124.9 NM\_032885.4  
133.9 NM\_004849.1  
141.6 NM\_006395.1  
108 NM\_001077198.1  
201.2 NM\_001077198.1  
208.3 NM\_024085.2  
119 NM\_173681.3  
955.2 NM\_025092.1  
189.3 NM\_004044.4  
114.8 NM\_000051.3  
989.6 NM\_000051.3  
105.4 NM\_138292.3  
117.4 NM\_001940.3  
233.7 NM\_001007026.1  
114.5 NM\_001007026.1  
113.6 NM\_005172.1  
118.4 NM\_145178.2  
121.4 NM\_032827.3  
245.9 NM\_004045.3  
121.6 NM\_024490.2  
128.7 NM\_020453.2  
113.5 NM\_015205.1  
105.2 NM\_032189.2  
288.3 NM\_014616.1  
121.1 NM\_173694.3  
137.9 NM\_173694.3  
113.7 NM\_001676.3  
180.5 NM\_020410.1  
136.8 NM\_022089.1

113.9 NM\_032279.2  
117.8 NM\_198505.2  
862.3 NM\_000701.6  
1270.7 NM\_001001586.1  
    241 NM\_000701.6  
109.2 NM\_000702.2  
122.1 NM\_152296.3  
    114 NM\_144699.2  
118.9 NM\_001001734.1  
144.7 NM\_001001787.1  
237.9 NM\_001001787.1  
169.8 NM\_001677.3  
140.6 NM\_001678.3  
1085.2 XM\_945505.1  
181.2 NM\_001679.2  
358.2 NM\_001679.2  
129.3 NM\_012069.2  
119.3 XM\_937782.1  
    256 NM\_001681.2  
677.6 NM\_001681.2  
283.2 NM\_170665.2  
123.5 NM\_174958.1  
132.6 NM\_174955.1  
    137 NM\_001001323.1  
    120 NM\_001001323.1  
115.6 NM\_001683.2  
114.5 NM\_001001331.1  
112.7 NM\_001683.2  
121.7 NM\_021949.2  
    123 NM\_021949.2  
108.5 NM\_001001344.1  
129.1 NM\_001001396.1  
    211 NM\_001684.3  
151.2 NM\_014382.2  
144.2 NM\_001001487.1  
274.5 NM\_001001486.1  
111.9 NM\_000704.2  
117.2 NM\_000705.2  
113.9 NM\_000705.2  
907.4 NM\_004046.4  
853.5 NM\_001001937.1  
3500.1 NM\_001686.3  
    210.5 NM\_005174.2  
    127.2 NM\_001687.4  
    255.5 NM\_001001975.1  
    147.7 NM\_001688.3  
    481.4 NM\_001688.3  
    129.8 NM\_005175.2  
    335.7 NM\_001002027.1  
    114.7 NM\_001002031.1  
    118.9 NM\_005176.4

543.2 NM\_005176.4  
124.2 NM\_001002256.1  
571.4 NM\_001003785.1  
734.5 NM\_006356.2  
1244.7 NM\_007100.2  
234.7 NM\_007100.2  
155.3 NM\_001003703.1  
1038.2 NM\_001685.4  
1126.4 NM\_001003696.1  
391.2 NM\_001003714.1  
592.5 NM\_004889.2  
179.9 NM\_006476.4  
1161 NM\_001697.2  
143.7 NM\_001003803.1  
118.6 NM\_015684.2  
1101.8 NM\_001183.3  
656.8 NM\_005765.2  
354.6 NM\_005177.2  
139.3 NM\_012463.2  
115.2 NM\_020632.1  
121 NM\_130841.1  
131.8 NM\_130840.1  
122.9 NM\_130840.2  
1601.5 NM\_004047.2  
153.7 NM\_001039457.1  
320 NM\_001694.2  
529.7 NM\_004691.3  
117.3 NM\_152565.1  
2719.2 NM\_003945.3  
136.6 NM\_145230.1  
1137.6 NM\_001690.2  
129 NM\_001692.2  
2081.9 NM\_001693.2  
194.5 NM\_001695.3  
116.6 NM\_001695.3  
116.6 NM\_144583.2  
108.9 NM\_144583.3  
469.3 NM\_015994.2  
1055.1 NM\_001039367.1  
661.8 NM\_001696.2  
203 NM\_080653.3  
479.2 NM\_004231.2  
1450.6 NM\_004888.2  
131.5 NM\_130463.2  
105.2 NM\_130463.2  
112.2 NM\_133262.2  
130.8 NM\_213620.1  
279 NM\_213619.1  
141.4 NM\_000052.2  
120.4 NM\_000053.2  
124.3 NM\_000053.2

124.5 NM\_006095.1  
130.4 NM\_016529.3  
119.4 NM\_005603.2  
119.1 NM\_001005855.1  
127.2 NM\_020452.2  
    113 NM\_138813.2  
137.7 NM\_024837.2  
158.6 NM\_006045.1  
132.6 NM\_198531.3  
136.4 NM\_022745.2  
161.6 NM\_001042546.1  
    123 NM\_145691.3  
224.7 NM\_018066.3  
109.4 NM\_016301.2  
141.2 NM\_145232.2  
116.9 NM\_080650.2  
206.3 NM\_016311.3  
138.7 NM\_178191.1  
118.5 NM\_001184.2  
108.9 NM\_001184.2  
127.1 NM\_001184.2  
    115 NM\_139322.1  
110.1 NM\_139321.1  
135.2 NM\_207303.1  
126.6 NM\_138270.1  
    117 NM\_000489.2  
125.8 NM\_138271.1  
198.6 NM\_000332.2  
122.9 NM\_013236.2  
675.8 NM\_002973.2  
153.7 NM\_007245.2  
139.6 NM\_017492.2  
234.3 NM\_030660.2  
124.2 NM\_030660.2  
119.1 NM\_000333.2  
160.3 NM\_153340.2  
119.3 NM\_152749.2  
117.1 NR\_002717.1  
124.3 NM\_001698.1  
142.3 NM\_012103.2  
209.4 NM\_198434.1  
197.3 NM\_198434.1  
    942 NM\_017900.1  
117.2 NM\_004217.1  
110.4 NM\_001015878.1  
115.4 NM\_001015878.1  
115.6 NM\_001015879.1  
    249 NM\_015570.1  
    120 NM\_020371.2  
214.8 NM\_006576.2  
132.9 NM\_000490.3

420.6 NM\_021732.1  
104.1 NM\_000706.3  
116.1 NM\_000707.2  
121.5 NM\_000054.2  
249.5 NM\_001014279.1  
466.5 NM\_181050.1  
132.8 NM\_003502.2  
282 NM\_004655.2  
120.2 NM\_001699.3  
124.7 NM\_021913.2  
1097.9 NM\_033027.2  
128 NM\_032193.2  
125 NM\_017839.3  
173.9 NM\_024830.3  
137.6 NM\_001185.2  
156.4 NM\_014984.1  
132.1 NM\_014984.1  
173.4 NM\_022461.2  
1324.8 NM\_015878.4  
162.6 NM\_015878.4  
215.1 NM\_148174.2  
116.7 NM\_001700.3  
2771.3 NM\_004048.2  
113 NM\_033168.2  
114.6 NM\_152490.1  
121.4 NM\_020981.2  
121.4 NM\_003783.2  
126 NM\_003781.2  
120.1 NM\_033169.1  
133.7 NM\_033169.1  
139.2 NM\_003782.3  
110.9 NM\_033172.1  
127.4 NM\_006057.1  
111.3 NM\_033173.1  
124.9 NM\_080605.2  
115.7 NM\_198540.2  
125 NM\_054025.1  
132 NM\_018644.3  
121.9 NM\_054025.1  
112.4 NM\_080742.1  
129.9 NM\_012200.2  
137.3 NM\_006577.3  
119 NM\_014256.2  
132.7 NM\_030765.2  
128.9 NM\_032047.3  
111.7 NM\_006876.1  
111.4 NM\_138706.2  
118.6 NM\_145236.1  
112.1 NM\_001009905.1  
167.1 NM\_194318.2  
119.3 NM\_153446.1

115.8 NM\_173593.3  
110.5 NM\_178537.3  
145.8 NM\_001497.2  
114.5 NM\_001005417.1  
130.1 NM\_003780.3  
138.9 NM\_001005417.1  
351.4 NM\_003779.2  
316.3 NM\_003778.3  
164.2 NM\_003778.3  
253.7 NM\_004776.2  
119.9 NM\_004775.2  
140.4 NM\_007255.1  
158.3 NM\_001015882.1  
113.9 NM\_001001663.1  
120.2 NM\_001024372.1  
125.4 NM\_024812.2  
119.5 NM\_001701.2  
117.2 NM\_138972.2  
130.4 NM\_012104.3  
122.1 NM\_138991.1  
113.9 NM\_012105.3  
123.5 NM\_001011545.1  
111.7 NM\_206866.1  
116.7 NM\_001011545.1  
290.9 NM\_021813.1  
114.1 NM\_032989.1  
136.9 NM\_004322.2  
124.6 NM\_004322.2  
133.9 NM\_004323.3  
9241.6 NM\_004281.3  
130.8 NM\_004874.2  
435.6 NM\_004873.2  
112.8 NM\_001015048.1  
113.1 NM\_001015049.1  
150.3 NM\_001015048.1  
119.3 NM\_001187.1  
121.8 NM\_182482.1  
121.5 NM\_182481.1  
115.1 NM\_181704.1  
138.8 NM\_182484.1  
126.3 NM\_014952.2  
115.9 XM\_940726.1  
108.4 NM\_001702.1  
118.1 NM\_001702.1  
117.1 NM\_001703.1  
110.8 NM\_001704.1  
134.7 NM\_006340.1  
115.3 NM\_017450.1  
111.9 NM\_006340.1  
115.5 NM\_017451.1  
127.4 NM\_018842.3

287.9 NM\_025045.3  
110.8 NM\_003933.3  
130.5 NM\_001188.2  
159.8 NM\_012342.2  
532.6 NM\_003860.2  
133.8 NM\_017935.2  
171.9 NM\_017869.3  
209.5 NM\_004656.2  
117.7 NM\_001189.2  
171.1 NM\_000465.1  
119.2 NM\_020064.2  
127.1 NM\_020063.1  
117.9 NM\_021570.2  
131.8 NM\_003658.3  
237.5 NM\_006317.3  
793.3 NM\_004640.4  
120.7 NM\_004640.4  
130.8 NM\_080598.4  
146.8 NM\_080686.1  
264 NM\_080686.1  
558.3 NM\_015172.2  
186 NM\_080703.1  
135.2 NM\_080703.1  
127.3 NM\_033177.2  
246.3 NM\_021160.1  
167.9 NM\_006399.2  
117.4 NM\_138456.3  
335.8 NM\_138765.2  
112 NM\_138764.2  
133.5 NM\_004324.3  
1135.8 NM\_182648.1  
316.7 NM\_013448.2  
223.8 NM\_023005.2  
127.8 NM\_013449.2  
162.4 NM\_013450.1  
135.6 NM\_014417.2  
119.3 NM\_003986.1  
126.7 NM\_024649.4  
112.6 NM\_152618.2  
111.2 NM\_031885.2  
132.7 NM\_033028.2  
115.3 NM\_152384.2  
110.6 XM\_939889.1  
113.2 NM\_152384.2  
117.5 NM\_018190.2  
164 NM\_176824.1  
114.7 NM\_018190.2  
103.8 NM\_198428.2  
363.5 NM\_020235.2  
332.9 NM\_033200.1  
123 NM\_001005850.1



120.3 NM\_005581.3  
114 NM\_001013257.1  
126.7 NM\_005581.3  
123.5 NM\_198427.1  
111.5 NM\_198427.1  
122.7 NM\_021948.3  
152.6 NM\_001008406.1  
115.4 NM\_001008407.1  
128.5 NM\_018844.2  
114.4 NM\_001008405.1  
136.6 NM\_001008406.1  
1370.7 NM\_005745.6  
114.5 NM\_014567.2  
125.5 NM\_003567.2  
119.8 NM\_003657.1  
138.4 NM\_005872.2  
115.6 NM\_017679.2  
134 NM\_017843.3  
135.6 NM\_017843.3  
135.6 NM\_017843.3  
125.9 NM\_005504.4  
136.6 NM\_001190.2  
223.6 NM\_078468.1  
163.4 NM\_078468.1  
189 NM\_016567.2  
141.5 NM\_078469.1  
902.1 NM\_019606.4  
109.2 NM\_001037290.1  
141 NM\_000055.1  
163.9 NM\_000709.2  
126.8 NM\_000056.2  
125.2 NM\_183050.1  
254.7 NM\_005881.1  
140.9 NM\_003921.2  
127.7 NM\_022893.2  
118 NM\_138559.1  
116.5 NM\_138553.1  
202.1 NM\_022898.1  
113.9 NM\_138576.2  
111.8 NM\_000657.2  
126.4 NM\_000657.2  
151.5 NM\_000633.2  
118.1 NM\_004049.2  
226.3 NM\_138578.1  
112.6 NM\_138578.1  
129.6 NM\_020396.2  
112.6 NM\_138625.2  
115.6 NM\_207002.1  
121.8 NM\_006538.3  
122.8 NM\_138639.1  
271.8 NM\_001040668.1

214.8 NM\_052842.2  
524.5 NM\_015367.2  
121 NM\_030766.1  
112.2 NM\_138724.1  
123.3 NM\_138723.1  
112.9 NM\_138724.1  
130.2 NM\_004050.2  
180.4 NM\_005178.2  
124.2 NM\_138931.1  
1189.9 NM\_001706.2  
103 NM\_181844.2  
119.4 NM\_020993.3  
120.2 NM\_020993.3  
113.9 NM\_001024808.1  
150 NM\_001707.2  
222.4 NM\_138707.1  
166.7 NM\_004765.2  
148.1 NM\_004326.2  
148.2 NM\_182557.1  
461.3 NM\_014739.1  
186.9 NM\_014739.2  
116.3 NM\_017429.2  
119.2 NM\_173544.2  
225.3 NM\_017745.4  
133.4 NM\_020926.2  
129.4 NM\_020926.2  
133.7 NM\_021946.2  
116.4 NM\_173700.1  
116.5 NM\_004327.2  
118.3 NM\_004327.2  
112.8 NM\_021574.2  
145.7 NM\_004328.3  
121.2 NM\_203314.1  
127.5 NM\_203315.1  
119.5 NM\_004051.3  
117.5 NM\_020139.3  
124.8 NM\_000710.2  
114 NM\_000623.2  
119.8 NM\_170732.3  
123.8 NM\_170731.3  
145.2 NM\_170734.2  
125.7 NM\_001709.3  
112.9 NM\_170735.4  
126.5 NM\_170733.2  
119.7 NM\_001709.3  
122.7 NM\_018429.1  
203.4 NM\_003766.2  
131.2 NM\_005868.3  
120 NM\_016526.3  
113.7 NM\_018476.3  
478.6 NM\_032621.2

236.4 NM\_001080425.1  
589.7 XM\_936467.1  
231.7 NM\_016561.1  
116.2 NM\_001195.2  
119.5 NM\_003571.2  
125.4 NM\_199173.2  
    121 NM\_001711.3  
479.5 NM\_003670.1  
116.8 NM\_030762.1  
125.2 NM\_080606.2  
107.9 NM\_152414.3  
115.6 NM\_177455.2  
    133 NM\_030639.1  
103.3 NM\_001713.1  
109.4 NM\_017614.3  
108.1 XM\_498431.2  
118.9 NM\_001714.2  
125.6 NM\_001003398.1  
    120 NM\_001003800.1  
421.4 NM\_001003800.1  
170.8 NM\_197967.1  
178.9 NM\_001196.2  
    107 NM\_197966.1  
116.3 NM\_001197.3  
266.4 NM\_139343.1  
435.7 NM\_139348.1  
125.7 NM\_016293.2  
    151 NM\_018688.3  
    115 NM\_004536.1  
105.8 XM\_936944.1  
575.6 NM\_001166.3  
1057.4 NM\_182962.1  
268.3 NM\_001165.3  
132.7 NM\_001165.3  
    133 NM\_001167.2  
116.1 NM\_001168.2  
    115 NM\_001012271.1  
131.9 NM\_016252.2  
112.4 NM\_022161.2  
117.4 NM\_139317.1  
118.1 NM\_033341.3  
120.7 NM\_017693.2  
147.1 NM\_006698.2  
123.9 NM\_031450.2  
    130 NM\_001715.2  
120.3 NM\_000057.1  
159.4 NM\_000386.2  
    118 NM\_013314.2  
165.8 NM\_001487.1  
121.2 NM\_001001342.1  
193.3 NM\_001001342.1

118.2 NM\_212550.1  
128.5 NM\_032966.1  
123.5 NM\_032966.1  
114.6 NM\_001716.2  
131.4 NM\_000712.3  
217.4 NM\_000713.1  
272.2 NM\_003666.2  
119.4 NM\_016564.2  
140.1 NM\_001003942.1  
108.3 NM\_033503.3  
119.8 NM\_001003940.1  
137.6 NM\_001003943.1  
106.7 NM\_006128.1  
113.7 NM\_006131.1  
121.4 NM\_006129.2  
111.8 NM\_014482.1  
108.8 NM\_005448.1  
120.5 NM\_001200.1  
119.4 NM\_017593.3  
115.9 NM\_017593.3  
126.1 NM\_198892.1  
122.5 NM\_001201.1  
133 NM\_001202.2  
106.2 NM\_001202.2  
113.1 NM\_130851.1  
123.4 NM\_021073.2  
118.1 NM\_001718.2  
123.6 NM\_001719.1  
122.7 NM\_181809.1  
121.6 NM\_001720.3  
127.5 NM\_133468.2  
110.4 NM\_004329.2  
115.7 NM\_001203.1  
133.3 NM\_001204.5  
220.7 NM\_014753.2  
117.9 NM\_001721.4  
117.1 NM\_203281.1  
118.9 NM\_001717.2  
109 NM\_001717.2  
126.8 NM\_017637.4  
156.3 NM\_013978.1  
186.5 NM\_013979.1  
651.7 NM\_004330.1  
762.5 NM\_004052.2  
154.8 NM\_004331.2  
122.9 XM\_936962.1  
172.3 NM\_138278.1  
113 NM\_138279.1  
117.1 NM\_033254.2  
139.8 NM\_032515.3  
119.6 NM\_016074.1

275.5 NM\_001031827.1  
154.7 NM\_001031827.1  
512.6 NM\_212552.1  
491.6 NM\_212552.2  
122.1 NM\_212552.2  
105.5 NM\_033030.3  
122.9 NM\_197970.1  
111 NM\_033030.3  
175.4 NM\_015201.3  
135.7 NR\_002730.1  
266.3 NM\_001724.3  
134.7 NM\_199186.1  
150.7 NM\_004332.1  
116.3 NM\_001725.1  
117.6 NM\_025227.1  
125.7 NM\_174932.1  
122.1 NM\_174897.1  
144.6 NM\_006085.3  
115.6 NM\_004678.1  
116.2 NM\_001002760.1  
249.8 NM\_018174.4  
129.3 NM\_004333.2  
126.1 NM\_006768.2  
126.2 NM\_007304.2  
114.8 NM\_007301.2  
126.2 NM\_007295.2  
116.4 NM\_000059.1  
112.5 NM\_001001786.1  
177.3 NM\_014577.1  
4819.3 NM\_005104.2  
188.8 NM\_007371.2  
127.2 NM\_014299.1  
142.8 NM\_058243.1  
179.1 NM\_013263.2  
214.6 NM\_183359.1  
136.1 NM\_139199.1  
314 NM\_023924.2  
113.9 NM\_023924.2  
109.4 NM\_012108.1  
109.5 NM\_207189.1  
116.8 NM\_001726.2  
109.2 NM\_001726.2  
160.4 NM\_199191.1  
160.2 NM\_199191.1  
114.7 NM\_004899.3  
120.7 NM\_145696.1  
123 NM\_145696.1  
121.4 NM\_001519.2  
700.3 NM\_018310.2  
481.8 NM\_015379.3  
112.4 NM\_080626.5

119.3 NM\_080626.5  
118.9 XM\_941876.1  
123.9 NM\_032043.1  
756 NM\_001024958.1  
163.3 NM\_015399.3  
120.1 NM\_032352.3  
393.9 NM\_015415.1  
408.7 NM\_016098.1  
188.1 NM\_001003694.1  
2056.6 NM\_004634.2  
341.7 NM\_015695.1  
139.2 NM\_015341.2  
116.4 NM\_001727.1  
234 NM\_032430.1  
137.9 NM\_003957.1  
113.3 NM\_020180.2  
113 XM\_943559.1  
117 NM\_021938.3  
138.3 NM\_052840.3  
111.7 NM\_018963.3  
130.1 NM\_001007246.1  
149.1 NM\_001007246.1  
135.2 NM\_033656.2  
120.8 NM\_018117.10  
118.4 NM\_153252.2  
301 NM\_032667.4  
822.3 NM\_018045.4  
318.5 NM\_198589.1  
114.1 NM\_001728.2  
116.5 NM\_003458.1  
118.1 NM\_057176.2  
121.2 NM\_004334.1  
662.1 NM\_004335.2  
642.6 NM\_003972.2  
136.3 NM\_001011885.1  
130.7 NM\_025238.3  
145.8 NM\_032320.4  
123 NM\_152322.2  
122.8 NM\_001017523.1  
112.4 NM\_001018072.1  
131.1 NM\_152322.2  
142 NM\_032444.2  
128.9 NM\_144653.3  
123.4 NM\_052876.2  
120.4 NM\_181443.1  
116.8 NM\_014962.2  
117.1 NM\_025224.2  
260.2 NM\_017658.2  
187.2 NM\_033271.1  
160.4 NM\_001002860.2  
114.3 NM\_018167.3

151.4 NM\_018167.3  
116.9 NM\_183242.1  
112.8 NM\_152733.1  
121.9 NM\_001729.1  
157.1 NM\_000060.2  
3638.7 NM\_001037637.1  
4219.6 NM\_001207.3  
169.9 NM\_001037637.1  
118.7 NM\_152265.1  
2182.5 NM\_001731.1  
314.8 NM\_006763.2  
305.8 NM\_006806.3  
122.8 NM\_017589.2  
139 NM\_000061.1  
141.9 NM\_181780.2  
115 NM\_001732.1  
130.6 NM\_078476.1  
347.5 NM\_007049.2  
140.1 NM\_181531.1  
113.6 NM\_006995.3  
120.7 NM\_024018.1  
114.2 NM\_194441.1  
138.6 NM\_007048.3  
150.4 NM\_007047.3  
144.9 NM\_197974.1  
120.5 NM\_019602.1  
117.6 NM\_197975.1  
111.6 NM\_197975.1  
119 NM\_006707.2  
109.5 NM\_024850.1  
117.8 NM\_152547.2  
130.9 NM\_003939.2  
120.5 NM\_033637.2  
122.1 NM\_004336.2  
131.8 NM\_001211.4  
1444.1 NM\_004725.2  
119.3 NM\_004725.2  
158.4 NM\_001007793.1  
118.3 NM\_147147.2  
116.2 NM\_007073.3  
116.4 NM\_007073.3  
225.2 NM\_032194.1  
156.2 NM\_018321.3  
169.2 NM\_025065.5  
153.3 NM\_004053.3  
208.5 NM\_004758.1  
109.3 NM\_001010873.1  
127.1 NM\_014670.2  
271.6 NM\_014038.1  
134.8 NM\_007021.2  
228.8 NM\_173473.2

116.3 NM\_173554.1  
109.9 NM\_032024.2  
124.5 NM\_153244.1  
119.3 NM\_001010896.1  
109.2 NM\_001010911.1  
123.5 NM\_006829.2  
133.2 NM\_018017.2  
123.5 NM\_024834.1  
119.5 NM\_015652.2  
119.8 NM\_001010912.1  
111.7 NM\_198472.1  
124.1 NM\_207321.1  
128.8 NM\_152429.2  
115.9 NM\_001001732.1  
117.8 NM\_001010917.1  
162.8 NM\_015608.2  
163.8 NM\_032804.5  
113.5 NM\_001039380.1  
153.6 NM\_017787.3  
123.2 NM\_152710.1  
155.7 NM\_014472.3  
114.6 NM\_152751.1  
223.8 NM\_144591.1  
159.8 NM\_032709.1  
221.4 NM\_145306.1  
    122 NM\_001080827.1  
113.1 NM\_001010924.1  
119.9 NM\_203441.2  
    126 NM\_145246.3  
119.6 NM\_203440.2  
109.4 NM\_203439.2  
127.8 NM\_203438.2  
172.1 NM\_138357.1  
114.2 NM\_153810.3  
115.1 NM\_153256.2  
    118 NM\_145314.1  
    122 NM\_182554.2  
118.9 NM\_001042427.1  
129.9 NM\_001042427.1  
257.6 NM\_022153.1  
122.8 NM\_001001791.1  
    124 NM\_153367.1  
115.3 NM\_025125.2  
1566.9 NM\_032333.2  
110.4 NM\_018363.1  
121.4 NM\_001031709.1  
132.1 NM\_001031709.1  
182.3 NM\_018121.2  
117.6 NM\_001013840.1  
103.6 NM\_015631.2  
115.6 NM\_001013840.1



120.4 NM\_001009997.1  
106.3 NM\_145010.2  
114.8 NM\_138413.2  
119.7 NM\_153714.1  
    111 NM\_024688.1  
284.3 NM\_006023.1  
    106 NM\_199459.2  
112.5 NM\_001031746.1  
    121 NM\_001031746.1  
119.1 NM\_144984.1  
161.1 NM\_024541.1  
113.6 NM\_024789.3  
114.7 NM\_145247.4  
124.3 NM\_025145.4  
115.2 NM\_001008723.1  
113.9 NM\_024889.3  
133.9 NM\_144661.2  
126.2 NM\_178832.2  
118.1 NM\_022063.1  
116.8 NM\_001012711.1  
233.9 NM\_017615.1  
129.5 NM\_144587.2  
128.9 NM\_024942.1  
122.9 NM\_153336.1  
130.9 NM\_181698.1  
106.5 NM\_181698.1  
112.4 NM\_001004298.2  
105.1 NM\_173541.2  
127.5 NM\_017609.2  
111.3 NM\_173572.1  
111.8 XM\_945168.1  
114.6 NM\_024886.1  
117.3 NM\_198515.1  
156.1 NM\_024948.2  
161.6 NM\_207373.1  
191.4 NM\_022761.2  
842.5 NM\_014206.1  
129.2 NM\_006133.1  
118.9 NM\_020643.1  
121.3 NM\_020642.3  
    132 NM\_020642.3  
119.7 NM\_020642.3  
116.2 NM\_182901.1  
144.8 NM\_020642.3  
669.9 NM\_013265.2  
117.4 NM\_022338.2  
128.8 NM\_020193.3  
116.1 NM\_170746.2  
108.7 NM\_173573.1  
115.3 NM\_173590.1  
196.5 NM\_212555.1

114.4 NM\_144663.1  
115.6 NM\_173525.1  
119.9 NM\_173580.1  
116.6 NM\_145013.1  
218.3 NM\_152316.1  
140.3 NM\_173589.2  
239.1 NM\_024099.2  
121.9 NM\_001003678.1  
117.4 NM\_001003678.1  
121.1 NM\_001003677.1  
118.8 NM\_001003676.1  
130.6 NM\_014042.1  
112.5 NM\_080659.1  
118.6 NM\_198498.1  
216.5 NM\_014039.2  
117.7 NM\_207428.1  
161.1 NM\_032127.1  
123.7 NM\_024631.1  
    114 NM\_024806.2  
    121 NM\_199124.1  
281.7 NM\_199124.1  
119.5 NM\_152587.3  
120.7 NM\_032930.1  
149.6 NM\_019021.1  
113.9 NM\_145308.2  
    137 NM\_173811.2  
123.2 NM\_013279.1  
254.8 NM\_021640.2  
119.1 NM\_018164.1  
    118 NM\_152638.2  
121.1 NM\_152261.1  
122.9 NM\_013300.1  
117.3 NM\_032130.1  
179.8 NM\_032230.1  
143.6 NM\_182530.1  
140.9 NM\_001009894.2  
123.9 NM\_024953.2  
171.1 NM\_032338.2  
138.1 NM\_031465.2  
120.8 NM\_032829.1  
170.2 NM\_018169.2  
112.5 NM\_182558.1  
    111 NM\_024809.2  
112.3 NM\_030572.1  
135.5 NM\_020374.2  
112.6 NM\_001031748.1  
112.5 NM\_001031748.1  
555.2 NM\_017822.2  
101.9 NM\_198521.1  
160.9 NM\_022895.1  
435.3 NM\_021934.3

132 NM\_152318.1  
175 NM\_152321.1  
564.9 NM\_016534.2  
115.6 NM\_017915.1  
156.1 NM\_024738.1  
136.7 NM\_020375.1  
121.1 NM\_152589.1  
126.5 NM\_032848.1  
112 NM\_153685.2  
117.7 NM\_152319.2  
1307.7 NM\_138425.2  
122.7 NM\_024685.2  
113.3 NM\_153022.1  
138.8 NM\_175874.2  
117.5 NM\_175895.2  
136.4 NM\_032901.2  
120.7 NM\_173591.1  
119.8 NM\_020456.1  
188.1 NM\_022118.3  
171.5 NM\_152324.1  
138.2 NM\_025113.1  
113.4 NM\_001010897.1  
172.1 NM\_025138.3  
176.3 NM\_025138.3  
113.9 NM\_025138.3  
120.5 NM\_006346.2  
118.3 NM\_152325.1  
119.2 NM\_145061.3  
136.6 NM\_024546.3  
172.7 NM\_032436.1  
120.3 NM\_007176.1  
174.2 NM\_016475.2  
114 NM\_017799.2  
847.5 NM\_017970.2  
167.8 NM\_199043.1  
152.5 NM\_018036.4  
120.8 NM\_018139.1  
115.6 NM\_018168.1  
176.1 NM\_018353.3  
204.3 NM\_018229.2  
118.1 NM\_018453.2  
244.6 NM\_016468.3  
110.7 NM\_018228.1  
132.8 NM\_017926.2  
218.3 NM\_017926.2  
135.6 NM\_017924.2  
243.3 XM\_945152.1  
137.1 NM\_138360.2  
160.3 NM\_016049.3  
123.5 NM\_020195.1  
108.9 NM\_080664.1

194.7 NM\_016472.3  
123.9 NM\_175748.1  
161.2 NM\_018108.2  
117.3 NM\_175748.1  
146.5 NM\_018335.2  
139.8 NM\_022067.2  
213.4 NM\_022495.3  
113.5 NM\_024558.1  
223.6 NM\_024558.1  
338.3 NM\_024558.1  
117.5 NM\_024633.2  
    114 NM\_001042430.1  
114.4 NM\_024643.1  
205.3 NM\_032490.3  
126.1 NM\_145231.2  
111.4 NM\_152446.2  
134.2 NM\_138288.2  
114.7 NM\_138791.1  
128.3 NM\_144581.1  
110.4 NM\_001008726.1  
130.8 NM\_001008726.1  
126.4 NM\_080666.2  
141.5 NM\_032714.1  
    114 NM\_138344.2  
2503.8 NM\_032374.2  
110.2 NM\_032135.2  
840.2 NM\_031210.3  
203.9 NM\_024952.4  
124.8 NM\_024764.2  
    121 NM\_020181.1  
226.2 NM\_016039.1  
106.5 NM\_001081002.1  
154.1 NM\_024644.1  
116.5 NM\_152307.1  
639.9 NM\_022489.2  
153.7 NM\_022489.1  
179.1 NR\_002937.1  
199.5 NM\_004894.1  
    130 NM\_174913.1  
4628 NM\_173607.2  
132.8 NM\_173607.2  
    141 NM\_173607.2  
151.3 NM\_001017923.1  
110.2 NM\_181533.3  
112.5 NM\_181533.3  
    324 NM\_144578.2  
126.2 NM\_001001872.2  
113.2 NM\_174978.1  
239.7 NM\_024496.2  
    111 NM\_194278.3  
124.3 NM\_194278.3

161.4 NM\_194278.2  
123 NM\_152445.1  
117.2 NM\_025057.1  
151.3 NM\_001024674.1  
116.8 NM\_152777.2  
121.5 NM\_152592.2  
105.3 NM\_172365.1  
123.8 NM\_173526.1  
119.3 NM\_017791.1  
119.4 NM\_207117.2  
117.9 NM\_001077594.1  
110.3 XM\_941093.1  
115.7 NM\_174891.2  
109.5 NM\_173846.3  
129.8 NM\_173608.1  
2054.7 NR\_002808.1  
141.4 NM\_014828.1  
163.8 NM\_021944.1  
132.6 NM\_017815.1  
2076.9 NM\_016304.2  
160.4 NM\_020447.2  
117.4 NM\_018958.1  
136.8 NM\_001005269.1  
122.9 NM\_001005267.1  
110.6 NM\_173609.2  
120.7 NM\_033286.2  
627.8 NM\_020154.2  
121.6 NM\_173528.1  
113.6 NM\_152335.1  
112.9 NM\_024713.1  
119.1 NM\_153040.1  
114.4 NM\_152647.1  
113.9 NM\_175898.2  
119.7 NM\_182616.1  
120.3 NM\_015492.3  
148.4 NM\_144597.1  
111.1 NM\_032499.3  
117.5 NM\_152259.2  
115.2 NM\_152448.1  
125.3 NM\_030800.1  
153.8 NM\_030800.1  
197 NM\_032413.2  
179.3 NM\_032413.2  
131.1 NM\_197955.1  
135.2 NM\_030944.1  
123.1 NM\_023933.1  
125.9 NM\_173476.2  
112.3 NM\_173476.2  
204.6 NM\_023076.2  
126.3 NM\_001214.2  
147.1 NM\_024600.1

179 NM\_024571.2  
135.9 NM\_144570.2  
124.1 NM\_001077350.1  
148.6 NM\_001039476.1  
180.3 NM\_024731.2  
121.7 NM\_033201.1  
128 NM\_152337.1  
138 NM\_032140.1  
161.8 NM\_013399.1  
116.1 NM\_032269.3  
112.6 NM\_024516.2  
118.8 NM\_175900.2  
123.1 NM\_153025.1  
154.6 NM\_025082.1  
160 NM\_024598.2  
148.6 NM\_022744.1  
206.5 NM\_018455.3  
1331.8 NM\_020188.2  
492.7 NM\_144600.1  
113.1 NM\_153261.3  
210.5 NM\_004913.1  
109.6 NM\_144602.2  
453.9 NM\_013242.2  
146 NM\_032039.1  
154.5 NM\_016080.2  
121.1 NM\_020914.3  
115.9 NM\_030630.1  
138.6 NM\_152464.1  
138.5 NM\_032339.3  
116.6 NM\_001010855.1  
129.9 NM\_024052.4  
247.7 NM\_018428.2  
110.3 NM\_024683.2  
2926.5 NM\_152350.1  
127.5 NM\_152343.1  
132.4 XR\_000576.1  
132.1 NM\_001038704.1  
172.9 NM\_020233.3  
294.5 NM\_174893.1  
122.9 NM\_145272.2  
109.5 NM\_024032.2  
118.7 NM\_182564.1  
120.6 NM\_178519.2  
121.7 NM\_144679.1  
113.5 NM\_152347.3  
164.2 NM\_181656.1  
139.6 XM\_942508.1  
128.6 NM\_181656.1  
130.3 NM\_017622.1  
248.3 NM\_152766.2  
169.5 NM\_001033046.1

178.7 NM\_018182.1  
126 NM\_181707.1  
122.2 NM\_178542.3  
118.1 NM\_152781.2  
140.8 XM\_938283.1  
127.2 NM\_025099.2  
107.5 NM\_152466.1  
179.3 NM\_025161.3  
115.3 NM\_018149.5  
128 NM\_017928.1  
127.5 NM\_175734.3  
124.1 NM\_022344.2  
121 NM\_207387.1  
113.6 NM\_152460.2  
111.3 NM\_173625.3  
129.3 NM\_018405.2  
149.1 NM\_017941.3  
141.8 NM\_203413.1  
153.2 NM\_015362.3  
151.4 NM\_203413.1  
124.3 NM\_203414.1  
116.3 NM\_199339.2  
172.7 NM\_018553.1  
116.8 NM\_181483.2  
122.8 NM\_015476.2  
118.8 NM\_024781.1  
178 NM\_153211.1  
154.2 NM\_152352.1  
144.8 NM\_031446.3  
122.2 NM\_024805.1  
129.5 NM\_145060.1  
619.7 NM\_001008239.1  
115 NM\_145055.2  
120.4 NM\_173629.1  
114.9 NM\_198995.1  
150.8 NM\_194281.2  
116.8 NM\_032933.3  
123.9 XM\_058931.9  
132.4 NM\_001044369.1  
122.1 NM\_173529.3  
216.9 NM\_014177.1  
201 NM\_001012716.1  
492.9 NM\_013326.2  
263.8 NM\_019107.3  
118.8 NM\_001031726.1  
172.6 NM\_001031726.1  
214.9 NM\_031448.2  
124.6 NM\_001031726.1  
139.2 NM\_021185.3  
120.9 NM\_152474.2  
108.4 NM\_182577.1

164.1 NM\_134447.1  
512 NM\_134447.1  
117.1 NM\_033513.2  
121 NM\_173481.2  
375.9 NM\_138774.2  
130.4 NM\_152480.1  
141.3 NM\_017914.2  
206.5 NM\_152482.1  
129.2 NM\_152769.1  
113.5 NM\_001042680.1  
126.9 NM\_174983.2  
157 NM\_001080543.1  
127.5 NM\_001080543.1  
123.9 NM\_174947.2  
15812.4 NM\_001014373.1  
119.4 NM\_033520.1  
102.9 NM\_152771.1  
118.6 NM\_198532.1  
114.4 NM\_001031735.1  
106.4 NM\_001039846.1  
225.7 NM\_182498.2  
118.7 NM\_012109.1  
126.9 NM\_152266.1  
128.7 NM\_199250.1  
117.2 NM\_001039887.1  
144.7 NM\_001033026.1  
277.5 NM\_001033026.1  
516 NM\_015168.1  
131 NM\_006333.2  
126.6 NM\_173177.1  
167 NM\_020156.1  
117.3 NM\_152692.3  
128.8 NM\_001011551.1  
119.8 NM\_001012970.1  
130.1 NM\_173807.2  
122.1 NM\_206837.1  
135.1 NM\_206837.1  
124.3 NM\_145047.3  
116.5 NM\_001006945.1  
203.4 NM\_018372.3  
124.1 NM\_001039517.1  
110.4 NM\_139240.2  
127.1 NM\_018265.1  
129.2 NM\_014388.5  
626.4 NM\_024595.1  
120.2 NM\_024595.1  
365.9 XM\_941120.1  
150.1 NM\_017850.1  
115.8 NM\_178550.3  
116.6 NM\_182581.1  
135.8 NM\_018186.2



128.4 NM\_024676.3  
126.6 NM\_021179.1  
109.9 NM\_024709.2  
109.2 NM\_023938.4  
113.7 NM\_182623.1  
121.3 NM\_199343.1  
463.3 NM\_020141.3  
169.6 NM\_016076.2  
176.4 NM\_198446.1  
174.8 NM\_017887.1  
161.4 NM\_032018.4  
144.3 NM\_032018.4  
116.9 NM\_001010984.1  
130.4 NM\_182766.2  
116.6 NM\_144696.3  
130 NM\_173507.1  
2037.9 NM\_020362.2  
123.6 NM\_025063.1  
193.3 NM\_152379.2  
118.7 NM\_024037.1  
112.8 NM\_030933.1  
115.9 NM\_001010913.2  
111.8 NM\_001013674.1  
119.5 NM\_053052.2  
353.2 NM\_015609.1  
113.4 NM\_001012425.1  
138.3 NM\_022756.3  
131.9 NM\_145278.1  
122.5 NM\_001032363.1  
116.3 NR\_003242.1  
240.6 NM\_033319.1  
125.6 NM\_033418.1  
122.3 NM\_182579.1  
116.3 NM\_152290.1  
134.2 NM\_017891.2  
186.1 NM\_032125.1  
272.3 NM\_174896.2  
124.6 NM\_023077.1  
208.5 NM\_018150.2  
125.1 NM\_024603.1  
140.5 NM\_024544.1  
121.1 NM\_001004303.2  
124.3 NM\_138467.1  
109.3 NM\_152365.1  
116.5 NM\_001002912.2  
117.3 NM\_198547.1  
747.6 NM\_022774.1  
124.4 NM\_152607.1  
112.3 NM\_001010922.1  
126.5 NM\_001029946.1  
104.2 NM\_176782.1

141.5 NM\_017953.2  
116.8 NM\_144627.1  
120.6 NM\_019099.3  
121.6 NM\_198926.1  
123.2 NM\_198926.1  
112.6 NM\_001007544.1  
116.6 NM\_198545.3  
120.8 NM\_173795.2  
113.3 NM\_001010979.1  
438.7 NM\_052965.1  
117.1 NM\_001013615.1  
130.6 NM\_001013625.2  
145 NM\_032800.1  
144.8 NM\_006589.2  
125.1 NM\_006589.2  
118.8 NM\_198264.1  
121.9 NM\_178122.2  
162.2 NM\_030806.3  
117.8 NM\_182517.1  
283.2 NM\_022083.1  
119.3 NM\_030934.3  
142.3 NM\_017673.4  
129.6 NM\_017847.3  
206.7 NM\_001012985.1  
106.6 NM\_199351.1  
129.6 NM\_016183.2  
119.5 NM\_001080494.1  
155.2 NM\_024319.2  
120.6 NM\_183059.1  
482.5 NM\_138391.3  
121.3 NM\_004848.1  
500.5 NM\_016126.1  
113.4 NM\_019060.1  
297.1 NM\_015449.1  
138.5 NM\_015449.1  
107.2 NM\_001025231.1  
398.3 NM\_015471.2  
117.6 NM\_032126.1  
196.5 NM\_024097.1  
136.4 NM\_144697.2  
531.3 NM\_198077.1  
117.1 NM\_001024594.1  
200.8 NM\_024579.1  
311.3 NM\_152608.2  
135.6 NM\_017860.3  
121.6 NM\_032324.1  
128.4 NM\_144695.1  
215.3 NM\_144584.1  
179.7 NM\_023015.3  
147.8 NM\_006365.1  
122.7 NM\_152763.3

187.3 NM\_020317.3  
119.2 NM\_178840.2  
109.7 NM\_152610.1  
200 NM\_015997.2  
138.4 NM\_001010867.1  
966 NM\_152609.1  
116.6 NM\_015434.1  
130 NM\_152485.2  
128.2 NM\_018252.1  
126.3 NM\_173509.2  
305.5 NM\_015607.2  
145.1 NM\_018166.1  
209.5 NM\_024813.1  
150.5 NM\_153035.1  
122.8 NM\_001012960.1  
119.6 NM\_001012961.1  
129 NM\_182518.2  
154.4 NM\_144580.1  
146.4 NM\_182533.2  
117.9 NM\_152377.1  
134.1 NM\_181643.2  
118 NM\_030907.2  
113.8 NM\_014283.2  
112.9 NM\_016227.1  
131.3 NM\_014283.2  
129.9 NM\_032648.1  
126.7 NM\_019118.3  
112.6 NM\_144702.1  
115.3 NM\_032884.2  
119.9 NM\_001003665.1  
121.1 NM\_145257.2  
137.2 NM\_032705.3  
116.3 NM\_001012274.1  
116.4 NM\_015991.1  
117.1 NM\_000491.2  
295.5 NM\_001212.3  
119.9 NM\_172369.2  
148.5 NM\_023925.3  
150.8 NM\_023925.3  
115.2 XM\_371208.3  
115.5 NM\_006688.3  
116.7 NM\_182528.1  
120.8 NM\_001010908.1  
116.3 NM\_001008223.1  
113.4 NM\_012072.2  
117.4 NM\_198593.1  
110.7 NM\_198594.1  
119 NM\_030968.2  
112 NM\_031908.3  
107.3 NM\_181435.4  
114.1 NM\_181435.4

118.1 NM\_031909.1  
127.9 NM\_015645.2  
118.1 NM\_031910.3  
110.3 NM\_031910.3  
107.4 NM\_182486.1  
118.4 NM\_031911.3  
124.5 NM\_207419.1  
110.7 NM\_001733.4  
111.7 NM\_016546.1  
121.2 NM\_201442.1  
139.3 NM\_001734.2  
120.6 NM\_000063.3  
114.8 NM\_014477.2  
259.5 NM\_032883.1  
    114 NM\_080607.1  
111.2 NM\_012261.2  
181.5 NM\_001012971.2  
    266 NM\_001013646.2  
    123 NM\_080821.1  
473.9 NM\_017896.2  
4470.7 NM\_016470.6  
    135 NM\_080616.1  
111.1 NM\_033197.2  
230.8 NM\_023935.1  
124.5 NM\_199181.2  
118.3 NM\_199181.2  
118.3 NM\_080628.1  
117.9 NM\_018152.2  
193.3 NM\_024331.3  
    150 NM\_024331.2  
125.3 NM\_178468.2  
185.8 NM\_030919.1  
110.5 NM\_213631.1  
117.2 NM\_213631.1  
124.2 NM\_152503.2  
128.1 NM\_001033086.1  
129.4 NM\_001033087.1  
116.4 NM\_001024675.1  
    115 NM\_080622.2  
    118 NM\_012469.2  
120.1 NM\_080739.2  
111.1 NM\_001080472.1  
110.7 NM\_080825.2  
126.9 NM\_024299.2  
125.1 NM\_080833.1  
123.1 NM\_080834.1  
234.2 NM\_019095.3  
120.3 NM\_080625.2  
123.6 NM\_033421.2  
115.3 NM\_033421.2  
    116 NM\_080608.3

117.4 NM\_178463.2  
125.3 NM\_024918.2  
142.8 XM\_940057.1  
178 NM\_178457.1  
200.8 NM\_022106.1  
116.6 NM\_178477.2  
113.9 NM\_178477.2  
120.9 NM\_182658.1  
113.2 NM\_182519.1  
126.7 NM\_018474.2  
158.5 NM\_001039379.1  
127.8 NM\_024059.2  
370.3 NM\_018270.3  
136.3 NM\_015600.2  
121.9 NM\_024704.3  
4669.8 NM\_018840.2  
6090.4 NM\_199485.1  
1724 NM\_018840.2  
119.6 NM\_015585.2  
123.3 NM\_017874.2  
130.7 NM\_015417.2  
127.4 NM\_018347.1  
337.7 NM\_020531.2  
413.4 NM\_001009923.1  
469.6 NM\_001009924.1  
132.8 NM\_018217.1  
103.6 NM\_020356.2  
199.7 NM\_033542.2  
112.9 NM\_024893.1  
222.9 NM\_015511.2  
104.6 NM\_017671.3  
1061.1 NM\_016407.1  
161.1 NM\_199487.1  
131.4 NM\_018244.3  
256.6 NM\_199513.1  
180.2 NM\_016045.1  
129.9 NM\_018354.1  
523.9 NM\_080748.1  
118.8 NM\_033409.2  
169.9 NM\_031424.3  
124.8 NM\_001042353.1  
214.1 NM\_001042353.1  
108.2 NM\_152864.2  
131.3 NM\_022082.2  
113.5 NM\_016649.3  
138 NM\_022104.3  
112.8 NM\_024120.3  
190.5 NM\_024120.2  
135.8 NM\_024120.3  
128.6 NM\_080574.2  
118.2 NM\_178466.3

115.1 NM\_178466.2  
111.2 NM\_178466.3  
308.1 NM\_052865.2  
109.4 XM\_945389.1  
123.8 NM\_020343.2  
122.4 NM\_152611.2  
119.5 NM\_021215.2  
109.3 NM\_178483.2  
120.5 NM\_178456.2  
125.4 NM\_080674.1  
137.4 NM\_001009608.1  
121.7 NM\_153269.1  
121.7 NM\_024958.1  
117.6 NM\_145033.1  
124.7 NM\_032910.2  
112.8 NM\_199175.1  
125.3 NM\_013240.2  
112.3 NM\_152506.1  
120.4 NM\_152505.3  
190.8 NM\_004928.1  
5235.8 NM\_001001789.1  
113.5 NM\_199050.1  
127.2 NM\_199050.1  
111.4 NM\_144991.2  
132.5 NM\_004649.4  
242.3 NM\_004649.4  
112.8 NM\_198155.1  
124.6 NM\_001005732.1  
112.6 NM\_001005732.1  
112.8 NM\_001005734.1  
112 NR\_002215.1  
117.9 NM\_018944.2  
114.7 NM\_001006116.1  
173.8 NM\_001042401.1  
137.7 NM\_001042401.1  
109.9 NM\_017833.3  
108.9 NM\_001040192.1  
120 NM\_017833.3  
115.5 NM\_032261.3  
209.2 NM\_058181.1  
129.6 NM\_058181.1  
109.5 NM\_001006114.1  
110.7 NM\_199071.2  
119.9 NM\_058180.3  
118 NM\_199071.2  
116.2 NM\_021254.1  
162.4 NM\_017835.1  
137.3 NM\_016940.1  
110.4 NM\_019596.2  
117.2 NM\_058187.3  
120.8 NM\_016631.3

131.6 NM\_013329.2  
129.8 NM\_016631.3  
238.2 NM\_016631.3  
127 NM\_058188.1  
114.6 NM\_058189.1  
184.8 NM\_020152.2  
131.6 NM\_058190.2  
127.2 XR\_001009.1  
121.6 NM\_001040140.1  
119.4 NM\_153754.1  
112.8 NM\_153204.1  
173.3 NM\_017447.2  
117.6 NM\_145180.2  
114.1 NM\_153773.1  
720.6 NM\_031444.2  
116.2 NM\_182520.1  
221.8 NM\_213720.1  
116.9 NM\_024053.3  
125.5 NM\_032561.2  
138.5 NM\_152906.2  
163.5 NM\_012264.3  
194.8 NM\_017911.1  
111.7 NM\_001009880.1  
132.2 NM\_015264.1  
115.7 NM\_015264.1  
111.5 NM\_194250.1  
121.6 NM\_144629.1  
113.7 XM\_944033.1  
107.9 NM\_173545.1  
119.2 NM\_032266.2  
241.3 NM\_024293.2  
117.6 NM\_017877.2  
114.5 NM\_182587.1  
207.8 NM\_015680.3  
884.8 NM\_015702.1  
228.1 NM\_023016.2  
119.3 NM\_013310.3  
273.2 NM\_080592.2  
185.8 NM\_080592.2  
292 NM\_017546.3  
119.7 NM\_003203.3  
188 NM\_015701.2  
112.8 NM\_015463.1  
125.2 NM\_020194.4  
117.2 NM\_024766.1  
168.4 NM\_015955.2  
115.3 NM\_173513.2  
107.6 NM\_032319.1  
118.1 NM\_000064.1  
136.9 NM\_004054.2  
121.1 NM\_016589.3

255.2 NM\_018462.4  
134.4 NM\_020685.3  
117 NM\_033364.2  
179.3 NM\_015412.3  
112 NM\_015412.3  
129 NM\_001025072.2  
118.5 NM\_016210.2  
426.4 NM\_016474.3  
121.2 NM\_032137.3  
114.5 NM\_152531.3  
113.8 NM\_152533.1  
126.5 NM\_001029839.1  
126 NM\_001029839.1  
110.7 NM\_001029840.1  
125 NM\_173826.1  
109.9 NM\_173472.1  
131.8 NM\_207307.1  
140.1 NM\_032359.2  
122 NM\_007354.1  
154.8 NM\_014367.3  
875.1 NM\_022485.2  
218.3 NM\_022485.2  
112.3 NM\_152539.1  
134.3 NM\_138807.2  
117.2 NM\_015931.1  
123.3 NM\_173657.1  
130 NM\_032898.2  
3973.6 NM\_032898.2  
122.3 NM\_178342.1  
121.8 NM\_178343.1  
113 NM\_025041.2  
264.4 NM\_020187.2  
116.2 NM\_001006109.1  
230.1 NM\_173824.2  
126.4 NM\_032806.4  
149.4 NM\_144635.3  
119.3 XR\_001028.1  
119.9 NM\_001039102.1  
122.9 NM\_153215.1  
115.7 NM\_144714.2  
111.9 NM\_024616.1  
119.2 NM\_203370.1  
117.2 NM\_001007534.1  
111.4 NM\_145035.2  
191 NM\_173552.2  
127.9 NM\_178496.2  
120.3 NM\_199074.1  
119.7 NM\_199073.1  
122.5 NM\_199417.1  
119.5 NM\_199073.1  
236.8 NM\_199069.1



181.2 NM\_198562.1  
148.1 NM\_015224.1  
163.8 NM\_173654.1  
118.3 NM\_001039788.1  
119.6 NM\_152305.1  
208.1 NM\_020231.3  
123.1 NM\_007293.2  
117.5 NM\_000715.3  
117.4 NM\_001017367.1  
117.9 NM\_000716.3  
118.1 NM\_001030316.1  
120.7 NM\_001029998.1  
170.8 NM\_032313.2  
117.6 NM\_024511.4  
124.6 NM\_018569.2  
113.2 NM\_032149.1  
121.4 NM\_016613.4  
131.2 NM\_016613.4  
110.1 NM\_001031700.1  
110.4 NM\_145048.2  
132.9 NM\_152400.1  
195 NM\_174921.1  
101.2 NM\_144645.1  
110.9 NM\_005750.2  
117.9 NM\_152997.2  
166.2 NM\_003704.3  
143.7 NM\_003703.1  
126.4 NM\_001735.2  
309.4 NM\_001736.2  
114.8 NM\_004772.1  
109.9 NM\_024715.2  
240.8 NM\_020199.1  
133.7 NM\_173828.3  
116.2 NM\_130848.1  
377.8 NM\_032042.3  
1693.2 NM\_022483.3  
135.8 NM\_018691.1  
107.8 NM\_198566.1  
106.4 NM\_173665.1  
172.8 NM\_152408.1  
118.1 NM\_016348.1  
112 NM\_016348.1  
119 NM\_032385.1  
386.6 NM\_016603.1  
117.8 NM\_000065.1  
113 NM\_178508.3  
115.8 NM\_001008704.1  
116.7 NM\_001008703.1  
117 NM\_006781.2  
116.2 NM\_032744.1  
165.5 NM\_024294.2

251.6 NM\_022758.4  
126.4 NM\_017754.2  
110 NM\_199184.1  
124.7 NM\_199184.1  
672.5 NM\_032870.1  
244.6 NM\_145062.1  
124.8 NM\_033069.1  
106 NM\_138409.1  
128.3 NM\_144980.1  
135.3 NM\_001029863.1  
117.9 NM\_207502.1  
128.3 NM\_032340.1  
122.8 NM\_145316.2  
206.8 NM\_138493.1  
348.2 NM\_145063.2  
122.3 NM\_001031722.1  
124 NM\_024909.1  
114.2 NM\_001031722.1  
177.6 NM\_145029.1  
129 NM\_018132.3  
126.8 NM\_138569.1  
114.5 NM\_001010872.1  
115.9 NM\_183373.2  
112.2 NM\_173563.1  
120.7 NM\_030568.3  
124.2 NM\_020408.3  
120.1 NM\_014070.1  
142.6 NM\_138441.1  
128.2 NM\_152551.3  
120.9 NM\_181714.1  
164.5 NM\_033112.2  
110.9 NM\_001012974.1  
111.5 NM\_198920.1  
123.3 NM\_001009994.1  
128.4 NM\_020425.3  
117.5 NM\_020425.3  
129.9 NM\_001031743.1  
117.9 NM\_178823.2  
133.9 NM\_178823.2  
984.1 NM\_018064.2  
132.7 NM\_198468.1  
118.5 NM\_032511.1  
421.6 NM\_152730.4  
133.1 NM\_001012507.1  
116.3 NM\_001012279.1  
114.8 NM\_173830.3  
111.2 NM\_153711.1  
178.9 NM\_001010923.1  
108.4 NM\_001010876.1  
119.4 NM\_052831.2  
116.3 NM\_001007531.1

114.4 NM\_152554.1  
118.2 NM\_145025.2  
117.4 NM\_206834.1  
121.8 NM\_016487.2  
135.1 NM\_001042475.1  
140.5 NM\_206921.1  
120.8 NM\_001010909.1  
120.9 NM\_001010909.1  
107 NM\_152732.2  
121.1 NM\_025002.1  
117.6 NM\_001003693.1  
143.5 NM\_024573.1  
110.8 NM\_001010852.2  
122.8 NM\_138276.1  
118.1 NM\_138275.1  
125.9 NM\_138277.1  
115.7 NM\_138274.1  
108.5 NM\_001039651.1  
121.1 NM\_025258.1  
166.8 NM\_015864.2  
111.9 NM\_018452.2  
156.8 NM\_021184.3  
123.6 NM\_001040437.1  
4537.3 NM\_001040437.1  
243.5 NM\_013397.3  
118.7 NM\_138408.2  
153.8 NM\_016485.3  
118.8 NM\_145267.2  
122.1 NM\_024929.1  
308.9 NM\_024581.3  
127.7 NM\_030939.3  
139.9 NM\_018322.1  
112.5 NM\_152731.1  
130.3 NM\_014165.1  
396.6 NM\_173562.3  
140.7 NM\_018341.1  
104.6 NM\_203395.1  
111.5 NM\_138785.1  
112.8 NM\_021820.1  
106.5 NM\_001031712.1  
150 NM\_001031712.1  
122.9 NM\_153036.2  
181.5 NM\_022102.1  
123.8 NM\_145028.3  
122.1 NM\_014895.1  
140.5 NM\_021945.4  
119.7 NM\_152734.2  
110.1 NM\_017909.1  
120.7 NM\_000587.2  
118.2 NM\_024728.1  
137.6 NM\_138701.1

117.3 NM\_006658.2  
216.7 XM\_946079.1  
148.3 NM\_015949.2  
303.1 NM\_031434.2  
    157 NM\_024051.2  
153.9 NM\_024054.1  
211.7 NM\_024067.2  
161.1 NM\_152743.2  
120.9 NM\_015622.5  
184.4 NM\_198097.1  
132.5 NM\_138434.2  
305.1 NM\_138446.1  
103.2 NM\_138811.3  
109.8 NM\_145304.2  
116.7 NM\_178829.2  
123.5 NM\_020192.1  
241.9 NM\_018224.2  
122.8 NM\_022150.2  
108.1 NM\_000562.1  
128.4 NM\_000066.2  
116.8 NM\_000606.1  
144.1 NM\_004337.1  
117.6 NM\_053279.1  
117.2 NM\_001033662.1  
116.9 NM\_001007176.1  
113.7 NM\_016458.2  
112.5 NM\_173687.1  
118.5 NM\_018024.1  
157.7 NM\_023080.1  
138.1 NM\_052958.1  
196.1 NM\_018142.1  
236.8 NM\_173685.1  
3141.4 NM\_177965.2  
    123 NM\_152416.1  
    112 NM\_020130.2  
    148 NM\_138436.2  
135.7 NM\_025115.1  
105.7 NM\_175075.2  
121.5 NM\_019607.1  
1263.1 NM\_173518.2  
120.6 NM\_152765.2  
115.3 NM\_173549.1  
127.8 NM\_001007090.1  
115.5 NM\_001031839.1  
126.9 NM\_017864.2  
133.3 NM\_032334.1  
    136 NM\_016647.1  
123.5 NM\_001013842.1  
174.1 NM\_001034061.1  
154.2 NM\_016010.1  
116.1 NM\_147189.1

118.8 NM\_001040032.1  
524.2 NM\_032847.1  
121.5 NM\_015912.2  
114.1 NM\_001081675.1  
    104 XR\_001454.1  
116.6 NM\_001737.2  
114.2 NM\_001031728.1  
119.5 NM\_001031728.1  
126.6 NM\_020207.1  
144.6 NM\_001001551.1  
116.5 NM\_001012715.1  
134.3 NM\_198841.1  
123.9 NM\_020641.1  
    246 NM\_152286.2  
    114 NM\_138778.1  
259.7 NM\_016390.2  
111.9 NM\_144654.1  
    120 NM\_144654.1  
    104 NM\_001012502.2  
110.3 NM\_145283.1  
124.4 NM\_033428.1  
111.9 NM\_032342.1  
105.8 NM\_173690.1  
132.2 NM\_016446.2  
115.1 NM\_001042590.1  
115.5 NM\_001012446.1  
132.5 NM\_203305.1  
117.2 NM\_153707.1  
119.2 NM\_178448.2  
268.5 NM\_183241.1  
123.7 NM\_203403.1  
167.1 NM\_001012993.1  
114.5 NM\_001010907.1  
442.6 NM\_016481.2  
110.7 NM\_001012415.1  
131.4 NM\_024112.2  
121.9 NM\_001080515.1  
109.5 NM\_198469.1  
281.9 NM\_022343.2  
129.2 NM\_153698.1  
123.7 NM\_148178.1  
130.1 NM\_148179.1  
180.2 NM\_148178.1  
146.8 NM\_147168.1  
136.3 NM\_147168.1  
130.2 NM\_032596.3  
143.3 NM\_147202.1  
123.8 NM\_033446.1  
110.8 NM\_032823.3  
112.8 NM\_080655.1  
161.8 NM\_014064.2

116.7 NM\_015667.1  
128.1 NM\_032937.3  
122.7 NM\_017738.1  
125.8 NM\_014334.1  
132.1 NM\_017998.1  
123.3 NM\_152420.1  
131.5 NM\_152786.1  
167.1 NM\_030814.4  
165.1 NM\_018465.1  
109.3 NM\_001001938.1  
    124 NM\_194313.1  
    220 NM\_032012.1  
117.6 NM\_199350.1  
112.8 NM\_152574.1  
122.9 NM\_031426.2  
123.1 NM\_001002260.1  
147.5 NM\_017832.2  
111.8 NM\_004816.2  
131.3 NM\_032307.2  
123.6 NM\_152569.1  
118.8 NM\_001039395.1  
139.9 NM\_017586.1  
111.1 NM\_153237.1  
138.5 NM\_018325.1  
119.5 NM\_145005.3  
128.2 NM\_145005.3  
223.6 NM\_030914.1  
133.7 NM\_173691.1  
149.7 NM\_016014.2  
124.8 NM\_016014.2  
231.3 NM\_001025780.1  
946.5 NM\_016482.2  
129.7 NM\_178828.3  
3384.6 NM\_021218.1  
111.6 NM\_024828.2  
131.1 NM\_173521.3  
108.2 NM\_173521.3  
130.1 NM\_182505.3  
119.9 NM\_182505.3  
140.3 NM\_024718.2  
392.4 NM\_022833.2  
464.1 NM\_032310.2  
118.1 NM\_018956.3  
259.3 NM\_197956.1  
127.2 NM\_153045.2  
119.5 NM\_173550.2  
169.7 NM\_017881.1  
112.8 NM\_153710.3  
140.4 NM\_139246.3  
132.5 NM\_152572.2  
    115 NM\_001738.1

115.1 NM\_020178.3  
125.3 NM\_001217.3  
116.9 NM\_001218.3  
120.3 NM\_001218.3  
126.5 NM\_198584.1  
103 NM\_012113.1  
298.1 NM\_000067.1  
109.3 NM\_005181.2  
119.8 NM\_000717.2  
112.2 NM\_001739.1  
169.6 NM\_007220.2  
126.7 NM\_001215.2  
122.1 NM\_005182.2  
110.5 NM\_001014435.1  
115.3 NM\_004056.4  
122.5 NM\_001216.1  
942.8 NM\_016289.2  
174.6 NM\_001031724.1  
114.1 NM\_001031724.1  
119.8 NM\_030925.1  
381.7 NM\_020247.3  
117.1 NM\_012295.2  
111.4 NM\_138375.1  
136.8 NM\_031215.1  
127.2 NM\_031205.2  
117 NM\_001033677.1  
120.2 NM\_001033677.1  
114.3 NM\_031204.2  
108.5 NM\_031204.2  
131.8 NM\_016366.1  
116.9 NM\_145200.2  
121.6 NM\_019855.3  
129.2 NM\_182527.1  
103.2 NM\_153770.1  
873.6 NM\_153768.1  
121.4 NM\_020925.1  
106 NM\_023035.1  
125.8 NM\_000068.2  
124.5 NM\_000718.1  
127.4 NM\_000719.4  
140.7 NM\_000720.1  
111.7 NM\_000721.2  
119.8 NM\_005183.2  
107.5 NM\_198397.1  
115.1 NM\_198396.1  
118.2 NM\_198376.1  
115.5 NM\_198397.1  
126 NM\_021098.2  
105 NM\_001005407.1  
112.7 NM\_021096.3  
168.7 NM\_001003406.1

115.5 NM\_000069.1  
113.9 NM\_000722.2  
117.4 NM\_001005505.1  
119.1 NM\_001005505.1  
104.9 NM\_018398.2  
121.1 NM\_001005737.1  
104.8 NM\_172364.3  
112.5 NM\_000723.3  
110.6 NM\_199247.1  
110.8 NM\_199247.1  
120.5 NM\_199247.1  
117.4 NM\_201572.1  
117.1 NM\_201570.1  
115.3 NM\_201590.1  
119.9 NM\_201572.1  
125.9 NM\_000724.2  
    200 NM\_000725.2  
112.8 NM\_001005747.1  
117.9 NM\_000726.2  
109.9 NM\_001005746.1  
115.5 NM\_000727.2  
    116 NM\_006078.2  
128.6 NM\_006539.2  
108.6 NM\_014405.2  
118.7 NM\_145811.1  
119.4 NM\_014404.1  
114.2 NM\_014404.1  
    119 NM\_031897.2  
111.8 NM\_145814.1  
117.7 NM\_031897.2  
113.3 NM\_031896.3  
127.7 NM\_031895.4  
2751.1 NM\_014412.2  
359.2 NM\_001007214.1  
116.6 NM\_001007214.1  
    137 NM\_004341.3  
110.6 NM\_183394.1  
111.1 NM\_183394.1  
113.2 NM\_003716.2  
113.5 NM\_017954.8  
117.9 NM\_017954.8  
    133 NM\_205864.1  
112.7 NM\_004929.2  
129.1 NM\_007088.1  
118.4 NM\_001740.2  
118.6 NM\_001033952.1  
126.6 NM\_001033953.1  
107.9 NM\_001741.2  
122.9 NM\_000728.3  
133.9 NM\_020898.1  
149.3 NM\_005831.3



112.2 NM\_001742.2  
116.5 NM\_005795.2  
126.5 NM\_033138.2  
2369 NM\_006888.2  
2052.5 NM\_001743.3  
703.7 NM\_005184.2  
116.6 NM\_005185.2  
123.3 NM\_001031733.1  
131.4 NM\_001031733.1  
383 NM\_033429.1  
123.1 NM\_001031733.1  
116 NM\_017422.3  
108.3 NM\_138705.2  
121.8 NM\_001017440.1  
147.1 NM\_031468.2  
114.2 NM\_031468.2  
248.8 NM\_004343.2  
113.8 NM\_145046.2  
116.4 NM\_001219.2  
143.9 NM\_003656.3  
130.5 NM\_020397.2  
108.5 NM\_153498.2  
114 NM\_020397.2  
116.2 NM\_020439.2  
117.2 NM\_171825.1  
112.4 NM\_172078.1  
114.4 NM\_172080.1  
117.4 XM\_936314.1  
113.7 NM\_001220.3  
123.2 NM\_172115.1  
127.5 NM\_172128.1  
116.3 NM\_001221.2  
113.6 NM\_172115.1  
122.4 NM\_172169.1  
120.2 NM\_172172.1  
217.2 NM\_018584.4  
120 NM\_033259.2  
107.2 NM\_001744.3  
127.7 NM\_172207.1  
122.3 NM\_032294.2  
115.6 NM\_172215.1  
116.6 NM\_172215.1  
119.5 NM\_024046.2  
114.7 NM\_004345.3  
183.6 NM\_015447.1  
149.9 NM\_203459.1  
127.1 NM\_015215.1  
108.4 NM\_015099.2  
139 NM\_018448.2  
115.4 XM\_932503.1  
124.8 NM\_012298.1

274 NM\_138793.2  
664.9 NM\_001024649.1  
2246.2 NM\_006367.2  
113.1 NM\_006366.2  
112.4 NM\_001747.2  
277 NM\_005186.2  
135 NM\_023083.2  
113.8 NM\_023089.1  
131.6 NM\_021251.2  
121.2 NM\_023083.2  
118 NM\_007058.2  
127.8 NM\_144691.3  
128 NM\_144575.2  
128.6 NM\_001748.3  
119.2 NM\_212464.1  
119.4 NM\_212467.1  
132.7 NM\_000070.2  
129.5 NM\_173087.1  
120.6 NM\_004055.3  
132.8 NM\_014296.2  
111.5 NM\_016452.1  
118.9 NM\_016452.1  
371.2 NM\_001003962.1  
173.2 NM\_001749.2  
115.5 NM\_032330.1  
113.9 NM\_004058.2  
144 NM\_080590.1  
121.8 NM\_032606.2  
120 NM\_144647.2  
114.7 NM\_144647.2  
127.7 NM\_144647.2  
500.9 NM\_006136.2  
115.3 NM\_033328.2  
149.6 NM\_004930.2  
114.4 NM\_014550.3  
258 NM\_032415.2  
123.6 NM\_021209.3  
127 NM\_052819.1  
118.6 NM\_052819.1  
119 NM\_024110.2  
122.8 NM\_022162.1  
121 NM\_032587.2  
256.5 NM\_014959.1  
209.9 NM\_052813.2  
439.4 NM\_017632.1  
230.9 NM\_014316.1  
148.4 NM\_013276.2  
496.6 NM\_199141.1  
156.2 NM\_001751.4  
970.4 NM\_001014438.1  
122.6 NM\_004291.2

108.3 NM\_006982.1  
138.5 NM\_018272.2  
116.7 NM\_178816.2  
116.7 NM\_201377.1  
230.7 NM\_007359.3  
118.8 NM\_138423.2  
145.7 NM\_177974.1  
110.3 NM\_144508.2  
126 NM\_170589.2  
114.1 NM\_022900.3  
154.2 NM\_003688.1  
120.4 NM\_020764.2  
128.8 NM\_020753.2  
400 NM\_033294.2  
124.7 NM\_033292.2  
242.1 NM\_033294.2  
124.5 NM\_032974.2  
139.7 NM\_001230.4  
123 NR\_000035.2  
112.7 NM\_012114.1  
122 NM\_032982.2  
836.6 NM\_032982.2  
158 NM\_001224.3  
403.4 NM\_032991.2  
142.1 NM\_004346.3  
109.4 NM\_033307.2  
397.6 NM\_033306.2  
128.1 NM\_001225.3  
213.1 NM\_033306.2  
113 NM\_004347.1  
167.1 NM\_032992.2  
129.2 NM\_001226.3  
132.8 NM\_032992.2  
128.4 NM\_033339.3  
118.9 NM\_033338.4  
116.5 NM\_033340.2  
158 NM\_033356.2  
132.3 NM\_001228.3  
144.3 NM\_033355.3  
136.1 NM\_033358.2  
110.6 NM\_012115.2  
123.4 NM\_001229.2  
261.6 NM\_001229.2  
120.3 NM\_001231.2  
120.9 NM\_001232.1  
116.7 NM\_000388.2  
148.7 NM\_001750.4  
116.7 NM\_001750.4  
121.4 NM\_173061.1  
160.8 NM\_001042442.1  
117.3 NM\_015576.1

322.1 NM\_017766.2  
114 NM\_001079843.1  
143.8 NM\_001079843.1  
131.4 NM\_001752.2  
115.5 NM\_053054.2  
121.8 NM\_054020.2  
125.9 NM\_178019.1  
104.5 NM\_198137.1  
111.2 NM\_001753.3  
124.6 NM\_001233.3  
127.8 NM\_001233.3  
117.4 NM\_001234.3  
129.9 NM\_033337.1  
196.3 NM\_006077.1  
125.6 NM\_005093.3  
114.7 NM\_005093.3  
138.3 NM\_001032999.1  
120.1 NM\_005187.4  
147.7 NM\_005187.4  
128 NM\_175931.1  
244.1 NM\_001755.2  
112.9 NM\_001755.2  
133 NM\_005188.2  
1361.9 NM\_170662.3  
119.3 NM\_012116.2  
381.1 NM\_024814.1  
116.8 NM\_004352.1  
124.3 NM\_182511.2  
140.9 NM\_001039771.2  
116.1 NM\_080617.4  
159.5 NM\_001757.2  
190.7 NM\_001236.3  
137.3 NM\_032783.3  
114 NM\_000071.1  
111.9 NM\_018491.3  
115.8 NM\_172003.2  
163.3 NM\_001024916.2  
130.4 NM\_006807.3  
131.8 NM\_032647.2  
114.1 NM\_032647.2  
120.7 NM\_005189.1  
170.5 NM\_007276.3  
324.7 NM\_016587.2  
113.2 NM\_007276.3  
475.1 NM\_003655.2  
154.8 NM\_012117.1  
403.4 NM\_014292.3  
154.6 NM\_175709.2  
118.8 NM\_020649.1  
116 NM\_015373.3  
137.4 NM\_017721.2

158.6 NM\_032449.1  
429.1 NM\_133459.1  
125.2 NM\_004059.3  
154.6 NM\_001008661.1  
    125 NM\_001008661.1  
112.7 NM\_001296.3  
121.4 NM\_080667.3  
118.2 NM\_152389.2  
116.5 NM\_152389.2  
134.5 NM\_145020.2  
127.7 NM\_152775.1  
138.7 NM\_173510.1  
    647 NM\_144716.1  
122.3 NM\_024584.2  
175.7 NM\_145265.2  
123.3 NM\_194300.1  
116.5 NM\_144719.2  
203.6 NM\_022757.3  
511.8 NM\_052857.2  
126.5 NM\_152500.1  
    125 NM\_206886.2  
154.1 NM\_022778.2  
120.7 NM\_014008.1  
298.8 NM\_199342.1  
123.5 NM\_152499.1  
123.3 NM\_001031708.1  
    147 NM\_018246.1  
118.4 NM\_152492.1  
    486 NM\_015439.2  
127.6 NM\_024296.3  
109.5 NM\_031455.2  
148.6 NM\_001080791.1  
703.7 NM\_052849.2  
    122 NM\_182791.1  
117.3 NM\_080654.2  
114.9 NM\_030771.1  
154.1 NM\_030771.1  
    130 NM\_178173.2  
110.6 NM\_182628.1  
103.7 NM\_182496.1  
113.1 NM\_207406.1  
119.2 NM\_207406.1  
118.8 NM\_016122.1  
142.1 NM\_016122.1  
105.8 NM\_144681.1  
122.6 NM\_144609.1  
224.4 NM\_016360.2  
258.9 NM\_138363.1  
    114 NM\_145036.2  
113.1 NM\_145036.2  
188.4 NM\_020198.1

111.5 NM\_024768.1  
429.7 NM\_017748.3  
124.5 NM\_138443.2  
    165 NM\_174908.2  
    121 NM\_178335.1  
120.9 NM\_024661.2  
    119 NM\_144718.2  
264.7 NM\_016053.1  
112.7 NM\_032600.2  
132.1 NM\_032141.2  
213.7 NM\_001040431.1  
111.6 NM\_198082.2  
136.8 NM\_001017928.2  
1938.8 NM\_014167.1  
197.3 NM\_005436.2  
116.1 NM\_178499.2  
127.8 NM\_201435.2  
127.8 NM\_032573.3  
124.1 NM\_152591.1  
108.1 NM\_207311.1  
113.8 NM\_033124.2  
154.9 NM\_001012506.1  
117.3 NM\_181645.2  
121.2 NM\_025214.1  
137.5 NM\_015621.2  
116.8 NM\_001026383.1  
111.9 NM\_001026383.1  
    117 NM\_145023.4  
116.3 NM\_031290.1  
127.8 NM\_022903.2  
647.6 NM\_015933.2  
    119 NM\_138770.1  
125.9 NM\_207310.1  
120.1 NM\_174931.1  
149.1 NM\_019083.1  
290.1 NM\_032358.2  
120.9 NM\_032040.1  
109.6 NM\_001080433.1  
145.2 NM\_015603.1  
413.1 NM\_021825.3  
    118 NM\_018318.3  
129.1 NM\_019052.2  
120.7 NM\_005893.1  
117.4 NM\_000729.3  
112.1 NM\_000730.2  
118.6 NM\_176875.2  
109.4 NM\_002981.1  
113.2 NM\_002986.2  
    121 NM\_005408.2  
106.5 NM\_004167.3  
117.8 NM\_032965.2

108.2 NM\_004590.2  
123.9 NM\_002987.2  
113.2 NM\_002988.2  
123.1 NM\_006274.2  
121.3 NM\_002982.3  
124.5 NM\_004591.1  
115.3 NM\_002989.2  
115.4 NM\_002990.3  
109.5 NM\_005064.3  
120.6 NM\_005064.3  
141.5 NM\_002991.2  
120.1 NM\_148888.1  
    116 NM\_005624.2  
113.4 NM\_006072.4  
119.2 NM\_006664.2  
120.1 NM\_148672.2  
163.9 NM\_002983.1  
136.5 NM\_021006.4  
    264 NM\_001001437.3  
153.5 NM\_001001435.2  
3790.3 NM\_002985.2  
120.6 NM\_006273.2  
120.7 NM\_005623.2  
    133 NM\_031443.3  
    244 NM\_001029835.1  
851.2 NM\_031443.3  
    125 NM\_003914.2  
    157 NM\_001237.2  
118.8 NM\_031966.2  
257.9 NM\_182851.1  
114.8 NM\_182852.1  
120.2 NM\_182851.1  
170.2 NM\_021178.2  
159.6 NM\_004701.2  
116.8 NM\_033031.1  
120.4 NM\_033670.2  
124.6 NM\_033031.1  
239.3 NM\_005190.3  
349.8 NM\_001013399.1  
177.1 NM\_005190.3  
116.8 NM\_053056.1  
831.7 NM\_001759.2  
    1369 NM\_001760.2  
136.8 NM\_012142.2  
120.6 NM\_037370.1  
1043.7 NM\_037370.1  
    378.9 NM\_001238.1  
        123 NM\_001238.1  
118.9 NM\_057749.1  
253.1 NM\_057735.1  
138.5 NM\_001761.1

214 NM\_199246.1  
116.7 NM\_199246.1  
178.6 NM\_004354.1  
190.2 NM\_001239.2  
3248.5 NM\_006835.2  
109.5 NM\_019084.2  
763.4 NM\_003858.2  
819.4 NM\_020307.2  
132.3 NM\_030937.3  
148.5 NM\_001240.2  
127.9 NM\_001241.2  
228.3 NM\_001241.2  
110.6 NM\_058241.1  
384.2 NM\_145012.3  
167 NM\_152523.1  
117.4 NM\_020739.2  
225.6 NM\_004748.3  
174.6 NM\_001295.2  
119 NM\_016602.1  
104.8 NM\_000647.4  
113.5 NM\_000647.4  
120.1 NM\_178329.1  
112.5 NM\_001837.2  
120.6 NM\_005508.4  
114.1 NM\_000579.2  
9122.1 NM\_031409.2  
112 NM\_031409.2  
1009.9 NM\_001838.2  
119.7 NM\_005201.2  
128.6 NM\_031200.1  
109.8 NM\_031200.1  
132.1 NM\_012119.3  
118.6 NM\_178432.1  
126.2 NM\_016557.2  
116.4 NM\_178445.1  
112.6 NM\_178445.1  
123.1 NM\_003965.4  
125.4 NM\_012118.2  
154.3 NM\_005125.1  
128.1 NM\_005125.1  
1558.7 NM\_006431.2  
158.5 NM\_001008800.1  
1018.5 NM\_005998.3  
291.1 NM\_006430.2  
128.4 NM\_012073.3  
303.9 NM\_001762.3  
570.2 NM\_001009186.1  
459.8 NR\_003110.2  
121.4 NM\_006584.2  
1118.2 NM\_001009570.1  
244.7 NM\_006429.2



297.3 NM\_006429.2  
917.2 NM\_006585.2  
120.1 NM\_133493.1  
1157.6 NM\_001040021.1  
242.3 NM\_000591.1  
125.2 NM\_004357.3  
522.5 NM\_139030.3  
124.5 NM\_139030.2  
123.9 NM\_007053.2  
117.7 NM\_203416.1  
123.6 NM\_004244.3  
167.8 NM\_006016.3  
114.6 NM\_207397.1  
120.2 NM\_020406.1  
123.7 NM\_005582.1  
160.3 NM\_001770.3  
103.6 NM\_001763.1  
111.8 NM\_001764.1  
    122 NM\_001765.1  
130.6 NM\_001766.2  
116.4 NM\_030893.1  
126.8 NM\_001042586.1  
209.5 NM\_001767.2  
126.4 NM\_001004196.1  
118.7 NM\_001004196.1  
117.9 NM\_138940.2  
115.8 NM\_001008784.1  
120.1 NM\_015717.1  
116.2 NM\_021155.2  
127.3 NM\_001771.1  
119.7 NM\_006566.1  
135.9 NM\_013230.2  
224.7 NM\_016382.2  
1911.4 NM\_198053.1  
1445.7 NM\_198053.1  
    119.2 NM\_020404.2  
    112.3 NM\_014143.2  
    117.5 NM\_001024736.1  
110.2 XM\_945867.1  
126.2 NM\_012120.1  
330.7 NM\_006110.1  
208.6 NM\_007261.2  
    122 NM\_006678.2  
115.1 NM\_181449.1  
139.5 NM\_174892.1  
110.1 NM\_139018.2  
121.2 NM\_145273.2  
121.6 NM\_014880.3  
121.3 NM\_016579.2  
115.7 NM\_001772.2  
    120 NM\_213602.1

130.1 NM\_001773.2  
113.7 NM\_001773.1  
125.3 NM\_001773.2  
115.4 NM\_001025109.1  
137.5 NM\_001001548.1  
137.9 NM\_001001548.1  
123.4 NM\_001001547.1  
156.5 NM\_001774.1  
178.3 NM\_001774.1  
112.5 NM\_001775.2  
890.4 NM\_000732.4  
716.8 NM\_001040651.1  
215.4 NM\_000733.2  
115.3 NM\_012099.1  
136.8 NM\_000073.1  
127.5 NM\_000616.2  
123.7 NM\_152854.2  
111.1 NM\_001250.3  
119.1 NM\_000074.2  
132.3 NM\_000610.3  
200 NM\_001001392.1  
1910.6 NM\_001001390.1  
214.4 NM\_172358.1  
172.9 NM\_001025080.1  
127.1 NM\_001777.3  
233.4 NM\_001778.2  
219.2 NM\_014207.2  
658.6 NM\_001803.2  
260.2 NM\_000560.2  
280.3 NM\_000560.2  
912.6 NM\_000574.2  
207.5 NM\_001779.1  
208.4 NM\_203329.1  
123.4 NM\_203331.1  
109.2 NM\_005894.1  
628.4 NM\_006725.2  
212.5 NM\_001780.3  
525.7 NM\_001251.2  
184.6 NM\_001251.2  
975.6 NM\_001781.1  
231.5 NM\_006137.6  
122 NM\_001782.1  
498.6 NM\_001025158.1  
119 NM\_001025159.1  
205.6 NM\_004355.2  
121.1 NM\_001783.2  
191.3 NM\_001783.2  
122.6 NM\_021601.3  
165.3 NM\_001039933.1  
141.9 NM\_021602.1  
112.4 NM\_000626.1

116.3 NM\_005191.2  
3214 NM\_004356.3  
148.2 NM\_001024844.1  
134.2 NM\_002231.3  
272.9 NM\_004233.2  
206.5 NM\_004233.3  
139.2 NM\_003874.1  
113.8 NM\_175862.2  
140.9 NM\_175862.2  
115 NM\_006889.2  
201.4 NM\_001768.4  
124.6 NM\_001768.4  
222.9 NM\_171827.2  
123.1 NM\_004931.3  
110 NM\_172213.1  
119.1 NM\_172101.1  
120.8 NM\_172099.1  
124.9 NM\_001769.2  
391.7 NM\_198196.1  
534.9 NM\_005816.4  
133.7 NM\_001784.3  
372.7 NM\_078481.2  
179.3 NM\_002414.3  
139.7 NM\_134446.2  
322.1 NM\_134445.2  
130.1 NM\_001785.1  
117 NM\_030911.1  
155.2 NM\_138477.2  
4521.7 NM\_138477.2  
126.6 NM\_003672.2  
125.9 NM\_033313.1  
109.8 NM\_033312.1  
120 NM\_033313.1  
122.1 NM\_033331.1  
121.5 NM\_033331.1  
835.3 NM\_003671.2  
233.1 NM\_001078645.1  
211.5 NM\_003903.2  
379.3 NM\_001078645.1  
119 NM\_033379.2  
121.3 NM\_001786.2  
117.1 NM\_001255.1  
226.5 NM\_004661.2  
106.6 NM\_001789.2  
111.4 NM\_001789.2  
513.7 NM\_004358.3  
125.7 NM\_001790.3  
122.9 NM\_001790.3  
117.8 NM\_001790.3  
1746.1 NM\_139286.3  
126.8 NM\_001256.2

116.9 NM\_033487.1  
150.7 NM\_033531.1  
184.2 NM\_031267.1  
161.4 NM\_003718.2  
230.1 NM\_015076.3  
140.7 NM\_004359.1  
5660.9 NM\_007065.3  
    123 NM\_017913.2  
    302 NM\_015891.2  
141.8 NM\_044472.1  
115.5 NM\_001039802.1  
191.6 NM\_044472.1  
261.9 NM\_001791.2  
119.6 NM\_014826.3  
118.6 NM\_003607.2  
133.3 NM\_006035.2  
108.7 NM\_017525.1  
130.1 NM\_007061.3  
122.9 NM\_007061.3  
119.5 NM\_006779.2  
125.8 NM\_006449.3  
339.9 NM\_012121.4  
109.7 NM\_145057.2  
209.6 NM\_001038707.1  
137.9 NM\_020239.2  
172.9 NM\_020240.1  
595.4 NM\_001038702.1  
127.8 NM\_003504.3  
155.1 NM\_001253.2  
122.7 NM\_001254.3  
126.1 NM\_003503.2  
118.4 NM\_024529.3  
125.9 NM\_080476.4  
110.3 NM\_145697.1  
119.1 NM\_152562.2  
114.2 NM\_031299.3  
112.4 NM\_145701.1  
171.1 NM\_017955.2  
125.4 NM\_017955.2  
165.8 NM\_080668.2  
121.2 NM\_145810.1  
114.6 NM\_031942.3  
115.8 NM\_018719.2  
145.6 NM\_018101.2  
123.9 NM\_178181.1  
119.1 NM\_022842.3  
120.1 NM\_178181.1  
114.2 NM\_201546.2  
120.4 NM\_020754.1  
108.4 NM\_004360.2  
126.5 NM\_006727.2

121.4 NM\_001797.2  
110.7 NM\_004061.2  
113.2 NR\_002209.1  
118.7 NM\_001257.3  
112.3 NM\_004933.2  
121.7 NM\_004062.2  
116.4 NM\_004063.2  
108.3 NM\_004934.2  
119.6 NM\_021153.2  
120.6 NM\_001792.2  
130.6 NM\_031891.2  
116.4 NM\_021248.1  
128 NM\_052836.1  
118.9 NM\_052836.1  
123.2 NM\_022124.2  
115.1 NM\_144985.2  
123 NM\_022478.2  
112.9 NM\_144985.2  
119.7 NM\_177980.1  
118.7 NM\_021810.3  
125.8 NM\_001793.3  
110.3 NM\_001794.2  
115.9 NM\_001795.2  
120.9 NM\_004932.2  
123.9 NM\_004361.2  
117.1 NM\_033646.1  
126.8 NM\_033646.1  
105.9 NM\_001796.2  
115.4 NM\_016279.2  
129 NM\_006319.2  
203.8 NM\_052988.2  
126.5 NM\_003674.2  
142.3 NM\_001798.2  
218.6 NM\_001798.2  
154.5 NM\_005851.3  
132.8 NM\_001258.1  
162.6 NM\_000075.2  
104.1 NM\_004935.2  
112 NM\_003885.2  
115.9 NM\_003936.3  
180.4 NM\_016408.2  
119.1 NM\_016408.2  
229.2 NM\_001011649.1  
537.1 NM\_001011649.1  
115.6 NM\_018249.4  
432.8 NM\_025197.2  
145.4 NM\_176095.1  
451.2 NM\_176096.1  
142.8 NM\_001259.5  
252.2 NM\_001799.2  
118.5 NM\_001260.1

145.8 NM\_001261.2  
114.7 NM\_017774.1  
123.1 NM\_004196.3  
114 NM\_003948.2  
199.3 NM\_016508.2  
114 NM\_001009565.1  
125.6 NM\_003159.1  
117.7 NM\_003159.2  
136 NM\_003159.2  
1859 NM\_078467.1  
337.5 NM\_078467.1  
389 NM\_004064.2  
141.3 NM\_000076.1  
110 NM\_058197.2  
122.3 NM\_058195.2  
117.9 NM\_058197.2  
138.7 NM\_078487.2  
111.9 NM\_078487.2  
132.9 NM\_078626.1  
123.1 NM\_001262.2  
137.1 NM\_001262.2  
125.1 NM\_001800.3  
455.1 NM\_001800.3  
130.4 NM\_005192.2  
127.4 NM\_001801.2  
120.7 NM\_016952.3  
119 NM\_016952.3  
114.9 NM\_004065.2  
233.8 NM\_001802.1  
132.9 NM\_014603.1  
114.6 NM\_006382.1  
124.4 NR\_003261.1  
116.6 NM\_001263.2  
180.8 NM\_003818.2  
121.7 NM\_001264.3  
118.2 NM\_030928.2  
513.8 XM\_945271.1  
668.5 NM\_017548.3  
110.3 NM\_001804.1  
111 NM\_001265.2  
117.8 NM\_005193.1  
109.4 NM\_004680.2  
114.5 NM\_004680.2  
117.6 NM\_001003894.1  
117.4 NM\_004825.2  
112.2 NM\_001001722.1  
123 NM\_004824.2  
114.6 NM\_004824.2  
123.1 NM\_152342.1  
125.5 NM\_001024912.1  
123.3 NM\_001712.3

134.7 NM\_001024912.1  
115.3 NM\_020219.2  
107 NM\_198444.1  
136.2 NM\_033543.2  
117.7 NM\_001815.1  
126.9 NM\_001817.2  
113 NM\_004363.1  
117.7 NM\_002483.3  
113 NM\_006890.1  
121.9 NM\_001816.2  
200.1 NM\_004364.2  
2683 NM\_005194.2  
433.5 NM\_005195.2  
113.9 NM\_001805.2  
482.6 NM\_001806.2  
747.5 NM\_005760.2  
113.2 NM\_017424.2  
207.9 NM\_017424.2  
118.7 NM\_177405.1  
122.6 NM\_017829.5  
168.9 NM\_017829.5  
125.3 NM\_031890.2  
119 NM\_016174.3  
111.3 NM\_178569.2  
187.4 NM\_001807.2  
124.3 NM\_014246.1  
115 NM\_001408.1  
117.6 NM\_001407.1  
128.4 NM\_001048216.1  
139.4 NM\_001809.2  
119.6 NM\_001042426.1  
292.5 NM\_001810.5  
117.3 NM\_001812.2  
121.9 NM\_001813.2  
125.1 NM\_016343.3  
114.9 NM\_022909.3  
115.9 NM\_006733.2  
127.7 NM\_018451.2  
127.7 NM\_001002876.1  
110 NM\_001002876.1  
119.6 NM\_024322.1  
318.5 NM\_006869.1  
199.6 NM\_018404.1  
254.8 NM\_014716.2  
152.9 NM\_012287.3  
116.1 NM\_030649.1  
164.5 NM\_015230.2  
118.4 NM\_139182.1  
119.6 NM\_015242.2  
174 NM\_015242.2  
293.7 NM\_022481.5

113.3 NM\_014770.2  
123.9 NM\_001037131.1  
125.4 NM\_014914.2  
111.9 NM\_001037131.1  
112.8 NM\_001042535.1  
132.2 NM\_001042535.1  
155.6 NM\_031946.3  
162.5 NM\_007018.3  
183.8 NM\_025009.3  
117.1 NM\_014985.2  
122.2 NM\_014956.3  
130.1 NM\_014812.2  
111.6 NM\_001042404.1  
    154 NM\_032142.2  
126.1 NM\_001035518.1  
117.6 NM\_007186.2  
437.3 NM\_018097.1  
146.1 NM\_025114.2  
    129 NM\_018131.3  
138.4 NM\_014679.3  
278.6 NM\_025180.2  
112.9 NM\_001042384.1  
107.3 NM\_001042384.1  
    122 NM\_001042400.1  
118.4 NM\_015147.1  
115.4 NM\_024491.2  
115.6 NM\_018140.2  
118.7 NM\_024899.2  
114.5 NM\_001007794.1  
139.8 NM\_006090.3  
    157 NM\_006090.3  
109.2 NM\_005454.2  
329.3 NM\_182661.1  
321.2 NM\_182661.1  
    118 NM\_022766.4  
131.1 NM\_201548.3  
113.6 NM\_001030311.1  
119.5 NM\_001030313.1  
119.3 NM\_001030311.1  
207.3 NM\_001025195.1  
153.2 NM\_198061.1  
130.4 NM\_003869.4  
112.1 NM\_024922.3  
121.3 NR\_003276.1  
112.8 NM\_145024.1  
108.5 NM\_014406.4  
114.3 NM\_004066.1  
176.9 NM\_004344.1  
117.6 NM\_004365.2  
118.7 NM\_000078.1  
123.2 NM\_001710.4



108.4 NM\_032545.2  
181.6 NM\_001928.2  
131.8 NM\_006324.2  
110.5 NM\_000186.2  
141 NM\_001014975.1  
119.4 NM\_001014975.1  
131.1 NM\_002113.1  
128 NM\_005666.2  
123.1 NM\_021023.4  
117.9 NM\_006684.1  
116.4 NM\_030787.1  
115.3 NM\_000204.1  
1424.6 NM\_005507.2  
128.3 NM\_138638.1  
111.9 NM\_021914.5  
347 NM\_003879.3  
133.1 NM\_000492.2  
118.4 NM\_052818.1  
127.1 NM\_001079691.1  
119.6 NM\_001079691.1  
118.5 NM\_000735.2  
115.1 NM\_000737.2  
125.6 NM\_033377.1  
107.9 NM\_033378.1  
117.8 NM\_033043.1  
118.9 NM\_033142.1  
729 NM\_003663.3  
133.1 NM\_001008390.1  
750.8 NM\_003663.3  
115.6 NM\_015939.3  
129 NM\_016052.2  
116.5 NM\_016140.2  
115.7 NM\_015964.2  
474.8 NM\_016016.1  
150.2 NM\_015703.3  
126.6 NM\_015703.3  
139.9 NM\_020770.1  
117.4 NM\_032866.3  
117.4 NM\_006569.2  
213.6 NM\_006568.2  
124.3 NM\_003956.2  
139.8 NM\_024111.2  
114.5 NM\_001008708.1  
113.3 NM\_001267.1  
119.6 NM\_005483.2  
147.5 NM\_005441.2  
117.6 NM\_020549.2  
108.9 NM\_020984.1  
115.2 NM\_020986.2  
111.8 NM\_020984.1  
128.8 NM\_203298.1

1557.2 NM\_016139.2  
141.9 NM\_017812.1  
145.1 NM\_144636.1  
135.9 NM\_032309.2  
123.4 NM\_032343.1  
135 NM\_001011670.1  
284.4 NM\_001011668.1  
120.4 NM\_016565.2  
533.5 NM\_001270.2  
127.8 NM\_004284.2  
204.7 NM\_001042572.2  
151.7 NM\_005852.2  
133.7 NM\_001005273.1  
575.6 NM\_001273.2  
117.9 NM\_015557.1  
126.4 NM\_032221.3  
472.9 NM\_017780.2  
687.4 NM\_020920.1  
304.4 NM\_025134.3  
113 NM\_018397.1  
134.2 NM\_001274.2  
119 NM\_007194.3  
121.2 NM\_001005735.1  
155.3 NM\_006387.4  
196.9 NM\_005197.2  
290.3 NM\_018223.1  
116 NM\_001275.2  
123.8 NM\_001819.1  
125.8 NM\_018371.3  
111.7 NM\_001276.1  
125.2 NM\_004000.2  
108.9 NM\_001025199.1  
120.6 NM\_201653.1  
121.5 NM\_021797.2  
145.8 XM\_942851.1  
111.1 NM\_001039840.1  
1335 NM\_012110.2  
116.3 NM\_023947.2  
188.2 NM\_001277.2  
134.7 XM\_942105.1  
323.6 NM\_005198.3  
112.2 NM\_152253.1  
121.4 NM\_006614.2  
129.8 NM\_000390.1  
132.9 NM\_001821.2  
1387.9 NM\_020412.3  
125.6 NM\_198426.1  
165 NM\_014453.2  
726.3 NM\_014453.2  
238.3 NM\_014043.2  
224.8 NM\_014169.2

214.7 NM\_176812.3  
118 NM\_152284.3  
236.7 NM\_016410.2  
136.4 NM\_024591.3  
119.2 NM\_024591.3  
131.1 NM\_152272.2  
155.7 NM\_001822.3  
113.8 NM\_001822.3  
113.9 NM\_004067.1  
114.5 NM\_004067.1  
118.8 NM\_004067.1  
113.8 NM\_024944.2  
132.7 NM\_012124.1  
145.5 NM\_007236.3  
122.1 NM\_024536.4  
132.5 NM\_020244.2  
113.1 NM\_001014372.2  
136.7 NM\_017444.3  
113.5 NM\_177978.1  
105 NM\_145234.2  
117.9 NM\_015424.3  
113 NM\_139320.1  
120.7 NM\_139320.1  
110.4 NM\_139320.1  
113.2 NM\_000738.2  
111.9 NM\_001006630.1  
118 NM\_001006626.1  
111.9 NM\_000741.2  
121 NM\_012125.2  
119.6 NM\_001039523.1  
126.7 NM\_000079.1  
105.8 NM\_001039523.1  
156.4 NM\_020402.2  
120.2 NM\_000742.1  
119.2 NM\_000743.2  
122.4 NM\_000744.2  
1758.8 NM\_000745.2  
119.5 NM\_004198.2  
114.4 NM\_000746.2  
116 NM\_017581.2  
177.1 NM\_000747.2  
121.4 NM\_000748.1  
121.9 NM\_000749.2  
125.5 NM\_000751.1  
124 NM\_000080.2  
115.3 NM\_005199.4  
110.8 NM\_003654.2  
117.3 NM\_004854.3  
132 NM\_018413.2  
285.4 NM\_018641.2  
122.4 NM\_152889.1

127.6 NM\_004267.3  
120.3 NM\_004273.2  
107.6 NM\_005769.1  
119.3 NM\_012126.1  
123.7 NM\_024533.2  
119.1 NM\_021615.3  
156.6 NM\_019886.2  
116.5 NM\_022467.3  
113.3 NM\_031422.1  
239.6 NM\_014918.3  
    126 NM\_022092.1  
220.1 NM\_001278.3  
438.5 NM\_145165.2  
120.4 NM\_182894.1  
246.5 NM\_004804.2  
    150 NM\_020313.1  
119.1 NM\_004895.3  
    125 NM\_004895.3  
1156.9 NM\_006384.2  
130.5 NM\_006383.2  
121.7 NM\_054113.2  
107.3 NM\_001029881.1  
219.6 NM\_015125.2  
121.5 NR\_002786.1  
118.9 NM\_001080858.1  
123.7 NM\_198289.1  
121.8 NM\_198289.1  
114.3 NM\_014430.1  
115.1 NM\_022094.2  
121.7 NM\_000246.2  
121.2 NM\_003613.2  
118.1 NM\_153221.1  
116.7 NM\_032630.2  
    584 NM\_033082.1  
147.9 NM\_004882.3  
    355 NM\_001280.1  
240.2 NM\_032830.1  
117.4 NM\_145071.1  
113.4 NM\_007174.1  
107.8 NM\_004143.2  
471.9 NM\_006079.3  
    121 NM\_133467.2  
123.6 NM\_012127.2  
    174 NM\_001281.2  
129.7 NM\_018204.2  
184.9 NM\_006825.2  
167.4 NM\_001008938.1  
119.8 NM\_001008938.1  
148.7 NM\_001823.3  
524.8 NM\_016326.2  
    281 NM\_001040139.1

117.8 NM\_001040139.1  
110.3 NM\_181521.1  
116.2 NM\_001824.2  
122.7 NM\_001015001.1  
116.7 NM\_020990.3  
123.6 NM\_001825.1  
184.2 NM\_001826.1  
2196.8 NM\_001827.1  
298.8 NM\_015282.1  
176.3 NM\_015097.1  
122.3 NM\_001828.4  
119 NM\_001285.1  
116.5 NM\_006536.4  
114.7 NM\_004921.1  
122.2 NM\_012128.2  
120.5 NM\_015127.2  
119.3 NM\_015127.2  
204.7 NM\_013246.2  
121 NM\_000083.1  
116.4 NM\_004366.2  
111.4 NM\_173872.2  
292.6 NM\_001829.2  
115.7 NM\_001830.2  
113 NM\_000084.1  
129.6 NM\_001286.1  
144.6 NM\_021737.1  
165.7 NM\_021737.1  
1607.6 NM\_001287.3  
110 NM\_004070.2  
114.9 NM\_001042704.1  
110.7 NM\_000085.1  
118.5 NM\_021101.3  
119.3 NM\_006984.3  
109.9 NM\_182848.2  
125 NM\_006984.3  
120.2 NM\_012129.2  
168.8 NM\_012130.2  
108.4 NM\_144492.1  
111.1 NM\_012130.2  
125.4 NM\_138429.1  
490.2 NM\_014343.1  
155.4 NM\_138429.1  
122.1 NM\_006580.2  
116.7 NM\_012131.1  
121.6 NM\_016369.3  
133 NM\_001002026.2  
111.1 NM\_016369.3  
123.1 NM\_016369.3  
129 NM\_148960.1  
119.6 NM\_020384.2  
111.5 NM\_001001346.1

131 NM\_194284.1  
122.3 NM\_001306.2  
106.8 NM\_001305.3  
116.7 NM\_003277.2  
119.6 NM\_021195.3  
115.1 NM\_001307.3  
120.3 NM\_199328.1  
131.9 NM\_020982.2  
703.8 NM\_001040181.1  
705.9 NM\_019895.1  
429.4 NM\_152353.1  
110.4 NM\_182906.2  
109.5 NM\_006344.2  
119.9 NM\_006344.2  
117.8 NM\_002975.2  
118.9 NM\_138337.4  
132.3 NM\_201625.1  
120.7 NM\_138337.4  
111.3 NM\_205852.1  
113.6 NM\_175060.1  
120.6 NM\_016511.2  
111.3 NM\_016509.2  
1024.3 NM\_005127.2  
128.2 NM\_001004419.1  
300.2 NM\_013269.2  
114.2 NM\_005752.2  
111.5 NM\_003278.1  
149.5 NM\_194448.1  
116.9 NM\_203503.1  
121.6 NM\_130441.2  
116.1 NM\_080387.4  
115.4 NM\_014358.1  
111.3 NM\_173535.2  
116.3 NM\_198492.1  
106.6 NM\_214679.1  
270.8 NM\_013252.2  
111.4 NM\_001007033.1  
124.3 NM\_197950.2  
120.4 NM\_197954.1  
127.4 NM\_197953.1  
120 NM\_207345.1  
120.4 NM\_004362.1  
683.2 NM\_001288.4  
116.1 NM\_001289.4  
180.7 NM\_004669.2  
168.2 NM\_013943.1  
122.3 NM\_016929.1  
119.8 NM\_053277.1  
263.2 NM\_002956.2  
129.4 NM\_032421.2  
150 NM\_032421.2

155.8 NM\_015526.1  
461.3 NM\_001024646.1  
189.3 NM\_004071.2  
124.7 NM\_001291.2  
184.3 XM\_941392.1  
107.9 NR\_002711.1  
199.7 NM\_003992.1  
526.2 NM\_003992.1  
130.9 NM\_001292.1  
176 NM\_020666.2  
117.8 NM\_001025233.1  
116.4 NM\_001025232.1  
109.7 NM\_024734.2  
183.4 NM\_000086.1  
143.5 NM\_000086.1  
145.4 NM\_006493.1  
125.2 NM\_017882.1  
176.2 NM\_018941.2  
186.1 NM\_001293.1  
126.6 NM\_004898.2  
111.9 NM\_030813.3  
157.6 NM\_006012.2  
110.1 NM\_001832.2  
378.5 NM\_001294.1  
171.4 NM\_006660.3  
112.5 NM\_152311.1  
115.8 NM\_022111.2  
239.9 NM\_001009566.1  
105 XM\_937951.1  
112.3 NM\_022131.1  
122 NM\_014718.2  
452.9 NM\_001076677.1  
112.9 NM\_007096.1  
346.6 NM\_007096.1  
306.7 NM\_001834.2  
110.2 NM\_007097.2  
144.8 NM\_004859.2  
115.8 NM\_007098.1  
126 NM\_007098.1  
102.2 NM\_001831.2  
111.2 NM\_203339.1  
116.5 NM\_001831.2  
125.6 NM\_015041.1  
13238.6 NM\_024793.1  
113.2 NM\_015041.1  
116.9 NM\_199167.1  
137.3 NM\_014410.4  
121.5 NM\_199167.1  
124.4 NM\_206808.1  
118.2 NM\_206808.1  
119.9 NM\_001836.2

122.7 NR\_002174.1  
334.5 NM\_018686.3  
279.5 NM\_030629.1  
130 NM\_198390.1  
119.5 NM\_030629.1  
116.6 NM\_004072.1  
126 NM\_020311.1  
121.6 NM\_016347.1  
322.2 NM\_016308.1  
119.9 NM\_181270.1  
118.5 NM\_181289.1  
118.5 NM\_181301.1  
116.4 NM\_144673.2  
119.9 NM\_144601.2  
350.9 NM\_181555.1  
122 NM\_181553.1  
169.3 NM\_001048251.1  
133.1 NM\_178818.2  
121.2 NM\_178818.2  
118 NM\_138460.2  
577.2 NM\_138410.2  
143 NM\_138410.2  
147 NM\_181472.1  
518 NM\_178868.3  
104.2 NM\_194293.2  
109.9 NM\_152381.3  
121.6 NM\_001079810.1  
115.6 NM\_153610.3  
189.9 NM\_014865.2  
111.7 NM\_173538.1  
614 NM\_003418.1  
120.4 NM\_032649.5  
792.4 NM\_018235.1  
135.2 NM\_032488.2  
122.9 NM\_000087.2  
115.2 NM\_005140.1  
114.2 NM\_001298.1  
115.7 NM\_001298.1  
130 NM\_001298.1  
118.1 NM\_001037329.1  
117.5 NM\_001297.1  
117.9 NM\_019098.2  
240.8 NM\_001009551.1  
199.5 NM\_005776.2  
116.3 NM\_182553.1  
118.7 NM\_182553.1  
117.1 NM\_152495.1  
247.4 NM\_014184.1  
116.4 NM\_006314.1  
122.8 NM\_014927.2  
120.4 NM\_173515.2



110.4 NM\_001299.4  
129 NM\_004368.2  
320 NM\_201277.1  
162 NM\_001839.2  
125.2 NM\_020348.1  
117.8 NM\_017649.3  
176.1 NM\_199077.1  
123.7 NM\_199077.1  
171.2 NM\_017623.3  
138.1 NM\_020184.2  
160.5 NM\_018366.2  
122.5 NM\_206999.1  
1163.2 NM\_016284.3  
152.8 NM\_015442.1  
526.6 NM\_014515.3  
149.6 NM\_014516.2  
428.1 NM\_013316.2  
125.2 NM\_013316.2  
126.9 NM\_001008225.1  
304.9 NM\_015455.3  
162.5 NM\_144571.2  
177 NM\_054026.1  
197.8 NM\_013354.4  
111.9 NM\_054026.1  
195.6 NM\_004779.4  
130.2 NM\_033133.3  
119.3 NM\_016083.3  
111.6 NM\_001841.1  
111.5 NM\_173478.1  
120.8 NM\_000614.2  
120.5 NM\_147164.1  
113.9 NM\_147164.1  
118.1 NM\_001842.3  
112 NM\_001843.2  
114.3 NM\_001843.2  
113.3 NM\_005076.2  
119.6 NM\_020872.1  
136.5 NM\_175612.1  
112.3 NM\_175607.1  
118.7 NM\_175613.1  
121.7 NM\_014361.2  
115.4 NM\_014361.2  
115.1 NM\_014461.2  
131.1 NM\_003632.1  
119.7 NM\_014141.3  
113 NM\_033655.2  
120.2 NM\_138994.1  
114.7 NM\_033401.2  
121.3 NM\_130773.2  
115.5 NM\_138996.1  
130.2 NM\_053051.1

216.2 NM\_025233.4  
124.4 NM\_025233.4  
118.8 NM\_015198.2  
127.9 NM\_014900.3  
109.6 NM\_015456.2  
186 NM\_015456.2  
222.5 NM\_015456.2  
117.7 NM\_004086.1  
127 NM\_018714.1  
135.3 NM\_007357.1  
172.2 NM\_031431.2  
123.6 NM\_015386.1  
132.2 NM\_006348.2  
124.5 NM\_006348.2  
125 NM\_020751.1  
126.2 NM\_153603.1  
119.6 NM\_032382.2  
198.4 NM\_004645.2  
124 NM\_000493.2  
113.2 NM\_001854.2  
120.2 NM\_080629.1  
119.9 NM\_080629.2  
123.5 NM\_080629.2  
143.9 NM\_080681.2  
117.6 NM\_080680.1  
127.2 NM\_080645.1  
137.2 NM\_004370.4  
107.6 NM\_080805.2  
118.3 NM\_080815.2  
116.7 NM\_001855.2  
117.1 NM\_001856.2  
115.8 NM\_130778.1  
127.1 NM\_000494.2  
132.7 NM\_030582.2  
136.5 NM\_130445.1  
112.5 NM\_001858.4  
116.8 NM\_000088.2  
130.8 NM\_000089.3  
118.6 NM\_020882.1  
111.9 NM\_030820.2  
115.3 NM\_152888.1  
127.6 NM\_173465.2  
112.2 NM\_152890.4  
109.3 NM\_198721.1  
115.3 NM\_032518.2  
111.6 NM\_198721.1  
118 NM\_032888.2  
132.1 NM\_001844.3  
117.9 NM\_001844.3  
132.5 NM\_000090.2  
125.2 NM\_001845.3

123 NM\_001846.1  
112.9 NM\_000091.3  
118.8 NM\_000091.2  
175.4 NM\_005713.1  
402.5 NM\_005713.1  
115.2 NM\_000092.3  
115 NM\_033381.1  
109.8 NM\_033380.1  
100.2 NM\_033641.1  
119.6 NM\_001847.1  
117.9 NM\_001847.1  
115.7 NM\_000093.2  
116.9 NM\_000393.2  
116.5 NM\_015719.2  
126.8 NM\_001848.1  
125.9 NM\_058174.1  
119.7 NM\_001849.2  
125.8 NM\_058175.1  
110.6 NM\_004369.2  
118.7 NM\_057164.2  
138.7 NM\_000094.2  
115.9 NM\_020351.2  
115.3 NM\_020351.2  
114.6 NM\_001850.3  
120.7 NM\_005202.1  
117.4 NM\_001851.3  
120.5 NM\_078485.2  
121.1 NM\_001851.3  
113.6 NM\_001851.3  
124.6 NM\_001852.3  
116.2 NM\_001853.2  
118.5 NM\_006438.2  
114.8 NM\_199235.1  
112 NM\_199235.1  
141.6 NM\_024027.3  
120.1 NM\_130386.1  
116.1 NM\_030781.2  
130.6 NM\_080540.2  
120.9 NM\_080542.1  
110.4 NM\_080539.2  
111.8 NM\_080538.1  
177.4 NM\_152516.2  
133.3 NM\_016144.2  
144.3 NM\_016094.2  
280.5 NM\_012071.2  
147.4 NM\_017828.3  
202.1 NM\_014066.3  
123.5 NM\_014066.3  
1492.4 NM\_203495.1  
113.5 NM\_203497.1  
221.5 NM\_053041.1

126.8 NM\_017845.2  
202.4 NM\_014186.1  
117.6 NM\_000095.2  
130.3 NM\_000754.2  
324.5 NM\_000754.2  
    146 NM\_144589.2  
126.5 NM\_052889.2  
    118 NM\_052889.2  
821.3 NM\_004371.2  
932.9 NM\_016451.3  
328.8 NM\_004766.1  
267.5 NM\_199444.1  
284.2 NM\_199444.1  
135.3 NM\_016128.3  
110.6 NM\_012133.2  
115.2 NM\_004236.1  
556.8 NM\_003653.2  
248.4 NM\_016129.2  
1283.7 NM\_006837.2  
148.4 NM\_006833.4  
201.7 NM\_016319.1  
171.4 NM\_022730.1  
    113 NM\_198189.2  
123.2 NM\_006710.4  
340.6 NM\_016057.1  
123.2 NM\_016429.1  
153.1 NM\_144576.2  
1213.2 NM\_025147.2  
133.3 NM\_015697.5  
415.8 NM\_017421.2  
200.2 NM\_032314.2  
133.2 NM\_182476.1  
183.6 NM\_182480.1  
    129 NM\_016138.3  
143.6 NM\_020312.1  
109.2 NM\_006587.2  
395.2 NM\_007074.2  
126.5 NM\_020441.2  
155.4 NM\_020441.2  
146.8 NM\_014325.2  
149.8 NM\_052820.2  
118.9 NM\_052820.2  
130.9 NM\_003389.2  
    116 NM\_006091.2  
    121 NM\_032854.1  
176.1 NM\_024535.1  
111.1 NM\_001302.3  
133.9 NM\_021149.2  
116.2 NM\_006375.2  
    118 NM\_182314.1  
111.5 NM\_006375.2

131.7 NM\_001303.2  
116.9 NM\_004375.2  
112.6 NR\_000031.1  
111.3 NM\_078470.2  
132.9 NM\_004376.3  
1569.9 NM\_005694.1  
5502.5 NM\_001861.2  
    115 NM\_032609.2  
    131.6 NM\_006067.3  
    623.8 NM\_004255.2  
    712 NM\_001862.2  
    434.3 NM\_004373.2  
    106.7 NM\_005205.2  
1927.4 NM\_001863.3  
    112.8 NM\_144613.4  
1583.1 NM\_004374.2  
    125.5 NM\_001864.2  
2676.3 NM\_001865.2  
    539.5 NM\_001866.2  
    112.3 NM\_130902.1  
5101.2 NM\_001867.2  
    931 NM\_004074.2  
    112.2 NM\_182971.1  
    110.3 NM\_000096.1  
    154.8 NM\_014711.3  
    117 NM\_001868.1  
    123.4 NM\_001869.1  
    111.1 NM\_001870.1  
    116.1 NM\_016352.2  
    117.4 NM\_080385.2  
    109.3 NM\_020361.2  
    110.8 NM\_015692.1  
    134 NM\_001871.2  
    113.3 NM\_001872.2  
    109.9 NM\_016413.3  
    116 NM\_001872.2  
233.4 NM\_001304.3  
118.1 NM\_001873.1  
116.2 NM\_030594.2  
116.7 NM\_001079534.1  
114.4 NM\_030594.2  
137.2 XM\_944543.1  
141.8 NM\_182646.1  
119.9 NM\_014912.3  
194.2 NM\_030627.1  
113.2 NM\_006651.3  
129.4 NM\_001008220.1  
111.4 NM\_006650.3  
121.8 NM\_001030005.2  
137.4 NM\_001005502.1  
107.1 NM\_001874.3

114.3 NM\_001308.1  
127.8 XM\_942072.1  
113.2 NM\_001080513.1  
133.9 NM\_003915.2  
214.9 NM\_152931.1  
245.9 NM\_152931.1  
119.9 NM\_152727.4  
268.8 NM\_003909.2  
109.3 NM\_130808.1  
120.6 NM\_020939.1  
115.4 NM\_006032.2  
121.4 NM\_153636.1  
137.7 NM\_153634.2  
129.1 NM\_001033755.1  
117.9 NM\_173077.1  
106.6 NM\_001875.2  
220.2 NM\_013291.2  
147.9 NM\_017437.1  
143.6 NM\_016207.2  
173.8 NM\_032179.1  
145.9 NM\_017871.3  
533 NM\_006693.1  
113.7 NM\_001081559.1  
123 NM\_007007.1  
115.1 NM\_001876.2  
113 NM\_001031847.1  
130.7 NM\_001876.2  
169.7 NM\_152246.1  
118.5 NM\_152247.1  
123.1 NM\_152359.1  
156.9 NM\_000098.1  
124.5 NM\_031311.3  
124.1 NM\_031311.2  
113.4 NM\_033048.3  
119.1 NM\_019609.3  
131.3 NM\_198148.1  
124.6 NM\_001014447.1  
116.4 NM\_001014448.1  
105.1 NM\_001014447.1  
128.5 NM\_000573.3  
118.6 XM\_936516.1  
105.6 NM\_000651.3  
109.5 NM\_001006658.1  
115.9 NM\_001877.3  
124 NM\_004378.1  
140 NM\_001878.2  
141.6 NM\_003805.3  
162.7 NM\_020825.2  
118.4 NM\_000755.2  
115.3 NM\_004003.2  
108.9 NM\_201253.1

115.9 NM\_173689.4  
115.4 NM\_139161.2  
127.2 NM\_174881.2  
129.7 NM\_139161.2  
302.3 NM\_016302.2  
1405.4 NM\_004379.2  
132.3 NM\_006368.4  
110.7 NM\_052854.1  
151.7 NM\_194071.2  
    119 NM\_032607.1  
    120 NM\_130898.2  
121.3 NM\_182898.2  
111.1 NM\_182899.3  
108.7 NM\_001011666.1  
121.1 NM\_182898.2  
117.9 NM\_004904.2  
    144 NM\_004380.2  
745.1 NM\_004380.1  
127.6 NM\_004381.3  
120.4 NM\_001310.2  
752.4 NM\_003851.2  
117.9 NM\_153836.1  
129.2 NM\_015513.2  
119.9 NM\_001031717.1  
146.9 NM\_001031717.1  
111.3 NM\_001077415.1  
257.2 NM\_024324.2  
151.7 NM\_001881.2  
112.3 NM\_000756.1  
113.4 NM\_001882.3  
    136 NM\_004382.2  
117.8 NM\_004382.2  
101.5 NM\_001883.2  
112.4 NM\_014335.2  
156.9 NM\_153232.3  
118.1 NM\_016441.1  
173.5 NM\_001311.3  
109.6 NM\_001312.2  
127.1 NM\_206922.1  
138.1 NM\_175918.2  
259.1 NM\_014171.3  
115.8 NM\_001131.2  
106.1 NM\_001131.2  
117.3 NM\_003296.1  
117.1 NM\_006061.1  
110.9 NM\_031461.3  
125.6 NM\_031476.1  
356.4 NM\_016823.2  
154.8 NM\_016823.2  
960.4 NM\_005207.2  
158.9 NM\_016507.1

115.2 NM\_004750.2  
116.1 NM\_001012288.1  
362.9 NM\_015986.2  
    131 NM\_001014809.1  
121.6 NM\_001313.3  
106.8 NM\_001014809.1  
135.4 NM\_016652.3  
123.5 NM\_016190.1  
124.7 NM\_014675.2  
152.9 NM\_016424.3  
924.3 NM\_006107.2  
135.1 NM\_021151.2  
125.6 NM\_000567.2  
    229 NM\_030782.2  
111.6 NM\_004229.2  
205.9 NM\_004830.2  
128.9 NM\_015979.2  
119.7 NM\_004268.3  
182.2 NM\_004831.3  
115.5 NM\_004270.3  
118.5 NM\_018058.4  
112.4 NM\_019604.2  
124.7 NM\_006371.3  
110.2 NM\_006371.3  
122.4 NM\_015321.1  
139.4 NM\_181715.1  
119.6 NM\_000554.2  
672.8 NM\_004075.2  
145.8 NM\_021117.1  
115.8 NM\_000394.2  
112.7 NM\_001885.1  
121.8 NM\_005208.3  
114.3 NM\_057093.1  
119.6 NM\_057093.1  
148.9 NM\_001886.1  
119.4 NM\_001887.3  
141.4 NM\_000496.1  
112.3 NM\_004076.3  
129.4 NM\_014617.2  
131.6 NM\_005210.2  
    119 NM\_020989.2  
    109 NM\_006891.2  
139.5 NM\_144727.1  
226.8 NM\_017541.2  
117.3 NM\_015974.1  
129.8 NM\_001888.2  
122.6 NM\_001014444.1  
118.3 NM\_001888.2  
    149 NM\_001889.2  
144.9 NM\_005111.5  
109.6 NM\_198324.1



428.6 NM\_004077.2  
139.9 NM\_004077.2  
201.5 NM\_015989.3  
124.3 NM\_153479.1  
110.2 NM\_153478.1  
122.2 NM\_004909.1  
    110 NM\_001080848.1  
105.4 NM\_001080848.1  
113.7 NM\_203311.1  
289.1 NM\_003651.3  
116.3 NM\_014460.2  
    154 NM\_007158.4  
131.1 NM\_001007553.1  
341.3 NM\_001316.2  
    376 NM\_177436.1  
128.8 NM\_013434.3  
111.6 NM\_172210.1  
112.4 NM\_172212.1  
104.2 NM\_000757.3  
519.6 NM\_005211.2  
114.5 NM\_000758.2  
243.9 XM\_942501.1  
1283.1 NM\_172249.1  
265.5 NM\_172249.1  
    109 NM\_000395.1  
130.3 NM\_000759.2  
111.9 NM\_000759.2  
118.3 NM\_172220.1  
114.8 NM\_000760.2  
106.8 NM\_172313.1  
204.5 NM\_019015.1  
121.3 NM\_022640.2  
114.9 NM\_001317.3  
118.1 NM\_022644.2  
105.8 NM\_022644.2  
120.7 NM\_022579.1  
124.1 NM\_022581.1  
334.7 NM\_004383.1  
117.2 NM\_033225.3  
134.2 NM\_052896.2  
117.2 NM\_198124.1  
    120 NM\_198123.1  
115.1 NM\_052900.2  
118.1 NM\_001025104.1  
119.5 NM\_001890.1  
115.6 NM\_001891.1  
119.5 NM\_005212.1  
160.9 NM\_001892.4  
130.6 NM\_001025105.1  
    249 NM\_001892.4  
113.1 NM\_145203.2

603.8 NM\_139062.1  
221.3 NM\_139062.1  
686.1 NM\_152221.2  
125.3 NM\_001894.4  
147.4 NM\_152221.2  
160.6 NM\_022048.2  
122.3 NM\_001011664.2  
183.8 NM\_001319.5  
105.7 NM\_004384.2  
    199 NM\_001031812.1  
135.2 NM\_001044722.1  
    144 NM\_001895.3  
161.6 NM\_001895.3  
135.1 NM\_177559.2  
155.5 NR\_002207.1  
454.1 NM\_001896.2  
513.6 NM\_001320.5  
120.6 NM\_004385.2  
140.1 NM\_004386.1  
118.6 NM\_001897.3  
115.6 NR\_002194.1  
120.2 NM\_006574.2  
185.6 NM\_024790.3  
128.6 NM\_024790.3  
152.8 NM\_004078.1  
126.3 NM\_001321.1  
126.3 NM\_020536.2  
111.5 NM\_020536.2  
    123 NM\_177926.1  
110.8 NM\_003476.2  
117.6 NM\_175856.4  
111.5 NM\_001898.2  
114.5 NM\_130794.1  
113.8 NM\_130794.1  
127.4 NM\_001322.2  
295.1 NM\_000099.2  
113.7 NM\_001899.2  
118.7 NM\_001900.4  
109.8 NM\_001323.2  
    120 NM\_001323.2  
    439 NM\_003650.2  
116.7 NM\_005492.2  
108.5 NM\_001008693.1  
109.2 NM\_080610.1  
116.1 NM\_005213.3  
1299.1 NM\_000100.2  
129.3 NM\_001033521.1  
123.8 NM\_001033522.1  
136.6 NM\_001033522.1  
112.6 NM\_001324.2  
179.8 NM\_001325.2

138.3 NM\_015235.2  
236 NM\_001033505.1  
127.8 NM\_001033506.1  
334.5 NM\_001326.2  
177.8 NM\_001033505.1  
113.7 NM\_138283.1  
110.6 NM\_001017417.1  
117.3 NM\_001017436.1  
109.6 NM\_001007551.2  
128.5 NM\_001007551.2  
118.3 NM\_001007551.2  
106.7 NM\_001080146.1  
113.2 NM\_001080141.1  
118.7 NM\_001080140.1  
129.9 NM\_139250.1  
115 NM\_001327.1  
114.8 NM\_020994.2  
117 NM\_020994.2  
107 NM\_022663.1  
128.2 NM\_203355.1  
109.8 NM\_203354.1  
117.8 NM\_203356.1  
124.2 NM\_203356.1  
117.8 NM\_001012614.1  
111.6 NM\_001328.2  
172.1 NM\_001012614.1  
131.5 NM\_001329.1  
121.5 NM\_022802.1  
180.9 NM\_004388.1  
157.8 NM\_006565.2  
123 NM\_080618.2  
136.4 NM\_004715.3  
113 NM\_004715.3  
147.9 NM\_004715.3  
154 NM\_021198.1  
119.6 NM\_182642.1  
908.8 NM\_005730.2  
131.6 NM\_005808.2  
126.8 NM\_016396.2  
117.4 NM\_001330.2  
118 NM\_001040144.1  
118.7 NM\_001901.2  
128.7 NM\_133446.1  
384.1 NM\_001077665.1  
153.4 NM\_001077685.1  
217.4 NM\_153742.3  
123.5 NM\_001902.4  
115.6 NM\_138455.2  
127.2 NM\_005214.3  
118 NM\_005214.3  
145.5 NM\_005214.2

317.8 NM\_001903.2  
109.6 NM\_004389.2  
119.4 NM\_013266.1  
448.2 NM\_003798.1  
154.4 NM\_001904.2  
124.7 NM\_001904.2  
129.3 NM\_001012329.1  
110.8 NM\_020248.2  
243.4 NM\_030877.3  
110.6 XM\_943098.1  
115.2 NM\_001331.1  
122.2 NM\_001332.2  
110.7 NM\_001031681.1  
195.9 NM\_004937.1  
129.2 NM\_004937.1  
    196 NM\_001905.1  
112.8 NM\_019857.3  
129.9 NM\_175859.1  
120.7 NM\_175859.1  
113.5 NM\_175859.1  
137.5 NM\_014633.2  
113.9 NM\_001906.4  
111.1 NM\_001906.4  
133.8 NM\_001025200.2  
137.5 NM\_007272.2  
167.4 NM\_001907.1  
2634.3 NM\_001908.3  
118.6 NM\_148170.2  
152.5 NM\_001814.2  
184.8 NM\_001814.2  
241.5 NM\_001909.3  
128.4 NM\_148964.1  
124.7 NM\_001910.2  
    129 NM\_001910.2  
    111 NM\_003793.2  
123.4 NM\_001911.2  
159.1 NM\_004390.2  
    132 NM\_004390.2  
144.3 NM\_000396.2  
197.4 NM\_001912.2  
1142.3 NM\_145918.2  
1014.6 NM\_145918.2  
    125.9 NM\_001333.2  
    145.4 NM\_001334.2  
    138.7 NM\_004079.3  
        139 NM\_001335.2  
202.8 NM\_001336.2  
113.8 NM\_138565.1  
111.9 NM\_138565.1  
110.2 NM\_005231.2  
115.4 NM\_033427.1

119.5 NM\_018704.1  
115.8 NM\_206833.1  
108.4 NM\_001048252.1  
113.6 NM\_001081.2  
138.2 NM\_017949.1  
156.7 NM\_024040.1  
118.3 NM\_198700.1  
133.6 NM\_198700.1  
116.4 NM\_001025076.1  
149.1 NM\_006561.2  
137.8 NM\_001025077.1  
206.2 NM\_003592.2  
213.9 NM\_003591.2  
116.7 NM\_003590.2  
121.8 NM\_001008895.1  
238.2 NM\_003589.2  
115.7 NM\_001079872.1  
129.6 NM\_003588.2  
179.6 NM\_003478.3  
118.7 NM\_014780.3  
689.7 NM\_001014433.2  
305.7 NM\_001014840.1  
    126 NM\_015921.2  
152.8 NM\_015960.1  
116.5 NM\_181500.1  
255.3 NM\_181552.1  
110.4 NM\_001913.2  
102.8 NM\_015267.1  
117.5 NM\_022034.3  
570.8 NM\_018294.3  
195.9 NM\_152434.1  
113.1 NM\_020660.1  
111.1 NM\_002996.3  
320.7 NM\_001337.3  
127.6 NM\_153368.1  
    110 NM\_032602.1  
    115 NM\_001338.3  
    120 NM\_001511.1  
103.2 NM\_001565.1  
116.6 NM\_005409.3  
    116 NM\_199168.2  
126.2 NM\_001033886.1  
    128 NM\_006419.1  
    125 NM\_004887.3  
    773 NM\_022059.1  
137.7 NM\_002089.1  
140.1 NM\_002090.2  
123.5 NM\_002994.3  
113.3 NM\_002993.2  
120.9 NM\_002416.1  
124.3 NM\_001504.1

235.4 NM\_001008540.1  
118.2 NM\_001008540.1  
669.8 NM\_003467.2  
200.1 NM\_006564.1  
110.4 NM\_001047841.1  
109.6 NM\_004709.2  
122.7 NM\_003492.1  
126.2 NM\_018360.1  
125.7 NM\_001586.1  
124.6 NM\_153346.2  
115.6 NM\_025159.1  
121.4 NM\_152632.1  
117.1 NM\_198279.1  
209.5 NM\_016500.3  
118.1 NM\_198450.1  
107.1 NM\_024917.4  
132.6 NM\_024689.1  
156.1 NM\_144970.1  
178.1 NM\_207318.1  
193.7 NM\_178124.3  
159.2 NM\_001013845.1  
103.1 NM\_173494.1  
121.3 NM\_144657.2  
164.3 NM\_138362.1  
185.1 NM\_024810.1  
110.2 NM\_001031705.1  
114.4 NM\_017863.2  
130.9 NM\_024332.2  
117.3 NM\_152425.1  
140.3 NM\_022101.2  
126.1 NM\_005491.1  
179.1 NM\_018990.2  
146.5 NM\_003928.1  
621 NM\_014593.2  
142.7 NM\_025212.1  
168.6 NM\_016463.5  
117.5 NM\_030625.1  
1856 NM\_005088.2  
138.6 NM\_001017916.1  
129.6 NM\_001017917.1  
124.9 NM\_001915.3  
140.4 NM\_007022.3  
146 NM\_148923.2  
120.6 NM\_001914.2  
163.8 NM\_144607.2  
141.5 NM\_144611.2  
459.9 NM\_030579.1  
351.4 NM\_016243.2  
131.8 NM\_016229.2  
139.2 NM\_007326.2  
795.9 NM\_007326.2

235.6 NM\_016230.2  
555.2 NM\_000101.2  
240.4 NM\_153611.3  
115.8 NM\_000397.2  
120.7 NM\_024843.2  
255.3 NM\_001916.2  
258.5 NM\_018947.4  
187.9 NR\_001561.1  
115.4 NM\_014608.2  
174.7 NM\_001033028.1  
133.6 NM\_001033028.1  
116.3 NM\_001037333.1  
252.6 NM\_001037333.1  
613.9 NM\_014376.1  
119.5 NM\_134268.3  
117.1 NM\_032687.2  
126.4 NM\_021118.1  
    126 NM\_001340.1  
114.1 NM\_015247.1  
352.6 NM\_015247.1  
131.6 NM\_003388.3  
120.4 NR\_001544.1  
156.2 NM\_001005852.1  
133.1 NM\_032576.2  
129.8 NM\_000781.1  
123.8 NM\_001026213.1  
120.2 NM\_000498.2  
115.1 NM\_000102.2  
115.6 NM\_000103.2  
118.1 NM\_031226.1  
145.6 NM\_031226.1  
127.2 NM\_000499.2  
111.1 NM\_000761.3  
571.7 NM\_000104.2  
222.8 NM\_177538.1  
114.8 NM\_177538.1  
129.7 NM\_000500.5  
120.1 NM\_000782.3  
116.6 NM\_057157.1  
120.7 NM\_000783.2  
116.5 NM\_057157.1  
    119 NM\_019885.2  
117.1 NM\_183374.2  
478.6 NM\_000784.2  
119.3 NM\_000785.3  
111.4 NM\_000766.3  
105.3 NM\_000762.4  
119.8 NM\_030589.2  
113.7 NM\_000767.4  
110.3 NR\_001278.1  
116.4 NM\_000772.1

110.6 NM\_000769.1  
121.2 NM\_000770.2  
108.8 NM\_000771.2  
    117 NM\_000106.4  
120.3 NR\_002570.2  
130.8 NM\_000773.3  
115.2 NM\_000774.3  
121.8 NM\_000775.2  
202.7 NM\_024514.4  
114.9 NM\_030622.5  
    118 NM\_030622.6  
117.3 NM\_183075.2  
    126 NM\_017781.2  
121.4 NM\_016593.3  
110.7 NM\_017460.3  
    107 NM\_057096.2  
112.5 NM\_057095.1  
118.4 NM\_000777.2  
117.8 NM\_000765.2  
114.9 NM\_006668.1  
120.4 NM\_000778.2  
116.7 NM\_001010969.2  
121.9 NM\_000779.2  
    116 NM\_021187.2  
113.6 NM\_023944.1  
117.4 NM\_001082.3  
124.3 NM\_000896.2  
112.4 NM\_007253.2  
129.6 NM\_207352.2  
117.8 NM\_178033.1  
    116 NM\_178134.2  
    114 NM\_178134.2  
112.1 NM\_178134.2  
122.4 NR\_002788.1  
140.9 NM\_000786.2  
113.7 NM\_000780.2  
118.4 NM\_004820.2  
128.6 NM\_004391.1  
116.3 NM\_001554.3  
121.7 XM\_927934.1  
114.9 NM\_001037160.1  
138.2 NM\_006639.2  
116.9 NM\_020377.2  
114.2 NM\_018659.2  
112.1 NM\_052954.2  
225.2 NM\_015704.1  
128.1 NM\_003683.4  
141.1 NM\_152783.3  
142.5 NM\_014392.2  
135.7 NM\_130468.2  
122.7 NM\_014992.1



129.8 NM\_015345.2  
117.3 NM\_021080.3  
164.5 NM\_001343.1  
108.7 NM\_032552.1  
116.4 NM\_138709.1  
112.2 NM\_138709.1  
112.3 NM\_080760.3  
117.4 NM\_080759.3  
114.6 NM\_080759.3  
112.2 NM\_016651.5  
112.5 NM\_016651.4  
118 NM\_016651.5  
110.2 NM\_214462.1  
2126.7 NM\_001344.1  
120.8 NM\_004393.1  
112.9 NM\_015533.2  
126.6 NM\_018114.4  
119.4 NM\_018114.4  
149.8 NM\_152654.2  
114.8 NM\_001917.3  
128.6 NM\_172370.2  
122 NM\_004394.1  
716.3 NM\_033657.1  
119 NM\_004938.1  
114.2 NM\_014326.3  
131 NM\_001348.1  
2249.8 NM\_014395.1  
121.1 NM\_002036.2  
597.1 NM\_001349.2  
127.1 NM\_018122.3  
161.3 NM\_001350.3  
115 NM\_004081.4  
110 NM\_020363.2  
122.1 NM\_001005785.1  
111.7 NM\_020420.2  
113.3 NM\_170711.1  
204 NM\_018959.2  
3864.7 NM\_014764.2  
111.2 NM\_001351.2  
108.9 NM\_014618.1  
123.7 NM\_006716.3  
121.9 NM\_025104.2  
108.5 NM\_145663.1  
118.6 NM\_000787.2  
446.7 NM\_001079863.1  
152.6 NM\_020548.4  
164.6 NM\_080881.1  
126.1 NM\_004395.2  
191.1 NM\_001042610.1  
112.6 NM\_001048221.1  
202.2 NM\_014063.5

125.1 NM\_014063.5  
117.8 NM\_001352.2  
118.6 NM\_016216.2  
207.1 NM\_001918.1  
118.6 NM\_001029865.1  
117.5 NM\_001004329.2  
149.7 NM\_021227.2  
205.9 NM\_024819.3  
    144 NM\_172004.2  
122.6 NM\_004734.2  
112.3 NM\_001040260.1  
112.9 NM\_152619.1  
154.4 NM\_173674.1  
132.7 NM\_080927.3  
117.5 NM\_005215.1  
119.5 NM\_024094.1  
115.8 NM\_053283.1  
115.9 NM\_181807.1  
113.8 NM\_016356.1  
225.2 NM\_198462.2  
137.3 NM\_003737.2  
115.8 NM\_017639.2  
127.9 NM\_001919.2  
141.1 NM\_000788.1  
122.1 NM\_014881.2  
    124 NM\_022836.2  
150.3 NM\_001033858.1  
118.9 NM\_001033858.1  
433.2 NM\_022487.2  
113.6 NM\_001920.3  
118.8 NM\_133503.2  
118.7 NM\_133505.2  
314.2 NM\_018403.2  
129.9 NM\_152640.3  
415.9 NM\_152624.4  
114.2 NM\_014026.3  
120.6 NM\_152494.1  
116.4 NM\_144622.1  
118.9 NM\_001922.2  
117.7 NM\_001921.2  
    182 NM\_001921.2  
187.6 NM\_023019.1  
114.4 NM\_004082.2  
    131 NM\_023019.1  
495.5 NM\_006400.3  
125.1 NM\_024348.2  
265.1 NM\_024348.2  
164.7 NM\_016221.2  
361.5 NM\_032486.2  
128.8 NM\_006571.2  
148.7 NM\_152277.1

115 NM\_020640.2  
130.9 NM\_001014283.1  
352.5 NM\_173475.1  
126 NM\_015115.1  
385.1 NM\_015115.1  
426.6 NM\_032299.2  
113.6 NM\_178151.1  
116.7 NM\_000555.2  
196.4 NM\_016286.2  
466 NM\_024050.4  
115.2 NM\_012137.2  
176.2 NM\_013974.1  
1013 NM\_001923.2  
127.2 NM\_001923.2  
119 NM\_000107.1  
107.7 NM\_000790.2  
152.2 NM\_018482.2  
127.4 NM\_003887.1  
136.6 NM\_017707.2  
110.4 NM\_030637.1  
117.9 NM\_015214.1  
121.2 NM\_001001711.1  
110.5 NM\_032341.3  
1953.4 NM\_004083.4  
1318.4 NM\_019058.2  
129.2 NM\_145244.2  
154.5 NM\_015086.1  
115.1 NM\_003649.2  
125.6 NM\_004032.2  
209.3 NM\_005216.3  
115.9 NM\_001954.3  
123.9 NM\_013994.2  
113.8 NM\_001954.3  
117.8 NM\_001014796.1  
131.8 NM\_006182.2  
532.7 NM\_001355.2  
343.5 NM\_004939.1  
168.2 NM\_004398.2  
122.7 NM\_030653.3  
120.5 NM\_030653.3  
124.1 NM\_004399.1  
492.2 NM\_030881.2  
131.4 NM\_030881.2  
185.4 NM\_006386.3  
232.7 NM\_006773.3  
192.6 NM\_018332.3  
194 NM\_001014451.1  
118.9 NM\_007204.3  
422.4 NM\_004728.2  
313.8 NM\_004818.2  
279 NM\_020414.3

114.3 NM\_013264.2  
1254.6 NM\_012141.1  
130.2 NM\_182540.3  
202.4 NM\_017895.6  
125.8 NM\_018380.2  
134.2 NM\_022779.7  
122.6 NM\_138620.1  
122.9 NM\_138620.1  
1567.6 NM\_005804.2  
125.5 NM\_024005.1  
1047.9 NM\_001356.2  
128 NM\_004660.2  
112.1 NM\_019039.1  
153.8 NM\_016222.2  
113.1 NM\_007372.2  
246.3 NM\_007372.2  
164.5 NM\_018665.1  
135.6 NM\_014829.2  
155.8 NM\_016355.3  
225.5 NM\_201224.1  
1774.3 NM\_014740.2  
124.7 NM\_019070.3  
9538.4 NM\_004396.2  
124 NM\_024045.1  
2765.3 NM\_175066.2  
127.3 NM\_007010.2  
122.1 NM\_182699.2  
144.8 NM\_024072.3  
171.4 NM\_020936.1  
300.3 NM\_019082.2  
114.8 NM\_014314.2  
197.7 NM\_001031725.1  
120.7 NM\_031306.1  
119.5 NM\_001031725.1  
123.2 NM\_004397.3  
110.9 NM\_182503.1  
127.4 NM\_021008.2  
112.6 NM\_021008.2  
107.2 NM\_017418.1  
175.1 NM\_001359.1  
136.3 NM\_020664.3  
268 NM\_001039712.1  
131.1 NM\_032998.1  
139.3 NM\_004216.2  
2189.1 NM\_133328.2  
224.6 NM\_022047.2  
364 NM\_004084.2  
253.3 NM\_005217.2  
116.7 NM\_001925.1  
117.9 NM\_021010.1  
114.5 NM\_001926.2

122.8 NM\_005218.3  
120 NM\_018661.3  
118.4 NM\_001040702.1  
115.9 NM\_152250.1  
119.7 NM\_152251.2  
126.4 NM\_001040704.1  
127.1 NM\_001037668.1  
121.2 NM\_001002035.1  
111.3 NM\_001037380.1  
120.4 NM\_001037728.1  
118 NM\_001037497.1  
114.9 NM\_001037498.1  
120.6 NM\_001037499.1  
114 NM\_054112.1  
121.8 NM\_153323.3  
108.9 NM\_153323.3  
111.8 NM\_001011878.1  
114.4 NR\_002577.1  
113.1 NM\_153324.2  
117.7 NM\_001037500.1  
120.3 NM\_153325.2  
117.5 NM\_030931.2  
114 NM\_139074.2  
116.3 NM\_001037732.1  
116.8 NM\_080831.2  
152.5 NM\_001040448.1  
107.1 NM\_001033019.1  
115.2 NM\_001033017.1  
121.7 NM\_001033018.1  
121.2 NM\_207469.1  
126.5 NM\_004942.2  
745.9 NM\_003676.2  
239.6 NM\_003676.2  
112.1 NM\_206918.1  
937.2 NM\_003472.2  
117.7 NM\_024820.2  
119.7 NM\_020946.1  
114.2 NM\_024820.2  
106.3 NM\_144977.1  
152.3 NM\_024898.1  
120.6 NM\_015689.2  
113.2 NM\_198459.3  
187.8 NM\_024901.3  
136.1 NM\_014957.2  
152.4 NM\_005848.2  
247.3 NM\_017925.3  
359.8 NM\_003677.3  
111.1 NM\_017779.3  
114.3 NM\_018369.1  
112.8 NM\_025170.4  
115.9 NM\_024870.2

115.8 NM\_152317.2  
145.2 NM\_014662.2  
115.4 NM\_001007188.1  
108.5 NM\_001007188.1  
113.2 NM\_022783.1  
116.3 NM\_001077242.1  
114.2 NM\_001077242.1  
218 NM\_015954.1  
412.3 NM\_024295.3  
252.2 NM\_016041.2  
127.8 NM\_198440.2  
121.1 NM\_001002862.1  
128.4 NM\_001002847.1  
121.5 NM\_017804.3  
118.6 NM\_001927.3  
138.8 NM\_017996.2  
234.3 NM\_014015.3  
238 NM\_004401.2  
120 NM\_213566.1  
117.2 NM\_001004285.1  
126.3 NM\_001004286.1  
152.9 NM\_004403.1  
129.1 NM\_015404.1  
114 NM\_001042702.1  
122.8 NM\_012079.2  
131.3 NM\_032564.2  
118.6 NM\_001013579.1  
110.7 NM\_001002254.1  
118.5 NM\_198512.1  
143.1 NM\_001024733.1  
127.4 NM\_022719.1  
138.7 NM\_005137.1  
118.5 NR\_002733.1  
120.8 NM\_005675.3  
145.5 NM\_022720.5  
119.5 NM\_001345.4  
114.1 NM\_201445.1  
143.3 NM\_201554.1  
136.7 NM\_201444.2  
194.9 NM\_201554.1  
120 NM\_145695.1  
127.1 NM\_145695.1  
102.7 NM\_004080.1  
133.8 NM\_152879.2  
129.8 NM\_152879.2  
112.8 NM\_003648.2  
114.4 NM\_003647.1  
119.1 NM\_001346.1  
108.8 NM\_152910.3  
124.8 NM\_178009.2  
109.6 NM\_004717.2

112.3 NM\_001013742.1  
175.6 NM\_001347.2  
112.1 NM\_201532.1  
130 NM\_003646.2  
114.1 NM\_201533.1  
728.1 NM\_080916.1  
786.3 NM\_080916.1  
220.7 NM\_080916.1  
114.4 NM\_014762.2  
160.7 NM\_001360.2  
154.9 NM\_024887.2  
123.7 NM\_024887.2  
667.6 NM\_014475.2  
112.1 NM\_000791.3  
121.4 NM\_176815.2  
126.7 NM\_021044.2  
111.3 NM\_001025193.1  
113.9 NM\_001361.3  
160.4 NM\_001930.2  
184.6 NM\_001930.2  
189.6 NM\_013406.1  
213.1 NM\_138452.1  
120.9 NM\_016246.2  
113.4 NM\_182908.3  
115.1 NM\_182908.3  
179.3 NM\_004753.4  
203.9 NM\_021004.2  
125.2 NM\_198083.1  
371.8 NM\_016029.1  
120.2 NM\_015510.3  
149.3 NM\_016245.2  
595.1 NM\_005771.3  
137.1 NM\_005771.3  
117 NM\_199204.1  
179.4 NM\_005771.3  
130.3 NM\_145177.1  
137.7 NM\_018706.4  
1040.6 NM\_001358.2  
324.2 NM\_003587.3  
274.9 NM\_019030.2  
312.8 NM\_014966.2  
112.3 NM\_138614.1  
169.9 NM\_014966.2  
122.2 NM\_018180.2  
169.9 NM\_020162.2  
198.6 NM\_194428.1  
151.8 NM\_021931.2  
192.1 NM\_020865.1  
159.3 NM\_032656.2  
274.5 NM\_014003.3  
389.6 NM\_024612.3

164.6 NM\_024612.3  
116.6 NM\_144995.2  
112.2 NM\_198963.1  
132 NM\_004941.1  
219.5 NM\_001357.2  
832.2 NM\_138930.2  
210.7 NM\_019887.3  
149.9 NM\_138930.2  
215.1 NM\_005219.2  
885.7 NM\_005219.3  
141.7 NM\_007309.1  
118.1 NM\_001042517.1  
118 NM\_030932.2  
119.5 NM\_001042517.1  
109.3 NM\_030621.2  
131.1 NM\_177438.1  
124.6 NM\_030621.2  
145 NM\_080796.2  
200.4 NM\_080797.2  
115.8 NM\_080796.2  
120.7 NM\_000792.4  
118.9 NM\_213593.3  
114.5 NM\_000792.4  
113 NM\_001007023.1  
119.5 NM\_013989.2  
106.6 NM\_001362.2  
127.4 NM\_015124.2  
257.9 NM\_018171.2  
122.6 NM\_206891.1  
108.7 NM\_206889.1  
150.2 NM\_206890.1  
145.8 NM\_206889.1  
136 NM\_015151.2  
340 NM\_173602.2  
116 NM\_014974.1  
108.1 NM\_006848.2  
109.1 NM\_145173.1  
118 NM\_017594.3  
118.6 NM\_004675.2  
112.2 NM\_052952.1  
287.4 NM\_032839.1  
109.8 NM\_001012959.1  
116.8 NM\_001012958.1  
120.2 NM\_001012959.1  
114.7 NM\_018662.2  
128.4 NM\_032890.2  
116.9 NM\_033510.1  
124.7 NM\_001037954.2  
115.6 NM\_001037954.2  
109.2 NM\_033425.1  
166.3 NM\_020466.3



131.9 NR\_002184.1  
327.1 NM\_001363.2  
112.8 NM\_001002840.1  
119.5 NM\_018991.2  
185.5 NM\_015395.1  
105.5 NM\_178275.3  
124.5 NM\_194295.1  
207.7 NM\_152892.1  
121.8 NM\_015594.2  
120.6 NM\_194302.1  
123.4 NM\_207343.1  
119.6 NM\_207343.1  
113.8 NM\_020161.2  
128.5 XR\_001087.1  
227.5 NM\_015459.3  
124.8 NM\_015398.1  
121.6 NM\_015398.1  
1903.8 NM\_032121.3  
115.6 NM\_182595.2  
154.4 NM\_032120.1  
138.1 NM\_015393.2  
131.4 NM\_030923.2  
138.2 NM\_206914.1  
    129 NM\_206914.1  
    112 NM\_015430.2  
116.9 NM\_001001991.1  
201.9 NR\_002186.1  
121.8 NM\_015531.2  
113.2 NM\_001008226.1  
115.7 NM\_153605.2  
120.3 NM\_014988.1  
115.3 NM\_033107.1  
109.4 NM\_001017992.1  
128.2 NM\_001048249.1  
114.1 NM\_207495.2  
122.9 NM\_001024596.1  
233.8 NM\_001012987.1  
225.1 NM\_194282.1  
100.2 NM\_173463.2  
133.3 NM\_138368.2  
123.2 NM\_031297.2  
155.3 NM\_031449.3  
120.3 NM\_018410.2  
    409 NM\_152411.1  
125.6 NM\_001010903.2  
117.4 NM\_001037232.2  
118.4 XM\_945945.1  
134.2 NM\_152622.2  
112.5 NM\_012242.2  
115.9 NM\_014421.2  
131.1 NM\_015881.5

122.1 NM\_013253.4  
117.9 NM\_013253.4  
125.2 NM\_013253.4  
121.4 NM\_014420.2  
125.3 NM\_014419.3  
136.1 NM\_001931.2  
117.3 NM\_024767.2  
    129 NM\_006094.3  
155.2 NM\_000108.2  
119.6 NM\_005106.2  
120.2 NM\_007337.2  
120.4 XR\_001515.1  
121.7 NR\_002605.1  
116.1 NR\_002771.1  
109.5 NM\_198989.1  
127.1 NM\_004087.1  
115.7 NM\_001364.1  
126.7 NM\_021120.1  
112.8 NM\_021120.1  
112.2 NM\_021120.1  
126.4 NM\_001365.1  
127.1 NM\_004747.2  
    118 NM\_014750.3  
112.7 NM\_004746.2  
121.6 NM\_001003809.1  
126.6 NM\_004745.3  
125.6 XM\_940825.1  
120.9 NM\_183006.1  
111.8 NM\_014902.2  
160.5 NM\_014902.2  
112.4 NM\_003836.4  
    106 NM\_003836.4  
139.4 NM\_005618.2  
120.8 NM\_016941.2  
107.6 NM\_016941.2  
    130 NM\_019074.2  
205.5 NM\_198489.1  
367.6 NM\_001933.3  
115.1 NM\_001038493.1  
123.2 NM\_178120.3  
120.7 NM\_004405.2  
122.9 NM\_005220.2  
121.6 NM\_001934.2  
117.8 NM\_138281.1  
112.8 NM\_001934.2  
110.5 NM\_005221.4  
116.6 NM\_005222.2  
    202 NM\_019100.3  
182.2 NM\_001034024.1  
118.6 NM\_017579.1  
117.2 NM\_172225.1

2602.9 NM\_007068.2  
127.6 NM\_004006.1  
119.3 NM\_004012.1  
167.2 NM\_004010.1  
120.5 NM\_004014.1  
114.2 NM\_004019.1  
116.5 NM\_004009.1  
115.1 NM\_004019.1  
121.7 NM\_000109.2  
118.9 NM\_013391.2  
141.5 NM\_015286.4  
121.6 NM\_145728.1  
116.7 NM\_004407.2  
117.8 NM\_001081563.1  
118.3 NM\_004409.2  
116.1 NM\_021951.2  
116.5 NM\_181872.1  
126.9 NM\_006557.3  
105.6 NM\_021240.2  
125.4 NM\_022160.1  
110.6 NM\_033067.1  
115.5 NM\_001040283.1  
262.4 NM\_021145.2  
144.7 NM\_004943.1  
118 NM\_005509.3  
119.2 NM\_015263.1  
131.9 XM\_938629.1  
131.7 NM\_001080449.1  
167.6 NM\_015512.3  
112.6 NM\_207437.1  
116.3 NM\_003777.2  
114.6 NM\_003727.1  
120.1 NM\_017539.1  
124 NM\_001369.1  
129 NM\_018897.1  
127.3 NM\_001371.1  
117.6 NM\_004662.1  
120.5 NM\_001372.2  
114.4 NM\_001372.2  
117.9 NM\_173628.1  
116.2 NM\_012144.2  
137.6 NM\_023036.1  
13517.7 NM\_001539.2  
545.4 NM\_005880.2  
266.8 NM\_005147.3  
9226.7 NM\_018602.2  
124.4 NM\_194283.3  
127.1 NM\_001012339.2  
8300.7 NM\_006145.1  
955.8 NM\_016306.4  
131.3 NM\_017626.3

129.1 NM\_001002762.1  
116.5 XM\_944538.1  
123.7 NM\_153614.2  
126.6 NM\_001031723.1  
234.2 NM\_001031723.1  
114.9 NM\_024920.3  
124.3 NM\_006736.5  
1264.7 NM\_006736.5  
245.5 NM\_007034.3  
127.9 NM\_012266.3  
121 NM\_012266.3  
4197.8 NM\_005494.2  
2927.4 NM\_058246.3  
128.6 NM\_145174.1  
124.2 NM\_153330.2  
792.4 NM\_012328.1  
118.9 NM\_022365.2  
147 NM\_018981.1  
113.8 NM\_018198.1  
121.8 NM\_021800.2  
117.4 NM\_201262.1  
125.9 NM\_201262.1  
140.1 NM\_015268.2  
143 NM\_032364.4  
223 NM\_013238.2  
111.9 NM\_015291.1  
127.6 NM\_018163.1  
119.9 NM\_152686.2  
117.9 NM\_145261.2  
147.5 NM\_006260.2  
125.3 NM\_005528.1  
186.3 NM\_025219.1  
110.5 NM\_033105.3  
113.3 NM\_173650.1  
110.4 NM\_014787.2  
374.7 NM\_003315.1  
3301.2 NM\_014280.1  
446 NM\_015190.3  
115.8 NM\_031427.1  
173.1 NM\_005740.2  
134.2 NM\_003462.3  
138.3 NM\_015535.1  
120.2 NM\_005223.3  
118.4 NM\_001009934.1  
117.7 NM\_006730.2  
127.1 NM\_006730.2  
116.7 NM\_001009932.1  
118 NM\_001374.2  
112.4 NM\_004944.2  
261.6 NM\_001375.2  
122.9 NM\_058248.1

117.2 NM\_021233.2  
120.2 NM\_021233.2  
173.9 NM\_177953.1  
146.4 NM\_177953.1  
110 NM\_194249.1  
121.9 NM\_139072.2  
125.1 NM\_144666.1  
132.3 NM\_178504.3  
118 NM\_020877.2  
111.2 NM\_004408.2  
360 NM\_012062.2  
139.5 NM\_005690.2  
149.3 NM\_004945.2  
176.4 NM\_004945.2  
114.2 NM\_015569.2  
107.2 NM\_015221.1  
756.9 NM\_001379.1  
126.1 NM\_176085.1  
113.4 NM\_175630.1  
126.9 NM\_022552.3  
124 NM\_153759.2  
121 NM\_175850.1  
107.5 NM\_006892.3  
116.7 NM\_006892.3  
111 NM\_175867.1  
118.5 NM\_013369.2  
172.5 NM\_012100.1  
113.2 NM\_001017520.1  
113.1 NM\_001017520.1  
167.7 NM\_052951.2  
163.6 NM\_014597.3  
115.4 NM\_014890.1  
117.4 NM\_182909.1  
114.9 NM\_182909.1  
113.3 NM\_003586.2  
112.9 NM\_003585.1  
125 NM\_001380.2  
478.8 NM\_014689.1  
407.4 NM\_144658.2  
229.5 NM\_004946.1  
111 NM\_004947.3  
120.4 NM\_014705.2  
117.7 NM\_024940.4  
120.7 NM\_020812.1  
106.2 NM\_033407.2  
230.9 NM\_203447.1  
140.1 NM\_015296.1  
122 NM\_001381.2  
117.6 NM\_003974.2  
188.9 NM\_201349.1  
116.5 NM\_024872.1

131.1 NM\_018110.2  
119 NM\_018431.3  
110.7 NM\_152721.2  
164.8 NM\_020438.3  
183.9 NM\_005510.3  
213.4 NM\_145794.1  
129.3 NM\_017613.2  
118.3 NM\_015018.2  
301.5 NM\_005128.2  
120.2 NM\_032482.1  
104.8 NM\_001004441.1  
115.5 NM\_001382.2  
134.3 NM\_001382.2  
118.2 NM\_080870.2  
117.5 NM\_004413.1  
146.5 NM\_022355.1  
124.1 NM\_022357.1  
125.7 NM\_004647.1  
328.5 NM\_006268.3  
114.5 NM\_012074.1  
122.1 NM\_001383.2  
125.9 NM\_001384.3  
107.6 NM\_001384.4  
143.8 NM\_001384.4  
220.4 NM\_001047434.1  
132 NM\_001047434.1  
157.5 NM\_015958.1  
135.6 NM\_001077395.1  
392.1 NM\_003859.1  
131.8 NM\_003863.2  
124.7 NM\_018973.3  
176.2 NM\_153741.1  
121.5 NM\_001004360.1  
119.1 NM\_020868.2  
135.1 NM\_130443.1  
122.6 NM\_005700.2  
169.6 NM\_005700.3  
127.7 NM\_001935.3  
135.8 NM\_130797.1  
114.3 NM\_001936.2  
156.8 NM\_013379.2  
181.3 NM\_013379.2  
148 NM\_130434.3  
176.5 NM\_130434.2  
127.1 NM\_197960.2  
215.7 NM\_139159.3  
123.5 NM\_138815.2  
113.4 NM\_199286.2  
116.5 NM\_018189.2  
115.1 NM\_001025290.1  
113.6 NM\_001012728.1

122.5 NR\_002221.1  
141.2 NM\_001937.3  
112 NM\_173812.3  
117.9 NM\_207325.1  
127.7 NM\_181787.1  
123.8 NM\_000110.2  
126.1 NM\_001385.1  
197.8 NM\_001386.4  
134.1 NM\_001387.2  
129.6 NM\_006426.1  
123.7 NM\_020134.2  
115 NM\_133637.1  
146.9 NM\_001938.2  
612.7 NM\_006442.2  
132.5 NM\_152945.1  
117.2 NM\_000794.2  
122.7 NM\_015722.2  
128.4 NM\_016574.2  
119.7 NM\_000795.2  
121.6 NM\_000795.2  
118.3 NM\_033663.2  
108.9 NM\_000796.3  
121.9 NM\_000796.3  
130.8 NM\_000797.2  
105.7 NM\_000798.3  
133.6 NM\_016025.2  
201.7 NM\_004147.3  
162 NM\_001388.3  
107.5 NM\_001939.1  
132.6 NM\_004948.2  
124 NM\_004949.2  
112.1 NM\_024422.2  
110.1 NM\_001941.2  
142.1 NM\_001389.3  
121.1 NM\_206887.1  
122.1 NM\_206887.1  
119.4 NM\_020693.2  
118.2 NM\_203418.1  
104.7 NM\_004414.5  
141.7 NM\_203417.1  
132.7 NM\_148676.1  
112.8 NM\_005822.2  
117.7 NM\_013441.2  
227.8 NM\_203433.1  
251.7 NM\_003720.2  
226 NM\_006052.1  
126.4 NM\_005867.2  
125.4 NM\_153682.1  
245.1 NM\_153681.1  
118 NM\_153681.1  
128.4 NM\_018962.1

118 NM\_032589.2  
120.8 NM\_032589.2  
119.1 NM\_203429.1  
113.7 NM\_148675.2  
137.6 NM\_032160.2  
131.3 NM\_001942.1  
115.9 NM\_001943.1  
126.2 NM\_001944.1  
115.6 NM\_177986.2  
119.6 NM\_004415.2  
113.8 NM\_004950.3  
121.2 NM\_014208.1  
120.2 NM\_183380.1  
117.4 NM\_020388.2  
116.6 NM\_001723.3  
116.8 NM\_001723.3  
108 NM\_183380.1  
175.9 NM\_006870.3  
125.3 NM\_001011546.1  
141.4 NM\_006870.3  
116.9 NM\_018000.1  
116 NM\_016448.1  
115.5 NM\_001392.3  
127.2 NM\_001392.3  
114.6 NM\_032981.2  
116.4 NM\_033148.2  
109 NM\_183040.1  
116.1 NM\_183041.1  
120.4 NM\_183041.1  
120.8 NM\_020234.3  
1134.2 NM\_173666.1  
125.3 NM\_004416.2  
295 NM\_020892.1  
122.9 NM\_178502.2  
117.9 NM\_138287.2  
120.3 NM\_012145.2  
122.4 NM\_201402.1  
136.1 NM\_015343.3  
115.1 NM\_017434.3  
120.4 NM\_017434.3  
112.3 NM\_017434.3  
118.9 NM\_014080.3  
119.7 NM\_001003892.1  
121.7 NM\_022156.3  
121.5 NM\_017803.3  
218.6 NM\_020175.1  
131.7 NM\_181581.1  
2868.7 NM\_004417.2  
142 NM\_007207.3  
122.8 NM\_144728.1  
205.5 NM\_144729.1



129.5 NM\_003584.1  
273.2 NM\_007240.1  
112.8 NM\_001007275.1  
117.7 NM\_001007271.1  
120.9 NM\_001007271.1  
109.8 NM\_016364.3  
204.7 NM\_007026.1  
    117 NM\_080611.3  
117.1 NM\_001012644.1  
123.1 NM\_080611.3  
130.5 NM\_030640.1  
    147 NM\_152511.3  
2478.9 NM\_080876.2  
208.7 NM\_004418.2  
116.9 NM\_022076.2  
130.7 NM\_020185.3  
219.3 NM\_020185.3  
243.3 NM\_017823.3  
111.4 NM\_024025.1  
120.1 XM\_935434.1  
126.1 NM\_001080426.1  
321.8 NM\_004090.2  
113.6 NM\_057158.2  
117.3 NM\_001394.5  
    745 NM\_004419.3  
    119 NR\_002834.1  
168.2 NM\_022652.2  
129.7 NM\_001946.2  
121.3 NM\_001947.1  
279.2 NM\_004420.1  
122.8 NM\_001395.1  
121.6 NM\_001025248.1  
118.1 NM\_001025248.1  
120.6 NM\_001025249.1  
113.2 NM\_012146.1  
122.9 NM\_012147.2  
110.5 NM\_012148.2  
126.2 NM\_033178.2  
112.1 NM\_001023569.1  
119.8 NM\_012149.2  
114.3 NM\_001012729.1  
1124.5 NR\_002220.1  
    114.3 NM\_181870.1  
    196.8 NM\_004422.2  
    210.6 NM\_004423.3  
    286.9 NM\_006014.2  
    119.6 NM\_138812.1  
    166.6 NM\_017653.2  
    344.4 NM\_001376.2  
    109.4 NM\_004411.1  
    209.1 NM\_001378.1

127.7 NM\_016141.1  
588.3 NM\_006141.2  
140.9 NM\_001080463.1  
121.6 NM\_016008.2  
108.4 NM\_015522.2  
116.7 NM\_001012665.1  
1833.1 NM\_001037494.1  
211.5 NM\_080677.1  
    279 NM\_014183.2  
179.9 NM\_130897.1  
237.6 NM\_006519.1  
114.3 NM\_006520.1  
257.2 NM\_130437.2  
129.5 NM\_101395.1  
319.2 NM\_130438.1  
128.5 NM\_130436.1  
125.7 NM\_006484.1  
130.3 NM\_004714.1  
268.1 NM\_003583.2  
121.9 NM\_006482.1  
116.7 NM\_003582.2  
117.3 NM\_003582.2  
111.9 NM\_001004023.1  
120.9 NM\_003845.1  
122.8 NM\_003494.2  
120.6 NM\_001007533.3  
120.7 NM\_130810.2  
    111 NM\_001033560.1  
119.6 NM\_198968.1  
110.1 NM\_014934.3  
114.5 NM\_173543.1  
119.5 NM\_014648.2  
114.7 NM\_005225.1  
133.7 NM\_004091.2  
572.5 NM\_001949.2  
190.9 NM\_001950.3  
125.7 NM\_001951.2  
124.7 NR\_003095.1  
857.4 NM\_001952.3  
115.6 NM\_203394.1  
118.1 NM\_024680.2  
    237 NM\_004424.3  
169.9 NM\_033083.5  
183.4 NM\_018456.4  
290.5 NM\_004215.3  
119.9 NM\_198120.1  
111.7 NM\_004215.3  
129.1 NM\_024007.2  
111.9 NM\_022659.2  
115.3 NM\_001005463.1  
278.7 NM\_004951.3

118.7 NM\_005755.2  
266.1 NM\_006824.1  
153.4 NM\_006579.1  
116.6 NM\_001017361.1  
119.2 NM\_019079.2  
143.8 NM\_007265.1  
117.3 NM\_001397.1  
136.5 NM\_014693.2  
113.7 NM\_014693.2  
121.4 NM\_014693.2  
111.6 NM\_004826.1  
499.8 NM\_001953.2  
294.7 NM\_001398.2  
121.8 NM\_018479.2  
210.3 NM\_018281.1  
124.4 NM\_024693.2  
171.8 NM\_004092.2  
123 NM\_004425.2  
133.7 NM\_022664.1  
119.8 NM\_001393.2  
126.9 NM\_030796.3  
122.7 NM\_032411.1  
123.1 NM\_016581.2  
114.5 NM\_001005610.1  
117.2 NM\_001005614.1  
117.8 NM\_001005615.1  
124.6 NM\_001005611.1  
115.6 NM\_001005613.1  
115.9 NM\_021783.2  
109.2 NM\_022336.1  
115.4 NM\_145861.1  
127.2 NM\_145861.1  
118.7 NM\_080738.2  
271.7 NM\_015902.4  
176.7 NM\_014674.1  
196.8 NM\_025191.2  
174.9 NM\_003792.2  
982.4 NM\_003792.2  
178.2 NM\_001400.2  
134.6 NM\_001401.3  
123.7 NM\_057159.2  
117.4 NM\_005226.2  
217.2 NM\_004720.4  
117.5 NM\_004230.2  
247.4 NM\_003775.1  
130.6 NM\_012152.1  
157.7 NM\_030760.3  
127.6 NM\_005711.3  
140.2 NM\_001955.2  
105.2 NM\_001956.2  
117.1 NM\_207033.1

117.8 NM\_207034.1  
121.5 NM\_001957.1  
120.2 NM\_003991.1  
125.9 NM\_003991.1  
114 NM\_000115.1  
116.7 NM\_003566.2  
121.1 NM\_152991.1  
234.7 NM\_003797.2  
131.9 NM\_152991.1  
25516.1 NM\_001402.4  
16725.5 NM\_001402.4  
133.1 NM\_001958.2  
128.9 NM\_021121.2  
2670.2 NM\_001037663.1  
270.8 NM\_001959.2  
6582.3 NM\_001959.2  
1611.6 NM\_032378.2  
118.8 NM\_032378.2  
117.7 NM\_004280.2  
3511.8 NM\_001404.4  
2731.9 NM\_001961.2  
123.4 NM\_013302.2  
114.3 NM\_021937.3  
113.4 NM\_024593.2  
110.3 NM\_032328.1  
116.3 NM\_173503.1  
121.7 NM\_022351.2  
112.2 NM\_019065.2  
123.6 NM\_004105.2  
120.6 NM\_004105.2  
118.5 NM\_001039348.1  
122.1 NM\_016938.1  
238.9 NM\_152726.1  
120 NM\_181723.1  
124.8 NM\_144715.2  
123.5 NM\_018100.1  
112 NM\_025184.2  
121.1 NM\_025202.2  
439.8 NM\_024329.4  
119.2 NM\_004428.2  
152.8 NM\_004428.2  
120 NM\_001405.2  
120.3 NM\_004952.3  
142.5 NM\_182690.1  
203.8 NM\_005227.2  
116.9 NM\_001962.1  
114.4 NM\_004429.3  
164.4 NM\_004093.2  
119.9 NM\_001406.3  
115.3 NM\_005864.2  
117.2 NM\_005864.2

124.8 NM\_024580.3  
147.3 NM\_024580.3  
115.2 NM\_024580.3  
195.8 NM\_004247.2  
111.9 NM\_001963.2  
117.2 XM\_929502.1  
118.3 NM\_015507.2  
114.2 NM\_016215.3  
118.4 NM\_016215.3  
121.2 NM\_030652.1  
128.2 NM\_023932.2  
113.3 NM\_023932.2  
119.9 NM\_206539.1  
116.9 NM\_182799.1  
113.5 NM\_005228.3  
    116 NM\_201284.1  
110.5 NM\_201282.1  
125.1 NM\_201283.1  
123.5 NM\_022051.1  
137.4 NM\_017555.1  
1293.8 NM\_080732.1  
    115.6 NM\_022073.2  
1300.6 NM\_001964.2  
    730.4 NM\_000399.2  
    178.7 NM\_004430.2  
    150.6 NM\_004430.2  
    113.5 NM\_001965.1  
    139.4 NM\_015252.2  
    607.8 NM\_006795.2  
    116.3 NM\_014601.2  
    117.5 NM\_014600.1  
    144.7 NM\_139265.2  
    121.1 NM\_012153.3  
    110.8 NM\_001966.2  
    119.9 NM\_024757.3  
    123.6 NM\_006709.2  
        117 NM\_006709.2  
    192.6 NM\_004879.3  
    119.7 NM\_004879.3  
1781.7 NM\_152361.1  
    174.8 NM\_001008394.1  
8735.4 NM\_005801.3  
    123.7 XM\_942595.1  
    295.9 NM\_001412.3  
        167 NM\_001412.3  
    211.8 NM\_004681.2  
    413.1 NM\_005875.2  
    261.2 NM\_032025.2  
    313.4 NM\_014413.2  
    225.8 NM\_002759.1  
    282.6 NM\_001013703.2

165 NM\_001414.2  
192.5 NM\_014239.2  
443.3 NM\_015636.2  
352.1 NM\_015636.3  
123.7 NM\_172195.1  
188.4 NM\_003907.1  
120.2 NM\_012199.2  
927 NM\_012154.2  
142.5 NM\_177422.1  
152.9 NM\_024852.2  
139.9 NM\_017629.2  
137.2 NM\_004094.4  
169.1 NM\_003908.3  
492 NM\_001415.2  
262.3 NM\_003758.1  
374.3 NM\_003750.1  
714 NM\_013234.1  
647 NM\_003757.1  
1140.6 NM\_003756.1  
696.2 NM\_003755.2  
923.1 NM\_003754.1  
3670.2 NM\_001568.1  
829.6 NM\_016091.2  
923.4 NM\_003753.2  
111.1 NM\_001037808.1  
1314 NM\_001037283.1  
167.7 NM\_001037283.1  
373.5 NM\_003751.2  
9552.3 NM\_001416.1  
6935.4 NM\_001967.2  
1504 NM\_001417.2  
126.6 NM\_001968.2  
180.8 NM\_004846.2  
234.6 NM\_173359.3  
116.6 NM\_004095.2  
197.4 NM\_004096.3  
119.2 NM\_003732.2  
152.1 NM\_019843.2  
236.3 NM\_198244.1  
113.7 NM\_182917.2  
643.6 NM\_004953.2  
113.6 NM\_004953.2  
1547 NM\_001418.1  
238.3 NM\_001418.1  
4301.7 NM\_001418.1  
160.5 NM\_003760.2  
811.9 NM\_022170.1  
386.7 NM\_001969.3  
1313.1 NM\_001969.3  
223.3 NM\_183004.3  
460.3 NM\_001970.3

132 NM\_020390.5  
205.6 NM\_015904.2  
209.7 NM\_001971.4  
130.3 NM\_001972.2  
112.4 NM\_033440.1  
117.5 NM\_015849.2  
104.7 NM\_005747.3  
114.5 NM\_007352.2  
118.2 NM\_018696.2  
144.3 NM\_018127.4  
126.7 NM\_001419.2  
112.4 NM\_004432.1  
113.2 NM\_001420.3  
133.7 NM\_001420.3  
109.2 NM\_021952.2  
849 NM\_172373.2  
119.1 NM\_201999.1  
166.1 NM\_006874.2  
138.5 NM\_006874.2  
112.5 NM\_004433.3  
310.8 NM\_001421.1  
111.4 NM\_198381.1  
114.3 NM\_001422.2  
149.7 NM\_005229.2  
122.2 NM\_005230.2  
135.2 NM\_001973.2  
105.1 NM\_021795.2  
135.9 NM\_001973.2  
242.7 NM\_006532.2  
122.9 NM\_025165.2  
483.2 NM\_152793.1  
125.7 NM\_130442.1  
333.8 NM\_014800.8  
122.9 NM\_001039459.1  
134.5 NM\_014800.8  
132.7 NM\_022086.6  
267.2 NM\_133171.2  
118.2 NM\_133171.2  
136.3 NM\_024712.2  
118.3 NM\_018712.2  
127.2 NM\_153702.1  
116.4 NM\_000501.1  
118 NM\_001081754.1  
135 NM\_032377.2  
134.7 NM\_022821.2  
116 NM\_017770.2  
123.8 NM\_152310.1  
160.2 NM\_022726.2  
749.1 NM\_021814.3  
130.3 NM\_024090.1  
116.3 NM\_024930.1

220.1 NM\_018091.3  
116.2 NM\_019040.2  
110.2 XM\_946145.1  
119.4 NM\_016242.2  
656.1 NM\_000117.1  
128.2 NM\_152463.1  
107.6 NM\_001010865.1  
225.8 NM\_006331.4  
123.8 NM\_133455.2  
124.9 NM\_007046.1  
267.6 NM\_032048.2  
116.4 NM\_052846.1  
123.4 NM\_004434.2  
116.6 NM\_001008707.1  
    118 NM\_004434.2  
558.3 NM\_153265.1  
    306 NM\_019063.2  
102.7 NM\_183387.1  
393.6 NM\_001423.1  
122.7 NM\_001424.3  
1313.8 NM\_001425.1  
114.1 NM\_001974.3  
130.2 NM\_152916.1  
109.8 NM\_032571.2  
127.2 NM\_032571.2  
113.6 NM\_001080498.1  
109.4 NM\_001080498.1  
112.3 NM\_004097.1  
117.9 NM\_001040404.1  
123.9 NM\_004098.2  
119.1 NM\_001426.2  
130.2 NM\_001427.2  
115.7 NM\_018212.4  
114.3 NM\_018212.4  
110.2 NM\_001008493.1  
    115 NM\_031889.1  
132.1 NM\_003633.1  
125.7 NM\_004435.2  
106.3 NM\_005107.1  
125.6 NM\_000118.1  
3173.8 NM\_001428.2  
    245 NM\_001975.2  
216.5 NM\_001976.2  
121.8 NM\_001976.2  
155.6 NM\_017512.2  
110.2 NM\_001977.2  
124.8 NM\_006208.1  
148.5 NM\_006209.2  
141.7 NM\_001040092.1  
119.9 NM\_005021.2  
147.5 NM\_014936.3



117.9 NM\_021572.4  
118 NM\_153343.2  
119.2 NM\_178543.3  
117.8 NM\_207168.1  
161.5 NM\_207168.1  
413 NM\_014666.2  
125.1 NM\_001776.3  
110.9 NM\_001246.2  
123 NM\_203468.1  
108.6 NM\_001248.1  
174.9 NM\_004901.1  
112.5 NM\_001249.1  
159.3 NM\_001247.1  
131.7 NM\_020354.2  
111.1 NM\_001033113.1  
124.7 NM\_198585.1  
105.2 NM\_001033113.1  
615.5 NM\_020189.4  
245.1 NM\_005442.2  
233.4 NM\_001429.2  
213.1 NM\_015409.3  
117.9 NR\_003290.1  
111.3 XM\_926826.1  
184 NM\_001430.3  
134.2 NM\_203343.1  
119.9 NM\_203342.1  
130.6 NM\_203343.1  
115.8 NM\_012156.2  
110.7 NM\_177996.1  
121.9 NM\_001431.1  
158.6 NM\_012307.2  
132.1 NM\_018424.1  
124.1 NM\_019114.2  
129.4 NM\_020909.2  
107.4 NM\_000119.1  
113.4 NM\_001978.1  
196.1 NM\_025209.2  
132.9 NM\_015630.2  
205.5 NM\_017549.2  
124.6 NM\_001013442.1  
157.1 NM\_005232.3  
134.3 NM\_173641.1  
119.1 NM\_001004338.1  
116.7 NM\_004431.2  
115.6 NM\_182644.1  
123.5 NM\_182644.1  
104.8 NM\_005233.3  
163 NM\_004438.3  
120.7 NM\_182472.1  
112.8 NM\_004439.4  
119.2 NM\_004439.4

119.8 NM\_001080448.1  
126.6 XM\_937418.1  
122.6 NM\_004440.2  
145.3 NM\_020526.3  
108.8 NM\_001006943.1  
111.8 NM\_004441.3  
126.1 NM\_004442.6  
108.1 NM\_017449.2  
    129 NM\_004443.3  
114.7 NM\_004444.4  
176.8 NM\_004445.2  
133.4 NM\_000120.2  
123.8 NM\_001979.4  
119.1 NM\_194356.1  
123.3 NM\_005670.3  
113.6 NM\_001018041.1  
292.2 NM\_014805.2  
466.3 NM\_013333.2  
114.3 NM\_148921.2  
113.9 NM\_014964.3  
110.2 NM\_014964.3  
111.8 NM\_017957.1  
119.7 NM\_000799.2  
120.4 NM\_000121.2  
114.2 NM\_015681.2  
123.4 NR\_002219.1  
715.7 NM\_004446.2  
133.9 NM\_001981.2  
121.5 NM\_021235.1  
115.1 NM\_139204.1  
116.5 NM\_133180.1  
115.5 NM\_133180.1  
122.3 NM\_017729.2  
125.2 NM\_022772.2  
122.9 NM\_133181.2  
128.3 NM\_024526.2  
291.3 NM\_033255.2  
126.2 NM\_000502.2  
130.6 NM\_016633.2  
147.3 NM\_005702.2  
117.2 NM\_181532.2  
    125 NM\_004448.2  
127.6 NM\_001005862.1  
125.1 NM\_004448.2  
126.6 NM\_018695.2  
123.8 NM\_001006600.1  
139.4 NM\_001005915.1  
112.9 NM\_001005915.1  
119.6 NM\_001982.2  
    133 NM\_005235.1  
122.5 NM\_178037.1

122.2 NM\_001983.2  
126 NM\_001983.2  
117.2 NM\_202001.1  
119.6 NM\_000400.2  
174.5 NM\_000122.1  
116.3 NM\_005236.1  
314.6 NM\_000123.2  
119.6 NM\_000124.1  
109.7 NM\_001007234.1  
115.8 NM\_001007234.1  
107.6 NM\_001007233.1  
110.3 NM\_000082.2  
130.4 NM\_001432.1  
206.1 NM\_006494.1  
121.7 NM\_182918.2  
113.9 NM\_004449.3  
139.1 NM\_182918.2  
148.3 NM\_001031711.1  
111.8 NM\_001031711.1  
140.4 NM\_020462.1  
180.7 NM\_016570.2  
169.1 NM\_198398.1  
688.3 NM\_198398.1  
329.8 NM\_004450.1  
301.5 NM\_207332.1  
118 NM\_001003791.1  
114.7 NM\_001017922.1  
133.4 NM\_001017922.1  
816.9 NM\_152461.2  
128.2 NM\_152461.2  
124.8 NM\_033266.2  
143.1 NM\_014584.1  
147.2 NM\_019891.2  
216.3 NM\_006817.3  
1845.3 NM\_001034025.1  
638.8 NM\_018948.2  
116.7 NM\_001007253.1  
111.6 NM\_014590.3  
124.4 NM\_138961.1  
127.4 NM\_052911.1  
117.3 NM\_001017420.2  
123.4 NM\_001984.1  
121.9 NM\_007036.3  
127.8 NM\_012291.3  
115.6 NM\_031475.1  
123.8 NM\_194312.1  
115.4 NM\_000125.2  
126 NM\_001040275.1  
114.3 NM\_001437.1  
165.7 NM\_004451.3  
124 NM\_004452.2

117.5 NM\_001438.2  
121.9 NM\_206595.1  
105.2 NM\_206594.1  
107.2 NM\_183375.1  
160.7 NR\_000033.2  
114.6 NM\_153448.2  
499.4 NM\_024311.2  
120.2 NM\_019002.2  
838.2 NM\_004730.1  
195.7 NM\_000126.1  
108.5 NM\_001014763.1  
144.6 NM\_001985.2  
246.3 NM\_001014763.1  
315.1 NM\_004453.1  
115.7 NM\_014297.3  
161.5 NM\_001039481.1  
165.9 NM\_001039481.1  
164.2 NM\_018638.3  
114.4 NM\_018208.1  
513.9 NM\_005238.2  
245.9 NM\_005239.4  
111.2 NM\_004956.3  
132.4 NM\_014209.1  
135.1 NM\_005240.1  
113.1 NM\_001986.1  
111 NM\_001986.1  
124.1 NM\_004454.1  
120.8 NM\_004454.1  
121.3 NM\_001987.3  
121.4 NM\_144765.1  
142.6 NM\_005797.2  
110 NM\_144765.1  
114.8 NM\_153717.1  
107.2 NM\_153717.1  
116.3 NM\_147127.2  
116 NM\_005241.1  
187.4 NM\_014210.2  
188.6 NM\_001003927.1  
124.9 NM\_006495.2  
172.8 NM\_145245.2  
1473.7 NM\_016337.2  
116.1 NM\_001988.1  
130.2 NM\_001989.2  
123 NM\_001080458.1  
1616.9 NM\_013986.2  
158.1 NM\_013986.2  
2354.3 NM\_005243.1  
121.9 NM\_152596.2  
118.4 NM\_018199.1  
119 NM\_003686.3  
108.8 NM\_006027.3

117.7 NM\_130398.2  
127 NM\_001024924.1  
116.9 NM\_018261.3  
182.3 NM\_018261.3  
128.9 NM\_018303.4  
127.7 NM\_178516.3  
136.2 NM\_001037126.1  
115 NM\_001013848.1  
128.9 NM\_001013848.1  
115.3 NM\_019053.3  
728.6 NM\_015219.2  
127.4 NM\_001013839.1  
134.1 NM\_175876.3  
310.7 NM\_016046.3  
191.9 NM\_002685.2  
258.1 NM\_002685.2  
189.8 NM\_001001998.1  
129.8 NM\_014285.4  
187.4 NM\_016042.2  
179.2 NM\_001002269.1  
145.1 NM\_019037.2  
118.5 NM\_020158.3  
340.5 NM\_058219.2  
129.2 NM\_015004.2  
333 NM\_181503.1  
159.9 NM\_001034194.1  
182.4 NM\_005033.1  
126.6 NM\_015065.1  
124.2 NM\_000127.2  
106.7 NM\_000401.2  
172 NM\_000401.2  
129 NM\_207122.1  
119.2 NM\_004455.1  
127.4 NM\_001033025.1  
146.4 NM\_001439.2  
151.6 NM\_001440.2  
120.1 NM\_000503.3  
109.7 NM\_172059.1  
108.7 NM\_172059.1  
115.5 NM\_005244.3  
115.8 NM\_172111.1  
123.5 NM\_172112.1  
124.4 NM\_172112.1  
117.5 NM\_172113.1  
130.9 NM\_172098.1  
114.3 NM\_001990.2  
117.3 NM\_172104.1  
113.6 NM\_004100.3  
118.7 NM\_172105.1  
128 NM\_001991.2  
169 NM\_004456.3

138 NM\_152998.1  
176.3 NM\_152998.1  
107.9 NM\_000504.2  
126 NM\_000128.2  
116.3 NM\_000128.2  
114.2 NM\_016946.3  
115.7 NM\_144503.1  
165.3 NM\_144504.1  
127.3 NM\_000505.2  
112.4 NM\_000129.2  
118.8 NM\_001994.1  
126.1 NM\_019104.1  
17798.4 NM\_001992.2  
120.1 NM\_005242.3  
122.5 NM\_004101.2  
109.8 NM\_003950.2  
122.3 NM\_001993.2  
125.3 NM\_000130.2  
107.7 NM\_000131.2  
130.8 NM\_000131.3  
118.3 NM\_000131.3  
118.7 NM\_019863.2  
116.2 NM\_000132.2  
115.2 NM\_019863.2  
117.7 NM\_012151.3  
119.4 NM\_001007524.1  
116 NM\_000133.2  
111.3 NM\_024306.2  
122.2 NM\_001441.1  
120.9 NM\_001443.1  
128.4 NM\_000134.2  
117.5 NM\_004102.3  
113 NM\_001442.1  
130.4 NM\_001444.1  
170.7 NR\_002935.1  
107.3 NM\_001445.1  
108 NM\_001445.1  
119.5 NM\_001446.3  
233 NM\_003824.2  
130 NM\_013402.3  
118.6 NM\_004265.2  
116.1 NM\_021727.3  
145.1 NM\_178128.2  
140.5 NM\_131917.1  
129.5 NM\_007051.2  
141.8 NM\_000137.1  
147.5 NM\_031208.1  
128.1 NM\_001018104.1  
114.9 NM\_001018104.1  
120 NM\_016044.1  
111.7 NM\_199336.1

114.2 NM\_001033032.1  
117 NM\_001033031.1  
129.6 NM\_018147.2  
102.4 NM\_001033030.1  
120.3 NM\_001033030.1  
131.1 NM\_012306.2  
1594.9 NM\_005449.3  
112.2 NM\_182641.2  
129.3 NM\_004459.5  
122.5 NM\_004459.5  
210 NM\_145253.1  
364.2 NM\_182565.2  
114.8 NM\_181709.2  
148.5 NM\_182705.1  
199.4 NM\_001035254.1  
128.2 NM\_001035254.1  
134.5 NM\_001010883.1  
186.4 NM\_031452.2  
637.1 NM\_032837.1  
130.4 NM\_019018.1  
330.7 NM\_138348.3  
121.2 NM\_007177.1  
1031.4 NM\_031453.2  
109.4 NM\_031213.2  
132.3 NM\_001080422.1  
113 NM\_001080422.1  
129.7 NM\_144671.2  
117.1 NM\_001002034.1  
113.9 NR\_002183.1  
114.2 NR\_002199.1  
142.2 NR\_002198.2  
121.3 NM\_001077710.1  
186.1 NM\_022074.2  
157.8 NM\_022074.2  
121 NM\_198947.1  
121.4 NM\_001008901.1  
113.4 NM\_176791.3  
119.6 NM\_144594.1  
129.2 NM\_022760.3  
434 NM\_138371.1  
2242.7 NM\_145280.3  
363.8 NM\_014612.3  
110.6 NM\_017848.3  
119.7 NM\_138333.3  
207.8 NM\_145284.3  
118.7 NM\_138819.1  
113.1 NM\_199138.1  
135.2 NM\_138401.2  
118.8 NM\_001011703.1  
107.8 NM\_001011703.1  
122.7 NM\_032581.2

117 NM\_173822.1  
106.9 NM\_001078172.1  
117.6 NM\_001078173.1  
114.6 NM\_001035534.1  
128.9 NM\_001035534.1  
133 NM\_006683.3  
116.4 NM\_022360.3  
196.4 NM\_030809.1  
111.6 NM\_024969.2  
127 NM\_001015045.1  
121.9 NM\_014883.2  
120 NM\_014883.2  
118.5 NM\_198215.2  
108.2 NM\_198215.2  
123.3 NM\_198215.2  
163.8 NM\_032036.2  
130.8 NM\_145249.1  
146.8 NM\_016078.3  
233.2 NM\_016078.3  
115.6 NM\_145301.1  
122.3 NM\_213609.2  
109.6 NM\_178539.3  
110 NM\_001004440.1  
128.9 NM\_182759.2  
111.6 NM\_182759.2  
133.7 NM\_182522.3  
124.1 NM\_182522.3  
116.1 NM\_001005527.1  
112.6 NM\_015381.3  
119.5 NM\_017565.2  
166.9 NM\_014864.2  
118.3 XM\_928334.1  
142.8 NM\_020223.1  
132.1 NM\_020223.1  
146.6 NM\_015262.1  
109 NM\_001045477.1  
113.5 NM\_001029888.1  
124.8 NM\_152644.2  
119.8 NM\_015916.3  
139.8 NM\_001001412.1  
119.5 NM\_203392.1  
107.9 XM\_935767.1  
117 NM\_017645.3  
141.2 NM\_182620.1  
129.7 NM\_019054.1  
147.8 NM\_198076.4  
376.7 NM\_014745.1  
120.2 NM\_022068.1  
273.8 NM\_021806.1  
125.3 NM\_058186.3  
126.1 NM\_206964.1



117.2 NM\_014888.1  
131.7 NM\_001040020.1  
120.1 NM\_138805.2  
133.1 NM\_033088.2  
463.5 NM\_020704.1  
223.3 NM\_153690.4  
115.9 NM\_207334.1  
116.8 NM\_148894.1  
143 NM\_138369.1  
119.3 NM\_207009.2  
125 NM\_018472.1  
687.4 NM\_017633.1  
116.5 NM\_052943.2  
1075.4 NM\_017709.2  
107.6 NM\_152630.2  
115.3 NM\_203408.1  
116.9 NM\_152631.1  
134.1 NM\_001013736.1  
150 NM\_001014286.1  
124.9 NM\_017569.2  
125.3 NM\_030797.1  
214 NM\_016623.3  
1879.9 NM\_004699.1  
127.8 NM\_012135.1  
124.8 NM\_017856.1  
156.4 NM\_001013622.1  
129.3 NM\_014661.3  
2387.8 NM\_016605.1  
120.4 NM\_138419.2  
105.5 NM\_152315.1  
121.4 NM\_182495.3  
132.3 NM\_145037.1  
117 NM\_017678.1  
113.3 NM\_001077639.1  
116.2 NM\_001077639.1  
117 NM\_024792.1  
168 NM\_152274.2  
115.9 NM\_022751.1  
119.9 NM\_021165.1  
118.5 NM\_199051.1  
190.8 NM\_015292.1  
1991.9 NM\_020728.1  
110.6 NM\_031913.1  
339.3 NM\_018379.2  
111 NM\_019092.1  
119 NM\_019013.1  
632.3 NM\_024519.2  
135.9 NM\_001006605.1  
118.7 XM\_942503.1  
115.4 NM\_152421.2  
110.2 NM\_017938.2

123.7 NM\_182614.2  
108.9 NM\_153606.1  
118.3 NM\_153364.1  
129.9 NM\_207418.2  
125.7 NM\_198549.1  
150.4 NM\_032809.2  
109.9 NM\_152660.1  
178 NM\_144664.3  
110.3 NM\_024522.1  
122.3 NM\_173688.1  
123.6 NM\_033387.2  
123 NM\_001017961.1  
955.3 NM\_182752.3  
111.8 NM\_198485.1  
114.5 NM\_001039841.1  
112 NM\_173642.1  
164.2 NM\_020734.1  
112.3 NM\_152450.1  
131.9 NM\_152548.1  
110.2 NM\_144713.1  
171.8 NM\_018145.1  
116.4 NM\_207006.1  
104.5 NM\_032899.4  
122.8 NM\_207006.1  
117.9 NM\_017708.1  
125.3 NM\_138435.1  
116 NM\_001039999.2  
113.4 NM\_145175.1  
448.7 NM\_174911.3  
116.9 NM\_201400.1  
122.7 NM\_201598.1  
153.8 NM\_198552.1  
255 NM\_198552.1  
203.5 NM\_152832.1  
166.4 NM\_016255.1  
124.6 NM\_018088.2  
166 NM\_144963.1  
119.6 NM\_198491.1  
543.8 NM\_032231.4  
168 NM\_001014812.1  
232.8 NM\_016062.1  
153.3 NM\_015475.3  
131.8 NM\_001042429.1  
119.7 NM\_173611.2  
133.2 NM\_174905.2  
118.1 NM\_174951.2  
112.7 NM\_205849.1  
110.1 NM\_174901.4  
122.4 NM\_000135.2  
127.9 NM\_001018112.1  
114.3 NM\_001018112.1

131.4 NM\_001018113.1  
127.9 NM\_001018113.1  
116.9 NM\_000136.2  
148.8 NM\_001018115.1  
113.2 NM\_033084.3  
119.5 NM\_001018115.1  
125.8 NM\_021922.2  
    119 NM\_022725.2  
148.2 NM\_004629.1  
120.3 NM\_018062.2  
125.3 NM\_020937.1  
119.4 NM\_145235.2  
    114 NM\_004460.2  
    118 NM\_001001715.1  
115.2 NM\_001001715.1  
110.1 NM\_005766.2  
    132 NM\_014808.1  
141.2 NM\_006567.2  
118.6 NM\_005687.3  
124.9 NM\_004461.1  
125.4 NM\_152871.1  
121.9 NM\_152877.1  
159.4 NM\_000639.1  
169.3 NM\_004104.4  
245.9 NM\_033015.2  
120.7 NM\_006712.3  
137.2 NM\_006712.3  
116.6 NM\_014929.2  
119.6 NM\_024091.2  
118.6 NM\_005245.3  
106.5 NM\_001447.1  
125.9 NM\_024582.2  
120.2 NM\_033085.2  
7959.5 NM\_001997.3  
120.8 NM\_001080542.1  
727.1 NM\_001436.2  
112.5 NM\_017556.2  
    117 NM\_001024215.1  
    123 NM\_006487.2  
118.9 NM\_001996.2  
    115 NM\_006486.2  
116.1 NM\_006485.2  
115.5 NM\_001996.2  
114.3 NM\_001004019.1  
126.5 NM\_001998.2  
117.8 NM\_001004019.1  
145.1 NM\_006329.2  
    122 NM\_000138.2  
    121 NM\_001999.3  
112.9 NM\_032447.3  
115.9 NM\_000507.2

110.1 NM\_003837.2  
184.4 NM\_022452.1  
113.8 NM\_032590.3  
536.6 NM\_032590.3  
125.1 NM\_001005366.1  
129.2 NM\_017703.1  
125.7 NM\_145032.2  
117.7 NM\_152441.1  
154.6 NM\_024326.2  
117.9 NM\_153350.2  
130.2 NM\_022824.1  
115.2 NM\_024963.2  
129.3 NM\_012157.2  
150.8 NM\_032875.1  
116.1 NM\_012159.1  
120.5 NM\_203373.1  
112.9 NM\_012158.1  
122.2 NM\_012160.3  
116.8 NM\_033535.2  
123.7 NM\_012161.2  
142.6 NM\_012161.2  
144.5 NM\_024555.3  
140.6 NM\_012304.3  
116.8 NM\_018378.2  
114.4 XM\_933940.1  
133.5 NM\_012166.2  
    126 NM\_018693.2  
565.5 NM\_025133.3  
119.5 NM\_012167.1  
    173 NM\_012167.1  
    121 NM\_152676.1  
103.9 NM\_172366.2  
113.1 NM\_024907.5  
115.7 NM\_148169.1  
114.8 NM\_024907.5  
120.7 NM\_032807.3  
360.2 NM\_032807.3  
125.6 NM\_012168.4  
129.8 NM\_033624.2  
232.9 NM\_015002.2  
124.2 NM\_147188.1  
108.8 NM\_012170.2  
123.8 NM\_012170.2  
118.6 NR\_003136.1  
105.1 NM\_033506.1  
112.4 NM\_033506.1  
115.3 NM\_012172.3  
116.9 NM\_183420.1  
121.7 NM\_178820.3  
218.5 NM\_015176.1  
121.3 NM\_012175.3

141.4 NM\_033406.2  
153 NM\_033406.2  
359.3 NM\_032145.4  
237.6 NM\_024735.2  
218.4 NM\_058229.2  
141.3 NM\_148177.1  
592.7 NM\_148177.1  
1187.6 NM\_203301.1  
211.4 NM\_017943.2  
119.8 NM\_174899.3  
127.8 NM\_205836.1  
143.8 NM\_030793.3  
116.5 NM\_153230.1  
165.3 NM\_012176.2  
125.1 NM\_012176.2  
111.6 NM\_016298.1  
134.6 NM\_018994.1  
119.4 NM\_001029860.1  
112.4 NM\_001029860.1  
116.6 NM\_183412.2  
132.1 NM\_033182.5  
113.8 NM\_001014765.1  
122.3 NM\_001080469.1  
119 NM\_001008777.1  
121.1 NM\_012177.2  
137.4 NM\_018438.4  
167.8 NM\_012179.3  
130.2 NM\_001033024.1  
273.7 NM\_012179.3  
170.4 NM\_012180.2  
108.5 NM\_012347.3  
116.6 NM\_033480.1  
129 NM\_033481.2  
120.1 NM\_033481.2  
109 NM\_031456.2  
109.4 NM\_033644.2  
121.1 NM\_012300.2  
291.8 NM\_033645.2  
112.7 NM\_207102.1  
132.1 NM\_012164.2  
136.3 NM\_022039.3  
179.8 NM\_178225.1  
311.5 NM\_033632.2  
122.7 NM\_018315.3  
268 NM\_033632.2  
118.9 NM\_001013415.1  
115 NM\_153348.2  
107.5 NM\_153348.2  
168.1 NM\_012174.1  
128.9 NM\_032301.1  
118.8 NM\_032029.2

771.4 NM\_133279.1  
145.1 NM\_133271.1  
117.8 NM\_133280.1  
319 NM\_004106.1  
115.6 NM\_002002.3  
168.7 NM\_015962.4  
135.3 XM\_940656.1  
189.8 NM\_003890.1  
124 NM\_000566.2  
121.5 NM\_001017986.1  
119.5 NM\_001004340.1  
122.6 NM\_021642.2  
129.4 NM\_021642.2  
108.9 NM\_004001.3  
112 NM\_001005411.2  
110 NM\_000569.6  
132 NM\_000570.2  
216.4 NM\_004107.3  
197.7 NM\_015122.1  
118.7 NM\_138782.1  
122.5 NM\_033449.1  
138.3 NM\_014824.1  
3006.9 NM\_006731.1  
117.5 NM\_006731.1  
211.5 NM\_002003.2  
110 NM\_004108.2  
123.6 NM\_004108.2  
116.8 NM\_173452.1  
128.8 NM\_173452.1  
114.5 NM\_052938.3  
111.4 NM\_138738.2  
118.3 NM\_138738.2  
113.1 NM\_030764.2  
126.6 NM\_001024667.1  
120.1 NM\_052939.3  
121.5 NM\_031282.1  
111.8 NM\_031281.1  
111.7 NM\_001004310.1  
116.9 NM\_032738.3  
119.3 NM\_001002901.2  
936.2 NM\_004462.3  
120.4 NM\_004109.3  
118.7 NM\_024417.1  
123.1 NM\_004110.3  
119.9 NM\_001012515.1  
133.7 NM\_000140.2  
224.1 NM\_018708.1  
127.7 NM\_015322.3  
193.5 NM\_020177.2  
232.3 NM\_004111.4  
115.8 NM\_005246.1

118.6 NM\_013451.2  
118.1 NM\_013451.2  
135.5 NR\_001442.2  
116.3 NM\_152898.2  
134.1 NM\_002005.2  
122.6 NM\_014375.2  
108.4 NM\_017521.2  
122 NM\_022549.2  
168.5 NM\_022549.2  
141.4 NM\_005103.3  
187 NM\_005102.1  
246.1 NM\_005102.1  
113.5 NM\_005303.1  
106.9 NM\_005306.1  
121.9 NM\_005304.2  
117.1 NM\_000508.3  
155.9 NM\_021871.2  
111.9 NM\_021871.2  
120.6 NM\_005141.2  
119.1 NM\_004463.2  
123.5 NM\_173558.2  
1276.6 NM\_033086.1  
120.8 NM\_139241.1  
109.3 NM\_152536.2  
123.3 NM\_018351.2  
125 NM\_033136.1  
132.2 NM\_000800.2  
112.8 NM\_004465.1  
136.8 NM\_004112.2  
118.3 NM\_004113.3  
116 NM\_004113.3  
115.7 NM\_021032.2  
114 NM\_033642.1  
105.9 NM\_004114.2  
114 NM\_033642.1  
117.1 NM\_175929.1  
116.9 NM\_004115.2  
108.6 NM\_003868.1  
116.6 NM\_003867.2  
139.9 NM\_003862.1  
122.5 NM\_033649.1  
128.4 NM\_005117.2  
125.8 NM\_002006.3  
111.2 NM\_019851.1  
111.3 NM\_019113.2  
113.9 NM\_020637.1  
108.5 NM\_020638.2  
123 NM\_005247.2  
123 NM\_002007.1  
109.8 NM\_033143.2  
123.5 NM\_004464.3

114.2 NM\_020996.1  
122.1 NM\_002009.2  
121 NM\_033164.1  
111.1 NM\_006119.2  
158.9 NM\_002010.1  
116.1 NM\_005130.3  
120.8 NM\_023107.2  
126.3 NM\_023110.1  
113.9 NM\_007045.2  
219 NM\_015633.1  
115.9 NM\_022971.1  
129.5 NM\_000142.2  
120.6 NM\_000142.2  
117.8 NM\_213647.1  
106.3 NM\_022963.2  
116 NM\_022963.2  
176.2 NM\_001004358.1  
129.3 NM\_001004358.1  
123.7 NM\_000509.4  
121.5 NM\_000509.4  
111.5 NM\_021870.2  
117.9 XM\_937886.1  
110.9 NM\_201553.1  
144.1 NM\_006682.1  
159.9 NM\_005248.1  
122.3 NM\_001042729.1  
228.6 NM\_001042729.1  
212.2 NM\_000143.2  
142.6 NM\_002012.1  
150.9 NM\_001449.3  
127.8 NM\_201555.1  
107.4 NM\_001450.3  
121.3 NM\_201555.1  
115.4 NM\_201557.1  
170.2 NM\_004468.3  
119.7 NM\_020482.3  
325.2 NM\_013241.1  
110.3 NM\_025135.2  
126.2 NM\_032843.3  
151.5 NM\_004214.4  
121.6 NM\_198897.1  
114.3 NM\_004469.2  
112.2 NM\_001004311.1  
115.9 NM\_018086.2  
127.7 NM\_001042762.1  
119.3 NM\_022116.2  
120.3 NM\_015687.2  
120.6 NM\_001042459.1  
118.8 NM\_030917.2  
158.1 NM\_016068.1  
121.3 NM\_014344.2



120.7 NM\_021939.2  
493.5 NM\_016594.1  
1688 NM\_017946.2  
114.4 NM\_054014.1  
125.7 NM\_054014.1  
190 NM\_000801.2  
112.9 NM\_054033.1  
176.6 NM\_004470.2  
136.7 NM\_057092.1  
141.5 NM\_004470.2  
133.2 NM\_002013.2  
1697 NM\_002014.2  
245.2 NM\_004117.2  
113.9 NM\_003602.2  
109.7 NM\_016105.2  
136.5 NM\_012181.3  
112.6 NM\_007270.2  
113.4 NM\_182827.1  
116.2 NM\_022110.3  
112.8 NM\_004118.3  
173.3 NM\_024301.3  
133.6 NM\_024301.2  
129.9 NM\_022145.2  
114.9 NM\_021631.1  
130 NM\_032683.1  
114 NM\_001017421.1  
114.1 NM\_031904.2  
123.7 NM\_025207.3  
219.1 NM\_201398.1  
156.6 NM\_144997.4  
146.5 NM\_144606.4  
129.3 NM\_144606.4  
115.1 NM\_002016.1  
121.5 NM\_001014342.1  
117.5 NM\_002017.2  
216.8 NM\_002018.2  
125.5 NM\_033206.1  
242.9 NM\_017969.1  
410.1 NM\_017991.3  
161.8 NM\_017994.3  
130.8 NR\_002940.1  
123.1 NR\_002940.1  
1282.3 NM\_018011.2  
119.2 NM\_018013.2  
164.6 NM\_018015.3  
127.9 NM\_018029.3  
295 NM\_018035.1  
139 NM\_018042.2  
124.4 NM\_018048.2  
116.6 NM\_018059.3  
107.6 NM\_018071.3

138.4 NM\_018074.3  
143.6 NM\_018079.3  
122.6 NM\_018111.1  
125.6 NM\_152563.1  
138.2 NM\_018195.2  
219.8 NM\_018210.1  
116 NM\_018215.2  
116.5 NM\_018219.1  
119.2 NM\_018231.1  
116.8 NM\_018242.2  
122.4 NM\_018271.2  
118.4 NM\_018273.2  
166.3 NM\_018275.3  
116.7 NM\_018280.1  
129 NM\_018291.2  
128.4 NM\_019044.2  
373.1 NM\_018295.1  
118.7 NM\_018302.1  
120.3 NM\_018340.1  
114.1 NM\_018342.2  
140 NM\_018348.4  
115.1 NM\_018352.1  
124.2 NM\_018356.1  
129.4 NM\_018359.1  
136.8 NM\_018370.1  
170.4 NM\_018381.1  
369.4 NM\_018386.1  
115.5 NM\_018392.3  
129.4 NM\_024570.1  
134.7 NM\_024891.1  
119.4 NM\_024669.1  
115.7 NM\_207661.2  
122.3 NM\_024824.3  
119.5 NM\_207662.2  
116.6 NM\_024824.3  
116.2 NM\_024933.2  
114.1 NM\_024537.1  
121.4 NM\_024986.1  
110.5 NM\_024749.2  
118.9 NM\_024811.2  
130.8 NM\_024926.1  
117.7 NM\_022773.1  
107.3 NM\_024534.4  
122.6 NM\_021942.4  
133.1 NM\_199053.1  
164.9 NM\_022492.2  
131.9 NM\_019108.1  
123.6 NM\_178159.1  
132.6 NM\_023008.2  
129.8 NM\_022764.1  
119.3 NM\_025000.1

464.1 NM\_021826.4  
115.1 NM\_023073.2  
122.1 NM\_024902.2  
132 NM\_024877.1  
126.3 NM\_001031720.1  
179.7 NM\_001031720.1  
131.7 NM\_032180.1  
118.1 NM\_032181.1  
124 NM\_022484.3  
122.4 NM\_024941.1  
109 NM\_139076.1  
123.5 NM\_001031719.1  
117.1 NM\_024705.1  
125.3 NM\_001031719.1  
131.1 NM\_024702.1  
119 NM\_025108.1  
136.7 NM\_022780.2  
139.8 NM\_022770.2  
128.2 NM\_152275.2  
120.2 NM\_024770.1  
121.5 NM\_024563.2  
128 NM\_025026.1  
158.2 NM\_024845.1  
102.8 NM\_024565.4  
170.4 NM\_024841.2  
129.9 NM\_025029.2  
121.2 NM\_032779.2  
145.4 NM\_032790.2  
115.7 NM\_032816.3  
159.1 NM\_032822.1  
137 NM\_032836.1  
140.2 NM\_032842.2  
115.6 NM\_032845.1  
100.2 NM\_032849.2  
137.5 NM\_001001665.2  
115.3 NM\_001004345.1  
113.2 NM\_001004318.1  
141.9 NM\_001008401.1  
118.5 NM\_001004320.1  
123.4 NM\_001004326.1  
115.8 NM\_001004341.1  
115.9 NM\_001004301.1  
111.4 NM\_001001662.1  
120.9 NM\_001004316.1  
146.4 NM\_001039756.1  
124.3 NM\_001039780.1  
106.8 NM\_017628.2  
134 NM\_017631.3  
214.9 NM\_019049.1  
188.2 NM\_017667.2  
111.6 NM\_024553.2

117.9 NM\_024553.2  
121.9 NM\_017669.2  
110.6 NM\_017669.2  
132.6 NM\_017676.1  
127.5 NM\_017681.1  
101.5 NM\_019000.2  
147.5 NM\_001034850.1  
    141 NM\_001034850.1  
160.5 NM\_017694.2  
117.9 NM\_017700.1  
172.3 NM\_017702.2  
    213 NM\_017702.2  
185.2 NM\_207514.1  
    157 NM\_019008.4  
139.5 NM\_017723.1  
129.6 NM\_017727.3  
139.9 NM\_017735.3  
123.6 NM\_019027.1  
155.2 NM\_017741.2  
131.1 NM\_017749.2  
141.2 NM\_017751.1  
118.3 NM\_198881.1  
110.2 NM\_198881.1  
119.1 NM\_017759.2  
138.9 NM\_019005.2  
124.9 NM\_017785.2  
107.4 NM\_017786.2  
110.8 NM\_017802.2  
117.3 NM\_017814.1  
    113 NM\_017820.2  
137.8 NM\_017842.1  
193.5 NM\_017854.1  
117.4 NM\_017858.1  
130.1 NM\_017867.1  
143.1 NM\_017875.1  
353.2 NM\_017880.1  
127.9 NM\_017888.2  
177.1 NM\_014106.2  
236.9 NM\_017907.1  
    121 NM\_017910.2  
156.6 NM\_017916.1  
718.3 NM\_017918.3  
117.4 NM\_019086.2  
119.7 NM\_019086.2  
    156 NM\_017931.2  
109.8 NM\_017933.3  
119.9 NM\_182922.1  
125.3 NM\_182922.1  
    122 NM\_017952.4  
127.4 NM\_017967.2  
108.7 NM\_025149.3

107.3 NM\_024788.2  
115.3 NM\_025031.1  
    119 NM\_024556.1  
    129 NM\_025097.1  
    120 NM\_024627.4  
127.4 NM\_024549.3  
114.2 NM\_024826.1  
115.1 NM\_025087.1  
163.1 NM\_024859.1  
117.2 NM\_032207.1  
130.4 NM\_025124.1  
110.6 NM\_024675.2  
    127 NM\_021925.1  
122.4 NM\_020153.2  
131.5 NM\_001035507.2  
180.9 NM\_021831.5  
272.9 NM\_022759.1  
140.6 NM\_024622.2  
113.9 NM\_024604.1  
179.4 NM\_025203.1  
119.7 NM\_024560.2  
115.7 NM\_024913.3  
138.9 NM\_022918.2  
117.1 NM\_001077419.1  
112.7 XM\_940456.1  
115.9 NM\_001080403.1  
    122 NM\_175902.3  
    116 NM\_024648.1  
118.8 XM\_941411.1  
118.9 NM\_022762.3  
116.1 NM\_024821.2  
118.3 NM\_032222.1  
128.7 NM\_024589.1  
333.2 NM\_025140.1  
    122 NM\_024650.2  
236.5 NM\_024520.1  
152.3 NM\_024808.2  
156.3 NM\_024796.1  
278.5 NM\_024829.4  
101.6 NM\_024861.1  
119.9 NM\_025129.3  
171.3 NM\_024578.1  
107.1 NM\_024785.2  
143.4 NM\_025084.1  
126.8 NM\_024687.1  
    119 NM\_024574.2  
124.7 NM\_032237.2  
115.6 NM\_024671.2  
113.3 NM\_024825.2  
    122 NM\_021827.2  
115.4 NM\_024725.2

114 NM\_144722.2  
129.4 NM\_024867.2  
111.8 NM\_144722.2  
149.4 NM\_024588.3  
115.9 NM\_198856.1  
119.3 NM\_022785.2  
123.5 NM\_022785.2  
113.6 NM\_178497.2  
116.9 NM\_152750.2  
133.1 NM\_152519.2  
125.5 NM\_144990.2  
112.7 NM\_144610.1  
126.8 NM\_152504.2  
141.2 NM\_152792.1  
121.9 NM\_182626.1  
135 NM\_182500.1  
257.4 NM\_199163.2  
114 NM\_152483.1  
108.2 NM\_152670.1  
111.2 NM\_152543.1  
138.9 NM\_144605.1  
120.8 NM\_145018.2  
119.7 NM\_152512.3  
122.7 NM\_144725.3  
115.7 NM\_152761.1  
127.8 NM\_152493.2  
114.5 NM\_152704.2  
116.3 NM\_152481.1  
122.7 NM\_153216.1  
107.3 NM\_178555.2  
112 NM\_182560.1  
139.2 NM\_173559.1  
120.9 NM\_173553.1  
112.6 NM\_174943.2  
114.9 NM\_001001699.1  
117.8 NM\_001001668.2  
126 NM\_207440.1  
128.2 NM\_001001687.1  
121.2 XM\_928328.1  
122.3 XM\_932785.1  
114 NM\_207408.1  
123.5 NM\_001080462.1  
144.2 NM\_144595.2  
115.6 NM\_144595.2  
128.3 NM\_144967.2  
136.8 NM\_153008.3  
108.2 NM\_144632.2  
106.7 NM\_152757.1  
116.9 NM\_153013.2  
110 NM\_144643.1  
113.4 NM\_145019.2

118.3 NM\_152399.1  
114.5 NM\_198553.1  
116.1 NM\_152760.2  
108.2 NM\_152517.1  
118.2 NM\_152908.2  
129.1 NM\_174912.2  
    113 XR\_001005.1  
519.6 NM\_152557.3  
121.7 NM\_152385.1  
    124 NM\_152509.1  
118.3 NM\_153027.1  
114.1 NM\_144974.1  
118.4 NM\_182516.1  
114.9 NM\_153031.1  
115.9 NM\_181646.2  
    118 NM\_152458.4  
110.6 NM\_152497.1  
114.1 NM\_144709.1  
147.2 NM\_153038.1  
120.7 NM\_152440.3  
117.1 NM\_152491.3  
115.6 NM\_152491.3  
    115 NM\_144688.2  
122.9 NM\_001012452.1  
123.5 NM\_144978.1  
128.6 NM\_145017.1  
124.7 NM\_001039500.1  
109.9 NM\_144648.1  
120.8 XR\_001429.1  
122.3 NM\_144674.1  
132.7 NM\_144667.1  
109.8 NM\_144577.1  
120.7 NM\_001001702.1  
122.8 NM\_173821.1  
126.4 NM\_152687.1  
122.5 NM\_173660.2  
140.7 NM\_173583.1  
114.4 NM\_173644.1  
110.1 NM\_199340.2  
125.1 NM\_173673.1  
122.3 NM\_001029883.1  
165.3 NM\_152678.1  
152.6 NM\_175871.2  
111.7 NM\_173627.2  
    123 NM\_001001688.1  
118.2 NM\_207444.1  
117.8 NM\_152544.1  
110.6 NM\_001031742.1  
162.3 NM\_207459.1  
114.9 NM\_152599.2  
114.6 NM\_001039796.1

127.4 NM\_198534.1  
118.1 NM\_207489.1  
111.8 NM\_178827.3  
107.4 NM\_001033659.1  
122.3 NM\_153264.2  
115.4 NM\_173616.1  
110.6 NM\_152590.1  
116.7 NM\_175884.3  
111.6 NM\_152612.2  
119.5 NM\_182574.1  
121.9 NM\_153223.1  
115.1 NM\_182634.2  
121.6 NM\_178556.3  
128.6 NM\_176677.1  
112.9 NM\_207511.1  
167.3 NM\_153233.1  
111.6 XM\_945320.1  
107.3 NM\_182568.2  
124.1 NM\_152406.1  
119.8 NM\_152571.2  
434.8 NM\_152716.1  
125.1 NM\_178830.2  
122.6 NM\_182598.1  
107.9 NM\_153043.3  
119.4 NM\_175892.3  
128.6 NM\_173645.1  
122.4 NM\_153214.1  
115.5 NM\_173815.3  
    120 NM\_173564.2  
    142 NM\_152409.2  
122.1 NM\_152623.1  
111.2 NM\_152382.1  
165.1 NM\_032251.3  
120.7 NM\_001039775.1  
120.7 NM\_152723.1  
116.4 NM\_173632.2  
114.9 NM\_152698.1  
128.2 NM\_175872.3  
196.6 NM\_152681.1  
112.5 NM\_001039905.1  
196.3 NM\_152269.1  
128.2 NM\_173805.2  
126.8 NM\_153218.1  
288.5 NM\_173527.1  
116.8 NM\_153689.3  
189.7 NM\_152374.1  
122.8 NM\_173827.2  
131.8 NM\_001033760.1  
109.3 NM\_001080445.1  
111.5 NM\_182801.1  
118.4 NM\_152403.2



111.1 NM\_152403.2  
119.1 NM\_198571.1  
133.2 NM\_178314.2  
126.5 NM\_173483.1  
112.5 NM\_173648.2  
124.6 NM\_207445.1  
599.8 NM\_182597.1  
133.2 NM\_173803.2  
114 NM\_001080539.1  
113.9 NM\_182562.1  
139.2 NM\_207442.1  
113.6 NM\_173512.1  
124.1 NM\_152424.1  
124 NR\_003246.1  
125.5 NM\_178494.2  
129.2 NM\_207435.1  
105.4 NM\_173649.1  
113.2 NM\_173635.1  
111.4 NM\_173489.2  
109.4 NM\_001039397.1  
123.7 NM\_173682.1  
116.9 NM\_198441.1  
114.7 NM\_173486.1  
115.7 NM\_173482.1  
120.2 NM\_001080504.1  
121.9 NM\_182605.1  
119.6 NM\_001007542.1  
130.1 NM\_173624.1  
107 NM\_152515.2  
125.5 NM\_173678.1  
129.1 NM\_173677.1  
120.9 NM\_182625.2  
118 NM\_182508.1  
113.3 NM\_207479.1  
142.7 NM\_198476.1  
123.9 NM\_001004332.1  
279 NM\_001001679.1  
117.8 NM\_001001669.1  
114.7 NM\_001001705.1  
122.1 NM\_207473.1  
117.9 NM\_001001697.1  
113.5 NM\_207499.1  
112.1 NM\_001001694.1  
118.5 NM\_001001680.1  
114.8 NM\_198463.1  
108.7 NM\_001001690.1  
113.6 NM\_001001706.1  
113 NM\_001004327.1  
115.3 NM\_207503.1  
115 NM\_207383.2  
111.7 NM\_198501.1

116.3 NM\_207379.1  
122.5 NM\_207474.1  
108.5 NM\_207436.1  
119.2 NM\_207403.1  
109.2 NM\_207498.1  
117.1 NM\_207382.1  
119.2 NM\_207380.1  
116.7 NM\_198582.1  
118.7 NM\_207468.1  
152.3 NM\_001003702.1  
116.3 NM\_207497.1  
113.1 NM\_001039892.1  
117.2 NM\_201628.1  
117.7 NM\_198857.1  
156.4 NM\_198857.1  
117.9 NM\_207414.1  
110 NM\_207414.1  
110.5 NM\_001004299.1  
115.8 XM\_942014.1  
110.8 NM\_001080474.1  
119.1 NM\_207482.1  
120 NM\_207366.1  
118.9 NM\_207486.1  
107.9 NM\_198520.1  
1218.7 NM\_001039755.1  
179.9 NM\_198567.1  
111.6 XM\_496787.2  
100.1 NM\_198564.2  
117.6 NM\_001080537.1  
117.8 NM\_207422.1  
112.1 NM\_207422.1  
112.3 NM\_001001678.1  
120.9 NM\_198506.1  
115.1 NM\_207454.1  
119.1 NM\_001039884.1  
118.7 NM\_207500.1  
114.6 NM\_198537.1  
127.9 NM\_001039770.1  
122 NM\_001001685.1  
118.1 NM\_207451.1  
114.3 NM\_001001692.1  
114.2 NM\_207510.2  
136.2 NM\_207448.1  
177.5 NM\_207465.1  
125.6 NM\_001004349.1  
125.3 NM\_001004321.2  
115.9 NM\_207386.1  
110.6 NM\_001001682.1  
131.8 NM\_001001709.1  
134.2 NM\_001039762.1  
123 NM\_198557.1

115.8 NM\_207401.1  
120.5 NM\_207490.1  
117.7 NM\_207429.2  
125.5 NM\_001001684.1  
121.2 NM\_207395.1  
144.2 NM\_198445.1  
108.1 NM\_207390.1  
111.8 NM\_207483.1  
120.7 NM\_001001700.1  
127.7 NM\_001001707.1  
119.5 NM\_207423.1  
111.8 NM\_001001703.1  
123.2 NM\_198488.1  
113.7 NM\_207417.1  
112.9 NR\_003082.1  
169.9 NR\_003082.1  
111.5 NM\_001004315.1  
117.3 NM\_001033562.1  
118.7 NM\_001033562.1  
128.5 NM\_198529.1  
116 NM\_001001693.1  
115.7 NM\_207430.1  
2540.8 NM\_001039797.1  
115.6 NM\_001001670.1  
111.6 NM\_001005303.1  
115.8 NM\_001001675.1  
125.9 NM\_207405.1  
115.6 NM\_198483.1  
131.6 NM\_001004330.1  
122.9 NM\_207426.1  
158.9 NM\_207509.1  
113.7 NM\_001007546.1  
135.6 NM\_153365.1  
122.6 NM\_153360.1  
328.8 NM\_153358.1  
113.8 NM\_153376.1  
106.6 NM\_153345.1  
116.6 NM\_173800.3  
170.4 NM\_173618.1  
125.3 NM\_173514.1  
129.1 NM\_001004336.1  
162.2 NM\_173633.1  
121.9 NM\_173578.1  
127.3 NM\_001456.1  
165.9 NM\_001457.1  
122.9 NM\_001458.2  
171.1 NM\_005803.2  
330.2 NM\_004475.1  
125.5 NM\_013280.4  
118.3 NM\_013231.4  
120.7 NM\_013281.2

123.4 NM\_198391.1  
112.2 NM\_002019.2  
111.5 NM\_004119.1  
181.8 NM\_001459.2  
118.1 NM\_002020.1  
113.7 NM\_182925.3  
136 NM\_014053.1  
108.2 NM\_020912.1  
150 NM\_032296.2  
103.1 NM\_020066.3  
134.5 NM\_005892.3  
116 NM\_001004422.1  
124.1 NM\_198900.2  
114.1 NM\_175736.3  
118.6 NM\_198900.2  
121.1 NM\_002021.1  
116 NM\_001460.2  
115.2 NM\_001002294.1  
120 NM\_006894.4  
131.2 NM\_002022.1  
127.9 NM\_001461.1  
169.7 XR\_001521.1  
125.2 NR\_002601.1  
117.7 NM\_002023.3  
124.4 NM\_002024.3  
117.3 NM\_152578.1  
117.6 NM\_054034.2  
110.7 NM\_054034.2  
123.4 NM\_212474.1  
115 NM\_022158.2  
157.8 NM\_024619.2  
129.4 NM\_020179.1  
1682.8 NM\_015033.2  
112.1 NM\_001024948.1  
127.7 NM\_017737.3  
1284.4 NM\_015308.1  
122.3 NM\_032532.1  
157.4 NM\_001079673.1  
117.7 NM\_001079673.1  
185.8 NM\_014923.2  
122.6 NM\_022823.1  
107.7 NM\_153756.1  
142.1 NM\_144717.2  
115.8 NM\_173532.1  
121 NM\_017559.2  
207.7 NM\_002027.2  
126.5 NM\_001018677.1  
502.7 NM\_002027.2  
131.4 NM\_002028.3  
115.6 NM\_004476.1  
132.5 NM\_001014986.1

115.9 NM\_016724.1  
111.4 NM\_016730.1  
118.2 NM\_016724.1  
116.7 NM\_016725.1  
127.1 NM\_000803.2  
121.3 NM\_000804.2  
1380.8 NM\_005252.2  
2956.6 NM\_006732.1  
151.8 NM\_005438.2  
121.8 NM\_005253.3  
110.1 NM\_004496.2  
117.3 NM\_021784.3  
109.4 NM\_153675.1  
115.2 NM\_021784.3  
119.9 NM\_004497.2  
125.2 NM\_012182.2  
139 NM\_001453.1  
130.4 NM\_005251.1  
108.4 NM\_004472.1  
138 NM\_004474.2  
114.9 NM\_012183.1  
208.2 NM\_207305.2  
147.6 NM\_012184.3  
120.2 NM\_199135.1  
127.3 NM\_199358.1  
117.7 NM\_004473.3  
125.7 NM\_012186.1  
130.1 NM\_012186.1  
120.8 NM\_001451.1  
118.4 NM\_001452.1  
124.6 NM\_005249.3  
124.2 NM\_003923.1  
121.7 NM\_012188.3  
119.6 NM\_012188.3  
133.4 NM\_001454.2  
569.2 NM\_018416.2  
732.4 NM\_014947.3  
215 NM\_001037165.1  
106.7 NM\_004514.3  
119.3 NM\_004514.3  
117.8 NM\_005250.1  
114.3 NM\_023067.2  
114.9 NM\_023067.2  
111.1 NM\_021953.2  
120.2 NM\_202002.1  
112.5 NM\_003593.2  
112.2 NM\_213596.1  
246.5 NM\_002015.2  
112 NM\_001455.2  
570.4 NM\_001455.2  
133.6 NM\_032682.4

127.5 NM\_001012505.1  
132 NM\_001012505.1  
110.3 NM\_148898.1  
123.8 NM\_014491.1  
117 NM\_014009.2  
144.2 NM\_001012427.1  
121.2 NM\_001012426.1  
119.3 NM\_033260.2  
113 NM\_181721.2  
113.3 NM\_181721.2  
114.2 NM\_198451.1  
139 NM\_017547.2  
137.4 NM\_024955.4  
120.5 NM\_004957.4  
132.2 NM\_001018078.1  
114.3 NM\_004957.4  
108.3 NM\_003838.2  
123.2 NM\_002029.3  
118.7 NM\_001462.3  
105.4 NM\_001462.3  
139.4 NM\_002030.3  
129.8 NM\_014489.1  
281.7 NM\_004958.2  
110 NM\_025074.3  
113.4 NM\_181355.1  
121.9 NM\_005479.2  
359.8 NM\_012083.2  
137.6 NM\_144966.3  
117.9 NM\_207361.4  
123.1 NM\_014286.2  
239.3 NM\_004477.2  
112.6 NM\_001005217.1  
121 NM\_002031.2  
117.6 NM\_024919.2  
119.8 NM\_018027.2  
116 NM\_001031729.1  
137.6 NM\_152330.2  
201.3 NM\_152330.2  
115.8 NM\_152330.2  
116.2 NM\_014907.1  
119.9 NM\_152428.3  
118.6 NM\_001018071.2  
113.1 NM\_001018071.2  
110.9 NM\_001017929.1  
117.8 NM\_001018071.2  
108.7 XM\_937471.1  
121.3 NM\_014728.1  
123.5 NM\_001013660.1  
125.1 NM\_006654.2  
121.6 NM\_006654.2  
106.7 NM\_006654.2

113.8 NM\_006653.3  
119.2 NM\_023037.1  
128.7 NM\_015030.1  
120.4 NM\_001463.2  
204.9 NM\_003088.2  
109.9 NM\_001077182.1  
112.8 NM\_012418.1  
114.2 NM\_020369.1  
122.9 NM\_024333.1  
112.2 NM\_024333.1  
132.1 NM\_024333.1  
113.2 NM\_207647.1  
126.2 NM\_031919.1  
122.4 NM\_001007122.1  
120.2 NM\_000510.2  
136.7 NM\_000510.2  
108.9 NM\_000145.2  
111.3 NM\_000145.2  
110.8 NM\_152597.3  
123.3 NM\_173651.1  
114.1 NM\_006350.2  
148.9 NM\_013409.1  
124.8 NM\_007085.3  
110.9 NM\_005860.1  
112.1 NM\_015082.1  
116.7 NM\_020116.2  
105.6 NM\_206965.1  
121.9 NM\_006657.2  
666.3 NR\_002204.1  
1994.9 NR\_002205.1  
118.4 NM\_031894.1  
190.4 NR\_002200.1  
800.2 NR\_002201.1  
10088.3 NR\_002202.2  
119.5 NR\_002203.1  
34768.5 NM\_000146.3  
112.6 NM\_177478.1  
119.2 NM\_001080432.1  
119.7 NM\_022476.2  
176 NM\_012280.2  
107.8 NM\_177439.1  
142.8 NM\_013393.1  
140.9 NM\_017647.2  
153.1 NM\_003902.3  
373.5 NM\_003934.1  
200.2 NM\_000147.2  
110.1 NM\_032020.3  
153.8 NM\_145059.2  
120.6 NM\_173794.2  
118 NM\_023934.3  
141.1 NM\_002569.2

149.5 NM\_004960.2  
111.4 NM\_054016.1  
176.3 NM\_054016.1  
135.4 NM\_000148.2  
118.3 NM\_032664.3  
119.3 NM\_173540.1  
111.4 NM\_000511.3  
114.9 NM\_000149.1  
130.7 NM\_002033.2  
112.9 NM\_002034.2  
144.7 NM\_000150.2  
122.9 NM\_000150.1  
105.7 NM\_004479.2  
    119 NM\_178154.1  
111.2 NM\_004480.3  
119.4 NM\_006581.2  
218.2 NM\_002035.1  
151.8 NM\_012192.2  
124.7 NM\_181425.1  
107.1 NM\_000144.3  
1070.9 NM\_001013438.1  
296.6 NM\_001013439.1  
558.7 NM\_005087.2  
200.6 NM\_004860.2  
124.2 NM\_005031.3  
    119 NM\_005031.3  
130.1 NM\_021902.2  
116.5 NM\_001680.3  
105.6 NM\_021603.2  
121.8 NM\_001680.3  
113.3 NM\_001680.3  
111.8 NM\_005971.2  
111.2 NM\_021910.1  
110.1 NM\_005971.2  
127.3 NM\_173160.2  
411.7 NM\_014164.4  
144.2 NM\_144779.1  
2072.2 NM\_014164.4  
113.3 NM\_022003.1  
118.3 NM\_022006.1  
124.7 NM\_001465.3  
502.8 NM\_199335.2  
    156 NM\_024513.1  
442.4 NM\_002037.3  
230.5 NM\_153048.1  
285.3 NM\_153047.1  
196.3 NM\_002037.3  
224.9 NM\_001011537.1  
180.6 NM\_032288.5  
    128 NM\_032288.5  
113.1 NM\_003505.1



115.3 NM\_007197.2  
116.5 NM\_001466.2  
117.1 NM\_017412.2  
118.3 NM\_012193.2  
122.3 NM\_003468.2  
116.3 NM\_003506.2  
158.5 NM\_003507.1  
113.1 NM\_031866.1  
144.1 NM\_003508.2  
142.3 NM\_016263.2  
113.5 NM\_015714.2  
1347.5 NM\_003910.2  
485.1 NM\_002038.2  
243.7 NM\_005754.2  
136 NM\_198395.1  
128.8 NM\_012297.3  
595.1 NM\_203504.1  
127.3 NM\_000151.2  
122.5 NM\_021176.1  
110.8 NM\_021176.1  
116.9 NM\_021176.1  
116.3 NM\_138387.2  
311.6 NM\_000402.2  
787.7 NM\_000402.3  
116.5 NM\_000402.3  
135.6 NM\_001079804.1  
113.4 NM\_000152.2  
116.1 NM\_207123.1  
116.7 NM\_002039.2  
116.4 NM\_207123.1  
156 NM\_080491.1  
120.3 NM\_080491.1  
111.5 NM\_012296.2  
128.5 NM\_080612.1  
143.1 NM\_007278.1  
4258.3 NM\_031412.2  
147.7 NM\_007285.6  
127.6 NM\_021905.1  
109.8 NM\_021903.1  
139.6 NM\_021905.1  
121.2 NM\_005458.5  
121 NM\_002040.2  
107.8 NM\_002041.3  
180.6 NM\_181427.2  
109.9 NM\_000806.3  
116.5 NM\_000807.1  
118.8 NM\_000808.2  
112.4 NM\_000809.2  
115.1 NM\_000810.2  
117.5 NM\_000811.1  
114.8 NM\_000812.2

122.1 NM\_021911.1  
115.1 NM\_021911.1  
120.3 XM\_937254.1  
116.6 XM\_937254.1  
109.9 NM\_000814.3  
122.9 NM\_000814.3  
113.7 NM\_000815.2  
119.5 NM\_004961.3  
104.7 NM\_021990.2  
124.5 NM\_021990.2  
113.6 NM\_173536.3  
108 NM\_198904.1  
116.6 NM\_000816.2  
124.4 NM\_033223.1  
113.4 NM\_018558.1  
114 NM\_002042.2  
119.1 NM\_002043.1  
113.4 NM\_013445.3  
114.6 NM\_013445.3  
106.4 NM\_000817.2  
118.7 NM\_000818.1  
722.1 NM\_001924.2  
601.5 NM\_015675.1  
384.2 NM\_006705.2  
120.4 NM\_052850.2  
103.7 NM\_207359.1  
113.2 XM\_937755.1  
112.5 NM\_001468.3  
115.7 NM\_001468.3  
106.9 NM\_001472.2  
113.9 NM\_001474.1  
118.8 NM\_001475.1  
121.8 NM\_001476.1  
121.2 NM\_021123.1  
114.3 NM\_001477.1  
115.7 NM\_012196.1  
1463.7 NM\_005255.1  
118 NM\_015973.2  
126.9 NM\_004861.1  
123.7 NM\_022134.1  
120 NM\_033036.1  
130.7 NM\_024637.3  
122.4 NM\_001037525.1  
155.8 NM\_000153.1  
110.1 NM\_001008216.1  
129.3 NM\_000403.3  
115.4 NM\_000403.3  
132 NM\_001478.2  
112.8 NM\_194327.1  
152.9 NM\_000154.1  
137 NM\_002044.2

147.1 NM\_001001556.1  
123.3 NM\_001001556.1  
127.9 NM\_138801.1  
151.7 NM\_015892.2  
128.8 NM\_018590.3  
122.3 NM\_000512.3  
114.1 NM\_020474.2  
126.8 NM\_198321.2  
140.5 NM\_198321.2  
116.8 NM\_017540.3  
192.6 NM\_022087.1  
112.3 NM\_024642.2  
109.3 NM\_052917.1  
117.7 NM\_024572.2  
119.2 NM\_001034845.1  
127.7 NM\_004481.2  
224.2 NM\_004482.2  
166.5 NM\_003774.3  
110.3 NM\_014568.1  
124.1 NM\_007210.2  
107.8 NM\_017423.1  
122.4 NM\_017417.1  
112.4 NM\_021808.2  
114.3 NM\_021808.2  
112.5 NM\_020692.1  
122.6 NM\_054110.2  
117.6 NM\_198516.1  
110.9 NM\_145292.2  
114.4 NM\_033106.1  
125.3 NM\_001480.2  
121 NM\_003857.2  
118.3 NM\_003614.1  
130.1 NM\_000155.2  
117.5 NM\_000155.2  
129.6 NM\_000156.4  
128 NM\_138924.1  
123.2 NM\_000156.4  
118.4 NM\_022041.2  
150.2 NM\_198334.1  
120 NM\_198141.2  
114.5 NM\_002045.2  
1381.2 NM\_002046.2  
374.7 NM\_002046.2  
3264.7 NM\_002046.2  
128.5 NM\_014364.4  
224 NM\_015635.2  
609.8 NM\_194301.2  
112.5 NM\_032293.3  
162.7 NM\_015085.3  
1795.9 NM\_002047.1  
363.2 NM\_000819.3

140.7 NM\_175085.1  
120.1 NM\_175085.1  
120.2 NM\_002048.1  
114.1 NM\_177553.1  
121.4 NM\_177553.1  
114.5 NM\_006478.3  
116.3 NM\_152236.1  
130.9 NM\_152237.1  
122 NM\_139285.2  
133.5 NM\_174942.1  
121 NM\_000820.1  
115 XM\_942084.1  
115.7 NM\_000820.1  
121.5 NM\_201432.1  
158 NM\_201432.1  
113.8 NM\_201433.1  
115.6 NM\_003644.2  
134.4 NM\_001481.1  
118.8 NM\_000805.3  
113 NM\_002049.2  
115.2 NM\_032638.3  
134.9 NM\_002051.2  
108.2 NM\_002052.2  
118.9 NM\_080473.3  
114 NM\_005257.3  
127.8 NM\_021167.2  
549.6 NM\_017660.2  
237.5 NM\_020699.1  
118.9 NM\_001482.1  
179.1 NM\_178831.4  
193.1 NM\_001005742.1  
133.4 NM\_020944.2  
119.9 NM\_020973.2  
137.8 NM\_001483.1  
180 NM\_000158.1  
184 NM\_004193.1  
114.6 NM\_021996.3  
114 NM\_022372.2  
165.2 NM\_002053.1  
903.4 NM\_004120.3  
126.5 NM\_018284.1  
174.9 NM\_052941.2  
236.3 NM\_052942.2  
111.6 NM\_198460.1  
114.5 NM\_207398.1  
116.5 NM\_001485.2  
116.2 NM\_000583.2  
188.1 NM\_012198.2  
114.6 NM\_014291.2  
383.5 NM\_024523.5  
121.9 NM\_014635.3

116 NM\_181453.2  
132.5 NM\_014635.3  
115.4 NM\_013976.2  
121.3 NM\_000159.2  
117.1 NM\_001008756.1  
128.4 NM\_001008756.1  
114.5 NM\_002054.2  
114 NM\_000160.1  
181.4 NM\_001024024.1  
183.5 NM\_001024070.1  
141.3 NM\_000161.2  
141.5 NM\_005258.2  
108 NM\_000162.2  
126.4 NM\_033508.1  
117.4 NM\_033508.1  
118.1 NM\_001486.2  
125 NM\_001498.2  
688.3 NM\_002061.2  
259.5 NM\_003643.2  
123.5 NM\_004752.1  
166.8 NM\_006836.1  
270.3 NM\_021078.1  
119 NM\_001490.3  
118.6 NM\_145649.2  
106 NM\_145655.2  
129.4 NM\_001491.2  
109.5 NM\_001491.2  
115.2 NM\_004751.1  
112.5 NM\_001018100.1  
114 NM\_001018090.1  
113.3 NM\_001018096.1  
109.7 NM\_001018097.1  
131.2 NM\_006302.1  
120.1 NM\_004483.3  
117.6 NM\_004293.2  
106.9 NM\_018972.1  
117.8 NM\_018972.1  
106.7 NM\_024034.3  
135.1 NM\_017686.1  
121.2 NM\_182536.2  
124.5 NM\_001492.3  
104.4 NM\_004962.2  
138.8 NM\_005811.2  
125.6 NM\_004864.1  
110.8 NM\_016204.1  
110.6 NM\_020634.1  
105.9 NM\_000557.2  
121.3 NM\_001001557.1  
117.8 NM\_182828.2  
135.5 NM\_005259.1  
137.4 NM\_005260.2

238.9 NM\_001493.1  
311.7 NM\_001494.2  
114.2 NM\_199231.1  
116.2 NM\_199234.1  
137.7 NM\_000514.2  
214.6 NM\_182569.1  
    118 NM\_017711.2  
    177 NM\_001031718.1  
106.9 NM\_024307.1  
123.9 NM\_182833.1  
147.1 NM\_030792.4  
123.8 NM\_133483.1  
116.1 NM\_182947.1  
132.4 NM\_182947.1  
120.1 NM\_181702.1  
122.3 NM\_005261.2  
200.3 NM\_015721.1  
127.1 NM\_015465.1  
138.4 NM\_024775.9  
131.7 NM\_024707.2  
115.9 NM\_001007269.1  
125.5 NM\_001042480.1  
118.7 NM\_003943.1  
117.6 NM\_002055.2  
131.9 NM\_005262.2  
142.2 NM\_005263.2  
    108 NM\_004188.2  
162.2 NM\_024996.5  
125.7 NM\_170681.1  
148.4 NM\_018988.1  
228.8 NM\_002056.1  
128.8 NM\_005110.1  
113.9 NM\_005264.3  
121.6 NM\_005264.3  
120.5 NM\_005264.2  
160.8 NM\_001495.4  
115.6 NM\_001496.3  
115.2 NM\_022139.2  
128.8 NM\_145762.1  
121.4 NM\_013365.3  
15759.2 NM\_001001561.1  
    126.8 NM\_001001560.1  
    119.6 NM\_001001561.1  
    197.5 NM\_015044.3  
    140.4 NM\_014001.2  
    141.7 NM\_138619.1  
        122 NM\_138619.1  
    176.5 NM\_000821.3  
    120.7 NM\_003878.1  
    114.7 NM\_152657.3  
    125.5 NM\_001037278.1

344.6 NM\_004837.2  
120.9 NM\_013430.2  
116.9 NM\_005265.2  
127.4 NR\_003267.1  
121.7 NM\_153338.1  
110.6 NR\_003191.1  
120.5 NM\_178025.1  
119.8 NM\_199127.1  
118 NM\_004121.1  
114.8 NM\_178311.1  
122.8 NM\_178312.1  
122.2 NM\_080920.2  
127.2 NM\_022562.2  
109.5 NM\_022560.2  
119.1 NM\_022557.2  
124.3 NM\_022558.2  
119.9 NM\_022556.2  
5931.7 NM\_014394.1  
109.5 NM\_000163.2  
115.1 NM\_021081.3  
107.6 NM\_001009824.1  
115.8 NM\_001009824.1  
120.7 NM\_000823.2  
110.3 NM\_016362.2  
114.7 NM\_004122.1  
114.6 NM\_198407.1  
110.5 NM\_005142.2  
143.8 NM\_130759.2  
187 NM\_015660.2  
372.7 NM\_018326.2  
254.2 NM\_018384.3  
134.5 NM\_024711.3  
172.2 NM\_001007224.1  
135.7 NM\_153236.3  
337.4 NM\_175571.2  
111.1 NM\_153257.2  
121.4 NM\_004123.2  
124 NM\_005716.2  
151.5 NM\_202468.1  
118.9 NM\_017655.4  
109.6 NM\_133261.1  
111.7 NM\_000164.2  
155.5 NM\_014030.2  
117.8 NM\_139201.1  
121.5 NM\_014776.2  
122.8 NM\_001014999.1  
108.1 NM\_001014999.1  
114.4 NM\_178044.1  
108.9 NM\_000165.2  
145.3 NM\_030772.3  
186.7 NM\_020435.2

117.1 NM\_021954.2  
113.3 NM\_002060.2  
118.8 NM\_005266.4  
121.3 NM\_181703.1  
115.8 NM\_005497.2  
5969.3 NM\_005497.2  
119.3 NM\_005267.3  
119.6 NM\_000166.2  
117.7 NM\_004004.3  
117.4 NM\_001005752.1  
119.9 NM\_001005752.1  
109.4 NM\_024009.2  
121.3 NM\_153212.1  
128.9 NM\_005268.2  
114.9 NM\_006783.2  
113.9 NM\_198568.1  
119.1 NM\_152219.2  
116.6 NM\_181538.1  
206.7 NM\_203391.1  
226 NM\_033214.2  
133.1 NM\_025211.2  
112.9 NM\_019617.2  
5032 NM\_000169.1  
242.9 NM\_001079811.1  
120.7 NM\_001079811.1  
240.4 NM\_000404.1  
177.9 NM\_024506.3  
130.1 NM\_138426.1  
121.8 NM\_015554.1  
115.6 NM\_000170.1  
114.6 NM\_181789.1  
280.1 NM\_001003722.1  
126.5 NM\_001499.2  
305.1 NM\_012201.4  
119.2 NM\_005269.1  
114.9 NM\_005270.2  
117.9 NM\_000168.2  
118.4 NM\_138465.3  
263.6 NM\_006851.1  
122.3 NM\_147193.1  
114.5 NM\_032575.1  
120.3 NM\_152629.2  
115.9 NM\_152629.2  
139.6 NM\_152629.2  
114.8 NM\_053274.1  
190.9 NM\_053274.1  
566.6 NM\_006708.1  
114.2 NM\_032756.2  
117 NM\_002062.2  
115.2 NM\_004246.1  
114.8 NM\_000171.1



114.6 NM\_002063.2  
122.4 NM\_006529.1  
111.5 NM\_001042543.1  
113.7 NM\_000824.2  
374.7 NM\_002064.1  
117.4 NM\_197962.1  
121 NM\_016066.3  
160.6 NM\_016066.3  
522.5 NM\_016417.2  
229.3 NM\_014905.2  
109.3 NM\_013267.2  
114.4 NM\_013267.2  
111.6 NM\_144669.1  
225.1 NM\_024656.2  
130.6 NM\_015101.1  
108.7 NM\_182974.1  
112.1 NM\_152932.1  
107.1 NM\_152932.1  
117.4 NM\_018446.2  
113.9 NM\_001010983.1  
127.6 NM\_031302.2  
728.1 NM\_016433.3  
193.1 NM\_015711.1  
6992.4 NM\_015710.3  
392.8 NM\_005271.1  
129.2 NM\_012084.3  
154.5 NM\_001033056.1  
113.2 NM\_002065.4  
119.9 NM\_001033044.1  
107.4 NM\_016571.1  
117.3 NM\_005838.2  
122.3 NM\_005838.2  
110 NM\_201648.1  
113 NM\_080661.2  
108.2 NM\_145016.2  
117.2 NR\_003039.1  
114.8 NM\_145262.2  
113.4 NM\_000405.3  
122 NM\_020713.1  
202.8 NM\_178439.3  
113.5 NM\_022471.2  
123.4 NM\_001500.2  
155.2 NM\_006582.2  
140.2 NM\_024482.1  
205.5 NM\_012384.2  
715.7 NM\_004124.2  
346.1 NM\_004877.1  
144.2 NM\_016573.1  
125.9 NM\_002066.1  
177.8 NM\_015895.3  
161.3 NM\_013335.2

114.6 NM\_205847.1  
122.5 NM\_021971.1  
131 NM\_021971.1  
119.3 NM\_013334.2  
122.2 NM\_006877.2  
174.5 NM\_001002002.1  
116.7 NM\_016576.3  
367.6 NM\_001002000.1  
129 NM\_002067.1  
139.5 NM\_007353.2  
228.4 NM\_006572.3  
112 NM\_004297.2  
241.2 NM\_002068.1  
114 NM\_002069.4  
540 NM\_002070.2  
206.8 NM\_006496.1  
129.4 NM\_182978.1  
114.9 NM\_182978.1  
117.7 NM\_020988.1  
117.3 NM\_138736.1  
115.8 NM\_138736.1  
123 NM\_002072.2  
126 NM\_016592.1  
118.1 NM\_080425.1  
6642.7 NM\_000516.3  
114.2 NM\_144499.1  
124.7 NM\_000172.2  
117.1 NM\_005272.2  
124 NM\_002073.2  
1119.1 NM\_002074.2  
118.4 NM\_053004.1  
159 NM\_005273.2  
7269.7 NM\_006098.3  
123.8 NM\_002075.2  
129.4 NM\_021629.2  
150.1 NM\_006578.3  
111.6 NM\_006578.3  
113.9 NM\_016194.3  
197.1 NM\_005476.3  
128.8 NM\_001017998.1  
131 NM\_004126.2  
120.3 NM\_018841.3  
114.3 NM\_016541.1  
170.6 NM\_053064.2  
133.8 NM\_012202.1  
113.5 NM\_004485.2  
158.3 NM\_005274.1  
128.2 NM\_052847.1  
122.7 NM\_033258.1  
120.9 NM\_021955.3  
121.1 NM\_031498.1

236.5 NM\_005275.2  
312.9 NM\_013285.1  
143.2 NM\_014366.4  
192.8 NM\_206826.1  
115.9 NM\_206825.1  
235.7 NM\_019067.3  
120.2 NM\_012483.1  
1072.5 NM\_012483.1  
444.1 NM\_006433.2  
115 NM\_018960.4  
159.8 NM\_014236.1  
1427.6 NM\_005471.3  
111.9 NM\_138335.1  
113 NM\_198066.2  
121.7 NM\_024312.3  
443.5 NM\_032520.3  
330.3 NM\_000825.2  
105.5 NM\_178332.1  
122.8 NM\_001501.1  
118.1 NM\_001012763.1  
117.2 NR\_002328.3  
1490.8 NM\_002076.2  
126.5 NM\_018652.4  
137.2 NM\_002077.2  
167.2 NM\_004486.4  
122 NM\_017600.1  
116.6 NR\_001555.1  
370.8 NM\_005895.2  
134.3 NM\_002078.3  
108 NM\_001038640.1  
1184.8 NM\_001002296.1  
132 NM\_016099.2  
138 NM\_001002296.1  
133.8 NM\_181077.2  
687.1 NM\_001023567.2  
116.2 NM\_001012423.1  
114 XM\_370843.4  
112.6 NM\_001012420.2  
242.3 NM\_004487.1  
113 NM\_016548.2  
119 NM\_177937.1  
297.7 NM\_022130.3  
178 NM\_018178.3  
119.6 NM\_014498.2  
113 NM\_198447.1  
146.2 NM\_016072.2  
111 NM\_032292.3  
125.3 NM\_020399.2  
123.7 NM\_031899.2  
190.1 NM\_015530.3  
138.3 NM\_004871.2

124.2 NM\_001007024.1  
124.5 NM\_001012511.1  
159.5 NM\_054022.2  
112.4 NM\_004287.3  
1036.5 NM\_002079.1  
110.3 NM\_152413.1  
233.4 NM\_002080.2  
    128 NM\_000173.3  
128.6 NM\_001007241.1  
123.4 NM\_016363.3  
100.6 NM\_000174.2  
    121 NM\_005814.1  
124.2 NM\_003801.2  
113.6 NM\_020918.2  
126.5 NM\_018025.2  
138.1 NM\_018040.1  
194.5 NM\_022078.1  
119.8 NM\_182679.1  
141.2 NM\_182679.1  
106.4 NM\_182679.1  
120.1 NM\_170699.1  
122.1 NM\_001077191.1  
236.9 NM\_022913.1  
    135 NM\_021639.3  
118.9 NM\_002081.1  
124.2 NM\_152742.1  
117.8 NM\_004484.2  
110.5 NM\_001448.2  
125.2 NM\_004466.3  
143.7 NM\_005708.2  
114.8 NM\_005276.2  
142.1 NM\_015141.2  
108.2 NM\_000408.2  
118.3 NM\_130769.2  
130.8 NM\_145171.2  
121.9 NM\_020806.4  
117.1 NM\_020806.4  
304.6 NM\_000175.2  
    124 NM\_005898.4  
150.9 NM\_203364.2  
138.4 NM\_203364.2  
140.4 NM\_015698.3  
122.4 NM\_001503.2  
109.1 NM\_177483.1  
112.4 NM\_201591.1  
119.4 NM\_005277.3  
127.3 NM\_201592.1  
116.6 NM\_001001994.1  
112.7 NM\_001001994.1  
134.3 NM\_001001995.1  
164.3 NM\_002510.2

235.5 NM\_001005340.1  
559.2 NM\_005279.2  
122.6 NM\_054021.1  
113.2 NM\_198179.1  
119.6 NM\_020960.2  
165 NM\_001080452.1  
119.4 NM\_177551.3  
113.8 NM\_006018.1  
125 NM\_025048.2  
114.5 NM\_153840.2  
106.8 NM\_025048.2  
119.1 NM\_153839.1  
108.2 NM\_153834.3  
129 NM\_153835.1  
135.2 NM\_153837.1  
120 NM\_153838.1  
110.3 NM\_015234.3  
135.9 NM\_178471.1  
105.7 NM\_005288.1  
119.5 NM\_181745.2  
112.6 NM\_032422.1  
114.9 NM\_032777.6  
138.7 NM\_145290.2  
113.5 NM\_001032394.1  
110.6 NM\_032787.1  
179.9 NM\_013345.2  
113.9 NM\_198827.2  
123.7 NM\_022571.5  
568.8 NM\_020155.2  
148.9 NM\_003272.1  
121.9 NM\_001002911.1  
119.8 NM\_181791.1  
120.5 NM\_181790.1  
122.1 NM\_000273.1  
128.5 NM\_138445.2  
114.8 NM\_207364.1  
115.7 NM\_001038705.1  
119.6 XM\_293580.2  
123.9 NM\_005290.1  
120 NM\_199243.1  
120.6 NM\_194251.2  
123.4 NM\_206997.1  
114.4 NM\_207370.1  
115.1 NM\_207173.1  
113.3 NM\_207172.1  
135.3 NM\_207172.1  
119.5 NM\_001033045.2  
131.4 NM\_152529.5  
144.5 NM\_153002.1  
115.5 NM\_024980.3  
111.4 NM\_020752.1

124.6 NM\_014373.1  
121 NM\_007369.1  
113.9 NM\_007369.1  
295.9 NM\_014449.1  
124.9 NM\_019858.1  
117.3 NM\_005291.1  
116.9 NM\_013308.2  
247.6 NM\_024531.3  
118.7 NM\_017986.2  
121.6 NM\_018969.3  
125.9 XM\_938451.1  
117 NM\_032553.1  
127.1 NM\_016372.1  
128.2 NM\_007223.1  
111.4 NM\_001002292.1  
121 NM\_024911.4  
118.6 NM\_001002292.1  
131.6 NM\_001004334.1  
258.9 NM\_005292.2  
114.3 NM\_006143.1  
121.5 NM\_005293.1  
116.5 NM\_005294.1  
125.2 NM\_005295.1  
115.1 NM\_005296.1  
119.1 NM\_005297.2  
119.8 NM\_005298.2  
130.2 NM\_153442.1  
129.4 NM\_018971.1  
125.7 NM\_005281.2  
112.6 NM\_001039966.1  
121.2 NM\_001031682.1  
119.7 NM\_001505.1  
122.5 NM\_005299.1  
122.7 NM\_001506.1  
115.8 NM\_005300.2  
110 NM\_005300.2  
123.4 NM\_001033513.1  
124.3 NM\_005301.2  
119.3 NM\_005302.2  
106.8 NM\_004767.2  
122.1 NM\_001508.1  
101.2 NM\_005282.1  
115.2 NM\_005305.1  
119.1 NM\_004778.1  
106.2 NM\_007227.3  
124.1 NM\_004224.1  
116.7 NM\_005684.2  
131.4 NM\_005683.2  
123.3 NM\_005682.4  
345.9 NM\_201524.1  
292.4 NM\_201525.1

119.3 NM\_005284.2  
129 NM\_031936.3  
118.3 NM\_080865.2  
110.1 NM\_030784.1  
113.9 NM\_005756.1  
114.2 NM\_005756.1  
299.6 NM\_003608.2  
131 NM\_003485.3  
118.5 NM\_006794.1  
108.8 NM\_018485.1  
123.9 NM\_080819.2  
112.4 NM\_032554.3  
115.5 NM\_080817.2  
135.9 NM\_016540.2  
125.2 NM\_020370.1  
118.8 NM\_018970.3  
120.1 NM\_023915.2  
112.9 NM\_022049.1  
229 NM\_016334.2  
145.2 NM\_020400.4  
125.9 NM\_170776.3  
116.2 NM\_170776.3  
120.1 NR\_003149.1  
112 NM\_014710.2  
143.7 NM\_138437.3  
140.6 NM\_138437.3  
117.2 NM\_003979.3  
134.7 NM\_016235.1  
125 NM\_018653.3  
118.5 NM\_022036.2  
129 NM\_018653.3  
124 NM\_018654.1  
115 NM\_148963.1  
126.7 NM\_212492.1  
220 NM\_004127.4  
125 NM\_004127.4  
202.4 NM\_004489.4  
116.4 XM\_939186.1  
121.9 NM\_013296.3  
173.3 NM\_022107.1  
529.7 NM\_138501.4  
130.6 NM\_005309.1  
179.6 NM\_133443.1  
316.2 NM\_201397.1  
124.8 NM\_201397.1  
116.8 NM\_002083.2  
127.9 NM\_002084.2  
316.1 NM\_002085.2  
1795.3 NM\_001039847.1  
112.2 NM\_001509.1  
110.6 NM\_001509.1

118.4 NM\_182701.1  
122 NM\_015696.2  
162.5 NM\_020895.2  
108.6 NM\_017577.2  
106.1 NM\_001012642.1  
126.3 NM\_023927.1  
127.5 NM\_006613.3  
595.9 NM\_006613.3  
112.8 NM\_004810.2  
137.1 NM\_181711.1  
121.3 NM\_001001550.1  
133.2 NM\_005311.3  
119.1 NM\_001001555.1  
114.7 NM\_005311.3  
120.3 NM\_004490.2  
116.8 NM\_004490.2  
171.7 NM\_002086.3  
244.6 NM\_002086.3  
112.6 NM\_005310.2  
114.7 NM\_005310.2  
126.9 NM\_001030002.1  
108.6 NM\_148903.1  
134.8 NM\_033090.1  
121.4 NM\_148903.1  
118 NM\_014668.2  
117.6 NM\_013372.5  
115 NM\_022469.3  
118.3 NM\_014552.2  
118.6 NM\_198182.1  
113 NM\_198182.1  
107.3 NM\_024915.1  
111.4 NM\_021180.2  
112.8 NM\_198173.1  
127.7 NM\_021180.2  
132.3 NM\_012203.1  
100.3 NM\_000827.2  
122.7 NM\_000826.2  
116.7 NM\_181894.1  
128.3 NM\_181894.1  
125.5 NM\_007325.2  
116.7 NM\_001077244.1  
113.8 NM\_000829.1  
111.7 NM\_017551.1  
108.1 NM\_001510.1  
127 NM\_000830.3  
117.5 NM\_000830.3  
115.2 NM\_175611.2  
112.8 NM\_021956.2  
112.8 NM\_175768.1  
105.9 NM\_000831.2  
112.7 NM\_014619.2



121.4 NM\_002088.3  
115.6 NM\_007327.1  
115.2 NM\_007327.1  
144.6 NM\_000832.5  
124.7 NM\_000833.2  
134.8 NM\_000834.2  
114.8 NM\_000835.3  
111.8 NM\_000836.1  
111.1 NM\_133445.1  
123.3 NM\_138690.1  
140.3 NM\_000837.1  
187.1 NM\_001009184.1  
109.2 NM\_001018103.1  
177.4 NM\_001018102.1  
125.5 NM\_001018102.1  
114.8 NM\_021150.1  
116.9 NM\_001080423.1  
178.3 NM\_020137.3  
139.2 NM\_020137.3  
3242.4 NM\_207672.1  
111.1 NM\_002929.2  
110.8 XM\_938093.1  
122.7 NM\_001004057.1  
130.3 NM\_001004056.1  
150.8 NM\_005308.2  
130.8 NM\_002082.2  
140.5 NM\_002082.2  
109.3 NM\_139209.2  
112.6 NM\_004491.2  
119.2 NM\_000838.2  
142.1 NM\_000839.2  
113.7 NM\_000840.2  
113.4 NM\_000841.1  
111.2 NM\_000842.1  
103.6 NM\_000843.2  
116.9 NM\_181874.1  
115.3 NM\_181875.1  
111.2 NM\_181875.1  
120.9 NM\_000845.1  
276.2 NM\_002087.2  
287.6 NM\_001012479.1  
118.7 NM\_001012513.1  
119.9 NM\_002091.3  
245.7 NM\_025196.2  
921.2 NM\_152407.2  
124.6 NM\_005314.2  
115.7 NM\_024869.2  
206.4 NM\_002092.2  
113.2 NM\_024719.2  
170.4 NM\_031485.2  
137.4 NM\_173849.2

120.6 NM\_005315.1  
127.7 NM\_178171.2  
261.4 NM\_024736.4  
231.2 NM\_018530.1  
161.9 NM\_018530.1  
    263 NM\_018530.1  
118.4 NM\_001080554.1  
111.7 NM\_031289.1  
118.5 NM\_153823.1  
123.5 NM\_031965.2  
114.7 NM\_145657.1  
114.5 NM\_133267.1  
127.1 NM\_019884.2  
260.5 NM\_002093.2  
120.5 NM\_198252.1  
111.5 NM\_000177.3  
943.7 NM\_002094.1  
141.6 NM\_018094.2  
120.9 NM\_000637.2  
182.8 NM\_000178.2  
    117 NM\_145740.2  
118.3 NM\_000846.3  
112.5 NM\_000847.3  
116.2 NM\_001512.2  
    111 NM\_153699.1  
116.2 NM\_024751.1  
269.8 NM\_015917.1  
134.5 NM\_000561.2  
213.3 NM\_000561.2  
115.8 NR\_003112.1  
239.1 NM\_000848.2  
152.4 NM\_000849.3  
124.6 NM\_000850.3  
121.8 NM\_147148.1  
113.6 NM\_000851.2  
573.1 NM\_004832.1  
117.6 NM\_183239.1  
2093.9 NM\_000852.2  
129.3 NM\_000853.1  
114.5 NM\_001080843.1  
130.6 NM\_000854.2  
114.1 NM\_001513.2  
    123 NM\_145871.1  
123.9 NM\_001513.2  
128.4 NM\_001006636.1  
127.4 NM\_001006636.1  
121.2 NM\_024659.2  
125.2 NM\_201595.1  
215.8 NM\_015859.2  
121.6 NM\_201595.1  
    341 NM\_004492.1

782.6 NM\_001514.3  
155.8 NM\_005513.1  
501.8 NM\_002095.3  
416.7 NM\_002096.1  
248 NM\_004128.1  
185.6 NM\_005316.2  
117.6 NM\_001515.2  
130.5 NM\_001516.3  
137.8 NM\_001517.4  
164.2 NM\_207118.1  
128.7 XM\_939506.1  
117.2 NM\_032999.1  
153.1 NM\_005685.2  
120 NM\_016328.1  
120.9 NM\_001003795.2  
117.5 NR\_002164.1  
128.9 NM\_001520.1  
192.3 NM\_001521.1  
124.5 NM\_001035521.1  
329.9 NM\_012086.1  
118.8 NM\_012204.1  
211.5 NM\_012087.1  
128.6 NM\_004286.3  
116.6 NM\_001042717.1  
123.9 NM\_019096.3  
118 NM\_133644.1  
115.4 NM\_133644.1  
163 NM\_032620.1  
336.2 NM\_012341.2  
118.5 NM\_015666.2  
533.7 NM\_012227.1  
224.9 NM\_014170.2  
152.9 NM\_014170.2  
140.1 NM\_138485.1  
108.5 NM\_001011708.1  
119.7 NM\_016426.4  
124.6 NM\_000409.2  
143.4 NM\_002098.3  
131.6 NM\_005459.2  
125.8 NM\_033553.2  
118.2 NM\_007102.1  
127.8 NM\_000855.1  
109.8 NM\_000856.2  
109.9 NM\_000857.1  
107 NM\_004963.1  
118.1 NM\_000180.1  
135.2 NM\_001522.1  
118.1 NM\_021927.1  
219.7 NM\_000858.4  
106.1 NM\_016315.2  
114.9 NM\_020707.2

151.3 NM\_000181.1  
129 NM\_206910.1  
234.1 NM\_004130.2  
114.6 NM\_003918.2  
119.5 NM\_003918.2  
116.1 NM\_003918.1  
112 NM\_152312.2  
115.2 NM\_002099.3  
111.5 NM\_002100.3  
207.3 NM\_002101.3  
230.2 XM\_940361.1  
117.2 NM\_198682.1  
111.7 NM\_002102.2  
105 NM\_002102.2  
117.7 NM\_002103.3  
115.5 NM\_021957.2  
262.7 NM\_006144.2  
426.7 NM\_004131.3  
272.1 NM\_033423.2  
255.8 NM\_002104.2  
132 NM\_005317.2  
115.3 NR\_002196.1  
124.3 NM\_005318.2  
117.7 NM\_153833.1  
146.4 NM\_006026.2  
110.8 NM\_181788.1  
124.5 NM\_001017990.1  
117.3 NM\_001017991.1  
125.2 NM\_080720.1  
163.5 NM\_018267.2  
191 NM\_177925.1  
128.2 NM\_138635.2  
231.2 NM\_002105.2  
123.6 NM\_004893.2  
145.8 NM\_138609.1  
1055.6 NM\_004893.2  
122.6 NM\_018649.1  
8693.9 NM\_002106.3  
630.2 NM\_017445.1  
106.1 NM\_001002916.2  
117.8 NR\_003238.1  
7916.8 NM\_002107.3  
2799.4 NM\_005324.3  
111.8 NM\_004285.3  
120.5 NM\_012205.1  
120.7 NM\_004132.2  
128.5 NM\_014282.1  
127.2 NM\_020771.2  
140.4 NM\_004493.1  
145.2 NM\_004493.1  
173.1 NM\_000182.3

139.5 NM\_000183.2  
156.1 NM\_005327.1  
125 NM\_005326.3  
198.4 NM\_005326.3  
120 NM\_207112.1  
123.9 NM\_032304.2  
126.9 NM\_032304.2  
123.7 NM\_052947.2  
122.3 NM\_002108.2  
152.5 NM\_021175.2  
114.5 NM\_004821.1  
119.7 NM\_021973.2  
121.6 NM\_017545.2  
120.7 NM\_001005783.1  
121.8 NM\_016527.2  
124.5 NM\_177977.2  
122.4 NM\_003949.2  
120.5 NM\_003949.2  
115.2 NM\_001884.2  
123.6 NM\_021817.2  
130.7 NM\_178232.2  
121.7 NM\_023002.1  
425.7 NM\_002109.3  
126.1 NM\_080820.3  
398.3 NM\_012208.2  
120.5 NM\_001523.1  
111.5 NM\_005328.1  
108.5 NM\_005328.1  
121.5 NM\_005329.2  
104.8 NM\_005329.2  
257.2 NM\_003642.2  
143.1 NM\_003642.2  
120.6 NM\_012206.1  
404.1 NM\_032782.3  
248.1 NM\_001018837.1  
146.4 NM\_006118.3  
146.9 NM\_006118.3  
107.3 NM\_021182.1  
4798.3 NM\_000517.3  
11650.4 NM\_000518.4  
140.4 NM\_000519.3  
109.3 NM\_005330.3  
443 NM\_001945.1  
214.5 NM\_000559.2  
273.9 NM\_000184.2  
119 NM\_001003938.3  
737.8 NM\_012257.3  
129.5 NM\_005331.3  
116.6 NM\_006620.2  
126.5 NM\_016578.3  
691.7 NM\_006402.2

117.8 NM\_005332.2  
104.2 NM\_018487.2  
120.7 NM\_015261.2  
175.7 NM\_022346.3  
154.8 NM\_152299.1  
115.2 NM\_014551.3  
107 NM\_014551.3  
207.2 NM\_053005.2  
128.9 NM\_005333.2  
701.3 NM\_005334.1  
115.5 NM\_001002018.1  
141.1 NM\_001002017.1  
122.4 NM\_013320.1  
154.3 NM\_181717.1  
2006 NR\_001318.1  
124.6 NM\_001001394.2  
116.9 NR\_002139.1  
153 NM\_005844.2  
142.3 NM\_002110.2  
2388.1 NM\_005335.3  
117.1 NM\_021072.1  
117.3 NM\_001194.2  
123 NM\_020897.1  
115.8 NM\_005477.1  
123.7 NM\_080669.2  
571.1 NM\_006674.2  
126.1 NM\_001524.1  
116.6 NM\_001525.1  
124.1 NM\_001526.2  
480.5 NM\_014266.3  
131 NM\_014266.3  
113.2 NM\_001023564.1  
581.2 NM\_004964.2  
112 NM\_032019.4  
112.1 NM\_024827.1  
291.7 NM\_001527.1  
291.7 NM\_003883.2  
137.3 NM\_006037.2  
134.7 NM\_005474.4  
240.1 NM\_001015053.1  
232.6 NM\_006044.2  
115.1 NM\_015401.1  
122.6 NM\_016596.2  
120.4 NM\_018486.1  
115.7 NM\_058176.2  
116.5 NM\_014707.1  
117.1 NM\_178423.1  
118.3 NM\_058177.1  
122.6 NM\_058177.1  
125.8 NM\_002112.1  
229.7 NM\_016648.1

357.6 NM\_016063.1  
121.2 NM\_198527.1  
255.4 NM\_004494.1  
159 NM\_001001520.1  
149.1 NM\_001001520.1  
114.4 NM\_138574.2  
124.6 NM\_016073.2  
121.4 NM\_012080.3  
120.3 NM\_032124.3  
164.5 NM\_031219.2  
140.6 NM\_005336.2  
132.1 NM\_005336.2  
126.5 NM\_203346.1  
192.5 NM\_006831.1  
341.8 NM\_018072.4  
180.8 NM\_019024.1  
243.5 NM\_015987.3  
179.6 NM\_014320.2  
537 NM\_016217.2  
705.6 NM\_015382.1  
119.3 NM\_182765.1  
117 NM\_173497.1  
134.6 NM\_173497.1  
145.5 NM\_024602.4  
122.1 NM\_015052.2  
113.5 NM\_020760.1  
205.6 NM\_133636.1  
132.9 NM\_033647.2  
121.5 NM\_018063.3  
111.5 NM\_001029887.1  
257.6 NM\_014877.2  
125.7 NM\_005337.2  
122.8 NM\_018437.3  
120.6 NM\_018437.3  
122.4 NM\_197978.1  
111.9 NM\_016173.3  
113.4 NM\_152722.4  
124.8 NM\_138737.1  
109 NM\_014799.2  
198.4 NM\_003922.2  
224.7 NM\_004667.3  
115.6 XR\_000517.1  
115.6 NR\_002827.1  
116.3 NM\_014606.1  
132.5 NM\_022079.1  
125.4 NM\_015601.2  
286.3 NM\_015601.2  
346.3 NM\_016323.1  
167 NM\_001013005.1  
681.1 NM\_001010990.1  
137.3 NM\_022373.3

119.2 NM\_207582.1  
117.2 NM\_005524.2  
120.5 NM\_019089.3  
180.7 NM\_021170.2  
323.4 NM\_018645.3  
110.5 NM\_032580.1  
113.9 NM\_003865.1  
124.2 NM\_000520.2  
1387.8 NM\_000521.2  
127.5 NM\_173620.1  
133.9 NM\_006460.2  
114.7 NM\_144608.1  
136.1 NM\_012258.2  
117 NM\_001040708.1  
169.6 NM\_012259.1  
110.7 NM\_014571.2  
113.2 NM\_139005.2  
116 NM\_139007.1  
124.2 NM\_000410.3  
117.8 NM\_145277.3  
122.7 NM\_213653.2  
112.5 NM\_213652.2  
127.5 NM\_000187.2  
119.5 NM\_001010934.1  
114.1 NM\_001010932.1  
112.1 NM\_001010931.1  
116.7 NM\_001528.2  
1932.1 NM\_004712.3  
119 NM\_018194.1  
131.6 NM\_002729.2  
109.4 NM\_022475.1  
116.9 NM\_005712.1  
125.9 NM\_007072.2  
118.9 NM\_001031693.1  
120.1 NM\_001036645.1  
118.6 NM\_001036645.1  
125.6 NM\_033055.2  
247 NM\_032558.1  
126.3 NM\_152740.2  
236.1 NM\_014362.2  
125.6 NM\_006497.2  
322.7 NM\_015094.1  
293.4 NM\_181054.1  
198.5 NM\_001530.2  
120.7 NM\_017902.1  
123.4 NM\_152796.1  
118.4 NM\_152795.2  
116.2 NM\_152794.2  
120.3 NM\_022462.2  
118.2 NM\_152794.1  
125.4 NM\_013332.1



523.4 NM\_014056.1  
131.5 NM\_016438.2  
414.7 NM\_138820.2  
113.5 XR\_000594.1  
117.2 NR\_002780.1  
128.8 NM\_194072.1  
5988.2 NM\_005340.3  
123.8 NM\_032593.2  
121.3 NM\_138571.3  
115.6 NM\_005338.4  
157.6 NM\_003959.1  
131.1 NM\_003959.1  
116.8 NM\_003959.1  
111.1 NM\_005339.3  
110.7 NM\_198269.1  
117.8 NM\_181358.1  
114.8 NM\_152696.3  
110 NM\_198268.1  
167.9 NM\_022740.2  
113.4 NM\_005734.2  
130.8 NM\_001048200.1  
121.9 NM\_144685.3  
139.8 NM\_003325.3  
137.7 NM\_003609.2  
112.7 NM\_015216.2  
159.2 NM\_001024463.2  
108.8 NM\_014659.3  
129.3 NM\_001024463.2  
117.6 NM\_005325.2  
108.8 NM\_005322.2  
140.8 NM\_005319.3  
131.7 NM\_005320.2  
111.9 NM\_005321.2  
114.5 NM\_005323.3  
121.2 NM\_170745.3  
114.5 NM\_003513.2  
248.2 NM\_003512.3  
115 NM\_021065.2  
192.8 NM\_021052.2  
129.9 NM\_021064.3  
118.5 NM\_080596.1  
125.9 NM\_003509.2  
111.5 NM\_021066.2  
131 NM\_003510.2  
383.3 NM\_003514.2  
105.7 NM\_170610.2  
179.3 NM\_021062.2  
127.4 NM\_003526.2  
378.4 NM\_138720.1  
318.7 NM\_138720.1  
113.4 NM\_021063.2

124.8 NM\_003523.2  
140.1 NM\_003522.3  
416 NM\_003518.3  
118.6 NM\_003524.2  
114 NM\_003525.2  
295.3 NM\_021058.3  
6574.3 NM\_080593.1  
110.9 NM\_003519.3  
119.7 NM\_003521.2  
133.6 NM\_003527.4  
230.4 NM\_003529.2  
114.8 NM\_003537.3  
131.8 NM\_003531.2  
153.5 NM\_003530.3  
139.2 NM\_021018.2  
120.1 NM\_003534.2  
174.4 NM\_003536.2  
150.7 NM\_003533.2  
160.8 NM\_003535.2  
866.5 NM\_003538.3  
147.6 NM\_003544.2  
1544 NM\_003542.3  
105.9 NM\_003539.3  
135.7 NM\_003545.3  
121.2 NM\_003540.3  
120.6 NM\_003547.2  
313.9 NM\_003543.3  
119.8 NM\_003495.2  
117 NM\_021968.3  
119 NM\_003546.2  
855.1 NM\_003516.2  
135.2 NM\_175065.2  
552.8 NM\_003517.2  
227.3 NM\_003528.2  
148.9 NM\_001024599.1  
141.6 NM\_021059.2  
137.1 NM\_003548.2  
233.8 NM\_033445.2  
125.8 NM\_175055.2  
119.6 NM\_003493.2  
132.3 NM\_175054.2  
244.9 NM\_002114.1  
139.7 NM\_006734.2  
108.5 NM\_024503.1  
719.2 NM\_033500.1  
114.7 NM\_000188.1  
107.9 NM\_033496.1  
106.4 NM\_033500.1  
143.8 NM\_000189.4  
112.6 NM\_002115.1  
112.8 NM\_025130.2

135 NM\_181786.2  
117.1 NM\_181846.1  
228.6 NM\_005341.1  
7408.2 NM\_002116.5  
117.8 NM\_002117.4  
232.9 NM\_006120.2  
204.1 NM\_002118.3  
105.9 NM\_002119.3  
128.1 NM\_002120.2  
342.6 NM\_033554.2  
109.4 NM\_002121.4  
113.6 NR\_001435.1  
163 XM\_936120.1  
114 NM\_020056.2  
104.6 NM\_002123.2  
117.9 NM\_182549.1  
755.6 NM\_019111.3  
118.4 NM\_002124.1  
115.4 NM\_022555.3  
144.3 NM\_021983.4  
115.3 NM\_002125.3  
169.5 NR\_001298.1  
390.8 NM\_005516.4  
444.7 NM\_018950.1  
171.2 NM\_002127.3  
1532.5 NR\_001434.1  
121.2 NM\_000411.4  
117.6 NM\_002126.3  
136.8 NM\_031304.2  
164.2 NM\_021958.2  
120.2 NM\_005515.2  
111.9 NM\_178580.1  
154.7 NM\_030789.2  
122.3 NM\_178582.1  
160.8 NM\_024567.2  
131.1 NM\_001024382.1  
144.5 NM\_000190.3  
126.9 NM\_001024382.1  
118.1 NM\_031935.1  
430.7 NM\_032717.3  
147.8 NM\_001008735.1  
122.6 NM\_018200.2  
383.5 NM\_006339.1  
128.8 NM\_014250.1  
113.9 NM\_005487.3  
111.1 NR\_002165.1  
131.8 NM\_002131.2  
123.4 NM\_145904.1  
126 NM\_145905.1  
352.3 NM\_145899.1  
125 NM\_003484.1

128.3 NM\_003483.4  
147.9 NM\_002128.4  
448.2 NM\_002129.2  
132.9 NM\_005342.2  
123.1 NM\_145205.3  
116.6 NM\_001008728.1  
129.2 NM\_000191.2  
117.7 NM\_019036.1  
110.9 NM\_019036.1  
105.1 NM\_019036.1  
228.4 NM\_000859.1  
604.2 NM\_002130.4  
120.4 NM\_005518.2  
2326 NM\_004965.6  
458 NM\_005517.2  
116.3 NM\_004242.2  
599.2 NM\_006353.2  
225.9 NM\_012292.2  
164.6 NM\_012484.1  
170.7 NM\_012485.1  
3104.9 NM\_002133.1  
128.2 NM\_002134.2  
118.1 NM\_015980.3  
117.3 NM\_018942.1  
111.2 NM\_005519.1  
138.4 NM\_016185.2  
123.9 NM\_001030004.1  
117.5 NM\_178850.1  
108.2 NM\_004133.3  
125.2 NM\_001024074.1  
155.3 NM\_001024074.1  
114.9 NM\_006895.2  
118 NM\_001024075.1  
118.7 NM\_014469.3  
480.6 NM\_006805.3  
130.1 NM\_002136.1  
127.3 NM\_031157.1  
209 NR\_002944.2  
3940.4 NM\_031243.1  
142.1 NM\_194247.1  
129.2 NR\_002726.1  
191.7 NM\_031266.2  
609 NM\_004499.3  
3494.8 NM\_031266.2  
216.8 NM\_031314.1  
946.1 NM\_001077442.1  
115.1 NM\_001013631.1  
1992.9 NM\_031369.2  
299.8 NM\_031372.1  
448.3 NM\_005463.2  
125.9 NM\_004966.2

138.9 NM\_005520.1  
228.2 NM\_019597.3  
273.9 NM\_012207.1  
123.2 NM\_021644.2  
1442.5 NM\_031263.1  
263.7 NM\_001005335.1  
127.4 NM\_138394.2  
134.4 NM\_005968.2  
2164.4 NM\_031203.1  
525.5 NM\_005826.2  
752.5 NM\_004501.3  
205.4 NM\_031844.2  
294.3 NM\_144732.1  
689 NM\_144732.1  
221.6 NM\_001079559.1  
112.9 NM\_016522.2  
117.2 NM\_001048209.1  
118.4 NM\_001048209.1  
122 NM\_004272.3  
113.2 NM\_199332.2  
116.8 NM\_004839.2  
109.3 NM\_004838.2  
110.6 NM\_080731.1  
125.5 NM\_080731.1  
239.7 NM\_080730.2  
153.9 NM\_015888.3  
138 NM\_013312.1  
127 NM\_032410.2  
115.9 NM\_032495.4  
130.9 NM\_139211.2  
250.8 NM\_139212.2  
104.2 NM\_032132.2  
119.5 NM\_152510.1  
117.8 NM\_005522.3  
128.4 NM\_005522.3  
115.9 NM\_153715.1  
115.4 NM\_153715.1  
106.8 NM\_018951.2  
119.8 NM\_005523.4  
107.3 NM\_000522.2  
115 NM\_006735.3  
117.4 NM\_030661.3  
112.9 NM\_153631.1  
114.3 NM\_153632.1  
115.4 NM\_153631.1  
110.8 NM\_002141.2  
117.4 NM\_019102.2  
138.8 NM\_024014.2  
113.5 NM\_006896.2  
119.8 NM\_152739.2  
111.9 NM\_152739.2

139.5 NM\_002144.2  
111.3 NM\_006361.4  
158.2 NM\_002145.2  
120.8 NM\_002146.3  
111.8 NM\_024015.3  
121.8 NM\_002147.2  
164.1 NM\_018952.3  
117.5 NM\_156036.1  
120.3 NM\_004502.2  
110.5 NM\_024016.2  
119.3 NM\_024017.3  
116.5 NM\_017409.2  
132.9 NM\_014212.2  
108.9 NM\_173860.1  
119.1 NM\_017410.2  
117.6 NM\_014620.2  
137 NM\_153633.1  
114.6 NM\_018953.2  
123.3 NM\_153693.3  
117.4 NM\_004503.2  
111.4 NM\_153693.1  
110.7 NM\_022658.3  
104 NM\_006897.1  
124 NM\_024501.1  
110.7 NM\_002148.2  
128.6 NM\_021192.2  
138.4 NM\_021193.2  
133.8 NM\_000523.2  
135.6 NM\_006898.4  
128.8 NM\_014621.2  
121.7 NM\_019558.2  
116.9 NM\_014213.2  
120.9 NM\_005143.2  
261.5 NM\_016287.2  
114.3 NM\_002143.2  
114.7 NM\_134421.1  
435.5 NM\_002149.2  
121.6 NM\_002149.2  
138.1 NM\_016257.2  
121.8 NM\_002150.2  
124.7 NM\_000860.3  
119.9 NM\_015852.1  
108.1 NM\_002151.1  
126.3 NM\_182983.1  
110 NM\_002151.1  
116.9 NM\_020995.3  
559.2 NM\_000194.1  
119.2 NM\_182639.1  
140.6 NM\_182639.1  
117.2 NM\_182637.1  
122 NM\_032383.3

121.3 NM\_152841.1  
131.7 NM\_152843.1  
115.1 NM\_152843.1  
125.5 NM\_022081.4  
467.5 NM\_007216.3  
131.5 NM\_181507.1  
265.5 NM\_024747.4  
123.4 NM\_006665.3  
114.9 NM\_021828.2  
127.7 NM\_000613.1  
104.2 NM\_005144.3  
109.2 NM\_018411.3  
128.5 NM\_176795.2  
120.2 NM\_176795.2  
119.1 NM\_020386.2  
136.7 NM\_017878.1  
151.3 NM\_007069.1  
109.9 NM\_054108.1  
112.9 NM\_004504.3  
131.4 NM\_007043.5  
118.9 NM\_006076.3  
    115 NM\_002152.2  
    120 NM\_000412.2  
111.4 NM\_000861.2  
117.5 NM\_022304.1  
120.9 NM\_007232.1  
107.7 NM\_021624.2  
140.5 NM\_138632.1  
106.8 NM\_138632.1  
136.8 NM\_007032.3  
117.9 NM\_003806.1  
125.3 NM\_001009931.1  
118.6 NM\_005836.2  
117.5 NM\_022460.3  
111.4 NM\_012262.2  
117.3 NM\_005114.2  
120.7 NM\_006043.1  
120.9 NM\_006042.1  
117.1 NM\_006041.1  
121.9 NM\_006040.1  
115.9 NM\_153612.2  
117.6 NM\_001009606.1  
129.7 NM\_004807.1  
106.4 NM\_001077188.1  
130.3 NM\_147175.2  
109.9 NM\_001077188.1  
    114 XM\_931159.1  
113.4 NM\_015370.1  
    267 NM\_014473.2  
380.7 NM\_001537.2  
143.5 NM\_020677.2

381.2 NM\_172002.3  
120.1 NM\_005525.2  
113.6 NM\_181755.1  
116.8 NM\_181755.1  
    121 NM\_198707.1  
116.2 NM\_000196.2  
122.8 NM\_000413.1  
    756 NM\_016142.1  
112.2 NM\_178135.2  
112.8 NM\_002153.1  
116.3 NM\_000197.1  
209.5 NM\_000414.1  
108.4 NM\_003725.2  
117.4 NM\_014234.3  
    117 NM\_000862.1  
    119 NM\_000198.2  
118.9 NM\_025193.2  
140.9 NM\_031463.3  
125.4 NM\_032303.2  
114.9 NM\_005526.1  
189.1 NM\_004506.2  
105.9 NM\_007031.1  
118.9 NM\_001538.1  
    112 NM\_001538.1  
123.7 NM\_001080439.1  
109.6 NM\_016153.1  
    127 NM\_001001871.1  
123.3 NM\_152584.1  
    107 NM\_153716.1  
122.8 NM\_153716.1  
137.9 NM\_032855.2  
269.1 NM\_017520.2  
127.3 NM\_213655.1  
    144 NM\_001017963.1  
13755.3 NM\_005348.2  
9547.3 NM\_007355.2  
129.3 NR\_003132.1  
113.7 NR\_002927.1  
1120 NM\_003299.1  
124.2 NR\_003130.1  
115.2 NM\_025015.2  
120.7 NM\_052970.3  
387.8 NM\_016299.1  
15208.2 NM\_005345.4  
18407.4 NM\_005346.3  
    724 NM\_005527.2  
396.7 NM\_021979.2  
141.6 NM\_002154.3  
146.1 NM\_198431.1  
696.2 NM\_198431.1  
    117 NM\_014278.2



489.9 NM\_005347.2  
9650.7 NM\_153201.1  
7436.6 NM\_006597.3  
1300.5 NM\_004134.4  
3200.5 NM\_001540.2  
112.5 NM\_001541.2  
131.7 NM\_006308.1  
114.8 NM\_144617.1  
116.3 NM\_014424.3  
111.6 NM\_014365.2  
117.4 NM\_033194.1  
158.7 NM\_024610.3  
121.6 NM\_012267.2  
113.9 XM\_938008.1  
297.8 NM\_014047.1  
156.8 NM\_014149.2  
119.6 NM\_014157.2  
122.9 NM\_014162.1  
116.4 NM\_145168.1  
170.6 NM\_016391.2  
173.8 NM\_014306.2  
137.9 NM\_014173.2  
280.2 NM\_014173.2  
254.6 NM\_016403.1  
833.7 NM\_016404.1  
111.1 NM\_014181.1  
215.2 NM\_014187.1  
218.3 NM\_016209.1  
154.2 NM\_016464.2  
866.6 NM\_197964.1  
2717.6 NM\_002156.4  
113.9 NM\_199440.1  
150 NM\_002156.4  
1730 NM\_002157.1  
113 NM\_005529.3  
10992.3 NM\_006644.2  
174.1 NM\_013301.1  
152.8 NM\_001080493.1  
130.1 XM\_936858.1  
126.2 NM\_182709.1  
136.2 NM\_182710.1  
892.5 NM\_006410.3  
119.2 NM\_014500.3  
128.4 NM\_022727.4  
111.9 NM\_022727.4  
119.6 NM\_182984.3  
222.2 NM\_002158.2  
112.1 NM\_002159.2  
129.9 NM\_000200.1  
119.2 NM\_000524.2  
98.2 NM\_000863.1

119.9 NM\_000864.3  
134.6 NM\_000865.1  
110.2 NM\_000866.1  
208.3 NM\_000621.2  
127.5 NM\_000867.2  
109.8 NM\_000868.1  
115.3 NM\_000869.2  
115.9 NM\_213621.1  
110.3 NM\_000869.2  
113.6 NM\_006028.3  
111.9 NM\_130770.2  
116.6 NM\_182537.2  
106.8 NM\_182589.2  
113.3 NM\_001040174.1  
118.7 NM\_000870.2  
122.5 NM\_199453.1  
115.6 NM\_199453.1  
119.8 NM\_024012.1  
132.4 NM\_000871.1  
115.9 NM\_000872.3  
109.5 NM\_019859.2  
125 NR\_002774.1  
119.5 NM\_002775.3  
171.1 NM\_013247.4  
193.8 NM\_145074.2  
125.9 NM\_053044.2  
124.3 NM\_153692.2  
113.1 NM\_014586.1  
112.8 NM\_004507.2  
137.1 NM\_148959.2  
178.5 NM\_031407.3  
118 NM\_153281.1  
121.4 NM\_153283.1  
113.2 NM\_153281.1  
128.4 NM\_007312.3  
125 NM\_033158.2  
120.8 NM\_003773.2  
115.7 NM\_003773.2  
109.5 NM\_003549.2  
117.2 NM\_012269.1  
125.5 NM\_017558.2  
119.1 NM\_032821.2  
111.7 NM\_032821.2  
117.6 XM\_936224.1  
117.3 NM\_031207.2  
167 NM\_145014.1  
148.1 NM\_006389.2  
744.4 NM\_012271.1  
172.3 NM\_007076.2  
2515.4 NM\_016400.2  
156.9 NM\_001039613.1

119.9 NM\_000415.1  
789.8 NM\_002161.2  
130.2 NM\_013417.1  
194.2 NM\_018060.3  
121.4 NM\_152553.2  
112.2 NM\_182757.2  
138.5 NM\_153341.1  
123.7 NM\_004967.2  
158.3 NM\_015525.2  
116.1 NM\_004968.2  
120.1 NM\_022308.1  
131.6 NM\_004968.2  
125.3 NM\_178231.2  
116.3 NM\_178231.2  
134.2 NM\_000201.1  
235.1 NM\_000873.2  
736.9 NM\_002162.2  
108.1 NM\_001544.2  
134.8 NM\_022377.1  
112.7 NM\_001544.3  
120.8 NM\_003259.2  
114.6 NM\_021571.2  
138.2 NM\_016513.3  
113.9 NM\_014920.2  
119.2 NM\_012405.2  
830.6 NM\_012092.2  
119.4 NM\_015259.4  
118.1 NM\_001545.1  
129.6 NM\_181353.1  
144.6 NM\_181353.1  
1815.7 NM\_002166.4  
348.5 NM\_002167.2  
126.3 NM\_001546.2  
153.8 NM\_004969.1  
228.6 NM\_005896.2  
147.3 NM\_002168.2  
142 NM\_005530.2  
650.9 NM\_174855.1  
126.4 NM\_174856.1  
292.3 NM\_006899.2  
134.9 NM\_174869.1  
161.4 NM\_004135.2  
186.8 NM\_004508.2  
117.4 NM\_033261.2  
678.4 NM\_000202.2  
172.4 NM\_006123.1  
381.7 NM\_006123.1  
147.1 NM\_000203.2  
226 NM\_004907.2  
1091.7 NM\_052815.1  
132.1 NM\_016097.2

1062.9 NM\_016545.3  
222 NM\_203434.1  
312.9 NM\_005531.1  
134.5 NM\_005532.3  
310.3 NM\_006332.3  
160.1 NM\_005533.2  
498.7 NM\_006417.2  
142 NM\_006820.1  
146.4 NM\_022872.2  
179.2 NM\_022168.2  
131.7 NM\_001548.2  
118.6 NM\_001010987.1  
252.3 NM\_001547.3  
121.7 NM\_001549.2  
172.5 NM\_001549.2  
116.6 NM\_001031683.1  
127.1 NM\_012420.1  
254.4 NM\_003641.2  
276 NM\_006435.1  
126.8 NM\_021034.1  
115.8 NR\_001590.1  
114.7 NM\_001025295.1  
114.3 NM\_024013.1  
115.5 NM\_002171.1  
118.4 NM\_006900.2  
114.3 NM\_002172.1  
121.2 NM\_002173.1  
119.2 NM\_021268.1  
110.9 NM\_000605.2  
116.4 NM\_002175.1  
113.9 NM\_021068.1  
115.3 NM\_002169.1  
119.7 NM\_021002.1  
123.5 NM\_021057.2  
130.1 NM\_002170.3  
150.1 NM\_000629.2  
138.3 NM\_207585.1  
128.7 NM\_207584.1  
114.6 NM\_207584.1  
120.1 NM\_002176.2  
118.9 NM\_176891.3  
329.3 NM\_000619.2  
445.7 NM\_000416.1  
225.4 NM\_005534.2  
126.3 NM\_020124.1  
104.6 NM\_002177.1  
212.7 NM\_001550.2  
125.2 NM\_001007245.1  
121.8 NM\_006764.3  
114 NM\_022347.1  
115.4 NM\_052985.1

119.9 NM\_052989.1  
146.3 NM\_018262.2  
110.5 NM\_014714.2  
113.6 NM\_015662.1  
127.4 NM\_016004.2  
136.7 NM\_018010.2  
140.6 NM\_025103.1  
118.9 NM\_020800.1  
107.4 NM\_031473.2  
123.3 NM\_014055.2  
117.6 NM\_031473.2  
114.8 NM\_006531.3  
232.4 NM\_001551.2  
118.3 NM\_000618.2  
116.6 NM\_000875.2  
119.3 NM\_001007139.3  
116.1 NM\_001007139.3  
121.1 NM\_016412.1  
117.9 NM\_006546.3  
155.6 NM\_006548.4  
133.1 NM\_006547.2  
807.6 NM\_000876.1  
124.4 NM\_004970.1  
111.8 NM\_001013029.1  
116.7 NM\_000597.2  
112 NM\_001013398.1  
122.3 NM\_001013398.1  
117.6 NM\_001552.2  
115.4 NM\_000599.2  
125.8 NM\_002178.2  
116.5 NM\_001553.1  
133.4 NM\_001007563.1  
115.8 NM\_198541.1  
108.5 NM\_001002915.1  
122.8 NM\_207393.1  
111.7 NM\_001002923.1  
141.7 NM\_002180.1  
113.3 NM\_144646.2  
139.3 NM\_020070.2  
113.4 NM\_020070.2  
112.2 NM\_001555.2  
120.4 NM\_205833.1  
118.2 NM\_205833.1  
109.7 NM\_178822.3  
105.8 NM\_001015887.1  
113.6 NM\_001015887.1  
113.7 NM\_152538.2  
118.4 NM\_004258.1  
114.2 NM\_032880.2  
120.1 NM\_173588.1  
116.2 NM\_001542.2

121.5 NM\_001542.2  
119.5 NM\_014333.2  
107 NM\_021189.2  
105.7 NM\_145296.1  
111.5 NM\_153184.2  
111.6 NM\_005849.1  
120 NM\_052868.1  
113.8 NM\_020789.2  
111 NM\_002181.1  
128 NM\_153273.3  
491.1 NM\_001006115.2  
563.4 NM\_153273.3  
196.8 NM\_001005911.1  
168.1 NM\_016291.2  
126.1 NM\_054111.2  
126.9 NM\_001025374.1  
117.2 NM\_001025374.1  
352.5 NM\_006083.2  
119.8 NM\_003640.2  
126.2 NM\_001556.1  
118.8 NM\_014002.2  
603.8 NM\_003639.2  
117.6 NM\_201612.1  
124.2 NM\_153687.2  
114 NM\_201612.1  
128.8 NM\_012481.3  
1309.3 NM\_000572.2  
272.6 NM\_001558.2  
307 NM\_000628.3  
114.3 NM\_000641.2  
131.3 NM\_147162.1  
281.6 NM\_004512.3  
113.8 NM\_147162.1  
124.9 NM\_000882.2  
108.3 NM\_002187.2  
109.2 NM\_005535.1  
118.5 NM\_005535.1  
121 NM\_153701.1  
114.5 NM\_001559.2  
116.3 NM\_002188.2  
318.9 NM\_001560.2  
117.9 NM\_000640.2  
148.7 NM\_172174.1  
121.1 NM\_172174.1  
126.3 NM\_172174.1  
115.8 NM\_172200.1  
123.2 NM\_002189.2  
125.4 NM\_172200.1  
124.3 NM\_172217.1  
136.9 NM\_172217.1  
115.4 NM\_002190.2

112.1 NM\_014443.2  
124 NM\_013278.3  
129.5 NM\_138284.1  
121 NM\_022789.2  
109.1 NM\_052872.3  
162 NM\_014339.3  
105.3 NM\_172234.1  
115.4 NM\_032732.3  
119.8 NM\_032732.2  
122.7 NM\_153461.1  
120.2 NM\_017563.1  
1040.6 NM\_001080973.1  
107.1 NM\_001080973.1  
125.4 NM\_144640.2  
113.4 NM\_153480.1  
105.2 NM\_153483.1  
4418.4 NM\_001562.2  
108.3 NM\_173042.2  
418.6 NM\_173042.2  
143.4 NM\_003855.2  
548 NM\_003853.2  
119.8 NM\_153758.1  
115 NM\_013371.2  
120.8 NM\_000575.3  
126.9 NM\_000576.2  
108.3 NM\_032556.4  
121.7 NM\_173161.1  
120.1 NM\_012275.2  
118.9 NM\_173170.1  
106.8 NM\_014440.1  
117.3 NM\_173205.1  
120.7 NM\_014439.3  
126.8 NM\_173204.1  
117.2 NM\_173178.1  
119.6 NM\_014438.3  
132.1 NM\_173178.1  
105.7 NM\_019618.2  
134.1 NM\_000877.2  
120.9 NM\_004633.3  
159.1 NM\_173343.1  
108.5 NM\_173343.1  
120 NM\_134470.2  
111.5 NM\_134470.2  
123 NM\_002182.2  
109.3 NM\_014271.2  
107.3 NM\_017416.1  
112.8 NM\_016232.4  
123.7 NM\_003856.2  
119.6 NM\_003856.2  
115.3 NM\_003854.2  
130.4 NM\_173843.1

134.2 NM\_173842.1  
115 NM\_173842.1  
110.7 NM\_000586.2  
123.2 NM\_014432.2  
125 NM\_021803.1  
120.4 NM\_181078.1  
115.3 NM\_181078.1  
117.8 NM\_181079.1  
102.8 NM\_021798.2  
106.9 NM\_020525.4  
124.7 NM\_021258.2  
133.1 NM\_181309.1  
108.7 NM\_052962.2  
210.5 NM\_016584.2  
120.2 NM\_144701.2  
112.3 NM\_181339.1  
138.7 NM\_181339.1  
119.4 NM\_006850.2  
115.8 NM\_172314.1  
130.3 NM\_172314.1  
119 NM\_018402.1  
99.1 NM\_145659.3  
183.3 NM\_004843.2  
112.5 NM\_172138.1  
120.8 NM\_172139.2  
128.3 NM\_170743.2  
123.4 NM\_172140.1  
128.8 NM\_000417.1  
233.6 NM\_000878.2  
133.8 NM\_000206.1  
113 NM\_000588.3  
101.3 NM\_001014336.1  
119.5 NM\_139017.3  
160 NM\_001012633.1  
140.5 NM\_001012632.1  
112.3 NM\_033439.2  
123 NM\_002183.2  
109.8 NM\_172348.1  
114.8 NM\_000589.2  
114.6 NM\_152899.1  
112.7 NM\_172374.1  
123 NM\_001008699.1  
123.1 NM\_000418.2  
121 NM\_000879.2  
146.5 NM\_175728.1  
122.1 NM\_175728.1  
119.9 NM\_000600.1  
120.3 NM\_000565.2  
137 NM\_181359.1  
127.7 NM\_175767.1  
131.6 NM\_002184.2



116.7 NM\_000880.2  
2444.8 NM\_002185.2  
3835.4 NM\_000584.2  
129.4 NM\_000634.2  
124.1 NM\_001557.2  
119.5 NM\_000590.1  
119.2 NM\_176786.1  
121.5 NM\_175924.2  
1182.9 NM\_004515.2  
689.2 NM\_012218.2  
133.9 NM\_153464.1  
185.3 NM\_004516.2  
111.5 NM\_001014795.1  
567.1 NM\_004517.2  
156.7 NM\_001014794.1  
179.1 NM\_030768.2  
111.8 NM\_176799.1  
160.9 NM\_006844.3  
265.1 NM\_006844.3  
143.3 XR\_000959.1  
23090 NR\_002594.1  
132.4 NM\_032549.1  
229 NM\_006839.1  
264.3 NM\_018285.2  
223.5 NM\_033416.1  
121.4 NM\_175882.1  
206.2 NM\_005536.2  
189.2 NM\_014214.1  
108.1 NM\_018439.1  
125.8 NM\_017813.2  
139.8 NM\_000883.2  
129.8 NM\_183243.1  
121.7 NM\_000883.2  
410.2 NM\_000884.2  
112.1 NM\_001563.2  
136.5 NM\_016247.2  
112.5 NM\_032727.2  
123.2 NM\_176877.1  
115.4 NM\_170605.2  
117.3 NM\_001007232.1  
117.5 NM\_213726.1  
138 NM\_001040694.1  
114.7 NM\_002164.3  
123.4 NM\_005537.3  
282.7 NM\_198219.1  
130.4 NM\_198219.1  
126 NM\_198217.1  
196.4 NM\_001564.2  
180.3 NM\_198267.1  
124.4 NM\_198267.1  
559.5 NM\_019071.2

164 NM\_198287.1  
129.6 NM\_032329.4  
123.1 NM\_032329.4  
117.1 NR\_002226.1  
113.7 NM\_002191.2  
118.4 NM\_002192.2  
124.2 NM\_002193.1  
117 NM\_005538.2  
120.3 NM\_031479.3  
106.7 NM\_006774.4  
119.2 NM\_017553.1  
166.1 NM\_032196.3  
132.5 NM\_002194.2  
117.3 NM\_004027.1  
127.8 NM\_001566.1  
123.5 NM\_001566.1  
151.3 NM\_003866.1  
142.5 XM\_936595.1  
131 NM\_005540.1  
179.9 NM\_001017915.1  
158.7 NM\_019892.3  
112.6 NM\_014937.2  
125.1 NM\_198331.1  
168.6 NM\_198330.1  
554.6 NM\_001567.2  
105.5 NM\_000207.1  
118.7 NM\_001042536.1  
224.2 NM\_198336.1  
148.2 NM\_016133.2  
122.9 NM\_001042377.1  
111.7 NM\_001042377.1  
214.6 NM\_005543.2  
111.1 NM\_002195.1  
120.5 NM\_005478.3  
129.4 NM\_007179.2  
122.5 NM\_002196.2  
122.9 NM\_032594.2  
141 NM\_000208.1  
116.9 NM\_014215.1  
144.9 XM\_931339.1  
228.7 NM\_033547.3  
187 NM\_001080453.1  
171.2 NM\_001039938.1  
114.7 NM\_015693.2  
115.1 NM\_183245.1  
153.9 NM\_183245.1  
115.6 NM\_014425.2  
105.4 NM\_000209.1  
126.2 NM\_152230.2  
173.9 NM\_016338.3  
137.1 NM\_014652.2

114.7 NM\_024658.3  
118.2 NM\_006391.1  
133.7 NM\_006390.2  
133.2 NM\_018085.3  
138.7 NM\_005897.1  
115.3 NM\_022755.4  
112.9 NM\_024726.3  
122.9 NM\_001023570.1  
180.2 NM\_001023571.1  
156.1 NM\_018134.1  
117.3 NM\_138451.1  
110.7 NM\_152558.2  
123.2 NM\_152397.1  
112.6 NM\_203424.1  
125.4 NM\_032263.2  
    111 NM\_022784.1  
    118 NM\_001031715.1  
120.1 NM\_153208.1  
210.3 NM\_003870.3  
122.4 NM\_006633.1  
125.8 NM\_178229.3  
188.1 NM\_014869.3  
116.5 NM\_015075.1  
116.8 NM\_015232.1  
287.7 NM\_018442.2  
123.7 NM\_018442.2  
127.4 NM\_001017977.1  
197.5 NM\_001025243.1  
    119 NM\_001010844.1  
203.2 NM\_001570.3  
121.4 NM\_007199.1  
143.1 NM\_016123.1  
    152 NM\_004136.1  
    772 NM\_002198.1  
123.2 NM\_002199.2  
128.7 NM\_015649.1  
157.8 NM\_182972.1  
133.1 NM\_182972.1  
222.7 NM\_001571.2  
127.2 NM\_002460.1  
123.9 NM\_002200.3  
    113 NM\_006147.2  
196.6 NM\_004029.2  
119.9 NM\_004031.1  
    747 NM\_004030.1  
235.2 NM\_002163.2  
    118 NM\_019612.2  
110.5 NM\_001007561.1  
    116 NM\_005544.1  
579.7 NM\_003749.2  
126.6 NM\_003604.1

142.2 NM\_024337.3  
118 NM\_033267.2  
108.5 NM\_024336.1  
108.4 NM\_016358.1  
114.8 NM\_005853.4  
118.5 NM\_024335.2  
115.3 NM\_173576.1  
172.7 NM\_030940.3  
140.3 NM\_194279.1  
819.1 NM\_213595.1  
173.7 NM\_005101.1  
950.4 NM\_002201.4  
166.8 NM\_022767.2  
361.4 NM\_030980.1  
424.6 NM\_006084.3  
115.8 NM\_145805.1  
118.3 NM\_005545.3  
124.3 NM\_005545.3  
113.4 NM\_201526.1  
112.4 NM\_020851.1  
136.1 NM\_016048.1  
127.4 NM\_024710.1  
164.3 NM\_016368.3  
135.4 NM\_031483.3  
118 NM\_030790.2  
121.2 NM\_181501.1  
166.9 NM\_003637.3  
106.6 NM\_012211.3  
122.7 NM\_012211.3  
109 NM\_002203.2  
115.3 NM\_000419.2  
111.9 NM\_002204.1  
180 NM\_002204.1  
125.9 NM\_000885.4  
774.8 NM\_002205.2  
118.8 NM\_000210.2  
108.6 NM\_000210.2  
117.4 NM\_002206.1  
104.4 NM\_003638.1  
121.5 NM\_005353.2  
179.4 NM\_002208.3  
172 NM\_002209.1  
122 NM\_000632.2  
151.6 NM\_002210.2  
178.3 NM\_000887.3  
122.5 NM\_000887.3  
238.8 NM\_133376.1  
1024 NM\_002211.2  
514 NM\_033669.1  
114.4 NM\_033666.1  
121.5 NM\_133376.1

115.8 NM\_033668.1  
204.7 NM\_022334.2  
161.4 NM\_004763.2  
117.6 NM\_012278.1  
123.3 NM\_014446.1  
119 NM\_170678.1  
950.3 NM\_000211.2  
112.6 NM\_000212.2  
134.8 NM\_014288.3  
136.8 NM\_001005731.1  
111.9 NM\_001005619.1  
120.7 NM\_001005619.1  
115.8 NM\_000213.3  
418.8 NM\_181466.1  
129.9 NM\_181466.1  
740.4 NM\_181469.1  
128.3 NM\_002213.3  
159.3 XM\_944693.1  
115.5 NM\_000888.3  
517.2 NM\_000889.1  
120.3 NM\_002214.1  
118.3 NM\_004791.1  
119.2 NM\_002215.1  
121.1 NM\_002216.2  
121.6 NM\_002217.2  
116.8 NM\_002218.3  
110.3 NM\_001001851.1  
12683.4 NM\_001001851.1  
120.3 NM\_030569.3  
114.9 NM\_032817.2  
123 NM\_198510.1  
904.9 NM\_005546.3  
123.1 NM\_017625.2  
113.9 NM\_080878.2  
124.8 NM\_004867.3  
126.5 NM\_021999.2  
239.6 NM\_030926.4  
312.9 NM\_001012516.1  
127.6 NM\_033453.2  
157 NM\_181493.1  
126.2 NM\_014216.3  
122.5 NM\_002220.1  
184.9 NM\_002221.2  
133.7 NM\_025194.2  
175.7 NM\_002222.1  
131.5 NM\_002223.1  
739.3 NM\_002224.1  
135.2 NM\_180989.3  
118.8 NM\_003024.2  
113.1 NM\_001001132.1  
130.9 NM\_001001132.1

121.5 NM\_147152.1  
122.2 NM\_006277.1  
119.1 NM\_002225.2  
126.9 NM\_005547.2  
210.1 NM\_006469.4  
216.3 NM\_006469.4  
140.4 NM\_016389.2  
276.9 NM\_017592.1  
116.6 NM\_182575.1  
113.3 NM\_000214.1  
131.2 NM\_002226.3  
127.9 NM\_002226.3  
119.9 NM\_145159.1  
538.5 NM\_002227.1  
    124 NM\_004972.2  
116.9 NM\_000215.2  
122.9 NM\_144720.2  
120.4 NM\_014790.3  
116.3 NM\_021219.2  
149.1 NM\_032801.3  
113.9 NM\_005056.2  
283.6 NM\_006618.3  
    212 NM\_004973.2  
139.6 NM\_175061.2  
127.8 NM\_130469.2  
139.3 NM\_033626.2  
215.4 NM\_018433.3  
160.6 NM\_016604.3  
626.2 NM\_004241.2  
586.3 NM\_032776.1  
117.7 NM\_014663.1  
118.2 NM\_015015.1  
111.1 NM\_015061.1  
119.2 NM\_018039.2  
135.7 NM\_001080424.1  
119.3 NM\_023007.1  
111.9 NM\_024773.1  
232.3 NM\_152405.1  
433.7 NM\_014876.3  
    119 NM\_138334.1  
123.2 NM\_024116.2  
149.9 NM\_024116.2  
115.3 NM\_020647.2  
132.3 NM\_175913.3  
    128 NM\_175913.3  
107.1 NM\_020433.4  
118.8 NM\_020655.2  
118.7 NM\_032452.1  
119.1 NM\_003724.1  
136.4 NM\_003772.2  
120.1 NM\_144616.2

1626.5 NM\_006694.2  
145.7 NM\_006303.2  
128.8 NM\_032876.4  
114.3 NM\_198086.1  
119.8 NM\_032876.4  
1943.4 NM\_002228.3  
339.8 NM\_002229.2  
4720.7 NM\_005354.2  
119.5 NM\_021991.1  
121.1 NM\_002230.1  
123.4 NM\_021991.1  
114.3 NM\_173352.1  
132.3 NM\_004693.1  
156.3 NM\_080747.1  
120.4 NM\_175068.2  
120.7 NM\_175053.2  
117.6 NM\_152349.1  
117.2 NM\_181337.2  
114.8 NM\_000216.1  
8855.4 NM\_006082.2  
121.2 NM\_001024660.1  
116.3 NM\_003947.3  
111.5 NM\_007064.2  
119.3 NM\_152366.3  
115.1 NM\_001007255.1  
195.2 NM\_005548.1  
556.7 NM\_007044.2  
134.2 NM\_001014380.1  
122.8 NM\_032116.3  
117.7 NM\_032116.3  
126 XM\_938693.1  
123.1 NM\_031303.1  
190.2 NM\_005886.1  
117.5 NM\_030929.3  
131 NM\_001003760.2  
114.3 NM\_006063.2  
152.6 NM\_014867.1  
573.2 NM\_015483.1  
121.1 NM\_152433.2  
151.9 NM\_198439.1  
122 NM\_016506.3  
111.8 NM\_018095.3  
118.6 NM\_152393.2  
127.6 NM\_152903.4  
142.2 NM\_032138.3  
236.7 NM\_032505.1  
129.7 NM\_020122.3  
130.7 NM\_020122.3  
163.4 XM\_942130.1  
113.3 NM\_000217.1  
103 NM\_005549.2

107.9 NM\_004974.2  
116.2 NM\_002232.2  
117.1 NM\_002233.2  
111.2 NM\_002234.2  
128.7 NM\_002235.2  
126.6 NM\_031886.2  
123 NM\_172159.2  
118.7 NM\_003471.2  
115.7 NM\_172159.2  
108.5 NM\_172160.1  
127.9 NM\_003636.2  
115.1 NM\_003636.2  
115.5 NM\_004732.2  
116.8 NM\_004975.2  
121.2 NM\_004770.2  
116.6 NM\_004976.2  
111.8 NM\_139137.2  
117.5 NM\_139137.2  
114 NM\_004977.2  
122.5 NM\_153763.1  
108.6 NM\_004978.3  
119.2 NM\_004978.3  
116.9 NM\_004978.2  
142.6 NM\_004979.4  
104.2 NM\_012281.2  
115 NM\_004980.3  
141.6 NM\_172198.1  
119.8 NM\_172198.1  
107.5 NM\_000219.2  
122.8 NM\_012282.2  
116.8 NM\_172201.1  
113.8 NM\_005472.3  
115.2 NM\_080671.1  
117.1 NM\_002236.4  
116.4 NM\_002237.2  
119.9 NM\_172318.1  
111.3 NM\_172318.1  
123.9 NM\_012283.1  
112.3 NM\_133329.4  
113.3 NM\_172344.1  
107.9 NM\_133490.2  
109.4 NM\_172347.1  
117.1 NM\_172362.1  
108.9 NM\_002238.2  
111.3 NM\_172056.1  
118.8 NM\_172057.1  
128.5 NM\_172056.1  
123.5 NM\_000238.2  
127.2 NM\_012284.1  
118.5 NM\_012285.1  
114.5 NM\_172376.1



114.8 NM\_172375.1  
107.3 NM\_173092.1  
3530.3 NM\_030779.2  
120.9 NM\_173162.1  
115.8 NM\_173162.1  
117.2 NM\_033272.2  
120.3 NM\_144633.2  
110.9 NM\_001034838.1  
116.4 NM\_014592.2  
107.4 NM\_014592.2  
120.3 NM\_014591.4  
124.5 NM\_173197.2  
121.4 NM\_001034914.1  
113.2 NM\_001034914.1  
117.2 NM\_147183.2  
113.6 NM\_147182.2  
110.1 NM\_001035003.1  
113.9 NM\_025221.4  
    114 NM\_025221.4  
107.1 NM\_001035004.1  
109.8 NM\_000220.2  
115.8 NM\_000220.2  
118.4 NM\_153766.1  
116.9 NM\_002241.2  
101.2 NM\_000525.3  
116.6 NM\_021012.3  
115.7 NM\_002242.2  
122.9 NM\_170720.1  
111.9 NM\_170720.1  
116.5 NM\_013348.2  
133.8 NM\_002243.3  
120.8 NM\_170737.1  
118.1 NM\_170736.1  
124.9 NM\_018658.1  
116.7 NM\_000891.2  
122.5 NM\_002239.2  
120.6 NM\_152868.1  
115.2 NM\_152868.1  
    119 NM\_004981.1  
122.2 NM\_000890.3  
    117 NM\_002240.2  
    116 NM\_004982.2  
117.3 NM\_004983.2  
    109 NM\_002245.2  
120.8 NM\_021161.3  
122.9 NM\_138317.1  
114.3 NM\_021161.3  
110.9 NM\_138318.1  
130.5 NM\_022055.1  
117.8 NM\_022054.2  
122.7 NM\_022358.2

110 NM\_032115.2  
130.9 NM\_031460.2  
111.9 NM\_181840.1  
114.9 NM\_001017425.2  
109.4 NM\_001017425.2  
113.9 NM\_001017424.1  
115 NM\_001017424.1  
128 NM\_002246.1  
111.1 NM\_033310.1  
113.7 NM\_033310.1  
131.2 NM\_003740.2  
122.1 NM\_004823.1  
129.7 NM\_033455.1  
128.6 NM\_033347.1  
124.5 NM\_016601.2  
117.7 NM\_001014797.1  
135.8 NM\_002247.2  
110 NM\_001014797.1  
113.8 NM\_004137.2  
108.8 NM\_005832.3  
111.1 NM\_181361.1  
115.5 NM\_005832.3  
110.7 NM\_171830.1  
112.9 NM\_171829.1  
124.4 NM\_171828.1  
116.8 NM\_014505.4  
129.3 NM\_002248.3  
114.1 NM\_021614.2  
116.2 NM\_170775.1  
113.4 NM\_170782.1  
107 NM\_002249.3  
124.9 NM\_002250.2  
111.3 NM\_000218.2  
129 NM\_000218.2  
120.3 NM\_181798.1  
108.9 NM\_018722.1  
116.6 NM\_172109.1  
128.3 NM\_172107.1  
120.9 NM\_172108.2  
123.5 NM\_004519.2  
113.8 NM\_004700.2  
113.4 NM\_004700.2  
116 NM\_172163.1  
115.2 NM\_019842.2  
115.3 NM\_173605.1  
130 NM\_199464.1  
119.9 NM\_002251.3  
123.1 NM\_020697.2  
110 NM\_002252.3  
121 NM\_020822.1  
117.5 NM\_198503.2

125.5 NM\_014379.2  
127.8 NM\_001013620.1  
123.1 NM\_198991.1  
154.3 NM\_031954.3  
137.3 NM\_001002914.1  
118.7 NM\_138444.2  
152.1 NM\_178863.2  
119.7 NM\_023930.2  
114.1 NM\_024076.1  
111.8 NM\_020768.1  
    114 NM\_024681.1  
118.6 NM\_152387.2  
115.2 NM\_015353.1  
137.1 NM\_015353.1  
131.8 NM\_016121.3  
112.6 NM\_198404.1  
624.6 NM\_018992.1  
345.4 NM\_153331.2  
132.5 NM\_153033.1  
124.5 NM\_198353.1  
    239 NM\_017634.2  
106.4 NM\_024089.1  
127.6 NM\_153705.2  
281.9 NM\_006801.2  
150.5 NM\_006854.2  
114.6 NM\_016657.1  
116.8 NM\_006855.2  
120.1 NM\_016657.1  
114.8 NM\_002253.1  
330.6 NM\_012289.3  
119.4 NM\_203500.1  
317.9 NM\_012289.3  
120.6 NM\_000420.2  
122.8 NM\_176816.2  
113.7 NM\_007035.3  
109.8 NM\_174950.2  
1109.6 NM\_006559.1  
    126.1 NM\_152688.1  
    121.2 NM\_006558.1  
    113.3 NM\_000221.1  
    121.3 NM\_006488.1  
    115.8 NM\_000221.1  
    210.9 NM\_003685.1  
    168.2 NM\_014878.3  
    112.2 NM\_015050.1  
    131.7 NM\_015047.1  
    120.9 NM\_014680.2  
    112.8 NM\_014736.4  
        118 NM\_014736.4  
7145.8 NM\_001029989.1  
    145 NM\_014673.2

132.9 NM\_014777.1  
171 NM\_014773.2  
270.1 NM\_015137.1  
193.5 NM\_014730.2  
197.6 NM\_032182.2  
1603.8 NM\_014761.2  
120.3 NM\_015056.1  
172.8 NM\_014615.1  
131.6 NM\_014738.2  
269.7 NM\_014846.2  
163 NM\_014743.1  
279.8 NM\_015349.1  
123.5 NM\_015060.1  
153.2 NM\_014734.2  
143.5 NM\_015027.1  
210.4 NM\_014701.2  
122.1 NM\_001080496.1  
337.7 NM\_015045.1  
116.9 NM\_014997.2  
150.5 NM\_014845.4  
125.1 NM\_015159.1  
124.4 NM\_015005.1  
206.8 NM\_015257.1  
705.9 NM\_014866.1  
120.5 NM\_014809.2  
122.2 NM\_024874.3  
134.6 NM\_024874.3  
120.6 NM\_182686.1  
359.5 NM\_015299.1  
111.9 NM\_014844.2  
214.3 NM\_015226.1  
475.2 NM\_014686.2  
120 NM\_015225.1  
164.4 NM\_001080398.1  
176.6 NM\_014639.2  
279.1 NM\_015330.1  
163.7 NM\_014672.2  
469.2 NM\_015104.1  
123.8 NM\_014657.1  
178.8 NM\_014702.3  
177.7 NM\_015324.2  
261.7 NM\_014855.1  
127.8 NM\_015091.1  
127.4 NM\_014772.1  
192.9 NM\_014655.1  
126.2 NM\_015203.2  
117.9 NM\_015284.2  
156 NM\_014774.1  
126.7 NM\_207306.1  
152.3 NM\_014732.2  
121.8 NM\_014696.2

120 NM\_015253.1  
146.7 NM\_014802.1  
122.1 NM\_001002909.1  
129.5 NM\_015202.1  
149.8 NM\_014704.2  
119.1 NM\_001009814.1  
123.4 NM\_015058.1  
130.7 NM\_014749.2  
123 NM\_014817.2  
116.9 NM\_014811.3  
119.9 NM\_014741.2  
133 NM\_015229.2  
115.7 NM\_014859.3  
147.1 NM\_016111.1  
165.5 NM\_015179.2  
120.5 NM\_001006947.1  
115.4 NM\_014861.1  
2833.1 NM\_014719.1  
387.7 NM\_015187.1  
126.4 NM\_014804.1  
122.7 NM\_001031690.1  
119.8 NM\_014690.2  
113.9 NM\_014690.2  
118.1 NM\_015233.3  
118.4 NM\_015233.3  
104.5 NM\_001033602.1  
120.9 NM\_015323.2  
111.8 NM\_014653.2  
124.4 NM\_015210.1  
134.1 NM\_015328.1  
200.8 NM\_014924.3  
124.4 NM\_015070.2  
145.5 NM\_015935.4  
230.8 NM\_015935.4  
157.3 NM\_015329.2  
122.6 NM\_015314.1  
467.3 NM\_014949.2  
403.6 NM\_015037.1  
153.9 NM\_015196.2  
108.9 NM\_014898.1  
128.2 NM\_014963.1  
112.7 NM\_025176.4  
357.9 NM\_025164.3  
112.2 NM\_015272.1  
131 NM\_014953.2  
599 NM\_014939.2  
118.3 NM\_015206.1  
122.8 NM\_001017999.1  
112.6 NM\_015209.1  
123.1 NM\_001018001.1  
121.2 NM\_001018000.2

119 NM\_015209.1  
122.3 NM\_015275.1  
257.5 NM\_018999.2  
113.3 NM\_020696.1  
181 NM\_001080392.1  
231.6 NM\_020701.1  
123 NM\_020702.1  
138.6 NM\_018684.1  
110.7 XM\_945420.1  
118.3 NM\_020711.1  
106.2 NM\_001009959.1  
121.4 NM\_020711.1  
285.1 NM\_020444.2  
209.1 NM\_020444.2  
120.1 NM\_017550.1  
119.5 NM\_018689.1  
133.3 NM\_018084.3  
123.2 NM\_019590.2  
201.6 NM\_020336.1  
148.6 NM\_020340.2  
688 NM\_015443.2  
129.7 NM\_014431.1  
136.1 NM\_015634.2  
117 NM\_015694.1  
237.3 NM\_020748.1  
114.3 NM\_020775.2  
119.4 NM\_152748.2  
121.5 NM\_020776.1  
130.4 NM\_017769.2  
126 NM\_020784.1  
114.3 NM\_001080522.1  
329.1 NM\_019600.1  
116.7 NM\_020802.1  
116.3 NM\_020817.1  
110.4 NM\_020818.2  
141.9 NM\_020819.2  
117.8 NM\_183009.1  
121.2 NM\_020829.1  
176.3 NM\_019593.2  
121.8 NM\_020834.1  
129 NM\_020836.2  
108.4 NM\_020844.1  
111.3 NM\_020853.1  
137.3 NM\_020854.2  
126.4 NM\_020879.1  
125.6 NM\_020888.1  
114.3 NM\_020890.1  
114.7 NM\_020893.1  
157.2 NM\_020894.1  
119.9 NM\_020894.1  
198.6 NM\_025182.2

122.8 NM\_020901.1  
118.6 XM\_048362.9  
107.2 NM\_001080429.1  
118.7 XM\_166320.6  
106.6 NM\_001080450.1  
111.7 NM\_020917.1  
    119 NM\_020927.1  
107.5 NM\_020931.1  
    185 NM\_018330.3  
    264 NM\_020940.2  
131.8 NM\_020943.1  
123.9 NM\_020947.2  
170.4 NM\_020954.2  
116.1 NM\_020958.2  
109.2 NM\_020958.2  
112.5 NM\_058237.1  
119.9 NM\_020961.2  
140.2 NM\_020964.1  
119.6 NM\_025190.2  
166.9 NM\_025249.1  
106.5 NM\_025251.1  
122.1 NM\_030628.1  
115.5 NM\_018559.2  
122.6 NM\_030636.2  
258.5 NM\_001040157.1  
161.1 NM\_030650.1  
130.7 NM\_033393.1  
176.7 NM\_053042.2  
170.5 NM\_033426.2  
911.7 NM\_001080484.1  
276.7 NM\_033397.2  
122.4 NM\_001008949.1  
    120 NM\_001008949.1  
118.3 NM\_178495.4  
122.7 NM\_001029864.1  
114.1 NM\_024935.2  
127.9 NM\_032442.2  
122.5 NM\_018193.1  
121.6 NM\_017794.2  
116.5 NM\_032437.1  
123.5 NM\_032435.1  
147.4 NM\_024896.2  
    107 NM\_032425.3  
114.2 NM\_024746.2  
190.4 NM\_032424.1  
221.5 NM\_032448.1  
    309 NM\_025137.2  
115.2 NM\_032506.1  
124.9 NM\_194286.2  
126.7 NM\_032534.1  
129.8 NM\_032529.1

120.8 NM\_052899.1  
125.1 NM\_052904.1  
119.1 NM\_052906.1  
111.4 NM\_052909.2  
109.1 XM\_941554.1  
    113 NM\_052913.2  
129.2 NM\_001001936.1  
    116 NM\_153369.1  
114.9 NM\_052919.1  
121.5 NM\_153239.2  
106.5 NM\_133448.1  
142.6 NM\_177454.2  
135.9 NM\_133465.1  
    117 NM\_133372.1  
    544 NM\_133372.1  
152.3 NM\_021174.4  
122.9 NM\_199205.1  
131.7 NM\_021174.4  
137.3 NM\_133451.1  
119.4 NM\_032874.2  
110.8 NM\_032560.3  
    424 NM\_032560.3  
179.8 NM\_138346.1  
108.7 NM\_001009899.1  
114.6 NM\_001008537.1  
173.5 NM\_001017969.1  
270.8 NM\_020738.1  
118.9 NM\_004523.2  
115.6 NM\_138424.1  
124.9 NM\_022113.3  
214.2 NM\_015254.2  
130.1 NM\_014875.1  
108.2 NM\_020242.1  
113.8 NM\_020816.1  
115.7 NM\_031217.2  
114.7 NM\_153209.1  
114.8 NM\_004321.4  
128.1 NM\_183416.2  
135.2 NM\_183416.2  
297.4 NM\_015074.2  
    125 NM\_006612.3  
280.8 NM\_004520.1  
    116 NM\_005733.1  
152.1 NM\_017641.2  
116.7 XM\_935437.1  
187.2 NM\_017596.2  
120.9 NM\_138555.1  
120.5 NM\_004856.4  
119.3 NM\_030615.1  
123.8 NM\_005355.2  
123.6 NM\_018012.2



141.8 NM\_017576.1  
131.4 NM\_017576.1  
115.5 NM\_032559.3  
130 NM\_006845.2  
114.1 NM\_007054.4  
142 NM\_004798.2  
108.5 NM\_002254.5  
113.7 NM\_012310.2  
114.9 NM\_004984.2  
168.5 NM\_004521.1  
142.8 NM\_004522.1  
121 NM\_145027.3  
114.4 NM\_198525.1  
118.3 NM\_182903.2  
165.2 NM\_014970.2  
118 NM\_002263.2  
176.5 NM\_145754.2  
123.9 NM\_005550.2  
114.3 NM\_012311.2  
147.3 NM\_014218.1  
112.1 NM\_014511.3  
205.8 NM\_015868.2  
115 NM\_001080770.1  
117.8 NM\_020535.3  
110.6 NM\_020535.3  
110.2 NM\_020535.3  
114 NM\_001018081.1  
121.4 NM\_014512.1  
125.1 NM\_012313.1  
119.8 NM\_012314.2  
123.7 NM\_014513.1  
141.9 NM\_013289.1  
129.1 NM\_006737.1  
137 NM\_153443.2  
125.1 NM\_001015070.1  
124.8 NM\_018240.3  
103.8 NM\_199180.1  
115.9 NM\_032123.4  
114.7 NM\_199179.1  
115.9 NM\_032531.1  
122.7 NM\_002256.2  
120.2 NM\_032551.3  
119.4 NM\_000222.1  
120.7 NM\_000899.3  
123.6 NM\_000899.3  
113.7 NM\_153683.2  
129 NM\_175737.2  
120 NM\_022822.1  
122.4 NM\_022822.1  
123.7 NM\_177417.1  
116.1 NM\_145275.1

117.5 NM\_138343.2  
116.4 NM\_201522.1  
123 NM\_201523.1  
123 NM\_006563.2  
147.1 NM\_005655.1  
130.7 NM\_001032282.1  
147.4 NM\_005655.1  
127 NM\_003597.4  
219.9 XM\_938887.1  
149.7 NM\_007249.3  
131 NM\_016285.2  
449.3 NM\_015995.2  
112.5 NM\_138693.1  
116.4 NM\_014079.2  
121.6 NM\_031918.1  
120 NM\_173484.2  
1430.2 NM\_016270.2  
116.8 NM\_016531.3  
144.1 NM\_004235.3  
120 NM\_001730.3  
254.7 NM\_001008490.1  
670.4 NM\_001300.4  
127.7 NM\_003709.1  
125.3 NM\_007250.2  
449.9 NM\_001206.2  
120.2 NM\_172193.1  
200.4 NM\_014315.2  
264.2 NM\_057161.2  
168.8 NM\_017566.2  
132.5 NM\_020782.1  
119.1 NM\_207335.1  
123.6 NM\_152375.1  
113.1 NM\_138433.2  
123.3 NM\_018203.1  
187.8 NM\_173546.1  
120.9 NM\_020866.1  
113 NM\_152467.1  
128.6 NM\_018143.1  
277.9 NM\_021633.2  
113.9 NM\_033495.2  
111.1 NM\_020805.1  
140.1 NM\_030624.1  
109.8 NM\_198317.1  
138.8 XM\_936706.1  
128.5 NM\_025010.2  
132.7 NM\_007246.2  
140.7 NM\_014458.3  
580.3 NM\_014851.2  
210 NM\_032775.2  
117.2 NM\_144711.3  
123.2 NM\_022480.2

123.7 NM\_018316.1  
177.3 NM\_017415.1  
113 NM\_057162.1  
107.4 NM\_019117.3  
127.1 NM\_001007075.1  
219.4 NM\_001007075.1  
150.2 NM\_001007075.1  
165.2 NM\_001031710.1  
107.7 NM\_018846.2  
186.4 NM\_020803.3  
150.3 NM\_018847.1  
119.4 NM\_002257.2  
110.8 NM\_002776.3  
119.4 NM\_145888.1  
116.9 NM\_144947.1  
123.4 NM\_006853.2  
129.7 NM\_019598.2  
129.7 NM\_019598.2  
113 NM\_015596.1  
104.7 NM\_022046.3  
117.9 NM\_023006.1  
121.8 NM\_017509.2  
117.5 NM\_017509.2  
106 NM\_001002232.1  
119.2 NM\_005551.3  
122.3 NM\_001030050.1  
114 NM\_001030047.1  
118 NM\_001030050.1  
112.4 NM\_004917.2  
114 NM\_012427.3  
122.8 NM\_012427.3  
112 NM\_012427.3  
121.9 NM\_002774.3  
126.3 NM\_002774.3  
122.9 NM\_005046.2  
121.3 NM\_139277.1  
118.5 NM\_144505.1  
105.1 NM\_144507.1  
109.4 NM\_012315.1  
135 NM\_000892.2  
111.6 NM\_001080492.1  
118.2 NR\_002948.1  
141.9 NM\_020378.2  
130.4 NM\_006611.1  
2545.9 NM\_002258.2  
118.5 NM\_213657.1  
132.9 NM\_002260.3  
104.5 NM\_002261.2  
142.6 NM\_002261.2  
126.1 NM\_007333.2  
126.9 NM\_013431.1

228.9 NM\_002262.2  
114.2 NM\_007334.1  
253 NM\_016523.1  
111.5 NM\_005810.3  
120.9 NM\_198508.2  
130.4 NM\_007360.1  
117.5 NM\_003679.2  
119.3 NM\_033404.2  
118.6 NM\_152643.5  
120.4 NM\_000893.2  
139 NM\_005552.3  
146.8 NM\_182923.2  
289 NM\_014708.3  
351.3 NM\_006101.1  
153.8 NM\_002266.2  
195.6 NM\_002267.2  
879.3 NM\_002268.3  
139.9 NM\_002269.2  
343.3 NM\_012316.3  
1248.7 NM\_002265.4  
113.5 NM\_007059.2  
192.7 NM\_004985.3  
115.8 NM\_033360.2  
146.1 NM\_016618.1  
133.2 NM\_153379.1  
133.4 NM\_153379.1  
128 NM\_172229.1  
118.8 NM\_024507.2  
113.7 NM\_001013406.1  
112.1 NM\_006121.2  
389.5 NM\_000421.2  
111.1 NM\_000223.2  
114.9 NM\_002274.2  
112.3 NM\_000526.3  
112.5 NM\_002275.2  
119.4 NM\_005557.2  
120.9 NM\_000422.1  
120.7 NM\_000224.2  
111.2 NM\_199187.1  
112.1 NM\_002276.3  
109.9 NM\_175078.1  
113.2 NM\_019010.1  
116.2 NM\_015515.3  
122.9 NM\_019016.1  
108.5 NM\_181534.2  
109.2 NM\_181537.2  
120.8 NM\_181535.2  
117.1 NM\_181539.3  
114.1 NM\_000423.2  
108.6 NM\_015848.1  
111.7 NM\_057088.1

113.4 NM\_004138.2  
117.9 NM\_213656.2  
118.4 NM\_002272.1  
116.6 NM\_182497.2  
111 NM\_000424.2  
118.8 NM\_005554.3  
112.1 NM\_005555.2  
118.6 NM\_173086.2  
120.8 NM\_033448.1  
125.3 NM\_175834.2  
115.7 NM\_005556.3  
120.1 NM\_002273.2  
111.7 NM\_002284.3  
133.2 NM\_000226.2  
117.5 NM\_198691.2  
130.7 NM\_181688.1  
119.1 NM\_198692.1  
109.6 NM\_198699.1  
123.1 XM\_942388.1  
109.1 NM\_198693.2  
117.5 NM\_198696.2  
114.7 NM\_198687.1  
136.9 NM\_198694.2  
112 NM\_198689.1  
116.6 NM\_198695.1  
126.5 NM\_198690.1  
125.5 NM\_030967.2  
120.5 NM\_175858.2  
116.7 NM\_181686.1  
112.5 NM\_181684.2  
126.8 NM\_198697.1  
118.4 NM\_198698.1  
112.6 NM\_030966.1  
114.5 NM\_181599.2  
118.4 NM\_181621.2  
120.1 NM\_181622.1  
114.7 NM\_181600.1  
118.9 NM\_181623.1  
123 NM\_031964.1  
111.6 NM\_181607.1  
107.9 NM\_181608.1  
119.6 NM\_181609.2  
116.7 NM\_181610.1  
132.2 NM\_181611.1  
130 NM\_181612.1  
126.8 NM\_181614.1  
112.7 NM\_181615.1  
117.8 NM\_181616.1  
122.6 NM\_181619.1  
113.2 NM\_181617.1  
118.2 NM\_181620.1

117 NM\_181624.1  
124.5 NM\_203405.1  
112.8 NM\_001077711.1  
104.6 NM\_031958.1  
113.3 NM\_031959.2  
114.2 NM\_033060.2  
121.1 NM\_031854.2  
119.1 NM\_033059.2  
107.4 NM\_033062.2  
116.1 NM\_032524.1  
107.7 NM\_033188.2  
121.6 NM\_033061.2  
116.1 NM\_001005922.1  
121.4 NM\_001012710.1  
121.4 NM\_001005405.1  
106.4 NM\_001004325.1  
118.2 NM\_001012708.1  
107.7 NM\_001012709.1  
120.8 NM\_001001480.2  
104.3 NM\_001012416.1  
114.7 NM\_001012503.1  
102.6 NM\_021046.2  
120.4 NM\_005553.2  
118.6 NM\_181602.1  
116 NM\_181604.1  
120.1 NM\_181605.1  
105.5 NM\_175857.3  
110.9 NM\_031962.2  
112.7 NM\_033191.2  
535.7 NM\_173852.3  
130.1 NM\_173853.2  
117.3 NM\_002278.2  
109.5 NM\_002279.3  
114.6 NM\_021013.3  
113.5 NM\_002280.3  
120.2 NM\_003771.3  
121.5 NM\_003770.4  
111.4 NM\_006771.3  
127 NM\_002281.2  
117.2 NM\_033033.3  
114.4 NM\_002282.2  
117.8 NM\_033045.2  
113 NM\_002283.2  
698.3 NM\_031950.2  
119.3 NM\_014238.1  
107.6 NM\_173598.2  
157.4 NM\_138417.2  
254 NM\_004986.2  
206.8 NM\_182926.1  
176 NM\_199129.1  
127.1 NM\_003349.4

120.8 NM\_178554.3  
739.2 NM\_003937.2  
329.8 NM\_003937.2  
134 NM\_000425.2  
139.1 NM\_024003.1  
118.7 NM\_032107.2  
120.5 NM\_032107.2  
120.6 NM\_015478.4  
127 NM\_015478.4  
107.6 NM\_001003689.1  
246.5 NM\_031488.4  
122.8 NM\_001007102.1  
125.4 NM\_001007102.1  
107.3 NM\_032438.1  
120.3 NM\_173464.1  
115.5 NM\_145315.3  
113 NM\_033277.1  
150.3 NM\_171846.1  
472.2 NM\_032857.2  
131.5 NM\_171846.1  
138.7 NM\_016027.1  
121.9 NM\_005558.3  
114.8 NM\_005558.3  
135.2 NM\_002286.4  
124.4 NM\_021708.1  
22828.7 NM\_021706.2  
132.7 NM\_002288.3  
123.7 NM\_021270.2  
113.1 NM\_002289.2  
122.3 NM\_005559.2  
107.8 NM\_005559.2  
125.6 NM\_000426.2  
115.8 NM\_000426.3  
114.7 NM\_198129.1  
112.8 NM\_198129.1  
117.2 NM\_000227.2  
109.6 NM\_198129.1  
117.3 NM\_002290.2  
200.3 NM\_005560.3  
118.9 NM\_002291.1  
111.6 NM\_002292.2  
113.4 NM\_000228.2  
118.4 NM\_001017402.1  
117.6 NM\_000228.2  
119.5 NM\_007356.1  
136.1 NM\_002293.2  
114.5 NM\_018891.1  
115.2 NM\_018891.1  
107.3 NM\_005562.1  
124.9 NM\_006059.2  
1491.1 NM\_005561.2

852.2 NM\_013995.1  
198.2 NM\_002294.1  
272.7 NM\_002294.1  
114.8 NM\_014398.2  
162.3 NM\_006055.1  
136.4 NM\_018697.3  
117.8 NM\_198511.1  
224.9 NM\_015907.2  
131.2 NM\_014713.3  
157 NM\_018407.4  
531.6 NM\_006762.1  
139.4 NM\_004737.3  
111.1 NM\_004737.3  
115.5 NM\_133642.2  
116 NM\_015315.3  
187.5 NM\_033551.2  
136.6 NM\_178043.1  
118.5 NM\_018078.2  
119 NM\_178043.1  
331.6 NM\_032239.2  
136.9 NM\_052879.3  
399.5 NM\_052879.3  
310.4 NM\_015155.1  
118.7 NM\_018357.2  
116.8 NM\_197958.1  
473.2 NM\_015454.1  
169 NM\_020117.8  
134.1 NM\_015340.3  
126.1 NM\_031206.2  
1764.7 NM\_006148.1  
121.1 NM\_021267.2  
140.8 NM\_198207.1  
119.9 NM\_021267.2  
183.1 NM\_022075.3  
226.4 NM\_013384.3  
112.9 NM\_178842.2  
122.7 NM\_024552.1  
231.9 NM\_147190.1  
270.2 NM\_203463.1  
350.2 NM\_001014987.1  
230.9 NM\_001014988.1  
102 NM\_001014989.1  
123.5 NM\_014387.3  
234.1 XR\_000518.1  
137.9 NR\_002593.1  
140 XR\_001385.1  
174.7 NM\_032464.2  
158.7 NM\_022040.2  
120.7 NM\_032464.2  
115.8 NM\_004690.2  
139.9 NM\_014572.1



248.5 NM\_017773.2  
110.2 NM\_178834.2  
138.1 NM\_030915.1  
242 NM\_030915.1  
113.3 NM\_004139.2  
165.9 NM\_002296.2  
271.9 NM\_002296.2  
139.6 NM\_194442.1  
124.7 NM\_006562.4  
119.4 NM\_001009812.1  
109.2 NM\_001031807.1  
114.5 NM\_001039768.2  
114 NM\_000229.1  
121 NM\_178348.1  
115.6 NM\_178349.1  
113.4 NM\_178352.1  
121.3 NM\_178353.1  
116 NM\_178353.1  
133.7 NM\_178354.1  
117.1 NM\_178428.3  
125.4 NM\_014357.3  
124 NM\_178429.2  
112 NM\_178430.2  
110.2 NM\_178431.1  
111.4 NM\_178433.1  
111.6 NM\_178434.1  
112.2 NM\_032563.1  
105.4 NM\_178435.2  
123.7 NM\_178438.3  
131.3 NM\_001042771.1  
123.4 NM\_005356.3  
116.2 NM\_001042771.1  
171.1 NM\_016309.2  
140.7 NM\_001032391.1  
135.4 NM\_016309.2  
140 NM\_014793.3  
124.5 NM\_002297.2  
126.4 NM\_001001712.1  
115.1 NM\_178536.3  
129 NM\_005564.2  
121.1 NM\_198946.2  
122.7 NM\_178469.3  
118.4 NM\_001001676.1  
252.4 NM\_032440.1  
118.9 NM\_153686.4  
5271 NM\_002298.2  
127.2 NM\_005565.3  
115.4 NM\_002299.2  
124.4 NM\_207338.1  
120.5 NM\_003893.3  
114.3 NM\_001290.2

123.9 NM\_001080116.1  
116.5 NM\_007078.2  
105.7 NM\_001080116.1  
1465.2 NM\_005566.1  
117.3 NM\_144972.3  
117.5 NM\_033195.1  
506 NM\_002300.3  
194.1 NM\_017448.1  
115.7 NM\_002301.2  
115.4 NM\_153486.2  
103.6 NM\_194436.1  
478.4 NM\_000527.2  
113.6 NM\_001010978.2  
119.9 NM\_001013693.1  
112.2 NM\_174902.2  
141.4 NM\_015627.1  
116.3 NM\_012317.2  
136.5 NM\_032287.2  
151.1 NM\_052971.2  
125.4 NM\_007015.2  
119.6 NM\_002302.2  
479.1 NM\_016269.2  
122.7 NM\_020997.2  
119.5 NM\_003240.2  
117.8 NM\_001010857.1  
119.5 NM\_001001552.3  
168.8 NM\_181336.2  
444.6 NM\_014319.3  
119.9 NM\_018655.2  
125.9 NM\_024316.1  
398.4 NM\_024298.2  
116.8 NM\_052925.1  
121 NM\_198988.1  
117.3 NM\_138792.2  
262.2 NM\_000230.1  
119 NM\_001003680.1  
128.3 NM\_001003679.1  
109.2 NM\_002303.3  
147.7 NM\_022356.2  
110 NM\_018192.2  
102.7 NM\_014262.2  
212.5 NM\_017526.2  
378.2 NM\_015344.1  
138.4 NM\_012318.1  
114.6 NM\_144652.1  
130.7 NM\_015416.3  
204.1 NM\_001024668.1  
125.5 NM\_001040168.1  
132.2 NM\_001040168.1  
218.4 NM\_002304.1  
618.2 NM\_002305.2

119.4 NM\_033101.2  
119.8 NM\_013268.2  
136.3 NM\_020129.2  
109.1 NM\_203471.1  
132.5 NM\_006498.2  
188.9 NM\_002306.1  
131.4 NM\_005567.2  
121.3 NM\_006149.2  
120 NM\_002307.1  
111.5 NM\_201545.1  
238.2 NM\_006499.3  
117.8 NM\_201544.1  
316.4 NM\_201545.1  
115.4 NM\_009587.2  
112 NM\_009587.2  
106 NM\_005097.1  
133.3 NM\_018176.2  
112.6 NM\_139278.2  
137.2 NM\_139284.1  
119.9 NM\_180990.2  
209 NM\_001008530.1  
116.7 NM\_001008530.1  
312.9 NM\_005606.5  
133.9 NM\_032484.3  
121.6 NM\_024119.1  
117 NM\_018490.1  
110.5 NM\_003667.2  
129.2 NM\_021636.2  
118 NM\_001017403.1  
122.9 NM\_001017404.1  
110.6 NM\_001017403.1  
108.2 NM\_021634.1  
109.5 NM\_130806.2  
184.7 NM\_006893.2  
111.3 NM\_000894.2  
115.2 NM\_000233.1  
114 NM\_005780.1  
134.8 NM\_178175.2  
344.6 NM\_005779.1  
123.1 NM\_199000.1  
109.1 NM\_182548.2  
118.8 NM\_022126.2  
123.4 NM\_005568.2  
122.3 NM\_004789.3  
112.5 NM\_014564.2  
125.1 NM\_014564.2  
112.3 NM\_178138.2  
114.3 NM\_014564.2  
119.6 NM\_178138.2  
123.3 NM\_033343.2  
115.4 NM\_022363.2

160.3 NM\_014368.2  
117.5 NM\_199160.1  
120.5 NM\_001001933.1  
104.1 NM\_001014434.1  
111.7 NM\_020204.2  
127.9 NM\_194451.1  
195.1 NM\_006859.2  
111.3 NM\_002309.2  
126.3 NM\_002310.3  
185.1 NM\_000234.1  
110.3 NM\_002311.3  
125.1 NM\_002311.3  
136.5 NM\_013975.2  
136.5 NM\_002312.3  
131.4 NM\_002312.3  
109.3 NM\_006863.1  
116.3 NM\_006866.1  
118 NM\_006865.2  
103.7 NM\_006865.2  
117.7 NM\_012276.3  
117.8 NM\_181986.1  
118.6 NM\_021250.2  
118.2 NM\_021250.2  
116.8 NM\_024318.2  
123.9 NM\_006669.2  
2959.1 NM\_001081637.1  
210.2 NM\_001080978.1  
293.1 NM\_006864.1  
13721.4 NM\_006864.1  
127 NM\_001081438.1  
117.2 NM\_006840.2  
120.9 NM\_006840.2  
116.2 NM\_030657.2  
138.5 NM\_016357.3  
111.6 NM\_014240.1  
117.4 NM\_030576.2  
340.2 NM\_017806.1  
118.5 NM\_016735.1  
108.5 NM\_002314.2  
119.3 NM\_016733.2  
116.6 NM\_001031801.1  
112.5 NM\_001031801.1  
115.4 NM\_005569.3  
197.7 NM\_004987.3  
118.6 NM\_004987.3  
110.7 NM\_017980.2  
108.9 NM\_033514.1  
134.8 NM\_025187.3  
105.8 NM\_024674.3  
121.3 NM\_001004317.2  
114.3 NM\_004664.2

120.1 NM\_022165.2  
121.1 NM\_018362.2  
116.8 NM\_173083.2  
117.7 NM\_001080535.1  
110.1 NM\_001004432.1  
116.1 NM\_001040614.1  
121.2 NM\_181739.1  
217.8 NM\_000235.2  
118.6 NM\_000236.1  
137.6 NM\_005357.2  
111.9 NM\_004190.1  
111.4 NM\_006033.2  
118.1 NM\_139248.2  
113.2 NM\_198996.2  
117.8 NM\_001080518.1  
126.2 NM\_001010939.1  
148.7 NM\_015929.2  
127.6 NM\_145196.1  
1874.1 NM\_004862.2  
117.9 NM\_153234.3  
126.7 NM\_153713.1  
686.5 NM\_014647.1  
163.3 NM\_004140.3  
121.7 NM\_001015002.1  
119.3 NM\_005570.2  
    129 NM\_021819.2  
144.9 NM\_006816.1  
208.5 NM\_030805.1  
200.8 NM\_022458.2  
127.5 NM\_018113.1  
264.1 NM\_018368.2  
120.7 NM\_001007527.1  
124.9 NM\_014583.2  
123.2 NM\_033029.1  
235.6 NM\_005572.2  
408.7 NM\_005572.2  
    121 NM\_005573.2  
146.5 NM\_032737.2  
117.5 NM\_002315.1  
127.8 NM\_005574.2  
117.3 NM\_018640.3  
123.1 NM\_001001395.1  
    114 NM\_018640.3  
519.4 NM\_006769.2  
115.6 NM\_006150.3  
122.6 NM\_005358.3  
116.1 NM\_012134.1  
695.3 NM\_198271.2  
120.8 NM\_014916.2  
    133 XM\_936372.1  
114.4 NM\_177398.2

109.5 NM\_177398.2  
115 NM\_001033507.1  
123.1 NM\_177399.2  
117.8 NM\_002316.1  
710.5 NM\_005475.1  
107.8 NM\_005575.2  
176.7 NM\_005575.2  
124.1 NM\_032622.1  
141.9 NM\_153371.2  
123.2 NM\_138411.1  
122.4 NM\_207312.1  
130.2 NM\_138414.1  
170.7 XM\_941168.1  
141.6 NM\_138422.1  
253.7 NM\_138781.2  
148 NM\_138428.2  
129 NM\_138439.1  
130.5 NM\_138442.2  
118.9 NM\_138458.1  
124.7 NM\_198147.1  
114.2 NM\_138787.2  
112.3 NM\_138789.2  
115.3 NM\_145248.2  
239.7 NM\_001013619.1  
111.5 NM\_001010845.1  
114.6 NM\_145252.1  
170.1 NM\_194280.2  
137.9 NM\_001080510.2  
152.9 NM\_001080510.2  
126.3 XM\_940962.1  
125.9 NM\_213597.1  
112.5 NM\_207313.1  
176.3 NM\_001031665.1  
129.1 NM\_001080503.1  
113.1 NM\_145807.1  
461.1 NM\_001002836.1  
121.4 NM\_173479.2  
114.1 NM\_173480.1  
119.8 NM\_001034966.1  
114.6 NM\_138796.2  
122.4 NM\_139016.2  
129.7 NM\_173793.3  
156.3 NM\_138797.1  
136.5 NM\_152994.2  
144 NM\_174898.1  
500.9 NM\_138798.1  
117.9 NM\_207315.1  
160.6 NM\_001009993.1  
124.3 NM\_001017927.1  
118.5 NM\_177964.3  
111.6 NM\_138803.2

127.3 NM\_138804.2  
113.8 NM\_001080440.1  
109.6 XM\_935351.1  
130.1 XM\_934203.1  
137.9 NM\_173487.1  
113.3 NM\_178833.3  
135.3 NM\_130809.2  
112.6 NM\_199133.1  
    117 NM\_138809.2  
    544 NR\_000030.1  
124.6 NM\_001008270.1  
123.5 NM\_145268.2  
113.7 NM\_174959.1  
106.6 NM\_173848.3  
118.3 NM\_001010940.1  
137.7 NM\_001012968.1  
115.1 NM\_001025447.1  
149.4 NR\_002197.1  
    117 NM\_001080441.1  
126.5 NM\_138471.1  
147.2 NM\_181708.1  
    160 NM\_001001660.1  
109.5 NM\_001080825.1  
116.5 XM\_084852.11  
110.9 NM\_182507.1  
116.4 NM\_182507.1  
123.1 NM\_001011724.1  
106.1 NM\_001011724.1  
    109 NM\_001080442.1  
114.9 NM\_145270.1  
118.4 NM\_139170.2  
118.1 NM\_001025448.1  
116.6 NM\_001080443.1  
121.3 NM\_001080443.1  
133.6 NM\_203374.1  
145.1 NM\_138479.2  
127.7 NM\_001024601.2  
111.9 NM\_001010976.1  
121.3 NM\_001080444.1  
    131 NM\_001017964.1  
127.9 NM\_001010859.1  
116.6 NM\_001008917.1  
    132 NM\_207327.4  
113.7 NM\_001008917.1  
130.7 NM\_207328.2  
113.9 NM\_001077637.1  
118.7 NM\_001033657.1  
113.1 NM\_194289.1  
154.4 NM\_178835.2  
    113 NM\_001080505.1  
110.2 NR\_002228.1

1290.6 NM\_153607.1  
120.4 NM\_145282.2  
111.5 NM\_203406.1  
112.3 NM\_001024607.1  
125.9 NM\_001029866.1  
183.6 NM\_001031744.1  
121.1 NM\_182829.1  
122.8 NM\_182829.1  
119.9 NM\_001029857.2  
126.2 NM\_001025265.1  
148.5 NM\_203402.1  
118.1 NM\_139174.2  
116.7 NM\_001034841.1  
129.7 NM\_178126.2  
121.9 NM\_001005851.1  
105.2 NR\_001279.1  
112.4 NM\_001080447.1  
115.8 NM\_199280.1  
113.7 XR\_000552.1  
300 NM\_176814.3  
131.9 NM\_198275.1  
120.2 NM\_207337.1  
128.2 NM\_173542.2  
113.1 NM\_001010977.1  
120.4 NM\_001014830.1  
125.7 NM\_174917.1  
129.1 NM\_145294.3  
111.3 NM\_001007125.1  
109.5 NM\_001017981.1  
129.5 NM\_145300.1  
118.6 NM\_001015050.1  
129.7 NM\_178836.2  
122.6 NM\_174919.2  
123.9 NM\_001013624.1  
107.2 XM\_942296.1  
112.9 NM\_001076680.1  
131.3 NM\_001008393.1  
194.3 NM\_001079529.2  
122.8 NM\_145303.1  
114.4 XM\_114621.5  
116.8 NM\_001017978.1  
219.5 NM\_001017980.1  
131.5 NM\_174925.1  
183.5 NM\_001080546.1  
115.7 XR\_000920.1  
105.3 NR\_002793.1  
117.8 NR\_003268.1  
105.9 NM\_203422.1  
117.3 NM\_203422.1  
135.5 NM\_174928.1  
116.2 NM\_194299.1



404 NM\_139179.1  
122.8 NM\_173565.1  
127.7 NM\_173565.1  
124.2 NM\_198151.1  
108.7 NM\_198151.1  
120.3 NM\_198151.1  
118.7 NM\_203397.1  
137.9 NM\_001025454.1  
113.3 NR\_001286.1  
124.8 NR\_001288.1  
112.8 XM\_929824.1  
102.6 NM\_001037225.1  
112.1 NM\_182556.1  
110.6 NM\_001033658.1  
115.5 NM\_001033658.1  
118 NM\_001001873.2  
216.9 NM\_001029859.1  
568.8 NR\_002803.1  
118.3 NM\_207344.1  
116.8 NM\_001025457.1  
135.6 NM\_198849.2  
158.8 NM\_181785.1  
109.1 NM\_001012706.1  
112.8 NM\_001042367.1  
111.7 NM\_001024682.1  
126.7 NM\_001042371.2  
127.2 NM\_001012731.1  
230.9 NM\_001010878.1  
115.1 NM\_001025459.1  
127.3 NM\_001042685.1  
113.7 NM\_001037331.1  
113 NM\_001010880.1  
113.2 NM\_175063.3  
118.5 NM\_175063.3  
121.4 NR\_002938.1  
117 NM\_001025591.1  
111.7 NM\_001007525.1  
118.3 NR\_003128.1  
114.4 NM\_207349.1  
128.9 NM\_001025463.1  
116.1 NM\_001004305.1  
122.3 NM\_203375.1  
113.6 NM\_198482.1  
114.1 NM\_001002919.1  
110.9 NM\_001037228.1  
371.7 NM\_001012626.1  
236.4 NM\_001033575.1  
130.5 NR\_002941.1  
136.2 NM\_001025266.1  
125.8 NM\_001029955.1  
123.3 NR\_002805.2

119.1 NM\_194439.1  
132.5 NM\_198281.1  
132.4 XM\_945291.1  
278.3 NM\_175921.4  
    118 NM\_001037231.1  
135.4 NM\_181722.2  
135.1 NM\_213603.2  
112.9 NM\_001013258.1  
161.2 NM\_001013258.1  
114.7 NM\_001024610.1  
113.4 NM\_001013626.1  
    113 NM\_001031834.1  
121.4 NM\_178172.2  
114.6 NM\_178172.2  
466.6 NR\_002809.1  
433.2 NM\_001005920.2  
175.9 NM\_001039842.1  
124.3 XM\_941327.1  
118.3 NR\_001443.1  
226.9 NM\_001012643.2  
122.1 NM\_001003808.1  
    110 NM\_001001664.1  
133.1 NM\_001024611.1  
117.4 NM\_182761.1  
118.7 NM\_001012418.1  
109.8 XM\_294209.6  
128.2 XM\_936425.1  
139.6 NM\_001013627.1  
117.1 NM\_001013627.1  
113.8 NM\_001012977.1  
    110 NM\_001013628.1  
111.5 NM\_203407.1  
153.5 NM\_001013629.1  
125.1 NM\_001001414.1  
124.5 NM\_001013630.1  
119.9 NM\_001013632.2  
125.4 XM\_941536.1  
133.7 NM\_001080459.1  
127.1 NM\_001080460.1  
116.9 NM\_001012982.2  
117.2 NM\_001012982.2  
115.4 NM\_001076781.1  
117.6 NM\_001012454.1  
119.9 NM\_182489.1  
118.7 NM\_001018116.1  
113.1 NM\_001013403.1  
121.6 NM\_182619.1  
108.5 NM\_001012759.1  
120.5 XM\_939188.1  
128.4 NM\_001012762.1  
130.3 NM\_207368.1

121.2 NM\_198851.1  
122.1 NM\_182631.1  
138 NM\_198284.1  
120.5 NM\_198285.1  
191.3 NM\_182635.1  
155 NM\_182905.1  
116 NM\_001031802.1  
303 NM\_199337.1  
112.8 XR\_000221.3  
120.9 NR\_002815.1  
125.1 NM\_199341.1  
119.6 NM\_198560.1  
113.8 NM\_198828.1  
113.9 NM\_001010895.1  
124.3 NM\_199352.2  
115.1 NM\_001006604.1  
168 NM\_001005751.1  
119.6 NM\_001031853.2  
117.9 NM\_203371.1  
112.1 XM\_929102.1  
117.3 XM\_370629.2  
113.6 NM\_001008778.1  
112.4 XM\_937099.1  
116.3 NM\_001013635.2  
109.2 NM\_001013635.2  
117 NM\_001007537.1  
113.7 NM\_001012754.2  
134.2 NM\_001017370.1  
113 NM\_001039614.1  
121.2 NM\_001013638.1  
122.8 NM\_001012984.1  
115.6 NM\_001014985.1  
137.5 NM\_001004313.1  
120.1 NM\_213607.1  
119.3 NM\_203425.1  
117.5 NM\_001080466.1  
124.1 NM\_001013640.1  
6041.8 NM\_001005472.1  
111.8 NM\_001013641.1  
117.2 NM\_001013642.1  
264 NM\_001013644.1  
111.9 NM\_001006606.1  
111.8 NM\_207644.1  
119.4 NM\_001012986.1  
110 NM\_001010902.1  
111.8 NM\_001080473.1  
109.8 NR\_003131.1  
111.7 NM\_001013648.3  
119.6 XM\_940482.1  
107.5 NM\_001080475.1  
129.5 NM\_001007540.1

117.3 NM\_001013650.1  
113.2 XM\_939104.1  
118.5 NM\_001080478.1  
226.4 NM\_001018022.1  
110.2 NM\_001080540.1  
103.2 NM\_001010905.1  
115.1 NM\_001030060.1  
110.4 NM\_203393.1  
113.6 NM\_001032389.1  
247.6 NM\_001008395.1  
    113 NM\_001024613.1  
111.3 NM\_001013651.1  
110.7 NM\_001080482.1  
118.2 NM\_001013653.1  
112.3 XM\_939320.1  
    103 NM\_001080483.1  
118.5 XM\_372180.3  
115.5 NM\_001013654.1  
118.2 NM\_001013655.1  
114.3 NM\_001013656.1  
113.7 NM\_001031854.1  
109.3 NM\_001080486.1  
    111 XM\_372428.3  
118.4 NM\_001013657.1  
    117 NM\_001013658.1  
116.5 NM\_001080829.1  
118.4 XM\_372648.3  
115.1 NM\_001080487.1  
117.3 NM\_001013659.1  
115.2 XM\_372760.2  
133.2 NM\_001013663.1  
108.2 NR\_003275.1  
113.3 NM\_001013664.1  
123.7 NM\_001080489.1  
116.9 NM\_001010910.1  
120.8 NM\_001013665.1  
120.5 NM\_212554.2  
118.4 NM\_001013666.1  
9954.9 NM\_001013667.1  
108.6 NM\_207645.1  
129.8 NM\_203451.1  
122.5 NM\_001008404.1  
113.7 NM\_207446.1  
147.4 NM\_001013670.1  
129.6 NM\_001013670.1  
109.9 NM\_001013671.1  
110.9 NM\_001012991.1  
119.4 NM\_001013672.2  
123.9 NM\_001013672.2  
293.4 NM\_001008234.1  
119.9 NM\_001013673.1

111 NM\_001013675.1  
123.5 NM\_001013676.1  
106.9 NM\_001013677.1  
112.5 NM\_001010914.1  
166.5 NM\_001010914.1  
123.3 NR\_002826.1  
3978.7 NM\_001080831.1  
134.1 NM\_001008737.1  
115.4 NM\_001013679.1  
124.2 NM\_214711.1  
224 NM\_001001701.1  
178.3 NM\_001013680.1  
124.8 NM\_001013681.1  
115.3 NM\_001023565.1  
114 NM\_001024677.1  
148.9 NM\_001013685.1  
122.9 NM\_001045475.1  
107.3 NM\_001023566.1  
113.4 NM\_001008742.1  
116.7 NM\_001008745.1  
113.1 NM\_212558.1  
128.3 NM\_001045476.1  
118.4 NM\_001001710.1  
122.1 NM\_001013687.1  
124.7 NM\_001013691.1  
109.6 NM\_001013694.1  
153.3 NM\_001080499.1  
113.8 NM\_001013695.1  
116.1 NM\_001080500.1  
163.6 NM\_001011538.1  
306.1 NM\_001004323.1  
119 NM\_001015072.1  
118.5 NM\_207581.1  
163.1 NR\_002144.1  
6315.4 NR\_002162.1  
114.8 NM\_001013696.1  
113.9 NM\_001039615.1  
107.8 NM\_001013698.1  
118.6 NM\_001013699.1  
150.8 XM\_933946.1  
124 NM\_001071775.1  
137.5 NM\_001013701.1  
118.8 NM\_199045.1  
121.8 NM\_198181.1  
121 NM\_001013704.1  
451 NM\_001018059.2  
106.7 NM\_001018122.1  
153.9 NR\_002473.2  
122.6 NR\_002943.1  
130.7 XM\_941901.1  
111.8 NR\_002931.1

107.8 NM\_001013707.1  
113.9 NM\_001013708.1  
197.8 NM\_001025303.1  
118.1 NM\_001013710.1  
117.3 NR\_002829.1  
122.6 NM\_001014440.2  
122.9 NM\_001013712.1  
185.7 NR\_002315.1  
132.5 NM\_001013713.1  
119.5 NM\_001011539.1  
133.4 NM\_001013715.1  
112.1 NM\_001013717.1  
116.2 NM\_001013718.1  
120.5 NM\_001008739.1  
111.2 NM\_001080507.1  
133.3 NM\_001010919.1  
111.7 NM\_001013720.1  
116.2 NM\_001025489.1  
    122 NM\_001013723.1  
104.2 NM\_001013724.1  
115.2 NM\_001013464.1  
    123 XM\_943658.1  
115.9 NM\_001034844.1  
110.6 NM\_001023562.1  
    133 NM\_001013725.1  
116.4 NM\_001080538.1  
128.2 NM\_001008747.1  
    111 NM\_001025357.1  
    109 NM\_001013727.1  
126.4 NM\_001004353.1  
114.5 XM\_927564.1  
114.8 NM\_001080998.1  
112.9 NR\_003034.1  
114.3 XM\_928094.1  
160.1 NM\_001045548.1  
119.2 NM\_001025075.1  
111.1 NM\_001013729.1  
111.5 NM\_001013729.1  
123.3 NM\_001013732.1  
130.1 NR\_002932.1  
108.3 XM\_498330.2  
118.4 NM\_001013735.1  
487.3 NM\_001013739.1  
134.3 NM\_001025202.1  
119.8 XM\_499461.2  
129.2 NR\_002830.1  
124.5 NM\_001007189.1  
134.3 NM\_001008274.1  
129.9 NM\_001008388.1  
113.7 NM\_001008391.1  
108.2 NM\_001008397.1

118.9 NM\_001011880.1  
140.5 NM\_001035005.2  
962.7 NM\_015853.3  
117.1 NM\_015910.3  
125.3 NM\_001042692.1  
128.2 NM\_016125.2  
124.5 NM\_001017987.2  
109.5 NM\_001018062.1  
121.5 NM\_016449.2  
110.4 NM\_016490.3  
555.7 NM\_016494.3  
156.9 NM\_016643.1  
124.1 NM\_016644.1  
128.1 NM\_017439.1  
136.8 NM\_001013617.1  
124.1 NM\_001013748.1  
119.9 NM\_001017437.1  
114.4 NM\_004125.2  
104.5 NM\_001024655.1  
131 NM\_001024656.1  
129.7 NM\_001024680.1  
160.7 NM\_017530.1  
135.1 NM\_018687.3  
119.6 NM\_020142.3  
128.8 NM\_020143.2  
113.2 NM\_020212.1  
1223.1 NM\_020424.2  
121.6 NM\_001031628.1  
181.1 NM\_001031628.1  
116.1 NM\_001033873.1  
129.5 NM\_001031628.1  
117.4 NM\_001042524.1  
119 NM\_001042525.1  
110.3 NM\_001042524.1  
123.9 NR\_002453.4  
113.1 NM\_001031672.1  
338.9 NR\_002454.2  
2728.6 NR\_002555.2  
110.5 XM\_938437.1  
110.5 NR\_002934.1  
112.8 NM\_001033564.1  
140.9 NM\_022090.3  
116.1 NM\_022097.1  
123.8 NM\_001039083.1  
118.1 XM\_935587.1  
116.1 XM\_935713.1  
302.9 XM\_942734.1  
114.5 XM\_936338.1  
118.8 XM\_936358.1  
105 NM\_001040065.1  
112.8 XM\_925836.1

121 XM\_925858.1  
148 XM\_925863.1  
123.2 XM\_931704.1  
115.1 XM\_931182.1  
7226.5 NM\_001039895.1  
129.9 XM\_926352.1  
121.1 NM\_001039761.2  
114.8 XM\_926361.1  
21146.7 XM\_926427.1  
121.7 XM\_931373.1  
109.2 XM\_931397.1  
109 XM\_926586.1  
116.3 NM\_001080516.1  
123.4 XM\_931536.1  
138.9 XM\_926644.1  
120.9 XM\_927886.1  
119.3 XM\_926728.1  
113.8 XM\_926746.1  
110.5 XM\_926759.1  
1153.7 XM\_926831.1  
114.6 XM\_931621.1  
149.7 XM\_931666.1  
3498.6 XM\_928629.1  
117.2 XM\_927025.1  
118.8 XM\_927093.1  
125.2 XM\_931851.1  
114.8 XM\_929395.1  
121 XM\_929395.1  
115.8 XM\_927137.1  
104.6 XM\_927170.1  
115.6 NM\_001039772.1  
115.8 XM\_927183.1  
422.4 XM\_927199.1  
186.3 XM\_930156.1  
111.6 XM\_934127.1  
181.1 NM\_001042631.1  
116.3 NM\_001080520.1  
114.2 XM\_927528.1  
120.6 XM\_927544.1  
120.9 XM\_927552.1  
124.3 XM\_934067.1  
116.9 XM\_927728.1  
115.9 XM\_927730.1  
137.3 XM\_930214.1  
120.1 XM\_927880.1  
121.6 XM\_932381.1  
117.1 XM\_927975.1  
118.6 NM\_001080521.1  
110.3 XM\_928065.1  
123.8 NM\_001045478.1  
109.2 XM\_928095.1



128.8 XM\_932899.1  
106.7 XM\_932970.1  
131.5 XM\_928831.1  
110.2 XM\_928893.1  
115.6 NM\_001042506.1  
115.4 XM\_928939.1  
105.9 NR\_003254.1  
3925.8 XM\_930460.1  
114.9 XM\_929401.1  
106.1 XM\_930522.1  
116.6 NM\_001039792.1  
120 XM\_934232.1  
110.9 XM\_496146.2  
105.6 XM\_936717.1  
123.7 XM\_942931.1  
124.3 XM\_943475.1  
117.5 XM\_944018.1  
108.4 XM\_937203.1  
347.6 XM\_944019.1  
117.6 XM\_943915.1  
115.2 XM\_938896.1  
123.2 XM\_937910.1  
125.9 XM\_943542.1  
109.7 NM\_001040069.1  
115.3 XM\_938230.1  
123.5 XM\_938298.1  
131.6 XM\_938449.1  
131.7 XM\_945043.1  
105.2 XM\_945040.1  
120.9 XM\_943707.1  
120.2 XM\_942115.1  
117.9 XM\_943751.1  
125.6 XM\_941960.1  
110.9 XM\_943783.1  
118.8 XM\_938776.1  
466.9 NM\_001080840.1  
652.1 NR\_003040.1  
112.4 XM\_942166.1  
119 XM\_941914.1  
116.2 NM\_001080841.1  
118 XM\_939222.1  
122.9 XM\_943161.1  
117.3 XM\_945692.1  
118.3 NM\_001040071.1  
137.7 XM\_939670.1  
120.3 XM\_944300.1  
110.4 XM\_939781.1  
121.9 XM\_942582.1  
127.6 XM\_940198.1  
113.3 XM\_945836.1  
129.6 XM\_940459.1

214.1 XM\_940575.1  
120.9 NM\_001080842.1  
116.2 XM\_945117.1  
118.5 XM\_941630.1  
148.6 XM\_941913.1  
110.8 XM\_945551.1  
120.4 XM\_942322.1  
    116 XM\_942375.1  
121.3 XM\_942584.1  
    112 XM\_942613.1  
130.8 XM\_931824.1  
126.1 NM\_001037666.1  
113.2 XM\_930589.1  
117.1 XM\_930698.1  
117.9 XM\_930645.1  
120.8 XM\_925895.1  
    122 XM\_925981.1  
142.2 XM\_925995.1  
113.4 XM\_926391.1  
120.5 XM\_926981.1  
119.7 XM\_926881.1  
110.7 XM\_926186.1  
141.4 XM\_931089.1  
128.3 XM\_926230.1  
115.7 XM\_926321.1  
118.8 XM\_926358.1  
    120 XM\_927227.1  
123.8 NM\_001079538.1  
119.2 XM\_931950.1  
116.4 XM\_926684.1  
116.4 XM\_926686.1  
114.4 XM\_926689.1  
1409.5 NM\_001080544.1  
    112.8 NM\_001079527.1  
    121.6 NM\_001040715.1  
3124.2 XM\_926913.1  
    111.7 XM\_933544.1  
    109.5 XM\_927205.1  
        136 XM\_927326.1  
    111.1 XM\_930216.1  
    125.5 XM\_933416.1  
    112.9 XM\_377002.2  
    130.3 XM\_927632.1  
    132.3 XM\_932255.1  
    113.4 NM\_001042507.1  
    118.7 XM\_927759.1  
    112.5 XM\_932358.1  
    151.7 XM\_927999.1  
    113.1 XM\_928014.1  
    104.6 XM\_928059.1  
245.5 NM\_001080536.1

109.9 XM\_928134.1  
216.2 NM\_001042500.1  
120.4 XM\_928353.1  
111.1 XM\_935128.1  
117 XM\_932857.1  
110.6 XM\_371416.3  
120.4 XM\_932876.1  
118.9 XM\_928461.1  
131 XM\_928685.1  
111.4 XM\_928912.1  
108.4 XM\_933280.1  
129.9 XM\_929011.1  
115.8 XM\_929041.1  
114.5 XM\_929053.1  
110.5 XM\_929072.1  
146.1 XM\_929105.1  
113.4 XM\_929192.1  
111.6 XM\_929209.1  
126.1 XM\_929354.1  
115.8 XM\_929370.1  
112 XM\_929376.1  
105.7 XM\_933630.1  
111.7 XM\_929409.1  
142.1 XM\_930555.1  
111.6 XM\_933689.1  
116.5 XM\_929519.1  
115 XM\_933779.1  
113.5 XM\_929596.1  
100.3 XM\_929910.1  
114.2 XM\_929939.1  
116.1 XM\_929976.1  
114.8 XM\_376278.3  
117.5 XM\_930091.1  
109.9 XM\_930108.1  
114.5 XM\_930313.1  
118.9 NM\_001042490.2  
116.1 XM\_936577.1  
112.6 XM\_937110.1  
125.6 XM\_944064.1  
130.6 XM\_944068.1  
164.4 XM\_937953.1  
161.6 XM\_496163.2  
123.9 XM\_938984.1  
116.3 XM\_939686.1  
130.8 XM\_945987.1  
122.9 XM\_945978.1  
117.8 XM\_939732.1  
116.6 XM\_939968.1  
110.5 XM\_940045.1  
115.7 XM\_940489.1  
127.6 XM\_945260.1

114.7 NM\_001040078.2  
119.8 NR\_003144.1  
125.1 NM\_001080393.1  
124.1 NM\_001077697.1  
111.1 NM\_001080396.1  
    118 NM\_001080790.1  
    277 NM\_001080849.1  
114.6 NM\_001080850.1  
119.4 NM\_001082488.1  
180.4 NR\_003277.1  
202.1 NM\_001080853.1  
112.7 NM\_001080856.1  
135.2 NM\_001080402.1  
4036.6 NR\_003288.1  
143.7 NM\_030802.2  
155.1 NM\_030941.1  
305.7 NM\_032574.2  
111.8 NM\_138342.2  
113.2 NM\_194277.1  
135.1 NM\_001010851.2  
129.9 NM\_033211.2  
115.8 XM\_944706.1  
162.6 NM\_138353.2  
173.7 NM\_138358.2  
2456.1 NR\_002773.1  
293.1 NM\_001031617.1  
122.3 NM\_138771.2  
130.1 NM\_138364.2  
    147 NM\_001014979.1  
124.5 NM\_175870.3  
140.2 NM\_138773.1  
120.2 NM\_001013618.1  
134.5 NM\_138698.2  
114.6 NM\_138370.1  
16138 NM\_001080822.1  
116.2 NM\_139160.1  
147.6 NM\_033318.3  
    119 NM\_001009607.1  
119.3 NM\_001017920.1  
130.6 NM\_001017971.1  
125.2 NM\_138386.1  
113.5 NM\_138389.1  
116.2 NM\_138390.2  
706.3 NM\_138779.2  
113.6 NM\_138402.3  
    203 NM\_138699.2  
123.2 NM\_198315.2  
135.5 NM\_014622.4  
129.2 NM\_058169.2  
109.7 NM\_013343.1  
    132 NM\_031490.2

135.4 NM\_152271.2  
114 NM\_198461.1  
162.5 NM\_024778.4  
133 NM\_001031855.1  
114.2 NM\_000427.1  
111.8 NM\_002317.3  
120.4 NM\_144612.4  
113.1 NM\_005576.2  
110.1 NM\_005576.2  
111 NM\_002318.2  
117.5 NM\_032603.2  
117.5 NM\_032211.6  
112.5 NM\_005577.2  
109.7 NM\_005577.2  
111.4 NM\_024492.2  
116.3 NM\_145727.1  
111.2 NM\_145727.1  
119.5 NM\_014873.1  
168.5 NM\_014921.3  
118.8 NM\_014921.3  
123.5 NM\_012302.2  
114.6 NM\_015236.3  
848.9 NM\_145693.1  
147.2 NM\_014646.2  
120.9 NM\_022896.1  
114.1 NM\_000237.1  
120.1 NM\_006151.1  
163.7 NM\_005578.2  
134.2 NM\_022737.1  
111.6 NM\_014839.3  
3867 NM\_004811.1  
5521.7 NM\_022350.1  
120.7 NM\_004744.3  
207.6 NM\_006726.1  
113.6 NM\_015116.1  
120.5 NM\_020871.2  
190.8 NM\_032773.2  
319 NM\_002319.3  
200.9 NM\_018494.3  
166.1 NM\_145887.2  
116.4 NM\_018494.3  
119.3 NM\_020737.1  
117.1 NM\_024509.1  
120 NM\_024036.3  
111.2 NM\_152447.2  
122 NM\_052972.2  
263.2 NM\_015541.2  
136.6 NM\_014813.1  
112.8 NM\_153377.3  
214.1 NM\_006152.2  
121 NM\_002332.1

163.3 NM\_014045.3  
121.6 NM\_032832.3  
109.2 NM\_013437.2  
122.6 NM\_014067.2  
129.2 NM\_018557.1  
105.2 NM\_004525.1  
127.1 NM\_018409.2  
113.4 NM\_002333.1  
104.7 NM\_002334.1  
110.7 NM\_002335.2  
175.2 NM\_182492.1  
137.6 NM\_002336.1  
115.3 NM\_001018054.1  
148.5 NM\_033300.2  
    154 NM\_002337.1  
147.3 NM\_133259.2  
112.8 NM\_025168.1  
    127 NM\_018214.3  
111.1 NM\_201550.2  
135.1 NM\_014665.1  
128.1 NM\_130830.2  
120.9 NM\_017640.3  
119.2 NM\_001031692.1  
113.8 NM\_005824.1  
116.3 NM\_001031692.1  
112.1 NM\_001006939.2  
119.5 NM\_022901.1  
112.7 NM\_024512.2  
109.7 NM\_207119.1  
    122 NM\_207119.1  
118.9 NM\_018239.2  
    117 NM\_015613.1  
    113 NM\_001017924.2  
123.4 NM\_201650.1  
    126 NM\_201650.1  
110.9 NM\_001024678.1  
121.8 NM\_145256.2  
113.7 NM\_030626.1  
115.3 NM\_144598.2  
112.4 NM\_012163.2  
121.1 NM\_012163.2  
120.7 NM\_030891.3  
115.9 NM\_024727.1  
112.8 NM\_005512.1  
    121 NM\_198565.1  
120.3 NM\_153353.2  
115.9 NM\_152715.2  
125.4 NM\_018296.4  
115.4 NM\_001006607.2  
    406 NM\_052888.2  
120.1 NM\_144620.1

110.8 NM\_052953.2  
111.3 NM\_022143.3  
123 NM\_017768.3  
136.6 NM\_006369.4  
425.6 NM\_052940.3  
109.4 NM\_152759.3  
115.7 NM\_144999.2  
109.4 NM\_144999.2  
119.8 NM\_033413.2  
143.9 NM\_020710.1  
108.1 NM\_031294.2  
119.4 NM\_031294.2  
116.5 NM\_017691.2  
124.2 NM\_001080457.1  
117.7 NM\_020929.1  
122 NM\_178452.3  
121.7 NM\_145309.1  
118.8 NM\_001005214.1  
113.1 NM\_015516.3  
115.3 NM\_001005210.1  
107.7 NM\_198075.1  
122.8 NM\_153260.1  
121 NM\_018509.2  
122.3 NM\_012472.3  
118.5 NM\_023942.1  
113.8 NM\_020794.1  
203.9 NM\_019594.2  
113.4 NM\_015350.1  
151.8 NM\_032270.2  
136.3 NM\_018103.3  
121 NM\_025061.3  
118.7 NM\_033402.2  
120.6 NM\_033402.2  
113.3 NM\_033402.2  
1159.4 NM\_004735.2  
99.2 NM\_006309.1  
275.2 NM\_017724.1  
220 NM\_006309.1  
105.3 NM\_032165.2  
103.2 NM\_024548.2  
126.7 NM\_024652.2  
116.8 NM\_198578.2  
126.1 XM\_930820.1  
111.7 NM\_020873.3  
192.6 NM\_018334.3  
106.9 NM\_006338.2  
120.6 NM\_006338.2  
124.3 NM\_201630.1  
112.9 NM\_032808.5  
119.5 NM\_152570.1  
111.4 NM\_178839.4

113.6 NM\_015564.1  
113.6 NM\_178011.3  
128.5 NM\_024993.3  
112.8 NM\_138361.3  
209.5 NM\_001005374.1  
120.2 NM\_001005373.1  
    125 NM\_020678.2  
126.9 NM\_001039029.1  
125.3 NM\_002338.2  
208.8 NM\_001013706.2  
138.7 NM\_018385.1  
1180.9 NM\_014462.1  
176.8 NM\_032881.1  
117.5 NM\_173491.1  
133.7 NM\_152344.1  
599.3 NM\_015578.1  
124.8 NM\_144703.1  
136.8 NM\_025083.2  
544.8 NM\_021177.3  
505.7 NM\_014463.1  
179.9 NM\_012321.2  
151.1 NM\_012322.1  
121.7 NM\_007080.1  
276.3 NM\_016199.1  
    115 NM\_016200.2  
126.5 NM\_032356.3  
121.9 NM\_001013255.1  
110.2 NM\_001013253.1  
117.4 NM\_001013253.1  
    114 NM\_001013254.1  
126.7 NM\_205835.2  
115.9 NM\_205834.2  
148.1 NM\_015925.5  
124.9 NM\_001001438.1  
109.8 NM\_001001438.1  
139.1 NM\_002340.3  
144.2 NM\_007161.2  
117.5 NM\_205837.1  
125.4 NM\_205837.1  
134.2 NM\_205840.1  
113.8 NM\_001009562.4  
344.6 NM\_000595.2  
407.9 NM\_000895.1  
1067.9 NM\_002341.1  
320.8 NM\_002341.1  
278.8 NM\_012212.2  
107.6 NM\_181657.1  
114.6 NM\_019839.1  
119.2 NM\_000627.2  
114.8 NM\_206943.1  
111.1 NM\_021070.2



112.8 XM\_938706.1  
192.6 NM\_021070.2  
114.7 NM\_003573.2  
    148 NM\_003573.1  
181.5 NM\_002342.1  
127.2 NM\_145867.1  
115.8 NM\_002343.2  
121.3 NM\_002344.3  
107.6 NM\_206961.1  
146.5 NM\_032860.3  
128.9 NM\_018032.3  
    216 NM\_018032.3  
149.4 NM\_016019.1  
111.9 NM\_002345.3  
665.3 NM\_033631.2  
115.4 NM\_001009909.2  
118.7 NM\_016383.2  
163.5 NM\_020169.2  
107.8 NM\_003695.2  
164.8 NM\_002346.1  
126.5 NM\_021221.2  
    222 NM\_025262.2  
122.6 NM\_001002848.1  
119.8 NM\_001002849.1  
123.1 NM\_025261.1  
127.8 NM\_021246.2  
121.7 NM\_002347.2  
125.9 XM\_937329.1  
114.4 NM\_017527.2  
119.6 NM\_002349.1  
133.3 NM\_004271.3  
170.4 NM\_001033667.1  
    187 NM\_002348.2  
108.2 NM\_001033667.1  
1086.4 NM\_015364.2  
436.1 NM\_017816.1  
119.1 NM\_182551.3  
    131 NM\_001002257.1  
114.6 NM\_175735.3  
    119 NM\_153335.4  
175.9 NM\_001003786.1  
128.9 NM\_001003787.1  
149.1 NM\_005583.3  
698.5 NM\_002350.1  
111.2 NM\_177476.1  
113.5 NM\_177458.1  
118.5 NM\_177477.1  
111.7 NM\_144586.3  
118.3 NM\_001077427.2  
    120 NM\_205545.1  
132.7 NM\_014400.1

107.9 NM\_173506.3  
108.3 NM\_182573.1  
121.3 NM\_001031749.1  
113.4 NM\_001031749.1  
123.7 NM\_006330.2  
136.5 NM\_007260.2  
123.9 NR\_001444.3  
135.9 NM\_012320.3  
180.2 NM\_138794.1  
121 NM\_212551.2  
252.8 NM\_153374.1  
126.4 XM\_938559.1  
110.7 NM\_198273.1  
178.6 NM\_152449.2  
145.1 NM\_000081.2  
117.2 NM\_001005736.1  
118.6 NM\_001005736.1  
167.3 NM\_000239.1  
117.4 NM\_032517.4  
120.1 NM\_183058.2  
110.8 NM\_144634.2  
126.1 NM\_020426.1  
125.6 NM\_032368.3  
160.7 NM\_020347.2  
336.4 NM\_006767.2  
114.7 NM\_033127.1  
112.5 NM\_021020.1  
126.8 NM\_032429.1  
113.5 NM\_174941.3  
332.5 NM\_002355.2  
438.7 NM\_005817.3  
115.3 NM\_005584.2  
116.8 NM\_006439.3  
119.3 NM\_006439.3  
130.4 NM\_012090.3  
119.2 NM\_033044.2  
243.5 NM\_012090.3  
139.1 NM\_001013836.1  
114.1 NM\_002358.2  
125.4 NM\_001003690.1  
179.9 NM\_014628.2  
249.5 NM\_014628.2  
267.1 NM\_006341.2  
114.4 NM\_130760.1  
117 NM\_130760.1  
110.3 NM\_130470.1  
175.5 NM\_130473.1  
174.7 NM\_130471.1  
226.3 NM\_005882.3  
138.3 NM\_001017405.1  
119.1 NM\_032858.1

122.5 NM\_001031804.1  
247.4 NM\_005360.3  
129 NM\_032272.3  
115.8 NM\_201589.2  
476.4 NM\_005461.3  
122.8 NM\_152878.1  
147.6 NM\_012323.2  
202 NM\_012323.2  
451.3 NM\_002359.2  
130.2 NM\_032711.2  
131.5 NM\_002360.2  
115.3 NM\_002361.2  
118.2 NM\_080600.1  
121.6 NM\_004988.3  
119.8 NM\_001011543.1  
111.7 NM\_001011543.1  
124.8 NM\_005366.4  
104.6 NM\_005366.4  
122.5 NM\_001011544.1  
120.4 NM\_005366.4  
112.9 NM\_005367.4  
115.9 NM\_005361.2  
114.6 NM\_175743.1  
123.6 NM\_153488.3  
110.9 NM\_005362.3  
117.7 NM\_002362.4  
111.5 NM\_021049.3  
125.5 NM\_175868.1  
108.2 NM\_005364.3  
111.3 NM\_002363.3  
105.5 NM\_002363.3  
112.5 NM\_182506.2  
108.3 NM\_173699.1  
113.5 NM\_002364.3  
126 NM\_002365.3  
116.7 NM\_002367.2  
116.4 NM\_173523.2  
124.9 NM\_005462.3  
116 NM\_005462.3  
109.5 NM\_016249.2  
105.7 NM\_177456.2  
113.9 NM\_177456.2  
112.9 NM\_138702.1  
206.4 NM\_001005333.1  
152.6 NM\_006986.3  
120.7 NM\_001005332.1  
121.3 NM\_001005333.1  
135.1 NM\_014599.4  
115.7 NM\_177433.1  
139.4 NM\_201222.1  
149.6 NM\_201222.1

158.5 NM\_030801.2  
155.6 NM\_020932.1  
120.3 NM\_138703.3  
114.4 NM\_022149.4  
131.1 NM\_014061.3  
104 NM\_001033057.1  
116.6 NM\_015520.1  
124.9 NM\_004742.2  
112.3 NM\_012301.3  
128.5 NM\_020965.2  
117.9 NM\_020965.2  
170.1 NM\_016069.8  
230.8 NM\_002370.2  
106.5 NM\_005906.3  
111.9 NM\_024635.2  
359.8 NM\_022440.1  
192.8 NM\_002371.2  
119.1 NM\_052886.1  
115.9 NR\_002819.1  
115.9 NM\_005434.3  
175.1 NM\_173844.1  
118.7 NM\_006785.2  
118.7 NM\_182830.2  
109.1 NM\_153267.3  
122 NM\_206920.1  
124.3 XM\_937023.1  
137.3 NM\_014757.3  
119.5 NM\_032427.1  
113.4 NM\_018717.3  
139.6 NM\_005907.2  
114.2 NM\_006699.3  
182.2 NM\_016219.2  
140.7 NM\_020379.1  
115.6 NM\_002372.2  
133.3 NM\_006122.2  
157.9 NM\_000528.2  
143.7 NM\_015274.1  
167.7 NM\_006715.2  
151.2 NM\_005908.2  
177.6 NM\_022077.3  
111.1 NM\_022077.3  
131.8 NM\_001003897.1  
115.3 NM\_024641.2  
129.9 NM\_024641.2  
116.4 NM\_152496.1  
113.3 NM\_001031740.1  
110.4 NM\_001031740.1  
121.8 NM\_018050.2  
125.8 NM\_000240.2  
113.6 NM\_000898.3  
143.1 NM\_002373.4

112.6 NM\_032010.1  
140.2 NM\_032010.1  
113.3 NM\_005909.2  
125.4 NM\_199227.1  
108 NM\_181509.1  
123.3 NM\_032514.2  
800.3 NM\_181509.1  
1520.4 NM\_022818.3  
128.9 NM\_001004343.1  
112.6 NM\_002374.3  
118.4 NM\_001039538.1  
115.4 NM\_031845.1  
130.8 NM\_002374.3  
358.4 NM\_002755.2  
684 NM\_021970.2  
117.8 NM\_145109.1  
130.4 NM\_145110.1  
122.3 NM\_002756.2  
126.6 XM\_944206.1  
187.4 NM\_003010.2  
137.4 NM\_002757.2  
121.1 NM\_145160.1  
115.2 NM\_002758.2  
129.5 NM\_145185.2  
117.5 NM\_002446.2  
206.8 NM\_002419.3  
128.4 NM\_006301.2  
110.5 NM\_004721.3  
170.8 NM\_003954.1  
120.6 NM\_001001671.1  
132.7 NM\_006609.2  
112.9 NM\_203351.1  
120 NM\_005922.2  
218.7 NM\_006724.2  
118 NM\_004672.3  
129.2 NM\_145333.1  
403.2 NM\_145331.1  
120.6 NM\_153497.2  
113.4 NM\_006116.2  
116 NM\_153497.2  
131.8 NM\_145342.1  
188.4 NM\_005204.2  
119.3 NM\_033141.2  
137.1 NM\_002375.3  
115.4 NM\_030885.2  
107.9 NM\_030884.2  
266.6 NM\_007181.3  
261.2 NM\_001042600.1  
647.4 NM\_004579.2  
133.7 NM\_003618.2  
117.7 NM\_145686.2

171 NM\_145687.2  
133.1 NM\_006575.3  
151.7 NM\_006575.3  
111.1 NM\_033063.1  
107.2 NM\_207577.1  
117.4 NM\_033063.1  
118.8 NM\_024871.1  
113.4 NM\_003980.3  
118 NM\_152780.2  
139.2 NM\_014017.1  
127.7 NM\_002745.4  
358.1 NM\_138957.2  
221.7 NM\_138957.2  
115.4 NM\_138981.1  
121.1 NM\_138980.1  
118 NM\_138980.1  
115.4 NM\_002753.2  
120.7 NM\_138980.1  
114.4 NM\_002751.5  
116.8 NM\_138993.2  
118.4 NM\_002969.3  
133.9 NM\_002754.3  
124.7 NM\_139013.1  
118.1 NM\_139013.1  
109.7 NM\_001315.1  
120.4 NM\_139021.1  
196.3 NM\_002746.1  
152.1 NM\_001040056.1  
114.6 NM\_002747.3  
469.4 NM\_002748.2  
116.7 NM\_139032.1  
151.8 NM\_139034.1  
124.1 NM\_002749.2  
114.8 NM\_002750.2  
115.4 NM\_139049.1  
116.3 NM\_005456.2  
124.2 NM\_012324.3  
116.2 NM\_012324.3  
117.2 NM\_016431.2  
120.7 NM\_012324.2  
125.1 NM\_001040439.1  
654.8 NM\_033392.3  
163.7 NM\_002752.3  
136.3 NM\_001006618.1  
145.5 NM\_001006618.1  
116.9 NM\_004759.3  
148.5 NM\_032960.2  
198.7 NM\_004635.3  
153.3 NM\_139078.1  
122.4 NM\_014994.1  
2255.9 NM\_012325.1

570.2 NM\_014268.1  
144.8 NM\_012326.2  
123.5 NM\_016835.2  
117.7 NM\_016841.2  
118.9 NM\_016834.1  
123 NM\_017923.2  
128.3 NM\_001005415.1  
116.4 NM\_001005415.1  
113.3 XM\_940510.1  
118.5 NM\_016496.4  
137.3 NM\_178450.2  
206.7 NM\_178450.2  
213.4 XM\_938009.1  
116.4 NM\_020814.1  
130.6 NM\_017824.4  
283 NM\_005885.2  
1031.6 NM\_022826.2  
108.8 NM\_001002265.1  
136.7 NM\_145021.4  
111.9 NM\_001002266.1  
108.3 NM\_138396.4  
159.6 NM\_002356.4  
751.5 NM\_023009.4  
116.7 NM\_006770.3  
118.6 NM\_018650.2  
126.6 NM\_004954.2  
122.7 NM\_017490.1  
145.1 NM\_004954.3  
150.6 NM\_002376.4  
156.7 NM\_031417.2  
368.3 NM\_004990.2  
123.2 NM\_138395.2  
136.5 NM\_144724.1  
118 NM\_001038603.1  
109.1 NM\_001038603.1  
120.9 NM\_001017967.2  
107.8 NM\_052858.3  
113.4 NM\_052858.3  
117.5 NM\_002377.2  
116.2 NM\_052967.1  
224.5 NM\_021204.1  
465 NM\_016542.2  
141.9 NM\_020690.4  
113.6 NM\_001031849.1  
117.6 NM\_139125.2  
120.5 NM\_001879.4  
126.2 NM\_001031849.1  
116.3 NM\_139208.1  
111.7 NM\_006610.2  
120.2 NM\_139208.1  
111.8 NM\_032119.1

116.5 NM\_014975.1  
125 NM\_015112.1  
144.1 NM\_032844.1  
119.3 NM\_000429.2  
6426.6 NM\_005911.4  
1090.2 NM\_013283.3  
126 NM\_013283.3  
114.3 NM\_182796.1  
130.6 NM\_002378.2  
192.7 NM\_139354.2  
129.7 NM\_139355.1  
118.5 NM\_002379.2  
105.8 NM\_002380.3  
118.4 NM\_030583.2  
123.7 NM\_002381.3  
107.3 NM\_030590.1  
110.9 NM\_003833.2  
119.8 NM\_030592.1  
119.9 NM\_199189.1  
127 NM\_018834.4  
591.6 NM\_018834.4  
179.1 NM\_199189.1  
120.5 NM\_022129.3  
126.1 NM\_001033083.1  
113.6 NM\_001033083.1  
170.2 NM\_145114.1  
150.9 NM\_002382.3  
135.6 NM\_197957.2  
145.9 NM\_145113.1  
116.2 NM\_145116.1  
136.9 NM\_002383.1  
115.3 NM\_001042539.1  
124.2 NM\_001042539.1  
128.9 NM\_005368.2  
110.5 NM\_203377.1  
124.1 NM\_005368.2  
125.7 NM\_203378.1  
182 NM\_015844.1  
207.7 NM\_015845.2  
108.6 NM\_003927.3  
120.9 NM\_015832.3  
116.9 NM\_015832.3  
180.3 NM\_003926.5  
123.1 NM\_145208.1  
126.2 NM\_144614.2  
1757.4 NM\_003925.1  
123.2 NM\_018328.3  
384.7 NM\_052897.3  
152.6 NM\_016586.1  
109.9 NM\_000242.1  
213.9 NM\_207295.1



404.5 NM\_207293.1  
110.5 NM\_207293.1  
104.2 NM\_144778.2  
235.5 NM\_207304.1  
162.6 NM\_144778.2  
118.3 NM\_133486.1  
112.5 NM\_018388.2  
128.4 NM\_001080480.1  
158.5 NM\_138799.2  
357.8 NM\_001025090.1  
985.5 NM\_001025100.1  
293 NM\_001025101.1  
123.6 NM\_017643.1  
178.6 NM\_201268.1  
114.3 NM\_003791.2  
115.3 NM\_015884.1  
566.7 NM\_002386.2  
127.7 NM\_000529.2  
106.1 NM\_019888.2  
117 NM\_005912.1  
110.2 NM\_005913.1  
119.6 NM\_006500.2  
120.3 NM\_033412.2  
110.7 NM\_001034172.1  
115.9 NM\_001012755.1  
125.7 NM\_002387.1  
162.7 NM\_020166.2  
115.7 NM\_022132.3  
122.1 NM\_001011700.1  
147.3 NM\_032601.2  
150.7 NM\_174918.1  
117.6 NM\_005369.2  
111.6 NM\_024979.2  
120.2 NM\_015078.2  
127.8 NM\_139279.3  
118.8 NM\_032503.1  
145.4 NM\_032503.1  
550.7 NM\_021960.3  
218.8 NM\_021960.3  
110.9 NM\_018518.3  
135.1 NM\_018518.3  
131.9 NM\_004526.2  
352.8 NM\_002388.3  
317.9 NM\_003906.3  
122.4 NR\_002776.1  
129.4 NM\_182746.1  
158.3 NM\_005914.2  
257 NM\_006739.2  
179.4 NM\_005915.4  
118.1 NM\_005916.3  
814.9 NM\_182776.1

112.2 NM\_182776.1  
130.1 NM\_032485.4  
125 NM\_182802.1  
1573.3 NM\_032485.4  
129.8 NM\_153255.2  
310.8 NM\_020533.1  
145.8 NM\_153259.2  
122.6 NM\_018298.9  
140.9 NM\_024596.1  
281.8 NM\_006337.3  
125.9 NM\_006337.3  
115.7 NM\_024717.3  
115.8 NM\_001002796.1  
122.5 NM\_001002796.1  
119.5 NM\_018349.2  
140.3 NM\_014060.1  
113.7 NM\_139172.1  
230.2 NM\_014641.1  
141.9 NM\_005586.2  
141.2 NM\_199072.2  
119.3 NM\_153487.2  
506.8 NM\_005917.2  
109 NM\_206892.1  
595.6 NM\_005918.2  
115.3 NM\_001012334.1  
114.8 NM\_001012334.1  
130.3 NM\_001012334.1  
125.1 NM\_002391.3  
129.1 NM\_001012333.1  
118.2 NM\_020128.1  
123.3 NM\_020128.1  
116 NM\_017440.2  
112.3 NM\_002392.2  
115.8 NM\_006879.2  
115.7 NM\_002393.1  
123.4 NM\_014611.1  
118 NM\_138476.2  
199.7 NM\_018463.2  
127.7 NM\_018467.2  
135.3 NM\_004991.1  
299.3 NM\_002395.2  
229 NM\_002396.3  
111.3 NM\_001014811.1  
119.2 NM\_006680.2  
118.2 NM\_006680.2  
153.4 NM\_014623.2  
141.4 NM\_004992.2  
107.6 NM\_001024732.1  
123.3 NM\_016011.2  
152.5 NM\_005120.1  
119.2 NM\_053002.2

115.8 NM\_017638.1  
310.8 NM\_153450.1  
129.9 NM\_030973.2  
272.9 NM\_025205.3  
115.4 NM\_016060.1  
251.6 NM\_014166.2  
1104.2 NM\_005466.2  
144.7 NM\_001001651.1  
161.4 NM\_001001653.1  
134.6 NM\_201542.2  
123.1 NM\_018019.2  
150.4 NM\_005587.1  
115.9 NM\_005919.1  
116.5 NM\_002397.2  
1753 NM\_005920.2  
112.7 NM\_000243.1  
124.8 NR\_002766.1  
111.6 XR\_000943.1  
109.2 NM\_032446.1  
118.6 NM\_032445.1  
117.2 NM\_001410.1  
126.5 NM\_001080497.1  
126.7 NM\_152513.3  
113.7 NM\_001080836.1  
128.8 NM\_020149.2  
115.4 NM\_170677.2  
113.3 NM\_172316.1  
116.4 NM\_002399.2  
121.5 NM\_001009813.1  
119.8 NR\_002211.1  
110.3 NM\_014791.2  
113.2 NM\_130803.1  
117.4 NM\_130803.1  
129.6 NM\_130802.1  
129.5 NM\_130799.1  
120.8 NM\_004527.2  
114.8 NM\_004527.2  
118.8 NM\_001040002.1  
115.6 NM\_005924.3  
143.3 NM\_005588.1  
126 NM\_005925.1  
113.6 NM\_020203.1  
119.2 NM\_006343.2  
123.1 NM\_022566.1  
103.7 NM\_015154.1  
116.9 NM\_018670.1  
119 NM\_002402.2  
112 NM\_177524.1  
119.3 NM\_177525.1  
117.3 NM\_000245.2  
263.3 NM\_015143.1

1088.4 NM\_006838.2  
124.6 NM\_024042.2  
162.8 XM\_941466.1  
119.8 NM\_001004431.1  
118 NM\_001004431.1  
128.5 NM\_024086.2  
119.4 NM\_001029991.1  
140.6 NM\_001029991.1  
122.5 NM\_152636.1  
124 NM\_005371.3  
128.2 NM\_005371.3  
132.1 NM\_181725.2  
122 NM\_001005372.1  
125.9 NM\_018396.1  
203.1 NM\_019852.2  
205.2 NM\_022840.2  
179.9 NM\_014168.1  
118.5 NM\_152396.1  
133.9 NM\_014033.2  
113.9 NM\_152637.1  
114.3 NM\_001077180.1  
282.2 NM\_005926.2  
115.5 NM\_017459.1  
120.2 NM\_002403.2  
118.7 NM\_017459.1  
182.6 NM\_005927.3  
122.1 NM\_021647.5  
116.2 NM\_021647.5  
109.6 NM\_001009554.1  
118.3 NM\_002404.1  
115.5 NM\_003480.2  
234.3 NM\_005928.1  
135.8 NM\_004225.1  
121.6 NM\_033316.2  
119.9 NM\_033316.2  
112 NM\_005929.3  
115 NM\_033540.2  
122.8 NM\_017927.2  
196.6 NM\_014874.2  
265.6 NM\_002405.2  
114.7 NM\_031433.1  
516.7 NM\_022736.1  
121.9 NM\_032793.2  
125.1 NM\_138431.1  
117.6 NM\_181644.2  
151.4 NM\_032889.2  
119.7 NM\_032219.2  
149.7 NM\_152778.1  
133.9 NM\_001080541.1  
137.3 NM\_004668.1  
133 NM\_004668.1

585.9 NM\_002406.2  
339 NM\_002408.3  
116.6 NM\_002408.3  
113.9 NM\_002409.3  
341.6 NM\_012214.1  
128.2 NM\_014275.2  
111 NM\_054013.1  
149.2 NM\_054013.1  
117.4 NM\_013244.2  
121.9 NM\_002410.2  
126.8 NM\_144677.2  
112.5 NM\_198955.1  
137.1 NM\_001029885.1  
332.6 NM\_024321.3  
1073.9 NM\_030818.2  
127.9 NM\_032302.2  
213.9 NM\_033212.2  
141.2 NM\_030577.1  
799.2 NR\_001565.1  
130.8 NM\_032325.2  
154 NM\_032350.3  
117.2 NM\_024323.3  
119.1 NM\_032718.2  
142.3 NM\_030819.2  
112.3 NM\_001031618.1  
117.5 NM\_198519.1  
120.9 NM\_001037163.1  
187.1 XM\_935791.1  
164.8 NM\_032357.2  
8127.8 NM\_080656.1  
114.1 NM\_152288.1  
119.4 NM\_153217.1  
113.7 NM\_001042519.1  
118.7 NM\_032321.1  
143.4 NM\_032346.1  
127.5 NM\_032366.2  
122 NM\_001040161.1  
140.5 NM\_032725.2  
124.8 NM\_033410.2  
120.5 NM\_199249.1  
135 NM\_199249.1  
157.7 NM\_016499.2  
118.9 NM\_032928.2  
218.3 NM\_053045.1  
2314.9 NM\_001001870.1  
117.9 NM\_138418.2  
161.4 NM\_145056.1  
129.7 NM\_001037984.1  
115.3 NM\_001037984.1  
138.3 NM\_138570.1  
137.3 NM\_032369.1

125 NM\_032369.1  
138.1 NM\_138381.1  
174 NM\_032921.1  
121.7 NM\_153373.1  
172.5 NM\_032886.1  
129.4 NM\_052873.1  
129.7 NM\_033115.2  
122.2 NM\_032372.3  
107.6 NM\_032770.3  
113.4 NM\_145038.1  
8857 NM\_145042.2  
119.4 NM\_020314.3  
119.6 NM\_080663.1  
348.6 NM\_052880.3  
123.8 NM\_206967.1  
109.9 NM\_174926.1  
275.7 NM\_144675.1  
127 XM\_927732.1  
161 NM\_001031734.1  
129.8 NM\_144975.2  
210.4 NM\_052848.1  
117.5 NM\_145053.3  
119.2 NM\_145045.3  
119.4 NM\_138492.4  
117.5 NM\_052861.2  
136.2 NM\_182563.2  
104.3 NM\_153238.1  
169 NM\_145030.1  
137 NM\_144683.2  
160.8 NM\_174909.1  
114.5 NM\_206966.1  
119.7 NM\_144973.2  
134.1 NM\_032331.2  
122.1 NM\_001001410.2  
140.4 NM\_024070.3  
136.4 NM\_152308.1  
115 NM\_023931.2  
122.9 NM\_153359.1  
185.6 NM\_024109.1  
115.6 NM\_152706.2  
109 NM\_001029999.1  
124.9 NM\_144992.4  
113.3 NM\_152613.1  
114.4 NM\_152779.1  
156.2 NM\_152339.2  
113.9 NM\_152621.3  
116.7 NM\_144979.2  
108.4 NM\_001001343.1  
138.8 NM\_024104.2  
150 NM\_024069.2  
151.4 NM\_023939.3

199.3 NM\_024038.2  
120.7 NM\_016459.3  
120.2 NM\_182538.3  
5823.9 NM\_144618.1  
187.2 NM\_024043.2  
628.8 NM\_024031.2  
133.2 NM\_177441.1  
242.9 NM\_001080501.1  
165.5 XM\_495878.2  
124.7 NM\_174923.1  
160.1 NM\_032285.2  
129.3 NM\_032285.2  
133.5 NM\_001031727.1  
    184 NM\_032285.1  
103.1 NM\_024028.2  
124.6 NM\_152773.2  
321.8 NM\_152773.2  
134.3 NM\_153354.2  
113.1 NM\_178525.2  
120.9 XM\_938846.1  
118.3 NM\_182546.1  
130.4 NM\_001004307.1  
113.7 NM\_173680.2  
116.2 NM\_182539.1  
254.9 NM\_153706.2  
114.2 NM\_001029996.1  
123.8 NM\_001001794.1  
106.2 NM\_175885.3  
121.6 NM\_145036.1  
120.2 NM\_152914.1  
113.3 NM\_173519.1  
111.7 NM\_152456.1  
117.9 NM\_173637.1  
113.9 NM\_173556.2  
121.6 NM\_173619.2  
111.5 NM\_203308.1  
118.5 NM\_173586.1  
120.4 NM\_173652.1  
118.4 NM\_152314.1  
115.7 NM\_152770.1  
    118 NM\_152614.1  
130.6 NM\_178552.2  
115.1 NM\_152764.1  
111.8 NM\_152717.1  
117.3 NM\_175922.3  
117.8 NM\_147194.1  
125.6 NM\_203307.2  
115.5 NM\_153220.1  
109.6 NM\_152436.1  
123.8 NM\_152784.2  
119.9 NM\_203306.1

132.9 NM\_152549.1  
117.8 NM\_152394.2  
114.7 NM\_174939.2  
120 NM\_152628.2  
136.8 XM\_936687.1  
124.4 NM\_194324.1  
136.5 NM\_194324.1  
112.7 NM\_182615.1  
115.2 NM\_152738.1  
308.4 NM\_152789.1  
175.6 NM\_152789.1  
136 NM\_152755.1  
117.2 NM\_152755.1  
139.4 NM\_152776.1  
169.3 NM\_030578.2  
131.5 NM\_024308.2  
126.6 NM\_203299.1  
125.4 NM\_203299.1  
112.2 NM\_152774.2  
119.1 NM\_153361.2  
136.7 NM\_152383.2  
179.3 NM\_207362.1  
110.5 NM\_032680.2  
174.7 NM\_031445.2  
115.8 NM\_032315.1  
123.9 NM\_001004344.1  
129.9 NM\_178553.2  
129.2 NM\_152459.2  
116 NM\_153246.2  
138 NM\_133375.2  
117.6 NM\_178838.3  
136.5 NM\_173584.2  
150.1 NM\_032326.2  
126.2 NM\_174952.1  
119.9 NM\_033309.1  
128.4 XM\_939115.1  
3286.3 NM\_052871.3  
209.8 NM\_198542.1  
164.3 NM\_024122.2  
119 NM\_203309.1  
115 NM\_207491.1  
112.8 NM\_178540.3  
109.4 NM\_214461.1  
116.5 NM\_173566.1  
124.4 NM\_173802.2  
107.5 NM\_173806.2  
117.5 NM\_203348.1  
113.2 NM\_198559.1  
107 NM\_178571.2  
117.6 XM\_934229.1  
116.5 NM\_194317.2



157.1 NM\_001008215.1  
125.7 NM\_024033.1  
116.4 NM\_001042693.1  
147.3 NM\_024093.1  
117.9 NM\_001004351.2  
113.7 NM\_001004351.2  
116.6 NM\_199001.1  
119.3 NM\_182523.1  
125.3 NM\_001004354.1  
117.1 NM\_206894.1  
171.7 NM\_145058.1  
136.9 NM\_001001795.1  
    113 NM\_203477.1  
123.2 NM\_203302.2  
117.2 NM\_203481.1  
116.1 NM\_199285.2  
639.9 NM\_001004333.1  
126.9 NM\_199136.1  
121.9 NR\_002822.1  
    108 NM\_001004309.1  
128.9 NM\_001004306.1  
122.2 NM\_001004331.1  
119.7 NM\_001001683.1  
119.6 NM\_152689.2  
170.1 NM\_152705.1  
112.8 NM\_001005209.1  
1588.6 NM\_012215.1  
116.2 NM\_007283.5  
123.9 NM\_001003794.1  
134.1 NM\_007283.5  
132.7 NM\_002412.2  
172.8 NM\_000900.2  
135.2 NM\_015246.1  
103.9 NM\_145764.1  
151.8 NM\_020300.3  
125.9 NM\_145791.1  
273.1 NM\_145792.1  
118.3 NM\_002413.3  
447.6 NM\_004528.2  
132.1 NM\_006533.1  
105.5 NM\_054024.3  
130.9 NM\_198551.2  
140.8 NM\_020774.2  
219.6 NM\_080875.1  
189.5 NM\_080875.1  
141.4 NM\_000247.1  
227.6 NM\_022765.2  
120.9 NM\_014632.2  
123.1 NM\_032867.1  
127.4 NM\_033386.2  
127.6 NM\_182924.1

121.2 NM\_182924.1  
343.7 NM\_005931.2  
114.3 NM\_000381.1  
111.3 NM\_033290.1  
105.4 NM\_000381.1  
189.9 NM\_021242.3  
    120 NM\_052817.1  
    117 NM\_012216.2  
122.5 NM\_052817.1  
583.6 NM\_177401.4  
119.5 NM\_001077702.1  
311.8 NM\_020948.1  
346.1 NM\_002415.1  
120.7 NM\_020679.2  
199.4 NM\_174889.2  
121.9 NM\_153182.1  
116.3 NM\_001042533.1  
111.1 NM\_153827.3  
121.8 NM\_015716.2  
118.4 NM\_004897.2  
112.3 NM\_017584.5  
109.7 NM\_012064.2  
109.1 NM\_005932.1  
119.3 NM\_138731.2  
145.4 NM\_016641.3  
598.7 NM\_024039.1  
    123 NM\_052964.1  
128.1 NM\_198158.1  
112.7 NM\_006722.1  
122.1 NM\_198159.1  
121.1 NM\_031944.1  
120.6 NM\_015517.3  
201.1 NM\_198971.1  
    155 NM\_015517.3  
125.3 NM\_002417.2  
268.4 NM\_032390.3  
111.7 NM\_170784.1  
240.1 NM\_018848.2  
112.7 NM\_018848.2  
    170 NM\_020831.3  
108.6 NM\_014048.3  
422.5 NM\_013255.3  
116.1 NM\_198973.1  
275.8 NM\_003684.3  
876.4 NM\_017572.2  
236.2 NM\_199054.1  
1305.4 NM\_013446.2  
274.4 NM\_014160.3  
117.8 NM\_005664.2  
120.2 NM\_017777.1  
110.4 NM\_005511.1

118.1 NM\_015166.2  
131.2 NM\_015166.2  
121.6 NM\_139202.1  
150.6 NM\_002475.2  
121.1 NM\_182493.1  
125.2 NM\_022443.2  
114.6 NM\_024629.2  
    341 NM\_005439.1  
185.9 NM\_000249.2  
145.1 NM\_001040108.1  
117.6 NM\_014381.1  
148.4 NM\_152649.1  
110.5 NM\_152649.1  
133.1 NM\_005933.2  
150.3 NM\_003482.1  
164.6 NM\_021230.1  
140.1 NM\_170606.2  
125.5 NM\_170606.2  
185.6 NM\_170606.2  
    266 NM\_014727.1  
154.7 NM\_018682.2  
119.3 NM\_182931.2  
437.4 NM\_182931.2  
114.4 NM\_005934.2  
120.6 NM\_004641.2  
139.1 NM\_004641.2  
487.3 NM\_006818.3  
115.2 NM\_004529.1  
247.7 NM\_005937.2  
214.4 NM\_005938.1  
124.3 NM\_002418.2  
    133 NM\_002418.1  
121.8 NM\_001507.1  
    113 NM\_024101.4  
116.7 NM\_018099.3  
172.1 NM\_032228.4  
115.1 NM\_198205.1  
    131 NM\_198204.1  
114.5 NM\_014938.2  
116.5 NM\_032953.2  
136.7 NM\_012213.1  
110.9 NM\_031415.1  
123.5 NM\_172250.1  
125.2 NM\_052845.2  
124.5 NM\_015506.1  
144.1 NM\_012329.2  
109.4 NM\_198403.2  
121.6 NM\_000902.2  
104.3 NM\_007289.1  
117.1 NM\_007288.1  
116.8 NM\_007287.1

114.9 NM\_033467.2  
111.4 NM\_002421.2  
118.1 NM\_002425.1  
116.4 NM\_005940.3  
118.8 NM\_002426.2  
104.8 NM\_002427.2  
118.2 NM\_004995.2  
134.4 NM\_002428.2  
120.2 NM\_022564.1  
121.6 NM\_022564.1  
105.3 NM\_005941.2  
117.7 NM\_016155.3  
122.8 XM\_938761.1  
121.9 NM\_001032360.1  
138.3 NM\_004530.2  
    119 NM\_004771.3  
114.7 NM\_147191.1  
116.4 NR\_002946.1  
131.6 NM\_006983.1  
117.6 NM\_006690.3  
114.7 NM\_022468.4  
131.2 NM\_022718.2  
106.3 NM\_021801.3  
121.3 NM\_022122.2  
120.4 NM\_024302.3  
112.7 NM\_001032278.1  
119.1 NM\_002422.3  
115.8 NM\_002423.3  
112.5 NM\_002424.1  
392.3 NM\_004994.2  
113.1 NM\_007351.2  
136.7 NM\_024756.1  
268.6 NM\_022362.2  
116.5 NM\_002430.2  
157.2 NM\_018835.1  
119.3 NM\_002431.2  
113.8 NM\_032117.2  
123.2 NM\_002432.1  
117.1 NM\_018365.1  
186.8 NM\_020310.2  
599.9 NM\_022151.4  
125.3 NM\_018221.1  
119.3 NM\_173468.2  
238.7 NM\_130807.2  
116.9 NM\_024761.3  
121.1 NM\_201403.1  
249.6 NM\_201403.1  
108.6 NM\_145279.3  
109.2 NM\_006501.1  
117.1 NM\_182935.2  
    128 NM\_182935.2

117.1 NM\_182935.2  
126 NM\_017947.1  
127.9 NM\_001075098.1  
115.6 NM\_138928.1  
115.4 NM\_001075098.1  
112 NM\_004531.3  
132.6 NM\_176806.2  
122.5 NM\_176806.2  
116.1 NM\_014484.3  
116.6 NM\_002433.3  
115.4 NM\_058165.1  
115.4 NM\_025098.2  
119.6 NM\_178176.2  
120.3 NM\_032355.2  
248.5 NM\_014940.2  
185.2 NM\_015026.1  
117.8 NM\_014429.2  
127.1 NM\_014941.1  
174.2 NM\_015358.1  
124.8 NM\_024657.2  
119.9 NM\_006792.2  
747 NM\_006791.2  
107.7 NM\_206839.1  
131.5 NM\_032332.2  
124.1 NM\_024848.1  
118.9 NM\_173855.3  
120.6 NM\_005372.1  
105.5 NM\_022746.2  
126.1 NM\_017898.3  
119 NM\_152581.1  
121 NM\_023948.3  
114.9 NM\_023948.3  
165.9 NM\_020963.1  
118.7 NM\_018995.1  
116.4 NM\_015529.1  
108.7 NM\_001031699.1  
151.7 NM\_004870.2  
108.5 NM\_003829.1  
114.8 NM\_001025190.1  
110.1 NM\_001015054.1  
112.7 NM\_001015052.1  
117.6 NM\_002434.2  
163.2 NM\_016195.2  
109.7 NM\_005791.1  
120.7 NM\_005792.1  
121.6 NM\_002435.1  
117.7 NM\_005373.1  
107.9 NM\_183062.2  
109.7 NM\_032868.2  
120 NM\_000250.1  
219.1 NM\_002436.2

117.5 NM\_005374.3  
117.2 NM\_001932.2  
112.5 NM\_033066.1  
145 NM\_022474.2  
122.5 NM\_016447.2  
123.9 NM\_173496.2  
212.3 NM\_023075.3  
117.8 NM\_001585.2  
106.8 NM\_001584.1  
125.4 NM\_001013440.1  
123.5 NM\_001013436.1  
132.5 NM\_001013436.1  
167.6 NM\_002437.3  
122.7 NM\_000530.3  
112.8 NM\_003953.4  
116.6 NM\_024569.3  
171.8 NM\_001531.1  
114.9 NM\_206898.1  
111.4 NM\_178817.3  
119.9 NM\_012219.2  
114.5 NM\_002438.1  
123.6 NM\_001009567.1  
119.6 NM\_006039.2  
1315.9 NM\_006471.2  
129.3 NM\_005590.3  
128.3 NM\_005590.3  
132.7 NM\_005591.3  
738.7 NM\_033296.1  
751.3 NM\_152301.3  
154.6 NM\_203462.1  
121 NM\_152301.3  
119.1 NM\_198923.2  
126 NM\_001039165.1  
114.7 NM\_145015.2  
117.2 NM\_147199.2  
107.9 NM\_054030.2  
119.4 NM\_054031.2  
115.5 NM\_054032.2  
125 NM\_201274.2  
137.8 NM\_201274.2  
1942.1 NM\_033546.2  
115.3 NM\_024864.3  
107.5 NM\_031939.2  
179.2 NM\_024026.4  
151.6 NM\_020236.2  
135.8 NM\_145255.2  
124.8 NM\_145255.2  
162.5 NM\_016050.2  
122.8 NM\_170739.1  
228.4 NM\_016050.2  
130.6 NM\_002949.2

205.8 NM\_014078.4  
210.5 NM\_032111.2  
127.3 NM\_014175.2  
127.3 NM\_017840.2  
147.1 NM\_022061.2  
2524 NM\_014161.2  
116.3 NM\_014763.2  
128 NM\_015950.3  
143.3 NM\_017971.2  
168.7 NM\_181514.1  
243.2 NM\_181513.1  
233.8 NM\_014180.2  
355.3 NM\_001014990.1  
246.8 NM\_021134.2  
124.2 NM\_024540.2  
162.5 NM\_024540.2  
152.8 NM\_016504.2  
119.6 NM\_148570.1  
134.7 NM\_148571.1  
123.7 NM\_006428.3  
110.3 NM\_007208.2  
126.4 NM\_145212.1  
131.4 NM\_145213.1  
233.9 NM\_031903.1  
315.9 NM\_004891.2  
1329.1 NM\_004891.2  
160.4 NM\_023937.2  
263.4 NM\_145644.1  
140.2 NM\_145644.1  
125.2 NM\_016622.2  
299.1 NM\_032479.2  
271.8 NM\_016491.2  
126.6 NM\_032478.2  
116.7 NM\_080794.2  
216.1 NM\_017446.2  
126.4 NM\_146388.1  
137.4 NM\_146387.1  
124.3 NM\_015956.2  
156.9 NM\_003776.2  
212.6 NM\_032477.1  
119.2 NM\_172177.1  
113.9 NR\_002208.1  
241.8 NM\_032112.2  
117 NM\_176792.1  
139.4 NM\_032112.2  
121.7 NM\_022915.2  
172 NM\_032351.3  
161.2 NM\_032351.3  
166.2 NM\_022163.2  
185.1 NM\_020409.2  
216.5 NM\_177988.1

133 NM\_016055.4  
181.8 NM\_004927.2  
306.3 NM\_019051.1  
454.3 NM\_016497.2  
258.9 NM\_180981.1  
180.5 NM\_181306.1  
167.1 NM\_053050.2  
136.9 NM\_172251.1  
227.6 NM\_181462.1  
130.4 NM\_181464.1  
127 NM\_181463.1  
149.2 NM\_031420.2  
247.9 NM\_018141.2  
252.5 NM\_176805.1  
182.7 NM\_176805.1  
183.2 NM\_033363.1  
115.5 NM\_033362.2  
127.4 NM\_033363.1  
138.9 NM\_021107.1  
118.6 NM\_022100.1  
230.2 NM\_031280.2  
144.6 NM\_016065.3  
174.4 NM\_015969.2  
168.4 NM\_018135.2  
176.1 NM\_014046.2  
113.8 NM\_016067.1  
145.5 NM\_016034.2  
171.4 NM\_031901.3  
183.2 NM\_018997.1  
420.5 NM\_020191.2  
145.5 NM\_016070.2  
200.8 NM\_032014.1  
133.1 NM\_030811.3  
200 NM\_015084.1  
135.9 NM\_014018.2  
343.8 NM\_016640.3  
347.8 NM\_005830.2  
202 NM\_016071.2  
135.5 NM\_016071.2  
129.3 NM\_023936.1  
143.2 NM\_021821.2  
151.5 NM\_033281.5  
175.4 NM\_031902.3  
4448.7 NM\_032476.2  
139.4 NM\_015971.2  
310.8 NM\_182640.1  
194.3 NM\_138777.2  
179 NM\_138777.2  
118 NM\_138777.2  
123.8 NM\_020662.1  
109.8 NM\_130385.1



115.1 NM\_130385.1  
128.7 NM\_021950.3  
115.6 NM\_152866.2  
110.9 NM\_152866.2  
114.8 NM\_206893.1  
114.1 NM\_017716.1  
    122 NM\_001012417.1  
119.3 NM\_000139.2  
118.1 NM\_006138.4  
113.7 NM\_001031666.1  
113.2 NM\_006138.4  
    129 NM\_148975.1  
110.3 NM\_024021.2  
117.2 NM\_148975.1  
110.9 NM\_023945.2  
115.1 NM\_152851.1  
132.4 NM\_152851.1  
120.5 NM\_022349.2  
124.1 NM\_139249.2  
    135 NM\_206938.1  
120.7 NM\_031457.1  
140.9 NM\_005098.2  
124.9 NM\_000251.1  
7907.8 NM\_002439.2  
    114 NM\_002440.2  
127.6 NM\_002441.2  
125.2 NM\_172166.2  
116.7 NM\_002441.2  
115.9 NM\_025259.3  
128.5 XM\_936150.1  
    494 NM\_000179.1  
114.3 NM\_002442.2  
    112 NM\_138962.2  
117.5 NM\_138962.2  
158.6 NM\_170721.1  
119.2 NM\_018133.2  
603.7 NM\_078630.1  
110.5 NM\_006800.2  
217.8 NM\_078630.1  
155.5 NM\_078628.1  
114.7 NM\_013404.3  
118.6 NM\_002443.2  
117.5 NM\_138634.1  
127.2 NM\_002443.2  
3574.9 NM\_002444.2  
108.4 NM\_138716.2  
113.5 NM\_002445.2  
111.1 NM\_138715.1  
    134 NM\_012331.2  
    148 NM\_012228.2  
115.1 NM\_198080.2

113.5 NM\_198080.2  
113.1 NM\_001031679.1  
123.8 NM\_032947.3  
121.5 NM\_002447.1  
286.8 NM\_001042453.1  
116.9 NR\_002729.1  
131.5 NM\_002448.1  
123.2 NM\_002449.3  
114.4 NR\_002307.1  
115.5 NM\_173467.3  
130.1 NM\_173467.3  
217.5 NM\_005946.2  
107.4 NM\_005947.1  
123.4 NM\_175617.3  
153.3 NM\_005949.1  
121.8 NM\_005950.1  
123.1 NM\_005951.2  
120.9 NM\_176870.1  
120.5 NM\_001039954.2  
    206 NM\_005952.2  
158.6 NM\_005953.2  
    112 NM\_005954.2  
110.8 NM\_032935.1  
187.1 NM\_004689.2  
218.9 NM\_004739.2  
116.5 NM\_020744.2  
122.2 NM\_152332.2  
129.1 NM\_002451.3  
121.3 NM\_022045.2  
4049.1 NM\_014341.1  
    128.3 NM\_014342.2  
225.1 NM\_001018025.2  
217.3 NM\_178812.2  
124.9 NM\_175621.2  
    128 NM\_006980.3  
129.2 NM\_015942.3  
126.3 NM\_182501.2  
119.4 NM\_025198.3  
112.7 NM\_025198.3  
327.1 NM\_005955.1  
    233 NM\_007358.1  
110.9 NM\_139242.2  
134.9 NM\_014637.2  
121.7 NM\_138384.1  
111.2 NM\_005956.2  
166.3 NM\_015440.3  
477.7 NM\_006636.2  
110.5 NM\_001040409.1  
1306.4 NM\_001040409.1  
292.2 NM\_001004346.2  
188.8 NM\_005957.2

162.3 NM\_006441.1  
223 NM\_002453.2  
121.1 NM\_001005369.1  
152 NM\_152912.3  
121.4 NM\_001039656.1  
114.6 NM\_004923.2  
122.7 NM\_000252.1  
110.5 NM\_003828.1  
117.6 NM\_181873.1  
122.1 NM\_019061.2  
154.4 NM\_001077525.1  
117.6 NM\_014967.3  
116.3 NM\_016156.3  
120.3 NM\_201281.1  
361 NM\_153050.1  
115.2 NM\_021090.2  
131.3 NM\_153050.1  
174.7 NM\_004687.3  
224.6 NM\_004685.2  
119.3 NM\_004686.2  
120.7 NM\_017677.2  
331.3 NM\_015458.3  
117.5 NM\_005958.3  
112.3 NM\_005959.3  
115.6 NM\_133645.1  
245.5 NM\_012123.2  
133.8 NM\_001003704.1  
120.3 NM\_016498.3  
141.5 NM\_016498.3  
1472.4 NM\_145808.1  
115.6 NM\_000254.1  
146.4 NM\_004294.2  
232.7 NM\_019041.3  
125.5 NM\_024010.1  
126.3 NM\_002454.1  
164.6 NM\_002454.1  
192 NM\_014751.2  
115.8 NM\_000253.1  
104.4 NM\_001001931.1  
122.5 NM\_020749.3  
118.6 NM\_001001924.1  
111.1 NM\_001001927.1  
117.7 NM\_020749.3  
136 NM\_002455.2  
161.8 NM\_002455.2  
145.7 NM\_006554.3  
116.7 NM\_001006635.1  
125.2 NM\_001010891.1  
113.5 NM\_002456.4  
118.4 NM\_001044390.1  
129.1 NM\_001018021.1

114.5 NM\_033049.2  
127.1 NM\_145650.2  
119.4 NM\_024690.2  
116.3 NM\_001004430.1  
139.2 NM\_002457.2  
124.3 NM\_152673.1  
121.4 NM\_018406.3  
119.6 XM\_936261.1  
    106 NM\_018406.3  
130.3 NM\_004532.2  
108.1 NM\_152291.1  
119.9 NM\_017717.3  
109.7 NM\_017717.3  
148.6 NM\_018238.2  
    459 NM\_032853.2  
116.8 NM\_152423.2  
161.4 NM\_025128.3  
130.1 NM\_005592.1  
125.3 NM\_205853.1  
121.8 NM\_000255.1  
146.2 NM\_201280.1  
116.4 NM\_012222.2  
180.2 NM\_012222.1  
114.3 NM\_001048174.1  
132.7 NM\_002461.1  
123.8 NM\_000431.1  
153.9 NM\_017458.2  
278.2 NM\_005115.3  
540.5 NM\_002462.2  
162.1 NM\_002463.1  
1032.8 NM\_002357.2  
125.1 NM\_031300.2  
1027.2 NM\_006454.2  
120.3 NM\_005962.4  
111.3 NM\_001008541.1  
124.1 NM\_001008541.1  
120.3 NM\_130439.3  
119.9 NM\_015419.1  
124.1 NM\_198530.2  
    133 NM\_001008528.1  
125.8 NM\_001008529.1  
105.5 NM\_032348.2  
116.2 NM\_001020821.1  
127.7 NM\_138373.3  
587.2 NM\_001020820.1  
114.4 NM\_207329.1  
    161 NM\_005375.2  
126.3 NM\_014520.1  
121.9 NM\_002466.2  
107.9 NM\_002465.2  
117.1 NM\_206820.1

124.1 NM\_002465.2  
119.2 NM\_206821.1  
119.8 NM\_004533.2  
115.4 NM\_000256.2  
120.6 NM\_004997.2  
    121 NM\_001010985.1  
    230 NM\_002467.3  
    122 NM\_012333.3  
    472 NM\_015057.2  
120.6 NM\_032133.2  
118.3 NM\_005376.3  
123.7 NM\_001033082.1  
120.4 NM\_001033081.1  
113.3 NM\_005378.4  
123.4 NM\_025107.1  
    167 NM\_002468.2  
124.4 NM\_016132.2  
116.9 NM\_138768.2  
109.8 NM\_138336.1  
112.7 NM\_005593.1  
111.8 NM\_002469.1  
125.8 NM\_005963.3  
130.9 NM\_005964.1  
123.9 NM\_001040114.1  
114.1 NM\_002474.1  
115.9 NM\_003802.1  
114.2 NM\_024729.2  
113.9 NM\_001077186.1  
118.2 NR\_002147.2  
119.8 NM\_017534.3  
    196 NM\_002470.1  
126.1 NM\_017533.1  
116.7 NM\_002471.1  
113.2 NM\_000257.1  
122.3 NM\_020884.1  
119.3 NM\_002472.1  
1334.6 NM\_002473.3  
    118.6 NM\_079420.1  
    115.5 NM\_079420.1  
    118.1 NM\_000432.2  
    109.3 NM\_002476.2  
    121.6 NM\_001002841.1  
    146.5 NM\_002477.1  
6467.7 NM\_021019.3  
6430.9 NM\_021019.2  
    122.4 NM\_021223.2  
    118.7 NM\_006097.3  
    126.6 NM\_006097.3  
    117.7 NM\_138403.3  
1119.9 NM\_013262.3  
    109.9 NM\_053026.3

114 NM\_005965.3  
108.7 NM\_033118.2  
114.4 NM\_013292.2  
112.4 NM\_018657.3  
118.1 NM\_012334.1  
119 NM\_016239.2  
131.2 NM\_203318.1  
117.3 NM\_078471.3  
114.8 NM\_032608.5  
125.5 NM\_005379.2  
113 NM\_012223.2  
139.8 NM\_001080779.1  
103.8 NM\_001080779.1  
155.7 NM\_033375.3  
127.6 NM\_015194.1  
117.5 NM\_004998.2  
193 NM\_012335.2  
156 NM\_033054.1  
106.8 NM\_017433.3  
271.5 NM\_138995.1  
180.7 NM\_000259.1  
113.9 NM\_001080467.1  
122.8 NM\_018728.1  
113.7 NM\_004999.2  
119.9 NM\_000260.1  
116.1 NM\_001080527.1  
198.4 NM\_006901.1  
250.3 NM\_004145.2  
117.1 NM\_000261.1  
120.7 NM\_153604.1  
108.9 NM\_002478.3  
118 NM\_002479.3  
110.8 NM\_001033580.1  
115.6 NM\_001033579.1  
126.2 NM\_001033580.1  
135.6 NM\_003803.2  
487.1 NM\_003970.1  
117.8 NM\_152372.2  
113.2 NM\_006790.1  
111.5 NM\_021245.2  
119.3 NM\_016599.2  
118.6 NM\_133371.2  
120.6 NM\_032578.1  
112.3 NM\_015011.1  
120.8 NM\_015460.2  
151.1 NM\_032188.1  
134.8 NM\_007067.3  
577.2 NM\_006766.2  
141.7 NM\_012330.1  
105.1 NM\_004535.2  
110.3 NM\_015025.2

161.2 NM\_153029.3  
410 NM\_018177.2  
110.8 NM\_015111.1  
122.8 NM\_182749.2  
132.6 NM\_005467.2  
119.8 NM\_005468.2  
111.7 NM\_207015.1  
121.1 NM\_005966.3  
118.8 NM\_005967.2  
2942.8 NM\_005594.2  
106.5 NM\_199290.2  
182.2 NR\_002182.1  
159.4 NM\_018161.4  
132.6 NM\_015909.2  
5895.1 NR\_002568.1  
141.4 NM\_022742.2  
150.1 NM\_014411.2  
114 NM\_000262.1  
278.3 NM\_017567.2  
126.5 NM\_000263.3  
164.4 NM\_016256.2  
114.9 NM\_153006.2  
127.1 NM\_004536.2  
117.6 NM\_004536.2  
130.7 NM\_001033053.1  
110.7 NM\_176821.2  
116.1 NM\_145007.1  
122.2 NM\_033297.1  
119.3 NM\_033297.1  
128.5 NM\_144687.1  
108.3 NM\_176810.1  
115.5 NM\_176822.2  
124 NM\_017852.1  
115.8 NM\_134444.3  
111.6 NM\_153447.2  
119.3 NM\_138329.1  
116.6 NM\_206828.2  
124.8 NM\_206828.2  
112 NM\_139176.2  
111.5 NM\_176820.2  
112.7 NM\_024865.1  
147.7 NM\_001009553.1  
116.5 NM\_199461.2  
104.8 NM\_199461.2  
114.9 NM\_001029861.1  
99.7 NM\_152667.1  
132.3 NM\_018946.2  
181.5 NM\_139207.1  
118.9 NM\_139207.1  
115.8 NM\_021963.2  
112 NM\_004538.3

1728.9 NM\_005969.3  
146.5 NM\_153757.1  
106.5 NM\_207363.2  
118.9 NM\_207363.2  
105.5 XM\_929894.1  
141.5 NM\_003827.2  
232.6 NM\_022080.1  
121.9 NM\_198990.3  
137.8 NM\_003826.1  
225.7 NM\_145201.3  
128 NM\_004851.1  
137.4 NR\_002798.1  
238.2 NM\_001038618.1  
142.2 NM\_022493.1  
128.4 NM\_057175.3  
235.9 NM\_024561.3  
198.3 NM\_018527.2  
116.8 NM\_018527.2  
122.5 NM\_001018089.1  
138.3 NM\_024611.4  
117.4 NM\_001018089.1  
784 NM\_004539.2  
124.4 NM\_024678.3  
148.5 NM\_172164.1  
186.8 NM\_002482.2  
114.9 NM\_000662.4  
132 XM\_938769.1  
258.6 NM\_024662.1  
117.6 NM\_024771.1  
147.2 NM\_001011713.1  
191 NM\_025146.1  
109.8 NM\_000015.1  
531.6 NM\_181528.1  
124.3 NM\_181527.1  
256 NM\_181528.2  
121.1 NM\_012191.2  
118.8 NM\_003960.2  
284.9 NM\_015654.3  
115.6 NM\_020443.2  
117.3 NM\_182964.4  
108 NM\_145117.3  
134 NM\_014903.3  
111.5 NM\_015678.3  
110.5 NM\_198945.1  
171.6 NM\_182744.1  
125.3 NM\_005380.4  
122.2 NM\_173622.2  
117.1 NM\_001024688.1  
114.5 NM\_001024688.1  
126.2 NM\_017940.2  
121.2 NM\_017940.2



3449.2 NM\_001039703.1  
351.5 NM\_183372.3  
160.3 NM\_015383.1  
106.6 NM\_173638.2  
5017.8 NM\_001037675.1  
167.9 NM\_032264.2  
111.4 NM\_032264.2  
118.7 NM\_001047980.1  
121 XM\_934022.1  
113.6 NM\_005899.2  
109.5 NM\_031858.1  
115.9 NM\_005821.3  
155.5 NM\_032041.1  
131.2 NM\_001040626.1  
109.3 NM\_032041.1  
127.9 NM\_001076682.2  
108.1 NM\_000615.1  
130.6 NM\_181351.1  
117.6 NM\_004540.2  
135.7 NM\_017760.5  
141.2 NM\_002486.3  
168.9 NM\_007362.2  
120.2 NM\_007362.2  
142 NM\_007362.2  
139.6 NM\_001014839.1  
128 NM\_014284.2  
120.8 NM\_001014839.1  
243.1 NM\_000265.1  
123.7 NR\_003186.1  
164.5 NR\_003187.1  
161.4 NM\_000433.2  
127.4 NM\_013416.2  
115.1 NM\_013416.2  
162.5 NM\_000631.3  
254 NM\_006153.3  
130 NM\_003581.2  
119.9 NM\_205842.1  
119.3 NM\_013436.3  
132.1 NM\_016453.2  
112.9 NM\_184231.1  
479.4 NM\_005381.2  
335.9 NM\_147223.2  
133.8 NM\_147223.2  
128.4 NM\_147233.2  
110.2 NM\_006540.2  
128.3 NM\_181659.1  
622.9 NM\_006534.2  
2900.4 NM\_005437.1  
211.6 NM\_020967.2  
477.8 NM\_014071.2  
152.1 NM\_024831.5

1189.9 NM\_181782.2  
143.5 NM\_006311.2  
165.9 NM\_006312.2  
394.7 NM\_006312.3  
114.3 NM\_006312.3  
113.9 NM\_004829.3  
115.6 NM\_004828.2  
121.9 NM\_147130.1  
361.1 NM\_015331.2  
260.2 NM\_017668.1  
984.2 NM\_030808.3  
156.7 NM\_030808.3  
158.7 NM\_030571.2  
251.1 NM\_019080.1  
119.2 NM\_002487.2  
131.3 NM\_138704.2  
121.8 NM\_014434.1  
115.6 NM\_000266.1  
286.3 NM\_006096.2  
146.2 NM\_201535.1  
129.7 NM\_201539.1  
151.4 NM\_022477.2  
121.8 NM\_022477.2  
128.9 NM\_020465.2  
119.2 NM\_020465.2  
120.9 NM\_022910.1  
136.5 NM\_001543.3  
226.2 NM\_003635.2  
116 NM\_004784.1  
111.9 NM\_022569.1  
4299.4 NM\_004541.2  
137.5 NM\_004544.2  
255.8 NM\_175614.2  
583.3 NM\_018838.3  
385.7 NM\_015965.3  
309.3 NM\_004542.1  
1409.1 NM\_002489.2  
116 NM\_005000.2  
131.8 NM\_005001.1  
248.5 NM\_014222.2  
195.9 NM\_005002.3  
391 NM\_005003.2  
150.3 NM\_016013.2  
128.7 NM\_004545.3  
170 NM\_004548.1  
705.6 NM\_019056.2  
756.5 NM\_004546.2  
706.6 NM\_002491.1  
114.6 NM\_004547.4  
975.8 NM\_002492.2  
188.3 NM\_002493.3

206.5 NM\_004146.4  
2073.1 NM\_005004.2  
204.8 NM\_002494.2  
117.7 NM\_004549.3  
131.6 NM\_005006.5  
115.8 NM\_004550.3  
236.2 NM\_004551.1  
202.6 NM\_002495.1  
1085.3 NM\_004552.1  
107.7 NM\_004553.2  
233.8 NM\_024407.3  
378.8 NM\_002496.1  
179.7 NM\_007103.2  
742.3 NM\_021074.1  
120.3 NM\_001001503.1  
113.2 NM\_021075.3  
129.5 NM\_004543.2  
116.6 NM\_006393.1  
112.9 NM\_213569.1  
135.1 NM\_213569.1  
361.9 NM\_015509.2  
472.2 NM\_018090.3  
119.6 NM\_152905.2  
132.2 NM\_006154.1  
122.2 NM\_198400.1  
125.8 NM\_198400.1  
116.6 NM\_015277.2  
2030.1 NM\_006156.1  
110.7 NM\_182966.1  
131.1 NM\_006403.2  
147.6 NM\_182966.1  
116.2 NM\_021076.2  
122.5 NM\_006158.1  
165.3 NM\_005382.1  
115 NM\_173808.2  
129.3 NM\_024608.1  
130.9 NM\_145043.1  
115.8 NM\_018248.1  
248.5 NM\_012224.1  
139.7 NM\_001031741.1  
124.6 NM\_152534.2  
131.7 NM\_024800.2  
136.7 NM\_145910.1  
118.5 NM\_002497.2  
116.5 NM\_152720.1  
129.1 NM\_002498.2  
111.7 NM\_002498.2  
121.9 NM\_003157.1  
109.4 NM\_199289.1  
134.4 NM\_014397.3  
114.1 NM\_133494.1

146.4 NM\_178170.2  
111.7 NM\_033116.3  
260.9 NM\_015537.3  
126 NM\_006157.2  
479.7 NM\_006159.1  
382 NM\_013349.3  
151.3 NM\_002499.1  
118.3 NM\_006617.1  
226.7 NM\_005863.2  
135.8 NM\_005863.2  
125.6 NM\_005863.2  
119.1 NM\_138966.2  
105 NM\_153181.2  
114.3 NM\_138999.1  
106.9 NM\_138999.1  
148.8 NM\_018092.3  
494.6 NM\_000434.2  
111.5 NM\_005383.1  
118.9 NM\_006656.4  
109.4 NM\_080741.1  
121.4 NM\_004210.3  
129.1 NM\_080749.2  
118.9 NM\_002500.1  
115.8 NM\_006160.2  
113 NM\_021191.1  
123.8 NM\_022728.2  
115.6 NM\_006161.2  
117.6 NM\_024019.2  
122.5 NM\_020999.2  
125.7 NM\_144573.1  
147.4 NM\_000267.1  
106.9 NM\_181831.1  
119.1 NM\_181828.1  
124.5 NM\_181825.1  
129.8 NM\_145912.4  
112 NM\_001005389.1  
120.1 NM\_138713.2  
134.7 NM\_173215.1  
110 NM\_173215.1  
197.3 NM\_172390.1  
129.8 NM\_172388.1  
118.6 NM\_172387.1  
107 NM\_172390.1  
119.5 NM\_012340.3  
116.4 NM\_173091.2  
126.1 NM\_032815.3  
120.8 NM\_032815.3  
221.2 NM\_173165.1  
118.1 NM\_173164.1  
177.7 NM\_004555.2  
168.9 NM\_173163.1

130.2 NM\_004555.2  
106.9 NM\_004554.3  
125.6 NM\_006163.1  
374.6 NM\_003204.1  
993.2 NM\_006164.2  
121.8 NM\_004289.5  
109.1 NM\_005595.1  
110.4 NM\_005596.1  
112.2 NM\_005597.2  
115.8 NM\_205843.1  
123.9 NM\_005597.2  
137.4 NM\_005384.2  
122.9 NM\_002501.2  
766.7 NM\_003998.2  
211.7 NM\_002502.2  
171.9 NM\_002502.2  
115.4 NM\_001077494.1  
130.4 NM\_002503.3  
136.4 NM\_001001716.1  
143.4 NM\_002503.3  
188.2 NM\_004556.2  
120.7 NM\_005007.2  
121.3 NM\_013432.3  
181.2 NM\_031419.2  
2076.2 NM\_001005474.1  
125.2 NM\_006165.2  
131.4 NM\_021100.3  
344.6 NM\_181679.1  
316.2 NM\_001002755.1  
137.4 NM\_002504.3  
161.7 NM\_147133.1  
144 NM\_147133.1  
268.8 NM\_147134.1  
135.8 NM\_152995.3  
143.6 NM\_021705.2  
122.5 NM\_002505.3  
130.1 NM\_006166.3  
148.1 NM\_014223.2  
122.9 NM\_021257.3  
133.3 NM\_015514.1  
551.2 NM\_001042635.1  
111.9 NM\_019850.1  
130.7 NM\_002506.2  
123.4 NM\_002507.1  
124 NM\_014380.1  
121.5 NM\_014380.1  
137.2 NM\_206917.1  
137.7 NM\_001012978.1  
188.2 NM\_018297.2  
1340.3 NM\_016645.2  
248 NM\_016645.2

120.1 NM\_005598.2  
120.6 NM\_005599.2  
123.4 NM\_198586.2  
144.7 NM\_198514.2  
153.4 NM\_144604.2  
425.3 NM\_005008.2  
629.9 NM\_005008.2  
140.1 NM\_001003796.1  
116.6 NM\_198270.2  
116.6 NM\_031466.3  
131.7 NM\_032316.2  
113.3 NM\_002508.1  
122.8 NM\_007361.2  
219.4 NM\_021824.2  
421.8 NM\_025075.1  
192.5 NM\_032635.2  
175.3 NM\_014301.2  
129.8 NM\_182945.1  
128.3 NM\_016350.3  
112.3 NM\_182944.1  
248.8 NM\_020921.2  
392.6 NM\_004148.2  
144.4 NM\_016533.4  
112.8 NM\_144565.2  
135.6 NM\_024946.1  
288 NM\_016101.3  
144.7 NM\_144599.3  
132.4 NM\_030922.5  
986.3 NM\_030922.5  
109.3 NM\_015384.3  
196.1 NM\_015384.3  
809.5 NM\_133433.2  
117.4 NM\_003634.1  
105.7 NM\_015469.1  
120.7 NM\_018376.2  
617 NM\_007184.2  
125.6 NM\_005600.1  
142.4 NM\_020202.2  
126 NM\_024528.1  
133.6 NM\_033119.3  
118.4 NM\_033120.2  
923.3 NM\_005601.3  
182.7 NM\_020345.3  
113.1 NM\_017595.4  
120.5 NM\_001001349.1  
149.9 NM\_017595.4  
122.2 NM\_198478.2  
176.3 NM\_017544.2  
148.9 NM\_001012651.1  
487.9 NM\_005385.3  
117.2 NM\_002509.2

118.8 NM\_145285.1  
110.9 NM\_004387.2  
116.6 NM\_014360.2  
139.9 NM\_006167.2  
110.7 NM\_006168.1  
109.9 NM\_177400.1  
130.5 NM\_152568.2  
112.4 NM\_018096.3  
126 NM\_001014445.1  
109.7 NM\_207322.1  
114.8 NM\_001007595.1  
129.1 XM\_940314.1  
117.4 NM\_014932.2  
144.6 NM\_020795.2  
119.8 NM\_018977.2  
107.2 NM\_181332.1  
117.9 NM\_020742.2  
109 NM\_014893.2  
123.5 NM\_016231.2  
122.1 NM\_020726.2  
132.6 NM\_033007.3  
121.3 NM\_004895.3  
3883.5 NM\_176811.2  
230.4 NM\_021077.3  
111.3 NM\_002511.1  
147.9 NM\_015938.2  
175.7 NM\_198175.1  
115.1 NM\_198175.1  
123.9 NM\_000269.2  
116.4 NM\_001018136.1  
111.9 NM\_001018137.1  
118.9 NM\_001018138.1  
117.7 NM\_001018139.1  
132.1 NM\_002512.2  
113.9 NR\_001577.1  
179.9 NM\_002513.2  
139 NM\_005009.2  
118 NM\_003551.2  
136.9 NM\_005793.3  
110.4 NM\_197972.1  
155.6 NM\_013330.3  
201.6 NM\_004688.1  
127.3 NM\_022787.2  
119.1 NM\_015039.2  
116.3 NM\_170706.2  
118.1 NM\_015039.2  
120.6 NM\_178177.2  
116.4 NM\_001011717.1  
181.6 NM\_021079.3  
136.6 NM\_004808.2  
109.1 NM\_006681.1

108.1 NM\_006056.2  
117.4 NM\_020167.3  
116.9 NM\_005386.2  
145.5 NM\_005386.2  
151.3 NM\_006169.2  
115.8 NM\_012343.3  
152 NM\_182977.1  
120.9 NM\_012343.3  
117.4 NM\_014062.1  
118.8 XR\_000623.1  
129.9 NM\_001080413.1  
107.6 NM\_015658.1  
125.2 NM\_022451.9  
116.3 NM\_024078.1  
130.9 NM\_024078.1  
118.5 NM\_006092.1  
142.2 NM\_032206.2  
132.5 NM\_178844.1  
126.2 NM\_024618.2  
126.9 NM\_024618.2  
117.7 NM\_018055.3  
119.7 NM\_005450.2  
1258 NM\_006170.2  
127.5 NM\_001033714.1  
129.3 NM\_006170.2  
137.1 NM\_024894.1  
231.3 NM\_015462.2  
205.4 NM\_024313.2  
127.6 NM\_003946.3  
113.6 NM\_003787.1  
628.6 NM\_006392.2  
157.1 NM\_139235.3  
118 NM\_022917.4  
932 NM\_016167.3  
166.5 NM\_017948.4  
116.8 NM\_024654.3  
136.7 NM\_018983.2  
424.5 NM\_032993.2  
149.3 NM\_032993.1  
135.6 NM\_017838.3  
138.2 NM\_001034833.1  
1217.5 NM\_018648.2  
160.9 NM\_004741.1  
116.7 NM\_138400.1  
120.9 NM\_014287.3  
114.1 NM\_001004060.1  
112.1 NM\_001004067.1  
1094.8 NM\_007363.3  
200.5 NM\_015934.3  
111.3 NM\_020962.1  
112.9 NM\_000620.1



115.2 NM\_014697.1  
120 NM\_153292.1  
110.2 NM\_000625.3  
119.1 NM\_000603.3  
913.3 NM\_015953.3  
111.8 NM\_052946.2  
832.6 NM\_017617.2  
125.4 NM\_024408.2  
113.6 NM\_203458.2  
133.8 NM\_000435.1  
116.3 NM\_004557.3  
117.4 NM\_178493.3  
115.7 NM\_002514.2  
117.5 NM\_006491.2  
110 NM\_006491.2  
113.2 NM\_002516.1  
113.3 NM\_007052.3  
126.3 NM\_013955.1  
115.9 NM\_013954.1  
116.6 NM\_015718.1  
116.5 NM\_016931.2  
108.1 NM\_024505.2  
127.1 NM\_006647.1  
134.4 NM\_144603.2  
116.6 NM\_172167.1  
124.7 NM\_144603.2  
837.8 NM\_000270.1  
343.9 NM\_032569.2  
117.6 NM\_207330.1  
114 NM\_024759.1  
180.6 NM\_020448.2  
110.6 NM\_002517.2  
118.5 NM\_002518.3  
109.4 NM\_022123.1  
116.7 NM\_173159.1  
120.2 NM\_173159.1  
107.9 NM\_178864.2  
247.2 NM\_002519.1  
134.5 NM\_148896.2  
116.5 NM\_005285.3  
133.1 NM\_005286.2  
547 NM\_000271.1  
146.3 NM\_013389.1  
3694.4 NM\_006432.3  
118.4 NM\_015392.2  
134.9 NM\_024663.3  
215 NM\_006310.2  
118.1 NM\_003717.1  
115.3 NM\_022146.1  
124.7 NM\_053036.1  
129.3 NM\_004885.1

120.1 NM\_207181.1  
114.2 NM\_000272.2  
121.6 NM\_000272.2  
195.5 NM\_153240.3  
    127 NM\_015102.2  
119.6 NM\_004646.1  
110.6 NM\_014625.1  
276.3 NM\_006985.1  
    352 NM\_030769.1  
336.7 NM\_017921.1  
114.8 NM\_199185.2  
117.2 NM\_182795.1  
146.5 NM\_006993.1  
104.1 NM\_001033047.1  
123.9 NM\_006172.1  
117.1 NM\_002521.1  
    120 NM\_024409.1  
133.1 NM\_000906.2  
    222 NM\_000907.2  
117.7 NM\_000908.2  
1312.4 NM\_017455.2  
117.6 NM\_002522.2  
127.4 NM\_002522.2  
110.2 NM\_002523.1  
118.3 NM\_058178.1  
125.8 NM\_000905.2  
114.7 NM\_000910.2  
114.1 NM\_006174.2  
116.3 NR\_002713.1  
119.1 NM\_000903.2  
    676 NM\_000903.2  
286.4 NM\_000904.1  
110.9 NM\_000475.3  
119.8 NM\_021969.1  
118.1 NM\_021724.1  
128.1 NM\_005126.2  
153.6 NM\_007121.2  
118.5 NM\_005693.1  
119.7 NM\_005123.1  
    114 NM\_022002.1  
121.1 NM\_033013.1  
122.2 NM\_005122.2  
110.2 NM\_001077475.1  
112.5 NM\_003297.1  
125.5 NM\_001032287.1  
    127 NM\_001032287.1  
224.1 NM\_003298.2  
    122 NM\_003269.2  
115.8 NM\_014249.2  
115.1 NM\_016346.2  
110.6 NM\_016346.2

109 NM\_005654.4  
124.5 NM\_021005.2  
125.4 NM\_005234.3  
131.1 NM\_001020825.1  
114.8 NM\_001018077.1  
132.7 NM\_001018076.1  
130.8 NM\_000901.1  
123.4 NM\_002135.3  
119.9 NM\_173157.1  
127.7 NM\_173158.1  
233.2 NM\_006186.2  
101.8 NM\_006981.2  
112 NM\_173199.1  
109 NM\_173198.1  
117.7 NM\_173199.1  
121.1 NM\_173200.1  
111.2 NM\_004959.3  
120 NM\_205860.1  
109.2 NM\_205860.1  
124.2 NM\_003822.3  
122.1 NM\_001489.3  
106.7 NM\_033334.2  
112.2 NM\_006175.3  
114.5 NM\_198060.2  
228.8 NM\_002524.2  
142.3 NM\_013392.2  
178.9 NM\_178564.2  
113.5 NM\_005010.3  
124.9 NM\_005010.2  
1107.4 NM\_002525.1  
122.9 NM\_005011.2  
119.5 NM\_005011.2  
117.7 NM\_005011.2  
113.2 NM\_013959.1  
118.6 NM\_013961.1  
111 NM\_013960.1  
117.5 NM\_013962.2  
122.3 NM\_013983.1  
116.6 NM\_013985.1  
118.5 NM\_001010848.2  
113.9 NM\_138573.1  
121.9 NM\_006176.1  
168 NM\_003489.2  
126.3 NM\_031474.1  
329.6 NM\_020645.1  
132.7 NM\_198465.1  
112.8 NM\_006177.2  
119.6 NM\_007243.1  
109.4 NM\_016588.2  
120.9 NM\_001024629.1  
119.2 NM\_003873.3

117.2 NM\_201264.1  
107.1 NM\_201264.1  
118.6 NM\_018534.3  
112.9 NM\_004558.2  
112.3 NM\_004801.2  
109.5 NM\_138735.1  
118.7 NM\_138735.1  
110.6 NM\_138734.1  
115.2 NM\_015080.2  
102.3 NM\_004796.3  
111.2 NM\_004796.3  
115.9 NM\_138970.2  
171.3 NM\_024632.3  
113.1 NM\_030763.1  
128.7 NM\_022455.3  
121.8 NM\_022455.3  
142.1 NM\_015922.1  
115.1 NM\_006178.1  
134.9 NM\_006178.1  
274.4 NM\_006178.1  
248.4 NM\_016143.3  
241.2 NM\_182483.1  
124.3 NM\_001042549.1  
120.6 NM\_001042549.1  
686.7 NM\_003580.2  
152.7 NM\_145080.2  
261.7 NM\_017755.4  
    148 NM\_022072.2  
    164 NM\_199044.2  
145.9 NM\_148956.1  
142.1 NM\_018044.2  
126.3 NM\_018044.2  
142.6 NM\_145645.2  
133.8 NM\_148980.1  
132.9 NM\_148936.1  
116.6 NM\_182543.1  
115.1 NM\_024677.3  
188.3 NM\_014595.1  
111.8 NM\_032526.1  
111.8 NM\_033253.2  
108.9 NM\_001002006.1  
253.9 NM\_012229.2  
782.2 NM\_001002010.1  
141.7 NM\_052935.2  
119.4 NM\_152729.2  
159.4 NM\_022908.1  
115.1 NM\_001031701.1  
132.6 NM\_016575.1  
127.6 NM\_002526.1  
111.5 NM\_020201.3  
    294 NM\_173474.2

525.3 NM\_006702.2  
112.9 NM\_002527.3  
119.5 NM\_006179.3  
114.7 NM\_002528.4  
112.7 NM\_004822.1  
120.1 NM\_006181.1  
113.6 NM\_021229.3  
118 NM\_014917.2  
126.2 NM\_032536.1  
118 NM\_001007792.1  
125.2 NM\_002529.3  
120.7 NM\_001012331.1  
110.5 NM\_001018065.1  
115.3 NM\_006180.3  
114.4 NM\_001007097.1  
125.3 NM\_002530.2  
124.1 NM\_001007156.1  
109.7 NM\_006183.3  
112.5 NM\_002531.1  
111.7 NM\_012344.2  
115 NM\_012344.2  
117.9 NM\_014840.2  
173.5 NM\_030952.1  
120.8 NM\_016118.3  
186.3 NM\_002484.1  
123.1 NM\_012225.1  
1001.3 NM\_025152.1  
2579.9 NM\_006184.3  
216.2 NM\_005013.1  
135.2 NM\_022731.2  
1668.5 NM\_006600.2  
121.4 NM\_032869.2  
118.4 NM\_145266.4  
129.9 NM\_015332.2  
112.3 NM\_198954.1  
156 NM\_198948.1  
118.5 NM\_153183.1  
123.3 NM\_018159.2  
106.1 NM\_031438.2  
119 NM\_015901.4  
149.8 NM\_177533.2  
117.5 NM\_018283.1  
124.5 NM\_152395.1  
227.2 NM\_032349.2  
119.8 NM\_001012758.1  
113 NM\_024815.2  
123.9 NM\_147173.1  
172.2 NM\_147173.1  
117.6 NM\_007006.2  
139.4 NM\_032344.1  
197.6 NM\_006703.2

116.8 NM\_019094.4  
124.9 NR\_002212.1  
265.7 NM\_014142.2  
114.5 NM\_007083.3  
103 NM\_007083.3  
121.5 NM\_198041.1  
107.9 NM\_181843.1  
151.6 NM\_198038.1  
887 NM\_198038.1  
130.5 NM\_024047.3  
120.7 NR\_002779.1  
112.2 NM\_031423.3  
110.8 NM\_031423.3  
128 NM\_012345.1  
473.8 NM\_020772.1  
1205.6 NM\_014972.1  
228 NM\_006185.2  
392.4 NM\_003744.5  
140.5 NM\_004756.2  
177.2 NM\_020401.2  
183.9 NM\_018230.2  
496.1 NM\_005124.2  
107.8 NM\_153485.1  
292.9 NM\_004298.2  
363.6 NM\_015231.1  
170.5 NM\_015354.1  
307.1 NM\_015135.1  
145.9 NM\_024923.2  
123.3 NM\_207308.1  
274.4 NM\_005085.2  
132.2 NM\_138285.3  
120.8 NM\_138285.3  
145.9 NM\_024057.2  
126.5 NM\_198887.1  
180.9 NM\_153645.1  
109.9 NM\_007172.2  
115.3 NM\_153645.1  
455.9 NM\_017426.2  
141 NM\_153719.2  
750.5 NM\_153719.2  
225.3 NM\_024844.2  
385.6 NM\_002532.3  
138.8 NM\_014669.2  
124.9 NM\_005387.4  
139.9 NM\_139131.2  
116.4 NM\_016320.3  
114 NM\_001008565.1  
129.2 NM\_001008565.1  
145.2 NM\_014089.3  
174.1 NM\_007342.1  
119.8 NM\_001042483.1

131.7 NM\_138459.3  
275.2 NM\_016359.2  
137.5 NM\_018454.5  
122.7 NM\_175741.1  
117.8 NM\_005796.1  
117.4 NM\_002533.2  
154.3 NM\_002533.2  
4774.1 NM\_006362.3  
5759.2 NM\_006362.3  
116.1 NM\_022053.1  
108.2 NM\_022053.1  
120.7 NM\_022052.1  
120.9 NR\_002216.1  
110.7 NM\_033155.1  
119.2 NM\_022463.3  
118 NM\_152745.1  
108.8 NM\_007226.1  
125.1 NM\_007225.1  
110.4 NM\_007224.1  
109.2 NM\_007224.1  
247.3 NM\_013248.2  
231.3 NM\_018698.3  
113 NM\_031956.1  
97.7 NM\_032599.1  
113.9 NM\_032597.2  
114 NM\_001079692.1  
112 NM\_033122.2  
117.1 NM\_173663.3  
124.2 NM\_033417.1  
179.1 NM\_001011699.1  
120.4 NM\_022567.1  
124.6 XM\_938724.1  
151.6 NM\_005768.5  
124.8 NM\_178507.2  
115.4 NM\_016816.2  
123.5 NM\_001032409.1  
130.1 NM\_002534.2  
129.6 NM\_001032409.1  
117.4 NM\_002535.2  
116.1 NM\_001032731.1  
109.8 NM\_016817.2  
199.8 NM\_016817.2  
120.7 NM\_006187.2  
137.5 NM\_003733.2  
229.2 NM\_003733.2  
853.1 NM\_000274.1  
123.2 NM\_002536.1  
149.4 NM\_001006113.1  
22768.7 NM\_004152.2  
126.2 NM\_016178.1  
117.6 NM\_024928.3

389.7 NM\_022837.1  
161.2 NM\_024068.2  
111.6 NM\_014582.1  
122 NM\_052843.2  
119.8 NM\_001080399.1  
120.9 NM\_000275.1  
2464.4 NM\_001079842.1  
683 NM\_017830.1  
270.4 NM\_152398.2  
1652.9 NM\_001014446.1  
115.8 NM\_022375.2  
114.1 NM\_002538.2  
124.6 NM\_002538.2  
108.8 NM\_006188.2  
117.2 NM\_000276.3  
124.5 NM\_001587.3  
1621 NM\_002539.1  
119.3 NM\_024410.2  
127.8 NM\_153437.1  
121.4 NM\_153437.1  
145.9 NM\_002540.3  
131.3 NM\_001007022.1  
117.6 NM\_020729.1  
134.8 NM\_175881.2  
117.8 NM\_153007.3  
107.5 NM\_014253.1  
124 NM\_001080428.1  
120 NM\_001080477.1  
116.8 NM\_153003.1  
191.8 NM\_003611.1  
128.6 NM\_001003941.1  
126.3 NM\_001003941.1  
163.9 NM\_002541.2  
118.7 NM\_018245.1  
110.2 NM\_001031707.1  
148.1 NM\_001031707.1  
187.6 NM\_018233.2  
127.8 NM\_024623.1  
221.7 NM\_007346.2  
117.3 NM\_024576.3  
111.4 NM\_002542.4  
129.7 NM\_016821.1  
109.7 NM\_014057.3  
119 NM\_033014.1  
103 NM\_024416.2  
982.7 NM\_003605.3  
370.5 NM\_181672.1  
133.8 NM\_007280.1  
118 NM\_152635.1  
130.1 NM\_058199.2  
124.4 NM\_014279.2



133.8 NM\_006334.2  
121.4 NM\_058164.1  
108.6 NM\_058170.1  
122.7 NM\_006418.3  
115.6 NM\_198474.2  
111.4 NM\_182487.1  
120.4 NM\_015441.1  
117.2 NM\_020190.2  
110.5 NM\_005806.2  
    126 NM\_175747.2  
    139 NM\_002543.2  
    127 NM\_145243.3  
114.7 NM\_005014.1  
162.1 NM\_002544.3  
    111 NM\_006189.1  
108.1 NM\_004498.1  
120.4 NM\_004852.1  
113.7 NM\_001080488.1  
136.9 NM\_130835.1  
    114 NM\_015560.1  
126.5 NM\_025136.1  
    173 NM\_025136.1  
112.1 NM\_001012393.1  
119.8 NM\_002545.3  
111.3 NM\_002547.1  
112.4 NM\_017570.1  
125.1 NM\_017570.1  
110.9 NM\_020061.2  
123.7 NM\_000513.1  
    126 NM\_001708.1  
147.5 NM\_001030012.1  
119.9 NM\_014322.2  
119.6 NM\_001030011.1  
114.9 NM\_033282.3  
115.8 NM\_033282.3  
113.7 NM\_001030051.1  
115.5 NM\_181744.2  
116.1 NM\_000911.3  
113.7 NM\_000912.3  
120.1 NM\_000913.3  
126.5 NM\_000913.3  
114.8 NM\_182647.1  
120.3 NM\_001008505.1  
    120 NM\_001008503.1  
    117 NM\_000914.2  
106.5 NM\_000914.2  
113.9 NM\_001008504.1  
120.2 NM\_000914.2  
119.3 NM\_147160.2  
126.8 NM\_005866.2  
122.7 NM\_014359.3

357.5 NM\_001008213.1  
116.6 NM\_001004460.1  
115.5 NM\_001003745.1  
121.1 NM\_207186.1  
111.4 NM\_178168.1  
    114 NM\_001004461.1  
116.1 NM\_001005280.1  
    120 NM\_001004134.1  
110.5 NM\_001005491.1  
116.1 NM\_013941.2  
122.3 NM\_001005466.1  
116.4 NM\_001005465.1  
120.7 NM\_001004462.1  
124.5 NM\_001004463.1  
111.1 NM\_001004464.1  
119.8 NM\_001001953.1  
103.6 NM\_013940.1  
117.3 NM\_013939.1  
120.6 NM\_013938.1  
110.3 NM\_001004465.1  
    109 NM\_001004466.1  
132.8 NM\_012351.1  
123.9 NM\_001004467.1  
115.7 NM\_001004469.1  
    119 NM\_001004473.1  
109.3 NM\_001004476.1  
112.1 NM\_206899.1  
110.3 NM\_001004471.1  
113.3 NM\_001004472.1  
116.2 NM\_001004474.1  
118.9 NM\_001004475.1  
128.2 NM\_001005324.1  
    117 NM\_207374.1  
114.9 NM\_001004477.1  
115.7 NM\_001004478.1  
102.1 NM\_013937.2  
116.3 NM\_001005503.1  
116.1 NM\_001005239.1  
120.4 XM\_939167.1  
    127 NM\_001013354.1  
123.5 NM\_001004479.1  
116.7 NM\_001004480.1  
136.5 NM\_001001959.1  
119.7 NM\_013936.2  
    117 NM\_030959.2  
124.7 NM\_001004297.1  
108.5 NM\_001004481.1  
115.2 NM\_001001961.1  
    117 NM\_001001919.1  
112.9 NM\_001004482.1  
    110 NM\_001004483.1

135.4 NM\_001001956.1  
115.8 NM\_001004484.1  
103.1 NM\_001004485.1  
121 NM\_001005487.1  
111.4 NM\_001004486.1  
109.6 NM\_001004487.1  
117.1 NM\_014565.1  
127.3 NM\_012352.1  
110.8 NM\_001004450.1  
113.8 NM\_012353.1  
121.3 NM\_002548.1  
118.3 NM\_003552.2  
121.7 NM\_003553.1  
117.5 NM\_003554.1  
115.1 NM\_012360.1  
109.2 NR\_002169.1  
110.8 NM\_003555.1  
113.6 NM\_001004713.1  
125.9 NM\_001004451.1  
128 NM\_054107.1  
116.4 NM\_001004452.1  
120.7 NM\_080859.1  
116.3 NM\_001005236.1  
113.5 NM\_001005234.1  
114.6 NM\_001005235.1  
123.3 NM\_001004453.1  
117.7 NM\_001004454.1  
115.9 NM\_001004456.1  
120.9 NM\_012363.1  
118.1 NM\_001004457.1  
108.3 NM\_012364.1  
115 NM\_001004458.1  
120.8 NM\_001004459.1  
130.6 NM\_001005287.1  
116.1 NM\_001004135.1  
119.9 NM\_001001659.1  
126.1 NM\_001005480.1  
114.6 NR\_002158.1  
118.1 NM\_001004488.1  
119.5 NM\_001001802.1  
126.9 NM\_012365.1  
125.3 NM\_001005328.1  
139.3 NR\_002157.1  
125.2 NM\_001005276.1  
125.4 NM\_001004489.1  
123.1 NM\_001004490.1  
125.2 NM\_001004491.1  
117.8 NM\_001005285.1  
114.7 NM\_001004492.1  
111.3 NM\_033057.1  
113.5 NM\_001005226.1

119.5 NM\_012367.1  
116.9 NM\_012368.1  
104 NM\_198074.3  
119.1 NM\_003700.1  
115.2 NM\_001004684.1  
111.9 NM\_012369.1  
118 NM\_001004685.1  
112.5 NM\_001001915.1  
123.5 NM\_001001914.1  
117.8 NM\_001013355.1  
114.9 NM\_030883.3  
131.4 NM\_007160.2  
106.2 NM\_030905.1  
108.4 NM\_001005216.1  
110.7 NM\_205859.1  
112.4 NM\_175911.2  
117.5 NR\_002145.1  
119.4 NM\_001004686.1  
129.8 NM\_001004687.1  
115.7 NM\_001001963.1  
115.8 NR\_002141.1  
116.9 NM\_001004688.1  
106.7 NM\_001004689.1  
114.5 NM\_017504.1  
120.1 NM\_001004690.1  
106.8 NM\_001004691.1  
115.8 NM\_019897.1  
131.7 NM\_030904.1  
118.3 NM\_001004693.1  
122.9 NM\_001001964.1  
112.6 NM\_001004692.1  
109 NM\_001001824.1  
115.8 NM\_001005495.1  
118.6 NM\_001004695.1  
115.3 NM\_001001827.1  
113.2 NM\_001004696.1  
116.2 NM\_001004697.1  
123.4 NM\_001005471.1  
119.4 NM\_001005522.1  
114.2 NM\_206880.1  
114 NM\_030903.2  
127.6 NM\_001001957.2  
127.4 NM\_001004698.1  
112.6 NM\_001001657.1  
118.6 NM\_001004699.1  
118 NM\_002550.1  
116.5 NM\_002551.2  
117.8 NM\_012373.1  
130.8 NM\_001005334.1  
133.8 NM\_001005275.1  
118.7 NM\_001005274.1

111.9 NM\_001005512.1  
104 NM\_001005272.1  
118.4 NM\_001005470.1  
120.8 NM\_001004700.1  
119.3 NM\_001005270.1  
119 NM\_001001955.1  
118.8 NM\_001001920.1  
119.4 NM\_001004701.1  
111.3 NM\_001004702.1  
128.6 NM\_001005513.1  
117.6 NM\_001004703.1  
121.3 NM\_001004704.1  
119.9 NM\_012374.1  
121.1 NM\_001004705.1  
119.2 NM\_001004706.1  
119 NM\_001004707.3  
118.5 NM\_001001965.1  
110.7 NM\_001004708.1  
111.2 NM\_001004711.1  
118.5 NM\_001001912.1  
118 NM\_001001674.1  
123.4 NM\_001005504.1  
118.8 NM\_001005224.1  
123.8 NM\_001004195.2  
121 NM\_001005484.1  
112.8 NM\_001005326.1  
119.3 NM\_001004063.1  
110.5 NM\_001004714.1  
113.8 NM\_001004712.1  
112 NM\_001005486.1  
122 NM\_001004715.1  
115.2 NM\_001005501.1  
114.6 NM\_001005483.1  
118 NM\_001004717.1  
118.2 NM\_001005500.1  
111 NM\_001004719.1  
119.5 NM\_001004723.1  
118.5 NM\_001005241.1  
105.1 NM\_001004724.1  
115.8 NM\_001004124.1  
108.7 NM\_172194.1  
119.2 NM\_001004725.1  
110.2 NM\_001004059.1  
116.9 NM\_001004726.1  
102.7 NM\_001004727.1  
111.4 NM\_001004748.1  
110.7 NM\_001005329.1  
114.7 NM\_001004749.1  
122.9 NM\_033180.1  
109.2 NM\_033179.1  
113.9 NM\_001005567.1

120.7 NM\_001004750.1  
118.5 NM\_001004751.1  
119.8 NM\_152430.2  
112.9 NM\_030774.2  
115.6 NM\_001004752.1  
120.7 NM\_001004753.1  
126.3 NM\_001005237.1  
118.7 NM\_001005238.1  
116.1 NM\_001005288.1  
116.8 NM\_001004754.1  
111.2 NM\_001004755.1  
118.5 NM\_001004756.1  
111.3 NM\_001004757.1  
119.7 NM\_001004758.1  
146.9 NM\_001004759.1  
111.8 NM\_001004760.1  
119.4 NM\_012375.1  
112.9 NM\_001005222.1  
111.3 NM\_001005160.1  
120.5 NM\_001004052.1  
119 NM\_001005161.1  
123.9 NM\_001005162.1  
124.1 NM\_001005163.1  
117.9 NM\_001005164.1  
114.1 NM\_001005165.1  
122.3 NM\_001005167.1  
112.6 NM\_001005168.1  
116.8 NM\_001005289.1  
123.1 NM\_001005169.1  
117.6 NM\_001005170.1  
120.9 NM\_001001916.1  
128.5 NM\_001005171.1  
118.6 NM\_001005172.1  
119.1 NM\_001005173.1  
118.2 NM\_001004137.1  
116.2 NM\_001001913.1  
121.1 NM\_001005174.1  
119.3 NM\_001005175.1  
119.7 NM\_001001922.1  
117.5 NM\_001005177.1  
120 NM\_001005178.1  
118.5 NM\_001001917.1  
110.1 NM\_001003443.1  
113.2 NM\_001005179.1  
118.3 NM\_001005180.1  
115.1 NM\_001005181.1  
110.5 NM\_001004728.1  
114.5 NM\_001001954.1  
123.8 NM\_054106.1  
110.8 NM\_001005323.1  
122.4 NM\_001004729.1

119.5 NM\_001002925.1  
115.2 NM\_001004730.1  
118.3 NM\_001001921.1  
119.1 NM\_001001966.1  
111.5 NM\_001004731.1  
114.9 NM\_001004732.1  
117.9 NM\_001004733.1  
109.7 NM\_001005489.1  
112.2 NM\_001005566.1  
125.2 NM\_001005218.1  
119.3 NM\_001005469.1  
116.7 NM\_001001918.1  
106.3 NM\_001004734.1  
120.9 NM\_001001923.1  
116.5 NM\_001001967.1  
116.7 NM\_001004735.1  
119.1 NM\_001005496.1  
111.5 NM\_001001952.1  
121.3 NM\_003697.1  
115.4 NM\_001005338.1  
105 NM\_001005514.1  
117.7 NM\_001005515.1  
114.3 NM\_001005482.1  
116.5 NM\_001005479.1  
116.3 NM\_006637.1  
114.4 NM\_001005492.1  
109.5 NM\_001004736.1  
127.5 NM\_001004737.1  
111.8 NM\_001005516.1  
115.7 NM\_001005517.1  
114.9 NM\_001004738.1  
117.2 NM\_001004739.1  
121.6 NM\_001004741.1  
116.3 NM\_001005245.1  
119.4 NM\_001004742.1  
120.6 NM\_001005282.1  
117.3 NM\_001004743.1  
111.2 NM\_153444.1  
125.1 NM\_153445.1  
119.4 NM\_001004744.1  
110.2 NM\_001004745.1  
107.5 NM\_001004746.1  
114.1 NM\_001004747.1  
114.3 NM\_030946.1  
125 NM\_030876.4  
117.3 NM\_001001960.1  
112.5 NM\_003696.2  
112.4 NM\_001005281.1  
125.5 NM\_001005853.1  
110.3 NM\_173351.1  
105.4 NM\_001005182.1

120 NM\_054105.1  
121.3 NM\_054104.1  
116.7 NM\_001005494.1  
115.7 NM\_001005493.1  
112.4 NM\_001005518.1  
112.9 NM\_001005519.1  
102.9 NM\_001005499.1  
114.8 NM\_001005490.1  
117.8 NM\_001005497.1  
108.6 NM\_001005183.1  
127.6 NM\_001005286.1  
113.1 NM\_001005279.1  
116.7 NM\_001005327.1  
111.4 NM\_001005184.1  
118 NM\_001005325.1  
115.7 NM\_001005185.1  
126.6 NM\_001005278.1  
116.6 NM\_001005186.1  
114 NM\_001001968.1  
118.9 NM\_001005187.1  
122.4 NM\_001001667.1  
118.8 NR\_002140.1  
125.6 NM\_001005188.1  
110.8 NM\_001005189.1  
113.1 NM\_001005190.1  
126.4 NM\_030901.1  
110.7 NM\_017506.1  
109 NM\_198944.1  
111.2 NM\_012377.1  
117.5 NM\_175883.1  
113.1 NM\_001005191.1  
187.3 NR\_002171.1  
123.9 NM\_001079935.1  
120.8 NR\_002163.2  
109.5 NR\_002185.1  
130.9 NM\_001005192.1  
120.6 NM\_001005193.1  
127.6 NM\_001001958.1  
119.6 NM\_001005194.1  
125.8 NM\_001005195.1  
119.9 NM\_001005468.1  
100.8 NM\_001005467.1  
115.3 NM\_001005196.1  
118.6 NM\_012378.1  
115.2 NM\_001002917.1  
114.9 NM\_001002918.1  
120.9 NM\_001005197.1  
111.1 NM\_001002905.1  
126.9 NM\_001007249.1  
116 NM\_001005198.1  
116.8 NM\_001005199.1



114.9 NM\_001005200.1  
123.4 NM\_001005201.1  
109.7 NM\_001003750.1  
112.8 NM\_001005205.1  
110.9 NM\_001004064.1  
115.1 NM\_001002907.1  
128.8 NM\_001005202.1  
124 NM\_001004058.1  
110.6 NM\_001005203.1  
114.5 NM\_001005204.1  
115.7 NM\_001013356.1  
112.4 NM\_001013357.1  
121.2 NM\_001001658.1  
116.1 NM\_001001656.1  
112.5 NM\_001005213.1  
119.9 NM\_001005284.1  
112.3 NM\_001013358.1  
116.6 NM\_001005211.1  
117.9 NM\_001005243.1  
106.1 NM\_001005212.1  
127.8 NM\_001005283.1  
197.6 NM\_153451.2  
134.1 NM\_004153.2  
249.1 NM\_006190.3  
190.1 NM\_181837.1  
123.7 NM\_181742.1  
160.4 NM\_002553.2  
118.7 NM\_002553.2  
111 NM\_181747.1  
10189.9 NM\_014321.2  
240.4 NM\_032412.2  
121.7 NM\_000607.1  
113.4 NM\_000608.2  
120.2 NM\_016467.3  
122.3 NM\_014182.3  
120.3 NM\_139280.1  
152.8 NM\_006812.2  
126.2 NM\_032623.3  
919.4 NM\_002556.2  
121.4 NM\_030758.3  
121.3 NM\_017784.3  
155.1 NM\_022776.3  
118.8 NM\_018030.3  
123.7 NM\_018030.3  
118.2 NM\_080597.2  
116.5 NM\_144498.1  
147.3 NM\_144498.1  
131 NM\_145320.1  
137.4 NM\_145322.1  
137.8 NM\_020896.2  
135.4 NM\_145638.1

132.8 NM\_032523.2  
119.8 NM\_145739.1  
214.6 NM\_145798.2  
130.5 NM\_145798.2  
200.7 NM\_020841.4  
230.2 NM\_020841.4  
108.6 NM\_148909.1  
367.7 NM\_148906.1  
122.6 NM\_130771.2  
126.7 NM\_133169.2  
129.4 NM\_017807.2  
126.1 NM\_022353.2  
156.3 NM\_182980.2  
106.6 NM\_013370.3  
135.1 NM\_020530.3  
108.8 NM\_003999.1  
118.5 NM\_145260.2  
116.8 NM\_053001.1  
124.6 NM\_053001.1  
163.7 NM\_012382.1  
118.6 NM\_152672.3  
117.4 NM\_178859.2  
392.3 NM\_012383.3  
157.3 NM\_014028.3  
113 NM\_198184.1  
114.3 NM\_000531.3  
113.5 NM\_139282.1  
113 NM\_170664.1  
115.4 NM\_144672.3  
124.5 NM\_144672.3  
109.7 NM\_194248.1  
121.1 NM\_194248.1  
111.4 NM\_194322.1  
113.4 NM\_177998.1  
119.8 NM\_178160.1  
122 NM\_178233.1  
132.2 NM\_020157.2  
111.7 NM\_148961.3  
126.9 NM\_032109.2  
121.2 NR\_003089.1  
113.8 NM\_017670.1  
165.7 NR\_003089.1  
119.6 NM\_023112.2  
152.1 NM\_199324.1  
116.2 NM\_017493.4  
124.1 NM\_017493.4  
154 NM\_017602.2  
119.4 NM\_207320.1  
147.5 NM\_016023.2  
124.7 XM\_938058.1  
118.3 NM\_130901.1

126.5 NM\_014562.2  
121.7 NM\_021728.2  
115.1 NM\_172337.1  
115.2 NM\_172337.1  
128.4 NM\_080822.1  
125.8 NM\_183378.1  
116.5 NM\_198185.1  
144.8 NM\_002557.3  
119.4 NM\_004561.2  
120.6 NM\_021220.2  
108.1 NM\_001080502.1  
138.4 NM\_001080502.1  
177.4 NM\_005015.1  
132.2 NM\_000436.2  
119.7 NM\_022120.1  
122.7 NM\_148962.3  
112.7 NM\_080818.3  
311.2 NM\_181354.3  
130.6 NM\_017897.1  
492.5 NM\_005109.2  
122.9 NM\_000915.2  
135.9 NM\_000916.3  
111.8 NM\_006025.2  
162.8 NM\_018170.2  
112.3 NM\_173829.2  
117.1 NM\_002558.2  
125.4 NM\_170682.2  
118.2 NM\_174873.1  
123.6 XM\_936449.1  
132.5 NM\_170683.2  
118.1 NM\_002559.2  
103.9 NM\_002559.2  
165.4 NM\_175568.1  
118.2 NM\_175081.1  
119.7 NM\_175081.1  
173.5 NM\_002562.4  
114.2 NM\_005446.2  
118.4 NM\_002563.2  
224.9 NM\_198333.1  
146.2 NM\_014499.2  
130.9 NM\_002566.4  
126.8 NM\_176894.1  
111.7 NM\_176894.1  
108.2 NM\_023914.2  
120.4 NM\_014879.3  
123 NM\_014879.2  
120.9 NM\_014879.3  
125.2 NM\_176072.1  
127.8 NM\_176071.1  
112.5 NM\_002564.2  
117.3 NM\_176071.1

113.7 NM\_002565.3  
644.9 NM\_005767.3  
121.2 NM\_176798.1  
119.3 NM\_176797.1  
    123 NM\_004154.3  
    188 NM\_178129.3  
111.6 NM\_001017962.1  
172.2 NM\_000917.2  
115.1 NM\_001017974.1  
112.7 NM\_001017974.1  
    120 NM\_182904.3  
114.8 NM\_198180.1  
110.7 NM\_022112.1  
122.2 NM\_012385.1  
195.4 NM\_006191.1  
125.3 NR\_003284.1  
403.1 NM\_002568.3  
106.3 NM\_030979.2  
591.1 NM\_003819.2  
114.3 NM\_080832.1  
122.9 NM\_080832.1  
114.4 NM\_080832.1  
380.3 NM\_004643.1  
119.6 NM\_152410.1  
125.7 NM\_001080379.1  
115.4 NM\_001080379.1  
112.7 NM\_152410.1  
135.7 NM\_018026.2  
124.5 NM\_015197.1  
125.2 NM\_020804.2  
281.1 NM\_007229.1  
120.1 NM\_016223.3  
120.4 NM\_013358.1  
120.9 NM\_007365.1  
113.3 NM\_016233.1  
117.4 NM\_012387.1  
121.4 NM\_207421.1  
103.3 NM\_001018049.1  
109.7 NM\_002571.2  
290.2 NM\_019088.2  
272.7 NM\_000430.2  
112.6 NM\_002572.1  
145.7 NM\_002573.2  
163.2 NM\_000437.2  
184.2 NM\_018440.3  
112.1 NM\_003785.3  
123.6 NM\_207339.1  
119.2 NM\_001015038.1  
    123 NM\_001017931.1  
109.9 NM\_007003.2  
118.9 NM\_130467.3

115.5 NM\_130467.3  
117.1 NM\_000277.1  
189.7 NM\_006452.2  
117.2 NM\_006452.2  
232.9 NM\_006452.2  
130.1 NM\_182789.2  
120.3 NM\_006451.3  
1741.9 NM\_001033112.1  
125.6 NM\_001033112.1  
126.1 NM\_016480.3  
152.6 NM\_002576.3  
115.1 NM\_017906.2  
185.2 NM\_002577.3  
158.9 NM\_002577.3  
119.9 NM\_002578.2  
116.4 NM\_005884.3  
120.2 NM\_001014831.1  
126.1 NM\_001014832.1  
112.8 NM\_020168.3  
121 NM\_020341.2  
113.2 NM\_020341.2  
163.7 NM\_016081.2  
110.1 NM\_002579.2  
107.8 NM\_002579.2  
130.5 NM\_002579.1  
119.9 NM\_001037293.1  
120.2 NM\_053016.3  
114.1 NM\_007203.3  
114.6 NM\_007203.3  
113.9 NM\_017734.2  
223.9 NM\_138821.1  
119.6 NM\_005447.2  
701.1 NM\_175854.5  
117.9 NM\_148977.1  
132.3 NM\_138316.2  
531.7 NM\_153640.1  
326.3 NM\_153640.2  
114 NM\_024960.3  
119.7 NM\_024594.2  
185.3 NM\_018216.1  
119 NM\_015368.3  
154.4 NM\_052839.2  
124 NM\_052959.2  
112 NM\_152911.2  
117.4 NM\_207128.1  
129.3 NM\_152911.2  
116.3 NM\_001010861.1  
115.7 NM\_001037317.1  
149.7 NM\_018109.2  
335.2 NM\_173797.2  
224.7 NM\_022447.1

119.3 NM\_173462.2  
1394.4 NM\_032632.3  
118.4 NM\_020144.3  
123.9 NM\_022894.2  
107.6 NM\_002581.3  
109.1 NM\_020318.1  
116.3 NM\_021936.1  
118.2 NM\_005443.4  
114.4 NM\_004670.3  
137.2 NM\_177453.2  
134 NM\_152341.2  
115.9 NM\_017705.2  
123.1 NM\_024897.2  
114.6 NM\_198406.1  
112.2 NM\_024897.2  
106.3 NM\_178422.4  
143.6 NM\_133367.2  
120.6 NM\_198504.1  
138.6 NM\_015089.2  
122.2 NM\_019619.2  
129.1 NM\_205863.2  
119.8 NM\_016948.1  
115.2 NM\_016948.2  
117.5 NM\_032521.1  
123.1 NM\_032510.2  
115.8 NM\_032510.2  
124.8 NM\_003631.2  
110.1 NM\_013987.1  
108.5 NM\_013987.1  
503 NM\_007262.3  
254.7 NM\_018622.5  
148.6 NM\_018622.5  
123.3 NM\_002582.1  
350 NM\_001618.2  
136.8 NM\_032789.1  
130.1 NM\_032789.1  
139 NM\_020367.3  
162.7 NM\_022750.2  
191.1 NM\_017554.1  
119.4 NM\_152615.1  
126.3 NM\_017851.4  
164.4 NM\_005484.2  
127.6 NM\_001042618.1  
121.6 NM\_001003935.1  
117.4 NM\_005485.3  
110.4 NM\_001003931.1  
351.7 NM\_006437.2  
127 NM\_020214.1  
180.7 NM\_020213.1  
123.6 NM\_020213.1  
501.4 NM\_024615.2

129.1 NM\_031458.1  
116.1 NM\_152268.2  
117.7 NM\_016590.2  
109.5 NM\_018222.2  
115 NM\_013327.3  
126.1 NM\_001003828.1  
121.9 NM\_013327.3  
305.2 NM\_022141.4  
104.9 NM\_173493.1  
354.3 NM\_015148.2  
120.8 NM\_138294.2  
147.6 NM\_032050.1  
122.8 NM\_006192.1  
117.8 NM\_003988.2  
115.8 NM\_003988.2  
116.3 NM\_000278.2  
115.6 NM\_013942.2  
121.5 NM\_000438.3  
118.5 NM\_181458.1  
108.5 NM\_181457.1  
119.8 NM\_006193.1  
107.4 NM\_016734.1  
103.4 NM\_001604.3  
121.7 NM\_000280.2  
176 NM\_002584.1  
116.1 NM\_013992.2  
113.5 NM\_013953.3  
126.4 NM\_003466.2  
111.7 NM\_006194.1  
177.9 NM\_007349.2  
124.9 NM\_018313.2  
126.6 NM\_181042.2  
138.2 NM\_181042.2  
170.3 NM\_005746.1  
230.6 NM\_182790.1  
108.4 NM\_018492.2  
113.7 NM\_021635.2  
119.5 NM\_002585.1  
205.2 NM\_002586.3  
199.2 NM\_006195.4  
184.2 NM\_025245.1  
150 NM\_020524.2  
117.6 NM\_000920.2  
132.9 NM\_022172.2  
124.8 NM\_000920.2  
126.7 NM\_001044264.1  
121.2 NM\_003884.3  
153.1 NM\_000281.2  
233.8 NM\_001001939.1  
115.8 NM\_032151.3  
1428.6 NM\_006196.2

1779.4 NM\_005016.3  
712.4 NM\_031989.2  
118 NM\_020528.1  
151.8 NM\_033009.1  
116.8 NM\_033008.1  
116.9 NM\_020418.2  
146.8 NM\_033008.1  
130.3 NM\_000282.2  
132 NM\_000532.2  
114.7 NM\_032420.2  
123.6 NM\_002587.3  
112.4 NM\_020815.1  
112.2 NM\_020815.1  
115.5 NM\_032961.1  
123.1 NM\_032967.1  
121 NM\_032968.2  
114.5 NM\_014522.1  
107.2 NM\_032973.1  
115.5 NM\_032971.1  
114.8 NM\_032973.1  
120 NM\_016580.2  
119.8 NM\_033056.2  
109.5 NM\_014459.2  
130.5 NM\_019035.2  
116.8 NM\_020766.1  
111.8 NM\_022843.2  
124.3 NM\_033100.1  
119.5 NM\_002589.2  
118.8 NM\_032457.1  
123.7 NM\_032456.1  
118.4 NM\_002589.2  
112.7 NM\_002590.2  
111.1 NM\_002590.2  
113.2 NM\_203487.1  
113.6 NM\_020403.3  
126.3 NM\_020403.3  
123 NM\_031411.1  
109.4 NM\_031410.1  
114 NM\_031410.1  
114.7 NM\_031859.1  
114.5 NM\_031859.1  
111.5 NM\_031861.1  
115.2 NM\_031864.1  
111.4 NM\_018903.2  
112.4 NM\_031865.1  
115.6 NM\_031495.1  
108.4 NM\_018906.2  
107.1 NM\_031497.1  
109.2 NM\_018906.2  
125 NM\_031500.1  
119.9 NM\_031501.1



126.5 NM\_031848.1  
119.2 NM\_031849.1  
116.3 NM\_018910.2  
126.7 NM\_018910.2  
110.1 NM\_031852.1  
    109 NM\_031856.1  
119.3 NM\_014005.3  
115.6 NM\_014005.3  
113.4 NM\_031882.2  
108.4 NM\_031882.2  
128.5 NM\_031883.2  
119.3 NM\_018899.4  
108.5 NM\_031883.2  
108.3 NM\_013340.2  
119.5 NM\_018930.3  
127.3 NM\_018931.2  
109.6 NM\_018932.3  
122.2 NM\_018933.2  
131.9 NM\_018934.2  
118.2 NM\_018935.2  
117.1 NM\_020957.1  
115.4 NR\_001280.1  
110.2 NR\_001281.1  
116.2 NM\_018936.2  
111.3 NM\_018937.2  
110.6 NM\_018938.2  
117.5 NM\_015669.2  
    109 NM\_018939.2  
111.6 NM\_018940.2  
136.3 NM\_019120.2  
393.5 NM\_019119.3  
119.4 NM\_031993.1  
114.5 NM\_018912.2  
111.9 NM\_031993.1  
119.6 NM\_032090.1  
115.9 NM\_032091.1  
112.3 NM\_032091.1  
125.8 NM\_032094.1  
114.5 NM\_032009.1  
121.8 NM\_032011.1  
113.2 NM\_032011.1  
    112 NM\_032053.1  
    111 NM\_032053.1  
111.7 NM\_032054.1  
121.1 NM\_018918.2  
    112 NM\_032086.1  
113.1 NM\_032087.1  
112.4 NM\_032087.1  
116.9 NM\_014004.2  
117.6 NM\_032089.1  
118.3 NM\_018921.2

123.2 NM\_032095.1  
112.5 NM\_032096.1  
113.2 NM\_032097.1  
122.5 NM\_032098.1  
122.4 NM\_032099.1  
107.7 NM\_018926.2  
147.8 NM\_032100.1  
117.4 NM\_032101.1  
104.1 NM\_032101.1  
114.9 NM\_002588.2  
117.2 NM\_002588.2  
    122 NM\_032402.1  
    119 NM\_032406.1  
110.9 NM\_032406.1  
106.8 NM\_018929.2  
121.4 NM\_032407.1  
475.6 NM\_015885.2  
145.5 NM\_032673.1  
110.2 NM\_007144.2  
125.6 NM\_006315.4  
229.7 NM\_005180.5  
131.4 NM\_032373.2  
128.6 NM\_032154.3  
115.4 NM\_001011663.1  
209.5 NM\_006360.3  
    116 NM\_002591.2  
124.2 NM\_001018073.1  
341.8 NM\_004563.2  
117.7 NM\_001018073.1  
128.3 NM\_017675.3  
268.5 NM\_006197.2  
893.8 NM\_005389.1  
209.1 NM\_052937.1  
145.2 NM\_018257.1  
124.9 NM\_002592.2  
115.1 NM\_182649.1  
284.9 NM\_182649.1  
1242.5 NM\_020357.1  
342.5 NM\_006031.3  
414.3 NM\_014982.1  
123.8 NM\_024938.2  
109.8 NM\_024938.2  
118.8 NM\_014801.2  
114.7 NM\_002593.2  
121.3 NM\_013363.2  
219.5 NM\_002768.1  
112.5 NM\_174895.1  
118.2 NM\_006198.2  
    164 NM\_015889.3  
142.2 NM\_001003891.1  
114.6 NM\_000439.3

117.8 NM\_013271.2  
122.1 NM\_002594.2  
125.6 NM\_017573.3  
120.8 XM\_940023.1  
121.6 NM\_138325.2  
117.4 NM\_138325.2  
108.4 NM\_138322.2  
113.8 NM\_138323.1  
198 NM\_004716.2  
128.4 NM\_174936.2  
115.9 NM\_006201.3  
115.6 NM\_033018.2  
116.6 NM\_002595.2  
108.4 NM\_212503.1  
120.7 NM\_002596.2  
114.5 NM\_002596.2  
108 NM\_212503.1  
127.4 NM\_021213.1  
185.9 NM\_016297.2  
121 NM\_005017.2  
113.5 NM\_004845.3  
133.7 NM\_002861.1  
131.5 NM\_014891.5  
120.8 NM\_002597.3  
112.3 NM\_002597.3  
127.8 NM\_005018.1  
132 NM\_145859.1  
119.4 NM\_007217.3  
298.5 NM\_145860.1  
137.9 NM\_145860.1  
104.3 NM\_025239.2  
181.6 NM\_144781.1  
283.1 NM\_002598.2  
1714.2 NM\_145341.2  
160.5 NM\_004708.2  
261.3 NM\_013232.2  
108.6 NM\_013374.3  
4766.3 NM\_005707.1  
120.2 NM\_004208.2  
143.8 NM\_004208.2  
112.2 NM\_145812.1  
122.4 NM\_005388.2  
115 NM\_152401.2  
200.2 NM\_024065.3  
106.4 NM\_182612.1  
156.4 NM\_182612.1  
113.6 NM\_006661.1  
111.9 NM\_001077358.1  
114.2 NM\_016953.2  
115.2 NM\_016953.3  
123 NM\_001003683.1

116.4 NM\_005019.3  
116.2 NM\_001003683.1  
135.5 NM\_000924.2  
119.1 NM\_005020.1  
117.4 NM\_002599.1  
124.2 NM\_000921.3  
184.8 NM\_000922.2  
121.3 NM\_006202.1  
    144 NM\_002600.3  
123.8 NM\_002600.2  
113.1 NM\_001037340.1  
    129 NM\_001037341.1  
113.4 NM\_000923.2  
178.3 NM\_006203.3  
112.4 NM\_001002811.1  
113.3 NM\_022359.3  
109.3 NM\_014644.3  
115.6 NM\_033437.2  
128.9 NM\_033437.2  
111.3 NM\_001083.3  
114.5 NM\_033430.2  
    112 NM\_001083.3  
111.4 NM\_000440.1  
116.5 NM\_000283.1  
117.1 NM\_006204.2  
131.6 NM\_002601.2  
124.9 NM\_002602.1  
    122 NM\_006205.1  
132.7 NM\_002603.1  
184.5 NM\_002604.1  
108.6 NM\_002603.1  
121.2 NM\_018945.3  
134.9 NM\_173455.1  
121.9 NM\_002605.2  
    117 NM\_002605.2  
134.4 NM\_001029851.1  
119.8 NM\_001029851.1  
113.9 NM\_001001584.1  
125.6 NM\_001001567.1  
118.3 NM\_001001573.1  
125.7 NM\_001001570.1  
116.6 NM\_022341.1  
120.6 NM\_033023.3  
127.9 XM\_942520.1  
124.2 NM\_002608.1  
118.4 NM\_033016.1  
    121 NM\_033016.1  
126.4 NM\_016205.1  
113.9 NM\_025208.4  
131.3 NM\_025208.3  
122.5 NM\_006206.3

120.7 NM\_002609.3  
115.3 NM\_006207.1  
181.6 NM\_000284.1  
115.4 NM\_005390.3  
326.7 NM\_000925.1  
165.4 NM\_003477.1  
122.5 NM\_006849.1  
126.7 NM\_005313.4  
119.3 NR\_002305.1  
126.3 NM\_004911.3  
117.4 NM\_006810.1  
145.3 NM\_005742.2  
134.8 NM\_152835.1  
115.4 NM\_174924.1  
133.7 NM\_002610.3  
122.8 NM\_002611.3  
130.8 NM\_005391.1  
145.6 NM\_002612.2  
117.8 NM\_020992.2  
118.2 NM\_176871.2  
110.3 NM\_198042.2  
117.3 NM\_014476.1  
110.9 NM\_003687.2  
119.2 NM\_001011515.1  
120.8 NM\_006457.2  
119.1 NM\_001011516.1  
116.7 NM\_213636.1  
    124 NM\_005451.3  
170.6 NM\_213636.1  
125.4 NM\_020786.1  
105.9 XM\_939834.1  
201.7 NM\_002613.3  
434.5 NM\_031268.4  
    114 NM\_001006625.1  
123.2 NM\_198389.2  
191.3 XM\_942678.1  
    383 NM\_017990.3  
    118 NM\_017990.3  
253.1 NM\_030815.2  
127.4 NM\_014317.3  
419.3 NM\_020381.2  
384.7 NM\_003681.3  
152.1 NM\_020315.3  
110.3 NM\_024411.2  
119.1 NM\_016484.4  
125.8 NM\_024791.2  
    125 NM\_032512.2  
106.4 NM\_024895.3  
147.6 NM\_173791.2  
123.6 NM\_002614.3  
127.6 NM\_005764.3

112.2 NM\_178140.1  
110.6 NM\_178140.1  
112.5 NM\_001042516.1  
109.8 NM\_001042515.1  
120.9 NM\_001042516.1  
    122 NM\_015009.1  
108.6 NM\_015009.1  
127.1 XM\_946222.1  
122.1 NM\_013377.2  
493.7 NM\_003768.2  
129.6 NM\_001080471.1  
135.2 NM\_002567.2  
129.9 NM\_144962.1  
149.6 NM\_000442.2  
161.4 NM\_006117.2  
143.1 NM\_006117.2  
126.9 NM\_018441.2  
303.1 NM\_012392.1  
117.3 NM\_001040152.1  
119.4 NM\_006210.1  
269.6 NM\_020651.2  
168.9 NM\_021255.1  
    127 NM\_145065.1  
1361.7 NM\_015946.4  
131.9 NM\_014389.1  
124.6 NM\_148173.1  
111.1 NM\_148173.1  
119.5 NM\_007169.2  
132.1 NM\_148172.1  
115.5 NM\_006211.2  
121.1 NM\_021830.3  
273.9 NM\_000285.1  
181.2 NM\_002616.1  
104.5 NM\_003894.3  
202.3 NM\_022817.1  
120.7 NM\_001080526.1  
134.4 NM\_033419.3  
111.4 NM\_022121.2  
133.2 NM\_022574.2  
125.3 NM\_014303.2  
118.4 NM\_004564.1  
159.8 NM\_000466.1  
135.2 NM\_002617.3  
120.6 NM\_153818.1  
120.5 NM\_003847.1  
218.5 NM\_003846.1  
125.9 NM\_080662.2  
114.4 NM\_000286.1  
    110 NM\_002618.2  
139.1 NM\_004565.1  
248.7 NM\_004813.1

115.7 NM\_057174.1  
244.2 NM\_004813.1  
171.3 NM\_002857.2  
119.7 NM\_017929.3  
112.7 NM\_003630.1  
    201 NM\_000319.3  
    112 NM\_016559.1  
122.6 NM\_000287.2  
127.6 NM\_000288.1  
115.6 NM\_002619.1  
123.2 NM\_002620.1  
173.7 NM\_014887.1  
126.3 NM\_012393.1  
139.8 NM\_002621.1  
    277 NM\_002622.3  
116.5 NM\_012394.2  
122.7 NM\_002623.3  
2137.7 NM\_002624.2  
1166.2 NM\_145897.2  
137.9 NM\_014260.2  
120.6 NM\_002625.1  
123.5 NM\_006212.2  
115.6 NM\_001018053.1  
126.1 NM\_001018053.1  
655.7 NM\_004566.2  
149.5 NM\_004567.2  
112.6 NM\_001002021.1  
140.6 NM\_002626.4  
139.2 NM\_000289.3  
236.2 NM\_002627.3  
2907.7 NM\_005022.2  
117.4 NM\_053024.2  
122.6 NM\_053024.2  
121.1 NM\_001029886.1  
110.5 NM\_199346.1  
129.2 NM\_016095.1  
119.5 NM\_012395.2  
112.8 NM\_001079807.1  
120.5 NM\_001079808.1  
109.4 NM\_014224.1  
284.7 NM\_002629.2  
119.7 NM\_000290.2  
125.9 NM\_001029891.2  
115.1 NM\_138575.1  
126.2 NM\_024989.3  
126.5 NM\_032507.2  
144.1 NM\_170725.2  
    116 NM\_170725.2  
119.8 NM\_170753.1  
118.2 NM\_152595.4  
123.1 NM\_024554.2

121.7 NM\_002630.1  
149.9 NM\_016134.2  
1326.6 NM\_002631.2  
119.5 NM\_014485.2  
126.7 NM\_001002880.1  
114.2 NM\_001002880.1  
119.3 NM\_002632.4  
130.3 NM\_005023.2  
448.3 NM\_000291.2  
110.1 NM\_138733.2  
175 NM\_012088.2  
130 NM\_005091.1  
119.2 NM\_052890.2  
118.5 NM\_052891.1  
115.7 NM\_020393.2  
164.8 NM\_002633.2  
114 NM\_018290.2  
230.2 NM\_173582.3  
114.7 NM\_015599.1  
114.8 NM\_021965.3  
111 NM\_021965.3  
103.2 XM\_936702.1  
115.9 NR\_002836.1  
117.6 XR\_001072.1  
106.8 NM\_017712.1  
111 NM\_000926.2  
381.7 NM\_006667.2  
391.8 NM\_006320.1  
170.8 NM\_024419.3  
116.3 NM\_017732.3  
120.6 NM\_177939.2  
141.7 NM\_177938.2  
118.5 NM\_032592.1  
135.4 NM\_030948.1  
161.7 NM\_014721.1  
119.9 NM\_080672.3  
117.7 NM\_080672.3  
113.8 NM\_183246.1  
240.6 NM\_023923.2  
118.2 NM\_023923.3  
111.4 NM\_023923.3  
184.2 NM\_002634.2  
138.1 NM\_007273.3  
130.2 NM\_004426.2  
114.4 NM\_004427.2  
131.1 NM\_198040.1  
109.6 NM\_198040.1  
174.2 NM\_024947.2  
169.5 NM\_018367.3  
117 NM\_000444.2  
128.7 NM\_024165.1



258.3 NM\_002636.3  
344.3 NM\_002636.3  
249.5 NM\_133325.1  
669.6 NM\_001040443.1  
1086.5 NM\_016119.1  
114.8 NM\_001040443.1  
113.2 NM\_020889.2  
145.9 NM\_001033561.1  
126.3 NM\_020889.2  
534.8 NM\_153812.1  
119.3 NM\_001007157.1  
125.5 NM\_014660.2  
132.3 NM\_001007157.1  
229.8 NM\_015288.4  
    137 NM\_014735.2  
127.5 NM\_014735.3  
121.6 NM\_199320.1  
162.3 NM\_024900.2  
143.3 NM\_199320.1  
136.4 NM\_015651.1  
134.7 NM\_001009936.1  
128.1 NM\_001009936.1  
129.7 NM\_005392.2  
169.5 NM\_024517.1  
150.6 NM\_016436.3  
148.3 NM\_198513.1  
273.3 NM\_016018.3  
120.6 NM\_198513.1  
129.9 NM\_032205.2  
186.6 NM\_198513.1  
465.2 NM\_016621.2  
123.6 NM\_138415.1  
331.9 NM\_020395.2  
137.6 NM\_024297.1  
129.1 NM\_015153.1  
486.1 NM\_032758.3  
    119 NM\_032335.2  
107.4 NM\_032458.2  
116.1 NM\_173341.1  
111.8 NM\_016483.4  
116.7 NM\_173341.1  
112.8 NM\_015107.1  
644.2 NM\_006623.2  
177.8 NM\_177967.2  
289.6 NM\_017934.4  
127.8 NM\_002637.1  
315.8 NM\_000292.1  
146.1 NM\_000293.1  
    123 NM\_001031835.1  
253.4 NM\_001031835.1  
124.5 NM\_006213.3

137.7 NM\_000294.1  
162.1 NM\_007350.2  
137.4 NM\_003311.3  
122.7 NM\_012396.2  
134 NM\_015157.1  
111 NM\_145753.1  
134.6 NM\_198850.2  
131.1 NM\_194449.1  
168.7 NM\_015020.2  
107.4 NM\_178500.2  
113.9 NM\_001008489.2  
117.6 NM\_005169.2  
115.5 NM\_003924.2  
131.6 NM\_014172.2  
436.1 NM\_006608.1  
128.2 NM\_020432.2  
123.3 NM\_006214.3  
123.1 NM\_006214.3  
205.6 NM\_006214.2  
1121.8 NM\_012260.1  
104.4 NM\_174933.2  
118 NM\_014759.2  
108.3 NM\_032439.1  
116 NM\_015886.3  
112.8 NM\_153370.2  
110.3 NM\_002638.2  
114.4 NM\_018323.2  
225.6 NM\_018425.2  
311.8 NM\_016166.1  
106.3 NM\_173206.2  
183.9 NM\_173206.2  
123.9 XM\_938229.1  
133.2 NM\_006099.2  
560.2 NM\_015897.2  
121.9 NM\_014422.2  
112.1 NM\_014422.2  
137.7 NM\_007166.2  
359.8 NM\_007166.2  
157.8 NM\_012407.3  
112.9 NM\_025049.2  
128.2 NM\_017993.1  
319.2 NM\_020472.1  
119.1 NM\_002641.1  
121.2 NM\_020473.2  
142.8 NM\_004855.3  
205.7 NM\_153747.1  
125.9 NM\_153747.1  
156.7 NM\_173074.1  
129.5 NM\_173074.1  
135 NM\_017733.2  
147 NM\_004569.2

134.7 NM\_005482.1  
110.3 NM\_004278.2  
138.3 NM\_145167.1  
127.7 NM\_176787.3  
126.5 NM\_176787.3  
144 NM\_012327.3  
119.3 NM\_032634.2  
115.5 NM\_152850.2  
126.3 NM\_032634.2  
134.9 NM\_004204.2  
117.8 NM\_002644.2  
157.4 NM\_033198.2  
158.3 NM\_015937.2  
156 NM\_017837.2  
119.2 NM\_178517.3  
154.6 NM\_017861.1  
286 NM\_032906.2  
121 NM\_025163.2  
134.9 NM\_152309.2  
119.1 NM\_002645.1  
107.3 NM\_002646.2  
104.2 NM\_004570.2  
124.4 NM\_002647.2  
159.2 NM\_006218.2  
119.8 NM\_006219.1  
264 NM\_005026.2  
135.5 NM\_002649.2  
184.3 NM\_181504.2  
109.4 NM\_181504.2  
123.4 NM\_181524.1  
118.8 NM\_181523.1  
125.9 NM\_181504.2  
212.2 NM\_005027.2  
118.1 NM\_003629.2  
116.5 NM\_014602.1  
113.8 NM\_014308.1  
958.6 NM\_058004.1  
205.1 NM\_002651.1  
410.4 NM\_178272.1  
174 NM\_178272.1  
237.5 NM\_013439.2  
121.7 NM\_013440.3  
260.6 NM\_175047.2  
117.6 NM\_178238.1  
124.6 NM\_175047.2  
324.2 NM\_002648.2  
471.6 NM\_006875.2  
198.8 NM\_001001852.2  
118.8 NM\_001001852.2  
409.9 NM\_006221.2  
150.9 NM\_032409.1

125.5 NM\_017884.3  
114.7 NM\_002652.2  
200.6 NM\_015553.1  
156.3 NM\_003557.1  
115.3 NM\_001031687.1  
177.8 NM\_012398.1  
    171 NM\_005028.3  
116.8 NM\_138687.1  
116.5 NM\_003559.3  
143.6 NM\_024779.3  
117.9 NM\_152671.2  
    114 NM\_152671.2  
117.5 NM\_015040.2  
114.8 NM\_173492.1  
101.3 NM\_016518.2  
164.3 NM\_001018109.1  
156.2 NM\_001018109.1  
162.6 NM\_014338.3  
150.7 NM\_006224.2  
216.8 NM\_012399.3  
206.3 NM\_181671.1  
120.5 NM\_181671.1  
821.5 NM\_004910.1  
131.7 NM\_020845.1  
114.1 NM\_031220.1  
303.6 NM\_014889.2  
106.6 NM\_002653.3  
112.4 NM\_000325.4  
128.8 NM\_153427.1  
113.5 NM\_153426.1  
104.4 NM\_005029.3  
116.5 NM\_004764.3  
124.9 XM\_938848.1  
120.5 NM\_018068.2  
    117 NM\_001008496.1  
125.4 NM\_152431.1  
126.9 NM\_145119.2  
183.6 NM\_001032396.1  
127.6 NM\_145119.2  
623.4 NM\_014819.2  
116.3 NM\_001040066.1  
147.6 NM\_001009944.1  
134.9 NM\_001009944.1  
126.5 NM\_138295.2  
108.6 NM\_001076780.1  
109.6 NM\_052892.2  
115.7 NM\_001076780.1  
118.7 NM\_182740.1  
129.7 NM\_181536.1  
126.5 NM\_000297.2  
114.3 NM\_016112.2

113.4 NM\_014386.1  
112.8 NM\_006071.1  
120.8 NM\_170724.1  
113.6 NM\_170724.1  
120.7 NM\_138694.2  
117.5 NM\_177531.3  
267.1 NM\_181839.1  
    126 NM\_006823.2  
147.9 NM\_006823.2  
113.2 NM\_181794.1  
116.6 NM\_032471.4  
113.8 NM\_181805.1  
128.1 NM\_007066.3  
127.5 NM\_181804.1  
117.9 NM\_181871.1  
113.4 NM\_000298.4  
119.4 NM\_181871.1  
116.9 NM\_000298.4  
965.2 NM\_182471.1  
171.8 NM\_182470.1  
165.8 NM\_002654.3  
117.7 NM\_182687.1  
118.1 NM\_213560.1  
132.2 NM\_213560.1  
127.6 NM\_213560.1  
125.9 NM\_002741.3  
124.1 NM\_006256.1  
123.5 NM\_013355.3  
255.9 NM\_197976.1  
188.8 NM\_004571.3  
112.9 NM\_022062.1  
118.8 NM\_000299.2  
109.2 NM\_001005337.1  
114.7 NM\_001005242.1  
124.6 NM\_007183.2  
111.1 NM\_003628.3  
146.1 NM\_003628.3  
118.1 NM\_015900.1  
106.8 NM\_003561.1  
    111 NM\_030821.3  
175.1 NM\_032562.2  
111.9 NM\_000928.2  
113.5 NM\_000300.2  
220.9 NM\_012400.2  
115.2 NM\_014589.1  
111.7 NM\_022819.2  
107.8 NM\_015715.2  
118.7 NM\_024420.1  
332.8 NM\_005090.1  
247.3 NM\_003706.1  
113.2 NM\_178034.3

130 NM\_001080490.1  
111.3 NM\_213600.2  
114.8 NM\_000929.1  
141.3 NM\_003560.2  
112.9 NM\_003560.2  
894.9 NM\_005084.2  
109.7 NM\_001007267.1  
117.4 NM\_007366.3  
129.2 NM\_004253.2  
132.2 NM\_001031689.1  
137.9 NM\_001031689.1  
119 NM\_021796.3  
135.2 NM\_153375.1  
119.4 NM\_182832.1  
326.9 NM\_016619.1  
220.1 NM\_001029869.1  
112.4 NM\_001012973.1  
125.4 NM\_002655.1  
122 NM\_002655.1  
124.1 NM\_006718.2  
116 NM\_001080952.1  
220.6 NM\_002657.2  
117.7 NM\_000930.2  
119.6 NM\_002658.2  
165.3 NM\_001005376.1  
158.5 NM\_002659.2  
252.2 NM\_001005376.1  
126.9 NM\_153021.3  
143.7 NM\_182734.1  
116.5 NM\_182734.1  
117.9 NM\_004573.1  
120.3 NM\_000932.1  
130.5 NM\_000933.2  
114.5 NM\_000933.2  
126.3 NM\_006225.1  
121.7 NM\_133373.2  
112.8 NM\_032726.2  
125.3 NM\_016341.2  
120.6 NM\_182811.1  
141.4 NM\_002660.2  
258.1 NM\_002661.1  
113.1 NM\_014996.1  
145.8 NM\_014638.2  
137.2 NM\_006226.1  
196.1 NM\_015184.2  
127.4 NM\_018390.1  
119.2 NM\_153268.1  
107.4 NM\_001005473.1  
116.8 NM\_033123.2  
121 NM\_002662.2  
121.4 NM\_002663.2

124.6 NM\_001031696.1  
343.9 NM\_001031696.1  
129.3 NM\_012268.1  
111.3 NM\_138790.1  
113.9 NM\_152666.1  
817.2 NM\_012388.2  
153.7 NM\_201384.1  
125.7 NM\_201378.1  
126.2 NM\_201380.2  
124.7 NM\_201381.1  
120.3 NM\_201379.1  
115 NM\_201382.1  
123.7 NM\_201383.1  
115.5 NM\_000445.2  
612.4 NM\_002664.1  
121.7 NM\_016445.1  
337.1 NM\_021622.3  
278.1 NM\_001001974.1  
159 NM\_019091.3  
140.2 NM\_020904.1  
123.9 NM\_019012.2  
113 NM\_014935.2  
111.8 NM\_175058.3  
124.9 NM\_032639.2  
145.3 NM\_015899.1  
131.7 NM\_021200.1  
392.3 NM\_017958.1  
499.9 NM\_001031706.1  
107.9 NM\_001031706.1  
141.4 NM\_006832.1  
392.5 NM\_024310.2  
134 NM\_024613.2  
109.3 NM\_001029884.1  
125.2 NM\_022835.1  
143.9 NM\_015549.1  
113.9 NM\_015432.2  
116.8 NM\_001042664.1  
121.4 NM\_001042663.1  
112.3 NM\_020631.2  
119.4 NM\_198681.1  
122.2 NM\_020631.2  
113.9 NM\_018173.1  
121.2 NM\_020715.1  
121.8 NM\_172069.1  
121.3 NM\_024927.3  
118.2 NM\_018049.1  
221 NM\_014798.1  
127.5 NM\_032129.1  
236.4 NM\_016274.3  
213 NM\_025201.3  
118.4 NM\_000301.1

202.6 NM\_001032392.2  
119.5 NM\_002666.3  
140.1 NM\_005030.3  
133.5 NM\_006622.1  
145.2 NM\_004073.2  
135 NM\_014264.2  
121.4 NM\_002667.2  
244.9 NM\_000302.2  
116.4 NM\_182943.2  
111.1 NM\_000935.2  
120.3 NM\_182943.2  
618 NM\_001084.4  
116.7 NM\_000533.3  
114.9 NM\_199478.1  
126.3 NM\_000533.3  
117.9 NM\_002668.1  
707.3 NM\_002669.2  
118.3 NM\_002670.1  
108.6 NM\_005032.3  
106.9 NM\_021105.1  
117 NM\_020359.1  
805.9 NM\_020360.2  
117.3 NM\_020353.1  
123.7 NM\_006227.2  
118.5 NM\_006227.2  
113.9 NM\_016583.2  
117.4 NM\_031310.1  
128.9 NM\_020405.3  
117.4 NM\_032812.7  
129.6 NM\_032242.2  
122.5 NM\_025179.2  
148.5 NM\_017514.2  
117.9 NM\_181775.2  
115.4 NM\_002673.3  
109.6 NM\_005393.1  
124.5 NM\_005761.1  
128.4 NM\_015103.1  
428.2 NM\_021127.1  
109.9 NM\_002674.2  
126.6 NM\_031887.2  
130.7 NM\_031293.1  
122 NM\_033246.2  
110.3 NM\_033238.2  
122.1 NM\_033246.2  
119.3 XM\_945882.1  
112.9 NM\_033240.2  
490.2 NM\_002676.1  
131.7 NM\_000303.1  
115.7 NM\_002677.3  
115.1 NM\_153321.1  
114.1 NM\_000304.2



115 NM\_153322.1  
117.9 NM\_001013743.1  
218.9 NM\_015160.1  
362.1 NM\_004279.1  
126.8 NM\_000534.3  
129.2 NM\_001018040.1  
121.2 NM\_000535.4  
123.5 NR\_002217.1  
107.5 NR\_002217.1  
109.6 NM\_002679.1  
146.6 NM\_001003686.1  
131.8 NM\_174930.2  
196.5 NM\_006556.2  
127.7 NM\_198452.1  
199.8 NM\_022572.2  
134.7 NM\_022572.2  
116.3 NM\_015488.3  
225.8 NM\_007254.2  
197.4 NM\_173516.1  
113.6 NM\_000936.2  
113.7 NM\_006229.1  
109.9 NM\_005396.3  
110.1 NM\_001011709.1  
127.6 NM\_006029.4  
124.7 NM\_007257.4  
110.3 NM\_013364.2  
118.7 NM\_052926.1  
128.8 NM\_032882.2  
103.7 NM\_002686.2  
729.9 NM\_002687.2  
123.4 NM\_006228.2  
112.1 NM\_001039725.1  
115.1 NM\_173676.1  
327.8 NM\_020376.2  
117.4 NM\_004650.1  
120.8 NM\_138814.2  
158.5 NM\_015723.2  
150 NM\_018129.1  
4416.2 NM\_033109.2  
133 NM\_006813.1  
669.8 NM\_017761.2  
122.9 NM\_153703.3  
123 NM\_001018111.1  
116.5 NM\_001018111.1  
117.3 NM\_005397.2  
114.4 NM\_015720.1  
126.7 NM\_024921.2  
688.9 NM\_015352.1  
121.5 NM\_172236.1  
101.4 NM\_172236.1  
184.6 NM\_133635.4

123.9 NM\_015227.3  
197.9 NM\_133635.4  
289.9 NM\_017542.3  
131.5 NM\_145796.2  
130.8 NM\_145796.2  
120.1 NM\_207171.1  
122.1 NM\_001039503.2  
119.7 NM\_016937.2  
138.2 NM\_002689.2  
484 NM\_002690.1  
173.9 NM\_002691.1  
114.7 NM\_006591.1  
118.5 NM\_021173.2  
157 NM\_015584.2  
343.9 NM\_032311.3  
120.8 NM\_032311.3  
175 NM\_006231.2  
123.8 NM\_002692.2  
1010.1 NM\_017443.3  
541.8 NM\_019896.2  
289.9 NM\_002693.1  
129.2 NM\_007215.2  
115.7 NM\_006502.1  
111.5 NM\_007195.1  
117.3 NM\_016218.1  
119.2 NM\_013274.2  
142.6 NM\_013284.1  
117.3 NM\_181808.1  
116.4 NM\_199420.2  
116.3 NM\_015425.1  
115.4 NM\_019014.3  
139.8 NM\_203290.1  
175.2 NM\_004875.2  
1552.1 NM\_015972.1  
224.9 NM\_022490.1  
1049.1 NM\_000937.2  
236.8 NM\_000938.1  
154.4 NM\_002694.2  
574.6 NM\_032940.1  
152.5 NM\_004805.2  
358.7 NM\_021974.2  
267.6 NM\_002696.1  
219.1 NM\_006232.2  
139.5 NM\_006233.4  
139.9 NM\_006234.4  
118.3 NM\_145325.2  
127.1 NM\_032958.3  
167.3 NM\_001015884.1  
125.5 NM\_005034.3  
165.2 NM\_021128.3  
164 NM\_007055.2

134.8 NM\_018082.3  
219.9 NM\_006468.5  
120.4 NM\_001722.2  
124.1 NM\_006466.2  
122.8 NM\_006467.2  
346.6 NM\_032305.1  
133.8 NM\_138338.2  
111.7 NM\_001018050.1  
106.6 NM\_001018051.1  
155.1 NM\_016310.2  
165.7 NM\_005035.2  
229.6 NM\_006999.3  
124.7 NM\_172020.1  
136.8 NM\_001035256.1  
124.4 NM\_000939.1  
142.3 NM\_017739.1  
109.3 NM\_015932.2  
    114 NM\_007171.3  
145.8 NM\_007171.3  
153.7 NM\_013382.3  
124.2 NM\_012230.2  
114.7 NM\_000446.3  
127.2 NM\_000305.2  
113.7 NM\_000940.1  
132.2 NM\_015029.1  
140.7 NM\_006627.1  
130.7 NM\_015918.3  
157.1 NM\_005837.1  
111.7 NM\_022135.2  
121.5 NM\_022361.3  
209.4 NM\_000941.1  
123.1 NM\_022825.2  
124.2 NM\_203474.1  
    114 NM\_006475.1  
124.3 NM\_015450.1  
145.5 NR\_003104.1  
115.3 NR\_003102.1  
119.6 NM\_207355.2  
105.8 NM\_001005364.1  
118.8 NM\_001005365.2  
110.1 NM\_000306.1  
    123 NM\_006235.1  
160.3 NM\_002697.2  
108.8 NM\_002698.1  
125.1 NM\_014352.1  
122.4 NM\_002699.3  
126.6 NM\_005604.2  
118.1 NM\_006236.1  
    117 NM\_000307.1  
111.1 NM\_006237.2  
120.9 NM\_004575.1

120.7 NM\_002700.1  
119.4 NM\_002701.3  
116.2 NR\_002304.1  
128.7 NM\_002702.2  
105.4 NM\_007252.2  
409 NM\_025204.2  
120.5 NM\_001080113.1  
570.2 NM\_021129.2  
173.1 NM\_006903.3  
3242.8 NM\_006903.4  
117.4 NM\_176869.1  
131 NM\_020230.4  
121.3 NM\_001040664.1  
119.2 NM\_003711.2  
138.2 NM\_176895.1  
138 NM\_176895.1  
127.6 NM\_003713.3  
114.1 NM\_177414.1  
125.9 NM\_177543.1  
117.8 NM\_177543.1  
129.3 NM\_177526.1  
118.1 NM\_001030059.1  
154.8 NM\_032483.2  
119.7 NM\_203453.2  
120 NM\_032728.2  
110.8 NM\_001001930.2  
126.4 NM\_001001928.2  
125.5 NM\_004774.2  
116.9 NM\_177435.1  
146.9 NM\_006238.2  
112.5 NM\_015869.3  
118.3 NM\_138712.3  
118.5 NM\_138712.3  
128.6 NM\_138711.2  
122.7 NM\_013261.2  
103.1 NM\_133263.2  
127.2 NM\_002703.3  
114.7 NM\_002704.2  
115.8 NM\_021823.3  
182.2 NM\_001077447.1  
209.5 NM\_024664.1  
127.4 NM\_006240.2  
120.1 NM\_006240.2  
115.8 NM\_152933.1  
331.4 NM\_003626.2  
126.2 NM\_177423.1  
140.8 NM\_177423.1  
112.3 NM\_003625.2  
110.7 NM\_003660.2  
110.5 NM\_015053.1  
116.2 NM\_177444.1

125.5 NM\_177444.1  
112.5 NM\_003622.2  
189.9 NM\_003621.1  
147.1 NM\_000308.1  
270.8 NM\_201440.1  
128.3 NM\_201438.1  
130.6 NM\_016488.5  
258 NM\_201440.1  
116.4 NM\_203430.1  
121.6 NM\_000942.4  
113.2 NM\_000943.4  
120.2 NM\_005038.2  
154.1 NM\_006112.2  
124.9 NM\_203456.1  
131.2 NM\_005729.3  
119.5 NM\_004792.2  
169 NM\_006347.3  
128 NM\_016059.3  
119.9 NM\_014337.2  
122.8 NM\_148175.1  
110.7 NM\_014337.2  
151.9 NM\_131916.1  
122.4 NM\_032472.3  
353.7 NM\_032472.3  
117.9 NM\_130906.1  
116.4 NM\_139126.2  
214.6 NM\_152329.3  
107.2 NM\_203467.1  
122.8 NM\_152329.3  
131.3 NM\_173672.1  
107.4 NM\_002705.3  
116.6 NM\_177952.1  
162.6 NM\_177952.1  
121.3 NM\_177951.1  
143.4 NM\_177952.1  
119 NM\_177969.2  
852.9 NM\_177968.2  
129.9 NM\_001033556.1  
133.8 NM\_001033556.1  
108.2 NM\_001033557.1  
316.7 NM\_003620.2  
121.3 NM\_014906.3  
205.9 NM\_014634.2  
120.3 NM\_177983.1  
395.2 NM\_002707.3  
113.2 NM\_005167.5  
216.6 NM\_152542.2  
106.9 NM\_139245.2  
221.9 NM\_144641.1  
139.5 NM\_018444.2  
143.8 NM\_016147.1

122.4 NM\_000309.2  
137 NM\_002708.3  
358.2 NM\_206876.1  
654.3 NM\_002710.1  
345.5 NM\_002714.2  
995.9 NM\_021959.1  
211.8 NM\_002480.1  
128.1 NM\_032103.1  
158.2 NM\_017607.1  
214 NM\_015316.1  
134.9 NM\_006663.2  
137.9 NM\_033256.1  
226.1 NM\_138689.2  
115.3 NM\_030949.1  
122.4 NM\_017726.6  
11243.9 NM\_014330.2  
114.8 NM\_032833.2  
116.3 NM\_032902.5  
293.4 NM\_015568.2  
116.1 NM\_006741.2  
114.6 NM\_032192.2  
109.3 NM\_181505.1  
134.4 NM\_181505.1  
114.8 XM\_945023.1  
480.6 NM\_006241.3  
132.3 NR\_002168.1  
108.2 NR\_002191.2  
120 NM\_002711.2  
115.2 NM\_024607.1  
112.5 NM\_005398.3  
124.7 NM\_006242.3  
166.2 NM\_033215.3  
154.9 NM\_002712.1  
143.7 NM\_014110.3  
117.3 NM\_014110.3  
130.9 NM\_002713.2  
108.9 XM\_934519.1  
112.4 NM\_032595.1  
717.2 NM\_002715.2  
129.7 NM\_001009552.1  
176.7 NM\_004156.2  
421.4 NM\_014225.3  
116.2 NM\_002716.3  
124.6 NM\_181699.1  
130.2 NM\_181699.1  
1102.8 NM\_002717.2  
163.6 NM\_181677.1  
111.8 NM\_181676.1  
112.3 NM\_181678.1  
114.2 NM\_181674.1  
158 NM\_181676.1

121.3 NM\_004576.2  
111.8 NM\_181876.2  
118.3 NM\_181876.2  
127.1 NM\_181876.2  
113.5 NM\_020416.2  
128.2 NM\_018461.2  
118.7 NM\_001003656.1  
261.4 NM\_018461.2  
115.8 NM\_181897.1  
112.9 NM\_002718.3  
130.4 NM\_002718.3  
129.2 NM\_013239.3  
120.2 NM\_199326.1  
108.7 NM\_199326.1  
448.4 NM\_017917.2  
111.1 NM\_178001.1  
121.7 NM\_178003.1  
124.6 NM\_021131.3  
216.2 NM\_178000.1  
257.7 NM\_006243.2  
120.5 NM\_006244.2  
492.6 NM\_178588.1  
    127 NM\_002719.2  
    126 NM\_178587.1  
121.5 NM\_006245.2  
    134 NM\_180977.1  
166.7 NM\_180976.1  
580.2 NM\_006246.2  
126.1 NM\_000944.2  
336.3 NM\_021132.1  
267.9 NM\_005605.3  
318.6 NM\_000945.3  
110.2 NM\_147180.2  
260.4 NM\_005134.1  
159.8 NM\_005134.1  
120.7 NM\_018498.2  
113.8 NM\_174907.1  
125.8 NM\_006247.2  
891.3 NM\_002721.3  
211.3 NM\_015062.3  
885.2 NM\_000310.2  
114.6 NM\_138717.1  
126.2 NM\_138717.1  
254.8 NM\_015342.1  
119.9 NM\_002722.2  
125.3 NR\_002181.1  
112.9 NM\_005972.3  
134.7 NM\_001032385.1  
158.8 NM\_001032382.1  
124.5 NM\_005710.2  
379.3 NM\_025078.3

125.4 NM\_001040125.1  
115.9 NM\_001040125.1  
234.3 NM\_152391.2  
122.3 NM\_032391.2  
116.1 NM\_007213.1  
114.7 NM\_032152.3  
106.1 NM\_206953.1  
134.9 NM\_206955.1  
124.8 NM\_206956.1  
105 NM\_023013.1  
122.9 NM\_001039361.1  
103.2 NM\_001039361.1  
119.5 XM\_496342.2  
111.9 NM\_001045480.1  
113.9 NM\_001009611.1  
144.2 NM\_001013407.1  
119.1 NM\_001010889.2  
117.9 NM\_001012277.1  
115.6 NM\_001012276.1  
124.3 NM\_001010890.1  
119.8 NM\_145202.3  
115.1 NM\_199354.1  
108.6 NM\_199353.1  
118.9 NM\_006248.2  
114.6 NM\_006249.4  
114 NM\_002723.3  
191.5 NM\_003981.2  
117.3 NM\_005973.4  
172.2 NM\_199416.1  
361.7 NM\_199418.1  
169.8 NM\_005040.2  
133.3 NM\_182907.1  
126 NM\_001198.2  
125.1 NM\_001198.2  
328.7 NM\_001198.2  
225 NM\_020228.2  
113.4 NM\_020229.2  
116.3 NM\_021619.2  
118.6 NM\_021620.2  
113.4 NM\_024504.2  
114.2 NM\_022115.2  
116 NM\_022114.2  
114.2 NM\_022114.2  
119.3 XM\_936938.1  
122.9 NM\_012231.3  
123.7 NM\_012231.3  
207.7 NM\_012406.3  
119.3 NM\_018699.2  
116.1 NM\_052996.2  
146.2 NM\_020226.2  
131.7 NM\_020227.1



5969.6 NM\_181696.1  
2681.6 NM\_181696.1  
112.8 NM\_181738.1  
127.3 NM\_181738.1  
339.1 NM\_006793.2  
136.1 NM\_006406.1  
337.1 NM\_012094.3  
854.1 NM\_181652.1  
917.8 NM\_181652.1  
1372.6 NM\_004905.2  
160.5 NM\_013388.4  
120 NM\_001080845.1  
193.1 NM\_199482.1  
145.1 NM\_015387.2  
114 NM\_199482.1  
281.3 NM\_013237.2  
113.2 NM\_205846.1  
113.3 NM\_201348.1  
137.5 NM\_002726.3  
141.3 NM\_006036.3  
134.2 NM\_020820.2  
315.5 NM\_005041.3  
117.3 NM\_024888.1  
120.5 NM\_002728.4  
116 NM\_006093.2  
125.2 NM\_017753.2  
108.3 NM\_207299.1  
112.7 NM\_017753.2  
122.1 NM\_006250.1  
112.8 NM\_005042.2  
351.2 NM\_033405.2  
122.3 NM\_153026.1  
112.5 NM\_198859.1  
138.9 NM\_000946.2  
113.4 NM\_000947.2  
108.6 NM\_178004.1  
144.8 NM\_206907.2  
158.6 NM\_206907.3  
111.1 NM\_006252.2  
143.5 NM\_006253.4  
126.9 NM\_005399.3  
121.2 NM\_002730.3  
126 NM\_207518.1  
115 NM\_182948.2  
151.6 NM\_002731.2  
111.9 NM\_207578.1  
130.5 NM\_207578.1  
113.9 NM\_002732.2  
193.8 NM\_212461.1  
232.5 NM\_002733.3  
206.4 NM\_016203.2

131.4 NM\_001040633.1  
114.1 NM\_016203.2  
125.9 NM\_017431.2  
112.6 NM\_212471.1  
535.3 NM\_002734.3  
119.2 NM\_002735.1  
116.5 NM\_004157.2  
111.8 NM\_002736.2  
204.7 NM\_002737.2  
123.2 NM\_012407.2  
133.2 NM\_212535.1  
237 NM\_212535.1  
1166.4 NM\_002738.5  
141.5 NM\_012408.3  
125.2 NM\_183047.1  
354.8 NM\_212539.1  
122.1 NM\_006254.3  
124.3 NM\_145040.2  
114 NM\_005400.2  
127 NM\_002739.3  
759.8 NM\_006255.3  
135.8 NM\_002740.4  
266.1 NM\_006257.2  
198.3 NM\_001001329.1  
126.4 NM\_001001329.1  
125.1 NM\_001033582.1  
120.9 NM\_002744.4  
162.4 NM\_002744.4  
108.9 NM\_001033581.1  
105.7 NM\_002742.1  
201.1 NM\_016457.3  
157.7 NM\_001079881.1  
131.4 NM\_005813.3  
127.1 NM\_006904.6  
118.6 NM\_006904.6  
120.7 NM\_006904.6  
109.3 NM\_006258.1  
98.4 NM\_006259.1  
208.9 NM\_024653.1  
617.8 NM\_004705.2  
174.4 NM\_005044.1  
151.2 NM\_002760.2  
118.2 NM\_000948.2  
105.5 NM\_015893.1  
114 NM\_004248.1  
112.3 NM\_000949.2  
111 NM\_002761.1  
109.7 NM\_002762.2  
110.3 XM\_929446.1  
125.9 NM\_021247.1  
113.3 NM\_198319.1

149.6 NM\_198318.1  
218.1 NM\_198319.1  
209.6 NM\_001535.2  
126.7 NM\_206962.1  
253.8 NM\_206962.1  
137.3 NM\_001039619.1  
    174 NM\_006109.2  
126.2 NM\_018137.1  
137.3 NM\_019023.1  
120.5 NM\_019854.3  
    116 NM\_012409.2  
723.9 NM\_183079.2  
2728.9 NM\_183079.2  
123.6 NM\_024066.1  
113.9 NM\_177549.2  
699.7 NM\_014117.2  
121.8 NR\_002762.1  
274.4 NR\_002764.1  
187.3 NM\_144736.3  
119.6 NM\_144736.3  
126.5 NM\_000312.1  
114.6 NM\_152465.1  
116.5 NM\_006404.3  
111.1 NM\_016335.2  
133.9 NM\_021232.1  
117.4 NM\_032414.2  
183.9 NM\_021935.2  
108.3 NM\_138964.2  
108.2 NM\_144773.2  
107.9 NM\_021225.1  
131.4 NM\_006017.1  
116.9 NM\_144707.1  
117.4 NM\_006261.2  
119.5 NM\_000313.1  
125.2 NM\_014731.2  
468.1 NM\_007198.2  
111.6 NM\_002763.3  
120.9 NM\_003891.1  
131.5 NM\_173490.4  
    145 NM\_003675.2  
130.1 NM\_014502.3  
229.1 NM\_004698.1  
219.5 NM\_015629.2  
    245 NM\_032864.2  
142.8 NM\_032284.2  
169.6 NM\_018061.1  
122.5 NM\_017922.2  
394.5 NM\_004697.3  
118.2 NM\_001031698.1  
110.3 NM\_012272.1  
161.8 NM\_176800.1

113.7 NM\_176800.1  
181.5 NM\_003913.3  
444.7 NM\_006445.2  
141.7 NM\_006262.3  
409.3 NM\_002764.2  
117.9 NM\_175886.2  
140.6 NM\_002765.2  
150.4 NM\_001039091.1  
188.2 NM\_002766.1  
200.1 NM\_002767.2  
122.8 NM\_018304.1  
2450.1 NM\_018457.2  
130.3 NM\_175887.2  
128.2 NM\_001077497.1  
114.4 NM\_025263.1  
125.2 NM\_007244.1  
116.5 NM\_181333.2  
183.4 NM\_001017530.1  
151.7 NM\_001017530.1  
220.2 NM\_181716.2  
157.2 NM\_030567.2  
118 NM\_053043.1  
118.5 NM\_000950.1  
132.7 NM\_000951.1  
113.1 NM\_024082.2  
212.3 NM\_024081.4  
122.2 NM\_030651.2  
125.2 NM\_145239.1  
132.6 NM\_207351.2  
113 NM\_022716.2  
119.4 NM\_006902.3  
121.7 NM\_016307.3  
114.5 NM\_002769.2  
123 NM\_003619.2  
715.3 NM\_004793.2  
117.9 NM\_005865.2  
133.4 NM\_002770.2  
123.3 NM\_006799.2  
112.2 NM\_006799.2  
119.7 NM\_022119.3  
127 NM\_007173.3  
121.1 NM\_031948.3  
112.6 NM\_002771.2  
115.3 NM\_152891.1  
122.8 NM\_153362.1  
132.6 NM\_002772.1  
123.1 NM\_002773.2  
126.9 NM\_214710.1  
106 NM\_020200.5  
122.5 XM\_945227.1  
112.2 NM\_173814.3

113.3 NM\_002777.3  
137.4 NM\_021222.1  
120.1 NM\_138818.2  
118.8 NM\_181882.2  
120.4 NM\_020956.1  
125.4 NM\_020956.1  
    120 NM\_004676.2  
    1978 NM\_002778.1  
    2297 NM\_002778.1  
304.6 NM\_018622.4  
512.2 NM\_021154.3  
111.4 NM\_058179.2  
117.3 NM\_005672.2  
194.6 NM\_017456.2  
1775.1 NM\_017456.2  
142.4 NM\_004228.4  
136.6 NM\_017457.3  
130.6 NM\_004227.3  
321.6 NM\_013385.2  
113.2 NM\_004288.3  
109.8 NM\_002779.3  
108.7 NM\_032289.1  
117.1 NM\_015310.2  
149.4 NM\_206909.1  
129.7 NM\_206909.1  
152.4 NM\_012455.2  
117.2 NM\_000021.2  
112.5 NM\_007319.1  
    118 NM\_000447.1  
129.4 NM\_012486.1  
135.5 NM\_172341.1  
129.5 NM\_021067.2  
112.7 NM\_006905.2  
125.2 NM\_203287.1  
109.7 NM\_031246.1  
110.3 NM\_021016.2  
111.5 NM\_002780.3  
123.7 NM\_002780.3  
107.9 NM\_002780.3  
    113 NM\_002781.2  
113.8 NM\_002782.3  
118.2 NM\_001031850.1  
117.7 NM\_002782.3  
113.5 NM\_002783.1  
124.1 NM\_182707.1  
120.5 NM\_002784.2  
112.5 NM\_021144.2  
156.7 NM\_033222.2  
119.4 NR\_001591.1  
125.5 NM\_006742.1  
119.1 NM\_033126.1

130.6 NM\_148976.1  
415.5 NM\_002786.2  
2488.6 NM\_148976.1  
224.5 NM\_002787.3  
1011 NM\_152132.1  
263.4 NM\_002788.2  
525.6 NM\_002789.3  
1543.7 NM\_002790.2  
4992 NM\_002791.1  
118.1 NM\_001025096.1  
107.5 NM\_153696.2  
1660.9 NM\_002793.2  
401 NM\_002801.2  
1227.2 NM\_002794.3  
2332.5 NM\_002795.2  
1247.1 NM\_002796.2  
384.2 NM\_002797.2  
3885.8 NM\_002798.1  
2633.3 NM\_002799.2  
130.1 NM\_148919.3  
122.7 NM\_004159.4  
115.6 NM\_004159.4  
269.5 NM\_004159.4  
135.2 NM\_002800.4  
124.9 NM\_002800.4  
5222.2 NM\_002802.2  
2282.4 NM\_002803.2  
725.6 NM\_002804.3  
139.8 NM\_016556.1  
150 NM\_016556.1  
621.9 NM\_006503.2  
442.4 NM\_006503.2  
474.6 NM\_002805.4  
170.4 NM\_002806.2  
1647.7 NM\_002807.2  
390.3 NM\_170750.1  
116.2 NM\_002814.2  
187 NM\_002814.2  
209 NM\_002815.2  
1289.5 NM\_002816.3  
130.9 NM\_175932.1  
167.1 NM\_002817.2  
950.6 NM\_005805.2  
689.6 NM\_002808.3  
186.7 NM\_002809.2  
134.8 NM\_153822.1  
567.4 NM\_002810.2  
1031.1 NM\_002810.1  
129.9 NM\_005047.2  
1490.5 NM\_014814.1  
766.5 NM\_002811.3

595.2 NM\_002812.3  
136.2 NM\_002813.4  
871.1 NM\_006263.2  
142.8 NM\_176783.1  
313.5 NM\_002818.2  
243.5 NM\_005789.2  
221 NM\_005789.2  
915.7 NM\_014614.1  
122.4 NM\_178578.1  
298.3 NM\_178579.1  
126.5 NM\_014068.1  
121.9 NM\_014069.1  
139.1 NM\_018282.1  
104.9 NM\_004577.3  
135.8 NM\_004158.2  
119 NM\_001005290.2  
121.5 NM\_001032291.1  
124.3 NM\_001032290.1  
177.3 NM\_144982.3  
137.8 NM\_003978.2  
129.3 NM\_024430.2  
150 NM\_000952.3  
2011.4 NM\_175847.1  
3682.3 NM\_175847.1  
208.8 NM\_021190.1  
364.4 NM\_015545.2  
119.8 NM\_024754.3  
118.1 NM\_000264.2  
121.8 NM\_003738.3  
115.6 NM\_173495.1  
116.8 NM\_001034842.2  
116.5 NM\_138296.2  
117.4 NM\_013341.3  
116.5 NM\_013341.3  
630.4 NM\_016145.1  
211.6 NM\_024684.2  
118.3 NM\_015167.1  
293.2 NM\_015167.1  
416.7 NM\_014754.1  
125.6 NM\_030783.1  
236.2 NM\_000314.3  
115.8 NM\_030664.3  
114.1 NM\_001001484.1  
133.6 NM\_030664.3  
116 NM\_178161.1  
123.8 NM\_000953.2  
112.4 NM\_000954.5  
115.7 NM\_000955.2  
145.6 NM\_000956.2  
108.3 NM\_198715.1  
115.6 NM\_198716.1

132.1 NM\_198719.1  
107.6 NM\_000957.2  
117.4 NM\_198718.1  
125.2 NM\_198712.2  
234.5 NM\_000958.2  
111.5 NM\_004878.3  
143.2 NM\_198938.1  
136.7 NM\_198938.1  
1987.3 NM\_006601.4  
124.3 NM\_000959.3  
126 NM\_000959.2  
114.9 NM\_020440.2  
119.3 NM\_000960.3  
115.3 NM\_000961.3  
115.7 NM\_080591.1  
121.6 NM\_000962.2  
141.1 NM\_000963.1  
113.4 NM\_000315.2  
122.4 NM\_198966.1  
122.9 NM\_198965.1  
128.8 NM\_000316.2  
114.7 NM\_005048.2  
332.7 NM\_153831.2  
116.2 NM\_153831.2  
127.2 NM\_004103.3  
127.2 NM\_173176.1  
123.7 NM\_173174.1  
146.8 NM\_005975.2  
106.7 NM\_152882.2  
117.6 NM\_152880.2  
119.5 NM\_198974.1  
121.3 XM\_936937.1  
286.1 NM\_007284.3  
364.3 NM\_002823.2  
134.9 NM\_002824.4  
135.3 NM\_002825.5  
1302.4 NM\_017432.2  
131.4 NM\_003463.3  
1742 NM\_080392.2  
119.6 NM\_007079.2  
119.2 NM\_007079.2  
119.5 NM\_152422.3  
129 NM\_152422.3  
126 NM\_177995.1  
126.5 NM\_014241.2  
168.5 NM\_016395.1  
594.9 NM\_001010915.1  
436.7 NM\_198402.2  
345.1 NM\_002827.2  
360.5 NM\_002834.3  
320.9 NM\_002835.2



117.5 NM\_080684.1  
116.7 NM\_005401.3  
116.1 NM\_014369.2  
106.9 NM\_002828.2  
135.9 NM\_080422.1  
104.3 NM\_001042389.1  
108 NM\_001042358.3  
114.5 NM\_007039.2  
126.4 NM\_012411.2  
118.3 NM\_012411.2  
286 NM\_015967.3  
141 NM\_015466.1  
119.3 NM\_002829.2  
343.1 NM\_002830.2  
123.1 NM\_032781.2  
134 NM\_001039970.1  
139.9 NM\_080548.2  
212.8 NM\_080549.2  
121.7 NM\_080588.1  
329.5 NM\_080588.1  
118.7 NM\_002833.2  
124.8 NM\_002833.2  
313.6 NM\_080792.1  
163.2 NM\_080792.1  
134.6 NM\_080841.2  
139 NM\_080841.2  
139.3 NM\_080841.2  
135.3 NM\_080840.1  
112.3 NM\_002837.2  
106 NM\_080923.1  
123.8 NM\_080921.2  
126.2 NM\_080922.1  
122.7 NM\_002838.2  
165.2 NM\_005608.2  
115 NM\_130391.2  
115.8 NM\_130391.2  
510.7 NM\_130435.2  
112.2 NM\_006504.3  
134.2 NM\_130435.2  
115.6 NM\_002840.3  
118.1 NM\_130440.1  
136.6 NM\_002841.2  
120.5 NM\_002842.2  
148.9 NM\_002844.2  
130.9 NM\_002845.2  
115.8 NM\_002846.2  
114.4 NM\_002847.2  
117.4 NM\_030670.1  
132 NM\_030671.1  
117 NM\_002849.2  
123.8 NM\_130846.1

120.5 NM\_130855.2  
114.4 NM\_130855.2  
107.2 NM\_133170.2  
108.2 NM\_133170.2  
114.2 NM\_007050.4  
124.1 NM\_005704.3  
122.2 NM\_133178.1  
119.5 NM\_002851.1  
128.9 NM\_012232.2  
126.2 NM\_001002913.1  
298.9 NM\_016077.3  
    129 NM\_001015509.1  
369.2 NM\_000317.1  
717.9 NM\_004219.2  
    606 NM\_004339.2  
122.5 NM\_006607.1  
337.7 NR\_002734.1  
116.6 NM\_002852.2  
1457.4 NM\_001020658.1  
641.4 NM\_014676.2  
365.9 NM\_015317.1  
109.2 NM\_004884.2  
143.2 NM\_005859.3  
593.4 NM\_033224.3  
145.9 NM\_001015508.1  
112.1 NM\_013357.2  
189.2 NM\_025215.4  
123.3 NM\_025215.4  
127.4 NM\_001002019.1  
132.6 NM\_031307.2  
133.6 NM\_019042.3  
146.1 NM\_031292.2  
    127 NM\_153339.1  
112.5 NM\_002854.2  
    114 NM\_006505.2  
127.4 NM\_203285.1  
123.7 NM\_203286.1  
118.7 NM\_203285.1  
113.3 NM\_002855.3  
124.5 NM\_001042724.1  
145.4 NM\_002856.1  
    104 NM\_001042724.1  
    167 NM\_015480.1  
113.6 NM\_030916.1  
230.5 NM\_007062.1  
124.7 NM\_005049.2  
192.3 NM\_138499.2  
125.3 NM\_138499.2  
129.2 NM\_012293.1  
109.2 NM\_144651.4  
132.6 NM\_017771.2

135.2 NM\_018663.1  
129.9 NM\_018663.1  
161 NM\_000318.1  
123.9 NM\_007238.3  
108.9 NM\_007238.3  
137.8 NM\_002859.1  
118.3 NM\_152990.2  
112.4 NM\_145182.1  
179.1 NM\_145183.1  
114.9 NM\_153824.1  
182.8 NM\_013328.2  
115.6 NM\_023078.1  
119.7 NM\_152901.1  
136.5 NM\_002862.3  
123 NM\_002863.3  
138.6 NM\_005609.1  
113 NM\_015617.1  
125 NM\_138300.3  
141.7 NM\_152501.3  
300.2 NM\_198929.2  
370 NM\_152501.3  
110.9 NM\_004160.3  
109.5 NR\_003064.2  
118.9 NM\_002864.1  
358.6 NM\_005051.1  
129.1 NM\_000320.1  
191.3 NM\_205767.1  
128.7 NM\_206853.1  
126.4 NM\_206854.1  
113.1 XM\_942223.1  
437.1 NM\_014402.2  
167.5 NM\_012413.3  
121.1 NM\_017659.1  
148.6 NM\_014298.3  
121.3 NM\_017730.2  
119 NM\_017730.2  
568.9 NM\_017730.2  
113.7 NM\_032134.1  
112.9 NM\_018292.2  
118.6 NM\_001004128.2  
115 NM\_002826.4  
135.3 NM\_181701.2  
124.8 NM\_001076786.1  
128.9 NM\_031209.1  
135 NM\_024638.2  
120.6 NM\_015361.2  
122.1 NM\_014925.2  
112.8 NM\_178491.2  
1373.1 NM\_016131.2  
304.8 NM\_004663.3  
112.9 NM\_004218.1

114.2 NM\_001002233.1  
115.6 NM\_025151.3  
299.3 NM\_001002814.1  
169.6 NM\_014904.1  
252.6 NM\_014700.2  
120.6 NM\_032932.3  
180.6 NM\_015470.1  
126.2 NM\_001025300.2  
118.3 NM\_002870.2  
109.8 NM\_016322.2  
    120 NM\_198686.1  
127.6 NM\_022449.1  
127.4 NM\_021252.3  
111.8 NM\_001008749.1  
157.3 NM\_004161.3  
136.9 NM\_030981.1  
307.7 NM\_002865.1  
126.8 NM\_017817.1  
325.5 NM\_014999.1  
365.9 NM\_020673.2  
116.5 NM\_183227.1  
126.3 NM\_016277.3  
143.1 NM\_016277.3  
124.4 NM\_001031677.2  
171.6 NM\_001031677.2  
149.5 NM\_130781.1  
    118 NM\_001031677.2  
117.5 NM\_020387.1  
117.5 NM\_014353.4  
153.2 NM\_004580.3  
117.7 NM\_183235.1  
114.7 NM\_183234.1  
105.3 NM\_004163.3  
122.4 NM\_004249.1  
119.1 NM\_001017979.1  
984.7 NM\_032846.2  
133.1 NM\_014488.3  
    335 NM\_006868.2  
182.5 NM\_006834.2  
128.3 NM\_004794.2  
144.9 NM\_031296.1  
    119 NM\_031934.3  
388.4 NM\_006861.4  
126.6 NM\_004914.2  
118.3 NM\_175738.3  
122.2 NM\_001006638.1  
    118 NM\_175738.3  
117.8 NM\_022337.1  
125.2 NM\_017516.1  
110.6 NM\_171998.2  
129.7 NM\_002866.3

120.7 NM\_002867.2  
116.3 NM\_138453.2  
117.5 NM\_004283.2  
725.2 NM\_012233.1  
115.9 NM\_013401.2  
189.1 NM\_001024647.2  
289.8 NM\_175624.1  
112.5 NM\_080879.2  
128.9 NM\_006822.1  
313 NM\_021168.2  
118.5 NM\_001032726.1  
125.8 NM\_152304.1  
255.9 NM\_198490.1  
115 NM\_004578.2  
155.2 NM\_016154.3  
431.3 NM\_004162.3  
619.4 NM\_002868.2  
296 NM\_201434.1  
147.7 NM\_004583.2  
137.7 NM\_198896.1  
143.4 NM\_016577.2  
108.1 NM\_032144.2  
787.3 NM\_015213.2  
128.1 NM\_178040.1  
2668 NM\_004637.5  
208.8 NM\_177403.3  
254.9 NM\_003929.1  
465.7 NM\_005370.4  
953.9 NM\_016530.2  
410.8 NM\_004251.3  
120.5 NM\_016370.1  
206.2 NM\_006423.1  
211.4 NM\_004703.3  
126.7 NM\_024816.1  
112.5 NM\_024816.1  
187.6 NM\_005833.2  
396.6 NM\_012197.2  
133.6 NM\_014504.1  
102.7 NM\_004581.3  
124.7 NM\_182836.1  
189 NM\_004582.2  
125.8 NM\_002871.3  
135.7 NM\_007082.2  
104.6 NM\_013412.1  
119.4 NM\_007081.2  
142.7 NM\_173825.2  
143.5 NM\_006860.2  
119.5 NM\_022777.1  
552.4 NM\_006908.3  
118.6 NM\_018890.2  
137.6 NM\_198829.1

339.4 NM\_002872.3  
126.2 NM\_005052.2  
169.6 NM\_013277.2  
124.2 NM\_133377.2  
118 NM\_133377.2  
115.1 NM\_002873.1  
134.1 NM\_133340.1  
127.8 NM\_133343.1  
108.7 NM\_020165.2  
511.7 NM\_006265.1  
338.2 NM\_005053.2  
242.5 NM\_002874.3  
123.6 NM\_005732.2  
110 NM\_005732.2  
151.9 NM\_133487.1  
141.8 NM\_133487.1  
113.1 NM\_002875.2  
133.6 NM\_006479.2  
148.6 NM\_058216.1  
116.3 NM\_002876.2  
132.7 NM\_002876.2  
105 NM\_133509.2  
134.6 NM\_002877.4  
118.5 NM\_133510.2  
107.3 NM\_002878.2  
113.7 NM\_002878.2  
118.4 NM\_002878.2  
121 NM\_134422.1  
119.9 NM\_145654.2  
109.6 NM\_012415.2  
116.9 NM\_012415.2  
109.4 NM\_003579.2  
262.7 NM\_004584.2  
112.5 NM\_152442.2  
136.1 NM\_003610.3  
114.5 NM\_001015885.1  
469.8 NM\_003610.3  
107 NM\_139165.1  
106.3 NM\_001001788.1  
113.2 NM\_130900.2  
289.4 NM\_002880.2  
175.7 NM\_015150.1  
123.7 NM\_000448.1  
125.7 NM\_018845.1  
122.5 NM\_000536.1  
132.9 NM\_014226.1  
146 NM\_030665.3  
122.7 NM\_015577.1  
138.8 NM\_022749.4  
264.9 NM\_020338.2  
443.6 NM\_005402.2

273.3 NM\_002881.2  
155.6 NM\_006788.3  
115.7 NM\_006266.2  
1097.8 NM\_006266.2  
121.8 NM\_014636.1  
121.4 NM\_018037.1  
118.6 NM\_018037.1  
111.3 NM\_152663.2  
380 NM\_007367.2  
940.6 NM\_016732.1  
115.1 NM\_005855.2  
128.5 NM\_005854.2  
114.1 NM\_005856.2  
211.5 NM\_006325.2  
232.6 NM\_002882.2  
176.6 NM\_020850.1  
119.6 NM\_022897.2  
111.5 NM\_006267.3  
243.7 NM\_007320.1  
156.2 NM\_003624.1  
112.3 NM\_145000.2  
113.8 NM\_002271.4  
117.4 NM\_012416.2  
130.8 NM\_005493.2  
667.3 NM\_002883.2  
115.1 NM\_016492.3  
121.8 NM\_002884.2  
139.5 NM\_001010935.1  
123.1 NM\_015646.4  
218.4 NM\_001010942.1  
118 NM\_002885.1  
147.5 NM\_021159.3  
313.6 NM\_021033.4  
119.7 NM\_002886.2  
170.9 NM\_021183.3  
446.5 NM\_016290.3  
132.2 NM\_005312.2  
753.1 NM\_005312.2  
110.1 NM\_198679.1  
113.9 NM\_006105.3  
131.9 NM\_007023.1  
364.5 NM\_016340.3  
130.2 NM\_016339.1  
113 NM\_203365.2  
112.9 NM\_025252.3  
119.1 NM\_025252.3  
123.9 NM\_213589.1  
131.3 NM\_032645.3  
126.4 NM\_005055.3  
115.1 NM\_020761.1  
124.4 NM\_000964.2

431 NM\_001024809.2  
114.6 NM\_001024809.2  
128.7 NM\_000965.2  
106 NM\_000965.2  
113.9 NM\_016152.2  
113.8 NM\_000966.3  
104.4 NM\_002888.2  
123.5 NM\_206963.1  
119.4 NM\_002888.2  
122.3 NM\_002889.2  
999.1 NM\_004585.2  
360.8 NM\_002887.3  
225.4 NM\_020320.2  
123.4 NM\_002890.1  
245.5 NM\_002890.1  
111.9 NM\_022650.1  
177.3 NM\_006506.2  
141 NM\_007368.2  
120.2 NM\_006989.3  
139.4 NM\_004658.1  
114.6 NM\_170692.1  
115.4 NM\_170692.1  
124 NM\_004841.2  
1050.5 NM\_016084.3  
133.7 NM\_014310.3  
117.1 NM\_152573.2  
107.3 NM\_145313.1  
123.8 NM\_152545.1  
111.7 NM\_175062.3  
109.7 NM\_001031799.1  
108.9 NM\_001031799.1  
117.4 NM\_002891.3  
120 NM\_153815.1  
109.8 NM\_006909.1  
192.8 NM\_005739.2  
671.6 NM\_005825.2  
318.2 NM\_005825.2  
123.8 NM\_005825.2  
134 NM\_170672.1  
116.7 NM\_170603.1  
122.3 NM\_170604.1  
111 NM\_170604.1  
130.2 NM\_017805.2  
114.9 NM\_033315.2  
122.7 NM\_206827.1  
126.9 NM\_023940.2  
118 NM\_016563.2  
157.9 NM\_007182.4  
212.2 NM\_007182.4  
115 NM\_170712.1  
122.8 NM\_170713.1



193.5 NM\_170774.1  
109.6 NM\_014737.1  
377.9 NM\_170773.1  
106.2 NM\_178169.2  
114.3 NM\_178145.1  
117.3 NM\_032023.3  
117.9 NM\_182664.2  
109 NM\_182665.1  
414.7 NM\_182664.2  
175 NM\_177532.3  
110.6 NM\_201431.1  
116.5 NM\_177532.3  
290 NM\_003475.2  
120.9 NM\_007211.2  
232.8 NM\_133452.1  
117.7 NM\_018211.2  
107.2 NM\_013435.1  
353.6 NM\_032753.2  
115.5 NM\_001008494.1  
154.1 NM\_000321.1  
634.3 NM\_014781.3  
973.2 NM\_020765.1  
124.2 NM\_021163.2  
130.1 NM\_005610.1  
194.8 NM\_005057.2  
107.9 NM\_006910.4  
129 NM\_032626.5  
118.2 NM\_032626.5  
151.5 NM\_002893.2  
119 NM\_002894.2  
127.7 NM\_203292.1  
248.3 NM\_203291.1  
131.2 NM\_006606.2  
119.7 NM\_006606.2  
169.5 NM\_006462.3  
148.2 NM\_006462.3  
131.1 NM\_032213.3  
165.1 NM\_016544.1  
125 NM\_022128.1  
109.3 NM\_183404.1  
114.3 NM\_002895.2  
217.7 NM\_005611.2  
325.1 NM\_005676.3  
2230.2 NM\_152856.1  
122.2 NM\_005676.3  
132 NM\_144770.2  
165 NM\_006047.4  
481 NM\_006047.4  
139.2 NM\_203390.1  
130.1 NM\_032509.2  
1456.4 NM\_006328.2

271.5 NM\_022768.4  
134.4 NM\_013286.3  
237.1 NM\_032905.3  
164 NM\_033117.2  
112.6 NM\_016196.1  
152.6 NM\_022830.1  
2461.6 NM\_018047.1  
631.1 NM\_018107.3  
1474 NM\_001077352.1  
105.8 NM\_153020.1  
279.2 NM\_021239.1  
131.2 NM\_018077.1  
113.8 NM\_001017430.1  
175.3 NM\_001017430.1  
557.8 NM\_001008408.1  
255.9 NM\_015014.1  
134.6 NM\_024939.2  
280.3 NM\_183425.1  
553.1 NM\_184234.1  
234.8 XM\_945490.1  
602.2 NM\_002896.1  
209.4 NM\_002896.1  
111.2 NM\_018301.2  
164.4 NM\_031492.2  
1726.6 NM\_005778.1  
234.5 NM\_005777.1  
215 NM\_016090.2  
123 NM\_005105.2  
161.3 NM\_001031695.1  
114 NM\_014309.1  
207.3 NM\_002897.3  
127.5 NM\_016839.2  
114.9 NM\_002898.2  
107.6 NM\_001003793.1  
120.9 NM\_014483.2  
125.9 NM\_014483.2  
245.8 NM\_002139.2  
140.5 NM\_016024.2  
122 NM\_019610.3  
107.8 NM\_005058.2  
111.9 NM\_001007526.1  
121.2 NR\_001547.1  
112.7 NM\_001006121.1  
122.6 NM\_001006118.2  
110.2 NM\_152585.1  
116 NM\_001006117.2  
114.1 NR\_001574.1  
110.9 NR\_002193.1  
112.4 NM\_002899.2  
109.8 NM\_004164.2  
124.5 NM\_002900.2

118.8 NM\_006744.3  
110.1 NM\_031491.1  
125 NM\_052960.1  
114.6 NM\_203283.1  
121 NM\_001008712.1  
120.4 NM\_001008711.1  
122 NM\_006867.2  
151.6 NM\_194272.1  
121.3 NM\_005349.2  
274.4 NM\_203284.1  
120.6 NM\_014276.2  
716.5 NM\_014248.2  
129.3 NM\_172071.1  
225.1 NM\_018250.1  
119 NM\_018191.3  
486.3 NM\_001268.2  
113.1 NM\_001269.3  
688.4 NM\_018715.1  
110.7 NM\_033544.2  
113.2 NM\_033544.2  
121.9 NM\_001017919.1  
452.4 NM\_014329.3  
231.3 NM\_001032279.1  
146.5 NM\_001032279.1  
145 NM\_015436.2  
120.9 NM\_001009922.1  
121.9 NM\_005772.2  
120.2 NM\_002901.1  
127.7 NM\_002902.1  
127.4 NM\_020650.2  
127.6 NM\_015156.1  
117.7 NM\_173587.2  
179 NM\_018254.2  
915.9 NM\_014478.3  
111.6 NM\_014478.3  
115.5 NM\_014478.3  
128.6 NM\_052862.2  
119.3 NM\_002903.2  
154.9 NM\_002904.5  
309.1 NM\_172037.2  
171.2 NM\_016026.2  
119.3 NM\_152443.1  
129.4 NM\_138412.2  
384 NM\_020905.1  
126.5 NM\_003708.2  
190.3 NM\_002905.2  
125.8 NM\_015725.1  
113 NM\_138969.2  
112.3 NM\_001034836.1  
118.9 NM\_000322.2  
349.3 NM\_005132.1

178.1 NM\_005132.1  
131.7 NM\_021111.1  
180.7 NM\_002907.2  
232.7 NM\_032941.1  
119.5 NM\_004260.1  
123.6 NM\_001003715.1  
134.1 NM\_004259.4  
124.8 NM\_001003716.1  
112.2 NM\_022912.1  
109.7 NM\_016606.2  
118.2 NM\_001001330.1  
129.1 NM\_025232.2  
284.9 NM\_005669.3  
118.9 NM\_138393.1  
114.9 NM\_002909.3  
114.7 NM\_006507.2  
128.4 NM\_138938.1  
115.1 NM\_138937.1  
118.5 NM\_001008387.1  
118.4 NM\_001008387.1  
108.9 NM\_032044.2  
129.4 NM\_002908.2  
146.2 NM\_021975.2  
293.2 NM\_006509.2  
    115 NM\_005045.2  
123.8 NM\_005045.2  
102.9 NM\_014012.4  
123.9 NM\_000537.2  
180.8 NM\_002910.4  
222.5 NM\_002911.2  
109.7 NM\_001029874.1  
115.2 NM\_013400.1  
121.5 NM\_014374.1  
    201 NM\_014374.1  
128.9 NM\_031922.2  
131.6 NM\_004726.1  
115.6 NM\_001080975.1  
112.1 XM\_942570.1  
124.9 XM\_942570.1  
110.4 NM\_004726.1  
130.6 NM\_007033.2  
222.8 NM\_012102.2  
118.2 NM\_012102.3  
150.1 NM\_012102.3  
114.1 NM\_032918.1  
130.5 NM\_001007089.1  
123.6 NM\_005612.3  
116.2 NM\_020630.3  
120.8 NM\_020975.3  
    124 NM\_020630.3  
    125 NM\_020415.2

118.2 NM\_032579.1  
139.7 NM\_017750.2  
224.5 NM\_001037872.1  
236.4 NM\_016316.1  
129.4 NM\_002912.1  
146.9 NM\_020695.2  
119.1 NM\_172239.1  
1156.6 NM\_015523.1  
147.9 NM\_020385.2  
194.2 NM\_002913.3  
126.2 NM\_002914.3  
125.1 NM\_181471.1  
112.6 NM\_181558.1  
121.8 NM\_002915.2  
104.7 NM\_181558.1  
156 NM\_002916.3  
135.9 NM\_002916.3  
126.2 NM\_007370.3  
117 NM\_181578.1  
124.4 NM\_173362.2  
114.8 NM\_057178.3  
118.6 NM\_001017368.1  
114.7 NM\_018339.3  
103.2 XM\_941367.1  
197.6 NM\_002917.1  
115.6 NM\_002917.1  
131.2 NM\_006510.3  
121 NM\_213590.1  
117.4 NR\_002727.1  
123.6 NR\_001450.2  
126.7 NR\_002596.1  
105.6 NM\_001013734.1  
117.8 NM\_052859.2  
384.4 NM\_022457.5  
124.2 NM\_022457.5  
418.2 NM\_022457.5  
161.6 NM\_018124.3  
230.5 NM\_002918.3  
113.3 NM\_134433.1  
117.3 NM\_000635.2  
114.8 NM\_134428.1  
129.1 NM\_134428.1  
104.2 NM\_002919.2  
116.2 NM\_002920.3  
122.7 NM\_213594.1  
127.3 NM\_032491.3  
120.6 NM\_002920.3  
126.2 NM\_000449.3  
198.3 NM\_000449.3  
136.4 NM\_134440.1  
134.7 NM\_003721.2

173.8 NM\_003721.2  
125.4 NM\_000538.2  
116.1 NM\_173560.1  
133.9 NM\_022841.2  
212.1 NM\_017819.1  
    128 NM\_152292.2  
121.1 NM\_144964.1  
118.3 NM\_020769.1  
117.3 NM\_001024455.1  
127.4 XM\_936417.1  
1606.5 NM\_014059.1  
357.8 NM\_015149.2  
146.3 NM\_004761.2  
129.1 NM\_001035223.1  
118.6 NM\_020211.1  
117.9 NM\_173670.2  
134.8 NM\_001012761.1  
114.2 NM\_173670.2  
    122 NM\_152869.2  
116.1 XM\_937211.1  
124.5 XM\_943466.1  
113.9 NM\_001080479.1  
131.9 NM\_001024457.1  
115.4 NM\_001078170.1  
122.6 NM\_005054.2  
107.8 NM\_005054.2  
    111 NM\_032260.2  
117.9 NM\_001037866.1  
116.6 NM\_001012722.1  
138.1 NM\_001012720.1  
133.7 NM\_153615.1  
240.4 NM\_002922.3  
203.4 NM\_001005339.1  
322.4 NM\_002925.3  
108.3 NM\_002925.3  
114.9 NM\_183337.1  
110.5 NM\_183337.1  
125.8 NM\_198227.1  
155.4 NM\_002926.2  
111.5 NM\_198229.2  
122.4 NM\_144766.1  
128.2 NM\_006480.4  
189.5 NM\_002928.2  
121.4 NM\_012419.4  
185.5 NM\_130782.2  
162.5 NM\_005873.1  
1273.9 NM\_002923.1  
109.1 NM\_170587.1  
    112 NM\_170587.1  
118.5 NM\_015668.2  
106.9 NM\_134427.1

122.2 NM\_144488.3  
114.6 NM\_130795.2  
110 NM\_021106.3  
126.1 NM\_017790.3  
125 NM\_144489.2  
121.5 NM\_005613.3  
120.5 NM\_003617.2  
125.7 NM\_004296.3  
112.2 NM\_002924.2  
112.8 NM\_033345.1  
130.4 NM\_003835.1  
109.9 NM\_003835.1  
112.2 NM\_207391.1  
113.4 NM\_000324.1  
140.8 NM\_032276.2  
826.6 NM\_001040456.1  
834 NM\_020684.2  
222.5 NM\_012265.1  
145.9 NM\_022450.2  
273.6 NM\_024599.3  
127.4 NM\_001005498.1  
212.8 NM\_024599.2  
108.8 NM\_024599.3  
117.3 NM\_003961.1  
133.8 NM\_017821.3  
119.2 NM\_138328.2  
108.3 NM\_020407.1  
124.3 NM\_138617.2  
112.2 NM\_020485.3  
115.7 NM\_016321.1  
114.4 NM\_016124.3  
1033.8 NM\_005614.2  
128.8 NM\_144593.1  
122.8 NM\_000539.2  
1140 NM\_001664.2  
122.4 NM\_004040.2  
101.9 NM\_198225.1  
104.6 NM\_001032380.1  
118 NM\_014836.3  
124.8 NM\_198225.1  
126.7 NM\_015178.1  
136.7 NM\_014899.2  
201.2 NM\_175744.3  
145.4 NM\_175744.3  
113.2 NM\_014578.2  
125.9 NM\_019034.2  
736.3 NM\_001665.2  
119.6 NM\_004310.2  
113.9 NM\_020663.2  
740.7 NM\_012249.2  
138.1 NM\_001033566.1

173.7 NM\_018307.3  
123.4 NM\_001033568.1  
319.4 NM\_138769.1  
124.6 NM\_133639.2  
126.5 NM\_052924.1  
130.6 NM\_033103.3  
131.1 NM\_001031745.1  
117.8 NM\_144968.1  
126.1 NM\_015653.2  
105.2 NM\_024557.2  
382.5 NM\_021932.4  
122 NM\_018157.1  
136.9 NM\_014715.2  
125.9 NM\_152756.3  
174.5 NM\_018151.3  
126.3 NM\_031430.1  
106.5 NM\_015347.3  
112.3 NM\_014989.2  
122 NM\_014677.2  
131 NM\_014747.2  
115.9 NM\_182970.2  
119.1 NM\_004292.2  
144.9 NM\_018993.2  
123.9 NM\_024832.3  
629.2 NM\_002931.3  
142.1 NM\_021930.3  
151 NM\_031480.2  
116.8 NM\_153005.1  
133.8 NM\_031480.2  
222.5 NM\_018343.1  
397 NM\_003831.2  
807.9 NM\_003831.2  
124.4 NM\_145906.1  
517.9 NM\_001033002.1  
227.2 NM\_003804.3  
173 NM\_003821.4  
143.4 NM\_006871.2  
143.8 NM\_020639.2  
140.2 NM\_015375.1  
152.9 NM\_199462.1  
176.8 NM\_015444.1  
288.5 NM\_006912.3  
121.4 NM\_002930.1  
123.5 NM\_203304.1  
359 NM\_016626.2  
127.7 NM\_032246.3  
115.4 NM\_000326.3  
162.5 NM\_012421.1  
125.6 NM\_006911.2  
113.9 NM\_005059.2  
125.6 NM\_005059.2



120.2 NM\_080864.2  
115.5 NM\_016568.1  
113.9 NM\_181885.1  
163.2 NM\_001013838.1  
193.1 NM\_024945.1  
12432.2 NR\_001445.1  
13123.4 NR\_002715.1  
157.4 NM\_198232.1  
250.8 NM\_198235.1  
125.9 NM\_001012975.1  
115.4 NM\_145250.3  
114.4 NM\_001024822.1  
115.5 NM\_001012264.2  
117.4 NM\_002934.2  
118.6 NM\_002935.2  
110.2 NM\_194431.1  
130.5 NM\_194430.1  
141.5 NM\_002937.3  
126.9 NM\_194430.1  
179 NM\_005615.2  
112.3 NM\_032572.2  
114.3 NM\_138331.1  
107.4 NM\_001001673.1  
285.5 NM\_002936.3  
124.8 NM\_006397.2  
154.8 NM\_021133.2  
119.9 NM\_013235.2  
360.4 NM\_003730.3  
185 NM\_014470.2  
123.6 NM\_005440.3  
115.8 NM\_005168.3  
169.7 NM\_014868.3  
131.7 NM\_014372.3  
114.6 NM\_017610.6  
146.6 NM\_006978.1  
117.8 NM\_178861.3  
122.6 NM\_183353.1  
107.3 NM\_183353.1  
119.3 NM\_183353.1  
138.9 NM\_018320.3  
197.1 NM\_018320.3  
126.6 NM\_024787.2  
176.7 NM\_022064.2  
150.3 NM\_017831.2  
186.5 NM\_194460.1  
155.5 NM\_194460.1  
118.5 XR\_000279.2  
109.4 NR\_002818.1  
116.6 NM\_194463.1  
130.9 NM\_024539.3  
136.1 NM\_024539.3

191.6 NM\_183381.1  
125 NM\_007282.3  
148.5 NM\_018434.4  
137.5 NM\_139175.1  
147.8 NM\_032322.3  
124.3 NM\_032322.3  
114.9 NM\_197939.1  
175 NM\_016271.3  
122.5 NM\_007218.3  
126.6 NM\_183401.1  
229.9 NM\_004290.3  
240.7 NM\_183400.1  
124.8 NM\_016422.3  
141.7 NM\_014746.2  
170.4 NM\_030963.2  
120 NM\_198085.1  
203.9 NM\_173647.2  
120.3 NM\_020724.1  
113.7 XM\_939671.1  
123.7 NM\_174903.4  
118.9 NM\_173557.2  
145.7 NM\_052916.1  
120 NM\_152470.2  
126.5 NM\_178841.2  
133.5 NM\_015528.1  
118.5 NM\_152617.2  
106.8 NM\_031994.1  
111.9 NM\_031277.1  
138 NM\_030954.2  
118 NM\_173662.1  
116.3 NM\_178532.2  
133.2 NM\_145051.2  
188.8 NM\_152267.2  
118.8 NM\_019062.1  
143.2 NM\_183419.1  
115.3 NM\_015435.3  
186.1 NM\_015435.3  
112.8 NM\_152598.1  
106.6 NM\_007212.3  
255.1 NM\_019592.5  
243.2 NM\_007219.2  
123.4 NM\_022453.2  
122.2 NM\_032015.3  
219.1 NM\_017999.3  
111.2 NM\_030936.2  
413.9 NM\_025126.2  
116.9 NM\_025126.2  
120.7 NM\_194271.1  
200 NM\_080745.2  
137.7 NM\_182985.2  
140.3 NM\_194330.2

133.7 NM\_194328.2  
473.7 NM\_194331.1  
114.8 NM\_025236.2  
115.3 NM\_170770.1  
136.4 NM\_002938.2  
196.8 NM\_014771.2  
131.7 NM\_194359.1  
117.3 NM\_194358.1  
130.5 NM\_017763.3  
492.6 NM\_014901.4  
143.5 NM\_006913.2  
212.7 XR\_000528.1  
    141 NR\_003129.1  
129.6 NM\_183044.1  
110.3 NM\_183043.1  
137.4 NM\_183045.1  
123.3 NM\_014245.2  
117.2 NM\_003958.2  
126.9 NM\_003958.2  
230.9 NM\_003800.1  
234.8 NM\_203385.1  
156.5 NM\_203384.1  
297.5 NM\_003799.1  
218.2 NM\_018146.2  
171.9 NM\_017495.4  
    120 NM\_004902.2  
170.9 NM\_017619.3  
137.1 NM\_020216.3  
136.4 NM\_018226.3  
308.7 NM\_006711.2  
118.7 NM\_080594.1  
    147 NR\_002716.1  
125.8 NM\_004704.3  
181.7 NM\_005701.2  
266.6 NM\_032177.2  
114.7 NM\_133631.1  
109.5 NM\_133631.1  
116.9 NM\_002941.2  
117.1 NM\_002942.2  
124.3 NM\_022370.2  
122.4 NM\_019055.4  
131.3 NM\_005406.1  
9311.6 NM\_004850.3  
388.4 NM\_005156.4  
132.7 NM\_000327.2  
107.2 NM\_017578.2  
123.6 NM\_001012337.1  
122.7 NM\_001012337.1  
158.8 NM\_031916.2  
117.3 NM\_005012.1  
118.1 NM\_004560.2

273.4 NM\_002943.2  
152.4 NM\_002943.2  
121.3 NM\_134262.1  
    122 NM\_134261.1  
114.7 NM\_134260.1  
115.1 NM\_002943.2  
119.1 NM\_006914.3  
117.8 NM\_001001523.1  
121.2 NM\_001001523.1  
122.3 NM\_001001523.1  
114.3 NM\_005060.3  
116.3 NM\_002944.2  
116.6 NM\_006269.1  
    248 NM\_058163.1  
114.3 NM\_001012267.1  
115.8 NM\_153270.1  
109.7 NM\_015448.1  
118.6 NM\_001079516.1  
136.1 NM\_173695.1  
110.5 NM\_001010866.1  
118.2 NM\_001010866.1  
122.8 NM\_173698.1  
    113 NM\_178857.4  
174.4 NM\_006915.1  
171.9 NM\_203288.1  
340.4 NM\_002945.2  
902.3 NM\_002946.3  
431.8 NM\_002947.3  
    120 NM\_013347.1  
893.1 NM\_032308.1  
    127 NM\_015540.2  
    111 NM\_006916.1  
117.4 NM\_006916.1  
    123 NM\_199229.1  
120.4 NM\_000329.2  
131.1 NM\_153225.2  
124.3 NM\_001034853.1  
127.1 NM\_001023582.1  
122.1 NM\_000328.2  
107.1 NM\_020366.2  
123.2 NM\_014954.2  
    113 NM\_006987.2  
121.9 NM\_144563.1  
116.8 NM\_138290.1  
113.2 NM\_006695.3  
122.8 NM\_006013.2  
5777.5 NM\_007104.4  
    180.2 NM\_080746.2  
7795.1 NM\_000975.2  
5817.4 NM\_000976.2  
    124.4 NM\_033251.1

313.4 NM\_033251.1  
910.5 NM\_012423.2  
350.6 NM\_003973.2  
216.8 NM\_001034996.1  
6944.8 NM\_001035006.1  
789.5 NM\_000985.2  
10923.6 NM\_000979.2  
12981.2 NM\_000980.2  
7876.2 NM\_000981.3  
3710.6 NM\_000982.3  
712 NM\_000983.3  
942.7 NM\_000978.2  
148.3 NM\_000984.4  
132 NR\_002229.1  
183.2 NR\_000029.1  
8851.2 NM\_000986.3  
2251.9 NM\_000987.2  
232.8 NM\_016093.2  
10942.9 NM\_000988.2  
5258.4 NM\_000990.2  
209.1 NM\_000991.3  
226.8 NM\_000992.2  
134.5 NR\_002778.1  
4309.6 NM\_001033853.1  
4864.6 NM\_001033853.1  
10243.3 NM\_000989.2  
1609.5 NM\_000993.2  
150.8 NM\_001007073.1  
125.8 NR\_003111.1  
362 NM\_000995.2  
181.9 NM\_033625.1  
3450.9 NM\_007209.3  
14461.9 NM\_000996.2  
2112.4 NM\_033643.1  
119.5 NM\_015414.2  
129 NM\_021029.4  
1533.1 NM\_001001.3  
123.1 NM\_000997.4  
2637.8 NM\_000998.4  
15759 NM\_000999.2  
15419.4 NM\_001035258.1  
13651.9 NM\_001000.2  
222.5 NM\_052969.1  
114.2 NM\_005061.2  
2707.1 NM\_000968.2  
164.7 NM\_021104.1  
17232.6 NM\_001035267.1  
2406 NM\_000969.3  
176.7 NM\_001024662.1  
426.3 NM\_000971.3  
188.9 NM\_000972.2

5073.1 NM\_198486.2  
164 NM\_033301.1  
8774 NM\_033301.1  
399.6 NM\_001024921.2  
1335.7 NM\_001024921.2  
117.3 NM\_001002.3  
350.2 NM\_053275.3  
129.2 NR\_002775.1  
8058.5 NM\_001003.2  
3575.3 NM\_213725.1  
14234.7 NM\_001004.2  
577.9 NM\_002950.3  
160.6 NM\_002951.2  
116.9 NM\_007042.1  
1159.8 NM\_024839.1  
114.9 NM\_017793.1  
109.4 NM\_006413.2  
132.6 NM\_183005.1  
130.6 NM\_183005.1  
132.8 NM\_006638.2  
1960.1 NM\_018067.2  
120.2 NM\_019845.2  
117.4 NM\_203400.1  
10764.7 NM\_001014.3  
9235.5 NM\_001015.3  
19668.3 NM\_001016.3  
4675.5 NM\_001017.2  
8294.3 NM\_001025071.1  
4611 NM\_001025071.1  
2745.2 NM\_001018.3  
1850 NM\_001019.4  
12305.2 NM\_001030009.1  
1447.4 NM\_001019.4  
10938.5 NM\_001020.4  
10169 NM\_001021.3  
5068.6 NM\_001022.3  
188.5 NM\_194326.2  
4367.7 NM\_002952.3  
6775.7 NM\_001023.2  
292.6 NM\_001024.3  
255.1 NM\_001025.4  
190.8 NM\_001026.3  
894.6 NM\_033022.2  
25027 NM\_001028.2  
524.3 NM\_001029.3  
450.6 NR\_002225.2  
125.1 NR\_002309.1  
32125.1 NM\_001030.3  
19854.4 NM\_002954.3  
116.2 NM\_015920.3  
2349.9 NM\_001031.4

6006 NM\_001030001.1  
415.7 NM\_001030001.1  
27806 NM\_001030001.1  
18442.8 NM\_001032.3  
20990.3 NM\_001005.3  
3307.4 NM\_001006.3  
3174.2 NM\_001007.3  
927.1 NM\_001008.3  
186.9 NM\_001039567.2  
4549.8 NM\_001009.3  
4204.2 NM\_001010.2  
107.8 NM\_002953.3  
223.4 NM\_001006665.1  
122.6 NM\_021135.4  
137.7 NM\_021135.4  
120.3 NM\_001006932.1  
160.4 NM\_004586.2  
127 XM\_944112.1  
135.8 NM\_004586.2  
149.1 NM\_003942.2  
208.7 NM\_004755.2  
110.4 NM\_182398.1  
120.1 NM\_014496.1  
230 NM\_003161.2  
331.1 NM\_003952.2  
146.8 NM\_012424.2  
120.6 NM\_031464.2  
433.5 NM\_001011.3  
4635.8 NM\_001013.2  
6458.2 NM\_001013.3  
8824.7 NM\_002295.4  
142.1 NM\_001012321.1  
142.6 NM\_058192.2  
170.7 NM\_152260.1  
136.5 NM\_173659.2  
326.5 NM\_032795.1  
202.7 NM\_005444.1  
124.6 NM\_004165.1  
408.3 NM\_006570.4  
134.4 NM\_006064.3  
111.8 NM\_016656.2  
219.8 NM\_006064.3  
457.7 NM\_022157.2  
184.2 NM\_021244.2  
160.5 NM\_006270.2  
216.8 NM\_012250.3  
126.7 NM\_004587.1  
392.6 NM\_001042576.1  
197.4 NM\_001042576.1  
127.2 NM\_002955.4  
112.7 NM\_001003699.1

111.3 NM\_001003699.1  
119.5 NM\_001003699.1  
114.5 NM\_006583.2  
437.2 NM\_001033.2  
113.1 NM\_001034.1  
116.2 NM\_015713.3  
134.3 NM\_018427.2  
124.8 NM\_001007279.1  
115.9 NM\_001007279.1  
    112 NM\_015169.3  
121.1 NM\_000330.2  
124.2 NM\_018346.1  
120.2 NM\_080657.3  
156.5 NM\_018264.2  
    291 NM\_018364.3  
137.4 NM\_198467.1  
133.6 NM\_006511.1  
111.4 NM\_030785.2  
121.4 NM\_031924.3  
111.1 NM\_001010892.1  
298.2 NM\_015659.1  
127.5 NM\_002956.2  
166.6 NM\_024692.3  
111.9 NM\_173640.1  
152.8 NM\_178565.3  
    130 NM\_032784.3  
115.9 NM\_001029871.1  
114.8 NM\_001040007.1  
716.1 NM\_133368.1  
139.6 NM\_016625.2  
751.1 NM\_023012.4  
140.1 NM\_152724.2  
118.6 NM\_152724.2  
121.5 NM\_031429.1  
110.4 NM\_031429.1  
117.6 NM\_031429.1  
161.2 NM\_003729.1  
124.5 NM\_014433.2  
    140 NM\_032957.2  
129.8 NM\_016434.2  
    127 NM\_015138.3  
126.3 NM\_001015056.1  
    123 NM\_001015055.1  
127.5 NM\_033046.2  
114.3 NM\_001015055.1  
111.3 NM\_206852.1  
    109 NM\_021136.2  
118.1 NM\_206857.1  
123.8 NM\_206902.1  
274.6 NM\_005619.3  
124.8 NM\_206902.1



191.5 NM\_006054.2  
119.1 NM\_201428.1  
116.4 NM\_201429.1  
438.7 NM\_201430.1  
573.3 NM\_020532.4  
123.4 NM\_207521.1  
2109 NM\_007008.2  
    117 NM\_007008.2  
    133 NM\_032730.3  
116.6 NM\_023004.5  
127.2 NM\_178568.2  
116.5 NM\_178570.1  
111.6 NM\_153708.1  
115.7 NM\_001004312.1  
109.2 NM\_031440.1  
122.3 NM\_022147.2  
112.2 NM\_025158.3  
131.4 NM\_001040451.1  
132.7 NM\_001042417.1  
130.6 NM\_017987.3  
110.7 NM\_001042417.1  
142.3 NM\_001037442.1  
122.6 NM\_014961.2  
112.4 NM\_001037442.1  
141.2 NM\_173079.1  
126.7 NM\_032167.1  
113.8 NM\_001754.3  
111.6 NM\_001001890.1  
148.2 NM\_001754.3  
116.5 NM\_175634.1  
115.1 NM\_175635.1  
    114 NM\_175636.1  
114.5 NM\_175636.1  
113.8 NM\_004349.2  
118.6 NM\_001015051.2  
124.2 NM\_001024630.1  
110.9 NM\_004348.3  
1402.3 NM\_004350.1  
120.7 NM\_001031680.1  
430.2 NM\_014328.2  
    125 NM\_014806.1  
1298.8 NM\_014853.1  
115.6 NM\_001039948.1  
147.1 NM\_015705.4  
132.9 NM\_003707.1  
172.1 NM\_006666.1  
167.4 NM\_016104.2  
479.7 NM\_001007464.1  
    129 NM\_033411.2  
151.8 NM\_152682.1  
367.3 NM\_002957.3

191.1 NM\_021976.3  
117.7 NM\_001009598.1  
115.8 NM\_001009598.1  
124.8 NM\_006917.3  
204 NM\_006857.1  
1465.8 NM\_012234.3  
123.8 NM\_002958.3  
125.2 XM\_940269.1  
195.6 NM\_001005861.1  
111.2 NM\_000540.1  
120.8 NM\_001042723.1  
118.5 NM\_001035.1  
114.4 NM\_001036.2  
125.2 NM\_006271.1  
1703.2 NM\_002966.2  
222.2 NM\_005620.1  
137.1 NM\_005621.1  
112.9 NM\_001024213.1  
112.8 NM\_001024212.1  
119.3 NM\_001024211.1  
150.8 NM\_001024211.1  
107.9 NM\_005979.2  
124.7 NM\_001024210.1  
130.5 NM\_020672.1  
120.7 NM\_080388.1  
114.4 NM\_005978.3  
123 NM\_002960.1  
613.6 NM\_002961.2  
763.4 NM\_002961.2  
118.3 NM\_002962.1  
332.9 NM\_014624.3  
113.4 NM\_002963.2  
111.1 NM\_176823.2  
113.6 NM\_001045479.1  
633.5 NM\_002964.3  
418 NM\_002965.2  
115.8 NM\_006272.1  
115.4 NM\_004057.1  
173.8 NM\_005980.2  
115.2 NM\_001017406.1  
142.8 NM\_022753.2  
109.9 NM\_130772.1  
130.3 NM\_199161.1  
117.7 NM\_199161.1  
112.5 NM\_000331.2  
121.7 NM\_030754.2  
114.3 NM\_006512.1  
140.6 NM\_138421.1  
117.3 NM\_018417.2  
242.9 NM\_014016.2  
128.6 NM\_014363.3

1975.6 NM\_005500.1  
436.5 NM\_002967.2  
302.3 NM\_014649.2  
117.8 NM\_000541.2  
107.3 NM\_018666.1  
123.8 NM\_172311.1  
113.8 NM\_002968.1  
121.1 NM\_005407.1  
159.7 NM\_171999.1  
115.4 NM\_020436.2  
127 NM\_138352.1  
123.2 NM\_080621.3  
132.3 NM\_152486.2  
109.5 NM\_207506.1  
113.6 NM\_001010971.1  
135.2 NM\_174920.2  
251 NM\_001017373.2  
141.4 NM\_152552.1  
135.7 NM\_001017373.2  
106.7 NM\_015589.3  
293.2 NM\_018028.2  
119 NM\_182610.1  
112.9 NM\_144660.1  
321 NM\_017654.2  
161.7 NM\_152703.2  
120.4 NM\_015474.2  
227.9 NM\_015380.3  
136.2 NM\_022136.3  
263.5 NM\_024545.2  
365.6 NM\_005870.3  
216 NM\_003864.1  
213.4 NM\_013260.5  
258.9 NM\_014931.2  
124.1 NM\_014678.3  
493.8 NM\_018312.3  
174.8 NM\_020150.3  
131.4 NM\_001033503.1  
462.6 NM\_016103.2  
201.2 NM\_001033503.1  
118 NM\_007101.2  
118 NM\_015077.1  
158.6 NM\_006513.2  
129.1 NM\_017827.2  
135.6 NM\_005146.3  
113.2 NM\_013352.1  
120 NM\_013352.1  
329.5 NM\_013352.1  
154.2 NM\_014706.2  
108.2 NM\_020368.1  
117.8 NM\_015278.3  
124.8 NM\_194292.1

112.5 NR\_002438.1  
1511.1 NM\_002970.1  
228.4 NM\_133491.2  
131 NM\_002971.2  
120.1 NM\_015265.1  
113.4 NM\_001012980.1  
131 NM\_021818.2  
450.8 NM\_016038.2  
150 NR\_001588.1  
115.8 NM\_058173.1  
388.3 NM\_002972.1  
115.3 NM\_030962.2  
115.6 NM\_001024401.2  
228.7 NM\_001024401.2  
128.9 NM\_018183.2  
123.1 NM\_178121.2  
110.6 NM\_198538.1  
128.6 NM\_006745.3  
149.7 NM\_006745.3  
114.8 NM\_001017369.1  
198.4 NM\_006918.3  
121.3 NM\_006455.2  
230.8 NM\_052822.2  
130.6 NM\_004866.3  
148 NM\_005697.3  
124.7 NM\_005698.2  
348.4 NM\_052837.1  
118.3 NM\_079834.2  
125.2 NM\_138967.2  
166.8 NM\_033630.1  
135.5 NM\_016558.2  
217.9 NM\_033630.1  
222.9 NM\_012235.2  
175.4 NM\_003726.2  
115.1 NM\_182826.1  
115.7 NM\_182826.1  
113 NM\_016240.2  
111.6 NM\_173833.3  
110.8 NM\_005505.3  
315.7 NM\_005506.2  
113 NM\_145351.1  
125.4 NM\_145350.1  
120.9 NM\_153334.3  
116.1 NM\_153334.3  
109.3 NR\_003011.1  
183.9 NM\_015200.1  
119.6 NM\_016002.2  
218.9 NM\_005063.4  
123.3 NM\_024906.1  
120.1 NM\_001037582.1  
129 NM\_001037582.1

128.1 NM\_198533.1  
118.7 NM\_003843.2  
554.4 NM\_182835.1  
116.1 NM\_016106.2  
124.2 NM\_152540.3  
113.5 NM\_003469.3  
116 NM\_013243.2  
113.6 NM\_003020.1  
125.2 NM\_003357.3  
118.1 NM\_145651.1  
113.7 NM\_006552.1  
120.8 NM\_006551.3  
119 NM\_206998.1  
105.7 NM\_002407.1  
127.6 NM\_002411.1  
121.6 NM\_052863.2  
126.6 NM\_054023.2  
117.6 NM\_006998.3  
112.6 NM\_014575.1  
117.8 NM\_033128.1  
126.7 NM\_016510.3  
114.8 NM\_001031694.1  
131.1 NM\_001031694.1  
123 NM\_012236.1  
121.9 NM\_001031694.1  
459.1 NM\_006746.3  
445.1 NM\_001037540.1  
108.9 NM\_001037540.1  
142.3 NM\_006089.1  
114.6 NM\_198081.1  
120.9 NM\_006514.1  
109 NM\_014139.1  
120.3 NM\_006920.2  
117.8 NM\_199037.2  
119.6 NM\_199037.2  
114.1 NM\_021007.1  
116.8 NM\_021007.1  
111.6 NM\_021007.1  
130.1 NM\_004588.3  
115.5 NM\_006922.2  
159.2 NM\_006922.2  
115.7 NM\_006922.2  
105.7 NM\_018400.2  
112.8 NM\_018400.2  
122.8 NM\_000334.3  
117.5 NM\_174934.1  
112.1 XM\_940695.1  
116.6 NM\_000335.3  
116.7 NM\_002976.1  
112.4 NM\_014191.1  
123.9 NM\_002977.1

228.8 NM\_024041.2  
253.5 NM\_024041.2  
119 NM\_001038.4  
116 NM\_000336.1  
147.9 NM\_002978.2  
117.7 NM\_001039.2  
193.7 NM\_004589.1  
176 NM\_005138.1  
165 NM\_032547.1  
272.6 NM\_016479.3  
125.7 NM\_001007098.1  
116.6 NM\_002979.3  
262.6 NM\_021626.1  
115.5 NM\_007281.1  
136.1 NM\_015356.3  
309.7 NM\_015356.3  
126 NM\_182706.2  
112.1 NM\_152358.2  
125.9 NM\_014766.2  
125 NM\_138355.2  
112.7 NM\_024583.2  
110.4 NM\_031309.3  
127.5 NM\_033129.1  
132.3 NM\_021920.2  
120 NM\_002980.1  
118.6 NM\_173050.1  
121.1 NM\_020974.1  
108.5 NM\_152753.2  
118.5 NM\_004757.2  
195.9 NM\_020680.2  
509.7 NM\_020680.2  
121.4 NM\_152281.1  
648.3 NM\_017988.4  
171.5 NM\_020423.4  
156.6 NM\_181093.1  
120.7 NM\_181093.1  
209.8 NM\_018115.1  
125.5 NM\_002997.4  
129.7 NM\_002997.4  
113.9 NM\_001006946.1  
123.4 NM\_002998.3  
122.6 NM\_014654.2  
105.6 XM\_944729.1  
117.2 NM\_002999.2  
1047.8 NM\_001007067.1  
126.9 NM\_080489.2  
116.1 NM\_015685.3  
119.6 NM\_015685.3  
112 NM\_080489.2  
233.7 NM\_004713.2  
216.4 NM\_005869.2

123 NM\_001039708.1  
137.4 NM\_001039707.1  
163.3 NM\_006643.2  
180 NM\_005786.3  
119.1 NM\_006642.1  
773.5 NM\_006923.2  
447.9 NM\_022044.2  
312.7 NM\_016547.1  
113.7 NM\_016547.1  
176 NM\_016176.2  
199.2 NM\_012428.1  
118.3 NM\_012428.1  
211.7 NM\_004168.1  
134 NR\_003263.1  
920.9 NM\_003000.1  
175.6 NM\_001035513.1  
316.7 NM\_003002.1  
115.1 NM\_152744.2  
116.6 NM\_152744.2  
125.4 NM\_019064.3  
135.7 NM\_004657.4  
112.9 NM\_148897.1  
120.2 NM\_006843.2  
114.3 NM\_138432.2  
108.5 NM\_001080837.1  
114.5 NM\_006544.2  
939.1 NM\_014300.2  
162.5 NM\_033280.1  
178.9 NM\_003003.2  
160.7 NM\_003003.2  
120.1 NM\_012429.1  
111.5 NM\_174975.3  
120.8 NM\_174977.2  
232.5 NM\_004206.2  
139.5 NM\_004206.2  
231.6 NM\_004892.3  
188.3 NM\_012430.2  
127.9 NM\_032970.2  
102.5 NM\_006364.2  
249.2 NM\_032985.3  
359.1 NM\_032985.4  
155.9 NM\_007190.2  
141.8 NM\_021982.1  
177.7 NM\_001042734.1  
111.1 NM\_006323.1  
142.4 NM\_006323.1  
147.8 XM\_945425.1  
845.2 NM\_198597.1  
134.2 NM\_004922.2  
185.4 NM\_014822.1  
121.6 NM\_014933.2

351.2 NM\_014933.2  
106.7 NM\_015490.3  
121 NM\_198138.1  
990.4 NM\_013336.3  
137 NM\_018144.2  
1031.9 NM\_006808.2  
1336.5 NM\_001012456.1  
1536.5 NM\_014302.3  
113.4 NM\_007214.3  
158 NM\_007277.3  
120.3 NM\_021807.2  
172.3 NM\_024077.2  
116.1 NM\_003004.1  
170.7 NR\_002166.1  
125.2 NM\_031216.3  
110.7 NM\_031216.3  
137.7 NM\_001013437.1  
137.4 NM\_005065.3  
112.6 NM\_000450.1  
127.3 NM\_003944.2  
115 NM\_033505.1  
2000.8 NM\_021237.3  
346.4 NM\_000655.2  
134.5 NM\_080430.2  
220.9 NM\_031454.1  
114.1 NM\_003005.2  
159.7 NM\_003006.3  
121.9 NM\_203472.1  
655.5 NM\_018445.4  
251.6 NM\_203472.1  
112.4 NM\_016275.3  
120.1 NM\_182704.1  
118.8 NM\_006080.1  
137.1 NM\_001005914.1  
128.2 NM\_001005914.1  
116.6 NM\_006379.2  
109.9 NM\_152754.2  
1378.5 NM\_012431.1  
112.9 NM\_004186.2  
130.4 NM\_020163.1  
126.2 NM\_022367.2  
148 NM\_020210.2  
114 NM\_020210.2  
115.1 NM\_017789.3  
769.9 NM\_006378.2  
138.7 NM\_004263.2  
109.4 NM\_017893.2  
112.7 NM\_003966.1  
113.5 NM\_001031702.1  
137.1 NM\_020241.2  
109.2 NM\_032108.2



119.4 NM\_133327.1  
128.3 NM\_030913.3  
116.7 NM\_153618.1  
119.7 NM\_024966.2  
131.5 NM\_024966.2  
121.6 NM\_003612.1  
118 NM\_198139.1  
119.5 NM\_003007.2  
115.2 NM\_003008.2  
149.8 NM\_021627.2  
116.1 NM\_015670.3  
129.7 NM\_152699.2  
119.5 NM\_015571.1  
140.5 NM\_020654.2  
161.1 NM\_001077203.1  
111.6 NM\_145204.2  
1054 NM\_004261.3  
148.1 NM\_012247.3  
148.5 NM\_012248.2  
115.7 NM\_020451.2  
112.1 NM\_020451.2  
134 NM\_206926.1  
105.1 NM\_005410.2  
124.3 NM\_052838.2  
106.3 NM\_144710.2  
108.4 NM\_144710.2  
154.7 NM\_018243.2  
2578.1 NM\_004404.3  
1704.3 NM\_001008491.1  
130.4 NM\_001008492.1  
129.9 NM\_001008491.1  
118.2 NM\_019106.4  
120.6 NM\_019106.4  
114.8 NM\_080415.1  
122.3 NM\_080417.1  
119.3 NM\_080416.1  
109.6 NM\_004574.2  
118.7 NM\_002688.3  
117.9 NM\_145802.2  
163.7 NM\_145799.2  
168.8 NM\_145800.2  
133.4 NM\_001011553.1  
1149.6 NM\_006640.2  
359.7 NM\_003009.2  
554.5 NM\_016332.2  
110.8 NM\_032861.2  
121.4 NM\_021967.1  
122.6 NM\_021967.1  
113.7 NM\_022978.1  
917.9 NM\_001018108.1  
148.4 NM\_012139.2

115.9 NM\_170694.1  
115 NM\_014509.3  
301 NM\_020755.2  
118.4 NM\_178865.3  
181 NM\_198941.1  
134.1 NM\_006811.2  
887.6 NM\_198941.1  
128.6 NM\_001033517.1  
110.8 NM\_178276.2  
167.9 NM\_014445.2  
115.7 NM\_001002236.1  
106.9 NM\_001002236.1  
118.8 NM\_001002235.1  
124.8 NM\_000295.3  
122.6 NM\_016186.1  
126.9 NM\_001080451.1  
113 XM\_940101.1  
108.2 NM\_173850.2  
115.5 NM\_207378.1  
116.8 NM\_001085.4  
133.3 NM\_006215.2  
117.4 NM\_000624.3  
116 NM\_001756.3  
119.7 NM\_000354.3  
109.9 NM\_175739.2  
113.6 NM\_001042518.1  
154.6 NM\_030666.2  
127.7 NM\_005024.1  
120.6 NM\_080475.1  
107.1 NM\_080474.1  
123.2 NM\_012397.2  
133.9 NM\_002575.1  
120 NM\_006919.1  
112.2 NM\_002974.1  
123.9 NM\_002639.2  
283.6 NM\_004568.4  
117.4 NM\_003784.1  
114.3 NM\_003784.1  
175.5 NM\_002640.3  
178.4 NM\_001031848.1  
115.1 NM\_004155.3  
151.2 NM\_000488.2  
117 NM\_000185.3  
121.6 NM\_000602.1  
404.5 NM\_006216.2  
111.1 NM\_002615.4  
114.2 NM\_000934.1  
126.9 NM\_000062.2  
123.4 NM\_000062.2  
433.6 NM\_001235.2  
136.3 NM\_005025.2

121.2 NM\_006217.3  
2122.6 NM\_013376.1  
795.8 NM\_014755.1  
325.8 NM\_203344.1  
124.3 NM\_013368.2  
167.2 NM\_203344.1  
124.4 NM\_019605.2  
202.3 NM\_014454.1  
172.9 NM\_031459.3  
134.5 NM\_144665.2  
138.5 NM\_178123.3  
310.1 NM\_003011.1  
110.9 NM\_030648.1  
123.7 NM\_015559.1  
416.5 NM\_014712.1  
118.4 NM\_199123.1  
124.2 NM\_199123.1  
527.9 NM\_032233.2  
127.7 NM\_001007260.1  
112.4 NM\_024860.1  
167.7 NM\_020382.3  
151.6 NM\_012432.2  
166.6 NM\_031915.1  
157.5 NM\_006515.1  
411.8 NM\_015046.4  
119.8 NM\_178860.3  
104.1 NM\_021115.3  
123.7 NM\_201575.1  
113.4 XM\_939114.1  
128.7 NM\_201575.1  
111.9 NM\_201997.1  
125.5 NM\_201997.1  
127.6 NM\_004630.2  
116.3 NM\_005877.4  
150.6 NM\_001005409.1  
399.4 NM\_007165.4  
280.1 NM\_006802.2  
129.9 NM\_001005526.1  
961.2 NM\_012433.2  
203.5 NM\_001005526.1  
240.8 NM\_016047.3  
287 NM\_006842.2  
298.1 NM\_012426.3  
731.7 NM\_005850.3  
389 NM\_031287.2  
273.1 NM\_021164.2  
120.6 NM\_001007467.1  
113.3 NM\_014775.2  
118.7 NM\_014775.2  
200.8 NM\_001005158.1  
212.7 NM\_001005158.1

117.9 NM\_001005159.1  
117.3 NM\_001029880.1  
114.3 NM\_006142.3  
147.9 NM\_005066.1  
113.8 NM\_003012.3  
104.7 NM\_003013.2  
120.4 NM\_003014.2  
113.8 NM\_003015.2  
335.8 NM\_006924.3  
2954.2 NM\_004593.1  
202.7 NM\_004768.2  
156.8 NM\_139168.1  
184.7 NM\_001077199.1  
116.2 NM\_001077199.1  
227.5 NM\_014884.1  
178.9 NM\_014884.1  
128.3 NM\_001017392.1  
386.2 NM\_020706.1  
157.9 NM\_007056.1  
5469.5 NM\_003016.2  
276.2 NM\_004719.2  
125.3 NM\_003017.3  
947.3 NM\_005626.3  
3503.6 NM\_006925.2  
3891.7 NM\_006925.3  
3698.1 NM\_006275.4  
728.8 NM\_001031684.1  
143.2 NM\_004592.2  
691.6 NM\_003769.2  
721.4 NM\_145169.1  
131 NM\_199344.1  
115.5 NM\_032740.3  
116.7 NM\_005411.3  
115 NM\_006926.1  
110.2 NM\_000542.2  
121.7 NM\_198843.1  
114.2 NM\_003018.2  
108.3 NM\_003019.4  
112.3 NM\_205854.1  
116.9 NM\_022754.4  
114.2 NM\_178858.3  
127.7 NM\_030971.3  
124.9 NM\_213650.1  
180 NM\_178867.3  
119.2 NM\_178867.3  
167.3 NM\_144579.1  
122.4 NM\_000023.1  
126.6 NM\_000232.3  
116.9 NM\_000337.4  
110 NM\_172244.2  
133.3 NM\_172244.2

117 NM\_003919.1  
117.3 NM\_000231.1  
106.5 NM\_139167.1  
122.5 NM\_015595.2  
118.5 NM\_032291.1  
2392.8 NM\_005627.2  
112.7 NM\_170693.1  
101.3 NM\_016276.3  
120.4 NM\_016276.3  
108.6 NM\_001033578.1  
208.5 NM\_170709.1  
201.1 NM\_170709.1  
107.8 NM\_001012413.1  
112.6 NM\_152524.3  
139 NM\_003901.2  
114.4 NM\_030791.2  
108.4 NM\_152386.2  
114.4 NM\_152386.2  
311.2 NM\_000199.2  
122.9 NM\_003021.3  
116.9 NM\_019072.2  
131.6 NM\_015503.1  
241.9 NM\_002351.1  
173.2 NM\_053282.4  
124.4 NM\_003975.2  
126.4 NM\_005490.1  
147.1 NM\_170600.1  
119.6 NM\_005489.1  
129.7 NM\_005489.1  
116 NM\_022071.2  
115.4 NM\_207372.1  
122 NM\_007341.2  
118.5 NM\_001001713.1  
105.4 NM\_003022.1  
126.8 NM\_031469.1  
560.4 NM\_031286.2  
151.9 NM\_018957.2  
116 NM\_003023.2  
131.6 NM\_014521.1  
114.2 NM\_004844.2  
111 NM\_001018009.1  
168.8 NM\_030645.1  
114.4 NM\_001009555.2  
123.9 NM\_003025.2  
117.6 NM\_003026.1  
109.9 NM\_003027.2  
651.5 NM\_016009.2  
228.2 NM\_020145.2  
857.1 NM\_031892.1  
133.5 NM\_001024666.1  
698.9 NM\_001024666.1

117.7 NM\_020870.2  
116 NM\_153271.1  
138.1 NM\_014631.2  
122.7 NM\_001017995.1  
131.9 NM\_152550.2  
121.1 NM\_018986.2  
118.3 NM\_024577.2  
150.4 NM\_015677.1  
119.1 NM\_016148.1  
113.7 NM\_133266.1  
113.9 NM\_012309.1  
122.7 NM\_001080420.1  
133.8 NM\_030974.2  
133.6 NM\_003028.1  
116.4 NM\_001040.2  
125 NM\_183001.3  
113.5 NM\_183001.3  
455.7 NM\_003029.3  
124.1 NM\_016848.2  
108.6 NM\_203349.2  
4290.2 NM\_024745.2  
116.8 NM\_020209.2  
123.3 NM\_001010846.1  
121.5 NM\_138356.2  
2303.2 NM\_006304.1  
123 NM\_000193.2  
149.7 NM\_138392.1  
120.8 NM\_148918.1  
131.9 NM\_148918.1  
123.2 NM\_004169.3  
379.4 NM\_005412.4  
142.9 NM\_007373.2  
114.4 NM\_006883.1  
114.7 NM\_006883.1  
137.3 NM\_006884.1  
118.5 NM\_006884.1  
116.3 NM\_173082.1  
115.2 NM\_173082.1  
120.7 NM\_018130.2  
122.2 NM\_020859.1  
1730.5 NM\_020717.2  
125.3 NM\_001041.1  
121.3 NM\_170601.3  
114.8 NM\_001006610.1  
111.3 NM\_003031.3  
246 NM\_001006610.1  
137.6 NM\_005067.5  
905.9 NM\_014281.3  
125.6 NM\_017699.1  
183.1 NM\_015996.1  
128.5 NM\_021805.1

121.1 NM\_021805.1  
107.5 NM\_033130.2  
110.6 NM\_052884.1  
128.5 NM\_053003.2  
117 NM\_053003.2  
117.4 NM\_033329.1  
112.3 NM\_003830.1  
121.3 NM\_198845.2  
134.1 NM\_014385.1  
108.8 NM\_014385.1  
123.6 NM\_016543.2  
114.5 NM\_014442.1  
125.4 NM\_014441.1  
123.4 NR\_002825.1  
119.9 NR\_002804.1  
118.3 XR\_001419.1  
117.7 NM\_025073.1  
115.3 NM\_001037633.1  
119.3 NM\_001037633.1  
132.1 NM\_022464.3  
116.4 NM\_006928.3  
118.2 NM\_005068.2  
111.9 NM\_009586.1  
121.6 NM\_005069.2  
455.6 NM\_015477.1  
131 NM\_015260.1  
172.8 NM\_001009182.1  
130.5 NM\_153253.28  
320.1 NM\_153253.28  
121.2 NM\_015556.1  
156.6 NM\_020808.1  
129.5 NM\_015073.1  
122.8 NM\_006065.1  
113.3 NM\_018556.2  
110.5 NM\_178460.1  
188.1 NM\_080816.2  
113.9 NM\_080816.2  
430.4 NM\_012238.3  
119.4 NM\_030593.1  
123.7 NM\_030593.1  
128.6 NM\_012239.4  
123.7 NM\_012239.4  
141 NM\_012240.1  
121.5 NM\_031244.1  
118.2 NM\_012241.2  
130 NM\_012241.2  
128.2 NM\_016539.1  
112.4 NM\_014450.2  
221.4 NM\_021709.1  
166.4 NM\_006427.2  
119.7 NM\_005982.1

112.4 NM\_016932.3  
115.7 NM\_005413.1  
132.5 NM\_017420.2  
119.9 NM\_175875.3  
119.3 NM\_007374.1  
162.6 NM\_001075099.1  
137.3 NM\_003930.3  
160.3 NM\_003036.1  
115.9 NM\_005414.2  
146.4 NM\_130766.1  
108.6 NM\_030623.1  
225.6 NM\_006929.4  
185.5 NM\_015360.2  
439.4 NM\_170679.1  
112.6 NM\_006930.2  
    155 NM\_032637.2  
119.6 NM\_032637.2  
114.9 NM\_005983.2  
116.1 NM\_001045556.1  
149.6 NM\_001045557.1  
118.4 NM\_153825.1  
113.1 NM\_016955.1  
110.3 NM\_032214.2  
141.1 NM\_175077.1  
176.9 NM\_003037.1  
    342 NM\_052931.3  
167.8 NM\_021181.3  
210.2 NM\_020125.1  
118.4 NM\_033438.1  
241.3 NM\_006527.2  
114.3 NM\_003049.1  
110.6 NM\_000452.1  
292.1 NM\_019848.2  
115.1 NM\_152679.2  
114.3 NM\_001010893.1  
118.9 NM\_197965.1  
112.3 NM\_032128.2  
155.4 NM\_001032220.1  
111.4 NM\_000578.2  
168.4 NM\_000617.1  
117.5 NM\_000338.1  
130.9 NM\_001046.2  
108.2 NM\_000339.1  
117.7 NM\_005072.3  
124.9 NM\_020708.3  
152.5 NM\_005135.1  
108.9 NM\_005135.1  
115.1 NM\_006598.1  
140.8 NM\_024628.4  
225.6 NM\_020246.2  
114.1 NM\_022444.3



109.4 NM\_003984.1  
179.7 NM\_022829.4  
116 NM\_001011554.1  
117.5 NM\_022829.4  
111.8 NM\_012450.2  
125.7 NM\_177550.2  
133.2 NM\_015865.1  
118 NM\_007163.2  
114.4 NM\_005073.1  
125.3 NM\_021082.2  
181.7 NM\_016582.1  
241.8 NM\_145648.1  
114.7 NM\_003051.2  
236.6 NM\_018593.3  
108.9 NM\_153357.1  
4476.8 NM\_213606.1  
109.3 NM\_201566.1  
112.4 NM\_152527.3  
124.5 NM\_006517.2  
345.8 NM\_004207.2  
114.1 NM\_004696.1  
129.8 NM\_004695.2  
139.5 NM\_004694.2  
113.5 NM\_004731.3  
115.9 NM\_013356.1  
113.9 NM\_194298.1  
127.7 NM\_005074.1  
125.3 NM\_005835.1  
117.4 NM\_006632.1  
124.1 NM\_005495.1  
107.3 NM\_012434.3  
117.3 NM\_020346.1  
121.3 NM\_020309.2  
126.3 NM\_139319.1  
117.4 NM\_003053.1  
110.8 NM\_003054.2  
109.4 NM\_003055.2  
127.7 NM\_003056.2  
111.5 NM\_006996.1  
120.9 NM\_025243.2  
112.9 NM\_004170.4  
112 NM\_004171.2  
132.3 NM\_004172.3  
146.3 NM\_003038.2  
272.7 NM\_005628.1  
109.9 NM\_005071.1  
124 NM\_006671.3  
1379.4 NM\_005415.3  
124.4 NM\_006749.3  
134.4 NM\_153187.1  
131.2 NM\_003057.2

119.4 NM\_001039752.2  
121.9 NM\_018484.2  
115.2 NM\_153378.1  
120.8 NM\_144585.2  
112.7 NM\_144585.2  
117.5 NM\_004256.1  
118.2 NM\_004803.2  
112.3 NM\_018420.1  
107.8 NM\_033125.2  
121.9 NM\_020372.2  
149.9 NM\_016609.3  
114.8 NM\_183233.1  
115.6 NM\_002555.3  
122.4 NM\_007105.1  
132.4 NM\_153191.1  
114.4 NM\_003058.2  
116.9 NM\_021977.2  
110.7 NM\_003059.2  
119.5 NM\_003060.2  
119.5 NM\_153276.1  
116.1 NM\_004790.3  
121.5 NM\_006672.2  
112.8 NM\_153320.2  
    112 NM\_004254.2  
    113 NM\_080866.2  
133.8 NM\_152685.2  
132.8 NM\_005847.3  
121.7 NM\_203327.1  
137.8 NM\_005116.5  
118.9 NM\_005116.5  
111.9 NM\_144712.2  
115.8 NM\_004727.1  
112.8 NM\_020344.1  
115.1 NM\_020689.3  
115.4 NM\_153648.2  
    122 NM\_153646.2  
    129 NM\_153647.2  
110.4 NM\_205850.1  
491.9 NM\_024959.2  
    189 NM\_005984.1  
118.3 NM\_012140.3  
133.2 NM\_003562.3  
127.6 NM\_003705.2  
121.3 NM\_014251.1  
140.8 NM\_022810.1  
    124 NM\_022810.1  
112.9 NM\_014252.2  
115.4 NM\_152707.2  
137.9 NM\_006358.2  
112.9 NM\_031481.1  
152.7 NM\_021734.3

116.1 NM\_031947.2  
131.7 NM\_000387.3  
110.9 NM\_030631.1  
204.3 NM\_024698.4  
135.1 NM\_024103.2  
    121 NM\_213651.1  
    121 NM\_013386.2  
122.6 NM\_013386.2  
324.1 NM\_052901.2  
123.1 NM\_001006641.1  
122.5 NM\_001006642.1  
    129 NM\_052901.2  
133.8 NM\_001009937.1  
117.6 NM\_173471.1  
139.2 NM\_001009937.1  
123.1 NM\_004277.2  
376.2 NM\_031212.2  
116.1 NM\_001039355.1  
133.6 NM\_152333.1  
1111.8 NM\_002635.2  
143.1 NM\_213611.1  
119.2 NM\_001010875.1  
119.9 NM\_031291.1  
119.9 NM\_030780.2  
119.8 NM\_207348.1  
117.4 NM\_201520.1  
199.4 NM\_018155.1  
139.6 NM\_016612.1  
234.7 NM\_001151.2  
126.3 NM\_018843.2  
268.3 NM\_178526.1  
131.7 NM\_145305.1  
119.1 NM\_001077241.1  
2786.6 NM\_001152.1  
127.1 NM\_134425.1  
    115 NM\_213613.2  
128.1 NM\_134425.1  
124.1 NM\_001018084.1  
121.4 NM\_173626.1  
265.3 NM\_173626.1  
    121 NM\_000112.2  
112.1 NM\_000111.1  
120.9 NM\_000441.1  
    110 NM\_206885.1  
128.8 NM\_206884.1  
118.3 NM\_198999.1  
157.2 NM\_134426.2  
108.5 NM\_001040454.1  
107.2 NM\_134426.2  
108.8 NM\_134266.1  
116.1 NM\_052832.2

125.3 NM\_052961.2  
112 NM\_138718.1  
115.4 NM\_052934.2  
129.2 NM\_134325.1  
113.8 NM\_134325.1  
139.4 NM\_198580.1  
128 NM\_003645.2  
130.5 NM\_024330.1  
133.4 NM\_005094.2  
120.2 NM\_012254.1  
119.3 NM\_014031.3  
120.2 NM\_001017372.1  
109.8 NM\_201651.1  
125.9 NM\_201651.1  
117.1 NM\_004213.3  
114.3 NM\_022127.1  
125.6 NM\_001078177.1  
118.9 NM\_004955.1  
120.4 NM\_001078174.1  
131.6 NM\_001532.2  
124 NM\_018344.3  
113.9 NM\_001040661.1  
186.4 NM\_006516.1  
109.7 NM\_030777.3  
119.2 NM\_030807.2  
117.3 NM\_001024938.1  
115.4 NM\_001024939.1  
114.5 NM\_145176.1  
110.4 NM\_052885.1  
132 NM\_153449.2  
123 NM\_000340.1  
4443.4 NM\_006931.1  
117.1 NM\_001042.1  
160.5 NM\_020062.3  
137.1 NM\_003039.1  
126.3 NM\_017585.2  
105.6 NM\_207420.1  
185 NM\_014580.3  
142.2 NM\_001001290.1  
123.4 NM\_020041.2  
116.8 NM\_001001290.1  
134.9 NM\_021194.2  
113.3 NM\_018713.2  
113.1 NM\_001004434.1  
117.2 NM\_032513.3  
131.5 NM\_003459.4  
113.3 NM\_013309.4  
186.8 NM\_024055.2  
127.6 NM\_022902.2  
118.9 NM\_024055.2  
115.8 NM\_017964.2

480.3 NM\_133496.3  
121.4 NM\_173851.2  
143.3 NM\_006345.3  
300.9 NM\_001860.1  
117.1 NM\_080552.2  
121.9 NM\_004733.2  
112.5 NM\_003052.2  
109.3 NM\_006424.2  
    122 NM\_080877.1  
230.9 NM\_006416.2  
377.7 NM\_001032289.1  
131.6 NM\_001032289.1  
126.6 NM\_005660.1  
176.6 NM\_005660.1  
134.9 NM\_012243.1  
    213 NM\_080670.2  
199.6 NM\_017945.2  
626.6 NM\_005827.1  
241.7 NM\_178148.1  
202.2 NM\_015948.2  
126.4 NM\_032826.3  
129.3 NM\_018389.3  
130.1 NM\_173073.2  
154.8 NM\_173073.2  
114.7 NM\_173179.2  
110.8 NM\_015139.1  
141.8 NM\_007001.1  
114.6 NM\_001008783.1  
1083.5 NM\_024881.3  
125.3 NM\_182838.1  
197.2 NM\_018656.2  
    117 NM\_001001479.1  
    118 NM\_001029858.1  
123.4 NM\_017515.3  
123.4 NM\_173508.1  
127.1 XM\_939358.1  
110.8 XM\_936857.1  
113.5 NM\_025181.2  
133.7 NM\_078483.2  
109.6 NM\_181776.1  
106.8 NM\_181774.2  
187.7 NM\_152313.2  
117.4 NM\_018964.3  
117.8 NM\_198277.1  
163.3 NM\_032295.2  
120.5 NM\_207113.1  
130.4 NM\_001467.3  
133.1 NM\_030674.2  
972.3 NM\_030674.2  
1112.5 NM\_018976.3  
110.6 NM\_006841.3

134.7 NM\_033518.1  
181 NM\_153811.1  
221 NM\_014437.3  
134.7 NM\_020342.1  
118.7 NM\_139177.2  
124.9 NM\_152725.1  
126.9 NM\_152264.2  
133.2 NM\_015359.1  
121.8 NM\_014579.1  
121.6 NM\_144564.4  
149.3 NM\_144564.4  
139.6 NM\_213568.1  
105.1 NM\_130849.1  
119.7 NM\_017767.1  
126 NM\_173596.1  
143.1 NM\_012319.2  
142 NM\_001077516.1  
156.7 NM\_006979.1  
133.4 NM\_022154.5  
114.9 NM\_018375.2  
115.9 NM\_000341.2  
1071.3 NM\_001013251.1  
199.2 NM\_001012661.1  
2469.8 NM\_001012661.1  
134.8 NM\_014585.3  
159 NM\_173854.4  
124.3 NM\_032148.2  
232.8 NM\_001008485.1  
110 NM\_001008487.1  
190.6 NM\_017836.3  
108 NM\_003627.4  
193.2 NM\_152346.1  
157.1 NM\_017611.2  
122.1 NM\_014096.2  
121.9 NM\_199329.1  
117.6 NM\_199329.1  
324.1 NM\_080546.2  
259.5 NM\_022109.2  
394.3 NM\_020428.2  
128.2 NM\_152369.2  
117 NM\_025257.1  
5758.9 NM\_032794.1  
120.6 NM\_032794.1  
119.1 NM\_152697.2  
129.8 NM\_001080397.1  
134.1 NM\_016180.3  
113.3 NM\_016180.3  
128.5 NM\_001012509.1  
117.5 NM\_033102.1  
206.9 NM\_001080431.1  
128.1 NM\_000342.1

113.2 NM\_022058.2  
119.8 NM\_032034.1  
127.8 NM\_018158.1  
122.2 NM\_003040.2  
119.8 NM\_005070.1  
117.7 NM\_201574.1  
119.3 NM\_003759.1  
536.2 NM\_133478.2  
117.5 NM\_133478.2  
107.5 NM\_133479.1  
225.9 NM\_003615.2  
112.3 NM\_004858.1  
120.9 NM\_001039960.1  
115.8 NM\_031467.1  
108.7 NM\_000343.1  
108.9 NM\_152351.2  
114.2 XM\_941678.1  
109.6 NM\_152351.2  
130.8 NM\_001042450.1  
115.5 NM\_052944.2  
    106 NM\_001042366.1  
    117 NM\_178498.2  
112.9 NM\_001042366.1  
113.7 NM\_003041.1  
291.1 NM\_006933.2  
116.2 NM\_014227.1  
111.6 NM\_000453.1  
143.9 NM\_021095.1  
113.6 NM\_021815.2  
267.4 NM\_145913.2  
118.9 NM\_001011547.1  
120.5 NM\_003042.2  
121.8 NM\_014229.1  
128.3 NM\_003044.2  
122.6 NM\_016615.2  
115.5 NM\_007231.1  
125.1 NM\_182767.3  
    120 NM\_182767.3  
106.8 NM\_018057.4  
150.9 NM\_014037.2  
128.1 NM\_001010898.1  
124.9 NM\_182632.1  
107.8 NM\_001003841.1  
116.1 NM\_001043.2  
120.5 NM\_020208.2  
114.3 NM\_022405.2  
115.3 NM\_020208.2  
106.8 NM\_001044.2  
    119 NM\_001045.2  
108.3 NM\_004211.1  
123.5 NM\_003043.2

130.4 NM\_014228.2  
131.5 NM\_005629.1  
117.6 NM\_201649.2  
116.5 NM\_006934.2  
117.8 NM\_001024845.1  
226.7 NM\_003045.3  
117.6 NM\_019849.1  
229.8 NM\_014331.2  
117.6 NM\_138817.2  
124.7 NM\_020949.1  
118.6 NM\_001008539.1  
116.6 NM\_003046.2  
118.7 NM\_003046.2  
113.6 NM\_001048164.1  
120.2 NM\_032803.3  
113.9 NM\_004173.1  
1847.7 NM\_003486.5  
135.7 NM\_003983.3  
124.4 NM\_001076785.1  
147.3 NM\_032178.1  
140.1 NM\_003982.2  
120.1 NM\_012244.2  
121.1 NM\_182728.1  
134.7 NM\_012244.2  
127.9 NM\_014270.3  
117.1 NM\_021097.1  
122.9 NM\_015063.1  
118.1 NM\_182936.1  
116.2 NM\_033262.3  
116.2 NM\_183002.1  
397.2 NM\_003047.2  
118.2 NM\_183061.1  
115.7 NM\_178527.2  
126.9 NM\_003048.3  
123.4 NM\_004174.1  
601.2 NM\_004252.1  
118.7 NM\_004785.3  
135.7 NM\_001011552.1  
135.5 NM\_004594.1  
113.3 NM\_001042537.1  
113.4 NM\_001042537.1  
190.2 NM\_006359.1  
125.5 NM\_032591.1  
148.8 NM\_015266.1  
118.4 NM\_173653.1  
109.2 NM\_005075.2  
113 NM\_005075.2  
112.3 NM\_021094.2  
109.6 NM\_021094.2  
124.1 NM\_134431.1  
111.8 NM\_006446.2



112.1 NM\_019844.1  
118.4 NM\_017435.2  
117.5 NM\_005630.1  
163.3 NM\_007256.2  
132.6 NM\_013272.2  
144.1 NM\_013272.2  
161 NM\_016354.3  
129.6 NM\_180991.4  
128.8 NM\_030958.1  
124.4 NM\_173488.2  
133.4 NM\_032336.1  
185.5 NM\_152270.2  
126.2 NM\_144682.3  
119.6 NM\_182854.1  
122.5 NM\_182854.1  
115.1 NM\_003061.1  
109 NM\_004787.1  
115.5 NM\_003062.1  
219.6 NM\_138440.1  
117.2 NM\_052910.1  
122.2 NM\_032539.2  
114.9 NM\_014926.2  
111.8 NM\_173078.2  
121.1 NM\_015567.1  
112.1 NM\_032229.2  
167.1 NM\_014720.2  
443.3 NM\_007159.2  
113.9 NM\_006553.2  
113.3 NM\_003063.1  
108.8 NM\_003064.2  
454 NM\_017968.2  
275.5 NM\_001013843.1  
195.3 NM\_024755.2  
396.9 NM\_006425.3  
121.2 NM\_020427.2  
130.3 NM\_021652.2  
115.5 NM\_021036.1  
111.2 NM\_005900.2  
129.2 NM\_001003688.1  
126.2 NM\_001003652.1  
121.4 NM\_005901.3  
277.7 NM\_005902.3  
288.3 NM\_005359.3  
125 NM\_001001419.1  
117.4 NM\_005903.5  
134.9 NM\_005903.5  
105.3 NM\_005585.2  
299.7 NM\_005904.2  
114.9 NM\_005905.2  
115.3 NM\_001018082.1  
129.2 NM\_014267.3

237.4 NM\_021940.2  
118.7 NM\_021940.2  
772.4 NM\_022733.1  
120.9 NM\_003069.2  
116.2 NM\_003070.3  
563.3 NM\_139045.2  
117.3 NM\_003071.2  
131.2 NM\_003071.2  
269.9 NM\_003072.2  
    132 NM\_003601.2  
126.6 NM\_020159.1  
153.4 NM\_014140.2  
136.2 NM\_001007468.1  
161.5 NM\_001007468.1  
262.4 NM\_003074.2  
111.9 NM\_139067.1  
    290 NM\_003075.2  
    132 NM\_003075.2  
123.3 NM\_003076.3  
326.2 NM\_003076.3  
161.4 NM\_003077.2  
121.1 NM\_001003802.1  
116.8 NM\_001003801.1  
131.8 NM\_003078.3  
160.2 NM\_003079.4  
167.6 NM\_020123.2  
111.9 NM\_006306.2  
    123 NM\_148674.3  
117.9 NM\_001042550.1  
    127 NM\_001042550.1  
128.4 NM\_006444.1  
122.8 NM\_005445.3  
368.7 NM\_001002800.1  
140.4 NM\_001002800.1  
126.6 NM\_005496.3  
123.4 NM\_015110.1  
125.3 NM\_024624.3  
111.8 NM\_030663.2  
114.7 NM\_139162.2  
130.4 NM\_139162.2  
118.5 NM\_144775.1  
117.6 NM\_004187.1  
    197 NM\_004653.3  
304.9 NM\_020463.1  
107.2 NR\_002784.1  
893.9 NM\_015092.3  
154.8 NM\_015327.1  
122.4 NM\_017575.3  
150.8 NM\_201569.1  
    135 NM\_173156.1  
170.8 NM\_014837.3

111.5 NM\_022874.1  
125.3 NM\_022875.1  
330.4 NM\_005871.2  
121.8 NM\_005631.3  
116.4 NM\_001034852.1  
121.8 NM\_022137.3  
117.3 NM\_022138.1  
118.4 NM\_019025.2  
111.3 NM\_175840.1  
115.9 NM\_175842.1  
124.3 NM\_000543.3  
120.3 NM\_001007593.1  
130.5 NM\_003080.1  
126.5 NM\_018667.2  
116.7 NM\_006714.2  
115.9 NM\_001009568.1  
114.5 NM\_014474.2  
118.4 NM\_014474.2  
117.5 NM\_014332.1  
116.4 NM\_012390.3  
110.6 NM\_006685.2  
148.7 NM\_004595.2  
113.1 NM\_134269.1  
115.5 NM\_134269.1  
137.7 NM\_006932.3  
141.2 NM\_018225.1  
126.2 NM\_014311.1  
131.1 NM\_181349.1  
111.3 NM\_020429.1  
134.4 NM\_022739.3  
115.3 NM\_198274.2  
130.4 NM\_020197.1  
121.6 NM\_022743.1  
155.2 NM\_052928.1  
116.8 NM\_006062.1  
105.1 NM\_023068.2  
133.9 NM\_052870.1  
142.9 NM\_005985.2  
108.1 NM\_003068.3  
114.1 NM\_178310.1  
233.5 NM\_003825.2  
458.4 NM\_130798.1  
127.2 NM\_130811.1  
116.7 NM\_003081.2  
135.7 NM\_004782.2  
107.5 NM\_014841.1  
125.7 NM\_012437.3  
244.2 NM\_003082.2  
201.4 NM\_003083.1  
113.4 NM\_001039697.1  
290.8 NM\_003086.1

131 NM\_006049.1  
160.5 NM\_007308.1  
118 NM\_000345.2  
120.7 NM\_005460.2  
115.7 XM\_936492.1  
115.5 NM\_003085.3  
121.5 NM\_003087.1  
210.1 NM\_014390.2  
232.5 NM\_173354.2  
118.3 NM\_015191.1  
137.3 NM\_007241.2  
132.3 NM\_018664.1  
124 NR\_001459.2  
125.5 NR\_002909.1  
109.9 NM\_001048198.1  
1455.9 NR\_003038.1  
117.7 NR\_003192.1  
108.5 NM\_025248.1  
385.8 NM\_024700.2  
132.8 NM\_003498.3  
126 NR\_003032.1  
113.4 NR\_001293.1  
121.1 NR\_003317.1  
115.1 NR\_003319.1  
125.2 NR\_002448.1  
161.5 NR\_000016.1  
131.7 NR\_002745.1  
774.9 NR\_002739.1  
121 NM\_014723.2  
626.2 NM\_017719.3  
164.6 NM\_003089.4  
980.1 NM\_003089.4  
126.2 NM\_001009820.1  
290.6 NM\_004596.3  
427.3 NM\_003090.2  
755.6 NM\_003091.3  
1122.6 NM\_003091.3  
631 NM\_003092.3  
590.3 NM\_003092.3  
189 NM\_003093.1  
120.9 NM\_006938.2  
120 NM\_177542.1  
3977.4 NM\_004597.4  
189.8 NM\_004175.3  
113.4 NM\_003094.2  
609 NM\_003095.2  
2899.4 NM\_003096.2  
267.8 NM\_022805.2  
109.2 NM\_022807.2  
144 NM\_003098.2  
134.9 NM\_021021.2

125.3 NM\_006750.2  
418.7 NM\_006750.2  
112.4 NM\_018967.2  
116.5 NM\_018968.2  
149.9 NM\_001042581.1  
200.3 NM\_005678.3  
    124 NM\_022804.2  
147.6 NM\_012245.2  
    211 NM\_003099.3  
175.8 NM\_013322.2  
    301 NM\_152244.1  
115.9 NM\_152244.1  
126.1 NM\_013346.2  
135.5 NM\_015132.2  
    114 NM\_153816.2  
223.4 NM\_020468.2  
113.9 NM\_013306.3  
117.8 NM\_013306.3  
158.6 NM\_022133.2  
116.7 NM\_152837.1  
227.6 NM\_014748.2  
128.1 NM\_014758.1  
360.7 NM\_003100.2  
108.8 NM\_001042633.1  
121.5 NM\_024798.2  
111.3 NM\_014035.1  
190.6 NM\_031953.2  
163.7 NM\_052948.2  
235.2 NM\_030918.5  
    2406 NM\_152828.2  
155.1 NM\_003794.2  
164.9 NM\_152227.1  
134.6 NM\_014426.2  
335.1 NM\_152233.1  
119.8 NM\_021249.2  
108.2 NM\_152238.1  
117.3 NM\_152238.1  
112.9 NM\_015976.2  
135.8 NM\_013321.1  
114.2 NM\_016224.3  
137.3 NM\_003101.4  
116.8 NM\_003578.3  
    162 NM\_003745.1  
115.2 NM\_003877.3  
    114 NM\_003955.3  
141.5 NM\_199421.1  
259.7 NM\_080867.2  
111.1 NM\_144949.2  
111.2 NM\_014011.4  
119.7 NM\_014011.4  
123.3 NM\_004232.2

123.6 XM\_936572.1  
119 NM\_014598.1  
7194.4 NM\_000454.4  
667.9 NM\_001024466.1  
4264.2 NM\_001024465.1  
119.3 NM\_000636.2  
115.7 NM\_003102.1  
113.2 NM\_017826.1  
132.8 NM\_005632.2  
202 NM\_032195.1  
164.8 NM\_138927.1  
236.4 NM\_032195.1  
2015.3 NM\_138927.1  
127.6 NM\_015385.1  
114.7 NM\_015385.2  
129.2 NM\_006434.1  
111.5 NM\_001034955.1  
120.5 NM\_001034954.1  
111.8 NM\_003603.4  
113.3 NM\_003603.4  
112.3 NM\_021069.3  
108.5 NM\_001018003.1  
116.5 NM\_005775.3  
143.6 NM\_005775.3  
106 NM\_001013031.1  
126.9 NM\_001013031.1  
113.7 NM\_052918.3  
115.7 NM\_020777.1  
116.5 NM\_014978.1  
117.6 NM\_003104.3  
112.1 NM\_003104.3  
161.9 NM\_003105.3  
139.5 NM\_002959.4  
154.4 NM\_005633.2  
126.6 NM\_006939.1  
108.9 NM\_025237.2  
120.4 NM\_015464.1  
119.6 NM\_005986.2  
120.5 NM\_006941.3  
118.3 NM\_003108.3  
138.4 NM\_006943.2  
125.6 NM\_005686.2  
126.6 NM\_004189.2  
119 NM\_006942.1  
108.5 NM\_022454.2  
112.6 NM\_018419.2  
106.7 NM\_003106.2  
121.7 NM\_007084.2  
114.5 NM\_005634.2  
117 NM\_007017.2  
123 NM\_178424.1

135.7 NM\_003107.2  
114.7 NM\_152989.2  
113.1 NM\_006940.4  
116.3 NM\_152989.2  
112 NM\_017508.1  
111.9 NM\_017508.1  
109.2 NM\_017508.1  
108.7 NM\_033326.2  
111.7 NM\_031439.2  
181.6 NM\_014587.2  
110.3 NM\_000346.2  
171.4 NM\_138473.2  
165.4 NM\_001080391.1  
176.4 NM\_003113.2  
196.1 NM\_001080391.1  
675.6 NM\_004510.2  
424.9 NM\_004510.2  
122.6 NM\_080424.1  
136.8 NM\_001005176.1  
169.4 NM\_007237.3  
162.2 NM\_001005176.1  
298.2 NM\_003110.4  
129.7 NM\_001017371.3  
125.3 NM\_001017371.3  
117.9 NM\_003111.3  
184.8 NM\_003112.3  
118.3 NM\_001003845.1  
114.5 NM\_199262.2  
127.8 NM\_152860.1  
117.2 NM\_182700.2  
116.4 NM\_198956.1  
122.6 NM\_017425.2  
119.6 NM\_030960.2  
116.2 NM\_173847.2  
100.7 NM\_133498.2  
117.8 NM\_205856.2  
114.2 NM\_001079900.1  
118.4 NM\_003114.3  
128.4 NM\_003114.3  
129.8 NM\_172218.1  
119.3 NM\_058203.1  
111.8 NM\_001081552.2  
110.5 NM\_024532.3  
118.9 NM\_001025436.1  
124.1 NM\_001025436.1  
118.8 NM\_206996.1  
122.1 NM\_003116.1  
122.9 NM\_080675.3  
125.4 NM\_006461.3  
121.7 NM\_012443.2  
114 NM\_172242.1

156.6 NM\_004890.1  
105.3 NM\_172312.1  
105.2 NM\_001039592.1  
    240 NM\_172345.1  
131.7 NM\_172345.1  
641.8 NM\_003971.3  
121.7 NM\_003117.3  
114.4 NM\_153189.1  
    108 NM\_013453.2  
109.5 NM\_032461.2  
110.6 NM\_022661.2  
120.7 NM\_145665.1  
118.7 NM\_001009614.1  
118.3 NM\_001009615.1  
115.8 NM\_001009609.1  
112.8 NM\_001009613.1  
112.3 NM\_001009616.1  
111.2 NM\_003118.2  
114.2 NM\_004684.2  
137.5 NM\_199436.1  
127.8 NM\_014946.3  
116.8 NM\_022354.1  
117.3 NM\_181727.1  
131.1 NM\_153023.1  
111.8 NM\_031955.2  
107.2 NM\_145263.1  
124.1 NM\_174927.1  
145.6 NM\_006038.2  
127.4 NM\_022827.2  
115.3 NM\_198546.1  
112.9 NM\_032598.2  
    120 NM\_139073.2  
120.4 NM\_144644.2  
108.6 NM\_145207.1  
    181 NM\_024063.1  
116.4 NM\_019073.1  
118.2 NM\_018418.1  
121.1 NM\_018418.1  
115.1 NM\_018418.1  
118.8 NM\_173499.2  
115.4 NM\_173360.2  
115.3 XM\_937647.1  
123.6 NM\_198572.1  
    110 NM\_145026.2  
147.5 NM\_023071.1  
136.9 NM\_182513.1  
110.9 NM\_020675.3  
516.9 NM\_014041.2  
116.9 NM\_014752.1  
123.5 NM\_021928.1  
114.2 NM\_012391.1



174.4 NM\_001008779.1  
297.1 NM\_182756.2  
112.3 NM\_001008779.1  
110.7 NM\_001033554.1  
114.3 NM\_001033554.1  
609.8 NM\_015001.2  
110.4 NM\_152719.1  
123.1 NM\_145658.1  
141.3 NM\_006459.2  
116.7 NM\_001003790.1  
122.4 NM\_007175.5  
153.1 NM\_015087.3  
127.7 NM\_016630.3  
156.9 XM\_945608.1  
117 NM\_181598.2  
122.2 NM\_199367.1  
122.9 NM\_199367.1  
374 NM\_003119.2  
111.3 NM\_006542.2  
200 NM\_021972.2  
109 NM\_182965.1  
512.2 NM\_020126.3  
142.6 NM\_003120.2  
207.4 NM\_003120.1  
108.2 NM\_003121.2  
112.4 NM\_152323.1  
132.7 NM\_006717.1  
258.2 NM\_032038.1  
126.3 NM\_019003.2  
149.2 NM\_001006681.1  
113.8 NM\_001006682.1  
251.8 NM\_003122.2  
133.2 NM\_021114.1  
112.3 NM\_014471.1  
124.5 NM\_006846.2  
104.6 NM\_001001325.1  
122.6 NM\_205841.2  
113.2 NM\_032566.2  
113.5 NM\_001040433.1  
107.7 NM\_020398.2  
137.2 NM\_181502.1  
116.4 NM\_020398.2  
120.1 NM\_181642.2  
114.5 NM\_003710.3  
132.4 NM\_021102.2  
120.6 XM\_938199.1  
161.6 NM\_020148.1  
129.3 NM\_032451.1  
274.3 NM\_001030288.1  
104.9 NM\_001030288.1  
148.2 NM\_003123.3

117.3 NM\_012444.2  
126 NM\_198265.1  
136 NM\_144569.3  
121.8 NM\_004598.2  
1027.6 NM\_014767.1  
114.8 NM\_016950.2  
131.8 NM\_006108.1  
107.1 NM\_012445.1  
1070.1 NM\_001007230.1  
125.3 NM\_001007228.1  
126.5 NM\_000582.2  
124.4 NM\_001040058.1  
122.3 NM\_006944.2  
466 NM\_032802.2  
113.1 NM\_020172.1  
113.6 NM\_001077238.1  
128.2 NM\_152988.1  
124.9 NM\_139015.3  
122.8 NM\_003124.3  
135.3 NM\_152594.1  
116.6 NM\_181784.1  
119.2 XM\_946006.1  
115.6 NM\_001042522.1  
121.7 NM\_001039616.1  
110.5 NM\_001012508.2  
124.6 NM\_005987.2  
129.6 NM\_003125.1  
99.4 NM\_005988.2  
122.4 NM\_001017418.1  
120.6 NR\_003062.1  
119.2 NM\_006945.3  
110.8 NM\_001024209.2  
110.9 NM\_001014450.1  
124 NM\_001014291.1  
128.6 NM\_005416.1  
115.5 NM\_173080.1  
111.6 NM\_005841.1  
124.4 NM\_005841.1  
118.3 NM\_005842.2  
124.4 NM\_005840.1  
124.2 NM\_030964.2  
170.7 NM\_032840.1  
149.1 NM\_025106.2  
154.3 NM\_032641.1  
1262.8 NM\_080861.3  
123.1 NM\_080862.1  
116.9 NM\_003126.1  
292.4 NM\_003127.1  
111.4 NM\_001024858.1  
116 NM\_000347.4  
114.8 NM\_178313.1

116.9 NM\_178313.1  
141.5 NM\_003128.1  
124.6 NM\_006946.1  
119.8 NM\_025213.2  
115.5 NM\_025213.2  
136.5 NM\_016642.1  
2372.7 NM\_178324.1  
149.1 NM\_006415.2  
144.4 NM\_178324.1  
153.1 NM\_004863.2  
115.1 NM\_018327.2  
282.1 NM\_194285.2  
112.5 NM\_032567.2  
171.7 NM\_003129.3  
195.5 NM\_021199.2  
2794.2 NM\_003900.3  
212.6 NM\_001080415.1  
155.5 NM\_001035235.2  
126.9 NM\_021228.1  
121.5 NM\_198291.1  
123 NM\_005417.3  
220.5 NM\_005417.3  
130.3 NM\_006662.1  
117.1 NM\_080744.1  
118.8 NM\_001047.1  
115.7 NM\_000348.2  
111.2 NM\_024592.1  
107.1 NM\_001010874.2  
155.3 NM\_004176.3  
118.4 NM\_001005291.1  
160.2 NM\_004176.3  
130 NM\_004599.2  
357.5 NM\_003131.2  
133.6 NM\_152546.1  
114.9 NM\_020762.1  
132.2 XM\_936300.1  
114.7 NM\_015326.2  
125.7 NM\_015326.2  
123.7 NM\_015326.2  
116.5 NM\_001033117.1  
127.6 NM\_014850.2  
5217.9 NM\_002727.2  
104 NM\_198901.1  
123.4 NM\_003130.2  
126.3 NM\_003130.2  
142.5 NM\_003132.2  
110.7 NM\_080823.2  
1582 NM\_003134.2  
448.5 NR\_003273.1  
238.9 NM\_003135.1  
238.7 NM\_032102.1

880.2 NM\_003136.2  
337.7 NM\_014230.2  
165.9 NM\_006947.2  
1026.6 NM\_003133.2  
267.5 NM\_003137.3  
178.4 NM\_182691.1  
121.7 NM\_182692.1  
129.4 NM\_182691.1  
195.4 NM\_003139.2  
195.7 NM\_021203.2  
110.1 NM\_006307.2  
113.7 NM\_014467.1  
120.4 NM\_021947.1  
472.6 NM\_005839.2  
1234.1 NM\_016333.2  
115 NM\_080743.2  
1721.2 NM\_080725.1  
114.4 NM\_003140.1  
126.9 NM\_005637.2  
119 NM\_001007559.1  
159.3 NM\_015558.3  
119.6 NM\_198935.1  
1972.1 NM\_016305.1  
116.3 NM\_003142.2  
457.5 NM\_003143.1  
136.9 NM\_012446.2  
133.6 NM\_018070.3  
123.4 NM\_145716.2  
115.8 NM\_032627.2  
134.2 NM\_006751.3  
137.9 NM\_018984.2  
170.4 NM\_033389.2  
126.8 NM\_017857.2  
113.5 NM\_017857.2  
337.2 NM\_003731.1  
113.7 NM\_005086.3  
276.6 NM\_003144.2  
312.8 NM\_003145.2  
131.4 NM\_007107.2  
597 NM\_006280.1  
133.9 NM\_003146.2  
111.2 NM\_006396.1  
111.9 NM\_001048.3  
117.7 NM\_001049.2  
316.5 NM\_001050.2  
115.7 NM\_001051.2  
114.7 NM\_001052.1  
121.3 NM\_001053.1  
698.4 NM\_014188.2  
113.2 NM\_005635.2  
111.4 NM\_003147.4

118.1 NM\_003147.4  
124.7 NM\_014021.2  
111.6 NM\_175711.1  
    119 NM\_021014.2  
111.3 NM\_175711.1  
114.3 NM\_175729.1  
125.9 NM\_005636.3  
122.9 NM\_001034832.2  
123.1 NM\_001034832.2  
112.4 NM\_021015.3  
116.3 NM\_021015.3  
116.9 NM\_173357.2  
119.9 NM\_173358.2  
113.4 NM\_174962.2  
104.7 XM\_937492.1  
714.1 NM\_003932.3  
110.8 NM\_021978.2  
117.2 NM\_014682.1  
415.2 NM\_173344.1  
129.2 NM\_003033.2  
121.6 NM\_006927.2  
119.1 NM\_174970.1  
119.8 NM\_006279.2  
121.5 NM\_006278.1  
    139 NM\_001042437.1  
157.5 NM\_003896.2  
122.8 NM\_006100.2  
126.1 NM\_139157.2  
130.5 NM\_005418.3  
118.1 NM\_005418.3  
117.7 NM\_213618.1  
137.9 NM\_173216.1  
205.6 NM\_173217.1  
    121 NM\_003032.2  
112.2 NM\_032528.1  
108.4 NM\_018414.2  
117.4 NM\_006456.1  
107.5 NM\_152996.1  
123.7 NM\_175040.1  
109.9 NM\_175039.3  
    124 NM\_175039.3  
    118 NM\_030965.1  
189.3 NM\_013443.3  
130.8 NM\_018412.3  
122.6 NM\_021908.2  
126.2 NM\_018412.3  
113.2 NM\_138729.2  
118.4 NM\_138729.2  
122.7 NM\_198327.1  
115.6 NM\_003034.2  
116.2 NM\_006011.3

131.4 NM\_015879.1  
120.1 NM\_175052.1  
120.6 NM\_175052.1  
127.2 NM\_005668.3  
113.6 NM\_013305.3  
113.6 NM\_001004470.1  
    130 NM\_015136.2  
107.9 NM\_017564.9  
109.7 NM\_003149.1  
121.6 NM\_198993.2  
131.4 NM\_145064.1  
400.4 NM\_005862.2  
133.2 NM\_001042749.1  
573.5 NM\_006603.3  
130.6 NM\_006603.3  
    131 NM\_012447.2  
210.7 NM\_003473.2  
130.1 NM\_005843.3  
242.2 NM\_201647.1  
107.8 NM\_213622.1  
173.6 NM\_006463.3  
142.9 NM\_020799.2  
112.9 NM\_017720.2  
117.4 XM\_939590.1  
119.7 NM\_017720.2  
119.3 NM\_017720.2  
117.4 NM\_001007243.1  
118.4 NM\_000349.2  
115.1 NM\_001007243.1  
126.6 NM\_006645.1  
121.9 NM\_052851.1  
108.4 NM\_178006.1  
112.1 NM\_178006.1  
123.7 NM\_178007.1  
148.7 NM\_006804.2  
    194 NM\_032016.2  
112.5 NM\_139164.1  
111.8 NM\_181900.2  
129.7 NM\_181900.2  
114.7 NM\_139171.1  
602.7 NM\_020151.2  
226.6 NM\_139267.1  
120.7 NM\_020151.2  
    124 NM\_014725.2  
188.1 NM\_139266.1  
484.6 NM\_139266.1  
612.1 NM\_007315.2  
815.2 NM\_005419.2  
294.9 NM\_213662.1  
584.2 NM\_003151.2  
166.1 NM\_003152.2

213.8 NM\_012448.3  
444.5 NM\_003153.3  
118.3 NM\_001009181.1  
181.5 NM\_018255.1  
123 NM\_017453.1  
305.2 NM\_017454.1  
1120.7 NM\_017454.2  
124.1 NM\_014393.1  
130 NM\_003155.2  
116.9 NM\_003714.2  
280.7 NM\_006948.4  
116.6 NM\_012449.2  
118 NM\_152999.2  
109.9 NM\_152999.2  
120 NM\_152999.2  
110.4 NM\_182915.2  
112.9 NM\_018234.2  
114.8 NM\_018234.2  
113.8 NM\_024636.1  
111.8 NM\_001006608.1  
122.4 NM\_001007532.1  
202.3 NM\_003035.2  
142.8 NM\_003156.2  
129.3 NM\_020860.1  
3297.4 NM\_006819.1  
212.7 NM\_005990.2  
129.9 NM\_000455.4  
222.6 NM\_052902.1  
118.2 NM\_003691.2  
119.2 NM\_001008910.1  
113.5 NM\_003691.2  
120.4 NM\_004760.1  
126.9 NM\_004226.2  
470.5 NM\_004197.1  
324.2 NM\_032454.1  
110.4 NM\_014370.2  
113.8 NM\_003576.2  
115.4 NM\_001032296.1  
725.8 NM\_001032296.1  
173.7 NM\_006374.3  
260.3 NM\_006281.1  
136.7 NM\_031414.2  
116.6 NM\_031414.2  
125.7 NM\_032944.1  
109.3 NM\_145001.1  
111.4 NM\_018401.1  
136.3 NM\_173575.2  
110.2 NM\_030906.2  
160.4 NM\_080836.2  
180.8 NM\_015690.2  
666.4 NM\_007271.2

146.2 NM\_015000.1  
142.2 NM\_013233.1  
1204.4 NM\_006282.2  
2274.9 NM\_032017.1  
129.8 NR\_001587.1  
115.6 NM\_203399.1  
624 NM\_005563.3  
118.6 NM\_005563.3  
122.5 NM\_203401.1  
126.4 NM\_007029.2  
114 NM\_030795.2  
315.3 NM\_004099.4  
166.6 NM\_004099.4  
115.6 NM\_004809.3  
261.6 NM\_013442.1  
113.3 NM\_145286.1  
112 NM\_006873.2  
115.4 NM\_033104.2  
114.1 NM\_152709.3  
113.4 NM\_020225.1  
270.2 NM\_144998.2  
114.7 NM\_022369.2  
267.1 NM\_007178.2  
163.2 NM\_018387.2  
146.4 NM\_153700.2  
125.5 NM\_003162.2  
466.6 NM\_014574.2  
190.8 NM\_013403.1  
119.5 NM\_013403.2  
116.6 NM\_000351.3  
125.6 NM\_032873.3  
209.1 NM\_152713.2  
161.6 NM\_178862.1  
163.4 NM\_005861.2  
252.6 NM\_003765.1  
319.1 NM\_003764.2  
181.3 NM\_177424.1  
113.7 NM\_001001433.1  
522.6 NM\_003763.3  
115.2 NM\_017919.1  
113.8 NM\_016930.2  
119.1 NM\_001001850.1  
155.8 NM\_004603.1  
112.9 NM\_052874.1  
160.6 NM\_001980.2  
166.1 NM\_001980.2  
229.6 NM\_004177.3  
452.6 NM\_004604.3  
780.1 NM\_003164.2  
119.8 XM\_938340.1  
254.2 NM\_003164.2



225.9 NM\_005819.4  
116.3 NM\_003569.1  
132.5 NM\_004853.1  
124.9 NM\_003165.1  
133.7 NM\_001032221.1  
    121 NM\_003165.1  
270.7 NM\_006949.1  
230.2 NM\_007269.1  
236.3 NM\_139244.2  
111.3 NM\_014178.6  
115.1 NM\_018423.1  
111.4 NM\_145251.2  
131.2 NM\_016086.2  
331.3 NM\_006713.2  
153.7 NM\_003850.1  
255.3 NM\_003849.1  
120.4 NM\_003848.1  
118.2 NM\_022491.2  
116.4 NM\_016169.2  
183.2 NM\_006704.2  
119.8 NM\_080740.3  
110.6 NM\_080764.2  
199.2 NM\_017666.2  
114.3 NM\_001002844.1  
119.4 NM\_001002844.1  
112.3 NM\_001002843.1  
119.2 NM\_015170.1  
123.9 NM\_018837.2  
120.6 NM\_018837.2  
131.1 NM\_177534.1  
120.6 NM\_177536.1  
1675.2 NM\_177530.1  
113.6 NM\_177534.1  
    117 NM\_177528.1  
    155 NM\_001054.2  
132.2 NM\_003166.3  
269.1 NM\_001017391.1  
112.7 NM\_001056.3  
113.5 NM\_001056.3  
118.8 NM\_006588.2  
120.8 NM\_001008743.1  
121.1 NM\_005420.2  
117.4 NM\_003167.2  
123.7 NM\_004605.2  
142.3 NM\_177973.1  
108.7 NM\_004605.2  
    116 NM\_176874.1  
125.9 NM\_001032377.1  
135.7 NM\_182760.2  
116.7 NM\_015411.1  
224.7 NM\_001042470.1

144.8 NM\_003352.4  
122.6 NM\_003352.4  
119.8 NR\_002189.2  
120.4 NR\_002190.1  
230.1 NM\_001005849.1  
559.4 NM\_001005849.1  
914.9 NM\_006936.2  
120.2 NM\_001002255.1  
122.6 NM\_001030019.1  
109.1 NM\_152782.3  
177.7 NM\_001032386.1  
121.9 NM\_000456.2  
120.1 NM\_001032386.1  
358.6 NM\_007192.2  
117.5 NM\_181356.1  
120.3 NM\_003599.1  
465.5 NM\_003168.1  
388.1 NM\_003169.2  
158.3 NM\_003170.3  
116.6 NM\_014860.1  
157.6 NM\_003171.2  
125.7 NM\_004264.2  
124.4 NM\_003172.2  
149.4 NM\_017503.2  
525.4 NM\_033161.2  
141.2 NM\_181491.1  
202.1 NM\_006752.4  
205.2 NM\_006753.3  
    166 NM\_022486.3  
116.1 NM\_019601.3  
158.3 NM\_145006.2  
107.6 NM\_001037175.1  
116.7 NM\_001037175.1  
167.6 NM\_003173.1  
144.2 NM\_024670.3  
124.1 NM\_017635.3  
149.3 NM\_017635.3  
146.2 NM\_016028.4  
130.9 NM\_032701.2  
1262.9 NM\_015355.1  
124.6 NM\_014849.2  
136.6 NM\_014848.2  
109.3 NM\_014979.1  
113.3 NM\_153366.2  
110.9 NM\_021738.1  
151.1 NM\_003174.2  
    251 NM\_003174.2  
    117 NM\_018711.2  
279.5 NM\_015055.1  
202.2 NM\_032796.2  
368.3 NM\_005638.3

115.6 NM\_201564.1  
103.4 NM\_130784.1  
115 XM\_942505.1  
115.1 NM\_003176.2  
126.2 NM\_014258.2  
120.2 NM\_153694.3  
117.7 NM\_033025.4  
558.7 NM\_207170.1  
118.7 NM\_015484.4  
1295.1 NM\_015484.4  
164.5 NM\_003177.3  
139.1 NM\_004819.1  
119.1 NM\_006950.2  
124.5 NM\_006950.2  
119.4 NM\_133499.1  
120.5 NM\_003178.3  
111.1 NM\_133625.2  
118.6 NM\_003490.2  
114 NM\_133633.1  
128 NM\_030786.1  
161.7 NM\_006372.3  
120.7 NM\_133650.1  
114.8 NM\_015293.1  
130.2 NM\_182961.1  
121.6 NM\_033071.1  
139.1 NM\_015180.3  
152.1 NM\_015180.4  
122.8 NM\_182910.1  
123 NM\_182913.1  
106.9 NM\_006772.1  
117.5 NM\_145738.1  
113.3 NM\_145738.1  
128.6 NM\_004711.3  
115.9 NM\_145731.2  
105.6 NM\_004710.3  
108.7 NM\_004209.4  
114.1 NM\_012451.2  
195.1 NM\_203446.1  
124.6 NM\_003895.2  
122.5 NM\_203446.1  
159.3 NM\_003898.2  
153.5 NM\_018373.1  
119.4 NM\_007286.3  
116.3 NM\_133477.1  
122.3 NM\_133477.1  
113.4 NM\_024875.2  
116.3 NM\_144642.3  
115.9 NM\_003179.2  
368.1 NM\_182715.1  
161.5 NM\_182715.1  
110.5 NM\_006754.2

116.9 NM\_001006603.1  
116.3 NM\_005639.1  
116.8 NM\_198992.1  
417.5 NM\_152280.2  
117.3 NM\_177963.2  
124.6 NM\_020826.1  
119.3 NM\_153262.1  
140.2 NM\_181519.2  
116.5 NM\_031912.3  
128.6 NM\_031914.1  
113.9 NM\_016524.2  
117.4 NM\_177402.3  
123.2 NM\_032298.1  
112.4 NM\_020783.2  
118 NM\_003180.1  
115.5 NM\_205848.1  
116.3 NM\_004200.2  
130.7 NM\_004200.2  
121.9 NM\_138567.2  
110.3 NM\_175733.2  
126.4 NM\_032872.1  
120.5 NM\_032943.2  
113.2 NM\_206930.1  
112.2 NM\_032379.3  
569.6 NM\_206929.1  
195.9 NM\_001009991.1  
117.5 NM\_080737.1  
136.4 NM\_138780.1  
202.8 NM\_032431.2  
125 NM\_172230.2  
119 NM\_003181.2  
115.6 NM\_181429.1  
120.6 NM\_138327.1  
116.6 NM\_014626.3  
111.7 NM\_003967.1  
128.1 NM\_053278.1  
120.7 NM\_175057.2  
119.7 NM\_198312.1  
110.8 NM\_152787.2  
113.8 NM\_013996.1  
115.1 NM\_013251.2  
129 NM\_001006667.1  
158.6 NM\_001006667.1  
108.8 NM\_170685.1  
123.9 NM\_001077504.1  
1165.9 NM\_006283.1  
114.1 NM\_006997.2  
112.8 NM\_206862.1  
138.4 NM\_206861.1  
136 NM\_006342.1  
114.5 NM\_001058.2

122.4 NM\_015727.1  
123.1 NM\_015727.1  
110.6 NM\_001057.1  
123.5 NM\_001059.1  
135.3 NM\_002354.1  
137.3 NM\_002353.1  
162.5 NM\_053053.2  
116.4 NM\_133439.2  
111.5 NM\_001488.3  
113.8 NM\_133439.2  
143.5 NM\_006354.2  
127.9 NM\_006354.2  
114.5 NM\_133480.1  
123.6 NM\_138923.1  
143.3 NM\_004606.2  
222.4 NM\_006284.2  
121.7 NM\_005643.2  
114.1 NM\_005645.3  
1024 NM\_003487.2  
173.2 NM\_003487.2  
127.6 NM\_005681.2  
120.5 NM\_005681.2  
130.2 NM\_005680.1  
119.5 NM\_005679.2  
146.3 NM\_139353.1  
410.4 NM\_139353.1  
139 NM\_153809.1  
219.1 NM\_003184.2  
239.5 NM\_003185.2  
128.3 NM\_006951.3  
114.7 NM\_001025247.1  
120 NM\_014409.3  
113.7 NM\_005641.2  
117.5 NM\_139122.1  
339.9 NM\_006473.2  
821.4 NM\_005642.2  
121.6 NM\_024885.2  
137.6 NM\_016283.4  
151.9 NM\_016283.4  
118.3 NM\_015975.4  
135.6 NM\_138810.2  
145.3 NM\_054114.3  
147.6 NM\_138810.2  
219 NM\_003186.3  
144 NM\_003186.3  
121.1 NM\_001001522.1  
263.5 NM\_003564.1  
115 NM\_001008273.1  
116.1 NM\_001008273.1  
128.3 NM\_003189.1  
110.1 NM\_005421.1

3456 NM\_006755.1  
129.6 NM\_033394.1  
136.3 NM\_139239.1  
135.9 NM\_004180.2  
110.4 NM\_133484.1  
134.9 NM\_020791.1  
140.6 NM\_016151.2  
121.9 NM\_004783.2  
127.8 NM\_004783.2  
118.2 NM\_016281.2  
651.3 NM\_000593.5  
130.3 NM\_018833.2  
145.2 NM\_000544.3  
313.3 NM\_003190.3  
129.1 NM\_172208.1  
127.1 NM\_172209.1  
124.6 NM\_018009.3  
214 NM\_139283.1  
140.5 NM\_005646.2  
132.4 NM\_134324.2  
141.5 NM\_134323.1  
159.2 NM\_007375.3  
139 NM\_001003799.1  
898.3 NM\_152295.3  
114.2 NM\_025150.3  
113.9 NM\_177539.1  
110.8 NM\_138697.2  
118.6 NM\_152232.1  
109 NM\_152228.1  
112.1 NM\_019599.2  
120.7 NM\_023921.1  
116.6 NM\_023920.2  
116.7 NM\_023922.1  
118.3 NM\_016945.2  
121.6 NM\_016943.2  
111.4 NM\_176817.1  
113.7 NM\_176881.1  
117.3 NM\_016944.1  
119.9 NM\_176882.1  
122.7 NM\_176884.1  
124 NM\_176885.1  
105.3 NM\_176886.1  
122.5 NM\_176887.1  
114.1 NM\_176888.1  
108.1 NM\_176889.1  
114.8 NM\_018980.2  
108 NM\_176890.1  
130.4 NM\_177437.1  
119.9 NM\_023919.2  
124.6 NM\_023918.1  
116.4 NM\_023917.2

131.9 NM\_017714.1  
114.3 NM\_000353.1  
151 NM\_032026.1  
138 NM\_014760.2  
141.6 NM\_001042552.1  
152.1 XM\_931843.1  
1861.9 NM\_001079864.1  
1780.3 NM\_006024.4  
138.9 NM\_014604.2  
118.8 NM\_181312.1  
127.4 NM\_181314.1  
138.8 NM\_181313.1  
128 NM\_015173.2  
128 NM\_031937.1  
147.6 NM\_015527.2  
848.9 NM\_198517.2  
141.5 NM\_018201.2  
224.2 NM\_020773.1  
1618.7 NM\_022771.3  
135.3 NM\_019020.2  
119 NM\_024682.1  
127.5 NM\_018317.1  
162 NM\_018421.2  
200.2 NM\_144628.2  
115.3 NM\_153356.1  
115.6 NM\_014346.1  
143.1 NM\_017772.2  
170.7 NM\_018309.1  
114.5 NM\_020705.1  
177.2 NM\_015079.2  
117.4 NM\_032258.1  
147.6 NM\_001001417.4  
114.3 NM\_001001418.3  
175.5 NM\_001040282.1  
304.8 NM\_014832.1  
118.7 NM\_014744.1  
123.5 NM\_016495.2  
123.1 NM\_017752.2  
123.7 NM\_015130.1  
137.2 NM\_015043.3  
134.4 NM\_015043.3  
1862.1 NM\_004607.1  
176.2 NM\_003192.1  
110.6 NM\_018138.1  
138.5 NM\_005993.3  
261 NM\_005993.3  
307.4 NM\_003193.2  
134.1 NM\_003193.2  
701.1 NM\_013254.2  
124.7 NM\_014726.1  
263.1 NM\_005647.2

123.6 NM\_024665.3  
112.3 NM\_134259.1  
121.5 NM\_033284.1  
146.8 NM\_032988.1  
114.6 NM\_006453.2  
121.6 NM\_138572.2  
230.7 NM\_003194.3  
114.9 NM\_013290.3  
477.7 NM\_004865.2  
114.6 NM\_199047.1  
120.5 NM\_006593.2  
130 NM\_032811.1  
154.7 NM\_030900.2  
187.6 NM\_199122.1  
115.7 NM\_004749.2  
121 NM\_080647.1  
115.2 NM\_005992.1  
118.2 NM\_005992.1  
108.5 NM\_080646.1  
120.7 NM\_005995.2  
118.6 NM\_152380.2  
131.3 XM\_943618.1  
115.5 NM\_001080508.1  
110.1 NM\_005149.1  
137.3 NM\_005994.3  
107.8 NM\_001077653.1  
116.2 NM\_020417.1  
127.6 NM\_013351.1  
111.7 NM\_016954.2  
124.9 NM\_016569.3  
118.5 NM\_016569.3  
113 NM\_018488.2  
110.3 NM\_181486.1  
116.9 NM\_080718.1  
115.7 NM\_000192.3  
145.2 NM\_080758.1  
110.6 NM\_004608.2  
121.3 NM\_080758.1  
117.2 NM\_201636.1  
118.2 NM\_001060.3  
122.3 NM\_001060.3  
200.8 NM\_001061.2  
135.1 NM\_003673.2  
117.6 NM\_153355.2  
173.2 NM\_201437.1  
112.4 NM\_006756.2  
127.1 XM\_943119.1  
125.3 NM\_003195.4  
111.1 NM\_003195.4  
137.3 NM\_198723.1  
119.7 NM\_003196.1



126.6 NM\_001006639.1  
112.8 NM\_001006640.1  
142.8 NM\_080390.3  
169.7 NM\_001006933.1  
290.6 NM\_001006933.1  
113.9 NM\_024863.4  
126.8 NM\_001006936.1  
282.5 NM\_001006937.1  
135.9 NM\_001012979.1  
117.4 NM\_001006938.1  
105.5 NM\_152278.1  
140.9 NM\_001006684.1  
150.3 NM\_153333.2  
198.5 NM\_153333.2  
1185 NM\_005648.2  
223.8 NM\_007108.2  
727 NM\_007108.2  
158.5 NM\_003198.1  
111.5 NM\_016427.2  
116.9 NM\_145653.2  
146.7 NM\_006706.2  
114.4 NM\_006706.2  
160.4 NM\_006706.2  
107.9 NM\_174937.1  
116.7 NM\_000545.3  
208.1 NM\_207037.1  
113.4 NM\_207040.1  
125.9 NM\_004609.3  
116.8 NM\_001077511.1  
124.7 NM\_007109.2  
112.4 NM\_000458.1  
120.7 NM\_000458.1  
116.2 NM\_006481.1  
145.5 XM\_935478.1  
112.3 NM\_005650.1  
378.2 NM\_181492.1  
115.9 NM\_198392.1  
112.4 NM\_003206.2  
112.9 NM\_003206.2  
114.5 NM\_175769.1  
160 NM\_003200.1  
121.8 NM\_003199.1  
115.6 NM\_201632.1  
123.5 NM\_201633.1  
116.8 NM\_213648.1  
113.4 NM\_201633.1  
123.7 NM\_003202.2  
107.7 NM\_201634.1  
113.6 NM\_031283.1  
123.5 NM\_030756.1  
138 NM\_030751.2

151.3 NM\_006602.2  
117.5 NM\_001008536.1  
125.2 NM\_032300.2  
304.8 NM\_006053.2  
115.4 NM\_006053.2  
126.8 NM\_006019.2  
123.6 NM\_021966.1  
127.5 NM\_004918.2  
113.3 NM\_199206.1  
115.9 NM\_020554.3  
102.7 NM\_012468.3  
119.8 NM\_020553.2  
115.9 NM\_001062.2  
113.9 NM\_000355.2  
116.6 NM\_001008657.1  
121.5 NM\_000356.2  
114.3 NM\_001008657.1  
122 NM\_001008656.1  
689.4 NM\_030752.2  
217.8 NM\_030752.2  
103.5 NM\_004610.3  
127.9 NM\_144659.3  
116.3 NM\_018679.2  
111.6 NM\_018393.2  
137.6 NM\_152772.1  
155 NM\_022171.1  
125.4 NM\_152665.1  
115.9 NM\_003212.1  
113.3 NR\_002718.2  
119.3 NR\_001578.1  
97.5 NM\_005651.1  
644 NM\_018319.3  
124.2 NM\_018319.3  
126.1 NM\_018319.3  
438.2 NM\_198795.1  
107.5 NM\_182499.2  
126.7 NM\_030794.1  
113.8 NM\_019038.2  
100.7 NM\_173533.2  
124.3 NM\_001010870.1  
236.9 NM\_014290.1  
124.4 NM\_153046.1  
122.5 NM\_006862.2  
132.8 NM\_021961.3  
141.9 NM\_003598.1  
121 NM\_003214.2  
126 NM\_201443.1  
118.6 NM\_003213.2  
120 NM\_201441.1  
121.5 NM\_003215.1  
121.8 NM\_005422.1

116.4 NM\_058222.1  
116.3 NM\_172000.1  
158.8 NM\_003216.2  
4434 NM\_003217.1  
117.8 NM\_000459.2  
116.1 NM\_053285.1  
123.9 NM\_014466.2  
120 NM\_031898.1  
107.8 NM\_144705.2  
116 NM\_015319.2  
118.3 NM\_198316.1  
125.3 NM\_198316.1  
108.6 NM\_170754.2  
118 NM\_139243.1  
119.9 NM\_007110.3  
112.1 NM\_199046.1  
136.5 NM\_199046.1  
111.7 NM\_199046.1  
168.8 NM\_017489.1  
110 NM\_003218.2  
131.3 NM\_003218.2  
167.2 NM\_005652.2  
444 NM\_018975.2  
118.3 NM\_198253.2  
110 NM\_003219.1  
169.2 NM\_152829.1  
197.6 NM\_015641.2  
123.4 NM\_017899.1  
438 NM\_006285.2  
153.7 NM\_007170.1  
129.5 NM\_182702.1  
111.8 NM\_199183.1  
543.7 NM\_001120.2  
585.4 NM\_017746.1  
108.9 NM\_031451.3  
112.8 NM\_001003811.1  
118.7 NM\_031276.2  
109 NM\_001003811.1  
122.9 NM\_031275.3  
118.3 NM\_031274.2  
120.8 NM\_031273.1  
115.6 NM\_198393.2  
123.2 NM\_031272.3  
115.5 NM\_031271.2  
155.2 NM\_018469.3  
112.5 NM\_144582.2  
145.7 NM\_015926.3  
115 NM\_198524.1  
120.3 NM\_001063.2  
249.2 NM\_003201.1  
187.4 NM\_003220.2

113.9 NM\_001032280.1  
118.8 NM\_001032280.2  
108.9 NM\_001032280.2  
117 NM\_003221.2  
124.8 NM\_003222.3  
114.6 NM\_172238.1  
120.4 NM\_178548.2  
113.4 NM\_003223.1  
131.2 NM\_016020.1  
167.8 NM\_022366.1  
186.4 NM\_005653.3  
110 NM\_014553.1  
128.9 NM\_007111.3  
121.2 NM\_006286.1  
115.8 NM\_016521.2  
216.6 NM\_006521.3  
113.4 NM\_007162.1  
110.3 NM\_012252.2  
128.2 NM\_012252.2  
119 NM\_003225.2  
117.8 NM\_005423.3  
119.7 NM\_003226.2  
125.6 NM\_006070.4  
842.8 NM\_006070.4  
291.9 NM\_012143.2  
231.7 NM\_012143.2  
177.2 NM\_001008697.1  
146.5 NM\_001032281.1  
112.9 NM\_001032281.1  
165.6 NM\_006287.3  
111.7 NM\_006528.2  
253.7 NM\_013342.1  
117.1 NM\_003227.2  
701.3 NM\_003234.1  
121.1 NM\_003235.4  
135.3 NM\_014305.1  
131.2 NM\_003236.1  
117.9 NM\_000660.3  
123.7 NM\_015927.3  
108.7 NM\_015927.3  
116.4 NM\_003238.1  
117.6 NM\_003239.1  
1995.8 NM\_000358.1  
114.2 NM\_004612.2  
120.7 NM\_001024847.1  
409.3 NM\_001024847.1  
491.7 NM\_003243.2  
149.3 NM\_004257.3  
121.5 NM\_173207.1  
114.1 NM\_003244.2  
111.6 NM\_173209.1

100.6 NM\_174886.1  
222.1 NM\_170695.2  
126.7 NM\_170695.2  
122.8 NM\_021809.4  
121 NM\_000359.1  
117.6 NM\_004613.2  
127.8 NM\_198951.1  
122.2 NM\_198951.1  
118.2 NM\_003245.2  
115.7 NM\_003241.1  
112.9 NM\_201631.1  
114.2 NM\_201631.2  
114.5 NM\_201631.2  
118.1 NM\_198994.1  
118.4 NM\_052955.1  
242.4 NM\_006464.2  
113.5 NM\_000360.2  
113.2 NM\_000360.3  
225.5 NM\_198976.1  
122.4 NM\_198554.1  
120.8 NM\_022065.3  
160.5 NM\_018105.2  
126.6 NM\_199003.1  
124.4 NM\_020147.2  
392.2 NM\_020457.2  
124.6 NM\_031435.1  
115.9 NM\_138350.2  
116.3 NM\_015963.4  
125.6 NM\_182529.1  
136.2 NM\_144721.3  
115.3 NM\_001008696.1  
133.7 NM\_030573.2  
121.3 NM\_030573.2  
109.6 NM\_152658.1  
118.3 NM\_024672.2  
121.1 NM\_000361.2  
128.5 NM\_003246.2  
118.1 NM\_003247.2  
137.7 NM\_007112.3  
115.5 NM\_003248.3  
131.9 NM\_018324.1  
125.7 NM\_199202.1  
118.2 NM\_016585.3  
242.9 NM\_018473.2  
118.6 NM\_053055.3  
114.4 NM\_182578.1  
119.2 NM\_153332.2  
122.2 NM\_017872.3  
111.1 NM\_024838.3  
158.3 NM\_005131.1  
253.3 NM\_020449.2

161.7 NM\_020449.1  
133.5 NM\_032361.1  
136.4 NM\_032361.1  
147.9 NM\_005782.2  
186.6 NM\_001002878.1  
    198 NM\_001002878.1  
152.6 NM\_003249.3  
120.4 NM\_199356.1  
110.1 NM\_199334.2  
118.7 NM\_199334.2  
110.9 NM\_003250.4  
126.8 NM\_005121.1  
141.3 NM\_015335.2  
132.9 NM\_005119.2  
126.7 NM\_014815.3  
186.9 NM\_014815.2  
261.1 XM\_939640.1  
334.5 NM\_005481.2  
138.1 NM\_005481.2  
663.2 NM\_080651.1  
116.8 NM\_000461.2  
111.5 NM\_003251.2  
111.6 NM\_018676.2  
110.8 NM\_018676.2  
115.9 NM\_199263.1  
116.1 NR\_002816.1  
112.2 XR\_000915.1  
123.7 NM\_199296.1  
115.6 NM\_199296.1  
    110 NM\_199265.1  
110.7 NM\_024817.1  
    125 NM\_001080427.1  
122.8 NM\_024328.2  
216.3 NM\_017736.3  
    129 NM\_025264.2  
125.5 NM\_015453.1  
    119 NM\_006288.2  
156.4 NM\_199298.1  
129.7 NM\_014174.2  
122.9 NM\_199297.1  
293.6 NM\_022173.1  
217.3 NM\_004740.3  
212.9 XM\_945552.1  
370.8 NM\_003252.2  
153.5 NM\_003252.3  
131.7 NM\_003253.1  
    111 NM\_012454.3  
107.7 NM\_001010927.2  
122.6 NM\_014261.1  
407.7 NM\_182919.1  
255.5 NM\_021649.3

127 NM\_005424.2  
114.6 NM\_052864.2  
110.6 NM\_145702.1  
133.7 NM\_145715.1  
119.9 NM\_145719.1  
98.8 NM\_145720.2  
122.6 NM\_032862.2  
133.4 NM\_030953.2  
176.2 NM\_033208.2  
120.4 NM\_138379.1  
146.9 NM\_003920.2  
275.7 NM\_012456.1  
119.7 NM\_012458.2  
129.2 NM\_006335.1  
143 NM\_005834.1  
200.5 NM\_013337.2  
190.4 NM\_006327.2  
345.5 NM\_006327.2  
232.1 XM\_943316.1  
287 NM\_006351.2  
122.7 NM\_001001563.1  
121.9 NM\_004085.2  
127.2 NM\_012459.1  
122.4 NM\_012460.2  
316.6 NM\_003254.2  
275.3 NM\_003255.4  
141.1 NM\_003255.4  
113.1 NM\_000362.4  
123.8 NM\_003256.2  
125.6 NM\_014464.2  
113.1 NM\_022164.1  
365.4 NM\_012461.1  
1509 NM\_014886.2  
144.6 NM\_178449.2  
1540.8 NM\_015508.2  
217.9 NM\_001031800.1  
167.4 NM\_152902.3  
121.6 NM\_148910.1  
128.9 NM\_001039661.1  
118.6 NM\_001039661.1  
111.2 NM\_003317.3  
121.1 NM\_003317.3  
536.2 NM\_080604.1  
110.4 NM\_175610.2  
114.9 NM\_003257.2  
120.2 NM\_201629.1  
113.8 NM\_004817.2  
139.1 NM\_014428.1  
124 NM\_003258.1  
119.1 NM\_004614.2  
883.6 NM\_001064.1

133 NM\_012253.2  
108.7 NM\_032136.3  
123.6 NM\_138463.2  
127.8 NM\_005077.3  
169.7 NM\_003260.3  
169 NM\_005078.1  
449.9 NM\_007005.3  
110.8 NM\_024760.1  
250 NM\_012290.3  
178.2 NM\_006852.2  
101.8 NM\_012464.3  
106 NM\_012465.2  
275.4 NM\_006289.2  
129.2 NM\_015059.1  
129.9 NM\_003262.3  
174.7 NM\_003263.3  
127.8 NM\_030956.2  
126.8 NM\_030956.2  
109.7 NM\_003264.3  
106.7 NM\_003265.2  
109.1 NM\_138557.1  
115.1 NM\_003268.3  
135 NM\_006068.2  
115.8 NM\_016562.3  
122.5 NM\_016610.2  
108.1 NM\_016610.2  
115.3 NM\_138636.2  
122.4 NM\_017442.2  
116 NM\_005521.2  
135 NM\_001534.2  
119.6 NM\_016170.3  
113.5 NM\_016170.3  
120.2 NM\_021025.2  
388.1 NM\_032027.2  
167.6 NM\_078473.2  
141.8 NM\_078474.1  
310.7 NM\_025141.2  
117.6 NM\_014220.2  
110.5 NM\_015993.1  
117 NM\_138786.1  
150.7 NM\_138461.2  
149.7 NM\_138461.2  
107.3 NM\_024795.1  
109.4 NM\_004617.2  
114 NM\_003963.2  
134.2 NM\_023003.1  
106.8 NM\_001001524.1  
117.5 NM\_203510.1  
118.9 NM\_203510.1  
149.9 NM\_003273.1  
126.5 NM\_016551.1



141.6 NM\_030788.2  
149.7 NM\_006405.5  
116 NM\_001014842.1  
125.4 NM\_001014842.1  
526.2 NM\_004800.1  
154.6 NM\_014742.2  
399.6 NM\_022152.4  
739 NM\_016056.1  
125.1 NM\_080751.1  
123.3 NM\_144686.1  
134.7 NM\_024780.3  
229.5 NM\_007267.5  
124.1 NM\_024847.2  
110.4 NM\_152468.3  
112.9 NM\_001017395.1  
127.9 NM\_015008.2  
117.5 NM\_014858.2  
126.1 NM\_020698.1  
641.1 NM\_019026.2  
124.9 NM\_001008740.2  
206.6 NM\_017905.3  
138.9 NM\_181719.2  
134.9 NM\_152453.2  
113.5 NM\_018502.3  
120.5 NR\_001448.1  
145.6 NM\_006858.2  
187.7 NM\_006827.4  
446.4 NR\_002807.1  
199.6 NM\_006815.2  
229.1 NM\_007364.2  
211.6 NM\_182547.2  
659.4 NM\_016040.3  
147.7 NM\_144676.1  
270.8 NM\_181836.3  
119.7 NM\_213601.1  
442 NM\_017510.3  
117.3 NM\_003692.2  
112.8 NM\_016192.2  
159.7 NM\_003274.3  
124.6 NM\_001001723.1  
130.3 NM\_001001723.1  
124.4 NM\_033207.2  
110.8 NM\_001040102.1  
117.8 NM\_018286.1  
166.4 NM\_032376.2  
121.3 NM\_178518.2  
197.3 NM\_001031703.1  
129.2 NM\_001031703.1  
126.2 NM\_017728.2  
118 NM\_178520.2  
129.5 NM\_018374.2

135.4 NM\_024056.2  
120.5 NM\_032354.2  
118.4 NM\_023943.1  
145.8 NM\_024092.1  
136.1 NM\_003876.1  
116.2 NM\_198563.1  
583.9 NM\_025222.2  
311.1 NM\_007024.4  
216.6 NM\_138341.1  
123.6 NM\_032256.1  
130.6 NM\_032814.1  
112.3 NM\_181724.1  
108.3 NM\_025268.2  
116.4 NM\_173801.3  
586 NM\_052932.1  
115.4 NM\_144626.1  
405.2 NM\_032273.2  
915.3 NM\_018480.2  
145.8 NM\_017849.1  
117.7 NM\_032927.2  
121.4 NM\_138385.2  
114.7 NM\_152913.1  
124.6 NM\_178031.2  
123.7 NM\_001078651.1  
129.4 NM\_014051.2  
303.5 NM\_030969.2  
341.8 NM\_016462.2  
145.3 NM\_014908.3  
121.2 NM\_001031738.1  
117.6 NM\_153266.2  
112.7 NM\_153266.2  
153.2 NM\_152680.1  
249 NM\_024943.1  
122.1 NM\_198507.1  
132.4 NM\_020422.3  
130.1 NM\_032227.2  
115.2 NM\_018043.4  
112.1 NM\_020373.1  
111.5 NM\_031418.1  
114.3 NM\_178826.2  
126.5 NM\_213599.1  
155.7 NM\_001025356.1  
110 NM\_001001666.1  
124.6 NM\_001001891.1  
114.2 NM\_001001666.1  
142.5 NM\_020959.1  
122 NM\_001012302.1  
120.5 NM\_001012302.1  
126.7 NM\_018075.2  
5832.2 NM\_198276.1  
204.3 NM\_145254.1

218.6 NM\_198282.1  
127.2 NM\_014020.2  
108.4 NM\_152390.1  
119.3 NM\_152834.2  
533.1 NM\_001079809.1  
139.5 NM\_032508.1  
143.6 NR\_000034.1  
122.9 NM\_015421.1  
116.7 NM\_018279.2  
340.9 NM\_013390.1  
110.5 NM\_153226.1  
123.2 NM\_025246.1  
126.9 NM\_147156.3  
114.1 NM\_014807.3  
108.6 NM\_032780.2  
118.8 NM\_178505.4  
119 NM\_020665.2  
127.8 NM\_015686.2  
141.9 NM\_014138.3  
169 NM\_018247.2  
128.5 NM\_001017970.1  
171.3 NM\_182541.2  
526.7 NM\_173470.1  
126.8 NM\_018241.1  
117 NM\_021637.1  
119 NM\_183240.1  
111 NM\_024074.1  
127.5 NM\_018112.1  
138.5 NM\_018266.1  
166.3 NM\_018056.1  
153.6 NM\_014255.3  
116.3 NM\_018306.2  
147.3 NM\_080652.2  
368.3 NM\_015012.1  
132.2 NM\_144638.1  
246.3 NM\_024334.1  
134.7 NM\_138399.3  
122.7 NM\_138399.3  
125.9 NM\_018004.1  
124.1 NM\_138788.2  
130.9 NM\_001007538.1  
112.3 NM\_031442.2  
125 NM\_018087.3  
1275.8 NM\_030938.2  
368.7 NM\_014254.1  
138.4 NM\_014313.2  
209.5 NM\_006134.5  
226.3 NM\_018022.1  
123.7 NM\_178545.2  
118.2 NM\_024587.2  
114.8 NM\_033504.2

177.5 NM\_018710.1  
310.8 NM\_144568.1  
122.4 NM\_152487.1  
214.3 NM\_018202.2  
118.7 NM\_198149.1  
696.9 NM\_004872.3  
541.7 NM\_032936.2  
111.8 NM\_182532.1  
163.9 NM\_024956.3  
116.4 NM\_014698.1  
128.1 NM\_018426.1  
111.3 NM\_020431.1  
131.6 NM\_001008495.2  
121.3 NM\_194291.1  
3535 NM\_016127.4  
    115 NM\_153704.3  
118.3 NM\_152417.1  
162.4 NM\_016486.2  
123.9 NM\_017866.4  
125.1 NM\_017866.3  
235.8 NM\_144649.1  
113.3 NM\_153015.1  
108.4 NM\_001037234.1  
134.6 NM\_178454.2  
159.4 NM\_032323.1  
138.6 NM\_021259.1  
132.2 XM\_938671.1  
141.9 NM\_174940.1  
118.7 NM\_174940.1  
141.9 NM\_203376.1  
119.2 NM\_152454.1  
611.7 NM\_016454.2  
127.1 NM\_153347.1  
136.4 NM\_173804.3  
1086.2 NM\_015497.2  
120.6 NM\_032824.1  
127.1 NM\_203411.1  
120.4 NM\_001008269.1  
110.6 NM\_016456.2  
146.1 NM\_001042595.1  
113.3 NM\_153229.1  
194.7 NM\_031298.2  
139.8 NM\_001014764.1  
327.9 NM\_001014764.1  
111.6 NM\_198154.1  
    120 NM\_014573.1  
108.6 NM\_015544.2  
123.6 NM\_015544.2  
213.4 NM\_145274.1  
    269 NM\_020644.1  
161.8 NM\_199169.1

117.6 NM\_020182.3  
143.1 NM\_199169.1  
112.7 NM\_199171.1  
159 NM\_007114.1  
123.1 NM\_147196.1  
134.6 NM\_206832.1  
114.9 NM\_144615.1  
121.1 NM\_018196.1  
119.6 NM\_018196.1  
116.8 NM\_003275.1  
109.9 NM\_014548.2  
122.7 NM\_014547.3  
122.2 NM\_013353.1  
122 NM\_031925.1  
115.1 NM\_003276.1  
118.8 NM\_003276.1  
116.7 NM\_001032283.1  
120.4 NM\_182606.2  
112.5 NM\_182502.1  
119.4 NM\_004262.2  
112.8 NM\_182559.1  
109 NM\_032046.1  
115.6 NM\_005656.2  
115.7 NM\_032405.1  
108.5 NM\_032401.1  
118.8 NM\_024022.1  
124.3 NM\_032404.1  
118.6 NM\_032405.1  
116.9 NM\_019894.2  
114.5 NM\_183247.1  
117.4 NM\_030770.1  
113 NM\_153609.2  
114.3 NM\_001042575.1  
113.2 XM\_938469.1  
112.5 NM\_182973.1  
3872.4 NM\_021103.3  
127.2 NM\_021109.2  
128.1 NM\_004202.2  
122.6 NM\_021992.2  
122.6 NM\_152588.1  
129.2 NM\_181783.1  
120.6 NM\_032813.1  
107.3 NM\_032813.1  
119.6 NM\_032813.1  
217.5 NM\_024107.2  
276.6 NM\_024107.2  
118.5 NM\_002160.1  
1098.8 NM\_000594.2  
125.9 NM\_021137.3  
155.1 NM\_006291.2  
393.8 NM\_006290.2

124.2 NM\_007115.2  
219.2 NM\_001077654.1  
138.9 NM\_014350.1  
182.8 NM\_152362.1  
124.4 NM\_024575.1  
123.6 NM\_207381.2  
424.3 NM\_003844.2  
128.7 NM\_147187.1  
126.6 NM\_003842.3  
280.1 NM\_003842.3  
135.9 NM\_003841.2  
235.3 NM\_003840.3  
103.5 NM\_003839.2  
115.4 NM\_002546.2  
114.8 NM\_016639.1  
135.6 NM\_012452.2  
126.6 NM\_052945.2  
979.2 NM\_003820.2  
120.9 NM\_001192.2  
131.3 NM\_148902.1  
119.8 NM\_148901.1  
124.8 NM\_018647.2  
129.7 NM\_148957.2  
    111 NM\_018647.2  
105.1 NM\_152222.1  
123.3 NM\_032871.3  
114.8 NM\_032871.3  
407.1 NM\_001065.2  
149.5 NM\_001066.2  
106.8 NM\_014452.3  
135.2 NM\_001039664.1  
423.6 NM\_148973.1  
135.4 NM\_003327.2  
    115 NM\_003823.2  
115.4 NM\_032945.2  
126.8 NM\_001242.3  
117.3 NM\_001243.3  
122.7 NM\_001243.3  
    113 NM\_001561.4  
136.7 NM\_003810.2  
129.2 NM\_003701.2  
115.7 NM\_003701.2  
113.1 NM\_033012.2  
120.5 NM\_003809.2  
117.3 NM\_172087.1  
113.5 NM\_172088.1  
138.2 NM\_006573.3  
246.7 NM\_003807.2  
143.6 NM\_003807.2  
416.6 NM\_172014.1  
367.2 NM\_005118.2

123.3 NM\_005092.2  
111.3 NM\_003326.2  
450.5 NM\_020232.3  
127.9 NM\_001252.2  
129.1 NM\_001244.2  
161.7 NM\_003811.2  
140.5 NM\_015028.1  
179.4 NM\_006058.2  
133.8 NM\_024309.2  
127.8 NM\_024873.2  
107.9 NM\_003985.1  
287.7 NM\_005781.4  
124.8 NM\_001010938.1  
117.5 NM\_005781.4  
120.5 NM\_003747.1  
128.6 NM\_033396.1  
134.4 NM\_025235.2  
115.6 NM\_022144.1  
110.5 NM\_022093.1  
112 NM\_003280.1  
113.5 NM\_003279.2  
119.4 NM\_003281.3  
118.4 NM\_003282.2  
128.8 NM\_000363.3  
118.8 NM\_015978.1  
115.9 NM\_003283.3  
134.3 NM\_001001431.1  
127.9 NM\_001001432.1  
124.5 NM\_001042780.1  
111.4 NM\_006757.1  
117.9 NM\_003284.2  
118.1 NM\_005425.4  
140.6 NM\_153188.1  
126.5 NM\_002270.2  
428.4 NM\_002270.2  
324.8 NM\_013433.3  
439.2 NM\_012470.2  
121.3 NM\_003285.1  
209.1 NM\_015575.2  
112.2 NM\_007185.3  
146.1 NM\_006586.2  
115.8 NM\_006586.2  
132.8 NM\_020847.1  
164 NM\_014494.1  
122 NM\_020847.1  
324.5 NM\_001024843.1  
113.3 NM\_001024843.1  
111.5 NM\_015088.1  
119 NM\_018996.2  
120.3 NM\_001080430.1  
127.6 NM\_022648.3

138.9 NM\_022748.9  
115.5 NM\_032865.3  
124.6 NM\_182831.1  
111.4 NR\_001284.1  
118.8 NM\_032470.2  
110.4 NM\_019105.5  
549.8 NM\_005749.2  
145.5 NM\_016272.3  
130.2 NM\_025077.2  
179.6 NM\_019009.2  
376.3 NM\_005488.1  
114.4 NM\_005486.1  
126.1 NM\_144678.3  
126.9 NM\_001033551.1  
112.3 NM\_144678.3  
225.7 NM\_014765.1  
169.3 NM\_020243.4  
290.1 NM\_006809.4  
440.7 NM\_006114.1  
128.5 NM\_032174.4  
4170.5 NM\_019059.2  
    408 NM\_014820.3  
168.9 NM\_003286.2  
142.4 NM\_052963.1  
123.7 NM\_052963.1  
116.8 XM\_944877.1  
137.9 NR\_002719.1  
328.5 NR\_001283.1  
137.8 NM\_001067.2  
607.2 NM\_001068.2  
359.9 NM\_004618.3  
137.4 NM\_003935.3  
167.8 NM\_007027.2  
130.5 NM\_005802.2  
135.7 NM\_000113.2  
368.4 NM\_015602.2  
152.5 NM\_145034.1  
198.7 NM\_014506.1  
118.8 NM\_130459.1  
158.1 NM\_022371.2  
114.2 NM\_014729.2  
108.7 NM\_000546.2  
269.2 NM\_005657.1  
309.2 NM\_001031685.1  
111.9 NM\_005426.2  
121.7 NM\_006034.2  
131.4 NM\_006034.2  
183.2 NM\_138349.2  
108.3 NM\_147184.1  
114.5 NM\_004881.2  
135.9 NM\_033285.2



371.9 NM\_021202.1  
150.7 NM\_033550.3  
126 NM\_016212.1  
120 NM\_016212.2  
125 NM\_005427.1  
112 NM\_003722.3  
140.4 NM\_018475.2  
104.5 NM\_017901.3  
149.7 NM\_139075.1  
108.4 NM\_001025253.1  
127 NM\_001003396.1  
120.8 NM\_001003395.1  
110.2 NM\_001003397.1  
199.2 NM\_199361.1  
842.1 NM\_199362.1  
120.3 NM\_001001874.1  
124.7 NM\_001001875.2  
116.5 NM\_033516.4  
116 NM\_004179.1  
120.5 NM\_173353.2  
2009.9 NM\_000365.4  
121.9 NM\_022445.2  
125.9 NM\_001042482.1  
133.7 NM\_000366.5  
124.6 NM\_001018008.1  
131.3 NM\_001018004.1  
372.4 NM\_213674.1  
120.6 NM\_003289.3  
195.8 NM\_003289.3  
337.7 NM\_153649.2  
135.9 NM\_001043353.1  
135 NM\_152263.1  
120.2 NM\_003290.1  
212.1 NM\_000367.2  
117 NM\_175719.1  
121.5 NM\_175720.1  
530.7 NM\_000391.2  
136.6 NM\_003291.1  
125.9 NM\_007030.1  
505.2 NM\_003292.1  
127.8 NM\_016058.1  
116.7 NM\_198479.2  
110.3 NR\_002223.1  
109.3 NM\_003294.3  
120.9 NM\_012217.2  
126.6 NM\_012467.2  
133.6 NM\_003596.2  
403.3 NM\_001008566.1  
31653.6 NM\_003295.1  
108.7 NM\_199260.2  
117.2 NM\_199254.1

118.4 NM\_130785.2  
110.9 NM\_130785.2  
120.6 NM\_012112.4  
115.1 NM\_001039783.1  
140.9 NM\_176880.4  
162.8 XR\_000203.3  
329.9 NM\_013293.2  
123.3 NM\_003789.2  
145.5 NM\_003789.2  
120.8 NM\_005658.3  
152.1 NM\_021138.3  
137.3 NM\_003300.2  
    122 NM\_015650.2  
112.2 NM\_147686.1  
125.7 NM\_147200.1  
149.3 NM\_147200.1  
262.5 NM\_025228.1  
134.8 NM\_004295.2  
119.4 NM\_004295.2  
    115 NM\_004619.3  
115.2 NM\_004619.3  
    129 NM\_145759.2  
    111 NM\_001033910.1  
120.9 NM\_004619.3  
117.5 NM\_145803.1  
    153 NM\_004620.2  
    164 NM\_004620.2  
124.8 NM\_032271.2  
126.2 NM\_206835.1  
191.3 NM\_006700.1  
119.2 NM\_005879.2  
127.9 NM\_014965.2  
135.5 NM\_001042646.1  
125.6 NM\_001042646.1  
196.5 NM\_015049.1  
1773.3 NM\_014294.3  
124.8 NM\_152402.1  
131.1 NM\_012288.3  
124.6 NM\_016292.1  
175.3 NM\_021210.2  
109.1 NM\_001011658.1  
249.6 NM\_014563.3  
114.2 NM\_014563.3  
331.9 NM\_014408.3  
426.5 NM\_016146.1  
184.1 NM\_001042462.1  
133.5 NM\_024108.1  
122.4 NM\_177452.2  
    131 NM\_001079537.1  
138.7 NM\_001079537.1  
121.6 NM\_016388.2

115.2 NM\_176083.2  
122.4 NM\_006073.1  
126.9 NM\_007180.1  
121.9 NM\_018643.2  
118.3 NM\_018965.1  
111.9 NM\_178174.2  
131 NM\_024807.1  
123.1 NR\_002794.1  
109.7 NM\_198153.1  
121.4 NM\_033501.1  
105.5 NM\_033502.1  
114.4 NM\_033627.3  
136.8 NM\_032166.2  
124.3 NM\_032166.2  
113.7 NM\_016381.2  
118.5 NM\_080701.3  
363.2 NM\_004275.3  
451.2 NM\_032286.2  
113.1 NM\_007117.1  
111.4 NM\_013381.1  
120.4 NM\_003301.1  
117.4 NM\_207111.2  
357.2 NM\_019011.4  
186.2 NM\_016399.2  
221.9 NM\_025195.2  
123.7 NM\_021643.1  
210.6 NM\_021158.3  
119.3 NM\_006778.2  
116.9 NM\_006778.2  
117 NM\_052828.1  
158.3 NM\_145214.2  
491.1 NM\_001007278.1  
153.9 NM\_001007278.1  
248.8 NM\_001007278.1  
120.9 NM\_033221.1  
119 NM\_033220.1  
120.6 NM\_014788.2  
110.2 NM\_033220.1  
115.8 NM\_052812.1  
103.4 NM\_033229.1  
120.8 NM\_052812.1  
112.1 NM\_006470.3  
122.9 NM\_001037330.1  
122.3 NM\_016102.2  
110.9 NM\_016102.2  
121 NM\_015271.2  
160.5 NM\_003141.3  
260.2 NM\_006074.2  
175.6 NM\_001656.3  
119.1 NM\_033227.2  
135.1 NM\_003852.3

107.9 NM\_015905.2  
270.3 NM\_015905.2  
172.1 NM\_005082.4  
533.1 NM\_003449.3  
267 NM\_005762.2  
108.1 NM\_058193.1  
119.3 NM\_012101.2  
141.6 NM\_006458.2  
109.4 NM\_006458.2  
124.4 NM\_052816.2  
124.7 NM\_007028.3  
125.8 NM\_012210.2  
237.5 NM\_033020.2  
324.4 NM\_033020.2  
110.3 NM\_015906.3  
114 NM\_001003827.1  
114.2 NM\_130389.2  
110.3 NM\_001003827.1  
113.6 NM\_130390.1  
120.4 NM\_171982.2  
121.8 NM\_001017398.1  
111.2 NM\_018700.3  
129.1 NM\_001017397.1  
110.6 NM\_001017397.1  
135.2 NM\_001005207.1  
126.7 NM\_015294.2  
311.4 NM\_006355.2  
108 NM\_021253.2  
229.9 NM\_172016.1  
136.6 NM\_172016.1  
475 NM\_033091.1  
131.8 NM\_033017.2  
113.7 NM\_138700.2  
170.6 NM\_201627.1  
120.3 NM\_033549.3  
113.4 NM\_152616.3  
110.2 NM\_138800.1  
350 NM\_017583.3  
117.8 NM\_025188.2  
111.9 NM\_025058.3  
110.3 NM\_033452.2  
105.9 NM\_024114.2  
132.8 NM\_020358.2  
172.3 NM\_033034.1  
115.1 NM\_033092.1  
155.9 NM\_033093.1  
107.6 NM\_178125.2  
131.1 NM\_032681.1  
255 NM\_032765.2  
123.6 NM\_187841.1  
117.9 NM\_187841.1

125.3 NM\_032546.2  
114.7 NM\_184086.1  
116.2 NM\_033058.2  
111.9 NM\_184086.1  
210.4 NM\_030961.1  
    120 NM\_015431.2  
    114 NM\_173084.1  
108.7 NM\_058166.3  
126.3 NM\_001003818.1  
116.5 NM\_152620.2  
149.7 NM\_018207.1  
119.3 NM\_032588.2  
122.2 NM\_001004342.2  
220.7 NM\_018073.5  
136.2 NM\_080745.3  
115.7 NM\_001003819.1  
122.7 NM\_203296.1  
123.3 NM\_203297.1  
120.1 NM\_033342.2  
117.1 NM\_001039111.1  
123.2 NM\_198853.1  
296.3 NM\_030912.1  
120.6 NM\_052978.3  
120.7 NM\_015163.4  
128.2 NM\_052978.3  
127.3 NM\_007118.2  
126.2 NM\_007032.5  
129.7 NM\_004240.2  
306.1 NM\_004239.1  
474.5 NM\_004238.1  
112.9 NM\_004237.2  
197.1 NM\_016213.3  
    167 NM\_003302.1  
124.5 NM\_017646.3  
    203 NM\_017722.2  
128.1 NM\_017956.1  
1103.2 NM\_020810.1  
    119 NM\_001008571.1  
    143 NM\_016000.2  
132.2 NM\_182916.1  
121.6 NM\_016000.2  
123.7 NM\_001039705.1  
116.6 NM\_177557.1  
144.6 NM\_001039705.1  
113.1 NM\_005480.2  
502.6 NM\_001042369.1  
117.6 NM\_004600.3  
174.1 NM\_001042370.1  
770.8 NM\_001042369.1  
115.6 NM\_007332.1  
125.9 NM\_003304.3

116.8 NR\_002720.1  
122.4 NM\_003305.1  
116.8 NM\_016179.1  
366.5 NM\_015638.2  
476.2 NM\_015638.2  
131.9 NM\_012471.1  
106.8 NM\_004621.3  
115.9 NM\_020389.1  
110.6 NM\_002420.3  
115.6 NM\_001001188.3  
113.4 NM\_001001188.3  
124.9 NM\_001007471.1  
117.5 NM\_001007470.1  
111.9 NM\_017636.2  
112.4 NM\_014555.2  
117.9 NM\_017662.3  
108.3 NM\_024080.4  
142.7 NM\_014112.1  
103.9 NM\_031472.2  
180.9 NM\_031472.2  
120.4 NM\_080705.2  
125.2 NM\_080706.2  
113 NM\_080704.2  
114.8 NM\_018727.4  
121.2 NM\_080705.2  
158.1 NM\_016113.3  
119.3 NM\_145068.2  
117.1 NM\_021625.3  
106.9 NM\_147204.1  
110.7 NM\_019841.4  
118.5 NM\_018646.2  
114.5 NM\_018646.2  
120.8 NM\_018646.2  
356.4 NM\_003496.1  
146.1 NM\_017846.3  
129.2 NR\_003109.1  
118.6 NM\_139169.3  
120.5 NM\_015679.1  
110.2 NM\_001001317.1  
132.3 NR\_001296.2  
119.5 NM\_001008567.1  
266.1 NM\_000368.3  
114.3 NM\_001008567.1  
129.2 NM\_021055.1  
113.7 NM\_000548.2  
138.3 NM\_183422.1  
127.3 NM\_006022.2  
118.3 NM\_183422.1  
712.4 NM\_014779.2  
127.9 NM\_004089.3  
536.4 NM\_004089.3

339.5 NM\_004089.3  
116.9 NM\_001015881.1  
104.7 NM\_198057.2  
146.6 NM\_030935.3  
152.5 NM\_033051.2  
    117 NM\_025265.2  
472.5 NM\_001077446.1  
343.8 NM\_024075.1  
150.3 NM\_207346.1  
132.9 NM\_005726.2  
448.2 NM\_006292.2  
127.8 NM\_025244.1  
120.3 NM\_182911.1  
119.6 NM\_025244.1  
111.1 NM\_152762.1  
    120 NM\_052933.2  
117.6 NM\_018718.1  
122.5 NM\_080860.2  
108.3 NM\_000549.2  
110.9 NM\_000369.2  
115.4 NM\_001018036.1  
117.6 NM\_001018036.1  
    116 NM\_021733.1  
130.9 NM\_138551.2  
122.7 NM\_033035.3  
126.9 NM\_004622.2  
117.9 NM\_145003.1  
132.8 NM\_005999.2  
113.4 NM\_018430.1  
    121 NM\_013270.2  
134.8 NM\_005727.2  
121.4 NM\_031945.2  
110.6 XM\_497334.2  
    116 NM\_001080509.1  
109.5 NM\_012338.3  
116.4 NM\_014399.3  
120.9 NM\_030927.1  
119.8 NM\_012339.3  
112.9 NM\_012466.2  
122.4 NM\_130465.3  
255.3 NM\_012171.1  
119.6 NM\_001031730.1  
    125 NM\_130783.2  
123.6 NM\_130783.2  
121.6 NM\_005725.3  
157.7 NM\_198902.1  
    183 NM\_005724.4  
    637 NM\_005981.3  
133.7 NM\_139022.2  
125.2 NM\_005705.4  
116.1 NM\_139022.2

131.4 NM\_178562.2  
126.8 NM\_001025235.1  
120 NM\_001025237.1  
116.9 NM\_001025238.1  
120.3 NM\_001025234.1  
119.5 NM\_005723.2  
127.1 NM\_003270.2  
117.2 NM\_004615.2  
115.1 NM\_004616.2  
180.7 NM\_006675.3  
179.2 NM\_000714.4  
142.5 NM\_007311.3  
868.1 NM\_000714.4  
104.7 NM\_003308.2  
116.6 NM\_022573.2  
208.8 NM\_003309.1  
158 NM\_022117.1  
583.6 NM\_022117.1  
127 NM\_022117.1  
2310.7 NM\_022117.1  
116.8 NR\_002781.1  
124.7 NM\_021648.4  
115.3 NM\_033512.2  
120.9 NM\_001003937.1  
121.4 NM\_018128.4  
117.1 NM\_025008.2  
108.2 NM\_019032.3  
114.3 NM\_025008.2  
191.7 NM\_003310.1  
338.7 NM\_005706.2  
128.6 NM\_032028.2  
119 NM\_053006.3  
121.2 NM\_052841.3  
128 NM\_174944.2  
150.9 NM\_003312.4  
134.7 NM\_003313.2  
106.3 NM\_032538.1  
116.1 NM\_173500.2  
275.3 NM\_003314.1  
110.4 NM\_175605.2  
113.6 NM\_175605.2  
122.5 NM\_017868.3  
142.1 XM\_939087.1  
115.7 NM\_024525.2  
123.7 NM\_024525.2  
202.6 NM\_133462.1  
162.2 NM\_133462.1  
216.3 NM\_016030.5  
134 NM\_144965.1  
180.5 NM\_018259.3  
175 NM\_145170.2



250.4 NM\_017775.2  
125.3 NM\_145755.1  
113.9 NM\_024753.3  
104.5 NM\_017904.1  
129.4 NM\_001040658.1  
109.7 NM\_022905.3  
130.6 NM\_031421.1  
293.3 NM\_003316.3  
117.4 NM\_003316.3  
240.9 NM\_001008237.1  
364.1 NM\_004623.2  
120.7 NM\_138376.1  
107.4 NM\_001007795.1  
108.8 NM\_020458.1  
118.9 NM\_001010854.1  
120.2 NM\_198309.2  
110.7 NM\_144596.2  
117.1 NM\_152479.3  
148.7 NM\_173810.3  
112.4 NM\_007344.2  
140.4 NM\_003594.3  
116.7 NM\_003318.3  
143.5 NM\_153712.3  
112.9 NM\_001008572.1  
123.8 NM\_001008572.1  
126.9 NM\_012263.3  
117.4 NM\_153254.1  
135.3 NM\_015140.2  
113.9 NM\_001029964.2  
111.6 NM\_031949.4  
157.2 NM\_015644.2  
118.6 NM\_001025930.1  
128.1 NM\_014640.2  
113.8 NM\_015072.3  
111.5 NM\_173623.1  
122.2 NM\_024686.3  
128.5 NM\_001008409.1  
108.3 NM\_001080209.1  
120.6 NM\_001003682.1  
113.7 NM\_133432.1  
115.1 NM\_133379.1  
110.9 NM\_133378.2  
111.2 NM\_003319.3  
115.8 NM\_000370.2  
116.8 NM\_000371.1  
151.1 NM\_016614.2  
119.1 NR\_001538.1  
121.8 NR\_001542.1  
128.9 NR\_001548.1  
104.7 NR\_001551.1  
122.5 NR\_001537.1

116.3 NR\_001543.1  
122.9 NR\_001526.1  
132.5 NR\_001549.1  
111.6 NR\_001536.1  
122.5 NR\_001535.1  
109.7 NR\_001541.1  
119.3 NR\_001527.1  
113.7 NR\_002175.2  
109.2 NR\_001534.1  
115.7 NR\_001533.1  
117.5 NR\_002159.1  
121.7 NM\_020659.2  
123.5 NM\_001005367.1  
130.3 NM\_052869.1  
124.3 NM\_052869.1  
113.4 NM\_032646.5  
134.9 NM\_025250.2  
111.4 NM\_177972.1  
125.8 NM\_003320.3  
118.1 NM\_177972.1  
678.7 NM\_006000.1  
3788.3 NM\_006009.2  
114.3 NM\_079836.1  
115.5 NM\_080386.1  
114.4 NM\_025019.1  
3525.9 NM\_032704.2  
114.6 NM\_018943.1  
113 NM\_024803.1  
320.4 NM\_001069.1  
458.3 NM\_178014.2  
239.5 NM\_001069.2  
123 NM\_178012.3  
1330.1 NM\_006088.5  
180 NM\_006086.2  
128 NM\_006087.2  
221.4 NM\_020040.3  
129.1 NM\_032525.1  
119.2 XM\_940079.1  
111.8 NM\_177987.1  
122.2 NM\_016261.2  
120.9 NM\_016262.3  
114.2 XM\_944510.1  
139.9 NM\_001070.3  
129.8 NM\_001070.3  
124.1 NM\_016437.1  
148.8 NM\_006659.1  
119.7 NM\_006322.3  
116.6 NM\_052903.2  
109.1 NM\_020461.3  
152.8 NM\_020461.3  
116.1 NM\_001008658.1

232.1 NM\_003321.3  
440.4 NM\_020127.1  
108.5 NM\_003322.2  
136.3 NM\_003323.1  
138.2 NM\_003324.3  
116.7 NM\_020245.3  
133.2 NM\_020245.3  
114.8 NM\_020245.3  
111.1 NM\_001004125.1  
126.6 NM\_007275.1  
116.6 NM\_006765.2  
113.1 NM\_006765.2  
468.4 NM\_006545.4  
117.7 NM\_172367.1  
129.3 NM\_000474.3  
124.9 NM\_001002926.1  
253.7 NM\_020648.3  
123.5 NM\_003328.1  
562.4 NM\_175852.3  
112.7 NM\_153235.2  
3086.7 NM\_003329.2  
9271.7 NM\_003329.1  
145.3 NM\_012473.3  
451.9 NM\_030755.3  
142.6 NM\_019022.3  
137.7 NM\_015914.5  
1662 NM\_015913.2  
154 NM\_021156.2  
446.9 NM\_015959.1  
119.6 NM\_016616.2  
119.3 NM\_015051.1  
114.5 NM\_022085.3  
123.6 NM\_022085.3  
118.7 NM\_030810.2  
134.8 NM\_178130.2  
114.9 NM\_001003936.1  
185.4 NM\_005783.3  
222 NM\_006472.1  
221 NM\_004786.1  
365.9 NM\_006541.2  
111.9 NM\_006701.2  
131.4 NM\_017853.1  
406.9 NM\_032731.2  
139.6 NM\_138454.1  
2934.9 NM\_003330.2  
962.8 NM\_182743.1  
120.6 NM\_145748.1  
472.2 NM\_003331.3  
122.5 NM\_001071.1  
117.9 NM\_000372.3  
123.4 NM\_006293.2

116.7 NR\_002721.1  
1020.2 NM\_003332.2  
111.1 NM\_000550.1  
174 NM\_173555.1  
122.4 NM\_173555.1  
141.1 NM\_173555.1  
173.9 NM\_180703.1  
127.7 NM\_180699.1  
306.4 NM\_001025204.1  
180.8 NM\_001025203.1  
303.5 NM\_005089.1  
160.7 NM\_144987.1  
141.6 NM\_144987.1  
190 NM\_024660.1  
871.1 NM\_007279.2  
135.1 NM\_007279.2  
109.8 NM\_018003.2  
123.2 NM\_018003.2  
116.3 NM\_001008224.1  
191.5 NM\_003115.3  
151.2 NM\_207309.1  
115 NM\_005499.2  
18067.8 NM\_003333.2  
216.3 NM\_003333.3  
207.7 NM\_016172.2  
715.8 NM\_016525.3  
158.5 NM\_018449.2  
153.5 NM\_014847.2  
123.2 NM\_001001895.1  
115.2 NM\_018961.2  
33195.6 NM\_018955.2  
25295.9 NM\_021009.3  
29774.4 NM\_021009.1  
462.4 NM\_021009.3  
125.8 NM\_006398.2  
463.9 NM\_153280.1  
118.4 NM\_153280.1  
138.1 NM\_198195.1  
140.1 NM\_198197.1  
139.8 NM\_024818.2  
108.7 NM\_198329.1  
120.5 NM\_024818.2  
152.8 NM\_003335.2  
252.8 NM\_018227.3  
122.9 NM\_181777.1  
1781 NM\_181762.1  
160.1 NM\_003337.2  
149.9 NM\_181800.1  
132.4 NM\_181803.1  
118.5 NM\_181799.1  
103.2 NM\_181802.1

114.4 NM\_003338.3  
146.1 NM\_003339.2  
119.4 NM\_003339.2  
145.4 NM\_181838.1  
178.9 NM\_181889.1  
2447.9 NM\_181890.1  
4809.3 NM\_181890.1  
110.3 NM\_181892.1  
133.8 NM\_015983.2  
607.1 NM\_003341.3  
119.8 NM\_003341.3  
133 NM\_152653.1  
138.8 XM\_944996.1  
288.2 NM\_006357.2  
472.2 NM\_080678.1  
192.6 NM\_182682.2  
220.1 NM\_003342.4  
167.7 NM\_182688.1  
112.1 NM\_182688.1  
140.6 NM\_003344.2  
202.7 NM\_182697.1  
808 NM\_003345.3  
113.7 NM\_194261.1  
116.8 NM\_194260.1  
120.7 NM\_194259.1  
196.2 NM\_016021.2  
120.3 NM\_194457.1  
124.2 NM\_194315.1  
122.7 NM\_194458.1  
297.2 NM\_003347.2  
134.5 NM\_198157.1  
118.5 NM\_198183.1  
588.2 NM\_004223.3  
160.5 NM\_004223.3  
531.2 NM\_003969.2  
119.9 NR\_002837.1  
442.4 NM\_003348.3  
128 NM\_001012989.1  
176 NM\_022066.2  
184.9 NM\_017582.5  
315.4 NM\_173469.1  
130.6 NM\_017811.3  
115.7 NM\_014501.2  
122.6 NM\_014176.1  
122.7 NM\_152489.1  
122.9 NM\_001032288.1  
131.1 NM\_021988.3  
116.5 NM\_022442.3  
122.3 NM\_003350.2  
116.7 NM\_018299.2  
165.2 XM\_945544.1

212 NM\_023079.2  
117 NM\_023079.2  
346.2 NM\_130839.1  
238.3 NM\_000462.2  
126.2 NM\_130839.1  
120.4 NM\_183414.1  
287.6 NM\_014671.1  
201.7 NM\_004788.2  
144.8 NM\_006048.2  
144.6 NM\_013319.1  
258.1 NM\_007106.2  
172.8 NM\_014235.2  
114.5 NM\_203412.1  
143.9 NM\_024292.2  
290.6 NM\_001048241.1  
142.5 NM\_032907.3  
146 NM\_201265.1  
153.3 NM\_145049.1  
128.2 NM\_001079514.1  
869 NM\_001079514.1  
123.7 NM\_014948.2  
130.6 NM\_014948.2  
276.6 NM\_014517.2  
164.3 NM\_019116.1  
481 NM\_053067.1  
698.9 NM\_013438.3  
352.9 NM\_013444.2  
144.4 NM\_017481.2  
300 NM\_020131.3  
163.7 NM\_174916.1  
430.8 NM\_015255.1  
146 NM\_024954.3  
156.5 NM\_014233.1  
115.9 NM\_014233.1  
131.1 NM\_014233.1  
132.4 NM\_001076683.1  
205.9 NM\_025241.1  
939.2 NM\_014607.2  
130.8 NM\_152376.2  
239.5 NM\_181713.3  
105 NM\_183008.2  
113.4 NM\_145345.2  
116.2 NM\_183008.2  
145.5 NM\_183008.2  
114 NM\_183008.2  
117.3 NM\_005671.1  
449.5 NM\_014613.1  
129.4 NM\_004181.3  
136 NM\_006002.3  
138.1 NM\_015984.1  
224.5 NM\_017518.5

121.6 NM\_031432.1  
136.1 NM\_012474.3  
277.3 NM\_017859.2  
115.5 NM\_003353.2  
108.7 NM\_033199.3  
115.2 NM\_053049.2  
132.5 NM\_003355.2  
123 NM\_022803.1  
131.3 NM\_003356.2  
119.3 NM\_022803.1  
198 NM\_001003684.1  
170.4 NM\_013387.3  
168.1 NM\_013387.3  
127.6 NM\_018314.2  
131.6 NM\_001040697.1  
668.6 NM\_016406.1  
211.9 NM\_005659.4  
152.5 NM\_001035247.1  
158.4 NM\_016617.1  
172.1 NM\_003358.1  
122.3 NM\_001025777.1  
125.3 NM\_020120.2  
153.3 NM\_020120.2  
119.5 NM\_020121.2  
294.9 NM\_003359.2  
208.9 NM\_006759.3  
141.8 NM\_006759.3  
402.4 NM\_006759.3  
119.7 NM\_000463.2  
106.4 NM\_019075.2  
107.7 NM\_019093.2  
113.2 NM\_007120.2  
120.5 NM\_019078.1  
122.1 NM\_205862.1  
111.3 NM\_001072.2  
108.3 NM\_001072.2  
113.7 NM\_019077.2  
117.7 NM\_019076.4  
114.6 NM\_021027.2  
118.8 NM\_006798.1  
113 NM\_024743.2  
120.2 NM\_001075.2  
124.6 NM\_001073.1  
112.7 NM\_001076.2  
119.6 NM\_001077.2  
111.9 NM\_001077.2  
109.8 NM\_053039.1  
114.7 NM\_021139.1  
114.9 XM\_943434.1  
122.3 NM\_001074.1  
110.3 NM\_152404.2

125.6 NM\_174914.2  
113.6 NM\_003360.2  
150.2 NM\_175866.2  
107.2 NM\_013282.3  
164.5 NM\_152306.2  
115.1 NM\_207107.2  
343.5 NM\_025218.2  
124.9 NM\_024518.1  
2715.6 XM\_942125.1  
2280.9 NM\_003565.1  
    116 NM\_003565.1  
123.2 NM\_014683.2  
132.6 NM\_015518.1  
    107 NM\_001008389.1  
139.9 NM\_003361.2  
125.6 NM\_173568.2  
116.4 NM\_173568.2  
116.1 NM\_000373.1  
117.7 NM\_054035.1  
140.5 NM\_005148.2  
118.3 NM\_001080421.1  
148.2 XM\_038604.9  
121.2 NM\_001080421.1  
128.6 NM\_006377.2  
116.4 NM\_001080534.1  
143.2 NM\_199242.1  
298.3 NM\_001039675.1  
129.1 NM\_017979.1  
300.6 NM\_018671.2  
124.2 NM\_001039675.1  
121.3 NM\_173167.2  
743.3 NM\_014044.4  
106.2 NM\_133369.2  
    114 NM\_170744.2  
    128 NM\_003728.2  
116.1 NM\_173561.1  
111.5 NM\_080872.1  
215.5 NM\_025154.2  
1099.1 NM\_015374.1  
116.5 NM\_018974.2  
    135 NM\_030930.2  
113.7 NM\_001080461.1  
127.1 NM\_080911.1  
146.2 NM\_080911.1  
111.7 NM\_003362.2  
134.8 NM\_021147.2  
118.9 NM\_001080419.1  
125.6 NM\_001037125.1  
109.9 NM\_205855.1  
112.1 NM\_198443.1  
115.4 NM\_203347.1



117.8 NM\_198481.1  
113.8 NM\_207409.1  
112.3 NM\_207392.1  
106.5 NM\_198573.2  
119.3 NM\_198477.1  
310.5 NM\_198536.1  
120.9 NM\_207103.1  
117.6 NM\_207384.1  
126.5 NM\_213608.1  
113.5 NM\_212557.1  
124.8 NM\_198570.1  
116.6 NM\_206895.1  
146.7 NM\_207316.1  
117.3 NM\_205548.1  
    117 NM\_207410.1  
    116 NM\_198464.1  
124.3 NM\_207413.1  
116.9 NM\_207377.1  
115.2 NM\_016327.2  
    859 NM\_080599.1  
172.3 NM\_080599.1  
609.4 NM\_015542.2  
    239 NM\_023011.2  
212.5 NM\_080687.1  
280.1 NM\_080632.1  
308.9 NM\_080632.1  
123.9 NM\_007000.2  
124.7 NM\_006952.3  
120.6 NM\_006760.1  
    122 NM\_006953.2  
120.8 NM\_182684.1  
115.2 NM\_182684.1  
119.7 NM\_030570.2  
127.9 NM\_003364.2  
129.6 NM\_181597.1  
824.2 NM\_181597.1  
125.3 NM\_173355.2  
181.1 NM\_145052.1  
129.4 NM\_006830.2  
125.7 NM\_006294.2  
185.1 NM\_003365.2  
191.1 NM\_003366.2  
777.1 NM\_006003.1  
2253.7 NM\_006004.2  
119.5 NM\_199511.1  
120.9 NM\_199512.1  
156.7 NM\_017920.2  
157.9 NM\_001077664.1  
    126 NM\_144639.1  
261.5 NM\_000374.3  
125.4 NM\_000375.1

1542.3 NM\_031471.4  
246.1 NM\_031471.4  
132.4 NM\_007122.3  
138.7 NM\_007122.3  
116.8 NM\_003367.2  
151.8 NM\_207291.1  
133.5 NM\_207291.1  
113.5 NM\_005709.2  
122 NM\_005709.2  
121.7 NM\_173477.2  
127.4 NM\_007123.4  
110.1 NM\_206933.1  
110.1 NM\_007123.4  
124.8 NM\_052995.2  
111.9 NM\_174878.2  
112.8 NM\_031941.3  
172 NM\_032747.1  
123.5 NM\_001017415.1  
273.6 NM\_003368.4  
136.9 NM\_003368.4  
129.5 NM\_005153.1  
201.1 NM\_004651.3  
118.9 NM\_182488.1  
112.3 NM\_003940.1  
681 NM\_005151.2  
204.5 NM\_001037334.1  
168 NM\_006313.1  
404.4 NM\_006447.2  
124.9 NM\_001032410.1  
116.4 NM\_006677.1  
107.9 NM\_171997.1  
118.9 NM\_004205.3  
120.3 NM\_171997.1  
118.6 NM\_006676.4  
127 NM\_001008563.1  
139.2 NM\_012475.4  
115.1 NM\_001014443.2  
171.3 NM\_012475.4  
120.9 NM\_013396.3  
114.3 NM\_031907.1  
115.8 NM\_020886.2  
115.9 NM\_020903.2  
503.6 NM\_006537.2  
133.3 NM\_032663.2  
111.7 NM\_020718.2  
110.7 XM\_939750.1  
135.3 NM\_032582.3  
124.8 NM\_201624.1  
143.6 NM\_201626.1  
244.1 NM\_014709.2  
131.3 NM\_020935.1

565.5 NM\_032557.4  
341.8 NM\_006590.2  
118 NM\_003363.2  
192.1 NM\_003363.2  
118.1 NM\_018218.1  
128.3 XM\_932190.1  
464.2 NM\_032172.1  
117.7 NM\_153210.2  
124.1 NM\_032147.1  
118.8 NM\_001042403.1  
112 NM\_001080481.1  
126.3 NM\_022832.2  
125.7 NM\_017944.3  
130.6 NM\_032236.5  
130.9 NM\_001032730.1  
120.9 NM\_001032730.1  
1643 NM\_018561.3  
593.9 NM\_003481.1  
114.9 NM\_203494.1  
109.1 NM\_201286.2  
249.7 NM\_014871.2  
119 NM\_019050.1  
122 NM\_152586.2  
140.4 NM\_004505.1  
127.2 NM\_001080491.1  
118.1 XM\_943796.1  
268.5 NM\_003470.1  
252.6 NM\_005154.2  
123.6 NM\_001039590.1  
275.4 NM\_004652.3  
124 NM\_004654.3  
230.6 NM\_005800.3  
126.7 NM\_005715.1  
122.7 NM\_003577.2  
400 NM\_016037.2  
190.1 NM\_006649.2  
213.2 NM\_021645.4  
126.8 NM\_032175.2  
108.9 NM\_014503.2  
132.8 NM\_007124.1  
119 NM\_006786.2  
119.5 NM\_021995.1  
110.8 NM\_021995.1  
130.2 NM\_198152.2  
113.1 NM\_018949.1  
206.4 NM\_021140.1  
132.9 NM\_182659.1  
154.4 NM\_007125.3  
111.5 NM\_182660.1  
126.9 NM\_003369.2  
151 NM\_025076.2

1360.7 NM\_004182.2  
143.2 NM\_153477.1  
120.1 NM\_018052.3  
137.9 NM\_018052.3  
125.2 NM\_014231.3  
114.6 NM\_199245.1  
655.4 NM\_016830.2  
170.8 NM\_014232.1  
213.9 NM\_004781.3  
115.7 NM\_003762.2  
112.9 NM\_003762.2  
179.8 NM\_006634.2  
540.6 NM\_003761.2  
118.8 NM\_138959.1  
111.9 NM\_020335.1  
118 NM\_194434.2  
127.2 NM\_194434.2  
154.8 NM\_003574.4  
109.9 NM\_004738.3  
108.9 NM\_006295.1  
142.7 NM\_006295.1  
256.4 NM\_020442.3  
129.1 NM\_014909.2  
134.3 NM\_001008736.1  
114 NM\_003370.3  
133.6 NM\_006373.2  
155.9 NM\_005428.2  
109.7 NM\_003371.2  
114.3 NM\_006113.4  
139.3 NM\_006113.3  
114.7 NM\_006113.4  
118.3 NM\_199131.1  
122.9 NM\_012476.1  
887.5 NM\_003372.4  
117.9 NM\_001078.2  
258.1 NM\_003373.3  
126.6 NM\_003373.3  
108.3 NM\_014000.2  
1858.7 NM\_007126.2  
248.8 NM\_025054.3  
126.8 NM\_013452.2  
113 NM\_016378.2  
107.9 NM\_016378.2  
114.4 NM\_016379.2  
126 NM\_016379.2  
114.1 NM\_001001888.1  
120.2 NM\_004679.2  
113.3 NM\_181880.1  
527.7 NM\_003374.1  
120.1 NM\_003375.2  
1582 NM\_005662.3

205.7 NM\_003715.1  
119.8 NM\_001017535.1  
117.5 NM\_000376.2  
122.9 NM\_001025366.1  
115.3 NM\_001025366.1  
139.6 NM\_003376.4  
406.6 XM\_938483.1  
115.9 NM\_003377.3  
125.3 NM\_003377.3  
124.5 NM\_005429.2  
134.3 NM\_014468.2  
115.2 NR\_002311.1  
116 NM\_024621.1  
117.1 NM\_017599.2  
124.4 NM\_052867.1  
128.5 NM\_003378.2  
114.1 NM\_016267.2  
124.1 NM\_153453.1  
122.3 NM\_182645.2  
111.7 NM\_016206.2  
155.4 NM\_014667.1  
167.7 NM\_198156.1  
343 NM\_000551.2  
134.6 NM\_000551.2  
123.8 NM\_001004319.1  
118.1 NM\_007127.1  
2609.7 NM\_003379.3  
124.2 NM\_015873.2  
430.3 NM\_003380.2  
125.9 NM\_194435.1  
115.3 NM\_003381.2  
190.8 NM\_004624.2  
111.7 NM\_003382.3  
120.9 NM\_020746.2  
126.8 NM\_053276.2  
327.9 NM\_024006.4  
128.8 NM\_024006.4  
149.8 NM\_173517.3  
113.8 NM\_001018056.1  
112.6 NM\_003383.3  
124.5 NM\_001017921.1  
132.6 NM\_004183.1  
124.6 NM\_017682.1  
108.4 NM\_153274.1  
130.4 NM\_152439.1  
117.9 NM\_152439.1  
231.5 NM\_182566.1  
112.8 NM\_080723.2  
123.8 NM\_020633.2  
122.2 NM\_173856.1  
119.3 NM\_173857.2

116.2 NM\_173858.1  
135.3 NM\_004666.1  
388 NM\_004665.2  
110.4 NM\_078488.1  
166.9 NM\_004665.2  
120.4 NM\_078625.2  
115.2 NM\_001024460.1  
130.2 NM\_001024460.1  
151 NM\_014703.1  
111.4 NM\_007128.2  
110.6 NM\_013378.1  
140.8 NM\_021729.4  
116.5 NM\_015186.2  
148.4 NM\_033305.2  
129.3 NM\_001018038.1  
150 NM\_015186.2  
113.3 NM\_015243.2  
139.5 NM\_184042.1  
115.6 NM\_181661.1  
119 NM\_017890.3  
106.6 NM\_152564.3  
154.4 NM\_152564.3  
120.8 NM\_018080.2  
134.6 NM\_018080.2  
118.9 NM\_015378.2  
118.7 NM\_015378.2  
115.1 NM\_015378.2  
138.4 NM\_022575.2  
248.3 NM\_080413.1  
122.3 NM\_080414.1  
151 NM\_020857.2  
138 NM\_001005753.1  
107 NM\_016079.2  
119.4 NM\_032353.2  
143.1 NM\_004896.2  
855.4 NM\_001035260.1  
123.6 NM\_052875.2  
222.2 NM\_016208.2  
169.3 NM\_016208.2  
694.2 NM\_016226.2  
151.1 NM\_022916.3  
150.5 NM\_018668.2  
384 NM\_018206.3  
149.5 NM\_016075.2  
171.3 NM\_152415.1  
1156.2 NM\_024667.1  
539.8 NM\_017966.4  
130.2 XM\_376631.3  
153.9 NM\_015289.2  
124.9 NM\_014396.3  
393.1 NM\_014396.3

315.4 NM\_014396.3  
123.9 NM\_014396.3  
190.9 NM\_007259.2  
148.8 NM\_013245.2  
601 NM\_004869.2  
156.6 NM\_022553.4  
111.9 NM\_018289.2  
127.4 NM\_001005739.1  
126.8 NM\_016516.2  
145.5 NM\_005997.1  
199.6 NM\_015303.3  
118.6 NM\_015303.3  
120.2 NM\_003384.2  
123.8 NM\_006296.3  
171.8 NM\_001025778.1  
150.8 NM\_016440.3  
362.4 NM\_001025778.1  
123.9 NM\_182607.3  
121.7 NM\_014312.3  
118.9 NM\_007268.1  
111.5 NM\_001013661.1  
120.6 NM\_173799.2  
119 NM\_003385.4  
110.2 NM\_199425.1  
119.4 NM\_199425.1  
116.3 NM\_014588.4  
111.1 NM\_024626.1  
138.6 NM\_006370.1  
112.1 NM\_000638.2  
123 NM\_022834.3  
121.7 NM\_022834.3  
106 NM\_198496.1  
131.7 NM\_152718.1  
128.2 NM\_000552.2  
925.9 NM\_100486.1  
119.7 NM\_100264.1  
1595.2 NM\_016628.2  
223.1 NM\_213646.1  
270.2 NM\_004184.3  
115.2 NM\_201263.2  
697.8 NM\_000377.1  
116 NM\_003931.2  
116.3 NM\_003931.2  
268.6 NM\_006990.2  
118.4 NM\_006646.4  
180.3 NM\_003941.2  
552.4 NM\_003387.3  
133.7 NM\_012477.2  
821.1 NM\_016312.2  
4224 NM\_012478.2  
226.7 NM\_007187.3

123.2 NM\_001006614.1  
117.1 NM\_032994.1  
119.1 NM\_030798.2  
116.9 NM\_022479.1  
147.7 NM\_032317.2  
116.2 NM\_175064.2  
113.4 NM\_175064.2  
1075.7 NM\_017528.2  
117.1 NM\_025042.2  
116.3 NM\_152559.2  
119 NM\_182504.2  
218.2 NM\_020830.3  
143.8 NM\_052950.2  
111.2 NM\_014991.3  
124.4 NM\_178583.1  
109.9 NM\_178585.1  
124.5 NM\_001008396.1  
118.2 NM\_001008396.1  
117.7 NM\_007086.2  
152.3 NM\_017491.3  
1096.5 NM\_017491.3  
130.5 NM\_018256.2  
139.8 NM\_017883.3  
113.5 NM\_145054.4  
133.2 NM\_145054.4  
110.9 NM\_181265.2  
122.6 NM\_170710.3  
200.1 NM\_024100.3  
395.8 NM\_025132.3  
333.9 NM\_181291.1  
172.2 NM\_181308.1  
121.4 NM\_144574.2  
123.3 NM\_015604.2  
125.2 NM\_152418.2  
158.3 NM\_003861.1  
138.8 NM\_025230.3  
423.9 NM\_025230.3  
125.7 NM\_032259.1  
131.7 NM\_024515.3  
460.1 NM\_025160.4  
125.7 NM\_182552.2  
116.3 NM\_006784.1  
115.3 NM\_145241.2  
115.1 NM\_001006623.1  
295.1 NM\_001006622.1  
136.6 NM\_001006622.1  
124.8 NM\_018383.3  
115.8 NM\_052844.3  
110.4 NM\_020779.3  
139 NM\_139281.2  
366.5 NM\_014023.3



141.5 NM\_033661.3  
116.6 NM\_033661.3  
115.9 NM\_018669.4  
161 NM\_015397.1  
117.6 NM\_178470.3  
127.4 NM\_018268.2  
103.9 NM\_001017930.1  
138.4 NM\_019045.3  
313.6 NM\_001029896.1  
128.2 NM\_007075.3  
125.5 NM\_001029896.1  
166.2 NM\_019613.2  
237.5 NM\_005452.4  
124.9 NM\_014969.3  
210 NM\_020839.2  
103.3 NM\_178824.3  
115.7 NM\_017588.2  
138 NM\_052821.3  
150.9 NM\_016001.1  
119.6 NM\_015426.2  
128.4 NM\_172240.1  
131.3 NM\_018338.2  
178 NM\_182627.1  
150.5 NM\_032118.2  
135.2 NM\_017706.3  
219.8 NM\_004814.1  
121.9 NM\_024339.2  
404.9 NM\_030581.3  
120.9 NM\_019069.3  
921 NM\_018031.2  
133 NM\_018051.2  
231.4 NM\_025234.1  
114.8 NM\_173636.3  
119 NM\_145172.1  
112.3 NM\_144625.2  
108.3 NM\_152498.1  
109.3 NM\_144668.3  
180.2 NM\_145647.1  
285.2 NM\_005828.2  
114.8 NM\_178821.1  
113.1 NM\_015285.2  
146.5 NM\_015285.2  
146.7 NM\_018034.2  
178.7 NM\_025155.1  
111.8 NM\_182758.1  
295.3 NM\_032856.1  
264.7 XM\_936269.1  
371.1 NM\_018093.1  
178.3 NM\_018093.1  
251 NM\_032168.1  
115.2 NM\_024102.2

115 NM\_207014.1  
118.9 NM\_024763.3  
113.5 NM\_207014.1  
133.6 NM\_018081.1  
228.4 NM\_017818.2  
147.3 NM\_152348.1  
116.7 NM\_145054.2  
124.6 NM\_015420.4  
168.3 NM\_152528.1  
121.8 NM\_015023.2  
126.1 NM\_003390.2  
113.3 NM\_021197.2  
120 NM\_080753.2  
114.8 NM\_172006.2  
129.6 NM\_172131.2  
112.3 NM\_147197.2  
113.8 NM\_080869.1  
134.6 NM\_172005.1  
112 NM\_080736.1  
106.5 NM\_080735.1  
119.2 NM\_181530.1  
112.6 NM\_181522.1  
119.1 NM\_080614.1  
112.1 NM\_145652.2  
123.5 NM\_080827.1  
115.6 NM\_181510.1  
130.4 NM\_130896.1  
112.5 NM\_147198.2  
116 NM\_053284.2  
113.8 NM\_175575.4  
129.2 NM\_006005.2  
279.7 XM\_058720.7  
152.4 NM\_001080435.1  
114.9 NM\_001042424.1  
111.9 NM\_133330.1  
120.2 NM\_007331.1  
119 NM\_133336.1  
122.6 NM\_133334.1  
111 NM\_023034.1  
146.1 NM\_023034.1  
140.7 NM\_017778.2  
130.3 NM\_005663.2  
135.2 NM\_032345.1  
113.3 NM\_007191.2  
117.7 NM\_001077269.1  
169.8 NM\_001077269.1  
115.4 NM\_001080529.1  
130.2 NM\_017983.3  
180.7 NM\_016003.3  
116.7 NM\_001033520.1  
125.2 NM\_133264.4

128.1 NM\_080838.1  
123.8 NM\_003882.2  
120.4 NM\_003881.2  
120.5 NM\_198239.1  
118.3 NM\_003880.2  
    121 NM\_130396.1  
116.3 NM\_015855.2  
185.3 NM\_018979.1  
113.9 NM\_006648.3  
120.9 NM\_020922.2  
109.6 NM\_001002838.1  
111.3 NM\_032387.3  
110.6 NM\_005430.2  
117.7 NM\_025216.2  
    103 NM\_003394.2  
120.2 NM\_004626.2  
119.9 NM\_016087.2  
111.4 NM\_057168.1  
125.3 NM\_003391.1  
114.9 NM\_024494.1  
116.5 NM\_004185.2  
114.7 NM\_030753.3  
116.6 NM\_033131.2  
114.1 NM\_030761.3  
114.3 NM\_003392.3  
133.9 NM\_032642.2  
111.3 NM\_030775.2  
119.2 NM\_006522.3  
117.2 NM\_004625.3  
    118 NM\_058238.1  
123.3 NM\_058244.1  
126.6 NM\_031933.1  
116.3 NM\_003393.2  
119.2 NM\_003395.1  
123.7 NM\_003396.1  
153.3 NM\_004627.2  
194.4 NM\_000553.2  
130.4 NM\_020135.2  
648.8 NM\_130395.1  
345.3 NM\_134265.2  
458.6 NM\_134264.2  
143.8 NM\_018639.3  
118.6 NM\_000378.3  
    124 NM\_024425.2  
1159.2 NM\_004906.3  
122.1 NM\_152857.1  
128.1 NM\_152858.1  
115.3 NM\_001080436.1  
    124 XM\_059037.7  
120.7 NM\_015238.1  
114.2 NM\_024949.4

148.6 NM\_015691.2  
109.7 NM\_130791.1  
126.6 NM\_018560.4  
113 NM\_130844.1  
126.5 NM\_130844.1  
114.2 NM\_007013.3  
119.1 NM\_007014.3  
133.8 NM\_199424.1  
160.3 NM\_199423.1  
117.6 NM\_015472.3  
596.9 NM\_007266.1  
324 NM\_020196.2  
133.8 NM\_199139.1  
127.2 NM\_199139.1  
126.1 NM\_133431.1  
119 NM\_133431.1  
126.5 NM\_130777.1  
113.6 NM\_133179.1  
113.6 NM\_130776.1  
115.6 NM\_130775.1  
1401.6 NM\_001079539.1  
1878.3 NM\_005080.2  
120.6 NM\_002995.1  
122.7 NM\_005283.2  
122.2 NM\_001024644.1  
118.3 NM\_001024644.1  
128.8 NM\_000379.2  
113.5 NM\_175569.1  
116.4 NM\_021083.2  
120.6 NM\_175878.2  
110.1 NM\_052898.1  
110.1 NM\_207411.2  
107.2 NM\_001012239.1  
129.2 NM\_173683.2  
143.9 NM\_001012239.1  
119.4 NM\_001011718.1  
124.2 NM\_018053.2  
117.2 NM\_001011720.1  
126.8 NM\_212559.1  
112.8 NM\_004677.2  
118.9 NM\_024782.1  
107.4 NM\_006691.2  
118.2 NM\_000380.2  
348.1 NM\_004628.3  
230.2 NM\_020383.2  
117.4 NM\_003399.4  
5509.6 NM\_022098.2  
1065 NM\_003400.3  
131 NM\_022459.3  
133.3 NM\_020750.1  
387.2 NM\_015171.1

145.3 NM\_015024.2  
140.7 NM\_007235.3  
215.8 NM\_004736.2  
136.7 NM\_006297.1  
1253.9 NM\_005431.1  
115.7 NM\_005432.2  
112.9 NM\_022406.1  
134 NM\_021141.2  
1116.4 NM\_001469.3  
116.3 NM\_001042604.1  
328.8 NM\_019001.2  
117.7 NM\_012255.3  
156.1 NM\_024096.1  
116.5 NM\_138568.2  
120.9 NM\_022166.2  
173.8 NM\_022167.1  
130.9 NM\_001012424.1  
119.3 NM\_005748.3  
158.8 NM\_001012424.1  
116.6 NM\_006106.2  
1695.2 NM\_003680.2  
129.1 NM\_015936.1  
601.5 NM\_004559.3  
107.4 NM\_015982.1  
182.8 NM\_018023.3  
137 NM\_006530.2  
201.4 NM\_005433.3  
148.5 NM\_020470.1  
112.8 NM\_001031731.1  
117.2 NM\_033557.1  
141 NM\_001039673.1  
293.5 NM\_018982.3  
123.7 NM\_024029.3  
307.2 NM\_015388.2  
115.4 NM\_032312.2  
164.1 NM\_030799.6  
118 NM\_001024947.1  
289.8 NM\_173834.2  
126.8 NM\_006555.3  
438.6 NM\_139313.1  
109 NM\_018566.3  
169.4 NM\_013313.3  
219.6 NM\_001005404.3  
359.2 NM\_031477.3  
115.3 NM\_145008.1  
2983.4 NM\_016061.1  
291.1 NM\_024640.3  
97 NM\_025052.3  
116.9 NM\_001018046.1  
114.7 NM\_001018046.1  
158.6 NM\_001031732.1

313.5 NM\_133370.1  
3188.6 NM\_001031732.1  
127 NM\_022828.2  
237.5 NM\_017798.2  
373.9 NM\_016258.1  
161 NM\_152758.3  
1861.9 NM\_139323.2  
208.3 NM\_003404.3  
150.3 NM\_006761.3  
368.6 NM\_012479.2  
839.6 NM\_003405.3  
2459.8 NM\_006826.2  
4790.7 NM\_003406.2  
131.4 NM\_003406.2  
401.8 NM\_003403.3  
432 NM\_139119.1  
106.7 NM\_206923.1  
4494.7 NM\_006007.1  
294.8 NM\_152444.1  
149.8 NM\_175907.3  
125.9 NM\_016653.1  
119.4 NM\_133646.1  
114.6 NM\_003386.1  
127.6 NM\_173055.1  
136.8 NM\_003386.1  
124.9 NM\_207519.1  
286 NM\_207519.1  
109.8 NM\_001079.3  
110.1 NM\_175619.1  
321.5 NM\_004729.3  
114.9 NM\_024508.3  
124 NM\_032367.1  
158 NM\_014838.1  
163.6 NM\_021211.2  
152.3 NM\_030776.1  
124.4 NM\_014950.1  
119.6 NM\_023929.2  
174.1 NM\_014415.1  
109.5 NM\_181842.1  
125.3 NM\_001018011.1  
126 NM\_006006.4  
111.2 NM\_006006.4  
269.1 NM\_003443.1  
129.8 NM\_020861.1  
209.2 NM\_015642.2  
141.8 NM\_014797.1  
132.8 NM\_006977.2  
113.5 NM\_020924.2  
139.7 NM\_024784.2  
126.5 NM\_014383.1  
479.6 NM\_006777.3

117 NM\_032522.2  
126.6 NM\_001080412.1  
108.9 NM\_014830.1  
477.9 NM\_020899.2  
227.7 NM\_014870.2  
116.6 NM\_194314.2  
131.7 NM\_014155.3  
225.8 NM\_014872.1  
134 NM\_015898.2  
120.4 NM\_015872.1  
120.4 NM\_144621.2  
109.9 NM\_001040441.1  
135.9 NM\_178547.2  
155 NM\_152735.3  
120.1 NM\_032786.1  
114 NM\_014827.3  
721.6 NM\_025079.1  
114.3 NM\_001010888.1  
141.4 NM\_207660.2  
205.7 NM\_018471.2  
270.6 NM\_015117.1  
125.8 NM\_198581.1  
129.8 NM\_014153.2  
111.8 NM\_017590.4  
136.3 NM\_032494.1  
203.2 NM\_024625.3  
190.1 NM\_024625.3  
3446.6 NM\_020119.3  
112.7 NM\_080660.2  
382 NM\_016478.3  
125 NM\_017665.1  
234.7 NM\_001009881.1  
165.4 NM\_015269.1  
158.4 NM\_173798.2  
109.9 NM\_203303.1  
174.6 NM\_015144.1  
107.7 NM\_001004308.1  
272.4 NM\_016505.2  
117.9 NM\_017742.3  
179 NM\_033089.6  
114.5 NM\_152694.1  
201.3 NM\_024617.2  
184.2 NM\_032226.1  
348.9 NM\_017612.2  
195.9 NM\_032280.1  
408.8 NM\_018464.2  
120 NM\_033114.3  
189.5 NM\_206831.1  
143.9 NM\_181706.3  
214.4 NM\_017984.2  
108.7 NM\_001040432.1

121.2 NM\_033317.2  
116.5 NM\_033317.2  
113.8 NM\_033317.2  
118 NM\_013304.1  
154.7 NM\_024786.1  
119.1 XM\_940764.1  
130.1 NM\_032799.4  
151.3 NM\_001001483.1  
117.6 NM\_001001483.1  
109.3 NM\_019028.2  
158.7 NM\_024630.2  
112.9 NM\_144969.1  
134 NM\_032327.2  
118.5 NM\_198046.1  
244.8 NM\_198044.1  
163.3 NM\_015336.1  
158.2 NM\_032283.1  
117 NM\_144637.2  
125.2 NM\_016353.2  
115.7 NM\_153251.2  
115.2 NM\_178566.2  
129.7 NM\_174976.1  
117.1 NM\_173570.2  
123.6 NM\_207340.1  
119.6 NM\_016598.1  
116.8 NM\_018106.2  
294 NM\_015457.2  
368.1 NM\_022494.1  
320.8 NM\_017740.1  
299.6 NM\_013373.2  
134.6 NM\_016032.2  
114 NM\_001008222.1  
110.7 NM\_016032.2  
150.7 NM\_021212.1  
141.3 NM\_024699.1  
5994.9 NM\_182491.1  
288.7 NM\_138802.1  
187.3 NM\_021943.1  
184.9 NM\_019006.2  
161.8 NM\_014795.2  
111.5 NM\_024721.2  
123.5 NM\_153688.2  
310.6 NM\_022473.1  
139.1 NM\_003409.2  
118 NM\_030613.2  
164.4 NM\_001012756.1  
121.8 NM\_020828.1  
141.2 NM\_153018.1  
1451.8 NM\_003407.1  
891.5 NM\_004926.2  
211.9 NM\_006887.3



148.1 NM\_003408.1  
136.6 NM\_173832.3  
125.7 XM\_944871.1  
110.6 NM\_174900.2  
114.7 NM\_199427.1  
112.2 NM\_199426.1  
144.5 NM\_133458.1  
653.8 NM\_053023.2  
152.8 NM\_170768.1  
114.3 NM\_145102.1  
114.6 NM\_014569.2  
177.6 NM\_014569.2  
121.3 NM\_006782.3  
185 NM\_153813.1  
113.4 NM\_012082.2  
192.2 NM\_016107.3  
125.4 NM\_003410.2  
129.4 NM\_003411.2  
116.6 NM\_021260.1  
127 NM\_021260.1  
163.1 NM\_014733.2  
180.7 NM\_032850.3  
291.4 NM\_022340.2  
174.9 NM\_024071.2  
293.4 NM\_015346.2  
132.3 NM\_001002262.1  
143.5 NM\_144588.4  
120.3 NM\_020972.1  
116.6 NM\_007323.1  
115.9 NM\_007323.1  
119.9 NM\_007324.2  
122.8 NM\_004799.2  
119 NM\_181485.1  
123.5 NM\_032527.2  
291 NM\_032527.2  
117.7 NM\_181484.1  
140.3 NM\_007222.3  
136 NM\_001017926.1  
116.8 NM\_007222.3  
192 NM\_014943.3  
131.4 NM\_015035.3  
119.3 NM\_003412.3  
123.9 NM\_007129.2  
107.1 NM\_003413.2  
110.3 NM\_032153.3  
112.9 NM\_033132.2  
144.9 NM\_001010879.1  
112.9 NM\_015363.3  
123.7 NM\_052882.1  
119.6 NM\_003439.1  
119.8 NM\_001011656.1

115.4 NM\_032441.1  
120.1 NM\_032441.1  
761.8 NM\_144723.1  
1985.1 NM\_152240.1  
119.8 NM\_019103.2  
146.3 NM\_019103.2  
131.9 NM\_174929.2  
555.1 NM\_005857.2  
143.9 NM\_024772.2  
118 NM\_005096.2  
123.2 NM\_005096.2  
122.6 NM\_201599.1  
155.1 NM\_005095.2  
183.8 NM\_014242.1  
181.6 NM\_001039649.1  
111.7 NM\_007167.3  
120.3 NM\_015896.2  
122.7 NM\_212479.1  
114.1 NM\_212479.1  
109.6 NM\_032257.3  
138.5 NM\_032265.1  
111.8 NM\_001024593.1  
160.1 NM\_138462.2  
130.8 NM\_183048.1  
222.2 NM\_015394.4  
120.7 NM\_173531.1  
177.2 NM\_033204.2  
119.8 NM\_153608.1  
105.3 NM\_024498.1  
184 NM\_006955.1  
141.2 NM\_016265.2  
108.3 NM\_001008727.1  
118.7 NM\_003431.2  
105.4 NM\_003432.1  
121.9 NM\_003433.2  
110.4 NM\_003434.3  
121.4 NM\_003435.2  
113.9 NM\_003436.2  
123.8 XM\_936978.1  
121.2 NM\_003437.2  
144.2 NM\_003438.1  
121.2 NM\_021030.2  
145.4 NM\_003440.2  
119.1 NM\_003441.1  
164 NM\_005081.2  
413.9 NM\_003442.3  
276.1 NM\_007145.1  
772.6 NM\_021964.1  
117.1 NM\_198089.1  
133.1 NM\_003445.2  
120.9 NM\_198089.1

120.3 NM\_003446.2  
152.8 NM\_006958.2  
115.7 NM\_001029976.1  
122.2 NM\_001029976.1  
138.8 NM\_033288.2  
    121 NM\_198893.1  
172.1 NM\_033288.2  
    458 NM\_007146.2  
141.7 NM\_003447.2  
    121 NM\_018651.2  
111.1 NM\_025169.1  
116.9 NM\_025169.1  
121.6 NM\_194320.1  
139.8 NM\_006959.1  
129.6 NM\_001032292.1  
    112 NM\_003450.1  
125.8 NM\_001032292.1  
125.6 NM\_007147.2  
153.5 NM\_003451.1  
133.6 NM\_007148.2  
159.4 NM\_144680.2  
123.9 NM\_001029997.1  
187.3 NM\_001007088.1  
110.7 NM\_007149.1  
119.6 NM\_007151.1  
139.8 NM\_001023560.1  
221.5 NM\_003452.2  
113.5 NM\_197977.1  
    108 NM\_006961.2  
118.3 NM\_006298.2  
125.3 NM\_006299.2  
193.1 NM\_007152.1  
125.2 NM\_006991.3  
    119 NM\_001024855.1  
132.7 NM\_001024855.1  
122.4 NM\_021088.2  
111.9 NM\_021088.2  
184.7 NM\_021143.1  
122.4 NM\_003454.2  
135.1 NM\_198088.1  
177.6 NM\_198088.1  
120.4 NM\_003455.2  
108.7 NR\_002722.1  
116.2 NM\_001042428.1  
111.8 NM\_001031686.1  
116.1 NM\_032805.1  
473.4 NM\_003457.2  
535.5 NM\_003457.2  
118.5 NM\_007153.1  
121.1 NM\_006962.1  
168.1 NM\_006385.2

200 NM\_012256.2  
135.6 NM\_004220.1  
122.8 NM\_013249.1  
123.5 NM\_013250.1  
200.2 NM\_006526.2  
140.6 NM\_173485.2  
147.3 NM\_016423.1  
194.5 NM\_006963.3  
120.9 NM\_013359.1  
137 NM\_013360.1  
671.2 NM\_013361.2  
120.4 NM\_013398.1  
121.2 NM\_013362.1  
112.2 NM\_001032374.1  
132.7 NM\_015919.3  
140.5 NM\_182490.1  
117.1 NM\_013380.2  
115.8 NM\_014518.1  
135.3 NM\_145911.1  
118.8 NM\_006300.2  
126.3 NM\_014519.2  
111.2 NM\_181756.1  
156.5 NM\_006630.1  
141.2 NM\_004234.3  
119 NM\_007345.1  
117 NM\_205768.1  
107.6 NM\_205768.1  
127.3 NM\_006352.3  
117.1 NM\_005674.1  
165.4 NM\_006965.1  
130.5 NM\_021045.1  
133.5 NM\_145011.2  
131.3 NM\_021061.1  
109.5 NM\_021047.1  
127.8 NM\_004876.2  
209.8 NM\_005773.2  
120.5 NM\_033468.1  
119.4 NM\_003904.3  
141.7 NM\_019591.2  
266.3 NM\_005741.3  
181.9 NM\_003417.2  
145.3 NM\_005455.3  
791.8 NM\_005455.3  
246.9 NM\_198058.1  
216.3 NM\_006631.2  
113.3 NM\_006631.2  
107.5 NM\_003414.3  
113.6 NM\_003415.1  
116.3 NM\_152943.1  
220.3 NM\_006629.3  
119.3 NM\_021148.1

114.9 NM\_021148.1  
357.7 NM\_016324.2  
120.6 NM\_133502.1  
162.7 NM\_016324.2  
349.2 NM\_001080485.1  
118.2 NM\_001080485.1  
141.1 NM\_152287.2  
267.6 NM\_021994.1  
108.6 NM\_032051.1  
117.4 NM\_014323.2  
121.9 NM\_006969.2  
117.8 NM\_001037813.1  
    121 NM\_152354.2  
124.3 NM\_020652.1  
112.6 NM\_020653.1  
159.7 NM\_032389.3  
147.5 NM\_020843.1  
137.1 NM\_015565.1  
306.9 NM\_020727.3  
290.3 NM\_014007.2  
124.5 NM\_017715.2  
130.2 NM\_017715.2  
135.3 NM\_032924.2  
111.7 NM\_017715.2  
123.4 NM\_194325.1  
114.7 NM\_052860.1  
108.7 NM\_001012320.1  
124.1 NM\_020657.1  
121.6 NM\_024493.1  
135.7 NM\_019110.3  
122.5 NM\_145238.2  
118.7 NM\_001010877.2  
115.2 NM\_018008.2  
430.7 NM\_018683.3  
    151 NM\_020933.2  
119.9 NM\_014345.2  
174.5 NM\_020807.1  
124.4 NM\_001005368.1  
    130 NM\_006973.2  
112.2 NM\_006973.2  
    122 NM\_207333.2  
142.1 NM\_024639.2  
119.6 NM\_199005.1  
126.3 NM\_145909.1  
    108 NM\_030899.2  
226.4 NM\_014347.1  
155.9 NM\_182976.1  
118.5 NM\_181781.2  
179.5 NM\_182975.1  
226.1 NM\_024620.3  
205.5 NM\_014487.2

150.5 NM\_018555.4  
114.9 NM\_018555.4  
148.3 NM\_018555.4  
115.8 NM\_032433.2  
119.1 NM\_199441.1  
113.1 NM\_018102.3  
147.1 NM\_022095.3  
123.2 NM\_022482.3  
193.9 NM\_015655.2  
123.9 NM\_006974.1  
114.8 NM\_006974.1  
127.7 NM\_030580.2  
125.4 NM\_032819.3  
164 NM\_145288.1  
115.6 NM\_024325.4  
121.5 NM\_003419.2  
114.2 NM\_012279.2  
114 NM\_032584.1  
137.2 NM\_003420.2  
144.3 NM\_021632.3  
136.2 NM\_005649.2  
119.3 NM\_058230.1  
106.4 NM\_014594.1  
157.7 NM\_018083.3  
384 NM\_014455.1  
112.8 NM\_199452.1  
115.9 NM\_199451.1  
115.3 NM\_199450.1  
121.5 NM\_014951.1  
129.5 NM\_152625.1  
121.2 NM\_153695.2  
107.2 NM\_003421.1  
114.4 NM\_001007094.1  
129.8 NM\_003421.1  
108.3 NM\_032825.3  
131.9 NM\_152604.1  
129 NM\_001039919.1  
169 NM\_133476.2  
162 NM\_015481.1  
1875.1 NM\_032164.2  
138.5 NM\_018660.2  
112.7 NM\_145756.1  
135.5 NM\_032347.1  
127.8 NM\_020781.2  
136.1 NM\_170686.1  
415.6 NM\_024835.2  
118 NM\_001033719.1  
117.2 NM\_020863.2  
114.9 NM\_001029939.1  
113.3 NM\_017757.1  
136.4 NM\_024741.1

115.6 NM\_153380.1  
119.4 NM\_007130.1  
116.6 NM\_007130.1  
    404 NM\_021188.1  
116.2 NM\_032370.1  
131.5 NM\_018355.2  
137.8 NM\_017879.1  
    117 NM\_152475.1  
112.5 NM\_133460.1  
181.5 NM\_024691.2  
269.5 NM\_198055.1  
113.8 NM\_198055.1  
116.7 NM\_144689.3  
122.2 NM\_015069.2  
128.2 NM\_001001661.1  
237.5 NM\_024106.1  
116.2 NM\_001001415.1  
120.9 NM\_003423.2  
2674.3 NM\_025189.2  
132.9 NM\_133473.1  
139.1 NM\_014650.2  
125.5 NM\_152602.1  
164.2 NM\_017810.2  
    165 NM\_025231.1  
115.7 NM\_030634.1  
    115 NM\_030634.1  
136.6 NM\_030634.1  
149.8 NM\_182755.1  
143.8 NM\_152262.1  
115.9 NM\_016264.2  
167.2 NM\_001012753.1  
119.5 NM\_152355.1  
153.1 NM\_030824.1  
135.1 NM\_005815.2  
152.7 NM\_018337.2  
115.9 NM\_181489.4  
127.1 NM\_017908.1  
270.6 NM\_023926.3  
116.5 NM\_152695.3  
137.6 NM\_003425.2  
115.2 NM\_015555.2  
    157 NM\_001031623.1  
119.4 NM\_001031623.1  
    105 NM\_052923.1  
    120 NM\_182594.1  
132.7 NM\_006635.2  
116.3 NM\_021224.3  
152.5 NM\_207336.1  
118.6 NM\_199132.1  
117.2 NM\_020813.1  
155.4 NM\_015428.1

119.1 NM\_015428.1  
113.8 NM\_207317.1  
136.8 NM\_144684.1  
132.5 NM\_006626.3  
120 NM\_001007169.1  
412.6 NM\_001007169.1  
126.8 NM\_133464.1  
159.1 NM\_031486.1  
121.7 NM\_145312.2  
120.4 NM\_020714.1  
101.9 NM\_152356.3  
134.5 NM\_001076678.1  
122.1 NM\_001076678.1  
111 NM\_032752.1  
118.8 NM\_198458.1  
123.4 NM\_145115.2  
150 NM\_032792.2  
122.7 NM\_021646.1  
106.6 NM\_145044.1  
125.7 NM\_033210.3  
120.5 NM\_032772.3  
118 NM\_014910.2  
354.2 NM\_014913.2  
164.4 NM\_145291.2  
100.6 NM\_014930.1  
168.9 NM\_145806.2  
267.9 NM\_032434.2  
136.7 NM\_144631.4  
137.1 NM\_032788.1  
113.9 NM\_213605.2  
130.1 NM\_014803.2  
113.6 XM\_940357.1  
112.6 NM\_145287.1  
110 NM\_015461.1  
199.9 NM\_153219.2  
131 NM\_133444.1  
114.8 NM\_032423.2  
237 NM\_020951.1  
109.1 NM\_020880.2  
125.8 NM\_018181.4  
112.1 NM\_152520.3  
115.8 NM\_014717.1  
144.8 NM\_020856.1  
118.9 NM\_203282.1  
118.7 NM\_152606.2  
118.2 NM\_194319.1  
116.4 NM\_213598.1  
117.3 NM\_014480.1  
153.7 NM\_133466.1  
112.4 NM\_178544.2  
114.9 NM\_173631.2



216.7 NM\_152909.2  
7280.3 NM\_153263.1  
128.5 NM\_001039654.1  
134.2 NM\_138347.2  
120.3 NM\_024762.2  
106.2 NM\_152652.1  
113.7 NM\_152303.1  
116.8 NM\_152791.3  
123.5 NM\_024967.1  
115.1 NM\_024341.1  
199.2 NM\_001044387.1  
141.4 NM\_144693.1  
151.8 NM\_032497.1  
116.5 NM\_152476.1  
121.4 NM\_152289.1  
244.5 NM\_017656.1  
141.5 NM\_145276.1  
151.2 NM\_144976.2  
143.6 NM\_152477.3  
116.3 NM\_032838.2  
114.3 NM\_152603.2  
124.5 NM\_198539.2  
118.2 NM\_152484.2  
123.1 NM\_144694.1  
127.9 NM\_016536.3  
121.3 NM\_152412.1  
151.4 NM\_152360.2  
124.1 NM\_022752.3  
126.3 NM\_174945.1  
143 NM\_024327.1  
384.9 NM\_032679.1  
129.3 NM\_152600.1  
137.6 NM\_207115.1  
141.4 NM\_207115.1  
126.6 NM\_016202.2  
230.4 NM\_016535.3  
119.6 NM\_144690.1  
115.2 NM\_173548.1  
159 NM\_152655.2  
129.7 NM\_199126.1  
125.5 NM\_152279.2  
200.5 NM\_017652.1  
223 NM\_017652.1  
127.2 NM\_017652.1  
119.2 NM\_032828.2  
113.1 NM\_001013746.1  
127.1 NM\_016089.1  
122.9 NM\_014630.1  
136.9 NM\_015871.2  
115.8 NM\_182524.1  
112.9 NM\_173539.1

116.2 NM\_001042416.1  
129.2 NM\_152457.1  
206.3 NM\_178167.2  
118.2 NM\_001007248.1  
120.6 NM\_001007247.1  
125.1 NM\_021998.3  
    142 NM\_198457.1  
110.5 NM\_025027.3  
    109 NM\_032689.3  
112.9 NM\_020747.1  
154.7 NM\_015042.1  
    109 NM\_173530.1  
132.2 NM\_030972.2  
144.3 NM\_001031721.1  
116.5 NM\_024840.2  
136.9 NM\_025040.2  
154.5 NM\_198480.2  
163.1 NM\_178523.3  
127.1 NM\_133374.1  
114.2 NM\_173656.1  
112.6 NM\_175888.1  
181.5 NM\_198484.2  
    432 NM\_033414.2  
111.4 NM\_014789.3  
118.3 NM\_020787.1  
122.1 NM\_145233.2  
125.1 NM\_145297.1  
136.7 NM\_001076675.1  
160.3 NM\_001076675.1  
182.7 NM\_145295.2  
120.9 NM\_033113.1  
119.7 NM\_001080417.1  
    114 XM\_034819.6  
121.7 NM\_001037735.1  
121.1 XM\_929476.1  
114.2 NM\_016331.1  
135.4 NM\_152320.1  
    116 NM\_198494.1  
123.3 NM\_023070.1  
126.1 NM\_016620.2  
    237 NM\_016620.2  
161.8 NM\_201269.1  
    126 NM\_152577.1  
131.6 NM\_014699.2  
115.8 NM\_001009992.1  
112.4 NM\_023074.2  
171.9 NM\_172070.2  
117.2 NM\_145166.2  
1613.7 NM\_014897.1  
262.8 NM\_138783.1  
155.2 NM\_018293.2

219 NM\_018293.2  
227.8 NM\_018293.2  
146.3 NM\_018293.2  
120.9 NM\_001009958.1  
120.9 NM\_024061.3  
124.4 NM\_001009957.1  
187.3 NM\_001009956.1  
118.4 NM\_033160.4  
106.5 NM\_001032297.1  
116.7 NM\_024697.1  
158.3 NM\_173658.1  
117.6 NM\_207404.2  
116.9 NM\_152437.1  
122.5 NM\_024733.2  
118 NM\_022103.2  
193.5 NM\_024706.3  
283.6 NM\_024804.1  
116.6 NM\_033213.2  
162.1 NM\_024833.1  
248.1 NM\_024836.1  
114.6 NM\_017776.1  
107.7 NM\_138330.1  
124.4 NM\_182609.1  
104.9 NM\_178549.2  
115.4 NM\_178558.2  
110.4 NM\_138286.1  
117 NM\_033196.1  
134.3 NM\_033196.1  
1355.9 NM\_033196.1  
139.6 NM\_173574.1  
174.2 NM\_152373.2  
116.3 NM\_020832.1  
131.7 NM\_145271.3  
118 NM\_145271.3  
322.8 NM\_138447.1  
1254.9 NM\_021915.1  
130.1 NM\_152455.2  
120.8 NM\_015911.2  
176.7 NM\_017865.2  
137.7 NM\_001012981.2  
120 NM\_020394.2  
124.4 NM\_030895.1  
122.5 NM\_198535.1  
162.9 NM\_003416.1  
114.7 NM\_021916.2  
281.8 NM\_144566.1  
126.5 NM\_018260.1  
120.1 NM\_024924.3  
120 NM\_025069.1  
106.6 NM\_025069.1  
114.5 NM\_001033723.1

137.9 NM\_001042511.1  
117.1 NM\_001042510.1  
139.6 NM\_016096.2  
153.4 NM\_173831.2  
115 NM\_021269.1  
115.1 NM\_152601.2  
119.1 NM\_021216.3  
107.5 NM\_198526.1  
119.4 NM\_182633.1  
122.6 NM\_182515.1  
125.3 NM\_001039127.2  
358 NM\_133474.1  
120.2 NM\_003426.1  
128.9 NM\_003426.1  
108.9 NM\_003426.1  
106.9 NM\_001004304.2  
108.1 NM\_001023561.1  
120.7 NM\_007131.2  
144 NM\_153028.1  
126 NM\_003427.3  
106.3 NM\_001040185.1  
204.7 NM\_024910.1  
167.8 NM\_021217.1  
106.1 NM\_152605.2  
116.4 NM\_007135.1  
133.1 NM\_021089.1  
127.1 NM\_007136.1  
124.4 NM\_001023563.1  
120.1 NM\_001039886.1  
109.4 NM\_007137.1  
142.7 NM\_018300.2  
102.8 NM\_003429.1  
175.4 NM\_003430.1  
119.4 NM\_152626.2  
115.4 NM\_007139.2  
162.5 NM\_001004126.1  
111.5 NM\_031218.2  
117.2 NM\_014724.2  
126.2 NM\_001080409.1  
220.9 NM\_006060.2  
126.5 NM\_016260.1  
114.7 NM\_016260.1  
129.1 NM\_183231.1  
148.3 NM\_022465.2  
214.7 NM\_022466.2  
622.4 NM\_021035.1  
247.2 NM\_006349.2  
126.6 NM\_014205.2  
940.3 NM\_004773.2  
111.4 NM\_001033577.1  
165.8 NM\_001033577.1

143.3 NM\_031288.1  
188.2 NM\_170783.1  
281.5 NM\_170783.1  
198.1 NM\_014596.4  
126.2 NM\_032268.3  
    117 NM\_147128.3  
112.4 NM\_181710.2  
128.2 NM\_207341.2  
123.8 NM\_003460.1  
116.1 NM\_007155.4  
113.1 NM\_021186.2  
115.1 NM\_007009.1  
116.8 NM\_198844.2  
137.1 NM\_199321.1  
108.1 NM\_198844.1  
    119 NM\_175056.1  
182.7 NM\_017580.1  
108.7 NM\_032143.2  
123.3 NM\_014377.1  
119.8 NM\_182572.2  
    127 NM\_017894.4  
127.3 NM\_181877.3  
112.1 NM\_001007072.1  
118.5 NM\_001007072.1  
117.9 NM\_152677.1  
130.5 NM\_024303.1  
197.3 NM\_080603.3  
112.5 NM\_182521.2  
127.2 NM\_080752.2  
150.3 NM\_080752.2  
130.4 NM\_080752.2  
135.1 NM\_080752.2  
295.4 NM\_023072.1  
268.1 NM\_004724.2  
114.8 NM\_017975.2  
    118 NM\_017975.2  
180.7 NR\_003105.1  
109.5 NM\_032997.2  
    114 NM\_001005413.1  
115.9 NM\_001005414.1  
117.4 NM\_007156.3  
125.2 NM\_007156.3  
125.3 NM\_007157.3  
131.1 NM\_001040653.1  
126.8 NM\_025112.3  
119.7 NM\_001004339.1  
166.7 NM\_024646.1  
148.7 NM\_006336.2  
252.2 NM\_003461.4  
644.3 NM\_003461.4  
197.8 NM\_015113.3

228.3 NM\_015534.3
